# Supplementary material
Source: PubMed Central journal article supplement (PMC1952668)
Supplement: 07_049_Haase_Suppl_Table3.pdf [file 07_049_Haase_Suppl_Table3.pdf]

| <i>Replicate 1<br/>50uM zinc control</i> |           |           | <i>Replicate 2<br/>50uM zinc control</i> |           |           | <i>Replicate 3<br/>50uM zinc control</i> |           |           |
|------------------------------------------|-----------|-----------|------------------------------------------|-----------|-----------|------------------------------------------|-----------|-----------|
| ID                                       | AMPCH1    | AMPCH2    | ID                                       | AMPCH1    | AMPCH2    | ID                                       | AMPCH1    | AMPCH2    |
| NM_006003                                | 9680.218  | 12366.711 | CY3Cy5                                   | 5607.014  | 267.849   | CY3Cy5                                   | 11667.71  | 368.307   |
| NM_006555                                | 4130.212  | 5687.473  | NM_006003                                | 23535.846 | 28388.471 | NM_006003                                | 27742.574 | 29604.512 |
| NM_004271                                | 4947.06   | 6023.696  | NM_006555                                | 6795.616  | 8130.724  | NM_006555                                | 8179.185  | 10602.641 |
| AF129928                                 | 440.522   | 1135.976  | NM_004271                                | 44957.215 | 47606.098 | NM_004271                                | 62030.594 | 59772.566 |
| AF070610                                 | 565.466   | 970.348   | AF129928                                 | 1957.822  | 1577.018  | AF129928                                 | 3228.121  | 2654.081  |
| AK022282                                 | 865.088   | 1399.637  | AK022282                                 | 920.174   | 1048.513  | AK022282                                 | 1512.116  | 1462.243  |
| NM_018266                                | 1872.073  | 2335.443  | NM_018266                                | 3857.495  | 2922.013  | NM_018266                                | 3583.701  | 3424.216  |
| NM_004867                                | 1512.346  | 1703.191  | NM_004867                                | 1480.686  | 838.856   | NM_004867                                | 1187.551  | 1336.403  |
| AL050021                                 | 11149.026 | 12139.208 | AL050021                                 | 25678.803 | 23111.709 | AL050021                                 | 26148.867 | 23836.42  |
| AB002448                                 | 1939.358  | 1860.941  | AB002448                                 | 1549.008  | 1496.812  | AB002448                                 | 1559.746  | 1662.547  |
| AF070580                                 | 649.024   | 894.44    | NM_003838                                | 4962.505  | 5485.556  | AF070580                                 | 1690.232  | 1879.935  |
| NM_003838                                | 1282.521  | 1691.58   | AB032991                                 | 4099.924  | 4553.422  | NM_003838                                | 9791.782  | 10139.476 |
| AB032991                                 | 2363.712  | 2563.012  | AK026985                                 | 7242.421  | 8288.115  | AB032991                                 | 4166.484  | 3550.515  |
| AK026985                                 | 3849.373  | 4713.659  | AK000855                                 | 1558.087  | 1603.896  | AK026985                                 | 6353.157  | 6328.472  |
| AF007153                                 | 766.455   | 779.602   | NM_006003                                | 27301.406 | 29878.207 | AK000855                                 | 1833.21   | 1926.719  |
| AK000855                                 | 1021.524  | 1105.355  | NM_006555                                | 8231.13   | 9740.851  | NM_006003                                | 26757.742 | 28522.402 |
| NM_006003                                | 9668.141  | 11036.916 | SR5                                      | 6626.083  | 9681.369  | NM_006555                                | 6034.247  | 5679.437  |
| NM_006555                                | 3461.159  | 4033.262  | SR7                                      | 6719.517  | 39067.832 | SR1                                      | 71772.133 | 63611.512 |
| SR1                                      | 68084.984 | 56948.246 | SR9                                      | 24519.619 | 5959.626  | SR3                                      | 42383.512 | 46406.844 |
| SR3                                      | 21140.701 | 22122.59  | CY3Cy5                                   | 8697.25   | 570.546   | SR5                                      | 6110.388  | 6689.61   |
| SR5                                      | 2014.725  | 2380.242  | NM_014029                                | 48386.992 | 55065.93  | SR7                                      | 6411.504  | 54018.762 |
| SR7                                      | 1515.232  | 13031.691 | Z83937                                   | 2271.084  | 3518.9    | SR9                                      | 24083.65  | 6434.671  |
| SR9                                      | 8374.656  | 1915.869  | L08443                                   | 7129.935  | 6429.302  | CY3Cy5                                   | 15499.993 | 601.628   |
| CY3Cy5                                   | 11339.931 | 821.608   | L38936                                   | 2046.648  | 2230.288  | M21536                                   | 1584.912  | 1885.454  |
| M87941                                   | 787.503   | 1088.143  | D55643                                   | 5432.816  | 6031.548  | NM_014029                                | 65528.488 | 68823.617 |
| M21536                                   | 1144.525  | 1530.772  | AK025818                                 | 5208.972  | 4572.14   | Z83937                                   | 2461.715  | 3302.734  |
| NM_014029                                | 31696.145 | 39452.293 | AK023185                                 | 7325.587  | 5808.176  | L08443                                   | 9343.061  | 7995.676  |
| Z83937                                   | 2216.959  | 2997.811  | AL359622                                 | 1759.781  | 1757.344  | L38936                                   | 1933.485  | 2409.58   |
| L08443                                   | 5103.204  | 7131.262  | AL050204                                 | 7554.628  | 6709.335  | D55643                                   | 5394.428  | 6428.95   |
| L38936                                   | 1611.217  | 1976.242  | AF085999                                 | 1813.757  | 1813.11   | AK025818                                 | 5873.333  | 5168.637  |
| D55643                                   | 4832.117  | 6024.011  | AK025316                                 | 3140.523  | 2942.085  | AK023185                                 | 7617.727  | 6397.32   |
| AK025818                                 | 3504.631  | 4056.03   | AK026357                                 | 4673.808  | 5183.744  | AL359622                                 | 2259.741  | 2086.192  |
| AK023185                                 | 3888.631  | 4356.808  | NM_018323                                | 8735.194  | 9780.3    | AL050204                                 | 9833.43   | 9461.063  |
| AL359622                                 | 979.705   | 1139.169  | NM_014235                                | 14667.389 | 15629.174 | AF085999                                 | 1740.069  | 2052.211  |
| AL050204                                 | 4716.165  | 5526.396  | AK026922                                 | 4595.126  | 4573.556  | AK025316                                 | 3073.622  | 3114.475  |
| AF085999                                 | 2055.707  | 2126.472  | AK022426                                 | 2089.202  | 2266.846  | AK026357                                 | 5040.109  | 5408.867  |
| AK025316                                 | 2294.834  | 2709.231  | AF070552                                 | 14629.677 | 18362.561 | NM_018323                                | 10824.473 | 11801.897 |
| AK026357                                 | 2620.446  | 3352.184  | AJ270695                                 | 2370.613  | 2438.254  | NM_014235                                | 17147.824 | 20087.584 |
| NM_018323                                | 3974.828  | 4933.759  | AK024517                                 | 4678.404  | 4348.549  | AK026922                                 | 3639.027  | 3721.65   |
| NM_014235                                | 7350.185  | 8570.512  | AK024585                                 | 2310.929  | 2544.573  | AK022426                                 | 1458.875  | 1327.822  |
| AK026922                                 | 1932.776  | 1997.292  | AK024887                                 | 7541.557  | 6775.333  | AF070552                                 | 16029.018 | 14794.904 |
| AK022426                                 | 758.397   | 639.764   | AK025005                                 | 1699.242  | 1887.678  | AK024517                                 | 5337.891  | 4966.694  |
| AK022645                                 | 768.008   | 675.982   | AK023089                                 | 4690.347  | 4510.853  | AK024585                                 | 2901.962  | 2942.715  |
| NM_014353                                | 893.982   | 1036.017  | AK026059                                 | 62517.461 | 73366.844 | AK024887                                 | 9397.368  | 8340.682  |
| AF070541                                 | 1311.154  | 1372.588  | AK026942                                 | 2455.703  | 1957.471  | AK025005                                 | 1755.314  | 1850.848  |
| AK022006                                 | 5533.574  | 5969.872  | AK025814                                 | 5646.894  | 5717.215  | AK023089                                 | 5613.75   | 5105.486  |
| AF070552                                 | 8365.998  | 9943.875  | AK000655                                 | 17093.936 | 17438.443 | AK026059                                 | 67006.461 | 66588.047 |
| AJ270695                                 | 809.796   | 1047.446  | AL117611                                 | 1320.751  | 1675.287  | AK026942                                 | 3019.609  | 2585.57   |

|           |           |           |           |           |           |           |           |           |
|-----------|-----------|-----------|-----------|-----------|-----------|-----------|-----------|-----------|
| AK024868  | 367.655   | 629.938   | NM_017936 | 7087.358  | 7449.208  | AK025814  | 5814.728  | 5754.83   |
| AK024968  | 415.628   | 602.344   | Y10209    | 1069.15   | 1231.841  | AK000655  | 19074.309 | 19681.58  |
| AK024517  | 2819.494  | 3466.999  | X64983    | 1468.66   | 1527.823  | AL117611  | 2581.24   | 3039.17   |
| AK024585  | 891.286   | 1592.669  | D63134    | 2474.344  | 3381.173  | NM_017936 | 7701.585  | 9597.651  |
| AK024887  | 1252.74   | 1583.577  | AJ227893  | 876.753   | 1255.889  | Y10209    | 812.546   | 913.655   |
| AK025005  | 1605.975  | 2132.786  | Y10513    | 9183.853  | 10949.912 | X64983    | 1478.336  | 957.845   |
| AK023089  | 2630.99   | 3095.178  | AK055950  | 1988.564  | 2197.231  | D63134    | 1640.297  | 1291.745  |
| AK026059  | 7592.184  | 10234.343 | AL050122  | 1192.475  | 1628.896  | Y10513    | 7642.43   | 10092.167 |
| AK026942  | 1517.682  | 1907.2    | AK000839  | 25601.885 | 24208.521 | AK055950  | 2514.693  | 2397.629  |
| AK025814  | 2180.136  | 2472.388  | AF086195  | 661.073   | 582.559   | AL050122  | 1618.649  | 2119.876  |
| AK000655  | 4455.384  | 8497.698  | AK026345  | 6508.847  | 6811.757  | AK000839  | 29879.021 | 30248.229 |
| AL117611  | 1046.711  | 1522.794  | AB007971  | 1703.378  | 1961.599  | AF086195  | 949.656   | 1237.479  |
| AF131841  | 524.946   | 682.094   | NM_018278 | 10069.077 | 10561.599 | AK021963  | 962.709   | 788.493   |
| NM_017936 | 3454.744  | 4068.355  | AK026328  | 1441.664  | 1394.439  | NM_018168 | 691.488   | 797       |
| AJ001868  | 255.675   | 710.042   | AK000417  | 2396.874  | 2706.209  | AK026345  | 9308.42   | 7270.527  |
| Y10209    | 249.897   | 712.939   | AK000864  | 12744.138 | 13695.735 | AB007971  | 1950.987  | 1823.117  |
| D63134    | 1537.085  | 1825.929  | AK022414  | 3952.735  | 4756.246  | NM_018278 | 9973.967  | 9416.707  |
| AJ227893  | 1342.828  | 1627.655  | NM_017624 | 13151.771 | 14911.382 | AK000417  | 2508.392  | 1876.534  |
| Y12018    | 13878.885 | 16354.2   | NM_017928 | 1574.279  | 2063.147  | AK000864  | 13224.11  | 11656.204 |
| X64990    | 443.642   | 588.867   | AK000907  | 18294.674 | 19750.797 | AK022414  | 3786.305  | 4348.362  |
| Y10513    | 4890.4    | 5772.489  | NM_016094 | 8265.835  | 9186.815  | NM_016094 | 10510.072 | 9799.501  |
| AK055950  | 2550.294  | 3167.134  | AK025003  | 4858.881  | 4671.721  | AK025003  | 5905.414  | 5404.224  |
| AL050122  | 1531.271  | 1990.127  | AK023601  | 649.74    | 676.718   | AK023601  | 1043.284  | 1164.831  |
| AK024209  | 52.946    | 1142.587  | NM_001427 | 4382.468  | 5006.983  | NM_001427 | 4902.723  | 5546.995  |
| AK000839  | 11279.051 | 15146.547 | NM_016175 | 2973.287  | 2709.118  | NM_016175 | 3026.279  | 3326.656  |
| AF086195  | 747.325   | 1080.109  | M15639    | 14701.495 | 12353.504 | M15639    | 14803.724 | 13079.417 |
| AK022183  | 427.824   | 558.912   | AF130084  | 5060.986  | 5469.127  | AF130084  | 6287.602  | 6568.096  |
| NM_018168 | 471.205   | 794.74    | AF133334  | 21131.072 | 22428.707 | AF133334  | 27556.176 | 29368.201 |
| AK026345  | 1485.734  | 1647.961  | NM_016290 | 10292.497 | 10875.169 | NM_016290 | 11452.501 | 10060.127 |
| NM_004803 | 393.296   | 424.147   | AK026498  | 4871.915  | 5347.385  | AK026498  | 6679.049  | 6349.021  |
| AB007971  | 638.718   | 627.004   | AK095587  | 8582.393  | 10549.336 | AK095587  | 10477.794 | 11784.44  |
| NM_018278 | 1196.963  | 1483.511  | AF086043  | 2035.533  | 2135.632  | AF086043  | 2161.977  | 2353.345  |
| AK026328  | 422.806   | 725.356   | AK024174  | 1889.241  | 2230.509  | AK024174  | 2121.151  | 2122.68   |
| AK000417  | 369.256   | 611.717   | AK000038  | 5004.991  | 5000.808  | AK000038  | 3166.328  | 3388.511  |
| AK000864  | 2091.747  | 2056.716  | BC010084  | 2734.061  | 3589.499  | BC010084  | 2695.976  | 2287.596  |
| AK022414  | 1476.872  | 1515.739  | U10513    | 3548.145  | 4291.385  | U10513    | 4017.221  | 4308.328  |
| NM_017624 | 3281.586  | 3619.531  | L10151    | 63204.566 | 53523.66  | L10151    | 66995.438 | 65152.078 |
| NM_017928 | 1721.284  | 1824.891  | AK022203  | 1624.301  | 2100.246  | AK022203  | 2033.476  | 2352.729  |
| AK000907  | 8204.36   | 10367.195 | BC032236  | 602.99    | 628.209   | L37704    | 1555.868  | 1455.63   |
| NM_016094 | 5835.687  | 7168.932  | AK023037  | 3097.762  | 3264.786  | AB007968  | 4023.304  | 3448.08   |
| AK025003  | 2820.494  | 2952.611  | S71611    | 692.075   | 833.752   | AL117544  | 1496.044  | 1414.649  |
| AK023601  | 793.868   | 1144.846  | L37704    | 1278.717  | 1102.47   | NM_005664 | 59176.223 | 57787.898 |
| NM_001427 | 3353.248  | 3957.619  | AB007968  | 3316.766  | 3008.308  | NM_006270 | 63854.43  | 65026.73  |
| NM_016175 | 2230.298  | 2771.952  | AL117544  | 1439.537  | 1584.572  | U50277    | 2479.109  | 2395.616  |
| M15639    | 12141.06  | 14143.759 | NM_005664 | 38734.148 | 46387.578 | Z48633    | 8497.406  | 8764.377  |
| AF130084  | 6257.447  | 7190.102  | NM_006270 | 52630.105 | 50041.813 | M62627    | 32604.781 | 35714.777 |
| AF133334  | 8133.873  | 9973.104  | U50277    | 2653.654  | 2168.903  | NM_006686 | 13390.203 | 14519.857 |
| AK023617  | 500.591   | 725.86    | Z48633    | 8101.132  | 8078.95   | AK002209  | 3622.963  | 4187.368  |
| NM_016290 | 4965.134  | 5977.321  | M62627    | 32158.367 | 36118.59  | NM_017854 | 66351.594 | 64464.238 |
| AK026498  | 2735.824  | 3775.385  | NM_006686 | 11421.038 | 11709.74  | NM_014354 | 4629.041  | 4539.803  |
| AF086151  | 255.448   | 566.199   | AK002209  | 2086.727  | 1940.657  | AL137548  | 12358.465 | 11985.935 |
| AK095587  | 5003.206  | 7055.156  | NM_017854 | 63172.852 | 65031.633 | AK095051  | 2383.116  | 1624.789  |
| AF086043  | 1391.994  | 1657.579  | NM_014354 | 4503.44   | 4132.594  | AF088062  | 2071.754  | 2342.569  |

|           |           |           |           |           |           |           |           |           |
|-----------|-----------|-----------|-----------|-----------|-----------|-----------|-----------|-----------|
| AK024174  | 830.253   | 982.644   | AL137548  | 13131.011 | 14396.808 | AK024929  | 3305.837  | 3191.422  |
| AK000038  | 2808.564  | 3557.838  | AK095051  | 2903.356  | 2910.982  | NM_017779 | 947.432   | 1011.037  |
| BC010084  | 633.606   | 793.6     | AF088062  | 2435.809  | 2571.758  | D17232    | 38608.609 | 48378.961 |
| U10513    | 1901.921  | 1996.483  | AK024929  | 2809.182  | 2982.069  | AK026663  | 1646.423  | 1585.966  |
| L10151    | 25792.705 | 23365.725 | NM_017779 | 854.912   | 1156.08   | NM_001174 | 1956.277  | 1775.151  |
| AK022203  | 1503.544  | 1415.278  | D17232    | 30009.42  | 41345.914 | U69645    | 1492.726  | 1490.275  |
| BC032236  | 1001.7    | 1050.522  | NM_005260 | 11958.183 | 12416.367 | NM_019082 | 13344.104 | 12187.729 |
| AK023037  | 1455.134  | 1746.323  | AF085880  | 15270.106 | 16565.762 | NM_001424 | 3673.667  | 3210.862  |
| S71611    | 684.844   | 1081.447  | NM_016158 | 2263.262  | 2186.298  | AB040950  | 4097.825  | 3902.715  |
| L37704    | 1309.7    | 1735.105  | AF000990  | 2207.603  | 2553.316  | NM_014003 | 9115.447  | 8782.657  |
| AB007968  | 1705.347  | 1759.212  | AK026663  | 1338.113  | 1019.232  | NM_001356 | 3631.382  | 3722.614  |
| AL117544  | 1473.481  | 1532.994  | NM_001174 | 1987.375  | 1952.373  | AB002282  | 66472.398 | 62491.922 |
| NM_005664 | 4503.7    | 4984.944  | U69645    | 1313.514  | 1037.657  | AB037805  | 16765.861 | 18758.678 |
| NM_006270 | 22291.986 | 29196.531 | NM_019082 | 10811.92  | 11557.334 | NM_006373 | 13824.43  | 15583.089 |
| S81580    | 575.149   | 499.828   | NM_001424 | 2708.212  | 2554.927  | AK001007  | 1780.318  | 1308.991  |
| U50277    | 2335.598  | 2304.438  | AB040950  | 4088.371  | 3713.9    | AF116655  | 25342.379 | 24105.779 |
| Z48633    | 4077.668  | 4724.069  | NM_014003 | 9423.817  | 9000.895  | AF086134  | 794.778   | 591.362   |
| M62627    | 21900.508 | 27418.486 | NM_001356 | 3022.609  | 2973.64   | AF009308  | 49399.664 | 50661.078 |
| NM_006686 | 4683.673  | 6347.991  | AB002282  | 61859.719 | 70278.352 | AB032969  | 71051.438 | 63610.734 |
| AK002209  | 1276.838  | 2168.483  | AB037805  | 15212.965 | 14689.899 | Y11610    | 6504.211  | 6181.872  |
| NM_017854 | 45541.574 | 53685.555 | NM_006373 | 12572.053 | 12685.284 | AF085940  | 795.564   | 633.351   |
| NM_014354 | 2246.18   | 2448.212  | AK001007  | 3325.469  | 3246.09   | L37695    | 1984.784  | 1853.527  |
| AL137548  | 6490.754  | 8448.927  | NM_014485 | 1229.761  | 1358.538  | AL050217  | 54569.879 | 55031.871 |
| AK095051  | 1513.055  | 1192.587  | AF116655  | 22611.979 | 25956.918 | NM_005928 | 4198.324  | 4501.49   |
| AK026468  | 389.968   | 612.556   | AF086134  | 617.733   | 766.161   | NM_005424 | 5051.186  | 4807.079  |
| AF088062  | 1149.979  | 1164.164  | AF009308  | 37647.41  | 45504.34  | NM_005975 | 5501.013  | 5589.916  |
| AK024929  | 1185.084  | 1279.92   | AB032969  | 59182.051 | 47854.996 | AY007220  | 34197.77  | 33810.211 |
| NM_017779 | 1542.194  | 1727.131  | Y11610    | 5909.544  | 6927.506  | NM_004438 | 5585.473  | 5180.608  |
| D17232    | 7725.678  | 9002.673  | AF085940  | 959.245   | 877.265   | X89399    | 828.184   | 1015.505  |
| NM_005260 | 2246.152  | 2084.482  | L37695    | 2630.492  | 2839.723  | NM_003808 | 4409.422  | 6291.495  |
| AF085880  | 6149.053  | 6223.272  | NM_004627 | 21076.34  | 20816.211 | AK023666  | 2101.432  | 3657.196  |
| NM_016158 | 1976.457  | 1885.056  | AK026523  | 21448.359 | 22403.545 | NM_005396 | 2716.818  | 3161.097  |
| AF000990  | 2670.03   | 2794.528  | AL050217  | 36997.453 | 39340.469 | NM_005118 | 1018.071  | 1144.696  |
| AK026663  | 1076.151  | 1198.878  | NM_005928 | 3668.214  | 3518.482  | NM_015185 | 6665.628  | 6547.166  |
| NM_001174 | 1786.286  | 1941.092  | NM_005424 | 3962.031  | 3794.838  | NM_005374 | 1040.725  | 1118.031  |
| U69645    | 1077.181  | 1187.752  | NM_005975 | 7029.887  | 6598.833  | AF011757  | 1789.85   | 1683.489  |
| NM_019082 | 5573.689  | 7870.101  | AY007220  | 25047.967 | 26988.32  | NM_003632 | 3178.128  | 2744.486  |
| NM_001424 | 1113.3    | 1282.096  | NM_004438 | 4591.098  | 4729.578  | NM_002194 | 5570.417  | 5594.779  |
| AB040950  | 3259.208  | 3935.696  | NM_003808 | 4058.075  | 4252.321  | AB028989  | 1630.033  | 1404.893  |
| NM_014003 | 4140.667  | 5081.882  | AK023666  | 1840.072  | 1780.958  | NM_016166 | 31095.08  | 29400.895 |
| NM_001356 | 1330.725  | 1127.806  | NM_005396 | 2885.098  | 3108.091  | NM_002086 | 26868.549 | 27538.645 |
| AB002282  | 52399.648 | 56165.848 | NM_006573 | 1530.395  | 617.163   | NM_005488 | 66830.883 | 64603.156 |
| AB037805  | 2167.778  | 3050.871  | NM_005118 | 1268.161  | 1538.892  | NM_004464 | 593.328   | 597.82    |
| NM_006373 | 4285.066  | 5921.649  | NM_015185 | 8713.604  | 8414.928  | NM_002396 | 1491.103  | 1675.419  |
| AF085922  | 595.72    | 742.305   | NM_005374 | 1227.693  | 1069.6    | NM_005417 | 2398.217  | 2874.176  |
| AK001007  | 1581.591  | 1580.564  | AF011757  | 1629.124  | 1542.625  | NM_002646 | 8604.191  | 8121.343  |
| NM_014485 | 1023.953  | 948.454   | NM_003632 | 2639.198  | 2380.786  | AK025329  | 22563.764 | 20165.773 |
| AF116655  | 8682.51   | 7605.618  | NM_002194 | 5272.521  | 6198.295  | NM_001256 | 1692.941  | 2047.091  |
| AF086134  | 908.447   | 836.744   | AB028989  | 1572.916  | 1523.513  | AL137679  | 4990.991  | 5318.621  |
| AF009308  | 21759.537 | 21965.709 | NM_016166 | 24135.063 | 28562.248 | NM_001786 | 26172.059 | 28386.662 |
| AB032969  | 29219.25  | 32294.609 | NM_002086 | 24076.422 | 26537.424 | AB040965  | 1600.338  | 1447.276  |
| AF085940  | 1018.109  | 865.889   | NM_016248 | 4385.54   | 4558.248  | AK025026  | 7733.725  | 9498.438  |
| L37695    | 1177.472  | 1217.364  | NM_005488 | 58826.059 | 52514.328 | AK023052  | 5439.685  | 5392.721  |

|           |           |           |           |           |           |           |           |           |
|-----------|-----------|-----------|-----------|-----------|-----------|-----------|-----------|-----------|
| NM_004627 | 7276.138  | 6787.427  | NM_00239E | 1331.306  | 1190.546  | AB018350  | 2262.348  | 2934.962  |
| AK026523  | 3545.621  | 3378.049  | NM_005417 | 2339.953  | 1936.297  | NM_00645E | 65264.609 | 65560.352 |
| AL050217  | 3981.671  | 3997.021  | NM_002649 | 7918.139  | 6095.238  | NM_01846C | 9560.797  | 9857.621  |
| AF278532  | 542.596   | 600.375   | AK025329  | 23462.996 | 25098.873 | NM_00270E | 32570.482 | 30701.318 |
| NM_00592E | 2366.202  | 2642.304  | NM_001259 | 1736.115  | 1544.302  | NM_005591 | 29159.764 | 29954.699 |
| NM_005424 | 760.346   | 1077.561  | AL137679  | 6228.987  | 6490.982  | NM_00237E | 1998.185  | 2072.393  |
| NM_00597E | 5818.058  | 7637.274  | NM_00178E | 20227.23  | 23640.74  | NM_00312E | 997.632   | 1421.913  |
| AY007220  | 2562.572  | 3025.065  | AB040965  | 1593.714  | 1143.221  | AK024251  | 1510.679  | 1419.947  |
| NM_00443E | 1623.851  | 2093.821  | AK025026  | 6329.78   | 7352.164  | NM_00254E | 5684.194  | 4935.308  |
| X89399    | 544.262   | 809.879   | AK023052  | 6590.484  | 5857.588  | NM_00668E | 66546.234 | 69924.922 |
| NM_00380E | 2982.402  | 3723.413  | AB018350  | 2643.743  | 2689.696  | NM_005411 | 17122.047 | 15914.142 |
| AK023666  | 1100.021  | 1168.85   | NM_00645E | 63768.422 | 65687.57  | NM_00438E | 2330.413  | 2890.875  |
| NM_00539E | 1600.672  | 1817.303  | NM_017541 | 988.917   | 1031.231  | NM_00480E | 1934.169  | 1671.218  |
| NM_00657E | 1022.284  | 1065.484  | NM_01846C | 8707.359  | 8531.946  | NM_004617 | 4458.735  | 5042.462  |
| NM_005118 | 990.175   | 1010.718  | NM_00270E | 25977.41  | 29734.666 | NM_00566E | 7588.316  | 9218.198  |
| NM_01518E | 4732.493  | 4295.751  | NM_005591 | 27362.354 | 33810.598 | NM_00674E | 891.888   | 793.218   |
| NM_005374 | 578.793   | 633.344   | NM_00237E | 1891.722  | 1845.832  | NM_012177 | 9083.688  | 9197.924  |
| AF011757  | 839.901   | 1075.112  | NM_00312E | 705.708   | 960.823   | NM_00666E | 50557.703 | 58892.148 |
| NM_00363E | 749.889   | 979.832   | AK024251  | 1251.042  | 1399.115  | NM_002807 | 18434.861 | 18642.695 |
| NM_002194 | 2885.487  | 5192.221  | NM_00254E | 5368.123  | 6087.969  | NM_00279E | 59368.793 | 60663.395 |
| AB028989  | 652.654   | 1010.966  | NM_00668E | 63328.453 | 65717.07  | NM_00279C | 48243.977 | 54035.434 |
| NM_01616E | 4692.617  | 5757.574  | NM_005411 | 12585.595 | 12055.988 | NM_01838E | 10403.134 | 10373.01  |
| NM_00208E | 11553.355 | 11465.885 | NM_00438E | 778.452   | 806.645   | NM_01494E | 1780.9    | 1711.689  |
| NM_01624E | 1368.517  | 1463.21   | NM_00480E | 1490.685  | 1227.515  | BF217579  | 31893.215 | 40266.199 |
| NM_00548E | 8443.37   | 8945.594  | NM_004617 | 4422.724  | 4247.974  | AB037840  | 12318.844 | 12749.433 |
| NM_004464 | 497.514   | 643.841   | NM_00566E | 6828.141  | 4959.463  | NM_007011 | 3634.082  | 3442.245  |
| NM_00239E | 1537.99   | 1501.133  | NM_00674E | 1119.961  | 981.291   | Y10210    | 17051.914 | 15907.249 |
| NM_005417 | 1654.609  | 1792.677  | NM_012177 | 9279.813  | 9682.504  | AB020689  | 8091.674  | 7780.532  |
| NM_00264E | 3573.5    | 4143.56   | NM_00666E | 52790.352 | 53735.543 | AK023916  | 1205.672  | 1341.654  |
| AK025329  | 15874.94  | 18096.338 | NM_002807 | 17032.939 | 15140.463 | NM_00320E | 8122.11   | 8480.612  |
| NM_00125E | 1561.265  | 1757.739  | NM_00279E | 61361.57  | 58310.777 | NM_002514 | 2741.977  | 2495.583  |
| AL137679  | 2963.495  | 3671.388  | NM_00279C | 36070.578 | 44587.316 | AF177238  | 2118.3    | 1839.306  |
| NM_00178E | 13687.794 | 15719.19  | NM_01838E | 10944.185 | 10955.279 | AF191770  | 1897.615  | 1844.389  |
| AB040965  | 716.427   | 808.776   | NM_01494E | 2551.356  | 2630.102  | NM_014947 | 60722.703 | 62084.5   |
| AK025026  | 995.956   | 1323.731  | BF217579  | 25880.848 | 28973.256 | AB033112  | 4407.331  | 5417.355  |
| AK023052  | 955.091   | 1241.509  | NM_00433E | 19548.77  | 19843.861 | AK023243  | 7647.055  | 5704.936  |
| AB018350  | 1771.735  | 1782.656  | AF040965  | 33275.148 | 39845.375 | NM_01440E | 5571.168  | 5185.101  |
| NM_00645E | 15455.604 | 17800.836 | AB037840  | 10408.923 | 10638.836 | BE791857  | 1265.577  | 1321.728  |
| NM_017541 | 972.717   | 946.873   | NM_007011 | 4036.925  | 3636.717  | NM_00142E | 5799.834  | 6758.045  |
| NM_01846C | 3838.38   | 3475.901  | Y10210    | 15486.192 | 14210.433 | NM_00551E | 1599.513  | 2405.681  |
| NM_00270E | 2521.819  | 3566.911  | AB020689  | 8799.941  | 8398.073  | AK022358  | 16165.791 | 19697.721 |
| NM_005591 | 11100.787 | 14998.262 | AK023916  | 1641.387  | 2437.316  | NM_01420E | 63243.52  | 58399.758 |
| NM_00237E | 2307.148  | 3089.135  | NM_00320E | 9016.07   | 8879.324  | NM_018141 | 30103.066 | 28839.814 |
| NM_00312E | 507.329   | 1045.879  | NM_002514 | 1883.523  | 1711.441  | BE790474  | 472.603   | 700.798   |
| AK024251  | 219.705   | 707.435   | AF177238  | 1798.963  | 2018.269  | NM_016504 | 64642.801 | 58079.117 |
| NM_00254E | 1566.66   | 2074.264  | AF191770  | 563.501   | 555.547   | U25752    | 65324.902 | 63554.52  |
| NM_00668E | 17139.719 | 24857.115 | NM_02048E | 10343.155 | 10551.608 | X96646    | 60383.508 | 58383.727 |
| NM_005411 | 1854.662  | 1727.868  | NM_014947 | 59943.078 | 64591.18  | NM_00485E | 18166.516 | 17650.449 |
| NM_00438E | 830.445   | 966.364   | AB033112  | 3884.862  | 3136.963  | NM_00695E | 1287.286  | 1648.175  |
| NM_00480E | 1095.183  | 1087.376  | NM_005674 | 836.852   | 749.711   | NM_00505E | 6740.147  | 6113.687  |
| NM_004617 | 4085.146  | 3969.835  | AK023243  | 7262.978  | 4727.718  | NM_00319E | 28285.383 | 24522.893 |
| NM_00566E | 3753.427  | 3890.646  | NM_01440E | 5571.487  | 5228.276  | AF220415  | 2358.505  | 2635.027  |
| NM_00674E | 1397.86   | 1044.788  | BE791857  | 987.613   | 996.848   | NM_005174 | 61766.758 | 61823.617 |



|           |           |           |           |           |           |           |           |           |
|-----------|-----------|-----------|-----------|-----------|-----------|-----------|-----------|-----------|
| NM_012177 | 5981.796  | 7832.849  | NM_006867 | 1105.126  | 859.465   | NM_000365 | 14641.797 | 13421.041 |
| NM_006666 | 12761.392 | 15629.863 | NM_001422 | 9876.392  | 10700.83  | NM_01345C | 10206.849 | 10504.374 |
| NM_002807 | 5695.28   | 6003.093  | NM_005513 | 1301.378  | 994.074   | NM_00453E | 2660.26   | 2623.664  |
| NM_00279E | 40018.535 | 40396.551 | AK022358  | 17177.236 | 18014.625 | NM_003077 | 6433.354  | 6663.954  |
| NM_00279C | 16747.842 | 21559.84  | NM_014205 | 61455.039 | 55072.617 | BE784999  | 1594.928  | 1880.949  |
| NM_01838E | 4645.946  | 5285.544  | NM_018141 | 27718.24  | 30109.734 | NM_00210E | 9830.603  | 11609.724 |
| NM_01494E | 1467.555  | 1457.89   | BE790474  | 594.009   | 1449.715  | NM_01848E | 5422.384  | 6649.533  |
| BF217579  | 2958.175  | 3400.095  | NM_000969 | 337.305   | 441.978   | L13203    | 15507.477 | 16256.374 |
| NM_00433E | 6704.98   | 6688.93   | NM_016504 | 64055.25  | 55282.027 | NM_01804C | 3515.032  | 2989.083  |
| AF040965  | 5645.54   | 5004.33   | U25752    | 62923.848 | 61149.605 | AB042646  | 56961.52  | 54881.969 |
| AB037840  | 1642.42   | 2300.768  | X96646    | 64075.762 | 56869.457 | NM_003431 | 5136.583  | 5393.872  |
| NM_007011 | 3098.635  | 3725.565  | NM_00485E | 15006.582 | 16611.664 | M29581    | 12948.316 | 13940.234 |
| Y10210    | 6759.625  | 8887.033  | NM_006952 | 966.924   | 1136.903  | AL096747  | 3706.53   | 3519.964  |
| AB020689  | 3385.89   | 4377.14   | NM_00505E | 1778.878  | 1871.048  | AB021641  | 1827.734  | 1771.57   |
| AK023916  | 883.404   | 1177.454  | NM_00319E | 23869.855 | 25269.709 | NM_01240E | 26026.619 | 26554.285 |
| NM_003203 | 4262.95   | 4955.238  | AF220415  | 2492.98   | 2505.915  | NM_01227E | 1912.704  | 2057.655  |
| NM_002514 | 1120.813  | 1379.766  | NM_005174 | 62226.969 | 64868.332 | AF023142  | 1140.423  | 963.913   |
| AF177238  | 1390.155  | 1466.845  | NM_00036E | 12076.368 | 11906.957 | NM_01610C | 1083.293  | 1281.398  |
| AF191770  | 896.539   | 999.263   | NM_01345C | 10793.668 | 9905.66   | NM_014057 | 3821.435  | 3692.329  |
| NM_020482 | 1910.083  | 1808.38   | NM_00453E | 5372.417  | 5962.458  | NM_00155C | 35094     | 30834.688 |
| NM_014947 | 14072.461 | 13759.923 | NM_003077 | 10488.734 | 9938.691  | AK026849  | 39918.449 | 41964.809 |
| AB033112  | 2528.463  | 2728.052  | NM_00210E | 9664.294  | 11518.024 | NM_018677 | 4812.645  | 4162.043  |
| NM_005674 | 451.123   | 643.54    | NM_01848E | 5417.351  | 6183.159  | NM_00278E | 5582.021  | 5107.436  |
| AK023243  | 3404.333  | 2813.774  | L13203    | 14131.475 | 15067.395 | X78947    | 1290.611  | 1136.602  |
| NM_01440E | 2078.318  | 2154.42   | NM_01804C | 3797.025  | 2586.137  | NM_000041 | 62369.039 | 57181.578 |
| BE791857  | 1061.796  | 1694.715  | AB042646  | 45009.309 | 46085.867 | W69211    | 2485.04   | 2332.121  |
| NM_006867 | 1067.945  | 1171.322  | NM_003431 | 5481.458  | 6142.951  | AA449931  | 25321.213 | 25450.018 |
| NM_001422 | 3813.815  | 4359.557  | M29581    | 11629.233 | 12621.768 | AA877347  | 59443.191 | 59250.547 |
| NM_005513 | 505.212   | 692.966   | AL096747  | 2444.582  | 2604.656  | R54049    | 1987.803  | 2149.208  |
| AK022358  | 6753.822  | 6169.85   | AB021641  | 1611.436  | 1483.512  | S57235    | 47523.676 | 47915.824 |
| NM_01420E | 51716.102 | 43243.531 | NM_01240E | 22788.68  | 24676.723 | AI376272  | 13496.102 | 12306.428 |
| NM_018141 | 10660.722 | 10125.386 | NM_01227E | 1528.327  | 1665.327  | BF242229  | 4740.462  | 4683.373  |
| BE790474  | 545.45    | 502.457   | AF023142  | 730.054   | 714.225   | X75756    | 62790.016 | 65048.129 |
| NM_00096E | 549.215   | 516.721   | NM_01610C | 964.654   | 1050.867  | AI754623  | 12246.09  | 12519.549 |
| NM_016504 | 58867.852 | 47562.441 | NM_014057 | 4023.737  | 4479.387  | AA401326  | 64438.457 | 61725.801 |
| U25752    | 64904.695 | 55524.484 | NM_00155C | 29249.656 | 29380.217 | N55461    | 1820.937  | 1754.707  |
| X96646    | 62595.66  | 53803.363 | AK026849  | 31717.217 | 37691.547 | AA504482  | 19912.814 | 22773.691 |
| NM_00485E | 11609.001 | 15036.009 | NM_018677 | 4192.99   | 4776.892  | BI602175  | 3997.128  | 4103.243  |
| NM_006952 | 1386.756  | 1144.965  | NM_00278E | 5747.813  | 6415.83   | NM_00410E | 19868.121 | 22339.373 |
| NM_00505E | 957.763   | 940.385   | X78947    | 1669.091  | 1554.715  | BF307652  | 6012.063  | 6031.522  |
| NM_00319E | 13722.601 | 14608.285 | NM_000041 | 61706.434 | 50682.777 | NM_017772 | 3199.979  | 4016.027  |
| NM_015954 | 11.462    | 1270.805  | W69211    | 2314.782  | 2532.293  | AF116574  | 3899.522  | 3791.751  |
| AF220415  | 1774.663  | 1875.968  | AA449931  | 27954.57  | 31064.057 | NM_00552E | 2718.605  | 2526.712  |
| NM_005011 | 441.857   | 357.018   | AA877347  | 49116.148 | 47735.059 | NM_00586E | 11550.016 | 10409.788 |
| NM_005174 | 42068.52  | 41654.023 | R54049    | 2076.949  | 1937.747  | AF105067  | 7533.603  | 6897.69   |
| NM_00036E | 5076.978  | 6185.877  | BI755551  | 572.285   | 669.927   | NM_01867E | 3291.679  | 3046.251  |
| NM_01345C | 1979.458  | 2435.165  | S57235    | 37732.535 | 42744.215 | NM_012072 | 1920.754  | 1577.645  |
| NM_00453E | 1385.553  | 1440.993  | AI376272  | 11236.045 | 10258.174 | NM_006014 | 4182.862  | 3913.797  |
| NM_003077 | 7784.699  | 7734.728  | BF242229  | 4346.535  | 5005.19   | NM_00628C | 63121.855 | 60792.543 |
| NM_00210E | 5828.743  | 4779.794  | X75756    | 64238.828 | 56592.563 | NM_00215E | 1853.853  | 2070.672  |
| NM_01848E | 1955.04   | 1688.52   | AI754623  | 12154.418 | 12158.706 | NM_001771 | 48266.309 | 49693.406 |
| L13203    | 1799.649  | 1438.736  | AA401326  | 48740.078 | 48642.676 | NM_00206E | 2626.401  | 2855.656  |
| NM_01804C | 1759.544  | 1276.239  | N55461    | 1817.695  | 2068.787  | NM_00735E | 62966.832 | 67335.25  |

|           |           |           |           |           |           |           |           |           |
|-----------|-----------|-----------|-----------|-----------|-----------|-----------|-----------|-----------|
| AB042646  | 10343.942 | 8769.539  | AA504482  | 15914.842 | 19404.588 | NM_006096 | 3285.89   | 3216.399  |
| NM_003431 | 1270.518  | 1187.839  | BI602175  | 3448.651  | 3888.781  | NM_006869 | 64786.91  | 61021.813 |
| M29581    | 1918.339  | 1846.362  | NM_004109 | 20732.008 | 23299.666 | NM_015364 | 30578.313 | 25490.369 |
| AL096747  | 826.209   | 839.349   | BF307652  | 4330.429  | 4234.365  | NM_006611 | 1065.467  | 1017.911  |
| AB021641  | 620.437   | 891.366   | NM_017772 | 3462.774  | 4246.281  | NM_004963 | 7825.271  | 9004.563  |
| NM_012406 | 6389.771  | 7244.24   | AF116574  | 3894.57   | 4387.695  | NM_001181 | 2009.554  | 2679.729  |
| NM_012278 | 1598.02   | 1937.667  | NM_005529 | 2204.062  | 2286.221  | NM_005535 | 63432.777 | 65449.074 |
| AF023142  | 664.383   | 1046.636  | NM_005869 | 10511.689 | 9420.098  | AB037857  | 9902.574  | 9929.358  |
| NM_016100 | 984.05    | 1251.147  | AF105067  | 6312.767  | 6711.367  | NM_005012 | 964.738   | 1264.36   |
| NM_014057 | 3046.642  | 3598.109  | NM_018676 | 3250.384  | 2988.419  | NM_013262 | 16618.031 | 17739.41  |
| NM_001550 | 7756.185  | 7986.445  | NM_012072 | 1924.014  | 1541.613  | NM_007185 | 32563.992 | 35959.367 |
| AK026849  | 1970.432  | 2481.591  | NM_006014 | 4459.425  | 4933.232  | NM_012288 | 6036.207  | 6512.232  |
| NM_018677 | 2593.824  | 3390.259  | NM_006280 | 62858.879 | 56770.789 | NM_005264 | 5520.757  | 7420.03   |
| NM_002785 | 1858.853  | 3206.789  | NM_002155 | 1965.11   | 2317.473  | NM_020373 | 2969.768  | 2557.657  |
| X78947    | 653.167   | 1034.719  | NM_001771 | 39685.402 | 42682.938 | NM_000714 | 23926.547 | 21452.367 |
| NM_000041 | 15625.259 | 18364.629 | NM_002066 | 2400.836  | 2871.642  | NM_002556 | 5970.59   | 6077.394  |
| W69211    | 654.083   | 891.893   | NM_007355 | 63983.313 | 54262.605 | NM_018089 | 18441.113 | 16587.938 |
| AA449931  | 2064.128  | 1484.964  | NM_006096 | 2593.403  | 3002.439  | L21934    | 3437.83   | 3596.806  |
| AA877347  | 23499.467 | 18006.855 | NM_006869 | 64454.453 | 52620.109 | AL117442  | 21149.736 | 21529.984 |
| BI755551  | 719.471   | 326.216   | NM_015364 | 26554.002 | 21019.066 | NM_007188 | 7370.631  | 8428.936  |
| S57235    | 12475.129 | 11427.778 | NM_006611 | 1028.531  | 829.448   | NM_014341 | 13941.364 | 14695.745 |
| AI376272  | 1528.646  | 1377.786  | NM_004963 | 6367.917  | 8105.441  | NM_014229 | 5768.57   | 5925.701  |
| BF242229  | 2724.32   | 2682.961  | NM_001181 | 1806.988  | 1437.514  | NM_013265 | 52156.73  | 53627.785 |
| X75756    | 9077.539  | 11846.759 | NM_005535 | 63394.66  | 47646.367 | NM_014964 | 12612.202 | 12583.96  |
| AI754623  | 5247.158  | 7770.643  | AB037857  | 6964.558  | 8138.39   | NM_014016 | 23556.482 | 22068.271 |
| AA401326  | 12231.501 | 14723.076 | NM_005012 | 814.524   | 697.532   | NM_013433 | 5884.575  | 5288.088  |
| N55461    | 561.587   | 748.968   | NM_012288 | 5745.148  | 6220.87   | AJ224867  | 1164.905  | 1437.076  |
| AA504482  | 3039.149  | 2520.882  | NM_005264 | 5399.596  | 5767.24   | NM_003794 | 21710.426 | 20569.209 |
| BI602175  | 666.28    | 925.354   | NM_020373 | 3516.942  | 2889.558  | NM_019892 | 23389.742 | 22202.656 |
| NM_004109 | 12290.904 | 11975.468 | NM_000714 | 22955.246 | 17296.863 | NM_016169 | 21634.184 | 18107.262 |
| BF307652  | 1295.886  | 2070.335  | NM_002556 | 5740.582  | 5564.703  | NM_004533 | 1913.052  | 1908.823  |
| NM_017772 | 1325.791  | 1683.816  | NM_018089 | 16609.064 | 15242.269 | NM_012135 | 1728.362  | 1131.399  |
| AF116574  | 1532.909  | 1725.97   | L21934    | 3707.405  | 3343.269  | M37190    | 915.131   | 951.225   |
| NM_005529 | 1744.442  | 2039.969  | AL117442  | 23250.195 | 22649.586 | NM_006812 | 19642.051 | 17594.867 |
| NM_005869 | 6819.904  | 7637.224  | NM_007188 | 6907.994  | 8156.185  | AK024434  | 32925.004 | 31916.807 |
| AF105067  | 3512.786  | 3660.615  | NM_014341 | 13573.991 | 12917.628 | NM_002388 | 16011.249 | 17654.801 |
| NM_018676 | 1695.07   | 2641.38   | NM_014229 | 5452.96   | 5937.728  | NM_016069 | 59629.316 | 57967.34  |
| NM_012072 | 1767.954  | 2052.364  | NM_013265 | 42158.359 | 42774.84  | NM_017612 | 5637.873  | 5428.375  |
| NM_006014 | 3693.812  | 5917.662  | NM_014964 | 11713.451 | 11739.154 | NM_013236 | 15619.532 | 15328.51  |
| NM_006280 | 33439.559 | 36437.031 | NM_014016 | 24093.76  | 23414     | NM_017841 | 11765.423 | 12232.51  |
| NM_002155 | 1042.815  | 606.985   | NM_013433 | 6072.391  | 5446.531  | NM_001254 | 9856.76   | 10289.632 |
| NM_001771 | 22684.797 | 19003.479 | AJ224867  | 1134.713  | 1447.256  | NM_020412 | 52623.664 | 45473.652 |
| NM_002066 | 787.183   | 518.37    | NM_003794 | 20103.99  | 18141.266 | NM_003032 | 53531.133 | 45150.316 |
| NM_007355 | 48802.359 | 43942.68  | NM_019892 | 19123.695 | 18222.215 | NM_017453 | 25754.322 | 21438.365 |
| NM_006096 | 972.621   | 946.232   | NM_016169 | 19766.998 | 17627.088 | AF038564  | 13357.995 | 11757.935 |
| NM_006869 | 24506.359 | 31767.348 | NM_004533 | 1970.989  | 1140.169  | AB033768  | 1989.02   | 2271.223  |
| NM_015364 | 14292.395 | 17503.617 | NM_012135 | 1366.498  | 1284.52   | NM_017659 | 9971.54   | 8073.671  |
| NM_006611 | 1043.099  | 1308.78   | M37190    | 962.493   | 906.72    | NM_006904 | 30390.064 | 28839.473 |
| NM_004963 | 2477.69   | 2830.76   | NM_006812 | 16683.832 | 14637.463 | NM_004217 | 38246.086 | 35863.391 |
| NM_001181 | 1958.532  | 2121.448  | AK024434  | 28158.674 | 29982.178 | NM_006347 | 27393.855 | 28038.105 |
| NM_005535 | 11848.494 | 12167.607 | NM_002388 | 14621.248 | 16018.123 | NM_020406 | 6002.541  | 5576.767  |
| AB037857  | 1960.776  | 1521.911  | NM_016069 | 58381.84  | 49481.605 | NM_014685 | 51312.426 | 51137.441 |
| NM_007185 | 6507.163  | 7105.671  | NM_017612 | 5769.899  | 4798.485  | NM_016100 | 1017.729  | 1466.089  |

|           |           |           |           |           |           |           |           |           |
|-----------|-----------|-----------|-----------|-----------|-----------|-----------|-----------|-----------|
| NM_01228E | 4986.509  | 6347.747  | NM_01323E | 16487.275 | 18557.445 | NM_014057 | 3891.227  | 4630.704  |
| NM_005264 | 2741.819  | 3158.836  | NM_017841 | 10993.254 | 11695.856 | NM_00155C | 36235.883 | 35457.902 |
| NM_020373 | 2948.856  | 2806.165  | NM_001254 | 9922.134  | 10899.916 | AK026849  | 39182.953 | 43172.582 |
| NM_000714 | 11844.826 | 12007.252 | NM_020412 | 41394.641 | 44744.145 | NM_018677 | 4554.501  | 4121.665  |
| NM_00255E | 4004.964  | 4863.566  | NM_003032 | 43135.449 | 47133.945 | NM_00278E | 5236.202  | 5135.1    |
| NM_01808E | 5766.328  | 6956.426  | NM_017453 | 28945.037 | 32218.832 | X78947    | 879.351   | 553.563   |
| L21934    | 1849.482  | 1156.746  | AF038564  | 14341.735 | 13772.944 | W69211    | 3573.495  | 4474.882  |
| AL117442  | 2526.697  | 1888.931  | AB033768  | 2090.85   | 1927.422  | AA449931  | 28391.701 | 23667.977 |
| NM_00718E | 3365.145  | 2521.667  | NM_01765E | 9243.915  | 8696.32   | AA877347  | 58047.813 | 49069.219 |
| NM_014341 | 7756.882  | 5639.237  | NM_006904 | 24641.266 | 27017.857 | R54049    | 1745.044  | 1476.84   |
| NM_00644E | 325.444   | 560.094   | NM_004217 | 29677.006 | 34692.891 | S57235    | 42873.379 | 36106.602 |
| NM_01422E | 4186.428  | 6773.873  | NM_006347 | 24455.049 | 28929.291 | AI376272  | 12002.039 | 8919.853  |
| NM_014964 | 2412.94   | 3984.453  | NM_02040E | 5406.093  | 5711.707  | BF242229  | 4732.846  | 3773.359  |
| NM_01401E | 3638.292  | 3397.864  | NM_01468E | 38615.715 | 40522.273 | X75756    | 62508.863 | 64330.121 |
| NM_013433 | 3028.84   | 3862.69   | NM_01610C | 1056.165  | 924.053   | AI754623  | 11694.702 | 11433.254 |
| AJ224867  | 876.649   | 549.336   | NM_014057 | 4457.083  | 4089.536  | AA401326  | 61394.141 | 60598.156 |
| NM_003794 | 4680.857  | 2914.308  | NM_00155C | 30427.275 | 31447.906 | N55461    | 2055.234  | 1891.563  |
| NM_019892 | 4091.847  | 3771.63   | AK026849  | 31060.123 | 41123.859 | AA504482  | 17077.773 | 18841.904 |
| NM_01213E | 1278.974  | 1308.964  | NM_018677 | 4120.391  | 3892.596  | BI602175  | 3363.934  | 3353.488  |
| M37190    | 690.419   | 613.894   | NM_00278E | 5432.886  | 5052.309  | NM_01651E | 4334.083  | 3966.444  |
| NM_006812 | 12299.382 | 10496.734 | X78947    | 1642.616  | 1193.035  | AF263538  | 5565.666  | 5509.698  |
| AK024434  | 5223.958  | 4710.621  | NM_000041 | 59419.68  | 53430.906 | AF116574  | 4098.032  | 4306.785  |
| NM_016397 | 535.264   | 686.243   | W69211    | 2328.904  | 2165.766  | NM_00552E | 2491.365  | 3089.694  |
| NM_00238E | 7899.857  | 9720.434  | AA449931  | 27101.016 | 30019.648 | NM_00586E | 11881.229 | 11697.767 |
| NM_01606E | 27255.643 | 25783.764 | AA877347  | 45602.699 | 49350.063 | AF105067  | 7106.179  | 6775.697  |
| NM_017612 | 2866.926  | 2034.94   | R54049    | 1840.306  | 1793.215  | NM_01867E | 2899.372  | 2597.011  |
| NM_01323E | 7639.447  | 7539.685  | BI755551  | 858.546   | 790.731   | NM_012072 | 1516.863  | 1512.085  |
| NM_017841 | 5498.208  | 4552.129  | S57235    | 34476.816 | 43927.543 | NM_006014 | 3009.464  | 3421.066  |
| NM_001254 | 4538.447  | 3536.035  | AI376272  | 12078.653 | 12131.813 | NM_00215E | 1899.673  | 2472.736  |
| NM_020412 | 4361.541  | 4597.603  | BF242229  | 4178.922  | 4970.22   | NM_001771 | 48157.773 | 48430.734 |
| NM_003032 | 29006.779 | 23461.693 | X75756    | 59908.43  | 62054.488 | NM_00206E | 2649.688  | 2094.931  |
| NM_017453 | 16698.273 | 23218.557 | AI754623  | 11155.146 | 11942.428 | NM_00735E | 64864.719 | 62383.117 |
| AB033768  | 2184.872  | 2939.278  | AA401326  | 47837.898 | 52293.676 | NM_00609E | 2420.303  | 2013.365  |
| NM_01765E | 3814.787  | 3174.199  | N55461    | 1534.063  | 1834.399  | NM_00686E | 61685.047 | 61422.297 |
| NM_006904 | 13978.683 | 11721.242 | AA504482  | 15798.893 | 18999.693 | NM_015364 | 28649.896 | 19677.793 |
| NM_004217 | 6771.588  | 4910.356  | BI602175  | 3082.748  | 3211.888  | NM_006611 | 1034.314  | 718.87    |
| NM_006347 | 8263.78   | 5451.108  | NM_01651E | 3753.665  | 3568.643  | NM_004963 | 6602.509  | 5650.923  |
| NM_02040E | 3530.537  | 2433.713  | AF263538  | 5643.951  | 5774.573  | NM_001181 | 1315.904  | 1472.877  |
| NM_01468E | 21338.68  | 16240.644 | AF116574  | 4496.832  | 3755.027  | NM_00553E | 63048.191 | 65736.039 |
| NM_01610C | 990.939   | 1191.119  | NM_00552E | 2521.388  | 2806.514  | AB037857  | 8330.488  | 8212.214  |
| NM_014057 | 4583.991  | 3954.219  | NM_00586E | 12806.225 | 9458.635  | NM_005012 | 1737.657  | 1730.848  |
| NM_00155C | 8172.978  | 7267.98   | AF105067  | 7148.275  | 6136.101  | NM_013262 | 16875.385 | 17667.953 |
| AK026849  | 2186.865  | 1848.87   | NM_01867E | 3307.874  | 2482.188  | NM_00718E | 29372.781 | 29493.906 |
| NM_018677 | 3671.747  | 3175.032  | NM_012072 | 1803.311  | 1976.606  | NM_01227E | 2195.704  | 2067.479  |
| NM_00278E | 1214.939  | 892.864   | NM_006014 | 5151.895  | 4504.728  | AF023142  | 3153.75   | 7595.291  |
| NM_000041 | 15549.139 | 11197.086 | NM_00628C | 60368.219 | 59592.652 | NM_020373 | 3420.051  | 3445.194  |
| W69211    | 513.733   | 530.612   | NM_00215E | 2046.923  | 2243.067  | NM_000714 | 25557.91  | 24374.051 |
| AA449931  | 2162.224  | 2420.698  | NM_001771 | 38555.473 | 47121.98  | NM_00255E | 5466.382  | 7443.263  |
| AA877347  | 19118.285 | 30717.531 | NM_00206E | 2602.657  | 2372.996  | NM_01808E | 16535.428 | 15707.795 |
| S57235    | 6422.197  | 4746.191  | NM_00735E | 61382.945 | 61901.406 | L21934    | 3552.602  | 2697.453  |
| AI376272  | 1198.811  | 797.526   | NM_00609E | 2863.219  | 2775.912  | AL117442  | 27289.164 | 22161.547 |
| BF242229  | 3289.837  | 2647.858  | NM_00686E | 61198.309 | 62153.461 | NM_00718E | 7506.53   | 6130.231  |
| X75756    | 9271.769  | 10187.386 | NM_015364 | 27163.664 | 25732.82  | NM_014341 | 13407.721 | 10940.565 |

|           |           |           |           |           |           |           |           |           |
|-----------|-----------|-----------|-----------|-----------|-----------|-----------|-----------|-----------|
| AI754623  | 5864.649  | 6264.288  | NM_006611 | 1100.501  | 959.08    | NM_014229 | 4551.367  | 4459.852  |
| AA401326  | 11050.576 | 11783.521 | NM_004963 | 6894.709  | 7624.773  | NM_013265 | 52701.344 | 46914.523 |
| N55461    | 1045.123  | 801.463   | NM_001181 | 1343.992  | 1487.763  | NM_014964 | 10518.261 | 8152.822  |
| AA504482  | 3484.236  | 2321.741  | NM_005012 | 1085.076  | 681.219   | NM_014016 | 21796.334 | 17025.732 |
| NM_016516 | 1737.091  | 1400.236  | NM_013262 | 15658.105 | 16458.357 | NM_013433 | 6390.881  | 4675.195  |
| AF263538  | 2500.25   | 1774.389  | NM_007185 | 26570.688 | 34626.418 | AJ224867  | 1257.303  | 1135.073  |
| AF116574  | 1668.729  | 1550.783  | NM_012278 | 1950.644  | 2271.378  | NM_003794 | 17091.975 | 18182.314 |
| NM_005529 | 1955.919  | 2006.646  | AF023142  | 643.296   | 1154.646  | NM_019892 | 19785.391 | 19054.232 |
| NM_005869 | 6361.626  | 6310.836  | NM_020373 | 3807.479  | 2547.697  | NM_016169 | 19302.289 | 18152.805 |
| AF105067  | 3832.354  | 3005.487  | NM_000714 | 24407.412 | 17709.705 | NM_004533 | 2314.135  | 2427.815  |
| NM_018676 | 1550.987  | 924.289   | NM_002556 | 6002.929  | 5730.766  | BF307652  | 4400.479  | 4464.201  |
| NM_012072 | 1001.795  | 637.681   | NM_018089 | 16768.861 | 15677.456 | NM_017772 | 3286.339  | 4562.527  |
| NM_006014 | 3933.274  | 3088.072  | L21934    | 3771.556  | 3376.723  | NM_006812 | 18766.959 | 17583.982 |
| NM_006280 | 42103.551 | 51963.762 | AL117442  | 22271     | 22467.568 | AK024434  | 35212.918 | 40331.215 |
| NM_002155 | 1366.118  | 1120.379  | NM_007188 | 7341.051  | 7959.473  | NM_002388 | 16695.24  | 27183.463 |
| NM_001771 | 10221.879 | 9742.778  | NM_014341 | 13096.429 | 13753.898 | NM_016069 | 58762.43  | 57150.266 |
| NM_002066 | 593.9     | 487.048   | NM_014229 | 5879.951  | 5206.612  | NM_017612 | 6104.709  | 5808.518  |
| NM_007355 | 50626.984 | 46056.094 | NM_013265 | 45599.414 | 47781.176 | NM_013236 | 18381.912 | 20430.32  |
| NM_006096 | 556.153   | 483.411   | NM_014964 | 8956.349  | 8725.848  | NM_017841 | 11328.574 | 11607.904 |
| NM_006869 | 16952.074 | 14435.857 | NM_014016 | 20712.463 | 21199.51  | NM_001254 | 9824.638  | 8050.977  |
| NM_015364 | 11404.394 | 6780.733  | NM_013433 | 5894.315  | 5950.495  | NM_020412 | 53028.836 | 45980.121 |
| NM_006611 | 655.295   | 524.73    | AJ224867  | 1034.517  | 1280.917  | NM_003032 | 51646.328 | 43052.844 |
| NM_004963 | 1619.505  | 1233.024  | NM_003794 | 19867.771 | 18561.902 | NM_017453 | 29383.998 | 22332.354 |
| NM_001181 | 1297.678  | 1020.133  | NM_019892 | 19838.219 | 19900.047 | AF038564  | 13131.831 | 10514.59  |
| NM_005535 | 13380.219 | 15405.259 | NM_016169 | 15714.307 | 14999.479 | AB033768  | 1786.588  | 1560.449  |
| AB037857  | 1470.325  | 1322.071  | NM_004533 | 1802.764  | 1232.496  | NM_017659 | 9280.701  | 7560.209  |
| NM_013262 | 6453.037  | 4330.452  | BF307652  | 5838.96   | 5609.349  | NM_006904 | 30837.982 | 29011.826 |
| NM_007185 | 6130.688  | 5621.292  | NM_017772 | 5032.352  | 5188.531  | NM_004217 | 35571.211 | 33393.945 |
| NM_012278 | 1150.503  | 1222.251  | NM_006812 | 18596.51  | 15643.677 | NM_006347 | 28344.471 | 29168.492 |
| AF023142  | 824.722   | 703.435   | AK024434  | 29997.461 | 32690.139 | NM_020406 | 6446.643  | 5602.485  |
| NM_020373 | 2348.384  | 1994.844  | NM_002388 | 16429.23  | 17175.15  | NM_014685 | 44354.309 | 48210.645 |
| NM_000714 | 12568.458 | 10897.773 | NM_016069 | 58489.391 | 52228.867 | NM_012288 | 6929.149  | 11182.676 |
| AK025626  | 384.103   | 510.664   | NM_017612 | 6293.677  | 4625.837  | NM_005264 | 5453.946  | 7034.141  |
| NM_002556 | 3541.543  | 2779.863  | NM_013236 | 17444.264 | 18675.17  | NM_001550 | 34902.961 | 33327.43  |
| NM_018089 | 4738.681  | 3145.246  | NM_017841 | 10939.013 | 11361.228 | AK026849  | 39205.426 | 45854.832 |
| L21934    | 1995.603  | 1418.169  | NM_001254 | 8936.77   | 9535.759  | NM_018677 | 4710.644  | 5940.37   |
| AL117442  | 2895.536  | 2611.54   | NM_020412 | 42970.934 | 45963.41  | NM_002785 | 5442.169  | 6630.02   |
| NM_007188 | 2185.875  | 2214.852  | NM_003032 | 42293.789 | 46663.766 | X78947    | 1447.806  | 1531.296  |
| NM_014341 | 6357.301  | 5746.631  | NM_017453 | 28123.771 | 28531.473 | NM_000041 | 61131.203 | 63644.086 |
| NM_014229 | 2682.091  | 2895.012  | AF038564  | 13861.892 | 13770.659 | W69211    | 2621.39   | 2341.219  |
| NM_013265 | 17474.592 | 19689.117 | AB033768  | 990.742   | 1086.99   | AA449931  | 34729.48  | 34663.496 |
| NM_014964 | 1853.568  | 1941.495  | NM_017659 | 8009.989  | 7580.915  | AA877347  | 53366.43  | 55958.988 |
| NM_014016 | 3225.893  | 2338.479  | NM_006904 | 27169.855 | 29987.129 | R54049    | 1682.833  | 1825.332  |
| NM_013433 | 3144.771  | 2152.696  | NM_004217 | 28009.777 | 31532.51  | S57235    | 41959.488 | 35802.984 |
| AJ224867  | 821.453   | 916.316   | NM_006347 | 24096.664 | 26034.785 | AI376272  | 8824.963  | 7056.898  |
| NM_003794 | 6053.78   | 3801.299  | NM_020406 | 4984.875  | 5053.685  | BF242229  | 3958.637  | 3215.94   |
| NM_019892 | 3767.518  | 2847.27   | NM_014685 | 38812.414 | 45331.484 | X75756    | 60147.719 | 59268.762 |
| NM_016169 | 4851.914  | 3752.105  | NM_012288 | 6817.181  | 6897.873  | AI754623  | 10975.021 | 9963.476  |
| NM_004533 | 683.87    | 655.534   | NM_005264 | 7824.983  | 7267.755  | AA401326  | 58725.078 | 57666.695 |
| BF307652  | 5735.083  | 4256.892  | NM_001550 | 31561.525 | 29764.938 | N55461    | 1600.801  | 1626.135  |
| NM_017772 | 2024.9    | 1841.141  | AK026849  | 34042.719 | 36200.883 | AA504482  | 13573.906 | 15252.306 |
| NM_006812 | 12057.858 | 11589.355 | NM_018677 | 4662.089  | 4461.05   | BI602175  | 3438.673  | 3437.135  |
| AK024434  | 6486.893  | 10393.263 | NM_002785 | 5223.195  | 5710.495  | NM_016516 | 6224.102  | 10450.299 |

|           |           |           |           |           |           |           |           |           |
|-----------|-----------|-----------|-----------|-----------|-----------|-----------|-----------|-----------|
| NM_016397 | 716.544   | 368.294   | X78947    | 1711.872  | 1016.821  | NM_00215E | 2039.421  | 2640.488  |
| NM_00238E | 7630.489  | 7854.424  | NM_000041 | 57265.035 | 53175.816 | NM_001771 | 48565.594 | 56128.648 |
| NM_01606E | 39199.523 | 44148.164 | W69211    | 2750.949  | 2341.359  | NM_00206E | 2486.248  | 2520.945  |
| NM_01761E | 3202.831  | 2601.383  | AA449931  | 28443.293 | 29617.584 | NM_00735E | 64208.285 | 70202.82  |
| NM_013357 | 431.224   | 311.805   | AA877347  | 45666.035 | 47242.445 | NM_00609E | 2936.243  | 2628.322  |
| NM_01323E | 6897.115  | 7155.036  | R54049    | 1859.129  | 1385.286  | NM_00686E | 60396.086 | 65507.617 |
| NM_017841 | 3825.634  | 3231.654  | S57235    | 35163.852 | 41366.566 | NM_01536A | 24302.422 | 18201.818 |
| NM_00125A | 4711.17   | 4405.246  | AI376272  | 11381.283 | 9169.923  | NM_00496E | 6663.256  | 5130.222  |
| NM_02041E | 3885.358  | 3163.696  | BF242229  | 4504.254  | 4308.484  | NM_001181 | 1163.131  | 1364.587  |
| NM_00303E | 22729.355 | 18452.318 | X75756    | 58527.359 | 62934.695 | NM_00553E | 60802.848 | 60133.016 |
| NM_01745E | 12196.41  | 10455.591 | AI754623  | 10664.085 | 9324.842  | AB037857  | 7786.909  | 6839.831  |
| AF038564  | 9030.051  | 8654.837  | AA401326  | 43814.184 | 48263.059 | AF218021  | 2061.009  | 1937.346  |
| AB033768  | 1057.798  | 1293.447  | N55461    | 2101.23   | 1937.495  | NM_01326E | 15458.679 | 13023.005 |
| NM_01765E | 3514.444  | 3178.307  | AA504482  | 14258.767 | 16654.182 | NM_00718E | 29190.135 | 25187.713 |
| NM_00690A | 16708.693 | 11957.969 | BI602175  | 2431.682  | 2233.822  | NM_003221 | 1215.801  | 1248.938  |
| NM_004217 | 9189.871  | 7329.783  | NM_01651E | 3028.719  | 3041.532  | NM_003357 | 51125.633 | 58127.461 |
| NM_006347 | 8607.503  | 6523.24   | AF263538  | 5090.919  | 5260.693  | AF195420  | 1447.67   | 1951.971  |
| NM_02040E | 1989.651  | 1108.079  | NM_01213E | 3154.342  | 3199.213  | AK023261  | 5207.483  | 6509.595  |
| NM_01468E | 14622.152 | 10042.516 | M37190    | 2353.982  | 1897.497  | NM_000341 | 2448.304  | 2757.036  |
| NM_01228E | 4996.954  | 5555.827  | NM_00215E | 2031.926  | 1883.903  | AK023533  | 1140.392  | 1901.288  |
| NM_00526A | 2460.549  | 3058.371  | NM_001771 | 37938.602 | 44816.746 | NM_01245C | 3783.743  | 4086.376  |
| NM_00155C | 10940.925 | 8127.19   | NM_00206E | 2481.846  | 2389.981  | NM_007071 | 14435.941 | 14932.465 |
| AK026849  | 2038.615  | 1691.867  | NM_00735E | 58475.797 | 63042.34  | NM_01658E | 28477.309 | 30690.072 |
| NM_018677 | 2945.61   | 3937.923  | NM_00609E | 2639.396  | 2317.368  | NM_01422E | 3872.115  | 3927.441  |
| NM_00278E | 1138.096  | 790.526   | NM_00686E | 58886.898 | 54446.496 | NM_01326E | 46712.582 | 50875.105 |
| NM_000041 | 14327.693 | 9444.008  | NM_01536A | 25665.264 | 21745.016 | NM_01496A | 8740.088  | 8757.375  |
| AA449931  | 1472.694  | 808.986   | NM_006611 | 1006.204  | 915.826   | NM_01401E | 20069.115 | 19143.785 |
| AA877347  | 19282.559 | 11929.139 | NM_00496E | 5770.457  | 5547.068  | NM_01343E | 5846.036  | 4967.322  |
| BI755551  | 545.024   | 283.767   | NM_001181 | 1251.271  | 1167.306  | AJ224867  | 857.619   | 791.976   |
| S57235    | 7567.704  | 5477.175  | NM_00553E | 59020.07  | 54410.395 | NM_00379A | 18217.18  | 16745.117 |
| AI376272  | 1089.073  | 895.174   | AB037857  | 6302.234  | 6414.309  | NM_01989E | 19359.27  | 16065.922 |
| BF242229  | 3356.064  | 3025.789  | NM_00501E | 739.246   | 462.535   | NM_01616E | 17899.041 | 15745.521 |
| X75756    | 7869.587  | 7495.027  | AF218021  | 1901.636  | 1914.814  | NM_00453E | 1459.864  | 1168.533  |
| AI754623  | 5184.568  | 4429.227  | NM_01326E | 14528.263 | 13776.639 | BF307652  | 5625.546  | 4612.097  |
| AA401326  | 9028.983  | 8428.517  | NM_00718E | 24767.146 | 28053.207 | NM_01777E | 3843.384  | 5201.756  |
| N55461    | 785.361   | 1078.961  | NM_003221 | 1073.674  | 1098.044  | AF116574  | 5445.133  | 7606.953  |
| AA504482  | 3602.609  | 3153.224  | NM_003357 | 37218.699 | 41740.797 | NM_00586E | 13251.485 | 15302.988 |
| NM_01651E | 1480.103  | 891.553   | AF195420  | 1390.186  | 1221.881  | NM_00628C | 65543.063 | 67802.602 |
| AF263538  | 2658.158  | 1846.506  | AK023261  | 5040.852  | 6401.833  | NM_02040E | 5257.954  | 4476.579  |
| NM_01213E | 1214.239  | 830.376   | NM_005097 | 2917.94   | 3073.588  | NM_01468E | 42070.102 | 50031.145 |
| M37190    | 537.425   | 481.815   | NM_01227E | 1775.258  | 2115.306  | NM_01228E | 1921.741  | 1810.099  |
| NM_00215E | 1055.757  | 741.266   | AF023142  | 1054.979  | 1043.481  | NM_00526A | 5423.222  | 6862.126  |
| NM_001771 | 23782.09  | 30187.945 | NM_01610C | 1766.747  | 1504.405  | NM_02037E | 3546.858  | 3539.009  |
| NM_00206E | 598.529   | 567.306   | NM_014057 | 4986.521  | 5289.115  | NM_00071A | 23803.225 | 18402.443 |
| NM_00735E | 48322.152 | 31808.566 | NM_000341 | 2146.868  | 2064.917  | NM_00255E | 5872.524  | 6019.66   |
| NM_00609E | 1204.404  | 677.061   | AK023533  | 1313.863  | 1235.214  | NM_01808E | 16333.747 | 13899.28  |
| NM_00686E | 14104.529 | 8104.443  | NM_01245C | 5243.137  | 3948.112  | L21934    | 2822.389  | 2816.422  |
| NM_01536A | 9800.043  | 4167.206  | NM_007071 | 18598.834 | 19619.313 | AL117442  | 21941.549 | 17714.701 |
| NM_006611 | 549.442   | 201.582   | NM_01658E | 29417.184 | 34288.918 | NM_00469E | 1432.856  | 1265.807  |
| NM_00496E | 716.286   | 409.47    | NM_01422E | 5345.978  | 5388.958  | AF299075  | 5847.813  | 5382.847  |
| NM_001181 | 805.367   | 610.203   | NM_01326E | 43253.434 | 45888.363 | NM_00034C | 674.595   | 795.44    |
| NM_00553E | 9053.279  | 6979.675  | NM_01496A | 10834.904 | 10108.976 | NM_00718E | 6673.826  | 7835.524  |
| AB037857  | 1337.246  | 1003.171  | NM_01401E | 22721.217 | 18512.355 | NM_01651E | 3352.997  | 3488.667  |

|           |           |           |           |           |           |           |           |           |
|-----------|-----------|-----------|-----------|-----------|-----------|-----------|-----------|-----------|
| NM_005012 | 422.529   | 275.384   | NM_013433 | 5971.968  | 4686.801  | AF263538  | 4796.87   | 4785.568  |
| AF218021  | 1136.901  | 935.553   | AJ224867  | 963.167   | 750.425   | M37190    | 955.034   | 992.62    |
| NM_013262 | 5730.02   | 4188.1    | NM_003794 | 19364.713 | 15871.445 | NM_006812 | 16535.129 | 15721.461 |
| NM_007185 | 5046.056  | 5171.822  | NM_019892 | 19340.643 | 16302.517 | AK024434  | 33211.191 | 34284.809 |
| NM_003221 | 461.115   | 745.868   | NM_016169 | 19363.361 | 17115.809 | NM_002388 | 15223.214 | 16304.592 |
| NM_003357 | 12031.882 | 11821.219 | NM_004533 | 1859.25   | 1122.038  | NM_016068 | 57821.934 | 53362.488 |
| AF195420  | 948.883   | 1029.609  | BF307652  | 5075.154  | 4878.105  | NM_017612 | 5540.05   | 4096.682  |
| AK023261  | 2767.81   | 4613.157  | NM_017772 | 3666.22   | 3781.33   | NM_013236 | 15702.103 | 17107.322 |
| NM_005097 | 1383.26   | 982.932   | AF116574  | 4863.676  | 4852.901  | NM_017841 | 11074.075 | 10664.756 |
| NM_012278 | 1018.283  | 866.195   | NM_005529 | 2945.736  | 2669.18   | NM_001254 | 9153.019  | 9591.245  |
| AF023142  | 874.046   | 813.058   | NM_005869 | 13056.176 | 10877.988 | NM_020412 | 47288.973 | 47677.91  |
| NM_016100 | 1213.412  | 963.937   | AF105067  | 9424.111  | 9011.007  | NM_003032 | 50598.922 | 52019.301 |
| NM_014057 | 3290.677  | 3210.172  | NM_018676 | 4141.588  | 3570.455  | NM_017453 | 28219.943 | 30786.553 |
| NM_000341 | 2023.051  | 2718.53   | NM_012072 | 3035.94   | 3791.915  | AF038564  | 14238.641 | 17047.133 |
| AK023533  | 721.331   | 728.744   | NM_006014 | 7276.818  | 6806.087  | NM_004217 | 24765.191 | 27688.975 |
| NM_012450 | 1335.512  | 779.736   | NM_006280 | 61469.918 | 57749.445 | NM_006347 | 26833.635 | 27233.928 |
| NM_007071 | 9095.273  | 4132.395  | NM_020406 | 5481.622  | 3669.896  | CY3Cy5    | 11213.893 | 589.391   |
| NM_016582 | 4223.009  | 2071.114  | NM_014685 | 35869.125 | 41039.57  | NM_002054 | 3214.43   | 3985.441  |
| NM_014229 | 2162.2    | 1054.998  | NM_012288 | 7632.928  | 6568.489  | AF086332  | 66767.055 | 66526.172 |
| NM_013265 | 11871.708 | 5695.983  | NM_005264 | 7312.82   | 7125.129  | AF086432  | 1356.301  | 3445.215  |
| NM_014964 | 1466.278  | 699.119   | NM_020373 | 4714.047  | 4086.265  | AF086444  | 3299.48   | 5696.286  |
| NM_014016 | 2131.557  | 1222.97   | NM_000714 | 26275.709 | 18355.998 | AK001043  | 20393.059 | 16651.033 |
| NM_013433 | 2403.566  | 1418.055  | NM_002556 | 7021.892  | 5920.863  | AK024535  | 19256.32  | 16801.486 |
| AJ224867  | 611.69    | 352.338   | NM_018089 | 17063.314 | 14530.621 | NM_016498 | 50282.367 | 47886.91  |
| NM_003794 | 7033.55   | 4086.287  | L21934    | 3043.985  | 3104.6    | NM_016551 | 1577.51   | 2332.876  |
| NM_019892 | 3795.49   | 3239.979  | AL117442  | 19656.305 | 15785.853 | AK024631  | 1919.25   | 1854.177  |
| NM_016169 | 5459.869  | 3716.214  | NM_004695 | 1137.972  | 1220.245  | AK026949  | 1495.884  | 1128.132  |
| NM_004533 | 1073.343  | 468.15    | AF299075  | 3980.112  | 4599.909  | NM_002054 | 1440.641  | 921.186   |
| BF307652  | 908.184   | 501.73    | NM_000340 | 1794.382  | 1761.754  | SR2       | 23274.939 | 23427.311 |
| NM_017772 | 1884.162  | 1397.619  | NM_007188 | 7838.713  | 8389.523  | SR4       | 7571.097  | 7085.987  |
| AF116574  | 1988.514  | 1467.859  | NM_001214 | 23553.285 | 23456.959 | SR8       | 651.564   | 4534.215  |
| NM_005529 | 1638.439  | 1423.609  | AK022409  | 2325.838  | 2388.782  | SR10      | 2837.106  | 1687.384  |
| NM_005869 | 5041.783  | 3303.064  | U16851    | 32090.689 | 33384.461 | CY3Cy5    | 10661.066 | 520.99    |
| AF105067  | 3522.071  | 2033.612  | NM_014341 | 12776.198 | 13937.64  | AF086068  | 3849.035  | 4033.807  |
| NM_018676 | 1354.243  | 1025.563  | NM_020309 | 2231.157  | 1498.991  | AK024239  | 4786.597  | 5375.913  |
| NM_012072 | 869.507   | 778.562   | NM_016516 | 2937.156  | 2236.503  | AF147390  | 3967.246  | 4805.26   |
| NM_006014 | 3938.794  | 2720.163  | AF263538  | 4598.135  | 3622.328  | AF075019  | 1128.885  | 1037.035  |
| NM_006280 | 36726.602 | 33625.625 | NM_012135 | 1810.781  | 1433.854  | AK021498  | 5561.928  | 4004.837  |
| NM_020406 | 2705.631  | 1539.923  | M37190    | 1123.06   | 945.35    | AF085874  | 8681.763  | 6684.211  |
| NM_014685 | 16896.168 | 7824.273  | NM_006812 | 18576.27  | 15699.258 | AF147346  | 1144.786  | 1065.333  |
| NM_012288 | 4005.852  | 1655.094  | AK024434  | 28869.35  | 30734.445 | AK026959  | 3877.704  | 3787.439  |
| NM_005264 | 4106.689  | 4140.522  | NM_002388 | 15043.042 | 16104.048 | NM_004753 | 43268.859 | 39061.785 |
| NM_020373 | 2606.676  | 942.943   | NM_016069 | 59582.227 | 50609.258 | AK026868  | 3100.485  | 2782.019  |
| NM_000714 | 10802.529 | 4024.991  | NM_017612 | 5819.752  | 4316.677  | AK022245  | 859.341   | 775.042   |
| NM_002556 | 3094.076  | 1886.724  | NM_013236 | 17194.588 | 18098.961 | AK022200  | 16835.641 | 17084.426 |
| NM_018089 | 6376.304  | 3655.741  | NM_017841 | 9402.905  | 8336.05   | AK026967  | 630.224   | 1649.459  |
| L21934    | 1882.553  | 873.828   | NM_001254 | 10111.127 | 9546.41   | AF088025  | 3939.462  | 5180.495  |
| AL117442  | 3486.656  | 2064.906  | NM_020412 | 38863.684 | 41783.262 | AF085934  | 1597.912  | 1495.593  |
| NM_004695 | 863.091   | 367.947   | NM_003032 | 44197.414 | 45858.145 | AF147423  | 798.414   | 1096.562  |
| AF299075  | 1009.428  | 649.178   | NM_017453 | 26901.727 | 25963.336 | AF075088  | 1801.749  | 1373.625  |
| NM_000340 | 819.409   | 506.501   | AF038564  | 12596.581 | 11550.881 | AK023971  | 69207.234 | 60863     |
| NM_007188 | 2957.72   | 2104.713  | AB033768  | 1697.495  | 1456.516  | AK024738  | 2853.484  | 2651.284  |
| NM_001214 | 3950.444  | 5668.17   | NM_017659 | 8863.196  | 8325.647  | AL133103  | 2226.792  | 2296.706  |

|           |           |           |           |           |           |           |           |           |
|-----------|-----------|-----------|-----------|-----------|-----------|-----------|-----------|-----------|
| AK022409  | 914.169   | 570.995   | NM_006904 | 28926.115 | 31062.988 | BC015321  | 2349.62   | 2028.024  |
| U16851    | 26018.717 | 15920.142 | NM_004217 | 29873.783 | 30271.883 | AL157450  | 3981.036  | 2959.287  |
| NM_014341 | 8891.351  | 6486.197  | NM_006347 | 25763.027 | 26057.676 | AL359594  | 1487.206  | 1722.556  |
| NM_020309 | 764.247   | 514.7     | CY3Cy5    | 7421.107  | 535.656   | AL137293  | 2548.492  | 1762.677  |
| NM_016516 | 1232.787  | 437.411   | SB        | 984.308   | 803.124   | AL157490  | 2313.207  | 2823.827  |
| AF263538  | 1765.372  | 623.129   | NM_002054 | 1689.942  | 1729.101  | AK001022  | 1377.307  | 1187.131  |
| NM_012135 | 695.73    | 244.465   | AF086332  | 51876.672 | 51757.848 | AL049351  | 52489.301 | 55163.629 |
| NM_006812 | 10965.002 | 4875.75   | AF086432  | 2794.692  | 2237.415  | AK021826  | 12656.101 | 14074.489 |
| AK024434  | 4976.533  | 2592.229  | AJ404614  | 4704.505  | 4009.885  | AK021838  | 40704.586 | 48264.313 |
| NM_016397 | 450.609   | 323.281   | AF086347  | 21115.557 | 19995.203 | AK021990  | 1919.683  | 5106.959  |
| NM_002388 | 8289.322  | 7772.185  | AF086388  | 2205.448  | 2058.611  | AF083118  | 1061.062  | 1237.74   |
| NM_016069 | 35585.07  | 33145.313 | AK001043  | 22862.244 | 22186.26  | AF089811  | 2282.541  | 1779.061  |
| NM_017612 | 3231.455  | 2885.436  | AK024535  | 32195.059 | 34156.754 | AF147444  | 2284.206  | 2511.663  |
| NM_013236 | 8622.103  | 7988.897  | AL359608  | 3356.372  | 2869.851  | NM_016566 | 1103.986  | 1023.477  |
| NM_017841 | 4669.444  | 3958.979  | NM_016498 | 56778.938 | 51675.816 | AK021909  | 1371.396  | 1546.26   |
| NM_001254 | 6268.487  | 4150.586  | NM_016551 | 4632.574  | 4446.364  | AK022043  | 1356.788  | 1419.65   |
| NM_020412 | 5333.317  | 3371.393  | AK024631  | 4708.833  | 4610.833  | AK022353  | 6711.562  | 5207.144  |
| NM_003032 | 27972.359 | 14277.485 | AF087977  | 2117.867  | 2539.909  | AF064848  | 48170.563 | 49927.949 |
| NM_017453 | 8451.741  | 5434.628  | AK026949  | 2560.164  | 2229.515  | U61089    | 18129.334 | 15824.283 |
| AF038564  | 8182.792  | 6966.583  | SB        | 1054.529  | 725.87    | AK001036  | 6140.862  | 8054.623  |
| AB033768  | 1337.666  | 951.854   | NM_002054 | 1562.414  | 1878.995  | AK024858  | 30291.002 | 34248.969 |
| NM_017659 | 3560.017  | 2189.65   | SR2       | 51059.793 | 49822.023 | Y16697    | 1668.963  | 2285.366  |
| NM_006904 | 16849.201 | 12706.062 | SR4       | 21908.545 | 24866.104 | NM_001049 | 19330.004 | 26302.064 |
| NM_004217 | 9650.715  | 8436.269  | SR6       | 2346.51   | 3674.299  | AK024554  | 6985.485  | 16333.75  |
| NM_006347 | 13747.036 | 13018.182 | SR8       | 10423.985 | 26624.449 | AF068294  | 9140.84   | 9639.132  |
| CY3Cy5    | 9032.739  | 638.934   | SR10      | 35196.086 | 14503.255 | AK025909  | 6668.994  | 6934.695  |
| NM_002054 | 2116.228  | 1471.753  | CY3Cy5    | 5825.346  | 312.958   | AK026138  | 2704.937  | 2890.264  |
| AF086332  | 6337.06   | 6937.357  | NM_014332 | 420.21    | 451.23    | NM_018101 | 15690.088 | 15915.365 |
| AF086347  | 6090.721  | 6634.832  | AF086068  | 3187.326  | 3544.425  | AF293366  | 1715.582  | 1766.124  |
| AF086388  | 3063.286  | 4173.722  | AF086059  | 2795.777  | 2902.654  | BF526704  | 3943.011  | 4223.393  |
| AK001043  | 9946.166  | 10936.043 | AF086091  | 997.046   | 885.088   | AJ491695  | 14931.658 | 14843.127 |
| AK024535  | 12564.016 | 14083.045 | AF075018  | 800.192   | 819.703   | AF052107  | 45169.707 | 46984.949 |
| AL359608  | 2238.046  | 2239.931  | AK024239  | 2086.376  | 2016.365  | AK022430  | 2536.788  | 1832.69   |
| NM_016498 | 34353.445 | 42706.207 | AF147390  | 795.14    | 737.425   | AL137279  | 5033.868  | 5501.439  |
| NM_016551 | 3205.621  | 4254.285  | AF075019  | 3082.94   | 3167.018  | AK023981  | 3824.668  | 4284.185  |
| AK024631  | 9880.351  | 11396.454 | AF147388  | 932.018   | 1056.568  | AK025037  | 4006.055  | 8713.72   |
| AF087977  | 2888.602  | 3158.344  | AK021498  | 8399.879  | 7938.796  | AK021874  | 46869.637 | 53178.305 |
| AK026949  | 2273.675  | 3229.323  | AF085874  | 13550.906 | 12648.881 | M77818    | 52564.207 | 59671.949 |
| NM_002054 | 1704.486  | 1895.661  | AF147346  | 2014.177  | 1820.291  | AK027129  | 6628.254  | 6672.531  |
| SR2       | 36339.227 | 43680.969 | AK026959  | 1846.266  | 2467.549  | NM_015698 | 4634.32   | 4655.563  |
| SR4       | 7112.121  | 10293.945 | NM_019556 | 1396.267  | 1713.871  | AK024138  | 6411.213  | 7427.107  |
| SR6       | 1862.947  | 2122.031  | NM_004753 | 42523.66  | 42769.336 | Y10505    | 5242.673  | 4467.21   |
| SR8       | 3981.621  | 14514.483 | NM_015462 | 15937.752 | 13850.218 | U00946    | 15372.625 | 16663.039 |
| SR10      | 15486.797 | 8306.667  | AF147377  | 1620.014  | 1085.317  | NM_005615 | 15422.934 | 15434.753 |
| CY3Cy5    | 20031.543 | 1788.418  | AK026700  | 2821.398  | 2936.225  | Z34290    | 2335.371  | 3364.044  |
| AF086068  | 2115.633  | 1797.085  | AK000127  | 737.973   | 1429.271  | D16918    | 3792.306  | 3711.624  |
| AF086059  | 2129.729  | 2390.398  | AF086242  | 1428.864  | 1015.961  | D16467    | 2142.99   | 2119.038  |
| AF086091  | 2283.276  | 2591.74   | AF086370  | 1065.393  | 1225.433  | AF090932  | 2083.822  | 1519.446  |
| AF075018  | 1097.332  | 1175.985  | AK026868  | 2564.786  | 3154.551  | AF225425  | 9787.138  | 7036.923  |
| AK024239  | 1084.591  | 928.731   | AK022245  | 784.538   | 698.698   | NM_014737 | 25787.775 | 28065.412 |
| AF147390  | 1130.493  | 922.852   | AK022200  | 10908.816 | 13152.795 | NM_003488 | 17672.016 | 18046.914 |
| AF085879  | 758.988   | 874.354   | AK023396  | 1277.487  | 1120.328  | NM_004824 | 3893.27   | 4276.217  |
| AF075019  | 3270.023  | 3077.12   | AF264625  | 1592.872  | 1480.077  | U83191    | 1812.327  | 1737.7    |

|           |           |           |           |           |           |           |           |           |
|-----------|-----------|-----------|-----------|-----------|-----------|-----------|-----------|-----------|
| AF147388  | 2116.525  | 2184.575  | AF088025  | 1052.507  | 1269.212  | NM_013952 | 19494.857 | 23159.412 |
| AK021498  | 2934.37   | 2915.935  | AK024286  | 426.619   | 527.28    | AK021434  | 23507.723 | 20406.35  |
| AF085874  | 9971.771  | 12416.971 | AF085934  | 2065.677  | 2524.597  | NM_016479 | 37538.344 | 37978.883 |
| AF147346  | 2129.298  | 2335.97   | AF147423  | 1360.671  | 1706.546  | AK000933  | 33338.813 | 34491.957 |
| AK026959  | 11890.89  | 13922.461 | AF075088  | 1764.137  | 1912.557  | Y10205    | 2347.049  | 2354.672  |
| NM_019556 | 1343.246  | 1209.744  | AK023971  | 62301.621 | 66286.039 | NM_014626 | 3751.264  | 4479.144  |
| NM_004753 | 23212.277 | 28546.588 | AK024738  | 3443.413  | 3916.496  | NM_013937 | 1098.457  | 1088.677  |
| NM_015462 | 10077.079 | 11980.37  | AL133103  | 3665.295  | 3573.076  | AK025277  | 3634.938  | 4765.341  |
| AF147377  | 3023.697  | 3970.232  | BC015321  | 3490.037  | 3263.331  | AF086095  | 1136.43   | 1036.798  |
| AK026700  | 1328.459  | 1868.307  | AL157450  | 3407.908  | 3688.988  | NM_018352 | 1226.088  | 1191.27   |
| AK000127  | 2757.82   | 3545.291  | AL359594  | 3437.323  | 3677.324  | AK026880  | 1901.962  | 1568.613  |
| AF086242  | 2607.597  | 2560.181  | AL137293  | 8693.874  | 8910.286  | AF086061  | 1423.712  | 1142.912  |
| AF086370  | 2401.722  | 2757.817  | AL137458  | 3772.185  | 3560.046  | AL080092  | 1755.523  | 1429.812  |
| AK026868  | 1253.227  | 1386.987  | AL157490  | 37894.605 | 43824.605 | AK024427  | 12733.394 | 11734.494 |
| AK022245  | 1217.939  | 1247.842  | AL390167  | 10367.032 | 9393.846  | NM_003006 | 5068.493  | 4721.881  |
| AK022200  | 3088.52   | 2837.254  | AK023657  | 1788.023  | 1904.855  | NM_000674 | 1470.391  | 1947.35   |
| AK026967  | 1890.882  | 1780.191  | AK001022  | 1540.38   | 1171.454  | AK024257  | 992.802   | 1596.222  |
| AK024604  | 611.862   | 726.235   | AL049351  | 33212.328 | 41128.367 | NM_016232 | 4442.484  | 5054.03   |
| AK023396  | 1392.811  | 1582.615  | AL137508  | 744.622   | 1128.7    | AF178930  | 5788.178  | 5338.493  |
| AF264625  | 2252.255  | 2372.614  | AK021826  | 8072.838  | 9297.05   | M74161    | 11858.137 | 11570.993 |
| AF088025  | 1122.642  | 1209.829  | AK024541  | 382.016   | 1003.082  | NM_016542 | 3199.152  | 2999.365  |
| AF085934  | 1072.571  | 1677.942  | AK025341  | 1454.293  | 1653.536  | NM_000484 | 3230.65   | 2626.353  |
| AF147423  | 3900.939  | 4067.065  | AK021838  | 31469.172 | 34502.809 | S40369    | 23682.75  | 21374.416 |
| AF075088  | 2606.423  | 2809.63   | AK021990  | 1372.524  | 1573.324  | NM_015831 | 6147.907  | 5381.677  |
| AK023971  | 73824.867 | 67551.086 | AF083118  | 3787.017  | 4160.741  | AK023154  | 3588.983  | 3520.766  |
| AK024738  | 6159.526  | 7890.085  | AF132602  | 494.697   | 676.996   | Z36820    | 1750.864  | 2135.04   |
| AL133103  | 3833.993  | 4315.092  | AK000957  | 719.428   | 623.455   | NM_003967 | 8551.106  | 7679.444  |
| BC015321  | 3250.19   | 3085.987  | AF089811  | 2617.77   | 3095.996  | NM_012451 | 2493.175  | 1983.698  |
| AL157450  | 1742.409  | 2006.922  | AF147444  | 2429.097  | 3250.003  | NM_006624 | 34681.797 | 35580.762 |
| AL359594  | 2881.784  | 3200.962  | NM_016566 | 1214.415  | 1603.371  | NM_017489 | 8131.559  | 7696.203  |
| AL137293  | 10970.243 | 14639.807 | AK021909  | 2853.08   | 2882.682  | NM_002824 | 31694.922 | 29248.41  |
| AL137458  | 5763.047  | 7317.537  | AK022043  | 2599.651  | 2758.081  | NM_006835 | 49518.688 | 48390.715 |
| AL157490  | 37391.309 | 43592.145 | AK022168  | 2079.777  | 2383.472  | NM_006023 | 32166.715 | 31989.24  |
| AL049351  | 5823.638  | 6388.041  | AK022327  | 2065.22   | 2165.321  | NM_014673 | 13452.134 | 13922.785 |
| AL137508  | 1449.123  | 1404.415  | AK021959  | 745.087   | 775.334   | AB002330  | 7899.683  | 7866.501  |
| AK021826  | 3089.363  | 3395.348  | AK022061  | 559.935   | 594.337   | AL137509  | 55601.301 | 53586.66  |
| AK024541  | 1200.804  | 1096.747  | AK022201  | 4155.441  | 4398.143  | NM_006538 | 22978.453 | 21889.119 |
| AK025341  | 1393.383  | 1947.644  | AK022353  | 21062.895 | 19896.119 | NM_019887 | 19650.598 | 18823.137 |
| AK021838  | 11780.475 | 13090.885 | AF064848  | 39227.938 | 41908.332 | NM_004050 | 34755.023 | 33997.957 |
| AF083118  | 2529.7    | 2713.813  | U61089    | 14217.317 | 15992.473 | NM_006024 | 9620.633  | 7643.045  |
| AF089811  | 931.197   | 1273.943  | AK001036  | 6392.897  | 6715.531  | NM_020191 | 1091.453  | 1172.432  |
| AF147444  | 2924.345  | 3464.664  | AK024858  | 27733     | 34949.449 | NM_017434 | 25355.469 | 22233.875 |
| NM_016566 | 1546.942  | 1770.175  | Y16697    | 1756.492  | 2054.591  | AL137669  | 2079.792  | 1711.669  |
| NM_014126 | 1545.569  | 1296.095  | NM_001049 | 19676.832 | 23271.48  | AB032958  | 3753.13   | 2820.725  |
| AK021909  | 3588.775  | 3562.312  | AK024554  | 4249.254  | 4130.179  | NM_014263 | 11936.044 | 12019.278 |
| AK022043  | 2307.742  | 2732.517  | AF068294  | 11580.307 | 11623.538 | NM_020361 | 2779.136  | 3153.453  |
| AK022168  | 1894.819  | 2096.044  | AK025909  | 11431.069 | 13838.883 | NM_015907 | 8236.152  | 7237.134  |
| AK022327  | 1318.216  | 1756.021  | AK026138  | 5603.092  | 6541.306  | NM_002454 | 8034.718  | 9063.922  |
| AK021959  | 1215.341  | 1981.696  | Z70706    | 1135.489  | 1356.164  | NM_001917 | 12962.986 | 14067.218 |
| AK022061  | 1383.766  | 1878.245  | NM_018101 | 17487.865 | 19590.488 | NM_005956 | 66251.68  | 67537.688 |
| AF064848  | 8879.29   | 8857.431  | AF293366  | 1758.352  | 2002.626  | NM_003043 | 48611.492 | 51861.336 |
| U61089    | 7332.159  | 7378.242  | BF526704  | 4164.099  | 3949.759  | D87077    | 3710.364  | 3860.75   |
| AK001036  | 4723.783  | 3936.543  | AJ491695  | 23003.732 | 23683.916 | NM_014308 | 1610.722  | 1921.047  |



|           |           |           |           |           |           |           |           |           |
|-----------|-----------|-----------|-----------|-----------|-----------|-----------|-----------|-----------|
| AK024858  | 8851.598  | 8446.524  | AF052107  | 47926.668 | 48945.777 | L07033    | 4888.001  | 5737.931  |
| Y16697    | 3974.124  | 4217.558  | AK025113  | 759.994   | 790.411   | AK023934  | 999.548   | 918.417   |
| NM_001049 | 9712.602  | 9962.209  | AK022430  | 6122.51   | 6239.265  | AK000142  | 2780.46   | 2383.917  |
| AK024554  | 3596.98   | 4433.484  | AL137279  | 5169.11   | 5227.071  | NM_005993 | 3018.684  | 3063.893  |
| AF068294  | 5662.436  | 5941.223  | AK023981  | 4600.994  | 5160.286  | AK026341  | 2836.779  | 3516.066  |
| AK025909  | 13565.824 | 15671.049 | AK025037  | 2853.681  | 3212.988  | NM_018943 | 4805.376  | 4009.74   |
| AK026138  | 6665.838  | 7536.708  | AK021874  | 44204.578 | 50033.168 | U01922    | 3378.342  | 2859.167  |
| NM_000549 | 1417.649  | 1239.712  | AK021877  | 1335.885  | 2676.281  | NM_001270 | 7634.78   | 7420.378  |
| BF526704  | 2445.895  | 3019.978  | AF086384  | 58162.824 | 86036.859 | NM_001952 | 58437.957 | 57072.594 |
| AJ491695  | 9399.401  | 11037.056 | M77818    | 43537.738 | 48403.285 | NM_003223 | 27677.568 | 27066.945 |
| AF052107  | 14775.253 | 17578.891 | AF009267  | 8118.258  | 8413.473  | NM_006713 | 56776.66  | 53373.094 |
| AK025113  | 1594.26   | 1323.556  | AK027129  | 19954.932 | 21289.115 | NM_020201 | 17876.51  | 17396.17  |
| AK022430  | 3285.826  | 4375.256  | L19367    | 749.138   | 731.349   | U81557    | 3403.669  | 3108.685  |
| AL137279  | 4561.24   | 3524.122  | NM_015698 | 7784.195  | 8171.045  | NM_014878 | 10027.323 | 12656.342 |
| AK023981  | 3688.927  | 3419.288  | AK024138  | 7759.368  | 9113.366  | AK023530  | 2567.783  | 2020.715  |
| AK025037  | 4924.038  | 5659.499  | Y10505    | 7093.128  | 6537.357  | NM_016019 | 26545.242 | 21316.594 |
| AK021874  | 16326.438 | 15127.862 | AF056443  | 461.973   | 459.804   | NM_012245 | 37229.258 | 29796.201 |
| AF086384  | 72047.688 | 65023.777 | U00946    | 22026.053 | 21515.559 | NM_003986 | 986.694   | 831.604   |
| M77818    | 37531.285 | 39709.469 | NM_005615 | 23386.434 | 24508.934 | NM_001533 | 54310.449 | 57172.996 |
| AF009267  | 3690.66   | 3916.202  | Z34290    | 3598.472  | 3531.641  | NM_006929 | 49419.641 | 41521.57  |
| AK027129  | 14449.016 | 16250.208 | AF070642  | 15509.978 | 15683.912 | NM_003977 | 61858.977 | 55302.371 |
| L19367    | 2427.704  | 2980.245  | AK027125  | 8508.44   | 8908.721  | NM_005998 | 38146.969 | 32943.301 |
| AK024138  | 11265.086 | 13638.433 | AK025311  | 1554.886  | 1557.574  | U28424    | 3984.03   | 3009.716  |
| Y10505    | 11641.429 | 12248.217 | D16918    | 6930.879  | 7174.746  | BF541372  | 18854.844 | 16258.157 |
| AF056443  | 1131.821  | 1554.578  | D16467    | 5828.846  | 6119.788  | AF092137  | 15777.248 | 16130.481 |
| U00946    | 11835.854 | 12258.773 | AF090932  | 11225.402 | 10007.744 | AL050028  | 19738.053 | 17714.271 |
| NM_005615 | 4094.128  | 4923.525  | AF166125  | 3336.27   | 3214.21   | NM_000371 | 1730.295  | 1770.426  |
| Z34290    | 5122.392  | 4775.7    | AF225425  | 16466.893 | 15917.914 | BE732255  | 12660.563 | 12404.947 |
| AF070642  | 13202.044 | 15297.561 | NM_014737 | 22288.621 | 25122.748 | NM_004955 | 5746.217  | 5896.112  |
| AK027125  | 4415.619  | 5860.767  | NM_003488 | 19649.65  | 21505.152 | NM_003364 | 5396.311  | 5699.409  |
| AK025311  | 1405.223  | 2004.166  | NM_001454 | 57629.191 | 100413.65 | NM_017803 | 5578.942  | 5237.424  |
| D16918    | 4734.006  | 5784.956  | NM_006558 | 10281.287 | 12864.512 | NM_005994 | 53263.297 | 49322.813 |
| D16467    | 4571.372  | 4650.911  | Z22780    | 915.463   | 2254.742  | AB027508  | 14507.459 | 14619.171 |
| AF090932  | 13147.325 | 14599.175 | NM_005797 | 2356.287  | 2806.602  | NM_016331 | 10016.303 | 9746.529  |
| AF166125  | 1224.667  | 2124.184  | NM_004824 | 9622.753  | 10267.158 | NM_014360 | 65193.391 | 62182.176 |
| AF225425  | 7909.391  | 10460.271 | U83191    | 2519.23   | 2607.646  | NM_018952 | 2005.493  | 2026.185  |
| NM_014737 | 16057.504 | 14615.621 | NM_013952 | 24356.082 | 31562.482 | NM_007358 | 8101.201  | 7415.741  |
| NM_003488 | 21449.461 | 20028.939 | AK021434  | 25001.473 | 21920.473 | NM_001571 | 6936.606  | 7203.996  |
| NM_001454 | 73341.031 | 85764.586 | NM_016479 | 34982.082 | 38416.047 | NM_018108 | 1671.592  | 1418.086  |
| Z22780    | 1123.003  | 1303.788  | AK000933  | 34445.855 | 36900.805 | NM_003408 | 4534.172  | 3369.039  |
| NM_005797 | 1372.522  | 2082.884  | Y10205    | 4908.617  | 4733.492  | NM_003450 | 2858.773  | 2542.89   |
| NM_004824 | 12561.733 | 12447.191 | NM_014626 | 6741.128  | 7646.895  | AK021577  | 2867.784  | 2960.477  |
| M17733    | 73565.797 | 84024.305 | AK025277  | 5182.731  | 5106.952  | NM_007193 | 1669.867  | 1765.563  |
| NM_013952 | 39365.73  | 48752.566 | AF086095  | 2468.491  | 2481.897  | NM_001994 | 29731.797 | 26934.004 |
| AK021434  | 13633.269 | 14525.22  | NM_018352 | 4461.006  | 3859.197  | J00129    | 46467.219 | 50167.699 |
| NM_016479 | 14257.063 | 15273.158 | AK026880  | 6930.942  | 6741.861  | NM_003320 | 3782.343  | 3990.683  |
| AK000933  | 37072.035 | 39509.891 | AF086061  | 2715.655  | 2588.187  | L10146    | 15104.863 | 15674.42  |
| Y10205    | 2444.438  | 2165.555  | AL080092  | 24578.588 | 24691.945 | NM_000685 | 25138.668 | 26013.447 |
| NM_014626 | 7974.029  | 8538.738  | AF075069  | 1662.905  | 1722.381  | AK025657  | 33189.41  | 36208.805 |
| NM_013937 | 1693.051  | 1991.703  | NM_005422 | 1215.138  | 1100.559  | AF142063  | 2077.683  | 2110.427  |
| NM_018352 | 6599.272  | 6941.357  | AK024427  | 11466.39  | 10881.943 | W42849    | 6530.203  | 5604.632  |
| AK026880  | 9109.112  | 10821.825 | NM_003006 | 4344.627  | 4119.659  | AI889961  | 12949.284 | 11920.796 |
| AF086061  | 3298.954  | 3808.524  | NM_000493 | 2058.818  | 2172.561  | AI360116  | 32826.328 | 31229.164 |

|           |           |           |           |           |           |           |           |           |
|-----------|-----------|-----------|-----------|-----------|-----------|-----------|-----------|-----------|
| X79985    | 1405.185  | 1412.764  | AF272035  | 15126.37  | 15174.104 | NM_013983 | 3009.258  | 2939.803  |
| AL080092  | 15695.561 | 16606.443 | AY009133  | 1823.156  | 2374.494  | AI572835  | 39302.512 | 39308.578 |
| AF075069  | 2530.17   | 2911.489  | NM_000965 | 1529.051  | 1681.438  | R20392    | 26592.725 | 26144.855 |
| NM_005422 | 4514.978  | 4179.5    | NM_013403 | 19994.232 | 22722.709 | AA486367  | 6698.281  | 4335.952  |
| AK024427  | 19843.445 | 15351.762 | NM_000674 | 1321.937  | 1476.082  | N56684    | 2473.569  | 2233.144  |
| NM_003006 | 4760.693  | 4398.879  | AB020671  | 1071.048  | 1022.298  | M55153    | 5113.722  | 5600.858  |
| NM_000493 | 2032.498  | 1488.617  | NM_016232 | 5418.863  | 5951.07   | AF414120  | 2299.479  | 2085.066  |
| AF272035  | 8021.82   | 8099.768  | AF178930  | 5736.385  | 5171.032  | AK097322  | 952.024   | 1207.629  |
| AY009133  | 1424.627  | 1360.13   | M74161    | 14246.702 | 13393.648 | AL136131  | 9846.238  | 8209.299  |
| NM_000965 | 1399.262  | 1713.913  | NM_016542 | 14421.635 | 14183.277 | NM_033357 | 9399.087  | 8307.78   |
| NM_013403 | 6985.751  | 8358.326  | NM_000484 | 7522.187  | 6929.004  | AV697672  | 1492.19   | 1483.793  |
| NM_004123 | 1268.148  | 1319.453  | NM_003855 | 1432.361  | 1377.613  | NM_000942 | 57341.301 | 55791.957 |
| NM_000674 | 1248.231  | 1644.112  | S40369    | 30672.768 | 33451.98  | NM_002982 | 1485.868  | 1671.407  |
| AB020671  | 1589.415  | 1735.857  | NM_015831 | 13573.26  | 13474.173 | NM_002190 | 1354.419  | 1493.557  |
| AK024257  | 1778.097  | 1729.954  | AK023154  | 13193.861 | 13972.641 | AK056773  | 11921.216 | 12023.548 |
| NM_016232 | 4399.28   | 4844.592  | Z36820    | 5291.756  | 5128.866  | NM_002182 | 65578.969 | 62076.402 |
| AF178930  | 4705.791  | 4926.949  | NM_003967 | 20861.006 | 20167.373 | NM_016470 | 10428.863 | 9124.777  |
| M74161    | 14984.866 | 16052.184 | NM_012451 | 10917.521 | 10622.009 | AL365408  | 65710.914 | 62778.121 |
| NM_003855 | 2257.991  | 2640.993  | NM_006624 | 27613.572 | 30989.488 | AK026204  | 15264.494 | 12224.994 |
| S40369    | 28530.998 | 35301.215 | NM_007069 | 1110.479  | 1042.747  | NM_014635 | 6486.331  | 5344.093  |
| NM_015831 | 9506.179  | 10178.169 | AF130079  | 1235.522  | 1239.771  | NM_004145 | 34720.797 | 36762.5   |
| AK023154  | 13178.462 | 14079.477 | NM_017667 | 6039.41   | 5903.989  | AK023196  | 15645.742 | 16645.867 |
| Z36820    | 5884.194  | 5870.313  | AK002211  | 28840.371 | 32736.203 | NM_018728 | 1041.32   | 1258.071  |
| NM_003967 | 16592.068 | 19137.516 | NM_012127 | 16017.746 | 18862.434 | AK024014  | 36268.602 | 41016.637 |
| NM_012451 | 23906.617 | 27578.213 | NM_014454 | 8530.114  | 10051.155 | NM_000865 | 8846.642  | 8512.222  |
| NM_006624 | 13568.387 | 11007.39  | NM_017489 | 11102.825 | 10883.378 | NM_000867 | 2586.373  | 2835.371  |
| AF130079  | 1698.784  | 1286.146  | NM_002824 | 28870.27  | 35536.785 | AF076642  | 2307.086  | 1955.555  |
| NM_017667 | 4846.771  | 4296.935  | NM_006835 | 40514.391 | 47898.777 | NM_002386 | 12722.25  | 13112.754 |
| AK002211  | 9455.519  | 9216.343  | NM_006023 | 34702.547 | 33446.191 | NM_005314 | 5014.829  | 4885.999  |
| NM_012127 | 11543.049 | 12668.675 | NM_014673 | 15973.672 | 17153.654 | NM_004885 | 5462.123  | 6828.316  |
| NM_014454 | 6586.501  | 6611.448  | AB002330  | 10126.659 | 10926.586 | NM_005145 | 10513.513 | 9950.832  |
| NM_017489 | 9236.354  | 8842.865  | AL137509  | 44022.992 | 48374.824 | NM_016234 | 22903.273 | 23925.207 |
| NM_002824 | 15328.42  | 17031.93  | NM_006538 | 20865.266 | 22597.922 | NM_001876 | 12154.185 | 10601.995 |
| NM_006835 | 44790.512 | 48922.527 | NM_019887 | 26009.41  | 28349.998 | NM_016144 | 4817.517  | 4508.686  |
| NM_006023 | 27499.148 | 27645.969 | NM_004050 | 40018.066 | 47977.895 | AL133099  | 10565.442 | 10862.319 |
| NM_014673 | 10764.091 | 12737.99  | NM_006024 | 30451.652 | 33282.621 | NM_016082 | 6878.116  | 8332.271  |
| AB002330  | 13475.563 | 14762.701 | NM_020191 | 8459.034  | 7411.386  | NM_000433 | 3965.005  | 3720.083  |
| AL137509  | 61220.648 | 59161.949 | NM_017434 | 38887.293 | 44925.652 | NM_000190 | 23995.705 | 22714.906 |
| NM_006538 | 27239.279 | 31037.77  | NM_020405 | 751.045   | 754.95    | X15667    | 22171.602 | 19699.432 |
| NM_019887 | 19986.828 | 20466.246 | NM_020182 | 2831.282  | 2739.085  | NM_017512 | 3011.698  | 2740.204  |
| NM_004050 | 9069.408  | 11451.012 | AL137669  | 9601.896  | 9884.646  | NM_018661 | 2231.726  | 2444.602  |
| NM_006024 | 14923.5   | 17453.367 | AJ275213  | 3831.033  | 4304.023  | NM_002245 | 64262.199 | 57123.961 |
| NM_020191 | 5973.825  | 5733.95   | AB032958  | 10934.007 | 11222.506 | NM_007126 | 60830.402 | 57076.137 |
| NM_017434 | 7226.618  | 8142      | NM_014263 | 10996.145 | 10324.812 | NM_004311 | 24631.121 | 30681.871 |
| NM_020405 | 1718.724  | 1842.108  | NM_020361 | 2589.083  | 2637.597  | NM_005624 | 11773.757 | 11514.948 |
| NM_020182 | 5135.814  | 5169.5    | NM_015907 | 8779.506  | 8359.189  | NM_002302 | 4067.256  | 4640.405  |
| AL137669  | 6245.616  | 6063.577  | NM_001912 | 6492.2    | 7164.262  | AB020672  | 1691.572  | 1929.704  |
| AJ275213  | 6323.46   | 6963.531  | NM_013267 | 13831.547 | 15156.239 | AK026958  | 2125.966  | 1821.946  |
| AB032958  | 7769.853  | 8467.78   | NM_002454 | 11215.507 | 11650.107 | NM_000579 | 1661.604  | 2136.96   |
| NM_014263 | 9146.731  | 7668.317  | NM_001917 | 17490.986 | 17501.67  | NM_001480 | 2251.885  | 2763.928  |
| NM_020361 | 3101.389  | 2936.623  | NM_005956 | 58694.738 | 61601.465 | AB040962  | 5109.244  | 6650.922  |
| NM_015907 | 7511.443  | 6036.448  | NM_003043 | 45326.973 | 48365.449 | NM_000635 | 2179.824  | 2148.421  |
| NM_001912 | 2523.558  | 2416.555  | D87077    | 5310.782  | 4997.984  | NM_015595 | 2062.655  | 2147.997  |

|           |           |           |           |           |           |           |           |           |
|-----------|-----------|-----------|-----------|-----------|-----------|-----------|-----------|-----------|
| NM_013267 | 6610.895  | 6716.651  | NM_014308 | 1321.249  | 1192.835  | AB037902  | 1134.482  | 771.593   |
| NM_002454 | 9771.466  | 9416.467  | L07033    | 5996.129  | 6160.392  | NM_018696 | 55409.934 | 51380.223 |
| NM_001917 | 13240.006 | 11769.584 | AK023934  | 1207.094  | 1120.683  | NM_000136 | 55074.172 | 49850.793 |
| NM_005956 | 26217.387 | 26355.25  | AK000142  | 3341.61   | 3095.02   | AL157456  | 4610.706  | 4254.642  |
| NM_003043 | 14163.515 | 13957.899 | NM_005993 | 19920.674 | 21999.371 | AL162056  | 3152.361  | 3210.522  |
| D87077    | 3824.888  | 3304.248  | AK026341  | 9754.266  | 8927.387  | NM_000386 | 54230.035 | 46579.773 |
| NM_014308 | 3684.992  | 3363.228  | NM_018943 | 16913.209 | 16796.283 | NM_004628 | 8872.064  | 7857.979  |
| L07033    | 4958.375  | 5126.21   | AJ292757  | 2125.794  | 2220.46   | AF085734  | 791.738   | 1223.551  |
| AK023934  | 3341.755  | 3643.452  | AK025239  | 837.626   | 532.585   | NM_014876 | 5360.132  | 4099.97   |
| AK000142  | 5784.091  | 6342.758  | U01922    | 9502.464  | 9609.529  | NM_005406 | 6323.1    | 7584.32   |
| NM_005993 | 18004.662 | 17584.539 | NM_003999 | 3935.911  | 3909.867  | NM_003328 | 6757.583  | 6567.234  |
| AK026341  | 11231.738 | 11533.795 | NM_004469 | 819.1     | 721.684   | X93921    | 5063.152  | 5638.739  |
| NM_018943 | 17750.477 | 18259.543 | NM_002510 | 2854.962  | 3190.053  | AF073482  | 5659.753  | 7868.148  |
| AJ292757  | 9744.679  | 10139.867 | NM_020386 | 1831.901  | 1906.36   | NM_005996 | 15304.264 | 15836.099 |
| AK025239  | 2177.708  | 2433.713  | NM_001270 | 6594.322  | 5710.684  | NM_016276 | 64874.875 | 65939.32  |
| U01922    | 7705.423  | 8305.148  | NM_001952 | 41176.973 | 46084.184 | NM_017762 | 15085.479 | 15350.086 |
| NM_003999 | 2929.203  | 2923.402  | NM_003223 | 27121.547 | 24716.943 | NM_001863 | 65481.563 | 60354.594 |
| NM_004469 | 2265.007  | 2102.359  | NM_006713 | 57728.168 | 57776.121 | NM_000921 | 26555.736 | 33432.418 |
| NM_002510 | 4522.635  | 4497.193  | NM_020201 | 25806.563 | 27878.027 | NM_000016 | 13553.054 | 10321.013 |
| NM_020386 | 2057.229  | 2127.546  | U81557    | 5488.224  | 5515.746  | AK026913  | 7453.454  | 6213.138  |
| NM_001270 | 3997.388  | 3095.392  | NM_014878 | 11218.046 | 10543.692 | J00129    | 34431.953 | 34060.691 |
| NM_001952 | 6159.273  | 5454.636  | AK023530  | 3468.679  | 4061.764  | NM_003320 | 7654.922  | 8152.498  |
| NM_003223 | 10746.373 | 10250.689 | NM_016019 | 30596.549 | 32698.141 | L10146    | 17666.941 | 14364.045 |
| NM_006713 | 39915.895 | 37070.656 | NM_012245 | 39826.059 | 42038.645 | NM_000685 | 26161.969 | 24721.154 |
| NM_020201 | 11486.206 | 12291.277 | AK022591  | 561.318   | 443.127   | AK025657  | 30800.207 | 29152.889 |
| U81557    | 1629.415  | 991.211   | NM_003986 | 1028.53   | 1284.387  | AF142063  | 1621.543  | 1846.877  |
| NM_014878 | 9244.58   | 8098.727  | NM_001533 | 45803.328 | 48911.434 | W42849    | 6568.842  | 6664.235  |
| AK023530  | 8043.22   | 6840.788  | NM_006929 | 57817.668 | 51418.523 | AI889961  | 13294.664 | 11660.774 |
| NM_016019 | 29499.109 | 27238.889 | AK022827  | 1363.984  | 1022.033  | AI360116  | 30376.77  | 26028.791 |
| NM_012245 | 27350.867 | 23270.301 | NM_003977 | 61636.332 | 53504.809 | NM_013983 | 2987.975  | 2817.023  |
| AK022591  | 1117.115  | 901.318   | NM_005998 | 58148.219 | 47007.883 | AI572835  | 39791.152 | 42055.227 |
| NM_003986 | 3536.011  | 3701.045  | U28424    | 16469.701 | 15151.649 | R20392    | 36629.773 | 35004.539 |
| NM_001533 | 54415.16  | 54375.258 | BF541372  | 29774.971 | 28891.127 | AA486367  | 8066.564  | 5288.695  |
| NM_006929 | 26736.156 | 28092.107 | AF092137  | 34764.496 | 22504.344 | N56684    | 2946.315  | 3007.356  |
| AK022827  | 2269.833  | 1957.063  | NM_004623 | 12542.086 | 12203.777 | M55153    | 6414.583  | 7147.684  |
| NM_003977 | 32582.35  | 33448.684 | NM_004793 | 32846.168 | 34865.969 | AF414120  | 2808.682  | 2809.063  |
| NM_005998 | 66350.672 | 54506.469 | NM_004390 | 32662.281 | 31536.916 | AK097322  | 1327.167  | 1506.147  |
| U28424    | 15729.295 | 15918.617 | AL050028  | 15007.866 | 16217.9   | AL136131  | 15100.237 | 11910.268 |
| BF541372  | 16171.153 | 17392.164 | NM_000371 | 1715.229  | 1540.661  | NM_033357 | 14239.333 | 13886.309 |
| AF092137  | 34068.074 | 33755.77  | BE732255  | 17460.789 | 17462.523 | AF335109  | 7438.646  | 7879.507  |
| NM_004623 | 14137.26  | 13613.263 | NM_004955 | 11241.027 | 12256.592 | NM_003263 | 3682.087  | 3771.812  |
| NM_004793 | 30112.248 | 29661.773 | NM_003364 | 10404.926 | 11027.355 | U59911    | 13298.307 | 15781.469 |
| NM_004390 | 21589.914 | 19057.041 | NM_017803 | 6520.303  | 6948.417  | NM_000352 | 1037.651  | 1596.669  |
| AL050028  | 9226.098  | 8335.179  | NM_015863 | 1407.648  | 1536.906  | NM_000942 | 53155.586 | 62690.039 |
| NM_000371 | 1711.577  | 1147.26   | NM_005994 | 45664.027 | 47175.57  | NM_002982 | 1954.781  | 2383.057  |
| BE732255  | 17348.705 | 14489.983 | AB027508  | 14335.943 | 18995.293 | NM_002190 | 1274.968  | 1809.235  |
| NM_004955 | 13790.947 | 14705.6   | NM_016331 | 11233.44  | 12447.02  | AK056773  | 11771.292 | 11531.549 |
| NM_003364 | 10701.64  | 9240.276  | NM_014360 | 59983.422 | 61850.957 | NM_002182 | 65570.688 | 65001.555 |
| NM_017803 | 7395.313  | 7101.578  | NM_018952 | 2171.678  | 2146.212  | NM_016470 | 9586.208  | 8296.606  |
| NM_015863 | 2048.471  | 1990.855  | AB033053  | 858.08    | 692.016   | AL365408  | 68655.984 | 70376.148 |
| NM_005994 | 18629.816 | 17859.803 | NM_007358 | 17873.164 | 18256.553 | AK026204  | 14309.37  | 12167.364 |
| AB027508  | 14044.802 | 13101.445 | NM_001571 | 9679.16   | 7910.419  | NM_014635 | 5299.43   | 3960.516  |
| NM_016331 | 7667.629  | 8919.711  | AF126749  | 2221.696  | 1825.44   | NM_004145 | 28215.609 | 32034.578 |

|           |           |           |           |           |           |           |           |           |
|-----------|-----------|-----------|-----------|-----------|-----------|-----------|-----------|-----------|
| NM_01436C | 14715.448 | 18015.691 | NM_01810E | 5652.202  | 5864.813  | AK023196  | 14134.803 | 16934.861 |
| NM_01895Z | 1619.568  | 1549.433  | NM_00340E | 6139.464  | 7455.915  | NM_01872E | 6443.471  | 5327.83   |
| AB033053  | 1373.634  | 1569.81   | NM_00345C | 7155.384  | 6892.438  | AK024014  | 37143.824 | 37351.789 |
| NM_00735E | 9119.807  | 10213.695 | AK021577  | 3958.432  | 4164.718  | NM_00086E | 9868.864  | 9241.964  |
| NM_001571 | 6165.247  | 4851.425  | NM_00343C | 25994.211 | 28172.027 | NM_000867 | 3485.697  | 2877.745  |
| AF126749  | 2841.332  | 2710.581  | NM_005221 | 11578.785 | 10812.169 | AF076642  | 2888.553  | 2807.805  |
| NM_01810E | 6900.289  | 6711.342  | NM_00587C | 1206.49   | 1622.175  | NM_00238E | 20022.078 | 18374.508 |
| NM_00340E | 4832.666  | 5861.152  | NM_018561 | 4111.815  | 4318.641  | NM_005314 | 8749.483  | 9258.487  |
| NM_00345C | 5182.913  | 6504.373  | NM_00719C | 1144.655  | 1094.705  | NM_00488E | 9526.58   | 10917.977 |
| AK021577  | 8406.363  | 9577.169  | NM_001994 | 24970.652 | 27917.338 | NM_00514E | 26866.674 | 27844.73  |
| NM_00343C | 4984.655  | 5447.92   | J00129    | 40987.883 | 37963.984 | NM_01215Z | 49166.563 | 48333.176 |
| NM_005221 | 10064.313 | 11077.151 | NM_00332C | 9371.213  | 10552.24  | NM_00719C | 1673.763  | 2621.323  |
| NM_00587C | 2723.459  | 3238.066  | L10146    | 19878.508 | 13652.998 | NM_001994 | 15454.086 | 13639.638 |
| NM_018561 | 7371.38   | 8381.472  | NM_00068E | 26932.939 | 28673.652 | AL133099  | 11055.02  | 13214.144 |
| NM_00719C | 3901.765  | 4024.034  | AK025657  | 29348.561 | 32151.4   | NM_01608Z | 6351.334  | 6326.841  |
| NM_001994 | 11341.527 | 12754.523 | AF142063  | 2821.799  | 2980.312  | NM_00043C | 4727.36   | 7083.016  |
| J00129    | 36201.027 | 34301.176 | W42849    | 10375.192 | 11089.188 | NM_00019C | 24456.949 | 25289.977 |
| NM_00332C | 12856.167 | 11895.209 | AI889961  | 16986.66  | 15641.348 | X15667    | 22144.648 | 21640.184 |
| L10146    | 15196.187 | 11363.035 | AI360116  | 29597.24  | 32507.293 | NM_01751Z | 1535.144  | 1484.668  |
| NM_00068E | 15349.226 | 14689.854 | NM_01398C | 2836.063  | 3220.377  | NM_018661 | 2057.807  | 1873.025  |
| AK025657  | 9692.997  | 11459.68  | AI572835  | 35540.402 | 39923.707 | NM_00224E | 64762.195 | 67905.516 |
| AF142063  | 4378.354  | 4494.588  | R20392    | 33767.801 | 34175.828 | NM_00712E | 63446.457 | 64284.883 |
| W42849    | 5438.883  | 6576.293  | AA486367  | 12171.816 | 7949.273  | NM_004311 | 30174.717 | 34418.227 |
| AI889961  | 23228.059 | 28444.381 | N56684    | 2941.061  | 3091.909  | NM_005624 | 11553.721 | 11310.888 |
| AI360116  | 44281.91  | 48901.457 | M55153    | 6768.916  | 8149.643  | NM_00230Z | 2236.462  | 2365.173  |
| NM_01398C | 2549.484  | 2845.141  | AF414120  | 2366.807  | 2994.54   | AB020672  | 916.268   | 539.241   |
| AI572835  | 4527.022  | 5042.764  | AK097322  | 2725.976  | 2401.119  | NM_00148C | 2437.733  | 3078.539  |
| R20392    | 14855.012 | 13935.339 | AL136131  | 16826.656 | 12808.353 | AF263462  | 3415.145  | 3096.155  |
| AA486367  | 7548.186  | 6573.767  | NM_033357 | 18230.914 | 16133.915 | AV697672  | 3785.301  | 8554.413  |
| N56684    | 3335.408  | 3592.538  | AF335109  | 8817.641  | 8105.024  | NM_01869E | 47606.523 | 50165.75  |
| M55153    | 2830.189  | 3114.398  | NM_00326C | 5795.563  | 5984.586  | NM_00013E | 58138.535 | 50263.504 |
| AF414120  | 5412.933  | 6077      | U59911    | 18292.719 | 18770.275 | AL157456  | 4149.776  | 3557.213  |
| AK097322  | 6146.334  | 7741.418  | NM_004957 | 15685.155 | 15603.864 | AL162056  | 3704.493  | 3785.62   |
| AL136131  | 17268.893 | 18177.744 | AV697672  | 1693.678  | 1569.375  | NM_00038C | 48713.359 | 46217.969 |
| NM_033357 | 19292.955 | 21905.234 | NM_00094Z | 44770.043 | 45244.758 | NM_00462E | 8195.924  | 8183.085  |
| AF335109  | 11829.024 | 11659.668 | NM_00298Z | 1893.04   | 1689.79   | NM_01487E | 10674.073 | 9288.402  |
| NM_00326C | 6464.114  | 6433.222  | NM_00219C | 1195.562  | 1139.767  | NM_00540E | 6772.823  | 7770.706  |
| U59911    | 14378.795 | 14731.155 | AK056773  | 13871.627 | 14761.697 | NM_00332E | 8488.381  | 8188.641  |
| NM_004957 | 14051.855 | 14913.93  | NM_00218Z | 59910.797 | 56354.801 | X93921    | 5628.155  | 6717.011  |
| AV697672  | 2268.825  | 1496.859  | NM_01647C | 10796.765 | 12271.196 | AF073482  | 8594.364  | 9157.369  |
| NM_00094Z | 31788.658 | 33420.805 | AL365408  | 59744.281 | 58865.867 | NM_00599C | 15492.067 | 13896.798 |
| NM_00298Z | 3839.517  | 3711.905  | AK026204  | 17647.469 | 16365.81  | NM_01627E | 64609.035 | 59466.434 |
| NM_00219C | 2320.435  | 2103.239  | NM_01463E | 6940.913  | 5196.934  | NM_000921 | 20878.277 | 23521.611 |
| AK056773  | 5339.411  | 5094.901  | NM_00414E | 32534.594 | 38059.953 | NM_00009E | 1825.308  | 1663.481  |
| NM_00218Z | 10411.222 | 8946.378  | AK023196  | 13747.444 | 15947.424 | L10146    | 17237.197 | 15342.814 |
| NM_01647C | 12172.146 | 11132.16  | NM_01872E | 9658.773  | 9344.097  | NM_00068E | 22063.895 | 22186.965 |
| AL365408  | 48536.785 | 46181.543 | AK024014  | 37314.215 | 39990.441 | AK025657  | 28308.555 | 28199.143 |
| AK026204  | 9518.592  | 9044.821  | NM_00086E | 11487.591 | 11682.764 | AF142063  | 1875.417  | 2083.632  |
| NM_01463E | 3816.348  | 2951.98   | NM_000867 | 4086.746  | 3396.048  | W42849    | 6374.21   | 5286.655  |
| NM_00414E | 8755.604  | 9359.696  | AF076642  | 3276.911  | 2799.596  | AI889961  | 12108.956 | 10774.437 |
| AK023196  | 5244.729  | 6689.357  | NM_00238E | 21856.092 | 22359.629 | AI360116  | 29063.561 | 25233.484 |
| NM_01872E | 6627.151  | 6842.129  | NM_005314 | 13425.158 | 13528.422 | NM_01398C | 2674.853  | 2633.813  |
| AK024014  | 10043.68  | 11448.29  | NM_00488E | 10935.071 | 12118.919 | AI572835  | 36486.645 | 34087.617 |

|           |           |           |           |           |           |           |           |           |
|-----------|-----------|-----------|-----------|-----------|-----------|-----------|-----------|-----------|
| NM_000865 | 19652.041 | 22715.846 | NM_005145 | 24369.176 | 27828.131 | R20392    | 40188.75  | 40566.797 |
| NM_000867 | 16430.578 | 18931.59  | NM_012152 | 46594.043 | 47396.281 | AA486367  | 9307.272  | 5385.75   |
| AF076642  | 6176.822  | 6910.517  | NM_001940 | 8565.586  | 9653.712  | N56684    | 2310.154  | 2234.931  |
| NM_002386 | 11932.999 | 15223.803 | U83115    | 34181.324 | 35203.027 | M55153    | 7098.548  | 7139.505  |
| NM_005314 | 20158.244 | 24205.689 | NM_016234 | 29817.598 | 30287.918 | AF414120  | 4143.045  | 5103.829  |
| NM_004885 | 24698.324 | 28463.168 | NM_001876 | 16903.484 | 15863.623 | AK097322  | 1350.066  | 1351.967  |
| NM_005145 | 18728.395 | 20550.695 | NM_016144 | 10986.335 | 10988.735 | AL136131  | 14243.96  | 10169.756 |
| NM_012152 | 15908.234 | 15993.525 | AL133099  | 10868.76  | 10899.589 | NM_033357 | 16262.926 | 14132.91  |
| NM_001940 | 10797.542 | 10510.413 | NM_016082 | 7013.331  | 7312.956  | AF335109  | 7581.471  | 7144.42   |
| U83115    | 31326.436 | 28967.107 | NM_000433 | 4733.423  | 5072.175  | NM_003263 | 3877.88   | 3611.206  |
| NM_016234 | 23341.262 | 21069.893 | NM_000190 | 27477.695 | 30364.105 | U59911    | 7714.736  | 9604.497  |
| NM_001876 | 12485.757 | 15282.753 | X15667    | 26433.344 | 26058.988 | NM_015595 | 1754.421  | 2315.69   |
| NM_016144 | 8197.918  | 7551.509  | NM_017512 | 2222.016  | 1824.403  | NM_014635 | 5794.597  | 4636.965  |
| AL133099  | 9427.554  | 8775.71   | NM_018661 | 2090.755  | 2122.823  | NM_004145 | 30392.609 | 29519.43  |
| NM_016082 | 8092.141  | 7487.382  | NM_002249 | 62283.676 | 53850.918 | AK023196  | 13830.916 | 15527.063 |
| NM_000433 | 6539.39   | 6545.788  | AK096507  | 625.635   | 697.365   | NM_018728 | 7160.506  | 7670.301  |
| AF268419  | 796.669   | 751.612   | NM_007126 | 60803.355 | 58328.918 | AK024014  | 34378.938 | 34050.711 |
| NM_000190 | 15595.956 | 15446.513 | NM_004311 | 26703.598 | 32250.01  | NM_000865 | 9590.521  | 8969.076  |
| X15667    | 6985.524  | 7521.766  | NM_005624 | 11812.656 | 12250.689 | NM_000867 | 3425.396  | 3178.271  |
| NM_017512 | 2653.704  | 2607.268  | NM_002302 | 3586.071  | 3393.882  | AF076642  | 2275.495  | 2108.14   |
| NM_018661 | 2349.543  | 2221.762  | AB020672  | 1770.866  | 1481.415  | NM_002386 | 20247.801 | 18343.375 |
| NM_002249 | 24811.078 | 29234.189 | AK026958  | 9636.484  | 9742.237  | NM_005314 | 8383.074  | 8965.99   |
| AK096507  | 2107.537  | 2027.364  | NM_000579 | 2416.171  | 2324.87   | NM_004885 | 11074.668 | 11812.912 |
| NM_007126 | 34026.758 | 39146.438 | NM_001480 | 1711.042  | 1232.487  | NM_005145 | 27875.795 | 26840.361 |
| NM_004311 | 13942.192 | 13961.293 | AF263462  | 9282.975  | 10569.25  | NM_012152 | 56473.02  | 54934.313 |
| NM_005624 | 6441.486  | 6815.484  | AB040962  | 2964.231  | 2602.634  | AK024093  | 11029.226 | 12262.974 |
| NM_002302 | 2864.675  | 2992.579  | NM_000639 | 1319.132  | 1014.824  | NM_001940 | 8081.289  | 8319.661  |
| AB020672  | 1739.499  | 1748.481  | NM_015595 | 3253.074  | 2572.331  | U83115    | 27803.488 | 23343.211 |
| AK026958  | 2918.138  | 4206.045  | AB037902  | 1881.737  | 1542.376  | NM_001264 | 36637.598 | 30909.807 |
| NM_000579 | 4071.683  | 4030.747  | NM_018696 | 37212.289 | 30337.971 | NM_013364 | 61978.66  | 55899.387 |
| NM_001480 | 2448.26   | 2545.299  | NM_000136 | 50172.188 | 42945.605 | NM_014368 | 2273.005  | 2620.521  |
| AF263462  | 5158.113  | 4987.705  | AL157456  | 6658.885  | 7324.412  | NM_000850 | 2903.168  | 3378.569  |
| AB040962  | 2650.015  | 3107.998  | AL162056  | 3621.182  | 4356.64   | NM_004676 | 1874.609  | 1962.564  |
| NM_000639 | 3935.763  | 4383.841  | NM_000380 | 55456.438 | 45151.992 | NM_007193 | 3667.563  | 9385.768  |
| NM_015595 | 2828.598  | 2012.767  | NM_004628 | 10324.198 | 9890.055  | NM_001994 | 14087.606 | 14144.029 |
| AB037902  | 2161.816  | 1652.83   | AF085734  | 455.06    | 526.371   | J00129    | 43822.766 | 45874.605 |
| NM_018696 | 9952.748  | 8528.645  | NM_014876 | 11301.511 | 11786.53  | NM_003320 | 3951.198  | 5143.793  |
| NM_000136 | 27061.85  | 23357.795 | NM_005406 | 9500.561  | 8362.388  | AL137631  | 20992.574 | 22882.291 |
| AL157456  | 3508.383  | 3249.179  | NM_003328 | 10335.153 | 8787.34   | NM_016057 | 20443.512 | 20724.693 |
| AL162056  | 7666.115  | 7394.578  | X93921    | 6098.994  | 6929.51   | NM_014677 | 5215.902  | 4720.281  |
| NM_000380 | 6333.094  | 5072.63   | AF073482  | 9783.69   | 11172.251 | NM_006855 | 2660.651  | 3124.979  |
| NM_004628 | 2816.803  | 2237.883  | NM_005990 | 17115.365 | 18630.104 | AK022790  | 32799.398 | 29288.318 |
| AF085734  | 1768.4    | 1560.903  | NM_016276 | 62062.813 | 61693.352 | NM_004311 | 23058.715 | 25724.379 |
| NM_006502 | 1280.235  | 433.276   | NM_017762 | 15744.147 | 15941.637 | NM_005624 | 11959.972 | 11803.259 |
| NM_014876 | 12354.099 | 12678.752 | NM_001863 | 59638.457 | 59858.336 | NM_002302 | 2450.906  | 2527.67   |
| NM_005406 | 3618.945  | 2958.471  | NM_000921 | 24344.021 | 25554.893 | AB020672  | 1398.64   | 1701.667  |
| NM_003328 | 6131.623  | 4608.863  | NM_000098 | 5358.538  | 6073.446  | AK026958  | 2970.381  | 2652.409  |
| X93921    | 5184.309  | 5240.043  | NM_000016 | 32023.236 | 37147.219 | NM_000579 | 2103.978  | 1958.252  |
| AF073482  | 12304.491 | 12040.369 | AK026913  | 9310.227  | 9560.442  | NM_001480 | 1361.817  | 864.355   |
| NM_005990 | 19445.545 | 20233.412 | J00129    | 38067.66  | 44285.527 | AF263462  | 8547.122  | 8238.95   |
| NM_016276 | 20323.346 | 23904.248 | NM_003320 | 9561.614  | 10678.424 | AB040962  | 5381.862  | 6045.73   |
| NM_017762 | 30872.047 | 28268.906 | L10146    | 20088.348 | 16014.46  | AV697672  | 1781.433  | 1511.116  |
| NM_001863 | 66591.289 | 52171.824 | NM_000685 | 25225.002 | 26960.363 | NM_000942 | 60540.086 | 58308.281 |

|           |           |           |           |           |           |           |           |           |
|-----------|-----------|-----------|-----------|-----------|-----------|-----------|-----------|-----------|
| NM_000921 | 35946.715 | 38793.621 | AK025657  | 25389.844 | 28066.133 | NM_002982 | 2499.27   | 3093.211  |
| NM_00009E | 7262.404  | 6400.719  | AF142063  | 2444.11   | 2800.576  | AK056773  | 4562.586  | 7157.04   |
| NM_00001E | 28878.148 | 27782.506 | W42849    | 8711.428  | 9470.451  | NM_01647C | 6404.727  | 7503.278  |
| AK026913  | 6345.727  | 6085.152  | AI889961  | 12694.771 | 13789.959 | AL365408  | 68427.313 | 70503.82  |
| J00129    | 36754.945 | 27743.74  | AI360116  | 28411.455 | 31426.129 | AK026204  | 5559.353  | 4841.74   |
| NM_00332C | 17298.32  | 13906.472 | NM_013983 | 3613.615  | 3362.458  | NM_00009E | 4799.642  | 4801.816  |
| L10146    | 14738.972 | 10239.894 | AI572835  | 36152.965 | 41074.715 | NM_00001E | 29961.623 | 28745.207 |
| NM_00068E | 11180.46  | 10511.851 | R20392    | 31416.471 | 32120.598 | NM_016234 | 28598.352 | 22645.166 |
| AK025657  | 8386.533  | 9105.237  | AA486367  | 10310.106 | 7305.688  | NM_00187E | 16347.079 | 13991.058 |
| AF142063  | 4904.817  | 4716.713  | N56684    | 2740.111  | 2704.166  | NM_016144 | 9772.823  | 8652.797  |
| W42849    | 5136.769  | 5510.534  | M55153    | 5652.007  | 6583.659  | AL133099  | 11135.271 | 10812.707 |
| AI889961  | 11809.015 | 9921.907  | AF414120  | 2663.961  | 2608.791  | NM_016082 | 6845.807  | 7763.64   |
| AI360116  | 29546.635 | 26108.748 | AK097322  | 2379.521  | 2494.816  | NM_000433 | 4105.873  | 4008.714  |
| NM_013983 | 2805.542  | 2468.394  | AL136131  | 16060.078 | 13111.667 | NM_00019C | 24480.529 | 25507.98  |
| AI572835  | 5562.079  | 5609.412  | NM_033357 | 16594.346 | 15633.042 | X15667    | 19773.047 | 18498.012 |
| R20392    | 17058.047 | 19627.369 | AF335109  | 7389.358  | 7518.59   | NM_017512 | 1754.132  | 2267.656  |
| AA486367  | 7789.813  | 6662.84   | NM_003263 | 5734.745  | 5089.353  | NM_018661 | 1846.418  | 1928.066  |
| N56684    | 3065.631  | 2864.495  | U59911    | 19084.59  | 19530.961 | AK023078  | 14308.764 | 14060.953 |
| M55153    | 2228.086  | 2128.827  | NM_004482 | 2224.68   | 3109.792  | NM_00223E | 67541.156 | 73756.633 |
| AF414120  | 4326.273  | 3414.575  | NM_000352 | 1360.938  | 1515.549  | NM_00224E | 68421.266 | 70071.094 |
| AK097322  | 2847.355  | 2409.757  | NM_000942 | 44704.77  | 44136.242 | NM_015684 | 9539.723  | 7891.912  |
| AL136131  | 15084.932 | 12197.336 | NM_002982 | 2239.193  | 2380.707  | NM_016524 | 3167.299  | 2931.375  |
| NM_033357 | 24005.584 | 24990.955 | NM_00219C | 2397.495  | 2282.525  | NM_00712E | 66339.148 | 63729.824 |
| AF335109  | 15577.242 | 14353.779 | AK056773  | 10612.586 | 12698.391 | NM_004482 | 1657.328  | 1886.012  |
| NM_003263 | 6777.846  | 7063.772  | NM_002182 | 56414.664 | 54465.02  | NM_01559E | 2553.604  | 1757.609  |
| U59911    | 15333.743 | 15869.319 | NM_01647C | 11448.501 | 12038.962 | AB037902  | 1123.045  | 718.238   |
| NM_004482 | 3359.63   | 3355.633  | AL365408  | 58019.527 | 62800.016 | NM_01869E | 50768.297 | 45146.402 |
| NM_000352 | 1119.478  | 1143.676  | AK026204  | 16290.204 | 16085.396 | NM_00013E | 53163.199 | 43876.98  |
| NM_000942 | 36051.98  | 30601.846 | NM_01463E | 6726.905  | 5373.776  | AL157456  | 3158.863  | 2215.196  |
| NM_002982 | 3856.724  | 3034.308  | NM_00414E | 37549.195 | 31080.527 | AL162056  | 2360.719  | 2218.702  |
| NM_00219C | 2028.892  | 1018.774  | AK023196  | 13051.01  | 15486.79  | NM_00038C | 54309.348 | 46478.652 |
| AK056773  | 4385.367  | 4708.165  | NM_01872E | 9056.844  | 9173.859  | NM_00462E | 9296.779  | 9188.167  |
| NM_002182 | 7432.961  | 7779.813  | AK024014  | 36424.184 | 37740.223 | NM_01487E | 4528.307  | 3524.099  |
| NM_01647C | 10938.584 | 9637.797  | NM_00086E | 11074.924 | 11226.104 | NM_00540E | 7374.878  | 7145.242  |
| AL365408  | 34947.082 | 36236.59  | NM_000867 | 3661.25   | 3274.874  | NM_00332E | 7931.684  | 7287.423  |
| AK026204  | 8727.929  | 8083.115  | AF076642  | 3526.139  | 3024.63   | X93921    | 3632.535  | 4012.502  |
| NM_01463E | 3092.372  | 2343.112  | NM_00238E | 24537.975 | 27009.68  | AF073482  | 4426.949  | 5329.725  |
| NM_00414E | 9109.654  | 9382.51   | NM_005314 | 13474.27  | 14430.495 | NM_00599C | 13123.301 | 17812.154 |
| AK023196  | 9274.898  | 11567.308 | NM_00488E | 9643.612  | 11165.194 | NM_01627E | 66620.891 | 63119.609 |
| NM_01872E | 11134.938 | 12925.007 | NM_00514E | 23418.07  | 28514.727 | NM_017762 | 9672.3    | 11094.818 |
| AK024014  | 9632.276  | 10748.029 | NM_012152 | 45776.734 | 46355.543 | NM_001863 | 68794.398 | 64884.242 |
| NM_00086E | 9870.588  | 8772.563  | NM_00194C | 8974.233  | 9396.903  | NM_000921 | 4941.259  | 4820.708  |
| NM_000867 | 12866.784 | 9695.069  | U83115    | 36376.195 | 27117.297 | CY3Cy5    | 22106.801 | 705.236   |
| AF076642  | 3217.104  | 2860.841  | NM_007193 | 1434.452  | 1558.372  | NM_006497 | 52571.793 | 46277.043 |
| NM_00238E | 11464.679 | 9758.968  | NM_001994 | 28356.779 | 30257.02  | NM_006892 | 3281.769  | 3373.313  |
| NM_005314 | 9757.666  | 8017.492  | NM_016144 | 12427.03  | 10881.119 | AK023616  | 2835.693  | 2666.365  |
| NM_00488E | 26129.088 | 26231.934 | AL133099  | 11154.205 | 10991.614 | AK025665  | 13319.454 | 10719.407 |
| NM_00514E | 22633.242 | 22619.857 | NM_016082 | 5971.383  | 6525.745  | AL355694  | 3005.663  | 3083.878  |
| NM_012152 | 12801.224 | 13167.691 | NM_000433 | 3913.716  | 4232.49   | AL049257  | 1456.056  | 2092.267  |
| NM_00194C | 13258.46  | 11797.248 | NM_00019C | 28065.816 | 30154.604 | BC037530  | 68984.805 | 62403.531 |
| U83115    | 28420.713 | 25784.816 | X15667    | 25902.834 | 27657.535 | NM_014851 | 19642.594 | 15219.431 |
| NM_007193 | 2754.862  | 3206.971  | NM_017512 | 2166.014  | 1973.224  | AL355743  | 3307.978  | 3502.732  |
| NM_001994 | 11867.946 | 12136.477 | NM_018661 | 1833.57   | 1848.77   | L77571    | 1752.012  | 1977.677  |

|           |           |           |           |           |           |           |           |           |
|-----------|-----------|-----------|-----------|-----------|-----------|-----------|-----------|-----------|
| NM_016144 | 10485.578 | 7627.023  | NM_002249 | 61150.336 | 56072.961 | X81896    | 1675.645  | 1834.441  |
| AL133099  | 7680.002  | 5479.322  | AK096507  | 716.383   | 546.863   | AF070595  | 1705.401  | 1602.39   |
| NM_016082 | 7488.815  | 7329.443  | NM_007126 | 60628.902 | 54279.793 | NM_006497 | 53227.395 | 49680.211 |
| NM_000433 | 5892.972  | 5168.72   | NM_004311 | 25748.859 | 29824.6   | NM_006892 | 5672.952  | 6885.783  |
| NM_000190 | 12727.5   | 12342.794 | NM_005624 | 10550.518 | 11423.286 | SR5       | 8676.505  | 10594.806 |
| X15667    | 4793.764  | 4164.821  | NM_002302 | 2987.659  | 3092.908  | SR7       | 7271.535  | 55130.426 |
| NM_017512 | 2774.796  | 2769.867  | AB020672  | 1436.664  | 987.924   | SR9       | 25143.768 | 6155.061  |
| NM_018661 | 2008.366  | 2482.794  | AK026958  | 7828.259  | 8754.395  | CY3Cy5    | 21403.396 | 644.217   |
| NM_002249 | 31577.285 | 35901.414 | NM_000579 | 2536.536  | 1946.369  | M74093    | 2639.332  | 1841.555  |
| AK096507  | 1656.973  | 1611.839  | NM_001480 | 1724.961  | 1374.075  | L17326    | 1784.198  | 1627.008  |
| NM_007126 | 27864.504 | 28246.938 | AF263462  | 9670.811  | 10977.839 | D17207    | 16186.28  | 15941.522 |
| NM_004311 | 18242.438 | 17334.311 | AB040962  | 2997.768  | 2706.042  | D55640    | 9273.638  | 9242.021  |
| NM_005624 | 4441.763  | 4360.72   | NM_000639 | 1146.742  | 1252.707  | AF085897  | 2275.743  | 2434.905  |
| NM_002302 | 3098.919  | 2632.145  | AV697672  | 1409.718  | 1636.014  | AF085822  | 3896.142  | 2837.562  |
| AB020672  | 1552.815  | 1145.569  | AB037902  | 1553.965  | 985.257   | AK021510  | 1797.072  | 2218.03   |
| AK026958  | 2163.775  | 2111.486  | NM_018696 | 41741.488 | 42451.066 | AK022711  | 2803.529  | 3457.321  |
| NM_000579 | 3006.9    | 2566.579  | NM_000136 | 46479.738 | 45130.59  | AK023039  | 1376.35   | 1814.24   |
| NM_001480 | 2409.528  | 1741.464  | AL157456  | 6898.283  | 7369.993  | AL109688  | 9470.071  | 8770.418  |
| AF263462  | 3880.264  | 3261.521  | AL162056  | 3961.282  | 4233.835  | AF074981  | 3458.463  | 3178.302  |
| AB040962  | 3139.284  | 3519.987  | NM_000380 | 55479.215 | 45133.359 | AK025863  | 6539.006  | 6901.146  |
| NM_000639 | 3091.453  | 3410.554  | NM_004628 | 10423.529 | 10136.696 | D42044    | 4764.311  | 5552.84   |
| AV697672  | 2899.305  | 2489.061  | NM_014876 | 10992.956 | 10828.568 | AK026149  | 5786.981  | 5453.706  |
| AB037902  | 2190.284  | 2255.276  | NM_005406 | 9410.086  | 8556.558  | AF131805  | 2924.504  | 3669.001  |
| NM_018696 | 7361.455  | 6141.158  | NM_003328 | 9993.447  | 8522.896  | AL117415  | 34521.391 | 32189.002 |
| NM_000136 | 20499.957 | 17206.379 | X93921    | 5641.539  | 5414.581  | AK024615  | 1347.385  | 1176.442  |
| AL157456  | 2433.556  | 2044.992  | AF073482  | 9020.815  | 9694.504  | AK025054  | 4456.99   | 4012.342  |
| AL162056  | 6957.488  | 5791.404  | NM_005990 | 17763.914 | 16748.75  | AK024556  | 3834.216  | 3622.866  |
| NM_000380 | 6315.533  | 5513.923  | NM_016276 | 60871.492 | 66565.258 | AK024935  | 3296.847  | 2960.215  |
| NM_004628 | 4339.357  | 3344.16   | NM_017762 | 14940.975 | 15488.952 | AK022811  | 2724.19   | 2903.981  |
| AF085734  | 1387.6    | 1298.752  | NM_001863 | 60031.863 | 55948.926 | AL117635  | 4635.063  | 2784.529  |
| NM_006502 | 769.101   | 995.812   | NM_000921 | 24979.322 | 27298.541 | AK025332  | 6959.737  | 7186.542  |
| NM_014876 | 13490.581 | 13670.197 | NM_000098 | 5823.896  | 6509.702  | AB040929  | 1359.334  | 2141.749  |
| NM_005406 | 8968.498  | 8875.379  | NM_000016 | 34743.816 | 37880.691 | AB020735  | 2832.619  | 2319.969  |
| NM_003328 | 13284.495 | 10428.608 | AK026913  | 10422.63  | 10677.129 | AJ011596  | 23285.145 | 22350.633 |
| X93921    | 5068.375  | 4058.28   | NM_016234 | 31381.412 | 29598.178 | AL049215  | 71336.719 | 61691.5   |
| AF073482  | 11969.199 | 9745.265  | NM_001876 | 20606.416 | 20346.555 | X51779    | 4332.791  | 3707.517  |
| NM_005990 | 15917.63  | 14693.424 | L10146    | 20630.422 | 15208.448 | X81001    | 2147.47   | 2268.313  |
| NM_016276 | 16557.361 | 17051.271 | NM_000685 | 21947.328 | 23640.516 | AL049254  | 2990.688  | 3592.852  |
| NM_017762 | 32873.172 | 31668.43  | AK025657  | 29084.781 | 32851.262 | Z83954    | 10675.473 | 8813.746  |
| NM_001863 | 60152.469 | 49947.031 | AF142063  | 2276.455  | 2196.359  | AK024331  | 1957.563  | 2108.849  |
| NM_000921 | 24180.48  | 23419.014 | W42849    | 9146.274  | 9309.781  | AK024452  | 2384.794  | 2185.841  |
| NM_000098 | 5455.043  | 5143.802  | AI889961  | 13154.974 | 14022.099 | AJ249975  | 1380.389  | 1783.427  |
| NM_000016 | 20710.25  | 19274.945 | AI360116  | 27837.152 | 29403.713 | AK021733  | 2491.157  | 2742.348  |
| AK026913  | 5337.462  | 5369.132  | NM_013983 | 3527.255  | 3135.791  | AK021551  | 5128.026  | 5124.472  |
| NM_016234 | 28378.486 | 29883.623 | AI572835  | 34204.031 | 37042.109 | AK025117  | 2703.855  | 2705.492  |
| NM_001876 | 12755.216 | 13386.962 | R20392    | 30083.559 | 30047.408 | AK022357  | 952.511   | 617.856   |
| L10146    | 12829.517 | 8420.317  | AA486367  | 11053.806 | 6741.883  | AK000024  | 45811.949 | 46644.18  |
| NM_000685 | 13401.702 | 10056.166 | N56684    | 2627.239  | 2262.437  | AK026693  | 3795.479  | 4220.393  |
| AK025657  | 8037.148  | 7100.294  | M55153    | 5883.88   | 5952.397  | NM_012285 | 2519.818  | 2165.204  |
| AF142063  | 3996.22   | 3666.4    | AF414120  | 2813.756  | 2594.089  | AK001128  | 1803.197  | 1590.269  |
| W42849    | 4577.723  | 3281.602  | AK097322  | 2892.661  | 2236.406  | AK000090  | 2286.99   | 2538.517  |
| AI889961  | 15321.259 | 12533.816 | AL136131  | 16844.742 | 11975.591 | AK000794  | 23870.447 | 22794.998 |
| AI360116  | 32743.311 | 30827.596 | NM_033357 | 17405.199 | 14291.922 | AK000950  | 21948.844 | 23901.75  |

|           |           |           |           |           |           |           |           |           |
|-----------|-----------|-----------|-----------|-----------|-----------|-----------|-----------|-----------|
| NM_013983 | 2405.249  | 2525.796  | AF335109  | 8067.46   | 7641.151  | AK026812  | 15130.138 | 14797.471 |
| AI572835  | 5928.266  | 5481.265  | NM_003263 | 6129.662  | 4941.371  | AK000176  | 9889.527  | 10051.438 |
| R20392    | 16023.752 | 14078.206 | U59911    | 19067.932 | 17830.074 | AK000831  | 27363.197 | 29004.502 |
| AA486367  | 8895.613  | 7334.377  | NM_004482 | 2407.582  | 2914.594  | AK000981  | 7914.279  | 7768.75   |
| N56684    | 2791.891  | 2655.656  | NM_000352 | 1324.24   | 1386.972  | X95095    | 7581.208  | 6764.922  |
| M55153    | 2095.383  | 2113.585  | NM_015599 | 4058.031  | 2987.1    | AB007902  | 3938.053  | 3807.734  |
| AF414120  | 3961.552  | 3388      | NM_014635 | 7024.725  | 4752.008  | AF078528  | 25274.268 | 17473.5   |
| AK097322  | 3886.007  | 3131.73   | NM_004145 | 27967.225 | 32444.373 | AF161411  | 6259.199  | 4689.895  |
| AL136131  | 12122.087 | 9801.998  | AK023196  | 13672.528 | 15534.463 | AK000450  | 64892.816 | 61483.566 |
| NM_033357 | 22230.932 | 21154.305 | NM_018728 | 9615.412  | 9234.377  | NM_018224 | 42763.27  | 47038.797 |
| AF335109  | 15785.664 | 15618.152 | AK024014  | 36564.68  | 40986.832 | NM_019896 | 14440.577 | 14684.517 |
| NM_003263 | 4819.785  | 4008.087  | NM_000865 | 11601.521 | 11248.818 | NM_018566 | 16205.832 | 14030.183 |
| U59911    | 11910.736 | 12602.934 | NM_000867 | 4401.457  | 3459.148  | J04118    | 4773.823  | 4597.575  |
| NM_004482 | 1662.125  | 1069.605  | AF076642  | 3215      | 2614.695  | AK025325  | 39532.078 | 44133.938 |
| NM_000352 | 1026.973  | 892.789   | NM_002386 | 20287.037 | 18577.992 | S75762    | 1347.832  | 1165.323  |
| NM_015599 | 3063.204  | 2815.328  | NM_005314 | 11278.093 | 10460.11  | U50531    | 13968.59  | 13707.546 |
| NM_014635 | 3875.771  | 2050.887  | NM_004885 | 10515.347 | 10985.71  | NM_005318 | 5328.274  | 5298.326  |
| NM_004145 | 8893.753  | 7203.145  | NM_005145 | 23427.432 | 23683.223 | L09099    | 68713.531 | 61516.055 |
| AK023196  | 8119.167  | 7965.866  | NM_012152 | 46164.445 | 41825.5   | AL117474  | 3485.626  | 3860.024  |
| NM_018728 | 8737.426  | 8211.038  | AK024093  | 10832.694 | 9093.605  | NM_005421 | 5572.423  | 5056.34   |
| AK024014  | 7618.039  | 8503.349  | NM_001940 | 8499.296  | 8117.865  | AK024580  | 70612.484 | 61709.891 |
| NM_000865 | 9166.704  | 10127.538 | U83115    | 34737.574 | 33425.68  | AL442093  | 16090.593 | 15413.813 |
| NM_000867 | 9734.514  | 8479.287  | NM_001264 | 44929.789 | 39799.156 | Z36874    | 54433.598 | 57834.488 |
| AF076642  | 4459.976  | 3752.969  | NM_013364 | 58691.426 | 49132.758 | AK022462  | 6158.859  | 6980.628  |
| NM_002386 | 8661.268  | 9301.601  | NM_014368 | 3004.763  | 2756.308  | NM_020530 | 7024.677  | 6864.644  |
| NM_005314 | 17864.016 | 16811.252 | NM_000850 | 4530.158  | 4742.314  | AK022418  | 17571.965 | 17717.281 |
| NM_004885 | 25248.535 | 26323.203 | NM_004676 | 7496.611  | 7519.036  | AF279777  | 2135.223  | 1917.242  |
| NM_005145 | 20868.863 | 23292.393 | NM_007193 | 1546.687  | 1273.986  | AK021748  | 68590.102 | 68385.141 |
| NM_012152 | 10148.675 | 10279.35  | NM_001994 | 32714.523 | 35747.004 | AL137257  | 10273.787 | 10582.313 |
| AK024093  | 16257.68  | 14030.399 | J00129    | 41350.961 | 45114.414 | AK000543  | 30217.291 | 39861.02  |
| NM_001940 | 10583.939 | 9457.229  | NM_003320 | 9773.994  | 10510.289 | AK026683  | 16031.406 | 17063.229 |
| U83115    | 29131.752 | 25716.766 | AL137631  | 20913.883 | 19523.779 | D16906    | 1334.788  | 1712.311  |
| NM_001264 | 19765.098 | 19104.648 | NM_016057 | 20340.521 | 21891.73  | AL079309  | 14120.075 | 13509.157 |
| NM_013364 | 12522.136 | 13960.257 | NM_014677 | 5521.897  | 5300.255  | AK022335  | 2883.354  | 3023.029  |
| NM_014368 | 3145.871  | 3140.204  | NM_006855 | 2545.706  | 2559.356  | AL110280  | 9921.739  | 11470.166 |
| NM_000850 | 2541.653  | 2565.992  | AK022790  | 32352.527 | 31406.572 | NM_017458 | 3955.545  | 4026.804  |
| NM_004676 | 2931.635  | 2849.296  | NM_004311 | 26101.98  | 30535.047 | NM_005542 | 69001.711 | 62899.023 |
| NM_007193 | 2683.134  | 2635.765  | NM_005624 | 10171.655 | 10396.777 | NM_000267 | 2379.863  | 2348.538  |
| NM_001994 | 12442.946 | 12200.454 | NM_002302 | 3312.25   | 3150.612  | NM_004396 | 68103.938 | 84279.211 |
| J00129    | 36967.43  | 36180.375 | AB020672  | 1908.667  | 1646.019  | NM_014966 | 18327.129 | 18914.299 |
| NM_003320 | 20054.1   | 21615.818 | AK026958  | 8089.586  | 6887.938  | D87684    | 20028.719 | 17639.135 |
| AL137631  | 7116.605  | 5109.648  | NM_000579 | 2500.43   | 1739.766  | NM_006317 | 68145.313 | 80552.43  |
| NM_016057 | 15970.239 | 12767.82  | NM_001480 | 1608.147  | 1290.919  | NM_001219 | 13000.422 | 14291.57  |
| NM_014677 | 3129.513  | 2710.677  | AF263462  | 10619.086 | 8510.994  | NM_000730 | 32209.182 | 21677.85  |
| NM_006855 | 2302.568  | 2074.894  | AB040962  | 2493.836  | 2085.371  | U31734    | 68068.711 | 74134.813 |
| AK022790  | 20933.641 | 17312.904 | NM_000639 | 1369.25   | 906.707   | AF085885  | 3123.43   | 2982.102  |
| NM_004311 | 21547.549 | 23715.854 | AV697672  | 2311.8    | 1692.004  | M24751    | 4157.288  | 4010.556  |
| NM_005624 | 4855.341  | 5039.26   | NM_000942 | 46739.297 | 47516.988 | AK022953  | 1690.526  | 1410.679  |
| NM_002302 | 2647.453  | 2687.368  | NM_002982 | 3262.88   | 2931.95   | AF009319  | 8992.195  | 9817.872  |
| AB020672  | 1277.961  | 1098.921  | NM_002190 | 2136.009  | 1979.998  | AL365519  | 1716.465  | 2430.155  |
| AK026958  | 2555.1    | 2377.682  | AK056773  | 13887.983 | 14672.225 | NM_018465 | 18953.945 | 17986.619 |
| NM_000579 | 3149.907  | 2964.039  | NM_002182 | 61147.645 | 58095.582 | Z36845    | 4444.488  | 5133.226  |
| NM_001480 | 2977.661  | 2137.98   | NM_016470 | 12090.279 | 11303.879 | M73792    | 3543.938  | 3485.393  |



|           |           |           |           |           |           |           |           |           |
|-----------|-----------|-----------|-----------|-----------|-----------|-----------|-----------|-----------|
| AF263462  | 3696.447  | 3315.441  | AL365408  | 62636.648 | 59839.508 | NM_016127 | 34420.93  | 35503.379 |
| AB040962  | 1589.098  | 1091.074  | AK026204  | 16317.588 | 15018.361 | AF085939  | 2693.443  | 3366.526  |
| NM_000639 | 1772.416  | 1772.352  | NM_000098 | 5220.207  | 5039.868  | NM_006792 | 57614.098 | 55923.637 |
| AV697672  | 2694.061  | 2828.669  | NM_000016 | 30836.961 | 30749.137 | NM_005876 | 68417.617 | 78975.055 |
| NM_000942 | 47562.996 | 47849.219 | AK026913  | 8578.318  | 7519.759  | NM_004445 | 2664.022  | 2816.271  |
| NM_002982 | 4451.683  | 3743.883  | NM_016234 | 29834.568 | 31839.57  | U39657    | 28872.24  | 28877.232 |
| NM_002190 | 1927.546  | 1393.398  | NM_001876 | 17944.227 | 16823.295 | NM_016340 | 8573.839  | 9710.493  |
| AK056773  | 5166.292  | 5946.162  | NM_016144 | 11896.303 | 10881.436 | NM_018373 | 2115.437  | 1906.408  |
| NM_002182 | 9408.099  | 9703.111  | AL133099  | 13068.348 | 11603.08  | NM_006445 | 7744.621  | 7577.03   |
| NM_016470 | 10875.438 | 9141.46   | NM_016082 | 6839.86   | 7499.956  | BF216030  | 13121.572 | 12636.466 |
| AL365408  | 45282.594 | 43696.359 | NM_000433 | 4410.957  | 3462.224  | NM_003684 | 5483.648  | 5274.244  |
| AK026204  | 10924.715 | 9788.738  | NM_000190 | 28035.723 | 30574.709 | NM_005657 | 6350.459  | 6010.679  |
| NM_000098 | 2762.706  | 2611.714  | X15667    | 23446.834 | 20769.178 | AB040883  | 3295.309  | 3754.541  |
| NM_000016 | 19276.664 | 14199.788 | NM_017512 | 1919.786  | 1527.469  | NM_018635 | 3461.082  | 3506.583  |
| AK026913  | 3484.234  | 2562.958  | NM_018661 | 2371.792  | 2142.62   | AF264628  | 1226.606  | 1561.81   |
| NM_016234 | 28328.365 | 24517.893 | NM_001678 | 1589.331  | 1554.932  | NM_001146 | 1506.706  | 2263.488  |
| NM_001876 | 12121.993 | 9961.621  | AK023078  | 18683.773 | 15158.769 | NM_001715 | 24429.055 | 26784.508 |
| NM_016144 | 7850.565  | 6584.038  | NM_002239 | 59117.945 | 65440.148 | NM_004395 | 20001.654 | 18540.277 |
| AL133099  | 8312.196  | 6372.906  | NM_002249 | 59675.637 | 62735.598 | NM_002663 | 2353.347  | 2189.788  |
| NM_016082 | 6370.337  | 6488.712  | NM_015684 | 22494.154 | 18865.711 | NM_006094 | 13098.27  | 11154.195 |
| NM_000433 | 5792.958  | 5868.382  | NM_003945 | 37058.777 | 31396.898 | AF080158  | 3285.302  | 3550.045  |
| NM_000190 | 12584.503 | 13401.96  | NM_004981 | 46705.145 | 46744.945 | AB037794  | 8902.307  | 8189.697  |
| X15667    | 4718.808  | 4943.863  | NM_016524 | 8726.423  | 7412.203  | NM_014178 | 23874.371 | 22645.701 |
| NM_017512 | 2565.708  | 2445.067  | NM_007126 | 63408.914 | 58784.016 | NM_001251 | 52085.605 | 52824.289 |
| NM_018661 | 3810.038  | 4773.7    | NM_004482 | 2301.703  | 1951.504  | AB011112  | 30479.162 | 26702.742 |
| NM_001678 | 846.133   | 1019.521  | NM_000352 | 1621.827  | 1176.979  | NM_018665 | 14928.753 | 16025.823 |
| AK023078  | 9143.97   | 9516.296  | NM_015599 | 3858.117  | 3018.605  | NM_002623 | 9647.342  | 8987.439  |
| NM_002239 | 44869.664 | 45547.238 | AB037902  | 1275.12   | 876.691   | NM_018844 | 13955.439 | 13360.227 |
| NM_002249 | 25921.672 | 27751.852 | NM_018696 | 39835.887 | 39931.258 | AF279778  | 6792.59   | 6749.477  |
| NM_015684 | 15236.759 | 12323.51  | NM_000136 | 42259.844 | 32298.436 | NM_015477 | 7790.499  | 8436.311  |
| NM_003945 | 27452.174 | 26092.137 | AL157456  | 6232.641  | 6172.392  | AK023212  | 5513.777  | 6161.728  |
| NM_004981 | 5447.644  | 5862.801  | AL162056  | 4615.147  | 3839.26   | AL353943  | 3150.058  | 3439.381  |
| AK096507  | 2555.807  | 2366.488  | NM_000380 | 55762.594 | 46421.516 | BE568801  | 9602.273  | 10278.767 |
| NM_016524 | 3222.557  | 2561.2    | NM_004628 | 9200.379  | 7975.095  | AB002336  | 2416.981  | 1932.879  |
| NM_007126 | 35850.898 | 34738.461 | NM_014876 | 11968.766 | 10528.353 | NM_003127 | 2988.54   | 3320.301  |
| NM_004482 | 1473.61   | 1054.438  | NM_005406 | 9904.766  | 8770.786  | NM_013286 | 17490.424 | 16924.412 |
| NM_015599 | 2868.669  | 1500.827  | NM_003328 | 9488.481  | 8270.043  | NM_006082 | 68030.078 | 76449.813 |
| AB037902  | 1555.838  | 894.207   | X93921    | 5995.348  | 5768.189  | NM_006633 | 922.517   | 819.036   |
| NM_018696 | 6285.814  | 5523.394  | AF073482  | 8984.448  | 8644.806  | NM_016262 | 1866.429  | 1682.449  |
| NM_000136 | 21274.328 | 18227.957 | NM_005990 | 15368.187 | 14623.442 | AB011116  | 22601.773 | 23831.396 |
| AL157456  | 3205.123  | 3268.797  | NM_016276 | 64092.063 | 59031.266 | AB037858  | 3915.55   | 4238.278  |
| AL162056  | 8620.742  | 8254.687  | NM_017762 | 15941.273 | 14581.349 | NM_005775 | 2742.96   | 2692.284  |
| NM_000380 | 8311.307  | 9331.251  | NM_001863 | 61307.617 | 78812.766 | NM_017635 | 3197.729  | 2123.89   |
| NM_004628 | 4788.668  | 4746.317  | NM_000921 | 25128.201 | 22051.57  | NM_004385 | 5964.023  | 5554.017  |
| AF085734  | 934.247   | 1108.418  | CY3Cy5    | 11809.927 | 588.475   | NM_017740 | 8316.171  | 6926.632  |
| NM_014876 | 13245.285 | 12692.651 | NM_006497 | 57336.391 | 50750.527 | AB033052  | 12426.826 | 13022.753 |
| NM_005406 | 12758.283 | 12781.64  | NM_006892 | 2942.799  | 3001.184  | NM_018227 | 6240.519  | 6756.351  |
| NM_003328 | 15120.978 | 12794.129 | AK023616  | 3269.388  | 3107.499  | AF050199  | 1756.946  | 1859.049  |
| X93921    | 5858.393  | 5272.233  | AK025665  | 9533.451  | 7377.558  | NM_003340 | 54179.766 | 57292.078 |
| AF073482  | 7400.866  | 5332.522  | AF191492  | 1257.764  | 860.929   | U46752    | 7853.414  | 7464.799  |
| NM_005990 | 11035.446 | 9453.191  | BC037530  | 82561.383 | 63896.137 | NM_002794 | 68663.695 | 66723.938 |
| NM_016276 | 13359.246 | 15038.706 | NM_014851 | 24528.078 | 21029.115 | BF244646  | 68094.305 | 73434.656 |
| NM_017762 | 29531.799 | 27895.648 | AL355743  | 3008.79   | 3035.433  | AK024030  | 16549.773 | 16736.402 |

|           |           |           |           |           |           |           |           |           |
|-----------|-----------|-----------|-----------|-----------|-----------|-----------|-----------|-----------|
| NM_001863 | 70292.195 | 53556.297 | L77571    | 1216.043  | 1223.766  | AF275808  | 3997.541  | 3661.99   |
| NM_000921 | 26796.418 | 20924.127 | X81896    | 2448.002  | 2381.62   | AK024038  | 12054.657 | 12844.204 |
| CY3Cy5    | 31302.977 | 2082.733  | NM_006497 | 46985.633 | 44886.742 | NM_002055 | 4075.228  | 5145.935  |
| NM_006497 | 17308.01  | 21064.244 | NM_006892 | 3460.488  | 3433.981  | NM_005803 | 20652.531 | 23484.416 |
| NM_006892 | 4499.123  | 5596.4    | SR5       | 6158.824  | 8088.148  | NM_015515 | 11268.961 | 9419.316  |
| AK023616  | 3908.203  | 4201.155  | SR9       | 26756.973 | 6164.667  | AK001579  | 43180.199 | 42809.273 |
| AK025665  | 13254.597 | 14870.305 | CY3Cy5    | 8363.332  | 230.484   | NM_002670 | 22892.506 | 23184.654 |
| AL355694  | 1883.49   | 2527.357  | M74093    | 6252.256  | 6209.571  | AF163302  | 8637.812  | 7384.823  |
| AK027152  | 1950.365  | 1829.903  | M28219    | 8594.802  | 9923.541  | NM_006408 | 10359.172 | 9493.729  |
| AL049257  | 1513.718  | 1652.247  | L17326    | 1137.635  | 1524.163  | NM_002419 | 18021.426 | 16531.561 |
| AF191492  | 2469.663  | 3037.069  | D17207    | 11046.109 | 10829.826 | NM_012415 | 6869.602  | 6979.117  |
| BC037530  | 16832.477 | 19486.766 | D55640    | 6827.485  | 6776.713  | NM_003454 | 1856.563  | 2019.532  |
| NM_014851 | 7827.936  | 7732.886  | AF085897  | 3777.588  | 3381.022  | NM_003418 | 38677.117 | 47037.543 |
| AL355743  | 4658.951  | 4698.843  | AF085822  | 2866.564  | 1865.766  | NM_017908 | 3028.125  | 3193.396  |
| L77571    | 2945.876  | 3141.477  | AK024310  | 6714.743  | 12070.99  | NM_006885 | 11167.726 | 6466.211  |
| X81896    | 2413.329  | 2574.508  | AL109688  | 12625.165 | 12855.17  | M25077    | 14363.761 | 15360.175 |
| AF070595  | 1837.799  | 1531.009  | AF074981  | 3905.018  | 3497.416  | NM_018702 | 12461.799 | 11784.799 |
| NM_006497 | 13490.37  | 15316.035 | AK025863  | 5496.519  | 5396.989  | M62843    | 2174.35   | 2853.827  |
| NM_006892 | 5899.501  | 5924.973  | D42044    | 4048.083  | 4055.331  | U96131    | 3896.245  | 6097.964  |
| SR5       | 6011.325  | 7143.697  | AK026149  | 5273.188  | 5202.873  | NM_001519 | 998.997   | 1322.959  |
| SR7       | 5405.115  | 38322.855 | AF131805  | 3047.116  | 3205.742  | NM_004593 | 10261.938 | 15685.347 |
| SR9       | 17030.764 | 4412.981  | AK024615  | 1859.173  | 1658.156  | NM_005778 | 59077.102 | 56119.609 |
| CY3Cy5    | 24258.035 | 1344.215  | AK025054  | 4314.342  | 4396.483  | NM_001032 | 67343.672 | 68411.117 |
| M74093    | 3599.905  | 3765.256  | AK024556  | 2585.503  | 2806.989  | NM_018084 | 65726.266 | 57796.664 |
| M28219    | 4179.078  | 4551.305  | AK024935  | 4546.315  | 4577.28   | AF164797  | 64213.082 | 63792.484 |
| M90754    | 537.704   | 1072.556  | AK022811  | 1720.541  | 1333.149  | NM_017840 | 63541.195 | 55825.305 |
| L17326    | 2188.916  | 2714.503  | AK025332  | 6579.448  | 6794.337  | AK001052  | 67706.555 | 61390.832 |
| D17207    | 7290.372  | 8514.195  | AB040929  | 591.104   | 515.166   | NM_001415 | 68272.07  | 63457.348 |
| D55640    | 11041.065 | 12222.025 | AB020735  | 1777.543  | 4159.239  | NM_004564 | 38556.324 | 32098.609 |
| AF085897  | 3267.382  | 3732.729  | AJ011596  | 19648.328 | 19742.836 | NM_000968 | 68223.352 | 61853.797 |
| NM_017418 | 1502.68   | 1564.574  | AL049215  | 69875.188 | 59932.398 | NM_003270 | 5234.713  | 4885.442  |
| AF085822  | 2570.213  | 2658.686  | X51779    | 5629.966  | 5816.889  | NM_016591 | 2735.635  | 2639.154  |
| AK021510  | 1804.87   | 1583.045  | AL049254  | 3359.711  | 3311.329  | AL157437  | 67488.172 | 56451.902 |
| AK022711  | 3424.632  | 3684.585  | AK024331  | 3506.126  | 3376.982  | NM_002629 | 64705.832 | 79459.867 |
| AK024310  | 2593.813  | 2899.384  | AK024452  | 3833.048  | 3632.395  | NM_014364 | 14126.755 | 14118.797 |
| AK023039  | 2313.898  | 2598.546  | AK021556  | 914.129   | 877.307   | NM_001685 | 68249.891 | 76032.305 |
| AL109688  | 4852.156  | 5293.502  | AJ249975  | 707.493   | 873.937   | NM_006067 | 47746.059 | 47279.164 |
| AF074981  | 2352.589  | 2436.826  | AK021733  | 2117.379  | 2199.146  | NM_000284 | 31253.627 | 34781.527 |
| AK025863  | 4053.593  | 4116.545  | NM_012449 | 759.977   | 590.394   | NM_004813 | 20826.625 | 21622.465 |
| D42044    | 4304.641  | 4478.333  | AK021551  | 4110.382  | 4027.639  | AK023008  | 5852.256  | 5658.05   |
| AK023009  | 2167.815  | 2594.075  | AK025117  | 2414.423  | 1812.342  | NM_004689 | 27101.645 | 24321.631 |
| AK026149  | 6315.818  | 7503.891  | AK000024  | 34013.516 | 41426.117 | NM_006026 | 30757.262 | 32605.559 |
| AB027011  | 12037.505 | 12980.036 | AB020691  | 527.873   | 504.475   | NM_016587 | 10354.801 | 12056.614 |
| AK025305  | 2433.969  | 2223.684  | AK026693  | 2776.285  | 3171.09   | BC000124  | 5878.857  | 6471.185  |
| AL117415  | 28342.012 | 30314.029 | NM_012285 | 2065.589  | 2390.881  | Z11773    | 4089.819  | 4874.382  |
| AK024532  | 4188.7    | 4578.04   | AK001128  | 838.329   | 1369.489  | NM_006914 | 1633.008  | 1414.094  |
| AK024615  | 3524.535  | 3775.163  | AK000090  | 1399.385  | 1885.124  | NM_003446 | 67604.93  | 58431.559 |
| AK025054  | 2977.531  | 2811.748  | AK000794  | 20334.055 | 22450.748 | NM_001485 | 28120.26  | 25475.023 |
| AK024556  | 1917.199  | 2501.308  | AK000950  | 16186.935 | 19255.467 | NM_002702 | 3972.286  | 2606.818  |
| AK024728  | 2959.829  | 3031.371  | AK026812  | 10763.769 | 12553.983 | NM_001989 | 50596.723 | 48867.629 |
| AK024935  | 2894.453  | 3937.193  | AK000176  | 7231.779  | 7749.515  | NM_002653 | 45568.645 | 53089.895 |
| AK025107  | 4133.112  | 4438.12   | AK000831  | 17552.309 | 20509.488 | NM_005604 | 6297.754  | 5875.398  |
| NM_007168 | 1954.825  | 2586.944  | AK000981  | 5523.614  | 5702.704  | S69023    | 8182.571  | 7537.895  |

|           |           |           |           |           |           |           |           |           |
|-----------|-----------|-----------|-----------|-----------|-----------|-----------|-----------|-----------|
| AK022811  | 2725.19   | 2881.167  | X95095    | 19344.502 | 22569.621 | NM_004625 | 17640.598 | 21199.766 |
| AL117635  | 3522.985  | 4465.901  | AB007902  | 4716.149  | 5289.252  | NM_007175 | 62308.332 | 69823.273 |
| AK025332  | 4335.006  | 5539.106  | AF078528  | 24030.611 | 27167.199 | NM_001306 | 7774.048  | 7590.361  |
| AB040929  | 1702.311  | 1489.213  | AF161411  | 4662.512  | 4885.896  | AB046861  | 1038.148  | 1472.19   |
| AB020735  | 2359.014  | 3068.086  | AK000450  | 44949.313 | 48150.199 | AB028173  | 1605.617  | 1454.996  |
| AL109700  | 1058.92   | 1295.636  | NM_018224 | 28104.043 | 40379.418 | NM_005940 | 3089.931  | 3409.881  |
| D17010    | 936.766   | 1017.94   | NM_019896 | 8631.729  | 9797.483  | AF061034  | 62819.98  | 60571.59  |
| AJ011596  | 5596.173  | 6367.094  | NM_018569 | 14896.172 | 14891.59  | X03655    | 4142.733  | 3161.01   |
| X79984    | 1054.447  | 1254.272  | AK025325  | 15176.48  | 13530.96  | BG696293  | 9753.312  | 10185.612 |
| U17639    | 6481.311  | 7111.303  | S75762    | 1313.816  | 1190.008  | AA777410  | 1651.077  | 1637.928  |
| AL049215  | 8945.813  | 9394.925  | U50531    | 10314.126 | 11143.586 | BG113873  | 5584.434  | 5863.815  |
| X51779    | 2690.98   | 2869.284  | NM_005318 | 5445.024  | 5487.301  | BC013135  | 68247.984 | 70219.375 |
| X81001    | 941.395   | 940.133   | L09099    | 68495.734 | 62910.375 | AA281652  | 16251.992 | 16674.898 |
| AL049254  | 3596.361  | 3673.278  | AL117474  | 4009.023  | 4304.193  | U31905    | 13856.664 | 14228.164 |
| Z83954    | 3757.91   | 4078.604  | NM_005421 | 5929.061  | 5138.056  | X52479    | 6811.648  | 6859.001  |
| AK024331  | 3402.7    | 4148.27   | Z36874    | 60701.578 | 68584.93  | BC013200  | 6576.747  | 8061.462  |
| AK024452  | 2624.163  | 2765.892  | AK023326  | 2428.894  | 2601.636  | AW408832  | 5156.625  | 5639.167  |
| AJ249975  | 1695.581  | 2820.482  | AK022462  | 7134.084  | 8626.018  | AA486364  | 58307.809 | 55547.102 |
| AK021733  | 4137.529  | 3373.517  | NM_020530 | 5408.828  | 6129.346  | M15476    | 67415.695 | 64059.512 |
| NM_012445 | 736.406   | 1120.844  | AK022418  | 12178.278 | 11693.389 | U57456    | 7199.664  | 7067.318  |
| AK021551  | 2729.764  | 3198.189  | AF279777  | 2765.578  | 2222.646  | N70057    | 50871.98  | 51050.375 |
| AK025117  | 2182.617  | 2704.345  | AK021748  | 64351.395 | 91505.422 | NM_002202 | 14008.193 | 14692.552 |
| AK022357  | 865.189   | 1297.254  | AL137257  | 11966.601 | 12106.791 | AL137938  | 14928.11  | 14911.094 |
| AK000024  | 9836.014  | 11342.165 | AK000543  | 12785.429 | 13719.03  | AF228704  | 11514.726 | 13961.359 |
| AK026693  | 3357.96   | 3376.034  | AK026683  | 3717.738  | 3182.313  | NM_004215 | 16778.813 | 18795.404 |
| NM_012285 | 1431.858  | 1510.809  | AL079309  | 10563.13  | 10172.411 | AK022746  | 7289.306  | 7132.591  |
| AK001128  | 3046.567  | 3244.379  | AK022335  | 2579.013  | 2504.384  | NM_006566 | 9505.646  | 10572.824 |
| AK000090  | 2656.744  | 2709.859  | AL110280  | 14069.038 | 16001.926 | NM_006440 | 19886.918 | 22772.867 |
| AK000794  | 14303.867 | 14621.604 | AK024235  | 540.01    | 527.466   | NM_004847 | 59075.789 | 59929.523 |
| AK000950  | 15955.431 | 16568.934 | NM_017458 | 4074.97   | 4106.49   | NM_002255 | 11629.681 | 10508.814 |
| AK026812  | 10722.131 | 11539.177 | NM_005542 | 59827.188 | 55925.875 | AF151889  | 19827.746 | 18729.564 |
| AK000176  | 6548.76   | 7139.518  | NM_000267 | 9897.452  | 10987.088 | BC034483  | 2543.882  | 2297.908  |
| AK000831  | 19951.672 | 20526.934 | NM_016603 | 7321.156  | 8029.845  | NM_003620 | 7100.198  | 7088.651  |
| AK000981  | 6740.892  | 6903.073  | NM_004398 | 65043.633 | 88740.313 | NM_013285 | 1853.502  | 2282.239  |
| X95095    | 17892.783 | 20467.975 | NM_014966 | 13591.349 | 14310.614 | AA586375  | 7449.942  | 7534.255  |
| AB007902  | 6221.423  | 6100.126  | NM_014962 | 2221.112  | 1914.657  | BE910339  | 59100.105 | 56550.75  |
| AF078528  | 14076.312 | 14636.893 | D87684    | 17257.166 | 14476.269 | U89715    | 11572.928 | 14419.943 |
| AF161411  | 5711.643  | 6972.354  | NM_001586 | 1342.539  | 1169.688  | AF254067  | 38221.84  | 44800.223 |
| AK000450  | 38394.488 | 47115.742 | NM_000730 | 23290.682 | 16122.817 | NM_016363 | 22617.32  | 22853.584 |
| NM_018224 | 14253.95  | 15615.968 | U31734    | 65738.469 | 76551.234 | AY009090  | 24509.674 | 24055.471 |
| NM_019896 | 10119.703 | 11038.451 | AF085885  | 1249.19   | 1888.861  | NM_005592 | 1667.904  | 1685.823  |
| NM_018569 | 12321.647 | 11231.76  | M24751    | 989.128   | 978.595   | U81380    | 1518.899  | 1850.147  |
| J04118    | 2750.799  | 3655.387  | AK026569  | 65539.398 | 86190.672 | NM_016505 | 2116.818  | 1917.454  |
| AK025325  | 16156.213 | 18986.039 | AL049974  | 2911.433  | 3076.438  | NM_012296 | 4250.705  | 5119.909  |
| S75762    | 3108.232  | 2444.707  | AF009319  | 12795.649 | 13870.812 | NM_004536 | 19752.016 | 22645.639 |
| AK023838  | 1666.974  | 1523.903  | AL365519  | 1456.391  | 2359.779  | NM_014672 | 6399.799  | 8014.455  |
| U50531    | 11012.771 | 10476.968 | NM_018465 | 16469.998 | 17207.488 | NM_005227 | 5601.147  | 5719.206  |
| NM_005318 | 3112.327  | 2766.528  | Z36845    | 2965.071  | 3463.044  | NM_000286 | 22792.129 | 22232.578 |
| AB015434  | 502.019   | 826.321   | M73792    | 2724.333  | 3235.352  | NM_016454 | 21112.805 | 23800.922 |
| U85653    | 2237.959  | 2280.057  | NM_016127 | 25994.658 | 31011.707 | NM_003465 | 6560.982  | 8210.364  |
| L09099    | 68127.906 | 59340.664 | AF085939  | 2399.505  | 2631.704  | NM_016433 | 1825.671  | 1988.451  |
| AL117474  | 2997.92   | 3180.106  | NM_006792 | 43185.191 | 48272.395 | NM_000855 | 3926.184  | 5037.695  |
| NM_005421 | 3207.112  | 3563.093  | NM_005876 | 65228.688 | 89478.68  | NM_005480 | 6357.046  | 5362.627  |

|           |           |           |           |           |           |           |           |           |
|-----------|-----------|-----------|-----------|-----------|-----------|-----------|-----------|-----------|
| AK024580  | 25189.955 | 26419.279 | NM_004934 | 1631.995  | 2015.944  | AB034694  | 1984.015  | 2080.325  |
| AL442093  | 10877.992 | 10218.648 | AF284436  | 3139.004  | 3213.771  | NM_003273 | 5154.778  | 5949.081  |
| AK095477  | 5858.436  | 7025.002  | NM_004445 | 2458.699  | 2432.71   | AK026404  | 8778.685  | 9477.943  |
| AK023326  | 4316.554  | 4570.34   | U39657    | 24328.572 | 25569.727 | NM_017948 | 12949.889 | 14526.683 |
| AK022462  | 11186.1   | 12849.757 | NM_016340 | 7642.979  | 7932.458  | NM_006744 | 3272.966  | 4711.364  |
| NM_020530 | 3045.936  | 3282.205  | NM_018373 | 3847.147  | 4280.618  | NM_018231 | 12837.702 | 12232.877 |
| AK022418  | 6877.574  | 7453.029  | BF216030  | 24622.527 | 28050.43  | NM_005833 | 11115.649 | 10501.801 |
| AF279777  | 3039.76   | 3185.443  | NM_002757 | 560.847   | 1154.359  | NM_003100 | 17476.01  | 19861.375 |
| AK021748  | 4523.102  | 4813.699  | NM_003684 | 5085.977  | 5907.496  | NM_006768 | 12501.925 | 13080.096 |
| AK021771  | 1150.992  | 1317.163  | NM_005657 | 1275.663  | 967.342   | NM_013322 | 14266.483 | 15756.682 |
| AL137257  | 12367.085 | 12674.092 | NM_017671 | 1358.283  | 1933.365  | AB020627  | 5931.936  | 5757.321  |
| AF086503  | 2502.423  | 2556.499  | AB040883  | 2967.281  | 3294.762  | NM_002003 | 6124.188  | 6169.807  |
| AK000543  | 25856.754 | 40733.582 | NM_018639 | 3838.146  | 3688.351  | NM_005387 | 17628.574 | 20111.801 |
| AK026683  | 17372.25  | 19838.592 | AF264628  | 1171.062  | 1800.455  | NM_006846 | 1347.154  | 2686.464  |
| D16906    | 1638.268  | 1679.291  | NM_001146 | 858.097   | 2726.808  | NM_018288 | 8366.434  | 10969.867 |
| AJ012492  | 1493.503  | 1616.22   | NM_001715 | 26228.748 | 30607.938 | AB018260  | 7530.799  | 10077.446 |
| AL079309  | 12954.967 | 12843.182 | NM_004395 | 19562.588 | 25081.303 | NM_014766 | 8767.351  | 9788.313  |
| AK022335  | 2024.502  | 2165.158  | NM_002663 | 2943.071  | 3029.826  | NM_016627 | 30157.363 | 31524.592 |
| AL110280  | 4408.02   | 4748.714  | NM_006094 | 11120.755 | 9479.714  | NM_016121 | 5695.229  | 6459.558  |
| AK024235  | 1281.373  | 1125.774  | AF080158  | 2615.769  | 2314.939  | NM_014768 | 8538.609  | 8515.669  |
| AF014457  | 1232.1    | 1611.686  | AB037794  | 7931.175  | 7603.075  | NM_006348 | 45397.406 | 50045.293 |
| NM_017458 | 2763.688  | 2772.121  | NM_014178 | 33765.223 | 45665.34  | AK026264  | 44415.969 | 45587.727 |
| AK024203  | 821.138   | 893.868   | NM_001251 | 51261.707 | 52263.156 | AF222927  | 2085.062  | 2050.436  |
| AF086196  | 2660.249  | 2249.913  | NM_004789 | 1815.886  | 1460.226  | NM_014345 | 3984.152  | 3132.854  |
| AF075087  | 1007.425  | 875.9     | AB011112  | 22888.758 | 21752.352 | NM_018217 | 2579.375  | 1699.032  |
| NM_005542 | 65364.766 | 64786.656 | NM_018669 | 13091.339 | 13097.764 | AF241831  | 7833.477  | 8622.629  |
| NM_016603 | 7988.668  | 8515.96   | NM_002623 | 7642.326  | 7622.918  | NM_003033 | 7279.783  | 6496.899  |
| NM_004398 | 11138.546 | 11012.728 | NM_018844 | 11335.334 | 11028.202 | NM_002733 | 9857.471  | 9397.861  |
| NM_016181 | 2035.063  | 1929.093  | AF279778  | 5240.727  | 4898.825  | M31008    | 3000.688  | 3091.958  |
| NM_014966 | 14285.033 | 16335.18  | NM_015477 | 8466.228  | 8066.835  | NM_006288 | 1544.507  | 1558.057  |
| NM_014962 | 2260.849  | 2166.766  | AK023212  | 5600.095  | 5426.413  | NM_016224 | 15650.44  | 15961.063 |
| D87684    | 12516.033 | 11674.317 | AL353943  | 3206.798  | 3205.818  | NM_007179 | 64827.961 | 67283.531 |
| NM_001586 | 1644.949  | 1758.186  | BE568801  | 8340.381  | 9023.457  | NM_001306 | 4579.764  | 4727.176  |
| NM_006317 | 57282.809 | 60490.164 | AB002336  | 1332.755  | 1174.322  | NM_005940 | 2745.361  | 4101.894  |
| NM_001219 | 14819.56  | 15031.042 | NM_013286 | 15531.608 | 15528.395 | AF061034  | 61300.781 | 62581.938 |
| NM_000730 | 24335.102 | 33044.543 | NM_006082 | 69244.633 | 63322.793 | X03655    | 5339.177  | 4839.087  |
| U31734    | 40892.805 | 54015.594 | NM_006633 | 761.077   | 975.923   | BG696293  | 9414.531  | 9481.782  |
| AF085885  | 4623.535  | 4488.267  | NM_016262 | 2938.845  | 2219.928  | AA777410  | 2401.529  | 2237.583  |
| M24751    | 2938.7    | 2761.981  | AB011116  | 18985.26  | 20713.746 | BG113873  | 4607.112  | 3698.678  |
| AK026569  | 69690.32  | 75330.438 | AB037858  | 3280.226  | 3700.146  | BC013135  | 66932.039 | 65643.008 |
| AL049974  | 6004.161  | 5159.762  | NM_005775 | 2124.339  | 2112.035  | AA281652  | 11890.24  | 9626.959  |
| AK022953  | 2228.456  | 1890.866  | NM_017639 | 3084.354  | 2670.012  | U31905    | 6682.375  | 4566.328  |
| AF009319  | 4479.441  | 4168.441  | NM_004385 | 4758.017  | 5326.396  | X52479    | 3099.958  | 2721.897  |
| AL365519  | 4149.068  | 4335.656  | L25629    | 1963.362  | 1976.399  | BC013200  | 1839.018  | 1500.982  |
| NM_018465 | 14050.838 | 13607.659 | AJ245539  | 1071.074  | 884.197   | AW408832  | 2899.749  | 2662.867  |
| Z36845    | 5660.707  | 4913.839  | NM_001490 | 4300.292  | 5320.591  | AA486364  | 61407.684 | 59931.059 |
| M73792    | 2700.613  | 2611.514  | NM_017740 | 14210.217 | 15131.334 | M15476    | 66418.906 | 61205.297 |
| NM_016127 | 18900.953 | 17673.355 | AB033052  | 14451.173 | 14018.738 | U57456    | 6595.632  | 6549.417  |
| AF085939  | 4959.334  | 4745.458  | NM_018227 | 6855.184  | 5567.614  | N70057    | 48363.199 | 48907.719 |
| NM_006792 | 31639.736 | 36378.512 | AF050199  | 1689.391  | 1434.97   | AK000124  | 3324.862  | 3538.275  |
| NM_005876 | 15985.371 | 19177.891 | NM_003340 | 37997.375 | 44805.789 | NM_004480 | 15277.63  | 12800.644 |
| AF039697  | 2079.702  | 2530.198  | U46752    | 10729.983 | 10493.654 | NM_014914 | 13995.675 | 14063.757 |
| NM_004934 | 2074.313  | 2059.841  | NM_002794 | 55193.586 | 50638     | NM_004215 | 11094.346 | 11570.019 |

|           |           |           |           |           |           |           |           |           |
|-----------|-----------|-----------|-----------|-----------|-----------|-----------|-----------|-----------|
| AF284436  | 4997.461  | 4952.298  | BF244646  | 66391.602 | 58757.164 | NM_00225E | 10322.072 | 10883.741 |
| NM_00444E | 4031.475  | 3889.756  | AK024030  | 11919.396 | 11613.246 | AF151889  | 18506.006 | 17228.406 |
| U39657    | 36936.133 | 43601.684 | AF275808  | 3046.273  | 2844.416  | BC034483  | 2537.127  | 2673.265  |
| NM_01634C | 8276.258  | 9609.096  | AK024038  | 1482.55   | 1685.752  | NM_00362C | 7891.327  | 7469.317  |
| NM_01837E | 1865.894  | 1821.159  | NM_00205E | 3436.269  | 2973.121  | AA586375  | 3627.994  | 2838.618  |
| NM_00644E | 6056.086  | 6421.663  | NM_00580E | 18709.99  | 20365.631 | BE910339  | 58103.613 | 53247.406 |
| BF216030  | 5025.356  | 5160.095  | NM_01551E | 14413.422 | 12465.122 | U89715    | 3372.448  | 3507.426  |
| AF131839  | 2075.335  | 2816.473  | AK001579  | 39684.176 | 45486.441 | AF254067  | 28287.939 | 25268.418 |
| NM_002757 | 2724.326  | 2987.532  | NM_00267C | 18960.691 | 19753.533 | NM_01636E | 14188.726 | 11328.001 |
| NM_003684 | 5842.856  | 5899.965  | AF163302  | 7362.817  | 7584.071  | AY009090  | 17635.795 | 13227.476 |
| NM_005657 | 6431.081  | 6072.074  | NM_00640E | 10816.727 | 12254.769 | NM_00230E | 1057.756  | 1377.583  |
| NM_017671 | 2803.071  | 2735.785  | NM_00241E | 13082.13  | 14377.515 | NM_01650E | 4695.135  | 5711.869  |
| AB040883  | 2229.623  | 1929.977  | NM_00593E | 821.494   | 920.503   | NM_01229E | 4644.852  | 4979.723  |
| NM_01863E | 2095.604  | 2099.07   | NM_01241E | 5344.974  | 5609.58   | NM_00453E | 17763.363 | 16421.561 |
| AF264628  | 1543.143  | 1610.187  | NM_003924 | 456.298   | 377.06    | NM_01467E | 5619.873  | 5690.758  |
| NM_00114E | 1207.026  | 1116.18   | NM_003454 | 5619.964  | 6134.899  | NM_003474 | 5789.065  | 5376.57   |
| NM_00171E | 17021.791 | 20018.277 | NM_00341E | 49437.043 | 53055.512 | NM_00462E | 20064.311 | 18229.807 |
| NM_00439E | 5683.823  | 5678.24   | NM_01790E | 6311.64   | 5964.449  | NM_016454 | 15376.747 | 19901.82  |
| NM_00266E | 2243.809  | 2315.449  | NM_00688E | 12665.897 | 6336.169  | NM_00327E | 4843.57   | 6497.76   |
| NM_006094 | 6499.236  | 5869.181  | M25077    | 17841.418 | 17369.631 | AK026404  | 5405.239  | 5648.206  |
| AF080158  | 6011.609  | 5222.154  | NM_01870E | 11144.01  | 9866.746  | NM_01794E | 9591.614  | 8695.456  |
| AB037794  | 5769.956  | 4312.921  | M62843    | 1836.005  | 1923.16   | NM_018231 | 17374.883 | 13087.8   |
| NM_01417E | 8329.591  | 9326.068  | U96131    | 3413.062  | 3034.461  | AF202889  | 35577.258 | 32550.201 |
| NM_001251 | 19411.293 | 21562.822 | NM_00459E | 7698.189  | 7202.324  | NM_00583E | 2919.387  | 2567.696  |
| NM_00660E | 1270.092  | 1770.814  | NM_00577E | 35145.516 | 42546.07  | NM_00310C | 6593.163  | 5853.614  |
| NM_00478E | 1962.597  | 2148.964  | NM_00103E | 66473.367 | 70206.289 | NM_00676E | 5624.098  | 4542.935  |
| AB011112  | 22695.963 | 23286.518 | AF164797  | 68951.305 | 55011.852 | NM_01332E | 10364.072 | 10747.318 |
| NM_01866E | 10353.572 | 11547.645 | NM_01784C | 53432.34  | 50230.781 | AB020627  | 9448.108  | 11201.139 |
| NM_00262E | 6199.717  | 6711.984  | AK001052  | 68483.906 | 56982.586 | NM_00200E | 6330.021  | 6864.219  |
| NM_018844 | 11016.229 | 11322.099 | NM_00141E | 66600.359 | 60039.707 | NM_005387 | 20858.631 | 24608.789 |
| AF279778  | 5322.049  | 5883.446  | NM_004564 | 34460.926 | 24130.207 | AL137938  | 23370.803 | 23675.293 |
| NM_015477 | 6640.067  | 6549.207  | NM_00096E | 68610.68  | 60458.359 | AF228704  | 9792.156  | 8902.989  |
| AK023212  | 3967.353  | 4180.477  | NM_00327C | 4751.923  | 4604.491  | NM_01828E | 4213.946  | 4099.394  |
| AL353943  | 4034.472  | 4284.472  | NM_016591 | 2162.833  | 2291.679  | NM_016121 | 5425.328  | 5900.459  |
| BE568801  | 6058.266  | 6734.646  | AL157437  | 57457.301 | 44636.32  | NM_01476E | 8281.088  | 7735.682  |
| AB002336  | 1700.954  | 1891.176  | NM_00600E | 10405.219 | 12520.153 | NM_00634E | 51171.953 | 52418.617 |
| NM_003127 | 2853.903  | 2409.802  | NM_00262E | 61339.801 | 81998.25  | AK026264  | 47102.621 | 43749.027 |
| NM_01328E | 9877.307  | 8699.86   | NM_014364 | 19025.803 | 18718.258 | AF222927  | 2614.472  | 2017.788  |
| NM_00608E | 69454.883 | 76902.383 | NM_00168E | 65167.453 | 69411.039 | NM_01434E | 8135.213  | 7346.41   |
| NM_00663E | 1456.176  | 1452.804  | NM_006067 | 54075.699 | 51704.484 | NM_018217 | 1550.681  | 1159.552  |
| NM_01626E | 1849.391  | 1635.524  | NM_000284 | 26440.395 | 28104.346 | AF241831  | 2978.882  | 2593.856  |
| AB011116  | 18322.854 | 17943.361 | NM_00481E | 18911.863 | 18770.965 | NM_00303E | 3829.459  | 3802.541  |
| AB037858  | 2811.838  | 2596.422  | AK023008  | 4929.172  | 4938.873  | NM_00273E | 3387.823  | 3291.939  |
| NM_00017E | 1158.641  | 1031.502  | NM_00468E | 23130.045 | 23164.537 | M31008    | 1548.863  | 1259.606  |
| NM_00577E | 2901.211  | 2608.085  | NM_00602E | 26801.316 | 28652.639 | NM_016224 | 12216.943 | 10308.255 |
| NM_01763E | 1060.668  | 708.01    | BG339855  | 2407.96   | 2405.363  | NM_005227 | 9875.744  | 10739.741 |
| NM_00438E | 1303.153  | 1244.279  | AB040956  | 8272.004  | 8201.604  | NM_00028E | 30771.418 | 30918.709 |
| L25629    | 3625.098  | 4158.015  | NM_016587 | 5736.366  | 4329.653  | BG113873  | 5661.993  | 4897.478  |
| AJ245539  | 1895.8    | 2000.361  | NM_00351E | 5396.053  | 5364.879  | BC013135  | 67656.898 | 70292.328 |
| NM_00149C | 5917.222  | 6141.45   | NM_01795E | 5258.038  | 4159.531  | AI625002  | 1048.101  | 853.205   |
| NM_01774C | 6846.864  | 6965.764  | BC000124  | 2845.325  | 2344.105  | AA281652  | 14996.922 | 12092.827 |
| AB033052  | 9892.331  | 11256.88  | Z11773    | 3512.039  | 3492.967  | U31905    | 12334.195 | 10902.204 |
| NM_018227 | 5736.935  | 5358.589  | NM_006914 | 1486.471  | 1519.663  | X52479    | 6872.58   | 6409.724  |

|           |           |           |           |           |           |           |           |           |
|-----------|-----------|-----------|-----------|-----------|-----------|-----------|-----------|-----------|
| AF050199  | 3693.662  | 3681.016  | NM_003446 | 69821.164 | 55813.02  | BC013200  | 3242.896  | 3315.256  |
| NM_003340 | 31547.885 | 42787.16  | NM_001485 | 26812.33  | 32357.49  | AW408832  | 1998.828  | 1755.488  |
| U46752    | 5215.055  | 5365.748  | NM_002702 | 3453.873  | 3096.536  | AA486364  | 38470.965 | 41958.332 |
| NM_002794 | 56958.895 | 51024.141 | NM_001989 | 32999.715 | 39165.703 | M15476    | 65759.281 | 59868.656 |
| BF244646  | 36678.246 | 41937.086 | NM_002653 | 33756.676 | 44950.07  | U57456    | 2820.052  | 2131.251  |
| AK024030  | 12184.919 | 11247.789 | NM_005604 | 5230.297  | 5274.326  | N70057    | 28314.928 | 25329.102 |
| AF275808  | 3620.207  | 3424.656  | S69023    | 5353.39   | 6086.45   | AK000124  | 3227.807  | 3521.8    |
| AK024038  | 9659.12   | 9625.586  | NM_003474 | 5108.109  | 5934.112  | NM_004480 | 6693.351  | 5692.796  |
| NM_002055 | 3682.661  | 3004.247  | NM_004625 | 25742.23  | 31091.826 | NM_014914 | 11264.281 | 9195.044  |
| NM_005803 | 14700.301 | 14823.781 | NM_007179 | 61753.738 | 62090.348 | NM_003620 | 2145.792  | 3098.147  |
| NM_015515 | 11915.459 | 11133.789 | NM_001306 | 9498.565  | 10088.315 | NM_016363 | 24657.529 | 24602.723 |
| AK001579  | 16100.988 | 18623.68  | AB046861  | 1752.632  | 1872.701  | AY009090  | 28520.523 | 25236.529 |
| NM_002670 | 16502.1   | 13828.524 | AB028173  | 1397.852  | 1324.702  | NM_005592 | 1031.36   | 770.376   |
| AF163302  | 4327.046  | 4340.236  | NM_005940 | 2302.323  | 2467.584  | NM_016505 | 2787.077  | 2271.403  |
| NM_006405 | 4315.77   | 3913.917  | AF061034  | 50135.066 | 50766.137 | NM_012296 | 3906.597  | 3210.59   |
| NM_002419 | 12195.618 | 11400.175 | X03655    | 3773.544  | 3427.793  | AF041038  | 3465.821  | 3111.773  |
| NM_005935 | 1553.03   | 1308.315  | BG696293  | 8489.742  | 8977.75   | NM_004536 | 9687.853  | 7800.028  |
| NM_012415 | 5863.4    | 5395.873  | AA777410  | 1241.179  | 1243.722  | NM_014672 | 4493.505  | 4482.753  |
| NM_003924 | 2645.699  | 3066.629  | BG113873  | 4884.831  | 5033.943  | AB058719  | 6349.107  | 5988.814  |
| NM_003454 | 3145.451  | 3435.576  | BC013135  | 63504.102 | 59472.629 | AK025935  | 4620.961  | 4678.783  |
| NM_003415 | 29518.525 | 42140.656 | AI625002  | 986.818   | 1048.72   | AB032953  | 1050.624  | 660.208   |
| NM_017905 | 2630.327  | 3096.16   | H07899    | 713.557   | 1135.431  | NM_016441 | 2203.695  | 2539.122  |
| NM_006885 | 8049.5    | 5066.992  | AA281652  | 11030.027 | 9800.247  | NM_006334 | 2614.671  | 2801.67   |
| M62843    | 4616.098  | 5011.43   | U31905    | 8527.484  | 10112.08  | NM_003474 | 5158.002  | 4476.454  |
| U96131    | 1760.11   | 2595.186  | X52479    | 7171.959  | 7197.554  | NM_004625 | 15083.462 | 12621.252 |
| NM_001519 | 1611.122  | 1518.969  | BC013200  | 4692.515  | 6430.98   | NM_007179 | 66459.867 | 65389.168 |
| NM_004593 | 6919.731  | 8608.439  | AW408832  | 5029.777  | 5207.783  | NM_001306 | 7775.858  | 7667.909  |
| NM_005775 | 48538.992 | 47268.254 | AA486364  | 45893.848 | 47431.699 | NM_000583 | 8497.773  | 9230.241  |
| NM_001032 | 67592.133 | 65273.539 | M15476    | 66614.609 | 60765.992 | NM_004254 | 4379.673  | 7246.298  |
| NM_018084 | 52608.543 | 46298.871 | U57456    | 6379.25   | 6331.562  | AB046833  | 2592.971  | 6889.901  |
| AF164797  | 68031.758 | 56046.73  | N70057    | 34467.836 | 41352.422 | AY007135  | 67222.68  | 71803.656 |
| NM_017840 | 64489.188 | 51897.988 | NM_002202 | 10198.444 | 11865.688 | AF202889  | 59040.074 | 57660.777 |
| AK001052  | 68734.914 | 60626.504 | AL137938  | 24145.758 | 24573.934 | NM_005833 | 10429.612 | 10112.867 |
| NM_001415 | 69724.078 | 60513.672 | AF228704  | 9460.456  | 10330.377 | NM_003100 | 19780.684 | 19939.496 |
| NM_004564 | 38100.637 | 31182.855 | NM_004215 | 19225.369 | 18732.08  | NM_006765 | 8935.379  | 8273.281  |
| NM_000965 | 71168.422 | 58811.98  | AK022746  | 7832.542  | 7429.819  | NM_013322 | 9176.094  | 7183.74   |
| NM_003270 | 7654.167  | 7435.434  | NM_006565 | 13550.488 | 13557.491 | AB020627  | 6606.194  | 5158.999  |
| NM_016591 | 2870.798  | 2493.643  | NM_006440 | 19174.713 | 20569.152 | NM_002003 | 6172.77   | 5783.442  |
| AL157437  | 13084.724 | 13677.79  | NM_004847 | 61818.383 | 51996.215 | NM_005387 | 17089.535 | 20098.818 |
| NM_006005 | 13577.343 | 14526.064 | NM_002255 | 9851.453  | 9041.968  | NM_006846 | 899.227   | 1262.594  |
| NM_002625 | 58591.43  | 59849.586 | AF151889  | 17766.539 | 16587.426 | AL137938  | 15224.944 | 14939.976 |
| NM_014364 | 6659.468  | 7300.679  | BC034483  | 2218.312  | 1631.944  | AF228704  | 5181.588  | 4511.017  |
| NM_001685 | 64367.762 | 57067.23  | NM_003620 | 6725.325  | 6344.681  | NM_004215 | 8880.537  | 7492.699  |
| NM_006067 | 60932.926 | 54164.395 | NM_013289 | 1219.866  | 1221.477  | AK022746  | 3289.915  | 2982.491  |
| NM_000284 | 25710.566 | 26580.26  | AA586375  | 6356.221  | 6717.519  | NM_006565 | 13927.854 | 14204.221 |
| NM_004813 | 19074.406 | 20148.988 | BE910339  | 49165.637 | 48531.133 | NM_006440 | 19638.633 | 19609.139 |
| AK023008  | 3710.137  | 4292.447  | U89715    | 8339.729  | 9071.078  | NM_004847 | 60572.711 | 55240.219 |
| NM_004685 | 15852.363 | 17521.617 | AF254067  | 27981.324 | 30465.172 | NM_002255 | 6553.497  | 5256.495  |
| NM_006026 | 12707.654 | 13712.334 | NM_016363 | 16556.613 | 14303.854 | AF151889  | 16629.018 | 14654.572 |
| BG339855  | 3063.753  | 3173.019  | AY009090  | 24657.574 | 22884.682 | BC034483  | 1819.365  | 1584.004  |
| AB040956  | 9767.688  | 10225.756 | NM_005592 | 1446.533  | 1549.273  | NM_014177 | 1884.791  | 1908.188  |
| NM_016587 | 4666.26   | 4216.725  | NM_002303 | 1446.756  | 1431.109  | NM_016224 | 4319.916  | 5524.635  |
| NM_003516 | 8414.391  | 8116.232  | NM_016505 | 4556.845  | 4947.186  | NM_005227 | 5077.231  | 2890.973  |

|           |           |           |           |           |           |           |           |           |
|-----------|-----------|-----------|-----------|-----------|-----------|-----------|-----------|-----------|
| NM_017953 | 7529.475  | 6698.828  | NM_012296 | 3978.951  | 4454.991  | NM_000286 | 27632.918 | 29275.447 |
| BC000124  | 2360.416  | 2490.83   | NM_004536 | 13686.607 | 15116.311 | NM_016454 | 30675.4   | 36956.242 |
| Z11773    | 4041.776  | 3215.56   | NM_014672 | 5237.204  | 5900.712  | NM_003466 | 11362.995 | 13824.338 |
| NM_006914 | 1485.115  | 1517.317  | NM_005227 | 10778.746 | 12419.304 | NM_016433 | 2919.101  | 2572.097  |
| NM_003446 | 37064.129 | 45837.25  | NM_000286 | 26918.492 | 29258.811 | NM_000856 | 2971.518  | 3530.572  |
| NM_001485 | 7523.755  | 7774.442  | NM_016454 | 22852.701 | 27671.379 | NM_005480 | 4543.003  | 3683.979  |
| NM_002702 | 3475.455  | 3157.179  | NM_003469 | 10552.949 | 11145.539 | AB034694  | 1475.641  | 1316.118  |
| NM_001989 | 12643.043 | 11446.922 | NM_016433 | 1726.723  | 2225.051  | NM_003273 | 3925.886  | 3427.056  |
| NM_002653 | 25909.539 | 25677.674 | NM_000859 | 3487.291  | 4553.641  | AK026404  | 8273.917  | 8093.356  |
| NM_005604 | 4036.058  | 3280.354  | NM_005480 | 3699.172  | 3414.302  | NM_017948 | 14350.836 | 14683.618 |
| S69023    | 6006.64   | 5415.509  | AB034694  | 1918.407  | 1421.233  | NM_000392 | 7724.16   | 6999.167  |
| NM_003474 | 5827.209  | 5815.408  | NM_003273 | 3864.93   | 4236.113  | AF208536  | 1890.619  | 1710.157  |
| NM_004625 | 6529.682  | 6969.775  | AK026404  | 6654.068  | 7859.997  | AB037848  | 2209.164  | 2211.948  |
| NM_007179 | 14962.926 | 15666.064 | NM_017948 | 14245.8   | 14352.997 | AF082657  | 8540.176  | 8041.871  |
| NM_001306 | 1635.172  | 2153.198  | NM_006744 | 2624.709  | 2887.289  | NM_006744 | 2203.108  | 2357.306  |
| AB046861  | 2119.735  | 1859.504  | NM_018231 | 21581.408 | 21223.402 | AF297659  | 1755.308  | 1252.275  |
| AB028173  | 2071.354  | 2250.333  | NM_005833 | 4244.869  | 3079.518  | NM_018231 | 18657.178 | 15162.951 |
| NM_005940 | 2746.656  | 2767.758  | NM_003100 | 16446.18  | 16752.877 | NM_018286 | 5810.939  | 6134.782  |
| AF061034  | 13405.365 | 15703.53  | NM_006768 | 10185.787 | 10689.646 | AB018260  | 6393.883  | 7563.675  |
| X03655    | 1581.519  | 1656.285  | NM_013322 | 12839.72  | 13961.522 | NM_014766 | 6961.186  | 7299.213  |
| BG696293  | 4194.287  | 4511.15   | AB020627  | 7268.914  | 7973.944  | NM_016627 | 24145.221 | 24032.139 |
| AA777410  | 947.707   | 1268.279  | NM_002003 | 6491.67   | 6190.548  | NM_016121 | 4623.43   | 5523.465  |
| BG113873  | 2288.6    | 2348.513  | NM_005387 | 17281.291 | 20625.283 | NM_014766 | 9923.724  | 9429.002  |
| BC013135  | 45446.52  | 50170.309 | NM_006846 | 1328.889  | 1181.949  | NM_006346 | 61314.316 | 60764.398 |
| AI625002  | 1607.675  | 1646.861  | NM_018289 | 8263.087  | 8619.363  | AK026264  | 44659.945 | 47849.789 |
| H07899    | 1756.413  | 1856.503  | AB018260  | 6289.964  | 7528.938  | AF222927  | 1908.331  | 2826.739  |
| AA281652  | 13860.107 | 13623.208 | NM_015985 | 776.712   | 926.767   | NM_014345 | 12853.384 | 12325.892 |
| U31905    | 2712.992  | 2726.805  | NM_014766 | 6731.125  | 7738.207  | NM_018217 | 4786.83   | 4148.226  |
| X52479    | 5886.815  | 6030.432  | NM_016627 | 23001.68  | 22494.83  | AF241831  | 6396.211  | 6904.642  |
| BC013200  | 4313.109  | 5343.493  | NM_016121 | 4841.295  | 4896.793  | NM_003033 | 4108.44   | 4647.629  |
| AW408832  | 2537.392  | 2266.641  | NM_014769 | 11086.165 | 11469.887 | U96113    | 5712.571  | 5617.624  |
| AA486364  | 18602.693 | 18581.66  | NM_006349 | 47066.09  | 47768.031 | NM_002733 | 3369.569  | 3335.897  |
| M15476    | 21215.902 | 20607.92  | AK026264  | 43478.934 | 46861.152 | CY3Cy5    | 11887.841 | 185.479   |
| U57456    | 4096.208  | 4158.617  | AF222927  | 4273.069  | 4672.931  | U93051    | 30221.189 | 29098.521 |
| N70057    | 12282.895 | 11435.348 | NM_014345 | 12383.934 | 10689.432 | AF086409  | 1030.787  | 974.381   |
| NM_002202 | 18350.566 | 18788.801 | NM_018217 | 8512.016  | 6471.965  | AK024268  | 3435.256  | 3313.673  |
| AL137938  | 16428.439 | 16605.777 | AF241831  | 5770.709  | 5978.432  | AF086295  | 1160.645  | 1449.923  |
| AF228704  | 11250.019 | 11833.978 | NM_003033 | 5106.31   | 5060.039  | AF086344  | 3515.823  | 2812.724  |
| NM_004215 | 11679.798 | 11460.746 | NM_002733 | 7893.868  | 7130.445  | AF086424  | 1233.999  | 1386.371  |
| AK022746  | 8248.004  | 7867.651  | M31008    | 2050.316  | 2728.14   | AL110130  | 982.772   | 713.401   |
| NM_006568 | 11514.659 | 11231.955 | NM_006288 | 1675.471  | 2017.9    | AF052116  | 553.7     | 1345.639  |
| NM_006440 | 7734.953  | 8488.117  | NM_016224 | 17884.693 | 18737.453 | NM_018087 | 9028.402  | 11191.115 |
| NM_004847 | 12865.445 | 13377.154 | NM_007179 | 58744.168 | 60875.582 | AL360260  | 923.414   | 1064.36   |
| NM_002255 | 2510.899  | 2092.243  | NM_001306 | 9776.851  | 10051.04  | AK023647  | 1308.749  | 1145.667  |
| AF151889  | 6608.659  | 7129.395  | AB046861  | 1684.676  | 1742.28   | AL096749  | 22887.611 | 18948.42  |
| BC034483  | 1100.42   | 1322.947  | AB028173  | 1235.193  | 1202.918  | AK023620  | 4047.443  | 3995.317  |
| NM_003620 | 3349.545  | 3233.496  | NM_005940 | 2690.53   | 2876.884  | AF086189  | 4261.328  | 3239.115  |
| NM_013289 | 2649.352  | 2926.207  | AF061034  | 46871.609 | 48659.867 | AL050055  | 6142.97   | 4836.796  |
| AA586375  | 3319.373  | 2973.147  | X03655    | 2929.699  | 2598.006  | U93051    | 22167.514 | 16615.637 |
| BE910339  | 18755.158 | 18240.264 | BG696293  | 7685.332  | 7619.547  | SR4       | 19946.379 | 25941.902 |
| U89715    | 11624.161 | 11481.755 | AA777410  | 1250.583  | 947.318   | SR6       | 3199.323  | 4463.442  |
| AF254067  | 27580.203 | 27577.695 | BG113873  | 4381.46   | 3932.28   | SR8       | 10717.603 | 35470.531 |
| NM_016363 | 12191.442 | 11358.664 | BC013135  | 63300.582 | 59379.18  | SR10      | 34709.094 | 12947.225 |

|           |           |           |           |           |           |           |           |           |
|-----------|-----------|-----------|-----------|-----------|-----------|-----------|-----------|-----------|
| AY009090  | 21070.002 | 18949.9   | H07899    | 1045.089  | 860.982   | CY3Cy5    | 12010.627 | 110.32    |
| NM_005592 | 1145.619  | 1147.321  | AA281652  | 13646.036 | 15055.459 | AL359931  | 4808.064  | 4854.377  |
| U81380    | 790.66    | 705.872   | U31905    | 8778.784  | 9459.828  | AK000954  | 5273.119  | 5064.034  |
| NM_002303 | 1960.774  | 1865.369  | X52479    | 6076.798  | 6513.09   | AF086099  | 2602.58   | 2380.893  |
| NM_016509 | 1581.393  | 1735.807  | BC013200  | 4285.916  | 4996.427  | AK021922  | 1281.177  | 1159.333  |
| NM_012296 | 1347.812  | 1027.096  | AW408832  | 4859.377  | 3933.345  | AK025800  | 9960.138  | 8959.006  |
| NM_004536 | 3420.162  | 3065.083  | AA486364  | 42397.625 | 46884.465 | AK022333  | 1966.551  | 1773.24   |
| NM_014672 | 4293.316  | 4189.694  | M15476    | 64213.988 | 54847.629 | AL137407  | 5893.277  | 5462.278  |
| NM_005227 | 9908.372  | 10600.591 | U57456    | 5862.459  | 5990.169  | AF085839  | 1012.278  | 859.168   |
| NM_000286 | 24747.164 | 22956.15  | N70057    | 35192.285 | 41497.531 | NM_018178 | 3717.864  | 4139.836  |
| NM_016454 | 19672.014 | 20598.189 | AK000124  | 5491.818  | 5996.027  | AK025204  | 1312.518  | 1008.738  |
| NM_003469 | 9006.758  | 9043.896  | NM_004480 | 12747.771 | 11764.507 | AK027256  | 768.407   | 795.61    |
| NM_016433 | 2756.552  | 3090.088  | NM_014914 | 11290.482 | 11944.316 | AL365406  | 844.218   | 667.684   |
| NM_000859 | 4315.897  | 5189.638  | NM_004215 | 19116.918 | 19903.404 | NM_019000 | 4755.301  | 3834.291  |
| NM_005480 | 2817.756  | 2663.417  | AK022746  | 8637.239  | 7871.459  | AF143330  | 1438.666  | 1404.961  |
| AB034694  | 1397.299  | 1558.796  | NM_006568 | 12735.588 | 13766.857 | AK025178  | 3449.055  | 2681.428  |
| NM_003273 | 3118.84   | 4463.932  | NM_006440 | 18523.496 | 21049.947 | AK001822  | 7968.656  | 7374.244  |
| AK026404  | 6158.283  | 6499.301  | NM_004847 | 56319.898 | 49386.293 | AK026969  | 8455.79   | 7991.584  |
| NM_017948 | 8941.298  | 8769.819  | NM_002255 | 6624.037  | 4612.02   | AF086287  | 1843.637  | 1501.519  |
| NM_006744 | 4165.062  | 3797.437  | AF151889  | 15579.646 | 14793.069 | AK027183  | 2493.188  | 2837.401  |
| NM_018231 | 4593.129  | 4764.935  | BC034483  | 1764.135  | 1643.692  | AK022613  | 68506.492 | 76345.125 |
| NM_005833 | 7914.263  | 6804.639  | NM_003620 | 6277.286  | 5839.406  | AK023843  | 1146.707  | 1039.097  |
| NM_003100 | 16192.971 | 15385.769 | NM_013289 | 1146.988  | 1165.456  | AL359557  | 3845.328  | 4672.678  |
| NM_006768 | 7845.032  | 8329.443  | AA586375  | 6047.17   | 5226.581  | AK027257  | 1137.506  | 1237.724  |
| NM_013322 | 10659.593 | 8207.207  | BE910339  | 43098.391 | 47333.945 | AK024582  | 1208.723  | 1574.688  |
| AB020627  | 6048.504  | 5676.553  | U89715    | 8865.941  | 11403.799 | AK024143  | 830.181   | 1030.05   |
| NM_002003 | 2072.041  | 1977.757  | AF254067  | 30447.084 | 36693.605 | AK022099  | 1501.816  | 1390.677  |
| NM_006846 | 981.003   | 1026.299  | NM_016363 | 22438.531 | 22033.688 | AL137366  | 867.845   | 1234.553  |
| NM_004484 | 1339.817  | 1132.78   | AY009090  | 24020.201 | 22619.24  | BC031635  | 1771.265  | 1702.948  |
| AK027035  | 694.69    | 739.551   | NM_005592 | 1122.957  | 850.497   | AF085916  | 716.451   | 925.326   |
| NM_018289 | 5224.532  | 4457.533  | NM_002303 | 1138.936  | 1008.813  | AF085950  | 755.783   | 880.778   |
| AB018260  | 5981.434  | 6117.747  | NM_016509 | 3926.768  | 4551.093  | AL359598  | 2580.523  | 2032.191  |
| NM_015985 | 1178.787  | 1028.634  | NM_012296 | 4160.301  | 3908.808  | AF085980  | 2086.774  | 2026.001  |
| NM_014766 | 7006.608  | 7875.968  | NM_004536 | 13072.224 | 14216.661 | AF085927  | 3443.283  | 2940.701  |
| NM_016627 | 20540.578 | 20215.49  | NM_014672 | 5260.927  | 5448.949  | AF085954  | 7032.033  | 8301.12   |
| NM_016121 | 6263.41   | 6347.073  | NM_003474 | 5190.711  | 5001.46   | AL137337  | 2162.591  | 1787.201  |
| NM_014769 | 5046.429  | 5558.455  | NM_004625 | 23377.08  | 23918.881 | AL161969  | 1002.016  | 778.231   |
| NM_006349 | 46154.332 | 49873.203 | NM_016454 | 24414.965 | 27581.184 | AL442095  | 1887.444  | 1206.287  |
| AK026264  | 20730.213 | 22410.859 | NM_003469 | 10776.081 | 11318.866 | X69081    | 10192.087 | 8433.421  |
| AF222927  | 3980.803  | 3631.468  | NM_016433 | 2160.667  | 2131.054  | NM_005714 | 3357.6    | 2728.069  |
| NM_014345 | 11852.043 | 12196.484 | NM_000859 | 3328.691  | 4227.039  | AL137474  | 4203.069  | 4740.232  |
| NM_018217 | 6683.549  | 4793.623  | NM_005480 | 3833.291  | 4069.149  | AL133023  | 1243.324  | 1355.704  |
| AF241831  | 3469.936  | 3581.152  | AB034694  | 1559.999  | 1314.481  | AK021572  | 2767.039  | 2855.364  |
| NM_003033 | 4350.199  | 3841.093  | NM_003273 | 3608.809  | 3968.861  | AK021631  | 1283.753  | 1233.058  |
| NM_002733 | 8378.094  | 6039.24   | AK026404  | 6211.868  | 6685.244  | AK026757  | 1602.386  | 1328.386  |
| M31008    | 1843.762  | 1375.724  | NM_017948 | 13166.738 | 13160.164 | AK023294  | 1830.225  | 1610.304  |
| NM_006288 | 2079.125  | 1409.065  | NM_006744 | 2695.277  | 2349.435  | NM_017808 | 1543.625  | 1609.073  |
| NM_016224 | 3920.388  | 3691.917  | NM_018231 | 21894.291 | 24328.385 | AF095854  | 2689.718  | 2914.419  |
| NM_007179 | 18048.607 | 18061.234 | NM_005833 | 8157.96   | 7335.899  | NM_014162 | 1778.301  | 1920.065  |
| NM_001306 | 2786.615  | 2765.351  | NM_003100 | 17790.17  | 16716.779 | NM_014133 | 1063.223  | 431.443   |
| AB046861  | 2308.457  | 1750.092  | NM_006768 | 8781.113  | 8627.807  | AF159093  | 4138.175  | 3447.458  |
| AB028173  | 1886.768  | 1711.054  | NM_013322 | 10342.994 | 9880.449  | AF113679  | 1643.836  | 1947.75   |
| NM_005940 | 2387.786  | 2749.406  | AB020627  | 6149.379  | 6262.388  | AK021997  | 3874.171  | 3533.135  |



|           |           |           |           |           |           |           |           |           |
|-----------|-----------|-----------|-----------|-----------|-----------|-----------|-----------|-----------|
| AF061034  | 11888.149 | 11771.932 | NM_002003 | 5511.969  | 5793.212  | AK022125  | 1663.528  | 1198.384  |
| X03655    | 1236.149  | 1122.318  | NM_005387 | 17026.805 | 19261.197 | AK022244  | 6822.128  | 5321.74   |
| BG696293  | 4664.908  | 4469.438  | NM_006846 | 1367.917  | 946.138   | AK022381  | 4105.235  | 4044.07   |
| AA777410  | 1037.64   | 1213.81   | AL137938  | 23347.801 | 22597.395 | AK022012  | 2138.233  | 2128.114  |
| BG113873  | 2629.028  | 2265.755  | AF228704  | 9717.016  | 8349.122  | AK022286  | 4425.067  | 4079.525  |
| BC013135  | 41092.66  | 45377.996 | NM_018289 | 9149.517  | 8284.771  | NM_001052 | 9016.593  | 8245.46   |
| AI625002  | 1279.416  | 1258.622  | AB018260  | 7632.118  | 8348.834  | Z70696    | 2355.892  | 2274.282  |
| H07899    | 1397.685  | 1216.458  | NM_015985 | 741.248   | 625.946   | NM_005792 | 6345.329  | 7847.595  |
| AA281652  | 12294.845 | 12566.12  | NM_014766 | 7305.707  | 7477.828  | AF048847  | 16658.547 | 16581.588 |
| U31905    | 1941.328  | 1828.583  | NM_016627 | 20904.754 | 19908.967 | L37718    | 68598.75  | 75174.25  |
| X52479    | 3671.875  | 3491.14   | NM_016121 | 4327.402  | 4523.139  | AL137717  | 9273.122  | 7482.188  |
| BC013200  | 3722.424  | 3605.156  | NM_014769 | 11117.753 | 10910.32  | AF035297  | 7679.202  | 7351.154  |
| AW408832  | 2073.884  | 1988.006  | NM_006349 | 44088.371 | 47510.828 | NM_014039 | 7685.463  | 7723.79   |
| AA486364  | 14627.104 | 13255.637 | AK026264  | 40517.82  | 44644.57  | S67154    | 9314.931  | 10082.854 |
| M15476    | 20454.063 | 18565.223 | AF222927  | 3205.146  | 3579.278  | AK026181  | 27897.365 | 26440.664 |
| U57456    | 3428.219  | 2804.006  | NM_014345 | 12301.666 | 11436.378 | NM_014367 | 1822.478  | 1741.542  |
| N70057    | 14055.37  | 12689.137 | NM_018217 | 9005.535  | 6410.731  | AK024901  | 884.734   | 976.621   |
| AK000124  | 3395.666  | 3516.795  | AF241831  | 6781.781  | 7800.6    | NM_019073 | 1092.41   | 1087.898  |
| NM_004480 | 9704.341  | 7904.846  | NM_003033 | 5141.404  | 4327.49   | NM_002365 | 1311.95   | 1062.56   |
| NM_014914 | 8053.386  | 7851.615  | NM_002733 | 6041.426  | 5656.846  | AF161441  | 8596.545  | 6956.759  |
| NM_004215 | 12066.522 | 10943.763 | M31008    | 2193.844  | 2207.833  | AF067777  | 66730.117 | 73443.008 |
| AK022746  | 8580.015  | 7958.754  | NM_006288 | 2250.226  | 2540.44   | U17613    | 1430.379  | 1288.359  |
| NM_006568 | 10317.904 | 10029.174 | NM_016224 | 15444.391 | 14923.317 | AJ299406  | 2221.038  | 2825.72   |
| NM_006440 | 7093.958  | 7777.316  | NM_005227 | 9802.495  | 9787.754  | AK021891  | 2943.385  | 2518.977  |
| NM_004847 | 13231.545 | 14427.943 | NM_000286 | 26443.063 | 24121.033 | Y10697    | 4495.736  | 4373.444  |
| NM_002255 | 1596.368  | 1487.372  | AB046861  | 1940.909  | 1967.993  | AY007166  | 61429.918 | 57346.191 |
| AF151889  | 6298.059  | 5565.356  | AB028173  | 1534.887  | 1347.092  | NM_004937 | 10764.552 | 11510.728 |
| BC034483  | 1171.31   | 1111.892  | NM_005940 | 2371.79   | 2444.013  | L13197    | 16625.484 | 14975.442 |
| NM_003620 | 4171.349  | 3813.118  | AF061034  | 63382.402 | 57964.605 | AF056450  | 8552.967  | 7989.364  |
| NM_013289 | 1943.218  | 2197.693  | X03655    | 4630.673  | 4205.55   | NM_000729 | 18885.314 | 18469.309 |
| AA586375  | 2452.55   | 2554.193  | BG696293  | 9260.818  | 8679.314  | AK024007  | 6018.292  | 6030.37   |
| BE910339  | 14312.427 | 15109.572 | AA777410  | 1057.093  | 814.902   | AF116699  | 2578.861  | 2271.544  |
| U89715    | 7397.808  | 7309.341  | BG113873  | 4200.788  | 3406.409  | AF119908  | 1223.545  | 1444.248  |
| AY009090  | 17750.691 | 15327.579 | BC013135  | 63841.938 | 65733.938 | U50539    | 1479.448  | 1587.909  |
| NM_005592 | 950.682   | 596.517   | AI625002  | 1081.44   | 853.408   | AK000653  | 36502.215 | 34720.184 |
| NM_002303 | 1014.772  | 996.784   | H07899    | 796.731   | 692.612   | AK000908  | 2787.837  | 2030.324  |
| NM_016509 | 1260.269  | 1395.737  | AA281652  | 14167.289 | 13633.038 | L77586    | 1567.364  | 935.848   |
| NM_012296 | 1852.132  | 1757.827  | U31905    | 10659.889 | 10936.845 | X96660    | 8400.736  | 6339.433  |
| NM_004536 | 3627.318  | 3000.563  | X52479    | 6854.148  | 6964.698  | AK000993  | 1950.908  | 1625.039  |
| NM_014672 | 4584.874  | 4334.325  | BC013200  | 4957.836  | 5349.449  | AK023519  | 6285.811  | 6857.293  |
| NM_003474 | 3162.236  | 2611.274  | AW408832  | 5950.939  | 5297.069  | NM_016444 | 2828.08   | 3707.463  |
| NM_004625 | 4258.876  | 3507.066  | AA486364  | 43109.766 | 48139.746 | NM_017839 | 1788.984  | 2251.688  |
| NM_016454 | 16016.782 | 16503.373 | M15476    | 62874.215 | 59938.27  | NM_003707 | 33616.855 | 42195.313 |
| NM_003469 | 9352.647  | 9284.292  | U57456    | 5543.438  | 4730.469  | AL137718  | 3031.926  | 4480.998  |
| NM_016433 | 3222.554  | 2816.754  | N70057    | 31614.41  | 36642.965 | NM_003460 | 17548.115 | 15128.78  |
| NM_000859 | 4430.156  | 4891.809  | AK000124  | 4923.713  | 4947.126  | U94354    | 1240.78   | 1304.02   |
| NM_005480 | 3388.979  | 3210.73   | NM_004480 | 12718.656 | 10674.728 | NM_002904 | 29363.305 | 33375.242 |
| AB034694  | 1980.136  | 1146.811  | NM_014914 | 11360.898 | 11982.451 | NM_014189 | 11224.861 | 11351.25  |
| NM_003273 | 3358.072  | 3998.459  | AK027035  | 790.377   | 516.523   | NM_005686 | 12417.572 | 13629.568 |
| AK026404  | 7095.183  | 7765.291  | NM_003620 | 15867.312 | 14042.258 | NM_006767 | 2161.696  | 2365.055  |
| NM_017948 | 10145.676 | 9841.77   | NM_013289 | 1660.857  | 1827.396  | AK021451  | 5222.468  | 4126.624  |
| NM_006744 | 2836.045  | 2696.383  | AA586375  | 6226.275  | 6514.603  | AK001971  | 3174.982  | 2760.104  |
| NM_018231 | 2754.653  | 2898.915  | BE910339  | 43614.867 | 46679.617 | AF086468  | 1890.325  | 1193.675  |

|           |           |           |           |           |           |           |           |           |
|-----------|-----------|-----------|-----------|-----------|-----------|-----------|-----------|-----------|
| AF202889  | 3163.61   | 3701.884  | U89715    | 9928.328  | 9661.48   | AK027239  | 5339.296  | 4767.701  |
| NM_005833 | 8520.724  | 8064.937  | AF254067  | 34533.297 | 42702.566 | AF005082  | 43360.816 | 38010.809 |
| NM_003100 | 17030.018 | 14826.292 | NM_016363 | 21666.697 | 18549.623 | AL117595  | 5544.417  | 4943.594  |
| NM_006768 | 6348.047  | 6177.604  | AY009090  | 21884.566 | 17112.141 | AB028988  | 8102.636  | 6698.062  |
| NM_013322 | 10497.265 | 8098.016  | NM_005592 | 7847.475  | 6350.136  | AK023072  | 1477.137  | 1154.491  |
| AB020627  | 4938.8    | 4394.548  | NM_002303 | 920.226   | 966.422   | AF086105  | 4530.516  | 3784.429  |
| NM_002003 | 2455.859  | 1968.018  | NM_016509 | 3984.848  | 4465.616  | AK026600  | 4125.989  | 3855.602  |
| NM_005387 | 13166.013 | 14172.015 | NM_012296 | 3494.486  | 3691.986  | AF161429  | 16339.869 | 14940.939 |
| NM_006846 | 1186.427  | 684.847   | AF041038  | 3632.463  | 3175.212  | AK021495  | 6346.418  | 5784.346  |
| AL137938  | 15285.897 | 12942.137 | NM_004536 | 10536.177 | 10216.573 | AF064846  | 5700.498  | 6573.032  |
| AF228704  | 8883.475  | 8467.93   | NM_014672 | 5565.906  | 4890.818  | AL110227  | 5176.979  | 6068.74   |
| NM_018289 | 6575.97   | 6481.593  | AB058719  | 6001.888  | 5305.842  | NM_001400 | 20125.164 | 23861.732 |
| AB018260  | 7008.781  | 7229.053  | AK025935  | 5931.06   | 5957.635  | AB033281  | 12519.23  | 14652.266 |
| NM_015985 | 1727.301  | 1458.978  | AB032953  | 1542.38   | 1454.449  | NM_002882 | 59067.254 | 57231.465 |
| NM_014766 | 12514.64  | 12527.034 | NM_016441 | 5356.183  | 4748.485  | AB011161  | 3485.183  | 4258.283  |
| NM_016627 | 16779.971 | 14300.803 | NM_006334 | 2169.934  | 1973.735  | NM_000827 | 2852.153  | 3680.857  |
| NM_016121 | 7742.673  | 8212.646  | NM_003474 | 5411.677  | 4492.166  | NM_002944 | 26893.576 | 25776.377 |
| NM_014769 | 5313.719  | 5181.486  | NM_004625 | 20269.377 | 21812.984 | AF327354  | 5310.827  | 6587.287  |
| NM_006349 | 41858.09  | 43148.965 | NM_007179 | 62272.391 | 50941.363 | NM_006259 | 1181.469  | 1788.912  |
| AK026264  | 20895.332 | 20930.051 | NM_001306 | 8838.396  | 8956.12   | NM_003961 | 59588.313 | 60378.578 |
| AF222927  | 3810.49   | 3519.868  | NM_007163 | 2505.635  | 2338.365  | AB014513  | 5999.295  | 5440.86   |
| NM_014345 | 11087.496 | 11301.925 | NM_000583 | 21643.639 | 24834.314 | NM_004747 | 3581.821  | 2971.205  |
| NM_018217 | 6220.287  | 5031.828  | NM_004254 | 6771.604  | 6155.156  | AK024430  | 60234.828 | 56239.117 |
| AF241831  | 4488.282  | 4556.149  | AB046833  | 1875.023  | 1700.714  | NM_002341 | 41704.352 | 34058.277 |
| NM_003033 | 3819.635  | 3559.192  | AY007135  | 64063.242 | 63500.059 | AL137651  | 1426.682  | 845.019   |
| NM_002733 | 6729.175  | 4789.733  | AF202889  | 60222.926 | 47477.328 | NM_018945 | 15578.6   | 12161.099 |
| M31008    | 2107.128  | 1822.751  | NM_005833 | 7278.145  | 5803.965  | AB029018  | 1084.094  | 677.665   |
| NM_006288 | 1282.231  | 1345.652  | NM_003100 | 14285.686 | 14083.439 | NM_000818 | 2643.967  | 3211.698  |
| NM_016224 | 6312.318  | 6056.689  | NM_006768 | 11179.374 | 11779.018 | NM_006650 | 2976.345  | 2836.05   |
| NM_005227 | 9022.23   | 9251.201  | NM_013322 | 11167.726 | 10318.281 | AK024436  | 2396.596  | 1901.774  |
| NM_000286 | 24552.859 | 20064.059 | AB020627  | 5985.021  | 5967.213  | NM_006648 | 5071.428  | 3884.674  |
| AB046861  | 3410.82   | 2742.999  | NM_002003 | 5147.433  | 5296.227  | NM_000868 | 1143.876  | 1393.033  |
| AB028173  | 3503.119  | 3049.258  | NM_005387 | 16193.475 | 16359.631 | NM_004711 | 7983.503  | 6304.12   |
| NM_005940 | 5070.339  | 5547.975  | NM_006846 | 1483.173  | 1186.216  | NM_006463 | 25789.164 | 24227.059 |
| AF061034  | 23280.186 | 22514.947 | AL137938  | 21161.5   | 20287.02  | NM_001444 | 65718.156 | 84956.883 |
| X03655    | 2270.089  | 2321.462  | AF228704  | 7788.73   | 7968.481  | NM_016521 | 25441.855 | 27079.25  |
| BG696293  | 5071.427  | 4937.522  | NM_004215 | 17709.314 | 15369.129 | X98494    | 26112.094 | 26319.543 |
| AA777410  | 1099.052  | 814.507   | AK022746  | 8104.894  | 6746.404  | NM_001240 | 17818.166 | 15486.467 |
| BG113873  | 2713.916  | 2640.635  | NM_006568 | 12728.511 | 12795.017 | NM_002709 | 25003.482 | 26973.01  |
| BC013135  | 47038.855 | 49515.07  | NM_006440 | 19527.555 | 21394.553 | NM_001099 | 4332.438  | 5358.277  |
| AI625002  | 1358.517  | 1547.703  | NM_004847 | 52977.723 | 47654.762 | NM_006823 | 8278.293  | 9550.971  |
| H07899    | 1119.496  | 1045.031  | NM_002255 | 8385.315  | 7603.689  | NM_016567 | 25546.336 | 28261.48  |
| AA281652  | 15199.257 | 14301.221 | AF151889  | 15214.739 | 15184.975 | NM_007031 | 3361.645  | 2503.374  |
| U31905    | 2112.638  | 1830.433  | BC034483  | 1468.454  | 1353.435  | NM_002657 | 3320.869  | 3671.215  |
| X52479    | 4621.646  | 4831.314  | NM_006288 | 1870.129  | 1614.888  | NM_004089 | 28283.785 | 25698.418 |
| BC013200  | 5042.178  | 5226.491  | NM_014177 | 3595.791  | 3283.33   | NM_001350 | 17135.357 | 15165.841 |
| AW408832  | 1295.349  | 1262.675  | NM_016224 | 13811.712 | 13892.321 | NM_014809 | 5464.458  | 4295.41   |
| AA486364  | 13032.989 | 12512.224 | NM_005227 | 9451.229  | 9685.172  | NM_016074 | 41084.781 | 38567.621 |
| M15476    | 16020.662 | 14870.292 | NM_000286 | 23346.242 | 19394.359 | NM_003921 | 5935.401  | 4215.373  |
| U57456    | 2752.173  | 2628.075  | NM_016454 | 25243.508 | 25986.854 | NM_004208 | 39255.227 | 34173.52  |
| N70057    | 13397.937 | 12158.604 | NM_003469 | 10340.741 | 10331.459 | NM_006336 | 675.485   | 1091.929  |
| AK000124  | 3084.023  | 3625.487  | NM_016433 | 1954.762  | 1648.591  | NM_001843 | 4996.813  | 5113.923  |
| NM_004480 | 9977.741  | 7973.614  | NM_000859 | 3619.177  | 4231.311  | NM_013266 | 1467.833  | 1238.706  |

|           |           |           |           |           |           |           |           |           |
|-----------|-----------|-----------|-----------|-----------|-----------|-----------|-----------|-----------|
| NM_014914 | 9563.504  | 9279.753  | NM_005480 | 3507.924  | 3140.843  | NM_000419 | 1918.358  | 1728.275  |
| AK027035  | 525.896   | 434.52    | AB034694  | 1548.257  | 1707.005  | NM_017768 | 7749.447  | 7635.842  |
| NM_003620 | 5975.195  | 6106.785  | NM_003273 | 3251.93   | 3940.407  | NM_002588 | 17060.477 | 15470.704 |
| NM_013289 | 4423.906  | 4148.198  | AK026404  | 8764.734  | 9789.998  | NM_002776 | 10866.202 | 11273.077 |
| AA586375  | 6390.142  | 5492.19   | NM_017948 | 13695.878 | 12057.913 | AK023398  | 13617.527 | 15920.185 |
| BE910339  | 23188.691 | 22707.557 | NM_000392 | 6972.88   | 6521.439  | NM_001907 | 1970.871  | 2409.348  |
| U89715    | 9434.497  | 9796.102  | AF208536  | 2611.131  | 1602.198  | NM_015711 | 62009.996 | 64578.941 |
| AF254067  | 33459.301 | 32235.109 | AB037848  | 2412.839  | 2434.258  | NM_000050 | 5180.354  | 4548.513  |
| NM_016363 | 11341.911 | 11191.463 | AF082657  | 7687.576  | 6838.324  | NM_000481 | 2797.671  | 2234.986  |
| AY009090  | 16884.16  | 16197.14  | NM_006744 | 2107.83   | 2057.584  | AK025681  | 4348.104  | 4613.614  |
| NM_005592 | 1229.162  | 1304.743  | AF297659  | 1920.271  | 2037.385  | NM_014905 | 18147.348 | 19331.172 |
| NM_002303 | 1502.639  | 1388.712  | NM_018231 | 20387.033 | 19508.719 | NM_012137 | 16898.195 | 18291.617 |
| NM_016509 | 1540.212  | 1600.12   | AK000124  | 4280.706  | 4844.864  | NM_004483 | 56865.473 | 57519.09  |
| NM_012296 | 1310.579  | 1381.216  | NM_004480 | 12425.724 | 11094.917 | NM_001513 | 61966.789 | 64992.816 |
| NM_004536 | 2834.834  | 3137.519  | NM_014914 | 10384.931 | 11647.688 | NM_001281 | 18346.811 | 17099.475 |
| NM_014672 | 3644.622  | 3225.902  | NM_018289 | 6744.635  | 5778.579  | NM_016835 | 1610.245  | 1234.682  |
| AB058719  | 1292.987  | 1018.864  | AB018260  | 5084.963  | 5345.739  | NM_003981 | 36900.621 | 31568.748 |
| AK025935  | 2947.411  | 3136.574  | NM_014766 | 6041.035  | 6673.298  | U26596    | 55192.48  | 52928.172 |
| AB032953  | 1281.913  | 1015.077  | NM_016627 | 22824.381 | 21883.717 | AF070600  | 65410.688 | 57873.602 |
| NM_016441 | 3852.988  | 3732.002  | NM_016121 | 5369.396  | 5526.342  | AB014522  | 22516.725 | 18789.605 |
| NM_006334 | 1361.012  | 1136.325  | NM_014769 | 10223.201 | 10173.223 | NM_014875 | 11326.665 | 11232.649 |
| NM_003474 | 3038.929  | 2729.289  | NM_006349 | 44110.191 | 46434.137 | AB033023  | 30959.426 | 33002.441 |
| NM_004625 | 4127.445  | 3776.207  | AK026264  | 37798.137 | 42132.105 | BC027895  | 2744.719  | 2678.746  |
| NM_007179 | 15815.455 | 14327.396 | AF222927  | 3938.176  | 3450.058  | U63542    | 1629.003  | 1860.354  |
| NM_001306 | 939.001   | 950.736   | NM_014345 | 13045.676 | 11407.288 | AF161361  | 2209.338  | 1903.975  |
| NM_007163 | 3629.328  | 3569.46   | NM_018217 | 8143.301  | 5570.781  | AF024703  | 33574.223 | 36485.59  |
| NM_000583 | 25387.217 | 26572.328 | AF241831  | 5993.601  | 6136.583  | NM_016531 | 3449.394  | 4708.217  |
| NM_004254 | 6668.136  | 5532.162  | NM_003033 | 4949.964  | 4085.021  | NM_003593 | 20012.99  | 20193.762 |
| AB046833  | 2629.515  | 2704.264  | U96113    | 4511.429  | 4345.922  | NM_014383 | 60245.613 | 61537.164 |
| AY007135  | 68613.984 | 59515.445 | NM_002733 | 6301.151  | 5381.79   | NM_000244 | 15629.992 | 17188.363 |
| AF202889  | 9831.342  | 12002.154 | M31008    | 2306.685  | 1955.753  | NM_014285 | 11610.171 | 12251.075 |
| NM_005833 | 9401.336  | 9307.059  | CY3Cy5    | 4843.931  | 284.663   | AF026816  | 60735.859 | 58955.234 |
| NM_003100 | 10877.702 | 10952.862 | U93051    | 19113.6   | 24256.408 | NM_004719 | 6893.009  | 5967.513  |
| NM_006768 | 6922.72   | 7146.36   | AF086409  | 924.649   | 1125.059  | NM_018553 | 7840.52   | 9116.104  |
| NM_013322 | 10290.303 | 9567.634  | AK024268  | 2570.775  | 3631.447  | NM_004704 | 13305.252 | 13494.888 |
| AB020627  | 6314.625  | 6753.167  | AF086295  | 1173.476  | 1253.245  | NM_005455 | 12307.101 | 11781.632 |
| NM_006846 | 998.786   | 1271.278  | AF086344  | 4604.244  | 5004.098  | NM_014633 | 6097.297  | 5223.66   |
| AL137938  | 14706.532 | 11780.384 | AF086424  | 1679.047  | 1797.223  | NM_001970 | 60584.766 | 57183.676 |
| AF228704  | 7292.645  | 7717.26   | AL110130  | 539.118   | 682.485   | NM_006810 | 33271.41  | 29029.68  |
| NM_004215 | 11225.689 | 10211.515 | AF052116  | 734.133   | 716.756   | AK024054  | 21666.783 | 18677.695 |
| AK022746  | 7590.141  | 5926.37   | NM_018087 | 6678.032  | 8900.34   | AL049674  | 1259.487  | 1012.477  |
| NM_006568 | 13317.28  | 11245.717 | AL360260  | 807.037   | 1043.463  | NM_001969 | 2375.704  | 1340.089  |
| NM_006440 | 7778.712  | 8133.039  | AK023647  | 1306.021  | 1599.184  | NM_004116 | 9844.386  | 8921.134  |
| NM_004847 | 13759.148 | 14457.586 | AL096749  | 21865.922 | 29838.893 | AK024508  | 10872.057 | 8940.56   |
| NM_002255 | 1928.053  | 1473.587  | AK023620  | 3054.022  | 3626.497  | AK027213  | 18624.229 | 15653.369 |
| AF151889  | 8421.919  | 7290.988  | AF086189  | 3028.447  | 3368.937  | NM_014596 | 18042.666 | 17906.314 |
| NM_006288 | 3639.446  | 2628.685  | AL050055  | 5322.36   | 6048.208  | NM_006703 | 26071.27  | 28313.84  |
| NM_014177 | 6036.116  | 4472.323  | U93051    | 12088.419 | 13589.204 | NM_004037 | 8504.687  | 9099.964  |
| NM_016224 | 5972.17   | 5685.202  | SR2       | 40734.285 | 46235.133 | NM_005116 | 10747.689 | 13319.5   |
| NM_005227 | 7991.333  | 9047.81   | SR4       | 12917.824 | 21751.314 | NM_002766 | 13271.215 | 13860.572 |
| NM_000286 | 22642.363 | 20579.967 | SR6       | 1621.518  | 3078.793  | AJ404857  | 1315.854  | 1504.692  |
| NM_016454 | 26565.297 | 25772.143 | SR8       | 6851.836  | 32585.178 | NM_000788 | 33807.883 | 39532.973 |
| NM_003469 | 11244.347 | 10842.502 | SR10      | 24659.209 | 14440.985 | AF254088  | 5864.566  | 7510.844  |

|           |           |           |           |           |           |           |           |           |
|-----------|-----------|-----------|-----------|-----------|-----------|-----------|-----------|-----------|
| NM_016433 | 3076.16   | 3073.578  | CY3Cy5    | 7660.021  | 169.266   | NM_00142C | 5318.66   | 5576.905  |
| NM_000859 | 3948.229  | 4950.528  | AL359931  | 3841.477  | 3953.8    | NM_00024E | 5430.473  | 5170.187  |
| NM_00548C | 3183.573  | 2968.453  | AK000954  | 4297.521  | 5146.756  | AB031046  | 4591.105  | 5042.032  |
| AB034694  | 1743.922  | 1401.226  | AF086099  | 822.585   | 817.067   | NM_00244E | 56664.703 | 56473.184 |
| NM_003273 | 3407.87   | 4090.682  | AK021922  | 788.407   | 902.916   | AK025388  | 5576.701  | 6415.633  |
| AK026404  | 6195.385  | 5497.332  | AK025800  | 9716.715  | 11450.968 | NM_006147 | 1712.416  | 2145.346  |
| NM_01794E | 10433.092 | 9933.13   | AK022333  | 2040.809  | 2149.945  | AB006631  | 6418.982  | 6442.799  |
| NM_000392 | 5701.224  | 4593.008  | AL137407  | 7800.86   | 8002.145  | AF291181  | 1235.348  | 1250.022  |
| AF208536  | 2958.256  | 2473.598  | AF085839  | 343.242   | 556.043   | NM_005741 | 6327.436  | 6115.326  |
| AB037848  | 2105.674  | 1623.453  | NM_01817E | 2803.398  | 3821.829  | NM_000964 | 3565.749  | 2394.454  |
| AF082657  | 10697.869 | 9287.01   | AK025204  | 770.853   | 670.553   | BF343886  | 1371.045  | 1417.556  |
| NM_006744 | 2858.523  | 2136.071  | AK027256  | 411.956   | 517.332   | NM_013263 | 24068.039 | 22296.699 |
| NM_018231 | 3127.03   | 3182.371  | NM_01900C | 3614.121  | 3827.813  | AF116238  | 5756.353  | 5612.188  |
| AK000124  | 5243.019  | 5123.532  | AF143330  | 1047.321  | 883.63    | NM_006982 | 4455.146  | 4618.339  |
| NM_00448C | 9706.469  | 7837.78   | AK025178  | 4398.041  | 5039.643  | NM_00306E | 707.509   | 901.804   |
| NM_014914 | 9829.214  | 9635.529  | AF147359  | 557.427   | 924.438   | AB033085  | 2438.482  | 2159.089  |
| NM_004484 | 899.584   | 727.619   | NM_014835 | 7581.569  | 9131.179  | L09100    | 7889.204  | 8297.585  |
| AK027035  | 942.491   | 406.87    | AK001822  | 6221.553  | 7368.417  | NM_005472 | 16504.93  | 15763.566 |
| NM_01828E | 4061.555  | 3377.756  | AK026969  | 7011.945  | 7923.086  | NM_004313 | 1793.708  | 2378.201  |
| AB018260  | 5986.581  | 6491.661  | AF086287  | 1156.531  | 1415.914  | NM_01343E | 2083.616  | 2748.257  |
| NM_01476E | 7981.79   | 7574.736  | AK022613  | 62135.5   | 60817.613 | NM_000132 | 40442.73  | 50870.602 |
| NM_016627 | 20418.109 | 18267.189 | AK023843  | 506.935   | 607.455   | NM_001727 | 34253.402 | 38945.266 |
| NM_016121 | 5478.303  | 5358.872  | AL359557  | 2474.618  | 3568.586  | NM_00407E | 8103.073  | 8835.46   |
| NM_01476E | 3169.466  | 2696.724  | AK027257  | 776.2     | 1113.058  | NM_007123 | 53914.863 | 56815.531 |
| NM_00634E | 42823.82  | 45630.762 | AK024582  | 704.041   | 1231.488  | BG717460  | 9953.071  | 9810.669  |
| AK026264  | 17876.777 | 16782.336 | AK024143  | 456.75    | 926.22    | AA778392  | 51716.031 | 51605.324 |
| AF222927  | 3749.177  | 2299.794  | AK022099  | 796.114   | 952.838   | AI478178  | 9785.356  | 10889.237 |
| NM_01434E | 10246.095 | 9072.342  | AL137366  | 441.029   | 602.934   | AA101279  | 4712.274  | 5383.685  |
| NM_018217 | 6950.369  | 4607.127  | BC031635  | 1911.084  | 2365.627  | M19154    | 17684.691 | 17654.572 |
| AF241831  | 4160.228  | 4471.518  | AF085916  | 414.525   | 583.106   | AA399410  | 17386.223 | 16875.127 |
| NM_003033 | 3842.49   | 3201.739  | AF085950  | 674.72    | 778.912   | AA137031  | 5269.136  | 4394.336  |
| U96113    | 4234.041  | 3994.773  | AL359598  | 1575.542  | 1372.709  | AA292226  | 28539.131 | 28397.691 |
| NM_002733 | 7118.764  | 4786.839  | AF085980  | 1218.495  | 1506.399  | NM_00050C | 1463.007  | 1338.378  |
| M31008    | 2228.137  | 2094.254  | AF085927  | 2245.006  | 2820.389  | M29873    | 933.538   | 546.919   |
| CY3Cy5    | 14232.411 | 349.282   | AF085954  | 3845.647  | 5298.226  | BC007031  | 3572.925  | 3678.388  |
| U93051    | 16420     | 18328.387 | AL137337  | 1277.9    | 1520.911  | AF129756  | 37095.859 | 32253.357 |
| AF086409  | 1353.541  | 1234.022  | AL137541  | 348.546   | 448.449   | NM_002957 | 10246.588 | 9121.701  |
| AK024268  | 3010.419  | 3248.481  | AL161969  | 374.994   | 469.15    | BC036369  | 4204.572  | 4091.779  |
| AF086295  | 2266.719  | 2369.948  | AL442095  | 1156.581  | 1021.266  | X12492    | 47993.676 | 50847.402 |
| AF086344  | 4934.983  | 5555.338  | AL137378  | 1298.599  | 1223.02   | NM_00500E | 36497.793 | 38950.855 |
| AF086424  | 760.995   | 1331.654  | AL137609  | 29840.963 | 32157.85  | NM_00311C | 10879.263 | 11435.097 |
| AL110130  | 810.327   | 1082.394  | AL353946  | 5395.105  | 5610.122  | NM_003612 | 12733.281 | 13051.733 |
| AF052116  | 846.339   | 967.409   | X69081    | 8814.615  | 9543.196  | NM_01323C | 4890.625  | 6098.187  |
| NM_018087 | 5854.854  | 5669.906  | NM_005714 | 923.686   | 848.593   | X72308    | 26033.914 | 28933.9   |
| AL360260  | 569.923   | 887.462   | AL137474  | 3744.382  | 3346.76   | NM_00540E | 2061.267  | 2578.157  |
| AK023647  | 964.047   | 931.537   | AL133023  | 1299.85   | 1216.805  | BC008376  | 48379.23  | 54124.848 |
| AL096749  | 8127.063  | 8078.788  | AK023484  | 412.038   | 679.7     | AB041269  | 9012.977  | 10468.399 |
| AK023620  | 2591.827  | 2075.094  | AK021572  | 1974.228  | 2364.214  | AK024908  | 12225.587 | 13414.227 |
| AF086189  | 3616.185  | 3956.134  | AK021631  | 545.338   | 542.906   | NM_01827C | 25145.498 | 27471.111 |
| AL050055  | 5558.172  | 6904.643  | AK026757  | 830.495   | 925.828   | NM_00026C | 58825.324 | 59662.113 |
| U93051    | 10920.87  | 9915.35   | AK023294  | 847.623   | 771.767   | NM_01416C | 5605.702  | 6467.397  |
| SR2       | 43334.035 | 46306.012 | NM_01780E | 575.541   | 788.312   | AF230877  | 60582.551 | 58392.621 |
| SR4       | 11404.868 | 10922.083 | AF095854  | 2614.197  | 3459.142  | NM_01766E | 12834.061 | 11910.826 |

|           |           |           |           |           |           |           |           |           |
|-----------|-----------|-----------|-----------|-----------|-----------|-----------|-----------|-----------|
| SR6       | 2075.605  | 1845.221  | NM_014162 | 1623.342  | 2270.141  | AB033049  | 58480.48  | 53420.273 |
| SR8       | 8964.766  | 30289.537 | AF159093  | 1805.548  | 2932.808  | NM_000406 | 1835.711  | 1756.867  |
| SR10      | 24565.348 | 7161.776  | AF113679  | 714.572   | 633.664   | NM_005682 | 3165.004  | 2550.832  |
| CY3Cy5    | 8166.827  | 168.169   | AK021997  | 2748.056  | 3220.284  | NM_002926 | 4017.531  | 3197.897  |
| AL359931  | 2947.491  | 2905.024  | AK022125  | 846.404   | 700.655   | NM_000233 | 1068.625  | 863.098   |
| AK000954  | 2598.685  | 2637.976  | AK022244  | 4691.514  | 4270.66   | NM_018697 | 3168.89   | 3894.196  |
| AK021922  | 1788.906  | 2050.372  | AK022381  | 5043.148  | 4335.583  | AF090116  | 1223.947  | 1189.17   |
| AK025800  | 9656.782  | 11561.154 | AK022012  | 1403.804  | 1102.054  | NM_014030 | 38218.156 | 36158.176 |
| AK022333  | 1134.377  | 1611.489  | AK022149  | 780.217   | 374.982   | NM_004224 | 2204.922  | 2680.931  |
| AL137407  | 3709.604  | 3637.708  | AK022286  | 2682.011  | 2124.201  | Z21967    | 9717.529  | 10476.855 |
| AF085839  | 914.46    | 752.699   | AL137364  | 1359.585  | 1556.092  | NM_003738 | 1097.842  | 956.543   |
| NM_018178 | 2762.254  | 2910.892  | NM_001052 | 7690.974  | 7912.454  | NM_004377 | 22761.682 | 22929.119 |
| AK025204  | 591.738   | 741.536   | Z70696    | 1457.344  | 1084.742  | AB037815  | 57931.086 | 61154.094 |
| AK027256  | 378.32    | 440.754   | NM_005792 | 6469.11   | 8229.754  | NM_003645 | 19512.58  | 23800.625 |
| AL365406  | 652.618   | 619.629   | AF048847  | 14173.181 | 15208.228 | AF263613  | 10995.558 | 13380.117 |
| NM_019000 | 4190.027  | 3834.235  | L37718    | 60786.609 | 63284.855 | NM_000097 | 3939.717  | 4071.61   |
| AF143330  | 1740.037  | 1268.491  | AL137717  | 7745.763  | 7223.123  | NM_001509 | 5977.814  | 8424.507  |
| AK025178  | 5448.59   | 4373.9    | AF035297  | 6446.897  | 6898.521  | AK022878  | 17498.439 | 17708.174 |
| AF147359  | 725.619   | 804.586   | NM_014039 | 8985.321  | 10304.198 | NM_018099 | 3014.065  | 3124.303  |
| NM_014835 | 5202.109  | 5193.021  | S67154    | 8558.64   | 9176.533  | AF217187  | 10674.375 | 12585.327 |
| AK001822  | 4498.807  | 4164      | AK026181  | 22241.541 | 28907.504 | NM_017750 | 4631.108  | 5838.156  |
| AK026969  | 6712.993  | 6039.879  | NM_014367 | 1144.143  | 1480.051  | AK027122  | 31171.602 | 33436.734 |
| AF086287  | 1280.592  | 946.518   | AK024901  | 481.44    | 682.566   | AK026196  | 4421.285  | 6814.544  |
| AF086356  | 702.971   | 348.304   | NM_019073 | 417.4     | 533.12    | NM_004977 | 22218.309 | 23881.018 |
| AK027183  | 734.762   | 968.545   | NM_002365 | 858.27    | 832.612   | NM_004700 | 2286.271  | 2377.201  |
| AK022613  | 7708.779  | 7925.921  | AF161441  | 6231.51   | 5055.42   | NM_006868 | 30984.656 | 26315.846 |
| AK023843  | 835.533   | 851.646   | AF067777  | 58007.758 | 59862.215 | NM_004161 | 27850.457 | 29824.965 |
| AK027257  | 2918.491  | 3869.214  | U17613    | 1100.609  | 999.962   | NM_001295 | 3483.532  | 3466.119  |
| AK024582  | 1896.196  | 2780.229  | AK027211  | 916.891   | 858.969   | NM_005161 | 3484.254  | 2745.188  |
| AK022099  | 1645.401  | 1540.226  | AJ299406  | 1835.617  | 1915.722  | AB037749  | 1012.144  | 581.45    |
| AL137366  | 2187.707  | 2374.596  | AK021891  | 3371.023  | 3440.789  | NM_020347 | 1187.45   | 887.628   |
| BC031635  | 1242.5    | 1337.136  | Y10697    | 5372.073  | 5100.409  | NM_001462 | 3065.53   | 2555.227  |
| AF085916  | 787.174   | 596.687   | AY007166  | 51257.059 | 49959.793 | NM_004072 | 1921.748  | 2560.129  |
| AF085950  | 511.468   | 640.093   | NM_004937 | 10349.696 | 12362.33  | AF068286  | 1802.425  | 1796.874  |
| AL359598  | 1272.877  | 1397.526  | L13197    | 14283.544 | 18485.855 | AB040957  | 7557.291  | 7493.362  |
| AF085980  | 1984.074  | 2637.146  | AF056450  | 7050.411  | 6632.169  | NM_006890 | 873.329   | 399.507   |
| AF085927  | 2986.703  | 2704.202  | NM_000729 | 11543.146 | 13125.633 | NM_005881 | 7126.177  | 8297.186  |
| AF085954  | 5301.06   | 5518.482  | AK024007  | 4089.083  | 5677.872  | NM_005794 | 1092.667  | 2073.043  |
| AL137337  | 1903.321  | 1712.205  | AF116699  | 1120.827  | 1295.459  | L40519    | 2769.281  | 2875.244  |
| AL137541  | 1112.754  | 367.533   | AF119908  | 891.862   | 1063.628  | NM_004204 | 7730.89   | 8212.256  |
| AL161969  | 811.955   | 676.545   | U50539    | 744.4     | 768.975   | AK002181  | 2526.615  | 2885.404  |
| AL442095  | 1208.439  | 1175.936  | AK000653  | 20829.898 | 27409.447 | AF118064  | 860.927   | 364.019   |
| AL137378  | 2397.068  | 1617.503  | AK000908  | 1287.832  | 1260.029  | NM_001641 | 52848.676 | 49969.566 |
| AL137609  | 41087.27  | 31165.217 | L77586    | 866.399   | 623.885   | BC015750  | 55521.195 | 57271.254 |
| AL353946  | 6810.215  | 5126.463  | X96660    | 5048.269  | 3915.216  | AK025769  | 17095.854 | 19136.428 |
| X69081    | 8784.398  | 6219.338  | AK000993  | 954.039   | 479.998   | AW945166  | 4533.929  | 4879.148  |
| NM_005714 | 1308.518  | 884.843   | AK023519  | 3883.54   | 3879.262  | NM_005236 | 9970.571  | 10483.345 |
| AL137474  | 2610.922  | 2538.042  | NM_016444 | 2996.584  | 3323.331  | NM_006384 | 26010.795 | 28310.523 |
| AK023484  | 617.718   | 1094.683  | NM_017839 | 2251.601  | 2100.719  | NM_013257 | 5043.032  | 5557.625  |
| AK021572  | 1972.013  | 2635.081  | NM_003707 | 28542.154 | 36814.137 | AB044546  | 3613.968  | 3652.806  |
| AK021631  | 425.831   | 540.321   | AL137718  | 2860.856  | 2669.24   | NM_014225 | 54887.191 | 50615.605 |
| AK026757  | 1034.604  | 1241.812  | NM_003460 | 16358.424 | 16158.066 | AF163473  | 3972.634  | 3930.693  |
| AK023294  | 1019.36   | 1143.44   | U94354    | 974.503   | 1257.478  | NM_006256 | 17704.52  | 15397.012 |

|           |           |           |           |           |           |           |           |           |
|-----------|-----------|-----------|-----------|-----------|-----------|-----------|-----------|-----------|
| NM_01780E | 1096.198  | 997.372   | NM_002904 | 27456.238 | 43760.465 | NM_00284E | 10178.139 | 23069.014 |
| AF095854  | 1111.013  | 1309.49   | NM_01418E | 10149.571 | 12194.767 | NM_002837 | 10796.718 | 9692.317  |
| NM_01416Z | 565.131   | 530.891   | NM_00568E | 14360.628 | 16945.465 | AL133077  | 47446.133 | 43250.387 |
| AF159093  | 1681.481  | 1498.034  | NM_006767 | 2506.962  | 3303.486  | AK025211  | 6805.557  | 5688.594  |
| AK021997  | 2919.963  | 2509.775  | AK021451  | 3767.869  | 3325.448  | U06715    | 909.22    | 711.286   |
| AK022125  | 1449.562  | 1757.606  | AK001971  | 2286.481  | 2744.642  | NM_01340Z | 5701.209  | 5360.347  |
| AK022244  | 4769.078  | 10354.609 | AF086468  | 815.233   | 943.671   | NM_00266Z | 913.924   | 855.503   |
| AK022381  | 8744.412  | 7364.388  | AK027239  | 2751.528  | 3411.232  | NM_00431Z | 2064.19   | 2346.718  |
| AK022012  | 3023.406  | 2220.56   | AF005082  | 31109.158 | 33873.039 | NM_01343E | 2251.204  | 2676.476  |
| AK022149  | 1425.512  | 777.22    | AL117595  | 3918.594  | 3482.004  | NM_00013Z | 41649.816 | 47503.621 |
| AK022286  | 6055.405  | 4005.082  | AB028988  | 8345.644  | 8153.258  | NM_001727 | 37413.953 | 40561.641 |
| AK022411  | 740.15    | 407.746   | AK023072  | 922.894   | 440.572   | NM_00407E | 7642.768  | 7642.22   |
| AL137364  | 1890.966  | 1668.579  | AF086105  | 2942.199  | 2430.422  | NM_00712Z | 51292.441 | 54887.723 |
| NM_00105Z | 2424.873  | 2519.076  | AK026600  | 2896.622  | 2425.147  | BG717460  | 9801.304  | 9175.838  |
| Z70696    | 1749.342  | 1985.638  | AF251189  | 744.33    | 619.371   | AA778392  | 53402.938 | 52546.023 |
| NM_00579Z | 3883.639  | 4566.794  | AK026733  | 365.013   | 368.635   | AI478178  | 13320.055 | 13326.61  |
| AF048847  | 18887.189 | 19494.994 | AF161429  | 12265.864 | 10920.576 | AA101279  | 4106.582  | 4783.643  |
| L37718    | 56971.555 | 55286.848 | AK021495  | 5052.197  | 5416.927  | M19154    | 17361.551 | 18672.959 |
| AL137717  | 5514.763  | 4845.941  | AF064846  | 4900.45   | 5112.021  | AA399410  | 10665.176 | 9232.556  |
| AF035297  | 4598.497  | 4500.444  | AL110227  | 4002.443  | 4745.705  | AA137031  | 5879.449  | 5374.747  |
| NM_01403E | 7022.792  | 8189.815  | NM_00140C | 31290.672 | 35506.23  | AA292226  | 32874.109 | 33714.992 |
| S67154    | 5295.639  | 5809.731  | AB033281  | 12218.189 | 10195.067 | NM_00050C | 3958.469  | 3995.825  |
| AK026181  | 9171.615  | 10357.783 | NM_00288Z | 41006.652 | 45849.52  | M29873    | 1020.385  | 1527.639  |
| U82320    | 247.492   | 431.717   | AB011161  | 2150.601  | 2889.755  | J04449    | 1080.048  | 996.225   |
| NM_014367 | 2149.032  | 2233.199  | NM_000827 | 1657.77   | 2101.964  | BC007031  | 28942.609 | 25301.26  |
| BF205340  | 454.695   | 672.76    | NM_002944 | 28204.66  | 35546.797 | AF129756  | 62356.102 | 53731.5   |
| AK024901  | 742.461   | 478.145   | AF327354  | 5399.089  | 6506.712  | NM_002957 | 53376.723 | 45837.844 |
| NM_01907Z | 875.504   | 714.708   | NM_00625E | 643.876   | 672.235   | BC036369  | 4393.057  | 3233.299  |
| NM_00236E | 2881.325  | 3849.283  | NM_003961 | 59187.141 | 55972.813 | X12492    | 46022.316 | 37226.719 |
| AF161441  | 11646.835 | 10794.687 | AB014513  | 2682.102  | 2891.395  | NM_01754C | 3394.754  | 2261.269  |
| AF067777  | 56954.758 | 54922.613 | NM_004747 | 1206.142  | 1475.09   | NM_00239E | 839.595   | 519.193   |
| U17613    | 1457.359  | 1527.028  | AK024430  | 52224.172 | 50772.852 | NM_00675E | 30230.373 | 20036.455 |
| AK027211  | 1274.647  | 2226.734  | NM_002341 | 26892.348 | 27667.557 | NM_01323C | 5245.346  | 6106.747  |
| AJ299406  | 2800.014  | 3459.49   | AL137651  | 863.412   | 583.148   | X72308    | 28450.59  | 30504.338 |
| AK021891  | 1451.372  | 1495.272  | NM_01894E | 7864.225  | 5822.163  | NM_00540E | 2745.356  | 2576.962  |
| Y10697    | 1783.459  | 2237.175  | AB029018  | 676.419   | 348.29    | BC008376  | 54207.02  | 57809.711 |
| AY007166  | 22586.762 | 26975.873 | NM_00081E | 2495.791  | 2296.344  | X87895    | 746.08    | 1347.742  |
| NM_004937 | 6387.129  | 6134.595  | NM_00665C | 2017.401  | 2201.321  | AB041269  | 8500.055  | 9906.476  |
| L13197    | 9755.652  | 10390.601 | AK024436  | 1505.042  | 1478.704  | AK024908  | 13544.956 | 12144.525 |
| AF056450  | 1818.311  | 1975.641  | NM_00664E | 2686.067  | 2402.616  | NM_01827C | 25508.889 | 26887.9   |
| NM_00072E | 12190.678 | 9769.434  | NM_00086E | 803.957   | 666.99    | NM_00026C | 59890.086 | 60529.281 |
| AK024007  | 5746.818  | 6786.938  | NM_004711 | 4834.318  | 4464.327  | NM_01416C | 8815.177  | 10540.515 |
| AF116699  | 1226.216  | 1525.888  | NM_00646Z | 18429.836 | 19726.629 | AF230877  | 55962.289 | 56295.156 |
| AF119908  | 1204.19   | 736.196   | NM_001444 | 57839.512 | 54409.918 | NM_01766E | 12005.964 | 13820.407 |
| U50539    | 1026.476  | 936.568   | AK027208  | 1779.529  | 1481.637  | AB033049  | 60218.793 | 62481.73  |
| AK000653  | 26377.318 | 26575.283 | NM_016521 | 18732.494 | 18017     | NM_00040E | 1565.733  | 1906.79   |
| AK000908  | 2367.399  | 2361.544  | X98494    | 21563.18  | 22029.564 | NM_00568Z | 3241.465  | 2834.313  |
| AF086211  | 804.688   | 597.418   | NM_00124C | 16872.436 | 17733.145 | NM_00292E | 5014.881  | 4588.806  |
| L77586    | 2872.504  | 2598.398  | NM_00270E | 20383.205 | 27276.354 | NM_00023Z | 1741.47   | 1823.914  |
| X96660    | 4919.212  | 4272.618  | NM_00109E | 3855.222  | 4368.77   | NM_018697 | 4573.475  | 4943.66   |
| AK000993  | 1533.835  | 1403.129  | NM_00682Z | 8280.89   | 9407.815  | AF090116  | 1524.58   | 1296.807  |
| AK022707  | 815.146   | 1252.766  | NM_016567 | 19906.588 | 18214.814 | NM_01403C | 62700.113 | 58288.203 |
| AK023519  | 8212.529  | 11413.355 | NM_007031 | 3119.292  | 2837.197  | NM_004224 | 24363.563 | 22378.215 |

|           |           |           |           |           |           |           |           |           |
|-----------|-----------|-----------|-----------|-----------|-----------|-----------|-----------|-----------|
| NM_016444 | 4712.502  | 4702.178  | NM_002657 | 3560.263  | 4016.419  | Z21967    | 10010.55  | 6914.826  |
| NM_017839 | 4166.427  | 4687.526  | NM_004089 | 21116.592 | 22430.322 | NM_003738 | 1488.344  | 751.772   |
| NM_003707 | 18518.148 | 20600.18  | NM_001350 | 10793.484 | 11465.688 | L09100    | 1612.39   | 1333.659  |
| AL137718  | 2767.848  | 2477.307  | NM_014809 | 3317.458  | 3234.535  | NM_005472 | 3712.305  | 1945.819  |
| NM_003460 | 5268.667  | 5566.568  | NM_016074 | 20930.648 | 15900.26  | NM_003645 | 18227.738 | 20504.355 |
| U94354    | 1380.855  | 1583.658  | NM_003921 | 3725.724  | 1792.956  | AF263613  | 11596.919 | 13113.193 |
| NM_002904 | 16446.512 | 16015.96  | NM_004208 | 22241.463 | 19208.145 | NM_000097 | 4020      | 3872.472  |
| NM_014189 | 8615.008  | 8764.367  | NM_001843 | 2545.341  | 2562.886  | NM_001509 | 6981.416  | 8324.86   |
| NM_005686 | 6592.26   | 7005.823  | NM_013266 | 836.203   | 839.676   | AK022878  | 17555.053 | 17839.002 |
| NM_006767 | 2858.235  | 2067.945  | NM_000419 | 1972.928  | 2082.518  | NM_018099 | 967.292   | 1568.353  |
| AK021451  | 4012.465  | 3734.174  | NM_017768 | 6811.322  | 7127.802  | AF217187  | 10369.731 | 13424.023 |
| AK001971  | 2824.789  | 3003.688  | NM_002589 | 12083.824 | 12396.098 | NM_017750 | 4503.872  | 4847.602  |
| AF086468  | 2859.275  | 3249.113  | NM_002776 | 12344.028 | 12736.518 | AK027122  | 33920.324 | 40234.426 |
| AK027239  | 4539.546  | 4303.332  | AK023398  | 12199.241 | 13363.597 | AK026196  | 6514.417  | 9848.38   |
| AF005082  | 30123.57  | 24836.631 | NM_001907 | 1528.57   | 1575.94   | NM_004977 | 28716.422 | 28256.348 |
| AL117595  | 3617.593  | 2562.463  | NM_006838 | 389.13    | 731.882   | NM_004700 | 2703.361  | 2969.757  |
| AB028988  | 8933.923  | 8439.762  | NM_015711 | 59011.742 | 56196.781 | NM_006868 | 31695.748 | 32694.715 |
| AK023072  | 2243.757  | 2190.401  | NM_000050 | 4706.764  | 4234.974  | NM_004161 | 33527.926 | 51272.16  |
| AF086105  | 3676.839  | 3261.31   | NM_000481 | 2982.974  | 3279.042  | NM_001295 | 3790.697  | 4248.663  |
| AK026600  | 4165.8    | 5124.446  | AK025681  | 5255.617  | 6004.446  | NM_005161 | 4012.938  | 3394.03   |
| Z70700    | 652.333   | 472.665   | NM_014905 | 21295.139 | 27357.906 | AB037749  | 2611.602  | 2327.688  |
| AF251189  | 1270.555  | 818.04    | NM_012137 | 16132.734 | 17451.742 | NM_020347 | 1250.147  | 992.248   |
| AK026733  | 1016.592  | 550.277   | NM_004483 | 41738.387 | 47929.02  | NM_001462 | 7228.332  | 6925.012  |
| AF161429  | 16380.44  | 16718.869 | NM_001513 | 60559.777 | 61229.535 | NM_004072 | 3605.55   | 3589.046  |
| AK021495  | 9083.952  | 9191.282  | NM_001281 | 12965.268 | 13010.808 | AF068286  | 2146.939  | 2028.602  |
| AF064846  | 10124.956 | 10371.621 | NM_016835 | 1072.559  | 1122.696  | AB040957  | 13360.672 | 11638.637 |
| AL110227  | 8627.448  | 11447.881 | NM_003981 | 24860.359 | 19077.5   | NM_003110 | 5713.717  | 4124.113  |
| NM_001400 | 5811.371  | 6471.101  | U26596    | 37470.023 | 31498.619 | NM_003612 | 1297.538  | 777.797   |
| AB033281  | 5070.479  | 4635.732  | AF070600  | 50245.293 | 48634.926 | L40519    | 2659.6    | 2383.968  |
| NM_002882 | 31668.697 | 42610.668 | AB014522  | 12599.667 | 12056.543 | NM_004204 | 8385.457  | 7835.106  |
| AB011161  | 1490.324  | 1535.277  | NM_014875 | 7538.346  | 7032.63   | AK002181  | 2954.607  | 2683.815  |
| NM_000827 | 846.139   | 1185.187  | AB033023  | 20694.141 | 21802.686 | NM_001641 | 51390.785 | 53130.328 |
| NM_002944 | 804.098   | 1175.181  | BC027895  | 1923.088  | 1514.228  | BC015750  | 54943.668 | 65504.395 |
| AF327354  | 2760.064  | 3010.082  | U63542    | 1083.061  | 1085.839  | AK025769  | 16431.137 | 17235.018 |
| NM_004490 | 798.202   | 989.927   | AF161361  | 1813.565  | 1614.054  | AW945166  | 4415.906  | 4754.222  |
| NM_006259 | 578.952   | 840.943   | NM_016531 | 2165.804  | 2337.584  | NM_005236 | 14437.453 | 14987.317 |
| NM_003961 | 47206.637 | 57006.66  | NM_003593 | 16831.857 | 16796.961 | NM_006384 | 26736.389 | 31700.811 |
| AB014513  | 3635.96   | 3774.308  | NM_014383 | 61173.75  | 53037.172 | NM_013257 | 4897      | 5863.179  |
| NM_004747 | 2491.325  | 2249      | NM_000244 | 15117.921 | 13037.272 | AB044546  | 3548.414  | 3903.574  |
| AK024430  | 18042.865 | 14125.456 | NM_014285 | 8822.916  | 9389.902  | NM_014225 | 56226.566 | 54617.984 |
| NM_002341 | 38034.742 | 34222.816 | AF026816  | 48069.797 | 47832.535 | AF163473  | 3338.033  | 4103.825  |
| AL137651  | 1907.051  | 1795.94   | NM_004719 | 8570.869  | 9402.571  | NM_006256 | 17024.502 | 16839.793 |
| NM_018945 | 12894.987 | 12499.836 | NM_018553 | 8478.141  | 9783.611  | NM_002846 | 12400.777 | 31654.943 |
| AB029018  | 1490.796  | 1860.432  | NM_004704 | 11650.113 | 9181.416  | NM_002837 | 9477.718  | 9433.561  |
| NM_000818 | 4005.739  | 3605.61   | NM_005455 | 9129.372  | 9598.17   | AL133077  | 46328.402 | 48523.773 |
| NM_006650 | 2530.593  | 2189.826  | NM_014633 | 4818.933  | 4066.244  | AK025211  | 9294.814  | 8920.839  |
| AK024436  | 2642.429  | 2137.92   | NM_001970 | 61998.449 | 51856.801 | U06715    | 1844.2    | 1959.045  |
| NM_006648 | 4251.57   | 2382.496  | NM_006810 | 22277.715 | 18044.086 | NM_013402 | 8256.662  | 6858.002  |
| NM_000868 | 1271.694  | 771.282   | AK024054  | 13239.095 | 8403.831  | NM_002662 | 869.862   | 914.491   |
| NM_004711 | 7021.521  | 5477.541  | AL049674  | 400.119   | 450.999   | NM_004377 | 13107.811 | 6819.525  |
| NM_006463 | 12731.189 | 11891.878 | NM_001969 | 1239.083  | 490.214   | AB037815  | 8152.381  | 5175.066  |
| AK023050  | 835.505   | 1372.001  | NM_004116 | 6076.479  | 5080.927  | NM_000132 | 43611.621 | 47997.129 |
| NM_001444 | 53374.207 | 53604.707 | AK024508  | 6424.639  | 5446.501  | NM_001727 | 31141.377 | 31307.859 |

|           |           |           |           |           |           |           |           |           |
|-----------|-----------|-----------|-----------|-----------|-----------|-----------|-----------|-----------|
| AK027208  | 2036.069  | 2789.456  | AK027213  | 10783.137 | 9629.614  | NM_004076 | 8764.02   | 9931.356  |
| NM_016521 | 13905.48  | 14753.599 | NM_006703 | 19926.59  | 25800.492 | NM_007123 | 63925.844 | 67497.867 |
| X98494    | 8757.583  | 8842.096  | NM_004037 | 6451.468  | 6313.305  | BG717460  | 9568.264  | 8956.999  |
| NM_001240 | 4441.092  | 4322.704  | NM_005116 | 8058.82   | 9787.604  | AA778392  | 52181.285 | 51884.914 |
| NM_002709 | 13082.262 | 13907.488 | NM_002766 | 10837.473 | 10587.364 | AI478178  | 13192.515 | 12695.015 |
| NM_001099 | 6069.626  | 5650.184  | AJ404857  | 896.568   | 825.661   | AA101279  | 3788.01   | 4468.344  |
| NM_006823 | 6623.237  | 8024.993  | NM_000788 | 22706.41  | 28329.887 | M19154    | 16739.029 | 18578.701 |
| NM_016567 | 18271.791 | 23157.631 | AF254088  | 5349.958  | 6095.582  | AA399410  | 15458.49  | 18224.582 |
| NM_007031 | 1363.248  | 1653.426  | NM_001420 | 6962.509  | 6879.188  | AA137031  | 4868.077  | 5265.152  |
| NM_002657 | 4535.94   | 4212.708  | NM_000248 | 10413.8   | 13165.855 | AA292226  | 33812.273 | 33565.691 |
| NM_004089 | 21669.289 | 18736.711 | AB031046  | 6310.237  | 5670.414  | NM_000500 | 4813.985  | 5009.065  |
| NM_001350 | 12839.054 | 9691.238  | NM_002449 | 56682.426 | 47096.215 | M29873    | 1419.182  | 1796.241  |
| NM_014809 | 5025.568  | 4390.76   | AK025388  | 5290.555  | 6613.998  | J04449    | 835.622   | 857.763   |
| NM_016074 | 34767.469 | 37578.938 | NM_006147 | 725.575   | 747.179   | BC007031  | 28544.627 | 27853.773 |
| NM_003921 | 8576.192  | 7560.69   | AB006631  | 6270.302  | 5799.946  | BC036369  | 9223.607  | 7544.628  |
| NM_004208 | 43022.137 | 46440.266 | AF291181  | 1050.064  | 581.083   | X12492    | 60220.422 | 51997.344 |
| NM_006336 | 1071.788  | 633.22    | NM_005741 | 5296.619  | 4439.937  | NM_017540 | 4270.088  | 3383.884  |
| NM_001843 | 3805.045  | 2606.511  | NM_000964 | 3221.879  | 2179.856  | NM_002396 | 1114.147  | 242.793   |
| NM_013266 | 1210.697  | 1337.278  | NM_013263 | 14288.311 | 13793.414 | NM_006755 | 31050.795 | 20682.279 |
| NM_000419 | 1782.432  | 1220.734  | AF116238  | 4535.94   | 4862.858  | NM_005881 | 8177.991  | 5654.547  |
| NM_017768 | 5819.515  | 3684.201  | NM_006982 | 4188.552  | 4484.746  | NM_005794 | 770.589   | 380.643   |
| NM_002589 | 19490.889 | 12237.545 | NM_003069 | 567.89    | 593.967   | NM_000260 | 65895.734 | 67581.742 |
| NM_002776 | 3835.353  | 4437.338  | AB033085  | 7907.499  | 6033.667  | NM_014160 | 7340.543  | 8594.232  |
| AK023398  | 5835.695  | 6211.685  | L09100    | 7622.843  | 8324.326  | AF230877  | 62594.059 | 58333.652 |
| NM_001907 | 2078.921  | 2942.064  | NM_005472 | 11522.81  | 12311.256 | NM_017668 | 12807.89  | 14508.236 |
| NM_006838 | 965.741   | 1193.966  | NM_004313 | 1326.573  | 1508.291  | AB033049  | 62005.719 | 54994.258 |
| NM_015711 | 47467.324 | 49759.941 | NM_013435 | 2556.572  | 2213.856  | NM_000406 | 1584.263  | 1445.352  |
| NM_000050 | 1405.207  | 932.885   | NM_000132 | 29251.645 | 35154.691 | NM_005682 | 3202.539  | 2707.189  |
| NM_000481 | 2030.151  | 2214.089  | NM_001727 | 26211.805 | 28761.975 | NM_002926 | 4571.906  | 4044.68   |
| AK025681  | 3681.428  | 3466.827  | NM_004076 | 6497.53   | 6947.185  | NM_000233 | 1197.653  | 1201.329  |
| NM_014905 | 10882.575 | 10806.784 | NM_007123 | 42535.746 | 44825.656 | NM_018697 | 4387.4    | 5794.244  |
| NM_012137 | 7227.84   | 7191.618  | BG717460  | 7369.833  | 6993.363  | AF090116  | 1659.569  | 2277.497  |
| NM_004483 | 47484.148 | 51176.734 | AA778392  | 39653.613 | 46421.488 | NM_014030 | 61731.645 | 59579.293 |
| NM_001513 | 45284.598 | 47483.133 | AI478178  | 10865.161 | 11364.836 | NM_004224 | 32792.84  | 40808.668 |
| NM_001281 | 18622.916 | 15213.228 | AA101279  | 4227.213  | 4042.189  | NM_000254 | 19387.26  | 19607.785 |
| NM_016835 | 1425.168  | 1181.731  | M19154    | 15762.233 | 18371.205 | Z21967    | 21803.463 | 20937.988 |
| NM_003981 | 29969.338 | 29701.375 | AA399410  | 11415.92  | 11928.216 | NM_003738 | 3171.846  | 3152.323  |
| AB014522  | 23532.371 | 23334.959 | AA137031  | 3816.58   | 2825.416  | NM_016185 | 59659.422 | 59903.555 |
| NM_014875 | 13622.257 | 13292.946 | AA292226  | 17865.186 | 14446.517 | NM_012110 | 44575.078 | 46647.82  |
| AB033023  | 30577.152 | 31598.26  | NM_000500 | 1706.925  | 1227.475  | AF052693  | 18512.979 | 14896.864 |
| BC027895  | 5490.061  | 6045.342  | M29873    | 324.681   | 233.849   | NM_001129 | 60564.047 | 53523.137 |
| NM_016529 | 1306.984  | 822.372   | J04449    | 721.795   | 297.145   | L09100    | 7513.704  | 5929.712  |
| U63542    | 1542.909  | 1277.689  | BC007031  | 8663.503  | 8508.658  | NM_005472 | 16600.205 | 10179.713 |
| AF161361  | 2449.755  | 1310.371  | AF129756  | 45569.773 | 48242.75  | NM_004313 | 2132.646  | 1646.818  |
| AF024703  | 8126.107  | 8764.129  | NM_002957 | 35569.523 | 36078.949 | NM_013435 | 1896.515  | 1525.181  |
| NM_016531 | 3004.316  | 3166.947  | BC036369  | 5318.285  | 6533.984  | AB020706  | 8853.107  | 8942.332  |
| NM_003593 | 15025.645 | 16524.543 | X12492    | 37672.355 | 43223.68  | NM_007166 | 19051.443 | 22257.811 |
| NM_014383 | 56136.637 | 52430.355 | NM_005009 | 30783.814 | 40961.125 | NM_018086 | 36900.238 | 40495.262 |
| NM_000244 | 9180.465  | 9069.094  | NM_003110 | 8464.666  | 9564.724  | NM_004161 | 28736.961 | 32303.184 |
| NM_014285 | 9295.773  | 10189.894 | NM_003612 | 12189.984 | 12795.039 | NM_001295 | 3478.077  | 3518.777  |
| AF026816  | 32537.471 | 37778.57  | NM_013230 | 4522.904  | 4804.858  | NM_005161 | 4004.237  | 3799.635  |
| NM_004719 | 6725.017  | 6562.484  | X72308    | 28156.74  | 36600.918 | AB037749  | 2316.86   | 2603.162  |
| NM_018553 | 6960.781  | 6425.013  | NM_005408 | 2223.342  | 2555.448  | NM_020347 | 1014.681  | 1017.611  |



|           |           |           |           |           |           |           |           |           |
|-----------|-----------|-----------|-----------|-----------|-----------|-----------|-----------|-----------|
| NM_004704 | 10911.804 | 11506.595 | BC008376  | 41246.898 | 44943.055 | NM_001462 | 8790.32   | 9157.813  |
| NM_005455 | 9408.463  | 8278.735  | X87895    | 857.439   | 760.641   | NM_004072 | 4761.518  | 5983.175  |
| NM_014633 | 5582.771  | 4169.539  | AB041269  | 9372.021  | 11478.978 | AF068286  | 2237.062  | 2811.561  |
| NM_001970 | 62692.508 | 53764.125 | AK024908  | 10826.601 | 11533.406 | AB040957  | 14058.908 | 15974.987 |
| NM_006810 | 37551.316 | 39831.617 | NM_018270 | 29466.662 | 37884.633 | NM_006890 | 1091.26   | 1797.719  |
| AK024054  | 26426.545 | 31977.656 | NM_000260 | 59062.23  | 54136.695 | NM_003110 | 10500.924 | 10712.239 |
| NM_001969 | 2797.983  | 2088.199  | NM_014160 | 10955.612 | 9943.401  | NM_003612 | 13101.329 | 11591.668 |
| NM_004116 | 9778.264  | 8859.374  | AF230877  | 48534.32  | 49190.145 | NM_013230 | 5155.062  | 4861.043  |
| AK024508  | 12948.802 | 9091.219  | NM_017668 | 10119.887 | 9123.578  | X72308    | 25253.193 | 27124.672 |
| AK027213  | 21147.627 | 15557.21  | AB033049  | 60135.746 | 47395.43  | NM_005408 | 1972.799  | 1789.469  |
| NM_014596 | 14228.614 | 14333.865 | NM_000406 | 979.379   | 455.724   | BC008376  | 49005.926 | 46212.973 |
| NM_006703 | 21799.096 | 27752.244 | NM_005682 | 1734.264  | 1051.737  | X87895    | 964.009   | 1033.111  |
| NM_004037 | 6104.364  | 8002.959  | NM_002926 | 2486.873  | 1926.34   | AB041269  | 9839.059  | 7342.548  |
| NM_005116 | 11832.113 | 15280.087 | NM_000233 | 1026.499  | 562.627   | AK024908  | 8387.471  | 6736.307  |
| NM_002766 | 12540.7   | 14311.99  | NM_018697 | 3755.805  | 3716.444  | NM_018270 | 23252.377 | 15009.567 |
| AJ404857  | 1965.049  | 1508.259  | AF090116  | 1103.705  | 1129.023  | U06715    | 1114.316  | 1651.534  |
| NM_000788 | 21888.1   | 22963.301 | NM_014030 | 62014.465 | 50119.332 | NM_013402 | 13622.116 | 16822.723 |
| AF254088  | 4116.455  | 5072.691  | NM_004224 | 8747.387  | 11582.212 | NM_002662 | 1490.58   | 1729.325  |
| NM_001420 | 4512.879  | 4130.826  | Z21967    | 8092.756  | 10863.207 | NM_004377 | 20350.328 | 20482.854 |
| NM_000248 | 1245.132  | 1693.834  | NM_003738 | 1112.735  | 1444.769  | AB037815  | 54754.41  | 53206.543 |
| AB031046  | 869.089   | 1380.685  | NM_004377 | 17420.945 | 19416.213 | NM_003645 | 17193.523 | 21198.406 |
| NM_002449 | 28944.926 | 35021.344 | AB037815  | 50375.848 | 46994.539 | AF263613  | 11861.3   | 13514.875 |
| AK025388  | 1620.707  | 1448.701  | NM_003645 | 14257.871 | 17019.043 | NM_000097 | 3791.194  | 3901.737  |
| NM_006147 | 867.642   | 924.27    | AF263613  | 10779.573 | 10314.104 | NM_001509 | 6860.609  | 8680.518  |
| AB006631  | 5383.356  | 4599.858  | NM_000097 | 3172.119  | 2759.697  | AK022878  | 19368.508 | 25274.902 |
| AF291181  | 1329.749  | 1381.372  | NM_001509 | 6017.16   | 6451.986  | NM_018099 | 1168.168  | 1680.862  |
| NM_005741 | 7265.538  | 8670.909  | AK022878  | 14013.683 | 11388.114 | AF217187  | 10639.05  | 13695.635 |
| NM_000964 | 3327.318  | 3760.024  | NM_018099 | 568.797   | 618.678   | NM_017750 | 5084.95   | 5498.047  |
| NM_012185 | 861.924   | 629.693   | AF217187  | 9259.88   | 11060.404 | AK027122  | 33438.816 | 35190.25  |
| BF343886  | 2324.105  | 1866.838  | NM_017750 | 5438.872  | 5346.228  | AK026196  | 6878.117  | 9968.407  |
| NM_013263 | 24301.965 | 16842.18  | AK027122  | 32069.104 | 36297.699 | AL137668  | 2097.862  | 2169.539  |
| AF116238  | 7983.548  | 6817.413  | AK026196  | 6386.338  | 7680.674  | NM_013348 | 9883.179  | 9021.161  |
| NM_006982 | 4997.647  | 4501.47   | NM_004977 | 23102.783 | 25220.236 | NM_004977 | 27119.863 | 21677.043 |
| NM_003069 | 364.431   | 496.974   | NM_004700 | 1596.439  | 1692.725  | NM_004888 | 47706.43  | 46461.848 |
| AB033085  | 7593.184  | 3776.919  | NM_006868 | 21861.031 | 13723.659 | NM_002251 | 920.752   | 559.81    |
| L09100    | 1452.492  | 1626.944  | NM_004161 | 21735.537 | 15323.013 | NM_012283 | 62723.941 | 58026.066 |
| NM_005472 | 3306.965  | 3617.764  | NM_001295 | 2301.039  | 1831.172  | NM_004700 | 1918.878  | 2058.362  |
| NM_004313 | 1671.761  | 1351.392  | NM_005161 | 1888.468  | 1177.66   | NM_004162 | 29888.219 | 24789.918 |
| NM_013435 | 1126.908  | 1286.281  | AB037749  | 1072.363  | 941.526   | NM_006868 | 28313.607 | 16404.764 |
| NM_000132 | 27465.02  | 33630.699 | NM_020347 | 1173.756  | 1059.785  | NM_017540 | 1881.244  | 2133.178  |
| NM_001727 | 11313.122 | 12559.465 | NM_001462 | 3297.948  | 3876.175  | NM_006755 | 27511.514 | 23248.887 |
| NM_004076 | 2755.834  | 3692.379  | NM_004072 | 2521.04   | 3046.919  | NM_005881 | 6808.892  | 8297.568  |
| NM_007123 | 50619.297 | 51958.035 | AF068286  | 1458.277  | 1891.506  | NM_005794 | 792.449   | 1450.81   |
| BG717460  | 9413.94   | 11607.425 | AB040957  | 7962.565  | 6757.799  | L40519    | 2068.195  | 1918.644  |
| AA778392  | 42353.902 | 51011.922 | NM_006890 | 698.047   | 660.624   | NM_004204 | 6406.655  | 6879.331  |
| AI478178  | 11603.94  | 14183.17  | NM_005881 | 5914.359  | 6802.041  | AK002181  | 2188.528  | 2962.778  |
| AA101279  | 3426.205  | 3170.974  | NM_005794 | 766.608   | 716.973   | NM_001641 | 45810.164 | 48724.191 |
| M19154    | 4473.292  | 4350.838  | L40519    | 1984.787  | 1864.861  | BC015750  | 54325.281 | 55390.461 |
| AA399410  | 11366.931 | 10463.706 | NM_004204 | 7855.684  | 7368.618  | AK025769  | 17344.359 | 17081.848 |
| AA137031  | 3182.092  | 2894.111  | AK002181  | 3430.146  | 3043.13   | AW945166  | 4296.981  | 4819.858  |
| AA292226  | 3858.089  | 5263.57   | NM_001641 | 35192.453 | 33798.746 | NM_005236 | 13135.947 | 14241.511 |
| NM_000500 | 1817.205  | 2081.471  | BC015750  | 57903.012 | 56488.574 | NM_006384 | 26234.273 | 28252.145 |
| M29873    | 1019.371  | 1195.414  | AK025769  | 14977.665 | 14974.279 | NM_013257 | 4871.569  | 5679.755  |

|           |           |           |           |           |           |           |           |           |
|-----------|-----------|-----------|-----------|-----------|-----------|-----------|-----------|-----------|
| J04449    | 1434.047  | 1538.133  | AW945166  | 4135.569  | 4399.818  | AB044546  | 3853.128  | 3410.676  |
| BC007031  | 3770.013  | 3187.915  | NM_005236 | 12230.907 | 12080.818 | NM_014225 | 55511     | 53063.074 |
| AF129756  | 39033.758 | 27139.229 | NM_006384 | 23749.975 | 28380.248 | AF163473  | 3389.723  | 3899.741  |
| NM_002957 | 14366.627 | 14085.55  | NM_013257 | 4101.242  | 2835.817  | NM_006256 | 16882.072 | 14899.09  |
| BC036369  | 4257.721  | 4956.55   | AB044546  | 3059.445  | 1685.249  | NM_002846 | 10895.605 | 26217.123 |
| X12492    | 54941.863 | 50150.332 | NM_014225 | 38132.328 | 33296.195 | NM_002837 | 9647.769  | 8706.636  |
| NM_005009 | 32326.07  | 19950.027 | AF163473  | 3467.394  | 2520.688  | AL133077  | 38559.957 | 38633.57  |
| NM_003110 | 5355.159  | 5522.981  | NM_006256 | 15294.541 | 10803.314 | AK025211  | 8406.814  | 5778.138  |
| NM_003612 | 1746.868  | 2241.592  | NM_002846 | 8136.032  | 21242.121 | CY3Cy5    | 10232.391 | 827.897   |
| NM_013230 | 4067.353  | 5382.282  | NM_002837 | 9852.105  | 10172.911 | NM_005456 | 2759.178  | 2399.62   |
| X72308    | 2124.531  | 2577.668  | AL133077  | 37601.406 | 43092.746 | NM_006534 | 13362.53  | 13243.024 |
| NM_005408 | 1729.557  | 2024.838  | AK025211  | 6807.995  | 7774.098  | AL832550  | 1275.801  | 1475.689  |
| BC008376  | 6748.196  | 8859.495  | U06715    | 518.271   | 684.37    | AF131798  | 839.344   | 1148.829  |
| X87895    | 1465.223  | 1545.908  | NM_013402 | 5150.385  | 5874.656  | AK001731  | 3562.238  | 4808.981  |
| AB041269  | 2698.602  | 2712.662  | NM_002662 | 663.576   | 525.224   | AF052108  | 1843.61   | 2603.122  |
| AK024908  | 9699.687  | 11521.395 | NM_004313 | 921.649   | 973.868   | AF052176  | 1093.77   | 1191.826  |
| NM_018270 | 11322.138 | 15125.293 | NM_013435 | 1816.792  | 1729.736  | AF086477  | 1894.819  | 1662.571  |
| NM_000260 | 12603.194 | 13285.628 | NM_000132 | 30355.898 | 36762.203 | NM_001412 | 7981.007  | 6008.05   |
| NM_014160 | 7127.192  | 6891.045  | NM_001727 | 27620.689 | 29778.51  | AF095771  | 1013.737  | 1047.879  |
| AF230877  | 10502.439 | 10578.144 | NM_004076 | 7229.984  | 5964.807  | AF071111  | 1410.444  | 1417.363  |
| NM_017668 | 10145.541 | 9437.17   | NM_007123 | 42581.871 | 47135.254 | NM_015942 | 10970.5   | 10129.518 |
| AB033049  | 31538.264 | 41962.258 | BG717460  | 7976.427  | 5633.033  | NM_017907 | 11464.184 | 16836.965 |
| NM_000406 | 2143.751  | 2572.43   | AA778392  | 36297.992 | 37469.047 | NM_005456 | 2537.08   | 3515.629  |
| NM_005682 | 2290.023  | 2315.144  | AI478178  | 10408.836 | 9676.427  | NM_006534 | 16803.359 | 18428.818 |
| NM_002926 | 6127.55   | 6180.775  | AA101279  | 4870.429  | 3350.857  | SR1       | 68787.18  | 63550.352 |
| NM_000233 | 1893.004  | 1424.363  | M19154    | 15157.768 | 15220.327 | SR3       | 46345.469 | 56583.402 |
| NM_018697 | 3587.675  | 3003.693  | AA399410  | 14063.438 | 16836.791 | SR5       | 4835.964  | 6997.333  |
| AF090116  | 2091.12   | 1621.217  | AA137031  | 5941.683  | 4760.705  | SR7       | 3877.328  | 42581.48  |
| NM_014030 | 38421.676 | 41913.938 | AA292226  | 27836.021 | 25969.059 | SR9       | 1872.858  | 562.441   |
| NM_004224 | 1960.977  | 2722.642  | NM_000500 | 3627.692  | 2109.766  | CY3Cy5    | 10702.568 | 797.703   |
| Z21967    | 10386.168 | 7909.429  | M29873    | 813.14    | 296.593   | U84521    | 22615.326 | 19713.629 |
| NM_003738 | 1839.413  | 1558.506  | J04449    | 1048.518  | 395.776   | U03241    | 1691.159  | 1479.547  |
| NM_004377 | 6945.937  | 8348.455  | BC007031  | 29413.213 | 27383.24  | U62539    | 1107.995  | 1052.145  |
| AB037815  | 8243.104  | 9829.939  | AF129756  | 53377.625 | 49833.148 | AF086110  | 810.862   | 977.887   |
| NM_003645 | 10458.596 | 12774.985 | NM_002957 | 43183.594 | 43622.57  | NM_016418 | 5270.991  | 4355.675  |
| AF263613  | 7055.418  | 8106.072  | BC036369  | 5643.228  | 6046.463  | AK025908  | 10526.922 | 7513.595  |
| NM_000097 | 3680.286  | 4286.135  | X12492    | 36891.469 | 43835.996 | AK022204  | 2027.306  | 1566.811  |
| NM_001509 | 2292.897  | 2535.577  | NM_017540 | 2533.17   | 2699.866  | AL109726  | 1251.594  | 780.016   |
| AK022878  | 7884.459  | 6774.25   | NM_006755 | 21336.039 | 25804.381 | AL109716  | 524.487   | 551.122   |
| NM_018099 | 931.026   | 1395.282  | NM_013230 | 4584.602  | 4639.468  | AK027065  | 5469.587  | 4151.476  |
| AF217187  | 10055.232 | 12319.131 | X72308    | 28074.762 | 33775.961 | AL353944  | 1648.519  | 1783.627  |
| NM_017750 | 4648.118  | 5080.205  | NM_005408 | 2199.398  | 2162.262  | AK001127  | 1428.236  | 1222.382  |
| AK027122  | 30401.684 | 30248.246 | BC008376  | 41407.008 | 45782.355 | U79256    | 30188.311 | 21240.631 |
| AK026196  | 7055.281  | 8084.387  | AB041269  | 9832.336  | 8709.975  | AK023761  | 775.638   | 434.354   |
| NM_004977 | 7954.618  | 7440.244  | AK024908  | 11413.052 | 9060.813  | AK023963  | 27941.801 | 23223.18  |
| NM_004700 | 6009.152  | 6601.618  | NM_018270 | 22230.064 | 18962.748 | AK022473  | 25196.572 | 23218.305 |
| NM_006868 | 18492.557 | 20656.459 | NM_000260 | 58790.996 | 58011.055 | AK023380  | 1132.232  | 1106.017  |
| NM_004161 | 23176.719 | 28792.277 | NM_014160 | 8111.171  | 6927.488  | AK023810  | 3129.754  | 2795.438  |
| NM_001295 | 1342.37   | 1997.209  | AF230877  | 48803.293 | 48647.602 | AK024860  | 649.793   | 791.074   |
| NM_005161 | 1836.159  | 2343.714  | NM_017668 | 11408.483 | 10279.755 | AF086154  | 766.616   | 629.176   |
| AB037749  | 1090.927  | 1379.811  | AB033049  | 57466.133 | 57961.664 | AF086205  | 2405.465  | 1738.371  |
| NM_020347 | 1001.051  | 778.841   | NM_000406 | 1396.085  | 555.175   | AK026723  | 922.668   | 852.641   |
| NM_001462 | 5984.464  | 4058.801  | NM_005682 | 2457.122  | 1200.525  | AK024169  | 1398.582  | 1270.498  |

|           |           |           |           |           |           |           |           |           |
|-----------|-----------|-----------|-----------|-----------|-----------|-----------|-----------|-----------|
| NM_004072 | 3776.427  | 3543.381  | NM_002926 | 3533.235  | 2415.932  | AF147395  | 4857.481  | 4868.536  |
| AF068286  | 2467.261  | 1968.686  | NM_000233 | 1479.864  | 678.271   | AK026447  | 1209.72   | 1125.25   |
| AB040957  | 7551.684  | 4992.379  | NM_018697 | 5387.921  | 5140.738  | AF085985  | 678.22    | 695.67    |
| NM_006890 | 1462.401  | 1014.842  | AF090116  | 1510.507  | 1180.486  | AF087972  | 2281.768  | 1711.968  |
| NM_005881 | 6904.578  | 9126.741  | NM_014030 | 60021.699 | 54342.074 | AL137342  | 4052.745  | 3404.813  |
| NM_005794 | 777.88    | 979.313   | NM_004224 | 21142.252 | 26522.059 | AF075105  | 1203.234  | 911.437   |
| L40519    | 3519.117  | 2722.361  | Z21967    | 10864.621 | 14499.913 | AK025102  | 4183.972  | 3969.77   |
| NM_004204 | 2109.111  | 2034.805  | NM_003738 | 1058.864  | 1288.009  | AF086562  | 3342.388  | 3413.349  |
| AK002181  | 1462.889  | 1949.081  | L09100    | 2153.55   | 2367.835  | AK021749  | 2100.031  | 1686.371  |
| AF118064  | 740.805   | 918.349   | NM_005472 | 3513.07   | 3763.986  | AJ011980  | 1050.101  | 965.795   |
| NM_001641 | 49309.164 | 47212.816 | NM_003645 | 10140.63  | 12173.104 | NM_002237 | 3562.568  | 3322.281  |
| BC015750  | 62845.57  | 55339.551 | AF263613  | 10903.628 | 9415.594  | NM_005117 | 5331.748  | 4503.016  |
| AK025769  | 13254.245 | 12379.98  | NM_000097 | 2955.573  | 3116.546  | AJ007733  | 2212.3    | 1851.162  |
| AW945166  | 5181.37   | 4769.173  | NM_001509 | 6688.271  | 7240.018  | AK021625  | 3820.32   | 2720.028  |
| NM_005236 | 14079.411 | 12613.807 | AK022878  | 14229.519 | 13480.449 | AK021679  | 1014.879  | 866.053   |
| NM_006384 | 22705.227 | 21600.619 | NM_018099 | 721.873   | 532.865   | AK001380  | 5837.761  | 3647.321  |
| NM_013257 | 7041.498  | 7576.866  | AF217187  | 8180.625  | 8611.307  | AK026753  | 915.826   | 806.925   |
| AB044546  | 4577.778  | 4277.016  | NM_017750 | 4026.235  | 3089.597  | AK025312  | 1824.281  | 1834.447  |
| NM_014225 | 58836.77  | 47177.805 | AK027122  | 25357.855 | 21385.342 | AK002042  | 799.655   | 590.568   |
| AF163473  | 4295.027  | 5251.72   | AK026196  | 5884.39   | 5755.625  | AK025092  | 3854.952  | 4098.049  |
| NM_006256 | 11898.777 | 10785.212 | NM_004977 | 22731.291 | 17679.666 | AF130047  | 1183.139  | 1247.919  |
| NM_002846 | 3570.766  | 9697.537  | NM_004700 | 2105.927  | 1703.333  | AF085904  | 1250.66   | 1722.814  |
| NM_002837 | 10807.145 | 8202.983  | NM_006868 | 23740.055 | 20950.484 | Z83944    | 1418.858  | 1845.111  |
| AL133077  | 44804.449 | 43903.012 | NM_004161 | 21465.031 | 15920.851 | AF085871  | 3131.712  | 2800.218  |
| AK025211  | 12447.773 | 13654.156 | NM_001295 | 2273.268  | 1397.727  | AL137284  | 2961.34   | 2542.909  |
| U06715    | 1327.249  | 886.612   | NM_005161 | 2886.477  | 2368.166  | AK001013  | 1766.662  | 2132.71   |
| NM_013402 | 6430.661  | 4321.459  | AB037749  | 2077.94   | 2656.855  | NM_005296 | 6861.438  | 4991.989  |
| NM_002662 | 1250.562  | 627.241   | NM_020347 | 1290.204  | 791.534   | AF026564  | 1980.887  | 1953.155  |
| NM_004313 | 2077.333  | 2319.069  | NM_001462 | 6860.149  | 6546.967  | X97301    | 4932.04   | 3900.49   |
| NM_013435 | 859.638   | 872.746   | NM_004072 | 4183.959  | 4965.949  | AL110141  | 68579.672 | 64026.359 |
| NM_000132 | 32113.668 | 41566.68  | AF068286  | 1587.467  | 1840.726  | AF116636  | 2232.677  | 2089.737  |
| NM_001727 | 10104.641 | 11681.105 | AB040957  | 9986.232  | 9432.054  | U80761    | 28190.77  | 27895.799 |
| NM_004076 | 2562.845  | 3039.632  | NM_006890 | 1022.39   | 1116.68   | Y16701    | 5663.482  | 5921.007  |
| NM_007123 | 53233.344 | 50942.258 | NM_003110 | 6799.245  | 7549.164  | U61100    | 981.707   | 1091.869  |
| BG717460  | 9154.007  | 7876.407  | NM_003612 | 3055.124  | 3628.082  | Y11161    | 1771.804  | 1830.838  |
| AA101279  | 3536.707  | 3557.08   | L40519    | 2239.797  | 2101.936  | AB007861  | 941.969   | 1047.43   |
| M19154    | 5132.972  | 5330.18   | NM_004204 | 8093.084  | 7371.243  | AK024761  | 815.608   | 828.952   |
| AA399410  | 11867.155 | 10372.773 | AK002181  | 2321.128  | 2149.072  | M55536    | 2284.496  | 1932.353  |
| AA137031  | 3347.54   | 2974.716  | NM_001641 | 33502.781 | 35662.629 | Z70766    | 1013.937  | 910.451   |
| AA292226  | 4915.248  | 5981.397  | BC015750  | 58703.898 | 56641.34  | AK000660  | 4476.68   | 4924.023  |
| NM_000500 | 2843.842  | 2987.803  | AK025769  | 14284.303 | 11684.437 | AL049289  | 1070.113  | 1045.415  |
| M29873    | 2675.823  | 2768.463  | AW945166  | 3317.22   | 2667.229  | NM_014711 | 3529.368  | 3222.349  |
| J04449    | 2072.708  | 1428.877  | NM_005236 | 9578.585  | 7332.779  | AK022015  | 3229.309  | 3639.282  |
| BC007031  | 4152.329  | 4393.823  | NM_006384 | 22365.924 | 17765.516 | D17234    | 1420.252  | 2129.815  |
| AF129756  | 39874.332 | 29201.65  | NM_013257 | 4324.701  | 3326.063  | AK002208  | 19786.842 | 21464.598 |
| NM_002957 | 12358.283 | 12122.366 | AB044546  | 3164.911  | 2513.795  | D63135    | 2501.714  | 2053.274  |
| BC036369  | 4132.626  | 3338.703  | NM_014225 | 37572.699 | 37110.211 | AB033083  | 10324.414 | 7749.493  |
| X12492    | 56255.266 | 46012.438 | AF163473  | 2829.28   | 2101.975  | NM_017826 | 15073.439 | 11221.771 |
| NM_017540 | 3407.005  | 1930.955  | NM_006256 | 15345.843 | 11850.796 | AY007113  | 1416.209  | 1126.394  |
| NM_002396 | 1371.346  | 573.502   | NM_002846 | 14605.114 | 34975.664 | AF130083  | 27793.619 | 23138.217 |
| NM_006755 | 30472.49  | 21572.932 | NM_002837 | 9165.573  | 9212.063  | AL110185  | 67518     | 60492.559 |
| NM_013230 | 6426.07   | 7631.31   | AL133077  | 35310.168 | 39578.191 | NM_002700 | 34031.195 | 32267.822 |
| X72308    | 2018.675  | 2765.32   | AK025211  | 8709.062  | 10038.299 | AB002437  | 43198.406 | 30599.164 |

|           |           |           |           |           |           |           |           |           |
|-----------|-----------|-----------|-----------|-----------|-----------|-----------|-----------|-----------|
| NM_00540E | 1230.881  | 1278.788  | U06715    | 1048.345  | 1143.222  | AK024013  | 359.478   | 386.767   |
| BC008376  | 8861.859  | 11142.384 | NM_013402 | 8301.771  | 9045.463  | NM_006777 | 1015.459  | 1577.316  |
| X87895    | 1105.772  | 1129.335  | NM_002662 | 808.324   | 766.943   | AK024969  | 2043.034  | 1976.512  |
| AB041269  | 1825.302  | 1999.408  | NM_004377 | 14503.056 | 14803.005 | AL049471  | 1168.232  | 2852.955  |
| AK024908  | 7783.351  | 8786.735  | AB037815  | 27777.242 | 30853.816 | NM_01959E | 10863.7   | 6834.19   |
| NM_01827C | 11226.464 | 11931.964 | NM_000132 | 30904.846 | 34312.617 | AF222904  | 2131.827  | 1675.959  |
| NM_00026C | 13123.732 | 14963.774 | NM_001727 | 27253.666 | 29603.139 | NM_00622E | 54216.086 | 50234.617 |
| NM_01416C | 8465.315  | 7883.649  | NM_00407E | 7312.707  | 7476.906  | NM_003254 | 42851.879 | 41803.734 |
| AF230877  | 11157.382 | 10167.666 | NM_007123 | 43864.43  | 41196.816 | NM_01773C | 6952.651  | 6957.793  |
| NM_01766E | 12082.187 | 10599.919 | BG717460  | 7409.136  | 6984.223  | NM_01463C | 10723.608 | 10758.56  |
| AB033049  | 37313.563 | 49376.816 | AA778392  | 38799.176 | 41486.496 | AF022728  | 1782.917  | 1675.858  |
| NM_00040E | 2622.262  | 3040.7    | AI478178  | 9400.793  | 9908.639  | AK025813  | 1332.161  | 1265.114  |
| NM_005682 | 2689.885  | 3179.505  | AA101279  | 4096.41   | 3091.101  | AK021829  | 952.456   | 1167.53   |
| NM_00292E | 15660.601 | 15913.322 | M19154    | 14954.799 | 10989.506 | NM_014681 | 1265.136  | 1365.276  |
| NM_000233 | 2023.154  | 2399.798  | AA399410  | 11498.229 | 8044.591  | NM_007182 | 6105.219  | 4908.559  |
| NM_018697 | 4146.873  | 5228.389  | AA137031  | 4357.228  | 2684.868  | NM_019063 | 65361.684 | 44235.395 |
| AF090116  | 1994.563  | 1779.655  | AA292226  | 26887.842 | 18800.906 | NM_01433E | 4419.465  | 3374.572  |
| NM_01403C | 29993.104 | 24336.041 | NM_00050C | 3333.375  | 2525.926  | NM_01245E | 49405.75  | 46809.18  |
| NM_004224 | 1691.348  | 1559.721  | M29873    | 742.172   | 538.014   | AB002308  | 1749.844  | 1849.052  |
| Z21967    | 10269.12  | 7011.049  | J04449    | 848.018   | 403.567   | NM_003324 | 44369.582 | 28699.074 |
| NM_00373E | 1582.218  | 1210.393  | BC007031  | 27784.822 | 23806.166 | NM_012143 | 8848.041  | 8820.693  |
| L09100    | 1573.331  | 1054.824  | NM_002957 | 55899.441 | 44522.238 | NM_00665E | 1459.676  | 2324.767  |
| NM_005472 | 3496.58   | 3219.009  | BC036369  | 9593.206  | 9417.488  | AF085892  | 1200.859  | 1102.064  |
| NM_00364E | 11834.172 | 13329.388 | X12492    | 48115.203 | 42862.238 | AF075114  | 6828.096  | 5415.694  |
| AF263613  | 8796.124  | 9535.976  | NM_01754C | 4378.48   | 4735.896  | AK022218  | 63990.965 | 48857.098 |
| NM_000097 | 4817.555  | 5643.652  | NM_00675E | 22613.432 | 28690.184 | NM_007112 | 1422.872  | 933.623   |
| NM_00150E | 1851.607  | 2372.991  | NM_005881 | 4898.355  | 6161.071  | M34571    | 2007.755  | 1992.535  |
| AK022878  | 9716.396  | 8196.524  | NM_005794 | 618.391   | 620.691   | AB037745  | 9495.954  | 9444.815  |
| NM_01809E | 679.096   | 761.098   | NM_00026C | 57870.77  | 61640.656 | NM_017717 | 1188.014  | 960.436   |
| AF217187  | 9450.238  | 10424.188 | NM_01416C | 7472.686  | 7332.601  | AK026201  | 7303.348  | 7719.864  |
| NM_01775C | 4958.388  | 4928.043  | AF230877  | 41742.973 | 46245.727 | AB028962  | 2070.095  | 2257.187  |
| AK027122  | 34339.359 | 47050.648 | NM_01766E | 10580.298 | 11860.212 | U63041    | 6494.078  | 5536.449  |
| AK026196  | 9342.033  | 9518.909  | AB033049  | 60069.059 | 55797.422 | NM_000297 | 25220.207 | 19798.75  |
| NM_004977 | 8960.305  | 9056.906  | NM_00040E | 1313.836  | 1223.599  | AF149019  | 46627.203 | 43354.652 |
| NM_00470C | 3896.175  | 4086.61   | NM_005682 | 2484.888  | 2267.544  | NM_013354 | 1783.19   | 1426.214  |
| NM_00686E | 22094.938 | 24810.947 | NM_00292E | 3577.645  | 2662.112  | AK023954  | 9882.334  | 8527.688  |
| NM_004161 | 23607.717 | 29370.049 | NM_000233 | 1227.023  | 895.183   | NM_00393C | 4491.572  | 3431.766  |
| NM_00129E | 1736.513  | 2141.861  | NM_018697 | 3189.482  | 3469.522  | NM_01341E | 9705.516  | 8575.938  |
| NM_005161 | 1602.734  | 2142.716  | AF090116  | 1234.43   | 779.934   | AB040934  | 1244.54   | 1208.73   |
| AB037749  | 2538.716  | 2466.995  | NM_01403C | 62434.641 | 52490.258 | NM_001883 | 2551.439  | 1813.488  |
| NM_020347 | 1413.989  | 1266.703  | NM_004224 | 27375.711 | 23740.438 | NM_015722 | 3775.307  | 3550.099  |
| NM_001462 | 5127.342  | 3987.325  | NM_000254 | 11942.84  | 7691.88   | NM_01461E | 8494.219  | 7588.187  |
| NM_004072 | 2538.985  | 1990.62   | Z21967    | 16672.902 | 13812.998 | AA902333  | 16217.169 | 15335.876 |
| AF068286  | 2369.562  | 1698.425  | NM_00373E | 2752.166  | 2293.747  | NM_015641 | 11402.507 | 10854.613 |
| AB040957  | 7542.93   | 5977.095  | NM_012110 | 42327.953 | 45141.418 | AF272377  | 8457.569  | 7596.468  |
| NM_00689C | 1359.746  | 919.806   | NM_005461 | 1713.288  | 1880.574  | NM_00656E | 2520.977  | 2252.054  |
| NM_003110 | 8247.947  | 5816.631  | AF052693  | 24383.391 | 25252.717 | NM_01779E | 17026.844 | 13691.98  |
| NM_003612 | 1814.893  | 1358.072  | NM_001129 | 54640.398 | 51908.219 | NM_01521E | 6789.575  | 7248.592  |
| L40519    | 3653.453  | 4192.526  | L09100    | 7404.849  | 8898.928  | NM_01834E | 3991.452  | 3377.449  |
| NM_004204 | 2678.553  | 3254.657  | NM_005472 | 11615.875 | 12558.497 | AF119900  | 22912.93  | 19512.398 |
| AK002181  | 1776.882  | 2030.081  | NM_004313 | 1017.929  | 860.614   | AF130087  | 7610.885  | 6670.853  |
| AF118064  | 686.993   | 527.796   | NM_01343E | 1578.34   | 1789.726  | AK027031  | 23438.775 | 17659.342 |
| NM_001641 | 48222.957 | 46353.957 | AB020706  | 6193.68   | 6998.838  | NM_018383 | 16948.699 | 15685.173 |

|           |           |           |           |           |           |           |           |           |
|-----------|-----------|-----------|-----------|-----------|-----------|-----------|-----------|-----------|
| BC015750  | 61497.273 | 54947.367 | NM_007166 | 14979.406 | 16192.564 | NM_00359C | 22744.914 | 18321.473 |
| AK025769  | 17346.791 | 18716.875 | NM_016223 | 59650.941 | 54462.566 | AJ278476  | 20290.893 | 20519.701 |
| AW945166  | 6429.139  | 7060.537  | NM_002869 | 9787.959  | 10452.148 | NM_00235E | 2777.525  | 2852.204  |
| NM_00523E | 15955.351 | 13585.272 | NM_01808E | 28120.658 | 33567.156 | NM_01222E | 4341.854  | 4551.543  |
| NM_006384 | 25172.746 | 23162.885 | NM_004161 | 22505.625 | 29150.125 | AB014595  | 3429.624  | 2748.255  |
| NM_013257 | 8375.733  | 6747.211  | NM_00129E | 3175.253  | 2700.689  | AB024704  | 53220.074 | 48396.086 |
| AB044546  | 3217.476  | 2850.956  | NM_005161 | 3055.636  | 2823.817  | NM_00632Z | 779.359   | 787.726   |
| NM_01422E | 59907.215 | 55295.242 | AB037749  | 2159.651  | 2233.889  | AK002081  | 754.83    | 693.834   |
| AF163473  | 4509.223  | 5563.861  | NM_020347 | 633.785   | 544.986   | NM_00550C | 9418.232  | 8982.514  |
| NM_00625E | 14651.193 | 15445.287 | NM_00146Z | 7177.671  | 5214.918  | U66702    | 68599.648 | 71040.836 |
| NM_00284E | 3529.929  | 9885.767  | NM_00407Z | 3921.112  | 3060.573  | AK025582  | 6532.694  | 6670.724  |
| NM_002837 | 15163.879 | 14681.65  | AF068286  | 1546.531  | 912.653   | NM_003884 | 3923.13   | 3324.401  |
| AL133077  | 47740.891 | 47633.953 | AB040957  | 12981.527 | 9694.978  | NM_01488E | 21287.029 | 18084.494 |
| AK025211  | 11526.331 | 11883.861 | NM_00689C | 1058.578  | 834.058   | NM_003344 | 11789.032 | 11295.104 |
| U06715    | 1221.441  | 943.817   | NM_003110 | 10517.802 | 8690.3    | NM_00277Z | 3015.153  | 2996.164  |
| NM_01340Z | 8213.988  | 8620.986  | NM_00361Z | 13451.817 | 12662.003 | U82970    | 2592.82   | 3068.323  |
| NM_00266Z | 1281.871  | 1450.269  | NM_01323C | 5909.809  | 5770.905  | NM_00592E | 2072.472  | 2139.092  |
| NM_004377 | 10385.592 | 10581.495 | X72308    | 28952.301 | 39284.391 | AJ278478  | 4039.097  | 3436.612  |
| AB037815  | 9635.37   | 6915.99   | NM_00540E | 2797.918  | 4052.317  | NM_01430C | 36285.023 | 31289.426 |
| NM_00013Z | 35474.809 | 43809.402 | BC008376  | 42366.379 | 46233.996 | NM_01460E | 2140.644  | 2457.272  |
| NM_001727 | 11395.17  | 11989.672 | X87895    | 931.62    | 872.219   | Y19188    | 4891.929  | 5939.233  |
| NM_00407E | 2251.646  | 3120.606  | AB041269  | 11277.949 | 12679.814 | NM_01446E | 1723.291  | 1800.112  |
| NM_00712Z | 52813.02  | 52241.945 | AK024908  | 11788.541 | 12550.538 | NM_00373Z | 9811.409  | 10144.937 |
| BG717460  | 7994.131  | 6910.49   | NM_01827C | 23555.223 | 24817.201 | AF216381  | 13457.698 | 9921.418  |
| AA778392  | 37748.035 | 43325.57  | U06715    | 1343.102  | 998.84    | AB023163  | 1140.833  | 965.444   |
| AI478178  | 10328.82  | 10186.296 | NM_01340Z | 11479.602 | 13204.889 | NM_00661E | 1731.269  | 1834.333  |
| AA101279  | 3910.829  | 4322.226  | NM_00266Z | 1255.477  | 1156.359  | AF272373  | 1667.968  | 1655.085  |
| M19154    | 4193.495  | 3635.015  | NM_004377 | 16661.338 | 16553.631 | NM_016327 | 905.512   | 731.561   |
| AA399410  | 12055.63  | 10051.173 | AB037815  | 43050.754 | 45871.063 | NM_00498E | 2867.075  | 2064.078  |
| AA137031  | 3499.24   | 2745.19   | NM_00364E | 12789.307 | 14795.553 | AK074832  | 31434.23  | 27579.561 |
| AA292226  | 4136.506  | 4119.29   | AF263613  | 10209.822 | 10025.005 | NM_01626E | 1397.686  | 1453.039  |
| NM_00050C | 2984.087  | 2665.11   | NM_000097 | 3403.118  | 3021.651  | NM_00623E | 46640.465 | 48547.137 |
| M29873    | 1483.535  | 1754.536  | NM_00150E | 6176.403  | 6449.364  | AK026353  | 6472.968  | 7007.812  |
| J04449    | 1489.487  | 1686.672  | AK022878  | 16158.362 | 12115.551 | L24123    | 17741.225 | 19437.746 |
| BC007031  | 3159.758  | 3391.542  | NM_01809E | 605.816   | 321.392   | D80001    | 12007.542 | 13888.3   |
| AF129756  | 42662.23  | 42956.832 | AF217187  | 8436.826  | 7221.09   | AK024288  | 18702.199 | 19112.301 |
| NM_002957 | 14708.674 | 14123.55  | NM_01775C | 3353.431  | 2083.009  | NM_006521 | 32542.09  | 35090.832 |
| BC036369  | 5582.622  | 5047.585  | AK027122  | 24202.797 | 18056.355 | NM_00289Z | 4811.595  | 4064.129  |
| X12492    | 55607.988 | 49589.969 | AK026196  | 5638.387  | 5818.936  | NM_00344Z | 807.606   | 619.635   |
| NM_01754C | 3623.639  | 2646.25   | AL137668  | 2390.119  | 2193.475  | M62324    | 6360.528  | 6246.706  |
| NM_00239E | 963.246   | 577.812   | AV704019  | 578.836   | 413.124   | NM_01620C | 35737.727 | 34488.121 |
| NM_00675E | 39488.887 | 30301.207 | NM_01334E | 10122.646 | 10998.538 | BE082230  | 4931.928  | 4923.92   |
| NM_005881 | 9010.43   | 8006.196  | NM_004977 | 26191.148 | 28468.396 | AK025929  | 22285.6   | 17281.863 |
| NM_005794 | 900.609   | 694.059   | NM_00488E | 38844.398 | 46303.754 | NM_001384 | 453.092   | 1223.538  |
| NM_00026C | 11756.069 | 15035.594 | NM_002251 | 923.503   | 738.506   | NM_01824E | 1002.018  | 951.687   |
| NM_01416C | 5995.014  | 7221.824  | NM_01228Z | 61466.469 | 64836.625 | NM_017857 | 2620.104  | 1955.493  |
| AF230877  | 9126.646  | 10010.531 | NM_00470C | 2111.798  | 2486.773  | NM_00684E | 5855.683  | 3904.096  |
| NM_01766E | 11629.778 | 10951.006 | NM_00416Z | 32589.93  | 40102.43  | AJ272267  | 4378.38   | 4108.243  |
| AB033049  | 28249.793 | 33859.949 | NM_00686E | 24573.742 | 23285.35  | NM_00466E | 381.291   | 392.397   |
| NM_00040E | 2182.918  | 1584.416  | NM_01754C | 3943.27   | 3258.923  | NM_00067Z | 1051.795  | 1264.6    |
| NM_00568Z | 2364.122  | 2013.721  | NM_00675E | 20232.176 | 20383.896 | NM_00267E | 20989.498 | 21442.982 |
| NM_00292E | 5795.802  | 6652.867  | NM_005881 | 6085.452  | 5816.626  | NM_00210Z | 4737.157  | 7964.767  |
| NM_00023Z | 1813.647  | 1689.312  | NM_005794 | 577.614   | 606.134   | NM_00666E | 8958.922  | 15881.457 |

|           |           |           |           |           |           |           |           |           |
|-----------|-----------|-----------|-----------|-----------|-----------|-----------|-----------|-----------|
| NM_018697 | 3933.383  | 3897.684  | L40519    | 1948.539  | 1905.841  | AK026256  | 5656.13   | 6833.845  |
| AF090116  | 2110.021  | 2109.186  | NM_004204 | 6025.188  | 5467.108  | NM_00027C | 39027.801 | 44158.766 |
| NM_01403C | 27643.125 | 32434.246 | AK002181  | 2307.195  | 1954.291  | U83111    | 1914.452  | 1777.511  |
| NM_004224 | 5019.218  | 6850.563  | NM_001641 | 34605.922 | 30501.691 | U89277    | 11367.043 | 11462.01  |
| NM_000254 | 18521.287 | 19995.031 | BC015750  | 60853.871 | 51657.047 | AB046837  | 4216.981  | 3591.018  |
| Z21967    | 10119.222 | 11608.084 | AK025769  | 13091.624 | 8589.817  | AK026670  | 1466.908  | 1132.614  |
| NM_00373E | 2059.29   | 2284.479  | AW945166  | 3201.231  | 2159.134  | NM_00287E | 3157.791  | 3491.666  |
| NM_01618E | 58315.711 | 58128.586 | NM_00523E | 10829.723 | 8369.009  | AK022332  | 5579.793  | 5991.591  |
| NM_012110 | 9095.127  | 9900.554  | NM_006384 | 27223.541 | 24696.818 | NM_00646E | 882.211   | 809.575   |
| NM_005461 | 1585.54   | 1212.267  | NM_013257 | 4660.408  | 4129.497  | NM_00676E | 6461.901  | 5122.092  |
| AF052693  | 4163.205  | 4730.04   | AB044546  | 3646.504  | 3399.787  | AF055009  | 64044.504 | 56540.207 |
| NM_001129 | 32535.127 | 41587.867 | NM_01422E | 42194.508 | 45902.074 | AL365370  | 937.075   | 542.178   |
| L09100    | 1765.79   | 1704.591  | AF163473  | 3886.317  | 4636.376  | NM_01630E | 1515.954  | 1026.744  |
| NM_00547Z | 3662.929  | 3870.024  | NM_00625E | 14636.134 | 16818.076 | D12485    | 5128.962  | 4487.352  |
| NM_00431Z | 1485.939  | 976.669   | NM_00284E | 11812.69  | 31160.342 | AK023204  | 2864.798  | 2783.151  |
| NM_01343E | 1119.181  | 1007.175  | NM_002837 | 8545.598  | 9559.091  | NM_00344E | 4386.476  | 4465.955  |
| AB020706  | 9477.431  | 11202.261 | AL133077  | 34954.059 | 42524.543 | NM_00247E | 7786.134  | 7898.458  |
| NM_00716E | 11967.448 | 13646.668 | AK025211  | 6674.929  | 7311.842  | D38163    | 2242.663  | 2609.742  |
| NM_01622Z | 38392.637 | 44563.543 | CY3Cy5    | 3526.11   | 587.156   | NM_004967 | 1035.156  | 1414.117  |
| NM_00286E | 13342.938 | 14504.9   | NM_00545E | 2577.856  | 2491.023  | D28449    | 21651.938 | 31562.012 |
| NM_01808E | 18075.07  | 16470.453 | NM_006534 | 16735.949 | 16401.219 | NM_003281 | 2531.723  | 3633.268  |
| NM_004161 | 22766.449 | 22334.623 | AL832550  | 1365.998  | 1265.257  | AA460480  | 3462.344  | 3616.092  |
| NM_00129E | 1617.537  | 1130.524  | AF131798  | 1014.466  | 716.038   | AI298884  | 33340.137 | 39010.355 |
| NM_005161 | 1681.285  | 2362.026  | AK001731  | 3036.726  | 3035.609  | D87845    | 4227.182  | 4488.51   |
| AB037749  | 1151.764  | 902.563   | AF052108  | 1466.261  | 1706.604  | X53279    | 2831.007  | 2905.953  |
| NM_020347 | 1062.795  | 940.42    | AF052176  | 981.844   | 1412.953  | M83254    | 14569.519 | 15995.289 |
| NM_00146Z | 5819.238  | 5302.415  | AF086477  | 1785.758  | 1764.916  | S56770    | 5138.685  | 5548.596  |
| NM_00407Z | 2860.053  | 2710.625  | NM_00141Z | 7285.986  | 6484.328  | AI193606  | 1285.468  | 1158.659  |
| AF068286  | 2825.867  | 3827.835  | AF095771  | 1020.484  | 1058.036  | H58872    | 6477.078  | 5628.102  |
| AB040957  | 10300.699 | 9024.037  | AF071111  | 1575.425  | 1445.126  | J04543    | 1588.32   | 1930.295  |
| NM_00689C | 1959.969  | 2528.093  | U00954    | 386.47    | 845.859   | AA456295  | 3299.373  | 2651.319  |
| NM_003110 | 9436.334  | 9223.443  | NM_01594Z | 13717.789 | 14247.343 | BE733577  | 4631.984  | 3813.912  |
| NM_00361Z | 1681.271  | 1465.337  | NM_017907 | 15758.857 | 17638.988 | AI817942  | 1827.064  | 1431.537  |
| NM_01323C | 5241.56   | 6623.332  | NM_00545E | 3065.234  | 3149.433  | NM_002044 | 16289.318 | 13784.556 |
| X72308    | 2950.203  | 2962.072  | NM_006534 | 17809.059 | 17390.496 | AL137262  | 3553.586  | 3157.042  |
| NM_00540E | 3460.381  | 3576.475  | SR1       | 74006.914 | 61577.289 | NM_020437 | 8440.582  | 6848.742  |
| BC008376  | 6141.249  | 6540.52   | SR3       | 38614.082 | 46354.48  | NM_00401C | 519.783   | 636.788   |
| X87895    | 1157.696  | 1437.226  | SR9       | 20025.365 | 5045.628  | NM_002077 | 324.879   | 363.429   |
| AB041269  | 1571.034  | 1496.487  | CY3Cy5    | 6037.598  | 1468.392  | NM_01864Z | 3907.902  | 4361.828  |
| AK024908  | 8143.844  | 6119.102  | U84521    | 21673.707 | 22855.791 | NM_01618E | 1467.307  | 1260.025  |
| NM_01827C | 12792.095 | 10734.073 | U03241    | 1800.971  | 1995.729  | M30142    | 13014.032 | 9482.059  |
| U06715    | 1682.95   | 1929.077  | U62539    | 1053.699  | 1198.323  | NM_00501E | 1918.852  | 2431.011  |
| NM_01340Z | 15370.208 | 16736.939 | AF086110  | 1319.462  | 1109.066  | NM_01337E | 44730.363 | 48014.969 |
| NM_00266Z | 2004.007  | 1676.894  | NM_01641E | 7953.939  | 7591.133  | NM_00108E | 1762.026  | 2052.728  |
| NM_004377 | 12135.841 | 10576.317 | AK025908  | 9601.557  | 8445.347  | NM_006110 | 4490.021  | 4625.292  |
| AB037815  | 8592.241  | 8059.266  | AK022204  | 2000.827  | 1880.008  | NM_01645Z | 1217.855  | 1214.017  |
| NM_00364E | 12123.44  | 11604.849 | AF086147  | 854.069   | 623.902   | NM_017701 | 973.256   | 903.517   |
| AF263613  | 12184.931 | 11575.581 | AL109726  | 1047.822  | 1018.857  | NM_01422E | 6078.833  | 5922.694  |
| NM_000097 | 5288.257  | 5732.815  | AL109716  | 684.716   | 783.966   | AF142567  | 3423.668  | 3456.617  |
| NM_00150E | 2086.167  | 1488.053  | AK027065  | 6645.403  | 7015.27   | NM_00620Z | 65521.156 | 60322.645 |
| AK022878  | 11086.268 | 7693.787  | AL353944  | 1492.314  | 1644.836  | NM_01741C | 3595.029  | 2639.044  |
| NM_01809E | 590.324   | 559.912   | S83249    | 881.031   | 797.934   | AY009398  | 597.545   | 705.337   |
| AF217187  | 9498.672  | 10303.565 | AF085912  | 201.019   | 2603.899  | NM_00286C | 9589.396  | 9785.156  |

|           |           |           |           |           |           |           |           |           |
|-----------|-----------|-----------|-----------|-----------|-----------|-----------|-----------|-----------|
| NM_01775C | 4766.578  | 4429.504  | AK001127  | 3569.394  | 2814.981  | NM_00616E | 14902.853 | 14153.039 |
| AK027122  | 34706.492 | 38465.277 | U79256    | 35896.434 | 40566.629 | NM_00121E | 1954.747  | 2448.398  |
| AK026196  | 10461.442 | 11679.815 | AK023761  | 1010.716  | 1182.877  | NM_01418E | 3475.028  | 3590.28   |
| AL137668  | 2331.039  | 2492.074  | AK023963  | 28002.559 | 28802.018 | AB046780  | 43607.082 | 47770.18  |
| AV704019  | 624.341   | 712.398   | AK022473  | 22263.836 | 25757.355 | NM_01835E | 7947.177  | 7245.615  |
| NM_01334E | 1161.724  | 912.641   | AK023380  | 1146.368  | 1038.067  | NM_01637E | 486.464   | 731.607   |
| NM_004977 | 7095.703  | 6024.373  | AK023810  | 3611.453  | 3840.695  | NM_00356C | 29405.91  | 33703.863 |
| NM_00488E | 40436.895 | 49402.379 | AK024860  | 1137.138  | 1299.765  | NM_01440E | 11949.461 | 13179.148 |
| NM_002251 | 2218.937  | 1982.743  | AF086154  | 842.44    | 1560.407  | AL050100  | 2892.052  | 3286.377  |
| NM_01228E | 48170.074 | 45459.004 | AF086205  | 1891.083  | 1774.798  | NM_00074E | 38760.617 | 42192.004 |
| NM_00470C | 2648.336  | 2720.446  | AK026723  | 1141.816  | 1047.22   | NM_00492E | 4416.016  | 4309.089  |
| NM_00416E | 17402.256 | 17584.313 | AK024169  | 1632.142  | 1300.123  | NM_00492E | 2495.943  | 2630.682  |
| NM_00686E | 21195.941 | 18480.885 | AF147395  | 5360.625  | 6996.626  | BE873653  | 62970.449 | 62337.441 |
| NM_01754C | 3295.93   | 3655.161  | AK026447  | 2797.279  | 2880.538  | NM_006987 | 1045.818  | 938.386   |
| NM_00239E | 839.659   | 842.317   | AF085985  | 1269.566  | 1132.888  | NM_00128E | 3816.156  | 3510.806  |
| NM_00675E | 36314.375 | 31051.945 | AF086011  | 1330.225  | 1194.518  | NM_01683C | 18955.363 | 17685.947 |
| NM_005881 | 8425.829  | 7322.401  | AK025217  | 1207.694  | 1345.846  | NM_01610E | 1147.985  | 1093.633  |
| NM_005794 | 999.471   | 656.336   | AF087972  | 5758.332  | 6687.522  | AL133654  | 3320.503  | 2483.362  |
| L40519    | 3337.536  | 2327.301  | AL137342  | 20735.602 | 21690.141 | AB051826  | 695.664   | 749.547   |
| NM_004204 | 3295.573  | 3544.344  | AF075105  | 3901.776  | 4258.009  | L25080    | 37897.586 | 42254.098 |
| NM_00040E | 1069.044  | 1205.449  | AK025102  | 3287.147  | 2591.607  | NM_00325E | 7083.981  | 9805.048  |
| AK002181  | 1540.661  | 1525.698  | AF086562  | 2781.925  | 2545.496  | AL133068  | 40032.285 | 45031.98  |
| NM_001641 | 52080.801 | 43201.594 | AK021749  | 1847.05   | 1688.248  | NM_00346E | 11114.885 | 12705.647 |
| BC015750  | 62073.32  | 59677.824 | AJ011980  | 1395.868  | 1175.64   | NM_004944 | 2437.595  | 3009.906  |
| AK025769  | 14757.391 | 15007.745 | AK022741  | 339.746   | 716.966   | AK024964  | 2844.706  | 3303.152  |
| AW945166  | 5104.114  | 5116.955  | NM_002237 | 3734.35   | 4743.278  | M20697    | 2192.237  | 2392.747  |
| NM_00523E | 15843.781 | 15227.631 | NM_005117 | 7571.885  | 8752.561  | NM_01504E | 7374.068  | 8945.927  |
| NM_006384 | 24087.279 | 24855.75  | AJ007733  | 2488.552  | 2580.136  | NM_002014 | 39720.004 | 42249.836 |
| NM_013257 | 5846.845  | 5866.027  | AK021625  | 4158.13   | 4341.475  | NM_00253E | 13258.934 | 14966.932 |
| AB044546  | 2364.631  | 1537.649  | AK021679  | 1351.695  | 1396.107  | NM_01658E | 22276.422 | 24491.207 |
| NM_01422E | 60953.66  | 51319.781 | AK001380  | 6423.876  | 4483.866  | NM_00333E | 62288.922 | 56717.227 |
| AF163473  | 5554.671  | 6121.563  | AK026753  | 779.86    | 768.752   | NM_00201E | 5020.943  | 6284.13   |
| NM_00625E | 15864.374 | 15561.409 | AL117553  | 3959.78   | 5301.749  | NM_006927 | 16241.789 | 14655.689 |
| NM_00284E | 4041.125  | 12072.665 | AK024938  | 920.254   | 766.862   | NM_017761 | 17058.963 | 15887.815 |
| NM_002837 | 11904.604 | 11561.95  | AK025312  | 4157.188  | 4119.126  | NM_00692E | 876.448   | 919.045   |
| AL133077  | 47490.172 | 46648.914 | AK027205  | 1024.842  | 1127.114  | AF237700  | 932.465   | 650.828   |
| AK025211  | 10457.763 | 9947.578  | NM_01860E | 822.307   | 930.055   | NM_00344E | 2299.322  | 2184.573  |
| CY3Cy5    | 3470.393  | 346.528   | AK022062  | 946.876   | 1146.954  | NM_00247E | 8491.728  | 8796.979  |
| NM_00545E | 1427.026  | 393.254   | AK026493  | 763.985   | 483.579   | D38163    | 1918.617  | 1864.503  |
| NM_006534 | 8020.966  | 4309.871  | AK002042  | 1115.862  | 1543.533  | D28449    | 22746.434 | 24262.17  |
| AL832550  | 777.668   | 471.994   | AL049268  | 1526.244  | 1872.633  | NM_003281 | 2507.526  | 3353.471  |
| AK001731  | 1676.843  | 1072.763  | AK025092  | 3009.756  | 2629.168  | AA460480  | 3625.054  | 4469.762  |
| AF052176  | 265.47    | 226.577   | AF130047  | 988.616   | 951.341   | AI298884  | 30959.455 | 33272.121 |
| AF086477  | 413.68    | 718.249   | AF085904  | 1102.156  | 1041.209  | D87845    | 4176.243  | 6025.956  |
| NM_00141E | 3589.017  | 3229.847  | Z83944    | 1877.245  | 2285.065  | X53279    | 2187.342  | 2494.829  |
| AF095771  | 627.714   | 837.178   | AF085871  | 3586.33   | 3453.58   | M83254    | 12060.422 | 12908.117 |
| AF071111  | 1438.578  | 1789.893  | AL137284  | 3195.91   | 2885.292  | S56770    | 4794.077  | 6170.182  |
| U00954    | 678.206   | 1076.14   | AK001013  | 2732.613  | 3325.58   | AI193606  | 1527.569  | 1866.818  |
| NM_01594E | 7407.319  | 4827.027  | NM_00529E | 7987.835  | 4987.634  | H58872    | 20990.896 | 23280.895 |
| NM_017907 | 9453.966  | 6810.078  | AK001394  | 914.492   | 1281.255  | J02938    | 750.967   | 1173.768  |
| NM_00545E | 1174.354  | 569.922   | AF026564  | 2239.875  | 2582.366  | J04543    | 10384.288 | 10344.69  |
| NM_006534 | 5226.409  | 2576.256  | X97301    | 4924.751  | 5827.3    | AA456295  | 1984.157  | 1643.112  |
| SR1       | 69356.133 | 61284.855 | AL110141  | 65623.969 | 58207.789 | BE733577  | 8550.051  | 7352.536  |

|           |           |           |           |           |           |           |           |           |
|-----------|-----------|-----------|-----------|-----------|-----------|-----------|-----------|-----------|
| SR3       | 23512.844 | 11902.359 | AF116636  | 2045.425  | 2273.347  | AA009484  | 2651.385  | 4594.828  |
| SR5       | 2806.113  | 2187.054  | U80761    | 21398.035 | 23944.035 | AF209930  | 1168.829  | 1383.14   |
| SR7       | 3773.618  | 22230.547 | Y16701    | 7933.168  | 8113.695  | AL133109  | 389.399   | 225.776   |
| SR9       | 11445.384 | 2115.34   | U61100    | 1300.573  | 1520.201  | NM_00401C | 510.455   | 1087.771  |
| CY3Cy5    | 9657.213  | 2821.763  | NM_018582 | 754.523   | 965.823   | NM_018643 | 4379.049  | 3977.403  |
| U84521    | 2951.861  | 1978.353  | M21539    | 1114.929  | 1368.944  | NM_016186 | 848.758   | 964.421   |
| U03241    | 780.958   | 508.855   | Y11161    | 6400.01   | 6814.669  | M30142    | 13240.075 | 11109.804 |
| U62539    | 761.299   | 641.236   | AF130117  | 1036.877  | 920.354   | NM_005018 | 2083.546  | 3411.777  |
| AF086110  | 641.043   | 581.93    | AB007861  | 2109.535  | 2840.598  | NM_013378 | 39750.301 | 49632.371 |
| NM_016418 | 3369.574  | 3382.457  | AK024125  | 1535.993  | 1790.703  | NM_001085 | 2041.059  | 3846.226  |
| AK025908  | 6420.129  | 7824.551  | AK024761  | 8097.795  | 8808.037  | NM_006110 | 7270.448  | 9399.972  |
| AK022204  | 832.715   | 1212.884  | M55536    | 13521.141 | 14531.883 | NM_016453 | 3296.666  | 4741.163  |
| AF086147  | 697.113   | 742.401   | AF086067  | 5347.287  | 7018.894  | NM_017701 | 1741.343  | 1729.762  |
| AL109726  | 503.017   | 669.274   | Z70766    | 828.331   | 678.897   | NM_014226 | 5877.485  | 5943.996  |
| AL109716  | 897.902   | 1079.935  | AK000660  | 6854.877  | 6078.002  | AF142567  | 2377.815  | 2140.155  |
| AK027065  | 2750.766  | 3447.594  | AL049289  | 1017.031  | 964.857   | NM_006202 | 63476.848 | 59310.27  |
| AL353944  | 1107.262  | 873.527   | NM_014711 | 3052.971  | 3500.463  | NM_01741C | 4169.3    | 3699.333  |
| AK001127  | 1143.513  | 896.68    | AK022015  | 3874.277  | 4149.325  | D12485    | 1519.053  | 1121.089  |
| U79256    | 3364.48   | 3591.658  | D17234    | 1084.797  | 808.534   | AK023204  | 929.392   | 614.421   |
| AK022427  | 329.636   | 366.995   | AK002208  | 21527.303 | 24916.658 | NM_001218 | 687.066   | 680.574   |
| AK023304  | 451.185   | 326.845   | D63135    | 2462.781  | 2816.16   | NM_014183 | 3161.426  | 3355.566  |
| AK023761  | 777.274   | 590.072   | AB033083  | 10227.471 | 10910.205 | AB046780  | 42164.902 | 51015.652 |
| AK023963  | 23386.146 | 17994.107 | NM_017828 | 14805.978 | 16111.798 | NM_018353 | 8176.441  | 6874.3    |
| AK022473  | 11000.573 | 13151.457 | AY007113  | 1329.962  | 1686.114  | NM_016373 | 591.317   | 1118.541  |
| AK023380  | 927.767   | 894.082   | AF130083  | 23756.602 | 27999.68  | NM_00356C | 29069.494 | 35305.039 |
| AK023810  | 1134.968  | 1755.253  | AL110185  | 68588.945 | 52739.855 | NM_014403 | 11071.495 | 12008.752 |
| AK024133  | 377.91    | 658.649   | NM_00270C | 27586.971 | 34382.535 | AL050100  | 3500.269  | 4121.944  |
| AK024860  | 1166.796  | 1560.648  | AB002437  | 53031.984 | 48343.367 | NM_000748 | 30864.625 | 37702.68  |
| AF086154  | 710.277   | 1039.841  | AK024013  | 1744.2    | 1703.398  | NM_004925 | 4762.836  | 6269.715  |
| AF086205  | 1171.735  | 1761.236  | NM_006777 | 2744.117  | 3394.177  | NM_004922 | 9752.904  | 11593.123 |
| AK026723  | 706.61    | 1007.009  | AK024969  | 7267.68   | 8647.35   | BE873653  | 62469.883 | 59913.77  |
| AK024169  | 556.025   | 958.246   | AL049471  | 4885.919  | 4430.947  | NM_006987 | 710.094   | 895.919   |
| AF147395  | 3526.062  | 5006.672  | AK022250  | 1389.375  | 2091.992  | NM_001282 | 2008.357  | 1641.838  |
| AK026447  | 1359.391  | 1294.683  | NM_019598 | 28752.082 | 25802.766 | NM_01683C | 14407.117 | 12902.401 |
| AF086011  | 807.153   | 531.623   | J05063    | 977.161   | 1244.529  | NM_016103 | 1341.854  | 1943.376  |
| AK025217  | 1053.252  | 598.848   | NM_012369 | 507.363   | 851.774   | AL133654  | 1165.287  | 1439.114  |
| AF087972  | 531.807   | 484.84    | AF222904  | 1802.518  | 1240.185  | AL137262  | 750.236   | 870.69    |
| AL137342  | 14861.763 | 10877.118 | NM_006225 | 47433.688 | 50544.777 | NM_020437 | 1307.025  | 967.511   |
| AF075105  | 2735.899  | 2670.338  | NM_003254 | 35907.297 | 46652.813 | L25080    | 21515.836 | 18834.656 |
| AK025102  | 2050.653  | 2047.266  | NM_01773C | 7792.875  | 8167.594  | NM_003143 | 60101.871 | 57562.516 |
| AF086562  | 2210.963  | 2577.08   | NM_01463C | 10823.465 | 12398.104 | AK026289  | 9437.48   | 9247.311  |
| Y11897    | 690.871   | 745.864   | AF022728  | 1717.928  | 2007.674  | NM_003258 | 7261.394  | 10165.243 |
| AK021749  | 1416.776  | 2193.382  | AK025813  | 1287.56   | 1334.798  | AL133068  | 37515.672 | 40982.387 |
| AJ011980  | 1667.575  | 2199.832  | AK021829  | 1157.265  | 1563.451  | NM_003463 | 10505.517 | 10498.094 |
| AK022741  | 558.874   | 752.921   | NM_014681 | 2567.282  | 2306.301  | NM_004944 | 2075.654  | 2762.15   |
| NM_002237 | 1147.583  | 1693.163  | NM_007182 | 6979.939  | 7062.553  | AK024964  | 3019.339  | 2920.515  |
| NM_005117 | 968.02    | 1361.145  | NM_019063 | 58815.863 | 48639.023 | M20697    | 2064.714  | 2134.831  |
| AJ007733  | 1846.726  | 3229.149  | NM_014336 | 3889.171  | 4500.977  | NM_015046 | 6690.5    | 7132.023  |
| AK021625  | 2260.866  | 2926.061  | NM_012456 | 39503.105 | 46531.27  | NM_002014 | 41937.449 | 51996.145 |
| AK021679  | 1432.142  | 1753.136  | AB002308  | 2068.036  | 3825.323  | NM_002538 | 18420.588 | 21954.967 |
| AK001380  | 2696.232  | 2779.554  | NM_003324 | 39900.16  | 43853     | NM_016585 | 31733.061 | 37819.383 |
| AK026753  | 760.547   | 1282.461  | NM_012143 | 11515.044 | 12199.999 | NM_003333 | 58080.781 | 61962.723 |
| AL117553  | 807.66    | 1313.391  | NM_006658 | 3361.188  | 2880.561  | NM_002013 | 7862.222  | 7962.189  |



|           |           |           |           |           |           |           |           |           |
|-----------|-----------|-----------|-----------|-----------|-----------|-----------|-----------|-----------|
| AK024938  | 646.79    | 792.074   | AF085892  | 4453.06   | 5208.184  | NM_006927 | 12129.253 | 10006.438 |
| AK025312  | 3553.694  | 4813.062  | AF075114  | 12450.215 | 11818.381 | NM_014601 | 1536.222  | 1087.622  |
| AK022062  | 959.184   | 432.653   | AL359562  | 5641.246  | 5571.912  | NM_017761 | 4493.352  | 4535.931  |
| AK002042  | 409.606   | 482.064   | AK022218  | 66017.328 | 53344.117 | NM_000067 | 5648.518  | 12295.017 |
| AK025092  | 2861.299  | 3597.306  | NM_007112 | 6354.945  | 6918.958  | AF237700  | 887.87    | 560.538   |
| AF130047  | 790.668   | 1043.804  | AK026037  | 1320.27   | 1965.847  | NM_002860 | 4081.49   | 4273.002  |
| AF085904  | 969.226   | 1469.134  | S82075    | 2023.474  | 2569.183  | NM_006160 | 8748.062  | 9301.753  |
| Z83944    | 715.497   | 626.998   | M34571    | 1450.452  | 1342.537  | D38163    | 1324.858  | 1002.186  |
| AF085871  | 2671.776  | 2957.54   | AB037745  | 8709.335  | 9890.287  | NM_004967 | 1078.388  | 820.77    |
| AL137284  | 3126.37   | 3102.256  | NM_017717 | 1251.124  | 1241.434  | D28449    | 21780.482 | 24910.691 |
| AK001013  | 1693.799  | 2205.886  | AK026201  | 7968.923  | 7371.028  | NM_003281 | 2570.305  | 2996.955  |
| NM_005290 | 4363.958  | 4090.878  | AB028962  | 2741.122  | 2990.512  | AA460480  | 4026.677  | 3844.56   |
| AF026564  | 1548.789  | 2131.223  | U63041    | 7035.111  | 6625.042  | AI298884  | 30122.727 | 33467.879 |
| X97301    | 815.418   | 1356.366  | NM_000297 | 29786.668 | 37245.492 | D87845    | 4166.832  | 4251.945  |
| AL110141  | 61826.473 | 61885.336 | AF149019  | 43106.289 | 49566.516 | X53279    | 2355.521  | 2067.194  |
| AF116636  | 1685.762  | 2246.054  | NM_013354 | 1831.008  | 2397.686  | M83254    | 13538.036 | 15793.741 |
| U80761    | 4115.896  | 7101.41   | AK023954  | 9730.508  | 9885.633  | S56770    | 4937.369  | 6604.516  |
| Y16701    | 5992.342  | 6560.502  | NM_003930 | 4737.706  | 4214.616  | AI193606  | 1566.266  | 1432.176  |
| U61100    | 1337.698  | 1781.759  | NM_013410 | 9840.662  | 9802.725  | H58872    | 25939.352 | 33585.113 |
| NM_018580 | 1030.805  | 1289.2    | AB040934  | 1819.539  | 1672.946  | J02938    | 1362.562  | 1865.701  |
| M21539    | 1055.433  | 670.461   | NM_005090 | 1385.984  | 1636.777  | J04543    | 17875.207 | 19359.859 |
| Y11161    | 2949.406  | 2112.61   | NM_001880 | 4459.894  | 4532      | S60415    | 1108.423  | 908.091   |
| AF130117  | 546.289   | 375.798   | NM_015720 | 12801.747 | 14581.129 | AA456295  | 2301.827  | 1798.187  |
| AB007861  | 1311.211  | 715.686   | NM_000900 | 465.841   | 701.012   | BE733577  | 2246.796  | 1710.16   |
| AK024125  | 379.611   | 332.385   | NM_016080 | 2865.851  | 3824.892  | AI817942  | 1309.763  | 1170.737  |
| AK024761  | 6460.822  | 4663.71   | NM_004380 | 2344.591  | 2389.753  | BG762340  | 463.875   | 204.429   |
| M55536    | 7781.706  | 9171.245  | NM_000831 | 2249.795  | 3064.25   | M30142    | 8281.034  | 5181.66   |
| AF086067  | 1634.521  | 2257.604  | NM_014610 | 7960.263  | 8146.714  | NM_005010 | 2250.103  | 2557.961  |
| Z70766    | 875.004   | 1102.884  | AA902333  | 23183.615 | 25076.432 | NM_013370 | 40583.359 | 44384.313 |
| AK000660  | 4268.189  | 5624.996  | NM_015641 | 11095.759 | 11568.486 | NM_001080 | 1976.837  | 2083.569  |
| AK026298  | 511.316   | 738.505   | AF272377  | 6971.418  | 6316.657  | NM_006110 | 5535.645  | 5279.173  |
| AL049289  | 998.529   | 1443.046  | NM_006560 | 3273.393  | 3028.371  | NM_016450 | 3139.869  | 4157.681  |
| NM_014711 | 2979.019  | 4328.494  | NM_017790 | 15826.499 | 15896.568 | NM_017701 | 2910.974  | 2770.419  |
| AK022015  | 2045.628  | 2496.577  | NM_015210 | 8467.467  | 8866.692  | NM_014220 | 12508.989 | 14467.588 |
| D17234    | 769.04    | 625.227   | NM_018340 | 4668.956  | 4914.322  | AF142567  | 5793.161  | 6261.783  |
| AK002208  | 3372.196  | 4544.683  | AF119900  | 26856.018 | 33480.105 | NM_006200 | 58474.547 | 54675.98  |
| D63135    | 1406.943  | 1694.278  | AF130087  | 7152.084  | 8311.625  | NM_003391 | 689.292   | 828.987   |
| AB033083  | 3223.166  | 3822.276  | AK027031  | 19105.697 | 19270.275 | NM_017410 | 10872.381 | 11817.027 |
| NM_017820 | 9862.218  | 12885.014 | NM_018380 | 17655.422 | 18938.859 | X99680    | 9876.185  | 9369.289  |
| AY007113  | 1234.641  | 1466.892  | NM_003590 | 23370.736 | 19791.689 | NM_016070 | 1679.126  | 1759.979  |
| AF130083  | 18221.318 | 21057.324 | AJ278476  | 19401.738 | 19794.074 | D12485    | 1235.673  | 1205.535  |
| AL110185  | 56167.324 | 54477.656 | NM_002350 | 3057.907  | 3346.489  | NM_003234 | 7099.52   | 5799.665  |
| NM_002700 | 1834.991  | 3225.721  | NM_012220 | 6015.319  | 7146.625  | NM_004850 | 7550.931  | 6979.581  |
| AB002437  | 36026.152 | 39397.977 | AB014595  | 14134.553 | 14573.939 | S78774    | 11465.324 | 11033.147 |
| AK024013  | 845.598   | 753.982   | AB024704  | 64681.785 | 48819.121 | NM_004920 | 9791.542  | 11331.692 |
| AK023496  | 542.51    | 594.314   | NM_006320 | 4814.669  | 5769.345  | NM_002871 | 1408.397  | 1446.699  |
| NM_006777 | 1724.578  | 1393.821  | AK002081  | 4386.113  | 3908.796  | BE873653  | 55681.227 | 54867.891 |
| AK024969  | 3132.183  | 1833.659  | NM_002210 | 7878.915  | 7904.632  | NM_006987 | 2208.526  | 2443.924  |
| AL049471  | 2358.991  | 1131.785  | NM_016360 | 729.659   | 987.714   | NM_001280 | 9326.161  | 8786.725  |
| AK022250  | 607.192   | 363.088   | AF231022  | 59811.16  | 50639.711 | NM_016830 | 26850.592 | 29568.828 |
| NM_019590 | 11584.501 | 8044.342  | NM_005500 | 8837.979  | 8884.88   | U44105    | 997.317   | 1038.336  |
| J05063    | 684.877   | 850.832   | U66702    | 67467.672 | 74453.328 | NM_016100 | 3556.203  | 4491.579  |
| NM_012360 | 441.804   | 862.135   | AK025582  | 6910.742  | 8192.979  | AL133654  | 10570.114 | 12273.295 |

|           |           |           |           |           |           |           |           |           |
|-----------|-----------|-----------|-----------|-----------|-----------|-----------|-----------|-----------|
| AF222904  | 1224.311  | 1912.951  | NM_003884 | 3883.035  | 3195.244  | AL137262  | 2857.846  | 2596.422  |
| NM_006225 | 19693.467 | 24897.891 | NM_014888 | 21325.951 | 19541.387 | NM_020437 | 4283.489  | 3060.764  |
| NM_003254 | 14834.115 | 17099.352 | NM_003344 | 13303.95  | 11550.719 | NM_006928 | 1255.822  | 1356.632  |
| NM_017730 | 4918.25   | 6223.896  | NM_002772 | 3046.152  | 3424.021  | AF237700  | 4008.485  | 4031.5    |
| NM_014630 | 8563.178  | 11841.146 | U82970    | 1936.024  | 1995.971  | NM_002860 | 17305.768 | 18577.475 |
| AF022728  | 1195.355  | 1886.744  | NM_005925 | 2209.851  | 2725.944  | NM_006165 | 12297.86  | 11825.126 |
| AK025813  | 785.242   | 1080.618  | NM_007173 | 953.19    | 827.621   | NM_001218 | 2286.865  | 2024.056  |
| AK021829  | 832.952   | 1358.627  | AJ278478  | 4079.474  | 4489.042  | NM_014183 | 3309.788  | 3279.855  |
| NM_014681 | 724.966   | 1000.979  | NM_014300 | 33776.531 | 37956.367 | AB046780  | 44500.957 | 49523.262 |
| NM_007182 | 3667.911  | 4346.304  | NM_014606 | 1945.052  | 1998.086  | NM_018353 | 9274.81   | 8437.331  |
| NM_019063 | 52816.457 | 55534.008 | Y19188    | 4097.397  | 4974.339  | NM_016373 | 733.984   | 589.309   |
| NM_014336 | 1268.485  | 1555.395  | NM_014466 | 2026.648  | 2146.346  | NM_003560 | 32536.08  | 40874.215 |
| NM_012456 | 17616.512 | 18793.219 | NM_003732 | 13348.218 | 14893.271 | NM_014403 | 10731.743 | 11259.813 |
| AB002308  | 1683.652  | 2025.899  | AF216381  | 35919.43  | 36950.348 | AL050100  | 3106.677  | 3706.59   |
| NM_003324 | 25780.229 | 40842.793 | AL137614  | 2699.449  | 2875.976  | NM_020135 | 5388.552  | 5674.802  |
| NM_012143 | 6192.619  | 8108.486  | AK023683  | 869.615   | 867.646   | AL080207  | 817.032   | 840.387   |
| NM_017506 | 662.343   | 949.632   | AK023093  | 1216.327  | 1190.778  | NM_000748 | 26486.352 | 24994.816 |
| NM_006658 | 2685.332  | 2465.702  | AB023163  | 5364.282  | 6146.909  | NM_004925 | 1314.436  | 1621.803  |
| AF085892  | 3687.481  | 2494.828  | NM_006618 | 5446.436  | 6317.497  | AF209930  | 1951.97   | 2036.201  |
| AF075114  | 4038.931  | 2466.159  | AF272373  | 7230.177  | 8296.744  | AL133109  | 2178.137  | 2175.703  |
| AL359562  | 2308.837  | 1262.953  | NM_016327 | 9878.119  | 11356.942 | AF203728  | 742.341   | 1290.865  |
| AK022218  | 44220.992 | 31733.955 | NM_004985 | 10558.429 | 14036.052 | AB051826  | 904.394   | 1068.641  |
| NM_007112 | 3544.071  | 2619.115  | AK074832  | 26090.117 | 30950.209 | L25080    | 35919.246 | 36627.383 |
| AK026037  | 1040.394  | 1162.533  | NM_016269 | 1466.656  | 1485.53   | NM_003143 | 59567.285 | 56118.43  |
| S82075    | 1746.374  | 2107.281  | NM_006235 | 39417.398 | 47725.047 | AK026289  | 8862.221  | 9808.911  |
| M34571    | 819.096   | 1286.96   | AK026353  | 5537.367  | 5207.504  | NM_003258 | 7102.588  | 10018.606 |
| M98457    | 677.346   | 877.78    | L24123    | 17338.814 | 15385.86  | AL133068  | 43621.52  | 43674.055 |
| NM_003246 | 823.534   | 1301.492  | D80001    | 12861.762 | 14528.532 | NM_003463 | 10971.804 | 11120.661 |
| AB037745  | 1659.502  | 1953.692  | AK024288  | 21143.508 | 22071.84  | NM_004944 | 2148.597  | 2057.109  |
| NM_017717 | 720.065   | 963.028   | NM_006521 | 31520.252 | 39411.23  | AK024964  | 2638.606  | 2566.779  |
| AK026201  | 4600.728  | 5623.052  | NM_002892 | 5025.546  | 4434.731  | M20697    | 1139.982  | 1452.398  |
| AB028962  | 1588.991  | 2006.136  | NM_003442 | 1098.436  | 948.037   | NM_015046 | 5170.492  | 4828.726  |
| U63041    | 3546.28   | 4944.374  | M62324    | 6750.828  | 6672.472  | NM_002014 | 33805.441 | 34435.977 |
| NM_000297 | 1947.829  | 2876.642  | NM_016200 | 34476.141 | 40923.156 | NM_002538 | 11366.216 | 11134.162 |
| AF149019  | 2587.259  | 3702.931  | BE082230  | 29999.559 | 36057.43  | NM_016585 | 20804.242 | 18747.209 |
| NM_013354 | 1091.212  | 1834.582  | AK025929  | 43857.109 | 45379.84  | NM_003333 | 60455.328 | 60419.418 |
| AK023954  | 1267.995  | 1954.82   | NM_001384 | 5024.963  | 4256.27   | NM_002013 | 6124.161  | 7211.709  |
| NM_003930 | 2826.254  | 3187.15   | NM_018246 | 2273.813  | 1971.03   | NM_006927 | 21328.645 | 21041.352 |
| NM_013416 | 2698.761  | 3196.228  | NM_007039 | 2005.104  | 1518.202  | CY3Cy5    | 4591.74   | 159.289   |
| AB040934  | 1163.557  | 1431.351  | NM_017857 | 10394.963 | 11094.017 | NM_006325 | 4180.084  | 2182.323  |
| NM_000598 | 752.102   | 758.603   | NM_006849 | 11224.104 | 12259.586 | AF088024  | 3351.665  | 2427.167  |
| NM_005092 | 1038.945  | 1098.275  | AJ272267  | 4406.977  | 5180.753  | AK025887  | 2562.146  | 2204.424  |
| NM_002753 | 324.075   | 269.352   | NM_000673 | 1044.827  | 1441.646  | AB037719  | 2574.111  | 2754.431  |
| NM_001883 | 1759.414  | 1001.189  | NM_002676 | 19455.605 | 18686.65  | AK024694  | 3110.922  | 4729.947  |
| NM_015722 | 411.034   | 225.401   | NM_002103 | 4906.823  | 5167.605  | AK026143  | 3542.078  | 2416.599  |
| NM_016086 | 1885.009  | 1583.665  | NM_006665 | 7911.451  | 8765.829  | AL110252  | 2944.545  | 2017.197  |
| NM_004382 | 665.891   | 740.454   | AK026256  | 5623.04   | 5871.426  | AL050143  | 7379.553  | 6778.738  |
| NM_000831 | 1475.076  | 2240.273  | NM_000270 | 33859.813 | 41844.426 | AL080219  | 2773.231  | 2423.675  |
| NM_014618 | 2276.847  | 2939.497  | U83111    | 1971.311  | 1740.077  | AK026709  | 1540.337  | 1697.864  |
| AA902333  | 14634.377 | 18941.699 | U89277    | 12194.781 | 12687.681 | AK024165  | 1202.249  | 922.681   |
| NM_015641 | 9094.552  | 11782.657 | AB046837  | 4305.91   | 3644.026  | NM_006325 | 12901.494 | 12008.331 |
| AF272377  | 5539.379  | 7606.135  | AK026670  | 1689.113  | 1191.13   | SR2       | 46131.93  | 55697.996 |
| NM_006566 | 2404.05   | 3312.962  | NM_002876 | 2414.27   | 2207.2    | SR8       | 3829.728  | 19083.406 |

|           |           |           |           |           |           |           |           |           |
|-----------|-----------|-----------|-----------|-----------|-----------|-----------|-----------|-----------|
| NM_01779E | 9922.237  | 14968.716 | AK022332  | 5838.912  | 6512.824  | SR10      | 11201.014 | 6219.885  |
| NM_01521E | 5767.551  | 6821.387  | NM_00646E | 1169.691  | 1137.043  | CY3Cy5    | 6110.74   | 105.229   |
| NM_01834E | 2949.629  | 3755.697  | NM_00676E | 14673.872 | 12533.179 | L35592    | 8946.078  | 3701.85   |
| AF119900  | 17308.152 | 20575.408 | NM_001189 | 2881.4    | 2945.762  | AL360274  | 20257.854 | 9273.053  |
| AF130087  | 2029.365  | 3093.342  | NM_00699E | 3413.904  | 2979.722  | NM_01405C | 10879.402 | 7049.856  |
| AK027031  | 6302.277  | 9647.86   | AF055009  | 67896.406 | 51352.094 | AF085854  | 5399.488  | 6807.005  |
| NM_01838E | 11517.911 | 14671.021 | AL365370  | 3464.595  | 3212.907  | AF074997  | 1030.136  | 1045.083  |
| NM_00359C | 10703.987 | 10239.217 | L08442    | 997.507   | 839.9     | NM_01406E | 1961.619  | 1770.312  |
| AJ278476  | 13187.189 | 17037.869 | AB014593  | 2430.896  | 2520.947  | NM_017814 | 6449.943  | 5569.074  |
| NM_00235E | 1274.038  | 1826.196  | NM_01630E | 7453.783  | 9004.285  | AF074996  | 1684.032  | 1272.767  |
| NM_01222E | 5279.199  | 7468.916  | D12485    | 6337.686  | 5261.367  | AF131811  | 3794.531  | 4014.856  |
| AB014595  | 6570.028  | 8608.063  | AK023204  | 3075.116  | 3100.001  | AF293026  | 8649.251  | 5720.479  |
| AB024704  | 26826.951 | 25952.285 | NM_00344E | 4065.267  | 4703.553  | AF217986  | 11773.432 | 10141.718 |
| NM_00632E | 2620.317  | 1744.034  | NM_00247E | 6881.836  | 7120.841  | AK026320  | 2043.109  | 2030.64   |
| AK002081  | 2435.997  | 1204.422  | D38163    | 2096.969  | 1709.114  | AL137530  | 3456.696  | 2995.624  |
| NM_00221C | 6551.925  | 4388.916  | NM_004967 | 1064.882  | 865.195   | AF147310  | 1450.537  | 1753.115  |
| NM_01636E | 637.409   | 614.768   | D28449    | 22063.439 | 26532.137 | AK024775  | 3691.964  | 3940.461  |
| AF231022  | 6096.048  | 9024.192  | NM_003281 | 2906.434  | 3791.801  | AK025562  | 1877.215  | 1270.063  |
| NM_00550C | 8239.303  | 10835.796 | AA460480  | 3428.865  | 3863.375  | AK025589  | 5333      | 3123.631  |
| U66702    | 22935.553 | 32229.275 | AI298884  | 30908.941 | 36916.945 | AK026734  | 1909.872  | 2059.078  |
| AK025582  | 3527.074  | 4777.252  | D87845    | 4215.792  | 4286.501  | AL137616  | 2939.679  | 2220.879  |
| NM_003884 | 2376.889  | 2918.657  | X53279    | 2295.791  | 2181.268  | AK021752  | 1038.409  | 917.341   |
| NM_01488E | 15910.354 | 18012.92  | M83254    | 10908.32  | 12192.307 | AL109706  | 9886.427  | 8822.226  |
| NM_003344 | 8393.556  | 9766.639  | S56770    | 4127.788  | 5691.264  | AF035291  | 67707.969 | 63509.293 |
| NM_00277E | 1285.395  | 2158.837  | AI193606  | 1607.896  | 1812.294  | AK026291  | 12641.749 | 10527.116 |
| U82970    | 1871.766  | 2363.493  | H58872    | 21289.797 | 24019.459 | AK021924  | 769.859   | 1020.995  |
| NM_00592E | 728.295   | 1264.381  | J02938    | 1351.304  | 1259.975  | AL049285  | 1528.5    | 1061.375  |
| NM_00717E | 481.569   | 886.028   | J04543    | 17786.166 | 17304.207 | AL117520  | 2499.659  | 3244.521  |
| AJ278478  | 3295.132  | 4788.246  | S60415    | 1340.731  | 1507.005  | AL080208  | 2808.653  | 1358.457  |
| NM_01430C | 18847.551 | 17169.498 | AA456295  | 7073.688  | 5538.277  | AL117577  | 2502.036  | 2045.591  |
| NM_01460E | 1787.227  | 1634.166  | BE733577  | 6821.457  | 6885.169  | AK022152  | 2620.214  | 1496.101  |
| Y19188    | 478.813   | 925.281   | AI817942  | 4255.97   | 4661.323  | AK027027  | 3818.116  | 4918.515  |
| NM_01446E | 963.229   | 752.535   | BG762340  | 2972.36   | 2716.502  | NM_014911 | 1137.358  | 923.413   |
| NM_00373E | 5716.946  | 6725.579  | AA009484  | 1012.906  | 1097.951  | AF009289  | 6580.962  | 5547.453  |
| AF216381  | 32719.762 | 36744.969 | NM_002044 | 19710.426 | 19131.107 | AF009303  | 6035.635  | 5025.347  |
| AL137614  | 3703.966  | 4385.314  | AL137262  | 3867.38   | 4458.356  | NM_004474 | 12336.54  | 11483.893 |
| AK023683  | 484.53    | 387.35    | NM_020437 | 8758.338  | 7260.358  | AF056449  | 5063.424  | 4824.603  |
| AK023093  | 494.242   | 377.951   | NM_00401C | 600.889   | 607.604   | AK001033  | 1955.402  | 1552.49   |
| AB023163  | 1454.476  | 913.954   | X87888    | 509.642   | 358.558   | AK021463  | 840.23    | 1080.938  |
| NM_00661E | 4113.995  | 4837.821  | NM_01864E | 4116.206  | 3719.225  | AK021698  | 906.552   | 810.498   |
| AF272373  | 5638.286  | 4655.938  | NM_01618E | 1022.386  | 1273.162  | AK001082  | 6745.622  | 7424.697  |
| NM_01632E | 7548.635  | 8578.745  | M30142    | 11978.738 | 8590.221  | AK001871  | 654.979   | 1106.327  |
| NM_00498E | 6890.958  | 9222.554  | NM_00501E | 2220.135  | 2545.786  | AK021521  | 674.366   | 949.603   |
| AK074832  | 10616.746 | 16302.785 | NM_01337E | 31763.336 | 38990.621 | AK021743  | 6866.533  | 7594.084  |
| NM_01626E | 1649.763  | 2167.486  | NM_00108E | 1990.444  | 2113.745  | AF196865  | 1633.371  | 1061.652  |
| NM_00623E | 31434.586 | 40068.383 | NM_006110 | 5919.71   | 6250.984  | AJ008114  | 72208.359 | 62823.715 |
| AK026353  | 2844.396  | 3407.804  | NM_01645E | 3210.206  | 3512.192  | AF147432  | 2861.496  | 2564.581  |
| L24123    | 10052.588 | 12381.83  | NM_017701 | 2953.915  | 2883.882  | AK023250  | 9002.791  | 7973.664  |
| D80001    | 5582.457  | 8039.657  | NM_01422E | 10072.451 | 9924.619  | AK024882  | 4814.828  | 4520.342  |
| AK024288  | 2295.233  | 2879.128  | AF142567  | 4156.87   | 3827.931  | NM_01406E | 33879.797 | 36117.641 |
| NM_006521 | 7902.358  | 9643.276  | NM_00620E | 66920.719 | 61615.926 | NM_006304 | 50590.82  | 40589.441 |
| NM_00289E | 3855.67   | 4130.249  | NM_01741C | 13359.991 | 12556.702 | X74804    | 1199.481  | 1361.488  |
| NM_00344E | 808.591   | 608.276   | AY009398  | 949.21    | 1009.43   | AF293367  | 3727.261  | 4394.588  |

|           |           |           |           |           |           |           |           |           |
|-----------|-----------|-----------|-----------|-----------|-----------|-----------|-----------|-----------|
| M62324    | 1910.657  | 1534.625  | NM_002860 | 17009.201 | 16000.823 | AF086231  | 6699.289  | 8120.95   |
| NM_006164 | 649.976   | 550.919   | NM_006169 | 14341.723 | 14889.529 | AK001494  | 2399.588  | 3386.485  |
| NM_016200 | 29453.246 | 19509.111 | NM_001218 | 1992.596  | 1893.195  | AL133438  | 3435.556  | 3052.212  |
| BC004520  | 441.661   | 376.203   | NM_014183 | 3315.75   | 2454.182  | NM_020357 | 12305.018 | 14318.583 |
| BE082230  | 37412.453 | 32262.465 | AB046780  | 34829.988 | 40911.496 | NM_014114 | 1761.202  | 1877.973  |
| AK025929  | 46287.578 | 15811.669 | NM_018353 | 8757.309  | 6764.295  | U62822    | 3419.515  | 2698.377  |
| NM_001384 | 4100.102  | 1129.833  | NM_016373 | 690.089   | 717.678   | NM_003534 | 48107.414 | 45771.008 |
| NM_018246 | 3677.678  | 1238.631  | NM_003560 | 26746.947 | 32689.031 | AK057143  | 4078.631  | 3912.877  |
| NM_007039 | 2677.86   | 2053.124  | NM_014403 | 9205.05   | 10922.178 | NM_015594 | 63448.32  | 52582.375 |
| NM_017857 | 5125.534  | 4354.04   | AL050100  | 2676.742  | 2344.243  | AK024399  | 1030.107  | 1209.496  |
| NM_006849 | 3101.296  | 3546.067  | NM_000748 | 30196.359 | 34272.027 | AF056423  | 10657.217 | 10328.325 |
| AJ272267  | 6592.655  | 8755.326  | NM_004925 | 4212.14   | 5076.434  | U00956    | 900.881   | 971.547   |
| NM_004668 | 1082.569  | 1106.75   | NM_004922 | 10534.583 | 11056.806 | U00962    | 54798.434 | 55513.133 |
| NM_000673 | 1505.973  | 2022.854  | NM_002871 | 1721.376  | 1704.104  | AK026130  | 56887.402 | 50065.813 |
| NM_002676 | 5792.889  | 5135.958  | BE873653  | 66963.539 | 55409.324 | NM_012480 | 4992.62   | 6252.128  |
| NM_002103 | 3781.531  | 3635.453  | NM_006987 | 2107.48   | 1971.411  | AB037823  | 3512.251  | 1585.607  |
| NM_006665 | 8807.706  | 9253.849  | NM_001282 | 8381.704  | 6724.389  | NM_015380 | 9803.052  | 5212.185  |
| AK026256  | 6128.02   | 6868.348  | NM_016830 | 21810.09  | 21951.355 | BE254485  | 1473.009  | 1033.953  |
| NM_000270 | 19461.137 | 23827.898 | U44105    | 1243.344  | 1281.507  | BC005946  | 67420.367 | 71963.797 |
| U83111    | 1559.784  | 2383.214  | NM_016103 | 3850.897  | 3454.319  | AK021893  | 5924.565  | 4891.048  |
| U89277    | 3839.022  | 4709.686  | AL133654  | 10409.854 | 10221.946 | NM_001048 | 5756.795  | 4738.001  |
| AB046837  | 2110.929  | 1631.928  | AB051826  | 838.467   | 788.274   | AK026497  | 9560.606  | 8583.892  |
| AK026670  | 1135.031  | 701.411   | L25080    | 33003.035 | 39228.988 | BE958139  | 4114.817  | 4178.812  |
| NM_002876 | 1754.329  | 1095.645  | NM_003143 | 66814.344 | 46719.336 | AF086516  | 2605.146  | 2478.365  |
| AK022332  | 5811.387  | 3978.175  | AK026289  | 9734.415  | 9364.654  | D86978    | 4326.18   | 5009.843  |
| NM_006465 | 1543.631  | 1113.338  | NM_003258 | 7216.115  | 10290.729 | AL080060  | 45598.906 | 49293.23  |
| NM_006769 | 10591.478 | 4849.378  | AL133068  | 36868.117 | 41288.473 | NM_005267 | 6740.454  | 7894.004  |
| NM_001189 | 1975.655  | 1252.836  | NM_003463 | 10037.057 | 10126.84  | AF086017  | 1530.457  | 2049.116  |
| NM_006992 | 1917.439  | 933.674   | NM_004944 | 2550.256  | 2314.629  | NM_005780 | 17516.826 | 19841.584 |
| AF055009  | 12767.965 | 6254.973  | AK024964  | 2518.499  | 2059.714  | AK025340  | 1593.982  | 1713.541  |
| AL365370  | 2337.65   | 904.96    | M20697    | 1925.542  | 1812.821  | NM_003565 | 2709.38   | 1485.237  |
| L08442    | 436.846   | 368.668   | NM_015046 | 5109.067  | 5230.073  | NM_018440 | 3421.415  | 5578.602  |
| AB014593  | 1124.64   | 715.237   | NM_002014 | 32924.074 | 42175.559 | AK025470  | 19509.74  | 18473.541 |
| NM_016305 | 5931.145  | 5417.869  | NM_002538 | 16448.928 | 15609.595 | M35410    | 2543.414  | 1957.537  |
| D12485    | 3671.867  | 4161.026  | NM_016585 | 26058.301 | 25546.029 | AB023227  | 1316.448  | 1250.578  |
| AK023204  | 3045.361  | 2857.402  | NM_003333 | 67681.063 | 50043.242 | NM_005776 | 31172.932 | 29482.652 |
| NM_003449 | 3164.894  | 3457.536  | NM_002013 | 16932.176 | 18631.223 | AK023071  | 13052.229 | 11858.059 |
| NM_002478 | 2450.856  | 2723.218  | NM_006927 | 25980.832 | 27879.039 | NM_004041 | 7378.798  | 6960.405  |
| D38163    | 924.259   | 1048.462  | NM_014601 | 4480.387  | 3668.425  | AK022888  | 5870.756  | 5682.995  |
| NM_004967 | 796.298   | 1011      | NM_017761 | 23855.195 | 24942.084 | AK024484  | 8620.479  | 8859.563  |
| D28449    | 16665.822 | 22724.58  | NM_006928 | 1529.683  | 1275.765  | NM_001953 | 66110.383 | 65862.422 |
| NM_003281 | 1644.017  | 3068.085  | AF237700  | 4520.35   | 3712.509  | NM_001406 | 881.854   | 1564.693  |
| AA460480  | 590.119   | 846.906   | NM_003449 | 4110.148  | 3841.263  | NM_002292 | 6646.875  | 6425.787  |
| AI298884  | 14970.943 | 16886.381 | NM_002478 | 7998.826  | 7504.493  | NM_000166 | 1862.172  | 2396.505  |
| D87845    | 2176.44   | 2451.16   | D38163    | 1903.897  | 2251.757  | AF305200  | 1425.416  | 1401.196  |
| X53279    | 791.335   | 1062.502  | NM_004967 | 652.191   | 645.384   | NM_003718 | 65638.398 | 55790.293 |
| M83254    | 1634.559  | 1510.02   | D28449    | 22843.26  | 25169.719 | NM_014180 | 12658.278 | 7712.25   |
| S56770    | 766.339   | 699.532   | NM_003281 | 2717.189  | 3465.18   | AF334406  | 1230.654  | 1231.515  |
| AI193606  | 1578.304  | 1124.488  | AA460480  | 3511.317  | 3768.32   | NM_017444 | 16665.211 | 13066.672 |
| H58872    | 15846.117 | 13973.76  | AI298884  | 29858.994 | 35777.215 | NM_015999 | 3609.732  | 3350.255  |
| J02938    | 1594.537  | 978.951   | D87845    | 4281.694  | 4807.787  | NM_003804 | 22276.711 | 17391.84  |
| J04543    | 12845.653 | 6885.003  | X53279    | 2255.925  | 2017.11   | NM_018453 | 11580.874 | 11760.227 |
| S60415    | 1905.233  | 1025.503  | M83254    | 10727.137 | 11785.603 | NM_004708 | 64848.996 | 60081.949 |

|           |           |           |           |           |           |           |           |           |
|-----------|-----------|-----------|-----------|-----------|-----------|-----------|-----------|-----------|
| AA456295  | 1572.73   | 749.477   | S56770    | 3972.155  | 4692.551  | NM_016001 | 20577.623 | 19203.906 |
| BE733577  | 3641.058  | 1722.694  | AI193606  | 1436.559  | 1397.77   | NM_016108 | 1874.255  | 1897.718  |
| AI817942  | 1589.999  | 969.918   | H58872    | 22854.473 | 25053.457 | S49432    | 11296.571 | 10978.207 |
| BG762340  | 1077.733  | 574.148   | J02938    | 1457.526  | 1037.323  | D86984    | 2990.315  | 2702.873  |
| AA009484  | 558.069   | 412.434   | J04543    | 14939.874 | 13658.429 | NM_015958 | 1027.596  | 898.555   |
| NM_002044 | 13666.695 | 10122.338 | S60415    | 1191.475  | 1057.074  | AF217974  | 8579.334  | 7279.051  |
| AL137262  | 1566.984  | 2462.229  | AA456295  | 6673.637  | 4859.111  | NM_003368 | 2320.954  | 1353.461  |
| NM_020437 | 7039.84   | 7508.43   | BE733577  | 5909.605  | 6281.912  | AB040886  | 1559.681  | 786.716   |
| NM_004010 | 383.685   | 848.617   | AI817942  | 3142.516  | 3783.149  | AB029020  | 1706.087  | 1554.046  |
| NM_002077 | 259.563   | 357.751   | BG762340  | 2993.023  | 2265.954  | AK022759  | 4080.881  | 3127.36   |
| X87888    | 639.698   | 864.823   | AA009484  | 1015.629  | 1081.521  | NM_012338 | 7197.791  | 6034.275  |
| NM_018643 | 691.171   | 1053.291  | AF209930  | 2549.908  | 3019.234  | AF161472  | 5120.037  | 5251.598  |
| M30142    | 7341.861  | 6925.265  | AL133109  | 996.845   | 1133.305  | AL133642  | 14427.598 | 15434.776 |
| NM_005018 | 1280.474  | 1697.12   | AF203728  | 1296.389  | 1542.563  | AB011154  | 7175.564  | 7040.099  |
| NM_013378 | 9361.113  | 12486.021 | NM_004010 | 532.089   | 638.107   | AF124432  | 3312.427  | 2833.227  |
| NM_001085 | 1409.086  | 1570.607  | X87888    | 606.745   | 655.985   | NM_006330 | 41648.918 | 39312.215 |
| NM_006110 | 5320.138  | 5717.999  | NM_018643 | 4016.43   | 4238.836  | NM_015873 | 4571.128  | 2814.76   |
| NM_016453 | 3393.775  | 5685.127  | NM_016186 | 1018.805  | 969.89    | NM_000377 | 3250.088  | 3345.662  |
| AB018301  | 359.851   | 831.899   | M30142    | 12262.128 | 9214.403  | NM_016823 | 6625.579  | 6262.611  |
| NM_017701 | 704.86    | 791.784   | NM_005018 | 2150.879  | 2316.601  | AL570170  | 2247.715  | 1940.307  |
| NM_014226 | 1818.237  | 1578.88   | NM_013378 | 31157.113 | 36729.566 | D56495    | 940.831   | 805.662   |
| AF142567  | 1974.474  | 1526.379  | NM_001085 | 2107.592  | 1847.892  | AF000560  | 14338.229 | 10544.859 |
| NM_005621 | 594.449   | 438.969   | NM_006110 | 5891.88   | 6668.545  | NM_013282 | 4117.763  | 3450.226  |
| NM_006202 | 9477.352  | 5720.912  | NM_016453 | 2786.005  | 3242.67   | NM_005777 | 8753.488  | 4376.164  |
| NM_017410 | 8881.203  | 5930.515  | NM_017701 | 2469.115  | 2687.53   | NM_012345 | 3083.914  | 1844.235  |
| NM_002860 | 15837.487 | 18322.934 | NM_014226 | 8303.934  | 7920.888  | NM_005826 | 29128.922 | 19346.766 |
| NM_006169 | 6573.607  | 8995.534  | AF142567  | 3970.105  | 3825.264  | NM_004592 | 3376.27   | 2947.892  |
| NM_001218 | 1424.704  | 1738.885  | NM_006202 | 67790.773 | 57139.633 | NM_015001 | 25054.092 | 21346.58  |
| NM_014183 | 3417.417  | 4389.612  | NM_017410 | 11757.722 | 10574.68  | NM_019027 | 4276.365  | 3721.56   |
| AB046780  | 34694.996 | 45167.484 | AY009398  | 875.475   | 948.047   | NM_016107 | 5628.653  | 4671.993  |
| NM_018353 | 5353.874  | 5465.257  | D12485    | 5394.285  | 5457.894  | NM_002567 | 52712.082 | 53228.555 |
| NM_001801 | 310.718   | 397.265   | AK023204  | 2916.98   | 3096.219  | NM_001404 | 10877.256 | 10525.242 |
| NM_003560 | 25165.027 | 28856.41  | NM_001218 | 1921.835  | 1580.59   | NM_001605 | 48008.063 | 45918.422 |
| NM_014403 | 8617.502  | 10946.347 | NM_014183 | 3050.11   | 2582.501  | AF225422  | 38466.262 | 38520.898 |
| NM_000748 | 3789.873  | 4372.445  | AB046780  | 37551.219 | 44275.891 | AB040960  | 29010.59  | 23315.818 |
| NM_004925 | 4111.803  | 6298.214  | NM_018353 | 9149.983  | 6868.994  | NM_015946 | 3032.173  | 2915.976  |
| NM_003058 | 499.98    | 407.201   | NM_016373 | 768.461   | 674.355   | NM_006303 | 9259.535  | 6969.818  |
| NM_004922 | 9064.703  | 10223.829 | NM_003560 | 28183.77  | 35619.793 | AK026904  | 1424.88   | 1513.304  |
| NM_002871 | 1299.754  | 1065.225  | NM_014403 | 10148.188 | 10816.984 | NM_001985 | 2812.86   | 1567.678  |
| BE873653  | 26696.549 | 31034.482 | AL050100  | 2965.685  | 2697.371  | NM_002493 | 4297.342  | 3533.852  |
| NM_006987 | 867.983   | 797.447   | NM_000748 | 28945.561 | 29546.686 | NM_002490 | 20871.734 | 13933.404 |
| NM_001282 | 5893.71   | 4863.244  | NM_004925 | 3746.849  | 3942.77   | BE563532  | 4660.605  | 3584.386  |
| NM_016830 | 11993.335 | 9370.364  | NM_004922 | 9916.713  | 9824.654  | NM_001916 | 26039.65  | 19261.168 |
| U44105    | 1164.503  | 910.142   | NM_002871 | 1484.48   | 1395.74   | NM_015425 | 5513.603  | 3771.606  |
| NM_016103 | 3444.551  | 2681.959  | BE873653  | 65100.926 | 52666.988 | NM_015153 | 2812.773  | 2059.285  |
| AL133654  | 8080.754  | 5861.647  | NM_006987 | 1838.818  | 1566.843  | AB032966  | 46186.727 | 44718.559 |
| AB051826  | 543.268   | 1045.348  | NM_001282 | 7656.594  | 6495.658  | M26747    | 914.837   | 713.494   |
| L25080    | 5591.328  | 7808.545  | NM_016830 | 19906.867 | 19665.068 | NM_014820 | 7023.737  | 5318.026  |
| NM_003143 | 58901.516 | 53567.828 | U44105    | 1052.134  | 896.681   | NM_005035 | 3478.224  | 2663.375  |
| AK026289  | 6722.152  | 9281.795  | NM_016103 | 3502.723  | 3316.186  | NM_019014 | 3126.036  | 2922.915  |
| NM_003258 | 7206.122  | 13553.288 | AL133654  | 8682.767  | 9638.472  | NM_002097 | 46967.617 | 49221.797 |
| AL133068  | 3121.988  | 3917.782  | AL137262  | 3996.305  | 4789.013  | X04706    | 39898.023 | 42949.645 |
| NM_003463 | 6294.543  | 8508.404  | NM_020437 | 9102.784  | 7732.384  | NM_018035 | 1348.051  | 1762.896  |

|           |           |           |           |           |           |           |           |           |
|-----------|-----------|-----------|-----------|-----------|-----------|-----------|-----------|-----------|
| NM_004944 | 1682.24   | 2279.486  | L25080    | 31304.109 | 32831.77  | NM_006494 | 22020.359 | 20828.818 |
| AK024964  | 1883.427  | 2052.375  | NM_003143 | 61943.27  | 46180.32  | X52343    | 9841.231  | 9940.91   |
| M20697    | 1262.308  | 1575.803  | AK026289  | 9816.683  | 8857.108  | NM_005853 | 1220.886  | 1198.424  |
| NM_015046 | 4088.543  | 4548.523  | NM_003258 | 6477.64   | 9112.839  | X99681    | 1960.579  | 1712.969  |
| NM_002014 | 26549.555 | 34960.289 | AL133068  | 35444.574 | 39041.918 | NM_003120 | 16439.01  | 13470.012 |
| NM_002538 | 15755.765 | 16211.553 | NM_003463 | 10485.849 | 10480.757 | X52360    | 3949.683  | 3019.457  |
| NM_016585 | 22468.035 | 23490.986 | NM_004944 | 2151.288  | 1974.228  | NM_002636 | 65575.883 | 60297.535 |
| NM_003333 | 60318.895 | 56564.125 | AK024964  | 2678.299  | 2450.324  | NM_016494 | 60342.023 | 59337.613 |
| NM_002013 | 15897.582 | 15909.843 | M20697    | 1808.46   | 1911.925  | NM_020384 | 7619.931  | 5804.224  |
| NM_006927 | 12518.955 | 13514.713 | NM_015046 | 6596.079  | 5459.57   | NM_006058 | 49628.875 | 43145.941 |
| NM_014601 | 2463.887  | 2914.958  | NM_002014 | 32495.508 | 37674.574 | NM_006628 | 22716.461 | 18926.141 |
| NM_017761 | 14393.577 | 15663.535 | NM_002538 | 16735.043 | 15262.516 | M97496    | 64095.637 | 59302.719 |
| NM_006928 | 1519.538  | 1902.951  | NM_016585 | 23377.004 | 22814.645 | AK026074  | 3715.263  | 2783.222  |
| AF237700  | 1260.501  | 1105.291  | NM_003333 | 64977.367 | 52674.586 | NM_003172 | 10352.467 | 6222.974  |
| NM_003449 | 3386.348  | 3211.915  | NM_002013 | 15668.254 | 14312.901 | NM_004809 | 11315.862 | 8629.71   |
| NM_002478 | 2576.097  | 2583.311  | NM_006927 | 24130.881 | 24047.877 | AA903183  | 2093.317  | 1266.137  |
| D38163    | 730.67    | 853.458   | NM_014601 | 3903.569  | 3266.501  | H41522    | 6975.157  | 4394.6    |
| D28449    | 17231.107 | 22795.482 | NM_017761 | 22651.1   | 21870.152 | AA460291  | 47774.941 | 43554.941 |
| NM_003281 | 1484.232  | 2438.547  | NM_006928 | 1201.502  | 1475.081  | BI821333  | 9277.441  | 9501.391  |
| AA460480  | 775.118   | 1014.41   | AF237700  | 4316.437  | 3588.385  | X51841    | 61410.359 | 57150.922 |
| AI298884  | 21118.877 | 25867.783 | NM_002860 | 17870.643 | 19306.223 | AF051344  | 60137.512 | 56840.375 |
| D87845    | 3306.77   | 4378.164  | NM_006169 | 17873.34  | 18279.119 | BG506100  | 15691.536 | 17633.123 |
| X53279    | 550.901   | 623.345   | D38163    | 1486.889  | 1410.668  | X53586    | 3725.097  | 7094.055  |
| M83254    | 2041.135  | 2466.264  | D28449    | 23482.447 | 25012.359 | M17176    | 2871.72   | 4896.803  |
| S56770    | 835.815   | 1224.728  | NM_003281 | 2652.889  | 3282.6    | M26576    | 1219.734  | 1380.298  |
| AI193606  | 714.47    | 1062.098  | AA460480  | 3199.733  | 3035.635  | M32972    | 21960.938 | 21722.705 |
| H58872    | 15517.595 | 17248.586 | AI298884  | 29225.68  | 33781.695 | M13207    | 3223.839  | 4066.944  |
| J02938    | 823.409   | 917.567   | D87845    | 4365.621  | 4118.825  | X14885    | 4216.007  | 6932.799  |
| J04543    | 15761.744 | 13913.499 | X53279    | 1985.67   | 2010.828  | M97815    | 1628.44   | 1732.099  |
| S60415    | 2079.253  | 2057.556  | M83254    | 12136.623 | 12752.893 | NM_003001 | 1810.773  | 1554.002  |
| AA456295  | 2214.759  | 2460.804  | S56770    | 4181.196  | 5059.07   | NM_012400 | 1129.428  | 902.9     |
| BE733577  | 5199.149  | 5662.65   | AI193606  | 1390.686  | 1119.831  | NM_005384 | 2891.302  | 2540.208  |
| AI817942  | 1876.627  | 1988.888  | H58872    | 23107.404 | 21255.117 | NM_006850 | 1498.035  | 2356.041  |
| BG762340  | 1726.309  | 1603.142  | J02938    | 1193.948  | 860.55    | AB013103  | 779.027   | 430.609   |
| AA009484  | 677.104   | 1386.345  | J04543    | 15789.204 | 14468.889 | AF019225  | 6151.95   | 4971.056  |
| AF209930  | 709.285   | 892.334   | S60415    | 1362.912  | 1304.978  | Z36803    | 13464.755 | 8471.385  |
| AL133109  | 537.973   | 987.478   | AA456295  | 5561.137  | 3926.986  | NM_013371 | 1195.539  | 842.129   |
| AF203728  | 1224      | 1852.149  | BE733577  | 5351.254  | 4528.442  | NM_000707 | 13892.725 | 10645.909 |
| NM_018643 | 827.195   | 640.204   | AI817942  | 3836.16   | 3878.741  | AF202092  | 13414.212 | 10666.755 |
| NM_016186 | 554.306   | 636.05    | BG762340  | 2421.811  | 1924.521  | NM_003201 | 4613.294  | 3709.385  |
| M30142    | 7979.672  | 6647.79   | AA009484  | 1010.043  | 793.234   | AB011139  | 5591.79   | 4527.114  |
| NM_005018 | 2476.367  | 2506.347  | AF209930  | 2486.664  | 2797.162  | NM_006919 | 3658.345  | 2902.066  |
| NM_013378 | 12675.928 | 19673.486 | AL133109  | 1019.196  | 1171.766  | AK022625  | 32631.424 | 29279.797 |
| NM_001085 | 2063.482  | 2359.704  | AF203728  | 890.302   | 716.387   | AK023084  | 21036.16  | 20703.338 |
| NM_006110 | 5998.839  | 6439.356  | AB051826  | 1190.562  | 1159.502  | AK025588  | 27136.543 | 27937.549 |
| NM_016453 | 2290.561  | 3056.049  | M30142    | 12187.383 | 7833.698  | NM_003188 | 8606.432  | 9226.274  |
| NM_017701 | 781.988   | 924.574   | NM_005018 | 1619.617  | 1640.308  | NM_007118 | 2276.449  | 3584.537  |
| NM_014226 | 1897.489  | 2110.863  | NM_013378 | 32916.633 | 41291.336 | U59431    | 38921.188 | 42055.719 |
| AF142567  | 2553.193  | 3461.689  | NM_001085 | 2234.536  | 1954.818  | U49349    | 3003.434  | 2898.818  |
| NM_005621 | 892.572   | 1275.763  | NM_006110 | 6482.447  | 6284.864  | NM_020152 | 1702.696  | 1635.002  |
| NM_006202 | 10838.198 | 13859.016 | NM_016453 | 3952.778  | 4027.756  | NM_013404 | 5169.272  | 4931.611  |
| NM_017410 | 10749.502 | 12592.026 | NM_017701 | 3206.429  | 3015.873  | AF300648  | 3740.221  | 3674.302  |
| AY009398  | 559.714   | 680.508   | NM_014226 | 10095.285 | 10289.705 | NM_002364 | 1730.432  | 2195.331  |

|           |           |           |           |           |           |           |           |           |
|-----------|-----------|-----------|-----------|-----------|-----------|-----------|-----------|-----------|
| D12485    | 3704.31   | 5279.245  | AF142567  | 4965.022  | 4433.827  | NM_003966 | 868.067   | 1196.027  |
| AK023204  | 2678.592  | 3341.547  | NM_006202 | 64912.242 | 57894.453 | BC012333  | 5990.6    | 4780.575  |
| NM_001218 | 812.578   | 294.611   | NM_017410 | 10580.529 | 8835.076  | AF237952  | 9267.325  | 8448.472  |
| NM_014183 | 3311.2    | 759.987   | AY009398  | 916.014   | 359.676   | AL079287  | 2202.237  | 2362.482  |
| AB046780  | 32367.738 | 12253.187 | X99680    | 18452.773 | 17928.229 | NM_014427 | 7754.307  | 5758.366  |
| NM_000748 | 2961.413  | 1582.197  | NM_001448 | 1695.287  | 1829.361  | AB046769  | 6885.648  | 5829.703  |
| NM_004925 | 4063.21   | 2314.333  | NM_016072 | 10084.091 | 9057.97   | NM_015922 | 13219.153 | 10589.701 |
| NM_004922 | 5592.991  | 6077.568  | AK026349  | 1186.099  | 1315.136  | NM_020381 | 4015.955  | 2841.713  |
| NM_002871 | 1214.797  | 1311.728  | NM_014733 | 1715.574  | 1746.961  | NM_002957 | 13959.915 | 10321.127 |
| BE873653  | 25760.158 | 33942.215 | D12485    | 6429.935  | 5872.817  | NM_018106 | 2949.222  | 3621.266  |
| NM_006987 | 925.216   | 1325.689  | AK023204  | 2851.093  | 2846.308  | BE899154  | 2226.126  | 1837.137  |
| NM_001282 | 6599.12   | 7734.086  | NM_003449 | 4452.333  | 4770.303  | NM_004863 | 4316.786  | 4543.587  |
| NM_016830 | 15339.501 | 20158.553 | NM_002478 | 8853.159  | 9374.672  | U15688    | 3605.158  | 3795.316  |
| U44105    | 1046.883  | 1578.227  | NM_003234 | 8766.804  | 6654.93   | NM_018448 | 14276.866 | 16353.612 |
| NM_016103 | 3104.984  | 4109.046  | NM_004858 | 6411.739  | 6700.168  | NM_018184 | 15546.575 | 20289.965 |
| AL133654  | 8215.189  | 11868.61  | S78774    | 12296.975 | 12264.481 | AB046823  | 2714.397  | 3599.239  |
| AL137262  | 1914.416  | 2726.409  | NM_004922 | 10831.982 | 11475.214 | NM_004925 | 4051.987  | 7218.374  |
| NM_020437 | 7829.431  | 8905.897  | NM_002871 | 1677.484  | 1651.554  | NM_004662 | 1751.364  | 2511.872  |
| L25080    | 4613.563  | 1913.129  | BE873653  | 64357.797 | 56396.695 | NM_016635 | 63410.094 | 61331.176 |
| NM_003143 | 51793.574 | 25233.814 | NM_006987 | 2057.613  | 1881.587  | U61739    | 25019.033 | 20925.703 |
| AK026289  | 5453.474  | 2297.9    | NM_001282 | 8116.842  | 5607.153  | AJ132089  | 2836.157  | 3146.403  |
| NM_003258 | 5978.227  | 2490.517  | NM_016830 | 20921.988 | 19669.512 | U92819    | 5228.874  | 5156.174  |
| AL133068  | 2540.624  | 1091.248  | U44105    | 1037.966  | 887.737   | AB020626  | 3818.633  | 3861.07   |
| NM_003463 | 4614.6    | 1823.207  | NM_016103 | 3709.961  | 3175.521  | NM_002036 | 33206.465 | 38600.758 |
| NM_004944 | 1548.038  | 801.65    | AL133654  | 9485.595  | 9093.006  | NM_014305 | 2339.865  | 2374.873  |
| AK024964  | 1925.997  | 646.24    | AL137262  | 3785.481  | 3496.956  | NM_017925 | 2768.199  | 2277.174  |
| M20697    | 1701.437  | 716.951   | NM_020437 | 7845.653  | 5189.915  | AK022208  | 19427.148 | 10699.237 |
| NM_015046 | 3967.352  | 1440.569  | NM_018643 | 4921.431  | 3949.646  | NM_003171 | 6110.811  | 3285.318  |
| NM_002014 | 20795.574 | 10348.443 | NM_016186 | 1149.875  | 1201.076  | NM_006437 | 8220.769  | 7257.207  |
| NM_002538 | 16692.832 | 7502.641  | NM_006928 | 1151.818  | 1210.326  | NM_017890 | 1764.206  | 1518.428  |
| NM_016585 | 16174.421 | 10909.852 | AF237700  | 4454.133  | 3520.906  | AK021654  | 2721.622  | 2334.121  |
| NM_003333 | 58552.145 | 51804.852 | NM_002860 | 18151.035 | 18549.086 | NM_003925 | 4762.564  | 3964.263  |
| NM_002013 | 12453.267 | 9367.894  | NM_006169 | 11095.644 | 10547.296 | Z15114    | 11741.374 | 11771.865 |
| NM_006927 | 15077.239 | 11855.319 | NM_001218 | 3003.506  | 3414.261  | AB040812  | 58646.02  | 59160.66  |
| NM_014601 | 2415.822  | 2139.893  | NM_014183 | 3710.617  | 3021.083  | NM_017625 | 1274.929  | 2100.667  |
| NM_017761 | 18185.064 | 19037.676 | AB046780  | 34307.293 | 44742.898 | NM_006285 | 17949.619 | 20184.26  |
| NM_006928 | 1036.691  | 820.642   | NM_018353 | 8337.553  | 6694.126  | NM_003656 | 65260.215 | 65582.969 |
| AF237700  | 1334.003  | 906.907   | NM_016373 | 653.375   | 440.645   | NM_001348 | 28971.129 | 36089.066 |
| NM_002860 | 15840.674 | 17501.332 | NM_003560 | 25261.85  | 26559.326 | NM_000215 | 9035.588  | 10564.77  |
| NM_006169 | 4380.574  | 5505.952  | NM_014403 | 8836.87   | 8145.634  | AK027148  | 32345.627 | 36533.344 |
| D38163    | 332.752   | 338.921   | AL050100  | 2469.25   | 2130.257  | NM_005084 | 4281.79   | 6452.593  |
| NM_004967 | 450.999   | 476.97    | NM_020139 | 6478.833  | 7048.086  | NM_007283 | 5034.843  | 5546.258  |
| D28449    | 13844.753 | 7357.849  | AL080207  | 830.288   | 680.096   | NM_006111 | 10288.268 | 12585.274 |
| NM_003281 | 1329.319  | 832.612   | NM_005688 | 536.288   | 542.338   | AK026071  | 12443.663 | 11725.799 |
| AA460480  | 426.429   | 405.833   | NM_000748 | 31492.541 | 34868.434 | NM_006628 | 13743.359 | 11315.088 |
| AI298884  | 17087.551 | 8119.676  | NM_000048 | 5271.389  | 5435.92   | M97496    | 62341.406 | 58803.895 |
| D87845    | 2380.044  | 1144.178  | AF104032  | 50811.332 | 47269.242 | NM_004805 | 5617.163  | 4470.455  |
| X53279    | 301.603   | 344.785   | U53531    | 884.622   | 723.876   | AA903183  | 1260.175  | 782.738   |
| M83254    | 1618.541  | 920.703   | NM_004925 | 4470.409  | 4201.847  | H41522    | 6671.695  | 5361.602  |
| S56770    | 493.196   | 334.76    | AF209930  | 2197.361  | 1933.683  | AA460291  | 38768.27  | 32065.699 |
| AI193606  | 520.538   | 321.144   | AL133109  | 1006.419  | 809.788   | BI821333  | 3873.462  | 3841.046  |
| H58872    | 12473.479 | 7651.627  | AB051826  | 944.233   | 701.317   | X51841    | 60208.906 | 57670.863 |
| J02938    | 741.084   | 358.597   | L25080    | 36540.516 | 40715.406 | AF051344  | 53681.32  | 46569.152 |

|           |           |           |           |           |           |           |           |           |
|-----------|-----------|-----------|-----------|-----------|-----------|-----------|-----------|-----------|
| J04543    | 9825.497  | 4175.826  | NM_003143 | 61382.531 | 51036.02  | BG506100  | 2241.927  | 2653.674  |
| S60415    | 1136.563  | 796.438   | AK026289  | 9750.23   | 8849.16   | X53586    | 1865.901  | 2931.364  |
| AA456295  | 1161.872  | 580.789   | NM_003258 | 6318.519  | 8175.3    | M17176    | 2508.164  | 3540.505  |
| BE733577  | 3643.194  | 2404.941  | AL133068  | 36325.867 | 37518.121 | M26576    | 1102.629  | 1651.042  |
| AI817942  | 1597.344  | 1367.061  | NM_003463 | 9812.555  | 7819.216  | M32972    | 18173.25  | 15455.424 |
| BG762340  | 1576.019  | 838.524   | NM_004944 | 2047.268  | 1706.483  | D11151    | 1290.9    | 1394.214  |
| AA009484  | 708.169   | 675.465   | AK024964  | 2698.348  | 2213.72   | D89854    | 2118.51   | 3138.977  |
| AF209930  | 418.415   | 742.831   | M20697    | 1711.109  | 1544.772  | M13207    | 3280.085  | 3718.059  |
| AF203728  | 625.416   | 698.556   | NM_015046 | 5834.015  | 4207.21   | M97815    | 1695.442  | 1877.541  |
| AB051826  | 418.174   | 611.023   | NM_002014 | 29932.076 | 32892.207 | AF085893  | 1872.219  | 1690.287  |
| M30142    | 5953.836  | 2378.572  | NM_002538 | 16178.385 | 13405.666 | NM_000707 | 7443.208  | 6966.72   |
| NM_005018 | 1162.091  | 881.066   | NM_016585 | 26355.971 | 24338.813 | AF202092  | 8698.206  | 6223.292  |
| NM_013378 | 11055.753 | 8332.036  | NM_003333 | 63195.043 | 53430.07  | NM_003201 | 6220.617  | 5053.612  |
| NM_001085 | 1349.27   | 818.875   | NM_002013 | 17027.51  | 15588.726 | AB011139  | 3841.431  | 2808.707  |
| NM_006110 | 3067.354  | 1561.965  | AK001433  | 3500.801  | 3010.73   | NM_006919 | 1335.792  | 1958.726  |
| NM_016453 | 1885.258  | 1389.435  | NM_006927 | 29255.141 | 30387.893 | AK022625  | 34030.098 | 33878.039 |
| NM_014226 | 1123.807  | 805.18    | NM_014601 | 5193.768  | 4847.976  | AK023084  | 9294.148  | 8569.794  |
| AF142567  | 1748.275  | 1200.811  | NM_017761 | 28509.328 | 34639.988 | AK025588  | 23794.369 | 24751.189 |
| NM_005621 | 500.974   | 388.981   | CY3Cy5    | 4106.017  | 115.671   | NM_003188 | 8276.179  | 9154.789  |
| NM_006202 | 7700.349  | 4701.789  | NM_006325 | 15202.935 | 17457.932 | NM_007118 | 2959.068  | 5320.796  |
| NM_003391 | 418.561   | 489.515   | AF088024  | 2005.049  | 2085.051  | U59431    | 35114.227 | 42342.551 |
| NM_017410 | 8710.153  | 5042.583  | AK025887  | 2612.803  | 2734.624  | U49349    | 4425.783  | 6915.163  |
| X99680    | 2839.831  | 2490.902  | AB037719  | 3042.282  | 3110.94   | NM_020152 | 5766.007  | 6571.452  |
| NM_001448 | 2427.474  | 2289.846  | AK024694  | 3610.567  | 4122.577  | NM_013404 | 5882.324  | 6334.546  |
| NM_016072 | 6809.619  | 5772.82   | AF086229  | 1360.572  | 1293.958  | NM_020384 | 8804.399  | 10092.523 |
| AK026349  | 1135.049  | 1275.774  | AK026143  | 6504.966  | 5175.913  | NM_006058 | 59646.543 | 58147.805 |
| NM_014733 | 1329.422  | 1194.987  | AL137578  | 1082.609  | 1247.462  | AL079287  | 946.06    | 913.438   |
| D12485    | 3435.054  | 3067.704  | AL110252  | 4428.396  | 4064.075  | NM_014427 | 9218.896  | 7715.06   |
| AK023204  | 2849.354  | 2211.685  | AL050143  | 2197.907  | 2443.137  | NM_002957 | 16227.403 | 14856.54  |
| NM_003449 | 3240.823  | 2700.496  | AL080059  | 1420.843  | 1753.37   | NM_018106 | 5327.441  | 4696.858  |
| NM_002478 | 2478.382  | 1990.683  | AL080219  | 6376.192  | 6522.289  | NM_003725 | 1537.333  | 1398      |
| NM_003234 | 3674.146  | 1498.122  | AK026709  | 1853.139  | 1995.583  | BE899154  | 2384.789  | 2200.428  |
| NM_004858 | 5541.422  | 3155.135  | AK024165  | 850.153   | 819.551   | NM_004863 | 5860.583  | 7262.589  |
| S78774    | 2368.243  | 1640.016  | NM_006325 | 15261.937 | 15078.658 | AB032963  | 3526.883  | 6411.654  |
| NM_004922 | 5973.407  | 4753.018  | SR2       | 44329.902 | 47753.992 | U15688    | 4896.084  | 5596.394  |
| NM_002871 | 798.133   | 461.779   | SR4       | 17581.9   | 23110.533 | NM_018448 | 14806.704 | 18225.57  |
| BE873653  | 18646.057 | 12280.861 | SR6       | 2195.559  | 2944.906  | NM_018184 | 14269.092 | 16725.623 |
| NM_006987 | 762.565   | 592.845   | SR8       | 8940.604  | 34069.508 | AB046823  | 2319.604  | 3080.343  |
| NM_001282 | 4642.147  | 2930.561  | SR10      | 28727.557 | 13144.865 | NM_004929 | 2958.403  | 4978.306  |
| NM_016830 | 11377.311 | 7874.338  | CY3Cy5    | 3904.582  | 77.397    | NM_004662 | 1862.76   | 2412.693  |
| U44105    | 1074.445  | 914.276   | L35592    | 13155.367 | 15752.67  | U61739    | 45458.305 | 52929.805 |
| NM_016103 | 2249.441  | 1709.873  | NM_012079 | 3297.771  | 4454.042  | AJ132089  | 2193.612  | 2064.067  |
| AL133654  | 6169.654  | 4750.995  | AL360274  | 31702.113 | 40856.027 | U92819    | 5119.792  | 4888.193  |
| AL137262  | 1012.467  | 887.96    | NM_014050 | 30038.105 | 34375.137 | AB020626  | 1967.024  | 1834.463  |
| NM_020437 | 5782.458  | 3703.203  | AF085854  | 3034.536  | 3432.836  | NM_002036 | 38163.152 | 42653.898 |
| NM_018643 | 1160.916  | 674.588   | AF074997  | 2075.023  | 2042.3    | NM_012400 | 1780.785  | 1932.062  |
| NM_016186 | 669.003   | 511.756   | NM_014068 | 1395.037  | 1243.493  | NM_005384 | 4367.369  | 4434.472  |
| NM_006928 | 870.786   | 932.991   | NM_017814 | 10970.077 | 11282.407 | NM_012123 | 33086.742 | 29534.273 |
| AF237700  | 1556.318  | 1026.552  | AF074996  | 4755.766  | 5056.476  | NM_003171 | 15709.097 | 11950.894 |
| NM_002860 | 11959.098 | 8914.772  | AF131811  | 13556.278 | 7965.397  | NM_006437 | 21770.736 | 21127.775 |
| NM_006169 | 4280.64   | 2818.087  | AF293026  | 20218.193 | 19430.184 | NM_017890 | 4609.763  | 5036.968  |
| NM_001218 | 879.005   | 618.686   | AF236158  | 1977.434  | 1702.827  | AK021654  | 3597.927  | 3386.541  |
| NM_014183 | 2914.576  | 1408.729  | AF217986  | 14363.726 | 15619.186 | NM_016481 | 3269.285  | 3321.677  |



|           |           |           |           |           |           |           |           |           |
|-----------|-----------|-----------|-----------|-----------|-----------|-----------|-----------|-----------|
| AB046780  | 26293.617 | 17622.529 | AK026320  | 2500.859  | 2414.279  | AB040812  | 58648.445 | 62037.512 |
| NM_018353 | 4824.415  | 2599.953  | AL137530  | 4950.696  | 4797.865  | NM_017625 | 878.061   | 1117.565  |
| NM_003560 | 27159.494 | 24728.555 | NM_015953 | 7661.482  | 7027.366  | NM_001348 | 30529.189 | 43408.656 |
| NM_014403 | 6928.852  | 5388.302  | AF147310  | 5456.924  | 5317.093  | NM_007283 | 2031.068  | 1911.619  |
| AL050100  | 516.317   | 368.974   | AK024775  | 9076.331  | 7762.611  | NM_006111 | 8811.995  | 8042.032  |
| NM_020139 | 436.785   | 635.483   | AK025562  | 2735.427  | 1867.096  | AK026071  | 24666.227 | 25214.732 |
| NM_000748 | 4260.043  | 4755.362  | AK026699  | 3463.411  | 4432.285  | BC012333  | 18554.434 | 20663.699 |
| NM_000048 | 2544.358  | 2997.29   | AK025182  | 1748.26   | 1947.492  | AF237952  | 15246.84  | 16004.088 |
| AF104032  | 22008.932 | 20942.162 | AK025589  | 13071.53  | 15809.619 | NM_002309 | 1039.365  | 1052.281  |
| U53531    | 876.411   | 1127.049  | AK026734  | 1500.468  | 1841.605  | AK026074  | 4378.036  | 4196.362  |
| NM_004925 | 3083.852  | 3850.365  | AL137616  | 5438.135  | 5637.592  | NM_003172 | 10859.92  | 9259.581  |
| AF209930  | 647.758   | 663.38    | AK021752  | 2241.184  | 2386.261  | NM_004809 | 9527.465  | 10276.399 |
| AF203728  | 929.522   | 761.149   | AL050012  | 1917.423  | 1847.145  | AA903183  | 2084.833  | 2832.319  |
| L25080    | 3379.542  | 2222.324  | AL109706  | 24656.609 | 25929.482 | H41522    | 11537.863 | 9866.299  |
| NM_003143 | 47111.832 | 35617.531 | AK001118  | 2612.337  | 2807.53   | AA460291  | 46849.141 | 39512.969 |
| AK026289  | 5348.97   | 3587.626  | AF035291  | 65872.445 | 68987.289 | BI821333  | 16897.074 | 16670.313 |
| NM_003258 | 5802.782  | 5621.992  | AK026291  | 16556.682 | 18112.965 | X51841    | 64144.805 | 61677.082 |
| AL133068  | 2236.202  | 1816.524  | AL049285  | 2117.727  | 1559.86   | AF051344  | 61392.793 | 59441.309 |
| NM_003463 | 5098.581  | 4189.504  | AL117520  | 5862.04   | 5598.344  | X53586    | 2373.954  | 3700.356  |
| NM_004944 | 1007.507  | 1248.338  | AL049303  | 2967.554  | 2941.806  | M17176    | 1874.428  | 2372.438  |
| AK024964  | 2325.478  | 2138.082  | AL080208  | 1424.884  | 1364.712  | M32972    | 15025.706 | 15489.365 |
| M20697    | 1448.05   | 1766.557  | L23851    | 2085.236  | 2019.572  | D11151    | 2990.922  | 3704.724  |
| NM_015046 | 3177.861  | 2538.208  | AK022310  | 1498.911  | 2113.54   | D89854    | 2366.278  | 3690.342  |
| NM_002014 | 22381.596 | 24077.104 | AK021784  | 1663.496  | 1424.245  | M13207    | 3414.881  | 4099.967  |
| NM_002538 | 15384.135 | 14716.031 | AF230800  | 7803.535  | 10646.827 | X14885    | 1820.12   | 1964.848  |
| NM_016585 | 18457.965 | 18848.508 | NM_018520 | 4795.117  | 6185.688  | M97815    | 1775.762  | 1677.747  |
| NM_003333 | 58559.633 | 55056.664 | AK026647  | 2481.736  | 3263.676  | AF085893  | 1875.276  | 1881.816  |
| NM_002013 | 10623.402 | 10046.276 | AK022152  | 6053.35   | 6254.031  | NM_003102 | 1453.138  | 1609.617  |
| NM_006927 | 20214.246 | 23515.529 | AK027027  | 2697.397  | 3367.227  | NM_014305 | 7252.292  | 7783.193  |
| NM_014601 | 2950.343  | 4638.349  | NM_014911 | 2345.8    | 2886.224  | AB011139  | 8553.896  | 7960.606  |
| NM_017761 | 16284.358 | 21494.98  | AF009289  | 12023.604 | 12501.939 | NM_006919 | 2585.384  | 2997.924  |
| CY3Cy5    | 7724.532  | 297.257   | AF040247  | 2249.565  | 2188.42   | AK022625  | 45291.449 | 41203.961 |
| NM_006325 | 6481.441  | 5924.707  | AF056439  | 2358.037  | 2232.454  | NM_005425 | 1815.492  | 1429.307  |
| AF088024  | 1329.66   | 1723.956  | AF007835  | 3080.474  | 3033.237  | AK023084  | 13149.013 | 12421.156 |
| AB037719  | 1332.157  | 1453.516  | AF009303  | 9010.644  | 10007.244 | AK025588  | 20569.898 | 16154.352 |
| AK024694  | 3628.251  | 4419.649  | NM_004474 | 12580.316 | 13695.913 | NM_003188 | 6124.315  | 4827.081  |
| AF086229  | 654.613   | 634.145   | AF056449  | 5044.789  | 6223.649  | NM_007118 | 1750.168  | 2026.407  |
| AK026143  | 4116.312  | 4955.657  | AK001033  | 3297.7    | 3497.336  | U59431    | 35924.352 | 33394.207 |
| AL137578  | 1447.839  | 1815.106  | AK001781  | 787.464   | 749.858   | NM_006157 | 1005.092  | 1109.744  |
| AL110252  | 4478.51   | 4899.978  | AK021463  | 1767.715  | 1567.762  | NM_002364 | 2547.943  | 3397.814  |
| AL050143  | 2753.486  | 4011.464  | AK021698  | 2150.895  | 1873.147  | NM_003966 | 2813.02   | 3661.08   |
| AL080059  | 2274.675  | 2321.549  | AK001082  | 13470.447 | 13533.537 | AK024443  | 57598.391 | 68538.984 |
| AL080219  | 1581.74   | 2212.462  | AK001871  | 1183.145  | 1352.696  | NM_020384 | 10594.137 | 10989.605 |
| AK026709  | 914.937   | 1087.853  | AK021521  | 1588.379  | 1445.575  | NM_006058 | 60902.586 | 60671.941 |
| AK024165  | 665.134   | 1161.993  | AK021743  | 17266.291 | 17711.195 | NM_006628 | 24787.609 | 27548.158 |
| NM_006325 | 10598.043 | 13874.544 | AK024144  | 19439.4   | 22203.391 | M97496    | 66919.844 | 71377.398 |
| SR4       | 18566.648 | 30328.383 | Y08959    | 3346.332  | 3908.219  | NM_001659 | 29614.518 | 27859.266 |
| SR6       | 2443.681  | 3555.329  | NM_005346 | 31362.01  | 43803.488 | AB020663  | 1731.136  | 1616.238  |
| SR8       | 7779.253  | 28744.018 | AB032985  | 1942.051  | 2255.368  | AF297866  | 10227.948 | 9003.093  |
| SR10      | 23940.281 | 10036.953 | AF196865  | 6039.761  | 5984.716  | NM_002864 | 2772.563  | 2734.628  |
| CY3Cy5    | 4612.82   | 167.754   | AJ008141  | 1289.678  | 1051.705  | NM_017817 | 5371.178  | 6285.867  |
| L35592    | 2174.196  | 2572.863  | AF147432  | 6247.507  | 7270.92   | NM_018184 | 12223.216 | 11637.45  |
| NM_012079 | 1026.188  | 939.127   | AK024690  | 3567.625  | 3381.463  | AB046823  | 1576.974  | 1622.679  |

|           |           |           |           |           |           |           |           |           |
|-----------|-----------|-----------|-----------|-----------|-----------|-----------|-----------|-----------|
| BC017695  | 1400.411  | 1152.928  | AK023250  | 11864.186 | 11080.816 | NM_004925 | 2882.69   | 3406.93   |
| AL360274  | 12154.187 | 12309.834 | AK024882  | 4545.428  | 5780.668  | NM_004662 | 898.947   | 1206.456  |
| NM_01405C | 9945.175  | 9742.207  | NM_014062 | 30001.809 | 33540.215 | U92819    | 11532.109 | 13164.494 |
| AF085854  | 1458.607  | 1392.909  | NM_006304 | 66416.469 | 55999.539 | AB020626  | 6333.706  | 7245.951  |
| AF074997  | 1706.995  | 2148.72   | X74804    | 2596.871  | 1962.463  | NM_002036 | 50164.445 | 56475.277 |
| NM_01406E | 1501.24   | 2511.146  | AF293367  | 6358.813  | 6436.158  | NM_01240C | 2464.548  | 3011.242  |
| NM_017814 | 7879.443  | 9247.931  | AF086231  | 9524.748  | 9703.271  | NM_005384 | 5043.641  | 6444.606  |
| AF074996  | 2111.985  | 2539.557  | AK001494  | 5745.183  | 6738.699  | Z36803    | 16726.119 | 16779.803 |
| AF131811  | 3394.522  | 3878.139  | AL133438  | 5658.956  | 5775.208  | NM_013371 | 2160.887  | 2566.669  |
| AF293026  | 13724.78  | 12012.301 | AK024978  | 37774.934 | 47811.551 | NM_000707 | 22262.262 | 21920.945 |
| AF236158  | 487.978   | 930.848   | U12897    | 4657.081  | 6515.115  | AF202092  | 33362.645 | 36902.023 |
| AF217986  | 4979.704  | 6652.394  | AJ227894  | 1216.958  | 1263.414  | NM_003201 | 18982.68  | 21824.391 |
| AK026320  | 1856.907  | 2541.722  | NM_020357 | 27347.402 | 31044.971 | NM_007283 | 8577.346  | 8522.802  |
| AL137530  | 1599.71   | 2132.754  | T59562    | 51288.578 | 51543.051 | NM_006111 | 10261.776 | 9061.326  |
| U82310    | 826.809   | 1202.398  | NM_018219 | 2542.705  | 2431.849  | AK026071  | 17903.645 | 14424.046 |
| AF147301  | 887.485   | 694.586   | AK026368  | 983.976   | 1197.221  | BC012333  | 14951.024 | 16363.494 |
| AF147310  | 1148.862  | 1076.813  | U62822    | 16130.631 | 14827.956 | AF237952  | 10951.73  | 8780.169  |
| AK024775  | 2086.802  | 2497.112  | NM_003534 | 57307.379 | 53577.793 | AL079287  | 2746.739  | 2838.365  |
| AK025562  | 1327.103  | 1320.032  | AK057143  | 13316.01  | 14906.231 | NM_014427 | 10587.965 | 8757.17   |
| AK026699  | 1297.553  | 1387.87   | NM_015594 | 57668.465 | 51427.133 | AB046769  | 8536.818  | 7351.083  |
| AK025589  | 11151.525 | 12334.72  | AK024399  | 1019.794  | 1198.636  | NM_015922 | 14161.732 | 13220.543 |
| AL137616  | 1533.322  | 1920.645  | AF056423  | 9188.424  | 9532.84   | NM_020381 | 5072.243  | 5103.122  |
| AK021752  | 2275.184  | 2414.207  | U00956    | 971.271   | 925.138   | NM_003725 | 5511.338  | 6618.642  |
| AL050012  | 1926.704  | 2073.142  | X04293    | 888.748   | 1807.723  | BE899154  | 5054.309  | 6317.71   |
| AL109706  | 6044.139  | 7497.43   | AK026475  | 1509.455  | 1409.086  | NM_004863 | 9756.731  | 11468.014 |
| AK001118  | 7152.752  | 8423.374  | K01884    | 1772.651  | 1881.727  | AK024573  | 5870.269  | 8073.604  |
| AF035291  | 41232.316 | 47089.465 | U00962    | 42507.41  | 46316.406 | NM_002295 | 11502.673 | 13200.791 |
| AK026291  | 16075.577 | 17699.93  | NM_000522 | 778.842   | 1211.115  | NM_000385 | 5172.017  | 5780.911  |
| AK021924  | 1686.114  | 1891.197  | AK026130  | 45789.875 | 47224.504 | AF301013  | 5962.612  | 8152.75   |
| AL049285  | 848.693   | 1436.689  | NM_01248C | 10705.036 | 11275.028 | NM_018992 | 62537.539 | 68834.133 |
| AL080106  | 691.067   | 868.837   | NM_00383C | 1560.008  | 2080.82   | U15688    | 5935.296  | 6043.691  |
| AL117520  | 434.237   | 596.839   | NM_000842 | 1582.347  | 1969.551  | NM_000483 | 9899.761  | 10804.618 |
| AL049303  | 1105.986  | 1446.616  | NM_015642 | 2450.833  | 3060.841  | NM_01844E | 17192.738 | 22110.004 |
| AL050059  | 868.465   | 1111.409  | NM_00464C | 25160.975 | 33383.23  | AF085893  | 2470.594  | 1831.661  |
| AL080208  | 1967.053  | 2145.677  | NM_002901 | 1833.983  | 1864.904  | NM_003102 | 1221.732  | 1011.581  |
| AK022310  | 885.298   | 628.491   | NM_016222 | 13913.422 | 16895.045 | NM_014305 | 4589.609  | 4206.356  |
| AF230800  | 2333.278  | 2693.889  | AB037823  | 9206.597  | 11672.408 | NM_012123 | 24195.156 | 15006.911 |
| NM_01852C | 3502.817  | 4028.578  | NM_01538C | 23747.76  | 28753.398 | U87972    | 5259.142  | 4560.52   |
| AK026647  | 666.954   | 827.046   | BE254485  | 6806.09   | 8580.384  | NM_017925 | 6068.962  | 5813.598  |
| AK022152  | 1642.237  | 2272.296  | NM_002732 | 2153.022  | 2257.522  | AK022208  | 26823.727 | 19018.389 |
| AK097417  | 575.186   | 786.334   | AK022694  | 3607.759  | 3637.873  | NM_003171 | 17968.223 | 13325.106 |
| NM_014911 | 1303.76   | 2039.544  | BC005946  | 66225.906 | 66306.781 | NM_006437 | 25631.463 | 30477.365 |
| AF009289  | 2430.322  | 2911.399  | AK021893  | 11879.384 | 12605.085 | NM_01789C | 5697.029  | 5753.711  |
| AF040247  | 2573.199  | 3111.188  | NM_00104E | 16117.094 | 17890.307 | AK021654  | 6856.157  | 6452.612  |
| AF056439  | 1133.724  | 1100.69   | AK026497  | 9492.533  | 9598.728  | NM_016481 | 3800.28   | 4089.999  |
| AF009303  | 4297.569  | 3883.188  | BE958139  | 3319.08   | 4019.589  | NM_003925 | 18827.969 | 19282.551 |
| NM_004474 | 2859.57   | 3131.854  | AF085359  | 1418.355  | 1975.697  | Z15114    | 17255.098 | 18571.754 |
| AF056449  | 1317.932  | 1874.435  | AF086516  | 2690.957  | 3091.514  | AB040812  | 60834.91  | 60763.332 |
| AK001033  | 2194.214  | 2458.95   | D86978    | 17084.242 | 17598.336 | NM_017625 | 783.725   | 1170.291  |
| AK001781  | 1089.475  | 1125.82   | AL080060  | 59910.371 | 48886.617 | NM_006285 | 18062.793 | 19619.082 |
| AK021463  | 824.882   | 797.094   | NM_005267 | 10204.957 | 10694.07  | NM_003656 | 66504.602 | 67491.992 |
| AK021698  | 661.172   | 586.497   | U80763    | 1192.148  | 430.449   | NM_00134E | 29601.049 | 38253.285 |
| AK001082  | 1610.592  | 1672.531  | AF086017  | 2142.667  | 2345.671  | NM_000215 | 9220.61   | 11035.204 |

|           |           |           |           |           |           |           |           |           |
|-----------|-----------|-----------|-----------|-----------|-----------|-----------|-----------|-----------|
| AK001871  | 1536.067  | 1577.633  | NM_005780 | 23472.949 | 21638.053 | AK027148  | 49641.227 | 49889.676 |
| AK021521  | 984.044   | 1145.178  | NM_003285 | 2733.689  | 3806.118  | NM_005084 | 10766.032 | 14590.712 |
| AK021743  | 1034.025  | 1077.268  | NM_000888 | 10815.586 | 14620.598 | CY3Cy5    | 16921.889 | 1222.366  |
| AK024144  | 8765.764  | 7580.34   | NM_000595 | 47067.734 | 52445.875 | NM_006079 | 19299.391 | 22417.895 |
| Y08959    | 1128.519  | 1481.992  | X99663    | 25199.775 | 29433.563 | NM_006696 | 3298.534  | 4480.25   |
| NM_005346 | 21530.408 | 28789.783 | NM_016552 | 20071.186 | 25409.215 | U79293    | 3877.353  | 4608.207  |
| AF086047  | 918.716   | 1390.839  | AK025340  | 1862.801  | 1571.733  | NM_015434 | 7018.383  | 7590.162  |
| NM_005343 | 23693.482 | 28914.912 | NM_003565 | 6127.22   | 6612.725  | NM_014055 | 2932.207  | 2559.644  |
| AB032985  | 1369.321  | 1613.57   | NM_004841 | 4500.275  | 4753.542  | AK023940  | 798.236   | 990.262   |
| AJ008114  | 56224.602 | 62081.863 | NM_004114 | 958.138   | 1165.323  | NM_018691 | 1042.393  | 675.523   |
| AJ008141  | 4492.172  | 6545.372  | NM_018440 | 15605.979 | 20733.332 | AK001020  | 770.974   | 808.475   |
| AF147432  | 8112.304  | 9752.26   | AK025470  | 2094.083  | 2188.665  | AF086431  | 1800.348  | 1632.588  |
| AK024690  | 10687.141 | 10297.386 | M35410    | 8743.071  | 8957.898  | AL110204  | 842.71    | 776.706   |
| NM_016633 | 18252.951 | 19283.48  | AB023227  | 3970.287  | 4346.161  | NM_014188 | 72243.617 | 62268.914 |
| AF083130  | 756.454   | 641.653   | NM_005776 | 31277.936 | 42073.684 | AK026365  | 6883      | 7285.235  |
| AK023250  | 9136.169  | 9589.253  | AK023071  | 19134.527 | 16494.674 | NM_006079 | 16527.346 | 13559.151 |
| AK024882  | 4991.977  | 6400.643  | NM_004041 | 5422.636  | 6005.236  | NM_006696 | 4468.9    | 5039.993  |
| NM_014062 | 23108.063 | 28017.807 | AK022888  | 6374.111  | 7560.078  | SR1       | 69292.727 | 62196.559 |
| AL109720  | 808.623   | 748.169   | AK024484  | 10596.738 | 12086.748 | SR3       | 34387.996 | 40530.922 |
| NM_006304 | 52594.551 | 58493.387 | NM_002632 | 1324.167  | 1340.477  | SR5       | 6116.05   | 7737.953  |
| X74804    | 1292.803  | 1317.777  | NM_001953 | 66397.336 | 62264.777 | SR7       | 5596.532  | 38193.414 |
| AF293367  | 6737.64   | 7037.587  | NM_001406 | 1805.239  | 1489.206  | SR9       | 17176.443 | 4263.109  |
| AF086231  | 5183.206  | 5477.103  | NM_002292 | 10121.272 | 11036.027 | CY3Cy5    | 15021.191 | 508.171   |
| AK001494  | 1374.296  | 1610.647  | NM_000166 | 2587.414  | 2808.43   | U50540    | 3042.496  | 7234.597  |
| AK024978  | 14733.908 | 13626.931 | AF305200  | 3383.241  | 3510.089  | Z36825    | 6416.762  | 7226.469  |
| U12897    | 5185.86   | 4621.609  | NM_014583 | 738.425   | 878.728   | U82311    | 1247.44   | 1464.595  |
| AJ227894  | 845.721   | 731.499   | NM_006613 | 31283.859 | 41606.129 | AF086157  | 4333.574  | 3835.957  |
| NM_020357 | 22076.771 | 27701.113 | NM_004638 | 33386.73  | 43428.973 | D17018    | 2275.366  | 1527.986  |
| AK026836  | 3327.955  | 4010.272  | L40027    | 8630.49   | 10332.41  | AB046852  | 1633.099  | 1170.571  |
| T59562    | 18934.523 | 21093.117 | NM_003718 | 64956.656 | 58750.422 | AF086167  | 954.603   | 701.062   |
| NM_018219 | 1336.474  | 1922.688  | NM_007062 | 2643.19   | 2319.685  | AF085891  | 5927.88   | 4677.109  |
| AK026368  | 1086.05   | 1926.108  | NM_002010 | 625.454   | 693.192   | AF019618  | 2946.921  | 2952.267  |
| NM_014114 | 6248.107  | 11022.842 | NM_014180 | 28866.666 | 30359.313 | AK025656  | 4826.987  | 4081.129  |
| AF147414  | 627.969   | 1181.502  | NM_017706 | 4373.114  | 3474.028  | AF161414  | 9257.816  | 7371.712  |
| U62822    | 12891.038 | 14084.942 | AF334406  | 3670.969  | 3633.539  | AK025967  | 1370.678  | 1568.006  |
| NM_003534 | 70031.664 | 66971.547 | NM_017444 | 14750.587 | 14038.651 | AL110177  | 4029.73   | 2773.848  |
| L08437    | 17704.539 | 17535.973 | NM_018025 | 2983.886  | 3293.157  | AK022686  | 14267.601 | 12866.033 |
| AK057143  | 10552.826 | 11784.951 | NM_015999 | 13081.574 | 14073.706 | AK023516  | 11459.072 | 10937.302 |
| NM_015594 | 8196.53   | 8971.243  | NM_003804 | 31726.775 | 37740.625 | AK023864  | 21232.887 | 23737.018 |
| AK024399  | 1629.591  | 1691.316  | NM_018453 | 11151.268 | 11659.492 | AK024183  | 2373.636  | 2629.262  |
| AF056423  | 1829.927  | 2151.878  | NM_004708 | 64984.098 | 65667.914 | AK023017  | 7968.074  | 8413.876  |
| U00956    | 496.482   | 740.529   | NM_016001 | 22173.699 | 22331.787 | AK023610  | 2027.574  | 1196.173  |
| X04293    | 1392.057  | 1581.314  | NM_016108 | 10568.646 | 10577.742 | AK023908  | 22537.379 | 21687.234 |
| AK026475  | 1481.284  | 1401.674  | AL137722  | 962.321   | 1102.894  | AK024236  | 3139.298  | 4053.786  |
| K01884    | 2085.853  | 1813.476  | S49432    | 13200.063 | 14030.088 | AK022098  | 1790.578  | 1706.1    |
| U00962    | 6949.327  | 6864.891  | D86984    | 6903.529  | 6713.701  | AB040933  | 1683.354  | 1447.692  |
| NM_000522 | 825.847   | 898.672   | NM_015959 | 2260.197  | 2349.402  | AK022072  | 1119.259  | 692.029   |
| NM_003830 | 1802.614  | 1384.547  | AF217974  | 15568.972 | 16076.246 | AK026900  | 4745.008  | 3406.725  |
| NM_000842 | 1723.895  | 1889.853  | NM_001910 | 5178.544  | 5680.655  | AK025020  | 12289.393 | 11375.52  |
| NM_015642 | 2621.84   | 3208.345  | J03210    | 706.072   | 884.48    | AF086009  | 989.477   | 1064.722  |
| NM_004640 | 22571.316 | 27530.869 | NM_001909 | 13486.492 | 16883.623 | AF086463  | 6363.844  | 7005.051  |
| NM_002901 | 734.959   | 1010.712  | NM_012198 | 30905.254 | 36687.406 | AK024130  | 1290.818  | 1407.531  |
| NM_016222 | 17913.652 | 24782.904 | NM_003368 | 10360.177 | 10039.021 | AK024598  | 7280.628  | 7325.34   |

|           |           |           |           |           |           |           |           |           |
|-----------|-----------|-----------|-----------|-----------|-----------|-----------|-----------|-----------|
| AB037823  | 6131.185  | 8085.77   | AB040886  | 3166.822  | 3403.707  | AF087983  | 2084.891  | 2062.05   |
| NM_015380 | 30645.494 | 43826.914 | NM_001460 | 1334.841  | 1063.226  | NM_020234 | 2408.982  | 1843.597  |
| BE254485  | 10328.746 | 13583.647 | AB029020  | 4773.047  | 4572.699  | AK021678  | 4647.61   | 6943.13   |
| NM_002732 | 2704.523  | 3558.852  | AK022759  | 8225.8    | 7659.656  | AJ011377  | 7751.345  | 10210.738 |
| AK022694  | 5991.004  | 6564.732  | NM_012333 | 19126.391 | 20778.289 | AL137734  | 3668.521  | 3821.939  |
| BC005946  | 51641.082 | 55287.711 | AF217798  | 3916.384  | 4102.918  | AK023784  | 2580.606  | 2113.76   |
| AK021893  | 6486.606  | 6622.392  | AF161472  | 6237.63   | 6583.214  | AK026323  | 6908.955  | 5426.564  |
| NM_001048 | 21062.225 | 23822.01  | AL133642  | 21788.479 | 24838.947 | AL109710  | 3513.588  | 3485.5    |
| NM_001508 | 1187.306  | 1305.61   | NM_006330 | 38355.254 | 46407.328 | AK021538  | 934.977   | 945.882   |
| AK026497  | 8364.671  | 10991.213 | NM_015873 | 7890.424  | 9248.624  | AK023793  | 4614.295  | 3986.892  |
| BE958139  | 4634.957  | 5594.583  | NM_000377 | 11260.844 | 11967.087 | AK022185  | 785.29    | 489.385   |
| AF085359  | 1080.245  | 1309.003  | NM_006818 | 3644.185  | 3565.198  | AK023286  | 4103.472  | 2823.291  |
| AF086516  | 4359.329  | 4172.07   | NM_016823 | 9370.719  | 10806.35  | AK021544  | 1525.725  | 1209.415  |
| D86978    | 14506.674 | 14054.072 | AL570170  | 5020.206  | 4006.941  | AL079282  | 1664.281  | 1586.555  |
| AL080060  | 1229.346  | 1392.667  | D56495    | 2895.971  | 2792.024  | AF116714  | 1513.218  | 1619.824  |
| NM_005267 | 5855.793  | 6294.048  | U09410    | 7746.578  | 7700.972  | NM_014058 | 4808.47   | 4273.31   |
| U80763    | 998.083   | 1095.604  | NM_020229 | 5962.121  | 7003.992  | AK026340  | 1387.314  | 1072.618  |
| AF086017  | 1826.366  | 2044.996  | NM_001186 | 12464.884 | 13950.644 | NM_018584 | 1232.882  | 1508.352  |
| NM_005780 | 17007.537 | 16755.967 | NM_004502 | 12496.543 | 12417.856 | AY007126  | 26750.822 | 24046.586 |
| NM_004948 | 737.609   | 535.916   | AF000560  | 17070.17  | 19004.971 | AF085951  | 15595.971 | 14688.28  |
| NM_003288 | 858.504   | 561.491   | NM_013282 | 4495.312  | 7405.745  | AF131787  | 1062.527  | 739.339   |
| NM_000888 | 16277.688 | 18101.793 | NM_005777 | 18628.307 | 17944.334 | AF087989  | 3815.41   | 3231.008  |
| NM_000598 | 27177.775 | 25388.34  | NM_012345 | 9652.223  | 9294.224  | Z70715    | 3012.157  | 3208.795  |
| X99663    | 12195.58  | 16706.76  | U94387    | 1346.599  | 1131.672  | NM_018182 | 8372.658  | 9491.433  |
| NM_016552 | 1509.116  | 2527.984  | NM_005826 | 37043.758 | 40613.594 | U80771    | 5586.285  | 5573.233  |
| AK025340  | 1244.861  | 1372.619  | NM_004592 | 7970.67   | 7660.861  | NM_006188 | 861.558   | 830.342   |
| NM_003568 | 4295.67   | 6052.237  | NM_015001 | 36451.664 | 40301.41  | AJ272173  | 22128.441 | 18070.695 |
| NM_004841 | 3151.589  | 4236.965  | NM_019027 | 3171.531  | 3017.125  | Z24724    | 10161.864 | 6950.982  |
| NM_004114 | 2936.322  | 4011.634  | NM_016107 | 18951.84  | 19318.635 | AK022712  | 8687.131  | 7525.76   |
| M35410    | 13385.821 | 14880.156 | NM_002567 | 43650.219 | 45145.395 | AK024132  | 3832.629  | 3564.675  |
| AB023227  | 4271.523  | 4086.588  | NM_001404 | 11459.388 | 11377.96  | AK021863  | 56921.98  | 51512.223 |
| NM_005778 | 32473.896 | 43082.199 | AF225422  | 38803.879 | 45116.91  | AK024208  | 899.39    | 892.609   |
| AK023071  | 9249.933  | 9825.928  | AB040960  | 32216.605 | 33473.285 | NM_020428 | 923.813   | 785.661   |
| NM_004041 | 1442.587  | 1548.866  | NM_015946 | 6386.043  | 6600.215  | NM_005684 | 968.18    | 920.705   |
| AK022888  | 5188.811  | 6102.239  | NM_006303 | 23954.486 | 23088.727 | AK022293  | 1444.154  | 1876.02   |
| AK024484  | 8704.938  | 8975.513  | AK026904  | 6047.729  | 6871.583  | AL117439  | 2611.706  | 2272.95   |
| NM_002632 | 605.201   | 478.474   | NM_003793 | 829.589   | 818.66    | AL133065  | 2076.632  | 1765.588  |
| NM_001953 | 25364.129 | 27289.182 | NM_001985 | 8590.202  | 9981.841  | NM_005297 | 4515.598  | 4157.792  |
| NM_001408 | 374.35    | 564.022   | NM_000102 | 6165.272  | 7317.984  | U80769    | 1921.6    | 1817.506  |
| NM_002292 | 922.233   | 1547.021  | NM_002490 | 26731.848 | 31439.234 | NM_014568 | 880.296   | 824.444   |
| NM_000168 | 2360.914  | 2496.093  | BE563532  | 6118.791  | 6235.698  | AK025052  | 4870.882  | 5509.828  |
| AF305200  | 1178.434  | 1327.398  | NM_001916 | 24147.285 | 28885.35  | NM_014388 | 2618.888  | 3401.977  |
| NM_014583 | 927.912   | 736.555   | NM_002491 | 2744.319  | 2127.226  | U85044    | 2213.828  | 2204.988  |
| NM_006613 | 14456.573 | 15345.265 | NM_015425 | 9239.505  | 9064.706  | BC018880  | 1902.601  | 1763.089  |
| NM_004638 | 16482.385 | 15538.675 | NM_015153 | 13256.655 | 11168.243 | AF086090  | 3395.394  | 3014.451  |
| NM_005373 | 1682.589  | 1509.479  | AB032966  | 58765.91  | 48069.277 | AK002173  | 48808.547 | 57158.246 |
| L40027    | 8258.954  | 9528.389  | M26747    | 2700.241  | 2345.516  | NM_017748 | 5310.536  | 6176.876  |
| NM_003718 | 56404.793 | 54890.375 | NM_014820 | 18448.43  | 15607.454 | NM_020188 | 45173.82  | 51379.188 |
| NM_007062 | 2128.514  | 2862.496  | NM_005035 | 9098.314  | 7802.53   | U88897    | 9839.963  | 10388.547 |
| NM_002010 | 497.003   | 627.435   | NM_019014 | 15948.605 | 14914.877 | NM_003493 | 66365.891 | 62016.688 |
| NM_014180 | 27028.053 | 35009.035 | NM_002097 | 41708.797 | 45520.887 | AL133430  | 34169.23  | 19521.648 |
| NM_017708 | 4299.365  | 5071.443  | X04706    | 37459.652 | 41533.043 | AF070633  | 60947.996 | 51521.922 |
| AF334406  | 5069.874  | 5376.956  | NM_018039 | 1679.663  | 1880.677  | S51971    | 68053.188 | 68093.336 |

|           |           |           |           |           |           |           |           |           |
|-----------|-----------|-----------|-----------|-----------|-----------|-----------|-----------|-----------|
| NM_017444 | 18542.363 | 24525.186 | NM_006494 | 32767.859 | 35188.176 | AF054996  | 41361.063 | 44111.891 |
| NM_018025 | 3545.465  | 5010.099  | X52343    | 13232.141 | 14173.38  | AF090098  | 9756.136  | 10168.751 |
| NM_015995 | 11809.908 | 14361.179 | NM_005853 | 4584.449  | 5015.72   | AF146694  | 5650.076  | 6136.208  |
| NM_003804 | 4915.114  | 5678.806  | X99681    | 3336.985  | 3381.746  | AK057104  | 2861.648  | 3033.78   |
| NM_018453 | 10637.405 | 13417.499 | NM_003120 | 26427.049 | 26164.275 | AK024979  | 58079.348 | 53929.18  |
| NM_004705 | 64139.301 | 61422.988 | X52360    | 13200.692 | 13820.388 | AF233648  | 3724.248  | 3395.012  |
| NM_016001 | 16775.057 | 15203.772 | NM_002636 | 60528.281 | 54543.508 | NM_013435 | 43702.961 | 35906.887 |
| NM_016105 | 5366.699  | 6051.398  | NM_016494 | 63280.633 | 56534.48  | NM_003405 | 61532.137 | 59419.734 |
| S49432    | 507.374   | 861.612   | NM_020384 | 8975.743  | 9645.8    | NM_018315 | 12231.946 | 12371.08  |
| D86984    | 3510.594  | 4142.208  | NM_006055 | 44509.273 | 49262.301 | AB011180  | 8273.296  | 7873.3    |
| AF217974  | 2516.859  | 3093.042  | NM_006625 | 26481.516 | 29503.854 | NM_007167 | 11631.454 | 10501.514 |
| NM_001910 | 838.62    | 810.97    | M97496    | 62253.516 | 70573.453 | NM_014832 | 4546.71   | 4018.084  |
| AK023354  | 996.283   | 853.553   | NM_002309 | 1293.897  | 608.851   | NM_003243 | 896.521   | 778.824   |
| NM_001905 | 10131.743 | 10619.526 | AK026074  | 7232.25   | 7987.022  | NM_002477 | 37839.313 | 42726.016 |
| NM_012195 | 4057.882  | 4478.022  | NM_003172 | 11943.349 | 10822.383 | NM_004673 | 1236.491  | 1640.536  |
| AF090904  | 789.967   | 882.967   | NM_004809 | 27097.016 | 26602.014 | Y17180    | 68290.008 | 63979.945 |
| NM_003365 | 9376.743  | 10021.492 | AA903183  | 2783.744  | 2875.554  | NM_005645 | 3137.714  | 3467.605  |
| AB040886  | 3658.234  | 3781.918  | H41522    | 14498.232 | 13099.076 | AK021566  | 1175.572  | 216.435   |
| NM_001460 | 1169.054  | 1305.695  | AA460291  | 50949.488 | 49258.305 | NM_002037 | 2711.732  | 2592.085  |
| AB029020  | 5181.778  | 6152.999  | BI821333  | 19231.469 | 19204.914 | NM_016345 | 3539.882  | 3271.954  |
| AK022759  | 11305.58  | 10733.073 | X51841    | 63873.094 | 60423.535 | NM_020157 | 36695     | 38899.504 |
| NM_012333 | 20144.283 | 20270.746 | AF051344  | 62153.91  | 53223.637 | X64991    | 1740.128  | 1602.727  |
| AF217798  | 6377.814  | 5748.399  | BG506100  | 16016.308 | 17042.379 | AK025703  | 11730.871 | 12351.167 |
| AF161472  | 6623.101  | 6984.474  | X53586    | 3827.804  | 3675.117  | NM_018185 | 6503.618  | 6645.379  |
| AL133642  | 4437.843  | 4713.778  | M17176    | 2769.39   | 2748.867  | AK022598  | 10402.945 | 9000.473  |
| AB011154  | 3252.849  | 3974.388  | M26576    | 2069.972  | 1957.672  | AK024306  | 1917.645  | 1793.273  |
| AF124432  | 2912.153  | 3417.758  | M32972    | 20966.77  | 22478.641 | NM_018322 | 24155.387 | 21905.646 |
| NM_006330 | 32069.822 | 33658.738 | D11151    | 1435.622  | 946.555   | AK025862  | 14804.017 | 14734.122 |
| NM_015873 | 1010.926  | 1192.553  | D89854    | 2277.935  | 2932.511  | AK026495  | 3068.633  | 2970.842  |
| NM_000377 | 9568.23   | 9751.754  | M13207    | 3768.397  | 3359.319  | AL137493  | 1786.34   | 1373.626  |
| NM_006815 | 1571.119  | 1810.941  | X14885    | 1649.941  | 1705.634  | NM_002457 | 1364.061  | 1384.108  |
| NM_016823 | 9165.688  | 10185.456 | M97815    | 3753.808  | 3610.778  | NM_001335 | 19968.02  | 18894.475 |
| AL570170  | 4859.622  | 4485.091  | NM_003001 | 4746.768  | 5343.238  | NM_003637 | 1916.956  | 1640.764  |
| D56495    | 932.766   | 875.233   | NM_012400 | 1870.816  | 1630.8    | BC035133  | 1676.769  | 1369.993  |
| U09410    | 5797.134  | 5379.494  | NM_005384 | 5029.131  | 4415.161  | NM_004233 | 22153.307 | 22293.762 |
| NM_020225 | 1491.491  | 1789.91   | NM_006850 | 679.493   | 634       | NM_001544 | 23485.967 | 21853.115 |
| NM_001186 | 11999.987 | 13838.476 | AB013103  | 1856.417  | 2074.706  | X58531    | 2862.482  | 2555.665  |
| NM_004502 | 6189.535  | 7026.009  | AF019225  | 12129.418 | 11593.778 | AB011168  | 16380.095 | 15403.392 |
| AF000560  | 15007.882 | 20238.625 | Z36803    | 22814.201 | 21901.035 | BE794262  | 12359.499 | 12450.1   |
| NM_013282 | 3417.695  | 5647.225  | NM_013371 | 2062.462  | 2000.86   | NM_003212 | 14378.576 | 10280.002 |
| NM_005777 | 19391.969 | 23293.137 | NM_000707 | 18720.055 | 18198.105 | NM_006382 | 6640.226  | 1942.9    |
| NM_012345 | 6562.164  | 6274.55   | AF202092  | 27773.945 | 27483.768 | NM_004811 | 30075.918 | 32331.668 |
| U94387    | 1071.028  | 1485.22   | NM_003201 | 15686.09  | 12745.389 | AK021910  | 66408.75  | 59346.09  |
| NM_005825 | 25776.104 | 35629.309 | AB011139  | 8506.427  | 6641.506  | NM_004745 | 7545.555  | 6706.904  |
| NM_004592 | 12932.251 | 14515.647 | NM_006919 | 5044.784  | 5942.79   | NM_002665 | 47487.113 | 49350.672 |
| NM_015001 | 10735.512 | 11874.955 | AK022625  | 46209.527 | 46534.004 | NM_001055 | 1309.854  | 1513.317  |
| NM_019027 | 3454.296  | 3792.135  | NM_005425 | 2384.981  | 2167.582  | NM_001380 | 691.89    | 804.264   |
| NM_016107 | 10537.317 | 11042.257 | AK023084  | 29065.166 | 28919.314 | NM_014315 | 22155.59  | 25589.613 |
| NM_002567 | 45118.934 | 43376.527 | AK025588  | 27249.771 | 27123.365 | NM_004054 | 10925.997 | 9240.533  |
| NM_001404 | 15289.899 | 14037.379 | NM_003185 | 9115.856  | 8678.791  | NM_001135 | 20552.969 | 22943.488 |
| NM_001605 | 39282.211 | 39432.418 | NM_007118 | 2939.66   | 3170.469  | NM_003443 | 67371.813 | 76320.813 |
| AF225422  | 10057.049 | 9793.551  | U59431    | 43289.129 | 46780.59  | NM_002025 | 4317.683  | 3670.819  |
| AB040960  | 34698.34  | 28595.898 | U49349    | 3293.254  | 3010.324  | AB015228  | 4185.027  | 4343.719  |

|           |           |           |           |           |           |           |           |           |
|-----------|-----------|-----------|-----------|-----------|-----------|-----------|-----------|-----------|
| NM_015946 | 5622.406  | 5036.799  | NM_020152 | 6076.909  | 6432.911  | AL049685  | 4539.433  | 3821.589  |
| NM_006303 | 24217.102 | 20987.369 | NM_013404 | 6877.433  | 7364.388  | AK026800  | 21538.109 | 16905.496 |
| AK026904  | 4102.836  | 4956.779  | AF300648  | 627.593   | 328.734   | NM_001442 | 2284.24   | 1901.992  |
| AB002364  | 824.735   | 804.602   | NM_003966 | 1918.559  | 1774.786  | NM_017775 | 18777.076 | 18030.908 |
| NM_003793 | 770.566   | 643.435   | BC012333  | 18685.266 | 18826.004 | AK001958  | 2899.629  | 2907.893  |
| NM_001985 | 8965.763  | 7383.804  | AF237952  | 14263.206 | 13219.838 | AK025947  | 5081.866  | 5765.521  |
| NM_000102 | 1627.936  | 1373.05   | AL079287  | 4240.822  | 3964.226  | AF217973  | 14479.279 | 15445.829 |
| NM_002490 | 26707.918 | 28787.652 | NM_014427 | 11460.313 | 10927.225 | NM_007033 | 22311.428 | 22257.576 |
| BE563532  | 6376.359  | 6969.763  | AB046769  | 18575.135 | 19596.383 | AF226048  | 14941.651 | 14116.043 |
| NM_001916 | 36769.582 | 43648.527 | NM_015922 | 15566.597 | 17106.053 | NM_005573 | 11090.095 | 4237.289  |
| NM_002491 | 2904.964  | 3509.113  | NM_020381 | 7164.763  | 7330.558  | D50918    | 46855.207 | 53497.797 |
| NM_015425 | 10311.312 | 11699.917 | NM_002957 | 23043.357 | 22280.521 | U48734    | 12867.888 | 16261.646 |
| NM_015153 | 11648.187 | 11028.313 | NM_018106 | 11916.601 | 12230.397 | NM_006400 | 16601.051 | 21812.574 |
| AB032966  | 5107.077  | 5614.103  | NM_003725 | 4987.163  | 4792.189  | NM_003903 | 9608.739  | 10116.656 |
| M26747    | 3546.014  | 4060.731  | BE899154  | 4759.547  | 4516.164  | NM_017955 | 9929.007  | 10612.646 |
| NM_014820 | 18093.756 | 19913.34  | NM_004863 | 9269.267  | 8938.716  | NM_016060 | 10883.261 | 13984.979 |
| NM_005035 | 8452.889  | 8181.121  | AB032963  | 1690.435  | 1524.594  | NM_002208 | 30628.145 | 30140.486 |
| NM_019014 | 15332.101 | 14531.572 | U15688    | 6261.482  | 5598.122  | NM_007216 | 5528.895  | 6533.977  |
| NM_002097 | 30393.412 | 30903.479 | NM_018448 | 16244.392 | 17004.959 | AK023518  | 5341.294  | 5554.061  |
| X04706    | 2446.992  | 3028.821  | NM_018184 | 15201.815 | 15210.052 | AJ007607  | 1687.319  | 1388.123  |
| NM_018039 | 2491.288  | 2854.292  | AB046823  | 3520.45   | 3642.857  | NM_000095 | 7443.941  | 7501.462  |
| NM_006494 | 7928.879  | 8585.557  | NM_004929 | 3840.101  | 4070.18   | NM_013390 | 13005.002 | 12940.409 |
| X52343    | 1774.897  | 2007.266  | NM_004662 | 1954.823  | 1987.037  | NM_002825 | 1201.933  | 823.999   |
| NM_005853 | 3779.785  | 3652.386  | NM_016639 | 62877.527 | 59915.566 | J02783    | 46279.176 | 53650.172 |
| X99681    | 1029.195  | 1074.511  | U61739    | 33265.426 | 41186.297 | NM_018137 | 1382.083  | 1229.395  |
| NM_003120 | 22041.178 | 21257.275 | AJ132089  | 2589.534  | 2484.505  | NM_006577 | 52928.895 | 55398.582 |
| X52360    | 2809.335  | 3195.667  | U92819    | 10542.79  | 11044.546 | NM_004413 | 1591.455  | 1707.546  |
| NM_002636 | 19112.051 | 21243.973 | AB020626  | 8560.416  | 9488.655  | NM_005317 | 4458.944  | 3571.083  |
| NM_016494 | 36858.02  | 40337.316 | NM_002036 | 46079.758 | 48163.195 | AF120493  | 2295.799  | 2080.411  |
| NM_020384 | 5064.808  | 4064.486  | NM_014305 | 6994.566  | 6441.106  | U12597    | 7642.663  | 7615.473  |
| NM_006058 | 47477.145 | 32713.559 | NM_012123 | 32971.957 | 29883.521 | U28055    | 1751.631  | 1971.321  |
| NM_006628 | 17844.652 | 13035.1   | U87972    | 7231.412  | 6831.271  | AB044343  | 31717.377 | 30092.283 |
| M97496    | 18235.758 | 13434.488 | NM_017925 | 7688.401  | 8036.378  | NM_001285 | 1145.744  | 836.673   |
| NM_002309 | 1147.95   | 977.051   | AK022208  | 30326.877 | 25219.016 | NM_018409 | 1152.165  | 513.893   |
| AK026074  | 2382.303  | 1955.798  | NM_003171 | 17491.973 | 13013.347 | NM_014662 | 1776.027  | 1761.501  |
| NM_003172 | 9824.141  | 7958.027  | NM_006437 | 22215.678 | 24929.016 | NM_005178 | 28178.213 | 30885.51  |
| NM_004809 | 2578.372  | 2314.739  | NM_017890 | 4484.668  | 4001.358  | NM_017702 | 8794.482  | 13645.409 |
| AA903183  | 1464.802  | 1482.459  | AK021654  | 8955.862  | 7073.686  | AB014516  | 13323.03  | 14047.565 |
| H41522    | 678.456   | 577.799   | NM_016481 | 3982.943  | 2268.806  | Z83950    | 1647.933  | 2272.548  |
| AA460291  | 11032.433 | 15310.77  | NM_003925 | 25844.52  | 23299.686 | AL080063  | 4008.735  | 5125.743  |
| BI821333  | 26376.016 | 32354.461 | Z15114    | 17528.197 | 16106.017 | NM_016590 | 1359.68   | 1798.356  |
| X51841    | 5903.813  | 6750.278  | AB040812  | 45323.426 | 51390.316 | NM_005625 | 26705.439 | 34015.051 |
| AF051344  | 21414.068 | 21161.844 | NM_017625 | 1075.722  | 1395.602  | X15262    | 12934.924 | 12865.651 |
| BG506100  | 10014.918 | 13389.958 | NM_006285 | 17503.943 | 17745.314 | NM_005475 | 3664.292  | 3559.094  |
| X53586    | 3776.132  | 4349.975  | NM_003656 | 65677.438 | 57198.98  | NM_007289 | 8573.484  | 10086.197 |
| M26576    | 1488.542  | 1638.363  | NM_001348 | 32452.266 | 41686.867 | NM_004219 | 77374.961 | 62929.703 |
| M32972    | 5518.576  | 5395.511  | NM_000215 | 14395.438 | 16004.088 | NM_004575 | 642.604   | 1095.081  |
| D11151    | 1234.849  | 1075.83   | AK027148  | 46799.387 | 45166.969 | AB023232  | 2036.374  | 1774.159  |
| D89854    | 2449.136  | 2239.279  | NM_005084 | 10214.615 | 11254.833 | NM_017420 | 1250.197  | 1373.558  |
| M13207    | 2195.547  | 2362.997  | NM_007283 | 15314.922 | 15796.68  | AL137589  | 4423.549  | 3644.848  |
| M97815    | 2171.833  | 2042.103  | NM_006111 | 15661.644 | 15621.639 | AF036943  | 1373.658  | 1123.476  |
| NM_003001 | 8038.04   | 9675.865  | AK026071  | 26715.932 | 29761.949 | NM_002502 | 25192.416 | 19981.074 |
| NM_012400 | 1465.877  | 456.759   | NM_006628 | 27126.035 | 30924.947 | AF226732  | 31388.781 | 28684.248 |

|           |           |           |           |           |           |           |           |           |
|-----------|-----------|-----------|-----------|-----------|-----------|-----------|-----------|-----------|
| NM_005384 | 5208.176  | 3462.844  | M97496    | 62269.512 | 69436.406 | NM_006312 | 17047.156 | 16630.227 |
| NM_006850 | 1685.053  | 1028.17   | NM_002309 | 1108.623  | 537.699   | NM_002805 | 3103.771  | 3447.531  |
| AB013103  | 2094.873  | 1564.082  | AK026074  | 4883.941  | 5556.788  | NM_004290 | 606.685   | 839.558   |
| AF019225  | 7685.434  | 4765.777  | NM_003172 | 12396.554 | 11736.133 | NM_003662 | 1586.548  | 1846.436  |
| Z36803    | 10016.481 | 7369.284  | NM_004809 | 23827.537 | 23877.336 | NM_002930 | 34506.402 | 40934.336 |
| NM_013371 | 1113.203  | 914.23    | AA903183  | 2538.451  | 2633.81   | NM_015830 | 65949.125 | 64226.711 |
| NM_000707 | 15328.636 | 11212.138 | H41522    | 13771.407 | 13469.214 | NM_004713 | 5040.556  | 5281.195  |
| AF202092  | 25652.719 | 16598.418 | AA460291  | 46032.66  | 47978.852 | NM_003760 | 1781.88   | 2234.302  |
| NM_003201 | 16139.5   | 12956.001 | BI821333  | 15350.112 | 13432.479 | NM_001690 | 45087.379 | 47016.516 |
| AB011139  | 6232.713  | 5483.069  | X51841    | 65680.188 | 62697.508 | NM_000944 | 10672.735 | 11647.257 |
| NM_006910 | 2794.118  | 2285.272  | AF051344  | 59255.988 | 50404.855 | NM_012230 | 5043.92   | 6159.364  |
| AK022625  | 11987.177 | 8758.594  | BG506100  | 15489.633 | 15400.404 | NM_012262 | 3369.647  | 4203.847  |
| NM_005425 | 3006.237  | 2003.038  | X53586    | 3381.958  | 3462.012  | S70004    | 6275.371  | 5268.854  |
| AK023084  | 3817.768  | 3797.772  | M17176    | 2288.579  | 2277.513  | AF105378  | 6918.657  | 5669.872  |
| AK025588  | 2193.096  | 1814.074  | M26576    | 1711.665  | 1338.509  | NM_000167 | 8175.522  | 9334.935  |
| NM_003180 | 4669.318  | 3764.379  | M32972    | 18766.201 | 18324.643 | AY007125  | 6633.079  | 6635.188  |
| NM_007118 | 2371.68   | 2618.788  | D11151    | 778.43    | 1140.9    | AB032987  | 7362.273  | 6443.787  |
| U59431    | 2977.615  | 2761.759  | D89854    | 2071.996  | 2394.604  | NM_017567 | 25779.891 | 22114.045 |
| U49349    | 1841.075  | 1735.298  | M13207    | 2933.811  | 3051.677  | NM_000691 | 14435.17  | 13270.101 |
| NM_020152 | 5031.32   | 4014.271  | X14885    | 1657.094  | 1231.927  | Y18643    | 1071.954  | 730.282   |
| NM_013404 | 1489.96   | 1733.637  | M97815    | 3429.517  | 3377.827  | D86971    | 43323.195 | 40216.941 |
| AF300648  | 324.794   | 917.103   | AF085893  | 4479.831  | 3821.704  | NM_003073 | 17754.01  | 13995.994 |
| NM_002364 | 904.412   | 1192.442  | NM_003102 | 1730.821  | 1944.137  | NM_014040 | 1102.215  | 1661.874  |
| NM_003960 | 1549.779  | 1224.899  | NM_006850 | 937.825   | 605.027   | AF274863  | 1939.68   | 2152.413  |
| BC012333  | 13862.806 | 11477.633 | AB013103  | 2171.495  | 2552.522  | AF319458  | 1049.859  | 1826.918  |
| AF237952  | 13318.834 | 11303.674 | AF019225  | 8902.247  | 8865.724  | AF024697  | 7199.424  | 8990.531  |
| AL079287  | 6166.654  | 5815.23   | Z36803    | 21222.137 | 22760.682 | NM_018651 | 966.346   | 1301.443  |
| NM_014427 | 5442.667  | 5471.95   | NM_013371 | 2450.877  | 2472.284  | AF164156  | 666.239   | 751.111   |
| AB046769  | 5984.144  | 5569.438  | NM_000707 | 18191.445 | 17450.473 | NM_005612 | 4685.6    | 6284.524  |
| NM_015922 | 11071.816 | 10560.032 | AF202092  | 25710.846 | 24995.781 | AK025281  | 1157.993  | 1232.605  |
| NM_020381 | 4858.255  | 3082.213  | NM_003201 | 15921.317 | 15022.023 | AB040918  | 20190.518 | 21884.189 |
| NM_002957 | 5280.376  | 3717.158  | AB011139  | 8402.399  | 6891.212  | NM_015850 | 7387.503  | 9823.151  |
| NM_018100 | 11763.337 | 11866.263 | NM_006910 | 4562.449  | 4584.297  | X60152    | 2456.335  | 3000.515  |
| NM_003725 | 4122.838  | 3479.725  | AK022625  | 44327.332 | 44648.234 | NM_002310 | 5200.057  | 5202.439  |
| BE899154  | 2940.137  | 2346.121  | NM_005425 | 2472.025  | 1570.631  | NM_012421 | 29285.51  | 30997.484 |
| NM_004863 | 13846.23  | 11993.393 | AK023084  | 27211.098 | 24382.857 | AB014601  | 2361.362  | 1966.225  |
| AB032963  | 2309.997  | 1814.885  | AK025588  | 22167.773 | 21687.93  | AK001393  | 36842.684 | 37544.555 |
| U15688    | 4605.287  | 3221.331  | NM_003180 | 7584.364  | 7758.292  | NM_000023 | 15781.396 | 12993.474 |
| NM_018440 | 13124.735 | 8964.459  | NM_007118 | 2247.177  | 2205.06   | AF022654  | 2226.494  | 1811.569  |
| NM_018184 | 12734.694 | 10965.96  | U59431    | 38604.383 | 41240.953 | NM_001143 | 2039.787  | 2008.9    |
| AB046823  | 1933.381  | 969.889   | U49349    | 3308.206  | 3316.789  | NM_003282 | 2019.809  | 2001.168  |
| NM_004920 | 1444.653  | 930.784   | NM_020152 | 5464.364  | 6084.225  | AK022638  | 27332.012 | 28684.84  |
| NM_004662 | 1605.239  | 921.594   | NM_013404 | 5572.607  | 5673.964  | BG698409  | 13172.363 | 11893.013 |
| NM_016630 | 30192.67  | 23068.322 | AF300648  | 2082.462  | 3474.938  | U36798    | 749.656   | 820.21    |
| U61739    | 4056.978  | 3575.411  | NM_003960 | 1763.075  | 1619.763  | AA220921  | 23374.965 | 25491.148 |
| AJ132089  | 1707.401  | 1571.859  | NM_020384 | 10573.969 | 10548.926 | N67770    | 4309.979  | 5115.181  |
| U92819    | 6612.803  | 5488.67   | NM_006050 | 47070.16  | 48568.551 | AA486200  | 61061.523 | 59469.129 |
| AB020626  | 2574.11   | 1983.135  | AL079287  | 4087.879  | 4065.163  | U90065    | 1508.667  | 1988.968  |
| NM_002030 | 1592.03   | 1670.335  | NM_014427 | 12387.528 | 12807.094 | AJ005898  | 23383.066 | 29699.287 |
| NM_014305 | 7624.696  | 7908.087  | AB046769  | 9377.12   | 10908.342 | X57303    | 10821.136 | 14383.744 |
| NM_012123 | 30326.133 | 21775.625 | NM_015922 | 13480.813 | 15616.729 | AA463224  | 2202.94   | 2742.285  |
| U87972    | 2964.334  | 3173.884  | NM_020381 | 8120.274  | 8522.171  | BG248802  | 21042.844 | 25679.711 |
| NM_017925 | 11083.955 | 13616.163 | NM_002957 | 21171.268 | 21344.125 | L19605    | 1916.472  | 2355.137  |

|           |           |           |           |           |           |           |           |           |
|-----------|-----------|-----------|-----------|-----------|-----------|-----------|-----------|-----------|
| AK022208  | 22149.863 | 21733.436 | NM_018106 | 10706.964 | 11390.852 | AA876532  | 17469.729 | 21964.793 |
| NM_003171 | 16842.141 | 10682.843 | NM_003725 | 5340.55   | 5096.006  | S74349    | 1294.205  | 1748.811  |
| NM_006437 | 29908.17  | 33087.086 | BE899154  | 5380.574  | 4259.659  | X07979    | 63047.695 | 56737.777 |
| NM_017890 | 5279.328  | 5321.477  | NM_004863 | 7386.557  | 7548.631  | BG324670  | 800.175   | 1168.31   |
| AK021654  | 2734.927  | 2975.571  | AB032963  | 1515.716  | 1323.007  | BG744224  | 47501.031 | 44995.777 |
| NM_016481 | 4248.749  | 2954.05   | U15688    | 5650.733  | 5165.192  | NM_006393 | 6794.074  | 5682.256  |
| NM_003925 | 16644.832 | 12355.746 | NM_018448 | 15376.41  | 14684.045 | NM_014923 | 1333.323  | 1036.636  |
| Z15114    | 18547.916 | 16184.032 | NM_018184 | 13957.7   | 14545.063 | NM_005477 | 33530.859 | 32741.303 |
| NM_006285 | 10108.056 | 5071.379  | AB046823  | 3412.885  | 3548.95   | NM_007018 | 1383.008  | 1037.46   |
| NM_003656 | 22371.391 | 18073.85  | NM_004929 | 3834.907  | 3494.114  | NM_004318 | 3373.926  | 2750.083  |
| NM_001348 | 3969.654  | 3122.786  | NM_004662 | 1696.205  | 1641.939  | L09089    | 6662.077  | 4954.394  |
| NM_000215 | 8012.016  | 7307.097  | NM_016639 | 62600.844 | 64599.625 | NM_002640 | 4732.8    | 3859.28   |
| AK027148  | 8201.527  | 6836.305  | U61739    | 33884.441 | 37778.566 | NM_000949 | 607.106   | 555.101   |
| NM_005084 | 10871.664 | 8923.797  | AJ132089  | 2588.819  | 1935.675  | M15530    | 7754.082  | 8771.254  |
| NM_007283 | 13878.538 | 11990.712 | U92819    | 9747.734  | 9113.751  | NM_000488 | 2328.428  | 2134.039  |
| NM_006111 | 13137.098 | 9840.548  | AB020626  | 7231.575  | 8136.701  | NM_001877 | 8544.937  | 10056.69  |
| AK026071  | 6422.999  | 5591.25   | NM_002036 | 40337.949 | 43413.137 | NM_014207 | 20690.73  | 24402.74  |
| NM_006628 | 18553.063 | 19958.363 | NM_012400 | 2171.587  | 2023.306  | AK002163  | 6090.244  | 7246.959  |
| M97496    | 18616.012 | 21052.842 | NM_005384 | 4888.567  | 5679.328  | NM_002287 | 4967.202  | 5503.791  |
| NM_002309 | 1744.199  | 1656.644  | NM_012123 | 32799.172 | 33494.066 | NM_012344 | 6966.272  | 7557.496  |
| AK026074  | 3238.666  | 3621.771  | U87972    | 6082.495  | 5410.561  | NM_002351 | 4552.411  | 6032.041  |
| NM_003172 | 11026.172 | 13784.143 | NM_017925 | 6656.138  | 7670.905  | NM_014385 | 2132.53   | 2976.719  |
| NM_004809 | 2497.398  | 3198.552  | AK022208  | 30407.664 | 29924.543 | NM_001704 | 2176.584  | 2851.649  |
| AA903183  | 1874.348  | 2162.849  | NM_003171 | 17181.506 | 12586.024 | AB036432  | 53719.637 | 54336.805 |
| H41522    | 956.801   | 1054.958  | NM_006437 | 19886.738 | 22036.459 | NM_003643 | 2103.481  | 2334.246  |
| AA460291  | 11821.195 | 15046.378 | NM_017890 | 5933.686  | 5181.323  | NM_003480 | 7744.301  | 7324.256  |
| BI821333  | 23377.336 | 27429.555 | AK021654  | 8971.519  | 6939.517  | NM_004059 | 992.684   | 1092.294  |
| X51841    | 5693.564  | 7101.218  | NM_016481 | 3319.209  | 1856.14   | NM_001634 | 12235.129 | 9059.155  |
| AF051344  | 22559.711 | 22782.211 | NM_003925 | 22366.566 | 18027.729 | NM_002267 | 19992.557 | 16017.172 |
| BG506100  | 15404.702 | 16993.852 | Z15114    | 17904.475 | 15745.982 | NM_006412 | 8360.412  | 7791.448  |
| X53586    | 4989.498  | 4674.963  | AB040812  | 41052.438 | 45108.48  | NM_003063 | 21306.549 | 19713.258 |
| M17176    | 2685.275  | 2002.485  | NM_017625 | 1518.091  | 665.152   | NM_014041 | 44462.234 | 48852.934 |
| M26576    | 1874.246  | 1309.742  | NM_006285 | 17952.801 | 18732.049 | NM_007169 | 22106.143 | 22303.529 |
| M32972    | 6173.801  | 3647.629  | NM_003656 | 65184.246 | 57938.305 | NM_014313 | 1403.719  | 1236.223  |
| D11151    | 1572.219  | 1589.178  | NM_001348 | 25886.979 | 27374.938 | AK024966  | 7323.553  | 8255.174  |
| D89854    | 1830.789  | 1605.42   | NM_000215 | 11309.682 | 11767.014 | NM_017585 | 26133.475 | 25855.164 |
| M13207    | 1975.704  | 1713.993  | AK027148  | 44632.758 | 43586.086 | NM_000033 | 5509.609  | 5457.427  |
| M97815    | 1669.876  | 1195.546  | NM_005084 | 9174.747  | 9427.019  | AF224741  | 2825.166  | 2475.61   |
| AF085893  | 1497.474  | 844.152   | NM_007283 | 14588.219 | 14279.163 | NM_006594 | 6798.558  | 7256.206  |
| NM_003102 | 1014.154  | 782.68    | NM_006111 | 14644.609 | 13927.523 | NM_004177 | 2598.617  | 3281.582  |
| NM_006850 | 1805.467  | 1896.114  | AK026071  | 25020.523 | 24118.957 | NM_012429 | 2326.895  | 3324.111  |
| AB013103  | 2248.161  | 2240.025  | BC012333  | 18310.977 | 17989.109 | NM_004871 | 11496.718 | 17159.568 |
| AF019225  | 5227.232  | 4938.279  | AF237952  | 15141.379 | 12641.095 | AB040903  | 564.225   | 755.915   |
| Z36803    | 8309.47   | 8718.447  | NM_002309 | 806.022   | 703.276   | NM_005698 | 16699.953 | 17547.906 |
| NM_013371 | 1661.038  | 1702.852  | AK026074  | 4559.988  | 4775.101  | AF202146  | 15399.188 | 16457.189 |
| NM_000707 | 16993.736 | 17944.846 | NM_003172 | 10813.101 | 9674.03   | NM_014868 | 7722.131  | 5111.907  |
| AF202092  | 27413.168 | 28851.637 | NM_004809 | 19683.293 | 19214.893 | AL442089  | 34743.586 | 28436.801 |
| NM_003201 | 18829.402 | 21127.699 | AA903183  | 3968.412  | 4433.584  | X83412    | 653.346   | 362.217   |
| AB011139  | 8035.615  | 9421.205  | H41522    | 14986.965 | 14755.514 | NM_001200 | 5631.075  | 5128.128  |
| NM_006919 | 1742.521  | 2009.509  | AA460291  | 43551.719 | 45194.891 | AB007964  | 631.219   | 789.995   |
| AK022625  | 4083.814  | 5270.216  | BI821333  | 16965.313 | 16377.512 | AF128541  | 9393.555  | 7786.039  |
| NM_005425 | 1422.493  | 1612.033  | X51841    | 62462.453 | 63049.336 | AK026305  | 18907.078 | 16740.66  |
| AK023084  | 5663.805  | 6362.113  | AF051344  | 55481.863 | 51328.379 | NM_002552 | 6464.524  | 6835.467  |



|           |           |           |           |           |           |           |           |           |
|-----------|-----------|-----------|-----------|-----------|-----------|-----------|-----------|-----------|
| AK025588  | 3551.143  | 4240.179  | BG506100  | 15633.354 | 13984     | NM_014321 | 10928.158 | 11491.009 |
| NM_00318E | 5768.825  | 6715.107  | X53586    | 3375.609  | 2923.638  | AK022733  | 3364.97   | 4300.104  |
| NM_007118 | 3244.483  | 3485.038  | M17176    | 2205.787  | 1844.163  | AB011132  | 12489.894 | 14733.703 |
| U59431    | 2570.977  | 2571.934  | M26576    | 1887.673  | 1084.467  | NM_02036Z | 21392.973 | 20521.459 |
| U49349    | 2167.226  | 1316.634  | M32972    | 18444.49  | 19387.299 | AB040937  | 5520.724  | 4516.565  |
| NM_02015Z | 4422.826  | 3001.228  | D11151    | 1168.247  | 835.017   | AF275798  | 54457.156 | 53209.418 |
| NM_013404 | 2061.624  | 2061.309  | D89854    | 2296.792  | 2073.591  | NM_005441 | 23449.76  | 25575.922 |
| NM_002364 | 1296.185  | 849.519   | M13207    | 3175.425  | 2769.963  | NM_01607C | 44858.344 | 46452.316 |
| NM_00396E | 1535.975  | 1438.651  | X14885    | 1586.297  | 1238.192  | AK023108  | 5003.079  | 5593.76   |
| NM_020384 | 7258.456  | 4976.403  | M97815    | 3559.76   | 2868.155  | AK026409  | 62792.578 | 52899.262 |
| NM_00605E | 48730.473 | 35159.301 | AF085893  | 4216.676  | 3409.965  | AF097025  | 14911.208 | 16222.75  |
| AL079287  | 4267.274  | 4844.875  | NM_00310Z | 1499.928  | 1884.406  | Y11339    | 18690.918 | 21956.994 |
| NM_014427 | 4404.363  | 4262.099  | NM_01430E | 6565.101  | 6783.545  | AB030176  | 1738.063  | 2296.671  |
| AB046769  | 5337.705  | 4924.934  | AB011139  | 8208.142  | 7426.213  | NM_003937 | 1132.615  | 1329.853  |
| NM_01592Z | 11565.062 | 15121.574 | NM_00691E | 2981.552  | 3597.452  | NM_002537 | 14090.621 | 15229.826 |
| NM_020381 | 5565.099  | 6532.728  | AK022625  | 40476.297 | 45064.742 | NM_00313E | 9842.867  | 11337.445 |
| NM_002957 | 5386.588  | 6152.548  | NM_00542E | 1746.292  | 1748.077  | NM_01231E | 11939.372 | 14588.901 |
| NM_01810E | 10765.313 | 12934.694 | AK023084  | 25591.635 | 26485.893 | AK001393  | 10906.149 | 8579.614  |
| NM_00372E | 4491.066  | 5191.045  | AK025588  | 26586.324 | 27656.902 | NM_00114Z | 2178.304  | 1730.96   |
| BE899154  | 3224.907  | 3678.785  | NM_00318E | 8078.857  | 7542.52   | NM_00328Z | 1717.81   | 1438.655  |
| NM_00486Z | 7712.364  | 9665.055  | NM_007118 | 2333.202  | 1889.786  | AK022638  | 27703.203 | 26193.184 |
| AB032963  | 2254.912  | 2450.596  | U59431    | 39001.051 | 40052.945 | BG698409  | 12649.434 | 10237.617 |
| U15688    | 4678.988  | 5218.377  | U49349    | 2924.967  | 2121.007  | U36798    | 959.715   | 805.479   |
| NM_01844E | 15570.857 | 19154.121 | NM_02015Z | 5289.065  | 4642.812  | AA220921  | 23474.928 | 26285.215 |
| NM_018184 | 14321.386 | 16804.4   | NM_013404 | 6991.434  | 6481.085  | N67770    | 3467.265  | 3604.882  |
| AB046823  | 2564.087  | 2779.059  | NM_006157 | 707.044   | 628.691   | AA486200  | 63071.293 | 56553.23  |
| NM_00492E | 3419.878  | 3721.987  | NM_00396E | 1868.639  | 1484.015  | U90065    | 1551.31   | 1558.107  |
| NM_00466Z | 2367.079  | 2110.986  | AK024443  | 62926.742 | 60877.215 | AJ005898  | 22460.662 | 20848.986 |
| NM_01663E | 32499.195 | 29746.994 | X06710    | 6664.111  | 5372.975  | X57303    | 13637.166 | 14897.609 |
| U61739    | 5196.132  | 4760.554  | AK000896  | 4613.531  | 4454.125  | AA463224  | 2756.43   | 3039.671  |
| AJ132089  | 2320.883  | 2080.591  | NM_00387Z | 1766.104  | 1809.655  | BG248802  | 19914.082 | 22832.139 |
| U92819    | 10137.38  | 7956.189  | NM_020384 | 10224.282 | 10411.516 | L19605    | 2228.993  | 2628.479  |
| AB020626  | 3694.766  | 2807.363  | NM_00605E | 44967.871 | 48234.602 | AA876532  | 20775.314 | 22810.854 |
| NM_00203E | 1850.311  | 1584.747  | NM_00662E | 31092.586 | 33681.129 | S74349    | 1189.966  | 1598.895  |
| NM_01240C | 1556.249  | 1260.272  | M97496    | 64038.895 | 64400.375 | X07979    | 64553.426 | 60326.824 |
| NM_005384 | 4907.095  | 3731.128  | NM_00165E | 28186.08  | 34668.316 | BG324670  | 788.572   | 1093.179  |
| NM_01212Z | 31173.004 | 27353.336 | AB020663  | 1984.61   | 2237.354  | BG744224  | 38471.695 | 45894.359 |
| U87972    | 3042.619  | 3527.814  | AF297866  | 7981.281  | 8559.232  | NM_01802E | 9816.856  | 12326.439 |
| NM_01792E | 9927.113  | 11234.789 | NM_002864 | 3350.391  | 3285.735  | NM_001707 | 35137.137 | 42459.836 |
| AK022208  | 20570.334 | 20968.824 | NM_017817 | 5543.015  | 5952.726  | AK022983  | 2216.472  | 2185.731  |
| NM_003171 | 19626.363 | 16748.18  | NM_018184 | 13589.566 | 13985.32  | NM_01492Z | 1240.632  | 1050.49   |
| NM_006437 | 25448.734 | 36051.039 | AB046823  | 2969.108  | 2499.801  | NM_00431E | 2803.903  | 2401.291  |
| NM_01789C | 4250.446  | 5237.804  | NM_00492E | 3222.119  | 2673.859  | L09089    | 6776.279  | 5189.937  |
| AK021654  | 3033.488  | 3250.815  | NM_00466Z | 1513.725  | 1116.798  | NM_00264C | 4321.036  | 3849.946  |
| NM_016481 | 3488.369  | 3753.105  | NM_01663E | 61593.629 | 55178.531 | X03084    | 796.93    | 556.595   |
| NM_00392E | 13138.888 | 14763.282 | U61739    | 33871.008 | 33520.348 | NM_00094E | 922.817   | 776.307   |
| Z15114    | 7117.814  | 8045.14   | AJ132089  | 2371.283  | 2178.04   | M15530    | 12696.404 | 13073.169 |
| AB040812  | 51812.445 | 54276.43  | U92819    | 10090.704 | 8727.278  | NM_00048E | 3257.774  | 3801.058  |
| NM_00628E | 22031.586 | 21124.176 | AB020626  | 8309.826  | 6870.331  | NM_001877 | 9491.988  | 10181.697 |
| NM_00365E | 20443.508 | 21130.664 | NM_00203E | 43395.258 | 48072.688 | NM_014207 | 21207.143 | 20932.988 |
| NM_00134E | 6504.873  | 7182.653  | NM_01240C | 2171.51   | 1814.219  | AF169158  | 1775.967  | 2183.92   |
| NM_00021E | 7051.792  | 7137.689  | NM_005384 | 4919      | 4562.257  | AK002163  | 6448.92   | 6868.843  |
| AK027148  | 23043.988 | 22506.135 | NM_00685C | 1121.454  | 475.889   | NM_002287 | 5629.719  | 5482.5    |

|           |           |           |           |           |           |           |           |           |
|-----------|-----------|-----------|-----------|-----------|-----------|-----------|-----------|-----------|
| NM_005084 | 16440.992 | 15999.771 | AB013103  | 2857.748  | 2289.118  | NM_012344 | 6562.874  | 7349.74   |
| NM_007283 | 16081.501 | 16251.167 | AF019225  | 13247.97  | 11298.729 | NM_002351 | 4826.22   | 6008.448  |
| NM_006111 | 20891.287 | 20082.992 | Z36803    | 25043.84  | 23240.965 | NM_014385 | 1991.201  | 2594.941  |
| AK026071  | 8315.282  | 8887.22   | NM_013371 | 2150.436  | 2042.456  | NM_001704 | 2637.949  | 3072.175  |
| BC012333  | 18306.861 | 18711.793 | NM_000707 | 19806.986 | 18780.119 | NM_003480 | 6311.999  | 7029.825  |
| AF237952  | 15266.749 | 13451.801 | AF202092  | 27248.123 | 26700.789 | NM_012421 | 25028.053 | 34084.793 |
| NM_002305 | 1104.374  | 849.521   | NM_003201 | 15220.61  | 14164.606 | AB014601  | 4244.66   | 5180.845  |
| AK026074  | 2390.095  | 2294.907  | NM_007283 | 17306.633 | 17105.568 | NM_002267 | 18725.26  | 17656.066 |
| NM_003172 | 9902.057  | 8497.412  | NM_006111 | 12844.503 | 12470.422 | NM_006412 | 8220.562  | 7622.728  |
| NM_004805 | 2967.806  | 3096.044  | AK026071  | 20591.619 | 19254.236 | NM_003063 | 21284.93  | 17673.332 |
| AA903183  | 1679.784  | 1723.393  | BC012333  | 16892.41  | 16374.878 | NM_014041 | 42654.281 | 43812.926 |
| H41522    | 925.886   | 948.773   | AF237952  | 12126.013 | 9271.412  | NM_007165 | 20015.32  | 17929.951 |
| AA460291  | 11222.096 | 13806.602 | AL079287  | 4359.857  | 3849.73   | NM_014313 | 1214.32   | 925.783   |
| BI821333  | 19092.682 | 20344.209 | NM_014427 | 11998.479 | 9230.167  | AK024966  | 5907.876  | 6221.816  |
| X51841    | 5837.855  | 7411.47   | AB046769  | 20642.969 | 18577.992 | NM_017585 | 32542.355 | 36158.465 |
| AF051344  | 18964.352 | 22050.957 | NM_015922 | 14701.134 | 13450.93  | NM_000033 | 6030.293  | 6607.752  |
| BG506100  | 12548.442 | 15404.505 | NM_020381 | 6974.021  | 5602.577  | AF224741  | 2660.156  | 2278.906  |
| X53586    | 3588.312  | 4485.975  | NM_002957 | 22338.482 | 18086.756 | NM_006594 | 7892.369  | 6482.901  |
| M17176    | 1788.137  | 2235.63   | NM_018106 | 10810.38  | 10409.495 | NM_004177 | 2849.94   | 3262.551  |
| M26576    | 1423.699  | 1225.125  | NM_003725 | 5415.174  | 4861.792  | NM_012425 | 2530.494  | 2736.914  |
| M32972    | 5212.033  | 5163.858  | BE899154  | 4449.717  | 3906.888  | NM_004871 | 10680.082 | 11485.916 |
| D11151    | 1131.978  | 1489.677  | NM_004863 | 8841.908  | 8323.821  | AB040903  | 540.413   | 1007.526  |
| D89854    | 2432.778  | 3183.129  | AK024573  | 3831.752  | 4212.033  | NM_005695 | 16385.77  | 19391.523 |
| M13207    | 2877.059  | 3300.295  | NM_002295 | 9135.672  | 8984.283  | AF202146  | 14864.05  | 20889.508 |
| X14885    | 1501.774  | 1260.787  | D79998    | 5954.199  | 5287.924  | NM_006393 | 4931.425  | 6236.801  |
| M97815    | 2848.465  | 2534.646  | AB032963  | 1623.494  | 1355.721  | X83412    | 703.582   | 908.876   |
| AF085893  | 1464.644  | 1720.977  | NM_000385 | 5062.487  | 3591.067  | NM_001200 | 6256.2    | 6475.943  |
| NM_003102 | 1482.167  | 1253.624  | AF301013  | 9020.663  | 8742.07   | AB007964  | 1452.236  | 1324.458  |
| NM_014305 | 8610.828  | 8319.87   | NM_018992 | 63437.047 | 62180.418 | AF128541  | 8088.071  | 6881.055  |
| AB011139  | 5259.258  | 3213.764  | U15688    | 6204.848  | 5370.76   | AK026305  | 17538.936 | 16267.057 |
| NM_006915 | 2093.782  | 1312.609  | NM_000483 | 12015.924 | 11244.831 | NM_002552 | 6219.121  | 6346.784  |
| AK022625  | 2845.179  | 2566.009  | NM_018445 | 14848.872 | 13993.147 | NM_014321 | 12121.087 | 10155.828 |
| NM_005425 | 1191.642  | 896.852   | AF085893  | 3177.699  | 2618.469  | AK022733  | 3643.503  | 3477.44   |
| AK023084  | 5127.119  | 4234.535  | NM_003102 | 1441.655  | 1081.204  | AB011132  | 11761.581 | 12656.519 |
| AK025588  | 2783.346  | 2671.195  | NM_014305 | 6167.301  | 5006.544  | NM_020362 | 19725.885 | 16263.066 |
| NM_003185 | 4737.279  | 3666.329  | NM_012123 | 31864.891 | 20918.676 | AB040937  | 5558.767  | 5214.517  |
| NM_007118 | 2593.126  | 1861.823  | U87972    | 7036.606  | 5042.96   | AF275798  | 56097.445 | 51632.246 |
| U59431    | 1829.662  | 1646.539  | NM_017925 | 7018.699  | 5678.977  | NM_005441 | 20083.242 | 16911.846 |
| U49349    | 1908.927  | 1614.072  | AK022208  | 29997.094 | 17299.855 | NM_016075 | 47229.629 | 53397.516 |
| NM_020152 | 4415.531  | 5257.751  | NM_003171 | 17211.102 | 9156.241  | AK023108  | 6816.223  | 6989.159  |
| NM_013404 | 1504.694  | 1963.473  | NM_006437 | 21921.498 | 19594.373 | AK026409  | 59417.668 | 56546.48  |
| NM_006157 | 573.279   | 589.707   | NM_017890 | 5856.696  | 4368.988  | AF097025  | 19260.814 | 20392.17  |
| NM_002364 | 806.222   | 675.866   | AK021654  | 10046.269 | 7554.966  | Y11339    | 18343.521 | 18961.172 |
| NM_003965 | 1345.698  | 1215.193  | NM_016481 | 3629.511  | 2472.468  | AB030176  | 1236.972  | 1527.66   |
| AK024443  | 64401.492 | 53650.125 | NM_003925 | 24552.313 | 20864.502 | NM_003937 | 1049.319  | 849.289   |
| X06710    | 6239.121  | 5980.297  | Z15114    | 16441.455 | 14448.8   | NM_002537 | 17185.266 | 19422.266 |
| AK000896  | 9464.663  | 9734.993  | AB040812  | 47216.754 | 48692.863 | NM_003135 | 9833.174  | 10581.068 |
| AV682011  | 1362.486  | 1358.103  | NM_017625 | 1227.099  | 969.7     | NM_012315 | 11848.81  | 14915.779 |
| NM_003872 | 2019.508  | 1778.371  | NM_006285 | 16615.342 | 12433.146 | NM_004055 | 964.734   | 1121.079  |
| NM_020384 | 8777.99   | 9574.654  | NM_003655 | 64663.301 | 62443.383 | NM_001634 | 32966.492 | 37451.035 |
| NM_006055 | 47093.578 | 41267.699 | NM_001345 | 26876.293 | 26157     | AF022654  | 1980.357  | 1735.325  |
| NM_006625 | 20407.619 | 18866.193 | NM_000215 | 15543.273 | 13818.211 | NM_001143 | 2484.983  | 2566.605  |
| M97496    | 21058.869 | 16532.424 | AK027148  | 45424.059 | 43950.285 | NM_003282 | 1565.499  | 1198.481  |

|           |           |           |           |           |           |           |           |           |
|-----------|-----------|-----------|-----------|-----------|-----------|-----------|-----------|-----------|
| NM_00165E | 9138.834  | 7352.436  | NM_005084 | 10686.947 | 9977.668  | AK022638  | 26097.678 | 26375.418 |
| AB020663  | 1939.456  | 1506.137  | CY3Cy5    | 6679.031  | 703.429   | BG698409  | 13677.432 | 11869.487 |
| AF297866  | 3789.45   | 2616.982  | NM_006079 | 14296.216 | 13338.037 | U36798    | 998.686   | 669.263   |
| NM_002864 | 2406.791  | 1695.565  | NM_00669E | 3563.106  | 4752.98   | AA220921  | 23733.078 | 22267.1   |
| NM_017817 | 5739.395  | 4781.298  | NM_002763 | 12032.609 | 12837.805 | N67770    | 3640.056  | 3336.114  |
| NM_018184 | 10945.262 | 11831.881 | AF070628  | 1986.9    | 2741.97   | AA486200  | 56824.414 | 58036.547 |
| AB046823  | 2182.751  | 1507.257  | U79293    | 890.572   | 741.941   | U90065    | 1591.593  | 1454.827  |
| NM_00492E | 3568.051  | 2160.677  | NM_015434 | 3741.719  | 3810.71   | AJ005898  | 24615.775 | 24042.08  |
| NM_00466E | 2374.255  | 1452.045  | NM_018691 | 2261.934  | 2700.138  | X57303    | 15877.113 | 16520.17  |
| NM_01663E | 25288.576 | 20338.412 | AK001020  | 1826.118  | 2095.712  | AA463224  | 2401.318  | 1197.111  |
| U61739    | 4823.917  | 4489.152  | AF086431  | 3487.814  | 3213.476  | BG248802  | 19483.707 | 20035.629 |
| AJ132089  | 2033.738  | 1787.129  | AL110204  | 889.858   | 809.613   | L19605    | 3086.584  | 2959.406  |
| U92819    | 9052.69   | 5434.978  | NM_01418E | 79378.664 | 64627.621 | AA876532  | 23321.551 | 27541.994 |
| AB020626  | 2173.414  | 1436.993  | AK026365  | 6796.298  | 6466.927  | S74349    | 1532.574  | 1973.187  |
| NM_00203E | 1798.27   | 1256.547  | NM_006079 | 12255.584 | 10833.035 | X07979    | 61120.832 | 56234.422 |
| NM_01240C | 1447.113  | 619.741   | NM_00669E | 3937.326  | 3894.37   | BG744224  | 32880.488 | 35433.664 |
| NM_005384 | 5008.596  | 3480.411  | SR1       | 73164.766 | 63645.746 | NM_01802E | 11278.752 | 12447.347 |
| NM_00685C | 1433.739  | 1028.548  | SR3       | 37676.07  | 45513.113 | NM_001707 | 36005.82  | 40233.563 |
| AB013103  | 2869.264  | 2002.922  | SR5       | 4614.042  | 6736.83   | AK022983  | 2005.624  | 2333.417  |
| AF019225  | 11367.783 | 8669.879  | SR7       | 5228.589  | 33482.254 | NM_01486E | 18657.9   | 19322.564 |
| Z36803    | 17151.006 | 14800.714 | SR9       | 20191.057 | 5758.401  | AL442089  | 35508.402 | 34381.84  |
| NM_013371 | 1510.978  | 1491.246  | CY3Cy5    | 4534.083  | 467.636   | M15530    | 11340.692 | 11399.307 |
| NM_000707 | 15535.018 | 15146.032 | Z36825    | 8046.385  | 8907.136  | NM_00048E | 2602.143  | 1992.713  |
| AF202092  | 27531.617 | 21810.85  | U30889    | 786.926   | 1893.377  | NM_001877 | 8349.061  | 7391.091  |
| NM_003201 | 16650.625 | 12659.729 | U52838    | 2213.249  | 2156.472  | NM_014207 | 19523.799 | 19847.766 |
| NM_00728E | 13122.636 | 12707.424 | AB046852  | 1926.239  | 2668.862  | AK002163  | 7165.772  | 6537.785  |
| NM_006111 | 13433.689 | 10759.356 | AF086167  | 1352.65   | 1239.697  | NM_002287 | 5768.541  | 4418.607  |
| AK026071  | 6630.55   | 5652.97   | AF085891  | 8079.724  | 8096.026  | NM_012344 | 7630.015  | 6829.648  |
| BC012333  | 12542.752 | 10623.288 | AF019618  | 2477.452  | 2691.989  | NM_002351 | 5151.115  | 5280.217  |
| AF237952  | 12457.526 | 9377.899  | AK025656  | 4062.88   | 3419.157  | NM_01438E | 2552.27   | 2515.405  |
| AL079287  | 4984.94   | 4097.021  | AF161414  | 10860.453 | 11129.535 | NM_001704 | 3045.81   | 3047.254  |
| NM_014427 | 5332.715  | 3731.004  | AK025967  | 1353.146  | 1532.073  | AB036432  | 46512.195 | 42688.488 |
| AB046769  | 4897.34   | 4069.468  | AL110177  | 4012.7    | 3409.587  | NM_01487E | 8279.064  | 7635.27   |
| NM_01592E | 10566.754 | 9615.896  | AK022686  | 22964.002 | 25810.57  | NM_00364E | 1313.04   | 1432.761  |
| NM_020381 | 4788.744  | 2942.351  | AK023516  | 13893.429 | 14066.248 | NM_00348C | 7180.396  | 7029.859  |
| NM_002957 | 4502.796  | 3097.358  | AK023864  | 31064.969 | 38374.938 | NM_00089E | 1964.658  | 1809.503  |
| NM_01810E | 10483.686 | 8037.729  | AK023017  | 8617.841  | 9481.125  | NM_032951 | 4626.48   | 6260.854  |
| NM_00372E | 3854.772  | 2606.226  | AK023610  | 1425.432  | 1494.693  | NM_00050E | 13461.393 | 15324.144 |
| BE899154  | 2320.905  | 1686.857  | AK023908  | 21493.488 | 24377.41  | NM_00240E | 36261.617 | 50691.012 |
| NM_00486E | 7803.883  | 5014.641  | AK024236  | 2290.881  | 2272.4    | AK000004  | 6458.021  | 8388.895  |
| AK024573  | 4244.3    | 3375.748  | AB040933  | 2610.723  | 2525.153  | NM_012421 | 23049.523 | 23869.232 |
| NM_00229E | 3656.213  | 2628.001  | AK021875  | 645.758   | 744.365   | AB014601  | 3822.19   | 3746.212  |
| D79998    | 3495.365  | 2517.487  | AK022072  | 1024.424  | 1244.888  | AK001393  | 34381.418 | 40328.695 |
| AB032963  | 1853.154  | 1445.545  | AK026900  | 4800.034  | 4430.141  | NM_00002E | 13283.824 | 12109.69  |
| NM_00038E | 3129.572  | 2185.047  | AK025020  | 10513.514 | 12107.823 | NM_014861 | 1810.671  | 2498.588  |
| AF301013  | 10318.516 | 9579.786  | AF086009  | 1020.833  | 1058.591  | NM_012434 | 6648.719  | 6576.384  |
| NM_01899E | 63300.727 | 52279.051 | AF086463  | 7387.602  | 7993.845  | NM_005694 | 22012.99  | 17926.787 |
| U15688    | 3431.418  | 3280.228  | AK024130  | 1309.505  | 1222.16   | M91368    | 513.42    | 874.704   |
| NM_00048E | 2274.653  | 1970.424  | AK024598  | 5291.821  | 5878.964  | AF224741  | 2526.668  | 1816.424  |
| NM_01844E | 12582.601 | 10658.321 | AF087983  | 2405.679  | 2252.624  | NM_006594 | 7729.502  | 6393.812  |
| AF085893  | 919       | 651.033   | NM_020234 | 3626.689  | 3899.325  | NM_004177 | 2522.235  | 2443.72   |
| NM_00310E | 1226.951  | 1166.298  | AJ011377  | 6498.998  | 7105.464  | NM_01242E | 2344.047  | 2063.569  |
| NM_01430E | 3941.851  | 3463.791  | AL137734  | 3045.463  | 3824.103  | NM_004871 | 10951.605 | 8650.649  |

|           |           |           |           |           |           |           |           |           |
|-----------|-----------|-----------|-----------|-----------|-----------|-----------|-----------|-----------|
| NM_012123 | 30408.902 | 25089.949 | AK023784  | 3355.639  | 4263.799  | AB040903  | 468.604   | 494.353   |
| U87972    | 2860.51   | 2517.225  | AK026323  | 6056.7    | 6610.568  | NM_00569E | 16438.865 | 13541.863 |
| NM_01792E | 8280.981  | 7941.192  | AL109710  | 1681.276  | 2146.143  | AF202146  | 16408.42  | 15440.687 |
| AK022208  | 19083.445 | 14691.341 | AK021538  | 1729.192  | 1776.66   | NM_00639E | 7145.291  | 6531.276  |
| NM_003171 | 16984.313 | 8146.514  | AK023793  | 10762.667 | 11524.434 | NM_01492E | 2383.381  | 2250.008  |
| NM_006437 | 24311.215 | 18837.521 | AK022185  | 797.192   | 882.428   | NM_005477 | 35447.941 | 41468.277 |
| NM_01789C | 3989.896  | 1966.536  | AK023286  | 8426.262  | 8488.836  | NM_00701E | 1417.323  | 1621.76   |
| AK021654  | 2016.916  | 898.867   | AK021544  | 1581.166  | 1623.838  | NM_00431E | 2677.911  | 3372.13   |
| NM_016481 | 2744.345  | 1493.43   | AL079282  | 1503.273  | 1519.889  | NM_00246E | 48.812    | 1520.026  |
| NM_00392E | 10130.727 | 6145.417  | AF116714  | 1648.885  | 1821.313  | L09089    | 6522.796  | 6072.099  |
| Z15114    | 7143.305  | 5097.584  | NM_01405E | 4487.326  | 4943.739  | NM_00264C | 4014      | 4017.698  |
| AB040812  | 57434.852 | 35638.734 | AK025045  | 655.319   | 818.257   | X03084    | 559.778   | 573.377   |
| NM_01762E | 1534.006  | 1184.62   | AK026340  | 845.75    | 1065.702  | NM_002537 | 16203.942 | 19178.236 |
| NM_00628E | 21898.221 | 11550.543 | AK022388  | 770.353   | 911.554   | NM_00313E | 7495.969  | 7282.031  |
| NM_00365E | 28027.547 | 19102.025 | AK027170  | 535.784   | 663.765   | NM_01231E | 7388.763  | 7638.307  |
| NM_00134E | 6537.158  | 5550.137  | AK021781  | 1020.641  | 1321.286  | NM_00405E | 1374.068  | 1633.25   |
| NM_00021E | 12635.557 | 10871.385 | NM_018584 | 1715.855  | 2377.108  | NM_001634 | 32443.508 | 35956.113 |
| AK027148  | 13377.205 | 10489.013 | AY007126  | 22584.123 | 27108.609 | NM_01430E | 2800.178  | 1808.63   |
| NM_005084 | 11519.507 | 9620.521  | AF085951  | 12836.764 | 15466.235 | NM_002267 | 21285.471 | 17506.445 |
| CY3Cy5    | 12009.398 | 1020.518  | AF131787  | 1085.764  | 1227.794  | NM_00641E | 6702.07   | 5634.7    |
| NM_00607E | 13372.625 | 13969.433 | AF087989  | 2980.599  | 3679.501  | NM_00306E | 21538     | 20245.34  |
| NM_00669E | 3558.796  | 4091.989  | Z70715    | 2852.726  | 3113.621  | NM_014041 | 42540.422 | 44075.184 |
| NM_00276E | 8582.59   | 9726.92   | NM_01818E | 8535.514  | 9762.07   | NM_00716E | 21033.314 | 18668.518 |
| AF070628  | 1893.315  | 2262.182  | U80771    | 8037.859  | 9193.693  | NM_01431E | 1130.393  | 1197.642  |
| NM_015434 | 3367.025  | 4028.054  | NM_00618E | 1100.716  | 982.154   | AK024966  | 6987.277  | 6015.863  |
| NM_01405E | 2175.181  | 2524.818  | AJ272173  | 25552.75  | 26882.666 | AF178941  | 56417.285 | 57194.102 |
| NM_018691 | 2114.808  | 2261.382  | Z24724    | 13393.564 | 13853.058 | NM_01603E | 20436.537 | 19901.482 |
| AK001020  | 1057.726  | 1137.955  | AK022712  | 11504.408 | 12251.78  | NM_01758E | 30411.736 | 32256.709 |
| AF086431  | 1817.014  | 2057.437  | AK024132  | 4217.793  | 4189.536  | U61737    | 59981.52  | 61249.996 |
| AL110204  | 929.318   | 957.758   | AK021863  | 41227.234 | 46178.883 | Y10506    | 963.434   | 2237.345  |
| NM_01418E | 42293.305 | 47448.023 | AK024208  | 1134.955  | 886.213   | X06389    | 1670.535  | 2276.418  |
| AK026365  | 5367.699  | 5628.701  | NM_02042E | 658.139   | 641.323   | NM_00003E | 6068.528  | 5955.526  |
| NM_00607E | 11324.255 | 11702.565 | NM_005684 | 723.083   | 892.576   | NM_01802E | 6542.851  | 6918.661  |
| NM_00669E | 3028.131  | 3599.132  | AK022293  | 1393.669  | 1322.404  | NM_001707 | 27665.564 | 26896.564 |
| SR1       | 64027.777 | 63003.188 | AL117439  | 1906.392  | 1846.229  | AK022983  | 1176.262  | 760.807   |
| SR3       | 39931.082 | 47892.852 | AL133065  | 2791.164  | 2597.219  | NM_01486E | 7245.573  | 4588.567  |
| SR5       | 3915.587  | 4941.658  | NM_005297 | 6019.193  | 6446.259  | AL442089  | 22999.928 | 19700.498 |
| SR7       | 5808.374  | 39406.191 | U80769    | 1955.305  | 2401.339  | NM_00120C | 2345.673  | 1774.109  |
| SR9       | 20949.164 | 4999.771  | AK025052  | 5364.515  | 7963.779  | AB007964  | 1037.982  | 1039.994  |
| CY3Cy5    | 9284.594  | 721.758   | NM_01438E | 2386.344  | 3270.179  | AF128541  | 9174.46   | 7688.472  |
| U70772    | 1060.004  | 948.136   | NM_00254E | 1041.744  | 1147.222  | AK026305  | 21158.051 | 16363.177 |
| Z36825    | 1136.195  | 1798.963  | U85044    | 1722.911  | 2313.594  | NM_00255E | 5787.152  | 5630.045  |
| U30889    | 846.211   | 852.826   | BC018880  | 1939.472  | 2305.138  | NM_014321 | 9348.304  | 7988.661  |
| U52838    | 640.065   | 803.339   | AF086090  | 3777.295  | 4953.627  | AK022733  | 3174.879  | 3509.835  |
| Z36846    | 531.567   | 955.466   | AK002173  | 36621.434 | 48386.164 | AB011132  | 11541.733 | 10227.235 |
| AF086127  | 644.345   | 877.193   | NM_01774E | 6641.126  | 7336.025  | NM_02036E | 20970.164 | 17697.773 |
| AF086157  | 3556.237  | 3365.864  | NM_02018E | 33455.25  | 36987.883 | AB040937  | 6339.264  | 6216.222  |
| AF088026  | 772.26    | 990.201   | U88897    | 8641.937  | 8503.99   | AF275798  | 58138.152 | 55268.336 |
| D17018    | 1002.25   | 1247.279  | NM_00349E | 68305.289 | 61313.438 | NM_005441 | 22931.506 | 22670.328 |
| AB046852  | 1474.88   | 1423.118  | AL133430  | 37364.73  | 44194.398 | NM_01607E | 42811.129 | 46447.133 |
| AF086167  | 1882.284  | 1739.619  | AF070633  | 56431.941 | 51233.23  | AK023108  | 10969.194 | 11975.422 |
| AL109727  | 1097.62   | 954.784   | S51971    | 70708.891 | 62809.516 | AK026409  | 58479.195 | 57105.961 |
| AF085891  | 3997.479  | 4616.104  | AF054996  | 32659.625 | 38066.082 | AF097025  | 17555.686 | 18220.395 |

|           |           |           |           |           |           |           |           |           |
|-----------|-----------|-----------|-----------|-----------|-----------|-----------|-----------|-----------|
| AF019618  | 2678.739  | 3177.198  | AF090098  | 9073.671  | 9329.862  | Y11339    | 20111.717 | 19716.393 |
| AK025656  | 3884.38   | 3713.728  | AF146694  | 4954.068  | 4124.504  | AB030176  | 2039.528  | 2020.961  |
| AF138859  | 1033.096  | 1044.439  | AK057104  | 2438.999  | 2344.612  | NM_003937 | 951.021   | 1134.765  |
| AF161414  | 4006.095  | 4056.133  | AK024979  | 54877.5   | 49984.785 | CY3Cy5    | 6294.923  | 286.552   |
| AK025967  | 1712.527  | 1500.524  | AF233648  | 2930.599  | 3363.285  | NM_17214C | 7496.121  | 8065.98   |
| AL110177  | 3953.49   | 3584.931  | NM_013439 | 50293.969 | 53049.859 | AK026783  | 1437.294  | 1659.212  |
| AK022686  | 3347.698  | 3360.708  | NM_003406 | 51322.035 | 54174.527 | AF088040  | 1394.2    | 2504.136  |
| AK023516  | 8483.844  | 9100.388  | NM_018316 | 9593.604  | 10838.402 | AK021814  | 2399.658  | 4168.415  |
| AK023864  | 2418.273  | 3230.538  | AB011180  | 6068.882  | 8189.277  | AF088035  | 3641.75   | 4086.315  |
| AK024183  | 957.727   | 1130.056  | NM_007167 | 13132.782 | 13283.935 | AF086251  | 841.16    | 1180.439  |
| AK023017  | 4123.143  | 4485.778  | NM_014832 | 4332.567  | 4440.606  | NM_018092 | 1690.203  | 2043.579  |
| AK023908  | 5186.227  | 6359.626  | NM_002477 | 32378.967 | 37991.305 | NM_016495 | 3461.736  | 3537.602  |
| AK024236  | 2795.39   | 3007.357  | NM_004673 | 707.181   | 726.851   | NM_17214C | 10144.689 | 9955.876  |
| AK022098  | 2624.75   | 2723.538  | Y17180    | 67700.383 | 65456.926 | SR4       | 19852.002 | 21894.492 |
| AK026751  | 655.572   | 990.372   | NM_005649 | 3449.15   | 4081.091  | SR6       | 2612.56   | 2763.271  |
| AB040933  | 1193.291  | 1415.585  | AK021566  | 731.609   | 847.788   | SR8       | 9379.682  | 32542.074 |
| AK021875  | 1340.23   | 2091.458  | NM_002037 | 3292.498  | 2749.983  | SR10      | 30849.059 | 10633.808 |
| AK022072  | 418.29    | 480.378   | NM_016346 | 5001.71   | 4937.134  | CY3Cy5    | 5402.2    | 220.447   |
| AK026900  | 4132.601  | 4461.863  | NM_020157 | 51089.02  | 48655.723 | AK000122  | 17305.582 | 15632.088 |
| AK025020  | 10898.968 | 12155.477 | X64991    | 2433.602  | 2715.057  | AK001091  | 11970.96  | 11875.84  |
| AF086009  | 1650.496  | 1544.044  | AK025703  | 10177.65  | 10371.184 | U80775    | 878.608   | 1242.038  |
| AF086463  | 1554.545  | 1840.479  | NM_018185 | 6646.073  | 6736.093  | AF086428  | 4704.915  | 4756.378  |
| AK024130  | 974.771   | 1151.32   | AK022598  | 8666.602  | 8720.013  | AK025310  | 3725.918  | 3733.167  |
| AK024598  | 6034.502  | 7028.499  | AK024306  | 1472.965  | 1123.201  | AL049353  | 985.424   | 919.602   |
| AF087983  | 2779.185  | 2646.544  | NM_018322 | 21433.955 | 21731.023 | AL117598  | 3703.322  | 4505.663  |
| NM_020234 | 3569.911  | 2795.292  | AK025862  | 12590.034 | 12247.01  | AL109670  | 2985.984  | 3061.909  |
| AK021678  | 1404.51   | 1979.156  | AK026495  | 2164.737  | 2076.495  | AL832149  | 5835.31   | 6380.68   |
| AJ011377  | 5401.423  | 5794.605  | AL137493  | 4099.333  | 4481.544  | AK022839  | 5581.637  | 8396.581  |
| AL137734  | 1371.682  | 1501.164  | NM_002457 | 829.409   | 885.627   | NM_003946 | 4005.091  | 3724.66   |
| AK023784  | 505.138   | 767.191   | NM_001338 | 35723.184 | 45851.488 | AB045292  | 3975.029  | 3983.431  |
| AK026323  | 4923.659  | 4770.54   | NM_003637 | 2256.51   | 2431.467  | AK025699  | 36580.227 | 28871.141 |
| AL109710  | 1511.169  | 1680.22   | BC035133  | 1924.915  | 2075.959  | AK025826  | 3527.104  | 3559.694  |
| AK023793  | 1114.18   | 978.712   | NM_004233 | 17928.416 | 20515.326 | AK026439  | 3177.206  | 3673.674  |
| AK022185  | 1576.436  | 1527.637  | NM_001544 | 26927.59  | 28881.684 | AK025278  | 1603.523  | 1682.242  |
| AK023286  | 1408.444  | 1746.34   | X58531    | 3197.535  | 2860.838  | AK026466  | 1261.948  | 986.87    |
| AK021544  | 1331.65   | 1538.985  | AB011168  | 21355.213 | 22110.625 | AK024280  | 2872.273  | 3046.363  |
| AL079282  | 1438.265  | 1409.502  | BE794262  | 9276.413  | 9456.439  | AF075036  | 5559.012  | 6367.791  |
| NM_01405E | 1081.193  | 1160.87   | NM_003212 | 18691.143 | 18696.424 | NM_014797 | 8132.313  | 9440.549  |
| AK002005  | 678.182   | 680.902   | NM_006382 | 7268.922  | 8065.116  | AK027139  | 1543.476  | 1930.02   |
| AK026340  | 1190.611  | 1105.557  | NM_004811 | 22786.938 | 23580.547 | AL831841  | 10274.478 | 9879.534  |
| AK022388  | 462.176   | 482.786   | AK021910  | 66840.414 | 70853.133 | AL110165  | 9754.229  | 8811.414  |
| AK027170  | 386.785   | 500.986   | NM_004748 | 9055.747  | 8221.774  | AL117652  | 3637.497  | 3183.281  |
| AK021781  | 1251.71   | 1438.071  | NM_002668 | 34930.617 | 38784.555 | AL050168  | 12604.521 | 9609.275  |
| NM_018584 | 1330.994  | 1137      | NM_001058 | 1106.114  | 785.268   | AL117447  | 4394.358  | 3173.441  |
| AK026776  | 877.705   | 950.426   | NM_014316 | 16229.771 | 19279.078 | AF131756  | 922.601   | 516.92    |
| AY007126  | 8380.779  | 9716.867  | NM_004054 | 10380.148 | 10109.266 | AK022135  | 3878.318  | 2603.19   |
| AF085951  | 6275.04   | 6630.996  | NM_001138 | 19537.529 | 18196.08  | NM_017555 | 51898.227 | 57680.094 |
| AF131787  | 815.553   | 956.233   | NM_003443 | 63423.434 | 77677.406 | NM_014896 | 1580.078  | 2208.55   |
| AF087989  | 1577.271  | 1753.601  | NM_002025 | 5720.958  | 6797.012  | AF009269  | 2640.262  | 2763.073  |
| Z70715    | 2754.497  | 2752.625  | AB015228  | 4314.796  | 4964.177  | AF009313  | 8065.987  | 7769.921  |
| NM_018182 | 7172.809  | 7737.578  | AL049685  | 4359.627  | 4301.597  | AF090887  | 1673.35   | 1888.395  |
| U80771    | 8852.253  | 10497.329 | AK026800  | 19165.262 | 18997.266 | AF009279  | 1280.634  | 1292.377  |
| NM_00618E | 1425.189  | 1482.394  | NM_001442 | 2352.313  | 2788.924  | NM_015883 | 4676.024  | 5351.612  |

|           |           |           |           |           |           |           |           |           |
|-----------|-----------|-----------|-----------|-----------|-----------|-----------|-----------|-----------|
| AJ272173  | 21012.807 | 21844.227 | NM_017775 | 16060.516 | 17845.104 | AF056429  | 1610.672  | 1979.896  |
| Z24724    | 12068.248 | 15167.648 | AK001958  | 2801.934  | 2362.199  | AF070547  | 9296.062  | 9468.694  |
| AK022712  | 4782.268  | 4876.615  | AK025947  | 6461.165  | 6781.419  | AK001110  | 35495.801 | 34391.793 |
| AK024132  | 4286.063  | 4507.514  | AF217973  | 14833.395 | 15668.324 | AK021609  | 629.136   | 828.058   |
| AK021863  | 44984.18  | 45599.031 | NM_005573 | 15776.723 | 15760.385 | AK001153  | 1300.881  | 644.876   |
| AK024208  | 737.363   | 920.432   | D50918    | 32703.699 | 41809.59  | AK002184  | 1514.313  | 1124.645  |
| NM_020426 | 886.985   | 822.461   | U48734    | 13663.306 | 16805.021 | AK021652  | 1655.198  | 1342.345  |
| NM_005684 | 1098.012  | 951.709   | NM_006400 | 16218.695 | 17624.906 | AK021859  | 2025.192  | 1194.141  |
| AK022293  | 1327.24   | 1238.167  | NM_003903 | 9005.555  | 8757.471  | M64700    | 905.787   | 698.678   |
| AL117439  | 2619.991  | 2343.749  | NM_017955 | 10035.44  | 10624.33  | NM_001267 | 1180.419  | 1645.257  |
| AL133065  | 4399.413  | 4333.28   | NM_016060 | 8181.725  | 9563.585  | L41143    | 18514.752 | 17005.533 |
| NM_005297 | 3638.604  | 3274.104  | NM_002208 | 23456.166 | 21535.48  | NM_005331 | 67054.859 | 66731.672 |
| U80769    | 1210.098  | 1329.742  | NM_007216 | 4684.68   | 4947.359  | S85075    | 2054.235  | 2061.526  |
| NM_014565 | 571.016   | 681.224   | AK023518  | 4267.797  | 3844.14   | AJ008129  | 7896.229  | 8257.522  |
| AK025052  | 7684.29   | 8097.868  | NM_000095 | 8927.301  | 9746.854  | AJ008158  | 1188.646  | 1147.168  |
| NM_014385 | 2264.667  | 2401.147  | NM_013390 | 15672.874 | 20229.482 | AF161451  | 27840.355 | 28852.295 |
| NM_002545 | 873.012   | 913.484   | NM_002829 | 1910.641  | 2292.175  | X02067    | 27406.102 | 25136.625 |
| U85044    | 4390.687  | 4963.042  | J02783    | 37473.52  | 49268.984 | NM_006236 | 76165.367 | 63148.32  |
| BC018880  | 2942.353  | 3444.978  | NM_018137 | 1323.058  | 1477.677  | AK023734  | 4158.031  | 4537.676  |
| AF086090  | 2890.015  | 3608.016  | NM_006577 | 51084.445 | 50872.066 | D17265    | 56354.262 | 60383.668 |
| AK002173  | 32343.564 | 40013.238 | NM_004413 | 1792.858  | 1716.748  | AF085827  | 3507.181  | 4300.571  |
| NM_017745 | 7615.691  | 7795.338  | NM_005317 | 4062.069  | 4442.517  | Y08266    | 54935.621 | 54628.094 |
| NM_020185 | 20812.625 | 24301.965 | AF120493  | 1858.913  | 1495.281  | AK002171  | 14454.802 | 13751.975 |
| M87929    | 496.427   | 638.559   | U12597    | 6335.106  | 7248.26   | AJ002572  | 5106.285  | 4628.426  |
| U88897    | 5937.383  | 7581.848  | U28055    | 1593.478  | 1351.086  | AK026897  | 14857.993 | 14493.184 |
| NM_003493 | 59138.133 | 57347.332 | AB044343  | 36763.453 | 44065.18  | AB037861  | 19994.807 | 16969.168 |
| AL133430  | 23100.412 | 29827.277 | NM_001285 | 3094.894  | 3711.352  | AK021887  | 12918.496 | 10321.288 |
| AF070633  | 42011.25  | 44776.738 | NM_018409 | 1745.878  | 2089.985  | NM_002503 | 67170.414 | 70651.938 |
| Y16184    | 586.803   | 613.132   | NM_014662 | 1689.253  | 1796.25   | NM_005315 | 10562.082 | 9857.612  |
| S51971    | 65810.414 | 58753.816 | NM_005178 | 29302.271 | 31761.084 | AK022351  | 1745.642  | 1267.042  |
| AF054996  | 32080.201 | 33472.84  | NM_017702 | 8567.792  | 13169.455 | NM_020194 | 7774.88   | 9319.966  |
| AF090098  | 6103.203  | 7278.938  | AB014516  | 18668.697 | 18554.34  | AK026853  | 1419.322  | 1760.778  |
| AF146694  | 5205.875  | 5547.205  | Z83950    | 3217.794  | 3887.573  | AF038183  | 39227.281 | 49426.934 |
| AK057104  | 2211.672  | 2651.009  | AL080063  | 5459.007  | 5555.951  | NM_017882 | 7537.816  | 9643.248  |
| AL133555  | 733.734   | 483.225   | NM_016590 | 883.429   | 932.977   | NM_003521 | 5841.073  | 7504.13   |
| AK024979  | 1572.769  | 1783.573  | NM_005625 | 21409.953 | 21792.723 | NM_003547 | 3552.318  | 3529.755  |
| AF233648  | 2002.747  | 2007.773  | X15262    | 9786.756  | 8767.05   | AF070529  | 3474.051  | 3394.996  |
| NM_013435 | 48503.098 | 51386.242 | NM_005475 | 2413.988  | 2413.902  | AK022978  | 8226.157  | 9871.939  |
| NM_018315 | 3025.613  | 3163.234  | NM_007289 | 6889.157  | 6720.332  | AK021447  | 19646.1   | 19369.432 |
| AB011180  | 2647.599  | 2741.781  | NM_004219 | 66352.344 | 57061     | AK025096  | 7390.416  | 7788.024  |
| NM_007167 | 7070.584  | 7966.131  | NM_004575 | 951.53    | 1117.7    | AF131774  | 7222.201  | 6471.191  |
| NM_014832 | 7320.063  | 7621.441  | AB023232  | 6056.232  | 8743.874  | AK025793  | 1730.124  | 1414.186  |
| NM_003243 | 511.843   | 689.348   | NM_017420 | 1757.8    | 2170.988  | AK000151  | 1440.667  | 1056.056  |
| NM_002477 | 3918.725  | 4633.125  | AL137589  | 4502.341  | 4960.495  | AL389942  | 5028.092  | 3541.551  |
| NM_004673 | 454.897   | 717.302   | AF036943  | 1369.778  | 1378.417  | AL137479  | 1016.41   | 1078.011  |
| Y17180    | 63691.57  | 62449.828 | NM_002502 | 20268.135 | 18310.549 | NM_004211 | 5218.683  | 4505.405  |
| NM_005645 | 5367.229  | 6133.34   | AF226732  | 25627.465 | 24888.229 | Y10776    | 4903.582  | 4606.206  |
| AK021566  | 1285.374  | 1468.182  | NM_006312 | 13667.355 | 13053.046 | AK027241  | 13595.636 | 13685.158 |
| NM_002037 | 3342.184  | 3693.905  | NM_002805 | 2866.707  | 3109.366  | NM_006975 | 8181.885  | 8825.612  |
| NM_016345 | 1250.914  | 1413.436  | NM_003662 | 1856.212  | 1980.932  | NM_004561 | 2192.517  | 2976.093  |
| NM_020157 | 3052.46   | 3548.239  | NM_002939 | 31691.73  | 34058.789 | AK024812  | 6103.1    | 6925.69   |
| X64991    | 1167.752  | 1281.942  | NM_015836 | 55784.57  | 49236.633 | M20642    | 1639.424  | 1225.439  |
| NM_014320 | 1154.328  | 813.148   | NM_004713 | 5233.066  | 3964.934  | AK026412  | 3490.931  | 3174.765  |

|           |           |           |           |           |           |           |           |           |
|-----------|-----------|-----------|-----------|-----------|-----------|-----------|-----------|-----------|
| AK025703  | 9589.109  | 10677.694 | NM_003769 | 1881.785  | 1925.105  | X89669    | 5551.274  | 6946.553  |
| NM_018185 | 4129.609  | 4537.809  | NM_001698 | 33523.844 | 36602.07  | AK023965  | 4309.702  | 6262.941  |
| AK022598  | 6427.597  | 7140.626  | NM_000661 | 68248.719 | 54179.273 | AK026211  | 1978.291  | 1914.587  |
| AK024306  | 989.866   | 1156.233  | NM_000973 | 68661.938 | 52416.082 | X58968    | 8212.283  | 9251.752  |
| NM_018322 | 5135.281  | 5817.301  | NM_000944 | 8909.768  | 7355.041  | U92020    | 17182.221 | 16040.171 |
| AK025862  | 10862.37  | 11028.515 | NM_012239 | 4097.531  | 4168.696  | AL117542  | 6061.345  | 6875.832  |
| AK026495  | 2439.823  | 2208.4    | NM_012262 | 2526.423  | 3140.887  | X04215    | 1382.734  | 1351.952  |
| AL137493  | 1848.601  | 2013.499  | S70004    | 26826.771 | 31400.471 | NM_017782 | 14747.365 | 16854.654 |
| NM_002457 | 857.488   | 1741.989  | AF105378  | 23156.955 | 27664.17  | NM_018145 | 10832.343 | 11713.703 |
| NM_001338 | 3325.179  | 3763.922  | NM_000167 | 6822.088  | 9262.6    | NM_018468 | 27461.467 | 25680.957 |
| NM_003637 | 1485.46   | 1709.651  | AY007125  | 5711.676  | 7002.509  | Z36814    | 2988.063  | 2280.073  |
| BC035133  | 931.502   | 1347.9    | AB032987  | 6739.713  | 7710.726  | D17045    | 1940.493  | 1319.431  |
| NM_004233 | 17539.744 | 22592.014 | NM_017567 | 26172.338 | 26657.721 | AB040878  | 4272.337  | 3635.612  |
| NM_001544 | 21204.91  | 25567.584 | NM_000691 | 14864.016 | 15789.051 | S74647    | 1430.607  | 1428.392  |
| X58531    | 948.282   | 983.961   | Y18643    | 971.486   | 558.993   | NM_003506 | 1398.889  | 1210.304  |
| AB011168  | 2763.305  | 3042.365  | D86971    | 38216.957 | 43159.754 | NM_018093 | 26167.709 | 26408.777 |
| BE794262  | 2595.639  | 2959.045  | NM_003073 | 17767.209 | 19326.646 | NM_003388 | 2667.308  | 2445.073  |
| NM_003212 | 4843.972  | 6032.644  | NM_014048 | 1326.885  | 1670.491  | NM_000430 | 2945.705  | 3169.997  |
| NM_006382 | 1782.045  | 1633.63   | AF274863  | 1810.71   | 1605.715  | AB033030  | 3226.271  | 3156.973  |
| NM_004811 | 27207.842 | 29874.354 | AF319458  | 1468.452  | 1666.821  | NM_016656 | 1621.019  | 1269.654  |
| AK021910  | 48070.742 | 51922.367 | AF024697  | 9644.334  | 10147.481 | NM_017813 | 13075.816 | 15219.67  |
| M62402    | 1338.018  | 1497.363  | NM_018651 | 1355.967  | 1545.669  | NM_003840 | 17251.393 | 19671.332 |
| NM_002547 | 1094.134  | 914.281   | AF164156  | 870.104   | 493.327   | NM_018378 | 3681.5    | 4210.958  |
| NM_004748 | 4770.986  | 3754.303  | NM_005612 | 5049.863  | 4208.009  | NM_018423 | 4337.455  | 4410.979  |
| NM_002668 | 37204.719 | 39888.828 | AK025281  | 771.628   | 776.745   | NM_000745 | 8225.109  | 8767.508  |
| NM_001058 | 886.654   | 1103.354  | AB040918  | 16068.085 | 15205.85  | AF116705  | 51498.723 | 49839.254 |
| NM_014316 | 17142.867 | 20456.689 | NM_015859 | 7137.618  | 6417.604  | NM_004460 | 2448.758  | 2494.27   |
| NM_004054 | 3814.26   | 3606.54   | X60152    | 2545.632  | 2117.612  | NM_006072 | 8975.649  | 10353.817 |
| NM_001138 | 2388.167  | 2692.483  | NM_002316 | 4410.147  | 4726.923  | BE794490  | 4198.965  | 4032.371  |
| NM_001442 | 2314.639  | 2465.595  | NM_012421 | 33095.047 | 39660.551 | NM_003561 | 10929.187 | 9316.988  |
| NM_017775 | 11324.405 | 14550.69  | AB014601  | 5372.232  | 5444.71   | NM_002991 | 1304.825  | 1079.532  |
| AK001958  | 3193.037  | 3239.813  | AK001393  | 35325.07  | 44340.262 | AJ008149  | 42199.547 | 47181.566 |
| AK025947  | 6710.559  | 7762.373  | NM_000023 | 16405.4   | 18340.148 | NM_001192 | 3598.193  | 3045.119  |
| AF217973  | 5648.143  | 7678.969  | AF022654  | 1795.657  | 1624.295  | NM_012153 | 2813.347  | 2727.75   |
| NM_007033 | 19571.488 | 24899.689 | NM_001143 | 2120.128  | 2010.36   | NM_013241 | 3267.74   | 2854.381  |
| AF226048  | 12166.143 | 16058.619 | NM_003282 | 1667.548  | 1621.093  | Z24725    | 533.509   | 544.822   |
| NM_005573 | 13554.214 | 15618.873 | AK022638  | 21047.869 | 21128.611 | AF161362  | 8979.241  | 8920.847  |
| AV723708  | 625.649   | 816.929   | BG698409  | 13934.919 | 14516.836 | NM_015938 | 15341.938 | 16528.266 |
| D50918    | 37959.715 | 44675.559 | U36798    | 1080.186  | 1064.89   | AB046840  | 2817.177  | 2854.2    |
| U48734    | 13674.853 | 15637.312 | AA220921  | 19625.197 | 21267.156 | AF174487  | 9364.985  | 10278.883 |
| NM_006400 | 14297.402 | 17351.475 | N67770    | 3254.827  | 3216.231  | NM_005041 | 2043.429  | 2481.726  |
| NM_003903 | 8710.549  | 9321.974  | AA486200  | 61587.434 | 56898.023 | NM_006407 | 14786.298 | 17112.201 |
| NM_017955 | 7466.09   | 9716.989  | U90065    | 1693.629  | 1266.15   | NM_007373 | 9741.711  | 7432.985  |
| NM_016060 | 8935.9    | 10773.134 | AJ005898  | 23805.113 | 25510.225 | M34572    | 1806.57   | 1488.472  |
| NM_002208 | 21768.15  | 22094.729 | X57303    | 13509.077 | 13583.38  | NM_006263 | 67054.547 | 62399.949 |
| NM_007216 | 5571.047  | 5813.979  | AA463224  | 2894.35   | 2818.603  | NM_004791 | 8636.817  | 6465.157  |
| AK023518  | 2313.758  | 2293.694  | BG248802  | 17163.982 | 17546.266 | X55525    | 5394.104  | 4200.324  |
| NM_000095 | 1341.383  | 1538.748  | L19605    | 3027.788  | 2753.894  | NM_005046 | 785.363   | 765.699   |
| NM_004413 | 981.421   | 1495.297  | AA876532  | 19103.633 | 19474.053 | NM_001873 | 1710.029  | 1971.731  |
| NM_005317 | 1214.319  | 1217.983  | S74349    | 1614.186  | 1557.497  | NM_007100 | 67265.023 | 66359.977 |
| AF120493  | 1013.703  | 1448.694  | X07979    | 55090.281 | 51276.543 | NM_003940 | 2272.741  | 2768.864  |
| U12597    | 6134.96   | 6829.929  | BG324670  | 859.117   | 363.934   | M26880    | 1341.606  | 1492.722  |
| U28055    | 2280.013  | 3458.921  | BG744224  | 36149.156 | 38812.629 | NM_017548 | 56428.973 | 51360.645 |

|           |           |           |           |           |           |           |           |           |
|-----------|-----------|-----------|-----------|-----------|-----------|-----------|-----------|-----------|
| AB044343  | 8926.819  | 13378.577 | NM_006393 | 13279.472 | 14790.014 | AF134802  | 9486.642  | 9822.596  |
| NM_001285 | 472.734   | 483.252   | NM_014923 | 1866.924  | 1774.554  | NM_018222 | 2325.539  | 3039.718  |
| NM_018409 | 1063.725  | 1169.098  | NM_005477 | 31149.27  | 38269.145 | NM_005740 | 6270.738  | 7197.24   |
| NM_014662 | 1698.285  | 2139.78   | NM_007018 | 1533.355  | 1294.659  | NM_004308 | 28859.795 | 32720.34  |
| NM_005178 | 8099.052  | 8356.852  | NM_004318 | 3134.303  | 3300.793  | AF112366  | 8689.112  | 9101.7    |
| NM_017702 | 8411.688  | 11343.747 | L09089    | 6286.799  | 5140.247  | NM_004274 | 5276.957  | 5442.293  |
| AB014516  | 6137.268  | 7308.488  | NM_002640 | 3569.799  | 3475.075  | AK024002  | 48318.855 | 47401.332 |
| Z83950    | 2724.506  | 3072.671  | NM_000949 | 385.732   | 520.295   | NM_020399 | 23618.74  | 21623.406 |
| AL080063  | 3843.252  | 4349.659  | M15530    | 11845.426 | 11003.526 | AB011117  | 9287.122  | 7227.896  |
| NM_016590 | 911.01    | 1219.319  | NM_000488 | 2881.684  | 2716.803  | NM_004071 | 6415.787  | 4447.789  |
| NM_005625 | 21919.811 | 24510.498 | NM_001877 | 6912.161  | 7611.788  | NM_001316 | 31636.791 | 24878.719 |
| X15262    | 4446.89   | 4787.439  | NM_014207 | 18300.477 | 17307.463 | NM_004264 | 2963.302  | 3216.693  |
| NM_005475 | 4473.531  | 4288.417  | AK002163  | 5976.914  | 5958.121  | AK024788  | 4328.592  | 4756.611  |
| NM_007289 | 7973.563  | 7005.199  | NM_002287 | 4479.519  | 3916.297  | NM_004473 | 748.2     | 851.653   |
| NM_004219 | 68761.094 | 61715.723 | NM_012344 | 6631.646  | 6731.208  | AK022696  | 3702.873  | 3335.823  |
| NM_002502 | 22537.098 | 25117.566 | NM_002351 | 4755.249  | 4536.65   | NM_001206 | 3139.317  | 2908.678  |
| AF226732  | 8247.705  | 9902.279  | NM_014385 | 2493.486  | 2505.501  | NM_005016 | 4801.645  | 5875.452  |
| NM_006312 | 15653.328 | 18142.463 | NM_001704 | 2370.273  | 1768.321  | NM_014469 | 4794.686  | 7829.583  |
| NM_002805 | 2230.646  | 3170.722  | AB036432  | 38729.805 | 41914.402 | NM_014852 | 10641.815 | 9808.69   |
| NM_004290 | 802.688   | 1006.709  | NM_003643 | 1308.486  | 1261.211  | NM_000344 | 27166.895 | 31003.607 |
| NM_016135 | 661.91    | 748.109   | NM_003480 | 6711.544  | 6578.199  | AF248650  | 12192.188 | 12780.002 |
| NM_003662 | 1310.465  | 1661.027  | NM_004059 | 1087.919  | 1322.63   | S74678    | 66780.125 | 66721.336 |
| NM_002939 | 32348.506 | 32130.803 | NM_001634 | 31143.717 | 40155.867 | AF248651  | 3669.268  | 3501.732  |
| NM_015839 | 62791.813 | 52819.207 | NM_002267 | 19084.922 | 19189.949 | NM_001358 | 34224.477 | 28054.174 |
| NM_004713 | 6303.345  | 5596.661  | NM_006412 | 8289.539  | 8878.258  | NM_004839 | 21246.607 | 22301.492 |
| NM_003769 | 2808.416  | 3118.733  | NM_003063 | 22634.752 | 22543.545 | AB037751  | 18542.463 | 21622.607 |
| NM_001698 | 43340.656 | 45251.418 | NM_014041 | 32942.406 | 35482.73  | S79281    | 23120.584 | 25584.74  |
| NM_000661 | 64187.223 | 57567.086 | NM_007169 | 16998.25  | 15618.81  | AK025585  | 11370.426 | 12576.097 |
| NM_000973 | 65050.504 | 54795.07  | NM_014313 | 880.594   | 932.793   | NM_001414 | 22511.604 | 30078.814 |
| NM_000944 | 11121.837 | 10300.655 | AK024966  | 7318.829  | 7680.931  | D16891    | 20213.412 | 20405.377 |
| NM_012239 | 3660.894  | 3520.963  | NM_017585 | 34392.02  | 36495.398 | NM_017760 | 23110.658 | 20896.047 |
| NM_012262 | 3280.593  | 4643.878  | NM_000033 | 5605.399  | 5803.965  | NM_015939 | 28957.936 | 26210.789 |
| S70004    | 1372.013  | 1685.495  | AF224741  | 1939.255  | 1781.704  | Z36876    | 4140.912  | 4043.897  |
| AB032987  | 4267.333  | 4806.697  | NM_006594 | 6832.244  | 6263.465  | NM_000892 | 6934.302  | 5898.067  |
| NM_017567 | 12565.721 | 14984.362 | NM_004177 | 2237.725  | 1826.731  | NM_000126 | 33525.703 | 35892.867 |
| NM_000691 | 5402.783  | 6238.017  | NM_012429 | 2417.335  | 2014.008  | AK022291  | 2214.344  | 2027.645  |
| Y18643    | 1226.866  | 1721.388  | NM_004871 | 8925.18   | 7639.359  | BF239974  | 8382.302  | 8339.169  |
| NM_000305 | 621.882   | 541.192   | NM_005698 | 12402.33  | 11389.235 | NM_000104 | 2647.53   | 2761.885  |
| D86971    | 24746.432 | 28831.752 | AF202146  | 12065.235 | 12806.938 | NM_005015 | 35728.684 | 33243.461 |
| NM_003073 | 14928.331 | 19367.178 | NM_014868 | 21937.238 | 24243.58  | NM_004255 | 64488     | 66500.781 |
| NM_014048 | 1254.73   | 1709.164  | AL442089  | 37568.191 | 47942.453 | NM_000269 | 66995.406 | 71220.844 |
| AF274863  | 1344.027  | 1716.028  | X83412    | 667.505   | 624.913   | AF182288  | 9004.504  | 9335.902  |
| AF319458  | 1423.935  | 1454.842  | NM_001200 | 5265.042  | 6851.878  | NM_004491 | 5737.551  | 4649.412  |
| AF024697  | 4614.094  | 4261.497  | AB007964  | 972.592   | 942.141   | L14787    | 944.796   | 701.539   |
| NM_018651 | 1016.658  | 937.146   | AF128541  | 13540.671 | 14013.696 | AK026810  | 8197.653  | 7879.11   |
| NM_005612 | 5234.938  | 5075.374  | AK026305  | 21188.592 | 19983.215 | NM_015629 | 21442.186 | 19411.686 |
| AK025281  | 1091.039  | 1029.513  | NM_002552 | 5467.323  | 5806.453  | AF218032  | 14612.866 | 12620.58  |
| AB040918  | 4559.329  | 5000.815  | NM_014321 | 9774.353  | 10003.447 | NM_017542 | 16461.059 | 15081.362 |
| NM_015859 | 8344.756  | 8680.396  | AK022733  | 2662.679  | 3043.211  | AK024407  | 3204.477  | 3569.07   |
| X60152    | 2678.701  | 2813.08   | AB011132  | 9509.979  | 10573.343 | NM_004182 | 62784.574 | 62115.77  |
| NM_002316 | 959.327   | 1083.208  | NM_020362 | 16772.543 | 15944.032 | NM_018419 | 1987.858  | 2437.406  |
| NM_012421 | 29100.49  | 31872.996 | AB040937  | 5648.134  | 4888.33   | NM_014240 | 6895.178  | 7929.122  |
| AB014601  | 4505.872  | 4752.604  | AF275798  | 43864.148 | 45565.254 | BE379399  | 3781.214  | 3579.217  |



|           |           |           |           |           |           |           |           |           |
|-----------|-----------|-----------|-----------|-----------|-----------|-----------|-----------|-----------|
| AK001393  | 25921.793 | 32619.299 | NM_005441 | 18006.127 | 16463.859 | NM_015877 | 13689.734 | 13882.675 |
| NM_000023 | 5235.843  | 7257.695  | NM_016079 | 37099.105 | 37841.496 | AF060935  | 11813.065 | 9945.455  |
| AF022654  | 2156.067  | 2262.091  | AK023108  | 6895.594  | 7374.996  | AK026886  | 2582.167  | 2264.905  |
| NM_001143 | 1638.668  | 1768.519  | AK026409  | 63806.309 | 45585.781 | D83778    | 3651.266  | 2859.497  |
| NM_003282 | 1493.001  | 2283.929  | AF097025  | 23705.48  | 20811.705 | NM_00647C | 3686.533  | 2799.372  |
| AK022638  | 25623.24  | 32944.656 | Y11339    | 17706.285 | 15558.67  | NM_00285E | 44806.613 | 48477.898 |
| BG698409  | 5215.98   | 5970.208  | AB030176  | 1269.354  | 1244.605  | AB038463  | 2613.687  | 3080.335  |
| U36798    | 460.107   | 806.043   | NM_003937 | 964.267   | 979.761   | M30262    | 8535.516  | 8730.813  |
| AA220921  | 18219.922 | 23803.758 | NM_002537 | 13801.131 | 12507.313 | NM_00546C | 1497.936  | 1577.599  |
| N67770    | 1070.999  | 1187.195  | NM_003139 | 7582.251  | 7088.116  | AF160477  | 6178.77   | 4436.754  |
| AA486200  | 63705.117 | 59548.297 | NM_012316 | 9317.928  | 8811.496  | M12883    | 9021.756  | 9502.719  |
| U90065    | 906.805   | 1028.458  | AK001393  | 35266.121 | 44932.059 | BG288747  | 12568.901 | 12849.995 |
| AJ005898  | 4390.965  | 4358.423  | NM_000023 | 18721.791 | 21531.045 | BG617923  | 1076.027  | 1192.11   |
| X57303    | 4960.348  | 6987.458  | AF022654  | 1767.984  | 1886.521  | U37448    | 3187.121  | 3621.255  |
| AA463224  | 2560.342  | 2140.131  | NM_001143 | 2269.624  | 2209.621  | BG435851  | 693.602   | 1067.503  |
| BG248802  | 16530.498 | 17577.291 | NM_003282 | 1916.262  | 1981.785  | AA927698  | 1364.236  | 1505.316  |
| L19605    | 2004.314  | 2201.383  | AK022638  | 22667.361 | 26109.701 | AI498426  | 3018.45   | 3648.97   |
| AA876532  | 14498.483 | 17864.348 | BG698409  | 18031.479 | 16738.219 | BG824773  | 1164.957  | 993.078   |
| S74349    | 1483.738  | 1961.884  | U36798    | 866.568   | 832.76    | D01038    | 52823.535 | 56762.941 |
| X07979    | 26539.305 | 31216.689 | AA220921  | 19391.709 | 19671.133 | AB019205  | 4580.25   | 4738      |
| BG324670  | 983.616   | 1025.252  | N67770    | 3212.215  | 3381.165  | J05008    | 3592.499  | 4066.811  |
| BG744224  | 9344.008  | 8765.807  | AA486200  | 67028.852 | 58489.465 | U11087    | 3237.264  | 2868.285  |
| NM_00001E | 470.464   | 551.293   | U90065    | 1338.816  | 986.674   | D50640    | 1341.254  | 1504.35   |
| NM_014923 | 1786.504  | 1804.836  | AJ005898  | 23831.965 | 24166.053 | D43747    | 1448.82   | 1298.706  |
| NM_005477 | 12772.103 | 15914.854 | X57303    | 13068.026 | 12884.688 | M98776    | 8382.633  | 7026.001  |
| NM_00701E | 1685.2    | 1768.871  | AA463224  | 2625.398  | 2336.788  | X99135    | 64027.508 | 63036.777 |
| NM_00431E | 3478.479  | 3469.618  | BG248802  | 16177.563 | 15774.707 | AF009744  | 5399.929  | 5324.7    |
| L09089    | 1380.505  | 1246.473  | L19605    | 2818.18   | 2350.047  | AF104921  | 57288.816 | 50730.715 |
| NM_00264C | 4099.641  | 4637.447  | AA876532  | 17834.66  | 18404.686 | NM_00069E | 60527.82  | 60118.281 |
| X03084    | 664.888   | 1223.021  | S74349    | 1460.722  | 1244.669  | NM_005091 | 995.472   | 818.533   |
| NM_00094E | 654.556   | 616.438   | X07979    | 56898.172 | 53444.781 | AF031167  | 844.006   | 1126.943  |
| M15530    | 15416.938 | 16202.845 | BG324670  | 706.459   | 643.158   | NM_003204 | 15806.412 | 13966.514 |
| NM_00048E | 3430.556  | 4175.615  | BG744224  | 36076.125 | 36177.398 | AF254069  | 1207.694  | 1320.464  |
| NM_001877 | 7322.92   | 8024.919  | NM_01802E | 8327.647  | 8436.423  | AL117600  | 21428.711 | 20291.578 |
| NM_014207 | 19829.129 | 19232.365 | NM_001707 | 29029.641 | 27535.242 | NM_001712 | 1022.532  | 832.555   |
| AK002163  | 5945.612  | 5756.283  | AK022983  | 1710.207  | 1492.945  | NM_004487 | 56256.59  | 53257.617 |
| NM_002287 | 4507.001  | 4977.075  | NM_014923 | 2020.467  | 1737.65   | AB029000  | 8642.595  | 8604.391  |
| NM_012344 | 4858.449  | 5259.138  | NM_005477 | 32078.195 | 41859.305 | AK026965  | 59960.281 | 56927.273 |
| NM_002351 | 5583.99   | 6586.271  | NM_00701E | 1406.027  | 1044.233  | AK025859  | 11488.621 | 12101.396 |
| NM_01438E | 2480.663  | 3187.897  | NM_00431E | 3177.056  | 3385.909  | AL117499  | 34063.895 | 37085.879 |
| NM_001704 | 1535.918  | 1375.463  | L09089    | 6550.691  | 6116.944  | NM_007054 | 4367.146  | 5160.631  |
| AB036432  | 7377.676  | 7653.64   | NM_00264C | 3586.137  | 3816.995  | AB007957  | 2307.644  | 2960.148  |
| NM_003643 | 1454.274  | 1382.465  | NM_001877 | 6795.814  | 6798.139  | AK000160  | 3324.992  | 3350.644  |
| NM_00348C | 2280.643  | 2068.942  | NM_014207 | 15862.201 | 15863.648 | NM_005311 | 2971.832  | 2599.247  |
| NM_00405E | 1209.277  | 917.285   | AK002163  | 5750.456  | 4950.905  | NM_00590E | 6366.973  | 6828.702  |
| NM_001634 | 25500.316 | 23350.389 | NM_002287 | 4215.729  | 3639.721  | NM_01623E | 1933.974  | 2579.243  |
| NM_002267 | 18290.605 | 17336.49  | NM_012344 | 6685.676  | 5874.724  | NM_00096C | 2370.015  | 3314.481  |
| NM_006412 | 6232.258  | 6892.027  | NM_002351 | 4009.584  | 3590.654  | AF172932  | 1103.246  | 1301.405  |
| NM_003063 | 7668.86   | 6673.251  | NM_01438E | 2305.73   | 2309.244  | NM_00535E | 16056.199 | 15214.042 |
| NM_014041 | 35682.793 | 40382.805 | NM_001704 | 2365.131  | 2381.032  | NM_002511 | 5426.503  | 4592.31   |
| NM_00716E | 17352.33  | 17391.645 | AB036432  | 37851.645 | 40608.262 | NM_00408E | 21356.18  | 18754.58  |
| NM_014313 | 1399.033  | 1421.143  | NM_003643 | 1216.445  | 827.95    | NM_006032 | 14331.002 | 15115.356 |
| AK024966  | 2899.856  | 3625.037  | NM_00348C | 6623.409  | 5448.003  | NM_01478E | 8697.893  | 10295.565 |

|           |           |           |           |           |           |           |           |           |
|-----------|-----------|-----------|-----------|-----------|-----------|-----------|-----------|-----------|
| NM_017585 | 8540.939  | 9006.757  | NM_012421 | 25833.135 | 25408.088 | NM_002153 | 1762.167  | 1730.472  |
| NM_000033 | 2020.904  | 2213.382  | AB014601  | 4062.558  | 3653.963  | AB040890  | 2439.828  | 2066.975  |
| AF224741  | 2849.287  | 2621.277  | NM_002267 | 19249.383 | 22004.289 | AK024233  | 3408.786  | 3281.037  |
| NM_006594 | 4767.952  | 4572.777  | NM_006412 | 8306.735  | 10457.673 | AK021870  | 1777.371  | 1966.093  |
| NM_004177 | 2574.698  | 2763.834  | NM_003063 | 21692.154 | 22960.967 | U06680    | 3713.679  | 3451.636  |
| NM_012429 | 2884.851  | 2528.251  | NM_014041 | 32557.271 | 39338.156 | NM_005123 | 901.241   | 1084.407  |
| NM_004871 | 9556.817  | 9279.654  | NM_007169 | 16773.859 | 17500.975 | NM_015584 | 21050.678 | 23216.16  |
| AB040903  | 863.344   | 929.093   | NM_014313 | 1071.758  | 946.822   | NM_001697 | 66071.969 | 66741.813 |
| NM_005695 | 16739.121 | 12273.396 | AK024966  | 6680.638  | 7868.061  | NM_016095 | 62569.668 | 61917.066 |
| AF202146  | 13360.111 | 12689.098 | NM_017585 | 29669.607 | 32694.988 | AK025125  | 1016.033  | 1618.098  |
| NM_014865 | 12369.015 | 9347.188  | NM_000033 | 4511.984  | 5110.223  | AF156548  | 4708.467  | 5420.559  |
| AL442089  | 12739.193 | 10018.511 | AF224741  | 1838.97   | 1538.132  | NM_004663 | 3212.3    | 4201.111  |
| NM_001200 | 5541.151  | 5187.238  | NM_006594 | 6483.323  | 5237.904  | AB024411  | 3183.677  | 3482.508  |
| AF128541  | 2221.644  | 1819.937  | NM_004177 | 2181.139  | 1723.414  | NM_002444 | 20142.365 | 25053.682 |
| AK026305  | 7768.726  | 6386.564  | NM_012429 | 2309.021  | 2108.471  | NM_001104 | 5742.292  | 6524.248  |
| NM_002552 | 5391.854  | 5983.985  | NM_004871 | 8566.205  | 7975.427  | NM_002985 | 23735.523 | 25047.385 |
| NM_014321 | 13066.221 | 11577.814 | NM_005695 | 12160.857 | 9746.881  | U88898    | 2342.675  | 2341.769  |
| AK022733  | 3350.453  | 4371.244  | AF202146  | 10459.793 | 9959.275  | NM_020154 | 37441.578 | 39414.387 |
| AB011132  | 13098.546 | 15469.862 | NM_006393 | 6917.928  | 6263.247  | NM_004665 | 17134.602 | 13943.444 |
| NM_020362 | 15945.509 | 15205.311 | X83412    | 355.596   | 801.618   | NM_005300 | 5778.64   | 5263.72   |
| AB040937  | 5650.589  | 5091.548  | NM_001200 | 4849.524  | 6432.92   | NM_000893 | 4959.315  | 5353.379  |
| AF275798  | 53591.902 | 44499.57  | AB007964  | 880.617   | 1081.64   | NM_014070 | 3158.966  | 2645.587  |
| NM_005441 | 24627.23  | 21645.711 | AF128541  | 11889.955 | 12416.913 | NM_016280 | 1829.469  | 1499.373  |
| NM_016079 | 45872.813 | 44382.379 | AK026305  | 21143.129 | 22001.133 | NM_016027 | 1148.441  | 1053.451  |
| AK023108  | 3841.175  | 3741.134  | NM_002552 | 5204.492  | 6823.084  | NM_014297 | 4852.506  | 4560.172  |
| AK026409  | 10574.779 | 11288.681 | NM_014321 | 9685.941  | 10562.561 | NM_018155 | 45168.98  | 39324.863 |
| AF097025  | 8851.925  | 10524.52  | AK022733  | 2656.612  | 3234.126  | X98266    | 3525.747  | 3030.67   |
| Y11339    | 9058.751  | 9178.234  | AB011132  | 9472.177  | 10236.083 | U00930    | 29735.496 | 33450.023 |
| AB030176  | 2235.543  | 2216.987  | NM_020362 | 15754.096 | 14172.268 | AK024958  | 2383.878  | 1988.306  |
| NM_003937 | 1281.79   | 1105.885  | AB040937  | 4701.516  | 4227.222  | NM_014575 | 12926.861 | 13033.431 |
| NM_002537 | 14577.93  | 11951.801 | AF275798  | 40256.16  | 44196.672 | NM_002435 | 13605.253 | 13225.6   |
| NM_003135 | 10515.391 | 9199.166  | NM_005441 | 15830.005 | 15005.975 | AL117552  | 4024.246  | 3640.057  |
| NM_012315 | 9555.394  | 8281.594  | NM_016079 | 33839.945 | 31962.166 | NM_002692 | 21496.521 | 20942.307 |
| AK001393  | 25673.668 | 21444.885 | AK023108  | 5987.51   | 6028.992  | AB023190  | 63412.488 | 59212.938 |
| NM_000023 | 4055.715  | 3420.869  | AK026409  | 62941.676 | 46259.996 | NM_007064 | 6325.541  | 6938.035  |
| AF022654  | 1198.418  | 981.381   | AF097025  | 23213.945 | 20941.713 | NM_006281 | 2526.882  | 3428.552  |
| NM_003282 | 1410.381  | 1540.545  | Y11339    | 15745.335 | 15317.444 | NM_002735 | 2668.288  | 3073.004  |
| AK022638  | 21798.092 | 20653.715 | AB030176  | 1210.289  | 1035.403  | U23460    | 65426.629 | 61654.379 |
| BG698409  | 5191.373  | 3960.165  | NM_003937 | 1096.671  | 864.814   | NM_005355 | 9274.562  | 11197.618 |
| U36798    | 499.65    | 392.912   | NM_002537 | 12159.993 | 10709.589 | Z25434    | 11888.312 | 11084.695 |
| AA220921  | 17551.383 | 16893.65  | NM_003135 | 6439.992  | 6348.985  | NM_005884 | 22728.146 | 29361.779 |
| N67770    | 866.206   | 1016.909  | NM_012315 | 9686.729  | 9731.863  | NM_012395 | 21367.967 | 19397.684 |
| AA486200  | 61698.348 | 50829     | NM_001634 | 27600.871 | 24612.023 | AF229804  | 65211.977 | 60151.051 |
| U90065    | 1211.972  | 901.763   | AF022654  | 1902.109  | 2130.99   | AF151638  | 1112.827  | 747.862   |
| AJ005898  | 3929.927  | 3432.093  | NM_001143 | 2277.471  | 2837.162  | U90552    | 18391.764 | 17609.791 |
| X57303    | 5603.372  | 5931.646  | NM_003282 | 1785.869  | 2205.508  | AB038463  | 2980.642  | 3556.596  |
| AA463224  | 1965.851  | 1372.612  | AK022638  | 22080.816 | 27101.186 | M30262    | 7682.022  | 7391.9    |
| BG248802  | 16153.612 | 15590.838 | BG698409  | 18772.189 | 19791.68  | NM_005460 | 1507.223  | 1616.81   |
| L19605    | 2054.531  | 1704.818  | U36798    | 1182.447  | 1468.682  | AF160477  | 5762.07   | 4879.709  |
| AA876532  | 16093.693 | 17830.4   | AA220921  | 20657.932 | 20676.176 | M12883    | 6019.012  | 5450.811  |
| S74349    | 1674.258  | 2098.49   | N67770    | 3720.978  | 3520.834  | BG288747  | 9980.917  | 7864.468  |
| X07979    | 28882.631 | 29897.99  | AA486200  | 64896.723 | 63609.281 | U37448    | 2299.664  | 2076.92   |
| BG324670  | 1044.191  | 1031.207  | U90065    | 1106.877  | 1019.964  | BG435851  | 627.23    | 940.484   |

|           |           |           |           |           |           |           |           |           |
|-----------|-----------|-----------|-----------|-----------|-----------|-----------|-----------|-----------|
| BG744224  | 9313.665  | 8722.348  | AJ005898  | 20225.574 | 19249.084 | AA927698  | 1245.257  | 1471.179  |
| NM_018026 | 9630.856  | 10930.58  | X57303    | 11831.357 | 11428.356 | AI498426  | 3307.489  | 2822.082  |
| NM_001707 | 26642.08  | 25282.285 | AA463224  | 2203.92   | 1987.786  | BG824773  | 1528.079  | 1561.762  |
| AK022983  | 1662.339  | 2078.736  | BG248802  | 14977.615 | 13324.235 | D01038    | 52403.258 | 55689.801 |
| NM_014923 | 1682.182  | 1166.503  | L19605    | 3126.309  | 2208.269  | AB019205  | 4609.933  | 4385.109  |
| NM_005477 | 10756.959 | 10008.47  | AA876532  | 20610.381 | 19094.771 | J05008    | 2773.005  | 2454.895  |
| NM_007018 | 1468.938  | 1161.115  | S74349    | 1619.852  | 1363.514  | U11087    | 2240.635  | 1548.019  |
| NM_004318 | 2777.171  | 2504.835  | X07979    | 54554.461 | 51837.637 | D50640    | 1220.925  | 1582.571  |
| L09089    | 1267.788  | 1054.915  | BG324670  | 688.218   | 627.216   | M98776    | 6811.967  | 6017.783  |
| NM_002640 | 3363.77   | 2527.938  | BG744224  | 35242.965 | 35876.125 | X99135    | 64278.621 | 62832.637 |
| X03084    | 531.643   | 476.41    | NM_018026 | 7463.794  | 7740.646  | AF009744  | 4992.888  | 4850.954  |
| M15530    | 13893.721 | 10967.09  | NM_001707 | 28367.102 | 25451.533 | NM_001072 | 3194.836  | 3096.228  |
| NM_000488 | 3860.49   | 3261.788  | AK022983  | 2089.592  | 1616.094  | AF031167  | 820.998   | 979.688   |
| NM_001877 | 7676.243  | 6290.208  | NM_014868 | 15268.18  | 12584.335 | NM_003204 | 14931.034 | 18525.879 |
| NM_014207 | 14567.779 | 12452.768 | AL442089  | 24009.148 | 21107.338 | AF254069  | 936.593   | 1328.894  |
| AK002163  | 4553.412  | 3218.65   | NM_000949 | 639.694   | 662.26    | AL117600  | 14570.544 | 12468.576 |
| NM_002287 | 4697.387  | 3451.531  | M15530    | 13524.487 | 13525.587 | NM_001712 | 1581.074  | 1521.584  |
| NM_012344 | 5781.528  | 4436.04   | NM_000488 | 3047.24   | 3714.287  | NM_004487 | 49277.316 | 48755.707 |
| NM_002351 | 6211.822  | 5684.891  | NM_001877 | 9113.168  | 12760.787 | AB029000  | 7848.152  | 6962.968  |
| NM_014385 | 2641.58   | 2636.449  | NM_014207 | 18152.168 | 21161.404 | AK026965  | 53072.492 | 52142.863 |
| NM_001704 | 1329.12   | 1185.455  | AF169158  | 301.055   | 456.713   | AK025859  | 10049.134 | 8508.682  |
| AB036432  | 6750.628  | 6181.587  | AK002163  | 6144.046  | 5068.955  | AL117499  | 29678.494 | 28424.811 |
| NM_003643 | 1674.848  | 1105.915  | NM_002287 | 4080.787  | 3568.389  | NM_007054 | 4324.576  | 3988.115  |
| NM_003480 | 2287.057  | 1603.548  | NM_012344 | 6652.418  | 6126.277  | AB007957  | 1466.402  | 1545.188  |
| NM_012421 | 28137.701 | 24355.428 | NM_002351 | 3716.768  | 3587.914  | AK000160  | 3334.918  | 3300.538  |
| AB014601  | 5235.585  | 4304.896  | NM_014385 | 2334.882  | 2612.984  | NM_005311 | 3567.56   | 3189.871  |
| NM_002267 | 17714.709 | 15315.047 | NM_001704 | 2515.437  | 2169.709  | NM_005905 | 5331.937  | 4525.624  |
| NM_006412 | 4965.593  | 4785.634  | AB036432  | 37292.551 | 41039.563 | NM_016235 | 810.872   | 650.458   |
| NM_003063 | 7377.622  | 5413.579  | NM_014872 | 6265.612  | 4522.243  | NM_000960 | 1716.751  | 1492.413  |
| NM_014041 | 34067.184 | 27282.391 | NM_003643 | 1256.694  | 717.729   | NM_005355 | 13431.366 | 11756.008 |
| NM_007169 | 16064.228 | 13732.71  | NM_003480 | 7358.537  | 5706.402  | NM_002511 | 3037.664  | 2524.471  |
| NM_014313 | 1083.103  | 846.034   | NM_000899 | 1450.484  | 1411.903  | NM_000794 | 863.268   | 736.97    |
| AK024966  | 836.14    | 542.461   | NM_032951 | 3964.465  | 3584.025  | NM_004085 | 20780.502 | 19691.117 |
| NM_017585 | 8465.447  | 8987.351  | NM_000503 | 15030.151 | 14125.11  | NM_006470 | 5386.292  | 4558.24   |
| NM_000033 | 1777.535  | 1503.99   | NM_002405 | 27567.26  | 25711.35  | NM_002855 | 48910.926 | 47239.945 |
| AF224741  | 2517.447  | 1662.121  | AK000004  | 4673.949  | 4287.682  | NM_002153 | 4458.9    | 8007.707  |
| NM_006594 | 3842.099  | 2644.358  | NM_012421 | 24819.914 | 24402.719 | AB040890  | 3018.052  | 5205.777  |
| NM_004177 | 1995.709  | 1811.042  | AB014601  | 3629.74   | 3361.005  | AK024233  | 3671.838  | 4608.033  |
| NM_012429 | 2660.402  | 1717.562  | AK001393  | 30131.707 | 28628.877 | AK021870  | 1320.103  | 1061.777  |
| NM_004871 | 9522.03   | 6638.416  | NM_000023 | 10178.458 | 8525.074  | U06680    | 2998.197  | 2517.715  |
| AB040903  | 939.518   | 810.564   | NM_014861 | 2174.717  | 2031.486  | NM_017855 | 423.46    | 470.047   |
| NM_005698 | 14515.133 | 10002.815 | NM_012434 | 6099.577  | 6505.65   | NM_015584 | 20342.805 | 20290.023 |
| AF202146  | 12268.426 | 9698.788  | NM_005694 | 17068.961 | 18175.412 | NM_001697 | 66912.188 | 68180.391 |
| NM_001200 | 5850.246  | 5539.734  | AF224741  | 2103.9    | 2052.984  | NM_016098 | 56880.602 | 59464.449 |
| AB007964  | 623.043   | 803.063   | NM_006594 | 7815.691  | 7453.708  | AK025125  | 936.875   | 1162.428  |
| AF128541  | 1890.806  | 1521.01   | NM_004177 | 2165.322  | 1653.234  | AF156548  | 4406.941  | 4669.553  |
| AK026305  | 6417.821  | 4825.9    | NM_012429 | 2295.038  | 1886.43   | NM_004663 | 3822.896  | 3677.569  |
| NM_002552 | 5746.652  | 5231.731  | NM_004871 | 8323.459  | 6794.343  | AB024411  | 3417.868  | 3771.943  |
| NM_014321 | 10867.5   | 9686.58   | NM_005698 | 10345.945 | 7105.812  | NM_002444 | 23570.488 | 23832.201 |
| AK022733  | 2908.216  | 2722.528  | AF202146  | 11157.688 | 8858.276  | NM_001104 | 5250.483  | 4520.352  |
| AB011132  | 9598.536  | 8369.22   | NM_006393 | 7150.919  | 6041.723  | NM_002985 | 21288.016 | 20995.127 |
| NM_020362 | 13009.61  | 8020.052  | NM_014923 | 1564.245  | 1080.757  | U88898    | 1378.992  | 1137.565  |
| AB040937  | 5462.42   | 4082.115  | NM_005477 | 29624.871 | 31792.551 | NM_020154 | 27699.244 | 23860.748 |

|           |           |           |           |           |           |           |           |           |
|-----------|-----------|-----------|-----------|-----------|-----------|-----------|-----------|-----------|
| AF275798  | 50567.883 | 43764.473 | NM_007018 | 1041.489  | 883.62    | NM_004665 | 15337.432 | 12906.385 |
| NM_005441 | 21747.057 | 17136.68  | NM_004318 | 2557.178  | 2295.625  | NM_005300 | 5695.956  | 4542.793  |
| NM_016079 | 39642.098 | 32774.855 | L09089    | 4587.959  | 3420.976  | NM_000893 | 4770.885  | 4864.094  |
| AK023108  | 3591      | 2545.168  | NM_002640 | 2950.741  | 2417.628  | NM_000698 | 65455.105 | 63023.223 |
| AK026409  | 9893.571  | 7869.347  | NM_002537 | 19938.023 | 19768.85  | NM_005091 | 1537.696  | 1528.447  |
| AF097025  | 9023.665  | 6101.551  | NM_003139 | 8161.575  | 8957.104  | NM_016280 | 1829.585  | 2421.115  |
| Y11339    | 7481.4    | 5414.323  | NM_012316 | 10817.901 | 11189.381 | NM_016027 | 2599.651  | 4043.156  |
| AB030176  | 2173.703  | 1908.51   | NM_004059 | 1304.189  | 1958.815  | NM_014297 | 4177.74   | 5190.834  |
| NM_003937 | 1250.452  | 816.385   | NM_001634 | 30551.623 | 32262.016 | NM_018156 | 48762.215 | 48753.68  |
| NM_002537 | 13227.686 | 9163.641  | NM_014302 | 3429.801  | 2624.274  | X98266    | 3580.9    | 3255.804  |
| NM_003139 | 10292.233 | 8095.774  | NM_002267 | 17050.164 | 16381.635 | U00930    | 22271.861 | 24308.359 |
| NM_012316 | 7851.131  | 6117.342  | NM_006412 | 6752.408  | 6579.771  | AK024958  | 1868.494  | 1804.838  |
| NM_004059 | 999.275   | 901.519   | NM_003063 | 21518.594 | 19943.762 | NM_014575 | 10475.097 | 11232.959 |
| NM_001634 | 30720.525 | 24339.066 | NM_014041 | 31254.5   | 26809.541 | NM_002439 | 9245.05   | 11416.196 |
| AF022654  | 2481.382  | 2538.542  | NM_007169 | 14432.14  | 11311.633 | AL117552  | 3038.956  | 3336.372  |
| NM_001143 | 1993.923  | 2015.56   | NM_014313 | 804.994   | 673.644   | NM_002692 | 18055.215 | 18122.787 |
| NM_003282 | 1678.006  | 1440.848  | AK024966  | 6671.107  | 5125.856  | AB023190  | 62484.535 | 60773.914 |
| AK022638  | 24794.461 | 26688.133 | AF178941  | 43223.695 | 40304.793 | NM_007064 | 5413.606  | 5205.242  |
| BG698409  | 4923.78   | 3704.113  | NM_016033 | 12936.571 | 11132.003 | NM_006281 | 3738.741  | 2861.013  |
| U36798    | 678.895   | 836.094   | NM_017585 | 27666.959 | 26158.217 | NM_002738 | 2983.767  | 2605.46   |
| AA220921  | 17034.385 | 16307.879 | U61737    | 60777.645 | 51172.164 | U23460    | 63380.375 | 61970.883 |
| N67770    | 828.73    | 810.905   | Y10506    | 999.63    | 1232.43   | NM_005356 | 10010.695 | 11751.268 |
| AA486200  | 62832.063 | 52076.496 | X06389    | 2366.559  | 2105.449  | Z25434    | 10522.08  | 9623.992  |
| U90065    | 759.192   | 589.229   | NM_000033 | 4257.984  | 4190.63   | NM_005884 | 19648.787 | 26470.674 |
| AJ005898  | 3978.719  | 3492.919  | NM_018026 | 11226.676 | 12193.404 | NM_012399 | 15247.976 | 15635.378 |
| X57303    | 5344.638  | 6314.588  | NM_001707 | 33193.051 | 36897.156 | AF229804  | 60391.305 | 56653.434 |
| AA463224  | 1626.792  | 1375.719  | AK022983  | 2711.038  | 2879.133  | AF151638  | 887.089   | 536.133   |
| BG248802  | 16710.035 | 11971.265 | NM_014868 | 21025.904 | 22261.379 | U90552    | 15312.367 | 14378.779 |
| L19605    | 2262.967  | 1437.924  | AL442089  | 36694.02  | 38096.582 | NM_006032 | 18216.318 | 15371.028 |
| AA876532  | 16596.297 | 15090.912 | NM_001200 | 4180.498  | 4462.252  | NM_014788 | 11012.911 | 9706.833  |
| S74349    | 1996.938  | 1356.578  | AB007964  | 955.807   | 544.294   | NM_005460 | 1782.013  | 2336.506  |
| X07979    | 27149.264 | 21713.348 | AF128541  | 10416.905 | 6089.523  | AF160477  | 10048.637 | 14081.361 |
| BG324670  | 895.691   | 1020.33   | AK026305  | 17889.006 | 13647.198 | NM_003226 | 661.102   | 819.496   |
| BG744224  | 9610.404  | 7607.808  | NM_002552 | 4603.292  | 3573.382  | M12883    | 6313.451  | 7298.781  |
| NM_018026 | 10378.665 | 10058.434 | NM_014321 | 8523.252  | 7057.221  | BG288747  | 9652.813  | 8859.396  |
| NM_001707 | 28011.844 | 23142.102 | AK022733  | 3288.826  | 2427.473  | U37448    | 2284.185  | 2407.741  |
| AK022983  | 1521.911  | 972.777   | AB011132  | 9027.006  | 7013.583  | AA927698  | 1324.938  | 1471.575  |
| NM_014868 | 13054.544 | 9670.021  | NM_020362 | 15566.059 | 10516.229 | AI498426  | 2785.886  | 3438.789  |
| AL442089  | 16160.423 | 12897.912 | AB040937  | 4975.971  | 3004.951  | BG824773  | 1019.667  | 824.076   |
| NM_000949 | 735.371   | 480.838   | AF275798  | 38700.602 | 38366.512 | D01038    | 56152.145 | 55329.93  |
| M15530    | 7068.255  | 5099.563  | NM_005441 | 14958.835 | 12277.077 | AB019205  | 4698.018  | 4392.593  |
| NM_000488 | 4194.059  | 4312.631  | NM_016079 | 31483.814 | 26759.893 | J05008    | 3521.945  | 2899.15   |
| NM_001877 | 6892.045  | 7584.268  | AK023108  | 9344.411  | 8080.642  | U11087    | 2696.106  | 2529.311  |
| NM_014207 | 14725.788 | 15988.36  | AK026409  | 61906.246 | 51161.73  | D50640    | 1564.069  | 1436.542  |
| AK002163  | 6064.498  | 5516.968  | AF097025  | 20221.199 | 16532.055 | D43747    | 836.574   | 632.308   |
| NM_002287 | 5399.115  | 4591.846  | Y11339    | 16937.188 | 14286.571 | M98776    | 6326.709  | 4640.228  |
| NM_012344 | 6323.169  | 5398.562  | AB030176  | 1276.298  | 962.096   | X99135    | 62703.219 | 67055.703 |
| NM_002351 | 7578.382  | 7398.095  | AK026783  | 905.148   | 1332.854  | AF009744  | 4135.945  | 4103.328  |
| NM_014385 | 2446.643  | 2006.53   | AK021814  | 1922.524  | 1894.905  | NM_001072 | 2886.894  | 2605.978  |
| NM_001704 | 1553.503  | 999.385   | AF088035  | 3286.842  | 4031.311  | NM_014070 | 4261.182  | 3614.249  |
| AB036432  | 7053.054  | 5905.652  | AF086251  | 838.484   | 1529.747  | AK025859  | 9992.345  | 12477.537 |
| NM_014872 | 8202.998  | 6972.568  | AL137344  | 1588.917  | 2026.521  | AL117499  | 26607.709 | 33078.742 |
| NM_003643 | 1346.435  | 1246.687  | NM_018092 | 1302.178  | 932.331   | NM_007054 | 3693.343  | 4269.143  |

|           |           |           |           |           |           |           |           |           |
|-----------|-----------|-----------|-----------|-----------|-----------|-----------|-----------|-----------|
| NM_00348C | 2445.367  | 1464.147  | AL109698  | 937.607   | 619.741   | AK000160  | 2665.87   | 2598.787  |
| NM_00089E | 1479.057  | 1040.919  | AF217980  | 10494.18  | 5817.527  | NM_005311 | 2264.493  | 1818.952  |
| NM_032951 | 3754.419  | 3238.765  | NM_01649E | 2570.299  | 3033.976  | NM_00590E | 4470.425  | 4071.74   |
| NM_00050E | 3064.484  | 3271.489  | NM_17214C | 7611.448  | 8901.718  | NM_01623E | 627.5     | 1089.73   |
| NM_00240E | 37582.258 | 35158.629 | SR6       | 2266.784  | 4141.233  | NM_00096C | 1333.719  | 1492.724  |
| AK000004  | 4451.087  | 4210.489  | SR8       | 7068.219  | 41031.121 | NM_00535E | 11044.792 | 11198.241 |
| NM_012421 | 28943.75  | 26403.342 | CY3Cy5    | 2949.107  | 179.546   | NM_002511 | 4125.576  | 3951.019  |
| AB014601  | 5434.779  | 3743.331  | AK000122  | 20174.447 | 25295.98  | NM_000794 | 809.323   | 823.207   |
| AK001393  | 26808.582 | 20146.781 | AK001091  | 13704.145 | 18289.641 | AF295378  | 8294.045  | 7239.092  |
| NM_00002E | 4648.756  | 3989.518  | AF086428  | 3070.005  | 4081.547  | NM_00408E | 19682.684 | 18083.867 |
| NM_014861 | 1882.217  | 1155.799  | AK025310  | 2908.606  | 3157.776  | NM_01244E | 65789.547 | 70634.805 |
| NM_012434 | 6008.56   | 3901.64   | AL049353  | 646.389   | 513.233   | NM_018104 | 7530.458  | 7083.572  |
| NM_005694 | 15226.326 | 11804.181 | AL117598  | 3198.97   | 3539.017  | NM_00442E | 14753.717 | 13076.248 |
| AF224741  | 2848.83   | 3118.882  | AL109670  | 2306.677  | 2513.853  | U64564    | 4300.575  | 4744.69   |
| NM_006594 | 4642.102  | 4731.896  | AL832149  | 4345.581  | 3110.392  | NM_00647C | 6017.326  | 5692.775  |
| NM_004177 | 2938.576  | 3252.269  | AK022839  | 4274.617  | 3140.489  | NM_00285E | 49847.629 | 51775.605 |
| NM_01242E | 3352.014  | 2773.36   | NM_01835C | 2049.688  | 1515.123  | AB038463  | 3216.655  | 3235.934  |
| NM_004871 | 10913.355 | 11741.592 | NM_00394E | 2838.251  | 3468.724  | M30262    | 9310.696  | 9840.587  |
| AB040903  | 1094.642  | 1002.138  | AB045292  | 2745.333  | 4139.964  | NM_01531C | 2359.826  | 3846.06   |
| NM_00569E | 17306.945 | 17188.205 | AK025826  | 5361.72   | 7405.333  | NM_016154 | 31463.918 | 41757.512 |
| AF202146  | 14006.201 | 15147.133 | AK026439  | 2505.987  | 3853.965  | NM_00501E | 45621.074 | 49766.715 |
| NM_00639E | 687.095   | 697.921   | AK025278  | 1011.349  | 1074.651  | AB002338  | 2023.16   | 1985.678  |
| NM_01492E | 2151.449  | 1926.451  | AK026466  | 1103.163  | 857.973   | AI524814  | 2505.555  | 2182.545  |
| NM_005477 | 12653.966 | 14928.536 | AK024280  | 2201.175  | 2047.093  | AB024411  | 2384.403  | 2728.747  |
| NM_00701E | 2116.162  | 1213.994  | AF075036  | 3761.06   | 2861.145  | NM_002444 | 18347.957 | 19297.932 |
| NM_00431E | 3752.517  | 2468.794  | NM_014797 | 5302.29   | 3538.295  | NM_001104 | 4639.814  | 4613.559  |
| L09089    | 1413.734  | 782.581   | AL831841  | 9127.29   | 9291.223  | NM_00298E | 18901.234 | 20775.344 |
| NM_00264C | 4409.579  | 2693.034  | AL110165  | 8093.3    | 10897.894 | U88898    | 1456.734  | 1721.943  |
| X03084    | 928.265   | 582.89    | AL117652  | 2904.295  | 4275.893  | NM_020154 | 36402.754 | 36049.332 |
| NM_002537 | 7277.314  | 4249.521  | AL050168  | 10799.479 | 14569.279 | NM_00466E | 15045.335 | 12956.111 |
| NM_00313E | 6551.97   | 6451.854  | AL117447  | 3057.186  | 4926.672  | NM_00530C | 5162.88   | 5102.216  |
| NM_01231E | 4698.365  | 4091.179  | AK022135  | 3968.273  | 5102.796  | NM_00089E | 4082.935  | 4171.761  |
| NM_00405E | 1986.783  | 2355.178  | AK022898  | 913.253   | 1177.625  | NM_00069E | 62498.637 | 60181.809 |
| NM_001634 | 27357.354 | 22971.115 | NM_01489E | 1179.844  | 1526.807  | NM_005091 | 1107.749  | 1114.683  |
| NM_01430E | 3922.652  | 2095.889  | AF009269  | 2047.792  | 2257.367  | AF031167  | 1206.907  | 1281.6    |
| NM_002267 | 17447.861 | 15438.792 | AF009313  | 5664.998  | 5593.356  | NM_003204 | 16107.534 | 11297.922 |
| NM_00641E | 7308.009  | 8520.214  | AF090887  | 1442.716  | 1172.559  | AF254069  | 1088.945  | 1322.872  |
| NM_00306E | 7646.911  | 6384.123  | NM_01588E | 2859.396  | 2538.758  | AL117600  | 27303.158 | 23311.916 |
| NM_014041 | 40678.785 | 48252.027 | AF056429  | 1141.663  | 797.443   | NM_00171E | 2666.47   | 2939.801  |
| NM_00716E | 18275.41  | 20179.211 | AF070547  | 6984.267  | 4460.319  | NM_004487 | 61848.441 | 60388.641 |
| NM_01431E | 1370.94   | 1645.167  | AK021609  | 443.792   | 1349.427  | AB029000  | 13740.043 | 14345.776 |
| AK024966  | 1251.825  | 1176.896  | AK021801  | 546.425   | 927.349   | AK026965  | 61354.047 | 59674.957 |
| AF178941  | 3988.136  | 4074.703  | AK001153  | 979.155   | 1492.846  | AF229804  | 61593.699 | 66788.008 |
| NM_01603E | 16831.639 | 16624.879 | AK002184  | 1265.221  | 1906.976  | AF151638  | 1230.884  | 2070.319  |
| NM_01758E | 9520.635  | 9148.738  | AK021652  | 1056.162  | 1891.01   | U90552    | 10143.62  | 13229.714 |
| U61737    | 35761.551 | 37998.973 | AK021859  | 1783.487  | 2172.348  | NM_00603E | 13235.807 | 15016.176 |
| X06389    | 1193.388  | 633.573   | M64700    | 790.83    | 1016.796  | NM_01478E | 6853.675  | 7215.183  |
| NM_00003E | 2687.308  | 2002.021  | NM_001267 | 1015.52   | 1417.634  | NM_00215E | 1232.688  | 1326.223  |
| NM_01802E | 5629.545  | 4039.689  | NM_005331 | 59047.754 | 55413.941 | AB040890  | 2305.896  | 2585.809  |
| NM_001707 | 15895.01  | 13305.416 | NM_014111 | 1933.438  | 2445.225  | AK024233  | 3392.149  | 3338.188  |
| AK022983  | 880.205   | 659.879   | S85075    | 1243.713  | 1717.18   | AK021870  | 921.041   | 1171.5    |
| NM_01486E | 10659.626 | 8858.049  | AJ008158  | 1121.202  | 1348.033  | U06680    | 2996.82   | 2717.716  |
| AL442089  | 8978.44   | 6724.006  | AF161451  | 17524.256 | 18710.516 | NM_01785E | 537.441   | 501.09    |

|           |           |           |           |           |           |           |           |           |
|-----------|-----------|-----------|-----------|-----------|-----------|-----------|-----------|-----------|
| NM_00120C | 5001.896  | 3467.056  | X02067    | 18811.166 | 15550.468 | NM_00512C | 1654.082  | 1697.219  |
| AB007964  | 850.912   | 913.91    | NM_006236 | 62440.145 | 53191.289 | NM_015584 | 22667.904 | 19893.477 |
| AF128541  | 2380.66   | 1691.813  | AK023734  | 2682.183  | 1944.411  | NM_001697 | 65918.031 | 63903.656 |
| AK026305  | 8085.054  | 6503.232  | D17265    | 32905.145 | 26454.857 | NM_01609E | 60528.113 | 59789.82  |
| NM_00255Z | 5571.276  | 6664.716  | AF085827  | 1821.351  | 1050.385  | AB032525  | 825.237   | 806.954   |
| NM_014321 | 12591.342 | 12298.428 | AK002171  | 9356.965  | 8248.484  | NM_00206C | 1366.59   | 1167.245  |
| AK022733  | 3898.68   | 4077.007  | AJ002572  | 4156.262  | 4998.539  | NM_006667 | 63026.211 | 61611.113 |
| AB011132  | 13741.592 | 10949.473 | AK026897  | 10432.445 | 17508.492 | AK025125  | 1135.655  | 1277.304  |
| NM_02036Z | 17472.189 | 11328.712 | AB037861  | 15496.393 | 22453.715 | NM_00081E | 3504.541  | 4436.698  |
| AB040937  | 6226.316  | 5434.764  | AK021887  | 8685.341  | 13860.42  | NM_00129C | 1630.076  | 1591.816  |
| AF275798  | 55754.953 | 53245.582 | NM_00250C | 69841.297 | 67276.711 | AB023173  | 9336.138  | 9377.668  |
| NM_005441 | 30401.09  | 34725.293 | NM_00531E | 10206.908 | 10150.439 | AF156548  | 4423.272  | 4777.392  |
| NM_01607E | 52887.461 | 49819.5   | NM_01905E | 786.243   | 962.847   | NM_000387 | 39157.926 | 39969.219 |
| AK023108  | 12144.456 | 12001.021 | AK022351  | 2725.24   | 3443.443  | NM_00466C | 4121.324  | 4284.125  |
| AK026409  | 15443.921 | 14400.011 | NM_020194 | 5659.706  | 7181.584  | NM_00107Z | 2567.957  | 3256.825  |
| AF097025  | 11477.422 | 10701.02  | AK026853  | 1559.948  | 1837.288  | NM_01407C | 2531.296  | 1369.058  |
| Y11339    | 8860.021  | 9327.439  | NM_01788Z | 5116.702  | 6700.524  | NM_01628C | 1224.256  | 1143.792  |
| AB030176  | 2664.342  | 2373.108  | NM_003521 | 2641.271  | 2933.276  | NM_016027 | 900.89    | 746.307   |
| NM_003937 | 1900.464  | 1753.299  | NM_003547 | 3228.354  | 2677.92   | NM_014297 | 4891.615  | 4868.198  |
| CY3Cy5    | 5687.723  | 421.877   | AF070529  | 2076.424  | 1621.874  | NM_01815E | 48169.34  | 44028.504 |
| NM_17214C | 5423.326  | 6414.744  | AK022978  | 4226.435  | 3245.465  | X98266    | 2818.499  | 1952.335  |
| AK026783  | 1456.426  | 1075.06   | AK021447  | 12207.352 | 7583.324  | U00930    | 31098.137 | 32826.102 |
| AK021814  | 1487.769  | 1403.242  | AK025096  | 4349.761  | 2023.658  | AK024958  | 2239.649  | 1928.634  |
| NM_01809Z | 645.585   | 1099.862  | AF131774  | 5432.802  | 6004.395  | NM_01457E | 13761.279 | 12690.224 |
| AL109698  | 1379.058  | 1789.644  | AK025793  | 1141.995  | 1576.4    | NM_00243C | 13434.031 | 11368.134 |
| AF217980  | 2848.336  | 3704.23   | AK000151  | 1123.146  | 1742.681  | AL117552  | 3398.673  | 3108.387  |
| AL117461  | 3944.074  | 4549.939  | AL389942  | 3934.782  | 5767.551  | NM_00269Z | 18417.893 | 16423.184 |
| NM_01649E | 1590.665  | 2119.323  | AL137479  | 723.405   | 1185.633  | AB023190  | 61913.41  | 61281.938 |
| NM_17214C | 6773.493  | 7071.981  | NM_004211 | 4687.618  | 5547.586  | NM_007064 | 5711.121  | 4568.634  |
| SR4       | 18228.629 | 18476.078 | Y10776    | 4472.412  | 5432.968  | NM_006281 | 3077.264  | 2680.042  |
| SR6       | 2606.375  | 2601.296  | AK027241  | 13504.146 | 16769.111 | NM_00273E | 2964.021  | 2342.752  |
| SR8       | 10341.602 | 36429.691 | NM_00697E | 5769.081  | 6686.97   | U23460    | 61992.465 | 68002.477 |
| SR10      | 29108.695 | 9423.972  | NM_004561 | 1246.803  | 1527.723  | NM_00535E | 10498.651 | 13745.629 |
| CY3Cy5    | 3171.932  | 239.992   | AK024812  | 5152.583  | 5742.626  | Z25434    | 12682.704 | 11893.254 |
| AK000122  | 5566.874  | 6115.098  | M20642    | 1601.026  | 1320.31   | NM_005884 | 21526.865 | 27210.57  |
| AK023159  | 3421.067  | 4089.938  | AK026412  | 2611.053  | 2354.68   | NM_01239E | 21815.775 | 20956.877 |
| AK001091  | 2762.967  | 3113.184  | X89669    | 3564.572  | 4742.728  | CY3Cy5    | 11386.129 | 657.955   |
| AF033199  | 1023.967  | 1510.382  | U92013    | 38727.871 | 38940.207 | NM_004774 | 8423.191  | 8909.662  |
| U80775    | 917.793   | 1101.621  | AK023965  | 3132.537  | 3603.558  | NM_005234 | 14661.187 | 15182.202 |
| AF086428  | 3249.184  | 4069.245  | AK026211  | 1406.368  | 1643.837  | NM_01540C | 14098.631 | 15245.993 |
| AL049353  | 1095.884  | 906.115   | X58968    | 5369.372  | 5552.532  | AL359561  | 761.08    | 933.445   |
| AL117598  | 5160.466  | 3800.798  | U92020    | 9922.408  | 8598.352  | AF131786  | 589.279   | 479.56    |
| AL109670  | 1202.625  | 1719.487  | AL117542  | 6825.782  | 6715.549  | AK026464  | 2888.834  | 3140.537  |
| AF085831  | 2327.043  | 2744.552  | AL109712  | 49896.848 | 43963.766 | AK001362  | 1493.005  | 1496.107  |
| AL832149  | 6073.053  | 6496.859  | NM_01778Z | 8571.563  | 4786.287  | AK023491  | 887.977   | 1234.701  |
| AK022839  | 7387.142  | 7860.123  | NM_01814E | 8448.37   | 7455.076  | AK022400  | 3640.126  | 3429.621  |
| NM_01835C | 3128.213  | 3505.02   | D16944    | 891.17    | 1038.974  | AF052100  | 3064.253  | 2480.647  |
| AK025839  | 4473.315  | 3652.795  | NM_01846E | 21084.635 | 29896.99  | AL110235  | 1831.853  | 1804.303  |
| NM_00394E | 2686.677  | 2821.224  | Z36814    | 2711.073  | 4290.164  | U79245    | 1235.599  | 1542.248  |
| AB045292  | 4279.647  | 4183.042  | D17045    | 1266.839  | 1952.157  | AF085983  | 1447.9    | 1535.237  |
| AK025699  | 8491.563  | 8534.083  | NM_00024Z | 810.056   | 895.906   | AF052105  | 1810.581  | 1769.955  |
| NM_018024 | 7511.066  | 4980.521  | AB040878  | 4010.195  | 4597.301  | AK001204  | 20610.551 | 16688.236 |
| NM_003787 | 913.645   | 728.426   | S74647    | 1567.534  | 2058.244  | NM_004774 | 5737.752  | 5923.157  |

|           |           |           |           |           |           |           |           |           |
|-----------|-----------|-----------|-----------|-----------|-----------|-----------|-----------|-----------|
| AK024280  | 1440.343  | 1760.426  | NM_003506 | 1742.88   | 2393.298  | NM_005234 | 5831.672  | 5030.128  |
| AF075036  | 1447.383  | 1853.218  | NM_018093 | 18315.031 | 21332.773 | SR1       | 76466.383 | 63260.32  |
| NM_014797 | 5617.367  | 6723.606  | NM_003389 | 2328.743  | 2412.968  | SR3       | 24750.398 | 32354.131 |
| AK027139  | 2092.396  | 2447.401  | NM_000430 | 2174.253  | 2661.707  | SR5       | 1940.133  | 2607.272  |
| AL831841  | 1629.585  | 1934.074  | AB033030  | 2310.472  | 2721.521  | SR7       | 1216.79   | 20336.824 |
| AL050168  | 2064.458  | 2028.375  | NM_016656 | 1510.901  | 919.485   | SR9       | 3601.73   | 705.512   |
| AL122122  | 2353.735  | 2263.662  | NM_015963 | 11102.495 | 13465.089 | CY3Cy5    | 10628.709 | 927.986   |
| AK022135  | 1005.025  | 1163.302  | NM_017813 | 9527.499  | 10261.795 | L34409    | 32460.973 | 31966.822 |
| AK022898  | 1828.147  | 2355.563  | NM_003840 | 14542.388 | 13804.909 | U12210    | 5189.596  | 4932.089  |
| NM_017559 | 3411.909  | 4018.778  | NM_018378 | 2606.906  | 2451.887  | L08440    | 14153.443 | 14258.469 |
| NM_014896 | 1596.845  | 1806.464  | NM_018423 | 2411.92   | 2131.425  | M19866    | 753.912   | 924.058   |
| AF090887  | 2320      | 2053.362  | NM_001741 | 12731.952 | 10390.515 | M73799    | 6130.585  | 5986.07   |
| AF009279  | 1171.894  | 1238.438  | NM_000745 | 4012.087  | 2851.921  | AF086119  | 3227.979  | 2873.821  |
| NM_015883 | 6306.543  | 5614.121  | AF116705  | 29652.174 | 16042.582 | NM_018364 | 8425.846  | 7255.592  |
| AF056429  | 1807.665  | 2221.646  | NM_004460 | 2201.75   | 902.281   | NM_006778 | 1904.925  | 1539.578  |
| AF070547  | 1569.215  | 1714.761  | NM_006072 | 8587.511  | 9704.05   | NM_007022 | 4699.67   | 4554.55   |
| AK001110  | 4500.042  | 3715.746  | BE794490  | 4255.699  | 4329.993  | AL049943  | 45800.906 | 49845.059 |
| AK021801  | 887.197   | 855.337   | NM_003561 | 8527.422  | 11756.864 | AL137303  | 5104.546  | 6189.781  |
| AK002184  | 1899.682  | 1494.243  | NM_002991 | 1223.782  | 1613.583  | AL355708  | 1559.633  | 1708.845  |
| AK021652  | 2040.006  | 2157.471  | AJ008149  | 31359.75  | 44488.23  | AB002449  | 1720.036  | 1845.027  |
| L41143    | 19806.066 | 17923.672 | NM_001192 | 1739.334  | 2415.19   | U79248    | 7831.992  | 19348.568 |
| NM_005331 | 16053.739 | 16728.801 | NM_002353 | 1664.438  | 2511.115  | NM_016480 | 12895.672 | 13985.153 |
| NM_014111 | 1085.113  | 1607.896  | NM_012153 | 3287.302  | 4195.469  | NM_015681 | 6983.827  | 5777.132  |
| S85075    | 1628.23   | 2153.051  | NM_013241 | 2490.629  | 2727.308  | NM_006383 | 5537.763  | 4283.234  |
| AF161451  | 18410.637 | 22905.479 | AF161362  | 5987.383  | 6273.892  | AK024351  | 2296.223  | 2373.235  |
| X02067    | 23326.914 | 23167.146 | NM_015939 | 12936.848 | 12118.322 | AK024867  | 1962.684  | 2716.003  |
| NM_006236 | 13062.145 | 14583.416 | AB046840  | 2196.635  | 1735.494  | AK025002  | 9508.556  | 9487.649  |
| AK023734  | 1829.361  | 1903.911  | AF174487  | 7092.315  | 7174.182  | AF086124  | 1678.829  | 2108.855  |
| D17265    | 53586.262 | 55906.75  | NM_005041 | 1229.38   | 785.082   | AK024820  | 2376.949  | 2130.648  |
| AF085827  | 3843.542  | 4388.25   | NM_006407 | 8643.85   | 5860.983  | AF052117  | 1206.827  | 1054.505  |
| Y08266    | 18943.217 | 16847.035 | NM_007373 | 6701.635  | 2179.642  | AB033105  | 2240.65   | 2361.201  |
| AK002171  | 12127.51  | 9312.438  | M34572    | 2118.483  | 1805.954  | AF038192  | 1805.992  | 1841.068  |
| AJ002572  | 4784.876  | 4293.729  | NM_004791 | 6795.151  | 8542.261  | AJ001865  | 2462.445  | 2526.002  |
| AK026897  | 13208.428 | 15887.979 | X55525    | 3947.739  | 5378.898  | Y10512    | 591.68    | 506.824   |
| AB037861  | 8408.54   | 9135.456  | NM_005046 | 589.569   | 663.459   | AL110175  | 2989.617  | 3348.513  |
| AK021887  | 15884.571 | 15545.499 | NM_001873 | 1149.845  | 1528.504  | AF288406  | 1890.89   | 2080.848  |
| NM_002503 | 49634.844 | 46343.355 | AB029025  | 814.137   | 1252.863  | AK027156  | 23264.33  | 23018.27  |
| NM_005319 | 12400.038 | 12370.509 | NM_007100 | 51051.262 | 53619.457 | AL157504  | 5710.113  | 5641.345  |
| NM_019058 | 1469.778  | 1622.858  | NM_003940 | 1405.009  | 1434.616  | AK023328  | 12361.04  | 12741.52  |
| AK022351  | 6022.327  | 6996.959  | NM_000027 | 1577.687  | 1579.559  | AL442096  | 4746.711  | 4596.971  |
| AK026853  | 1022.054  | 1600.067  | NM_017548 | 48377.391 | 47755.41  | AK023299  | 1032.42   | 933.428   |
| NM_017882 | 5289.452  | 5685.811  | AF134802  | 8570.785  | 7608.196  | NM_018228 | 1721.034  | 1588.661  |
| NM_003521 | 1869.176  | 2338.06   | NM_018222 | 1340.843  | 1327.136  | AJ270693  | 991.587   | 668.758   |
| NM_003547 | 661.681   | 1023.836  | NM_005740 | 3621.542  | 3569.245  | NM_017790 | 3441.63   | 3269.382  |
| AF070529  | 1350.251  | 1020.542  | NM_004308 | 17380.758 | 13457.425 | AK000023  | 1962.16   | 1571.208  |
| AK022978  | 7179.171  | 8214.348  | AF112366  | 5920.788  | 3830.855  | AK000901  | 610.241   | 484.945   |
| AK021447  | 3768.341  | 3520.472  | NM_004274 | 3826.61   | 2370.135  | AB007866  | 1410.583  | 1577.82   |
| AK025096  | 2768.68   | 2414.972  | AK024002  | 32721.238 | 24334.619 | X77485    | 65734.523 | 68516.117 |
| L31955    | 953.58    | 759.066   | NM_020399 | 16700.902 | 8570.142  | NM_014495 | 4201.882  | 3838.197  |
| AF131774  | 4231.222  | 4397.001  | NM_004071 | 3967.128  | 3746.077  | AK021555  | 930.821   | 1027.571  |
| AK025793  | 1626.757  | 1604.658  | NM_001316 | 22207.268 | 22226.938 | AB046765  | 2952.504  | 2793.486  |
| AK000151  | 971.216   | 1261.642  | NM_004264 | 2017.222  | 2938.85   | AF133333  | 13438.936 | 13993.777 |
| AL389942  | 2600.005  | 2652.135  | AK024788  | 3853.854  | 4876.032  | NM_018368 | 3008.417  | 2607.438  |

|           |           |           |           |           |           |           |           |           |
|-----------|-----------|-----------|-----------|-----------|-----------|-----------|-----------|-----------|
| AL137479  | 1776.493  | 1641.705  | NM_004473 | 1232.176  | 1290.874  | AK024011  | 2345.583  | 1961.886  |
| NM_004211 | 2757.092  | 2597.277  | AK022696  | 4127.761  | 4131.421  | AL390145  | 1487.539  | 1253.52   |
| Y10776    | 6775.365  | 8012.633  | NM_001206 | 2063.497  | 2770.475  | AF119913  | 3499.835  | 2638.125  |
| AK027241  | 2744.006  | 3449.146  | NM_005016 | 3308.383  | 4612.262  | NM_018340 | 3645.974  | 3825.667  |
| NM_006978 | 8344.74   | 8164.338  | NM_014469 | 5010.01   | 5589.992  | AF049883  | 2828.122  | 3370.026  |
| NM_004561 | 2553.87   | 2929.556  | NM_014852 | 9269.574  | 9255.844  | L10148    | 65308.051 | 59542.957 |
| M20642    | 1248.793  | 1433.396  | NM_000344 | 19721.771 | 22960.988 | AK024893  | 629.73    | 589.004   |
| AK026412  | 4634.221  | 4557.271  | AF248650  | 7576.192  | 9158.544  | L37703    | 56222.332 | 56237.68  |
| X89669    | 1672.873  | 1827.799  | S74678    | 43067.793 | 47526.156 | AF084516  | 1926.609  | 2226.723  |
| U92013    | 28187.477 | 36491.805 | AF248651  | 2934.339  | 3068.245  | AL137554  | 911.899   | 845.255   |
| AK023965  | 5721.327  | 6280.161  | NM_001358 | 29676.164 | 26827.533 | AJ001907  | 4571.365  | 4278.707  |
| AK026211  | 2235.594  | 2784.1    | NM_004836 | 20780.398 | 16871.145 | M32220    | 14945.513 | 12496.103 |
| X58968    | 1762.229  | 2655.236  | AB037751  | 9975.84   | 8075.008  | D17188    | 34169.516 | 36293.039 |
| U92020    | 3341.726  | 3749.587  | S79281    | 11363.359 | 9397.168  | AJ001432  | 63594.199 | 59391.152 |
| AL109712  | 6821.038  | 6200.436  | AK025585  | 5186.44   | 3440.662  | NM_020435 | 29150.412 | 31124.488 |
| X04215    | 963.572   | 871.553   | NM_001414 | 10835.613 | 7093.975  | AF052169  | 3156.437  | 2669.213  |
| NM_017782 | 12979.553 | 14281.922 | D16891    | 11825.576 | 6489.455  | AK024900  | 10441.212 | 8525.196  |
| NM_018149 | 10090.318 | 9851.445  | NM_017760 | 13292.146 | 6475.428  | AK026249  | 891.666   | 1067.599  |
| D16944    | 2727.401  | 2528.261  | NM_015936 | 17888.084 | 9943.128  | AF119879  | 65249.328 | 60591.594 |
| NM_018468 | 27972.949 | 33635.137 | Z36876    | 2616.433  | 1190.117  | L16951    | 1913.521  | 1841.281  |
| Z36814    | 4502.9    | 4625.33   | NM_000892 | 7360.972  | 8688.129  | Y10482    | 67576.609 | 56697.027 |
| D17045    | 2494.599  | 2880.213  | NM_000126 | 22522.826 | 30138.316 | AY007095  | 1924.55   | 2111.947  |
| NM_000242 | 1277.335  | 1350.223  | AK022291  | 1735.584  | 2095.868  | AF086244  | 6446.938  | 7162.183  |
| AB040878  | 1565.16   | 1260.104  | BF239974  | 7386.918  | 10385.082 | AL161992  | 2963.473  | 2681.882  |
| S74647    | 2519.693  | 2541.838  | NM_000104 | 1873.478  | 2884.687  | AK023551  | 692.345   | 751.703   |
| NM_003506 | 1002.798  | 1411.435  | NM_005015 | 24295.205 | 30562.697 | AK023910  | 3423.49   | 2741.021  |
| NM_018093 | 23379.08  | 29317.979 | NM_004255 | 65234.922 | 65047.914 | D16991    | 1113.554  | 976.257   |
| NM_003389 | 1006.034  | 1199.062  | NM_000269 | 67505.828 | 66042.031 | AK023538  | 2344.328  | 1782.387  |
| NM_016656 | 1877.822  | 1081.428  | AF182288  | 6725.558  | 7179.787  | NM_006695 | 6756.481  | 7858.61   |
| NM_015963 | 18367.299 | 21422     | NM_004491 | 3607.569  | 3137.127  | NM_004815 | 3026.198  | 3534.554  |
| AB007871  | 1573.999  | 1715.75   | L14787    | 886.305   | 633.516   | NM_004147 | 2205.898  | 2332.601  |
| NM_017813 | 10631.68  | 12407.642 | AK026810  | 5123.36   | 4833.375  | AK000959  | 1482.301  | 1889.584  |
| NM_003840 | 5907.58   | 6261.36   | NM_015629 | 13975.422 | 12334.233 | AB037743  | 5347.528  | 5464.245  |
| NM_018378 | 1269.387  | 1253.076  | AF218032  | 10001.719 | 7841.973  | AB046820  | 2750.384  | 3114.177  |
| NM_018423 | 3629.49   | 3164.637  | NM_017542 | 11321.792 | 10084.39  | AK025922  | 3062.646  | 3216.128  |
| NM_001741 | 23195.914 | 21170.793 | AK024407  | 2474.048  | 1961.536  | NM_014646 | 974.713   | 1089.885  |
| NM_000745 | 7947.377  | 7667.161  | NM_004182 | 39288.656 | 38766.211 | NM_006375 | 1541.898  | 1664.343  |
| AF116705  | 29773.637 | 30825.15  | NM_018419 | 1066.721  | 594.523   | AF123659  | 8284.693  | 8173.456  |
| NM_006072 | 4795.113  | 6234.4    | NM_014240 | 3760.686  | 2640.294  | U94903    | 2909.499  | 2832.16   |
| NM_003561 | 3653.933  | 4514.187  | BE379399  | 2042.28   | 1255.542  | AF009300  | 2864.45   | 4553.447  |
| NM_002991 | 1787.411  | 2181.256  | NM_015877 | 9262.285  | 6950.453  | NM_005155 | 34384.871 | 32981.77  |
| AJ008149  | 3137.159  | 3142.379  | AF060935  | 7283.699  | 3139.512  | NM_019095 | 22472.801 | 23733.686 |
| NM_001192 | 3531.176  | 3543.429  | AK026886  | 2069.909  | 863.302   | U80764    | 24811.746 | 24220.9   |
| NM_002353 | 3384.77   | 3900.228  | D83778    | 2406.229  | 2223.207  | AB020684  | 12320.661 | 13699.628 |
| NM_012153 | 4915.047  | 6084.642  | NM_006470 | 3737.329  | 4895.928  | NM_020421 | 811.757   | 422.412   |
| NM_013241 | 4623.369  | 5423.482  | NM_002855 | 30296.023 | 43676.859 | D17094    | 1736.223  | 1647.408  |
| Z24725    | 528.609   | 655.868   | AB038463  | 2155.022  | 2993.632  | L37690    | 40804.02  | 38880.57  |
| AF161362  | 8821.587  | 9803.697  | M30262    | 7584.863  | 9536.783  | D61707    | 1873.503  | 1571.995  |
| AK024078  | 1171.223  | 1110.982  | NM_005460 | 1700.797  | 1631.102  | AK021610  | 1279.859  | 1127.028  |
| NM_015939 | 14186.045 | 14925.199 | AF160477  | 6448.558  | 7222.053  | Z36835    | 17167.094 | 15077.367 |
| AB046840  | 1893.74   | 2275.777  | NM_003226 | 1147.046  | 1438.895  | NM_004648 | 1870.591  | 2624.029  |
| AF174487  | 1283.195  | 1621.822  | M12883    | 6008.018  | 7220.757  | AF029325  | 2627.903  | 3292.827  |
| NM_005041 | 2025.154  | 1758.167  | BG288747  | 8534.543  | 9798.586  | NM_005704 | 4077.11   | 4395.85   |



|           |           |           |           |           |           |           |           |           |
|-----------|-----------|-----------|-----------|-----------|-----------|-----------|-----------|-----------|
| NM_006407 | 15539.83  | 16588.178 | BG617923  | 1240.49   | 1679.124  | AF097021  | 2633.079  | 2636.526  |
| NM_007373 | 11431.186 | 10427.105 | U37448    | 2412.898  | 2957.393  | NM_001365 | 3600.911  | 3255.915  |
| M34572    | 783.055   | 1134.031  | BG435851  | 501.199   | 692.086   | NM_000677 | 15001.082 | 15317.912 |
| NM_004791 | 3202.136  | 4308.021  | AA927698  | 1192.973  | 1016.978  | BF308728  | 8799.036  | 9291.231  |
| X55525    | 5451.214  | 5944.869  | AI498426  | 2015.023  | 2003.555  | NM_013280 | 1014.334  | 1252.517  |
| NM_005046 | 912.773   | 873.968   | BG824773  | 1394.319  | 647.744   | NM_018315 | 55179.652 | 58632.008 |
| NM_001873 | 2655.915  | 2470.107  | D01038    | 42063.926 | 43591.266 | AF051151  | 2106.175  | 2332.755  |
| AB029025  | 1091.144  | 1593.358  | AB019205  | 3373.157  | 2854.092  | AF142421  | 9473.082  | 9357.903  |
| NM_001308 | 780.988   | 868.73    | J05008    | 2624.412  | 1869.223  | AB037836  | 5229.861  | 6003.608  |
| NM_007100 | 70022.922 | 69031.648 | U11087    | 1856.924  | 1572.247  | NM_014247 | 3327.638  | 3648.925  |
| NM_003940 | 1955.423  | 1335.843  | D50640    | 1101.178  | 550.884   | NM_018695 | 63254.848 | 60211.906 |
| M26880    | 1695.672  | 1266.222  | M98776    | 5321.279  | 3011.809  | NM_006343 | 1716.081  | 2000.376  |
| NM_000027 | 2812.893  | 3426.509  | X99135    | 66363.313 | 55875.102 | NM_001423 | 772.237   | 740.843   |
| NM_017548 | 48004.227 | 45589.938 | AF009744  | 2935.006  | 1779.11   | NM_015716 | 13640.45  | 11436.494 |
| AF134802  | 12038.263 | 10038.282 | AF104921  | 34260.145 | 13034.73  | NM_003955 | 644.357   | 396.564   |
| NM_018222 | 1650.878  | 1712.982  | NM_000698 | 46651.344 | 52369.82  | NM_005733 | 2527.712  | 1813.967  |
| NM_005740 | 4506.98   | 4480.839  | NM_005091 | 829.298   | 819.856   | AB023166  | 1430.73   | 1137.215  |
| NM_004308 | 29862.275 | 33643.223 | AF031167  | 646.513   | 912.008   | AB028966  | 26423.867 | 21900.922 |
| AF112366  | 3272.004  | 2797.682  | NM_003204 | 14501.248 | 18718.521 | NM_005402 | 12265.399 | 15376.821 |
| NM_004274 | 1681.356  | 1739.43   | AF254069  | 1282.839  | 1528.391  | AF055027  | 17899.861 | 20770.67  |
| AK024002  | 9688.283  | 10828.434 | AL117600  | 16290.172 | 16166.21  | U63541    | 13142.397 | 13935.173 |
| NM_020395 | 14928.209 | 15439.573 | NM_001712 | 1860.177  | 1817.53   | AB033045  | 3128.176  | 3134.354  |
| NM_004071 | 7449.457  | 9420.059  | NM_004487 | 41700.016 | 47759.809 | AF055006  | 19885.928 | 18366.035 |
| NM_001316 | 37469.629 | 40723.789 | AB029000  | 8053.469  | 9455.434  | NM_004935 | 8734.25   | 8974.393  |
| NM_004264 | 3059.467  | 2925.318  | AK026965  | 52977.523 | 53217.027 | NM_006951 | 3269.018  | 3595.59   |
| AK024788  | 5732.259  | 5510.282  | AK025859  | 8307.711  | 8753.373  | NM_001896 | 16068.466 | 17298.752 |
| NM_004473 | 1380.118  | 2185.272  | AL117499  | 23651.42  | 24938.67  | NM_014023 | 1486.237  | 1279.385  |
| AK022696  | 4318.333  | 4804.111  | NM_007054 | 2949.324  | 2774.504  | NM_002745 | 21497.367 | 23425.58  |
| NM_001206 | 3345.685  | 4007.518  | AB007957  | 1288.063  | 953.897   | D26488    | 20902.074 | 16820.012 |
| NM_005016 | 4901.19   | 4158.939  | AK000160  | 2518.557  | 2349.429  | NM_001432 | 2130.06   | 2096.77   |
| NM_014469 | 3493.301  | 3273.449  | NM_005311 | 2186.022  | 1865.79   | AK002193  | 1821.433  | 2059.87   |
| NM_014852 | 5690.422  | 5086.636  | NM_005905 | 5841.623  | 4322.644  | AB014554  | 8198.136  | 8648.634  |
| NM_000344 | 24519.471 | 26823.846 | NM_016235 | 733.142   | 561.451   | AF097431  | 6385.953  | 5125.702  |
| AF248650  | 11196.175 | 9703.714  | NM_000960 | 1375.37   | 1061.936  | NM_001978 | 3627.94   | 3307.505  |
| S74678    | 59670.508 | 52159.367 | NM_005359 | 9273.108  | 7418.176  | NM_005897 | 463.238   | 747.725   |
| AF248651  | 4035.746  | 4203.721  | NM_002511 | 4320.529  | 2998.303  | NM_002579 | 806.566   | 930.519   |
| NM_001358 | 41793.301 | 35671.516 | NM_000794 | 912.829   | 550.167   | NM_004221 | 1981.057  | 1664.367  |
| NM_004836 | 22945.068 | 18960.947 | NM_004085 | 12464.979 | 7474.811  | NM_003019 | 3537.629  | 2566.069  |
| AB037751  | 20364.123 | 17024.098 | NM_006032 | 11328.041 | 13321.027 | AL109790  | 2852.607  | 2061.398  |
| S79281    | 23414.654 | 19164.021 | NM_014788 | 6674.447  | 9834.102  | NM_003628 | 2942.428  | 2156.063  |
| AK025585  | 12457.178 | 11733.087 | NM_002153 | 1557.767  | 1852.693  | NM_002407 | 463.966   | 721.852   |
| NM_001414 | 24323.373 | 20726.299 | AB040890  | 2522.449  | 3255.558  | M90657    | 1188.298  | 1656.657  |
| D16891    | 28689.301 | 23618.303 | AK024233  | 2762.168  | 3643.227  | NM_006695 | 5733.277  | 6607.306  |
| NM_017760 | 28246.986 | 21773.344 | AK021870  | 1347.739  | 1811.226  | AK025645  | 2628.907  | 2715.965  |
| NM_015936 | 32946.77  | 31209.234 | U06680    | 2599.688  | 3163.54   | AK023266  | 1914.138  | 1997.745  |
| Z36876    | 5660.207  | 6914.721  | NM_005123 | 674.562   | 836.86    | NM_006814 | 32415.795 | 37096.738 |
| NM_000892 | 979.875   | 1250.095  | NM_015584 | 15982.021 | 18707.361 | NM_005067 | 10405.8   | 12741.312 |
| X75363    | 856.271   | 1432.436  | AK025125  | 990.523   | 908.364   | AB007899  | 2135.885  | 2203.207  |
| NM_000126 | 30804.063 | 29362.764 | AF156548  | 3525.479  | 3362.618  | NM_002817 | 19242.01  | 21608.018 |
| AK022291  | 3200.123  | 2940.893  | NM_004663 | 2792.063  | 2913.572  | NM_002801 | 41875.07  | 47063.605 |
| BF239974  | 6856.034  | 6116.284  | AB024411  | 3136.244  | 3118.031  | BE905810  | 4081.981  | 3551.275  |
| NM_000104 | 3846.613  | 4523.161  | NM_002444 | 14552.754 | 14916.289 | NM_014780 | 3460.701  | 3260.832  |
| NM_005015 | 43000.879 | 51224.48  | NM_001104 | 4946.668  | 4193.812  | NM_018116 | 666.428   | 821.353   |

|           |           |           |           |           |           |           |           |           |
|-----------|-----------|-----------|-----------|-----------|-----------|-----------|-----------|-----------|
| NM_00425E | 68049.586 | 58453.141 | NM_00298E | 14300.204 | 12935.427 | NM_01473C | 6263.767  | 6433.64   |
| NM_00026E | 66006.781 | 52030.152 | U88898    | 1385.971  | 1025.173  | NM_014167 | 2014.546  | 2212.442  |
| AF182288  | 11697.804 | 13375.533 | NM_020154 | 23021.834 | 17776.988 | NM_01606E | 6617.808  | 5940.909  |
| L14787    | 1260.397  | 789.759   | NM_00466E | 9354.507  | 7184.864  | U82987    | 13105.031 | 12301.522 |
| AK026810  | 8831.126  | 8620.818  | NM_00530C | 3195.479  | 2093.801  | NM_00573E | 3443.807  | 3238.418  |
| NM_01562E | 20969.221 | 19846.832 | NM_00089E | 3353.489  | 2006.175  | NM_01489C | 1754.936  | 1857.958  |
| AF218032  | 16538.881 | 12433.955 | NM_01407C | 3441.906  | 3586.936  | NM_00543E | 699.519   | 557.427   |
| NM_01754E | 22496.662 | 18958.334 | NM_01628C | 1892.71   | 2667.577  | AF232000  | 68037.5   | 62866.633 |
| AK024407  | 2453.692  | 2322.143  | NM_016027 | 840.749   | 1157.11   | NM_00575E | 4659.32   | 3711.576  |
| NM_00418E | 56239.074 | 48981.906 | NM_014297 | 4102.247  | 4462.917  | AF044774  | 2157.34   | 1594.967  |
| NM_01841E | 1240.252  | 1534.071  | NM_01815E | 37972.27  | 41779.145 | NM_00443C | 714.606   | 620.554   |
| NM_01424C | 1928.121  | 1633.006  | X98266    | 2838.135  | 2994.976  | NM_00295E | 2204.127  | 2584.05   |
| BE379399  | 2560.819  | 2347.022  | U00930    | 20804.955 | 28822.486 | NM_00193E | 8246.242  | 9409.37   |
| NM_015877 | 5460.317  | 5748.942  | AK024958  | 1622.948  | 1758.094  | AF230808  | 13486.892 | 14634.424 |
| AF060935  | 15341.671 | 15120.449 | NM_01457E | 8780.502  | 11866.673 | U18910    | 4160.228  | 4382.449  |
| AK026886  | 1954.169  | 2314.115  | NM_00243E | 11097.702 | 11201.202 | NM_00523E | 49083.723 | 50027.09  |
| D83778    | 5041.09   | 4747.873  | AL117552  | 2801.848  | 2505.898  | S83390    | 1441.761  | 1595.383  |
| NM_00647C | 4284.52   | 4234.967  | NM_00269E | 16625.938 | 15815.287 | AK075306  | 19021.447 | 21911.311 |
| NM_00285E | 16681.844 | 20309.473 | NM_007064 | 5714.17   | 4655.302  | AB037820  | 2142.104  | 2290.619  |
| AB038463  | 4191.646  | 4679.449  | NM_006281 | 1954.522  | 2096.6    | U37689    | 1086.549  | 1006.437  |
| M30262    | 2095.484  | 1872.515  | NM_00273E | 2568.763  | 2146.787  | NM_00128C | 34438.27  | 35454.934 |
| NM_00546C | 2626.86   | 2957.79   | U23460    | 68493.242 | 56838.613 | AB019572  | 62575.438 | 59745.348 |
| AF160477  | 4818.546  | 5538.758  | NM_00535E | 6174.985  | 5982.784  | NM_00294E | 63904.867 | 60970.141 |
| M12883    | 3023.315  | 3991.565  | Z25434    | 7488.472  | 6153.958  | AF113008  | 8424.341  | 7573.768  |
| BG288747  | 14167.246 | 15543.157 | NM_005884 | 15009.661 | 19046.135 | NM_020217 | 10026.304 | 9569.956  |
| U37448    | 1663.208  | 1785.052  | NM_01239E | 13578.059 | 11589.655 | NM_01813E | 63698.48  | 57617.344 |
| BG435851  | 1103.995  | 1071.191  | AF229804  | 65939.828 | 51077.629 | AF205435  | 41862.332 | 32755.361 |
| AI498426  | 3023.108  | 2968.807  | AF151638  | 526.879   | 327.206   | L05093    | 64572.82  | 62323.383 |
| BG824773  | 649.45    | 741.731   | U90552    | 10258.177 | 7430.26   | NM_00692E | 6714      | 5400.931  |
| D01038    | 12402.084 | 13459.155 | AB038463  | 1933.452  | 2540.178  | AF119889  | 37573.66  | 29119.127 |
| AB019205  | 4651.89   | 4135.554  | M30262    | 6997.556  | 9308.198  | J03866    | 27586.473 | 29199.926 |
| J05008    | 2616.366  | 2161.507  | NM_00546C | 1440.927  | 1694.97   | AK022836  | 16235.304 | 18507.52  |
| U11087    | 1590.219  | 1539.447  | AF160477  | 6600.034  | 8066.92   | NM_01234E | 57973.488 | 58390.957 |
| D50640    | 1896.995  | 1766.744  | M12883    | 5650.158  | 6537.186  | NM_000397 | 5906.043  | 5527.769  |
| D43747    | 1222.305  | 1396.893  | BG288747  | 7188.244  | 7659.232  | AL157461  | 3540.825  | 4066.478  |
| M98776    | 2363.106  | 2548.882  | BG617923  | 1182.126  | 1409.076  | BF217340  | 1450.298  | 1829.528  |
| X99135    | 42527.152 | 50296.285 | U37448    | 2032.791  | 2388.718  | NM_00307E | 5745.939  | 6535.724  |
| AF009744  | 6819.891  | 7684.952  | BG435851  | 616.809   | 785.218   | AL137703  | 2806.672  | 2783.521  |
| AF104921  | 57995.563 | 55049.973 | AA927698  | 1253.407  | 1247.781  | NM_00180E | 9358.484  | 12298.4   |
| NM_00069E | 26788.16  | 27747.639 | AI498426  | 4292.59   | 4553.415  | NM_01825E | 542.916   | 660.487   |
| NM_005091 | 1505.196  | 1238.283  | BG824773  | 1518.124  | 1291.577  | AL117477  | 9694.173  | 9822.944  |
| AF031167  | 1651.063  | 1613.705  | AB019205  | 3729.37   | 3280.735  | NM_012107 | 9483.507  | 14820.838 |
| NM_003204 | 9170.001  | 8893.265  | J05008    | 2616.504  | 2382.575  | AB037760  | 6096.941  | 6501.565  |
| AF254069  | 2764.63   | 2762.548  | U11087    | 2572.81   | 1661.923  | NM_01568C | 15045.541 | 12474.145 |
| AL117600  | 18195.697 | 21200.41  | D50640    | 1172.089  | 750.623   | M22637    | 9650.229  | 9552.66   |
| NM_00171E | 2523.529  | 2555.823  | M98776    | 4421.705  | 3331.286  | AB037770  | 818.534   | 899.064   |
| NM_004487 | 20446.393 | 19862.576 | X99135    | 66740.719 | 64947.719 | L35035    | 9205.417  | 6975.799  |
| AK025859  | 7722.844  | 5831.383  | AF009744  | 3255.601  | 3167.9    | NM_00715E | 4251.072  | 3585.971  |
| AL117499  | 29158.998 | 29063.494 | NM_00107E | 1805.5    | 822.186   | NM_01829E | 3236.406  | 2325.306  |
| NM_007054 | 3961.566  | 3177.649  | NM_003204 | 13515.729 | 14533.864 | AF073931  | 558.127   | 649.842   |
| AB007957  | 1611.171  | 1405.877  | AF254069  | 1238.216  | 1385.101  | NM_018047 | 5139.432  | 4943.922  |
| AK000160  | 1384.357  | 1374.557  | AL117600  | 17124.105 | 18083.982 | NM_00502E | 3531.359  | 4379.774  |
| NM_005311 | 2563.862  | 2713.07   | NM_00171E | 1512.58   | 1920.634  | NM_00128E | 1539.745  | 1541.053  |

|           |           |           |           |           |           |           |           |           |
|-----------|-----------|-----------|-----------|-----------|-----------|-----------|-----------|-----------|
| NM_016235 | 1175.719  | 1219.565  | NM_004487 | 39948.469 | 44715.574 | NM_003564 | 13418.989 | 12467.548 |
| AF172932  | 931.699   | 845.014   | AB029000  | 8252.539  | 9345.819  | AK023414  | 1037.219  | 707.326   |
| NM_005355 | 10010.398 | 11849.831 | AK026965  | 42915.785 | 47816.297 | NM_002581 | 5775.768  | 5657.791  |
| NM_002511 | 946.704   | 1600.056  | AK025859  | 7810.222  | 8618.916  | AI417964  | 11376.609 | 11950.453 |
| NM_004085 | 5808.837  | 5900.063  | AL117499  | 22080.574 | 24960.508 | J03571    | 51525.813 | 57580.43  |
| NM_006032 | 3807.306  | 3471.692  | NM_007054 | 3169.424  | 3189.769  | T57791    | 1044.639  | 1280.902  |
| NM_014785 | 11972.459 | 11207.299 | AB007957  | 2641.993  | 2767.498  | T64134    | 3002.642  | 3991.638  |
| NM_002153 | 1689.35   | 1956.414  | AK000160  | 3110.3    | 3237.44   | X56134    | 9841.699  | 12179.566 |
| AB040890  | 4385.822  | 4155.937  | NM_005311 | 2183.304  | 2326.084  | NM_001455 | 2901.352  | 2799.795  |
| AK024233  | 3727.17   | 3778.403  | NM_005905 | 5439.157  | 4360.814  | H44784    | 1948.682  | 1815.013  |
| AK021870  | 2590.777  | 3130.049  | NM_016235 | 1483.353  | 784.806   | AI421041  | 58974.938 | 56253.195 |
| U06680    | 3014.977  | 3607.102  | NM_000960 | 1639.023  | 1292.128  | BI759091  | 6649.735  | 7734.222  |
| NM_005123 | 1533.217  | 1818.411  | NM_005355 | 8717.747  | 8206.806  | BG685843  | 35393.813 | 40354.383 |
| NM_015584 | 23485.432 | 25027.215 | NM_002511 | 3349.298  | 3171.085  | BI490011  | 8061.063  | 7558.313  |
| NM_001697 | 67751.945 | 61231.508 | NM_004085 | 13513.066 | 12222.241 | AF035771  | 1446.736  | 1318.063  |
| NM_016095 | 60290.094 | 58955.031 | NM_006470 | 3513.998  | 2855.814  | N20475    | 14309.839 | 14174.679 |
| AK025125  | 1437.5    | 1213.446  | NM_002855 | 32022.621 | 27477.027 | BI199286  | 2291.136  | 2233.816  |
| AF156548  | 3760.347  | 3693.714  | NM_002153 | 1253.155  | 1358.242  | AA026626  | 3564.37   | 2882.143  |
| NM_004663 | 3041.063  | 3119.973  | AB040890  | 2459.401  | 3049.993  | H61726    | 1846.873  | 1388.924  |
| AB024411  | 1512.021  | 1462.923  | AK024233  | 3083.145  | 3188.682  | M15465    | 14579.283 | 9774.655  |
| NM_002444 | 26276.258 | 28064.496 | AK021870  | 1248.125  | 1664.192  | NM_007181 | 21204.916 | 21885.223 |
| NM_001104 | 1973.586  | 1827.634  | U06680    | 2855.948  | 3061.169  | AB007857  | 2790.4    | 2850.667  |
| NM_002985 | 8750.142  | 9822.893  | NM_005123 | 726.485   | 1148.413  | NM_001775 | 55442.633 | 56756.309 |
| U88898    | 2846.588  | 3408.331  | NM_015584 | 14799.469 | 17072.676 | NM_004997 | 49808.824 | 55647.133 |
| NM_020154 | 37308.184 | 44643.93  | NM_001697 | 51703.125 | 54239.941 | NM_005923 | 12768.737 | 11504.876 |
| NM_004665 | 19964.34  | 20157.848 | NM_016095 | 41751.93  | 49562.32  | NM_003465 | 5267.885  | 6017.945  |
| NM_005300 | 7725.438  | 6634.112  | AK025125  | 817.322   | 1160.608  | AF289028  | 3722.112  | 4715.839  |
| NM_000893 | 2052.687  | 2128.503  | AF156548  | 3434.335  | 3658.383  | NM_005127 | 31199.023 | 35027.074 |
| NM_014070 | 1515.141  | 1222.736  | NM_004663 | 2964.655  | 2945.683  | NM_005567 | 35862.93  | 38695.699 |
| NM_014297 | 4977.292  | 5531.762  | AB024411  | 3037.319  | 3168.36   | NM_005215 | 15757.811 | 16196.747 |
| NM_018155 | 19787.834 | 25536.006 | NM_002444 | 14679.28  | 15984.777 | NM_006625 | 1287.891  | 1270.597  |
| X98266    | 5326.036  | 7128.812  | NM_001104 | 5259.318  | 5139.647  | NM_003965 | 2053.338  | 2397.279  |
| U00930    | 35526.883 | 42617.449 | NM_002985 | 16690.953 | 15183.536 | NM_004584 | 6963.6    | 7717.615  |
| AK024958  | 3679.985  | 4582.03   | U88898    | 1719.574  | 1065.418  | X15183    | 60432.523 | 58430.059 |
| NM_014575 | 12647.848 | 11758.616 | NM_020154 | 22629.117 | 18991.082 | AK023618  | 13110.625 | 13059.727 |
| NM_002435 | 8934.678  | 7109.103  | NM_004665 | 9285.876  | 8277.459  | AF212842  | 2135.222  | 6212.579  |
| AL117552  | 3683.378  | 2850.91   | NM_005300 | 3260.045  | 2513.696  | NM_018404 | 2671.554  | 2655.091  |
| NM_002692 | 13263.307 | 10998.514 | NM_000893 | 3047.375  | 2798.183  | M27544    | 31208.959 | 31926.668 |
| AB023190  | 8866.844  | 8282.959  | NM_000695 | 50496.531 | 48023.727 | NM_002255 | 780.093   | 956.696   |
| NM_007064 | 3048.129  | 2779.33   | NM_005091 | 844.324   | 443.881   | NM_001118 | 9897.046  | 9637.532  |
| NM_006281 | 4358.855  | 4487.904  | NM_016280 | 1746.47   | 2027.06   | AL133097  | 16040.841 | 14260.31  |
| NM_002735 | 2902.903  | 2688.422  | NM_016027 | 662.729   | 801.449   | NM_001165 | 32717.621 | 32218.578 |
| U23460    | 22866.725 | 21531.986 | NM_014297 | 3432.329  | 4234.056  | NM_001381 | 62248.629 | 65059.832 |
| NM_005355 | 10741.679 | 11907.713 | NM_018155 | 42222.336 | 43209.75  | NM_006455 | 10547.251 | 8356.216  |
| Z25434    | 4051.784  | 3908.624  | X98266    | 2975.435  | 2914.476  | NM_014455 | 734.367   | 1183.034  |
| NM_005884 | 29937.813 | 39980.914 | U00930    | 20871.928 | 28011.82  | NM_001492 | 2132.564  | 2459.729  |
| NM_012395 | 25274.625 | 26854.566 | AK024958  | 1403.477  | 1809.173  | AB012643  | 41317.137 | 41376.609 |
| AF229804  | 19547.051 | 20803.129 | NM_014575 | 8555.328  | 10089.534 | AB023170  | 5371.913  | 5568.526  |
| AF151638  | 1302.861  | 1332.913  | NM_002435 | 8106.892  | 8418.651  | NM_014153 | 22065.881 | 24272.883 |
| U90552    | 15273.333 | 12052.61  | AL117552  | 2636.399  | 2469.563  | NM_002295 | 35190.957 | 32878.223 |
| AB038463  | 4229.591  | 3806.026  | NM_002692 | 16668.322 | 18231.994 | NM_000414 | 17607.203 | 14603.839 |
| M30262    | 1672.828  | 1864.961  | AB023190  | 63192.711 | 49183.609 | AL133033  | 1043.483  | 824.384   |
| NM_005460 | 3014.992  | 2569.679  | NM_007064 | 5506.928  | 5645.762  | NM_018845 | 15533.323 | 13829.519 |

|           |           |           |           |           |           |           |           |           |
|-----------|-----------|-----------|-----------|-----------|-----------|-----------|-----------|-----------|
| AF160477  | 4625.16   | 4478.105  | NM_006281 | 2181.111  | 2355.206  | AY008372  | 1157.692  | 1311.457  |
| M12883    | 3055.342  | 3607.008  | NM_002738 | 2295.886  | 2166.578  | NM_005505 | 9726.398  | 10460.938 |
| BG288747  | 11840.668 | 13486.96  | U23460    | 63880.25  | 55856.785 | AK026964  | 2004.564  | 1912.267  |
| BG617923  | 781       | 1031.165  | NM_005356 | 6080.393  | 6872.33   | NM_000079 | 8727.896  | 9333.813  |
| U37448    | 1789.579  | 2542.608  | Z25434    | 7937.977  | 7577.1    | AL110245  | 12509.791 | 12854.443 |
| BG435851  | 835.825   | 969.302   | NM_005884 | 16571.268 | 20822.848 | NM_016208 | 30234.836 | 33476.668 |
| AI498426  | 2908.334  | 2557.888  | NM_012399 | 13247.146 | 12462.503 | NM_001635 | 783.759   | 727.43    |
| D01038    | 10694.954 | 10661.638 | AF229804  | 62377.996 | 49415.051 | NM_005638 | 13240.463 | 13597.326 |
| AB019205  | 4087.379  | 3477.877  | U90552    | 9707.482  | 8445.766  | NM_007235 | 36210.828 | 31287.373 |
| J05008    | 2610.187  | 2265.512  | NM_006032 | 12674.137 | 9768.184  | NM_007269 | 7095.361  | 7098.386  |
| U11087    | 1985.848  | 1552.962  | NM_014788 | 6048.179  | 4318.358  | AK026014  | 7033.827  | 7169.548  |
| D50640    | 1831.479  | 1936.283  | NM_005460 | 1429.178  | 1363.754  | NM_014845 | 4337.826  | 4820.502  |
| D43747    | 1012.291  | 1123.552  | AF160477  | 6224.362  | 6596.013  | NM_004298 | 4552.91   | 4361.095  |
| M98776    | 2616.893  | 2190.707  | NM_003226 | 587.454   | 301.791   | AF007190  | 911.128   | 1160.285  |
| X99135    | 37091.695 | 43937.004 | M12883    | 5794.791  | 6662.216  | X74609    | 56620.926 | 57787.629 |
| AF009744  | 6088.183  | 6586.94   | BG288747  | 7293.355  | 6875.544  | AB002316  | 2691.502  | 2886.593  |
| NM_001072 | 3512.913  | 2428.522  | BG617923  | 724.205   | 494.532   | NM_018990 | 10360.719 | 12424.551 |
| AF031167  | 1212.853  | 1236.426  | U37448    | 2022.339  | 1755.161  | NM_013363 | 2408.786  | 2080.625  |
| NM_003204 | 8742.694  | 8731.046  | AA927698  | 831.005   | 585.973   | NM_000947 | 3737.045  | 4121.446  |
| AF254069  | 2657.189  | 2856.866  | AI498426  | 1935.935  | 2105.783  | AL096750  | 58516.125 | 56526.129 |
| AL117600  | 16805.059 | 14539.128 | BG824773  | 858.129   | 803.317   | NM_016061 | 11430.711 | 11612.974 |
| NM_001712 | 2781.541  | 2607.337  | D01038    | 41101.402 | 49612.758 | NM_016062 | 39887.082 | 38412.285 |
| NM_004487 | 19957.082 | 22067.375 | AB019205  | 3921.304  | 3460.888  | NM_004153 | 5943.734  | 7155.896  |
| AB029000  | 14591.032 | 18015.951 | J05008    | 2999.757  | 2517.376  | AK024740  | 7167.691  | 7430.556  |
| AK026965  | 9246.303  | 10256.351 | U11087    | 2215.88   | 1771.98   | AF078164  | 14345.94  | 13235.494 |
| AK025859  | 7626.819  | 6062.673  | D50640    | 998.116   | 753.978   | NM_019049 | 4297.167  | 4513.098  |
| AL117499  | 30579.756 | 25969.986 | M98776    | 5042.031  | 3875.401  | NM_005447 | 858.92    | 806.182   |
| NM_007054 | 4332.552  | 3712.19   | X99135    | 66662.094 | 55918.629 | NM_012413 | 872.756   | 894.801   |
| AB007957  | 1223.001  | 1040.494  | AF009744  | 3019.889  | 3009.778  | AF130101  | 1917.874  | 1918.903  |
| AK000160  | 982.659   | 1015.895  | NM_001072 | 1914.317  | 1064.579  | NM_004656 | 6684.38   | 6379.591  |
| NM_005311 | 2674.906  | 2296.309  | NM_014070 | 3316.46   | 2147.707  | AF071569  | 9571.061  | 9571.212  |
| NM_005905 | 576.471   | 634.072   | AK025859  | 8306.404  | 7373.48   | NM_002269 | 6352.155  | 8161.417  |
| NM_016235 | 1238.161  | 1262.977  | AL117499  | 22142.047 | 23860.252 | J04948    | 2933.245  | 3041.596  |
| NM_000960 | 823.083   | 564.481   | NM_007054 | 3035.812  | 2783.403  | NM_018043 | 610.617   | 1470.912  |
| AF172932  | 750.361   | 990.26    | AB007957  | 1225.07   | 1064.353  | AK022564  | 61315.637 | 59371.117 |
| NM_005359 | 9435.512  | 10390.293 | AK000160  | 2143.73   | 1939.271  | NM_005022 | 3730.914  | 4972.904  |
| NM_002511 | 1062.117  | 1098.153  | NM_005311 | 1807.618  | 1834.481  | NM_001288 | 1767.703  | 2115.893  |
| NM_004085 | 5758.205  | 5113.331  | NM_005905 | 3990.91   | 3256.613  | NM_003564 | 13915.861 | 15508.472 |
| NM_006470 | 4721.699  | 3600.986  | NM_000960 | 1333.479  | 1172.849  | AK023414  | 1075.873  | 1236.274  |
| NM_002855 | 16187.547 | 15154.07  | NM_005359 | 10547.825 | 10498.975 | AF317516  | 15839.414 | 18336.438 |
| NM_002153 | 1655.272  | 1535.928  | NM_002511 | 3850.679  | 3841.788  | NM_002581 | 5721.545  | 6417.345  |
| AB040890  | 4225.304  | 4714.377  | AF295378  | 5760.568  | 4952.519  | AI417964  | 10599.901 | 12744.888 |
| AK024233  | 3828.947  | 3577.23   | NM_004085 | 14159.077 | 13646.967 | J03571    | 47282.211 | 56514.777 |
| AK021870  | 2341.235  | 2598.434  | NM_012445 | 63431.922 | 55526.383 | T57791    | 1118.519  | 1392.728  |
| U06680    | 3185.775  | 2779.528  | NM_018104 | 7036.583  | 6485.285  | T64134    | 906.503   | 868.174   |
| NM_005123 | 1355.274  | 1768.231  | NM_004429 | 13712.854 | 11098.708 | X56134    | 6774.22   | 6928.174  |
| NM_015584 | 23533.4   | 20167.283 | U64564    | 3552.385  | 3442.976  | NM_001456 | 3096.013  | 2954.797  |
| NM_001697 | 67853.742 | 62300.324 | NM_006470 | 3530.618  | 3426.197  | H44784    | 1787.882  | 1454.615  |
| NM_016098 | 59944.996 | 48800.805 | NM_002855 | 33019.871 | 33767.738 | AI421041  | 59243.551 | 56458.887 |
| AK025125  | 1099.835  | 1447.947  | AB038463  | 1630.991  | 1590.449  | BI759091  | 6230.895  | 8496.92   |
| AF156548  | 3162.265  | 3073.697  | M30262    | 8803.467  | 6586.717  | BG685843  | 23377.467 | 22834.754 |
| NM_004663 | 2604.271  | 2198.499  | NM_015310 | 2160.597  | 1801.44   | BI490011  | 8288.453  | 7432.672  |
| AB024411  | 1283.23   | 1215.385  | NM_016154 | 29222.275 | 32762.973 | AF035771  | 1292.758  | 1088.198  |

|           |           |           |           |           |           |           |           |           |
|-----------|-----------|-----------|-----------|-----------|-----------|-----------|-----------|-----------|
| NM_002444 | 27130.48  | 29497.996 | NM_005013 | 33913.871 | 32329.354 | N20475    | 13944.856 | 14947.358 |
| NM_001104 | 1977.099  | 1710.286  | AB002338  | 2124.811  | 2421.112  | BI199286  | 5526.8    | 5773.797  |
| NM_002989 | 8297.043  | 9440.766  | AI524814  | 3328.448  | 3132.12   | AA026626  | 4372.554  | 4953.325  |
| U88898    | 2522.242  | 2328.704  | AB024411  | 2035.03   | 1888.132  | H61726    | 2874.659  | 4683.563  |
| NM_020154 | 36371.668 | 36979.809 | NM_002444 | 14138.146 | 15591.873 | AL050355  | 672.382   | 935.209   |
| NM_004665 | 19169.904 | 19512.119 | NM_001104 | 3886.358  | 3603.805  | NM_001778 | 53174.102 | 56841.051 |
| NM_005300 | 6911.515  | 7361.396  | NM_002989 | 14629.602 | 15112.894 | NM_004997 | 57213.582 | 55662.559 |
| NM_000893 | 2144.276  | 2008.789  | U88898    | 1764.41   | 1043.253  | NM_005923 | 12920.928 | 14293.136 |
| NM_000698 | 25657.846 | 20104.758 | NM_020154 | 25324.496 | 22019.063 | NM_003465 | 6120.074  | 9971.172  |
| NM_005091 | 1236.052  | 629.354   | NM_004665 | 10635.299 | 10465.522 | AF289028  | 4273.431  | 5414.635  |
| NM_014297 | 5320.18   | 4440.569  | NM_005300 | 4391.289  | 4574.653  | NM_005127 | 30804.799 | 36856.52  |
| NM_018156 | 19649.449 | 17888.674 | NM_000893 | 2678.723  | 2269.891  | NM_005567 | 36796.309 | 43946.301 |
| X98266    | 3898.507  | 2832.195  | NM_000698 | 44609.383 | 48695.98  | NM_005216 | 15731.702 | 15623.721 |
| U00930    | 31508     | 35010.934 | NM_005091 | 1091.105  | 656.596   | NM_006626 | 1375.815  | 1208.176  |
| AK024958  | 2852.616  | 2779.706  | NM_003204 | 14571.177 | 12707.839 | NM_003965 | 1655.422  | 1766.8    |
| NM_014575 | 12324.386 | 10334.8   | AF254069  | 1519.586  | 1124.978  | NM_004584 | 7402.394  | 6661.949  |
| NM_002439 | 9585.241  | 7833.087  | AL117600  | 19097.426 | 16469.35  | X15183    | 60083.043 | 57220.676 |
| AL117552  | 4087.766  | 2304.37   | NM_001712 | 1860.682  | 1219.824  | AK023618  | 11818.191 | 11477.2   |
| NM_002692 | 14382.521 | 9716.769  | NM_004487 | 49626.941 | 44987.672 | AF212842  | 2843.435  | 8340.847  |
| AB023190  | 8553.854  | 6118.668  | AB029000  | 6631.462  | 5393.204  | NM_018404 | 2927.098  | 2745.075  |
| NM_007064 | 3023.311  | 2056.199  | AK026965  | 43006.871 | 41978.824 | M27544    | 30320.902 | 27360.219 |
| NM_006281 | 4607.157  | 3472.695  | AF229804  | 63348.852 | 53480.074 | NM_002258 | 875.302   | 813.545   |
| NM_002738 | 2729.606  | 1783.743  | AF151638  | 672.335   | 703.245   | NM_001118 | 8894.163  | 8846.016  |
| U23460    | 22324.648 | 17781.59  | U90552    | 8500.381  | 9511.803  | AL133097  | 14686.747 | 13839.405 |
| NM_005356 | 10462.533 | 11878.855 | NM_006032 | 10342.914 | 10653.943 | NM_001165 | 34679.715 | 36280.797 |
| Z25434    | 3709.177  | 3548.789  | NM_014788 | 6430.033  | 5753.382  | NM_001381 | 57946.402 | 61006.813 |
| NM_005884 | 27221.17  | 33614.402 | NM_002153 | 1064.001  | 933.045   | NM_006458 | 11791.321 | 11729.633 |
| NM_012396 | 26470.557 | 30712.785 | AB040890  | 2506.405  | 2463.157  | NM_014458 | 1189.29   | 1344.75   |
| AF229804  | 18985.484 | 23497.104 | AK024233  | 2697.326  | 2816.57   | NM_018047 | 5307.173  | 3590.401  |
| AF151638  | 1748.002  | 1853.947  | AK021870  | 1346.559  | 1435.178  | AB023170  | 5328.611  | 5540.132  |
| U90552    | 14149.523 | 13451.729 | U06680    | 2398.008  | 2192.908  | NM_014153 | 25900.602 | 33677.133 |
| NM_006032 | 3604.478  | 2677.644  | NM_005123 | 916.299   | 831.912   | NM_002296 | 32264.822 | 39048.879 |
| NM_014788 | 11944.271 | 8889.765  | NM_015584 | 14759.14  | 15490.941 | NM_000414 | 18012.766 | 18580.377 |
| NM_005460 | 2346.25   | 1891.094  | NM_001697 | 52459.75  | 52306.07  | AL133033  | 1184.499  | 751.045   |
| AF160477  | 4254.332  | 3375.773  | NM_016098 | 39653.207 | 47250.801 | NM_018845 | 14337.167 | 14432.394 |
| NM_003226 | 460.526   | 396.963   | AB032525  | 1102.511  | 606.098   | AY008372  | 1159.601  | 1299.448  |
| M12883    | 2639.032  | 2482.615  | NM_002063 | 948.916   | 1023.251  | NM_005505 | 10191.438 | 11655.828 |
| BG288747  | 11145.843 | 7335.256  | NM_006667 | 60702.953 | 53191.164 | AK026964  | 2269.733  | 2071.783  |
| BG617923  | 865.48    | 838.458   | AK025125  | 797.022   | 723.089   | NM_000079 | 8524.558  | 8344.419  |
| U37448    | 1477.066  | 1480.703  | NM_000815 | 3074.3    | 2994.193  | AL110245  | 12519.297 | 11874.861 |
| BG435851  | 918.652   | 851.478   | NM_001293 | 1356.953  | 1135.531  | NM_016208 | 30932.617 | 31204.686 |
| AI498426  | 3413.517  | 2726.375  | AB023173  | 5461.97   | 4770.795  | NM_001635 | 628.252   | 698.709   |
| D01038    | 11632.635 | 8760.344  | AF156548  | 3132.724  | 2911.56   | NM_005638 | 13000.411 | 14545.248 |
| AB019205  | 4592.059  | 2939.756  | NM_000387 | 28451.242 | 28252.256 | NM_007235 | 35572.215 | 32781.832 |
| J05008    | 2619.821  | 1619.733  | NM_004663 | 2163.581  | 1809.214  | NM_007268 | 7386.888  | 6596.604  |
| U11087    | 1979.495  | 1048.503  | NM_001072 | 1640.667  | 1382.288  | AK026014  | 6876.084  | 6954.041  |
| D50640    | 1694.319  | 1072.224  | NM_014070 | 2240.875  | 2110.586  | NM_014845 | 5944.179  | 5550.394  |
| D43747    | 979.226   | 538.285   | NM_016280 | 1343.036  | 950.699   | NM_004298 | 5910.909  | 5792.098  |
| M98776    | 2194.362  | 1534.838  | NM_016027 | 558.43    | 460.975   | NM_001232 | 1445.899  | 1266.826  |
| X99135    | 37167.816 | 47136.344 | NM_014297 | 3226.171  | 3262.083  | NM_007181 | 21673.408 | 17382.471 |
| AF009744  | 6266.281  | 8697.579  | NM_018156 | 33333.063 | 35883.012 | AB007857  | 2464.46   | 1941.567  |
| NM_001072 | 3905.094  | 4324.317  | X98266    | 2482.022  | 2084.808  | AB002316  | 2454.883  | 2944.169  |
| NM_014070 | 1162.593  | 917.316   | U00930    | 20656.621 | 24965.916 | NM_018990 | 11275.883 | 16756.115 |

|           |           |           |           |           |           |           |           |           |
|-----------|-----------|-----------|-----------|-----------|-----------|-----------|-----------|-----------|
| AK025859  | 7269.557  | 6774.192  | AK024958  | 1699.089  | 1592.963  | NM_013363 | 2381.65   | 2787.658  |
| AL117499  | 33145.129 | 28898.842 | NM_014575 | 8992.346  | 9330.497  | NM_000947 | 4075.683  | 4305.314  |
| NM_007054 | 4424.495  | 3667.336  | NM_002439 | 11343.366 | 9420.165  | AL096750  | 59158.625 | 57941.883 |
| AB007957  | 2105.118  | 1910.246  | AL117552  | 3365.079  | 3004.515  | NM_016061 | 11850.807 | 12104.089 |
| AK000160  | 1878.811  | 1709.188  | NM_002692 | 16923.834 | 14808.234 | NM_016062 | 39880.313 | 38815.754 |
| NM_005311 | 2500.621  | 1786.364  | AB023190  | 63985.582 | 52774.547 | NM_004153 | 6219.249  | 7082.054  |
| NM_005905 | 909.344   | 619.727   | NM_007064 | 5718.194  | 4526.662  | AK024740  | 7486.251  | 7405.542  |
| NM_016235 | 1084.991  | 960.21    | NM_006281 | 2197.772  | 1615.163  | AF078164  | 14400.888 | 12921.991 |
| NM_000960 | 854.992   | 641.329   | NM_002738 | 2117.604  | 1369.444  | NM_019045 | 3986.969  | 3631.385  |
| AF172932  | 1363.958  | 823.045   | U23460    | 64790.063 | 55016.309 | NM_005447 | 990.439   | 711.504   |
| NM_005355 | 9586.139  | 8221.323  | NM_005356 | 6156.501  | 5900.207  | NM_012413 | 1135.242  | 758.832   |
| NM_002511 | 920.466   | 655.689   | Z25434    | 8720.635  | 7425.81   | AF130101  | 1833.16   | 1766.843  |
| AF295378  | 10128.679 | 8049.646  | NM_005884 | 13962.599 | 16904.982 | NM_004656 | 6204.515  | 4691.032  |
| NM_004085 | 5759.071  | 5078.943  | NM_012399 | 10787.112 | 8999.743  | AF071569  | 10305.533 | 8097.646  |
| NM_012445 | 29940.119 | 22658.549 | CY3Cy5    | 3380.131  | 707.585   | NM_002265 | 6707.296  | 6590.708  |
| NM_018104 | 1739.396  | 1367.042  | NM_004774 | 8324.89   | 8848.254  | J04948    | 3611.878  | 3974.324  |
| NM_006080 | 1740.552  | 1606.022  | NM_005234 | 11748.626 | 13966.969 | NM_018043 | 1508.083  | 1371.63   |
| NM_004425 | 4434.94   | 5786.98   | NM_015400 | 10487.418 | 13398.697 | AK022564  | 63826.152 | 63709.613 |
| U64564    | 3876.604  | 4425.316  | AL359561  | 572.578   | 787.595   | NM_001492 | 2578.298  | 1980.312  |
| NM_006470 | 6075.012  | 6684.69   | AK026464  | 2532.035  | 2877.002  | AB012643  | 44054.82  | 35155.082 |
| NM_002855 | 20220.387 | 28802.195 | AK001362  | 886.463   | 1032.054  | NM_003564 | 12670.536 | 14125.057 |
| AB038463  | 5711.721  | 7138.851  | AK023491  | 672.324   | 936.336   | AK023414  | 850.465   | 1259.765  |
| M30262    | 1610.69   | 1435.747  | AK022400  | 2515.954  | 2493.987  | AF317516  | 17164.172 | 22013.527 |
| NM_015310 | 2179.236  | 1969.406  | AF052100  | 2181.822  | 1996.429  | NM_002581 | 5046.632  | 4999.256  |
| NM_016154 | 19565.217 | 19232.393 | AL110235  | 1533.1    | 1745.292  | AI417964  | 10032.989 | 8885.104  |
| NM_005013 | 55113.008 | 49097.617 | U79245    | 1118.07   | 1339.176  | J03571    | 54323.039 | 56928.645 |
| AB002338  | 3017.648  | 3050.125  | AF085983  | 1848.389  | 2432.389  | T57791    | 1128.991  | 1444.586  |
| AI524814  | 6427.996  | 5343.27   | AF052105  | 2731.722  | 2525.25   | T64134    | 1350.766  | 1285.199  |
| AB024411  | 1350.962  | 1336.342  | AF131806  | 548.445   | 378.623   | X56134    | 7003.928  | 7406.189  |
| NM_002444 | 28294.859 | 33086.898 | AK001204  | 21077.318 | 22456.984 | NM_001456 | 3604.267  | 2817.566  |
| NM_001104 | 1837.609  | 1848.92   | NM_004774 | 6619.104  | 7509.851  | H44784    | 1778.211  | 1175.673  |
| NM_002985 | 9492.892  | 10254.386 | NM_005234 | 11053.883 | 11861.011 | AI421041  | 60636.781 | 63675.086 |
| U88898    | 2859.522  | 2471.679  | SR1       | 72654.211 | 61695.664 | BI759091  | 5875.926  | 6403.041  |
| NM_020154 | 38396.488 | 36576.047 | SR3       | 30561.797 | 43072.18  | BG685843  | 35511.316 | 35590.441 |
| NM_004665 | 18098.916 | 15016.52  | SR5       | 3604.316  | 5678.12   | BI490011  | 8714.009  | 8234.05   |
| NM_005300 | 6868.272  | 5350.74   | SR7       | 4240.812  | 35231.98  | AF035771  | 1092.138  | 1189.061  |
| NM_000893 | 2319.913  | 2444.884  | SR9       | 16076.018 | 4667.838  | N20475    | 15101.949 | 16618.127 |
| NM_000695 | 26820.975 | 25052.631 | CY3Cy5    | 3135.153  | 593.174   | BI199286  | 6378.956  | 6729.199  |
| NM_005091 | 1410.902  | 865.457   | L34409    | 25542.689 | 32417.66  | AA026626  | 4590.435  | 4397.749  |
| AF031167  | 2606.823  | 2140.636  | U12210    | 4439.176  | 5582.576  | H61726    | 2534.757  | 1941.621  |
| NM_003204 | 8893.335  | 10348.087 | Z83936    | 1138.134  | 1360.816  | NM_016436 | 827.008   | 668.893   |
| AF254069  | 2924.169  | 3554.915  | L08440    | 8473.356  | 10185.565 | AL050355  | 516.67    | 654.941   |
| AL117600  | 18460.211 | 20337.332 | M19866    | 515.439   | 730.102   | X74609    | 59258.512 | 57820.363 |
| NM_001712 | 3037.318  | 3090.984  | M73799    | 4581.484  | 5235.675  | NM_006626 | 1324.912  | 1166.767  |
| NM_004487 | 23066.846 | 21342.494 | AF086119  | 2256.542  | 2266.884  | NM_003965 | 1560.029  | 1535.916  |
| AB029000  | 17465.203 | 20478.16  | NM_018364 | 6508.277  | 5665.427  | NM_004584 | 7537.354  | 7925.427  |
| AK026965  | 9733.174  | 13073.267 | NM_006778 | 1428.125  | 1483.105  | X15183    | 57665.891 | 58656.43  |
| AF229804  | 27067.873 | 28978.326 | NM_007022 | 3753.715  | 3824.296  | AK023618  | 13354.1   | 13168.52  |
| AF151638  | 1865.661  | 1588.98   | AL049943  | 35676.945 | 45069.98  | AF212842  | 2992.2    | 7955.367  |
| U90552    | 13302.844 | 9757.621  | AL137303  | 2564.799  | 3105.581  | NM_018404 | 2888.408  | 2888.093  |
| NM_006032 | 4243.905  | 3421.813  | AL355708  | 1520.22   | 1776.624  | M27544    | 32955.234 | 34384.492 |
| NM_014785 | 13832.713 | 11887.773 | AB002449  | 1586.8    | 1459.408  | NM_001118 | 9571.814  | 8825.684  |
| NM_002153 | 1557.294  | 1553.882  | NM_016480 | 25492.371 | 25115.234 | AL133097  | 14160.228 | 10696.143 |

|           |           |           |           |           |           |           |           |           |
|-----------|-----------|-----------|-----------|-----------|-----------|-----------|-----------|-----------|
| AB040890  | 5104.71   | 5502.807  | AK001489  | 1369.478  | 1617.442  | NM_001165 | 32999.41  | 33066.707 |
| AK024233  | 3830.951  | 3992.797  | NM_015681 | 10992.446 | 11968.416 | NM_001381 | 55438.578 | 67773.703 |
| AK021870  | 3058.967  | 3629.269  | AF070582  | 2357.559  | 2532.564  | U90908    | 1079.355  | 1348.636  |
| U06680    | 3266.178  | 3348.455  | NM_006383 | 7653.063  | 8428.673  | NM_00645E | 10357.438 | 9378.826  |
| NM_01785E | 688.014   | 1064.692  | AK024351  | 2488.532  | 2239.121  | NM_01445E | 1201.969  | 1137.876  |
| NM_015584 | 27004.551 | 27964.143 | AK024867  | 1645.736  | 1674.823  | NM_00409E | 5057.133  | 5434.814  |
| NM_001697 | 67660.586 | 59201.105 | AK025002  | 7944.367  | 7893.983  | NM_00144E | 23430.072 | 27600.117 |
| NM_01609E | 62562.602 | 57244.523 | AF086124  | 1548.154  | 1682.151  | NM_001387 | 1865.75   | 2214.55   |
| AB032525  | 1519.047  | 954.897   | AK024820  | 1549.807  | 1703.797  | AF086122  | 1889.987  | 2359.188  |
| NM_00206E | 853.882   | 504.746   | AF052117  | 1008.424  | 980.654   | AK024397  | 40947.727 | 39092.563 |
| NM_006667 | 32355.6   | 38023.512 | AB033105  | 1806.264  | 1921.259  | NM_018047 | 5464.46   | 3926.133  |
| AK025125  | 1840.279  | 2170.048  | AF038192  | 1437.003  | 1563.121  | NM_00502E | 4058.227  | 3667.49   |
| NM_00081E | 2942.1    | 3140.233  | AJ001865  | 2159.611  | 2383.753  | NM_00128E | 1828.259  | 1622.092  |
| NM_00129E | 1563.829  | 1691.534  | D61704    | 29570.533 | 31772.992 | NM_00562E | 36687.902 | 32313.168 |
| AB023173  | 10442.252 | 10753.263 | AJ227889  | 1859.548  | 2237.806  | NM_003951 | 733.343   | 693.239   |
| AF156548  | 4539      | 4821.448  | Y12017    | 958.51    | 1327.705  | NM_01660E | 57332.84  | 59511.418 |
| NM_000387 | 7185.51   | 6998.917  | X64989    | 1076.222  | 1125.931  | S78203    | 4606.944  | 4273.861  |
| NM_00466E | 4180.226  | 4750.644  | Y10512    | 1860.016  | 2459.355  | NM_01620E | 29707.91  | 32304.492 |
| NM_00107E | 3535.328  | 2625.932  | AL110175  | 1758.691  | 2069.965  | NM_00163E | 655.055   | 839.023   |
| NM_01407C | 1864.507  | 1643.785  | AF288406  | 1634.902  | 1784.724  | NM_00563E | 12167.153 | 12335.508 |
| NM_014297 | 6243.652  | 7211.502  | AK027156  | 24604.609 | 25617.707 | NM_00723E | 34976.352 | 27634.635 |
| NM_01815E | 22426.266 | 24230.939 | AL157504  | 5604.301  | 5987.883  | NM_00726E | 6989.261  | 5345.69   |
| X98266    | 4849.956  | 4891.304  | AK023328  | 13057.453 | 14721.193 | AK026014  | 7019.583  | 5963.221  |
| U00930    | 38106.555 | 43815.109 | AL442096  | 3301.944  | 3711.062  | NM_01484E | 6046.657  | 5247.529  |
| AK024958  | 3899.571  | 3998.062  | AK023299  | 676.122   | 506.272   | NM_00429E | 5699.786  | 6101.174  |
| NM_01457E | 16163.742 | 16272.432 | NM_01822E | 2974.742  | 3379.578  | NM_00123E | 1125.739  | 1085.756  |
| NM_00243E | 11968.349 | 9003.511  | AJ270693  | 2490.301  | 2493.793  | NM_007181 | 22875.088 | 20430.031 |
| AL117552  | 5056.495  | 3256.585  | NM_01779C | 5551.727  | 6311.994  | AB007857  | 2962.323  | 2774.108  |
| NM_00269E | 17322.279 | 12737.473 | AK000861  | 1135.251  | 1200.637  | NM_00177E | 53384.633 | 54364.461 |
| AB023190  | 9748.666  | 7462.923  | AK025009  | 687.151   | 921.029   | NM_004997 | 58813.309 | 60505.738 |
| NM_007064 | 3281.495  | 3690.537  | AK000023  | 6691.547  | 8161.198  | NM_00592E | 14525.648 | 13441.752 |
| NM_006281 | 5141.945  | 4958.014  | AK000652  | 352.725   | 437.965   | NM_00346E | 6080.507  | 5712.585  |
| NM_00273E | 3085.716  | 3029.365  | AK000901  | 1889.374  | 1983.808  | AF289028  | 4295.204  | 4900.918  |
| U23460    | 20664.582 | 20895.074 | AB007866  | 1907.351  | 2301.762  | NM_005127 | 33876.922 | 33919.473 |
| NM_00535E | 12472.593 | 13727.958 | AF075086  | 51799.617 | 54693.57  | NM_005567 | 35964.285 | 36914.262 |
| Z25434    | 3573.575  | 3903.361  | X77485    | 44396.973 | 54664.777 | NM_00521E | 16502.164 | 15379.556 |
| NM_005884 | 28874.939 | 32385.098 | NM_01449E | 3341.753  | 3303.599  | J04948    | 4221.146  | 4240.73   |
| NM_01239E | 26857.656 | 25095.287 | AK021555  | 899.227   | 1049.525  | NM_01804E | 1904.428  | 1888.304  |
| CY3Cy5    | 4655.254  | 1100.814  | AB046765  | 2873.492  | 2949.826  | AK022564  | 52961.719 | 61618.32  |
| NM_004774 | 4827.375  | 3690.778  | AF133333  | 11711.368 | 12381.536 | NM_00149E | 2304.346  | 2146.94   |
| NM_005234 | 6795.467  | 6005.167  | NM_01836E | 1987.87   | 2156.745  | AB012643  | 33352.313 | 26853.131 |
| NM_01540C | 2752.049  | 2718.499  | AK024011  | 1707.947  | 1670.437  | AB023170  | 5266.809  | 4848.036  |
| AL359561  | 539.215   | 414.465   | AL390145  | 1064.254  | 730.602   | NM_01415E | 28241.473 | 28453.248 |
| AF131786  | 356.748   | 453.859   | AF119913  | 2675.652  | 1944.32   | NM_00229E | 39127.07  | 34836.996 |
| AK026464  | 929.609   | 755.546   | NM_01834C | 2562.927  | 3780.02   | NM_000414 | 19561.742 | 14791.188 |
| AK001362  | 941.381   | 824.342   | AF049883  | 2901.293  | 3149.533  | AL133033  | 1195.035  | 933.97    |
| AK023491  | 332.818   | 517.016   | U10512    | 555.567   | 702.738   | NM_01884E | 13609.514 | 9749.125  |
| AK022400  | 1328.523  | 1257.058  | L10148    | 65359.543 | 59437.973 | AY008372  | 1111.257  | 1454.189  |
| AF052100  | 1614.869  | 1410.479  | AK026247  | 964.027   | 1374.825  | NM_00550E | 9486.776  | 8859.784  |
| AL110235  | 1060.683  | 1013.185  | AK024893  | 722.094   | 877.911   | AK026964  | 1859.617  | 1596.513  |
| U79245    | 1309.126  | 1137.078  | AK023302  | 549.056   | 508.708   | NM_001134 | 13588.406 | 12111.191 |
| AF085983  | 906.604   | 870.614   | L37703    | 37355.719 | 52046.523 | NM_01601E | 28466.887 | 28359.068 |
| AF052105  | 1976.762  | 1739.905  | AK023767  | 28160.188 | 41466.793 | NM_020407 | 5441.887  | 5289.923  |

|           |           |           |           |           |           |           |           |           |
|-----------|-----------|-----------|-----------|-----------|-----------|-----------|-----------|-----------|
| AK001204  | 15773.999 | 16183.239 | AF084516  | 1709.475  | 2044.29   | AF118274  | 36709.383 | 38991.797 |
| NM_004774 | 4891.836  | 5351.739  | AJ001907  | 3388.669  | 3447.854  | NM_018344 | 3502.435  | 4170.234  |
| NM_005234 | 7214.405  | 8055.164  | M32220    | 9728.552  | 10147.654 | NM_000079 | 8139.841  | 11224.483 |
| SR1       | 67005.008 | 62286.059 | D17188    | 25310.164 | 30188.754 | NM_000083 | 2445.512  | 2629.201  |
| SR3       | 32188.191 | 33123.57  | AJ001432  | 42525.828 | 53028.703 | AL110245  | 14728.051 | 14870.325 |
| SR5       | 2951.467  | 4233.782  | NM_020435 | 20051.643 | 22254.689 | NM_016436 | 636.994   | 436.934   |
| SR7       | 2835.319  | 37302.742 | AF052169  | 2381.538  | 2237.836  | AL050355  | 735.646   | 935.491   |
| SR9       | 13010.455 | 3874.173  | AK024900  | 7220.336  | 7981.93   | AF007190  | 926.013   | 671.399   |
| CY3Cy5    | 8732.967  | 1711.807  | AK026249  | 876.537   | 855.096   | X74609    | 52603.77  | 53411.75  |
| L34409    | 5398.452  | 3952.908  | AF119879  | 54324.215 | 51328.844 | AB002316  | 2496.889  | 2284.998  |
| U12210    | 3117.291  | 2606.383  | L16951    | 634.15    | 526.288   | NM_018990 | 10506.484 | 10227.047 |
| Z83936    | 1217.933  | 1122.368  | Y10482    | 57333.188 | 53728.273 | NM_013363 | 2459.123  | 2343.128  |
| L08440    | 483.479   | 390.731   | AY007095  | 1354.394  | 2150.131  | NM_000947 | 4148.348  | 3538.545  |
| M19866    | 867.435   | 872.57    | AF086244  | 6369.46   | 7279.738  | AL096750  | 55664.652 | 53509.746 |
| M73799    | 1174.258  | 1074.456  | AL161992  | 7859.389  | 7744.562  | NM_016061 | 9903.462  | 7635.205  |
| AF086119  | 658.857   | 629.119   | AK023551  | 1473.717  | 1866.401  | NM_016062 | 33455.586 | 29367.781 |
| NM_003782 | 617.39    | 513.37    | AK023910  | 4683.071  | 5761.337  | NM_004153 | 5378.299  | 5686.097  |
| NM_018364 | 3332.993  | 2655.229  | D16991    | 4522.346  | 5148.835  | AK024740  | 7079.933  | 7054.917  |
| AK021601  | 386.072   | 363.493   | AK023538  | 2791.547  | 3561.744  | AF078164  | 12924.275 | 12013.991 |
| NM_006778 | 755.101   | 610.369   | U17620    | 637.45    | 556.376   | NM_019049 | 4036.705  | 4142.672  |
| NM_007022 | 3320.244  | 2939.305  | NM_006695 | 5242.69   | 6250.763  | NM_005447 | 1313.677  | 1195.577  |
| AL049943  | 11294.647 | 11744.278 | NM_004815 | 2605.302  | 2767.488  | NM_012413 | 866.228   | 907.171   |
| AL137303  | 1828.901  | 1796.112  | NM_004147 | 1458.571  | 1929.925  | AF130101  | 1714.438  | 1932.74   |
| AL355708  | 1383.235  | 1379.383  | AK000959  | 1326.938  | 1383.082  | NM_004656 | 7644.29   | 7258.391  |
| AL161980  | 488.789   | 508.809   | AB037743  | 4308.47   | 4623.275  | AF247820  | 718.377   | 1153.027  |
| AB002449  | 991.419   | 1014.307  | AB046820  | 2938.363  | 2739.551  | AF071569  | 9852.127  | 8405.118  |
| U79248    | 878.098   | 1228.938  | AK025922  | 2386.77   | 2465.58   | NM_002269 | 6763.192  | 7081.517  |
| NM_016480 | 18646.422 | 17301.674 | NM_014646 | 859.24    | 897.516   | CY3Cy5    | 6495.135  | 201.28    |
| AK001489  | 1182.184  | 1567.279  | NM_006375 | 1111.633  | 989.245   | AF086328  | 11989.918 | 8791.496  |
| NM_015681 | 1788.305  | 3186.321  | AF123659  | 5677.503  | 6209.326  | AK001099  | 2129.837  | 3485.432  |
| AF070582  | 2620.245  | 3123.223  | U94903    | 1805.789  | 1933.399  | AK023753  | 8041.629  | 6476.402  |
| NM_006383 | 1534.472  | 2192.124  | AF009300  | 1359.053  | 1536.863  | AF086441  | 31057.209 | 23411.189 |
| AK024351  | 625.61    | 282.842   | NM_005155 | 27953.227 | 29583.293 | AK027255  | 1065.743  | 1229.945  |
| AK024867  | 483.9     | 437.354   | NM_019095 | 15544.793 | 15852.868 | NM_018019 | 6817.76   | 6751.053  |
| AK025002  | 899.24    | 830.197   | U80764    | 18709.934 | 19424.582 | AK027220  | 2265.052  | 2184.472  |
| AF086124  | 701.478   | 782.462   | AB020684  | 11109.426 | 12625.824 | NM_018011 | 13616.373 | 13915.912 |
| AK024820  | 1574.678  | 1206.17   | AF077036  | 56248.059 | 52161.828 | NM_080824 | 895.919   | 1304.853  |
| AF052117  | 892.077   | 904.577   | NM_020421 | 3048.388  | 3262.158  | AK023086  | 9510.515  | 6536.53   |
| AB033105  | 1389.639  | 1252.587  | D17094    | 4838.83   | 5442.091  | AK023857  | 520.708   | 976.989   |
| AF038192  | 609.725   | 890.89    | L37690    | 38463.004 | 51031.914 | NM_016115 | 3235.012  | 3056.978  |
| NM_017938 | 395.408   | 449.659   | D61707    | 2643.467  | 2707.767  | NM_014950 | 5929.994  | 5367.404  |
| AJ001865  | 2756.143  | 2644.869  | AK021610  | 2951.086  | 2571.947  | AL080180  | 1827.439  | 1598      |
| AJ227875  | 561.911   | 429.567   | Z36835    | 17966.164 | 22046.064 | X89067    | 3109.734  | 2932.553  |
| D61704    | 9437.975  | 9648.819  | NM_004648 | 456.608   | 523.407   | NM_018280 | 2278.035  | 2348.789  |
| AJ227889  | 790.544   | 1157.121  | AF029325  | 2775.536  | 2941.172  | AK024381  | 1075.943  | 750.85    |
| Y12017    | 1312.726  | 1666.976  | NM_005704 | 2879.565  | 2738.954  | AK026503  | 1754.512  | 1745.158  |
| X64989    | 542.782   | 651.602   | AF097021  | 1807.155  | 2146.771  | AK026671  | 3063.55   | 2885.23   |
| Y10512    | 1853.02   | 2424.681  | NM_001365 | 2962.216  | 2673.013  | AF086087  | 12809.467 | 11131.169 |
| AL110175  | 793.265   | 794.374   | NM_000677 | 12824.645 | 12471.786 | AF075091  | 1345.294  | 1247.515  |
| AF288406  | 1225.185  | 1036.43   | BF308728  | 6319.11   | 6905.373  | AK000671  | 72249.68  | 62024.039 |
| AK027156  | 19652.465 | 15950.543 | NM_013280 | 936.479   | 691.492   | AK094020  | 1280.491  | 1407.899  |
| AL157504  | 5713.487  | 5120.296  | NM_018315 | 50821.988 | 53631.973 | AL137425  | 2077.512  | 1987.8    |
| AK023328  | 9942.488  | 10111.832 | AF051151  | 1870.076  | 1664.432  | AL137637  | 909.96    | 1024.355  |



|           |           |           |           |           |           |           |           |           |
|-----------|-----------|-----------|-----------|-----------|-----------|-----------|-----------|-----------|
| AL442096  | 1255.79   | 1544.635  | AF142421  | 7952.234  | 6874.949  | AL359584  | 1931.149  | 2855.357  |
| AK023299  | 733.287   | 642.169   | M84131    | 471.488   | 511.012   | AK021649  | 2132.4    | 1888.296  |
| NM_01822E | 1125.81   | 1385.149  | AB037836  | 4291.077  | 3522.855  | AL080151  | 943.943   | 940.963   |
| AJ270693  | 2195.46   | 2242.337  | NM_014247 | 2546.27   | 2219.675  | AL050085  | 1269.468  | 1382.053  |
| NM_01779C | 3379.356  | 3833.318  | NM_01869E | 68733.969 | 67839.531 | AK021574  | 5148.238  | 4825.4    |
| AK000861  | 1057.419  | 1026.547  | NM_006343 | 1438.565  | 1781.112  | NM_017621 | 18191.348 | 16997.031 |
| AK025009  | 1008.322  | 1605.191  | NM_01478E | 2869.834  | 3472.865  | AK023574  | 849.44    | 927.023   |
| AK000023  | 5771.99   | 9744.713  | NM_001423 | 797.905   | 922.232   | AF131767  | 13523.431 | 13512.205 |
| AK000652  | 698.164   | 796.498   | NM_01571E | 17991.621 | 18986.295 | AK021907  | 3205.99   | 3241.021  |
| AK000901  | 1362.947  | 1424.544  | NM_00395E | 1330.014  | 1378.395  | AK022029  | 3830.693  | 2863.029  |
| AB007866  | 1880.348  | 1767.364  | NM_00573E | 4748.619  | 5234.263  | AK022167  | 795.905   | 1077.776  |
| AF075086  | 40311.566 | 38466.176 | AB023166  | 1733.859  | 1402.149  | AK022058  | 4697.376  | 5101.993  |
| X77485    | 2170.309  | 2152.49   | AB028966  | 27176.715 | 31392.277 | AK024326  | 1737.737  | 1417.075  |
| NM_01694E | 809.185   | 738.232   | NM_005402 | 9668.498  | 11771.836 | U61088    | 496.737   | 2175.722  |
| NM_01449E | 2164.089  | 1737.078  | AF055027  | 13846.929 | 15210.051 | AL137345  | 2104.341  | 1904.537  |
| AK021555  | 467.271   | 428.954   | U63541    | 11275.591 | 12203.563 | AK000967  | 6233.484  | 6450.834  |
| AB046765  | 1756.85   | 1534.277  | AB033045  | 2426.07   | 2181.076  | AL137442  | 3751.414  | 4433.142  |
| AF133333  | 7865.106  | 7995.48   | AF055006  | 15185.299 | 15747.643 | AL049281  | 2239.877  | 2532.166  |
| NM_01836E | 2157.909  | 1879.568  | NM_00493E | 6993.042  | 7189.236  | NM_00120E | 52071.113 | 46947.504 |
| AK024011  | 2252.545  | 1811.603  | NM_006951 | 2816.311  | 2763.713  | AL050061  | 7796.064  | 6821.76   |
| AL390145  | 1468.761  | 1193.54   | NM_00189E | 12426.098 | 11923.915 | AL050206  | 1045.618  | 1279.089  |
| AF119913  | 2770.081  | 2055.912  | NM_014023 | 1213.283  | 1145.099  | AK025522  | 31029.504 | 31200.678 |
| NM_01834C | 1864.618  | 1973.716  | NM_00274E | 17632.006 | 17275.449 | BE746723  | 1830.499  | 1851.22   |
| AF049883  | 1366.103  | 1378.124  | D26488    | 16217.153 | 12827.927 | AK026218  | 4488.339  | 6048.402  |
| U10512    | 473.344   | 480.707   | NM_001432 | 1464.405  | 1451.304  | NM_00498E | 27469.354 | 31275.232 |
| L10148    | 60590.484 | 60750.84  | AK002193  | 811.429   | 800.486   | AK025129  | 1095.055  | 1427.521  |
| AK026247  | 807.369   | 1043.418  | AB014554  | 4746.572  | 4028.361  | BF541820  | 2428.19   | 2893.936  |
| M14755    | 535.952   | 970.552   | AF097431  | 4643.132  | 4572.496  | AF119911  | 16874.514 | 18668.752 |
| AK024893  | 639.063   | 764.259   | NM_00197E | 2923.733  | 3182.244  | AF116656  | 13448.929 | 12534.497 |
| AK023302  | 596.442   | 740.991   | NM_005897 | 615.073   | 793.79    | AF132206  | 4321.668  | 4313.181  |
| L37703    | 9571.183  | 9232.575  | NM_00257E | 619.007   | 790.974   | AJ001869  | 28566.195 | 26358.854 |
| AK023767  | 12688.956 | 13737.21  | NM_004221 | 3900.038  | 4137.857  | AJ002969  | 657.001   | 987.521   |
| S81579    | 581.772   | 560.899   | NM_00301E | 4181.482  | 4380.59   | NM_00529E | 3667.894  | 4365.148  |
| AF084516  | 1475.442  | 1821.724  | AL109790  | 3984.143  | 3966.046  | NM_02021E | 8544.317  | 7984.115  |
| AL137554  | 874.09    | 821.712   | NM_00362E | 3899.229  | 4164.955  | AF200341  | 2531.563  | 2497.396  |
| AJ001907  | 912.463   | 886.954   | NM_002407 | 235.389   | 340.5     | AJ238214  | 3110.695  | 4577.808  |
| M32220    | 1673.241  | 1573.657  | M90657    | 1320.376  | 1232.402  | AB040944  | 8262.797  | 7590.08   |
| D17188    | 29490.096 | 27482.92  | NM_00669E | 5088.962  | 5233.396  | NM_01814E | 5587.329  | 4759.26   |
| AJ001432  | 34107.672 | 38147.594 | AK025645  | 2593.015  | 2939.823  | NM_01847E | 18805.738 | 17262.086 |
| NM_02043E | 18436.977 | 20294.877 | AK023266  | 1913.898  | 2093.51   | AF220492  | 12279.686 | 10389.86  |
| AF052169  | 778.985   | 555.861   | NM_006814 | 24040.393 | 29980.758 | X89671    | 2672.756  | 2722.833  |
| AJ012499  | 65929.93  | 62398.168 | NM_005067 | 9116.28   | 9912.163  | NM_01837E | 4264.028  | 5012.047  |
| AK024900  | 8092.138  | 6831.508  | AB007899  | 1661.136  | 1723.717  | NM_01325E | 2912.261  | 3450.536  |
| AK026249  | 591.439   | 864.998   | NM_002817 | 15199.012 | 16186.263 | NM_003814 | 3735.94   | 4607.26   |
| AF119879  | 13414.432 | 13805.548 | NM_002801 | 28580.855 | 30559.26  | NM_00296E | 1621.132  | 2078.488  |
| L16951    | 557.251   | 426.961   | BE905810  | 2681.41   | 2046.854  | AK026898  | 6320.053  | 6430.895  |
| Y10482    | 1646.292  | 1266.782  | NM_01478C | 2309.725  | 1867.389  | NM_006637 | 968.561   | 1244.217  |
| AY007095  | 821.612   | 840.916   | NM_01811E | 689.906   | 602.21    | AK022419  | 2379.943  | 2206.024  |
| AF086244  | 1486.814  | 1287.764  | NM_01473C | 5880.648  | 5145.614  | AJ251832  | 1688.047  | 1792.349  |
| AL161992  | 6135.417  | 6321.532  | NM_014167 | 1616.419  | 1420.4    | NM_014624 | 1045.509  | 1017.831  |
| AK023551  | 1275.985  | 1396.291  | NM_01606E | 4745.926  | 4588.617  | NM_01393E | 6065.48   | 6517.299  |
| AK023910  | 1681.71   | 3713.642  | U82987    | 11105.339 | 12315.683 | AF086145  | 2996.729  | 2832.908  |
| D16991    | 4159.343  | 5300.386  | NM_00573E | 3019.14   | 2827.18   | Z70709    | 3694.445  | 4264.189  |

|           |           |           |           |           |           |           |           |           |
|-----------|-----------|-----------|-----------|-----------|-----------|-----------|-----------|-----------|
| AK023538  | 899.755   | 1033.631  | NM_014890 | 1468.335  | 1415.597  | BC002538  | 6848.477  | 8430.449  |
| U17620    | 734.849   | 855.725   | AK056481  | 6746.079  | 7535.669  | AK022355  | 2573.636  | 2923.73   |
| NM_006695 | 1317.24   | 1419.48   | NM_005433 | 997.91    | 1200.932  | NM_017836 | 5835.917  | 6304.736  |
| NM_004815 | 1950.703  | 2036.972  | AF232000  | 68279.633 | 64397.051 | AL078636  | 7431.702  | 7177.919  |
| NM_004147 | 1010.071  | 1173.402  | NM_005758 | 7163.336  | 7949.641  | AK022382  | 1681.687  | 1639.995  |
| AK000959  | 1295.593  | 1197.376  | AF044774  | 2842.338  | 2880.231  | AL080128  | 7855.183  | 5396.245  |
| AB037743  | 3393.624  | 3133.126  | NM_004430 | 860.064   | 419.505   | AB037787  | 6174.506  | 4102.55   |
| AB046820  | 1974.99   | 1571.928  | NM_002955 | 2073.537  | 2189.498  | AB040892  | 3331.017  | 3116.906  |
| AK025922  | 592.351   | 663.618   | NM_001938 | 6709.36   | 8707.556  | AF230904  | 20451.795 | 25221.801 |
| NM_014646 | 946.654   | 808.559   | AF230808  | 9696.795  | 10589.659 | NM_017596 | 12047.118 | 11379.069 |
| NM_006375 | 1185.879  | 1220.099  | U18910    | 3375.48   | 4020.87   | AL157480  | 5281.978  | 5777.582  |
| AF123659  | 2050.624  | 2212.311  | NM_005238 | 37207.793 | 41170.254 | NM_014386 | 2783.924  | 3102.498  |
| NM_002518 | 512.157   | 290.698   | S83390    | 1849.211  | 2031.843  | NM_018110 | 4939.28   | 5208.088  |
| NM_004881 | 4136.091  | 4116.164  | AK075306  | 15984.369 | 14543.497 | AF312678  | 793.93    | 911.342   |
| U94903    | 820.706   | 646.114   | AB037820  | 1841.437  | 1798.866  | NM_006253 | 8470.031  | 8590.958  |
| AF009300  | 783.864   | 527.985   | U37689    | 776.353   | 681.185   | NM_003866 | 1060.146  | 1061.558  |
| NM_005155 | 1188.568  | 1321.126  | NM_001280 | 25909.904 | 26822.932 | NM_018262 | 3372.554  | 3542.007  |
| NM_019095 | 15002.217 | 13426.334 | AB019572  | 64286.531 | 57013.996 | NM_006207 | 1927.535  | 1919.78   |
| U80764    | 17796.334 | 16716.525 | NM_002948 | 56480.039 | 54278.953 | NM_000360 | 4207.94   | 4376.894  |
| AB020684  | 10417.13  | 9371.102  | AF113008  | 5824.557  | 6290.9    | NM_000844 | 4041.252  | 5915.031  |
| AF077036  | 56347.574 | 46232.137 | NM_020217 | 7707.908  | 8539.064  | Z36817    | 2731.049  | 3851.834  |
| NM_020421 | 2392.843  | 2692.626  | NM_018135 | 64723.395 | 55614.012 | NM_014505 | 39029.93  | 49535.473 |
| D17094    | 6178.836  | 7101.855  | AF205435  | 31270.977 | 38601.184 | NM_004205 | 9458.521  | 9090.884  |
| L37690    | 8752.943  | 18678.875 | L05093    | 65213.051 | 57590.43  | NM_002201 | 67791.359 | 78553.992 |
| D61707    | 1421.221  | 2167.306  | NM_006923 | 6592.896  | 7080.698  | NM_006806 | 1956.914  | 1814.398  |
| AK021610  | 3594.929  | 3259.812  | NM_004615 | 671.044   | 626.985   | NM_006763 | 5957.015  | 4524.518  |
| Z36835    | 12571.446 | 14022.775 | AF119889  | 33452.434 | 42113.848 | NM_006119 | 10279.094 | 9247.321  |
| NM_004648 | 714.81    | 801.881   | J03866    | 22548.594 | 21765.998 | NM_004465 | 3443.618  | 3392.365  |
| AF029325  | 2630.586  | 2200.555  | AK022836  | 13105.05  | 14612.829 | AK026927  | 6470.019  | 6749.793  |
| NM_005704 | 994.157   | 690.794   | NM_012343 | 46478.34  | 50787.992 | NM_014058 | 17411.176 | 19486.414 |
| AF097021  | 1279.424  | 1306.739  | NM_000397 | 4774.803  | 4377.592  | AF231997  | 4933.969  | 5852.378  |
| NM_001365 | 1297.225  | 1087.868  | NM_002046 | 59023.039 | 59151.586 | NM_007125 | 5431.415  | 5390.487  |
| NM_000677 | 13905.286 | 12588.768 | AL157461  | 2266.17   | 2077.95   | NM_002598 | 17419.875 | 18999.688 |
| BF308728  | 1630.724  | 1303.08   | BF217340  | 1075.071  | 1112.741  | NM_020184 | 3371.851  | 4122.957  |
| NM_013280 | 855.651   | 727.22    | NM_003078 | 4366.108  | 4419.643  | NM_005815 | 1825.675  | 2323.875  |
| NM_018315 | 4429.242  | 4877.268  | AL137703  | 2051.984  | 2060.622  | NM_001225 | 4357.061  | 4260.586  |
| AF051151  | 987.719   | 1090.559  | NM_001809 | 7510.306  | 8536.941  | NM_014916 | 1409.315  | 1453.795  |
| AF142421  | 5600.716  | 5261.793  | AL117477  | 8008.424  | 8147.167  | NM_000250 | 1829.004  | 2040.398  |
| AF257238  | 543.475   | 273.071   | NM_012107 | 7460.952  | 8136.829  | NM_018147 | 25584.023 | 32682.664 |
| AB037836  | 3701.147  | 3233.875  | AB037760  | 5225.208  | 5488.586  | NM_018967 | 16386.227 | 17010.338 |
| NM_014247 | 1809.017  | 1956.021  | NM_015680 | 12308.973 | 11404.543 | AJ278018  | 1402.199  | 1515.283  |
| NM_018695 | 11962.679 | 10907.391 | M22637    | 8426.647  | 9629.089  | NM_001850 | 2087.473  | 2638.781  |
| NM_006343 | 2391.991  | 2235.498  | AB037770  | 891.602   | 955.481   | NM_002160 | 4206.43   | 5022.736  |
| NM_014786 | 1718.817  | 1940.986  | NM_018118 | 1034.998  | 1244.415  | NM_005675 | 3618.478  | 4538.148  |
| NM_001423 | 962.981   | 1002.426  | L35035    | 10239.415 | 10339.881 | NM_003255 | 47149.73  | 41125.219 |
| NM_015716 | 3636.198  | 4550.071  | NM_007152 | 4475.179  | 4717.772  | NM_006587 | 1303.456  | 1000.888  |
| NM_003955 | 419.756   | 736.692   | NM_018293 | 3528.775  | 3873.452  | NM_002812 | 7282.302  | 6231.237  |
| NM_005739 | 4355.297  | 4944.711  | AF073931  | 389.047   | 547.695   | NM_020365 | 4194.19   | 3840.526  |
| AB023166  | 1264.711  | 1378.62   | NM_018047 | 4194.328  | 4212.418  | NM_003982 | 5395.071  | 4817.436  |
| AB028966  | 1233.596  | 1501.263  | NM_005022 | 2986.276  | 3236.52   | NM_002079 | 11284.757 | 10577.804 |
| NM_005402 | 8183.779  | 7677.744  | NM_001288 | 1383.519  | 1480.6    | NM_002112 | 17121.871 | 15839.625 |
| AF055027  | 15121.665 | 14387.305 | NM_003564 | 10280.25  | 10745.402 | NM_004121 | 15246.675 | 17615.211 |
| U63541    | 7440.46   | 7652.414  | AK023414  | 834.833   | 836.396   | AY007092  | 5864.058  | 6354.008  |

|           |           |           |           |           |           |           |           |           |
|-----------|-----------|-----------|-----------|-----------|-----------|-----------|-----------|-----------|
| AB033045  | 1373.419  | 1013.487  | AF317516  | 14902.49  | 14662.361 | NM_001902 | 2189.001  | 2362.14   |
| AF055006  | 7782.088  | 7307.829  | NM_002581 | 4779.355  | 3676.217  | AL137605  | 62493.441 | 60474.305 |
| NM_004935 | 7602.115  | 5971.784  | AI417964  | 9195.762  | 8564.198  | NM_016261 | 1851.795  | 2066.261  |
| NM_006951 | 2038.49   | 1656.627  | J03571    | 46600.055 | 51941.148 | NM_006515 | 1659.278  | 1782.821  |
| NM_001896 | 9928.27   | 8942.708  | T57791    | 1100.882  | 929.751   | NM_004607 | 62534.363 | 59662.633 |
| NM_014023 | 1079.613  | 1191.281  | T64134    | 660.519   | 813.205   | NM_012076 | 3558.141  | 3239.867  |
| NM_002745 | 8546.797  | 9086.479  | X56134    | 6210.406  | 6057.818  | NM_007285 | 45485.082 | 44244.043 |
| D26488    | 11787.499 | 9157.609  | NM_001456 | 2299.68   | 2347.555  | D14678    | 13883.225 | 16934.389 |
| NM_001432 | 1946.893  | 1958.183  | H44784    | 2219.069  | 1380.781  | NM_016221 | 4855.271  | 5202.97   |
| AK002193  | 931.208   | 1027.572  | AI421041  | 50287.867 | 52316.168 | NM_018113 | 2410.728  | 2424.73   |
| AB014554  | 1150.387  | 1023.792  | BI759091  | 4794.026  | 5771.472  | NM_005187 | 1774.027  | 1889.957  |
| AF097431  | 3139.114  | 3264.797  | BG685843  | 27583.412 | 32038.432 | U73377    | 6005.401  | 6051.232  |
| NM_001978 | 622.067   | 491.684   | BI490011  | 6976.079  | 6624.567  | NM_016162 | 4478.113  | 3950.22   |
| NM_005897 | 789.703   | 700.534   | AF035771  | 1161.348  | 1176.817  | AF130056  | 3507.803  | 2949.072  |
| NM_002579 | 476.283   | 608.976   | N20475    | 11962.724 | 14328.959 | NM_006662 | 21403.502 | 14852.614 |
| NM_004221 | 1366.399  | 2434.585  | BI199286  | 4660.398  | 5646.864  | NM_004031 | 1670.316  | 1025.749  |
| NM_004061 | 198.589   | 496.551   | AA026626  | 3771.263  | 4046.595  | NM_004514 | 3629.691  | 3560.319  |
| NM_003019 | 456.898   | 692.69    | H61726    | 1900.743  | 1596.667  | NM_006163 | 1556.749  | 1321.822  |
| AL109790  | 1029.231  | 1021.333  | M15465    | 14181.058 | 14282.646 | NM_001272 | 14930.399 | 11344.114 |
| NM_003628 | 2229.395  | 2248.173  | NM_007181 | 17060.244 | 19142.494 | NM_016303 | 808.658   | 590.952   |
| NM_002407 | 596.795   | 473.042   | AB007857  | 2285.504  | 2515.427  | NM_006196 | 26843.078 | 26238.654 |
| M90657    | 1012.104  | 1009.959  | NM_001778 | 49107.457 | 53299.613 | AV733560  | 5448.029  | 4966.635  |
| NM_006699 | 4005.771  | 3506.087  | NM_004997 | 41019.453 | 48350.621 | D17129    | 68114.914 | 68842.766 |
| AK025645  | 1159.789  | 1060.959  | NM_005923 | 10622.986 | 8443.783  | NM_003091 | 42160.738 | 52096.137 |
| AK023266  | 2159.386  | 2130.51   | NM_003465 | 5030.538  | 5497.202  | NM_004247 | 7718.777  | 9622.658  |
| NM_006814 | 11135.628 | 12253.839 | AF289028  | 3489.639  | 4161.683  | NM_017722 | 11542.753 | 12781.231 |
| NM_005067 | 7473.92   | 6183.763  | NM_005127 | 25126.66  | 26371.996 | AL137730  | 12407.816 | 13149.684 |
| AB007899  | 1963.012  | 1380.784  | NM_005567 | 27730.992 | 32103.658 | NM_004500 | 62184.832 | 58985.746 |
| NM_002817 | 12536.386 | 14036.224 | NM_005216 | 12052.026 | 11637.627 | NM_003276 | 14803.044 | 15231.245 |
| NM_002801 | 20989.441 | 20424.143 | NM_006626 | 1066.65   | 655.512   | AL137681  | 5157.372  | 5187.112  |
| BE905810  | 1222.614  | 1108.724  | NM_003965 | 1545.812  | 1687.499  | AK025694  | 65090.551 | 64123.16  |
| NM_014780 | 1820.642  | 1836.52   | NM_004584 | 5701.586  | 5395.308  | NM_002157 | 65559.602 | 68211.047 |
| NM_018116 | 990.251   | 974.783   | X15183    | 59906.902 | 52511.477 | NM_004095 | 17297.922 | 20805.715 |
| NM_014730 | 4765.244  | 3979.531  | AK023618  | 10800.295 | 11469.194 | NM_014365 | 2167.984  | 2491.193  |
| NM_014167 | 2500.415  | 1908.123  | AF212842  | 2169.467  | 5518.505  | NM_005147 | 17499.947 | 15932.772 |
| NM_016063 | 3861.172  | 4287.166  | NM_018404 | 2163.55   | 2050.097  | NM_014665 | 13668.981 | 13382.876 |
| U82987    | 4022.395  | 3264.697  | M27544    | 24782.621 | 26620.361 | NM_005588 | 940.864   | 1539.47   |
| NM_005732 | 2602.055  | 2024.526  | NM_002258 | 881.62    | 867.567   | BC030636  | 3474.494  | 3453.685  |
| NM_014890 | 1816.641  | 1653.858  | NM_001118 | 8237.094  | 8966.631  | NM_000476 | 1162.841  | 809.635   |
| AK056481  | 4112.137  | 6656.473  | AL133097  | 12498.267 | 13882.011 | AF132733  | 2104.087  | 1807.995  |
| NM_005433 | 920.767   | 1320.273  | NM_001165 | 25530.676 | 27421.32  | NM_001071 | 7447.083  | 7943.39   |
| AF232000  | 42269.992 | 51307.617 | NM_001381 | 64392.23  | 60052.695 | NM_006187 | 3598.961  | 4194.113  |
| NM_005758 | 6852.014  | 6951.061  | NM_006458 | 9228.282  | 8071.55   | NM_020354 | 5795.302  | 5168.351  |
| AF044774  | 3242.901  | 3515.26   | NM_014459 | 1820.665  | 1760.925  | AF202637  | 9300.351  | 6862.403  |
| NM_004430 | 455.421   | 459.077   | NM_001492 | 1643.162  | 1675.681  | NM_000026 | 62551.742 | 62033.09  |
| NM_002955 | 1302.091  | 1176.558  | AB012643  | 29164.859 | 33248.996 | AB033016  | 22569.889 | 34292.762 |
| NM_001938 | 6858.507  | 6392.247  | AB023170  | 4137.112  | 4171.447  | D87452    | 8731.549  | 9817.969  |
| AF230808  | 2825.648  | 2507.387  | NM_014153 | 23589.703 | 25804.322 | AB037864  | 4155.688  | 5697.784  |
| U18910    | 2880.282  | 2541.781  | NM_002296 | 28690.086 | 24739.479 | L26494    | 8529.226  | 9019.046  |
| NM_005238 | 10220.758 | 10561.481 | NM_000414 | 13916.945 | 12144.668 | NM_000346 | 2548.918  | 2351.39   |
| S83390    | 1474.329  | 965.047   | AL133033  | 789.345   | 880.821   | AK024322  | 1114.177  | 1010.85   |
| AK075306  | 12349.029 | 12555.054 | NM_018845 | 11350.572 | 9578.48   | BF382513  | 23890.984 | 24033.027 |
| AB037820  | 2299.459  | 2238.517  | AY008372  | 1146.99   | 858.521   | AB020713  | 29501.152 | 31973.771 |

|           |           |           |           |           |           |           |           |           |
|-----------|-----------|-----------|-----------|-----------|-----------|-----------|-----------|-----------|
| U37689    | 848.837   | 458.28    | NM_005505 | 6813.605  | 7138.758  | AK025426  | 4636.398  | 3964.116  |
| BC008865  | 1072.815  | 729.239   | AK026964  | 1690.285  | 1423.681  | NM_016558 | 16989.164 | 23788.643 |
| NM_002948 | 57006.207 | 54620.355 | NM_000079 | 6959.802  | 7079.065  | NM_007148 | 14006.839 | 14698.455 |
| AF113008  | 6491.571  | 5825.397  | AL110245  | 9796.676  | 10751.862 | AL133112  | 2152.798  | 2139.787  |
| NM_020217 | 10323.507 | 11528.409 | NM_016208 | 22727.662 | 27299.387 | NM_002198 | 12834.522 | 15441.007 |
| NM_018138 | 51446.152 | 55416.738 | NM_001638 | 832.803   | 747.805   | BC005219  | 8163.332  | 9689.117  |
| AF205435  | 41748.258 | 43331.02  | NM_005638 | 10821.852 | 11010.69  | NM_004268 | 2451.693  | 2398.677  |
| L05093    | 53787.996 | 56596.777 | NM_007238 | 28012.51  | 25944.928 | NM_000950 | 65573.234 | 59852.801 |
| NM_006928 | 4824.735  | 5104.07   | NM_007269 | 6287.399  | 6116.747  | NM_005138 | 2796.13   | 2070.556  |
| AF119889  | 9608.749  | 12510.216 | AK026014  | 6049.436  | 6480.301  | NM_001278 | 67105.844 | 69185.406 |
| J03866    | 17459.199 | 15143.959 | NM_014848 | 5336.566  | 5635.896  | NM_000322 | 47473.996 | 56049.137 |
| AK022836  | 12934.817 | 11994.275 | NM_004298 | 5167.619  | 4953.303  | L10139    | 5238.982  | 4995.441  |
| NM_012348 | 13754.448 | 10982.288 | NM_001232 | 993.465   | 1155.045  | NM_000038 | 56871.516 | 59469.188 |
| NM_000397 | 4636.644  | 3803.833  | AF007190  | 903.971   | 839.575   | NM_020470 | 16705.076 | 14469.406 |
| NM_012140 | 455.314   | 492.79    | X74609    | 52085.742 | 46215.539 | NM_006574 | 1391.295  | 1294.4    |
| NM_002048 | 58123.473 | 54196.32  | AB002316  | 2484.228  | 2601.41   | AA478950  | 4495.086  | 3238.253  |
| AL157461  | 3067.756  | 2600.84   | NM_018990 | 9022.823  | 9209.314  | BF942101  | 15693.446 | 17223.371 |
| BF217340  | 1216.361  | 1349.912  | NM_013368 | 1977.519  | 1755.007  | BI825012  | 61365.852 | 61671.941 |
| NM_003078 | 2771.168  | 2848.304  | NM_000947 | 3770.938  | 3298.395  | M21574    | 4070.741  | 7229.649  |
| AL137703  | 1011.886  | 1174.706  | AL096750  | 61648.234 | 52387.188 | BM051302  | 2621.669  | 3090.822  |
| AJ242730  | 422.314   | 788.045   | NM_016061 | 9674.562  | 8289.898  | BE314182  | 31474.287 | 32397.34  |
| NM_001808 | 7947.897  | 8392.882  | NM_016062 | 29105.158 | 28756.002 | AI808029  | 2350.182  | 2557.343  |
| NM_018258 | 797.701   | 715.81    | NM_004158 | 4845.44   | 5092.113  | AI971217  | 1024.661  | 949.655   |
| AL117477  | 9888.37   | 9309.613  | AK024740  | 5546.343  | 5272.163  | X03225    | 8183.786  | 9681.217  |
| NM_012107 | 7920.916  | 8661.523  | AF078164  | 10805.307 | 10753.461 | AK097395  | 44390.984 | 45545.422 |
| AB037760  | 2975.112  | 3422.658  | NM_019049 | 3363.063  | 3375.367  | M12783    | 7330.53   | 7643.319  |
| NM_015680 | 6238.67   | 5394.388  | NM_005447 | 746.062   | 685.41    | AK091535  | 2517.717  | 2273.48   |
| M22637    | 7181.686  | 10705.839 | NM_012418 | 934.945   | 684.407   | AF085357  | 11313.345 | 10806.03  |
| AB037770  | 1125.364  | 1182.088  | AF130101  | 1421.949  | 1183.837  | AK092768  | 1203.018  | 1639.651  |
| NM_018118 | 1248.957  | 1429.383  | NM_004658 | 5178.829  | 5293.343  | NM_003841 | 50368.664 | 36485.879 |
| L35035    | 9952.047  | 10812.407 | AF071569  | 8926.626  | 7136.006  | AF296673  | 8314.374  | 7383.045  |
| NM_007152 | 2617.469  | 3487.346  | NM_002269 | 5990.728  | 6542.818  | NM_004078 | 27486.268 | 22255.494 |
| NM_018298 | 1359.881  | 1666.452  | J04948    | 3070.771  | 3612.157  | NM_000388 | 3556.234  | 3629.511  |
| AF073931  | 533.632   | 450.239   | NM_018048 | 1327.116  | 1071.787  | NM_004638 | 1921.226  | 2127.177  |
| NM_018047 | 1684.502  | 1669.688  | AK022564  | 55913.684 | 44838.719 | X01394    | 64499.324 | 62461.867 |
| NM_005022 | 1589.984  | 1333.252  | NM_005022 | 2633.713  | 2866.934  | NM_000041 | 64618.168 | 60662.063 |
| NM_001288 | 1201.478  | 1167.265  | NM_001288 | 1567.262  | 1805.62   | NM_002984 | 9241.284  | 9419.102  |
| NM_003564 | 3826.877  | 4250.925  | NM_003564 | 10763.892 | 11132.653 | AB037752  | 21446.701 | 18966.482 |
| AK023414  | 790.018   | 1000.625  | AK023414  | 940.314   | 868.475   | AF317425  | 3979.521  | 4052.268  |
| AF317516  | 13605.176 | 13391.361 | AF317516  | 13431.745 | 11650.278 | NM_018002 | 5253.381  | 8049.021  |
| NM_002581 | 1239.28   | 1178.358  | NM_002581 | 5236.785  | 4406.434  | AK024821  | 8623.996  | 10014.704 |
| AI417964  | 493.683   | 288.591   | AI417964  | 8478.425  | 8535.805  | AB002340  | 14276.566 | 21896.055 |
| J03571    | 12156.3   | 12984.519 | J03571    | 43704.57  | 49514.313 | NM_000224 | 15331.102 | 19523.572 |
| X56134    | 2124.619  | 2257.986  | T57791    | 752.747   | 921.894   | NM_014328 | 7149.468  | 8458.707  |
| NM_001458 | 2470.789  | 2535.256  | T64134    | 692.839   | 566.219   | NM_006414 | 12819.057 | 13802.249 |
| H44784    | 1432.491  | 1371.405  | X56134    | 5576.581  | 4811.87   | NM_014322 | 26932.168 | 27704.074 |
| AI421041  | 52816.117 | 52607.441 | NM_001458 | 2681.92   | 2495.071  | NM_004122 | 9723.647  | 10438.944 |
| BI759091  | 3476.048  | 4352.526  | H44784    | 1787.2    | 1123.888  | NM_002928 | 40583.43  | 43177.129 |
| BG685843  | 24636.984 | 27365.463 | AI421041  | 50114.344 | 53937.328 | NM_000160 | 4510.816  | 4841.067  |
| BI490011  | 1547.467  | 1682.32   | BI759091  | 5122.799  | 5832.141  | NM_003301 | 980.869   | 607.493   |
| AF035771  | 746.316   | 824.557   | BG685843  | 26672.926 | 27579.482 | NM_000958 | 3139.752  | 2487.22   |
| N20475    | 11434.214 | 15497.321 | BI490011  | 6093.188  | 5499.951  | U27768    | 3679.846  | 3264.735  |
| BI199286  | 5154.632  | 7955.938  | AF035771  | 1423.852  | 1027.338  | U66582    | 12591.978 | 9531.874  |

|           |           |           |           |           |           |           |           |           |
|-----------|-----------|-----------|-----------|-----------|-----------|-----------|-----------|-----------|
| AA026626  | 1790.121  | 1825.981  | N20475    | 12520.918 | 14335.013 | NM_018475 | 14895.367 | 12780.087 |
| H61726    | 2240.495  | 2064.271  | BI199286  | 4389.155  | 5164.166  | NM_014362 | 1906.393  | 1466.523  |
| M15465    | 5911.841  | 9044.268  | AA026626  | 4259.695  | 4249.303  | NM_018308 | 4676.484  | 4217.976  |
| NM_007181 | 18207.322 | 16735.768 | H61726    | 1969.947  | 1671.887  | NM_001832 | 58387.305 | 66156.711 |
| AB007857  | 1315.052  | 1811.027  | NM_016436 | 909.037   | 608.924   | NM_017774 | 37530.992 | 41687.727 |
| NM_001778 | 50029.402 | 48050.914 | NM_001778 | 47536.887 | 52112.828 | AB037716  | 3590.433  | 3322.284  |
| NM_004997 | 8174.549  | 6837.685  | NM_004997 | 40051.227 | 46127.957 | NM_016297 | 4367.011  | 4222.257  |
| NM_005923 | 7888.327  | 6534.142  | NM_005923 | 11195.958 | 10510.052 | NM_001752 | 6035.686  | 6883.128  |
| NM_003465 | 2221.069  | 2243.093  | NM_003465 | 4829.604  | 4551.214  | BC003406  | 1284.34   | 1585.03   |
| AF289028  | 2587.403  | 2970.258  | AF289028  | 3124.456  | 3148.069  | AL137672  | 1990.926  | 2301.201  |
| NM_005127 | 20110.266 | 21490.424 | NM_005127 | 25598.104 | 26337.309 | NM_002241 | 988.279   | 954.191   |
| NM_005567 | 3884.237  | 4001.17   | NM_005567 | 28785.734 | 31358.588 | NM_012281 | 14138.578 | 13190.366 |
| NM_005216 | 15217.646 | 16113.617 | NM_005216 | 11949.615 | 10352.211 | NM_005505 | 2536.686  | 2361.945  |
| NM_006626 | 1125.274  | 913.256   | NM_006626 | 810.118   | 930.111   | AF091034  | 5961.021  | 6071.069  |
| NM_003965 | 815.12    | 1085.702  | NM_003965 | 1198.564  | 1181.247  | NM_005301 | 61289.063 | 58085.641 |
| NM_004584 | 2529      | 2898.737  | NM_004584 | 5205.908  | 4184.564  | NM_004167 | 760.755   | 654.6     |
| X15183    | 55285.918 | 56320.359 | X15183    | 58223.848 | 54842.078 | NM_016653 | 4522.049  | 5231.365  |
| AK023618  | 8017.319  | 8503.359  | AK023618  | 9565.618  | 8899.548  | AB035124  | 10424.651 | 8142.526  |
| AF212842  | 1106.74   | 4405.238  | AF212842  | 2417.564  | 5620.167  | AF060170  | 1822.806  | 1922.162  |
| NM_018404 | 906.198   | 851.901   | NM_018404 | 2341.4    | 2388.083  | NM_016602 | 1134.668  | 1222.237  |
| M27544    | 1285.248  | 1356.827  | M27544    | 23667.973 | 24055.338 | NM_004405 | 9610.589  | 9190.797  |
| NM_002258 | 774.826   | 1165.75   | NM_002258 | 1085.123  | 872.023   | AK023397  | 2039.54   | 1918.343  |
| NM_001118 | 990.055   | 1538.595  | NM_001118 | 7850.208  | 8379.87   | NM_001725 | 5013.836  | 3800.666  |
| AL133097  | 5808.916  | 6678.599  | AL133097  | 13019.675 | 14059.524 | NM_015957 | 771.291   | 350.191   |
| NM_001165 | 18835.689 | 22935.18  | NM_001165 | 28169.807 | 32139.867 | NM_000262 | 6376.66   | 4871.674  |
| NM_001381 | 56949.512 | 57765.191 | NM_001381 | 62104.34  | 60142.078 | NM_017831 | 1873.126  | 1460.196  |
| NM_006458 | 4764.056  | 6124.873  | NM_006458 | 9961.107  | 9463.707  | AK022537  | 7623.442  | 6850.771  |
| NM_014459 | 847.199   | 1226.087  | NM_014459 | 884.541   | 993.932   | AF116632  | 760.147   | 1236.197  |
| NM_001492 | 891.932   | 1211.869  | NM_018047 | 6253.623  | 7707.579  | AF064597  | 2070.497  | 2326.207  |
| AB012643  | 2813.384  | 2598.183  | AB023170  | 4007.593  | 3608.884  | NM_006345 | 5220.732  | 5813.608  |
| AB023170  | 1158.584  | 1200.481  | NM_014153 | 25220.654 | 29864.748 | NM_006875 | 23607.18  | 23499.516 |
| NM_014153 | 9403.923  | 10314.097 | NM_002296 | 29773.771 | 29776.555 | D87119    | 22695.76  | 23194.607 |
| NM_002296 | 22690.188 | 18259.857 | NM_000414 | 13552.89  | 11008.261 | AB037769  | 916.131   | 828.509   |
| NM_000414 | 3409.769  | 2646.742  | AL133033  | 960.235   | 528.662   | AL050040  | 1328.427  | 1738.957  |
| AL133033  | 435.896   | 326.855   | NM_018845 | 11393.137 | 10196.622 | NM_006556 | 23581.969 | 23284.063 |
| NM_018845 | 11917.099 | 11348.564 | AY008372  | 1051.659  | 857.645   | AL133066  | 2292.494  | 3464.511  |
| AY008372  | 1311.134  | 1240.766  | NM_005505 | 8854.771  | 6902.942  | AF264717  | 3720.154  | 3964.422  |
| NM_005505 | 7584.887  | 7475.958  | AK026964  | 1545.362  | 1569.349  | NM_012260 | 14506.553 | 15818.122 |
| AK026964  | 1118.663  | 1181.725  | NM_000079 | 6379.465  | 6038.112  | NM_001141 | 810.61    | 963.995   |
| NM_000079 | 6402.668  | 5930.854  | AL110245  | 8781.142  | 9173.008  | NM_000018 | 5333.631  | 7569.296  |
| AL110245  | 1226.77   | 1378.538  | NM_016208 | 22029.684 | 24856.879 | NM_001275 | 67704.531 | 65183.73  |
| NM_016208 | 8157.855  | 8268.658  | NM_001635 | 953.207   | 395.732   | NM_000322 | 44752.742 | 37944.934 |
| NM_001635 | 765.393   | 729.774   | NM_005638 | 10382.757 | 10494.946 | L10139    | 5013.193  | 4222.314  |
| NM_005638 | 8706.567  | 11685.795 | NM_007235 | 27396.219 | 27219.279 | NM_000035 | 67116.07  | 66564.641 |
| NM_007235 | 24711.559 | 27982.84  | NM_007269 | 6002.881  | 5998.408  | NM_020470 | 15888.693 | 14822.876 |
| NM_007269 | 4297.201  | 5302.419  | AK026014  | 5849.688  | 6632.585  | NM_006574 | 1559.823  | 1121.446  |
| AK026014  | 4007.692  | 4738.189  | NM_014845 | 5462.516  | 5417.157  | AA478950  | 5908.426  | 5094.056  |
| NM_014845 | 4220.639  | 5778.278  | NM_004298 | 5245.842  | 5638.967  | BF942101  | 10354.483 | 6098.258  |
| NM_004298 | 4229.239  | 6175.469  | NM_001232 | 1113.357  | 1264.466  | BI825012  | 60959.617 | 57570.98  |
| NM_001232 | 584.851   | 820.625   | NM_007181 | 16095.868 | 17098.266 | M21574    | 1965.016  | 1752.853  |
| AF007190  | 831.277   | 839.53    | AB007857  | 2370.922  | 2631.134  | BM051302  | 2832.15   | 2741.989  |
| X74609    | 18234.068 | 18918.332 | AB002316  | 2254.541  | 1959.812  | BE314182  | 30173.516 | 30620.02  |
| AB002316  | 1200.118  | 1177.176  | NM_018990 | 8976.594  | 8712.298  | AI808029  | 2505.854  | 2922.6    |

|           |           |           |           |           |           |           |           |           |
|-----------|-----------|-----------|-----------|-----------|-----------|-----------|-----------|-----------|
| NM_01899C | 7583.471  | 7282.663  | NM_013363 | 2063.738  | 1628.517  | AI971217  | 1093.912  | 1258.56   |
| NM_013363 | 1535.803  | 1205.866  | NM_000947 | 3458.675  | 2725.16   | X03225    | 8242.463  | 9241.752  |
| NM_000947 | 3549.546  | 3172.95   | AL096750  | 58888.863 | 49041.41  | AK097395  | 44584.816 | 44811.684 |
| AL096750  | 7091.575  | 7080.684  | NM_016061 | 9150.283  | 7203.46   | M12783    | 6222.74   | 8355.976  |
| NM_016061 | 7767.349  | 6569.936  | NM_016062 | 28924.066 | 26641.979 | AK091535  | 3484.169  | 3316.812  |
| NM_016062 | 22554.555 | 19323.217 | NM_004153 | 4420.586  | 4812.428  | AF085357  | 13439.879 | 12760.312 |
| NM_004153 | 5154.883  | 5735.966  | AK024740  | 5531.97   | 5617.65   | AK092768  | 649.919   | 949.49    |
| AK024740  | 5410.31   | 5293.611  | AF078164  | 9847.726  | 8789.861  | NM_003841 | 48474.324 | 40574.379 |
| AF078164  | 9195.437  | 8593.949  | NM_019049 | 2886.57   | 2209.458  | AF296673  | 5853.198  | 4878.073  |
| NM_019049 | 3294.218  | 3058.263  | NM_005447 | 603.774   | 427.854   | NM_000383 | 3078.875  | 1488.675  |
| NM_005447 | 627.66    | 501.771   | NM_012413 | 872.431   | 661.735   | NM_004633 | 3045.741  | 2019.909  |
| NM_012413 | 899.997   | 488.528   | AF130101  | 1205.824  | 939.541   | X01394    | 63765.145 | 65399.949 |
| AF130101  | 1679.657  | 1659.509  | NM_004656 | 4849.6    | 3832.6    | NM_002984 | 10861.043 | 12369.199 |
| NM_004656 | 4744.538  | 4953.26   | AF071569  | 8455.252  | 6951.229  | AB037752  | 23133.195 | 22045.02  |
| NM_005576 | 300.865   | 508.148   | NM_002269 | 5757.752  | 6408.867  | AF317425  | 5101.495  | 4194.551  |
| AF071569  | 7710.482  | 7504.233  | J04948    | 3101.846  | 3585.113  | NM_018002 | 5804.273  | 5623.704  |
| NM_002269 | 3456.928  | 4134.589  | NM_018043 | 865.791   | 1093.872  | AK024821  | 7728.36   | 5946.519  |
| J04948    | 3163.351  | 3442.744  | AK022564  | 63653.195 | 55923.648 | AB002340  | 13830.575 | 13605.116 |
| NM_018043 | 1459.011  | 2053.133  | NM_001492 | 1818.378  | 1912.137  | NM_000224 | 13427.108 | 14735.472 |
| AK022564  | 46450.262 | 48213.824 | AB012643  | 31652.316 | 35721.191 | NM_014322 | 26652.227 | 31046.518 |
| NM_005022 | 1552.643  | 1607.945  | NM_003564 | 10072.75  | 10001.521 | NM_004122 | 9288.384  | 10675.559 |
| NM_001288 | 1231.761  | 1202.482  | AK023414  | 874.867   | 875.237   | NM_002928 | 39518.441 | 45828.371 |
| NM_003564 | 4333.049  | 4692.744  | AF317516  | 15098.264 | 14008.003 | NM_000160 | 5660.566  | 6587.645  |
| AK023414  | 1022.849  | 1030.753  | NM_002581 | 4851.569  | 4170.989  | NM_003301 | 2446.992  | 1900.381  |
| AF317516  | 14550.378 | 14675.898 | AI417964  | 7549.895  | 6531.664  | NM_000955 | 5744.076  | 5619.373  |
| NM_002581 | 1183.454  | 1113.984  | J03571    | 44030.805 | 43352.059 | U27768    | 7680.295  | 6433.167  |
| AI417964  | 461.655   | 272.933   | T57791    | 1153.257  | 832.865   | U66582    | 14906.037 | 14290.721 |
| J03571    | 12334.521 | 10871.912 | T64134    | 788.024   | 586.079   | NM_000950 | 62182.824 | 59146.254 |
| T57791    | 516.574   | 449.541   | X56134    | 7108.859  | 8459.234  | NM_005139 | 6399.194  | 5928.519  |
| X56134    | 1693.206  | 1785.792  | NM_001456 | 2580.108  | 2365.251  | NM_018308 | 4891.909  | 3181.117  |
| NM_001456 | 1901.578  | 2282.606  | H44784    | 1678.966  | 823.304   | NM_001832 | 53189.195 | 47313.016 |
| H44784    | 1020.663  | 933.206   | AI421041  | 45680.973 | 48047.832 | NM_017774 | 34562.586 | 38997.363 |
| AI421041  | 53236.605 | 53297.195 | BI759091  | 3979.355  | 4650.124  | NM_016297 | 3946.781  | 2586.924  |
| BI759091  | 2996.247  | 4027.149  | BG685843  | 25175.133 | 23179.207 | NM_001752 | 8213.743  | 7317.92   |
| BG685843  | 21657.197 | 19593.982 | BI490011  | 5757.694  | 5257.725  | BC003406  | 1520.266  | 1246.748  |
| BI490011  | 1749.897  | 1400.623  | AF035771  | 1273.166  | 1061.397  | AL137672  | 2247.162  | 2100.761  |
| AF035771  | 675.421   | 700.297   | N20475    | 10750.036 | 11310.94  | NM_002241 | 1529.089  | 2032.246  |
| N20475    | 8983.59   | 10792.357 | BI199286  | 5457.659  | 6419.804  | NM_012281 | 13829.581 | 14760.448 |
| BI199286  | 5644.132  | 7643.651  | AA026626  | 3669.785  | 3976.015  | NM_005509 | 2291.825  | 2221.617  |
| AA026626  | 1760.828  | 2482.181  | H61726    | 2016.01   | 1901.953  | AF091034  | 6459.712  | 7130.475  |
| H61726    | 2137.397  | 3585.464  | AF007190  | 829.604   | 1422.139  | NM_005301 | 59068.844 | 57714.66  |
| NM_016436 | 587.463   | 661.88    | X74609    | 63057.496 | 51919.133 | NM_004167 | 1086.713  | 1210.925  |
| AL050355  | 691.279   | 730.399   | NM_006626 | 1208.083  | 997.482   | NM_016653 | 3706.703  | 3641.641  |
| NM_001778 | 51188.336 | 46308.781 | NM_003965 | 1440.982  | 1366.021  | AB035124  | 18150.219 | 14776.016 |
| NM_004997 | 9807.39   | 8605.113  | NM_004584 | 6520.555  | 5756.394  | AF060170  | 3409.992  | 3147.024  |
| NM_005923 | 8250.902  | 7242.389  | X15183    | 59662.656 | 53810.914 | NM_016602 | 2222.504  | 2533.283  |
| NM_003465 | 2447.929  | 2190.43   | AK023618  | 10815.382 | 8731.65   | NM_004409 | 11712.449 | 9107.853  |
| AF289028  | 2676.898  | 2978.844  | AF212842  | 2530.406  | 5840.522  | AK023397  | 3378.979  | 3013.326  |
| NM_005127 | 20376.631 | 20266.746 | NM_018404 | 2321.502  | 2349.328  | NM_001725 | 5577.599  | 4337.339  |
| NM_005567 | 3530.145  | 3297.929  | M27544    | 22327.674 | 19765.42  | NM_004079 | 27369.631 | 23528.414 |
| NM_005216 | 15808.745 | 14090.204 | NM_002258 | 713.599   | 654.393   | NM_002996 | 911.678   | 791.2     |
| NM_006626 | 1136.135  | 879.147   | NM_001118 | 7820.51   | 6988.526  | NM_000262 | 5323.457  | 3471.905  |
| NM_003965 | 926.303   | 962.649   | AL133097  | 12145.842 | 9080.479  | NM_017831 | 2205.235  | 2574.282  |

|           |           |           |           |           |           |           |           |           |
|-----------|-----------|-----------|-----------|-----------|-----------|-----------|-----------|-----------|
| NM_004584 | 3529.814  | 3888.784  | NM_001165 | 26895.289 | 23045.688 | AK024393  | 1065.604  | 959.299   |
| X15183    | 54952.109 | 55840.082 | NM_001381 | 59328.336 | 65018.461 | AK022537  | 11873.57  | 9184.393  |
| AK023618  | 6781.468  | 7079.76   | U90908    | 1134.02   | 1008.854  | AF116632  | 3210.564  | 3031.251  |
| AF212842  | 1090.651  | 3070.867  | NM_006458 | 8435.49   | 7552.532  | AF064597  | 2000.701  | 2235.103  |
| NM_018404 | 937.611   | 705.472   | NM_014459 | 906.199   | 787.526   | AF198444  | 632.116   | 221.57    |
| M27544    | 1054.941  | 998.19    | NM_004093 | 3242.06   | 2907.083  | D87119    | 21894.277 | 22568.732 |
| NM_002258 | 786.272   | 632.893   | NM_001449 | 19508.561 | 19589.111 | AB037769  | 1152.943  | 1405.11   |
| NM_001118 | 1015.275  | 1124.757  | NM_001387 | 1473.772  | 1389.603  | AL050040  | 1384.404  | 1614.811  |
| AL133097  | 5428.091  | 6610.564  | AF086122  | 1844.224  | 1624.88   | NM_006558 | 22651.418 | 25239.805 |
| NM_001165 | 19574.459 | 23054.639 | AK024397  | 31286.902 | 33169.699 | AL133066  | 1640.803  | 1861.107  |
| NM_001381 | 53783.645 | 54683.227 | NM_018047 | 4469.736  | 3840.144  | AF264717  | 3640.177  | 2684.02   |
| NM_006458 | 3840.979  | 4571.165  | NM_005022 | 3630.258  | 3872.786  | NM_012260 | 17134.857 | 15271.385 |
| NM_014459 | 850.743   | 1075.08   | NM_001288 | 1575.578  | 1592.783  | NM_001141 | 1558.747  | 1373.944  |
| AF073931  | 359.586   | 552.005   | NM_005628 | 28115.584 | 27231.703 | NM_000018 | 8556.352  | 8972.327  |
| NM_018047 | 2038.37   | 3191.209  | NM_003951 | 790.751   | 622.066   | AB028992  | 661.741   | 723.557   |
| AB023170  | 1526.507  | 1111.056  | NM_016605 | 61030.211 | 60209.422 | NM_018479 | 15154.651 | 13724.84  |
| NM_014153 | 14641.205 | 14677.856 | S78203    | 3718.364  | 3317.607  | NM_014362 | 1790.715  | 1648.786  |
| NM_002298 | 21046.955 | 17250.959 | NM_016208 | 24985.061 | 27793.701 | L10139    | 7171.416  | 5743.057  |
| NM_000414 | 4007.501  | 3353.904  | NM_005638 | 10288.265 | 9339.185  | NM_000038 | 65345.969 | 55332.301 |
| NM_018845 | 12242.616 | 11107.073 | NM_007235 | 29549.641 | 23885.666 | NM_020470 | 20073.328 | 19010.668 |
| AY008372  | 1135.959  | 1165.648  | NM_007269 | 6040.76   | 4156.681  | NM_006574 | 1109.281  | 1296.715  |
| NM_005505 | 6283.78   | 5747.127  | AK026014  | 5779.135  | 5349.572  | AA478950  | 8409.807  | 8527.696  |
| AK026964  | 1363.106  | 1607.936  | NM_014845 | 5193.22   | 3962.612  | BF942101  | 16041.468 | 14927.045 |
| NM_000079 | 6806.058  | 6846.241  | NM_004298 | 5432.553  | 4437.625  | BI825012  | 61241.516 | 60517.969 |
| AL110245  | 1282.404  | 1524.262  | NM_001232 | 1078.067  | 738.034   | M21574    | 2652.793  | 2573.201  |
| NM_016208 | 7290.706  | 6958.216  | NM_007181 | 16969.916 | 13861.788 | BM051302  | 2586.595  | 2428.379  |
| NM_001635 | 684.855   | 355.204   | AB007857  | 2740.272  | 1866.907  | BE314182  | 31696.188 | 27393.592 |
| NM_005638 | 7405.19   | 9276.326  | NM_001778 | 51754.27  | 49889.848 | AI808029  | 4310.153  | 5429.254  |
| NM_007235 | 22869.998 | 23200.252 | NM_004997 | 53788.281 | 52710.566 | X03225    | 8778.235  | 10995.558 |
| NM_007269 | 4616.928  | 5074.2    | NM_005923 | 11572.614 | 9241.473  | AK097395  | 45119.043 | 45678.289 |
| AK026014  | 3960.483  | 3880.046  | NM_003465 | 5127.41   | 4855.69   | M12783    | 7730.362  | 9394.881  |
| NM_014845 | 3612.386  | 3904.729  | AF289028  | 3164.206  | 3456.066  | AK091535  | 4944.785  | 5824.026  |
| NM_004298 | 3793.955  | 3984.528  | NM_005127 | 24890.037 | 24067.186 | AF085357  | 12087.406 | 11353.939 |
| NM_001232 | 424.439   | 892.898   | NM_005567 | 31608.635 | 32726.398 | AK092768  | 749.793   | 683.134   |
| NM_007181 | 19194.691 | 25772.039 | NM_005216 | 12492.404 | 13262.701 | NM_003841 | 56373.684 | 46977.449 |
| AB007857  | 1749.095  | 3295.457  | J04948    | 3698.991  | 3331.354  | AF296673  | 10373.375 | 8267.672  |
| AB002316  | 1092.615  | 1189.865  | NM_018043 | 2795.619  | 2253.324  | AK024821  | 9099.327  | 6337.615  |
| NM_018990 | 7764.949  | 8087.866  | AK022564  | 59325.641 | 58235.465 | AB002340  | 13397.307 | 10268.264 |
| NM_013363 | 1508.216  | 1295.353  | NM_001492 | 1954.578  | 1899.015  | NM_000224 | 14779.642 | 12903.61  |
| NM_000947 | 3085.685  | 2793.06   | AB012643  | 23814.801 | 18964.891 | NM_014328 | 6439.926  | 6973.651  |
| AL096750  | 7948.458  | 8621.836  | AB023170  | 4578.294  | 3937.758  | NM_006414 | 11646.466 | 11331.965 |
| NM_016061 | 7414.59   | 6787.506  | NM_014153 | 26241.275 | 28034.795 | NM_014322 | 26418.818 | 24286.746 |
| NM_016062 | 23633.045 | 19439.051 | NM_002296 | 29050.068 | 24768.92  | NM_004122 | 8555.476  | 8421.04   |
| NM_004153 | 5412.011  | 4853.094  | NM_000414 | 14755.355 | 11948.492 | NM_002928 | 40094.316 | 39697.84  |
| AK024740  | 4718.531  | 4727.14   | AL133033  | 1021.896  | 708.002   | NM_000160 | 5811.317  | 4444.208  |
| AF078164  | 10358.878 | 9053.045  | NM_018845 | 11583.19  | 8460.378  | NM_003301 | 2814.259  | 2377.614  |
| NM_019049 | 3785.55   | 3517.419  | AY008372  | 1044.545  | 703.2     | NM_000955 | 6301.109  | 5339.647  |
| NM_005447 | 755.526   | 759.972   | NM_005505 | 6651.328  | 6330.524  | U27768    | 8211.234  | 7541.875  |
| NM_012413 | 1074.899  | 919.018   | AK026964  | 1739.517  | 1521.013  | AF305550  | 8565.935  | 8637.117  |
| AF130101  | 1421.536  | 1617.221  | NM_001134 | 10687.802 | 8355.196  | U66582    | 32101.219 | 46107.355 |
| NM_004658 | 3852.187  | 2566.611  | NM_016016 | 19047.055 | 17772.891 | S73288    | 1866.781  | 2228.069  |
| AF247820  | 372.297   | 340.262   | NM_020407 | 3772.789  | 2920.486  | NM_006198 | 4799.507  | 3851.742  |
| AF071569  | 6787.429  | 6364.935  | AF118274  | 28072.385 | 25001.861 | NM_003812 | 3194.748  | 2631.694  |

|           |           |           |           |           |           |           |           |           |
|-----------|-----------|-----------|-----------|-----------|-----------|-----------|-----------|-----------|
| NM_002269 | 4350.783  | 4592.405  | NM_018344 | 2925.83   | 2249.879  | NM_000849 | 742.357   | 396.905   |
| J04948    | 2657.025  | 2659.587  | NM_000079 | 6495.955  | 5386.923  | NM_004678 | 2082.371  | 1708.999  |
| NM_018043 | 1125.511  | 1046.22   | NM_000083 | 2348.587  | 1914.582  | NM_000950 | 62932.418 | 61212.422 |
| AK022564  | 39401.266 | 43717.359 | AL110245  | 11969.79  | 12070.133 | NM_005139 | 3513.704  | 3129.21   |
| NM_001492 | 1050.406  | 1532.807  | AL050355  | 846.197   | 642.028   | NM_001275 | 67563.539 | 67625.477 |
| AB012643  | 3251.128  | 4145.434  | AF007190  | 656.084   | 654.228   | NM_000322 | 57488.23  | 53971.137 |
| NM_003564 | 4854.418  | 5109.815  | X74609    | 62640.926 | 53393.641 | NM_152747 | 2366.851  | 1895.672  |
| AK023414  | 918.785   | 1027.775  | AB002316  | 1958.176  | 1778.065  | NM_017415 | 1733.715  | 1158.371  |
| AF317516  | 13740.177 | 13963.615 | NM_018990 | 8934.731  | 8440.427  | NM_001667 | 66909.07  | 61687.977 |
| NM_002581 | 1266.386  | 1228.119  | NM_013363 | 2151.223  | 1830.001  | AB046834  | 1629.193  | 1268.471  |
| AI417964  | 400.637   | 573.144   | NM_000947 | 3421.024  | 3276.261  | AB029033  | 57725.359 | 53319.859 |
| J03571    | 14082.117 | 14244.82  | AL096750  | 62057.887 | 51472.305 | AF091034  | 6075.178  | 5719.49   |
| T57791    | 555.143   | 647.368   | NM_016061 | 8580.542  | 6831.446  | NM_005301 | 67583.336 | 70116.945 |
| X56134    | 1886.446  | 1686.683  | NM_016062 | 28336.643 | 23359.182 | NM_004167 | 808.707   | 541.897   |
| NM_001456 | 1956.998  | 2277.1    | NM_004153 | 4493.222  | 4255.801  | NM_016653 | 3921.042  | 3258.467  |
| H44784    | 1436.999  | 1033.043  | AK024740  | 5525.898  | 4778.455  | AB035124  | 19833.766 | 13180.858 |
| AI421041  | 54512.816 | 53857.504 | AF078164  | 10071.938 | 6664.134  | AF060170  | 3859.648  | 3919.912  |
| BI759091  | 3778.502  | 4265.056  | NM_019049 | 3083.087  | 2019.838  | NM_016602 | 2412.874  | 2229.253  |
| BG685843  | 20821.143 | 22933.768 | NM_012413 | 593.04    | 616.15    | NM_004409 | 16088.758 | 13887.124 |
| BI490011  | 1413.565  | 1426.348  | AF130101  | 1114.07   | 1022.472  | AK023397  | 4000.546  | 5002.391  |
| AF035771  | 561.152   | 347.957   | NM_004656 | 5822.729  | 4363.09   | NM_001725 | 9808.381  | 11088.304 |
| N20475    | 8134.06   | 10132.685 | NM_005576 | 685.704   | 632.844   | NM_004079 | 30612.654 | 29438.664 |
| BI199286  | 5013.329  | 7092.389  | AF247820  | 672.848   | 692.578   | NM_002996 | 1223.405  | 1411.736  |
| AA026626  | 1728.823  | 2246.006  | AF071569  | 7750.546  | 4317.126  | NM_000383 | 6134.016  | 5207.522  |
| H61726    | 2013.639  | 2394.414  | NM_002269 | 5578.026  | 5485.028  | NM_004633 | 4534.645  | 3782.209  |
| NM_016436 | 435.881   | 708.22    | CY3Cy5    | 2099.003  | 272.171   | X01394    | 61520.184 | 62589.523 |
| AL050355  | 843.362   | 752.266   | NM_080824 | 919.953   | 1245.112  | NM_000041 | 64891.699 | 62434.34  |
| AF007190  | 924.765   | 675.12    | AF086328  | 16223.851 | 14944.552 | NM_002984 | 5061.602  | 4337.96   |
| X74609    | 23603.18  | 26104.457 | AF086427  | 1020.784  | 1254.177  | AB037752  | 24732.385 | 22326.227 |
| NM_006626 | 811.439   | 725.171   | AK024196  | 2410.871  | 2327.092  | AF317425  | 2411.018  | 2332.945  |
| NM_003965 | 1222.444  | 1314.577  | AK023753  | 9962.065  | 8387.174  | NM_018002 | 5513.427  | 5118.815  |
| NM_004584 | 3801.72   | 3984.652  | AF086441  | 43316.773 | 42643.77  | NM_001141 | 1641.636  | 1190.082  |
| X15183    | 52096.527 | 50609.25  | AK027255  | 870.691   | 605.2     | NM_000018 | 7443.193  | 4089.509  |
| AK023618  | 6269.457  | 6234.525  | NM_014117 | 9991.814  | 8336.272  | AB028992  | 1161.951  | 711.908   |
| AF212842  | 1040.629  | 4595.562  | AK023609  | 3313.694  | 3758.287  | NM_018479 | 18116.369 | 13869.521 |
| NM_018404 | 801.104   | 707.018   | NM_018019 | 5284.872  | 5243.978  | NM_014362 | 2677.754  | 2417.486  |
| M27544    | 1288.349  | 1081.915  | AK027220  | 2228.87   | 2082.51   | NM_018308 | 5357.708  | 4576.937  |
| NM_002258 | 838.107   | 668.423   | NM_018011 | 11242.745 | 11104.782 | NM_001832 | 50393.195 | 57306.063 |
| NM_001118 | 987.383   | 977.234   | NM_080824 | 605.882   | 761.331   | NM_017774 | 40403.109 | 44482.996 |
| AL133097  | 5749.487  | 5457.184  | SR2       | 38008.32  | 49232.918 | AB037716  | 3737.138  | 3337.135  |
| NM_001165 | 16407.064 | 19334.336 | SR4       | 13883.298 | 17633.58  | NM_016297 | 5339.767  | 4367.455  |
| NM_001381 | 54650.52  | 53261.563 | SR6       | 1624.523  | 2437.389  | NM_001752 | 8466.918  | 7619.835  |
| U90908    | 1033.135  | 945.799   | SR8       | 6047.803  | 24186.512 | BC003406  | 1347.517  | 1274.327  |
| NM_006458 | 3802.15   | 3590.423  | CY3Cy5    | 1720.756  | 183.516   | AL137672  | 2316.674  | 2152.081  |
| NM_014459 | 890.839   | 1030.754  | AK024874  | 760.172   | 915.849   | X64177    | 1563.746  | 2217.597  |
| NM_004093 | 3720.523  | 4376.428  | AF086071  | 799.079   | 967.861   | NM_015994 | 8056.21   | 6822.894  |
| NM_001449 | 16277.973 | 20162.379 | AK002078  | 2966.762  | 2597.078  | NM_002235 | 1158.342  | 821.826   |
| NM_001387 | 912.905   | 1035.767  | AF085837  | 4978.627  | 4640.247  | NM_002241 | 970.824   | 821.839   |
| AF086122  | 1695.772  | 1900.258  | AK023165  | 2030.042  | 2089.561  | NM_014065 | 3298.359  | 2934.163  |
| AK024397  | 1444.242  | 1381.605  | NM_016115 | 3042.664  | 2470.977  | NM_001695 | 11721.604 | 9916.814  |
| AF073931  | 425.434   | 338.845   | NM_014950 | 4976.402  | 4593.52   | NM_002248 | 6583.923  | 4460.116  |
| NM_018047 | 2140.091  | 2111.852  | AL080180  | 1548.226  | 1804.729  | NM_012281 | 11903.558 | 10434.168 |
| NM_005022 | 1872.478  | 1893.928  | X89067    | 3247.267  | 3470.185  | AK025772  | 6298.513  | 6014.421  |



|           |           |           |           |           |           |           |           |           |
|-----------|-----------|-----------|-----------|-----------|-----------|-----------|-----------|-----------|
| NM_00128E | 1078.808  | 1161.299  | AF147376  | 4059.059  | 3902.54   | NM_00550E | 2005.462  | 1427.83   |
| NM_00562E | 28093.225 | 24175.4   | AK027190  | 5054.442  | 4794.987  | AL137698  | 781.625   | 479.908   |
| NM_003951 | 937.021   | 855.811   | AF086369  | 1044.151  | 1188.155  | NM_00026E | 7390.693  | 6822.764  |
| NM_01660E | 30366.551 | 33048.074 | NM_01828C | 3997.862  | 4289.074  | NM_017831 | 1896.137  | 1530.086  |
| NM_00417E | 659.39    | 639.335   | AK026503  | 2468.318  | 2217.751  | AK024393  | 1124.236  | 745.463   |
| S78203    | 2042.953  | 2346.532  | AF086087  | 15083.903 | 13660.695 | AK022537  | 13600.409 | 11089.565 |
| NM_01620E | 8112.047  | 8188.6    | AF075091  | 1893.189  | 1711.576  | AF064597  | 2114.088  | 1948.06   |
| NM_00163E | 694.088   | 619.706   | AK000671  | 71133.336 | 61979.434 | NM_00634E | 5992.269  | 5685.907  |
| NM_00563E | 9145.085  | 7613.395  | AK094020  | 859.653   | 812.893   | NM_00687E | 24641.061 | 20155.473 |
| NM_00723E | 23402.842 | 20015.346 | AL137425  | 2131.496  | 2255.614  | D87119    | 20322.457 | 18448.977 |
| NM_00726E | 4504.65   | 3632.378  | AL137637  | 968.507   | 954.36    | AB037769  | 1080.905  | 1089.678  |
| AK026014  | 4708.572  | 4624.575  | AL359584  | 1932.751  | 1580.824  | AL050040  | 1533.972  | 2340.566  |
| NM_01484E | 4539.685  | 3877.991  | AL137285  | 2695.318  | 2404.76   | NM_00655E | 23646.824 | 23061.43  |
| NM_00429E | 4121.332  | 4107.761  | AL137456  | 2570.945  | 2495.801  | AL133066  | 1491.229  | 1391.505  |
| NM_00123E | 755.4     | 958.807   | AL157489  | 1968.597  | 1992.466  | AF264717  | 4508.778  | 4650.4    |
| NM_007181 | 21804.84  | 20412.424 | AL390157  | 1488.947  | 1372.478  | NM_01226C | 18688.893 | 19624.6   |
| AB007857  | 1822.944  | 2263.772  | AK021649  | 765.376   | 676.367   | NM_01831E | 7866.217  | 7144.739  |
| NM_00177E | 55694.641 | 53339.223 | AL080151  | 2803.081  | 3084.711  | AL359559  | 1504.182  | 1477.83   |
| NM_004997 | 11890.737 | 11022.762 | AL050085  | 1842.191  | 1906.523  | AK024063  | 2565.971  | 2071.082  |
| NM_00592E | 9382.762  | 8397.23   | AK024127  | 2309.786  | 2658.727  | AK021714  | 3161.073  | 2805.72   |
| NM_00346E | 2884.379  | 2547.104  | AK024243  | 795.216   | 1102.399  | NM_020314 | 5987.797  | 7686.66   |
| AF289028  | 2118.463  | 2291.69   | AK021574  | 5015.11   | 5028.068  | AK022972  | 6904.04   | 6708.208  |
| NM_005127 | 21015.135 | 22426.953 | AK023574  | 1574.382  | 1243.036  | AK025996  | 5048.678  | 3829.133  |
| NM_005567 | 4281.844  | 3760.921  | AF083117  | 669.074   | 600.72    | NM_01759E | 491.502   | 750.014   |
| NM_00521E | 15847.11  | 17220.563 | AF131767  | 15082.649 | 14737.386 | NM_00571E | 12854.796 | 12150.856 |
| J04948    | 2684.189  | 2227.88   | AK021907  | 3349.435  | 3461.344  | AK026992  | 5917.075  | 4489.608  |
| NM_01804E | 2691.411  | 2354.825  | AK022029  | 5109.839  | 6432.797  | X81895    | 1597.899  | 2732.224  |
| AK022564  | 43295.094 | 45796.242 | AK022167  | 1024.148  | 810.923   | AL137343  | 1585.253  | 1882.253  |
| NM_00149E | 1889.845  | 2017.056  | AK022320  | 4247.889  | 4522.916  | NM_00506C | 3977.341  | 3151.684  |
| AB012643  | 4162.645  | 3649.862  | AK022058  | 5581.365  | 5551.166  | NM_005437 | 16714.023 | 18546.596 |
| AB023170  | 1893.015  | 1648.224  | AK022196  | 422.652   | 549.272   | SR9       | 21585.438 | 8386.687  |
| NM_01415E | 13434.723 | 13150.699 | AK024326  | 2783.677  | 3419.665  | CY3Cy5    | 14162.357 | 966.699   |
| NM_00229E | 20142.377 | 14502.853 | U61088    | 1091.657  | 1307.386  | M73048    | 2134.786  | 2606.247  |
| NM_000414 | 4145.504  | 3072.369  | AF086467  | 1513.178  | 1748.373  | D55639    | 4706.446  | 4490.67   |
| NM_01884E | 13885.904 | 11386.452 | AL137345  | 4438.337  | 4529.197  | D16477    | 3398.92   | 3303.254  |
| AY008372  | 1346.25   | 1058.832  | AL049281  | 2337.894  | 1823.01   | AK024759  | 1001.701  | 728.516   |
| NM_00550E | 8178.306  | 6648.068  | NM_00120E | 42263.457 | 43324.004 | AK023754  | 2266.028  | 1973.896  |
| AK026964  | 1220.601  | 962.833   | AL050061  | 9909.708  | 9498.491  | AK021689  | 1113.31   | 871.788   |
| NM_001134 | 1878.76   | 1577.812  | AL050206  | 807.862   | 1000.854  | AK024737  | 4699.584  | 4085.688  |
| AK023497  | 642.303   | 496.491   | AK025522  | 23351.24  | 21451.842 | AB007890  | 24714.619 | 20525.703 |
| NM_01601E | 26017.027 | 29936.906 | AK025464  | 74838.695 | 61541.691 | AF070591  | 2637.271  | 2879.465  |
| NM_020407 | 1259.202  | 1284.116  | AL049962  | 6500.189  | 6300.583  | AF286160  | 687.285   | 571.659   |
| AF118274  | 1233.851  | 1123.481  | BE746723  | 1143.014  | 1150.136  | NM_020411 | 1240.912  | 966.628   |
| NM_018344 | 1721.043  | 1241.742  | NM_02040E | 1361.77   | 2027.391  | AB020633  | 2783.531  | 3468.785  |
| NM_00007E | 3711.971  | 3115.983  | NM_00498E | 30649.904 | 34859.266 | AL357200  | 3944.328  | 4359.093  |
| NM_00008E | 1258.575  | 1297.692  | AF147362  | 1292.42   | 1436.241  | AK024527  | 1370.994  | 955.746   |
| AL110245  | 1176.765  | 1401.962  | AF147365  | 1382.972  | 1663.332  | AK025051  | 3171.319  | 2653.322  |
| NM_01643E | 658.642   | 242.649   | S72917    | 1329.092  | 1658.396  | AK024930  | 1301.246  | 1162.231  |
| AL050355  | 901.967   | 742.851   | AF076617  | 71107.898 | 62080.703 | AF086168  | 2102.762  | 2389.599  |
| AF007190  | 891.191   | 1182.502  | M91159    | 1081.83   | 1498.998  | AF007132  | 953.293   | 1176.878  |
| X74609    | 20037.688 | 20801.072 | AK025129  | 2009.754  | 2148.948  | AK026711  | 948.15    | 879.317   |
| AB002316  | 1137.834  | 1186.536  | NM_01439E | 30496.053 | 30418.207 | NM_017864 | 13708.694 | 12943.012 |
| NM_01899C | 7538.79   | 7974.743  | AK023291  | 12500.094 | 11656.892 | NM_00486E | 5923.303  | 5579.076  |

|           |           |           |           |           |           |           |           |           |
|-----------|-----------|-----------|-----------|-----------|-----------|-----------|-----------|-----------|
| NM_013363 | 1557.119  | 1127.467  | BF541820  | 1628.707  | 1921.98   | AF136408  | 1268.989  | 1331.443  |
| NM_000947 | 3040.048  | 2613.737  | AF119911  | 14261.252 | 14814.014 | AL110203  | 1388.117  | 1776.55   |
| AL096750  | 10121.834 | 9064.346  | AF116656  | 10871.918 | 9663.347  | AJ011595  | 1197.098  | 1772.998  |
| NM_016061 | 9659.098  | 7196.186  | NM_001050 | 9490.791  | 9249.184  | X93501    | 820.116   | 1263.762  |
| NM_016062 | 24068.52  | 17981.67  | AF132206  | 3144.038  | 3093.6    | AJ011602  | 1749.981  | 2548.348  |
| NM_004153 | 5474.135  | 4913.264  | AJ001869  | 22505.314 | 20276.068 | AJ002787  | 13194.242 | 15929.539 |
| AK024740  | 5440.189  | 4598.367  | AJ002969  | 1058.403  | 907.354   | AF086214  | 1958.015  | 2547.063  |
| AF078164  | 11934.89  | 9000.325  | AF070579  | 828.292   | 708.481   | AK026860  | 6520.323  | 6232.262  |
| NM_019049 | 3783.711  | 3868.983  | NM_005295 | 8376.052  | 9662.792  | AK024211  | 1688.418  | 1278.986  |
| NM_005447 | 679.552   | 726.002   | NM_020213 | 6083.631  | 5844.159  | NM_014896 | 1442.773  | 1263.042  |
| NM_012413 | 884.116   | 738.926   | D17267    | 9935.05   | 10132.562 | AK021432  | 3586.122  | 3724.863  |
| AF130101  | 1878.516  | 1867.511  | AF200341  | 1214.729  | 1110.619  | AK023435  | 1804.555  | 1743.161  |
| NM_004656 | 4444.267  | 3690.284  | AJ238214  | 2294.798  | 2488.961  | AK025041  | 1121.04   | 1179.049  |
| NM_005576 | 620.182   | 832.986   | AB040944  | 6962.089  | 6217.102  | AK022309  | 3018.46   | 3373.851  |
| AF247820  | 1193.613  | 1332.558  | NM_018145 | 5870.781  | 5733.872  | AK000063  | 2218.472  | 2914.957  |
| AF071569  | 7761.718  | 6638.444  | NM_018476 | 24420.426 | 31382.545 | AK000792  | 1071.305  | 1657.659  |
| NM_002269 | 3501.247  | 3935.657  | AF220492  | 25085.793 | 26605.592 | AK000949  | 5411.666  | 6431.917  |
| CY3Cy5    | 8884.49   | 608.334   | X89671    | 5998.338  | 7042.624  | AK027068  | 2784.612  | 3468.718  |
| NM_080824 | 1214.079  | 1218.493  | NM_014941 | 7212.372  | 8056.699  | AK000165  | 1280.827  | 1824.89   |
| AF086328  | 1458.942  | 1578.015  | NM_018372 | 6315.245  | 6817.875  | AK000974  | 8600.183  | 11255.89  |
| AF086427  | 1117.111  | 1331.464  | NM_013253 | 2671.113  | 2301.224  | NM_006233 | 22861.98  | 27862.355 |
| AK024196  | 871.597   | 968.843   | NM_005895 | 7652.999  | 7536.594  | AK021889  | 1635.686  | 1669.987  |
| AK001099  | 750.779   | 948.596   | D82345    | 1685.168  | 2624.995  | AK000992  | 2565.823  | 3172.268  |
| AK023753  | 2140.959  | 2201.327  | NM_003814 | 3336.763  | 3428.773  | L23544    | 21060.59  | 21075.977 |
| AF086441  | 2801.657  | 3141.001  | NM_002968 | 1792.043  | 1809.265  | NM_019020 | 4898.211  | 4447.823  |
| AK027255  | 1300.296  | 1338.924  | AK026898  | 5050.542  | 3985.118  | AF119892  | 844.652   | 1284.711  |
| AL355728  | 457.306   | 422.047   | NM_006637 | 928.009   | 995.017   | NM_016474 | 2698.652  | 4446.078  |
| NM_014117 | 902.738   | 1196.247  | AK022419  | 2824.608  | 2557.486  | AF143879  | 11028.872 | 12027.326 |
| AK023609  | 3408.346  | 4419.888  | AJ251832  | 1404.995  | 1238.215  | AK024621  | 32247.164 | 35752.422 |
| NM_018019 | 4577.835  | 5129.741  | NM_014624 | 616.405   | 862.619   | AL157449  | 50008.195 | 50305.301 |
| AK027220  | 2509.281  | 2919.413  | NM_013936 | 5530.715  | 5218.289  | AL117582  | 4117.946  | 3447.117  |
| NM_018011 | 8977.586  | 12063.973 | AF086145  | 1950.46   | 1890.986  | AK025525  | 2129.769  | 2289.743  |
| NM_080824 | 1001.496  | 1222.458  | Z70709    | 3587.515  | 3531.884  | NM_018166 | 572.364   | 675.116   |
| SR2       | 46558.875 | 51981.223 | BC002538  | 5722.061  | 5019.757  | L09095    | 30046.434 | 29093.895 |
| SR4       | 12972.797 | 15181.646 | AK022355  | 2497.763  | 2777      | NM_018233 | 47025.699 | 52698.113 |
| SR6       | 1998.122  | 2207.628  | NM_017836 | 5446.854  | 4675.751  | AV740891  | 5548.838  | 6409.208  |
| SR8       | 6796.312  | 20426.123 | AK096584  | 66715.156 | 59339.512 | AF143329  | 996.86    | 1137.718  |
| SR10      | 20887.686 | 8183.754  | Z29070    | 1761.561  | 1620.639  | AF090916  | 1649.64   | 1876.741  |
| CY3Cy5    | 3513.412  | 296.175   | AL078636  | 4710.208  | 4725.172  | AL390183  | 1719.779  | 1526.816  |
| AK024874  | 1334.139  | 1315.17   | AK022382  | 2025.385  | 2010.728  | Y13897    | 2267.194  | 2018.796  |
| AK021847  | 2763.117  | 2485.466  | AL080128  | 13141.491 | 14587.881 | AK001857  | 2220.981  | 1875.175  |
| AK023086  | 7189.574  | 7427.934  | AB037787  | 11372.09  | 12734.537 | AK021525  | 4206.458  | 11658.354 |
| AF085855  | 473.63    | 558.537   | AB033072  | 2191.019  | 2706.776  | AF067801  | 3295.605  | 2619.336  |
| AF085877  | 767.001   | 667.988   | AB040892  | 4146.821  | 4213.448  | AL133577  | 6012.368  | 5241.273  |
| AK002078  | 2010.284  | 2096.563  | NM_017596 | 11679.413 | 7643.223  | AF279773  | 1085.521  | 1212.303  |
| AF085837  | 1934.137  | 2213.804  | AL157480  | 4571.481  | 4446.958  | AK025378  | 11040.463 | 11122.869 |
| AK023165  | 2265.601  | 2668.274  | NM_014386 | 4748.696  | 5128.708  | NM_000479 | 8504.192  | 8737.804  |
| AK023857  | 697.008   | 560.79    | NM_018110 | 4078.38   | 4180.79   | AK000677  | 1785.207  | 1793.511  |
| NM_016115 | 2847.849  | 3660.091  | AF312678  | 526.49    | 864.179   | AF038199  | 4284.97   | 5851.423  |
| NM_014950 | 4205.9    | 5089.158  | NM_006253 | 6391.743  | 5972.941  | AF086035  | 17565.201 | 21592.908 |
| AL080180  | 614.192   | 680.31    | NM_003866 | 1817.761  | 1619.839  | AK022159  | 10679.755 | 13073.795 |
| X89067    | 662.306   | 657.964   | NM_018262 | 2540.038  | 2284.001  | D16905    | 1409.769  | 1736.324  |
| AF147376  | 2258.414  | 2676.936  | NM_006207 | 3143.699  | 3170.28   | AJ012491  | 950.694   | 1009.57   |

|           |           |           |           |           |           |           |           |           |
|-----------|-----------|-----------|-----------|-----------|-----------|-----------|-----------|-----------|
| AK027190  | 1235.842  | 1235.01   | NM_003220 | 7028.585  | 7566.152  | AF007136  | 1226.521  | 1095.86   |
| AL360136  | 1910.167  | 1755.556  | AF009674  | 21397.41  | 25270.24  | U25750    | 18706.797 | 17659.498 |
| AF086259  | 1348.135  | 1376.486  | NM_000360 | 3299.325  | 3505.759  | AK023691  | 17645.9   | 17241.359 |
| NM_018280 | 877.024   | 878.092   | NM_000844 | 3561.63   | 3488.758  | AK023502  | 1286.115  | 1283.29   |
| AK025763  | 972.338   | 708.968   | NM_005510 | 18870.75  | 17775.092 | AF014456  | 675.122   | 762.442   |
| AK024381  | 672.693   | 811.896   | Z36817    | 3923.31   | 3746.646  | AK026744  | 2094.406  | 2625.578  |
| AK026503  | 2623.318  | 2612.541  | NM_014505 | 40688.063 | 49351.484 | AK002105  | 878.924   | 883.7     |
| AK026671  | 1722.739  | 1668.489  | NM_004209 | 13344.666 | 11478.516 | NM_005234 | 20456.73  | 23217.693 |
| AF086087  | 15738.874 | 17037.658 | NM_002201 | 66445.922 | 73827.602 | BC023536  | 1388.838  | 2014.711  |
| AF147422  | 629.224   | 578.395   | AK025047  | 4069.667  | 3655.422  | NM_001803 | 34612.867 | 46257.781 |
| AK000671  | 46903.566 | 53149.426 | NM_006806 | 5875.125  | 6703.686  | NM_012297 | 21697.018 | 25098.459 |
| AK094020  | 1264.997  | 1687.238  | NM_006763 | 10749.98  | 11188.279 | NM_018180 | 2053.05   | 2062.876  |
| AL137425  | 1721.253  | 1998.768  | NM_006119 | 12226.488 | 12336.483 | NM_000361 | 23601.27  | 23661.336 |
| AL137637  | 1263.63   | 940.453   | NM_004465 | 2974.282  | 2923.572  | NM_017987 | 2818.015  | 2760.878  |
| AL359584  | 2134.599  | 1641.282  | AK026927  | 5879.407  | 6431.458  | NM_018203 | 1286.613  | 1217.819  |
| AL137285  | 1442.765  | 1321.31   | NM_014059 | 15029.353 | 15478.424 | NM_014244 | 919.025   | 1188.24   |
| AL137456  | 4206.479  | 3016.383  | NM_001761 | 7297.42   | 6750.584  | NM_000910 | 4231.787  | 4632.551  |
| AL157489  | 1516.646  | 1323.615  | BE884341  | 6623.758  | 5938.459  | AL117560  | 41931.434 | 47624.77  |
| AL390157  | 1725.935  | 1668.395  | AF231997  | 4928.689  | 4741.41   | M24749    | 12452.734 | 14297.574 |
| AK021649  | 983.314   | 1054.195  | NM_007125 | 4464.515  | 4887.928  | NM_000554 | 62705.102 | 54305.25  |
| AL080151  | 4047.064  | 4163.744  | NM_002598 | 13413.807 | 13457.836 | AF009317  | 10713.165 | 12190.48  |
| AK001308  | 595.299   | 633.085   | NM_020184 | 2624.627  | 3308.221  | AK026583  | 14178.612 | 13813.005 |
| AK024127  | 1497.375  | 1360.092  | NM_005815 | 1982.342  | 2363.164  | AF218031  | 12832.643 | 14953.536 |
| AK024243  | 830.3     | 1204.016  | NM_001229 | 4202.883  | 3908.462  | AF210650  | 7706.012  | 7961.081  |
| AK021574  | 2411.465  | 2730.854  | NM_014916 | 2444.349  | 2375.788  | NM_018356 | 5292.799  | 5663.097  |
| NM_017621 | 7084.845  | 7923.378  | NM_000250 | 1798.887  | 1764.458  | AF085896  | 2093.314  | 2480.934  |
| AK023574  | 2350.221  | 2305.657  | NM_018147 | 19560.605 | 22286.443 | AF075080  | 37778.043 | 46325.68  |
| AF131767  | 1338.338  | 1290.041  | NM_018967 | 14469.588 | 15372.263 | NM_004616 | 3433.133  | 2841.183  |
| AK021907  | 3851.237  | 2947.442  | AJ278018  | 1269.982  | 1251.489  | NM_017692 | 5751.042  | 4149.814  |
| AK022029  | 1296.208  | 1453.605  | NM_001850 | 2250.027  | 2480.973  | NM_003975 | 2803.348  | 3572.915  |
| AK022167  | 965.846   | 844.145   | NM_002160 | 4521.563  | 4509.074  | NM_004834 | 20092.268 | 22207.604 |
| AK022320  | 1956.578  | 1753.117  | NM_005675 | 2006.496  | 2389.798  | NM_018173 | 984.602   | 1111.234  |
| AK022058  | 816.598   | 752.202   | NM_003259 | 43968.668 | 50371.18  | NM_000812 | 5106.328  | 5525.58   |
| AK022196  | 758.678   | 841.964   | NM_006587 | 1475.548  | 1286.643  | AK024747  | 22582.307 | 22165.814 |
| AK024326  | 2634.154  | 2843.135  | D21064    | 1015.351  | 1343.143  | NM_006390 | 4954.536  | 4984.402  |
| U61088    | 1056.659  | 1004.117  | NM_002812 | 6827.683  | 7462.587  | NM_006506 | 1970.515  | 2150.207  |
| AK024538  | 679.955   | 1058.261  | NM_020365 | 4853.567  | 4707.778  | NM_003235 | 35809.336 | 37247.426 |
| AF086467  | 1390.602  | 1342.428  | NM_003982 | 4843.507  | 4779.475  | AB042562  | 2730.695  | 2029.687  |
| AL137345  | 4171.325  | 3900.955  | NM_002079 | 10602.206 | 10210.103 | NM_002378 | 9406.707  | 7800.57   |
| AK000967  | 5900.239  | 5712.919  | NM_002112 | 11889.106 | 9440.532  | NM_001364 | 1403.961  | 1832.457  |
| AK021583  | 3118.906  | 3637.445  | NM_004121 | 15564.626 | 14212.783 | NM_017431 | 1027.089  | 842.081   |
| AL137442  | 2111.288  | 2405.146  | AY007092  | 4823.488  | 4653.872  | NM_006097 | 6795.398  | 7822.081  |
| AL049281  | 1246.631  | 1089.22   | NM_001902 | 1620.79   | 1687.096  | NM_006113 | 2640.621  | 3035.727  |
| NM_001208 | 28305.266 | 28307.6   | AL137605  | 56456.488 | 55855.676 | NM_015313 | 4660.69   | 4974.834  |
| AL050061  | 613.707   | 647.214   | NM_016261 | 1735.138  | 1531.741  | NM_015897 | 3140.133  | 3614.767  |
| AL050206  | 890.766   | 787.685   | NM_006519 | 1427.619  | 1139.669  | AF177473  | 68453.063 | 67758.422 |
| AK025522  | 12929.406 | 12336.057 | NM_004607 | 60543.023 | 56055.703 | NM_000546 | 50062.078 | 55153.422 |
| AK025464  | 32859.48  | 38204.426 | NM_012076 | 3646.093  | 3601.713  | AB023223  | 1784.243  | 2707.267  |
| AL049962  | 6783.029  | 6614.097  | NM_007285 | 36261.633 | 44909.754 | AB018257  | 9938.548  | 10186.924 |
| BE746723  | 2625.54   | 2032.92   | D14678    | 15575.241 | 15912.663 | NM_002708 | 35325.422 | 43519.223 |
| NM_020408 | 2304.232  | 2291.693  | NM_016221 | 4373.609  | 4128.843  | AK001059  | 5686.626  | 5925.729  |
| AK026218  | 549.077   | 700.082   | NM_018113 | 1458.425  | 1446.803  | NM_007282 | 10429.006 | 11550.529 |
| NM_004988 | 3688.154  | 3693.71   | U73377    | 6839.925  | 6937.488  | NM_017770 | 3125.394  | 6278.653  |

|           |           |           |           |           |           |           |           |           |
|-----------|-----------|-----------|-----------|-----------|-----------|-----------|-----------|-----------|
| AF147362  | 935.997   | 860.91    | NM_016162 | 5238.246  | 5452.934  | NM_01761C | 2335.08   | 2470.619  |
| AF147365  | 1175.117  | 1050.956  | AF130056  | 3589.773  | 3370.582  | AL122070  | 1215.297  | 1096.201  |
| S72917    | 1653.865  | 1341.395  | NM_006662 | 24012.877 | 27628.648 | AK025133  | 44090.191 | 57670.004 |
| M91159    | 1212.097  | 1588.508  | NM_004031 | 3501.513  | 3362.608  | NM_016642 | 668.277   | 1156.491  |
| AK025129  | 885.563   | 796.728   | NM_004514 | 7363.378  | 7812.604  | AB020704  | 2993.546  | 2322.721  |
| NM_014392 | 21166.615 | 19075.842 | NM_006163 | 3502.228  | 3309.872  | NM_020197 | 1203.308  | 958.454   |
| AK023291  | 8756.987  | 8713.088  | NM_001272 | 20321.111 | 18309.797 | NM_004087 | 7589.199  | 7024.128  |
| AK001117  | 627.548   | 726.929   | NM_016303 | 1465.632  | 1114.906  | NM_01870C | 1704.793  | 1545.884  |
| BF541820  | 1139.8    | 1501.943  | NM_006196 | 23813.799 | 26190.045 | NM_000119 | 9423.472  | 9512.315  |
| AF119911  | 12335.687 | 11827.515 | AV733560  | 9129.708  | 9267.753  | NM_001065 | 4082.499  | 3978.353  |
| AF116656  | 8691.243  | 7480.256  | D17129    | 55345.977 | 52910.973 | AK027100  | 1092.802  | 1418.342  |
| NM_00105C | 5444.457  | 5111.169  | NM_003091 | 29681.266 | 28212.805 | AY010111  | 903.206   | 1222.295  |
| AF132206  | 3060.558  | 3271.155  | NM_004247 | 7076.166  | 7221.165  | NM_01695C | 1196.085  | 1973.218  |
| AJ001869  | 1439.117  | 1660.396  | NM_017722 | 9546.245  | 8910.076  | NM_003622 | 7950.075  | 7418.968  |
| AJ002969  | 592.117   | 602.712   | AL137730  | 24027.08  | 23253.691 | NM_007115 | 4794.622  | 6029.221  |
| AF070579  | 763.998   | 838.369   | NM_00450C | 47448.73  | 51214.488 | AK021645  | 1671.623  | 1486.782  |
| NM_005295 | 386.897   | 401.958   | NM_003276 | 13610.059 | 12564.857 | NM_01333C | 4695.489  | 4975.35   |
| NM_020213 | 5441.562  | 6231.277  | AL137681  | 4923.537  | 5329.142  | NM_001491 | 8602.169  | 8663.213  |
| D17267    | 11332.35  | 10742.271 | AK025694  | 62067.164 | 56866.531 | NM_002642 | 3721.136  | 5175.011  |
| AF200341  | 928.66    | 934.622   | NM_002157 | 66238.781 | 61754.832 | AK026541  | 6428.872  | 7342.515  |
| AJ238214  | 2432.05   | 2490.042  | NM_004095 | 15544.928 | 15438.366 | NM_00589C | 44783.594 | 51902.234 |
| AB040944  | 3525.682  | 3286.625  | NM_014365 | 1808.244  | 1826.041  | NM_00333C | 2128.641  | 2459.975  |
| NM_018145 | 3807.734  | 4417.485  | NM_005147 | 13610.102 | 12979.244 | NM_004562 | 1024.139  | 1021.362  |
| NM_018476 | 2170.302  | 2135.495  | NM_014665 | 10058.868 | 9804.346  | NM_016476 | 61698.387 | 57757.035 |
| AF220492  | 23902.016 | 21510.322 | NM_005588 | 739.87    | 844.345   | NM_015902 | 7891.102  | 5877.911  |
| X89671    | 6304.335  | 5824.655  | BC030636  | 2737.639  | 2873.426  | NM_020155 | 12855.133 | 13431.179 |
| NM_018372 | 6291.04   | 5751.679  | NM_000476 | 1940.949  | 1818.643  | BE874471  | 5900.069  | 5950.825  |
| NM_013253 | 1857.635  | 1660.842  | AF132733  | 5125.101  | 4901.375  | NM_006121 | 4652.224  | 4767.459  |
| NM_005895 | 6375.423  | 5955.652  | NM_001071 | 12487.608 | 12890.911 | AK023520  | 13473.854 | 11961.642 |
| D82345    | 1052.938  | 998.257   | NM_006187 | 5849.55   | 5458.667  | NM_004693 | 1316.291  | 1212.304  |
| NM_003814 | 3979.524  | 3983.972  | NM_020354 | 9801.095  | 9462.997  | NM_007211 | 14744.854 | 12818.354 |
| AK026898  | 3294.75   | 2552.28   | AF202637  | 10815.417 | 10696.446 | AB011152  | 2845.033  | 3504.696  |
| NM_006637 | 588.376   | 702.145   | NM_000026 | 57071.703 | 50548.375 | NM_014956 | 14357.684 | 16815.389 |
| AK022419  | 923.899   | 693.635   | AB033016  | 18645.709 | 22012.279 | AB014592  | 1994.509  | 2244.131  |
| AJ251832  | 1171.494  | 1448.8    | D87452    | 8385.758  | 8626.664  | NM_016952 | 2175.201  | 2411.457  |
| NM_013936 | 2671.587  | 2406.5    | AB037864  | 4582.141  | 4866.808  | NM_001654 | 8094.916  | 8971.687  |
| AF086145  | 2537.223  | 1942.746  | L26494    | 11084.028 | 11049.018 | U48728    | 1212.327  | 986.768   |
| Z70709    | 2550.926  | 2475.877  | NM_000346 | 1236.576  | 1392.116  | NM_005436 | 24242.354 | 29163.059 |
| BC002538  | 7214.57   | 9094.056  | AK024322  | 2611.115  | 3750.178  | AK024418  | 3572.719  | 3185.95   |
| AK022355  | 1031.24   | 1465.949  | BF382513  | 31810.432 | 35876.219 | NM_003367 | 19148.75  | 13572.005 |
| NM_017836 | 5543.517  | 5060.127  | AB020713  | 24753.295 | 24635.752 | NM_005194 | 23449.047 | 27843.352 |
| AK096584  | 5288.999  | 5431.935  | AK025426  | 7534.135  | 6429.722  | AB002296  | 6273.449  | 6911.224  |
| Z29070    | 1966.209  | 1636.866  | NM_016558 | 9772.381  | 10471.815 | AF165520  | 14045.89  | 12361.279 |
| AL078636  | 1385.769  | 1421.329  | NM_007145 | 12143.424 | 11458.476 | AK026072  | 2414.325  | 2440.979  |
| AK022382  | 1154.127  | 1125.217  | AL133112  | 1753.295  | 1959.883  | NM_00428C | 2394.367  | 2395.314  |
| AL080128  | 5075.785  | 4716.598  | NM_002199 | 10032.233 | 11805.396 | NM_01567C | 11257.58  | 13052.314 |
| AB037787  | 2557.433  | 2433.353  | BC005219  | 7681.305  | 8803.85   | AK025353  | 50385.098 | 45697.844 |
| AB033072  | 1807.558  | 1822.83   | NM_004268 | 3157.7    | 3617.196  | AK056896  | 63886.195 | 58295.879 |
| AB040892  | 1496.927  | 1597.916  | NM_00095C | 65607.391 | 62386.277 | AK022763  | 54089.078 | 51940.535 |
| NM_018268 | 9422.415  | 9825.807  | NM_005139 | 7938.947  | 8329.895  | NM_000976 | 66201.594 | 60914.508 |
| AF230904  | 14180.919 | 13932.037 | NM_001275 | 67766.039 | 60949.582 | NM_00100C | 65679.492 | 65494.723 |
| NM_017596 | 8643.982  | 6135.445  | NM_000322 | 40147.801 | 49488.098 | AF288207  | 58180.25  | 54409.609 |
| AL157480  | 4017.015  | 3946.165  | L10139    | 5355.963  | 4920.718  | NM_00102E | 672.798   | 960.138   |

|           |           |           |           |           |           |           |           |           |
|-----------|-----------|-----------|-----------|-----------|-----------|-----------|-----------|-----------|
| NM_01438E | 1448.054  | 1453.867  | NM_000039 | 53902.598 | 53657.934 | NM_001001 | 66022.023 | 62659.469 |
| NM_018110 | 2755.477  | 2547.163  | NM_020470 | 14917.063 | 14497.402 | NM_001774 | 68430.453 | 65397     |
| NM_006253 | 6351.422  | 5250.104  | NM_006574 | 1390.416  | 1475.209  | NM_005023 | 1094.175  | 1550.18   |
| NM_00386E | 1049.396  | 933.031   | AA478950  | 6311.753  | 6437.22   | NM_006830 | 63244.535 | 64678.871 |
| NM_018262 | 3416.047  | 2942.553  | BF942101  | 12536.371 | 11822.034 | NM_01843E | 39221.496 | 40528.039 |
| NM_006207 | 686.427   | 659.414   | BI825012  | 62253.813 | 55225.27  | AF157115  | 11800.563 | 9692.587  |
| NM_003220 | 954.119   | 731.554   | M21574    | 2667.075  | 2817.643  | AJ223353  | 18019.748 | 18788.35  |
| NM_000844 | 1458.286  | 1697.069  | BM051302  | 2614.043  | 2605.596  | NM_012241 | 15313.698 | 16986.83  |
| NM_005510 | 21327.756 | 20786.754 | BE314182  | 26516.117 | 26931.66  | AF250288  | 1211.532  | 1181.787  |
| Z36817    | 1864.096  | 1980.13   | AI808029  | 2191.276  | 2347.807  | NM_01848E | 5262.516  | 7226.906  |
| NM_01450E | 9748.846  | 9554.945  | AI971217  | 1079.664  | 998.438   | AL080201  | 55450.645 | 56011.273 |
| NM_00420E | 12680.442 | 10796.962 | X03225    | 10441.102 | 11822.913 | NM_015363 | 2157.689  | 1581.268  |
| NM_002201 | 42999.719 | 38499.547 | AK097395  | 38321.492 | 41364.207 | NM_00180E | 15120.21  | 12260.175 |
| AK025047  | 1323.755  | 1179.738  | M12783    | 6534.339  | 6360.778  | AB040941  | 8482.404  | 8163.759  |
| NM_00680E | 6740.941  | 7223.699  | AK091535  | 2935.558  | 2596.972  | AL137241  | 1641.847  | 1585.068  |
| NM_006763 | 9769.772  | 7737.255  | AF085357  | 11255.286 | 11009.96  | AB037742  | 3676.635  | 4265.184  |
| NM_006119 | 6988.062  | 5049.864  | AK092768  | 889.849   | 1251.119  | AF272375  | 4270.859  | 4597.045  |
| NM_00446E | 2776.486  | 2507.188  | NM_003841 | 51697.75  | 52031.746 | NM_01451E | 6644.206  | 8465.535  |
| AK026927  | 5715.942  | 5011.982  | AF296673  | 11157.784 | 11780.071 | NM_002517 | 4454.144  | 4444.622  |
| NM_01405E | 12912.047 | 11717.372 | AK022132  | 446.804   | 842.628   | NM_007147 | 52410.172 | 51182.918 |
| NM_001761 | 5745.164  | 4950.816  | NM_004079 | 23422.029 | 21479.512 | X65463    | 8289.399  | 8863.121  |
| BE884341  | 3370.877  | 3003.417  | NM_00299E | 951.494   | 1025.58   | NM_00223E | 5474.902  | 4235.507  |
| AF231997  | 2555.298  | 2191.724  | NM_000383 | 4131.821  | 4786.037  | NM_00486E | 3927.906  | 5181.352  |
| NM_00712E | 4429.581  | 3693.597  | NM_004633 | 3567.752  | 3822.639  | AF130728  | 2098.816  | 1949.596  |
| NM_00259E | 13575.043 | 11465.19  | X01394    | 66051.961 | 61814.5   | NM_004987 | 1234.171  | 1239.076  |
| NM_020184 | 2613.031  | 2293.262  | NM_000041 | 65328.34  | 58234.914 | NM_00128E | 40137.188 | 43177.82  |
| NM_00581E | 933.123   | 937.311   | NM_002984 | 11443.001 | 12077.26  | NM_001131 | 64891.66  | 64205.25  |
| NM_00122E | 2397.393  | 2387.492  | AB037752  | 23194.805 | 24422.729 | M54894    | 1873.325  | 1615.013  |
| NM_01491E | 1173.52   | 1106.614  | AF317425  | 4308.581  | 3583.444  | BG752013  | 1709.751  | 1568.85   |
| NM_000250 | 1231.669  | 1175.189  | NM_018002 | 5434.619  | 5604.14   | X07696    | 23355.217 | 29878.836 |
| NM_018147 | 27513.389 | 32701.91  | AK024821  | 8850.622  | 7488.438  | AA481015  | 3334.912  | 3333.593  |
| NM_018967 | 6655.398  | 8216.741  | AB002340  | 19572.508 | 20538.445 | AI925826  | 21855.039 | 18341.986 |
| AJ278018  | 895.844   | 831.426   | NM_000224 | 16195.818 | 16576.379 | U04209    | 15351.169 | 14485.165 |
| NM_001850 | 836.371   | 964.616   | NM_01432E | 6431.001  | 7087.461  | AI393201  | 24056.307 | 24905.596 |
| NM_002160 | 1700.479  | 1714.459  | NM_006414 | 16488.18  | 15654.86  | M34664    | 66260.523 | 61280.043 |
| NM_00567E | 2434.132  | 2635.613  | NM_014322 | 22894.842 | 21748.863 | Z15108    | 7676.907  | 7747.001  |
| NM_00325E | 25896.283 | 29728.342 | NM_004122 | 8410.479  | 8813.703  | M55284    | 2002.983  | 2302.089  |
| NM_006587 | 1150.219  | 840.872   | NM_00292E | 33747.504 | 35064.637 | AA001218  | 2425.963  | 2533.325  |
| D21064    | 1238.788  | 1005.62   | NM_000160 | 4923.08   | 4514.795  | AA679391  | 2637.677  | 2704.276  |
| NM_002812 | 6715.6    | 5696.244  | NM_003301 | 3624.9    | 3437.866  | BG682146  | 9696.939  | 13381.791 |
| NM_02036E | 4811.628  | 3979.825  | NM_00095E | 5131.587  | 5053.569  | AA884709  | 1303.1    | 1523.477  |
| NM_003982 | 4698.219  | 4518.361  | U27768    | 8911.604  | 9035.238  | NM_004541 | 61039.293 | 58374.773 |
| NM_00207E | 11542.915 | 9796.166  | NM_001742 | 635.723   | 866.814   | NM_00670E | 13531.571 | 13622.467 |
| NM_002112 | 6333.075  | 5723.647  | U66582    | 23711.572 | 20378.678 | NM_005582 | 23417.416 | 27982.777 |
| NM_004121 | 2873.335  | 2494.238  | NM_018479 | 13957.151 | 13854.039 | NM_01226E | 11426.342 | 12792.844 |
| AY007092  | 4110.12   | 3390.627  | NM_014362 | 2077.293  | 2169.783  | NM_00455E | 8221.995  | 8309.728  |
| NM_001902 | 1874.86   | 1385.46   | NM_01830E | 6552.558  | 6635.397  | NM_01447E | 1204.216  | 1380.553  |
| AL137605  | 7059.275  | 5982.737  | NM_001832 | 47809.871 | 49893     | NM_01427E | 2468.645  | 2071.769  |
| NM_016261 | 1750.584  | 1541.753  | NM_017774 | 28346.631 | 35223.273 | NM_00583E | 1769.351  | 1308.59   |
| NM_00651E | 1358.263  | 1204.519  | AB037716  | 3584.23   | 4073.966  | NM_000734 | 20168.031 | 20280.799 |
| NM_004607 | 61594.965 | 57275.711 | NM_016297 | 5149.383  | 4780.183  | NM_012331 | 10806.671 | 10176.812 |
| NM_01207E | 2167.031  | 1642.484  | NM_001752 | 6668.909  | 8536.111  | NM_006644 | 13463.569 | 15847.854 |
| NM_00728E | 46202.555 | 41736.313 | BC003406  | 1432.365  | 1255.503  | NM_006583 | 64347.32  | 11683.786 |

|           |           |           |           |           |           |           |           |           |
|-----------|-----------|-----------|-----------|-----------|-----------|-----------|-----------|-----------|
| D14678    | 6496.204  | 6907.935  | AL137672  | 1759.985  | 1749.043  | NM_00606E | 1892.774  | 1738.473  |
| NM_016221 | 6787.083  | 6602.604  | NM_002241 | 1453.342  | 1271.707  | NM_01433E | 50524.32  | 52618.012 |
| NM_018113 | 2140.289  | 2012.317  | NM_012281 | 16855.9   | 15831.705 | NM_00149E | 3575.904  | 4141.493  |
| U73377    | 4471.518  | 3938.901  | NM_00550E | 2293.684  | 2279.975  | NM_00228E | 1195.651  | 1403.862  |
| NM_01616E | 7083.271  | 6067.464  | AF091034  | 5955.961  | 5845.673  | NM_00441E | 30791.354 | 34602.996 |
| AF130056  | 4902.332  | 4861.418  | NM_005301 | 62611.988 | 53207.043 | NM_00062E | 5028.677  | 6179.214  |
| NM_00666E | 3413.876  | 3410      | NM_004167 | 574.28    | 416.622   | AB005216  | 1645.946  | 1978.144  |
| NM_004031 | 2242.133  | 2171.452  | NM_01665E | 3508.029  | 3634.005  | AF015041  | 7102.521  | 8668.976  |
| NM_004514 | 7709.709  | 8550.87   | AB035124  | 15459.097 | 12998.595 | NM_00236E | 1435.574  | 1953.839  |
| NM_00616E | 1878.422  | 1697.245  | AF060170  | 3903.01   | 3762.765  | X82693    | 45226.129 | 44679.602 |
| NM_00127E | 14859.586 | 10476.752 | NM_01660E | 2477.454  | 2931.403  | NM_00717E | 12680.96  | 17056.385 |
| NM_00619E | 21985.686 | 21241.105 | NM_00440E | 16396.961 | 14151.986 | NM_00272E | 6556.812  | 9959.296  |
| AV733560  | 8103.393  | 6949.303  | AK023397  | 4739.661  | 4974.855  | AF317058  | 1389.419  | 1530.174  |
| D17129    | 60895.91  | 52000.598 | NM_00172E | 12099.465 | 12004.489 | AK025965  | 1258.103  | 936.752   |
| NM_003091 | 36212.043 | 27970.5   | NM_00026E | 6454.8    | 6813.693  | AL137576  | 15174.925 | 15010.911 |
| NM_004247 | 6779.719  | 6233.464  | NM_017831 | 2276.938  | 2003.234  | NM_00651E | 24453.482 | 22565.383 |
| NM_01772E | 8814.217  | 6916.166  | AK024393  | 988.818   | 902.627   | NM_00035E | 2777.114  | 2205.638  |
| AL137730  | 2518.803  | 2116.391  | AK022537  | 9280.375  | 7634.787  | NM_005451 | 5273.891  | 8197.604  |
| NM_00450E | 54946.184 | 46893.047 | AF116632  | 789.497   | 397.562   | NM_00717E | 6346.46   | 7098.951  |
| NM_00327E | 15381.548 | 14554.477 | AF064597  | 1875.751  | 1899.905  | NM_01333E | 51745.789 | 61836.277 |
| AL137681  | 6149.63   | 5451.354  | NM_00634E | 4298.691  | 4584.014  | NM_00233E | 10821.469 | 12827.688 |
| AK025694  | 46840.844 | 47252.473 | NM_00687E | 19628.008 | 18432.936 | NM_00340E | 15575.559 | 22180.846 |
| NM_00215E | 57995.809 | 50216.648 | D87119    | 20950.518 | 20836.039 | NM_01482E | 4433.167  | 5312.423  |
| NM_00409E | 9594.46   | 9006.588  | AB037769  | 992.858   | 691.724   | NM_01450E | 5709.033  | 6849.311  |
| NM_01436E | 2327.606  | 2104.009  | AL050040  | 1210.833  | 1078.903  | NM_01440E | 23645.383 | 23175.072 |
| NM_00514E | 13563.501 | 12507.938 | NM_00655E | 19987.605 | 18561.994 | NM_014741 | 10440.006 | 9680.42   |
| NM_01466E | 18528.756 | 15010.49  | AL133066  | 1337.766  | 1518.978  | AF212247  | 7919.371  | 8329.46   |
| NM_00558E | 710.445   | 772.158   | AF264717  | 4414.525  | 4355.721  | AF161407  | 39715.359 | 40425.336 |
| NM_00277E | 632.315   | 576.696   | NM_01226E | 26281.09  | 25794.895 | NM_01473E | 8788.206  | 7108.044  |
| BC030636  | 5339.869  | 6986.831  | NM_001141 | 5808.737  | 5625.815  | NM_01640E | 8129.562  | 6234.685  |
| NM_00047E | 1436.613  | 2247.973  | NM_00001E | 14616.028 | 20083.672 | NM_01808E | 13259.219 | 12252.787 |
| AF132733  | 6640.98   | 7896.613  | AB028992  | 904.318   | 905.523   | NM_00571E | 2514.034  | 2587.377  |
| NM_001071 | 13406.176 | 14273.623 | NM_00127E | 66628.859 | 62796.953 | AK021951  | 1285.33   | 1400.518  |
| NM_00618E | 4167.899  | 4342.937  | NM_00032E | 39859.172 | 53113.332 | AK023553  | 4712.408  | 5407.396  |
| NM_02035E | 9418.26   | 9750.83   | L10139    | 6670.185  | 6563.906  | NM_01460E | 2619.362  | 2645.398  |
| AF202637  | 12521.535 | 11891.828 | NM_00003E | 49446.348 | 53281.445 | NM_01673E | 2133.483  | 2555.593  |
| NM_00002E | 58132.949 | 50630.91  | NM_02047E | 13039.474 | 13213.517 | AF181994  | 6058.311  | 7387.275  |
| AB033016  | 20565.523 | 18959.678 | NM_00657E | 1019.706  | 1009.648  | NM_01896E | 4991.914  | 5897.129  |
| D87452    | 10891.718 | 9772.42   | AA478950  | 5733.726  | 6300.827  | AF125100  | 5738.822  | 6513.177  |
| AB037864  | 2830.204  | 2769.378  | BF942101  | 10834.661 | 10049.902 | NM_00466E | 6169.509  | 5287.255  |
| NM_00034E | 1095.536  | 1095.523  | BI825012  | 57741.457 | 50691.621 | NM_00702E | 13041.033 | 14780.562 |
| AK024322  | 1199.66   | 1176.26   | M21574    | 2479.455  | 2477.137  | AF130728  | 1448.523  | 1700.933  |
| BF382513  | 7220.067  | 6203.317  | BM051302  | 2788.306  | 3312      | NM_00498E | 1077.415  | 849.717   |
| AB020713  | 24279.73  | 22997.578 | BE314182  | 26699.928 | 27669.381 | NM_00128E | 41502.363 | 47884.004 |
| AK025426  | 2043.932  | 1637.928  | AI808029  | 1994.541  | 1979.315  | NM_001131 | 63088.504 | 63409.27  |
| NM_01655E | 13755.629 | 14348.033 | AI971217  | 1074.894  | 1146.948  | M54894    | 1581.587  | 1085.635  |
| NM_00714E | 10392.183 | 10376.244 | X03225    | 10658.759 | 11515.347 | BG752013  | 1426.665  | 1259.415  |
| AL133112  | 1820.995  | 1993.288  | AK097395  | 40085.098 | 43812.625 | X07696    | 21569.592 | 19029.807 |
| NM_00219E | 7979.061  | 7943.494  | M12783    | 5970.578  | 5791.028  | AA481015  | 2712.739  | 1860.349  |
| BC005219  | 8355.111  | 8305.407  | AK091535  | 3089.732  | 2399.071  | AI925826  | 29238.857 | 24250.768 |
| NM_00426E | 3330.276  | 3082.383  | AF085357  | 10487.118 | 9783.609  | U04209    | 15041.068 | 11970.043 |
| NM_00154E | 726.038   | 1105.009  | AK092768  | 740.575   | 950.155   | AI393201  | 22299.264 | 18765.764 |
| NM_00095E | 12861.948 | 17129.264 | NM_003841 | 46336.906 | 48831.109 | Z15108    | 6214.044  | 4048.88   |

|           |           |           |           |           |           |           |           |           |
|-----------|-----------|-----------|-----------|-----------|-----------|-----------|-----------|-----------|
| NM_005139 | 9663.27   | 12716.041 | AF296673  | 10278.607 | 8971.329  | M55284    | 1981.28   | 1824.007  |
| NM_001275 | 59961.148 | 56535.621 | AB032956  | 681.749   | 490.463   | AA001218  | 2306.501  | 2141.367  |
| NM_000322 | 47732.961 | 48708.063 | AL137698  | 1035.869  | 917.653   | AA679391  | 2237.586  | 2030.3    |
| L10139    | 764.173   | 921.672   | NM_000383 | 4319.813  | 4702.58   | BG682146  | 8841.926  | 8675.488  |
| NM_000039 | 61663.75  | 57329.574 | NM_004633 | 3688.996  | 3510.062  | AA884709  | 1342.697  | 1490.064  |
| NM_020470 | 2238.085  | 2671.906  | X01394    | 65145.191 | 64234.625 | AK022417  | 7788.328  | 7911.531  |
| NM_006574 | 904.462   | 858.872   | NM_000041 | 62978.668 | 61081.363 | U50534    | 3881.025  | 4682.744  |
| AA478950  | 3547.975  | 3382.85   | NM_002984 | 10883.228 | 10879.768 | NM_005582 | 12529.795 | 13813.08  |
| BF942101  | 16866.082 | 14831.145 | AB037752  | 23049.453 | 24289.313 | NM_012266 | 10856.088 | 9542.895  |
| BI825012  | 43079.082 | 41318.348 | AF317425  | 4288.43   | 3684.735  | NM_004559 | 8310.592  | 7126.157  |
| M21574    | 2222.821  | 1876.669  | NM_018002 | 4763.361  | 5186.226  | X56692    | 43766.754 | 46507.063 |
| BM051302  | 2183.085  | 2033.582  | AK024821  | 7562.297  | 7006.302  | NM_014476 | 1313.485  | 1145.354  |
| BE314182  | 10141.905 | 9271.122  | AB002340  | 17136.619 | 20408.434 | NM_014278 | 2163.832  | 1527.078  |
| AI808029  | 3410.398  | 3164.167  | NM_000224 | 16444.057 | 18804.605 | NM_005838 | 1618.027  | 1216.692  |
| AI971217  | 1140.698  | 1332.486  | NM_014328 | 6045.214  | 7525.097  | NM_000734 | 18932.813 | 15715.036 |
| X03225    | 4420.204  | 4785.451  | NM_006414 | 16058.866 | 16092.499 | NM_012331 | 10568.849 | 7610.781  |
| AK097395  | 17653.602 | 17363.309 | NM_014322 | 21741.029 | 20470.139 | NM_006644 | 13370.782 | 11314.617 |
| M12783    | 9799.013  | 10667.562 | NM_004122 | 8274.716  | 9102.548  | NM_006583 | 63524.352 | 12650.646 |
| AK091535  | 8491.145  | 10466.823 | NM_002928 | 34187.387 | 39783.703 | NM_006065 | 1670.41   | 1166.669  |
| AF085357  | 13559.624 | 12884.601 | NM_000160 | 4915.546  | 4533.482  | NM_014339 | 47484.582 | 40273.117 |
| AK092768  | 474.175   | 548.184   | NM_003301 | 3255.397  | 3192.005  | NM_001495 | 3141.382  | 2532.989  |
| NM_003841 | 2548.948  | 3023.29   | NM_000955 | 4702.208  | 4380.373  | NM_002288 | 1119.772  | 586.474   |
| AF296673  | 7423.419  | 7548.93   | U27768    | 8832.828  | 7662.607  | NM_004416 | 29129.721 | 31284.156 |
| AK022132  | 1034.186  | 978.805   | U66582    | 24880.379 | 22275.021 | NM_000628 | 4901.536  | 5037.108  |
| NM_004079 | 17979.627 | 20923.018 | NM_000950 | 65349.609 | 60447.512 | AB005216  | 1374.593  | 2052.452  |
| NM_000383 | 6910.935  | 10498.34  | NM_005139 | 9269.37   | 9248.938  | AF015041  | 6498.145  | 6665.33   |
| NM_004633 | 1965.427  | 2377.667  | NM_018308 | 6160.147  | 6158.681  | NM_002363 | 1673.087  | 3059.292  |
| X01394    | 27942.854 | 37869.859 | NM_001832 | 43314.645 | 48928.547 | NM_002238 | 6677.744  | 8169.147  |
| NM_000041 | 26210.885 | 31711.563 | NM_017774 | 26413.416 | 34541.918 | NM_004868 | 4383.575  | 5504.344  |
| NM_002984 | 9240.129  | 12344.731 | AB037716  | 2986.686  | 3059.494  | NM_007176 | 3034.919  | 2876.86   |
| AB037752  | 8533.152  | 9219.763  | NM_004827 | 1188.054  | 1618.884  | NM_002722 | 5847.517  | 4813.839  |
| AF317425  | 5036.664  | 4093.929  | NM_016297 | 3753.293  | 3322.1    | AF317058  | 1303.22   | 943.893   |
| NM_018002 | 5599.581  | 5752.633  | NM_001752 | 5831.235  | 6567.621  | AK025965  | 1195.431  | 714.084   |
| AK024821  | 7295.339  | 5570.057  | BC003406  | 1402.031  | 1091.917  | AL137576  | 14528.276 | 10757.955 |
| AB002340  | 4797.375  | 4617.842  | AL137672  | 1288.261  | 2089.469  | NM_006516 | 23693.734 | 20230.787 |
| NM_000224 | 1704.678  | 1873.555  | NM_002241 | 1323.611  | 1531.6    | NM_000355 | 6113.54   | 4709.387  |
| NM_014328 | 6615.487  | 6494.083  | NM_012281 | 20918.154 | 33174.879 | NM_005451 | 4430.01   | 3721.03   |
| NM_006414 | 6893.754  | 7063.431  | NM_005509 | 2542.309  | 2484.954  | NM_007172 | 5374.091  | 4856.945  |
| NM_014322 | 21108.412 | 21954.303 | AF091034  | 5560.151  | 5265.069  | NM_013333 | 51142.68  | 58044.316 |
| NM_004122 | 7668.697  | 7970.947  | NM_005301 | 61339.691 | 55937.098 | NM_002333 | 12542.935 | 12007.212 |
| NM_002928 | 26472.008 | 25367.834 | NM_004167 | 528.804   | 640.742   | NM_003400 | 18305.531 | 21295.281 |
| NM_000160 | 8643.211  | 9597.645  | NM_016653 | 3461.479  | 3751.968  | NM_006705 | 18056.955 | 19332.199 |
| NM_003301 | 2379.855  | 2891.723  | AB035124  | 14507.956 | 11569.094 | NM_014439 | 2596.592  | 3301.225  |
| NM_000955 | 3179.036  | 3157.708  | AF060170  | 3796.537  | 3351.328  | NM_014504 | 5339.276  | 4416.582  |
| U27768    | 5520.887  | 4983.775  | NM_016602 | 2491.725  | 2851.582  | NM_014408 | 19391.498 | 15492.338 |
| NM_001742 | 661.608   | 782.263   | NM_004409 | 15419.097 | 15247.167 | NM_014741 | 10974.771 | 8856.381  |
| U66582    | 25651.002 | 23472.74  | AK023397  | 4519.104  | 3520.225  | AF212247  | 7845.853  | 6370.687  |
| NM_018479 | 14810.806 | 17426.379 | NM_001725 | 12976.856 | 12378.299 | AF161407  | 40175.969 | 36518.43  |
| NM_014362 | 3169.577  | 3405.193  | NM_004079 | 28555.756 | 27678.596 | NM_014738 | 9019.739  | 7892.999  |
| NM_018308 | 1444.526  | 1674.54   | NM_002996 | 1766.98   | 1462.206  | NM_016406 | 7641.609  | 5281.667  |
| NM_001832 | 6032.077  | 7802.817  | NM_000262 | 5571.014  | 5956.997  | NM_018080 | 14845.602 | 11461.646 |
| NM_017774 | 23756.994 | 30478.311 | NM_017831 | 1738.006  | 1464.872  | NM_014453 | 48342.223 | 41308.066 |
| AB037716  | 4435.787  | 5658.284  | AK024393  | 853.094   | 711.277   | NM_005713 | 2699.838  | 2304.301  |

|           |           |           |           |           |           |           |           |           |
|-----------|-----------|-----------|-----------|-----------|-----------|-----------|-----------|-----------|
| NM_004827 | 530.488   | 1032.412  | AK022537  | 7927.741  | 7551.616  | AK021951  | 1444.944  | 1274.466  |
| NM_001926 | 824.663   | 846.8     | AF116632  | 334.374   | 931.422   | AK023553  | 5223.849  | 4135.064  |
| NM_016297 | 1962.345  | 2108.385  | AF064597  | 2538.489  | 2388.858  | NM_014600 | 2119.37   | 1635.644  |
| NM_001752 | 6018.243  | 6883.202  | NM_006345 | 3852.418  | 5061.488  | NM_016733 | 1857.448  | 1428.027  |
| BC003406  | 1318.146  | 993.53    | NM_006875 | 19773.252 | 19228.049 | AF181994  | 6814.914  | 5976.083  |
| AL137672  | 1070.412  | 1050.612  | D87119    | 20534.121 | 22406.715 | NM_018962 | 6597.358  | 5744.036  |
| NM_012281 | 2214.956  | 2528.938  | AB037769  | 1017.124  | 1152.367  | AF125100  | 6112.486  | 6142.871  |
| NM_005509 | 2110.409  | 2484.861  | AL050040  | 1312.763  | 1380.557  | X82693    | 54435.078 | 51996.676 |
| AF091034  | 5930.131  | 9075.636  | NM_006556 | 19792.266 | 20766.295 | AF130728  | 2073.658  | 1658.048  |
| NM_005301 | 26512.746 | 32931.457 | AL133066  | 1506.862  | 1655.326  | NM_001289 | 37341.188 | 31923.654 |
| NM_004167 | 934.162   | 762.23    | AF264717  | 4056.972  | 3723.399  | NM_001131 | 67747.945 | 79002.5   |
| NM_016653 | 4027.224  | 4604.492  | NM_012260 | 24735.678 | 21790.814 | M54894    | 1801.26   | 1047.339  |
| AB035124  | 22049.693 | 20968.93  | NM_001141 | 5255.853  | 4850.311  | BG752013  | 1416.243  | 989.113   |
| AF060170  | 2148.674  | 1829.483  | NM_000018 | 12757.497 | 17040.412 | X07696    | 21920.293 | 19135.148 |
| NM_016602 | 1551.482  | 1506.085  | AB028992  | 826.304   | 840.235   | AA481015  | 2649.317  | 1842.976  |
| NM_004409 | 6897.199  | 6296.215  | NM_018479 | 16268.698 | 16638.854 | AI925826  | 31566.898 | 24661.625 |
| AK023397  | 2996.026  | 2527.105  | NM_014362 | 2529.331  | 2333.779  | U04209    | 15478.592 | 12223.794 |
| NM_001725 | 2791.397  | 2890.798  | L10139    | 8635.472  | 10611.024 | AI393201  | 22390.049 | 21857.555 |
| NM_015957 | 445.879   | 498.969   | NM_000039 | 52838.797 | 55972.672 | M34664    | 67017.977 | 70591.578 |
| NM_000262 | 976.73    | 1330.465  | NM_020470 | 15656.481 | 16899.17  | Z15108    | 9061.111  | 7159.057  |
| NM_017831 | 919.219   | 1171.349  | NM_006574 | 1228.77   | 1205.001  | M55284    | 2381.22   | 1914.139  |
| AK024393  | 544.762   | 753.868   | AA478950  | 6296.981  | 6670.523  | AA001218  | 2512.779  | 2585.997  |
| AK022537  | 12291.985 | 10240.578 | BF942101  | 12771.112 | 12711.826 | AA679391  | 2274.382  | 1938.762  |
| AF116632  | 560.155   | 521.918   | BI825012  | 52517.531 | 53111.211 | BG682146  | 10369.402 | 8779.672  |
| AF064597  | 1991.699  | 1476.614  | M21574    | 2171.439  | 2067.658  | AA884709  | 1427.428  | 1382.236  |
| NM_006345 | 3496.843  | 4565.671  | BM051302  | 2061.478  | 2238.081  | AK022417  | 7530.83   | 6032.403  |
| NM_006875 | 22533.945 | 22179.467 | BE314182  | 24472.02  | 24676.211 | U50534    | 4639.729  | 4933.762  |
| D87119    | 4333.233  | 4489.933  | AI808029  | 2283.002  | 2164.019  | NM_014824 | 6562.595  | 6857.585  |
| AB037769  | 1019.803  | 1460.951  | AI971217  | 1197.233  | 1027.859  | NM_005838 | 1691.249  | 1576.624  |
| AL050040  | 1160.789  | 1214.4    | X03225    | 10842.326 | 13151.245 | NM_000734 | 17295.906 | 16382.305 |
| NM_006556 | 19170.262 | 17961.502 | AK097395  | 50719.055 | 53687.184 | NM_012331 | 9503.21   | 6935.136  |
| AL133066  | 1448.428  | 1795.1    | M12783    | 6789.418  | 7823.758  | NM_006644 | 13313.938 | 10313.654 |
| AF264717  | 2671.727  | 2381.073  | AK091535  | 2909.863  | 2964.08   | NM_006065 | 2129.671  | 1621.189  |
| NM_012260 | 4571.905  | 3392.452  | AF085357  | 11457.81  | 11366.232 | NM_014339 | 55860.492 | 51834.363 |
| NM_001141 | 793.463   | 864.639   | NM_003841 | 45683.914 | 48285.348 | NM_001495 | 4180.965  | 3192.124  |
| NM_000018 | 17841.697 | 16161.104 | AF296673  | 9800.089  | 8473.174  | NM_002288 | 1332.224  | 840.24    |
| AB028992  | 771.975   | 898.155   | AL137698  | 1079.815  | 1125.572  | NM_004416 | 29637.74  | 25777.455 |
| NM_001275 | 62667.023 | 59126.637 | AK024821  | 8339.066  | 7152.827  | NM_000628 | 5050.6    | 3768.053  |
| NM_000322 | 51361.953 | 51526.211 | AB002340  | 13576.628 | 13524.781 | AB005216  | 1584.819  | 1553      |
| L10139    | 690.783   | 773.166   | NM_000224 | 14043.077 | 13377.97  | NM_000325 | 14503.915 | 13853.595 |
| NM_000039 | 55890.391 | 54707.102 | NM_014328 | 5820.548  | 6254.775  | AF015041  | 6356.912  | 4703.095  |
| NM_020470 | 2711.287  | 4060.776  | NM_006414 | 11742.137 | 11856.192 | NM_002363 | 1443.112  | 1206.404  |
| NM_006574 | 888.286   | 1413.573  | NM_014322 | 21531.982 | 19562.48  | AK000184  | 2783.072  | 2652.511  |
| AA478950  | 4030.303  | 4988.243  | NM_004122 | 7058.784  | 6501.896  | AF055020  | 39103.25  | 38650.016 |
| BF942101  | 17429.086 | 20043.955 | NM_002928 | 30464.49  | 29698.9   | NM_006986 | 8403.389  | 8039.923  |
| BI825012  | 47007.227 | 48309.004 | NM_000160 | 4161.095  | 3900.376  | AF272043  | 2922.826  | 2294.846  |
| M21574    | 1859.889  | 1739.225  | NM_003301 | 2844.887  | 3208.905  | NM_002587 | 66318.648 | 70858.344 |
| BM051302  | 2172.523  | 2427.804  | NM_000955 | 5284.069  | 5287.339  | NM_002238 | 7306.05   | 7052.221  |
| BE314182  | 13534.242 | 13397.771 | U27768    | 9461.296  | 10350.222 | NM_004868 | 4972.626  | 6482.904  |
| AI808029  | 2953.879  | 2900.61   | NM_001742 | 467.965   | 582.193   | NM_004669 | 8372.081  | 9141.701  |
| AI971217  | 940.762   | 1171.996  | AF305550  | 9519.039  | 9873.875  | NM_007028 | 21254.951 | 27158.316 |
| X03225    | 4010.017  | 4529.708  | NM_003812 | 3110.938  | 2615.271  | NM_015865 | 1767.507  | 1523.902  |
| AK097395  | 17714.5   | 21651.145 | NM_000849 | 871.389   | 527.978   | NM_003055 | 25730.689 | 22536.301 |



|           |           |           |           |           |           |           |           |           |
|-----------|-----------|-----------|-----------|-----------|-----------|-----------|-----------|-----------|
| M12783    | 7303.771  | 7229.279  | NM_004678 | 3524.862  | 2903.373  | NM_005075 | 1738.502  | 1533.2    |
| AK091535  | 6428.591  | 5608.956  | NM_000322 | 44518.867 | 50852.395 | NM_006841 | 2517.635  | 2507.873  |
| AF085357  | 10535.767 | 8852.289  | NM_152747 | 2254.573  | 2121.454  | NM_014666 | 11229.735 | 10819.093 |
| AK092768  | 462.299   | 412.882   | NM_017415 | 2218.833  | 2456.638  | NM_005451 | 4621.507  | 5289.588  |
| NM_003841 | 1711.09   | 1871.708  | NM_001667 | 66287.805 | 64233.859 | NM_007172 | 6786.429  | 6306.267  |
| AF296673  | 6084.779  | 5234.683  | AB046834  | 4159.568  | 4691.281  | NM_013333 | 49353.406 | 49586.996 |
| AL137698  | 1115.258  | 785.448   | AB029033  | 43192.797 | 52821.184 | NM_002333 | 13850.813 | 12507.607 |
| NM_000383 | 4107.274  | 4810.283  | AF091034  | 4731.666  | 5144.858  | NM_003400 | 18416.188 | 19786.365 |
| NM_004633 | 2800.726  | 2256.49   | NM_005301 | 50640.027 | 54713.34  | NM_006705 | 20109.416 | 17260.541 |
| X01394    | 25313.061 | 31806.977 | NM_004167 | 1951.972  | 1985.499  | NM_014433 | 2989.45   | 2233.093  |
| NM_000041 | 27142.646 | 35589.926 | NM_016653 | 3766.958  | 3867.78   | NM_005582 | 26135.369 | 24426.793 |
| NM_002984 | 10193.369 | 14090.02  | AB035124  | 16082.574 | 17045.938 | NM_003826 | 858.372   | 280.879   |
| AB037752  | 7154.929  | 8055.834  | AF060170  | 3859.859  | 4076.608  | NM_012266 | 11954.181 | 10966.14  |
| AF317425  | 5662.299  | 5225.748  | NM_016602 | 3475.024  | 3619.201  | NM_004553 | 8026.699  | 7299.133  |
| AK024821  | 7003.087  | 6298.873  | NM_004409 | 16736.311 | 17262.785 | X56692    | 50081.242 | 53968.242 |
| AB002340  | 8025.17   | 8868.577  | AK023397  | 4014.35   | 4638.503  | NM_014476 | 1242.2    | 1529.163  |
| NM_000224 | 2079.195  | 2646.742  | NM_001725 | 13708.234 | 14874.923 | NM_014278 | 2476.254  | 2501.762  |
| NM_014328 | 6261.02   | 8740.953  | NM_002996 | 2193.876  | 2337.924  | NM_018962 | 7264.822  | 5741.755  |
| NM_006414 | 6907.514  | 8718.996  | NM_004633 | 4321.286  | 4273.699  | AF125100  | 5917.329  | 5461.69   |
| NM_014322 | 19386.729 | 19879.906 | X01394    | 62861.746 | 58270.496 | NM_007176 | 16789.977 | 15279.756 |
| NM_004122 | 6108.524  | 6996.08   | NM_000041 | 65197.289 | 59356.422 | NM_002722 | 5321.871  | 4578.401  |
| NM_002928 | 25490.357 | 26259.84  | NM_018002 | 6984.001  | 6582.645  | AF317058  | 2366.276  | 2685.556  |
| NM_000160 | 6626.385  | 6655.468  | NM_001141 | 2144.204  | 2143.882  | AK025965  | 3682.47   | 2768.743  |
| NM_003301 | 2223.158  | 2400.369  | NM_000018 | 10754.665 | 14487.637 | NM_016242 | 1621.455  | 1813.868  |
| NM_000955 | 2941.699  | 3115.306  | AB028992  | 1347.454  | 2215.814  | M22538    | 30210.965 | 25428.215 |
| U27768    | 5152.966  | 5031.052  | NM_018479 | 16062.836 | 18179.479 | NM_006028 | 1791.668  | 1499.741  |
| NM_001742 | 1194.125  | 1364.163  | NM_014362 | 2214.288  | 2311.713  | NM_014904 | 3025.259  | 2495.136  |
| U66582    | 22023.148 | 18577.709 | NM_018308 | 5244.696  | 4769.808  | AL137576  | 17058.602 | 13886.215 |
| NM_000950 | 11887.259 | 10917.247 | NM_001832 | 41750.078 | 48233.496 | NM_018358 | 12701.562 | 11403.117 |
| NM_005133 | 9498.663  | 9216.276  | NM_017774 | 28779.611 | 36499.434 | NM_016321 | 1999.057  | 1501.362  |
| NM_018308 | 1225.083  | 1021.656  | AB037716  | 4878.949  | 7216.396  | NM_013356 | 854.637   | 943.032   |
| NM_001832 | 4065.433  | 4580.085  | NM_004827 | 1288.806  | 3279.104  | AF131781  | 13897.474 | 21717.525 |
| NM_017774 | 25418.621 | 29384.443 | NM_016297 | 9592.074  | 12453.969 | NM_006516 | 26603.705 | 37087.797 |
| AB037716  | 5009.175  | 6152.171  | NM_001752 | 9621.787  | 14192.952 | AK022417  | 8665.419  | 8551.142  |
| NM_004827 | 521.2     | 900.264   | BC003406  | 1925.831  | 1945.253  | U50534    | 4953.488  | 4504.564  |
| NM_016297 | 1402.765  | 2129.832  | AL137672  | 1984.314  | 1963.882  | NM_014824 | 6347.593  | 5309.658  |
| NM_001752 | 6813.967  | 9019.136  | NM_002241 | 2146.304  | 1952.477  | AK000782  | 965.497   | 1034.419  |
| BC003406  | 1328.42   | 1117.128  | NM_014065 | 3641.052  | 3952.682  | NM_014504 | 6353.123  | 4346.681  |
| AL137672  | 1062.43   | 1852.307  | NM_001695 | 9078.659  | 8687.559  | NM_014408 | 24157.648 | 26699.938 |
| NM_012281 | 3183.259  | 5490.632  | NM_005509 | 4482.633  | 4395.819  | NM_014741 | 12747.954 | 15136.738 |
| NM_005509 | 2661.871  | 2918.578  | AL137698  | 975.221   | 852.725   | AF212247  | 8728.289  | 8380.064  |
| AF091034  | 4222.983  | 4668.709  | NM_000262 | 5662.615  | 5101.107  | AF161407  | 46143.781 | 47372.141 |
| NM_005301 | 22317.193 | 23107.537 | NM_017831 | 5204.459  | 5610.715  | NM_014738 | 9869.447  | 10036.579 |
| NM_004167 | 1141.147  | 988.429   | AK024393  | 1260.475  | 1274.113  | NM_016406 | 9309.003  | 5778.411  |
| NM_016653 | 3707.94   | 3635.968  | AK022537  | 12333.42  | 13313.056 | NM_018080 | 16676.713 | 12446.88  |
| AB035124  | 21808.074 | 19156.734 | AF064597  | 1716.634  | 1681.956  | AF174605  | 758.887   | 735.131   |
| AF060170  | 2103.382  | 1982.93   | NM_006345 | 4576.469  | 4843.769  | AL050107  | 1089.886  | 847.578   |
| NM_016602 | 1911.578  | 1930.37   | NM_006875 | 19933.139 | 18640.684 | NM_014453 | 47952.102 | 40975.355 |
| NM_004409 | 7978.915  | 9991.341  | D87119    | 19922.938 | 17364.004 | NM_005713 | 3354.672  | 2900.48   |
| AK023397  | 2238.146  | 2487.611  | AB037769  | 1757.602  | 1257.916  | AK021951  | 1738.213  | 1774.909  |
| NM_001725 | 2879.667  | 2632.075  | AL050040  | 1285.271  | 993.317   | AK023553  | 4907.97   | 4826.755  |
| NM_004079 | 15501.94  | 15061.992 | NM_006556 | 19254.148 | 18097.137 | NM_014600 | 2961.334  | 3064.658  |
| NM_000262 | 1414.297  | 1089.849  | AL133066  | 1416.699  | 1373.464  | NM_016733 | 3006.93   | 3484.919  |

|           |           |           |           |           |           |           |           |           |
|-----------|-----------|-----------|-----------|-----------|-----------|-----------|-----------|-----------|
| NM_017831 | 934.891   | 873.156   | AF264717  | 4521.327  | 4356.601  | AF181994  | 7866.844  | 8729.731  |
| AK024393  | 705.502   | 765.126   | NM_012260 | 23245.389 | 19026.5   | CY3Cy5    | 9583.135  | 576.918   |
| AK022537  | 11776.511 | 13748.144 | CY3Cy5    | 4320.322  | 819.122   | NM_058197 | 4952.67   | 6432.885  |
| AF116632  | 523.163   | 334.284   | NM_005060 | 4860.597  | 6090.214  | AF086314  | 642.283   | 751.915   |
| AF064597  | 1781.616  | 1477.03   | NM_005437 | 14798.268 | 19590.535 | NM_016364 | 1301.988  | 1009.878  |
| NM_006345 | 4824.043  | 7815.09   | NM_018319 | 11461.633 | 15840.352 | AF086419  | 3946.948  | 2906.935  |
| NM_006875 | 24231.203 | 27717.451 | AL359559  | 569.269   | 868.603   | AF086461  | 829.014   | 715.644   |
| D87119    | 3820.216  | 4901.053  | AY008301  | 523.231   | 975.34    | AL833296  | 4883.778  | 4899.806  |
| AB037769  | 1075.711  | 1244.84   | AK024063  | 698.989   | 917.433   | AL110240  | 7831.479  | 8857.809  |
| AL050040  | 933.941   | 883.142   | AK021714  | 2350.617  | 2697.78   | AF070549  | 1145.872  | 1145.12   |
| NM_006556 | 20405.955 | 23352.271 | NM_020314 | 4134.514  | 4358.05   | AK025695  | 4452.307  | 5510.832  |
| AL133066  | 1211.295  | 1342.221  | AK022972  | 4972.231  | 4394.308  | AK025442  | 3880.623  | 4884.042  |
| AF264717  | 2721.65   | 3268.741  | AK025996  | 3069.753  | 2905.064  | AL050041  | 1703.536  | 2088.344  |
| NM_012260 | 5590.329  | 5053.026  | NM_005715 | 13037.448 | 13716.097 | NM_058197 | 5132.088  | 5411.89   |
| NM_001141 | 958.11    | 868.221   | AK026992  | 4258.401  | 3217.534  | SR4       | 17957.012 | 31701.787 |
| NM_000018 | 18190.953 | 17175.422 | X81895    | 869.69    | 1077.796  | SR6       | 2219.64   | 3912.127  |
| AB028992  | 930.686   | 941.708   | AL137343  | 1183.248  | 1165.844  | SR8       | 7819.535  | 41413.75  |
| NM_018479 | 16640.359 | 13792.592 | NM_005060 | 2826.026  | 2383.706  | SR10      | 27054.961 | 18534.043 |
| NM_014362 | 2313.814  | 2454.487  | NM_005437 | 9534.948  | 9965.85   | CY3Cy5    | 7423.15   | 356.404   |
| L10139    | 1220.082  | 1383.732  | SR5       | 3521.429  | 4281.148  | AK024713  | 1016.2    | 1816.294  |
| NM_000039 | 49615.035 | 44259.656 | SR7       | 3921.642  | 38353.727 | AK024204  | 719.807   | 923.63    |
| NM_020470 | 2160.646  | 2845.097  | SR9       | 15353.412 | 3880.433  | AK023737  | 1209.616  | 1239.925  |
| NM_006574 | 751.659   | 1037.375  | CY3Cy5    | 2412.118  | 621.322   | NM_006609 | 4535.681  | 3609.941  |
| AA478950  | 4190.961  | 4953.767  | M25785    | 1825.171  | 2019.52   | AK023525  | 6205.843  | 6291.063  |
| BF942101  | 12131.862 | 12802.886 | M32443    | 5579.362  | 7066.147  | AF085829  | 1804.076  | 1641.233  |
| BI825012  | 43710.242 | 49508.707 | M73048    | 3032.457  | 5204.838  | AF075029  | 1156.109  | 1039.707  |
| M21574    | 2384.774  | 2789.806  | D16908    | 2522.493  | 3186.41   | AK021903  | 7908.441  | 8016.743  |
| BM051302  | 2406.115  | 2610.731  | D16477    | 1152.94   | 1588.09   | AL390143  | 7398.225  | 7819.716  |
| BE314182  | 15225.044 | 15802.055 | AK024759  | 756.2     | 1029.696  | AL162075  | 3173.981  | 3336.4    |
| AI808029  | 2887.374  | 3233.114  | AK023754  | 1704.685  | 1650.497  | AF147384  | 1860.222  | 2712.838  |
| AI971217  | 949.324   | 1176.502  | AK021689  | 902.656   | 512.104   | AK021595  | 1747.509  | 2222.989  |
| X03225    | 4755.394  | 4828.474  | AK024737  | 3390.81   | 3207.205  | NM_018410 | 5022.301  | 6386.959  |
| AK097395  | 16958.313 | 18700.889 | AB007890  | 17313.07  | 14816.207 | AF086355  | 1404.382  | 1159.296  |
| M12783    | 7444.49   | 7139.693  | AF070591  | 1669.426  | 1625.579  | AL110173  | 1260.746  | 1326.411  |
| AK091535  | 5397.756  | 4244.105  | AB020633  | 1150.949  | 1758.783  | AK024106  | 2015.107  | 2282.125  |
| AF085357  | 11974.047 | 9566.505  | AK025445  | 14046.285 | 11297.331 | AK027254  | 2262.83   | 2301.765  |
| AK092768  | 844.048   | 982.039   | AL357200  | 3095.975  | 2959.835  | AK021772  | 2895.531  | 2514.415  |
| NM_003841 | 2011.933  | 2721.326  | AK024527  | 623.202   | 743.228   | AK026297  | 6652.255  | 6162.899  |
| AF296673  | 6775.553  | 6066.964  | AK025051  | 2044.861  | 2951.153  | AF075081  | 808.757   | 401.358   |
| AK024821  | 6326.599  | 6014.114  | AK024553  | 69818.055 | 63893.418 | AF085919  | 753.343   | 1170.349  |
| AB002340  | 5405.322  | 6348.667  | AK024930  | 1902.946  | 2615.873  | AF085933  | 1336.076  | 1363.885  |
| NM_000224 | 2625.321  | 2806.603  | AK026702  | 605.996   | 548.174   | AF147431  | 1564.903  | 1708.819  |
| NM_014328 | 6585.205  | 6268.805  | AF086168  | 1300.218  | 1331.696  | AK026422  | 12553.72  | 13667.848 |
| NM_006414 | 4802.579  | 4123.916  | NM_017864 | 10655.161 | 9598.916  | AF085938  | 1148.774  | 2034.195  |
| NM_014322 | 20206.096 | 17895.771 | NM_004869 | 4348.599  | 4538.769  | AK022264  | 1621.801  | 2357.533  |
| NM_004122 | 6939.019  | 8166.248  | AF136408  | 882.074   | 798.766   | AL137331  | 2793.556  | 4754.647  |
| NM_002928 | 28194.252 | 30099.189 | AJ002787  | 10036.885 | 10598.045 | AL162040  | 9137.885  | 9649.335  |
| NM_000160 | 9420.999  | 9884.244  | Z70764    | 2552.904  | 2491.495  | AL442084  | 1441.943  | 1920.606  |
| NM_003301 | 2651.795  | 3809.569  | AF086214  | 850.411   | 1437.899  | AL137596  | 5364.733  | 6176.821  |
| NM_000955 | 3531.549  | 3811.733  | AK026860  | 6195.024  | 7922.359  | AL353942  | 29984.961 | 33660.605 |
| U27768    | 4991.516  | 5647.671  | AK024211  | 1987.199  | 2806.779  | Z38010    | 34909.363 | 37337.535 |
| NM_001742 | 845.469   | 1082.706  | NM_014898 | 834.846   | 2690.606  | AF088003  | 724.791   | 939.82    |
| AF305550  | 7749.688  | 7386.086  | AK023435  | 2199.386  | 2331.521  | AK025799  | 1269.842  | 1852.256  |

|           |           |           |           |           |           |           |           |           |
|-----------|-----------|-----------|-----------|-----------|-----------|-----------|-----------|-----------|
| U66582    | 21434.695 | 17774.563 | AK022309  | 1957.348  | 1967.721  | AK022857  | 573.726   | 1193.216  |
| NM_00619E | 3759.474  | 3363.919  | AK000063  | 1279.821  | 1251.678  | AL110206  | 5157.655  | 5617.721  |
| NM_003812 | 1115.336  | 1212.625  | AK000792  | 520.968   | 765.187   | NM_004821 | 2163.231  | 2307.718  |
| NM_00084C | 588.75    | 390.787   | AK000949  | 2114.923  | 2364.116  | AK024292  | 1089.849  | 1317.431  |
| NM_00467E | 2888.911  | 2074.448  | AK027068  | 1441.259  | 1700.042  | AK026263  | 3702.23   | 3246.849  |
| NM_00095C | 11825.435 | 10157.506 | AK000165  | 594.688   | 657.629   | AK023643  | 879.992   | 1003.109  |
| NM_00513C | 9889.227  | 9480.396  | AK000974  | 5032.453  | 5316.952  | AL390159  | 1274.865  | 1116.3    |
| NM_00127E | 62638.621 | 59117.254 | NM_006233 | 16144.046 | 18866.039 | NM_014157 | 669.892   | 1209.637  |
| NM_000322 | 53575.219 | 54110.836 | AK021889  | 1247.145  | 1521.228  | AF090933  | 1103.231  | 1065.769  |
| NM_152747 | 2995.839  | 3312.357  | AK000992  | 2866.888  | 4147.537  | AF111851  | 7150.582  | 6859.998  |
| NM_01741E | 2112.588  | 2235.426  | L23544    | 26608.955 | 27733.045 | AF152529  | 831.425   | 795.024   |
| NM_001667 | 29537.584 | 31356.945 | NM_01902C | 3904.984  | 4180.64   | AL360200  | 1140.641  | 1394.634  |
| AB046834  | 1005.734  | 974.388   | AF119892  | 510.682   | 569.329   | AK021992  | 1729.695  | 1379.297  |
| AB029033  | 7206.032  | 7580.218  | NM_016474 | 1550.564  | 1551.899  | AK022102  | 783.132   | 1074.829  |
| AF091034  | 5401.682  | 5259.288  | AF143879  | 8409.291  | 10007.298 | AK022235  | 1119.175  | 1111.309  |
| NM_005301 | 28040.141 | 40001.762 | AK024621  | 27403.242 | 37793.637 | AK022009  | 785.749   | 942.448   |
| NM_004167 | 797.059   | 1924.096  | AL157449  | 33781.953 | 28674.01  | AK022401  | 775.722   | 840.98    |
| NM_016653 | 4556.309  | 5290.461  | AL117582  | 2358.23   | 1715.42   | AK022078  | 1208.483  | 2523.902  |
| AB035124  | 25047.701 | 29491.109 | AK025525  | 1491.443  | 1496.2    | AL133104  | 718.294   | 716.983   |
| AF060170  | 2272.387  | 2434.231  | L09095    | 23852.092 | 28784.949 | AF075101  | 778.792   | 919.206   |
| NM_016602 | 1412.895  | 1546.828  | NM_018233 | 31042.75  | 34080.676 | NM_020224 | 12986.425 | 13630.713 |
| NM_00440E | 7299.748  | 6990.016  | AV740891  | 3099.293  | 3136.261  | U17617    | 5467.251  | 4682.874  |
| AK023397  | 2637.126  | 2611.462  | AF143329  | 883.252   | 864.308   | NM_01410C | 480.987   | 426.827   |
| NM_00172E | 2603.294  | 2718.5    | AF090916  | 870.7     | 982.737   | AK022952  | 11534.949 | 11554.558 |
| NM_00407E | 17161.484 | 14828.401 | AL390183  | 1433.16   | 1796.766  | BF218888  | 880.957   | 908.58    |
| NM_000383 | 5779.124  | 5440.253  | Y13897    | 1821.158  | 2451.957  | AK021770  | 1048.759  | 1172.901  |
| NM_004633 | 3343.753  | 2665.386  | AK001857  | 2383.021  | 2800.698  | AK027248  | 3218.158  | 3684.063  |
| X01394    | 26051.986 | 24436.572 | AK021525  | 904.554   | 878.134   | AK022804  | 19447.688 | 21534.533 |
| NM_000041 | 26825.238 | 21806.713 | AF067801  | 1043.314  | 1536.336  | AF009263  | 2504.434  | 2437.258  |
| NM_002984 | 13143.406 | 11588.775 | AL133577  | 6043.37   | 6012.777  | AF009283  | 1700.604  | 1736.326  |
| AB037752  | 9351.234  | 8774.232  | AF279773  | 1066.202  | 1187.1    | AF086329  | 8416.413  | 8496.5    |
| AF317425  | 6284.841  | 5171.906  | AK025378  | 13559.701 | 15464.298 | U92989    | 6768.176  | 9551.205  |
| NM_018002 | 7719.811  | 10814.758 | NM_00047E | 5975.974  | 6493.489  | AF075102  | 3489.495  | 3720.988  |
| NM_00001E | 15378.726 | 18966.209 | AF038199  | 2998.628  | 2862.646  | NM_018463 | 30828.063 | 39120.336 |
| AB028992  | 1531.226  | 1895.999  | AF086035  | 10935.344 | 10721.441 | X74956    | 56216.734 | 57116.863 |
| NM_01847E | 15573.614 | 16933.713 | AK022159  | 8098.714  | 8596.479  | AF132197  | 10266.552 | 11760.111 |
| NM_014362 | 3245.498  | 4361.709  | D16905    | 4512.914  | 828.98    | AK025546  | 1164.917  | 1373.021  |
| NM_01830E | 1280.824  | 984.59    | AF007136  | 579.944   | 525.298   | AF278761  | 625.609   | 1232.068  |
| NM_001832 | 4406.276  | 4824.089  | U25750    | 11474.978 | 10508.5   | AL137487  | 2118.098  | 1739.028  |
| NM_017774 | 31517.727 | 36611.398 | AK023691  | 11442.449 | 10784.596 | AK023800  | 1740.168  | 2031.283  |
| AB037716  | 3982.182  | 3963.196  | AK023502  | 750.95    | 715.987   | AK024120  | 3332.335  | 3192.698  |
| NM_00192E | 576.015   | 628.88    | AK026744  | 1276.494  | 1256.724  | AF056455  | 20816.516 | 21179.701 |
| NM_016297 | 1935.431  | 1933.548  | NM_005234 | 11117.237 | 11378.165 | NM_01851C | 1910.082  | 1832.96   |
| NM_001752 | 6985.438  | 7042.444  | BC023536  | 975.855   | 1221.39   | U50537    | 1783.146  | 2161.435  |
| BC003406  | 1386.074  | 1084.659  | NM_001803 | 19881.846 | 23207.453 | AK024988  | 1499.826  | 1551.418  |
| AL137672  | 1279.471  | 1195.768  | NM_012297 | 19053.713 | 25993.844 | AF026943  | 3032.095  | 4808.587  |
| X64177    | 986.818   | 1653.569  | AB007925  | 68364.57  | 60380.848 | L77582    | 983.345   | 995.339   |
| NM_015994 | 6578.346  | 6429.589  | NM_01818C | 2766.053  | 3068.394  | NM_02044E | 1734.201  | 1314.725  |
| NM_00223E | 927.986   | 1008.724  | NM_000361 | 17454.729 | 20327.225 | NM_00541E | 5445.591  | 6268.095  |
| NM_002241 | 305.304   | 239.203   | NM_00247E | 52808.707 | 54296.707 | NM_00347E | 23368.389 | 23113.266 |
| NM_01406E | 2411.705  | 1880.757  | NM_017987 | 5554.825  | 7744.725  | NM_006773 | 5742.308  | 8253.779  |
| NM_00169E | 10330.811 | 7195.903  | NM_018203 | 925.948   | 1061.659  | AK024439  | 18858.223 | 26470.832 |
| NM_00224E | 2234.14   | 2285.393  | NM_014244 | 965.825   | 1097.604  | X89676    | 3228.511  | 3495.387  |

|           |           |           |           |           |           |           |           |           |
|-----------|-----------|-----------|-----------|-----------|-----------|-----------|-----------|-----------|
| NM_012281 | 3160.158  | 2528.749  | NM_000910 | 2719.979  | 2432.003  | NM_012444 | 918.283   | 1354.542  |
| AK025772  | 4838.107  | 4231.977  | AL117560  | 26219.504 | 24460.662 | Z32684    | 6817.332  | 9267.67   |
| NM_005505 | 3769.931  | 3317.61   | M24749    | 8852.589  | 8991.936  | NM_016512 | 1708.446  | 1473.785  |
| AL137698  | 683.733   | 513.084   | NM_005831 | 49361.016 | 47624.984 | NM_017485 | 8040.809  | 9031.016  |
| NM_000262 | 1639.058  | 1322.386  | NM_000554 | 37362.656 | 37318.547 | AY009400  | 7967.947  | 8315.267  |
| NM_017831 | 1041.126  | 1409.953  | AF009317  | 6344.572  | 6515.797  | NM_005065 | 1402.084  | 1258.957  |
| AK024393  | 756.079   | 834.038   | AK026583  | 9811.427  | 8900.079  | AF086401  | 5604.25   | 5214.283  |
| AK022537  | 11112.721 | 8979.879  | AF218031  | 8461.271  | 10418.67  | L23869    | 1930.589  | 1472.335  |
| AF064597  | 1813.573  | 1430.94   | AF210650  | 4164.051  | 4155.398  | Z21853    | 4286.866  | 3507.996  |
| AF198444  | 576.89    | 552.644   | NM_018355 | 3226.697  | 3398.217  | U80770    | 1619.99   | 1431.402  |
| NM_006345 | 4753.431  | 4074.945  | AF085896  | 951.414   | 1135.939  | AB075846  | 1159.565  | 1185.283  |
| NM_006875 | 27284.305 | 21081.514 | X74613    | 54951.352 | 52236.488 | NM_018342 | 3572.96   | 3343.443  |
| D87119    | 4568.419  | 4069.292  | AF075080  | 27909.527 | 29096.705 | BC020260  | 5818.102  | 5380.062  |
| AB037769  | 1373.379  | 1024.051  | NM_004615 | 3243.476  | 3851.751  | D17156    | 11574.186 | 10347.251 |
| AL050040  | 1528.318  | 1080.148  | NM_004360 | 2372.256  | 3167.082  | L04461    | 1261.915  | 1532.615  |
| NM_006555 | 21994.455 | 16760.309 | NM_003821 | 15313.671 | 16399.043 | AK024373  | 16395.969 | 20253.299 |
| AL133066  | 1240.432  | 986.703   | NM_017692 | 4792.458  | 6104.542  | AK022343  | 17278.236 | 22664.83  |
| AF264717  | 3364.244  | 2997.177  | NM_004834 | 17736.912 | 20680.223 | AF119870  | 702.266   | 911.24    |
| NM_012260 | 6597.027  | 5750.212  | NM_018173 | 690.675   | 876.456   | AK026400  | 3238.266  | 3016.146  |
| CY3Cy5    | 6699.506  | 1043.723  | NM_000812 | 3833.548  | 4996.49   | NM_004145 | 8289.846  | 11887.923 |
| NM_005060 | 1625.98   | 1347.481  | AK024747  | 15131.762 | 14406.078 | X03168    | 4040.892  | 5172.278  |
| NM_005437 | 14415.685 | 13320.835 | NM_006390 | 3526.757  | 2900.338  | NM_005165 | 8688.878  | 11281.203 |
| NM_018315 | 2778.618  | 2768.96   | NM_006505 | 1257.813  | 1260.528  | NM_017801 | 10968.25  | 13877.552 |
| AL359559  | 913.866   | 672.468   | NM_003235 | 27671.197 | 24760.875 | NM_007345 | 5912.886  | 6093.461  |
| AY008301  | 795.714   | 793.677   | AB042562  | 1765.382  | 1288.647  | NM_016953 | 870.606   | 903.907   |
| AK024063  | 1609.026  | 1240.995  | NM_002375 | 7056.543  | 6345.804  | U65473    | 18850.211 | 21619.604 |
| AK021714  | 2501.443  | 2644.876  | NM_001364 | 898.483   | 1056.048  | D63481    | 57088.129 | 56553.742 |
| NM_020314 | 5224.581  | 4778.971  | NM_003725 | 535.541   | 633.12    | AY009951  | 1277.913  | 1062.663  |
| AK022972  | 7435.184  | 6707.422  | NM_006097 | 4450.276  | 5265.923  | AL157424  | 1732.206  | 1811.673  |
| AK025996  | 2177.878  | 2204.838  | NM_006113 | 1678.877  | 2271.765  | AK024422  | 714.964   | 632.719   |
| NM_017595 | 586.085   | 503.191   | NM_015313 | 2111.656  | 1961.007  | NM_002673 | 814.398   | 521.862   |
| AF088015  | 794.981   | 682.532   | AK022287  | 9355.859  | 10535.128 | NM_003875 | 8369.133  | 7792.354  |
| NM_005715 | 5955.037  | 4372.371  | NM_015897 | 1892.484  | 2144.395  | AJ276310  | 1068.619  | 782.88    |
| AK026992  | 4759.976  | 2796.95   | AF177473  | 68743.938 | 74676.227 | NM_012295 | 14628.277 | 13923.871 |
| X81895    | 1237.848  | 771.92    | NM_000545 | 39423.578 | 57080.629 | NM_015910 | 1558.767  | 1352.544  |
| AL137343  | 1308.122  | 1238.115  | AB023223  | 1710.874  | 2201.684  | NM_000222 | 941.586   | 496.037   |
| NM_005060 | 1834.048  | 1276.695  | AB018257  | 8962.349  | 10751.153 | AL133666  | 4932.542  | 4131.255  |
| NM_005437 | 18929.932 | 19103.949 | NM_002705 | 27572.521 | 34472.48  | NM_000663 | 1944.495  | 1152.645  |
| SR5       | 5918.532  | 8228.994  | AK001059  | 4348.784  | 4601.869  | NM_004395 | 23843.051 | 25138.188 |
| SR7       | 7764.003  | 56416.203 | NM_007282 | 7811.527  | 8512.35   | NM_017995 | 6058.185  | 5631.846  |
| SR9       | 27076.287 | 7141.398  | NM_017770 | 880.166   | 727.237   | NM_015985 | 66074.969 | 60402.598 |
| CY3Cy5    | 18544.232 | 1675.248  | NM_017610 | 1503.306  | 1744.655  | NM_001043 | 12661.248 | 11206.334 |
| M25785    | 2154.694  | 1982.201  | AL122070  | 718.819   | 654.894   | NM_014395 | 1002.905  | 980.758   |
| M32443    | 1203.355  | 987.337   | AK025133  | 28530.357 | 29203.73  | AF113685  | 2699.948  | 3560.239  |
| D16908    | 1714.956  | 1778.124  | AB020704  | 2013.814  | 1671.052  | NM_005470 | 12937.104 | 17346.406 |
| D16477    | 1960.005  | 1866.467  | NM_020197 | 797.177   | 717.376   | AF142570  | 2653.309  | 3226.195  |
| AK024759  | 938.53    | 798.731   | NM_004087 | 5234.677  | 4064.819  | NM_004225 | 25314.289 | 25677.053 |
| AK025078  | 1071.765  | 710.27    | NM_018700 | 1090.414  | 1416.89   | NM_003862 | 3463.254  | 3494.344  |
| AK023754  | 725.474   | 571.586   | NM_000119 | 7437.35   | 8101.576  | NM_002873 | 9342.631  | 8304.472  |
| AK021689  | 909.148   | 615.261   | NM_001065 | 2903.432  | 3235.128  | NM_015571 | 25817.186 | 22779.252 |
| AK024737  | 4021.311  | 3439.226  | AK027100  | 1898.223  | 3049.699  | NM_004701 | 12160.248 | 12319.249 |
| AB007890  | 7647.181  | 5312.576  | AY010111  | 1624.24   | 1500.515  | AK025554  | 3216.315  | 3247.396  |
| AF070591  | 2194.211  | 1944.053  | NM_003622 | 6564.098  | 4797.396  | BI824151  | 7378.658  | 7569.334  |

|           |           |           |           |           |           |           |           |           |
|-----------|-----------|-----------|-----------|-----------|-----------|-----------|-----------|-----------|
| NM_020411 | 697.141   | 617.271   | NM_007115 | 2711.879  | 2960.978  | AK021791  | 10080.291 | 8470.269  |
| AB020633  | 3282.387  | 2563.359  | AK021645  | 2006.286  | 2642.512  | NM_005019 | 785.571   | 631.004   |
| AK025445  | 19646.471 | 14997.666 | NM_013339 | 3909.709  | 5203.901  | NM_004052 | 2952.883  | 2533.248  |
| AL357200  | 1811.81   | 1777.058  | NM_001491 | 8876.988  | 11346.831 | NM_004394 | 13058.793 | 11691.09  |
| NM_017727 | 20460.402 | 20580.982 | NM_002642 | 931.767   | 818.696   | NM_005727 | 52541.426 | 56467.887 |
| AK025051  | 2681.071  | 3171.625  | AK026541  | 4854.802  | 6420.451  | AK027242  | 4277.474  | 3734.005  |
| AK024553  | 7241.463  | 9934.75   | NM_005899 | 47050.953 | 53047.84  | NM_001279 | 34834.371 | 26528.541 |
| AK024930  | 717.99    | 823.934   | D42055    | 10011.124 | 11342.682 | NM_005010 | 9716.604  | 12519.046 |
| AK026702  | 593.049   | 747.605   | AL137349  | 6230.313  | 6994.422  | NM_019055 | 7433.04   | 6387.182  |
| AF086168  | 1700.765  | 1691.382  | NM_003339 | 1469.012  | 1619.793  | NM_020199 | 1549.669  | 1655.31   |
| AF007132  | 1127.942  | 1042.532  | NM_004562 | 1080.978  | 1103.208  | U96136    | 896.32    | 822.644   |
| AK026711  | 1259.258  | 1118.146  | NM_016476 | 42139.152 | 45275.516 | NM_017586 | 36878.988 | 34239.324 |
| NM_017864 | 10181.922 | 8382.392  | NM_015902 | 4471.436  | 3138.681  | NM_005941 | 1496.736  | 1748.75   |
| NM_004869 | 4771.096  | 4153.955  | NM_020155 | 7711.891  | 7058.763  | NM_015884 | 1118.074  | 1336.159  |
| AF136408  | 978.714   | 774.236   | BE874471  | 4244.811  | 4068.082  | AF201380  | 4370.94   | 6395.832  |
| AL110203  | 1475.348  | 985.92    | NM_006121 | 2664.301  | 2797.61   | NM_003619 | 918.326   | 932.347   |
| AJ011595  | 841.451   | 622.14    | AK023520  | 9002.09   | 7169.689  | NM_012392 | 4966.517  | 6021.64   |
| X93501    | 593.031   | 339.674   | NM_004693 | 713.843   | 814.862   | NM_014833 | 45457.594 | 44696.938 |
| AJ011602  | 1353.854  | 1174.091  | NM_007211 | 10218.891 | 9209.824  | NM_000045 | 2831.99   | 2978.703  |
| AJ002787  | 2123.182  | 1624.58   | AB011152  | 2324.268  | 2111.083  | NM_003878 | 16296.106 | 17159.582 |
| Z70764    | 1956.896  | 1644.128  | NM_014956 | 9052.027  | 10392.11  | NM_004832 | 2261.45   | 2020.569  |
| AL049252  | 837.891   | 618.106   | AB014592  | 1342.551  | 1890.849  | NM_005957 | 1687.568  | 1757.749  |
| Z83948    | 1069.074  | 813.662   | NM_016952 | 1540.369  | 1817.154  | AK024374  | 3236.522  | 3395.44   |
| AK026860  | 4422.271  | 5435.801  | NM_001654 | 4395.276  | 4445.218  | NM_007101 | 3200.022  | 2687.789  |
| NM_014895 | 1269.054  | 1624.202  | NM_005436 | 18364.592 | 20507.539 | NM_018234 | 1013.243  | 1317.902  |
| AK021432  | 513.497   | 679.242   | AK024418  | 3849.859  | 4750.041  | AB033062  | 2712.822  | 2118.182  |
| AK026808  | 607.942   | 1022.265  | NM_003367 | 21092.561 | 20480.447 | NM_016437 | 46048.98  | 42054.238 |
| AK022309  | 2353.966  | 2144.292  | NM_005194 | 17958.693 | 20080.395 | NM_002720 | 14744.26  | 13092.639 |
| AK000063  | 1338.403  | 1328.731  | AB002296  | 4953.853  | 5834.214  | AK024716  | 51626.852 | 46122.285 |
| AK000792  | 867.344   | 608.79    | NM_014315 | 8902.253  | 10502.32  | X67155    | 3100.337  | 3043.556  |
| AK000949  | 3544.817  | 2947.208  | NM_012087 | 3582.653  | 4959.529  | NM_020380 | 6904.664  | 6770.183  |
| AK027068  | 1338.703  | 933.114   | AF165520  | 10563.256 | 9707.282  | AL137519  | 1638.04   | 1090.068  |
| AK000165  | 771.015   | 578.165   | AK026072  | 1645.83   | 1642.455  | NM_002890 | 61409.898 | 56793.094 |
| AK000974  | 7570.897  | 5209.078  | NM_004289 | 1185.063  | 1264.453  | NM_001330 | 65063.746 | 60411.121 |
| NM_006233 | 18975.293 | 18084.805 | NM_015679 | 6647.301  | 6909.163  | NM_015927 | 2956.975  | 2089.537  |
| AK021889  | 1279.712  | 1221.101  | AF299118  | 65077.625 | 57590.625 | NM_004779 | 14786.83  | 13783.38  |
| AK023736  | 630.311   | 873.578   | AK025353  | 29845.047 | 22906.686 | NM_019071 | 9956.105  | 8316.243  |
| AK000992  | 3535.024  | 4186.494  | AK056896  | 47291.066 | 45540.652 | NM_001913 | 11049.383 | 16100.423 |
| L23544    | 31457.297 | 28132.279 | AK022763  | 33467.207 | 29080.408 | AK025594  | 2103.652  | 2423.233  |
| NM_019020 | 5503.971  | 7096.308  | NM_000976 | 63478.383 | 56702.051 | AB040931  | 9050.681  | 9784.273  |
| AF119892  | 874.055   | 1097.092  | NM_001000 | 65697.133 | 56048.512 | NM_003599 | 2133.084  | 2176.212  |
| NM_016474 | 1765.493  | 2097.28   | AF288207  | 39252.563 | 41658.848 | NM_015911 | 2522.091  | 2866.444  |
| AL833081  | 474.642   | 602.055   | NM_001001 | 67246.844 | 58687.207 | BC011826  | 9214.418  | 8845.024  |
| AF143879  | 7762.392  | 9453.196  | NM_001774 | 51218.828 | 52310.609 | NM_017647 | 7038.839  | 7083.604  |
| AK024621  | 28948.953 | 31564.4   | NM_005023 | 744.582   | 885.045   | NM_012091 | 2729.236  | 2309.188  |
| AL157449  | 44726.602 | 48692.609 | NM_006830 | 66403.805 | 59910.813 | NM_012321 | 11795.388 | 10231.784 |
| AL117582  | 6293.558  | 5210.333  | AK026414  | 33738.242 | 44188.699 | D13642    | 8129.751  | 7597.46   |
| AK025525  | 1081.115  | 1537.315  | D17297    | 2838.095  | 2812.83   | NM_004741 | 34588.637 | 29088.125 |
| NM_018166 | 736.049   | 710.05    | NM_004074 | 43614.531 | 49933.938 | NM_018032 | 8670.244  | 6099.398  |
| L09095    | 1914.55   | 1773.793  | NM_002626 | 59476.527 | 56481.992 | NM_003675 | 36547.973 | 28927.643 |
| NM_018233 | 9992.143  | 10216.124 | NM_018436 | 33361.957 | 42749.602 | NM_017518 | 5038.655  | 4149.014  |
| AV740891  | 3103.349  | 2891.159  | AF157115  | 12199.128 | 13604.125 | NM_004117 | 7832.124  | 7771.313  |
| AF143329  | 619.208   | 627.448   | AJ223353  | 15396.002 | 14930.399 | NM_016594 | 35842.992 | 29334.133 |

|           |           |           |           |           |           |           |           |           |
|-----------|-----------|-----------|-----------|-----------|-----------|-----------|-----------|-----------|
| AF090916  | 596.244   | 497.744   | NM_012241 | 11078.447 | 10418.282 | NM_030752 | 21368.102 | 17745.57  |
| AL390183  | 814.862   | 875.574   | AF250288  | 1226.577  | 929.534   | D26068    | 56034.645 | 49527.422 |
| Y13897    | 1650.601  | 1880.801  | NM_018486 | 3003.904  | 2705.793  | NM_018556 | 45046.094 | 39481.055 |
| AK001857  | 1352.66   | 1885.393  | NM_005324 | 20085.107 | 20728.154 | NM_017593 | 8777.218  | 6935.064  |
| AK021525  | 628.336   | 771.582   | AL080201  | 33546.32  | 32639.438 | NM_004282 | 27995.688 | 24859.76  |
| AF067801  | 1060.465  | 1465.504  | NM_015363 | 1528.231  | 1491.681  | AF188747  | 3173.236  | 2375.496  |
| AL133577  | 4182.603  | 4147.902  | NM_001806 | 10215.048 | 7759.068  | NM_002773 | 2215.985  | 2267.894  |
| AK025378  | 816.41    | 991.34    | AB040941  | 5985.658  | 5936.354  | NM_013411 | 4572.414  | 7199.522  |
| NM_000479 | 4576.434  | 4875.31   | AL137241  | 1320.618  | 1048.395  | AB007956  | 733.34    | 1100.768  |
| AF038199  | 3818.571  | 5118.084  | AB037742  | 2937.973  | 3371.27   | NM_020200 | 2925.805  | 4080.469  |
| AF086035  | 15733.596 | 19143.291 | AF272375  | 2599.095  | 2789.258  | NM_000156 | 1314.701  | 1116.308  |
| AK022159  | 10427.657 | 11988.623 | NM_014519 | 4273.559  | 4968.114  | NM_000180 | 49307.582 | 50857.609 |
| D16905    | 695.088   | 802.371   | NM_002517 | 2947.86   | 2432.665  | NM_000858 | 26368.785 | 25387.115 |
| AJ012491  | 1135.48   | 1271.143  | NM_007147 | 65557.984 | 52507.172 | AF254087  | 4835.887  | 5503.335  |
| AF007136  | 431.521   | 656.475   | X65463    | 6646.066  | 6367.317  | NM_017715 | 4207.939  | 4696.802  |
| U25750    | 3679.649  | 4793.027  | NM_002238 | 5123.183  | 6271.729  | AL117607  | 5286.463  | 4529.088  |
| AK023691  | 16651.725 | 18461.398 | NM_004868 | 5718.84   | 6606.517  | AB037774  | 3168.335  | 2937.572  |
| AK023502  | 844.926   | 900.056   | NM_004669 | 5728.995  | 6680.512  | NM_005438 | 2092.773  | 2088.095  |
| AF014456  | 710.513   | 747.869   | NM_007028 | 14302.912 | 17023.514 | AK024361  | 3809.557  | 3804.525  |
| AK026744  | 1548.533  | 1507.349  | AF130728  | 2032.83   | 2110.584  | NM_004350 | 12274.765 | 8881.511  |
| NM_005234 | 14638.689 | 13361.174 | NM_004987 | 1204.687  | 1416.427  | NM_018044 | 13036.7   | 11214.273 |
| BC023536  | 1760.648  | 1372.946  | NM_001289 | 30332.217 | 40731.102 | NM_004503 | 1680.822  | 1231.287  |
| NM_001803 | 32450.57  | 32205.613 | NM_001131 | 68671.578 | 61059.582 | NM_001717 | 894.68    | 848.659   |
| NM_012297 | 8062.022  | 10845.069 | M54894    | 1552.975  | 1012.706  | AF274347  | 10201.844 | 7211.676  |
| AB007925  | 9180.021  | 11518.205 | BG752013  | 1837.821  | 1773.025  | AK001144  | 1209.999  | 1138.762  |
| NM_018180 | 568.674   | 756.765   | X07696    | 15268.534 | 16559.051 | NM_018555 | 6903.161  | 5891.888  |
| NM_000361 | 23150.332 | 24045.029 | AA481015  | 2458.237  | 2552.373  | NM_005122 | 1564.957  | 1418.832  |
| NM_002475 | 36904.34  | 34125.793 | AI393201  | 17364.1   | 16135.978 | AL133055  | 632.688   | 267.788   |
| NM_003836 | 4756.923  | 4887.24   | M34664    | 59746.254 | 56083.254 | NM_014552 | 9169.762  | 7028.085  |
| NM_017987 | 1916.707  | 1904.553  | Z15108    | 7035.322  | 6873.178  | NM_003072 | 28013.305 | 26047.393 |
| NM_019039 | 619.424   | 619.519   | M55284    | 1403.565  | 1473.218  | L09081    | 27055.068 | 35787.805 |
| NM_018203 | 1494.285  | 1831.903  | AA001218  | 2151.505  | 2370.089  | NM_000218 | 67511.133 | 67146.828 |
| NM_014244 | 625.703   | 888.763   | AA679391  | 2142.379  | 1880.216  | NM_016113 | 26180.74  | 34559.121 |
| NM_000910 | 5233.961  | 5669.784  | BG682146  | 8004.427  | 8617.662  | NM_014222 | 7180.423  | 8670.051  |
| AF086001  | 28688.826 | 37882.23  | AA884709  | 1134.004  | 1246.201  | L14819    | 813.083   | 886.954   |
| AL117560  | 39607.648 | 40535.598 | NM_004541 | 53739.766 | 51882.664 | NM_000509 | 6394.007  | 6308.404  |
| M24749    | 11465.264 | 12612.385 | NM_006705 | 20611.57  | 28683.697 | NM_004542 | 1914.908  | 1865.627  |
| NM_005831 | 61479.348 | 60553.207 | NM_012266 | 10756.794 | 13151.83  | X06182    | 6193.894  | 5706.727  |
| NM_000554 | 58002.426 | 56916.602 | NM_004559 | 7136.623  | 9445.004  | BE908993  | 58557.027 | 59355.281 |
| AF009317  | 7481.916  | 7559.584  | X56692    | 43454.105 | 50299.016 | AB012701  | 10233.359 | 9311.302  |
| AK026583  | 12013.657 | 10886.237 | NM_014476 | 1026.874  | 1209.07   | M61156    | 6973.943  | 5770.739  |
| AF218031  | 13037.103 | 15466.748 | NM_014278 | 2095.373  | 2299.321  | R44005    | 50008.516 | 56059.246 |
| AF210650  | 7970.79   | 6995.633  | NM_005838 | 1336.682  | 1322.831  | AI942392  | 6228.129  | 5625.398  |
| NM_018356 | 5597.828  | 5288.284  | NM_000734 | 12545.394 | 13822.809 | M55040    | 1362.93   | 1157.273  |
| AF085896  | 2031.079  | 1903.642  | NM_012331 | 8768.354  | 10818.29  | AW009739  | 4132.222  | 3855.527  |
| X74613    | 9247.884  | 9173.423  | NM_006644 | 16068.496 | 27665.361 | BC036805  | 6687.033  | 5897.614  |
| AF075080  | 3873.458  | 3981.168  | NM_006583 | 77974.344 | 9104.452  | Z74615    | 62409.305 | 60885.289 |
| NM_004616 | 1228.807  | 1446.536  | NM_006065 | 1152.386  | 943.238   | X03884    | 16856.826 | 12721.548 |
| NM_004360 | 1209.519  | 1341.444  | NM_014339 | 37400.074 | 41407.766 | U36759    | 1541.939  | 1270.218  |
| NM_003821 | 11515.415 | 11883.591 | NM_001495 | 2686.741  | 2765.391  | X91625    | 4204.19   | 3958.625  |
| NM_017692 | 4727.501  | 4620.188  | NM_002288 | 715.375   | 746.509   | AF090901  | 1310.441  | 977.958   |
| NM_003975 | 1454.451  | 1422.327  | NM_004416 | 19720.889 | 20275.734 | AF004231  | 4622.641  | 3991.27   |
| NM_004834 | 15927.287 | 17670.027 | NM_000628 | 4314.809  | 3536.39   | AF001862  | 10921.191 | 9590.514  |

|           |           |           |           |           |           |           |           |           |
|-----------|-----------|-----------|-----------|-----------|-----------|-----------|-----------|-----------|
| NM_018173 | 985.25    | 1101.238  | AB005216  | 1101.626  | 1432.461  | NM_002451 | 8837.473  | 8749.729  |
| NM_000812 | 4603.181  | 5115.104  | AF015041  | 6399.302  | 6193.036  | AF119902  | 1533.683  | 1888.367  |
| AK024747  | 20888.203 | 21038.469 | NM_002363 | 1064.322  | 1010.74   | NM_020525 | 32087.51  | 38588.137 |
| NM_006390 | 5507.855  | 6216.185  | X82693    | 51874.488 | 48615.539 | X62468    | 1478.281  | 2021.826  |
| NM_003580 | 8376.585  | 9597.444  | NM_007176 | 12453.94  | 15703.647 | NM_003890 | 15153.512 | 21375.982 |
| NM_006506 | 2078.217  | 2708.091  | NM_002722 | 6208.43   | 6477.205  | BF127978  | 6938.876  | 7661.709  |
| NM_003235 | 2787.274  | 2838.422  | AF317058  | 635.269   | 1222.67   | AF110801  | 1224.431  | 947.155   |
| AB042562  | 2360.146  | 2232.022  | AK025965  | 946.835   | 811.19    | NM_016579 | 63989.125 | 58066.703 |
| NM_002378 | 1185.591  | 917.656   | AL137576  | 11011.175 | 11636.208 | AB018297  | 3412.683  | 3773.257  |
| NM_001364 | 873.48    | 1058.329  | NM_006516 | 14487.365 | 12844.411 | AK022565  | 12330.636 | 10824.755 |
| NM_017431 | 628.042   | 816.494   | NM_000355 | 4349.493  | 4427.68   | AK023151  | 7636.931  | 7416.229  |
| NM_006097 | 4476.097  | 4154.699  | NM_005451 | 3614.459  | 3337.438  | AB033076  | 2351.356  | 2073.807  |
| NM_006113 | 1217.388  | 1182.018  | NM_007172 | 4273.37   | 4363.944  | AK022876  | 3235.149  | 3110.973  |
| NM_015313 | 5399.941  | 4728.292  | NM_013333 | 33191.094 | 36357.895 | AF134894  | 56258.137 | 53822.016 |
| AK022287  | 13029.711 | 11802.7   | NM_002333 | 8567.669  | 8994.038  | NM_003938 | 11113.25  | 9956.782  |
| NM_015897 | 2854.427  | 2895.334  | NM_003400 | 13211.145 | 15076.556 | NM_014827 | 15824.648 | 14503.014 |
| AF177473  | 11010.192 | 11745.345 | NM_014824 | 4520.489  | 5737.493  | NM_004126 | 9498.642  | 9276.62   |
| NM_000546 | 38229.645 | 41814.59  | AK000782  | 481.322   | 873.343   | U87460    | 20794.965 | 19643.367 |
| AB023223  | 1001.52   | 1233.922  | NM_014504 | 4652.506  | 4759.597  | NM_003617 | 1560.374  | 1702.727  |
| AB018257  | 12124.521 | 11745.145 | NM_014741 | 7892.666  | 10196.632 | NM_001841 | 5002.4    | 4207.145  |
| NM_002708 | 31462.338 | 31418.881 | AF212247  | 6945.609  | 9252.357  | NM_002054 | 6114.406  | 4963.555  |
| AK001059  | 3238.177  | 3173.324  | AF161407  | 32809.969 | 39315.844 | AF300649  | 20292.369 | 16965.273 |
| NM_007282 | 13761.648 | 14500.537 | NM_014738 | 6190.247  | 5177.699  | NM_004125 | 5315.433  | 4350.955  |
| NM_017770 | 1134.051  | 1208.22   | NM_016406 | 5527.672  | 4473.647  | NM_000823 | 8889.982  | 8058.656  |
| NM_017610 | 2451.71   | 3186.564  | NM_018080 | 11012.605 | 10506.501 | NM_003317 | 20353.455 | 17604.295 |
| AL122070  | 1075.326  | 1424.496  | AF174605  | 1297.528  | 905.904   | NM_001139 | 7555.191  | 6272.061  |
| AK025133  | 36086.484 | 42142.383 | NM_005713 | 1778.188  | 1645.146  | NM_001441 | 3307.786  | 3984.927  |
| NM_016642 | 552.063   | 737.994   | AK021951  | 951.678   | 859.852   | NM_018324 | 2404.591  | 3321.887  |
| AB020704  | 924.413   | 1120.028  | AK023553  | 3214.292  | 2802.91   | AF064255  | 61158.508 | 65921.063 |
| NM_020197 | 1519.158  | 1712.907  | NM_014600 | 1722.886  | 1726.68   | NM_016368 | 67134.242 | 73867.797 |
| NM_004087 | 8016.841  | 6893.218  | NM_016733 | 1688.681  | 1474.747  | U08853    | 9350.648  | 9658.316  |
| NM_018700 | 1262.692  | 1309.929  | AF181994  | 3826.527  | 4492.136  | NM_004261 | 38889.281 | 41712.688 |
| NM_000119 | 6858.728  | 7682.839  | NM_018962 | 5170.888  | 4910.996  | NM_016006 | 1981.581  | 2690.215  |
| NM_001065 | 4170.359  | 3837.946  | AF125100  | 3876.07   | 3689.383  | NM_016245 | 6226.46   | 7496.056  |
| AK027100  | 1086.496  | 1218.503  | NM_004669 | 5321.37   | 5819.118  | AF005632  | 13529.137 | 13651.482 |
| AY010111  | 1009.609  | 963.506   | NM_007028 | 14274.195 | 15845.978 | NM_000903 | 3890.9    | 4633.686  |
| NM_016950 | 763.864   | 595.813   | AF130728  | 1659.443  | 2040.343  | NM_004493 | 23370.023 | 25604.568 |
| NM_003622 | 7620.408  | 4715.365  | NM_004987 | 994.328   | 1353.605  | AF309489  | 1660.405  | 1355.412  |
| NM_007115 | 5155.485  | 5432.746  | NM_001289 | 30319.957 | 42358.625 | NM_000288 | 3173.655  | 2921.656  |
| AK021645  | 1091.243  | 1131.313  | M54894    | 1693.153  | 1178.367  | NM_004762 | 9688.952  | 10627.78  |
| NM_013339 | 4398.092  | 5605.284  | BG752013  | 2185.11   | 2435.955  | NM_006641 | 60490.367 | 58968.238 |
| NM_001491 | 4654.816  | 5373.448  | X07696    | 15495.543 | 15395.695 | NM_000634 | 22291.918 | 21181.238 |
| NM_002642 | 1028.404  | 1350.649  | AA481015  | 1913.22   | 1611.053  | NM_014679 | 61129.703 | 52171.906 |
| AK026541  | 4463.89   | 5708.724  | AI925826  | 26796.5   | 25974.273 | AB040969  | 4944.635  | 4617.938  |
| NM_005899 | 9899.502  | 9947.974  | U04209    | 12131.822 | 9964.752  | NM_003467 | 23188.902 | 17675.014 |
| D42055    | 14044.555 | 14485.822 | AI393201  | 16620.684 | 13863.518 | NM_014936 | 3932.096  | 3138.182  |
| AL137349  | 6316.524  | 7025.943  | Z15108    | 7039.011  | 6109.909  | NM_003943 | 4586.981  | 5010.662  |
| NM_003339 | 1693.156  | 2267.83   | M55284    | 1362.096  | 1201.943  | NM_019052 | 7550.309  | 9691.551  |
| NM_004562 | 1231.904  | 1277.925  | AA001218  | 1627.048  | 1431.817  | NM_003202 | 1199.424  | 1091.876  |
| NM_016476 | 44150.195 | 50901.254 | AA679391  | 1526.618  | 1507.95   | NM_000289 | 19364.316 | 24742.785 |
| NM_015902 | 6996.849  | 6934.816  | BG682146  | 6620.715  | 5681.847  | NM_001500 | 1590.696  | 2711.684  |
| NM_020155 | 7454.743  | 8432.244  | AA884709  | 1034.778  | 954.484   | NM_004388 | 4900.846  | 5980.296  |
| BE874471  | 5830.821  | 6712.326  | AK022417  | 6696.151  | 5324.247  | NM_020379 | 1102.992  | 1223.649  |

|           |           |           |           |           |           |           |           |           |
|-----------|-----------|-----------|-----------|-----------|-----------|-----------|-----------|-----------|
| NM_006121 | 5151.267  | 5838.903  | U50534    | 3295.461  | 2542.469  | AL110127  | 3229.799  | 4578.595  |
| AK023520  | 14117.152 | 12934.133 | NM_005582 | 24029.779 | 32085.389 | AK001997  | 834.382   | 768.069   |
| NM_004693 | 1271.545  | 1341.438  | NM_012266 | 8614.221  | 8701.373  | NM_002528 | 7185.917  | 6049.932  |
| NM_007211 | 5803.336  | 5345.875  | NM_004559 | 6417.514  | 6648.593  | D38438    | 11724.646 | 12586.595 |
| AB011152  | 4663.058  | 4500.53   | X56692    | 39792.621 | 51750.004 | AV714945  | 2110.394  | 1888.021  |
| NM_014956 | 19183.797 | 18050.777 | NM_014476 | 798.35    | 1014.816  | AF089897  | 874.334   | 702.739   |
| AB014592  | 2460.377  | 2644.992  | NM_014278 | 2022.053  | 2537.101  | AF007872  | 4335.117  | 4338.586  |
| NM_016952 | 1573.472  | 1631.06   | NM_005838 | 1835.856  | 1935.907  | M30938    | 9163.746  | 10366.381 |
| NM_001654 | 7539.515  | 6965.897  | NM_000734 | 18947.889 | 18122.387 | NM_015148 | 2457.939  | 2572.674  |
| U48728    | 460.237   | 553.511   | NM_012331 | 11141.18  | 9410.021  | NM_004714 | 3946.742  | 3821.63   |
| NM_005436 | 7297.774  | 6855.806  | NM_006644 | 9831.084  | 7963.382  | NM_005401 | 842.542   | 493.033   |
| AK024418  | 867.834   | 838.086   | NM_006583 | 69583.109 | 9932.036  | NM_002497 | 22947.104 | 19137.807 |
| NM_003367 | 27583.043 | 24739.074 | NM_006065 | 1148.264  | 909.626   | AB025194  | 19048.885 | 17430.678 |
| NM_005194 | 17679.91  | 17608.162 | NM_014339 | 38000.258 | 35382.121 | NM_006236 | 3795.24   | 3585.017  |
| AB002296  | 4833.229  | 5866.253  | NM_001495 | 3384.431  | 2717.381  | BC020863  | 1536.562  | 1403.645  |
| NM_014315 | 10554.24  | 11979.217 | NM_002288 | 847.997   | 527.416   | NM_017897 | 4814.702  | 4623.624  |
| NM_012087 | 6505.619  | 9443.014  | NM_004416 | 19875.787 | 17776.283 | NM_004265 | 1941.837  | 1684.467  |
| AF165520  | 13498.532 | 13723.127 | NM_000628 | 3418.784  | 2583.222  | NM_002572 | 4135.526  | 3534.481  |
| AK026072  | 2870.21   | 3226.332  | AB005216  | 881.845   | 945.244   | NM_016113 | 27675.85  | 41838.941 |
| NM_004289 | 2286.361  | 2782.053  | AF015041  | 6353.932  | 5044.178  | NM_014222 | 6500.162  | 10126.952 |
| NM_015679 | 9455.534  | 10641.518 | NM_002363 | 807.077   | 707.852   | L14819    | 1365.156  | 2113.441  |
| AF299118  | 56282.242 | 56769.957 | NM_002238 | 3902.561  | 3787.42   | NM_000509 | 6388.604  | 8496.903  |
| AK025353  | 48735.621 | 45333.379 | NM_004868 | 3508.329  | 4492.946  | NM_004542 | 1606.926  | 2252.126  |
| AK056896  | 56371.324 | 55157.828 | NM_007176 | 11943.67  | 14263.875 | X06182    | 5390.356  | 5437.704  |
| AK022763  | 53442.176 | 48229.813 | NM_002722 | 7930.054  | 10244.156 | BE908993  | 59614.336 | 59357.484 |
| NM_000976 | 61951.996 | 60597.563 | AF317058  | 1619.935  | 2370.546  | AB012701  | 12648.065 | 13583.716 |
| NM_001000 | 63554.055 | 61266.273 | AK025965  | 953.299   | 753.823   | M61156    | 9799.79   | 9105.407  |
| AF288207  | 48557.117 | 45492.699 | NM_016242 | 1790.604  | 3074.561  | R44005    | 49089.047 | 46406.875 |
| NM_001028 | 1060.263  | 1014.908  | AL137576  | 9759.361  | 7880.91   | AI942392  | 6181.829  | 6022.083  |
| NM_001001 | 60117.813 | 57803.828 | NM_006516 | 14981.231 | 12668.228 | M55040    | 2024.791  | 1918.81   |
| NM_001774 | 60805.773 | 58911.371 | NM_000355 | 4383.36   | 4095.127  | AW009739  | 3405.62   | 3587.276  |
| NM_005023 | 1165.377  | 860.796   | NM_005451 | 3391.182  | 2916.711  | BC036805  | 5186.27   | 4207.852  |
| NM_006830 | 60509.176 | 56028.781 | NM_007172 | 3973.47   | 4445.362  | Z74615    | 57594.41  | 59684.52  |
| AK026414  | 34782     | 33088.453 | NM_013333 | 32601.465 | 34822.801 | X03884    | 18156.688 | 16989.754 |
| D17297    | 3391.411  | 3716.785  | NM_002333 | 8471.673  | 8414.404  | U36759    | 1731.372  | 1451.701  |
| NM_004074 | 49375.227 | 47965.449 | NM_003400 | 12640.318 | 13293.44  | X91625    | 3823.997  | 3520.052  |
| NM_002626 | 61313.32  | 56069.223 | NM_006705 | 13135.595 | 11559.589 | AF090901  | 1155.807  | 901.252   |
| NM_018436 | 55433.094 | 53217.164 | NM_014439 | 1619.615  | 1529.968  | AF004231  | 4170.784  | 3075.278  |
| AF157115  | 6296.802  | 7129.538  | NM_014504 | 4132.484  | 4548.134  | AF001862  | 11830.603 | 9272.85   |
| AJ223353  | 17288.381 | 20196.73  | NM_014741 | 7924.502  | 8934.502  | NM_016044 | 3203.807  | 3150.362  |
| NM_012241 | 16817.867 | 17920.014 | AF212247  | 6433.74   | 7543.666  | NM_000520 | 3021.96   | 1966.99   |
| AF250288  | 1181.665  | 1046.536  | AF161407  | 33015.117 | 40662.188 | X62468    | 1546.932  | 2053.338  |
| NM_018486 | 3800.873  | 4095.261  | NM_014738 | 6451.244  | 7698.414  | NM_003890 | 10822.674 | 16293.118 |
| NM_005324 | 25809.168 | 27021.199 | NM_016406 | 5466.929  | 5044.765  | BF127978  | 6846.094  | 8795.851  |
| AL080201  | 51991.055 | 53616.777 | NM_018080 | 13823.174 | 11366.428 | AF110801  | 1209.551  | 1339.063  |
| NM_015363 | 817.101   | 885.878   | NM_014453 | 32771.758 | 25111.943 | NM_016579 | 55680.969 | 61552.215 |
| NM_001806 | 13848.4   | 11706.294 | NM_005713 | 1765.125  | 1197.067  | AB018297  | 3375.211  | 4774.729  |
| AB040941  | 5683.508  | 6004.656  | AK021951  | 1030.311  | 907.088   | AK022565  | 10165.174 | 11632.459 |
| AL137241  | 2792.364  | 2076.07   | AK023553  | 3080.68   | 2102.036  | AK023151  | 6833.902  | 7099.601  |
| AB037742  | 5181.262  | 5140.027  | NM_014600 | 2146.747  | 1601.489  | AB033076  | 2645.828  | 2560.731  |
| AF272375  | 4218.099  | 4110.487  | NM_016733 | 1385.096  | 1260.312  | AK022876  | 3278.469  | 3018.889  |
| NM_014519 | 7565.359  | 6959.847  | AF181994  | 3674.478  | 3269.636  | AF134894  | 52283.734 | 57398.973 |
| NM_002517 | 2868.267  | 2295.882  | NM_018962 | 5716.118  | 5277.216  | NM_003938 | 12014.659 | 11321.981 |



|           |           |           |           |           |           |           |           |           |
|-----------|-----------|-----------|-----------|-----------|-----------|-----------|-----------|-----------|
| NM_007147 | 7231.087  | 6468.405  | AF125100  | 3699.759  | 3605.188  | NM_014827 | 18919.063 | 18796.568 |
| X65463    | 8030.626  | 6460.519  | X82693    | 39207.605 | 35853.988 | NM_004126 | 8349.187  | 8128.37   |
| NM_002238 | 6739.959  | 6885.085  | AF130728  | 1687.247  | 1698.063  | U87460    | 18594.199 | 17017.4   |
| NM_004868 | 1994.223  | 2731.646  | NM_004987 | 1029.535  | 1361.683  | NM_003617 | 1483.491  | 1537.444  |
| NM_004668 | 6501.849  | 6488.788  | NM_001289 | 29884.783 | 35119.383 | NM_001841 | 4589.255  | 3923.592  |
| NM_007028 | 17249.254 | 17624.967 | M54894    | 1687.75   | 1314.003  | NM_002054 | 6603.352  | 5293.58   |
| AF130728  | 955.162   | 1274.965  | BG752013  | 2112.132  | 2365.785  | AF300649  | 19631.229 | 17003.27  |
| NM_001288 | 42019.484 | 45207.523 | X07696    | 20049.473 | 26082.547 | NM_004125 | 5023.03   | 4765.825  |
| NM_001131 | 8828.018  | 11210.085 | AA481015  | 1854.968  | 1560.415  | NM_000823 | 6752.223  | 5975.787  |
| AA831963  | 634.011   | 404.22    | AI925826  | 36560.965 | 31029.262 | NM_003317 | 19770.236 | 15709.594 |
| M54894    | 3058.471  | 2531.659  | U04209    | 13872.508 | 10186.784 | NM_001139 | 7511.905  | 5779.117  |
| BG752013  | 846.174   | 1040.397  | AI393201  | 18630.998 | 14491.664 | L09081    | 20809.867 | 17144.75  |
| X07696    | 2239.6    | 2662.764  | M34664    | 52534.996 | 52038.254 | NM_000218 | 62533.949 | 62244.68  |
| AA481015  | 2561.94   | 2859.939  | Z15108    | 5711.191  | 4157.106  | AF064255  | 66044.133 | 67733.703 |
| AI925826  | 5722.411  | 6252.596  | M55284    | 1634.358  | 1097.385  | NM_016368 | 63679.59  | 63146.59  |
| U04209    | 13485.303 | 11715.379 | AA001218  | 1960.35   | 1676.249  | U08853    | 9480.961  | 12029.299 |
| AI393201  | 9693.755  | 11364.487 | AA679391  | 1826.301  | 1826.105  | NM_004261 | 37775.648 | 49148.996 |
| M34664    | 62552.809 | 59414.063 | BG682146  | 7083.129  | 5777.877  | NM_016006 | 2002.594  | 3003.591  |
| Z15108    | 2432.865  | 2775.235  | AA884709  | 824.864   | 701.433   | NM_016245 | 6700.107  | 8283.954  |
| M55284    | 1849.444  | 1991.118  | AK022417  | 6340.931  | 5428.428  | AF005632  | 7702.248  | 6398.361  |
| AA679391  | 1730.37   | 1995.411  | U50534    | 2821.008  | 2491.898  | NM_000903 | 4224.446  | 5135.434  |
| BG682146  | 4772.527  | 5368.75   | NM_014824 | 3794.469  | 4390.637  | NM_004493 | 21146.564 | 17417.359 |
| AA884709  | 1092.596  | 982.977   | NM_000734 | 21539.451 | 20657.973 | AF309489  | 1592.659  | 1320.667  |
| NM_004541 | 58298.32  | 54729.574 | NM_012331 | 12604.433 | 12700.847 | NM_000288 | 4924.33   | 4702.916  |
| NM_006705 | 1382.933  | 1458.83   | NM_006065 | 1524.309  | 1237.821  | NM_004762 | 10236.069 | 10651.611 |
| NM_014438 | 615.557   | 789.514   | NM_014339 | 46130.293 | 50598.734 | NM_006641 | 57361.262 | 58796.516 |
| NM_005582 | 13049.801 | 12113.092 | NM_001495 | 4898      | 4492.947  | NM_000634 | 29105.537 | 28168.398 |
| NM_012266 | 8404.908  | 8293.773  | NM_002288 | 1007.557  | 852.362   | NM_014679 | 56136.016 | 53577.445 |
| NM_004558 | 5880.865  | 6777.513  | NM_004416 | 20247.787 | 16834.053 | AB040969  | 5684.884  | 5206.939  |
| X56692    | 9462.328  | 12408.438 | NM_000628 | 3775.439  | 2718.236  | NM_003467 | 24667.852 | 18625.564 |
| AK024467  | 1094.335  | 1043.193  | AB005216  | 963.859   | 845.441   | NM_014936 | 4150.475  | 4172.38   |
| NM_014476 | 1672.49   | 1596.065  | NM_000325 | 11402.334 | 8598.641  | NM_003943 | 3660.234  | 3917.7    |
| NM_014278 | 856.297   | 846.381   | AF015041  | 4584.236  | 2916.662  | NM_019052 | 7283.581  | 9072.542  |
| NM_005838 | 1053.988  | 1330.084  | NM_002363 | 1065.99   | 786.264   | NM_003202 | 1267.956  | 753.372   |
| NM_000734 | 2813.248  | 3388.468  | AK000184  | 1866.791  | 1264.786  | AF119902  | 1337.26   | 1294.576  |
| NM_012331 | 3739.524  | 4734.105  | AF055020  | 30751.594 | 27493.02  | NM_020525 | 40119.102 | 39623.734 |
| NM_006644 | 13512.99  | 15616.916 | NM_006986 | 5469.374  | 4986.281  | NM_004388 | 4635.405  | 7105.766  |
| NM_006583 | 72075.578 | 9431.068  | AF272043  | 1863.683  | 1496.505  | NM_020379 | 1160.482  | 1579.521  |
| NM_006065 | 1411.516  | 2020.88   | NM_002587 | 60856.305 | 54943.047 | AL110127  | 3931.386  | 4702.791  |
| NM_014338 | 15239.771 | 15937.721 | NM_002238 | 4332.24   | 3400.921  | AK001997  | 821.686   | 841.582   |
| NM_001495 | 1204.916  | 1170.527  | NM_004868 | 3175.121  | 3154.097  | NM_002528 | 7434.162  | 7441.596  |
| NM_002288 | 1693.676  | 1480.422  | NM_004669 | 4932.783  | 3736.222  | D38438    | 10895.303 | 12153.66  |
| NM_004416 | 29391.262 | 28526.389 | NM_007028 | 12831.294 | 11435.693 | AV714945  | 2077.725  | 1910.797  |
| NM_000628 | 5950.256  | 5095.602  | NM_015865 | 1698.384  | 1624.915  | AF089897  | 820.352   | 785.978   |
| AB005216  | 1961.835  | 2082.094  | NM_003055 | 34252.305 | 40895.34  | AF007872  | 4362.739  | 4441.096  |
| AF015041  | 3029.704  | 2707.393  | NM_006841 | 2606.446  | 2355.854  | M30938    | 12601.939 | 11795.617 |
| NM_002363 | 1747.613  | 1868.507  | NM_002414 | 20210.578 | 25177.561 | NM_015148 | 2870.933  | 2816.637  |
| X82693    | 5617.689  | 5376.309  | NM_000355 | 6742.091  | 7419.449  | NM_004714 | 4971.586  | 4240.971  |
| NM_007176 | 15178.637 | 14949.297 | NM_014666 | 9244.283  | 9138.194  | NM_005401 | 1676.231  | 1420.153  |
| NM_002722 | 3016.814  | 3019.082  | NM_005451 | 5766.205  | 5583.854  | NM_002497 | 19795.76  | 18121.688 |
| AF317058  | 991.85    | 1169.096  | NM_007172 | 5159.171  | 5461.262  | AB025194  | 18232.637 | 16667.443 |
| AK025965  | 975.172   | 660.274   | NM_013333 | 32061.451 | 31037.707 | NM_006238 | 3632.479  | 3628.918  |
| AF016693  | 741.437   | 610.998   | NM_002333 | 9585.278  | 8217.55   | BC020863  | 1822.967  | 1758.677  |

|           |           |           |           |           |           |           |           |           |
|-----------|-----------|-----------|-----------|-----------|-----------|-----------|-----------|-----------|
| AL137576  | 15729.112 | 14919.228 | NM_00340C | 12961.941 | 13825.587 | NM_017897 | 4678.016  | 4682.709  |
| NM_00651E | 17652.859 | 21137.705 | NM_006705 | 16906.713 | 12674.063 | NM_00426E | 1770.603  | 1227.082  |
| NM_00035E | 853.136   | 1196.03   | NM_014439 | 1826.499  | 1478.229  | NM_00257Z | 4632.063  | 3943.408  |
| NM_005451 | 5139.166  | 5316.792  | NM_00558Z | 21255.543 | 18405.945 | NM_001441 | 2802.413  | 2480.719  |
| NM_00717Z | 5704.746  | 6261.829  | NM_01226E | 8414.974  | 5975.291  | NM_01832A | 2196.519  | 3019.323  |
| NM_01333Z | 44111.828 | 43757.746 | NM_004559 | 5697.984  | 4907.212  | L14819    | 987.195   | 1338.749  |
| NM_00340C | 16916.113 | 19353.715 | X56692    | 37620.363 | 36928.684 | NM_00050E | 6394.83   | 8533.891  |
| NM_01482A | 4545.354  | 4754.71   | NM_01447E | 785.683   | 553.203   | NM_00454Z | 2020.548  | 2917.017  |
| NM_01450A | 5633.646  | 5322.43   | NM_01427E | 1294.165  | 1289.501  | AI742810  | 421.765   | 781.863   |
| NM_00570E | 690.163   | 417.942   | NM_01896Z | 11139.096 | 11959.749 | X06182    | 6867.966  | 7744.227  |
| NM_01440E | 21459.242 | 20066.623 | AF125100  | 4688.849  | 4833.734  | BE908993  | 61414.133 | 63612.422 |
| NM_014741 | 15009.299 | 16393.666 | NM_00272Z | 5781.964  | 6037.129  | AB012701  | 12756.03  | 15376.681 |
| AF212247  | 5912.219  | 7565.669  | AF317058  | 869.707   | 1412.458  | M61156    | 10504.437 | 10628.346 |
| AF161407  | 16306.146 | 19375.879 | AK025965  | 983.818   | 643.454   | R44005    | 58536.25  | 56005.473 |
| NM_01473E | 9756.978  | 10333.433 | M22538    | 17570.414 | 13327.438 | AI942392  | 7233.007  | 7528.84   |
| NM_01640E | 9971.669  | 10016.824 | NM_00602E | 1088.344  | 757.04    | M55040    | 2226.128  | 2276.083  |
| NM_01808C | 6280.431  | 7418.656  | NM_01490A | 2087.538  | 1275.062  | AW009739  | 3998.87   | 3694.128  |
| AF174605  | 859.312   | 450.729   | AL137576  | 9875.522  | 7467.74   | BC036805  | 7790      | 6763.462  |
| AL050107  | 759.136   | 1043.167  | NM_01835E | 8437.04   | 6875.239  | Z74615    | 54976.535 | 59598.988 |
| NM_00571Z | 2800.12   | 3046.848  | NM_016321 | 1375.941  | 1128.636  | X03884    | 14267.25  | 12111.622 |
| AK021951  | 1684.071  | 1826.161  | AF131781  | 7187.813  | 6684.11   | U36759    | 3621.139  | 3150.197  |
| AK023553  | 2994.65   | 2859.117  | NM_00651E | 15762.19  | 12998.206 | X91625    | 3421.687  | 3192.556  |
| NM_01460C | 881.116   | 928.238   | AK022417  | 10458.705 | 9059.071  | AF090901  | 1241.632  | 1136.487  |
| NM_01673Z | 2426.927  | 1776.202  | U50534    | 4498.248  | 4300.023  | AF004231  | 4517.571  | 4382.573  |
| AF181994  | 5400.193  | 5054.386  | NM_01482A | 4185.577  | 3771.001  | AF001862  | 12656.466 | 11990.771 |
| NM_01896Z | 1748.908  | 1546.589  | NM_01450A | 4035.101  | 3416.054  | NM_01604A | 3693.018  | 3817.017  |
| AF125100  | 6775.125  | 4566.996  | NM_01440E | 16946.473 | 15221.872 | NM_00052C | 2773.743  | 2235.645  |
| NM_00466E | 6510.929  | 5759.234  | NM_014741 | 7202.271  | 6517.454  | NM_00028E | 18267.301 | 12169.271 |
| NM_00702E | 14846.638 | 14560.951 | AF212247  | 5891.138  | 5249.437  | NM_00150C | 1670.634  | 2326.353  |
| AF130728  | 957.294   | 1119.672  | AF161407  | 31403.951 | 30546.418 | AB033076  | 2464.579  | 4276.75   |
| NM_004987 | 397.078   | 548.34    | NM_01473E | 6146.983  | 7970.416  | AK022876  | 3385.735  | 4369.119  |
| NM_00128E | 44505.234 | 45597.984 | NM_01640E | 5616.277  | 3730.94   | AF134894  | 58900.313 | 61612.152 |
| NM_001131 | 8196.566  | 8647.714  | NM_01808C | 9153.513  | 6732.767  | NM_00393E | 11491.209 | 14581.412 |
| M54894    | 2188.285  | 1528.594  | NM_01445Z | 32733.934 | 25361.4   | NM_014827 | 18067.508 | 18106.865 |
| BG752013  | 781.27    | 752.489   | NM_00571Z | 2136.41   | 1417.036  | NM_00412E | 9548.688  | 9516.673  |
| X07696    | 2575.52   | 2893.351  | AK021951  | 814.508   | 868.025   | U87460    | 21172.967 | 21665.807 |
| AA481015  | 3252.103  | 3048.077  | AK023553  | 3165.78   | 1861.322  | NM_003617 | 1587.117  | 1578.948  |
| AI925826  | 4776.609  | 4607.531  | NM_01460C | 2343.979  | 1555.775  | NM_001841 | 4831.375  | 4429.887  |
| U04209    | 14284.718 | 11686.469 | NM_01673Z | 1308.259  | 970.934   | NM_00205A | 6916.453  | 5766.183  |
| AI393201  | 10116.301 | 12151.758 | AF181994  | 4468.551  | 3687.941  | AF300649  | 19213.645 | 17740.457 |
| Z15108    | 2478.052  | 2576.507  | CY3Cy5    | 1316.831  | 306.208   | NM_00412E | 5608.229  | 4294.855  |
| M55284    | 1551.776  | 1715.546  | NM_058197 | 2536.199  | 2426.821  | NM_00082Z | 7770.088  | 7196.669  |
| AA001218  | 556.35    | 554.35    | NM_01636A | 807.196   | 605.147   | NM_00441A | 3043.961  | 2033.04   |
| AA679391  | 1301.324  | 1292.157  | AF086419  | 3911.324  | 3860.142  | NM_003317 | 16686.855 | 12978.277 |
| BG682146  | 4443.343  | 4250.297  | AF086461  | 668.951   | 748.316   | NM_001139 | 6782.504  | 6087.698  |
| AA884709  | 787.804   | 932.867   | AF131795  | 667.483   | 477.494   | NM_00460E | 58314.918 | 63847.266 |
| AK022417  | 2320.736  | 2123.913  | AL833296  | 4684.553  | 5081.541  | NM_00377Z | 1293.892  | 1063.435  |
| U50534    | 3073.874  | 2552.199  | AL110240  | 4877.633  | 5675.014  | NM_001541 | 15876.746 | 14774.416 |
| NM_00558Z | 13395.372 | 12304.562 | AF070549  | 483.419   | 792.008   | NM_00541E | 3264.61   | 2946.148  |
| NM_01226E | 10872.178 | 9950.002  | AK025695  | 3259.714  | 3977.201  | L09081    | 18251.465 | 17035.412 |
| NM_00455E | 6276.6    | 6686.014  | AK025442  | 2890.503  | 3531.447  | NM_00021E | 65857.141 | 64773.707 |
| X56692    | 10838.18  | 12875.898 | AL050041  | 1036.886  | 1392.141  | NM_016113 | 23153.057 | 19852.057 |
| AK024467  | 807.038   | 867.608   | NM_058197 | 2768.302  | 2708.371  | NM_01422Z | 6748.229  | 7615.602  |

|           |           |           |           |           |           |           |           |           |
|-----------|-----------|-----------|-----------|-----------|-----------|-----------|-----------|-----------|
| NM_014476 | 1468.989  | 1102.983  | SR4       | 9852.517  | 13650.433 | AK026317  | 17891.99  | 27008.869 |
| NM_014278 | 538.996   | 746.286   | SR6       | 1445.036  | 1692.586  | X82207    | 56155.398 | 59793.059 |
| NM_005838 | 1035.203  | 1247.481  | SR8       | 5070.559  | 21392.547 | NM_015044 | 12891.192 | 16952.965 |
| NM_000734 | 2630.436  | 3018.385  | SR10      | 14917.195 | 6654.664  | NM_002867 | 1166.611  | 1521.73   |
| NM_012331 | 2857.543  | 3721.365  | CY3Cy5    | 932.411   | 149.506   | BF217496  | 16266.706 | 19352.678 |
| NM_006644 | 13451.059 | 14501.698 | AK024713  | 2139.68   | 3325.953  | NM_004762 | 10745.816 | 12654.775 |
| NM_006583 | 66613.531 | 8780.144  | AK024204  | 582.46    | 576.621   | NM_006641 | 58473.332 | 65625.43  |
| NM_006065 | 1775.919  | 1953.218  | AK023737  | 733.156   | 872.814   | NM_000634 | 32730.465 | 29199.316 |
| NM_014339 | 15693.322 | 17838.514 | NM_006609 | 3733.312  | 3738.461  | NM_014679 | 57416.969 | 55734.414 |
| NM_001495 | 1118.392  | 1372.609  | NM_014118 | 349.083   | 526.938   | AB040969  | 5445.884  | 4892.999  |
| NM_002288 | 1331.374  | 1367.426  | AK023525  | 4206.124  | 4068.226  | NM_003467 | 23290.094 | 18604.682 |
| NM_004416 | 28036.727 | 28146.121 | AF085829  | 1482.049  | 1578.153  | NM_014936 | 3572.15   | 2729.877  |
| NM_000628 | 5886.389  | 4338.542  | AK021903  | 5942.827  | 6063.072  | NM_003943 | 5363.564  | 5601.324  |
| AB005216  | 1701.354  | 1671.232  | AL390143  | 6035.911  | 6003.825  | NM_019052 | 7834.334  | 9686.819  |
| AF015041  | 2957.682  | 2967.259  | AL162075  | 2261.119  | 1762.99   | NM_003202 | 1347.432  | 1110.978  |
| NM_002363 | 1776.015  | 1316.836  | AF147384  | 1774.843  | 2157.78   | AF119902  | 1283.427  | 1285.876  |
| NM_002238 | 6850.257  | 5586.197  | AK021595  | 1278.814  | 1235.823  | NM_020525 | 43202.93  | 40075.875 |
| NM_004868 | 2409.219  | 3008.443  | NM_018410 | 2528.991  | 2599.453  | X62468    | 1214.665  | 1250.617  |
| NM_007176 | 16320.381 | 15545.152 | AL110173  | 988.36    | 1095.773  | NM_003890 | 15263.84  | 15760.017 |
| NM_002722 | 3087.309  | 2934.207  | AK024106  | 965.312   | 1050.804  | BF127978  | 5614.269  | 4972.674  |
| AF317058  | 1086.276  | 1733.541  | AK027254  | 1409.423  | 1594.122  | AF110801  | 1425.189  | 1242.779  |
| AK025965  | 881.117   | 854.22    | AK021772  | 2652.198  | 2638.369  | NM_016579 | 58562.504 | 57025.121 |
| NM_016242 | 462.623   | 606.979   | AK026297  | 3683.348  | 4428.776  | AB018297  | 2841.568  | 3009.663  |
| AL137576  | 14558.876 | 14696.852 | AF075081  | 536.029   | 505.268   | AK022565  | 9722.452  | 8491.918  |
| NM_006516 | 17066.287 | 18494.285 | NM_015372 | 793.362   | 1043.74   | AK023151  | 6474.66   | 6125.21   |
| NM_000355 | 900.268   | 1788.973  | AF085933  | 1752.717  | 1919.928  | NM_017897 | 5570.612  | 9333.406  |
| NM_005451 | 4594.002  | 5165.375  | AF147431  | 993.202   | 1105.43   | NM_004265 | 1947.379  | 2556.602  |
| NM_007172 | 6632.458  | 7309.706  | AK026422  | 10236.771 | 10234.39  | NM_002572 | 4905.85   | 6877.225  |
| NM_013333 | 47911.68  | 45879.141 | AK022264  | 1218.93   | 1411.958  | NM_001441 | 2556.99   | 2631.608  |
| NM_003400 | 17034.418 | 16680.838 | AL137331  | 1807.76   | 1913.273  | NM_018324 | 1747.259  | 1752.896  |
| NM_006705 | 1817.773  | 2457.814  | AL162040  | 5804.046  | 6153.146  | AF064255  | 59820.973 | 59886.816 |
| NM_014439 | 754.037   | 764.098   | AL442084  | 760.036   | 928.8     | NM_016368 | 60694.695 | 63305.113 |
| AK000782  | 672.597   | 694.954   | AL137371  | 8930.131  | 8134.87   | U08853    | 9386.991  | 8410.884  |
| NM_014504 | 5438.066  | 5172.456  | AL137596  | 3046.727  | 2601.112  | NM_004261 | 39874.242 | 37487.922 |
| AF212247  | 5971.906  | 6455.749  | AL353942  | 17422.342 | 15787.886 | NM_016006 | 2079.097  | 1796.089  |
| AF161407  | 16353.418 | 19566.238 | Z38010    | 28693.436 | 29202.725 | NM_016245 | 6993.664  | 5998.414  |
| NM_014738 | 9713.95   | 10681.104 | AK025799  | 657.277   | 925.071   | AF005632  | 12004.232 | 9886.28   |
| NM_016406 | 9764.077  | 8265.909  | AK022857  | 614.372   | 961.998   | NM_000903 | 4261.08   | 4635.52   |
| NM_018080 | 6229.774  | 7306.751  | AL110206  | 3192.454  | 3538.968  | NM_004493 | 25424.246 | 26250.715 |
| AF174605  | 715.423   | 805.373   | NM_004821 | 940.665   | 1393.273  | AF309489  | 1271.326  | 1242.351  |
| AL050107  | 1000.762  | 1003.856  | AK024292  | 856.093   | 876.649   | NM_004047 | 41856.566 | 37143.152 |
| NM_014453 | 28359.594 | 23611.227 | AK026263  | 2566.903  | 2729.54   | NM_004823 | 3791.228  | 3279.671  |
| NM_005713 | 2357.107  | 2926.95   | AK023643  | 571.775   | 601.909   | Y17179    | 60142.867 | 57408.801 |
| AK021951  | 2217.107  | 2296.743  | AL390159  | 1061.809  | 1266.851  | NM_000891 | 2317.019  | 1986.945  |
| AK023553  | 3403.921  | 3740.608  | NM_014157 | 722.949   | 1288.1    | AK026840  | 4287.219  | 4116.402  |
| NM_014600 | 861.549   | 972.016   | AF090933  | 777.485   | 652.115   | NM_000288 | 4445.158  | 4224.983  |
| NM_016733 | 2623.077  | 2360.841  | AF111851  | 5120.781  | 5307.017  | NM_016044 | 3806.759  | 5863.204  |
| AF181994  | 4713.032  | 5059.089  | AF152529  | 623.153   | 605.847   | NM_000520 | 3186.015  | 3995.489  |
| NM_018962 | 1934.635  | 1432.351  | AL360200  | 980.111   | 1145.804  | NM_000289 | 21593.285 | 23038.799 |
| AF125100  | 6995.248  | 5681.492  | AK021992  | 1345.122  | 1076.021  | NM_001500 | 1661.112  | 1524.197  |
| X82693    | 7788.491  | 5830.347  | AK022102  | 586.688   | 545.582   | NM_004388 | 4267.324  | 4759.761  |
| AF130728  | 935.432   | 1041.003  | AK022235  | 945.159   | 915.565   | AL110127  | 2624.615  | 2415.352  |
| NM_004987 | 703.676   | 513.373   | AK022378  | 3072.558  | 2717.828  | AK001997  | 891.093   | 798.829   |

|           |           |           |           |           |           |           |           |           |
|-----------|-----------|-----------|-----------|-----------|-----------|-----------|-----------|-----------|
| NM_00128E | 49657.246 | 51621.984 | AK022078  | 437.007   | 551.339   | NM_00252E | 8307.771  | 6545.287  |
| M54894    | 1906.307  | 1167.564  | AF130108  | 365.255   | 366.794   | D38438    | 12406.224 | 10801.924 |
| BG752013  | 698.059   | 935.921   | NM_020224 | 8284.012  | 8671.839  | AV714945  | 1758.932  | 1218.994  |
| X07696    | 2388.902  | 2718.665  | U17617    | 3756.649  | 3826.045  | AF089897  | 906.312   | 672.549   |
| AA481015  | 2957.912  | 3089.612  | AK022952  | 7554.872  | 7600.204  | AF007872  | 3192.52   | 2773.137  |
| AI925826  | 4922.264  | 5388.503  | BF218888  | 923.894   | 985.728   | M30938    | 13322.59  | 11484     |
| U04209    | 12601.119 | 10419.323 | AK021770  | 615.194   | 587.074   | NM_01514E | 2761.453  | 2691.368  |
| AI393201  | 9105.922  | 9800.123  | AK027248  | 2896.816  | 3560.851  | NM_004714 | 4048.438  | 3357.881  |
| M34664    | 57480.813 | 56588.762 | AK022804  | 12521.062 | 14296.838 | NM_005401 | 784.262   | 317.992   |
| Z15108    | 2827.355  | 3495.203  | AF009263  | 2035.384  | 2480.15   | NM_017677 | 723.501   | 732.177   |
| M55284    | 1611.222  | 1818.068  | AF009283  | 721.729   | 743.364   | NM_002497 | 22978.762 | 18513.762 |
| AA001218  | 668.679   | 789.178   | AF086329  | 7211.881  | 7720.765  | AB025194  | 16610.188 | 18751.09  |
| AA679391  | 1258.503  | 1536.88   | U92989    | 3615.803  | 4387.382  | NM_00623E | 2932.653  | 2631.115  |
| BG682146  | 4499.071  | 4400.535  | AF075102  | 2039.522  | 2270.67   | BC020863  | 1590.575  | 1318.121  |
| AA884709  | 921.949   | 907.741   | NM_018463 | 19447.176 | 22739.307 | CY3Cy5    | 13082.427 | 1026.152  |
| AK022417  | 2273.043  | 1858.338  | X74956    | 40162.531 | 46444.16  | NM_00475E | 1220.015  | 1272.596  |
| U50534    | 3470.154  | 2612.97   | AF132197  | 7408.667  | 8605.716  | NM_00516E | 8032.917  | 8427.009  |
| NM_014824 | 5400.712  | 4381.573  | AK025546  | 788.08    | 888.103   | AL117623  | 1036.047  | 1088.776  |
| NM_00583E | 820.153   | 773.742   | AL137487  | 1828.52   | 2010.705  | AF085988  | 1308.303  | 1245.544  |
| NM_000734 | 2373.11   | 2735.187  | AK023800  | 1105.25   | 1389.487  | AK025785  | 6721.496  | 6658.107  |
| NM_012331 | 3757.67   | 4249.03   | AK024120  | 2353.005  | 2631.059  | AF038190  | 933.655   | 1027.4    |
| NM_006644 | 14056.835 | 12692.327 | U50526    | 1022.298  | 1024.496  | AF143877  | 1229.087  | 1369.031  |
| NM_00658E | 60235.531 | 7519.608  | AF056455  | 17670.691 | 22205.953 | NM_00073E | 62941.672 | 52701.43  |
| NM_003974 | 550.244   | 417.668   | NM_018510 | 2000.765  | 2149.706  | AF086474  | 1090.052  | 1097.04   |
| NM_00606E | 2197.256  | 2526.058  | U50537    | 2184.152  | 3736.658  | AF086529  | 1103.65   | 1038.326  |
| NM_01433E | 15190.667 | 16358.81  | AK024988  | 1482.841  | 1790.015  | AF086023  | 5792.967  | 5122.735  |
| NM_00149E | 1120.79   | 1110.431  | AK025719  | 548.947   | 716.92    | AF131803  | 18908.428 | 16220.656 |
| NM_00228E | 1391.205  | 1519.127  | AF026943  | 2098.422  | 2928.242  | AF086558  | 558.003   | 616.044   |
| NM_00441E | 22844.348 | 24327.607 | L77582    | 465.362   | 531.086   | AF086538  | 1733.397  | 1767.196  |
| NM_00062E | 5160.209  | 5595.271  | NM_02044E | 1053.483  | 890.784   | NM_00475E | 1560.881  | 1957.329  |
| AB005216  | 1612.196  | 1956.674  | NM_00541E | 2503.881  | 2940.928  | NM_00516E | 8819.418  | 16018.021 |
| NM_00032E | 18974.672 | 17792.848 | NM_00347E | 11811.145 | 12615.084 | SR1       | 64838.523 | 57992.133 |
| AF015041  | 3430.531  | 3709.384  | NM_00677E | 3364.956  | 4098.66   | SR3       | 37693.09  | 50515     |
| NM_00236E | 1489.333  | 1261.898  | AK024439  | 12777.355 | 16729.607 | SR5       | 4693.943  | 6516.748  |
| AK000184  | 1976.906  | 1920.717  | X89676    | 1518.369  | 1745.529  | SR7       | 4598.721  | 48698.418 |
| AF055020  | 2511.838  | 2397.915  | NM_012444 | 421.341   | 816.386   | SR9       | 14337.837 | 4724.717  |
| NM_00698E | 7767.655  | 7750.526  | Z32684    | 3493.827  | 4314.64   | CY3Cy5    | 13810.799 | 1348.351  |
| AF272043  | 2587.583  | 1827.319  | NM_01651E | 882.335   | 884.646   | AF182420  | 1583.534  | 1372      |
| NM_002587 | 2479.825  | 2532.819  | NM_01748E | 6056.475  | 7193.543  | U84517    | 16948.389 | 14710.47  |
| NM_00223E | 7199.817  | 6416.297  | AY009400  | 6462.214  | 8756.009  | U03237    | 1114.564  | 1380.635  |
| NM_00486E | 2309.896  | 2855.462  | NM_00506E | 961.843   | 987.316   | AB033113  | 1922.172  | 1833.717  |
| NM_00466E | 7059.827  | 4966.375  | AF086401  | 3432.946  | 3796.215  | AK025877  | 2889.2    | 3011.689  |
| NM_00702E | 20653.016 | 16972.422 | L23869    | 1373.627  | 1332.36   | NM_01814E | 1120.121  | 1121.66   |
| NM_01586E | 1097.767  | 1228.55   | Z21853    | 2565.864  | 2554.794  | AK001921  | 8101.446  | 6948.85   |
| NM_00305E | 8325.908  | 9248.123  | U80770    | 1367.326  | 1628.598  | AF088004  | 3540.648  | 3461.793  |
| NM_00507E | 1608.382  | 1235.914  | AB075846  | 696.947   | 845.801   | AF086149  | 2852.329  | 2365.051  |
| NM_006841 | 967.374   | 1027.047  | NM_01834E | 3025.691  | 3261.949  | NM_01827E | 4784.184  | 4520.81   |
| NM_002414 | 26181.342 | 24618.494 | BC020260  | 4785.557  | 5579.492  | AK024944  | 4477.121  | 4388.407  |
| NM_00035E | 963.532   | 968.907   | D17156    | 7031.663  | 6970.062  | S81893    | 17713.848 | 21410.887 |
| AL133580  | 7919.427  | 7953.069  | L04461    | 924.628   | 564.012   | AK022034  | 1337.477  | 1790.573  |
| NM_01466E | 10614.081 | 10920.104 | AK026938  | 21717.533 | 21539.314 | NM_00720E | 4616.844  | 4696.193  |
| NM_005451 | 3769.426  | 2996.163  | AK024373  | 9533.139  | 9158.24   | NM_00366E | 6540.424  | 5823.585  |
| NM_00717E | 6199.689  | 6834.869  | AK022343  | 12719.018 | 12227.307 | AK021777  | 2724.931  | 2839.844  |

|           |           |           |           |           |           |           |           |           |
|-----------|-----------|-----------|-----------|-----------|-----------|-----------|-----------|-----------|
| NM_006152 | 56436.602 | 55489.977 | AK026400  | 1856.423  | 1753.716  | AF007137  | 3708.889  | 4662.922  |
| NM_013333 | 51188.023 | 51234.422 | NM_004148 | 6617.272  | 8246.082  | AK023292  | 918.482   | 1024.374  |
| NM_002333 | 3096.921  | 3615.384  | X03168    | 3213.902  | 3360.683  | AK023752  | 382.69    | 318.554   |
| NM_003400 | 18455.535 | 19173.139 | NM_005168 | 5700.184  | 6417.873  | AK022452  | 997.449   | 985.82    |
| NM_006705 | 1600.129  | 1717.986  | NM_017801 | 6278.357  | 7596.744  | AK023375  | 2638.957  | 2823.895  |
| NM_014439 | 497.612   | 614.647   | NM_007348 | 3166.182  | 2897.578  | AK023781  | 1185.982  | 990.023   |
| NM_005582 | 16629.381 | 14399.988 | NM_016953 | 505.702   | 587.818   | AK024366  | 1797.488  | 1477.228  |
| NM_012266 | 12338.482 | 9068.119  | U65473    | 11730.451 | 12787.136 | AK022171  | 3929.973  | 3161.59   |
| NM_004559 | 7166.596  | 6197.405  | D63481    | 33548.008 | 40452.766 | AK025913  | 2226.095  | 2063.537  |
| X56692    | 11313.421 | 10294.569 | AY009951  | 718.187   | 810.578   | AF147389  | 796.907   | 1016.406  |
| AK024467  | 976.189   | 951.124   | AL157424  | 1309.492  | 1425.149  | AK021930  | 683.349   | 748.154   |
| NM_014476 | 1453.516  | 1129.391  | AK024422  | 678.271   | 664.6     | NM_016500 | 5545.058  | 6291.095  |
| NM_014278 | 858.512   | 743.464   | NM_002673 | 690.263   | 393.022   | AF087966  | 669.649   | 923.883   |
| NM_018962 | 2370.946  | 2194.948  | NM_003876 | 5040.351  | 5587.423  | AF087985  | 729.873   | 477.98    |
| AF125100  | 6364.925  | 5196.712  | AJ276310  | 775.572   | 712.09    | AF087971  | 1534.335  | 1636.511  |
| NM_006114 | 25464.867 | 23985.047 | NM_012295 | 10649.829 | 12245.719 | AF087974  | 5073.896  | 5726.674  |
| X82693    | 10700.83  | 9576.544  | NM_015910 | 1395.627  | 1397.563  | NM_018004 | 1229.456  | 1209.276  |
| NM_016559 | 969.151   | 763.703   | NM_000222 | 618.62    | 521.497   | X78938    | 4423.948  | 5582.555  |
| NM_007176 | 19212.566 | 18017.869 | AL133666  | 4241.175  | 4650.78   | AL359056  | 768.774   | 679.925   |
| NM_002722 | 3151.174  | 3192.799  | NM_000663 | 1620.669  | 1617.435  | AK021497  | 2210.736  | 2226.89   |
| AF317058  | 1379.282  | 1481.456  | NM_004710 | 5918.193  | 6325.852  | AF124367  | 1017.656  | 1050.93   |
| AK025965  | 1213.185  | 835.825   | NM_004396 | 13555.114 | 15099.026 | AK000798  | 496.31    | 455.629   |
| NM_016242 | 655.073   | 620.449   | NM_017999 | 3649.215  | 3407.953  | AK025615  | 36764.609 | 31884.746 |
| M22538    | 26863.154 | 27105.477 | NM_015989 | 64542.082 | 53632.984 | AK023803  | 1719.087  | 1485.751  |
| NM_006028 | 1265.09   | 1204.012  | NM_001043 | 6978.512  | 5909.333  | AK022379  | 1200.179  | 1077.378  |
| NM_014904 | 3051.8    | 2557.631  | NM_014399 | 496.99    | 791.695   | AK025231  | 63671.965 | 60950.73  |
| AL137576  | 16260.72  | 11863.53  | AF113685  | 2095.93   | 2639.974  | AK025338  | 4775.559  | 4256.152  |
| NM_018358 | 7411.549  | 6298.774  | NM_005470 | 8182.193  | 10285.221 | AK001132  | 714.466   | 581.619   |
| NM_016321 | 769.117   | 610.265   | AF142570  | 1527.414  | 1657.95   | AK022321  | 812.518   | 970.324   |
| NM_013356 | 877.776   | 839.835   | NM_004225 | 13760.461 | 13276.398 | AK023296  | 975.782   | 993.712   |
| AF131781  | 14169.592 | 10743.726 | NM_003862 | 1543.401  | 1093.134  | AK001439  | 940.337   | 959.906   |
| NM_006516 | 17775.791 | 15578.03  | NM_002873 | 5238.394  | 4776.215  | AK023462  | 3549.208  | 3819.027  |
| AK022417  | 2067.127  | 1608.151  | NM_015571 | 17215.725 | 16822.053 | AF210649  | 1075.855  | 1242.638  |
| U50534    | 2947.522  | 1548.704  | NM_004701 | 7824.855  | 9135.466  | AK001115  | 4696.546  | 4580.228  |
| NM_014824 | 5234.811  | 5113.143  | AK025554  | 2388.474  | 2314.566  | AL117586  | 472.237   | 508.489   |
| AK000782  | 351.104   | 670.939   | BI824151  | 4246.34   | 5876.65   | NM_014099 | 4260.159  | 5144.231  |
| NM_014504 | 5864.604  | 4834.61   | AK021791  | 5266.652  | 5915.512  | AL133050  | 1488.396  | 1463.874  |
| NM_014408 | 27349.559 | 33813.273 | NM_005019 | 363.547   | 550.82    | AK027233  | 6504.692  | 8242.796  |
| NM_014741 | 14399.85  | 14327.285 | NM_004052 | 2618.687  | 2676.573  | AK024131  | 1376.977  | 1135.24   |
| AF212247  | 6433.063  | 7305.063  | NM_004394 | 8355.488  | 10090.207 | AK023343  | 1797.795  | 1656.316  |
| AF161407  | 14456.872 | 14592.813 | NM_005727 | 52697.898 | 51122.574 | AK000246  | 627.792   | 1806.772  |
| NM_014738 | 9561.102  | 8582.411  | AK027242  | 2988.483  | 3005.347  | AK025323  | 806.51    | 775.753   |
| NM_016406 | 10046.462 | 8803.592  | NM_001279 | 22309.291 | 21699.078 | NM_013326 | 16487.031 | 17683.111 |
| NM_018080 | 6640.229  | 5644.606  | NM_005010 | 4035.963  | 4439.475  | BC037322  | 1000.785  | 1132.952  |
| AF174605  | 872.999   | 529.343   | NM_019055 | 5114.118  | 5826.415  | Y10202    | 704.168   | 572.419   |
| AL050107  | 1149.125  | 1021.118  | NM_020199 | 979.513   | 1103.304  | Y12022    | 2205.833  | 2462.101  |
| NM_014453 | 25990.449 | 18942.609 | U96136    | 705.993   | 413.521   | AK001375  | 1857.634  | 1550.579  |
| NM_005713 | 3561.383  | 2904.042  | NM_017586 | 27057.711 | 24775.566 | NM_019597 | 7080.84   | 8438.984  |
| AK021951  | 1763.147  | 1311.444  | NM_005941 | 1523.729  | 1640.069  | AL137559  | 1182.046  | 1202.878  |
| AK023553  | 3212.19   | 2669.007  | NM_015884 | 834.897   | 832.976   | AF026944  | 9981.677  | 9297.386  |
| NM_014600 | 1811.558  | 1628.015  | AF201380  | 2922.101  | 3694.988  | AK021493  | 6974.403  | 6698.239  |
| NM_016733 | 2028.493  | 1529.034  | NM_003619 | 499.28    | 387.828   | NM_006161 | 29862.713 | 24837.758 |
| AF181994  | 8397.105  | 6881.81   | NM_012392 | 2676.112  | 2626.36   | NM_006192 | 1079.397  | 968.514   |

|           |           |           |           |           |           |           |           |           |
|-----------|-----------|-----------|-----------|-----------|-----------|-----------|-----------|-----------|
| CY3Cy5    | 12520.88  | 1061.537  | NM_014833 | 22116.121 | 20911.406 | AF085881  | 1521.82   | 1561.645  |
| NM_058197 | 6858.928  | 8509.202  | NM_000045 | 1551.95   | 1545.738  | AK022737  | 12923.415 | 13834.035 |
| SB        | 1014.334  | 1192.3    | NM_003878 | 8485.243  | 9814.023  | NM_003472 | 51558.727 | 51304.738 |
| AF086403  | 827.824   | 1133.04   | NM_004832 | 1751.804  | 1701.503  | U92980    | 2194.781  | 2694.503  |
| AF086452  | 765.614   | 1105.608  | NM_005957 | 1036.917  | 1342.78   | AF133658  | 1457.239  | 1635.787  |
| AF086314  | 1293.635  | 1564.213  | AK024374  | 2093.783  | 2581.642  | AB048287  | 17073.174 | 19122.488 |
| NM_016364 | 573.841   | 731.563   | NM_007101 | 2071.082  | 2307.214  | Y11159    | 2215.422  | 2703.669  |
| AF086419  | 3070.955  | 3483.656  | NM_018234 | 455.625   | 476.491   | AB020648  | 3670.178  | 4379.248  |
| AF086461  | 1070.239  | 1305.712  | AB033062  | 2137.122  | 2464.424  | AK025798  | 22084.002 | 26559.887 |
| AK000789  | 686.422   | 819.249   | NM_016437 | 28994.256 | 33392.473 | AF086173  | 1441.687  | 2068.945  |
| AF131795  | 1029.76   | 1032.348  | NM_002720 | 8120.87   | 7128.5    | AK025164  | 1148.552  | 1058.72   |
| AL833296  | 3617.249  | 5365.93   | AK024716  | 26724.682 | 28633.457 | NM_018366 | 8615.68   | 10406.439 |
| AL110240  | 11456.903 | 14126.786 | X67155    | 1700.245  | 1891.596  | NM_019848 | 29003.229 | 42442.441 |
| AF070549  | 932.942   | 1215.291  | NM_020380 | 4370.458  | 4376.91   | AL833005  | 4826.351  | 5028.704  |
| AK025695  | 5801.627  | 7086.655  | AL137519  | 883.051   | 580.285   | L43366    | 4278.449  | 5306.441  |
| AK025442  | 4465.425  | 5073.214  | NM_002890 | 45749.684 | 47652.523 | AK026124  | 6052.536  | 6863.132  |
| AL050041  | 1747.754  | 2235.23   | NM_001330 | 60453.055 | 55681.352 | NM_015509 | 10414.033 | 9948.368  |
| NM_058197 | 6842.685  | 8074.281  | NM_015927 | 2649.548  | 2144.911  | AL110157  | 6581.968  | 5276.893  |
| SB        | 644.466   | 1040.546  | NM_004779 | 11459.064 | 12383.459 | NM_002319 | 6768.831  | 6072.008  |
| SR6       | 2621.697  | 3508.955  | NM_019071 | 4732.124  | 4060.78   | L38712    | 30633.791 | 27532.051 |
| SR8       | 9564.699  | 34426.883 | NM_001913 | 6689.326  | 8724.621  | U84508    | 2311.264  | 1681.258  |
| SR10      | 30764.469 | 13576.608 | AK025594  | 1164.091  | 1700.749  | NM_017793 | 4346.59   | 3707.618  |
| CY3Cy5    | 3814.719  | 364.315   | AB040931  | 5269.609  | 5856.723  | NM_012131 | 4432.967  | 3613.802  |
| AK024713  | 4207.772  | 5848.116  | NM_003599 | 1356.041  | 1376.896  | S41540    | 3677.332  | 3137.472  |
| AF086114  | 472.843   | 850.627   | NM_015911 | 1379.022  | 1230.734  | AK026947  | 60178.715 | 61340     |
| AK024204  | 1413.127  | 1661.17   | BC011826  | 4630.701  | 4485.663  | U84526    | 18042.613 | 15794.982 |
| AK023737  | 1302.141  | 1876.447  | NM_017647 | 3760.738  | 3320.115  | L23401    | 4332.052  | 4979.986  |
| NM_006609 | 6166.12   | 8740.786  | NM_012091 | 1457.111  | 1024.019  | NM_018090 | 62225.434 | 64484.406 |
| NM_014118 | 889.155   | 1214.366  | NM_012321 | 6761.668  | 6534.932  | AK022728  | 48601.488 | 53952.527 |
| AK023525  | 7651.892  | 9090.38   | D13642    | 5471.386  | 5962.84   | AL109678  | 3665.669  | 3639.153  |
| AF085829  | 1604.596  | 1782.874  | NM_004741 | 22359.072 | 20830.979 | AL137524  | 9691.813  | 9760.914  |
| AF075029  | 852.076   | 1032.756  | NM_018032 | 4994.309  | 4823.039  | AF218008  | 6024.623  | 6264.92   |
| AK021903  | 2940.493  | 3118.779  | NM_003675 | 23530.857 | 26705.754 | M22404    | 61157.57  | 49252.801 |
| AL390143  | 5822.17   | 6548.518  | NM_017518 | 3605.497  | 3787.741  | AF052115  | 1333.209  | 1530.152  |
| AL162075  | 4315.177  | 3297.093  | NM_004117 | 4975.729  | 5996.939  | NM_014019 | 46603.957 | 43378.414 |
| AK021595  | 2711.273  | 3406.492  | NM_016594 | 18813.664 | 20094.121 | Z70711    | 1709.867  | 1560.064  |
| AK021648  | 927.114   | 1231.012  | NM_030752 | 10684.24  | 9767.749  | AF116653  | 585.633   | 544.548   |
| AL110290  | 906.254   | 844.052   | D26068    | 28686.908 | 30470.766 | NM_012368 | 3102.137  | 3356.441  |
| NM_018410 | 6609.003  | 7444.598  | NM_018559 | 33841.75  | 35206.48  | AK022097  | 14320.334 | 21437.605 |
| AF147404  | 987.568   | 868.596   | NM_017593 | 5466.242  | 6058.162  | NM_002166 | 38946.613 | 42948.465 |
| AF086355  | 1029.043  | 715.16    | NM_004282 | 18031.678 | 21596.658 | NM_004660 | 18256.736 | 14021.273 |
| AK027174  | 687.805   | 694.568   | AF188747  | 1730.99   | 1501.903  | NM_006165 | 3439.948  | 3266.801  |
| AL110173  | 649.716   | 853.579   | NM_002773 | 980.357   | 951.808   | NM_016011 | 23190.482 | 21949.199 |
| AK024106  | 450.016   | 876.665   | NM_013411 | 2333.622  | 3042.129  | AL035307  | 3775.896  | 3852.004  |
| AK025833  | 817.657   | 1083.44   | AB007956  | 411.52    | 882.521   | AK023772  | 842.712   | 831.983   |
| AK021772  | 1101.048  | 1663.276  | NM_020200 | 2179.96   | 2396.613  | NM_012234 | 4062.155  | 4304.738  |
| AK026297  | 5279.399  | 7787.057  | NM_001248 | 1407.642  | 1894.786  | NM_006204 | 617.066   | 573.88    |
| AF075081  | 1001.892  | 1272.916  | NM_000180 | 33028.789 | 36837.672 | NM_012155 | 18895.098 | 15952.305 |
| NM_015372 | 373.31    | 664.799   | NM_000858 | 12491.588 | 12210.993 | AF144700  | 4657.152  | 4447.722  |
| AF085919  | 1189.513  | 1389.167  | AF254087  | 2819.05   | 2683.597  | NM_002599 | 536.344   | 382.387   |
| AF085933  | 1652.408  | 1834.371  | NM_017715 | 2394.19   | 2313.764  | NM_004105 | 15227.264 | 17166.863 |
| AF147431  | 1686.042  | 1893.995  | AL117607  | 3400.324  | 3547.459  | AB046825  | 5008.098  | 5311.055  |
| AK026422  | 4364.09   | 5495.077  | AB037774  | 2738.048  | 2889.567  | X64975    | 3960.549  | 3826.452  |

|           |           |           |           |           |           |           |           |           |
|-----------|-----------|-----------|-----------|-----------|-----------|-----------|-----------|-----------|
| AF085938  | 1495.297  | 1169.966  | NM_005438 | 2102.083  | 1933.705  | AF071509  | 553.925   | 592.875   |
| AK022264  | 2819.787  | 2560.537  | AK024361  | 2514.129  | 2472.401  | AL050297  | 10453.262 | 17239.84  |
| AL137331  | 2259.272  | 2326.109  | NM_004350 | 10288.458 | 10586.016 | AK026966  | 5773.225  | 6043.479  |
| AL162040  | 7610.056  | 11000.001 | NM_018044 | 8239.096  | 8330.143  | AF147398  | 478.869   | 581.008   |
| AL442084  | 1818.857  | 2086.74   | NM_004503 | 840.413   | 449.681   | AF185573  | 531.744   | 625.089   |
| AL137371  | 18701.826 | 21646.143 | NM_001717 | 940.52    | 876.373   | AK025268  | 1810.149  | 1506.27   |
| AL137596  | 6105.441  | 6492.57   | AF274347  | 6489.511  | 5404.471  | NM_005203 | 778.152   | 1212.288  |
| AL353942  | 27577.832 | 24962.789 | AK001144  | 895.175   | 778.594   | NM_006566 | 951.168   | 1341.886  |
| Z38010    | 2507.044  | 2457.076  | NM_018555 | 5952.47   | 6120.678  | AK026154  | 16859.729 | 23422.129 |
| AF088003  | 1014.4    | 1107.782  | NM_005122 | 1444.498  | 1558.915  | AL117546  | 44059.402 | 45583.977 |
| AK025799  | 1208.695  | 1981.744  | AL133055  | 134.584   | 1645.372  | AK027073  | 1333.044  | 1082.445  |
| AK022857  | 961.308   | 1017.359  | NM_014552 | 8206.081  | 8098.218  | NM_000384 | 782.067   | 1005.192  |
| AL110206  | 2079.351  | 2700.907  | NM_003072 | 14623.364 | 13145.799 | AB018325  | 14130.878 | 13824.191 |
| NM_004821 | 552.557   | 776.642   | L09081    | 21124.02  | 27842.352 | AL157482  | 27609.318 | 27057.1   |
| AK024292  | 1474.821  | 1965.958  | NM_000218 | 66546.383 | 61394.355 | NM_003603 | 512.788   | 677.763   |
| AK026263  | 2824.213  | 3866.384  | NM_016113 | 22156.434 | 26390.893 | NM_005428 | 9717.431  | 8924.104  |
| AK023643  | 930.518   | 1226.937  | NM_014222 | 4697.087  | 6612.468  | NM_017974 | 1755.526  | 1972.551  |
| AL390159  | 731.09    | 521.48    | L14819    | 738.208   | 606.258   | NM_003979 | 2204.898  | 2625.315  |
| AF095853  | 532.158   | 741.967   | NM_000509 | 3919.946  | 3578.577  | X14677    | 11827.555 | 11960.607 |
| NM_014157 | 1583.987  | 2203.082  | NM_004542 | 1122.126  | 1054.661  | NM_005863 | 6890.634  | 7407.001  |
| AF090933  | 726.625   | 1061.58   | X06182    | 3887.787  | 3488.988  | U17077    | 9885.733  | 9838.319  |
| AF111851  | 1890.802  | 2121.209  | BE908993  | 41539.371 | 42333.773 | NM_000915 | 6468.27   | 5678.292  |
| AF152529  | 918.806   | 908.69    | AB012701  | 7714.433  | 7295.114  | NM_002344 | 621.473   | 671.792   |
| AL360200  | 1888.172  | 1829.259  | M61156    | 6187.887  | 6437.59   | AK024475  | 1046.744  | 964.272   |
| NM_014083 | 596.182   | 840.82    | R44005    | 36967.168 | 42723.066 | AB026542  | 20766.836 | 24836.83  |
| AK021992  | 2378.143  | 2685.759  | AI942392  | 3859.736  | 4049.078  | NM_019846 | 8992.067  | 8846.38   |
| AK022102  | 1228.143  | 1346.886  | M55040    | 1535.541  | 1547.824  | NM_014433 | 2879.347  | 2668.38   |
| AK022235  | 2389.877  | 2705.49   | AW009739  | 3048.186  | 3515.522  | NM_002062 | 29373.016 | 24982.209 |
| AK022378  | 6429.271  | 7648.507  | BC036805  | 4995.581  | 5080.623  | NM_014394 | 62075.262 | 58753.742 |
| AK022009  | 1078.821  | 634.91    | Z74615    | 65699.531 | 59239.773 | NM_018140 | 5711.95   | 7707.389  |
| AK022274  | 731.129   | 546.236   | X03884    | 12915.362 | 12511.091 | NM_016948 | 6919.408  | 8548.1    |
| AK022401  | 814.186   | 612.845   | U36759    | 1299.142  | 1004.941  | NM_000142 | 4194.882  | 4934.31   |
| AK022078  | 847.83    | 803.826   | X91625    | 2837.532  | 2708.135  | AF272372  | 48812.688 | 55936.25  |
| AL133104  | 974.602   | 1476.4    | AF090901  | 1049.84   | 962.22    | AK097045  | 3824.086  | 2995.53   |
| AF075101  | 1232.689  | 1285.565  | AF004231  | 4186.586  | 4366.225  | AB014548  | 8909.714  | 10002.396 |
| AF130108  | 1567.68   | 1965.33   | AF001862  | 9893.758  | 9317.712  | NM_018256 | 8982.396  | 8014.73   |
| NM_020224 | 12728.131 | 17878.775 | NM_002451 | 4748.031  | 4016.213  | AK025150  | 2670.561  | 2517.218  |
| U17617    | 2455.252  | 3284.827  | AF119902  | 938.599   | 1340.5    | AK024611  | 29998.031 | 32232.01  |
| NM_014100 | 960.091   | 1076.084  | NM_020525 | 30036.863 | 38038.855 | BC010420  | 11021.111 | 11951.683 |
| AK022952  | 16039.921 | 21793.215 | X62468    | 1269.752  | 1387.833  | NM_018172 | 10318.649 | 10827.529 |
| BF218888  | 1704.654  | 1821.337  | NM_003890 | 12253.351 | 13926.677 | U03886    | 8608.888  | 8857.844  |
| AF147407  | 729.729   | 607.346   | BF127978  | 4532.991  | 4330.477  | AK022040  | 1485.813  | 1378.699  |
| AK054831  | 3261.75   | 4299.947  | AF110801  | 690.184   | 392.926   | AK022722  | 2244.704  | 2118.191  |
| AK021770  | 1523.127  | 1434.332  | NM_016579 | 49962.707 | 54593.082 | NM_003591 | 25302.352 | 40760.305 |
| AK027248  | 4628.682  | 5765.797  | AB018297  | 1677.38   | 1916.162  | AL080111  | 5958.205  | 7282.259  |
| AK022804  | 22829.441 | 25549.309 | AK022565  | 6674.192  | 6111.48   | NM_003550 | 11273.973 | 10319.765 |
| AF009263  | 1649.531  | 1829.265  | AK023151  | 4261.843  | 3801.502  | NM_014642 | 10717.25  | 11210.112 |
| AF009283  | 2120.052  | 1914.086  | AB033076  | 1866.639  | 1866.286  | NM_003829 | 3931.182  | 3478.487  |
| AF086329  | 1408.854  | 1372.286  | AK022876  | 2451.04   | 2502.375  | AL110168  | 12202.938 | 11225.71  |
| U92989    | 6587.143  | 6172.853  | AF134894  | 34672.766 | 34112.781 | NM_014522 | 637.699   | 615.143   |
| AF075102  | 3912.327  | 3475.213  | NM_003938 | 7266.788  | 7416.822  | NM_016147 | 11219.115 | 12165.319 |
| NM_018463 | 5651.422  | 5373.101  | NM_014827 | 13087.919 | 12102.731 | NM_002833 | 2929.787  | 3302.787  |
| X74956    | 17584.371 | 22068.785 | NM_004126 | 6305.743  | 6523.226  | NM_016592 | 2231.018  | 1806.286  |

|           |           |           |           |           |           |           |           |           |
|-----------|-----------|-----------|-----------|-----------|-----------|-----------|-----------|-----------|
| AF132197  | 17332.207 | 22767.977 | U87460    | 13133.305 | 12984.771 | NM_018527 | 1037.61   | 1016.339  |
| AK025546  | 2268.521  | 3288.06   | NM_003617 | 1067.431  | 998.354   | NM_001866 | 1635.235  | 1324.158  |
| AF278761  | 930.018   | 1185.421  | NM_001841 | 3401.203  | 3348.773  | NM_014773 | 1599.019  | 1338.575  |
| AL137487  | 4609.354  | 5241.774  | NM_002054 | 5011.708  | 4894.855  | NM_005606 | 7305.121  | 6469.03   |
| AK023800  | 2376.076  | 3160.797  | AF300649  | 16598.166 | 18087.953 | BE730629  | 2416.456  | 2640.236  |
| AK024120  | 1375.436  | 1625.908  | NM_004125 | 5170.209  | 5197.791  | NM_018162 | 558.517   | 754.318   |
| U50526    | 2125.585  | 2878.218  | NM_000823 | 6823.049  | 8016.12   | AK027167  | 5719.753  | 5236.024  |
| S75105    | 8176.57   | 9517.442  | NM_003317 | 22262.58  | 23290.473 | AK025265  | 4221.871  | 4397.368  |
| AF056455  | 1860.72   | 2084.398  | NM_001139 | 6680.493  | 6014.572  | NM_013279 | 1010.029  | 1174.706  |
| NM_018510 | 2701.969  | 2418.941  | NM_001441 | 2360.852  | 2832.925  | NM_018652 | 42128.758 | 43468.266 |
| U50537    | 2275.257  | 2720.801  | NM_018324 | 1855.483  | 2069.662  | AB011166  | 4372.339  | 4506.938  |
| AK024988  | 1911.336  | 2260.37   | AF064255  | 60466.391 | 60039.84  | AK024460  | 7661.607  | 8451.611  |
| AV749548  | 450.021   | 726.475   | NM_016368 | 53468.215 | 58533.664 | NM_006606 | 11842.544 | 10942.362 |
| AK025719  | 542.106   | 831.497   | U08853    | 4697.063  | 4668.593  | S78570    | 1234.968  | 1055.375  |
| AF026943  | 5806.506  | 9175.99   | NM_004261 | 20924.373 | 20237.221 | NM_005243 | 28768.266 | 27065.133 |
| L77582    | 906.023   | 1379.815  | NM_016006 | 1199.044  | 1270.666  | NM_006218 | 4458.749  | 4899.593  |
| NM_020448 | 1440.867  | 1419.475  | NM_016245 | 4335.452  | 3972.006  | NM_016265 | 5982.909  | 6284.688  |
| NM_005419 | 4553.435  | 4432.233  | AF005632  | 7460.633  | 7128.442  | NM_002095 | 18241.48  | 14724.783 |
| NM_003479 | 20308.184 | 21455.93  | NM_000903 | 2409.654  | 2445.938  | AK022814  | 4685.63   | 4981.042  |
| NM_006773 | 6236.681  | 6173.842  | NM_004493 | 12467.456 | 12858.898 | NM_006268 | 3754.301  | 3263.015  |
| AK024439  | 24951.258 | 30652.031 | AF309489  | 1036.256  | 998.325   | NM_005515 | 377.674   | 297.234   |
| X89676    | 2235.588  | 2244.021  | NM_000288 | 2576.233  | 3185.253  | X78931    | 1114.932  | 1108.441  |
| NM_012444 | 1733.083  | 1645.957  | NM_004762 | 7149.911  | 9171.498  | NM_006442 | 59767.637 | 61494.531 |
| Z32684    | 8364.813  | 9536.15   | NM_006641 | 62778.059 | 57581.953 | NM_003902 | 38010.359 | 37132.566 |
| NM_016512 | 1256.742  | 1664.493  | NM_000634 | 22364.215 | 24554.781 | NM_016427 | 10423.793 | 9506.464  |
| NM_017488 | 10591.298 | 15448.13  | NM_014679 | 37739.035 | 37196.5   | NM_006706 | 1591.533  | 1275.272  |
| AY009400  | 13160.045 | 22863.977 | AB040969  | 3507.618  | 3672.936  | U80741    | 21357.436 | 20145.578 |
| NM_005069 | 1165.98   | 1229.935  | NM_003467 | 14793.387 | 11820.533 | NM_014497 | 3375.941  | 3068.764  |
| AF086401  | 6083.31   | 6958.625  | NM_014936 | 2391.882  | 2390.985  | AL133598  | 17622.439 | 15816.227 |
| L23869    | 2569.975  | 3254.494  | NM_003943 | 3582.206  | 4765.874  | NM_015511 | 12710.708 | 14561.079 |
| Z21853    | 4383.595  | 5363.911  | NM_019052 | 5272.706  | 7849.208  | NM_006625 | 13700.44  | 17054.018 |
| AL050183  | 578.372   | 747.326   | NM_003202 | 746.501   | 870.414   | NM_004891 | 34735.449 | 35053.641 |
| U80770    | 1797.072  | 1868.7    | NM_000289 | 11509.772 | 12788.806 | NM_002831 | 22398.488 | 20340.084 |
| AB075846  | 1404.344  | 1249.604  | NM_001500 | 775.211   | 1231.445  | AL833409  | 12263.131 | 12297.502 |
| NM_018342 | 3035.341  | 4693.573  | NM_004388 | 3048.209  | 3678.991  | NM_015966 | 1524.223  | 2149.193  |
| BC020260  | 1936.586  | 2825.434  | NM_020379 | 771.276   | 615.659   | NM_000147 | 4562.526  | 4044.329  |
| D17156    | 12196.251 | 16139.859 | AL110127  | 1875.061  | 1628.905  | NM_000158 | 8111.785  | 6956.683  |
| L04461    | 1572.823  | 2014.426  | AK001997  | 653.638   | 421.673   | NM_000670 | 942.84    | 942.346   |
| AK026938  | 15806.994 | 23944.154 | NM_002528 | 4218.507  | 3419.994  | NM_006416 | 5106.405  | 3900.681  |
| AK024373  | 18408.721 | 19901.902 | D38438    | 7437.113  | 7478.936  | NM_000151 | 14187.788 | 12662.521 |
| AK022343  | 5774.388  | 4354.164  | AV714945  | 1210.689  | 898.492   | NM_003773 | 4240.651  | 3614.588  |
| AK026400  | 2042.625  | 1585.828  | AF007872  | 2008.587  | 1930.928  | NM_003935 | 1384.095  | 1424.29   |
| NM_004148 | 2669.594  | 2759.514  | M30938    | 7331.684  | 6844.357  | NM_002879 | 2434.694  | 2414.649  |
| X03168    | 4258.092  | 3563.176  | NM_015148 | 1726.407  | 1632.388  | AB028999  | 1943.36   | 2212.037  |
| NM_005168 | 7905      | 8656.581  | NM_004714 | 3044.584  | 2991.241  | AB018348  | 15452.374 | 12934.427 |
| NM_017801 | 9867.756  | 10094.75  | NM_005401 | 626.024   | 428.687   | NM_013369 | 2077.32   | 2457.129  |
| NM_007348 | 8869.231  | 6446.696  | NM_002497 | 13258.756 | 11581.563 | NM_003686 | 3824.431  | 3759.384  |
| NM_016953 | 618.019   | 663.86    | AB025194  | 15759.48  | 15724.252 | NM_014812 | 5609.914  | 4964.943  |
| U65473    | 5436      | 7508.032  | NM_006239 | 3678.222  | 4389.676  | NM_004641 | 2403.456  | 2605.773  |
| D63481    | 9039.558  | 12594.379 | BC020863  | 1529.653  | 1215.686  | NM_002049 | 9259.26   | 9096.25   |
| AY009951  | 1521.846  | 2227.208  | NM_017897 | 4068.988  | 4744.56   | AK026312  | 2685.692  | 4099.644  |
| AL157424  | 2267.943  | 2882.833  | NM_004265 | 1374.552  | 1396.403  | NM_017776 | 4125.316  | 4098.156  |
| AK024422  | 902.69    | 909.611   | NM_002572 | 5064.731  | 6692.703  | U81599    | 2401.908  | 3387.961  |



|           |           |           |           |           |           |           |           |           |
|-----------|-----------|-----------|-----------|-----------|-----------|-----------|-----------|-----------|
| NM_002673 | 1025.494  | 1121.02   | NM_016113 | 18527.912 | 23317.918 | AF275722  | 2720.227  | 4228.25   |
| NM_003876 | 12772.325 | 16349.814 | NM_014222 | 4448.056  | 5720.388  | NM_003206 | 2203.074  | 2579.95   |
| AJ276310  | 817.686   | 931.595   | L14819    | 741.226   | 1127.775  | AK000564  | 1195.383  | 1879.765  |
| NM_012295 | 9695.066  | 11776.385 | NM_000509 | 4075.296  | 3966.616  | X60155    | 1780.213  | 1847.442  |
| NM_015910 | 1816.02   | 1784.817  | NM_004542 | 1043.066  | 1138.912  | AB037901  | 20509.135 | 21047.352 |
| NM_000222 | 583.618   | 828.255   | X06182    | 3823.356  | 3343.849  | AV762646  | 1087.464  | 1711.175  |
| AL133666  | 454.612   | 468.773   | BE908993  | 39519.605 | 37245.359 | NM_006125 | 2914.262  | 3253.405  |
| NM_000663 | 3143.085  | 3657.492  | AB012701  | 6999.848  | 5855.43   | NM_000582 | 30600.621 | 30804.861 |
| NM_004710 | 12536.335 | 17847.264 | M61156    | 5673.409  | 4780.101  | NM_005593 | 5914.922  | 4730.68   |
| NM_004396 | 25747.197 | 33951.559 | R44005    | 35662.176 | 36961.281 | AJ224741  | 1580.812  | 1404.79   |
| NM_017999 | 7488.74   | 6388.457  | AI942392  | 3614.255  | 2947.636  | NM_004684 | 5665.122  | 4323.632  |
| NM_015989 | 40562.145 | 44026.348 | M55040    | 1621.612  | 1276.621  | BF338709  | 5956.28   | 5623.786  |
| NM_001043 | 10857.011 | 8274.457  | AW009739  | 2601.795  | 2332.947  | AF204171  | 1071.725  | 905.102   |
| NM_014399 | 911.592   | 850.561   | BC036805  | 5070.565  | 4337.545  | M18182    | 680.939   | 810.398   |
| AF113685  | 1616.798  | 1347.644  | Z74615    | 65077.297 | 56954.457 | W96179    | 4804.029  | 5156.651  |
| NM_005470 | 13829.61  | 15119.885 | X03884    | 11725.416 | 10626.8   | AW247841  | 27146.588 | 24853.391 |
| AF142570  | 1351.907  | 1194.383  | U36759    | 1081.204  | 1020.198  | BG568198  | 5315.994  | 4643.046  |
| NM_004225 | 23323.277 | 22616.207 | X91625    | 2813.163  | 2579.211  | M76559    | 9802.25   | 9457.91   |
| NM_003862 | 3957.63   | 3337.631  | AF090901  | 1107.919  | 798.205   | AF043473  | 1111.929  | 1574.027  |
| NM_002873 | 8677.608  | 7432.659  | AF004231  | 4195.439  | 3786.717  | U03884    | 2313      | 2226.216  |
| NM_015571 | 30931.291 | 32941.941 | AF001862  | 8852.826  | 8594.547  | U11058    | 2320.148  | 2230.581  |
| NM_004701 | 20979.23  | 27713.037 | NM_016044 | 2166.071  | 2207.177  | AI222585  | 1741.972  | 1874.45   |
| AK025554  | 4934.067  | 5382.217  | NM_000520 | 1827.406  | 1452.577  | AA411678  | 14599.435 | 16885.451 |
| BI824151  | 7710.805  | 9871.618  | X62468    | 962.332   | 1049.772  | AA862813  | 47433.156 | 53508.219 |
| AK021791  | 10455.083 | 12603.176 | NM_003890 | 12437.183 | 15683.173 | AA398427  | 4463.276  | 5900.29   |
| NM_005019 | 1036.172  | 914.178   | BF127978  | 5455.873  | 5833.23   | T55728    | 12146.619 | 14313.074 |
| NM_004052 | 3824.665  | 4340.952  | AF110801  | 867.795   | 591.444   | H20856    | 4309.117  | 3522.836  |
| NM_004394 | 17369.783 | 20168.252 | NM_016579 | 54464.547 | 55227.762 | N62586    | 4782.909  | 5251.828  |
| NM_005727 | 7264.656  | 7678.851  | AB018297  | 1663.99   | 1825.87   | AA242743  | 55185.477 | 53961.539 |
| AK027242  | 5743.397  | 6226.08   | AK022565  | 5990.168  | 5761.051  | NM_006759 | 11588.806 | 13538.436 |
| NM_001279 | 24759.252 | 30094.875 | AK023151  | 4018.64   | 3471.906  | NM_006831 | 9252.204  | 8659.908  |
| NM_005010 | 4766.814  | 7151.874  | AB033076  | 1617.085  | 1347.665  | AL162044  | 13577.827 | 13319.255 |
| NM_019055 | 6604.669  | 7157.585  | AK022876  | 2290.056  | 2114.709  | AK024004  | 1671.687  | 1517.067  |
| NM_020199 | 1536.395  | 1103.756  | AF134894  | 34682.48  | 33776.152 | AK022365  | 1033.928  | 725.539   |
| U96136    | 689.341   | 628.812   | NM_003938 | 6807.604  | 6530.017  | BE892273  | 55761.645 | 57466.574 |
| NM_017586 | 5555.644  | 4646.554  | NM_014827 | 11731.838 | 10125.753 | AF026929  | 1229.94   | 1101.166  |
| NM_005941 | 661.91    | 628.517   | NM_004126 | 5608.834  | 4518.661  | NM_016734 | 2610.711  | 2414.224  |
| NM_015884 | 1732.383  | 1489.805  | U87460    | 11598.07  | 10508.911 | M16006    | 289.53    | 223.199   |
| AF201380  | 4898.802  | 5495.245  | NM_003617 | 1152.888  | 969.419   | AF035803  | 789.986   | 638.181   |
| NM_003619 | 1159.153  | 1199.241  | NM_001841 | 3154.801  | 2977.665  | Y08147    | 21961.396 | 19507.543 |
| NM_012392 | 4529.441  | 4453.454  | NM_002054 | 4483.821  | 3970.627  | D00174    | 45561.477 | 39558.641 |
| NM_014833 | 27999.191 | 26392.24  | AF300649  | 14530.255 | 13080.509 | AB000520  | 18308.736 | 18629.293 |
| NM_000045 | 712.718   | 582.613   | NM_004125 | 5330.458  | 5002.412  | NM_016382 | 401.231   | 510.178   |
| NM_003878 | 19391.41  | 17595.809 | NM_000823 | 6840.733  | 7352.226  | AK023117  | 4799.276  | 4867.97   |
| NM_004832 | 2443.224  | 3033.013  | NM_003317 | 17956.865 | 18154.533 | AL122046  | 4916.88   | 5006.304  |
| NM_005957 | 1943.085  | 2474.786  | NM_001139 | 7330.263  | 6596.479  | AF119914  | 991.187   | 1254.434  |
| AK024374  | 4234.501  | 4408.465  | L09081    | 19025.561 | 22212.451 | NM_000855 | 11104.81  | 17781.902 |
| NM_007101 | 1593.872  | 1367.323  | NM_000218 | 65114.473 | 60031.676 | NM_005536 | 14869.801 | 13470.33  |
| NM_018234 | 720.715   | 597.428   | AF064255  | 59822.02  | 56049.824 | NM_005077 | 3180.568  | 3134.192  |
| AB033062  | 2495.936  | 2381.945  | NM_016368 | 52401.684 | 57759.305 | NM_001990 | 3687.218  | 3837.923  |
| NM_016437 | 33704.738 | 35370.754 | U08853    | 4771.149  | 5185.136  | NM_002141 | 5254.643  | 5477.122  |
| NM_002720 | 20348.172 | 20655.424 | NM_004261 | 22930.869 | 24224.293 | NM_006907 | 4377.889  | 4672.76   |
| AK024716  | 55314.164 | 56220.965 | NM_016006 | 1321.822  | 1381.072  | NM_002686 | 1085.335  | 1405.566  |

|           |           |           |           |           |           |           |           |           |
|-----------|-----------|-----------|-----------|-----------|-----------|-----------|-----------|-----------|
| X67155    | 4350.371  | 5642.476  | NM_016245 | 4226.607  | 3950.531  | NM_006267 | 2809.638  | 2498.546  |
| NM_02038C | 9516.209  | 10509.357 | AF005632  | 7480.614  | 7359.862  | NM_002661 | 35714.574 | 34295.313 |
| AL137519  | 1152.233  | 1667.389  | NM_000903 | 2692.133  | 2586.818  | NM_001263 | 727.063   | 963.096   |
| NM_00289C | 57970.98  | 63020.066 | NM_004493 | 12160.852 | 12067.691 | AK023982  | 2639.423  | 2575.793  |
| NM_00133C | 25277.498 | 27147.559 | AF309489  | 1214.8    | 910.419   | NM_01846E | 3482.569  | 3543.084  |
| NM_015927 | 688.732   | 898.163   | NM_00028E | 2565.542  | 2709.63   | Y11312    | 3761.526  | 3574.958  |
| NM_00477E | 10957.775 | 10759.111 | NM_004762 | 6699.407  | 7386.876  | NM_00303E | 20681.082 | 19899.711 |
| NM_019071 | 7971.929  | 5734.724  | NM_006641 | 62753.352 | 55568.348 | NM_00263E | 54310.211 | 53276.387 |
| NM_001913 | 10476.015 | 9660.758  | NM_000634 | 24005.371 | 25005.463 | AF100756  | 12611.293 | 12817.103 |
| AK025594  | 2265.312  | 2324.485  | NM_01467E | 36114.52  | 37912.262 | NM_00682E | 14954.853 | 16710.818 |
| AB040931  | 4935.587  | 4587.172  | AB040969  | 3634.727  | 3296.955  | NM_00486E | 3342.103  | 5846.164  |
| NM_00359E | 2437.364  | 2447.631  | NM_003467 | 12942.07  | 9255.712  | NM_001661 | 3367.08   | 2994.296  |
| NM_015911 | 2294.698  | 1942.936  | NM_01493E | 2548.729  | 2313.701  | NM_01456E | 3428.729  | 2864.846  |
| BC011826  | 7666.125  | 5835.474  | NM_003943 | 3465.647  | 3907.215  | NM_02015C | 3918.029  | 4391.092  |
| NM_017647 | 7140.631  | 5400.825  | NM_019052 | 5104.01   | 7210.279  | NM_00715C | 14039.551 | 13701.487 |
| NM_012091 | 2500.567  | 1582.486  | NM_003202 | 1189.052  | 939.469   | NM_01652C | 24243.172 | 35053.035 |
| NM_012321 | 7293.012  | 5587.678  | AF119902  | 1320.278  | 1352.413  | AB018353  | 9307.665  | 9721.432  |
| D13642    | 13697.142 | 12113.734 | NM_02052E | 33868.148 | 39733.777 | NM_00703E | 6689.499  | 5564.722  |
| NM_004741 | 21115.416 | 17087.408 | NM_00438E | 3155.184  | 3657.715  | NM_002617 | 5450.893  | 4356.568  |
| NM_018032 | 8367.437  | 6127.043  | NM_02037E | 650.194   | 762.677   | NM_003313 | 44825.199 | 41560.773 |
| NM_00367E | 14790.102 | 14272.526 | AL110127  | 2195.359  | 2525.7    | AF090907  | 6631.641  | 6464.541  |
| NM_01751E | 9188.889  | 9520.792  | AK001997  | 733.376   | 313.863   | AK024476  | 10936.424 | 10090.71  |
| NM_004117 | 9272.897  | 10615.529 | NM_00252E | 3976.9    | 3216.866  | X74794    | 30413.086 | 30409.217 |
| NM_016594 | 32370.879 | 33624.691 | D38438    | 7557.178  | 7392.519  | AL050298  | 7587.73   | 7309.374  |
| NM_030752 | 23276.146 | 27203.869 | AV714945  | 1082.13   | 649.801   | NM_00707E | 50618.07  | 47535.918 |
| D26068    | 54988.23  | 59232.227 | AF007872  | 2238.259  | 1629.012  | M20696    | 7230.484  | 6742.197  |
| NM_01855E | 10827.913 | 13124.596 | M30938    | 6827.737  | 5601.367  | NM_00291E | 2948.938  | 3030.203  |
| NM_01759E | 14133.814 | 14968.378 | NM_01514E | 1529.728  | 1570.319  | NM_00673E | 5464.045  | 6531.723  |
| NM_004282 | 27202.426 | 32269.559 | NM_004714 | 2944.01   | 2455.319  | NM_01224E | 10201.703 | 10984.051 |
| AF188747  | 3430.674  | 2422.519  | NM_005401 | 662.989   | 487.254   | NM_01497C | 13780.257 | 15495.256 |
| NM_00277E | 1608.341  | 1269.647  | NM_002497 | 13884.076 | 12150.148 | NM_01439E | 6466.768  | 10590.713 |
| NM_013411 | 5010.597  | 4699.37   | AB025194  | 14080.491 | 13207.802 | NM_00422E | 34581.34  | 37535.668 |
| AB007956  | 683.698   | 619.05    | NM_00623E | 3144.391  | 3348.002  | NM_00681E | 2130.737  | 1757.924  |
| NM_02020C | 2020.874  | 1604.39   | BC020863  | 957.009   | 861.376   | NM_00135E | 42138.32  | 39184.559 |
| NM_00124E | 912.688   | 794.871   | NM_017897 | 3708.588  | 3893.308  | NM_00121E | 551.564   | 579.741   |
| NM_00015E | 2667.063  | 1743.967  | NM_00426E | 1234.892  | 1250.589  | U63336    | 1144.215  | 1180.221  |
| NM_00018C | 9084.563  | 9106.723  | NM_002572 | 3200.798  | 3358.239  | NM_00058E | 27327.67  | 34435.059 |
| NM_00085E | 18162.654 | 14300.795 | NM_001441 | 2987.708  | 2985.093  | NM_00559E | 6303.542  | 6155.484  |
| AF254087  | 4469.835  | 4086.569  | NM_018324 | 1585.001  | 1344.035  | AJ224741  | 1868.827  | 1788.597  |
| NM_01771E | 4459.086  | 5364.396  | L14819    | 644.049   | 844.461   | NM_004684 | 5579.403  | 4318.958  |
| AL117607  | 2231.178  | 2119.799  | NM_00050E | 3733.719  | 3842.4    | BF338709  | 4864.118  | 4628.97   |
| AB037774  | 3516.301  | 2821.224  | NM_004542 | 1102.712  | 1322.994  | AF204171  | 1150.664  | 957.83    |
| NM_00543E | 1266.496  | 734.011   | X06182    | 4017.228  | 3469.942  | M18182    | 752.14    | 606.164   |
| AK024361  | 2492.555  | 2854.806  | BE908993  | 39041.352 | 36192.98  | W96179    | 5106.385  | 5038.792  |
| NM_00435C | 21590.098 | 22136.764 | AB012701  | 6949.686  | 6151.599  | AW247841  | 26595.547 | 25989.189 |
| NM_018044 | 19971.896 | 22006.053 | M61156    | 5565.734  | 5366.89   | BG568198  | 4218.933  | 3797.913  |
| NM_00450E | 1458.972  | 1149.987  | R44005    | 33835.797 | 31181.311 | M76559    | 9396.499  | 9627.34   |
| NM_001717 | 832.354   | 961.236   | AI942392  | 3804.903  | 3189.38   | U03884    | 2242.108  | 1706.725  |
| AF274347  | 1303.601  | 1283.255  | M55040    | 1238.082  | 1081.012  | U11058    | 2211.095  | 3037.578  |
| AK001144  | 1103.718  | 1172.164  | AW009739  | 2435.851  | 2054.426  | AA862813  | 44556.609 | 43298.688 |
| NM_01855E | 5080.262  | 4994.438  | BC036805  | 4436.067  | 3882.69   | AA398427  | 4040.309  | 4562.108  |
| NM_005122 | 1392.427  | 1063.463  | Z74615    | 60566.23  | 56196.984 | T55728    | 11885.864 | 13437.685 |
| AL133055  | 748.183   | 510.005   | X03884    | 11493.501 | 10109.226 | H20856    | 4267.015  | 3420.98   |

|           |           |           |           |           |           |           |           |           |
|-----------|-----------|-----------|-----------|-----------|-----------|-----------|-----------|-----------|
| NM_014552 | 3089.969  | 2504.032  | U36759    | 1193.529  | 1122.006  | N62586    | 4886.109  | 5017.077  |
| NM_003072 | 25333.377 | 18100.49  | X91625    | 2805.392  | 2321.282  | AA242743  | 55757.23  | 53963.035 |
| L09081    | 2030.091  | 2246.56   | AF090901  | 985.622   | 700.392   | NM_015361 | 40973.457 | 35330.461 |
| NM_000218 | 57725.949 | 61609.566 | AF004231  | 3859.489  | 3364.385  | NM_004310 | 12573.954 | 11303.536 |
| NM_016113 | 4194.948  | 5123.528  | AF001862  | 8640.61   | 8248.06   | NM_015537 | 19749.139 | 18535.375 |
| NM_014222 | 5968.004  | 6490.528  | NM_016044 | 1976.247  | 2008.7    | AK024004  | 1579.047  | 1705.692  |
| L14819    | 718.983   | 607.714   | NM_000520 | 1694.221  | 1027.516  | AK022365  | 1170.255  | 870.16    |
| NM_000509 | 7485.986  | 6515.63   | NM_000289 | 12144.005 | 9443.338  | BE892273  | 54751.355 | 56043.512 |
| NM_004542 | 2221.585  | 2276.437  | NM_001500 | 844.607   | 679.475   | AF026929  | 1144.826  | 1194.184  |
| X06182    | 5761.774  | 6240.5    | AB033076  | 1448.567  | 1674.562  | NM_016734 | 2685.178  | 2413.586  |
| BE908993  | 59171.035 | 61127.77  | AK022876  | 2721.574  | 3610.487  | AF035803  | 913.182   | 565.335   |
| AB012701  | 12600.977 | 10675.615 | AF134894  | 37413.051 | 39816.098 | Y08147    | 22161.34  | 19769.752 |
| M61156    | 1248.058  | 1155.707  | NM_003938 | 8287.949  | 7427.854  | D00174    | 44390.309 | 42654.891 |
| R44005    | 7196.481  | 6952.278  | NM_014827 | 11901.361 | 9721.816  | AB000520  | 16755.654 | 16562.139 |
| AI942392  | 8509.686  | 6527.671  | NM_004126 | 5391.861  | 4554.72   | NM_016382 | 445.871   | 849.383   |
| M55040    | 2828.748  | 3000.381  | U87460    | 11304.049 | 9403.316  | AK023117  | 3241.404  | 3467.248  |
| AW009739  | 4593.301  | 4825.53   | NM_003617 | 980.034   | 714.703   | AL122046  | 5099.883  | 5953.064  |
| BC036805  | 3472.462  | 3387.772  | NM_001841 | 2973.739  | 2323.913  | AF119914  | 1192.402  | 1199.292  |
| Z74615    | 10142.242 | 13130.925 | NM_002054 | 4947.209  | 3863.625  | NM_000855 | 9067.598  | 10031.233 |
| X03884    | 7348.158  | 9037.597  | AF300649  | 14862.945 | 12134.656 | NM_014817 | 1117.97   | 1192.249  |
| U36759    | 1282.48   | 1610.217  | NM_004125 | 4609.054  | 3623.338  | NM_005536 | 14726.731 | 13703.481 |
| X91625    | 5182.457  | 5092.247  | NM_000823 | 5689.695  | 4787.272  | NM_005077 | 2768.597  | 3452.572  |
| AF090901  | 1607.98   | 1166.437  | NM_004414 | 2390.634  | 1767.324  | NM_001990 | 3676.938  | 4093.319  |
| AF004231  | 596.263   | 614.797   | NM_003317 | 16909.664 | 13475.658 | NM_002141 | 4779.682  | 5047.248  |
| AF001862  | 13154.073 | 11055.428 | NM_001139 | 7413.307  | 5316.538  | NM_012464 | 472.666   | 546.558   |
| NM_002451 | 10926.651 | 9147.709  | NM_004609 | 62162.957 | 59314.051 | NM_006129 | 3369.917  | 3831.404  |
| AF119902  | 1048.258  | 1061.4    | NM_003772 | 1091.692  | 869.423   | NM_006267 | 3130.53   | 3414.512  |
| NM_020525 | 5830.61   | 6478.61   | NM_001541 | 14357.23  | 13741.376 | NM_002661 | 36586.805 | 37492.754 |
| X62468    | 880.281   | 781.691   | NM_005416 | 2144.731  | 1749.426  | NM_001263 | 726.219   | 685.871   |
| NM_003890 | 3017.078  | 3156.463  | L09081    | 20730.254 | 19124.615 | AK023982  | 2347.587  | 2170.994  |
| BF127978  | 1610.425  | 1428.56   | NM_000218 | 63474.797 | 58380.563 | NM_018466 | 3672.76   | 3243.426  |
| AF110801  | 775.622   | 792.989   | NM_016113 | 26156.484 | 25778.975 | Y11312    | 4551.446  | 3952.377  |
| NM_016579 | 25036.148 | 25763.045 | NM_014222 | 4926.584  | 4990.669  | NM_003039 | 21114.73  | 18832.396 |
| AB018297  | 4333.009  | 4040.62   | AK026317  | 12022.533 | 13320.794 | NM_002635 | 54175.938 | 53487.219 |
| AK022565  | 13525.206 | 15928.435 | X82207    | 57056.363 | 58649.691 | AF100756  | 12737.965 | 11460.341 |
| AK023151  | 5966.566  | 7494.16   | NM_015044 | 7339.416  | 8874.888  | NM_006825 | 13308.347 | 13202.907 |
| AB033076  | 2162.009  | 1826.477  | NM_002867 | 867.655   | 1099.397  | NM_004862 | 3587.608  | 3493.359  |
| AK022876  | 1905.012  | 1322.365  | BF217496  | 12308.706 | 12255.763 | NM_001661 | 3001.637  | 3478.438  |
| AF134894  | 55563.332 | 44017.984 | NM_004762 | 6827.482  | 6683.552  | NM_014563 | 3433.999  | 3989.527  |
| NM_003938 | 13959.373 | 14055.476 | NM_006641 | 61993.688 | 55821.871 | NM_020150 | 4067.887  | 5954.793  |
| NM_014827 | 17088.063 | 15295.285 | NM_000634 | 21888.301 | 20184.227 | NM_007150 | 14475.285 | 23168.822 |
| NM_004126 | 11860.513 | 11505.004 | NM_014679 | 39611.82  | 38620.367 | NM_006831 | 9484.237  | 9328.432  |
| U87460    | 28416.523 | 23499.535 | AB040969  | 3166.581  | 2463.74   | AL162044  | 13516     | 13461.241 |
| NM_003617 | 1671.706  | 2337.912  | NM_003467 | 13243.661 | 8925.372  | AB018353  | 9954.944  | 9561.218  |
| NM_001841 | 6687.958  | 7283.711  | NM_014936 | 2374.92   | 1855.32   | NM_007036 | 7819.868  | 7119.915  |
| NM_002054 | 4377.43   | 5807.95   | NM_003943 | 3112.624  | 2910.281  | NM_002617 | 5537.943  | 5716.201  |
| AF300649  | 6939.157  | 8284.444  | NM_019052 | 4811.864  | 5676.621  | NM_003313 | 44669.254 | 44319.629 |
| NM_004125 | 2426.37   | 2257.049  | NM_003202 | 796.701   | 745.035   | AF090907  | 6304.139  | 6019.426  |
| NM_000823 | 1842.188  | 1913.748  | AF119902  | 1052.302  | 876.916   | AK024476  | 11755.459 | 10917.768 |
| NM_003317 | 3029.626  | 2438.626  | NM_020525 | 34011.242 | 32463.102 | X74794    | 29175.131 | 28632.135 |
| NM_001139 | 7506.205  | 6632.755  | X62468    | 1371.598  | 1431.12   | AL050298  | 8817.191  | 7573.079  |
| NM_001441 | 2092.564  | 1767.676  | NM_003890 | 13513.669 | 12355.971 | NM_007079 | 56415.605 | 56276.668 |
| NM_018324 | 1573.468  | 1543.235  | BF127978  | 5494.451  | 5088.829  | M20696    | 8312.662  | 7289.698  |

|           |           |           |           |           |           |           |           |           |
|-----------|-----------|-----------|-----------|-----------|-----------|-----------|-----------|-----------|
| AF064255  | 27542.91  | 29035.215 | AF110801  | 1565.945  | 1750.053  | NM_002915 | 2696.522  | 3196.447  |
| NM_016365 | 22649.906 | 26604.363 | NM_016579 | 61357.199 | 55228.766 | NM_006736 | 6558.079  | 7711.802  |
| U08853    | 11909.251 | 9889.367  | AB018297  | 2403.344  | 2132.344  | NM_003640 | 3641.447  | 4264.447  |
| NM_004261 | 35102.422 | 31668.4   | AK022565  | 8414.179  | 7229.413  | NM_014444 | 10729.957 | 11125.549 |
| NM_016006 | 1601.055  | 1637.164  | AK023151  | 4891.818  | 4174.64   | NM_012245 | 11600.645 | 13662.286 |
| NM_016245 | 6151.515  | 5220.979  | NM_017897 | 3573.255  | 3356.709  | NM_014970 | 13126.455 | 12786.336 |
| AF005632  | 2118.192  | 1968.832  | NM_004265 | 1218.303  | 1324.05   | NM_014393 | 7069.208  | 8451.296  |
| NM_000903 | 3847.039  | 5231.937  | NM_002572 | 2970.251  | 3373.495  | NM_004223 | 41304.801 | 43481.383 |
| NM_004493 | 19286.053 | 16706.557 | NM_001441 | 2576.782  | 2549.656  | NM_006813 | 2150.688  | 2142.177  |
| NM_000285 | 5905.684  | 6034.509  | NM_018324 | 1510.756  | 1334.442  | NM_001355 | 44794.781 | 47013.645 |
| NM_004762 | 9969.866  | 10879.722 | AF064255  | 50723.945 | 54703.816 | NM_001216 | 650.637   | 729.541   |
| NM_006641 | 47368.547 | 46812.281 | NM_016365 | 58741.23  | 59418.426 | U63336    | 1172.72   | 1106.89   |
| NM_000634 | 13960.446 | 16436.258 | U08853    | 4854.804  | 3616.676  | NM_006907 | 4518.906  | 4337.394  |
| NM_014679 | 32917.336 | 33002.66  | NM_004261 | 21976.768 | 19566.58  | NM_002686 | 1911.687  | 2122.727  |
| AB040969  | 5793.812  | 6629.037  | NM_016006 | 1503.125  | 1460.076  | AJ224741  | 1897.962  | 1964.181  |
| NM_003467 | 32013.822 | 33948.031 | NM_016245 | 4541.623  | 3864.978  | NM_004684 | 5673.268  | 5203.324  |
| NM_014936 | 6146.881  | 5685.221  | AF005632  | 8275.881  | 6384.79   | BF338709  | 6115.033  | 8158.302  |
| NM_003943 | 2325.107  | 2451.071  | NM_000903 | 2836.372  | 2146.151  | AF204171  | 1119.823  | 1425.124  |
| NM_019052 | 7690.95   | 10153.928 | NM_004493 | 11880.83  | 10081.897 | M18182    | 804.621   | 801.152   |
| NM_003202 | 1419.846  | 1739.61   | AF309489  | 1335.704  | 796.519   | W96179    | 5334.389  | 4679.183  |
| NM_000285 | 20353.359 | 13942.708 | NM_004047 | 21700.322 | 18312.85  | AW247841  | 30933     | 32027.469 |
| NM_004385 | 3963.387  | 3815.721  | NM_004823 | 2677.843  | 2650.628  | BG568198  | 6045.585  | 4764.528  |
| NM_020379 | 819.655   | 658.434   | Y17179    | 62584.492 | 55377.84  | M76559    | 10338.586 | 9927.735  |
| AL110127  | 3596.823  | 2985.467  | NM_000891 | 2077.974  | 1687.788  | U03884    | 2066.477  | 1757.059  |
| AK001997  | 1177.911  | 778.121   | AK026840  | 2865.511  | 3020.618  | U11058    | 2591.893  | 3152.148  |
| NM_002525 | 8286.157  | 6420.892  | NM_000285 | 2610.474  | 2341.37   | AI222585  | 2229.014  | 2135.94   |
| D38438    | 2653.192  | 2225.361  | NM_016044 | 2011.835  | 2600.586  | AA411678  | 16054.856 | 16907.641 |
| AV714945  | 2372.012  | 2901.265  | NM_000520 | 1918.664  | 2197.23   | AA862813  | 51722.875 | 54124.125 |
| AF089897  | 1099.21   | 698.99    | NM_000285 | 12103.862 | 10878.393 | AA398427  | 2146.029  | 1974.952  |
| AF007872  | 3909.003  | 2615.03   | NM_001500 | 804.034   | 758.016   | T55728    | 12059.243 | 13338.62  |
| M30938    | 12140.454 | 8143.075  | NM_004385 | 2855.293  | 2752.121  | H20856    | 4564.658  | 3596.844  |
| NM_015145 | 2103.874  | 1831.008  | NM_020379 | 601.597   | 394.767   | N62586    | 5346.099  | 5784.31   |
| NM_004714 | 2173.357  | 1635.122  | AL110127  | 2503.505  | 1865.575  | AA242743  | 59554.836 | 61872.859 |
| NM_005401 | 1294.193  | 1021.353  | AK001997  | 655.037   | 182.896   | NM_015361 | 46899     | 48829.031 |
| NM_017677 | 849.12    | 679.934   | NM_002525 | 4092.234  | 3180.627  | NM_004310 | 14654.627 | 14694.461 |
| NM_002497 | 23961.846 | 23275.127 | D38438    | 8037.963  | 6304.481  | NM_015537 | 21378.459 | 20543.426 |
| AB025194  | 12812.142 | 12723.561 | AV714945  | 860.17    | 671.504   | NM_016520 | 25811.338 | 27214.172 |
| NM_006239 | 1642.631  | 1731.639  | AF007872  | 2065.433  | 1475.105  | AF035803  | 643.403   | 849.856   |
| BC020863  | 2620.474  | 3149.137  | M30938    | 7097.674  | 5064.725  | Y08147    | 22881.695 | 22309.914 |
| NM_017897 | 3516.014  | 3259.125  | NM_015145 | 1808.628  | 1486.57   | D00174    | 44052.172 | 42608.363 |
| NM_004265 | 2034.881  | 1957.959  | NM_004714 | 2838.064  | 2254.565  | AB000520  | 17880.35  | 15067.308 |
| NM_002572 | 5056.354  | 6120.649  | NM_002497 | 13417.766 | 11179.282 | NM_016382 | 730.869   | 645.949   |
| NM_016113 | 4029.906  | 4042.684  | AB025194  | 14917.66  | 13197.421 | AK023117  | 4959.196  | 5098.254  |
| NM_014222 | 5296.621  | 5919.127  | NM_006239 | 3760.465  | 3453.583  | AL122046  | 5015.159  | 4946.932  |
| L14819    | 791.86    | 808.109   | BC020863  | 1084.703  | 687.701   | AF119914  | 1149.32   | 945.976   |
| NM_000505 | 7660.519  | 6564.547  | CY3Cy5    | 2533.662  | 777.592   | NM_000855 | 10760.814 | 10328.33  |
| NM_004542 | 2551.134  | 2090.377  | NM_004755 | 1081.114  | 807.144   | NM_005536 | 14206.229 | 12525.824 |
| X06182    | 5564.092  | 4612.994  | NM_005163 | 5478.178  | 5779.206  | NM_005077 | 3008.963  | 2964.069  |
| BE908993  | 59772.586 | 55176.93  | AL117623  | 876.574   | 700.686   | NM_004423 | 18891.484 | 19716.492 |
| AB012701  | 11974.144 | 8889.686  | AF085988  | 748.073   | 726.757   | NM_001990 | 3709.312  | 3832.704  |
| M61156    | 1246.522  | 1281.743  | AK025785  | 5760.191  | 7710.674  | NM_002141 | 4512.823  | 4415.497  |
| R44005    | 8505.612  | 8161.417  | AF038190  | 853.164   | 1386.747  | NM_003311 | 5671.208  | 5968.99   |
| AI942392  | 6682.477  | 4966.817  | AF143877  | 941.851   | 1093.794  | NM_003776 | 8283.307  | 8937.572  |

|           |           |           |           |           |           |           |           |           |
|-----------|-----------|-----------|-----------|-----------|-----------|-----------|-----------|-----------|
| M55040    | 1967.197  | 1469.432  | NM_000738 | 45761.594 | 46158.395 | NM_015719 | 1185.049  | 1717.55   |
| AW009739  | 3266.411  | 3762.621  | AF086474  | 767.388   | 845.708   | NM_012464 | 535.422   | 595.256   |
| BC036805  | 2525.449  | 2164.401  | AF086529  | 773.978   | 747.502   | NM_006129 | 3662.335  | 3809.51   |
| Z74615    | 10934.831 | 10351.94  | AF086023  | 4176.371  | 4457.396  | NM_000582 | 39755.18  | 45192.563 |
| X03884    | 8967.104  | 10012.617 | AF131803  | 12803.656 | 14095.505 | NM_005593 | 7952.699  | 7413.539  |
| U36759    | 1090.3    | 1188.939  | AF086538  | 1084      | 1252.977  | NM_016077 | 7934.578  | 6549.447  |
| X91625    | 4769.397  | 4905.782  | NM_004776 | 1725.989  | 1910.841  | AF100756  | 11674.15  | 9917.999  |
| AF090901  | 1653.032  | 1573.153  | AK023353  | 4177.557  | 3898.792  | NM_006825 | 11639.286 | 11322.912 |
| AF004231  | 850.892   | 715.207   | NM_004758 | 1408.982  | 1207.689  | NM_004862 | 3703.916  | 3694.896  |
| AF001862  | 15424.424 | 16663.346 | NM_005163 | 4907.819  | 4690.613  | NM_001661 | 3044.028  | 2565.102  |
| NM_016044 | 3594.171  | 4496.826  | SR1       | 78281.633 | 62365.602 | NM_014563 | 3901.66   | 3344.448  |
| NM_000520 | 3451.876  | 3445.193  | SR3       | 23511.176 | 28345.441 | NM_020150 | 4568.903  | 5130.054  |
| X62468    | 715.776   | 914.317   | SR5       | 3401.441  | 4800.688  | NM_007150 | 13924.046 | 12500.395 |
| NM_003890 | 2788.877  | 2851.975  | SR7       | 3229.858  | 39271.617 | NM_006831 | 10244.08  | 8687.061  |
| BF127978  | 1807.045  | 1756.919  | SR9       | 11572.433 | 3381.473  | AL162044  | 13414.489 | 13063.765 |
| AF110801  | 926.089   | 978.824   | CY3Cy5    | 2858.741  | 896.365   | AK024004  | 1623.284  | 3213.65   |
| NM_016579 | 25061.729 | 25638.775 | AF182420  | 1082.689  | 1194.63   | AK022365  | 1256.246  | 1458.146  |
| AB018297  | 4123.768  | 3850.55   | U84517    | 13989.239 | 13283.81  | BE892273  | 54810.664 | 55991.609 |
| AK022565  | 13779.842 | 10457.193 | U03237    | 934.42    | 908.287   | NM_000432 | 264.35    | 1766.765  |
| AK023151  | 5724.646  | 4347.367  | AB033113  | 1585.362  | 1912.182  | AF026929  | 1536.28   | 2644.467  |
| AB033076  | 2134.718  | 1453.462  | AK025877  | 2397.529  | 2620.945  | NM_016734 | 2728.355  | 2851.225  |
| AK022876  | 2381.673  | 2289.822  | NM_018148 | 892.002   | 987.609   | NM_001355 | 34194.145 | 50066.32  |
| AF134894  | 55815.531 | 49123.77  | AK001921  | 5172.27   | 5932.105  | U63336    | 1404.046  | 1643.793  |
| NM_003938 | 9831.193  | 8334.237  | AF088004  | 2580.505  | 2886.219  | NM_006907 | 3852.757  | 3239.019  |
| NM_014827 | 12795.414 | 10123.311 | AF086149  | 1944.048  | 1926.876  | NM_002688 | 952.467   | 994.936   |
| NM_004126 | 9202.524  | 6963.375  | NM_018273 | 3230.715  | 3525.607  | NM_006267 | 2768.184  | 2902.669  |
| U87460    | 22071.123 | 16208.467 | AK024944  | 3733.251  | 3194.215  | NM_002661 | 29454.027 | 28567.098 |
| NM_003617 | 1791.864  | 1607.042  | AF075068  | 60051.551 | 52431.152 | AK023982  | 2596.04   | 2338.745  |
| NM_001841 | 6762.455  | 7827.708  | S81893    | 11285.854 | 10826.68  | NM_018466 | 3410.49   | 2549.708  |
| NM_002054 | 4297.362  | 5285.51   | NM_007202 | 3894.436  | 4009.933  | Y11312    | 4367.432  | 3601.254  |
| AF300649  | 6665.809  | 8001.965  | NM_003663 | 4614.118  | 4431.733  | AB014533  | 20615.301 | 20124.773 |
| NM_004125 | 1938.766  | 1963.02   | AK021777  | 2253.616  | 2734.292  | M11427    | 742.702   | 642.529   |
| NM_000823 | 1875.7    | 2469.702  | AF007137  | 2814.499  | 3091.155  | NM_000744 | 1384.467  | 1336.101  |
| NM_003317 | 3641.318  | 4352.465  | AK023292  | 674.587   | 883.866   | NM_003039 | 23915.787 | 23039.713 |
| NM_001139 | 7610.715  | 7908.075  | AK022452  | 707.785   | 779.031   | NM_014509 | 2070.132  | 2068.96   |
| L09081    | 1631.235  | 1298.891  | AK023375  | 2075.432  | 2694.003  | U26662    | 372.568   | 375.373   |
| NM_000218 | 61436.648 | 67400.922 | AK023781  | 782.284   | 788.309   | NM_020372 | 49012.93  | 46256.059 |
| AF064255  | 26298.512 | 21971.566 | AK024366  | 961.745   | 1092.074  | NM_002635 | 57251.141 | 55183.203 |
| NM_016368 | 21653.17  | 26890.736 | AK022171  | 2791.179  | 3295.206  | NM_004979 | 3271.616  | 2359.387  |
| U08853    | 11772.863 | 10943.271 | AK025913  | 1510.348  | 1314.67   | NM_015361 | 25533.203 | 32753.459 |
| NM_004261 | 33337.02  | 34375.891 | AK021930  | 441.493   | 616.456   | NM_004310 | 12427.972 | 15562.353 |
| NM_016006 | 1451.482  | 1577.301  | NM_016500 | 3639.51   | 3462.121  | NM_015537 | 9721.4    | 9924.898  |
| NM_016245 | 5905.458  | 4840.083  | NM_018354 | 1391.102  | 1606.571  | NM_016520 | 18730.75  | 17728.707 |
| AF005632  | 2511.731  | 2165.189  | AF087971  | 1258.346  | 1230.865  | AB018353  | 9621.923  | 9010.559  |
| NM_000903 | 4130.804  | 3892.403  | AF087974  | 4159.404  | 4657.516  | NM_007036 | 7215.907  | 5885.672  |
| NM_004493 | 23604.285 | 17935.869 | NM_018004 | 938.651   | 1119.444  | NM_002617 | 5571.921  | 6195.66   |
| NM_000288 | 5141.523  | 4724.545  | X78938    | 3513.672  | 4469.963  | NM_003313 | 41849.426 | 39487.57  |
| NM_004762 | 7908.266  | 8473.367  | AL359056  | 371.741   | 590.103   | AF090907  | 6582.067  | 6350.348  |
| NM_006641 | 46277.508 | 47679.852 | AK021497  | 1755.296  | 1956.197  | AK024476  | 11537.459 | 8935.967  |
| NM_000634 | 11107.615 | 14076.203 | AF124367  | 670.218   | 664.791   | X74794    | 30721.564 | 28501.051 |
| NM_014679 | 32141.264 | 34412.766 | AK025615  | 25854.66  | 22787.234 | AL050298  | 8066.122  | 6558.806  |
| AB040969  | 6410.713  | 6602.432  | AK023803  | 1118.138  | 1060.487  | NM_007079 | 55095.605 | 51598.414 |
| NM_003467 | 25398.99  | 30424.348 | AK022379  | 1034.01   | 1080.172  | M20696    | 8317.809  | 5907.582  |

|           |           |           |           |           |           |           |           |           |
|-----------|-----------|-----------|-----------|-----------|-----------|-----------|-----------|-----------|
| NM_014936 | 4984.876  | 6525.333  | AK025231  | 68579.25  | 63958.289 | NM_002915 | 3179.333  | 3358.832  |
| NM_003943 | 1927.772  | 2645.442  | AK025338  | 3314.389  | 3678.52   | NM_006736 | 5592.702  | 5450.713  |
| NM_019052 | 8100.066  | 12802.073 | AK001132  | 871.244   | 907.63    | NM_003640 | 3991.531  | 4549.473  |
| NM_003202 | 1510.606  | 1735.02   | AK022321  | 456.558   | 629.602   | NM_014444 | 10731.86  | 10871.209 |
| AF119902  | 1390.671  | 1737.387  | AK023296  | 1516.801  | 1631.578  | NM_012248 | 11540.938 | 11569.671 |
| NM_020525 | 4194.67   | 4427.03   | AK001439  | 853.365   | 952.397   | NM_006145 | 4189.397  | 3786.455  |
| NM_004388 | 3930.324  | 3335.995  | AK023462  | 5954.267  | 6470.856  | NM_014970 | 14493.252 | 14782.101 |
| NM_020379 | 795.656   | 640.748   | AF210649  | 509.385   | 433.174   | NM_014393 | 7247.417  | 9031.275  |
| AL110127  | 3146.086  | 2969.17   | AK001115  | 2651.741  | 2472.992  | NM_004223 | 42015.332 | 39930.059 |
| AK001997  | 1054.419  | 737.036   | NM_014099 | 3089.235  | 3525.932  | NM_006813 | 2600.963  | 1813.838  |
| NM_002528 | 8980.939  | 6376.919  | AL133050  | 753.955   | 981.101   | CY3Cy5    | 2338.179  | 115.304   |
| D38438    | 2917.146  | 2280.609  | AK027233  | 4875.917  | 6890.382  | NM_078467 | 11720.82  | 11595.859 |
| AV714945  | 2073.595  | 1468.099  | AK024131  | 507.783   | 571.237   | NM_013345 | 2142.163  | 1812.24   |
| AF089897  | 1243.026  | 519.979   | AK023343  | 1244.312  | 1704.167  | AL117454  | 37382.383 | 28077.385 |
| AF007872  | 4650.001  | 3351.12   | AK025323  | 555.622   | 458.172   | AF272890  | 1338.222  | 1127.741  |
| M30938    | 14755.685 | 10102.072 | NM_013326 | 12490.973 | 13373.771 | U00684    | 2383.348  | 2253.073  |
| NM_015148 | 2438.129  | 2020.685  | BC037322  | 665.623   | 679.908   | NM_016455 | 47780.453 | 37202.648 |
| NM_004714 | 2431.053  | 2038.788  | Y10202    | 598.003   | 579.164   | AF086227  | 2650.332  | 2562.633  |
| NM_005401 | 1262.769  | 766.702   | Y12022    | 1456.494  | 1630.473  | AK026246  | 7906.78   | 6714.999  |
| NM_017677 | 618.424   | 429.888   | AK001375  | 1328.602  | 1629.727  | AF070524  | 17993.984 | 20721.139 |
| NM_002497 | 23266.904 | 17674.531 | NM_019597 | 5569.632  | 6787.927  | AF035281  | 2086.44   | 1816.353  |
| AB025194  | 10403.09  | 10532.078 | AL137559  | 1190.496  | 1196.39   | AK026304  | 644.319   | 290.898   |
| NM_006239 | 1125.016  | 1225.301  | AF026944  | 6383.751  | 6830.413  | AF070625  | 5151.298  | 4199.476  |
| BC020863  | 2262.932  | 2342.527  | AK021493  | 4810.061  | 5332.635  | AL365512  | 3175.825  | 2823.339  |
| NM_017897 | 3572.631  | 4929.151  | NM_006161 | 20067.178 | 18432.395 | AK001740  | 9444.225  | 7953.242  |
| NM_004265 | 1989.349  | 2880      | NM_006192 | 401.961   | 504.637   | AF131793  | 1554.353  | 1763.401  |
| NM_002572 | 5569.221  | 5615.884  | AF085881  | 1028.975  | 1311.833  | NM_078467 | 12956.841 | 11167.983 |
| NM_001441 | 2014.055  | 2068.511  | AK022737  | 9583.891  | 10137.308 | SR2       | 43062.094 | 49736.922 |
| NM_018324 | 1361.269  | 1618.113  | NM_003472 | 37000.41  | 34169.098 | SR4       | 5933.845  | 7096.004  |
| L14819    | 702.655   | 492.591   | U92980    | 1693.956  | 1687.63   | SR6       | 1653.853  | 2755.55   |
| NM_000509 | 7536.314  | 6513.782  | AF133658  | 1095.463  | 994.897   | SR8       | 7066.899  | 49055.914 |
| NM_004542 | 2294.866  | 2519.683  | AB048287  | 12515.097 | 13659.382 | SR10      | 21852.49  | 11918.747 |
| X06182    | 5218.041  | 4964.35   | Y11159    | 1693.439  | 2169.631  | CY3Cy5    | 3208.458  | 168.149   |
| BE908993  | 68302.719 | 63601.496 | AB020648  | 3157.389  | 4107.623  | AK091573  | 726.067   | 641.349   |
| AB012701  | 12626.437 | 10234.015 | AK025798  | 13380.82  | 15745.981 | AF131814  | 1880.188  | 1457.059  |
| M61156    | 1329.702  | 1327.363  | AF086173  | 888.021   | 1266.542  | AL359600  | 2410.89   | 2335.295  |
| R44005    | 10748.895 | 8963.46   | AK025164  | 718.781   | 843.64    | AL360144  | 3717.111  | 3038.168  |
| AI942392  | 7658.736  | 5326.528  | NM_018366 | 5800.849  | 7771.357  | BC028617  | 821.636   | 779.47    |
| M55040    | 2541.774  | 2007.079  | NM_019848 | 15515.491 | 21217.877 | AL117653  | 819.555   | 802.455   |
| AW009739  | 3879.465  | 3460.6    | AL833005  | 3300.455  | 3938.409  | AF087999  | 1658.526  | 1602.988  |
| BC036805  | 3359.598  | 2970.762  | L43366    | 3224.443  | 2973.772  | NM_003740 | 5518.955  | 5405.215  |
| Z74615    | 9536.073  | 10673.126 | AK026124  | 3884.487  | 3961.152  | AL050078  | 5492.977  | 4957.108  |
| X03884    | 7997.866  | 6677.281  | NM_015509 | 6637.535  | 5346.937  | NM_018538 | 1407.376  | 1188.934  |
| U36759    | 964.816   | 1138.39   | AL110157  | 4270.291  | 4149.319  | NM_013346 | 2022.719  | 1859.707  |
| X91625    | 3710.539  | 4479.89   | NM_002319 | 5139.298  | 5426.881  | AF131784  | 748.597   | 521.536   |
| AF090901  | 1391.987  | 1488.433  | L38712    | 21353.842 | 24755.313 | NM_017851 | 2375.357  | 1682.681  |
| AF004231  | 707.972   | 845.503   | U84508    | 1490.804  | 1682.518  | AK026182  | 61585.34  | 55493.754 |
| AF001862  | 13625.906 | 14497.104 | NM_017793 | 3329.491  | 3540.116  | AK025603  | 3452.048  | 2976.679  |
| NM_016044 | 3790.628  | 5916.854  | NM_012131 | 2693.39   | 3112.226  | NM_016085 | 21527.529 | 21151.408 |
| NM_000520 | 3627.808  | 3189.293  | S41540    | 2342.416  | 1868.659  | AK025768  | 3539.157  | 4515.741  |
| NM_000289 | 13799.844 | 12763.509 | AK026947  | 59968.516 | 59704.871 | AL117502  | 6233.749  | 6870.149  |
| NM_001500 | 1659.252  | 1724.65   | U84526    | 13234.413 | 11654.644 | AK001846  | 1631.713  | 1694.153  |
| AB033076  | 2342.742  | 2012.661  | L23401    | 2632.531  | 3112.421  | AF147300  | 489.241   | 335.938   |

|           |           |           |           |           |           |           |           |           |
|-----------|-----------|-----------|-----------|-----------|-----------|-----------|-----------|-----------|
| AK022876  | 2629.967  | 1906.583  | NM_018090 | 64595.09  | 58571.445 | AK024637  | 11667.225 | 10718.829 |
| AF134894  | 55741.504 | 47955.855 | AK022728  | 30752.064 | 32825.629 | AK024108  | 439.47    | 487.11    |
| NM_003938 | 12250.584 | 10862.27  | AL109678  | 2210.376  | 1903.113  | AK026238  | 974.22    | 986.114   |
| NM_014827 | 17958.379 | 13238.456 | AL137524  | 6475.6    | 7061.523  | AK026694  | 1256.898  | 794.493   |
| NM_004126 | 9812.327  | 8754.264  | AF218008  | 3677.461  | 3962.648  | AK025564  | 1625.709  | 1028.9    |
| U87460    | 26813.99  | 21658.479 | M22404    | 40508.391 | 41730.715 | AK026286  | 2685.074  | 3012.685  |
| NM_003617 | 1810.324  | 1373.855  | AF052115  | 1250.438  | 1635.353  | AK026731  | 7974.043  | 9333.276  |
| NM_001841 | 6959.826  | 4556.764  | NM_014019 | 32175.248 | 42715.117 | AK021754  | 1839.049  | 1803.436  |
| NM_002054 | 4032.255  | 2552.417  | Z70711    | 1236.476  | 1393.24   | AK023501  | 903.778   | 782.037   |
| AF300649  | 6778.905  | 4694.634  | AF116653  | 438.166   | 444.495   | AL133446  | 6193.682  | 5692.184  |
| NM_004125 | 2257.722  | 1598.343  | NM_012368 | 2012.847  | 2681.628  | AF147406  | 1105.619  | 849.194   |
| NM_000823 | 2188.284  | 2218.246  | AK022097  | 11138.691 | 12496.159 | NM_006553 | 2478.117  | 1856.316  |
| NM_004414 | 791.942   | 728.173   | NM_002166 | 21839.67  | 20706.898 | U56251    | 3920.31   | 3317.569  |
| NM_003317 | 2425.589  | 2021.356  | NM_004660 | 12457.148 | 12106.984 | BC035667  | 1180.89   | 1077.938  |
| NM_001139 | 7096.215  | 7238.543  | NM_006165 | 2695.052  | 2836.366  | AL049277  | 4406.219  | 4375.991  |
| NM_004609 | 15660.511 | 18662.734 | NM_016011 | 15193.903 | 18777.076 | AL080104  | 1042.686  | 2510.269  |
| NM_003772 | 1679.362  | 2360.389  | AL035307  | 2439.203  | 3219.433  | AL117506  | 1781.258  | 3044.917  |
| NM_001541 | 794.156   | 676.749   | AK023772  | 681.585   | 828.591   | AL049302  | 514.598   | 686.307   |
| NM_005416 | 2219.12   | 2009.384  | NM_012234 | 2639.021  | 2993.753  | AL050043  | 2102.602  | 2293.622  |
| NM_004670 | 528.462   | 604.347   | NM_006204 | 390.612   | 288.616   | AL117571  | 1879.686  | 2170.172  |
| L09081    | 1425.518  | 1864.552  | NM_012155 | 12058.362 | 9511.901  | L22263    | 691.009   | 934.434   |
| NM_000218 | 59774.547 | 61067.094 | AF144700  | 3096.868  | 3424.275  | AL137470  | 1429.674  | 1159.355  |
| NM_016113 | 4331.72   | 4858.143  | NM_004105 | 9601.159  | 9839.959  | AL137709  | 5060.035  | 2796.087  |
| NM_014222 | 5402.705  | 5703.251  | AB046825  | 2938.959  | 3002.12   | AK023277  | 900.456   | 734.523   |
| AK026317  | 10697.896 | 8995.344  | X64975    | 2281.586  | 2571.806  | AK000425  | 6568.076  | 6381.899  |
| X82207    | 13838.134 | 13241.877 | AL050297  | 7112.654  | 8549.217  | AK021616  | 530.243   | 608.01    |
| NM_015044 | 15872.041 | 16043.729 | AK026966  | 3916.553  | 4570.687  | AK022933  | 873.23    | 1299.013  |
| NM_002867 | 1307.678  | 899.501   | AF147398  | 245.264   | 414.001   | NM_014276 | 9017.415  | 8375.663  |
| BF217496  | 3792.065  | 3570.8    | AF185573  | 461.866   | 706.471   | AF035303  | 774.978   | 795.468   |
| NM_004762 | 9420.847  | 8509.53   | AK025268  | 1116.101  | 1365.489  | AF056438  | 3863.393  | 3195.335  |
| NM_006641 | 50885.91  | 47102.246 | NM_005203 | 619.312   | 672.876   | AF003737  | 63999.359 | 57905.023 |
| NM_000634 | 17479.344 | 13882.209 | NM_006566 | 488.545   | 412.146   | AF009296  | 1453.644  | 1753.646  |
| NM_014679 | 38921.766 | 27652.984 | AK026154  | 11982.231 | 12272.934 | AK001011  | 13953.855 | 17202.088 |
| AB040969  | 5769.77   | 4253.376  | AK027073  | 896.858   | 1399.12   | AK001398  | 1220.365  | 1402.876  |
| NM_003467 | 28137.955 | 16121.982 | NM_000384 | 774.374   | 873.404   | AK021457  | 532.125   | 1149.404  |
| NM_014936 | 5191.327  | 3405.534  | AB018325  | 10226.524 | 10910.881 | AK021690  | 1520.345  | 2278.415  |
| NM_003943 | 1973.764  | 1739.396  | AL157482  | 17755.082 | 20814.021 | AK001840  | 1722.099  | 2011.967  |
| NM_019052 | 6412.7    | 7358.962  | NM_003603 | 502.752   | 398.087   | AK021486  | 1546.224  | 2013.839  |
| NM_003202 | 1632.07   | 1424.359  | NM_005428 | 6302.554  | 7535.398  | NM_005444 | 4970.308  | 5245.305  |
| AF119902  | 1235.913  | 1573.489  | NM_017974 | 1172.711  | 1297.501  | V00589    | 53550.113 | 33721.934 |
| NM_020525 | 4556.15   | 4582.748  | NM_003979 | 1819.449  | 1648.467  | AL390163  | 1571.312  | 1188.742  |
| X62468    | 991.34    | 941.679   | X14677    | 8557.931  | 8349.553  | NM_018572 | 1975.457  | 1391.99   |
| NM_003890 | 2128.936  | 2528.701  | NM_005863 | 4430.665  | 4998.249  | AK024838  | 668.083   | 892.413   |
| BF127978  | 1111.259  | 1237.836  | U17077    | 5708.261  | 5534.524  | AK000175  | 7826.59   | 6399.802  |
| AF110801  | 1332.874  | 1382.376  | NM_000915 | 4952.404  | 4576.785  | AL137736  | 7647.978  | 7138.662  |
| NM_016579 | 26626.895 | 33520.016 | AK024475  | 653.998   | 828.077   | AF143870  | 1588.096  | 1378.415  |
| AB018297  | 5125.816  | 4865.119  | AB026542  | 14609.113 | 18535.021 | NM_004192 | 10773.514 | 10543.351 |
| AK022565  | 13178.81  | 12235.662 | NM_019846 | 7145.386  | 9433.449  | AK024160  | 1703.854  | 1797.931  |
| AK023151  | 6729.044  | 5371.876  | NM_014433 | 2764.586  | 6591.894  | AK025077  | 1955.653  | 1499.064  |
| NM_017897 | 3357.451  | 2596.721  | NM_002062 | 24335.635 | 31622.844 | NM_006417 | 13264.775 | 11819.622 |
| NM_004265 | 2249.969  | 1785.528  | NM_014394 | 65870.75  | 57273.426 | L43350    | 1994.912  | 1871.156  |
| NM_002572 | 5824.409  | 5291.021  | NM_018140 | 3864.972  | 4510.395  | NM_020317 | 5903.51   | 6513.947  |
| NM_001441 | 2271.145  | 1938.054  | NM_016948 | 4228.105  | 4408.193  | AL080234  | 6266.597  | 6511.479  |

|           |           |           |           |           |           |           |           |           |
|-----------|-----------|-----------|-----------|-----------|-----------|-----------|-----------|-----------|
| NM_018324 | 1783.795  | 1412.171  | NM_000142 | 2925.745  | 2664.267  | AK027025  | 3155.384  | 3089.868  |
| AF064255  | 28349.641 | 21848.471 | AK097045  | 2267.433  | 2914.913  | AK025105  | 1010.598  | 1883.762  |
| NM_016368 | 23919.682 | 22186.23  | AF161356  | 63455.277 | 61199.969 | AB002446  | 655.159   | 859.324   |
| U08853    | 12955.132 | 9538.268  | AB014548  | 7434.558  | 9863.615  | AF212220  | 9170.389  | 8727.955  |
| NM_004261 | 37089.113 | 27678.607 | NM_018256 | 7576.257  | 9291.135  | AF147387  | 4493.996  | 4559.313  |
| NM_016006 | 2042.446  | 1219.855  | AK025150  | 1771.159  | 2597.583  | NM_012081 | 1452.909  | 1172.801  |
| NM_016245 | 6485.131  | 4963.315  | AK024611  | 21541.645 | 28978.395 | AL137463  | 590.666   | 538.134   |
| AF005632  | 2058.9    | 1614.896  | BC010420  | 7735.642  | 7180.995  | AF085909  | 42866.742 | 33391.527 |
| NM_000903 | 3832.956  | 2615.153  | NM_012280 | 42013.055 | 49626.508 | AF090888  | 967.348   | 582.887   |
| NM_004493 | 21975.736 | 14997.181 | NM_018172 | 8424.285  | 8556.565  | AK027193  | 2985.364  | 3259.748  |
| NM_004047 | 47740.16  | 32857.559 | U03886    | 5903.947  | 6349.021  | AF086471  | 12967.724 | 10159.808 |
| AF287303  | 784.835   | 848.184   | AK022040  | 1059.386  | 902.267   | NM_018455 | 11975.748 | 8868.52   |
| NM_004823 | 974.804   | 1029.283  | AK022722  | 1452.957  | 1289.582  | AF113018  | 2461.422  | 2045.042  |
| Y17179    | 59514.199 | 60218.949 | NM_003591 | 17107.816 | 20299.025 | AK021996  | 1726.694  | 1695.369  |
| NM_000891 | 1147.236  | 1581.892  | AL080111  | 4277.983  | 4070.765  | AL049337  | 11650.963 | 12414.097 |
| NM_004974 | 363.426   | 384.889   | NM_003550 | 8514.369  | 9279.538  | Z27200    | 2933.102  | 2922.572  |
| AK026840  | 5434.898  | 4706.68   | NM_014642 | 7152.234  | 8485.207  | AF070571  | 7596.883  | 5594.853  |
| NM_000288 | 6040.996  | 5532.296  | NM_003829 | 2671.498  | 3074.333  | AK023554  | 6591.057  | 5671.685  |
| NM_016044 | 3613.668  | 2700.45   | AL110168  | 7877.405  | 10716.282 | NM_003513 | 11129.869 | 24220.434 |
| NM_000520 | 3887.265  | 2646.324  | NM_014522 | 356.025   | 596.112   | AL079294  | 848.612   | 776.665   |
| NM_000289 | 24999.963 | 15423.294 | NM_016147 | 7489.262  | 7242.895  | AK024844  | 1344.089  | 1075.686  |
| NM_001500 | 1981.039  | 1385.81   | NM_002833 | 2177.758  | 2147.751  | AL049437  | 609.525   | 669.313   |
| NM_004388 | 4523.097  | 3270.012  | NM_016592 | 1735.029  | 1165.322  | AF161427  | 61502.199 | 58613.117 |
| NM_020379 | 699.543   | 614.966   | NM_018527 | 630.5     | 570.962   | AK021715  | 16969.691 | 16762.504 |
| AL110127  | 3718.18   | 2619.379  | NM_018326 | 5563.599  | 6181.049  | AK000315  | 14153.103 | 11511.485 |
| AK001997  | 1168.068  | 596.212   | NM_001868 | 1108.939  | 1427.024  | AK023248  | 2513.53   | 3329.175  |
| NM_002528 | 4933.422  | 3517.206  | NM_014773 | 1433.191  | 1384.146  | NM_012404 | 37975.313 | 39960.508 |
| D38438    | 2565.047  | 1693.405  | NM_005606 | 5195.927  | 6259.707  | AF251190  | 1110.564  | 1792.646  |
| AV714945  | 1992.82   | 999.992   | AF134707  | 1271.403  | 1287.556  | AF130075  | 14614.36  | 13221.646 |
| AF089897  | 1007.741  | 559.867   | BE730629  | 1725.403  | 1569.522  | L29496    | 690.527   | 501.188   |
| AF007872  | 4643.838  | 3076.238  | NM_018162 | 413.052   | 622.703   | NM_000928 | 1093.203  | 1045.785  |
| M30938    | 15888.497 | 9357.023  | AK027167  | 5515.452  | 5207.009  | NM_007002 | 13751.665 | 10500.58  |
| NM_015148 | 2771.175  | 2720.842  | AK025265  | 2729.486  | 2502.472  | NM_012121 | 2105.163  | 1509.709  |
| NM_004714 | 2323.72   | 3006.398  | NM_013279 | 621.768   | 685.813   | NM_014155 | 4321.491  | 3528.986  |
| NM_005401 | 1340.175  | 1397.626  | NM_018652 | 30014.725 | 35077.207 | AK026331  | 27152.088 | 21046.262 |
| NM_017677 | 1772.264  | 2693.633  | AB011166  | 3252.35   | 3242.097  | M30773    | 3314.022  | 3010.06   |
| NM_002497 | 28810.18  | 26636.219 | AK024460  | 5938.665  | 7693.924  | NM_016338 | 20105.314 | 16549.025 |
| NM_007050 | 1048.924  | 688.456   | NM_006606 | 12262.803 | 18688.801 | AF113699  | 56739.602 | 51242.148 |
| AB025194  | 13459.222 | 10301.852 | S78570    | 827.307   | 951.228   | AK021897  | 11077.993 | 10605.194 |
| NM_006239 | 1480.401  | 1096.828  | NM_005243 | 18554.6   | 19146.934 | AK001051  | 3751.389  | 3433.162  |
| BC020863  | 2336.554  | 2121.156  | NM_006218 | 3496.951  | 5575.078  | NM_018317 | 1022.743  | 656.569   |
| CY3Cy5    | 6717.058  | 1839.01   | NM_016265 | 3746.587  | 3665.422  | AF086051  | 1716.102  | 1366.316  |
| NM_004758 | 1174.914  | 968.888   | NM_002095 | 12511.52  | 10141.078 | AK026434  | 746.606   | 657.137   |
| NM_005163 | 7649.021  | 8811.45   | AK022814  | 3579.018  | 3596.589  | AK024356  | 740.839   | 833.301   |
| AL117623  | 935.077   | 772.151   | NM_006268 | 2620.372  | 2416.54   | AL049370  | 6294.605  | 5312.974  |
| AF085988  | 1591.702  | 1453.825  | NM_005515 | 637.311   | 849.213   | AL365410  | 10372.176 | 10509.935 |
| AK025785  | 5069.859  | 5731.632  | X78931    | 1022.068  | 1124.921  | D17082    | 21874.785 | 20666.877 |
| AF038190  | 950.796   | 892.697   | NM_006442 | 51680.32  | 56717.516 | D17252    | 53294.164 | 55126.715 |
| AF143877  | 1024.381  | 1091.856  | NM_003902 | 29088.135 | 37108.902 | D16476    | 1285.758  | 1762.222  |
| NM_000738 | 6301.681  | 6355.224  | NM_005098 | 359.148   | 735.5     | NM_003673 | 10197.582 | 10622.781 |
| AF086474  | 1103.602  | 1212.964  | NM_016427 | 7601.819  | 13004.954 | NM_001848 | 4971.31   | 5030.537  |
| AF086529  | 907.823   | 805.017   | NM_006706 | 1502.175  | 1126.729  | NM_003734 | 31905.607 | 28497.27  |
| AF086023  | 3681.609  | 3280.89   | U80741    | 12816.954 | 11673.3   | NM_014935 | 26763.219 | 20599.086 |



|           |           |           |           |           |           |           |           |           |
|-----------|-----------|-----------|-----------|-----------|-----------|-----------|-----------|-----------|
| AF131803  | 10080.33  | 8061.002  | NM_014497 | 2596.692  | 1989.586  | X99660    | 46385.781 | 36637.418 |
| AF086558  | 600.539   | 474.573   | AL133598  | 10976.277 | 9571.733  | X03635    | 7086.668  | 5449.568  |
| AF086538  | 733.125   | 693.471   | NM_015511 | 8108.309  | 7875.573  | NM_004351 | 16852.299 | 14916.406 |
| NM_004776 | 1510.798  | 1601.047  | NM_006625 | 8178.047  | 8263.387  | NM_004236 | 12591.491 | 11026.83  |
| AK023353  | 2462.257  | 3396.073  | NM_004891 | 22860.561 | 23727.059 | AB011093  | 14930.825 | 13970.759 |
| NM_004758 | 863.169   | 714.882   | NM_002831 | 14503.854 | 14663.051 | NM_002462 | 651.05    | 360.819   |
| NM_005163 | 7651.74   | 7392.979  | AL833409  | 7950.641  | 9105.669  | NM_005618 | 765.027   | 644.398   |
| SR1       | 57584.285 | 58925.617 | NM_015966 | 798.39    | 1041.101  | NM_020533 | 22484.023 | 21726.945 |
| SR3       | 24228.225 | 20908.998 | NM_000147 | 3375.69   | 2777.668  | NM_001894 | 26583.613 | 27945.254 |
| SR5       | 2529.811  | 3453.799  | NM_000158 | 5475.541  | 5187.694  | NM_000614 | 1970.875  | 2180.808  |
| SR7       | 3698.033  | 38484.723 | NM_000670 | 953.02    | 889.065   | AK022884  | 4236.843  | 4253.328  |
| SR9       | 9995.462  | 2963.909  | NM_006416 | 3503.907  | 3190.174  | AF305072  | 451.212   | 610.705   |
| CY3Cy5    | 16152.622 | 2730.415  | NM_000151 | 9654.938  | 11330.099 | NM_006620 | 13286.48  | 11007.834 |
| AF182420  | 1113.732  | 883.31    | NM_003773 | 1378.026  | 1819.107  | NM_001397 | 1616.614  | 2041.569  |
| U84517    | 1806.466  | 2080.641  | NM_003935 | 959.995   | 1024.031  | Y08770    | 1052.283  | 1115.75   |
| AB033113  | 1893.657  | 1869.38   | NM_002879 | 1804.25   | 2005.571  | NM_004772 | 5463.78   | 7081.991  |
| AK025877  | 2748.962  | 3369.134  | AB028999  | 1760.703  | 2112.596  | U42977    | 12902.823 | 11860.445 |
| NM_018148 | 950.088   | 1008.965  | AB018348  | 8513.597  | 9105.317  | NM_002881 | 17754.877 | 14034.919 |
| AK001921  | 2786.323  | 2605.437  | NM_013369 | 1423.96   | 1834.867  | NM_003666 | 18534.697 | 14449.627 |
| AF088004  | 2312.783  | 1941.566  | NM_003686 | 2750.13   | 2890.032  | NM_003288 | 9264.186  | 8192.385  |
| AF086149  | 1705.837  | 1051.812  | NM_014812 | 4094.481  | 3940.135  | NM_018242 | 1336.31   | 1224.593  |
| NM_018273 | 1867.92   | 1287.16   | NM_004641 | 1605.294  | 1548.192  | M83822    | 5570.366  | 4523.239  |
| AK024944  | 4252.974  | 4909.27   | NM_002049 | 6955.8    | 6500.075  | NM_018434 | 865.588   | 682.134   |
| AF075068  | 49800.703 | 43621.754 | AK026312  | 1628.259  | 1668.138  | NM_003914 | 1088.216  | 1009.635  |
| S81893    | 3275.812  | 3433.516  | NM_017776 | 2233.199  | 2176.299  | NM_020423 | 3125.073  | 2535.229  |
| AK022034  | 1089.684  | 961.294   | U81599    | 2306.577  | 1639.496  | AK021437  | 7499.414  | 6799.438  |
| NM_007202 | 2245.694  | 2089.443  | AF275722  | 1106.374  | 1040.302  | NM_003831 | 6906.898  | 6616.141  |
| NM_003663 | 5815.119  | 8771.811  | NM_003206 | 1428.493  | 1255.096  | NM_001758 | 1798.791  | 2427.255  |
| AK021777  | 1056.543  | 2111.247  | AK000564  | 916.31    | 928.749   | AB007965  | 16050.402 | 15127.104 |
| AF007137  | 2730.723  | 2592.793  | X60155    | 1119.177  | 1400.352  | NM_017648 | 1717.885  | 1433.304  |
| AK023292  | 523.186   | 506.254   | AB037901  | 13717.312 | 14376.286 | NM_000066 | 2104.78   | 2558.249  |
| AK022452  | 299.109   | 606.523   | AV762646  | 452.849   | 674.962   | NM_001196 | 13329.671 | 13808.173 |
| AK023781  | 779.822   | 806.345   | NM_006129 | 2295.702  | 2443.732  | NM_016008 | 2973.332  | 2428.085  |
| AK024129  | 766.058   | 900.743   | NM_000582 | 22800.24  | 26188.75  | NM_017744 | 1574.765  | 1800.179  |
| AK024366  | 688.464   | 688.866   | NM_005593 | 4342.797  | 3619.994  | NM_001924 | 10904.321 | 12289.16  |
| AK025913  | 1601.809  | 1555.224  | AJ224741  | 1254.661  | 1282.215  | NM_017705 | 13167.496 | 14632.104 |
| AF147389  | 690.564   | 549.596   | NM_004684 | 5300.496  | 6103.194  | AB002325  | 1199.327  | 1396.366  |
| AK021930  | 340.889   | 247.351   | BF338709  | 5019.089  | 6986.129  | NM_001796 | 10378.857 | 10934.637 |
| NM_016500 | 4318.01   | 3937.313  | AF204171  | 828.62    | 880.138   | AB040880  | 2198.912  | 2836.379  |
| NM_018354 | 1292.263  | 1247.15   | M18182    | 506.954   | 688.184   | NM_009587 | 26432.818 | 30258.658 |
| AF087966  | 469.53    | 486.181   | W96179    | 3950.623  | 3337.854  | NM_001097 | 1554.235  | 1272.557  |
| AF087971  | 1703.492  | 1744.145  | AW247841  | 16394.707 | 16849.061 | NM_002630 | 2969.643  | 2625.353  |
| AF087974  | 1299.114  | 1848.088  | BG568198  | 3542.538  | 3744.983  | AJ295149  | 68224.344 | 69541.688 |
| NM_018004 | 542.387   | 764.509   | M76559    | 7002.733  | 8059.53   | NM_013438 | 8967.077  | 10879.254 |
| X78938    | 473.125   | 567.981   | AF043473  | 474.117   | 392.414   | NM_014688 | 17385.822 | 13758.181 |
| AL359056  | 732.035   | 757.342   | U03884    | 1587.207  | 1238.357  | AB037784  | 1055.422  | 961.582   |
| AF124367  | 535.328   | 762.251   | U11058    | 1687.619  | 1595.225  | AL359623  | 5074.83   | 4603.595  |
| AK000798  | 557.617   | 510.973   | AI222585  | 1517.401  | 1472.606  | AK026920  | 10625.965 | 11145.963 |
| AK025615  | 25736.174 | 24262.92  | AA411678  | 9239.958  | 9604.616  | AL137255  | 5755.853  | 5582.014  |
| AK023803  | 779.389   | 667.148   | AA862813  | 30260.414 | 26296.406 | NM_003370 | 17437.492 | 19790.498 |
| AK022379  | 974.783   | 1076.687  | AA398427  | 2788.995  | 2321.654  | AB037715  | 11577.772 | 8764.568  |
| AK025231  | 23521.469 | 26458.461 | T55728    | 7927.253  | 7988.781  | AF250924  | 26360.449 | 24031.072 |
| AK025338  | 3809.64   | 3727.546  | H20856    | 2805.586  | 1991.671  | D86979    | 4659.656  | 5106.444  |

|           |           |           |           |           |           |           |           |           |
|-----------|-----------|-----------|-----------|-----------|-----------|-----------|-----------|-----------|
| AK022321  | 455.201   | 367.852   | N62586    | 3359.36   | 3944.697  | NM_018212 | 1114.474  | 1378.626  |
| AK023296  | 498.302   | 407.08    | AA242743  | 39619.133 | 39347.703 | AB023230  | 4654.776  | 5528.381  |
| AK001439  | 703.071   | 645.485   | NM_006759 | 7599.161  | 8482.687  | NM_020202 | 38982.375 | 41176.73  |
| AK023462  | 465.641   | 720.39    | NM_006831 | 5999.342  | 5034.28   | NM_001668 | 5566.323  | 5118.351  |
| AK001115  | 967.005   | 1022.733  | AL162044  | 9627.856  | 9208.496  | AK025362  | 4516.973  | 3641.807  |
| AL117586  | 305.337   | 415.717   | AK024004  | 1206      | 1085.428  | AK021776  | 4180.368  | 3635.728  |
| AK027233  | 2300.715  | 1909.711  | AK022365  | 704.574   | 884.64    | AK026042  | 4442.435  | 3652.63   |
| AK025323  | 990.53    | 899.54    | BE892273  | 60987.742 | 55480.191 | NM_014233 | 58101.496 | 56233.18  |
| NM_013326 | 3395.338  | 3825.703  | AF026929  | 948.41    | 935.212   | NM_002137 | 67488.172 | 72971.703 |
| BC037322  | 701.2     | 835.184   | NM_016734 | 1960.781  | 2274.001  | NM_002911 | 8676.31   | 10573.977 |
| Y10202    | 382.111   | 455.74    | AF035803  | 494.756   | 417.191   | U94386    | 2577.876  | 2275.296  |
| Y12022    | 1855.722  | 2094.162  | Y08147    | 17030.984 | 15131.058 | NM_016000 | 62082.145 | 59727.156 |
| AK001375  | 1227.354  | 1404.546  | D00174    | 34072.77  | 35018.383 | NM_006372 | 15722.731 | 16036.784 |
| NM_019597 | 5776.284  | 7477.279  | AB000520  | 12290.946 | 12617.278 | NM_014150 | 4041.737  | 3859.542  |
| AL137559  | 1595.414  | 1499.701  | AK023117  | 3520.576  | 3145.373  | NM_006805 | 59087.109 | 57231.586 |
| AF026944  | 6029.751  | 5652.689  | AL122046  | 3094.417  | 3093.365  | AF132027  | 59838.449 | 57586.063 |
| AK021493  | 6341.358  | 5868.244  | AF119914  | 549.77    | 513.741   | NM_015950 | 449.712   | 571.332   |
| NM_006161 | 2575.545  | 2254.744  | NM_000855 | 8273.031  | 7709.198  | NM_004681 | 35453.125 | 40647.949 |
| NM_006192 | 566.246   | 493.722   | NM_005536 | 10359.673 | 7945.233  | AB033096  | 25902.379 | 21044.709 |
| AF085881  | 883.446   | 699.573   | NM_005077 | 2389.605  | 2667.134  | NM_014886 | 4757.915  | 4196.027  |
| AK022737  | 11588.645 | 9374.039  | NM_001990 | 3005.827  | 5392.076  | L31408    | 40281.57  | 41519.395 |
| NM_003472 | 41099.836 | 33204.973 | NM_002141 | 3539.364  | 4321.784  | NM_001545 | 23057.973 | 20466.725 |
| U92980    | 1669.124  | 1588.237  | NM_006907 | 2947.136  | 2500.292  | AL133566  | 2615.687  | 2709.212  |
| AF133658  | 1022.011  | 1083.564  | NM_002686 | 855.041   | 732.114   | M36118    | 47818.074 | 45760.918 |
| AB048287  | 2408.084  | 2610.001  | NM_006267 | 2247.811  | 2194.332  | NM_003396 | 29028.998 | 27056.123 |
| Y11159    | 913.239   | 1105.57   | NM_002661 | 25953.84  | 29029.068 | J02625    | 35733.133 | 36729.395 |
| AB020648  | 2713.378  | 2882.794  | NM_001263 | 785.339   | 783.873   | Y17175    | 67968.07  | 67107.898 |
| AK025798  | 14021.761 | 12204.454 | AK023982  | 1706.185  | 2160.97   | NM_004546 | 37486.965 | 41944.906 |
| AF086173  | 331.082   | 235.827   | NM_018466 | 2441.679  | 2490.992  | NM_005333 | 50382.531 | 50186.176 |
| AK025164  | 846.706   | 849.326   | Y11312    | 2767.685  | 2665.964  | NM_000767 | 1596.758  | 1696.383  |
| NM_018366 | 8631.213  | 10948.692 | NM_003039 | 13966.009 | 13750.649 | AK026161  | 3105.599  | 3143.074  |
| NM_019846 | 7476.044  | 7886.925  | NM_002635 | 47123.293 | 49161.332 | NM_004553 | 67206.656 | 68921.422 |
| AL833005  | 1616.728  | 1924.109  | AF100756  | 7580.746  | 5845.904  | D63484    | 6176.89   | 6990.865  |
| L43366    | 1993.197  | 2141.9    | NM_006825 | 8721.419  | 8074.233  | AK026745  | 10980.9   | 9998.021  |
| AK026124  | 2357.254  | 2804.316  | NM_004862 | 2158.067  | 2039.881  | AL157440  | 7447.563  | 6442.783  |
| NM_015509 | 7188.878  | 6331.902  | NM_001661 | 1892.267  | 1875.179  | NM_016423 | 18305.994 | 15209.187 |
| AL110157  | 4412.098  | 4655.357  | NM_014563 | 2354.982  | 2265.558  | AB040975  | 2582.232  | 2687.746  |
| NM_002319 | 5670.161  | 6344.617  | NM_020150 | 2704.809  | 3162.585  | NM_005119 | 27535.076 | 24724.199 |
| L38712    | 9191.605  | 10579.328 | NM_007150 | 7980.835  | 9075.634  | NM_003166 | 16350.979 | 18537.467 |
| U84508    | 818.839   | 807.579   | NM_016520 | 17126.551 | 15450.661 | AK055844  | 3257.479  | 4012.212  |
| NM_017793 | 2231.835  | 2516.998  | AB018353  | 6068.714  | 6038.568  | NM_018286 | 21767.75  | 23561.084 |
| NM_012131 | 4120.943  | 4766.847  | NM_007036 | 5028.858  | 3766.363  | NM_003146 | 11901.286 | 12918.337 |
| S41540    | 2002.488  | 1562.451  | NM_002617 | 3888.628  | 3839.11   | X52342    | 993.539   | 920.088   |
| AK026947  | 6924.61   | 5502.995  | NM_003313 | 31991.627 | 37791.129 | NM_003131 | 22872.141 | 36756     |
| U84526    | 14481.991 | 7734.516  | AF090907  | 5008.957  | 5262.549  | NM_005236 | 19393.676 | 19673.355 |
| L23401    | 842.417   | 750.092   | AK024476  | 8376.959  | 9325.84   | AK022889  | 22993.076 | 23570.646 |
| NM_018090 | 14677.233 | 14158.613 | X74794    | 21495.783 | 23127.867 | X52357    | 61966.063 | 57472.57  |
| AK022728  | 12157.851 | 12521.009 | AL050298  | 5398.418  | 5583.134  | AF211891  | 2641.18   | 2878.615  |
| AL109678  | 2043.641  | 2124.851  | NM_007079 | 35519.785 | 34660.371 | NM_005641 | 4839.583  | 3756.563  |
| AL137524  | 890.5     | 999.224   | M20696    | 5719.779  | 5742.083  | NM_003796 | 44968.883 | 51622.523 |
| AF218008  | 2933.017  | 3126.561  | NM_002915 | 1750.468  | 2240.137  | NM_002973 | 7123.005  | 9758.003  |
| M22404    | 1867.508  | 1736.31   | NM_006736 | 4302.667  | 5036.086  | NM_004436 | 23401.588 | 26078.229 |
| AF052115  | 952.296   | 864.186   | NM_003640 | 2271.8    | 2255.633  | NM_006580 | 15428.818 | 16739.357 |

|           |           |           |           |           |           |           |           |           |
|-----------|-----------|-----------|-----------|-----------|-----------|-----------|-----------|-----------|
| NM_014019 | 8783.961  | 9510.9    | NM_014444 | 6596.381  | 5528.109  | NM_001305 | 17172.611 | 15743.662 |
| NM_012368 | 615.105   | 1328.572  | NM_012248 | 6306.399  | 6271.339  | NM_005082 | 1608.526  | 1749.327  |
| AK022097  | 3066.446  | 3721.698  | NM_014970 | 8258.686  | 7359.123  | D17028    | 59734.488 | 61594.719 |
| NM_002166 | 31118.418 | 31684.125 | NM_014393 | 4164.331  | 4321.374  | NM_013442 | 55538.355 | 57460.844 |
| NM_004660 | 10894.116 | 11995.635 | NM_004223 | 26072.969 | 25074.045 | BG611243  | 8982.217  | 8635.983  |
| NM_006165 | 2212.766  | 2340.397  | NM_006813 | 1656.52   | 1110.522  | AI417481  | 1942.074  | 1938.936  |
| NM_016011 | 4988.744  | 5534.279  | NM_001355 | 29130.447 | 26240.691 | BI906766  | 10936.753 | 10067.398 |
| AL035307  | 2060.111  | 2083.569  | U63336    | 702.981   | 704.144   | U60519    | 1803.244  | 1959.726  |
| AK023772  | 763.941   | 1001.265  | NM_000582 | 19339.113 | 23819.881 | AA282906  | 13365.135 | 13485.107 |
| NM_012234 | 2518.495  | 2524.678  | NM_005593 | 4448.099  | 4186.827  | L02870    | 54493.777 | 55867.852 |
| NM_006204 | 525.604   | 536.493   | AJ224741  | 1299.372  | 1441.342  | BG755482  | 38872.512 | 45962.219 |
| NM_012155 | 10305.29  | 6103.005  | NM_004684 | 4244.48   | 2933.819  | AI480307  | 14465.488 | 14148.289 |
| AF144700  | 3430.201  | 2108.915  | BF338709  | 4151.948  | 5964.469  | X51420    | 5357.45   | 6291.584  |
| NM_002599 | 436.705   | 725.864   | AF204171  | 979.718   | 1115.251  | D28235    | 919.742   | 1007.735  |
| NM_004105 | 2951.187  | 3716.949  | M18182    | 674.204   | 739.506   | X51757    | 2698.636  | 2856.591  |
| AB046825  | 3111.364  | 3562.603  | W96179    | 3913.336  | 3168.925  | L24038    | 4496.827  | 5594.651  |
| X64975    | 533.753   | 638.605   | AW247841  | 18145.156 | 21693.65  | NM_053056 | 2000.766  | 1949.721  |
| AF064876  | 533.75    | 765.619   | BG568198  | 3076.046  | 3254.552  | NM_006186 | 2947.168  | 3237.761  |
| AF071509  | 513.245   | 685.022   | M76559    | 6785.345  | 7126.186  | NM_002751 | 12835.868 | 14395.129 |
| AL050297  | 1740.383  | 2019.378  | U03884    | 1548.254  | 1122.562  | M55593    | 5688.369  | 6458.769  |
| AK026966  | 3558.502  | 3945.773  | U11058    | 1738.807  | 1730.419  | NM_005918 | 54359.219 | 54173.074 |
| AF147398  | 482.093   | 360.873   | AI222585  | 1576.327  | 1368.69   | AK023011  | 60909.668 | 60820.402 |
| AK025268  | 1474.717  | 1569.93   | AA411678  | 8506.583  | 7558.182  | NM_016816 | 3166.274  | 3808.248  |
| NM_005203 | 547.186   | 504.324   | AA862813  | 26506.025 | 23028.551 | L17325    | 2855.531  | 3035.412  |
| NM_006566 | 443.179   | 468.31    | AA398427  | 2469.927  | 2528.757  | NM_017716 | 3585.295  | 3859.852  |
| AK026154  | 5488.861  | 5428.547  | T55728    | 7110.44   | 6297.833  | M58603    | 14978.532 | 14303.759 |
| AL117546  | 6976.482  | 7240.704  | H20856    | 2505.013  | 1748.903  | NM_003639 | 14995.956 | 15914.127 |
| AK027073  | 1488.709  | 1509.382  | N62586    | 3120.511  | 3164.752  | NM_001549 | 1617.508  | 1353.519  |
| NM_000384 | 1163.296  | 1206.237  | AA242743  | 39119.238 | 39299.168 | NM_000115 | 12429.203 | 13715.873 |
| AB018325  | 5452.606  | 5502.446  | NM_015361 | 33424.246 | 33479.691 | AF308801  | 6149.442  | 5748.503  |
| AL157482  | 3004.119  | 3629.796  | NM_004310 | 8183.773  | 8461.513  | NM_007318 | 58637.273 | 61910.16  |
| NM_003603 | 682.631   | 597.981   | NM_015537 | 16023.67  | 15122.215 | NM_014874 | 3860.274  | 4153.185  |
| NM_005428 | 6868.939  | 6669.588  | AK024004  | 1156.837  | 1110.607  | NM_012397 | 1206.524  | 1277.174  |
| NM_017974 | 1477.366  | 1059.246  | AK022365  | 793.756   | 768.586   | NM_005765 | 21950.258 | 20599.879 |
| NM_003979 | 1038.103  | 681.226   | BE892273  | 56682.637 | 57939.457 | NM_002762 | 6393.391  | 6482.44   |
| X14677    | 806.414   | 536.468   | AF026929  | 988.527   | 991.98    | NM_006324 | 18672.268 | 19483.414 |
| NM_005863 | 4654.468  | 5495.386  | NM_016734 | 2025.777  | 2432.375  | NM_016848 | 26454.793 | 25215.902 |
| U17077    | 1545.042  | 1942.437  | AF035803  | 531.471   | 480.694   | NM_000514 | 25668.654 | 25712.834 |
| NM_000915 | 4671.547  | 5035.969  | Y08147    | 13907.181 | 11959.222 | AL137432  | 3553.651  | 2528.673  |
| NM_002344 | 550.029   | 597.714   | D00174    | 33644.309 | 35192.98  | NM_000957 | 7208.787  | 7093.057  |
| AK024475  | 1279.069  | 1811.815  | AB000520  | 11880.6   | 12164.797 | NM_019043 | 7990.082  | 8613.214  |
| AB026542  | 13679.321 | 13427.753 | AK023117  | 3668.735  | 3464.497  | NM_003240 | 34222.344 | 37968.313 |
| NM_019846 | 1274.179  | 1270.634  | AL122046  | 2849.949  | 2310.496  | NM_016564 | 57141.465 | 56506.305 |
| NM_014433 | 1832.257  | 1832.072  | NM_000855 | 6870.583  | 6776.416  | NM_000796 | 982.346   | 2155.86   |
| NM_002062 | 6128.842  | 9374.935  | NM_005536 | 9657.391  | 6967.101  | AK021660  | 9073.283  | 10005.898 |
| NM_014394 | 37357.586 | 36333.477 | NM_005077 | 2361.82   | 2164.12   | AB007933  | 57131.805 | 56455.602 |
| NM_018140 | 3829.711  | 4100.435  | NM_001990 | 2312.744  | 2591.553  | NM_005469 | 10133.913 | 13070.852 |
| NM_016948 | 3057.855  | 3245.065  | NM_002141 | 3489.025  | 3785.746  | NM_016361 | 5127.706  | 5047.296  |
| NM_000142 | 3462.593  | 3909.781  | NM_012464 | 266.545   | 232.818   | NM_003708 | 61023.285 | 65101.742 |
| AF272372  | 33525.441 | 31269.248 | NM_006129 | 3456.078  | 6341.35   | NM_014349 | 17049.318 | 17955.65  |
| AK097045  | 2518.334  | 2910.207  | NM_006267 | 2197.658  | 2289.27   | AB040895  | 998.97    | 1261.226  |
| AF161356  | 53321.898 | 58990.953 | NM_002661 | 26176.93  | 24943.201 | NM_004820 | 711.579   | 967.828   |
| AB014548  | 8242.808  | 8043.917  | NM_001263 | 576.515   | 642.947   | NM_018210 | 2879.551  | 2889.27   |

|           |           |           |           |           |           |           |           |           |
|-----------|-----------|-----------|-----------|-----------|-----------|-----------|-----------|-----------|
| NM_018256 | 4619.303  | 4047.97   | AK023982  | 1521.1    | 1647.404  | NM_001096 | 12936.154 | 15743.038 |
| AK025150  | 679.129   | 949.909   | NM_018466 | 2615.574  | 2924.073  | NM_016014 | 4121.434  | 3526.641  |
| AK024611  | 14914.788 | 14302.991 | Y11312    | 3167.257  | 2827.053  | NM_000196 | 985.249   | 1053.97   |
| BC010420  | 7923.782  | 5813.483  | NM_003039 | 14014.616 | 12155.204 | NM_018327 | 4688.024  | 5047.176  |
| NM_012280 | 11233.848 | 8654.229  | NM_002635 | 50418.742 | 45774.801 | NM_001684 | 1131.684  | 1323.911  |
| NM_018172 | 9239.695  | 5895.595  | AF100756  | 7464.663  | 5898.475  | NM_013306 | 2926.852  | 2978.433  |
| U03886    | 4894.731  | 5054.73   | NM_006825 | 7949.496  | 5568.893  | AF038186  | 6587.773  | 8062.664  |
| AK022040  | 1677.386  | 1929.424  | NM_004862 | 1959.619  | 1875.437  | NM_003664 | 6697.134  | 6191.632  |
| AK022722  | 1854.724  | 1905.217  | NM_001661 | 1800.865  | 1662.958  | NM_002426 | 7455.536  | 7228.716  |
| NM_003591 | 20170.439 | 24751.365 | NM_014563 | 2234.65   | 2228.653  | AK027182  | 2112.527  | 1968.853  |
| AL080111  | 5613.973  | 6519.817  | NM_020150 | 2756.289  | 3314.691  | J03651    | 21257.025 | 20003.295 |
| NM_003550 | 2501.961  | 2986.672  | NM_007150 | 8504.268  | 8192.282  | U61738    | 20762.59  | 27526.332 |
| NM_014642 | 8388.042  | 7955.733  | NM_006831 | 5826.221  | 5283.777  | AJ132087  | 2195.417  | 2500.348  |
| AB037821  | 346.699   | 467.848   | AL162044  | 11397.533 | 12764.787 | U92818    | 4475.698  | 4534.031  |
| NM_003829 | 3949.397  | 3835.421  | AB018353  | 6095.119  | 6538.267  | NM_000442 | 9817.089  | 12053.278 |
| AL110168  | 2022.138  | 1951.105  | NM_007036 | 5409.743  | 4247.041  | NM_002934 | 5519.622  | 4724.204  |
| NM_014522 | 630.048   | 448.531   | NM_002617 | 3637.791  | 3454.678  | AL050114  | 2423.833  | 3140.818  |
| AK026015  | 633.162   | 958.817   | NM_003313 | 29644.162 | 35411.48  | AK021492  | 9876.164  | 10626.375 |
| NM_016147 | 4389.444  | 5167.37   | AF090907  | 3999.432  | 4839.093  | AK023794  | 57336.426 | 55240.867 |
| NM_002833 | 2513.411  | 2801.81   | AK024476  | 8484.501  | 10258.353 | NM_019885 | 4483.79   | 4741.302  |
| NM_016592 | 909.214   | 935.277   | X74794    | 21613.449 | 27545.996 | NM_005328 | 956.129   | 785.444   |
| NM_018527 | 733.283   | 770.328   | AL050298  | 6107.713  | 7027.42   | AB033103  | 2869.969  | 2243.798  |
| NM_018326 | 5942.558  | 5546.174  | NM_007079 | 44166.23  | 50094.77  | NM_002907 | 5678.087  | 4197.817  |
| NM_001868 | 1053.745  | 785.114   | M20696    | 6355.43   | 4974.282  | AK024098  | 3314.378  | 3931.396  |
| NM_014773 | 2479.261  | 1723.136  | NM_002915 | 2064.534  | 2041.689  | AK001116  | 1247.766  | 1140.798  |
| NM_005606 | 5647.976  | 4731.666  | NM_006736 | 4447.637  | 4956.112  | AK022371  | 11185.878 | 11345.715 |
| AF134707  | 1275.047  | 819.38    | NM_003640 | 2219.165  | 2087.189  | D42045    | 6867.744  | 7957.328  |
| BE730629  | 454.575   | 468.715   | NM_014444 | 6907.015  | 6474.279  | AB007953  | 6120.666  | 9251.454  |
| AK027167  | 778.771   | 920.592   | NM_012248 | 7054.248  | 7027.088  | NM_014002 | 16476.826 | 18677.498 |
| AK025265  | 2641.823  | 3429.008  | NM_014970 | 7524.532  | 5415.373  | NM_004197 | 29874.641 | 30223.459 |
| NM_013279 | 556.758   | 685.97    | NM_014393 | 3928.004  | 4412.296  | NM_004073 | 4640.956  | 4753.027  |
| NM_018652 | 8330.067  | 10150.328 | NM_004223 | 25589.178 | 24951.404 | NM_001278 | 9367.182  | 10453.456 |
| AB011166  | 4302.867  | 3258.89   | NM_006813 | 1309.01   | 1017.688  | NM_019105 | 13235.867 | 13289.015 |
| AK024460  | 4801.775  | 4712.772  | NM_001355 | 28880.775 | 25910.211 | NM_000294 | 12948.177 | 13503.561 |
| NM_006606 | 2961.575  | 3322.56   | NM_001216 | 268.308   | 228.185   | AJ272212  | 5350.754  | 5452.224  |
| S78570    | 984.661   | 1184.069  | U63336    | 875.154   | 800.711   | NM_001626 | 58091.625 | 56517.168 |
| NM_005243 | 33091.27  | 43964.262 | NM_006907 | 2582.034  | 2498.746  | NM_005677 | 13120.688 | 12481.512 |
| NM_006218 | 3853.43   | 3941.485  | NM_002686 | 591.33    | 784.108   | AF229803  | 2930.199  | 4400.662  |
| NM_016265 | 4364.913  | 5047.103  | AJ224741  | 1368.865  | 1255.612  | AF151810  | 1102.524  | 1116.114  |
| NM_002095 | 11844.532 | 10368.729 | NM_004684 | 4445.976  | 3014.692  | NM_004436 | 23592.066 | 34599.828 |
| AK022814  | 4072.475  | 4270.009  | BF338709  | 4217.047  | 3959.05   | NM_006580 | 15574.146 | 20281.453 |
| NM_006268 | 3524.762  | 3023.398  | AF204171  | 833.284   | 996.274   | NM_001305 | 15580.047 | 19761.508 |
| NM_005515 | 468.938   | 339.135   | M18182    | 604.138   | 515.956   | NM_005082 | 1573.865  | 1613.842  |
| X78931    | 771.644   | 640.452   | W96179    | 4064.531  | 4093.723  | D17028    | 52613.418 | 57382.633 |
| NM_006442 | 22623.596 | 17987.986 | AW247841  | 19207.195 | 26005.018 | NM_013442 | 51089.984 | 50527.66  |
| NM_003902 | 8008.439  | 6545.314  | BG568198  | 3565.536  | 3204.955  | BG611243  | 9205.105  | 8868.011  |
| NM_005098 | 613.483   | 359.428   | M76559    | 6373.193  | 7869.352  | AI417481  | 1739.749  | 1832.673  |
| NM_016427 | 3508.271  | 2181.011  | U03884    | 1654.679  | 906.043   | BI906766  | 10993.093 | 8261.966  |
| NM_006706 | 1715.824  | 824.732   | U11058    | 1612.664  | 1648.944  | U60519    | 1405.069  | 1307.213  |
| U80741    | 23079.207 | 22295.428 | AI222585  | 1350.927  | 1178.901  | AA282906  | 14218.584 | 14363.915 |
| NM_014497 | 2732.635  | 2799.576  | AA411678  | 9048.565  | 7755.93   | L02870    | 49748.383 | 54287.852 |
| AL133598  | 19022.689 | 16282.706 | AA862813  | 29213.047 | 24135.461 | BG755482  | 34211.813 | 35342.121 |
| NM_015511 | 9416.972  | 8930.336  | AA398427  | 2305.915  | 1674.026  | AI480307  | 13693.018 | 14280.354 |

|           |           |           |           |           |           |           |           |           |
|-----------|-----------|-----------|-----------|-----------|-----------|-----------|-----------|-----------|
| NM_006625 | 12677.625 | 12538.492 | T55728    | 5954.261  | 3649.731  | X51420    | 6382.503  | 7511.779  |
| NM_004891 | 29296.711 | 21757.695 | H20856    | 2548.326  | 1605.429  | D28235    | 977.081   | 1146.685  |
| NM_002831 | 19290.643 | 16192.427 | N62586    | 3084.287  | 2772.995  | X51757    | 2416.156  | 2654.089  |
| AL833409  | 2439.645  | 2452.265  | AA242743  | 40831     | 41220.32  | L24038    | 3649.381  | 4088.441  |
| NM_015966 | 2194.076  | 2844.904  | NM_015361 | 29780.684 | 27135.494 | NM_053056 | 1980.728  | 1640.837  |
| NM_000147 | 4432.759  | 4207.608  | NM_004310 | 8495.996  | 8772.319  | NM_006186 | 3326.799  | 2634.773  |
| NM_000158 | 6852.017  | 6366.375  | NM_015537 | 13057.163 | 11129.506 | NM_002751 | 11184.472 | 10455.848 |
| NM_000670 | 1391.073  | 1373.769  | NM_016520 | 17759.285 | 14310.36  | M55593    | 4287.801  | 4388.187  |
| NM_006416 | 3328.936  | 3168.474  | AF035803  | 541.797   | 466.457   | AK001883  | 49867.555 | 49913.695 |
| NM_000151 | 12791.01  | 10866.758 | Y08147    | 17791.734 | 14328.428 | NM_014625 | 3636.845  | 3585.977  |
| NM_003773 | 1605.5    | 1271.196  | D00174    | 31374.541 | 28129.473 | AK025587  | 716.768   | 729.442   |
| NM_003935 | 1213.994  | 886.927   | AB000520  | 11997.26  | 12086.091 | L17325    | 3499.139  | 4529.38   |
| NM_002879 | 1934.238  | 1157.787  | AK023117  | 4116.748  | 4349.22   | NM_017716 | 6063.31   | 10090.271 |
| AB028999  | 1730.05   | 1139.995  | AL122046  | 3017.637  | 3260.671  | M58603    | 16728.057 | 31891.938 |
| AB018348  | 3927.84   | 2363.851  | AF119914  | 562.098   | 428.958   | NM_003636 | 14494.251 | 19757.783 |
| NM_013369 | 562.235   | 363.302   | NM_000855 | 7573.826  | 8465.472  | NM_001546 | 1246.426  | 1257.685  |
| NM_003686 | 3299.936  | 2964.744  | NM_005536 | 9884.873  | 6949.556  | NM_000115 | 11540.508 | 11938.808 |
| NM_014812 | 3561.535  | 3282.534  | NM_005077 | 2349.544  | 2113.257  | AF308801  | 5748.731  | 5184.581  |
| NM_004641 | 2444.833  | 2247.26   | NM_004423 | 10565.194 | 10060.246 | NM_007318 | 59179.98  | 62331.879 |
| NM_002049 | 1762.857  | 1485.343  | NM_001990 | 2182      | 1832.893  | NM_014874 | 4811.904  | 2824.718  |
| AK026312  | 1349.316  | 1415.717  | NM_002141 | 3324.458  | 2587.385  | NM_005765 | 21645.232 | 22237.523 |
| NM_017776 | 2316.012  | 2089.807  | NM_003311 | 3428.125  | 2974.746  | NM_002762 | 6857.689  | 6494.518  |
| U81599    | 937.561   | 770.148   | NM_003776 | 4864.575  | 4481.87   | NM_006324 | 18272.961 | 15045.259 |
| AF275722  | 776.416   | 809.935   | NM_015719 | 856.377   | 1250.479  | NM_016846 | 23164.1   | 22660.857 |
| NM_003206 | 2586.662  | 1993.821  | NM_006129 | 2607.153  | 2536.336  | NM_000514 | 22705.42  | 23775.277 |
| AK000564  | 1045.627  | 1127.909  | NM_000582 | 29068.15  | 31954.492 | AL137432  | 3220.074  | 2974.811  |
| X60155    | 1267.869  | 1397.885  | NM_005593 | 5317.74   | 4969.834  | NM_000957 | 5990.402  | 5173.864  |
| AB037901  | 3117.588  | 3593.602  | NM_016077 | 5539.748  | 3913.778  | NM_019043 | 9351.025  | 10019.595 |
| AV762646  | 1401.73   | 2248.479  | AF100756  | 9417.185  | 9033.714  | AK021660  | 6685.477  | 7159.499  |
| NM_012464 | 409.45    | 519.385   | NM_006825 | 9749.375  | 9368.572  | AB007933  | 57253.715 | 58553.777 |
| NM_006129 | 2614.674  | 3147.116  | NM_004862 | 2258.287  | 2200.676  | NM_003796 | 45013.363 | 43774.582 |
| NM_000582 | 1282.155  | 1263.104  | NM_001661 | 1973.59   | 1805.904  | NM_002973 | 5599.825  | 7663.53   |
| NM_005593 | 2144.2    | 1810.026  | NM_014563 | 2505.071  | 2016.554  | NM_003708 | 57457.668 | 61020.746 |
| AJ224741  | 376.8     | 607.403   | NM_020150 | 2593.57   | 2760.409  | NM_014346 | 16739.76  | 24136.324 |
| NM_004684 | 5091.019  | 3591.688  | NM_007150 | 8172.487  | 6726.721  | AB040895  | 886.083   | 2255.461  |
| BF338709  | 1095.503  | 957.641   | NM_006831 | 5511.763  | 3780.922  | NM_018210 | 3428.186  | 3708.217  |
| AF204171  | 1079.481  | 605.087   | AL162044  | 7509.044  | 4653.708  | NM_001096 | 11759.545 | 12626.661 |
| M18182    | 501.446   | 435.883   | AK024004  | 942.601   | 733.219   | NM_016014 | 4146.64   | 3840.7    |
| W96179    | 5526.614  | 2988.646  | AK022365  | 585.648   | 512.521   | NM_000196 | 1132.031  | 985.597   |
| AW247841  | 12151.971 | 7662.319  | BE892273  | 57472.43  | 51165.098 | NM_018327 | 4906.104  | 4465.927  |
| BG568198  | 448.499   | 473.848   | AF026929  | 923.135   | 684.849   | NM_001684 | 1314.395  | 1704.356  |
| M76559    | 8206.049  | 7834.628  | NM_016734 | 1908.461  | 1752.108  | NM_013306 | 3420.471  | 3674.477  |
| AF043473  | 390.74    | 432.585   | NM_001355 | 27392.736 | 23057.119 | AF038186  | 6189.565  | 6594.781  |
| U03884    | 1708.938  | 2043      | NM_001216 | 530.706   | 460.332   | NM_003664 | 7596.426  | 6250.83   |
| U11058    | 2689.068  | 3965.908  | U63336    | 1037.388  | 1032.678  | NM_002426 | 6613.838  | 6737.012  |
| AI222585  | 2044.821  | 2330.233  | NM_006907 | 2426.225  | 2133.676  | AK027182  | 2075.153  | 2167.493  |
| AA411678  | 11439.649 | 8865.278  | NM_002686 | 994.527   | 1310.899  | J03651    | 19477.869 | 17119.254 |
| AA862813  | 55419.512 | 51528.172 | NM_006267 | 2198.142  | 2261.217  | NM_000442 | 9460.752  | 9621.081  |
| AA398427  | 3757.165  | 3324.054  | NM_002661 | 26749.332 | 30905.541 | NM_002934 | 6195.701  | 5709.114  |
| T55728    | 7145.597  | 6934.751  | NM_001263 | 659.092   | 412.76    | AK023011  | 52463.723 | 52622.176 |
| H20856    | 3929.647  | 3368.607  | AK023982  | 1513.591  | 1389.049  | NM_016816 | 3065.319  | 4034.668  |
| N62586    | 4592.091  | 5226.076  | NM_018466 | 2332.116  | 1456.165  | AK023794  | 55952.637 | 59506.305 |
| AA242743  | 3357.555  | 4656.316  | Y11312    | 2816.112  | 2226.761  | NM_019885 | 5778.816  | 8020.199  |

|           |           |           |           |           |           |           |           |           |
|-----------|-----------|-----------|-----------|-----------|-----------|-----------|-----------|-----------|
| NM_00675  | 12000.474 | 20030.543 | AB014533  | 10523.696 | 8881.204  | AB033103  | 2903.318  | 3089.178  |
| NM_006831 | 6332.038  | 3957.086  | M11427    | 548.104   | 427.487   | NM_002907 | 5226.428  | 3484.812  |
| AK024004  | 1404.3    | 1186.056  | NM_000744 | 809.866   | 821.753   | AK024098  | 4772.753  | 4588.558  |
| AK022365  | 1101.322  | 790.094   | NM_003039 | 14398.567 | 12629.26  | AK001116  | 1191.948  | 1247.219  |
| BE892273  | 26962.129 | 17961.148 | NM_014509 | 1219.044  | 1042.061  | AK022371  | 11156.039 | 9829.414  |
| AF026929  | 1193.437  | 377.075   | NM_020372 | 37723.992 | 32288.318 | D42045    | 7374.592  | 5864.612  |
| NM_016734 | 2359.609  | 1266.632  | NM_002635 | 51276.531 | 46379.32  | AB007953  | 5254.016  | 4857.192  |
| M16006    | 488.302   | 187.666   | NM_004979 | 2006.383  | 1456.155  | NM_014002 | 16689.746 | 19232.42  |
| AF035803  | 850.685   | 443.061   | NM_015361 | 26975.162 | 21732.08  | NM_004197 | 27376.631 | 25861.08  |
| Y08147    | 1971.619  | 2490.747  | NM_004310 | 9047.361  | 6850.842  | NM_004073 | 4241.601  | 4545.569  |
| D00174    | 5366.481  | 7034.612  | NM_015537 | 12111.531 | 9048.512  | NM_001278 | 10347.841 | 12133.556 |
| AB000520  | 19416.305 | 24463.297 | NM_016520 | 16222.627 | 12785.923 | NM_019105 | 13747.632 | 15656.904 |
| NM_016382 | 544.162   | 649.921   | AB018353  | 5765.698  | 5900.115  | NM_000294 | 13366.182 | 15019.256 |
| AK023117  | 1941.468  | 2321.092  | NM_007036 | 4931.343  | 4359.078  | AJ272212  | 6061.703  | 5644.559  |
| AL122046  | 4006.737  | 3344.61   | NM_002617 | 3652.968  | 3769.774  | NM_005677 | 11703.592 | 11788.917 |
| AF119914  | 302.129   | 163.377   | NM_003313 | 30000.844 | 33420.777 | AF229803  | 4779.519  | 5496.13   |
| NM_000855 | 1263.578  | 1423.994  | AF090907  | 4426.232  | 4677.274  | NM_002130 | 32337.654 | 37578.02  |
| NM_005536 | 12215.299 | 9010.11   | AK024476  | 6922.326  | 5745.166  | NM_005465 | 10535.843 | 11468.936 |
| NM_005077 | 1602.12   | 1657.15   | X74794    | 19812.631 | 19372.885 | NM_016361 | 3900.755  | 3907.571  |
| NM_001990 | 3986.903  | 6096.12   | AL050298  | 4997.86   | 4348.715  | NM_001305 | 16681.688 | 23075.76  |
| NM_002141 | 657.431   | 1022.48   | NM_007079 | 43768.551 | 38149.609 | NM_005082 | 2754.196  | 3644.488  |
| NM_006907 | 5396.158  | 3512.721  | M20696    | 5873.675  | 4272.562  | D17028    | 66713.563 | 65449.895 |
| NM_002686 | 928.629   | 705.668   | NM_002915 | 1550.722  | 1338.723  | NM_013442 | 57844.004 | 51379.664 |
| NM_006267 | 3063.956  | 2384.082  | NM_006736 | 3925.962  | 2448.406  | BG611243  | 9399.168  | 8803.847  |
| NM_002661 | 20583.363 | 16701.943 | NM_003640 | 2693.178  | 2189.828  | AI417481  | 1755.59   | 1782.418  |
| NM_001263 | 603.387   | 479.914   | NM_014444 | 6127.029  | 4962.947  | BI906766  | 12030.063 | 9963.074  |
| AK023982  | 1616.035  | 1272.594  | NM_012248 | 7018.52   | 5987.928  | U60519    | 1900.374  | 1971.901  |
| NM_018466 | 3970.896  | 2262.68   | NM_006145 | 3311.429  | 1949.848  | AA282906  | 15620.722 | 13449.232 |
| Y11312    | 4107.344  | 2977.659  | NM_014970 | 8781.033  | 6842.815  | L02870    | 57256.063 | 56789.512 |
| AF020774  | 334.085   | 518.895   | NM_014393 | 4118.577  | 4096.668  | BG755482  | 41037.371 | 38455.852 |
| NM_003039 | 20467.924 | 28652.525 | NM_004223 | 26125.67  | 23952.359 | AI480307  | 16144.617 | 14744.294 |
| NM_002635 | 49046.973 | 46961.77  | NM_006813 | 1829.339  | 1410.657  | X51420    | 6140.432  | 6515.777  |
| AF100756  | 13778.039 | 9473.111  | CY3Cy5    | 574.618   | 131.072   | D28235    | 1324.868  | 1312.358  |
| NM_006825 | 6595.837  | 5523.227  | NM_078467 | 9132.523  | 11041.882 | X51757    | 3050.391  | 4142.92   |
| NM_004862 | 5393.104  | 5301.635  | NM_013345 | 1752.414  | 2554.6    | L24038    | 4562.762  | 4879.987  |
| NM_001661 | 2689.384  | 2552.581  | AL117454  | 28783.617 | 35960.66  | NM_053056 | 5640.29   | 6047.727  |
| NM_014563 | 3239.923  | 2788.319  | AF272890  | 2126.14   | 3268.033  | NM_006186 | 2754.777  | 2639.088  |
| NM_020150 | 5436.322  | 9119.401  | U00684    | 2830.758  | 2873.11   | AK001883  | 18292.996 | 16890.713 |
| NM_007150 | 11675.643 | 14336.808 | NM_016459 | 36091.883 | 34940.938 | AK025587  | 581.883   | 647.73    |
| NM_016520 | 18979.66  | 22319.301 | AF086227  | 2179.678  | 2613.736  | AL050114  | 4915.685  | 5659.295  |
| AB018353  | 9460.451  | 15491.443 | AK026246  | 3633.384  | 4720.428  | AK021492  | 7755.005  | 7030.166  |
| NM_007036 | 9206.768  | 11730.912 | AF070524  | 1967.498  | 2471.11   | NM_014874 | 4413.298  | 5007.179  |
| AF090907  | 4801.03   | 5434.414  | AF035281  | 1584.035  | 1794.897  | NM_012397 | 520.794   | 601.518   |
| AK024476  | 4811.213  | 6077.124  | AK026304  | 546.444   | 607.479   | NM_005765 | 22754.289 | 18333.426 |
| X74794    | 26385.635 | 23672.793 | AF070625  | 5382.39   | 7070.494  | NM_002762 | 7266.632  | 5454.308  |
| AL050298  | 8682.552  | 7803.248  | AL365512  | 3414.379  | 6263.066  | NM_006324 | 18255.156 | 12288.211 |
| NM_007079 | 17205.947 | 15967.213 | AK001740  | 11890.869 | 14137.203 | NM_016848 | 30272.385 | 25466.982 |
| M20696    | 4457.6    | 3299.288  | AF131793  | 1144.003  | 1437.52   | NM_000514 | 29910.279 | 30871.135 |
| NM_002915 | 3174.908  | 3033.803  | NM_078467 | 9357.181  | 9321.191  | NM_003240 | 36582.594 | 34951.902 |
| NM_006736 | 6714.364  | 6392.669  | SR2       | 35152.789 | 50241.074 | NM_016564 | 55473.441 | 59290.742 |
| NM_003640 | 3975.354  | 3165.391  | SR4       | 11978.187 | 17366.986 | NM_000796 | 1128.424  | 1915.522  |
| NM_014444 | 12462.607 | 13733.975 | SR6       | 1290.932  | 1832.236  | AF279656  | 1861.557  | 2057.051  |
| NM_012248 | 12178.434 | 7889.01   | SR8       | 5045.667  | 22126.068 | AK021660  | 6636.918  | 7554.715  |

|           |           |           |           |           |           |           |           |           |
|-----------|-----------|-----------|-----------|-----------|-----------|-----------|-----------|-----------|
| NM_014970 | 17152.965 | 13947.482 | SR10      | 17341.813 | 8299.006  | AB007933  | 55807.094 | 60601.207 |
| NM_014393 | 7714.099  | 7629.282  | CY3Cy5    | 457.873   | 152.541   | NM_006702 | 10235.128 | 10361.022 |
| NM_004223 | 25811.154 | 22843.473 | AK091573  | 783.913   | 873.794   | NM_001396 | 34661.473 | 33630.52  |
| NM_006813 | 974.795   | 916.364   | AF131814  | 1751.192  | 1619.779  | NM_014474 | 4251.432  | 5172.518  |
| NM_001355 | 38231.535 | 33357.551 | AL359600  | 1948.516  | 2309.305  | NM_016246 | 6519.115  | 7204.571  |
| U63336    | 1728.957  | 3485.6    | AL360144  | 2957.738  | 4283.46   | NM_002973 | 6905.071  | 10544.162 |
| NM_000582 | 1775.458  | 2580.126  | BC028617  | 786.329   | 1476.594  | NM_004436 | 22500.27  | 25504.037 |
| NM_005593 | 3001.398  | 3446.546  | AL117653  | 1021.141  | 1251.449  | NM_006580 | 12803.912 | 13486.422 |
| AJ224741  | 287.052   | 548.783   | NM_003740 | 3897.707  | 4620.223  | NM_016277 | 3981.687  | 4362.902  |
| NM_004684 | 5585.759  | 4463.567  | AB014526  | 2211.827  | 3506.868  | NM_007247 | 7480.842  | 6581.793  |
| BF338709  | 1116.426  | 1095.2    | NM_018538 | 3921.9    | 3182.707  | NM_006554 | 11303.928 | 8546.411  |
| AF204171  | 1021.327  | 1338.835  | NM_017851 | 1950.573  | 2217.023  | X99962    | 21942.93  | 19546.557 |
| M18182    | 793.273   | 1354.381  | AK026182  | 63829.059 | 56441.441 | AK023221  | 27026.152 | 19106.898 |
| W96179    | 7970.948  | 9842.879  | AK025603  | 2581.586  | 3090.539  | NM_003664 | 7316.747  | 5488.701  |
| AW247841  | 20766.801 | 28289.451 | NM_016085 | 15724.065 | 18346.15  | J03651    | 18562.004 | 16190.362 |
| BG568198  | 898.609   | 1338.923  | AK025768  | 2398.359  | 2776.79   | U61738    | 20499.932 | 19715.711 |
| M76559    | 11079.032 | 15053.778 | AL117502  | 6488.422  | 8601.117  | AJ132087  | 2095.025  | 2103.274  |
| AF043473  | 622.91    | 882.348   | AK001846  | 2254.846  | 2501.143  | U92818    | 4724.383  | 4534.883  |
| U03884    | 2142.666  | 2726.652  | AF147300  | 310.107   | 429.004   | NM_000442 | 9786.864  | 11345.639 |
| U11058    | 3019.481  | 4261.907  | AK024637  | 9321.068  | 7257.097  | NM_002934 | 6058.509  | 8294.904  |
| AI222585  | 1736.278  | 1956.824  | AK024108  | 628.746   | 747.5     | AK023011  | 52544.945 | 52031.457 |
| AA411678  | 14492.613 | 13968.26  | AL110293  | 626.221   | 784.741   | NM_016816 | 3263.636  | 2981.318  |
| AA862813  | 52472.66  | 41177.523 | AK025148  | 501.145   | 908.317   | L17325    | 2819.237  | 3099.055  |
| AA398427  | 3385.37   | 2245.789  | AK026238  | 940.811   | 1506.725  | NM_017716 | 3181.43   | 3029.705  |
| T55728    | 6760.264  | 5500.479  | AK026694  | 1092.278  | 1371.819  | M58603    | 12436.706 | 13808.913 |
| H20856    | 4502.001  | 2360.295  | AK025564  | 1643.38   | 1782.086  | NM_003636 | 15226.063 | 17883.133 |
| N62586    | 4101.465  | 4033.124  | AK026286  | 2652.979  | 2871.563  | NM_001546 | 1438.224  | 1820.757  |
| AA242743  | 3277.308  | 3121.143  | AK026731  | 2438.407  | 3166.864  | NM_000115 | 12495.017 | 15724.182 |
| NM_015361 | 13332.055 | 10666.191 | AL133446  | 6697.88   | 10668.161 | AF308801  | 5806.722  | 7515.855  |
| NM_004310 | 13173.393 | 10218.617 | AF147406  | 1297.396  | 2757.159  | NM_007318 | 60416.383 | 60774.352 |
| NM_015537 | 9901.67   | 9474.629  | AK024689  | 335.754   | 1763.626  | AF229803  | 3130.618  | 2430.78   |
| AK024004  | 1503.132  | 1042.841  | BC035667  | 1314.642  | 1108.941  | AF151810  | 1338.173  | 1055.705  |
| AK022365  | 1029.582  | 849.081   | AL049277  | 5941.91   | 7380.298  | NM_002130 | 33173.156 | 33156.59  |
| BE892273  | 31035.754 | 20963.438 | AL117506  | 2031.101  | 2310.168  | NM_005466 | 9041.049  | 7234.111  |
| AF026929  | 1174.336  | 768.858   | AL049302  | 493.521   | 522.095   | NM_016361 | 4738.527  | 3712.386  |
| NM_016734 | 3205.992  | 2805.208  | AL050043  | 4713.797  | 5420.391  | NM_003708 | 58323.492 | 56897.57  |
| M16006    | 422.805   | 281.729   | L22263    | 1231.562  | 1307.532  | AB040895  | 1635.428  | 1765.739  |
| AB023144  | 556.903   | 348.039   | AL137470  | 1558.388  | 1842.063  | NM_004820 | 997.097   | 894.581   |
| AF035803  | 1013.2    | 655.69    | AL137709  | 5103.904  | 7740.981  | NM_018210 | 3650.123  | 3982.291  |
| Y08147    | 3455.279  | 3773.624  | AK023277  | 1855.159  | 1980.049  | NM_001096 | 12812.36  | 12362.917 |
| D00174    | 7158.383  | 8334.927  | AK000425  | 4499.66   | 4930.652  | NM_016014 | 4247.351  | 4370.919  |
| AB000520  | 20532.559 | 22939.859 | AK022933  | 1055.997  | 2235.005  | NM_000198 | 1168.515  | 1172.768  |
| NM_016382 | 485.529   | 554.171   | NM_014276 | 11684.051 | 10830.999 | NM_018327 | 4724.381  | 5782.935  |
| AK023117  | 2143.236  | 3004.234  | AF009288  | 427.729   | 692.441   | NM_017581 | 3936.451  | 4096.027  |
| AL122046  | 5251.926  | 6369.75   | AF035303  | 2248.933  | 4218.504  | AA488804  | 15247.285 | 16123.711 |
| NM_000855 | 1798.131  | 2118.391  | AF056438  | 7015.212  | 7456.653  | NM_006536 | 3906.976  | 5025.725  |
| NM_005536 | 14507.166 | 15322.613 | AF009296  | 1534.686  | 1664.943  | NM_001684 | 1718.919  | 2329.281  |
| NM_001990 | 4827.479  | 7556.435  | AF041410  | 438.584   | 593.769   | AB028977  | 536.361   | 652.784   |
| NM_002141 | 679.77    | 1007.648  | AF056448  | 1176.183  | 1752.046  | NM_000808 | 739.721   | 1214.2    |
| NM_012464 | 495.237   | 793.169   | AK001011  | 10176.71  | 10400.681 | NM_016318 | 27443.859 | 30555.824 |
| NM_006129 | 3515.264  | 4498.902  | AK001398  | 468.396   | 348.122   | NM_013306 | 3068.378  | 3885.659  |
| NM_006267 | 3352.752  | 3395.761  | AK021457  | 408.784   | 552.614   | NM_019891 | 4224.321  | 4512.438  |
| NM_002661 | 23111.615 | 22205.127 | AK021690  | 2141.558  | 2108.619  | AF038186  | 6978.493  | 7556.004  |

|           |           |           |           |           |           |           |           |           |
|-----------|-----------|-----------|-----------|-----------|-----------|-----------|-----------|-----------|
| NM_001263 | 626.243   | 466.295   | AK001840  | 1545.219  | 1353.842  | AK001883  | 52253.152 | 48767.504 |
| AK023982  | 2264.169  | 1682.233  | AK021486  | 2192.853  | 2526.893  | NM_014625 | 3524.072  | 1870.965  |
| NM_018466 | 5103.589  | 3819.493  | AK021740  | 719.784   | 1421.234  | AL050114  | 1883.233  | 1115.995  |
| Y11312    | 4793.853  | 4026.185  | NM_005444 | 4134.295  | 5410.711  | AK021492  | 11165.904 | 7854.435  |
| AF020774  | 423.051   | 544.13    | V00589    | 35226.766 | 31363.42  | AK023794  | 51045.496 | 45052.082 |
| NM_003039 | 22293.92  | 29040.896 | AK000451  | 973.463   | 637.914   | NM_019885 | 4510.882  | 3468.131  |
| NM_002635 | 53359.504 | 55838.094 | AL390163  | 2522.12   | 3045.734  | AB033103  | 2606.396  | 1726.838  |
| AF100756  | 13969.513 | 9246.255  | NM_018572 | 2102.233  | 3139.758  | NM_002907 | 6257.623  | 3702.161  |
| NM_006825 | 6838.195  | 5147.865  | NM_005315 | 956.092   | 580.441   | AK024098  | 3734.6    | 3551.503  |
| NM_004862 | 5432.383  | 4339.473  | AK000175  | 4644.766  | 4530.345  | AK001116  | 2833.977  | 2839.126  |
| NM_001661 | 2953.532  | 2024.273  | AL137736  | 4927.5    | 5243.066  | AK022371  | 13400.438 | 24638.986 |
| NM_014563 | 2505.733  | 1662.534  | AF143870  | 3703.28   | 3441.927  | D42045    | 7250.595  | 8196.595  |
| NM_020150 | 4852.096  | 4827.606  | NM_004192 | 8436.932  | 12809.89  | AB007953  | 5634.19   | 5217.767  |
| NM_007150 | 13821.544 | 11431.714 | AK024160  | 970.656   | 1279.727  | NM_014002 | 18218.322 | 22472.789 |
| NM_006831 | 9808.522  | 6737.165  | AK025077  | 1576.516  | 1467.877  | NM_004197 | 27001.996 | 24608.023 |
| AL162044  | 12780.419 | 12926.03  | NM_006417 | 13776.585 | 17109.174 | NM_004073 | 3998.654  | 3984.19   |
| AB018353  | 9417.693  | 13399.021 | L43350    | 2901.115  | 5636.175  | NM_001278 | 7998.941  | 8509.052  |
| NM_007036 | 8743.389  | 7634.224  | NM_020317 | 3532.208  | 4687.003  | NM_019105 | 13939.765 | 15693.659 |
| NM_002617 | 5342.622  | 4204.746  | AL080234  | 4588.957  | 4952.566  | NM_000294 | 13373.443 | 15184.309 |
| NM_003313 | 10409.955 | 8275.708  | AK027025  | 4015.347  | 4537.407  | NM_005677 | 12155.534 | 11793.409 |
| AF090907  | 4555.602  | 4038.847  | AK025105  | 637.182   | 650.279   | CY3Cy5    | 10112.611 | 468.13    |
| AK024476  | 5317.913  | 4708.363  | AB002446  | 473.324   | 374.136   | NM_004957 | 5638.293  | 6000.523  |
| X74794    | 29941.766 | 23935.391 | AF212220  | 3596.415  | 3390.602  | NM_005252 | 5538.111  | 6103.543  |
| AL050298  | 9870.245  | 7867.964  | AF147387  | 4013.845  | 5553.82   | AL359211  | 1484.224  | 4841.281  |
| NM_007079 | 18492.938 | 17824.545 | NM_012081 | 1604.336  | 2590.739  | AF070526  | 1046.802  | 1007.834  |
| M20696    | 5178.962  | 5321.781  | AL137463  | 623.259   | 575.173   | U79264    | 5615.515  | 5704.767  |
| NM_002915 | 2939.456  | 3806.338  | AF085909  | 30987.051 | 40788.281 | AF070530  | 18483.127 | 25124.324 |
| NM_006736 | 6471.655  | 9187.506  | AF090888  | 878.665   | 830.764   | AF086487  | 668.521   | 1014.742  |
| NM_003640 | 4063.148  | 5763.411  | AK027193  | 2156.92   | 2252.714  | NM_006420 | 3712.292  | 3844.376  |
| NM_014444 | 11834.519 | 18492.631 | AF086471  | 8361.101  | 9153.191  | AF131855  | 2490.003  | 2902.168  |
| NM_012248 | 14111.425 | 12872.652 | NM_018455 | 8026.15   | 8177.494  | AF086046  | 7732.696  | 8333.933  |
| NM_014970 | 15869.901 | 12860.624 | AF113018  | 2017.737  | 1816.773  | AK023309  | 1018.258  | 994.788   |
| NM_014393 | 6985.493  | 6999.775  | AK021996  | 1242.488  | 1415.713  | AK000724  | 6341.819  | 5462.938  |
| NM_004223 | 26277.061 | 24546.91  | AL049337  | 9534.549  | 10836.302 | NM_003720 | 37361.219 | 32508.742 |
| NM_006813 | 824.772   | 772.738   | Z27200    | 2494.937  | 3437.294  | NM_004957 | 4851.49   | 4633.797  |
| NM_001355 | 39043.34  | 30950.918 | AF070571  | 8322.914  | 8568.829  | NM_005252 | 2868.22   | 2443.119  |
| U63336    | 792.227   | 955.344   | AK023554  | 5490.329  | 6514.94   | SR1       | 77244.414 | 64195.535 |
| NM_006907 | 6910.108  | 4441.307  | NM_003513 | 9710.461  | 18350.098 | SR3       | 45721.004 | 56186.77  |
| NM_002686 | 1136.258  | 832.464   | AL079294  | 519.44    | 625.708   | SR5       | 5079.555  | 7900.904  |
| AJ224741  | 456.66    | 545.474   | AK024844  | 1021.748  | 1656.756  | SR7       | 5589.161  | 61409.773 |
| NM_004684 | 5502.843  | 4076.658  | AL049437  | 724       | 613.383   | SR9       | 20949.17  | 6789.301  |
| BF338709  | 1038.776  | 1190.334  | AF161427  | 62204.035 | 57045.012 | CY3Cy5    | 10726.305 | 639.483   |
| AF204171  | 926.7     | 640.827   | AK021715  | 8540.838  | 9908.5    | Z36818    | 2013.969  | 4781.258  |
| M18182    | 613.135   | 635.945   | AK000315  | 9403.581  | 10600.508 | Z36842    | 1687.565  | 2215.991  |
| W96179    | 8353.627  | 7822.125  | AK023248  | 1259.905  | 1158.594  | AF086526  | 2208.35   | 2184.179  |
| AW247841  | 22167.004 | 26709.574 | NM_012404 | 23956.088 | 26154.932 | AK025788  | 10765.556 | 12040.736 |
| BG568198  | 835.642   | 652.471   | AF130075  | 17505.807 | 15088.319 | AF086164  | 2410.12   | 2897.278  |
| M76559    | 10307.538 | 10655.133 | NM_000928 | 753.027   | 1051.164  | AK025577  | 4245.444  | 4764.906  |
| AF043473  | 415.066   | 478.213   | NM_007002 | 10434.954 | 11789.019 | AK000216  | 2393.771  | 2133.064  |
| U03884    | 2208.22   | 1992.939  | NM_012121 | 1794.364  | 1690.17   | AK023440  | 2079.995  | 2016.156  |
| U11058    | 3177.244  | 3498.435  | NM_003255 | 493.562   | 527.999   | AB033041  | 46531.922 | 41769.285 |
| AI222585  | 1973.23   | 2819.636  | NM_014155 | 3889.657  | 2908.969  | NM_014894 | 67597.984 | 64236.813 |
| AA411678  | 15375.567 | 20871.836 | AK026331  | 21990.148 | 21416.971 | AY007155  | 1304.133  | 2413.199  |



|           |           |           |           |           |           |           |           |           |
|-----------|-----------|-----------|-----------|-----------|-----------|-----------|-----------|-----------|
| AA862813  | 49028.863 | 47096.223 | M30773    | 2209.659  | 2466.309  | AK027160  | 32865.18  | 25163.748 |
| AA398427  | 4010.95   | 2971.869  | NM_016338 | 14241.827 | 11717.124 | AK022678  | 1928.644  | 2608.555  |
| T55728    | 7746.568  | 6884.479  | AF113699  | 43742.074 | 44152.43  | AK023473  | 782.819   | 1092.154  |
| H20856    | 4316.381  | 3182.45   | AK021897  | 7392.977  | 7592.036  | AK023835  | 5263.365  | 6024.014  |
| N62586    | 4754.122  | 4978.455  | AK001051  | 3113.439  | 3543.64   | AK023012  | 1054.994  | 1874.638  |
| AA242743  | 3954.31   | 4705.251  | NM_018317 | 1012.993  | 1252.701  | AK023906  | 6723.987  | 7394.116  |
| NM_015361 | 12470.932 | 10656.486 | AF086051  | 1028.084  | 1333.28   | AK024234  | 2708.379  | 3394.641  |
| NM_004310 | 13260.649 | 12468.074 | AK026434  | 812.757   | 1171.355  | AK024962  | 2505.04   | 2738.656  |
| NM_015537 | 8313.09   | 6921.582  | AK024356  | 502.501   | 528.411   | AK022164  | 898.823   | 994.221   |
| NM_016520 | 21581.066 | 18179.301 | AL049370  | 8198.881  | 7535.969  | AK025135  | 13005.55  | 13936.835 |
| AF035803  | 810.313   | 363.185   | AL365410  | 7047.044  | 7465.54   | D38549    | 4247.595  | 4116.65   |
| Y08147    | 3262.064  | 2177.277  | D17082    | 12481.663 | 13490.346 | AK024780  | 3633.985  | 2941.503  |
| D00174    | 6738.566  | 6379.162  | D17252    | 37758.059 | 46070.891 | AF085947  | 1707.743  | 1639.655  |
| AB000520  | 21067.768 | 30904.85  | NM_003673 | 7020.033  | 9562.092  | AF086000  | 851.181   | 1003.077  |
| NM_016382 | 454.879   | 823.503   | Z36823    | 21393.746 | 22027.521 | AL359591  | 824.974   | 958.55    |
| AK023117  | 1960.839  | 3313.729  | NM_001849 | 3493.464  | 3970.98   | AK022389  | 540.249   | 626.89    |
| AL122046  | 4383.393  | 6927.311  | NM_003734 | 26482.021 | 23767.957 | AK022123  | 905.425   | 1357.617  |
| AF119914  | 318.658   | 654.679   | NM_014935 | 22377.557 | 23566.389 | AK024184  | 1490.958  | 3683.461  |
| NM_000855 | 1497.033  | 1392.104  | X99660    | 36616.754 | 39243.625 | AF075116  | 665.39    | 690.904   |
| NM_005536 | 13749.562 | 10089.967 | X03635    | 5252.437  | 5172.57   | U10510    | 16875.369 | 18182.449 |
| NM_005077 | 1655.737  | 1720.996  | NM_004351 | 16881.654 | 13160.553 | AK023018  | 4280.019  | 3337.101  |
| NM_004423 | 7136.835  | 11258.204 | NM_004236 | 8834.397  | 7514.939  | AK022672  | 3695.979  | 3596.696  |
| NM_001990 | 3618.413  | 3100.491  | AB011093  | 10452.657 | 9515.762  | AK023870  | 6533.807  | 9277.037  |
| NM_002141 | 664.74    | 355.938   | NM_002462 | 436.499   | 613.428   | AK023474  | 1279.531  | 3977.234  |
| NM_003311 | 2615.365  | 2877.011  | NM_004560 | 1712.381  | 3675.47   | AK021599  | 2384.26   | 3388.712  |
| NM_003776 | 11256.954 | 11138.298 | NM_005618 | 653.336   | 742.831   | BC030975  | 862.983   | 951.49    |
| NM_015719 | 1012.597  | 1892.78   | NM_020533 | 23793.703 | 26374.244 | AF116677  | 777.62    | 1391.028  |
| NM_012464 | 487.187   | 499.114   | NM_001894 | 25773.578 | 27177.541 | AK026131  | 2045.593  | 1504.893  |
| NM_006129 | 4710.889  | 5591.103  | NM_000614 | 1188.148  | 1140.402  | AK023312  | 3555.555  | 3134.772  |
| NM_000582 | 2157.849  | 2400.269  | AK022884  | 3000.621  | 3683.29   | AK022483  | 1094.544  | 1112.873  |
| NM_005593 | 2975.854  | 2955.786  | NM_006620 | 9050.621  | 8182.663  | AL133570  | 2248.794  | 2929.574  |
| NM_016077 | 8882.576  | 9779.303  | NM_001397 | 1375.399  | 1623.581  | AK021462  | 1490.264  | 2765.063  |
| NM_006825 | 8349.106  | 12194.431 | NM_005543 | 892.995   | 1240.735  | AK023392  | 627.215   | 901.444   |
| NM_004862 | 7255.731  | 11570.1   | Y08770    | 689.219   | 738.584   | AF131836  | 5386.283  | 5715.74   |
| NM_001661 | 3012.219  | 2052.702  | NM_004772 | 2294.8    | 3618.42   | AF275804  | 16715.277 | 17056.447 |
| NM_014563 | 3332.064  | 2685.77   | NM_003714 | 2847.334  | 3949.061  | AL137488  | 3578.284  | 4215.503  |
| NM_020150 | 4704.541  | 8396.086  | U42977    | 12383.707 | 12906.419 | AL049447  | 68588.68  | 64174.113 |
| NM_007150 | 11616.085 | 8792.727  | NM_002881 | 14167.779 | 13805.411 | NM_005286 | 11846.456 | 14104.105 |
| NM_006831 | 9260.345  | 5044.011  | NM_003666 | 17331.613 | 17356.084 | AK024365  | 14145.064 | 13816.158 |
| AL162044  | 14336.81  | 11900.051 | NM_003288 | 7337.573  | 8522.182  | AJ251759  | 4620.383  | 5854.914  |
| AK024004  | 1412.841  | 1522.367  | NM_018242 | 1588.264  | 1691.337  | AK024371  | 6530.904  | 7416.93   |
| AK022365  | 854.703   | 1085.608  | M83822    | 4184.459  | 3342.774  | AL050205  | 14734.188 | 11946.097 |
| BE892273  | 47289.457 | 51081.477 | NM_018434 | 805.62    | 677.117   | AK023947  | 962.138   | 804.738   |
| AF026929  | 1774.185  | 2151.399  | NM_003914 | 788.346   | 754.921   | NM_005691 | 2434.472  | 2890.166  |
| NM_016734 | 2836.417  | 3290.931  | NM_020423 | 2134.473  | 1582.276  | AF086156  | 1098.009  | 1344.019  |
| M16006    | 609.732   | 376.92    | AK021437  | 5877.43   | 5045.207  | AK023814  | 1001.318  | 1628.548  |
| NM_001355 | 36263.324 | 42112.098 | NM_003831 | 5952.071  | 5912.006  | AF130063  | 1828.738  | 2252.084  |
| NM_001216 | 1384.557  | 1253.509  | NM_001759 | 2765.368  | 4608.207  | AF086528  | 1884.747  | 2256.474  |
| U63336    | 3565.472  | 4613.889  | AB007965  | 13487.402 | 14479.074 | AL162043  | 1313.219  | 1989.595  |
| NM_006907 | 6542.263  | 8061.261  | NM_017649 | 1067.151  | 1069.508  | NM_006543 | 2077.417  | 2734.506  |
| NM_002686 | 1439.063  | 2271.917  | NM_000066 | 3078.116  | 4300.897  | AF086252  | 2854.985  | 3324.975  |
| NM_020401 | 437.96    | 765.973   | NM_001196 | 9670.533  | 11333.104 | AK026703  | 2175.962  | 2408.842  |
| NM_006267 | 4704.619  | 7752.875  | NM_016008 | 1789.957  | 1769.783  | NM_017595 | 440.413   | 1780.816  |

|           |           |           |           |           |           |           |           |           |
|-----------|-----------|-----------|-----------|-----------|-----------|-----------|-----------|-----------|
| NM_002661 | 27045.295 | 51278.285 | NM_017744 | 1762.109  | 1701.156  | AK024367  | 725.503   | 1968.362  |
| NM_018466 | 6597.943  | 7419.886  | NM_001924 | 7811.582  | 9067.971  | NM_017866 | 13433.258 | 18108.518 |
| Y11312    | 4840.013  | 2973.171  | NM_017705 | 9218.188  | 11133.177 | AJ131244  | 907.479   | 1594.124  |
| AF020774  | 506.616   | 447.091   | AB002325  | 1132.251  | 1272.536  | NM_003536 | 3117.746  | 3169.031  |
| AB014533  | 2806.962  | 2598.125  | NM_001796 | 12261.153 | 13438.909 | AF116707  | 10310.446 | 10782.828 |
| M11427    | 346.555   | 345.693   | AB040880  | 1288.12   | 1676.635  | U90910    | 14749.248 | 13808.167 |
| NM_000744 | 743.225   | 973.205   | NM_009587 | 19820.152 | 21052.598 | AL049979  | 716.386   | 784.503   |
| NM_003036 | 19224.693 | 17558.703 | NM_017820 | 1553.995  | 1382.345  | AK025765  | 3653.493  | 3849.328  |
| NM_014509 | 1698.782  | 1403.072  | NM_002630 | 2079.989  | 2168.352  | NM_016613 | 8694.878  | 9783.256  |
| U26662    | 1464.643  | 2429.6    | AJ295149  | 59790.098 | 60451.215 | AF086414  | 9751.907  | 8898.439  |
| NM_002636 | 51891.492 | 53456.168 | NM_013438 | 7822.234  | 8747.487  | AJ012490  | 18144.41  | 15765.604 |
| NM_004979 | 1480.759  | 972.643   | NM_014688 | 12135.436 | 8513.4    | U84516    | 31797.047 | 25586.613 |
| NM_015361 | 13286.21  | 21911.102 | AL359623  | 3555.961  | 2665.082  | AL049270  | 4285.318  | 3347.576  |
| NM_004310 | 11334.897 | 13268.579 | AK026920  | 8341.695  | 9499.581  | U88834    | 27335.736 | 22489.746 |
| NM_015537 | 8876.249  | 10228.309 | AL137255  | 10015.2   | 10317.889 | BC025324  | 2865.458  | 2040.155  |
| NM_016520 | 22087     | 22677.109 | NM_003370 | 12648.167 | 14068.525 | NM_006087 | 65309.891 | 62989.824 |
| AB018353  | 10102.118 | 14644.868 | AB037715  | 11250.58  | 9971.111  | AK023564  | 689.645   | 1017.298  |
| NM_007036 | 9971.954  | 13334.652 | AF250924  | 27542.953 | 28949.047 | NM_003533 | 2543.453  | 3494.782  |
| NM_002617 | 6084.636  | 10476.48  | D86979    | 4510.602  | 5710.224  | AL157478  | 1308.588  | 2320.594  |
| NM_003313 | 13507.592 | 21871.664 | NM_018212 | 757.566   | 1033.578  | AK023726  | 20158.125 | 25706.486 |
| AF090907  | 4666.186  | 9175.435  | AB023230  | 9753.927  | 12081.968 | AK024906  | 1526.237  | 2034.94   |
| X74794    | 35656.18  | 40368.793 | AF018081  | 45763.137 | 48585.195 | NM_005607 | 5381.913  | 5375.942  |
| AL050298  | 9891.571  | 5712.659  | NM_020202 | 24492.299 | 29235.258 | NM_018371 | 33065.535 | 43084.012 |
| NM_007079 | 17801.877 | 12425.179 | AF024540  | 2586.017  | 2455.388  | NM_014390 | 32866.461 | 33100.762 |
| M20696    | 3534.261  | 2831.027  | NM_002189 | 4797.758  | 4469.077  | NM_018143 | 2193.489  | 2033.54   |
| NM_006736 | 7149.758  | 9412.749  | NM_001668 | 3607.604  | 3376.271  | X78924    | 15257.447 | 15831.71  |
| NM_003640 | 7571.331  | 10538.049 | AK025362  | 2887.661  | 2039.054  | NM_013250 | 2478.768  | 2890.743  |
| NM_014444 | 10118.451 | 8921.234  | AK021776  | 3732.402  | 4425.033  | NM_001886 | 27110.293 | 17896.174 |
| NM_012248 | 10217.93  | 10427.835 | AK026042  | 2655.336  | 3033.902  | NM_004996 | 744.927   | 626.94    |
| NM_006145 | 9386.224  | 7440.314  | NM_014233 | 50432.449 | 48999.426 | X89668    | 57156.035 | 39491.625 |
| NM_014970 | 21754.623 | 29510.814 | NM_002137 | 52326.496 | 51084.809 | NM_004458 | 6427.448  | 3384.525  |
| NM_014393 | 6766.351  | 6977.661  | NM_002911 | 3504.834  | 2508.672  | NM_006901 | 3992.093  | 3308.782  |
| NM_004223 | 29864.533 | 23552.594 | U94386    | 1607.141  | 1205.844  | NM_018530 | 14395.749 | 10870.53  |
| NM_006813 | 2351.174  | 1437.947  | NM_016000 | 56604.742 | 50935.863 | AJ003145  | 1738.131  | 1195.191  |
| CY3Cy5    | 2587.81   | 297.761   | NM_006372 | 11794.441 | 10133.026 | AK022855  | 24712.531 | 24048.838 |
| NM_078467 | 5074.022  | 7615.77   | NM_014150 | 2419.096  | 2315.13   | AK023816  | 2954.314  | 2579.834  |
| NM_013345 | 1815.092  | 2538.937  | NM_006805 | 59606.055 | 51440.473 | AL050102  | 1784.92   | 2239.154  |
| AL117454  | 3800.542  | 4788.694  | AF132027  | 61211.176 | 53134.453 | AF305686  | 9524.051  | 11497.19  |
| AF272890  | 531.183   | 693.423   | NM_004681 | 26880.631 | 22433.467 | AF085832  | 3227.405  | 4126.083  |
| NM_016459 | 41970.383 | 52262.637 | AB033096  | 16183.979 | 15812.553 | AK025981  | 7158.578  | 10278.887 |
| AF086227  | 813.066   | 1048.289  | NM_014886 | 3446.463  | 3063.306  | AF113212  | 1346.683  | 2058.31   |
| AK026246  | 2742.154  | 3321.357  | L31408    | 28345.354 | 27007.859 | AF086266  | 1985.504  | 3672.656  |
| AF035281  | 958.085   | 1407.074  | NM_001545 | 18034.422 | 17053.982 | AK025337  | 3641.514  | 4521.458  |
| AK026304  | 620.533   | 882.499   | NM_004446 | 30164.563 | 30431.264 | NM_000296 | 12421.244 | 13236.625 |
| AF070625  | 2946.309  | 5052.766  | AL133566  | 2015.615  | 1903.674  | NM_012302 | 2673.534  | 2826.871  |
| AL365512  | 2075.241  | 3217.29   | M36118    | 44675.918 | 51722.246 | NM_017422 | 63212.672 | 62700.711 |
| AK001740  | 1467.413  | 1726.145  | NM_003399 | 22600.133 | 29333.139 | NM_005879 | 1328.973  | 1371.379  |
| AF131793  | 1267.685  | 1323.079  | J02625    | 20677.254 | 21764.889 | AF147790  | 1151.095  | 1473.361  |
| NM_078467 | 4580.51   | 4268.757  | Y17175    | 56043.582 | 60250.078 | NM_018966 | 859.499   | 855.807   |
| SR2       | 47623.594 | 47814.234 | NM_004549 | 30828.646 | 38767.965 | NM_004112 | 14013.384 | 11517.179 |
| SR4       | 15965.099 | 29153.469 | NM_005333 | 42908.883 | 53139.926 | AK025592  | 4511.573  | 3257.395  |
| SR6       | 2090.997  | 2937.321  | NM_000767 | 888.876   | 891.415   | NM_004635 | 6513.774  | 6006.109  |
| SR8       | 8660.854  | 42565.285 | AK026161  | 1849.254  | 1551.633  | AK023023  | 14002.616 | 12355.206 |

|           |           |           |           |           |           |           |           |           |
|-----------|-----------|-----------|-----------|-----------|-----------|-----------|-----------|-----------|
| SR10      | 24498.523 | 11364.142 | NM_004553 | 40289.258 | 42677.172 | NM_015993 | 8696.107  | 8050.024  |
| CY3Cy5    | 1971.025  | 163.827   | D63484    | 4294.526  | 3785.827  | NM_002653 | 7509.673  | 5269.934  |
| AK091573  | 919.103   | 1107.007  | AK026745  | 6744.301  | 5227.384  | Z36776    | 6970.276  | 7919.581  |
| AF131814  | 3076.44   | 3617.315  | AL157440  | 4954.376  | 3763.625  | NM_020343 | 2124.942  | 2495.021  |
| AL359600  | 1429.996  | 1816.352  | NM_016423 | 10860.789 | 9268.123  | NM_019607 | 16900.883 | 15869.066 |
| AL360144  | 593.207   | 566.75    | AB040975  | 1755.508  | 1831.072  | U79260    | 9066.676  | 8279.502  |
| BC028617  | 1030.544  | 1355.266  | NM_005119 | 26173.646 | 22459.045 | NM_001893 | 17062.17  | 18691.857 |
| AL117653  | 1104.838  | 2457.8    | NM_003163 | 10876.689 | 11976.048 | NM_006447 | 6386.131  | 5726.681  |
| AF087999  | 1544.951  | 2280.405  | AK055844  | 2359.063  | 2467.703  | AF119851  | 2261.222  | 2223.09   |
| NM_003740 | 1469.137  | 1870.797  | NM_018283 | 14118.196 | 15480.049 | NM_014123 | 9106.589  | 11347.354 |
| AL050078  | 343.882   | 677.964   | NM_003143 | 8837.777  | 12588.892 | D87455    | 4388.64   | 4863.477  |
| NM_013343 | 1141.045  | 1454.36   | X52342    | 776.498   | 836.31    | AF080577  | 2111.685  | 1778.212  |
| AF131784  | 431.109   | 682.159   | NM_003131 | 14614.155 | 12541.572 | L22005    | 18904.586 | 14924.011 |
| NM_017851 | 2956.004  | 4024.872  | NM_005233 | 13727.229 | 13635.997 | NM_012291 | 33723.531 | 28301.553 |
| AK026182  | 55118.516 | 52439.098 | AK022889  | 14600.87  | 16633.225 | NM_013363 | 3870.341  | 3816.005  |
| AK025603  | 3268.583  | 3179.49   | X52357    | 48888.141 | 52224.801 | NM_003807 | 60806.961 | 60697.168 |
| NM_016083 | 16697.152 | 14826.274 | AF211891  | 1966.381  | 2550.377  | NM_004353 | 9308.176  | 7262.714  |
| AK025768  | 2775.783  | 2615.566  | NM_005641 | 2417.907  | 2213.434  | NM_001790 | 5013.525  | 4761.016  |
| AL117502  | 6034.89   | 6591.227  | NM_003793 | 29742.666 | 31113.631 | NM_018243 | 5786.527  | 4903.024  |
| AK001846  | 1124.036  | 1152.715  | NM_002973 | 4554.123  | 5782.183  | NM_014933 | 6152.486  | 6975.417  |
| AF147300  | 416.442   | 661.525   | NM_004433 | 17750.08  | 18589.682 | Y17866    | 3339.898  | 5707.577  |
| AK024637  | 11848.773 | 9337.319  | NM_006580 | 10727.615 | 11135.067 | AK024247  | 1291.947  | 2042.137  |
| AL110293  | 436.984   | 711.999   | NM_001303 | 10246.688 | 9416.155  | NM_003003 | 13608.411 | 16235.278 |
| AK025148  | 348.641   | 718.166   | NM_005082 | 1257.206  | 1394.7    | NM_000873 | 6584.937  | 9072.723  |
| AK026238  | 1096.309  | 1850.332  | D17028    | 42339.055 | 49297.438 | AB033025  | 1749.178  | 1649.719  |
| AK025564  | 490.034   | 783.402   | NM_013442 | 41927.504 | 43811.762 | NM_004413 | 17890.863 | 18679.102 |
| AK026286  | 535.271   | 721.287   | BG611243  | 6213.535  | 5517.524  | NM_005383 | 40144.656 | 37854.148 |
| AK026731  | 1873.735  | 2005.865  | AI417481  | 1634.891  | 1259.916  | NM_014443 | 51961.789 | 51612.23  |
| AL133446  | 297.861   | 627.807   | BI906766  | 7805.976  | 6703.686  | AL832826  | 3574.061  | 3555.801  |
| AF147406  | 557.754   | 819.812   | U60519    | 1307.683  | 1320.973  | NM_016123 | 2578.053  | 2283.796  |
| NM_006553 | 2106.153  | 2492.347  | AA282906  | 14494.223 | 13292.537 | AB048365  | 3949.859  | 3573.863  |
| U56251    | 3984.864  | 4301.076  | L02870    | 44977.961 | 44161.16  | NM_000391 | 12589.979 | 10577.143 |
| BC035667  | 1123.126  | 986.505   | BG755482  | 32058.598 | 35584.688 | AF229179  | 2570.28   | 1885.444  |
| AL049277  | 1539.135  | 1286.668  | AI480307  | 12728.568 | 12397.378 | NM_014771 | 10817.9   | 9443.985  |
| AL080104  | 422.34    | 633.3     | X51420    | 5496.302  | 5477.295  | NM_002273 | 14867.338 | 12417.636 |
| AL049302  | 433.826   | 281.936   | D28235    | 1416.716  | 1221.817  | AB032945  | 2361.834  | 1627.036  |
| AL050043  | 446.425   | 463.258   | X51757    | 1872.414  | 2082.97   | AK025215  | 29628.451 | 23146.229 |
| AL117571  | 2123.703  | 1837.29   | L24038    | 2892.742  | 2744.445  | BF569160  | 3050.326  | 2223.958  |
| L22263    | 678.067   | 660.413   | NM_053053 | 1504.093  | 1450.518  | AK024625  | 1646.068  | 1523.88   |
| AK025010  | 394.23    | 975.681   | NM_006183 | 2455.982  | 2635.655  | NM_018131 | 7125.762  | 6869.154  |
| AL137709  | 4647.543  | 3963.774  | NM_002751 | 10751.228 | 11719.567 | NM_014834 | 1437.541  | 1840.683  |
| AK023277  | 1308.358  | 1103.046  | M55593    | 3895.525  | 4556.821  | NM_017633 | 18064.318 | 18754.834 |
| AK000425  | 3714.342  | 3880.363  | NM_005913 | 37232.199 | 38909.656 | NM_012463 | 1789.019  | 2113.522  |
| AK021616  | 476.158   | 407.504   | AK023011  | 45403.535 | 48128.219 | NM_002430 | 1031.038  | 1263.277  |
| AK022933  | 681.18    | 842.842   | NM_016813 | 2152.889  | 1779.789  | NM_006150 | 6829.97   | 7681.021  |
| NM_014273 | 1045.954  | 991.472   | L17325    | 1943.673  | 1956.445  | NM_014943 | 14252.064 | 14091.942 |
| AF009288  | 496.884   | 638.819   | NM_017713 | 2130.718  | 2330.83   | AK024392  | 5243.568  | 4629.814  |
| AF056438  | 908.321   | 818.269   | M58603    | 10743.227 | 8780.267  | NM_013260 | 3356.801  | 2746.134  |
| AF003737  | 4575.637  | 4377.306  | NM_003633 | 8824.702  | 8419.191  | NM_005243 | 819.111   | 654.399   |
| AF009296  | 2020.491  | 1412.464  | NM_001543 | 955.558   | 646.848   | NM_018300 | 2823.644  | 2026.52   |
| AK001011  | 1487.142  | 1241.545  | NM_000115 | 8072.524  | 7224.879  | NM_004873 | 7788.801  | 8432.873  |
| AK021457  | 715.693   | 574.039   | AF308801  | 3901.347  | 3307.596  | NM_018254 | 26554.945 | 24101.393 |
| AK021690  | 746.706   | 613.52    | NM_007313 | 61955.719 | 57612.941 | NM_017743 | 6504.899  | 6312.681  |

|           |           |           |           |           |           |           |           |           |
|-----------|-----------|-----------|-----------|-----------|-----------|-----------|-----------|-----------|
| AK001078  | 663.143   | 508.22    | NM_014874 | 3408.833  | 3340.047  | NM_018433 | 4911.874  | 4934.365  |
| AK001840  | 23188.342 | 24648.383 | NM_012397 | 542.754   | 395.857   | NM_000937 | 1854.08   | 1593.86   |
| AK021740  | 754.992   | 732.08    | NM_005765 | 18693.15  | 17006.947 | AB028451  | 3920.51   | 3552.592  |
| NM_005444 | 4253.469  | 4265.063  | NM_002762 | 10452.539 | 9015.555  | AK024810  | 30925.836 | 25282.689 |
| V00589    | 8887.557  | 9983.432  | NM_006324 | 13787.287 | 13044.287 | AK022615  | 61866.922 | 59505.375 |
| AL390163  | 1503.367  | 1474.62   | NM_016848 | 23573.113 | 23161.449 | NM_004043 | 17415.195 | 12384.762 |
| NM_018572 | 1907.786  | 1911.76   | NM_000514 | 27227.244 | 27471.953 | BM458096  | 37629.391 | 29978.895 |
| AL109959  | 397.549   | 622.035   | AL137432  | 5218.513  | 4874.768  | NM_005626 | 23607.793 | 18179.824 |
| AK024838  | 596.064   | 624.309   | NM_000957 | 10781.92  | 10324.666 | D29958    | 52434.266 | 45223.734 |
| AK000175  | 4058.088  | 4468.76   | NM_019043 | 6494.27   | 6043.072  | NM_015971 | 37035.426 | 33848.883 |
| AL137736  | 1747.606  | 2216.127  | NM_003240 | 27862.201 | 27542.777 | D17257    | 61993.668 | 64027.039 |
| NM_004192 | 9523.933  | 10696.237 | NM_016564 | 61144.93  | 56591.125 | NM_002842 | 9770.606  | 8184.045  |
| AK024160  | 972.589   | 920.934   | NM_000796 | 1367.158  | 1461.821  | AF290204  | 1037.574  | 1068.051  |
| AK025077  | 1625.282  | 1166.657  | AK021660  | 9012.139  | 9584.788  | NM_012126 | 2160.273  | 2296.36   |
| NM_006417 | 3353.074  | 2642.097  | AB007933  | 58414.895 | 56502.625 | NM_003918 | 902.27    | 900.367   |
| L43350    | 1316.391  | 1264.826  | NM_005469 | 6603.391  | 7113.75   | NM_004807 | 2777.97   | 2488.907  |
| NM_020317 | 3718.911  | 3087.223  | NM_016361 | 3284.744  | 3053.058  | AF219140  | 988.534   | 1229.792  |
| AL080234  | 5349.262  | 3962.445  | NM_003708 | 53621.969 | 58419.023 | J03569    | 59220.801 | 64486.41  |
| AK027025  | 1598.319  | 1510.886  | NM_014349 | 11170.28  | 12368.114 | NM_003115 | 10567.993 | 13246.877 |
| AK025105  | 1002.4    | 982.251   | AB040895  | 562.386   | 456.421   | NM_000446 | 970.819   | 1185.05   |
| AK021675  | 304.472   | 504.744   | NM_018210 | 1764.143  | 1485.586  | NM_018200 | 3777.622  | 2819.43   |
| AB002446  | 393.019   | 427.983   | NM_001096 | 7720.961  | 5875.621  | NM_014838 | 3782.171  | 2969.282  |
| AF212220  | 10175.495 | 8798.022  | NM_016014 | 3425.307  | 2460.101  | NM_007212 | 931.915   | 1213.654  |
| AF147387  | 755.359   | 707.344   | NM_000198 | 805.115   | 512.394   | AF005067  | 3989.838  | 3756.303  |
| NM_012081 | 1267.847  | 1056.334  | NM_018327 | 16160.426 | 15560.831 | NM_005710 | 25192.848 | 21586.998 |
| AL137463  | 1031.608  | 1057.323  | NM_001684 | 1132.51   | 1200.705  | AF252284  | 4452.606  | 3642.211  |
| AF085909  | 13050.658 | 12657.406 | NM_013309 | 4484.403  | 5318.188  | NM_014930 | 6360.392  | 4915.677  |
| AF090888  | 1106.866  | 1140.089  | AF038186  | 5261.227  | 7297.139  | NM_001530 | 9976.746  | 8917.333  |
| AK027193  | 938.632   | 931.267   | NM_003664 | 9515.449  | 9416.71   | U80232    | 23235.943 | 20245.732 |
| AF086471  | 15116.987 | 18766.566 | NM_002426 | 12132.678 | 13789.575 | M27877    | 51181.129 | 47222.164 |
| NM_018455 | 11202.188 | 18020.064 | AK027182  | 1945.683  | 2294.336  | D70836    | 60448.723 | 57727.723 |
| AF113018  | 1143.657  | 1697.779  | J03651    | 12978.113 | 13774.786 | D16878    | 2127.66   | 1882.385  |
| AK021996  | 1608.308  | 2304.712  | U61738    | 15403.501 | 16516.512 | NM_007035 | 8306.616  | 10405.379 |
| AL049337  | 1538.065  | 1945.242  | AJ132087  | 1756.436  | 1700.984  | AB019562  | 2871.229  | 2589.432  |
| Z27200    | 1946.842  | 2438.091  | U92818    | 3510.652  | 3753.732  | U20582    | 21362.518 | 43938.395 |
| AF070571  | 11655.717 | 8697.679  | NM_000442 | 8292.933  | 8637.94   | NM_002079 | 12219.364 | 15394.526 |
| AK023554  | 6484.945  | 4877.626  | NM_002934 | 5517.514  | 4905.027  | AI660957  | 983.182   | 1674.249  |
| NM_003513 | 15699.989 | 15018.872 | AL050114  | 1272.2    | 1252.219  | U13697    | 1754.977  | 2221.491  |
| AL079294  | 736.601   | 392.117   | AK021492  | 6905.15   | 5473.742  | U04270    | 44953.984 | 46721.172 |
| AK024844  | 1392.57   | 1254.084  | AK023794  | 44371.723 | 44462.828 | Z34820    | 934.344   | 1043.117  |
| AL049437  | 879.501   | 478.883   | NM_019885 | 2734.478  | 2083.168  | L02840    | 16521.219 | 7867.985  |
| AF161427  | 19888.805 | 17911.273 | AB033103  | 1677.136  | 1109.649  | AA629719  | 59209.434 | 60895.934 |
| AK021715  | 2092.232  | 2282.168  | NM_002907 | 3490.111  | 1720.942  | AA927528  | 9039.051  | 6534.258  |
| AK000315  | 12044.98  | 10909.506 | AK024098  | 2386.278  | 1888.414  | BG676364  | 11905.932 | 9197.487  |
| AK023248  | 2636.764  | 2018.38   | AK001116  | 932.949   | 572.942   | BG181154  | 2791.141  | 2034.119  |
| NM_012404 | 32408.365 | 28498.273 | AK022371  | 6194.953  | 5865.479  | AA843679  | 17148.008 | 21078.348 |
| AF251190  | 1235.534  | 914.481   | D42045    | 4531.837  | 4125.235  | H68922    | 1402.09   | 1333.293  |
| AF130075  | 1679.572  | 1359.551  | AB007953  | 3807.628  | 2936.531  | AF097159  | 2413.263  | 2708.194  |
| L29496    | 913.384   | 1017.33   | NM_014002 | 12958.521 | 12380.562 | NM_014684 | 2380.56   | 1831.565  |
| NM_000928 | 773.017   | 861.459   | NM_004197 | 31438.406 | 36822.246 | AK027247  | 2434.054  | 2273.508  |
| NM_007002 | 16020.483 | 18646.873 | NM_004073 | 5144.742  | 6811.407  | NM_017571 | 16162.854 | 20338.193 |
| NM_012121 | 798.814   | 1050.692  | NM_001278 | 6995.407  | 8190.399  | NM_001928 | 5147.208  | 5280.872  |
| NM_003255 | 482.162   | 976.813   | NM_019105 | 14558.764 | 15559.191 | NM_006395 | 2402.46   | 2002.625  |

|           |           |           |           |           |           |           |           |           |
|-----------|-----------|-----------|-----------|-----------|-----------|-----------|-----------|-----------|
| NM_01415E | 5181.522  | 5793.58   | NM_000294 | 11476.701 | 14330.701 | NM_01896E | 772.995   | 863.413   |
| AK026331  | 11583.172 | 15687.21  | AJ272212  | 6444.461  | 7078.522  | NM_00018E | 14936.107 | 12981.525 |
| M30773    | 3721.397  | 5166.821  | NM_00162E | 62724.023 | 58337.766 | Y00816    | 2512.266  | 2438.092  |
| NM_01633E | 6603.589  | 10107.038 | NM_005677 | 12946.904 | 13393.312 | NM_00451E | 27545.326 | 24147.273 |
| AF113699  | 9287.518  | 10348.997 | AF229803  | 2595.108  | 2637.078  | NM_00293C | 643.333   | 412.357   |
| AK021897  | 13599.357 | 12953.208 | AF151810  | 1476.297  | 1641.112  | NM_00438C | 44348.883 | 41799.719 |
| AK001051  | 3861.603  | 3674.629  | NM_00213C | 23632.74  | 27176.68  | U86813    | 958.549   | 961.226   |
| NM_018317 | 1458.132  | 1064.747  | NM_00443E | 16458.832 | 13965.633 | NM_00411E | 2454.882  | 1943.01   |
| AF086051  | 1919.912  | 1765.869  | NM_00658C | 7480.006  | 6072.28   | D26070    | 3091.888  | 2564.911  |
| AK024356  | 450.926   | 255.033   | NM_00130E | 10627.235 | 10935.606 | NM_00164E | 12490.886 | 12899.828 |
| AL049370  | 524.027   | 479.28    | NM_00508E | 810.542   | 913.057   | NM_00154E | 1509.869  | 1559.916  |
| AL365410  | 4673.402  | 4256.576  | D17028    | 40545.629 | 40288.082 | NM_00228C | 2122.54   | 2088.886  |
| D17082    | 20321.682 | 22070.59  | NM_01344E | 35583.008 | 30679.195 | NM_01745E | 1303.736  | 1529.364  |
| D17252    | 42306.59  | 38053.945 | BG611243  | 5548.338  | 4556.926  | NM_00105E | 49672.105 | 47770.07  |
| D16476    | 815.474   | 892.537   | AI417481  | 1293.708  | 855.875   | NM_00227I | 65091.602 | 69434.172 |
| NM_00367E | 2190.979  | 1968.218  | BI906766  | 6579.853  | 3911.628  | NM_01836I | 5968.154  | 6153.55   |
| Z36823    | 17922.6   | 18103.07  | U60519    | 1077.113  | 617.59    | NM_01989E | 1204.962  | 869.275   |
| AK022110  | 454.154   | 610.016   | AA282906  | 12023.209 | 9552.396  | AB040966  | 11931.025 | 13510.61  |
| NM_00184E | 1508.924  | 1241.532  | L02870    | 41256.633 | 38076.223 | NM_02013E | 10905.338 | 11748.293 |
| NM_00373A | 10717.588 | 9783.096  | BG755482  | 27723.398 | 27739.807 | NM_016467 | 14185.283 | 11246.473 |
| NM_01493E | 3629.715  | 3746.026  | AI480307  | 12575.206 | 12232.453 | NM_00725E | 6156.92   | 5572.445  |
| X99660    | 9692.354  | 13539.773 | X51420    | 5758.612  | 6040.525  | NM_00055E | 18950.447 | 21429.041 |
| X03635    | 1841.346  | 3566.896  | D28235    | 1522.962  | 1278.843  | NM_00083E | 1227.974  | 1144.42   |
| X97671    | 767.87    | 953.298   | X51757    | 2127.097  | 2476.606  | NM_00680E | 38995.18  | 28874.322 |
| NM_004351 | 2272.186  | 2568.919  | L24038    | 2887.472  | 3269.465  | NM_00663A | 3089.564  | 1624.938  |
| NM_00423E | 16564.113 | 28195.148 | NM_05305E | 1469.243  | 1429.058  | NM_01646E | 7785.225  | 6050.177  |
| AB011093  | 19312.248 | 22267.855 | NM_00618E | 2689.191  | 2648.816  | NM_00032E | 2150.25   | 1334.716  |
| NM_00246E | 840.533   | 636.88    | NM_00275I | 10591.913 | 10769.948 | NM_01339E | 2605.198  | 3176.679  |
| NM_00456C | 548.25    | 303.045   | M55593    | 3701.431  | 3957.604  | NM_00241C | 1832.884  | 2137.889  |
| NM_00561E | 696.298   | 625.328   | AK001883  | 50008.773 | 48669.063 | AL122120  | 10757.951 | 10635.691 |
| NM_02053E | 7411.738  | 5794.038  | NM_01462E | 2760.56   | 2551.498  | NM_01883E | 5752.784  | 6774.405  |
| NM_00189A | 12859.411 | 10881.969 | AK025587  | 440.704   | 303.839   | NM_00340I | 3393.135  | 3153.76   |
| NM_00061A | 767.3     | 773.734   | L17325    | 1723.101  | 1482.327  | AL13772A  | 3977.546  | 3711.321  |
| AK022884  | 924.625   | 1088.292  | NM_01771E | 1778.399  | 1634.213  | NM_00475E | 4086.161  | 2481.203  |
| NM_00662C | 11823.969 | 15365.449 | M58603    | 14626.838 | 20634.781 | NM_00291E | 4570.093  | 3869.563  |
| NM_001397 | 1813.001  | 2581.26   | NM_00363E | 11123.018 | 16596.34  | AK022797  | 1886.105  | 1552.753  |
| NM_00554E | 443.979   | 518.244   | NM_00154E | 803.989   | 647.178   | NM_00737C | 5567.649  | 5619.933  |
| Y08770    | 672.813   | 577.967   | NM_00011E | 7224.562  | 6215.68   | NM_00623I | 1797.993  | 1839.741  |
| NM_00477E | 4600.974  | 4892.51   | AF308801  | 3756.478  | 3432.652  | AK023471  | 2681.502  | 2024.037  |
| NM_00371A | 518.724   | 242.423   | NM_00731E | 61988.48  | 58581.762 | AF044578  | 8893.5    | 7481.043  |
| NM_00400A | 815.124   | 853.372   | NM_01487A | 3306.689  | 2693.533  | NM_00194E | 6633.423  | 7073.602  |
| U42977    | 10030.852 | 9479.926  | NM_012397 | 1986.763  | 1668.514  | NM_001067 | 20107.58  | 26715.086 |
| NM_00288I | 14407.396 | 13625.216 | NM_00576E | 15894.299 | 11058.185 | NM_01403A | 8246.33   | 7624.314  |
| NM_00366E | 2105.535  | 2382.218  | NM_00276E | 8746.5    | 7553.763  | J04474    | 13653.635 | 11021.961 |
| NM_00328E | 10042.943 | 13766.193 | NM_00632A | 12538.63  | 11072.232 | NM_00472E | 1395.438  | 996.256   |
| NM_01824E | 704.855   | 1219.983  | NM_01684E | 24039.086 | 31326.09  | NM_01401I | 10956.785 | 7935.4    |
| M83822    | 6145.771  | 5989.799  | NM_00051A | 26271.131 | 30301.93  | AK025994  | 7531.041  | 5158.404  |
| NM_01843A | 869.219   | 1048.918  | AL137432  | 4893.921  | 5013.323  | L29306    | 1688.712  | 1247.511  |
| NM_00391A | 1442.07   | 1520.122  | NM_000957 | 11346.777 | 12190.33  | NM_01398E | 6577.192  | 5858.636  |
| NM_02042E | 2302.68   | 2224.276  | NM_01904E | 7164.685  | 6958.391  | NM_00173E | 2851.561  | 4097.341  |
| AK021437  | 1303.438  | 1564.95   | NM_00324C | 28359.309 | 31874.234 | NM_00227C | 902.657   | 1054.169  |
| NM_003831 | 7773.917  | 6418.258  | NM_01656A | 62232.969 | 56627.418 | AF036364  | 4369.107  | 6151.776  |
| NM_00175E | 1324.932  | 1069.723  | NM_00079E | 1579.66   | 1672.188  | AK022847  | 8050.597  | 8409.401  |

|           |           |           |           |           |           |           |           |           |
|-----------|-----------|-----------|-----------|-----------|-----------|-----------|-----------|-----------|
| AB007965  | 8022.102  | 6622.17   | AK021660  | 8854.497  | 9871.486  | NM_020203 | 4827.538  | 4786.482  |
| NM_01600E | 2671.46   | 3538.681  | AB007933  | 56376.766 | 55616.688 | L40992    | 1156.505  | 1276.539  |
| NM_017744 | 775.365   | 770.319   | NM_00379E | 32345.613 | 33852.219 | U20582    | 19349.953 | 18945.357 |
| NM_001924 | 10714.481 | 11200.366 | NM_002973 | 5562.271  | 9178.083  | NM_000337 | 909.939   | 587.952   |
| NM_01770E | 8431.705  | 8615.846  | NM_00370E | 62446.258 | 58028.367 | NM_00207E | 12813.631 | 10386.225 |
| AB002325  | 681.656   | 651.914   | NM_01434E | 11304.8   | 9771.03   | AI660957  | 2535.877  | 3039.447  |
| NM_00179E | 996.434   | 925.415   | AB040895  | 634.573   | 556.122   | U13697    | 1527.998  | 2880.216  |
| AB040880  | 2712.272  | 3065.064  | NM_00482C | 268.178   | 221.313   | X75308    | 1750.809  | 3052.799  |
| NM_009587 | 5630.134  | 5386.073  | NM_01821C | 2062.269  | 1873.738  | U04270    | 41927.117 | 46328.398 |
| NM_01782C | 2682.883  | 2979.628  | NM_00109E | 7779.33   | 5805.741  | Z34820    | 2291.479  | 5880.716  |
| NM_001097 | 556.902   | 630.057   | NM_016014 | 2781.942  | 1904.325  | L02840    | 15433.847 | 10082.243 |
| NM_00263C | 2007.79   | 3116.006  | NM_00019E | 708.922   | 459.63    | BG569143  | 1123.766  | 1311.157  |
| AJ295149  | 34187.984 | 45798.586 | NM_018327 | 10448.535 | 6997.528  | AA927528  | 7612.999  | 5629.115  |
| NM_01343E | 6512.186  | 8570.558  | NM_001684 | 1055.576  | 859.657   | BG676364  | 10160.005 | 7084.412  |
| NM_017481 | 390.65    | 609.028   | NM_01330E | 4312.535  | 4535.159  | BG181154  | 2592.693  | 1582.382  |
| NM_01468E | 13036.374 | 10359.235 | AF038186  | 4447.583  | 5122.004  | AA843679  | 16347.995 | 17603.51  |
| AB037784  | 863.064   | 855.956   | NM_003664 | 9472.395  | 9281.136  | H68922    | 1234.577  | 1189.007  |
| AL359623  | 6059.691  | 5037.739  | NM_00242E | 12816.466 | 14381.799 | AF090906  | 3253.97   | 2941.094  |
| AK026920  | 6648.447  | 6943.62   | AK027182  | 2050.577  | 1991.349  | AB023219  | 7783.191  | 9114.639  |
| AL137255  | 670.896   | 902.522   | J03651    | 15541.642 | 13367.858 | NM_01414E | 1517.842  | 2750.476  |
| AB037715  | 2162.49   | 2600.575  | U61738    | 16338.467 | 18753.865 | NM_00248C | 10431.77  | 9780.708  |
| AF250924  | 7169.892  | 7293.715  | AJ132087  | 1885.208  | 1783.254  | NM_017571 | 14244.146 | 10559.29  |
| D86979    | 3083.292  | 3627.197  | U92818    | 4220.511  | 4356.617  | AB007946  | 642.016   | 384.139   |
| NM_01821E | 707.873   | 770.584   | NM_00044E | 9129.69   | 9703.064  | L03169    | 1941.559  | 1427.353  |
| AB023230  | 633.258   | 689.341   | NM_002934 | 6555.084  | 6669.212  | NM_00192E | 4066.96   | 4223.416  |
| AF018081  | 22815.117 | 22214.619 | AK023011  | 53006.734 | 52315.414 | NM_00639E | 2433.843  | 6171.712  |
| NM_02020E | 34970.828 | 43476.691 | NM_01681E | 3026.433  | 2863.353  | NM_01896E | 905.874   | 781.836   |
| AF024540  | 4451.297  | 3600.807  | AK023794  | 42950.246 | 42407.434 | NM_00018E | 16054.756 | 14781.818 |
| NM_00218E | 5000.631  | 4593.402  | NM_01988E | 3093.043  | 2203.386  | Y00816    | 2654.519  | 2871.4    |
| NM_00166E | 2826.637  | 4104.896  | NM_00532E | 347.849   | 366.736   | NM_00451E | 25292.969 | 30533.766 |
| AK025362  | 4218.581  | 5510.664  | AB033103  | 1979.216  | 1654.177  | NM_00293C | 497.757   | 945.788   |
| AK021776  | 3977.138  | 4380.32   | NM_002907 | 3520.751  | 2048.354  | NM_00438C | 38649.496 | 36891.633 |
| AK026042  | 5262.267  | 9952.581  | AK024098  | 2224.061  | 1349.477  | U86813    | 803.802   | 653.924   |
| NM_01423E | 37755.27  | 47995.383 | AK001116  | 655.597   | 326.055   | NM_00411E | 2409.303  | 1952.193  |
| NM_002137 | 59445.398 | 56392.797 | AK022371  | 5997.088  | 4760.546  | AY007378  | 5989.588  | 4470.889  |
| NM_002911 | 4190.725  | 3915.988  | D42045    | 4250.873  | 2617.07   | D26070    | 2664.451  | 1884.394  |
| U94386    | 3103.928  | 3198.641  | AB007953  | 3191.174  | 2217.842  | NM_00164E | 10541.67  | 8530.758  |
| NM_01600C | 6796.222  | 7624.13   | NM_01400E | 11591.058 | 9595.427  | NM_00154E | 1569.25   | 1375.602  |
| NM_00637E | 7363.176  | 7897.852  | NM_004197 | 30729.146 | 28475.658 | NM_00228C | 1451.692  | 1076.563  |
| NM_01415C | 2196.159  | 2697.307  | NM_00407E | 5039.516  | 5530.143  | NM_01745E | 863.473   | 538.629   |
| NM_00680E | 18686.469 | 17234.279 | NM_00127E | 6614.587  | 7444.3    | NM_00703E | 7957.013  | 8610.329  |
| AF132027  | 26714.971 | 20958.094 | NM_01910E | 14996.786 | 15668.684 | AB019562  | 3424.139  | 3834.617  |
| NM_01595C | 738.379   | 864.713   | NM_000294 | 11901.378 | 14332.36  | NM_002271 | 61762.57  | 65469.215 |
| NM_004681 | 31479.127 | 25299.061 | AJ272212  | 6853.688  | 8474.23   | NM_018361 | 6521.043  | 5264.322  |
| NM_00195E | 612.804   | 285.95    | NM_00162E | 52616.457 | 56017.836 | NM_01989E | 1356.469  | 904.867   |
| AB033096  | 21371.158 | 18680.463 | NM_005677 | 13098.757 | 14314.035 | AB040966  | 11395.828 | 7830.725  |
| NM_01488E | 4880.638  | 3104.013  | AF229803  | 3136.267  | 3547.016  | NM_02013E | 10929.313 | 10074.835 |
| L31408    | 37292.188 | 30369.336 | AF151810  | 1523.612  | 1830.213  | NM_016467 | 15365.558 | 12131.913 |
| NM_00154E | 30847.029 | 39250.781 | NM_00213C | 26433.451 | 32283.381 | NM_00725E | 6343.661  | 4582.186  |
| NM_00444E | 44228.016 | 41821.184 | NM_00546E | 7390.108  | 8364.327  | NM_00055E | 24071.799 | 28930.219 |
| AL133566  | 1842.166  | 1929.043  | NM_016361 | 3915.378  | 4327.28   | NM_00083E | 1230.059  | 1149.591  |
| M36118    | 3385.101  | 3907.454  | NM_00130E | 11417.497 | 11388.346 | NM_00183C | 1076.393  | 1212.05   |
| NM_00339E | 4703.629  | 4876.774  | NM_00508E | 951.582   | 1130.719  | NM_00114E | 942.152   | 817.714   |

|           |           |           |           |           |           |           |           |           |
|-----------|-----------|-----------|-----------|-----------|-----------|-----------|-----------|-----------|
| J02625    | 31236.803 | 34994.188 | D17028    | 44260.57  | 55071.629 | NM_00680E | 41843.555 | 38004.383 |
| Y17175    | 60646.969 | 58349.465 | NM_013442 | 41732.152 | 39876.691 | NM_006634 | 3785.597  | 2687.227  |
| NM_00454E | 36522.602 | 43252.086 | BG611243  | 6087.141  | 4837.664  | NM_01646E | 6897.051  | 5665.801  |
| NM_00533E | 48158.168 | 55695.207 | AI417481  | 1155.707  | 906.209   | NM_00032E | 1769.477  | 987.57    |
| NM_000767 | 829.848   | 1609.4    | BI906766  | 6951.052  | 4324.419  | NM_01339E | 2482.615  | 1926.554  |
| AK026161  | 3813.802  | 4220.374  | U60519    | 949.518   | 570.053   | NM_00241C | 1682.018  | 1297.327  |
| NM_00455E | 58292.621 | 57057.613 | AA282906  | 10747.91  | 6820.529  | AL122120  | 9225.379  | 6754.242  |
| D63484    | 6474.95   | 6033.962  | L02870    | 43850.773 | 33731.313 | NM_014684 | 2442.027  | 1542.683  |
| AK026745  | 9798.782  | 8666.919  | BG755482  | 29475.76  | 24253.959 | AK027247  | 2698.213  | 2652.658  |
| AL157440  | 5002.855  | 6324.625  | AI480307  | 11186.87  | 9164.129  | AL137724  | 4753.619  | 4657.429  |
| NM_01642E | 15378.008 | 17702.16  | X51420    | 5109.398  | 4390.944  | NM_00475E | 5160.614  | 3927.235  |
| AB040975  | 2867.25   | 5550.725  | D28235    | 1544.287  | 1245.579  | NM_00291E | 5208.689  | 4261.616  |
| AK026213  | 591.405   | 406.832   | X51757    | 2015.184  | 2637.73   | AK022797  | 1905.005  | 1729.912  |
| NM_005119 | 11962.813 | 9333.214  | L24038    | 3145.668  | 3243.1    | NM_00737C | 5084.602  | 3918.525  |
| NM_00316E | 14173.901 | 13985.519 | NM_05305E | 1657.669  | 1658.933  | NM_006231 | 2055.928  | 1660.636  |
| AK055844  | 2776.373  | 2866.582  | NM_00618E | 3044.14   | 3056.153  | AK023471  | 2725.365  | 2147.538  |
| NM_01828E | 28528.908 | 25394.555 | NM_002751 | 11798.162 | 11908.201 | AF044578  | 9094.829  | 7057.581  |
| NM_00314E | 17860.617 | 18933.084 | M55593    | 4311.145  | 5300.099  | NM_00194E | 6404.703  | 6950.054  |
| X52342    | 1119.801  | 914.925   | AK001883  | 53941.855 | 50773.84  | NM_001067 | 19696.295 | 21536.014 |
| NM_003131 | 21848.234 | 16737.553 | NM_01462E | 3368.781  | 2610.038  | NM_014034 | 9015.087  | 9365.203  |
| NM_00523E | 8689.279  | 8780.718  | AK025587  | 603.128   | 688.368   | NM_00533E | 42084.258 | 35622.773 |
| AK022889  | 27115.268 | 24960.252 | AL050114  | 1416.061  | 1571.289  | J04474    | 14039.198 | 13277.665 |
| X52357    | 43090.781 | 37582.262 | AK021492  | 11402.895 | 13307.543 | NM_00472E | 643.535   | 761.995   |
| AF211891  | 2091.429  | 2314.745  | NM_014874 | 3287.834  | 2975.881  | NM_014011 | 10808.736 | 10241.5   |
| NM_005641 | 6628.025  | 6407.635  | NM_00576E | 17607.021 | 13860.925 | AK025994  | 8734.549  | 8043.149  |
| NM_00379E | 38055.508 | 44996.711 | NM_00276E | 5839.973  | 4361.704  | L29306    | 1576.574  | 916.105   |
| NM_00297E | 8287.503  | 16501.271 | NM_006324 | 12390.391 | 7836.634  | NM_01398E | 5967.058  | 4270.193  |
| NM_00443E | 26415.238 | 26486.461 | NM_01684E | 21230.975 | 14772.221 | NM_00173E | 2517.172  | 2077.087  |
| NM_00658C | 6456.489  | 7266.734  | NM_000514 | 20436.566 | 13143.861 | NM_00227C | 563.155   | 585.441   |
| NM_00130E | 4255.875  | 4912.791  | AL137432  | 2574.932  | 1263.946  | NM_00105E | 52398.68  | 50118.906 |
| NM_00508E | 2106.01   | 2508.004  | NM_000957 | 8245.78   | 5208.916  | NM_01587E | 588.195   | 608.616   |
| D17028    | 54842.902 | 57669.398 | NM_01904E | 6185.336  | 3793.236  | NM_02020E | 5872.508  | 5441.759  |
| NM_01344E | 27387.592 | 26467.879 | NM_00324C | 26576.756 | 19520.879 | L40992    | 1192.592  | 954.88    |
| BG611243  | 7251.208  | 10406.652 | NM_016564 | 55859.285 | 54744.816 | U20582    | 22072.359 | 19398.359 |
| AI417481  | 1140.272  | 1446.344  | NM_00079E | 1326.805  | 1217.401  | NM_000337 | 967.963   | 791.125   |
| BI906766  | 11857.027 | 13831.009 | AF279656  | 3607.483  | 6215.878  | NM_00207E | 13693.643 | 12280.49  |
| U60519    | 715.197   | 740.672   | AK021660  | 7945.139  | 8213.275  | AI660957  | 984.341   | 859.571   |
| AA282906  | 580.341   | 881.841   | AB007933  | 60535.031 | 56240.086 | U13697    | 2228.628  | 2744.591  |
| L02870    | 1224.313  | 1469.558  | NM_00670E | 12967.033 | 11791.851 | U04270    | 46721.391 | 51824.898 |
| BG755482  | 12001.023 | 15335.704 | NM_00139E | 49269.762 | 48425.637 | BG569143  | 701.273   | 945.903   |
| AI480307  | 5766.44   | 7123.578  | NM_014474 | 3350.405  | 3134.514  | AA629719  | 60611.629 | 62590.715 |
| X51420    | 5453.23   | 6561.755  | NM_01624E | 15730.576 | 14122.044 | AA927528  | 8735.761  | 8552.283  |
| D28235    | 1013.272  | 1134.944  | NM_006181 | 2619.422  | 2809.931  | BG181154  | 2562.855  | 2934.812  |
| X51757    | 2486.682  | 1966.275  | NM_00379E | 35361.914 | 40771.801 | AA843679  | 17831.955 | 26094.604 |
| L24038    | 4024.846  | 3516.682  | NM_00297E | 7362.665  | 11072.34  | H68922    | 1296.407  | 1186.813  |
| NM_05305E | 1067.576  | 890.797   | NM_00443E | 20306.504 | 21252.289 | AF090906  | 4147.917  | 3325.045  |
| NM_00618E | 1088      | 1014.733  | NM_00658C | 15855.776 | 13502.105 | AB023219  | 7637.341  | 4976.904  |
| NM_002751 | 2055.656  | 2749.053  | NM_016277 | 2923.869  | 2855.462  | NM_01414E | 2971.407  | 2641.815  |
| M55593    | 2736.305  | 2782.039  | NM_007247 | 5830.334  | 5272.694  | NM_01883E | 6927.719  | 6001.774  |
| NM_00591E | 53465.598 | 53416.406 | NM_006554 | 7835.416  | 7330.935  | NM_003401 | 3676.87   | 3244.757  |
| AK023011  | 12358.847 | 18548.174 | X99962    | 17278.164 | 15518.553 | NM_00639E | 2432.499  | 2370.124  |
| NM_01681E | 3470.624  | 4561.967  | AK023221  | 19696.518 | 12486.316 | NM_01896E | 939.987   | 823.694   |
| L17325    | 2791.745  | 2903.66   | NM_003664 | 5570.353  | 4214.599  | NM_00018E | 15896.922 | 12407.716 |

|           |           |           |           |           |           |           |           |           |
|-----------|-----------|-----------|-----------|-----------|-----------|-----------|-----------|-----------|
| NM_01771E | 4693.276  | 4901.885  | NM_00242E | 6112.394  | 4865.764  | Y00816    | 2361.981  | 2009.36   |
| M58603    | 17231.584 | 14952.411 | AK027182  | 2408.513  | 1664.289  | NM_00451E | 29768.662 | 26931.426 |
| NM_00363E | 14485.377 | 15848.297 | J03651    | 15057.52  | 12796.335 | NM_00438E | 27076.555 | 13187.041 |
| NM_00154E | 785.342   | 744.204   | U61738    | 15249.281 | 12286.379 | U86813    | 2025.695  | 1962.036  |
| NM_000115 | 8274.77   | 8371.498  | AJ132087  | 1600.516  | 1169.496  | NM_00411E | 2588.046  | 3174.481  |
| AF308801  | 4820.409  | 7669.759  | U92818    | 4173.143  | 3409.417  | NM_00154E | 1765.818  | 1307.394  |
| NM_00731E | 55507.852 | 50151.406 | NM_00044E | 9211.16   | 7928.383  | NM_00339E | 1606.102  | 986.986   |
| NM_014874 | 5783.055  | 7041.386  | NM_002934 | 6893.445  | 6573.688  | NM_00515E | 3709.089  | 5279.524  |
| NM_012397 | 910.562   | 759.809   | AK023011  | 54862.352 | 50662.723 | NM_01519E | 3831.326  | 2970.691  |
| NM_00576E | 21823.412 | 19090.338 | NM_01681E | 3338.212  | 3026.033  | X98834    | 8931.857  | 7599.235  |
| NM_00276E | 1388.103  | 1831.715  | L17325    | 2858.344  | 2602.684  | NM_00703E | 9177.447  | 8478.282  |
| NM_006324 | 16952.932 | 23110.775 | NM_01771E | 2379.953  | 2324.698  | AB019562  | 3173.089  | 2929.649  |
| NM_000514 | 4081.858  | 5051.938  | M58603    | 12498.802 | 11658.875 | AF036364  | 5222.546  | 5314.145  |
| AL137432  | 3123.907  | 2796.213  | NM_00363E | 12019.386 | 14922.011 | AK022847  | 11061.154 | 12067.846 |
| NM_000957 | 723.489   | 620.939   | NM_00154E | 1791.65   | 2154.859  | AK000271  | 2379.109  | 1449.043  |
| NM_01904E | 8066.669  | 6519.165  | NM_000115 | 15196.844 | 23762.98  | NM_00517E | 850.874   | 972.198   |
| NM_00324E | 2094.779  | 2324.153  | AF308801  | 5752.277  | 7514.865  | NM_00183E | 1084.595  | 5035.939  |
| NM_016564 | 25673.871 | 24050.389 | NM_00731E | 63398.965 | 60341.672 | NM_00680E | 37504.871 | 32230.734 |
| NM_00079E | 569.172   | 716.029   | AF229803  | 2334.794  | 1977.554  | NM_006634 | 3251.359  | 2507.571  |
| AK021660  | 1175.261  | 1208.936  | AF151810  | 1260.875  | 1572.839  | NM_01646E | 7438.56   | 7921.102  |
| AB007933  | 17091.133 | 17946.941 | NM_00213E | 30291.854 | 47295.055 | NM_00032E | 1454.756  | 1496.978  |
| NM_00546E | 10655.897 | 13408.814 | NM_00546E | 7076.565  | 6321.95   | NM_01339E | 3195.252  | 2284.443  |
| NM_016361 | 1657.331  | 1927.626  | NM_016361 | 3530.282  | 2595.255  | NM_00241E | 1663.909  | 1440.21   |
| NM_00370E | 15210.112 | 16918.777 | NM_00370E | 60008.59  | 54259.926 | AB007946  | 909.573   | 482.792   |
| NM_01434E | 12300.412 | 11958.769 | NM_01434E | 10571.975 | 7707.949  | L03169    | 2474.935  | 2039.274  |
| AB040895  | 578.142   | 986.417   | AB040895  | 594.302   | 358.795   | NM_00192E | 4767.127  | 3775.806  |
| NM_01821E | 3025.012  | 4449.487  | NM_00482E | 410.047   | 234.215   | NM_01398E | 6648.588  | 6195.229  |
| NM_00109E | 18647.41  | 19778.713 | NM_01821E | 2195.258  | 1626.879  | NM_00173E | 2925.08   | 3194.293  |
| NM_016014 | 3673.969  | 3728.494  | NM_00109E | 7691.864  | 6817.51   | NM_00227E | 1378.066  | 881.843   |
| NM_00019E | 746.247   | 927.876   | NM_016014 | 3930.064  | 3271.089  | NM_00105E | 44925.977 | 46554.324 |
| NM_018327 | 793.753   | 1064.881  | NM_00019E | 850.641   | 686.048   | NM_01587E | 492.535   | 483.072   |
| NM_001684 | 1489.121  | 2234.771  | NM_018327 | 19547.193 | 17761.469 | NM_002271 | 62614.992 | 62243.848 |
| NM_01330E | 2553.448  | 2498.49   | NM_017581 | 2898.441  | 3029.56   | NM_018361 | 7263.863  | 5795.25   |
| AK027182  | 3251.439  | 4085.437  | AA488804  | 11359.233 | 10736.565 | NM_01989E | 1517.905  | 879.54    |
| J03651    | 11301.913 | 10043.849 | NM_00653E | 1089.719  | 1106.5    | AB040966  | 13060.47  | 12300.873 |
| U61738    | 2328.952  | 2170.846  | NM_001684 | 1077.27   | 1270.444  | NM_02013E | 11154.926 | 11452.444 |
| AJ132087  | 3563.683  | 3107.268  | AB028977  | 552.037   | 629.958   | NM_016467 | 15826.347 | 12530.368 |
| U92818    | 2195.891  | 1817.339  | NM_00080E | 1770.907  | 2183.369  | NM_00725E | 5673.772  | 4153.002  |
| NM_00044E | 7729.633  | 7789.911  | NM_01631E | 34745.813 | 37910.141 | NM_00419E | 1296.292  | 1342.39   |
| NM_002934 | 4355.437  | 4256.47   | NM_01330E | 6255.495  | 7323.737  | NM_01417E | 5960.047  | 4630.77   |
| AL050114  | 3534.505  | 6225.656  | NM_019891 | 3545.72   | 3380.424  | AF116652  | 61352.203 | 63424.805 |
| AK021492  | 8014.848  | 7327.728  | AF038186  | 5325.699  | 5376.514  | NM_00083E | 1165.324  | 1109.928  |
| AK023794  | 9474.183  | 10857.444 | AK001883  | 38476.219 | 40098.316 | AF090906  | 3901.946  | 3514.226  |
| NM_01988E | 4012.583  | 2964.759  | NM_01462E | 2403.294  | 1755.074  | AB023219  | 7125.021  | 6086.671  |
| NM_00532E | 813.352   | 1444.089  | AK025587  | 585.591   | 634.947   | NM_01414E | 5782.098  | 5353.602  |
| AB033103  | 2709.234  | 3426.542  | AL050114  | 1310.486  | 873.751   | NM_01883E | 6839.136  | 5741.958  |
| NM_002907 | 6726.837  | 5925.585  | AK021492  | 9137.203  | 7799.436  | NM_003401 | 3776.269  | 3407.814  |
| AK024098  | 1838.877  | 1923.634  | AK023794  | 43069.695 | 39319.465 | AL137724  | 4887.723  | 4586.087  |
| AK001116  | 708.003   | 564.847   | NM_01988E | 2622.258  | 1637.04   | NM_00475E | 4702.36   | 3365.182  |
| AK022371  | 10389.097 | 9105.171  | AB033103  | 1472.566  | 826.95    | NM_00291E | 4461.897  | 4743.171  |
| D42045    | 8395.733  | 6787.455  | NM_002907 | 3743.405  | 1660.77   | AK022797  | 1657.331  | 1508.919  |
| AB007953  | 6992.126  | 6771.742  | AK024098  | 3763.784  | 2645.452  | NM_00737E | 6177.551  | 5628.621  |
| NM_000294 | 9741.341  | 11922.841 | AK001116  | 1103.398  | 658.151   | NM_006231 | 2555.387  | 2117.093  |



|           |           |           |           |           |           |           |           |           |
|-----------|-----------|-----------|-----------|-----------|-----------|-----------|-----------|-----------|
| AJ272212  | 2194.149  | 2723.811  | AK022371  | 6845.916  | 6673.211  | AK023471  | 2880.523  | 2785.102  |
| NM_001626 | 17076.527 | 17227.703 | D42045    | 5137.917  | 4435.173  | AF044578  | 8244.208  | 6118.539  |
| NM_005677 | 5178.538  | 5173.094  | AB007953  | 3848.614  | 3094.058  | NM_001948 | 6931.268  | 7791.508  |
| AF229803  | 1518.751  | 1852.605  | NM_014002 | 14657.571 | 13940.171 | NM_001067 | 19623.137 | 27852.482 |
| AF151810  | 1971.154  | 2009.423  | NM_004197 | 31579.174 | 29427.621 | NM_014034 | 8671.935  | 8091.235  |
| NM_002130 | 33354.527 | 35653.258 | NM_004073 | 4934.886  | 4430.344  | NM_005335 | 40214.59  | 31587.551 |
| NM_004436 | 25053.996 | 21409.508 | NM_001278 | 7029.15   | 6907.195  | J04474    | 14723.491 | 11260.717 |
| NM_006580 | 5161.024  | 5302.129  | NM_019105 | 14620.794 | 14835.493 | NM_003761 | 56921.68  | 45191.137 |
| NM_001305 | 3893.604  | 4582.988  | NM_000294 | 18309.033 | 24607.578 | NM_004726 | 2202.115  | 1329.429  |
| NM_005082 | 2762.798  | 5121.382  | AJ272212  | 10393.063 | 11466.968 | NM_014011 | 11498.426 | 8045.12   |
| D17028    | 55827.891 | 54593.957 | NM_001626 | 60714.242 | 57724.84  | AK025994  | 9388.936  | 7951.094  |
| NM_013442 | 47556.805 | 51739.539 | NM_005677 | 13032.228 | 12496.339 | L29306    | 1674.04   | 1411.168  |
| BG611243  | 6892.498  | 9816.518  | CY3Cy5    | 2015.278  | 605.59    | CY3Cy5    | 5519.787  | 365.135   |
| AI417481  | 1095.495  | 1258.04   | NM_004957 | 4214.792  | 4453.195  | AK022262  | 2524.624  | 3613.358  |
| BI906766  | 9822.442  | 8601.228  | NM_005252 | 2803.044  | 2926.405  | AF088039  | 83269.664 | 64860.387 |
| U60519    | 456.43    | 612.165   | AL359211  | 936.042   | 1159.65   | AF086220  | 2946.11   | 2958.942  |
| AA282906  | 616.528   | 468.919   | AF070526  | 1459.687  | 1597.807  | AK023941  | 2404.112  | 2646.806  |
| L02870    | 1495.586  | 1271.261  | U79264    | 5085.751  | 5260.859  | AF086265  | 803.758   | 644.902   |
| BG755482  | 10836.92  | 10704.804 | NM_015699 | 20497.773 | 19551.256 | AL390083  | 10724.347 | 10625.607 |
| AI480307  | 5409.318  | 6283.429  | AK023619  | 533.474   | 488.899   | AB020702  | 822.214   | 1047.99   |
| L24038    | 4282.358  | 5403.231  | AF070530  | 12321.944 | 12195.261 | AL050227  | 900.469   | 700.773   |
| NM_053056 | 1291.964  | 2337.713  | AF086487  | 1248.323  | 1217.003  | AF085905  | 765.618   | 698.273   |
| NM_006186 | 1127.538  | 1060.189  | NM_006420 | 3036.883  | 2419.417  | AK075087  | 930.718   | 835.625   |
| NM_002751 | 2084.847  | 2016.262  | AF131855  | 1640.841  | 1532.766  | AK026571  | 4272.063  | 2927.714  |
| M55593    | 2376.666  | 2206.922  | AF086046  | 5023.878  | 4850.877  | AK024673  | 7485.537  | 5928.314  |
| AK001883  | 12155.878 | 10490.931 | AK023309  | 695.774   | 978.835   | AF070618  | 2117.111  | 2250.682  |
| NM_014629 | 6016.78   | 5208.84   | AK000724  | 3863.067  | 2901.684  | SR2       | 41695.219 | 46016.379 |
| AK025587  | 981.443   | 1016.013  | NM_003720 | 23248.973 | 19255.1   | SR4       | 13693.985 | 18427.881 |
| L17325    | 2835.271  | 2300.478  | NM_004957 | 3126.788  | 3167.529  | SR6       | 1980.991  | 2501.975  |
| NM_017716 | 3935.764  | 3475.228  | NM_005252 | 2062.292  | 2281.178  | SR8       | 6944.87   | 27382.109 |
| M58603    | 17711.393 | 13111.036 | SR1       | 79421.719 | 64181.695 | SR10      | 23305.258 | 11097.987 |
| NM_003639 | 21122.885 | 18463.17  | SR3       | 25751.039 | 29562.65  | CY3Cy5    | 4151.807  | 298.028   |
| NM_001549 | 806.692   | 788.947   | SR5       | 3274.49   | 4144.33   | AL049365  | 29470.012 | 42137.773 |
| NM_000115 | 8647.34   | 7893.109  | SR7       | 3352.486  | 29730.201 | AK025132  | 1845.856  | 2657.861  |
| AF308801  | 4538.496  | 3789.187  | SR9       | 11072.687 | 2875.085  | AK025157  | 9307.707  | 11615.491 |
| NM_007318 | 52510.609 | 37686.559 | Z36818    | 595.367   | 658.728   | NM_020215 | 10445.636 | 30915.174 |
| NM_014874 | 5641.581  | 3312.306  | AF086137  | 7292.668  | 6448.877  | AK022001  | 642.881   | 1050.06   |
| NM_012397 | 1037.798  | 574.444   | AF086155  | 1087.702  | 1072.055  | AK027199  | 607.37    | 440.762   |
| NM_005765 | 19885.635 | 11494.71  | AF086526  | 2040.495  | 1981.694  | AK000079  | 1690.884  | 1403.065  |
| NM_002762 | 1191.866  | 601.425   | AK025788  | 10484.342 | 8939.014  | NM_012243 | 4456.619  | 4338.4    |
| NM_006324 | 15942.001 | 10669.682 | AF086164  | 1672.643  | 1501.124  | AK025743  | 3132.642  | 3145.491  |
| NM_016848 | 4732.146  | 5564.218  | AK025577  | 3789.647  | 4111.848  | AL137466  | 676.888   | 750.68    |
| NM_000514 | 2880.928  | 3290.777  | AK000216  | 1481.499  | 1362.915  | AL122040  | 1364.314  | 1700.632  |
| AL137432  | 2092.666  | 2025.984  | AK023440  | 1539.947  | 1633.964  | AK023974  | 5406.444  | 5191.623  |
| NM_000957 | 506.868   | 355.748   | AB033041  | 25440.662 | 23268.355 | AK023768  | 2374.955  | 1784.458  |
| NM_019043 | 7873.306  | 6824.607  | NM_014894 | 81096.813 | 64240.738 | AF147335  | 2364.108  | 1536.209  |
| NM_003240 | 2520.21   | 2890.917  | AY007155  | 512.783   | 691.563   | AK022216  | 9147.173  | 8186.181  |
| NM_016564 | 24406.299 | 22989.758 | AK022678  | 1076.122  | 978.353   | AK025812  | 5910.091  | 4942.294  |
| AK021660  | 1038.771  | 1114.639  | AK023473  | 1178.613  | 2423.375  | U00960    | 2415.37   | 1968.324  |
| AB007933  | 14363.897 | 13864.262 | AK023835  | 2099.553  | 2258.127  | AK026419  | 1085.165  | 1785.045  |
| NM_003796 | 39701.234 | 37315.016 | AK024159  | 2656.005  | 4017.827  | AK025276  | 7973.207  | 8571.125  |
| NM_002973 | 8797.58   | 17763.143 | AK023906  | 5590.445  | 5828.418  | AK026027  | 401.491   | 814.628   |
| NM_003708 | 16032.297 | 21303.43  | AK024962  | 2688.16   | 2911.773  | AK026457  | 4616.091  | 4496.324  |

|           |           |           |           |           |           |           |           |           |
|-----------|-----------|-----------|-----------|-----------|-----------|-----------|-----------|-----------|
| NM_01434  | 15189.171 | 19187.361 | AK022164  | 1155.779  | 1078.208  | AK026825  | 2525.543  | 2826.89   |
| AB040895  | 995.512   | 1817.544  | AK025135  | 13494.048 | 10674.59  | NM_01335  | 2040.425  | 1725.053  |
| NM_004820 | 492.159   | 830.5     | NM_01792  | 3261.164  | 3310.786  | NM_003847 | 40790.203 | 32310.633 |
| NM_018210 | 3681.872  | 5319.083  | D38549    | 4012.357  | 4020.215  | AK021973  | 1049.026  | 735.761   |
| NM_00109  | 21314.533 | 25815.688 | AK024780  | 2384.049  | 1738.798  | AL050165  | 72394.094 | 65412.586 |
| NM_016014 | 4009.235  | 4411.997  | AF085947  | 1362.718  | 1507.701  | AL117445  | 2292.409  | 2005.187  |
| NM_00019  | 865.477   | 837.438   | AL359591  | 544.655   | 515.925   | AL122113  | 9762.604  | 8526.241  |
| NM_018327 | 894.933   | 590.475   | AK022123  | 479.71    | 645.57    | AK024415  | 2800.006  | 2730.62   |
| NM_001684 | 1309.03   | 1125.771  | AK023018  | 736.207   | 800.179   | AK023515  | 1188.782  | 1614.112  |
| NM_01330  | 1083.852  | 577.779   | AK022672  | 1418.861  | 1487.177  | AL137623  | 41537.199 | 44242.328 |
| AF038186  | 5366.87   | 3962.863  | AK023870  | 7110.187  | 6580.994  | AK026485  | 977.057   | 1121.359  |
| NM_003664 | 4340.208  | 2574.785  | AK021599  | 1006.993  | 920.849   | AL137361  | 321.795   | 607.925   |
| NM_00242  | 3793.35   | 2013.752  | AF116677  | 763.274   | 644.118   | AJ227874  | 2852.01   | 3785.785  |
| AK027182  | 1438.058  | 617.455   | NM_01415  | 7382.221  | 5477.383  | AF009268  | 879.291   | 959.143   |
| J03651    | 10303.277 | 6698.119  | AK021795  | 7395.848  | 12325.048 | AF056418  | 723.134   | 999.824   |
| U61738    | 2143.203  | 1714.059  | AL162042  | 8338.746  | 13664.839 | AF009276  | 872.505   | 630.654   |
| AJ132087  | 3006.295  | 2425.518  | AK026131  | 1478.101  | 1472.443  | AF056428  | 20063.555 | 15865.093 |
| U92818    | 2427.632  | 1386.009  | AK023312  | 2377.652  | 1998.566  | AF069136  | 572.846   | 648.847   |
| NM_00044  | 7098.482  | 6667.918  | AK022483  | 761.174   | 666.823   | AK001995  | 750.156   | 617.712   |
| NM_002934 | 4649.447  | 3928.698  | AL133570  | 1121.745  | 1507.886  | AK021594  | 891.402   | 538.889   |
| AK023011  | 12422.79  | 12422.311 | AK021462  | 590.364   | 493.813   | AK021635  | 2517.76   | 2230.861  |
| NM_01681  | 3953.399  | 4383.352  | AK023392  | 654.921   | 723.945   | AK021856  | 2388.135  | 2817.453  |
| AK023794  | 10419.233 | 10201.911 | AF131836  | 3406.076  | 3895.498  | S97393    | 1167.562  | 1346.251  |
| NM_01988  | 4509.816  | 3664.079  | AF275804  | 4050.607  | 4316.665  | BE698533  | 882.802   | 1557.663  |
| NM_00532  | 462.154   | 613.44    | AL137488  | 3506.642  | 3146.193  | NM_01792  | 1872      | 2761.781  |
| AB033103  | 3249.025  | 2558.941  | AL049447  | 38925.156 | 37175.023 | NM_01847  | 1603.202  | 2137.784  |
| NM_002907 | 6619.903  | 3574.618  | NM_020527 | 4143.729  | 3998.6    | AL133108  | 738.509   | 487.655   |
| AK024098  | 1945.829  | 1665.967  | AB020637  | 755.936   | 800.024   | AF085923  | 385.681   | 758.664   |
| AK001116  | 940.373   | 954.736   | NM_00528  | 10392.99  | 8723.861  | AJ008128  | 59502.285 | 52956.148 |
| AK022371  | 13879.023 | 19202.176 | AK024365  | 13110.846 | 10283.704 | AL449243  | 25913.336 | 24346.773 |
| D42045    | 11497.742 | 15704.763 | AJ251759  | 1917.148  | 1984.322  | M12211    | 8486.012  | 7093.972  |
| AB007953  | 8219.226  | 11309.81  | AK024371  | 5798.967  | 6866.624  | AF086338  | 577.355   | 601.838   |
| NM_01400  | 16274.467 | 22228.982 | NM_005454 | 2916.959  | 3084.13   | AK024303  | 1405.076  | 1205.85   |
| NM_004197 | 4688.854  | 6229.429  | AB019569  | 67220.32  | 60956.973 | AL160131  | 13702.815 | 12955.899 |
| NM_00407  | 3109.958  | 4991.487  | NM_01240  | 6581.803  | 10983.539 | AF086045  | 4234.368  | 3212.534  |
| NM_00127  | 12259.542 | 10476.373 | AK021708  | 448.689   | 790.387   | AK027028  | 6511.202  | 4370.602  |
| NM_01910  | 7632.18   | 4560.081  | AL050205  | 8642.383  | 7448.814  | AK027069  | 890.255   | 877.367   |
| NM_000294 | 9289.777  | 7536.552  | AK023947  | 763.014   | 834.87    | AK026916  | 2635.258  | 2212.551  |
| AJ272212  | 2264.242  | 1986.632  | NM_005691 | 1879.066  | 2042.577  | AK026914  | 2812.229  | 2089.668  |
| NM_00162  | 19512.311 | 16889.436 | AK023814  | 721.165   | 977.051   | Y13808    | 1093.774  | 772.782   |
| NM_005677 | 4839.401  | 3939.91   | AF130063  | 917.988   | 1055.757  | Y11166    | 4013.302  | 3851.386  |
| AF229803  | 1919.333  | 1717.659  | AF086528  | 1337.383  | 1523.805  | AK024942  | 5555.71   | 7693.46   |
| AF151810  | 1985.094  | 1659.332  | NM_00654  | 1276.17   | 1490.489  | AJ227873  | 20054.277 | 24564.988 |
| NM_002130 | 35727.648 | 34167.305 | AF086252  | 1190.836  | 905.703   | AK022886  | 5100.867  | 6781.716  |
| NM_00546  | 11277.398 | 10058.607 | AK026703  | 1985.966  | 2433.076  | AK024665  | 8727.322  | 10801.635 |
| NM_016361 | 1732.045  | 1951.111  | NM_01786  | 2560.199  | 2697.688  | AF147363  | 1205.347  | 1467.85   |
| NM_00130  | 3167.315  | 4485.097  | NM_00353  | 1477.468  | 1521.394  | AJ227880  | 1111.881  | 1538.669  |
| NM_00508  | 2784.215  | 5189.802  | AF116707  | 5274.365  | 5313.661  | AK000691  | 1957.847  | 1729.36   |
| D17028    | 57565.859 | 53808.688 | U90910    | 18129.064 | 15963.499 | AK001448  | 2557.427  | 2760.682  |
| NM_01344  | 45787.543 | 48068.883 | AK025765  | 4744.043  | 4682.818  | AF131817  | 1486.749  | 1537.61   |
| BG611243  | 8265.832  | 7955.741  | AF086414  | 14300.153 | 19147.604 | AL049321  | 5186.568  | 5323.322  |
| AI417481  | 1077.946  | 903.25    | AJ012490  | 14431.301 | 11678.813 | NM_00354  | 6942.979  | 6090.614  |
| BI906766  | 10349.998 | 7877.437  | U84516    | 18887.6   | 12909.464 | AK025750  | 2013.536  | 1849.5    |

|           |           |           |           |           |           |           |           |           |
|-----------|-----------|-----------|-----------|-----------|-----------|-----------|-----------|-----------|
| U60519    | 868.832   | 728.682   | AL049270  | 2964.749  | 3130.37   | BF031253  | 2384.053  | 1804.036  |
| AA282906  | 719.489   | 519.577   | BC025324  | 3013.592  | 4096.273  | AK025783  | 3081.158  | 2179.306  |
| L02870    | 1957.365  | 1729.863  | AK023564  | 481.895   | 653.5     | AF113675  | 1995.825  | 1667.119  |
| BG755482  | 13378.527 | 10610.174 | NM_003533 | 1578.587  | 1899.807  | AK024514  | 1244.711  | 904.102   |
| AI480307  | 6662.012  | 4879.787  | AL157478  | 838.614   | 1522.08   | NM_020119 | 2800.52   | 1919.006  |
| X51420    | 6779.539  | 5263.263  | AK023726  | 17442.115 | 16212.162 | AL049417  | 3154.946  | 2645.977  |
| D28235    | 944.646   | 770.889   | AK024906  | 943.977   | 1307.959  | AK023507  | 990.632   | 773.203   |
| X51757    | 2309.598  | 1994.643  | NM_005607 | 996.295   | 941.286   | NM_005169 | 7554.568  | 5903.215  |
| L24038    | 4433.491  | 5340.945  | NM_006761 | 25289.283 | 22708.777 | AL109818  | 838.148   | 950.944   |
| NM_053056 | 1198.76   | 1615.368  | NM_014897 | 795.036   | 787.665   | NM_000066 | 5621.464  | 8347.008  |
| NM_006186 | 1175.238  | 1399.189  | NM_003453 | 3450.785  | 3057.205  | AB033046  | 29043.76  | 49432.059 |
| NM_002751 | 2768.451  | 4294.125  | NM_018371 | 9767.155  | 8532.783  | NM_015918 | 9863.637  | 16534.207 |
| M55593    | 3200.013  | 4324.874  | NM_014390 | 18353.611 | 15998.08  | AK023228  | 919.085   | 1263.701  |
| AK001883  | 16955.881 | 19272.377 | NM_018143 | 974.832   | 1227.142  | NM_013249 | 830.609   | 1020.242  |
| NM_014629 | 6873.443  | 9859.848  | X78924    | 17617.115 | 15876.364 | AL359063  | 1297.67   | 1861.798  |
| AK025587  | 1288.678  | 1692.786  | NM_001889 | 15504.968 | 10642.107 | AL079292  | 4274.856  | 4782.769  |
| AL050114  | 3788.966  | 4402.46   | NM_004999 | 2322.571  | 5092.044  | X89667    | 9258.908  | 9851.544  |
| AK021492  | 10682.512 | 13430.88  | NM_004458 | 4208.035  | 4234.412  | NM_014027 | 6821.902  | 6950.486  |
| NM_014874 | 6745.733  | 11675.902 | NM_006901 | 2970.387  | 2554.067  | NM_020467 | 1161.85   | 1306.342  |
| NM_012397 | 1045.382  | 1061.542  | NM_018530 | 12710.757 | 9644.498  | AF116621  | 10650.539 | 10215.015 |
| NM_005765 | 24714.504 | 23372.049 | AK023816  | 2713.958  | 3345.024  | AF086554  | 5717.131  | 5413.467  |
| NM_002762 | 1094.305  | 976.87    | AF305686  | 5536.274  | 6731.869  | AL390136  | 53834.66  | 39362.121 |
| NM_006324 | 19352.779 | 13097.05  | AF085832  | 2024.743  | 2562.18   | AK023156  | 728.687   | 474.853   |
| NM_016848 | 5107.26   | 4364.829  | AK025981  | 3660.533  | 4352.364  | AF086398  | 67623.625 | 65419.867 |
| NM_000514 | 3300.548  | 2628.767  | AF113212  | 1063.218  | 1153.135  | AK024545  | 2709.302  | 1553.61   |
| AL137432  | 2674.859  | 1759.238  | AF086266  | 1168.398  | 1278.62   | AK023444  | 1362.945  | 1152.397  |
| NM_000957 | 591.744   | 385.784   | AK025337  | 869.869   | 830.039   | AK025953  | 1922.405  | 1457.794  |
| NM_019043 | 8417.771  | 5567.942  | NM_005602 | 4683.351  | 4135.325  | NM_003180 | 1739.137  | 1333.004  |
| NM_003240 | 2816.83   | 2980.473  | NM_003573 | 22978.068 | 18152.662 | AF086406  | 15850.05  | 12582.438 |
| NM_016564 | 24757.162 | 18864.949 | NM_000296 | 9861.869  | 8186.747  | D17216    | 6416.906  | 4882.227  |
| NM_000796 | 524.702   | 319.197   | NM_017422 | 61287.316 | 54134.25  | AL137581  | 3695.73   | 4742.613  |
| AF279656  | 1006.166  | 623.862   | AF147790  | 642.727   | 773.931   | J05158    | 848.697   | 1339.784  |
| AK021660  | 920.104   | 651.118   | NM_004112 | 15991.581 | 15542.267 | NM_015564 | 2873.857  | 4018.44   |
| AB007933  | 13246.072 | 8586.159  | AY007233  | 948.609   | 1294.104  | AF160476  | 1748.654  | 3650.696  |
| NM_006702 | 6453.123  | 3288.564  | AK025592  | 2633.404  | 1876.659  | L22650    | 3169.66   | 4618.111  |
| NM_001396 | 3044.552  | 1723.781  | NM_004635 | 4021.04   | 3165.052  | NM_004907 | 5689.218  | 6426.294  |
| NM_014474 | 5222.413  | 3251.492  | AK023023  | 9365.745  | 6459.223  | NM_002891 | 1067.342  | 1405.131  |
| NM_016249 | 1362.986  | 953.489   | NM_015993 | 6228.771  | 5371.354  | NM_001775 | 4297.771  | 4922.603  |
| NM_006181 | 4713.248  | 3527.536  | NM_002659 | 4809.866  | 4447      | BE083789  | 603.925   | 868.856   |
| NM_003796 | 43688.887 | 27845.602 | Z36776    | 4361.939  | 4231.222  | X04526    | 35883.988 | 33099.258 |
| NM_002973 | 9696.148  | 8353.947  | AB029015  | 2100.531  | 2313.369  | D26067    | 5082.703  | 4980.441  |
| NM_004436 | 30480.814 | 18905.357 | NM_020345 | 717.204   | 643.975   | AF227924  | 5904.282  | 5562.185  |
| NM_006580 | 7024.104  | 5123.349  | NM_003287 | 1624.176  | 1465.016  | NM_005716 | 48675.488 | 43359.664 |
| NM_016277 | 3805.239  | 4284.527  | NM_012325 | 11519.472 | 10715.479 | NM_006183 | 5310.974  | 5531.07   |
| NM_007247 | 4930.535  | 5355.1    | NM_014434 | 2404.473  | 1987.109  | NM_016087 | 838.699   | 662.607   |
| NM_006554 | 16970.275 | 13832.781 | NM_019607 | 5238.798  | 4767.263  | S59184    | 2945.6    | 2250.549  |
| X99962    | 20133.5   | 18343.697 | U79260    | 4176.156  | 3343.677  | NM_005130 | 678.066   | 619.916   |
| AK023221  | 26779.035 | 16000.578 | NM_001895 | 8999.668  | 8603.344  | NM_006661 | 4419.677  | 3529.593  |
| NM_003664 | 4122.491  | 2828.792  | NM_006447 | 2382.997  | 2061.724  | NM_005746 | 24503.156 | 20226.572 |
| NM_002426 | 3474.045  | 2693.142  | AF119851  | 2385.636  | 2335.434  | NM_004588 | 1448.874  | 1398.645  |
| AK027182  | 1889.857  | 1058.86   | NM_014129 | 5387.173  | 6039.392  | U16126    | 1310.276  | 1176.238  |
| J03651    | 12482.099 | 9586.353  | D87455    | 1863.09   | 1638.56   | NM_002172 | 40791.621 | 36444.789 |
| U61738    | 3418.309  | 2805.775  | AF080577  | 2014.558  | 1476.621  | AJ008144  | 2306.197  | 2999.127  |

|           |           |           |           |           |           |           |           |           |
|-----------|-----------|-----------|-----------|-----------|-----------|-----------|-----------|-----------|
| AJ132087  | 3319.166  | 1879.625  | NM_013368 | 2566.71   | 2849.316  | NM_007314 | 13328.041 | 18030.133 |
| U92818    | 2102.388  | 997.901   | NM_003807 | 50117.109 | 33479.23  | NM_016073 | 1705.154  | 2167.629  |
| NM_000442 | 4045.742  | 3251.877  | NM_004358 | 5278.62   | 3151.49   | NM_006600 | 28141.355 | 37113.625 |
| NM_002934 | 2748.68   | 1436.564  | NM_001790 | 3275.018  | 2568.199  | L77564    | 1511.46   | 1813.906  |
| AK023011  | 8831.405  | 5295.029  | NM_018243 | 3821.731  | 3138.894  | NM_015384 | 3922.456  | 4193.439  |
| NM_016810 | 3337.354  | 1473.63   | NM_014939 | 4159.257  | 4085.576  | AK023327  | 8265.703  | 8601.643  |
| L17325    | 3041.069  | 1382.078  | Y17866    | 1913.569  | 1909.901  | AB046858  | 4121.266  | 3592.121  |
| NM_017710 | 5044.924  | 3628.563  | AK024247  | 441.114   | 450.568   | D50914    | 10895.164 | 13719.246 |
| M58603    | 19527.311 | 12647.426 | NM_003005 | 8097.812  | 7579.656  | BE878692  | 925.4     | 1190.551  |
| NM_003630 | 22639.385 | 17868.229 | NM_000873 | 4004.454  | 4255.933  | NM_002007 | 1422.416  | 1465.466  |
| NM_001540 | 1062.489  | 696.298   | AB033025  | 958.901   | 695.774   | NM_002305 | 13843.788 | 12603.783 |
| NM_000115 | 12479.567 | 8428.599  | NM_004418 | 4730.137  | 4555.273  | AK025439  | 6112.909  | 5256.423  |
| AF308801  | 4069.794  | 2872.547  | NM_000917 | 18860.379 | 17763.863 | NM_001737 | 7742.668  | 6621.008  |
| NM_007310 | 45635.176 | 37868.379 | NM_005389 | 12569.124 | 10535.307 | Z36784    | 2193.6    | 1619.3    |
| AF229803  | 2413.719  | 2046.135  | NM_014445 | 21104.188 | 17117.113 | NM_016620 | 17900.533 | 14365.897 |
| AF151810  | 1592.719  | 1267.052  | AL832826  | 1225.222  | 970.099   | NM_007213 | 1827.26   | 1513.783  |
| NM_002130 | 32055.006 | 33627.238 | NM_016123 | 1108.208  | 959.712   | NM_019064 | 1583.87   | 1100.115  |
| NM_005460 | 8722.054  | 7222.707  | AB048365  | 2212.908  | 1902.412  | NM_000094 | 15074.772 | 9684.607  |
| NM_016361 | 1809.706  | 1183.536  | NM_000391 | 7282.905  | 5849.965  | AK024732  | 12056.057 | 10702.095 |
| NM_003700 | 12214.549 | 10665.242 | AB032945  | 1076.959  | 810.883   | NM_016302 | 3296.343  | 4052.048  |
| NM_014340 | 11262.507 | 8238.357  | AK025215  | 17843.549 | 9150.117  | NM_004150 | 36832.461 | 44675.156 |
| AB040895  | 569.106   | 673.094   | BF569160  | 1490.497  | 1156.153  | AK021866  | 769.863   | 1134.784  |
| NM_018210 | 2801.567  | 2509.882  | AK024625  | 1178.432  | 1036.927  | NM_003240 | 9065.585  | 15788.194 |
| NM_001090 | 19324.537 | 13159.071 | NM_018131 | 4962.849  | 4651.232  | M21897    | 1922.845  | 2513.742  |
| NM_016014 | 3572.324  | 2647.514  | NM_014834 | 1241.5    | 1799.497  | AF301463  | 2196.938  | 2172.241  |
| NM_000190 | 761.975   | 580.475   | NM_017630 | 13800.9   | 12960.96  | NM_015984 | 10471.712 | 10725.797 |
| NM_018327 | 693.34    | 388.8     | NM_012460 | 1188.254  | 1093.006  | NM_006894 | 6487.968  | 5382.888  |
| NM_017581 | 3798.248  | 1570.316  | NM_002430 | 627.042   | 692.178   | AK023031  | 5766.641  | 5232.784  |
| AA488804  | 16605.039 | 7978.86   | NM_006150 | 4446.163  | 4726.466  | NM_005717 | 62028.02  | 63602.406 |
| NM_006530 | 899.195   | 443.806   | NM_014943 | 5219.539  | 5301.284  | NM_012090 | 3722.328  | 3555.208  |
| NM_001684 | 1207.041  | 996.19    | AK024392  | 1274.195  | 1124.96   | BE793385  | 1743.316  | 2599.125  |
| AB028977  | 732.503   | 541.581   | NM_013260 | 1248.352  | 1126.323  | NM_003080 | 13257.087 | 8487.854  |
| NM_000800 | 645.565   | 402.527   | NM_018300 | 743.283   | 678.823   | AF043290  | 1774.216  | 1432.661  |
| NM_016310 | 5886.316  | 3968.655  | NM_004875 | 2767.709  | 2816.229  | NM_004082 | 5973.741  | 5563.01   |
| NM_013300 | 741.624   | 554.976   | NM_018254 | 34131.992 | 27465.15  | NM_014390 | 8369.069  | 5365.798  |
| NM_019891 | 3372.336  | 3019.487  | NM_017745 | 4280.559  | 3602.347  | NM_005934 | 51042.324 | 37310.398 |
| AF038186  | 6105.859  | 6517.804  | NM_018433 | 2970.158  | 2101.178  | NM_002614 | 1506.007  | 1155.03   |
| AK001883  | 14125.929 | 9827.333  | NM_000937 | 889.939   | 627.267   | NM_005655 | 7298.071  | 5696.482  |
| NM_014620 | 5056.192  | 3033.017  | AK022615  | 43208.371 | 24504.59  | NM_002690 | 6695.289  | 8943.411  |
| AK025587  | 880.612   | 610.488   | NM_004043 | 9287.048  | 5028.139  | AF069138  | 519.896   | 1003.435  |
| AL050114  | 2249.715  | 1536.304  | BM458096  | 21331.559 | 10999.926 | NM_002140 | 2198.408  | 2939.852  |
| AK021492  | 7344.637  | 3821.952  | NM_005620 | 14770.499 | 10393.232 | AL137449  | 3475.802  | 4437.129  |
| AK023794  | 7694.415  | 5902.856  | D29958    | 31089.986 | 28187.627 | U88153    | 6794.763  | 7786.927  |
| NM_019880 | 4286.819  | 2002.157  | NM_015971 | 20824.66  | 19578.635 | X03910    | 31192.117 | 36959.555 |
| AB033103  | 3807.22   | 6061.312  | D17257    | 63887.148 | 57264.051 | NM_018420 | 28147.574 | 32721.645 |
| NM_002907 | 7367.991  | 7036.374  | NM_002842 | 7195.736  | 7803.84   | NM_005050 | 1023.74   | 1321.101  |
| AK024098  | 1994.764  | 1487.688  | AF290204  | 470.027   | 646.438   | NM_006924 | 37122.543 | 47016.004 |
| AK001116  | 630.99    | 435.935   | NM_012120 | 1232.039  | 1409.78   | NM_016024 | 9972.39   | 10856.053 |
| AK022371  | 8938.543  | 5055.796  | J03569    | 60527.68  | 54746.508 | NM_018107 | 6708.976  | 6729.077  |
| D42045    | 8289.994  | 3186.819  | NM_003115 | 1694.104  | 1820.036  | NM_012270 | 1663.122  | 1397.264  |
| AB007953  | 5813.673  | 1897.865  | NM_000687 | 17550.121 | 11531.006 | NM_018387 | 36229.25  | 29574.359 |
| NM_014002 | 15508.777 | 6666.031  | NM_000440 | 331.524   | 456.968   | BF310673  | 5594.288  | 4619.351  |
| NM_004197 | 4126.982  | 1777.387  | NM_018200 | 2407.523  | 1449.15   | R97012    | 62468.156 | 60496.211 |

|           |           |           |           |           |           |           |           |           |
|-----------|-----------|-----------|-----------|-----------|-----------|-----------|-----------|-----------|
| NM_004073 | 2528.433  | 1553.771  | NM_007212 | 794.744   | 1164.498  | U77700    | 20212.846 | 17506.607 |
| NM_001278 | 11154.145 | 8257.84   | AF005067  | 1995.726  | 1161.627  | NM_006567 | 17505.018 | 13525.348 |
| NM_019105 | 6960.556  | 5013.692  | NM_005710 | 16678.449 | 10626.558 | AF038554  | 46714.563 | 29079.764 |
| NM_000294 | 4701.042  | 4510.551  | AF252284  | 3451.253  | 2502.506  | AF264621  | 18170.594 | 13707.569 |
| AJ272212  | 2368.565  | 2342.333  | NM_014930 | 5681.676  | 4397.689  | NM_005875 | 34354.617 | 24003.473 |
| NM_001626 | 23582.676 | 29907.77  | NM_001530 | 6111.615  | 5598.801  | NM_004184 | 28497.787 | 18696.842 |
| NM_005677 | 4490.238  | 3892.689  | U80232    | 17241.258 | 16623.232 | NM_000435 | 1065.505  | 843.5     |
| CY3Cy5    | 8150.367  | 1464.088  | M27877    | 32789.004 | 33410.09  | AJ295148  | 1279.474  | 929.32    |
| NM_004957 | 4263.704  | 4275.871  | D70836    | 40680.168 | 42226.418 | NM_000456 | 6146.626  | 8198.363  |
| NM_005252 | 2106.857  | 3324.117  | D16878    | 1136.244  | 1153.159  | AF190122  | 758.855   | 1116.102  |
| AL359211  | 828.584   | 1066.143  | NM_007035 | 6181.981  | 7436.569  | NM_002496 | 44927.855 | 54815.172 |
| AF070526  | 384.618   | 456.47    | AB019562  | 2386.395  | 2760.297  | NM_016243 | 6958.964  | 9713.74   |
| U79264    | 1464.094  | 1662.223  | AF036364  | 3137.796  | 3804.38   | X53943    | 1084.601  | 1364.542  |
| NM_015695 | 4230.161  | 6243.14   | AK022847  | 4904.102  | 5810.535  | NM_014402 | 60545.133 | 61788.012 |
| AK023619  | 623.436   | 1305.741  | NM_020203 | 6602.989  | 7215.154  | NM_004645 | 21310.352 | 30246.65  |
| AF070530  | 28588.584 | 35146.25  | L40992    | 1222.701  | 938.575   | NM_006540 | 11458.718 | 13757.194 |
| AF086487  | 1796.596  | 3565.632  | U20582    | 10796.027 | 10292.31  | NM_017766 | 3110.555  | 3811.438  |
| NM_006420 | 5095.778  | 5363.984  | NM_000337 | 789.899   | 789.078   | NM_002811 | 17502.424 | 16245.237 |
| AF131855  | 2333.823  | 2745.172  | NM_002079 | 9270.086  | 7074.35   | NM_020310 | 6521.242  | 6625.489  |
| AF086046  | 6918.359  | 9981.597  | AI660957  | 943.669   | 475.883   | AK024444  | 1203.247  | 1361.856  |
| AK023309  | 554.324   | 647.326   | U13697    | 1024.749  | 826.801   | NM_005802 | 6137.138  | 5157.739  |
| AK022077  | 422.407   | 455.236   | X75308    | 1264.05   | 3634.873  | AB002331  | 5229.967  | 4935.415  |
| AK000724  | 5447.508  | 5400.424  | U04270    | 33713.277 | 24847.775 | NM_002504 | 6076.746  | 5393.467  |
| NM_003720 | 31217.91  | 29131.805 | Z34820    | 602.429   | 363.225   | AB046775  | 5332.441  | 4867.749  |
| NM_004957 | 4365.369  | 3700.631  | L02840    | 12789.176 | 3995.977  | X74862    | 3350.517  | 3132.231  |
| NM_005252 | 1911.614  | 1700.698  | AA629719  | 62020.5   | 57745.824 | X65663    | 14177.978 | 10512.991 |
| SR1       | 58260.695 | 58140.109 | AA927528  | 6631.156  | 3605.936  | NM_003185 | 4794.181  | 4101.193  |
| SR3       | 40108.945 | 35746.039 | X02152    | 64361.504 | 58497.988 | NM_004456 | 12336.351 | 9679.979  |
| SR5       | 3984.144  | 4026.305  | BG676364  | 8180.249  | 6977.158  | NM_004284 | 11811.386 | 8977.992  |
| SR7       | 5210.716  | 38558.328 | BG181154  | 1995.161  | 1966.146  | NM_007125 | 10534.096 | 8158.988  |
| SR9       | 19645.594 | 3693.86   | AA843679  | 13738.585 | 15515.487 | AY004253  | 14386.66  | 11596.126 |
| CY3Cy5    | 4522.903  | 689.845   | H68922    | 1042.926  | 1090.118  | Z46967    | 872.832   | 838.117   |
| Z36818    | 1002.602  | 1481.705  | AF097159  | 1397.086  | 1238.198  | NM_017583 | 24845.162 | 30213.848 |
| Z36842    | 1669.985  | 1911.7    | NM_014684 | 1544.789  | 1192.962  | Y16132    | 43572.375 | 49381.48  |
| AF086137  | 1614.461  | 2092.483  | AK027247  | 1689.625  | 1866.84   | NM_016593 | 5617.204  | 8995.715  |
| AF086155  | 1610.046  | 2093.962  | NM_002480 | 9738.478  | 8703.798  | NM_002521 | 3354.095  | 4940.665  |
| AF086526  | 1916.688  | 2354.075  | NM_017571 | 11649.132 | 6888.309  | NM_001150 | 4242.57   | 5857.329  |
| AK025788  | 9256.453  | 11013.208 | L03169    | 1319.768  | 1284.388  | NM_002856 | 10012.607 | 13533.369 |
| AF086164  | 2844.908  | 2719.111  | NM_001928 | 3951.278  | 2378.04   | NM_003225 | 1595.587  | 2566.579  |
| AK025577  | 4401.3    | 4739.941  | NM_006399 | 1650.876  | 912.36    | NM_000096 | 2208.494  | 3374.399  |
| AK000216  | 1880.353  | 2073.429  | NM_000185 | 14584.029 | 6401.967  | AA418251  | 1936.319  | 2278.542  |
| AK023440  | 1578.055  | 1863.926  | Y00816    | 1271.291  | 496.513   | AA143087  | 33354.109 | 31102.938 |
| AB033041  | 38934.805 | 34722.801 | NM_004512 | 19324.828 | 7574.715  | U25804    | 698.412   | 779.745   |
| U25029    | 759.285   | 814.999   | NM_004380 | 26878.957 | 9899.38   | BI870965  | 16545.844 | 16662.209 |
| NM_014894 | 28660.846 | 26245.025 | U86813    | 615.402   | 275.564   | BI835536  | 17812.568 | 16980.5   |
| AY007155  | 1139.703  | 935.33    | NM_004119 | 2229.479  | 1231.953  | BF205051  | 12801.743 | 10107.2   |
| AK027160  | 25535.215 | 14519.364 | AY007378  | 4977.773  | 3950.607  | X02761    | 29856.367 | 26766.406 |
| AK022678  | 1309.427  | 1620.158  | D26070    | 2852.034  | 2001.903  | M91463    | 3351.139  | 2470.147  |
| AK023473  | 772.056   | 842.328   | NM_001642 | 8775.51   | 8725.961  | U88317    | 1158.709  | 901.748   |
| AK023835  | 4454.254  | 5928.603  | NM_001542 | 1264.317  | 1299.298  | J03060    | 4640.485  | 3139.448  |
| AK024159  | 459.883   | 904.361   | NM_002280 | 1923.904  | 2215.146  | X54156    | 1259.132  | 904.188   |
| AK023012  | 649.275   | 667.157   | NM_017459 | 657.398   | 700.036   | NM_003743 | 2119.071  | 1571.076  |
| AK023906  | 5332.519  | 5562.398  | NM_001055 | 46284.262 | 49224.207 | AA829383  | 15394.492 | 12391.717 |

|           |           |           |           |           |           |           |           |           |
|-----------|-----------|-----------|-----------|-----------|-----------|-----------|-----------|-----------|
| AK024234  | 1210.337  | 1471.486  | NM_002271 | 42423.863 | 47890.371 | AF012434  | 39092.465 | 26689.891 |
| AK024962  | 1961.671  | 2063.096  | NM_018361 | 1715.227  | 1317.669  | AF131748  | 6774.458  | 4726.355  |
| AK022164  | 708.74    | 836.705   | NM_019893 | 714.562   | 1039.681  | NM_002348 | 2193.021  | 3007.876  |
| AK025135  | 11897.272 | 12972.74  | AB040966  | 7221.123  | 5684.078  | NM_005080 | 22383.92  | 33938.203 |
| NM_017926 | 5076.459  | 5458.275  | NM_020132 | 9242.339  | 8370.367  | NM_004887 | 15800.945 | 33023.613 |
| AY007145  | 1090.591  | 1330.949  | NM_016467 | 8143.141  | 4157.915  | NM_006404 | 1629.718  | 2653.026  |
| AK021573  | 678.256   | 821.759   | NM_007253 | 5173.247  | 1864.733  | NM_014795 | 2477.194  | 3232.547  |
| D38549    | 431.371   | 529.708   | NM_000558 | 22546.227 | 11399.271 | NM_002986 | 2272.398  | 3159.702  |
| AK024780  | 3067.861  | 2735.605  | NM_000835 | 424.946   | 238.892   | M15330    | 2896.117  | 6577.646  |
| AF085947  | 965.882   | 968.822   | NM_006808 | 20935.461 | 5964.854  | NM_014396 | 5998.134  | 10020.711 |
| AF086000  | 779.698   | 777.094   | NM_006634 | 1745.175  | 507.784   | AK027201  | 4980.088  | 5946.574  |
| AL359591  | 682.007   | 598.717   | NM_016465 | 5702.557  | 3252.711  | NM_000488 | 35003.355 | 37927.891 |
| AK022123  | 760.635   | 626.672   | NM_000328 | 1433.645  | 1228.008  | X98507    | 16326.082 | 16022.66  |
| AF075116  | 552.861   | 553.191   | NM_013399 | 2607.027  | 2844.343  | NM_016030 | 59596.93  | 63820.277 |
| U10510    | 4307.893  | 4089.368  | NM_002410 | 1356.864  | 1251.378  | NM_014668 | 18549.027 | 20400.801 |
| AK023018  | 4770.314  | 4374.321  | AL122120  | 6012.146  | 5044.573  | NM_005652 | 47262.305 | 46583.098 |
| AK022672  | 3670.107  | 3755.374  | NM_018835 | 3830.495  | 4665.03   | AK026686  | 1409.602  | 1411.669  |
| AK023870  | 3629.262  | 3821.337  | NM_003401 | 1826.453  | 1429.332  | NM_005902 | 7265.748  | 6478.456  |
| AK021599  | 4124.69   | 5812.341  | AL137724  | 2558.658  | 1996.043  | NM_002850 | 66646.93  | 65361.469 |
| BC030975  | 940.11    | 1907.371  | NM_004758 | 5933.913  | 6016.543  | NM_005302 | 608.537   | 484.859   |
| AK025619  | 743.778   | 771.606   | NM_002913 | 2635.904  | 2084.703  | NM_004302 | 895.658   | 803.024   |
| AK001872  | 619.4     | 778.432   | AK022797  | 1361.356  | 1249.932  | NM_005903 | 2211.066  | 1767.46   |
| AF116677  | 1198.457  | 1340.579  | NM_007370 | 3854.08   | 3438.142  | NM_000861 | 1710.37   | 1302.773  |
| AK022010  | 562.612   | 620.49    | NM_006231 | 1178.922  | 1056.258  | U77493    | 1569.71   | 1119.612  |
| NM_014158 | 9234.554  | 7069.456  | AK023471  | 1842.552  | 804.314   | NM_019062 | 1561.291  | 1109.692  |
| AK021795  | 867.82    | 1052.107  | AF044578  | 5011.724  | 1491.016  | AL133064  | 7473.844  | 9683.391  |
| AL162042  | 1430.114  | 1853.619  | NM_001948 | 2289.287  | 829.736   | NM_006227 | 9777.077  | 15034.089 |
| AK026131  | 582.463   | 625.33    | NM_001067 | 11899.564 | 5511.832  | NM_002905 | 9675.765  | 15356.407 |
| AK023312  | 2290.301  | 2237.722  | NM_014034 | 7474.403  | 9768.992  | NM_000700 | 5412.715  | 8322.987  |
| AK022483  | 482.762   | 373.305   | NM_004726 | 1682.506  | 3008.275  | NM_019028 | 24741.598 | 32606.131 |
| AK022893  | 262.174   | 570.673   | NM_014011 | 6513.157  | 3178.748  | NM_000431 | 4514.125  | 5735.668  |
| AL133570  | 1961.703  | 1860.649  | AK025994  | 5898.701  | 3135.241  | NM_013421 | 4879.408  | 9583.683  |
| AK023392  | 541.978   | 353.37    | L29306    | 1007.29   | 838.196   | NM_012474 | 10236.07  | 17123.154 |
| AF131836  | 2159.771  | 2344.009  | NM_013989 | 6546.896  | 6253.708  | AB033118  | 2748.628  | 4123.388  |
| AF275804  | 13443.766 | 14731.827 | NM_001738 | 2062.953  | 2159.678  | NM_019606 | 8492.338  | 9003.968  |
| AL137488  | 1117.961  | 1265.896  | NM_002270 | 388.42    | 302.541   | NM_001690 | 19407.383 | 19841.236 |
| AL049447  | 65900.688 | 65444.828 | AF036364  | 3768.338  | 4716.97   | AF034374  | 26721.449 | 27546.73  |
| NM_020527 | 4106.274  | 3701.554  | AK022847  | 4766.046  | 5469.237  | NM_001682 | 5916.936  | 5435.035  |
| AB020637  | 4118.576  | 4531.333  | NM_020203 | 4418.552  | 4069.323  | AK025130  | 7588.269  | 7969.658  |
| NM_005286 | 2200.316  | 2440.186  | L40992    | 828.858   | 648.493   | AK023232  | 11422.133 | 13240.054 |
| AK024365  | 3428.538  | 3929.737  | U20582    | 11310.072 | 9951.123  | NM_006380 | 3706.696  | 4073.217  |
| AJ251759  | 3190.811  | 3238.064  | NM_000337 | 887.734   | 931.438   | AB020710  | 3883.959  | 3951.13   |
| AK024371  | 1109.757  | 1297.971  | NM_002079 | 7240.488  | 5439.763  | Z83801    | 303.669   | 639.703   |
| NM_005454 | 1049.06   | 846.696   | AI660957  | 596.827   | 452.329   | NM_016174 | 14988.417 | 12981.144 |
| AB019569  | 50250.66  | 55634.156 | U13697    | 851.018   | 507.848   | NM_020377 | 2038.044  | 1777.118  |
| NM_012408 | 3993.453  | 5183.364  | U04270    | 29241.768 | 11066.818 | U88896    | 3134.847  | 2304.631  |
| AK021708  | 1145.851  | 1328.956  | Z34820    | 1217.057  | 1183.463  | AF116702  | 60469.18  | 59279.906 |
| AL050205  | 15006.613 | 13269.72  | L02840    | 26401.102 | 21708.975 | NM_005724 | 12621.354 | 10070.629 |
| AK023947  | 1009.167  | 867.777   | BG569143  | 1104.106  | 1366.177  | X58794    | 2529.347  | 1951.056  |
| NM_005691 | 3164.373  | 2868.401  | AA843679  | 16174.87  | 15255.148 | NM_001735 | 3886.943  | 3002.723  |
| AB045832  | 475.194   | 457.431   | H68922    | 953.003   | 927.305   | Z70701    | 30252.246 | 32662.197 |
| AF086156  | 1070.977  | 727.419   | AF090906  | 3094.118  | 2527.515  | AB040972  | 8939.476  | 11772.689 |
| AK023814  | 910.366   | 919.488   | AB023219  | 5436.73   | 4747.329  | AF148505  | 5056.146  | 6840.005  |

|           |           |           |           |           |           |           |           |           |
|-----------|-----------|-----------|-----------|-----------|-----------|-----------|-----------|-----------|
| AF130063  | 1097.019  | 814.928   | NM_014148 | 1304.937  | 1516.211  | NM_018686 | 26401.799 | 30464.682 |
| AF086528  | 1597.07   | 1167.924  | NM_002480 | 10381.243 | 9816.088  | NM_017676 | 2767.818  | 3383.34   |
| AL162043  | 1286.274  | 885.525   | NM_017571 | 12064.033 | 7827.382  | AK021764  | 1730.839  | 2150.995  |
| NM_006543 | 2153.546  | 1746.039  | L03169    | 771.062   | 867.642   | NM_005431 | 7814.938  | 8978.297  |
| AF086252  | 2545.716  | 2250.012  | NM_001928 | 3032.236  | 2302.164  | NM_002894 | 20747.193 | 22265.361 |
| AK026703  | 749.703   | 718.961   | NM_006399 | 1548.382  | 1088.814  | NM_004260 | 20298.602 | 20797.752 |
| NM_017599 | 698.938   | 763.238   | NM_000185 | 17966.803 | 10923.016 | AL050067  | 4963.375  | 4902.319  |
| AK024367  | 719.43    | 1009.196  | Y00816    | 2080.033  | 2541.267  | NM_004972 | 19542.469 | 19764.504 |
| NM_017866 | 14783.136 | 16688.934 | NM_004512 | 34743.191 | 49541.379 | NM_006251 | 9234.848  | 8288.54   |
| AJ131244  | 898.905   | 1108.987  | NM_002930 | 1230.605  | 895.959   | NM_004103 | 26142.492 | 23916.381 |
| NM_003536 | 3783.219  | 4470.564  | NM_004380 | 40238.688 | 55560.781 | NM_002314 | 16058.372 | 17716.254 |
| AF116707  | 10924.108 | 13188.601 | U86813    | 1899.112  | 2987.707  | NM_001744 | 4819.593  | 4384.365  |
| U90910    | 1267.398  | 1512.449  | NM_004119 | 3818.319  | 6196.935  | NM_006296 | 5238.498  | 5041.678  |
| AL049979  | 1090.948  | 2105.201  | D26070    | 4085.808  | 5805.471  | Z25433    | 3871.997  | 3410.736  |
| AK025765  | 1674.789  | 2785.115  | NM_002280 | 2330.564  | 1580.306  | NM_005922 | 4163.391  | 3777.542  |
| AK024263  | 3332.951  | 4194.456  | NM_017459 | 651.387   | 457.401   | NM_018636 | 13573.419 | 11464.492 |
| NM_016613 | 9916.875  | 12399.371 | NM_007035 | 6981.34   | 7193.34   | AL137593  | 38002.012 | 28815.875 |
| AF086414  | 2200.482  | 2932.971  | AB019562  | 2812.365  | 2784.911  | NM_003915 | 3863.82   | 3308.26   |
| AJ012490  | 8770.559  | 10237.547 | NM_002271 | 54207.066 | 57821.25  | NM_000382 | 3172.055  | 3211.804  |
| U84516    | 20361.791 | 16158.481 | NM_018361 | 3099.261  | 3231.482  | NM_016593 | 5806.541  | 8426.915  |
| AL049270  | 3287.649  | 2990.015  | AB040966  | 5905.401  | 5857.085  | NM_002521 | 2937.627  | 3380.951  |
| U88834    | 4566.592  | 3442.916  | NM_020132 | 8577.013  | 7426.108  | NM_001150 | 4148.677  | 5113.465  |
| BC025324  | 877.06    | 834.781   | NM_016467 | 8227.197  | 5512.897  | NM_002856 | 10023.016 | 12881.274 |
| AK023564  | 579.792   | 592.372   | NM_007253 | 5628.945  | 3909.082  | NM_003225 | 1637.186  | 2173.478  |
| NM_003533 | 2048.95   | 1623.146  | NM_000558 | 30409.869 | 34150.813 | NM_000096 | 1768.131  | 2284.966  |
| AK023726  | 4624.815  | 3408.478  | NM_000835 | 1476.994  | 2059.477  | AA418251  | 1573.884  | 1839.266  |
| AK024906  | 879.013   | 558.041   | NM_014437 | 1141.107  | 591.101   | AA143087  | 29822.088 | 31915.713 |
| NM_005607 | 6635.497  | 5630.812  | NM_001830 | 1047.248  | 1495.325  | U25804    | 501.491   | 677.54    |
| NM_006761 | 53660.406 | 59902.234 | NM_006808 | 28419.693 | 42554.363 | BI870965  | 16061.57  | 17026.586 |
| NM_014897 | 3134.408  | 4378.841  | NM_006634 | 2862.542  | 3200.947  | BI835536  | 17155.705 | 18180.191 |
| NM_003453 | 16496.27  | 18737.314 | NM_016465 | 8106.242  | 12717.556 | BF205051  | 12877.229 | 11144.421 |
| NM_018371 | 29259.67  | 32703.93  | NM_000328 | 1933.718  | 2760.904  | X02761    | 30130.422 | 27440.887 |
| AF052095  | 387.408   | 495.802   | NM_002410 | 1973.112  | 1537.697  | M91463    | 3101.75   | 2178.15   |
| NM_014390 | 32546.713 | 37272.945 | AL122120  | 7378.819  | 8258.393  | U88317    | 1502.998  | 1089.82   |
| NM_018143 | 1588.795  | 2288.978  | NM_014684 | 2088.597  | 1572.384  | J03060    | 4349.855  | 3459.95   |
| X78924    | 3272.94   | 3971.424  | AK027247  | 2336.174  | 2030.075  | X54156    | 1110.214  | 879.909   |
| NM_013250 | 2193.417  | 3173.193  | AL137724  | 4163.257  | 4847.876  | NM_003743 | 3139.235  | 2462.072  |
| NM_001889 | 22744.332 | 31005.727 | NM_004758 | 8397.353  | 10676.819 | AA829383  | 17180.26  | 14890.905 |
| NM_004999 | 653.509   | 980.142   | NM_002913 | 2521.134  | 2991.457  | L22524    | 403.969   | 288.064   |
| X89668    | 14401.647 | 21271.814 | AK022797  | 980.011   | 916.639   | AF012434  | 42052.402 | 30018.461 |
| NM_004458 | 4981.193  | 5988.678  | NM_007370 | 3362.69   | 3159.086  | NM_018124 | 14992.818 | 10463.503 |
| NM_006901 | 2842.812  | 3347.994  | NM_006231 | 879.028   | 820.752   | NM_004887 | 14468.426 | 19732.344 |
| NM_018530 | 2836.24   | 3177.672  | AK023471  | 1909.222  | 1315.986  | NM_006404 | 1365.379  | 2291.066  |
| AJ003145  | 748.895   | 851.95    | AF044578  | 7161.385  | 4675.009  | NM_014795 | 2543.503  | 2745.74   |
| AK022855  | 7518.648  | 6771.197  | NM_001948 | 3351.105  | 1065.408  | NM_002986 | 2299.733  | 2900.231  |
| AK023816  | 824.726   | 852.939   | NM_001067 | 17776.537 | 18798.693 | M15330    | 2417.009  | 4178.126  |
| AF305686  | 6788.164  | 6238.968  | NM_014034 | 8937.604  | 13382.455 | NM_014396 | 5805.583  | 6749.84   |
| AF085832  | 1748.18   | 1288.201  | NM_005335 | 36139.582 | 52455.645 | AK027201  | 4801.942  | 5646.258  |
| AK025981  | 7325.985  | 6448.452  | J04474    | 12847.042 | 18954.758 | NM_000489 | 38865.66  | 39646.902 |
| AF086266  | 1993.138  | 1725.585  | NM_003761 | 51020.051 | 54589.512 | X98507    | 16525.209 | 17698.83  |
| AK025337  | 3086.125  | 3307.108  | NM_004726 | 1266.885  | 1907.436  | NM_016030 | 57966.977 | 65146.969 |
| AB028984  | 1235.234  | 1305.448  | NM_014011 | 10613.764 | 15847.577 | NM_014669 | 16590.623 | 18697.277 |
| NM_005602 | 1023.352  | 1562.985  | AK025994  | 8774.614  | 10610.226 | NM_005652 | 42804.336 | 47800.98  |

|           |           |           |           |           |           |           |           |           |
|-----------|-----------|-----------|-----------|-----------|-----------|-----------|-----------|-----------|
| NM_003573 | 6769.888  | 6850.995  | L29306    | 1548.53   | 1958.597  | AK026686  | 1270.182  | 1334.949  |
| NM_000296 | 5921.099  | 6535.753  | NM_013989 | 9028.884  | 10461.885 | NM_005902 | 6546.117  | 6441.688  |
| NM_012302 | 1239.649  | 1397.068  | NM_002270 | 558.779   | 530.909   | NM_002850 | 61125.535 | 66081.82  |
| NM_017422 | 3750.025  | 4100.519  | NM_001055 | 47205.867 | 47506.762 | NM_005302 | 765.357   | 736.758   |
| NM_006149 | 429.505   | 806.15    | NM_015878 | 344.892   | 369.104   | NM_004302 | 1062.337  | 940.912   |
| NM_005879 | 2277.208  | 2645.186  | NM_020203 | 8051.979  | 8975.451  | NM_005903 | 3306.016  | 3021.858  |
| AF147790  | 1363.477  | 1358.242  | L40992    | 1653.175  | 1812.33   | NM_000861 | 1807.428  | 1574.03   |
| NM_018969 | 932.558   | 917.242   | U20582    | 16281.12  | 22481.135 | U77493    | 1576.588  | 1408.377  |
| NM_004112 | 1242.111  | 1412.113  | NM_000337 | 1114.459  | 1282.959  | NM_019062 | 2002.988  | 1483.27   |
| AY007233  | 466.508   | 550.468   | NM_002079 | 6349.747  | 7139.386  | NM_017583 | 22475.053 | 15346.31  |
| AK025592  | 4358.482  | 3539.857  | AI660957  | 1049.658  | 893.363   | Y16132    | 24252.268 | 21102.848 |
| NM_004635 | 5604.958  | 5168.748  | U13697    | 713.056   | 758.215   | NM_002905 | 10245.665 | 11917.782 |
| AK023023  | 8649.867  | 8249.684  | X75308    | 352.722   | 304.866   | NM_000700 | 6301.083  | 7948.099  |
| NM_015993 | 4412.014  | 4105.132  | U04270    | 35504.262 | 27400.576 | NM_019028 | 35397.145 | 44531.586 |
| NM_002659 | 3209.681  | 3056.198  | Z34820    | 1164.046  | 1421.498  | NM_000431 | 4548.982  | 6339.258  |
| Z36776    | 2031.826  | 2312.204  | AA629719  | 62630.043 | 65508.098 | NM_013421 | 4635.402  | 6185.258  |
| AB029015  | 1917.923  | 1642.79   | AA927528  | 10783.275 | 13504.854 | NM_012474 | 9338.362  | 11881.572 |
| NM_002067 | 14010.396 | 10824.921 | X02152    | 61465.516 | 65824.133 | AB033118  | 2918.101  | 3470.137  |
| NM_001059 | 65022.898 | 65623.305 | BG676364  | 11047.434 | 14560.63  | NM_019606 | 8435.989  | 8227.695  |
| NM_020345 | 2302.008  | 2398.805  | BG181154  | 2995.622  | 3096.293  | NM_001690 | 20713.264 | 21590.555 |
| NM_003287 | 2808.851  | 3072.638  | AA843679  | 19520.377 | 29676.361 | AF034374  | 29351.221 | 34564.238 |
| NM_012325 | 24146.936 | 27115.201 | H68922    | 1603.024  | 1777.837  | NM_001682 | 6649.274  | 6736.063  |
| NM_014434 | 6075.826  | 7563.229  | AF090906  | 5196.474  | 6477.601  | AK025130  | 7415.338  | 8110.071  |
| NM_019607 | 14957.45  | 16267.971 | AB023219  | 8652.288  | 8831.051  | AK023232  | 13809.537 | 13313.855 |
| U79260    | 9989.568  | 11824.374 | NM_014148 | 1637.675  | 1577.193  | NM_006380 | 3751.614  | 3820.165  |
| NM_001895 | 21249.434 | 29201.221 | NM_018835 | 7111.817  | 6983.761  | AB020710  | 3870.37   | 3408.725  |
| NM_006447 | 7579.014  | 9593.504  | NM_003401 | 3961.1    | 4213.13   | Z83801    | 337.719   | 262.757   |
| AF119851  | 1378.552  | 1923.925  | NM_006399 | 2738.51   | 3548.325  | NM_016174 | 16152.829 | 15057.616 |
| NM_014129 | 11607.192 | 19812.131 | NM_018965 | 983.087   | 1405.202  | NM_020377 | 2571.084  | 2167.865  |
| D87455    | 4264.431  | 5582.609  | NM_000185 | 24841.771 | 26587.486 | U88896    | 3686.17   | 2614.85   |
| AF080577  | 3263.315  | 4084.731  | Y00816    | 2008.908  | 2082.726  | AF116702  | 62813.512 | 63584.699 |
| L22005    | 18681.949 | 27406.426 | NM_004512 | 25205.031 | 22849.088 | NM_005724 | 14608.028 | 12774.841 |
| NM_012291 | 30230.143 | 32536.707 | NM_004380 | 32959.547 | 30002.311 | X58794    | 2918.823  | 2436.609  |
| NM_013368 | 3607.904  | 4274.266  | U86813    | 1506.477  | 1323.517  | NM_001735 | 4583.754  | 3837.18   |
| NM_003807 | 6845.543  | 7165.81   | NM_004119 | 4244.554  | 3358.129  | NM_002349 | 1922.46   | 1381.082  |
| NM_004358 | 7497.493  | 6853.232  | D26070    | 4029.028  | 4809.916  | NM_005080 | 20504.305 | 20163.654 |
| NM_001790 | 4917.973  | 4276.366  | NM_001642 | 13986.668 | 22120.309 | AF148505  | 5171.178  | 6492.62   |
| NM_018243 | 5582.587  | 4894.359  | NM_003392 | 1989.856  | 2337.305  | NM_018686 | 26662.486 | 29832.211 |
| NM_014939 | 4917.264  | 4629.829  | NM_002280 | 3969.357  | 6056.175  | NM_017676 | 3176.243  | 4037.063  |
| NM_003005 | 6707.968  | 4559.771  | NM_017459 | 1220.43   | 1427.105  | AK021764  | 1467.76   | 2077.974  |
| NM_000873 | 7529.178  | 5735.918  | NM_000501 | 61887.039 | 60445.199 | NM_005431 | 7361.878  | 7559.759  |
| AB033025  | 920.29    | 1212.501  | NM_000114 | 8344      | 9700.504  | NM_002894 | 22780.889 | 22353.506 |
| NM_004418 | 16522.518 | 27721.414 | NM_005156 | 3924.981  | 5823.998  | NM_004629 | 8145.102  | 7450.438  |
| NM_000917 | 11696.034 | 14052.629 | NM_015193 | 4340.208  | 4525.113  | NM_004260 | 21907.186 | 24268.344 |
| NM_005389 | 38837.758 | 41562.672 | X98834    | 9101.704  | 12189.988 | AL050067  | 5599.537  | 5948.852  |
| NM_014445 | 51571.965 | 50791.734 | NM_007035 | 11490.255 | 13261.257 | NM_004972 | 19628.141 | 20495.352 |
| AL832826  | 4098.868  | 6407.46   | AF036364  | 5557.455  | 7311.982  | NM_006251 | 9714.777  | 8891.044  |
| NM_016123 | 3541.504  | 5360.249  | AK022847  | 7723.422  | 11528.226 | NM_004103 | 29951.674 | 27323.053 |
| AB048365  | 4300.844  | 5396.159  | AK000271  | 1748.418  | 1781.439  | NM_002314 | 16254.319 | 14253.163 |
| NM_000391 | 13705.022 | 15021.326 | NM_006808 | 23930.469 | 16599.42  | NM_001744 | 4527.5    | 4129.965  |
| AF229179  | 1324.888  | 1905.816  | NM_006634 | 2174.422  | 1311.482  | NM_006296 | 5532.806  | 4518.031  |
| NM_014771 | 10112.455 | 9412.05   | NM_016465 | 5308.234  | 2854.105  | Z25433    | 3873.334  | 3247.738  |
| NM_002275 | 1534.967  | 1635.046  | NM_013399 | 5360.018  | 8464.505  | NM_005922 | 5486.803  | 4164.974  |



|           |           |           |           |           |           |           |           |           |
|-----------|-----------|-----------|-----------|-----------|-----------|-----------|-----------|-----------|
| AB032945  | 726.582   | 769.324   | NM_002410 | 1893.924  | 2741.597  | NM_01863E | 14510.078 | 10783.06  |
| AK025215  | 28753.793 | 22364.988 | AL122120  | 7769.969  | 10943.174 | AL137593  | 41071.871 | 30798.564 |
| BF569160  | 418.409   | 428.93    | NM_014684 | 2358.825  | 2637.857  | NM_00391E | 4869.317  | 4127.329  |
| NM_018131 | 6255.54   | 6390.591  | AK027247  | 2645.378  | 2973.415  | NM_00038E | 4155.563  | 4292.458  |
| NM_014834 | 712.457   | 660.952   | NM_002480 | 14384.313 | 16877.115 | AL133064  | 7274.743  | 5904.8    |
| NM_01763E | 8789.352  | 6872.04   | NM_017571 | 18368.842 | 14652.066 | NM_006227 | 6799.718  | 6404.025  |
| NM_01246E | 1074.301  | 835.062   | AB007946  | 429.272   | 650.294   | NM_001150 | 3585.392  | 3785.381  |
| NM_002430 | 1084.114  | 1013.839  | NM_00192E | 4895.048  | 5970.027  | NM_00285E | 10725.265 | 12675.501 |
| NM_006150 | 2446.558  | 2234.4    | NM_01398E | 11535.625 | 16327.982 | NM_00322E | 1901.607  | 2992.152  |
| NM_01494E | 9749.102  | 11207.261 | NM_00173E | 2551.128  | 3447.655  | NM_00009E | 2401.655  | 3263.694  |
| AK024392  | 6583.82   | 7034.898  | NM_002270 | 654.74    | 1233.981  | AA418251  | 1488.648  | 1717.588  |
| NM_013260 | 2825.339  | 3325.748  | NM_00105E | 60324.48  | 60853.313 | AA143087  | 30147.748 | 30465.219 |
| NM_00524E | 432.615   | 576.672   | NM_002271 | 55881.246 | 54374.031 | NM_00190E | 464.54    | 373.967   |
| NM_018300 | 3014.411  | 3082.594  | NM_018361 | 4019.578  | 3124.741  | BI835536  | 18951.305 | 20475.479 |
| NM_00487E | 10921.992 | 13140.371 | NM_01989E | 712.537   | 610.186   | BF205051  | 13724.688 | 13785.679 |
| NM_018254 | 5290.481  | 5770.261  | NM_00725E | 10666.189 | 15093.498 | X02761    | 32306.074 | 29912.814 |
| NM_01774E | 5399.666  | 6303.341  | NM_01910E | 3679.708  | 5859.759  | M91463    | 3489.05   | 2938.964  |
| NM_01843E | 7775.781  | 12523.481 | L08436    | 1132.036  | 2141.979  | U88317    | 1469.554  | 1265.542  |
| NM_000937 | 2106.973  | 2627.048  | AB033002  | 1924.809  | 3376.889  | J03060    | 5068.244  | 3971.942  |
| AB028451  | 3445.521  | 4085.182  | NM_00055E | 28499.254 | 37866.496 | X54156    | 1372.864  | 1163.837  |
| AK024810  | 37413.113 | 38992.547 | NM_00419E | 1057.097  | 1308.259  | NM_00374E | 2822.838  | 2162.528  |
| AK022615  | 56690.211 | 58065.555 | NM_014170 | 4955.913  | 5870.125  | AA829383  | 17159.762 | 13817.719 |
| NM_00404E | 12846.849 | 11763.67  | AF116652  | 60720.656 | 57576.969 | AF012434  | 41819.707 | 28909.494 |
| BM458096  | 25793.859 | 21555.732 | AF090906  | 4407.816  | 5218.883  | NM_018124 | 16657.129 | 12732.602 |
| NM_00562E | 13742.079 | 12386.838 | AB023219  | 6141.753  | 6559.407  | Z70701    | 25871.18  | 18137.244 |
| D29958    | 39467.637 | 33142.973 | NM_01414E | 1427.78   | 1339.512  | AB040972  | 6318.021  | 4825.601  |
| NM_015971 | 29602.145 | 23792.465 | NM_01883E | 4631.383  | 4706.833  | X98507    | 16458.6   | 18604.195 |
| D17257    | 57667.664 | 58365.094 | NM_003401 | 2197.693  | 1976.721  | NM_016030 | 54602.457 | 60539.809 |
| NM_00284E | 3041.075  | 2388.014  | AL137724  | 2394.52   | 1513.602  | NM_01466E | 16373.393 | 22343.783 |
| AF290204  | 755.085   | 430.491   | NM_00475E | 5470.894  | 4401.148  | NM_00565E | 45845.48  | 53502.207 |
| NM_01212E | 2166.579  | 2190.712  | NM_00291E | 2722.018  | 2390.14   | AK026686  | 1052.645  | 1416.184  |
| NM_00391E | 1115.32   | 1030.473  | AK022797  | 1376.839  | 1052.309  | NM_00590E | 6696.947  | 7231.798  |
| NM_004807 | 4190.464  | 6594.891  | NM_007370 | 4026.627  | 2448.632  | NM_00530E | 1174.849  | 604.719   |
| AF219140  | 1456.43   | 1610.227  | NM_00194E | 6481.407  | 10382.243 | NM_00430E | 1119.415  | 1376.14   |
| J03569    | 55006.422 | 59452.59  | NM_001067 | 20093.24  | 31141.629 | NM_00590E | 3138.27   | 3729.38   |
| NM_00311E | 11923.876 | 11699.99  | NM_014034 | 8192.229  | 12014.814 | NM_000861 | 2873.623  | 2558.443  |
| NM_000694 | 967.66    | 1277.112  | NM_00533E | 36125.953 | 41070.012 | NM_000024 | 456.786   | 716.533   |
| NM_000687 | 50218.422 | 44118.438 | J04474    | 12129.311 | 13767.343 | AB037734  | 679.988   | 900.361   |
| NM_00044E | 1268.658  | 1287.334  | NM_003761 | 50597.68  | 53550.598 | U77493    | 1745.213  | 1932.325  |
| NM_018200 | 4230.677  | 4250.965  | NM_00472E | 2146.461  | 2292.237  | NM_01906E | 2441.404  | 2501.925  |
| NM_01483E | 5022.853  | 4969.944  | L29306    | 1282.229  | 1291.004  | NM_00387E | 1770.207  | 1556.305  |
| NM_00721E | 1182.045  | 1574.892  | AK022262  | 1557.837  | 1780.313  | NM_00026E | 5331.417  | 4708.052  |
| AF005067  | 4099.705  | 4662.371  | AF088039  | 68770.453 | 62379.984 | AF073519  | 20893.148 | 13995.605 |
| NM_005710 | 12050.38  | 10490.494 | AF086220  | 1719.56   | 1987.925  | AB001451  | 1315.824  | 1080.097  |
| AF252284  | 3734.657  | 3547.441  | AK023941  | 1824.312  | 1749.898  | NM_01758E | 24741.906 | 17191.549 |
| NM_014930 | 1476.956  | 1231.497  | AF086265  | 428.869   | 578.53    | Y16132    | 32049.92  | 22735.416 |
| NM_001530 | 7716.823  | 7976.811  | AL390083  | 7259.1    | 5507.941  | NM_01659E | 5146.229  | 4301.272  |
| U80232    | 10115.712 | 8648.293  | AL050227  | 860.746   | 765.312   | NM_002521 | 2945.941  | 2355.312  |
| M27877    | 22811.139 | 17755.436 | AF085905  | 749.824   | 742.703   | NM_000271 | 25246.648 | 30602.604 |
| D70836    | 48945.883 | 35523.383 | AK026571  | 4976.541  | 3577.63   | NM_01820E | 7724.003  | 9697.191  |
| D16878    | 2320.58   | 2247.474  | AK024673  | 4714.304  | 3042.012  | NM_006184 | 17493.305 | 22122.18  |
| NM_00703E | 11615.488 | 13072.019 | AF070618  | 3375.555  | 3292.464  | AB018268  | 17203.195 | 23668.445 |
| AB019562  | 2575.077  | 3331.686  | SR4       | 9281.154  | 8872.602  | NM_01904E | 794.933   | 819.29    |

|           |           |           |           |           |           |           |           |           |
|-----------|-----------|-----------|-----------|-----------|-----------|-----------|-----------|-----------|
| AF036364  | 6080.837  | 8464.94   | SR6       | 1086.241  | 1248.085  | NM_00638C | 3266.821  | 3834.499  |
| AK022847  | 7717.143  | 10761.951 | SR8       | 4273.774  | 12754.051 | AB020710  | 3429.185  | 4453.077  |
| NM_020203 | 3307.777  | 3945.07   | SR10      | 13588.979 | 5166.637  | Z83801    | 506.852   | 459.05    |
| L40992    | 523.502   | 604.785   | AL049365  | 16087.23  | 16324.264 | NM_016174 | 16046.204 | 16783.42  |
| U20582    | 20807.416 | 22251.525 | AK025132  | 858.846   | 1009.655  | NM_020377 | 2842.636  | 2857.387  |
| NM_000337 | 767.274   | 857.593   | AK025157  | 5714.437  | 4603.701  | U88896    | 4049.629  | 3876.696  |
| NM_002079 | 14933.429 | 12838.589 | AK022633  | 955.83    | 743.024   | AF116702  | 61186.277 | 62816.945 |
| U13697    | 1551.033  | 1856.283  | AK000079  | 740.189   | 547.761   | NM_005724 | 14628.571 | 17130.793 |
| X75308    | 533.797   | 676.464   | NM_012243 | 2261.811  | 1747.839  | X58794    | 4119.868  | 4774.003  |
| U04270    | 9180.265  | 11095.44  | AK025743  | 2493.015  | 2009.698  | NM_001735 | 4781.777  | 4418.325  |
| J03810    | 401.278   | 580.828   | AL137466  | 622.886   | 362.631   | NM_002345 | 2384.548  | 2329.213  |
| BG569143  | 670.57    | 403.16    | AK023974  | 3074.773  | 2990.025  | NM_00508C | 22296.117 | 23413.26  |
| AA629719  | 58693.617 | 58913.598 | AK023768  | 1530.102  | 1066.467  | NM_004887 | 17635.738 | 14825.528 |
| AA927528  | 7524.309  | 6311.478  | NM_014729 | 794.512   | 604.101   | NM_006404 | 1629.536  | 1191.69   |
| X02152    | 61082.535 | 63171.738 | AF147335  | 1988.226  | 1501.699  | NM_014795 | 2853.26   | 1964.801  |
| BG676364  | 8833.038  | 7583.242  | AK022216  | 8067.622  | 5662.131  | NM_002986 | 1966.301  | 1699.84   |
| BG181154  | 2444.056  | 1811.388  | AK025812  | 7000.76   | 5075.893  | M15330    | 2659.597  | 3547.734  |
| AA843679  | 6214.543  | 5670.525  | U00960    | 1685.308  | 1458.014  | NM_014396 | 5025.697  | 3604.271  |
| H68922    | 1166.653  | 836.655   | AK026419  | 764.78    | 907.896   | AK027201  | 4176.752  | 3014.459  |
| AF097159  | 2689.278  | 2627.144  | AK025276  | 6105.321  | 5439.576  | NM_000485 | 23478.395 | 19140.578 |
| NM_014684 | 2653.626  | 1827.305  | AK026457  | 3027.469  | 2215.755  | AL137593  | 44668.711 | 45844.043 |
| AK027247  | 3142.814  | 2674.255  | AK026825  | 1122.038  | 976.206   | NM_003915 | 5207.085  | 6591.848  |
| NM_00248C | 13152.971 | 15802.437 | NM_013355 | 1375.244  | 1327.283  | NM_000382 | 3710.719  | 5874.846  |
| NM_017571 | 20949.078 | 17335.824 | NM_003847 | 31760.848 | 21510.738 | AL133064  | 7986.268  | 9037.327  |
| AB007946  | 1303.449  | 1287.184  | AK021973  | 1371.444  | 944.262   | NM_006227 | 9129.309  | 11370.919 |
| L03169    | 3942.26   | 3471.27   | AL050165  | 68826.078 | 58704.602 | NM_002905 | 10075.873 | 12989.071 |
| M81349    | 1291.879  | 1620.033  | AL117445  | 2164.857  | 2066.855  | NM_00070C | 6363.908  | 6856.424  |
| NM_001925 | 4413.521  | 4258.086  | AL122113  | 8286.85   | 7316.224  | NM_019025 | 33202.648 | 33262.457 |
| NM_006395 | 2376.499  | 2558.017  | AK024415  | 2099.778  | 1818.986  | NM_000431 | 4852.062  | 4821.302  |
| NM_018965 | 1047.644  | 1143.793  | AK023515  | 710.259   | 773.855   | NM_013421 | 5219.85   | 5126.809  |
| NM_000185 | 1687.693  | 1927.332  | AL137623  | 25415.977 | 21050.67  | NM_012474 | 11145.588 | 12147.89  |
| Y00816    | 3972.29   | 5464.313  | AJ227874  | 1462.235  | 1376.717  | AB033118  | 2419.696  | 2689.272  |
| NM_004512 | 5561.493  | 6887.619  | AF009276  | 425.384   | 383.769   | NM_019606 | 8277.866  | 7384.48   |
| NM_00293C | 690.857   | 770.825   | AF056428  | 17940.842 | 13952.571 | NM_00169C | 21590.887 | 17072.287 |
| NM_00438C | 25222.244 | 27283.902 | AK021594  | 559.462   | 439.475   | AF034374  | 31775.045 | 30709.188 |
| U86813    | 682.093   | 295.896   | AK021635  | 1373.715  | 1142.691  | NM_016118 | 14701.315 | 10855.062 |
| NM_004119 | 445.26    | 629.348   | AK021856  | 2048.183  | 1858.791  | NM_018674 | 46697.516 | 43082.773 |
| AY007378  | 4624.267  | 4096.594  | S97393    | 473.841   | 1046.059  | NM_001683 | 29409.748 | 27095.619 |
| D26070    | 2507.219  | 2065.858  | BE698533  | 251.36    | 780.262   | NM_001682 | 6884.911  | 6026.749  |
| NM_001642 | 9172.938  | 8247.058  | NM_017929 | 1358.732  | 1470.684  | NM_014405 | 6330.486  | 4325.457  |
| NM_001542 | 752.681   | 654.752   | NM_018472 | 1251.885  | 1011.172  | NM_000816 | 1532.407  | 1608.191  |
| NM_017455 | 551.617   | 452.329   | AJ008128  | 32036.578 | 24976.533 | NM_014925 | 2678.403  | 2015.568  |
| NM_001055 | 15708.093 | 19194.018 | AL449243  | 14153.347 | 10425.042 | AK025130  | 6944.411  | 5832.863  |
| NM_015875 | 1069.959  | 926.79    | M12211    | 6509.554  | 4734.286  | NM_017875 | 3383.224  | 2137.044  |
| NM_002271 | 58466.699 | 63219.816 | AF086338  | 658.269   | 584.62    | AK023232  | 8633.528  | 6248.123  |
| NM_018361 | 8118.65   | 9324.917  | AK024303  | 787.329   | 830.183   | NM_018124 | 16826.891 | 22182.75  |
| NM_019893 | 1022.035  | 1055.733  | AL160131  | 8520.654  | 7313.025  | Z70701    | 29261.891 | 29928.813 |
| AB040966  | 16094.837 | 12975.814 | AF086045  | 2421.783  | 1974.418  | AB040972  | 8188.859  | 8708.771  |
| NM_020132 | 10853.265 | 11834.405 | AK027028  | 3714.346  | 2462.52   | AF148505  | 4826.271  | 5256.396  |
| NM_016467 | 15587.271 | 13583.529 | AK027069  | 732.371   | 576.011   | NM_018686 | 27020.709 | 24089.988 |
| NM_007253 | 674.975   | 1175.154  | AK026916  | 1910.816  | 1796.741  | NM_017676 | 3418.584  | 3204.179  |
| NM_000555 | 2497.963  | 3788.877  | AK026914  | 2288.658  | 1831.887  | AK021764  | 1516.098  | 1438.595  |
| NM_000835 | 1378.517  | 1362.607  | Y13808    | 389.206   | 348.658   | NM_005431 | 7573.017  | 6915.971  |

|           |           |           |           |           |           |           |           |           |
|-----------|-----------|-----------|-----------|-----------|-----------|-----------|-----------|-----------|
| NM_00183C | 832.81    | 1042.201  | Y11166    | 2413.508  | 2225.657  | NM_002894 | 21078.408 | 21327.641 |
| NM_001149 | 829.186   | 593.845   | AK024942  | 3850.34   | 5049.02   | NM_004625 | 9059.118  | 6563.663  |
| NM_00680E | 41130.262 | 35834.648 | AJ227873  | 12823.835 | 14134.304 | NM_00426C | 18329.869 | 17035.299 |
| NM_006634 | 2250.377  | 1880.855  | AK022886  | 3436.634  | 4050.394  | AL050067  | 4951.265  | 4341.737  |
| NM_01646E | 8414.854  | 7608.475  | AK024665  | 5643.344  | 5124.786  | NM_004972 | 19666.498 | 17785.006 |
| NM_00032E | 1696.901  | 1201.873  | AF147363  | 746.276   | 731.915   | NM_006251 | 9772.751  | 8014.264  |
| NM_01339E | 991.553   | 831.579   | AJ227880  | 451.879   | 557.683   | NM_004103 | 26982.289 | 22899.803 |
| NM_00241C | 1172.124  | 774.125   | AK000691  | 1258.17   | 1226.833  | NM_002314 | 16303.385 | 13674.191 |
| AL122120  | 8043.856  | 5400.467  | AK001448  | 1487.412  | 1242.057  | NM_001744 | 4373.219  | 3714.568  |
| NM_01883E | 7939.116  | 9265.431  | AF131817  | 921.598   | 488.443   | NM_00629E | 5280.725  | 4245.533  |
| NM_003401 | 3704.481  | 3933.653  | AL049321  | 2945.125  | 1985.696  | Z25433    | 3438.459  | 2620.18   |
| AL137724  | 3623.93   | 4901.666  | NM_00354E | 3980.018  | 2581.337  | NM_005922 | 6552.572  | 4319.926  |
| NM_00475E | 521.442   | 689.8     | AL137625  | 792.917   | 598.386   | NM_01863E | 11735.798 | 6979.122  |
| NM_002913 | 6181.622  | 5829.658  | AK025750  | 1271.211  | 1046.644  | CY3Cy5    | 9031.813  | 1255.684  |
| AK022797  | 2401.949  | 2269.459  | BF031253  | 2368.48   | 1983.796  | NM_003942 | 2821.524  | 5174.912  |
| NM_00737C | 6544.036  | 6773.157  | AF143887  | 1495.145  | 1129.241  | NM_004452 | 1140.435  | 1218.041  |
| NM_006231 | 1772.231  | 2134.172  | AK025783  | 1775.65   | 1246.623  | AK022632  | 2035.883  | 1809.555  |
| AK023471  | 971.448   | 1101.324  | AF113675  | 1209.584  | 950.346   | AK021554  | 2569.126  | 1983.065  |
| AF044578  | 2844.393  | 3212.193  | AK024514  | 924.742   | 798.044   | AF070620  | 516.895   | 424.89    |
| NM_00194E | 5307.836  | 5618.701  | NM_020119 | 2216.844  | 1887.934  | NM_02023E | 5767.614  | 6154.982  |
| NM_001067 | 23174.926 | 29231.568 | AL049417  | 2944.634  | 2469.101  | AK000532  | 1254.288  | 1132.358  |
| NM_014034 | 8959.797  | 10497.673 | AK023507  | 757.13    | 840.663   | AL109681  | 743.47    | 756.8     |
| NM_00533E | 43575.895 | 39037.254 | NM_00516E | 9628.02   | 8336.707  | AL162039  | 7467.461  | 5106.758  |
| J04474    | 15848.442 | 16727.523 | AL109818  | 1033.133  | 1011.721  | AK024896  | 4529.446  | 3625.861  |
| NM_003761 | 56205.027 | 47792.781 | NM_00006E | 4520.32   | 5414.85   | AL353952  | 778.56    | 720.92    |
| NM_00472E | 663.939   | 590.512   | AB033046  | 15913.47  | 21091.643 | AK021912  | 461.905   | 483.49    |
| NM_014011 | 15643.993 | 12304.26  | NM_01591E | 6532.777  | 8029.671  | BU165106  | 2733.16   | 2205.895  |
| AK025994  | 8894.496  | 7844.891  | AK023228  | 1044.276  | 409.232   | AF038202  | 2149.211  | 1548.065  |
| L29306    | 1406.04   | 1101.563  | AK026642  | 760.31    | 614.875   | AL360198  | 809.039   | 801.186   |
| NM_01398E | 5029.086  | 3837.09   | AL359063  | 513.115   | 684.845   | AB040925  | 1577.037  | 1345.97   |
| NM_00173E | 3043.546  | 2051.407  | AL079292  | 2355.902  | 1822.982  | NM_003942 | 3072.261  | 2432.123  |
| NM_00227C | 1204.071  | 765.708   | X89667    | 6702.9    | 5426.069  | NM_004452 | 2685.594  | 2569.952  |
| AF036364  | 5932.97   | 6551.668  | NM_014027 | 3855.874  | 3197.404  | SR1       | 78424.789 | 62776.129 |
| AK022847  | 7691.438  | 9359.733  | AF116621  | 6397.247  | 4478.693  | SR3       | 40460.09  | 53266.477 |
| NM_020203 | 2601.091  | 3679.825  | AF086554  | 5162.612  | 3498.712  | SR5       | 4523.926  | 7619.639  |
| L40992    | 612.321   | 844.891   | AL390136  | 37274.68  | 24590.42  | SR7       | 4951.585  | 60006.207 |
| U20582    | 21005.389 | 23763.895 | AK023156  | 623.629   | 542.498   | SR9       | 15870.856 | 4127.566  |
| NM_000337 | 752.132   | 603.156   | AF086398  | 66017.133 | 45699.844 | CY3Cy5    | 6140.07   | 475.645   |
| NM_00207E | 12171.469 | 11179.019 | AK024545  | 1631.911  | 902.044   | M14624    | 314.452   | 756.337   |
| U13697    | 2163.612  | 1765.334  | AK023444  | 786.361   | 835.824   | M26147    | 545.767   | 739.74    |
| X75308    | 499.82    | 413.355   | AK025953  | 1167.719  | 993.98    | AF018254  | 1059.755  | 974.393   |
| U04270    | 6769.509  | 9000.753  | NM_00318C | 1629.903  | 1469.232  | NM_01624C | 2097.724  | 1881.796  |
| Z34820    | 580.656   | 513.847   | AF086406  | 13849.409 | 10938.842 | AK026459  | 1825.91   | 1453.969  |
| BG569143  | 670.495   | 907.313   | D17216    | 4324.115  | 3291.683  | AL049390  | 4362.231  | 3707.033  |
| AA629719  | 59142.836 | 60054.277 | AL137581  | 2087.066  | 2185.109  | AK000584  | 5816.827  | 5426.839  |
| AA927528  | 7540.734  | 6968.877  | J05158    | 433.065   | 646.467   | AJ297363  | 1619.376  | 1218.077  |
| X02152    | 59276.227 | 65265.902 | NM_015564 | 1462.922  | 1637.961  | AK026379  | 3272.054  | 2633.223  |
| BG676364  | 8884.647  | 9622.431  | AF160476  | 974.632   | 1184.36   | AF075002  | 589.062   | 497.035   |
| BG181154  | 2386.613  | 1870.323  | L22650    | 1998.066  | 2625.242  | AK022965  | 1783.361  | 1485.216  |
| AA843679  | 7592.227  | 8003.789  | AB014520  | 37709.359 | 33250.336 | AK024278  | 5289.596  | 4553.645  |
| H68922    | 954.32    | 861.126   | NM_004907 | 4173.061  | 3926.419  | NM_018022 | 2643.387  | 3915.376  |
| AF090906  | 2203.688  | 1565.754  | NM_002891 | 583.729   | 589.177   | AB056722  | 9434.551  | 9665.427  |
| AB023219  | 7900.791  | 4862.758  | NM_00177E | 2533.569  | 2166.513  | NM_013242 | 8168.863  | 7850.634  |

|           |           |           |           |           |           |           |           |           |
|-----------|-----------|-----------|-----------|-----------|-----------|-----------|-----------|-----------|
| NM_01414E | 653.257   | 480.358   | X04526    | 19811.377 | 13712.32  | AK023198  | 8738.274  | 8519.96   |
| NM_00248C | 13201.137 | 16556.002 | D26067    | 2864.341  | 2344.354  | NM_01206E | 25813.469 | 22516.238 |
| NM_017571 | 20495.066 | 21030.807 | AF227924  | 3044.498  | 2174.582  | AF052168  | 26444.514 | 24403.998 |
| AB007946  | 884.547   | 657.703   | NM_00571E | 33488.801 | 19841.479 | NM_01465C | 1176.685  | 959.606   |
| L03169    | 2717.927  | 2711.411  | NM_00618E | 2834.596  | 2088.083  | AK024330  | 269.895   | 497.337   |
| M81349    | 532.179   | 541.227   | S59184    | 1465.593  | 1156.263  | AK024947  | 2033.681  | 2357.401  |
| NM_00192E | 3603.826  | 2966.726  | NM_00513C | 456.743   | 433.027   | AK095125  | 1662.23   | 1531.379  |
| NM_00639E | 2219.184  | 2147.065  | NM_006661 | 5857.342  | 3769.921  | AK024059  | 2475.634  | 1971.478  |
| NM_01896E | 1076.099  | 1657.216  | NM_00574E | 15637.107 | 12415.203 | AK023663  | 828.332   | 835.519   |
| NM_00018E | 1015.605  | 1439.191  | NM_00458E | 1425.1    | 1233.077  | AB007928  | 1789.579  | 1561.543  |
| Y00816    | 5072.93   | 7615.151  | U16126    | 1974.67   | 1703.529  | AK023645  | 2724.025  | 2707.054  |
| NM_00451E | 5774.802  | 7423.347  | AJ008144  | 1650.751  | 2004.949  | D83543    | 1307.039  | 1001.747  |
| NM_00293C | 680.805   | 1015.644  | NM_007314 | 8189.91   | 9452.818  | NM_01693C | 3624.625  | 3210.518  |
| NM_00438C | 26217.969 | 28728.588 | NM_01607E | 1321.842  | 1571.582  | AJ001861  | 4425.453  | 4343.966  |
| U86813    | 449.093   | 500.986   | NM_00660C | 17865.311 | 20150.666 | AJ227865  | 524.229   | 634.208   |
| NM_004119 | 858.25    | 772.039   | AF297709  | 4914.839  | 4629.165  | X64981    | 2880.518  | 3021.797  |
| AY007378  | 5349.586  | 5165.111  | L77564    | 941.55    | 926.384   | AJ001890  | 699.812   | 508.488   |
| D26070    | 2827.678  | 2560.96   | NM_015384 | 3098.287  | 2173.249  | X75692    | 10009.42  | 9157.711  |
| NM_00164E | 11518.855 | 11492.722 | AK023327  | 4927.285  | 4478.579  | X64988    | 1645.668  | 1574.058  |
| NM_00154E | 716.259   | 737.69    | AB046858  | 2672.721  | 1979.086  | Y10511    | 23313.152 | 19804.555 |
| NM_01745E | 635.345   | 356.061   | D50914    | 6777.66   | 5378.314  | AK021832  | 609.413   | 580.453   |
| NM_00703E | 9651.04   | 8276.482  | NM_002007 | 723.426   | 647.342   | AK021505  | 928.495   | 1198.468  |
| AB019562  | 2856.696  | 2464.917  | NM_00230E | 9250.256  | 6285.074  | AK021598  | 4974.925  | 4132.184  |
| NM_002271 | 57962.27  | 58686.785 | AK025439  | 3169.657  | 2347.034  | AK025238  | 690.051   | 624.414   |
| NM_018361 | 8285.727  | 7370.782  | NM_001737 | 5968.104  | 3529.282  | NM_00412E | 704.115   | 579.668   |
| NM_01989E | 798.064   | 1063.573  | Z36784    | 811.633   | 545.186   | AK026416  | 42403.977 | 38436.094 |
| AB040966  | 15920.78  | 14331.124 | NM_01662E | 11160.937 | 7048.779  | AK025797  | 2869.21   | 2894.44   |
| NM_02013E | 10145.769 | 10810.535 | NM_00721E | 965.584   | 739.028   | NM_01775E | 600.083   | 851.763   |
| NM_016467 | 14978.944 | 10979.838 | NM_019064 | 1648.642  | 1323.946  | AK000853  | 865.891   | 751.201   |
| NM_00725E | 1812.206  | 1727.862  | NM_000094 | 22030.006 | 16581.313 | AK000085  | 873.46    | 1025.531  |
| NM_00055E | 2291.597  | 2495.914  | NM_01630E | 1914.387  | 2099.731  | AK000019  | 1274.059  | 1163.478  |
| NM_00083E | 1416.312  | 1703.81   | NM_00415E | 23794.834 | 23844.471 | AK000645  | 1832.237  | 1750.122  |
| NM_00183C | 1057.718  | 1055.854  | AK021866  | 558.532   | 869.306   | AK000893  | 544.697   | 500.358   |
| NM_001149 | 1149.841  | 1429.732  | NM_00324E | 5901.927  | 7543.331  | AK024156  | 2096.363  | 3134.301  |
| NM_00680E | 54978.734 | 52093.539 | M21897    | 1283.419  | 1456.554  | AF086288  | 2070.736  | 2684.223  |
| NM_006634 | 2979.68   | 2292.526  | AF301463  | 1320.969  | 1217.652  | AF119866  | 362.037   | 617.664   |
| NM_01646E | 8820.373  | 9807.4    | NM_015984 | 6667.232  | 5093.978  | NM_016944 | 478.165   | 665.436   |
| NM_00032E | 1964.808  | 1555.292  | NM_006894 | 4539.476  | 3103.047  | AK023109  | 2035.409  | 2733.603  |
| NM_01339E | 1437.06   | 1193.125  | AK023031  | 3295.057  | 2276.796  | NM_00529E | 5393.607  | 6976.714  |
| NM_00241C | 1383.349  | 976.929   | NM_005717 | 65671.078 | 51605.145 | S50185    | 707.638   | 656.718   |
| AL122120  | 10429.646 | 6834.534  | NM_01209C | 2587.705  | 1997.466  | AF133332  | 8075.627  | 7177.123  |
| NM_014684 | 2775.031  | 1528.806  | BE793385  | 1550.217  | 2173.963  | AK022805  | 4842.77   | 4214.285  |
| AK027247  | 3534.021  | 2164.974  | AF177292  | 595.225   | 693.81    | NM_01750E | 1208.074  | 946.084   |
| AL137724  | 4806.89   | 4267.587  | NM_00308E | 8415.495  | 4829.381  | AK024606  | 5147.398  | 4193.492  |
| NM_00475E | 520.29    | 523.761   | AF043290  | 1321.726  | 919.385   | NM_016417 | 26013.988 | 25056.533 |
| NM_00291E | 5868.22   | 6121.46   | NM_00408E | 3759.062  | 3543.451  | NM_01910E | 1836.954  | 1506.605  |
| AK022797  | 2587.702  | 2128.309  | NM_01439E | 10709.969 | 8037.009  | L10147    | 31446.582 | 28891.576 |
| NM_00737C | 6808.705  | 5731.074  | NM_005934 | 51213.387 | 40225.816 | AL080118  | 7854.722  | 8870.095  |
| NM_006231 | 2314.408  | 2343.29   | NM_002614 | 1533.016  | 1230.439  | AL049378  | 5524.862  | 5814.84   |
| AK023471  | 3654.268  | 2707.598  | NM_00565E | 5656.69   | 4172.766  | L09086    | 3187.521  | 2503.183  |
| AF044578  | 3209.889  | 3237.126  | NM_00269E | 4362.456  | 4572.17   | L37702    | 11948.582 | 18016.553 |
| NM_00194E | 8321.539  | 6635.164  | NM_00214E | 1426.847  | 1460.776  | AF238318  | 838.318   | 879.712   |
| NM_001067 | 18921.535 | 17844.762 | AL137449  | 2190.955  | 2294.065  | U79301    | 4361.084  | 4606.646  |

|           |           |           |           |           |           |           |           |           |
|-----------|-----------|-----------|-----------|-----------|-----------|-----------|-----------|-----------|
| NM_014034 | 10776.399 | 11704.11  | U88153    | 4792.706  | 4972.031  | AK022260  | 4724.154  | 4582.882  |
| NM_005335 | 50491.07  | 48021.07  | X03910    | 18754.617 | 17828.609 | M32219    | 14693.854 | 18824.053 |
| J04474    | 24364.848 | 33240.039 | NM_018428 | 22085.99  | 20568.287 | BC018868  | 3016.055  | 2439.236  |
| NM_003761 | 54344.496 | 54900.355 | NM_005058 | 760.361   | 969.651   | AF086174  | 1120.835  | 1041.414  |
| NM_004726 | 807.456   | 1230.532  | NM_006924 | 24360.506 | 23270.107 | AF007128  | 14528.915 | 11512.323 |
| NM_014011 | 19760.865 | 16963.293 | NM_016024 | 5804.379  | 5066.028  | AJ012498  | 1676.556  | 1680.071  |
| AK025994  | 11414.868 | 10295.004 | NM_018107 | 4408.077  | 3398.566  | NM_005973 | 29931.867 | 28465.582 |
| L29306    | 1658.401  | 1276.268  | NM_012279 | 974.393   | 779.022   | X04547    | 2718.927  | 2217.943  |
| NM_013989 | 5567.002  | 4698.634  | NM_018387 | 20353.828 | 12900.659 | AK025823  | 2004.843  | 1758.097  |
| NM_001738 | 4027.866  | 3008.405  | BF310673  | 2875.35   | 1871.804  | AK026691  | 1456.43   | 1443.547  |
| NM_002270 | 1555.046  | 856.014   | R97012    | 59124.176 | 43084.238 | AL359941  | 8300.27   | 8525.527  |
| NM_001055 | 16810.33  | 10813.915 | U77700    | 11649.941 | 7692.422  | U52076    | 1626.137  | 1986.137  |
| NM_015878 | 824.431   | 454.381   | NM_006567 | 10354.379 | 6448.896  | AF035278  | 4423.088  | 5306.908  |
| NM_020203 | 2620.778  | 3531.779  | AF038554  | 26577.393 | 13777.844 | AF086493  | 2625.627  | 3060.788  |
| L40992    | 360.903   | 585.466   | AF264621  | 13054.835 | 8945.522  | AL050202  | 3446.75   | 3067.418  |
| U20582    | 19466.99  | 29053.668 | NM_005875 | 22056.682 | 13891.637 | U32999    | 25375.203 | 22542.33  |
| NM_000337 | 829.022   | 976.091   | NM_004184 | 20460.773 | 13005.683 | U66052    | 9319.385  | 6537.496  |
| NM_002079 | 15328.232 | 12153.807 | NM_000439 | 1255.847  | 1117.682  | NM_000857 | 1493.766  | 2306.361  |
| AI660957  | 375.984   | 437.662   | AJ295148  | 901.222   | 761.601   | L20688    | 52403.777 | 59713.352 |
| U13697    | 1683.798  | 1039.569  | AF176701  | 364.556   | 446.523   | X69111    | 19166.818 | 25065.324 |
| X75308    | 575.424   | 471.518   | NM_000456 | 4705.737  | 5468.443  | AF252283  | 1254.819  | 1353.205  |
| U04270    | 8095.245  | 6727.532  | AF190122  | 985.426   | 1335.58   | AB037799  | 5536.285  | 6267.718  |
| J03810    | 846.684   | 962.079   | NM_002496 | 31296.332 | 35416.832 | AB007950  | 10779.769 | 11792.691 |
| Z34820    | 785.48    | 547.011   | NM_016243 | 4605.341  | 5012.305  | AL133111  | 725.182   | 680.571   |
| BG569143  | 783.574   | 630.485   | X53943    | 541.223   | 691.273   | AK025593  | 3884.467  | 4176.211  |
| AA629719  | 56800.664 | 63487.574 | NM_014402 | 38067.32  | 40496.031 | AB018304  | 4277.893  | 4090.021  |
| AA927528  | 10671.785 | 12427.099 | NM_004649 | 12399.755 | 12875.298 | NM_007061 | 30544.541 | 26946.971 |
| X02152    | 58425.707 | 63754.672 | NM_006540 | 7111.003  | 6004.92   | NM_001088 | 30231.102 | 31999.482 |
| BG676364  | 10665.689 | 11073.278 | NM_017766 | 2236.041  | 2338.304  | BC015991  | 13297.817 | 12933.534 |
| BG181154  | 3101.532  | 2617.527  | NM_002811 | 12435.438 | 9486.666  | U94902    | 1090.412  | 1116.413  |
| AA843679  | 9521.592  | 10865.708 | NM_020310 | 3993.993  | 3060.992  | U46214    | 11324.924 | 11548.813 |
| H68922    | 1346.94   | 1215.116  | AK024444  | 524.115   | 640.8     | NM_000310 | 26350.629 | 24709.324 |
| AF090906  | 2581.782  | 2040.328  | NM_005802 | 4468.149  | 2783.721  | AF161343  | 11228.688 | 8808.768  |
| AB023219  | 9309.704  | 7035.747  | AB002331  | 2632.527  | 2323.39   | NM_004765 | 1120.967  | 1149.672  |
| NM_014148 | 702.838   | 553.322   | NM_002504 | 4171.411  | 2855.87   | AF009307  | 1130.379  | 1418.823  |
| NM_018835 | 8839.272  | 5733.824  | AB046775  | 3780.274  | 3028.35   | AK022246  | 4520.089  | 4662.541  |
| NM_003401 | 3737.458  | 2373.1    | X74862    | 2209.968  | 1796.954  | X75684    | 2712.659  | 3397.857  |
| NM_006399 | 1775.843  | 1538.381  | X65663    | 11232.715 | 6597.408  | D17200    | 1223.015  | 2121.27   |
| NM_018965 | 1308.392  | 1511.755  | NM_003185 | 2635.599  | 2205.538  | AF113701  | 29038.613 | 36443.363 |
| NM_000185 | 4464.204  | 3381.091  | NM_004456 | 7464.462  | 5595.062  | Y11158    | 5396.166  | 4173.862  |
| Y00816    | 3851.865  | 4116.356  | NM_004284 | 9452.593  | 7703.066  | NM_006771 | 35338.73  | 23246.578 |
| NM_004512 | 5621.397  | 7495.761  | NM_007129 | 7758.365  | 5485.721  | NM_014718 | 4521.701  | 7735.21   |
| NM_002930 | 910.323   | 1125.374  | AY004253  | 13428.337 | 10222.558 | NM_000632 | 2330.969  | 2935.248  |
| NM_004380 | 27894.152 | 36153.215 | Z46967    | 890.136   | 847.399   | AB002298  | 1771.615  | 2417.607  |
| U86813    | 562.28    | 731.293   | NM_017583 | 16755.881 | 14087.421 | AK024488  | 1757.267  | 1933.044  |
| NM_004119 | 907.57    | 1002.809  | Y16132    | 28850.18  | 31049.443 | AK023249  | 66283.781 | 70980.414 |
| AY007378  | 4997.484  | 6462.232  | NM_016593 | 3374.557  | 3987.819  | NM_007360 | 956.812   | 1072.636  |
| D26070    | 3560.16   | 3698.255  | NM_002521 | 2258.862  | 2810.7    | NM_017442 | 16564.596 | 16416.945 |
| NM_001642 | 13797.461 | 18248.102 | NM_001150 | 3079.157  | 3351.661  | NM_000743 | 4413.415  | 4402.703  |
| NM_001542 | 864.881   | 1129.379  | NM_002856 | 7358.087  | 8276.718  | NM_007218 | 5026.066  | 5304.611  |
| NM_003392 | 2344.206  | 2387.807  | NM_003225 | 1283.893  | 1217.255  | Z25436    | 3977.422  | 3765.27   |
| NM_017459 | 822.795   | 501.511   | NM_000096 | 1283.895  | 1624.145  | NM_005275 | 7400.465  | 6435.58   |
| NM_000501 | 9797.599  | 12158.199 | AA418251  | 1207.315  | 1120.169  | NM_003844 | 58013.773 | 57922.758 |

|           |           |           |           |           |           |           |           |           |
|-----------|-----------|-----------|-----------|-----------|-----------|-----------|-----------|-----------|
| NM_000114 | 1691.569  | 1873.07   | AA143087  | 23459.355 | 18526.742 | NM_002005 | 47552.848 | 46003.59  |
| NM_005156 | 6632.086  | 6807.354  | BI870965  | 12370.886 | 9372.29   | NM_012324 | 8163.808  | 7979.99   |
| NM_015193 | 770.465   | 1045.284  | BI835536  | 10973.347 | 7087.91   | AK000039  | 1389.859  | 1161.343  |
| X98834    | 11130.156 | 11207.537 | BF205051  | 8894.613  | 5290.825  | AL137352  | 5042.241  | 4122.342  |
| NM_007035 | 15544.503 | 15149.342 | X02761    | 21769.754 | 14953.303 | NM_014745 | 4143.19   | 3770.167  |
| AB019562  | 3282.24   | 3213.3    | M91463    | 2020.939  | 1428.573  | D49958    | 1287.847  | 2034.481  |
| AF036364  | 6409.357  | 4377.623  | U88317    | 614.146   | 507.606   | NM_004485 | 10264.605 | 14477.663 |
| AK022847  | 7797.639  | 6680.325  | J03060    | 3052.95   | 2030.233  | BF240063  | 2325.642  | 2756.013  |
| AK000271  | 3951.032  | 1787.84   | X54156    | 1771.181  | 1657.55   | BI461699  | 2906.862  | 3370.933  |
| NM_005173 | 607.844   | 430.479   | NM_003743 | 2351.732  | 2045.936  | AK090409  | 590.216   | 550.111   |
| NM_001830 | 1176.277  | 527.79    | AA829383  | 10413.727 | 9447.659  | AF172264  | 1570.703  | 1126.605  |
| NM_006805 | 46392.531 | 30418.762 | AF012434  | 28055.201 | 20323.717 | U80756    | 60562.52  | 64975.426 |
| NM_006634 | 3123.579  | 1807.688  | AF131748  | 5431.564  | 4025.061  | NM_018161 | 3148.188  | 4697.724  |
| NM_016465 | 8731.866  | 7443.972  | NM_002349 | 1837.394  | 1899.308  | NM_005245 | 39063.82  | 48880.047 |
| NM_000325 | 1872.05   | 1244.289  | NM_005080 | 17342.633 | 19397.504 | NM_004810 | 970.806   | 1004.916  |
| NM_013395 | 1373.328  | 1152.584  | NM_004887 | 11935.675 | 11349.556 | AL117629  | 5655.315  | 6167.954  |
| NM_002410 | 1495.166  | 1334.156  | NM_006404 | 1328.491  | 1735.651  | NM_002595 | 2471.904  | 3124.141  |
| AL122120  | 12391.259 | 10387.319 | NM_014795 | 1862.955  | 1798.38   | NM_015725 | 2093.907  | 2231.937  |
| NM_014684 | 3794.517  | 3076.678  | NM_002985 | 1531.224  | 2131.25   | AF174604  | 6470.328  | 6585.895  |
| AK027247  | 4256.609  | 4872.078  | M15330    | 2529.985  | 3947.942  | AB002379  | 15265.966 | 20762.693 |
| NM_002480 | 17157.461 | 21352.453 | NM_014395 | 4862.86   | 4545.011  | AF113223  | 5407.877  | 5396.814  |
| NM_017571 | 27470.947 | 26118.357 | AK027201  | 2941.18   | 3284.883  | AB046851  | 2786.39   | 2533.924  |
| AB007946  | 839.57    | 624.782   | NM_000485 | 29009.004 | 27838.484 | NM_005745 | 23383.137 | 24443.324 |
| L03169    | 5843.668  | 6234.994  | X98507    | 12420.925 | 11409.912 | NM_019855 | 61328.723 | 61309.215 |
| M81349    | 905.953   | 1005.942  | NM_016030 | 66127.516 | 57767.133 | NM_018174 | 2829.725  | 2802.843  |
| NM_001925 | 6235.479  | 6357.317  | NM_014665 | 12180.95  | 10282.826 | NM_014545 | 10051.008 | 10409.021 |
| NM_013985 | 3837.617  | 3258.425  | NM_005652 | 37106.617 | 27598.854 | NM_004437 | 3369.824  | 3128.947  |
| NM_001735 | 3002.373  | 2387.08   | AK026686  | 566.499   | 679.782   | AK025875  | 2039.295  | 1894.993  |
| NM_002270 | 895.166   | 801.215   | NM_005902 | 4625.517  | 3590.639  | BC014152  | 58582.969 | 59939.484 |
| NM_001055 | 13033.379 | 11224.608 | NM_002850 | 66818.852 | 58550.711 | NM_012415 | 1369.672  | 1267.644  |
| NM_015875 | 575.882   | 606.204   | NM_005302 | 231.061   | 452.31    | NM_000225 | 2960.03   | 2204.745  |
| NM_001217 | 1356.213  | 1035.645  | NM_004302 | 2368.299  | 3000.639  | AB037779  | 59129.563 | 57417.539 |
| NM_002271 | 57624.641 | 59947.945 | NM_000861 | 2112.672  | 1914.723  | NM_000655 | 2527.367  | 3930.211  |
| NM_018361 | 8591.033  | 6820.46   | NM_000024 | 566.644   | 444.813   | NM_000393 | 2348.163  | 1934.499  |
| NM_019893 | 1084.449  | 853.445   | U77493    | 1563.991  | 1412.721  | NM_000885 | 10098.769 | 8842.128  |
| AB040966  | 16939.988 | 12755.829 | NM_019062 | 1761.872  | 1590.912  | NM_005761 | 1379.42   | 959.256   |
| NM_020132 | 12426.307 | 11586.081 | AL133064  | 5937.049  | 6438.307  | NM_002411 | 496.649   | 836.802   |
| NM_016467 | 17816.686 | 11144.085 | NM_006227 | 7519.804  | 10710.659 | NM_012335 | 3497.186  | 4834.391  |
| NM_007253 | 2227.933  | 2001.71   | NM_002905 | 8449.936  | 10566.179 | NM_005787 | 31605.092 | 36438.133 |
| NM_019105 | 1113.473  | 766.42    | NM_000700 | 4602.131  | 5280.952  | NM_002143 | 5303.273  | 5018.955  |
| L08436    | 1389.796  | 993.944   | NM_019025 | 28654.924 | 33586.191 | AF284421  | 18032.742 | 17521.885 |
| NM_000555 | 2921.472  | 3045.666  | NM_000431 | 3062.38   | 3989.277  | NM_006045 | 6960.194  | 7079.125  |
| NM_004195 | 1492.388  | 1043.416  | NM_013421 | 3822.559  | 5397.656  | NM_006360 | 54273.398 | 53455.043 |
| NM_014170 | 6762.62   | 5662.085  | NM_012474 | 7195.519  | 8247.997  | NM_003965 | 9279.633  | 8176.804  |
| AF116652  | 24464.688 | 19337.289 | AB033118  | 1610.996  | 2308.77   | NM_002785 | 413.827   | 629.783   |
| NM_000835 | 1435.202  | 978.061   | NM_019605 | 5855.242  | 5757.878  | NM_002810 | 57170.867 | 58610.848 |
| AF090906  | 1908.155  | 1260.753  | NM_001690 | 14000.962 | 12021.63  | NM_003343 | 38376.039 | 32502.418 |
| AB023219  | 5877.154  | 5000.645  | AF034374  | 24702.074 | 22450.852 | NM_002785 | 53163.285 | 48618.77  |
| NM_014145 | 469.071   | 660.858   | NM_001682 | 4731.804  | 3662.29   | NM_003470 | 25378.818 | 24622.664 |
| NM_018835 | 6675.671  | 6608.377  | AK025130  | 5588.354  | 4190.562  | AL080137  | 4007.073  | 6729.307  |
| NM_003401 | 2847.453  | 2603.464  | AK023232  | 10606.751 | 9422.708  | NM_017675 | 15361.972 | 21886.766 |
| AL137724  | 5164.933  | 7427.182  | NM_006380 | 2611.161  | 2069.505  | AF155103  | 7733.666  | 6947.837  |
| NM_004755 | 568.262   | 604.34    | AB020710  | 3039.686  | 2123.374  | NM_017704 | 5842.366  | 4844.435  |

|           |           |           |           |           |           |           |           |           |
|-----------|-----------|-----------|-----------|-----------|-----------|-----------|-----------|-----------|
| NM_002913 | 6508.415  | 5365.794  | NM_016174 | 13141.457 | 10149.158 | BC006359  | 5981.547  | 6001.478  |
| AK022797  | 2561.75   | 2101.042  | NM_020377 | 1833.311  | 1712.452  | AK026127  | 2819.253  | 2678.816  |
| NM_007370 | 7472.893  | 8073.388  | U88896    | 3003.133  | 2162.476  | BC016062  | 30171.564 | 29365.236 |
| NM_006231 | 3967.584  | 3594.491  | AF116702  | 58663.488 | 52851.91  | NM_002814 | 6895.513  | 7680.884  |
| AK023471  | 5646.125  | 3917.091  | NM_005724 | 9782.662  | 9014.591  | NM_012250 | 22003.656 | 23753.584 |
| AF044578  | 4127.326  | 3466.569  | X58794    | 3441.414  | 3332.882  | NM_006283 | 21442.379 | 18502.67  |
| NM_001948 | 8586.709  | 6609.998  | NM_001735 | 3917.022  | 3424.289  | Y08267    | 6406.389  | 5967.728  |
| NM_001067 | 22062.703 | 17313.734 | Z70701    | 21645.525 | 19494.242 | AB016898  | 1131.178  | 799.402   |
| NM_014034 | 11145.741 | 9590.426  | AB040972  | 8760.184  | 10624.529 | NM_017530 | 4245.958  | 6173.561  |
| NM_005335 | 47194.672 | 31215.439 | AF148505  | 3579.565  | 4315.826  | AB029030  | 857.906   | 970.915   |
| J04474    | 23085.357 | 19130.996 | NM_018686 | 20445.867 | 22482.82  | AL360183  | 4143.423  | 5418.025  |
| NM_003761 | 56041.758 | 37113.922 | NM_017676 | 1953.211  | 2786.805  | AK027046  | 1914.018  | 1648.395  |
| NM_004726 | 2682.043  | 1982.49   | AK021764  | 675.091   | 1234.028  | NM_003113 | 6476.108  | 5700.092  |
| NM_014011 | 18114.455 | 9929.793  | NM_005431 | 5521.15   | 5435.017  | NM_016578 | 8109.182  | 8115.292  |
| AK025994  | 9779.489  | 5115.421  | NM_002894 | 15235.237 | 14520.189 | NM_003822 | 706.929   | 926.999   |
| L29306    | 1643.692  | 720.464   | NM_004260 | 16618.162 | 15827.55  | NM_015832 | 22165.254 | 17950.018 |
| CY3Cy5    | 1901.787  | 301.512   | AL050067  | 3507.736  | 3017.448  | NM_001326 | 21427.955 | 18816.941 |
| AF088039  | 26793.6   | 30079.605 | NM_004972 | 13627.791 | 10329.009 | NM_014319 | 4162.319  | 3825.776  |
| AF086220  | 1151.221  | 1504.761  | NM_006251 | 5422.458  | 4150.842  | NM_004865 | 13636.35  | 13077.469 |
| AK023941  | 1392.203  | 1349.401  | NM_004103 | 21700.725 | 17883.994 | NM_017923 | 1746.053  | 2188.076  |
| AL390083  | 2256.109  | 2060.529  | NM_002314 | 11611.224 | 10191.212 | AB019566  | 58729.203 | 63724.891 |
| AB020702  | 828.962   | 463.874   | NM_001744 | 5811.347  | 5570.889  | NM_000981 | 55730.977 | 56711.18  |
| AF085905  | 743.244   | 339.861   | NM_006296 | 3521.059  | 3211.485  | NM_002047 | 48029.375 | 34773.344 |
| AK075087  | 596.407   | 465.714   | Z25433    | 2625.179  | 2922.385  | NM_001031 | 54163.305 | 56433.508 |
| SR4       | 16912.383 | 33301.672 | NM_005922 | 3982.65   | 3697.196  | NM_007208 | 30931.189 | 30046.273 |
| SR6       | 2705.234  | 4876.635  | NM_018638 | 13421.446 | 12476.403 | NM_000996 | 58636.863 | 60274.047 |
| SR8       | 8818.545  | 36177.039 | AL137593  | 34080.563 | 30619.637 | NM_000985 | 39688.301 | 34499.836 |
| SR10      | 29573.307 | 13273.143 | NM_003915 | 4026.002  | 4111.463  | BF130622  | 48476.465 | 40625.949 |
| CY3Cy5    | 3154.488  | 1737.61   | NM_000382 | 3395.49   | 4472.161  | NM_003859 | 18069.801 | 14943.339 |
| AK025132  | 1365.994  | 1289.492  | NM_016593 | 3816.617  | 4521.309  | NM_000236 | 2405.101  | 1993.097  |
| AK025157  | 11594.964 | 11659.159 | NM_002521 | 2234.985  | 2768.698  | NM_002903 | 58796.184 | 56412.906 |
| AK022633  | 954.194   | 1126.723  | NM_001150 | 3686.176  | 4160.963  | NM_001861 | 3843.302  | 6640.798  |
| AK000079  | 1331.199  | 950.382   | NM_002856 | 9808.425  | 11990.06  | AK025558  | 17026.936 | 32544.834 |
| NM_012243 | 4793.275  | 2849.968  | NM_003225 | 1088.916  | 1329.215  | AK024355  | 4354.871  | 6379.143  |
| AK025743  | 866.043   | 773.441   | NM_000096 | 1348.372  | 1772.66   | NM_001864 | 54412.57  | 56382.938 |
| AK023974  | 4755.666  | 4400.952  | AA418251  | 1398.148  | 1354.823  | NM_003477 | 30141.594 | 28137.01  |
| AF147335  | 736.639   | 1415.259  | AA143087  | 25860.018 | 23670.01  | NM_002654 | 57884.609 | 59039.828 |
| BI768072  | 1583.644  | 2611.79   | BI870965  | 14287.772 | 14466.97  | NM_015478 | 3008.042  | 2818.72   |
| AK022216  | 1737.117  | 2542.896  | BI835536  | 11927.269 | 11419.88  | NM_020382 | 9835.175  | 8550.502  |
| AK021459  | 564.286   | 757.122   | BF205051  | 9416.368  | 8725.35   | NM_007192 | 30225.555 | 27651.727 |
| U00960    | 1784.411  | 1823.214  | X02761    | 21290.898 | 16426.682 | AB002337  | 24267.186 | 20425.18  |
| AK025276  | 1338.669  | 1740.114  | M91463    | 2078.44   | 1596.542  | NM_014933 | 14759.72  | 25943.721 |
| AK026825  | 1400.359  | 1534.06   | U88317    | 796.49    | 714.017   | NM_003076 | 53486.477 | 55739.008 |
| NM_003847 | 1001.477  | 814.692   | J03060    | 3479.15   | 2455.274  | NM_006385 | 1265.861  | 980.035   |
| AL050165  | 11163.851 | 17317.932 | X54156    | 649.78    | 604.278   | AK024250  | 1825.151  | 1433.236  |
| AL117445  | 1367.169  | 1827.735  | NM_003743 | 2151.87   | 1473.459  | NM_003456 | 21353.508 | 18647.145 |
| AL122113  | 5215.441  | 6915.988  | AA829383  | 12071.511 | 10416.481 | NM_002585 | 16156.255 | 12975.598 |
| AK024415  | 1593.566  | 2120.35   | AF012434  | 29198.596 | 25078.768 | AB029016  | 4555.702  | 5425.392  |
| AK023515  | 1031.551  | 813.73    | NM_018124 | 12489.069 | 11043.641 | AK000445  | 932.831   | 1082.259  |
| AL137623  | 25035.064 | 24753.561 | NM_004887 | 11506.975 | 12535.407 | NM_002701 | 7398.646  | 7380.451  |
| AJ227874  | 2800.821  | 2753.342  | NM_006404 | 1152.468  | 1876.772  | NM_005693 | 2176.585  | 1482.463  |
| AF056428  | 972.971   | 814.578   | NM_014795 | 2145.121  | 2100.438  | X97303    | 19842.383 | 15183.688 |
| AF069136  | 696.041   | 844.971   | NM_002986 | 1829.099  | 2755.273  | L32162    | 849.92    | 538.43    |

|           |           |           |           |           |           |           |           |           |
|-----------|-----------|-----------|-----------|-----------|-----------|-----------|-----------|-----------|
| AK001995  | 887.965   | 1621.719  | M15330    | 2073.726  | 3801.69   | NM_00614E | 849.654   | 1364.144  |
| AK021594  | 355.49    | 907.127   | NM_01439E | 4701.856  | 5199.874  | AJ290954  | 3787.19   | 5897.298  |
| AK021635  | 2400.385  | 3246.164  | AK027201  | 3267.144  | 3592.712  | AK025451  | 6927.705  | 8739.442  |
| AK021856  | 608.138   | 932.698   | NM_00048E | 31741.557 | 37354.48  | NM_00278E | 3888.684  | 4282.898  |
| BE698533  | 1699.844  | 1970.043  | X98507    | 12416.246 | 12751.178 | X52005    | 51639.035 | 38371.047 |
| NM_01792E | 1820.222  | 1992.822  | NM_01603E | 63314.012 | 59710.656 | NM_001047 | 1609.826  | 1687.677  |
| NM_01847E | 874.928   | 1152.885  | NM_01466E | 13062.634 | 13612.147 | AK02439E  | 6100.544  | 6498.79   |
| AL133108  | 870.786   | 523.826   | NM_00565E | 43084.145 | 44379.988 | U58514    | 5896.287  | 6107.851  |
| AJ008128  | 6023.354  | 6409.411  | AK02668E  | 797.815   | 830.547   | M57627    | 1584.238  | 2635.861  |
| AL449243  | 27804.104 | 17399.51  | NM_00590E | 5036.738  | 4319.94   | W74254    | 3214.005  | 3038.979  |
| AJ008131  | 5220.467  | 4450.289  | NM_00285E | 62731.684 | 63228.371 | M58603    | 13596.482 | 14231.71  |
| NM_00627E | 699.997   | 637.392   | NM_00530E | 371.961   | 396.993   | AA44328E  | 6817.228  | 5327.392  |
| AK024303  | 1489.358  | 1338.116  | NM_00430E | 535.19    | 600.673   | AB003334  | 15073.021 | 20438.1   |
| AL160131  | 14943.622 | 18873.873 | NM_00590E | 1992.706  | 2244.054  | AW276315  | 4783.626  | 4806.886  |
| AF086045  | 5674.299  | 7175.628  | NM_00086E | 2008.638  | 2173.993  | AA490737  | 11814.201 | 9602.67   |
| AK027028  | 8123.191  | 11681.222 | U77493    | 1468.866  | 1843.803  | AI87888E  | 43481.375 | 41280.91  |
| AK027069  | 560.279   | 1028.197  | NM_01906E | 2081.503  | 2703.159  | BG697179  | 36127.367 | 32033.41  |
| AK026916  | 2365.614  | 3493.227  | NM_01758E | 18478.246 | 16295.162 | NM_00213E | 54641.574 | 57724.918 |
| AK026914  | 892.145   | 1242.52   | Y16132    | 33242.246 | 32189.268 | BM012504  | 26181.133 | 27248.865 |
| Y13808    | 1636.144  | 2118.803  | NM_00290E | 9188.795  | 12197.527 | AA664145  | 7845.544  | 10921.112 |
| Y11166    | 6578.384  | 9759.256  | NM_00070E | 4568.108  | 5983.354  | X72308    | 58501.035 | 61003.746 |
| AK024942  | 1601.058  | 1854.452  | NM_01902E | 30494.254 | 43695.063 | T70999    | 2254.249  | 2772.449  |
| AK02288E  | 4250.744  | 4642.731  | NM_00043E | 3528.277  | 4721.706  | T50790    | 11588.103 | 9916.814  |
| AK024665  | 9700.445  | 9560.832  | NM_01342E | 4292.995  | 5382.703  | R48168    | 22195.086 | 20108.334 |
| AF147363  | 2159.323  | 1820.209  | NM_012474 | 6958.791  | 9516.99   | BC008837  | 3705.852  | 2707.198  |
| AJ227880  | 1326.609  | 1306.589  | AB033118  | 1648.941  | 2842.764  | NM_00681E | 55211.688 | 59304.047 |
| AK000691  | 644.184   | 583.612   | NM_01960E | 5542.498  | 6746.836  | NM_014744 | 3145.113  | 4784.346  |
| AK001448  | 1944.276  | 1964.032  | NM_00169E | 14358.578 | 15273.006 | AF146759  | 1687.202  | 1920.094  |
| AF131817  | 1708.368  | 869.901   | AF034374  | 25362.602 | 29762.867 | AB032993  | 8584.042  | 7080.509  |
| AL049321  | 4778.859  | 3847.922  | NM_00168E | 5548.421  | 5669.732  | NM_000854 | 7086.643  | 6907.584  |
| NM_00354E | 6795.833  | 4849.06   | AK025130  | 6286.081  | 6532.487  | NM_00190E | 1195.818  | 1194.652  |
| AF118077  | 5252.758  | 4237.505  | AK02323E  | 12203.68  | 13250.751 | AL117423  | 9917.718  | 11622.011 |
| AK025750  | 1956.474  | 2176.389  | NM_00638E | 2893.36   | 2758.574  | NM_00614E | 714.954   | 503.977   |
| AK025783  | 1507.547  | 1510.681  | AB020710  | 3121.601  | 2933.806  | NM_002084 | 5113.06   | 5531.573  |
| AF113675  | 1282.581  | 1506.396  | NM_016174 | 16799.662 | 16574.906 | D16892    | 17183.646 | 17288.188 |
| AK024514  | 1661.931  | 2077.595  | NM_020377 | 2437.294  | 2850.3    | NM_00475E | 6473.292  | 6821.341  |
| NM_02011E | 3908.843  | 5704.579  | U88896    | 3194.415  | 2994.15   | NM_00729E | 11701.209 | 13210.287 |
| AL049417  | 1795.088  | 2991.669  | AF116702  | 64037.43  | 54086.633 | AK023317  | 674.478   | 450.835   |
| AK023507  | 1270.259  | 2105.709  | NM_005724 | 10199.519 | 12784.846 | NM_00365E | 44884.254 | 38954.242 |
| NM_00516E | 1261.354  | 2079.432  | X58794    | 3274.192  | 3953.444  | NM_01401E | 1332.627  | 1136.194  |
| AL109818  | 1250.071  | 2113.767  | NM_00173E | 4516.9    | 5122.936  | NM_00041E | 3797.02   | 3651.279  |
| NM_00006E | 1009.343  | 1054.084  | NM_00234E | 2523.106  | 2838.879  | NM_01324E | 2409.191  | 2888.424  |
| AB03304E  | 17627.945 | 21615.836 | NM_00508E | 19571.906 | 21807.449 | NM_01843E | 1937.735  | 1910.19   |
| NM_01591E | 9235.39   | 10148.479 | AF148505  | 3958.209  | 5491.248  | NM_00059E | 7179.399  | 9233.688  |
| AK02322E  | 1684.576  | 886.725   | NM_01868E | 20442.396 | 24115.363 | NM_00056E | 4333.535  | 5235.685  |
| NM_01324E | 1241.896  | 1334.142  | NM_01767E | 1980.963  | 3180.068  | NM_016614 | 645.24    | 744.718   |
| AB02904E  | 2800.309  | 3463.398  | AK021764  | 816.705   | 1403.114  | NM_00201E | 975.753   | 1048.579  |
| AK02664E  | 1496.627  | 1523.544  | NM_00543E | 5256.8    | 7342.527  | AF253318  | 8972.536  | 7542.672  |
| AL359063  | 1711.723  | 1466.18   | NM_002894 | 16631.383 | 20298.516 | NM_017767 | 31942.643 | 30530.082 |
| AL07929E  | 3627.198  | 2969.49   | NM_00426E | 19496.711 | 23268.65  | NM_00326E | 6365.189  | 7109.336  |
| X89667    | 801.172   | 573.043   | AL050067  | 4587.087  | 5625.711  | NM_02012E | 1268.404  | 1602.921  |
| NM_014027 | 6135.545  | 5369.816  | NM_00497E | 16496.014 | 19799.336 | AK02283E  | 3699.659  | 3617.776  |
| AF11662E  | 7593.11   | 6793.877  | NM_00625E | 6597.939  | 7598.882  | NM_017784 | 1763.964  | 1554.332  |



|           |           |           |           |           |           |           |           |           |
|-----------|-----------|-----------|-----------|-----------|-----------|-----------|-----------|-----------|
| AF086554  | 1634.109  | 1435.632  | NM_004103 | 26055.361 | 30037.113 | NM_014641 | 5634.508  | 5240.373  |
| AL390136  | 10097.851 | 7936.82   | NM_002314 | 12370.489 | 13781.039 | NM_004462 | 7712.453  | 11092.346 |
| AF086398  | 26429.357 | 33004.188 | NM_001744 | 3768.817  | 4268.937  | NM_000343 | 1544.359  | 1667.616  |
| AK024545  | 2342.018  | 3434.549  | NM_006296 | 4920.656  | 6100.376  | NM_020246 | 5549.467  | 4887.287  |
| AK023444  | 1529.67   | 2275.684  | Z25433    | 4072.349  | 5709.311  | NM_016354 | 5470.95   | 4855.263  |
| AK025953  | 3012.094  | 4445.736  | NM_005922 | 5784.603  | 6282.413  | NM_001044 | 1579.171  | 1303.341  |
| NM_00318C | 1621.32   | 1964.231  | NM_000382 | 4305.59   | 6864.411  | NM_004644 | 3104.79   | 2967.082  |
| AF086406  | 22670.002 | 29585.016 | AL133064  | 8444.202  | 11184.659 | AV681967  | 2230.399  | 2207.689  |
| D17216    | 11009.869 | 17217.074 | NM_006227 | 10205.577 | 15727.893 | NM_01825C | 3334.42   | 3080.324  |
| AL137581  | 4700.572  | 7269.103  | NM_001150 | 6006.006  | 9851.686  | NM_016553 | 16253.19  | 19637.684 |
| J05158    | 674.07    | 783.319   | NM_002856 | 13568.742 | 20558.777 | AB023136  | 1732.186  | 2591.743  |
| NM_015564 | 2643.107  | 2919.545  | NM_003225 | 1795.137  | 3410.799  | NM_003795 | 49898.863 | 54831.09  |
| AF160476  | 1868.551  | 2101.503  | NM_000096 | 1814.452  | 3832.668  | NM_014232 | 8606.28   | 8258.592  |
| L22650    | 2439.274  | 2921.5    | AA418251  | 1666.224  | 2712.744  | NM_005701 | 4253.491  | 3553.095  |
| AB014520  | 8378.859  | 8231.08   | AA143087  | 36833.289 | 51408.258 | NM_001231 | 1500.646  | 1796.12   |
| AF161420  | 1835.064  | 1547.47   | U25804    | 747.066   | 977.159   | AB023139  | 13681.403 | 12295.715 |
| NM_004907 | 1602.519  | 1293.825  | NM_001903 | 1467.628  | 1919.557  | NM_017885 | 8676.017  | 10621.253 |
| NM_002891 | 1071.434  | 724.154   | BI835536  | 17199.975 | 23639.49  | D80004    | 1234.119  | 1451.686  |
| NM_001775 | 3478.116  | 2593.091  | BF205051  | 15209.478 | 20761.213 | NM_000946 | 5851.911  | 5397.697  |
| BE083789  | 849.74    | 444.074   | X02761    | 33002.328 | 46640.875 | NM_01607C | 5934.77   | 5733.397  |
| X04526    | 25914.074 | 16563.807 | M91463    | 3565.636  | 4536.279  | NM_01639C | 6539.604  | 8095.763  |
| D26067    | 4370.145  | 3265.514  | U88317    | 1236.695  | 2020.492  | NM_016101 | 16351.008 | 21748.541 |
| AF227924  | 6106.294  | 4404.411  | J03060    | 4905.586  | 6312.803  | NM_005855 | 56108.75  | 57961     |
| NM_005716 | 2020.706  | 1421.516  | X54156    | 1050.749  | 1654.821  | NM_020313 | 2733.609  | 2483.298  |
| NM_006183 | 6449.644  | 7052.151  | NM_003743 | 3169.027  | 4055.884  | NM_014628 | 7265.241  | 7507.71   |
| NM_016087 | 1069.053  | 1004.4    | AA829383  | 15302.811 | 19791.164 | AK025630  | 5167.132  | 4845.458  |
| S59184    | 3084.207  | 3660.217  | AF012434  | 38267.152 | 49218.332 | AL365404  | 58268.832 | 53567.184 |
| NM_00513C | 582.024   | 580.216   | NM_018124 | 16851.072 | 19703.49  | AK022907  | 31411.76  | 27089.361 |
| NM_006661 | 1794.314  | 2035.053  | Z70701    | 24655.877 | 27831.346 | NM_014793 | 4465.31   | 3890.811  |
| M54886    | 568.042   | 1187.421  | AB040972  | 9122.257  | 12434.849 | NM_004245 | 16245.87  | 12552.149 |
| NM_005746 | 31589.197 | 38514.055 | X98507    | 15952.691 | 22219.6   | NM_003241 | 6939.698  | 6716.566  |
| NM_004588 | 880.681   | 1299.477  | NM_01603C | 68315.008 | 71226.383 | NM_002685 | 7521      | 7034.078  |
| U16126    | 733.748   | 1292.625  | NM_014669 | 16407.051 | 25748.039 | AK024504  | 5536.703  | 5237.46   |
| NM_004572 | 611.406   | 1043.926  | NM_005652 | 48392.133 | 57003.66  | AF039023  | 5311.951  | 6001.279  |
| NM_002172 | 10739.663 | 18274.521 | AK026686  | 890.202   | 1572.148  | NM_005511 | 7411.849  | 6506.207  |
| NM_007314 | 11793.055 | 10875.762 | NM_005902 | 6620.531  | 9418.987  | NM_014698 | 56832.293 | 54686.43  |
| NM_00660C | 25155.025 | 22670.877 | NM_005302 | 1189.723  | 1009.536  | NM_018475 | 10437.945 | 8891.504  |
| AF297709  | 6078.47   | 5496.182  | NM_004302 | 1339.379  | 1594.588  | AK025451  | 6597.424  | 9007.415  |
| L77564    | 817.085   | 900.078   | NM_005903 | 2936.74   | 4550.156  | NM_002783 | 4872.99   | 7124.276  |
| NM_015384 | 2995.957  | 2114.882  | NM_000861 | 3208.111  | 4440.126  | X52005    | 53840.434 | 50927.656 |
| AK023327  | 3882.269  | 4213.827  | NM_000024 | 563.149   | 642.632   | NM_001047 | 1836.717  | 1451.494  |
| AB046858  | 3212.788  | 2070.538  | AB037734  | 612.497   | 891.063   | AK024396  | 6392.732  | 6465.053  |
| D50914    | 8470.386  | 7472.771  | U77493    | 1626.18   | 2623.756  | U58514    | 4409.451  | 4394.652  |
| BE878692  | 812.551   | 408.351   | NM_019062 | 2866.731  | 4002.628  | M57627    | 1589.525  | 1799.245  |
| NM_002007 | 1755.517  | 966.185   | NM_003873 | 1477.174  | 2322.463  | W74254    | 3912.323  | 3590.616  |
| NM_002305 | 1465.45   | 778.912   | NM_000263 | 5001.376  | 5912.472  | M58603    | 14040.137 | 21869.977 |
| AK025439  | 6257.479  | 5921.092  | AF073519  | 20684.355 | 23409.697 | AA443286  | 6365.073  | 5281.8    |
| NM_001737 | 1187.307  | 1226.573  | AB001451  | 1203.96   | 1687.489  | AB003334  | 14273.128 | 14882.221 |
| Z36784    | 2988.998  | 3071.054  | NM_017583 | 24710.338 | 25859.557 | AW276315  | 4934.326  | 4123.013  |
| NM_019064 | 1943.398  | 2519.217  | Y16132    | 41701.152 | 47645.047 | AA490737  | 12331.732 | 10259.722 |
| NM_018939 | 606.084   | 795.709   | NM_016593 | 5456.258  | 7447.048  | AI878886  | 46735.453 | 48122.063 |
| NM_000094 | 2167.626  | 3496.731  | NM_002521 | 3208.284  | 4258.677  | BG697179  | 36642.895 | 34591.785 |
| AK024732  | 14406.236 | 19396.084 | NM_000271 | 35029.551 | 44222.012 | NM_002136 | 57437.082 | 59357.375 |

|           |           |           |           |           |           |           |           |           |
|-----------|-----------|-----------|-----------|-----------|-----------|-----------|-----------|-----------|
| NM_016302 | 3013.833  | 2681.966  | NM_018209 | 7679.782  | 10873.33  | BM012504  | 27048.213 | 24070.732 |
| NM_003249 | 12061.747 | 12674.442 | NM_006184 | 20018.775 | 26995.736 | AA664145  | 5726.392  | 5050.918  |
| M21897    | 2253.653  | 1983.348  | AB018268  | 27765.857 | 41939.758 | X72308    | 54047.43  | 55692.309 |
| AF301463  | 2209.436  | 1598.282  | NM_019045 | 822.378   | 1389.969  | T70999    | 1009.649  | 1100.629  |
| NM_015984 | 11168.236 | 8316.399  | NM_006380 | 4289.817  | 5265.678  | T50790    | 12917.279 | 11346.284 |
| AK022471  | 726.44    | 578.291   | AB020710  | 4223.888  | 4961.902  | R48168    | 22876.404 | 22833.266 |
| NM_006894 | 1080.521  | 781.938   | Z83801    | 315.095   | 720.348   | AB040954  | 12200.224 | 10206.195 |
| AK023031  | 5149.886  | 3890.484  | NM_016174 | 22635.713 | 31748.279 | NM_002081 | 2454.023  | 2271.157  |
| NM_005717 | 33121.066 | 23967.469 | NM_020377 | 3663.559  | 5271.271  | NM_006141 | 440.709   | 546.614   |
| NM_012090 | 1888.188  | 1943.099  | U88896    | 4836.516  | 6267.492  | AF146759  | 2095.523  | 2862.106  |
| BE793385  | 2100.734  | 2263.422  | AF116702  | 66997.68  | 62570.504 | AB032993  | 9483.844  | 13233.173 |
| AF043290  | 1839.117  | 2085.426  | NM_005724 | 13203.546 | 19012.508 | NM_000854 | 7831.523  | 8650.391  |
| NM_004082 | 7723.199  | 10315.171 | X58794    | 4388.285  | 5477.314  | NM_001901 | 1377.533  | 1242.149  |
| NM_014398 | 2198.521  | 3208.857  | NM_001735 | 5519.503  | 6625.574  | AL117423  | 9286.468  | 10689.401 |
| NM_005934 | 8633.862  | 12259.805 | NM_002349 | 2512.947  | 3842.364  | NM_006140 | 753.215   | 1003.358  |
| NM_002614 | 2420.242  | 2889.655  | NM_005080 | 23771.365 | 30483.939 | NM_002084 | 4815.757  | 4675.427  |
| NM_005655 | 12824.943 | 20710.09  | NM_004887 | 22928.82  | 25997.6   | D16892    | 17488.488 | 17236.246 |
| NM_002698 | 3042.315  | 2837.163  | NM_006404 | 2190.122  | 3140.696  | NM_004750 | 5825.601  | 4959.196  |
| NM_002148 | 2313.312  | 1921.677  | NM_014795 | 3529.747  | 3925.487  | NM_007295 | 11184.365 | 10885.467 |
| AL137449  | 3500.09   | 2598.298  | NM_002986 | 3153.81   | 4187.374  | AK023317  | 754.628   | 683.292   |
| U88153    | 3936.936  | 4130.86   | M15330    | 3926.92   | 5222.196  | NM_003651 | 46278.203 | 43162.91  |
| X03910    | 23870.609 | 21387.408 | NM_014396 | 7472.601  | 8905.574  | NM_014012 | 1697.369  | 1487.438  |
| NM_018428 | 11916.328 | 10354.301 | AK027201  | 5959.388  | 6645.628  | NM_000418 | 4081.661  | 3990.526  |
| NM_005058 | 854.414   | 751.057   | NM_000489 | 38584.184 | 46164.332 | NM_013246 | 2339.049  | 2629.118  |
| NM_006924 | 21067.213 | 18160.916 | AL137593  | 45828.594 | 52399.242 | NM_018431 | 1721.017  | 1463.069  |
| NM_016024 | 7916.729  | 6019.21   | NM_003915 | 5276.553  | 9094.881  | NM_000591 | 6237.726  | 6151.582  |
| NM_018107 | 5748.084  | 3488.241  | NM_000382 | 3690.806  | 6843.598  | NM_000565 | 4625.169  | 3715.918  |
| NM_012279 | 2541.78   | 1494.169  | AL133064  | 10458.194 | 15005.775 | NM_016614 | 467.946   | 495.024   |
| NM_018387 | 26002.211 | 16234.93  | NM_006227 | 10352.277 | 17120.529 | NM_002019 | 1009.6    | 1215.921  |
| BF310673  | 7176.06   | 5809.623  | NM_002905 | 11186.038 | 15931.313 | AF253318  | 9409.856  | 7779.509  |
| R97012    | 59147.383 | 61941.648 | NM_000700 | 6916.062  | 9087.632  | NM_017767 | 33547.949 | 29045.348 |
| U77700    | 22429.799 | 22057.918 | NM_019028 | 39876.84  | 49240.516 | NM_006148 | 653.281   | 550.525   |
| NM_006567 | 19731.197 | 25217.621 | NM_000431 | 4169.772  | 5390.002  | AJ290954  | 4793.719  | 3631.276  |
| AF038554  | 55769.418 | 57135.57  | NM_013421 | 5614.768  | 7645.069  | AK022832  | 4239.156  | 6102.065  |
| AF264621  | 18408.109 | 22191.887 | NM_012474 | 9333.121  | 13590.601 | NM_017784 | 2101.998  | 2438.844  |
| NM_005875 | 49147.77  | 51099.461 | AB033118  | 2615.522  | 3901.612  | NM_014641 | 5163.016  | 5158.697  |
| NM_004184 | 52677.492 | 50878.777 | NM_019606 | 7184.719  | 8771.888  | NM_004462 | 7684.67   | 7845.917  |
| NM_000439 | 909.97    | 982.817   | NM_001690 | 16893.338 | 19134.18  | AB037739  | 568.047   | 602.924   |
| AJ295148  | 1573.201  | 1894.758  | AF034374  | 31429.072 | 40806.645 | NM_000343 | 885.416   | 1233.784  |
| AF176701  | 753.263   | 1040.974  | NM_016118 | 12880.024 | 12130.299 | NM_020246 | 5818.534  | 4778.067  |
| NM_000456 | 5886.988  | 6630.084  | NM_018674 | 47311.375 | 50409.754 | NM_016354 | 5534.591  | 5935.957  |
| NM_002496 | 22207.027 | 22292.357 | NM_001683 | 31504.256 | 32443.635 | NM_001044 | 1687.929  | 1603.716  |
| NM_016243 | 5030.471  | 5462.979  | NM_001682 | 5568.253  | 5546.651  | NM_004644 | 3151.404  | 4818.798  |
| X53943    | 647.432   | 739.846   | NM_014405 | 6443.557  | 6804.016  | AV681967  | 2506.358  | 2572.993  |
| NM_014402 | 55503.055 | 50099.949 | NM_000816 | 1228.597  | 1713.471  | NM_018250 | 3360.264  | 2877.117  |
| NM_004649 | 23632.072 | 20224.514 | NM_014928 | 3220.69   | 3594.091  | NM_016553 | 13855.561 | 13016.195 |
| NM_006540 | 8918.176  | 8135.845  | AK025130  | 6816.803  | 6975.802  | AB023136  | 1462.328  | 1404.714  |
| NM_017766 | 2612.236  | 2032.975  | NM_017875 | 3060.605  | 3338.073  | NM_003795 | 53776.352 | 54615.199 |
| NM_002811 | 18502.504 | 9759.449  | AK023232  | 13259.719 | 13858.384 | NM_014232 | 8572.397  | 7943.158  |
| NM_020310 | 5778.018  | 3209.783  | NM_018124 | 12822.606 | 14970.696 | NM_005701 | 3751.742  | 3285.374  |
| AK024444  | 1574.571  | 787.931   | Z70701    | 23881.133 | 27587.717 | NM_001231 | 1044.266  | 982.24    |
| NM_005802 | 6207.855  | 4005.292  | AB040972  | 8480.659  | 11241.578 | NM_006819 | 55613.902 | 57680.465 |
| AB002331  | 5702.807  | 4097.962  | AF148505  | 3824.411  | 5758.798  | NM_014744 | 3635.585  | 3456.439  |

|           |           |           |           |           |           |           |           |           |
|-----------|-----------|-----------|-----------|-----------|-----------|-----------|-----------|-----------|
| NM_002504 | 5836.146  | 5728.439  | NM_018686 | 21321.402 | 23259.434 | D80004    | 1232.417  | 1574.944  |
| AB046775  | 3013.838  | 3467.708  | NM_017676 | 2568.695  | 3293.683  | X63966    | 335.096   | 1082.871  |
| X74862    | 3439.533  | 3334.793  | AK021764  | 965.615   | 1012.147  | NM_000946 | 6362.463  | 6450.924  |
| X65663    | 6266.399  | 9413.695  | NM_005431 | 5273.948  | 6616.793  | NM_016070 | 4593.47   | 4554.32   |
| NM_003185 | 6161.857  | 8612.713  | NM_002894 | 15490.251 | 14500.306 | NM_016390 | 3509.819  | 4802.601  |
| NM_004456 | 16116.739 | 18567.443 | NM_004629 | 4779.404  | 5055.544  | NM_016101 | 14616.712 | 13344.554 |
| NM_004284 | 17079.061 | 22660.32  | NM_004260 | 18852.027 | 17968.17  | NM_005855 | 55111.137 | 57239.699 |
| NM_007129 | 16880.58  | 24805.18  | AL050067  | 3800.703  | 3984.388  | NM_020313 | 2534.271  | 2201.29   |
| AY004253  | 7255.537  | 10767.392 | NM_004972 | 16143.35  | 14474.028 | NM_014628 | 7018.814  | 7333.852  |
| Z46967    | 2058.4    | 2764.498  | NM_006251 | 5930.518  | 5467.308  | AK025630  | 4902.557  | 5413.519  |
| NM_017583 | 19895.463 | 16826.914 | NM_004103 | 21936.574 | 18252.348 | AL365404  | 56169.148 | 56664.398 |
| Y16132    | 11256.669 | 10586.3   | NM_002314 | 11426.771 | 9125.002  | AK022907  | 31298.879 | 32860.973 |
| NM_016593 | 4619.115  | 4967.416  | NM_001744 | 3325.136  | 2916.328  | NM_014793 | 4615.209  | 4710.264  |
| NM_002521 | 1729.985  | 1963.392  | NM_006296 | 4001.21   | 3557.99   | NM_004245 | 17306.852 | 12816.054 |
| NM_001150 | 670.589   | 751.93    | Z25433    | 3772.091  | 3556.622  | NM_003241 | 7216.596  | 6565.453  |
| NM_002856 | 1172.851  | 1100.571  | NM_005922 | 6486.739  | 4895.587  | NM_002685 | 6835.476  | 6453.108  |
| NM_003225 | 2188.159  | 1836.59   | NM_018638 | 13727.577 | 11645.575 | AK024504  | 4920.547  | 4084.664  |
| NM_000096 | 2660.833  | 2646.914  | CY3Cy5    | 860.855   | 227.214   | AF039023  | 4342.8    | 4895.099  |
| AA418251  | 1433.212  | 1163.261  | NM_003942 | 1914.428  | 1447.803  | NM_005511 | 6894.362  | 6699.361  |
| AA143087  | 4784.995  | 3341.956  | NM_004452 | 1567.93   | 1429.143  | NM_014696 | 50249.07  | 54721.074 |
| BI870965  | 3168.442  | 1541.536  | AK022632  | 1282.396  | 1261.81   | NM_018475 | 10164.278 | 10002.897 |
| BI835536  | 15786.245 | 10367.191 | AK021554  | 2458.785  | 3232.705  | NM_003262 | 7526.343  | 11211.773 |
| BF205051  | 8312.212  | 7764.013  | NM_020235 | 4092.044  | 3585.422  | NM_020125 | 1498.557  | 1360.311  |
| X02761    | 4893.521  | 5529.57   | AK000532  | 639.044   | 764.465   | X52005    | 50841.551 | 42685.293 |
| M91463    | 1519.125  | 1147.532  | AL109681  | 538.591   | 527.172   | NM_001047 | 1668.956  | 2169.698  |
| U88317    | 871.737   | 1273.929  | AL162039  | 4161.85   | 3140.468  | AK024396  | 7541.686  | 9033.208  |
| J03060    | 2930.193  | 4229.188  | AK024896  | 2521.92   | 3677.603  | U58514    | 4780.636  | 5737.753  |
| X54156    | 1463.771  | 1500.331  | AL353952  | 338.65    | 418.533   | M58603    | 12146.941 | 14063.788 |
| NM_003743 | 2678.67   | 3481.323  | BU165106  | 1737.642  | 1724.546  | AA443286  | 6644.875  | 4566.067  |
| AA829383  | 22457.836 | 26681.385 | AF038202  | 1220.851  | 1151.557  | AB003334  | 13872.754 | 15880.101 |
| L22524    | 476.252   | 535.429   | AB040925  | 1091.082  | 1066.674  | AW276315  | 5439.117  | 4692.271  |
| AF012434  | 47278.742 | 48442.828 | NM_003942 | 1539.295  | 1277.272  | AA490737  | 11773.497 | 9841.641  |
| AF131748  | 7430.74   | 10823.781 | NM_004452 | 2099.36   | 1559.827  | AI878886  | 42628.887 | 49355.973 |
| NM_005080 | 21459.674 | 21412.537 | SR1       | 72470.836 | 64694.516 | BG697179  | 37080.996 | 38300.023 |
| NM_004887 | 19257.881 | 14685.504 | SR3       | 20532.531 | 22551.33  | NM_002136 | 52880.879 | 51964.363 |
| NM_006404 | 1522.172  | 1446.584  | SR5       | 2686.46   | 3504.218  | BM012504  | 27347.822 | 26508.857 |
| NM_014795 | 2604.811  | 2141.971  | SR7       | 2410.656  | 25309.105 | AA664145  | 6084.719  | 5786.63   |
| NM_002986 | 1513.072  | 1310.291  | SR9       | 10016.157 | 2685.627  | X72308    | 54028.281 | 57136.254 |
| M15330    | 3285.177  | 4431.776  | AF018254  | 738.934   | 808.318   | T70999    | 996.243   | 900.342   |
| NM_014396 | 4607.499  | 4584.761  | NM_016240 | 1561.295  | 1668.207  | T50790    | 13226.916 | 11291.629 |
| AK027201  | 4060.689  | 3014.054  | AK026459  | 821.365   | 804.733   | R48168    | 21741.543 | 22668.424 |
| NM_000489 | 5733.821  | 4042.434  | AL049390  | 2130.553  | 2104.98   | AB040954  | 11590.265 | 12860.921 |
| X98507    | 11773.172 | 8793.377  | AK000584  | 3528.416  | 3340.391  | NM_002081 | 2551.76   | 3739.853  |
| NM_016030 | 40023.129 | 25558.973 | AJ297363  | 780.37    | 743.629   | AB023139  | 14800.38  | 15380.539 |
| NM_014669 | 14896.639 | 10522.096 | AK026379  | 1972.08   | 1604.483  | NM_017885 | 8585.146  | 6374.356  |
| NM_005652 | 10991.954 | 7793.078  | AF075002  | 371.374   | 326.219   | D16892    | 17073.592 | 17308.344 |
| AK026686  | 1184.493  | 1318.51   | AK022965  | 946.214   | 790.225   | NM_004750 | 3217.244  | 4143.44   |
| NM_005902 | 6148.033  | 6380.555  | AK024278  | 3396.072  | 3171.861  | NM_007295 | 6948.146  | 8469.13   |
| NM_002850 | 61378.152 | 64234.387 | NM_018022 | 1343.796  | 1058.276  | AK023317  | 828.433   | 1305.423  |
| NM_004302 | 1692.686  | 2049.731  | AB056722  | 6081.715  | 6431.847  | NM_014012 | 1514.487  | 2312.498  |
| NM_005903 | 3341.239  | 4656.12   | NM_013242 | 4499.041  | 3846.528  | NM_000418 | 3598.428  | 5874.951  |
| NM_000861 | 519.322   | 758.513   | AK023198  | 5013.5    | 5092.235  | NM_013246 | 2530.246  | 3028.453  |
| U77493    | 1169.587  | 1645.441  | NM_012066 | 14462.832 | 12308.995 | NM_018431 | 2084.493  | 2027.114  |

|           |           |           |           |           |           |           |           |           |
|-----------|-----------|-----------|-----------|-----------|-----------|-----------|-----------|-----------|
| NM_019062 | 793.415   | 1073.77   | AF052168  | 16978.066 | 16725.955 | NM_000591 | 8540.247  | 9688.399  |
| AL133064  | 6922.808  | 6695.432  | AK024864  | 405.995   | 492.711   | NM_000565 | 5146.139  | 5267.455  |
| NM_006227 | 8117.238  | 9406.819  | AK024947  | 4594.201  | 5687.073  | NM_016614 | 536.543   | 833.304   |
| NM_002905 | 8035.09   | 7078.532  | AK024879  | 318.038   | 308.47    | NM_002019 | 1168.998  | 1273.79   |
| NM_000700 | 3293.836  | 3401.039  | AK095125  | 829.046   | 665.59    | AF253318  | 7401.774  | 6276.571  |
| NM_019028 | 6609.386  | 6072.841  | AK024059  | 1288.106  | 1175.964  | NM_017767 | 34294.832 | 32034.633 |
| NM_000431 | 5961.59   | 5995.122  | AB007928  | 941.932   | 933.698   | AK024848  | 27562.088 | 29959.398 |
| NM_013421 | 2033.214  | 2019.728  | AK023645  | 1418.329  | 1528.758  | NM_004852 | 1088.258  | 1195.455  |
| NM_012474 | 10986.42  | 11896.761 | D83543    | 670.743   | 462.356   | NM_000543 | 1984.887  | 1980.376  |
| AB033118  | 2555.382  | 2480.954  | NM_016930 | 2032.774  | 2001.093  | U06699    | 46123.375 | 53596.738 |
| NM_019606 | 8160.871  | 6553.896  | AJ001861  | 2586.407  | 2374.429  | NM_006148 | 613.76    | 817.459   |
| NM_001690 | 20510.646 | 13923.881 | NM_005188 | 354.347   | 311.222   | AJ290954  | 4803.32   | 5006.501  |
| AF034374  | 3399.918  | 2351.001  | X64981    | 1620.411  | 1665.043  | AK025451  | 7694.575  | 8144.214  |
| NM_001682 | 5459.01   | 3357.52   | X75692    | 8189.95   | 7319.759  | NM_002783 | 10570.159 | 9259.723  |
| AK025130  | 5080.946  | 3747.452  | X64988    | 844.969   | 644.737   | NM_003038 | 2812.397  | 2409.447  |
| AK023232  | 3435.067  | 4475.28   | Y10511    | 13071.885 | 13200.788 | NM_004731 | 1024.785  | 1325.48   |
| NM_006380 | 4375.066  | 5260.905  | AK021832  | 952.899   | 702.018   | NM_000544 | 4390.394  | 5213.734  |
| AB020710  | 3542.156  | 3897.1    | AK021505  | 4060.198  | 6504.72   | NM_001044 | 2763.776  | 6979.09   |
| Z83801    | 1024.304  | 805.434   | AL133627  | 335.853   | 421.174   | NM_004644 | 3336.847  | 3645.909  |
| NM_016174 | 3649.896  | 4630.653  | AK021598  | 3410.874  | 3827.023  | AV681967  | 2674.576  | 2946.572  |
| NM_020377 | 1458.266  | 1950.396  | AK025238  | 434.232   | 262.22    | NM_018250 | 3404.271  | 3757.016  |
| U88896    | 4162.716  | 4395.992  | NM_004129 | 496.083   | 377.305   | NM_016553 | 15636.747 | 20241.006 |
| AF116702  | 60162.273 | 60682.285 | AK026416  | 24413.129 | 19035.994 | AB023136  | 1949.395  | 2838.516  |
| NM_005724 | 15762.412 | 19764.479 | AK025797  | 1178.955  | 1323.897  | NM_003795 | 52526.23  | 56452.387 |
| X58794    | 1327.682  | 1540.637  | NM_017759 | 336.676   | 268.123   | NM_014232 | 9235.446  | 8557.381  |
| NM_001735 | 4864.617  | 6195.105  | AK000853  | 601.315   | 664.361   | NM_005701 | 4163.146  | 3512.783  |
| Z70701    | 12385.347 | 11015.741 | AK000085  | 523.241   | 618.184   | NM_001231 | 1016.313  | 1027.172  |
| AB040972  | 2871.828  | 3186.116  | AK000019  | 605.954   | 657.784   | NM_006819 | 55374.699 | 55874.219 |
| AF148505  | 3719.645  | 4153.355  | AK000645  | 1376.093  | 1294.001  | NM_014744 | 3875.049  | 4384.048  |
| NM_018686 | 21537.611 | 16339.855 | AK000893  | 630.967   | 1345.047  | AF146759  | 6319.711  | 6225.759  |
| NM_017676 | 3471.743  | 3515.195  | AK024156  | 960.044   | 1017.434  | AB032993  | 14115.145 | 12565.329 |
| AK021764  | 2229.78   | 1815.67   | AF086288  | 1414.011  | 1183.922  | NM_001901 | 1431.25   | 2118.85   |
| NM_005431 | 5590.305  | 5240.77   | NM_016944 | 481.998   | 580.981   | AL117423  | 17290.787 | 21382.586 |
| NM_002894 | 18961.186 | 10860.607 | AK023109  | 1324.973  | 1876.717  | NM_007003 | 595.164   | 1062.74   |
| NM_004260 | 7771.594  | 4696.072  | NM_005293 | 18881.355 | 21774.104 | NM_002084 | 4630.199  | 3781.712  |
| AL050067  | 879.505   | 494.386   | S50185    | 577.49    | 737.925   | NM_005511 | 5428.842  | 5671.532  |
| NM_004972 | 7387.108  | 5506.389  | AF133332  | 5058.742  | 4517.545  | NM_018475 | 9374.487  | 9319.591  |
| NM_006251 | 10715.394 | 9707.283  | AK022805  | 3022.179  | 2687.581  | NM_003262 | 4900.23   | 4998.17   |
| NM_004103 | 11065.604 | 11533.227 | NM_017503 | 596.902   | 432.125   | NM_020125 | 1255.565  | 1399.92   |
| NM_002314 | 21339.49  | 27517.303 | AK024606  | 2321.774  | 2013.799  | AB028127  | 660.173   | 502.088   |
| NM_001744 | 5175.253  | 7064.74   | NM_016417 | 16194.02  | 17881.588 | AK022832  | 3952.472  | 3959.385  |
| NM_006296 | 5142.706  | 7415.972  | NM_019108 | 1021.5    | 1033.769  | NM_017784 | 2273.767  | 2049.565  |
| Z25433    | 3538.19   | 4988.76   | L10147    | 18609.936 | 15966.407 | NM_014641 | 6673.863  | 6590.977  |
| NM_005922 | 5884.369  | 6520.762  | AL080118  | 4935.32   | 5303.952  | NM_004462 | 7995.469  | 8923.648  |
| NM_018638 | 6232.984  | 7777.305  | AL049378  | 3738.155  | 3970.672  | AB037739  | 678.804   | 493.478   |
| AL137593  | 17150.566 | 20422.988 | L09086    | 1698.734  | 1712.299  | AB020664  | 2957.642  | 2354.733  |
| NM_003915 | 5132.049  | 7340.385  | L37702    | 16123.007 | 14454.139 | NM_006640 | 35234.461 | 30505.766 |
| NM_000382 | 4012.227  | 5548.892  | AK022812  | 753.151   | 790.654   | NM_000865 | 677.697   | 607.636   |
| NM_016593 | 4235.626  | 4079.601  | AF238318  | 385.976   | 574.485   | NM_000343 | 1541.249  | 1610.467  |
| NM_002521 | 1563.476  | 1446.931  | AK022433  | 327.707   | 307.211   | NM_012336 | 13616.578 | 13037.793 |
| NM_002856 | 1289.931  | 969.538   | U79301    | 7238.585  | 7450.542  | NM_020161 | 937.47    | 961.552   |
| NM_003225 | 1833.703  | 1572.619  | AK022260  | 8134.255  | 8999.665  | NM_016354 | 5241.336  | 4159.188  |
| NM_000096 | 2474.294  | 2255.917  | M32219    | 9841.096  | 11867.124 | AB040954  | 7679.634  | 8778.783  |

|           |           |           |           |           |           |           |           |           |
|-----------|-----------|-----------|-----------|-----------|-----------|-----------|-----------|-----------|
| AA418251  | 1237.307  | 943.252   | BC018868  | 1786.477  | 1543.935  | NM_002081 | 1418.565  | 1238.158  |
| AA143087  | 5253.958  | 4627.946  | AF086174  | 646.098   | 353.317   | AB023139  | 11237.957 | 10048.773 |
| BI870965  | 3214.135  | 2118.745  | AF007128  | 8619.507  | 6755.243  | NM_017885 | 5780.426  | 5635.635  |
| BI835536  | 14582.92  | 8077.459  | AJ012498  | 1039.922  | 1009.784  | D80004    | 1502.469  | 1580.753  |
| BF205051  | 8501.079  | 5055.332  | NM_005973 | 15399.6   | 12622.174 | NM_000946 | 7038.841  | 6047.004  |
| X02761    | 4616.143  | 2958.495  | X04547    | 1355.99   | 1146.832  | NM_016070 | 7715.097  | 6605.427  |
| M91463    | 1679.2    | 1259.629  | AK025823  | 2020.226  | 2474.299  | NM_016390 | 6585.253  | 5686.192  |
| U88317    | 1079.988  | 817.608   | AK026691  | 715.707   | 720.924   | NM_016101 | 12789.06  | 10991.529 |
| J03060    | 3063.238  | 4311.555  | AL359941  | 4842.983  | 4537.878  | NM_005855 | 53027.16  | 51972.652 |
| X54156    | 1211.93   | 1492.366  | U52076    | 770.887   | 666.911   | NM_020313 | 2187.367  | 1937.19   |
| NM_003743 | 2471.581  | 3357.129  | AF035278  | 2118.99   | 1762.952  | NM_014628 | 5941.758  | 5760.428  |
| AA829383  | 19548.031 | 21180.287 | AF086493  | 1967.941  | 1919.891  | AK025630  | 4302.991  | 3839.563  |
| L22524    | 482.055   | 848.52    | AL050202  | 1943.645  | 2010.032  | AL365404  | 47051.512 | 47387.039 |
| AF012434  | 46158.707 | 41928.746 | U32999    | 16296.061 | 16326.073 | AK022907  | 27501.975 | 22665.383 |
| NM_018124 | 19345.654 | 21167.752 | U66052    | 6712.782  | 5981.915  | NM_014793 | 5125.353  | 4468.399  |
| NM_004887 | 16839.762 | 10695.646 | NM_000857 | 1680.722  | 1508.663  | BF213077  | 1237.128  | 1122.696  |
| NM_006404 | 1836.896  | 1186.131  | L20688    | 33161.746 | 33337.066 | NM_004245 | 7153.746  | 5803.983  |
| NM_014795 | 2878.329  | 2038.088  | X69111    | 18276.82  | 17804.496 | NM_003241 | 5869.922  | 5677.179  |
| NM_002986 | 1254.475  | 1048.882  | AF252283  | 514.496   | 546.542   | AF039023  | 4173.698  | 3446.008  |
| M15330    | 2822.118  | 3818.504  | AB037799  | 4256.859  | 4691.64   | CY3Cy5    | 4757.545  | 498.781   |
| NM_014396 | 3712.58   | 2977.388  | AB007950  | 14740.396 | 16511.367 | NM_145904 | 38788.68  | 25253.096 |
| AK027201  | 3818.422  | 2626.667  | AL133111  | 417.547   | 714.944   | AF086303  | 789.937   | 611.342   |
| NM_000489 | 5330.521  | 4650.084  | AK025593  | 2352.485  | 2003.568  | AF086434  | 1304.5    | 1062.674  |
| X98507    | 11779.38  | 8514.97   | AB018304  | 2280.953  | 2646.62   | AK022063  | 14052.127 | 11916.39  |
| NM_016030 | 40053.352 | 27220.324 | NM_007061 | 15657.714 | 13679.282 | AF086345  | 11054.827 | 9202.153  |
| NM_014669 | 15704.378 | 10810.706 | NM_001088 | 17665.828 | 17643.762 | AF086464  | 1178.141  | 817.022   |
| NM_005652 | 10415.698 | 5605.586  | BC015991  | 6807.273  | 6123.972  | AL049278  | 4042.424  | 3330.577  |
| AK026686  | 1311.509  | 668.558   | U94902    | 570.892   | 598.452   | AL117519  | 2460.121  | 2348.505  |
| NM_005902 | 7330.886  | 7107.635  | U46214    | 7051.979  | 6470.09   | NM_003715 | 5677.831  | 5302.15   |
| NM_002850 | 62197.086 | 63956.672 | NM_000310 | 14268.955 | 12075.591 | NM_145904 | 43147.289 | 50779.059 |
| NM_005302 | 546.424   | 895.904   | AF161343  | 6098.875  | 4799.846  | NM_021965 | 1493.632  | 1626.317  |
| NM_004302 | 1366.641  | 1743.104  | NM_004765 | 1465.266  | 1348.797  | SR2       | 44531.117 | 55554.059 |
| NM_005903 | 3278.49   | 4274.889  | AF009307  | 395.066   | 502.574   | SR4       | 11523.955 | 20272.049 |
| NM_000861 | 301.202   | 632.929   | AK022246  | 2675.534  | 2829.699  | SR6       | 1434.103  | 2576.539  |
| U77493    | 1087.812  | 1701.945  | X75684    | 1388.478  | 1539.328  | SR8       | 5319.372  | 32802.328 |
| NM_019062 | 776.5     | 975.033   | D17200    | 344.263   | 225.205   | SR10      | 18993.012 | 15787.813 |
| NM_017583 | 25035.156 | 22172.885 | AF113701  | 16705.822 | 15278.231 | CY3Cy5    | 4114.235  | 314.204   |
| Y16132    | 11795.101 | 14010.571 | Y11158    | 2941.617  | 3055.649  | AF086395  | 7880.679  | 6602.146  |
| NM_002905 | 8626.125  | 6179.063  | NM_006771 | 20368.98  | 18527.297 | AF086049  | 5057.856  | 3786.174  |
| NM_000700 | 3513.549  | 2979.888  | NM_014718 | 4505.747  | 4000.512  | AF088020  | 804.957   | 412.17    |
| NM_019028 | 6551.854  | 6032.354  | AB028953  | 531.332   | 345.743   | AF114263  | 1194.456  | 927.18    |
| NM_000431 | 6131.875  | 5268.315  | NM_000632 | 1314.104  | 1493.828  | AK026142  | 7003.958  | 6192.812  |
| NM_013421 | 2024.664  | 1426.306  | AB002298  | 1235.602  | 1039.891  | AK021494  | 5699.948  | 4339.64   |
| NM_012474 | 10501.411 | 10092.117 | AK024488  | 1776.067  | 1384.408  | NM_014144 | 2415.193  | 2603.477  |
| AB033118  | 2471.376  | 2209.099  | AK023249  | 45259.926 | 48991.25  | AF147345  | 3112.25   | 4099.842  |
| NM_019606 | 8149.038  | 7333.857  | NM_017442 | 8916.429  | 8296.464  | AF147373  | 5384.754  | 6489.106  |
| NM_001690 | 19657.918 | 12189.613 | NM_000743 | 2395.613  | 2616.493  | AF086253  | 1136.722  | 1237.882  |
| AF034374  | 3021.002  | 2715.451  | NM_007218 | 2873.267  | 2491.531  | AF086337  | 1116.646  | 1004.73   |
| AK025130  | 6584.783  | 3535.675  | Z25436    | 2464.867  | 2354.78   | AK026861  | 423.295   | 448.329   |
| AK023232  | 3409.816  | 2218.62   | NM_005275 | 3623.235  | 3108.045  | AK021642  | 7000.511  | 5512.164  |
| NM_006380 | 3662.363  | 1985.304  | NM_003844 | 31146.443 | 29151.889 | AK022455  | 1019.151  | 448.247   |
| AB020710  | 3824.579  | 3285.799  | NM_002005 | 26254.238 | 23788.139 | AK021987  | 3098.811  | 2593.396  |
| Z83801    | 1069.881  | 1023.112  | NM_012324 | 4445.378  | 3387.86   | AK026905  | 2502.741  | 2175.462  |

|           |           |           |           |           |           |           |           |           |
|-----------|-----------|-----------|-----------|-----------|-----------|-----------|-----------|-----------|
| NM_016174 | 3729.854  | 5678.627  | AK000039  | 1368.453  | 1342.379  | AK023449  | 853.178   | 648.675   |
| NM_020377 | 1734.121  | 1847.634  | AL137352  | 2684.799  | 2152.195  | NM_000134 | 1564.428  | 1376.838  |
| U88896    | 4065.917  | 5247.472  | NM_014749 | 2773.853  | 2301.213  | AF075108  | 2223.059  | 1820.482  |
| AF116702  | 62506.746 | 60422.863 | D49958    | 553.725   | 698.008   | NM_00506C | 1513.646  | 1290.404  |
| NM_005724 | 16319.314 | 18351.523 | NM_004489 | 5991.411  | 6013.335  | AF085935  | 500.904   | 463.96    |
| X58794    | 1566.073  | 1694.642  | BF240063  | 1339.987  | 1473.745  | AL137630  | 2840.811  | 3277.571  |
| NM_001735 | 4825.228  | 5485.723  | BI461699  | 1695.146  | 1537.508  | AK055236  | 896.374   | 1211.716  |
| NM_002349 | 1364.138  | 1300.237  | AF172264  | 919.008   | 1007.3    | AL137277  | 11288.94  | 19971.055 |
| NM_00508C | 26441.227 | 25541.002 | U80756    | 41497.531 | 35084.816 | AL137447  | 906.457   | 956.742   |
| AF148505  | 4060.924  | 3865.724  | NM_018161 | 4045.837  | 3245.654  | AL157467  | 670.37    | 837.767   |
| NM_01868E | 23329.125 | 15768.289 | NM_00524E | 23534.709 | 19550.953 | BC023609  | 2787.927  | 3256.04   |
| NM_01767E | 3762.582  | 2990.465  | NM_00481C | 3004.483  | 3136.321  | AK023264  | 764.692   | 742.087   |
| AK021764  | 2175.842  | 1444.328  | AL117629  | 5896.314  | 5199.067  | AK024457  | 15754.786 | 13634.305 |
| NM_005431 | 5652.559  | 5119.067  | NM_00259E | 1698.414  | 1993.817  | AL389977  | 3326.55   | 3129.043  |
| NM_002894 | 21963.016 | 14815.25  | NM_01572E | 1853.384  | 1586.095  | AK026894  | 2483.401  | 2300.186  |
| NM_00426C | 8679.703  | 6210.257  | AF174604  | 3906.524  | 3772.112  | AK026372  | 1910.403  | 1736.672  |
| AL050067  | 1109.816  | 579.013   | AB002379  | 7783.55   | 8756.507  | AF161369  | 5462.836  | 6087.946  |
| NM_004972 | 8331.132  | 3936.093  | AF113223  | 2828.867  | 3165.22   | AK027176  | 9675.585  | 8668.973  |
| NM_006251 | 9732.891  | 5249.323  | AB046851  | 1401.281  | 1307.035  | AF073328  | 1672.825  | 1321.93   |
| NM_004103 | 9923.241  | 4824.325  | NM_00574E | 13046.815 | 12041.555 | AF129266  | 1044.996  | 797.071   |
| NM_002314 | 20283     | 16803.869 | NM_01985E | 58992.281 | 57087.457 | AF211968  | 995.138   | 949.492   |
| NM_001744 | 5816.546  | 4770.618  | NM_018174 | 1681.51   | 1212.797  | Y12019    | 3969.99   | 3163.807  |
| NM_00629E | 5350.92   | 7398.947  | NM_01454E | 5777.009  | 4056.127  | AL137326  | 2853.075  | 3927.658  |
| Z25433    | 3551.822  | 5362.061  | NM_004437 | 1889.105  | 1953.23   | AK021898  | 4880.953  | 6339.417  |
| NM_005922 | 6393.632  | 7500.601  | AK025875  | 1353.62   | 1298.523  | AK022024  | 2201.224  | 2651.939  |
| NM_01863E | 6843.767  | 9609.167  | BC014152  | 58590.539 | 55190.641 | AK022163  | 547.7     | 702.918   |
| AL137593  | 20138.029 | 23598.168 | NM_01241E | 791.296   | 718.969   | AK022301  | 1674.128  | 2628.999  |
| NM_00391E | 5171.391  | 8440.722  | NM_00022E | 1200.499  | 1120.274  | AK021948  | 3671.458  | 5217.045  |
| NM_000382 | 4288.545  | 5987.583  | AB037779  | 59194.105 | 53540.043 | AK022341  | 847.329   | 1279.425  |
| AL133064  | 7641.574  | 7754.372  | NM_00065E | 1367.024  | 1666.8    | U48697    | 580.794   | 558.033   |
| NM_006227 | 8207.705  | 10692.266 | NM_000393 | 1109.66   | 1047.143  | AF230317  | 1076.056  | 982.887   |
| NM_001150 | 815.245   | 776.634   | NM_00088E | 5598.468  | 5783.46   | AK023806  | 6013.329  | 4954.399  |
| NM_00285E | 1335.839  | 1295.536  | NM_005761 | 1076.195  | 768.618   | AF088068  | 601.382   | 464.552   |
| NM_00322E | 2057.238  | 2021.157  | NM_01233E | 2016.874  | 1385.146  | Y16696    | 26866.199 | 19411.701 |
| NM_00009E | 2584.04   | 2211.549  | NM_005787 | 18972.092 | 14943.373 | AK026094  | 5178.14   | 4062.57   |
| AA418251  | 1432.624  | 1017.922  | NM_002143 | 3861.094  | 3571.26   | AF161344  | 15394.702 | 12394.313 |
| AA143087  | 5460.389  | 3834.681  | AF284421  | 40560.563 | 44871.203 | AF022793  | 527.334   | 311.669   |
| BI870965  | 3531.394  | 2597.949  | NM_00604E | 8509.758  | 8993.889  | AF086027  | 2341.027  | 2502.59   |
| BI835536  | 17187.713 | 10431.546 | NM_00636C | 35351.656 | 37727.27  | NM_001207 | 71089.391 | 65190.695 |
| BF205051  | 10824.7   | 6728.903  | NM_00396E | 6013.405  | 5491.063  | AK023655  | 399.615   | 711.458   |
| X02761    | 6151.013  | 3032.302  | NM_00281C | 56842.906 | 57551.031 | NM_00663E | 5527.645  | 6041.387  |
| M91463    | 1845.474  | 689.679   | NM_003343 | 20768.141 | 19164.953 | X14675    | 3671.779  | 3548.224  |
| U88317    | 851.556   | 589.065   | NM_00278E | 31359.859 | 27317.428 | AF075075  | 2009.876  | 2640.654  |
| J03060    | 2961.197  | 2802.965  | NM_00347C | 14460.831 | 11278.396 | NM_005453 | 493.829   | 760.163   |
| X54156    | 1219.58   | 1442.244  | AL080137  | 1714.035  | 1980.36   | NM_018304 | 12742.73  | 18710.287 |
| NM_003743 | 2538.473  | 3358.065  | NM_01767E | 8072.295  | 6283.121  | NM_016472 | 2696.598  | 2428.086  |
| AA829383  | 22297.078 | 25925.998 | AF155103  | 4500.755  | 3733.84   | AF086064  | 929.541   | 621.862   |
| L22524    | 420.54    | 528.237   | NM_017704 | 3032.425  | 2260.575  | AK023042  | 3166.839  | 2759.961  |
| AF012434  | 47900.98  | 46682.609 | BC006359  | 3776.195  | 3765.039  | AF086501  | 542.059   | 401.322   |
| NM_018124 | 20757.906 | 20144.818 | AK026127  | 1507.067  | 1538.94   | AK026429  | 982.966   | 1118.872  |
| Z70701    | 14235.917 | 14772.464 | BC016062  | 17547.803 | 19894.057 | NM_01655C | 6863.989  | 5972.528  |
| AB040972  | 2881.233  | 3726.593  | NM_002814 | 4150.359  | 5080.295  | AK024813  | 10435.681 | 10248.32  |
| X98507    | 12706.552 | 12828.469 | NM_01225C | 12893.746 | 14352.041 | AJ227909  | 40846.383 | 47709.449 |

|           |           |           |           |           |           |           |           |           |
|-----------|-----------|-----------|-----------|-----------|-----------|-----------|-----------|-----------|
| NM_01603C | 46464.66  | 45322.762 | NM_006283 | 13391.65  | 13761.595 | AK021880  | 1299.966  | 1030.286  |
| NM_01466E | 19673.508 | 20291.273 | Y08267    | 4180.199  | 4573.484  | L19365    | 1151.526  | 1639.426  |
| NM_005652 | 13567.935 | 13172.383 | AB016898  | 850.799   | 905.96    | AK024107  | 1214.6    | 899.438   |
| AK026686  | 1370.273  | 1619.264  | NM_01753C | 6419.147  | 5402.781  | NM_01418E | 11072.709 | 11429.282 |
| NM_005902 | 7588.152  | 6363.501  | AB029030  | 537.866   | 405.649   | AF056442  | 2946.803  | 2972.364  |
| NM_00285C | 58858.43  | 61553.777 | AL360183  | 2542.327  | 2370.826  | AK024752  | 50955.246 | 49527.895 |
| NM_005302 | 1101.702  | 318.992   | AK027046  | 1080.964  | 1068.659  | BG117194  | 1381.517  | 1239.961  |
| NM_004302 | 1571.996  | 1054.73   | NM_003113 | 4517.883  | 3454.363  | AK024181  | 457.949   | 480.485   |
| NM_005903 | 2987.127  | 2627.623  | NM_01657E | 6102.604  | 6419.91   | AF131859  | 5081.272  | 7875.121  |
| NM_000861 | 758.428   | 347.092   | NM_003822 | 779.653   | 1172.692  | AK001864  | 452.257   | 825.772   |
| AB037734  | 889.089   | 961.6     | NM_015832 | 12133.538 | 9929.267  | AK023632  | 510.381   | 545.648   |
| U77493    | 1199.278  | 1659.804  | NM_00132E | 11854.477 | 12468.962 | AF086118  | 9738.893  | 13598.229 |
| NM_019062 | 797.545   | 1128.854  | NM_01431E | 2421.175  | 2746.355  | NM_01413E | 2061.258  | 3334.281  |
| NM_003873 | 898.214   | 1334.126  | NM_00486E | 7099.53   | 6659.489  | AK025044  | 4743.912  | 11799.098 |
| NM_000263 | 5125.001  | 6442.678  | NM_017923 | 955.01    | 834.78    | AK023690  | 2069.978  | 3065.229  |
| AF073519  | 23782.461 | 26776.627 | AB019566  | 60600.504 | 60460.098 | NM_014723 | 1803.211  | 1709.469  |
| AB001451  | 2079.741  | 2566.546  | NM_000981 | 55633.605 | 51117.668 | AB011106  | 3300.567  | 2515.425  |
| NM_017583 | 29639.09  | 29903.346 | NM_002047 | 29801.834 | 21611.334 | D26362    | 3034.604  | 2424.633  |
| Y16132    | 13568.102 | 16306.64  | NM_001031 | 58249.082 | 56627.73  | NM_013452 | 5518.353  | 4747.709  |
| NM_016593 | 6059.854  | 6381.442  | NM_00720E | 17456.891 | 14764.504 | AL133073  | 697.353   | 732.894   |
| NM_002521 | 1827.541  | 2134.732  | NM_00099E | 58076.492 | 55339.957 | AY009402  | 6088.003  | 5114.543  |
| NM_000271 | 8062.58   | 10764.806 | NM_00098E | 20766.332 | 19468.754 | NM_018451 | 1855.321  | 1551.562  |
| NM_01820E | 7838.54   | 10228.39  | BF130622  | 30324.271 | 31695.9   | NM_012443 | 1190.149  | 1808.738  |
| NM_006184 | 30492.301 | 36608.652 | NM_00385E | 10466.089 | 12283.094 | NM_00700E | 631.148   | 407.093   |
| AB018268  | 3141.029  | 5300.063  | NM_00023E | 1433.839  | 1780.51   | NM_002584 | 10927.909 | 9196.806  |
| NM_01904E | 1361.826  | 1863.452  | NM_002903 | 57439.113 | 54228.262 | AK022154  | 772.169   | 627.705   |
| NM_00638C | 4756.412  | 5178.591  | NM_001861 | 2248.898  | 1548.763  | AK022199  | 1775.763  | 1416.158  |
| AB020710  | 3643.539  | 3480.224  | AK025558  | 12159.397 | 10128.508 | NM_006211 | 1183.675  | 1191.29   |
| Z83801    | 948.418   | 800.551   | AK024355  | 2633.397  | 2301.544  | NM_003524 | 10418.929 | 8464.839  |
| NM_016174 | 4131.902  | 3558.658  | NM_001864 | 39453.57  | 36522.367 | AK021438  | 1624.582  | 1456.51   |
| NM_020377 | 1749.599  | 1446.352  | NM_003477 | 20191.764 | 19453.842 | NM_005913 | 1716.195  | 1581.386  |
| U88896    | 4683.075  | 3692.02   | NM_002654 | 44231.355 | 48291.902 | AK022315  | 572.21    | 495.777   |
| AF116702  | 64601.348 | 64339.086 | NM_01547E | 1536.1    | 1762.25   | S39891    | 3124.756  | 4096.595  |
| NM_005724 | 17202.822 | 19614.941 | NM_020382 | 5374.609  | 6055.927  | R17536    | 1347.649  | 1817.085  |
| X58794    | 1733.96   | 1597.516  | NM_007192 | 16765.057 | 15800.289 | AK021624  | 1164.338  | 998.735   |
| NM_00173E | 4820.941  | 3373.849  | AB002337  | 12835.944 | 11020.169 | AF278605  | 10243.353 | 10475.236 |
| NM_00234E | 1632.361  | 1687.507  | NM_014933 | 7104.206  | 7065.804  | NM_006497 | 63955.629 | 67039.094 |
| NM_00508C | 25986.436 | 27791.02  | NM_00307E | 28350.459 | 24595.041 | AK022329  | 2339.356  | 4715.76   |
| NM_004887 | 19504.891 | 17733.055 | NM_00638E | 870.691   | 888.515   | AL133599  | 2132.333  | 3505.52   |
| NM_006404 | 1716.256  | 2005.85   | AK024250  | 1119.078  | 1042.199  | AK022380  | 967.523   | 1217.788  |
| NM_01479E | 3570.506  | 4181.292  | NM_00345E | 12674.133 | 10928.674 | AB037776  | 1768.469  | 1681.784  |
| NM_00298E | 1389.278  | 1682.5    | NM_00258E | 9567.014  | 7799.82   | AF196976  | 12352.42  | 9853.789  |
| M15330    | 3373.674  | 3582.169  | AB029016  | 2816.868  | 3080.348  | AL050379  | 4428.011  | 3554.648  |
| NM_01439E | 5034.886  | 5257.104  | AK000445  | 971.798   | 1083.74   | NM_003161 | 3635.554  | 3004.014  |
| AK027201  | 4839.549  | 4834.969  | NM_002701 | 5610.211  | 5408.228  | NM_00545E | 1245.236  | 1198.479  |
| NM_00048E | 7248.315  | 6808.511  | NM_005693 | 964.551   | 846.431   | NM_01449E | 1786.528  | 1437.178  |
| AL137593  | 18099.887 | 12979.165 | X97303    | 12102.511 | 12010.021 | NM_01621E | 44118.313 | 35815.781 |
| NM_00391E | 5270.42   | 4058.074  | L32162    | 646.059   | 730.022   | AK026919  | 1283.319  | 1244.98   |
| NM_000382 | 4356.573  | 4645.742  | AJ290954  | 2817.642  | 2281.255  | NM_001501 | 19699.42  | 14180.282 |
| AL133064  | 12694.804 | 11539.161 | AK025451  | 4213.711  | 3494.653  | NM_00617E | 59734.684 | 52092.621 |
| NM_006227 | 9874.802  | 11055.803 | NM_002783 | 6156.6    | 6437.411  | AL137459  | 4113.646  | 3345.923  |
| NM_00290E | 10568.307 | 9919.503  | X52005    | 30026.166 | 22159.662 | AB037812  | 871.816   | 920.964   |
| NM_00070C | 4577.821  | 5886.258  | NM_001047 | 1555.762  | 1609.878  | AB007932  | 10354.313 | 9100.434  |

|           |           |           |           |           |           |           |           |           |
|-----------|-----------|-----------|-----------|-----------|-----------|-----------|-----------|-----------|
| NM_01902E | 9503.795  | 12149.199 | AK024396  | 12548.66  | 13799.576 | AF219257  | 59280.613 | 52698.375 |
| NM_000431 | 8750.557  | 10908.388 | U58514    | 3466.854  | 3804.655  | NM_00397E | 2383.242  | 2345.936  |
| NM_013421 | 2419.902  | 2834.8    | M57627    | 1018.945  | 1525.337  | NM_002561 | 36286.652 | 30535.959 |
| NM_012474 | 13247.343 | 15183.919 | W74254    | 1775.497  | 1617.754  | NM_006103 | 61596.969 | 59018.988 |
| AB033118  | 3128.589  | 4055.86   | M58603    | 7426.195  | 7076.663  | NM_00620E | 658.883   | 1002.615  |
| NM_01960E | 10341.947 | 12675.594 | AA443286  | 4000.202  | 2541.783  | NM_00080E | 1237.078  | 1695.659  |
| NM_00169C | 27318.172 | 23975.443 | AB003334  | 8623.332  | 8071.69   | AL359933  | 30439     | 33700.539 |
| AF034374  | 3749.714  | 3985.753  | AW276315  | 3025.919  | 2813.83   | M17783    | 11752.673 | 17947.764 |
| NM_016118 | 19705.879 | 17281.949 | AA490737  | 6593.528  | 5631.304  | NM_01859C | 6280.006  | 8460.978  |
| NM_018674 | 3479.146  | 4655.869  | AI878886  | 25856.795 | 27907.426 | NM_00317E | 3473.315  | 5008.464  |
| NM_001683 | 20389.344 | 27603.869 | BG697179  | 21227.285 | 22443.641 | NM_012437 | 9040.438  | 9811.089  |
| NM_001682 | 7195.85   | 9136.419  | NM_00213E | 57525.211 | 50742.789 | NM_002607 | 1627.932  | 1331.098  |
| NM_01440E | 2844.106  | 4540.876  | BM012504  | 16445.973 | 15806.428 | NM_01818E | 5701.288  | 5654.992  |
| NM_00081E | 1725.577  | 1922.019  | AA664145  | 3615.487  | 3518.641  | AF116712  | 2483.382  | 1998.285  |
| NM_01492E | 978.199   | 986.971   | X72308    | 60938.297 | 57286.59  | AF116626  | 8929.368  | 8076.685  |
| AK025130  | 7918.537  | 7885.297  | T70999    | 595.695   | 663.323   | NM_00176C | 34611.539 | 27235.559 |
| NM_01787E | 3911.271  | 4936.681  | T50790    | 8434.242  | 8340.101  | NM_002527 | 2528.838  | 1996.967  |
| AK023232  | 4092.02   | 4969.063  | R48168    | 14277.756 | 15293.568 | NM_00589C | 2784.256  | 2242.362  |
| NM_018124 | 17598.469 | 8465.005  | BC008837  | 2120.867  | 2105.774  | NM_00706E | 55460.328 | 49097.367 |
| Z70701    | 14083.208 | 8539.183  | NM_00681E | 52458.844 | 54908.414 | AF149785  | 13038.662 | 9732.055  |
| AB040972  | 3004.483  | 2349.331  | NM_014744 | 2490.255  | 2111.698  | NM_01206E | 23270.994 | 21765.115 |
| AF148505  | 3996.65   | 2745.888  | AF146759  | 3205.194  | 2994.952  | NM_004064 | 15098.352 | 12724.277 |
| NM_01868E | 26746.318 | 15930.504 | AB032993  | 8103.009  | 5952.064  | NM_00125E | 22266.049 | 18733.238 |
| NM_01767E | 4091.563  | 2984      | NM_000854 | 6295.146  | 5707.625  | NM_014704 | 10307.596 | 10043.745 |
| AK021764  | 2267.191  | 1598.022  | NM_001901 | 947.948   | 1002.971  | NM_02020E | 1754.703  | 1757.986  |
| NM_005431 | 5904.288  | 5011.487  | AL117423  | 9698.807  | 9936.454  | AK024815  | 805.993   | 835.666   |
| NM_002894 | 26072.389 | 19368.664 | NM_00614C | 391.854   | 455.966   | NM_001227 | 3565.153  | 3469.323  |
| NM_00462E | 7368.95   | 6447.292  | NM_002084 | 2550.073  | 2536.425  | NM_001191 | 28647.74  | 29302.398 |
| NM_00426C | 10004.452 | 12458.562 | D16892    | 9997.728  | 9346.503  | U15174    | 1173.943  | 1773.676  |
| AL050067  | 1418.429  | 1372.568  | NM_00475C | 3472.401  | 3636.776  | NM_013342 | 3354.683  | 5131.722  |
| NM_004972 | 10146.017 | 12350.483 | NM_00729E | 6648.077  | 7243.241  | NM_014344 | 2008.528  | 2149.56   |
| NM_006251 | 11111.401 | 12111.958 | AK023317  | 565.811   | 351.905   | AB040917  | 1157.336  | 1505.892  |
| NM_004103 | 12217.535 | 16141.667 | NM_003651 | 27075.377 | 27264.547 | AL110261  | 39188.746 | 40614.555 |
| NM_002314 | 22330.102 | 23385.895 | NM_014012 | 1238.825  | 1233.615  | AA203539  | 1327.809  | 1846.297  |
| NM_001744 | 5228.043  | 6384.148  | NM_00041E | 2215.805  | 2254.768  | AK021786  | 2270.936  | 2186.181  |
| NM_00629E | 5265.949  | 5808.44   | NM_01324E | 1535.771  | 1651.221  | AF245505  | 3788.417  | 4160.729  |
| Z25433    | 3037.571  | 3882.089  | NM_018431 | 1105.817  | 1122.772  | M26663    | 685.854   | 408.388   |
| NM_00592E | 10225.697 | 10549.191 | NM_000591 | 4573.069  | 5547.385  | NM_00427E | 20479.721 | 14237.103 |
| NM_01863E | 6300.695  | 8470.6    | NM_00056E | 2508.194  | 2393.944  | NM_004851 | 24166.645 | 17657.82  |
| CY3Cy5    | 6860.277  | 1228.105  | NM_016614 | 515.355   | 321.373   | NM_00190E | 10316.368 | 8121.972  |
| NM_003942 | 3781.015  | 4038.579  | NM_00201E | 618.459   | 727.069   | NM_00028E | 23853.057 | 18116.85  |
| NM_004452 | 1294.177  | 1290.863  | AF253318  | 6230.243  | 6567.313  | NM_005911 | 54824.324 | 57059.27  |
| AK022632  | 2587.843  | 3068.55   | NM_017767 | 21343.066 | 20727.98  | AV702690  | 3789.295  | 3384.007  |
| AK021554  | 979.31    | 955.465   | NM_003262 | 4765.81   | 4588.807  | AL117452  | 18507.615 | 13626.016 |
| AF070620  | 716.932   | 732.373   | NM_02012E | 873.759   | 764.331   | NM_01223C | 2410.051  | 1838.269  |
| NM_02023E | 6439.451  | 10012.014 | AK022832  | 2459.055  | 2433.217  | NM_01403E | 12273.883 | 11900.922 |
| AK000532  | 1250.195  | 2043.391  | NM_017784 | 1409.764  | 1453.459  | NM_002061 | 6517.669  | 5327.979  |
| AL109681  | 699.385   | 910.396   | NM_014641 | 3809.265  | 2551.264  | AF169974  | 6982.952  | 5667.112  |
| AL162039  | 7885.726  | 10993.05  | NM_004462 | 4914.014  | 4705.622  | NM_004522 | 2355.304  | 1861.677  |
| AK024896  | 4203.469  | 10183.885 | AB037739  | 371.462   | 295.942   | NM_005733 | 3206.044  | 3439.646  |
| AK021912  | 476.578   | 380.133   | NM_000343 | 893.601   | 953.567   | NM_01813E | 7063.639  | 7868.234  |
| BU165106  | 2766.063  | 2715.792  | NM_02024E | 3575.618  | 3827.646  | NM_01961E | 6117.568  | 6208.188  |
| AF038202  | 2648.728  | 4767.453  | NM_016354 | 3905.195  | 4043.048  | AF183411  | 3950.672  | 5070.934  |



|           |           |           |           |           |           |           |           |           |
|-----------|-----------|-----------|-----------|-----------|-----------|-----------|-----------|-----------|
| AB040925  | 2121.455  | 2692.04   | NM_001044 | 861.132   | 878.946   | BF244591  | 1842.145  | 2285.21   |
| NM_003942 | 4423.174  | 5072.029  | NM_004644 | 2419.856  | 2334.311  | NM_005886 | 19545.926 | 16448.762 |
| NM_004452 | 1545.267  | 1913.44   | AV681967  | 1633.326  | 1692.015  | U63785    | 2819.132  | 2799.82   |
| SR1       | 58533.785 | 57176.523 | NM_018250 | 2334.659  | 2316.718  | NM_005966 | 3489.699  | 4002.171  |
| SR3       | 35278.164 | 23239.838 | NM_016553 | 9623.628  | 10474.13  | NM_003156 | 6764.738  | 6630.31   |
| SR5       | 3799.813  | 3486.289  | AB023136  | 744.527   | 873.937   | AF090944  | 2085.988  | 1974.409  |
| SR7       | 4710.539  | 27191.025 | NM_003795 | 38182.262 | 35188.055 | NM_006473 | 2600.542  | 2018.103  |
| SR9       | 16316.712 | 2759.741  | NM_014232 | 6288.312  | 5352.459  | NM_014643 | 163.316   | 172.942   |
| CY3Cy5    | 2274.235  | 356.219   | NM_005701 | 2955.972  | 2341.602  | NM_005653 | 3796.598  | 2810.215  |
| M14624    | 523.87    | 752.685   | NM_001231 | 919.845   | 1478.254  | NM_014553 | 11669.031 | 10395.595 |
| M26147    | 731.027   | 875.57    | AB023139  | 8958.691  | 7627.067  | NM_003440 | 1178.396  | 736.68    |
| AF018254  | 1734.055  | 1920.933  | NM_017885 | 4714.269  | 4194.786  | NM_004696 | 6162.583  | 4087.482  |
| Y19237    | 159.725   | 210.703   | D80004    | 857.023   | 710.893   | U41387    | 49059.766 | 45238.988 |
| L08438    | 258.433   | 144.473   | NM_000946 | 4603.272  | 4563.062  | NM_004516 | 25654.701 | 20886.043 |
| K00627    | 439.953   | 500.586   | NM_016070 | 4800.881  | 4640.127  | NM_006513 | 7934.913  | 5377.041  |
| NM_016240 | 3735.926  | 5447.501  | NM_016390 | 3928.012  | 3920.153  | NM_003685 | 28699.578 | 22145.523 |
| AK026459  | 716.146   | 972.43    | NM_016101 | 8819.122  | 9290.235  | NM_002486 | 1141.762  | 940.46    |
| AL049390  | 1194.65   | 1620.216  | NM_005859 | 57646.23  | 61413.77  | NM_006295 | 15936.256 | 13601.2   |
| AK000584  | 5284.138  | 11264.555 | NM_020313 | 1456.067  | 1747.534  | NM_001540 | 9091.18   | 7596.612  |
| AJ297363  | 2001.525  | 1108.055  | NM_014628 | 4278.446  | 5670.589  | NM_012111 | 35722.184 | 32058.699 |
| AK026379  | 3454.396  | 1942.836  | AK025630  | 2970.157  | 3950.811  | NM_004470 | 38400.43  | 37758.527 |
| AF075002  | 868.899   | 785.091   | AL365404  | 47548.063 | 54386.504 | NM_001418 | 19554.98  | 35928.234 |
| AK022965  | 2407.145  | 3711.813  | AK022907  | 18602.057 | 21342.559 | NM_003756 | 55689.918 | 57588.898 |
| AK024278  | 6093.027  | 8588.673  | NM_014793 | 2582.214  | 3050.392  | AL049680  | 7402.409  | 8563.975  |
| NM_018022 | 2279.915  | 2236.046  | NM_004245 | 12508.038 | 13367.12  | AL133660  | 7735.433  | 5630.417  |
| AB056722  | 970.427   | 1191.504  | NM_003241 | 4060.089  | 4533.299  | NM_005932 | 1557.029  | 1887.259  |
| NM_013242 | 7464.837  | 4397.573  | NM_002685 | 4721.846  | 4462.917  | BF036874  | 6798.983  | 5906.711  |
| AK023198  | 178.607   | 148.534   | AK024504  | 3277.807  | 3062.504  | BE888487  | 1765.973  | 1134.281  |
| NM_012066 | 9216.933  | 5442.854  | AF039023  | 3110.288  | 3539.127  | AF182419  | 7411.604  | 5780.306  |
| AF052168  | 5615.78   | 4203.185  | NM_005511 | 4911.946  | 5097.749  | NM_004293 | 4237.667  | 4209.588  |
| NM_014650 | 418.286   | 452.385   | NM_014698 | 50677.773 | 48421.512 | NM_004450 | 475.569   | 399.639   |
| AK024330  | 413.564   | 494.45    | NM_018475 | 6657.647  | 6569.212  | NM_007016 | 3415.542  | 2333.716  |
| AK024561  | 273.646   | 272.146   | AK025451  | 4604.848  | 4148.733  | NM_002703 | 9357.018  | 7623.963  |
| AK024864  | 474.257   | 459.389   | NM_002783 | 6254.358  | 6646.444  | NM_005375 | 3109.451  | 2441.932  |
| AK024947  | 936.313   | 1509.458  | X52005    | 26050.852 | 18065.281 | NM_005985 | 33134.727 | 24491.594 |
| AK024581  | 255.658   | 268.051   | NM_001047 | 1566.754  | 2438.756  | NM_015906 | 6872.372  | 8287.754  |
| AK024879  | 455.494   | 521.103   | AK024396  | 12422.025 | 14374.769 | AK023759  | 6249.123  | 4992.601  |
| AK024999  | 373.274   | 526.495   | U58514    | 3520.021  | 3888.086  | L25270    | 56640.301 | 50641.289 |
| AK095125  | 1410.003  | 2437.905  | M57627    | 859.357   | 1059.806  | AB033111  | 2737.835  | 2871.497  |
| AK024059  | 2710.923  | 4252.66   | W74254    | 1884.099  | 1996.044  | AJ276316  | 4163.787  | 3360.295  |
| AK023663  | 836.43    | 1405.136  | M58603    | 7365.02   | 7958.25   | AF229246  | 55222.836 | 52435.027 |
| AK023645  | 2566.054  | 1800.558  | AA443286  | 4096.177  | 3221.325  | S64709    | 6853.008  | 6192.911  |
| D83543    | 911.524   | 1429.158  | AB003334  | 9288.726  | 11732     | NM_018488 | 5467.956  | 6040.615  |
| NM_016930 | 4339.454  | 5048.419  | AW276315  | 3153.532  | 3359.566  | X56465    | 2771.519  | 2717.858  |
| AF070575  | 365.065   | 423.168   | AA490737  | 7231.229  | 7411.751  | NM_003071 | 25709.789 | 26045.424 |
| AJ001861  | 4627.782  | 6328.28   | AI878886  | 26122.207 | 41628.402 | NM_003108 | 1160.846  | 1456.023  |
| AJ227865  | 474.857   | 416.99    | BG697179  | 20887.73  | 25245.525 | NM_013310 | 9821.787  | 10372.668 |
| NM_005186 | 796.296   | 957.554   | NM_002136 | 53217.938 | 52298.508 | BC004958  | 6778.604  | 5612.584  |
| X64981    | 1809.477  | 1765.421  | BM012504  | 17265.195 | 19289.771 | NM_005762 | 13831.021 | 14268.69  |
| AJ001890  | 457.829   | 352.775   | AA664145  | 3989.791  | 4925.908  | X84370    | 17839.215 | 18174.467 |
| X75692    | 2061.101  | 1136.832  | X72308    | 58103.355 | 57671.523 | NM_004036 | 1740.509  | 1525.642  |
| X64988    | 1017.292  | 839.21    | T70999    | 836.377   | 738.337   | NM_000508 | 912.801   | 825.046   |
| Y10511    | 16586.027 | 12531.935 | T50790    | 8271.576  | 9212.253  | AB014558  | 2690.927  | 2668.534  |

|           |           |           |           |           |           |           |           |           |
|-----------|-----------|-----------|-----------|-----------|-----------|-----------|-----------|-----------|
| NM_019617 | 235.257   | 292.749   | R48168    | 13846.183 | 16376.179 | NM_006287 | 2431.042  | 2354.826  |
| AK021832  | 512.902   | 416.22    | AB040954  | 7208.439  | 7598.474  | NM_000118 | 7597.688  | 5888.763  |
| AL133627  | 350.829   | 581.65    | NM_002081 | 1614.313  | 1823.487  | NM_000913 | 2195.404  | 1753.174  |
| U00951    | 398.526   | 439.787   | AF146759  | 3246.949  | 3604.088  | NM_001298 | 54582.813 | 52425.969 |
| AK021598  | 4875.843  | 7017.724  | AB032993  | 7934.449  | 5209.385  | BG325046  | 7196.523  | 8440.569  |
| AK000027  | 363.428   | 758.416   | NM_000854 | 5386.159  | 3700.985  | AI351740  | 40562.941 | 32008.314 |
| AK025238  | 1129.27   | 1616.853  | NM_001901 | 708.289   | 1118.733  | AA444051  | 24766.957 | 26415.227 |
| NM_004129 | 421.414   | 533.795   | AL117423  | 8997.575  | 10334.489 | NM_007164 | 37714.508 | 36432.973 |
| AK026416  | 1356.241  | 1101.91   | NM_006140 | 385.546   | 534.871   | BE783826  | 58211.078 | 59158.695 |
| AK025797  | 1567.798  | 1151.54   | NM_002084 | 2535.777  | 2708.779  | X04827    | 4476.15   | 3846.269  |
| NM_017759 | 370.288   | 297.414   | D16892    | 10087.575 | 9682.829  | H07088    | 7737.708  | 8304.671  |
| AK000853  | 248.112   | 220.813   | NM_004750 | 3389.792  | 3999.169  | AI004656  | 4897.205  | 5682.769  |
| AK000085  | 633.936   | 595.24    | NM_007295 | 6718.667  | 6534.035  | BC008428  | 767.759   | 964.336   |
| AK000019  | 1204.172  | 620.362   | AK023317  | 333.187   | 598.411   | BC020596  | 2832.695  | 3854.763  |
| AK000645  | 547.751   | 466.532   | NM_003651 | 26660.521 | 25646.883 | AF116606  | 59708.766 | 63813.445 |
| AK000893  | 356.044   | 297.046   | NM_014012 | 878.103   | 930.6     | X98922    | 8513.787  | 10816.587 |
| AK024156  | 1505.814  | 1724.704  | NM_000418 | 2181.335  | 2400.998  | AK098435  | 10711.388 | 13406.349 |
| AF086288  | 3222.447  | 3323.311  | NM_013246 | 1438.33   | 1827.253  | AK092872  | 7393.934  | 8946.416  |
| AF119866  | 770.345   | 883.004   | NM_018431 | 1103.909  | 983.441   | AF230496  | 1657.211  | 1927.372  |
| NM_016944 | 856.693   | 1194.012  | NM_000591 | 4680.952  | 5417.467  | M16801    | 1795.152  | 2053.643  |
| AK023109  | 1924.214  | 2891.739  | NM_000565 | 2523.517  | 2955.856  | M94065    | 3814.126  | 4018.226  |
| NM_005293 | 3845.347  | 4739.657  | NM_002019 | 908.513   | 1305.405  | NM_006068 | 4371.184  | 4413.913  |
| S50185    | 827.701   | 960.675   | AF253318  | 5494.203  | 6072.901  | NM_002704 | 1022.577  | 837.339   |
| AF133332  | 7833.173  | 11441.752 | NM_017767 | 18868.668 | 20706.639 | U16752    | 2105.495  | 1744.259  |
| AK022805  | 5293.989  | 7384.17   | AJ290954  | 2782.329  | 2739.559  | M30134    | 939.907   | 601.28    |
| NM_018944 | 387.15    | 909.739   | AK022832  | 2507.425  | 2143.303  | NM_000880 | 343.817   | 285.461   |
| NM_017503 | 1488.239  | 997.336   | NM_017784 | 1221.265  | 883.94    | NM_002038 | 24419.531 | 19542.998 |
| AK024606  | 1472.642  | 1489.201  | NM_014641 | 3635.033  | 3525.674  | NM_005729 | 32047.859 | 25336.051 |
| AK023907  | 507.2     | 431.495   | NM_004462 | 4635.924  | 5036.665  | NM_015493 | 1774.45   | 1559.976  |
| NM_016417 | 20894.066 | 20699.889 | AB037739  | 351.503   | 406.845   | NM_003747 | 1498.051  | 2858.507  |
| NM_019108 | 2674.985  | 1797.894  | NM_000343 | 833.694   | 892.853   | AB037744  | 2486.755  | 3352.137  |
| L10147    | 14021.449 | 10719.291 | NM_020246 | 3635.154  | 3436.022  | AF141901  | 669.691   | 930.225   |
| AL080118  | 6185.568  | 4316.501  | NM_016354 | 3410.261  | 3520.139  | NM_007008 | 1309.094  | 1415.736  |
| AL049378  | 2285.605  | 3118.667  | NM_001044 | 914.227   | 779.57    | AL109708  | 1554.52   | 1245.677  |
| L09086    | 992.507   | 930.559   | NM_004644 | 1930.655  | 2476.624  | L29143    | 5063.656  | 4469.701  |
| L37702    | 5936.07   | 5766.782  | AV681967  | 1359.131  | 1829.133  | AF234532  | 3991.856  | 4491.396  |
| AK022812  | 666.251   | 729.265   | NM_018250 | 2366.318  | 2467.757  | NM_002418 | 2526.575  | 2759.027  |
| AF238318  | 1122.896  | 1186.09   | NM_016553 | 9715.596  | 10904.177 | NM_002090 | 1228.058  | 1504.883  |
| AK022433  | 741.884   | 1044.804  | AB023136  | 851.335   | 1005.929  | NM_004485 | 1164.095  | 1266.317  |
| U79301    | 2268.288  | 2593.233  | NM_003795 | 36493.488 | 42195.199 | NM_012419 | 1187.544  | 1943.144  |
| AK022260  | 3735.492  | 4285.204  | NM_014232 | 5953.638  | 7244.749  | NM_013296 | 17156.623 | 23788.291 |
| M32219    | 14883.982 | 17227.781 | NM_005701 | 2557.409  | 2586.755  | AL117478  | 4263.938  | 5063.588  |
| BC018868  | 2773.592  | 3624.215  | NM_001231 | 650.236   | 809.781   | NM_005307 | 16052.643 | 20540.641 |
| AF086174  | 1262.761  | 1936.542  | NM_006819 | 54561.383 | 56667.098 | NM_005958 | 6223.935  | 7991.675  |
| AF007128  | 14495.056 | 17472.779 | NM_014744 | 2594.924  | 3971.014  | AF225426  | 1309.28   | 1495.761  |
| AJ012498  | 2888.524  | 4599.824  | D80004    | 929.445   | 665.404   | NM_005208 | 18315.25  | 20176.342 |
| NM_005973 | 16494.566 | 28267.365 | X63966    | 259.781   | 236.855   | AF099740  | 1063.769  | 1111.646  |
| X04547    | 3263.319  | 4865.503  | NM_000946 | 4706.008  | 4417.402  | NM_006117 | 10801.513 | 9893.676  |
| AK025324  | 389.36    | 676.921   | NM_016070 | 4077.871  | 4286.208  | NM_002225 | 2742.172  | 2495.197  |
| AK025823  | 3400.151  | 3601.34   | NM_016390 | 3818.034  | 3895.909  | NM_006229 | 926.207   | 936.164   |
| AK026691  | 1537.23   | 1511.782  | NM_016101 | 8761.069  | 9430.772  | NM_015415 | 43609.555 | 34092.195 |
| AL359941  | 1656.708  | 1743.528  | NM_005859 | 56316.074 | 59230.723 | NM_004897 | 4116.237  | 3732.292  |
| U52076    | 1716.514  | 1615.332  | NM_020313 | 1494.391  | 1514.146  | NM_002555 | 2561.715  | 1699.449  |

|           |           |           |           |           |           |           |           |           |
|-----------|-----------|-----------|-----------|-----------|-----------|-----------|-----------|-----------|
| AF035278  | 1486.433  | 1597.424  | NM_014628 | 4239.943  | 4914.851  | AF225418  | 2046.766  | 2040.553  |
| AF086493  | 395.767   | 300.674   | AK025630  | 2926.602  | 3311.999  | NM_000308 | 1918.406  | 2078.724  |
| AL050202  | 1341.664  | 1311.412  | AL365404  | 43304.695 | 48101.52  | NM_004528 | 24606.512 | 25251.432 |
| U32999    | 6432.92   | 5207.804  | AK022907  | 18924.979 | 20872.281 | AK026381  | 43627.254 | 48954.617 |
| U66052    | 1442.218  | 1368.814  | NM_014793 | 3028.351  | 3138.353  | AK023107  | 8966.787  | 9845.539  |
| NM_000857 | 1212.11   | 1375.252  | NM_004245 | 12077.554 | 11399.527 | NM_004578 | 605.203   | 834.719   |
| L20688    | 49688.023 | 48033.945 | NM_003241 | 4363.925  | 4661.735  | NM_000647 | 3735.271  | 3025.257  |
| X69111    | 22441.576 | 26418.242 | NM_002685 | 4624.104  | 4300.45   | AB046793  | 660.907   | 789.842   |
| AF252283  | 1421.258  | 1858.809  | AK024504  | 3878.957  | 4038.498  | NM_017604 | 6120.502  | 7308.841  |
| AB037799  | 5150.972  | 6503.01   | AF039023  | 3632.292  | 4397.568  | NM_017738 | 28280.549 | 30964.352 |
| AB007950  | 3840.426  | 4775.624  | NM_005511 | 5251.986  | 6380.844  | NM_016557 | 3632.464  | 3728.925  |
| AL133111  | 790.681   | 1011.748  | NM_014698 | 52180.172 | 51419.699 | NM_000623 | 4465.026  | 4111.377  |
| AK025593  | 4529.887  | 5619.712  | NM_018475 | 6642.681  | 7398.652  | AF161348  | 2364.082  | 2314.666  |
| AB018304  | 4673.079  | 7566.249  | NM_003262 | 4871.951  | 5672.936  | NM_018467 | 31906.766 | 32424.256 |
| NM_007061 | 11624.898 | 18371.652 | NM_020125 | 955.784   | 1056.588  | AF150735  | 12272.552 | 10349.028 |
| BC015991  | 13448.753 | 18936.854 | X52005    | 28664.287 | 19626.359 | NM_018183 | 2506.337  | 2100.714  |
| U94902    | 1782.064  | 1772.234  | NM_001047 | 1366.12   | 1257.096  | NM_012382 | 5654.575  | 5125.38   |
| U46214    | 1642.334  | 1807.274  | AK024396  | 12232.136 | 10645.04  | BF038366  | 1818.044  | 1653.876  |
| NM_000310 | 22684.27  | 19441.078 | U58514    | 3368.861  | 3527.119  | NM_002452 | 12341.425 | 14271.088 |
| AF161343  | 5157.958  | 3871.223  | M57627    | 767.089   | 784.639   | NM_012304 | 1560.488  | 1185.815  |
| NM_004765 | 2678.685  | 2064.768  | W74254    | 1870.174  | 2016.873  | NM_016440 | 47336.719 | 36280.746 |
| AF009307  | 993.252   | 876.487   | M58603    | 8174.968  | 7899.733  | NM_007194 | 3562.667  | 3758.763  |
| AK022246  | 3166.425  | 3201.224  | AA443286  | 5029.179  | 3488.374  | NM_000314 | 13592.916 | 11209.326 |
| X75684    | 2971.203  | 2692.879  | AB003334  | 9056.681  | 10390.236 | AB002369  | 2001.752  | 1979.362  |
| D17200    | 907.541   | 1139.547  | AW276315  | 3647.319  | 3763.103  | S74620    | 1330.636  | 1529.025  |
| AF113701  | 32390.768 | 32800.332 | AA490737  | 7028.508  | 6601.074  | AF305239  | 4800.884  | 7228.518  |
| Y11158    | 5010.38   | 5768.345  | AI878886  | 27455.563 | 31845.842 | NM_002827 | 24842.076 | 25406.053 |
| NM_006771 | 16938.363 | 18613.275 | BG697179  | 21402.527 | 22422.674 | NM_001946 | 1262.948  | 1345.195  |
| NM_014718 | 2890.937  | 3142.383  | NM_002136 | 54456.637 | 51827.883 | BF035425  | 57887.617 | 61587.652 |
| AB028953  | 523.635   | 265.53    | BM012504  | 16847.041 | 16634.994 | NM_000158 | 63788.184 | 65422.484 |
| NM_000632 | 2639.299  | 2783.753  | AA664145  | 4144.56   | 5249.452  | NM_014638 | 1878.826  | 2037.737  |
| AB002298  | 2233.035  | 2663.76   | X72308    | 52178.277 | 56214.504 | NM_000508 | 693.168   | 764.435   |
| AK024488  | 2148.195  | 2621.504  | T70999    | 518.894   | 824.078   | AB014558  | 2184.393  | 1916.968  |
| AK023249  | 51878.117 | 55255.148 | T50790    | 9918.731  | 12472.688 | NM_006287 | 2157.866  | 2399.461  |
| NM_007360 | 1054.754  | 1498.728  | R48168    | 15110.813 | 19148.436 | NM_000118 | 8145.685  | 6840.457  |
| NM_017442 | 12389.555 | 15807.307 | AB040954  | 8173.433  | 10232.539 | NM_000913 | 2731.063  | 2460.309  |
| AF055084  | 700.053   | 1206.29   | NM_002081 | 1549.433  | 2228.061  | NM_001298 | 56106.07  | 57864.738 |
| NM_000743 | 4374.176  | 8392.734  | AB023139  | 9218.604  | 10919.642 | BG325046  | 7461.072  | 5817.716  |
| Z25436    | 2759.041  | 2516.967  | NM_017885 | 5278.98   | 5080.464  | AI351740  | 39371.57  | 28371.299 |
| NM_005275 | 5491.083  | 4721.178  | D16892    | 10624.257 | 7143.075  | AA444051  | 24705.438 | 21929.131 |
| NM_003844 | 6742.318  | 5701.766  | NM_004750 | 3099.284  | 2660.564  | NM_007164 | 22979.652 | 22437.131 |
| NM_002005 | 14898.859 | 11757.63  | NM_007295 | 5995.272  | 4657.858  | BE783826  | 55445.156 | 58306.008 |
| NM_012324 | 3138.942  | 2302.383  | AK023317  | 320.87    | 555.191   | X04827    | 4170.192  | 4111.415  |
| AK000039  | 1555.375  | 1189.995  | NM_003651 | 27390.488 | 24111.988 | H07088    | 7122.609  | 5623.227  |
| AL137352  | 1526.583  | 1261      | NM_014012 | 801.273   | 973.621   | AI004656  | 4258.641  | 3587.854  |
| NM_014748 | 2471.008  | 1958.487  | NM_000418 | 2317.649  | 2664.425  | BC020596  | 2514.343  | 2336.307  |
| D49958    | 869.887   | 907.916   | NM_013246 | 1546.297  | 1919.49   | AF116606  | 56232.492 | 60129.789 |
| NM_004488 | 6741.445  | 5777.292  | NM_018431 | 1247.938  | 980.616   | X98922    | 7926.183  | 9093.18   |
| BF240063  | 957.361   | 732.232   | NM_000591 | 5051.375  | 5857.005  | AK098435  | 10161.636 | 16468.371 |
| BI461699  | 3036.874  | 2582.589  | NM_000565 | 2619.077  | 2732.081  | AK092872  | 6902.66   | 9572.464  |
| AK090409  | 597.514   | 647.321   | NM_002019 | 706.328   | 883.606   | AF230496  | 1998.29   | 2370.913  |
| AF172264  | 2016.708  | 1683.376  | AF253318  | 4279.354  | 3640.447  | M16801    | 1784.636  | 2331.565  |
| U80756    | 49859.789 | 46621.625 | NM_017767 | 20980.73  | 23183.957 | NM_013334 | 30006.111 | 30578.947 |

|           |           |           |           |           |           |           |           |           |
|-----------|-----------|-----------|-----------|-----------|-----------|-----------|-----------|-----------|
| NM_018161 | 3344.363  | 3581.065  | AK024848  | 17370.43  | 22325.193 | U16752    | 1716.473  | 1602.039  |
| NM_00524E | 35022.051 | 37781.926 | NM_004852 | 630.18    | 767.48    | M30134    | 938.745   | 777.51    |
| NM_00481C | 986.974   | 1073.757  | NM_000543 | 1349.67   | 1863.292  | NM_00203E | 27818.135 | 25483.99  |
| AL117629  | 7136.263  | 8084.256  | U06699    | 29917.107 | 46377.004 | NM_00572E | 32275.432 | 30247.291 |
| NM_00259E | 3050.546  | 3948.692  | NM_00614E | 610.965   | 918.889   | NM_01549E | 2383.418  | 2497.151  |
| NM_01572E | 3724.517  | 4148.5    | AJ290954  | 3992.598  | 5185.563  | NM_003747 | 1324.538  | 1100.753  |
| AF174604  | 3847.526  | 5199.634  | AK025451  | 4935.816  | 6315.521  | AB037744  | 2468.239  | 2446.606  |
| AB002379  | 2262.785  | 3689.72   | NM_002783 | 8255.607  | 9621.833  | AF141901  | 648.338   | 631.567   |
| AF113223  | 6563.03   | 13414.555 | NM_00303E | 1608.747  | 1262.323  | NM_00700E | 1893.956  | 2132.343  |
| NM_00574E | 19484.084 | 12709.81  | NM_01815E | 8547.387  | 6406.371  | AL109708  | 2134.022  | 2282.725  |
| NM_01985E | 23690.443 | 18233.467 | AL050358  | 2613.305  | 2555.553  | L29143    | 5144.908  | 4777.982  |
| NM_018174 | 4134.501  | 2185.21   | NM_004731 | 979.858   | 838.412   | AF234532  | 3814.144  | 3413.302  |
| NM_01454E | 5080.035  | 3346.853  | NM_000544 | 5463.396  | 3544.604  | NM_00241E | 1956.512  | 1535.64   |
| NM_004437 | 4461.859  | 3748.28   | NM_001044 | 919.012   | 817.051   | NM_00209C | 1000.931  | 1044.884  |
| AK025875  | 4528.786  | 4377.907  | NM_004644 | 2389.817  | 2442.985  | NM_00448E | 1253.802  | 957.201   |
| BC014152  | 54570.758 | 51395.16  | AV681967  | 1370.487  | 1624.935  | NM_01329E | 16315.214 | 18279.928 |
| NM_01241E | 1477.207  | 1074.972  | NM_01825C | 2422.154  | 2615.329  | AL117478  | 3848.042  | 4247.911  |
| NM_00022E | 965.261   | 754.314   | NM_016553 | 9570.404  | 11467.157 | NM_005307 | 10385.654 | 10978.91  |
| AB037779  | 10207.195 | 7878.332  | AB023136  | 938.312   | 1083.153  | NM_00595E | 6440.399  | 8420.187  |
| NM_00065E | 1612.201  | 1049.8    | NM_00379E | 37383.898 | 36316.68  | AF225426  | 1253.619  | 1832.178  |
| NM_00039E | 1728.446  | 1367.558  | NM_01423E | 6240.067  | 5334.078  | NM_00520E | 21291.551 | 28057.818 |
| NM_00088E | 6367.729  | 4441.442  | NM_005701 | 3134.366  | 2051.889  | X84370    | 15804.072 | 22088.834 |
| NM_005761 | 1030.888  | 726.909   | NM_001231 | 671.394   | 612.737   | NM_00403E | 1761.795  | 3008.997  |
| NM_002411 | 926.271   | 829.994   | NM_00681E | 53844.121 | 55319.379 | NM_00222E | 2448.773  | 2039.881  |
| NM_01233E | 3419.13   | 2890.239  | NM_014744 | 2597.61   | 3386.504  | NM_00622E | 1185.611  | 1001.949  |
| NM_005787 | 30419.48  | 31846.52  | AF146759  | 4283.633  | 4661.393  | NM_01541E | 46357.133 | 38082.789 |
| NM_00214E | 4992.63   | 5486.732  | AB032993  | 9716.981  | 8887.987  | NM_004897 | 4474.779  | 5120.778  |
| AF284421  | 3286.645  | 3748.885  | NM_000854 | 7943.247  | 7757.081  | NM_00255E | 2534.74   | 1904.326  |
| NM_00604E | 6439.497  | 7714.209  | NM_001901 | 1151.911  | 1557.587  | AF225418  | 2324.171  | 2330.075  |
| NM_00636C | 53069.535 | 56301.766 | AL117423  | 12902.411 | 17446.316 | NM_00030E | 3058.95   | 2407.169  |
| NM_00396E | 11371.643 | 14176.786 | NM_00614C | 730.867   | 718.851   | NM_00452E | 27036.4   | 25859.818 |
| NM_00278E | 1002.544  | 1622.764  | NM_00700E | 399.121   | 953.771   | AK026381  | 37248.977 | 33425.629 |
| NM_00281C | 19086.297 | 31050.666 | NM_002084 | 3498.387  | 3820.431  | AK023107  | 8002.557  | 8112.162  |
| NM_00278E | 47054.191 | 26036.43  | NM_005511 | 5253.669  | 3714.885  | NM_00457E | 564.757   | 621.184   |
| NM_00347C | 24397.412 | 13959.512 | NM_01469E | 44430.191 | 39232.551 | NM_000647 | 2840.055  | 2114.529  |
| AL080137  | 2704.346  | 3863.483  | NM_01847E | 6556.244  | 4891.446  | AB046793  | 593.718   | 616.056   |
| NM_01767E | 3529.788  | 2690.832  | NM_00326E | 4668.941  | 4098.024  | NM_017604 | 5500.372  | 4933.717  |
| AF155103  | 7025.772  | 5870.841  | NM_02012E | 854.765   | 661.659   | NM_01773E | 20346.588 | 19128.797 |
| NM_017704 | 6099.905  | 5139.401  | AB028127  | 368.734   | 396.892   | NM_016557 | 3493.136  | 3597.552  |
| BC006359  | 8089.402  | 7618.077  | AK022832  | 2684.874  | 2533.855  | NM_00062E | 4008.557  | 3787.687  |
| AK026127  | 3008.588  | 2780.454  | NM_017784 | 1412.119  | 1028.963  | AF161348  | 6953.89   | 10863.947 |
| BC016062  | 28994.111 | 22103.178 | NM_014641 | 3757.499  | 3186.853  | NM_018467 | 33796.973 | 39695.348 |
| NM_002814 | 6842.932  | 7654.103  | NM_00446E | 4910.328  | 5212.395  | NM_00606E | 4972.718  | 6371.101  |
| NM_01225C | 20298.48  | 13687.398 | AB037739  | 291.921   | 347.245   | NM_002704 | 887.728   | 1156.451  |
| NM_00628E | 14401.876 | 9486.288  | AB020664  | 1669.227  | 1955.681  | AF150735  | 13200.188 | 15971.474 |
| Y08267    | 3030.365  | 2729.538  | NM_00664C | 25030.432 | 32776.762 | NM_01818E | 2516.218  | 2356.675  |
| AB016898  | 441.338   | 560.071   | NM_00086E | 499.608   | 511.241   | NM_01238E | 6920.586  | 6632.418  |
| NM_01753C | 2207.715  | 2784.728  | NM_00034E | 938.127   | 1532.413  | BF038366  | 2175.043  | 3328.174  |
| AB029030  | 1058.909  | 1051.052  | NM_019112 | 11319.248 | 12470.187 | NM_00245E | 11460.1   | 9725.059  |
| AL360183  | 6403.936  | 7306.867  | NM_01233E | 11262.67  | 14115.676 | NM_012304 | 1231.586  | 923.594   |
| AK027046  | 2520.532  | 2999.355  | NM_020161 | 663.383   | 889.528   | NM_01644C | 48737.531 | 53682.172 |
| NM_003113 | 8156.177  | 8413.438  | NM_02024E | 4324.359  | 5887.347  | NM_007194 | 3239.647  | 3523.843  |
| NM_01657E | 9803.555  | 12128.796 | NM_000084 | 5278.192  | 7762.741  | NM_000314 | 12209.387 | 10675.188 |

|           |           |           |           |           |           |           |           |           |
|-----------|-----------|-----------|-----------|-----------|-----------|-----------|-----------|-----------|
| NM_003822 | 1621.063  | 2261.99   | NM_016354 | 4313.941  | 5579.581  | AB002369  | 1873.432  | 1557.376  |
| NM_015832 | 24246.455 | 33607.734 | AB040954  | 7182.727  | 5272.854  | S74620    | 1332.955  | 1370.276  |
| NM_001326 | 26320.473 | 36872     | NM_002081 | 1449.35   | 975.884   | AF305239  | 2640.8    | 2245.993  |
| NM_014319 | 4128.67   | 9134.373  | AB023139  | 8183.356  | 6526.013  | NM_002827 | 20858.951 | 18607.959 |
| NM_004865 | 11995.607 | 8932.582  | NM_017885 | 5379.244  | 4376.443  | NM_001946 | 831.591   | 831.17    |
| NM_017923 | 2217.581  | 1596.875  | D80004    | 1138.537  | 1125.509  | BF035425  | 58251.52  | 58888.848 |
| AB019566  | 54427.211 | 57291.078 | NM_000946 | 5411.247  | 7589.599  | NM_001606 | 740.321   | 793.878   |
| NM_000981 | 51443.148 | 57069.133 | NM_016070 | 4843.299  | 4658.737  | NM_000155 | 58328.363 | 61510.871 |
| NM_002047 | 48956.398 | 52463.164 | NM_016390 | 4089.561  | 3897.024  | NM_014636 | 2421.635  | 3234.728  |
| NM_001031 | 53206.996 | 57072.617 | NM_016101 | 9415.634  | 8596.349  | AF099740  | 1586.505  | 2419.144  |
| NM_007206 | 32953.957 | 22306.123 | NM_005859 | 57063.352 | 59831.094 | NM_006117 | 12521.974 | 19562.744 |
| NM_000996 | 54612.789 | 53870.441 | NM_020313 | 1832.529  | 1735.748  | NM_006287 | 1889.076  | 2038.092  |
| NM_000985 | 40348.211 | 22190.885 | NM_014626 | 4461.443  | 5280.243  | NM_000116 | 3909.798  | 3850.296  |
| BF130622  | 38677.324 | 21466.43  | AK025630  | 2677.384  | 2749.06   | NM_000913 | 2446.608  | 2629.12   |
| NM_003859 | 14736.818 | 10634.367 | AL365404  | 48068.336 | 54545.539 | NM_001296 | 55612.836 | 62829.75  |
| NM_000236 | 1656.018  | 1289.715  | AK022907  | 21519.232 | 27599.469 | BG325046  | 6986.916  | 7318.073  |
| NM_002903 | 14651.33  | 12282.053 | NM_014793 | 3197.42   | 3793.964  | AI351740  | 43468.754 | 36896.27  |
| NM_001861 | 4030.074  | 5173.237  | BF213077  | 1367.534  | 1767.152  | AA444051  | 26082.959 | 27993.738 |
| AK025558  | 10663.415 | 13492.758 | NM_004245 | 12937.639 | 14954.389 | NM_007164 | 40425     | 57037.324 |
| AK024355  | 4067.67   | 5258.088  | NM_003241 | 5305.925  | 7427.504  | BE783826  | 55977.578 | 55128.535 |
| NM_007103 | 309.689   | 385.928   | NM_002685 | 4996.55   | 7310.345  | X04827    | 4628.574  | 4163.849  |
| NM_001864 | 51404.496 | 57687.352 | AK024504  | 4033.172  | 4191.092  | H07088    | 7714.674  | 7899.66   |
| NM_003477 | 39334.496 | 38793.137 | AF039023  | 3748.002  | 5353.457  | AI004656  | 4862.759  | 5055.111  |
| NM_002654 | 51803.961 | 61241.867 | CY3Cy5    | 720.603   | 193.542   | BC008428  | 419.729   | 638.976   |
| NM_015476 | 1112.3    | 1975.834  | NM_145904 | 26200.551 | 23186.449 | BC020596  | 2827.271  | 2360.109  |
| NM_020382 | 10132.131 | 17710.117 | AK022063  | 7019.438  | 7055.492  | AF116606  | 53199.672 | 56458.633 |
| NM_018267 | 667.469   | 1435.391  | AF086345  | 9207.433  | 18300.674 | X98922    | 8155.125  | 7525.892  |
| NM_007192 | 27271.957 | 14333.304 | AF086464  | 970.055   | 723.756   | AK098435  | 9387.895  | 9360.095  |
| AB002337  | 15441.974 | 8525.861  | AL049278  | 2514.366  | 1882.781  | AK092872  | 6371.731  | 6385.265  |
| NM_014933 | 12616.193 | 10106.364 | AL117519  | 1541.744  | 1186.836  | AF230496  | 1749.367  | 1848.327  |
| NM_003076 | 45924.707 | 37370.043 | AK001595  | 2546.402  | 2059.875  | M16801    | 1884.966  | 2026.169  |
| NM_006385 | 902.018   | 889.264   | NM_018015 | 2702.772  | 2270.018  | NM_013334 | 28898.363 | 34008.539 |
| AK024250  | 1876.716  | 2373.752  | NM_003715 | 6140.7    | 5375.289  | AF141901  | 638.588   | 655.142   |
| NM_003456 | 6664.837  | 11757.041 | NM_145904 | 28801.748 | 24019.205 | AL109708  | 2571.566  | 2224.388  |
| NM_002585 | 2789.45   | 2077.444  | SR2       | 31344.242 | 35987.762 | L29143    | 5148.195  | 5123.599  |
| AB029016  | 3713.768  | 3627.023  | SR4       | 11303.735 | 11558.022 | AF234532  | 3677.882  | 3812.473  |
| AK000445  | 545.719   | 431.61    | SR6       | 1168.451  | 1530.404  | NM_002416 | 2303.838  | 2261.219  |
| NM_002701 | 1919.098  | 1253.887  | SR8       | 4623.866  | 16337.759 | NM_002090 | 1052.984  | 1554.455  |
| NM_005693 | 2147.136  | 1716.336  | SR10      | 15115.537 | 6681.035  | NM_004485 | 1394.894  | 1733.029  |
| L32162    | 641.783   | 1017.036  | CY3Cy5    | 735.387   | 207.674   | NM_013296 | 17296.291 | 18067.156 |
| NM_006146 | 620.443   | 799.975   | AK026142  | 4832.617  | 4826.451  | AL117478  | 3581.251  | 3752.286  |
| AJ290954  | 3364.26   | 3264.505  | AK021494  | 9509.59   | 6231.875  | NM_005307 | 11376.295 | 13261.235 |
| AK025451  | 9257.536  | 10448.115 | AK022117  | 1043.528  | 789.592   | NM_005956 | 6669.842  | 6973.68   |
| NM_002783 | 2969.012  | 3335.761  | AF075023  | 3447.527  | 3375.519  | NM_013436 | 776.11    | 1082.204  |
| X52005    | 38928.277 | 44757.637 | AL360160  | 66003.781 | 57599.113 | AF225426  | 1124.38   | 1153.635  |
| NM_001047 | 2524.123  | 2826.615  | AK001092  | 73479.641 | 63290.281 | NM_005206 | 22594.539 | 20847.488 |
| AK024396  | 4177.99   | 6051.947  | NM_014144 | 2436.639  | 2321.779  | NM_000421 | 1726.999  | 1741.274  |
| U58514    | 4880.067  | 7560.199  | AF147345  | 6720.106  | 6848.623  | AK025687  | 37195.074 | 32028.578 |
| M57627    | 1672.769  | 2530.276  | AF147373  | 10203.034 | 8588.412  | AF218941  | 6398.243  | 6472.555  |
| W74254    | 1620.901  | 2840.888  | AF086337  | 3801.644  | 2896.76   | AL137264  | 53579.113 | 57205.973 |
| M58603    | 10973.242 | 6673.687  | AK026861  | 435.823   | 480.399   | NM_002226 | 1372.7    | 1408.95   |
| AA443286  | 736.416   | 402.215   | AK021642  | 5661.008  | 5470.578  | X84370    | 17055.529 | 23390.85  |
| AB003334  | 12629.787 | 9021.022  | AK022455  | 456.703   | 744.253   | NM_006854 | 14901.052 | 13537.377 |

|           |           |           |           |           |           |           |           |           |
|-----------|-----------|-----------|-----------|-----------|-----------|-----------|-----------|-----------|
| AW276315  | 2145.841  | 1187.052  | AK021987  | 2744.092  | 3157.371  | NM_00458C | 3942.407  | 3597.61   |
| AA490737  | 5704.068  | 4937.33   | AK026905  | 2459.588  | 3066.858  | NM_020387 | 50666.551 | 59556.887 |
| AI878886  | 45726.41  | 58264.383 | AK023449  | 494.132   | 1084.961  | NM_00724E | 2441.146  | 2330.444  |
| BG697179  | 18868.986 | 20545.5   | NM_000134 | 976.041   | 1145.446  | AK026248  | 2645.892  | 2863.52   |
| NM_00213E | 51241.609 | 59633.207 | AF075108  | 3433.241  | 3393.857  | NM_00457E | 679.816   | 753.446   |
| BM012504  | 14511.146 | 12589.89  | NM_00506C | 1753.512  | 1895.099  | NM_000647 | 3875.225  | 3667.055  |
| AA664145  | 6358.11   | 5495.009  | AF085935  | 751.65    | 692.985   | AB046793  | 638.736   | 516.938   |
| X72308    | 11423.782 | 9973.587  | AL035369  | 2009.341  | 1620.344  | NM_017604 | 5520.586  | 4755.99   |
| T50790    | 3558.239  | 3896.704  | AF075097  | 14723.258 | 13075.188 | NM_01773E | 28925.004 | 26208.598 |
| BC008837  | 4969.954  | 7957.134  | AK022801  | 646.289   | 614.596   | NM_016557 | 4204.702  | 3737.37   |
| NM_00681E | 47583.344 | 51081.945 | AL133075  | 22476.145 | 17574.564 | NM_00062E | 4370.305  | 3479.655  |
| NM_014744 | 3783.897  | 4554.842  | AL137692  | 353.364   | 413.921   | AF161348  | 2257.325  | 2823.707  |
| AF146759  | 938.96    | 1369.687  | AL137630  | 3400.657  | 2656.251  | NM_018467 | 41421.301 | 43099.207 |
| AB032993  | 9273.372  | 8605.706  | AL137277  | 21689.436 | 16541.029 | NM_00606E | 4693.933  | 6080.18   |
| NM_000854 | 8813.106  | 9447.767  | AL137447  | 396.938   | 419.961   | NM_002704 | 1207.353  | 1692.409  |
| NM_001901 | 1939.652  | 2653.3    | AL157467  | 372.201   | 297.077   | U16752    | 3102.907  | 3327.567  |
| AL117423  | 10653.401 | 15871.988 | BC023609  | 3188.786  | 3156.735  | M30134    | 1166.216  | 935.501   |
| NM_00614C | 678.92    | 791.445   | AK024457  | 11083.86  | 14378.374 | NM_00203E | 28870.955 | 28642.701 |
| NM_00700E | 635.868   | 1199.874  | AK026894  | 2824.917  | 5352.243  | NM_00572E | 35137.219 | 42116.617 |
| NM_002084 | 4273.993  | 7421.233  | AK026372  | 530.734   | 750.796   | NM_01549E | 3082.067  | 5841.914  |
| D16892    | 10880.282 | 7546.183  | AF161369  | 4040.02   | 3917.115  | NM_003747 | 2374.881  | 4532.281  |
| NM_00475C | 2733.463  | 1853.687  | AK027176  | 8566.619  | 5892.425  | NM_00160E | 409.247   | 364.131   |
| NM_00729E | 6128.036  | 3854.284  | AF073328  | 2445.574  | 1654.689  | NM_00015E | 52469.711 | 59820.012 |
| AK023317  | 684.374   | 541.005   | AF129266  | 1096.385  | 983.125   | NM_01463E | 2096.71   | 1756.768  |
| NM_003651 | 46856.137 | 41398.941 | Y12019    | 4878      | 5130.677  | AF099740  | 1288.934  | 1282.034  |
| NM_01401E | 1232.286  | 1556.61   | AF147418  | 1320.933  | 1190.062  | NM_006117 | 10516.695 | 10989.298 |
| NM_00041E | 4569.049  | 4803.419  | AL137326  | 363.694   | 457.001   | NM_00222E | 2552.308  | 2692.642  |
| NM_01324E | 3576.181  | 3993.617  | AK021898  | 5211.493  | 4464.298  | NM_00622E | 1506.136  | 2583.368  |
| NM_018431 | 873.17    | 1024.629  | AK022024  | 2871.092  | 2206.731  | NM_01541E | 47599.465 | 48892.938 |
| NM_000591 | 5231.93   | 5978.366  | AK022301  | 1210.321  | 1348.471  | NM_004897 | 3872.387  | 4380.943  |
| NM_00056E | 2204.197  | 3335.107  | AK021948  | 3041.575  | 2843.632  | NM_00255E | 2352.166  | 2203.712  |
| NM_016614 | 577.774   | 616.517   | AK022054  | 417.677   | 470.312   | AF225418  | 2230.264  | 2322.924  |
| NM_00201E | 1174.821  | 989.934   | AK022341  | 628.541   | 568.931   | NM_00030E | 2708.389  | 2353.625  |
| AF253318  | 620.449   | 412.073   | AF230317  | 683.412   | 962.194   | NM_00452E | 26968.902 | 27481.635 |
| NM_017767 | 5954.449  | 7117.476  | AK023806  | 5647.998  | 5611.746  | AK026381  | 41818.102 | 43845.496 |
| NM_00326E | 6636.18   | 8843.895  | Y16696    | 24380.43  | 21587.002 | NM_00245C | 8600.788  | 16251.581 |
| NM_02012E | 1528.181  | 1869.063  | AK026094  | 4910.504  | 5054.391  | NM_00168E | 1808.526  | 3020.452  |
| AB028127  | 203.434   | 424.986   | AF161344  | 11568.724 | 8926.509  | NM_00497E | 1129.282  | 1205.67   |
| AK022832  | 4173.947  | 4627.067  | AF086027  | 1471.074  | 1128      | AF004711  | 1237.612  | 1006.521  |
| NM_017784 | 4013.284  | 4447.267  | NM_001207 | 56714.027 | 45588.715 | NM_00070E | 1524.099  | 1446.258  |
| U10991    | 360.656   | 431.354   | NM_00663E | 4321.405  | 3552.483  | NM_004231 | 52871.426 | 59905.02  |
| NM_014641 | 5847.077  | 6523.796  | X14675    | 3037.644  | 2448.377  | NM_016577 | 3788.601  | 5892.783  |
| NM_00446E | 10387.121 | 17482.43  | AF071170  | 860.587   | 1016.622  | NM_013334 | 16171.462 | 10181.872 |
| AB037739  | 635.852   | 294.211   | AF075075  | 1150.278  | 1360.301  | AF150735  | 9993.881  | 9653.544  |
| NM_00034E | 1161.805  | 1024.023  | NM_018304 | 13384.514 | 13472.437 | NM_01818E | 2247.425  | 2140.381  |
| NM_02024E | 4370.949  | 3248.378  | NM_01647E | 2318.037  | 3293.66   | NM_01238E | 7370.08   | 5939.607  |
| NM_016354 | 3069.494  | 3777.836  | AF086064  | 596.621   | 698.001   | BF038366  | 2364.964  | 2369.442  |
| NM_001044 | 1620.158  | 1413.191  | AK023042  | 2557.479  | 2635.198  | NM_00245E | 12720.053 | 12895.492 |
| NM_004644 | 3675.139  | 4211.409  | AF086501  | 454.3     | 418.059   | NM_012304 | 986.438   | 1128.613  |
| AV681967  | 3668.146  | 4440.585  | AK026429  | 583.401   | 478.902   | NM_01644C | 44678.508 | 49562.328 |
| NM_01825C | 5078.039  | 6236.005  | NM_01655C | 4995.273  | 3469.072  | NM_007194 | 3647.191  | 3973.235  |
| NM_01655E | 18677.508 | 23669.773 | AK024813  | 7709.615  | 5502.25   | NM_000314 | 12071.943 | 9587.935  |
| AB023136  | 1516.027  | 1686.117  | AJ227909  | 32968.539 | 31414.031 | AB002369  | 1922.677  | 1976.541  |

|           |           |           |           |           |           |           |           |           |
|-----------|-----------|-----------|-----------|-----------|-----------|-----------|-----------|-----------|
| NM_00379E | 54624.176 | 55529.398 | AK021880  | 817.805   | 634.339   | S74620    | 1309.278  | 1261.714  |
| NM_01423Z | 7605.004  | 6659.907  | AK024107  | 535.79    | 483.212   | AF305239  | 2745.902  | 2707.814  |
| NM_005701 | 2463.784  | 2062.366  | AL109684  | 516.749   | 356.984   | NM_002827 | 22555.172 | 25902.404 |
| NM_001231 | 811.241   | 739.527   | NM_01418E | 9503.514  | 6161.764  | BF035425  | 53880.164 | 60686.324 |
| AB023139  | 16138.128 | 19324.102 | AF056442  | 3187.502  | 2489.289  | NM_00417E | 9710.334  | 9566.419  |
| NM_01788E | 12749.093 | 14659.394 | AK024752  | 39089.281 | 37141.047 | NM_00454E | 47505.027 | 37812.504 |
| D80004    | 1552.092  | 1835.255  | BG117194  | 1212.245  | 1140.792  | AB006624  | 6163.904  | 9011.843  |
| X63966    | 797.589   | 963.108   | AK024181  | 521.763   | 654.715   | AL109717  | 3856.629  | 7349.521  |
| NM_00094E | 7655.112  | 9978.714  | AF131859  | 4469.428  | 3745.136  | AK025473  | 1112.747  | 1809.057  |
| NM_01607C | 4919.262  | 5653.18   | AK023632  | 461.915   | 478.345   | AF146693  | 1366.329  | 2054.467  |
| NM_01639C | 5458.851  | 6754.546  | AF086118  | 9775.424  | 8414.085  | AF271070  | 23908.477 | 22829.738 |
| NM_016101 | 11555.434 | 10690.025 | NM_01413E | 1680.315  | 1803.841  | AK055959  | 2001.394  | 2344.579  |
| NM_00585E | 8851.565  | 8496.114  | AK025044  | 9494.228  | 8351.894  | AF052141  | 1786.967  | 2162.76   |
| NM_02031Z | 1649.028  | 1682.437  | AK023644  | 646.24    | 1124.534  | AY007128  | 1472.104  | 2397.22   |
| NM_01462E | 8086.299  | 10082.669 | AK023690  | 2667.084  | 2680.932  | AF052149  | 6978.533  | 8610.536  |
| AK025630  | 5831.926  | 5685.706  | NM_01472Z | 1575.18   | 2372.505  | AK025586  | 2015.927  | 2037.616  |
| AL365404  | 11828.372 | 12414.931 | AB011106  | 2302.444  | 2279.151  | AL137512  | 878.075   | 873.202   |
| AK022907  | 8683.437  | 8143.013  | D26362    | 2475.55   | 2137.164  | SR3       | 38884.16  | 46119.922 |
| NM_01479Z | 1833.409  | 2162.708  | NM_01345Z | 4475.741  | 3698.625  | SR5       | 3572.418  | 5367.023  |
| NM_00424E | 1805.455  | 1439.165  | AL133073  | 340.778   | 326.722   | SR7       | 4739.473  | 47034.039 |
| NM_003241 | 1199.232  | 902.251   | AY009402  | 3806.825  | 2143.187  | SR9       | 14895.534 | 4545.521  |
| NM_00268E | 6754.482  | 7304.02   | NM_018451 | 1353.95   | 557.32    | CY3Cy5    | 7143.282  | 329.129   |
| AK024504  | 6960.229  | 4763.897  | NM_01244Z | 696.382   | 415.434   | AK091125  | 2205.068  | 3124.633  |
| AF039023  | 4530.302  | 3847.784  | NM_002584 | 6679.248  | 4330.9    | M93056    | 1077.923  | 1284.53   |
| NM_005511 | 7218.527  | 4872.811  | AK022199  | 1442.167  | 967.96    | D16474    | 10525.05  | 11955.405 |
| NM_01469E | 5625.591  | 5490.375  | NM_006211 | 1307.386  | 932.222   | AL080072  | 1847.53   | 2941.888  |
| NM_01847E | 12950.089 | 8934.391  | NM_003524 | 7918.752  | 4966.517  | NM_017687 | 2525.999  | 3140.915  |
| AK025451  | 6770.059  | 7951.253  | AK021438  | 688.98    | 633.116   | NM_01797E | 5363.407  | 6358.898  |
| NM_00278Z | 2373.511  | 2830.535  | NM_00591Z | 2064.752  | 2006.672  | AK025036  | 1763.785  | 2181.809  |
| X52005    | 17241.395 | 24292.986 | S39891    | 2448.239  | 2317.918  | AK024843  | 23441.115 | 25171.668 |
| NM_001047 | 2423.19   | 3124.257  | R17536    | 791.468   | 940.887   | AF074994  | 1364.075  | 1797.245  |
| AK024396  | 4161.456  | 5825.63   | AK021624  | 1242.975  | 940.648   | NM_01767C | 10787.87  | 12036.099 |
| U58514    | 4910.299  | 7445.71   | AF278605  | 10693.024 | 6619.027  | BC033020  | 1922.141  | 2780.383  |
| M57627    | 1933.137  | 2943.492  | NM_006497 | 61569.434 | 53718.801 | AK026168  | 2418.255  | 2908.004  |
| W74254    | 1305.968  | 1725.234  | AK022329  | 1796.58   | 1757.029  | AJ296152  | 14036.608 | 18165.52  |
| M58603    | 10643.32  | 13106.19  | AL133599  | 2121.879  | 2107.531  | AK001067  | 3892.315  | 4860.458  |
| AA443286  | 1090.869  | 1069.679  | AK022380  | 628.362   | 710.645   | AK027088  | 15437.789 | 13153.968 |
| AB003334  | 14735.876 | 21484.066 | AB037776  | 1178.044  | 1149.491  | AB037721  | 9468.278  | 9236.688  |
| AW276315  | 2847.765  | 3158.227  | AF196976  | 9782.662  | 7517.907  | AK024525  | 12477.249 | 13461.285 |
| AA490737  | 7203.624  | 11313.855 | AL050379  | 3708.836  | 2803.064  | AK024909  | 1782.821  | 2309.366  |
| AI878886  | 49544.176 | 53813.301 | NM_003161 | 2967.42   | 2243.669  | AK024544  | 3563.311  | 4709.13   |
| BG697179  | 23274.117 | 24993.127 | NM_01449E | 1073.918  | 766.632   | AK024629  | 964.182   | 2074.817  |
| NM_00213E | 52225.742 | 59404.887 | NM_01621E | 32496.846 | 14618.149 | AL109702  | 2074.648  | 2207.249  |
| BM012504  | 17250.363 | 17047.254 | AK026919  | 534.737   | 376.781   | AK025624  | 11188.165 | 15811.426 |
| AA664145  | 8024.523  | 10032.216 | NM_001501 | 14692.496 | 5418.178  | AK026684  | 1392.093  | 2007.551  |
| X72308    | 16227.8   | 17048.463 | NM_00617E | 46627.18  | 23381.178 | AL110125  | 16110.604 | 14711.34  |
| T70999    | 370.398   | 379.547   | AL137459  | 3405.834  | 1502.783  | AK022764  | 1000.344  | 1409.765  |
| T50790    | 3134.75   | 2387.708  | AB037812  | 574.839   | 363.952   | AK002118  | 629.194   | 1061.061  |
| R48168    | 20330.158 | 14075.993 | AB007932  | 9729.142  | 5959.053  | AJ011594  | 505.387   | 310.119   |
| AB040954  | 5535.094  | 4474.756  | AF219257  | 59093.18  | 52240.855 | AJ243673  | 795.806   | 1071.758  |
| NM_002081 | 1424.261  | 827.199   | NM_00397E | 1984.929  | 1848.7    | AJ011600  | 3482.659  | 3687.599  |
| NM_006141 | 429.276   | 512.442   | NM_002561 | 30964.936 | 26343.91  | AJ002785  | 3308.033  | 4140.946  |
| AF146759  | 671.898   | 838.163   | NM_00610Z | 61398.84  | 49202.008 | Z70716    | 1145.371  | 1099.568  |

|           |           |           |           |           |           |           |           |           |
|-----------|-----------|-----------|-----------|-----------|-----------|-----------|-----------|-----------|
| AB032993  | 8570.6    | 7541.067  | NM_006206 | 756.648   | 764.941   | AL049251  | 869.313   | 981.242   |
| NM_000854 | 7295.106  | 7358.535  | NM_000805 | 1362.739  | 1196.071  | Z83945    | 2111.309  | 1950.923  |
| NM_001901 | 1705.995  | 2104.248  | AL359933  | 41755.195 | 38825.359 | AF086216  | 1008.252  | 862.31    |
| AL117423  | 9746.983  | 16602.223 | NM_001302 | 1635.769  | 1669.406  | AK022422  | 1589.667  | 1905.417  |
| NM_006140 | 699.621   | 1375.983  | M17783    | 14854.157 | 14318.107 | AK023485  | 1811.211  | 1862.271  |
| NM_007003 | 748.151   | 1289.813  | NM_018590 | 6790.823  | 9591.019  | AK022474  | 14698.351 | 15290.545 |
| NM_002084 | 4369.335  | 3618.69   | NM_003178 | 4238.922  | 4450.709  | AK022392  | 3225.843  | 3532.999  |
| D16892    | 17325.529 | 26587.174 | NM_012437 | 8108.907  | 7133.936  | AL117451  | 2180.903  | 2341.228  |
| NM_004750 | 3490.364  | 5338.879  | NM_002607 | 1051.242  | 1043.628  | AL049280  | 4213.473  | 3529.607  |
| NM_007295 | 6730.581  | 8679.471  | AF116712  | 1414.836  | 1393.184  | AB021925  | 1557.151  | 1136.306  |
| AK023317  | 581.978   | 902.843   | AF116626  | 6914.117  | 5651.746  | AL157503  | 9585.94   | 10703.037 |
| NM_003651 | 52194.746 | 55905.715 | NM_001760 | 26797.303 | 16425.799 | AK000053  | 1176.541  | 1422.02   |
| NM_014012 | 1273.082  | 1263.732  | NM_002527 | 1721.85   | 755.954   | AK000786  | 2596.132  | 2153.844  |
| NM_000418 | 5132.686  | 6784.055  | NM_005890 | 1861.549  | 627.629   | AK000935  | 2657.419  | 3168.774  |
| NM_013246 | 3611.078  | 5180.894  | AF149785  | 18051.801 | 25868.031 | AK021458  | 6049.753  | 6454.417  |
| NM_018431 | 1117.276  | 1036.432  | NM_012068 | 26582.932 | 43171.59  | NM_017674 | 19533.166 | 18757.475 |
| NM_000591 | 5800.143  | 6855.815  | NM_004064 | 17692.711 | 20604.801 | AK000811  | 1194.905  | 1633.715  |
| NM_000565 | 2587.016  | 3062.476  | NM_001256 | 19861.396 | 9138.79   | AK000966  | 2459.363  | 3828.224  |
| NM_016614 | 1284.794  | 1209.478  | NM_014704 | 10781.83  | 6270.991  | NM_018630 | 7957.029  | 12677.733 |
| NM_002019 | 1069.425  | 1096.467  | NM_020205 | 2622.445  | 1964.16   | AF086175  | 1645.357  | 2714.779  |
| AF253318  | 757.945   | 763.218   | AK024815  | 774.454   | 650.488   | AK002196  | 1421.241  | 1474.34   |
| NM_017767 | 13586.19  | 16699.869 | NM_001227 | 1558.307  | 1571.474  | NM_004576 | 4134.29   | 4790.451  |
| NM_006148 | 739.89    | 834.817   | NM_001191 | 22807.461 | 22967.213 | AF040097  | 2634.433  | 3386.647  |
| AJ290954  | 2662.726  | 2347.33   | U15174    | 1197.537  | 1502.958  | NM_020436 | 1446.851  | 2084.553  |
| AB028127  | 641.538   | 919.914   | NM_013342 | 2986.854  | 3084.755  | AK024182  | 2986.754  | 3114.975  |
| AK022832  | 3372.531  | 4822.469  | NM_014344 | 2088.834  | 2046.741  | NM_006913 | 16816.057 | 19485.109 |
| NM_017784 | 3162.793  | 5287.382  | AB040917  | 1420.012  | 1235.957  | AF177229  | 1957.792  | 2806.872  |
| U10991    | 449.273   | 678.529   | AL110261  | 39124.871 | 41586.008 | AF156166  | 9534.345  | 12233.64  |
| NM_004462 | 7157.441  | 4374.076  | AA203539  | 1192.372  | 1549.343  | NM_014373 | 5417.885  | 6903.286  |
| AB037739  | 787.827   | 600.987   | AK021786  | 1929.155  | 2093.819  | NM_014206 | 32440.678 | 27485.59  |
| NM_000343 | 1734.942  | 1173.19   | AF245505  | 3273.062  | 3163.973  | NM_001651 | 12512.975 | 12444.377 |
| NM_020246 | 5154.199  | 3313.769  | M26663    | 356.72    | 322.676   | L32786    | 3317.056  | 3005.575  |
| NM_016354 | 3038.47   | 2894.38   | NM_004279 | 16702.865 | 12771.056 | U03239    | 735.312   | 593.253   |
| NM_001044 | 1580.842  | 1575.109  | NM_004851 | 19670.881 | 14753.4   | AL355720  | 6602.843  | 7089.373  |
| NM_004644 | 2827.802  | 2488.299  | NM_001908 | 7833.243  | 4471.359  | AK002023  | 4998.271  | 5198.674  |
| AV681967  | 3085.238  | 3144.418  | NM_000285 | 15839.749 | 6377.146  | AF150156  | 1014.037  | 886.181   |
| NM_018250 | 3133.816  | 2531.308  | NM_005911 | 42569.145 | 25012.629 | NM_016464 | 1050.724  | 1001.716  |
| NM_016553 | 14179.661 | 12783.729 | AV702690  | 4245.404  | 6476.432  | L40402    | 3222.218  | 3663.357  |
| AB023136  | 1447.18   | 1154.173  | AL117452  | 23339.271 | 37337.926 | Z36780    | 6240.093  | 12136.355 |
| NM_003795 | 44010.031 | 36379.379 | NM_012230 | 3452.218  | 5782.542  | AK022403  | 2948.658  | 4072.633  |
| NM_014232 | 9291.61   | 5631.373  | NM_002061 | 8958.121  | 10777.263 | AK022955  | 9450.451  | 11041.193 |
| NM_005701 | 5838.168  | 2945.272  | AF169974  | 8653.092  | 4795.951  | AK021760  | 2012.48   | 3110.287  |
| NM_001231 | 1002.742  | 1048.638  | NM_004522 | 1652.607  | 966.485   | BC035855  | 5914.859  | 4219.934  |
| NM_006819 | 50312.059 | 40077.715 | NM_005733 | 2763.505  | 2310.221  | AL137408  | 21217.473 | 21455.092 |
| NM_014744 | 4067.857  | 4684.608  | NM_018138 | 8097.666  | 7334.675  | AF054995  | 5368.061  | 5895.384  |
| D80004    | 1487.003  | 1004.096  | NM_019619 | 5027.208  | 4994.86   | AL080176  | 5678.552  | 6154.127  |
| NM_016390 | 4132.759  | 2866.599  | AF183411  | 3402.153  | 3431.642  | AK023627  | 4995.817  | 5687.088  |
| NM_016101 | 11349.898 | 6722.468  | BF244591  | 2043.521  | 1784.243  | AK021725  | 6096.273  | 7381.059  |
| NM_005859 | 11219.644 | 6934.895  | NM_005886 | 24962.6   | 20915.408 | AF119893  | 2229.571  | 2158.783  |
| NM_020313 | 1809.28   | 1384.878  | U63785    | 1963.012  | 1634.303  | NM_002408 | 9022.713  | 9095.601  |
| NM_014628 | 6977.071  | 5770.693  | NM_005966 | 2649.86   | 2703.643  | AK024282  | 2198.878  | 1971.223  |
| AK025630  | 5184.868  | 4068.527  | NM_003156 | 6708.459  | 6461.409  | AF085838  | 8813.501  | 7199.174  |
| AL365404  | 12147.551 | 13885.991 | AF090944  | 3226.661  | 3300.818  | NM_018277 | 2169.511  | 1560.618  |



|           |           |           |           |           |           |           |           |           |
|-----------|-----------|-----------|-----------|-----------|-----------|-----------|-----------|-----------|
| AK022907  | 8123.363  | 6830.899  | NM_006473 | 2228.043  | 1945.996  | AF014455  | 1331.727  | 1360.806  |
| NM_014793 | 1507.145  | 1669.923  | NM_005653 | 3091.521  | 2768.095  | AF086335  | 4282.701  | 2986.423  |
| BF213077  | 120.199   | 196.114   | NM_014553 | 4192.426  | 2619.216  | AL355741  | 414.947   | 492.535   |
| NM_004245 | 1707.681  | 2648.084  | NM_003440 | 994.479   | 552.042   | AB011118  | 32225.131 | 28150.799 |
| NM_003241 | 887.916   | 957.394   | NM_004698 | 10357.271 | 10870.616 | S66666    | 673.183   | 728.808   |
| NM_002685 | 8266.006  | 12691.688 | U41387    | 58196.996 | 57859.535 | AK021476  | 2783.792  | 2365.887  |
| AK024504  | 4227.686  | 4446.534  | NM_016505 | 619.819   | 433.692   | NM_004066 | 1336.84   | 2299.197  |
| AF039023  | 7637.91   | 10927.877 | NM_006513 | 7897.787  | 11430.149 | NM_004941 | 8617.287  | 6435.618  |
| NM_005511 | 7007.712  | 7408.367  | NM_002486 | 959.687   | 487.002   | AF151831  | 4792.05   | 3939.263  |
| NM_014698 | 7068.053  | 6150.568  | NM_006295 | 16145.61  | 16532.354 | AB011121  | 3217.274  | 2917.787  |
| NM_018475 | 12724.831 | 8813.38   | NM_001540 | 6493.503  | 5414.444  | AF083255  | 7094.375  | 7006.622  |
| NM_003262 | 5680.284  | 4313.647  | NM_012111 | 40592.348 | 50491.43  | AK022605  | 1862.253  | 2015.484  |
| NM_020125 | 1041.777  | 767.975   | NM_004470 | 33214.277 | 33156.031 | AL049955  | 30183     | 27500.258 |
| X52005    | 32271.064 | 22479.721 | NM_001418 | 14125.549 | 14922.771 | AF155654  | 11946.992 | 14500.267 |
| NM_001047 | 1959.469  | 2075.082  | NM_003756 | 52891.75  | 48685.871 | AF088044  | 3519.089  | 5616.125  |
| AK024396  | 3368.717  | 3209.178  | AL049680  | 5509.775  | 6049.025  | AK000028  | 4897.517  | 5433.875  |
| U58514    | 4824.148  | 3235.052  | AL133660  | 6884.743  | 3531.831  | NM_013320 | 61055.426 | 56695.988 |
| M57627    | 1181.345  | 781.122   | NM_005932 | 1296.592  | 1514.297  | AJ245902  | 1216.328  | 1130.339  |
| W74254    | 695.01    | 403.691   | BF036874  | 5768.381  | 7062.648  | AL050039  | 2018.056  | 1699.434  |
| M58603    | 10153.867 | 5067.601  | BE888487  | 1468.148  | 1479.981  | BE816678  | 735.675   | 488.015   |
| AA443286  | 721.75    | 373.584   | AF182419  | 6879.082  | 8116.589  | AF087987  | 4220.558  | 3557.008  |
| AB003334  | 12200.188 | 10021.209 | NM_004293 | 985.844   | 1219.1    | Z36840    | 440.831   | 268.242   |
| AW276315  | 2122.663  | 1538.324  | NM_007016 | 2671.012  | 1057.664  | AK021723  | 594.978   | 564.377   |
| AA490737  | 6398.307  | 4358.481  | NM_005985 | 34799.48  | 46025.23  | H09474    | 4559.499  | 3678.344  |
| AI878886  | 38364.035 | 30025.596 | AK021699  | 530.245   | 583.777   | AB002368  | 12674.329 | 12521.283 |
| BG697179  | 18373.377 | 18553.16  | NM_015906 | 23699.783 | 34196.379 | AL360263  | 69075.836 | 64929.059 |
| NM_002136 | 49871.008 | 53629.961 | AK023759  | 13525.101 | 16439.271 | NM_005883 | 1983.59   | 2079.676  |
| BM012504  | 15544.494 | 21112.93  | AB033111  | 2617.965  | 2291.275  | NM_004446 | 2755.596  | 2539.074  |
| AA664145  | 7311.9    | 7581.133  | AJ276316  | 4582.905  | 4387.089  | NM_014591 | 5563.616  | 4818.191  |
| X72308    | 13646.979 | 12523.509 | AF229246  | 58328.578 | 48809.684 | NM_014592 | 2420.442  | 1860.939  |
| T70999    | 249.888   | 120.804   | S64709    | 10028.952 | 8645.377  | NM_001945 | 1903.979  | 1924.999  |
| T50790    | 3885.242  | 3932.745  | NM_018488 | 8201.901  | 8194.272  | NM_020036 | 5570.77   | 4654.261  |
| R48168    | 23239.674 | 32801.859 | X56465    | 2449.972  | 2186.932  | NM_006653 | 1638.108  | 1595.78   |
| AB040954  | 6499.686  | 7346.932  | NM_003071 | 27887.744 | 27986.891 | NM_000208 | 11259.875 | 10850.011 |
| NM_002081 | 1270.721  | 943.226   | NM_003108 | 1334.427  | 1504.797  | NM_002188 | 59382.125 | 57336.418 |
| NM_006141 | 363.058   | 610.359   | NM_013310 | 7685.021  | 7736.778  | AK027119  | 48911.703 | 33194.316 |
| AB023139  | 13805.702 | 10939.035 | BC004958  | 5153.632  | 5507.074  | AB037727  | 56375.09  | 58714.813 |
| NM_017885 | 12180.642 | 8964.669  | NM_005762 | 11285.493 | 11979.673 | NM_005426 | 1733.01   | 1249.281  |
| D16892    | 13042.262 | 7242.808  | X84370    | 15122.554 | 19082.309 | NM_004763 | 981.208   | 725.749   |
| NM_004750 | 2702.042  | 1465.562  | NM_004039 | 1308.131  | 1732.445  | NM_014063 | 16011.894 | 12997.536 |
| NM_007295 | 5272.164  | 2712.962  | NM_000508 | 670.314   | 874.964   | D86964    | 7758.777  | 6157.777  |
| AK023317  | 386.464   | 319.826   | AB014558  | 1907.507  | 1757.198  | AL049801  | 1929.176  | 1790.24   |
| NM_003651 | 43628.871 | 23312.139 | NM_006287 | 1847.045  | 1208.836  | NM_016395 | 13908.472 | 12656.447 |
| NM_014012 | 852.172   | 498.266   | NM_000118 | 5829.286  | 2129.081  | NM_003152 | 1774.44   | 1524.364  |
| NM_000418 | 4209.799  | 2539.005  | BG325046  | 14217.632 | 18488.295 | NM_005552 | 53517.953 | 57651.703 |
| NM_013246 | 2378.396  | 1860.975  | AI351740  | 44969.223 | 53651.102 | NM_006717 | 5113.446  | 3860.686  |
| NM_018431 | 780.374   | 730.757   | AA444051  | 31068.041 | 45051.496 | AL109786  | 3207.627  | 3032.005  |
| NM_000591 | 5171.793  | 4613.167  | NM_007164 | 46250.84  | 49025.836 | AK026479  | 10968.151 | 8921.165  |
| NM_000565 | 2412.996  | 3534.317  | BE783826  | 63667.25  | 61881.09  | AK022860  | 8813.392  | 8040.301  |
| NM_016614 | 638.58    | 306.015   | H07088    | 7646.898  | 7573.054  | NM_000347 | 36854.73  | 28937.629 |
| NM_002019 | 1096.373  | 1110.198  | AI004656  | 5792.91   | 6854.601  | M13452    | 3365.547  | 2540.508  |
| NM_000796 | 248.79    | 463.582   | BC020596  | 5249.866  | 6090.32   | AF082075  | 1804.733  | 1616.451  |
| AF253318  | 518.949   | 769.061   | AF116606  | 64449.113 | 59597.848 | NM_016114 | 3697.307  | 2862.441  |

|           |           |           |           |           |           |           |           |           |
|-----------|-----------|-----------|-----------|-----------|-----------|-----------|-----------|-----------|
| NM_017767 | 10821     | 15546.421 | X98922    | 11431.458 | 12876.452 | AY007114  | 2260.65   | 1551.595  |
| AK024848  | 17715.102 | 18587.332 | AK098435  | 14376.478 | 19857.721 | AF086604  | 1129.937  | 955.725   |
| NM_004852 | 1104.181  | 1277.267  | AK092872  | 8784.572  | 11876.548 | AB000895  | 1650.923  | 1430.371  |
| NM_003633 | 430.08    | 407.61    | AF230496  | 2446.245  | 3788.071  | X80031    | 978.726   | 1150.378  |
| NM_000543 | 2603.302  | 2782.933  | M16801    | 3584.849  | 5778.928  | AF019382  | 1532.642  | 1248.315  |
| U06699    | 6463.948  | 6273.483  | M94065    | 4342.952  | 7604.651  | NM_015601 | 2110.84   | 2522.427  |
| NM_006148 | 543.191   | 558.05    | NM_006068 | 3926.239  | 4369.388  | NM_001780 | 43491.504 | 45035.152 |
| AJ290954  | 2898.776  | 2158.239  | NM_002704 | 653.711   | 1041.508  | AJ277442  | 2356.357  | 3286.369  |
| AK025451  | 7482.754  | 6858.293  | U16752    | 1636.771  | 1731.519  | NM_004568 | 5072.724  | 3910.009  |
| NM_002783 | 3210.856  | 4023.167  | M30134    | 751.109   | 728.084   | AF089088  | 9589.02   | 9642.762  |
| NM_003038 | 3738.284  | 1506.684  | NM_002038 | 19666.002 | 8575.391  | L07557    | 10738.752 | 8074.702  |
| NM_018155 | 8496.926  | 5146.461  | NM_003747 | 2214.211  | 3098.919  | NM_002796 | 36813.961 | 29776.963 |
| AL050358  | 368.526   | 328.08    | AB037744  | 3503.433  | 5487.522  | D78514    | 13552.434 | 11464.265 |
| NM_004731 | 1438.571  | 671.242   | AF141901  | 1634.225  | 2036.083  | AK021665  | 3311.308  | 3068.813  |
| NM_000544 | 4358.311  | 1656.983  | NM_007008 | 2533.907  | 2514.433  | NM_003347 | 9168.621  | 10220.917 |
| NM_001044 | 1026.936  | 673.161   | AL109708  | 2376.028  | 2109.846  | AF273051  | 2340.883  | 1614.801  |
| NM_004644 | 1873.237  | 1448.298  | L29143    | 9586.467  | 10354.993 | AK021868  | 3253.313  | 2292.637  |
| AV681967  | 3271.062  | 2332.5    | AF234532  | 10116.083 | 11421.274 | AK000643  | 59032.59  | 62384.344 |
| NM_018250 | 3452.573  | 2208.981  | NM_002418 | 6311.974  | 8953.335  | NM_018421 | 5027.194  | 4353.183  |
| NM_016553 | 15617.692 | 12501.082 | NM_002090 | 1432.885  | 2427.73   | AB014574  | 52919.449 | 57613.438 |
| AB023136  | 1492.227  | 2140.807  | NM_004485 | 1658.268  | 2559.473  | NM_020127 | 2867.709  | 2694.31   |
| NM_003795 | 49433.129 | 34612.246 | NM_013296 | 20935.361 | 30000.354 | NM_015623 | 13020.262 | 9206.619  |
| NM_014232 | 9483.495  | 6717.039  | AL117478  | 6150.148  | 9239.133  | AB045116  | 1159.235  | 884.562   |
| NM_005701 | 6199.7    | 8045.675  | NM_005307 | 20514.617 | 32780.527 | L49054    | 1177.62   | 1165.348  |
| NM_001231 | 690.656   | 657.276   | NM_005958 | 7899.28   | 12465.715 | NM_014727 | 4809.838  | 4071.716  |
| NM_006818 | 52533.688 | 49093.598 | AF225426  | 2527.972  | 4039.268  | BE885010  | 1683.368  | 1495.778  |
| NM_014744 | 3954.253  | 3920.905  | NM_005208 | 31736.617 | 43808.508 | NM_000192 | 1147.08   | 1182.895  |
| AF146759  | 1071.151  | 1397.155  | AF099740  | 1400.107  | 1513.635  | NM_002943 | 8188.274  | 6636.675  |
| AB032993  | 10347.371 | 6352.726  | NM_006117 | 10329.41  | 9758.016  | AL133649  | 2794.625  | 2496.613  |
| NM_000854 | 9472.427  | 7234.834  | NM_002225 | 2112.002  | 2061.292  | AB018303  | 2184.189  | 1894.332  |
| NM_001901 | 1690.394  | 1484.088  | NM_006229 | 921.389   | 1425.198  | NM_006454 | 11661.926 | 10107.575 |
| AL117423  | 9039.227  | 8797.823  | NM_015415 | 35545.59  | 31990.719 | NM_015846 | 9674.309  | 8351.15   |
| NM_006140 | 410.047   | 571.412   | NM_004897 | 3593.418  | 2214.378  | NM_015972 | 38413.344 | 29909.865 |
| NM_007003 | 363.532   | 376.789   | NM_002555 | 2471.329  | 1025.336  | NM_001644 | 1447.493  | 1474.231  |
| NM_002084 | 5755.752  | 6478.826  | NM_000309 | 3252.396  | 4413.28   | AK024040  | 12087.719 | 9212.249  |
| NM_005511 | 6411.512  | 2659.212  | NM_004528 | 46796.895 | 56985.484 | NM_005061 | 11424.526 | 8292.374  |
| NM_014698 | 4560.683  | 2544.498  | AK026381  | 54778.125 | 47995.023 | NM_000997 | 58040.086 | 61145.156 |
| NM_018475 | 11067.528 | 5198.701  | NM_016611 | 540.057   | 635.322   | AF182417  | 60074.906 | 47785.488 |
| NM_003262 | 5318.95   | 3144.62   | AK023107  | 11868.291 | 13137.038 | AL137354  | 49594.18  | 29419.861 |
| NM_020125 | 1002.243  | 435.926   | NM_004578 | 1049.164  | 1445.99   | NM_001023 | 60698.152 | 60776.84  |
| AB028127  | 936.155   | 505.26    | NM_000647 | 10691.132 | 11966.164 | AK021571  | 20940.252 | 13376.725 |
| AK022832  | 3142.329  | 1901.7    | AB046793  | 1118.064  | 2237.263  | AK022178  | 2754.686  | 1973.928  |
| NM_017784 | 2805.279  | 1679.599  | NM_017604 | 7362.079  | 8903.465  | NM_006011 | 1299.461  | 1192.252  |
| U10991    | 235.486   | 426.117   | NM_017738 | 51429.609 | 54028.223 | L00635    | 3633.697  | 3399.913  |
| NM_014641 | 5641.671  | 4801.207  | NM_016557 | 4947.025  | 5511.221  | NM_002541 | 5869.583  | 5950.413  |
| NM_004462 | 8548.603  | 5292.979  | NM_000623 | 4570.164  | 5744.098  | NM_000056 | 10998.268 | 9216.205  |
| AB037739  | 642.956   | 482.07    | AF161348  | 2394.188  | 2609.416  | NM_016311 | 25824.709 | 20685.615 |
| AB020664  | 1692.4    | 2083.222  | NM_018467 | 35982.973 | 39750.484 | NM_001867 | 53428.965 | 56719.824 |
| NM_006640 | 34911.301 | 40996.617 | AF150735  | 8280.637  | 7394.701  | NM_002300 | 57694.605 | 62758.375 |
| NM_000868 | 1042.589  | 928.458   | NM_018183 | 1933.735  | 910.938   | NM_000290 | 13872.603 | 13326.706 |
| NM_000343 | 1840.494  | 1519.435  | BF038366  | 2526.716  | 3263.365  | NM_016538 | 8116.046  | 6106.755  |
| NM_019112 | 7008.153  | 5157.928  | NM_002452 | 14589.419 | 22639.508 | AK023275  | 18848.178 | 15522.508 |
| NM_012336 | 13955.16  | 8984.634  | NM_012304 | 1837.822  | 2627.519  | L16464    | 1574.186  | 1312.823  |

|           |           |           |           |           |           |           |           |           |
|-----------|-----------|-----------|-----------|-----------|-----------|-----------|-----------|-----------|
| NM_020161 | 1316.155  | 1197.534  | NM_000314 | 14539.11  | 13212.324 | NM_006532 | 20764.104 | 20020.008 |
| NM_020246 | 5382.71   | 6412.988  | AB002369  | 2021.353  | 2399.009  | U07132    | 16165.023 | 12724.339 |
| NM_000084 | 4565.916  | 5257.343  | S74620    | 1694.986  | 2090.258  | NM_003436 | 1346.897  | 1013.332  |
| NM_016354 | 2682.842  | 2295.068  | AF305239  | 3047.078  | 3065.972  | AK027006  | 520.33    | 415.483   |
| AB040954  | 4648.503  | 2245.233  | NM_002827 | 26955.451 | 32423.234 | AB034691  | 555.614   | 437.261   |
| NM_002081 | 880.967   | 506.96    | NM_001946 | 1239.313  | 1720.162  | NM_001675 | 2071.563  | 1473.856  |
| NM_006141 | 281.337   | 217.274   | BF035425  | 61573.922 | 57749.863 | NM_003422 | 4063.962  | 3010.002  |
| AB023139  | 10529.854 | 5320.63   | NM_001608 | 872.516   | 1218.375  | NM_001451 | 2142.115  | 1844.745  |
| NM_017885 | 7264.483  | 3202.755  | NM_000159 | 61916.949 | 64918.027 | NM_014779 | 3499.113  | 3418.691  |
| D80004    | 1299.911  | 729.975   | NM_014638 | 3281.267  | 4178.815  | NM_014446 | 3052.235  | 4198.482  |
| X63966    | 476.354   | 290.646   | NM_000508 | 599.776   | 866.32    | U58096    | 25269.561 | 33158.07  |
| NM_000946 | 7358.254  | 5073.052  | AB014558  | 1678.17   | 1874.042  | NM_016929 | 23770.498 | 23642.379 |
| NM_016070 | 4939.826  | 3661.162  | NM_006287 | 1834.43   | 2659.38   | NM_012323 | 3159.484  | 3703.45   |
| NM_016390 | 5453.266  | 4857.958  | NM_000118 | 7122.238  | 7030.38   | NM_006942 | 981.755   | 1376.086  |
| NM_016101 | 8853.957  | 7999.295  | NM_000913 | 1476.042  | 1753.012  | NM_018199 | 2339.877  | 1859.64   |
| NM_005859 | 10033.907 | 7692.894  | NM_001298 | 49793.836 | 49029.633 | NM_013943 | 3088.324  | 3270.294  |
| NM_020313 | 1545.59   | 1174.72   | BG325046  | 8117.94   | 3954.588  | NM_001639 | 17320.662 | 22319.141 |
| NM_014628 | 8375.401  | 7475.839  | AI351740  | 28409.932 | 10951.278 | H39560    | 3592.125  | 4496.476  |
| AK025630  | 4070.806  | 4294.889  | NM_007164 | 42909.82  | 55373.414 | BG534366  | 28329.033 | 22353.631 |
| AL365404  | 12294.915 | 12743.123 | BE783826  | 56372.516 | 58133.137 | AF022912  | 7689.025  | 6749.043  |
| AK022907  | 8136.283  | 7488.183  | X04827    | 7236.813  | 10594.136 | AA477428  | 27974.111 | 35745.082 |
| NM_014793 | 1670.912  | 1874.843  | H07088    | 7446.99   | 10966.138 | AA156342  | 3729.334  | 4637.382  |
| BF213077  | 4081.158  | 3012.99   | BC020596  | 4088.002  | 4218.743  | R45594    | 24838.727 | 21760.457 |
| NM_004245 | 1666.107  | 919.345   | AF116606  | 58771.77  | 56532.254 | AI143386  | 1023.46   | 731.038   |
| NM_003241 | 904.888   | 861.853   | X98922    | 9155.497  | 9365.5    | H46425    | 9801.388  | 7465.781  |
| NM_002685 | 6871.562  | 4535.229  | AK098435  | 10806.235 | 11240.877 | AI355949  | 2101.321  | 1620.625  |
| AK024504  | 6829.941  | 5250.605  | AK092872  | 6516.408  | 8162.809  | AA278152  | 20179.736 | 19438.889 |
| AF039023  | 8424.392  | 8480.735  | AF230496  | 1708.4    | 2222.899  | H75530    | 6703.095  | 6649.49   |
| CY3Cy5    | 1658.758  | 213.78    | M16801    | 2834.207  | 3461.047  | NM_005036 | 1391.547  | 1304.45   |
| NM_145904 | 58317.563 | 54707.438 | NM_013334 | 36351.953 | 48705.352 | NM_018201 | 6420.381  | 7883.709  |
| NM_021969 | 391.319   | 454.232   | U16752    | 1813.611  | 1774.242  | NM_014438 | 2536.978  | 3958.298  |
| AF086303  | 597.154   | 323.223   | M30134    | 667.459   | 749.289   | NM_014880 | 5055.478  | 6571.588  |
| AF086434  | 1118.848  | 894.05    | NM_002038 | 20592.455 | 16892.533 | NM_003764 | 7966.466  | 7141.216  |
| AK022063  | 3079.816  | 3152.969  | NM_005729 | 24127.533 | 28631.787 | NM_004829 | 6127.535  | 6978.49   |
| AF086345  | 1538.868  | 2632.339  | NM_015493 | 1973.186  | 1911.031  | NM_006793 | 50944.066 | 58433.852 |
| AF086400  | 582.84    | 619.869   | NM_003747 | 1125.949  | 600.13    | NM_001538 | 33616.488 | 30303.684 |
| AF086464  | 831.584   | 674.265   | AB037744  | 2266.983  | 898.611   | X97261    | 6427.596  | 14424.295 |
| AL049278  | 3748.969  | 2701.997  | AL109708  | 2684.952  | 4138.817  | NM_001315 | 4156.354  | 3869.774  |
| AL117519  | 2202.316  | 1555.627  | L29143    | 9405.469  | 16119.411 | AF286095  | 8678.805  | 8966.178  |
| NM_013318 | 422.347   | 289.064   | AF234532  | 9012.041  | 14013.106 | NM_000878 | 3320.1    | 3416.49   |
| AK001595  | 2765.406  | 1226.71   | NM_002090 | 964.451   | 708.919   | S66407    | 3600.734  | 3206.302  |
| NM_018015 | 2530.575  | 1060.893  | NM_004485 | 1244.982  | 1226.571  | NM_004258 | 56361.75  | 55710.816 |
| NM_003715 | 6034.808  | 2283.055  | NM_013296 | 15528.625 | 15496.184 | NM_001981 | 11980.235 | 9921.508  |
| NM_145904 | 38807.164 | 21673.451 | AL117478  | 4108.001  | 4647.077  | NM_001585 | 58814.418 | 60620.301 |
| NM_021969 | 418.681   | 401.286   | NM_005307 | 15551.174 | 17859.131 | AK026108  | 41010.758 | 34250.004 |
| SR2       | 45482.594 | 31659.131 | NM_005958 | 6317.207  | 7749.523  | AF149304  | 1406.658  | 1961.073  |
| SR4       | 9977.53   | 9585.604  | AF225426  | 2082.34   | 2480.621  | X73079    | 49690.539 | 50605.227 |
| SR6       | 1556.011  | 1892.616  | NM_005208 | 24938.352 | 30340.902 | NM_019091 | 1722.963  | 1650.616  |
| SR8       | 6250.819  | 21042.707 | X84370    | 19067.314 | 24064.928 | L07518    | 1260.264  | 1224.561  |
| SR10      | 19922.799 | 6586.777  | NM_004039 | 1616.634  | 2128.844  | AF264781  | 3966.03   | 4203.996  |
| CY3Cy5    | 1922.665  | 272.333   | NM_002225 | 2304.977  | 2806.632  | AK022823  | 499.76    | 570.091   |
| AF086395  | 7602.779  | 5946.042  | NM_006229 | 790.321   | 987.277   | NM_002456 | 718.576   | 406.199   |
| AF086049  | 1152.877  | 839.859   | NM_015415 | 35059.406 | 35926.945 | NM_016124 | 5757.404  | 6052.727  |

|           |           |          |           |           |           |           |           |           |
|-----------|-----------|----------|-----------|-----------|-----------|-----------|-----------|-----------|
| AF114263  | 611.28    | 1023.902 | NM_004897 | 3931.702  | 4248.258  | NM_01594E | 10632.229 | 10286.66  |
| AF086073  | 973.31    | 1185.14  | NM_00255E | 2070.582  | 1788.222  | NM_000804 | 1221.142  | 1556.202  |
| AK026142  | 6541.56   | 8733.77  | AF225418  | 1613.243  | 1646.084  | NM_00655E | 6436.896  | 5581.828  |
| AK021494  | 2091.583  | 1818.852 | NM_000309 | 2143.455  | 1077.258  | NM_014521 | 5092.518  | 4839.436  |
| AK022117  | 549.081   | 269.85   | NM_00452E | 31484.459 | 16241.185 | NM_00244E | 4239.118  | 3009.172  |
| AF075023  | 446.889   | 443.541  | NM_016611 | 1457.466  | 1944.886  | NM_01780E | 1181.785  | 850.07    |
| AL360160  | 7386.38   | 2674.5   | NM_000647 | 6145.441  | 2327.346  | AK023202  | 5550.372  | 5615.16   |
| AK001092  | 6815.384  | 4233.599 | AB046793  | 720.579   | 495.436   | D63877    | 4799.006  | 3723.8    |
| NM_014144 | 1984.88   | 1989.23  | NM_017604 | 5500.39   | 4879.948  | AF131760  | 3337.34   | 2970.442  |
| AF147345  | 440.336   | 370.099  | NM_01773E | 39297.598 | 42734.863 | NM_01869E | 2541.32   | 2647.86   |
| AF147373  | 653.672   | 586.164  | NM_016557 | 4011.357  | 3654.525  | NM_006461 | 3841.162  | 4264.424  |
| AK026209  | 289.675   | 431.951  | NM_000623 | 4192.45   | 4082.372  | NM_00282E | 4380.52   | 4734.105  |
| AF086253  | 1401.044  | 1732.093 | AF161348  | 2602.186  | 2732.457  | NM_00242C | 726.12    | 1414.208  |
| AK021642  | 2524.049  | 2128.082 | NM_018467 | 42939.773 | 49541.246 | NM_01645E | 57809.418 | 55905.66  |
| AK021987  | 369.881   | 219.978  | NM_00606E | 5466.098  | 7226.58   | AK022233  | 6028.906  | 9779.728  |
| AK026704  | 730.798   | 1306.587 | NM_002704 | 1285.651  | 2086.721  | AK026410  | 24070.896 | 27768.902 |
| AF075108  | 1712.437  | 1279.386 | AF150735  | 10422.106 | 11558.98  | AF113208  | 26089.385 | 24713.586 |
| NM_00506C | 382.952   | 400.441  | NM_018183 | 2194.099  | 2133.341  | NM_00615E | 7502.034  | 7401.49   |
| AL035369  | 1220.519  | 596.271  | NM_01238E | 6045.446  | 3327.845  | NM_012164 | 4994.769  | 4836.181  |
| AK022801  | 795.246   | 382.651  | BF038366  | 1524.222  | 664.654   | AK026010  | 769.651   | 662.383   |
| AL133075  | 4394.055  | 2683.62  | NM_00245E | 7862.199  | 3067.727  | NM_004721 | 762.107   | 466.567   |
| AL137630  | 3615.5    | 1386.162 | NM_012304 | 1410.309  | 1027.376  | AB011156  | 1415.022  | 1200.337  |
| AK055236  | 353.914   | 218.524  | NM_01644C | 36142.324 | 25083.107 | NM_01807E | 833.768   | 768.789   |
| AL137277  | 1348.412  | 1247.493 | NM_007194 | 3099.068  | 2865.223  | NM_00476C | 21250.838 | 15020.238 |
| AL137447  | 1147.689  | 1564.018 | NM_000314 | 10689.668 | 5256.079  | NM_00675E | 9346.37   | 6256.325  |
| AL157467  | 611.821   | 601.527  | AB002369  | 1638.254  | 1326.42   | NM_00442E | 474.37    | 443.536   |
| BC023609  | 805.101   | 775.254  | S74620    | 1815.382  | 1644.854  | NM_00680E | 12194.699 | 14650.615 |
| AK025100  | 296.17    | 475.239  | AF305239  | 3243.924  | 2524.798  | NM_01692E | 25831.057 | 25382.918 |
| AK023264  | 498.422   | 378.187  | NM_002827 | 24921.467 | 22829.803 | NM_01232E | 3374.887  | 4193.302  |
| AK024457  | 1294.317  | 799.248  | NM_00194E | 1025.803  | 1216.965  | NM_00694E | 910.972   | 970.171   |
| AK026894  | 1535.081  | 1880.254 | BF035425  | 62861.941 | 62063.207 | NM_01819E | 1851.643  | 1956.209  |
| AK026372  | 684.627   | 583.02   | NM_00160E | 881.697   | 1320.776  | NM_01394E | 3362.937  | 3811.642  |
| AF161369  | 368.243   | 335.072  | NM_00015E | 64771.895 | 63004.621 | NM_00163E | 17016.41  | 24506.012 |
| AK027176  | 863.567   | 558.128  | NM_01463E | 2807.39   | 4367.866  | H39560    | 1422.864  | 1783.493  |
| AF073328  | 438.497   | 328.752  | AF099740  | 2188.118  | 3566.073  | BG534366  | 27802.334 | 29228.906 |
| AF129266  | 503.07    | 236.428  | NM_006117 | 11441.923 | 13201.965 | BI822179  | 16714.861 | 16275.75  |
| AF211968  | 336.106   | 154.486  | NM_006287 | 2191.374  | 2124.881  | AF022912  | 8146.909  | 6568.607  |
| Y12019    | 587.049   | 410.681  | NM_000118 | 6824.04   | 5949.313  | AA477428  | 28610.959 | 22951.141 |
| AF147418  | 1017.356  | 745.904  | NM_00091E | 2188.271  | 2233.809  | AA156342  | 4370.063  | 3567.169  |
| AF232217  | 383.957   | 447.845  | NM_00129E | 47976.246 | 58263.711 | R45594    | 26232.309 | 21393.574 |
| AL137326  | 325.467   | 798.018  | BG325046  | 7059.478  | 6280.958  | AI143386  | 1173.305  | 888.938   |
| AK021898  | 1216.331  | 1458.656 | AI351740  | 34704.992 | 29864.287 | H46425    | 9189.327  | 6612.942  |
| AK022024  | 3077.621  | 1854.412 | AA444051  | 19706.156 | 11148.506 | AI355949  | 1785.848  | 1543.374  |
| AK022163  | 543.63    | 472.979  | NM_007164 | 29314.238 | 14930.116 | AA278152  | 20288.418 | 18713.445 |
| AK022301  | 1645.431  | 1038.449 | BE783826  | 50614.844 | 25792.51  | H75530    | 6437.566  | 5633.784  |
| AK021948  | 2913.711  | 3201.79  | X04827    | 3746.398  | 1580.006  | AK000554  | 2454.212  | 2205.97   |
| AK022054  | 457.725   | 364.881  | H07088    | 4044.924  | 2164.487  | NM_00647E | 4885.204  | 5011.899  |
| AK022341  | 597.512   | 546.183  | AI004656  | 4209.541  | 1744.512  | NM_01488C | 5523.369  | 5843.861  |
| U48697    | 410.533   | 506.43   | BC020596  | 3578.964  | 3704.701  | NM_003764 | 7842.935  | 7844.714  |
| AK023806  | 1743.327  | 1234.457 | AF116606  | 59852.66  | 56682.613 | NM_01961E | 500.087   | 596.284   |
| AF088068  | 503.361   | 654.642  | X98922    | 9070.951  | 7185.46   | NM_00482E | 5717.514  | 6068.985  |
| Y16696    | 25491.887 | 23530.77 | AK098435  | 11441.782 | 10973.424 | NM_00679E | 54727.156 | 59685.082 |
| AK026094  | 4882.936  | 5059.626 | AK092872  | 6506.095  | 7267.781  | NM_00153E | 24490.354 | 25204.596 |

|           |           |           |           |           |           |           |           |           |
|-----------|-----------|-----------|-----------|-----------|-----------|-----------|-----------|-----------|
| AF161344  | 4988.284  | 3346.597  | AF230496  | 1894.171  | 2276.212  | NM_001315 | 3196.775  | 3522.47   |
| AF086027  | 1847.902  | 1440.899  | M16801    | 2975.191  | 3183.725  | AF286095  | 7417.476  | 6073.478  |
| NM_001207 | 55877.133 | 51257.156 | NM_013334 | 33878.566 | 37405.668 | NM_000878 | 3697.079  | 2951.093  |
| AF071170  | 900.364   | 1414.656  | AF141901  | 822.84    | 1224.093  | S66407    | 5120.852  | 3795.084  |
| NM_018304 | 10905.148 | 8177.523  | NM_007008 | 1552.824  | 1548.788  | NM_016523 | 354.096   | 238.726   |
| NM_016472 | 2910.176  | 3045.404  | AL109708  | 1593.554  | 1622.833  | NM_004258 | 57597.445 | 60707.227 |
| AF086064  | 558.497   | 580.9     | L29143    | 5015.078  | 6148.061  | NM_001981 | 13170.845 | 10350.802 |
| AK023042  | 1076.807  | 923.761   | AF234532  | 4286.924  | 4520.102  | NM_001585 | 56243.98  | 60790.488 |
| AF086501  | 694.485   | 640.856   | NM_002418 | 3338.973  | 2950.801  | AK026108  | 42500.359 | 31090.686 |
| AK026429  | 1006.79   | 810.373   | NM_002090 | 724.736   | 722.75    | NM_014446 | 2424.601  | 2654.935  |
| NM_016550 | 8394.899  | 6625.417  | NM_004485 | 1026.265  | 676.105   | U58096    | 25018.332 | 29877.188 |
| AK024813  | 6341.034  | 4507.504  | NM_013296 | 9407.722  | 3435.325  | X73079    | 48912.613 | 57522.918 |
| AJ227909  | 8607.233  | 7421.187  | AL117478  | 2827.669  | 1088.672  | NM_019091 | 1556.541  | 925.689   |
| AK021880  | 911.973   | 609.205   | NM_005307 | 10377.337 | 5443.583  | L07518    | 2251.463  | 2039.043  |
| AL109684  | 922.546   | 578.88    | NM_005958 | 5064.212  | 3583.62   | AF264781  | 3841.314  | 3724.976  |
| AF056442  | 929.803   | 1022.844  | NM_013436 | 766.74    | 860.605   | NM_000804 | 959.424   | 963.688   |
| AK024752  | 43988.492 | 56240.508 | AF225426  | 1230.877  | 1250.138  | NM_006555 | 6428.992  | 6203.502  |
| AK024181  | 390.15    | 807.028   | NM_005208 | 23395.504 | 18146.174 | NM_014521 | 5052.806  | 4671.531  |
| AF131859  | 9185.806  | 12754.52  | NM_000421 | 2421.573  | 2155.271  | NM_002445 | 4890.343  | 3885.599  |
| AK001864  | 546.229   | 695.228   | AK025687  | 42236.984 | 43710.172 | NM_017805 | 1153.516  | 1212.434  |
| NM_014138 | 2117.915  | 1438.543  | AF218941  | 10793.4   | 10785.868 | AK023202  | 5551.571  | 4666.304  |
| AK025044  | 456.666   | 1132.449  | AL137264  | 57639.184 | 56351.641 | D63877    | 4778.482  | 3933.006  |
| AK023690  | 481.107   | 567.403   | NM_002226 | 1236.433  | 1948.121  | AF131760  | 4008.694  | 3585.065  |
| NM_014723 | 2509.798  | 3486.628  | X84370    | 20208.514 | 23084.674 | NM_018698 | 2820.71   | 2248.097  |
| AB011106  | 4842.584  | 5210.653  | NM_004039 | 1869.795  | 2686.001  | NM_006461 | 4458.645  | 4550.554  |
| D26362    | 4092.606  | 4515.627  | NM_000508 | 1651.802  | 1764.945  | NM_018201 | 7529.748  | 7218.78   |
| NM_013452 | 1232.859  | 1721.799  | AB014558  | 2052.691  | 2346.297  | NM_014438 | 2084.981  | 2228.035  |
| AL133073  | 817.443   | 823.065   | NM_006854 | 15151.218 | 14376.894 | AF159141  | 13459.304 | 11734.461 |
| AY009402  | 1895.79   | 2573.648  | NM_004580 | 5155.093  | 4505.781  | NM_002420 | 641.94    | 803.47    |
| NM_018451 | 2171.97   | 1682.151  | NM_020387 | 52561.465 | 56359.965 | NM_016458 | 54196.699 | 55714.516 |
| NM_012443 | 945.767   | 972.186   | NM_007246 | 2142.697  | 2552.662  | AK022233  | 5886.489  | 7452.094  |
| NM_007009 | 500.454   | 636.361   | AK026248  | 2463.099  | 2497.552  | AK026410  | 26391.203 | 30695.188 |
| NM_002584 | 13195.146 | 10282.034 | NM_004578 | 606.521   | 1027.163  | NM_014637 | 13234.724 | 23550.98  |
| AK022154  | 567.768   | 672.47    | NM_000647 | 5674.566  | 3115.226  | NM_012164 | 4414.151  | 4184.117  |
| NM_003524 | 10510.107 | 9859.543  | AB046793  | 602.76    | 346.652   | AK026010  | 913.298   | 750.898   |
| AK021438  | 1872.569  | 2572.305  | NM_017604 | 3854.02   | 1460.259  | NM_004721 | 755.347   | 1102.204  |
| NM_005913 | 905.251   | 1156.871  | NM_017738 | 29433.203 | 11870.099 | AB011156  | 1976.351  | 2003.378  |
| AK022315  | 305.542   | 639.56    | NM_016557 | 2397.98   | 1036.666  | NM_018079 | 1064.111  | 1100.013  |
| S39891    | 2774.837  | 3911.253  | NM_000623 | 2886.112  | 1211.541  | NM_004760 | 20076.057 | 11618.623 |
| R17536    | 826.711   | 1407.849  | AF161348  | 1902.243  | 1088.523  | NM_006752 | 8768.447  | 6552.617  |
| AK021624  | 503.226   | 1078.42   | NM_018467 | 41430.277 | 37013.746 | NM_006809 | 12391.393 | 11500.852 |
| NM_006497 | 9704.5    | 11764.076 | NM_006068 | 5449.392  | 4919.784  | AF149304  | 2104.827  | 1525.891  |
| AK022329  | 487.948   | 631.784   | NM_002704 | 1353.765  | 1794.208  | NM_012095 | 12868.418 | 12172.869 |
| AL133599  | 773.806   | 1139.721  | U16752    | 2596.76   | 2664.976  | NM_006942 | 1020.319  | 1146.349  |
| AK022380  | 788.635   | 991.817   | M30134    | 2300.734  | 2529.708  | NM_013943 | 3209.173  | 3319.265  |
| AB037776  | 1621.675  | 1693.774  | NM_000880 | 531.604   | 362.367   | NM_001639 | 17711.236 | 24317.615 |
| AF196976  | 4679.855  | 5302.543  | NM_002038 | 30108.135 | 31607.078 | H39560    | 761.777   | 956.726   |
| AL050379  | 2619.036  | 2787.822  | NM_005729 | 30058.236 | 37704.734 | BG534366  | 27068.273 | 22147.846 |
| NM_003161 | 4550.226  | 4984.297  | NM_015493 | 3019.766  | 4099.75   | BG698522  | 41397.734 | 44104.559 |
| NM_005459 | 445.648   | 514.019   | NM_003747 | 2054.164  | 2723.891  | AA152346  | 2745.429  | 3814.008  |
| NM_014496 | 2093.844  | 2367.094  | AB037744  | 3326.674  | 3216.696  | AB023420  | 30720.945 | 41669.992 |
| NM_016215 | 3455.858  | 4597.542  | NM_001608 | 624.454   | 816.394   | BI822179  | 16799.305 | 21238.061 |
| NM_001501 | 3598.359  | 3949.895  | NM_000159 | 62788.254 | 59105.953 | AF022912  | 7869.452  | 7369.41   |

|           |           |           |           |           |           |           |           |           |
|-----------|-----------|-----------|-----------|-----------|-----------|-----------|-----------|-----------|
| NM_006176 | 8593.329  | 12890.998 | NM_014638 | 2043.882  | 2092.575  | AA477428  | 28735.508 | 26115.523 |
| AL137459  | 852.136   | 874.951   | AF099740  | 1591.457  | 2092.412  | AA156342  | 4164.407  | 3653.609  |
| AB037812  | 1267.075  | 1517.469  | NM_006117 | 12142.393 | 15692.283 | R45594    | 24535.146 | 23628.451 |
| AF219257  | 13545.56  | 18299.213 | NM_002225 | 2626.071  | 2773.416  | AI143386  | 1431.267  | 1049.95   |
| NM_003978 | 634.509   | 1177.422  | NM_006229 | 930.889   | 946.749   | H46425    | 13662.955 | 11071.318 |
| NM_002561 | 39417.145 | 49478.418 | NM_015415 | 39206.352 | 25457.057 | AI355949  | 2604.426  | 2422.409  |
| NM_006103 | 27821.063 | 33248.539 | NM_004897 | 3523.031  | 1777.469  | AA278152  | 20294.072 | 16548.344 |
| NM_006206 | 1002.754  | 1347.936  | NM_002555 | 2648.806  | 1235.514  | H75530    | 6105.548  | 5083.936  |
| NM_000805 | 458.526   | 726.075   | AF225418  | 806.32    | 377.866   | AK000554  | 2394.429  | 1802.378  |
| AL359933  | 25681.295 | 31938.006 | NM_000309 | 1907.302  | 659.741   | NM_006472 | 5101.699  | 3630.909  |
| NM_001302 | 1936.919  | 4636.619  | NM_004528 | 29869.328 | 14639.796 | NM_002826 | 5352.457  | 4259.068  |
| NM_018590 | 10432.005 | 12427.244 | AK026381  | 43921.57  | 37353.496 | X97261    | 6060.774  | 17687.404 |
| NM_003178 | 3127.734  | 5841.219  | NM_002450 | 7693.268  | 11420.161 | NM_001468 | 1224.679  | 1440.813  |
| NM_012437 | 10938.302 | 16115.149 | NM_001686 | 1179.292  | 1172.011  | NM_005410 | 1119.323  | 1034.355  |
| NM_002607 | 1931.199  | 1588.285  | NM_004978 | 660.535   | 880.545   | D87666    | 56917.52  | 59354.738 |
| NM_018189 | 416.77    | 305.089   | NM_000705 | 1454.422  | 1849.809  | NM_002921 | 589.445   | 770.417   |
| AF116712  | 815.293   | 620.428   | NM_004231 | 58261.934 | 54765.82  | NM_001315 | 3664.905  | 4489.705  |
| AF116626  | 9909.572  | 8221.521  | NM_002243 | 283.3     | 430.538   | AF286095  | 9609.737  | 9467.327  |
| NM_001760 | 32082.711 | 24231.289 | NM_016577 | 7180.787  | 10176.077 | NM_000878 | 5999.718  | 8596.364  |
| NM_002527 | 891.389   | 1045.093  | AK023107  | 8335.592  | 9392.419  | S66407    | 3904.833  | 5626.997  |
| NM_005890 | 1594.789  | 1854.457  | NM_013334 | 29757.33  | 42029.02  | NM_016523 | 5170.574  | 7414.482  |
| NM_007065 | 35029.246 | 26220.289 | AF150735  | 7637.569  | 3327.834  | NM_004258 | 52665.699 | 57324.957 |
| AF149785  | 7402.066  | 5421.316  | NM_018183 | 1945.899  | 778.913   | NM_001981 | 12543.922 | 11847.012 |
| NM_012068 | 10831.273 | 11473.521 | NM_012382 | 6422.068  | 2465.999  | NM_014654 | 2743.446  | 2040.102  |
| NM_004064 | 7445.388  | 5893.411  | BF038366  | 1376.91   | 462.727   | NM_001585 | 60712.98  | 62580.078 |
| NM_020205 | 1505.421  | 1710.747  | NM_002452 | 9640.946  | 3995.598  | AK026108  | 48981.152 | 49727.953 |
| NM_001227 | 1859.815  | 2596.545  | NM_012304 | 1118.021  | 897.62    | NM_006379 | 6008.514  | 5765.877  |
| NM_001191 | 11648.968 | 15533.125 | NM_016440 | 37780.641 | 30201.984 | BF571428  | 24926.105 | 19339.559 |
| U15174    | 1216.252  | 1989.724  | NM_007194 | 3333.581  | 3006.641  | AB037723  | 50310.324 | 45672.086 |
| NM_013342 | 3554.349  | 4320.23   | NM_000314 | 11707.896 | 8662.399  | NM_006246 | 7445.957  | 6356.429  |
| NM_014344 | 1703.166  | 2442.652  | AB002369  | 1867.465  | 2019.766  | NM_004316 | 1853.902  | 1671.435  |
| AB040917  | 607.417   | 995.97    | S74620    | 1595.574  | 1858.323  | NM_014446 | 3030.97   | 2206.141  |
| AA203539  | 575.917   | 722.053   | AF305239  | 2567.932  | 2607.945  | U58096    | 26821.453 | 21826.893 |
| AK021786  | 1767.913  | 2081.16   | NM_002827 | 24184.664 | 25465.146 | NM_016929 | 28816.535 | 21815.063 |
| AF245505  | 4084.764  | 4909.299  | NM_001946 | 829.454   | 989.071   | NM_012323 | 4058.546  | 4139.025  |
| M26663    | 562.298   | 451.588   | BF035425  | 61588.699 | 57439.793 | NM_003054 | 3225.75   | 3115.367  |
| NM_004279 | 26092.979 | 13238.923 | CY3Cy5    | 2055.527  | 375.111   | NM_003042 | 668.379   | 899.367   |
| NM_004851 | 15737.606 | 11512.963 | NM_004176 | 7311.046  | 7281.246  | NM_004790 | 717.041   | 735.475   |
| NM_001908 | 2647.719  | 2169.99   | NM_004548 | 33102.828 | 30726.283 | NM_002219 | 11362.124 | 10473.374 |
| NM_000285 | 23471.559 | 13525.069 | AK027120  | 3243.175  | 4556.962  | AF182404  | 10803.905 | 12155.33  |
| NM_005911 | 17737.777 | 14975.71  | AB029001  | 3754.3    | 4669.176  | NM_000804 | 983.257   | 1133.511  |
| AV702690  | 5857.496  | 3599.427  | AB006624  | 5452.921  | 4862.143  | NM_006555 | 6332.23   | 6216.128  |
| AL117452  | 21730.51  | 12028.71  | AL109717  | 5714.432  | 4262.837  | NM_014521 | 5887.259  | 6453.751  |
| NM_012230 | 1987.07   | 1446.81   | AK025473  | 671.727   | 716.229   | NM_002445 | 5608.354  | 6884.586  |
| NM_014038 | 14208.79  | 9231.381  | AF146693  | 1632.063  | 1496.12   | NM_017809 | 1324.974  | 974.72    |
| NM_004522 | 3354.953  | 5057.931  | AF271070  | 19849.873 | 12347.545 | AK023202  | 5509.314  | 6091.478  |
| NM_005733 | 5451.569  | 8797.647  | NM_014903 | 1692.415  | 1548.325  | D63877    | 4583.732  | 4142.92   |
| NM_018138 | 4544.22   | 6638.855  | AK055959  | 1882.916  | 1873.324  | AF131760  | 4359.683  | 4940.304  |
| NM_019619 | 8943.213  | 12673.689 | AF052141  | 2983.155  | 3802.327  | NM_018698 | 2081.285  | 2187.398  |
| AF183411  | 5164.049  | 6720.277  | AY007128  | 1304.338  | 1314.162  | NM_006461 | 4563.454  | 4307.915  |
| BF244591  | 2513.438  | 3027.108  | SR5       | 3470.133  | 5225.329  | NM_018201 | 7570.517  | 6175.688  |
| NM_005886 | 8722.278  | 14041.473 | SR7       | 4125.167  | 40633.137 | NM_014438 | 2308.834  | 2021.535  |
| NM_003156 | 7251.098  | 4207.593  | SR9       | 15090.669 | 5999.754  | NM_014880 | 5701.694  | 4836.29   |

|           |           |           |           |           |           |           |           |           |
|-----------|-----------|-----------|-----------|-----------|-----------|-----------|-----------|-----------|
| NM_004744 | 561.634   | 561.191   | CY3Cy5    | 1827.778  | 239.623   | NM_003764 | 8835.784  | 5466.771  |
| AF090944  | 354.235   | 446.185   | L32606    | 2188.748  | 2208.504  | NM_019618 | 531.027   | 573.489   |
| NM_006473 | 2664.546  | 5953.162  | AK091125  | 2420.253  | 2962.086  | NM_004829 | 5815.102  | 4317.773  |
| NM_014643 | 351.941   | 378.362   | D16474    | 10411.226 | 7429.436  | NM_006793 | 50503.605 | 47352.266 |
| NM_005653 | 3096.212  | 3022.925  | AK024898  | 1304.811  | 1127.761  | NM_001538 | 25100.885 | 19887.99  |
| NM_014553 | 4363.327  | 2796.809  | AL035301  | 581.075   | 467.445   | NM_004428 | 944.876   | 1175.447  |
| NM_003440 | 1655.913  | 1138.246  | NM_017687 | 3580.593  | 2722.521  | NM_006809 | 11028.958 | 12559.361 |
| NM_004698 | 10171.501 | 6929.346  | NM_017975 | 3886.884  | 3286.639  | AF149304  | 2323.233  | 2377.241  |
| U41387    | 51933.723 | 31326.791 | AF074994  | 1121.065  | 818.945   | NM_012095 | 12135.464 | 12505.558 |
| NM_016505 | 596       | 429.654   | NM_017670 | 9119.657  | 6039.961  | NM_016438 | 747.238   | 720.414   |
| NM_004516 | 15924.745 | 8540.121  | NM_004366 | 33054.527 | 37426.137 | X73079    | 48739.578 | 40715.777 |
| NM_006513 | 5568.062  | 2182.245  | AK026168  | 2565.355  | 2323.759  | NM_019091 | 1927.155  | 1231.982  |
| NM_002486 | 1969.035  | 2359.764  | AJ296152  | 10794.065 | 8721.908  | AF264781  | 3563.9    | 2820.299  |
| NM_012111 | 22062.785 | 31260.467 | AK001067  | 4822.843  | 6682.081  | NM_002456 | 832.321   | 729.429   |
| NM_004470 | 37990.145 | 47261.586 | AK027088  | 17311.072 | 17879.57  | AK024215  | 12642.042 | 8511.01   |
| NM_001418 | 25291.33  | 35412.082 | AB037721  | 18445.4   | 15062.06  | AB044661  | 6135.999  | 4679.513  |
| NM_005932 | 2620.401  | 2278.085  | AK024525  | 17027.395 | 17167.154 | NM_000606 | 43413.816 | 28751.035 |
| AK027251  | 933.52    | 760.742   | AK024909  | 1781.625  | 1884.737  | NM_016124 | 6676.928  | 4710.088  |
| BF036874  | 2969.361  | 2940.055  | AK024544  | 4283.742  | 4547.972  | NM_019079 | 1201.409  | 641.76    |
| BE888487  | 475.254   | 811.294   | AK021705  | 2005.559  | 1946.401  | U53530    | 6074.001  | 4905.135  |
| AF182419  | 2263.314  | 2127.914  | NM_016141 | 50800.055 | 49282.332 | NM_006598 | 2376.758  | 1995.82   |
| NM_004293 | 1752.154  | 1692.259  | AL109702  | 1509.203  | 1200.733  | NM_015948 | 10231.875 | 8566.044  |
| NM_004450 | 876.872   | 800.659   | AK025624  | 11524.612 | 12480.743 | AK000554  | 2601.511  | 2546.745  |
| NM_007016 | 4398.746  | 3805.699  | AK026684  | 1088.453  | 1603.729  | NM_006472 | 4837.407  | 4456.534  |
| NM_002703 | 17182.959 | 14515.705 | AL110125  | 33474.648 | 29973.119 | NM_002826 | 4068.151  | 3696.512  |
| NM_005375 | 3573.926  | 2529.107  | AK022764  | 791.371   | 888.027   | AF159141  | 13327.809 | 11264.657 |
| NM_005985 | 2542.631  | 2187.938  | AK002118  | 424.173   | 364.187   | NM_002420 | 1136.913  | 1395.652  |
| NM_015906 | 4902.929  | 3179.043  | X89744    | 611.62    | 580.244   | NM_016458 | 48939.031 | 49999     |
| AK023759  | 1716.728  | 1450.924  | AJ011600  | 4848.892  | 6103.39   | AK022233  | 5677.91   | 5719.733  |
| L25270    | 21655.404 | 36019.195 | AJ002785  | 5489.362  | 6375.429  | AK026410  | 26281.535 | 26382.943 |
| AB033111  | 3129.519  | 5913.24   | Z70716    | 1251.874  | 1463.192  | NM_014637 | 10929.324 | 12419.806 |
| NM_003071 | 18340.857 | 25224.75  | Z83945    | 2296.921  | 1910.257  | NM_013379 | 43902.387 | 40984.867 |
| NM_003108 | 808.878   | 806.255   | AF086216  | 1327.597  | 1307.809  | AF113208  | 23009.285 | 18022.09  |
| NM_013310 | 10234.433 | 9855.839  | AK022422  | 1501.882  | 2516.666  | NM_006153 | 8880.346  | 6358.841  |
| BC004958  | 11221.486 | 16711.656 | AK023485  | 1109.67   | 1594.445  | NM_012164 | 5447.989  | 3881.795  |
| NM_005762 | 26861.246 | 37565.598 | AK022474  | 18979.068 | 16963.373 | AK026010  | 978.021   | 640.105   |
| X84370    | 6049.702  | 9571.164  | AK022392  | 9994.544  | 8691.422  | NM_004721 | 553.499   | 460.645   |
| NM_004039 | 2551.567  | 2709.87   | AL117451  | 700.065   | 673.889   | AB011156  | 1771.389  | 1276      |
| NM_000913 | 1089.433  | 1500.468  | AL049280  | 3321.889  | 2622.693  | NM_018079 | 1163.525  | 1193.913  |
| NM_001298 | 49055.777 | 55931.254 | AK025212  | 11301.313 | 8295.979  | NM_004760 | 21545.436 | 14835.154 |
| BG325046  | 5742.355  | 3778.484  | AB021925  | 806.143   | 460.729   | NM_006752 | 10029.846 | 7004.532  |
| AI351740  | 40577.328 | 26458.635 | AL157503  | 8003.631  | 6429.058  | CY3Cy5    | 6844.187  | 164.091   |
| AA444051  | 36219.938 | 23063.832 | AK000053  | 986.939   | 851.475   | NM_021005 | 1185.394  | 1406.657  |
| NM_007164 | 4181.302  | 2761.272  | AK000786  | 2989.562  | 1943.53   | SB        | 2316.603  | 3648.653  |
| BE783826  | 16549.818 | 11978.489 | AK000935  | 1529.52   | 1599.155  | AF086342  | 679.956   | 1868.785  |
| X04827    | 1737.88   | 1324.331  | AK021458  | 7482.032  | 6320.089  | AF086451  | 462.835   | 721.235   |
| H07088    | 14103.451 | 15709.684 | NM_017674 | 23370.477 | 18426.637 | AF086310  | 471.613   | 457.031   |
| AI004656  | 6366.992  | 12537.621 | AK000811  | 1006.982  | 1182.182  | AF086387  | 1328.686  | 1265.332  |
| BC008428  | 709.185   | 1134.083  | AK000966  | 1769.38   | 1604.048  | AL389941  | 2056.873  | 2004.696  |
| BC020596  | 3939.343  | 6004.957  | NM_018630 | 8050.6    | 14211.236 | AB037756  | 2695.271  | 2601.846  |
| AF230496  | 2025.233  | 2556.432  | AF086175  | 1213.028  | 1460.025  | AK001853  | 4925.1    | 4309.473  |
| M16801    | 1513.485  | 2762.274  | AK002196  | 974.48    | 1007.839  | AK025071  | 1175.958  | 1019.929  |
| M94065    | 5996.227  | 6581.406  | NM_004576 | 3342.025  | 3428.159  | AK021888  | 887.712   | 1019.809  |

|           |           |           |           |           |           |           |           |           |
|-----------|-----------|-----------|-----------|-----------|-----------|-----------|-----------|-----------|
| NM_00606E | 2897.371  | 2884.079  | AF040097  | 4469.843  | 4243.938  | AK022848  | 8002.334  | 6542.794  |
| NM_002704 | 248.814   | 795.837   | NM_020436 | 668.639   | 635.578   | AL049957  | 2421.988  | 1821.347  |
| U16752    | 740.031   | 2097.589  | AK024182  | 2056.566  | 1842.813  | NM_02100E | 1087.014  | 965.294   |
| NM_00572E | 41478.453 | 54712.316 | NM_006913 | 8809.027  | 7613.947  | SB        | 2065.685  | 1050.077  |
| NM_01549E | 3867.361  | 3452.74   | NM_00049E | 24716.002 | 25108.816 | SR2       | 48157.828 | 37599.512 |
| NM_003747 | 1530.292  | 1373.475  | AK001880  | 8569.851  | 14617.223 | SR4       | 14030.238 | 13599.56  |
| AB037744  | 3455.674  | 2322.18   | AF156166  | 17838.191 | 16397.895 | SR6       | 1771.349  | 1575.719  |
| AF141901  | 779.226   | 588.063   | NM_01437E | 5329.434  | 4497.387  | SR8       | 5778.816  | 18715.23  |
| NM_00700E | 1451.852  | 1194.549  | NM_01420E | 20779.24  | 12952.239 | SR10      | 20441.055 | 7291.889  |
| AL109708  | 1744.177  | 835.293   | NM_001651 | 14239.516 | 11860.514 | CY3Cy5    | 6889.059  | 250.205   |
| L29143    | 1242.914  | 779.134   | L32786    | 5005.653  | 3850.959  | AF086063  | 1929.982  | 1975.118  |
| AF234532  | 1952.906  | 958.811   | U03239    | 928.052   | 863.233   | AF086098  | 2066.781  | 2222.547  |
| NM_00241E | 2035.084  | 1221.005  | AL355720  | 6414.206  | 4686.513  | AF086076  | 950.515   | 2324.647  |
| NM_00209C | 2106.997  | 1891.368  | AK002023  | 7620.121  | 7368.161  | AL833393  | 3318.504  | 4024.9    |
| NM_00448E | 666.717   | 701.484   | AF150156  | 965.015   | 771.576   | AF088005  | 3325.8    | 3427.1    |
| NM_00595E | 7607.772  | 7733.458  | NM_016464 | 1531.658  | 1719.285  | AF086096  | 5501.07   | 5654.825  |
| AF225426  | 1111.735  | 1328.19   | L40402    | 6308.493  | 6403.822  | AL390132  | 777.516   | 959.649   |
| NM_00520E | 4587.113  | 4258.877  | Z36780    | 4647.415  | 6802.813  | NM_01793E | 21867.955 | 22046.551 |
| AF099740  | 1529.031  | 1331.945  | AK022403  | 4902.828  | 4614.922  | NM_01781E | 10977.382 | 11443.899 |
| NM_006117 | 15771.925 | 12003.11  | AK022955  | 7319.792  | 6013.983  | NM_01480E | 2248.248  | 1801.182  |
| NM_00222E | 2532.375  | 2797.97   | AF131741  | 563.847   | 697.133   | AK024956  | 1630.999  | 1337.191  |
| NM_00622E | 918.45    | 1193.89   | AK021760  | 679.369   | 847.367   | AF147386  | 2213.969  | 1706.991  |
| NM_01541E | 44934.301 | 46698.742 | BC035855  | 10136.139 | 7952.078  | AF086500  | 598.111   | 704.217   |
| NM_004897 | 5318.569  | 7851.737  | AL137408  | 33573.09  | 27259.02  | AF273052  | 15682.938 | 12379.634 |
| NM_00255E | 1829.032  | 2548.289  | AF054995  | 1409.828  | 1413.366  | NM_01794E | 9408.668  | 7075.655  |
| AF225418  | 3305.052  | 3727.324  | AL080176  | 3691.651  | 2812.71   | AF147383  | 2540.651  | 1993.773  |
| NM_00030E | 3685.76   | 3379.587  | AK023627  | 4814.348  | 3817.866  | AK025682  | 1770.607  | 1153.418  |
| NM_00452E | 10074.118 | 11081.011 | AK025949  | 3552.727  | 3417.846  | NM_01647E | 22743.791 | 15391.129 |
| AK026381  | 7860.313  | 6087.994  | Y10259    | 6075.26   | 4961.89   | AL389986  | 9364.506  | 5709.599  |
| AK023107  | 8503.925  | 5776.341  | AK021725  | 10791.708 | 9828.975  | AF086279  | 726.662   | 504.571   |
| NM_00457E | 597.297   | 407.104   | AF119893  | 1375.33   | 1070.335  | AF088052  | 1469.641  | 1580.801  |
| NM_000647 | 1815.5    | 618.315   | NM_00240E | 6349.776  | 4939.797  | AK027155  | 12365.455 | 13928.224 |
| AB046793  | 666.053   | 290.335   | AK024282  | 2137.37   | 1461.893  | AF221846  | 1327.905  | 1610.66   |
| NM_017604 | 9978.378  | 7809.665  | AF085838  | 6285.123  | 4007.891  | AF264626  | 806.515   | 1335.188  |
| NM_018467 | 11512.96  | 12502.055 | NM_018277 | 3232.802  | 2197.328  | AK027219  | 354.758   | 642.682   |
| AF113125  | 612.839   | 573.28    | AF014455  | 708.288   | 590.123   | AK024528  | 29260.215 | 26824.779 |
| AL137675  | 696.531   | 511.842   | AF086335  | 5102.234  | 3249.726  | AF075082  | 495.594   | 560.516   |
| AF150735  | 13896.48  | 13349.965 | AL355741  | 530.792   | 645.445   | NM_01537C | 9857.847  | 10480.784 |
| NM_01818E | 3268.767  | 3516.201  | AB011118  | 44104.297 | 44215.809 | AF085917  | 2169.255  | 2480.977  |
| NM_01238E | 7557.567  | 11355.56  | S66666    | 674.363   | 988.569   | AF085989  | 1581.687  | 1698.592  |
| BF038366  | 4154.739  | 5806.178  | AK021476  | 3891.244  | 3564.664  | AL360139  | 70533.281 | 65282.75  |
| NM_00245E | 14606.817 | 13024.993 | NM_01537E | 14629.424 | 12534.279 | AF075110  | 5350.474  | 4300.83   |
| NM_012304 | 942.041   | 656.674   | NM_001176 | 1304.996  | 1421.699  | AL137323  | 1352.761  | 1118.969  |
| NM_01644C | 33208.789 | 19639.346 | NM_013341 | 769.624   | 727.198   | AL137494  | 7254.814  | 5579.365  |
| NM_007194 | 4431.055  | 2934.497  | NM_01653E | 566.368   | 761.309   | AL162037  | 7236.088  | 5194.174  |
| NM_000314 | 15943.945 | 6907.022  | NM_00406E | 819.23    | 1256.124  | AL390150  | 2238.632  | 1975.369  |
| AB002369  | 3042.868  | 3036.836  | NM_004941 | 8813.621  | 5670.859  | AL137359  | 536.929   | 361.308   |
| S74620    | 713.449   | 2046.226  | AF151831  | 4714.046  | 3895.579  | AL137575  | 669.337   | 513.342   |
| NM_00160E | 858.255   | 2134.234  | AB011121  | 676.037   | 545.193   | NM_002761 | 1063.876  | 1038.784  |
| NM_00050E | 360.943   | 356.665   | AF083255  | 3054.125  | 2214.961  | AK021962  | 775.522   | 657.069   |
| AB014558  | 3550.712  | 2798.093  | AK022605  | 1976.169  | 1649.041  | AK056674  | 1765.12   | 2219.495  |
| NM_006287 | 602.178   | 424.365   | AL049955  | 34822.559 | 28550.514 | AK022856  | 825.306   | 1050.003  |
| NM_000118 | 10330.762 | 5985.495  | AF155654  | 22072.605 | 20118.934 | AK022042  | 1396.42   | 1720.013  |



|           |           |           |           |           |           |           |           |           |
|-----------|-----------|-----------|-----------|-----------|-----------|-----------|-----------|-----------|
| NM_000913 | 985.333   | 908.25    | AF088044  | 2006.139  | 2478.628  | AL117588  | 861.599   | 1036.812  |
| NM_001298 | 53793.91  | 51206.258 | AK000028  | 5316.623  | 4613.428  | AK024653  | 41119.066 | 36242.863 |
| BG325046  | 6288.308  | 4824.109  | NM_013320 | 52458.285 | 42581.277 | AF103907  | 1705.155  | 1398.519  |
| AI351740  | 43737.723 | 36185.594 | AJ245902  | 1521.093  | 1374.019  | AF094508  | 1567.275  | 1715.124  |
| AA444051  | 41692.504 | 45060.309 | AL050039  | 2039.676  | 1850.059  | AF161351  | 2355.817  | 2365.263  |
| NM_007164 | 6993.332  | 9841.124  | AF009316  | 800.837   | 783.42    | AF257098  | 625.162   | 786.145   |
| BE783826  | 19655.895 | 18176.002 | AF087987  | 1895.506  | 1335.391  | NM_014130 | 460.302   | 563.917   |
| X04827    | 2153.392  | 1490.276  | Z36840    | 415.119   | 342.985   | AF111782  | 7515.566  | 6116.825  |
| H07088    | 11201.826 | 7030.645  | AK021723  | 346.996   | 272.588   | AF151530  | 2739.159  | 1939.563  |
| AI004656  | 4090.554  | 2813.319  | H09474    | 6600.213  | 4911.69   | AK021991  | 1302.514  | 901.674   |
| BC008428  | 298.72    | 541.915   | AB002368  | 13598.328 | 11923.076 | AK022093  | 4838.33   | 2998.163  |
| BC020596  | 3209.263  | 2323.561  | AL360263  | 64007.543 | 53452.41  | AK022232  | 542.63    | 454.246   |
| AF116606  | 52502.336 | 62227.391 | BC012757  | 2680.168  | 4326.185  | AK022376  | 1958.356  | 1580.31   |
| X98922    | 9325.392  | 16514.861 | M96686    | 831.7     | 1072.24   | AK022005  | 1190.184  | 901.418   |
| M16801    | 1640.713  | 2194.3    | NM_004062 | 4539.12   | 4668.869  | AK022137  | 891.001   | 682.666   |
| NM_013334 | 5057.771  | 7737.706  | NM_005883 | 3063.481  | 2889.874  | AK022272  | 2184.803  | 1499.26   |
| U16752    | 503.7     | 950.913   | NM_004449 | 2432.017  | 2116.903  | AL357201  | 510.614   | 397.526   |
| M30134    | 459.826   | 725.625   | NM_014591 | 4769.282  | 3349.546  | AF279780  | 54371.289 | 47107.777 |
| NM_000880 | 494.584   | 495.073   | NM_014592 | 2756.61   | 2655.997  | AK022510  | 3261.701  | 3628.897  |
| NM_002038 | 4819.08   | 5208.376  | NM_001945 | 955.302   | 1096.078  | AK023878  | 1531.451  | 1699.448  |
| NM_005729 | 32628.18  | 29662.02  | NM_020039 | 6639.01   | 5713.661  | AK021851  | 1062.638  | 1024.969  |
| NM_015493 | 4071.072  | 3923.03   | NM_006653 | 1057.806  | 827.221   | L37717    | 1226.033  | 1171.507  |
| NM_003747 | 1921.207  | 1850.762  | NM_014442 | 29698.787 | 25961.207 | AJ131609  | 6398.772  | 6220.245  |
| AB037744  | 3578.968  | 3794.242  | AB002313  | 3303.478  | 3019.271  | BC019280  | 7778.873  | 6772.191  |
| AF141901  | 666.137   | 893.139   | AB011167  | 4190.437  | 4359.25   | AF086498  | 1317.485  | 1141.278  |
| NM_007008 | 1644.677  | 1595.818  | NM_005409 | 2718.784  | 2131.957  | AK000687  | 1345.27   | 1657.615  |
| AL109708  | 2117.534  | 1897.436  | NM_000208 | 11866.706 | 9781.216  | AF079567  | 2665.938  | 2402.522  |
| L29143    | 1466.262  | 1268.811  | NM_002188 | 62609.828 | 53222.754 | AL049311  | 1456.896  | 1270.706  |
| AF234532  | 2470.881  | 1731.502  | AK027119  | 45461.113 | 36629.332 | AK000016  | 5333.788  | 4550.121  |
| NM_002418 | 1881.484  | 1692.196  | AB037727  | 56933.461 | 56665.469 | AK023367  | 2398.266  | 2053.394  |
| NM_002090 | 2101.287  | 1996.274  | NM_005426 | 1663.742  | 1309.517  | AL080209  | 2709.891  | 2389.925  |
| NM_004485 | 877.574   | 926.865   | NM_004763 | 729.271   | 628.303   | AL137431  | 958.755   | 665.992   |
| NM_012419 | 390.063   | 738.262   | NM_014063 | 19557.592 | 17212.635 | NM_016255 | 1579.903  | 1335.691  |
| NM_013298 | 28095.053 | 33886.926 | D86964    | 7804.617  | 5629.036  | NM_014318 | 3551.891  | 2925.577  |
| NM_005307 | 2407.795  | 3508.976  | AL049801  | 1538.139  | 1179.151  | unknown ( | 960.258   | 2112.886  |
| NM_005958 | 8250.169  | 10424.809 | NM_016395 | 14086.139 | 10858.97  | AL133089  | 8233.342  | 9916.823  |
| AF225426  | 1127.247  | 1581.156  | NM_003152 | 2917.671  | 2201.875  | AK023526  | 1882.072  | 2125.451  |
| NM_002225 | 2930.782  | 3462.034  | NM_006342 | 6311.653  | 8104.957  | BE266129  | 1914.463  | 2238.412  |
| NM_006229 | 980.386   | 1346.77   | NM_016396 | 6284.932  | 11410.101 | AK025602  | 17093.982 | 16980.318 |
| NM_015415 | 48867.656 | 50108.27  | NM_005689 | 4624.104  | 6067.424  | AK026309  | 6381.379  | 6167.087  |
| NM_004897 | 5484.427  | 6308.273  | NM_005552 | 62565.805 | 53575.816 | AL137486  | 11516.022 | 12084.646 |
| NM_002555 | 2203.958  | 2371.965  | NM_006717 | 4275.296  | 3508.772  | AL110162  | 2182.961  | 2206.6    |
| AF225418  | 3234.159  | 5260.394  | AL109786  | 2460.64   | 2514.01   | AF119880  | 906.767   | 1045.217  |
| NM_000309 | 4626.689  | 4210.524  | AK026479  | 9120.646  | 7008.138  | AK022681  | 11923.637 | 13042.604 |
| NM_004528 | 11956.498 | 12329.332 | AK022860  | 7172.723  | 7059.358  | NM_017708 | 1372.577  | 1429.385  |
| AK026381  | 9954.424  | 12613.263 | X60188    | 58173.172 | 46743.988 | BE895529  | 8250.999  | 7244.545  |
| AF004711  | 426.379   | 379.753   | NM_005977 | 3110.942  | 3155.573  | AK000964  | 1156.17   | 957.804   |
| NM_016611 | 411.045   | 545.197   | NM_002747 | 1525.112  | 1695.926  | AL117536  | 15383.822 | 13582.413 |
| AK023107  | 11623.502 | 13184.807 | NM_006265 | 22015.033 | 23089.135 | NM_017751 | 12769.869 | 10435.132 |
| NM_004578 | 904.619   | 875.658   | NM_003126 | 1492.838  | 1461.57   | NM_003771 | 3109.448  | 2116.606  |
| NM_000647 | 2297.571  | 2140.451  | NM_006059 | 5911.639  | 4932.281  | NM_017860 | 1679.51   | 1342.264  |
| AB046793  | 1262.57   | 1879.278  | NM_000347 | 46593.383 | 44795.719 | X91195    | 60301.016 | 58752.367 |
| NM_017604 | 10438.339 | 10121.322 | M13452    | 3294.192  | 3133.586  | AF086190  | 1473.392  | 1225.897  |

|           |           |           |           |           |           |           |           |           |
|-----------|-----------|-----------|-----------|-----------|-----------|-----------|-----------|-----------|
| NM_01773E | 15293.441 | 14863.29  | AF082075  | 1854.484  | 1820.66   | NM_00614E | 844.873   | 755.844   |
| NM_016557 | 4607.857  | 3818.015  | NM_016114 | 4138.171  | 3167.878  | AL050035  | 7482.603  | 6186.862  |
| NM_018301 | 936.349   | 1066.951  | AY007114  | 2097.841  | 1924.043  | AF090101  | 632.353   | 558.8     |
| AF161348  | 3140.058  | 2952.864  | AF086604  | 1800.054  | 1382.989  | AF040723  | 55902.246 | 57139.438 |
| NM_018467 | 10670.713 | 9062.746  | AB000895  | 1827.139  | 1537.128  | NM_015527 | 7322.083  | 7788.318  |
| NM_00606E | 4154.785  | 4054.127  | X80031    | 1430.426  | 992.652   | X89675    | 3132.587  | 3141.026  |
| NM_002704 | 841.617   | 835.033   | AF019382  | 3047.975  | 3731.524  | NM_01218E | 1932.226  | 2267.464  |
| AF150735  | 14240.29  | 9439.155  | NM_015601 | 1699.315  | 1672.342  | NM_00579E | 18396.316 | 20607.328 |
| NM_01818E | 3889.651  | 2892.876  | NM_00178C | 33416.543 | 33469.07  | NM_00421E | 3594.96   | 3526.844  |
| NM_01238E | 6652.53   | 4871.591  | AJ277442  | 2852.037  | 2693.719  | NM_01628E | 57635.324 | 52185.008 |
| BF038366  | 2736.088  | 2130.667  | NM_00456E | 4124.189  | 3318.732  | NM_001464 | 1459.951  | 1622.24   |
| NM_00245E | 13126.906 | 9540.658  | L07557    | 8109.584  | 6703.347  | NM_002051 | 6793.496  | 8101.979  |
| NM_012304 | 870.664   | 685.764   | NM_00279E | 42399.363 | 34911.457 | AK022177  | 2039.165  | 1993.479  |
| NM_01644C | 38765.785 | 30683.932 | D78514    | 11175.523 | 10400.905 | AK023852  | 1130.117  | 1179.554  |
| NM_007194 | 5445.031  | 5721.076  | AK021665  | 3066.407  | 2942.782  | AF086466  | 5990.813  | 4668.96   |
| NM_000314 | 19739.25  | 18621.521 | NM_002787 | 34229.512 | 30381.008 | AB007962  | 10530.044 | 8450.622  |
| AB002369  | 3444.066  | 4503.954  | U95006    | 17376.949 | 17368.439 | AF005081  | 2807.974  | 2544.238  |
| S74620    | 518.053   | 801.183   | NM_003347 | 20343.813 | 21843.867 | AK026438  | 938.632   | 770.482   |
| AF305239  | 3939.602  | 4055.305  | AF273051  | 2566.834  | 2509.514  | AK021546  | 1504.42   | 1033.923  |
| NM_002827 | 12879.263 | 12882.914 | NM_01451E | 27294.514 | 28252.465 | AL050186  | 20512.639 | 13160.814 |
| NM_00194E | 816.392   | 1201.004  | AK021868  | 3218.511  | 2997.603  | AK021918  | 6801.778  | 5491.924  |
| BF035425  | 5217.024  | 4596.257  | AK000643  | 60698.137 | 61292.82  | AK021669  | 7665.524  | 7610.666  |
| NM_00160E | 667.789   | 795.987   | NM_018421 | 5690.967  | 5642.702  | AL080113  | 53760.133 | 37142.973 |
| NM_00015E | 30076.869 | 26149.494 | AB014574  | 61973.184 | 61558.094 | AL050083  | 1568.287  | 1398.218  |
| NM_01463E | 3069.986  | 3634.639  | NM_020127 | 2573.493  | 2843.672  | AK022766  | 952.309   | 752.169   |
| AF099740  | 1932.523  | 2723.685  | NM_01562E | 10578.208 | 9516.227  | AL049422  | 9174.153  | 8481.082  |
| NM_006117 | 17338.73  | 18810.197 | AB045116  | 1256.123  | 1242.115  | NM_00009E | 3037.589  | 4263.243  |
| NM_006287 | 555.237   | 631.419   | L49054    | 1143.744  | 1278.491  | NM_00177E | 14799.97  | 13412.039 |
| NM_000118 | 9997.085  | 8509.472  | NM_014727 | 5567.231  | 5968.037  | AB033059  | 2849.147  | 3407.789  |
| NM_00091E | 1028.922  | 1473.605  | BE885010  | 2143.929  | 2476.591  | NM_016484 | 5391.191  | 7192.025  |
| NM_00129E | 52978.582 | 59860.148 | NM_00019E | 621.885   | 745.32    | AK026114  | 1815.358  | 1845.892  |
| BG325046  | 7277.587  | 6573.699  | NM_00294E | 7523.665  | 7715.246  | NM_01445E | 1481.041  | 1830.117  |
| AI351740  | 42046.113 | 31878.451 | AL133649  | 2329.181  | 2329.162  | NM_01468E | 810.011   | 554.127   |
| AA444051  | 37882.297 | 27025.258 | AB018303  | 1932.331  | 2029.287  | AF023130  | 627.903   | 361.592   |
| NM_007164 | 5608.556  | 4031.615  | NM_006454 | 7988.589  | 7896.728  | AK021536  | 15668.764 | 17351.508 |
| BE783826  | 21576.879 | 14178.525 | NM_01584E | 10278.925 | 9617.666  | U31285    | 613.59    | 497.139   |
| X04827    | 2373.063  | 1943.752  | NM_01597E | 31679.035 | 27016.381 | AF079529  | 994.376   | 905.872   |
| H07088    | 13170.416 | 8444.272  | NM_001644 | 725.334   | 840.857   | NM_00260C | 2465.103  | 1912.284  |
| AI004656  | 5116.268  | 3638.139  | NM_01613E | 2424.916  | 2890.846  | NM_00364E | 38862.582 | 25592.631 |
| BC008428  | 551.363   | 583.697   | NM_01800E | 4980.422  | 5446.743  | NM_00666E | 2149.128  | 2056.149  |
| BC020596  | 3383.358  | 1951.95   | NM_01609C | 3184.862  | 3313.919  | NM_00609E | 1890.292  | 1907.965  |
| AF116606  | 51897.082 | 56463.121 | NM_00101E | 58002.52  | 57522.949 | NM_00393E | 1206.729  | 1539.172  |
| X98922    | 8481.279  | 6053.939  | AK024040  | 11155.375 | 11731.416 | NM_012424 | 1235.286  | 1274.571  |
| AK098435  | 11760.568 | 10486.791 | NM_005061 | 10179.857 | 10305.607 | NM_00244E | 4399.388  | 3229.96   |
| AK092872  | 9400.844  | 8091.746  | NM_000997 | 64487.461 | 62901.102 | NM_00086E | 2967.938  | 2538.173  |
| AF230496  | 1978.484  | 1705.294  | AF182417  | 57017.465 | 56665.938 | NM_006651 | 9260.438  | 8013.527  |
| M16801    | 1438.026  | 1407.24   | AL137354  | 38205.344 | 36315.93  | NM_00533E | 14810.771 | 12171.2   |
| NM_003034 | 414.073   | 504.396   | NM_00102E | 62761.168 | 65256.211 | NM_00141E | 13072.854 | 11640.337 |
| NM_013334 | 5346.017  | 6304.096  | AK021571  | 16534.178 | 17950.611 | AF119817  | 59658.105 | 42757.711 |
| AF113125  | 988.076   | 993.734   | AK022178  | 3622.086  | 3986.972  | AL035306  | 4603.303  | 3684.285  |
| AL137675  | 1324.189  | 1204.636  | NM_006011 | 2717.625  | 4407.098  | NM_00423C | 17895.969 | 18691.914 |
| AF141901  | 1014.429  | 1250.984  | L00635    | 6932.125  | 10109.906 | AK024372  | 380.661   | 534.298   |
| NM_00700E | 1877.981  | 2380.428  | NM_002541 | 5896.586  | 6908.041  | NM_01450E | 2251.579  | 3329.376  |

|           |           |           |           |           |           |           |           |           |
|-----------|-----------|-----------|-----------|-----------|-----------|-----------|-----------|-----------|
| AL109708  | 2742.033  | 3251.372  | NM_000056 | 8722.375  | 8884.11   | NM_014655 | 5642.597  | 7012.068  |
| L29143    | 1858.109  | 3077.205  | NM_016311 | 19409.934 | 18344.047 | NM_004395 | 13835.796 | 13711.788 |
| AF234532  | 2792.957  | 4362.473  | NM_001867 | 55825.52  | 55045.656 | NM_006337 | 13929.37  | 14352.433 |
| NM_002418 | 2046.408  | 2578.865  | NM_002300 | 63672.941 | 66547.023 | NM_004507 | 6330.552  | 5382.117  |
| NM_002090 | 2639.149  | 4503.875  | NM_000290 | 16863.699 | 20660.367 | NM_002710 | 39074.605 | 38928.16  |
| NM_004485 | 729.693   | 842.513   | NM_016538 | 9778.497  | 10355.571 | NM_014060 | 11633.73  | 14145.438 |
| NM_012419 | 398.664   | 461.977   | AK023275  | 27522.416 | 29492.465 | NM_004745 | 22657.072 | 21919.668 |
| NM_013296 | 23024.959 | 15768.021 | AJ223352  | 12832.469 | 16525.549 | BQ446064  | 3592.244  | 3822.419  |
| AL117478  | 2591.118  | 1779.845  | NM_012238 | 3582.756  | 4120.092  | AF302502  | 4968.2    | 5238.341  |
| NM_005307 | 2553.856  | 2305.626  | NM_016539 | 21722.127 | 36739.141 | AF274571  | 3315.244  | 3185.948  |
| NM_005958 | 7926.451  | 7288.361  | NM_006807 | 29958.592 | 44596.945 | NM_005445 | 1832.783  | 1836.767  |
| NM_013436 | 1242.794  | 1151.05   | NM_000326 | 1963.988  | 3159.427  | NM_003879 | 4856.042  | 4005.607  |
| AF225426  | 1104.489  | 847.795   | L16464    | 4403.229  | 5560.47   | NM_016052 | 19115.805 | 14471.874 |
| NM_005208 | 4546.985  | 3467.216  | NM_006532 | 31912.188 | 44495.809 | NM_005427 | 2147.565  | 1970.623  |
| NM_000421 | 1316.396  | 1054.44   | U07132    | 28343.436 | 34376.195 | NM_016312 | 1731.604  | 1346.349  |
| AK025687  | 12134.508 | 8907.933  | NM_003436 | 1882.523  | 2697.796  | AF234887  | 1049.254  | 965.485   |
| AF218941  | 2223.127  | 1340.556  | AK027006  | 716.05    | 1029.89   | NM_001776 | 3705.102  | 3238.016  |
| AL137264  | 7996.733  | 5931.979  | AB034691  | 767.598   | 1034.293  | NM_001792 | 1639.278  | 1831.28   |
| NM_002226 | 964.768   | 621.089   | NM_001675 | 2222.262  | 2503.937  | NM_001903 | 770.023   | 710.454   |
| X84370    | 8394.038  | 8365.953  | NM_003422 | 5742.023  | 7878.341  | U87223    | 12514.319 | 9767.011  |
| NM_004039 | 3567.995  | 4215.187  | NM_001451 | 3349.179  | 5259.842  | NM_005857 | 1271.396  | 1256.887  |
| NM_000508 | 1047.518  | 761.986   | NM_014779 | 5140.247  | 7120.814  | NM_002425 | 939.736   | 737.433   |
| AB014558  | 4152.637  | 4054.913  | NM_014446 | 3672.665  | 6390.217  | NM_000425 | 4676.182  | 5031.461  |
| NM_006854 | 24893.389 | 27095.508 | U58096    | 31511.752 | 49122.113 | AK027037  | 1491.655  | 1983.043  |
| NM_004580 | 4364.732  | 3752.918  | NM_016929 | 40209.441 | 53780.285 | NM_003875 | 20807.977 | 22447.426 |
| NM_020387 | 41381.984 | 39073.152 | NM_012323 | 6000.083  | 9109.411  | AF191687  | 7908.583  | 9361.135  |
| NM_007246 | 3907.903  | 3730.272  | NM_006942 | 1166.922  | 1458.611  | NM_003046 | 774.448   | 1034.002  |
| AK026248  | 3155.323  | 3547.511  | NM_018199 | 2704.761  | 3256.679  | NM_000274 | 27771.213 | 27718.094 |
| NM_004578 | 639.482   | 724.4     | NM_013943 | 6488.918  | 9313.943  | NM_000170 | 10880.297 | 10875.111 |
| NM_000647 | 1765.874  | 1469.57   | NM_001639 | 18115.824 | 29246.424 | NM_000281 | 811.019   | 846.625   |
| AB046793  | 661.719   | 462.089   | H39560    | 1373.089  | 1706.834  | AK001295  | 4360.348  | 4258.875  |
| NM_017604 | 8364.348  | 5923.718  | BG534366  | 38761.227 | 37659.566 | NM_006031 | 6745.557  | 6508.928  |
| NM_017738 | 13183.161 | 8418.128  | BG698522  | 54827.566 | 56373.684 | NM_002715 | 10813.562 | 8273.801  |
| NM_016557 | 3690.25   | 2434.081  | AA152346  | 4504.835  | 6647.654  | NM_001020 | 58265.207 | 63545.141 |
| NM_000623 | 5184.476  | 3063.858  | L15189    | 6991.782  | 8931.333  | AB020660  | 3962.582  | 2677.12   |
| AF161348  | 2854.298  | 1780.852  | AB023420  | 39390.957 | 50571.586 | NM_006655 | 55347.496 | 57018.813 |
| NM_018467 | 10546.222 | 7097.534  | BI822179  | 22297.369 | 27296.236 | NM_018051 | 3089.092  | 2568.712  |
| NM_006068 | 3801.279  | 3080.26   | AF022912  | 10431.888 | 13500.538 | NM_015371 | 14420.04  | 12913.73  |
| NM_002704 | 544.964   | 409.56    | AA477428  | 33724.09  | 42384.379 | AB040915  | 6790.282  | 5095.112  |
| U16752    | 477.204   | 436.475   | AA156342  | 4894.965  | 7004.318  | AF147791  | 599.597   | 619.145   |
| NM_000880 | 436.767   | 404.548   | R45594    | 28729.955 | 38969.949 | NM_001328 | 56127.508 | 54558.551 |
| NM_002038 | 5352.552  | 3219.01   | AI143386  | 1466.94   | 1494.485  | NM_005745 | 8004.916  | 6594.151  |
| NM_005729 | 37111.133 | 30162.891 | H46425    | 20691.93  | 30014.285 | NM_006696 | 5132.971  | 5997.562  |
| NM_015493 | 4564.981  | 6092.062  | AI355949  | 2957.631  | 4315.375  | NM_004595 | 21118.031 | 26246.186 |
| NM_003747 | 2500.788  | 3398.696  | AA278152  | 22561.004 | 34547.402 | NM_006037 | 3095.777  | 3864.333  |
| AB037744  | 3658.273  | 3194.469  | H75530    | 8140.947  | 11537.145 | NM_015871 | 16709.369 | 20567.211 |
| NM_001608 | 1132.849  | 971.161   | NM_005036 | 1807.852  | 2935.586  | NM_019037 | 28971.076 | 28773.328 |
| NM_000155 | 19650.598 | 18255.721 | NM_018201 | 12865.71  | 17012.293 | NM_015891 | 9004.995  | 8107.174  |
| NM_014638 | 3187.943  | 3003.557  | NM_014438 | 5395.722  | 8697.748  | NM_006802 | 2658.098  | 2711.326  |
| AF099740  | 1732.954  | 1282.772  | NM_014880 | 26670.293 | 36211.414 | AB037778  | 4697.545  | 4538.86   |
| NM_006117 | 18041.766 | 18453.82  | NM_003764 | 11815.199 | 12432.235 | NM_005066 | 42089.102 | 37136.168 |
| NM_002225 | 2566.217  | 2736.23   | NM_019618 | 796.079   | 675.76    | NM_003085 | 18208.404 | 14389.248 |
| NM_006225 | 830.917   | 997.678   | NM_004829 | 11729.698 | 13475.678 | NM_003753 | 36750.25  | 26957.861 |

|           |           |           |           |           |           |           |           |           |
|-----------|-----------|-----------|-----------|-----------|-----------|-----------|-----------|-----------|
| NM_01541E | 36693.246 | 28511.188 | NM_00679E | 55898.148 | 54274.785 | NM_00622E | 1602.223  | 1065.229  |
| NM_004897 | 4943.148  | 3834.372  | NM_00153E | 48650.547 | 47305.598 | NM_01759C | 6543.958  | 5008.284  |
| NM_00255E | 1683.377  | 1053.087  | X97261    | 3686.98   | 11295.747 | AB011145  | 12773.395 | 8785.062  |
| AF225418  | 3036.298  | 2524.628  | NM_00146E | 1778.874  | 1649.87   | NM_00375C | 50985.809 | 33828.695 |
| NM_00030E | 4289.25   | 3021.563  | NM_00541C | 1496.824  | 1933.031  | M92422    | 11524.614 | 7433.192  |
| NM_00452E | 9926.133  | 8414.541  | D87666    | 59781.598 | 58995.773 | NM_01786E | 7400.468  | 4572.373  |
| AK026381  | 8895.185  | 7583.367  | NM_002921 | 1119.875  | 886.159   | NM_00421E | 698.009   | 1294.41   |
| NM_00245C | 9879.678  | 15992.593 | NM_00131E | 3970.739  | 5188.728  | NM_01815E | 56240.18  | 58893.832 |
| NM_00168E | 2534.516  | 1774.261  | AF286095  | 8276.09   | 10016.416 | NM_00081E | 34203.25  | 34906.371 |
| NM_00070E | 1267.574  | 1120.644  | NM_00087E | 5928.211  | 7832.379  | NM_00251E | 13675.062 | 17269.117 |
| NM_004231 | 58688.02  | 41178.02  | S66407    | 5734.313  | 6758.672  | NM_01742E | 6000.751  | 8181.652  |
| NM_016611 | 289.053   | 302.416   | NM_00425E | 64576.191 | 60263.922 | NM_00152E | 29912.668 | 38791.371 |
| NM_016577 | 734.115   | 823.542   | NM_001981 | 13698.707 | 14662.546 | NM_00088E | 21470.973 | 26023.486 |
| AK023107  | 10052.783 | 8704.421  | NM_00158E | 59168.203 | 55694.363 | AF254086  | 5401.725  | 6993.146  |
| NM_00303E | 391.264   | 513.863   | AK026108  | 52302.535 | 55155.762 | AL390142  | 4925.637  | 5689.755  |
| NM_01333E | 4691.171  | 3661.181  | AF149304  | 1917.441  | 1920.587  | NM_00656E | 5321.158  | 5690.551  |
| AF113125  | 821.908   | 839.048   | NM_01209E | 15878.834 | 17699.164 | AB007930  | 10704.751 | 11062.792 |
| AL137675  | 572.418   | 536.095   | NM_01643E | 649.801   | 756.907   | X76978    | 1625.832  | 1645.537  |
| AF150735  | 13729.172 | 8614.032  | X73079    | 37557.188 | 33891.367 | AJ005273  | 4355.693  | 4449.096  |
| NM_01818E | 3241.26   | 2364.433  | NM_019091 | 1440.13   | 1192.178  | AK021892  | 4387.92   | 3579.262  |
| NM_01238E | 6101.049  | 4392.293  | L07518    | 1091.166  | 1164.849  | NM_01763E | 733.835   | 758.564   |
| BF038366  | 2648.401  | 1697.094  | AF264781  | 3644.211  | 3572.073  | NM_00312E | 45658.234 | 35036.633 |
| NM_00245E | 12712.739 | 8537.203  | NM_00245E | 979.901   | 1021.491  | NM_00343E | 10295.089 | 7041.287  |
| NM_01230E | 773.771   | 523.471   | NM_01612E | 5016.721  | 4506.053  | NM_01833E | 24319.342 | 15763.104 |
| NM_01644C | 30012.102 | 14745.588 | NM_01594E | 12083.605 | 14278.157 | AA193295  | 745.358   | 641.457   |
| NM_00719E | 4460.878  | 2624.97   | NM_00080E | 1322.417  | 1905.666  | NM_01804E | 7981.096  | 6914.678  |
| NM_00031E | 14187.74  | 6917.231  | NM_00655E | 5940.768  | 7162.824  | NM_00648E | 12593.672 | 9974.825  |
| AB002369  | 2490.766  | 1711.149  | NM_014521 | 9197.974  | 12667.041 | AB011115  | 2099.572  | 2370.981  |
| S74620    | 469.29    | 445.792   | NM_00244E | 8603.807  | 9052.295  | NM_00391C | 44916.293 | 29822.682 |
| AF305239  | 2643.489  | 1680.174  | NM_01780E | 1826.099  | 2312.408  | AB007913  | 4135.9    | 3462.334  |
| NM_00282E | 10712.343 | 10436.574 | AK023202  | 5715.842  | 5999.429  | L09080    | 30429.609 | 33934.102 |
| NM_00194E | 987.792   | 952.419   | D63877    | 4718.886  | 5316.915  | NM_00732E | 17627.268 | 19001.176 |
| BF035425  | 4679.224  | 3599.07   | AF131760  | 4389.203  | 4498.271  | AK023080  | 693.467   | 789.732   |
| CY3Cy5    | 4136.299  | 545.066   | NM_01869E | 2381.634  | 2805.946  | NM_00188E | 8393.947  | 12448.815 |
| NM_00417E | 8955.339  | 9992.734  | NM_006461 | 4294.54   | 4764.679  | NM_00446E | 1161.457  | 1556.449  |
| NM_00454E | 30259.785 | 29274.689 | NM_00282E | 5421.637  | 6184.996  | NM_01805E | 40254.258 | 42026.16  |
| AK027120  | 1039.208  | 839.748   | AF159141  | 13763.015 | 13310.243 | NM_00454E | 35487.887 | 45006.402 |
| AB029001  | 2416.149  | 3993.776  | NM_00242C | 718.273   | 903.95    | X69079    | 57826.773 | 62018.207 |
| AB00662E  | 3692.646  | 4807.789  | NM_01645E | 60686.047 | 53653.313 | BI759406  | 49455.633 | 52554.605 |
| AL109717  | 719.44    | 1064.938  | AK022233  | 4565.924  | 4911.75   | R76099    | 19466.709 | 20127.643 |
| AK025473  | 1058.68   | 1146.488  | AK026410  | 33161.992 | 34341.672 | S74445    | 3397.155  | 3443.161  |
| AF146693  | 739.851   | 981.719   | NM_01463E | 10369.646 | 12757.306 | BI763360  | 11274.065 | 10185.654 |
| AF271070  | 24317.58  | 22745.867 | NM_01337E | 46984.488 | 48246.223 | D25538    | 4242.384  | 4089.141  |
| NM_01490E | 927.812   | 1055.892  | AF113208  | 35111.5   | 37914.133 | NM_00036C | 46610.609 | 42036.645 |
| AK055959  | 1607.598  | 1913.233  | NM_00615E | 12138.85  | 11748.356 | D49950    | 1153.844  | 1068.619  |
| AF052141  | 2856.438  | 3650.189  | NM_01216E | 4640.868  | 5081.058  | NM_00184E | 1839.999  | 1323.326  |
| AY007128  | 700.512   | 1248.735  | AK026010  | 1077.942  | 1782.392  | X03635    | 8702.743  | 7067.042  |
| AF052149  | 3635.284  | 5190.071  | NM_004721 | 342.985   | 1096.496  | BC011847  | 58628.453 | 64415.078 |
| AK02558E  | 2705.568  | 3653.467  | AB011156  | 1277.39   | 1710.4    | X03348    | 3303.187  | 3403.229  |
| AL137512  | 537.424   | 619.567   | NM_01807E | 1239.402  | 1278.349  | AF35367E  | 8721.838  | 8787.454  |
| NM_00417E | 9425.968  | 9933.716  | NM_00476C | 21488.172 | 23013.564 | BC002645  | 9904.993  | 7957.558  |
| NM_00454E | 43383.191 | 37608.914 | NM_00675E | 7419.886  | 8506.274  | NM_02113E | 7309.673  | 6604.797  |
| SR1       | 56349.527 | 65516.477 | NM_00680E | 10032.748 | 11799.159 | BC002792  | 9557.973  | 11500.107 |

|           |           |           |           |           |           |           |           |           |
|-----------|-----------|-----------|-----------|-----------|-----------|-----------|-----------|-----------|
| SR3       | 37963.156 | 34404.078 | NM_016929 | 32922.758 | 45014.078 | NM_005847 | 702.824   | 683.063   |
| SR5       | 3472.656  | 4163.157  | NM_012323 | 4999.601  | 5021.125  | NM_002286 | 57003.57  | 63288.449 |
| SR7       | 4982.516  | 36465.684 | NM_006942 | 765.667   | 872.179   | NM_002164 | 1957.816  | 2719.659  |
| SR9       | 18085.449 | 4104.217  | NM_018199 | 1508.644  | 1123.319  | NM_003811 | 21483.352 | 30870.469 |
| CY3Cy5    | 2287.609  | 369.864   | NM_013943 | 4874.636  | 4913.394  | NM_002981 | 14423.996 | 18369.154 |
| L32606    | 895.307   | 1235.715  | NM_001639 | 11369.903 | 12435.971 | NM_001244 | 3974.022  | 4808.124  |
| L05148    | 346.85    | 981.341   | H39560    | 806.286   | 966.281   | NM_012275 | 981.704   | 1472.36   |
| AK091125  | 604.948   | 524.778   | BG534366  | 26721.775 | 19217.266 | NM_006137 | 2931.469  | 3620.607  |
| D16904    | 360.363   | 351.566   | BG698522  | 44549.168 | 47298.82  | NM_016135 | 58421.824 | 62014.121 |
| D16474    | 1569.054  | 1407.737  | AA152346  | 3618.513  | 3795.321  | AL117468  | 6363.884  | 7422.742  |
| AL080072  | 809.262   | 836.304   | L15189    | 4338.108  | 4263.073  | NM_019613 | 3126.176  | 4176.002  |
| AK024898  | 950.343   | 1009.173  | AB023420  | 26823.631 | 25679.822 | NM_005382 | 1292      | 1780.003  |
| AL035301  | 809.003   | 1107.999  | BI822179  | 14765.651 | 13319.759 | AK027086  | 4201.817  | 4783.601  |
| NM_017687 | 4533.144  | 5130.553  | AF022912  | 7036.648  | 6005.561  | AB032997  | 1938.192  | 2150.951  |
| NM_017975 | 5663.539  | 5353.538  | AA477428  | 24538.459 | 23488.127 | AL096857  | 5369.764  | 5576.52   |
| AK025036  | 1802.992  | 2136.506  | AA156342  | 3999.352  | 4202.039  | AB002351  | 650.901   | 647.447   |
| AK024843  | 21896.945 | 29678.893 | R45594    | 20035.342 | 24795.705 | X07203    | 43734.797 | 32880.375 |
| AF074994  | 1467.852  | 1538.305  | AI143386  | 1185.575  | 900.017   | AB040104  | 1445.064  | 1136.176  |
| NM_017670 | 11533.274 | 15345.834 | H46425    | 18509.168 | 15522.709 | NM_003834 | 9662.043  | 8757.844  |
| AK021468  | 835.48    | 806.318   | AI355949  | 2260.599  | 2076.189  | NM_005955 | 14989.915 | 13300.292 |
| BC033020  | 1348.134  | 1487.861  | AA278152  | 15356.484 | 17591.383 | NM_003381 | 3251.354  | 3026.632  |
| NM_004366 | 4271.793  | 6151.416  | H75530    | 5880.707  | 6192.719  | NM_005755 | 3061.206  | 3090.682  |
| AK026168  | 3493.744  | 3303.356  | AK000554  | 2588.297  | 3117.611  | NM_003702 | 43607.422 | 29070.309 |
| AJ296152  | 11847.339 | 11821.835 | NM_006472 | 3980.272  | 5040.97   | NM_000365 | 1838.893  | 2082.368  |
| AK001067  | 3453.963  | 3620.516  | NM_014880 | 19728.549 | 20062.607 | NM_004405 | 3649.169  | 2535.875  |
| AK027088  | 16979.34  | 13647.219 | NM_003764 | 9206.656  | 9355.588  | NM_001988 | 8722.341  | 7222.508  |
| AB037721  | 987.995   | 940.345   | NM_004829 | 8020.287  | 7787.805  | AF073770  | 3831.427  | 4295.954  |
| AK024525  | 905.481   | 1881.397  | NM_006793 | 44910.523 | 44710.875 | AL359401  | 9918.426  | 13152.015 |
| AK024544  | 460.887   | 423.234   | NM_001538 | 40430.871 | 38109.039 | NM_012213 | 2406.68   | 2619.671  |
| AK024924  | 1621.255  | 1690.926  | X97261    | 3912.102  | 11850.064 | NM_016573 | 10836.723 | 12449.114 |
| AK021705  | 3639.042  | 4100.569  | NM_001468 | 1847.654  | 1911.423  | NM_001303 | 26471.902 | 32376.473 |
| NM_016141 | 10436.427 | 13921.702 | NM_005410 | 1361.326  | 1306.707  | M21304    | 897.363   | 1188.497  |
| AL109702  | 1895.075  | 1839.307  | D87666    | 57002.785 | 57566.461 | NM_001975 | 1570.116  | 2037.101  |
| AK025624  | 14808.112 | 19697.568 | NM_002921 | 441.726   | 647.481   | AB040896  | 2507.609  | 3100.662  |
| AK026684  | 1645.605  | 1923.004  | NM_001315 | 3458.306  | 3450.877  | NM_001107 | 6126.811  | 8085.097  |
| AL110125  | 1440.861  | 1901.787  | AF286095  | 7038.374  | 7011.169  | AF084645  | 888.363   | 1065.081  |
| AK022764  | 1628.52   | 1654.414  | NM_000878 | 4842.173  | 5963.688  | AF151851  | 11173.409 | 12507.773 |
| AK002118  | 412.908   | 637.565   | S66407    | 5477.759  | 5540.314  | NM_003471 | 553.558   | 552.918   |
| AJ011594  | 324.388   | 610.136   | NM_016523 | 280.135   | 272.363   | NM_014375 | 533.891   | 466.63    |
| AJ243673  | 236.357   | 432.937   | NM_004258 | 62151.359 | 58945.094 | AF220417  | 2673.698  | 2700.528  |
| X89744    | 566.666   | 552.251   | NM_001981 | 12770.328 | 11603.852 | NM_001122 | 49194.395 | 43344.535 |
| AJ002785  | 896.209   | 1214.457  | NM_001585 | 62988.652 | 56963.992 | NM_004591 | 12783.247 | 11463.035 |
| Z70716    | 551.042   | 599.98    | AK026108  | 42454.465 | 38989.246 | NM_006274 | 828.46    | 518.412   |
| AL049251  | 976.553   | 904.88    | NM_014446 | 2968.641  | 3251.825  | AL133027  | 3955.928  | 3270.718  |
| AK022474  | 20086.148 | 13856.651 | U58096    | 21558.436 | 20200.184 | AB037732  | 3184.215  | 3599.744  |
| AK022392  | 707.999   | 769.735   | NM_016438 | 739.793   | 1042.714  | NM_005767 | 1411.315  | 1253.196  |
| AL117451  | 857.744   | 997.613   | X73079    | 42243.414 | 42076.395 | NM_001837 | 1230.132  | 1476.502  |
| AL049280  | 1620.342  | 1420.575  | NM_019091 | 1036.307  | 644.442   | NM_001835 | 58977.926 | 64273.781 |
| AK025212  | 5097.576  | 4295.199  | L07518    | 1257.942  | 919.248   | BC016029  | 917.266   | 676.99    |
| AB021925  | 863.949   | 920.713   | AF264781  | 3164.251  | 2380.524  | M27487    | 55955.078 | 50092.055 |
| AL157503  | 7820.576  | 7133.489  | NM_002456 | 625.329   | 446.314   | NM_002611 | 4513.763  | 5426.366  |
| AK000053  | 1161.315  | 1102.41   | NM_016124 | 5864.227  | 4797.047  | NM_017417 | 1376.96   | 1507.238  |
| AK000786  | 716.464   | 854.647   | NM_015948 | 11328.099 | 11534.159 | AL133602  | 3268.397  | 3406.959  |

|           |           |           |           |           |           |           |           |           |
|-----------|-----------|-----------|-----------|-----------|-----------|-----------|-----------|-----------|
| AK000935  | 2003.812  | 2340.451  | NM_000804 | 1174.838  | 1335.644  | AF037219  | 8999.802  | 11458.905 |
| AK021458  | 1500.264  | 1568.771  | NM_006555 | 5875.655  | 6104.629  | AK026075  | 892.672   | 1070.141  |
| NM_017674 | 1056.195  | 1097.208  | NM_014521 | 13599.15  | 21856.449 | NM_000251 | 6818.854  | 8904.401  |
| AK000811  | 801.425   | 921.236   | NM_002445 | 10335.076 | 10068.908 | AF118071  | 651.08    | 908.139   |
| AK000966  | 1973.453  | 2089.906  | NM_017809 | 1946.373  | 1816.04   | NM_006038 | 7548.008  | 9056.507  |
| NM_018630 | 10985.005 | 22083.541 | AK023202  | 5214.125  | 4815.396  | NM_002485 | 509.781   | 299.062   |
| AF040097  | 1395.233  | 1035.687  | D63877    | 4601.02   | 3872.458  | AB011133  | 7607.406  | 8295.573  |
| NM_020436 | 1481.717  | 1527.651  | AF131760  | 3678.799  | 3313.124  | NM_017572 | 52097.969 | 45633.68  |
| AK024182  | 3898.883  | 4711.004  | NM_018698 | 2113.456  | 2258.453  | NM_018444 | 3951.517  | 3990.202  |
| NM_006913 | 13042.106 | 17096.338 | NM_006461 | 3903.506  | 3703.266  | NM_000252 | 2826.149  | 2767.834  |
| AF177229  | 355.817   | 407.073   | NM_018201 | 7351.253  | 7282.989  | NM_006947 | 15317.478 | 12182.868 |
| NM_018565 | 605.311   | 645.546   | NM_014438 | 2119.669  | 2219.839  | NM_017917 | 5043.295  | 4103.401  |
| NM_000495 | 15019.285 | 23083.006 | AF159141  | 16983.395 | 20066.941 | NM_004090 | 10122.711 | 9485.691  |
| AK001880  | 8261.908  | 17076.992 | NM_002420 | 646.044   | 764.857   | NM_014634 | 15313.371 | 11258.574 |
| AF156166  | 4471.517  | 6436.684  | NM_016458 | 54452.156 | 52612.523 | NM_001919 | 43381.922 | 34631.516 |
| NM_014373 | 5213.923  | 6421.396  | AK022233  | 4697.378  | 5121.747  | BC031485  | 3405.837  | 3126.201  |
| NM_014206 | 43070.414 | 32917.801 | AK026410  | 30109.268 | 25729.697 | NM_004092 | 7187.229  | 6124.746  |
| NM_001651 | 1400.411  | 1445.04   | NM_014637 | 10517.473 | 10847.365 | X15624    | 2786.94   | 2458.565  |
| L32786    | 1630.499  | 1402.15   | NM_013379 | 46162.938 | 44076.336 | AK023080  | 678.827   | 1137.562  |
| U03239    | 412.948   | 346.805   | AF113208  | 34688.012 | 37239.984 | NM_001886 | 8966.473  | 11937.376 |
| AL355720  | 6296.034  | 6696.782  | NM_006153 | 12186.179 | 11583.534 | NM_004467 | 1201.785  | 2000.561  |
| AK002023  | 1110.811  | 1314.531  | NM_012164 | 4653.796  | 4954.01   | NM_005622 | 469.927   | 902.858   |
| AF150156  | 415.961   | 575.565   | AK026010  | 785.387   | 1013.018  | NM_018058 | 34609.527 | 36682.711 |
| NM_016464 | 1008.516  | 998.187   | NM_004721 | 585.74    | 572.32    | NM_004548 | 29651.17  | 36026.512 |
| L40402    | 460.845   | 556.21    | AB011156  | 1837.579  | 1975.439  | X69079    | 55967.465 | 62600.688 |
| Z36780    | 4182.483  | 6086.43   | NM_018079 | 963.592   | 1051.874  | BI759406  | 49702.168 | 48671.641 |
| AK022403  | 2454.61   | 3589.283  | NM_004760 | 17607.607 | 12678.54  | R76099    | 16975.104 | 16948.85  |
| AK022955  | 12837.215 | 12439.578 | NM_006752 | 7471.918  | 6614.447  | S74445    | 2878.692  | 3075.119  |
| AF131741  | 731.794   | 691.89    | NM_006809 | 13617.273 | 20508.779 | BI763360  | 9891.776  | 9889.539  |
| AK021760  | 1766.061  | 1332.592  | AF149304  | 1708.664  | 1731.586  | D25538    | 3734.114  | 3930.831  |
| AL137408  | 3646.115  | 7001.46   | NM_012095 | 12587.988 | 11539.663 | NM_000360 | 45627.398 | 47846.488 |
| AF054995  | 6042.312  | 9579.081  | NM_006942 | 1266.376  | 1183.295  | D49950    | 1254.594  | 1369.58   |
| AL080176  | 7383.905  | 8303.153  | NM_018199 | 1816.172  | 1422.678  | NM_001848 | 1740.181  | 1803.892  |
| AK023627  | 5345.98   | 5126.839  | NM_013943 | 5001.346  | 4512.974  | X03635    | 8138.853  | 7746.38   |
| AK025949  | 1246.352  | 1610.041  | NM_001639 | 13210.308 | 15116.002 | BC011847  | 53314.488 | 62547.715 |
| Y10259    | 8562.209  | 9350.947  | H39560    | 846.036   | 1279.05   | X03348    | 2411.051  | 2129.329  |
| AK021725  | 7031.036  | 7603.979  | BG534366  | 25973.684 | 14621.358 | AF353674  | 7354.138  | 6860.404  |
| AF119893  | 830.649   | 750.643   | BG698522  | 46504.684 | 46032.684 | BC002645  | 9936.389  | 7942.585  |
| NM_002408 | 9007.938  | 8766.332  | AA152346  | 3209.366  | 3191.261  | NM_021138 | 8630.83   | 6735.431  |
| AK024282  | 2557.353  | 1722.663  | L15189    | 4605.042  | 3851.158  | BC002792  | 9596.455  | 9305.755  |
| AF085838  | 15382.325 | 11820.245 | AB023420  | 40633.043 | 56978.246 | NM_001523 | 1856.473  | 1504.109  |
| NM_018277 | 615.754   | 748.016   | BI822179  | 13209.496 | 10587.891 | NM_017423 | 824.59    | 1136.436  |
| AF014455  | 1287.2    | 1294.414  | AF022912  | 7772.147  | 6370.804  | Z70705    | 1245.186  | 673.867   |
| AF086335  | 1208.371  | 1324.195  | AA477428  | 25992.051 | 24726.668 | NM_003811 | 22472.188 | 33507.031 |
| AL355741  | 578.397   | 681.003   | AA156342  | 3896.34   | 3457.091  | NM_002981 | 14903.951 | 18866.168 |
| AB011118  | 11244.854 | 11031.662 | R45594    | 20064.473 | 22920.049 | NM_001244 | 4729.293  | 7852.362  |
| S66666    | 948.05    | 1106.712  | AI143386  | 1457.947  | 1715.72   | NM_012275 | 847.204   | 1077.801  |
| AK021476  | 846.536   | 752.589   | H46425    | 22824.287 | 20219.219 | NM_006137 | 3047.841  | 3605.534  |
| NM_015376 | 19506.602 | 20996.941 | AI355949  | 2753.161  | 2546.3    | NM_016138 | 53557.996 | 60925.602 |
| NM_001176 | 2617.882  | 4696.379  | AA278152  | 14906.433 | 14926.271 | AL117468  | 10548.582 | 12492.901 |
| NM_013341 | 1455.42   | 1174.9    | H75530    | 5649.957  | 5369.15   | NM_019613 | 12465.927 | 14581.432 |
| NM_016536 | 979.041   | 836.151   | AK000554  | 2581.188  | 2411.901  | NM_005382 | 1739.58   | 1925.509  |
| NM_004066 | 1225.005  | 1035.492  | NM_006472 | 4176.154  | 4342.806  | AK027086  | 5914.172  | 8189.825  |

|           |           |           |           |           |           |           |           |           |
|-----------|-----------|-----------|-----------|-----------|-----------|-----------|-----------|-----------|
| NM_004941 | 7148.464  | 6795.773  | NM_002826 | 4914.096  | 4924.069  | AB032997  | 1940.844  | 2659.638  |
| AF151831  | 5079.759  | 5120.606  | X97261    | 4647.139  | 12210.591 | AL096857  | 6560.733  | 7448.55   |
| AB011121  | 1136.295  | 1184.558  | NM_001468 | 1805.208  | 2202.127  | AB002351  | 771.184   | 530.819   |
| AF083255  | 11178.338 | 11167.272 | NM_005410 | 1431.739  | 1391.713  | X07203    | 48265.367 | 43398.484 |
| AK022605  | 1367.812  | 1979.376  | D87666    | 58845.051 | 55416.395 | AB040104  | 1513.905  | 1575.624  |
| AL049955  | 28288.305 | 27443.111 | NM_002921 | 517.508   | 416.756   | NM_003834 | 10690.179 | 11913.096 |
| AF155654  | 7647.276  | 8989.943  | NM_001315 | 3316.342  | 3158.155  | NM_005955 | 14976.849 | 12796.983 |
| AF088044  | 948.885   | 1001.583  | AF286095  | 7459.87   | 6500.782  | NM_003381 | 3189.928  | 3109.068  |
| AK000028  | 4786.536  | 5150.683  | NM_000878 | 4848.688  | 5027.96   | NM_005755 | 3097.958  | 2576.431  |
| NM_013320 | 55027.488 | 57795.645 | S66407    | 5813.781  | 5804.016  | NM_003702 | 43222.988 | 31384.658 |
| AJ245902  | 1817.62   | 1716.2    | NM_004258 | 58016.84  | 58067.055 | NM_000365 | 2019.328  | 2005.186  |
| AL050039  | 1104.295  | 817.842   | NM_001981 | 12997.06  | 12111.635 | NM_004405 | 3485.699  | 1976.38   |
| AF009316  | 1197.461  | 1405.148  | NM_014654 | 3159.305  | 2757.481  | NM_001988 | 11210.353 | 8998.509  |
| BE816678  | 943.168   | 1037.102  | NM_001585 | 59978.695 | 64720.855 | L09080    | 16104.291 | 11879.723 |
| AF087987  | 2318.395  | 2313.879  | AK026108  | 42523.863 | 47911.82  | NM_007325 | 12331.882 | 11062.752 |
| Z36840    | 590.54    | 635.342   | NM_006379 | 12726.979 | 11874.176 | NM_012213 | 2415.808  | 2914.266  |
| AK021723  | 662.433   | 631.605   | BF571428  | 27498.59  | 25802.24  | NM_016573 | 10980.734 | 11778.212 |
| H09474    | 1210.462  | 1220.69   | AB037723  | 55510.527 | 49870.203 | NM_001303 | 28113.279 | 33669.367 |
| AB002368  | 18579.283 | 17502.121 | NM_006245 | 6595.008  | 5683.825  | M21304    | 945.055   | 756.069   |
| AL360263  | 57024.91  | 60882.371 | NM_004315 | 2061.495  | 2058.162  | NM_001975 | 1494.173  | 1662.831  |
| BC012757  | 2431.465  | 2766.188  | NM_014445 | 2653.25   | 2994.39   | AB040896  | 2034.673  | 2537.232  |
| M96686    | 1197.736  | 1803.34   | U58096    | 21462.291 | 20712.908 | NM_001107 | 6418.039  | 8456.8    |
| NM_004062 | 7538.521  | 6295.067  | NM_016929 | 31106.65  | 28533.775 | AF084645  | 810.404   | 1308.202  |
| NM_005883 | 882.702   | 747.858   | NM_012323 | 3670.337  | 4007.486  | AF151851  | 13029.347 | 15893.88  |
| NM_004445 | 3484.057  | 2397.875  | NM_003054 | 6370.641  | 7735.642  | NM_003471 | 520.695   | 1081.598  |
| NM_014591 | 7994.183  | 8321.17   | NM_003042 | 797.978   | 1129.459  | NM_014375 | 396.027   | 345.392   |
| NM_014592 | 1151.664  | 1268.894  | NM_004790 | 488.885   | 594.811   | AF220417  | 4328.1    | 4953.21   |
| NM_001945 | 585.825   | 736.241   | NM_002219 | 10800.47  | 8545.883  | NM_001122 | 45338.051 | 53210.637 |
| NM_020035 | 1258.598  | 1147.798  | AF182404  | 10151.056 | 10126.949 | NM_004591 | 14491.127 | 15830.651 |
| NM_006653 | 1754.046  | 1768.247  | NM_000804 | 1239.384  | 1141.433  | NM_006274 | 522.555   | 420.638   |
| NM_014442 | 809.315   | 768.784   | NM_006555 | 5952.357  | 5070.796  | AL133027  | 3290.108  | 4019.613  |
| AB002313  | 1200.666  | 1483.615  | NM_014521 | 9006.546  | 8533.74   | AB037732  | 3133.992  | 2922.902  |
| AB011167  | 7161.762  | 7303.627  | NM_002445 | 9785.029  | 8998.03   | NM_005767 | 1435.472  | 1216.784  |
| NM_005405 | 605.593   | 656.64    | NM_017805 | 1975.659  | 1694.797  | NM_001837 | 1280.178  | 1039.979  |
| NM_000208 | 2158.249  | 2031.698  | AK023202  | 5743.483  | 4972.738  | NM_001835 | 54621.887 | 62473.734 |
| NM_002185 | 19625.578 | 18490.871 | D63877    | 4775.018  | 4396.096  | BC016029  | 1459.124  | 1201.962  |
| AK027119  | 8782.125  | 7899.327  | AF131760  | 4572.718  | 4198.824  | M27487    | 51217.773 | 51650.766 |
| AB037727  | 5659.517  | 5294.48   | NM_018698 | 2248.653  | 2287.192  | NM_002285 | 53865.777 | 59477.027 |
| NM_005425 | 582.452   | 838.989   | NM_006461 | 3711.835  | 4130.391  | NM_002164 | 1843.688  | 1684.043  |
| NM_004763 | 1466.406  | 1064.301  | NM_018201 | 9611.216  | 10365.759 | NM_017417 | 1655.358  | 1168.501  |
| NM_014063 | 8001.126  | 8587.146  | NM_014438 | 3733.869  | 4001.735  | AL133602  | 3458.892  | 3367.926  |
| D86964    | 11698.6   | 9164.919  | NM_014880 | 20613.752 | 19468.859 | AF037219  | 8450.557  | 9794.727  |
| AL049801  | 2295.021  | 1968.823  | NM_003764 | 7935.361  | 6025.259  | AK026075  | 982.71    | 1202.692  |
| NM_016395 | 16638.725 | 14461.52  | NM_004829 | 8058.542  | 8702.519  | NM_000251 | 7028.778  | 9398.986  |
| NM_003152 | 3527.848  | 3215.75   | NM_006793 | 47869.957 | 51170.551 | AF118071  | 808.158   | 1026.473  |
| NM_006342 | 6228.806  | 8382.157  | NM_001538 | 27456.58  | 21976.826 | NM_006035 | 7444.415  | 9190.418  |
| NM_016395 | 4280.987  | 5705.224  | NM_004428 | 750.85    | 677.225   | NM_002485 | 490.205   | 479.524   |
| NM_005685 | 4612.559  | 3788.144  | NM_006805 | 9310.546  | 8732.591  | AB011133  | 7918.698  | 10616.072 |
| NM_005552 | 25745.523 | 21852.479 | AF149304  | 2722.606  | 2499.11   | NM_017572 | 50021.227 | 56901.172 |
| NM_006717 | 6121.049  | 4980.979  | NM_012095 | 15253.971 | 14130.902 | NM_018444 | 4925.854  | 4738.369  |
| AL109786  | 3906.126  | 4586.089  | NM_016438 | 633.198   | 529.374   | NM_000252 | 3027.268  | 3762.567  |
| AK026479  | 10282.33  | 8815.426  | X73079    | 38812.367 | 31389.518 | NM_006947 | 20221.346 | 21009.98  |
| AK022860  | 8469.129  | 7597.376  | NM_019091 | 1260.175  | 788.76    | NM_017917 | 5700.779  | 5243.66   |

|           |           |           |           |           |           |           |           |           |
|-----------|-----------|-----------|-----------|-----------|-----------|-----------|-----------|-----------|
| X60188    | 25280.379 | 23190.105 | L07518    | 1221.034  | 896.838   | NM_00409C | 10396.541 | 9589.543  |
| NM_005977 | 4394.942  | 3890.668  | AF264781  | 3238.141  | 2746.301  | NM_014634 | 14995.846 | 11243.836 |
| NM_002747 | 542.249   | 465.04    | NM_002456 | 398.528   | 435.296   | NM_00191C | 43539.434 | 32151.441 |
| NM_00626E | 24366.324 | 20361.084 | AK024215  | 10446.77  | 9109.609  | BC031485  | 4459.811  | 3539.477  |
| NM_00312E | 1723.987  | 1430.49   | AB044661  | 5683.939  | 5268.183  | NM_00409Z | 12670.454 | 11756.608 |
| NM_00605E | 6163.581  | 4771.118  | NM_00060E | 47136.859 | 47347.266 | X15624    | 2795.812  | 2410.281  |
| NM_000347 | 604.352   | 377.783   | NM_016124 | 5483.626  | 4570.825  | AF073770  | 1147.333  | 834.673   |
| M13452    | 1150.249  | 1308.944  | NM_019079 | 1581.165  | 1202.721  | AL359401  | 9558.737  | 12212.902 |
| AF082075  | 2848.478  | 3337.474  | U53530    | 6336.42   | 6160.574  | NM_004467 | 1344.648  | 1820.427  |
| NM_016114 | 3627.621  | 2575.656  | NM_00659E | 2089.338  | 2036.833  | NM_00562Z | 325.669   | 806.735   |
| AY007114  | 1372.44   | 1405.581  | NM_01594E | 10863.216 | 11083.688 | NM_01805E | 37289.555 | 38350.582 |
| AB000895  | 1711.167  | 1336.59   | AK000554  | 2395.718  | 2589.27   | NM_00454E | 33814.73  | 40411.059 |
| X80031    | 1205.222  | 1124.416  | NM_00647Z | 4257.563  | 3856.592  | X69079    | 55375.922 | 60152.941 |
| AF019382  | 479.657   | 362.135   | NM_00282E | 4253.247  | 3523.605  | BI759406  | 51990.684 | 53103.258 |
| NM_015601 | 2357.558  | 2349.216  | AF159141  | 13160.285 | 9547.627  | R76099    | 20132.867 | 19080.594 |
| NM_00178C | 34001.484 | 54668.703 | NM_00242C | 935.614   | 664.225   | S74445    | 3072.253  | 3409.821  |
| AJ277442  | 1421.574  | 1255.583  | NM_01645E | 59338.836 | 54155.445 | BI763360  | 10410.741 | 12009.275 |
| NM_00456E | 5254.985  | 4188.137  | AK022233  | 4439.319  | 4525.482  | D25538    | 3844.959  | 4855.205  |
| AF089088  | 2787.369  | 2575.358  | AK026410  | 32924.684 | 33123.418 | NM_00036C | 48368.129 | 56304.453 |
| L07557    | 8564.326  | 8269.154  | NM_014637 | 15034.394 | 24132.885 | D49950    | 1199.529  | 1910.983  |
| NM_00279E | 50264.168 | 39101.613 | NM_013379 | 52960.449 | 52041.379 | NM_00184E | 1697.305  | 2518.015  |
| D78514    | 14189.907 | 13270.842 | AF113208  | 35843.707 | 33840.328 | X03635    | 10122.619 | 15126.463 |
| AK021665  | 2493.103  | 2266.525  | NM_00615Z | 12709.124 | 13189.994 | BC011847  | 50257.344 | 61075.609 |
| NM_01336E | 1618.473  | 1546.343  | NM_012164 | 5784.025  | 11087.282 | X03348    | 3274.143  | 3810.995  |
| NM_002787 | 43874.363 | 34827.711 | AK026010  | 1498.428  | 2041.714  | AF353674  | 7830.257  | 7458.704  |
| U95006    | 21239.055 | 18094.641 | NM_004721 | 615.35    | 820.422   | BC002645  | 11087.315 | 8433.202  |
| NM_003347 | 7172.081  | 7158.542  | AB011156  | 1740.132  | 1618.475  | NM_02113E | 9770.217  | 7067.708  |
| AF273051  | 2315.832  | 2051.905  | NM_018079 | 987.901   | 1091.909  | BC002792  | 10013.888 | 10708.061 |
| NM_01451E | 940.283   | 920.936   | NM_00476C | 17910.834 | 15725.398 | NM_00152Z | 2234.182  | 1380.165  |
| AK021868  | 2755.619  | 2060.793  | NM_00675Z | 7613.187  | 6925.213  | NM_01742Z | 2452.055  | 1945.945  |
| AK000643  | 51830.543 | 59078.645 | CY3Cy5    | 1648.368  | 157.037   | Z70705    | 1911.096  | 1281.522  |
| NM_018421 | 7366.881  | 6455.894  | NM_02100E | 832.095   | 669.01    | NM_002611 | 2191.196  | 1384.084  |
| AB014574  | 13842.835 | 15059.799 | SB        | 1491.01   | 1540.289  | NM_00538Z | 1725.486  | 2391.308  |
| NM_020127 | 3903.622  | 3996.793  | AF086342  | 661.685   | 1027.05   | AK027086  | 6034.546  | 7839.561  |
| NM_01562Z | 13492.884 | 13654.02  | AF086451  | 447.472   | 641.447   | AB032997  | 2042.653  | 2589.25   |
| L49054    | 1669.999  | 1429.773  | AF086310  | 490.453   | 916.038   | AL096857  | 6963.149  | 7653.768  |
| NM_014727 | 2458.036  | 2068.632  | AF086387  | 1034.262  | 1046.723  | AB002351  | 819.353   | 876.285   |
| BE885010  | 938.141   | 860.442   | AL389941  | 1458.498  | 1491.133  | X07203    | 49816.809 | 46270.289 |
| NM_00019Z | 1018.529  | 1292.468  | AB037756  | 2235.027  | 2290.247  | AB040104  | 1519.283  | 2042.793  |
| NM_00294Z | 2512.715  | 4226.646  | AK001853  | 4267.696  | 3634.181  | NM_003834 | 11488.675 | 15495.437 |
| AL133649  | 3601.294  | 3163.066  | AK025071  | 913.977   | 783.856   | NM_00595E | 15500.46  | 17005.965 |
| AB018303  | 1786.306  | 3407.272  | AK021888  | 808.643   | 897.78    | NM_003381 | 3638.737  | 4697.086  |
| NM_006454 | 12492.967 | 22291.957 | AK022848  | 7487.669  | 5967.155  | NM_00575E | 3565.721  | 4192.816  |
| NM_01584E | 7015.478  | 7833.977  | AL049957  | 1428.366  | 1104.609  | NM_00370Z | 45292.094 | 44020.93  |
| NM_01597Z | 41970.328 | 36109.059 | NM_02100E | 858.925   | 709.578   | NM_00036E | 2549.833  | 3582.761  |
| NM_001644 | 1201.094  | 1682.033  | SR2       | 30663.5   | 28049.195 | NM_016351 | 4696.279  | 7545.02   |
| NM_01613Z | 3859.733  | 3671.924  | SR4       | 10591.122 | 9365.638  | NM_00440E | 3111.449  | 3067.466  |
| NM_01800E | 4943.113  | 4358.649  | SR6       | 1218.762  | 1043.196  | NM_00198E | 14887.544 | 13858.874 |
| NM_01609C | 3742.547  | 2782.437  | SR8       | 4531.793  | 12090.27  | NM_00606C | 3436.953  | 3593.866  |
| NM_00101Z | 55534.152 | 56962.699 | SR10      | 14863.667 | 4292.148  | NM_005667 | 6523.781  | 6456.267  |
| AK024040  | 15018.168 | 11025.04  | CY3Cy5    | 1096.991  | 136.95    | NM_00630E | 2278.752  | 1552.085  |
| NM_005061 | 14399.473 | 10503.218 | AF086063  | 1414.939  | 1116.962  | NM_00006C | 1060.82   | 825.165   |
| NM_000997 | 57312.461 | 62479.977 | AF086098  | 1969.813  | 1832.334  | NM_00958E | 999.214   | 1058.239  |



|           |           |           |           |           |           |           |           |           |
|-----------|-----------|-----------|-----------|-----------|-----------|-----------|-----------|-----------|
| AF182417  | 58586.074 | 61764.859 | AF086076  | 637.902   | 576.501   | L09080    | 29851.441 | 23912.264 |
| AL137354  | 49566.973 | 34895.691 | AL833393  | 2391.999  | 2376.341  | NM_007326 | 19320.891 | 16070.406 |
| NM_001023 | 54016.281 | 63860.469 | AF088005  | 2659.858  | 2457.098  | AK023080  | 933.134   | 788.962   |
| AK021571  | 26967.217 | 20430.674 | AF086096  | 5282.996  | 4977.014  | NM_001886 | 7159.592  | 8893.822  |
| AK022178  | 1758.445  | 1551.636  | AL390132  | 655.354   | 627.708   | D83782    | 11608.958 | 12732.526 |
| NM_006011 | 1038.768  | 917.4     | NM_017933 | 19645.822 | 18585.826 | NM_002078 | 5797.833  | 7662.083  |
| L00635    | 1620.247  | 1591.115  | NM_017819 | 7891.88   | 6171.809  | NM_000287 | 4671.173  | 5654.738  |
| NM_002541 | 5652.108  | 6812.425  | NM_014803 | 1434.422  | 973.26    | NM_001656 | 3599.538  | 4574.343  |
| NM_000056 | 13423.432 | 13429.787 | AK024956  | 1190.152  | 944.402   | AF091033  | 2607.665  | 2603.092  |
| NM_016311 | 28812.82  | 25959.455 | AF147386  | 1444.659  | 1257.538  | NM_001122 | 52608.938 | 59414.324 |
| NM_001867 | 51633.531 | 56464.211 | AF273052  | 10620.566 | 7277.988  | NM_004591 | 17430.816 | 20206.891 |
| NM_002300 | 50006.539 | 65235.637 | NM_017943 | 6615.299  | 4344.689  | NM_006274 | 703.625   | 1118.114  |
| NM_000290 | 8047.456  | 11379.948 | AF147383  | 2506.849  | 1770.823  | AL133027  | 4415.094  | 5624.192  |
| NM_016538 | 5092.356  | 5188.885  | AK025682  | 1575.202  | 1112.802  | AB037732  | 3417.71   | 4874.391  |
| AK023275  | 14900.413 | 13783.592 | NM_013352 | 3062.463  | 7952.329  | NM_005767 | 1283.493  | 1448.254  |
| AJ223352  | 10627.894 | 10983.847 | NM_016478 | 22803.703 | 14806.522 | NM_001837 | 1225.566  | 1593.005  |
| NM_012238 | 4698.47   | 4946.689  | AL389986  | 5967.2    | 4162.84   | NM_001836 | 57743.32  | 64057.805 |
| NM_016536 | 20524.025 | 22682.24  | AF088052  | 1827.803  | 1075.33   | BC016029  | 1749.153  | 1779.613  |
| NM_006807 | 21603.15  | 19239.557 | AK027155  | 12271.778 | 9892.767  | M27487    | 53894.363 | 56666.973 |
| NM_000326 | 619.889   | 402.763   | AF221846  | 899.738   | 754.516   | NM_002286 | 54760.566 | 60514.914 |
| L16464    | 789.06    | 721.975   | AF264626  | 622.285   | 1141.633  | NM_002164 | 2339.717  | 2759.942  |
| NM_006532 | 3105.504  | 2659.515  | AK027219  | 532.746   | 682.264   | NM_003811 | 21673.895 | 27235.16  |
| U07132    | 9057.283  | 7718.171  | AK024528  | 24051.561 | 21229.873 | NM_002981 | 16996.791 | 16626.32  |
| NM_003436 | 1414.237  | 1235.157  | NM_015370 | 7615.577  | 7518.568  | NM_001244 | 5335.104  | 4832.489  |
| AK027006  | 405.905   | 505.709   | AF085917  | 1593.796  | 1878.511  | NM_012275 | 1056.781  | 1277.665  |
| AB034691  | 433.137   | 371.638   | AF085989  | 1410.317  | 1322.893  | NM_006137 | 2729.515  | 2116.458  |
| NM_001675 | 1505.925  | 1545.018  | AL360139  | 63151.352 | 56260.746 | NM_016136 | 54049.738 | 54568.801 |
| NM_003422 | 2961.2    | 2549.231  | AF075110  | 4135.375  | 2271.365  | AL117468  | 6378.904  | 4247.633  |
| NM_001451 | 1405.804  | 1115.748  | AL137323  | 709.215   | 666.404   | NM_019613 | 8410.782  | 9716.004  |
| NM_014779 | 3837.683  | 3095.129  | AL137494  | 5160.646  | 3314.807  | BC031485  | 5367.072  | 5510.969  |
| NM_014446 | 689.728   | 965.468   | AL162037  | 5810.582  | 3500.332  | NM_004092 | 13211.633 | 14380.04  |
| U58096    | 27443.75  | 34286.809 | AL390150  | 1431.316  | 1189.563  | X15624    | 3159.805  | 3659.007  |
| NM_016929 | 10516.272 | 16889.979 | AL137575  | 418.932   | 485.918   | AF073770  | 4153.733  | 4841.257  |
| NM_012323 | 1510.225  | 1870.341  | NM_002761 | 955.901   | 768.04    | AL359401  | 10746.347 | 14485.592 |
| NM_006942 | 768.126   | 776.45    | AK021962  | 527.96    | 389.194   | NM_012213 | 2582.78   | 2569.113  |
| NM_018196 | 2187.122  | 2052.031  | AK056674  | 1687.047  | 1450.745  | NM_016573 | 12345.731 | 13046.541 |
| NM_013943 | 1682.105  | 2822.594  | AK022856  | 754.966   | 878.378   | NM_001303 | 29587.16  | 40112.809 |
| NM_001636 | 23686.996 | 35308.188 | AK022042  | 942.701   | 1055.488  | M21304    | 1084.83   | 975.518   |
| H39560    | 688.548   | 708.371   | AL117588  | 733.466   | 925.339   | NM_001979 | 1557.635  | 1726.139  |
| BG534366  | 32012.609 | 22657.207 | AK024653  | 37607.32  | 35553.445 | AB040896  | 2491.283  | 2993.134  |
| BG698522  | 2351.159  | 2239.608  | AF103907  | 1271.8    | 1343.843  | NM_001107 | 6794.131  | 9227.396  |
| AA152346  | 1296.194  | 1292.761  | AF094508  | 1288.661  | 1620.663  | AF084645  | 909.711   | 899.401   |
| L15189    | 4694.494  | 3600.417  | AF161351  | 1805.559  | 1491.768  | AF151851  | 15326.423 | 16645.926 |
| AB023420  | 19324.977 | 16329.062 | AF257098  | 487.056   | 422.507   | NM_005176 | 2191.769  | 2345.963  |
| BI822179  | 15519.002 | 12147.493 | AF111782  | 6971.173  | 4917.797  | NM_003636 | 5834.917  | 7717.661  |
| AF022912  | 7746.21   | 6439.208  | AF151530  | 3035.905  | 1994.824  | NM_002234 | 6066.668  | 6520.286  |
| AA477428  | 20930.018 | 18237.424 | AK021991  | 668.681   | 579.757   | NM_003471 | 636.349   | 535.958   |
| AA156342  | 3904.153  | 3402.371  | AK022093  | 5000.091  | 2767.977  | NM_000701 | 6233.088  | 5282.614  |
| R45594    | 23666.939 | 25454.846 | AK022232  | 418.012   | 423.141   | AB022696  | 33205.27  | 23120.504 |
| AI143386  | 1035.616  | 706.76    | AK022376  | 1339.717  | 1097.442  | AF137372  | 5016.285  | 3691.943  |
| H46425    | 1411.512  | 1174.035  | AK022005  | 893.009   | 565.405   | AF220417  | 3647.54   | 3177.267  |
| AI355949  | 1576.554  | 1430.286  | AK022137  | 1059.311  | 575.85    | NM_001523 | 2084.538  | 2325.566  |
| AA278152  | 20876.76  | 21810.684 | AK022272  | 3777.618  | 2442.966  | NM_017423 | 2455.059  | 2416.943  |

|           |           |           |           |           |           |           |           |           |
|-----------|-----------|-----------|-----------|-----------|-----------|-----------|-----------|-----------|
| H75530    | 8352.984  | 7536.699  | AF279780  | 39952.359 | 27479.225 | Z70705    | 1684.413  | 1527.809  |
| NM_00503E | 1962.56   | 1595.12   | AK022510  | 2138.136  | 2248.813  | NM_002611 | 4096.146  | 4597.587  |
| NM_018201 | 5224.29   | 6050.44   | AK023878  | 1186.439  | 1713.89   | NM_017417 | 1556.325  | 1472.368  |
| NM_01443E | 1305.535  | 2481.881  | AK021851  | 1107.256  | 1398.465  | AL133602  | 3462.361  | 3661.486  |
| NM_01488C | 742.302   | 1099.85   | L37717    | 1697.749  | 2233.572  | AF037219  | 9425.664  | 9391.136  |
| NM_003764 | 7897.386  | 6858.61   | AJ131609  | 5630.498  | 6418.542  | AK026075  | 931.782   | 1006.282  |
| NM_01961E | 266.868   | 719.243   | BC019280  | 5026.958  | 5081.47   | NM_000251 | 7007.286  | 11246.614 |
| NM_00679E | 44268.09  | 43793.484 | AF086498  | 855.224   | 861.461   | AF118071  | 894.904   | 857.724   |
| NM_00153E | 1834.748  | 1863.778  | AK000687  | 949.82    | 1184.484  | NM_00603E | 8193.753  | 7860.147  |
| X97261    | 7160.095  | 19739.971 | AF079567  | 1914.236  | 1643.695  | NM_00248E | 431.569   | 383.213   |
| NM_00146E | 1007.755  | 1077.064  | AL049311  | 1120.769  | 1148.335  | AB011133  | 6494.154  | 6725.292  |
| D87666    | 50493.141 | 50891.578 | AK000016  | 5379.021  | 4574.819  | NM_01757E | 50195.191 | 51497.988 |
| NM_002921 | 668.005   | 519.154   | AK023367  | 1935.736  | 1582.517  | NM_018444 | 4285.801  | 3324.466  |
| NM_00131E | 3650.282  | 3857.251  | AL080209  | 2177.679  | 2101.008  | NM_00025E | 2952.969  | 2441.63   |
| AF286095  | 9445.504  | 8191.039  | AL137431  | 747.391   | 467.537   | NM_006947 | 19342.844 | 14050.348 |
| NM_00087E | 1499.814  | 1519.112  | NM_01625E | 1065.854  | 762.428   | NM_017917 | 5267.964  | 3770.994  |
| S66407    | 707.527   | 663.528   | NM_01431E | 2510.031  | 1841.403  | NM_00409C | 6009.073  | 4501.94   |
| NM_01652E | 488.047   | 412.01    | AL133089  | 8050.832  | 7629.863  | NM_014634 | 12431.638 | 7297.559  |
| NM_018727 | 539.507   | 591.897   | AK023526  | 1315.212  | 1382.414  | NM_00191E | 33855.402 | 25848.117 |
| NM_00425E | 12301.872 | 11318.177 | BE266129  | 1966.952  | 2244.272  | CY3Cy5    | 8227.525  | 538.714   |
| NM_001981 | 11998.622 | 9890.4    | X66227    | 1268.274  | 2970.721  | NM_00382E | 955.156   | 1297.93   |
| NM_00158E | 7953.122  | 7714.385  | AK025602  | 13241.487 | 15662.883 | NM_00441E | 10127.675 | 12819.349 |
| AK026108  | 3644.446  | 3338.888  | AK026309  | 5520.435  | 6712.014  | NM_016647 | 1796.883  | 2060.604  |
| AF149304  | 1348.572  | 1173.418  | AL137486  | 13158.259 | 13803.495 | AK024695  | 1376.367  | 1164.818  |
| NM_01209E | 11211.941 | 21631.418 | AL110162  | 1729.995  | 2349.723  | NM_01865E | 774.582   | 722.928   |
| NM_01643E | 738.876   | 1597.595  | AF119880  | 966.503   | 1329.227  | AF038174  | 6971.079  | 5184.258  |
| X73079    | 42944.121 | 34239.91  | AK022681  | 8518.027  | 9223.188  | NM_01324E | 1164.685  | 1110.815  |
| NM_019091 | 1398.174  | 989.013   | NM_01770E | 923.149   | 1590.458  | AF070632  | 1158.258  | 1061.46   |
| AK022823  | 833.468   | 735.21    | BE895529  | 7935.695  | 7341.117  | AF161359  | 2656.493  | 3101.137  |
| NM_00245E | 1128.074  | 1026.464  | AK000964  | 805.544   | 818.752   | AL365520  | 3024.541  | 2389.39   |
| NM_016124 | 6474.302  | 4906.081  | AL117536  | 10783.192 | 8998.522  | AL359338  | 984.466   | 1178.16   |
| NM_01594E | 2055.292  | 1745.402  | NM_017751 | 11364.438 | 8697.569  | AK023623  | 15987.694 | 18022.109 |
| NM_000804 | 657.757   | 663.323   | NM_003771 | 3236.408  | 2394.504  | AK026261  | 603.294   | 865.126   |
| NM_00655E | 6316.32   | 5532.19   | NM_01786C | 1302.411  | 841.078   | AF086534  | 1538.023  | 1684.938  |
| NM_014521 | 630.745   | 624.426   | X91195    | 55295.586 | 46451.699 | AF070617  | 1100.736  | 1187.962  |
| NM_00244E | 1961.659  | 2461.577  | AF086190  | 1371.64   | 1097.61   | NM_01491E | 3213.993  | 2711.954  |
| NM_01780E | 898.788   | 843.905   | NM_00614E | 792.393   | 642.116   | NM_00382E | 1460.703  | 1358.629  |
| AK023202  | 6844.269  | 6434.301  | AL050035  | 7575.367  | 5990.169  | NM_00441E | 11721.476 | 14744.48  |
| D63877    | 5411.241  | 4906.511  | AF090101  | 510.938   | 525.27    | SR1       | 70971.57  | 63084.195 |
| AF131760  | 2799.403  | 2265.823  | AF040723  | 51976.07  | 50620.688 | SR3       | 38615.707 | 50976.07  |
| NM_01869E | 3182.984  | 2751.448  | NM_015527 | 5402.981  | 5211.995  | SR9       | 13447.636 | 4631.513  |
| NM_006461 | 5923.057  | 5828.123  | X89675    | 3257.74   | 6087.648  | CY3Cy5    | 6088.328  | 439.897   |
| NM_00282E | 4910.203  | 4190.912  | NM_01218E | 1981.634  | 2558.365  | U84515    | 1288.724  | 1677.165  |
| AF159141  | 5776.91   | 5053.637  | NM_00579E | 13814.044 | 14485.124 | AF086106  | 1324.041  | 1146.692  |
| NM_00242C | 374.57    | 291.694   | NM_00421E | 2968.5    | 3457.866  | AF086143  | 14643.673 | 14541.228 |
| NM_01645E | 9295.15   | 8351.031  | NM_01628E | 48344.133 | 53002.07  | AF086112  | 611.683   | 835.232   |
| AK022233  | 5695.595  | 6020.803  | NM_001464 | 998.594   | 1604.516  | AL137254  | 3104.931  | 3594.688  |
| AL137713  | 553.615   | 627.689   | NM_002051 | 4170.752  | 4536.922  | AK026359  | 1678.762  | 2566.392  |
| AK026410  | 15326.878 | 20738.623 | AK022177  | 1207.183  | 1212.077  | AF085884  | 3121.272  | 3351.083  |
| NM_014637 | 14249.398 | 15350.294 | AK023852  | 638.241   | 807.648   | S81522    | 11023.577 | 10834.461 |
| NM_01337E | 36057.195 | 35460.898 | AF086466  | 4555.85   | 4677.767  | S94541    | 1756.765  | 2734.885  |
| AF113208  | 7697.906  | 8565.133  | AB007962  | 8217.751  | 7162.264  | L36587    | 34967.523 | 29480.438 |
| NM_00615E | 5069.608  | 5069.401  | AF005081  | 2307.96   | 2328.64   | AK024228  | 2610.328  | 2668.82   |

|           |           |           |           |           |           |           |           |           |
|-----------|-----------|-----------|-----------|-----------|-----------|-----------|-----------|-----------|
| NM_012164 | 5001.974  | 3868.537  | AK026438  | 561.429   | 587.558   | AK022420  | 4309.451  | 4906.792  |
| AK026010  | 1073.953  | 757.138   | AK021546  | 716.597   | 711.689   | AK023254  | 1475.979  | 1214.355  |
| NM_004721 | 652.033   | 629.527   | AL050186  | 14795.068 | 10801.336 | AK023945  | 26670.742 | 24552.396 |
| AB011156  | 1286.395  | 1265.664  | AK021918  | 5443.985  | 3891.074  | AK023352  | 743.938   | 537.427   |
| NM_018079 | 1168.266  | 1214.039  | AK021669  | 5526.026  | 4020.464  | AK023773  | 1680.945  | 1325.487  |
| NM_004760 | 21061.432 | 16614.131 | AL080113  | 40691.598 | 26753.523 | AK024123  | 705.14    | 476.583   |
| NM_006752 | 11013.276 | 9575.828  | AL050083  | 1666.278  | 1536.156  | AK026202  | 1082.427  | 1516.508  |
| NM_004428 | 480.452   | 342.22    | AK022766  | 1018.159  | 909.799   | AK021539  | 14351.05  | 12962.034 |
| NM_006809 | 10685.047 | 11659.845 | AL049422  | 6209.617  | 5565.427  | AK021819  | 1123.922  | 1001.685  |
| NM_016929 | 8421.385  | 6259.114  | NM_000093 | 2167.039  | 2477.718  | AK026738  | 1759.086  | 1733.631  |
| NM_012323 | 1595.857  | 1469.03   | NM_001779 | 11802.022 | 9382.295  | AK025011  | 2265.419  | 2925.836  |
| NM_006942 | 667.804   | 731.761   | AB033059  | 2226.513  | 2742.927  | AL157491  | 3253.171  | 3726.946  |
| NM_018199 | 2287.233  | 1492.651  | NM_016484 | 3873.889  | 4979.68   | NM_005266 | 5160.415  | 4957.486  |
| NM_013943 | 1168.394  | 1076.797  | AK026114  | 1485.047  | 2008.345  | AF087965  | 970.029   | 1084.432  |
| NM_001639 | 20530.217 | 22537.914 | NM_014452 | 1233.418  | 1487.17   | AF085998  | 2378.742  | 2040.739  |
| H39560    | 671.951   | 597.407   | NM_014683 | 1048.741  | 1251.448  | AB030240  | 712.629   | 862.021   |
| BG534366  | 30786.096 | 20122.625 | AK021536  | 11219.737 | 13015.355 | AK024681  | 1657.113  | 2021.742  |
| BG698522  | 2079.099  | 1787.974  | AF079529  | 645.025   | 868.625   | X68742    | 708.768   | 746.495   |
| AA152346  | 1330.046  | 1005.133  | NM_002600 | 1740.781  | 1450.323  | AF085990  | 2072.096  | 2617.476  |
| L15189    | 4875.026  | 4780.893  | NM_003646 | 23500.326 | 17021.402 | NM_014907 | 41367.125 | 49146.918 |
| AB023420  | 20093.512 | 18006.912 | NM_006663 | 1604.845  | 1325.326  | AB007977  | 26677.832 | 28189.498 |
| BI822179  | 15244.488 | 13444.457 | NM_006092 | 1413.977  | 1462.102  | NM_014221 | 12972.308 | 12648.929 |
| AF022912  | 8310.766  | 6253.61   | NM_003939 | 858.279   | 826.022   | AK025181  | 784.989   | 946.89    |
| AA477428  | 21765.152 | 15471.985 | NM_012424 | 897.969   | 928.24    | AK021773  | 3897.811  | 2795.824  |
| AA156342  | 3657.141  | 3141.772  | NM_002446 | 4265.293  | 3764.63   | AK027074  | 1758.105  | 1428.81   |
| R45594    | 22615.922 | 22139.42  | NM_000863 | 2056.637  | 1903.363  | AL365456  | 893.142   | 710.936   |
| AI143386  | 1105.938  | 907.662   | NM_006651 | 9039.663  | 7029.816  | NM_018038 | 899.913   | 665.572   |
| H46425    | 1188.569  | 1178.91   | NM_005336 | 10827.174 | 9520.842  | AK022239  | 503.465   | 320.928   |
| AI355949  | 1429.505  | 1211.353  | NM_001419 | 11389.59  | 11470.45  | AK022364  | 514.485   | 510.471   |
| AA278152  | 19867.242 | 21410.357 | AF119817  | 58536.684 | 48050.219 | AK024674  | 1172.61   | 1041.583  |
| H75530    | 8198.547  | 8485.623  | AL035306  | 4857.805  | 4417.012  | AK024244  | 10909.415 | 8612.034  |
| AK000554  | 3180.868  | 3045.933  | NM_004230 | 18463.66  | 14886.942 | AK023812  | 1471.069  | 1372      |
| NM_006472 | 2882.586  | 2562.724  | NM_014503 | 2198.858  | 2106.187  | AL390084  | 2401.196  | 2238.723  |
| NM_003764 | 7626.206  | 3595.519  | NM_014659 | 5103.591  | 5608.523  | AK023565  | 868.047   | 938.639   |
| NM_019618 | 337.802   | 385.105   | NM_004399 | 9846.855  | 12348.103 | AK021479  | 1302.613  | 1591.796  |
| NM_004829 | 546.779   | 486.396   | NM_006337 | 11071.064 | 12921.38  | NM_003835 | 10100.395 | 8715.024  |
| NM_006793 | 43268.273 | 46024.242 | NM_004507 | 6714.443  | 9406.749  | AK000245  | 4463.814  | 4887.972  |
| NM_001538 | 2114.953  | 2801.123  | NM_002710 | 26073.412 | 35241.465 | AF113684  | 456.198   | 437.008   |
| X97261    | 7227.091  | 19160.277 | NM_014060 | 8520.409  | 11551.467 | AF118072  | 1397.94   | 1867.752  |
| NM_001468 | 1052.749  | 1213.501  | NM_004749 | 19016.162 | 22502.863 | AK023724  | 525.012   | 728.83    |
| NM_005410 | 387.42    | 329.501   | BQ446064  | 2279.728  | 2737.659  | AK024112  | 1267.31   | 2056.91   |
| D87666    | 49796.328 | 53426.297 | AF302502  | 4368.301  | 5517.458  | AF085900  | 40611.945 | 41731.273 |
| NM_002921 | 698.803   | 716.444   | AF274571  | 2447.425  | 3243.883  | AK026195  | 2260.528  | 4301.832  |
| NM_001315 | 3882.663  | 3612.352  | NM_005449 | 1254.731  | 1328.448  | AL079274  | 48615     | 42046.086 |
| AF286095  | 10151.058 | 7091.308  | NM_003879 | 3845.158  | 4192.572  | S46403    | 2241.489  | 2841.157  |
| NM_000878 | 1465.401  | 1677.462  | NM_016052 | 15191.574 | 15088.069 | AL137398  | 4318.482  | 2792.635  |
| S66407    | 696.583   | 613.005   | NM_005427 | 2150.34   | 2244.769  | Y12021    | 7099.87   | 5543.064  |
| NM_016523 | 448.501   | 426.665   | NM_016312 | 1046.947  | 1294.047  | AF127771  | 792.608   | 834.601   |
| NM_018727 | 589.223   | 682.388   | AF234887  | 687.514   | 841.197   | NM_013300 | 43332.941 | 39076.07  |
| NM_004258 | 11809.237 | 11410.891 | NM_001776 | 1944.147  | 2306.726  | AK026039  | 6468.601  | 6118.188  |
| NM_001981 | 12048.114 | 12858.014 | NM_001792 | 1126.459  | 1406.29   | AF108756  | 12755.072 | 12517.416 |
| NM_001585 | 7391.356  | 7845.167  | NM_001903 | 722.467   | 600.854   | AF086394  | 644.897   | 746.723   |
| AK026108  | 4064.802  | 3801.971  | U87223    | 16504.785 | 18482.525 | AF116709  | 2338.802  | 2254.545  |

|           |           |           |           |           |           |           |           |           |
|-----------|-----------|-----------|-----------|-----------|-----------|-----------|-----------|-----------|
| NM_01444E | 802.999   | 849.32    | NM_005857 | 6362.888  | 6696.268  | AK025533  | 2662.791  | 2946.309  |
| U58096    | 25239.406 | 21771.203 | NM_002429 | 565.603   | 627.849   | AK026499  | 1108.362  | 1153.958  |
| NM_01643E | 739.164   | 489.283   | NM_000429 | 4014.676  | 4337.456  | AK021911  | 16895.633 | 19477.68  |
| X73079    | 41769.605 | 23858.848 | AK027037  | 1006.632  | 1699.342  | D17225    | 1368.935  | 1452.127  |
| NM_019091 | 1556.366  | 955.042   | NM_003875 | 17743.131 | 19935.006 | AF147430  | 641.569   | 863.738   |
| AF264781  | 4630.752  | 2952.188  | AF191687  | 8145.626  | 11224.358 | AK025766  | 17075.775 | 17544.998 |
| AK022823  | 834.487   | 651.31    | NM_00304E | 507.285   | 1030.175  | U35875    | 58157.59  | 54427.547 |
| NM_00245E | 1222.624  | 726.805   | NM_000274 | 22379.346 | 24128.283 | AK021857  | 57599.289 | 52677.754 |
| NM_016124 | 7095.851  | 5105.641  | NM_00017C | 11992.119 | 14173.792 | AK022257  | 2005.328  | 2287.689  |
| NM_01594E | 2504.572  | 2207.896  | NM_000281 | 876.412   | 1278.945  | BE887356  | 65432.199 | 61381.105 |
| NM_000804 | 769.785   | 637.25    | AK001295  | 4049.353  | 5760.286  | AK024756  | 3267.367  | 2620.521  |
| NM_00655E | 6041.356  | 4859.142  | NM_006031 | 6111.095  | 8048.993  | NM_017911 | 3112.687  | 2448.515  |
| NM_014521 | 632.352   | 663.875   | NM_00271E | 9479.09   | 12214.735 | AJ224168  | 12552.452 | 9429.141  |
| NM_00244E | 2137.601  | 1790.892  | NM_00102C | 63549.238 | 59993.703 | S69873    | 1799.8    | 1325.22   |
| NM_01780E | 924.676   | 697.777   | AB020660  | 5604.603  | 6837.212  | AF147325  | 67325.594 | 67280.039 |
| AK023202  | 7146.506  | 7108.22   | NM_006659 | 57231.543 | 55439.539 | NM_01442E | 2236.924  | 2247.196  |
| D63877    | 6120.553  | 5137.721  | NM_018051 | 2691.666  | 3472.425  | NM_018497 | 670.257   | 562.693   |
| AF131760  | 2925.79   | 2584.374  | NM_015371 | 18593.404 | 21011.639 | AK023584  | 826.927   | 907.854   |
| NM_01869E | 3395.029  | 2920.476  | AB040915  | 7916.969  | 9468.538  | NM_003774 | 1323.708  | 1030.354  |
| NM_006461 | 5543.205  | 5168.658  | AF147791  | 1554.131  | 1956.748  | D87466    | 7920.261  | 7513.597  |
| NM_018201 | 6167.948  | 6331.993  | NM_00132E | 61648.398 | 57808.859 | AK025048  | 1171.866  | 1131.698  |
| NM_01443E | 1439.836  | 1348.223  | NM_00574E | 11140.139 | 12033.798 | U84522    | 4571.178  | 4364.9    |
| AF159141  | 6990.694  | 9142.774  | NM_00669E | 5168.548  | 7636.803  | AK021694  | 3435.547  | 3563.332  |
| NM_00242C | 522.851   | 451.973   | NM_00459E | 18803.779 | 22854.234 | AF086013  | 1599.489  | 1313.667  |
| NM_01645E | 9954.337  | 9855.231  | NM_006037 | 3200.414  | 4210.365  | U84505    | 8115.526  | 8012.895  |
| AK022233  | 6013.509  | 6911.166  | NM_015871 | 16804.543 | 22103.898 | X81005    | 3870.143  | 4085.539  |
| AL137713  | 587.827   | 865.118   | NM_019037 | 29366.688 | 40282.324 | AL049265  | 3178.505  | 3161.234  |
| AK026410  | 14403.464 | 12182.102 | NM_015891 | 10144.749 | 11512.247 | AK022225  | 784.098   | 939.104   |
| NM_014637 | 15982.381 | 17023.627 | NM_00680E | 2874.297  | 4200.435  | AL137635  | 1055.645  | 1061.155  |
| NM_01337E | 37270.98  | 32178.771 | AB037778  | 6002.963  | 8392.218  | AL049430  | 3491.124  | 3552.339  |
| AF113208  | 7936.567  | 8560.157  | NM_00506E | 37368.453 | 47188.988 | AK021461  | 765.252   | 928.477   |
| NM_00615E | 5503.444  | 5318.666  | NM_00308E | 18473.381 | 21967.213 | AB015349  | 1311.549  | 1086.79   |
| NM_012164 | 5373.268  | 5183.268  | NM_00375E | 32512.617 | 39148.852 | NM_01491E | 35023.711 | 25422.795 |
| AK026010  | 1015.41   | 855.568   | NM_00622E | 1144.946  | 1432.399  | NM_005864 | 731.023   | 605.663   |
| NM_004721 | 694.754   | 434.67    | NM_01759C | 5772.169  | 6641.923  | NM_012341 | 11448.582 | 8886.118  |
| AB011156  | 1362.485  | 1105.273  | AB011145  | 11367.551 | 13750.175 | NM_00325E | 49332.406 | 32161.615 |
| NM_01807E | 1289.294  | 1223.811  | NM_00375C | 56456.375 | 53054.766 | D87450    | 6171.758  | 4739.52   |
| NM_00476C | 21273.273 | 18643.123 | NM_015251 | 419.989   | 538.973   | NM_017797 | 6783.137  | 5745.438  |
| NM_00675E | 11424.142 | 10619.515 | M92422    | 9385.428  | 12045.223 | AK021919  | 797.816   | 589.56    |
| NM_00442E | 414.872   | 434.004   | NM_01786E | 7437.343  | 8472.896  | AF000562  | 9351.364  | 9432.983  |
| NM_00680E | 11177.985 | 10259.596 | NM_001874 | 3836.855  | 5711.305  | AK025713  | 7561.32   | 7008.65   |
| AF149304  | 1488.879  | 1184.208  | NM_00186E | 751.195   | 608.763   | NM_01810C | 865.112   | 749.654   |
| NM_01209E | 11260.945 | 11194.347 | X69637    | 508.029   | 700.904   | NM_00407E | 6215.711  | 6623.817  |
| NM_00694E | 980.562   | 1226.979  | NM_00251E | 11978.242 | 16758.93  | NM_001887 | 12280.987 | 7188.736  |
| NM_01819E | 2810.42   | 2830.37   | NM_017424 | 5993.12   | 8652.312  | NM_00653E | 9739.138  | 9658.757  |
| NM_01394E | 1643.574  | 1817.384  | NM_00152E | 32188.762 | 47955.332 | AK026747  | 14744.191 | 10224.285 |
| NM_00163E | 26040.924 | 31494.441 | NM_00088E | 19744.074 | 25070.025 | AL110150  | 14980.637 | 18523.543 |
| H39560    | 940.316   | 899.335   | AF254086  | 7396.882  | 12757.801 | NM_00199E | 15177.474 | 15738.695 |
| BG534366  | 37617.863 | 32098.713 | AL390142  | 6671.992  | 8790.693  | X87825    | 7930.195  | 7684.717  |
| BG698522  | 2865.188  | 3376.931  | NM_00656E | 5075.568  | 6765.831  | NM_000914 | 712.71    | 814.192   |
| AA152346  | 1476.308  | 1830.448  | AB007930  | 11591.013 | 12607.348 | AK001285  | 35164.043 | 33392.754 |
| L15189    | 5919.55   | 7911.74   | X76978    | 1943.226  | 2273.038  | D17215    | 19217.113 | 20631.518 |
| AB023420  | 27158.045 | 35724.664 | AJ005273  | 4833.651  | 7047.011  | BE781513  | 2748.656  | 2340.138  |

|           |           |           |           |           |           |           |           |           |
|-----------|-----------|-----------|-----------|-----------|-----------|-----------|-----------|-----------|
| BI822179  | 20168.576 | 28032.295 | AK021892  | 4197.784  | 4973.576  | NM_015714 | 58600.246 | 54362.387 |
| AF022912  | 9436.042  | 11366.889 | NM_017637 | 890.474   | 892.534   | AK075564  | 1094.692  | 1367.184  |
| AA477428  | 26376.684 | 28966.545 | NM_003121 | 37137.598 | 50129.406 | AK026219  | 1664.599  | 1483.996  |
| AA156342  | 4559.115  | 3840.836  | NM_003437 | 13467.65  | 16084.063 | D28446    | 3691.877  | 3830.033  |
| R45594    | 27046.566 | 24647.6   | NM_018337 | 26764.139 | 35868.492 | NM_016279 | 860.491   | 727.767   |
| AI143386  | 1277.824  | 1080.575  | AA193295  | 782.086   | 1000.475  | NM_000211 | 20508.486 | 15682.249 |
| H46425    | 1356.291  | 1128.092  | NM_018045 | 9091.052  | 12129.688 | AB037830  | 3181.374  | 2444.048  |
| AI355949  | 1579.518  | 1376.254  | NM_006481 | 8949.319  | 12110.313 | NM_015685 | 20350.506 | 15724.524 |
| AA278152  | 22232.219 | 23507.52  | AB011115  | 1515.923  | 1966.593  | NM_004357 | 58570.441 | 56438.855 |
| H75530    | 8521.891  | 8101.185  | NM_003910 | 35478.164 | 34622.008 | X03324    | 7988.349  | 6442.058  |
| AK000554  | 3337.731  | 3197      | AB007913  | 6496.556  | 6887.494  | AF130988  | 2178.066  | 2087.62   |
| NM_006472 | 2995.717  | 3044.149  | NM_007326 | 27127.164 | 28164.865 | NM_014934 | 638.644   | 528.115   |
| NM_002826 | 5732.212  | 4941.967  | NM_001886 | 12587.7   | 16146.584 | NM_015385 | 1908.689  | 1871.81   |
| X97261    | 8489.176  | 27306.23  | NM_004467 | 1762.278  | 2576.27   | NM_003690 | 10943.347 | 9753.027  |
| NM_001468 | 1292.997  | 1662.603  | NM_005622 | 804.284   | 1180.034  | NM_000876 | 11504.03  | 11155.854 |
| NM_005410 | 394.042   | 652.83    | NM_018058 | 35736.074 | 44098.688 | NM_014214 | 8426.189  | 9589.272  |
| D87666    | 51304.035 | 65901.141 | NM_004548 | 31953.104 | 46770.797 | NM_000856 | 1222.008  | 1250.944  |
| NM_002921 | 956.603   | 1354.172  | X69079    | 62660.922 | 58330.367 | NM_002752 | 5128.95   | 5089.848  |
| NM_001315 | 4097.975  | 7022.333  | BI759406  | 48937.484 | 53413.602 | NM_013281 | 1948.059  | 1981.712  |
| AF286095  | 13197.565 | 16922.195 | R76099    | 15532.901 | 17944.611 | Y11306    | 2509.246  | 2797.672  |
| NM_000878 | 1595.425  | 3056.379  | S74445    | 3285.313  | 3758.745  | NM_016112 | 1188.777  | 1442.63   |
| S66407    | 954.359   | 1687.314  | BI763360  | 11942.207 | 13239.981 | X85106    | 1350.809  | 1261.372  |
| NM_016523 | 766.056   | 1187.567  | D25538    | 3199.187  | 3512.354  | NM_003931 | 6458.758  | 6949.547  |
| NM_018727 | 817.797   | 1194.353  | NM_000360 | 40057.844 | 45541.137 | NM_006681 | 698.19    | 980.845   |
| NM_004258 | 15941.962 | 23810.006 | D49950    | 967.08    | 1064.5    | NM_012479 | 59742.117 | 56592.156 |
| NM_001981 | 13371.701 | 17544.057 | NM_001849 | 1169.2    | 1534.695  | AF250226  | 25772.707 | 28384.115 |
| NM_014654 | 1057.412  | 1334.371  | X03635    | 10110.582 | 11159.352 | NM_003217 | 43499.066 | 40257.23  |
| NM_001585 | 7181.821  | 11588.91  | BC011847  | 63997.234 | 62748.25  | NM_006534 | 21864.664 | 19311.168 |
| AK026108  | 4376.629  | 6816.95   | X03348    | 2499.166  | 2882.465  | NM_017601 | 4775.918  | 3817.806  |
| NM_006379 | 4399.994  | 5525.032  | AF353674  | 6054.275  | 6950.444  | AF110265  | 28434.871 | 22178.836 |
| BF571428  | 2116.214  | 2956.219  | BC002645  | 9304.759  | 8380.202  | AF272371  | 59169.617 | 67471.563 |
| AB037723  | 1912.671  | 2908.109  | NM_021138 | 8529.672  | 7317.567  | AK021848  | 5062.954  | 5012.183  |
| NM_006246 | 8573.344  | 11112.205 | BC002792  | 7366.48   | 8164.144  | NM_003704 | 5699.556  | 5119.253  |
| NM_004316 | 516.563   | 804.071   | NM_002981 | 13376.019 | 15519.196 | AK023140  | 1225.319  | 1156.344  |
| NM_014446 | 748.647   | 940.619   | NM_001244 | 6332.343  | 7303.466  | AF084362  | 2120.783  | 3274.056  |
| U58096    | 28424.391 | 27082.672 | NM_012275 | 827.683   | 1429.269  | NM_001553 | 6926.271  | 8031.417  |
| NM_016929 | 11133.258 | 12720.871 | NM_006137 | 2690.267  | 3703.083  | NM_014173 | 19773.895 | 19067.646 |
| NM_012323 | 1956.607  | 2013.456  | NM_016139 | 47794.984 | 55580.129 | NM_001731 | 39520.195 | 35964.852 |
| NM_003054 | 1313.124  | 1049.947  | AL117468  | 11856.287 | 18427.656 | AL137506  | 1321.611  | 1326.967  |
| NM_003042 | 708.591   | 624.484   | NM_019613 | 10624.993 | 13559.115 | AK022961  | 5237.392  | 5504.652  |
| NM_004790 | 1004.873  | 593.979   | NM_005382 | 1492.043  | 1854.877  | NM_007375 | 10587.727 | 10861.363 |
| NM_002219 | 12302.847 | 10039.38  | AK027086  | 4623.432  | 4974.663  | NM_014371 | 7286.601  | 7461.835  |
| AF182404  | 10994.255 | 7810.204  | AB032997  | 1604.625  | 1896.486  | AF290512  | 14219.262 | 15278.314 |
| NM_000804 | 593.319   | 698.413   | AL096857  | 6103.403  | 6261.417  | NM_006716 | 15113.423 | 22162.582 |
| NM_006555 | 6599.838  | 4891.073  | AB002351  | 785.441   | 928.843   | AB002323  | 11070.285 | 13052.183 |
| NM_014521 | 882.901   | 637.894   | X07203    | 36908.254 | 33760.922 | AK022241  | 17233.021 | 17292.34  |
| NM_002445 | 2420.103  | 2245.356  | AB040104  | 1479.785  | 1224.026  | AK022587  | 6313.377  | 7883.879  |
| NM_017809 | 950.249   | 880.996   | NM_003834 | 10978.677 | 11529.116 | NM_005512 | 1099.832  | 1514.8    |
| AK023202  | 7645.027  | 9088.315  | NM_005959 | 11298.11  | 9872.038  | NM_005506 | 3100.95   | 3238.419  |
| D63877    | 6144.009  | 6950.813  | NM_003381 | 2844.658  | 3191.429  | NM_005723 | 1282.81   | 1202.326  |
| AF131760  | 3156.057  | 3752.385  | NM_005756 | 2475.775  | 2888.592  | AL137404  | 63213.191 | 65066.43  |
| NM_018698 | 3253.991  | 4290.867  | NM_003702 | 28521.086 | 22708.635 | NM_005814 | 9168.298  | 11273.541 |
| NM_006461 | 6728.66   | 10149.333 | NM_000369 | 2010.738  | 2178.331  | NM_002851 | 2273.115  | 2031.022  |

|           |           |           |           |           |           |           |           |           |
|-----------|-----------|-----------|-----------|-----------|-----------|-----------|-----------|-----------|
| NM_018201 | 6964.872  | 9478.122  | NM_004405 | 3839.025  | 3099.614  | NM_002071 | 2921.791  | 2918.887  |
| NM_01443E | 1513.104  | 2146.619  | NM_00198E | 11955.299 | 9801.76   | NM_00533E | 55834.254 | 52328.227 |
| NM_01488C | 542.604   | 727.642   | NM_016573 | 11176.892 | 11519.254 | NM_00190E | 16643.949 | 15432.537 |
| NM_003764 | 9914.803  | 11322.015 | NM_001303 | 23066.1   | 24054.521 | NM_004142 | 2929.735  | 2745.425  |
| NM_01961E | 455.681   | 1014.018  | M21304    | 707.092   | 812.149   | AF108138  | 8725.604  | 7502.876  |
| NM_00482E | 855.861   | 1124.523  | NM_00197E | 1534.726  | 1554.174  | NM_004347 | 446.381   | 512.2     |
| NM_00679E | 46330.43  | 54823.234 | AB040896  | 2062.069  | 2588.177  | BF340302  | 9699.627  | 8271.224  |
| NM_00153E | 2399.47   | 2850.598  | NM_001107 | 5476.788  | 8581.567  | AB037728  | 234.692   | 478.105   |
| NM_00442E | 1513.663  | 1016.453  | AF084645  | 1183.612  | 1376.411  | AK024210  | 5669.348  | 5794.035  |
| NM_00680E | 11902.794 | 9609.285  | AF151851  | 17109.068 | 17609.336 | NM_00227E | 9676.126  | 9565.607  |
| AF149304  | 4612.873  | 4847.144  | NM_003471 | 551.64    | 840.012   | AL133087  | 6884.404  | 6519.67   |
| NM_01209E | 11062.217 | 8426.44   | AF220417  | 2787.902  | 3189.614  | NM_01801C | 5520.161  | 5977.567  |
| NM_01643E | 616.248   | 608.34    | NM_001122 | 54055.496 | 51566.535 | NM_002274 | 45522.457 | 47304.922 |
| X73079    | 40397.391 | 26054.322 | NM_004591 | 19401.143 | 17673.422 | AL080200  | 2237.955  | 2562.11   |
| NM_019091 | 1473.259  | 906.811   | NM_006274 | 518.297   | 430.791   | BF337874  | 15033.465 | 15076.281 |
| AF264781  | 4934.825  | 3603.138  | AL133027  | 4657.909  | 4784.498  | NM_00347E | 50965.117 | 51845.238 |
| AK022823  | 1077.916  | 721.897   | AB037732  | 3447.617  | 3513.161  | NM_00024E | 13461.464 | 15381.207 |
| NM_00245E | 1283.579  | 692.253   | NM_005767 | 1788.371  | 1447.802  | NM_00438E | 32602.09  | 41968.5   |
| AK024215  | 14379.662 | 10754.432 | NM_001837 | 811.05    | 1057.81   | AL157475  | 10569.266 | 11097.47  |
| AB044661  | 7849.556  | 6262.398  | NM_00183E | 62296.543 | 58613.301 | NM_00606E | 56690.184 | 56243.145 |
| NM_00060E | 4986.368  | 4483.049  | BC016029  | 1221.711  | 1099.522  | NM_01765E | 4434.84   | 4333.981  |
| NM_016124 | 8298.513  | 6517.811  | M27487    | 46274.578 | 42671.879 | X16282    | 18693.385 | 12811.046 |
| NM_01907E | 908.83    | 661.783   | NM_002611 | 4750.535  | 5949.262  | AK022519  | 619.958   | 376.913   |
| U53530    | 5403.782  | 5909.477  | NM_017417 | 1543.569  | 1814.047  | NM_01441E | 3312.246  | 2639.407  |
| NM_00659E | 2447.81   | 2681.625  | AL133602  | 3704.327  | 3564.951  | S75264    | 20140.58  | 16038.995 |
| NM_000111 | 518.074   | 776.762   | AF037219  | 7207.996  | 6605.319  | AF027513  | 2674.877  | 2543.19   |
| NM_01594E | 2946.803  | 3774.316  | AK026075  | 685.693   | 590.789   | NM_00137E | 13421.605 | 12501.931 |
| AK000554  | 3114.377  | 2027.28   | NM_000251 | 5904.89   | 7914.769  | NM_018664 | 1973.717  | 2101.036  |
| NM_00647E | 3423.463  | 2579.043  | AF118071  | 532.155   | 764.265   | BC006428  | 7393.082  | 7443.695  |
| NM_00282E | 5169.982  | 6837.232  | NM_00603E | 8427.244  | 9679.787  | NM_005034 | 3348.539  | 2989.509  |
| AF159141  | 6444.579  | 10721.346 | AB011133  | 5669.32   | 5137.259  | NM_00392E | 28105.453 | 21095.301 |
| NM_01645E | 9009.318  | 6919.097  | NM_01757E | 42339.133 | 43036.949 | AF085356  | 3614.954  | 3531.827  |
| AK022233  | 7042.662  | 10086.063 | NM_018444 | 4022.668  | 3929.604  | NM_016047 | 52145.059 | 46085.008 |
| AL137713  | 456.391   | 469.053   | NM_00025E | 2605.207  | 2502.657  | NM_00149E | 22238.424 | 21435.512 |
| AK026410  | 13016.134 | 10893.782 | NM_006947 | 16081.859 | 13075.043 | BF030165  | 31611.986 | 31180.059 |
| NM_014637 | 14748.743 | 14212.842 | NM_017917 | 4678.201  | 3621.001  | NM_01673E | 18247.584 | 20390.844 |
| NM_01337E | 37676.043 | 26145.793 | NM_00409C | 7915.98   | 6893.294  | NM_01476E | 33701.68  | 32411.758 |
| AF113208  | 7734.646  | 6530.477  | NM_014634 | 14622.618 | 10063.948 | NM_02018E | 12826.933 | 17547.52  |
| NM_00615E | 5392.533  | 4143.784  | NM_00191E | 34332.41  | 26345.807 | NM_00283E | 10759.092 | 11121.001 |
| NM_012164 | 5852.176  | 5053.372  | BC031485  | 3673.215  | 2963.378  | NM_01773E | 10784.667 | 9706.046  |
| AK026010  | 970.243   | 836.918   | NM_00409E | 10465.915 | 9055.505  | NM_003654 | 649.093   | 508.173   |
| NM_00662E | 581.594   | 576.778   | X15624    | 1746.411  | 1637.168  | NM_00015E | 60445.453 | 57390.977 |
| NM_004721 | 654.182   | 579.518   | AK023080  | 1082.512  | 2100.537  | D17222    | 36956.852 | 31831.334 |
| AB011156  | 1684.887  | 1480.103  | NM_00188E | 13165.474 | 21491.83  | NM_000154 | 7449.63   | 6453.011  |
| NM_01807E | 1147.431  | 1238.345  | NM_004467 | 2109.794  | 2534.808  | NM_00621E | 752.106   | 840.792   |
| NM_00476C | 23777.162 | 16761.371 | NM_00562E | 494.86    | 1061.361  | NM_00354E | 1236.357  | 1107.162  |
| NM_00675E | 12723.135 | 11657.639 | NM_01805E | 28941.607 | 30872.277 | NM_000671 | 4533.576  | 4531.176  |
| CY3Cy5    | 1474.497  | 231.205   | NM_00454E | 23186.82  | 26312.16  | NM_006297 | 42616.684 | 41576.609 |
| NM_02100E | 1053.972  | 1012.092  | X69079    | 55768.992 | 57848.703 | X85325    | 56764.219 | 58204.027 |
| SB        | 2396.099  | 2788.164  | BI759406  | 39437.004 | 39885.723 | AF318366  | 17822.063 | 17266.545 |
| AF086342  | 381.027   | 343.959   | R76099    | 12365.488 | 11637.783 | AF182423  | 4617.717  | 4402.717  |
| AF086451  | 439.261   | 285.984   | S74445    | 2852.866  | 3467.851  | D26018    | 7722.846  | 7917.33   |
| AF086387  | 1124.774  | 888.207   | BI763360  | 10409.46  | 10314.32  | AK023029  | 498.677   | 360.042   |

|           |           |           |           |           |           |           |           |           |
|-----------|-----------|-----------|-----------|-----------|-----------|-----------|-----------|-----------|
| AF086443  | 430.18    | 426.723   | D25538    | 2797.33   | 2874.863  | NM_017643 | 646.593   | 622.598   |
| AL389941  | 1287.731  | 833.453   | NM_000360 | 36550.883 | 37030.875 | AB037863  | 4081.405  | 4857.245  |
| AB037756  | 2000.082  | 1745.592  | D49950    | 910.84    | 804.353   | BC000363  | 3287.368  | 4153.078  |
| AK001853  | 2557.888  | 1238.761  | NM_001849 | 1339.513  | 1560.352  | NM_007237 | 3529.322  | 3534.299  |
| AK025071  | 1020.415  | 732.664   | X03635    | 10248.199 | 9430.801  | NM_004608 | 2764.693  | 2571.709  |
| AK021888  | 951.039   | 922.443   | BC011847  | 58823.801 | 61751.027 | NM_018257 | 28990.732 | 28378.268 |
| AK022848  | 1004.25   | 2648.936  | X03348    | 2366.596  | 2176.232  | NM_005919 | 7323.457  | 7841.558  |
| AK055302  | 609.322   | 977.277   | AF353674  | 5785.841  | 5285.29   | NM_012256 | 57467.402 | 55488.121 |
| AL049957  | 2294.486  | 3711.296  | BC002645  | 8875.368  | 6144.632  | NM_006006 | 4781.808  | 4288.397  |
| NM_021005 | 1158.048  | 2392.955  | NM_021138 | 7754.259  | 5696.86   | NM_016325 | 4945.303  | 4913.971  |
| SB        | 2685.214  | 6351.036  | BC002792  | 6464.429  | 5721.029  | NM_001604 | 1745.942  | 1687.2    |
| SR2       | 52118.629 | 56624.945 | NM_001523 | 1289.333  | 891.296   | NM_000908 | 2602.429  | 2310.601  |
| SR4       | 13479.396 | 28210.23  | NM_017423 | 1720.681  | 1112.79   | AB011102  | 7016.108  | 6807.225  |
| SR6       | 1857.435  | 4012.633  | Z70705    | 1083.02   | 591.522   | D63480    | 6698.524  | 6113.766  |
| SR8       | 7191.811  | 40838.191 | NM_003811 | 28422.859 | 47858.805 | NM_002969 | 11411.389 | 9895.901  |
| SR10      | 25728.732 | 18847.717 | NM_002981 | 18118.652 | 25854.082 | NM_006475 | 1287.77   | 1412.579  |
| CY3Cy5    | 6618.743  | 629.529   | NM_001244 | 6494.762  | 8296.381  | NM_004620 | 6117.819  | 5565.552  |
| AF086063  | 1056.078  | 828.061   | NM_012275 | 1170.233  | 1618.698  | AF087940  | 17184.746 | 15037.856 |
| AF086098  | 778.83    | 844.406   | NM_006137 | 2971.116  | 3352.639  | AJ277587  | 4157.743  | 3753.039  |
| AF086076  | 722.246   | 887.167   | NM_016139 | 45880.945 | 50389.047 | D87432    | 8525.472  | 9477.701  |
| AL833393  | 2651.063  | 2363.144  | AL117468  | 10176.48  | 10945.219 | Y18483    | 1503.204  | 1512.807  |
| AF088005  | 655.924   | 934.49    | NM_019613 | 9551.441  | 11683.839 | AI565117  | 57204.469 | 65085.469 |
| AF086096  | 1379.728  | 1141.154  | NM_005382 | 1470.326  | 1669.058  | AI299075  | 11301.637 | 9035.198  |
| AL390132  | 503.433   | 638.346   | AK027086  | 4305.572  | 5181.221  | M59979    | 4726.542  | 4035.519  |
| NM_017933 | 798.409   | 873.077   | AB032997  | 1583.426  | 1787.098  | AB011098  | 3876.709  | 3789.85   |
| NM_017819 | 7286.922  | 5314.047  | AL096857  | 5582.13   | 5630.482  | AA609759  | 7262.639  | 7304.638  |
| NM_014803 | 1619.308  | 962.68    | AB002351  | 623.85    | 505.952   | AA029418  | 20395.344 | 25151.773 |
| AK024956  | 352.291   | 329.787   | X07203    | 33860.301 | 28854.391 | L20815    | 22494.592 | 24206.518 |
| AF147386  | 412.325   | 241.764   | AB040104  | 1130.561  | 1212.257  | AI364483  | 56422.852 | 58298.859 |
| AF273052  | 11517.297 | 8172.027  | NM_003834 | 10451.393 | 10444.037 | AA456001  | 36550.445 | 43215.156 |
| AF075066  | 357.655   | 676.933   | NM_005959 | 11305.389 | 9063.532  | AA176581  | 2485.577  | 2661.802  |
| NM_017943 | 11501.044 | 20528.721 | NM_003381 | 2878.546  | 2745.696  | BI818232  | 799.741   | 853.576   |
| AF147383  | 435.348   | 873.672   | NM_005756 | 2325.6    | 1967.27   | AA451686  | 16645.756 | 16668.367 |
| AK025682  | 435.389   | 851.943   | NM_003702 | 26845.885 | 17137.342 | AA934644  | 891.559   | 1278.748  |
| NM_016478 | 8827.724  | 15409.433 | NM_000369 | 1440.649  | 1352.258  | NM_004285 | 379.913   | 582.766   |
| AL389986  | 8994.02   | 13072.122 | NM_004405 | 3481.814  | 2251.383  | NM_017896 | 25479.6   | 19176.787 |
| AF086279  | 857.103   | 1481.971  | NM_001988 | 11453.993 | 8129.428  | AB002374  | 11861.593 | 9309.255  |
| AF088052  | 1522.442  | 2489.606  | L09080    | 29914.998 | 22567.592 | U17327    | 5479.701  | 4918.463  |
| AK027155  | 667.521   | 1018.563  | NM_007326 | 17096.428 | 12546.318 | AB046781  | 978.92    | 621.614   |
| AF221846  | 288.328   | 157.422   | NM_012213 | 2519.581  | 2993.471  | M87790    | 54831.934 | 56874.234 |
| AF264626  | 472.968   | 520.012   | NM_016573 | 12745.395 | 15526.781 | NM_001768 | 4501.997  | 4183.315  |
| AK027219  | 444.791   | 416.024   | NM_001303 | 25464.023 | 29804.188 | NM_000029 | 24573.973 | 25353.721 |
| AK024528  | 2028.521  | 1639.42   | NM_001979 | 1613.504  | 1929.354  | NM_000715 | 2270.228  | 2374.452  |
| AF075082  | 251.565   | 178.987   | AB040896  | 2173.956  | 2217.12   | AF035802  | 13954.327 | 14041.193 |
| NM_015370 | 1030.982  | 957.899   | NM_001107 | 4916.77   | 5677.859  | Y08145    | 7560.119  | 8303.296  |
| AF085917  | 1354.405  | 1189.698  | AF084645  | 715.595   | 941.001   | M26123    | 875.4     | 1253.193  |
| AF085989  | 1374.512  | 754.123   | AF151851  | 16035.284 | 18227.338 | NM_001838 | 15883.37  | 16688.117 |
| AL360139  | 27278.246 | 19685.35  | NM_003471 | 558.201   | 621.172   | NM_019555 | 2442.13   | 2745.795  |
| AF075110  | 6004.511  | 7147.112  | AF220417  | 2567.33   | 2498.135  | NM_012096 | 15939.215 | 16206.553 |
| AK022157  | 447.777   | 1136.08   | NM_001122 | 50615.223 | 49034.082 | NM_003905 | 29419.291 | 31139.373 |
| AL137323  | 1029.922  | 1985.431  | NM_004591 | 18554.779 | 17128.297 | L12052    | 6584.545  | 8911.99   |
| AL137494  | 7738.562  | 10681.427 | NM_006274 | 523.919   | 615.545   | AB028976  | 17150.133 | 19059.225 |
| AL162037  | 6665.563  | 9750.45   | AL133027  | 5356.99   | 4782.355  | AK026337  | 22369.426 | 33582.574 |

|           |           |           |           |           |           |           |           |           |
|-----------|-----------|-----------|-----------|-----------|-----------|-----------|-----------|-----------|
| AL390150  | 2687.118  | 5655.715  | AB037732  | 3002.756  | 2384.384  | NM_01586E | 2658.865  | 2352.627  |
| AL137359  | 474.609   | 1104.502  | NM_005767 | 1031.49   | 722.436   | NM_00462E | 1877.654  | 2383.266  |
| AL137575  | 492.625   | 1184.383  | NM_001837 | 806.705   | 792.287   | NM_00189E | 1941.629  | 2384.036  |
| NM_002761 | 777.895   | 1431.944  | NM_00183E | 60876.438 | 59226.938 | NM_01332E | 19487.391 | 16132.878 |
| AK021962  | 412.758   | 361.088   | BC016029  | 977.797   | 859.157   | NM_00079C | 1246.825  | 971.702   |
| AK056674  | 665.644   | 956.803   | M27487    | 45770.039 | 32668.059 | NM_00266C | 6986.655  | 8017.65   |
| AK022856  | 245.931   | 301.503   | NM_00228E | 61235.23  | 55062.238 | NM_01590C | 2516.921  | 1687.287  |
| AK022042  | 673.596   | 787.786   | NM_002164 | 1673.497  | 1190.883  | NM_00370E | 2963.874  | 2815.166  |
| AL117588  | 518.103   | 573.304   | NM_017417 | 1764.039  | 1605.291  | AF182218  | 1266.219  | 1314.643  |
| AK024653  | 5777.735  | 4967.47   | AL133602  | 3780.08   | 3838.449  | NM_01612E | 2948.518  | 2959.913  |
| AF103907  | 588.994   | 513.812   | AF037219  | 7410.618  | 6139.665  | AK023749  | 917.261   | 1443.438  |
| AF094508  | 351.929   | 198.234   | AK026075  | 517.681   | 520.703   | NM_002337 | 7694.575  | 8046.635  |
| AF161351  | 909.054   | 898.052   | NM_000251 | 6002.939  | 6567.758  | NM_01324E | 4208.759  | 5371.641  |
| AF257098  | 552.109   | 272.249   | AF118071  | 529.928   | 738.173   | NM_00642E | 56019.555 | 54905.168 |
| NM_01413C | 445.753   | 205.22    | NM_00603E | 12023.057 | 20107.168 | NM_00476E | 3714.365  | 5416.741  |
| AF111782  | 495.182   | 210.707   | AB011133  | 5553.14   | 5327.204  | NM_00581E | 53687     | 53972.02  |
| AF151530  | 680.326   | 653.733   | NM_01757E | 41546.418 | 35687.305 | AK025520  | 7202.204  | 6894.563  |
| AK000877  | 202.964   | 691.368   | NM_018444 | 3988.789  | 3926.16   | NM_00489E | 6023.75   | 7546.94   |
| AK021991  | 1055.425  | 2129.859  | NM_00025E | 3064.756  | 4930.797  | NM_014597 | 37653.477 | 44071.07  |
| AK022093  | 1006.405  | 1800.08   | NM_006947 | 16413.172 | 14128.215 | BF540935  | 19001.908 | 16244.239 |
| AK022232  | 315.715   | 432.091   | NM_017917 | 4633.96   | 3878.046  | NM_00446E | 1053.943  | 966.295   |
| AK022376  | 951.458   | 2127.678  | NM_00409C | 8207.162  | 6202.366  | NM_007081 | 4222.433  | 3416.499  |
| AK022005  | 896.858   | 1924.411  | NM_014634 | 14419.259 | 9456.228  | AB032964  | 4629.091  | 4098.493  |
| AK022137  | 445.237   | 800.402   | NM_00191E | 34540.055 | 24694.553 | BE733605  | 12325.84  | 13234.305 |
| AK022272  | 476.838   | 1017.615  | BC031485  | 4165.412  | 2901.748  | NM_003334 | 51836.328 | 48600.16  |
| AK022394  | 342.753   | 387.03    | NM_00409E | 9508.771  | 7849.333  | NM_00269E | 5714.56   | 6574.755  |
| AL357201  | 478.561   | 301.289   | X15624    | 2133.795  | 1414.764  | NM_003671 | 2400.419  | 4881.914  |
| AF279780  | 44226.605 | 30955.033 | AF073770  | 3497.728  | 2038.174  | AK026000  | 9742.036  | 9191.944  |
| AK022510  | 2942.792  | 2475.296  | AL359401  | 7739.536  | 6550.637  | NM_01783E | 4336.11   | 3987.614  |
| AK023878  | 236.982   | 341.801   | NM_004467 | 1463.962  | 1660.938  | NM_00667E | 13864.067 | 15976.952 |
| AK021851  | 241.047   | 172.903   | NM_00562E | 651.747   | 661.29    | NM_00302E | 12202.945 | 14668.835 |
| L37717    | 535.006   | 633.979   | NM_01805E | 29457.061 | 31801.834 | NM_00487E | 10492.013 | 12868.574 |
| AJ131609  | 5563.62   | 5435.891  | NM_00454E | 22181.496 | 27296.203 | NM_01984E | 3709.518  | 5751.918  |
| BC019280  | 3974.092  | 4052.721  | X69079    | 61700.52  | 57948.977 | NM_002951 | 24224.98  | 30214.875 |
| AF086498  | 948.379   | 797.988   | BI759406  | 42769.129 | 35368.844 | NM_002317 | 5187.513  | 5648.993  |
| AK000687  | 1202.479  | 1097.031  | R76099    | 13491.971 | 10896.306 | NM_00032C | 2763.579  | 3570.768  |
| L77565    | 231.971   | 274.376   | S74445    | 3259.409  | 3335.838  | NM_017921 | 814.289   | 721.05    |
| AF079567  | 2296.632  | 1214.064  | BI763360  | 16048.826 | 22332.566 | NM_00313E | 11852.638 | 14107.037 |
| AL049311  | 550.351   | 379.687   | D25538    | 4127.916  | 4641.253  | D63480    | 6798.058  | 5617.971  |
| AK000016  | 1060.179  | 808.177   | NM_00036C | 41444.828 | 42522.066 | NM_00296E | 11729.122 | 10545.856 |
| AK023367  | 1589.391  | 1574.008  | D49950    | 914.82    | 794.532   | NM_00647E | 1180.68   | 1383.773  |
| AL080209  | 2101.642  | 4279.395  | NM_00184E | 1035.816  | 1117.309  | NM_00462C | 4927.721  | 4832.093  |
| AL137431  | 283.051   | 531.959   | X03635    | 10286.818 | 9236.834  | AF087940  | 15973.613 | 14081.271 |
| L27642    | 279.308   | 235.573   | BC011847  | 57967.344 | 62037.398 | AJ277587  | 4185.75   | 4037.805  |
| AF009297  | 129.865   | 409.804   | X03348    | 2477.146  | 2673.727  | D87432    | 8789.48   | 8833.237  |
| NM_01625E | 1760.86   | 3220.658  | AF353674  | 6070.575  | 4633.957  | Y18483    | 1112.016  | 1239.876  |
| NM_01431E | 2457.293  | 4261.644  | BC002645  | 8977.666  | 7111.602  | AI565117  | 57757.328 | 61168.543 |
| AK023526  | 1601.455  | 1545.255  | NM_021138 | 8759.628  | 6555.498  | AI299075  | 11993.257 | 11666.545 |
| AF075038  | 393.247   | 260.527   | BC002792  | 6964.264  | 6990.081  | M59979    | 4709.067  | 5018.164  |
| BE266129  | 1297.526  | 1147.66   | NM_00152E | 1465.518  | 1078.537  | AB011098  | 3782.961  | 3856.933  |
| X66227    | 409.096   | 429.946   | NM_01742E | 2017.325  | 1186.162  | AA609759  | 7587.692  | 7551.745  |
| AK025602  | 13596.344 | 10917.971 | Z70705    | 1210.483  | 764.267   | AA029418  | 18694.393 | 16698.922 |
| AK026309  | 3442.451  | 2912.779  | NM_002611 | 3144.145  | 1981.923  | L20815    | 20653.893 | 19996.629 |



|           |           |           |           |           |           |           |           |           |
|-----------|-----------|-----------|-----------|-----------|-----------|-----------|-----------|-----------|
| AL137486  | 1353.605  | 1398.006  | NM_005382 | 1581.694  | 1494.516  | AI364483  | 51792.695 | 52222.719 |
| AL110162  | 1165.009  | 1236.067  | AK027086  | 4182.461  | 3332.496  | AA456001  | 37074.012 | 32857.426 |
| AF119880  | 614.91    | 638.534   | AB032997  | 1704.688  | 1670.09   | AA176581  | 2483.508  | 2442.369  |
| AK022681  | 9916.806  | 7941.936  | AL096857  | 5931.891  | 7011.835  | BI818232  | 715.378   | 689.717   |
| NM_01770E | 609.442   | 436.014   | X07203    | 35212.195 | 29502.717 | AA451686  | 16153.615 | 17360.699 |
| BE895529  | 3958.964  | 2873.169  | AB040104  | 1217.636  | 1003.854  | AA934644  | 594.967   | 802.057   |
| AF056453  | 320.04    | 247.581   | NM_003834 | 10839.083 | 11246.306 | D87446    | 11201.838 | 16863.063 |
| AK000964  | 1272.451  | 1060.043  | NM_005959 | 12733.034 | 11667.08  | U17327    | 4462.287  | 3994.04   |
| AL117536  | 20201.27  | 34804.715 | NM_003381 | 3225.909  | 3418.833  | AB046781  | 876.253   | 508.416   |
| NM_017751 | 9451.381  | 16342.931 | NM_005756 | 2354.352  | 2620.85   | M87790    | 54490.945 | 56791.281 |
| NM_003771 | 698.752   | 1209.758  | NM_003702 | 29417.148 | 24126.713 | NM_00176E | 4758.436  | 3486.049  |
| NM_01786C | 1346.429  | 2731.102  | NM_000369 | 1822.849  | 1877.116  | NM_00002E | 24827.25  | 19210.877 |
| X91195    | 52815.016 | 70506.008 | NM_016351 | 3259.542  | 3238.445  | NM_00071E | 2669.57   | 2171.269  |
| AF086190  | 491.09    | 882.204   | NM_00440E | 3397.834  | 2594.825  | AF035802  | 13378.377 | 12978.133 |
| NM_006143 | 617.528   | 1184.328  | NM_00198E | 13706.71  | 10944.859 | Y08145    | 8797.65   | 8492.594  |
| AL050035  | 5046.716  | 8423.428  | NM_00606C | 2789.654  | 2184.396  | M26123    | 744.553   | 738.06    |
| AK024449  | 348.442   | 641.24    | NM_005667 | 4956.511  | 4614.683  | NM_00183E | 16722.621 | 15784.712 |
| AF090101  | 306.482   | 589.639   | NM_00630E | 1879.366  | 1394.587  | NM_01955E | 2371.176  | 2751.731  |
| AF040723  | 6650.413  | 6304.653  | NM_00006C | 853.339   | 706.779   | NM_01209E | 15757.476 | 14971.531 |
| NM_015527 | 6711.961  | 5722.945  | NM_00958E | 728.409   | 623.832   | NM_00390E | 28256.055 | 25578.064 |
| X89675    | 745.934   | 754.534   | L09080    | 30465.953 | 21401.389 | L12052    | 6265.231  | 6667.342  |
| NM_01218E | 536.564   | 672.736   | NM_00732E | 18529.492 | 12521.169 | AB028976  | 15593.435 | 14289.454 |
| NM_00579E | 13671.225 | 12196.197 | AK023080  | 473.887   | 353.935   | AK026337  | 18111.002 | 18212.707 |
| NM_00421E | 3734.484  | 3218.649  | NM_00188E | 7188.784  | 5731.908  | NM_01586E | 2591.335  | 2338.305  |
| NM_01628E | 18793.977 | 15366.885 | D83782    | 13282.526 | 10746.511 | NM_00462E | 1750.022  | 2246.252  |
| NM_001464 | 808.389   | 826.962   | NM_00207E | 4940.077  | 3999.934  | NM_00266C | 6114.753  | 6926.794  |
| NM_002051 | 4834.972  | 5197.606  | NM_000287 | 3871.188  | 4395.533  | NM_01590C | 2125.314  | 1923.485  |
| AK022177  | 2090.292  | 1687.319  | NM_00165E | 3285.781  | 3518.025  | NM_00370E | 2380.079  | 2298.321  |
| AK023852  | 907.106   | 808.409   | AF091033  | 2225.106  | 2203.621  | AF182218  | 1445.654  | 1356.09   |
| AF086466  | 984.752   | 853.989   | NM_001122 | 43575.027 | 44009.25  | NM_016122 | 3234.136  | 2546.25   |
| AB007962  | 4838.982  | 3031.468  | NM_004591 | 19186.479 | 15879.826 | AK023749  | 1108.074  | 1052.162  |
| AF005081  | 1543.997  | 1305.94   | NM_006274 | 423.556   | 368.365   | NM_002337 | 7429.634  | 8545.861  |
| AK026438  | 968.251   | 1217.081  | AL133027  | 5172.724  | 5079.466  | NM_01324E | 3773.386  | 4005.111  |
| AK021546  | 1453.5    | 3367.719  | AB037732  | 3266.692  | 3582.606  | NM_00642E | 50924.887 | 49917.871 |
| AL050186  | 20975.695 | 28296.072 | NM_005767 | 1191.897  | 1064.796  | NM_00476E | 3647.015  | 4231.262  |
| AK021918  | 7609.634  | 11145.13  | NM_001837 | 1034.217  | 906.521   | NM_00581E | 47375.828 | 51575.84  |
| AF069137  | 381.102   | 568.893   | NM_00183E | 59073.371 | 56478.676 | AK025520  | 6585.261  | 5231.606  |
| AK021669  | 6225.404  | 9284.547  | BC016029  | 1074.377  | 931.35    | NM_00489E | 6631.939  | 10612.386 |
| AL080113  | 49564.617 | 58410.141 | M27487    | 47447.441 | 44489.402 | NM_014597 | 37986     | 44963.617 |
| AL050083  | 1973.101  | 2735.935  | NM_00228E | 59348.109 | 55712.988 | NM_00446E | 1181.729  | 1211.96   |
| AK022766  | 1110.645  | 1998.49   | NM_002164 | 1759.591  | 1841.823  | NM_007081 | 3874.134  | 5062.496  |
| AL049422  | 10954.321 | 16700.951 | NM_003811 | 17928.369 | 18063.85  | AB032964  | 5138.388  | 4573.904  |
| NM_00009E | 1396.253  | 1253.499  | NM_002981 | 13475.305 | 10955.104 | BE733605  | 12861.778 | 11494.994 |
| NM_00177E | 9754.139  | 6743.792  | NM_001244 | 4920.222  | 4860.585  | NM_003334 | 45195.27  | 46224.258 |
| AB033059  | 1444.181  | 1724.947  | NM_01227E | 1033.257  | 1113.144  | NM_00269E | 5880.07   | 5870.67   |
| NM_016484 | 4687.684  | 3880.096  | NM_006137 | 2896.877  | 2431.966  | NM_003671 | 2450.817  | 3254.315  |
| NM_01445E | 986.175   | 911.433   | NM_01613E | 43621.488 | 37120.211 | AK026000  | 9997.304  | 9181.598  |
| NM_01468E | 432.821   | 349.976   | AL117468  | 9700.152  | 7502.563  | NM_01783E | 4058.371  | 5001.798  |
| AF023130  | 343.535   | 363.124   | NM_01961E | 9229.446  | 7294.973  | NM_00667E | 13811.788 | 13540.766 |
| AK021536  | 12502.915 | 9090.475  | BC031485  | 4307.434  | 3731.65   | NM_00302E | 11225.007 | 11130.354 |
| U31285    | 361.947   | 218.972   | NM_00409E | 10317.104 | 9550.375  | NM_00487E | 10697.588 | 14174.891 |
| NM_00260C | 1208.313  | 846.145   | X15624    | 2828.009  | 3295.779  | NM_01984E | 3197.178  | 4236.451  |
| NM_00364E | 24766.826 | 13396.957 | AF073770  | 3506.177  | 3237.042  | NM_002951 | 23758.369 | 27084.137 |

|           |           |           |           |           |           |           |           |           |
|-----------|-----------|-----------|-----------|-----------|-----------|-----------|-----------|-----------|
| NM_006663 | 2106.083  | 1156.385  | AL359401  | 8798.687  | 9806.823  | NM_002317 | 5377.69   | 5422.157  |
| NM_006092 | 829.099   | 597.813   | NM_012213 | 2238.994  | 2074.19   | NM_000320 | 2812.353  | 2231.934  |
| NM_003939 | 958.57    | 906.726   | NM_016573 | 10188.756 | 8844.952  | NM_017921 | 591.294   | 578.597   |
| NM_012424 | 1145.282  | 2715.713  | NM_001303 | 22296.434 | 20709.523 | NM_006475 | 1254.56   | 1311.221  |
| NM_002446 | 1171.165  | 1931.409  | M21304    | 679.729   | 524.304   | NM_004620 | 6215.402  | 6900.743  |
| NM_004440 | 345.459   | 606.823   | NM_001979 | 2289.553  | 2520.511  | AF087940  | 22167.221 | 32760.723 |
| NM_000863 | 2143.002  | 2827.024  | AB040896  | 2950.655  | 2832.979  | AJ277587  | 4450.16   | 5702.869  |
| NM_006651 | 3524.017  | 5542.747  | NM_001107 | 4835.191  | 5717.204  | D87432    | 7976.438  | 9185.05   |
| NM_005336 | 15451.151 | 23260.467 | AF084645  | 1344.435  | 1505.191  | Y18483    | 1102.563  | 1533.736  |
| NM_001419 | 13740.833 | 21648.547 | AF151851  | 16130.15  | 14589.902 | AI565117  | 59305.344 | 63475.398 |
| AF119817  | 14335.991 | 22336.891 | NM_005176 | 1919.712  | 2076.282  | U28015    | 903.823   | 807.144   |
| AL035306  | 5596.678  | 8715.483  | NM_003636 | 4559.772  | 5650.44   | AI299075  | 11272.872 | 9199.549  |
| NM_004230 | 6186.815  | 4199.936  | NM_002234 | 8067.679  | 7820.081  | M59979    | 4839.122  | 4667.847  |
| AK024372  | 412.985   | 320.277   | NM_003471 | 705.387   | 919.874   | AB011098  | 3548.616  | 3535.087  |
| NM_014503 | 1615.768  | 1402.704  | NM_000701 | 4802.83   | 4507.475  | AA609759  | 7637.973  | 8028.008  |
| NM_014659 | 1452.829  | 1464.453  | AB022696  | 34704.984 | 32675.029 | AA029418  | 17934.176 | 15750.507 |
| NM_004399 | 8771.614  | 6449.989  | AF137372  | 5491.895  | 4762.969  | L20815    | 20431.385 | 18388.092 |
| NM_006337 | 6634.909  | 4886.794  | AF220417  | 2477.314  | 2427.74   | AI364483  | 57837.336 | 58753.656 |
| NM_004507 | 5258.043  | 3474.354  | NM_001523 | 1542.315  | 1246.26   | AA456001  | 36056.875 | 34195.117 |
| NM_002710 | 27060.414 | 20788.383 | NM_017423 | 1857.926  | 1459.902  | AA176581  | 2303.471  | 2368.245  |
| NM_014060 | 8906.804  | 7218.675  | Z70705    | 1585.561  | 1591.515  | BI818232  | 793.708   | 644.19    |
| NM_004749 | 10256.652 | 8126.717  | NM_002611 | 3302.02   | 3192.009  | AA451686  | 17887.34  | 15399.794 |
| BQ446064  | 2846.152  | 2600.174  | NM_017417 | 1489.091  | 1333.367  | AA934644  | 426.899   | 460.689   |
| AF302502  | 753.026   | 740.329   | AL133602  | 4245.46   | 3969.522  | NM_002050 | 12048.074 | 10707.906 |
| AF274571  | 3103.928  | 2136.999  | AF037219  | 6716.886  | 6346.553  | NM_007097 | 17312.314 | 15752.695 |
| NM_005449 | 1452.775  | 1003.65   | AK026075  | 815.959   | 797.869   | NM_000715 | 1722.99   | 1456.796  |
| NM_003879 | 4506.856  | 2869.573  | NM_000251 | 6333.047  | 6016.647  | AF035802  | 13737.04  | 14523.367 |
| U69263    | 310.844   | 276.689   | NM_006038 | 8514.166  | 7918.352  | Y08145    | 7774.998  | 9927.67   |
| NM_016052 | 16993.057 | 22468.994 | AB011133  | 5539.093  | 5139.648  | NM_001838 | 17116.5   | 16223.391 |
| NM_006718 | 319.034   | 675.97    | NM_017572 | 41259.945 | 46357.695 | NM_019555 | 2461.993  | 2350.974  |
| NM_005427 | 1667.964  | 3063.226  | NM_018444 | 4576.482  | 4175.385  | NM_012096 | 16443.736 | 15583.561 |
| NM_016312 | 1487.683  | 2138.891  | NM_000252 | 2323.803  | 2388.743  | NM_003905 | 28998.152 | 23483.865 |
| AF234887  | 1126.514  | 2278.33   | NM_006947 | 15552.773 | 13776.677 | L12052    | 5827.486  | 6083.166  |
| NM_001776 | 3529.161  | 5046.483  | NM_017917 | 4724.047  | 4066.251  | AB028976  | 15568.176 | 12652.423 |
| NM_001792 | 386.53    | 438.573   | NM_004090 | 8165.69   | 7998.759  | AK026337  | 19406.506 | 16304.91  |
| NM_001903 | 607.245   | 964.691   | NM_014634 | 14829.523 | 10105.68  | NM_015869 | 2450.7    | 1815.075  |
| U87223    | 3204.323  | 5697.716  | NM_001919 | 31469.236 | 25196.662 | AB031038  | 697.519   | 1120.647  |
| NM_005857 | 5728.137  | 4974.144  | CY3Cy5    | 790.933   | 206.291   | NM_004626 | 1159.799  | 1104.703  |
| NM_002429 | 1107.765  | 881.475   | NM_003822 | 747.498   | 381.639   | NM_001899 | 1804.613  | 2595.031  |
| NM_000429 | 3752.543  | 2886.998  | NM_004412 | 6487.777  | 4639.659  | NM_004305 | 54342.918 | 57574.629 |
| AK027037  | 1395.082  | 1260.132  | NM_016647 | 986.788   | 711.945   | AF072506  | 453.951   | 794.754   |
| NM_003875 | 16138.646 | 11347.172 | AK024695  | 1410.885  | 1159.518  | NM_005992 | 813.829   | 1350.857  |
| AF191687  | 6214.647  | 4781.746  | NM_018659 | 462.877   | 540.068   | NM_003144 | 17461.232 | 20080.682 |
| NM_003046 | 629.163   | 593.884   | AF038174  | 4117.83   | 3796.453  | NM_000908 | 2744.743  | 2904.597  |
| NM_000274 | 19863.307 | 13072.748 | NM_013243 | 953.582   | 1211.307  | AB011102  | 8049.273  | 8721.22   |
| NM_000170 | 1871.659  | 1201.816  | AF070632  | 798.226   | 881.146   | D63480    | 5743.11   | 6505.405  |
| NM_000281 | 698.116   | 558.015   | AF161359  | 1972.718  | 2680.476  | NM_002969 | 11860.048 | 12708.356 |
| AK001295  | 3917.468  | 2413.71   | AL365520  | 1915.953  | 2433.261  | M81768    | 1082.557  | 988.569   |
| NM_006031 | 5522.598  | 3309.495  | AL359338  | 615.279   | 693.934   | NM_001037 | 693.525   | 249.767   |
| NM_002715 | 9298.738  | 5989.092  | AK023623  | 10423.179 | 9977.078  | AK023749  | 1051.666  | 1077.742  |
| NM_001020 | 55017.527 | 69460.969 | AF086534  | 1299.239  | 994.765   | NM_002337 | 8042.742  | 7569.699  |
| AB020660  | 4842.915  | 9102.724  | AF070617  | 969.232   | 954.201   | NM_013245 | 3665.911  | 3209.79   |
| NM_006659 | 19907.369 | 32592.479 | NM_014918 | 2273.719  | 2513.152  | NM_006423 | 52319.938 | 47795.891 |

|           |           |           |           |           |           |           |           |           |
|-----------|-----------|-----------|-----------|-----------|-----------|-----------|-----------|-----------|
| NM_018051 | 2809.694  | 4844.087  | NM_003822 | 1101.869  | 1265.322  | NM_004766 | 3703.993  | 3151.483  |
| NM_015371 | 3168.133  | 5008.213  | NM_004412 | 8078.538  | 10559.909 | NM_005819 | 46698.215 | 41879.688 |
| AB040915  | 6077.888  | 9444.676  | SR1       | 64617.055 | 52208.43  | AK025520  | 6359.082  | 4827.379  |
| NM_001328 | 33373.148 | 37561.41  | SR3       | 24786.35  | 29339.029 | NM_004892 | 6191.572  | 5986.675  |
| NM_005749 | 11195.425 | 14602.112 | SR5       | 2712.163  | 4548.558  | NM_014597 | 37784.266 | 35661.059 |
| NM_006696 | 3971.038  | 3751.218  | SR7       | 3081.3    | 33401.012 | NM_017896 | 35170.508 | 53602.625 |
| NM_004599 | 19461.887 | 14090.983 | SR9       | 10468.963 | 2707.837  | AB002374  | 13523.802 | 12484.299 |
| NM_006037 | 2447.526  | 1723.946  | CY3Cy5    | 1567.08   | 361.791   | U17327    | 5527.465  | 5335.341  |
| NM_015871 | 15622.935 | 10614.174 | U84515    | 874.201   | 678.52    | AB046781  | 1116.27   | 722.731   |
| AB032962  | 248.414   | 220.073   | AF086106  | 544.42    | 489.022   | M87790    | 55755.902 | 55221.191 |
| NM_019037 | 10063.673 | 7497.933  | AF086143  | 9660.748  | 10472.318 | NM_001766 | 5151.697  | 4378.23   |
| NM_015891 | 7062.668  | 4144.439  | AF086112  | 787.363   | 1024.364  | NM_000029 | 32123.689 | 25763.707 |
| NM_006802 | 1817.602  | 1287.154  | AL137254  | 1917.802  | 1778.849  | NM_017921 | 811.544   | 763.416   |
| AB037778  | 972.98    | 616.534   | AK026359  | 950.03    | 1264.208  | NM_003136 | 12036.383 | 11356.549 |
| NM_005066 | 31493.615 | 19346.764 | AF085884  | 2064.591  | 1753.58   | NM_013328 | 29544.26  | 25231.025 |
| NM_003089 | 12479.443 | 6397.665  | S81522    | 7688.624  | 10372.156 | NM_000790 | 1031.477  | 978.191   |
| NM_003753 | 31237     | 15253.82  | AF085911  | 424.042   | 278.726   | NM_002660 | 6566.891  | 6308.735  |
| NM_006223 | 1539.933  | 1023.428  | S94541    | 1238.694  | 1264.336  | NM_015900 | 2336.468  | 1544.612  |
| NM_017590 | 6624.262  | 4219.451  | L36587    | 25589.578 | 17937.141 | NM_003706 | 2549.674  | 2499.623  |
| AB011145  | 15163.701 | 13651.824 | AK024228  | 2408.565  | 3092.584  | AF182218  | 1180.932  | 1080.989  |
| NM_003750 | 46778.617 | 53893.953 | AK022420  | 3084.116  | 2496.607  | NM_005218 | 533.584   | 854.478   |
| NM_015251 | 521.378   | 916.22    | AK023254  | 950.718   | 567.802   | AL122071  | 760.279   | 712.652   |
| M92422    | 15751.586 | 23314.424 | AK023945  | 18216.631 | 15690.582 | AB033054  | 20120.783 | 20096.52  |
| NM_017868 | 7910.389  | 11010.811 | AK022446  | 951.437   | 927.507   | NM_016122 | 3172.983  | 3209.203  |
| NM_001869 | 362.674   | 933.93    | AK023352  | 380.939   | 659.535   | AF153330  | 1868.027  | 3788.128  |
| X69637    | 408.735   | 711.403   | AK023773  | 1102.785  | 1208.019  | NM_001652 | 455.638   | 830.869   |
| NM_004212 | 424.776   | 499.383   | AK024123  | 606.761   | 864.288   | NM_002050 | 9823.396  | 8998.314  |
| NM_018159 | 28735.906 | 22965.055 | AK026202  | 383.67    | 708.423   | NM_007097 | 17458.584 | 16735.912 |
| NM_000819 | 17433.736 | 14141.25  | AK021539  | 9998.703  | 11013.425 | D87446    | 12519.877 | 12176.604 |
| NM_002513 | 11476.94  | 9014.493  | AK021819  | 881.014   | 839.832   | BF540935  | 30219.635 | 29437.238 |
| NM_017424 | 4993.443  | 4507.844  | AK026738  | 1748.504  | 1445.594  | NM_004466 | 1082.344  | 896.654   |
| NM_001522 | 17759.201 | 11752.358 | AK025011  | 1266.624  | 1314.312  | NM_007081 | 3935.956  | 3413.704  |
| NM_000883 | 16175.364 | 13537.755 | AL157491  | 1752.697  | 1782.796  | AB032964  | 4599.699  | 5232.236  |
| AF254086  | 3782.58   | 3361.436  | NM_005266 | 3414.395  | 3904.429  | BE733605  | 10862.756 | 10779.65  |
| AL390142  | 1149.852  | 953.573   | AF087965  | 619.299   | 1101.264  | NM_003334 | 46511.715 | 44471.316 |
| NM_006565 | 4658.07   | 3322.612  | AF085998  | 1595.592  | 2197.141  | NM_002693 | 5024.37   | 4607.563  |
| AB007930  | 7174.042  | 4917.757  | AB030240  | 425.217   | 589.113   | NM_003671 | 2227.82   | 2850.873  |
| X76978    | 500.042   | 410.317   | AK024681  | 896.148   | 1052.643  | AK026000  | 10579.981 | 12011.069 |
| AJ005273  | 3548.368  | 2930      | X68742    | 564.076   | 1012.959  | NM_017833 | 4069.969  | 4134.708  |
| AK021892  | 3069.055  | 1917.642  | AF085990  | 387.597   | 386.834   | NM_006675 | 13817.102 | 15369.787 |
| NM_017637 | 525.527   | 307.083   | NM_014907 | 25648.369 | 26890.848 | NM_003022 | 12639.766 | 13622.707 |
| NM_003121 | 36879.055 | 20020.516 | AB007977  | 18656.254 | 19555.953 | NM_004873 | 10571.875 | 10884.448 |
| NM_003437 | 1343.407  | 920.263   | NM_014221 | 9269.245  | 8222.2    | NM_019842 | 3843.369  | 3663.103  |
| NM_018337 | 7155.402  | 4957.026  | AK025181  | 383.052   | 402.51    | NM_002951 | 19947.426 | 19066.734 |
| AA193295  | 612.813   | 1708.975  | AK021773  | 1736.526  | 1326.455  | NM_002317 | 4815.517  | 4501.705  |
| NM_018045 | 5242.123  | 10085.535 | AK027074  | 1129.27   | 989.427   | NM_000320 | 2555.819  | 1974.168  |
| NM_006481 | 10836.105 | 16723.328 | AL365456  | 612.624   | 778.888   | CY3Cy5    | 1099.701  | 111.553   |
| AB011115  | 1300.654  | 2107.352  | NM_018038 | 590.897   | 831.536   | NM_145659 | 1628.099  | 1218.197  |
| NM_003910 | 47305.57  | 51188.555 | AK022364  | 512.836   | 604.031   | NM_021957 | 871.952   | 1117.801  |
| AB007913  | 742.054   | 1734.805  | AK024674  | 636.23    | 1114.835  | AK022138  | 1845.41   | 2449.01   |
| L09080    | 696.114   | 793.299   | AK024244  | 5987.256  | 7069.047  | AF086191  | 8644.43   | 7827.971  |
| NM_007326 | 1844.596  | 1774.573  | AK023812  | 861.297   | 1057.895  | AF143880  | 430.883   | 400.177   |
| AK023080  | 469.307   | 508.795   | AL390084  | 1595.025  | 1734.236  | AL133052  | 2433.591  | 2951.135  |

|           |           |           |           |           |           |           |           |           |
|-----------|-----------|-----------|-----------|-----------|-----------|-----------|-----------|-----------|
| NM_001886 | 4763.301  | 4988.627  | AK023565  | 495.458   | 443.595   | AB037824  | 2344.157  | 2564.302  |
| NM_004467 | 423.723   | 340.236   | AK021479  | 877.947   | 618.513   | AF361494  | 1316.749  | 1057.639  |
| NM_005622 | 311.508   | 198.363   | NM_003835 | 6009.622  | 5279.137  | AK022810  | 1840.769  | 2039      |
| NM_018058 | 23685.209 | 19489.566 | AK000245  | 2696.507  | 3189.654  | AK001384  | 2079.667  | 2775.153  |
| NM_004548 | 34304.816 | 29664.453 | AF113684  | 281.387   | 332.037   | AK025437  | 4684.819  | 10156.521 |
| X69079    | 25973.223 | 19698.938 | AF118072  | 1174.324  | 1571.809  | AK074164  | 6702.386  | 9421.134  |
| BI759406  | 27392.832 | 17618.363 | AK023724  | 221.236   | 426.667   | NM_145658 | 2505.306  | 2541.398  |
| R76099    | 15645.291 | 9614.611  | AK024112  | 1442.487  | 1899.432  | NM_021957 | 1091.5    | 1133.807  |
| S74445    | 1424.925  | 1106.515  | AF085900  | 23515.781 | 23265.064 | SR2       | 41706.652 | 39136.938 |
| BI763360  | 1864.129  | 1408.165  | AK026195  | 562.883   | 834.385   | SR4       | 11472.68  | 14620.591 |
| D25538    | 3661.952  | 2367.939  | AL049443  | 2220.065  | 2817.965  | SR6       | 1298.331  | 2663.029  |
| NM_000360 | 35395.047 | 21653.914 | AL079274  | 25615.82  | 18761.111 | SR8       | 5064.921  | 27979.246 |
| D49950    | 1105.35   | 772.711   | S46403    | 371.374   | 318.748   | SR10      | 12657.475 | 14294.687 |
| NM_001848 | 1312.687  | 816.361   | AL137398  | 1380.996  | 787.059   | CY3Cy5    | 1065.487  | 190.184   |
| X03635    | 1586.368  | 1270.057  | Y12021    | 2337.842  | 2318.379  | AK026818  | 248.755   | 394.868   |
| BC011847  | 52662.633 | 71263.898 | AF127771  | 771.676   | 1746.467  | NM_018468 | 1179.849  | 1477.647  |
| X03348    | 3970.689  | 8567.556  | NM_013300 | 31406.582 | 35107.164 | AL359932  | 700.722   | 938.461   |
| AF353674  | 8523.96   | 14464.371 | AK026039  | 7614.469  | 13198.097 | AB037850  | 3860.662  | 3215.449  |
| BC002645  | 10329.338 | 15265.039 | AF108756  | 15496.976 | 20578.125 | AK002197  | 3656.248  | 3869.744  |
| NM_021138 | 5712.649  | 8131.746  | AF116709  | 1613.29   | 1976.349  | AF087996  | 8014.738  | 11297.749 |
| BC002792  | 10992.156 | 17163.666 | AK025533  | 1765.396  | 2037.59   | AL833249  | 8842.862  | 10891.49  |
| NM_005847 | 536.602   | 995.733   | AK026499  | 787.153   | 413.094   | NM_018374 | 448.333   | 509.376   |
| NM_002286 | 45683.73  | 47631.199 | AK021911  | 9472.664  | 10180.185 | AF131852  | 445.122   | 528.738   |
| NM_002164 | 1248.41   | 1615.415  | D17225    | 884.442   | 1298.871  | AK021894  | 2522.239  | 2828.854  |
| NM_003811 | 15757.42  | 24159.668 | AF147430  | 1311.01   | 2479.796  | NM_020424 | 8981.986  | 10930.103 |
| NM_002981 | 13055.196 | 11090.249 | AK025766  | 15265.546 | 24199.305 | AF438313  | 622.171   | 1582.046  |
| NM_001244 | 3339.334  | 3544.635  | U35875    | 35469.68  | 36478.613 | NM_017815 | 686.392   | 457.034   |
| NM_012275 | 639.062   | 528.561   | AK021857  | 41661.195 | 42530.426 | AF147341  | 1421.857  | 997.646   |
| NM_006137 | 370.352   | 428.475   | AK024756  | 1863.095  | 1352.79   | AB033009  | 45583.637 | 32634.779 |
| NM_016138 | 47018.699 | 39917.055 | NM_017911 | 1811.548  | 1275.732  | AK022086  | 728.578   | 672.802   |
| AL117468  | 2115.184  | 1916.844  | AJ224168  | 5946.015  | 4260.462  | AF147320  | 2482.398  | 2314.499  |
| NM_019613 | 8110.23   | 6015.708  | S69873    | 674.805   | 638.712   | AK027024  | 1147.251  | 1260.1    |
| NM_005382 | 1143.447  | 906.804   | AF147325  | 63794.195 | 60572.883 | AK022339  | 3173.273  | 2654.379  |
| AK027086  | 5894.347  | 4486.481  | NM_014428 | 1410.174  | 1521.223  | AK025126  | 352.528   | 509.942   |
| AB032997  | 1421.199  | 1305.251  | NM_018497 | 436.433   | 446.424   | AK025317  | 14518.133 | 12244.091 |
| AL096857  | 4706.679  | 3690.875  | AK023584  | 527.405   | 724.607   | NM_005110 | 1429.793  | 1264.777  |
| X07203    | 32498.445 | 18527.141 | NM_003774 | 945.896   | 981.911   | X92110    | 546.407   | 1049.086  |
| AB040104  | 636.129   | 466.153   | D87466    | 9983.606  | 18141.145 | AK023122  | 722.596   | 825.549   |
| NM_003834 | 5029.989  | 4119.825  | AK025048  | 939.33    | 952.851   | AF147408  | 4150.403  | 4577.318  |
| NM_005958 | 14224.814 | 13061.338 | U84522    | 2787.895  | 2613.042  | AK027222  | 8907.563  | 9554.243  |
| NM_003381 | 3604.858  | 8515.7    | AK021694  | 2487.411  | 1762.602  | AF085868  | 587.583   | 1050.308  |
| NM_005756 | 4012.735  | 7205.843  | AF086013  | 828.587   | 579.271   | AL049275  | 570.074   | 1353.797  |
| NM_003702 | 48028.121 | 61693.871 | U84505    | 4543.241  | 4273.646  | AK054767  | 773.829   | 733.556   |
| NM_000368 | 2148.043  | 3689.956  | X81005    | 1966.996  | 2010.215  | AL080086  | 993.031   | 735.933   |
| NM_004405 | 1834.069  | 2833.963  | AL049265  | 2558.359  | 3158.667  | AL117486  | 742.212   | 967.044   |
| NM_001988 | 3108.76   | 5343.17   | AK022225  | 708.739   | 928.82    | AL049301  | 2230.319  | 1993.605  |
| AF073770  | 3519.383  | 2884.841  | AL137635  | 898.868   | 868.187   | AL050042  | 3773.804  | 3538.518  |
| AL359401  | 8824.244  | 9226.549  | AL049430  | 2732.99   | 2766.17   | AL117570  | 1389.854  | 1640.584  |
| NM_012213 | 1358.496  | 1689.29   | AK021461  | 554.511   | 825.596   | AL157458  | 1035.634  | 859.991   |
| NM_016573 | 5678.674  | 5434.651  | AB015349  | 1004.727  | 923.953   | NM_015377 | 1576.001  | 1295.597  |
| NM_001303 | 13252.133 | 10713.775 | NM_014913 | 22246.879 | 14983.613 | AL137531  | 1906.903  | 1445.544  |
| M21304    | 617.526   | 440.898   | NM_005864 | 483.694   | 345.721   | AK022210  | 503.203   | 414.784   |
| NM_001978 | 329.362   | 185.059   | NM_012341 | 5409.579  | 3930.73   | AL080085  | 5648.753  | 5201.693  |

|           |           |           |           |           |           |           |           |           |
|-----------|-----------|-----------|-----------|-----------|-----------|-----------|-----------|-----------|
| AB040896  | 2143.301  | 1636.457  | NM_003256 | 24957.971 | 17048.078 | NM_007017 | 2711.225  | 3402.998  |
| NM_001107 | 4505.786  | 3697.526  | D87450    | 3105.707  | 2323.682  | AL137446  | 8500.254  | 11854.648 |
| AF084645  | 674.517   | 724.412   | NM_017797 | 4276.906  | 3344.063  | AB025286  | 6951.345  | 8377.479  |
| AF151851  | 4942.14   | 4497.99   | AF000562  | 5132.907  | 6307.419  | AF009286  | 788.532   | 976.06    |
| NM_003471 | 326.262   | 204.697   | AK025713  | 4820.797  | 5838.439  | NM_015880 | 399.408   | 752.782   |
| NM_014379 | 279.016   | 200.726   | NM_018100 | 711.863   | 789.921   | AF056437  | 1808.734  | 1712.186  |
| AF220417  | 5285.732  | 4349.691  | NM_004075 | 4739.196  | 5538.416  | AB032364  | 941.492   | 1044.271  |
| NM_001122 | 6771.48   | 5761.255  | NM_001887 | 6781.897  | 4725.152  | AF009295  | 1118.762  | 1622.624  |
| NM_004591 | 608.673   | 424.379   | NM_006533 | 5646.912  | 5616.185  | NM_005029 | 2619.094  | 2793.687  |
| NM_006274 | 564.726   | 446.879   | AK026747  | 7762.667  | 4993.055  | AF056447  | 3061.687  | 4512.551  |
| AL133027  | 1562.013  | 1405.708  | AL110150  | 8217.737  | 7842.323  | AK001010  | 3762.289  | 2587.163  |
| AB037732  | 3553.328  | 7266.575  | NM_001998 | 8364.237  | 6279.329  | NM_018076 | 1642.448  | 1573.371  |
| NM_005767 | 1684.751  | 2900.243  | X87825    | 4769.112  | 4464.691  | AK021442  | 5882.467  | 5726.463  |
| NM_001837 | 1407.433  | 2396.207  | AK001285  | 20930.303 | 20240.871 | AK001076  | 1233.38   | 1710.762  |
| NM_001839 | 52379.691 | 67612.953 | D17215    | 12741.173 | 14331.666 | AK001820  | 2312.288  | 2677.098  |
| BC016029  | 1466.199  | 3069.832  | BE781513  | 1883.546  | 2732.954  | AK021482  | 13987.508 | 24674.527 |
| M27487    | 51585.094 | 63973.879 | NM_015714 | 49574.348 | 53735.453 | AK021730  | 617.76    | 1155.323  |
| NM_002611 | 2461.962  | 2358.244  | AK075564  | 631.581   | 1084.993  | NM_006158 | 41747.742 | 32820.027 |
| AL133602  | 719.225   | 621.823   | AK026219  | 1130.101  | 1217.436  | NM_006346 | 2680.367  | 2514.516  |
| AF037219  | 7498.645  | 4642.181  | D28446    | 3191.792  | 4007.036  | AK025240  | 4729.483  | 4826.652  |
| AK026075  | 944.89    | 818.314   | NM_016279 | 496.709   | 513.802   | NM_017633 | 13091.671 | 11716.559 |
| NM_000251 | 5336.449  | 4086.831  | NM_000211 | 10266.765 | 7416.376  | AF086186  | 48278.945 | 33946.668 |
| AF118071  | 744.357   | 670.639   | AB037830  | 1250.234  | 822.817   | NM_017802 | 8434.601  | 8642.985  |
| NM_006038 | 3075.928  | 2237.389  | NM_015685 | 7775.611  | 6912.733  | AF155194  | 348.539   | 245.286   |
| AB011133  | 6567.77   | 4051.704  | NM_004357 | 49082.898 | 43617.145 | AK023667  | 2137.116  | 2351.773  |
| NM_017572 | 37497.207 | 19825.102 | X03324    | 4794.824  | 5021.431  | AJ008137  | 29932.078 | 27337.459 |
| NM_018444 | 3221.531  | 2014.197  | AF130988  | 1136.196  | 1109.822  | AF085841  | 998.625   | 1799.39   |
| NM_000252 | 2348.005  | 1615.408  | NM_015385 | 941.667   | 1047.344  | AJ008118  | 66660.688 | 67813.438 |
| NM_006947 | 16690.422 | 7912.334  | NM_003690 | 6454.41   | 6284.307  | AK000939  | 1672.252  | 1205.443  |
| NM_017917 | 4955.634  | 3107.421  | NM_000876 | 6265.269  | 5193.714  | NM_005523 | 341.791   | 388.648   |
| NM_004090 | 9195.289  | 6274.717  | NM_014214 | 4948.144  | 5624.718  | AL109674  | 3497.557  | 2787.325  |
| NM_014634 | 12103.151 | 22772.293 | NM_000856 | 795.964   | 1022.531  | AK024512  | 10148.563 | 13155.382 |
| NM_001919 | 36557.371 | 44271.039 | NM_002752 | 2857.242  | 2164.012  | AK023454  | 5012.079  | 3865.364  |
| BC031485  | 3644.179  | 6958.015  | NM_013281 | 949.678   | 653.181   | L23207    | 2158.455  | 1634.447  |
| NM_004092 | 14851.761 | 20969.873 | Y11306    | 1561.554  | 1337.071  | NM_018062 | 2556.689  | 2240.407  |
| X15624    | 2722.955  | 4658.891  | NM_016112 | 654.869   | 747.135   | NM_007128 | 33616.32  | 29039.992 |
| AK023080  | 388.448   | 456.95    | X85106    | 664.979   | 656.835   | NM_007160 | 791.872   | 783.493   |
| NM_001886 | 4862.716  | 5856.46   | NM_003931 | 3476.027  | 3747.944  | NM_018627 | 2250.098  | 2969.01   |
| NM_004467 | 480.433   | 436.358   | NM_006681 | 572.181   | 763.342   | S82164    | 1630.504  | 1547.431  |
| NM_018058 | 23394.676 | 18820.902 | NM_012479 | 45196.82  | 43533.879 | AK024394  | 2858.439  | 3362.681  |
| NM_004548 | 32810.449 | 23981.855 | AF250226  | 21245.658 | 22637.236 | AF147374  | 1356.028  | 1074.058  |
| X69079    | 22646.57  | 16012.906 | NM_003217 | 28313.109 | 28450.826 | AF130091  | 942.285   | 937.76    |
| BI759406  | 25837.668 | 15626.689 | NM_006534 | 11680.8   | 9574.208  | L43338    | 20695.4   | 16948.152 |
| R76099    | 13693.495 | 7246.576  | NM_017601 | 2878.292  | 2304.819  | AJ227866  | 35407.172 | 27074.523 |
| S74445    | 1454.037  | 863.86    | AF110265  | 13502.883 | 10009.454 | AF458223  | 6346.177  | 5227.815  |
| BI763360  | 1699.419  | 1200.189  | AF272371  | 58627.008 | 64604.164 | AK026822  | 535.524   | 478.54    |
| D25538    | 3099.77   | 1889.543  | AK021848  | 3158.499  | 2789.861  | NM_018587 | 268.243   | 308.5     |
| NM_000360 | 31330.883 | 18494.563 | NM_003704 | 4529.29   | 8737.833  | AK022838  | 21371.641 | 19440.625 |
| D49950    | 1073.454  | 558.606   | AK023140  | 676.883   | 654.459   | NM_003509 | 1024.21   | 1512.033  |
| NM_001849 | 995.273   | 725.96    | AF084362  | 1198.945  | 1047.852  | AF086519  | 2121.908  | 2274.522  |
| X03635    | 1159.401  | 800.137   | NM_001553 | 3708.974  | 3886.816  | AF055012  | 11943.017 | 9200.838  |
| BC011847  | 47861.398 | 68870.711 | NM_014173 | 10448.246 | 8693.172  | AK022307  | 5992.197  | 5351.499  |
| X03348    | 2751.615  | 1786.852  | NM_001731 | 23556.246 | 16807.703 | AF085997  | 610.04    | 506.67    |

|           |           |           |           |           |           |           |           |           |
|-----------|-----------|-----------|-----------|-----------|-----------|-----------|-----------|-----------|
| AF353674  | 5955.651  | 3869.902  | AL137506  | 748.875   | 688.671   | NM_005172 | 8295.068  | 7490.857  |
| BC002645  | 7824.489  | 4147.361  | AK022961  | 3129.838  | 3042.973  | AK025192  | 46103.57  | 34642.832 |
| NM_021138 | 6610.061  | 11254.795 | NM_007375 | 6019.271  | 5844.903  | NM_012403 | 6877.965  | 8317.878  |
| BC002792  | 11289.253 | 19637.125 | NM_014371 | 3746.648  | 3547.576  | AK023251  | 382.91    | 322.733   |
| NM_001523 | 1472.13   | 2762.195  | AF290512  | 7023.808  | 5594.121  | AK022611  | 6808.159  | 15542.216 |
| NM_017423 | 2819.271  | 4399.912  | NM_006716 | 7262.962  | 6747.265  | NM_004952 | 3193.529  | 3670.348  |
| Z70705    | 882.853   | 1605.381  | AB002323  | 6474.646  | 7396.5    | NM_020414 | 6016.302  | 5787.506  |
| NM_003811 | 15668.777 | 22241.621 | AK022241  | 10890.326 | 10780.194 | AB037730  | 4356.132  | 3959.941  |
| NM_002981 | 13260.436 | 12298.899 | AK022587  | 3603.583  | 4135.023  | NM_001357 | 11924.803 | 9460.898  |
| NM_001244 | 3578.186  | 4379.374  | NM_005506 | 2347.567  | 2555.874  | NM_003893 | 3910.493  | 3437.513  |
| NM_012275 | 617.379   | 546.444   | NM_005723 | 960.232   | 1120.91   | AB037816  | 2729.139  | 2429.577  |
| NM_006137 | 351.322   | 274.78    | AL137404  | 61757.648 | 58478.262 | NM_014265 | 1335.204  | 1076.383  |
| NM_016139 | 45656.996 | 29537.928 | NM_005814 | 6597.136  | 9397.995  | U92026    | 3574.04   | 3890.369  |
| AL117468  | 2171.416  | 1582.509  | NM_002851 | 1721.091  | 1448.215  | AF086234  | 33754.461 | 24550.939 |
| NM_019613 | 8328.825  | 5415.081  | NM_002071 | 1292.218  | 944.649   | AK023680  | 12511.882 | 10085.015 |
| NM_005382 | 1052.771  | 777.067   | NM_005339 | 35399.238 | 28094.281 | AF009324  | 5461.935  | 5826.558  |
| AK027086  | 5474.91   | 3568.032  | NM_001906 | 9130.179  | 9327.832  | AF019226  | 661.249   | 866.189   |
| AB032997  | 1233.781  | 1042.479  | NM_004142 | 1391.885  | 1179.89   | AK022112  | 846.143   | 777.099   |
| AL096857  | 4639.921  | 2897.027  | AF108138  | 4566.567  | 3634.134  | AL137480  | 47521.051 | 31543.471 |
| X07203    | 27809.695 | 12045.649 | BF340302  | 5093.702  | 3118.105  | AK022182  | 2618.305  | 2209.305  |
| AB040104  | 606.706   | 494.508   | AK024210  | 2885.919  | 2691.566  | D16473    | 4056.151  | 3893.716  |
| NM_003834 | 3820.576  | 3457.386  | NM_002276 | 5417.818  | 5269.016  | AB028968  | 4055.519  | 4360.666  |
| NM_005959 | 11569.187 | 6853.972  | AL133087  | 3220.613  | 2789.783  | AK001202  | 2053.734  | 1903.443  |
| NM_003381 | 2131.856  | 1226.152  | NM_018010 | 3138.073  | 2678.531  | AF195764  | 58686.574 | 55794.113 |
| NM_005756 | 2725.707  | 1500.533  | NM_002274 | 28482.135 | 29703.799 | AF055029  | 2715.961  | 4208.868  |
| NM_003702 | 35050.223 | 14774.29  | AL080200  | 1044.57   | 1128.432  | AB011542  | 1829.641  | 3051.852  |
| NM_000369 | 2006.677  | 2410.448  | BF337874  | 9530.188  | 10150.026 | NM_001853 | 8244.672  | 11051.188 |
| NM_004405 | 2273.603  | 4238.864  | NM_003475 | 43422.941 | 42661.086 | U41737    | 765.591   | 563.925   |
| NM_001988 | 3483.89   | 7445.801  | NM_000243 | 8640.285  | 9176.903  | NM_005799 | 1756.754  | 1749.147  |
| L09080    | 899.03    | 1761.828  | NM_004383 | 21251.682 | 24028.314 | X99661    | 1785.018  | 1394.631  |
| NM_007326 | 2523.2    | 4626.621  | AL157475  | 7470.437  | 11432.082 | NM_005927 | 2706.767  | 1927.146  |
| NM_012213 | 1617.135  | 1591.928  | NM_006069 | 55806.914 | 51373.152 | AB028983  | 10705.28  | 9008.433  |
| NM_016573 | 5719.597  | 5522.995  | NM_017656 | 2680.639  | 1967.889  | AB037800  | 3830.233  | 2894.453  |
| NM_001303 | 14023.956 | 12300.26  | X16282    | 14728.968 | 9938.23   | AK026377  | 2194.258  | 1898.552  |
| M21304    | 653.034   | 505.127   | NM_014415 | 2435.903  | 2065.531  | NM_018660 | 4699.933  | 4731.88   |
| NM_001979 | 305.487   | 378.761   | S75264    | 11279.273 | 10724.044 | NM_003394 | 10255.394 | 10887.366 |
| AB040896  | 2221.444  | 1483.135  | AF027513  | 1435.701  | 1484.796  | NM_014636 | 1411.898  | 1149.042  |
| NM_001107 | 4582.076  | 3141.036  | NM_001379 | 7229.103  | 5814.195  | NM_006747 | 5156.528  | 4877.024  |
| AF084645  | 770.451   | 549.6     | NM_018664 | 1041.97   | 824.481   | NM_007086 | 2248.349  | 2082.904  |
| AF151851  | 4831.048  | 3733.124  | BC006428  | 3905.493  | 3505.385  | NM_003870 | 17609.301 | 18969.885 |
| NM_003471 | 275.557   | 329.221   | NM_005034 | 1728.753  | 1438.686  | AK024507  | 2365.363  | 2220.695  |
| AF220417  | 4994.97   | 3333.272  | NM_003926 | 16964.012 | 11228.255 | NM_001243 | 5567.554  | 6400.61   |
| NM_001122 | 6520.789  | 3775.941  | AF085356  | 1934.609  | 1894.112  | AK025997  | 2005.337  | 1733.922  |
| NM_004591 | 548.459   | 335.553   | NM_016047 | 29201.871 | 25504.174 | NM_005546 | 1060.324  | 926.39    |
| NM_006274 | 440.434   | 417.207   | NM_001499 | 12745.346 | 12296.527 | NM_000299 | 986.62    | 996.561   |
| AL133027  | 1103.921  | 1009.079  | BF030165  | 19134.568 | 21107.326 | NM_005478 | 600.438   | 918.777   |
| AB037732  | 2294.132  | 1608.878  | NM_016732 | 11733.314 | 13147.363 | S51112    | 556.708   | 708.933   |
| NM_005767 | 1019.73   | 437.908   | NM_014763 | 21419.305 | 19428.154 | NM_014887 | 3239.97   | 3336.596  |
| NM_001837 | 908.757   | 552.445   | NM_020185 | 9005.273  | 11134.042 | NM_002590 | 603.874   | 443.181   |
| NM_001839 | 54412.34  | 53609.98  | NM_002832 | 7832.778  | 8176.5    | NM_018556 | 13526.539 | 13641.402 |
| BC016029  | 1571.033  | 3188.618  | NM_017732 | 7859.942  | 10157.994 | NM_005235 | 1607.735  | 1850.684  |
| M27487    | 51706.512 | 68564.914 | NM_003654 | 314.394   | 378.192   | NM_005600 | 4541.483  | 7712.438  |
| NM_002286 | 53558.836 | 68081.461 | NM_000152 | 52778.707 | 45691.203 | NM_005967 | 23458.498 | 22175.531 |

|           |           |           |           |           |           |           |           |           |
|-----------|-----------|-----------|-----------|-----------|-----------|-----------|-----------|-----------|
| NM_002164 | 1967.548  | 3327.134  | D17222    | 19761.277 | 15444.313 | AB014566  | 3187.262  | 2927.8    |
| NM_017417 | 322.058   | 374.273   | NM_000154 | 4001.104  | 4228.253  | NM_015678 | 830.214   | 807.303   |
| AL133602  | 943.848   | 730.261   | NM_003549 | 662.264   | 837.686   | AK025950  | 426.466   | 460.203   |
| AF037219  | 8340.258  | 5294.92   | NM_000671 | 2529.986  | 2706.743  | NM_014223 | 4142.808  | 3105.311  |
| AK026075  | 956.974   | 774.976   | NM_006297 | 24085.871 | 20280.27  | NM_016194 | 1608.577  | 1333.169  |
| NM_000251 | 6052.616  | 4016.635  | X85325    | 51576.422 | 40653.512 | AL050385  | 2406.105  | 1625.583  |
| AF118071  | 772.734   | 594.269   | AF318366  | 8479.896  | 7086.048  | NM_007027 | 7579.843  | 7571.278  |
| NM_006038 | 3078.104  | 1838.575  | AF182423  | 2966.108  | 1942.554  | NM_000633 | 53418.383 | 59265.285 |
| NM_002485 | 312.455   | 127.327   | D26018    | 4187.272  | 3378.261  | AB037855  | 4153.55   | 4016.499  |
| AB011133  | 6521.377  | 2967.35   | AB037863  | 2094.993  | 3242.491  | AK024524  | 9461.509  | 8514.076  |
| NM_017572 | 37360.914 | 16401.105 | BC000363  | 1705.261  | 2246.847  | NM_000562 | 10278.528 | 10139.881 |
| NM_018444 | 2957.468  | 1408.102  | NM_007237 | 2160.429  | 2463.631  | NM_020353 | 925.321   | 927.596   |
| NM_000252 | 2596.623  | 1240.136  | NM_004608 | 1321.006  | 2004.011  | NM_019011 | 31088.346 | 34420.496 |
| NM_006947 | 14023.949 | 6989.806  | NM_018257 | 21631.559 | 38671.465 | NM_004879 | 9730.841  | 12022.995 |
| NM_017917 | 4251.275  | 2433.991  | NM_005919 | 4418.452  | 6512.94   | AB020694  | 3355.732  | 2620.796  |
| NM_004090 | 9609.242  | 6148.605  | NM_012256 | 54536.734 | 51176.316 | NM_016071 | 43827.113 | 36696.379 |
| NM_014634 | 7272.674  | 4268.902  | NM_006006 | 3392.566  | 4298.707  | AL050131  | 2246.165  | 2059.873  |
| NM_001919 | 21611.768 | 10520.875 | NM_016325 | 3918.062  | 5983.834  | NM_004475 | 22011.086 | 20788.367 |
| BC031485  | 3120.574  | 1687.365  | NM_001604 | 1345.132  | 1655.873  | NM_001627 | 5610.909  | 5692.832  |
| NM_004092 | 13669.928 | 13632.673 | NM_000908 | 1604.132  | 1267.153  | NM_002544 | 1863.073  | 1852.891  |
| X15624    | 2972.323  | 4598.986  | AB011102  | 4841.814  | 4078.065  | X77690    | 3787.769  | 4370.879  |
| AF073770  | 5386.584  | 10250.964 | D63480    | 3119.707  | 3088.302  | NM_006536 | 2230.976  | 2738.891  |
| AL359401  | 13916.031 | 25346.77  | NM_002969 | 6069.452  | 5593.82   | NM_005658 | 10553.503 | 13304.227 |
| NM_004467 | 471.021   | 471.815   | NM_006475 | 728.79    | 561.187   | NM_002422 | 1986.396  | 1717.391  |
| NM_005622 | 334.871   | 431.449   | NM_004620 | 4213.398  | 5540.062  | NM_006690 | 6908.959  | 6594.195  |
| NM_018058 | 27122.641 | 25810.393 | AF087940  | 10943.339 | 10361.827 | NM_006156 | 513.813   | 269.734   |
| NM_004548 | 41223.727 | 37127.063 | AJ277587  | 2250.012  | 2208.981  | AF218022  | 6693.995  | 4358.401  |
| X69079    | 29420.305 | 24057.4   | D87432    | 5390.367  | 6303.673  | NM_003348 | 4233.489  | 3642.011  |
| BI759406  | 32069.486 | 19806.84  | Y18483    | 737.767   | 771.065   | AB033029  | 458.417   | 440.2     |
| R76099    | 17080.768 | 10761.536 | AI565117  | 49035.523 | 55075.727 | AL137663  | 418.012   | 453.827   |
| S74445    | 1535.214  | 1145.561  | AI299075  | 5464.63   | 4779.583  | AB006198  | 19031.709 | 20456.473 |
| BI763360  | 2424.609  | 1476.391  | M59979    | 2505.006  | 1978.347  | U72518    | 6188.552  | 6121.61   |
| D25538    | 4541.465  | 4189.567  | AB011098  | 2044.949  | 1834.807  | AF264765  | 1732.076  | 2380.89   |
| NM_000360 | 42792.109 | 41367.746 | AA609759  | 4059.388  | 5046.307  | NM_015322 | 3822.291  | 6916.646  |
| D49950    | 1195.922  | 903.375   | AA029418  | 11335.549 | 13127.012 | NM_016607 | 10458.95  | 10093.885 |
| NM_001849 | 1194.167  | 517.394   | L20815    | 11974.029 | 14957.914 | NM_003275 | 1132.84   | 830.66    |
| X03635    | 1483.963  | 651.514   | AI364483  | 48530.207 | 55774.609 | NM_000268 | 53791.508 | 54996.563 |
| BC011847  | 48928.086 | 65236.809 | AA456001  | 25351.594 | 30434.369 | M30493    | 54113.559 | 49688.066 |
| X03348    | 2743.322  | 1894.962  | AA176581  | 1443.426  | 2315.992  | AJ008160  | 1731.617  | 2643.354  |
| AF353674  | 5532.106  | 3991.144  | BI818232  | 468.191   | 832.315   | NM_005824 | 2525.543  | 2157.733  |
| BC002645  | 7080.559  | 4048.767  | AA451686  | 12193.643 | 17348.223 | AF052211  | 11160.624 | 10842.38  |
| NM_021138 | 3896.793  | 2271.81   | AA934644  | 528.171   | 647.551   | U66561    | 1564.782  | 1792.361  |
| BC002792  | 8422.491  | 6480.922  | NM_017896 | 17781.688 | 12964.557 | NM_000306 | 4698.362  | 4221.902  |
| NM_001523 | 991.23    | 503.192   | AB002374  | 6497.847  | 4908.201  | NM_002200 | 1931.32   | 1578.764  |
| NM_017423 | 2114.816  | 972.339   | U17327    | 2824.38   | 1847.723  | AF017433  | 2912.108  | 1847.555  |
| Z70705    | 972.112   | 1087.187  | M87790    | 46843.211 | 38771.734 | AF130111  | 2887.713  | 2295.989  |
| NM_002611 | 3455.385  | 5369.95   | NM_001768 | 2775.203  | 2633.592  | NM_016307 | 13197.159 | 8247.735  |
| NM_005382 | 1513.164  | 2123.518  | NM_000029 | 15342.266 | 14237.477 | AB028449  | 5573.829  | 3979.457  |
| AK027086  | 7666.263  | 8501.448  | NM_000715 | 1393.642  | 1135.495  | NM_004697 | 6596.832  | 5266.677  |
| AB032997  | 1859.005  | 2094.704  | AF035802  | 7657.041  | 7244.097  | U94384    | 555.817   | 563.042   |
| AL096857  | 6245.514  | 7084.146  | Y08145    | 4008.836  | 3854.597  | AF131776  | 14432.794 | 10261.894 |
| AB002351  | 242.798   | 362.86    | M26123    | 495.943   | 325.781   | NM_020528 | 11921.539 | 11273.45  |
| X07203    | 41021.063 | 26624.465 | NM_001838 | 9029.434  | 6697.377  | NM_007040 | 52022.645 | 51236.328 |

|           |           |           |           |           |           |            |           |           |
|-----------|-----------|-----------|-----------|-----------|-----------|------------|-----------|-----------|
| AB040104  | 658.792   | 635.985   | NM_019555 | 1227.426  | 1088.168  | NM_014483  | 19890.973 | 23021.352 |
| NM_003834 | 5260.43   | 4696.885  | NM_012096 | 11248.987 | 14725.452 | AK024249   | 4988.123  | 6262.619  |
| NM_005959 | 15253.169 | 16784.096 | NM_003905 | 18538.289 | 19931.543 | AF239156   | 12328.275 | 14296.989 |
| NM_003381 | 3360.715  | 7380.905  | L12052    | 3944.844  | 5590.466  | NM_020390  | 7505.537  | 7549.793  |
| NM_005756 | 4252.112  | 8362.624  | AB028976  | 10150.15  | 11723.061 | NM_003321  | 35553.914 | 35884.23  |
| NM_003702 | 45936.602 | 44248.953 | AK026337  | 12468.626 | 14410.615 | U18937     | 28493.506 | 24638.975 |
| NM_000369 | 1912.387  | 2941.236  | NM_015869 | 2343.959  | 2773.467  | U01925     | 1258.503  | 1206.471  |
| NM_016351 | 3031.957  | 1859.114  | NM_004626 | 1405.742  | 2207.27   | AF268872   | 4280.535  | 3731.552  |
| NM_004405 | 1336.752  | 683.856   | NM_001899 | 1555.656  | 2619.02   | AK022180   | 56717.523 | 54896.047 |
| NM_001988 | 2665.776  | 1539.623  | NM_013328 | 18677.469 | 13573.896 | NM_001226  | 2715.078  | 3369.427  |
| NM_006060 | 2803.916  | 1772.139  | NM_000790 | 676.251   | 342.609   | NM_001336  | 3216.73   | 3138.901  |
| NM_005667 | 5210.257  | 3948.77   | NM_002660 | 3976.277  | 4086.202  | AB050716   | 1796.529  | 1951.1    |
| NM_006308 | 900.581   | 458.874   | NM_015900 | 1309.408  | 1028.151  | AF161353   | 25813.201 | 24791.986 |
| NM_000060 | 725.085   | 414.696   | NM_003706 | 1670.806  | 1473.579  | NM_000764  | 8803.563  | 8148.603  |
| NM_009589 | 760.51    | 714.778   | AF182218  | 845.568   | 636.772   | NM_004146  | 49923.148 | 36310.715 |
| L09080    | 658.19    | 353.329   | NM_016122 | 2120.417  | 1799.719  | NM_003002  | 25084.537 | 22021.77  |
| NM_007326 | 2672.927  | 3647.078  | AK023749  | 901.666   | 1073.214  | D42047     | 6147.978  | 5028.284  |
| NM_001886 | 6456.863  | 14737.203 | NM_002337 | 4882.906  | 6607.109  | AB009282   | 21105.738 | 16348.74  |
| D83782    | 3540.576  | 7319.232  | NM_013245 | 2739.79   | 4321.8    | NM_005004  | 52025.438 | 44125.469 |
| NM_002078 | 5106.234  | 9158.121  | NM_006423 | 43891.484 | 51418.766 | NM_014639  | 11968.407 | 8538.885  |
| NM_000287 | 4281.378  | 7644.35   | NM_004766 | 2250.032  | 3546.161  | NM_006392  | 7688.143  | 5953.144  |
| NM_001656 | 3845.675  | 6579.514  | NM_005819 | 38905.223 | 45786.438 | NM_014717  | 6006.767  | 4652.527  |
| AF091033  | 659.411   | 1298.309  | AK025520  | 4733.973  | 4820.721  | NM_017922  | 5591.486  | 5423.133  |
| NM_001122 | 9828.065  | 15581.226 | NM_004892 | 4677.666  | 6593.07   | NM_002823  | 53423.941 | 64345.758 |
| NM_004591 | 793.518   | 1684.987  | NM_014597 | 28075.389 | 46639.902 | NM_017916  | 29156.561 | 39470.582 |
| NM_006274 | 531.673   | 1541.954  | BF540935  | 8079.806  | 7561.82   | NM_006756  | 372.431   | 461.061   |
| AL133027  | 1613.005  | 3479.324  | NM_004466 | 512.977   | 208.816   | NM_001805  | 28976.016 | 33587.953 |
| AB037732  | 3245.664  | 4716.101  | NM_007081 | 2468.594  | 1798.877  | AK022360   | 8278.708  | 9788.938  |
| NM_005767 | 1539.156  | 2327.836  | AB032964  | 3020.801  | 3452.362  | AK095694   | 1371.545  | 1341.909  |
| NM_001837 | 1383.08   | 2799.913  | BE733605  | 6636.438  | 6957.571  | X52341     | 56629.645 | 51920.512 |
| NM_001839 | 50910.477 | 69604.695 | NM_003334 | 39367.438 | 37962.574 | AL133632   | 10667.046 | 8729.785  |
| BC016029  | 1233.366  | 768.561   | NM_002693 | 2931.073  | 3294.67   | NM_004343  | 29513.045 | 25869.791 |
| M27487    | 47159.895 | 24117.867 | NM_003671 | 1542.663  | 1434.52   | X52355     | 15049.715 | 15440.534 |
| NM_002286 | 46343.824 | 34868.898 | AK026000  | 6500.085  | 7852.49   | NM_006963  | 13565.78  | 16380.107 |
| NM_002164 | 1455.518  | 1176.304  | NM_017833 | 2359.659  | 1969.279  | NM_000307  | 2588.803  | 2243.433  |
| NM_003811 | 16440.424 | 16560.053 | NM_006675 | 7213.31   | 5993.511  | NM_006510  | 26932.609 | 28663.797 |
| NM_002981 | 14264.841 | 8386.661  | NM_003022 | 6471.599  | 5131.009  | NM_003141  | 8377.937  | 10091.164 |
| NM_001244 | 3684.295  | 2550.523  | NM_004873 | 6540.779  | 8779.936  | NM_020245  | 11961.315 | 10277.146 |
| NM_012275 | 638.156   | 385.863   | NM_019842 | 2437.928  | 4355.962  | NM_007175  | 1350.887  | 1085.985  |
| NM_006137 | 332.649   | 224.804   | NM_002951 | 16916.785 | 28161.133 | AB046381   | 853.433   | 648.499   |
| NM_016139 | 47188.359 | 41317.824 | NM_002317 | 4576.335  | 7489.732  | AJ011497   | 10131.584 | 7163.167  |
| AL117468  | 3570.119  | 9281.117  | NM_000320 | 2033.719  | 2678.314  | NM_003018  | 953.571   | 1005.079  |
| NM_019613 | 13071.611 | 26370.611 | NM_017921 | 523.709   | 864.948   | NM_000336  | 3254.514  | 3128.189  |
| BC031485  | 4802.232  | 8962.841  | NM_003136 | 8208.738  | 10191.425 | W61100     | 57722.918 | 61781     |
| NM_004092 | 13831.812 | 25365.84  | D63480    | 3927.483  | 3446.122  | AA608568   | 12161.648 | 10948.198 |
| X15624    | 4830.015  | 7755.614  | NM_002969 | 6722.889  | 7491.397  | BG831301   | 53539.551 | 57113.242 |
| AF073770  | 4451.61   | 7613.178  | NM_006475 | 752.179   | 588.353   | M14764     | 4681.014  | 5026.601  |
| AL359401  | 12320.109 | 22824.113 | NM_004620 | 2825.407  | 1378.713  | AA478647   | 11037.089 | 19674.186 |
| NM_012213 | 1993.902  | 3456.376  | AF087940  | 9818.079  | 8012.936  | M35999     | 3317.61   | 6246.132  |
| NM_016573 | 7448.274  | 10470.951 | AJ277587  | 2615.596  | 3210.04   | AW058501   | 3708.981  | 5415.798  |
| NM_001303 | 17364.357 | 29337.637 | D87432    | 6053.658  | 7994.247  | M81379     | 1415.918  | 1551.568  |
| M21304    | 814.343   | 1497.332  | Y18483    | 687.175   | 709.947   | ID 2623896 | 5658.284  | 5906.277  |
| NM_001979 | 369.489   | 405.677   | AI565117  | 53927.734 | 55588.32  | ID 2602214 | 17068.318 | 14757.142 |



|           |           |           |           |           |           |            |           |           |
|-----------|-----------|-----------|-----------|-----------|-----------|------------|-----------|-----------|
| AB040896  | 3026.466  | 4676.33   | U28015    | 384.553   | 466.853   | ID 2071279 | 13175.609 | 10053.128 |
| NM_001107 | 6449.3    | 10309.015 | AI299075  | 6108.562  | 5582.491  | L10709     | 10259.386 | 10822.79  |
| AF084645  | 1043.319  | 1291.174  | M59979    | 2742.137  | 2518.898  | N35489     | 3589.064  | 3196.549  |
| AF151851  | 5436.95   | 3481.383  | AB011098  | 2549.959  | 2648.352  | AI928195   | 300.232   | 338.561   |
| NM_005176 | 1164.755  | 787.088   | AA609759  | 4272.865  | 3277.133  | AA482489   | 1190.495  | 1177.656  |
| NM_003636 | 6682.518  | 5032.73   | AA029418  | 9955.313  | 7718.229  | AA458922   | 4461.448  | 4698.464  |
| NM_002234 | 393.066   | 315.244   | L20815    | 11072.607 | 7821.944  | NM_004166  | 19902.777 | 20186.424 |
| NM_003471 | 432.534   | 398.315   | AI364483  | 57455.949 | 53552.254 | NM_003485  | 11573.361 | 12615.979 |
| NM_000701 | 4925.007  | 3737.035  | AA456001  | 24135.898 | 25311.494 | NM_005036  | 6695.086  | 6301.208  |
| AB022696  | 1106.02   | 634.017   | AA176581  | 1511.932  | 2041.161  | M95923     | 9380.064  | 7627.331  |
| NM_002233 | 299.129   | 271.508   | BI818232  | 422.317   | 1611.668  | NM_002415  | 55053.523 | 58595.688 |
| NM_014379 | 343.355   | 126.693   | AA451686  | 12851.663 | 17643.66  | NM_006332  | 54057.875 | 59360.691 |
| AF137372  | 8647.323  | 23015.824 | AA934644  | 406.76    | 954.104   | NM_002000  | 461.15    | 360.289   |
| AF220417  | 8517.188  | 23399.178 | NM_002050 | 11474.3   | 21829.07  | NM_000916  | 5265.13   | 4574.731  |
| NM_001523 | 1113.77   | 1222.589  | NM_007097 | 13120.211 | 18979.457 | NM_018663  | 6714.464  | 6383.192  |
| NM_017423 | 2291.19   | 2126.481  | D87446    | 7735.229  | 8646.555  | NM_145904  | 21769.508 | 18432.045 |
| Z70705    | 794.581   | 915.958   | U17327    | 3019.805  | 1862.085  | NM_006796  | 17869.596 | 17043.879 |
| NM_002611 | 2974.333  | 3200.752  | M87790    | 49463.156 | 48799.203 | NM_000706  | 1796.813  | 2471.383  |
| NM_017417 | 335.403   | 424.6     | NM_001766 | 2886.27   | 2751.825  | NM_015941  | 7566.675  | 12010.218 |
| AL133602  | 1001.263  | 2229.053  | NM_000029 | 14891.884 | 12335.441 | NM_003655  | 6529.884  | 10966.454 |
| AF037219  | 11061.778 | 18394.525 | NM_000715 | 1474.98   | 1226.99   | NM_014837  | 6865.449  | 10039.876 |
| AK026075  | 1604.648  | 2934.139  | AF035802  | 7876.514  | 7898.358  | NM_017726  | 819.663   | 950.278   |
| NM_000251 | 7852.401  | 8587.668  | Y08145    | 4504.916  | 4640.029  | NM_005256  | 25860.111 | 24677.203 |
| AF118071  | 840.178   | 703.651   | M26123    | 462.905   | 342.082   | NM_002840  | 868.109   | 919.656   |
| NM_006036 | 3396.188  | 1376.87   | NM_001836 | 9027.936  | 7394.825  | NM_006174  | 3168.915  | 3241.301  |
| NM_002485 | 252.966   | 249.062   | NM_019555 | 1497.664  | 1022.532  | NM_015850  | 16288.969 | 14694.842 |
| AB011133  | 7176.343  | 4372.47   | NM_012096 | 8742.12   | 5776.788  | NM_004864  | 2492.78   | 1924.327  |
| NM_017572 | 39672.734 | 20178.039 | NM_003905 | 15652.229 | 10599.72  | NM_002836  | 9024.753  | 9366.086  |
| NM_018444 | 3525.606  | 1859.03   | L12052    | 4246.45   | 5014.227  | AK027377   | 2052.37   | 4131.901  |
| NM_000252 | 2692.875  | 1720.263  | AB028976  | 11643.234 | 13549.181 | BF528358   | 1255.332  | 1432.318  |
| NM_006947 | 16525.217 | 7155.781  | NM_015869 | 1854.173  | 2433.122  | NM_016336  | 1161.093  | 1313.803  |
| NM_017917 | 4141.325  | 2007.2    | NM_004626 | 1438.999  | 1873.501  | AK025111   | 804.299   | 894.701   |
| NM_004090 | 12469.836 | 6575.018  | NM_001899 | 1591.49   | 2659.774  | NM_001732  | 3240.843  | 4043.412  |
| NM_014634 | 11269.07  | 14215.529 | NM_000906 | 2169.676  | 2716.235  | NM_018690  | 10515.098 | 9533.795  |
| NM_001919 | 37120.633 | 48838.098 | AB011102  | 5433.395  | 7339.177  | NM_000860  | 2414.315  | 2249.667  |
| CY3Cy5    | 2055.666  | 464.658   | NM_002660 | 3971.808  | 3723.27   | AB037798   | 3029.28   | 2631.776  |
| NM_003822 | 504.12    | 325.913   | NM_015900 | 1023.135  | 729.176   | NM_000780  | 708.63    | 541.4     |
| NM_004412 | 14955.383 | 7492.917  | NM_003706 | 1428.978  | 1361.878  | AF272663   | 26646.129 | 26885.809 |
| NM_016647 | 1760.753  | 988.903   | AF182218  | 996.931   | 1056.116  | NM_012190  | 4645.939  | 3752.929  |
| AK024695  | 1868.842  | 903.038   | NM_016122 | 2242.302  | 3387.666  | AB033015   | 785.813   | 726.846   |
| NM_018659 | 686.549   | 434.657   | AK023749  | 565.671   | 413.759   | AF277719   | 747.509   | 714.997   |
| AF038174  | 3321.702  | 2061.262  | NM_002337 | 4051.104  | 3072.448  | NM_000791  | 3293.453  | 3030.427  |
| NM_013243 | 628.69    | 570.47    | NM_013245 | 2675.717  | 1654.468  | NM_003681  | 4655.963  | 6023.061  |
| AF070632  | 679.248   | 651.646   | NM_004892 | 4384.01   | 6671.467  | NM_014906  | 12989.744 | 16962.262 |
| AF161359  | 2186.067  | 2064.074  | NM_014597 | 25271.596 | 32534.211 | NM_015700  | 6674.562  | 9869.186  |
| AL359338  | 561.904   | 519.304   | NM_017896 | 22022.705 | 21230.818 | U66621     | 15420.499 | 19236.129 |
| AK023623  | 1156.863  | 872.816   | AB002374  | 8270.956  | 8382.823  | NM_005720  | 52277.484 | 49893.629 |
| AF086534  | 1096.598  | 1503.298  | NM_004466 | 752.484   | 534.516   | AB040936   | 1542.394  | 1236.206  |
| AF070617  | 1509.732  | 1275.777  | NM_007081 | 2583.097  | 1902.361  | AB023161   | 553.165   | 330.626   |
| NM_014916 | 4552.02   | 7078.326  | AB032964  | 2417.182  | 1853.793  | U61736     | 1959.393  | 1756.59   |
| NM_003822 | 1616.853  | 1958.64   | BE733605  | 6983.701  | 7504.455  | AJ132086   | 2757.739  | 3554.025  |
| NM_004412 | 21239.412 | 16731.152 | NM_003334 | 41856.645 | 37143.574 | U92816     | 33062.164 | 45798.684 |
| SR1       | 59996.34  | 59801.832 | NM_002693 | 3334.705  | 3560.979  | NM_004106  | 1571.829  | 1737.822  |

|           |           |           |           |           |           |            |           |           |
|-----------|-----------|-----------|-----------|-----------|-----------|------------|-----------|-----------|
| SR3       | 37948.609 | 22954.033 | NM_003671 | 1483.103  | 1652.945  | S76984     | 12941.389 | 15870.573 |
| SR5       | 3918.439  | 3699.187  | AK026000  | 5779.875  | 5374.734  | NM_01449E  | 54930.156 | 58373.859 |
| SR7       | 5311.023  | 31643.926 | NM_017833 | 2794.245  | 2358.63   | NM_014081  | 3109.109  | 2863.606  |
| SR9       | 20825.1   | 3340.095  | NM_00667E | 8310.313  | 7053.367  | NM_005651  | 1856.152  | 1830.495  |
| CY3Cy5    | 3703.544  | 503.724   | NM_003022 | 6787.318  | 5056.717  | NM_00541E  | 433.51    | 208.797   |
| U84515    | 1099.622  | 563.264   | NM_004873 | 5753.207  | 5648.044  | NM_00719E  | 1963.638  | 1360.594  |
| AF086106  | 1338.204  | 749.513   | NM_002951 | 24349.189 | 43338.234 | AK023337   | 12300.852 | 12304.229 |
| AF086143  | 2641      | 2848.713  | NM_002317 | 6344.528  | 12027.44  | NM_01327E  | 22079.186 | 19116.008 |
| AF086112  | 765.665   | 1326.189  | NM_000320 | 2557.586  | 5346.585  | AB037842   | 739.255   | 599.712   |
| AL137254  | 1202.067  | 668.481   | NM_003136 | 8239.242  | 10163.455 | U92074     | 848.472   | 597.425   |
| AK026359  | 593.057   | 591.192   | NM_01332E | 21026.367 | 20460.598 | NM_019011  | 3150.13   | 4061.885  |
| AF085884  | 3092.297  | 2949.222  | NM_000790 | 912.455   | 930.601   | AF459094   | 7186.306  | 8019.314  |
| S81522    | 17985.648 | 15624.031 | NM_00647E | 714.978   | 551.244   | NM_003157  | 5781.772  | 7318.593  |
| S94541    | 942.276   | 888.952   | NM_004620 | 3984.53   | 2528.557  | NM_00493E  | 2395.352  | 3376.425  |
| L36587    | 35049.559 | 21737.934 | AF087940  | 11395.155 | 9582.753  | NM_01432E  | 2625.111  | 2743.461  |
| AK024228  | 1352.725  | 919.292   | AJ277587  | 2393.858  | 1988.971  | NM_00444E  | 1307.749  | 1104.852  |
| AK022420  | 4465.817  | 2341.239  | D87432    | 4670.563  | 4827.832  | NM_015981  | 2850.132  | 2994.691  |
| AK023254  | 511.921   | 303.032   | Y18483    | 934.454   | 959.664   | NM_00045E  | 6771.096  | 6542.336  |
| AK023945  | 22464.994 | 15366.125 | AI565117  | 56220.051 | 57921.355 | NM_014791  | 9199.281  | 8002.129  |
| AK022446  | 535.214   | 547.446   | U28015    | 461.284   | 483.881   | NM_00331E  | 5909.557  | 5034.279  |
| AK023773  | 476.29    | 478.634   | AI299075  | 6292.838  | 5893.556  | NM_00436E  | 10296.51  | 10031.042 |
| AK026202  | 526.283   | 831.608   | M59979    | 2953.726  | 2829.611  | NM_00018E  | 18185.516 | 17503.822 |
| AK021539  | 8774.144  | 7886.166  | AB011098  | 2370.002  | 2125.861  | AK023384   | 4558.01   | 4728.223  |
| AK021819  | 841.706   | 880.465   | AA609759  | 4691.039  | 4402.989  | NM_01602E  | 13556.335 | 13319.606 |
| AK026738  | 754.577   | 931.383   | AA029418  | 10591.903 | 8892.318  | NM_02024E  | 12332.966 | 16078.56  |
| AK025011  | 2265.317  | 2082.295  | L20815    | 12647.862 | 9144.806  | NM_00717E  | 2252.697  | 3108.771  |
| AL157491  | 3059.149  | 2655.912  | AI364483  | 51459.805 | 48314.543 | AB046381   | 1698.177  | 2006.909  |
| NM_00526E | 2555.49   | 2566.896  | AA456001  | 18369.111 | 12379.684 | AJ011497   | 11917.224 | 12636.352 |
| AF087965  | 1032.256  | 939.707   | BI818232  | 648.997   | 1319.783  | NM_00301E  | 1144.602  | 1099.509  |
| AF085998  | 869.071   | 1267.544  | AA451686  | 17350.02  | 27917.545 | NM_00033E  | 2867.616  | 3110.562  |
| AB030240  | 407.524   | 595.171   | AA934644  | 537.467   | 1400.558  | W61100     | 53623.344 | 60988.734 |
| AK024681  | 878.378   | 599.297   | NM_007097 | 13415.451 | 17833.822 | AA478647   | 8996.711  | 8389.491  |
| NM_014907 | 42922.789 | 41637.77  | D87446    | 7632.876  | 8578.314  | M35999     | 2551.534  | 2856.303  |
| AB007977  | 1119.276  | 1344.827  | BF540935  | 23781.156 | 23389.324 | AW058501   | 3060.708  | 3217.206  |
| NM_014221 | 15571.803 | 10093.81  | NM_00071E | 1578.33   | 862.334   | M81379     | 1310.981  | 1714.436  |
| AK025181  | 651.215   | 391.159   | AF035802  | 6916.067  | 5677.648  | ID 2602214 | 14056.499 | 15529.948 |
| AK021773  | 1723.181  | 1108.692  | Y08145    | 4866.274  | 4243.203  | ID 2071279 | 12029.632 | 8199.643  |
| AK027074  | 1363.902  | 1254.493  | M26123    | 745.885   | 561.106   | L10709     | 10463.026 | 9258.044  |
| AL365456  | 796.87    | 622.431   | NM_00183E | 10128.285 | 6798.409  | N35489     | 3439.289  | 2111.264  |
| NM_01803E | 404.103   | 467.356   | NM_01955E | 1615.162  | 1588.498  | AA458922   | 4489.042  | 3654.57   |
| AK022239  | 441.539   | 556.981   | NM_01209E | 10492.295 | 8486.555  | NM_00171E  | 23148.482 | 21001.438 |
| AK022364  | 509.812   | 930.495   | NM_00390E | 17723.566 | 14228.002 | AL080062   | 3655.786  | 3743      |
| AK024674  | 512.2     | 691.127   | L12052    | 3737.73   | 4271.022  | AF308802   | 3450.885  | 2982.524  |
| AK024244  | 1695.424  | 1212.981  | AB028976  | 9486.325  | 8379.507  | M95923     | 9222.022  | 9677.891  |
| AL390084  | 1863.505  | 760.039   | AK026337  | 12076.072 | 11351.193 | NM_00241E  | 57329.516 | 59849.902 |
| AK023565  | 845.151   | 742.086   | NM_01586E | 1455.82   | 886.18    | NM_00633E  | 57864.188 | 61553.805 |
| AK021479  | 939.632   | 701.732   | AB031038  | 485.687   | 397.673   | NM_00200C  | 709.384   | 849.607   |
| NM_00383E | 4327.758  | 3095.029  | NM_00462E | 775.595   | 379.091   | NM_00091E  | 6230.34   | 5103.474  |
| AK000245  | 1182.78   | 1189.206  | NM_00189E | 6425.326  | 10603.925 | NM_01866E  | 7312.437  | 7436.938  |
| AF118072  | 1891.424  | 2899.055  | AF072506  | 479.721   | 1740.096  | NM_145904  | 22186.904 | 19732.615 |
| AK023724  | 554.76    | 804.506   | NM_00090E | 1899.266  | 2608.361  | NM_015941  | 6625.561  | 6792.067  |
| AF085900  | 2711.701  | 2462.522  | AB011102  | 5875.082  | 6693.151  | NM_00365E  | 5414.429  | 6143.984  |
| AK026195  | 457.161   | 425.033   | D63480    | 4609.232  | 5191.15   | NM_00284C  | 1272.238  | 1459.859  |

|           |           |           |           |           |           |           |           |           |
|-----------|-----------|-----------|-----------|-----------|-----------|-----------|-----------|-----------|
| AL079274  | 2792.277  | 1988.545  | NM_002969 | 13241.28  | 13649.883 | NM_006174 | 2951.677  | 2651.003  |
| S46403    | 596.852   | 470.295   | M81768    | 573.961   | 362.065   | NM_01585C | 17189.34  | 13807.048 |
| AL137398  | 632.086   | 299.539   | AK023749  | 477.796   | 280.606   | NM_004864 | 2549.631  | 1593.715  |
| Y12021    | 919.737   | 1005.366  | NM_002337 | 4646.417  | 4515.998  | NM_00283E | 8633.28   | 6224.336  |
| AF127771  | 1043.502  | 1235.732  | NM_01324E | 2210.343  | 1898.477  | AK027377  | 718.915   | 723.634   |
| Z83949    | 543.671   | 791.542   | NM_006423 | 39047.488 | 31021.904 | BF528358  | 1319.784  | 1118.275  |
| NM_01330C | 43536.105 | 49724.203 | NM_00476E | 2308.138  | 2090.501  | NM_01633E | 1487.849  | 1139.635  |
| AK026039  | 7669.005  | 8154.086  | NM_00581E | 36812.168 | 40255.613 | NM_00651C | 34196.266 | 32438.332 |
| AF108756  | 14378.079 | 12238.334 | AK025520  | 3987.145  | 2279.964  | NM_00314I | 8299.729  | 8369.111  |
| AF086394  | 306.004   | 476.641   | NM_004892 | 4110.984  | 3119.336  | NM_01869C | 11316.362 | 13548.855 |
| AF116709  | 1155.242  | 895.001   | NM_014597 | 21664.121 | 16261.41  | NM_00086C | 2590.273  | 2962.758  |
| AK025533  | 2875.973  | 2694.546  | NM_01789E | 18386.762 | 10068.829 | AB037798  | 3392.415  | 3281.562  |
| AK026499  | 1216.998  | 755.488   | AB046781  | 759.685   | 596.914   | NM_00078C | 1081.614  | 1120.216  |
| AK021911  | 13105.876 | 11716.061 | M87790    | 57809.992 | 49207.555 | AF272663  | 29134.531 | 25913.438 |
| D17225    | 1585.58   | 1541.936  | NM_00176E | 4353.306  | 3607.717  | NM_01219C | 4679.976  | 4114.854  |
| AF147430  | 698.582   | 700.42    | NM_00002E | 27506.998 | 21356.465 | AB033015  | 579.183   | 645.992   |
| AK025766  | 19909.805 | 19097.092 | NM_00313E | 7996.218  | 6188.551  | AF277719  | 755.537   | 749.106   |
| U35875    | 10734.457 | 9094.211  | NM_01332E | 17730.697 | 10536.53  | NM_00079I | 3580.384  | 3740.162  |
| AK021857  | 14918.622 | 11792.746 | NM_00079C | 789.816   | 471.187   | NM_00368I | 4611.485  | 4938.521  |
| AK022257  | 2744.262  | 2000.145  | NM_00266C | 4001.002  | 3736.4    | NM_004677 | 1308.246  | 1187.032  |
| BE887356  | 7308.997  | 5116.952  | NM_01590C | 1151.28   | 1133.27   | NM_01490E | 11899.771 | 13145.111 |
| AK024756  | 4098.643  | 3436.947  | NM_00370E | 1598.151  | 1587.55   | NM_01570C | 11289.449 | 14728.38  |
| NM_01791I | 2960.214  | 2340.938  | AF182218  | 1067.221  | 623.582   | AB040936  | 1186.559  | 1695.294  |
| AJ224168  | 10926.412 | 7878.798  | AB033054  | 13155.931 | 13112.764 | AB023161  | 280.864   | 396.825   |
| S69873    | 1314.107  | 915.029   | NM_01612E | 2272.379  | 1817.338  | U61736    | 1997.264  | 1925.145  |
| AF147325  | 64206.805 | 62156.082 | NM_01658E | 173.42    | 877.776   | AJ132086  | 2507.743  | 2767.985  |
| NM_01442E | 2680.541  | 2162.034  | AF153330  | 1147.173  | 1438.09   | U92816    | 28095.432 | 22138.365 |
| NM_018497 | 584.601   | 586.96    | NM_00165E | 499.446   | 384.195   | NM_00410E | 1762.467  | 1614.522  |
| AK023584  | 842.701   | 941.255   | NM_00205C | 4304.098  | 3061.857  | NM_00348E | 13280.841 | 11350.948 |
| NM_003774 | 653.733   | 1177.137  | NM_007097 | 10434.642 | 7428.736  | NM_00503E | 6815.447  | 5840.042  |
| D87466    | 11542.715 | 14119.635 | D87446    | 7303.458  | 4752.381  | NM_01408I | 3113.419  | 4102.445  |
| AK025048  | 1116.928  | 992.816   | BF540935  | 8893.145  | 5726.795  | NM_00565I | 1850.475  | 2184.528  |
| U84522    | 1321.869  | 1082.818  | NM_00446E | 633.261   | 425.41    | NM_00541E | 517.297   | 371.25    |
| AK021694  | 3194.063  | 2234.308  | NM_00708I | 2631.988  | 1683.373  | NM_00719E | 2136.036  | 2212.594  |
| AF086013  | 1991.25   | 1453.416  | AB032964  | 3224.112  | 4202.577  | AK023337  | 10058.709 | 9467.105  |
| U84505    | 2332.167  | 1974.047  | BE733605  | 6551.641  | 5578.75   | NM_01327E | 27988.76  | 22583.996 |
| X81005    | 3702.447  | 3173.699  | NM_003334 | 35595.301 | 30219.844 | AB037842  | 929.885   | 652.725   |
| AK023486  | 359.302   | 242.922   | NM_00269E | 3343.125  | 3032.196  | U92074    | 639.344   | 517.034   |
| AL049265  | 4671.976  | 5968.582  | NM_00367I | 1563.711  | 1357.374  | NM_01901I | 3364.625  | 2844.635  |
| NM_01235E | 494.643   | 398.6     | AK026000  | 5203.377  | 3504.192  | AF459094  | 6663.294  | 6126.212  |
| AL137635  | 952.9     | 626.579   | NM_01783E | 2881.922  | 2540.158  | NM_003157 | 5186.496  | 6300.263  |
| AL049430  | 2694.959  | 1585.416  | NM_00667E | 9584.991  | 9986.792  | NM_00493E | 2129.306  | 2257.712  |
| AB015349  | 625.931   | 528.897   | NM_00302E | 8208.044  | 7338.82   | NM_01432E | 2252.951  | 2402.197  |
| NM_01491E | 35213.438 | 32031.715 | NM_00487E | 6480.301  | 7731.561  | NM_00444E | 1531.654  | 2702.313  |
| NM_005864 | 979.034   | 763.504   | NM_01984E | 2462.777  | 2251.953  | NM_01598I | 2888.408  | 3629.7    |
| NM_01234I | 10964.259 | 6992.117  | NM_00295I | 16351.53  | 15982.29  | NM_00045E | 7084.079  | 6552.327  |
| NM_00325E | 27650.635 | 20515.975 | NM_002317 | 6182.635  | 5159.881  | NM_01479I | 9096.011  | 8703.695  |
| D87450    | 5764.801  | 4072.169  | NM_00032C | 2504.913  | 2196.155  | NM_00331E | 6089.188  | 4938.724  |
| NM_017797 | 7675.668  | 4775.992  | CY3Cy5    | 361.511   | 106.33    | NM_00436E | 10692.189 | 8506.77   |
| AK021919  | 539.536   | 548.489   | NM_14565E | 1749.56   | 1866.023  | NM_00018E | 16998.176 | 12824.315 |
| AF000562  | 6213.219  | 4956.819  | NM_021957 | 1108.505  | 1298.19   | AK023384  | 4248.244  | 3328.164  |
| AK025713  | 6326.751  | 7163.566  | AK022138  | 2095.053  | 2309.727  | NM_01602E | 14407.377 | 11449.891 |
| NM_01810C | 1657.897  | 3137.605  | AF086191  | 12247.412 | 11142.734 | AK025111  | 1058.156  | 1121.326  |

|           |           |           |           |           |           |            |           |           |
|-----------|-----------|-----------|-----------|-----------|-----------|------------|-----------|-----------|
| NM_004075 | 1103.821  | 1747.576  | AF143880  | 532.251   | 522.445   | NM_001732  | 3555.742  | 3046.742  |
| NM_001887 | 10063.263 | 13354.436 | NM_017638 | 5530.406  | 2365.073  | AB046381   | 1322.785  | 1426.518  |
| NM_006533 | 1608.23   | 1802.132  | AK001384  | 1539.018  | 417.049   | AJ011497   | 11472.51  | 14022.967 |
| AK026747  | 11510.023 | 11767.088 | AK025437  | 4982.52   | 1862.308  | NM_003018  | 1366.76   | 1605.453  |
| AL110150  | 1013.754  | 1103.502  | AF052152  | 427.706   | 348.282   | NM_000336  | 3133.259  | 4007.289  |
| NM_001998 | 3478.157  | 3007.981  | AK074164  | 968.498   | 866.798   | W61100     | 52171.926 | 60450.371 |
| X87825    | 2486.26   | 1828.9    | NM_145659 | 2223.726  | 1470.795  | AA608568   | 14067.962 | 14682.482 |
| NM_000914 | 495.505   | 520.407   | NM_021957 | 1437.606  | 1484.005  | BG831301   | 52370.727 | 57101.027 |
| AK001285  | 42995.594 | 39121.723 | SR2       | 35270.77  | 37006.738 | M14764     | 4615.786  | 3715.071  |
| D17215    | 3568.599  | 5505.319  | SR4       | 12065.473 | 13865.828 | AA478647   | 10505.24  | 7841.445  |
| BE781513  | 1115.804  | 902.607   | SR6       | 1366.6    | 1468.716  | M35999     | 2747.787  | 1882.622  |
| NM_015714 | 6196.722  | 5702.897  | SR8       | 5528.112  | 20031.453 | AW058501   | 3103.154  | 2801.364  |
| AK075564  | 2051.939  | 2180.977  | SR10      | 16706.27  | 7253.715  | M81379     | 1130.787  | 978.943   |
| AK026219  | 1865.036  | 2298.987  | AK026818  | 547.224   | 1389.053  | ID 2623896 | 5191.625  | 4975.31   |
| D28446    | 1011.584  | 1619.553  | NM_018469 | 1743.864  | 1868.04   | ID 2602214 | 15370.29  | 14488.707 |
| NM_000211 | 11935.669 | 9737.619  | AL359932  | 1590.102  | 1422.985  | ID 2071279 | 13707.397 | 15747.804 |
| AB037830  | 1581.335  | 1364.051  | AB037850  | 5845.698  | 5557.018  | L10709     | 9557.162  | 12462.319 |
| NM_015685 | 1700.769  | 1145.88   | AK002197  | 6365.247  | 4819.37   | N35489     | 3451.397  | 2254.738  |
| NM_004357 | 16278.837 | 13678.514 | AF087996  | 15777.403 | 9799.75   | AA482489   | 584.242   | 519.077   |
| X03324    | 8597.324  | 6198.526  | AK021710  | 4649.602  | 2257.772  | AA458922   | 4136.349  | 2831.911  |
| AF130988  | 1004.529  | 924.582   | AK021894  | 3343.444  | 1799.955  | NM_001719  | 22107.643 | 17287.795 |
| NM_014934 | 582.337   | 614.02    | NM_020424 | 8890.247  | 3534.785  | AL080062   | 3619.024  | 2642.693  |
| NM_015385 | 3314.875  | 5589.16   | AF438313  | 590.165   | 618.673   | AF308802   | 3426      | 2439.116  |
| NM_003690 | 14015     | 17452.947 | NM_017815 | 3141.681  | 3352.136  | S76984     | 13560.173 | 9287.264  |
| NM_000876 | 5188.331  | 9653.384  | AF147341  | 5675.081  | 6045.563  | NM_014495  | 57663.656 | 58004.387 |
| NM_014214 | 10066.882 | 17846.309 | AB033009  | 40835.234 | 34318.246 | NM_006796  | 22594.334 | 30296.324 |
| NM_000856 | 2317.581  | 3753.172  | AL137761  | 545.732   | 541.056   | NM_000706  | 2290.583  | 4858.064  |
| NM_002752 | 6698.553  | 5796.976  | AK022086  | 742.602   | 720.172   | NM_015941  | 7931.006  | 8330.719  |
| NM_013281 | 740.722   | 510.453   | AF147320  | 5224.057  | 6705.061  | NM_003655  | 6873.607  | 7607.018  |
| Y11306    | 2423.485  | 1948.6    | AK027024  | 1219.888  | 1476.339  | NM_014837  | 7765.784  | 7499.497  |
| NM_016112 | 1599.408  | 1126.171  | AK022339  | 4330.262  | 4279.72   | NM_017729  | 1028.598  | 1304.071  |
| X85106    | 922.337   | 836.934   | AK025126  | 1127.658  | 1467.468  | NM_005255  | 27377.965 | 25700.313 |
| NM_003931 | 7410.387  | 5876.297  | AK025317  | 21463.861 | 24289.457 | NM_002840  | 996.577   | 831.253   |
| NM_004367 | 458.46    | 621.258   | AK026119  | 1337.766  | 1684.301  | NM_006174  | 2960.078  | 2336.277  |
| NM_006681 | 1017.905  | 1086.747  | AK025552  | 627.573   | 744.042   | NM_015850  | 17661.801 | 15335.095 |
| NM_012479 | 53597.973 | 55921.711 | AK026725  | 5195.215  | 2649.161  | NM_002838  | 8006.536  | 8217.353  |
| AF250226  | 18340.693 | 19850.807 | AF085868  | 659.087   | 575.343   | AK027377   | 651.071   | 565.863   |
| NM_003217 | 34066.902 | 27628.033 | AK054767  | 913.811   | 954.48    | NM_014686  | 51878.496 | 55814.586 |
| NM_006534 | 8028.86   | 10481.62  | AL080086  | 2120.365  | 2071.551  | BF528358   | 1084.325  | 1581.097  |
| NM_017601 | 4325.874  | 4830.127  | AL049301  | 5782.129  | 5663.659  | NM_016339  | 1437.113  | 1442.446  |
| AF110265  | 16655.924 | 22413.48  | AL050042  | 6118.493  | 5421.539  | NM_002487  | 5441.555  | 3620.733  |
| AF272371  | 44699.934 | 59538.215 | AL117570  | 740.39    | 743.235   | NM_013340  | 2989.958  | 4277.489  |
| AK021848  | 4460.63   | 6188.531  | AL157458  | 1026.719  | 1314.883  | NM_005462  | 2204.512  | 2154.173  |
| NM_003704 | 4492.275  | 6352.061  | NM_015377 | 2210.296  | 2223.095  | NM_012319  | 4406.466  | 4036.577  |
| AK023140  | 593.467   | 735.714   | AL137531  | 2612.303  | 2607.836  | NM_006510  | 30679.393 | 24943.076 |
| AF084362  | 932.721   | 689.721   | AK022210  | 1574.9    | 2228.906  | NM_003141  | 9106.021  | 8138.417  |
| NM_001553 | 860.05    | 948.474   | AL080085  | 6613.538  | 5560.442  | NM_020245  | 11270.264 | 8809.325  |
| NM_014173 | 20800.238 | 19217.805 | NM_007017 | 5030.76   | 1816.288  | NM_007175  | 1309.955  | 1077.366  |
| NM_001731 | 47964.613 | 56807.488 | NM_015880 | 453.575   | 325.463   | NM_019087  | 3514.217  | 3868.969  |
| AL137506  | 1210.341  | 2215.697  | AF056437  | 2062.141  | 2129.327  | NM_016322  | 1152.771  | 1880.758  |
| AK022961  | 6755.888  | 13007.651 | AF009295  | 1862.176  | 1793.01   | NM_004277  | 1390.428  | 1459.771  |
| NM_007375 | 11837.47  | 15531.917 | NM_005029 | 3443.117  | 2050.753  | NM_005072  | 1372.047  | 1848.332  |
| NM_014371 | 9368.922  | 9349.911  | AF056447  | 4187.085  | 3403.351  | AF215923   | 6405.146  | 7639.025  |

|           |           |           |           |           |           |           |           |           |
|-----------|-----------|-----------|-----------|-----------|-----------|-----------|-----------|-----------|
| AF290512  | 569.656   | 602.506   | AK001010  | 6381.145  | 4783.048  | U66621    | 16596.445 | 23726.963 |
| NM_006716 | 14034.741 | 10754.13  | NM_018076 | 7941.43   | 7794.703  | NM_005720 | 51545.082 | 55425.348 |
| AB002323  | 11206.314 | 8346.783  | AK021442  | 6113.616  | 5758.383  | AB040936  | 1533.277  | 1550.326  |
| AK022241  | 15923.16  | 11709.111 | AK001076  | 1288.491  | 1362.048  | U61736    | 1914.143  | 1891.185  |
| AK022587  | 8169.653  | 7264.563  | AK001820  | 3088.945  | 2287.927  | AJ132086  | 2819.045  | 4487.694  |
| NM_005512 | 342.685   | 297.17    | AK021482  | 17984.514 | 17661.826 | U92816    | 28276.027 | 28324.367 |
| NM_005506 | 834.585   | 923.868   | AK021730  | 1199.782  | 897.617   | NM_004106 | 2019.319  | 3294.123  |
| NM_005723 | 737.76    | 850.652   | NM_006158 | 39551.516 | 41438     | NM_003485 | 13009.232 | 14269.892 |
| AL137404  | 49733.973 | 62836.516 | NM_006346 | 4533.741  | 4487.41   | NM_005038 | 6527.278  | 4915.218  |
| NM_002851 | 1162.938  | 1656.462  | AK025240  | 5887.422  | 7841.792  | M95923    | 9308.569  | 7989.013  |
| NM_002071 | 459.357   | 737.192   | NM_005377 | 537.721   | 459.183   | NM_002415 | 52294.594 | 53481.551 |
| NM_005336 | 14331.745 | 19228.607 | NM_017633 | 25320.225 | 35026.477 | NM_006332 | 50217.988 | 54589.965 |
| NM_001906 | 12986.458 | 17095.006 | AF086186  | 49922.809 | 42248.73  | NM_002000 | 727.29    | 580.439   |
| NM_004142 | 531.323   | 965.06    | NM_017802 | 11577.278 | 8512.036  | NM_000916 | 6166.28   | 4831.479  |
| AF108138  | 8069.341  | 7504.036  | AJ008137  | 35681.641 | 45358.043 | NM_018663 | 7936.891  | 7838.383  |
| NM_004347 | 862.684   | 1099.873  | AJ008118  | 63701.727 | 58818.066 | NM_145904 | 23310.037 | 16806.354 |
| BF340302  | 857.24    | 1330.074  | NM_005523 | 880.946   | 887.973   | NM_000182 | 17946.846 | 17829.555 |
| AB037728  | 484.813   | 1105.709  | AL109674  | 5320.885  | 5536.672  | AK023384  | 4302.846  | 4405.185  |
| AK024210  | 1762.379  | 3231.296  | AK024512  | 12259.123 | 14818.18  | NM_016026 | 14751.85  | 17642.635 |
| NM_002276 | 1282.799  | 1467.433  | AK023454  | 7826.366  | 8801.171  | AK025111  | 1196.552  | 1678.59   |
| AL133087  | 3313.352  | 3052.519  | L23207    | 6119.294  | 7786.106  | NM_001732 | 3280.391  | 4836.947  |
| NM_018010 | 7545.718  | 6169.53   | NM_018062 | 3730.436  | 3923.612  | NM_018690 | 12603.245 | 23798.775 |
| NM_002274 | 4579.813  | 4616.403  | NM_007128 | 43772.82  | 53878.035 | NM_000860 | 3862.324  | 3886.489  |
| AL080200  | 1561.168  | 1541.405  | NM_007160 | 1312.057  | 1701.479  | AB037798  | 3184.763  | 3217.445  |
| BF337874  | 6644.334  | 6251.68   | NM_018627 | 3615.96   | 5291.976  | NM_000780 | 1076.427  | 941.923   |
| NM_003475 | 6019.38   | 5029.621  | S82164    | 2433.084  | 2210.307  | AF272663  | 28201.479 | 23058.949 |
| NM_000243 | 5912.665  | 4579.347  | AK024394  | 3267.792  | 3080.234  | NM_012190 | 4205.679  | 4200.167  |
| NM_004383 | 45214.258 | 42901.203 | AF147374  | 1481.226  | 1487.002  | AB033015  | 878.801   | 1036.784  |
| AL157475  | 12707.001 | 17707.514 | AF130091  | 994.924   | 943.922   | AF277719  | 1467.404  | 1469.299  |
| NM_006069 | 8298.098  | 10142.783 | L43338    | 26651.285 | 24044.568 | NM_000791 | 4290.002  | 4470.452  |
| NM_017656 | 3759.916  | 5826.819  | AJ227866  | 44128.887 | 43182.16  | NM_003681 | 3713.001  | 5097.305  |
| X16282    | 16737.982 | 19690.359 | AF458223  | 7075.977  | 4088.983  | NM_004800 | 8647.969  | 10017.995 |
| AK022519  | 727.816   | 871.339   | AK026822  | 489.525   | 232.64    | AB037738  | 1372.32   | 1043.925  |
| NM_014415 | 5123.329  | 5198.495  | AK022838  | 31535.707 | 42362.496 | NM_004677 | 401.475   | 507.401   |
| S75264    | 8525.051  | 9882.117  | NM_003509 | 1703.602  | 1622.979  | NM_014954 | 45135.191 | 50828.918 |
| AF027513  | 2885.481  | 4300.442  | AF086519  | 2245.636  | 2445.467  | NM_000807 | 1078.439  | 1041.867  |
| NM_001379 | 17037.844 | 22235.447 | AF055012  | 14275.258 | 10912.58  | NM_014909 | 14407.482 | 11888.321 |
| NM_018664 | 2209.163  | 4220.779  | AK022307  | 10127.592 | 8213.479  | X91148    | 2740.799  | 2909.09   |
| BC006428  | 10223.777 | 8604.582  | AF132201  | 472.495   | 710.55    | NM_015700 | 6845.511  | 5641.889  |
| NM_005034 | 4165.92   | 4088.701  | U00950    | 687.963   | 630.717   | NM_001719 | 21249.998 | 20884.146 |
| NM_003926 | 13350.774 | 11571.796 | AF085997  | 1465.427  | 1511.542  | AL080062  | 3477.021  | 3697.158  |
| AF085356  | 1695.424  | 2706.961  | L31942    | 702.931   | 260.209   | AF308802  | 3460.063  | 4590.666  |
| NM_016047 | 53704.605 | 41354.371 | NM_005172 | 16256.892 | 18577.9   | S76984    | 13154.662 | 15414.602 |
| NM_001499 | 21746.268 | 15927.526 | AK025192  | 60276.66  | 52280.801 | NM_014495 | 45186.348 | 54449.223 |
| BF030165  | 36420.188 | 26151.203 | NM_012403 | 10685.829 | 13913.802 | NM_014081 | 3160.013  | 4075.831  |
| NM_016732 | 21229.381 | 15202.307 | AK023251  | 581.065   | 428.602   | NM_005651 | 1846.895  | 2127.121  |
| NM_014763 | 46890.285 | 30702.965 | AK022611  | 9478.505  | 11923.941 | NM_005418 | 679.987   | 544.782   |
| NM_020185 | 15200.335 | 17124.189 | NM_004952 | 4202.281  | 3501.038  | NM_007195 | 1887.135  | 1606.684  |
| NM_002832 | 14973.348 | 16743.316 | AY007239  | 1063.355  | 1011.215  | AK023337  | 9885.608  | 9074.174  |
| NM_017732 | 14582.533 | 11712.758 | NM_020414 | 7187.005  | 6997.162  | NM_013275 | 23727.783 | 20355.311 |
| NM_003654 | 610.569   | 706.8     | AB037730  | 5376.721  | 5360.217  | AB037842  | 751.365   | 791.827   |
| NM_000152 | 8768.634  | 8620.466  | AF147429  | 430.507   | 545.171   | U92074    | 635.343   | 585.355   |
| D17222    | 43947.391 | 35440.113 | NM_001357 | 12642.903 | 10453.933 | NM_019011 | 2037.354  | 3223.614  |

|           |           |           |           |           |           |           |           |           |
|-----------|-----------|-----------|-----------|-----------|-----------|-----------|-----------|-----------|
| NM_000154 | 6105.374  | 7073.395  | NM_003893 | 4664.776  | 3151.506  | AF459094  | 6858.942  | 7624.357  |
| NM_006213 | 443.808   | 640.649   | AB037816  | 2823.618  | 2062.113  | NM_003157 | 5318.859  | 5714.614  |
| NM_003549 | 2106.444  | 3199.043  | NM_014265 | 2400.201  | 2387.177  | NM_004938 | 2848.473  | 2413.813  |
| NM_000671 | 3597.121  | 4991.74   | AF075076  | 479.532   | 350.669   | NM_014328 | 2282.358  | 2011.681  |
| NM_006297 | 4894.152  | 6074.052  | U92026    | 5299.688  | 5129.718  | NM_004448 | 1679.05   | 1839.263  |
| X85325    | 54528.137 | 46623.016 | AF086234  | 40074.445 | 33232.215 | NM_015981 | 3685.997  | 2862.09   |
| AF318366  | 16110.699 | 13923.651 | AK023680  | 14277.478 | 12502.732 | NM_000458 | 7497.24   | 7428.872  |
| AF182423  | 5446.796  | 4075.602  | AF009324  | 6855.304  | 7041.396  | NM_014791 | 9958.917  | 9018.632  |
| D26018    | 6469.118  | 4357.666  | AF144056  | 1313.39   | 731.303   | NM_003318 | 6391.277  | 5454.317  |
| AK023029  | 522.185   | 493.966   | AF019226  | 829.414   | 920.06    | NM_004362 | 9846.262  | 7862.641  |
| NM_017643 | 720.484   | 682.781   | AK022112  | 2087.558  | 2504.999  | CY3Cy5    | 9982.214  | 884.747   |
| AB037863  | 1396.907  | 1373.984  | AL137480  | 57707.98  | 53154.355 | NM_004102 | 8983.397  | 9914.429  |
| BC000363  | 3570.412  | 3379.803  | AK022182  | 3076.603  | 3990.584  | NM_004544 | 8270.055  | 9362.514  |
| NM_007237 | 3744.522  | 2471.228  | D16473    | 5163.621  | 5458.001  | AF052140  | 707.081   | 787.98    |
| NM_004608 | 1506.497  | 1235.313  | AB028968  | 4983.75   | 5402.134  | NM_018838 | 3460.002  | 3939.914  |
| NM_018257 | 10555.833 | 8577.48   | AK001202  | 2778.469  | 3107.017  | AK024261  | 2655.649  | 3462.427  |
| NM_005919 | 3611.141  | 2426.84   | AF195764  | 61928.16  | 56293.984 | AF052150  | 4700.771  | 5393.177  |
| NM_012258 | 5843.545  | 5219.841  | AF055029  | 2709.98   | 3046.653  | AF086481  | 1882.159  | 2033.261  |
| NM_006008 | 1103.64   | 1194.421  | AB011542  | 2480.684  | 2438.464  | AL355689  | 1647.466  | 2850.763  |
| NM_016325 | 5027.462  | 5899.695  | NM_001853 | 8527.592  | 6583.793  | AK024885  | 3897.16   | 8081.716  |
| NM_001604 | 1924.636  | 2143.392  | U41737    | 1267.522  | 1193.281  | AL080223  | 4081.995  | 3299.944  |
| NM_000908 | 1575.555  | 1713.268  | NM_005799 | 2568.009  | 2295.489  | AK001630  | 7542.699  | 6308.454  |
| AB011102  | 3502.918  | 4221.623  | X99661    | 1813.105  | 1801.691  | NM_014612 | 38336.688 | 31873.102 |
| D63480    | 4365.021  | 5268.461  | NM_005927 | 4742.773  | 4303.082  | NM_004102 | 7113.905  | 4958.229  |
| NM_002968 | 5304.328  | 6991.925  | AB028983  | 12977.973 | 8493.927  | NM_004544 | 8203.799  | 5760.679  |
| NM_006475 | 600.548   | 1129.207  | AB037800  | 4580.623  | 3304.01   | SR1       | 91943.25  | 64805.195 |
| NM_004620 | 993.719   | 1304.905  | NM_014636 | 1970.688  | 1331.157  | SR3       | 37401.824 | 36033.535 |
| AF087940  | 1906.557  | 2217.076  | NM_006747 | 6615.875  | 6537.237  | SR5       | 4202.31   | 3510.571  |
| AJ277587  | 2420.939  | 3596.914  | NM_007086 | 3192.612  | 3446.249  | SR7       | 4118.197  | 36527.344 |
| D87432    | 7622.528  | 10236.565 | NM_003870 | 21622.305 | 22547.717 | SR9       | 14609.395 | 2782.076  |
| Y18483    | 1218.466  | 1968.813  | AK024507  | 2609.262  | 2295.411  | CY3Cy5    | 8422.204  | 528.42    |
| AI565117  | 53171.398 | 63799.914 | NM_001243 | 4862.826  | 4761.791  | Z36807    | 55386.535 | 53243.285 |
| U28015    | 722.682   | 555.81    | AK025997  | 2070.619  | 2074.936  | U52836    | 2957.31   | 2605.549  |
| AI299075  | 800.313   | 436.822   | NM_005546 | 718.34    | 1000.281  | AK021837  | 6318.433  | 6845.947  |
| M59979    | 5230.372  | 4849.924  | NM_000299 | 689.744   | 1040.512  | AF075112  | 1716.543  | 2474.678  |
| AB011098  | 4321.466  | 7483.992  | S51112    | 582.414   | 610.959   | AK001796  | 1926.803  | 2668.019  |
| AA609759  | 6822.886  | 7481.647  | NM_014887 | 3028.02   | 2514.357  | AF086152  | 50743.691 | 56642.449 |
| AA029418  | 2985.312  | 3173.335  | NM_002590 | 520.547   | 501.615   | U78519    | 2252.367  | 2722.903  |
| L20815    | 5979.603  | 5518.941  | NM_018556 | 16515.076 | 13800.963 | AK026872  | 4117.87   | 3696.742  |
| AI364483  | 6489.605  | 5305.4    | NM_005235 | 1125.964  | 825.69    | AL157505  | 1671.998  | 1117.881  |
| AA456001  | 11332.93  | 10545.736 | NM_005600 | 2943.615  | 2453.206  | NM_007190 | 11290.573 | 7569.309  |
| BI818232  | 1003.674  | 874.485   | NM_005967 | 25078.043 | 19184.889 | AF043897  | 2037.179  | 1629.878  |
| AA451686  | 23124.189 | 23202.791 | AB014566  | 3098.667  | 2937.975  | U79246    | 3284.122  | 2397.177  |
| AA934644  | 966.871   | 1096.674  | NM_015678 | 1209.56   | 1229.766  | AK022619  | 999.536   | 1913.345  |
| NM_017898 | 24104.594 | 27064.869 | AK025950  | 1044.206  | 759.322   | AK024157  | 557.524   | 702.197   |
| AB002374  | 8490.927  | 9143.555  | NM_014223 | 4782.307  | 3061.923  | AK022963  | 507.597   | 794.559   |
| U17327    | 3597.026  | 3765.254  | NM_016194 | 2012.42   | 1185.083  | AK026208  | 3657.488  | 4217.995  |
| AB046781  | 798.961   | 550.004   | AB037855  | 5612.415  | 6987.601  | NM_016947 | 73533.484 | 66088.984 |
| M87790    | 33869.375 | 39159.707 | NM_020353 | 1436.833  | 928.933   | AY007136  | 1924.302  | 3290.792  |
| NM_001768 | 1538.01   | 1856.623  | NM_019011 | 33752.789 | 29554.586 | AF085961  | 720.553   | 761.11    |
| NM_000028 | 6847.813  | 9196.372  | NM_004879 | 9220.927  | 8734.74   | AK024925  | 42792.957 | 30505.531 |
| NM_000715 | 1147.41   | 1105.084  | AB020694  | 2939.063  | 3199.076  | AL049460  | 15953.68  | 8737.786  |
| AF035802  | 3166.023  | 2988.512  | NM_016071 | 36155.699 | 39759.344 | AK022396  | 1731.138  | 1167.6    |

|           |           |           |           |           |           |           |           |           |
|-----------|-----------|-----------|-----------|-----------|-----------|-----------|-----------|-----------|
| Y08145    | 528.562   | 280.465   | AL050131  | 2202.85   | 2266.81   | AF075113  | 2090.846  | 1727.917  |
| M26123    | 1132.195  | 656.07    | NM_004475 | 20974.602 | 19593.658 | AK022892  | 11501.628 | 6894.663  |
| NM_00183E | 22487.469 | 32175.387 | NM_001627 | 5831.223  | 5002.858  | AL359058  | 3672.494  | 4807.962  |
| NM_01955E | 1016.034  | 1431.926  | NM_002544 | 1742.317  | 1376.405  | AK026237  | 3275.285  | 4304.292  |
| NM_01209E | 17111.064 | 17053.93  | X77690    | 8044.817  | 5863.505  | AK023687  | 3344.949  | 3844.952  |
| NM_00390E | 32948.469 | 23917.783 | NM_00653E | 2622.981  | 1675.813  | AK002088  | 37829.762 | 43875.332 |
| L12052    | 7763.866  | 6704.663  | NM_00565E | 9951.699  | 10407.563 | X98206    | 3208.085  | 5005.385  |
| AB028976  | 3330.275  | 2448.744  | NM_002422 | 4525.963  | 5126.885  | AK022193  | 845.039   | 956.89    |
| AK026337  | 378.798   | 426.807   | NM_00669C | 8989.782  | 10182.92  | AK000106  | 5219.127  | 6623.145  |
| NM_01586E | 1212.281  | 1246.984  | AF218022  | 11164.3   | 3832.772  | AK022370  | 1909.039  | 2211.906  |
| NM_00462E | 1141.799  | 1047.74   | U72518    | 6102.368  | 3354.238  | AK026765  | 2298.555  | 2416.514  |
| NM_00189E | 1801.37   | 1658.966  | AF264765  | 1676.531  | 1565.828  | AK021639  | 1586.569  | 2108.949  |
| NM_01332E | 17162.158 | 17208.508 | NM_015322 | 3862.374  | 4147.649  | AF119844  | 11258.363 | 29579.102 |
| NM_00370E | 2366.305  | 2802.034  | NM_016607 | 13870.153 | 16170.749 | AK023189  | 4259.111  | 2768.723  |
| AF182218  | 731.538   | 698.078   | NM_00327E | 1178.624  | 1124.415  | AK023872  | 1006.411  | 803.621   |
| NM_016122 | 3525.332  | 1638.284  | NM_00026E | 58393.352 | 53008.43  | AK022127  | 851.053   | 573.871   |
| AK023749  | 1122.743  | 1208.252  | M30493    | 50591.742 | 47488.039 | AF306347  | 2370.095  | 1811.351  |
| NM_002337 | 10025.968 | 10844.467 | AJ008160  | 1375.964  | 1431.354  | AF070599  | 2110.215  | 3004.676  |
| NM_01324E | 5190.121  | 4674.033  | NM_005824 | 2701.523  | 2319.909  | NM_00545C | 6641.729  | 12663.985 |
| NM_00642E | 56331.926 | 44027.137 | AF052211  | 8875.495  | 8199.45   | NM_00552E | 666.497   | 1200.254  |
| NM_00476E | 4302.297  | 3141.918  | U66561    | 2197.164  | 1945.516  | NM_00528E | 12159.813 | 14673.015 |
| NM_00581E | 7983.668  | 6004.537  | NM_00030E | 5676.237  | 4101.863  | AK001918  | 1314.539  | 1584.165  |
| AK024722  | 540.547   | 554.092   | NM_00220C | 1778.934  | 1269.688  | AF086048  | 3552.529  | 3247.066  |
| AK025520  | 8261.485  | 5260.116  | AF017433  | 2537.78   | 2272.906  | L15616    | 13560.497 | 14571.185 |
| NM_004892 | 7177.938  | 5923.845  | AF130111  | 2938.219  | 2827.305  | AB019565  | 11522.459 | 10762.3   |
| NM_014597 | 36119.121 | 27275.963 | NM_016307 | 12148.407 | 8910.353  | NM_01694C | 4534.445  | 4506.664  |
| NM_00446E | 851.972   | 1129.869  | AB028449  | 11402.346 | 7526.581  | L07394    | 17509.313 | 24072.365 |
| NM_007081 | 3499.008  | 4648.432  | NM_004697 | 6929.926  | 5699.655  | AK056133  | 2131.056  | 2372.242  |
| NM_00037E | 357.114   | 874.163   | NM_02039C | 8213.29   | 4033.159  | NM_01784E | 15370.057 | 13823.055 |
| NM_003334 | 21116.688 | 27056.475 | NM_003321 | 29700.307 | 22891.795 | AF130080  | 947.736   | 760.265   |
| NM_00269E | 4063.656  | 6459.471  | U18937    | 25703.115 | 23823.025 | AK026006  | 3234.466  | 2523.202  |
| NM_003671 | 3163.284  | 3502.178  | U01925    | 1993.023  | 3186.948  | NM_01908E | 17118.898 | 12394.977 |
| M20695    | 398.541   | 246.866   | AJ420488  | 60273.832 | 60517.793 | AF147440  | 526.598   | 402.712   |
| AK026000  | 9151.557  | 5488.164  | AF268872  | 5009.934  | 4945.893  | AL122072  | 7162.614  | 4126.19   |
| NM_01783E | 1766.615  | 1723.862  | AK022180  | 58241.035 | 53105.637 | AK026221  | 699.895   | 761.147   |
| NM_00667E | 18039.936 | 24593.541 | NM_00122E | 1895.872  | 2484.795  | AK026403  | 3707.487  | 2190.21   |
| NM_003022 | 20396.588 | 30099.867 | NM_00133E | 3478.553  | 3156.594  | U90904    | 12401.16  | 16736.404 |
| NM_00487E | 13383.592 | 12344.188 | AB050716  | 1731.345  | 1507.082  | AF088053  | 4333.139  | 5339.093  |
| NM_019842 | 4610.854  | 4463.132  | AF161353  | 27112.477 | 23360.93  | AL133662  | 1318.495  | 1586.004  |
| NM_002951 | 28509.123 | 30532.863 | NM_000764 | 12043.708 | 12549.774 | NM_00256E | 849.458   | 1023.742  |
| NM_002317 | 3205.311  | 2674.383  | NM_00414E | 38352.797 | 33462.031 | U90903    | 1986.212  | 2959.596  |
| NM_00032C | 1536.259  | 1231.818  | NM_003002 | 23026.65  | 20600.477 | AF278760  | 3133.018  | 3500.831  |
| NM_017921 | 1561.675  | 1200.725  | D42047    | 7565.942  | 6299.772  | X58061    | 620.264   | 935.697   |
| NM_00313E | 12423.797 | 10200.471 | AB009282  | 21628.398 | 17696.551 | AB032954  | 7843.545  | 8676.172  |
| D63480    | 5312.06   | 6160.785  | NM_005004 | 48870.461 | 36124.207 | AL110197  | 1032.379  | 831.738   |
| NM_00296E | 6906.224  | 8986.936  | NM_01463E | 10008.815 | 7095.338  | AF085995  | 1153.384  | 1218.426  |
| NM_00647E | 496.459   | 511.658   | NM_006392 | 7803.287  | 3474.798  | NM_01763E | 4268.673  | 4378.087  |
| NM_00462C | 2015.051  | 1658.481  | NM_017922 | 8190.81   | 11317.467 | AK026655  | 3278.601  | 2977.469  |
| AF087940  | 2317.721  | 2613.231  | NM_00282E | 58717.063 | 63750.113 | NM_00527E | 786.45    | 724.51    |
| AJ277587  | 2328.76   | 3596.697  | NM_01791E | 39784.383 | 53955.504 | AF129926  | 3539.074  | 3036.478  |
| D87432    | 7365.373  | 15261.55  | NM_00180E | 28753.1   | 22021.83  | AK025822  | 4554.062  | 3911.408  |
| AI565117  | 61076.762 | 65988.469 | AK022360  | 9262.575  | 8295.967  | AL360140  | 1642.006  | 1112.572  |
| U28015    | 959.419   | 1508.431  | AK095694  | 1781.265  | 1844.845  | AF201937  | 48907.684 | 30178.346 |

|           |           |           |            |           |           |           |           |           |
|-----------|-----------|-----------|------------|-----------|-----------|-----------|-----------|-----------|
| AI299075  | 852.231   | 767.763   | X52341     | 59557.23  | 56370.031 | AL390128  | 5730.208  | 4040.142  |
| M59979    | 4445.396  | 2720.85   | NM_003082  | 10218.974 | 8693.056  | AL157429  | 22965.885 | 19226.689 |
| AB011098  | 4284.719  | 2769.92   | AL133632   | 11414.536 | 11656.405 | NM_012071 | 16814.131 | 11654.507 |
| AA609759  | 7676.681  | 6705.846  | NM_004343  | 24746.832 | 25371.197 | AF055018  | 14979.521 | 10200.284 |
| AA029418  | 4169.329  | 7624.576  | X52355     | 14596.509 | 16082.929 | NM_001777 | 32977.223 | 35891.078 |
| L20815    | 7602.762  | 14210.359 | NM_006963  | 15426.438 | 19021.885 | U79457    | 12896.027 | 14494.689 |
| AI364483  | 7442.107  | 8520.326  | NM_000307  | 2434.533  | 1919.268  | AB037832  | 4331.632  | 3501.3    |
| AA456001  | 12049.74  | 11226.568 | NM_006510  | 29418.621 | 29053.984 | NM_014347 | 20210.828 | 19291.309 |
| AA176581  | 452.01    | 499.96    | NM_003141  | 17269.947 | 24389.807 | NM_001296 | 17230.119 | 20248.432 |
| BI818232  | 887.345   | 889.921   | NM_020245  | 13218.088 | 11350.399 | NM_004344 | 13471.765 | 13706.345 |
| AA451686  | 20992.076 | 14927.173 | NM_007175  | 1413.683  | 1329.74   | AF085972  | 658.534   | 928.303   |
| AA934644  | 661.568   | 957.578   | AB046381   | 1148.972  | 793.729   | NM_000757 | 2400.661  | 2800.642  |
| NM_002050 | 1742.079  | 2331.259  | AJ011497   | 14860.802 | 12421.279 | AB046786  | 2078.959  | 2152.883  |
| NM_007097 | 24967.09  | 21566.09  | NM_003018  | 1174.32   | 1123.87   | NM_016620 | 52452.957 | 56933.332 |
| D87446    | 10661.517 | 9243.466  | NM_000336  | 3522.856  | 3415.183  | D16914    | 64010.902 | 70902.281 |
| U17327    | 4513.121  | 4278.067  | W61100     | 58602.211 | 58387.359 | AA084879  | 3305.627  | 2591.857  |
| AB046781  | 1128.569  | 911.048   | AA608568   | 10898.831 | 8240.101  | NM_000833 | 4154.561  | 3101.112  |
| M87790    | 31128.732 | 32615.473 | M14764     | 10266.442 | 13914.687 | NM_000283 | 6177.601  | 4515.446  |
| NM_001768 | 1762.51   | 2259.134  | AA478647   | 15732.504 | 19529.797 | NM_012460 | 4061.481  | 3677.7    |
| NM_000029 | 6589.906  | 10274.263 | M35999     | 3078.346  | 3919.312  | NM_012118 | 4387.916  | 2953.651  |
| AF035802  | 3259.07   | 3823.383  | M81379     | 1464.956  | 953.913   | AK001133  | 718.596   | 452.09    |
| Y08145    | 736.888   | 626.878   | ID 2623896 | 4994.898  | 3480.774  | AK024092  | 3552.304  | 3359.839  |
| M26123    | 1902.237  | 1591.848  | ID 2602214 | 19940.504 | 15427.018 | AK022226  | 410.827   | 340.399   |
| NM_001838 | 17567.131 | 9990      | ID 2071279 | 12900.15  | 9784.289  | AK002044  | 8225.562  | 5275.785  |
| NM_019558 | 976.97    | 1209.178  | L10709     | 12286.583 | 13866.323 | AK022206  | 840.362   | 606.605   |
| NM_012096 | 20834.518 | 34049.422 | N35489     | 3044.809  | 3129.438  | BC032460  | 10253.145 | 12818.242 |
| NM_003905 | 39255.016 | 47818.691 | AA482489   | 1149.286  | 1317.048  | NM_014071 | 3688.066  | 3420.218  |
| L12052    | 8439.771  | 9991.747  | AA458922   | 4414.876  | 5035.037  | NM_006329 | 601.175   | 642.742   |
| AB028976  | 3907.524  | 3340.067  | NM_004168  | 15504.393 | 14366.553 | NM_005166 | 1161.595  | 1299.203  |
| AK026337  | 407.219   | 585.552   | NM_003485  | 17936.711 | 14652.737 | NM_000213 | 54507.316 | 45294.738 |
| NM_015869 | 1276.746  | 697.599   | NM_005038  | 5954.425  | 4260.41   | BE906107  | 19833.945 | 21062     |
| NM_004626 | 1166.646  | 1198.092  | M95923     | 9252.424  | 6668.351  | NM_015516 | 5542.545  | 6718.288  |
| NM_001899 | 1717.994  | 1816.417  | NM_002415  | 53005.934 | 54823.141 | AB033065  | 1814.631  | 1946.422  |
| NM_000908 | 3241.608  | 4890.236  | NM_006332  | 59369.77  | 53395.977 | NM_005211 | 1343.923  | 1316.526  |
| AB011102  | 7352.696  | 11570.459 | NM_002000  | 368.071   | 404.097   | NM_004857 | 21307.395 | 18579.953 |
| NM_002660 | 4785.456  | 4788.322  | NM_000916  | 7248.061  | 5556.211  | NM_012108 | 9144.577  | 8045.486  |
| NM_015900 | 1177.538  | 1005.633  | NM_018663  | 6339.7    | 7517.05   | NM_003253 | 2255.07   | 1940.336  |
| NM_003706 | 2465.953  | 2291.03   | NM_145904  | 17943.191 | 11579.054 | NM_013285 | 7813.277  | 6110.032  |
| NM_016122 | 3547.821  | 1415.784  | NM_006796  | 20392.746 | 12809.722 | NM_002872 | 19212.236 | 14731.723 |
| AK023749  | 1153.428  | 1192.903  | NM_000706  | 4155.566  | 3494.469  | NM_000490 | 2468.605  | 1623.842  |
| NM_002337 | 10524.545 | 14203.724 | NM_015941  | 8835.119  | 9072.488  | AJ225028  | 862.775   | 518.947   |
| NM_013245 | 5274.443  | 5738.511  | NM_003655  | 6587.344  | 5818.732  | NM_004839 | 2897.832  | 2492.496  |
| NM_006423 | 53795.523 | 54408.93  | NM_017729  | 728.336   | 533.346   | NM_012193 | 7770.908  | 5551.73   |
| NM_004766 | 4663.691  | 3107.36   | NM_005259  | 29662.658 | 23995.363 | NM_003405 | 21838.42  | 14028.269 |
| NM_005819 | 9413.646  | 8375.85   | NM_002840  | 783.939   | 625.63    | NM_004720 | 9104.33   | 6304.583  |
| AK024722  | 527.697   | 531.942   | NM_006174  | 3101.008  | 2916.22   | NM_001057 | 2510.304  | 1734.819  |
| AK025520  | 7671.126  | 4309.941  | NM_015850  | 17507.67  | 16503.906 | NM_004524 | 5528.218  | 6780.95   |
| NM_004892 | 7288.661  | 6622.354  | NM_004864  | 2379.307  | 1526.205  | NM_006315 | 8520.017  | 10456.052 |
| NM_014597 | 43015.539 | 47870.746 | NM_002838  | 8830.902  | 8630.552  | NM_018401 | 2969.695  | 3673.317  |
| NM_017896 | 37137.301 | 39341.324 | AK027377   | 1281.937  | 1447.102  | NM_005163 | 7436.291  | 8358.783  |
| AB002374  | 12996.434 | 18377.781 | BF528358   | 1270.221  | 1435.912  | NM_007273 | 63964.625 | 69767.641 |
| NM_004466 | 841.872   | 850.334   | NM_016339  | 990.994   | 991.769   | BE894943  | 1265.016  | 1123.632  |
| NM_007081 | 3032.06   | 2657.332  | AK025111   | 1246.185  | 1229.107  | AF085994  | 627.896   | 757.575   |



|           |           |           |           |           |           |           |           |           |
|-----------|-----------|-----------|-----------|-----------|-----------|-----------|-----------|-----------|
| AB032964  | 5104.583  | 4888.61   | NM_001732 | 5238.974  | 4341.162  | NM_016422 | 4972.396  | 8869.46   |
| BE733605  | 11035.697 | 10464.735 | NM_018690 | 15051.276 | 12234.506 | NM_017878 | 11192.347 | 14161.269 |
| NM_003334 | 19779.523 | 21834.869 | NM_000860 | 5565.799  | 5784.269  | NM_004494 | 66049.742 | 66576.688 |
| NM_002693 | 3926.961  | 6326.666  | AB037798  | 3850.821  | 3489.227  | AL049687  | 731.543   | 830.95    |
| AK026000  | 9150.819  | 4350.983  | NM_000780 | 935.568   | 744.505   | NM_005643 | 14720.746 | 20036.961 |
| NM_017833 | 1386.617  | 833.201   | AF272663  | 34522.785 | 29915.045 | NM_003592 | 17051.994 | 17749.42  |
| NM_006675 | 15251.396 | 10779.647 | NM_012190 | 4767.389  | 3459.123  | NM_014953 | 9065.641  | 6921.087  |
| NM_003022 | 17355.916 | 15881.624 | AB033015  | 511.97    | 596.628   | AF179995  | 1742.716  | 1858.003  |
| NM_004873 | 13848.405 | 16167.699 | AF277719  | 680.2     | 779.177   | NM_016195 | 5401.622  | 2515.792  |
| NM_019842 | 4843.205  | 5497.197  | NM_000791 | 3222.736  | 2140.899  | NM_004523 | 3999.497  | 2727.766  |
| NM_002951 | 27656.07  | 28714.871 | NM_003681 | 4257.924  | 5678.587  | NM_004404 | 16525.623 | 12811.846 |
| NM_002317 | 3677.492  | 3274.97   | NM_004677 | 1297.848  | 1224.249  | NM_002960 | 12275.281 | 10756.504 |
| NM_000320 | 1397.992  | 1385.176  | NM_014909 | 22720.221 | 22196.873 | AB046788  | 1008.206  | 949.272   |
| NM_017921 | 1416.626  | 1246.406  | NM_015700 | 8449.724  | 13317.088 | NM_006790 | 4261.382  | 3209.801  |
| NM_003136 | 14006.882 | 12955.027 | U66621    | 16275.035 | 14616.648 | AL117522  | 46543.727 | 34779.328 |
| NM_013328 | 36856.754 | 30455.436 | NM_005720 | 49868.262 | 52226.656 | AB011541  | 1466.212  | 1195.295  |
| NM_000790 | 1519.23   | 1459.395  | AB040936  | 1610.681  | 1654.609  | NM_019105 | 627.041   | 771.552   |
| NM_006475 | 442.67    | 627.622   | AB023161  | 731.62    | 767.637   | NM_019061 | 11155.807 | 16892.158 |
| NM_004620 | 2217.806  | 1776.354  | U61736    | 1981.037  | 2230.685  | AB033007  | 5471.801  | 8493.349  |
| AF087940  | 2413.812  | 2021.546  | AJ132086  | 2681.635  | 3203.06   | NM_003781 | 659.313   | 1209.44   |
| AJ277587  | 2603.379  | 2537.497  | U92816    | 30099.424 | 31495.283 | NM_000504 | 588.955   | 866.192   |
| D87432    | 6922.619  | 6484.167  | NM_004106 | 1858.131  | 2244.672  | NM_003130 | 5466.049  | 6698.381  |
| Y18483    | 1028.34   | 1161.443  | S76984    | 13025.104 | 11153.37  | NM_004716 | 60041.465 | 61019.453 |
| AI565117  | 58118.023 | 61426.742 | NM_014495 | 56576.41  | 56401.496 | D29810    | 4772.682  | 4344.768  |
| U28015    | 1476.051  | 1822.854  | NM_014081 | 4403.731  | 4085.963  | NM_000128 | 7208.515  | 7777      |
| M59979    | 4799.077  | 4162.709  | NM_005651 | 1871.444  | 1833.623  | AB002384  | 11008.978 | 9448.581  |
| AB011098  | 4281.571  | 3213.055  | NM_005418 | 315.324   | 213.084   | NM_018437 | 1242.5    | 1326.031  |
| AA609759  | 7367.472  | 4970.498  | NM_007195 | 1951.587  | 1560.269  | NM_000422 | 2856.931  | 1666.753  |
| AA029418  | 3482.654  | 2928.063  | AK023337  | 11282.133 | 9473.49   | AK023164  | 2615.312  | 2256.248  |
| L20815    | 7274.093  | 9423.362  | NM_013275 | 27453.148 | 19805.689 | NM_005379 | 4170.857  | 3689.414  |
| AI364483  | 8496.213  | 17307.436 | AB037842  | 901.828   | 695.617   | AK027121  | 18651.314 | 14136.299 |
| AA456001  | 12222.93  | 14763.949 | NM_019011 | 4281.329  | 6637.484  | NM_017433 | 8435.394  | 6321.108  |
| AA176581  | 607.282   | 870.728   | AF459094  | 8384.463  | 10407.939 | AL117661  | 6002.894  | 3983.231  |
| BI818232  | 1125.714  | 954.735   | NM_003157 | 8434.255  | 12053.74  | X64643    | 3486.857  | 2012.966  |
| AA451686  | 23204.127 | 18838.037 | NM_004938 | 2809.058  | 4823.723  | NM_005380 | 30951.586 | 22957.664 |
| AA934644  | 850.07    | 953.025   | NM_014326 | 3673.712  | 2980.971  | NM_005561 | 14543.307 | 12220.923 |
| NM_002050 | 1712.859  | 1829.314  | NM_004448 | 1292.079  | 1311.091  | AF272381  | 28751.15  | 20299.533 |
| NM_007097 | 31035.65  | 32661.209 | NM_015981 | 3847.973  | 3344.037  | NM_001518 | 21701.576 | 27988.268 |
| D87446    | 11588.387 | 11914.78  | NM_000455 | 6509.567  | 6931.841  | NM_003412 | 62300.488 | 71625.438 |
| BF540935  | 492.556   | 639.128   | NM_014791 | 11019.651 | 11925.061 | NM_018336 | 1574.04   | 4027.65   |
| NM_000715 | 1194.803  | 1210.1    | NM_003318 | 6440.674  | 6225.177  | AK022668  | 6998.527  | 8644.078  |
| AF035802  | 2488.716  | 2249.249  | NM_004362 | 12821.065 | 14742.571 | AW975132  | 5617.229  | 5909.578  |
| Y08145    | 509.128   | 434.889   | NM_000182 | 15915.359 | 16161.067 | NM_006051 | 6720.221  | 4691.483  |
| M26123    | 1173.809  | 728.486   | AK023384  | 4403.549  | 4571.007  | NM_018427 | 9502.99   | 9929.932  |
| NM_001838 | 18323.199 | 14404.104 | NM_016026 | 13175.062 | 12454.942 | AB037814  | 839.756   | 1258.654  |
| NM_019555 | 686.122   | 822.54    | NM_020245 | 14924.521 | 16641.271 | NM_014663 | 2990.251  | 3567.74   |
| NM_012096 | 16743.098 | 16300.355 | NM_007175 | 2537.841  | 3013.944  | AF007217  | 2393.428  | 2039.248  |
| NM_003905 | 35627.691 | 40806.602 | AB046381  | 1191.575  | 1268.239  | AB037753  | 8255.883  | 8417.708  |
| AB028976  | 3383.161  | 2781.746  | AJ011497  | 18345.611 | 22346.938 | NM_004674 | 5062.013  | 4593.488  |
| AK026337  | 434.217   | 289.789   | NM_003018 | 1391.844  | 1408.766  | AB037801  | 5884.348  | 4626.072  |
| NM_015868 | 1266.181  | 1166.379  | NM_000336 | 3694.876  | 4015.276  | AL080159  | 45971.934 | 43787.223 |
| AB031038  | 1575.464  | 2518.084  | W61100    | 60527.781 | 58313.242 | NM_017823 | 54594.414 | 49781.777 |
| NM_004626 | 1264.637  | 2406.201  | AA608568  | 12283.479 | 11405.348 | U55185    | 2647.106  | 2048.416  |

|           |           |           |            |           |           |           |           |           |
|-----------|-----------|-----------|------------|-----------|-----------|-----------|-----------|-----------|
| NM_001899 | 1753.069  | 2712.502  | BG831301   | 60545.727 | 54076.926 | U30828    | 24409.666 | 15774.064 |
| NM_004305 | 17977.566 | 17934.295 | M14764     | 7444.61   | 4762.516  | AF085886  | 56541.945 | 58468.043 |
| AF072506  | 733.582   | 923.695   | AA478647   | 11255.028 | 9549.734  | AK023828  | 24921.592 | 18499.93  |
| NM_005992 | 959.522   | 1176.276  | M35999     | 3246.841  | 4058.799  | NM_006572 | 29227.775 | 23144.871 |
| NM_003144 | 21400.836 | 31670.42  | AW058501   | 5124.305  | 5582.974  | NM_004784 | 490.992   | 312.043   |
| NM_000908 | 3299.785  | 4974.613  | M81379     | 2086.584  | 2820.892  | AK021815  | 2483.166  | 2745.131  |
| AB011102  | 8618.737  | 13310.297 | ID 2623896 | 6481.078  | 8585.461  | NM_001543 | 3592.988  | 7572.649  |
| D63480    | 7376.416  | 8741.078  | ID 2602214 | 17198.578 | 12122.162 | NM_016641 | 12765.161 | 33822.156 |
| NM_002969 | 8249.716  | 7813.973  | ID 2071279 | 12635.339 | 8372.582  | AB018010  | 3313.159  | 4285.436  |
| NM_001037 | 635.678   | 437.219   | L10709     | 11821.04  | 12144.488 | NM_014610 | 20024.779 | 23335.168 |
| AK023749  | 984.591   | 701.749   | N35489     | 3031.927  | 2645.809  | NM_000689 | 2794.798  | 2720.238  |
| NM_002337 | 9031.956  | 10900.895 | AA482489   | 729.483   | 785.029   | NM_006621 | 5330.418  | 6896.787  |
| NM_013245 | 5006.907  | 8555.691  | AA458922   | 4752.901  | 4541.579  | BF347398  | 17796.348 | 32214.541 |
| NM_004766 | 5028.43   | 2385.464  | NM_001719  | 19806.387 | 20159.383 | AK026762  | 5661.19   | 8014.484  |
| NM_005819 | 8438.48   | 5749.667  | AL080062   | 3128.064  | 3327.069  | AF078844  | 730.548   | 579.395   |
| AK024722  | 712.971   | 423.882   | AF308802   | 2877.282  | 2740.626  | NM_004412 | 1743.008  | 2049.008  |
| AK025520  | 8492.659  | 5073.002  | L03418     | 1190.734  | 1476.818  | L48516    | 6639.775  | 5179.975  |
| NM_004892 | 8126.092  | 12390.454 | M95923     | 15100.639 | 21846.234 | NM_016648 | 12604.783 | 9852.605  |
| NM_014597 | 46158.18  | 53679.191 | NM_002415  | 54196.52  | 56201.777 | AF083930  | 3319.034  | 2590.955  |
| NM_017896 | 35649.52  | 28612.998 | NM_006332  | 59820.93  | 61360.633 | AB040907  | 670.939   | 502.101   |
| AB002374  | 14331.375 | 9411.94   | NM_002000  | 480.178   | 851.226   | NM_003426 | 1206.686  | 800.019   |
| U17327    | 5363.523  | 4033.922  | NM_000916  | 7403.115  | 6827.495  | NM_014862 | 2333.179  | 2335.109  |
| AB046781  | 1411.823  | 933.674   | NM_018663  | 6363.904  | 8513.277  | AK027159  | 1640.423  | 1571.65   |
| M87790    | 40040.305 | 48186.246 | NM_145904  | 20430.529 | 18462.379 | NM_005269 | 1126.89   | 1034.759  |
| NM_001768 | 1607.02   | 1610.516  | NM_006796  | 21926.145 | 16631.035 | D70835    | 63630.699 | 65012.395 |
| NM_000029 | 6192.254  | 4374.953  | NM_000706  | 2654.312  | 2535.226  | NM_002697 | 8400.298  | 6556.745  |
| NM_000550 | 1469.316  | 1282.862  | NM_015941  | 6816.921  | 5363.831  | AF053952  | 56451.461 | 60893.309 |
| NM_017921 | 1230.084  | 1010.211  | NM_003655  | 6251.677  | 5609.169  | NM_003213 | 15025.262 | 23639.961 |
| NM_003136 | 13929.591 | 9346.091  | NM_014837  | 9856.015  | 9735.7    | BF184738  | 2705.12   | 3101.34   |
| NM_013328 | 31012.441 | 20413.889 | NM_017729  | 1114.7    | 995.461   | NM_014044 | 6535.89   | 6591.007  |
| NM_000790 | 1201.066  | 1036.821  | NM_005259  | 33630.035 | 29447.621 | NM_000900 | 6189.002  | 6304.213  |
| NM_013299 | 605.012   | 679.238   | NM_002840  | 708.984   | 657.091   | AK023684  | 10615.372 | 13516.474 |
| NM_015900 | 1529.18   | 1335.228  | NM_006174  | 3151.791  | 2790.166  | NM_000232 | 4742.987  | 7517.151  |
| NM_003706 | 2379.911  | 1578.902  | NM_015850  | 17925.59  | 15627.778 | AA700390  | 6450.611  | 8549.417  |
| AF182218  | 654.522   | 1003.45   | NM_004864  | 2932.721  | 2387.375  | Y18474    | 2195.705  | 2433.63   |
| AB033054  | 15981.168 | 14630.179 | NM_002838  | 9360.419  | 9254.255  | AA436163  | 3627.181  | 4893.054  |
| NM_016122 | 3871.604  | 3042.979  | AK027377   | 1350.345  | 2194.374  | BI907981  | 10632.691 | 9813      |
| NM_016583 | 417.338   | 860.426   | BF528358   | 1266.109  | 1461.122  | BI603841  | 18522.795 | 17562.686 |
| AF153330  | 2263.733  | 2856.48   | NM_016339  | 955.626   | 995.079   | M19888    | 3233.456  | 2570.183  |
| NM_001652 | 766.839   | 860.696   | NM_006510  | 30404.346 | 36279.203 | Y08136    | 2253.779  | 1837.106  |
| NM_002050 | 1183.203  | 674.916   | NM_003141  | 13310.521 | 14725.354 | AA156863  | 21499.633 | 16420.957 |
| NM_007097 | 20651.611 | 12834.343 | NM_018690  | 18722.168 | 20308.064 | BI915199  | 1953.293  | 1724.941  |
| D87446    | 10097.731 | 6427.544  | NM_000860  | 7490.315  | 10145.228 | R82957    | 60651.141 | 61279.672 |
| BF540935  | 616.14    | 276.807   | AB037798   | 4113.934  | 4033.078  | BI830442  | 7636.932  | 6386.212  |
| NM_004466 | 933.023   | 1051.164  | NM_000780  | 1105.257  | 1380.975  | AA398951  | 668.488   | 452.486   |
| NM_000373 | 306.83    | 547.119   | AF272663   | 38489.145 | 42455.938 | AI218732  | 3861.659  | 5821.484  |
| AB032964  | 5925.69   | 3141.095  | NM_012190  | 6007.633  | 6640.997  | AF079098  | 3065.852  | 4036.239  |
| BE733605  | 12131.115 | 7232.215  | AB033015   | 917.967   | 1460.63   | AK023448  | 3873.325  | 4006.335  |
| NM_003334 | 17957.35  | 13742.046 | AF277719   | 983.32    | 1208.218  | Y18213    | 13105.988 | 14826.895 |
| NM_002693 | 4372.675  | 4869.766  | NM_000791  | 3269.411  | 2855.802  | NM_003283 | 9291.612  | 9073.468  |
| NM_003671 | 4447.763  | 9960.732  | NM_003681  | 3878.688  | 3372.302  | AF249898  | 12507.39  | 12180.755 |
| M20695    | 459.578   | 571.359   | NM_014909  | 22005.676 | 18358.096 | M69181    | 21435.105 | 22498.717 |
| AK026000  | 9869.996  | 8237.46   | NM_015700  | 6698.497  | 5165.1    | L09078    | 999.447   | 1277.088  |

|           |           |           |            |           |           |           |           |           |
|-----------|-----------|-----------|------------|-----------|-----------|-----------|-----------|-----------|
| NM_017833 | 1407.512  | 1375.988  | U66621     | 17669.994 | 15269.387 | NM_002652 | 1348.271  | 1486.309  |
| NM_006675 | 17319.828 | 14960.813 | NM_005720  | 57119.363 | 54089.734 | NM_001311 | 27768.477 | 31859.635 |
| NM_003022 | 24430.359 | 25036.602 | AB040936   | 1644.574  | 1305.37   | NM_017795 | 15614.731 | 36753.93  |
| NM_004873 | 15719.925 | 24243.664 | U61736     | 2750.725  | 3757.444  | NM_012410 | 7474.899  | 5668.907  |
| NM_019842 | 5564.955  | 7093.599  | AJ132086   | 3534.054  | 4196.702  | NM_001111 | 25358.066 | 25802.861 |
| NM_002951 | 31336.75  | 37571.398 | U92816     | 31593.799 | 33957.793 | NM_018045 | 17171.063 | 15859.229 |
| NM_002317 | 5926.877  | 6907.163  | NM_004106  | 1726.75   | 1862.552  | AJ133439  | 3090.344  | 2671.668  |
| NM_000320 | 1315.503  | 1383.549  | NM_003485  | 18333.172 | 18761.145 | NM_014395 | 6306.733  | 4424.268  |
| CY3Cy5    | 1223.334  | 198.943   | NM_005035  | 6324.471  | 4911.977  | NM_001561 | 3110.673  | 2454.325  |
| NM_145655 | 3223.381  | 6080.83   | NM_014081  | 4868.391  | 4936.777  | NM_005160 | 6415.21   | 5097.716  |
| NM_021957 | 895.213   | 856.637   | NM_005651  | 1928.498  | 2434.265  | NM_000595 | 1572.643  | 1296.291  |
| AK022138  | 1522.68   | 1507.614  | NM_005415  | 812.982   | 624.522   | X78817    | 56616.031 | 61622.289 |
| AF086191  | 1785.434  | 2049.934  | NM_007195  | 2885.025  | 3575.884  | AB023135  | 3140.66   | 3638.698  |
| AF143880  | 395.721   | 366.709   | AK023337   | 15716.545 | 20026.502 | AY009401  | 2045.849  | 2558.634  |
| NM_017635 | 6817.154  | 6428.361  | NM_013275  | 32702.295 | 38732.352 | AF294628  | 2308.363  | 2373.378  |
| AL050013  | 538.657   | 1048.583  | AB037842   | 1490.767  | 1189.897  | NM_004152 | 583.717   | 816.754   |
| AL133052  | 3310.928  | 2702.295  | U92074     | 456.559   | 668.983   | BU565263  | 64262.375 | 76616.289 |
| AB037824  | 2691.179  | 2466.6    | NM_019011  | 3471      | 3255.748  | NM_005025 | 6138.59   | 8151.193  |
| AF361494  | 471.668   | 313.083   | AF459094   | 7051.146  | 6159.506  | NM_001611 | 2142.861  | 1572.595  |
| AK022810  | 740.596   | 635.299   | NM_003157  | 6727.218  | 7452.741  | M59979    | 1749.017  | 1607.847  |
| AK001384  | 3484.434  | 4879.894  | NM_004935  | 2910.772  | 3546.912  | AB018310  | 2948.466  | 3171.123  |
| AK025437  | 4145.519  | 2552.072  | NM_014326  | 4198.727  | 4188.361  | NM_020133 | 1618.103  | 1592.111  |
| AF052152  | 233.533   | 135.451   | NM_004445  | 1738.926  | 2603.193  | NM_015375 | 30393.354 | 31106.744 |
| AK074164  | 1080.171  | 1107.221  | NM_015981  | 4563.751  | 5977.954  | NM_004875 | 1053.799  | 898.312   |
| NM_145655 | 2525.612  | 2364.598  | NM_000455  | 9279.691  | 13541.231 | NM_015057 | 1586.936  | 2031.372  |
| NM_021957 | 954.03    | 999.981   | NM_014791  | 11907.382 | 13377.372 | AF303398  | 31250.863 | 26816.648 |
| SR2       | 45995.859 | 33824.441 | NM_003315  | 7198.054  | 6087.609  | NM_014810 | 3376.343  | 2487.036  |
| SR4       | 11443.093 | 9789.033  | NM_004362  | 13161.199 | 13676.078 | NM_004735 | 6511.391  | 5238.156  |
| SR6       | 1819.026  | 1794.045  | NM_000182  | 17210.17  | 19159.354 | NM_007357 | 7789.812  | 7580.664  |
| SR8       | 6388.268  | 17371.451 | AK023384   | 5047.37   | 5376.74   | NM_003763 | 14106.313 | 13426.956 |
| SR10      | 20399.006 | 7587.742  | NM_016026  | 15092.809 | 14589.592 | AB046836  | 3612.104  | 6305.302  |
| CY3Cy5    | 2268.909  | 442.634   | AK025111   | 1311.047  | 1495.775  | NM_017815 | 12599.808 | 12458.991 |
| AK026818  | 898.684   | 1255.028  | NM_001732  | 5897.626  | 7268.507  | AJ224166  | 6088.393  | 4635.75   |
| NM_018465 | 1944.897  | 3254.807  | AB046381   | 1576.773  | 1583.612  | AK026098  | 7358.649  | 7341.927  |
| NM_014867 | 307.426   | 465.987   | AJ011497   | 15504.822 | 13603.112 | NM_012381 | 3417.52   | 3308.215  |
| AL359932  | 370.361   | 466.61    | NM_003015  | 1765.007  | 1824.636  | M20702    | 1105.45   | 1016.275  |
| AB037850  | 4896.24   | 5819.017  | NM_000336  | 4664.29   | 5991.755  | NM_006397 | 49379.613 | 44011.816 |
| AK002197  | 1787.724  | 2002.689  | W61100     | 55558.797 | 63229.902 | D83776    | 4200.652  | 3872.861  |
| AF087996  | 486.676   | 826.223   | AA608568   | 19083.379 | 31652.383 | NM_004085 | 13263.923 | 10033.314 |
| AK021710  | 2288.701  | 2388.131  | BG831301   | 52543.281 | 52552.559 | NM_002180 | 2956.135  | 3307.975  |
| BC033114  | 291.483   | 317.797   | M14764     | 8251.327  | 8368.646  | NM_000135 | 5465.751  | 5727.385  |
| AK024551  | 338.75    | 379.117   | AA478647   | 12141.98  | 10896.527 | NM_018163 | 4135.822  | 3090.707  |
| AL833249  | 1482.548  | 1270.779  | M35999     | 4005      | 5729.097  | AK026362  | 8952.956  | 7187.394  |
| NM_018374 | 467.452   | 325.59    | AW058501   | 4180.974  | 4545.711  | NM_004965 | 4612.683  | 3870.36   |
| AF131852  | 446.689   | 367.454   | M81379     | 1784.036  | 1633.688  | NM_005905 | 6588.188  | 6563.076  |
| AK021894  | 2767.316  | 1986.579  | ID 2623896 | 6615.996  | 6846.725  | NM_004785 | 6927.176  | 7037.949  |
| NM_020424 | 9391.723  | 5802.932  | ID 2602214 | 25264.43  | 30508.412 | NM_002425 | 4325.68   | 4389.162  |
| AF438313  | 1493.416  | 1080.039  | ID 2071279 | 16596.41  | 17551.006 | NM_014674 | 6007.004  | 5571.519  |
| NM_017815 | 260.109   | 356.107   | L10709     | 12320.322 | 13003.731 | NM_018271 | 2417.982  | 1789.563  |
| AB033009  | 20899.811 | 18480.41  | N35489     | 3209.75   | 3151.342  | NM_000547 | 638.547   | 420.14    |
| AL137761  | 534.09    | 495.989   | AI928195   | 361.54    | 622.258   | NM_014652 | 2494.753  | 1751.393  |
| AK022086  | 938.734   | 1031.542  | AA482489   | 1007.17   | 1278.304  | AL133020  | 8365.865  | 7383.779  |
| AF147320  | 718.816   | 668.221   | AA458922   | 5524.491  | 5948.046  | NM_003213 | 14514.761 | 18058.855 |

|           |           |           |           |           |           |           |           |           |
|-----------|-----------|-----------|-----------|-----------|-----------|-----------|-----------|-----------|
| AK027024  | 1256.714  | 969.232   | NM_001719 | 20885.289 | 24765.563 | BF184738  | 2780.677  | 2908.478  |
| AK022339  | 4257.771  | 4429.071  | AL080062  | 3198.455  | 4303.036  | NM_014044 | 5789.653  | 6284.415  |
| AK025126  | 609.904   | 955.084   | AF308802  | 3200.124  | 3508.34   | NM_00090C | 5411.223  | 4874.231  |
| AK025317  | 7378.666  | 9272.184  | S76984    | 12322.449 | 12029.892 | AK023684  | 10590.545 | 11585.885 |
| AK026119  | 316.641   | 287.436   | NM_014495 | 59076.66  | 54584.98  | NM_000232 | 4661.551  | 4142.285  |
| AK025552  | 464.534   | 451.84    | NM_006796 | 23327.939 | 20619.242 | J05070    | 1163.541  | 1356.627  |
| AK026725  | 534.593   | 706.904   | NM_000706 | 2992.569  | 2578.938  | AA700390  | 6199.264  | 5715.906  |
| NM_005110 | 487.932   | 610.075   | NM_015941 | 8278.893  | 6976.917  | Y18474    | 1952.142  | 1879.12   |
| AK023122  | 746.454   | 847.065   | NM_003655 | 6693.034  | 7394.812  | AA436163  | 4368.559  | 5072.339  |
| AF147408  | 4752.125  | 4264.963  | NM_014837 | 10214.495 | 12619.52  | BI907981  | 9231.773  | 8036.58   |
| AK027222  | 2012.623  | 2044.172  | NM_017729 | 1911.462  | 2487.63   | BI603841  | 18806.377 | 14980.41  |
| AF054994  | 205.332   | 143.048   | NM_005259 | 35377.066 | 44433.82  | M19888    | 2880.866  | 2575.995  |
| AF085868  | 1002.65   | 1379.728  | NM_00284C | 795.828   | 1212.043  | Y08136    | 2329.789  | 2079.825  |
| AF075049  | 322.072   | 601.598   | NM_006174 | 2996.534  | 3678.603  | AA156863  | 21104.701 | 17479.406 |
| AL049275  | 291.955   | 241.578   | NM_01585C | 19359.127 | 17134.395 | BI915199  | 1629.669  | 1655.465  |
| AK054767  | 726.305   | 508.108   | NM_004864 | 2206.755  | 1927.594  | R82957    | 57541.555 | 60682.816 |
| AL050042  | 964.103   | 1263.311  | NM_00283E | 9088.574  | 7742.738  | BI830442  | 8364.086  | 11386.956 |
| AL157458  | 1017.408  | 1499.997  | AK027377  | 1387.536  | 1451.807  | AI218732  | 3273.338  | 2700.653  |
| NM_015377 | 552.791   | 772.996   | NM_014686 | 53976.117 | 55404.41  | NM_01889C | 48819.66  | 41275.734 |
| AL137531  | 1171.888  | 1545.853  | BF528358  | 1021.103  | 1322.746  | NM_016204 | 23170.316 | 20436.953 |
| AK022210  | 329.747   | 465.04    | NM_016339 | 1069.477  | 1238.368  | NM_003283 | 9850.85   | 8968.02   |
| AL080085  | 7317.306  | 11214.206 | NM_002487 | 6078.376  | 5300.833  | AF249898  | 12532.923 | 10636.698 |
| AK022106  | 222.312   | 640.36    | NM_01334C | 4282.852  | 4757.846  | M69181    | 20668.879 | 15465.663 |
| NM_007017 | 213.169   | 253.467   | NM_005462 | 2593.932  | 2784.48   | L09078    | 1030.121  | 939.792   |
| AL137446  | 631.646   | 688.146   | NM_012319 | 4879.295  | 6042.706  | NM_002652 | 903.429   | 879.333   |
| AB025286  | 772.538   | 840.481   | AK026235  | 875.416   | 1484.888  | NM_001311 | 26245.523 | 20093.135 |
| AF009286  | 1141.069  | 843.334   | NM_00651C | 32392.865 | 42005.453 | NM_01779E | 14267.687 | 13356.27  |
| NM_01588C | 405.106   | 275.327   | NM_003141 | 15233.318 | 17762.607 | NM_000354 | 416.245   | 449.509   |
| AB032364  | 704.854   | 437.126   | NM_020245 | 16323.084 | 17660.4   | NM_01241C | 7918.636  | 6016.178  |
| NM_00502E | 2107.859  | 1840.378  | NM_007175 | 1713.05   | 1352.542  | NM_001111 | 23726.959 | 19633.621 |
| AF056447  | 1500.302  | 1190.83   | NM_019087 | 2714.431  | 2005.11   | NM_01804E | 16332.847 | 13393.295 |
| AK001010  | 536.268   | 401.735   | NM_016322 | 2067.177  | 1701.277  | AJ133439  | 2930.539  | 2596.955  |
| NM_01807E | 598.107   | 717.197   | NM_004277 | 1961.364  | 2545.381  | NM_01439E | 5888.877  | 4314.041  |
| AK021442  | 888.266   | 1223.463  | NM_005072 | 1540.174  | 1952.077  | NM_001561 | 2476.914  | 2042.851  |
| AK021686  | 206.172   | 268.937   | AF215923  | 5874.851  | 6918.096  | NM_00516C | 6054.844  | 5117.758  |
| AK001076  | 1680.398  | 1527.165  | U66621    | 15947.428 | 19832.154 | NM_00059E | 1629.027  | 2066.655  |
| AK001820  | 547.47    | 523.862   | U61736    | 2684.939  | 4138.104  | X78817    | 57591.156 | 71229.898 |
| AK021482  | 1586.929  | 1466.953  | AJ132086  | 2827.121  | 3271.677  | AB023135  | 3846.165  | 6059.281  |
| NM_00615E | 4602.628  | 6532.779  | U92816    | 31568.299 | 32346.17  | AY009401  | 2103.288  | 1746.819  |
| NM_00634E | 1648.602  | 2127.164  | NM_004106 | 2085.956  | 2310.249  | AF294628  | 2457.437  | 1934.948  |
| AK025240  | 5002.726  | 7640.948  | NM_003485 | 16125.615 | 15866.584 | NM_00244E | 1037.163  | 771.263   |
| NM_005377 | 530.756   | 942.682   | NM_00503E | 6232.8    | 5479.781  | AF053952  | 51523.219 | 39325.645 |
| NM_017633 | 13256.893 | 20840.84  | M95923    | 9874.863  | 8945.016  | BU565263  | 58552.129 | 70831.023 |
| AF086186  | 3087.369  | 4344.973  | NM_00200C | 1016.756  | 1371.062  | NM_00502E | 6496.808  | 7211.339  |
| NM_017802 | 7177.01   | 8358.208  | NM_000916 | 7848.942  | 8852.715  | NM_001611 | 1673.786  | 1656.543  |
| AF155194  | 204.345   | 120.589   | NM_018663 | 6296.358  | 10942.024 | M59979    | 2335.729  | 1794.936  |
| AK023667  | 2961.401  | 2707.159  | NM_145904 | 18791.162 | 19471.928 | AB018310  | 1869.882  | 1559.381  |
| AJ008137  | 5990.463  | 7333.25   | NM_000182 | 13880.545 | 10792.952 | NM_020133 | 657.374   | 539.025   |
| AF085841  | 505.907   | 394.765   | AK023384  | 4485.653  | 2698.781  | NM_01537E | 27639.533 | 25949.807 |
| AL049232  | 298.035   | 233.079   | NM_016026 | 15621.718 | 15265.17  | NM_00487E | 708.461   | 752.778   |
| AJ008118  | 43948.625 | 34832.152 | AK025111  | 1507.076  | 1765.502  | NM_015057 | 1029.685  | 1372.111  |
| AK000939  | 281.408   | 197.139   | NM_001732 | 4816.646  | 5279.739  | AF303398  | 28605.328 | 27046.807 |
| AL109674  | 450.835   | 547.481   | NM_01869C | 16607.566 | 16496.525 | NM_01481C | 3649.846  | 4849.714  |

|           |           |           |           |           |           |           |           |           |
|-----------|-----------|-----------|-----------|-----------|-----------|-----------|-----------|-----------|
| AK024512  | 9811.646  | 9266.032  | AF272663  | 31309.49  | 33402.605 | NM_00473E | 7171.112  | 12096.162 |
| AK023454  | 1769.247  | 1687.062  | NM_01219C | 4988.53   | 4644.218  | NM_007357 | 8740.267  | 13570.718 |
| L23207    | 699.414   | 1245.682  | AB033015  | 756.255   | 829.34    | NM_003763 | 13142.138 | 12567.984 |
| NM_018062 | 1871.92   | 1665.483  | NM_000791 | 3908.066  | 4052.404  | AK023448  | 4190.5    | 2480.327  |
| NM_00712E | 17009.727 | 15596.785 | NM_003681 | 3452.724  | 3653.598  | Y18213    | 13514.696 | 8853.469  |
| NM_00716C | 914.716   | 1181.528  | NM_00480C | 9862.949  | 10338.403 | NM_01781E | 12970.949 | 14756.378 |
| NM_018627 | 1437.891  | 1123.987  | AB037738  | 644.525   | 633.13    | AJ224166  | 6052.311  | 5717.994  |
| S82164    | 543.533   | 875.914   | S82769    | 302.978   | 800.313   | AK026098  | 7251.713  | 8301.268  |
| AK024394  | 3925.196  | 5591.331  | NM_014954 | 56826.762 | 55938.434 | NM_012381 | 3970.448  | 3495.977  |
| AF147374  | 2607.111  | 3958.588  | NM_000807 | 1475.34   | 2122.492  | M20702    | 1250.271  | 1042.358  |
| AF130091  | 1537.938  | 2459.392  | NM_014909 | 25709.057 | 28328.547 | NM_006397 | 45384.273 | 53159.051 |
| L43338    | 2469.71   | 3282.51   | X91148    | 2442.88   | 3561.837  | D83776    | 4407.994  | 5508.397  |
| AJ227866  | 1802.664  | 2264.536  | NM_01570C | 6053.321  | 6520.001  | NM_00408E | 12793.256 | 16318.93  |
| AF458223  | 8568.876  | 7916.587  | NM_001719 | 18771.869 | 13190.464 | NM_00218C | 2030.359  | 3289.167  |
| AK026822  | 587.096   | 522.896   | AL080062  | 2837.238  | 1789.64   | NM_00013E | 5655.864  | 6612.258  |
| AK022838  | 12704.027 | 13094.227 | AF308802  | 3089.958  | 2510.157  | AK026362  | 8607.121  | 8154.58   |
| NM_00350E | 935.635   | 774.988   | S76984    | 11914.132 | 9220.973  | NM_00496E | 4584.544  | 3957.228  |
| AF086519  | 522.066   | 611.196   | NM_01449E | 54084.27  | 55492.586 | NM_00590E | 5698.758  | 7367.571  |
| L08435    | 393.034   | 422.434   | NM_014081 | 3910.038  | 3761.425  | NM_00478E | 7280.495  | 18629.914 |
| AF055012  | 12029.837 | 9221.308  | NM_005651 | 2170.002  | 2067.369  | AK024079  | 886.125   | 1472.125  |
| AK022307  | 2298.708  | 2885.129  | AK023699  | 2251.374  | 2018.436  | NM_00242E | 4056.472  | 4090.747  |
| AF132201  | 1648.058  | 2239.827  | NM_00541E | 1631.908  | 1303.552  | NM_014674 | 6308.467  | 5774.473  |
| U00950    | 1068.947  | 836.475   | NM_00719E | 1940.446  | 1736.444  | NM_018271 | 2541.819  | 3045.348  |
| AF085997  | 771.345   | 900.659   | AK023337  | 12354.669 | 12025.552 | NM_014652 | 2261.714  | 1622.316  |
| L31942    | 290.448   | 555.987   | NM_01327E | 31948.67  | 27102.65  | AL133020  | 8210.53   | 6502.039  |
| NM_005172 | 583.26    | 576.182   | AB037842  | 942.927   | 903.178   | NM_004152 | 690.043   | 542.001   |
| AK025192  | 5751.139  | 6468.572  | U92074    | 1039.289  | 878.133   | NM_014044 | 5881.367  | 5528.351  |
| NM_012403 | 2242.404  | 1798.486  | NM_019011 | 4204.67   | 4825.365  | NM_00090C | 6631.845  | 6198.689  |
| AK023251  | 280.656   | 360.133   | AF459094  | 7696.325  | 7323.708  | AK023684  | 11405.772 | 9059.377  |
| AK022611  | 6666.354  | 4869.481  | NM_003157 | 7664.226  | 8313.408  | NM_000232 | 4569.739  | 4369.605  |
| NM_004952 | 4883.125  | 5690.162  | NM_00493E | 2447.714  | 2631.662  | J05070    | 1251.57   | 1500.332  |
| AY007239  | 475.144   | 443.995   | NM_01432E | 3788.932  | 3904.755  | AA700390  | 6084.95   | 7423.776  |
| NM_020414 | 9006.959  | 12861.47  | NM_00444E | 2286.203  | 2628.647  | Y18474    | 1953.802  | 2940.082  |
| AB037730  | 6719.006  | 8443.421  | NM_015981 | 6297.08   | 7474.065  | AA436163  | 3591.869  | 6336.979  |
| AF147429  | 469.801   | 447.557   | NM_00045E | 8038.858  | 10271.041 | BI907981  | 9778.969  | 13371.725 |
| NM_001357 | 14088.518 | 13451.781 | NM_014791 | 12570.486 | 14887.976 | BI603841  | 18597.592 | 21196.65  |
| NM_003893 | 5840.911  | 5935.968  | NM_00331E | 8014.338  | 8282.452  | Y08136    | 2416.194  | 1863.106  |
| AB037816  | 3463.381  | 3339.824  | NM_004362 | 13289.792 | 14458.337 | AA156863  | 20022.453 | 24607.188 |
| NM_01438C | 269.187   | 265.502   | CY3Cy5    | 3355.401  | 644.408   | BI915199  | 2008.018  | 3017.201  |
| NM_01426E | 1541.94   | 1287.158  | NM_004102 | 10739.406 | 8713.722  | R82957    | 51729.738 | 60393.785 |
| U92026    | 785.863   | 892.461   | NM_004544 | 7165.235  | 5885.625  | BI830442  | 8248.259  | 7812.258  |
| AF086234  | 36185.008 | 28074.48  | AF052140  | 581.972   | 557.993   | AI218732  | 3832.942  | 4169.022  |
| AK023680  | 11293.71  | 11276.429 | NM_01883E | 4931.542  | 4265.746  | NM_01889C | 47854.422 | 50903.676 |
| AF009324  | 7847.892  | 9969.701  | AF007147  | 1569.582  | 972.296   | NM_016204 | 20426.105 | 15485.527 |
| AF019226  | 614.708   | 739.642   | AF052127  | 8184.36   | 6347.203  | AB046836  | 3423.826  | 2084.816  |
| AK022112  | 365.779   | 376.113   | AK024261  | 1509.512  | 1198.973  | NM_001311 | 26016.568 | 16739.305 |
| AL137480  | 22622.225 | 18225.002 | AF052150  | 1522.719  | 1361.14   | NM_01779E | 13474.006 | 13311.119 |
| AK022182  | 1909.014  | 1665.725  | AF086481  | 827.746   | 765.443   | NM_01241C | 7096.774  | 6216.477  |
| D16473    | 6874.254  | 5612.385  | AL355689  | 282.29    | 331.109   | NM_001111 | 24035.773 | 23785.492 |
| AB028968  | 5026.712  | 4819.083  | AK024885  | 2615.482  | 2578.843  | NM_01804E | 15193.732 | 15712.682 |
| AK001202  | 1493.105  | 2188.925  | AL080223  | 4603.907  | 4192.333  | AJ133439  | 2874.945  | 2843.882  |
| AF195764  | 49188.094 | 34399.254 | AK001630  | 7400.017  | 7115.023  | NM_01439E | 6115.438  | 5653.451  |
| AF055029  | 2928.026  | 2366.778  | NM_014612 | 48438.781 | 46976.508 | NM_001561 | 2490.351  | 3340.149  |

|           |           |           |           |           |           |           |           |           |
|-----------|-----------|-----------|-----------|-----------|-----------|-----------|-----------|-----------|
| AB011542  | 2726.713  | 3545.062  | NM_004102 | 9357.648  | 8035.229  | NM_00516C | 7489.874  | 20490.471 |
| NM_001853 | 2719.171  | 3613.179  | NM_004544 | 7615.513  | 6571.087  | NM_00059C | 1919.668  | 2870.308  |
| U41737    | 374.82    | 420.268   | SR1       | 75907.844 | 64426.141 | X78817    | 56691.773 | 58693.523 |
| NM_00579C | 1604.479  | 1978.16   | SR3       | 33110.695 | 44775.313 | AB023135  | 3010.399  | 3468.818  |
| X99661    | 3559.017  | 4276.938  | SR5       | 3903.049  | 5005.37   | NM_00339C | 1528.115  | 1622.052  |
| NM_005927 | 2759.025  | 2655.241  | SR7       | 3828.321  | 34902.953 | AY009401  | 1715.065  | 2496.809  |
| AB028983  | 637.67    | 558.646   | SR9       | 13512.526 | 2721.498  | AF294628  | 2396.18   | 4781.928  |
| AB037800  | 1064.265  | 841.021   | CY3Cy5    | 2772.494  | 567.036   | AK026960  | 963.843   | 1691.731  |
| AK026377  | 2675.317  | 1977.807  | Z36807    | 52494.934 | 42221.039 | NM_001991 | 5419.495  | 4574.858  |
| NM_01866C | 5890.189  | 5866.412  | U20896    | 671.886   | 512.937   | NM_01785C | 618.088   | 416.832   |
| NM_003394 | 1593.209  | 1358.45   | U52836    | 2216.008  | 1700.099  | NM_00019C | 17403.164 | 21276.404 |
| NM_01463C | 1304.619  | 1181.158  | NM_01793C | 4510.971  | 3238.077  | BC014586  | 1845.755  | 2288.663  |
| NM_006747 | 7728.045  | 7283.917  | AK021837  | 6709.211  | 5941.457  | NM_00244C | 909.848   | 696.967   |
| NM_00708C | 2849.422  | 3482.073  | AF075112  | 1219.393  | 1078.112  | AF053952  | 47114.719 | 33251.859 |
| NM_00387C | 18860.172 | 27910.82  | AK001796  | 1576.859  | 1154.314  | NM_00321C | 16707.092 | 12649.76  |
| AK024507  | 1447.383  | 1417.364  | AF086152  | 53710.957 | 48514.469 | BF184738  | 2500.307  | 1464.787  |
| NM_00124C | 8439.204  | 7582.17   | U78519    | 2623.422  | 2264.676  | NM_02038C | 768.757   | 477.449   |
| AK025997  | 2291.257  | 1744.561  | AK026872  | 7122.629  | 6438.732  | NM_015057 | 921.912   | 904.696   |
| NM_00554C | 521.921   | 496.171   | AL157505  | 4089.518  | 3954.99   | AF303398  | 39017.219 | 48319.215 |
| NM_00029C | 710.92    | 558.376   | NM_00719C | 15377.194 | 15403.621 | NM_01481C | 3253.586  | 4193.443  |
| S51112    | 414.887   | 404.158   | AF043897  | 1802.651  | 1490.316  | NM_00473C | 6929.014  | 8095.596  |
| NM_014887 | 3169.755  | 3282.736  | U79246    | 3002.589  | 2375.343  | NM_007357 | 8680.88   | 9687.012  |
| NM_00259C | 315.798   | 264.139   | AK022619  | 676.085   | 742.066   | NM_00376C | 11434.397 | 11456.688 |
| NM_01855C | 1546.023  | 2157.993  | AK023464  | 2333.097  | 2320.34   | AK023448  | 4353.776  | 9098.304  |
| NM_00523C | 675.013   | 756.809   | AK024157  | 1375.991  | 1264.109  | Y18213    | 13641.36  | 24032.16  |
| NM_00560C | 3445.245  | 4742.482  | AK022963  | 430.251   | 302.609   | NM_00328C | 10112.462 | 12084.481 |
| NM_005967 | 3462.242  | 3727.593  | AK023905  | 23231.52  | 19358.16  | AF249898  | 12110.659 | 9465.488  |
| AB014566  | 4553.944  | 4172.948  | AK024231  | 8141.395  | 7467.687  | M69181    | 23248.852 | 16882.084 |
| NM_01567C | 985.41    | 849.764   | AK022441  | 2029.207  | 1991.887  | L09078    | 904.087   | 719.914   |
| AK025950  | 639.937   | 366.484   | AK026208  | 2969.333  | 3015.269  | NM_00265C | 799.035   | 401.822   |
| NM_01422C | 3185.471  | 2681.077  | NM_016947 | 64819.93  | 57769.094 | NM_000547 | 818.585   | 759.881   |
| NM_016194 | 1384.235  | 1239.907  | AY007136  | 1453.635  | 1383.074  | NM_01465C | 2212.23   | 1882.879  |
| AL050385  | 1844.964  | 1518.632  | AL359940  | 4202.583  | 3825.96   | AL133020  | 8600.705  | 7373.773  |
| NM_007027 | 7157.059  | 7599.6    | NM_01828C | 1816.956  | 1872.141  | BC001123  | 562.775   | 426.63    |
| NM_00063C | 14420.379 | 16451.504 | AF085961  | 649.688   | 718.189   | NM_00415C | 2552.291  | 1971.017  |
| AB037855  | 4265.681  | 6516.984  | AK024925  | 53756.816 | 49115.73  | BU565263  | 58813.43  | 67260.594 |
| AK024524  | 10365.668 | 12490.315 | AL049460  | 24977.443 | 23444.613 | NM_00502C | 8458.103  | 9132.768  |
| NM_00056C | 1153.335  | 1483.202  | AK022396  | 5561.844  | 5670.082  | NM_001611 | 3123.137  | 3220.694  |
| NM_02035C | 1653.488  | 1459.015  | AF075113  | 2226.997  | 2589.14   | M59979    | 2391.677  | 2735.324  |
| NM_019011 | 7203.188  | 7130.492  | AF086037  | 748.674   | 712.855   | AB018310  | 2988.136  | 3886.758  |
| NM_00487C | 10700.014 | 9286.179  | AK022892  | 15981.198 | 11317.795 | NM_02013C | 1785.606  | 1436.173  |
| AB020694  | 3737.824  | 2891.808  | AK002162  | 684.051   | 883.07    | NM_01537C | 31605.566 | 31561.809 |
| NM_016071 | 38132.715 | 29271.057 | AK022980  | 1457.72   | 1264.134  | AF144638  | 57929.242 | 68509.586 |
| AL050131  | 483.293   | 362.464   | AL359058  | 4605.325  | 3970.979  | BF028822  | 356.893   | 1216.469  |
| NM_00447C | 10555.639 | 7686.311  | AK022439  | 390.11    | 434.916   | NM_00550C | 661.24    | 909.767   |
| NM_001627 | 5798.925  | 5411.172  | AK026237  | 8705.843  | 7742.328  | NM_00074C | 2531.698  | 2126.737  |
| NM_01493C | 179.468   | 191.281   | AK023687  | 4368.432  | 4083.075  | NM_00235C | 19184.914 | 18698.512 |
| NM_002544 | 359.195   | 266.177   | AK002088  | 50210.742 | 49274.441 | AK026608  | 6203.878  | 9236.538  |
| X77690    | 2022.862  | 2751.096  | X98206    | 1063.578  | 1040.29   | NM_01889C | 46268.48  | 34685.297 |
| NM_00653C | 723.739   | 1271.229  | AK022193  | 1155.338  | 1068.73   | NM_016204 | 19598.742 | 20102.408 |
| NM_00565C | 13401.768 | 20299.088 | AK000106  | 5414.663  | 7490.769  | AB046836  | 3127.967  | 2591.699  |
| NM_00242C | 1515.496  | 1449.047  | AK022370  | 2875.714  | 3934.982  | NM_01781C | 13125.048 | 11042.433 |
| NM_00669C | 739.932   | 517.028   | AK026765  | 9988.475  | 12191.017 | AJ224166  | 6672.836  | 5729.883  |

|           |           |           |           |           |           |           |           |           |
|-----------|-----------|-----------|-----------|-----------|-----------|-----------|-----------|-----------|
| NM_006156 | 989.152   | 794.315   | AL117530  | 1518.784  | 2003.931  | AK026098  | 6873.337  | 5935.911  |
| AF218022  | 2637.251  | 1995.332  | AK025016  | 1186.617  | 1464.904  | NM_012381 | 6243.293  | 6738.909  |
| NM_003348 | 4876.984  | 3458.546  | AL080191  | 22115.465 | 25810.006 | M20702    | 1364.304  | 1351.067  |
| AB033029  | 1114.485  | 944.743   | AK021639  | 2756.998  | 3953.244  | NM_006397 | 46921.254 | 47647.586 |
| NM_006002 | 280.369   | 352.45    | AK023189  | 6760.382  | 7604.314  | D83776    | 4541.691  | 4813.149  |
| NM_002021 | 206.889   | 824.807   | AK023872  | 1941.145  | 2355.094  | NM_004088 | 14511.192 | 13541.214 |
| AL137663  | 664.057   | 1200.595  | AK022127  | 1782.234  | 1663.046  | NM_018163 | 5448.156  | 5914.837  |
| AB006198  | 16978.061 | 15743.099 | AF118062  | 956.762   | 1164.776  | AK026362  | 9087.42   | 8224.646  |
| U72518    | 8071.326  | 6408.753  | AF306347  | 4211.301  | 5926.785  | NM_004968 | 4762.49   | 4073.056  |
| AF264765  | 938.861   | 675.666   | AF070599  | 3803.071  | 5201.264  | NM_005908 | 6482.166  | 4434.412  |
| NM_015322 | 4325.293  | 3066.987  | NM_005450 | 10496.381 | 16248.636 | NM_004785 | 7349.67   | 3887.002  |
| NM_016607 | 2695.601  | 2466.49   | AK023600  | 1788.286  | 2399.113  | AK024079  | 1689.802  | 1258.212  |
| NM_003275 | 624.972   | 296.904   | Z83952    | 1024.818  | 1466.027  | NM_002428 | 4862.826  | 4350.832  |
| NM_000268 | 5925.785  | 4393.032  | NM_005525 | 908.569   | 803.328   | NM_014674 | 7522.057  | 8181.697  |
| M30493    | 10754.988 | 10924.694 | NM_005285 | 18669.619 | 25504.949 | NM_018271 | 2621.661  | 2069.462  |
| AJ008160  | 636.014   | 888.232   | AK001918  | 2579.673  | 3258.635  | CY3Cy5    | 2965.602  | 174.334   |
| NM_005824 | 3030.262  | 2248.637  | NM_018635 | 65303.906 | 69078.102 | NM_020967 | 1769.104  | 2119.305  |
| AF052211  | 7557.727  | 6469.616  | AF086048  | 6376.961  | 7593.967  | NM_001071 | 15795.734 | 20248.889 |
| U66561    | 3403.688  | 5908.801  | L15616    | 20949.188 | 25919.035 | AF086181  | 2189.449  | 1566.994  |
| NM_000308 | 1231.623  | 1480.988  | AB019565  | 18066.723 | 20599.023 | AK021540  | 998.885   | 1504.951  |
| NM_002200 | 2966.306  | 2883.307  | NM_016940 | 6165.329  | 8672.19   | D86985    | 411.78    | 888.627   |
| AF017433  | 2374.642  | 1714.165  | AK025757  | 5827.758  | 8503.434  | AK022258  | 2447.715  | 3454.087  |
| AF130111  | 5434.804  | 4985.87   | Y16713    | 1886.953  | 2130.416  | AF088043  | 698.625   | 1022.484  |
| NM_016307 | 753.484   | 598.661   | L07394    | 30557.68  | 40168.211 | AF131799  | 1450.117  | 1992.678  |
| AB028449  | 5731.977  | 5254.439  | AK056133  | 2664.265  | 3134.781  | AK000455  | 2857.678  | 3711.85   |
| NM_004697 | 8465.273  | 6743.569  | NM_017845 | 20486.82  | 24568.904 | NM_005230 | 615.277   | 858.245   |
| U94384    | 1031.941  | 728.093   | AF130080  | 1597.331  | 1627.143  | AF088011  | 689.771   | 1259.931  |
| AF131776  | 8817.11   | 6958.443  | AK026006  | 4546.89   | 4844.757  | AK023719  | 8937.75   | 11650.967 |
| NM_020528 | 9183.093  | 9295.487  | NM_019089 | 32918.707 | 39169.445 | AK025590  | 5842.728  | 6797.8    |
| NM_007040 | 33695.906 | 31520.061 | AF147440  | 840.302   | 1113.031  | AY007149  | 2432.528  | 3288.662  |
| NM_014483 | 40948.547 | 48647.688 | AL122072  | 12598.673 | 15338.46  | NM_020967 | 2260.979  | 2866.609  |
| AK024249  | 3758.714  | 5564.954  | AK026221  | 1574.061  | 2107.975  | NM_001071 | 16502.402 | 18952.813 |
| AF239156  | 13142.703 | 10700.927 | AK026403  | 5733.229  | 7753.951  | SR2       | 45434.281 | 37054.41  |
| NM_020390 | 9195.588  | 5478.819  | U90904    | 17204.744 | 21403.15  | SR4       | 12247.574 | 12921.25  |
| NM_003321 | 21877.633 | 17671.949 | AF088053  | 6913.583  | 8888.395  | SR6       | 1503.412  | 1782.103  |
| U18937    | 30273.967 | 16975.279 | AL133662  | 1909.353  | 2500.012  | SR8       | 4065.481  | 15198.546 |
| U01925    | 1436.413  | 954.777   | NM_002565 | 1684.173  | 2336.068  | SR10      | 18793.326 | 6879.118  |
| AJ420488  | 52685.336 | 63230.512 | U90903    | 2757.737  | 3898.914  | CY3Cy5    | 2619.845  | 138.402   |
| AF268872  | 5437.101  | 3736.507  | AF278760  | 6954.524  | 8220.171  | AL157484  | 19281.9   | 18142.646 |
| AK022180  | 42092.84  | 39370.277 | X58061    | 1271.601  | 1361.452  | Y09836    | 1878.307  | 2778.202  |
| NM_001228 | 2865.065  | 2576.743  | AB032954  | 15420.48  | 19887.027 | AL137597  | 4270.387  | 6114.59   |
| NM_001338 | 2317.782  | 1902.528  | NM_006003 | 31586.219 | 40849.297 | AK022144  | 675.3     | 771.734   |
| AB050716  | 1868.595  | 1303.954  | AL110197  | 3163.7    | 3371.005  | AF086044  | 738.685   | 1317.782  |
| AF161353  | 31186.254 | 30437.512 | AF085995  | 1826.538  | 1855.055  | NM_014928 | 1096.157  | 1089.325  |
| NM_000764 | 1312.238  | 1305.99   | NM_017632 | 5616.081  | 5457.31   | AF131790  | 1144.88   | 1479.173  |
| NM_004148 | 30464.738 | 21882.061 | AK026655  | 3393.35   | 3748.57   | NM_012075 | 4535.157  | 6174.311  |
| NM_003002 | 31296.604 | 34276.828 | S41522    | 547.911   | 455.023   | AB004851  | 1190.115  | 1693.993  |
| D42047    | 8127.678  | 6248.297  | NM_005279 | 938.766   | 768.72    | NM_013381 | 415.725   | 872.073   |
| AB009282  | 18213.275 | 16674.25  | AF129926  | 3255.069  | 3378.134  | AK023911  | 10359.499 | 14702.916 |
| NM_005004 | 52950.941 | 41479.344 | AK025822  | 3635.672  | 3773.687  | NM_001283 | 11171.809 | 14000.198 |
| NM_003670 | 370.044   | 464.659   | AL360140  | 1580.748  | 1233.161  | AL110237  | 1169.975  | 1726.501  |
| NM_014638 | 9692.166  | 7669.521  | AF201937  | 42076.09  | 38999.773 | D87470    | 2392.368  | 3064.758  |
| NM_006392 | 10242.475 | 8151.923  | AL390128  | 8310.562  | 7437.176  | AF147307  | 7819.693  | 10725.563 |

|            |           |           |           |           |           |           |           |           |
|------------|-----------|-----------|-----------|-----------|-----------|-----------|-----------|-----------|
| NM_014717  | 3905.879  | 3179.274  | AL157429  | 28610.035 | 29109.785 | AK001829  | 1966.407  | 2822.294  |
| NM_017922  | 6557.308  | 5330.168  | NM_012071 | 15742.284 | 15158.646 | NM_016525 | 4552.762  | 3514.972  |
| NM_002823  | 51431.469 | 60970.691 | AF055018  | 19263.859 | 20393.111 | AK024931  | 19010.453 | 11847.259 |
| NM_017916  | 21517.676 | 17479.467 | NM_001777 | 28150.918 | 29110.143 | AL109715  | 1016.724  | 1050.717  |
| NM_006756  | 577.253   | 434.252   | U79457    | 12123.253 | 12420.603 | AK025659  | 2876.577  | 2924.698  |
| NM_001805  | 2211.504  | 2222.2    | AB037832  | 4030.134  | 3781.247  | AK026407  | 798.634   | 852.953   |
| AK022360   | 6755.998  | 8046.483  | NM_014347 | 19989.695 | 17940.254 | AK026788  | 4337.76   | 5958.565  |
| AK095694   | 995.632   | 854.822   | NM_001296 | 17257.434 | 17834.006 | AK025272  | 5505.901  | 8802.561  |
| X52341     | 39545.012 | 31383.984 | NM_004344 | 14272.425 | 14014.362 | AK026824  | 1010.063  | 2028.033  |
| NM_003082  | 10152.016 | 7712.829  | AF085972  | 760.308   | 1059.66   | AL365407  | 3240.736  | 3824.532  |
| AL133632   | 9524.845  | 7190.1    | NM_000757 | 2230.447  | 2522.115  | AK022407  | 638.653   | 933.972   |
| NM_004343  | 31685.371 | 28378.529 | AB046786  | 2546.535  | 2036.307  | AK000840  | 44603.133 | 49873.863 |
| X52355     | 10591.009 | 8668.241  | NM_016620 | 36148.898 | 35995.051 | AL162073  | 2349.719  | 3115.711  |
| NM_006963  | 8221.182  | 7918.287  | D16914    | 65730.938 | 61777.777 | AL390160  | 1628.879  | 2098.135  |
| NM_000307  | 932.054   | 530.576   | AA084879  | 2036.447  | 1374.638  | AJ006835  | 21542.078 | 24669.934 |
| NM_006510  | 17799.348 | 26676.93  | NM_000833 | 4133.972  | 3844.019  | AL110138  | 1836.076  | 2386.359  |
| NM_003141  | 2235.528  | 3837.81   | NM_000283 | 9078.215  | 12070.486 | AL122039  | 782.433   | 664.681   |
| NM_020245  | 3877.917  | 3773.324  | NM_012460 | 4153.493  | 3842.41   | AF070577  | 11579.3   | 8333.512  |
| NM_007175  | 1274.777  | 1164.134  | X64980    | 759.996   | 759.842   | AL137445  | 1011.383  | 794.872   |
| AB046381   | 1388.898  | 1229.923  | NM_012118 | 5499.426  | 4804.109  | BC028422  | 1535.997  | 1605.931  |
| AJ011497   | 1210.878  | 1548.689  | AK001133  | 414.106   | 371.307   | AK022219  | 958.004   | 1139.949  |
| NM_003018  | 939.461   | 978.559   | AK024092  | 3809.735  | 2967.92   | NM_013244 | 545.5     | 684.676   |
| NM_000336  | 2566.131  | 3818.478  | AK026285  | 898.282   | 734.556   | AJ011378  | 2655.85   | 3319.671  |
| W61100     | 19637.525 | 24990.695 | AK022226  | 334.768   | 305.183   | AF009266  | 1546.826  | 2135.752  |
| AA608568   | 13590.931 | 13280.126 | AK002044  | 7215.54   | 6356.402  | AF009310  | 1383.298  | 2199.367  |
| BG831301   | 44850.363 | 39517.023 | AK022206  | 1356.488  | 1264.946  | AF054991  | 1091.684  | 1146.807  |
| AA478647   | 1645.637  | 1493.289  | BC032460  | 9067.787  | 10236.728 | AF060168  | 3016.946  | 3717.975  |
| M35999     | 283.708   | 186.469   | NM_014071 | 4312.14   | 4192.361  | AF009275  | 2194.457  | 2262.594  |
| AW058501   | 1143.943  | 978.738   | AK024404  | 435.022   | 488.519   | AF015251  | 860.733   | 1128.394  |
| M81379     | 519.492   | 440.373   | NM_006329 | 689.596   | 601.57    | AF056426  | 1826.125  | 2167.216  |
| ID 2623896 | 6560.667  | 10916.754 | AB032369  | 349.391   | 325.232   | AF064850  | 453.285   | 967.385   |
| ID 2602214 | 6102.659  | 4578.434  | NM_005166 | 947.651   | 969.94    | AK001096  | 911.408   | 1020.326  |
| ID 2071279 | 11232.237 | 7725.207  | NM_000213 | 55451.082 | 51336.207 | NM_018325 | 1235.175  | 1640.756  |
| L10709     | 7942.501  | 7565.931  | BE906107  | 21251.836 | 17762.02  | AK021565  | 546.277   | 467.51    |
| N35489     | 4661.297  | 3611.885  | NM_015516 | 8513.052  | 7180.657  | AK021778  | 735.627   | 615.412   |
| AI928195   | 345.536   | 453.113   | AB033065  | 1232.5    | 1118.846  | AK001150  | 6959.479  | 5179.485  |
| AA482489   | 1043.689  | 3116.993  | NM_005211 | 1591.265  | 1783.879  | AK002123  | 888.453   | 601.919   |
| AA458922   | 3849.474  | 3069.42   | NM_004857 | 35639.363 | 33718.031 | AK021633  | 1822.429  | 1495.979  |
| NM_004168  | 18216.51  | 13236.138 | NM_012108 | 8074.409  | 8133.478  | AF189251  | 1328.038  | 1049.959  |
| NM_003485  | 4825.5    | 6900.051  | NM_003253 | 3125.311  | 3202.983  | NM_005322 | 2665.427  | 2754.828  |
| NM_005038  | 7866.697  | 7370.82   | NM_013285 | 7204.286  | 7127.054  | AK024465  | 15728.454 | 16631.582 |
| L03418     | 324.536   | 206.014   | NM_002872 | 15339.221 | 13702.204 | AF075119  | 1058.098  | 1199.702  |
| M95923     | 1998.562  | 1811.829  | NM_000490 | 2570.584  | 2448.246  | AK021478  | 6693.529  | 6758.518  |
| NM_002415  | 51229.422 | 57480.672 | AJ225028  | 658.415   | 621.717   | AF131782  | 2467.531  | 2517.25   |
| NM_006332  | 54106.043 | 59485.527 | NM_004839 | 4951.835  | 4893.809  | NM_014210 | 10918.282 | 10646.968 |
| NM_002000  | 911.697   | 849.901   | NM_012193 | 9329.224  | 8001.603  | AK021603  | 9101.479  | 11815.218 |
| NM_000916  | 1618.375  | 1905.916  | NM_003405 | 27109.074 | 22834.813 | AL110136  | 7004.693  | 8173.227  |
| NM_018663  | 6902.003  | 9188.125  | NM_004720 | 8052.976  | 6621.01   | AF075095  | 312.729   | 268.356   |
| NM_145904  | 45159.59  | 37460.113 | NM_001057 | 2319.237  | 1993.592  | AJ008130  | 69163.711 | 63560.789 |
| NM_006796  | 16369.872 | 13374.236 | NM_004524 | 5706.513  | 5687.956  | NM_003665 | 934.856   | 1090.349  |
| NM_000706  | 1675.101  | 1681.286  | NM_006315 | 7785.667  | 5798.267  | AF086502  | 2521.668  | 3289.238  |
| NM_015941  | 9849.221  | 7593.248  | NM_018401 | 2343.651  | 1836.993  | L39924    | 3189.833  | 4737.462  |
| NM_003655  | 3407.134  | 3305.625  | NM_005163 | 5995.382  | 6137.176  | U52054    | 10456.252 | 20415.17  |



|           |           |           |           |           |           |           |           |           |
|-----------|-----------|-----------|-----------|-----------|-----------|-----------|-----------|-----------|
| NM_014837 | 4844.017  | 4584.866  | NM_007273 | 61540.797 | 61367.633 | D17226    | 432.907   | 933.332   |
| NM_017729 | 984.894   | 711.132   | BE894943  | 2561.421  | 2168.587  | AK023325  | 2179.012  | 3577.156  |
| NM_005259 | 1679.439  | 1722      | AF085994  | 316.084   | 332.171   | NM_017985 | 4022.457  | 3732.047  |
| NM_002840 | 273.622   | 322.139   | NM_016422 | 4663.315  | 6141.268  | AK025866  | 5448.55   | 5526.129  |
| NM_006174 | 2365.616  | 2102.372  | NM_017878 | 20596.58  | 19546.041 | AF088058  | 5073.84   | 4098.605  |
| NM_015850 | 1948.512  | 1647.933  | NM_004494 | 57313.328 | 58483.926 | NM_000513 | 1501.215  | 1238.218  |
| NM_004864 | 3188.248  | 1844.454  | AL049687  | 1031.173  | 867.721   | Y11165    | 2597.705  | 1920.649  |
| NM_002838 | 9967.344  | 9782.33   | NM_005643 | 19062.795 | 18823.404 | NM_003530 | 1116.617  | 1215.079  |
| AK027377  | 1021.676  | 237.722   | NM_003592 | 16407.195 | 14681.284 | AJ227871  | 1211.261  | 915.767   |
| BF528358  | 1611.456  | 1170.674  | NM_014953 | 8772.45   | 7221.3    | AK025344  | 3032.298  | 3058.81   |
| NM_016339 | 723.763   | 567.274   | AF179995  | 1778.88   | 2163.783  | D28589    | 42301.836 | 29831.5   |
| AK025111  | 1564.676  | 2048.893  | NM_002099 | 269.694   | 239.837   | AF301223  | 1669.608  | 1751.601  |
| NM_001732 | 1446.22   | 1826.078  | NM_016195 | 4772.862  | 2546.897  | NM_017867 | 6388.516  | 5465.494  |
| NM_018690 | 5526.408  | 5246.371  | NM_004523 | 3806.503  | 3239.161  | U92820    | 4740.532  | 5325.276  |
| NM_000860 | 1207.661  | 1245.664  | NM_004404 | 14579.713 | 14316.763 | NM_017937 | 2791.455  | 3764.74   |
| AB037798  | 4215.676  | 3767.765  | NM_002960 | 16771.855 | 15519.201 | AL360266  | 4352.743  | 6060.583  |
| NM_000780 | 1089.403  | 749.148   | AB046788  | 830.258   | 621.599   | AL160132  | 57530.18  | 59460.938 |
| AF272663  | 2437.841  | 2323.86   | NM_006790 | 8470.619  | 8705.731  | NM_019557 | 3612.411  | 4379.836  |
| NM_012190 | 6827.289  | 6545.126  | AL117522  | 46578.613 | 47722.816 | NM_003545 | 602.677   | 789.705   |
| AB033015  | 447.271   | 423.806   | AB011541  | 1585.383  | 1807.728  | AK024413  | 1896.576  | 2123.234  |
| AF277719  | 967.928   | 931.191   | NM_019109 | 401.626   | 339.079   | AL137752  | 462.566   | 639.207   |
| NM_000791 | 5127.14   | 4863.794  | NM_019061 | 12986.816 | 13111.411 | AK022247  | 1618.841  | 2527.85   |
| NM_003681 | 4366.329  | 4549.82   | AB033007  | 7554.653  | 7001.389  | AK001453  | 3991.338  | 5733.399  |
| NM_004677 | 451.273   | 624.427   | NM_003781 | 510.128   | 527.005   | AB007972  | 6226.102  | 11550.005 |
| NM_014909 | 1759.06   | 1607.355  | NM_001304 | 1017.642  | 963.595   | AL390144  | 8537.068  | 19988.869 |
| NM_015700 | 7339.675  | 6562.626  | NM_000504 | 314.042   | 278.847   | AK024017  | 2700.709  | 4868.926  |
| U66621    | 7540.754  | 7256.093  | NM_003130 | 4746.986  | 4572.754  | X56196    | 1240.44   | 1303.096  |
| NM_005720 | 51224.781 | 42743.746 | NM_004716 | 59788.199 | 50263.215 | D17220    | 11439.41  | 9933.396  |
| AB040936  | 991.319   | 956.957   | D29810    | 6147.55   | 6000.88   | D28363    | 61122.703 | 54733.668 |
| AB023161  | 466.604   | 330.627   | NM_000128 | 8951.489  | 9741.118  | AB011171  | 1365.265  | 1087.372  |
| U61736    | 569.809   | 589.277   | AB002384  | 16007.734 | 16445.469 | AF090099  | 524.058   | 189.888   |
| AJ132086  | 5999.222  | 4764.176  | NM_018437 | 1250.83   | 1064.67   | NM_003586 | 1363.056  | 1361.552  |
| U92816    | 13096.931 | 12789.745 | NM_000422 | 3898.557  | 3967.561  | NM_000922 | 3711.801  | 3689.122  |
| BC011987  | 226.785   | 237.581   | AK023164  | 2702.867  | 2717.948  | NM_013232 | 16604.195 | 15137.942 |
| NM_004106 | 1514.387  | 1292.75   | NM_005379 | 7339.819  | 7476.639  | NM_017993 | 3075.313  | 2525.084  |
| S76984    | 27041.277 | 30428.109 | AK027121  | 15430.197 | 15703.827 | NM_000362 | 1442.55   | 1276.63   |
| NM_014495 | 54855.602 | 55887.715 | NM_017433 | 10567.821 | 10742.968 | NM_014429 | 3756.251  | 4045.613  |
| NM_014081 | 1394.711  | 1336.808  | AL117661  | 5836.68   | 5101.99   | AK000770  | 2662.552  | 3341.441  |
| NM_005651 | 2062.169  | 1728.148  | X64643    | 4196.326  | 3116.84   | NM_002370 | 16444.953 | 19031.178 |
| AK023699  | 217.736   | 231.374   | NM_005380 | 28674.568 | 24604.531 | NM_015670 | 4493.944  | 6443.189  |
| NM_005418 | 762.443   | 372.576   | NM_005561 | 13719.391 | 15230.247 | NM_014709 | 2100.885  | 4970.016  |
| NM_007195 | 2347.476  | 2425.719  | AF272381  | 46279.383 | 47469.832 | AK002203  | 1325.488  | 1247.146  |
| AK023337  | 3271.48   | 4173.159  | NM_001518 | 19051.729 | 21410.477 | AK026469  | 15086.678 | 18403.359 |
| NM_013275 | 19359.145 | 18349.52  | NM_003412 | 61290.711 | 58627.422 | D16935    | 7320.167  | 10542.567 |
| AB037842  | 1208.009  | 1329.828  | NM_018336 | 1180.261  | 1098.837  | U92019    | 1731.818  | 2156.68   |
| U92074    | 1205.774  | 698.63    | AK022668  | 7124.129  | 6140.821  | U52835    | 2797.975  | 2802.578  |
| NM_019011 | 3551.109  | 3844.166  | AW975132  | 5497.813  | 5690      | NM_000756 | 5653.503  | 9171.136  |
| AF459094  | 8175.84   | 6572.968  | NM_006051 | 13168.425 | 11468.913 | AK022148  | 1400.821  | 2545.68   |
| NM_003157 | 3592.097  | 3253.839  | NM_018427 | 10582.094 | 10128.497 | Z36811    | 65101.676 | 64719.25  |
| NM_004938 | 3277.424  | 2742.634  | AB037814  | 521.477   | 539.106   | NM_018950 | 23862.447 | 16547.752 |
| NM_014326 | 1401.576  | 1113.052  | NM_014663 | 2810.296  | 2407.958  | K03200    | 7765.561  | 6993.37   |
| NM_004448 | 1173.923  | 1008.601  | AF007217  | 2641.808  | 1928.078  | U17629    | 3848.694  | 2896.204  |
| NM_015981 | 908.99    | 610.695   | AB037753  | 6838.502  | 6595.146  | NM_020428 | 9781.533  | 8272.543  |

|            |           |           |           |           |           |           |           |           |
|------------|-----------|-----------|-----------|-----------|-----------|-----------|-----------|-----------|
| NM_00045E  | 6690.092  | 6156.049  | NM_004674 | 3265.402  | 2955.064  | U79265    | 4470.219  | 2499.416  |
| NM_014791  | 6239.298  | 5110.112  | AB037801  | 6166.041  | 4596.47   | AK022868  | 6203.587  | 4841.404  |
| NM_00331E  | 6581.56   | 5119.448  | AL080159  | 52100.055 | 47933.609 | NM_002687 | 19343.176 | 17066.746 |
| NM_00436E  | 2297.293  | 2566.858  | NM_01782E | 47831.594 | 47933.211 | NM_000627 | 5722.245  | 5998.862  |
| NM_00018E  | 22138.738 | 20492.936 | U55185    | 2662.759  | 3261.586  | NM_00003E | 1721.606  | 1220.347  |
| AK023384   | 3007.674  | 2570.306  | U30828    | 18246.789 | 15888.174 | NM_00082E | 3830.046  | 3911.74   |
| NM_01602E  | 15060.214 | 11400.364 | AF085886  | 59732.063 | 58714.656 | NM_00196E | 919.893   | 989.133   |
| NM_02024E  | 4335.031  | 5566.318  | AK023828  | 32001.084 | 28397.977 | NM_004334 | 6540.98   | 7147.229  |
| NM_00717E  | 1292.462  | 1720.444  | NM_00657E | 27063.111 | 26298.049 | NM_00388E | 21905.586 | 27084.035 |
| AB046381   | 1477.611  | 1373.471  | NM_004784 | 472.883   | 454.956   | NM_00584E | 5241.146  | 6611.785  |
| AJ011497   | 1324.776  | 1532.923  | AK021815  | 2100.403  | 2258.583  | NM_003854 | 867.354   | 970.031   |
| NM_00301E  | 893.242   | 1128.281  | NM_00154E | 3572.816  | 4803.108  | NM_01798C | 1549.34   | 1753.402  |
| NM_00033E  | 3189.322  | 4763.683  | NM_016641 | 8102.31   | 9045.665  | NM_00125E | 65886.344 | 67814.227 |
| W61100     | 22975.869 | 39325.082 | AB018010  | 3449.987  | 3371.958  | AF053712  | 7807.37   | 9000.842  |
| AA608568   | 16789.797 | 30147.32  | NM_01461C | 20329.936 | 20285.143 | NM_003947 | 2328.706  | 2660.307  |
| BG831301   | 48995.598 | 53891.563 | NM_004737 | 570.947   | 661.649   | NM_002821 | 34635.551 | 36730.734 |
| M14764     | 422.643   | 446.064   | NM_00068E | 3227.031  | 2746.104  | M96652    | 63409.895 | 63928.43  |
| AA478647   | 1410.129  | 1645.922  | NM_006621 | 5244.079  | 4571.2    | L41690    | 4005.37   | 9120.75   |
| AW058501   | 1224.706  | 883.392   | BF347398  | 34475.617 | 35682.152 | NM_01805E | 3581.232  | 4161.779  |
| M81379     | 416.279   | 529.942   | AK026762  | 4602.642  | 4627.018  | NM_00093E | 60078.324 | 62545.063 |
| ID 2623896 | 5640.915  | 4840.032  | AF078844  | 857.371   | 840.193   | NM_006514 | 4123.895  | 3154.332  |
| ID 2602214 | 6556.624  | 4648.661  | NM_00441E | 1936.063  | 2048.527  | AF065164  | 13116.287 | 8390.086  |
| ID 2071279 | 11659.449 | 8678.614  | L48516    | 5782.384  | 5450.515  | K01900    | 501.272   | 336.753   |
| L10709     | 8307.58   | 7922.216  | NM_01664E | 11224.836 | 9404.77   | AJ008143  | 53805.184 | 46997.465 |
| N35489     | 4996.137  | 3796.196  | AF083930  | 3010.909  | 3062.024  | NM_007144 | 1918.243  | 1656.111  |
| AI928195   | 239.767   | 204.276   | AB040907  | 1226.489  | 1432.035  | NM_00509E | 714.437   | 682.451   |
| AA482489   | 425.376   | 459.583   | NM_00598E | 600.417   | 532.649   | NM_004424 | 29260.271 | 26739.299 |
| AA458922   | 4526.542  | 3653.174  | NM_00342E | 1680.66   | 1775.197  | AL133117  | 3190.714  | 2324.99   |
| NM_00171E  | 14440.774 | 14328.095 | NM_01486E | 2482.039  | 2530.397  | AB033040  | 869.99    | 869.143   |
| AL080062   | 4400.752  | 2596.804  | AK027159  | 1644.616  | 1731.07   | AF070586  | 32156.148 | 32140.439 |
| AF308802   | 3179.696  | 1908.92   | AF060169  | 457.005   | 372.14    | NM_01441E | 3731.861  | 4151.33   |
| L03418     | 407.928   | 430.245   | NM_00526E | 1149.677  | 1219.854  | NM_01330E | 2132.661  | 1405.031  |
| M95923     | 2273.407  | 1962.905  | D70835    | 60525.797 | 55899.191 | NM_012227 | 9507.126  | 11311.883 |
| NM_00241E  | 52533.965 | 58278.402 | NM_002697 | 6638.05   | 5668.134  | NM_006101 | 3532.881  | 4940.707  |
| NM_00633E  | 51750.098 | 59035.223 | NM_00244E | 873.481   | 1150.986  | NM_001237 | 13415.51  | 18574.674 |
| NM_00200C  | 1008.583  | 1187.654  | AF053952  | 53294.801 | 58285.578 | NM_002507 | 4328.698  | 5378.924  |
| NM_00091E  | 1993.001  | 2632.893  | NM_00321E | 16042.362 | 16901.209 | NM_01596E | 6131.637  | 8043.15   |
| NM_01866E  | 7600.754  | 11320.948 | BF184738  | 4734.627  | 4913.879  | NM_01614E | 2038.005  | 1967.762  |
| NM_145904  | 47214.703 | 44712.293 | NM_014044 | 6878.738  | 6773.946  | NM_01607E | 18332.756 | 24981.791 |
| NM_00679E  | 18464.861 | 19276.625 | NM_00090C | 12602.045 | 13123.924 | NM_00379E | 2104.403  | 2325.063  |
| NM_00070E  | 2063.576  | 3079.382  | AK023684  | 9931.767  | 10599.723 | NM_004401 | 11292.844 | 7337.666  |
| NM_015941  | 10164.293 | 8685.611  | NM_00023E | 5267.673  | 6125.645  | NM_00184E | 23001.768 | 15282.601 |
| NM_00365E  | 3647.894  | 3589.042  | J05070    | 1007.94   | 1660.182  | AF255910  | 2021.558  | 1199.988  |
| NM_014837  | 5253.558  | 4190.624  | AA700390  | 6031.363  | 6749.278  | NM_01614E | 6128.483  | 4630.278  |
| NM_01772E  | 989.105   | 861.735   | Y18474    | 1987.328  | 2120.741  | AB046776  | 2483.189  | 1630.994  |
| NM_00525E  | 1678.095  | 1779.214  | AA436163  | 3367.992  | 4458.483  | D42084    | 7022.047  | 9147.788  |
| NM_00284C  | 407.437   | 399.388   | BI907981  | 10855.234 | 9867.982  | NM_001734 | 1050.397  | 1100.583  |
| NM_006174  | 2128.436  | 2040.925  | BI603841  | 21208.783 | 20444.982 | NM_01469E | 11684.963 | 13530.413 |
| NM_01585C  | 2021.576  | 1751.102  | M19888    | 2700.256  | 2956.737  | AB007896  | 3050.409  | 3904.67   |
| NM_004864  | 2931.422  | 2307.881  | Y08136    | 2620.76   | 2306.348  | AB007916  | 7101.825  | 6913.107  |
| NM_00283E  | 9684.795  | 8268.982  | AA156863  | 32739.885 | 35507     | NM_002874 | 1666.462  | 1611.216  |
| AK027377   | 446.642   | 290.931   | BI915199  | 1369.986  | 1709.395  | AF049140  | 6572.818  | 8338.99   |
| BF528358   | 1595.165  | 1404.105  | R82957    | 61677.691 | 58162.668 | AB037793  | 897.405   | 1141.649  |

|           |           |           |           |           |           |           |           |           |
|-----------|-----------|-----------|-----------|-----------|-----------|-----------|-----------|-----------|
| NM_01633E | 782.416   | 794.477   | BI830442  | 12531.369 | 12013.866 | AL136794  | 2844.292  | 3215.525  |
| NM_00651C | 13910.158 | 12046.328 | AI218732  | 3870.316  | 3575.891  | BC035601  | 57576.172 | 60474.906 |
| NM_003141 | 1965.448  | 1715.996  | AK023448  | 2992.478  | 3022.887  | NM_00145E | 4089.913  | 4486.854  |
| NM_01869C | 5409.578  | 5406.654  | Y18213    | 12047.141 | 12054.617 | NM_02038E | 19159.164 | 22678.27  |
| NM_00086C | 1231.504  | 1342.84   | NM_003283 | 8296.573  | 6966.638  | NM_00420Z | 56525.027 | 61265.969 |
| AB037798  | 4426.082  | 4299.116  | AF249898  | 10079.68  | 9944.146  | AB046829  | 2250.89   | 2162.479  |
| NM_00078C | 1007.427  | 1106.959  | M69181    | 23875.502 | 24205.031 | NM_01644E | 3115.822  | 3208.283  |
| AF272663  | 2441.165  | 3092.749  | L09078    | 1511.737  | 1418.713  | NM_00337E | 56365.09  | 45545.918 |
| NM_01219C | 7431.835  | 8327.464  | NM_00265Z | 876.541   | 1340.956  | NM_004521 | 20694.813 | 13695.082 |
| AF277719  | 946.401   | 1165.095  | NM_001311 | 21339.402 | 21396.463 | AF229162  | 3877.698  | 1992.828  |
| NM_000791 | 5488.861  | 5735.969  | NM_01779E | 13052.77  | 15508.072 | U02309    | 61666.57  | 61079.055 |
| NM_003681 | 4847.985  | 5889.708  | NM_000354 | 405.053   | 154.989   | AB028991  | 8775.195  | 6249.55   |
| NM_004677 | 392.656   | 413.049   | NM_01241C | 11524.979 | 9944.126  | AF263547  | 17125.258 | 13403.819 |
| NM_01490E | 1869.766  | 1830.354  | NM_001111 | 25860.143 | 23384.506 | NM_00392Z | 1004.721  | 850.912   |
| NM_01570C | 7205.492  | 6510.809  | NM_01804E | 14634.481 | 14550.297 | NM_004831 | 2958.596  | 2745.203  |
| U66621    | 7425.023  | 7426.181  | AJ133439  | 4093.974  | 3572.704  | NM_01421Z | 20500.326 | 20144.133 |
| NM_00572C | 49245.238 | 46854.098 | NM_01439E | 5411.998  | 4507.781  | NM_00016E | 11747.993 | 11876.165 |
| AB040936  | 854.407   | 866.31    | NM_001561 | 3667.43   | 3292.356  | AF294629  | 30984.99  | 26452.514 |
| AB023161  | 461.483   | 364.602   | NM_00516C | 7183.76   | 7599.174  | NM_00054E | 23796.721 | 23326.684 |
| U61736    | 901.393   | 1363.124  | NM_00059E | 2527.41   | 2813.745  | NM_00213E | 58249.625 | 62994.336 |
| U92816    | 14150.601 | 17709.5   | X78817    | 62314.57  | 59424.59  | AK025571  | 7205.125  | 7411.039  |
| NM_00410E | 1853.148  | 1606.57   | AB023135  | 5710.145  | 6073.675  | NM_00494C | 630.505   | 998.336   |
| NM_00348E | 2976.275  | 2024.761  | AY009401  | 1902.669  | 1862.616  | NM_01446Z | 38080.551 | 38847.996 |
| NM_00503E | 6770.126  | 3781.832  | AF294628  | 2768.654  | 2679.247  | NM_00552C | 29346.184 | 32077.301 |
| NM_014081 | 1317.888  | 1255.79   | NM_00415Z | 541.919   | 298.34    | AK023265  | 3785.946  | 4328.627  |
| NM_005651 | 2200.535  | 2037.409  | BU565263  | 63608.281 | 63560.84  | NM_01872Z | 2526.912  | 5422.125  |
| AK023699  | 274.157   | 249.869   | NM_00502E | 6460.899  | 7749.545  | AB029009  | 8495.394  | 10678.193 |
| NM_00541E | 777.452   | 518.419   | NM_001611 | 1962.718  | 2396.9    | AF112207  | 5724.197  | 7006.278  |
| NM_00719E | 2244.41   | 2351.007  | M59979    | 1910.379  | 1780.941  | AJ420488  | 61620.527 | 62390.145 |
| AK023337  | 3324.954  | 3463.593  | AB018310  | 3006.733  | 3856.452  | NM_005594 | 60220.367 | 60107.543 |
| NM_01327E | 22344.688 | 29960.299 | NM_02013Z | 2766.704  | 5084.763  | NM_004461 | 60432.242 | 59617.859 |
| AB037842  | 1318.327  | 1420.22   | NM_01537E | 27416.236 | 29387.461 | NM_01847Z | 7705.29   | 6736.538  |
| U92074    | 1102.189  | 735.036   | NM_00487E | 1548.731  | 2276.127  | BF106121  | 3192.333  | 2712.08   |
| NM_019011 | 3722.282  | 3736.715  | NM_015057 | 1093.444  | 886.143   | AK022590  | 3933.999  | 2191.691  |
| AF459094  | 7953.82   | 7591.548  | AF303398  | 38261.984 | 39819.66  | AK024343  | 3334.288  | 2225.389  |
| NM_003157 | 3447.719  | 3716.3    | NM_01481C | 4989.3    | 5434.57   | NM_00193E | 573.701   | 364.463   |
| NM_00493E | 3047.686  | 2587.483  | NM_00473E | 6331.819  | 6346.875  | NM_00256E | 1880.142  | 1530.887  |
| NM_01432E | 1430.823  | 1544.05   | NM_007357 | 9541.589  | 9291.413  | M12078    | 12098.609 | 13409.868 |
| NM_00444E | 1219.295  | 1251.021  | NM_00376Z | 15704.328 | 16322.828 | NM_00455C | 15274.943 | 23616.971 |
| NM_015981 | 923.883   | 763.172   | AB046836  | 4148.188  | 4948.033  | NM_00078E | 4118.503  | 5320.184  |
| NM_00045E | 6706.442  | 9089.699  | NM_01781E | 11749.941 | 12342.368 | NM_00411C | 47496.773 | 44956.867 |
| NM_014791 | 6856.636  | 12306.128 | AJ224166  | 5419.065  | 6255.196  | NM_013387 | 58278.965 | 60364.738 |
| NM_00331E | 7985.517  | 11967.097 | AK026098  | 5799.586  | 6695.043  | NM_00526Z | 53088.25  | 49982.27  |
| AK023384  | 2843.62   | 2669.293  | NM_012381 | 3403.246  | 3520.674  | NM_005757 | 2363.007  | 2586.307  |
| NM_01602E | 15672.175 | 10881.973 | M20702    | 1251.615  | 1309.293  | NM_01648Z | 977.145   | 943.299   |
| AK025111  | 1004.049  | 769.021   | NM_006397 | 56086.648 | 54445.02  | NM_02012E | 3030.519  | 3195.251  |
| NM_00173Z | 1066.406  | 854.819   | D83776    | 4906.136  | 6683.921  | NM_00506E | 26632.32  | 30314.723 |
| AB046381  | 1513.274  | 1368.883  | NM_00408E | 14743.956 | 14076.681 | NM_01822Z | 9857.055  | 13837.13  |
| AJ011497  | 1309.974  | 1432.98   | NM_00218C | 2619.494  | 4104.625  | NM_00669Z | 40393.883 | 44216.008 |
| NM_00301E | 985.134   | 1349.208  | NM_00013E | 4958.416  | 6215.2    | NM_00172Z | 4199.377  | 5047.847  |
| NM_00033E | 3228.029  | 4632.918  | NM_01816Z | 4260.107  | 4578.411  | AB046802  | 9488.814  | 11517.813 |
| W61100    | 22975.943 | 36008.629 | AK026362  | 12888.858 | 12353.505 | NM_003297 | 2312.36   | 3149.703  |
| AA608568  | 15843.639 | 19963.215 | NM_00496E | 5691.381  | 6041.805  | X74861    | 818.858   | 1025.408  |

|            |           |           |           |           |           |            |           |           |
|------------|-----------|-----------|-----------|-----------|-----------|------------|-----------|-----------|
| BG831301   | 47776.066 | 50612.109 | NM_005908 | 6686.588  | 6408.404  | NM_006940  | 1636.87   | 1279.638  |
| M14764     | 354.513   | 436.107   | NM_004785 | 5823.14   | 6671.924  | NM_018265  | 13638.163 | 10319.797 |
| AA478647   | 1398.656  | 1420.605  | AK024079  | 699.573   | 763.467   | AK024633   | 7461.282  | 5638.476  |
| M35999     | 200.145   | 257.191   | NM_002428 | 4192.057  | 4641.358  | NM_001453  | 8251.842  | 6235.916  |
| AW058501   | 1147.982  | 1336.332  | NM_014674 | 6303.898  | 6969.821  | NM_005257  | 24123.791 | 19093.375 |
| M81379     | 528.097   | 609.149   | NM_018271 | 3062.717  | 3176      | AF011573   | 19504.813 | 15857.764 |
| ID 2623896 | 5622.705  | 5119.868  | NM_000547 | 675.414   | 1595.023  | NM_002145  | 10134.188 | 6118.909  |
| ID 2602214 | 7879.258  | 11483.089 | NM_014652 | 2766.73   | 2654.664  | NM_007245  | 14024.002 | 13266.208 |
| ID 2071279 | 13411.467 | 12304.995 | AL133020  | 7899.226  | 9311.639  | NM_001890  | 2371.705  | 2826.595  |
| L10709     | 8689.729  | 11384.308 | NM_003213 | 18013.393 | 19835.432 | NM_001286  | 9095.421  | 12258.594 |
| AI928195   | 576.179   | 881.026   | BF184738  | 4967.584  | 5252.012  | NM_014648  | 1901.016  | 1777.589  |
| NM_001719  | 15245.232 | 16293.269 | NM_014044 | 6452.465  | 7036.38   | NM_019604  | 1769.243  | 1876.388  |
| AL080062   | 4390.705  | 3312.836  | NM_000900 | 13240.312 | 13192.367 | NM_005073  | 2114.107  | 2168.252  |
| AF308802   | 3056.892  | 2974.273  | AK023684  | 10564.106 | 11441.727 | NM_000951  | 9894.941  | 11421.307 |
| S76984     | 18534.396 | 11529.281 | NM_000232 | 5050.342  | 4783.198  | X52599     | 10141.241 | 10749.618 |
| NM_014495  | 54440.156 | 43255.762 | J05070    | 994.645   | 1611.838  | AA029300   | 6638.713  | 8120.971  |
| NM_006796  | 18199.217 | 15421.561 | AA700390  | 6442.312  | 7221.966  | BG708842   | 54380.891 | 61329.664 |
| NM_000706  | 2247.766  | 1768.529  | Y18474    | 2482.429  | 2252.57   | M19723     | 56228.688 | 62616.227 |
| NM_015941  | 11054.504 | 8943.658  | AA436163  | 3282.107  | 4370.219  | X06256     | 9652.91   | 10644.641 |
| NM_003655  | 4085.289  | 4047.702  | BI907981  | 11625.307 | 12908.147 | AA709271   | 3604.955  | 4480.683  |
| NM_014837  | 5503.717  | 5713.644  | BI603841  | 22900.816 | 23342.119 | M34057     | 8827.457  | 7999.694  |
| NM_017729  | 989.488   | 1113.885  | M19888    | 3010.039  | 3090.404  | ID 1984668 | 4027.066  | 3585.491  |
| NM_005259  | 1701.695  | 2215.439  | Y08136    | 3050.853  | 2630.534  | ID 1832579 | 5732.043  | 4250.398  |
| NM_006174  | 1918.647  | 2329.177  | AA156863  | 36960.574 | 38343.699 | H-430185 N | 3215.055  | 2367.407  |
| NM_015850  | 1966.723  | 2368.874  | BI915199  | 1391.473  | 1632.523  | D16583     | 9939.601  | 6679.141  |
| NM_004864  | 3985.552  | 4748.191  | R82957    | 55494.617 | 58338.266 | H44051     | 4974.866  | 3813.474  |
| NM_002838  | 9443.008  | 9120.6    | BI830442  | 13834.868 | 13225.855 | AA481547   | 47765.785 | 34787.547 |
| AK027377   | 442.272   | 426.415   | AA398951  | 473.364   | 460.991   | AA831880   | 4695.521  | 3148.6    |
| NM_014686  | 37199.953 | 33082.496 | AI218732  | 3859.209  | 4274.032  | T64880     | 13393.19  | 9054.733  |
| BF528358   | 1460.327  | 1332.489  | NM_018890 | 47852.902 | 58149.141 | NM_002852  | 9125.559  | 14746.585 |
| NM_016339  | 899.734   | 787.275   | NM_016204 | 39371.836 | 51361.379 | NM_001817  | 9810.577  | 14074.477 |
| NM_012319  | 6161.769  | 7930.152  | NM_003283 | 8596.37   | 8829.85   | AF063611   | 2043.738  | 2407.242  |
| AK026235   | 437.708   | 388.826   | AF249898  | 10865.282 | 11367.306 | NM_006039  | 5322.738  | 6690.092  |
| NM_006510  | 14556.327 | 13874.776 | M69181    | 22568.406 | 22574.986 | NM_002089  | 2349.4    | 2317.793  |
| NM_003141  | 1944.51   | 2892.766  | L09078    | 1295.485  | 1152.495  | NM_004590  | 491.642   | 712.802   |
| NM_020245  | 4036.264  | 3296.196  | NM_002652 | 946.415   | 1011.705  | M28983     | 753.572   | 738.757   |
| NM_007175  | 1511.522  | 1322.521  | NM_001311 | 22350.41  | 22366.256 | NM_014656  | 22277.896 | 22465.883 |
| NM_019087  | 3695.912  | 3704.49   | NM_017798 | 17986.141 | 26622.523 | NM_002076  | 8097.624  | 8144.237  |
| NM_016322  | 1081.927  | 1128.332  | NM_012410 | 12258.524 | 11445.188 | X05299     | 6215.12   | 7719.342  |
| NM_004277  | 1316.423  | 1311.806  | NM_001111 | 26905.32  | 26042.682 | BM468475   | 1656.332  | 2353.261  |
| NM_005072  | 1147.009  | 1279.999  | NM_018049 | 14836.449 | 14808.304 | NM_000318  | 6909.811  | 10038.057 |
| AF215923   | 7970.652  | 8501.292  | AJ133439  | 4500.545  | 4090.656  | NM_002060  | 52769.305 | 57330.773 |
| U66621     | 8499.25   | 10571.806 | NM_014395 | 5474.159  | 5092.944  | AK001230   | 12529.95  | 16474.566 |
| NM_005720  | 47731.668 | 48127.078 | NM_001561 | 3808.858  | 3777.172  | NM_014680  | 23196.914 | 24400.514 |
| AB040936   | 978.307   | 1246.182  | NM_005160 | 7851.816  | 6695.455  | NM_005027  | 6790.674  | 7052.527  |
| AB023161   | 678.992   | 1422.575  | NM_000596 | 2500.005  | 1984.848  | NM_004612  | 3468.529  | 3250.517  |
| U61736     | 584.551   | 774.03    | X78817    | 62406.609 | 58207.801 | NM_005608  | 45140.41  | 34393.402 |
| AJ132086   | 3655.931  | 4451.219  | AB023135  | 6267.035  | 6949.616  | NM_012294  | 626       | 493.208   |
| U92816     | 13242.818 | 11710.077 | AY009401  | 1917.865  | 1848.53   | NM_001106  | 1310.973  | 1276.118  |
| NM_004106  | 1922.258  | 1988.995  | AF294628  | 3188.622  | 3642.077  | NM_018490  | 4013.615  | 2897.297  |
| NM_003485  | 3447.67   | 3075.991  | NM_002448 | 1580.814  | 2088.225  | NM_004778  | 1842.398  | 1587.782  |
| NM_005038  | 8026.234  | 8260.547  | AF053952  | 51756.469 | 56175.57  | NM_004352  | 694.878   | 531.707   |
| L03418     | 407.678   | 636.458   | BU565263  | 58745.961 | 68580.93  | NM_012258  | 1040.177  | 1019.004  |

|           |           |           |           |           |           |           |           |           |
|-----------|-----------|-----------|-----------|-----------|-----------|-----------|-----------|-----------|
| M95923    | 2452.198  | 2300.565  | NM_005028 | 6300.387  | 7133.106  | NM_006224 | 59716.832 | 68877.617 |
| NM_002415 | 47426.691 | 55497.57  | NM_001611 | 2422.149  | 3017.5    | AL137300  | 16540.918 | 23352.986 |
| NM_006332 | 48069.809 | 59001.891 | M59979    | 1849.566  | 1977.896  | NM_000225 | 9138.371  | 11459.929 |
| NM_00200C | 1464.1    | 1178.547  | AB018310  | 2985.727  | 3008.074  | NM_006995 | 45803.398 | 54435.418 |
| NM_00091E | 2087.96   | 2955.535  | NM_020133 | 1176.945  | 1204.646  | NM_003125 | 20457.324 | 28488.791 |
| NM_018663 | 8147.904  | 11622.393 | NM_015379 | 27480.773 | 28688.299 | NM_001955 | 12274.287 | 11634.077 |
| NM_145904 | 43153.285 | 35789.242 | NM_004878 | 944.878   | 1279.233  | AB033064  | 9412.749  | 10468.39  |
| NM_000182 | 29850.988 | 32290.65  | NM_015057 | 1120.685  | 952.297   | AK022317  | 22043.541 | 22968.299 |
| AK023384  | 3144.764  | 3235.258  | AF303398  | 39192.336 | 39462.297 | NM_018395 | 15365.283 | 18086.615 |
| NM_016025 | 17175.678 | 13841.236 | NM_01481C | 3444.312  | 2368.621  | NM_003124 | 34094.172 | 35020.219 |
| AK025111  | 1499.911  | 1542.1    | NM_004738 | 6532.401  | 6285.769  | NM_006885 | 52605.332 | 59169.973 |
| NM_001732 | 1028.499  | 923.167   | NM_007357 | 9521.056  | 11336.891 | NM_004531 | 8929.647  | 13038.454 |
| NM_01869C | 7347.324  | 10903.592 | NM_003763 | 15465.675 | 16573.443 | AB040920  | 1990.912  | 3350.579  |
| NM_00086C | 2259.134  | 2547.948  | AK023448  | 3782.8    | 3568.185  | NM_01572C | 39457.984 | 50835.199 |
| AB037798  | 4500.689  | 4370.199  | Y18213    | 14597.735 | 13552.655 | AB033070  | 1105.037  | 2012.392  |
| NM_00078C | 1297.518  | 2203.923  | NM_017815 | 13154.702 | 15944.525 | AK000158  | 13097.367 | 16494.34  |
| AF272663  | 2270.101  | 2408.143  | AJ224166  | 6448.549  | 8548.046  | NM_005765 | 3930.282  | 3983.972  |
| NM_01219C | 6588.72   | 5805.655  | AK026098  | 5866.977  | 6126.046  | AK024500  | 40658.781 | 32383.449 |
| AF277719  | 962.744   | 923.785   | NM_012381 | 3297.9    | 3341.146  | NM_002564 | 46355.152 | 52225.027 |
| NM_000791 | 5234.166  | 5288.57   | M20702    | 953.409   | 1061.97   | NM_001884 | 323.354   | 417.274   |
| NM_003681 | 4752.525  | 4848.037  | NM_006397 | 50064.586 | 43420.105 | NM_000963 | 1457.332  | 1239.184  |
| NM_00480C | 9730.868  | 9726.119  | D83776    | 4096.778  | 4769.646  | NM_013305 | 11014.372 | 8743.08   |
| AB037738  | 653.352   | 910.509   | NM_004085 | 14963.163 | 12604.106 | AF027302  | 10120.336 | 7839.989  |
| S82769    | 467.265   | 491.894   | NM_00218C | 2357.201  | 2923.87   | NM_006705 | 53601.563 | 58068.555 |
| NM_004677 | 485.154   | 546.165   | NM_000135 | 5331.07   | 5852.855  | AB037835  | 4407.807  | 6788.076  |
| NM_014954 | 7354.76   | 6412.161  | NM_018163 | 4407.843  | 4265.942  | NM_016225 | 1398.524  | 1765.134  |
| NM_000807 | 1882.414  | 2017.375  | AK026362  | 12173.982 | 12208.798 | NM_000157 | 6580.119  | 8455.308  |
| NM_014905 | 2230.557  | 3993.135  | NM_004965 | 5361.386  | 4740.322  | NM_000712 | 714.166   | 780.281   |
| X91148    | 3685.706  | 5798.15   | NM_005905 | 5603.097  | 5327.217  | NM_018085 | 4586.515  | 3471.108  |
| NM_01570C | 8083.46   | 8862.501  | NM_004785 | 6095.212  | 5930.003  | BC013695  | 14205.247 | 15052.719 |
| NM_001715 | 14542.688 | 12293.445 | AK024079  | 764.636   | 702.895   | NM_007205 | 2611.31   | 1727.961  |
| AL080062  | 3897.908  | 3090.297  | NM_002425 | 4409.15   | 4462.414  | AK023035  | 7975.192  | 7603.296  |
| AF308802  | 3437.522  | 3438.577  | NM_014674 | 5454.044  | 5138.967  | NM_014845 | 5444.508  | 7077.935  |
| S76984    | 21270.471 | 15806.715 | NM_018271 | 3413.286  | 3609.446  | AB011164  | 11037.358 | 19514.992 |
| NM_014495 | 49367.023 | 58690.379 | NM_000547 | 587.339   | 468.357   | M24750    | 3107.601  | 7835.954  |
| NM_014081 | 1127.292  | 1381.621  | NM_014652 | 2549.25   | 2268.859  | NM_005965 | 7780.473  | 19241.41  |
| NM_005651 | 1945.677  | 1913.906  | AL133020  | 8486.556  | 9131.739  | NM_00274C | 7839.592  | 10232.796 |
| AK023699  | 238.717   | 238.443   | NM_004152 | 479.457   | 518.357   | AL117482  | 7538.89   | 8768.412  |
| NM_005415 | 778.092   | 748.151   | NM_014044 | 6754.811  | 7553.042  | NM_006545 | 55576.016 | 53028.336 |
| NM_007195 | 2252.41   | 2227.163  | NM_00090C | 13700.057 | 14229.524 | AB018324  | 27404.082 | 26469.383 |
| AK023337  | 3073.563  | 3204.951  | AK023684  | 9661.895  | 9298.291  | NM_002742 | 50882.539 | 54745.023 |
| NM_013275 | 18113.832 | 16359.563 | NM_000232 | 5113.411  | 5610.728  | Z25431    | 4543.818  | 4852.465  |
| AB037842  | 1107.165  | 1254.329  | J05070    | 922.806   | 1594.596  | NM_005627 | 25531.672 | 22063.34  |
| U92074    | 1094.975  | 807.697   | AA700390  | 6461.192  | 6449.897  | M64497    | 1519.966  | 1123.369  |
| NM_019011 | 3878.9    | 3762.571  | Y18474    | 2405.534  | 2267.945  | NM_007274 | 29999.824 | 24833.936 |
| AF459094  | 10204.442 | 16749.186 | AA436163  | 3542.55   | 4625.778  | NM_003355 | 21763.93  | 15882.723 |
| NM_003157 | 5982.252  | 9714.832  | BI907981  | 12267.45  | 12152.526 | AF238315  | 1327.418  | 1026.251  |
| NM_004935 | 3541.232  | 2962.524  | BI603841  | 25572.043 | 28765.508 | NM_00189C | 2663.784  | 3370.434  |
| NM_014325 | 1688.9    | 1383.146  | M19888    | 3166.405  | 2917.899  | NM_001285 | 8763.703  | 10319.936 |
| NM_004445 | 2779.111  | 2067.315  | Y08136    | 2388.284  | 2359.334  | NM_014645 | 2190.944  | 2420.902  |
| NM_015981 | 781.779   | 772.504   | AA156863  | 28075.316 | 28938.373 | NM_019604 | 2020.229  | 2553.889  |
| NM_000455 | 6749.803  | 6616.462  | BI915199  | 1398.315  | 1460.842  | NM_005073 | 2302.581  | 2468.366  |
| NM_014791 | 6748.125  | 7679.239  | R82957    | 61144.668 | 57515.32  | NM_000951 | 9668.995  | 9308      |

|           |           |           |           |           |           |            |           |           |
|-----------|-----------|-----------|-----------|-----------|-----------|------------|-----------|-----------|
| NM_00331E | 8995.359  | 14329.381 | BI830442  | 12379.05  | 11969.035 | X52599     | 8826.035  | 8761.382  |
| NM_004362 | 2672.205  | 3857.455  | AA398951  | 508.654   | 515.038   | AA029300   | 6306.088  | 6064.245  |
| CY3Cy5    | 4155.09   | 814.55    | AI218732  | 4437.458  | 5134.028  | BG708842   | 53410.699 | 62338.977 |
| NM_004102 | 2609.24   | 1702.555  | NM_01889C | 40034.652 | 39870.492 | M19723     | 56618.828 | 62803.535 |
| NM_004544 | 9354.136  | 7538.731  | NM_016204 | 28779.01  | 28405.264 | X06256     | 8789.695  | 10895.468 |
| AF052140  | 958.599   | 769.632   | AB046836  | 5099.149  | 4803.422  | AA709271   | 4374.842  | 10535.201 |
| NM_01883E | 735.143   | 598.908   | NM_001311 | 25551.973 | 25034.383 | M34057     | 10413.124 | 23700.652 |
| AF007147  | 1563.14   | 1113.945  | NM_01779E | 12917.199 | 13176.393 | ID 1984668 | 3683.812  | 5239.607  |
| AF052127  | 1874.304  | 1857.702  | NM_01241C | 11961.619 | 10051.242 | ID 1832579 | 5725.444  | 7257.361  |
| AK024885  | 3322.544  | 3779.585  | NM_001111 | 25903.291 | 27245.783 | H-430185 N | 2956.144  | 3193.913  |
| AL080223  | 3901.377  | 2985.687  | NM_018049 | 14060.188 | 12544.136 | D16583     | 10995.925 | 11790.863 |
| AK001630  | 8253.924  | 8041.31   | AJ133439  | 3809.414  | 3715.48   | H44051     | 4698.379  | 5404.537  |
| NM_014612 | 7974.349  | 8153.019  | NM_01439E | 5381.959  | 4394.592  | AA481547   | 46875.086 | 37236.512 |
| NM_004102 | 2460.519  | 1615.002  | NM_001561 | 3686.075  | 3450.538  | AA831880   | 4562.904  | 3494.185  |
| NM_004544 | 10019.431 | 9079.155  | NM_00516C | 7107.571  | 6075.79   | T64880     | 12593.886 | 8335.058  |
| SR1       | 64840.602 | 66876.195 | NM_00059E | 2090.023  | 2083.205  | AB028990   | 2198.063  | 1425.149  |
| SR3       | 36499.527 | 23179.549 | X78817    | 57092.922 | 58603.977 | AK002089   | 693.23    | 392.996   |
| SR5       | 3086.124  | 3802.778  | AB023135  | 5562.69   | 6090.227  | AF063611   | 2136.018  | 2342.847  |
| SR7       | 4569.772  | 30410.152 | AY009401  | 1332.714  | 1200.677  | NM_00603E  | 5506.534  | 6258.083  |
| SR9       | 17535.121 | 3303.105  | AF294628  | 2803.012  | 2538.696  | NM_00208E  | 2366.078  | 2556.792  |
| CY3Cy5    | 3165.374  | 621.401   | AK026960  | 1574.19   | 1881.498  | NM_00459C  | 734.462   | 681.933   |
| Z36807    | 15737.856 | 11806.344 | NM_001991 | 6498.409  | 5680.768  | M28983     | 837.754   | 641.233   |
| U20896    | 819.805   | 675.52    | NM_000193 | 16671.873 | 17847.76  | NM_01465E  | 21092.574 | 19110.201 |
| U52836    | 2633.246  | 1608.479  | BC014586  | 1946.732  | 2624.786  | NM_00207E  | 9135.761  | 8378.507  |
| AK001796  | 1776.564  | 1414.165  | NM_00244E | 842.067   | 970.529   | X05299     | 6354.644  | 7024.191  |
| AF086152  | 1526.635  | 1728.417  | AF053952  | 48660.953 | 54809.93  | BM468475   | 1686.977  | 1890.431  |
| U78519    | 2374.689  | 2289.98   | NM_003213 | 21029.967 | 21924.049 | NM_00031E  | 6951.682  | 8826.043  |
| AK026872  | 1284.851  | 892.026   | BF184738  | 6281.724  | 6050.132  | NM_00206C  | 55086.355 | 58091.746 |
| NM_00719C | 5602.517  | 4808.721  | NM_02038E | 946.195   | 1247.78   | AK001230   | 12560.982 | 17591.195 |
| AF043897  | 1776.615  | 1327.065  | NM_00507C | 480.314   | 546.913   | NM_01468C  | 25433.959 | 37181.855 |
| U79246    | 3861.785  | 3774.304  | NM_015057 | 904.715   | 900.036   | NM_005027  | 7743.157  | 13592.68  |
| AK022619  | 972.667   | 1195.838  | AF303398  | 38320.004 | 39243.688 | NM_004612  | 3315.134  | 3796.59   |
| AK024157  | 411.392   | 418.135   | NM_01481C | 3472.542  | 2696.663  | NM_00560E  | 51710.594 | 51811.066 |
| AK022963  | 932.315   | 730.431   | NM_00473E | 5946.339  | 5109.871  | NM_012294  | 743.991   | 927.3     |
| AK023563  | 432.026   | 308.557   | NM_007357 | 8780.399  | 9692.225  | NM_00110E  | 1595.266  | 3426.468  |
| AK023905  | 702.319   | 683.716   | NM_003763 | 13860.132 | 14034.569 | NM_015583  | 1764.828  | 2354.248  |
| AK024231  | 1240.794  | 1676.068  | AK023448  | 2946.449  | 2355.781  | NM_01849C  | 3409.011  | 2885.146  |
| AK022441  | 520.421   | 507.878   | Y18213    | 12193.499 | 9191.665  | NM_00477E  | 1720.942  | 1534.621  |
| AK026208  | 4194.429  | 4577.333  | NM_003283 | 9282.425  | 8018.255  | NM_004352  | 705.149   | 416.628   |
| NM_016947 | 55839.777 | 46829.414 | AF249898  | 10363.054 | 8433.73   | NM_01225E  | 952.011   | 856.989   |
| AY007136  | 1764.516  | 1489.898  | M69181    | 28142.752 | 26618.994 | NM_00724E  | 13342.581 | 7932.423  |
| AL359940  | 2697.347  | 2072.981  | AK027224  | 382.858   | 523.238   | NM_00022E  | 9959.95   | 10833.847 |
| NM_01828E | 1482.687  | 845.835   | L09078    | 1450.007  | 1332.584  | NM_00699E  | 51754.027 | 50523.949 |
| AF085961  | 493.551   | 291.693   | NM_002652 | 994.751   | 1074.978  | NM_00312E  | 21424.611 | 26475.162 |
| AK024925  | 3907.295  | 4326.609  | NM_000547 | 852.566   | 758.026   | NM_00195E  | 15269.25  | 14458.962 |
| AL049460  | 995.17    | 924.299   | NM_014652 | 2429.02   | 2342.536  | AB033064   | 9646.541  | 9741.935  |
| AK022396  | 911.367   | 612.079   | AL133020  | 7968.448  | 8347.028  | AK022317   | 22591.34  | 21482.137 |
| AF075113  | 2184.228  | 2079.786  | BC001123  | 552.478   | 830.734   | NM_01839E  | 17480.641 | 20431.586 |
| AF086037  | 417.269   | 298.372   | NM_004152 | 1671.47   | 1393.223  | NM_003124  | 41715.648 | 38142.969 |
| AK022892  | 1922.229  | 1195.392  | BU565263  | 56822.434 | 61897.191 | NM_00688E  | 48509.633 | 55980.148 |
| AK022980  | 1681.757  | 2250.251  | NM_00502E | 7884.931  | 9170.086  | NM_004531  | 9009.066  | 10036.958 |
| AL359058  | 4955.696  | 5765.319  | NM_001611 | 2516.475  | 2241.739  | AB040920   | 1984.727  | 2257.687  |
| AK022439  | 5149.468  | 8033.624  | M59979    | 1903.386  | 1457.361  | NM_01572C  | 38898.566 | 39030.844 |

|           |           |           |           |           |           |            |           |           |
|-----------|-----------|-----------|-----------|-----------|-----------|------------|-----------|-----------|
| AK026237  | 1578.312  | 1572.267  | AB018310  | 3303.431  | 3091.546  | AB033070   | 1168.599  | 1934.073  |
| AK023687  | 810.66    | 972.313   | NM_020133 | 1155.829  | 871.974   | AK000158   | 15413.436 | 21153.814 |
| AK002088  | 10351.22  | 19232.49  | NM_015379 | 26870.969 | 24007.119 | NM_005765  | 4117.382  | 5456.772  |
| X98206    | 1019.638  | 1957.046  | NM_004878 | 904.433   | 934.64    | AK024500   | 44780.527 | 47366.891 |
| AK022193  | 978.33    | 1222.285  | AF144638  | 59079.789 | 60695.242 | NM_002564  | 48305.406 | 50601.328 |
| AK000106  | 5112.153  | 6724.471  | NM_005502 | 684.346   | 921.226   | Z83806     | 398.544   | 284.483   |
| AK022370  | 1530.569  | 1470.477  | NM_000742 | 3072.13   | 2904.056  | NM_000963  | 1391.022  | 1637.436  |
| AK026765  | 725.187   | 832.153   | NM_002355 | 17292.813 | 17141.684 | NM_013308  | 9669.599  | 7956.928  |
| AL117530  | 403.531   | 324.9     | AK026608  | 6121.991  | 5684.81   | AF027302   | 11263.622 | 9327.336  |
| AL080191  | 553.121   | 475.249   | NM_018890 | 38972.711 | 44041.656 | NM_002852  | 6946.857  | 5154.236  |
| AK021639  | 1435.639  | 1334.166  | NM_016204 | 24494.854 | 25018.557 | NM_001817  | 8461.028  | 6479.424  |
| AK023189  | 3878.798  | 3471.57   | AB046836  | 4952.797  | 5614.836  | NM_016228  | 1427.484  | 1272.224  |
| AK022127  | 375.45    | 186.23    | NM_017816 | 12219.093 | 12284.426 | NM_000157  | 6430.483  | 4858.025  |
| AF070599  | 644.053   | 482.414   | AJ224166  | 5921.11   | 5717.291  | NM_000712  | 719.454   | 814.299   |
| NM_005450 | 1333.038  | 1140.056  | AK026098  | 6048.831  | 6026.787  | NM_018088  | 5309.158  | 3507.682  |
| AK023600  | 919.017   | 958.616   | NM_012381 | 3129.869  | 2847.592  | BC013695   | 14846.065 | 13925.486 |
| NM_005210 | 651.861   | 943.674   | M20702    | 1042.56   | 979.196   | NM_007205  | 2332.438  | 1566.964  |
| NM_005525 | 731.608   | 587.752   | NM_006397 | 50537.707 | 43792.191 | AK023035   | 8032.481  | 8054.517  |
| NM_005285 | 1162.558  | 1313.605  | D83776    | 4292.855  | 4000.848  | NM_014846  | 5426.492  | 5476.262  |
| AK001918  | 943.634   | 1039.985  | NM_004088 | 14251.32  | 10352.305 | AB011164   | 12852.661 | 12402.654 |
| NM_018635 | 20873.902 | 18184.055 | NM_002180 | 2182.945  | 2263.9    | M24750     | 2821.466  | 3337.386  |
| AF086048  | 3183.645  | 3390.006  | NM_000138 | 4824.329  | 5177.183  | NM_005965  | 7743.499  | 8018.424  |
| L15616    | 14977.095 | 23023.137 | NM_018163 | 6145.574  | 5371.951  | NM_002740  | 9026.973  | 9566.589  |
| AB019565  | 13801.261 | 16571.076 | AK026362  | 14086.889 | 13018.939 | AL117482   | 6901.561  | 7105.478  |
| NM_016940 | 5984.163  | 9378.065  | NM_004968 | 4731.994  | 3893.51   | NM_006545  | 46416.891 | 54072.332 |
| AK025757  | 3652      | 4334.875  | NM_005908 | 6530.948  | 4908.085  | AB018324   | 24007.57  | 24604.07  |
| Y16713    | 863.298   | 563.45    | NM_004785 | 6213.801  | 6382.439  | NM_002742  | 54307.699 | 57229.68  |
| L07394    | 4794.751  | 6034.071  | AK024079  | 2056.603  | 1903.68   | Z25431     | 4966.564  | 4636.787  |
| AK056133  | 2269.373  | 1996.389  | NM_002428 | 4898.999  | 4251.756  | NM_005627  | 27594.244 | 24406.25  |
| NM_017845 | 13081.868 | 12155.424 | NM_014674 | 6488.982  | 5852.625  | M64497     | 1728.522  | 1390.385  |
| AF130080  | 1380.967  | 1570.551  | NM_018271 | 3412.752  | 2661.372  | NM_007274  | 29846.951 | 23204.441 |
| AK026006  | 2863.663  | 2096.182  | CY3Cy5    | 752.208   | 125.626   | NM_003356  | 19303.951 | 15539.716 |
| NM_019085 | 899.552   | 769.131   | NM_020967 | 1387.2    | 1198.434  | AF238315   | 1543.81   | 1526.668  |
| AF147440  | 537.294   | 580.813   | NM_001071 | 14086.187 | 12075.588 | NM_006224  | 61050.414 | 58119.938 |
| AL122072  | 2806.65   | 2293.303  | AF086181  | 753.874   | 786.444   | AL137300   | 13017.085 | 8793.85   |
| AK026221  | 611.427   | 604.021   | AK021540  | 961.862   | 1264.946  | NM_014648  | 1878.141  | 1428.051  |
| AK026403  | 3035.009  | 2799.345  | D86985    | 560.577   | 961.509   | NM_019604  | 1900.973  | 1227.728  |
| U90904    | 12538.904 | 9573.998  | AK022258  | 2574.843  | 4431.202  | NM_005073  | 2540.172  | 2051.314  |
| AF088053  | 3737.198  | 2265.43   | AF088043  | 1121.438  | 1108.106  | NM_000951  | 10917.29  | 9738.69   |
| AL133662  | 1155.057  | 1216.812  | AF131799  | 1352.61   | 1292.227  | X52599     | 9824.561  | 8973.519  |
| NM_002565 | 857.805   | 1222.627  | AK000455  | 3073.873  | 2941.985  | AA029300   | 6049.972  | 5293.198  |
| U90903    | 3210.372  | 7020.388  | NM_005230 | 544.121   | 704.206   | BG708842   | 53324.977 | 60809.41  |
| AF278760  | 387.886   | 370.04    | AK023719  | 11354.731 | 12846.839 | M19723     | 58645.488 | 63232.535 |
| X58061    | 794.365   | 813.044   | AF035317  | 596.85    | 678.228   | X06256     | 10091.939 | 9911.976  |
| AB032954  | 3585.311  | 3809.128  | AK025590  | 6478.162  | 5851.939  | AA709271   | 4120.456  | 4804.332  |
| NM_006003 | 27006.486 | 22516.016 | AY007149  | 2586.341  | 2324.123  | M34057     | 9883.419  | 9253.868  |
| AL110197  | 559.696   | 690.718   | NM_020967 | 2428.124  | 2407.856  | ID 1984668 | 3968.162  | 3985.602  |
| AF085995  | 1825.19   | 2053.977  | NM_001071 | 15393.973 | 16772.268 | ID 1832579 | 5397.75   | 4524.501  |
| NM_017632 | 3151.219  | 3091.83   | SR4       | 15231.292 | 20774.404 | H-430185 N | 2917.333  | 2925.631  |
| AK026655  | 3215.612  | 3346.178  | SR6       | 2391.056  | 3400.703  | D16583     | 12450.099 | 8096.92   |
| S41522    | 922.586   | 754.029   | SR8       | 6440.45   | 27999.383 | H44051     | 5699.784  | 4526.935  |
| AF129926  | 3623.506  | 4238.085  | SR10      | 19459.344 | 11350.269 | AA481547   | 44931.121 | 31654.957 |
| AK025822  | 5169.98   | 6279.175  | CY3Cy5    | 2469.74   | 275.624   | AA831880   | 4964.474  | 3547.717  |

|           |           |           |           |           |           |           |           |           |
|-----------|-----------|-----------|-----------|-----------|-----------|-----------|-----------|-----------|
| AL360140  | 1164.84   | 1550.19   | AL157484  | 30581.072 | 29068.723 | T64880    | 14567.569 | 9433.659  |
| AF201937  | 35652.984 | 25720.637 | AK024850  | 1182.087  | 1079.787  | AB028990  | 2274.578  | 1378.609  |
| AL390128  | 2599.977  | 2270.288  | Y09836    | 2219.24   | 2414.19   | AK002089  | 622.194   | 461.443   |
| AK001044  | 387.845   | 272.338   | AL137597  | 4641.74   | 4077.738  | NM_00670E | 44439.07  | 29109.354 |
| AL157429  | 1313.078  | 1036.957  | AK022144  | 838.878   | 723.827   | AB037835  | 4728.255  | 2998.329  |
| NM_012071 | 15648.097 | 11956.654 | AF086044  | 1247.363  | 1455.684  | BM468475  | 1910.928  | 2050.335  |
| AF055018  | 1813.622  | 1798.613  | NM_014926 | 1040.022  | 1265.818  | NM_00031E | 7211.707  | 5094.712  |
| NM_001777 | 30664.934 | 24233.658 | AF131790  | 3914.348  | 5208.98   | NM_00206C | 59450.676 | 55308.918 |
| U79457    | 15300.728 | 11507.947 | NM_012075 | 5658.355  | 5442.285  | AK001230  | 13166.969 | 12454.977 |
| AB037832  | 3869.378  | 3869.63   | AB004851  | 2323.889  | 2560.435  | NM_01468C | 27370.092 | 20395.822 |
| NM_014347 | 7115.531  | 7573.692  | AK023911  | 20720.979 | 22553.26  | NM_005027 | 8166.311  | 7374.622  |
| NM_00129E | 19938.926 | 34815.09  | NM_001283 | 13444.058 | 15296.559 | NM_004612 | 4034.58   | 3113.809  |
| NM_004344 | 14653.072 | 12452.311 | AL110237  | 2268.7    | 2268.428  | NM_00560E | 51196.199 | 43184.336 |
| AF085972  | 956.11    | 1028.333  | D87470    | 3107.353  | 3412.469  | NM_012294 | 649.729   | 840.243   |
| NM_000757 | 481.046   | 518.668   | AF147307  | 8194.686  | 8822.477  | NM_00110E | 1492.626  | 1172.201  |
| NM_01662C | 47986.988 | 39310.156 | AK001829  | 2433.618  | 2917.865  | NM_015583 | 2507.192  | 2142.613  |
| D16914    | 68681.492 | 69013.695 | AK024931  | 22813.369 | 21784.117 | NM_01849C | 5362.895  | 5263.003  |
| AA084879  | 1972.875  | 2614.252  | AL109715  | 1234.067  | 1378.676  | NM_00477E | 2434.218  | 1990.872  |
| Y10529    | 699.867   | 833.03    | AK025659  | 5096.895  | 7031.201  | NM_00624E | 4663.489  | 4300.708  |
| NM_000833 | 1660.544  | 1819.561  | AK026407  | 1005.522  | 1277.496  | NM_004352 | 908.219   | 1136.123  |
| NM_000283 | 3707.939  | 3808.685  | AK026788  | 8103.161  | 10845.479 | NM_01225E | 1191.756  | 1123.905  |
| NM_01246C | 4359.608  | 6247.655  | AK025272  | 6367.504  | 11897.12  | NM_005103 | 1643.117  | 1087.303  |
| X64980    | 599.136   | 587.245   | AK026824  | 1934.956  | 2286.177  | NM_004822 | 4585.718  | 3794.863  |
| NM_012118 | 4051.79   | 7669.519  | AL365407  | 6043.813  | 6635.456  | AK022349  | 4829.753  | 2806.487  |
| AK024092  | 2127.277  | 2423.359  | AK022407  | 1040.007  | 1177.936  | NM_00575C | 2504.802  | 1183.164  |
| AK022226  | 411.064   | 509.132   | AK000840  | 58027.672 | 56190.328 | NM_004973 | 1308.476  | 952.979   |
| AK002044  | 8969.493  | 7131.324  | AL162073  | 4206.668  | 4634.6    | AF101051  | 305.325   | 92.435    |
| AK021967  | 423.23    | 281.795   | AL390160  | 2816.108  | 3249.463  | NM_00724E | 13850.271 | 7771.832  |
| AK022206  | 455.27    | 227.873   | AJ006835  | 21466.451 | 26771.883 | NM_00189C | 2585.257  | 1474.325  |
| BC032460  | 7363.439  | 6150.099  | AL110138  | 3684.028  | 4157.754  | NM_00128E | 8394.242  | 5233.465  |
| NM_014071 | 2293.782  | 2169.031  | AL122039  | 1559.143  | 1805.384  | NM_01822E | 3799.171  | 2661.046  |
| AK024404  | 536.516   | 525.632   | AF070577  | 25071.676 | 26776.918 | NM_00632E | 21150.695 | 13385.142 |
| NM_00632E | 1081.769  | 1600.706  | AL137445  | 1969.858  | 2938.321  | AY009127  | 36434.309 | 26450.895 |
| AB032369  | 557.216   | 335.999   | U92992    | 980.859   | 983.387   | NM_01486E | 11204.308 | 9459.03   |
| NM_00516E | 1177.032  | 1214.282  | BC028422  | 1827.441  | 3020.556  | NM_00392E | 819.642   | 674.269   |
| NM_000213 | 1511.013  | 1461.033  | AK022219  | 1060.648  | 1393.294  | AK000158  | 17087.535 | 16306.135 |
| BE906107  | 3253.421  | 4079.617  | AK024192  | 951.381   | 1470.132  | NM_00576E | 4804.511  | 4689.667  |
| NM_01551E | 1481.947  | 1916.488  | NM_013244 | 2205.834  | 2622.651  | AK024500  | 48841.418 | 41516.66  |
| AB033065  | 2177.407  | 2300.152  | AJ011378  | 5019.998  | 7106.375  | NM_002564 | 47611.734 | 46726.484 |
| NM_01210E | 8926.632  | 9206.756  | AF009266  | 1466.68   | 2452.452  | Z83806    | 771.535   | 807.95    |
| NM_003253 | 1247.323  | 1457.58   | AF009310  | 2808.11   | 4860.082  | NM_000963 | 1378.69   | 1696.478  |
| NM_01328E | 6930.383  | 7347.807  | AF054991  | 1884.359  | 2306.347  | NM_01330E | 13867.509 | 13106.991 |
| NM_002872 | 34008.863 | 27599.709 | AF060168  | 3772.008  | 4433.328  | AF027302  | 11844.423 | 12181.155 |
| NM_00049C | 639.431   | 926.692   | AF009275  | 2471.177  | 2809.407  | NM_002852 | 8880.776  | 7721.797  |
| AJ225028  | 397.845   | 390.431   | AF015251  | 762.813   | 986.234   | NM_001817 | 9991.961  | 7689.045  |
| NM_00483E | 2008.999  | 2327.713  | AF056426  | 2416.196  | 2741.285  | AF063611  | 1843.802  | 1519.821  |
| NM_012193 | 1458.486  | 1460.908  | AK001096  | 865.728   | 1036.602  | NM_00603E | 3984.395  | 3617.615  |
| NM_00340E | 11611.487 | 10047.146 | NM_018329 | 1838.457  | 2024.578  | NM_00208E | 1831.601  | 1614.189  |
| NM_00472C | 9408.423  | 7268.837  | AK021565  | 684.796   | 583.598   | NM_00459C | 594.99    | 513.451   |
| NM_001057 | 3174.368  | 2555.121  | AK021778  | 1084.816  | 1495.552  | M28983    | 513.342   | 453.986   |
| NM_004524 | 4930.004  | 5153.46   | AK001150  | 7735.043  | 7191.488  | NM_01465E | 17769.83  | 12550.192 |
| NM_00631E | 6498.679  | 5377.939  | AK002123  | 1169.697  | 1027.21   | NM_00207E | 7782.374  | 4737.154  |
| NM_018401 | 3614.621  | 2871.441  | AK021633  | 2973.043  | 3072.723  | X05299    | 5942.805  | 4204.555  |



|           |           |           |           |           |           |           |           |           |
|-----------|-----------|-----------|-----------|-----------|-----------|-----------|-----------|-----------|
| NM_005163 | 7970.087  | 9898.498  | AF189251  | 1757.993  | 2257.099  | NM_007274 | 37867.246 | 19893.945 |
| NM_007273 | 56783.355 | 65885.336 | NM_005322 | 3316.691  | 3845.676  | NM_003356 | 24584.982 | 12093.607 |
| BE894943  | 618.577   | 624.248   | AK024465  | 16037.747 | 19726.865 | AF238315  | 1425.708  | 1037.222  |
| AF085994  | 515.246   | 548.307   | AF075119  | 1590.791  | 1609.617  | NM_006224 | 56323.141 | 61993.234 |
| NM_016422 | 3989.549  | 6646.515  | AK021478  | 6847.746  | 6706.29   | AL137300  | 16370.347 | 11743.485 |
| NM_017878 | 1235.299  | 1228.894  | AF131782  | 2505.599  | 2446.216  | NM_000229 | 10159.669 | 7921.533  |
| NM_004494 | 56911.309 | 64487.16  | NM_014210 | 9478.508  | 6835.032  | NM_006995 | 47669.5   | 39037.176 |
| AL049687  | 529.373   | 791.758   | AK021603  | 13038.746 | 12876.282 | NM_003129 | 20380.258 | 20282.889 |
| NM_005643 | 6653.438  | 9938.507  | AL110136  | 6911.43   | 7446.5    | NM_001956 | 13706.495 | 10370.875 |
| AF179995  | 1482.203  | 1491.523  | AF075095  | 912.785   | 804.931   | AB033064  | 8365.522  | 8547.215  |
| NM_002099 | 447.382   | 519.46    | NM_003669 | 1019.057  | 987.742   | AK022317  | 21847.396 | 22421.113 |
| NM_016195 | 5438.82   | 3308.817  | AF086502  | 2611.416  | 2780.498  | NM_018396 | 15831.83  | 15543.279 |
| NM_004523 | 3852.525  | 4310.317  | L39924    | 2500.898  | 2544.221  | NM_003124 | 33308.004 | 27191.434 |
| NM_004404 | 15640.91  | 17690.209 | U52054    | 10182.171 | 9629.213  | NM_006886 | 53135.035 | 58195.371 |
| NM_002960 | 3821.738  | 4833.423  | AK023325  | 4293.226  | 5290.248  | NM_004531 | 8950.34   | 8553.756  |
| AB046788  | 1716.69   | 2340.679  | NM_017985 | 4804.041  | 4630.976  | AL133581  | 4556.924  | 3623.501  |
| NM_006790 | 1342.793  | 1362.116  | AK025866  | 5036.536  | 4788.128  | NM_002558 | 1659.943  | 1524.945  |
| AL117522  | 4814.714  | 5361.806  | AF088058  | 6860.619  | 5257.317  | NM_005031 | 14272.606 | 9574.063  |
| AB011541  | 1638.264  | 1588.652  | NM_000513 | 2194.893  | 2088.914  | AB040920  | 1839.51   | 1450.883  |
| NM_019109 | 1105.616  | 954.001   | Y11165    | 2570.471  | 2232.968  | NM_000720 | 1396.515  | 928.505   |
| NM_019061 | 8075.526  | 6588.982  | NM_003530 | 2245.854  | 4225.863  | NM_004842 | 907.327   | 600.186   |
| AB033007  | 2724.439  | 2351.333  | AJ227871  | 1260.411  | 1298.594  | AK024639  | 2166.771  | 1785.891  |
| NM_003781 | 815.978   | 1557.863  | AK025344  | 2771.4    | 2728.136  | NM_015720 | 33501.48  | 24484.516 |
| NM_001304 | 1209.874  | 1288.728  | D28589    | 38871.438 | 45522.125 | AB007915  | 1456.509  | 1146.633  |
| NM_003130 | 5190.923  | 5278.88   | AF301223  | 1161.073  | 1448.05   | AB033070  | 1309.227  | 1270.1    |
| NM_004716 | 11642.937 | 11499.09  | NM_017867 | 5688.118  | 4135.15   | AB028990  | 2094.719  | 653.964   |
| D29810    | 2715.481  | 3065.025  | U92820    | 3845.804  | 3328.346  | AK002089  | 497.125   | 131.666   |
| NM_000128 | 490.414   | 525.893   | NM_017937 | 2895.742  | 2835.475  | NM_006708 | 48621.793 | 30476.244 |
| AB002384  | 6491.719  | 5705.24   | AL360266  | 4074.147  | 3687.883  | AB037835  | 4688.167  | 3066.41   |
| NM_018437 | 790.571   | 809.059   | AL160132  | 57916.852 | 58604.539 | NM_016228 | 1460.249  | 1293.726  |
| NM_000422 | 865.411   | 853.603   | NM_019557 | 3033.903  | 2484.96   | NM_000157 | 7049.247  | 5356.744  |
| AK023164  | 2904.968  | 2828.305  | NM_003545 | 740.512   | 819.083   | NM_000712 | 708.772   | 448.379   |
| NM_005379 | 462.194   | 473.942   | AK022247  | 1736.658  | 1521.831  | NM_018088 | 4544.094  | 2900.185  |
| AK027121  | 17738.344 | 19810.861 | AK001453  | 3739.712  | 3301.095  | BC013695  | 14452.471 | 14918.847 |
| NM_017433 | 388.455   | 662.801   | AB007972  | 7382.056  | 7383.712  | NM_007205 | 2256.421  | 1574.815  |
| AL117661  | 6298.625  | 7365.23   | AL390144  | 10126.467 | 12460.674 | AK023035  | 8045.014  | 6548.087  |
| X64643    | 4240.927  | 6003.004  | AK024017  | 4582.526  | 5704.204  | NM_014846 | 6041.909  | 5531.66   |
| NM_005380 | 27454.225 | 24208.084 | X56196    | 1834.005  | 1914.686  | AB011164  | 11209.93  | 8071.776  |
| NM_005561 | 7671.091  | 8637.836  | D17220    | 9813.796  | 9205.209  | M24750    | 2678.826  | 2170.247  |
| AF272381  | 6310.907  | 5810.667  | D28363    | 60879.91  | 58839.84  | NM_005965 | 6346.213  | 4692.542  |
| NM_001518 | 14957.131 | 10771.107 | AB011171  | 1731.86   | 1638.095  | NM_002740 | 8794.226  | 6112.112  |
| NM_003412 | 3268.215  | 2660.559  | AF090099  | 648.101   | 587.957   | AL117482  | 6776.989  | 4297.231  |
| NM_018336 | 2332.463  | 2084.304  | NM_003586 | 2568.084  | 2533.875  | NM_006546 | 38133.66  | 39509.941 |
| AK022668  | 2233.255  | 2548.657  | NM_000922 | 2852.695  | 2895.795  | AB018324  | 22067.023 | 16346.13  |
| AW975132  | 2279.454  | 4441.359  | NM_013232 | 19396.662 | 19727.799 | NM_002742 | 52976.488 | 58789.102 |
| AB037814  | 782.411   | 741.684   | NM_017993 | 1825.327  | 2016.423  | Z25431    | 5890.313  | 3864.913  |
| NM_014663 | 2750.252  | 1887.218  | NM_000362 | 1167.536  | 992.337   | NM_005627 | 27289.438 | 15704.968 |
| AF007217  | 2104.978  | 1668.536  | NM_014429 | 3583.287  | 3322.439  | M64497    | 1389.432  | 1113.269  |
| AB037753  | 8220.693  | 6704.515  | AK000770  | 3311.78   | 3099.68   | CY3Cy5    | 5681.805  | 416.341   |
| NM_004674 | 5565.221  | 4413.358  | NM_002370 | 13400.516 | 11312.531 | NM_001073 | 622.296   | 702.372   |
| AB037801  | 6445.776  | 4051.623  | NM_015670 | 3630.739  | 3195.731  | NM_002711 | 5346.821  | 8180.576  |
| AL080159  | 17002.607 | 10700.205 | NM_014709 | 1855.499  | 1683.327  | AF143873  | 2182.619  | 3335.851  |
| NM_017823 | 53811.379 | 39377.715 | AK002203  | 847.984   | 960.852   | AL355732  | 3520.641  | 3228.663  |

|           |           |           |           |           |           |           |           |           |
|-----------|-----------|-----------|-----------|-----------|-----------|-----------|-----------|-----------|
| U55185    | 3575.268  | 2703.469  | AK026469  | 24057.613 | 23707.893 | NM_01796  | 5565.602  | 6341.807  |
| U30828    | 29269.805 | 23794.605 | D16935    | 5567.874  | 5051.473  | AF143327  | 3664.016  | 3294.81   |
| AF085886  | 52768.809 | 63297.406 | U92019    | 1699.446  | 1389.945  | AL137535  | 558.798   | 629.467   |
| AK023828  | 1887.554  | 2327.759  | U52835    | 2619.297  | 2154.9    | AL049991  | 462.654   | 581.865   |
| NM_006572 | 26051.139 | 20087.307 | NM_000756 | 6125.665  | 5176.391  | AL049990  | 2305.158  | 2083.361  |
| NM_004784 | 754.396   | 919.181   | AK022148  | 1750.931  | 1539.16   | AF131843  | 2067.504  | 1727.139  |
| AK021815  | 2122.796  | 1404.027  | Z36811    | 65484.289 | 67342.445 | AK026653  | 1374.287  | 1400.694  |
| NM_001543 | 3147.264  | 2831.941  | NM_018950 | 20102.496 | 14554.48  | NM_020231 | 2278.709  | 1817.197  |
| NM_016641 | 11354.453 | 10103.489 | K03200    | 9719.451  | 9208.558  | AF075008  | 3792.383  | 3573.926  |
| AB018010  | 2013.079  | 2357.021  | U17629    | 6111.625  | 5008.56   | NM_006504 | 3647.295  | 4070.7    |
| NM_014610 | 16759.68  | 26684.162 | NM_020428 | 9256.592  | 9399.728  | AF070538  | 808.093   | 1115.775  |
| NM_004737 | 1322.996  | 2039.236  | U79265    | 3011.72   | 2379.751  | NM_001073 | 502.653   | 512.99    |
| NM_000689 | 1240.306  | 1310.168  | AK022868  | 5843.269  | 4994.997  | NM_002711 | 3627.847  | 4814.481  |
| NM_006621 | 5984.135  | 6130.347  | AF217289  | 322.78    | 455.901   | SR3       | 39969.168 | 49842.375 |
| BF347398  | 765.681   | 582.226   | NM_002687 | 19894.412 | 19015.365 | SR5       | 5369.989  | 6825.81   |
| AK026762  | 4336.515  | 4507.049  | NM_000627 | 7348.354  | 6425.083  | SR7       | 3868.569  | 32908.535 |
| AF078844  | 326.292   | 530.132   | NM_000038 | 1884.289  | 1345.547  | SR9       | 12193.835 | 2330.371  |
| NM_004412 | 1533.966  | 1151.377  | NM_000825 | 4021.542  | 3974.325  | CY3Cy5    | 4946.46   | 455.943   |
| L48516    | 5284.482  | 3749.667  | NM_001963 | 932.716   | 861.43    | L38282    | 7356.219  | 6202.785  |
| NM_016648 | 10751.63  | 7200.959  | NM_004334 | 8207.258  | 6728.513  | NM_018056 | 3654.806  | 3740.772  |
| AF083930  | 4334.015  | 4149.396  | NM_003886 | 24086.846 | 22229.695 | NM_019008 | 4886.604  | 4069.132  |
| AB040907  | 372.501   | 236.422   | NM_005843 | 4146.62   | 3833.16   | M20838    | 1981.335  | 2147.233  |
| NM_005986 | 522.461   | 501.846   | NM_003854 | 1158.209  | 1492.734  | AK022738  | 1266.187  | 1000.99   |
| NM_003426 | 505.922   | 816.142   | NM_017980 | 1104.543  | 1142.409  | NM_014951 | 353.024   | 187.082   |
| NM_014862 | 2554.537  | 2995.948  | NM_001252 | 48095.07  | 42580.039 | AK023505  | 5085.92   | 4508.421  |
| AK027159  | 2037.96   | 2552.771  | AF053712  | 9738.406  | 7962.205  | AB037851  | 17329.998 | 14718.797 |
| AF060169  | 577.308   | 648.674   | NM_003947 | 2458.999  | 2156.124  | AL050389  | 11583.336 | 10316.444 |
| NM_005269 | 952.859   | 1047.104  | NM_002821 | 27576.123 | 19888.988 | AK024684  | 3047.076  | 2718.249  |
| D70835    | 59420.32  | 47812.168 | M96652    | 62602.781 | 58312.281 | NM_014945 | 29929.82  | 36128.602 |
| NM_002697 | 11027.654 | 9796.506  | L41690    | 3611.941  | 2597.452  | AK001546  | 2712.727  | 3222.122  |
| NM_002448 | 1957.653  | 2066.62   | NM_018059 | 2429.461  | 1497.803  | NM_006537 | 11491.446 | 13422.904 |
| AF053952  | 10790.285 | 9193.275  | NM_000939 | 62234.785 | 54753.805 | AL049282  | 9973.973  | 8469.692  |
| NM_003213 | 8453.72   | 7820.14   | NM_005183 | 618.138   | 612.181   | AK021443  | 4612.453  | 3619.059  |
| BF184738  | 615.75    | 818.493   | NM_006514 | 4166.072  | 3521.364  | AF070569  | 1423.699  | 1323.726  |
| NM_014044 | 3595.34   | 3545.075  | AF065164  | 17184.061 | 12709.566 | NM_020233 | 3087.722  | 1888.165  |
| NM_000900 | 2899.841  | 3219.741  | AJ008143  | 49169.852 | 51355.598 | AK024315  | 22499.318 | 21461.102 |
| AK023684  | 9610.016  | 9962.658  | NM_007144 | 2565.104  | 3075.589  | AK024560  | 809.416   | 1292.869  |
| NM_000232 | 956.327   | 1039.575  | NM_005093 | 671.608   | 627.167   | AK024945  | 10537.16  | 8613.921  |
| J05070    | 1638.391  | 1804.461  | NM_004424 | 29372.881 | 28039.771 | AK024579  | 6341.53   | 4962.832  |
| U76368    | 486.39    | 388.964   | AL133117  | 3272.672  | 2677.502  | AL133118  | 7777.671  | 8383.875  |
| AA700390  | 5636.201  | 5415.25   | AB033040  | 749.64    | 1387.21   | AK023571  | 10534.732 | 9552.287  |
| Y18474    | 1586.617  | 1477.1    | AF070586  | 31101.84  | 25794.061 | NM_001702 | 5724.771  | 5241.568  |
| AA436163  | 1386.386  | 1933.438  | NM_014412 | 2809.881  | 2423.224  | AK026657  | 3108.425  | 2994.678  |
| BI907981  | 2502.866  | 4258.757  | NM_013303 | 2591.095  | 1460.683  | AL833558  | 1009.094  | 1048.762  |
| BI603841  | 1425.416  | 1429.868  | NM_012227 | 7759.612  | 6943.288  | AF087991  | 46822.484 | 59002.375 |
| M19888    | 3533.338  | 2403.821  | NM_006101 | 3529.972  | 2724.53   | Y12839    | 2597.96   | 3003.483  |
| Y08136    | 2188.6    | 2569.391  | NM_001237 | 10356.872 | 10541.265 | AJ227884  | 5139.717  | 6289.371  |
| AA156863  | 6910.564  | 8118.383  | NM_002507 | 4698.977  | 3281.605  | X64986    | 20607.932 | 14825.614 |
| BI915199  | 2254.578  | 4864.033  | NM_015962 | 6861.833  | 5802.269  | Y10510    | 849.18    | 633.306   |
| R82957    | 53927.656 | 61631.363 | NM_016145 | 1968.94   | 1613.878  | AK000842  | 18408.197 | 18528.695 |
| BI830442  | 933.382   | 846.478   | NM_016078 | 21331.406 | 16261.309 | AK023386  | 34166.039 | 29608.377 |
| AI218732  | 3299.17   | 3383.396  | NM_003798 | 1697.808  | 1337.218  | NM_007053 | 38227.176 | 30046.336 |
| AF079098  | 3438.634  | 3988.048  | NM_004401 | 8419.709  | 6764.229  | AK022153  | 7217.361  | 5818.747  |

|           |           |           |           |           |           |           |           |           |
|-----------|-----------|-----------|-----------|-----------|-----------|-----------|-----------|-----------|
| AK023448  | 3583.238  | 1989.464  | NM_001849 | 31821.488 | 22465.035 | AK022789  | 3217.892  | 2525.631  |
| Y18213    | 7794.734  | 4026.186  | AF255910  | 3676.343  | 2305.059  | AK023756  | 939.266   | 771.066   |
| NM_003283 | 7535.392  | 4946.269  | NM_016146 | 5197.708  | 4559.595  | AK024252  | 631.675   | 400.308   |
| AF249898  | 11167.973 | 9085.188  | AB046776  | 3355.022  | 2279.429  | AK002095  | 2781.4    | 2189.866  |
| M69181    | 4490.952  | 4076.742  | D42084    | 6338.99   | 5873.508  | AK000821  | 18697.916 | 25528.484 |
| AK027224  | 518.634   | 526.06    | NM_001734 | 924.746   | 855.197   | AK024526  | 26286.436 | 34994.809 |
| L09078    | 640.27    | 749.087   | NM_014693 | 10827.675 | 10554.38  | AK023307  | 1582.89   | 1479.609  |
| NM_002652 | 1004.604  | 850.095   | AB007896  | 2854.822  | 3239.001  | NM_017618 | 4525.146  | 3415.418  |
| NM_001311 | 14075.775 | 12003.696 | AB007916  | 6650.414  | 6422.793  | NM_017848 | 1174.015  | 728.891   |
| NM_017798 | 12001.954 | 11220.239 | NM_002874 | 2528.021  | 1119.135  | NM_019056 | 12065.581 | 11827.777 |
| NM_000354 | 356.833   | 152.073   | AF049140  | 5143.215  | 4662.802  | AF279783  | 9363.164  | 10049.2   |
| NM_012410 | 3161.245  | 2769.251  | AB037793  | 603.935   | 817.852   | AF182422  | 21199.289 | 20527.484 |
| NM_001111 | 13857.343 | 21359.639 | AL136794  | 2087.023  | 2138.893  | NM_016943 | 1182.486  | 1065.731  |
| NM_018049 | 21832.166 | 28472.801 | BC035601  | 59824.613 | 55662.93  | AF070602  | 2602.899  | 2212.153  |
| AJ133439  | 346.486   | 453.27    | NM_001458 | 5427.247  | 4567.08   | BE393290  | 3046.902  | 3425.412  |
| NM_014395 | 5590.661  | 4728.057  | NM_020388 | 22614.41  | 21948.318 | NM_017622 | 2518.083  | 2120.984  |
| NM_001561 | 1042.615  | 1102.421  | NM_004202 | 61412.891 | 59374.543 | AF133331  | 8648.527  | 8336.661  |
| NM_005160 | 7476.716  | 10227.045 | AB046829  | 1841.741  | 1320.316  | AK022289  | 6980.484  | 5295.766  |
| NM_000596 | 670.024   | 744.716   | NM_016445 | 5343.849  | 4465.37   | L34408    | 931.986   | 732.337   |
| X78817    | 13491.944 | 14156.113 | NM_003379 | 60212.516 | 52451.555 | AF161403  | 50713.383 | 40678.313 |
| AB023135  | 938.908   | 1149.261  | NM_004521 | 15753.438 | 11593.021 | S75708    | 22162.719 | 16747.441 |
| AY009401  | 626.944   | 845.869   | AF229162  | 2798.487  | 2133.108  | U79291    | 13839.76  | 11642.898 |
| AF294628  | 717.98    | 1030.634  | U02309    | 63648.84  | 60022.863 | D17172    | 42163.867 | 36793.938 |
| NM_004152 | 570.283   | 352.557   | AB028991  | 9248.699  | 7012.875  | AF161370  | 506.72    | 551.548   |
| BU565263  | 58649.48  | 64624.637 | AF263547  | 13037.063 | 9043.276  | AJ227859  | 3447.326  | 4866.708  |
| NM_005028 | 5613.842  | 6536.209  | NM_003923 | 848.055   | 803.508   | NM_018544 | 3264.1    | 4365.498  |
| NM_001611 | 820.171   | 835.254   | NM_004831 | 2568.798  | 2318.3    | AF086269  | 4737.558  | 4460.057  |
| M59979    | 2088.288  | 1753.774  | NM_014213 | 18916.279 | 15735.687 | U90437    | 6912.607  | 5132.361  |
| AB018310  | 1054.921  | 1086.336  | NM_000168 | 13035.756 | 10924.37  | D17169    | 56052.613 | 54826.633 |
| NM_020133 | 1466.457  | 1195.315  | AF294629  | 30242.473 | 29037.275 | NM_017924 | 5835.352  | 6946.89   |
| NM_015379 | 30247.086 | 28524.402 | NM_000545 | 21871.311 | 22272.955 | S81578    | 2158.725  | 3042.352  |
| NM_004878 | 441.493   | 413.663   | NM_002136 | 58886.965 | 55243.758 | NM_017546 | 10108.883 | 13715.396 |
| NM_015057 | 1190.928  | 1080.01   | AK025571  | 4392.174  | 4550.627  | AJ001889  | 750.749   | 654.921   |
| AF303398  | 2753.196  | 3203.747  | NM_004940 | 573.862   | 670.587   | AF086210  | 1192.46   | 1246.234  |
| NM_014810 | 3483.451  | 3301.207  | NM_014463 | 29962.018 | 32064.771 | AL137400  | 1061.797  | 1024.297  |
| NM_004738 | 6612.276  | 5796.517  | NM_005520 | 19880.92  | 21315.318 | NM_006511 | 2591.738  | 2635.356  |
| NM_007357 | 5792.039  | 6540.095  | AK023265  | 2585.385  | 2761.574  | AF007142  | 2336.586  | 1978.932  |
| NM_003763 | 7247.404  | 7922.617  | NM_018723 | 2067.232  | 1829.484  | AF119853  | 8789.501  | 5582.232  |
| AB046836  | 1419.447  | 1015.576  | AB029009  | 6868.816  | 4975.054  | AF279782  | 580.694   | 752.756   |
| NM_017816 | 12805.891 | 8143.866  | AF112207  | 4925.89   | 3763.08   | NM_001126 | 8667.594  | 7664.117  |
| AJ224166  | 5704.741  | 4083.916  | AJ420488  | 62436.414 | 60033.719 | AK023673  | 4202.117  | 4037.189  |
| AK026098  | 8337.525  | 8433.475  | NM_005594 | 60273.449 | 54332.59  | NM_018252 | 3412.209  | 2947.427  |
| NM_012381 | 3906.964  | 8087.122  | NM_004461 | 62462.098 | 60196.461 | NM_018000 | 69460.688 | 61936.273 |
| M20702    | 1130.63   | 1137.176  | NM_018473 | 6826.071  | 5734.858  | AF164963  | 1702.574  | 2338.046  |
| NM_004088 | 11641.17  | 11163.411 | BF106121  | 2434.183  | 2155.737  | AF124366  | 59874.008 | 60409.117 |
| NM_002180 | 3128.956  | 4779.05   | AK022590  | 3479.907  | 2630.781  | AL365518  | 1419.466  | 1654.404  |
| NM_000138 | 7197.459  | 9030.9    | AK024343  | 2613.922  | 2102.71   | AF086257  | 8298.088  | 8035.779  |
| NM_004968 | 5230.944  | 5473.533  | NM_001936 | 640.999   | 593.057   | AF075056  | 515.94    | 584.582   |
| NM_005908 | 5818.123  | 5196.148  | NM_002569 | 1903.773  | 1430.17   | AC119751  | 887.45    | 742.367   |
| NM_004785 | 8122.642  | 8314.492  | M12078    | 12114.093 | 10341.139 | U00928    | 2801.056  | 2085.917  |
| AK024079  | 971.141   | 855.087   | NM_004550 | 13289.631 | 12809.345 | AK002114  | 5470.308  | 6011.484  |
| NM_002428 | 5020.62   | 5838.911  | NM_000785 | 4100.896  | 4030.797  | AL390184  | 2775.126  | 4711.088  |
| NM_014674 | 6073.379  | 6496.702  | NM_004110 | 49997.18  | 46529.738 | NM_018695 | 6166.279  | 10160.219 |

|           |           |           |            |           |           |           |           |           |
|-----------|-----------|-----------|------------|-----------|-----------|-----------|-----------|-----------|
| NM_018271 | 1844.785  | 1624.718  | NM_013387  | 57031.879 | 56374.77  | AK026318  | 2336.596  | 2433.966  |
| NM_000547 | 844.512   | 800.263   | NM_005262  | 31846.17  | 34254.098 | AF291673  | 2516.295  | 2912.012  |
| NM_014652 | 2349.592  | 1866.618  | NM_005757  | 1801.898  | 2096.345  | NM_004365 | 24862.924 | 21372.203 |
| AL133020  | 7758.458  | 8988.73   | NM_016483  | 468.608   | 548.57    | NM_016355 | 10269.027 | 8790.133  |
| NM_003213 | 7940.552  | 6344.794  | NM_020128  | 1765.515  | 1809.41   | AJ296290  | 7112.229  | 5420.203  |
| BF184738  | 511.254   | 443.59    | NM_005068  | 19379     | 22580.207 | NM_020183 | 7686.632  | 8769.918  |
| NM_014044 | 3059.576  | 2482.445  | NM_018223  | 6250.993  | 7182.055  | NM_018025 | 1775.379  | 2017.291  |
| NM_000900 | 2787.187  | 2635.301  | NM_006693  | 25144.289 | 26440.023 | AL389954  | 1882.247  | 1952.735  |
| AK023684  | 9691.491  | 8299.581  | NM_001722  | 3032.471  | 2475.341  | NM_019852 | 7521.881  | 7281.463  |
| NM_000232 | 1015.885  | 953.141   | AB046802   | 9857.726  | 7291.611  | NM_006118 | 16697.865 | 13979.315 |
| J05070    | 1735.386  | 2294.017  | NM_003297  | 1554.203  | 1531.625  | AK026225  | 38460.711 | 49287.695 |
| U76368    | 412.862   | 456.956   | X74861     | 702.562   | 1113.996  | AL050032  | 16365.598 | 23733.254 |
| AA700390  | 5999.631  | 8220.121  | NM_006940  | 1354.964  | 1265.988  | AF009304  | 2152.369  | 3061.807  |
| Y18474    | 2009.161  | 2744.784  | NM_018269  | 11359.397 | 10361.364 | AK021593  | 625.347   | 779.18    |
| AA436163  | 1340.97   | 3083.6    | AK024633   | 7613.971  | 6940.222  | D17187    | 3803.984  | 2716.672  |
| BI907981  | 1960.022  | 2517.193  | NM_001453  | 7414.727  | 6866.239  | AJ243672  | 4249.726  | 3454.959  |
| BI603841  | 1841.142  | 2761.938  | NM_005257  | 26310.422 | 27018.725 | AL122087  | 1190.792  | 1482.499  |
| Y08136    | 2310.111  | 1992.923  | AF011573   | 20039.121 | 19127.281 | NM_014767 | 671.366   | 777.219   |
| AA156863  | 6993.3    | 5743.922  | NM_002145  | 9373.475  | 7121.651  | Y17867    | 8706.256  | 8683.24   |
| BI915199  | 1721.115  | 1712.027  | NM_007245  | 10602.079 | 8893.221  | M92642    | 3369.328  | 4396.557  |
| R82957    | 52604.816 | 53788.891 | NM_001890  | 2163.227  | 2101.046  | NM_018071 | 7452.467  | 9513.375  |
| BI830442  | 705.98    | 667.541   | NM_001286  | 7926.897  | 7566.342  | NM_004333 | 6894.035  | 6570.918  |
| AA398951  | 385.179   | 176.096   | NM_014648  | 1460.197  | 1390.48   | M31520    | 65733.023 | 64486.816 |
| AI218732  | 3212.263  | 3789.179  | NM_019604  | 1526.155  | 2014.399  | NM_002020 | 43318.563 | 42310.504 |
| NM_018890 | 49701.324 | 40687.871 | NM_005073  | 1809.488  | 1860.341  | AL050137  | 5443.92   | 4985.278  |
| NM_016204 | 1033.827  | 1026.081  | NM_000951  | 6806.424  | 6832.488  | AK024423  | 8348.149  | 7564.943  |
| NM_003283 | 7173.03   | 4193.225  | X52599     | 5000.812  | 5111.565  | NM_005043 | 60065.57  | 51358.289 |
| AF249898  | 10404.526 | 5470.083  | AA029300   | 5178.737  | 5957.309  | NM_005979 | 27075.447 | 24394.395 |
| M69181    | 4807.649  | 3121.03   | BG708842   | 58978.656 | 62406.137 | NM_006282 | 13225.687 | 15291.201 |
| AK027224  | 493.914   | 370.828   | M19723     | 59729.371 | 61160.852 | NM_020321 | 1650.488  | 2014.459  |
| L09078    | 695.78    | 667.726   | X06256     | 6355.102  | 6916.477  | NM_000826 | 638.677   | 526.668   |
| NM_002652 | 1106.495  | 978.549   | AA709271   | 3409.545  | 4095.853  | NM_015920 | 53625.738 | 46922.445 |
| NM_001311 | 15826.381 | 14269.555 | M34057     | 10738.884 | 8776.07   | AB011113  | 6180.83   | 7093.242  |
| NM_017798 | 12922.383 | 15187.893 | ID 1984668 | 2778.889  | 2382.195  | NM_004115 | 2795.071  | 4825.972  |
| NM_000354 | 421.664   | 347.954   | ID 1832579 | 5013.028  | 5627.153  | NM_003567 | 10530.282 | 13005.759 |
| NM_012410 | 2799.153  | 2814.242  | H-430185 N | 3229.252  | 4269.486  | NM_007315 | 1481.606  | 1149.752  |
| NM_001111 | 10727.797 | 12542.232 | D16583     | 11001.9   | 7245.846  | L20686    | 8275.232  | 7986.793  |
| NM_018049 | 17739.148 | 19132.598 | H44051     | 8606.433  | 9083.008  | NM_000304 | 1487.219  | 2024.181  |
| AJ133439  | 342.865   | 402.618   | AA481547   | 57851.012 | 56635.172 | AK023362  | 1987.165  | 2434.889  |
| NM_014395 | 6087.485  | 5108.616  | AA831880   | 4265.841  | 4054.346  | NM_002460 | 1485.964  | 1510.776  |
| NM_001561 | 825.112   | 778.292   | T64880     | 14659.447 | 12301.617 | NM_002675 | 8982.58   | 8579.478  |
| NM_005160 | 6095.172  | 4845.416  | NM_002852  | 8481.195  | 8407.775  | NM_012432 | 62135.023 | 60635.316 |
| NM_000596 | 643.406   | 686.831   | NM_001817  | 9417.851  | 8102.438  | NM_005007 | 21409.914 | 22458.816 |
| X78817    | 16230.38  | 23160.381 | AF063611   | 1764.551  | 1659.409  | AK024996  | 7567.817  | 8153.828  |
| AB023135  | 1431.269  | 2712.103  | NM_006039  | 4782.356  | 5011.384  | NM_001258 | 1147.385  | 1172.459  |
| AY009401  | 752.869   | 909.24    | NM_002089  | 1541.318  | 1713.643  | NM_004417 | 1124.73   | 1161.076  |
| AF294628  | 597.637   | 1030.822  | NM_004590  | 347.068   | 534.156   | NM_012290 | 13788.988 | 11996.325 |
| NM_002448 | 1397.319  | 1207.283  | M28983     | 470.299   | 431.476   | NM_002431 | 5748.191  | 4796.734  |
| AF053952  | 12259.69  | 13912.84  | NM_014656  | 11954.638 | 12042.285 | NM_001827 | 60676.426 | 55444.184 |
| BU565263  | 55698.766 | 65626.25  | NM_002076  | 6346.901  | 6159.838  | NM_020466 | 15094.459 | 17695.307 |
| NM_005028 | 5983.65   | 5878.934  | X05299     | 5031.38   | 4740.026  | AL079280  | 2084.756  | 3387.569  |
| NM_001611 | 1152.008  | 849.414   | BM468475   | 1537.76   | 1885.831  | NM_002853 | 7631.144  | 9658.827  |
| M59979    | 1941.143  | 965.695   | NM_000318  | 5161.122  | 6391.545  | NM_003174 | 3554.577  | 4168.959  |

|           |           |           |           |           |           |           |           |           |
|-----------|-----------|-----------|-----------|-----------|-----------|-----------|-----------|-----------|
| AB018310  | 1178.482  | 1316.205  | NM_002060 | 40495.828 | 46604.77  | NM_012307 | 34926.766 | 29098.695 |
| NM_020133 | 1340.711  | 1364.454  | AK001230  | 9131.91   | 10875.113 | NM_002540 | 3738.72   | 3961.544  |
| NM_015379 | 42745.84  | 51560.207 | NM_014680 | 18805.779 | 18364.865 | NM_006371 | 6206.93   | 8914.243  |
| NM_004878 | 390.788   | 467.171   | NM_005027 | 6425.786  | 6967.643  | NM_004574 | 3861.663  | 7877.507  |
| NM_015057 | 1138.757  | 932.065   | NM_004612 | 3280.992  | 3290.979  | NM_001944 | 954.088   | 1451.142  |
| AF303398  | 2982.275  | 3037.624  | NM_005608 | 49863.098 | 53393.035 | NM_014813 | 795.992   | 797.302   |
| NM_014810 | 3631.552  | 2753.183  | NM_012294 | 1292.117  | 1666.298  | AF014459  | 7842.33   | 6544.811  |
| NM_004738 | 6392.553  | 5081.763  | NM_001106 | 1385.452  | 896.905   | M64108    | 2477.498  | 2171.545  |
| NM_007357 | 5337.588  | 6312.676  | NM_018490 | 5512.229  | 6037.182  | NM_001503 | 9966.6    | 8862.492  |
| NM_003763 | 6921.33   | 7616.087  | NM_004778 | 2431.61   | 2105.686  | NM_006302 | 5881.864  | 6262.203  |
| AK023448  | 4441.862  | 3158.507  | NM_004352 | 923.047   | 797.978   | AJ224875  | 7175.9    | 7322.549  |
| Y18213    | 9352.063  | 7600.758  | NM_012258 | 703.168   | 793.471   | NM_002140 | 4973.959  | 5328.789  |
| NM_017810 | 11873.978 | 8106.972  | NM_006224 | 61379.219 | 62211.461 | AF043324  | 12788.762 | 15289.725 |
| AJ224166  | 5376.647  | 3681.524  | AL137300  | 16888.398 | 13859.594 | AK024172  | 4118.419  | 4793.417  |
| AK026098  | 6832.364  | 5185.546  | NM_000229 | 8104.13   | 8625.798  | NM_014814 | 10412.46  | 10065.184 |
| NM_012381 | 3037.809  | 1715.284  | NM_006995 | 40963.066 | 44945.723 | NM_002797 | 43769.695 | 36396.738 |
| M20702    | 1080.845  | 807.379   | NM_003129 | 16610.322 | 20757.434 | AK024318  | 2965.881  | 3159.543  |
| NM_006397 | 17275.822 | 13315.375 | NM_001956 | 8084.559  | 8127.592  | NM_016120 | 8447.141  | 8588.366  |
| D83776    | 3346.641  | 3778.751  | AB033064  | 6049.816  | 8087.625  | NM_002800 | 17569.887 | 28516.361 |
| NM_004088 | 9953.495  | 8255.515  | AK022317  | 15165.348 | 16925.055 | NM_017912 | 45275.199 | 57075.656 |
| NM_002180 | 2841.231  | 3866.779  | NM_018396 | 13656.87  | 15342.986 | NM_000423 | 19890.805 | 18488.74  |
| NM_000138 | 7233.052  | 8360.036  | NM_003124 | 23816.08  | 26214.434 | AB046838  | 10899.146 | 10012.612 |
| NM_018163 | 4221.842  | 4210.258  | NM_006886 | 59239.629 | 55624.355 | AK026339  | 1153.38   | 1487.551  |
| AK026362  | 7505.353  | 13177.787 | NM_004531 | 7878.374  | 9286.905  | X98411    | 3991.575  | 5882.56   |
| NM_004968 | 5295.945  | 8272.074  | AB040920  | 1831.427  | 2261.957  | NM_014865 | 31169.918 | 46094.527 |
| NM_005908 | 5741.084  | 4984.631  | NM_015720 | 29542.131 | 32336.162 | AB032977  | 29118.609 | 42702.445 |
| NM_004785 | 8004.898  | 8046.451  | AB033070  | 1143.353  | 1457.911  | NM_003030 | 3499.94   | 4218.92   |
| AK024079  | 999.089   | 753.379   | AK000158  | 14129.764 | 18061.609 | NM_020520 | 21180.842 | 18528.012 |
| NM_002428 | 5064.671  | 5095.142  | NM_005769 | 5378.164  | 5301.488  | S72604    | 53301.188 | 39934.738 |
| NM_014674 | 6289.882  | 6272.943  | AK024500  | 58975.039 | 55718.203 | NM_017984 | 828.872   | 629.143   |
| NM_018271 | 1766.703  | 1686.894  | NM_002564 | 51140.508 | 44679.527 | AF038951  | 21926.238 | 16588.99  |
| NM_000547 | 681.058   | 868.159   | Z83806    | 296.103   | 251.542   | NM_006492 | 3630.431  | 3615.295  |
| NM_014652 | 2272.557  | 1992.538  | NM_000963 | 1277.331  | 1013.142  | AK021811  | 2402.2    | 2675.284  |
| AL133020  | 9755.972  | 15013.827 | NM_013308 | 11136.469 | 10156.188 | NM_003428 | 6768.292  | 6796.659  |
| NM_004152 | 570.548   | 795.98    | AF027302  | 8420.027  | 7444.674  | AF055030  | 5100.444  | 5387.608  |
| NM_014044 | 3348.957  | 2499.95   | NM_006708 | 47148.098 | 46486.813 | AK000589  | 5962.28   | 4601.979  |
| NM_000900 | 2623.781  | 2166.807  | AB037835  | 3564.135  | 3601.05   | X53281    | 37710.348 | 32408.609 |
| AK023684  | 9223.233  | 6087.521  | NM_016228 | 1043.535  | 1433.425  | BC012782  | 5545.253  | 4527.761  |
| NM_000232 | 947.161   | 682.906   | NM_000157 | 4847.407  | 5568.601  | AF132026  | 59865.801 | 59632.668 |
| J05070    | 1487.611  | 1318.415  | NM_000712 | 377.298   | 532.702   | AL050353  | 3487.13   | 2908.199  |
| U76368    | 934.399   | 998.216   | NM_018088 | 1962.323  | 2093.613  | AB037788  | 21566.145 | 21218.543 |
| AA700390  | 5542.037  | 4668.146  | BC013695  | 12299.523 | 14024.916 | NM_004587 | 21472.193 | 16782.123 |
| Y18474    | 1545.641  | 1202.76   | NM_007205 | 1874.074  | 1650.4    | NM_000975 | 62465.359 | 62267.859 |
| AA436163  | 1286.044  | 1548.115  | AK023035  | 6851.375  | 7185.685  | AF147412  | 57864.461 | 56098.52  |
| BI907981  | 2058.323  | 2230.64   | NM_014846 | 4647.904  | 5432.335  | AK024570  | 28140.918 | 33399.711 |
| BI603841  | 2032.969  | 1943.946  | AB011164  | 7893.47   | 8706.11   | AF161401  | 23024.547 | 31547.229 |
| M19888    | 3378.639  | 3013.292  | M24750    | 2241.791  | 2463.666  | NM_000990 | 41061.219 | 51339.32  |
| Y08136    | 2083.931  | 1671.724  | NM_005965 | 5475.844  | 6374.799  | NM_014740 | 13082.874 | 15433.833 |
| AA156863  | 6895.914  | 5058.964  | NM_002740 | 7861.938  | 8477.103  | NM_015950 | 36654.77  | 35464.055 |
| BI915199  | 1772.845  | 1708.648  | AL117482  | 5778.65   | 7468.816  | AK024601  | 18305.344 | 16916.098 |
| R82957    | 52998.105 | 53583.258 | NM_006549 | 59881.594 | 57359.539 | S68069    | 4550.65   | 3716.669  |
| BI830442  | 1046.059  | 838.122   | AB018324  | 23865.297 | 28396.621 | AB011095  | 8235.797  | 7287.34   |
| AA398951  | 425.903   | 122.643   | NM_002742 | 58696.805 | 58298.129 | NM_002488 | 30916.838 | 26371.34  |

|           |           |           |            |           |           |           |           |           |
|-----------|-----------|-----------|------------|-----------|-----------|-----------|-----------|-----------|
| AI218732  | 3774.899  | 6345.312  | Z25431     | 4497.655  | 3436.075  | NM_004003 | 46210.648 | 38797.137 |
| NM_018890 | 51765.875 | 53408.441 | NM_005627  | 23793.438 | 13710.46  | NM_000188 | 5194.38   | 5649.812  |
| NM_016204 | 851.989   | 1070.066  | M64497     | 1225.192  | 827.088   | BF244401  | 26325.199 | 19842.979 |
| AB046836  | 2044.161  | 2637.514  | NM_007274  | 29323.164 | 23574.412 | NM_004718 | 54994.203 | 54820.168 |
| NM_001311 | 14621.87  | 12548.748 | NM_003356  | 27743.773 | 22395.625 | AL359585  | 14152.958 | 11889.882 |
| NM_017798 | 11661.741 | 8790.905  | AF238315   | 1519.112  | 1261.951  | AB046850  | 13812.549 | 11665.444 |
| NM_000354 | 427.475   | 95.256    | NM_001890  | 2524.973  | 2813.768  | NM_014801 | 10395.858 | 8652.746  |
| NM_012410 | 3268.812  | 2032.963  | NM_001286  | 7071.979  | 8196.735  | NM_003642 | 11687.956 | 9146.515  |
| NM_001111 | 9566.935  | 5951.074  | NM_014648  | 1326.488  | 1653.787  | AB027013  | 16228.974 | 14104.646 |
| NM_018048 | 15024.768 | 13101.9   | NM_019604  | 1834.96   | 2182.731  | BF185480  | 6709.778  | 6494.131  |
| NM_014395 | 5426.399  | 4271.121  | NM_005073  | 1660.567  | 1761.408  | NM_002128 | 45156.734 | 35231.914 |
| NM_001561 | 767.884   | 805.202   | NM_000951  | 5597.841  | 6873.352  | NM_007105 | 757.227   | 873.131   |
| NM_005160 | 6407.072  | 5560.554  | X52599     | 5208.615  | 6245.364  | NM_003074 | 12764.149 | 9666.899  |
| NM_000596 | 628.348   | 562.931   | AA029300   | 5377.76   | 5512.83   | AL360195  | 19426.063 | 17904.598 |
| X78817    | 12217.974 | 12362.847 | BG708842   | 58623.406 | 58803.68  | U14383    | 3180.367  | 1984.295  |
| AB023135  | 1013.197  | 1186.495  | M19723     | 59902.613 | 63672.641 | NM_017810 | 3027.203  | 3962.747  |
| AY009401  | 536.697   | 490.47    | X06256     | 6998.544  | 8608.585  | NM_003181 | 61653.164 | 58171.488 |
| AF294628  | 773.513   | 919.079   | AA709271   | 2286.181  | 2715.001  | NM_004451 | 9366.074  | 10810.754 |
| AK026960  | 416.542   | 404.529   | M34057     | 7721.301  | 7738.426  | NM_004364 | 2033.353  | 1092.114  |
| NM_001991 | 3570.523  | 3144.462  | ID 1984668 | 3287.53   | 3862.502  | NM_020395 | 6359.897  | 8439.289  |
| NM_017852 | 399.084   | 665.77    | ID 1832579 | 6267.197  | 12027.409 | NM_003425 | 4015.528  | 3450.848  |
| NM_000193 | 1693.377  | 1895.145  | H-430185 N | 2551.825  | 2621.697  | NM_013388 | 13379.069 | 9811.204  |
| BC014586  | 2152.657  | 2981.644  | D16583     | 13055.941 | 9479.311  | AK026232  | 12593.306 | 9774.479  |
| NM_002448 | 1188.84   | 1211.188  | H44051     | 7772.283  | 6489.103  | NM_014892 | 22957.455 | 19458.418 |
| AF053952  | 8874.185  | 12130.555 | AA481547   | 39294.641 | 26492.736 | AK023827  | 13210.009 | 12593.095 |
| NM_003213 | 9346.189  | 11149.97  | AA831880   | 3991.973  | 2247.098  | NM_001117 | 994.061   | 1490.212  |
| BF184738  | 858.409   | 846.031   | T64880     | 13211.553 | 8749.464  | NM_000231 | 617.048   | 764.698   |
| NM_015057 | 964.244   | 748.373   | AB028990   | 3188.975  | 2545.748  | L07517    | 4504.384  | 4277.398  |
| AF303398  | 2756.604  | 2788.723  | AF063611   | 1906.825  | 2638.973  | AK022451  | 27961.371 | 28144.867 |
| NM_014810 | 3156.229  | 3078.765  | NM_006039  | 4555.58   | 5486.671  | NM_014358 | 60008.133 | 58597.262 |
| NM_004738 | 6989.574  | 8575.568  | NM_002089  | 1849.372  | 2534.773  | BM918441  | 12846.685 | 13111.782 |
| NM_007357 | 5723.862  | 5945.072  | NM_004590  | 417.124   | 510.789   | AA425102  | 813.272   | 694.003   |
| NM_003763 | 6444.07   | 6266.739  | M28983     | 627.584   | 815.476   | AA878880  | 658.384   | 575.244   |
| AK023448  | 4414.815  | 3503.687  | NM_014656  | 16992.475 | 25114.561 | AA150828  | 8942.751  | 8645.791  |
| Y18213    | 8944.812  | 7797.553  | NM_002076  | 7751.824  | 11462.366 | H90764    | 3184.101  | 3336.802  |
| NM_003283 | 8118.415  | 6276.061  | X05299     | 5162.192  | 5504.075  | AI859208  | 1421.636  | 1675.869  |
| AF249898  | 12146.97  | 10786.356 | BM468475   | 1572.45   | 1860.177  | H64379    | 37345.848 | 32331.973 |
| M69181    | 7154.195  | 8555.729  | NM_000318  | 6104.478  | 7472.937  | BE208258  | 55872.52  | 58868.441 |
| AK027224  | 584.281   | 485.854   | NM_002060  | 41452.336 | 52462.477 | T72202    | 4063.965  | 5321.015  |
| L09078    | 1187.355  | 1217.599  | AK001230   | 13302.5   | 23781.66  | M69238    | 7705.269  | 8187.994  |
| NM_002652 | 1514.684  | 2255.76   | NM_014680  | 19158.207 | 23232.313 | AA664180  | 2331.364  | 2214.554  |
| NM_000547 | 1442.165  | 2368.482  | NM_005027  | 5167.793  | 6273.956  | M80244    | 771.042   | 742.694   |
| NM_014652 | 2033.323  | 2530.962  | NM_004612  | 3303.426  | 3757.268  | AA599158  | 32848.875 | 25379.879 |
| AL133020  | 8392.657  | 5882.389  | NM_005608  | 37280.73  | 42803.684 | BE294756  | 2224.694  | 1772.63   |
| BC001123  | 1185.888  | 705.588   | NM_012294  | 685.167   | 554.913   | NM_000696 | 10271.837 | 7792.342  |
| NM_004152 | 3005.402  | 1447.693  | NM_001106  | 1450.261  | 1022.858  | L08240    | 4060.483  | 3388.743  |
| NM_001611 | 1219.728  | 1089.788  | NM_015583  | 2340.051  | 1645.099  | NM_017952 | 4355.767  | 4433.224  |
| M59979    | 2175.455  | 1475.172  | NM_018490  | 4596.108  | 2992.62   | NM_002940 | 5895.792  | 6278.752  |
| AB018310  | 1251.329  | 945.154   | NM_004778  | 1966.597  | 1427.766  | NM_016081 | 26480.363 | 25188.643 |
| NM_020133 | 1552.319  | 1059.047  | NM_004352  | 873.212   | 629.571   | NM_006388 | 9904.782  | 8813.875  |
| NM_015378 | 30051.604 | 19676.357 | NM_012258  | 800.739   | 551.961   | M30818    | 3626.499  | 3876.432  |
| NM_004878 | 535.807   | 770.907   | NM_007245  | 9601.359  | 7312.084  | NM_000163 | 1540.519  | 1531.703  |
| AF144638  | 7023.679  | 8001.845  | NM_000229  | 11239.51  | 13030.634 | NM_005755 | 9859.879  | 7590.159  |

|           |           |           |           |           |           |           |           |           |
|-----------|-----------|-----------|-----------|-----------|-----------|-----------|-----------|-----------|
| BF028822  | 940.817   | 1109.149  | NM_006995 | 40136.84  | 47972.141 | NM_003325 | 59084.625 | 56607.922 |
| NM_005502 | 1006.604  | 1030.144  | NM_003129 | 18255.371 | 24797.682 | NM_003295 | 57818.688 | 56271.047 |
| NM_000742 | 2629.482  | 2622.432  | NM_001956 | 10503.562 | 11707.22  | NM_014330 | 57964.445 | 57736.828 |
| NM_002355 | 23750.67  | 29140.666 | AB033064  | 6805.871  | 9616.364  | NM_007034 | 1650.762  | 1772.655  |
| AK026608  | 3604.338  | 3713.631  | AK022317  | 16837.953 | 21077.867 | NM_005261 | 632.969   | 614.673   |
| NM_018890 | 51102.363 | 60316.18  | NM_018396 | 13788.893 | 16119.715 | NM_001560 | 2048.163  | 2657.219  |
| NM_016204 | 1621.719  | 2681.172  | NM_003124 | 25066.578 | 31136.867 | J03171    | 8220.054  | 14967.399 |
| AB046836  | 1383.822  | 932.57    | NM_006886 | 57692.328 | 61593.699 | NM_005856 | 2280.566  | 2415.468  |
| NM_017816 | 13989.428 | 11361.597 | NM_004531 | 7935.151  | 8221.297  | NM_004323 | 58967.324 | 56793.691 |
| AJ224166  | 6640.734  | 7530.245  | AB040920  | 2067.765  | 2450.634  | NM_002310 | 971.821   | 828.128   |
| AK026098  | 7682.663  | 6548.333  | NM_015720 | 30212.219 | 41171.652 | NM_005312 | 5619.262  | 5052.071  |
| NM_012381 | 3288.352  | 2695.653  | AB033070  | 1052.474  | 1510.31   | NM_004210 | 22113.748 | 20303.629 |
| M20702    | 1128.701  | 942.045   | AK000158  | 13871.634 | 17228.51  | NM_020140 | 4013.202  | 4386.53   |
| NM_006397 | 17281.15  | 11550.326 | NM_005769 | 3998.895  | 4629.43   | NM_007214 | 13997.991 | 12400.022 |
| D83776    | 3486.629  | 3463.102  | AK024500  | 36678.184 | 41170.711 | NM_000311 | 21370.855 | 19935.852 |
| NM_004086 | 14363.072 | 18115.449 | NM_002564 | 52014.074 | 51316.129 | NM_017905 | 5700.525  | 5429.174  |
| NM_002180 | 3813.598  | 6124.997  | Z83806    | 343.307   | 311.724   | NM_006335 | 23940.75  | 22417.537 |
| NM_000136 | 7582.021  | 8987.019  | NM_000963 | 1243.056  | 844.382   | NM_000786 | 9518.274  | 7033.142  |
| NM_018163 | 10827.944 | 10375.675 | NM_013308 | 10216.872 | 7476.488  | NM_017731 | 1162.567  | 890.719   |
| AK026362  | 5707.658  | 5524.646  | AF027302  | 8467.411  | 5499.197  | AB040891  | 3379.677  | 4132.252  |
| NM_004966 | 5363.277  | 4700.235  | NM_002852 | 8242.019  | 4727.313  | AB037780  | 1006.909  | 808.754   |
| NM_005906 | 5651.587  | 4870.667  | NM_001817 | 8807.708  | 5641.319  | AK025616  | 1012.698  | 1314.364  |
| NM_004785 | 7763.253  | 7607.615  | NM_016228 | 1690.245  | 1985.07   | NM_007256 | 5000.714  | 4756.808  |
| AK024079  | 4613.107  | 3911.12   | NM_000157 | 5152.713  | 5538.104  | NM_001045 | 39501.344 | 35937.215 |
| NM_002426 | 7184.794  | 8403.75   | NM_000712 | 685.734   | 715.701   | NM_005697 | 44658.293 | 49002.965 |
| NM_014674 | 6172.63   | 7258.766  | NM_018086 | 2567.776  | 2222.578  | NM_003095 | 7732.289  | 11498.897 |
| NM_018271 | 2481.216  | 2504.552  | BC013695  | 13262.194 | 16446.418 | NM_004781 | 4707.674  | 5316.111  |
| CY3Cy5    | 944.986   | 193.017   | NM_007205 | 1578.25   | 1551.195  | NM_018303 | 3641.948  | 3542.172  |
| NM_020967 | 2828.58   | 3217.853  | AK023035  | 6771.556  | 7879.721  | NM_014756 | 14068.161 | 11603.921 |
| NM_001071 | 13793.479 | 15982.985 | NM_014846 | 4617.919  | 5172.04   | AL133047  | 862.451   | 942.159   |
| AK021540  | 500.807   | 665.702   | AB011164  | 8657.614  | 9199.354  | NM_005124 | 4457.319  | 5221.021  |
| D86985    | 398.047   | 359.11    | M24750    | 2071.471  | 2536.405  | AK000947  | 8502.281  | 9153.952  |
| AK022258  | 2157.19   | 2278.462  | NM_005965 | 6177.682  | 8247.172  | NM_003897 | 7422.135  | 7508.66   |
| AF088043  | 339.928   | 346.698   | NM_002740 | 10633.499 | 19117.191 | NM_014165 | 39235.59  | 39003.492 |
| AF131799  | 1120.663  | 830.364   | AL117482  | 5621.156  | 6873.872  | AL442085  | 14255.753 | 11361.146 |
| AK000455  | 1637.192  | 1018.868  | NM_006549 | 57341.176 | 53390.965 | J03250    | 480.478   | 586.872   |
| NM_005230 | 575.029   | 129.686   | AB018324  | 20254.088 | 20579.479 | NM_013313 | 8129.417  | 6750.89   |
| AK023719  | 3579.374  | 1861.517  | NM_002742 | 61109.633 | 56094.785 | NM_014736 | 12320.396 | 11131.586 |
| AF035317  | 413.038   | 187.833   | Z25431    | 4987.398  | 4505.45   | AK023886  | 4127.203  | 3458.958  |
| AK025590  | 3425.938  | 2436.365  | NM_005627 | 25347.951 | 16556.709 | NM_002553 | 6340.787  | 5870.827  |
| AY007149  | 2063      | 1452.848  | M64497    | 1074.741  | 978.008   | AJ404615  | 5248.299  | 4347.305  |
| NM_020967 | 2557.316  | 1506.327  | NM_007274 | 30018.734 | 20906.891 | NM_016053 | 44336.828 | 36413.953 |
| NM_001071 | 12635.083 | 7406.034  | NM_003356 | 26609.373 | 19634.119 | AB007869  | 7710.81   | 5973.666  |
| SR2       | 36864.492 | 23184.232 | AF238315  | 1655.313  | 1477.724  | AB046844  | 3263.277  | 4425.291  |
| SR4       | 9607.979  | 6955.761  | NM_006224 | 61680.266 | 56225.688 | NM_000302 | 5219.44   | 4678.63   |
| SR6       | 1251.277  | 823.969   | AL137300  | 10250.681 | 7095.739  | NM_013235 | 56389.281 | 57077.145 |
| SR8       | 5641.681  | 10123.081 | NM_014646 | 1555.506  | 1665.255  | NM_016015 | 13122.006 | 11767.378 |
| SR10      | 15893.258 | 2999.885  | NM_019604 | 1716.22   | 2411.286  | NM_020120 | 2282.892  | 2226.095  |
| CY3Cy5    | 782.695   | 159.275   | NM_005073 | 1852.629  | 1699.993  | AK022900  | 1695.716  | 1603.193  |
| AL157484  | 403.598   | 445.815   | NM_000951 | 5956.295  | 7467.206  | AB023216  | 1389.306  | 1048.903  |
| AK024850  | 639.574   | 873.211   | X52599    | 5299.38   | 6287.663  | NM_002266 | 57571.352 | 57723.301 |
| Y09836    | 1639.658  | 1839.901  | AA029300  | 5596.661  | 6844.991  | NM_014400 | 13011.973 | 11122.873 |
| AL137597  | 3976.279  | 3734.427  | BG708842  | 57509.863 | 61165.789 | AL157492  | 2718.729  | 2484.358  |

|           |           |           |            |           |           |           |           |           |
|-----------|-----------|-----------|------------|-----------|-----------|-----------|-----------|-----------|
| AF086044  | 786.478   | 720.855   | M19723     | 57762.363 | 63230.867 | AL353957  | 6895.159  | 7579.726  |
| NM_014926 | 802.233   | 652.018   | X06256     | 7048.531  | 8441.267  | AK023827  | 11280.985 | 9539.003  |
| AF131790  | 602.049   | 413.478   | AA709271   | 2629.984  | 3128.54   | NM_001117 | 1057.357  | 1488.612  |
| NM_012075 | 2160.783  | 1405.604  | M34057     | 8192.779  | 9551.786  | NM_000231 | 582.815   | 940.423   |
| AB004851  | 554.166   | 419.136   | ID 1984668 | 3201.651  | 4007.756  | L07517    | 4968.567  | 7228.964  |
| NM_013381 | 345.639   | 279.026   | ID 1832579 | 5199.377  | 4946.026  | AK022451  | 23265.213 | 20075.568 |
| AK023911  | 790.407   | 471.614   | H-430185 N | 2145.677  | 2209.921  | NM_014356 | 61624.508 | 58618.574 |
| NM_001283 | 8987.651  | 5861.944  | D16583     | 9457.64   | 7222.961  | BM918441  | 10129.138 | 9399.11   |
| AL110237  | 624.86    | 661.57    | H44051     | 4398.117  | 4495.175  | AA425102  | 1330.895  | 1067.497  |
| D87470    | 2164.774  | 1600.467  | AA481547   | 41203.98  | 36599.328 | AA878880  | 662.955   | 658.554   |
| AF147307  | 5800.042  | 3870.037  | AA831880   | 4733.013  | 3686.71   | AA150828  | 8608.302  | 8798.311  |
| AK001829  | 977.013   | 610.839   | T64880     | 15119.037 | 10188.523 | H90764    | 4384.977  | 5549.09   |
| NM_016525 | 4405.12   | 3299.063  | AB028990   | 1420.963  | 1202.607  | AI859208  | 1225.136  | 1528.458  |
| AK024931  | 4305.04   | 2725.374  | AK002089   | 1638.279  | 1137.971  | H64379    | 38127.973 | 28442.865 |
| AL109715  | 605.123   | 438.035   | NM_006708  | 40025.148 | 27693.412 | BE208258  | 57446.16  | 57326.207 |
| AK025659  | 2261.54   | 3089.008  | AB037835   | 3191.97   | 2571.155  | T72202    | 3770.752  | 3111.076  |
| AK026788  | 1331.387  | 2344.471  | BM468475   | 2009.713  | 2798.336  | BI831922  | 3731.991  | 3654.731  |
| AK025272  | 3911.907  | 5688.078  | NM_000318  | 5420.111  | 6617.647  | M69238    | 8059.633  | 6873.032  |
| AK026824  | 549.308   | 482.179   | NM_002060  | 44052.09  | 52036.297 | AA664180  | 2384.116  | 1877.564  |
| AL365407  | 1333.887  | 987.81    | AK001230   | 10452.676 | 12497.994 | M80244    | 659.028   | 734.438   |
| AK000840  | 430.597   | 399.874   | NM_014680  | 17577.191 | 19475.199 | AA599158  | 30777.805 | 21682.484 |
| AL162073  | 516.94    | 375.166   | NM_005027  | 5483.672  | 7310.302  | BE294756  | 2687.534  | 2198.723  |
| AJ006835  | 20172.309 | 13190.521 | NM_004612  | 3511.777  | 4301.994  | AK026092  | 19114.643 | 14775.859 |
| AL110138  | 368.335   | 177.291   | NM_005608  | 36908.906 | 44276.191 | AK001175  | 3833.866  | 3042.892  |
| AL050153  | 504.82    | 249.495   | NM_012294  | 501.911   | 445.207   | NM_002940 | 5059.043  | 4216.304  |
| AL122039  | 675.117   | 315.554   | NM_001106  | 1179.88   | 1219.496  | NM_016081 | 37247.035 | 35843.203 |
| AF070577  | 1100.362  | 702.092   | NM_015583  | 1727.226  | 1964.555  | NM_006386 | 10820.854 | 13129.458 |
| AL137445  | 378.426   | 493.532   | NM_018490  | 3269.28   | 4021.998  | M30818    | 3617.625  | 3203.473  |
| U92992    | 503.559   | 786.833   | NM_004778  | 1499.538  | 1794.679  | NM_000163 | 1228.7    | 1173.924  |
| BC028422  | 1018.733  | 1264.351  | NM_006245  | 3737.278  | 4659.602  | NM_005755 | 8342.899  | 7889.723  |
| AK022219  | 368.126   | 584.783   | NM_004352  | 552.32    | 589.739   | NM_003326 | 57907.313 | 58501.598 |
| AF009266  | 1036.084  | 717.007   | NM_012258  | 801.435   | 944.631   | NM_003296 | 55070.402 | 57817.586 |
| AF009310  | 548.964   | 254.946   | NM_005103  | 1252.566  | 1070.132  | U70981    | 1373.983  | 2010.381  |
| AF054991  | 308.453   | 267.327   | NM_004822  | 6197.962  | 5658.937  | NM_014330 | 52765.449 | 60693.867 |
| AF060168  | 2238.679  | 1593.619  | AK022349   | 5065.978  | 3508.64   | NM_007034 | 1643.073  | 1977.997  |
| AF009275  | 739.509   | 411.72    | NM_005750  | 2205.24   | 1022.933  | NM_005261 | 546.718   | 531.622   |
| AF015251  | 765.599   | 522.703   | NM_004973  | 1043.951  | 727.797   | NM_001560 | 2440.807  | 1629.133  |
| AF056426  | 641.646   | 446.239   | NM_007245  | 10950.265 | 7279.057  | NM_001783 | 59284.512 | 60244.16  |
| AK001096  | 373.14    | 314.89    | NM_001890  | 1746.953  | 1231.046  | J03171    | 7938.272  | 5852.305  |
| NM_018326 | 768.615   | 578.341   | NM_001286  | 6486.156  | 4322.583  | NM_005856 | 3627.881  | 2834.889  |
| AK021778  | 259.532   | 235.287   | NM_018229  | 3299.206  | 4122.354  | NM_004323 | 56282.355 | 57576.176 |
| AK001150  | 1673.394  | 1221.687  | NM_006325  | 17584.096 | 20886.215 | NM_002310 | 1047.1    | 849.041   |
| AK002123  | 500.665   | 238.247   | AY009127   | 29120.477 | 32566.781 | NM_005312 | 5542.133  | 4481.976  |
| AK021633  | 1008.384  | 677.106   | NM_014869  | 8733.588  | 10784.261 | NM_004210 | 22697.342 | 18664.311 |
| NM_005322 | 1875.249  | 2394.921  | NM_003929  | 607.505   | 886.786   | NM_020140 | 4018.075  | 4430.923  |
| AK024465  | 12965.153 | 16271.734 | AK000158   | 8744.808  | 12521.239 | AK026232  | 14610.417 | 9637.163  |
| AF075119  | 825.105   | 1124.283  | NM_005769  | 3250.257  | 4089.021  | NM_014892 | 23030.947 | 15451.063 |
| AK021478  | 3447.594  | 3323.493  | AK024500   | 38123.887 | 43175.293 | NM_017906 | 5645.571  | 4508.024  |
| AF131782  | 1031.92   | 1071.588  | NM_002564  | 46456.168 | 50940.945 | NM_006335 | 26029.701 | 26317.072 |
| NM_014210 | 8732.821  | 5615.792  | NM_000963  | 1071.49   | 1111.612  | NM_000786 | 10431.142 | 8906.466  |
| AL110136  | 3323.847  | 2445.322  | NM_013308  | 7731.956  | 9746.915  | NM_002516 | 388.632   | 351.456   |
| AJ008130  | 16139.551 | 13957.078 | AF027302   | 8459.859  | 9472.835  | NM_017731 | 1312.259  | 1107.67   |
| AF086502  | 580.568   | 559.513   | NM_002852  | 6815.138  | 7090.438  | AB040891  | 4079.484  | 5218.426  |



|           |           |           |           |           |           |           |           |           |
|-----------|-----------|-----------|-----------|-----------|-----------|-----------|-----------|-----------|
| L39924    | 2796.32   | 1937.41   | NM_001817 | 7368.081  | 6976.249  | AB037780  | 1289.555  | 1498.15   |
| U52054    | 8294.772  | 5925.442  | AF063611  | 1742.299  | 1528.879  | AK025616  | 792.108   | 1231.633  |
| D17226    | 470.566   | 319.881   | NM_002089 | 2525.113  | 1573.674  | NM_007256 | 4352.428  | 3296.73   |
| AK023325  | 1327.207  | 1254.213  | NM_004590 | 344.296   | 330.116   | NM_001045 | 45947.434 | 35242.754 |
| NM_017985 | 1260.114  | 1006.202  | M28983    | 444.941   | 425.819   | NM_005697 | 46072.91  | 35053.777 |
| AK025866  | 5719.492  | 4594.335  | NM_014656 | 21949.236 | 15960.861 | NM_004781 | 5418.906  | 4430.274  |
| AF088058  | 543.968   | 317.439   | NM_002076 | 9546.939  | 6263.829  | NM_018303 | 3868.229  | 2940.081  |
| NM_000513 | 1423.385  | 1249.489  | X05299    | 4697.457  | 2916.344  | NM_014755 | 21779.492 | 16912.658 |
| Y11165    | 1222.663  | 916.031   | NM_007274 | 21239.48  | 23383.039 | AL133047  | 655.043   | 569.778   |
| NM_003530 | 1065.288  | 1380.707  | NM_003356 | 18752.949 | 21251.166 | NM_005124 | 4173.616  | 3675.284  |
| AJ227871  | 1013.291  | 1298.23   | AF238315  | 1433.78   | 1866.694  | AK000947  | 9002.699  | 8980.517  |
| AK025344  | 2867.695  | 3578.486  | NM_006224 | 58421.168 | 61277.641 | L08240    | 4427.744  | 2974.032  |
| D28589    | 24923.332 | 22126.408 | AL137300  | 10365.345 | 11673.09  | NM_017952 | 3720.581  | 3550.695  |
| AF301223  | 1142.515  | 1725.553  | NM_000229 | 6214.536  | 6992.996  | NM_014165 | 39741.734 | 32450.572 |
| NM_017867 | 5522.621  | 4725.029  | NM_006995 | 41014.594 | 47692.559 | AL442085  | 14212.305 | 12712.921 |
| U92820    | 3836.274  | 3858.771  | NM_003129 | 17661.008 | 21317.008 | J03250    | 584.428   | 651.034   |
| NM_017937 | 1107.13   | 1316.21   | NM_001956 | 10900.068 | 11722.412 | NM_013313 | 7279.597  | 6837.21   |
| AL360266  | 3123.484  | 3062.919  | AB033064  | 7180.358  | 8336.399  | NM_014736 | 12062.71  | 11556.44  |
| AL160132  | 5956.06   | 5896.928  | AK022317  | 17313.363 | 20525.393 | AK023886  | 4502.241  | 3912.36   |
| NM_019557 | 2985.284  | 2469.47   | NM_018396 | 14531.774 | 16861.672 | NM_002553 | 6749.781  | 6617.956  |
| AK024413  | 558.505   | 551.216   | NM_003124 | 24779.57  | 32406.09  | AJ404615  | 5384.418  | 4846.471  |
| AL137752  | 334.905   | 155.124   | NM_006886 | 56997.453 | 58359.813 | NM_016053 | 45110.91  | 43114.539 |
| AK022247  | 571.233   | 421.583   | NM_004531 | 7785.1    | 9403.344  | AB007869  | 7987.442  | 6853.357  |
| AK001453  | 3265.179  | 2586.514  | AL133581  | 3956.761  | 4379.499  | AB046844  | 2408.983  | 2570.219  |
| AB007972  | 945.417   | 1013.367  | NM_002555 | 1422.3    | 1168.876  | NM_000302 | 2873.532  | 2370.222  |
| AL390144  | 6414.218  | 5230.596  | NM_005031 | 10719.463 | 9600.497  | NM_013235 | 55239.867 | 51718.566 |
| AK024017  | 1313.554  | 1214.309  | AB040920  | 1930.002  | 1546.013  | NM_016015 | 10145.363 | 7277.251  |
| X56196    | 1609.488  | 1698.207  | NM_000720 | 969.854   | 841.506   | AK022900  | 4891.931  | 3702.887  |
| D17220    | 8727.164  | 8591.397  | NM_004842 | 1025.273  | 824.628   | AB023216  | 1202.858  | 884.6     |
| D28363    | 48902.188 | 49434.07  | AK024639  | 4491.678  | 2948.253  | NM_002266 | 58886.805 | 57810.703 |
| AB011171  | 453.939   | 462.336   | NM_015720 | 39198.051 | 30632.367 | NM_014400 | 11825.588 | 9448.174  |
| NM_003586 | 528.349   | 680.157   | AB007915  | 1170.723  | 1019.704  | AL157492  | 2973.001  | 2690.76   |
| NM_000922 | 5774.56   | 6482.458  | AB033070  | 1386.687  | 1266.575  | AL353957  | 7501.389  | 5616.674  |
| NM_013232 | 3106.221  | 3957.836  | AB028990  | 1590.109  | 1553.6    | NM_007214 | 14775.441 | 11382.137 |
| NM_017993 | 1938.014  | 2349.164  | AK002089  | 357.635   | 537.492   | NM_000311 | 19789.428 | 14357.764 |
| NM_000362 | 1397.524  | 1450.231  | NM_006708 | 43304.039 | 42960.836 | NM_000231 | 798.131   | 690.266   |
| NM_014429 | 2937.929  | 3214.996  | AB037835  | 3782.125  | 4416.313  | L07517    | 4720.935  | 4236.796  |
| AK000770  | 728.458   | 910.524   | NM_016225 | 1028.62   | 1517.914  | AK022451  | 33357.145 | 30799.053 |
| NM_002370 | 14102.219 | 14240.896 | NM_000157 | 6044.563  | 5505.729  | NM_014355 | 52787.027 | 59662.813 |
| NM_015670 | 5833.352  | 6792.53   | NM_000712 | 477.996   | 629.334   | BM918441  | 13566.661 | 13302.26  |
| NM_014705 | 1611.821  | 1428.1    | NM_018085 | 3574.135  | 2825.217  | AA425102  | 798.975   | 790.941   |
| AK002203  | 520.45    | 379.715   | BC013695  | 13871.346 | 16655.01  | AA878880  | 780.585   | 864.928   |
| AK026469  | 384.355   | 289.284   | NM_007205 | 2785.759  | 4914.205  | AA150828  | 8948.402  | 8927.805  |
| D16935    | 7470.614  | 5662.609  | AK023035  | 6958.934  | 7596.469  | H90764    | 3004.659  | 3244.988  |
| U92019    | 799.235   | 756.711   | NM_014846 | 5500.37   | 8298.479  | AI859208  | 1360.336  | 1603.504  |
| U52835    | 1239.19   | 851.316   | AB011164  | 9625.994  | 10971.935 | H64379    | 38384.145 | 32823.699 |
| NM_000756 | 2794.346  | 2293.713  | M24750    | 2080.412  | 1984.395  | BE208258  | 56153.039 | 57792.773 |
| AK022148  | 450.518   | 413.868   | NM_005965 | 5736.784  | 5422.875  | T72202    | 3794.572  | 3181.386  |
| Z36811    | 49909.656 | 55312.137 | NM_002740 | 7145.974  | 5961.692  | BI831922  | 3414.515  | 3515.066  |
| NM_018950 | 18835.699 | 12919.678 | AL117482  | 5069.356  | 3907.844  | AA599158  | 35908.063 | 31859.283 |
| K03200    | 9128.053  | 7622.483  | NM_006549 | 55873.363 | 52318.105 | BE294756  | 2443.508  | 2487.529  |
| U17629    | 6812.815  | 5638.024  | AB018324  | 18701.695 | 12494.342 | AK026092  | 18000.98  | 15934.099 |
| NM_020425 | 7557.31   | 6693.985  | NM_002742 | 62622.969 | 58308.617 | AK001175  | 4109.572  | 3932.049  |

|           |           |           |           |           |           |           |           |           |
|-----------|-----------|-----------|-----------|-----------|-----------|-----------|-----------|-----------|
| U79265    | 3588.725  | 2992.345  | Z25431    | 4843.041  | 3309.434  | NM_003897 | 6755.793  | 5899.139  |
| AK022868  | 7882.867  | 7826.697  | NM_005627 | 24192.211 | 13756.852 | NM_003295 | 47466.551 | 53643.77  |
| NM_002687 | 8084.993  | 10458.814 | M64497    | 886.305   | 716.926   | NM_014330 | 49326.398 | 53138.973 |
| NM_000627 | 4552.533  | 5103.818  | CY3Cy5    | 555.146   | 189.287   | NM_007034 | 1890.213  | 1868.407  |
| NM_000035 | 1379.135  | 1158.555  | NM_002711 | 2190.248  | 1841.377  | NM_005261 | 700.393   | 958.853   |
| NM_000825 | 535.238   | 554.21    | AF143873  | 461.839   | 357.088   | NM_001783 | 51966.863 | 54948.027 |
| NM_001963 | 694.721   | 750.455   | AL355732  | 1307.931  | 953.323   | J03171    | 7893.554  | 8477.253  |
| NM_004334 | 217.796   | 248.857   | NM_017966 | 2944.936  | 2383.503  | NM_005855 | 3235.598  | 4010.3    |
| S62027    | 273.343   | 362.085   | AF143327  | 1117.543  | 995.965   | NM_004323 | 53984.637 | 56886.66  |
| NM_003886 | 3804.916  | 3791.046  | AL137535  | 335.451   | 346.348   | NM_002310 | 1122.214  | 986.984   |
| NM_005843 | 4524.415  | 4156.569  | AL049991  | 320.644   | 351.247   | NM_005312 | 5303.195  | 4624.995  |
| NM_003854 | 419.167   | 317.593   | AL049990  | 1101.41   | 1289.359  | NM_001711 | 3889.252  | 3425.788  |
| NM_017980 | 649.129   | 596.569   | AF131843  | 1040.683  | 823.862   | NM_004210 | 19789.061 | 18432.609 |
| NM_001252 | 44545.191 | 35508.707 | AK026653  | 812.952   | 821.059   | NM_002500 | 13715.823 | 12079.291 |
| AF053712  | 870.761   | 899.121   | NM_020231 | 1284.881  | 926.497   | AK026232  | 13667.462 | 13336.181 |
| NM_003947 | 580.178   | 499.003   | AF075008  | 2400.224  | 1773.709  | NM_014892 | 21670.174 | 20084.426 |
| NM_002821 | 22428.646 | 16623.961 | NM_006504 | 1821.221  | 1546.839  | AK023827  | 12854.696 | 14534.889 |
| M96652    | 2806.684  | 2750.647  | AL137430  | 383.443   | 337.471   | NM_001117 | 882.249   | 1317.737  |
| L41690    | 3478.143  | 3071.119  | NM_002711 | 2039.192  | 1854.62   | AF283645  | 14983.071 | 13559.338 |
| NM_018055 | 2471.161  | 1727.724  | SR1       | 68474.125 | 62425.168 | NM_016575 | 9385.023  | 9430.473  |
| NM_000935 | 46445.758 | 53813.426 | SR3       | 20280.891 | 19317.641 | NM_018557 | 996.949   | 1133.26   |
| NM_006514 | 1237.457  | 1125.808  | SR5       | 2074.627  | 2740.292  | NM_003095 | 7808.256  | 10526.966 |
| AF065164  | 1180.967  | 1014.66   | SR7       | 2238.309  | 20511.229 | NM_004781 | 4201.262  | 4563.766  |
| K01900    | 238.763   | 313.701   | SR9       | 7635.84   | 1494.078  | NM_016315 | 309.691   | 612.243   |
| AJ008143  | 6714.174  | 7473.476  | CY3Cy5    | 725.536   | 203.928   | NM_018303 | 3566.739  | 6777.055  |
| NM_007144 | 1449.586  | 1431.706  | L38282    | 2388.683  | 1493.782  | NM_014755 | 24105.105 | 26050.613 |
| NM_005093 | 779.927   | 930.251   | NM_018055 | 1701.621  | 1395.111  | AL133047  | 603.415   | 642.719   |
| NM_004424 | 4836.194  | 5507.59   | NM_019005 | 2368.031  | 1492.632  | NM_005124 | 4243.91   | 4850.837  |
| AL133117  | 3682.504  | 3521.921  | M20838    | 893.113   | 1039.353  | AK000947  | 8803.341  | 9942.817  |
| AF070586  | 1895.216  | 2381.173  | AK022738  | 557.792   | 389.327   | NM_016081 | 13588.472 | 22254.178 |
| NM_014412 | 3273.063  | 3387.864  | AK023505  | 2635.944  | 2218.016  | M30818    | 4907.258  | 7874.142  |
| NM_013303 | 662.097   | 593.757   | AB037851  | 8715.965  | 8184.674  | NM_000163 | 2042.348  | 4162.119  |
| NM_012227 | 9092.005  | 7796.196  | AL050389  | 5070.314  | 4710.485  | NM_014400 | 14017.104 | 11948.968 |
| NM_006101 | 3141.23   | 2339.195  | AK024684  | 1336.052  | 937.258   | AL157492  | 3630.091  | 3835.785  |
| NM_001237 | 9509.44   | 7839.354  | NM_014945 | 11550.963 | 9052.142  | AL353957  | 7119.012  | 6138.97   |
| NM_002507 | 1501.418  | 1229.05   | AK001546  | 1292.981  | 1163.714  | NM_007214 | 14931.046 | 16337.22  |
| NM_015962 | 2829.692  | 2558.86   | NM_006537 | 6001.03   | 5496.799  | NM_000311 | 20730.373 | 30033.711 |
| NM_016145 | 1474.546  | 1038.717  | AF007155  | 16449.035 | 17816.043 | NM_017905 | 6850.801  | 9121.549  |
| NM_016075 | 4623.846  | 3995.379  | AK023055  | 692.216   | 546.476   | NM_000785 | 7572.755  | 7125.563  |
| NM_003795 | 1796.377  | 1292.889  | AL049282  | 5176.093  | 4144.804  | AL133561  | 1254.44   | 249.484   |
| NM_004401 | 11375.353 | 7851.543  | AK021443  | 2933.776  | 3019.598  | NM_017731 | 1437.414  | 1550.512  |
| NM_001845 | 656.167   | 544.125   | AF070569  | 737.051   | 759.613   | AB040891  | 4106.103  | 4396.934  |
| AF255910  | 543.983   | 495.046   | NM_020233 | 2390.304  | 1742.869  | AB037780  | 945.74    | 698.757   |
| NM_016145 | 5541.377  | 4621.098  | AK024315  | 8762.807  | 7162.262  | NM_005845 | 42520.699 | 34551.098 |
| AB046776  | 641.504   | 824.474   | AK024945  | 3997.843  | 2604.484  | NM_000080 | 4161.499  | 4574.716  |
| D42084    | 7619.249  | 9344.86   | AK024579  | 2542.926  | 2049.842  | NM_001825 | 2829.848  | 5175.617  |
| NM_001734 | 1038.62   | 1460.867  | AL133118  | 4035.095  | 4482.138  | NM_007255 | 5651.061  | 7688.478  |
| NM_014693 | 5569.892  | 7719.63   | AK023571  | 4801.746  | 5200.168  | AK026092  | 18479.969 | 14816.444 |
| AB007896  | 2865.342  | 4290.604  | NM_001702 | 2558.881  | 2302.097  | AK001175  | 3933.232  | 3338.162  |
| AB007916  | 5029.371  | 6793.102  | AK026657  | 1265.279  | 1344.577  | NM_014165 | 36834.117 | 36868.074 |
| NM_002874 | 2473.066  | 1591.134  | AL833558  | 308.075   | 300.572   | AL442085  | 11826.289 | 8533.392  |
| AB028980  | 922.736   | 791.014   | AF087991  | 17084.529 | 14851.747 | NM_013313 | 4188.156  | 4833.619  |
| AF049140  | 4965.179  | 4265.336  | Y12839    | 1150.53   | 1269.789  | NM_014735 | 8536.042  | 7907.014  |

|           |           |           |           |           |           |           |           |           |
|-----------|-----------|-----------|-----------|-----------|-----------|-----------|-----------|-----------|
| AB037793  | 965.58    | 668.377   | X64979    | 1065.025  | 1194.646  | AK023886  | 3641.472  | 3012.854  |
| AL136794  | 2577.322  | 2126.424  | AJ001876  | 1083.431  | 1035.125  | NM_002553 | 5675.107  | 4967.122  |
| BC035601  | 30087.67  | 21707.088 | AJ227884  | 2249.578  | 2395.828  | AJ404615  | 5359.598  | 3753.885  |
| NM_001458 | 1201.965  | 1066.491  | X64986    | 9003.146  | 9036.469  | NM_016053 | 45325.727 | 35295.383 |
| NM_020388 | 5098.748  | 4567.767  | Y10510    | 629.401   | 405.695   | AB007869  | 8589.638  | 6547.838  |
| NM_004202 | 20083.957 | 17766.967 | AK000842  | 10198.081 | 8601.367  | AK022900  | 2073.908  | 1639.9    |
| AB046829  | 1682.142  | 1804.599  | AK023386  | 12851.387 | 11362.869 | NM_001125 | 2865.513  | 2445.921  |
| NM_016445 | 939.682   | 777.605   | NM_007053 | 19756.316 | 13701.429 | AB023216  | 1424.736  | 1447.849  |
| NM_003379 | 20353.645 | 15566.407 | AK022153  | 3124.704  | 2202.638  | NM_002266 | 57841.316 | 59696.641 |
| NM_004521 | 17223.428 | 13820.265 | AK022789  | 1417.519  | 1035.565  | CY3Cy5    | 2446.266  | 226.876   |
| AF229162  | 2876.116  | 2449.565  | AK023756  | 528.097   | 440.324   | NM_033195 | 4150.532  | 7331.641  |
| U02309    | 41284.5   | 30260.293 | AK024252  | 359.398   | 224.795   | NM_015001 | 2645.15   | 4783.915  |
| AB028991  | 5541.432  | 4108.65   | AK002095  | 1002.201  | 922.55    | AF086261  | 1555.992  | 3657.369  |
| AF263547  | 15884.617 | 14480.466 | AK000821  | 8146.496  | 9072.665  | AF086367  | 920.747   | 940.436   |
| NM_003923 | 764.77    | 865.696   | AK024526  | 13835.679 | 14147.833 | AF086437  | 3426.058  | 3023.246  |
| NM_004831 | 3597.14   | 5290.547  | AK000848  | 1094.311  | 1376.694  | AK025088  | 4156.417  | 3381.866  |
| NM_014213 | 12706.789 | 14874.68  | AK023307  | 709.061   | 553.053   | U79295    | 794.089   | 772.554   |
| NM_000168 | 3343.737  | 4363.424  | NM_017618 | 2297.983  | 2233.423  | AK002107  | 453.375   | 375.299   |
| AF294629  | 5002.142  | 6460.125  | NM_017848 | 718.894   | 683.411   | NM_003596 | 4158.82   | 3745.994  |
| NM_000545 | 3450.984  | 4680.378  | NM_019056 | 5086.813  | 4285.896  | AF052181  | 2036.41   | 2404.055  |
| NM_002136 | 46583.477 | 68294.938 | AF279783  | 4058.391  | 3965.825  | AL050074  | 5398.167  | 6677.068  |
| AK025571  | 1059.576  | 1217.103  | AF182422  | 10534.52  | 9079.67   | AK026436  | 822.866   | 1271.538  |
| NM_004940 | 551.608   | 610.435   | NM_016943 | 1189.168  | 136.464   | NM_018061 | 1802.916  | 3867.342  |
| NM_014463 | 29558.16  | 23280.395 | AF070602  | 1119.815  | 728.076   | NM_033195 | 1756.417  | 1402.806  |
| NM_005520 | 18508.346 | 18966.01  | BE393290  | 1525.804  | 1316.365  | NM_015001 | 2143.533  | 1787.449  |
| AK023265  | 1110.094  | 1040.875  | NM_017622 | 1064.997  | 956.966   | SR2       | 38066.934 | 36171.465 |
| NM_018723 | 914.934   | 793.183   | AF133331  | 4425.306  | 3774.612  | SR4       | 10847.385 | 13041.062 |
| AB029009  | 8001.467  | 5527.348  | AK022289  | 3469.662  | 2909.987  | SR8       | 5488.455  | 24804.602 |
| AF112207  | 4855.768  | 3292.786  | L34408    | 513.373   | 380.267   | SR10      | 15804.269 | 7096.12   |
| AJ420488  | 50934.008 | 74083.547 | AF161403  | 23570.135 | 24045.988 | CY3Cy5    | 1785.31   | 167.048   |
| NM_005594 | 13591.545 | 10104.521 | S75708    | 9410.948  | 8303.474  | AF088014  | 869.608   | 1489.083  |
| NM_004461 | 47943.91  | 62797.734 | U79291    | 5691.59   | 5093.026  | AL109719  | 2612.977  | 3136.355  |
| NM_018473 | 6334.507  | 4238.751  | D17172    | 17168.301 | 13850.923 | U92022    | 1362.212  | 3034.048  |
| BF106121  | 2423.993  | 2743.637  | AJ227859  | 1776.609  | 1745.82   | NM_003650 | 1832.348  | 3459.479  |
| AK022590  | 4099.075  | 2869.711  | NM_018544 | 1338.253  | 1501.417  | AK022119  | 15254.293 | 18380.707 |
| AK024343  | 2704.131  | 1952.899  | AK022670  | 183.299   | 135.005   | AL157488  | 542.228   | 507.295   |
| NM_002569 | 1277.088  | 1311.318  | L10141    | 13778.685 | 12176.993 | NM_016644 | 2621.027  | 2276.193  |
| M12078    | 2643.72   | 3099.794  | AB020699  | 3974.349  | 4465.954  | AF085842  | 703.738   | 610.009   |
| NM_004550 | 13914.843 | 18450.686 | AF086269  | 2885.266  | 2583.52   | AF147397  | 667.214   | 771.992   |
| NM_000785 | 3735.986  | 5621.514  | U90437    | 3615.579  | 3520.588  | AK027158  | 660.181   | 524.18    |
| NM_004110 | 10035.1   | 12345.79  | D17169    | 30412.381 | 22865.395 | AK002187  | 968.031   | 932.298   |
| NM_013387 | 45534.27  | 64888.035 | NM_017924 | 2907.444  | 2765.729  | AF085836  | 7128.749  | 5921.945  |
| NM_005262 | 8838.207  | 10717.21  | S81578    | 1118.411  | 1049.657  | AL049449  | 2574.622  | 2614.545  |
| NM_005757 | 2449.559  | 2598.98   | NM_017546 | 5114.902  | 4257.016  | AF147347  | 438.723   | 458.558   |
| NM_016483 | 642.091   | 757.907   | AF086210  | 466.953   | 354.221   | AL359654  | 1883.074  | 2403.281  |
| NM_020128 | 2485.527  | 2375.581  | AL137400  | 494.731   | 314.758   | AK024224  | 1877.982  | 1812.97   |
| NM_005068 | 3043.752  | 3418.11   | NM_006511 | 1402.8    | 1055.716  | NM_015362 | 11420.925 | 9981.069  |
| NM_018223 | 8824.137  | 8780.951  | AF007142  | 1150.718  | 1019.179  | AF147344  | 622.479   | 869.011   |
| NM_006693 | 35593.465 | 27538.98  | AF119853  | 3474.902  | 2473.129  | AF147371  | 599.573   | 538.453   |
| NM_001722 | 2779.974  | 1908.232  | AF279782  | 289.2     | 184.802   | NM_018982 | 2543.118  | 2596.119  |
| AB046802  | 1183.16   | 854.48    | NM_001126 | 4039.879  | 3085.688  | AF086254  | 5313.193  | 5239.891  |
| NM_003297 | 2077.388  | 2011.588  | AK023673  | 1748.251  | 1731.84   | AK026856  | 1018.943  | 1654.749  |
| X74861    | 291       | 573.875   | NM_018252 | 1433.853  | 1217.719  | AK026893  | 1956.056  | 2836.639  |

|            |           |           |           |           |           |           |           |           |
|------------|-----------|-----------|-----------|-----------|-----------|-----------|-----------|-----------|
| NM_00694C  | 1585.868  | 1255.623  | NM_01800C | 52966.121 | 46766.781 | AK026761  | 876.132   | 688.063   |
| NM_01826E  | 10617.089 | 8714.594  | AF164963  | 855.364   | 909.519   | NM_01883E | 10192.838 | 9695.505  |
| AK024633   | 6547.582  | 5133.862  | AF124366  | 29322.635 | 31271.543 | AF075083  | 881.187   | 852.459   |
| NM_00145E  | 7545.649  | 6306.466  | AF130112  | 1647.336  | 2080.914  | AK021454  | 1615.049  | 1293.199  |
| NM_005257  | 13255.846 | 10439.262 | NM_000551 | 5380.806  | 5840.763  | AK022069  | 3055.362  | 2514.066  |
| AF011573   | 7808.271  | 6249.047  | AL365518  | 787.361   | 998.885   | AL137457  | 2476.027  | 1909.983  |
| NM_00214E  | 5952.042  | 3795.305  | AF086257  | 4335.238  | 4767.21   | AF075092  | 784.054   | 689.906   |
| NM_00724E  | 10462.312 | 13217.949 | AF075056  | 460.983   | 404.591   | AF085944  | 1136.373  | 953.419   |
| NM_00189C  | 2411.001  | 3349.649  | AC119751  | 598.257   | 529.88    | AL133038  | 1944.556  | 2117.226  |
| NM_00128E  | 6950.438  | 10057.518 | U00928    | 2026.86   | 1742.476  | AL137414  | 1845.028  | 2248.823  |
| NM_01464E  | 1731.528  | 2351.443  | AK002114  | 2374.519  | 2396.152  | AL359574  | 2676.572  | 1843.607  |
| NM_019604  | 400.652   | 653.785   | AL390184  | 1109.643  | 1060.312  | AL133569  | 6374.675  | 4098.609  |
| NM_00507E  | 1599.036  | 1917.567  | NM_01869E | 2690.464  | 2225.765  | AL137435  | 769.129   | 900.451   |
| NM_000951  | 2326.667  | 3224.428  | AK026318  | 1141.998  | 978.246   | AL157463  | 511.883   | 491.949   |
| X52599     | 415.123   | 397.601   | AF291673  | 1390.897  | 1041.968  | AL359604  | 1389.282  | 2475.969  |
| AA029300   | 5218.911  | 5985.439  | NM_00436E | 11055.032 | 8846.67   | AK027189  | 1725.541  | 1300.309  |
| BG708842   | 34305.039 | 36576.836 | NM_01635E | 4361.037  | 3640.362  | AK023892  | 965.487   | 3073.612  |
| M19723     | 46318.234 | 63057.211 | AJ296290  | 3327.87   | 2427.266  | AF265210  | 4014.767  | 6429.243  |
| AA709271   | 329.415   | 428.911   | NM_02018E | 3526.988  | 3627.075  | AK024241  | 1836.782  | 2512.97   |
| M34057     | 3847.155  | 3899.85   | NM_01802E | 700.195   | 743.407   | AK025061  | 2875.885  | 3356.886  |
| ID 1984668 | 4132.353  | 3741.231  | AL389954  | 747.557   | 821.172   | AK023882  | 740.65    | 693.364   |
| ID 1832579 | 4756.958  | 3929.812  | NM_01985E | 3159.771  | 2686.19   | AK026750  | 2259.448  | 2380.56   |
| H-430185 N | 2106.631  | 1689.301  | NM_006118 | 6541.841  | 5295.709  | AF072164  | 3520.748  | 3618.108  |
| D16583     | 3824.891  | 2981.375  | AK026225  | 16845.789 | 14271.597 | NM_01861C | 462.719   | 361.411   |
| H44051     | 598.31    | 531.748   | AL050032  | 6752.629  | 7576.38   | AK025234  | 1186.826  | 1069.421  |
| AA481547   | 32138.408 | 22647.533 | AF009304  | 895.989   | 890.432   | AF083122  | 527.054   | 421.82    |
| AA831880   | 2421.352  | 1882.709  | AF086177  | 10198.972 | 11266.58  | AF147317  | 847.313   | 856.178   |
| T64880     | 8175.336  | 6368.606  | NM_01894E | 3364.015  | 3327.93   | AF232216  | 1164.948  | 1016.055  |
| NM_00285E  | 3722.388  | 4222.852  | AK021593  | 309.162   | 467.94    | NM_01777E | 11010.136 | 9055.188  |
| NM_001817  | 4955.455  | 6625.526  | D17187    | 1996.931  | 1577.611  | AK021885  | 746.836   | 1139.865  |
| AF063611   | 2648.028  | 3243.308  | AJ243672  | 2707.53   | 3369.963  | AK022161  | 488.525   | 552.098   |
| NM_00603E  | 1109.046  | 1573.249  | AL122087  | 779.937   | 829.143   | AK022296  | 1066.327  | 903.802   |
| NM_00208E  | 832.461   | 1279.037  | NM_014767 | 471.126   | 349.276   | AK021940  | 1681.075  | 1568.024  |
| NM_00459C  | 556.153   | 880.733   | Y17867    | 3912.726  | 3548.484  | AK022189  | 1190.99   | 4546.068  |
| M28983     | 512.559   | 723.399   | M92642    | 1238.086  | 1310.38   | AK022338  | 1108.521  | 1508.789  |
| NM_01465E  | 5071.311  | 5219.523  | NM_018071 | 3437.166  | 3375.096  | AF230316  | 8069.476  | 20372.504 |
| NM_00207E  | 3235.51   | 4173.781  | NM_00433E | 3317.935  | 2802.267  | AK024515  | 15134.115 | 16272.571 |
| X05299     | 5946.258  | 6442.594  | M31520    | 59897.738 | 64446.57  | AF085862  | 5746.397  | 5924.95   |
| BM468475   | 1479.267  | 1806.556  | NM_00202C | 21265.967 | 18434.518 | NM_01799E | 2416.792  | 2341.11   |
| NM_00031E  | 5306.978  | 4809.642  | AL050137  | 2337.039  | 1869.294  | AL049271  | 62590.898 | 55106.684 |
| NM_00206C  | 7057.211  | 7310.514  | AK024423  | 4150.025  | 3515.922  | AK023079  | 45594.688 | 34913.324 |
| AK001230   | 4573.947  | 4342.223  | NM_00504E | 37002.852 | 29803.918 | NM_01960E | 3933.964  | 3862.683  |
| NM_01468C  | 8818.166  | 7205.667  | NM_00597E | 10454.609 | 8142.304  | AK026198  | 4878.649  | 3930.32   |
| NM_005027  | 5154.236  | 4885.543  | NM_00628E | 6275.078  | 5530.137  | NM_005001 | 20844.684 | 19746.74  |
| NM_00461E  | 3030.367  | 3070.909  | NM_020321 | 674.294   | 609.482   | AK024175  | 2559.441  | 1782.356  |
| NM_00560E  | 36095.941 | 25876.369 | NM_01592C | 21515.76  | 19833.26  | NM_00051C | 2755.186  | 2109.213  |
| NM_012294  | 304.851   | 233.437   | AB011113  | 2999.433  | 2695.873  | NM_017787 | 2331.33   | 2185.773  |
| NM_001106  | 568.763   | 418.776   | NM_004115 | 1456.775  | 1483.819  | NM_02031E | 14067.164 | 11855.494 |
| NM_01849C  | 771.378   | 745.256   | NM_018287 | 1068.745  | 1253.464  | NM_00568E | 8183.27   | 16328.469 |
| NM_00435E  | 232.166   | 223.839   | NM_00195E | 4539.515  | 4398.981  | NM_020427 | 57465.32  | 74356.297 |
| NM_01225E  | 825.842   | 845.752   | AF016004  | 3242.623  | 8044.582  | AF085920  | 2270.48   | 3513.208  |
| NM_006224  | 40312.844 | 35959.273 | NM_003567 | 5996.079  | 6382.791  | AK023173  | 27299.586 | 30431.775 |
| AL137300   | 8834.67   | 10518.976 | NM_00731E | 950.76    | 545.452   | AK025225  | 1252.304  | 1210.704  |

|           |           |           |           |           |           |           |           |           |
|-----------|-----------|-----------|-----------|-----------|-----------|-----------|-----------|-----------|
| NM_000229 | 2737.771  | 3938.024  | L20686    | 4495.415  | 5440.013  | U79275    | 17002.391 | 17677.063 |
| NM_006995 | 43889.297 | 46978.285 | NM_000304 | 704.743   | 773.856   | AJ227908  | 1303.189  | 1471.503  |
| NM_003129 | 18173.227 | 26298.441 | AK023362  | 1086.279  | 1246.042  | AF007193  | 1442.377  | 1221.795  |
| NM_001956 | 1839.498  | 2508.859  | NM_002460 | 840.607   | 736.513   | AK022367  | 1558.029  | 1501.587  |
| AB033064  | 1721.179  | 3218.998  | NM_002675 | 3950.318  | 3523.69   | BC028589  | 2633.003  | 2833.518  |
| AK022317  | 4391.404  | 6306.366  | NM_012432 | 47946.621 | 41132.77  | AF088067  | 13325.83  | 13147.069 |
| NM_018396 | 13025.431 | 17943.445 | NM_005007 | 8466.563  | 7352.971  | AK022213  | 775.086   | 839.295   |
| NM_003124 | 935.454   | 1663.422  | AK024996  | 3690.262  | 2745.833  | AF056441  | 3999.209  | 3226.231  |
| NM_006886 | 46834.918 | 67783.805 | NM_001258 | 514.274   | 349.661   | Y10509    | 788.915   | 802.296   |
| NM_004531 | 7068.452  | 7024.565  | NM_004417 | 478.079   | 499.81    | AK024389  | 13879.137 | 33874.75  |
| AB040920  | 1738.791  | 1941.157  | NM_012290 | 6530.752  | 5822.064  | AK026793  | 2228.463  | 3673.001  |
| NM_015720 | 2137.397  | 2470.79   | NM_002431 | 2899.989  | 2097.027  | NM_001672 | 794.702   | 682.374   |
| AB033070  | 866.019   | 1075.943  | NM_001827 | 27820.742 | 23948.133 | AJ276253  | 21020.262 | 16622.777 |
| AK000158  | 1937.823  | 2605.121  | NM_020466 | 6041.023  | 5216.258  | AF147314  | 1461.535  | 1212.672  |
| NM_005769 | 1739.222  | 1708.023  | AL079280  | 706.696   | 665.034   | NM_018980 | 7659.529  | 6996.733  |
| AK024500  | 12684.252 | 11452.889 | NM_002853 | 3733.511  | 3613.616  | AF086201  | 1586.785  | 1422.861  |
| NM_002564 | 3722.956  | 3942.832  | NM_003174 | 1493.583  | 1573.641  | AK024712  | 1307.64   | 2533.595  |
| Z83806    | 596.852   | 438.637   | NM_012307 | 13045.271 | 10724.132 | NM_002902 | 10184.835 | 17323.627 |
| NM_000963 | 746.368   | 866.444   | NM_002540 | 1887.546  | 1342.374  | NM_020248 | 51727.234 | 57784.801 |
| NM_013308 | 954.226   | 1075.374  | NM_006371 | 2812.319  | 3094.474  | X89670    | 2467.995  | 3995.012  |
| AF027302  | 10795.442 | 10032.382 | NM_018834 | 1522.479  | 1773.544  | NM_001726 | 649.142   | 1561.14   |
| NM_006708 | 38128.422 | 29239.26  | AK026882  | 3686.874  | 4619.111  | NM_004053 | 7043.507  | 8133.579  |
| AB037835  | 3011.618  | 3304.524  | NM_004574 | 1835.581  | 2489.902  | NM_001489 | 1518.637  | 1579.64   |
| NM_016228 | 842.78    | 1280.639  | NM_004848 | 6351.786  | 6973.997  | M20259    | 492.525   | 530.703   |
| NM_000157 | 4147.552  | 5726.589  | NM_001944 | 600.355   | 655.028   | NM_020374 | 3232.536  | 3106.058  |
| NM_000712 | 514.113   | 668.602   | NM_014813 | 656.56    | 653.48    | NM_014922 | 2490.611  | 1864.008  |
| NM_018088 | 937.943   | 943.793   | AF014459  | 4580.957  | 5006.206  | AF183570  | 842.592   | 540.268   |
| AF130052  | 223.586   | 212.585   | M64108    | 1220.938  | 1059.516  | NM_005497 | 54444.715 | 59316.57  |
| BC013695  | 14207.098 | 16666.102 | NM_001503 | 3577.506  | 3054.8    | AL117603  | 1703.504  | 1262.059  |
| NM_007205 | 832.815   | 650.679   | NM_006302 | 3231.693  | 3124.714  | AK024048  | 3605.978  | 3515.024  |
| AK023035  | 7215.46   | 7725.799  | AJ224875  | 3438.278  | 2968.707  | AB033093  | 3744.035  | 3244.996  |
| NM_014846 | 5465.93   | 5778.05   | NM_002149 | 2034.247  | 1867.266  | NM_005912 | 864.842   | 874.286   |
| AB011164  | 6188.755  | 5985.761  | AF043324  | 5625.267  | 4194.081  | NM_005909 | 49694.039 | 38651.086 |
| M24750    | 3193.17   | 3124.312  | AK024172  | 1794.378  | 1677.282  | AK001948  | 814.655   | 1594.623  |
| NM_005965 | 3361.493  | 3283.847  | NM_014814 | 4795.367  | 4258.408  | AK021879  | 518.023   | 833.932   |
| NM_002740 | 8160.446  | 7892.092  | NM_002797 | 19861.521 | 17204.367 | AL355717  | 655.746   | 511.168   |
| AL117482  | 4747.637  | 4841.715  | AK024318  | 1454.421  | 1436.735  | AK055991  | 1360.007  | 1076.405  |
| NM_006549 | 28394.553 | 22799.873 | NM_016129 | 3654.226  | 3951.409  | AF113697  | 1279.101  | 1494.343  |
| AB018324  | 18826.148 | 17443.109 | NM_002809 | 7202.406  | 5768.168  | AK022326  | 2598.483  | 1774.127  |
| NM_002742 | 12609.107 | 13535.366 | NM_017912 | 17384.58  | 15463.05  | AF085991  | 2463.167  | 1740.051  |
| Z25431    | 4445.792  | 4302.584  | NM_000423 | 9296.892  | 6835.351  | NM_001943 | 1628.057  | 2023.379  |
| NM_005627 | 26769.896 | 19253.414 | AB046838  | 4988.604  | 3880.366  | NM_004927 | 16246.222 | 25722.734 |
| M64497    | 1930.997  | 2036.601  | AK026339  | 539.85    | 563.045   | AB040928  | 1562.03   | 2183.91   |
| NM_007274 | 9817.644  | 9263.082  | X98411    | 2244.763  | 2377.052  | NM_001459 | 3827.21   | 4458.873  |
| NM_003356 | 1737.67   | 1743.058  | AF116658  | 18456.063 | 23016.844 | NM_015513 | 51820.41  | 44834.125 |
| AF238315  | 742.081   | 881.135   | NM_014865 | 15763.57  | 20882.902 | NM_006219 | 8081.299  | 8032.37   |
| NM_001890 | 2041.917  | 2440.763  | AB032977  | 16732.645 | 20834.176 | NM_004443 | 16031.425 | 15131.826 |
| NM_001286 | 7057.666  | 8376.297  | AK001725  | 996.195   | 1619.578  | NM_001932 | 618.005   | 453.921   |
| NM_014648 | 1595.063  | 1972.247  | NM_003036 | 1761.941  | 2563.949  | NM_017412 | 3372.044  | 3225.91   |
| NM_019604 | 346.271   | 471.265   | NM_020529 | 10946.414 | 13120.761 | NM_005544 | 822.708   | 628.261   |
| NM_005073 | 1605.325  | 1994.594  | S72604    | 32117.504 | 30526.295 | NM_002964 | 59324.633 | 61532.086 |
| NM_000951 | 2597.378  | 3339.535  | NM_017984 | 619.212   | 561.808   | NM_003215 | 3665.97   | 3086.353  |
| X52599    | 322.651   | 415.462   | AF038951  | 10571.176 | 7587.93   | NM_016447 | 2606.583  | 2228.589  |

|            |           |           |           |           |           |           |           |           |
|------------|-----------|-----------|-----------|-----------|-----------|-----------|-----------|-----------|
| AA029300   | 5216.174  | 6061.75   | NM_006492 | 1698.355  | 1567.17   | NM_015626 | 8884.474  | 8855.913  |
| BG708842   | 30777.904 | 29197.564 | AK021811  | 1201.678  | 1149.725  | NM_004896 | 9120.919  | 8196.854  |
| M19723     | 52737.801 | 67467.508 | NM_003428 | 2909.601  | 2334.34   | AB006628  | 27441.234 | 22154.383 |
| AA709271   | 465.497   | 379.91    | AF055030  | 2128.421  | 1795.339  | AF272036  | 2385.594  | 4739.268  |
| M34057     | 4036.578  | 3509.057  | AK000589  | 2989.269  | 2089.81   | AF231023  | 3348.113  | 4239.423  |
| ID 1984668 | 4595.06   | 3856.726  | X53281    | 18565.441 | 17118.477 | NM_005146 | 9349.241  | 8511.045  |
| ID 1832579 | 4849.479  | 4152.267  | BC012782  | 2745.776  | 2254.336  | NM_004746 | 2865.975  | 2576.445  |
| H-430185 N | 2108.174  | 1475.877  | AF132026  | 50622.711 | 52610.508 | AF146019  | 5220.536  | 4460.461  |
| D16583     | 3747.107  | 2977.293  | AL050353  | 1550.929  | 1389.167  | Z36782    | 7943.887  | 6800.379  |
| H44051     | 562.019   | 511.922   | AB037788  | 10639.263 | 9514.165  | M70435    | 561.854   | 522.251   |
| AA481547   | 33724.152 | 22569.699 | NM_004587 | 9523.939  | 8227.329  | NM_003490 | 35100.742 | 25953.504 |
| AA831880   | 2724.555  | 2472.753  | NM_000975 | 47602.762 | 57415.961 | AF508940  | 8506.593  | 8656.496  |
| T64880     | 8484.472  | 6782.422  | AF147412  | 34301.031 | 27289.443 | NM_005426 | 700.542   | 619.895   |
| AB028990   | 2454.797  | 1668.883  | AK024570  | 14296.354 | 15560.756 | NM_020237 | 2085.622  | 2441.903  |
| AK002089   | 650.911   | 455.16    | AF161401  | 10398.002 | 13232.015 | AF130051  | 1102.896  | 1486.187  |
| AF063611   | 2294.689  | 2486.159  | NM_000990 | 19065.043 | 20163.908 | M25753    | 20659.48  | 19084.813 |
| NM_006036  | 1061.034  | 1248.106  | NM_014740 | 6387.011  | 6901.988  | NM_003883 | 4305.979  | 3763.37   |
| NM_002086  | 886.974   | 1117.035  | NM_015956 | 19419.996 | 22253.381 | NM_014926 | 3132.013  | 2645.976  |
| NM_004590  | 586.914   | 795.413   | AK024601  | 10321.695 | 13149.563 | NM_004203 | 19448.377 | 15351.594 |
| M28983     | 524.295   | 613.655   | S68069    | 2579.77   | 2966.714  | NM_001951 | 1438.591  | 1174.858  |
| NM_014656  | 4902.348  | 4863.195  | AB011095  | 4627.916  | 5443.952  | NM_002391 | 2806.583  | 2067.239  |
| NM_002076  | 3577.039  | 3812.827  | NM_002486 | 17496.965 | 16138.482 | NM_007066 | 7139.975  | 6654.163  |
| X05299     | 5836.352  | 6780.823  | NM_004003 | 20303.451 | 16772.684 | NM_001197 | 7455.995  | 7329.367  |
| BM468475   | 1445.061  | 1607.903  | NM_000186 | 2632.585  | 2459.813  | NM_006682 | 1529.579  | 1334.74   |
| NM_000316  | 5283.092  | 5750.251  | BF244401  | 11531.252 | 8318.966  | NM_006410 | 1024.744  | 986.987   |
| NM_002060  | 7236.505  | 8693.426  | NM_004716 | 34970.453 | 22271.541 | NM_014977 | 57661.09  | 60212.316 |
| AK001230   | 4613.713  | 4395.894  | AL359585  | 6903.364  | 5157.123  | AK026325  | 5382.193  | 4632.764  |
| NM_014680  | 9182.553  | 8821.33   | AB046850  | 6742.188  | 6139.731  | U83857    | 1012.885  | 1726.032  |
| NM_005027  | 4966.454  | 4736.055  | NM_014801 | 5212.729  | 4438.318  | NM_001230 | 882.899   | 1084.987  |
| NM_004612  | 2994.639  | 2868.465  | NM_003642 | 5233.279  | 4687.695  | AK025662  | 2550.206  | 1986.375  |
| NM_005606  | 34813.621 | 24170.057 | AB027013  | 7475.131  | 7132.443  | NM_000201 | 14166.238 | 11274.497 |
| NM_012294  | 399.7     | 251.087   | BC032686  | 551.902   | 453.821   | AB011539  | 2705.32   | 2471.356  |
| NM_001106  | 584.67    | 419.593   | BF185480  | 4140.364  | 3956.63   | U37028    | 5790.118  | 5060.104  |
| NM_015583  | 875.667   | 787.768   | NM_002126 | 21534.656 | 19204.141 | AB014597  | 2911.778  | 2651.918  |
| NM_018490  | 746.203   | 695.329   | NM_007105 | 341.483   | 250.176   | NM_001793 | 44976.309 | 30266.916 |
| NM_004776  | 261.048   | 172.544   | NM_003074 | 6619.477  | 6167.765  | S81361    | 1111.941  | 1127.088  |
| NM_004352  | 225.07    | 317.297   | AL360195  | 10528.34  | 9970.943  | AK024313  | 19968.145 | 19222.404 |
| NM_012256  | 799.045   | 991.882   | U14383    | 2247.47   | 1695.464  | NM_003891 | 6231.894  | 6903.141  |
| NM_007245  | 10882.226 | 8671.679  | NM_017810 | 2006.553  | 2331.36   | AL359575  | 2041.453  | 1812.8    |
| NM_000226  | 2500.835  | 2619.38   | NM_003181 | 51801.113 | 60168.309 | NM_002022 | 890.731   | 991.807   |
| NM_006995  | 40746.484 | 37046.41  | NM_004451 | 5703.359  | 9184.235  | NM_015524 | 1557.45   | 1532.462  |
| NM_003126  | 17866.609 | 23146.801 | NM_004364 | 1391.42   | 876.062   | NM_001673 | 28118.064 | 22026.396 |
| NM_001956  | 1495.351  | 2262.336  | NM_020395 | 3426.76   | 4567.321  | AK023167  | 760.298   | 638.206   |
| AB033064   | 1583.32   | 2822.593  | NM_003425 | 2707.672  | 3755.679  | NM_016510 | 5430.403  | 5307.994  |
| AK022317   | 3931.954  | 5101.736  | NM_013386 | 6388.041  | 8251.346  | NM_014270 | 4100.717  | 4243.64   |
| NM_018396  | 11945.072 | 16406.822 | AK026232  | 6628.254  | 5733.41   | NM_000071 | 16094.3   | 15829.67  |
| NM_003124  | 784.041   | 1341.517  | NM_014892 | 9140.099  | 8089.52   | NM_006843 | 7285.468  | 6865.842  |
| NM_006886  | 45204.789 | 66212.25  | AK023827  | 5655.282  | 6462.225  | NM_004321 | 4813.764  | 3503.469  |
| NM_004531  | 6737.207  | 7392.231  | NM_001117 | 632.031   | 685.584   | AF311212  | 6528.924  | 5714.79   |
| AB040920   | 1595.604  | 2126.419  | NM_000231 | 386.349   | 294.54    | NM_006915 | 1978.164  | 1582.865  |
| NM_015720  | 2119.78   | 2371.245  | L07517    | 2062.446  | 2092.925  | NM_006035 | 2117.782  | 2040.293  |
| AB033070   | 639.045   | 1113.154  | AK022451  | 15116.126 | 17764.199 | NM_006086 | 23269.697 | 24287.99  |
| AK000158   | 1502.85   | 1836.666  | NM_014359 | 51630.141 | 60557.688 | NM_004520 | 11684.816 | 12367.926 |

|            |           |           |           |           |           |           |           |           |
|------------|-----------|-----------|-----------|-----------|-----------|-----------|-----------|-----------|
| NM_005769  | 1717.822  | 1605.294  | BM918441  | 7148.92   | 8174.896  | AK027118  | 5004.509  | 3770.658  |
| AK024500   | 12000.009 | 10737.505 | AA878880  | 293.324   | 119.744   | AK022882  | 33996.531 | 16035.668 |
| NM_002564  | 3708.676  | 3685.733  | AA150828  | 4522.158  | 4274.844  | NM_006105 | 6904.772  | 5605.931  |
| NM_001884  | 306.796   | 223.395   | H90764    | 1615.189  | 2075.13   | NM_005981 | 3140.872  | 2335.743  |
| Z83806     | 453.544   | 375.682   | AI859208  | 683.638   | 800.81    | AF210651  | 2205.687  | 1732.912  |
| NM_000963  | 688.485   | 707.968   | H64379    | 19188.795 | 20261.803 | AF090942  | 1403.333  | 1183.525  |
| NM_013308  | 927.797   | 897.141   | BE208258  | 41939.758 | 36924.926 | NM_014595 | 21719.707 | 20379.391 |
| AF027302   | 9555.436  | 8561.939  | T72202    | 2242.507  | 2611.37   | NM_014785 | 2374.829  | 2493.921  |
| NM_002852  | 4030.47   | 3012.611  | BI831922  | 2111.583  | 3464.144  | AB046784  | 6492.521  | 7569.125  |
| NM_001817  | 4614.841  | 4261.449  | M69238    | 4606.058  | 5924.376  | X52402    | 9044.66   | 11951.176 |
| NM_016228  | 737.604   | 1089.784  | AA664180  | 1262.075  | 1481.836  | AL133663  | 1500.514  | 1527.875  |
| NM_000157  | 3772.131  | 4381.855  | M80244    | 490.943   | 497.415   | NM_004992 | 2018.827  | 1886.391  |
| NM_000712  | 303.031   | 386.469   | AA599158  | 18852.547 | 25716.936 | NM_014462 | 5471.207  | 5231.509  |
| NM_018088  | 908.381   | 1062.013  | BE294756  | 1490.185  | 1848.801  | NM_014155 | 52008.691 | 58865.996 |
| BC013695   | 13294.326 | 14627.512 | NM_000696 | 5200.574  | 7219.017  | NM_003137 | 13263.944 | 12637.456 |
| NM_007205  | 885.696   | 903.067   | L08240    | 1992.087  | 1843.101  | NM_006938 | 40607.387 | 29991.945 |
| AK023035   | 6747.723  | 8231.805  | NM_017952 | 2174.557  | 2177.602  | NM_004515 | 1241.964  | 998.45    |
| NM_014846  | 4831.616  | 5835.369  | NM_002940 | 3071.365  | 2619.542  | NM_020158 | 9465.729  | 10722.407 |
| AB011164   | 6279.541  | 6614.226  | NM_016081 | 16759.502 | 17383.422 | AF176085  | 5698.698  | 4360.064  |
| M24750     | 3084.969  | 3156.944  | NM_006389 | 4735.276  | 3920.77   | NM_006985 | 35612.41  | 24928.58  |
| NM_005965  | 3311.629  | 3682.111  | M30818    | 1897.587  | 2240.532  | AF265228  | 2977.788  | 2212.692  |
| NM_002740  | 7327.304  | 8014.967  | NM_000163 | 681.947   | 698.983   | NM_003757 | 29664.039 | 24579.414 |
| AL117482   | 4624.796  | 3855.046  | NM_005755 | 4745.984  | 4967.57   | AK025561  | 5537.585  | 4119.55   |
| NM_006549  | 21649.197 | 18202.732 | NM_003329 | 47925.664 | 36537.262 | NM_018602 | 49968.355 | 54027.367 |
| AB018324   | 17156.521 | 16302.028 | NM_003299 | 52658.055 | 47478.473 | NM_004096 | 4374.251  | 5029.295  |
| NM_002742  | 11895.983 | 11531.432 | NM_014330 | 50000.285 | 55624.512 | NM_017629 | 16108.603 | 12536.722 |
| Z25431     | 4163.906  | 3214.439  | NM_007034 | 813.908   | 989.42    | AL049681  | 4090.419  | 3732.428  |
| NM_005627  | 24231.293 | 17194.523 | NM_005261 | 502.068   | 437.056   | NM_006584 | 1043.876  | 787.733   |
| M64497     | 2146.368  | 2016.991  | NM_001560 | 1146.691  | 1208.007  | AJ001495  | 365.465   | 213.976   |
| NM_007274  | 8799.454  | 8580.274  | NM_001783 | 55566.84  | 56487.82  | NM_003551 | 9080.964  | 10914.077 |
| NM_003356  | 1728.768  | 1698.327  | J03171    | 5252.938  | 13024.697 | AF305210  | 1917.261  | 2410.115  |
| AF238315   | 627.492   | 898.866   | NM_005856 | 1851.691  | 2722.26   | AK021900  | 7547.578  | 7015.791  |
| NM_006224  | 43444.328 | 30672.459 | NM_004323 | 46903.246 | 54797.961 | NM_002764 | 25176.502 | 24385.244 |
| AL137300   | 9498.971  | 8023.759  | NM_002310 | 456.817   | 598.226   | NM_019857 | 2115.333  | 2796.656  |
| NM_014648  | 1607.958  | 1715.941  | NM_005312 | 3089.548  | 4252.559  | NM_015455 | 49226.41  | 55792.25  |
| NM_019604  | 362.357   | 635.311   | NM_004210 | 15031.604 | 20183.93  | AF024702  | 13750.584 | 13822.943 |
| NM_005073  | 1804.237  | 2485.556  | NM_020140 | 2398.541  | 4280.293  | NM_001964 | 4418.568  | 4381.654  |
| NM_000951  | 2645.84   | 3445.169  | NM_007214 | 7342.948  | 6957.849  | NM_005962 | 15980.793 | 16251.927 |
| X52599     | 287.901   | 633.878   | NM_000311 | 10819.507 | 9653.533  | X74864    | 11289.068 | 10694.636 |
| AA029300   | 5145.423  | 6407.048  | NM_017909 | 2908.473  | 2182.865  | AK026804  | 3119.961  | 2963.506  |
| BG708842   | 32736.414 | 35608.301 | NM_006335 | 10877.693 | 11068.8   | NM_016170 | 26120.957 | 19880.637 |
| M19723     | 45126.34  | 69154.227 | NM_000786 | 4593.164  | 3471.19   | NM_002114 | 693.563   | 578.888   |
| AA709271   | 314.283   | 597.034   | NM_002519 | 256.756   | 225.439   | NM_006166 | 5536.615  | 5714.914  |
| M34057     | 3813.542  | 3913.213  | NM_017731 | 589.834   | 657.739   | S72620    | 49144.25  | 50717.617 |
| ID 1984668 | 4113.513  | 3594.628  | AB040891  | 1796.258  | 2011.63   | NM_016831 | 1488.484  | 1098.14   |
| ID 1832579 | 4235.164  | 3477.314  | AB037780  | 431.215   | 372.963   | S73501    | 791.559   | 800.479   |
| H-430185 N | 1865.239  | 1323.624  | NM_007256 | 2254.528  | 2700.423  | NM_005263 | 10183.731 | 10792.881 |
| D16583     | 3571.642  | 2747.79   | NM_001045 | 20839.625 | 21683.531 | AB033022  | 11282.691 | 10132.577 |
| H44051     | 573.403   | 388.604   | NM_005697 | 22801.506 | 24968     | NM_000474 | 1047.77   | 836.598   |
| AA481547   | 31751.662 | 21304.195 | NM_003099 | 3953.329  | 5796.048  | AB037837  | 4001.875  | 4465.804  |
| AA831880   | 2470.018  | 2127.999  | NM_004781 | 2397.233  | 3058.138  | NM_001155 | 21909.33  | 25159.111 |
| T64880     | 7965.081  | 6126.603  | NM_018303 | 2156.321  | 2551.027  | M62896    | 51821.813 | 48331.969 |
| AB028990   | 2359.433  | 1730.627  | NM_014758 | 13114.475 | 15429.786 | NM_017736 | 3778.666  | 3831.684  |

|           |           |           |           |           |           |           |           |           |
|-----------|-----------|-----------|-----------|-----------|-----------|-----------|-----------|-----------|
| AK002089  | 605.416   | 424.653   | AL133047  | 343.986   | 556.666   | NM_00039C | 548.1     | 673.747   |
| NM_00670E | 35112.637 | 22688.09  | NM_005124 | 2120.378  | 4775.895  | NM_000313 | 886.621   | 1378.954  |
| AB037835  | 3190.913  | 2557.899  | AK000947  | 4757.175  | 8150.378  | NM_00149E | 51156.934 | 61260.691 |
| BM468475  | 1533.63   | 1639.581  | NM_003897 | 3763.651  | 3831.963  | AF263523  | 3639.956  | 5766.684  |
| NM_00031E | 5223.916  | 6403.851  | NM_01416E | 18220.102 | 14038.133 | L08441    | 28649.5   | 25883.521 |
| NM_00206C | 7469.474  | 11285.7   | AL442085  | 5448.402  | 5085.312  | AA641953  | 1954.025  | 2504.208  |
| AK001230  | 4840.818  | 7239.802  | J03250    | 408.905   | 536.653   | AI248827  | 8827.969  | 9564.813  |
| NM_01468C | 9039.634  | 10257.644 | NM_013313 | 4040.769  | 4566.561  | R45026    | 52343.707 | 56010.559 |
| NM_005027 | 4974.507  | 6579.295  | NM_01473E | 6565.513  | 6497.63   | BI768063  | 3064.731  | 2668.274  |
| NM_004612 | 3142.501  | 4706.349  | AK023886  | 2296.549  | 1928.48   | BG386057  | 903.311   | 1342.82   |
| NM_00560E | 37447.879 | 38615.098 | NM_002553 | 3162.902  | 3075.786  | AI970239  | 7681.797  | 6580.78   |
| NM_012294 | 359.38    | 549.529   | AJ404615  | 2318.407  | 1548.254  | AA496452  | 29214.318 | 24768.189 |
| NM_001106 | 579.917   | 649.327   | NM_016053 | 21823.135 | 20874.463 | X67594    | 15398.303 | 14500.914 |
| NM_015583 | 899.1     | 1204.773  | AB007869  | 3556.505  | 4057.965  | AF363393  | 473.175   | 523.375   |
| NM_01849C | 895.118   | 864.28    | AB046844  | 1461.341  | 2267.318  | BC008837  | 562.557   | 925.584   |
| NM_00477E | 305.547   | 342.698   | NM_000302 | 2997.261  | 2862.441  | NM_01586E | 1178.742  | 1213.579  |
| NM_00624E | 3763.673  | 3535.442  | NM_01323E | 39116.012 | 35288.387 | NM_001631 | 2997.54   | 3210.722  |
| NM_01225E | 747.134   | 692.12    | NM_01601E | 6457.289  | 6717.486  | AB000734  | 19548.268 | 17130.465 |
| NM_005103 | 332.251   | 221.272   | NM_02012C | 1392.628  | 1624.614  | NM_000862 | 1478.047  | 1145.374  |
| NM_004822 | 1244.328  | 1180.378  | AK022900  | 980.964   | 1330.534  | AK023059  | 1498.287  | 1457.812  |
| AK022349  | 2740.955  | 1708.966  | AB023216  | 723.075   | 869.196   | AF224266  | 10142.71  | 11528.313 |
| NM_00575C | 1076.254  | 654.544   | NM_00226E | 51297.797 | 53579.527 | U72882    | 54846.328 | 51343.867 |
| NM_004973 | 920.396   | 806.245   | NM_01440C | 7579.216  | 10395.754 | NM_014337 | 32995.797 | 35304.484 |
| NM_00724E | 10915.65  | 8551.07   | AL157492  | 1695.919  | 2361.004  | NM_007161 | 42569.762 | 39588.582 |
| NM_00189C | 2200.641  | 1779.625  | AL353957  | 3762.91   | 7551.448  | NM_014387 | 3848.22   | 4239.667  |
| NM_00128E | 6992.081  | 5816.82   | AK023827  | 6318.68   | 5915.377  | NM_003641 | 10126.407 | 12891.703 |
| NM_01822E | 2621.392  | 3915.811  | NM_001117 | 519.745   | 525.948   | NM_012463 | 4645.139  | 5287.591  |
| NM_00632E | 8438.813  | 11694.582 | NM_000231 | 323.667   | 519.306   | L29140    | 52277.297 | 59338.191 |
| AY009127  | 29242.031 | 33665.164 | L07517    | 2134.19   | 1991.665  | AK026448  | 9568.9    | 15609.303 |
| NM_01486E | 7167.09   | 11169.256 | AK022451  | 13210.482 | 14715.659 | AK057418  | 6064.573  | 7015.739  |
| NM_00392E | 1148.318  | 1186.862  | NM_01435E | 54291.613 | 61283.891 | L37199    | 1062.957  | 1276.917  |
| AK000158  | 1565.057  | 2540.626  | BM918441  | 7808.115  | 9700.561  | NM_00726C | 4768.117  | 4706.667  |
| NM_00576E | 1794.464  | 2764.431  | AA425102  | 453.289   | 190.041   | AF148646  | 17549.33  | 17601.877 |
| AK024500  | 12854.05  | 17732.404 | AA878880  | 374.125   | 214.997   | AL110218  | 3123.343  | 3158.793  |
| NM_002564 | 3928.817  | 5674.903  | AA150828  | 4624.294  | 4100.528  | AB023201  | 3328.385  | 3407.286  |
| Z83806    | 475.707   | 465.296   | H90764    | 1668.429  | 1383.192  | X00094    | 3439.437  | 3405.314  |
| NM_000963 | 683.164   | 980.565   | AI859208  | 745.505   | 735.954   | NM_00377E | 16691.566 | 17003.385 |
| NM_01330E | 863.658   | 936.144   | H64379    | 18355.797 | 17880.512 | NM_002082 | 38427.484 | 31902.148 |
| AF027302  | 10038.896 | 8708.945  | BE208258  | 48028.949 | 50066.184 | NM_002922 | 25045.303 | 24726.811 |
| NM_002852 | 3950.848  | 4058.727  | BI833114  | 247.91    | 491.705   | AF155657  | 17594.316 | 19463.873 |
| NM_001817 | 5252.064  | 4958.928  | T72202    | 2139.259  | 2100.547  | NM_00605E | 18663.34  | 19232.172 |
| AF063611  | 2619.052  | 2357.12   | BI831922  | 2045.187  | 2334.706  | AF045229  | 18950.094 | 20658.104 |
| NM_00208E | 909.336   | 877.119   | M69238    | 4844.331  | 5786.482  | NM_00184C | 19161.92  | 21398.568 |
| NM_00459C | 509.416   | 545.096   | AA664180  | 1294.913  | 1690.189  | NM_01609E | 59899.59  | 56227.313 |
| M28983    | 557.788   | 514.799   | M80244    | 475.514   | 654.99    | NM_000394 | 841.293   | 801.305   |
| NM_01465E | 4920.579  | 3810.571  | AA599158  | 18035.248 | 17779.254 | NM_000072 | 1463.266  | 1378.326  |
| NM_00207E | 3607.291  | 2684.18   | BE294756  | 1397.259  | 1608.892  | NM_000697 | 2980.741  | 3135.162  |
| X05299    | 5944.018  | 4939.98   | AK026092  | 11538.639 | 13651.243 | NM_000017 | 17870.889 | 21286.012 |
| NM_007274 | 9196.337  | 14607.288 | AK001175  | 2281.431  | 2568.344  | NM_000237 | 1981.794  | 3731.555  |
| NM_00335E | 3018.368  | 4545.29   | NM_00294C | 3179.967  | 2597.663  | NM_01834E | 11687.386 | 13300.659 |
| AF238315  | 572.325   | 1003.407  | NM_016081 | 17378.557 | 18776.74  | AL122054  | 1891.993  | 2131.338  |
| NM_006224 | 41631.098 | 44303.926 | NM_00638E | 4745.803  | 4739.126  | AB023151  | 1361.544  | 1451.636  |
| AL137300  | 8710.513  | 11948.747 | M30818    | 1821.757  | 1664.734  | NM_00014C | 32176.758 | 34131.277 |



|           |           |           |           |           |           |           |           |           |
|-----------|-----------|-----------|-----------|-----------|-----------|-----------|-----------|-----------|
| NM_000229 | 3587.284  | 4349.317  | NM_000163 | 648.468   | 822.365   | NM_005125 | 8428.479  | 7795.371  |
| NM_006995 | 44436.746 | 43057.383 | NM_005755 | 5255.999  | 5140.511  | NM_020038 | 2914.815  | 2102.254  |
| NM_003129 | 18889.832 | 27008.861 | NM_003329 | 48866.789 | 40109.645 | NM_016246 | 6378.253  | 6154.733  |
| NM_001956 | 2060.791  | 3203.109  | NM_003299 | 51631.598 | 60442.078 | NM_005136 | 1676.593  | 2007.196  |
| AB033064  | 1668.994  | 2433.593  | NM_014330 | 49277.047 | 45603.723 | NM_004976 | 36918.426 | 30619.242 |
| AK022317  | 4141.991  | 5947.305  | NM_007034 | 701.413   | 847.857   | NM_005737 | 48774.98  | 43557.438 |
| NM_018396 | 12213.711 | 18325.838 | NM_005261 | 350.544   | 633.062   | NM_001660 | 18665.777 | 18130.66  |
| NM_003124 | 1287.63   | 1497.141  | NM_001560 | 1355.755  | 1559.107  | NM_000710 | 943.837   | 1026.178  |
| NM_006886 | 46107.773 | 54790.785 | NM_001783 | 51649.742 | 51763.219 | NM_000752 | 4794.877  | 4084.242  |
| NM_004531 | 7186.203  | 7022.33   | J03171    | 4075.719  | 4673.537  | AB040945  | 4047.865  | 2950.168  |
| AL133581  | 3030.339  | 3280.176  | NM_005856 | 1996.459  | 2358.083  | NM_002018 | 17086.176 | 20033.215 |
| NM_002558 | 883.924   | 936.716   | NM_004323 | 43459.387 | 52654.438 | NM_002377 | 765.79    | 1035.836  |
| NM_005031 | 11925.193 | 11544.181 | NM_002310 | 504.45    | 528.613   | NM_006018 | 3097.065  | 2790.492  |
| AB040920  | 1737.551  | 1964.022  | NM_005312 | 3045.155  | 3496.821  | NM_000410 | 23503.244 | 26994.527 |
| NM_000720 | 1076.78   | 949.544   | NM_004210 | 13911.916 | 15090.924 | AF182814  | 3713.385  | 5067.434  |
| NM_004842 | 842.075   | 767.406   | NM_020140 | 2594.819  | 3819.403  | NM_005329 | 2034.246  | 2932.357  |
| AK024639  | 5366.831  | 4282.964  | AK026232  | 6588.943  | 8334.673  | NM_000107 | 16660.016 | 22005.516 |
| NM_015720 | 2529.155  | 2727.27   | NM_014892 | 11205.924 | 12372.503 | AL157445  | 7710.759  | 8241.665  |
| AB007915  | 1714.134  | 1246.67   | NM_017909 | 3080.59   | 2404.648  | NM_001517 | 38234.363 | 32352.207 |
| AB033070  | 632.841   | 1141.401  | NM_006335 | 11391.143 | 11380.447 | NM_005053 | 15038.102 | 14410.92  |
| AB028990  | 2216.755  | 2697.365  | NM_000786 | 4649.215  | 4214.777  | D86974    | 10169.487 | 8025.76   |
| AK002089  | 536.846   | 729.843   | NM_017731 | 689.084   | 716.941   | NM_018283 | 11288.01  | 9430.391  |
| NM_006708 | 37938.266 | 31670     | AB040891  | 1793.199  | 2446.306  | NM_001983 | 4304.826  | 4553.027  |
| AB037835  | 3442.583  | 4163.348  | AB037780  | 329.445   | 308.375   | NM_004993 | 752.273   | 748.665   |
| NM_016228 | 962.76    | 1121.19   | AK025616  | 421.882   | 409.639   | NM_003384 | 10882.521 | 9252.824  |
| NM_000157 | 4103.212  | 5760.104  | NM_007256 | 2211.429  | 2539.854  | Y12337    | 4450.759  | 3396.974  |
| NM_000712 | 405.422   | 516.453   | NM_001045 | 26921.666 | 30874.646 | M29551    | 24318.42  | 19688.285 |
| NM_018088 | 994.96    | 1110.777  | NM_005697 | 23663.971 | 25615.32  | AB023148  | 1105.224  | 879.629   |
| BC013695  | 14585.034 | 17024.08  | NM_003099 | 3808.044  | 3955.885  | NM_002929 | 2201.984  | 1997.413  |
| NM_007205 | 822.676   | 733.372   | NM_004781 | 2393.634  | 2324.885  | BC028375  | 1775.122  | 1670.698  |
| AK023035  | 7477.661  | 8192.392  | NM_018303 | 2029.832  | 2239.121  | AB026436  | 5470.736  | 6183.505  |
| NM_014846 | 5239.413  | 5603.353  | NM_014758 | 12305.697 | 13377.571 | NM_014066 | 3374.249  | 4047.613  |
| AB011164  | 6258.399  | 5863.454  | AL133047  | 377.588   | 359.256   | NM_004573 | 2266.561  | 2288.573  |
| M24750    | 3140.99   | 3225.296  | NM_005124 | 2392.521  | 3326.93   | NM_017736 | 4636.026  | 8579.99   |
| NM_005965 | 3931.648  | 3443.231  | AK000947  | 4635.386  | 5818.449  | NM_000390 | 613.615   | 1325.735  |
| NM_002740 | 8041.079  | 7427.047  | L08240    | 1894.286  | 2333.978  | NM_000313 | 1482.708  | 3041.293  |
| AL117482  | 4886.95   | 4373.005  | NM_017952 | 2019.282  | 2492.111  | NM_001498 | 56027.613 | 62827.195 |
| NM_006549 | 32003.893 | 22523.502 | NM_014165 | 18377.752 | 14137.533 | AF263523  | 3328.73   | 4481.215  |
| AB018324  | 18311.047 | 15793.766 | AL442085  | 6388.365  | 5539.32   | L08441    | 27577.707 | 23431.809 |
| NM_002742 | 12402.078 | 10918.144 | NM_013313 | 3426.29   | 3165.307  | AA641953  | 2262.701  | 3001.854  |
| Z25431    | 4842.706  | 3968.408  | NM_014736 | 5788.503  | 5505.483  | AI248827  | 9091.776  | 9540.918  |
| NM_005627 | 25722.383 | 15993.276 | AK023886  | 2126.546  | 1937.709  | R45026    | 56705.559 | 55811.043 |
| M64497    | 2104.899  | 1811.25   | NM_002553 | 3178.768  | 3334.741  | BI768063  | 3085.763  | 2669.055  |
| CY3Cy5    | 8988.899  | 1031.762  | AJ404615  | 2794.116  | 2232.045  | BG386057  | 857.396   | 847.808   |
| NM_002711 | 7650.332  | 6698.846  | NM_016053 | 22530.926 | 21971.904 | AI970239  | 8322.102  | 7121.061  |
| AL355732  | 674.394   | 682.198   | AB007869  | 3141.245  | 2783.146  | AA496452  | 31612.109 | 27956.342 |
| NM_017966 | 6362.247  | 8624.076  | AB046844  | 1266.38   | 1791.1    | X67594    | 14215.347 | 12631.758 |
| AF143327  | 1350.501  | 1892.959  | NM_000302 | 2471.955  | 2776.735  | AF363393  | 481.546   | 488.293   |
| AL049991  | 663.609   | 426.176   | NM_013235 | 39836.98  | 40623.043 | BC008837  | 889.037   | 1298.028  |
| AL049990  | 2348.259  | 1136.747  | NM_016015 | 6659.795  | 7394.579  | NM_015866 | 1178.138  | 1098.79   |
| AF131843  | 2008.774  | 931.96    | NM_020120 | 1213.512  | 1138.375  | NM_001631 | 3253.27   | 2877.561  |
| AK026653  | 1760.674  | 1155.413  | AK022900  | 1078.975  | 1019.022  | AB000734  | 17615.83  | 15112.56  |
| NM_020231 | 3495.389  | 5235.562  | NM_001125 | 291.244   | 286.119   | NM_000862 | 1371.813  | 1488.778  |

|           |           |           |           |           |           |           |           |           |
|-----------|-----------|-----------|-----------|-----------|-----------|-----------|-----------|-----------|
| AF075008  | 6324.27   | 12465.284 | AB023216  | 691.288   | 899.775   | X87838    | 7055.983  | 8003.422  |
| NM_006504 | 2659.025  | 2404.488  | NM_002266 | 50040.93  | 51411.461 | NM_000166 | 9609.793  | 8058.689  |
| AF070538  | 560.275   | 596.095   | NM_014400 | 6701.161  | 8223.221  | NM_000696 | 374.119   | 240.721   |
| AL137430  | 612.675   | 462.893   | AL157492  | 1474.793  | 1740.831  | NM_014337 | 33770.797 | 42861.473 |
| NM_001073 | 361.046   | 401.051   | AL353957  | 3412.724  | 4022.709  | NM_007161 | 38450.656 | 47481.875 |
| NM_002711 | 8373.743  | 5838.691  | NM_007214 | 7148.965  | 7565.309  | NM_014387 | 3951.224  | 6310.58   |
| SR1       | 69795.227 | 67568.648 | NM_000311 | 10420.892 | 10366.169 | NM_003641 | 10255.239 | 14029.88  |
| SR3       | 54004.879 | 47107.277 | NM_000231 | 408.211   | 178.903   | NM_012463 | 4640.309  | 5034.274  |
| SR5       | 4515.128  | 5039.095  | L07517    | 2117.364  | 1848.609  | L29140    | 53436.066 | 58273.242 |
| SR7       | 5664.687  | 37566.313 | AK022451  | 13434.911 | 13633.76  | AK026448  | 9534.45   | 10821.606 |
| SR9       | 22500.322 | 3696.267  | NM_014359 | 54358.477 | 60327.527 | AK057418  | 5951.188  | 5088.735  |
| CY3Cy5    | 2050.356  | 269.273   | BM918441  | 7199.428  | 6709.281  | L37199    | 701.081   | 903.966   |
| L38282    | 842.517   | 690.925   | AA425102  | 410.017   | 443.723   | NM_007260 | 4180.906  | 4659.104  |
| NM_018056 | 4536.079  | 4208.266  | AA878880  | 422.239   | 324.497   | AF148646  | 21575.35  | 20603.494 |
| NM_019006 | 5044.687  | 5839.587  | AA150828  | 4920.52   | 4193.983  | AL110218  | 2797.922  | 2469.715  |
| M20838    | 1211.452  | 1931.515  | H90764    | 1700.432  | 2104.079  | AB023201  | 3694.266  | 3706.396  |
| AK023505  | 1421.796  | 758.299   | AI859208  | 845.928   | 993.679   | X00094    | 3281.243  | 3244.394  |
| AB037851  | 10005.841 | 6978.956  | H64379    | 18117.367 | 16806.936 | NM_003775 | 17289.316 | 17546.602 |
| AL050389  | 6946.667  | 11266.771 | BE208258  | 45675.629 | 43695.961 | NM_002082 | 35502.91  | 29936.707 |
| AK025855  | 376.922   | 573.761   | BI833114  | 291.006   | 331.17    | NM_002922 | 24134.514 | 21639.527 |
| AK024684  | 2404.382  | 1868.191  | T72202    | 1823.252  | 2043.625  | AF155657  | 16970.953 | 14174.32  |
| NM_014945 | 23293.295 | 16143.455 | BI831922  | 2548.667  | 2927.234  | NM_006056 | 19400.072 | 17587.844 |
| AK001546  | 3728.266  | 2157.356  | M69238    | 3953.524  | 4519.568  | AF045229  | 19277.912 | 24152.086 |
| NM_006537 | 12272.064 | 9736.286  | AA664180  | 1379.886  | 1306.724  | NM_016096 | 56285.516 | 57828.297 |
| AF007155  | 20363.592 | 20598.834 | AA599158  | 17385.203 | 21111.768 | NM_000394 | 1309.397  | 1337.79   |
| AK023055  | 1002.925  | 679.942   | BE294756  | 1654.056  | 1971.692  | NM_001155 | 20777.229 | 23854.061 |
| AL049282  | 8205.012  | 6555.295  | AK026092  | 10433.928 | 12592.873 | M62896    | 42561.68  | 36412.504 |
| AK021443  | 4318.44   | 3258.423  | AK001175  | 2072.05   | 2507.887  | NM_000017 | 19454.141 | 23081.758 |
| AF070569  | 1431.467  | 973.762   | NM_003897 | 3616.167  | 3749.04   | NM_000237 | 1845.293  | 5616.604  |
| NM_020233 | 3825.62   | 2475.229  | NM_003299 | 51330.168 | 55387.051 | NM_018346 | 12526.608 | 26193.117 |
| AK024315  | 18733.68  | 16525.439 | U70981    | 469.067   | 522.573   | AL122054  | 2228.066  | 3035.142  |
| AK024945  | 762.489   | 770.744   | NM_014330 | 46586.082 | 47074.117 | AB023151  | 1381.311  | 1532.101  |
| AK024411  | 592.449   | 706.81    | NM_007034 | 819.401   | 671.691   | NM_000140 | 29770.709 | 30888.57  |
| AK024579  | 1160.764  | 1529.297  | NM_005261 | 424.387   | 336.162   | NM_005125 | 9576.299  | 8959.892  |
| AK024998  | 277.562   | 225.158   | NM_001560 | 1283.174  | 1075.229  | NM_020038 | 3259.792  | 2388.7    |
| AL133118  | 6645.148  | 4142.48   | NM_001783 | 50317.422 | 43866.039 | NM_016246 | 7150.039  | 6427.102  |
| AK023571  | 984.296   | 630.018   | J03171    | 4002.283  | 4017.381  | NM_005136 | 1732.752  | 1760.903  |
| AF052148  | 437.35    | 457.233   | NM_005856 | 1749.268  | 1748.3    | NM_004976 | 43203.867 | 35372.254 |
| AF131783  | 691.119   | 679.409   | NM_004323 | 44489.344 | 34384.254 | NM_005737 | 51064.371 | 49193.793 |
| NM_001702 | 3006.796  | 6603.253  | NM_002310 | 605.551   | 532.796   | NM_001660 | 20814.363 | 22195.674 |
| AK026657  | 3618.657  | 3836.789  | NM_005312 | 3281.911  | 3546.156  | NM_000710 | 808.217   | 985.514   |
| AL833558  | 917.74    | 835.805   | NM_001711 | 2630.83   | 3123.432  | NM_000752 | 4623.68   | 3933.386  |
| AF087991  | 35171.793 | 25410.66  | NM_004210 | 14946.147 | 14823.455 | AB040945  | 4511.302  | 4942.644  |
| AJ227862  | 490.846   | 975.48    | NM_020140 | 2856.133  | 3399      | NM_002018 | 17242.525 | 17967.045 |
| Y12839    | 417.659   | 311.226   | NM_001496 | 11785.915 | 13781.044 | NM_006018 | 2736.836  | 2708.543  |
| AJ001876  | 909.171   | 953.486   | NM_001962 | 1687.776  | 2004.689  | AF161383  | 9947.246  | 12343.208 |
| AJ227884  | 891.033   | 1177.696  | NM_002500 | 6977.991  | 7680.556  | NM_005326 | 1754.328  | 1941.523  |
| X64986    | 1986.578  | 1588.115  | AK026232  | 7032.493  | 7340.039  | NM_000107 | 17576.697 | 27612.307 |
| Y10510    | 879.021   | 691.13    | NM_014892 | 10550.232 | 10049.051 | AL157445  | 7920.226  | 8407.176  |
| AK000842  | 12165.151 | 10856.553 | AK023827  | 8398.853  | 8758.828  | NM_001517 | 35810.348 | 32783.332 |
| AK023386  | 14472.515 | 16330.39  | NM_001117 | 487.7     | 683.846   | NM_005053 | 13320.595 | 14175.585 |
| NM_007053 | 35040.031 | 28642.537 | NM_000339 | 458.631   | 255.012   | D86974    | 9797.023  | 9095.83   |
| AK022789  | 939.873   | 1278.675  | AF283645  | 8188.563  | 7482.27   | NM_018283 | 12240.139 | 9378.819  |

|           |           |           |           |           |           |           |           |           |
|-----------|-----------|-----------|-----------|-----------|-----------|-----------|-----------|-----------|
| AK024252  | 410.896   | 450.655   | NM_016575 | 5420.431  | 5852.45   | NM_001983 | 4363.427  | 4450.836  |
| AK002095  | 621.104   | 474.189   | NM_018557 | 311.406   | 284.702   | NM_004993 | 718.834   | 885.243   |
| AK000821  | 17689.498 | 22212.318 | NM_001045 | 19905.328 | 18955.283 | NM_003384 | 11267.106 | 11427.994 |
| AK024526  | 4447.274  | 4462.902  | NM_005697 | 22533.111 | 21878.676 | Y12337    | 5320.938  | 3571.04   |
| AK023307  | 821.973   | 923.542   | NM_003099 | 4175.422  | 3805.135  | M29551    | 27990.221 | 28368.639 |
| NM_017618 | 1382.93   | 984.097   | NM_004781 | 2286.303  | 2263.475  | AB023148  | 1324.15   | 1032.489  |
| NM_017848 | 1183.285  | 950.882   | NM_018303 | 1920.565  | 1395.282  | NM_002928 | 2197.76   | 1978.915  |
| NM_019056 | 11002.789 | 10589.273 | NM_014758 | 11446.825 | 11874.205 | BC028375  | 1775.706  | 2128.695  |
| AF279783  | 5610.955  | 5958.208  | AL133047  | 443.942   | 447.071   | AB026436  | 4356.5    | 6802.493  |
| AF182422  | 20601.75  | 21343.162 | NM_005124 | 2222.018  | 2958.288  | NM_016028 | 17785.996 | 19312     |
| NM_016943 | 308.002   | 346.602   | AK000947  | 4913.386  | 7276.356  | AK024562  | 4107.754  | 4739.551  |
| AF070602  | 1304.822  | 2312.736  | L08240    | 2274.74   | 2223.489  | NM_014066 | 3126.148  | 3605.317  |
| NM_017622 | 3386.031  | 3081.624  | NM_017952 | 2265.948  | 2813.381  | NM_000313 | 917.675   | 943.546   |
| AF133331  | 9858.391  | 6024.146  | NM_002940 | 2801.985  | 3832.566  | NM_001498 | 52851.617 | 59205.566 |
| AK022289  | 8700.313  | 3235.205  | NM_016081 | 19823.73  | 26760.123 | AF263523  | 3582.388  | 4622.289  |
| L34408    | 491.765   | 365.376   | NM_006389 | 4689.016  | 6662.724  | L08441    | 30092.453 | 26934.619 |
| AF161403  | 5862.97   | 5772.229  | M30818    | 2180.752  | 2912.82   | AA641953  | 2189      | 2315.975  |
| S75708    | 10382.272 | 18745.031 | NM_000163 | 644.549   | 938.896   | AI248827  | 8946.148  | 8119.576  |
| U79291    | 12880.642 | 10894.472 | NM_005755 | 5141.187  | 5514.264  | R45026    | 49087.031 | 56709.887 |
| D17172    | 45338.086 | 30836.76  | NM_003329 | 49152.965 | 45010.781 | BI768063  | 3117.451  | 3096.926  |
| AJ227859  | 3471.557  | 3575.752  | NM_014400 | 6912.407  | 5344.276  | BG386057  | 846.65    | 886.582   |
| NM_018544 | 1560.481  | 2293.632  | AL157492  | 2167.549  | 2136.679  | AI970239  | 10155.951 | 9274.637  |
| AK022670  | 866.775   | 1438.511  | AL353957  | 3430.597  | 3004.02   | AA496452  | 35707.617 | 29621.654 |
| L10141    | 4843.589  | 5792.857  | NM_007214 | 8026.325  | 6515.82   | X67594    | 16463.842 | 15780.819 |
| AB020699  | 5804.232  | 4873.145  | NM_000311 | 8801.878  | 6067.275  | AF363393  | 436.02    | 453.556   |
| AF086269  | 3783.452  | 3978.437  | NM_017909 | 3636.514  | 2637.006  | BC008837  | 717.711   | 1026.398  |
| U90437    | 8984.436  | 7066.174  | NM_006335 | 11661.849 | 11048.666 | NM_015868 | 1171.245  | 1080.237  |
| S71604    | 717.147   | 665.452   | NM_000786 | 4507.218  | 3116.468  | NM_001631 | 3288.869  | 2674.002  |
| D17169    | 59533.246 | 53454.063 | NM_017731 | 553.441   | 609.137   | AB000734  | 19608.754 | 14264.226 |
| NM_017924 | 5515.114  | 7136.952  | AB040891  | 2049.313  | 2628.557  | NM_000862 | 1293.995  | 857.222   |
| S81578    | 1148.015  | 1231.908  | AB037780  | 450.478   | 555.1     | NM_005987 | 52224.258 | 63217.918 |
| NM_017546 | 10264.722 | 14546.637 | NM_005845 | 21100.65  | 23583.887 | X87838    | 6525.649  | 9019.356  |
| AL137400  | 547.45    | 257       | NM_016209 | 11180.972 | 13636.873 | NM_000168 | 10408.74  | 9889.533  |
| NM_006511 | 2875.88   | 1077.408  | AK075415  | 1408.889  | 2214.134  | AF182814  | 4047.039  | 3463.692  |
| AF007142  | 1706.251  | 712.206   | AK025616  | 669.257   | 1285.441  | L37199    | 734.793   | 949.828   |
| AF119853  | 3304.992  | 1331.405  | NM_018964 | 8007.976  | 11147.985 | NM_007260 | 3063.888  | 3028.399  |
| AF279782  | 1053.878  | 795.776   | NM_000080 | 2324.832  | 3216.235  | AF148646  | 21832.557 | 21862.309 |
| NM_001126 | 11154.803 | 11985.764 | NM_001829 | 1507.508  | 1688.377  | AL110218  | 3679.004  | 5322.246  |
| AK023673  | 4221.889  | 4191.6    | NM_007256 | 2954.699  | 3859.123  | AB023201  | 4236.388  | 4776.125  |
| NM_018252 | 4554.096  | 3377.531  | AK026092  | 6649.252  | 5423.947  | X00094    | 3946.741  | 4103.528  |
| NM_018000 | 25189.018 | 18734.883 | AK001175  | 1976.503  | 1648.441  | NM_003775 | 17500.537 | 18862.543 |
| AF164963  | 1175.344  | 1290.395  | NM_003897 | 3203.384  | 2419.764  | NM_002082 | 40091.719 | 32606.889 |
| AF124366  | 56628.016 | 56149.188 | NM_014165 | 18441.758 | 14137.398 | NM_002922 | 25897.813 | 24414.576 |
| AF130112  | 2093.822  | 2864.812  | AL442085  | 6046.417  | 5147.482  | AF155657  | 17929.246 | 15073.801 |
| NM_000551 | 11237.977 | 12663.188 | J03250    | 270.801   | 340.389   | NM_006056 | 23544.799 | 23185.24  |
| AL365518  | 2351.101  | 2009.021  | NM_013313 | 4023.364  | 4532.729  | AF045229  | 18891.631 | 19233.301 |
| AF086257  | 9367.098  | 8287.381  | NM_014736 | 6211.767  | 5633.584  | NM_001840 | 17564.332 | 14663.011 |
| AF075056  | 816.015   | 865.318   | AK023886  | 2098.082  | 1685.346  | AK025099  | 4320.923  | 3447.152  |
| AC119751  | 1315.412  | 1217.325  | NM_002553 | 2969.611  | 3035.172  | NM_016098 | 51253.602 | 53512.949 |
| U00928    | 1439.866  | 817.55    | AJ404615  | 2599.403  | 2680.14   | NM_000394 | 798.327   | 626.316   |
| NM_002028 | 599.913   | 868.826   | NM_016053 | 23150.193 | 23105.809 | NM_000228 | 1284.186  | 1037.219  |
| AK002114  | 3618.941  | 6491.653  | AB007869  | 4183.906  | 4749.566  | NM_000830 | 2119.805  | 2554.409  |
| AL390184  | 899.72    | 1857.409  | AB046844  | 1425.097  | 1749.04   | NM_014587 | 496.221   | 317.284   |

|           |           |           |           |           |           |           |           |           |
|-----------|-----------|-----------|-----------|-----------|-----------|-----------|-----------|-----------|
| NM_01869  | 835.15    | 1488.453  | NM_000302 | 2942.109  | 4281.302  | NM_00520  | 962.577   | 1653.285  |
| AK026318  | 3097.985  | 2326.455  | NM_020120 | 3399.135  | 4316.008  | AF148950  | 2205.374  | 2316.524  |
| AF291673  | 2910.354  | 1368.654  | AK022900  | 1041.324  | 1119.683  | NM_001155 | 22270.75  | 27087.543 |
| NM_00436  | 10718.896 | 4124.765  | NM_001125 | 2301.959  | 2447.173  | M62896    | 53008.445 | 56101.719 |
| NM_01635  | 10989.121 | 5498.794  | AB023216  | 700.058   | 678.794   | NM_01773  | 4139.565  | 4245.397  |
| AJ296290  | 7698.261  | 3230.696  | NM_00226  | 49487.012 | 48231.586 | NM_00039  | 1125.378  | 1486.489  |
| NM_02018  | 7444.148  | 9466.808  | AF086261  | 2474.808  | 1655.877  | NM_000014 | 1176.997  | 1273.901  |
| NM_01802  | 1989.894  | 3699.779  | AF086367  | 952.208   | 366.175   | NM_00680  | 2060.324  | 1819.095  |
| AL389954  | 2176.445  | 2356.4    | AF086437  | 3174.104  | 2702.045  | NM_00253  | 2122.619  | 2276.142  |
| NM_01985  | 8752.688  | 7952.427  | AK025088  | 8447.685  | 11056.244 | AF235022  | 2075.429  | 2827.829  |
| NM_00611  | 13040.903 | 9607.273  | U79295    | 977.238   | 812.993   | AL137764  | 42644.551 | 35960.266 |
| AK026225  | 50421.25  | 41390.652 | AK002107  | 604.774   | 478.028   | NM_00166  | 20423.359 | 19635.436 |
| AL050032  | 2795.49   | 3911.128  | NM_00359  | 6299.126  | 5605.326  | NM_00071  | 1100.909  | 1092.369  |
| AF009304  | 3070.084  | 3322.6    | AF052181  | 4608.426  | 6042.988  | NM_00075  | 4337.988  | 4233.953  |
| AF086177  | 34151.129 | 30725.738 | AL050074  | 19748.072 | 22480.99  | AB040945  | 4975.148  | 3459.961  |
| NM_01894  | 2063.82   | 3653.37   | AK026436  | 1323.379  | 1008.747  | NM_00201  | 19055.303 | 17594.004 |
| AK021593  | 286.677   | 246.873   | NM_018061 | 2345.67   | 2203.333  | NM_002377 | 893.908   | 832.865   |
| Z36847    | 400.882   | 447.986   | NM_03319  | 2303.77   | 1973.984  | NM_00601  | 2646.821  | 1940.645  |
| D17187    | 3462.405  | 3246.774  | NM_015001 | 2481.479  | 2984.373  | AF161383  | 9946.404  | 8974.75   |
| AJ243672  | 1975.337  | 2045.717  | SR2       | 37637.41  | 47279.352 | NM_00041  | 22588.764 | 26814.686 |
| AL122087  | 2217.871  | 1685.158  | SR4       | 17927.953 | 29411.266 | AF224266  | 9922.014  | 9962.107  |
| NM_00433  | 8562.165  | 8438.979  | SR6       | 1527.387  | 2074.778  | U72882    | 51610.301 | 53238.941 |
| M31520    | 68537.781 | 66040.828 | SR8       | 5687.59   | 23710.762 | NM_014337 | 31174.449 | 27958.564 |
| NM_00202  | 1608.306  | 747.122   | SR10      | 17528.176 | 8498.122  | NM_007161 | 37945.414 | 30181.559 |
| AL050137  | 1211.483  | 681.5     | CY3Cy5    | 1194.181  | 97.861    | NM_014387 | 4419.161  | 4137.579  |
| AK024423  | 5458.251  | 2990.81   | AL109719  | 3001.433  | 4206.711  | NM_003641 | 10785.597 | 10803.027 |
| NM_00504  | 19225.568 | 13804.965 | AF086093  | 1586.433  | 2590.693  | NM_01246  | 4889.94   | 6763.951  |
| NM_00597  | 7442.701  | 8446.577  | NM_00365  | 1606.926  | 1203.632  | L29140    | 57587.039 | 60031.223 |
| NM_00628  | 18190.021 | 27517.494 | AK022119  | 21269.742 | 13219.436 | AK026448  | 9374.16   | 11014.16  |
| NM_020321 | 1293.945  | 1158.735  | NM_016644 | 2058.091  | 1706.012  | AK057418  | 5027.864  | 6679.386  |
| NM_01592  | 53891.945 | 48673.016 | AF085842  | 723.327   | 253.072   | AK024562  | 3395.087  | 3918.016  |
| AB011113  | 3281.055  | 3344.373  | AF147397  | 952.831   | 850.239   | NM_01406  | 2928.229  | 3268.813  |
| NM_004115 | 2215.564  | 2051.441  | AK027158  | 1107.543  | 632.86    | NM_00457  | 2489.883  | 2299.217  |
| NM_018287 | 2872.222  | 3094.634  | AK002187  | 1253.065  | 982.244   | NM_00007  | 1774.688  | 1975.487  |
| NM_00195  | 2779.688  | 2989.217  | AF085836  | 8458.824  | 7311.621  | NM_000697 | 3602.882  | 2993.638  |
| AF016004  | 3980.288  | 16496.232 | AL049449  | 4927.053  | 4757.129  | NM_000017 | 18330.98  | 16635.939 |
| NM_003567 | 5751.542  | 6181.173  | AL359654  | 2856.107  | 2617.189  | NM_000237 | 1503.122  | 1734.988  |
| NM_00731  | 1769.283  | 1048.767  | AK024224  | 2762.942  | 2785.769  | NM_01834  | 11061.36  | 11492.495 |
| L20686    | 2463.382  | 2122.785  | NM_01536  | 14838.104 | 15105.328 | AL122054  | 1985.198  | 2206.577  |
| NM_000304 | 2776.438  | 3770.621  | AF147371  | 968.034   | 1004.493  | AB023151  | 1505.734  | 1768.472  |
| AK023362  | 483.037   | 396.638   | AK023745  | 6774.254  | 5759.887  | NM_00014  | 32267.51  | 30149.307 |
| NM_00246  | 1608.378  | 2868.244  | NM_01898  | 3013.856  | 3274.82   | NM_00512  | 9255.95   | 7597.955  |
| NM_00267  | 4036.587  | 6588.578  | AF086254  | 5300.48   | 6313.905  | NM_02003  | 3101.583  | 2439.905  |
| NM_01243  | 16984.211 | 27064.559 | AF086294  | 349.128   | 588.56    | NM_01624  | 6493.256  | 5549.846  |
| NM_005007 | 7472.837  | 17525.631 | AK026893  | 2548.463  | 2059.353  | NM_01592  | 20231.236 | 15529.05  |
| AK024996  | 9713.809  | 7636.423  | AK026761  | 1035.536  | 535.439   | X03757    | 10449.883 | 7704.309  |
| NM_00125  | 611.131   | 359.581   | NM_01883  | 8906.236  | 7681.869  | NM_01865  | 42060.828 | 36987.656 |
| NM_004417 | 1061.612  | 667.447   | AF075083  | 1512.066  | 1374.723  | NM_00513  | 1746.589  | 2181.224  |
| NM_01229  | 14008.599 | 7267.408  | AK021454  | 1323.983  | 1326.958  | AK094513  | 1549.055  | 1895.886  |
| NM_002431 | 6477.834  | 2896.198  | AK022069  | 3377.941  | 2926.037  | NM_001183 | 14911.729 | 18630.949 |
| NM_001827 | 61488.766 | 51876.613 | AL137457  | 3508.765  | 2905.169  | NM_00089  | 5783.273  | 6779.04   |
| NM_02046  | 993.252   | 1460.548  | AF075092  | 929.952   | 892.604   | NM_00497  | 39959.223 | 38631.414 |
| AL079280  | 1168.702  | 2026.547  | AF085944  | 2158.013  | 2211.318  | AK021597  | 2797.46   | 4362.6    |

|           |           |           |           |           |           |           |           |           |
|-----------|-----------|-----------|-----------|-----------|-----------|-----------|-----------|-----------|
| NM_002853 | 9423.438  | 11321.016 | AL133038  | 2109.127  | 2386.474  | NM_005737 | 37804.121 | 41897.773 |
| NM_003174 | 4522.789  | 4634.842  | AL137414  | 1817.061  | 1922.132  | NM_000169 | 9058.723  | 9049.19   |
| NM_012307 | 5340.754  | 4453.786  | AL359574  | 6208.779  | 6308.167  | AF182814  | 3842.345  | 2962.049  |
| NM_002540 | 5523.769  | 4755.889  | AL137435  | 972.036   | 1332.314  | NM_005329 | 1665.312  | 1525.044  |
| NM_006371 | 8687.225  | 11994.934 | AL157463  | 879.751   | 996.388   | NM_000107 | 16584.477 | 19222.244 |
| NM_018834 | 4602.105  | 6591.814  | AL359604  | 1265.115  | 1519.013  | AL157445  | 6622.804  | 6078.129  |
| AK026882  | 3061.642  | 3719.235  | AK027189  | 1800.693  | 1975.053  | NM_001517 | 34970.172 | 34669.98  |
| NM_004574 | 3992.955  | 6421.625  | AK001910  | 8167.09   | 8456.46   | NM_005053 | 14839.147 | 13697.904 |
| NM_004848 | 15069.271 | 15984.079 | AK023892  | 1233.705  | 1404.102  | D86974    | 10546.631 | 8240.348  |
| NM_001944 | 1314.645  | 1769.257  | AF124368  | 2833.657  | 3004.442  | NM_018283 | 11410.904 | 9646.22   |
| NM_014813 | 1059.209  | 1081.179  | AF265210  | 4036.54   | 2955.217  | NM_001983 | 3814.959  | 3348.359  |
| AF014459  | 4877.856  | 5668.725  | AK024241  | 1677.379  | 1516.035  | NM_004993 | 587.226   | 383.793   |
| M64108    | 560.319   | 659.569   | AK025061  | 4348.026  | 3005      | NM_003384 | 9426.542  | 9466.096  |
| NM_001503 | 3064.588  | 5038.692  | AK023882  | 596.395   | 487.484   | Y12337    | 5035.104  | 3589.127  |
| NM_006302 | 6638.283  | 12167.676 | AK026750  | 5481.296  | 4860.879  | M29551    | 26218.191 | 23536.445 |
| AJ224875  | 8141.764  | 16484.57  | AF072164  | 3188.75   | 2766.811  | AB023148  | 1441.793  | 1425.54   |
| NM_002149 | 5375.238  | 5342.125  | NM_018610 | 782.69    | 688.864   | NM_002929 | 2558.143  | 2615.067  |
| AF043324  | 12141.503 | 6311.198  | AF083122  | 735.52    | 581.163   | BC028375  | 1991.99   | 2501.615  |
| AK024172  | 2805.041  | 1528.641  | AF147317  | 2895.817  | 3165.576  | AB026436  | 4421.622  | 5080.389  |
| NM_014814 | 11396.215 | 5894.626  | AF232216  | 3174.448  | 3046.13   | NM_016029 | 15315.36  | 17080.906 |
| NM_002797 | 38306.297 | 19650.451 | NM_017773 | 20026.77  | 16600.246 | CY3Cy5    | 5760.865  | 383.218   |
| AK024318  | 3098.587  | 2155.819  | AK021885  | 671.289   | 604.571   | NM_002103 | 72231.727 | 61787.195 |
| NM_016129 | 8973.876  | 9072.881  | AK022161  | 680.203   | 943.538   | NM_003379 | 38223.457 | 40011.691 |
| NM_002809 | 25805.986 | 39842.254 | AK021940  | 3205.338  | 4025.126  | AK000819  | 2482.753  | 5622.977  |
| NM_017912 | 2739.529  | 4401.377  | AK022189  | 1724.78   | 2056.767  | AF201941  | 3037.693  | 3059.301  |
| NM_000423 | 19928.283 | 16770.213 | AK022338  | 1659.92   | 1645.645  | AF143325  | 435.041   | 592.024   |
| AB046838  | 13240.164 | 15412.253 | U48696    | 2544.781  | 2080.861  | AF143878  | 631.541   | 478.648   |
| AK026339  | 1371.553  | 1410.334  | AF230316  | 6992.929  | 4428.694  | AF026941  | 773.549   | 1044.227  |
| X98411    | 5600.167  | 6836.165  | AK024515  | 15202.573 | 11660.747 | NM_007070 | 3643.705  | 3624.792  |
| AF116658  | 48985.449 | 48992.93  | AF085862  | 5594.524  | 4051.359  | AL133019  | 4990.199  | 4688.604  |
| NM_014865 | 9966.25   | 13395.684 | NM_017998 | 2037.964  | 1619.949  | AK026192  | 976.665   | 940.367   |
| AB032977  | 6786.687  | 11442.494 | AL049271  | 47419.961 | 47366.73  | NM_014895 | 1680.421  | 2105.698  |
| AK001725  | 2742.325  | 3711.498  | AK023079  | 34155.121 | 28681.02  | NM_017748 | 8347.434  | 8352.876  |
| NM_003036 | 3542.052  | 5459.384  | NM_019609 | 3669.9    | 3547.997  | AK025374  | 1630.375  | 1733.833  |
| NM_020529 | 25112.404 | 37548.492 | AK026198  | 4031.252  | 3655.662  | AK000005  | 5846.695  | 6090.284  |
| S72604    | 19603.092 | 25441.9   | NM_005001 | 18754.789 | 17345.857 | NM_002103 | 47943.199 | 44589.973 |
| NM_017984 | 1424.635  | 1027.229  | AK024175  | 2498.584  | 2471.921  | NM_003379 | 29159.775 | 27154.85  |
| AF038951  | 26094.621 | 38486.512 | NM_000510 | 3086.826  | 3227.438  | SR1       | 94593.023 | 62829.328 |
| NM_006492 | 744.595   | 1767.849  | NM_017787 | 2604.916  | 3463.552  | SR3       | 30900.85  | 20420.969 |
| AK021811  | 2622.007  | 5535.59   | NM_020315 | 18276.584 | 25517.037 | SR5       | 4872.021  | 3285.276  |
| NM_003428 | 1891.823  | 1194.339  | NM_005683 | 2128.182  | 1311.537  | NM_013288 | 1484.179  | 2223.497  |
| AF055030  | 4510.155  | 2998.246  | NM_020427 | 25028.598 | 15679.764 | AF071508  | 3321.844  | 6084.304  |
| AK000589  | 5228.018  | 2259.779  | AF085920  | 4180.867  | 3313.64   | L07265    | 64591.195 | 68292.328 |
| X53281    | 10714.516 | 6219.268  | AK023173  | 32519.201 | 26288.061 | D16472    | 6614.035  | 7959.837  |
| BC012782  | 6813.802  | 3819.091  | AK025225  | 1341.665  | 1236.338  | AF085823  | 798.209   | 1169.349  |
| AF132026  | 59275.949 | 61893.824 | U79275    | 19117.139 | 14359.364 | AK022467  | 1016.995  | 2165.517  |
| AL050353  | 3079.621  | 3123.007  | AJ227908  | 843.853   | 599.502   | NM_002813 | 41318.133 | 33692.344 |
| AB037788  | 30724.854 | 26676.254 | AF007193  | 2363.7    | 1946.415  | AK022745  | 21201.984 | 21243.602 |
| NM_004587 | 15782.099 | 12233.709 | AK022367  | 1512.505  | 1518.739  | AL049450  | 7909.063  | 8033.23   |
| NM_000975 | 56776.52  | 60902.887 | BC028589  | 2452.889  | 2431.498  | NM_005086 | 80415.984 | 65056.727 |
| AF147412  | 22203.734 | 19210.863 | AF088067  | 16324.265 | 16357.819 | NM_017606 | 2652.796  | 5674.716  |
| AK024570  | 36206.586 | 36153.805 | AK022213  | 1858.469  | 3098.477  | AK024644  | 10571.017 | 5428.711  |
| AF161401  | 21664.084 | 25131.973 | AF056441  | 7879.042  | 7641.585  | U68494    | 2723.24   | 3731.413  |

|           |           |           |           |           |           |           |           |           |
|-----------|-----------|-----------|-----------|-----------|-----------|-----------|-----------|-----------|
| NM_00099C | 56960.055 | 62549.012 | AK024142  | 336.344   | 400.303   | AK024523  | 5194.45   | 5631.392  |
| NM_01474C | 28310.1   | 38684.086 | Y10509    | 1584.363  | 1717.924  | AK024600  | 4726.163  | 4672.416  |
| NM_01595E | 50714.449 | 57456.129 | AK024389  | 14163.481 | 13847.468 | AK024543  | 3581.949  | 5611.821  |
| AK024601  | 11756.347 | 20515.559 | AK026793  | 2456.816  | 2794.993  | AK024624  | 46886.301 | 39364.66  |
| S68069    | 5946.501  | 5524.01   | NM_001672 | 1339.049  | 1441.207  | AK025090  | 2158      | 1874.124  |
| AB011095  | 1795.52   | 1066.767  | AJ276253  | 21585.623 | 20544.736 | AK024883  | 7803.494  | 6741.985  |
| NM_00248E | 50438.641 | 44940.156 | AF147314  | 2439.721  | 2995.266  | AF217989  | 10180.682 | 8128.156  |
| NM_00400E | 5791.915  | 8248.424  | NM_01898C | 14696.125 | 18158.154 | AL109696  | 2399.074  | 2686.54   |
| NM_00018E | 7193.649  | 4989.563  | AF086201  | 1888.498  | 2503.497  | AF086208  | 6289.076  | 6986.51   |
| BF244401  | 6392.035  | 3636.606  | AK024712  | 1720.619  | 1575.404  | AK023335  | 7912.687  | 7046.103  |
| NM_00471E | 55034.836 | 35101.398 | NM_002902 | 7941.483  | 5108.195  | AK023187  | 842.935   | 1241.776  |
| AL359585  | 9998.615  | 4690.792  | NM_02024E | 41094.625 | 25632.891 | AK022231  | 1232.706  | 2349.854  |
| AB046850  | 13872.71  | 7002.932  | X89670    | 3622.616  | 2821.948  | NM_01903E | 1380.149  | 1564.162  |
| NM_014801 | 1068.705  | 745.575   | NM_00172E | 633.698   | 678.596   | AL133101  | 3374.93   | 2850.554  |
| NM_003642 | 11995.151 | 7085.079  | NM_00405E | 5972.594  | 4985.757  | AL157459  | 3361.875  | 2496.546  |
| AB027013  | 515.443   | 509.849   | NM_01442C | 328.871   | 263.946   | NM_01763C | 2018.307  | 3205.456  |
| BC032686  | 1659.481  | 3171.023  | NM_00148E | 1463.214  | 1036.961  | AK000778  | 3539.964  | 1902.848  |
| BF185480  | 7867.504  | 8151.999  | NM_020374 | 3272.646  | 2711.675  | AL133573  | 12086.197 | 10839.371 |
| NM_00212E | 53741.629 | 49625.645 | NM_014922 | 5117.076  | 4027.401  | BC024924  | 12708.091 | 13023.096 |
| NM_00710E | 775.013   | 598.048   | AF183570  | 1091.699  | 962.229   | NM_01790E | 6240.137  | 6836.937  |
| NM_003074 | 14380.863 | 15307.26  | NM_005497 | 62977.785 | 58930.68  | AL110286  | 8658.845  | 8384.585  |
| AL360195  | 3202.963  | 3962.327  | AK024048  | 3829.452  | 4224.831  | AL162066  | 45401.75  | 43584.023 |
| U14383    | 2305.394  | 2999.578  | AB033093  | 4371.124  | 4126.084  | NM_01609E | 37081.289 | 28237.016 |
| NM_01781C | 3372.736  | 3620.687  | NM_005912 | 933.241   | 1247.025  | U79290    | 2972.015  | 2414.574  |
| NM_003181 | 49605.793 | 55778.957 | NM_00590E | 51526.195 | 46759.664 | X98114    | 736.97    | 846.55    |
| NM_004451 | 16306.455 | 26152.758 | AK021879  | 1092.566  | 786.299   | NM_01415E | 576.714   | 393.236   |
| NM_004364 | 1010.776  | 1191.559  | AL355717  | 874.351   | 813.09    | D87682    | 2282.537  | 3369.552  |
| NM_02039E | 7279.627  | 9739.153  | AK055991  | 1295.716  | 1606.471  | M85205    | 2387.542  | 5918.332  |
| NM_00342E | 3890.216  | 4823.792  | AF113697  | 2592.307  | 4182.446  | AF223389  | 855.637   | 1495.492  |
| NM_01338E | 12742.732 | 10512.793 | AK022326  | 6678.282  | 7139.488  | NM_01629E | 4931.776  | 4922.361  |
| AK026232  | 14905.252 | 14608.004 | AF085991  | 4328.755  | 5251.543  | AK002146  | 1482.782  | 1690.317  |
| NM_014892 | 3955.008  | 3459.828  | NM_00194E | 3927.082  | 2639.083  | AB007970  | 1937.682  | 1748.236  |
| AK023827  | 4035.654  | 3254.728  | NM_004927 | 10814.015 | 6257.615  | AF130107  | 4119.517  | 4107.071  |
| NM_001117 | 804.667   | 659.662   | AB040928  | 1187.396  | 1139.011  | NM_00315E | 2380.527  | 2556.701  |
| NM_000231 | 353.645   | 341.284   | NM_00145E | 16323.237 | 14578.812 | AK023494  | 1183.001  | 1055.152  |
| L07517    | 3965.417  | 2259.525  | NM_01551E | 39784.633 | 36564.816 | NM_01549E | 16066.02  | 14317.691 |
| AK022451  | 936.024   | 801.2     | NM_00621E | 7819.043  | 5401.276  | NM_00693E | 854.678   | 1214.058  |
| NM_01435E | 59959.383 | 62069.949 | NM_00444E | 22152.615 | 16649.836 | AF132204  | 7640.13   | 7071.419  |
| BM918441  | 1062.924  | 1158.483  | NM_00193E | 471.953   | 488.294   | AK022874  | 12268.811 | 11453.34  |
| AA878880  | 904.169   | 1939.213  | NM_01741E | 1469.481  | 1354.426  | AK024602  | 42415.922 | 38049.219 |
| AA150828  | 5535.621  | 6932.437  | NM_005544 | 985.58    | 833.003   | NM_018507 | 1039.938  | 787.314   |
| H90764    | 921.269   | 1067.942  | NM_002964 | 64601.109 | 58627.66  | AK025503  | 3209.352  | 3480.527  |
| AI859208  | 1922.894  | 1916.229  | AF311862  | 67525.102 | 67161.992 | AF130073  | 4286.452  | 3573.804  |
| H64379    | 9127.649  | 11440.158 | NM_00321E | 3801.59   | 3132.831  | AK024225  | 19315.209 | 16126.7   |
| BE208258  | 58556.613 | 62863.871 | NM_016447 | 2720.333  | 2634.512  | AF086334  | 787.436   | 462.607   |
| BI833114  | 603.781   | 872.343   | NM_01562E | 9793.493  | 10287.869 | AL137602  | 449.736   | 289.403   |
| T72202    | 6609.583  | 7858.563  | NM_00489E | 9219.478  | 8441.511  | U00949    | 1121.929  | 2020.678  |
| BI831922  | 5653.362  | 8099.9    | AB006628  | 32241.818 | 25880.361 | NM_00726E | 42027.813 | 35125.207 |
| M69238    | 3237.347  | 4529.252  | AF272036  | 4078.791  | 3336.313  | NM_01478E | 5895.382  | 6525.885  |
| AA664180  | 1255.912  | 1836.989  | AF231023  | 3333.915  | 2489.112  | NM_01405E | 8787.229  | 8496.88   |
| M80244    | 749.125   | 1115.411  | NM_00514E | 8671.874  | 8111.904  | NM_002571 | 704.147   | 669.318   |
| AA599158  | 31852.541 | 30880.189 | NM_00474E | 4293.344  | 4454.901  | NM_00493E | 6456.352  | 6744.431  |
| BE294756  | 424.611   | 482.17    | AF146019  | 8181.241  | 8197.236  | NM_00142E | 13648.509 | 12463.341 |

|           |           |           |           |           |           |           |           |           |
|-----------|-----------|-----------|-----------|-----------|-----------|-----------|-----------|-----------|
| NM_000696 | 12796.233 | 9204.951  | Z36782    | 9021.517  | 9937.899  | NM_01571C | 1822.296  | 1671.572  |
| L08240    | 3952.411  | 3745.276  | M70435    | 612.569   | 753.695   | NM_01415E | 7746.915  | 6341.4    |
| NM_017952 | 3852.795  | 2614.25   | NM_00349C | 50825.973 | 45114.961 | AK021591  | 3501.94   | 3361.01   |
| NM_00294C | 5065.571  | 3406.149  | AF508940  | 7090.72   | 3932.39   | NM_01467E | 3598.33   | 3373.593  |
| NM_016081 | 11260.825 | 8518.174  | NM_020237 | 1331.976  | 1087.017  | NM_01404C | 9002.317  | 14598.853 |
| NM_00638E | 14714.969 | 8779.633  | AF130051  | 1053.432  | 923.683   | AK000799  | 7975.778  | 11048.688 |
| M30818    | 2123.003  | 1385.685  | M25753    | 22271.762 | 36733.77  | NM_015582 | 822.313   | 864.589   |
| NM_000163 | 1038.699  | 702.052   | NM_003883 | 3859.704  | 3438.978  | AK027091  | 1250.745  | 943.56    |
| NM_00575E | 9546.093  | 10079.511 | NM_014929 | 3116.671  | 2391.795  | NM_00152E | 3576.636  | 4648.214  |
| NM_00332E | 58400.465 | 67232.891 | NM_004203 | 19209.885 | 14831.596 | U31738    | 3504.745  | 3071.77   |
| NM_00329E | 56571.32  | 64597.148 | NM_001951 | 1794.296  | 1730.297  | AF179890  | 11919.867 | 9258.488  |
| U70981    | 657.15    | 873.086   | NM_002391 | 2443.181  | 1915.478  | AK021568  | 9904.4    | 6472.882  |
| NM_01433C | 14852.122 | 12140.579 | NM_00706E | 7597.954  | 6605.22   | Z36838    | 2534.856  | 734.71    |
| NM_007034 | 2156.27   | 1924.369  | NM_003674 | 64357.551 | 60771.059 | NM_00107E | 6051.38   | 5962.481  |
| NM_005261 | 462.07    | 1009.65   | NM_001197 | 6553.534  | 6499.823  | NM_000552 | 11658.301 | 12034.332 |
| NM_00156C | 1064.641  | 1539.735  | NM_006682 | 1628.589  | 1482.621  | AK000860  | 8607.407  | 6545.334  |
| NM_001783 | 56801.047 | 64804.926 | NM_00641C | 1619.501  | 1516.923  | NM_014961 | 1321.886  | 947.938   |
| J03171    | 10132.409 | 13595.088 | NM_014977 | 63495.094 | 58686.832 | NM_02014E | 5753.157  | 4461.273  |
| NM_00585E | 745.277   | 1206.265  | AK026325  | 5239.826  | 4378.417  | AK021529  | 7910.486  | 7341.734  |
| NM_004323 | 36768.426 | 45117.566 | U83857    | 766.018   | 1184.584  | AB037845  | 9138.8    | 9016.409  |
| NM_00231C | 1084.782  | 1279.256  | NM_00123C | 1045.216  | 1214.671  | NM_00598C | 2132.274  | 3202.489  |
| NM_005312 | 8930.689  | 11178.263 | AK025662  | 2664.728  | 2679.983  | AL137579  | 15762.756 | 32883.582 |
| NM_00421C | 32045.385 | 28772.357 | NM_000201 | 14096.054 | 13037.854 | NM_012383 | 7846      | 10534.605 |
| NM_02014C | 6392.027  | 5316.603  | AB011539  | 4069.57   | 4635.594  | AJ271684  | 1851.589  | 1245.772  |
| NM_007214 | 14019.891 | 13687.567 | U37028    | 9154.082  | 9625.9    | AF255342  | 15861.059 | 14179.163 |
| NM_000311 | 21019.127 | 13442.202 | AB014597  | 3112.297  | 3619.111  | NM_00330C | 17797.049 | 12476.277 |
| NM_01790E | 6065.439  | 3418.564  | NM_001793 | 47462.879 | 46675.852 | AK026682  | 7654.544  | 4475.474  |
| NM_00633E | 20107.344 | 13043.078 | S81361    | 707.383   | 479.676   | NM_003942 | 2642.993  | 2565.332  |
| NM_00078E | 9039.884  | 4290.731  | AK024313  | 18357.662 | 14381.018 | NM_006471 | 17994.422 | 8969.446  |
| AK023180  | 242.977   | 145.757   | NM_003891 | 7941.885  | 5555.794  | NM_00416E | 1738.497  | 539.569   |
| NM_00251E | 790.713   | 371.316   | AL359575  | 1605.051  | 1421.919  | NM_00036E | 2569.384  | 1349.173  |
| NM_017731 | 1256      | 1474.585  | NM_002022 | 1135.49   | 1063.919  | NM_01658E | 2889.817  | 1080.052  |
| AB040891  | 5451.111  | 10766.104 | NM_015524 | 2133.883  | 1892.696  | AK023847  | 468.363   | 479.202   |
| AB037780  | 657.728   | 704.18    | NM_001673 | 23967.447 | 18658.496 | NM_00386C | 8217.972  | 7461.624  |
| AK025616  | 934.581   | 719.353   | AK023167  | 821.315   | 649.337   | NM_005414 | 1524.821  | 1141.765  |
| NM_00725E | 1173.314  | 1210.39   | NM_01651C | 6474.537  | 6889.399  | NM_00446E | 32427.764 | 27979.336 |
| NM_00104E | 4434.538  | 6306.544  | NM_01427C | 11107.564 | 10110.449 | NM_016031 | 13258.782 | 11818.317 |
| NM_005697 | 34844.785 | 40616.645 | NM_000071 | 13928.008 | 11892.994 | NM_004804 | 4136.708  | 2750.565  |
| NM_00309E | 9617.395  | 12841.937 | NM_006843 | 7743.456  | 7366.061  | M92439    | 29486.072 | 25518.08  |
| NM_004781 | 6361.201  | 10975.633 | NM_004321 | 6403.236  | 9448.94   | AL117665  | 9864.144  | 9798.119  |
| NM_01631E | 760.355   | 1136.438  | AF311212  | 6748.021  | 7879.738  | AF263541  | 3641.8    | 4418.226  |
| NM_018303 | 3206.001  | 3375.035  | NM_00691E | 1997.913  | 1827.584  | AK027169  | 1135.486  | 2203.837  |
| NM_01475E | 8396.963  | 11947.628 | NM_00603E | 1494.626  | 1638.485  | BE873030  | 8819.068  | 21023.721 |
| AL133047  | 1084.198  | 1063.09   | NM_00608E | 19173.398 | 16504.283 | NM_00244C | 836.791   | 1400.841  |
| NM_005124 | 4220.885  | 5503.798  | NM_00452C | 11073.763 | 8555.407  | NM_00362E | 2308.934  | 2353.68   |
| AK000947  | 10088.677 | 9049.21   | AK027118  | 4493.422  | 3704.468  | BC006990  | 11266.699 | 10853.343 |
| NM_003897 | 8464.213  | 6715.338  | AK022882  | 29627.514 | 19416.65  | NM_002277 | 7516.607  | 5434.199  |
| NM_01416E | 35307.469 | 18669.623 | NM_00610E | 9676.754  | 12667.229 | NM_019114 | 6152.122  | 7337.305  |
| AL442085  | 8301.695  | 5462.512  | NM_005981 | 3484.733  | 3337.839  | M33552    | 33730.367 | 43242.117 |
| J03250    | 687.862   | 321.122   | AF210651  | 4064.787  | 4284.928  | AJ252060  | 3959.46   | 5361.433  |
| NM_013313 | 6872.329  | 4604.803  | AF090942  | 1559.931  | 1758.466  | NM_006403 | 7807.303  | 7701.803  |
| NM_01473E | 13786.927 | 8856.598  | NM_01459E | 15518.728 | 9424.684  | NM_018977 | 1079.889  | 875.711   |
| AK023886  | 4605.484  | 4321.463  | NM_01478E | 1358.632  | 745.501   | AJ001402  | 2438.168  | 819.062   |

|           |           |           |           |           |           |           |           |           |
|-----------|-----------|-----------|-----------|-----------|-----------|-----------|-----------|-----------|
| NM_002553 | 9461.264  | 15659.716 | AB046784  | 8579.287  | 6908.181  | NM_00454C | 1561.941  | 1244.903  |
| AJ404615  | 9163.982  | 9494.795  | X52402    | 10714.77  | 9751.374  | L25628    | 1249.287  | 1188.86   |
| NM_016053 | 46815.887 | 38741.559 | AL133663  | 1431.469  | 1114.34   | M37033    | 30507.326 | 25200.414 |
| AB007869  | 4650.927  | 4581.735  | NM_004992 | 1712.592  | 1459.898  | NM_007171 | 4333.076  | 2757.81   |
| AB046844  | 2455.985  | 2922.376  | NM_014462 | 4789.75   | 4668.763  | NM_00427E | 3401.96   | 3075.612  |
| NM_000302 | 5305.177  | 5005.469  | NM_014156 | 51577.363 | 55829.379 | NM_005632 | 2627.854  | 2144.717  |
| NM_01323E | 58930.191 | 49756.445 | NM_003137 | 13125.495 | 13544.928 | AK021499  | 843.738   | 759.913   |
| NM_01601E | 18808.91  | 21221.834 | NM_00693E | 34743.156 | 33300.348 | AK000336  | 4822.424  | 3199.6    |
| NM_02012C | 3894.948  | 5215.628  | NM_00451E | 1100.838  | 1055.626  | NM_00279E | 44271.18  | 34551.094 |
| AK022900  | 2783.792  | 3622.618  | NM_02015E | 11660.068 | 10092.033 | NM_006292 | 14435.983 | 15039.41  |
| NM_00112E | 779.378   | 1059.144  | AF176085  | 6976.19   | 6064.659  | AB007948  | 3193.19   | 4194.361  |
| AB023216  | 2424.937  | 3405.465  | NM_00698E | 39630.918 | 42006.703 | AB033066  | 5139.598  | 8251.913  |
| NM_00226E | 57147.02  | 60658.523 | AF265228  | 4045.646  | 4215.535  | AF126028  | 2148.173  | 4200.035  |
| NM_01440C | 15404.496 | 18114.268 | NM_003757 | 29749.627 | 26669.871 | NM_00701E | 32248.672 | 36400.684 |
| AL157492  | 4279.868  | 4130.35   | AK025561  | 5098.455  | 4490.685  | NM_00707E | 1000.067  | 1112.632  |
| AL353957  | 6057.866  | 5293.642  | NM_018602 | 56335.941 | 54200.863 | NM_016042 | 1072.891  | 707.082   |
| AK023827  | 4998.385  | 6295.511  | NM_00409E | 3391.321  | 3494.956  | NM_01764C | 1705.126  | 1076.107  |
| NM_001117 | 843.111   | 926.023   | NM_01762E | 16858.277 | 15540.672 | NM_017721 | 4071.41   | 4716.724  |
| NM_000231 | 362.099   | 452.364   | AL049681  | 3678.7    | 3674.954  | AK024167  | 8148.486  | 10318.449 |
| L07517    | 4086.526  | 3363.974  | NM_006584 | 1014.572  | 1412.496  | NM_00502E | 7126.824  | 2727.958  |
| AK022451  | 1058.01   | 842.472   | NM_003551 | 6667.428  | 5064.971  | NM_00414C | 792.728   | 460.636   |
| NM_01435E | 59017.352 | 63038.16  | AF305210  | 1136.388  | 864.031   | NM_00286E | 34289.348 | 14536.915 |
| BM918441  | 923.252   | 824.173   | AK021900  | 6459.797  | 6647.598  | AF230809  | 8256.842  | 5281.068  |
| AA878880  | 775.289   | 997.432   | NM_002764 | 30912.25  | 25210.465 | NM_017894 | 60554.121 | 68070.5   |
| AA150828  | 5825.877  | 7761.647  | NM_019857 | 2179.835  | 2208.904  | NM_00650E | 19281.055 | 12426.13  |
| H90764    | 1013.462  | 1318.739  | NM_01545E | 53146.516 | 52367.648 | AK025447  | 3140.339  | 2850.634  |
| AI859208  | 2577.941  | 2370.245  | AF024702  | 18581.883 | 20230.605 | NM_002624 | 55266.672 | 64903.293 |
| H64379    | 7979.011  | 7001.172  | NM_001964 | 4196.989  | 4260.202  | AF006199  | 2274.916  | 1660.91   |
| BE208258  | 56007.004 | 62921.027 | NM_005962 | 19165.455 | 20401.453 | NM_004554 | 40548.145 | 34478.227 |
| BI833114  | 343.665   | 482.659   | X74864    | 11250.803 | 12033.538 | NM_01811E | 10423.431 | 8767.789  |
| T72202    | 5726.643  | 6017.648  | AK026804  | 5029.161  | 4553.343  | NM_01457E | 1831.733  | 1830.692  |
| BI831922  | 5599.803  | 6650.913  | NM_01617C | 36171.375 | 37682.113 | AL162035  | 3160      | 3136.251  |
| M69238    | 2993.427  | 3675.159  | NM_002114 | 830.515   | 885.813   | NM_006692 | 2170.614  | 2316.385  |
| AA664180  | 1456.226  | 1626.761  | NM_00616E | 4946.45   | 5120.197  | NM_003084 | 4072.261  | 3650.956  |
| M80244    | 632.855   | 869.752   | S72620    | 54376.359 | 50961.547 | NM_002582 | 16342.259 | 17360.492 |
| AA599158  | 26025.652 | 27107.592 | NM_016831 | 1907.514  | 1473.641  | NM_00100E | 62910.684 | 63661.816 |
| BE294756  | 637.08    | 716.052   | S73501    | 631.512   | 715.782   | NM_00102E | 63662.93  | 65567.914 |
| AK026092  | 2448.728  | 3421.166  | NM_005263 | 12280.693 | 13058.145 | NM_01423C | 15884.147 | 11692.55  |
| AK001175  | 3461.372  | 3203.725  | AB033022  | 16406.732 | 16171.268 | NM_00023E | 3850.757  | 2251.142  |
| NM_00294C | 5683.577  | 4782.068  | NM_000474 | 979.209   | 926.253   | NM_01587E | 1055.949  | 946.161   |
| NM_016081 | 12621.159 | 11277.355 | NM_016264 | 2332.312  | 2789.46   | AF068236  | 61429.93  | 47857.551 |
| NM_00638E | 15819.439 | 10192.263 | NM_00607E | 33667.246 | 32392.633 | U28480    | 1167.224  | 1022.786  |
| M30818    | 2288.612  | 1745.612  | AB037837  | 4678.452  | 6300.099  | NM_00010E | 26635.188 | 22601.98  |
| NM_000163 | 884.631   | 727.211   | NM_001155 | 17552.508 | 13820.026 | NM_01812E | 8164.084  | 5193.055  |
| NM_00575E | 8004.778  | 6208.354  | M62896    | 52872.555 | 46798.766 | NM_016931 | 23250.381 | 18131.057 |
| NM_00332E | 59158.785 | 55616.418 | NM_01773E | 3931.316  | 5595.223  | NM_004373 | 56885.625 | 56077.961 |
| NM_00329E | 54304.699 | 58697.609 | NM_00039C | 556.966   | 1116.846  | NM_00556E | 59496.516 | 65465.719 |
| U70981    | 813.696   | 1338.177  | NM_000313 | 925.675   | 1001.322  | NM_000162 | 9359.709  | 6882.875  |
| NM_01433C | 16164.617 | 16127.851 | NM_00149E | 61024.652 | 59545.707 | AK027067  | 757.753   | 869.406   |
| NM_007034 | 1970.728  | 2046.459  | AF263523  | 3416.242  | 4136.887  | NM_016287 | 17502.127 | 15155.292 |
| NM_005261 | 403.094   | 678.666   | L08441    | 26772.916 | 24889.322 | AK021661  | 918.286   | 911.138   |
| NM_00156C | 877.612   | 1171.51   | AA641953  | 2346.976  | 3016.428  | NM_003864 | 24456.633 | 21713.365 |
| NM_001783 | 58590     | 63971.762 | AI248827  | 8695.911  | 10032.491 | NM_006824 | 21278.838 | 18100.945 |



|           |           |           |           |           |           |           |           |           |
|-----------|-----------|-----------|-----------|-----------|-----------|-----------|-----------|-----------|
| J03171    | 9819.689  | 10463.895 | R45026    | 59609.176 | 58544.375 | NM_002107 | 3736.233  | 2743.427  |
| NM_005856 | 836.427   | 1109.411  | BI768063  | 2830.864  | 3197.191  | NM_002694 | 16631.684 | 11038.597 |
| NM_004323 | 37299.074 | 43209.25  | BG386057  | 744.106   | 843.339   | NM_004454 | 1723.842  | 1476.308  |
| NM_002310 | 684.529   | 896.383   | AI970239  | 9806.378  | 10464.308 | NM_000966 | 1107.598  | 680.349   |
| NM_005312 | 6773.506  | 8081.131  | AA496452  | 30290.982 | 34311.84  | U13706    | 2632.736  | 4843.869  |
| NM_004210 | 29542.074 | 26563.219 | X67594    | 13591.273 | 15662.812 | AF213356  | 2361.519  | 1396.97   |
| NM_020140 | 6310.281  | 7877.313  | AF363393  | 682.072   | 743.988   | BC035716  | 9687.106  | 4497.267  |
| AK026232  | 17334.098 | 19605.85  | BC008837  | 736.255   | 679.303   | NM_018014 | 8133.566  | 3483.24   |
| NM_014892 | 4867.278  | 5875.723  | NM_015869 | 1261.994  | 1229.509  | NM_002356 | 42287.625 | 24037.006 |
| NM_017909 | 6154.715  | 4062.207  | NM_001631 | 2829.555  | 2900.428  | NM_001312 | 647.266   | 613.009   |
| NM_006335 | 21360.289 | 16327.386 | AB000734  | 22939.225 | 21644.402 | AF007192  | 1779.754  | 1635.05   |
| NM_000786 | 9896.123  | 6026.29   | NM_000862 | 716.164   | 729.073   | NM_001276 | 10633.386 | 9040.015  |
| AK023180  | 316.325   | 187.078   | NM_005987 | 64856.379 | 59763.41  | NM_016157 | 2659.008  | 2013.878  |
| NM_002519 | 887.666   | 477.933   | X87838    | 6521.562  | 8936.211  | NM_014915 | 55288.461 | 34053.449 |
| NM_017731 | 1088.485  | 813.786   | AK023059  | 1796.625  | 2692.584  | NM_012286 | 9440.831  | 7788.412  |
| AB040891  | 4911.288  | 8276.766  | AF224266  | 8335.007  | 6874.42   | NM_002195 | 22764.061 | 19480.418 |
| AB037780  | 798.414   | 1367.765  | U72882    | 52710.676 | 47188.195 | D84294    | 8361.961  | 5538.139  |
| AK025616  | 922.947   | 916.531   | NM_014337 | 38372.801 | 41904.961 | X59770    | 3188.295  | 2630.579  |
| NM_007256 | 1140.069  | 1123.35   | NM_007161 | 39457.055 | 44719.219 | K02765    | 18840.539 | 15624.323 |
| NM_001045 | 3386.239  | 3790.328  | NM_014387 | 5211.174  | 5449.545  | M65134    | 2628.337  | 2290.241  |
| NM_005697 | 26703.59  | 31130.809 | NM_003641 | 10216.465 | 9702.862  | BG539651  | 22237.635 | 17958.24  |
| NM_003099 | 9923.405  | 14986.644 | NM_012463 | 4954.508  | 4978.68   | N52646    | 56491.035 | 58150.945 |
| NM_004781 | 6388.534  | 9174.757  | L29140    | 52749.172 | 58382.125 | AW160671  | 57560.484 | 44936.453 |
| NM_016315 | 782.801   | 874.076   | AK026448  | 11274.968 | 13392.412 | BI870529  | 18917.061 | 16199.82  |
| NM_018303 | 3347.254  | 3627.004  | AK057418  | 8407.053  | 8689.943  | AA702698  | 2315.595  | 2020.153  |
| NM_014758 | 7578.51   | 9096.709  | L37199    | 876.986   | 949.026   | AI681514  | 3209.118  | 2263.314  |
| AL133047  | 756.843   | 663.531   | NM_007260 | 3283.033  | 3656.766  | NM_001300 | 5394.085  | 4546.04   |
| NM_005124 | 4095.686  | 4695.697  | AF148646  | 22012.145 | 21992.418 | BG748827  | 18204.146 | 23776.287 |
| AK000947  | 10606.203 | 13199.803 | AL110218  | 6166.058  | 6073.13   | BG760342  | 5092.242  | 6234.574  |
| L08240    | 4049.704  | 3983.038  | AB023201  | 5917.852  | 6530.207  | AA703141  | 2693.056  | 2495.63   |
| NM_017952 | 3922.227  | 4424.586  | X00094    | 3957.861  | 4475.072  | AI122630  | 14145.431 | 7607.539  |
| NM_014165 | 35579.422 | 20828.643 | NM_003775 | 16698.309 | 16308.729 | AF086790  | 4292.813  | 1801.916  |
| AL442085  | 8227.314  | 5918.23   | NM_002082 | 33196.32  | 31836.016 | AK025966  | 7615.593  | 6275.11   |
| J03250    | 630.183   | 473.413   | NM_002922 | 25655.131 | 19921.561 | NM_014440 | 652.946   | 725.141   |
| NM_013313 | 6887.126  | 4977.776  | AF155657  | 16713.684 | 15311.443 | NM_018725 | 1757.94   | 2063.973  |
| NM_014736 | 13800.65  | 7974.097  | NM_006056 | 24627.354 | 25782.252 | NM_003081 | 54603.836 | 55896.762 |
| AK023886  | 4400.286  | 2514.149  | AF045229  | 17665.137 | 21932.307 | NM_016495 | 2415.388  | 2414.118  |
| NM_002553 | 7255.054  | 6368.588  | NM_001840 | 16710.555 | 21322.242 | D50402    | 57479.016 | 56100.273 |
| AJ404615  | 9295.778  | 9177.094  | NM_016099 | 61819.57  | 54995.254 | M73547    | 24303.543 | 22480.803 |
| NM_016053 | 48740.961 | 44313.266 | NM_000394 | 879.118   | 910.82    | AF181722  | 1014.707  | 882.287   |
| AB007869  | 5453.543  | 6146.936  | NM_000072 | 982.351   | 668.454   | NM_003687 | 8587.409  | 7168.588  |
| AB046844  | 2079.851  | 2962.284  | NM_000697 | 2732.02   | 2033.743  | NM_004134 | 11597.49  | 9919.827  |
| NM_000302 | 5381.116  | 4116.282  | NM_000017 | 19123.467 | 18475.906 | NM_005955 | 20478.82  | 16909.678 |
| NM_013235 | 54273.227 | 49888.813 | NM_000237 | 1329.865  | 1836.947  | NM_004046 | 2948.033  | 2025.3    |
| NM_016015 | 18465.762 | 18652.27  | NM_018346 | 13976.082 | 13833.74  | BE548044  | 1093.654  | 1034.35   |
| NM_020120 | 3316.626  | 4114.001  | AL122054  | 1719.315  | 1900.06   | NM_012428 | 6079.63   | 4788.762  |
| AK022900  | 2519.015  | 2645.357  | AB011182  | 329.018   | 781.498   | NM_013266 | 20350.949 | 14596.945 |
| NM_001125 | 721.048   | 993.1     | AB023151  | 1512.629  | 1619.974  | NM_001728 | 9641.958  | 13555.128 |
| AB023216  | 2457.01   | 3080.835  | NM_000140 | 33190.977 | 40343.586 | NM_003824 | 16559.07  | 11962.364 |
| NM_002266 | 58395.82  | 60053.637 | NM_005125 | 8753.046  | 9481.188  | NM_000686 | 2145.601  | 2285.496  |
| NM_014400 | 12832.388 | 14227.143 | NM_020038 | 3001.795  | 2611.385  | NM_012452 | 10828.049 | 8180.675  |
| AL157492  | 4316.012  | 4069.605  | NM_016246 | 8568.233  | 8254.067  | AF229166  | 1251.386  | 910.034   |
| AL353957  | 7523.858  | 9559.453  | NM_005136 | 1455.587  | 1675.326  | NM_006764 | 6801.646  | 3727.949  |

|           |           |           |           |           |           |           |           |           |
|-----------|-----------|-----------|-----------|-----------|-----------|-----------|-----------|-----------|
| NM_007214 | 15299.817 | 14684.617 | NM_004976 | 31461.418 | 34584.965 | NM_001386 | 6911.568  | 2463.2    |
| NM_000311 | 22195.107 | 19381.445 | NM_005737 | 47280.75  | 49830.289 | NM_001179 | 2008.641  | 2040.887  |
| NM_000231 | 388.117   | 315.285   | NM_001660 | 19235.588 | 20003.291 | NM_005313 | 43926.301 | 45982.547 |
| L07517    | 3644.643  | 3065.851  | NM_000710 | 1012.328  | 1155.075  | NM_017765 | 38945.129 | 33142.129 |
| AK022451  | 1192.256  | 1076.394  | NM_000752 | 4529.959  | 4811.189  | NM_000428 | 1744.071  | 1996.804  |
| NM_014359 | 48446.656 | 55770.309 | AB040945  | 3941.698  | 3375.912  | AB040967  | 1326.131  | 1083.427  |
| BM918441  | 2306.245  | 1757.391  | NM_002018 | 22760.57  | 22577.449 | NM_003578 | 643.723   | 514.555   |
| AA878880  | 522.322   | 369.883   | NM_002377 | 1025.88   | 1139.497  | NM_014721 | 1314.024  | 1315.98   |
| AA150828  | 5748.787  | 4616.987  | NM_006018 | 2985.868  | 2390.353  | AK026352  | 1970.29   | 3427.718  |
| H90764    | 1074.149  | 2019.926  | AF161383  | 10746.013 | 17440.055 | NM_016180 | 1779.802  | 1244.462  |
| AI859208  | 2222.352  | 2402.53   | NM_000410 | 28311.357 | 28527.512 | NM_005827 | 12607.137 | 9091.003  |
| H64379    | 9523.702  | 10472.931 | AF182814  | 2856.245  | 1472.154  | NM_003056 | 12742.52  | 13275.443 |
| BE208258  | 50374.668 | 57598.434 | NM_005329 | 2055.249  | 1987.234  | NM_016226 | 11492.539 | 12547.404 |
| BI833114  | 841.121   | 819.101   | NM_000107 | 15100.634 | 20793.211 | AK024311  | 1206.743  | 2117.832  |
| T72202    | 6234.058  | 6609.86   | AL157445  | 10449.919 | 12339.769 | AF052155  | 7041.742  | 7799.059  |
| BI831922  | 7195.429  | 10688.972 | NM_001517 | 32607.992 | 33804.816 | NM_005085 | 6954.457  | 3014.323  |
| M69238    | 2793.269  | 2932.614  | NM_005053 | 22313.139 | 32225.313 | AF060902  | 6312.797  | 3914.088  |
| AA664180  | 1449.975  | 1414.09   | D86974    | 10057.757 | 9554.654  | AF121858  | 28472.693 | 19272.893 |
| M80244    | 616.834   | 849.975   | NM_018283 | 11657.772 | 11166.719 | NM_013437 | 816.494   | 759.282   |
| AA599158  | 30177.582 | 28623.41  | NM_001983 | 4195.019  | 4896.742  | NM_017681 | 2021.005  | 1209.573  |
| BE294756  | 538.574   | 566.779   | NM_004993 | 624.03    | 473.953   | X57655    | 35959.727 | 14181.841 |
| AK026092  | 2304.606  | 2399.677  | NM_003384 | 11001.165 | 10762.975 | NM_018261 | 3744.509  | 2686.2    |
| AK001175  | 3798.796  | 3476.933  | Y12337    | 9531.137  | 12463.078 | NM_014796 | 2266.108  | 2673.434  |
| NM_003897 | 9417.104  | 13281.34  | M29551    | 30092.598 | 28946.117 | NM_005040 | 9557.462  | 8856.397  |
| NM_003299 | 47616.906 | 38110.336 | AB023148  | 1287.923  | 1376.745  | NM_016391 | 33355.34  | 30878.688 |
| U70981    | 449.553   | 559.796   | NM_002929 | 2502.1    | 2605.454  | M80783    | 714.942   | 573.355   |
| NM_014330 | 14159.262 | 8008.728  | BC028375  | 1728.56   | 1821.929  | AF075033  | 8642.078  | 7089.222  |
| NM_007034 | 1743.503  | 1284.435  | AB026436  | 7113.803  | 7112.272  | D50911    | 20021.328 | 17339.066 |
| NM_005261 | 351.082   | 327.033   | NM_016029 | 17172.027 | 16264.56  | AB011104  | 2294.194  | 2243.296  |
| NM_001560 | 698.234   | 550.395   | AK024562  | 5741.521  | 6456.732  | AK024069  | 13992.593 | 8494.74   |
| NM_001783 | 52977.391 | 59238.551 | NM_014066 | 2670.82   | 3528.838  | NM_004582 | 22745.691 | 15920.795 |
| J03171    | 11287.258 | 16725.131 | NM_004573 | 2734.49   | 3110.435  | NM_015640 | 29297     | 30921.492 |
| NM_005856 | 640.086   | 911.953   | NM_017736 | 2413.044  | 1725.991  | AF233450  | 1620.657  | 3952.056  |
| NM_004323 | 33457.043 | 32838.59  | NM_000313 | 762.065   | 679.822   | NM_000821 | 51257.617 | 58079.559 |
| NM_002310 | 923.764   | 871.199   | NM_001498 | 61462.648 | 59669.434 | NM_020121 | 808.979   | 343.496   |
| NM_005312 | 8172.233  | 8418.112  | AF263523  | 3538.687  | 4866.868  | NM_003145 | 41993.188 | 23143.125 |
| NM_001711 | 3436.883  | 4747.265  | L08441    | 26821.412 | 23252.977 | NM_001632 | 2801.182  | 1933.488  |
| NM_004210 | 26769.428 | 26080.26  | AA641953  | 2232.376  | 3222.531  | NM_012264 | 1909.831  | 963.614   |
| NM_020140 | 6409.483  | 7952.307  | AI248827  | 8973.866  | 9840.092  | AF311312  | 2412.333  | 988.721   |
| NM_001496 | 15568.976 | 19702.518 | R45026    | 53900.926 | 55072.773 | NM_014915 | 54354.75  | 65478.074 |
| NM_007029 | 1183.924  | 957.266   | BI768063  | 3007.599  | 2970.884  | NM_012286 | 6711.638  | 8147.251  |
| NM_001962 | 983.537   | 1173.538  | BG386057  | 895.969   | 1084.071  | NM_002195 | 17968.258 | 22489.439 |
| AK026232  | 18376.367 | 18250.686 | AI970239  | 9752.596  | 10278.063 | D84294    | 6994.788  | 4561.518  |
| NM_014892 | 4589.608  | 4210.856  | AA496452  | 30728.352 | 26944.434 | K02765    | 18003.688 | 14531.67  |
| AK023827  | 5201.987  | 5318.704  | X67594    | 17857.689 | 17445.234 | M65134    | 2749.487  | 2527.494  |
| NM_001117 | 1220.824  | 1131.33   | AF363393  | 932.838   | 2052.516  | BG539651  | 20726.289 | 17669.295 |
| AF283645  | 14785.176 | 10095.2   | BC008837  | 748.469   | 1040.009  | N52646    | 53972.215 | 59802.105 |
| NM_016575 | 1411.885  | 1139.406  | NM_015869 | 1433.887  | 1429.72   | AW160671  | 55883.418 | 47845.922 |
| NM_018557 | 713.341   | 540.301   | NM_001631 | 2690.363  | 2849.654  | BI870529  | 19155.707 | 20076.51  |
| NM_001045 | 3254.182  | 2216.866  | AB000734  | 21684.873 | 18416.113 | AA702698  | 2329.486  | 2395.373  |
| NM_005697 | 27179.051 | 18846.658 | NM_000862 | 646.203   | 765.72    | AI681514  | 3582.1    | 3022.347  |
| NM_003099 | 8728.336  | 8737.81   | NM_005987 | 59885.258 | 57247.781 | NM_001300 | 5304.92   | 5252.477  |
| NM_004781 | 6173.325  | 7639.437  | X87838    | 6788.14   | 8903.088  | BG760342  | 6815.792  | 10176.345 |

|           |           |           |           |           |           |           |           |           |
|-----------|-----------|-----------|-----------|-----------|-----------|-----------|-----------|-----------|
| NM_016315 | 618.176   | 687.206   | NM_000169 | 14908.391 | 15111.916 | AA703141  | 1977.09   | 1443.242  |
| NM_018303 | 3038.202  | 2678.098  | NM_000699 | 441.4     | 418.516   | AA195244  | 1859.92   | 1202.828  |
| NM_014758 | 7507.168  | 6571.166  | NM_014337 | 26197.902 | 21075.301 | AI122630  | 15116.911 | 8761.437  |
| AL133047  | 1042.466  | 877.432   | NM_007161 | 27170.586 | 19067.572 | NM_006585 | 13464.91  | 6436.989  |
| NM_005124 | 4592.166  | 6856.722  | NM_014387 | 3544.76   | 3041.063  | NM_002191 | 343.803   | 327.809   |
| AK000947  | 12525.832 | 18353.434 | NM_003641 | 10375.915 | 9199.733  | AB007875  | 5496.527  | 1431.185  |
| L08240    | 4726.273  | 5283.216  | NM_012463 | 4544.174  | 4638.821  | NM_003081 | 48171.848 | 54020.645 |
| NM_017952 | 4421.166  | 4976.623  | L29140    | 53411.055 | 57568.52  | NM_016495 | 1775.83   | 2530.037  |
| NM_002940 | 6400.595  | 6084.224  | AK026448  | 10863.419 | 11071.912 | D50402    | 42621.543 | 49692.523 |
| NM_016081 | 12987.563 | 14461.435 | AK057418  | 7271.482  | 6532.758  | M73547    | 18192.828 | 24843.529 |
| NM_006385 | 18630.322 | 17839.699 | L37199    | 579.716   | 654.129   | AF181722  | 351.398   | 448.61    |
| M30818    | 3326.18   | 3256.245  | NM_007260 | 3361.589  | 3712.363  | NM_003687 | 5182.314  | 4456.376  |
| NM_000163 | 1221.179  | 1284.01   | AF148646  | 23045.779 | 23769.275 | NM_005955 | 19742.346 | 18676.057 |
| NM_005755 | 9533.399  | 10783.537 | AL110218  | 6253.478  | 6512.416  | NM_004045 | 3304.29   | 2316.467  |
| NM_003325 | 53898.156 | 60860.586 | AB023201  | 6826.897  | 7050.707  | BE548044  | 1153.657  | 1208.427  |
| NM_014400 | 12688.7   | 9159.559  | X00094    | 5599.747  | 5962.069  | NM_012425 | 6298.169  | 5308.582  |
| AL157492  | 5716.535  | 3948.335  | NM_003775 | 22872.205 | 35414.023 | NM_013265 | 21326.197 | 14725.671 |
| AL353957  | 5633.318  | 3585.453  | NM_002082 | 36335.203 | 48105.023 | NM_001725 | 9063.875  | 8906.311  |
| NM_007214 | 15070.068 | 9120.308  | NM_002922 | 27173.215 | 23254.635 | NM_005565 | 951.207   | 1364.905  |
| NM_000311 | 20601.471 | 10856.513 | AF155657  | 15980.504 | 15262.76  | NM_003824 | 19719.385 | 26402.055 |
| NM_017905 | 9952.604  | 5131.666  | NM_006055 | 23010.15  | 23375.525 | NM_000685 | 2371.249  | 2775.305  |
| NM_006335 | 21476.811 | 14001.238 | AF045229  | 17216     | 18699.887 | NM_012452 | 11500.883 | 8575.727  |
| NM_000785 | 10576.044 | 7133.761  | NM_001840 | 17311.512 | 16903.42  | AF229166  | 1713.778  | 1459.359  |
| AK023180  | 482.533   | 815.057   | NM_016095 | 61505.973 | 58062.5   | NM_006764 | 7498.719  | 4673.057  |
| NM_002515 | 980.829   | 707.535   | NM_000394 | 743.052   | 1035.428  | NM_001385 | 8115.315  | 4017.877  |
| NM_017731 | 1512.643  | 1113.384  | NM_001155 | 20438.936 | 22840.822 | AF007192  | 1692.074  | 698.213   |
| AB040891  | 5142.316  | 6767.91   | M62896    | 60136.395 | 54201.293 | NM_017765 | 22240.674 | 25425.148 |
| AB037780  | 856.558   | 1371.743  | NM_000017 | 15278.736 | 10857.993 | NM_000425 | 952.93    | 1802.089  |
| NM_005845 | 48136.57  | 53645.297 | NM_000237 | 1372.613  | 939.249   | NM_003575 | 770.285   | 1247.145  |
| NM_016205 | 20068.377 | 24046.881 | NM_018345 | 10208.476 | 9282.965  | NM_014721 | 1094.083  | 1909.536  |
| AK075415  | 904.158   | 944.798   | AL122054  | 1794.64   | 1999.805  | AK026352  | 1475.353  | 2279.106  |
| AK025616  | 1025.118  | 1011.833  | AB023151  | 1505.672  | 1738.987  | NM_016180 | 2355.173  | 2089.427  |
| NM_018964 | 6535.727  | 8685.101  | NM_000140 | 31567.039 | 34362.852 | NM_005827 | 15569.084 | 13694.126 |
| NM_000080 | 2690.384  | 2487.66   | NM_005125 | 9254.663  | 8863.364  | NM_003055 | 14440.661 | 13744.807 |
| NM_001825 | 3193.033  | 3292.923  | NM_020035 | 2470.549  | 2130.497  | NM_016225 | 9078.631  | 6974.698  |
| NM_007255 | 969.178   | 1213.738  | NM_016245 | 8040.516  | 7387.261  | AK024311  | 1386.527  | 1597.548  |
| AK026092  | 2271.47   | 1296.106  | NM_005135 | 1503.755  | 1753.104  | AF052155  | 8129.525  | 8196.647  |
| AK001175  | 3152.3    | 1940.46   | NM_004975 | 33143.758 | 35735.016 | NM_005085 | 9779.298  | 10128.533 |
| NM_003897 | 8006.269  | 5128.511  | NM_005737 | 47935.363 | 50987.066 | AF060902  | 7643.472  | 6751.074  |
| NM_014165 | 36940.785 | 19876.029 | NM_001660 | 18980.334 | 21045.924 | AF121858  | 34608.605 | 27897.262 |
| AL442085  | 8502.035  | 7596.11   | NM_000710 | 1109.316  | 1434.089  | NM_013437 | 975.943   | 990.027   |
| J03250    | 766.448   | 620.003   | NM_000752 | 5360.31   | 6054.637  | NM_017681 | 2633.187  | 1609.348  |
| NM_013313 | 6966.871  | 6324.982  | AB040945  | 4587.575  | 4102.631  | X57655    | 38836.309 | 21933.355 |
| NM_014735 | 14483.719 | 12418.547 | NM_002015 | 23459.393 | 24914.686 | AK025966  | 7914.469  | 3685.553  |
| AK023886  | 4282.185  | 3256.522  | NM_002377 | 1049.044  | 1270.561  | NM_014795 | 2168.688  | 2429.964  |
| NM_002553 | 8111.724  | 7939.032  | NM_006015 | 2607.749  | 1872.469  | AL050288  | 42903.453 | 51559.191 |
| AJ404615  | 9045.072  | 7702.952  | AF161383  | 8532.582  | 11292.573 | NM_005040 | 8061.653  | 10895.009 |
| NM_016053 | 56380.902 | 55661.617 | NM_000410 | 29864.264 | 33944.457 | NM_016391 | 23563.207 | 27650.523 |
| AB007869  | 5775.91   | 7104.756  | AF224266  | 15798.805 | 17540.924 | M80783    | 506.757   | 755.267   |
| AB046844  | 2553.7    | 2900.422  | U72882    | 57554.363 | 52186.066 | AF075033  | 10466.501 | 12842.753 |
| NM_000302 | 7305.726  | 7903.818  | NM_005325 | 1874.033  | 1364.657  | D50911    | 22919.391 | 23694.752 |
| NM_013235 | 52754.074 | 50855.359 | NM_000107 | 15289.235 | 24825.781 | AB011104  | 2533.982  | 2961.506  |
| NM_016015 | 19836.918 | 21761.402 | AL157445  | 12001.616 | 15310.335 | AK024069  | 14428.599 | 12607.667 |

|           |           |           |           |           |           |           |           |           |
|-----------|-----------|-----------|-----------|-----------|-----------|-----------|-----------|-----------|
| NM_020120 | 3172.19   | 2926.742  | NM_001517 | 38564.461 | 50156.379 | NM_004582 | 27009.271 | 23474.469 |
| AK022900  | 2892.17   | 3556.1    | NM_005053 | 19582.215 | 26064.248 | NM_015640 | 29413.871 | 26480.963 |
| NM_001125 | 10560.785 | 10159.256 | D86974    | 8973.661  | 8598.84   | AF233450  | 1620.612  | 1731.334  |
| AB023216  | 2707.672  | 2392.487  | NM_018283 | 9465.777  | 8518.844  | NM_016233 | 4512.759  | 3414.995  |
| NM_002266 | 57895.484 | 50407.871 | NM_001983 | 3424.026  | 3891.211  | NM_000821 | 56346.117 | 63488.605 |
| CY3Cy5    | 956.843   | 147.622   | NM_004993 | 514.953   | 622.881   | NM_020121 | 910.661   | 1102.812  |
| NM_033196 | 1041.092  | 768.054   | NM_003384 | 9999.172  | 10209.374 | NM_003145 | 45047.289 | 30520.203 |
| NM_015001 | 4215.864  | 3268.112  | Y12337    | 6982.074  | 6653.63   | NM_001632 | 3010.865  | 2543.664  |
| AF086324  | 405.765   | 407.294   | M29551    | 27526.438 | 25494.963 | NM_012264 | 1934.27   | 1159.851  |
| AF086261  | 744.404   | 710.242   | AB023148  | 1211.513  | 1572.027  | AF311312  | 2787.387  | 1744.817  |
| AF086367  | 1180.152  | 835.464   | NM_002929 | 2943.935  | 3287.179  | NM_001179 | 453.557   | 422.88    |
| AF086437  | 956.171   | 650.247   | BC028375  | 1759.384  | 2444.036  | NM_005313 | 40430.363 | 28306.584 |
| AK025088  | 4893.867  | 2981.046  | AB026436  | 6463.697  | 7353.557  | NM_014915 | 50121.77  | 53067.574 |
| U79295    | 857.56    | 790.512   | NM_016029 | 15780.705 | 15693.421 | NM_012286 | 7401.619  | 10423.994 |
| AK002107  | 975.032   | 1209.555  | AK024562  | 5499.927  | 5808.851  | NM_002195 | 17988.555 | 23159.6   |
| NM_003596 | 1084.591  | 1988.599  | NM_014066 | 2828.054  | 3724.537  | D84294    | 7731.13   | 7558.78   |
| AF052181  | 3361.203  | 6414.754  | NM_004573 | 3797.884  | 5240.467  | X59770    | 3141.769  | 3596.979  |
| AL050074  | 1472.962  | 939.602   | NM_000072 | 1329.348  | 1471.58   | K02765    | 9938.722  | 10221.74  |
| AK026436  | 1301.262  | 669.237   | NM_000697 | 3589.607  | 4110.468  | M65134    | 1557.853  | 2159.359  |
| NM_018061 | 1748.935  | 1127.382  | NM_000313 | 572.271   | 458.967   | BG539651  | 21138.129 | 36412.957 |
| NM_033196 | 1035.771  | 576.972   | NM_001498 | 57089.473 | 57306.191 | N52646    | 57430.469 | 65956.297 |
| NM_015001 | 3502.28   | 2420.341  | AF263523  | 3527.513  | 3694.17   | AW160671  | 56674.84  | 65644.445 |
| SR2       | 45453.441 | 27487.473 | L08441    | 28311.84  | 28489.828 | BI870529  | 20932.271 | 32326.988 |
| SR4       | 12351.351 | 9268.672  | AA641953  | 2244.213  | 2653.968  | AA702698  | 3138.464  | 3968.569  |
| SR6       | 1706.9    | 1273.817  | AI248827  | 8910.087  | 8804.392  | AI681514  | 4222.199  | 3726.116  |
| SR8       | 7036.667  | 16777.17  | R45026    | 52052.512 | 54705.672 | NM_001300 | 5064.326  | 3985.111  |
| SR10      | 23007.623 | 6409.283  | BI768063  | 2939.932  | 3025.194  | BG748827  | 17414.104 | 14769.911 |
| CY3Cy5    | 1595.624  | 232.106   | BG386057  | 747.341   | 1016.336  | AA952897  | 16956.102 | 15977.246 |
| AF088014  | 757.612   | 577.533   | AI970239  | 9319.626  | 8604.708  | BG760342  | 7623.99   | 11096.065 |
| AL109719  | 548.204   | 458.709   | AA496452  | 32340.65  | 29766.771 | AA703141  | 2796.276  | 2701.92   |
| AF086093  | 1886.173  | 1885.622  | X67594    | 16134.207 | 16952.18  | AI122630  | 15351.425 | 12604.971 |
| U92022    | 1805.367  | 1546.642  | AF363393  | 489.447   | 549.565   | NM_006586 | 13980.146 | 9695.967  |
| NM_003650 | 797.55    | 551.268   | BC008837  | 789.09    | 917.211   | NM_002191 | 895.912   | 477.256   |
| AK022119  | 707.867   | 704.58    | NM_015869 | 1386.931  | 1593.972  | AB007875  | 6174.226  | 3835.922  |
| AL157488  | 302.299   | 287.565   | NM_001631 | 4453.152  | 5827.561  | NM_018261 | 3468.977  | 1875.242  |
| NM_016644 | 3553.547  | 5173.931  | AB000734  | 22884.023 | 23670.768 | NM_005955 | 9882.305  | 16323.714 |
| AF085842  | 570.707   | 491.744   | NM_000862 | 628.484   | 401.21    | NM_004048 | 3612.267  | 3824.783  |
| AF147397  | 1186.015  | 999.592   | NM_005987 | 59984.137 | 59916.813 | BE548044  | 1298.948  | 1528.074  |
| AK027158  | 1025.856  | 676.869   | X87838    | 6894.018  | 7769.679  | NM_012428 | 6923.852  | 9690.092  |
| AK002187  | 996.254   | 987.633   | NM_000169 | 14369.723 | 13562.036 | NM_013266 | 20270.088 | 22790.646 |
| AF085836  | 1291.563  | 1544.463  | NM_000699 | 626.727   | 445.913   | NM_001728 | 7381.353  | 10588.79  |
| AL049449  | 460.595   | 315.37    | AF182814  | 4004      | 3790.694  | NM_003824 | 19005.629 | 32224.727 |
| AF147347  | 335.08    | 193.071   | L37199    | 639.282   | 555.07    | NM_000686 | 3183.532  | 6960.945  |
| AL359654  | 703.929   | 379.943   | NM_007260 | 2978.35   | 2520.356  | NM_012452 | 13813.022 | 18760.895 |
| AK024224  | 3046.353  | 2258.396  | AF148646  | 20944.758 | 20530.424 | NM_006764 | 4678.766  | 4859.314  |
| NM_015362 | 9547.434  | 7085.663  | AL110218  | 3683.386  | 3983.746  | NM_005878 | 9805.22   | 10534.933 |
| AF147344  | 830.365   | 606.738   | AB023201  | 6325.796  | 5827.131  | AF308602  | 6388.468  | 4439.789  |
| AF147371  | 1053.123  | 700.617   | X00094    | 5667.162  | 5447.069  | AB011089  | 4344.958  | 2735.336  |
| AK023745  | 404.228   | 263.842   | NM_003775 | 18428.023 | 21974.156 | AF007192  | 2196.379  | 1356.334  |
| NM_018982 | 3454.062  | 4787.02   | NM_002082 | 30573.174 | 33754.375 | NM_001276 | 11894.345 | 8538.767  |
| AF086254  | 6233.874  | 5128.942  | NM_002922 | 25279.123 | 21150.402 | NM_016157 | 2610.149  | 1196.752  |
| AF086294  | 297.254   | 248.274   | AF155657  | 16277.176 | 13771.027 | NM_003053 | 5061.356  | 6222.096  |
| AK026856  | 1341.13   | 1077.134  | NM_006056 | 26440.164 | 28839.238 | NM_003044 | 3314.182  | 3936.776  |

|           |           |           |           |           |           |           |           |           |
|-----------|-----------|-----------|-----------|-----------|-----------|-----------|-----------|-----------|
| AL162033  | 536.079   | 386.707   | AF045229  | 16708.797 | 19989.979 | NM_006672 | 12009.035 | 14724.38  |
| AK026761  | 373.459   | 809.921   | NM_001840 | 16234.021 | 17338.648 | NM_00033E | 1044.33   | 1242.217  |
| NM_01883E | 12178.183 | 12802.565 | AK025099  | 4325.967  | 4091.006  | M31659    | 1607.505  | 2283.063  |
| AF075083  | 245.766   | 387.724   | NM_016099 | 52493.07  | 54762.738 | NM_00305E | 11994.307 | 16589.457 |
| AK021454  | 1909.701  | 2328.711  | NM_000394 | 952.55    | 1138.476  | NM_01622E | 12192.438 | 16464.865 |
| AK022069  | 868.114   | 935.722   | NM_00022E | 1885.043  | 3576.091  | AK024311  | 1071.249  | 1898.17   |
| AL137457  | 545.138   | 521.203   | NM_000830 | 2541.198  | 3451.453  | AF052155  | 6890.406  | 11703.726 |
| AF075092  | 435.575   | 535.057   | NM_014587 | 656.249   | 553.922   | NM_00508E | 9707.847  | 13327.282 |
| AF085944  | 385.142   | 413.668   | NM_005209 | 1211.65   | 1685.453  | AF060902  | 7745.03   | 11038.725 |
| AL133038  | 2259.113  | 1590.816  | AF148950  | 3673.159  | 3343.417  | AF121858  | 38113.059 | 42874.023 |
| AL137414  | 2445.03   | 1851.309  | NM_001155 | 22950.436 | 26392.975 | NM_017681 | 2490.265  | 2556.263  |
| AL359574  | 1672.574  | 1723.701  | M62896    | 61595.617 | 62160.762 | X57655    | 39139.051 | 46211.227 |
| AL133569  | 1233.859  | 943.508   | NM_01773E | 3765.777  | 5154.59   | AK025966  | 2539.218  | 3055.723  |
| AL137435  | 541.48    | 498.665   | NM_000390 | 470.186   | 725.478   | NM_01872E | 1581.848  | 1852.251  |
| AL157463  | 563.009   | 608.469   | NM_000014 | 1367.428  | 940.803   | NM_003081 | 50369.801 | 51814.816 |
| AL359604  | 764.49    | 648.422   | NM_006803 | 1838.969  | 1597.822  | NM_01649E | 2450.806  | 1631.489  |
| AK027189  | 2270.673  | 1446.915  | NM_002533 | 1937.832  | 1924      | D50402    | 52839.465 | 51427.391 |
| AK001910  | 601.815   | 425.253   | AF235022  | 1612.73   | 1313.763  | M73547    | 25119.404 | 16412.645 |
| AK023892  | 857.042   | 740.448   | AL137764  | 40561.262 | 38332.023 | AF181722  | 1942.655  | 1424.419  |
| AF124368  | 365.237   | 327.51    | NM_001660 | 17682.393 | 19023.906 | NM_003687 | 7732.097  | 4458.979  |
| AF265210  | 4397.728  | 3930.507  | NM_000710 | 1145.094  | 1439.986  | NM_004134 | 12540.436 | 5740.591  |
| AK024241  | 787.51    | 1038.927  | NM_000752 | 4667.297  | 4411.605  | NM_001632 | 3469.982  | 3913.45   |
| AK025061  | 944.814   | 856.278   | AB040945  | 4347.563  | 3760.969  | NM_012264 | 3354.175  | 3597.056  |
| AK023882  | 601.177   | 566.947   | NM_00201E | 23271.896 | 21852.184 | AF311312  | 2907.704  | 3094.344  |
| AK026750  | 597.111   | 521.836   | NM_002377 | 969.467   | 1178.075  | NM_001179 | 1145.075  | 1135.149  |
| AF072164  | 3399.674  | 3001.325  | NM_00601E | 2498.551  | 1960.53   | NM_005313 | 42073.391 | 50746.121 |
| NM_018610 | 840.511   | 877.552   | AF161383  | 8129.241  | 9628.689  | NM_01776E | 19560.082 | 23382.645 |
| AF181286  | 342.97    | 758.454   | NM_000410 | 31241.059 | 34992.738 | NM_00042E | 1779.835  | 2591.935  |
| AK025234  | 355.264   | 368.395   | AF224266  | 16223.705 | 18259.678 | AB040967  | 518.469   | 640.851   |
| AF083122  | 355.082   | 260.327   | U72882    | 59352.695 | 56800.063 | NM_00357E | 910.514   | 1155.14   |
| NM_017773 | 1232.365  | 858.772   | NM_014337 | 39952.422 | 45675.836 | NM_014721 | 1085.145  | 1618.699  |
| AK021885  | 1316.23   | 933.452   | NM_007161 | 40393.828 | 43990.961 | AK026352  | 2267.892  | 4935.704  |
| AK022018  | 362.815   | 210.179   | NM_014387 | 4982.516  | 5899.361  | AL137705  | 4859.896  | 8206.575  |
| AK022161  | 829.924   | 1568.82   | NM_003641 | 11462.81  | 11093.665 | NM_02034E | 535.353   | 395.084   |
| AK022296  | 658.848   | 904.276   | NM_012463 | 5236.166  | 6387.957  | AF169257  | 493.812   | 504.411   |
| AK021940  | 1070.536  | 942.548   | L29140    | 59171.586 | 57531.773 | NM_01484E | 2137.004  | 1461.312  |
| AK022052  | 376.51    | 417.192   | AK026448  | 14178.069 | 18872.77  | BF217766  | 929.357   | 603.251   |
| AK022189  | 779.933   | 555.877   | AK057418  | 8580.453  | 10003.327 | NM_000184 | 3674.35   | 1893.314  |
| AK022338  | 372.652   | 287.138   | AK024562  | 3352.912  | 2653.873  | NM_016180 | 2321.547  | 1145.569  |
| U48696    | 2603.345  | 3997.779  | NM_01406E | 2473.198  | 1708.342  | NM_000112 | 1978.897  | 1209.384  |
| AF230316  | 13393.488 | 9359.825  | NM_004573 | 2284.792  | 2619.816  | NM_00658E | 10863.209 | 11720.922 |
| L32136    | 802.899   | 789.327   | NM_000072 | 1774.602  | 1222.247  | NM_002191 | 1080.518  | 1477.85   |
| K00629    | 335.071   | 343.503   | NM_000697 | 3214.521  | 2939.743  | AB007875  | 2205.181  | 1840.876  |
| NM_00448E | 316.572   | 386.748   | NM_000017 | 18903.994 | 15782.132 | NM_018261 | 3345.643  | 3094.157  |
| AK024515  | 1068.357  | 1169.898  | NM_000237 | 1255.855  | 1634.765  | AK027150  | 415.643   | 625.661   |
| AF085862  | 5021.275  | 4153.93   | NM_01834E | 12023.965 | 11250.453 | NM_01479E | 2151.931  | 2645.255  |
| NM_01799E | 2782.19   | 2714.652  | AL122054  | 1767.833  | 1619.208  | AL050288  | 43248.742 | 41436.621 |
| AL049271  | 53122.773 | 54391     | AB023151  | 1422.081  | 1426.637  | NM_005040 | 8539.729  | 8971.868  |
| AK023079  | 52112.816 | 37962.422 | NM_000140 | 32593.34  | 35220.66  | NM_016391 | 31537.568 | 30189.635 |
| NM_01960E | 4578.843  | 4266.32   | NM_00512E | 9307.185  | 7974.146  | M80783    | 522.395   | 624.428   |
| AK026198  | 1088.927  | 1469.834  | NM_02003E | 2427.459  | 2118.742  | AF075033  | 10794.575 | 9518.077  |
| NM_005001 | 32454.211 | 27427.73  | NM_01624E | 7533.089  | 7543.692  | D50911    | 20951.525 | 20204.666 |
| AK024175  | 3083.508  | 2792.7    | NM_01592E | 35824.758 | 40713.609 | NM_004582 | 27669.891 | 26972.875 |

|           |           |           |           |           |           |           |           |           |
|-----------|-----------|-----------|-----------|-----------|-----------|-----------|-----------|-----------|
| NM_00051C | 3307.565  | 2724.427  | X03757    | 10626.064 | 11073.44  | NM_01564C | 28251.209 | 27536.98  |
| NM_017787 | 2685.6    | 3476.674  | NM_018658 | 44977.914 | 49499.055 | AF233450  | 1199.548  | 1102.111  |
| M20839    | 950.178   | 773.526   | NM_005136 | 1656.39   | 2093.81   | NM_016233 | 4078.999  | 2321.069  |
| NM_02031E | 15072.798 | 14314.385 | AK094513  | 2154.949  | 2263.241  | NM_000821 | 45749.945 | 42519.418 |
| NM_005683 | 2510.309  | 2060.099  | NM_001183 | 16336.327 | 19511.52  | NM_020121 | 740.888   | 546.153   |
| NM_020427 | 19295.873 | 18904.678 | NM_00089C | 10557.266 | 12300.742 | AF086448  | 3900.348  | 6150.605  |
| AJ011601  | 631.035   | 970.685   | NM_004976 | 35525.723 | 42919.715 | AB019391  | 469.239   | 610.817   |
| AF085920  | 1109.842  | 1771.514  | AK021597  | 3889.56   | 5450.251  | AF086386  | 3162.385  | 2149.318  |
| AK023173  | 4034.928  | 3822.111  | NM_005737 | 51010.582 | 50534.195 | AF086457  | 2038.962  | 2170.571  |
| AK025225  | 638.7     | 545.338   | NM_000169 | 8667.882  | 5197.875  | AK025469  | 2963.662  | 4184.311  |
| U79275    | 877.789   | 901.821   | AF182814  | 3264.716  | 2421.929  | NM_02023E | 5079.676  | 6458.471  |
| AJ227908  | 1286.383  | 1208.483  | NM_005329 | 1889.028  | 1796.001  | AF070581  | 3635.996  | 3095.31   |
| AF007193  | 586.335   | 587.249   | NM_000107 | 15472.877 | 17616.488 | AK024187  | 1706.955  | 1121.071  |
| AK022367  | 1408.267  | 1204.181  | AL157445  | 10697.208 | 10696.216 | NM_003307 | 1104.129  | 873.137   |
| BC028589  | 4327.02   | 3791.588  | NM_001517 | 33491.945 | 32683.555 | AF070565  | 1465.423  | 945.551   |
| AF088067  | 7810.842  | 7427.597  | NM_005053 | 17692.182 | 17368.486 | AK021644  | 2524.251  | 1409.688  |
| AK022213  | 529.549   | 520.77    | D86974    | 9585.396  | 7962.467  | NM_01246E | 8561.627  | 5319.14   |
| AF056441  | 4804.309  | 6536.836  | NM_018283 | 10445.812 | 9208.31   | NM_13426C | 11870.983 | 6451.69   |
| AK024142  | 865.151   | 715.833   | NM_001983 | 3898.27   | 4982.955  | SR2       | 45461.688 | 31465.137 |
| Y10509    | 585.976   | 572.114   | NM_004993 | 549.962   | 578.751   | SR4       | 13123.329 | 10332.108 |
| AK024389  | 7363.692  | 7467.88   | NM_003384 | 12177.217 | 13121.778 | SR6       | 1343.78   | 1197.761  |
| AK026793  | 2062.513  | 2300.206  | Y12337    | 9503.028  | 12818.019 | SR8       | 6616.05   | 16131.233 |
| NM_001672 | 671.318   | 993.367   | M29551    | 31217.678 | 35878.855 | SR10      | 19796.127 | 5153.368  |
| AJ276253  | 15049.657 | 17741.391 | AB023148  | 1398.761  | 1517.414  | CY3Cy5    | 3963.966  | 217.887   |
| AF147314  | 835.384   | 918.404   | NM_002929 | 3269.462  | 3274.616  | AF086084  | 1430.021  | 1025.96   |
| NM_01898C | 734.788   | 1160.704  | BC028375  | 2182.23   | 2543.507  | AL050184  | 1743.777  | 1792.27   |
| AF086201  | 2752.902  | 4235.164  | AB026436  | 6892.92   | 7919.119  | AF085853  | 595.19    | 1388.825  |
| NM_002902 | 9800.754  | 9826.512  | NM_016029 | 17718.453 | 16137.78  | AK027185  | 2780.458  | 5601.523  |
| NM_02024E | 16971.148 | 14231.479 | CY3Cy5    | 3006.146  | 367.692   | AK025576  | 3560.02   | 4727.89   |
| X89670    | 1165.293  | 2171.405  | NM_002103 | 56098.398 | 56172.902 | AF147385  | 813.899   | 776.099   |
| NM_00172E | 1087.438  | 1056.31   | NM_003379 | 35858.137 | 35963.418 | AL442086  | 8917.038  | 7263.094  |
| NM_004053 | 10208.15  | 9589.828  | AF143331  | 1455.179  | 1340.54   | BC034819  | 5123.566  | 3636.43   |
| NM_01442C | 610.72    | 1159.262  | AK000819  | 3641.359  | 3749.243  | AF147313  | 28470.127 | 18407.27  |
| NM_00148E | 2586.289  | 2125.819  | AF201941  | 2452.392  | 2427.063  | AF147382  | 75388.617 | 65561.648 |
| M20259    | 679.353   | 509.579   | AF143325  | 897.404   | 757.449   | AK001957  | 4595.838  | 2436.156  |
| NM_020374 | 4698.953  | 3806.375  | AF026941  | 1604.22   | 1812.233  | AK021833  | 2461.271  | 1363.201  |
| NM_014922 | 561.811   | 696.278   | NM_00707C | 3609.447  | 2555.593  | AF143867  | 1886.013  | 1163.418  |
| AF183570  | 677.004   | 579.152   | AL133019  | 4663.794  | 3804.673  | AK025889  | 5121.535  | 2654.629  |
| NM_005497 | 3248.119  | 2921.192  | AK026192  | 1217.378  | 858.458   | NM_01471E | 3680.243  | 2398.278  |
| AK024048  | 6228.459  | 7482.303  | NM_01489E | 2787.189  | 2159.609  | AK027134  | 2359.293  | 4737.615  |
| AB033093  | 4211.906  | 3296.458  | NM_01774E | 11000.071 | 8961.463  | AK024168  | 2300.949  | 3862.193  |
| NM_005912 | 1576.137  | 1462.537  | AK025374  | 1496.711  | 1434.814  | AK021793  | 6053.736  | 5557.291  |
| NM_00590E | 32949.148 | 37664.828 | NM_014901 | 11706.435 | 7607.965  | AK022255  | 19431.512 | 19026.352 |
| AK001948  | 500.25    | 473.238   | AK000005  | 4901.717  | 3993.298  | AF075079  | 1116.659  | 1409.323  |
| AK021879  | 409.191   | 598.783   | NM_002103 | 58433.711 | 48770.809 | AK022479  | 1314.738  | 1616.893  |
| AK055991  | 1626.557  | 2064.152  | NM_003379 | 35659.668 | 32302.166 | AK023572  | 1000.207  | 1058.803  |
| AF113697  | 1099.81   | 981.298   | SR1       | 85498.047 | 64456.184 | AF086004  | 41199.777 | 35445.281 |
| AK022326  | 413.271   | 480.489   | SR3       | 30750.502 | 29230.895 | AF086006  | 1448.098  | 1105.684  |
| AF085991  | 1949.465  | 1849.653  | SR5       | 4066.216  | 4292.056  | AL137318  | 3603.574  | 2566.419  |
| AF075007  | 716.339   | 1241.972  | SR7       | 4046.341  | 31627.1   | AL137482  | 1746.003  | 952.821   |
| NM_001943 | 867.318   | 724.619   | SR9       | 13105.439 | 2532.31   | AL162011  | 16386.041 | 8712.317  |
| NM_004927 | 12992.063 | 10072.184 | CY3Cy5    | 2037.484  | 200.274   | AL390177  | 739.854   | 518.331   |
| AB040928  | 1276.021  | 1229.284  | NM_01328E | 2400.662  | 3527.868  | AL137678  | 451.013   | 436.458   |

|           |           |           |           |           |           |           |           |           |
|-----------|-----------|-----------|-----------|-----------|-----------|-----------|-----------|-----------|
| NM_001459 | 2780.28   | 2599.637  | AF071508  | 4948.976  | 4747.413  | AK056111  | 1442.1    | 852.611   |
| NM_015513 | 3484.506  | 3220.977  | L07265    | 61361.105 | 59535.953 | Y13807    | 2182.354  | 1277.479  |
| NM_006219 | 14337.347 | 15285.98  | D16472    | 8341.842  | 8380.91   | unknown ( | 788.184   | 3425.265  |
| NM_004443 | 1841.571  | 2849.366  | AF085823  | 682.464   | 399.259   | AB037792  | 2472.232  | 4619.823  |
| NM_001932 | 583.664   | 624.659   | NM_002813 | 41955.949 | 41254.004 | AK022480  | 1126.219  | 1753.161  |
| NM_017412 | 1576.297  | 1476.113  | AK022745  | 20124.891 | 16861.584 | AL080082  | 1204.104  | 1822.214  |
| NM_005544 | 694.831   | 725.24    | AL049450  | 9747.574  | 9070.634  | AK021623  | 1651.883  | 2465.593  |
| NM_002964 | 2100.634  | 2538.268  | NM_005086 | 77539.492 | 64139.66  | AK023733  | 956.577   | 1399.047  |
| AF311862  | 11374.217 | 14036.971 | NM_017606 | 3160.909  | 2750.864  | AK027112  | 9181.908  | 13279.985 |
| NM_003215 | 5444.273  | 4500.11   | AK024644  | 13437.088 | 9670.87   | AL049314  | 10737.095 | 17015.361 |
| NM_016447 | 4260.798  | 4338.477  | U68494    | 1138.363  | 1352.795  | AF093016  | 48190.637 | 57417.672 |
| NM_015626 | 14052.071 | 13713.399 | AK021524  | 1738.106  | 1290.845  | AF161345  | 1574.899  | 2300.722  |
| NM_004899 | 13431.035 | 10053.273 | AL137360  | 6762.149  | 5812.363  | -         | 1383.933  | 2167.231  |
| AB006628  | 7856.171  | 6079.717  | AK024523  | 1914.137  | 2285.695  | AF090925  | 767.005   | 1489.624  |
| AF272036  | 1105.332  | 803.402   | AK024600  | 9820.102  | 11053.361 | NM_014163 | 30273.881 | 33054.699 |
| AF231023  | 3327.25   | 3470.821  | AK024543  | 7771.369  | 7023.603  | AK021974  | 2035.756  | 1926.148  |
| NM_005148 | 19398.73  | 24324.496 | AK024624  | 43822.469 | 34643.492 | AK022068  | 1295.996  | 1175.195  |
| NM_004746 | 2623.56   | 3924.943  | AK025090  | 4478.976  | 3664.278  | AK022229  | 3293.013  | 2426.6    |
| AF146019  | 11386.972 | 12712.003 | AK024883  | 7088.448  | 6443.052  | AK022362  | 12893.483 | 9573.722  |
| Z36782    | 4517.457  | 4605.614  | AF217989  | 10628.626 | 9428.337  | AK022004  | 11812.879 | 7863.927  |
| M70435    | 1144.429  | 994.792   | L77561    | 515.03    | 350.55    | AK022136  | 561.506   | 425.088   |
| NM_003490 | 9792.858  | 7729.003  | AL109696  | 2109.324  | 1489.991  | AK022390  | 2062.669  | 1240.922  |
| AF508940  | 8231.041  | 5400.711  | AJ011593  | 3908.359  | 4294.372  | U61096    | 1147.24   | 2009.408  |
| NM_005429 | 500.657   | 535.542   | AJ227907  | 732.26    | 869.739   | AF085865  | 8693.78   | 13458.378 |
| NM_020237 | 1455.646  | 1258.757  | X89743    | 885.339   | 617.518   | AK025521  | 774.126   | 1277.331  |
| AF130051  | 2749.537  | 2264.26   | U17621    | 1003.414  | 817.701   | NM_001053 | 67810.703 | 66872.68  |
| M25753    | 22840.908 | 17346.588 | AL049239  | 8145.635  | 6842.314  | Z70694    | 8647.635  | 12630.838 |
| NM_003883 | 6681.108  | 5650.853  | AF086208  | 7096.095  | 7703.817  | L77602    | 3082.46   | 4832.048  |
| NM_014929 | 5293.246  | 4509.498  | AK023335  | 7736.743  | 6221.047  | NM_015421 | 21018.809 | 31912.934 |
| NM_004203 | 14562.486 | 19667.52  | AK022231  | 1280.644  | 1354.683  | AF086081  | 10018.661 | 15926.483 |
| NM_001951 | 1732.651  | 1633.463  | NM_019033 | 2438.46   | 2262.921  | NM_018634 | 725.965   | 1328.731  |
| NM_002391 | 2960.497  | 2215.651  | AL133101  | 4669.622  | 5016.691  | NM_018111 | 1505.958  | 2379.886  |
| NM_007066 | 7902.307  | 6805.823  | AL157459  | 2986.278  | 3036.202  | AK023730  | 645.05    | 1593.322  |
| NM_003674 | 16629.201 | 17788.486 | AL353954  | 4485.379  | 3687.149  | AF161360  | 2280.222  | 4552.032  |
| NM_001197 | 10096.914 | 12433.234 | NM_017630 | 2570.921  | 2155.132  | AK021720  | 1833.294  | 3087.657  |
| NM_006682 | 974.843   | 1137.616  | AK000778  | 6066.354  | 5637.738  | NM_016497 | 62934.672 | 67427.813 |
| NM_006410 | 458.601   | 559.857   | AL133573  | 22330.316 | 18475.387 | AK000617  | 1320.438  | 1784.498  |
| NM_014977 | 16763.049 | 14489.237 | AK000115  | 6479.165  | 5730.271  | AK026293  | 1140.827  | 2626.014  |
| AK026325  | 4602.618  | 4718.066  | NM_017959 | 727.735   | 528.319   | AF009261  | 2014.349  | 2501.517  |
| U83857    | 1176.469  | 1727.25   | AK000958  | 3098.508  | 2698.755  | AL133086  | 2348.333  | 4485.646  |
| NM_001230 | 918.604   | 1195.642  | BC024924  | 16951.438 | 25060.555 | NM_012151 | 14732.466 | 35369.121 |
| AK025662  | 3960.921  | 6630.771  | NM_017906 | 7339.757  | 7854.517  | NM_018195 | 3899.78   | 5656.461  |
| NM_000201 | 26450.541 | 35320.188 | AL110286  | 13317.791 | 12920.907 | AK025532  | 33639.313 | 44552.5   |
| AB011539  | 1231.482  | 2365.979  | AL162066  | 56670.102 | 57516.918 | AF086383  | 799.563   | 1923.878  |
| U37028    | 1194.276  | 1059.044  | NM_016096 | 36119.191 | 31128.311 | NM_003522 | 1563.713  | 3468.388  |
| AB014597  | 3729.751  | 3102.457  | U79290    | 4224.089  | 4071.068  | BF217847  | 2400.665  | 4125.081  |
| NM_001793 | 12202.134 | 9268.073  | X98114    | 1627.096  | 1247.502  | NM_005320 | 11260.184 | 18369.229 |
| S81361    | 548.537   | 583.346   | NM_014152 | 721.628   | 627.461   | U79242    | 1038.151  | 1318.295  |
| AK024313  | 5038.497  | 3976.798  | D87682    | 2118.823  | 1625.344  | Y10519    | 1019.713  | 1929.673  |
| NM_003891 | 4199.059  | 3186.953  | AF321617  | 24343.223 | 21804.961 | AF056452  | 769.864   | 1651.857  |
| AL359575  | 2699.428  | 2113.595  | M85205    | 578.444   | 651.301   | AF119901  | 9056.456  | 14034.426 |
| NM_002022 | 714.009   | 735.814   | AF223389  | 1513.537  | 1405.816  | AL049782  | 726.097   | 1272.928  |
| NM_015524 | 2093.836  | 1745.604  | NM_000682 | 615.311   | 585.442   | AK001936  | 2262.753  | 3285.852  |

|           |           |           |           |           |           |           |           |           |
|-----------|-----------|-----------|-----------|-----------|-----------|-----------|-----------|-----------|
| NM_001673 | 41847.023 | 28335.943 | NM_016298 | 2662.226  | 2884.523  | AF222023  | 483.209   | 1148.882  |
| AK023167  | 1084.923  | 774       | AK002146  | 2720.812  | 2826.12   | AK001395  | 10787.137 | 15056.144 |
| NM_016510 | 4441.748  | 4583.96   | NM_003159 | 3361.465  | 3435.494  | S57803    | 13079.177 | 20131.766 |
| NM_014270 | 2555.262  | 2915.083  | AK023494  | 1476.771  | 1064.465  | AF131822  | 836.378   | 1112.937  |
| NM_000071 | 19059.65  | 17771.801 | NM_015492 | 22375.252 | 19867.561 | AK023131  | 4306.624  | 6321.178  |
| NM_006843 | 2805.988  | 4060.391  | NM_006933 | 1205.508  | 1475.873  | AF029900  | 8008.931  | 7052.773  |
| NM_004321 | 3499.003  | 5174.728  | AF132204  | 9879.771  | 9048.597  | NM_003325 | 8713.668  | 9170.554  |
| AF311212  | 8927.506  | 8148.759  | AK022874  | 11048.781 | 8702.327  | NM_016178 | 3865.632  | 4900.438  |
| NM_006915 | 3689.239  | 2770.203  | AK024602  | 62116.5   | 66703.055 | AK022639  | 10214.884 | 13374.834 |
| NM_006035 | 2801      | 2505.23   | NM_018507 | 921.378   | 840.632   | D31766    | 2093.523  | 3914.302  |
| NM_006086 | 8528.012  | 7483.478  | NM_000485 | 6691.551  | 7354.498  | NM_006547 | 7003.236  | 10480.464 |
| NM_004520 | 13267.879 | 11267.411 | NM_018542 | 2591.406  | 2468.124  | L23867    | 1481.337  | 1459.692  |
| AK027118  | 6837.559  | 8515.588  | AK025503  | 5292.302  | 5097.815  | AB020968  | 604.324   | 1147.888  |
| AK022882  | 32401.939 | 42155.113 | AF130073  | 5001.283  | 4401.497  | AL138690  | 6043.674  | 11175.855 |
| NM_006105 | 10279.906 | 17251.695 | AK024225  | 17805.91  | 16546.762 | AK000394  | 1533.063  | 2518.439  |
| NM_005981 | 5046.224  | 5072.64   | AF086334  | 1752.94   | 1369.613  | NM_013941 | 3352.902  | 4976.653  |
| AF210651  | 3365.512  | 2554.1    | AL137602  | 920.193   | 782.612   | AF074989  | 3322.533  | 5135.792  |
| AF090942  | 2755.919  | 2514.956  | NM_003696 | 558.447   | 575.068   | AF147393  | 1397.044  | 1873.963  |
| NM_014595 | 5721.308  | 3718.555  | AF075035  | 48558.352 | 47763.629 | AL080112  | 4551.498  | 6588.059  |
| NM_014789 | 1995.457  | 1263.89   | AL110180  | 5900.131  | 6246.169  | AL137325  | 1855.203  | 2885.547  |
| AB046784  | 5179.125  | 3587.162  | NM_007262 | 36647.012 | 40314.883 | AF147361  | 3309.429  | 4631.341  |
| X52402    | 1429.443  | 1171.309  | NM_014783 | 11339.73  | 15502.052 | NM_004195 | 47940.094 | 28848.631 |
| AL133663  | 1698.358  | 1111.28   | NM_014053 | 7421.351  | 7563.108  | NM_004705 | 6055.338  | 5101.907  |
| NM_004992 | 1893.167  | 1516.479  | NM_002571 | 1347.617  | 1152.854  | NM_020190 | 53018.977 | 44327.379 |
| NM_014462 | 5697.31   | 4737.993  | NM_004939 | 6440.633  | 6513.177  | AK024003  | 1311.646  | 1408.139  |
| NM_014156 | 41971.879 | 32377.408 | NM_001425 | 13459.702 | 11180.787 | NM_014357 | 10190.466 | 16917.238 |
| NM_003137 | 17249.869 | 13194.934 | NM_015710 | 2850.721  | 2014.635  | NM_004067 | 948.364   | 1095.785  |
| NM_006938 | 43452.523 | 27260.336 | NM_014158 | 6880.805  | 5722.337  | NM_000121 | 23977.629 | 21537.234 |
| NM_004515 | 1920.223  | 1609.28   | AK021591  | 3471.583  | 2848.998  | NM_002091 | 23879.221 | 27471.459 |
| NM_020158 | 15111.001 | 15326.776 | NM_014675 | 4949.057  | 3765.473  | AB033092  | 12953.716 | 14112.921 |
| AF176085  | 8737.297  | 12265.725 | NM_014040 | 7416.294  | 8009.415  | M89957    | 40443.125 | 36803.23  |
| NM_006985 | 27887.617 | 33635.57  | AK000799  | 7096.186  | 8022.708  | NM_003023 | 1039.795  | 1246.88   |
| AF265228  | 4054.044  | 3056.272  | NM_015582 | 1618.634  | 1717.663  | BC035030  | 6594.022  | 7638.357  |
| NM_003757 | 40569.211 | 28585.633 | AK027091  | 1235.527  | 1097.35   | NM_005340 | 60807.066 | 56666.977 |
| AK025561  | 6593.047  | 4615.192  | NM_001526 | 3533.307  | 3446.497  | NM_016201 | 9505.287  | 11064.799 |
| NM_018602 | 12660.85  | 11894.354 | U31738    | 2832.073  | 2248.736  | NM_000864 | 4887.814  | 5781.523  |
| NM_004096 | 5759.586  | 6539.114  | AF179890  | 12037.287 | 11701.897 | NM_017977 | 3632.284  | 4129.521  |
| NM_017629 | 11460.583 | 10404.12  | AK023536  | 18679.627 | 17128.518 | AF147727  | 3725.049  | 3998.328  |
| AL049681  | 8257.257  | 8371.723  | AK026561  | 3579.551  | 3240.538  | NM_006751 | 1763.933  | 2621.499  |
| NM_006584 | 1512.153  | 2067.145  | AK021568  | 22919.043 | 20214.951 | AB037834  | 2775.67   | 4539.179  |
| AJ001495  | 376.511   | 412.027   | Z36838    | 4902.13   | 3624.243  | NM_003569 | 5448.172  | 9220.298  |
| NM_003551 | 14179.424 | 11790.605 | AF088054  | 1251.114  | 985.633   | NM_014125 | 2489.931  | 980.092   |
| AF305210  | 466.934   | 411.442   | AK023881  | 8332.287  | 7803.026  | NM_017904 | 3791.75   | 2330.917  |
| AK021900  | 5897.758  | 4356.563  | AK027114  | 69661.094 | 63267.539 | NM_013367 | 5905.977  | 3122.351  |
| NM_002764 | 16867.697 | 11324.216 | NM_001078 | 11242.259 | 11449.762 | AL137550  | 597.239   | 488.152   |
| NM_019857 | 3309.167  | 2720.328  | NM_000552 | 12835.637 | 12105.598 | NM_000321 | 5325.807  | 3684.175  |
| NM_015455 | 48112.832 | 46732.379 | NM_003809 | 659.588   | 599.289   | NM_006341 | 22414.029 | 19671.475 |
| AF024702  | 2514.321  | 2846.419  | AK000860  | 9767.172  | 9157.165  | NM_001709 | 3009.882  | 2501.22   |
| NM_001964 | 4481.638  | 3253.652  | NM_014961 | 1341.856  | 1135.432  | NM_006191 | 9496.626  | 9806.787  |
| NM_005962 | 20232.145 | 19919.713 | NM_020145 | 5051.478  | 4664.314  | NM_001800 | 3545.854  | 3835.941  |
| X74864    | 3074.516  | 3681.839  | AK021529  | 14277.956 | 12301.008 | NM_004336 | 13922.518 | 15886.129 |
| AK026804  | 3041.353  | 4478.867  | AB037845  | 8440.809  | 7116.126  | NM_015949 | 4463.912  | 5511.677  |
| NM_016170 | 2542.112  | 3883.662  | NM_005980 | 2352.444  | 2054.003  | NM_013979 | 5472.039  | 7352.696  |



|           |           |           |           |           |           |           |           |           |
|-----------|-----------|-----------|-----------|-----------|-----------|-----------|-----------|-----------|
| NM_002114 | 1068.236  | 1021.074  | NM_016190 | 66941.938 | 67038.32  | NM_003790 | 7074.405  | 7772.316  |
| NM_006160 | 5109.162  | 4258.96   | AL137579  | 29071.053 | 26325.234 | NM_000494 | 12226.549 | 12501.327 |
| S72620    | 45751.465 | 41447.707 | NM_012383 | 9534.629  | 11895.935 | NM_016023 | 3328.843  | 2493.457  |
| NM_016831 | 575.31    | 434.525   | AJ271684  | 8206.663  | 8996.367  | NM_003722 | 37824.383 | 26212.461 |
| S73501    | 707.752   | 585.646   | AF255342  | 30391.432 | 26391.158 | NM_014430 | 807.98    | 637.631   |
| NM_005263 | 4989.813  | 4985.396  | NM_003300 | 26074.822 | 22793.82  | NM_000495 | 1537.458  | 1025.951  |
| AB033022  | 2996.715  | 2531.214  | AK026682  | 7778.352  | 7222.858  | AF085883  | 3864.399  | 2828.697  |
| NM_000474 | 1469.944  | 1118.894  | NM_017720 | 66986.156 | 62913.137 | NM_016571 | 2560.199  | 1943.283  |
| NM_016264 | 1159.357  | 1094.79   | NM_004655 | 1391.122  | 1016.236  | NM_003688 | 2867.5    | 2711.282  |
| NM_001155 | 26546.689 | 29368.979 | NM_003942 | 2915.427  | 2785.927  | NM_016440 | 8269.863  | 7658.666  |
| M62896    | 8873.861  | 11782.328 | NM_006471 | 21696.246 | 17561.668 | BC036368  | 1101.599  | 1073.683  |
| NM_017730 | 3092.845  | 4698.558  | NM_004165 | 4566.794  | 2710.64   | AK023237  | 817.21    | 621.24    |
| NM_000390 | 251.112   | 326.715   | NM_000368 | 4382.048  | 4503.285  | NM_001870 | 1927.381  | 715.086   |
| NM_000313 | 882.616   | 718.73    | NM_016580 | 3106.372  | 2689.768  | AJ271216  | 3534.832  | 1508.113  |
| NM_001490 | 14463.177 | 12634.089 | AK023847  | 909.87    | 900.192   | U23028    | 6093.001  | 3720.15   |
| AF263523  | 5198.924  | 4666.344  | NM_003860 | 15784.303 | 18286.783 | NM_000817 | 6900.962  | 6077.6    |
| L08441    | 34605.234 | 31388.488 | NM_005414 | 1772.25   | 1463.727  | AF113132  | 46206.074 | 40670.992 |
| AA641953  | 3160.151  | 3981.709  | NM_004460 | 58340.566 | 66398.508 | NM_006571 | 5525.956  | 6046.755  |
| AI248827  | 14306.796 | 11730.128 | NM_016031 | 14576.841 | 14599.002 | NM_001875 | 554.917   | 849.954   |
| R45026    | 51172.215 | 58047.813 | NM_004804 | 3735.104  | 2923.145  | AK022680  | 4022.364  | 4229.032  |
| BI768063  | 4324.476  | 4810.466  | M92439    | 37669.699 | 33887.313 | NM_018940 | 25671.799 | 43366.457 |
| BG386057  | 1176.679  | 1190.058  | AL117665  | 9688.796  | 8250.332  | NM_016350 | 15022.72  | 16161.324 |
| AI970239  | 2938.541  | 3777.764  | AF263541  | 3665.998  | 3500.713  | NM_001060 | 63552.355 | 69942.195 |
| AA496452  | 40837.832 | 37495.004 | AK027169  | 493.981   | 407.295   | NM_004150 | 2865.634  | 3152.22   |
| X67594    | 5064.875  | 7410.736  | NM_001262 | 7625.574  | 7209.929  | AK000561  | 2724.661  | 2155.136  |
| AF363393  | 437.481   | 726.961   | BE873030  | 11606.424 | 10048.449 | AB051449  | 37306.516 | 24183.76  |
| BC008837  | 1109.745  | 1042.972  | NM_002440 | 1409.927  | 1151.198  | BC009187  | 8853.427  | 6783.967  |
| NM_015860 | 715.067   | 920.444   | NM_003625 | 3489.067  | 3355.902  | AL133617  | 2225.181  | 972.953   |
| NM_001631 | 960.533   | 1023.876  | BC006990  | 11001.971 | 10742.56  | NM_016480 | 10305.539 | 7229.597  |
| AB000734  | 7945.511  | 7262.544  | NM_002277 | 17871.328 | 14686.678 | NM_002615 | 550.404   | 381.772   |
| NM_000862 | 1268.691  | 929.588   | NM_019114 | 6067.389  | 5749.516  | AF090894  | 1965.611  | 1384.013  |
| NM_005987 | 54269.914 | 64756.246 | M33552    | 30518.648 | 25844.783 | NM_013344 | 609.461   | 513.17    |
| X87838    | 12727.987 | 11186.493 | AJ252060  | 3831.616  | 3405.321  | NM_014052 | 23517.32  | 20437.639 |
| AK023059  | 3059.252  | 2558.705  | NM_006403 | 9709.561  | 8423.929  | AK023792  | 871.554   | 792.573   |
| AF224266  | 1065.783  | 966.695   | NM_018977 | 1372.992  | 1130.044  | NM_020140 | 3537.238  | 1014.812  |
| U72882    | 9358.119  | 8312.526  | AJ001402  | 4252.433  | 3442.628  | NM_006237 | 1731.03   | 732.876   |
| NM_014337 | 19973.766 | 18108.297 | NM_004540 | 1095.874  | 1174.246  | NM_001271 | 7388.088  | 2685.625  |
| NM_007161 | 19274.246 | 16726.762 | L25628    | 1724.606  | 1803.155  | NM_003683 | 9607.489  | 6990.356  |
| NM_014387 | 1441.176  | 1123.538  | M37033    | 28066.717 | 27751.088 | AF039019  | 5356.917  | 3734.557  |
| NM_003641 | 4698.729  | 4630.176  | NM_007171 | 4836.917  | 4821.758  | NM_012250 | 7370.474  | 5799.481  |
| NM_012463 | 4340.165  | 4026.372  | NM_004270 | 6491.349  | 6885.813  | NM_018190 | 2151.23   | 2053.843  |
| L29140    | 23363.322 | 21451.209 | NM_005632 | 2756.76   | 2480.802  | NM_004810 | 7395.121  | 7535.582  |
| AK026448  | 10204.035 | 10053.189 | AK021499  | 1231.156  | 1007.017  | J04205    | 22541.176 | 21340.098 |
| AK057418  | 8361.293  | 7621.679  | AK000336  | 4683.167  | 3546.567  | D38491    | 9196.032  | 6320.952  |
| L37199    | 906.654   | 1279.716  | NM_002790 | 40585.996 | 36575.559 | AK026835  | 6003.551  | 6315.001  |
| NM_007260 | 4396.857  | 5857.343  | NM_006292 | 14229.199 | 13118.219 | NM_002810 | 29776.828 | 29528.814 |
| AF148646  | 12611.178 | 13807.884 | AB007948  | 3104.958  | 3037.282  | NM_003090 | 53308.141 | 60312.273 |
| AL110218  | 1210.325  | 1445.517  | AB033066  | 6005.276  | 5269.091  | NM_013264 | 8462.993  | 8093.953  |
| AB023201  | 5368.591  | 5250.505  | AF126028  | 1983.29   | 2205.567  | NM_003310 | 23093.438 | 16719.834 |
| X00094    | 2200.455  | 2928.757  | NM_007010 | 32609.717 | 31595.584 | NM_005570 | 13975.631 | 9384.875  |
| NM_003770 | 22334.416 | 29360.459 | NM_007070 | 1132.572  | 1322.475  | NM_000080 | 15338.349 | 10019.092 |
| NM_002082 | 9718.934  | 12157.277 | NM_016042 | 1470.755  | 1282.664  | NM_003752 | 5842.507  | 5823.823  |
| NM_002922 | 29406.326 | 27492.432 | NM_017640 | 2180.724  | 1704.685  | NM_003932 | 19337.047 | 12000.048 |

|           |           |           |           |           |           |           |           |           |
|-----------|-----------|-----------|-----------|-----------|-----------|-----------|-----------|-----------|
| AF155657  | 26326.598 | 23903.721 | NM_017721 | 4425.028  | 4092.055  | NM_016491 | 26801.904 | 17558.564 |
| NM_006056 | 4377.088  | 4626.119  | NM_019088 | 15544.447 | 13068.178 | NM_006426 | 44937.168 | 28347.424 |
| AF045229  | 24441.342 | 21382.316 | AB002373  | 3485.017  | 2980.982  | NM_002516 | 1992.373  | 1953.147  |
| NM_001840 | 26558.523 | 21882.674 | NM_016350 | 60375.633 | 58862.5   | NM_002064 | 2140.507  | 843.965   |
| NM_016096 | 8393.494  | 7588.658  | AK024167  | 8655.744  | 7250.56   | NM_015523 | 12386.035 | 4484.515  |
| NM_000394 | 807.514   | 883.322   | NM_005026 | 8864.133  | 7902.713  | NM_015960 | 31620.826 | 15350.995 |
| NM_000072 | 2378.824  | 2020.966  | NM_004140 | 1244.802  | 1306.542  | NM_006085 | 13590.789 | 7661.147  |
| NM_000697 | 2561.281  | 2401.247  | NM_002866 | 61428.965 | 56124.211 | NM_000907 | 15599.812 | 10111.018 |
| NM_000017 | 4617.466  | 4119.703  | AF230809  | 9541.124  | 8748.374  | AF254085  | 10820.934 | 14245.596 |
| NM_000237 | 1493.2    | 1604.229  | NM_017894 | 66612.75  | 71985.172 | AK023541  | 514.544   | 517.532   |
| NM_018346 | 9663.774  | 10405.297 | NM_006509 | 20709.555 | 16849.35  | NM_001987 | 4510.457  | 3981.71   |
| AL122054  | 2820.702  | 2489.086  | AK025447  | 3333.143  | 3194.728  | AF244088  | 5536.874  | 5532.403  |
| AB023151  | 1911.533  | 2053.034  | NM_002624 | 65957.055 | 73778     | NM_007136 | 2545.3    | 1891.394  |
| NM_000140 | 8037.275  | 8031.579  | AF006199  | 2658.04   | 2435.077  | AK025434  | 511.957   | 441.352   |
| NM_005125 | 4310.36   | 5098.76   | NM_004554 | 53827.945 | 52027.68  | AJ251845  | 1371.223  | 1267.281  |
| NM_020038 | 470.003   | 1170.635  | NM_018119 | 10943.017 | 10328.671 | AK000435  | 5252.235  | 4471.79   |
| NM_016246 | 1973.63   | 3547.78   | NM_014576 | 1717.143  | 1640.409  | AK000569  | 6101.897  | 4963.49   |
| NM_005136 | 1134.635  | 1535.902  | AL162035  | 3394.771  | 2973.098  | NM_006046 | 4899.749  | 2844.028  |
| NM_004976 | 37290.445 | 34389.785 | NM_006692 | 4241.601  | 4166.418  | BC016698  | 10845.972 | 6602.639  |
| NM_005737 | 44257     | 42142.57  | NM_003084 | 4002.306  | 3554.224  | NM_007374 | 1547.855  | 1351.727  |
| NM_001660 | 25344.539 | 24889.883 | NM_002582 | 22764.715 | 21869.465 | AK000049  | 689.107   | 1069.418  |
| NM_000710 | 1017.146  | 1490.934  | NM_001009 | 64807.879 | 59511.703 | NM_006167 | 1255.354  | 1943.303  |
| NM_000752 | 3283.271  | 3463.533  | NM_001026 | 64913.426 | 54294.156 | NM_016357 | 2669.93   | 2622.723  |
| AB040945  | 1969.135  | 2740.045  | NM_001011 | 65182.148 | 57146.695 | NM_014500 | 19347.387 | 22866.855 |
| NM_002018 | 7336.874  | 12755.361 | AB061315  | 3623.142  | 2646.664  | NM_005924 | 1709.336  | 893.798   |
| NM_002377 | 641.487   | 1068.701  | D17289    | 19593.088 | 15633.215 | NM_019841 | 1125.578  | 778.608   |
| NM_006018 | 4705.517  | 2856.732  | NM_002949 | 45437.141 | 37876.223 | NM_003322 | 1663.341  | 1103.952  |
| AF161383  | 14893.497 | 14366.277 | NM_014230 | 15518.017 | 13649.94  | NM_003568 | 1255.486  | 819.207   |
| NM_000410 | 29978.135 | 35702.75  | NM_000235 | 4192.846  | 4455.936  | BC036375  | 22915.953 | 16853.684 |
| BE799167  | 385.755   | 242.437   | NM_015879 | 1887.101  | 2015.031  | NM_000496 | 772.426   | 676.777   |
| AF182814  | 7052.846  | 5391.921  | AF068236  | 64775.879 | 60104.91  | BF347926  | 12464.331 | 17318.279 |
| NM_005329 | 2333.438  | 2610.092  | U28480    | 2192.384  | 2147.043  | N54821    | 23167.729 | 28786.18  |
| NM_000107 | 19137     | 20661.18  | NM_000108 | 31176.723 | 31458.207 | BI912037  | 10513.502 | 9915.995  |
| AL157445  | 965.602   | 1138.007  | NM_018128 | 8398.685  | 8100.943  | AA454646  | 35611.977 | 31254.979 |
| NM_001517 | 6790.404  | 6760.687  | NM_016931 | 36860.977 | 46345.551 | BF063899  | 3379.856  | 3293.461  |
| NM_005053 | 1043.606  | 1048.361  | NM_004373 | 64233.984 | 56721.516 | U18087    | 60586.23  | 65787.523 |
| D86974    | 6528.223  | 6758.673  | NM_005566 | 64586.461 | 61485.211 | U66349    | 2835.971  | 2835.577  |
| NM_018283 | 15208.567 | 20179.309 | NM_000162 | 14789.564 | 14231.741 | AA057156  | 16466.322 | 16342.243 |
| NM_001983 | 7050.123  | 9187.669  | AK027067  | 864.304   | 808.639   | U19487    | 1382.766  | 1372.065  |
| NM_004993 | 810.728   | 920.936   | NM_016287 | 22681.879 | 22176.848 | AF166327  | 58255.387 | 54650.695 |
| NM_003384 | 12260.96  | 12147.61  | AK021661  | 712.124   | 643.614   | AF260739  | 4317.226  | 3096.513  |
| Y12337    | 918.977   | 976.482   | NM_003864 | 25351.746 | 21734.691 | AF531423  | 46927.305 | 30323.584 |
| M29551    | 9776.288  | 9534.776  | NM_006824 | 23294.436 | 21720.799 | X76555    | 1363.2    | 1152.658  |
| AB023148  | 1726.156  | 2304.199  | NM_002107 | 3848.934  | 3484.186  | NM_005432 | 10233.313 | 9359.605  |
| NM_002929 | 3316.178  | 3363.833  | NM_002694 | 26292.977 | 25471.709 | L10386    | 28485.082 | 32102.277 |
| BC028375  | 2327.867  | 2707.469  | NM_004454 | 1937.808  | 1933.782  | AF061812  | 47695.031 | 59142.285 |
| AB026436  | 5163.042  | 5618.879  | NM_000966 | 1972.887  | 1662.688  | AL136756  | 7069.633  | 10448.552 |
| NM_016029 | 23999.205 | 19725.941 | NM_012482 | 6150.774  | 6091.35   | NM_015944 | 2635.943  | 4583.736  |
| AK024562  | 1840.878  | 1954.629  | AF217227  | 1999.123  | 1920.632  | NM_000758 | 10058.621 | 4485.419  |
| NM_014066 | 8121.143  | 7638.181  | AK024141  | 13876.729 | 16126.011 | M17017    | 1245.241  | 1052.68   |
| NM_004573 | 1748.327  | 1881.005  | U13706    | 3362.053  | 3091.299  | NM_002990 | 4925.336  | 2902.371  |
| NM_017736 | 3510.179  | 4144.752  | AF213356  | 2556.026  | 2251.698  | NM_002432 | 8100.744  | 5311.041  |
| NM_000313 | 1019.431  | 1467.041  | BC035716  | 15797.045 | 14566.771 | NM_012420 | 739.465   | 799.679   |

|           |           |           |           |           |           |           |           |           |
|-----------|-----------|-----------|-----------|-----------|-----------|-----------|-----------|-----------|
| NM_00149E | 14099.307 | 17335.682 | NM_018014 | 8919.625  | 8295.942  | NM_00234E | 8790.459  | 8265.998  |
| AF263523  | 5146.488  | 6130.795  | NM_00235E | 59629.348 | 58172.809 | AB033037  | 3113.458  | 3176.204  |
| L08441    | 33441.191 | 38154.816 | AF007192  | 2088.945  | 2989.743  | L40400    | 11017.072 | 11487.64  |
| AA641953  | 4145.071  | 4340.049  | NM_00127E | 10414.404 | 10989.312 | AK025688  | 4119.521  | 4165.058  |
| AI248827  | 14096.146 | 13452.995 | NM_016157 | 4407.02   | 4188.98   | NM_00593C | 704.546   | 883.832   |
| R45026    | 49845.695 | 56312.656 | NM_01491E | 51327.152 | 48606.145 | Z36819    | 13587.45  | 11874.492 |
| BI768063  | 4032.118  | 4129.25   | NM_01228E | 7926.495  | 8139.238  | NM_014847 | 61083.512 | 61331.738 |
| BG386057  | 1040.702  | 873.553   | NM_00219E | 23597.143 | 24551.525 | NM_01444E | 9102.483  | 12102.935 |
| AI970239  | 3167.598  | 3457.702  | D84294    | 7145.722  | 6403.426  | AL080157  | 8876.369  | 10723.879 |
| AA496452  | 42320.039 | 38825.211 | X59770    | 3112.444  | 2583.063  | NM_00510C | 1039.933  | 1261.583  |
| X67594    | 4332.667  | 5621.158  | K02765    | 35712.68  | 31009.578 | NM_00530E | 4891.497  | 4451.688  |
| AF363393  | 539.217   | 822.401   | M65134    | 3484.137  | 3361.973  | NM_000911 | 1596.706  | 1513.195  |
| BC008837  | 1038.441  | 1040.507  | BG539651  | 25873.363 | 22963.053 | NM_007227 | 2016.345  | 1691.31   |
| NM_01586E | 842.374   | 1029.952  | N52646    | 58357.918 | 60642.648 | NM_00702E | 1891.023  | 2212.66   |
| NM_001631 | 833.632   | 1003.638  | AW160671  | 63344.777 | 57681.172 | NM_00386E | 2226.064  | 4205.799  |
| AB000734  | 8043.528  | 10056.578 | BI870529  | 20938.346 | 25059.988 | AB015330  | 25543.137 | 32828.191 |
| NM_00086E | 1042.17   | 1042.222  | AA702698  | 2977.385  | 3535.876  | NM_00431E | 17108.27  | 8415.046  |
| NM_005987 | 52038.07  | 65604.625 | AI681514  | 3863.886  | 3696.131  | NM_02016E | 10270.841 | 4064.588  |
| X87838    | 9724.899  | 9857.743  | NM_00130C | 5220.929  | 4763.974  | AK023860  | 10539.871 | 7014.68   |
| NM_00016E | 7408.582  | 6085.808  | BG748827  | 16320.187 | 14140.451 | NM_000031 | 6650.915  | 5593.277  |
| NM_014337 | 20978.998 | 25075.598 | AA952897  | 15849.802 | 15525.953 | NM_00208E | 43393.512 | 25930.908 |
| NM_007161 | 17969.021 | 19671.887 | BG760342  | 7415.617  | 8005.991  | AK026061  | 853.95    | 820.286   |
| NM_014387 | 1339.218  | 1657.753  | AA703141  | 2944.441  | 3644.157  | NM_01628E | 19775.141 | 19607.967 |
| NM_003641 | 4471.815  | 4769.453  | AA195244  | 679.309   | 617.643   | NM_001567 | 6580.422  | 7003.703  |
| NM_01246E | 4291.479  | 4881.313  | AI122630  | 16674.539 | 17217.953 | NM_00490E | 18554.529 | 17661.789 |
| L29140    | 21182.465 | 21656.758 | AF086790  | 7757.255  | 8110.502  | AF217971  | 16527.514 | 16062.078 |
| AK026448  | 10268.524 | 10757.433 | AK025966  | 7226.496  | 7646.474  | NM_00192E | 1312.104  | 1461.149  |
| AK057418  | 8187.923  | 7554.467  | NM_01444C | 582.403   | 807.665   | NM_00498E | 6056.94   | 7654.318  |
| L37199    | 922.038   | 1096.375  | NM_01872E | 1574.16   | 1854.339  | NM_00473E | 5920.228  | 8282.708  |
| NM_00726C | 5541.353  | 8857.029  | NM_003081 | 51909.918 | 51819.082 | NM_01834E | 7622.81   | 15078.07  |
| AF148646  | 13014.727 | 13136.383 | NM_01649E | 2610.563  | 2911.001  | NM_00636E | 10448.96  | 14154.242 |
| AL110218  | 1175.19   | 1242.701  | D50402    | 58879.801 | 60217.367 | NM_02041E | 3801.853  | 4454.309  |
| AB023201  | 4710.871  | 4274.762  | M73547    | 24254.104 | 24335.93  | NM_01487E | 596.26    | 604.582   |
| X00094    | 1991.062  | 1887.017  | AF181722  | 1525.073  | 1469.705  | AL049667  | 6080.943  | 5439.301  |
| NM_00377E | 20475.826 | 21967.738 | NM_003687 | 9042.528  | 8756.475  | NM_000334 | 11158.526 | 9649.409  |
| NM_00208E | 10039.72  | 11185.008 | NM_004134 | 9614.131  | 9220.421  | NM_02040C | 3295.37   | 4251.035  |
| NM_00292E | 33630.063 | 38214.746 | NM_00595E | 27682.582 | 24805.096 | D50926    | 673.546   | 2323.582  |
| AF155657  | 25143.547 | 23352.025 | NM_00404E | 2357.206  | 1979.515  | BF205683  | 7576.221  | 14420.51  |
| NM_00605E | 4221.741  | 5220.598  | BE548044  | 1584.954  | 1158.268  | NM_00156E | 1634.437  | 2498.119  |
| AF045229  | 28248.465 | 39049.176 | NM_006017 | 858.039   | 1012.539  | NM_00447E | 34703.367 | 22557.438 |
| NM_00184C | 26080.264 | 25080.248 | NM_01242E | 6151.972  | 8185.896  | NM_00261C | 3512.575  | 1944.37   |
| NM_01609E | 8240.765  | 7989.144  | NM_01326E | 21601.01  | 18763.32  | AF070587  | 5818.858  | 2972.095  |
| NM_000394 | 3259.654  | 2625.78   | NM_00172E | 9122.318  | 12656.155 | BE250526  | 2466.109  | 2114.721  |
| NM_00115E | 22235.148 | 20150.66  | NM_00556E | 493.842   | 280.14    | NM_01681E | 7521.895  | 6827.767  |
| M62896    | 9450.35   | 12589.185 | NM_003824 | 18602.324 | 22244.732 | NM_01222E | 14430.172 | 15848.584 |
| NM_000017 | 4172.257  | 5421.896  | NM_00068E | 3286.344  | 4240.031  | NM_00500E | 4657.377  | 5253.36   |
| NM_000237 | 1648.536  | 2069.864  | NM_01245E | 27552.496 | 30616.957 | NM_00659E | 6194.542  | 7650.808  |
| NM_01834E | 8568.643  | 8879.816  | AF229166  | 1635.14   | 1793.297  | AK023214  | 21889.422 | 20792.529 |
| AL122054  | 2857.736  | 2418.886  | NM_006764 | 14982.234 | 20014.412 | NM_00146E | 18563.172 | 19748.188 |
| AB023151  | 1729.23   | 1842.542  | NM_00138E | 21760.336 | 24691.465 | NM_00360C | 31268.777 | 31403.527 |
| NM_00014C | 7616.674  | 7965.059  | NM_001179 | 629.953   | 960.522   | NM_01749C | 12030.634 | 14101.614 |
| NM_00512E | 4310.142  | 4106.008  | NM_00531E | 40352.121 | 51340.711 | NM_00271E | 4570.124  | 4903.453  |
| NM_02003E | 327.489   | 342.721   | NM_01776E | 51359.895 | 59167.492 | AK026727  | 4389.916  | 4188.116  |

|           |           |           |           |           |           |           |           |           |
|-----------|-----------|-----------|-----------|-----------|-----------|-----------|-----------|-----------|
| NM_016246 | 2091.979  | 3259.034  | NM_000428 | 2620.359  | 3525.698  | NM_00283C | 927.031   | 932.7     |
| NM_005136 | 939.726   | 1139.927  | AB040967  | 553.898   | 405.41    | NM_006247 | 9982.737  | 7843.942  |
| NM_004976 | 33890.922 | 32997.406 | NM_003578 | 1381.894  | 1010.076  | AB032983  | 5253.607  | 5711.912  |
| NM_005737 | 40276.156 | 36421.84  | NM_014721 | 855.85    | 1122.396  | NM_018281 | 19128.354 | 25783.521 |
| NM_00166C | 22629.508 | 19112.482 | AK026352  | 3272.313  | 7011.47   | NM_004457 | 6657.181  | 12809.57  |
| NM_00071C | 1020.878  | 1306.086  | AF169257  | 613.412   | 413.508   | NM_01404C | 3825.511  | 7845.539  |
| NM_000752 | 2932.211  | 2477.307  | NM_01618C | 6520.53   | 4936.086  | NM_00539C | 1524.24   | 3102.674  |
| AB040945  | 1724.489  | 1585.589  | NM_005827 | 17006.822 | 17910.455 | BC036375  | 22075.555 | 12362.409 |
| NM_00201E | 6025.125  | 6823.083  | NM_00305C | 15345.414 | 17065.246 | NM_00049C | 745.427   | 475.191   |
| NM_002377 | 682.816   | 929.813   | NM_01622C | 11215.807 | 11582.171 | BF347926  | 10687.506 | 7802.288  |
| NM_00041C | 27558.922 | 24533.723 | AF052155  | 7142.883  | 7425.274  | N54821    | 22630.789 | 18806.49  |
| AF224266  | 999.039   | 1439.792  | NM_005085 | 10613.083 | 13304.854 | BI912037  | 10058.489 | 9923.701  |
| U72882    | 6670.298  | 5777.089  | AF060902  | 5292.5    | 7505.922  | AA454646  | 33816.063 | 29233.834 |
| AK026147  | 197.279   | 229.517   | AF121858  | 32276.963 | 41156.633 | BF063899  | 3236.743  | 3371.952  |
| NM_00532C | 2169.146  | 2328.962  | NM_013437 | 1172.569  | 1629.821  | U18087    | 57224.34  | 65936.609 |
| NM_000107 | 17780.404 | 20012.195 | NM_017681 | 2459.712  | 3108.638  | U66349    | 2826.082  | 2831.393  |
| AL157445  | 955.945   | 900.805   | X57655    | 35925.313 | 39697.129 | AA057156  | 17346.785 | 16420.463 |
| NM_001517 | 6709.546  | 5971.757  | NM_018261 | 4247.5    | 5549.231  | U19487    | 1667.238  | 1829.279  |
| NM_005053 | 941.659   | 970.356   | NM_01479C | 2907.566  | 2672.868  | AF166327  | 54017.914 | 60736.836 |
| D86974    | 6782.214  | 6243.539  | AL050288  | 48509.098 | 52260.363 | AF260739  | 4951.805  | 4762.879  |
| NM_018283 | 13429.221 | 12064.787 | NM_00504C | 8195.888  | 8074.623  | AF531423  | 48266.891 | 34596.664 |
| NM_001983 | 7038.966  | 6976.325  | NM_016391 | 33844.59  | 31704.91  | X76555    | 1667.52   | 1431.788  |
| NM_004993 | 838.005   | 1054.147  | M80783    | 468.941   | 470.253   | NM_005432 | 11150.016 | 8758.666  |
| NM_003384 | 11508.498 | 9835.443  | AF075033  | 9939.809  | 8553.347  | L10386    | 26849.475 | 18083.994 |
| Y12337    | 710.431   | 842.709   | D50911    | 19063.842 | 16529.633 | AF061812  | 51629.707 | 46205.156 |
| M29551    | 8842.271  | 6968.941  | AB011104  | 2518.912  | 2447.303  | AL136756  | 6727.733  | 7378.205  |
| AB023148  | 1527.048  | 1531.271  | AK024069  | 13592.584 | 10020.447 | NM_00147E | 57396.152 | 64527.934 |
| NM_00292C | 3374.67   | 3204.512  | NM_004582 | 26467.879 | 22941.746 | NM_01242C | 491.374   | 440.031   |
| BC028375  | 2206.25   | 1934.047  | NM_01564C | 37496.387 | 45527.332 | NM_002343 | 8334.948  | 7176.308  |
| AB026436  | 4475.999  | 3884.251  | AF233450  | 2947.55   | 3507.351  | AB033037  | 2899.219  | 2114.971  |
| NM_01602C | 23712.795 | 22261.445 | NM_016233 | 4891.886  | 5432.113  | L40400    | 10758.517 | 9527.877  |
| AK024562  | 1937.174  | 2621.252  | NM_000821 | 48343.332 | 38418.941 | AK025688  | 4148.366  | 3430.607  |
| NM_01406C | 5733.009  | 7598.169  | NM_020121 | 888.43    | 1126.427  | NM_00593C | 764.907   | 928.077   |
| NM_004573 | 1971.092  | 3350.559  | NM_003145 | 35172.871 | 43922.203 | Z36819    | 13467.522 | 12063.442 |
| NM_000072 | 2467.812  | 3406.511  | NM_001632 | 3324.095  | 4599.721  | NM_014847 | 57464.703 | 60938.477 |
| NM_000697 | 2489.076  | 2406.44   | NM_012264 | 2005.871  | 1979.242  | NM_01444E | 9667.329  | 9332.338  |
| NM_000313 | 959.248   | 1102.809  | AF311312  | 3302.09   | 3234.02   | AL080157  | 9710.059  | 9945.203  |
| NM_00149E | 15066.229 | 17486.893 | NM_00127C | 10753.856 | 12559.793 | NM_00510C | 1155.09   | 1185.897  |
| AF263523  | 5050.014  | 5323.337  | NM_016157 | 5624.729  | 7259.777  | NM_00530E | 5155.567  | 5059.837  |
| L08441    | 31268.787 | 33278.41  | NM_014915 | 62473.523 | 61337.762 | NM_000911 | 1495.645  | 1643.553  |
| AA641953  | 4012.248  | 4022.402  | NM_01228C | 9633.035  | 11503.15  | NM_007227 | 2162.143  | 1771.728  |
| AI248827  | 13202.079 | 12212.758 | NM_002195 | 23984.191 | 25900.988 | NM_007023 | 1808.555  | 1773.848  |
| R45026    | 50807.441 | 55169.48  | D84294    | 6840.691  | 6067.026  | NM_005873 | 19364.789 | 11475.203 |
| BI768063  | 4314.556  | 4033.644  | X59770    | 3013.391  | 2522.234  | NM_004624 | 5154.713  | 5094.057  |
| BG386057  | 1158.094  | 1213.66   | K02765    | 37382.078 | 30919.037 | NM_00386E | 2330.479  | 1677.615  |
| AI970239  | 3380.381  | 3783.595  | M65134    | 3569.21   | 3400.581  | AB015330  | 34323.523 | 25315.393 |
| AA496452  | 40472.234 | 34935.234 | BG539651  | 25491.746 | 22780.064 | L09071    | 1262.724  | 1188.955  |
| X67594    | 4218.62   | 4447.314  | N52646    | 62306.371 | 60496.207 | NM_005924 | 1902.964  | 4265.77   |
| BC008837  | 831.861   | 873.57    | AW160671  | 61171.203 | 58036.801 | NM_00208E | 43717.156 | 25035.926 |
| NM_01586C | 930.701   | 864.443   | BI870529  | 20584.193 | 21715.824 | AK026061  | 921.491   | 565.774   |
| NM_001631 | 771.407   | 924.325   | AA702698  | 2731.706  | 2873.323  | NM_01628C | 19081.561 | 12970.702 |
| AB000734  | 8148.811  | 6800.238  | AI681514  | 3856.642  | 3410.161  | NM_001567 | 5660.667  | 4855.514  |
| NM_000862 | 895.16    | 801.159   | NM_00130C | 5428.808  | 4946.535  | NM_00490E | 17561.928 | 13368.002 |

|           |           |           |           |           |           |           |           |           |
|-----------|-----------|-----------|-----------|-----------|-----------|-----------|-----------|-----------|
| NM_005987 | 46013.66  | 60809.543 | BG748827  | 18277.23  | 16145.832 | AF217971  | 16438.695 | 12601.015 |
| X87838    | 9973.28   | 10091.869 | AA952897  | 19079.205 | 18790.271 | NM_001925 | 1179.707  | 1446      |
| NM_000169 | 7235.801  | 6863.239  | BG760342  | 7385.608  | 8209.997  | NM_004982 | 6050.723  | 6981.71   |
| AF182814  | 6655.065  | 5672.792  | AA703141  | 2731.344  | 3394.473  | NM_004732 | 5929.231  | 6988.598  |
| L37199    | 1168.76   | 1190.186  | AA195244  | 538.204   | 922.433   | NM_018349 | 6095.145  | 7053.647  |
| NM_007260 | 5223.544  | 5779.665  | AI122630  | 21589.559 | 28627.039 | NM_006363 | 10289.621 | 9247.595  |
| AF148646  | 12386.18  | 12499.267 | NM_006589 | 20110.189 | 27184.92  | NM_020415 | 3908.439  | 3271.263  |
| AL110218  | 1179.337  | 1467.393  | NM_002191 | 949.345   | 896.398   | NM_014879 | 561.144   | 970.185   |
| AB023201  | 5439.328  | 4693.822  | AB007875  | 7297.075  | 8023.499  | AL049667  | 5783.732  | 6579.308  |
| X00094    | 2089.23   | 2186.987  | NM_018725 | 2309.546  | 2395.3    | NM_000334 | 11418.893 | 11944.409 |
| NM_003775 | 22240.217 | 20858.662 | NM_003081 | 56771.859 | 61794.84  | NM_001504 | 9120.054  | 5984.075  |
| NM_002082 | 11360.117 | 11878.587 | NM_016495 | 3027.952  | 2969.394  | D50926    | 8161.212  | 6930.281  |
| NM_002922 | 30939.205 | 26512.102 | D50402    | 53884.957 | 57272.699 | NM_001565 | 1879.256  | 1699.539  |
| AF155657  | 27218.908 | 21207.498 | M73547    | 29520.305 | 31309.662 | NM_000758 | 12744.754 | 20564.123 |
| NM_006056 | 4255.02   | 4733.687  | AF181722  | 1441.958  | 1533.674  | NM_004479 | 45724.586 | 58566.656 |
| AF045229  | 24903.521 | 23522.641 | NM_003687 | 9197.266  | 9240.857  | AF070587  | 5995.817  | 4271.674  |
| NM_001840 | 24150.318 | 20854.148 | NM_004134 | 10156.917 | 9819.139  | BE250526  | 2316.596  | 1380.976  |
| AK025099  | 2019.94   | 1578.787  | NM_005955 | 28150.059 | 26599.596 | NM_016819 | 7559.247  | 5188.329  |
| NM_016099 | 7915.909  | 6728.723  | NM_004048 | 2451.82   | 2200.258  | NM_012222 | 14885.439 | 12254.228 |
| NM_000394 | 665.342   | 702.889   | BE548044  | 1257.058  | 1063.9    | NM_005002 | 4758.44   | 3490.186  |
| NM_000228 | 440.29    | 702.516   | NM_006017 | 660.895   | 694.43    | NM_006596 | 6378.216  | 7007.963  |
| NM_000830 | 3251.356  | 4050.942  | NM_012428 | 6415.092  | 6361.887  | AK023214  | 23627.814 | 21893.719 |
| NM_014587 | 484.075   | 800.899   | NM_013269 | 22357.639 | 18285.178 | NM_001469 | 16842.42  | 21317.867 |
| NM_005209 | 2502.338  | 2451.342  | NM_001728 | 7698.229  | 8728.967  | NM_003600 | 35194.117 | 51508.715 |
| AF148950  | 333.104   | 289.904   | NM_005565 | 724.302   | 669.794   | NM_017490 | 10958.385 | 10368.105 |
| NM_001155 | 23951.072 | 30962.074 | NM_003824 | 26046.221 | 28801.561 | NM_002718 | 4306.017  | 3925.599  |
| M62896    | 8333.252  | 9413.497  | NM_000686 | 4264.244  | 5551.235  | AK026727  | 4511.752  | 5528.884  |
| NM_017736 | 3100.199  | 3511.971  | NM_012452 | 29426.506 | 33355.16  | NM_002830 | 813.917   | 907.444   |
| NM_000390 | 514.794   | 1422.325  | AF229166  | 1648.256  | 2331.772  | NM_006247 | 10121.176 | 13769.402 |
| NM_000014 | 664.036   | 827.346   | NM_006764 | 15741.338 | 23127.232 | AB032983  | 5934.567  | 9667.876  |
| NM_006803 | 1836.157  | 1696.785  | NM_001386 | 20863.016 | 21390.98  | NM_018281 | 20102.619 | 13973.658 |
| NM_002533 | 2392.222  | 2152.295  | AF007192  | 2716.148  | 2863.518  | NM_004457 | 6097.108  | 5078.828  |
| AF235022  | 2525.77   | 2422.161  | NM_017765 | 54842.75  | 56358.543 | NM_014049 | 3825.136  | 2667.213  |
| AL137764  | 26939.578 | 22703.719 | NM_000428 | 2936.648  | 3622.775  | NM_005396 | 1817.924  | 1302.742  |
| NM_001660 | 27786.537 | 25323.563 | AB040967  | 516.494   | 391.39    | NM_004315 | 18214.395 | 12245.45  |
| NM_000710 | 1138.783  | 1363.63   | NM_003578 | 1640.855  | 1424.576  | NM_020166 | 11904.524 | 13779.08  |
| NM_000752 | 3571.175  | 4921.32   | NM_014721 | 929.094   | 1360.301  | NM_003568 | 1058.643  | 2848.46   |
| AB040945  | 1966.215  | 2084.824  | AK026352  | 3359.829  | 8527.89   | BC036375  | 22972.066 | 40184.141 |
| NM_002018 | 7730.611  | 7679.545  | AF169257  | 510.091   | 411.308   | BF347926  | 11550.521 | 10916.406 |
| NM_002377 | 766.104   | 994.208   | NM_016180 | 7987.19   | 5875.412  | N54821    | 21714.689 | 15516.074 |
| NM_006018 | 5352.122  | 3712.053  | NM_005827 | 17106.133 | 16712.674 | BI912037  | 9869.224  | 7499.4    |
| AF161383  | 15413.544 | 16737.365 | NM_003056 | 15753.554 | 15351.76  | AA454646  | 32244.166 | 25154.086 |
| NM_000410 | 26780.012 | 22455.092 | NM_016226 | 11515.372 | 10278.235 | BF063899  | 3197.343  | 2612.302  |
| AF224266  | 2643.075  | 2144.127  | AK024311  | 1218.467  | 1371.562  | U18087    | 57493.477 | 66157.461 |
| U72882    | 6794.28   | 6410.338  | AF052155  | 6986.946  | 7297.919  | U66349    | 2955.71   | 2856.489  |
| NM_014337 | 16710.729 | 13228.636 | NM_005085 | 17311.277 | 18446.84  | AA057156  | 16838.469 | 20422.84  |
| NM_007161 | 17554.752 | 13212.602 | AF060902  | 9928.473  | 10969.778 | U19487    | 1748.662  | 2380.516  |
| NM_014387 | 1175.283  | 960.271   | AF121858  | 44029.379 | 46521.391 | AF166327  | 53470.961 | 63561.672 |
| NM_003641 | 4516.547  | 3938.882  | NM_013437 | 1473.617  | 1777.924  | AF260739  | 5041.269  | 5693.511  |
| NM_012463 | 5159.517  | 5566.25   | NM_017681 | 2409.738  | 3119.594  | AF531423  | 47210.27  | 37496.664 |
| L29140    | 29908.285 | 39800.375 | X57655    | 35972.711 | 39947.324 | X76555    | 1828.982  | 1878.456  |
| AK026448  | 10531.206 | 11971.287 | AK025966  | 9463.65   | 9594.094  | NM_005432 | 11189.3   | 11824.219 |
| AK057418  | 10565.382 | 13903.106 | NM_014440 | 832.294   | 921.573   | L10386    | 28503.174 | 38899.828 |

|           |           |           |           |           |           |           |           |           |
|-----------|-----------|-----------|-----------|-----------|-----------|-----------|-----------|-----------|
| AK024562  | 1700.202  | 1844.361  | NM_014796 | 3189.015  | 3429.173  | AF061812  | 51348.527 | 55651.535 |
| NM_014066 | 5511.51   | 5703.674  | AL050288  | 43776.195 | 54576.742 | AL136756  | 6491.913  | 4404.139  |
| NM_004573 | 1787.863  | 1868.977  | NM_005040 | 8670.688  | 12070.486 | NM_001478 | 49319.742 | 44648.25  |
| NM_000072 | 3229.85   | 2192.519  | NM_016391 | 32582.885 | 34912.297 | NM_002612 | 596.491   | 444.003   |
| NM_000697 | 5248.435  | 4948.263  | M80783    | 466.696   | 469.95    | AF135422  | 3444.541  | 2589.979  |
| NM_000017 | 5393.492  | 7584.96   | AF075033  | 10027.729 | 9616.567  | NM_014448 | 9932.679  | 7846.595  |
| NM_000237 | 1865.705  | 3389.838  | D50911    | 19695.24  | 18655.359 | AL080157  | 8905.326  | 8066.854  |
| NM_018346 | 9864.977  | 9976.971  | AB011104  | 2314.57   | 2481.828  | NM_005100 | 1117.345  | 1084.761  |
| AL122054  | 3031.707  | 2894.481  | AK024069  | 14403.306 | 11745.304 | NM_005308 | 4914.781  | 4481.588  |
| AB023151  | 2109.678  | 3065.157  | NM_004582 | 27276.994 | 22529.426 | NM_000911 | 2219.018  | 1950.932  |
| NM_000140 | 8506.986  | 10457.649 | NM_015640 | 27282.227 | 27686.691 | NM_007227 | 2172.659  | 2123.216  |
| NM_005125 | 4446.588  | 6013.142  | AF233450  | 1158.187  | 1603.973  | NM_007023 | 1555.85   | 1987.294  |
| NM_020038 | 286.254   | 417.838   | NM_016233 | 4665.033  | 4896.741  | NM_005873 | 20613.139 | 20106.105 |
| NM_016246 | 1745.07   | 1432.631  | NM_000821 | 60766.645 | 55517.418 | NM_004624 | 6185.206  | 8034.324  |
| NM_015926 | 3416.11   | 3499.05   | NM_020121 | 1140.809  | 1111.016  | NM_014461 | 1427.378  | 1779.757  |
| X03757    | 6890.423  | 5842.557  | NM_003145 | 41313.344 | 45511.523 | NM_003865 | 2514.056  | 2178.724  |
| NM_018658 | 1161.087  | 1099.861  | NM_001632 | 3157.568  | 3927.327  | AB015330  | 40842.848 | 35886.164 |
| NM_005136 | 1044.769  | 875.705   | NM_012264 | 2010.188  | 2396.29   | NM_001455 | 5511.357  | 6606.605  |
| AK094513  | 1107.622  | 892.872   | AF311312  | 3169.186  | 3340.601  | NM_002385 | 7066.951  | 6587.85   |
| NM_001183 | 23217.928 | 18830.58  | NM_001179 | 505.388   | 758.428   | NM_001885 | 931.393   | 1033.138  |
| NM_000890 | 508.73    | 639.243   | NM_005313 | 43409.203 | 49363.387 | AF039196  | 1196.866  | 606.174   |
| NM_004976 | 46616.332 | 55170.305 | NM_014915 | 56110.297 | 54750.844 | L09071    | 1027.068  | 755.755   |
| AK021597  | 2563.54   | 3621.864  | NM_012286 | 9559.043  | 11992.137 | NM_005924 | 1470.681  | 1025.202  |
| NM_005737 | 45729.219 | 52475.422 | NM_002195 | 27480.379 | 34713.637 | NM_019841 | 1163.23   | 981.154   |
| NM_000169 | 8039.375  | 5924.682  | D84294    | 8322.694  | 9305.601  | NM_003322 | 1288.049  | 1103.805  |
| BE799167  | 286.518   | 230.809   | X59770    | 3193.195  | 3570.61   | NM_002870 | 59457.949 | 64183.461 |
| AF182814  | 8462.994  | 11137.586 | K02765    | 35695.91  | 39290.992 | NM_002802 | 1009.678  | 863.399   |
| AK026147  | 217.612   | 122.4     | M65134    | 3428.751  | 4457.117  | NM_006363 | 9529.994  | 7662.779  |
| NM_005329 | 2191.864  | 1912.538  | BG539651  | 22991.996 | 23698.535 | NM_020415 | 4074.488  | 3556.272  |
| NM_000107 | 20359.881 | 22054.705 | N52646    | 59372.039 | 60113.699 | NM_014879 | 439.332   | 715.097   |
| AL157445  | 991.16    | 1091.66   | AW160671  | 57346.695 | 58270.898 | AL049667  | 5705.574  | 6388.204  |
| NM_001517 | 8026.659  | 12865.936 | BI870529  | 22759.279 | 29622.688 | NM_000334 | 13391.57  | 14614.514 |
| NM_005053 | 1123.009  | 1726.042  | AA702698  | 3055.251  | 3575.986  | NM_020400 | 3475.296  | 3780.118  |
| D86974    | 7760.025  | 13082.18  | AI681514  | 4317.77   | 4560.069  | NM_001504 | 11481.2   | 9425.349  |
| NM_018283 | 15600.994 | 18909.563 | NM_001300 | 5412.23   | 5296.75   | D50926    | 9279.933  | 8725.248  |
| NM_001983 | 7709.561  | 9875.079  | BG748827  | 18220.77  | 15939.628 | BF205683  | 8174.246  | 9024.024  |
| NM_004993 | 944.696   | 1478.982  | AA952897  | 18842.793 | 19354.494 | NM_001565 | 1764.716  | 1479.618  |
| NM_003384 | 15817.289 | 29219.676 | BG760342  | 8946.937  | 10683.104 | NM_001548 | 1156.25   | 1198.879  |
| Y12337    | 1293.73   | 906       | AA703141  | 3109.239  | 3842.673  | NM_000758 | 11649.626 | 9071.205  |
| M29551    | 9560.921  | 6557.121  | AA195244  | 714.479   | 693.334   | M17017    | 1080.469  | 885.058   |
| AB023148  | 1523.571  | 1066.433  | AI122630  | 16893.533 | 17897.799 | NM_002990 | 5623.074  | 4973.01   |
| NM_002929 | 2946.696  | 2225.156  | NM_006589 | 14905.444 | 15897.32  | NM_002432 | 7989.883  | 5593.837  |
| BC028375  | 2328.355  | 1900.495  | NM_002191 | 1182.762  | 1162.712  | NM_012420 | 630.106   | 548.422   |
| AB026436  | 6551.386  | 8691.007  | AB007875  | 6868.078  | 6467.935  | NM_002343 | 6924.474  | 5537.85   |
| NM_016029 | 29989.295 | 32732.951 | NM_018261 | 3634.191  | 3154.48   | AB033037  | 2926.66   | 2216.491  |
| NM_003379 | 38609.895 | 24695.777 | NM_005955 | 28551.393 | 32912.641 | L40400    | 8081.81   | 6192.59   |
| AF201941  | 3530.939  | 2876.158  | NM_004048 | 2690.792  | 2881.545  | AK025688  | 4212.07   | 2647.465  |
| AF143878  | 1546.668  | 2405.112  | BE548044  | 1556.868  | 1613.501  | NM_005396 | 2361.571  | 1184.968  |
| AF026941  | 1305.912  | 1174.412  | NM_006017 | 827.607   | 850.314   | NM_004315 | 17755.996 | 12335.119 |
| NM_007070 | 3475.726  | 3085.334  | NM_012428 | 6842.771  | 10644.58  | NM_020166 | 11860.786 | 8662.824  |
| AL133019  | 3764.96   | 3007.314  | NM_013269 | 25027.955 | 27826.199 | S56138    | 663.943   | 525.202   |
| AK026192  | 1026.153  | 746.356   | NM_001728 | 7684.621  | 9702.561  | AK023860  | 11306.62  | 10567.753 |
| NM_014895 | 943.725   | 728.585   | NM_005565 | 1293.641  | 1565.56   | NM_000031 | 6184.57   | 6181.042  |

|           |           |           |           |           |           |           |           |           |
|-----------|-----------|-----------|-----------|-----------|-----------|-----------|-----------|-----------|
| NM_014901 | 12550.228 | 11494.089 | NM_003824 | 26313.441 | 29529.037 | NM_002085 | 45707.16  | 34500.93  |
| AK000005  | 7166.511  | 11557.041 | NM_000686 | 4322.951  | 5723.917  | NM_016286 | 20370.639 | 18102.785 |
| NM_002103 | 11879.876 | 11988.451 | NM_012452 | 31223.186 | 35838.504 | NM_001567 | 6222.784  | 6705.212  |
| NM_003379 | 39506.219 | 25905.68  | AF229166  | 2463.774  | 2866.82   | NM_004905 | 17966.557 | 15907.722 |
| SR1       | 69315.273 | 66731.32  | NM_005137 | 28542.516 | 32768.109 | AF217971  | 16122.967 | 13719.897 |
| SR3       | 53682.871 | 52146.703 | NM_006764 | 12190.818 | 13523.012 | NM_001925 | 1397.728  | 1245.353  |
| SR5       | 3432.029  | 3460.695  | NM_001386 | 22657.123 | 23004.33  | AF245517  | 3300.231  | 3005.247  |
| SR7       | 4972.459  | 28980.697 | NM_001163 | 9825.203  | 10554.074 | NM_004137 | 1068.789  | 933.767   |
| SR9       | 18000.676 | 2904.714  | NM_005878 | 26641.363 | 27776.539 | NM_014407 | 1327.048  | 949.658   |
| CY3Cy5    | 2601.484  | 341.117   | AB006713  | 470.208   | 314.551   | NM_004982 | 6318.523  | 5496.313  |
| NM_013288 | 1670.103  | 2688.991  | AF308602  | 7217.664  | 7503.568  | NM_001694 | 56267.371 | 63287.273 |
| M60721    | 2704.426  | 3303.591  | AB011089  | 7038.417  | 7713.873  | AF286370  | 2193.782  | 2007.203  |
| L39061    | 3216.863  | 2188.356  | AF007192  | 2428.913  | 2244.05   | NM_000217 | 805.842   | 748.888   |
| AF071508  | 584.092   | 416.231   | NM_001276 | 12177.875 | 13598.476 | NM_004732 | 4859.491  | 3282.704  |
| L07265    | 9886.175  | 6612.205  | NM_016157 | 5992.148  | 5391.886  | AK026180  | 1487.319  | 1619.548  |
| D16472    | 937.692   | 1651.827  | NM_003053 | 14232.011 | 17742.621 | NM_018346 | 5909.911  | 4300.437  |
| AF085823  | 778.412   | 954.41    | NM_003044 | 19476.438 | 25197.281 | NM_001478 | 54673.027 | 50432.578 |
| AK022467  | 851.32    | 700.668   | NM_006672 | 35538.27  | 45734.039 | NM_002612 | 526.612   | 409.939   |
| NM_002813 | 14455.308 | 22626.295 | NM_000338 | 1081.645  | 1148.667  | AF135422  | 4474.52   | 3110.605  |
| NM_001198 | 1041.835  | 2069.456  | M31659    | 1390.227  | 1776.56   | NM_004479 | 41343.48  | 39464.621 |
| AK022745  | 34737.934 | 22762.949 | NM_003056 | 15915.085 | 18770.988 | NM_002610 | 3309.063  | 2926.919  |
| AL049450  | 6117.223  | 4719.639  | NM_016226 | 12655.275 | 13014.438 | AF070587  | 5917.7    | 3345.837  |
| AK022011  | 375.967   | 359.097   | AK024311  | 1383.936  | 2195.344  | BE250526  | 2852.464  | 2078.962  |
| NM_005086 | 6639.205  | 6645.468  | AF052155  | 7869.392  | 8991.695  | NM_016819 | 8212.882  | 7306.816  |
| NM_007238 | 2059.417  | 1476.494  | NM_005085 | 18475.443 | 22902.303 | NM_012222 | 14117.772 | 13724.976 |
| AL049340  | 1063.449  | 1053.776  | AF060902  | 9885.676  | 12904.498 | NM_005002 | 4649.443  | 4036.498  |
| NM_017606 | 3766.211  | 3519.252  | AF121858  | 42114.844 | 49390.156 | NM_006596 | 6005.694  | 6605.717  |
| AK024644  | 7756.193  | 7745.62   | NM_013437 | 1756.094  | 2035.081  | AK023214  | 20918.256 | 16607.172 |
| AB019573  | 1115.691  | 855.592   | NM_017681 | 2559.561  | 3244.164  | NM_001466 | 17140.418 | 14050.94  |
| U68494    | 1666.94   | 1590.509  | X57655    | 36543.996 | 43469.387 | NM_003600 | 30923.512 | 20998.633 |
| AF064254  | 2092.961  | 1432.885  | AK025966  | 10494.732 | 10834.025 | NM_017490 | 10837.412 | 6416.516  |
| AL137360  | 5635.643  | 4521.012  | NM_014440 | 1155.155  | 1650.906  | NM_002718 | 4564.845  | 2784.089  |
| AK024523  | 1257.833  | 1389.691  | NM_018725 | 2568.229  | 2587.628  | AK026727  | 4813.855  | 3483.948  |
| AK024600  | 764.691   | 717.758   | NM_003081 | 55413.102 | 58112.152 | NM_002830 | 588.256   | 535.765   |
| AK024543  | 1160.128  | 886.779   | NM_016495 | 3592.238  | 4244.571  | NM_006247 | 9651.246  | 6848.937  |
| AK024624  | 3615.677  | 3040.55   | D50402    | 63391.418 | 61037.82  | AB032983  | 4035.602  | 3003.183  |
| AK025090  | 522.574   | 665.687   | M73547    | 34436.797 | 38480.734 | NM_018281 | 18025.816 | 9002.8    |
| AK024883  | 7274.311  | 6315.375  | AF181722  | 1845.807  | 2063.403  | CY3Cy5    | 6229.804  | 510.575   |
| AF217989  | 7886.027  | 7016.208  | NM_003687 | 11694.943 | 11024.535 | NM_000945 | 3144.672  | 2760.192  |
| NM_017654 | 589.275   | 736.601   | NM_004134 | 11992.205 | 12495.702 | NM_002574 | 72583.281 | 65482.789 |
| AK000776  | 286.809   | 203.822   | NM_001632 | 3097.21   | 4639.048  | AK026924  | 7868.714  | 6463.006  |
| L77561    | 609.111   | 503.517   | NM_012264 | 3112.817  | 3780.404  | AL122047  | 3432.363  | 3613.612  |
| AL109696  | 2558.722  | 1598.449  | AF311312  | 2836.082  | 3322.385  | AF052091  | 2877.856  | 2944.6    |
| AK022190  | 542.99    | 345.375   | NM_001179 | 847.161   | 908.616   | AK024447  | 73195.508 | 65567.68  |
| AJ011593  | 5476.487  | 4057.029  | NM_005313 | 43969.461 | 50966.832 | AK023717  | 2482.146  | 1995.067  |
| AJ227907  | 416.965   | 402.931   | NM_017765 | 53185.711 | 56457.809 | AK022294  | 1751.793  | 1759.29   |
| X89743    | 653.463   | 532.069   | NM_000428 | 2946.209  | 3292.03   | AF086507  | 2221.471  | 2110.458  |
| AJ002784  | 546.259   | 372.267   | AB040967  | 573.423   | 633.671   | U79289    | 1941.035  | 3280.102  |
| U17621    | 1229.821  | 896.35    | NM_003578 | 1562.712  | 1678.892  | NM_014028 | 7759.341  | 11038.435 |
| AL049239  | 2046.098  | 1581.858  | NM_014721 | 906.466   | 1601.534  | SR1       | 70188.484 | 65769.438 |
| AF086208  | 4972.569  | 4608.368  | AL137705  | 5406.943  | 7741.723  | SR3       | 37913.328 | 38895.602 |
| AK023335  | 1260.165  | 1454.615  | U41898    | 2535.225  | 2704.087  | SR5       | 4579.443  | 6077.007  |
| AK023187  | 3657.272  | 3122.212  | NM_020346 | 918.796   | 981.952   | SR7       | 4524.551  | 38077.316 |

|           |           |           |           |           |           |           |           |           |
|-----------|-----------|-----------|-----------|-----------|-----------|-----------|-----------|-----------|
| AL133101  | 2295.968  | 2161.397  | AF169257  | 681.134   | 595.545   | SR9       | 13671.884 | 3140.612  |
| AL157459  | 3413.618  | 3389.885  | NM_014848 | 4685.629  | 4659.994  | CY3Cy5    | 5534.115  | 418.978   |
| AB020654  | 584.003   | 346.445   | BF217766  | 1462.379  | 1118.557  | AK026923  | 3223.412  | 2510.484  |
| AL353954  | 2012.269  | 1783.236  | NM_000184 | 3877.256  | 4848.762  | AK021691  | 36672.566 | 34546.531 |
| NM_017630 | 1518.111  | 1336.865  | NM_016180 | 7872.338  | 6449.389  | AK023595  | 1300.477  | 1492.657  |
| AK000778  | 3028.444  | 2825.338  | NM_000112 | 1280.55   | 1113.245  | NM_015721 | 5186.655  | 4596.262  |
| AK000932  | 320.933   | 620.183   | NM_005827 | 19337.209 | 19144.529 | AF086298  | 996.422   | 1059.527  |
| AL133573  | 1250.878  | 1091.305  | NM_006589 | 14832.039 | 16305.293 | AK027238  | 1059.497  | 784.633   |
| AK000115  | 3072.157  | 3566.777  | NM_002191 | 726.237   | 1190.639  | AK000032  | 1764.924  | 1140.098  |
| NM_017959 | 704.655   | 597.642   | AB007875  | 6077.987  | 6795.883  | AL360201  | 1096.436  | 1283.789  |
| AK000958  | 1064.759  | 866.786   | NM_018261 | 3685.708  | 3537.11   | S94540    | 60511.711 | 52186.875 |
| BC024924  | 13238.922 | 11125.576 | NM_014796 | 3078.479  | 3324.527  | U79297    | 1470.591  | 1603.633  |
| NM_017906 | 5506.303  | 4082.352  | AL050288  | 42057.777 | 51042.176 | AK002164  | 1374.784  | 1336.007  |
| AL110286  | 7108.641  | 6524.505  | NM_005040 | 9756.123  | 12396.478 | AF052122  | 22604.313 | 20800.92  |
| AF086374  | 703.925   | 649.141   | M80783    | 1075.572  | 692.858   | AK022416  | 1543.557  | 1573.854  |
| AL162066  | 3751.671  | 2512.37   | AF075033  | 14978.321 | 22635.586 | AK023224  | 4506.971  | 3513.992  |
| NM_016096 | 36544.969 | 24545.877 | D50911    | 21320.891 | 22499.395 | AK023731  | 2768.12   | 1852.073  |
| U79290    | 1998.508  | 2248.954  | AB011104  | 2480.695  | 2882.927  | AK022442  | 627.778   | 612.443   |
| AK022121  | 499.159   | 982.133   | AK024069  | 15800.498 | 14637.037 | AK023336  | 839.456   | 792.95    |
| X98114    | 473.842   | 482.935   | NM_004582 | 30106.07  | 24614.32  | AK023727  | 2125.308  | 2254.233  |
| AK024197  | 487.538   | 631.543   | NM_015640 | 30071.313 | 29461.213 | AK025271  | 956.195   | 931.832   |
| NM_014152 | 756.34    | 831.677   | AF233450  | 1573.526  | 2144.971  | AF086204  | 9409.076  | 7031.179  |
| NM_018606 | 399.89    | 290.803   | NM_016233 | 5173.432  | 5271.437  | NM_007021 | 2035.386  | 1708.509  |
| AF086473  | 732.314   | 522.035   | NM_000821 | 60638.309 | 55475.816 | AK026283  | 553.173   | 467.035   |
| D87682    | 2137.816  | 1294.203  | NM_020121 | 1315.997  | 2142.486  | AK022076  | 423.247   | 721.19    |
| AF321617  | 6941.334  | 5186.316  | NM_003145 | 42588.73  | 44945.523 | AK023065  | 544.63    | 758.709   |
| M85205    | 400.614   | 579.817   | CY3Cy5    | 2224.915  | 282.652   | NM_017678 | 722.049   | 929.743   |
| AF223389  | 410.01    | 378.009   | NM_012469 | 8615.697  | 8159.848  | AK021570  | 1063.969  | 1113.001  |
| AV710479  | 823.97    | 1615.842  | AF086448  | 3506.939  | 2763.881  | AL360204  | 1935.956  | 2376.738  |
| NM_006950 | 601.599   | 708.308   | AF086386  | 3140.671  | 2480.932  | AK000103  | 2010.511  | 1831.605  |
| NM_000682 | 1470.525  | 2057.483  | AF086413  | 460.156   | 355.293   | AK026294  | 579.978   | 668.244   |
| unknown ( | 766.958   | 520.985   | AF086457  | 1389.781  | 1256.485  | AF085959  | 758.114   | 884.983   |
| NM_016296 | 2002.55   | 1699.993  | AK025469  | 2560.899  | 2383.729  | AF075107  | 543.787   | 920.955   |
| AK002146  | 563.141   | 1065.392  | NM_020239 | 5165.567  | 4849.387  | AK023104  | 1087.654  | 1369.023  |
| AB007970  | 1219.883  | 1940.375  | AF070581  | 2977.433  | 2611.899  | AK022181  | 2011.848  | 2141.156  |
| NM_003159 | 1302.552  | 1013.685  | AK024187  | 1648.48   | 1340.989  | NM_018474 | 12832.075 | 9489.491  |
| AK023494  | 1312.696  | 1039.06   | NM_003307 | 1062.63   | 691.075   | AK024937  | 4135.112  | 3352.857  |
| AF086256  | 497.723   | 497.575   | AF070565  | 1399.899  | 1135.599  | D17178    | 1723.504  | 1418.929  |
| NM_015492 | 4285.095  | 8502.311  | AK021644  | 2507.438  | 1720.618  | AK022094  | 4278.608  | 2730.353  |
| NM_006933 | 693.173   | 1078.614  | NM_012469 | 6810.239  | 4299.566  | AK026695  | 1297.113  | 1181.591  |
| AF143875  | 967.096   | 1159.816  | NM_134260 | 9176.686  | 4501.687  | AK022220  | 762.384   | 1052.513  |
| AK024602  | 2336.538  | 4018.808  | SR2       | 30416.121 | 20226.641 | AK000141  | 9040.997  | 7772.675  |
| NM_018507 | 749.956   | 813.737   | SR4       | 11279.454 | 6814.344  | AL137758  | 4499.208  | 3838.438  |
| NM_000485 | 17568.221 | 14759.316 | SR6       | 1191.723  | 900.193   | AK023865  | 732.044   | 771.869   |
| NM_018542 | 437.925   | 592.618   | SR8       | 4550.845  | 11262.768 | AK025786  | 1105.861  | 1084.59   |
| AK025503  | 1617.645  | 1478.221  | SR10      | 14406.998 | 3333.61   | AK024188  | 1453.105  | 1320.224  |
| AF130073  | 2057.774  | 1704.647  | CY3Cy5    | 1077.382  | 205.597   | AF113683  | 2105.967  | 2760.746  |
| AK024225  | 26587.313 | 35773.063 | AK023038  | 2103.302  | 1580.262  | NM_014095 | 1023.896  | 998.244   |
| AF086334  | 1278.779  | 2060.047  | AK026206  | 1737.318  | 1716.265  | AK026821  | 4544.993  | 3842.183  |
| AL137602  | 520.994   | 601.764   | AK023964  | 7065.869  | 5825.78   | AK026280  | 4487.294  | 4234.742  |
| NM_003696 | 370.103   | 448.547   | AF086084  | 1292.103  | 1220.039  | AF113017  | 14965.571 | 14382.894 |
| AF075035  | 732.343   | 587.731   | AL050184  | 1395.526  | 1671.272  | AL080232  | 33275.387 | 27293.164 |
| AL110180  | 6262.471  | 5350.812  | AF085853  | 776.787   | 731.631   | AK001120  | 19814.4   | 19179.586 |



|           |           |           |           |           |           |           |           |           |
|-----------|-----------|-----------|-----------|-----------|-----------|-----------|-----------|-----------|
| U00949    | 436.463   | 358.51    | AK027185  | 2411.148  | 1740.477  | AF264629  | 2345.966  | 2637.213  |
| NM_014053 | 8560.418  | 10964.521 | AK025576  | 3589.03   | 2920.208  | AK021980  | 6178.668  | 4393.934  |
| NM_002571 | 333.826   | 547.777   | AF147385  | 1050.525  | 1596.181  | S46402    | 1119.498  | 1055.706  |
| NM_004939 | 6731.163  | 4815.261  | AL442086  | 9367.292  | 7723.991  | AF075048  | 569.26    | 590.881   |
| NM_001425 | 20970.85  | 17341.596 | BC034819  | 5477.213  | 3961.263  | Z83940    | 1104.015  | 1210.316  |
| NM_015710 | 1980.143  | 1762.054  | AF147313  | 30397.371 | 22677.693 | NM_005800 | 1765.847  | 1876.155  |
| NM_014158 | 6916.122  | 10619.605 | AF147382  | 72583.383 | 63303.168 | NM_005290 | 1093.089  | 1287.568  |
| AK021591  | 3908.026  | 6078.137  | AK001957  | 3276.271  | 2018.185  | AK025802  | 1434.406  | 1548.393  |
| NM_014675 | 2192.659  | 2598.582  | AK000850  | 294.448   | 181.319   | AF085973  | 867.795   | 1044.642  |
| NM_014040 | 9443.302  | 11856.267 | AK021833  | 2016.211  | 1336.179  | NM_018013 | 3931.318  | 2889.551  |
| AK000799  | 8574.141  | 8999.652  | AF143867  | 2458.687  | 1501.506  | AK026873  | 5234.398  | 8100.11   |
| NM_015582 | 475.875   | 559.642   | AK025889  | 4839.224  | 2644.051  | AK026394  | 4954.532  | 6122.945  |
| AK027091  | 1567.999  | 1490.292  | NM_014715 | 3740.203  | 2583.488  | NM_005448 | 2088.062  | 2825.476  |
| NM_001520 | 981.56    | 1640.167  | AK027134  | 1415.323  | 1480.77   | AB000464  | 1825.831  | 1085.161  |
| U31738    | 4883.104  | 4400.503  | AK024168  | 1296.778  | 1994.396  | BG106479  | 2657.241  | 3667.246  |
| AF179890  | 23612.676 | 21540.578 | AF222857  | 358.408   | 444.367   | AF130069  | 38630.41  | 36052.996 |
| AK023536  | 17262.01  | 17157.578 | AF264622  | 1457.004  | 1576.69   | AL109669  | 6786.305  | 5192.866  |
| AK026561  | 537.594   | 628.146   | AK021793  | 6140.632  | 5174.07   | AB037766  | 5049.809  | 4324.507  |
| AK021568  | 7654.181  | 7082.245  | AK022255  | 21243.871 | 22412.105 | AK026995  | 721.881   | 644.945   |
| Z36838    | 471.562   | 371.389   | AF075079  | 909.775   | 979.467   | AL133091  | 1461.764  | 1365.852  |
| AF088054  | 920.61    | 898.5     | AK022479  | 1290.984  | 1278.303  | BF842915  | 638.53    | 714.519   |
| AK023881  | 5610.006  | 4243.517  | AK023572  | 878.133   | 880.304   | X82545    | 14950.751 | 16042.776 |
| AK027114  | 47423.73  | 38621.629 | AF086004  | 30093.359 | 27918.566 | AF302079  | 27479.395 | 19940.379 |
| NM_000552 | 11107.677 | 13729.933 | AF147433  | 416.229   | 360.516   | AJ224167  | 1189.149  | 823.832   |
| NM_003809 | 1057.254  | 1145.976  | AF086006  | 714.912   | 683.836   | NM_002550 | 1083.843  | 1176.628  |
| AK000860  | 2352.485  | 1636.65   | AL137318  | 2084.968  | 1761.55   | L47668    | 56769.285 | 61290.109 |
| NM_014961 | 1307.328  | 1145.146  | AL137482  | 1285.9    | 802.163   | NM_017920 | 8629.949  | 7248.996  |
| NM_020145 | 5411.664  | 4681.898  | AL162011  | 11695.807 | 5823.41   | AK025345  | 1510.648  | 1327.412  |
| AK021529  | 4080.027  | 6073.499  | AL390177  | 687.198   | 378.528   | D25274    | 18913.313 | 12729.3   |
| AB037845  | 13172.16  | 21180.635 | AK056111  | 1674.084  | 930.847   | U84520    | 10354.159 | 10197.014 |
| NM_005980 | 904.56    | 1017.891  | Y13807    | 1684.808  | 948.284   | Z11853    | 876.234   | 956.558   |
| NM_016190 | 5934.75   | 5952.51   | AB037792  | 2643.99   | 4060.622  | AL133616  | 6294.26   | 4157.338  |
| AL137579  | 3479.412  | 3802.896  | AK022480  | 609.407   | 778.733   | AK023391  | 1061.794  | 1005.4    |
| NM_012383 | 7851.071  | 7778.645  | AK024158  | 929.576   | 1122.108  | AK026382  | 6542.678  | 8825.317  |
| AJ271684  | 648.123   | 675.505   | AL080082  | 894.15    | 875.885   | AK091169  | 5198.771  | 6832.992  |
| AF255342  | 1077.124  | 1156.425  | AK021623  | 1131.189  | 1225.736  | NM_014745 | 58047.102 | 61326.07  |
| NM_003300 | 7186.582  | 5892.69   | AK027112  | 8342.61   | 11863.746 | AF086026  | 15446.802 | 13894.185 |
| AK026682  | 4406.497  | 3335.08   | AL049314  | 6284.207  | 6827.617  | AL133011  | 2374.763  | 2701.565  |
| NM_017720 | 44507.605 | 36284.77  | AF093016  | 27145.178 | 27910.143 | NM_016300 | 717.116   | 836.564   |
| NM_004655 | 550.581   | 1059.961  | AF161345  | 1066.037  | 1092.335  | NM_015607 | 26903.381 | 24721.732 |
| NM_003942 | 3997.131  | 4032.517  | -         | 936.678   | 819.601   | AK026955  | 2068.894  | 1693.375  |
| NM_006471 | 14436.239 | 14045.317 | AF090925  | 505.15    | 625.421   | AL110202  | 32666.73  | 31970.521 |
| NM_004165 | 3305.668  | 2678.919  | NM_014163 | 28740.191 | 21594.438 | NM_006228 | 2367.598  | 2274.646  |
| NM_000368 | 4163.975  | 3996.385  | NM_014137 | 820.741   | 500.164   | NM_003768 | 18424.93  | 15153.184 |
| NM_016586 | 3763.402  | 3251.553  | AK021974  | 1437.916  | 952.245   | NM_018393 | 2554.649  | 2485.946  |
| NM_003860 | 1311.177  | 1653.297  | AK022068  | 855.364   | 721.286   | BF032535  | 3074.822  | 2139.511  |
| NM_005414 | 3399.114  | 3981.868  | AK022229  | 3241.281  | 1742.182  | NM_012289 | 8896.479  | 8897.723  |
| NM_004468 | 2717.526  | 3027.634  | AK022362  | 9033.841  | 5705.947  | AB037775  | 1023.771  | 1000.415  |
| NM_016031 | 11504.145 | 10253.799 | AK022004  | 8211.069  | 4913.467  | L27560    | 2218.124  | 1671.466  |
| NM_004804 | 9173.387  | 6507.744  | AK022136  | 474.095   | 291.504   | AK022517  | 4459.069  | 3072.295  |
| M92439    | 15618.567 | 13678.549 | AK022390  | 2196.123  | 1530.779  | NM_000329 | 23300.627 | 18190.016 |
| AL117665  | 12997.767 | 14439.935 | AL360138  | 321.84    | 569.887   | NM_001182 | 25369.846 | 18472.299 |
| AF263541  | 4303.107  | 6640.625  | U61096    | 1103.599  | 1652.136  | NM_000333 | 4456.571  | 2715.828  |

|           |           |           |           |           |           |           |           |           |
|-----------|-----------|-----------|-----------|-----------|-----------|-----------|-----------|-----------|
| AK027169  | 769.58    | 1269.171  | AF085865  | 6919.426  | 8252.078  | NM_000172 | 15821.032 | 12613.731 |
| NM_001262 | 6536.813  | 6852.957  | X78261    | 747.969   | 993.136   | NM_002297 | 13041.481 | 15239.593 |
| BE873030  | 575.841   | 803.868   | AK025521  | 606.164   | 1069.703  | AB040968  | 30867.303 | 31626.227 |
| NM_002440 | 811.795   | 1710.221  | NM_001053 | 67065.734 | 69886.109 | X85323    | 1786.19   | 2031.912  |
| NM_003625 | 1665.874  | 2594.479  | Z70694    | 4779.869  | 5976.124  | AK000802  | 784.482   | 847.238   |
| BC006990  | 12139.653 | 13133.379 | L77602    | 1933.71   | 1872.266  | NM_016126 | 13672.453 | 13686.694 |
| NM_002277 | 776.942   | 831.608   | NM_015421 | 13937.378 | 13229.556 | U84119    | 2284.524  | 2877.164  |
| NM_019114 | 8372.233  | 13147.551 | AF086081  | 6358.626  | 6322.404  | NM_003608 | 4823.568  | 5143.154  |
| M33552    | 43069.871 | 43800.293 | NM_018634 | 503.498   | 574.632   | NM_004598 | 395.171   | 327.927   |
| AJ252060  | 3880.102  | 4804.924  | NM_018111 | 1062.214  | 1094.636  | NM_006460 | 3382.004  | 2304.01   |
| NM_006403 | 9734.016  | 10794.877 | AK023730  | 466.585   | 488.405   | L34156    | 1474.562  | 1374.659  |
| NM_018977 | 2485.477  | 2872.138  | AF161360  | 2217.35   | 2165.33   | NM_003748 | 865.996   | 946.974   |
| AJ001402  | 844.122   | 963.039   | AK021720  | 1343.47   | 969.594   | NM_003557 | 12493.831 | 12028.754 |
| NM_004540 | 657.303   | 752.422   | NM_016497 | 49095.754 | 37932.906 | NM_001257 | 31803.502 | 26948.746 |
| NM_003248 | 365.367   | 324.113   | AF009261  | 1155.857  | 812.221   | NM_001795 | 346.848   | 564.381   |
| L25628    | 697.819   | 948.619   | AF087994  | 2262.346  | 3060.488  | D85245    | 9077.825  | 6320.318  |
| M37033    | 31373.623 | 27515.5   | AJ227912  | 1058.376  | 1573.094  | NM_000943 | 1268.254  | 934.87    |
| NM_007171 | 4623.995  | 5677.586  | NM_018195 | 3150.122  | 3083.319  | NM_004658 | 7613.288  | 6581.839  |
| NM_004278 | 1988.495  | 2038.906  | AK025532  | 22821.346 | 25459.822 | NM_001250 | 32123.098 | 20542.574 |
| NM_005632 | 2950.043  | 2798.24   | AK021789  | 505.831   | 568.08    | AF298812  | 2553.069  | 1822.457  |
| AK021499  | 1232.779  | 1074.892  | NM_003522 | 1227.531  | 1368.374  | NM_004968 | 3100.606  | 2257.033  |
| AK000336  | 5323.863  | 3439.219  | BF217847  | 1245.964  | 1329.1    | AJ249900  | 1124.835  | 808.46    |
| NM_002795 | 38588     | 28060.111 | NM_005320 | 7355.197  | 8756.987  | AK022581  | 10485.819 | 12122.793 |
| NM_006292 | 15877.329 | 17630.34  | U79242    | 737.982   | 759.665   | NM_018054 | 4407.908  | 5568.803  |
| AB007948  | 3180.546  | 3386.365  | Y10519    | 782.453   | 746       | NM_000684 | 1033.656  | 1054.396  |
| AB033066  | 2179.421  | 1576.488  | AF056452  | 778.222   | 628.104   | NM_007354 | 1983.431  | 1623.438  |
| NM_007075 | 1244.785  | 1457.024  | AF119901  | 5802.206  | 5035.911  | U67037    | 1594.676  | 1380.689  |
| NM_016042 | 1643.497  | 1357.74   | AL049782  | 562.194   | 540.91    | NM_004960 | 40903.035 | 29696.766 |
| NM_017640 | 1498.747  | 1645.229  | AK001936  | 1372.174  | 1287.941  | AF272370  | 23769.484 | 18605.314 |
| NM_017721 | 4476.361  | 4471.629  | NM_003770 | 71506.281 | 62557.828 | AF130050  | 20295.908 | 15736.736 |
| NM_019088 | 18141.795 | 27153.813 | AK001395  | 5764.296  | 3539.671  | AF119898  | 829.607   | 1075.07   |
| AB002373  | 4054.674  | 4987.256  | S57803    | 10947.063 | 8133.119  | AK023045  | 1101.625  | 925.762   |
| NM_016350 | 3492.673  | 3497.735  | AF131822  | 800.634   | 558.624   | NM_012197 | 10510.849 | 7971.02   |
| AK024167  | 9688.596  | 8825.423  | AK023131  | 4149.197  | 3008.576  | AK024016  | 5738.857  | 5631.363  |
| AK025308  | 392.449   | 448.679   | X78926    | 2863.179  | 3199.826  | NM_003581 | 3752.488  | 3673.991  |
| NM_005026 | 7927.891  | 7129.537  | AJ278110  | 2532.923  | 3714.276  | NM_002888 | 423.129   | 460.687   |
| NM_004140 | 892.261   | 848.907   | NM_014237 | 2456.64   | 2898.884  | NM_012407 | 1913.627  | 1760.619  |
| NM_002866 | 9151.268  | 14689.91  | NM_020396 | 837.913   | 1227.022  | AF302505  | 2600.724  | 1918.62   |
| AF230809  | 3268.65   | 3243.474  | AF029900  | 3558.365  | 4098.533  | NM_007186 | 7654.823  | 4738.981  |
| NM_017894 | 7084.51   | 7141.3    | NM_003325 | 8149.569  | 9897.695  | NM_007044 | 4125.526  | 2875.262  |
| NM_006509 | 17688.768 | 15634.893 | NM_016178 | 2758.744  | 3313.793  | AF294326  | 9069.817  | 6884.249  |
| AK025447  | 2861.882  | 3119.222  | AK022639  | 6392.628  | 6573.337  | NM_014678 | 5925.032  | 7600.021  |
| NM_002624 | 3880.167  | 3808.095  | D31766    | 1395.639  | 1467.191  | NM_006438 | 3630.503  | 3581.765  |
| AF006199  | 1965.869  | 1819.602  | NM_006547 | 5704.276  | 5733.559  | AF209198  | 9456.661  | 7247.134  |
| NM_004554 | 5142.417  | 4422.009  | L23867    | 894.862   | 842.18    | L09247    | 759.641   | 665.243   |
| NM_018119 | 9331.351  | 8112.876  | AB020968  | 383.27    | 394.228   | M69012    | 58190.504 | 62576.191 |
| NM_014576 | 2250.236  | 1549.55   | AL138690  | 4015.165  | 3862.312  | NM_016347 | 584.522   | 588.578   |
| AL162035  | 2825.912  | 2515.226  | AK000394  | 1012.705  | 820.625   | NM_006936 | 22971.928 | 18924.453 |
| NM_006692 | 445.863   | 620.754   | NM_013941 | 2280.065  | 1813.062  | NM_001327 | 41039.289 | 42177.836 |
| NM_003084 | 4566.599  | 5455.728  | AF074989  | 2063.466  | 1557.536  | AF321182  | 881.927   | 627.779   |
| NM_002582 | 10580.189 | 18114.25  | AK001107  | 1682.739  | 870.971   | AB037722  | 1457.781  | 1346.934  |
| NM_001008 | 60442.535 | 64031.023 | AF147393  | 979.13    | 559.816   | NM_003652 | 784.447   | 665.934   |
| NM_001026 | 58231.512 | 64307.945 | AL080112  | 2813.862  | 1697.19   | NM_000063 | 3886.753  | 3756.578  |

|           |           |           |           |           |           |           |           |           |
|-----------|-----------|-----------|-----------|-----------|-----------|-----------|-----------|-----------|
| NM_001011 | 60960.016 | 63672.035 | AL137325  | 2065.79   | 1648.606  | NM_01838E | 3123.443  | 2179.213  |
| AB061315  | 6760.748  | 4862.046  | AF147361  | 2498.25   | 1792.647  | AB033026  | 1038.331  | 985.074   |
| D17289    | 26514.676 | 21026.512 | NM_001851 | 8331.775  | 10680.354 | AF104914  | 24477.305 | 17919.938 |
| NM_00294E | 53181.813 | 52398.223 | S67789    | 3496.543  | 6288.393  | NM_01471E | 20335.914 | 14640.38  |
| NM_01423C | 17860.24  | 16074.264 | AK022689  | 14412.038 | 16721.76  | AB002354  | 879.482   | 1048.182  |
| NM_00023E | 5573.505  | 4894.694  | NM_016227 | 2086.95   | 2799.546  | NM_016487 | 1846.598  | 1726.907  |
| NM_01587E | 1519.106  | 1378.19   | NM_00419E | 33095.477 | 36426.594 | NM_00580E | 17169.238 | 21202.416 |
| AF068236  | 10808.138 | 12617.155 | NM_00470E | 5078.086  | 6524.794  | NM_01816E | 3810.061  | 3145.246  |
| U28480    | 1125.599  | 1727.959  | NM_02019C | 22229.002 | 28137.35  | AK021452  | 1306.507  | 1214.235  |
| NM_00010E | 30032.357 | 43265.914 | AK024003  | 691.586   | 814.043   | NM_00450E | 6100.64   | 5546.969  |
| NM_01812E | 8251.886  | 9141.116  | NM_014357 | 4190.417  | 4007.531  | S74529    | 55996.625 | 60752.969 |
| NM_016931 | 6839.828  | 7440.811  | NM_004067 | 522.461   | 547.835   | NM_020227 | 2655.928  | 3794.51   |
| NM_00437E | 58548.172 | 63810.102 | NM_000121 | 17993.439 | 15276.468 | NM_00593E | 655.798   | 543.009   |
| AK027067  | 1015.568  | 860.638   | NM_002091 | 19733.537 | 21072.584 | NM_00559E | 1290.807  | 1319.015  |
| NM_016287 | 11760.727 | 11145.112 | AB033092  | 8812.494  | 9806.462  | NM_001421 | 1048.083  | 1092.868  |
| AK021661  | 1167.518  | 1162.318  | M89957    | 27214.295 | 21498.104 | U97060    | 1873.951  | 1613.465  |
| NM_003864 | 14529.447 | 13435.034 | NM_00302E | 949.315   | 813.314   | M73837    | 6041.502  | 4592.59   |
| NM_006824 | 22597.902 | 22473.572 | BC035030  | 12754.523 | 12028.58  | NM_00422E | 594.801   | 382.31    |
| NM_002107 | 4108.96   | 5037.805  | NM_00534C | 51930.301 | 36701.469 | U69127    | 59270.281 | 51731.641 |
| NM_002694 | 8925.896  | 8761.819  | NM_016201 | 10622.533 | 8178.699  | NM_00583E | 17693.859 | 11177.498 |
| NM_004454 | 3045.033  | 3525.34   | NM_000864 | 3367.214  | 1968.539  | AK023379  | 7284.409  | 5384.221  |
| NM_00096E | 1517.603  | 2044.219  | NM_017977 | 4042.214  | 2581.099  | NM_01829E | 1344.35   | 1642.929  |
| NM_01248E | 5134.565  | 6538.536  | AF147727  | 3277.538  | 1846.518  | AL049705  | 14570.008 | 16706.385 |
| AF217227  | 2774.905  | 2625.951  | NM_006751 | 993.707   | 796.794   | NM_01545E | 4177.429  | 5344.907  |
| AK024141  | 943.864   | 1964.67   | AB037834  | 2304.193  | 1635.5    | NM_00427E | 1116.056  | 918.36    |
| U13706    | 841.817   | 807.469   | NM_00356E | 3677.085  | 2978.59   | NM_00069C | 3834.622  | 3829.509  |
| AF213356  | 735.578   | 750.649   | NM_002777 | 2024.424  | 3558.648  | NM_00015E | 22041.389 | 19101.818 |
| BC035716  | 3155.798  | 2741.767  | NM_01412E | 2398.864  | 2666.993  | AK024489  | 2480.378  | 2400.226  |
| NM_018014 | 8135.031  | 5625.084  | NM_017904 | 2769.636  | 3373.459  | NM_000181 | 12462.138 | 17648.443 |
| NM_00235E | 15881.429 | 12836.318 | NM_013367 | 5225.343  | 4763.969  | NM_000667 | 364.359   | 647.861   |
| NM_00131E | 1815.096  | 5919.145  | AL137550  | 499.42    | 727.122   | NM_014121 | 1913.444  | 1506.234  |
| AF007192  | 2257.418  | 4448.214  | NM_000321 | 5199.799  | 5039.755  | NM_00673C | 2404.046  | 2142.97   |
| NM_00127E | 13582.42  | 16700.992 | NM_006341 | 12725.721 | 14243.381 | NM_005644 | 3291.316  | 4194.328  |
| NM_00219E | 16317.477 | 17062.623 | NM_00170E | 1559.769  | 1409.452  | NM_01844E | 11209.82  | 9131.468  |
| D84294    | 7400.379  | 6754.688  | NM_006191 | 7982.089  | 8069.804  | AF182416  | 17576.949 | 14631.535 |
| X59770    | 1817.632  | 1408.027  | NM_00180C | 3457.967  | 3473.519  | NM_00599E | 35614.699 | 30373.563 |
| K02765    | 1241.071  | 937.298   | NM_00433E | 11591.884 | 13438.649 | NM_00601E | 2905.093  | 2674.719  |
| M65134    | 1396.42   | 1280.762  | NM_01594E | 3190.954  | 3783.592  | NM_004634 | 6310.29   | 5304.263  |
| BG539651  | 11026.293 | 10780.648 | NM_01397E | 4478.318  | 4785.002  | NM_002017 | 6288.084  | 6072.062  |
| BI870529  | 24669.67  | 25451.852 | NM_00379C | 7319.715  | 7828.195  | NM_01481E | 3817.01   | 3737.389  |
| AA702698  | 2526.347  | 3159.371  | NM_000494 | 11992.228 | 15298.506 | NM_00544E | 5789.793  | 5686.64   |
| AI681514  | 975.955   | 817.387   | NM_01602E | 2687.422  | 2169.342  | NM_007221 | 14578.422 | 12601.41  |
| NM_00130C | 4709.973  | 3762.242  | NM_00372E | 40720.191 | 34042.832 | X54163    | 49353.512 | 51618.242 |
| BG748827  | 22758.084 | 19914.844 | NM_01443C | 631.698   | 368.573   | AK025395  | 1500.782  | 2407.079  |
| AA952897  | 22372.277 | 30342.777 | NM_00049E | 1499.58   | 1079.034  | NM_00038E | 3983.646  | 5089.892  |
| BG760342  | 3284.24   | 3472.174  | AF085883  | 3179.668  | 2228.297  | X58377    | 1041.349  | 1030.863  |
| AA703141  | 3596.678  | 3269.612  | NM_016571 | 3095.184  | 2086.104  | NM_00246E | 654.61    | 607.077   |
| AA195244  | 495.063   | 635.063   | NM_00368E | 1992.439  | 1658.997  | AI673575  | 678.291   | 504.779   |
| AI122630  | 15252.851 | 12780.851 | NM_01644E | 12374.712 | 8969.96   | BI830936  | 1709.872  | 1599.823  |
| AF086790  | 804.362   | 871.652   | BC036368  | 1283.293  | 1041.424  | U79292    | 43893.484 | 50500.164 |
| NM_003081 | 37086.586 | 42674.18  | AK023237  | 939.477   | 819.557   | AA947915  | 1629.532  | 1715.769  |
| NM_01649E | 3625.803  | 4361.986  | NM_00187C | 1733.362  | 2148.22   | BI830753  | 1861.006  | 2221.761  |
| D50402    | 11469.948 | 13855.922 | AJ271216  | 3015.186  | 2993.323  | X68314    | 5167.235  | 6575.322  |

|           |           |           |           |           |           |           |           |           |
|-----------|-----------|-----------|-----------|-----------|-----------|-----------|-----------|-----------|
| M73547    | 18196.459 | 16283.523 | U23028    | 5090.333  | 5145.37   | X71973    | 46818.93  | 53293.059 |
| AF181722  | 320.552   | 349.749   | NM_000817 | 4960.9    | 5229.937  | T49651    | 42209.945 | 34558.68  |
| NM_003687 | 889.768   | 825.062   | AF113132  | 29259.574 | 35475.809 | NM_000402 | 3261.972  | 3194.76   |
| NM_004134 | 11883.37  | 12937.506 | NM_006571 | 4725.442  | 5109.486  | AK026266  | 47961.898 | 45986.344 |
| NM_005955 | 2683.271  | 2930.563  | NM_001875 | 540.579   | 867.043   | NM_007124 | 23382.416 | 19894.193 |
| NM_004045 | 1728.611  | 1796.113  | AK022680  | 3424.555  | 4035.024  | NM_003175 | 14992.963 | 12448.182 |
| BE548044  | 1775.813  | 1831.958  | NM_018945 | 19310.922 | 21631.373 | NM_000723 | 3048.471  | 2144.373  |
| NM_012425 | 6933.991  | 7293.72   | NM_016355 | 11790.332 | 11485.424 | AL096751  | 20805.949 | 21510.48  |
| NM_013265 | 19544.627 | 14830.656 | NM_001065 | 57283.371 | 59963.551 | NM_000364 | 2381.769  | 2324.169  |
| NM_001725 | 18641.264 | 26861.057 | NM_004155 | 2362.642  | 3038.845  | AF026920  | 30735.363 | 26563.658 |
| NM_005565 | 735.149   | 534.833   | AK000561  | 1880.443  | 1847.617  | NM_004931 | 8314.212  | 6540.258  |
| NM_003824 | 8999.158  | 8783.623  | AB051449  | 31864.662 | 25901.676 | NM_000607 | 50605.762 | 44759.973 |
| NM_000685 | 633.86    | 841.466   | BC009187  | 7733.182  | 5204.183  | AB011099  | 645.026   | 366.341   |
| NM_012452 | 3302.741  | 2993.662  | AL133617  | 1778.953  | 782.692   | AF090409  | 585.866   | 1864.135  |
| AF229166  | 1963.288  | 2692.704  | NM_016485 | 8216.674  | 5753.25   | NM_002575 | 10764.657 | 14387.743 |
| NM_006764 | 5159.805  | 4153.308  | NM_002615 | 695.567   | 536.874   | NM_004244 | 8476.985  | 13812.879 |
| NM_017765 | 5218.277  | 9862.235  | AF090894  | 2126.721  | 1322.467  | NM_003371 | 55656.848 | 62386.344 |
| NM_000425 | 1398.01   | 1962.689  | NM_013344 | 411.874   | 376.368   | AF049460  | 762.699   | 835.034   |
| AB040967  | 3656.569  | 2808.703  | NM_014052 | 18206.059 | 14380.129 | AK001500  | 5288.514  | 4701.165  |
| NM_014721 | 2060.768  | 2169.185  | NM_020145 | 4002.056  | 4555.447  | NM_006774 | 1888.233  | 1677.169  |
| AK026352  | 1243.005  | 1223.171  | NM_006237 | 1704.037  | 2142.834  | NM_020125 | 2792.298  | 3283.013  |
| AF169257  | 370.917   | 422.003   | NM_001271 | 7948.243  | 5921.414  | Y16521    | 13235.57  | 9266.315  |
| NM_016180 | 608.351   | 573.17    | NM_003683 | 8811.404  | 10493.131 | AL050371  | 10549.956 | 8370.663  |
| NM_005827 | 6506.55   | 4975.951  | AF039019  | 5307.755  | 5335.961  | NM_002651 | 5637.137  | 4383.628  |
| NM_003055 | 11592.69  | 10429.576 | NM_012255 | 6401.264  | 6324.65   | NM_002413 | 29121.105 | 23291.824 |
| NM_016225 | 13420.741 | 9760.162  | NM_018195 | 1717.72   | 1895.841  | NM_017577 | 1146.812  | 1180.849  |
| AK024311  | 1257.987  | 1382.551  | NM_004815 | 5736.771  | 6157.868  | NM_016301 | 18316.275 | 20121.82  |
| AF052155  | 7563.914  | 5997.63   | J04205    | 17276.188 | 21615.457 | NM_014665 | 13551.912 | 13461.486 |
| NM_005085 | 1812.212  | 1469.106  | D38491    | 8289.102  | 5556.014  | NM_007351 | 64085.582 | 59078.715 |
| AF060902  | 3512.104  | 3159.03   | AK026835  | 6606.307  | 10027.953 | AL049935  | 24761.199 | 20806.008 |
| AF121858  | 7956.753  | 7948.073  | NM_002815 | 21715.158 | 23486.369 | AB033043  | 32490.209 | 35945.867 |
| NM_013437 | 802.599   | 831.775   | NM_003090 | 45892.863 | 44022.336 | NM_014995 | 10634.06  | 9538.439  |
| NM_017681 | 1946.917  | 1739.092  | NM_013264 | 6582.101  | 5250.879  | AK025220  | 5700.521  | 5057.708  |
| X57655    | 42949.895 | 28303.436 | NM_003315 | 17492.385 | 14949.029 | NM_016305 | 28235.504 | 23935.842 |
| NM_014795 | 5951.499  | 4568.721  | NM_005570 | 12467.068 | 9372.134  | D42046    | 7243.046  | 5865.379  |
| NM_001147 | 1106.953  | 682.491   | NM_000085 | 16332.041 | 13468.456 | NM_001033 | 14452.478 | 12700.293 |
| AL050288  | 42991.91  | 33964.859 | NM_003752 | 4870.898  | 3674.522  | NM_004525 | 17092.816 | 18982.73  |
| NM_005040 | 10309.698 | 9020.009  | NM_003932 | 13511.212 | 9389.393  | NM_002525 | 31687.547 | 28348.936 |
| NM_016391 | 25509.1   | 19841.771 | NM_016491 | 22623.832 | 15131.942 | NM_020135 | 5473.434  | 5645.899  |
| M80783    | 1906.996  | 1518.511  | NM_006425 | 33275.84  | 21460.191 | NM_018515 | 8604.837  | 8405.209  |
| AF075033  | 14998.429 | 13216.412 | NM_002515 | 2879.999  | 2245.542  | AK023149  | 3848.667  | 3778.466  |
| D50911    | 24267.768 | 18098.592 | NM_002064 | 2145.79   | 2799.703  | AK023168  | 7466.555  | 8172.323  |
| AB011104  | 3345.263  | 2891.825  | NM_015523 | 12933.626 | 13462.952 | NM_006645 | 934.773   | 1224.911  |
| AK024069  | 13689.22  | 7769.188  | NM_015960 | 25607.285 | 33210.496 | NM_004742 | 6191.772  | 4507.539  |
| NM_004582 | 26279.502 | 15961.357 | NM_006085 | 11771.219 | 11522.764 | AF298880  | 13037.764 | 8836.65   |
| NM_015640 | 26807.893 | 19895.693 | NM_000907 | 12687.485 | 12659.202 | NM_007221 | 13785.636 | 13105.363 |
| AF233450  | 1460.308  | 1620.742  | AF254085  | 7269.734  | 7450.328  | X54163    | 51656.285 | 59072.84  |
| NM_016233 | 1068.906  | 1774.509  | AK023541  | 391.52    | 560.054   | AK025395  | 1685.218  | 1865.576  |
| NM_000821 | 11354.923 | 11814.035 | NM_001987 | 4021.894  | 3501.255  | NM_000385 | 3345.89   | 3064.983  |
| NM_020121 | 381.787   | 290.82    | AF244088  | 5328.499  | 5647.185  | X58377    | 1374.861  | 1488.722  |
| NM_003145 | 32400.752 | 28172.646 | NM_007135 | 2286.968  | 2615.766  | NM_002465 | 696.83    | 662.692   |
| NM_001632 | 3243.206  | 3201.768  | AK025434  | 501.797   | 726.6     | AI673575  | 564.645   | 767.751   |
| NM_012264 | 2408.852  | 2024.296  | AJ251845  | 1083.029  | 1240.642  | BI830936  | 1599.412  | 1178.457  |

|           |           |           |           |           |           |           |           |           |
|-----------|-----------|-----------|-----------|-----------|-----------|-----------|-----------|-----------|
| AF311312  | 3702.635  | 3184.36   | AK000435  | 5618.813  | 4155.874  | U79292    | 43298.422 | 40686.035 |
| NM_001276 | 13624.731 | 15358.041 | AK000569  | 7741.929  | 6230.442  | AA947915  | 1379.556  | 2012.905  |
| NM_014915 | 52921.738 | 62596.531 | NM_006049 | 3904.531  | 2633.213  | BI830753  | 1875.481  | 2550.138  |
| NM_012286 | 7186.703  | 10729.904 | BC016698  | 9212.31   | 5463.008  | X68314    | 4882.634  | 5527.015  |
| NM_002195 | 22544.686 | 36699.109 | NM_007374 | 1094.193  | 890.571   | X71973    | 45639.57  | 41527.145 |
| D84294    | 9113.324  | 9118.691  | NM_006167 | 955.606   | 693.356   | T49651    | 42468.875 | 35013.434 |
| X59770    | 2821.991  | 3273.46   | NM_016357 | 1937.527  | 1461.3    | N51014    | 1669.442  | 1847.054  |
| K02765    | 1384.94   | 886.723   | NM_014500 | 23526.521 | 13912.862 | BE392471  | 28124.117 | 24186.049 |
| M65134    | 1504.467  | 910.636   | L09071    | 1324.433  | 1801.859  | AI802950  | 9044.271  | 8000.025  |
| BG539651  | 11508.504 | 8183.074  | NM_005924 | 1188.139  | 1377.674  | AB040879  | 2786.711  | 2109.04   |
| N52646    | 12759.562 | 10318.635 | NM_019841 | 973.288   | 1208.055  | NM_003176 | 15337.153 | 10887.074 |
| AW160671  | 55524.547 | 40598.852 | NM_003322 | 1192.349  | 1353.959  | NM_000723 | 2972.532  | 2724.424  |
| BI870529  | 22328.561 | 20435.35  | NM_003568 | 1210.885  | 1172.863  | AL096751  | 21538.73  | 20247.982 |
| AA702698  | 2678.991  | 2314.781  | BC036375  | 19216.561 | 20646.738 | NM_000364 | 2656.312  | 2757.351  |
| AI681514  | 1237.511  | 1166.059  | NM_000496 | 523.026   | 584.843   | AF026920  | 31588.729 | 32955.789 |
| NM_001300 | 4739.58   | 3487.426  | BF347926  | 10888.053 | 10467.199 | NM_004931 | 9322.67   | 6123.264  |
| BG748827  | 21465.66  | 15690.443 | N54821    | 17487.781 | 19907.033 | NM_000607 | 48263.188 | 41879.699 |
| AA952897  | 17644.383 | 16674.232 | BI912037  | 7093.338  | 7974.311  | AB011099  | 569.861   | 859.321   |
| BG760342  | 3551.508  | 4170.2    | AA454646  | 27086.475 | 29959.088 | NM_002575 | 8460.051  | 7948.414  |
| AA703141  | 4158.519  | 7053.479  | BF063899  | 2596.65   | 2674.849  | NM_004244 | 6532.736  | 6179.516  |
| AA195244  | 480.551   | 575.069   | U18087    | 62038.543 | 60794.805 | NM_003371 | 55342.141 | 61427.113 |
| AI122630  | 15500.188 | 15746.511 | U66349    | 2030.458  | 2097.339  | NM_001164 | 987.931   | 935.848   |
| NM_006586 | 14003.869 | 11568.313 | AA057156  | 12534.785 | 12506.213 | AK023114  | 10425.776 | 14284.541 |
| NM_002191 | 326.142   | 561.162   | U19487    | 1166.493  | 1272.458  | NM_003678 | 7407.108  | 6302.001  |
| AB007875  | 1726.657  | 1559.283  | AF166327  | 49517.391 | 46747.539 | NM_014271 | 1756.672  | 2414.209  |
| NM_018725 | 2113.456  | 2400.618  | AF260739  | 4756.08   | 3389.753  | NM_014815 | 6037.323  | 5908.164  |
| NM_003081 | 30730.076 | 29510.377 | AF531423  | 34958.066 | 23771.096 | NM_005443 | 5547.25   | 4054.724  |
| NM_016495 | 2234.298  | 2296.208  | X76555    | 1345.103  | 954.459   | NM_020125 | 2991.508  | 2999.892  |
| D50402    | 11885.205 | 17865.066 | NM_005432 | 10409.253 | 7709.48   | Y16521    | 13682.226 | 14493.231 |
| M73547    | 22766.465 | 33307.57  | L10386    | 18972.279 | 13087.045 | AL050371  | 11087.053 | 9387.238  |
| AF181722  | 1707.965  | 1602.123  | AF061812  | 56249.098 | 48279.367 | NM_002651 | 5301.225  | 3593.224  |
| NM_003687 | 1101.148  | 1158.149  | AL136756  | 7424.957  | 6267.14   | NM_002413 | 28263.211 | 24913.09  |
| NM_004134 | 9948.58   | 7093.235  | NM_015944 | 2182.942  | 1778.977  | NM_017577 | 1483.366  | 1526.277  |
| NM_005955 | 2390.667  | 1658.331  | NM_000758 | 9449.229  | 9244.243  | NM_016301 | 18955.836 | 18314.086 |
| NM_004048 | 1878.36   | 1960.567  | M17017    | 975.138   | 1230.025  | NM_014668 | 13908.532 | 16632.531 |
| BE548044  | 615.445   | 433.26    | NM_002990 | 3965.541  | 5118.842  | NM_004722 | 11116.446 | 13217.568 |
| AF028832  | 360.522   | 263.264   | NM_002432 | 5739.257  | 5238.496  | NM_014425 | 5756.712  | 8424.928  |
| NM_006017 | 342.09    | 392.663   | NM_012420 | 777.03    | 719.659   | NM_012133 | 12206.656 | 11757.138 |
| NM_012428 | 6760.36   | 5838.856  | NM_002343 | 4719.057  | 5387.763  | NM_017954 | 1489.083  | 2028.49   |
| NM_013269 | 1996      | 16117.475 | AB033037  | 2930.821  | 3247.908  | NM_006612 | 16381.192 | 15583.037 |
| NM_001728 | 15566.484 | 12934.458 | L40400    | 6940.911  | 8079.577  | NM_007351 | 68516.117 | 64577.16  |
| NM_005565 | 573.704   | 354.173   | AK025688  | 3622.985  | 4347.456  | AK026266  | 46843.051 | 36637.051 |
| NM_003824 | 8664.067  | 7976.954  | NM_005930 | 628.083   | 778.113   | NM_007124 | 22524.32  | 14168.28  |
| NM_000686 | 797.641   | 943.359   | Z36819    | 11311.952 | 11535.199 | AB033043  | 34815.141 | 35927.414 |
| NM_012452 | 3658.316  | 5194.064  | NM_014847 | 45931.066 | 54152.816 | NM_014996 | 11406.168 | 9232.877  |
| AF229166  | 1335.306  | 1974.045  | NM_014448 | 7793.19   | 8386.874  | AK025220  | 4978.027  | 4084.757  |
| NM_006764 | 5783.896  | 5825.867  | AL080157  | 8728.265  | 8988.923  | NM_016308 | 30425.67  | 38007.434 |
| AF007192  | 1570.02   | 1632.427  | NM_005100 | 853.021   | 654.5     | D42046    | 8122.825  | 14095.619 |
| NM_017765 | 4471.612  | 4969.14   | NM_005308 | 4471.203  | 3834.216  | NM_001033 | 15244.298 | 21569.225 |
| NM_000428 | 1193.531  | 1240.025  | NM_000911 | 1718.306  | 1608.527  | NM_004526 | 17197.955 | 23437.213 |
| AB040967  | 261.806   | 264.838   | NM_007227 | 1623.943  | 1254.548  | NM_002526 | 27359.117 | 26073.383 |
| NM_014721 | 2120.13   | 2647.477  | NM_007023 | 1451.554  | 1025.919  | NM_020135 | 5703.426  | 6121.069  |
| AK026352  | 1427.752  | 1745.07   | NM_005873 | 14765.906 | 10013.313 | NM_018518 | 9282.36   | 10391.313 |

|           |           |           |           |           |           |           |           |           |
|-----------|-----------|-----------|-----------|-----------|-----------|-----------|-----------|-----------|
| AF169257  | 452.498   | 438.58    | NM_004624 | 5255.587  | 4613.12   | AK023149  | 3836.617  | 3716.702  |
| NM_01618C | 461.894   | 317.475   | NM_003865 | 2162.791  | 1854.976  | AK023168  | 7383.147  | 9378.722  |
| NM_005827 | 5755.29   | 4757.203  | AB015330  | 28193.865 | 18229.402 | NM_00664E | 934.788   | 1472.676  |
| NM_00305E | 10417.68  | 8874.932  | NM_004315 | 17672.131 | 18673.084 | NM_00474Z | 7350.706  | 8537.711  |
| NM_01622E | 13293.006 | 10634.363 | NM_02016E | 9317.146  | 10170.586 | NM_01475Z | 3946.352  | 3826.688  |
| AK024311  | 1256.449  | 1089.455  | S56138    | 484.18    | 596.149   | NM_00658E | 50092.344 | 59595.367 |
| AF052155  | 6966.637  | 4528.558  | AK023860  | 7828.498  | 8960.908  | NM_014331 | 8047.849  | 6744.31   |
| NM_00508E | 2148.648  | 1710.241  | NM_000031 | 5418.28   | 5694.453  | NM_00679E | 52915.199 | 48562.438 |
| AF060902  | 3908.206  | 3951.635  | NM_00208E | 33210.367 | 32315.283 | AF070568  | 4505.334  | 3593.268  |
| AF121858  | 7976.712  | 9506.871  | AK026061  | 611.923   | 756.628   | NM_00024C | 19067.934 | 19177.637 |
| NM_013437 | 862.386   | 1094.941  | NM_01628E | 15560.811 | 16388.709 | AK055733  | 25163.324 | 26596.047 |
| NM_017681 | 2466.23   | 2791.488  | NM_001567 | 4626.907  | 5178.949  | AF298880  | 15837.852 | 14771.039 |
| X57655    | 45286.867 | 39481.637 | NM_00490E | 15546.607 | 17308.178 | AK001500  | 6728.391  | 5384.243  |
| AK025966  | 2709.694  | 2647.593  | AF217971  | 9682.772  | 10120.207 | NM_006774 | 1760.653  | 1337.889  |
| NM_01444C | 463.732   | 514.822   | NM_00192E | 571.646   | 871.15    | AK025395  | 2087.677  | 2104.464  |
| NM_01479E | 3018.701  | 2400.323  | NM_00498Z | 4017.014  | 4437.792  | NM_00038E | 3197.701  | 3232.756  |
| NM_001147 | 558.468   | 414.257   | NM_00473Z | 3871.512  | 4041.986  | X58377    | 1083.682  | 870.917   |
| AL050288  | 50002.773 | 50204.523 | NM_01834E | 6537.995  | 7485.912  | NM_00246E | 681.864   | 1168.92   |
| NM_00504C | 10836.996 | 12836.498 | NM_00636Z | 9314.898  | 8561.322  | BI830936  | 1579.408  | 1899.684  |
| NM_016391 | 26572.814 | 26106.668 | NM_02041E | 3066.325  | 3072.367  | U79292    | 49883.777 | 54336.137 |
| M80783    | 2816.368  | 1960.675  | AL049667  | 5733.237  | 4436.391  | AA947915  | 1253.656  | 1798.246  |
| AF075033  | 15706.839 | 17215.477 | NM_000334 | 11682.232 | 10134.426 | BI830753  | 2000.922  | 2468.169  |
| D50911    | 23278.49  | 17270.654 | NM_02040C | 2482.503  | 2525.555  | X68314    | 6337.869  | 11479.404 |
| AB011104  | 3711.672  | 4430.648  | NM_001504 | 9804.754  | 6638.259  | X71973    | 45020.828 | 45242.828 |
| AK024069  | 13249.739 | 7592.981  | NM_00156E | 1093.886  | 735.25    | T49651    | 41606.293 | 35516.809 |
| NM_00458Z | 25551.916 | 21655.891 | NM_00261Z | 799.21    | 768.37    | N51014    | 2561.394  | 4171.798  |
| NM_01564C | 26123.834 | 20006.094 | AF135422  | 2973.26   | 2793.073  | BE392471  | 29602.926 | 35163.445 |
| AF233450  | 1248.443  | 1388.44   | NM_00447E | 32628.029 | 33199.184 | AI802950  | 8583.715  | 7254.289  |
| NM_01623Z | 846.046   | 727.496   | NM_00261C | 2890.092  | 3083.579  | AI741278  | 836.442   | 790.522   |
| NM_000821 | 8555.394  | 6203.521  | AF070587  | 5662.153  | 3907.116  | AA682423  | 3020.55   | 2313.503  |
| NM_020121 | 595.536   | 340.78    | BE250526  | 1627.209  | 1737.997  | AL043686  | 12298.798 | 9014.43   |
| NM_00314E | 43338.395 | 46556.645 | NM_01681E | 5589.281  | 6074.683  | AA490172  | 3084.78   | 2617.032  |
| NM_00163Z | 4618.196  | 6164.58   | NM_01222Z | 8979.641  | 11180.813 | AB011174  | 5770.004  | 6526.277  |
| NM_012264 | 2736.929  | 2527.886  | NM_00500Z | 4273.086  | 4305.833  | AL049935  | 23952.85  | 21296.02  |
| AF311312  | 2924.32   | 2474.057  | NM_00659E | 5391.485  | 6626.33   | AB011099  | 590.011   | 730.426   |
| NM_00117E | 1065.309  | 1124.016  | AK023214  | 13439.616 | 14919.372 | NM_00257E | 7744.336  | 8510.263  |
| NM_00531Z | 45222.766 | 40757.754 | NM_00146E | 13686.889 | 13481.969 | NM_004244 | 6954.396  | 7152.986  |
| NM_01491E | 49371.617 | 50431.254 | NM_00360C | 22268.188 | 23987.859 | NM_003371 | 53633.191 | 65328.887 |
| NM_01228E | 5443.597  | 6975.681  | NM_01749C | 8472.73   | 7455.285  | NM_001164 | 572.573   | 1374.02   |
| NM_00219E | 19056.996 | 22199.693 | NM_00271E | 3862.292  | 3669.235  | AK023114  | 9626.999  | 9262.477  |
| D84294    | 8525.008  | 14892.264 | AK026727  | 4185.167  | 3866.649  | NM_00367E | 6740.751  | 5692.771  |
| X59770    | 3046.191  | 2630.873  | NM_00283C | 615.575   | 426.446   | NM_012301 | 9218.273  | 6464.567  |
| K02765    | 2795.455  | 2946.074  | NM_006247 | 7620.632  | 6779.303  | NM_00068C | 1050.604  | 871.808   |
| M65134    | 2057.394  | 2239.476  | AB032983  | 6398.611  | 5510.182  | NM_005631 | 870.446   | 1309.077  |
| BG539651  | 11934.989 | 11177.335 | NM_018281 | 16120.627 | 13116.8   | NM_01441E | 32288.775 | 30307.285 |
| N52646    | 13134.739 | 11308.312 | NM_004457 | 5173.321  | 4504.227  | NM_01493E | 6054.533  | 5211.758  |
| AW160671  | 51683.508 | 46542.547 | NM_01404E | 3581.982  | 3457.39   | AF049460  | 949.404   | 652.601   |
| AA702698  | 2248.377  | 2353.326  | NM_00539E | 2749.563  | 2584.292  | AK026066  | 3250.817  | 2260.613  |
| AI681514  | 916.377   | 893.155   | NM_019841 | 1409.749  | 1343.456  | NM_005244 | 17906.143 | 11459.43  |
| NM_00130C | 4356.545  | 4121.313  | NM_00332Z | 1336.876  | 1529.708  | NM_007221 | 16785.262 | 16282.489 |
| BG748827  | 23093.463 | 20496.482 | NM_00356E | 1149.56   | 1328.522  | X54163    | 50173.438 | 52256.371 |
| AA952897  | 16104.394 | 13830.36  | BC036375  | 21682.596 | 22717.23  | NM_018607 | 792.896   | 730.909   |
| BG760342  | 3279.237  | 2523.996  | NM_00049E | 680.39    | 950.104   | NM_00297E | 25816.34  | 23744.266 |

|           |           |           |           |           |           |           |           |           |
|-----------|-----------|-----------|-----------|-----------|-----------|-----------|-----------|-----------|
| AA703141  | 2681.256  | 2952.613  | BF347926  | 10810.478 | 10604.778 | NM_01466E | 14723.326 | 18996.984 |
| AA195244  | 710.29    | 874.772   | N54821    | 16147.109 | 19372.367 | NM_00472E | 10448.77  | 19832.307 |
| AI122630  | 14522.93  | 13095.355 | BI912037  | 5521.441  | 5760.881  | NM_01442E | 5014.054  | 4910.912  |
| NM_00658E | 14199.904 | 12850.771 | AA454646  | 27519.365 | 27922.49  | NM_01213E | 10339.778 | 6155.696  |
| NM_002191 | 416.089   | 558.327   | BF063899  | 2916.602  | 2903.227  | NM_017954 | 542.708   | 324.462   |
| AB007875  | 1573.851  | 1384.992  | U18087    | 60900.16  | 59657.066 | NM_00661E | 14366.928 | 7721.085  |
| NM_018261 | 4228.837  | 3600.938  | U66349    | 1724.204  | 2183.975  | NM_016451 | 5080.879  | 2481.316  |
| NM_00595E | 4405.251  | 5886.681  | AA057156  | 11375.549 | 12363.141 | NM_007351 | 54411.934 | 47700.246 |
| NM_00404E | 3585.944  | 5590.969  | U19487    | 1101.774  | 1349.513  | AK026266  | 45938.082 | 26729.607 |
| BE548044  | 1769.765  | 3803.955  | AF166327  | 51343.301 | 54183.848 | NM_007124 | 23833.645 | 10135.386 |
| NM_01242E | 7282.654  | 9450.414  | AF260739  | 5045.88   | 4850.732  | NM_00317E | 17575.939 | 7524.211  |
| NM_01326E | 21718.527 | 18619.619 | AF531423  | 36679.586 | 32463.848 | NM_00072E | 3127.274  | 1501.786  |
| NM_00172E | 17033.928 | 17129.234 | X76555    | 1454.48   | 1126.57   | AF026920  | 33586.855 | 25334.734 |
| NM_00556E | 2036.84   | 1914.493  | NM_00543E | 11394.055 | 8687.158  | NM_004931 | 8830.807  | 4591.19   |
| NM_01245E | 3446.551  | 3131.256  | L10386    | 19557.711 | 15024.764 | NM_000607 | 55604.918 | 54815.441 |
| AF229166  | 871.063   | 979.646   | AF061812  | 51720.754 | 50547.023 | NM_00024E | 18411.645 | 17669.234 |
| NM_005137 | 5753.725  | 9624.363  | AL136756  | 9652.479  | 8136.188  | AK055733  | 23837.439 | 24533.033 |
| NM_006764 | 5036.947  | 7164.924  | NM_00147E | 59940.59  | 55466.52  | AF298880  | 15148.084 | 13773.268 |
| NM_001163 | 3511.265  | 3264.298  | M17017    | 1508.525  | 1769.698  | AK001500  | 5574.987  | 6531.048  |
| NM_00587E | 1259.031  | 1271.815  | NM_00299E | 4464.783  | 4761.211  | NM_006774 | 1628.238  | 2393.809  |
| AF308602  | 4191.146  | 3504.763  | NM_00243E | 6207.281  | 6081.464  | NM_02012E | 2740.164  | 2653.8    |
| AB011089  | 3223.597  | 4541.861  | NM_01242E | 614.781   | 717.814   | Y16521    | 13659.029 | 5471.139  |
| AF007192  | 1689.053  | 1630.933  | NM_00234E | 4994.866  | 5809.969  | AL050371  | 10780.174 | 7432.178  |
| NM_00127E | 13941.182 | 11401.989 | AB033037  | 2063.481  | 2263.603  | NM_002651 | 5038.273  | 3632.459  |
| NM_00305E | 3844.708  | 6001.232  | L40400    | 4599.557  | 4415.186  | NM_00241E | 34233.176 | 30381.625 |
| NM_003044 | 6422.384  | 5359.858  | AK025688  | 2864.521  | 3095.417  | NM_017577 | 1398.572  | 1325.732  |
| NM_00667E | 5257.971  | 8096.047  | NM_00593E | 509.818   | 432.618   | NM_001757 | 878.785   | 1102.178  |
| M31659    | 2035.922  | 2893.899  | Z36819    | 12066.807 | 12785.707 | NM_001647 | 29274.883 | 28805.232 |
| NM_01622E | 14804.777 | 13937.582 | NM_014847 | 45381.176 | 49777.551 | NM_01815E | 3449.638  | 3285.038  |
| AK024311  | 1291.873  | 1247.684  | NM_01444E | 6850.442  | 7392.696  | NM_016301 | 21399.648 | 20435.455 |
| AF052155  | 7425.282  | 4848.665  | AL080157  | 7845.099  | 8871.987  | AK021975  | 2684.163  | 2811.606  |
| NM_00508E | 1801.808  | 1731.824  | NM_00510E | 756.208   | 867.352   | AB032952  | 55341.621 | 35528.289 |
| AF060902  | 5005.384  | 10608.604 | NM_00530E | 5162.013  | 5013.542  | NM_00252E | 61243.961 | 59864.098 |
| AF121858  | 8569.23   | 12458.308 | NM_000911 | 1736.64   | 1953.479  | AB011174  | 6730.222  | 7685.551  |
| NM_013437 | 889.674   | 1144.987  | NM_007227 | 1625.134  | 1395.319  | AB043635  | 710.042   | 480.88    |
| NM_017681 | 3069.461  | 4298.762  | NM_00702E | 1588.472  | 1368.247  | AB040879  | 2859.982  | 2727.199  |
| X57655    | 44319.797 | 56109.297 | NM_00587E | 17088.928 | 12993.068 | AL049935  | 26905.873 | 43240.113 |
| AK025966  | 2571.31   | 2852.665  | NM_004624 | 5078.348  | 5266.888  | AB033043  | 36157.852 | 45049.078 |
| NM_01872E | 2192.205  | 2050.026  | NM_00386E | 2133.51   | 1837.663  | NM_01499E | 11011.748 | 7623.423  |
| NM_003081 | 43618.898 | 50456.977 | AB015330  | 29704.863 | 25349.158 | AK025220  | 4905.763  | 2423.879  |
| NM_01649E | 2452.923  | 3527.347  | L09071    | 1153.728  | 881.816   | NM_01630E | 26407.09  | 13347.438 |
| D50402    | 11440.808 | 11609.456 | NM_005924 | 1337.401  | 1742.134  | D42046    | 6377.343  | 5221.524  |
| M73547    | 18792.867 | 17266.756 | S56138    | 738.95    | 699.188   | NM_00103E | 13571.163 | 13449.634 |
| AF181722  | 294.04    | 535.091   | AK023860  | 11239.595 | 12873.789 | NM_00452E | 16604.277 | 11988.3   |
| NM_003687 | 997.435   | 711.217   | NM_000031 | 5427.905  | 5845.776  | NM_00252E | 32132.795 | 29416.814 |
| NM_004134 | 12422.769 | 12010.715 | NM_00208E | 33828.703 | 36663.145 | NM_02013E | 6428.734  | 9196.516  |
| NM_00163E | 4303.542  | 6038.247  | AK026061  | 508.939   | 550.874   | NM_01851E | 9578.158  | 11633.222 |
| NM_012264 | 7148.492  | 8366.165  | NM_01628E | 14083.231 | 13788.323 | AK023149  | 4419.559  | 7049.572  |
| AF311312  | 5557.435  | 9163.713  | NM_001567 | 3413.557  | 3780.904  | AK023168  | 8778.41   | 15759.423 |
| NM_01776E | 4711.605  | 4986.664  | NM_00490E | 15133.707 | 15930.896 | NM_00664E | 1080.247  | 2360.976  |
| NM_00042E | 1555.523  | 1235.111  | AF217971  | 7169.67   | 7744.662  | NM_00474E | 7586.936  | 11503.929 |
| AB040967  | 259.317   | 228.294   | NM_00192E | 583.032   | 866.956   | NM_01475E | 4188.344  | 6382.936  |
| NM_014721 | 1826.238  | 1858.704  | NM_00498E | 3563.221  | 3906.346  | NM_00658E | 52593.02  | 57622.188 |

|           |           |           |           |           |           |           |           |           |
|-----------|-----------|-----------|-----------|-----------|-----------|-----------|-----------|-----------|
| AK026352  | 1795.777  | 2961.005  | NM_004732 | 4107.589  | 3928.201  | NM_014331 | 8905.9    | 8172.327  |
| AL137705  | 4697.472  | 5616.812  | NM_018349 | 5711.115  | 5712.048  | NM_006795 | 46655.328 | 39218.984 |
| U41898    | 417.981   | 413.76    | NM_006363 | 9381.574  | 10004.802 | AF070568  | 3106.464  | 1279.839  |
| AF169257  | 455.48    | 308.246   | NM_020415 | 2848.804  | 2804.35   | NM_000277 | 2970.256  | 1449.198  |
| NM_014845 | 588.711   | 404.764   | NM_014879 | 333.013   | 668.737   | CY3Cy5    | 873.832   | 131.901   |
| BF217766  | 1301.494  | 1283.563  | AL049667  | 5318.749  | 5195.18   | NM_022552 | 4082.807  | 3584.221  |
| NM_000184 | 3079.186  | 4420.023  | NM_000334 | 11970.955 | 11774.163 | NM_014385 | 16135.551 | 13073.747 |
| NM_016180 | 670.974   | 440.402   | NM_001504 | 11473.659 | 8727.132  | AF086187  | 4172.65   | 6055.78   |
| NM_000112 | 837.277   | 696.666   | NM_000758 | 9383.796  | 8267.399  | AF305836  | 87405.336 | 62260.262 |
| NM_005827 | 6430.992  | 5768.951  | NM_004479 | 37669.887 | 40711.77  | AL109784  | 995.91    | 1113.299  |
| NM_006585 | 16221.75  | 23313.947 | NM_002610 | 2589.483  | 3467.913  | AL137383  | 502.055   | 343.349   |
| NM_002191 | 574.494   | 768.226   | AF070587  | 5946.701  | 4103.661  | AL035295  | 5841.998  | 5331.707  |
| NM_018261 | 4142.87   | 3139.971  | BE250526  | 1440.556  | 1717.691  | NM_018302 | 10252.938 | 8496.772  |
| NM_014795 | 2663.427  | 1725.867  | NM_016819 | 4784.406  | 4509.959  | AK027252  | 7991.94   | 6105.756  |
| NM_001147 | 398.693   | 385.012   | NM_012222 | 6543.522  | 8441.098  | AF165527  | 4681.712  | 3438.807  |
| AL050288  | 39803.59  | 23369.854 | NM_005002 | 3890.224  | 4053.096  | NM_014092 | 1006.022  | 771.318   |
| NM_005040 | 10257.279 | 9113.891  | NM_006596 | 4311.673  | 4365.716  | AL359596  | 2227.486  | 1388.873  |
| NM_016391 | 35402.18  | 42359.574 | AK023214  | 15094.091 | 15477.787 | U79249    | 1185.969  | 507.37    |
| M80783    | 1377.397  | 2278.084  | NM_001469 | 13411.889 | 14731.627 | AK022114  | 658.916   | 976.079   |
| AF075033  | 15585.142 | 16432.695 | NM_003600 | 20383.635 | 20800.838 | AL133585  | 1368.324  | 743.194   |
| D50911    | 26191.201 | 20235.037 | NM_017490 | 8135.92   | 8331.354  | NM_022552 | 3907.48   | 2196.161  |
| AB011104  | 3461.173  | 2951.568  | NM_002718 | 3065.654  | 3739.412  | NM_014385 | 13629.507 | 8768.946  |
| AK024069  | 15786.419 | 9681.498  | AK026727  | 3913.513  | 4167.563  | SR2       | 44972.797 | 41526.285 |
| NM_004582 | 26245.668 | 17153.471 | NM_002830 | 596.708   | 724.001   | SR4       | 14012.202 | 12341.485 |
| NM_015640 | 28155.678 | 19888.777 | NM_006247 | 7700.819  | 7153.907  | SR8       | 5280.693  | 20760.047 |
| AF233450  | 1990.878  | 1980.693  | AB032983  | 6049.759  | 5781.222  | SR10      | 18034.832 | 8144.358  |
| NM_016233 | 905.962   | 715.23    | NM_018281 | 16693.486 | 14376.851 | CY3Cy5    | 1252.182  | 616.664   |
| NM_000821 | 9822.313  | 7055.214  | NM_004457 | 5444.898  | 5450.814  | NM_003887 | 3440.449  | 2906.051  |
| NM_020121 | 1002.193  | 1033.882  | NM_014049 | 3501.623  | 3119.905  | NM_004267 | 19599.359 | 15775.888 |
| NM_003145 | 33233.605 | 26931.531 | NM_005396 | 2312.54   | 2150.463  | AL357212  | 962.979   | 952.973   |
| CY3Cy5    | 1440.283  | 359.836   | NM_004315 | 14969.384 | 12745.553 | AK026687  | 1865.403  | 3110.901  |
| NM_012465 | 6117.806  | 6449.969  | NM_020166 | 8337.588  | 7318.417  | AL117444  | 2502.479  | 2485.108  |
| NM_134260 | 10484.791 | 9657.245  | NM_003568 | 1191.724  | 1284.765  | NM_017994 | 8758.362  | 7964.497  |
| AF086448  | 2884.498  | 2814.155  | BC036375  | 23397.625 | 34366.699 | AK021693  | 3311.998  | 2525.421  |
| AB019391  | 319.565   | 301.293   | NM_000496 | 548.939   | 974.958   | AB023177  | 889.028   | 676.336   |
| AF086386  | 2413.972  | 2448.821  | BF347926  | 12193.48  | 16095.3   | AL050015  | 2198.454  | 1409.269  |
| AF086413  | 371.386   | 508.371   | N54821    | 16193.153 | 18871.613 | AY007117  | 5719.494  | 5182.563  |
| AF086457  | 1090.755  | 1029.721  | BI912037  | 5971.291  | 5794.845  | AF039698  | 3162.827  | 2970.245  |
| AK025469  | 2637.71   | 2707.556  | AA454646  | 27051.969 | 28043.223 | AB046828  | 3776.98   | 2781.291  |
| NM_020235 | 4741.675  | 4271.846  | BF063899  | 2457.796  | 2414.679  | AF144487  | 339.647   | 252.859   |
| AF070581  | 342.497   | 244.426   | U18087    | 52493.426 | 59084.57  | AL137532  | 2873.749  | 2961.11   |
| AK024187  | 1104.403  | 995.426   | U66349    | 1854.315  | 2212.557  | AK025419  | 4891.356  | 2816.89   |
| NM_003307 | 1174.923  | 875.849   | AA057156  | 11893.986 | 14860.863 | NM_013255 | 21093.563 | 14471.842 |
| AF070565  | 539.256   | 519.173   | U19487    | 797.328   | 1066.998  | NM_018375 | 7695.667  | 6617.656  |
| AK021644  | 1908.153  | 1284.384  | AF166327  | 46868.855 | 55902.668 | AK022443  | 2066.977  | 2067.308  |
| NM_016595 | 553.32    | 434.317   | AF260739  | 3538.758  | 4002.381  | AK025112  | 4542.501  | 4206.099  |
| NM_012465 | 5972.369  | 4819.746  | AF531423  | 37283.656 | 40012.543 | AK026079  | 651.086   | 847.724   |
| NM_134260 | 10577.976 | 6346.452  | X76555    | 1190.153  | 1402.298  | AK025173  | 13662.433 | 14795.393 |
| SR4       | 9663.196  | 8069.747  | NM_005432 | 11230.915 | 12369.772 | AK025430  | 1001.588  | 981.178   |
| SR6       | 1579.161  | 1198.343  | L10386    | 19064.744 | 17657.102 | AK026722  | 814.968   | 693.199   |
| SR8       | 5307.342  | 11288.936 | AF061812  | 52331.109 | 53171.914 | AL110133  | 8418.115  | 5592.782  |
| SR10      | 17088.068 | 4287.789  | AL136756  | 6854.336  | 6223.398  | AL050053  | 756.87    | 792.189   |
| CY3Cy5    | 1076.802  | 226.808   | NM_001478 | 55782.613 | 55670.992 | AK000529  | 5854.408  | 5189.864  |



|           |           |           |           |           |           |           |           |           |
|-----------|-----------|-----------|-----------|-----------|-----------|-----------|-----------|-----------|
| AK026206  | 1287.641  | 1382.384  | NM_002612 | 686.858   | 770.755   | AK027243  | 1538.683  | 1222.016  |
| AF086074  | 767.922   | 513.383   | AF135422  | 2912.456  | 2279.196  | AF147415  | 3221.391  | 3182.362  |
| AK023964  | 4580.483  | 4622.067  | NM_005930 | 1624.09   | 2451.085  | AK098474  | 815.176   | 394.512   |
| AF086066  | 235.899   | 425.967   | Z36819    | 12651.137 | 13712.743 | AK025365  | 3240.609  | 3807.982  |
| AF086084  | 1077.617  | 1049.637  | NM_014847 | 47775.254 | 60918.25  | AK023489  | 1044.935  | 1025.155  |
| AK000156  | 295.624   | 449.598   | NM_014448 | 5934.326  | 5997.598  | AK021561  | 8476.604  | 7894.037  |
| AL050184  | 1393.173  | 1470.976  | AL080157  | 3208.908  | 3767.503  | AK025222  | 598.035   | 1106.215  |
| AF085853  | 415.852   | 215.252   | NM_005100 | 849.285   | 1134.42   | Y11609    | 5608.988  | 5818.274  |
| AK027185  | 2303.135  | 1904.999  | NM_005308 | 4082.912  | 4636.284  | AJ278482  | 1428.08   | 1595.998  |
| AK025576  | 1155.44   | 1029.255  | NM_000911 | 1053.82   | 1577.208  | NM_012122 | 23308.242 | 19047.537 |
| AF147385  | 1013.632  | 956.115   | NM_007227 | 1618.635  | 2075.798  | AF009285  | 17232.662 | 11415.513 |
| AL442086  | 2419.638  | 2253.969  | NM_007023 | 1618.877  | 2539.06   | NM_012125 | 4286.413  | 3801.855  |
| BC034819  | 2584.872  | 2002.374  | NM_005873 | 18604.912 | 21088.324 | AB032363  | 588.701   | 469.573   |
| AF147313  | 1079.861  | 972.473   | NM_004624 | 3537.794  | 5532.621  | AF009294  | 5024.9    | 3555.57   |
| AF147382  | 3240.817  | 3954.101  | NM_014461 | 925.383   | 1426.214  | NM_001524 | 1178.127  | 795.684   |
| AK001957  | 2921.92   | 2216.128  | NM_003865 | 1757.812  | 2353.085  | AK000998  | 869.937   | 602.022   |
| AF143867  | 662.509   | 430.294   | AB015330  | 26729.721 | 37376.059 | AK001225  | 707.495   | 504.38    |
| AK025889  | 4163.491  | 2814.386  | NM_001455 | 5768.71   | 8722.417  | AK001819  | 550.913   | 458.489   |
| NM_014715 | 1317.037  | 915.113   | NM_002385 | 8500.535  | 9040.916  | AL080186  | 2026.151  | 4432.945  |
| AK024168  | 715.154   | 883.655   | NM_001885 | 1084.475  | 1019.178  | NM_005306 | 55993.039 | 53407.539 |
| AF222857  | 364.345   | 314.504   | AF039196  | 1381.077  | 1326.626  | NM_001646 | 28607.781 | 29088.381 |
| AF264622  | 226.708   | 308.113   | L09071    | 1052.748  | 1098.891  | AL137327  | 4850.232  | 5390.746  |
| AK021793  | 603.58    | 690.941   | NM_005924 | 1304.872  | 1442.839  | AK026090  | 2996.795  | 2767.278  |
| AK022255  | 408.094   | 501.858   | NM_019841 | 1307.58   | 1457.579  | AF070637  | 1766.289  | 1800.835  |
| AF075079  | 997.057   | 1144.001  | NM_003322 | 1274.474  | 1140.417  | AL137634  | 1188.201  | 1096.843  |
| AK022479  | 716.451   | 845.559   | NM_013365 | 9326.114  | 12467.598 | AK024863  | 10439.893 | 9414.12   |
| AK023572  | 531.539   | 319.843   | NM_005817 | 15114.167 | 20720.922 | AK026908  | 24473.719 | 20297.781 |
| AF086004  | 5530.528  | 5496.975  | NM_003916 | 21041.145 | 29255.455 | AF117338  | 17292.258 | 13619.373 |
| AF147433  | 791.884   | 944.908   | NM_002870 | 57872.039 | 61524.141 | AK025567  | 4177.03   | 2751.068  |
| AF085978  | 344.671   | 345.392   | NM_002802 | 745.591   | 941.07    | NM_019102 | 508.78    | 384.536   |
| AF085930  | 328.86    | 260.792   | NM_006363 | 6695.832  | 7308.127  | U56857    | 34574.879 | 20592.615 |
| AF086006  | 481.615   | 515.103   | NM_020415 | 2204.919  | 2651.631  | L43349    | 847.807   | 566.654   |
| AL137318  | 2338.989  | 1832.253  | NM_014879 | 646.533   | 906.957   | BE905682  | 743.68    | 615.347   |
| AL137482  | 1480.896  | 1347.515  | AL049667  | 2625.242  | 3242.395  | AF086421  | 1982.286  | 1469.38   |
| AL162011  | 11527.962 | 6186.903  | NM_000334 | 4107.04   | 5640.449  | U46119    | 1246.521  | 1228.991  |
| AL390177  | 513.693   | 320.87    | NM_020400 | 2460.479  | 3032.021  | NM_019897 | 877.75    | 1175.196  |
| AL137678  | 386.776   | 323.445   | NM_001504 | 4257.856  | 5670.011  | AF038188  | 18397.078 | 17213.693 |
| AK056111  | 657.748   | 407.192   | D50926    | 4607.957  | 6140.422  | D17046    | 3739.085  | 3532.749  |
| AL162055  | 403.848   | 173.916   | BF205683  | 4846.926  | 6068.095  | NM_017645 | 15588.536 | 12777.356 |
| Y13807    | 1871.698  | 836.461   | NM_001565 | 1455.69   | 1849.382  | AJ227864  | 1149.282  | 996.822   |
| AK022053  | 331.898   | 155.577   | NM_001548 | 1130.366  | 1303.233  | AF157562  | 4944.95   | 5202.202  |
| AB037792  | 2129.288  | 1986.572  | NM_000758 | 7789.227  | 8696.863  | AK021958  | 17356.781 | 11293.531 |
| AK024158  | 227.567   | 293.572   | M17017    | 1250.213  | 1625.387  | M31164    | 2869.75   | 3204.523  |
| AL080082  | 805.967   | 860.49    | NM_002990 | 4007.415  | 5247.865  | NM_003511 | 1169.702  | 4809.241  |
| AK021623  | 1174.758  | 1266.275  | NM_002432 | 7350.739  | 7377.149  | NM_003531 | 3106.497  | 3108.238  |
| AK023733  | 313.926   | 447.006   | NM_012420 | 944.883   | 1083.708  | L08434    | 422.561   | 733.373   |
| AK027112  | 5466.937  | 5638.987  | NM_002343 | 6696.083  | 8069.573  | NM_017795 | 2034.275  | 1354.816  |
| AL049314  | 6480.581  | 7219.705  | AB033037  | 4179.072  | 5315.132  | NM_003510 | 1049.322  | 742.584   |
| AF093016  | 17219.104 | 18559.203 | L40400    | 13626.145 | 18983.697 | AL137403  | 4848.272  | 2872.037  |
| AF161345  | 452.378   | 418.099   | AK025688  | 3478.199  | 3356.908  | AL049348  | 2506.68   | 1660.548  |
| -         | 644.236   | 494.796   | NM_004457 | 6574.468  | 7827.017  | NM_018534 | 1934.449  | 1761.755  |
| AF090925  | 1121.781  | 1037.294  | NM_014049 | 4123.235  | 4509.162  | AB037847  | 2987.42   | 2647.828  |
| AF100637  | 231.431   | 250.725   | NM_005396 | 1879.708  | 2274.999  | NM_016116 | 869.174   | 1472.493  |

|           |           |           |           |           |           |           |           |           |
|-----------|-----------|-----------|-----------|-----------|-----------|-----------|-----------|-----------|
| NM_014163 | 1295.363  | 1219.268  | NM_004315 | 13609.148 | 16251.801 | NM_018655 | 3792.313  | 4506.448  |
| NM_014137 | 397.007   | 241.564   | NM_020166 | 7147.77   | 7980.586  | NM_005663 | 3707.49   | 4186.556  |
| AK021974  | 1694.158  | 1285.73   | S56138    | 861.455   | 796.903   | X89960    | 981.19    | 842.089   |
| AK022068  | 1032.121  | 896.889   | AK023860  | 3894.1    | 4339.779  | NM_006550 | 1089.74   | 1249.632  |
| AK022229  | 1606.617  | 967.898   | NM_000031 | 4533.749  | 5950.882  | NM_017644 | 11298.541 | 13490.031 |
| AK022362  | 6402.405  | 4586.696  | NM_002085 | 30935.307 | 40532.469 | AB032971  | 618.017   | 1908.08   |
| AK022004  | 6658.948  | 4138.832  | AK026061  | 797.866   | 1037.236  | NM_002482 | 2638.97   | 3210.668  |
| AK022136  | 324.171   | 266.661   | NM_016286 | 13108.472 | 15417.951 | AL050068  | 1850.902  | 2687.679  |
| AK022390  | 870.199   | 510.205   | NM_001567 | 3598.643  | 4820.529  | U92025    | 709.054   | 743.009   |
| AL360138  | 477.485   | 625.179   | NM_004905 | 14086.078 | 17709.309 | AF009323  | 716.825   | 483.776   |
| U61096    | 520.525   | 539.774   | AF217971  | 10030.85  | 12291.277 | U52829    | 536.116   | 538.345   |
| AF085865  | 6240.306  | 7498.821  | NM_001925 | 972.926   | 1478.916  | AK001526  | 5428.883  | 3700.313  |
| AK025521  | 406.244   | 569.656   | AF245517  | 2622.236  | 3195.265  | NM_000519 | 747.222   | 804.335   |
| NM_001053 | 20415.799 | 20306.547 | NM_004137 | 904.039   | 1181.676  | AF086183  | 2947.972  | 3421.391  |
| Z70694    | 1183.276  | 1694.573  | NM_014407 | 1040.594  | 1119.987  | NM_006670 | 4426.34   | 4786.466  |
| NM_015421 | 15556.816 | 18151.887 | NM_004982 | 4394.35   | 4703.314  | NM_012425 | 5615.147  | 5446.524  |
| AF086081  | 8537.214  | 9465.354  | NM_001694 | 61135.035 | 59688.332 | NM_005816 | 582.882   | 606.559   |
| NM_018634 | 598.318   | 623.699   | AF286370  | 1849.798  | 2750.5    | NM_002750 | 9961.194  | 9616.624  |
| NM_018111 | 970.994   | 846.703   | NM_000217 | 981.845   | 1037.672  | AK024134  | 15175.326 | 13002.336 |
| AK023730  | 684.573   | 631.641   | NM_004732 | 6233.792  | 9907.812  | NM_003014 | 1643.673  | 1688.681  |
| AF161360  | 444.008   | 477.67    | AK026180  | 2209.103  | 2977.607  | NM_018555 | 1765.234  | 2708.046  |
| AK021720  | 878.863   | 979.283   | NM_018349 | 6310.714  | 6008.432  | NM_001974 | 7966.093  | 15171.708 |
| NM_016497 | 39733.172 | 35547.828 | NM_001478 | 56426.656 | 49726.566 | NM_013957 | 1885.956  | 4883.429  |
| AK000617  | 982.369   | 639.739   | NM_002612 | 680.476   | 821.333   | NM_002465 | 7821.689  | 9158.669  |
| AF009261  | 1497.661  | 924.923   | AF135422  | 2601.222  | 2972.905  | NM_003025 | 2632.503  | 2511.548  |
| AL133086  | 1601.485  | 1671.7    | NM_004479 | 13848.072 | 16275.989 | NM_001566 | 1551.363  | 1488.915  |
| NM_012151 | 10252.354 | 12882.43  | NM_002610 | 1720.693  | 2217.267  | NM_016541 | 5325.458  | 4263.987  |
| AF087994  | 2965.997  | 3388.106  | AF070587  | 5570.43   | 3793.827  | NM_018545 | 5254.086  | 4236.649  |
| AJ227912  | 881.522   | 1020.45   | BE250526  | 1353.838  | 1691.695  | NM_013401 | 1085.881  | 776.171   |
| NM_018195 | 2418.114  | 2202.731  | NM_016819 | 4389.433  | 5298.886  | NM_018235 | 7170.587  | 4247.519  |
| AK025532  | 3151.265  | 3089.435  | NM_012222 | 4593.828  | 6171.977  | NM_006855 | 28671.332 | 23868.332 |
| AK021789  | 523.067   | 610.911   | NM_005002 | 3827.744  | 4115.396  | NM_013275 | 2242.492  | 1810.945  |
| AF086383  | 465.163   | 541.838   | NM_006596 | 4969.87   | 5597.647  | NM_006477 | 6077.529  | 5906.062  |
| NM_003522 | 908.603   | 994.415   | AK023214  | 10672.731 | 11404.521 | NM_002880 | 5976.796  | 5351.771  |
| BF217847  | 965.274   | 1162.52   | NM_001469 | 12890.735 | 13996.64  | NM_000675 | 40238.207 | 33682.863 |
| NM_005320 | 1075.107  | 1284.468  | NM_003600 | 10249.352 | 10534.807 | NM_001066 | 2504.351  | 2831.607  |
| U79242    | 766.953   | 860.36    | NM_017490 | 6493.586  | 6350.794  | NM_004657 | 10200.978 | 10046.815 |
| Y10519    | 626.711   | 585.023   | NM_002715 | 3444.427  | 3198.022  | NM_018170 | 4970.942  | 6640.772  |
| AF056452  | 265.793   | 206.681   | AK026727  | 3223.134  | 3231.713  | NM_003867 | 5949.018  | 7900.286  |
| AF119901  | 5586.758  | 6170.867  | NM_002830 | 668.536   | 472.802   | AL162062  | 1454.368  | 3538.432  |
| AL049782  | 555.172   | 731.876   | NM_006247 | 7723.783  | 9058.881  | NM_003173 | 18148.16  | 21493.59  |
| AK001936  | 1640.628  | 1773.499  | AB032983  | 6934.48   | 8086.091  | NM_005030 | 21625.93  | 21939.057 |
| NM_003770 | 2505.542  | 2405.674  | NM_018281 | 15379.53  | 14580.948 | NM_017584 | 5949.147  | 5340.547  |
| AF222023  | 456.541   | 278.688   | CY3Cy5    | 634.495   | 171.8     | NM_020355 | 6757.993  | 5418.802  |
| AK001395  | 8580.237  | 6402.308  | NM_000945 | 1563.006  | 1455.617  | AB014541  | 48648.359 | 30103.184 |
| S57803    | 5759.79   | 4615.097  | NM_002574 | 63811.727 | 49476.281 | NM_002583 | 19348.109 | 10972.896 |
| AF131822  | 417.941   | 267.007   | NM_001310 | 2724.636  | 2161.534  | NM_006570 | 25101.768 | 15774.705 |
| AK023131  | 1126.966  | 782.328   | AK026924  | 3691.339  | 2109.627  | NM_020345 | 1736.965  | 1479.764  |
| AJ276248  | 419.378   | 284.277   | AL122047  | 2026.075  | 1659.51   | NM_006034 | 28924.969 | 27464.541 |
| X78926    | 2509.74   | 2289.807  | AF052091  | 1485.091  | 1402.797  | NM_016640 | 597.147   | 747.981   |
| AJ278110  | 1734.893  | 2290.198  | AK024447  | 62687.836 | 48203.414 | NM_019086 | 10961.252 | 9787.027  |
| NM_014237 | 1070.223  | 1372.295  | AF052145  | 993.18    | 979.051   | NM_018384 | 39083.809 | 27926.871 |
| NM_020396 | 456.533   | 578.021   | AF086458  | 1589.717  | 1555.265  | NM_001872 | 2900.58   | 3095.929  |

|           |           |           |           |           |           |           |           |           |
|-----------|-----------|-----------|-----------|-----------|-----------|-----------|-----------|-----------|
| AF029900  | 895.613   | 1435.425  | AF086548  | 1255.119  | 982.339   | AF157323  | 4809.824  | 5197.093  |
| NM_003325 | 7059.404  | 9192.099  | AK023717  | 1349.332  | 1198.493  | NM_005877 | 19298.52  | 21234.775 |
| NM_016178 | 4320.679  | 4727.915  | AK022294  | 1028.889  | 1132.239  | AK024458  | 438.527   | 528.572   |
| AK022639  | 3372.773  | 3094.381  | AF086507  | 925.385   | 982.238   | NM_013396 | 4073.27   | 5207.71   |
| D31766    | 1337.305  | 1790.161  | U79289    | 825.995   | 648.07    | NM_017752 | 4124.823  | 3913.46   |
| NM_006547 | 4711.937  | 4781.783  | NM_014028 | 1624.787  | 1931.939  | D26069    | 18856.545 | 12034.36  |
| L23867    | 557.811   | 621.135   | NM_000945 | 1434.068  | 1622.178  | BF107577  | 51751.324 | 40295.344 |
| AB020968  | 274.512   | 486.535   | NM_002574 | 59691.359 | 58001.668 | NM_005837 | 15436.549 | 10673.387 |
| AL138690  | 4287.046  | 4028.739  | SR1       | 68465.656 | 68544.359 | NM_016625 | 10545.865 | 5719.368  |
| AK000394  | 831.635   | 820.817   | SR3       | 19289.689 | 23872.496 | NM_017493 | 9972.597  | 7898.445  |
| NM_013941 | 2875.982  | 2525.828  | SR5       | 2410.798  | 3324.586  | AJ008154  | 3019.647  | 2755.287  |
| AF074989  | 1533.607  | 1442.61   | SR7       | 2200.009  | 25709.609 | NM_003487 | 13990.094 | 9180.111  |
| AK001107  | 466.123   | 383.486   | SR9       | 8563.365  | 2338.098  | NM_006887 | 9454.312  | 7022.467  |
| AF147393  | 639.618   | 421.696   | CY3Cy5    | 881.765   | 256.049   | U90919    | 7357.202  | 7592.574  |
| AK022368  | 380.434   | 211.931   | AK026923  | 1291.576  | 1061.005  | NM_006177 | 12579.86  | 11059.513 |
| AL080112  | 3070.518  | 1783.695  | AK021691  | 18869.064 | 14521.729 | AL137286  | 16649.672 | 17271.865 |
| AL137325  | 1672.783  | 1311.276  | AK023595  | 758.596   | 575.315   | NM_016275 | 19561.227 | 24810.518 |
| AF147361  | 1778.643  | 1163.967  | AK001357  | 384.573   | 266.994   | NM_020418 | 17151.855 | 17360.248 |
| NM_001851 | 5275.386  | 5960.362  | NM_015721 | 2359.034  | 2127.66   | NM_013293 | 7463.089  | 9198.134  |
| S67789    | 2373.845  | 2694.19   | AF086298  | 722.61    | 636.628   | AF095844  | 6671.365  | 7390.537  |
| AK022689  | 7899.813  | 9850.072  | AK027238  | 540.867   | 531.527   | NM_015833 | 4910.981  | 5714.937  |
| NM_016227 | 1790.182  | 2443.489  | AK000032  | 713.755   | 576.132   | NM_000986 | 54157.531 | 59240.02  |
| NM_004195 | 3749.264  | 4388.191  | AL360201  | 593.933   | 514.331   | AK026760  | 49460.262 | 43006.563 |
| NM_004705 | 4809.434  | 6197.329  | S94540    | 39214.418 | 35778.824 | NM_014772 | 5571.021  | 4232.251  |
| NM_020190 | 3666.705  | 5172.755  | AK002164  | 638.087   | 1168.183  | AK025248  | 5057.95   | 3404.659  |
| AK024003  | 677.543   | 759.919   | AF052122  | 16543.939 | 18106.953 | AF174600  | 7032.765  | 6734.854  |
| NM_014357 | 1353.989  | 1523.716  | AK022416  | 728.445   | 413.567   | AK001003  | 1453.195  | 1268.174  |
| NM_000121 | 5915.034  | 7189.769  | AK023224  | 1978.177  | 1416.875  | NM_002800 | 22741.127 | 16990.244 |
| NM_002091 | 500.549   | 394.424   | AK023731  | 1520.568  | 571.404   | NM_000775 | 4871.294  | 6932.186  |
| AB033092  | 8864.513  | 10327.987 | AK022442  | 330.862   | 276.22    | AB032981  | 2149.192  | 2291.662  |
| M89957    | 37604.363 | 33351.184 | AK023336  | 437.003   | 277.131   | BF217864  | 37889.152 | 41291.801 |
| NM_003023 | 1178.17   | 1155.821  | AK023727  | 1064.968  | 1115.914  | NM_005917 | 39730.938 | 46947.824 |
| BC035030  | 842.512   | 787.258   | AK025271  | 643.028   | 385.236   | BC017044  | 1689.259  | 2933.606  |
| NM_005340 | 44064.84  | 38907.051 | AF086204  | 4735.651  | 3443.057  | AV758498  | 3465.146  | 6093.522  |
| NM_016201 | 638.385   | 412.091   | NM_007021 | 1062.679  | 1151.944  | NM_020196 | 3596.107  | 3937.269  |
| NM_000864 | 4686.948  | 3084.995  | NM_017678 | 242.008   | 310.59    | NM_018657 | 1992.212  | 2911.782  |
| NM_017977 | 1774.897  | 1244.858  | AK021570  | 500.896   | 509.117   | L40410    | 18189.559 | 16573.496 |
| AF147727  | 1755.858  | 1229.162  | AL360204  | 642.9     | 756.113   | NM_007055 | 3889.192  | 3496.876  |
| NM_006751 | 1248.079  | 958.313   | AK000103  | 1008.222  | 1212.566  | NM_016652 | 2532.786  | 2497.16   |
| AB037834  | 2130.858  | 1482.26   | AK026294  | 229.877   | 383.907   | NM_016310 | 27657.547 | 27172.934 |
| NM_003566 | 3251.752  | 2380.018  | AF085959  | 602.472   | 853.59    | AK021562  | 1162.697  | 1804.896  |
| NM_002777 | 1097.499  | 1084.133  | AK023104  | 696.956   | 817.381   | BC006560  | 4399.212  | 4094.007  |
| AF202635  | 1759.413  | 2267.725  | AK022181  | 718.462   | 1012.93   | X52350    | 59453.98  | 58104.211 |
| NM_014125 | 1290.328  | 1454.996  | NM_018474 | 5465.407  | 3206.936  | AF071554  | 2419.855  | 2372.934  |
| NM_017904 | 2597.915  | 2607.516  | AK024937  | 2094.377  | 1727.759  | NM_002147 | 1046.753  | 959.254   |
| NM_013367 | 5761.184  | 5595.224  | D17178    | 1013.801  | 759.671   | NM_017688 | 8587.123  | 14480.702 |
| AL137550  | 601.703   | 626.77    | AK022094  | 1123.007  | 842.01    | AK025612  | 48513.93  | 48128.559 |
| NM_000321 | 4765.593  | 5018.372  | AK026695  | 668.245   | 539.444   | NM_012268 | 59323.109 | 58083.559 |
| NM_006341 | 10324.013 | 11525.597 | AK000141  | 4947.784  | 4527.575  | NM_012203 | 3483.523  | 4754.236  |
| NM_001709 | 783.987   | 821.614   | AL137758  | 2365.203  | 2203.599  | NM_003296 | 567.619   | 894.366   |
| NM_006191 | 9795.49   | 11536.743 | AK023865  | 469.358   | 428.169   | NM_004736 | 15834.447 | 22610.631 |
| NM_001800 | 3252.306  | 2957.48   | AK025786  | 768.383   | 597.018   | NM_006895 | 847.138   | 1737.552  |
| NM_004336 | 10104.362 | 10943.347 | AK024188  | 584.849   | 614.941   | NM_006455 | 21879.719 | 25619.322 |

|           |           |           |           |           |           |             |           |           |
|-----------|-----------|-----------|-----------|-----------|-----------|-------------|-----------|-----------|
| NM_015949 | 5251.313  | 6519.619  | AK024379  | 233.987   | 143.629   | AA427949    | 937.199   | 1386.644  |
| NM_013979 | 4260.178  | 4701.938  | AK001716  | 3832.004  | 4644.033  | D50373      | 2140.376  | 2458.084  |
| NM_003790 | 1209.898  | 1199.501  | AF113683  | 328.453   | 589.361   | AA488757    | 52998.934 | 53056.879 |
| NM_000494 | 5724.744  | 5550.91   | NM_014095 | 499.384   | 547.507   | AA205399    | 2096.525  | 2128.516  |
| NM_016023 | 2860.504  | 2423.565  | AK026821  | 1965.478  | 2168.346  | H07071      | 9810.234  | 11806.392 |
| NM_003722 | 3033.252  | 2617.191  | AK026280  | 2085.037  | 2619.715  | M25322      | 16389.963 | 19745.721 |
| NM_014430 | 1112.342  | 747.121   | AF113017  | 6546.313  | 8595.413  | AA436187    | 594.267   | 881.84    |
| NM_000495 | 1100.849  | 942.143   | AL080232  | 16507.652 | 16169.988 | H-L 27586 I | 5028.872  | 4978.511  |
| AF085883  | 3613.862  | 2537.1    | AK001120  | 10119.762 | 10516.211 | BE735403    | 4144.871  | 3671.07   |
| NM_016571 | 770.486   | 583.264   | AK021980  | 3943.597  | 2172.731  | NM_002631   | 22089.988 | 19919.988 |
| NM_003688 | 2048.838  | 1260.812  | S46402    | 871.069   | 762.253   | AB033109    | 4629.892  | 5713.729  |
| NM_016446 | 1547.763  | 1232.099  | AF075048  | 335.006   | 283.863   | NM_002053   | 59043.59  | 56992.848 |
| BC036368  | 482.003   | 383.034   | Z83940    | 857.198   | 584.765   | NM_006888   | 6639.292  | 7414.438  |
| AK023237  | 1400.698  | 1301.466  | NM_005800 | 1020.282  | 757.619   | NM_002438   | 11170.532 | 13373.163 |
| NM_001870 | 314.902   | 463.857   | AF019617  | 14412.733 | 11237.219 | NM_014588   | 16755.982 | 19597.201 |
| AJ271216  | 4085.094  | 4243.916  | AL137305  | 4943.385  | 4660.832  | NM_000758   | 4575.087  | 4757.443  |
| U23028    | 5626.283  | 5448.901  | NM_005290 | 508.725   | 447.814   | AK023334    | 13507.057 | 13481.139 |
| NM_001172 | 229.755   | 482.369   | AK025802  | 888.81    | 789.432   | NM_002563   | 44862.129 | 40426.117 |
| NM_000817 | 4227.101  | 5039.668  | AF085973  | 313.402   | 305.581   | NM_002437   | 7884.965  | 7934.78   |
| AF113132  | 20363.357 | 20454.502 | NM_018013 | 1890.684  | 2064.042  | D79991      | 3667.533  | 3845.141  |
| NM_006571 | 4191.588  | 5100.631  | AK026873  | 2229.607  | 2334.983  | AK022425    | 2999.226  | 2910.087  |
| NM_001875 | 601.128   | 661.654   | AK026394  | 2335.424  | 2571.165  | NM_000054   | 48367.488 | 42901.895 |
| AK022680  | 3572.076  | 3864.539  | NM_005448 | 871.318   | 814.873   | NM_014713   | 19462.84  | 19748.061 |
| NM_018946 | 19251.805 | 21059.258 | AK025943  | 23498.027 | 22882.258 | NM_001812   | 3308.317  | 3943.271  |
| NM_016358 | 12191.272 | 11344.505 | BG106479  | 916.747   | 1325.437  | NM_014788   | 2057.197  | 5139.959  |
| NM_001068 | 41365     | 93110.969 | AF130069  | 23367.445 | 25268.467 | AK025175    | 751.686   | 1362.238  |
| NM_004156 | 2360.353  | 2731.415  | AL109669  | 4247.211  | 5336.745  | NM_005811   | 16775.221 | 14561.101 |
| AK000561  | 2617.277  | 2430.672  | AB037766  | 2636.196  | 2682.195  | NM_016058   | 19862.23  | 15576.654 |
| AB051449  | 10065.609 | 8732.06   | AK026995  | 275.739   | 280.652   | NM_014005   | 11491.67  | 8665.127  |
| BC009187  | 7650.99   | 5932.286  | AL133091  | 758.168   | 881.188   | NM_006033   | 31652.287 | 30867.404 |
| AL133617  | 1291.614  | 1059.564  | BF842915  | 425.346   | 448.538   | NM_004837   | 10222.558 | 9060.637  |
| NM_016485 | 7925.4    | 5710.675  | X82545    | 7088.985  | 7717.954  | NM_000370   | 2528.576  | 2499.514  |
| NM_002615 | 393.876   | 219.911   | AF302079  | 13133.087 | 9603.067  | BE865893    | 14726.92  | 14840.266 |
| AF090894  | 592.709   | 323.96    | AJ224167  | 307.349   | 371.097   | NM_003123   | 58714.512 | 59158.617 |
| NM_013344 | 581.711   | 364.479   | NM_002550 | 441.289   | 419.23    | AY005822    | 11157.095 | 9585.951  |
| NM_014052 | 16991.836 | 9793.701  | NM_000692 | 1169.433  | 870.318   | NM_018128   | 59872.555 | 57998.258 |
| AK023792  | 283.835   | 312.566   | AF086062  | 1074.888  | 962.089   | AF289022    | 6914.937  | 7392.018  |
| NM_020149 | 2332.031  | 2577.401  | L47668    | 49874.141 | 35584.035 | AB002326    | 785.314   | 590.65    |
| NM_006237 | 1207.728  | 1602.193  | NM_017920 | 4100.872  | 4002.171  | M17252      | 884.684   | 878.498   |
| NM_001271 | 5789.923  | 4130.929  | AK025345  | 805.189   | 714.824   | NM_016025   | 17360.326 | 13909.943 |
| NM_003683 | 6663.804  | 9356.372  | D25274    | 8939.073  | 6489.476  | NM_013318   | 5130.346  | 5048.971  |
| AF039019  | 4782.652  | 5828.173  | U84520    | 4234.777  | 3881.519  | NM_020410   | 9425.361  | 8890.611  |
| NM_012255 | 7873.867  | 8302.883  | Z11853    | 507.782   | 384.912   | NM_000453   | 4655.91   | 5299.693  |
| NM_018196 | 1944.281  | 1868.549  | AL133616  | 3394.774  | 2482.251  | J03048      | 19047.045 | 23414.99  |
| NM_004818 | 5235.323  | 5524.748  | AK026382  | 2922.51   | 2685.853  | NM_004583   | 1086.726  | 1856.708  |
| J04205    | 17453.207 | 18936.813 | AK091169  | 3118.721  | 4514.202  | NM_001103   | 1600.416  | 1601.937  |
| D38491    | 9659.4    | 6728.929  | NM_014745 | 55393.254 | 60460.898 | NM_001897   | 2909.281  | 3030.367  |
| AK026835  | 5650.739  | 5509.123  | AF086026  | 7621.423  | 9540.811  | NM_003853   | 2841.835  | 2953.393  |
| NM_002819 | 22665.213 | 22007.699 | AL133011  | 1121.019  | 1399.821  | NM_018376   | 6034.669  | 4975.538  |
| NM_003090 | 20604.758 | 15955.199 | NM_016300 | 376.793   | 405.491   | NM_017615   | 2071.036  | 1830.474  |
| NM_013264 | 10958.182 | 8142.725  | NM_015607 | 13319.204 | 12483.372 | NM_017438   | 6190.792  | 5473.792  |
| NM_003315 | 22410.885 | 18946.545 | AK026955  | 897.275   | 1058.25   | U59209      | 7347.015  | 6284.448  |
| NM_005570 | 10128.777 | 8565.897  | AL110202  | 17207.365 | 15271.478 | NM_020195   | 11794.817 | 9378.264  |

|           |           |           |           |           |           |             |           |           |
|-----------|-----------|-----------|-----------|-----------|-----------|-------------|-----------|-----------|
| NM_00008E | 4941.509  | 4706.851  | NM_00622E | 1381.643  | 1060.106  | BC002753    | 743.756   | 789.981   |
| NM_00375Z | 5323.56   | 4953.701  | NM_00376E | 10106.904 | 7214.634  | AK023824    | 12584.442 | 11707.355 |
| NM_00393Z | 17449.686 | 13579.19  | NM_01839Z | 1360.894  | 1298.644  | AL133069    | 10258.814 | 11102.569 |
| NM_01649I | 20815.973 | 15124.503 | BF032535  | 1531.364  | 1106.372  | AL117574    | 1106.311  | 1285.403  |
| NM_00642E | 31711.789 | 21616.814 | NM_01833Z | 1993.53   | 1370.445  | AK026055    | 13772.974 | 14006.471 |
| NM_00251E | 805.744   | 562.06    | NM_00509E | 4439.601  | 4211.859  | AK024126    | 1107.127  | 1355.102  |
| NM_002064 | 2170.542  | 2394.354  | NM_00676C | 891.635   | 817.697   | NM_00151E   | 8566.156  | 7865.83   |
| NM_01552Z | 12197.632 | 12121.861 | NM_01228E | 4439.303  | 3502.863  | NM_002744   | 15129.24  | 14549.66  |
| NM_01596C | 15096.468 | 20365.949 | AB037775  | 530.432   | 459.485   | NM_015917   | 22448.654 | 20774.008 |
| NM_00608E | 14014.762 | 15560.359 | L27560    | 1249.406  | 1129.639  | NM_020397   | 2311.345  | 2888.347  |
| NM_000907 | 12192.552 | 13117.172 | AK022517  | 2660.929  | 2350.248  | NM_000061   | 8886.499  | 7767.818  |
| AF254085  | 7862.868  | 9402.655  | NM_00032E | 16916.703 | 14487.261 | AB046859    | 51199.152 | 41783.34  |
| AK023541  | 687.18    | 736.127   | NM_00118Z | 10680.098 | 10223.79  | AB011540    | 56757.602 | 58057.156 |
| NM_001987 | 3328.219  | 3492.506  | NM_00033Z | 2275.885  | 1875.161  | NM_00004C   | 18843.008 | 18263.314 |
| AF244088  | 1273.341  | 1341.074  | NM_00017Z | 7195.752  | 7724.227  | NM_004631   | 7978.804  | 8018.621  |
| NM_00713E | 1638.374  | 1825.492  | NM_002297 | 5960.557  | 5752.306  | NM_01226E   | 50015.457 | 53542.387 |
| AK025434  | 761.872   | 753.838   | AB040968  | 15131.782 | 18684.949 | NM_01220Z   | 3311.881  | 2959.616  |
| AJ251845  | 1616.597  | 1509.949  | X85323    | 796.031   | 968.748   | NM_00329E   | 930.869   | 709.404   |
| AK000435  | 2085.688  | 2223.712  | U17615    | 2648.035  | 2809.919  | NM_00473E   | 14863.686 | 15002.546 |
| AK000569  | 316.076   | 401.966   | NM_00530Z | 5297.544  | 6825.79   | NM_00689E   | 754.071   | 773.382   |
| NM_00604E | 4387.23   | 3704.367  | NM_01612E | 6277.917  | 7058.159  | NM_00645E   | 21662.771 | 21204.053 |
| BC016698  | 8768.375  | 5619.884  | U84119    | 1035.373  | 1172.953  | AA427949    | 723.171   | 859.054   |
| NM_007374 | 803.247   | 517.756   | NM_00360E | 2378.89   | 2721.082  | D50373      | 1841.988  | 1914.267  |
| AK000049  | 386.539   | 230.476   | NM_00646C | 2082.068  | 1679.824  | AA488757    | 49303.094 | 52490.855 |
| NM_006167 | 977.94    | 667.83    | L34156    | 716.61    | 638.883   | AA205399    | 1790.852  | 2073.155  |
| NM_016357 | 2215.441  | 1099.155  | NM_00374E | 416.854   | 380.659   | H07071      | 14091.492 | 14704.728 |
| NM_01450C | 8318.384  | 5081.592  | NM_003557 | 6238.512  | 5751.533  | M25322      | 21812.641 | 20307.5   |
| L09071    | 708.14    | 922.598   | NM_001257 | 16152.279 | 12683.908 | AA436187    | 574.568   | 382.532   |
| NM_005924 | 2157.904  | 2747.899  | D85245    | 4882.19   | 4608.714  | H-L 27586 I | 4520.44   | 4621.16   |
| NM_019841 | 917.847   | 1333.134  | NM_00094Z | 824.576   | 601.113   | ID 214180   | 1590.728  | 1973.546  |
| NM_00332Z | 584.143   | 671.375   | NM_00465E | 4124.791  | 4114.138  | ID 1867426  | 44204.652 | 30922.717 |
| NM_00356E | 1122.8    | 1322.249  | NM_00125C | 16318.645 | 13666.411 | ID 396450   | 657.259   | 987.378   |
| BC036375  | 11607.808 | 14136.415 | AF298812  | 1466.622  | 1428.738  | W99328      | 3422.886  | 2838.573  |
| NM_00049E | 645.547   | 802.735   | NM_00496E | 1503.654  | 1459.762  | AI434176    | 2566.799  | 2465.081  |
| BF347926  | 8918.332  | 9481.34   | AJ249900  | 414.891   | 583.047   | H08563      | 4946.088  | 4380.095  |
| N54821    | 16516.555 | 21492.297 | AK022581  | 5024.815  | 5082.71   | BE735403    | 4387.068  | 3508.166  |
| BI912037  | 5027.223  | 5498.735  | NM_018054 | 2307.121  | 2635.836  | NM_00171E   | 802.241   | 680.668   |
| AA454646  | 27473.873 | 28256.225 | NM_00618E | 1093.155  | 1443.819  | AF116659    | 5037.396  | 4036.636  |
| BF063899  | 3211.397  | 3347.818  | NM_00095E | 6445.714  | 8161.266  | NM_000317   | 41352.746 | 37801.934 |
| U18087    | 7547.24   | 8777.078  | NM_00140I | 619.724   | 828.659   | NM_00688E   | 6317.889  | 5579.113  |
| U66349    | 2591.304  | 2759.488  | NM_01327I | 31810.785 | 34378.551 | NM_00243E   | 8218.688  | 7121.6    |
| AA057156  | 14824.516 | 18303.801 | NM_004157 | 3359.59   | 3261.436  | NM_01458E   | 16659.662 | 16934.27  |
| U19487    | 534.695   | 606.507   | NM_000684 | 485.798   | 519.011   | NM_00075E   | 4578.679  | 5150.307  |
| AF166327  | 38192.75  | 48826.883 | NM_007354 | 591.429   | 420.855   | AK023334    | 14475.76  | 15174.619 |
| AF260739  | 1100.464  | 1301.499  | U67037    | 792.887   | 746.811   | NM_00256Z   | 42580.602 | 40928.84  |
| AF531423  | 32957.516 | 28183.5   | NM_00496C | 18480.439 | 14226.979 | NM_002437   | 7430.251  | 7629.623  |
| X76555    | 663.76    | 543.203   | AF272370  | 12242.255 | 10744.631 | D79991      | 3907.239  | 4047.532  |
| NM_00543Z | 1905.793  | 1726.763  | AF130050  | 11448.326 | 8313.498  | AK022425    | 2777.122  | 3051.169  |
| L10386    | 25346.133 | 16866.844 | AF119898  | 387.214   | 457.387   | NM_000054   | 44673.266 | 44992.359 |
| AF061812  | 3371.165  | 2143.51   | AK023045  | 764.353   | 507.743   | NM_01471Z   | 18674.527 | 19634.391 |
| AL136756  | 2223.686  | 1805.331  | NM_012197 | 5639.995  | 4783.186  | NM_00181Z   | 3353.423  | 3618.98   |
| NM_015944 | 1209.092  | 1028.245  | AK024016  | 3142.491  | 3858.112  | NM_01478E   | 2003.863  | 1999.327  |
| NM_00075E | 9297.375  | 9475.688  | NM_00358I | 1899.804  | 2187.534  | NM_005811   | 16255.751 | 12842.022 |

|           |           |           |           |           |           |           |           |           |
|-----------|-----------|-----------|-----------|-----------|-----------|-----------|-----------|-----------|
| M17017    | 451.374   | 952.034   | NM_012407 | 1021.57   | 1071.488  | NM_005764 | 3909.601  | 3930.968  |
| NM_00299C | 4366.375  | 6552.115  | AF302505  | 1331.755  | 1307.955  | NM_016362 | 8033.256  | 6254.008  |
| NM_002432 | 911.715   | 1389.309  | NM_007186 | 3266.924  | 3246.916  | NM_004214 | 14640.116 | 11703.872 |
| NM_01242C | 409.167   | 468.95    | NM_007044 | 2392.196  | 2245.138  | NM_004322 | 20951.449 | 17371.99  |
| NM_002343 | 1773.015  | 2381.434  | AF294326  | 4753.065  | 4712.175  | NM_002832 | 19799.822 | 16006.372 |
| AB033037  | 2595.517  | 2422.358  | NM_014672 | 2265.579  | 2490.406  | NM_020167 | 5039.357  | 4110.883  |
| L40400    | 3337.011  | 3785.299  | NM_012317 | 55666.645 | 59174.648 | NM_016052 | 18786.91  | 12816.323 |
| AK025688  | 3428.225  | 4153.035  | NM_017853 | 5573.446  | 7194.149  | NM_014002 | 11287.266 | 7815.058  |
| NM_00593C | 564.301   | 637.563   | NM_016097 | 6573.192  | 9501.133  | NM_017682 | 6954.818  | 5153.333  |
| Z36819    | 9864.556  | 10827.645 | AB035301  | 564.141   | 939.836   | AK025612  | 48851.094 | 49148.016 |
| NM_014847 | 10586.832 | 12556.953 | AB046800  | 10493.546 | 12611.959 | NM_00037C | 2413.404  | 2853.008  |
| NM_001195 | 387.877   | 368.496   | NM_002162 | 3072.026  | 3899.669  | BE865893  | 14973.908 | 14018.123 |
| NM_014442 | 1034.101  | 1239.631  | NM_006432 | 1550.75   | 1991.455  | NM_003122 | 56905.352 | 61964.438 |
| AL080157  | 1769.389  | 2546.289  | AF209198  | 5112.952  | 3218.299  | AY005822  | 10252.426 | 14276.875 |
| NM_00510C | 1033.977  | 1278.837  | L09247    | 350.391   | 263.867   | NM_018122 | 56327.547 | 60284.559 |
| NM_005302 | 3544.577  | 4105.175  | M69012    | 50243.762 | 48297.82  | AF289022  | 8123.35   | 13152.87  |
| NM_000911 | 505.947   | 564.457   | NM_006932 | 11965.327 | 9135.747  | AB002326  | 694.967   | 924.743   |
| NM_007227 | 2126.367  | 1831.867  | NM_001327 | 19180.672 | 18226.055 | M17252    | 1115.929  | 1000.128  |
| NM_007022 | 1624.08   | 1371.316  | AF321182  | 441.706   | 380.8     | NM_02041C | 9680.65   | 10173.297 |
| NM_005872 | 14612.947 | 9989.934  | AB037722  | 857.256   | 706.357   | NM_000452 | 4914.063  | 5649.734  |
| NM_004624 | 3539.994  | 3627.167  | NM_000062 | 1657.625  | 1520.18   | J03048    | 18462.111 | 16604.211 |
| NM_003862 | 1067.582  | 710.569   | NM_018382 | 1521.648  | 1179.516  | NM_004582 | 898.521   | 975.665   |
| AB015330  | 6614.427  | 5053.96   | AB033026  | 477.789   | 581.518   | NM_001102 | 1636.916  | 1291.243  |
| NM_004312 | 11982.115 | 12548.779 | AF104914  | 11081.545 | 10863.122 | AF228710  | 55097.352 | 57304.734 |
| NM_020162 | 6115.21   | 6302.665  | NM_014712 | 9455.693  | 8933.399  | NM_018392 | 1061.391  | 837.393   |
| S56138    | 513.539   | 553.985   | AB002354  | 341.436   | 426.823   | AY007131  | 57589.344 | 59765.496 |
| AK023860  | 1658.716  | 2098.024  | NM_002272 | 384.19    | 646.532   | U61735    | 6937.182  | 6533.772  |
| NM_000031 | 5132.519  | 5396.372  | AK023845  | 2329.248  | 3177.575  | NM_001144 | 35712.637 | 29004.404 |
| NM_002082 | 35330.336 | 31310.883 | NM_002632 | 12892.128 | 16487.844 | AK023766  | 12017.984 | 9254.998  |
| AK026061  | 395.964   | 617.145   | NM_016487 | 2549.911  | 3723.426  | NM_001897 | 2803.581  | 2278.024  |
| NM_016282 | 16017.195 | 17959.637 | NM_005802 | 16549.555 | 26139.025 | NM_003852 | 3305.326  | 3039.287  |
| NM_001567 | 4702.175  | 5140.72   | NM_006401 | 27674.125 | 34038.801 | AB033109  | 3987.8    | 3548.356  |
| NM_004902 | 12812.633 | 11688.506 | NM_015912 | 9036.081  | 11847.64  | NM_002052 | 59335.109 | 59468.973 |
| AF217971  | 3084.34   | 3439.645  | NM_005157 | 6877.021  | 9274.575  | NM_017432 | 7951.516  | 13325.695 |
| NM_001922 | 432.147   | 418.39    | NM_018162 | 2080.669  | 1406.506  | U59209    | 6070.877  | 8853.547  |
| NM_004982 | 1105.739  | 1495.521  | AK021452  | 579.405   | 364.752   | NM_020192 | 11144.612 | 11204.682 |
| NM_004732 | 1127.626  | 1295.615  | NM_004502 | 3273.203  | 2489.462  | BC002753  | 694.718   | 773.497   |
| NM_018342 | 2786.755  | 3654.808  | S74529    | 47526.805 | 36138.207 | AK023824  | 13153.067 | 23545.68  |
| NM_006362 | 8139.289  | 9016.954  | NM_020227 | 1214.474  | 1009.46   | AL133069  | 9768.327  | 13915.884 |
| NM_020412 | 1517.747  | 1627.448  | NM_005932 | 371.94    | 315.631   | AL117574  | 2842.459  | 4169.02   |
| NM_014872 | 555.348   | 920.768   | NM_005592 | 572.146   | 672.366   | NM_001512 | 9211.444  | 12073.847 |
| AL049667  | 1535.571  | 1448.655  | NM_001421 | 546.925   | 517.837   | NM_002744 | 15173.413 | 17243.863 |
| NM_000334 | 1608.2    | 1667.856  | U97060    | 874.847   | 713.581   | NM_015917 | 21773.393 | 20451.547 |
| NM_02040C | 2532.933  | 2540.909  | M73837    | 3002.19   | 2154.671  | NM_020397 | 1957.067  | 2008.118  |
| NM_001504 | 700.951   | 614.405   | U69127    | 35255.008 | 31919.127 | NM_000061 | 9336.338  | 8823.46   |
| NM_001562 | 1790.968  | 1262.844  | NM_005832 | 7945.865  | 6100.361  | AB046859  | 47188.781 | 47234.344 |
| NM_002612 | 450.819   | 312.31    | AK023379  | 3785.299  | 3402.923  | NM_005102 | 12327.862 | 9803.019  |
| AF135422  | 2025.255  | 1743.587  | NM_006072 | 866.044   | 1080.451  | AK023573  | 13678.746 | 11398.854 |
| NM_004472 | 1729.626  | 1827.75   | AK021904  | 8673.976  | 8877.62   | NM_00273C | 4815.377  | 3985.531  |
| NM_00261C | 4046.045  | 3785.565  | -         | 2426.653  | 3386.223  | NM_004822 | 3031.246  | 3341.37   |
| AF070587  | 5040.523  | 3590.084  | NM_018292 | 953.737   | 1444.396  | AB011540  | 57465.387 | 58051.391 |
| BE250526  | 1275.295  | 1292.136  | AL049705  | 8510.926  | 12026.114 | NM_00004C | 23642.441 | 21760.801 |
| NM_016812 | 4729.992  | 4554.631  | NM_015452 | 3783.913  | 5745.157  | NM_004631 | 7999.021  | 7274      |

|          |           |           |          |           |           |             |           |           |
|----------|-----------|-----------|----------|-----------|-----------|-------------|-----------|-----------|
| NM_01222 | 2022.797  | 2514.857  | D13540   | 5707.181  | 8139.145  | NM_00603    | 30278.66  | 26932.373 |
| NM_00500 | 3586.737  | 3987.624  | NM_01657 | 5004.53   | 6078.55   | NM_00483    | 9843.186  | 8460.61   |
| NM_00659 | 6159.955  | 7179.766  | NM_00427 | 404.64    | 368.954   | NM_00329    | 1694.715  | 2317.823  |
| AK023214 | 8597.621  | 9032.841  | NM_00069 | 1590.216  | 1482.537  | NM_00473    | 14505.228 | 21574.014 |
| NM_00146 | 18509.549 | 22644.551 | NM_00015 | 9751.959  | 6765.127  | NM_00689    | 550.703   | 866.932   |
| NM_00360 | 3747.731  | 4347.698  | AK024489 | 1339.329  | 761.881   | NM_00645    | 20353.436 | 25860.924 |
| NM_01749 | 4346.721  | 4304.356  | NM_00018 | 5807.353  | 4864.165  | AA427949    | 1041.747  | 1228.452  |
| NM_00271 | 3125.688  | 3368.494  | NM_00067 | 241.329   | 290.365   | D50373      | 2022.94   | 2477.625  |
| AK026727 | 1571.76   | 1639.091  | NM_01412 | 942.535   | 986.377   | AA488757    | 49718.852 | 56114.902 |
| NM_00283 | 841.127   | 634.413   | NM_00673 | 1182.815  | 1191.229  | AA205399    | 1841.721  | 2312.309  |
| NM_00624 | 9010.264  | 8083.419  | NM_00564 | 1585.385  | 1777.043  | H07071      | 9472.796  | 14653.272 |
| AB032983 | 623.951   | 561.429   | NM_01844 | 4999.398  | 4026.949  | M25322      | 19615.545 | 22340.629 |
| NM_01828 | 6741.038  | 5552.429  | AF182416 | 8898.026  | 7642.296  | AA436187    | 689.321   | 702.056   |
| NM_00445 | 4700.027  | 4118.542  | NM_00599 | 18142.002 | 15377.714 | H-L 27586 I | 5318.083  | 5656.761  |
| NM_01404 | 3194.019  | 2496.783  | NM_00601 | 1298.041  | 1419.976  | ID 214180   | 1542.738  | 1439.608  |
| NM_00539 | 456.356   | 298.697   | NM_00463 | 2884.063  | 2429.661  | ID 1867426  | 46114.938 | 34316.199 |
| NM_01984 | 846.329   | 987.395   | NM_00201 | 2860.05   | 3664.398  | ID 396450   | 565.116   | 659.744   |
| NM_00332 | 622.564   | 665.669   | NM_01752 | 8888.97   | 10282.479 | W99328      | 3872.391  | 4246.571  |
| NM_00356 | 1104.348  | 1173.675  | NM_00238 | 36675.254 | 39608.516 | AI434176    | 2430.683  | 2349.301  |
| BC036375 | 11686.665 | 13690.034 | NM_00215 | 779.025   | 1329.913  | H08563      | 5950.949  | 4614.969  |
| NM_00049 | 699.431   | 644.285   | U13223   | 19600.102 | 25297.908 | BE735403    | 4342.975  | 3989.98   |
| BF347926 | 8674.706  | 8648.308  | NM_01627 | 6625.238  | 7919.832  | NM_00171    | 665.243   | 577.842   |
| N54821   | 15832.737 | 19704.164 | AF269249 | 890.834   | 1213.942  | AF116659    | 5847.006  | 4361.952  |
| BI912037 | 4516.224  | 4955.168  | X51417   | 443.795   | 629.577   | NM_00031    | 42697.223 | 46022.914 |
| AA454646 | 24312.309 | 21123.982 | D31763   | 5055.129  | 5483.396  | NM_01837    | 5528.204  | 4996.156  |
| BF063899 | 3236.166  | 3174.193  | NM_01481 | 1637.353  | 1467.199  | NM_01761    | 1430.621  | 1536.667  |
| U18087   | 6823.098  | 7688.515  | NM_00544 | 3014      | 2376.977  | AK022425    | 2947.308  | 4353.084  |
| U66349   | 2422.071  | 2602.572  | NM_00722 | 7097.691  | 5135.388  | NM_00005    | 42156.43  | 47532.523 |
| AA057156 | 14688.568 | 19424.93  | X54163   | 30480.289 | 25045.545 | NM_01471    | 20010.9   | 22679.475 |
| U19487   | 459.691   | 436.697   | AK025395 | 785.417   | 939.617   | NM_00181    | 3832.23   | 4424.435  |
| AF166327 | 38881.648 | 50886.91  | NM_00038 | 1780.121  | 1659.416  | NM_01478    | 2230.181  | 2155.854  |
| AF260739 | 1174.81   | 1464.563  | X58377   | 637.362   | 405.052   | AK025175    | 327.086   | 812.932   |
| AF531423 | 33962     | 35153.383 | NM_00246 | 366.772   | 321.986   | NM_00581    | 16338.02  | 16882.838 |
| X76555   | 667.488   | 822.975   | AI673575 | 387.125   | 454.096   | NM_00576    | 4509.373  | 4927.304  |
| NM_00543 | 2010.268  | 1851.058  | BI830936 | 977.526   | 900.254   | NM_00432    | 23685.123 | 27861.34  |
| L10386   | 26668.395 | 19373.787 | U79292   | 26296.709 | 22151.395 | NM_00283    | 22575.445 | 21870.867 |
| AF061812 | 3353.459  | 2764.766  | AA947915 | 829.47    | 828.057   | NM_02016    | 5534.626  | 5447.058  |
| AL136756 | 2347.016  | 2223.218  | BI830753 | 955.783   | 1125.775  | AL049963    | 27384.918 | 23300.297 |
| NM_01638 | 419.31    | 356.247   | X68314   | 2343.499  | 2562.752  | NM_01605    | 17812.273 | 15100.211 |
| NM_00147 | 10345.342 | 7939.295  | X71973   | 22246.215 | 19504.455 | NM_01400    | 10393.324 | 7823.35   |
| M17017   | 367.711   | 551.496   | T49651   | 20633.055 | 17824.709 | NM_00463    | 23871.967 | 36020.598 |
| NM_00299 | 4262.518  | 5385.524  | N51014   | 1034.74   | 1258.458  | AK022603    | 998.617   | 789.715   |
| NM_00243 | 915.662   | 1130.488  | BE392471 | 15649.772 | 16865.949 | NM_00489    | 11009.277 | 12028.165 |
| NM_01242 | 314.426   | 319.893   | AI802950 | 4159.033  | 5046.433  | NM_01337    | 1144.495  | 1530.208  |
| NM_00234 | 1891.136  | 2689.488  | AI741278 | 482.813   | 807.731   | NM_00397    | 2934.585  | 2467.193  |
| AB033037 | 2409.781  | 2760.877  | AA682423 | 1274.634  | 1735.464  | NM_01768    | 6975.536  | 7134.852  |
| L40400   | 3469.093  | 4024.884  | AL043686 | 5723.333  | 9708.59   | AK025612    | 47814.91  | 52129.73  |
| AK025688 | 3101.159  | 3572.998  | AA490172 | 1510.188  | 2254.642  | NM_01226    | 51952.77  | 56768.445 |
| NM_00593 | 493.619   | 670.536   | AA775212 | 2428.573  | 4016.348  | NM_01220    | 3189.611  | 3008.752  |
| Z36819   | 9756.821  | 9520.605  | NM_00040 | 1954.323  | 2504.346  | AL157469    | 864.49    | 1292.939  |
| NM_01484 | 10416.55  | 11729.22  | AK026266 | 20692.793 | 14829.564 | NM_00286    | 5765.78   | 9276.737  |
| NM_00119 | 322.368   | 376.989   | NM_00712 | 9599.828  | 6648.931  | AK024100    | 10928.222 | 16658.453 |
| NM_01444 | 900.569   | 834.011   | NM_00317 | 6281.69   | 4515.002  | NM_00513    | 2217.341  | 3122.965  |

|           |           |           |           |           |           |           |           |           |
|-----------|-----------|-----------|-----------|-----------|-----------|-----------|-----------|-----------|
| AL080157  | 1747.432  | 1842.131  | NM_000723 | 1551.888  | 1096.183  | NM_003827 | 13436.445 | 14967.552 |
| NM_00510C | 1088.538  | 1170.078  | AL096751  | 9841.428  | 8800.895  | NM_004583 | 1005.272  | 1374.707  |
| NM_00530E | 3562.714  | 3982.015  | NM_000364 | 1346.77   | 1155.569  | NM_001103 | 1687.129  | 1500.957  |
| NM_000911 | 491.327   | 570.652   | AF026920  | 14385.171 | 15769.563 | AF228710  | 51787.949 | 54583.625 |
| NM_007227 | 1888.151  | 2145.191  | NM_004931 | 5166.146  | 3912.368  | U61735    | 6489.969  | 8425.971  |
| NM_007023 | 1786.627  | 1672.463  | NM_000607 | 28380.828 | 25530.766 | NM_001144 | 34364.535 | 31834.109 |
| NM_005873 | 14898.311 | 12142.319 | NM_002575 | 3629.607  | 3975.734  | AK023766  | 11680.507 | 10851.649 |
| NM_004624 | 3560.438  | 4270.836  | NM_004244 | 4353.162  | 3867.745  | NM_001897 | 2325.917  | 2151.583  |
| NM_003865 | 1045.038  | 1161.927  | NM_003371 | 51395.707 | 55596.621 | NM_003853 | 2848.183  | 2807.876  |
| AB015330  | 6258.015  | 5240.417  | AK023114  | 4457.787  | 5760.674  | AB033109  | 3974.064  | 3839.946  |
| L09071    | 743.9     | 604.051   | NM_003678 | 3602.65   | 3546.789  | NM_002053 | 56880.973 | 60582.602 |
| NM_005924 | 1616.436  | 1511.063  | NM_012301 | 4257.984  | 5213.333  | NM_006888 | 6222.987  | 7389.642  |
| S56138    | 410.967   | 629.22    | NM_00068C | 428.671   | 730.851   | NM_002438 | 9904.025  | 16580.303 |
| AK023860  | 1783.413  | 1753.316  | NM_005631 | 312.449   | 340.786   | NM_014588 | 21618.973 | 33217.75  |
| NM_000031 | 5176.455  | 6782.464  | NM_014938 | 3519.998  | 4831.673  | NM_000755 | 4281.929  | 5127.427  |
| NM_002085 | 33886.844 | 35068.227 | AF049460  | 462.561   | 825.035   | AK023334  | 15023.958 | 20936.805 |
| AK026061  | 440.254   | 640.021   | AK001500  | 1968.916  | 1371.646  | NM_002563 | 42859.672 | 49061.836 |
| NM_016286 | 16269.133 | 18199.779 | NM_006774 | 961.866   | 648.135   | NM_002437 | 7499.084  | 7279.537  |
| NM_001567 | 4325.292  | 5998.089  | NM_020129 | 1419.652  | 1545.106  | D79991    | 3911.365  | 3081.58   |
| NM_004905 | 12759.64  | 14665.293 | Y16521    | 6211.08   | 4374.161  | AB011540  | 57308.938 | 60919.594 |
| AF217971  | 3204.012  | 3785.514  | AL050371  | 4741.538  | 5031.149  | NM_00004C | 29720.307 | 39654.203 |
| NM_001925 | 371.706   | 602.484   | NM_002651 | 2653.16   | 2104.73   | NM_004631 | 9881.528  | 16602.268 |
| NM_004982 | 977.826   | 1657.669  | NM_002413 | 11605.32  | 9088.358  | NM_006033 | 39443.332 | 45883.363 |
| NM_004732 | 1085.215  | 1263.534  | NM_017577 | 728.999   | 734.228   | NM_004837 | 10393.076 | 10700.984 |
| NM_018349 | 2645.823  | 3284.238  | NM_016301 | 8658.535  | 8220.499  | NM_00037C | 2437.65   | 2717.252  |
| NM_006363 | 7792.548  | 6267.81   | NM_014668 | 5135.78   | 6524.449  | BE865893  | 18031.26  | 16817.537 |
| NM_020415 | 1352.738  | 1332.5    | NM_004722 | 4400.56   | 5242.976  | NM_003123 | 57936.16  | 60947.133 |
| NM_014879 | 723.102   | 812.451   | NM_014425 | 2463.502  | 2796.115  | AY005822  | 11586.358 | 13936.198 |
| AL049667  | 1566.01   | 1511.468  | NM_012133 | 6622.571  | 6985.733  | NM_018125 | 59225.203 | 59067.309 |
| NM_000334 | 1573.289  | 2033.738  | NM_017954 | 565.337   | 981.559   | AF289022  | 6115.177  | 7458.047  |
| NM_001504 | 789.549   | 676.756   | NM_006612 | 6727.185  | 9117.733  | AB002326  | 791.905   | 681.711   |
| NM_000755 | 10164.695 | 7690.95   | NM_016451 | 2737.384  | 3837.086  | M17252    | 1024.372  | 1329.943  |
| NM_004479 | 1412.254  | 1661.674  | NM_007351 | 55146.762 | 63691.359 | NM_016025 | 18420.807 | 14914.224 |
| NM_00261C | 3587.258  | 3517.593  | AL049935  | 12841.497 | 8110.096  | NM_013315 | 5645.197  | 4690.151  |
| AF070587  | 4572.469  | 3234.451  | AB033043  | 12940.854 | 13214.436 | NM_000746 | 2863.887  | 2587.334  |
| BE250526  | 1156.924  | 1236.928  | NM_014999 | 4872.438  | 3290.93   | NM_000722 | 2285.986  | 2088.964  |
| NM_016819 | 4668.026  | 4770.704  | AK025220  | 2539.661  | 1950.92   | NM_00603C | 2969.959  | 2659.357  |
| NM_012222 | 2020.547  | 3201.387  | NM_016308 | 14854.184 | 10966.847 | NM_02041C | 10984.726 | 17878.205 |
| NM_005002 | 3743.379  | 4189.932  | D42046    | 3340.091  | 2929.678  | AF000143  | 56277.32  | 60973.336 |
| NM_006596 | 6646.248  | 6650.319  | NM_001033 | 6839.265  | 5680.457  | NM_014211 | 1726.766  | 3168.333  |
| AK023214  | 8492.81   | 8632.735  | NM_004526 | 8689.454  | 9527.985  | NM_000814 | 5568.03   | 9920.516  |
| NM_001469 | 16496.375 | 16861.992 | NM_002526 | 11818.169 | 11244.277 | NM_000453 | 4933.217  | 9861.487  |
| NM_00360C | 3722.729  | 3369.102  | NM_020135 | 2673.348  | 2613.571  | J03077    | 49972.133 | 53183.762 |
| NM_01749C | 4169.572  | 3585.421  | NM_018518 | 4052.712  | 4442.979  | J03048    | 20278.049 | 17925.76  |
| NM_002718 | 2640.153  | 2267.029  | AK023149  | 1657.399  | 1747.466  | NM_001718 | 966.681   | 1067.617  |
| AK026727  | 1434.053  | 1527.099  | AK023168  | 3651.545  | 4586.846  | AF116659  | 6961.797  | 6431.055  |
| NM_00283C | 801.326   | 823.665   | NM_006646 | 473.805   | 574.787   | NM_000317 | 44627.141 | 44719.406 |
| NM_006247 | 9206.014  | 10239.681 | NM_004742 | 2429.6    | 2212.039  | NM_018376 | 7265.034  | 8575.178  |
| AB032983  | 563.171   | 615.936   | NM_014753 | 2063.686  | 1921.082  | NM_017615 | 1538.949  | 1829.885  |
| NM_018281 | 6464.654  | 7101.251  | NM_006585 | 26839.506 | 34817.004 | NM_017438 | 5986.645  | 5336.375  |
| NM_004457 | 5017.378  | 4773.274  | NM_014331 | 4255.555  | 5442.973  | U59209    | 6456.096  | 7312.308  |
| NM_014049 | 3052.978  | 3159.058  | NM_006795 | 28458.16  | 29464.176 | NM_020195 | 11179.002 | 10734.53  |
| NM_005396 | 379.136   | 395.292   | AF070568  | 1894.831  | 2024.221  | BC002753  | 336.743   | 596.852   |



|           |           |           |           |           |           |           |           |           |
|-----------|-----------|-----------|-----------|-----------|-----------|-----------|-----------|-----------|
| NM_00431E | 13280.725 | 11422.106 | NM_000277 | 453.279   | 930.326   | AK023824  | 12921.438 | 13540.319 |
| NM_02016E | 6722.271  | 5128.853  | NM_00024C | 10379.86  | 14284.309 | AL133069  | 9367.942  | 11553.943 |
| NM_00356E | 1024.248  | 1396.255  | AK055733  | 12769.598 | 17302.84  | AL117574  | 799.336   | 1421.869  |
| BC036375  | 10833.269 | 12530.012 | AF298880  | 6802.534  | 10100.95  | AK026055  | 12933.579 | 11527.544 |
| NM_00049E | 712.947   | 687.4     | NM_007221 | 7035.393  | 5556.657  | AK024126  | 852.088   | 870.672   |
| BF347926  | 8840.667  | 8805.273  | X54163    | 30120.545 | 24411.012 | NM_00151E | 8362.896  | 7666.038  |
| N54821    | 16284.069 | 19490.934 | AK025395  | 757.591   | 830.646   | NM_002744 | 14657.419 | 13992.056 |
| BI912037  | 4915.188  | 5915.582  | NM_00038E | 1555.719  | 971.361   | NM_015917 | 22101.863 | 19098.736 |
| AA454646  | 26011.084 | 24999.18  | X58377    | 366.94    | 300.821   | NM_020397 | 2287.223  | 3119.299  |
| BF063899  | 3367.918  | 3776.624  | NM_00246E | 330.647   | 237.787   | NM_000061 | 9633.452  | 13799.734 |
| U18087    | 7059.665  | 8607.372  | BI830936  | 781.107   | 709.786   | AB046859  | 47989.637 | 56855.594 |
| U66349    | 2433.467  | 2884.779  | U79292    | 28651.209 | 25947.002 | NM_00510E | 13531.073 | 23094.061 |
| AA057156  | 14073.546 | 16465.336 | AA947915  | 740.369   | 794.942   | AK023573  | 14519.192 | 25915.865 |
| U19487    | 510.152   | 691.817   | BI830753  | 845.321   | 1029.606  | NM_00273C | 5306.207  | 9677.479  |
| AF166327  | 37704.566 | 44745.344 | X68314    | 2269.375  | 2371.783  | NM_00482E | 2848.762  | 2972.008  |
| AF260739  | 1098.123  | 1176.19   | X71973    | 22927.619 | 18425.063 | NM_01803E | 1808.149  | 1924.103  |
| AF531423  | 33933.652 | 30235.016 | T49651    | 21746.246 | 17167.668 | AF052087  | 1251.901  | 1278.524  |
| X76555    | 700.16    | 937.742   | N51014    | 1094.572  | 1082.277  | AF007143  | 1196.626  | 1180.255  |
| NM_00543Z | 2103.516  | 2058.114  | BE392471  | 14393.63  | 13518.301 | AF086511  | 3796.46   | 4254.083  |
| L10386    | 27091.277 | 26006.102 | AI802950  | 4212.717  | 4296.343  | AK022989  | 9199.083  | 8065.568  |
| AF061812  | 3386.424  | 3381.256  | AI741278  | 378.076   | 538.301   | AK001604  | 5619.189  | 4831.217  |
| AL136756  | 2239.34   | 2725.076  | AA682423  | 1354.319  | 1740.135  | AF086497  | 1130.237  | 1051.674  |
| NM_01638E | 383.307   | 184.677   | AL043686  | 5537.938  | 6561.792  | NM_020141 | 8938.422  | 6255.998  |
| NM_00147E | 9260.344  | 7357.49   | AA490172  | 1316.036  | 1597.349  | NM_00648Z | 2161.183  | 3407.107  |
| NM_00261Z | 434.305   | 369.807   | AA775212  | 2341.563  | 2913.09   | NM_001824 | 65854.672 | 67032.141 |
| AF135422  | 2077.735  | 1038.13   | AB011174  | 3500.545  | 5530.611  | SR1       | 85768.539 | 65357.027 |
| NM_00593C | 444.875   | 458.622   | AB040879  | 1447.134  | 1998.753  | SR3       | 35924.965 | 27249.021 |
| Z36819    | 9116.21   | 8616.177  | NM_00317E | 6476.104  | 3915.121  | SR5       | 3838.485  | 3999.969  |
| NM_014847 | 10437.345 | 11468.143 | NM_00072Z | 1484.291  | 1029.013  | SR7       | 4104.136  | 34775.902 |
| NM_00119E | 308.925   | 303.074   | AL096751  | 8344      | 5299.506  | SR9       | 14024.385 | 2855.321  |
| NM_01444E | 901.912   | 1115.309  | NM_000364 | 1110.18   | 833.819   | U15553    | 3818.903  | 3165.907  |
| AL080157  | 1655.697  | 2078.047  | AF026920  | 13779.673 | 13160.982 | Z36829    | 1217.094  | 1114.79   |
| NM_00510C | 1103.713  | 1182.072  | NM_004931 | 4642.747  | 3481.152  | AK022223  | 618.252   | 591.482   |
| NM_00530E | 3618.322  | 3934.523  | NM_000607 | 24250.033 | 19675.213 | NM_005887 | 6648.406  | 5478.427  |
| NM_000911 | 457.759   | 466.677   | AB011099  | 285.087   | 258.614   | AK024921  | 831.707   | 863.11    |
| NM_007227 | 2126.429  | 2551.966  | NM_00257E | 3810.164  | 3643.426  | AL110232  | 1087.181  | 1176.752  |
| NM_00702Z | 1703.753  | 1837.841  | NM_004244 | 4405.616  | 3620.638  | AK026103  | 4301.342  | 2668.137  |
| NM_00587Z | 14920.476 | 13019.531 | NM_003371 | 52844.18  | 56877.016 | NM_01635Z | 28109.826 | 21924.74  |
| NM_004624 | 3889.518  | 4847.32   | AK023114  | 4547.179  | 4895.955  | AK022567  | 1537.491  | 1273.044  |
| NM_014461 | 477.253   | 494.468   | NM_00367E | 3342.225  | 3262.882  | AL080280  | 16243.815 | 18190.543 |
| NM_00386E | 1009.49   | 1055.752  | NM_012301 | 3922.645  | 3949.094  | AK023437  | 2008.189  | 3201.376  |
| AB015330  | 6816.757  | 6693.424  | NM_00068C | 420.156   | 471.344   | AK023556  | 980.119   | 1490.54   |
| NM_00145E | 4364.116  | 5244.512  | NM_005631 | 234.819   | 269.194   | AK023898  | 2997.927  | 3832.295  |
| NM_00238E | 587.692   | 768.237   | NM_01493E | 3261.635  | 4072.294  | AK025872  | 1084.03   | 1253.681  |
| NM_00188E | 1297.097  | 1063.718  | AF049460  | 422.257   | 562.424   | AF131762  | 9590.314  | 8506.682  |
| AF039196  | 422.846   | 339.986   | NM_01481E | 1989.022  | 2598.677  | AY007089  | 5001.293  | 5083.03   |
| NM_00146Z | 370.981   | 219.411   | NM_00544Z | 2855.97   | 4071.287  | AK021816  | 8853.761  | 6299.311  |
| L09071    | 860.122   | 803.076   | NM_02012E | 1434.3    | 1418.536  | D43770    | 29145.082 | 26761.662 |
| NM_005924 | 1703.203  | 1619.892  | Y16521    | 5534.413  | 3159.713  | AF085960  | 887.667   | 1101.01   |
| NM_019841 | 976.016   | 645.441   | AL050371  | 4704.434  | 4097.323  | AK021519  | 1569.064  | 1507.212  |
| NM_00332Z | 562.938   | 326.842   | NM_002651 | 2490.313  | 1848.087  | AK025218  | 5048.203  | 5545.954  |
| NM_01336E | 5413.447  | 5644.521  | NM_00241Z | 11308.555 | 9728.728  | AJ227899  | 1962.872  | 2751.406  |
| NM_005817 | 8642.501  | 10458.313 | NM_017577 | 701.459   | 526.392   | AL359607  | 2284.495  | 2318.067  |

|           |           |           |           |           |           |           |           |           |
|-----------|-----------|-----------|-----------|-----------|-----------|-----------|-----------|-----------|
| NM_00391E | 10915.178 | 9024.899  | NM_016301 | 8738.819  | 8137.883  | AF161371  | 7127.419  | 6759.54   |
| NM_00287C | 14986.082 | 16152.777 | NM_01466E | 6432.04   | 7512.949  | AK023408  | 3179.74   | 3209.995  |
| NM_00280Z | 754.941   | 990.694   | NM_00472Z | 4217.803  | 5136.638  | AK000144  | 3197.121  | 2903.475  |
| NM_00636Z | 7614.098  | 7144.461  | NM_01442E | 2531.021  | 2750.703  | AK022275  | 572.328   | 473.5     |
| NM_02041E | 1629.711  | 1739.035  | NM_01213Z | 6293.29   | 7034.891  | AK000942  | 1016.832  | 1019.014  |
| NM_01487E | 595.107   | 941.665   | NM_017954 | 592.177   | 967.158   | NM_01634E | 952.577   | 1108.206  |
| AL049667  | 1480.044  | 1943.844  | NM_00661Z | 6543.707  | 8224.764  | AL117533  | 1855.555  | 1175.157  |
| NM_000334 | 1571.054  | 1773.127  | NM_016451 | 2681.47   | 2635.115  | AK026036  | 1911.932  | 1635.409  |
| NM_02040C | 2419.608  | 2579.468  | NM_007351 | 45542.207 | 46149.258 | AK023422  | 5401.274  | 4286.161  |
| NM_001504 | 695.052   | 756.826   | AK026266  | 25319.336 | 26827.053 | AK022796  | 2445.636  | 2333.722  |
| D50926    | 3385.966  | 3423.45   | NM_007124 | 11674.946 | 12761.288 | AK095193  | 1930.003  | 1332.175  |
| BF205683  | 1093.59   | 1181.667  | AB033043  | 11656.152 | 10045.11  | AK025081  | 3132.825  | 1977.822  |
| NM_00156E | 1537.351  | 1687.635  | NM_01499E | 5478.877  | 3769.55   | AL122088  | 3042.217  | 2826.879  |
| NM_00154E | 447.87    | 513.023   | AK025220  | 2447.27   | 1940.94   | T99941    | 3557.107  | 3746.004  |
| NM_00075E | 10464.253 | 8797.469  | NM_01630E | 13879.788 | 8740.706  | AF113678  | 2798.344  | 2447.233  |
| M17017    | 387.623   | 583.643   | D42046    | 3239.204  | 2803.372  | AL137313  | 39571.418 | 30689.221 |
| NM_00299C | 4599.053  | 4443.077  | NM_00103Z | 7356.394  | 7006.623  | AB002363  | 9152.988  | 7088.025  |
| NM_00243Z | 913.788   | 800.146   | NM_00452E | 8445.499  | 9001.144  | D83199    | 21121.113 | 17795.148 |
| NM_01242C | 328.609   | 190.649   | NM_00252E | 9629.757  | 8698.695  | AK025957  | 1043.801  | 1083.728  |
| NM_00234Z | 1948.928  | 1948.624  | NM_02013E | 2874.22   | 2718.693  | Y16708    | 2215.546  | 2905.469  |
| AB033037  | 2616.898  | 1739.384  | NM_01851E | 3981.443  | 3524.938  | NM_00597E | 2637.889  | 2861.913  |
| L40400    | 3677.004  | 2700.105  | AK023149  | 1546.43   | 1381.873  | Y16711    | 1515.039  | 1228.838  |
| AK025688  | 3365.15   | 2475.26   | AK023168  | 3944.958  | 5012.622  | AJ272179  | 8028.976  | 5657.963  |
| NM_004457 | 4477.128  | 4678.653  | NM_00664E | 434.99    | 576.772   | AJ007015  | 4617.612  | 4129.885  |
| NM_01404E | 3254.077  | 3616.25   | NM_00474Z | 2558.299  | 2723.827  | AL049317  | 2762.015  | 2376.771  |
| NM_00539E | 908.663   | 890.599   | NM_01475Z | 1764.028  | 1611.685  | AL050090  | 1848.406  | 1489.779  |
| NM_00431E | 13480.175 | 15646.376 | NM_00658E | 25669.807 | 30642.873 | AF086309  | 881.493   | 676.519   |
| NM_02016E | 6576.797  | 6512.277  | NM_014331 | 4394.416  | 5078.242  | AF238870  | 1559.764  | 1749.909  |
| S56138    | 1275.358  | 1283.769  | NM_00679E | 29552.572 | 31445.434 | AF217970  | 2925.067  | 4613.458  |
| AK023860  | 1776.372  | 1819.183  | AF070568  | 2069.452  | 2519.352  | AF086297  | 2096.062  | 2837.572  |
| NM_000031 | 5438.275  | 6025.901  | NM_000277 | 476.62    | 790.539   | NM_018157 | 1478.398  | 1258.52   |
| NM_00208E | 36840.313 | 39297.063 | NM_00024C | 9019.283  | 10656.414 | Z70714    | 5501.751  | 4545.268  |
| AK026061  | 434.118   | 602.139   | AK055733  | 11980.822 | 16695.346 | AK021640  | 17479.834 | 11844.687 |
| NM_01628E | 16113.422 | 15090.726 | AF298880  | 6822.368  | 9403.593  | NM_01656E | 67332.016 | 66786.906 |
| NM_001567 | 4806.265  | 4165.666  | AK001500  | 2953.178  | 3253.158  | U84509    | 4709.029  | 5592.194  |
| NM_00490E | 13796.8   | 12791.96  | NM_006774 | 921.281   | 1390.301  | AL110201  | 309.688   | 193.701   |
| AF217971  | 3072.152  | 2937.184  | AK025395  | 683.921   | 546.801   | AK002036  | 4410.597  | 3079.464  |
| NM_00192E | 440.411   | 455.563   | NM_00038E | 1704.375  | 1063.415  | U84512    | 630.172   | 268.945   |
| AF245517  | 2685.458  | 2770.589  | X58377    | 472.936   | 360.929   | AK025775  | 5295.775  | 4071.36   |
| NM_004137 | 735.845   | 720.188   | NM_00246E | 300.666   | 240.266   | AB046791  | 1451.442  | 1154.781  |
| NM_00498Z | 1236.108  | 1128.392  | AI673575  | 269.69    | 229.007   | AF043469  | 3008.293  | 1914.068  |
| NM_001694 | 37567.898 | 44112.629 | BI830936  | 917.553   | 750.22    | AL109671  | 1603.816  | 1559.094  |
| AF286370  | 566.535   | 619.027   | U79292    | 25591.365 | 23727.633 | NM_01237E | 1306.66   | 1415.641  |
| NM_000217 | 391.055   | 479.068   | AA947915  | 864.711   | 871.135   | AK022008  | 4119.239  | 3747.487  |
| NM_00473Z | 1227.145  | 1057.22   | BI830753  | 913.269   | 905.852   | NM_01818E | 3127.961  | 2607.117  |
| AK026180  | 1665.398  | 1537.905  | X68314    | 2019.301  | 1838.601  | AL080188  | 4552.167  | 3462.188  |
| NM_01834E | 2796.938  | 2362.949  | X71973    | 23219.523 | 17143.811 | NM_001294 | 12191.348 | 10363.077 |
| NM_01638Z | 342.706   | 353.66    | T49651    | 23145.199 | 19598.115 | AF302786  | 4514.832  | 3888.782  |
| NM_00147E | 8453.244  | 8640.739  | N51014    | 1105.016  | 1123.656  | AL122083  | 10598.854 | 9769.309  |
| NM_00261Z | 445.561   | 449.074   | BE392471  | 16572.01  | 17612.691 | NM_01909E | 18552.85  | 13120.694 |
| AF135422  | 2139.213  | 2152.812  | AI802950  | 4898.551  | 4985.329  | AK022212  | 57195.395 | 60115.02  |
| NM_00447E | 1688.594  | 1580.828  | AI741278  | 426.086   | 533.631   | X64974    | 11362.19  | 6390.952  |
| NM_00261C | 4377.733  | 5383.366  | AA682423  | 1255.096  | 1511.28   | NM_000834 | 17467.986 | 9261.256  |

|           |           |           |           |           |           |           |           |           |
|-----------|-----------|-----------|-----------|-----------|-----------|-----------|-----------|-----------|
| AF070587  | 5157.894  | 3357.547  | AL043686  | 5299.825  | 7040.914  | NM_00648E | 57460.465 | 42076.613 |
| BE250526  | 1170.679  | 1097.083  | AA490172  | 1318.796  | 1883.881  | NM_01245E | 6326.223  | 4404.556  |
| NM_01681E | 4909.816  | 4954.592  | AA775212  | 2109.22   | 2826.503  | NM_01236C | 738.297   | 704.151   |
| NM_01222E | 2324.235  | 2736.2    | AB011174  | 3356.679  | 5048.129  | AL137268  | 4077.057  | 3383.409  |
| NM_00500E | 3950.625  | 3041.298  | AB040879  | 1457.457  | 2032.494  | AK001130  | 920.318   | 675.058   |
| NM_00659E | 6316.075  | 5188.265  | AL049935  | 13421.948 | 16081.325 | AK022398  | 1583.235  | 1188.99   |
| AK023214  | 8951.729  | 8696.117  | AB011099  | 287.295   | 228.906   | AK024109  | 9697.691  | 6571.802  |
| NM_00146E | 17152.188 | 15403.176 | NM_00257E | 2675.96   | 1717.136  | AF088048  | 3570.794  | 3351.018  |
| NM_00360C | 4407.767  | 4001.145  | NM_004244 | 4180.298  | 2309.677  | AK001143  | 4267.089  | 4369.018  |
| NM_01749C | 4516.891  | 4343.479  | NM_003371 | 46307.629 | 47233.188 | AK001701  | 5628.552  | 3290.549  |
| NM_00271E | 3137.883  | 2756.001  | AK023114  | 4385      | 3491.307  | AK022205  | 1501.734  | 929.539   |
| AK026727  | 1554.592  | 1396.766  | NM_00367E | 3475.034  | 2717.325  | L23206    | 17922.711 | 13405.816 |
| NM_00283C | 949.128   | 507.106   | NM_012301 | 3219.691  | 2388.201  | NM_01219E | 6925.674  | 5813.663  |
| NM_006247 | 9105.156  | 7259.212  | NM_00068C | 494.272   | 686.977   | NM_00629E | 4390.37   | 3507.926  |
| AB032983  | 804.097   | 487.777   | NM_005631 | 383.759   | 233.669   | NM_00722E | 8074.896  | 5609.063  |
| NM_018281 | 8471.817  | 6111.217  | NM_01441E | 17303.727 | 20205.713 | NM_00221E | 2016.146  | 1967.537  |
| CY3Cy5    | 3177.403  | 544.745   | NM_01493E | 2941.991  | 3061.451  | NM_01897C | 673.371   | 482.806   |
| NM_00094E | 2657.201  | 2059.782  | AF049460  | 504.328   | 536.346   | NM_004814 | 5349.449  | 5548.149  |
| NM_002574 | 55337.035 | 63455.281 | AK026066  | 1768.805  | 2367.799  | D86976    | 21492.852 | 18922.256 |
| NM_00131C | 5884.655  | 4066.477  | NM_005244 | 8390.52   | 10204.77  | AF307080  | 832.594   | 878.255   |
| AK026924  | 1855.859  | 1129.597  | AF054589  | 3944.217  | 4508.564  | NM_004057 | 6243.614  | 4549.426  |
| AL122047  | 4473.794  | 2919.12   | NM_00527C | 484.661   | 808.102   | NM_018971 | 1821.228  | 1620.638  |
| AF052091  | 1011.282  | 695.543   | NM_01481E | 1958.597  | 2946.092  | K03175    | 1681.725  | 1523.803  |
| AK024447  | 54582.152 | 66261.258 | NM_00544E | 3113.44   | 4431.682  | NM_00301E | 3065.36   | 2354.204  |
| AF052145  | 960.107   | 1766.084  | NM_007221 | 7979.963  | 10984.742 | NM_003711 | 2256.09   | 1379.78   |
| AF086458  | 3010.334  | 3036.18   | X54163    | 37842.227 | 49742.273 | NM_00649E | 7985.702  | 5159.091  |
| AF086548  | 693.38    | 600.018   | NM_018607 | 338.667   | 273.24    | NM_00082E | 854.341   | 753.636   |
| AK024350  | 333.129   | 440.524   | NM_00297E | 6562.718  | 4366.449  | NM_00482E | 5979.919  | 4121.479  |
| AK023717  | 2030.696  | 2127.403  | NM_01466E | 4565.371  | 4104.108  | NM_013314 | 5104.683  | 3972.9    |
| AK022294  | 773.448   | 938.962   | NM_00472E | 4312.836  | 3781.447  | NM_00207E | 558.08    | 452.038   |
| AF086507  | 1932.26   | 2445.026  | NM_01442E | 2018.331  | 1812.12   | NM_00318E | 1377.702  | 967.909   |
| U79289    | 1170.226  | 896.811   | NM_01213E | 6495.699  | 5107.446  | NM_004431 | 31401.438 | 27475.07  |
| NM_01402E | 3977.739  | 3576.785  | NM_017954 | 522.102   | 613.732   | NM_00201E | 4978.743  | 4446.889  |
| NM_00094E | 3709.704  | 4684.089  | NM_00661E | 6978.353  | 6729.239  | NM_00207C | 41910.594 | 26684.33  |
| NM_002574 | 53402.395 | 68115.398 | NM_016451 | 2784.489  | 2583.672  | AF227969  | 8644.836  | 7370.921  |
| SR1       | 52974.902 | 67091.742 | NM_007351 | 43802.941 | 35522.555 | AF116657  | 1930.63   | 2110.259  |
| SR3       | 44698.793 | 51090.012 | AK026266  | 23284.551 | 19667.873 | NM_00410E | 692.478   | 618.172   |
| SR5       | 4320.373  | 5959.625  | NM_007124 | 10502.505 | 9612.754  | NM_01612C | 60068.156 | 60237.188 |
| SR7       | 6242.839  | 64172     | NM_00317E | 7851.986  | 8430.996  | NM_00289E | 2021.105  | 2027.721  |
| SR9       | 20400.689 | 4286.418  | NM_00072E | 1719.615  | 1953.474  | NM_00239E | 38338.672 | 33915.387 |
| CY3Cy5    | 3124.893  | 403.448   | AL096751  | 12839.74  | 15367.912 | NM_00266E | 7169.171  | 7995.997  |
| AK026923  | 1214.776  | 1038.969  | NM_000364 | 1793.691  | 2336.269  | AB014600  | 7488.012  | 12118.056 |
| Y11177    | 368.278   | 413.143   | AF026920  | 18283.813 | 25371.35  | NM_01831E | 6396.233  | 7864.22   |
| U61091    | 487.867   | 410.137   | NM_004931 | 5711.714  | 5171.485  | X98259    | 2300.881  | 2235.461  |
| AK021691  | 41622.648 | 37305.695 | NM_000607 | 35168.34  | 43401.082 | NM_01479E | 807.715   | 884.055   |
| AK023595  | 997.403   | 1488.472  | NM_00024C | 7056.406  | 4471.813  | U05255    | 1227.716  | 839.975   |
| AK001357  | 430.649   | 603.394   | AK055733  | 12380.13  | 9122.166  | X98260    | 13580.135 | 9399.518  |
| NM_015721 | 5696.351  | 6017.744  | AF298880  | 7266.708  | 5369.984  | NM_007217 | 11430.82  | 8702.095  |
| AF086298  | 1692.758  | 1036.633  | AK001500  | 2068.492  | 1341.098  | NM_014777 | 47348.383 | 29586.537 |
| AK027238  | 1215.981  | 1164.768  | NM_006774 | 851.002   | 579.742   | NM_00110E | 9222.31   | 5875.797  |
| AK000032  | 656.549   | 810.151   | NM_02012E | 1444.232  | 1789.101  | NM_00380E | 6818.586  | 4426.508  |
| AK025758  | 708.824   | 671.608   | Y16521    | 6452.892  | 5052.238  | NM_00281E | 64067.539 | 50013.059 |
| AL360201  | 479.129   | 434.301   | AL050371  | 4413.514  | 4507.521  | NM_001937 | 19159.621 | 12371.547 |

|           |          |           |           |           |           |           |           |           |
|-----------|----------|-----------|-----------|-----------|-----------|-----------|-----------|-----------|
| S81294    | 324.53   | 449.44    | NM_002651 | 2382.43   | 2181.95   | AK024778  | 1658.825  | 918.614   |
| S94540    | 1331.079 | 1341.156  | NM_002413 | 13164.346 | 13151.494 | AL157500  | 700.721   | 454.446   |
| U79297    | 1680.252 | 2341.432  | NM_017577 | 683.282   | 659.966   | NM_002068 | 1789.105  | 1788.395  |
| AK002164  | 1098.389 | 1533.554  | NM_001757 | 362.97    | 297.585   | NM_019854 | 1177.028  | 863.191   |
| AF052122  | 4944.077 | 6422.021  | NM_001647 | 10329.818 | 12076.817 | NM_013338 | 5109.709  | 4608.4    |
| AK022416  | 1787.372 | 1268.947  | NM_018158 | 1595.716  | 1718.058  | NM_018438 | 876.891   | 724.625   |
| AK023224  | 2578.241 | 2188.713  | NM_016301 | 9540.293  | 13298.749 | NM_005658 | 4700.082  | 4210.984  |
| AK023731  | 246.832  | 315.751   | AK021975  | 1263.134  | 1900.639  | NM_006012 | 13053.509 | 12455.389 |
| AK022442  | 901.899  | 602.162   | AB032952  | 42415.223 | 43116.055 | NM_002151 | 3078.963  | 3178.15   |
| AK023336  | 509.768  | 317.298   | NM_002522 | 49224.785 | 62226.59  | NM_014888 | 4288.622  | 4068.179  |
| AK023771  | 458.044  | 467.068   | AB011174  | 2712.876  | 2100.787  | AF173935  | 1358.497  | 1480.505  |
| AK024099  | 388.305  | 225.317   | AB040879  | 891.789   | 607.78    | AK025322  | 50061.785 | 42237.707 |
| AK023727  | 3063.449 | 4618.533  | AL049935  | 11944.729 | 6987.27   | NM_017887 | 7434.935  | 6314.238  |
| AK025271  | 1607.367 | 1514.564  | AB033043  | 11678.771 | 11320.874 | NM_017650 | 691.427   | 806.051   |
| AF086204  | 2206.17  | 2102.352  | NM_014999 | 5128.941  | 3912.216  | NM_000528 | 7373.286  | 9459.649  |
| NM_007021 | 1072.266 | 990.591   | AK025220  | 2566.547  | 2335.74   | AF007152  | 4437.988  | 3402.408  |
| AK026283  | 766.419  | 753.378   | NM_016308 | 14122.995 | 12286.292 | NM_017578 | 1391.382  | 1313.78   |
| AK022076  | 548.046  | 520.178   | D42046    | 3421.098  | 3253.229  | AL122100  | 4355.477  | 3053.359  |
| AK023065  | 458.651  | 534.254   | NM_001033 | 6510.308  | 6382.708  | NM_005310 | 13310.546 | 6869.054  |
| NM_017678 | 303.585  | 421.792   | NM_004526 | 8006.34   | 8496.674  | NM_014423 | 17229.607 | 12904.609 |
| AK021570  | 1034.267 | 1444.634  | NM_002526 | 11668.5   | 11046.054 | BE904126  | 70797.852 | 65396.684 |
| AL360204  | 1800.134 | 1584.743  | NM_020135 | 2719.636  | 2886.116  | AF272380  | 83354.703 | 61735.23  |
| AK000103  | 571.749  | 667.35    | NM_018518 | 4110.282  | 4124.246  | NM_033288 | 887.198   | 858.922   |
| AK026294  | 572.295  | 1044.847  | AK023149  | 1570.25   | 1722.236  | AB040916  | 8674.84   | 6236.188  |
| AF085959  | 1515.474 | 1542.348  | AK023168  | 3624.225  | 5192.315  | NM_005587 | 4948.539  | 3519.793  |
| AF075107  | 526.695  | 642.262   | NM_006646 | 341.94    | 642.224   | AF038362  | 7722.328  | 5344.369  |
| AK023104  | 2114.124 | 2268.037  | NM_004742 | 2534.332  | 2435.416  | NM_005198 | 46033.832 | 41603.816 |
| AK022181  | 1821.944 | 2098.329  | NM_014753 | 2058.963  | 2001.611  | NM_005481 | 3306.536  | 3135.199  |
| NM_018474 | 6451.718 | 5075.672  | NM_006588 | 28892.305 | 36577.215 | NM_004718 | 12034.54  | 11033.036 |
| AK024937  | 4410.851 | 3799.221  | NM_014331 | 4364.589  | 6337.833  | L40392    | 5028.582  | 4507.268  |
| D17178    | 2620.468 | 2050.369  | NM_006798 | 31064.195 | 34593.238 | BF541482  | 991.042   | 1003.323  |
| AK022094  | 1724.053 | 1216.005  | AF070568  | 2104.581  | 2676.921  | NM_001007 | 64010.039 | 77653.203 |
| AK026695  | 1648.086 | 1004.415  | NM_000277 | 2940.405  | 3504.241  | NM_003017 | 15859.549 | 17711.996 |
| AK022220  | 402.829  | 429.64    | NM_022552 | 3142.749  | 1774.855  | NM_020368 | 9743.604  | 7511.157  |
| AL137539  | 657.662  | 563.723   | NM_014389 | 11186.728 | 7900.552  | AK021608  | 5170.488  | 4542.104  |
| AK022037  | 642.439  | 711.104   | AK025015  | 522.726   | 624.492   | NM_004297 | 3170.13   | 2429.772  |
| AK000141  | 9097.469 | 10142.561 | AF086187  | 2192.482  | 1918.122  | NM_006044 | 15194.116 | 13821.191 |
| AL137758  | 4909.139 | 5042.046  | AF305836  | 73271.773 | 62299.762 | NM_003638 | 7888.478  | 6632.597  |
| AK025786  | 1786.056 | 1543.166  | AL109784  | 2019.214  | 1740.509  | NM_000662 | 3558.049  | 3015.417  |
| AK024188  | 661.464  | 558.412   | AL137383  | 554.822   | 529.012   | NM_000292 | 3767.526  | 4210.607  |
| AK024379  | 669.525  | 558.663   | AL035295  | 6532.241  | 7397.56   | NM_003688 | 57150.52  | 61861.117 |
| AK026820  | 862.687  | 787.708   | NM_018302 | 8793.627  | 9215.132  | NM_016173 | 1723.67   | 1715.504  |
| AK001716  | 2729.214 | 2475.417  | AK027252  | 8946.885  | 9634.801  | NM_004427 | 15639.989 | 14916.559 |
| AF113683  | 734.984  | 822.307   | AF165527  | 11379.891 | 19719.143 | U90549    | 12939.855 | 11071.074 |
| NM_014098 | 920.455  | 844.729   | NM_014092 | 1144.953  | 1242.654  | NM_013240 | 25548.51  | 20985.293 |
| AK026821  | 427.726  | 502.356   | AL359596  | 1864.425  | 2019.479  | NM_015874 | 32541.566 | 26611.996 |
| AK026280  | 1005.929 | 1181.963  | U79249    | 1262.303  | 1317.994  | NM_004968 | 56284.914 | 60532.539 |
| AF113017  | 2359.788 | 3143.404  | AK022114  | 979.293   | 1015.529  | AF312393  | 53355.105 | 52703.359 |
| AL080232  | 1649.278 | 2089.921  | AL133585  | 1434.38   | 1568.014  | AF272898  | 23384.508 | 23099.729 |
| AK001120  | 2062.974 | 2149.554  | NM_022552 | 4107.963  | 3755.323  | AB037817  | 2107.325  | 2869.296  |
| AF264629  | 421.102  | 418.494   | NM_014389 | 13695.821 | 13834.427 | AB032951  | 20235.391 | 30195.125 |
| AK021980  | 7157.868 | 5442.558  | SR2       | 39762.453 | 54029.438 | NM_003417 | 746.524   | 1082.973  |
| S46402    | 1960.632 | 1602.361  | SR4       | 13250.587 | 15440.002 | NM_005148 | 18198.904 | 16937.896 |

|           |           |           |           |           |           |           |           |           |
|-----------|-----------|-----------|-----------|-----------|-----------|-----------|-----------|-----------|
| AF075048  | 531.184   | 388.067   | SR6       | 1190.258  | 1566.224  | AK024073  | 2779.277  | 2370.896  |
| Z83940    | 2245.385  | 1471.411  | SR8       | 4898.377  | 18245.631 | NM_018083 | 6800.844  | 5944.001  |
| NM_00580C | 2783.45   | 2191.888  | SR10      | 16816.922 | 8646.917  | AL110188  | 12328.043 | 8414.857  |
| AF019617  | 4345.678  | 4459.521  | NM_003887 | 2415.295  | 1355.057  | D70834    | 49056.852 | 31294.355 |
| AL137305  | 11781.266 | 11834.759 | NM_004267 | 12865.379 | 8120.813  | NM_00097C | 67618.75  | 66483.766 |
| NM_00529C | 932.85    | 1350.859  | AL357212  | 481.126   | 363.268   | NM_01246E | 1494.577  | 1528.113  |
| AK025802  | 2801.687  | 4512.271  | AK026687  | 1255.207  | 1035.781  | M60499    | 2978.54   | 3685.096  |
| AF085973  | 870.461   | 1020.641  | AL117444  | 1903.784  | 1612.619  | NM_001614 | 56348.016 | 63793.492 |
| NM_00543C | 356.171   | 443.467   | NM_017994 | 6982.555  | 5632.649  | NM_00036E | 1027.063  | 1014.968  |
| NM_018013 | 1704.834  | 1531.508  | AK021693  | 3678.009  | 2897.367  | NM_003833 | 48819.223 | 46043.16  |
| AK026873  | 5787.864  | 6215.501  | AB023177  | 640.295   | 612.319   | AK000868  | 14060.17  | 11418.122 |
| AK026394  | 6203.523  | 6207.784  | AL050015  | 2206.341  | 1808.237  | NM_001233 | 3849.576  | 4118.526  |
| NM_00544E | 1980.817  | 2166.794  | AY007117  | 7023.593  | 6625.558  | NM_001234 | 2970.631  | 3329.995  |
| AK025943  | 48190.941 | 44348.949 | AF039698  | 3337.395  | 4230.589  | L33404    | 1277.047  | 1172.567  |
| BG106479  | 2006.663  | 2046.469  | AL109679  | 452.665   | 582.413   | M13509    | 4172.261  | 4927.349  |
| AF130069  | 6523.574  | 8054.926  | AB046828  | 3461.531  | 3302.082  | X04076    | 7347.631  | 7879.861  |
| AL109669  | 10138.799 | 13228.264 | AF144487  | 501.267   | 480.253   | W95082    | 295.825   | 757.464   |
| AB037766  | 1880.911  | 2047.548  | AL137532  | 3121.427  | 3412.225  | AA485362  | 2488.831  | 2672.014  |
| AK026995  | 895.161   | 1054.211  | AK025419  | 5964.492  | 9408.669  | AJ222801  | 19300.85  | 21243.551 |
| AL133091  | 1118.708  | 1426.155  | NM_013259 | 20996.611 | 21395.623 | W72207    | 33269.582 | 43745.27  |
| BF842915  | 989.349   | 1051.267  | NM_018375 | 15461.26  | 13740.585 | BI772354  | 2485.544  | 3149.669  |
| X82545    | 11830.264 | 17043.943 | AK026838  | 4135.782  | 3593.691  | AA733033  | 10845.793 | 20344.297 |
| AF302079  | 18921.707 | 14332.189 | AK022443  | 1821.168  | 1855.691  | AA583574  | 2590.666  | 3714.127  |
| AJ224167  | 1078.532  | 801.266   | AK023371  | 6818.202  | 6790.677  | U67733    | 661.414   | 688.709   |
| NM_00255C | 615.717   | 585.158   | AK026675  | 578.508   | 409.417   | AI690184  | 59104.531 | 63886.355 |
| NM_000692 | 3269.751  | 2529.112  | AK025173  | 10200.609 | 7190.697  | T48692    | 905.812   | 607.39    |
| AF086062  | 2379.842  | 1633.921  | AK025430  | 814.404   | 700.065   | AA927490  | 4342.171  | 3064.871  |
| AF000268  | 517.03    | 478.527   | AK026722  | 1056.901  | 997.365   | NM_00377E | 1057.679  | 934.435   |
| L47668    | 22509.652 | 27264.346 | AL110133  | 10893.946 | 10333.945 | NM_020164 | 24636.693 | 17244.258 |
| NM_01792C | 2495.77   | 4214.864  | AL050053  | 616.311   | 645.019   | AK023521  | 19616.469 | 15469.457 |
| AK025345  | 1892.833  | 2623.34   | AK000529  | 4736.528  | 5005.178  | NM_014267 | 37855.66  | 27703.947 |
| D25274    | 21957.385 | 21431.873 | AK027243  | 1255.058  | 1275.884  | NM_001481 | 1009.882  | 715.844   |
| AK000807  | 405.325   | 353.058   | AF147415  | 2070.885  | 3250.08   | U30872    | 3624.767  | 3312.685  |
| U84520    | 1608.219  | 1727.307  | AL049273  | 1107.215  | 1518.091  | AF111783  | 651.233   | 494.352   |
| AL133616  | 6820.415  | 5704.584  | AK098474  | 1256.609  | 1116.486  | NM_02046E | 11561.739 | 10727.919 |
| AK023391  | 1073.388  | 1221.329  | AL117475  | 7033.854  | 7358.345  | NM_00263E | 2556.712  | 2802.961  |
| AK026382  | 3805.177  | 3752.221  | AL049300  | 12785.584 | 13640.058 | NM_014734 | 5592.099  | 5175.069  |
| AK091169  | 10299.252 | 14098.987 | NM_017535 | 8741.859  | 8320.535  | NM_00228E | 3024.549  | 2202.121  |
| NM_01474E | 43376.656 | 60034.02  | AK025365  | 1900.63   | 1590.254  | AK026408  | 3709.511  | 4945.137  |
| AF086026  | 6479.968  | 8953.237  | AK023445  | 292.124   | 266.581   | NM_00502E | 679.355   | 819.784   |
| AL133011  | 637.669   | 675.707   | AK023489  | 798.358   | 525.662   | NM_006307 | 1434.381  | 1910.465  |
| NM_01630C | 948.146   | 834.978   | AK021561  | 6221.864  | 4386.481  | M74782    | 7967.609  | 5686.835  |
| NM_015607 | 26461.652 | 34386.098 | AK025222  | 615.213   | 509.106   | NM_01781E | 6034.894  | 6285.514  |
| AK026955  | 1830.118  | 1793.727  | Y11609    | 8770.268  | 7113.908  | NM_020433 | 1580.234  | 1749.379  |
| AL110202  | 38974.965 | 31673.111 | AJ278482  | 1537.461  | 1743.346  | NM_001767 | 722.81    | 922.596   |
| NM_00622E | 3960.06   | 3026.938  | NM_012122 | 20538.26  | 20191.721 | AF028823  | 10915.686 | 23027.902 |
| NM_00376E | 20515.055 | 15960.057 | AF009285  | 21314.525 | 18432.104 | NM_00497C | 643.321   | 829.785   |
| NM_018393 | 2687.906  | 2555.005  | NM_012125 | 5886.372  | 5862.791  | NM_00429E | 59587.223 | 63464.809 |
| BF032535  | 2841.219  | 1703.711  | AB032363  | 632.76    | 627.664   | NM_002087 | 46636.227 | 32910.918 |
| NM_018332 | 7681.188  | 5124.634  | AF009294  | 8694.27   | 9509.87   | AB023154  | 1927.882  | 1522.377  |
| NM_00509E | 5730.424  | 5730.753  | NM_001524 | 2410.09   | 3741.841  | NM_01458E | 1383.316  | 1286.531  |
| NM_00676C | 2412.551  | 2269.427  | AK000998  | 943.831   | 1028.528  | AF200815  | 1660.87   | 1216.177  |
| NM_01228E | 11755.014 | 13043.048 | AK001225  | 1469.837  | 1317.843  | NM_00105E | 1497.948  | 1515.535  |

|           |           |           |           |           |           |           |           |           |
|-----------|-----------|-----------|-----------|-----------|-----------|-----------|-----------|-----------|
| AB037775  | 970.978   | 1548.529  | AK021435  | 475.744   | 537.046   | AY026461  | 7071.846  | 6817.262  |
| L27560    | 1066.434  | 1399.457  | AK021684  | 5475.265  | 5521.411  | AK025708  | 8673.308  | 7476.078  |
| AK022517  | 5170.763  | 4879.598  | AK001060  | 959.69    | 806.502   | NM_000405 | 2286.82   | 2042.32   |
| NM_000329 | 30616.516 | 23446.773 | AK021480  | 1299.911  | 1389.475  | NM_005564 | 57437.188 | 61489.438 |
| NM_001182 | 2945.142  | 3414.943  | AL080186  | 954.458   | 854.669   | NM_004508 | 7082.141  | 7152.003  |
| AF143328  | 471.724   | 574.678   | NM_005306 | 56045.25  | 49435.238 | AL137619  | 13221.74  | 12948.68  |
| NM_000333 | 3496.008  | 3482.347  | NM_001646 | 20547.432 | 16803.461 | AB007859  | 2114.026  | 2135.716  |
| NM_000172 | 3499.558  | 3785.337  | AL137327  | 3565.623  | 3118.307  | NM_006754 | 901.592   | 1314.142  |
| NM_002297 | 1664.088  | 1417.782  | AK026090  | 3167.568  | 2000.83   | NM_001127 | 6762.316  | 10943.275 |
| AB040968  | 4333.177  | 7192.532  | AF070637  | 1535.189  | 1422.954  | NM_012430 | 5663.867  | 8745.579  |
| X85323    | 1138.577  | 1803.853  | AL137634  | 829.906   | 616.571   | NM_003917 | 59208.535 | 62809.664 |
| AK000802  | 554.875   | 492.319   | AK024863  | 6947.938  | 6292.581  | NM_007077 | 5594.345  | 5418.598  |
| U17615    | 3116.308  | 4160.578  | AJ008135  | 66490.813 | 63396.406 | NM_002956 | 4586.923  | 4476.096  |
| NM_005303 | 1330.61   | 1628.126  | AK026908  | 25656.199 | 24814.201 | AB018739  | 4419.966  | 3906.771  |
| NM_016126 | 17212.611 | 23970.432 | AF117338  | 16584.787 | 15091.907 | NM_006750 | 62628.203 | 56888.734 |
| U84119    | 2279.149  | 2932.287  | AK025567  | 4401.643  | 4174.968  | AK001913  | 6741.132  | 6970.691  |
| NM_003608 | 8059.462  | 7509.657  | NM_019102 | 579.301   | 568.323   | NM_017737 | 1208.06   | 1251.866  |
| NM_001845 | 374.78    | 106.928   | U56857    | 38056.625 | 39239.52  | NM_004292 | 4116.341  | 4305.962  |
| AK024697  | 371.959   | 409.139   | L43349    | 522.955   | 820.901   | NM_015484 | 9002.469  | 8081.431  |
| NM_006460 | 4068.846  | 3135.251  | BE905682  | 725.156   | 703.016   | NM_018046 | 1819.657  | 1854.2    |
| L34156    | 1630.845  | 1148.161  | AF086421  | 1998.901  | 2147.783  | NM_013316 | 6886.34   | 6643.13   |
| NM_003749 | 442.696   | 440.179   | AK001612  | 517.762   | 690.262   | M20701    | 48851.379 | 44666.215 |
| NM_003557 | 5294.887  | 5465.396  | AF161522  | 3398.902  | 3346.194  | NM_002912 | 3201.623  | 3334.685  |
| NM_001257 | 3995.254  | 4829.076  | AF086028  | 43225.875 | 35985.516 | NM_013284 | 6169.756  | 7045.885  |
| NM_001795 | 786.159   | 1250.109  | U46119    | 337.636   | 527.543   | NM_006739 | 4065.797  | 6153.013  |
| D85245    | 2235.043  | 2946.704  | NM_019897 | 547.21    | 395.913   | NM_013274 | 7853.042  | 8574.673  |
| NM_000943 | 1952.038  | 2003.884  | AF038188  | 11712.752 | 9266.168  | AL050187  | 1587.643  | 1666.039  |
| NM_004658 | 6238.185  | 6957.424  | D17046    | 2147.613  | 1661.8    | NM_007127 | 861.628   | 1038.618  |
| NM_001250 | 21393.588 | 18358.955 | NM_017645 | 9800.118  | 6989.585  | NM_012387 | 44753.641 | 43096.637 |
| AF298812  | 941.275   | 923.409   | AJ227864  | 658.39    | 387.874   | NM_014735 | 2555.691  | 2551.626  |
| NM_004969 | 4509.925  | 4525.22   | AF157562  | 3687.025  | 2944.197  | NM_004252 | 41196.703 | 40862.199 |
| AJ249900  | 912.136   | 1234.444  | AK021958  | 11181.146 | 6804.326  | AF172929  | 10546.604 | 11475.64  |
| AK022581  | 11775.147 | 12398.277 | M31164    | 2146.749  | 1588.441  | NM_006398 | 38633.926 | 54611.418 |
| NM_018054 | 8825.043  | 9496.048  | AF113674  | 18034.838 | 19185.434 | AK025655  | 4326.518  | 3966.217  |
| NM_006186 | 1238.978  | 1422.185  | NM_003511 | 726.27    | 3418.459  | NM_001362 | 3579.391  | 2018.311  |
| NM_000958 | 17782.416 | 23824.342 | NM_003531 | 2413.394  | 2525.33   | NM_004056 | 1910.761  | 1372.148  |
| NM_001401 | 1459.313  | 2195.204  | L08434    | 535.512   | 689.585   | NM_001614 | 56425.402 | 66669.883 |
| NM_013271 | 2449.872  | 2983.111  | NM_017799 | 1774.378  | 1614.262  | NM_000366 | 1010.998  | 1564.328  |
| NM_004157 | 8811.729  | 8496.681  | NM_003510 | 1147.779  | 1083.461  | NM_003833 | 53478.34  | 52794.609 |
| NM_000684 | 580.724   | 687.669   | AL137403  | 7815.341  | 8129.409  | AK000868  | 13823.662 | 15308.599 |
| NM_007354 | 401.101   | 180.051   | AL049348  | 5996.892  | 6215.555  | NM_001233 | 5154.09   | 7081.958  |
| U67037    | 906.858   | 682.953   | NM_018534 | 3647.532  | 3934.794  | NM_001234 | 2913.013  | 3091.416  |
| NM_004960 | 26959.881 | 20084.582 | AB037847  | 3583.635  | 4228.65   | BF679789  | 15987.826 | 17887.984 |
| AF272370  | 16445.486 | 14174.038 | NM_005170 | 3090.059  | 4774.629  | H97792    | 21686.377 | 23582.701 |
| AF130050  | 25129.848 | 17537.541 | S96437    | 5250.01   | 5642.953  | L33404    | 1320.765  | 1341.285  |
| AF119898  | 879.879   | 968.01    | NM_015176 | 1605.577  | 1855.417  | M13509    | 6619.096  | 7169.13   |
| AK023045  | 890.051   | 610.513   | AL353939  | 1088.651  | 1137.943  | X04076    | 9437.927  | 18985.221 |
| NM_012197 | 10216.165 | 10367.838 | AL117573  | 5326.76   | 4803.347  | AA485362  | 2948.138  | 2718.104  |
| AK024016  | 8258.572  | 14889.594 | NM_016116 | 409.936   | 446.139   | AJ222801  | 18571.568 | 16561.229 |
| NM_003581 | 3892.947  | 7386.448  | NM_000929 | 277.686   | 385.859   | W72207    | 32963.508 | 28771.102 |
| NM_002888 | 766.361   | 1030.94   | NM_018655 | 2320.052  | 2348.096  | BI772354  | 2468.37   | 2398.566  |
| NM_012407 | 2573.339  | 2573.471  | NM_005663 | 2740.197  | 2297.656  | AA733033  | 4750.158  | 4777.999  |
| AF302505  | 3285.035  | 3318.962  | X89960    | 790.867   | 530.704   | AA583574  | 2895.114  | 3113.017  |

|           |           |           |           |           |           |           |           |           |
|-----------|-----------|-----------|-----------|-----------|-----------|-----------|-----------|-----------|
| NM_007186 | 2956.204  | 3004.66   | NM_006550 | 785.864   | 596.18    | AI690184  | 57240.922 | 67655.031 |
| NM_007044 | 7257.844  | 5994.708  | NM_017644 | 7091.256  | 6256.106  | T48692    | 1095.413  | 1694.695  |
| AF294326  | 12711.768 | 11591.258 | AB032971  | 328.939   | 407.281   | AA927490  | 4170.679  | 3645.508  |
| NM_014678 | 3363.265  | 4724.757  | NM_002482 | 2472.275  | 2211.183  | NM_005052 | 15463.513 | 11369.823 |
| NM_012317 | 53114.406 | 62425.855 | AL050068  | 1625.226  | 1408.933  | BF038439  | 1382.851  | 1221.544  |
| NM_017853 | 13207.312 | 15962.227 | U92025    | 564.206   | 620.942   | AF319476  | 1920.034  | 1395.433  |
| NM_016097 | 13820.151 | 18757.746 | AF009323  | 1101.447  | 1185.315  | NM_014267 | 38760.352 | 43073.68  |
| AB035301  | 1399.942  | 1822.772  | U52829    | 687.919   | 1054.403  | NM_001481 | 949.474   | 1117.587  |
| AF286113  | 467.61    | 580.184   | Z25437    | 320.322   | 226.221   | U30872    | 3562.557  | 4491.194  |
| AB046800  | 3130.948  | 4007.19   | AK001526  | 4515.449  | 4323.711  | AF111783  | 688.934   | 894.67    |
| NM_002162 | 5823.716  | 8654.563  | NM_000519 | 434.998   | 419.157   | NM_020466 | 10674.767 | 11244.703 |
| NM_006438 | 881.051   | 1138.229  | AF086183  | 2468.397  | 2589.588  | NM_002636 | 2605.821  | 3218.409  |
| AF209198  | 10754.327 | 7532.958  | AK000525  | 3708.137  | 6235.814  | NM_014734 | 5673.916  | 6462.202  |
| L09247    | 445.876   | 364.336   | AL137434  | 2010.716  | 2652.128  | NM_002286 | 2849.86   | 2898.628  |
| M69012    | 17106.242 | 15081.13  | Z36795    | 2166.732  | 3002.885  | AK026408  | 3480.993  | 4301.531  |
| NM_016347 | 424.172   | 295.956   | AL080216  | 2504.273  | 2831.792  | NM_005025 | 757.576   | 1099.619  |
| NM_006936 | 22889.355 | 18249.281 | NM_006670 | 2917.53   | 2124.83   | NM_006307 | 1724.355  | 1867.4    |
| NM_001327 | 37123.734 | 28955.234 | NM_012425 | 3762.103  | 2471.628  | M74782    | 7522.544  | 6006.351  |
| AF321182  | 659.57    | 782.449   | NM_005816 | 277.385   | 243.273   | NM_017818 | 5942.42   | 6300.468  |
| AB037722  | 2375.331  | 2828.255  | NM_002750 | 6838.855  | 5865.359  | NM_020433 | 1423.272  | 1630.993  |
| NM_003652 | 347.761   | 698.125   | AK024134  | 9714.711  | 6878.742  | NM_001767 | 883.307   | 793.415   |
| NM_000063 | 632.849   | 621.705   | NM_003014 | 2655.69   | 1944.355  | AF028823  | 11314.563 | 16287.217 |
| NM_018386 | 3735.861  | 2803.578  | NM_018558 | 1448.406  | 1200.216  | NM_004970 | 943.905   | 875.933   |
| AB033026  | 763.803   | 847.31    | NM_001974 | 5282.122  | 4600.433  | NM_004295 | 57557.055 | 62083.965 |
| AF104914  | 25577.85  | 23361.186 | NM_013957 | 1978.661  | 1908.963  | NM_002087 | 47829.184 | 43451.703 |
| NM_014716 | 20517.691 | 18041.857 | NM_002468 | 6735.562  | 6604.488  | AB023154  | 2027.609  | 2152.428  |
| AB002354  | 887.841   | 1298.125  | NM_003028 | 1868.433  | 1647.592  | NM_014585 | 1320.214  | 1673.823  |
| NM_002278 | 782.745   | 1153.711  | NM_001566 | 1381.176  | 1195.164  | AF200815  | 1438.484  | 1252.128  |
| AK023845  | 5404.627  | 7736.158  | NM_016541 | 7582.583  | 6647.098  | NM_012465 | 2030.754  | 1666.147  |
| NM_002638 | 3202.316  | 5319.792  | NM_018548 | 4193.38   | 4281.421  | M60499    | 3902.948  | 3541.647  |
| NM_016487 | 1311.169  | 1878.079  | NM_013401 | 1293.048  | 1343.851  | AY026461  | 6371.919  | 7471.468  |
| NM_005808 | 25042.344 | 33062.82  | NM_018238 | 11980.502 | 10767.723 | AK025708  | 8770.85   | 8815.076  |
| NM_006401 | 52039.328 | 64779.102 | NM_006858 | 17924.85  | 17838.754 | NM_000405 | 2715.823  | 2846.898  |
| NM_015913 | 28677.158 | 37662.277 | NM_001405 | 10926.545 | 12526.08  | NM_014873 | 570.975   | 650.06    |
| NM_005157 | 10111.664 | 10990.091 | NM_003880 | 3764.924  | 6122.002  | NM_005564 | 52469.672 | 58477.66  |
| NM_018166 | 4162.668  | 2940.831  | NM_005468 | 381.867   | 634.688   | NM_004508 | 7194.061  | 7688.767  |
| AK021452  | 542.469   | 426.687   | AF131778  | 2844.246  | 3926.238  | AL137619  | 13234.341 | 17122.926 |
| NM_004506 | 7647.97   | 5381.333  | NM_001562 | 2670.89   | 3133.501  | NM_000085 | 410.12    | 373.943   |
| S74529    | 43726.582 | 30101.152 | NM_013278 | 5468.108  | 5481.699  | AB007859  | 2059.345  | 2426.177  |
| NM_020227 | 334.566   | 537.173   | NM_006477 | 3405.669  | 2125.555  | NM_006754 | 960.851   | 1138.114  |
| NM_005933 | 1194.256  | 1369.7    | NM_002880 | 4084.195  | 2998.19   | NM_001127 | 5900.851  | 7659.147  |
| NM_005596 | 1294.219  | 2239.328  | NM_000678 | 26401.5   | 20058.563 | NM_012430 | 4997.849  | 5645.267  |
| NM_001421 | 2497.072  | 3644.141  | NM_001066 | 1583.441  | 1282.556  | NM_003917 | 53026.363 | 58101.012 |
| U97060    | 1796.572  | 2090.126  | NM_004657 | 7474.178  | 6328.838  | NM_007077 | 5414.961  | 6082.349  |
| M73837    | 6557.726  | 5907.878  | NM_006291 | 432.209   | 314.936   | NM_002956 | 5015.41   | 5252.607  |
| NM_004226 | 1438.945  | 997.364   | NM_018170 | 3725.83   | 3410.325  | AB018739  | 4489.991  | 3968.16   |
| U69127    | 48380.961 | 59016.445 | NM_003867 | 8148.44   | 7379.996  | NM_006750 | 56698.352 | 57372.367 |
| NM_005836 | 18231.639 | 15979.386 | AL162062  | 886.441   | 1147.52   | NM_020164 | 24700.426 | 18252.305 |
| AK023379  | 9090.61   | 8251.718  | NM_003173 | 15502.034 | 15539.662 | AK023521  | 23869.49  | 16522.621 |
| NM_006076 | 1700.066  | 1643.065  | NM_005030 | 18282.268 | 15987.42  | NM_004292 | 3751.275  | 4459.451  |
| AK021904  | 25485.82  | 27613.85  | NM_017584 | 4614.877  | 4679.873  | NM_015484 | 9314.678  | 11037.768 |
| -         | 7368.77   | 9107.839  | NM_020359 | 6302.228  | 5403.508  | NM_018046 | 1504.13   | 1791.391  |
| NM_018292 | 2475.109  | 2922.817  | AB014541  | 42410.43  | 44057.988 | NM_013316 | 5786.543  | 8413.703  |

|           |           |           |           |           |           |           |           |           |
|-----------|-----------|-----------|-----------|-----------|-----------|-----------|-----------|-----------|
| AL049705  | 20706.395 | 24840.045 | NM_002583 | 23740.945 | 23116.879 | M20701    | 41577.438 | 45482.719 |
| NM_01545E | 6882.589  | 10190.301 | NM_00657C | 31914.375 | 30668.287 | NM_002912 | 7568.046  | 12213.545 |
| D13540    | 11766.875 | 16543.539 | NM_02034E | 1494.94   | 1299.002  | NM_013284 | 7718.593  | 10648.239 |
| NM_01657C | 11945.359 | 14286.987 | NM_006034 | 19948.334 | 22527.781 | NM_00673C | 3656.448  | 6312.604  |
| NM_004273 | 461.272   | 336.139   | AB040943  | 1286.733  | 1632.813  | NM_013274 | 7854.029  | 13610.576 |
| NM_00069C | 1117.166  | 699.886   | NM_005201 | 64015.602 | 59710.418 | AL050187  | 2445.743  | 3809.083  |
| NM_00015E | 7802.062  | 6286.443  | NM_000092 | 2221.689  | 2119.164  | NM_007127 | 1364.735  | 1995.687  |
| AK024489  | 3119.557  | 1989.281  | NM_01908E | 8890.013  | 10681.758 | NM_012387 | 42632.305 | 47806.168 |
| NM_000181 | 8166.143  | 5275.74   | NM_018384 | 21819.689 | 15197.783 | NM_01473E | 2705.698  | 3751.785  |
| NM_000667 | 482.748   | 468.422   | NM_001872 | 1785.784  | 1683.977  | NM_004252 | 41612.605 | 41962.254 |
| NM_014121 | 1880.443  | 2241.563  | AF157323  | 3088.711  | 2301.951  | AF172929  | 10393.15  | 10155.784 |
| NM_00673C | 3517.386  | 6469.055  | NM_00602E | 557.8     | 633.959   | NM_00639E | 38796.027 | 41785.836 |
| NM_005644 | 4649.572  | 6578.336  | NM_005877 | 13509.461 | 9764.355  | AK025655  | 4161.482  | 4289.54   |
| NM_018442 | 9816.605  | 13310.771 | AK024458  | 247.229   | 271.461   | NM_001362 | 3136.057  | 2384.483  |
| AF182416  | 18216.057 | 18397.127 | NM_00333E | 4012.156  | 4481.302  | NM_00405E | 1809.741  | 1784.421  |
| NM_00599E | 41118.5   | 34756.625 | NM_01339E | 4207.64   | 5551.324  | NM_00105E | 1910.827  | 1543.148  |
| NM_00601E | 3458.58   | 3556.763  | NM_017752 | 3612.127  | 3426.099  | NM_003833 | 48861.855 | 58451.344 |
| NM_004634 | 4893.824  | 5853.696  | D26069    | 15384.813 | 14730.481 | AK000868  | 16076.807 | 20951.648 |
| NM_002017 | 8229.391  | 9662.826  | BF107577  | 49256.324 | 49861.113 | NM_001233 | 4191.687  | 5789.712  |
| NM_017523 | 18521.393 | 17254.297 | NM_005837 | 13729.455 | 15310.249 | NM_001234 | 2760.323  | 4019.587  |
| NM_002382 | 12027.376 | 15711.145 | NM_01662E | 9395.649  | 8044.241  | BF679789  | 16629.229 | 27891.627 |
| NM_00215E | 2363.897  | 3678.234  | NM_017493 | 2626.498  | 2728.625  | L33404    | 1149.463  | 2409.548  |
| U13223    | 23425.336 | 28275.541 | NM_00613E | 12861.708 | 14558.605 | M13509    | 6438.01   | 8576.58   |
| NM_01627C | 8626.643  | 10376.421 | AF237772  | 2187.788  | 2220.106  | X04076    | 8783.653  | 12874.442 |
| AF269249  | 2282.726  | 2956.642  | AK025934  | 3305.372  | 4263.223  | W95082    | 501.905   | 808.059   |
| X51417    | 1097.665  | 1737.136  | AJ008154  | 2592.861  | 3023.707  | AA485362  | 5983.419  | 8796.015  |
| D31763    | 9768.738  | 9229.236  | NM_003487 | 19856.016 | 17879.781 | AJ222801  | 21671.045 | 24960.131 |
| AB040889  | 642.906   | 606.592   | NM_006887 | 8062.44   | 8935.226  | W72207    | 34898.797 | 35377.227 |
| NM_01481E | 3634.441  | 3297.009  | U90919    | 4843.529  | 3903.477  | BI772354  | 2626.502  | 3143.076  |
| NM_005443 | 5910.228  | 4356.345  | NM_006177 | 7033.675  | 5628.088  | AA733033  | 4646.89   | 5281.075  |
| NM_007221 | 13824.355 | 10546.861 | AL137286  | 10033.732 | 6691.777  | AA583574  | 2726.617  | 3829.231  |
| X54163    | 46887     | 36923.992 | NM_01635E | 36360.852 | 27287.455 | AI690184  | 53586.43  | 64890.082 |
| AK025395  | 1654.88   | 1994.399  | NM_01627E | 12909.725 | 11342.743 | T48692    | 739.925   | 1015.309  |
| NM_00038E | 3843.192  | 2777.243  | NM_02041E | 12734.741 | 12508.206 | AA927490  | 4336.107  | 4467.819  |
| X58377    | 700.639   | 780.759   | NM_013293 | 5988.444  | 6093.897  | NM_005052 | 14739.751 | 13055.608 |
| NM_00246E | 961.645   | 1034.385  | AF315592  | 6734.106  | 8926.729  | BF038439  | 2042.453  | 2338.475  |
| AI673575  | 446.21    | 963.997   | AF095844  | 5360.339  | 4312.282  | AF319476  | 2023.903  | 1863.022  |
| BI830936  | 1235.82   | 1827.349  | NM_015833 | 4424.662  | 4382.857  | AK001913  | 7149.031  | 5879.69   |
| U79292    | 1900.054  | 2624.394  | NM_00098E | 58503.941 | 53871.68  | NM_00228E | 3301.396  | 2638.234  |
| AA947915  | 346.752   | 522.208   | AK026760  | 42601.223 | 45449.953 | AK026408  | 3289.977  | 4032.607  |
| BI830753  | 1917.621  | 2476.547  | NM_014772 | 6209.551  | 6311.117  | NM_00502E | 732.359   | 972.72    |
| X68314    | 459.024   | 597.395   | AK025248  | 4321.291  | 3723.312  | NM_006307 | 1754.439  | 2610.433  |
| X71973    | 48593.867 | 52392.793 | NM_00453E | 19726.273 | 18188.166 | NM_001767 | 4103.462  | 8607.548  |
| T49651    | 43658.563 | 34799.758 | NM_00642E | 23624.072 | 21657.143 | AF028823  | 11158.178 | 16220.136 |
| N51014    | 2210.47   | 2787.109  | NM_00428C | 13686.844 | 14225.602 | NM_00497C | 1164.816  | 2135.244  |
| BE392471  | 35025.758 | 31979.373 | AF110399  | 4650.381  | 6100.617  | NM_00429E | 51462.789 | 61058.75  |
| AI802950  | 4248.505  | 5491.406  | AK027094  | 6309.622  | 6782.765  | NM_002087 | 47656.316 | 54090.742 |
| AA682423  | 1292.06   | 1542.572  | AF174600  | 6580.007  | 7497.432  | AB023154  | 1788.661  | 2401.172  |
| AL043686  | 4848.125  | 7107.837  | AK001003  | 1283.517  | 1850.467  | NM_001714 | 1346.144  | 2644.37   |
| AA490172  | 948.723   | 1436.186  | NM_00280C | 17810.002 | 17081.379 | NM_01458E | 1253.05   | 1887.809  |
| AA775212  | 3516.896  | 4508.851  | NM_00077E | 3306.842  | 2780.891  | AF200815  | 1474.853  | 1763.772  |
| NM_000402 | 5037.997  | 4780.961  | AB032981  | 1333.333  | 998.503   | NM_014564 | 770.143   | 703.455   |
| AK026266  | 36237.98  | 24247.664 | BF217864  | 19699.344 | 16388.99  | NM_013441 | 6818.454  | 6392.419  |



|           |           |           |             |           |           |           |           |           |
|-----------|-----------|-----------|-------------|-----------|-----------|-----------|-----------|-----------|
| NM_007124 | 18031.057 | 10270.422 | NM_005917   | 23721.131 | 17749.615 | NM_014421 | 5480.965  | 4656.555  |
| NM_003176 | 9214.697  | 6625.331  | NM_007052   | 1423.05   | 1002.588  | AB033028  | 640.675   | 582.578   |
| NM_000723 | 3818.872  | 1983.502  | BC017044    | 645.455   | 586.745   | NM_017680 | 1332.352  | 1847.485  |
| AL096751  | 8151.233  | 5414.639  | AV758498    | 1740.241  | 1842.925  | NM_012465 | 2095.938  | 1769.907  |
| NM_000364 | 1836.751  | 1013.739  | NM_020196   | 2999.39   | 2642.754  | M60499    | 3672.711  | 4071.837  |
| AF026920  | 6780.074  | 9124.982  | AK024113    | 870.198   | 882.602   | NM_001614 | 59076.363 | 64114.09  |
| NM_004931 | 14377.904 | 16288.981 | NM_018657   | 1631.098  | 1720.727  | NM_000366 | 1557.067  | 1758.751  |
| NM_000607 | 20137.428 | 24815.818 | L40410      | 13647.3   | 13131.78  | NM_004300 | 5155.466  | 4933.79   |
| AB011099  | 1001.252  | 1097.587  | NM_007055   | 3099.089  | 3404.19   | NM_000052 | 345.026   | 1523.955  |
| AF035799  | 387.052   | 388.418   | NM_016652   | 2088.997  | 2388.537  | NM_006754 | 1249.568  | 1857.669  |
| AF090409  | 549.644   | 668.95    | NM_016310   | 24680.391 | 35577.086 | NM_001127 | 6243.687  | 9332.558  |
| NM_002575 | 955.888   | 1106.895  | AK021562    | 1317.609  | 1877.622  | NM_012430 | 5791.596  | 8909.996  |
| NM_004244 | 10613.429 | 12567.603 | BC006560    | 3749.212  | 4061.504  | NM_003917 | 48192.934 | 58146.301 |
| NM_003371 | 5211.517  | 6872.582  | NM_006298   | 1144.84   | 1366.233  | NM_007077 | 5556.027  | 8329.817  |
| NM_001164 | 340.16    | 482.323   | AF060938    | 30668.014 | 33457.199 | NM_002956 | 4530.496  | 5574.65   |
| AK023114  | 12745.286 | 15553.854 | NM_001973   | 13615.078 | 16594.854 | AB018739  | 3998.653  | 4664.139  |
| NM_003678 | 10085.767 | 10044.454 | NM_014468   | 9430.763  | 12450.226 | NM_006750 | 53476.734 | 58999.195 |
| NM_012301 | 416.089   | 335.13    | NM_006856   | 11354.774 | 13513.87  | NM_020164 | 25595.09  | 22570.324 |
| NM_005631 | 886.248   | 764.662   | X52350      | 58820.59  | 55626.941 | AK023521  | 24423.768 | 20655.426 |
| NM_014938 | 7843.325  | 11023.98  | AF071554    | 2201.449  | 2737.429  | NM_014267 | 44330.395 | 36211.805 |
| AF049460  | 931.231   | 1009.076  | NM_002147   | 1292.355  | 1230.304  | NM_001481 | 1799.021  | 1648.789  |
| AK001500  | 2531.32   | 1405.453  | NM_017688   | 5048.742  | 4359.229  | U30872    | 3726.243  | 4248.944  |
| NM_006774 | 1497.089  | 973.42    | AK025612    | 35282.109 | 47960.871 | AF111783  | 1596.768  | 1438.963  |
| NM_020129 | 2730.558  | 2329.84   | NM_012268   | 43779.031 | 42581.332 | NM_020466 | 12361.768 | 13503.625 |
| Y16521    | 6170.068  | 3425.049  | NM_012203   | 1953.496  | 1882.12   | NM_002639 | 2698.909  | 2465.818  |
| AL050371  | 11783.355 | 17730.91  | NM_003296   | 412.683   | 433.297   | NM_014734 | 5914.832  | 4674.406  |
| NM_002651 | 6388.746  | 5922.378  | NM_004736   | 9840.617  | 9031.816  | NM_001362 | 3301.202  | 2455.24   |
| NM_002413 | 3519.933  | 3351.934  | NM_006895   | 504.571   | 573.483   | NM_004056 | 1551.931  | 1715.499  |
| NM_017577 | 1317.242  | 1453.505  | NM_006459   | 15522.118 | 15305.112 | NM_001056 | 1869.177  | 2334.599  |
| NM_016301 | 16308.073 | 16808.582 | AA427949    | 662.1     | 628.538   | AK025708  | 9203.003  | 10253.011 |
| NM_014668 | 2195.939  | 2268.462  | D50373      | 1807.046  | 1934.201  | NM_000405 | 3309.621  | 4774.663  |
| NM_004722 | 3708.911  | 4431.601  | AA488757    | 56703.695 | 51222.16  | NM_005564 | 56532.723 | 61417.352 |
| NM_014425 | 3270.462  | 4992.521  | AA205399    | 1677.944  | 1956.813  | NM_004508 | 7478.457  | 7250.516  |
| NM_012133 | 15689.824 | 16317.432 | H07071      | 13451.327 | 13986.45  | NM_006405 | 58237.824 | 63596.238 |
| NM_017954 | 1142.386  | 1376.448  | M25322      | 17038.848 | 18317.281 | AJ245946  | 814.132   | 827.492   |
| NM_006612 | 8996.782  | 10442.735 | AA436187    | 617.905   | 661.938   | NM_006746 | 968.46    | 1206.013  |
| NM_016451 | 6785.347  | 6122.667  | H-L 27586 I | 4860.767  | 5423.225  | NM_004694 | 4041.597  | 4181.237  |
| NM_007351 | 49110.09  | 56061.43  | ID 214180   | 1304.522  | 1564.913  | NM_000324 | 3888.969  | 4361.508  |
| AL049935  | 23098.766 | 16663.076 | ID 1867426  | 36893.508 | 42358.855 | AL137619  | 16416.682 | 17711.844 |
| AB033043  | 6027.527  | 4751.943  | ID 396450   | 676.068   | 1033.343  | NM_003615 | 1016.492  | 881.418   |
| NM_014999 | 9775.872  | 6376.943  | W99328      | 4234.295  | 5520.11   | NM_005052 | 14857.876 | 13355.592 |
| AK025220  | 6272.203  | 4122.9    | AI434176    | 2017.549  | 2871.214  | BF038439  | 1199.812  | 1496.533  |
| NM_016308 | 29089.939 | 17855.572 | H08563      | 5957.893  | 6670.27   | AF319476  | 1931.348  | 1858.353  |
| D42046    | 5683.277  | 4939.631  | BE735403    | 4489.199  | 4746.793  | AK001913  | 8401.477  | 11009.918 |
| NM_001033 | 16332.237 | 14140.309 | NM_002631   | 18767.74  | 21344.102 | NM_017737 | 2366.527  | 4744.581  |
| NM_004526 | 26209.375 | 32060.355 | AB033109    | 3370.002  | 3013.716  | NM_004292 | 4234.485  | 6099.946  |
| NM_002526 | 1378.289  | 1631.867  | NM_002053   | 54123.313 | 59462.852 | NM_015484 | 9104.354  | 10389.11  |
| NM_020135 | 7298.051  | 8969.213  | NM_006889   | 4679.433  | 4834.854  | NM_018046 | 1837.514  | 2691.714  |
| NM_018518 | 7952.784  | 8837.027  | NM_002438   | 6257.667  | 5755.751  | NM_013316 | 7304.225  | 7936.268  |
| AK023149  | 3650.915  | 3771.764  | NM_014589   | 10707.516 | 9779.68   | M20701    | 44220.012 | 44946.859 |
| AK023168  | 4922.171  | 5665.872  | NM_000759   | 2893.929  | 2333.671  | NM_002912 | 3199.34   | 5016.188  |
| NM_006646 | 738.249   | 815.043   | AK023334    | 11213.998 | 9514.804  | NM_013284 | 6467.982  | 8443.349  |
| NM_004742 | 1567.184  | 1178.159  | NM_002563   | 27765.662 | 25544.918 | NM_006739 | 4056.513  | 5319.323  |

|           |           |           |           |           |           |           |           |           |
|-----------|-----------|-----------|-----------|-----------|-----------|-----------|-----------|-----------|
| NM_014753 | 4283.133  | 4514.467  | NM_002437 | 5715.939  | 5478.458  | NM_013274 | 8681.174  | 9455.443  |
| NM_006585 | 52769.324 | 58763.129 | D79991    | 3181.685  | 3744.434  | AL050187  | 1675.144  | 1893.083  |
| NM_014331 | 12355.251 | 15117.936 | AK022425  | 2440.098  | 2360.098  | NM_007127 | 965.95    | 1082.404  |
| NM_006795 | 35083.078 | 39799.984 | NM_000054 | 41304.371 | 42816.703 | NM_012387 | 42380.426 | 37416.469 |
| AF070568  | 6889.82   | 7551.607  | NM_014713 | 14040.103 | 14182.782 | NM_014735 | 2695.89   | 3155.585  |
| NM_000277 | 1165.063  | 1437.791  | NM_001812 | 2963.677  | 2686.469  | NM_004252 | 41692.566 | 47238.105 |
| NM_000240 | 6736.614  | 8325.098  | NM_014785 | 1569.314  | 1999.586  | AF172929  | 11246.848 | 9269.238  |
| AK055733  | 35594.449 | 35012.961 | AK025175  | 209.224   | 665.6     | NM_006395 | 38653.031 | 34356.266 |
| AF298880  | 8099.912  | 7005.625  | NM_005811 | 11725.16  | 14565.493 | L11285    | 783.235   | 760.794   |
| NM_007221 | 14095.227 | 10883.063 | NM_005764 | 7069.51   | 10950.041 | AK025655  | 4239.346  | 4885.827  |
| X54163    | 45345.676 | 38073.445 | NM_016362 | 6945.649  | 7624.069  | CY3Cy5    | 5231.871  | 541.32    |
| AK025395  | 1676.398  | 989.947   | NM_004214 | 13409.99  | 14755.201 | NM_133263 | 2912.338  | 2377.425  |
| NM_000385 | 3781.743  | 2599.439  | NM_004329 | 26722.416 | 29138.057 | AF086176  | 2401.901  | 2992.877  |
| X58377    | 651.891   | 497.564   | NM_002836 | 20084.291 | 31162.906 | AF086232  | 498.153   | 554.828   |
| NM_002465 | 611.392   | 449.591   | NM_020167 | 7123.4    | 9266.202  | NM_017742 | 1841.105  | 1518.031  |
| AI673575  | 236.549   | 158.152   | NM_016055 | 16130.161 | 16401.35  | NM_005105 | 3139.207  | 2202.624  |
| BI830936  | 1249.885  | 986.546   | NM_014005 | 8604.291  | 9479.393  | AK022292  | 10916.791 | 8683.935  |
| U79292    | 1879.036  | 2737.909  | NM_006033 | 16392.092 | 16612.525 | AB051436  | 4286.61   | 4333.507  |
| BI830753  | 1738.964  | 2010.392  | NM_004837 | 6219.481  | 5298.4    | AK026482  | 31426.145 | 27008.375 |
| X68314    | 275.508   | 247.675   | NM_000370 | 1836.871  | 1341.36   | AL137473  | 4759.972  | 4430.424  |
| X71973    | 47235.105 | 46197.945 | BE865893  | 10313.128 | 8125.578  | AJ001873  | 19857.035 | 19108.623 |
| T49651    | 44953.633 | 32896.297 | NM_003123 | 58580.969 | 54647.535 | AL137476  | 14512.602 | 11584.714 |
| N51014    | 2361.25   | 2879.559  | AY005822  | 6191.675  | 4885.359  | AF052174  | 4764.527  | 4617.301  |
| BE392471  | 34535.523 | 26379.803 | NM_018129 | 55996.496 | 48329.945 | AF070590  | 1662.33   | 1510.517  |
| AI802950  | 3934.29   | 3576.059  | AF289022  | 4600.976  | 4533.888  | NM_004705 | 543.32    | 433.537   |
| AI741278  | 438.67    | 674.237   | M17252    | 1236.477  | 948.772   | NM_012245 | 47324.965 | 23406.949 |
| AA682423  | 1168.57   | 1334.192  | NM_016025 | 12212.719 | 11554.952 | NM_133263 | 2670.758  | 1501.109  |
| AL043686  | 5386.063  | 6881.419  | NM_013319 | 4698.571  | 5158.794  | SR2       | 43297.504 | 54821.379 |
| AA490172  | 1119.726  | 1042.223  | NM_020410 | 7628.963  | 8275.836  | SR4       | 10703.285 | 10978.607 |
| AA775212  | 3601.984  | 5047.948  | NM_000453 | 4000.364  | 5003.415  | SR6       | 1312.215  | 1171.265  |
| AB011174  | 5920.086  | 8430.428  | J03048    | 16683.598 | 17893.92  | SR8       | 5216.345  | 16181.297 |
| AB043635  | 756.584   | 631.983   | NM_004583 | 1219.906  | 1706.333  | SR10      | 18366.594 | 5425.168  |
| AB040879  | 547.561   | 534.097   | NM_001103 | 1343.176  | 1499.203  | CY3Cy5    | 2530.485  | 137.559   |
| NM_003175 | 10127.326 | 6529.546  | AF228710  | 54323.352 | 50320.141 | NM_018067 | 12572.666 | 13229.41  |
| NM_000723 | 3519.662  | 2190.926  | NM_018399 | 1136.633  | 1278.393  | NM_018955 | 27896.07  | 21766.221 |
| AL096751  | 7558.024  | 4750.932  | AY007131  | 62292.246 | 60569.68  | NM_014787 | 1914.709  | 1544.967  |
| NM_000364 | 1727.507  | 857.908   | U61735    | 6452.51   | 7429.956  | AL122109  | 1087.654  | 883.28    |
| AF026920  | 4980.783  | 4092.851  | NM_001144 | 27836.004 | 43653.543 | AF074988  | 3422.216  | 3270.407  |
| NM_004931 | 10002.743 | 5190.685  | AK023766  | 9978.219  | 11554.466 | AK024946  | 1497.704  | 1363.588  |
| NM_000607 | 15460.303 | 10346.308 | NM_001897 | 2513.633  | 3242.365  | AF052497  | 415.932   | 394.394   |
| AB011099  | 894.608   | 922.497   | NM_003853 | 3126.769  | 3826.668  | AK026375  | 4469.886  | 3881.888  |
| AF035799  | 276.339   | 306.759   | NM_018375 | 4305.812  | 2796.71   | U85992    | 1418.368  | 1243.659  |
| AF090409  | 484.527   | 256.259   | NM_017615 | 890.648   | 741.344   | AL110152  | 1473.386  | 1520.577  |
| NM_002575 | 993.944   | 1004.042  | NM_017435 | 4375.48   | 3003.146  | AF131745  | 4732.662  | 3464.157  |
| NM_004244 | 8843.951  | 7228.697  | U59209    | 4823.067  | 3534.578  | AL117565  | 7052.112  | 5957.137  |
| NM_003371 | 4184.664  | 5359.271  | NM_020195 | 6721.267  | 4813.761  | AF147305  | 617.748   | 543.1     |
| NM_001164 | 383.304   | 272.259   | BC002753  | 350.628   | 287.507   | AK022109  | 4177.142  | 2459.386  |
| AK023114  | 10881.664 | 9142.276  | AK023824  | 7609.672  | 6632.152  | NM_007030 | 635.624   | 602.298   |
| NM_003675 | 10596.195 | 9348.291  | AL133069  | 7203.121  | 8004.915  | AK022111  | 638.074   | 339.591   |
| NM_012301 | 345.767   | 368.167   | AL117574  | 542.42    | 696.836   | AK021527  | 655.013   | 318.763   |
| NM_005631 | 742.97    | 660.35    | AK026055  | 10105.843 | 10249.755 | AF143882  | 1475.298  | 915.465   |
| NM_014935 | 7690.224  | 8548.021  | AK024126  | 717.24    | 949.851   | U00953    | 703.323   | 650.754   |
| AF049460  | 1047.231  | 1056.935  | NM_001515 | 6423.22   | 5892.988  | AK026773  | 2463.469  | 2966.094  |

|           |           |           |             |           |           |           |           |           |
|-----------|-----------|-----------|-------------|-----------|-----------|-----------|-----------|-----------|
| NM_014815 | 4192      | 5605.845  | NM_002744   | 20096.834 | 19941.58  | AK026452  | 330.509   | 542.232   |
| NM_005443 | 6284.227  | 6175.287  | NM_015917   | 18108.717 | 19144.389 | AB026054  | 532.658   | 489.481   |
| NM_002714 | 428.349   | 211.779   | NM_020397   | 1676.467  | 2858.951  | AK022604  | 1431.847  | 1238.13   |
| NM_020129 | 2459.511  | 1951.22   | NM_000061   | 7062.027  | 8962.331  | U66048    | 2058.899  | 1817.474  |
| Y16521    | 5963.876  | 3111.83   | AB046859    | 46357.348 | 47801.371 | AL080095  | 559.047   | 615.264   |
| AL050371  | 8458.249  | 6308.137  | NM_005109   | 11619.927 | 14308.456 | AK023401  | 9395.077  | 8799.632  |
| NM_002651 | 5395.687  | 3417.661  | AK023573    | 10956.437 | 11918.919 | AK001865  | 2450.569  | 2022.59   |
| NM_002413 | 3027.535  | 2458.715  | NM_002730   | 4155.509  | 4164.658  | AK024035  | 42394.824 | 33836.617 |
| NM_017577 | 1433.605  | 984.154   | NM_004828   | 3740.92   | 5406.998  | AL050079  | 2451.287  | 1692.336  |
| NM_016301 | 15275.15  | 16268.957 | AB011540    | 59126.078 | 55631.332 | AL080233  | 2788.734  | 1476.929  |
| NM_014668 | 1452.977  | 1316.303  | NM_000040   | 23447.266 | 27580.713 | AL050132  | 381.872   | 216.078   |
| NM_004722 | 3570.228  | 3527.322  | NM_004631   | 6527.262  | 7198.934  | AL117663  | 2323.734  | 1560.954  |
| NM_014425 | 2862.668  | 2608.851  | NM_012268   | 44314.445 | 43443.535 | NM_014293 | 7560.979  | 5469.893  |
| NM_012133 | 16872.979 | 17928.869 | NM_012203   | 1689.217  | 1448.839  | AK026881  | 828.461   | 1141.431  |
| NM_017954 | 1310.574  | 1346.173  | NM_003296   | 395.753   | 251.549   | AL133653  | 886.827   | 684.066   |
| NM_006612 | 8590.405  | 8815.138  | NM_004736   | 10353.559 | 11597.356 | AK023774  | 1752.703  | 954.434   |
| NM_016451 | 7905.612  | 9764.778  | NM_006895   | 551.033   | 611.159   | AL049377  | 1465.017  | 1303.395  |
| NM_007351 | 51948.121 | 60686.949 | NM_006459   | 12140.253 | 9555.706  | AK001432  | 2510.665  | 2024.507  |
| AK026266  | 42730.691 | 36885.012 | AA427949    | 408.403   | 272.502   | AL133568  | 6178.657  | 6837.057  |
| NM_007124 | 19064.186 | 17586.949 | D50373      | 1673.12   | 1444.616  | AF009265  | 4290.371  | 4488.103  |
| AB033043  | 6031.443  | 5156.062  | AA488757    | 56844.613 | 51513.883 | AF009309  | 8014.381  | 8073.694  |
| NM_014999 | 8953.446  | 5594.853  | AA205399    | 1674.724  | 1675.844  | NM_002360 | 4170.44   | 4409.971  |
| AK025220  | 5541.569  | 3511.008  | H07071      | 13251.561 | 13938.897 | AF009322  | 733.458   | 769.47    |
| NM_016308 | 28386.199 | 16578.414 | M25322      | 17203.553 | 15691.805 | AF056425  | 5548.685  | 4793.348  |
| D42046    | 4982.391  | 4035.989  | AA436187    | 462.86    | 661.321   | AF090893  | 808.489   | 692.922   |
| NM_001033 | 15684.507 | 12374.183 | H-L 27586 I | 5232.654  | 6298.273  | NM_018033 | 16532.098 | 9590.904  |
| NM_004526 | 18783.045 | 13971.815 | ID 214180   | 1495.955  | 2372.541  | AK001945  | 2118.05   | 1271.843  |
| NM_002526 | 1134.035  | 763.823   | ID 1867426  | 37886.535 | 44001.465 | AK021541  | 459.776   | 330.441   |
| NM_020135 | 7234.684  | 7707.162  | ID 396450   | 917.028   | 1385.009  | AK021766  | 438.809   | 362.92    |
| NM_018518 | 8028.079  | 8240.855  | W99328      | 4101.078  | 5287.417  | AK001147  | 492.083   | 404.886   |
| AK023149  | 2987.091  | 3283.419  | AI434176    | 1920.198  | 2788.438  | AK002109  | 279.384   | 167.137   |
| AK023168  | 4544.49   | 5854.812  | H08563      | 6063.125  | 6298.182  | AK021630  | 1244.573  | 873.622   |
| NM_006646 | 757.013   | 877.897   | BE735403    | 4612.077  | 4541.384  | AK021831  | 1075.935  | 679.952   |
| NM_004742 | 1688.573  | 1314.556  | NM_001718   | 715.453   | 823.847   | NM_020153 | 1081.563  | 1399.422  |
| NM_014753 | 4137.391  | 3701.411  | AF116659    | 7881.242  | 8476.935  | NM_005321 | 2134.397  | 3360.3    |
| NM_006585 | 52328.734 | 46297.289 | NM_000317   | 32216.869 | 28741.086 | AF073520  | 8294.468  | 7682.767  |
| NM_014331 | 12505.841 | 14000.788 | NM_006889   | 4248.092  | 3709.76   | AF143885  | 804.551   | 707.037   |
| NM_006795 | 34413.051 | 37511.609 | NM_002438   | 5356.66   | 4237.183  | NM_014015 | 15984.317 | 13129.612 |
| AF070568  | 6104.331  | 6825.166  | NM_014589   | 10335.334 | 9069.128  | AK026839  | 2046.918  | 1577.15   |
| NM_000277 | 1337.574  | 1591.56   | NM_000759   | 3181.772  | 2637.079  | AJ008123  | 12018.007 | 9991.081  |
| NM_000240 | 5974.945  | 5495.542  | AK023334    | 9372.964  | 7391.583  | AJ008156  | 1497.322  | 1731.147  |
| AK055733  | 35703.109 | 37838.406 | NM_002563   | 26010.141 | 22366.592 | AF147321  | 464.933   | 479.863   |
| AF298880  | 8201.619  | 8384.62   | NM_002437   | 4943.271  | 4165.609  | AF161437  | 5127.833  | 5162.342  |
| AK001500  | 3625.622  | 3399.289  | D79991      | 2698.099  | 2789.846  | U73530    | 563.599   | 588.495   |
| NM_006774 | 1633.683  | 1807.908  | AK022425    | 2192.774  | 2025.29   | AF086158  | 10805.067 | 9841.442  |
| AK025395  | 1391.623  | 1177.272  | NM_000054   | 39592.945 | 39544.734 | AF086050  | 2798.955  | 2696.942  |
| NM_000388 | 3229.087  | 2197.866  | NM_014713   | 14249.281 | 14210.84  | AF147375  | 2251.182  | 1800.49   |
| X58377    | 425.785   | 365.962   | NM_001812   | 3082.356  | 2488.929  | X51524    | 10571.407 | 7528.031  |
| NM_002469 | 567.602   | 419.801   | NM_014785   | 1445.852  | 1315.203  | AK025759  | 4365.303  | 3160.767  |
| BI830936  | 999.288   | 888.158   | AK025175    | 410.189   | 539.287   | AK024105  | 1019.691  | 779.338   |
| U79292    | 1203.988  | 1183.515  | NM_005811   | 12947.019 | 14398.966 | AJ238556  | 1249.147  | 715.877   |
| BI830753  | 1596.353  | 1833.454  | NM_005764   | 5869.414  | 6409.815  | AK021516  | 4216.312  | 2819.028  |
| X71973    | 45988.184 | 47226.645 | NM_016362   | 7134.004  | 7096.701  | Z70699    | 1047.632  | 547.764   |

|           |           |           |           |           |           |           |           |           |
|-----------|-----------|-----------|-----------|-----------|-----------|-----------|-----------|-----------|
| T49651    | 40123.859 | 32010.145 | NM_004214 | 12608.908 | 13014.323 | AL049919  | 187.486   | 482.064   |
| N51014    | 2188.139  | 1739.775  | NM_004329 | 24562.564 | 25434.451 | NM_006896 | 3862.767  | 2495.476  |
| BE392471  | 33372.301 | 25393.799 | NM_002836 | 15677.552 | 18081.439 | AL080066  | 22291.248 | 18357.51  |
| AI802950  | 3364.345  | 3090.314  | NM_020167 | 6602.761  | 8086.35   | AJ227870  | 813.564   | 1002.983  |
| AI741278  | 387.944   | 565.427   | NM_016058 | 16162.409 | 16314.007 | AL137620  | 1727.654  | 2547.366  |
| AA682423  | 1140.233  | 1023.129  | NM_014005 | 8093.866  | 9105.829  | NM_005294 | 6418.679  | 6642.431  |
| AL043686  | 5351.584  | 5933.182  | NM_017688 | 6205.886  | 7410.513  | AK026879  | 619.927   | 672.566   |
| AA490172  | 919.9     | 810.776   | AK025612  | 49654.102 | 51453.563 | AF085826  | 2153.684  | 1462.421  |
| AA775212  | 3120.105  | 3548.318  | NM_000370 | 1885.276  | 1315.872  | AK024362  | 1609.754  | 1366.629  |
| AB011174  | 5900.7    | 6923.656  | BE865893  | 8064.921  | 6746.374  | AF118068  | 6982.25   | 4822.832  |
| AB043635  | 877.233   | 950.2     | NM_003123 | 60004.184 | 58048.77  | NM_004164 | 826.062   | 802.066   |
| AB040879  | 551.553   | 766.688   | AY005822  | 6871.813  | 6062.87   | NM_019018 | 2102.113  | 2254.744  |
| AL049935  | 29910.633 | 27531.652 | NM_018129 | 50342.301 | 49101.418 | M87931    | 901.703   | 1227.916  |
| AB011099  | 495.86    | 753.254   | AF289022  | 4331.264  | 3145.313  | NM_003544 | 65572.328 | 61534.672 |
| NM_002575 | 681.953   | 487.343   | AB002326  | 487.963   | 432.763   | U17640    | 551.756   | 530.088   |
| NM_004244 | 6341.852  | 3602.526  | M17252    | 672.21    | 630.03    | AK001187  | 3248.457  | 2762.045  |
| NM_003371 | 2892.993  | 2655.316  | NM_016025 | 12284.179 | 10875.01  | NM_003525 | 28361.818 | 23529.334 |
| AK023114  | 8262.205  | 5907.753  | NM_013319 | 4413.072  | 4738.621  | AF056436  | 3658.596  | 3289.523  |
| NM_003678 | 7533.434  | 6358.569  | NM_020410 | 7765.805  | 8193.851  | AB023191  | 1589.584  | 1280.242  |
| NM_012301 | 440.779   | 169.455   | NM_000453 | 4292.824  | 4588.695  | AK027212  | 8007.246  | 6515.652  |
| NM_000680 | 300.386   | 299.987   | J03048    | 16378.77  | 14990.058 | X56197    | 1376.11   | 1265.848  |
| NM_005631 | 701.218   | 735.266   | NM_004583 | 1195.454  | 1459.114  | NM_005195 | 9075.82   | 5960.201  |
| NM_014419 | 4518.229  | 4946.56   | NM_001103 | 1462.717  | 1870.842  | U90905    | 1308.658  | 1015.042  |
| NM_014938 | 6826.647  | 6310.698  | AF228710  | 48434.949 | 47645.219 | AF161422  | 1767.391  | 1320.835  |
| AF049460  | 746.917   | 961.117   | NM_018399 | 953.513   | 1346.441  | AL137384  | 1348.9    | 398.355   |
| AK026066  | 3910.404  | 4028.308  | AY007131  | 60935.453 | 59627.285 | AF070619  | 2525.65   | 1568.738  |
| NM_005244 | 1978.081  | 2360.589  | U61735    | 6104.077  | 6340.143  | NM_000787 | 1157.2    | 1097.816  |
| AF054589  | 8911.304  | 8916.879  | NM_001144 | 27992.105 | 29634.473 | U57962    | 5466.445  | 6186.343  |
| NM_005270 | 1431.289  | 1447.113  | AK023766  | 10405.464 | 11158.242 | NM_005574 | 18248.678 | 19866.078 |
| NM_014815 | 4507.961  | 5395.261  | NM_001897 | 2202.271  | 3129.788  | NM_017895 | 16713.768 | 13890.355 |
| NM_005443 | 6842.785  | 7058.751  | NM_003853 | 3255.103  | 4054.913  | NM_004610 | 6855.119  | 5962.308  |
| NM_007221 | 15880.32  | 16452.73  | AB033109  | 4637.382  | 7353.309  | NM_001612 | 2767.63   | 2496.662  |
| X54163    | 49155.754 | 55717.738 | NM_002053 | 57388.617 | 57263.633 | AK027002  | 4986.245  | 4820.684  |
| NM_018607 | 1639.309  | 1108.251  | NM_017438 | 3778.253  | 2723.611  | AB025254  | 5199.498  | 4521.521  |
| NM_002978 | 791.809   | 658.714   | U59209    | 3648.554  | 2346.474  | NM_004081 | 2766.835  | 2719.626  |
| NM_014668 | 1061.79   | 918.763   | NM_020195 | 6566.022  | 4708.199  | AK001039  | 8493.257  | 8045.03   |
| NM_004722 | 2627.409  | 2149.693  | AK023824  | 7346.439  | 5708.451  | AK026465  | 2216.741  | 2234.541  |
| NM_014425 | 1881.383  | 1486.933  | AL133069  | 6490.321  | 5099.152  | AK024321  | 1144.948  | 1043.567  |
| NM_012133 | 11111.618 | 9658.37   | AK026055  | 9199.938  | 10008.64  | U52834    | 1262.04   | 1210.271  |
| NM_017954 | 1102.242  | 1204.669  | AK024126  | 756.733   | 738.732   | M34428    | 418.284   | 409.258   |
| NM_006612 | 8006.244  | 7143.695  | NM_001516 | 6431.621  | 7863.879  | NM_003532 | 2003.561  | 1653.437  |
| NM_016451 | 6805.333  | 6024.594  | NM_002744 | 18433.064 | 19843.131 | NM_017865 | 13315.799 | 9510.555  |
| NM_007351 | 51139.383 | 50930.172 | NM_015917 | 16415.01  | 14451.327 | AF075100  | 576.042   | 539.93    |
| AK026266  | 40754.711 | 29668.66  | NM_020397 | 1445.359  | 1534.93   | AF203447  | 15057.965 | 9270.612  |
| NM_007124 | 19859.203 | 14746.994 | NM_000061 | 7551.288  | 7193.488  | NM_018502 | 2887.981  | 1826.523  |
| NM_003176 | 11222.31  | 10319.279 | AB046859  | 43385.551 | 40590.02  | AB040976  | 17120.018 | 13128.314 |
| NM_000723 | 4276.54   | 3874.07   | NM_005109 | 11637.083 | 11963.767 | U49089    | 698.263   | 838.517   |
| AL096751  | 9894.45   | 9506.969  | AK023573  | 10306.126 | 10864.295 | NM_002221 | 7834.073  | 4423.012  |
| NM_000364 | 1891.731  | 1492.235  | NM_002730 | 3418.109  | 3784.283  | NM_002371 | 1096.734  | 822.034   |
| AF026920  | 10419.345 | 11280.629 | NM_004828 | 3097.248  | 3899.638  | NM_002562 | 777.396   | 957.913   |
| NM_004931 | 10670.443 | 6986.204  | AB011540  | 59958.281 | 56976.516 | AK024502  | 11540.932 | 9948.339  |
| NM_000607 | 26161.186 | 23599.316 | NM_000040 | 21258.209 | 24970.244 | NM_001124 | 825.934   | 991.045   |
| NM_000240 | 4156.414  | 4806.458  | NM_004631 | 6866.491  | 8459.499  | NM_004586 | 4272.942  | 3970.411  |

|           |           |           |             |           |           |           |           |           |
|-----------|-----------|-----------|-------------|-----------|-----------|-----------|-----------|-----------|
| AK055733  | 26638.975 | 25800.598 | NM_006033   | 28108.252 | 42360.461 | NM_004844 | 6595.027  | 7186.683  |
| AF298880  | 12383.508 | 8690.9    | NM_004837   | 8496.93   | 10461.347 | NM_013447 | 356.965   | 381.858   |
| AK001500  | 2392.175  | 1671.285  | NM_003296   | 334.481   | 295.848   | NM_000051 | 4905.292  | 4195.214  |
| NM_006774 | 1499.193  | 1310.804  | NM_004736   | 8926.675  | 8502.821  | NM_005705 | 841.158   | 853.348   |
| NM_003624 | 466.021   | 325.151   | NM_006895   | 450.763   | 553.876   | NM_004180 | 7716.383  | 7239.562  |
| NM_020129 | 2366.608  | 1646.918  | NM_006459   | 12259.264 | 13215.301 | NM_004786 | 33880.328 | 28496.836 |
| Y16521    | 4168.673  | 3409.593  | AA427949    | 356.261   | 464.028   | AF302109  | 1561.502  | 1454.292  |
| AL050371  | 9685.002  | 9614.989  | D50373      | 1381.202  | 1215.702  | AL117485  | 22672.494 | 18693.529 |
| NM_002651 | 6088.656  | 4923.655  | AA488757    | 43039.082 | 44093.363 | NM_003505 | 785.202   | 837.867   |
| NM_002413 | 4019.691  | 3207.206  | AA205399    | 1626.778  | 1519.392  | NM_007191 | 2878.664  | 1829.152  |
| NM_017577 | 1370.573  | 1327.326  | H07071      | 14274.521 | 15563.29  | AL109667  | 1306.939  | 886.095   |
| NM_001757 | 498.239   | 449.101   | M25322      | 17003.385 | 18110.418 | NM_000840 | 911.363   | 731.841   |
| NM_001647 | 2291.163  | 2468.332  | AA436187    | 586.821   | 453.536   | AJ008142  | 49848.559 | 36282.035 |
| NM_018158 | 3605.443  | 3085.441  | H-L 27586 I | 4554.581  | 4561.809  | AL035289  | 626.423   | 687.651   |
| NM_016301 | 18187.391 | 17515.219 | ID 214180   | 1217.877  | 1042.949  | NM_001343 | 3471.289  | 4997.795  |
| AK021975  | 1768.454  | 2039.87   | ID 1867426  | 37102.887 | 39230.836 | NM_018461 | 7660.983  | 5644.277  |
| AB032952  | 21448.305 | 23050.184 | ID 396450   | 752.819   | 722.144   | AF235023  | 5791.794  | 6016.459  |
| NM_002522 | 2077.687  | 2698.604  | W99328      | 4018.669  | 3887.672  | NM_006910 | 6524.985  | 5534.8    |
| AB011174  | 5206.697  | 4399.072  | AI434176    | 1675.209  | 2446.286  | AF162667  | 4569.013  | 4213.61   |
| AB043635  | 565.866   | 264.583   | H08563      | 5214.351  | 4776.82   | AB046847  | 3526.869  | 3480.655  |
| AB040879  | 405.445   | 473.631   | BE735403    | 4057.794  | 4053.135  | NM_000447 | 4658.664  | 4155.232  |
| AL049935  | 23443.035 | 23809.396 | NM_001718   | 567.39    | 521.646   | NM_006354 | 6967.289  | 10349.725 |
| AB033043  | 5254.745  | 5369.333  | AF116659    | 8524.716  | 8071.882  | AF303378  | 8301.406  | 7627.686  |
| NM_014995 | 10540.927 | 9619.039  | NM_000317   | 31833.869 | 33039.266 | NM_016037 | 15029.761 | 13939.952 |
| AK025220  | 6372.855  | 3585.18   | NM_018376   | 6041.4    | 6113.509  | NM_000043 | 7099.037  | 6323.424  |
| NM_016308 | 35411.676 | 20847.322 | NM_017615   | 1403.027  | 1670.983  | NM_016140 | 593.564   | 557.097   |
| D42046    | 6437.801  | 8700.895  | AK022425    | 2053.746  | 1723.955  | NM_015965 | 1074.151  | 665.901   |
| NM_001033 | 18295.381 | 19070.729 | NM_000054   | 26288.445 | 20894.734 | NM_000417 | 6164.318  | 5494.076  |
| NM_004526 | 24519.379 | 23708.422 | NM_014713   | 12296.615 | 11518.27  | NM_020356 | 9396.484  | 5677.408  |
| NM_002526 | 1788.154  | 1469.276  | NM_001812   | 2907.903  | 2359.078  | NM_004063 | 534.539   | 532.62    |
| NM_020135 | 7661.271  | 8047.627  | NM_014785   | 1344.709  | 1184.234  | NM_006144 | 2715.029  | 2040.457  |
| NM_018518 | 8626.285  | 9432.104  | NM_005811   | 11737.916 | 10027.813 | AL136549  | 23497.441 | 25300.58  |
| AK023149  | 3619.41   | 3692.18   | NM_005764   | 3126.429  | 2848.025  | NM_012168 | 3514.989  | 4131.942  |
| AK023168  | 6074.514  | 7323.376  | NM_016362   | 6212.811  | 5410.639  | NM_002216 | 1353.725  | 1139.458  |
| NM_006646 | 1110.471  | 1318.109  | NM_004214   | 11917.475 | 10300.078 | NM_007038 | 6434.693  | 5308.985  |
| NM_004742 | 1449.807  | 1210.16   | NM_004329   | 23600.344 | 24523.572 | AF311324  | 8954.588  | 7091.849  |
| NM_014753 | 4796.454  | 5444.062  | NM_002836   | 14944.09  | 14546.132 | AF124433  | 2483.09   | 1864.805  |
| NM_006585 | 59990.117 | 65047.016 | NM_020167   | 6694.497  | 6584.073  | AK001647  | 679.955   | 730.806   |
| NM_014331 | 12557.507 | 12044.923 | AL049963    | 26249.795 | 33007.711 | NM_001461 | 902.566   | 866.38    |
| NM_006795 | 37555.918 | 29660.744 | NM_016058   | 15118.094 | 14329.012 | AF061556  | 2222.064  | 2233.809  |
| AF070568  | 6100.329  | 6017.729  | NM_014005   | 7608.215  | 7129.476  | AL162049  | 3587.927  | 4171.033  |
| NM_000277 | 16080.127 | 21807.061 | NM_004636   | 18414.379 | 19094.412 | AF036144  | 1317.685  | 1272.926  |
| CY3Cy5    | 448.733   | 163.103   | AK022603    | 1040.88   | 921.822   | NM_001823 | 458.761   | 402.592   |
| NM_022552 | 2517.846  | 1341.912  | NM_004896   | 7984.216  | 6857.659  | NM_005032 | 1558.652  | 1663.017  |
| NM_014389 | 11776.966 | 8360.099  | NM_013372   | 1011.624  | 1182.115  | NM_004160 | 10026.898 | 10950.947 |
| AK025015  | 1029.666  | 1559.232  | NM_003976   | 2579.925  | 2949.175  | AL109677  | 2821.637  | 2639.864  |
| AF086187  | 9849.418  | 7900.804  | NM_017688   | 5090.965  | 6616.69   | NM_003941 | 62250.41  | 62850.977 |
| AF305836  | 15946.134 | 16006.63  | AK025612    | 49952.941 | 51921.957 | AF177909  | 2477.481  | 2241.651  |
| AL109784  | 1297.517  | 1399.774  | NM_012268   | 58541.824 | 60094.027 | NM_002664 | 31637.291 | 21933.094 |
| AL137383  | 1566.98   | 1095.061  | NM_012203   | 3734.078  | 6683.005  | AB018271  | 2398.026  | 1722.643  |
| NM_018302 | 12066.896 | 7921.328  | AL157469    | 646.323   | 687.335   | AL137665  | 7687.049  | 5274.535  |
| NM_014389 | 10239.843 | 7258.058  | NM_002868   | 3853.221  | 4710.851  | NM_016434 | 5080.803  | 3204.142  |
| SR2       | 41753.66  | 22126.5   | AK024100    | 6615.927  | 8416.951  | U36561    | 61007.363 | 65851.758 |

|           |           |           |           |           |           |           |           |           |
|-----------|-----------|-----------|-----------|-----------|-----------|-----------|-----------|-----------|
| SR4       | 12858     | 8571.038  | NM_005135 | 973.894   | 1143.48   | AF205437  | 1891.14   | 1609.528  |
| SR6       | 2003.879  | 1878.153  | NM_003827 | 8609.997  | 8539.679  | AF034102  | 50054.258 | 28223.498 |
| SR8       | 7912.952  | 18057.059 | NM_004583 | 711.584   | 695.046   | AB037748  | 2698.868  | 2472.32   |
| SR10      | 25008.432 | 7302.106  | NM_001103 | 1180.938  | 1235.212  | AB002306  | 4160.432  | 4405.468  |
| CY3Cy5    | 601.682   | 136.864   | AF228710  | 45397.105 | 44613.168 | NM_00130C | 4889.651  | 4333.177  |
| NM_003887 | 732.215   | 410.591   | NM_018399 | 878.931   | 666.5     | NM_012472 | 1118.372  | 1268.122  |
| NM_004267 | 3365.735  | 2119.051  | AY007131  | 57411.09  | 57144.555 | NM_018187 | 12326.808 | 12711.168 |
| AL357212  | 667.403   | 1132.139  | U61735    | 5668.684  | 5406.819  | NM_003016 | 38776.473 | 34671.98  |
| AK026687  | 2522.433  | 2386.679  | NM_001144 | 24689.969 | 24546.428 | NM_005463 | 50722.016 | 57994.215 |
| AL117444  | 2990.332  | 2722.737  | AK023766  | 9103.302  | 8724.051  | NM_001325 | 4111.299  | 4442.181  |
| NM_017994 | 9441.928  | 7455.281  | NM_001897 | 2144.903  | 2113.694  | NM_018282 | 35860.449 | 33089.422 |
| AK021693  | 3115.082  | 1660.13   | NM_003853 | 2737.717  | 3612.567  | BC019932  | 4075.563  | 4494.844  |
| AB023177  | 1111.69   | 757.701   | AB033109  | 4398.246  | 4243.028  | AF114818  | 7996.22   | 8407.068  |
| AL050015  | 2060.916  | 1219.753  | NM_002053 | 53756.402 | 51846.66  | AK025106  | 3895.647  | 3864.201  |
| AY007117  | 9235.455  | 8436.924  | NM_006889 | 5058.463  | 5697.218  | NM_020144 | 8489.783  | 10157.883 |
| NM_017413 | 387.691   | 343.916   | NM_002438 | 8403.943  | 9244.505  | NM_003908 | 54383.145 | 61430.645 |
| NM_013259 | 758.103   | 493.121   | NM_014589 | 14642.849 | 15731.832 | BE893142  | 5081.601  | 5724.857  |
| NM_018375 | 3232.47   | 2200.26   | NM_000759 | 4441.352  | 4826.412  | NM_003103 | 9111.461  | 8834.181  |
| NM_004913 | 371.27    | 461.445   | AK023334  | 16258.323 | 18443.994 | NM_01534C | 18664.305 | 14113.332 |
| AK026838  | 667.07    | 497.104   | NM_002563 | 32333.26  | 44634.488 | NM_006451 | 9209.053  | 8620.693  |
| AK022443  | 2882.145  | 2587.184  | NM_002437 | 7567.436  | 8229.877  | NM_002094 | 4393.107  | 3057.825  |
| AK023371  | 1748.977  | 1492.331  | D79991    | 3711.356  | 5883.499  | NM_002937 | 2089.358  | 1438.256  |
| AK025112  | 1104.578  | 756.567   | AB011540  | 56359.945 | 54652.008 | NM_003191 | 14786.968 | 10836.996 |
| AK026675  | 208.48    | 484.113   | NM_00004C | 15054.564 | 16006.729 | NM_018235 | 60949.387 | 61917.578 |
| AK025173  | 1531.293  | 1317.648  | NM_004631 | 5341.081  | 5037.908  | NM_002424 | 767.991   | 592.438   |
| AK025430  | 431.293   | 398.392   | NM_006033 | 16187.179 | 17969.807 | NM_012104 | 51805.852 | 36898.496 |
| AK026722  | 537.306   | 273.676   | NM_004837 | 6535.994  | 6043.195  | NM_000761 | 52949.707 | 61100.32  |
| AL110133  | 943.057   | 776.32    | NM_00037C | 1837.902  | 1517.537  | NM_020142 | 9428.586  | 8706.957  |
| AL050053  | 586.064   | 471.49    | BE865893  | 10311.758 | 10874.521 | NM_000774 | 10207.327 | 9995.03   |
| AK000529  | 7399.758  | 6764.541  | NM_003123 | 51913.988 | 55403.348 | NM_017781 | 51897.508 | 61430.898 |
| AK027243  | 1910.307  | 1639.88   | AY005822  | 5521.292  | 5857.779  | NM_006004 | 58298.25  | 53402.73  |
| AL109783  | 853.682   | 1152.853  | NM_018129 | 45745.723 | 50034.223 | NM_004894 | 39910.219 | 32591.699 |
| AF085861  | 449.729   | 526.159   | AF289022  | 4417.121  | 4983.166  | AB028960  | 831.066   | 1269.854  |
| AF147415  | 1934.948  | 3017.264  | AB002326  | 497.861   | 550.824   | NM_005648 | 45300.402 | 44338.563 |
| AL049273  | 1034.522  | 1867.803  | M17252    | 1138.303  | 1079.619  | AK000689  | 443.173   | 523.746   |
| AK098474  | 540.026   | 285.923   | NM_016025 | 11743.937 | 10685.522 | NM_006943 | 19323.893 | 18806.24  |
| AL117475  | 2283.932  | 1223.695  | NM_013319 | 4623.489  | 5027.4    | NM_006741 | 39278.773 | 36177.516 |
| AL049300  | 336.454   | 325.477   | NM_000746 | 2962.007  | 3951.399  | NM_014166 | 11575.011 | 12014.355 |
| NM_017535 | 1389.574  | 1375.276  | NM_000722 | 2347.038  | 2558      | AL117606  | 20709.701 | 22837.416 |
| AL080161  | 212.195   | 86.193    | NM_00603C | 2360.818  | 2579.434  | NM_01233C | 5161.084  | 4870.802  |
| AK025365  | 3339.478  | 2831.508  | NM_02041C | 7259.359  | 7440.2    | AF294278  | 13146.385 | 13121.443 |
| AK023445  | 583.086   | 640.782   | AF000143  | 52337.953 | 50250.52  | NM_018211 | 6442.48   | 5323.468  |
| AK023489  | 590.448   | 694.605   | NM_014211 | 1218.425  | 1482.218  | NM_01452C | 9308.109  | 6754.315  |
| AK021561  | 429.69    | 221.003   | NM_000814 | 7670.145  | 7527.958  | NM_002616 | 5253.712  | 4615.072  |
| AL050145  | 572.85    | 484.436   | NM_000453 | 4877.273  | 5491.815  | AK025712  | 42353.387 | 31034.641 |
| AK025222  | 827.625   | 688.61    | J03077    | 34119.871 | 41058.191 | NM_005634 | 4924.693  | 3316.312  |
| Y11609    | 1157.714  | 998.426   | J03048    | 16370.876 | 16563.922 | NM_017757 | 10727.775 | 7390.569  |
| NM_012122 | 17205.598 | 14015.913 | AF116659  | 4700.175  | 6569.439  | NM_002146 | 51260.809 | 42956.07  |
| AF009285  | 3034.744  | 1766.649  | NM_000317 | 24082.07  | 15857.635 | AB007892  | 3473.473  | 2597.019  |
| NM_012125 | 3368.313  | 2677.135  | NM_018376 | 4103.413  | 3145.247  | NM_018207 | 5467.35   | 5437.891  |
| AF056435  | 707.302   | 932.415   | NM_017615 | 889.51    | 1129.66   | NM_000345 | 56116.488 | 64949.93  |
| AB032363  | 673.068   | 390.833   | NM_017438 | 3672.02   | 2503.868  | NM_001862 | 53612.535 | 64910.883 |
| AF009294  | 2912.244  | 2234.02   | U59209    | 4027.92   | 3865.755  | NM_006531 | 7290.933  | 8706.074  |

|            |           |           |           |           |           |            |           |           |
|------------|-----------|-----------|-----------|-----------|-----------|------------|-----------|-----------|
| AK000998   | 1310.041  | 473.662   | NM_020195 | 6580.618  | 5177.3    | AB029021   | 51681.172 | 56115.883 |
| AK001225   | 611.925   | 422.933   | BC002753  | 333.133   | 368.75    | NM_002101  | 2329.994  | 1723.685  |
| AK021684   | 2035.054  | 1630.806  | AK023824  | 7063.083  | 6220.995  | NM_005423  | 1370.107  | 1550.485  |
| AK001060   | 732.69    | 707.482   | AL133069  | 8072.71   | 12941.117 | Z36789     | 859.97    | 1169.386  |
| AK001819   | 1122.419  | 620.631   | AL117574  | 472.899   | 768.285   | J02874     | 12897.242 | 14214.844 |
| AK021480   | 801.861   | 833.569   | AK026055  | 11157.24  | 17310.125 | BF310427   | 18949.959 | 22651.645 |
| AK021726   | 318.702   | 345.186   | AK024126  | 632.886   | 746.761   | N94424     | 954.902   | 1394.457  |
| AL080186   | 564.995   | 433.815   | NM_001516 | 5777.433  | 6060.051  | AA045192   | 5429.813  | 6709.725  |
| NM_005306  | 1561.359  | 1237.5    | NM_002744 | 17489.729 | 17023.988 | H45617     | 1070.147  | 1278.902  |
| NM_001646  | 1269.59   | 1143.04   | NM_015917 | 17252.982 | 14148.507 | M92642     | 10437.277 | 10645.85  |
| AL137327   | 5376.086  | 4733.85   | NM_020397 | 1784.02   | 1571.694  | H-U 44385  | 40761.848 | 34208.516 |
| AK026090   | 841.607   | 792.927   | NM_000061 | 7365.669  | 7171.844  | ID 1654970 | 15793.301 | 13200.462 |
| AF070637   | 351.308   | 376.479   | AB046859  | 42324.418 | 40376.461 | ID 2531132 | 21166.332 | 18034.326 |
| AL137634   | 502.077   | 462.868   | NM_005109 | 12648.873 | 13039.442 | ID 4365538 | 2297.986  | 1694.804  |
| AK024863   | 12046.153 | 9249.933  | AK023573  | 10946.767 | 11195.348 | AA485665   | 921.975   | 644.885   |
| AJ008135   | 4254.967  | 3401.107  | NM_002730 | 4407.131  | 4227.334  | BF125928   | 19533.273 | 14797.239 |
| AK026908   | 9638.224  | 8405.167  | NM_004828 | 2947.323  | 3105.88   | BG571026   | 4420.229  | 3876.58   |
| D17110     | 609.046   | 913.63    | CY3Cy5    | 3577.705  | 800.967   | AA489017   | 22604.508 | 16128.931 |
| AF117338   | 4398.903  | 6044.143  | NM_001824 | 68659.805 | 67829.664 | NM_001140  | 3320.92   | 3939.164  |
| AK025567   | 1037.93   | 858.651   | AF035314  | 1424.378  | 1773.844  | NM_016059  | 525.83    | 311.541   |
| NM_019102  | 935.693   | 789.916   | NM_018036 | 2493.105  | 2931.411  | NM_004843  | 2373.203  | 2323.414  |
| AF086421   | 1392.984  | 922.402   | AF052087  | 1304.794  | 1209.795  | AK022845   | 1667.572  | 1454.147  |
| AK001612   | 870.931   | 750.602   | AF007143  | 5650.752  | 7148.421  | NM_003004  | 749.468   | 1104.651  |
| AF161522   | 4833.794  | 3339.895  | AF147417  | 1447.833  | 1550.459  | S77835     | 2775.258  | 2634.299  |
| AF086028   | 786.273   | 736.545   | AK023656  | 2634.316  | 2475.308  | NM_002985  | 4056.443  | 5181.155  |
| U46119     | 960.348   | 816.204   | AF086511  | 4715.986  | 5867.826  | AB018347   | 42062.02  | 39984.375 |
| unknown (4 | 580.84    | 550.617   | AK022989  | 10483.542 | 11099.748 | AB033073   | 19358.641 | 20478.01  |
| NM_019897  | 321.828   | 255.55    | AK001604  | 6212.144  | 6192.365  | NM_003284  | 12692.63  | 14611.18  |
| AF038188   | 2864.763  | 2261.504  | AF086497  | 1205.923  | 1043.892  | NM_018152  | 1710.832  | 2157.7    |
| AJ227888   | 801.995   | 1089.414  | NM_020141 | 9493.067  | 9047.055  | NM_000319  | 9084.364  | 10592.285 |
| D17046     | 736.081   | 712.709   | NM_006482 | 2696.361  | 2778.256  | NM_003257  | 772.384   | 897.01    |
| NM_017645  | 5530.071  | 4355.863  | NM_001824 | 68367.43  | 60242.262 | NM_012461  | 8371.591  | 9096.544  |
| AJ227864   | 1706      | 1535.599  | SR1       | 70676.273 | 61774.199 | AK001379   | 3786.702  | 4108.627  |
| AF157562   | 6830.116  | 5089.521  | SR3       | 32812.66  | 35681.375 | NM_017450  | 5969.183  | 7583.895  |
| AK021958   | 18009.865 | 16215.253 | SR5       | 4225.057  | 4693.086  | NM_002023  | 1756.314  | 1998.386  |
| M31164     | 4487.974  | 5140.477  | SR7       | 4150.957  | 35775.762 | NM_002839  | 3069.056  | 2170.379  |
| AF113674   | 27548.486 | 26980.629 | SR9       | 15575.391 | 3139.331  | AF190500   | 1468.163  | 1428.409  |
| NM_003511  | 1499.76   | 3533.2    | CY3Cy5    | 2670.455  | 468.473   | NM_001616  | 665.328   | 701.14    |
| NM_003531  | 2907.241  | 3339.185  | U15553    | 12377.646 | 12413.335 | NM_005904  | 1134.294  | 1104.653  |
| L08434     | 493.603   | 851.896   | U52831    | 603.482   | 804.329   | NM_005273  | 37198.141 | 26573.334 |
| NM_017799  | 1768.478  | 1566.984  | Z36829    | 2366.335  | 2187.05   | NM_000524  | 762.095   | 752.027   |
| AL137403   | 485.114   | 424.203   | AK024734  | 13662.095 | 14344.673 | NM_018645  | 303.485   | 315.649   |
| NM_018534  | 1464.613  | 1127.963  | NM_017741 | 2823.611  | 2568.25   | NM_007072  | 6544.129  | 6935.11   |
| AB037847   | 1786.649  | 1566.223  | AK022223  | 657.716   | 565.651   | NM_012320  | 6117.174  | 5149.248  |
| NM_005170  | 7351.832  | 11070.935 | NM_005887 | 6590.274  | 6125.293  | NM_018208  | 4014.133  | 3807.033  |
| S96437     | 1307.43   | 1180.221  | AK024921  | 1049.672  | 1211.669  | NM_015929  | 5902.774  | 5495.265  |
| NM_015176  | 2417.472  | 1950.749  | AL110232  | 1368.853  | 1227.082  | U90653     | 12965.867 | 12987.896 |
| AL353939   | 992.134   | 791.942   | AK026103  | 4372.172  | 4162.211  | NM_000196  | 826.089   | 919.717   |
| AL117573   | 7222.15   | 5302.619  | NM_016353 | 28070.02  | 27170.014 | NM_018339  | 5691.292  | 5906.548  |
| NM_016116  | 629.902   | 571.78    | AK022567  | 1462.055  | 1228.383  | NM_006745  | 26348.762 | 29962.799 |
| NM_000929  | 448.381   | 495.712   | AK023450  | 470.966   | 190.93    | NM_000275  | 1906.154  | 2183.324  |
| NM_018655  | 5979.605  | 8961.086  | AL080280  | 30896.32  | 28376.199 | AK000037   | 3395.115  | 3228.958  |
| NM_005663  | 6004.645  | 5205.558  | AB028947  | 6662.394  | 5706.985  | NM_014760  | 3910.017  | 4859.16   |

|           |           |           |           |           |           |            |           |           |
|-----------|-----------|-----------|-----------|-----------|-----------|------------|-----------|-----------|
| X89960    | 1651.152  | 916.861   | AK022556  | 630.717   | 659.996   | NM_018713  | 2084.387  | 2656.488  |
| NM_00655C | 2238.359  | 1886.031  | AK023437  | 9606.469  | 11911.134 | AJ006268   | 1460.031  | 1923.145  |
| NM_005773 | 427.809   | 611.448   | AK023822  | 1236.155  | 810.409   | AF190864   | 9581.853  | 9646.236  |
| NM_017644 | 14212.494 | 12190.11  | AK024147  | 1571.451  | 1326.44   | NM_001177  | 4783.151  | 5789.034  |
| AB032971  | 443.064   | 785.595   | AK022897  | 1610.505  | 2250.633  | NM_014447  | 2603.734  | 3252.497  |
| NM_002482 | 3954.919  | 2828.9    | AK023556  | 844.532   | 869.699   | NM_002356  | 2115.34   | 2291.511  |
| AL050068  | 778.875   | 887.984   | AK023898  | 12664.457 | 12287.216 | NM_006691  | 2749.81   | 2415.755  |
| U92025    | 1569.726  | 2316.147  | AK021619  | 1379.965  | 1513.286  | NM_001505  | 1564.704  | 1730.112  |
| AB046766  | 357.518   | 907.61    | AK022347  | 430.543   | 457.822   | NM_00371C  | 13491.209 | 12455.824 |
| NM_000519 | 1476.712  | 2038.403  | AK025872  | 1524.342  | 1496.027  | Z83805     | 1022.92   | 875.855   |
| AF086183  | 1048.045  | 971.761   | AF131762  | 11559.57  | 12456.055 | NM_004666  | 1720.731  | 1656.815  |
| AK000525  | 6511.069  | 5521.834  | AY007089  | 4517.578  | 3634.474  | NM_003614  | 11783.002 | 9747.54   |
| AL137434  | 1258.839  | 1071.299  | AK021816  | 15931.783 | 16673.941 | NM_014257  | 10473.876 | 6151.662  |
| Z36795    | 4380.694  | 4770.805  | AK024018  | 623.81    | 309.118   | NM_000025  | 29891.266 | 22791.982 |
| AL080216  | 2356.538  | 1882.87   | D43770    | 23813.213 | 25238.197 | D38521     | 5719.043  | 4235.068  |
| NM_00667C | 11103.979 | 9918.688  | AF085960  | 915.511   | 1292.276  | NM_000403  | 27061.691 | 22590.064 |
| NM_012425 | 8030.599  | 6878.944  | AK021519  | 1350.191  | 1692.161  | NM_018127  | 20546.059 | 20771.904 |
| NM_00275C | 5790.572  | 5189.827  | NM_014254 | 8100.709  | 7416.007  | AB020677   | 18546.908 | 16157.016 |
| NM_000081 | 387.702   | 414.923   | AF086036  | 1657.127  | 1693.08   | AB033097   | 7434.661  | 8306.863  |
| AK024134  | 4186.162  | 2985.723  | AF086010  | 781.865   | 608.669   | NM_000135  | 5585.218  | 5992.74   |
| NM_003014 | 582.533   | 602.989   | U09197    | 2447.592  | 1846.33   | AJ223948   | 10700.565 | 13048.048 |
| NM_01855E | 3131.958  | 2665.127  | AK025218  | 2154.091  | 1928.299  | NM_01621E  | 1135.518  | 1337.854  |
| NM_001974 | 12765.937 | 12653.967 | AJ227899  | 3885.244  | 4016.694  | AK022947   | 2850.951  | 3747.232  |
| NM_013957 | 1250.15   | 1212.653  | AL359607  | 8466.083  | 7071.284  | AL050029   | 2563.037  | 3015.45   |
| NM_00246E | 10191.996 | 9488.99   | AF161371  | 7919.062  | 8634.494  | AL049966   | 925.38    | 1214.853  |
| NM_00302E | 3335.436  | 4464.86   | AK022464  | 5305.796  | 5609.363  | NM_005204  | 11502.006 | 16267.283 |
| NM_00156E | 2377.469  | 2224.573  | AF086230  | 4158.299  | 4747.146  | NM_016203  | 2005.638  | 2761.391  |
| NM_016541 | 999.875   | 1156.035  | AK023408  | 5184.69   | 5863.993  | NM_002755  | 5012.017  | 5732.876  |
| NM_00685E | 8334.157  | 8157.043  | AK000144  | 4049.834  | 3886.581  | NM_007271  | 3385.882  | 5631.901  |
| NM_00140E | 1526.211  | 1287.5    | AK022275  | 1023.64   | 836.264   | NM_00625E  | 4405.192  | 6066.917  |
| NM_00388C | 555.192   | 690.98    | AK000942  | 1304.645  | 1441.486  | BE392143   | 6510.559  | 7427.456  |
| NM_00546E | 497.131   | 508.925   | NM_016349 | 542.445   | 616.129   | NM_005813  | 5521.868  | 4399.061  |
| AF131778  | 760.581   | 902.552   | AL117533  | 3959.608  | 3984.674  | AB037718   | 11704.155 | 10092.084 |
| NM_001562 | 3316.893  | 2044.71   | AK026036  | 1858.253  | 1886.884  | AL389994   | 2197.942  | 1910.781  |
| NM_01327E | 629.777   | 391.944   | AK023422  | 9070.943  | 9103.061  | NM_003905  | 6864.22   | 6564.508  |
| NM_006477 | 2010.881  | 1685.347  | AK022796  | 5125.373  | 4985.958  | NM_001277  | 17288.359 | 13398.817 |
| NM_00288C | 9099.063  | 12425.223 | AF090910  | 317.762   | 541.248   | NM_003655  | 7665.194  | 6828.433  |
| NM_00067E | 8827.563  | 9910.856  | AK095193  | 1975.765  | 1946.877  | NM_001862  | 50696.582 | 62903.793 |
| NM_00106E | 1178.732  | 1101.68   | AK025081  | 2819.562  | 3883.019  | NM_006531  | 6816.312  | 8270.166  |
| NM_004657 | 1065.293  | 1006.702  | AL122088  | 2531.495  | 2865.534  | AB029021   | 54463.617 | 57761.699 |
| NM_006291 | 348.937   | 382.761   | AF116633  | 1264.907  | 1379.616  | NM_002101  | 2430.13   | 2219.993  |
| NM_01817C | 6181.742  | 7088.744  | AF119912  | 2220.736  | 2020.629  | NM_005423  | 1763.82   | 1831.763  |
| NM_003867 | 621.464   | 772.887   | AL137518  | 4429.894  | 4333.303  | Z36789     | 575.098   | 586.302   |
| AL162062  | 1357.809  | 1531.64   | AK023134  | 605.572   | 598.586   | J02874     | 13884.115 | 16754.303 |
| NM_003173 | 8625.061  | 7655.674  | T99941    | 13039.352 | 13875.786 | BF310427   | 17660.533 | 22825.887 |
| NM_00503C | 18498.553 | 20729.26  | AF113678  | 6053.67   | 6022.728  | N94424     | 1064.845  | 1115.613  |
| NM_017584 | 6948.222  | 6876.533  | AL137313  | 68139.578 | 75660.969 | AA045192   | 5419.698  | 7039.712  |
| NM_020355 | 8046.253  | 8423.629  | AB002363  | 11895.315 | 10426.601 | AI521645   | 403.937   | 520.682   |
| NM_02034E | 2241.192  | 1826.033  | NM_005284 | 10716.383 | 11267.576 | H45617     | 1155.804  | 1349.274  |
| NM_006034 | 5579.157  | 6843.334  | AF086351  | 1605.207  | 1618.461  | M92642     | 10865.886 | 12707.698 |
| AB040943  | 2002.358  | 1913.664  | D83199    | 26577.365 | 24709.873 | H-U 44385  | 44692.379 | 41981.984 |
| NM_005201 | 2778.058  | 1940.585  | AK025957  | 1253.145  | 1351.001  | ID 1654970 | 18565.094 | 21582.271 |
| NM_000092 | 1657.868  | 1100.306  | Y16708    | 3264.028  | 3365.128  | ID 2531132 | 22275.254 | 23751.252 |



|           |           |           |           |           |           |            |           |           |
|-----------|-----------|-----------|-----------|-----------|-----------|------------|-----------|-----------|
| NM_019086 | 856.786   | 922.768   | AL157453  | 4106.636  | 3311.8    | ID 4365538 | 2482.549  | 2440.728  |
| NM_018384 | 18280.436 | 16209.331 | NM_019040 | 12791.352 | 15954.71  | AA485665   | 969.183   | 1052.139  |
| NM_001872 | 1546.231  | 1518.784  | NM_005978 | 2866.285  | 3340.293  | BF125928   | 20545.039 | 16970.854 |
| AF282617  | 400.239   | 391.507   | Y16711    | 1518.919  | 1670.4    | BG571026   | 4763.556  | 4115.845  |
| AF157323  | 4156.497  | 4930.393  | AJ272179  | 9197.169  | 8705.331  | AA489017   | 22388.648 | 14955.719 |
| NM_006025 | 2110.918  | 1621.553  | AJ007015  | 4495.377  | 5482.306  | NM_004843  | 2328.8    | 2315.859  |
| NM_005877 | 17539.574 | 12572.814 | AL049317  | 3331.291  | 3319.178  | AK022845   | 1614.063  | 1400.374  |
| AK024458  | 952.596   | 812.85    | AL050090  | 2052.501  | 2273.192  | NM_003004  | 804.606   | 1451.047  |
| NM_003338 | 6636.711  | 7957.095  | AF086309  | 1072.064  | 1145.025  | S77835     | 1279.654  | 1395.697  |
| NM_013396 | 7269.652  | 5438.717  | AF238870  | 2230.044  | 2106.561  | NM_002985  | 2667.831  | 3616.891  |
| NM_005151 | 643.847   | 707.053   | AK026279  | 4608.883  | 3792.324  | AB018347   | 34008.285 | 32343.324 |
| D26069    | 23027.189 | 30815.143 | AF130094  | 20825.186 | 20830.537 | AB033073   | 16669.699 | 17829.074 |
| NM_005837 | 22401.756 | 30545.914 | AK026673  | 4617.969  | 4890.455  | NM_003284  | 13156.996 | 15249.394 |
| NM_016625 | 12130.67  | 7362.658  | AF170935  | 19612.094 | 18948.514 | NM_018152  | 2115.433  | 2373.282  |
| NM_017493 | 3670.078  | 3224.448  | AB007978  | 2382.095  | 2845.368  | NM_000319  | 9532.028  | 11343.59  |
| NM_006136 | 16878.141 | 13000.15  | AF217970  | 1901.447  | 1950.465  | NM_003257  | 800.815   | 1378.288  |
| AF237772  | 2507.032  | 1197.969  | AF086297  | 4011.112  | 5076.531  | NM_012461  | 8707.042  | 10581.491 |
| AK025934  | 4665.88   | 3486.683  | AK025455  | 3735.153  | 4278.337  | AK001379   | 3446.688  | 4647.221  |
| AJ008154  | 3041.044  | 2920.093  | AK026799  | 22632.777 | 20813.783 | NM_017450  | 5727.311  | 7651.788  |
| NM_003487 | 12083.733 | 6461.491  | NM_014860 | 2012.77   | 2593.623  | NM_002023  | 1724.71   | 2037.878  |
| NM_006887 | 9027.832  | 6427.424  | AK022549  | 2402.448  | 2892.86   | NM_002839  | 3374.297  | 3335.852  |
| U90919    | 6253.707  | 5069.824  | NM_018157 | 925.238   | 1016.552  | AF190500   | 1439.412  | 1729.786  |
| NM_006177 | 5627.136  | 4948.958  | Z70714    | 7202.503  | 6802.463  | NM_001616  | 587.39    | 849.831   |
| AL137286  | 8417.224  | 7230.418  | AK021640  | 17010.879 | 14429.406 | NM_005904  | 1023.513  | 799.191   |
| NM_016358 | 2756.254  | 2217.021  | NM_016565 | 61140.289 | 60044.648 | NM_005273  | 40164.426 | 30764.297 |
| NM_016275 | 22010.213 | 20380.145 | U84509    | 6279.681  | 7225.617  | NM_000524  | 697.629   | 841.91    |
| NM_020418 | 3999.034  | 3898.494  | AK002036  | 5615.785  | 4996.755  | NM_018207  | 4407.545  | 3950.023  |
| NM_013293 | 7627.319  | 7282.004  | U84512    | 827.335   | 724.029   | NM_000345  | 52936.922 | 57086.438 |
| AF315592  | 9775.88   | 12848.619 | AK025775  | 6556.498  | 6333.532  | NM_018208  | 3843.639  | 3063.44   |
| AF095844  | 7928.623  | 6722.194  | AB046791  | 3825.795  | 3754.309  | NM_015929  | 6182.158  | 6321.502  |
| NM_015833 | 5382.191  | 7005.187  | AF043469  | 2908.19   | 3158.772  | U90653     | 12666.115 | 14107.24  |
| NM_000986 | 46976.18  | 58728.527 | AL109671  | 4220.967  | 4540.323  | NM_000196  | 916.029   | 1045.309  |
| AK026760  | 12658.459 | 18714.398 | NM_012375 | 1132.266  | 1249.205  | NM_000275  | 1887.73   | 2344.898  |
| NM_005617 | 675.657   | 866.096   | AK022008  | 3997.07   | 3759.828  | AK000037   | 4315.976  | 4133.213  |
| NM_014772 | 7187.895  | 12041.019 | NM_018186 | 2389.897  | 2213.688  | NM_014760  | 4466.212  | 5393.066  |
| AK025248  | 7332.777  | 9226.146  | AJ132194  | 652.14    | 486.555   | NM_018713  | 3594.593  | 5248.444  |
| NM_004539 | 33223.195 | 29814.186 | AL080188  | 7937.846  | 5412.405  | AJ006268   | 1557.799  | 2068.348  |
| NM_006428 | 25606.055 | 19527.254 | NM_002390 | 5576.767  | 5977.214  | AF190864   | 9363.945  | 11594.688 |
| NM_004280 | 18953.447 | 13905.846 | NM_006142 | 4711.584  | 4319.864  | NM_001177  | 4795.214  | 10861.101 |
| AF110399  | 4869.048  | 3535.588  | NM_014910 | 15501.979 | 16546.516 | NM_014447  | 2552.23   | 3274.862  |
| AK027094  | 9960.002  | 8948.599  | AK001064  | 8126.849  | 8032.269  | NM_002356  | 2124.099  | 2278.497  |
| AF174600  | 11130.76  | 11226.935 | AB029031  | 4627.857  | 4806.504  | NM_006691  | 2700.478  | 2370.053  |
| AK001003  | 2013.749  | 1797.957  | NM_001294 | 11710.241 | 13802.283 | NM_001505  | 1414.163  | 1317.632  |
| NM_002800 | 25285.441 | 17837.936 | AF302786  | 5574.051  | 5434.579  | NM_003710  | 15507.011 | 17377.424 |
| NM_000775 | 2185.631  | 2036.703  | AL122083  | 16044.867 | 15347.972 | Z83805     | 1125.386  | 1066.217  |
| AB032981  | 1771.574  | 1936.48   | NM_019098 | 17182.434 | 11710.526 | NM_004666  | 1816.793  | 1646.748  |
| BF217864  | 4443.525  | 4544.02   | AK022212  | 59188.926 | 58981.82  | NM_003614  | 9615.71   | 8644.577  |
| NM_005917 | 43159.5   | 35694.715 | X64974    | 10527.053 | 9241.607  | NM_014257  | 10757.823 | 9213.89   |
| NM_007052 | 1840.076  | 1646.42   | NM_000834 | 15004.335 | 12226.527 | NM_001140  | 1564.519  | 1725.716  |
| BC017044  | 1716.616  | 2033.653  | NM_006485 | 54497.012 | 56049.477 | NM_016059  | 477.474   | 342.516   |
| AV758498  | 6155.87   | 6034.262  | NM_012459 | 6070.772  | 5581.643  | NM_000403  | 28570.553 | 28976.938 |
| NM_020196 | 4775.102  | 4939.463  | NM_012360 | 1158.026  | 1371.761  | NM_018127  | 20270.465 | 23879.109 |
| AB002299  | 297.413   | 249.636   | AL137268  | 5396.705  | 5304.211  | AB020677   | 16771.984 | 15687.521 |

|             |           |           |           |           |           |            |           |           |
|-------------|-----------|-----------|-----------|-----------|-----------|------------|-----------|-----------|
| AK024113    | 1132.113  | 1104.6    | AK001130  | 833.492   | 860.41    | AB033097   | 7242.135  | 7508.994  |
| NM_018657   | 4665.231  | 6446.942  | AK022398  | 1977.087  | 1835.039  | NM_000135  | 5137.853  | 4693.46   |
| L40410      | 22484.98  | 24673.012 | AK024109  | 9685.247  | 9466.074  | NM_016218  | 932.049   | 1082.434  |
| NM_007055   | 6011.753  | 7096.991  | AF088048  | 3068.224  | 3518.588  | AK022947   | 2634.864  | 3370.874  |
| NM_016652   | 6900.688  | 9499.861  | AK001143  | 4672.543  | 3905.236  | AL050029   | 3031.678  | 4283.68   |
| NM_016310   | 35531.918 | 47295.742 | AK001701  | 6495.635  | 5356.26   | AL049966   | 1694.969  | 2430.501  |
| AK021562    | 2234.468  | 2948.292  | AK022205  | 3113.985  | 2238.381  | NM_005204  | 11706.893 | 15142.075 |
| BC006560    | 1264.416  | 1540.43   | AK024955  | 68444.297 | 65754.672 | NM_016203  | 1676.096  | 2602.921  |
| NM_006295   | 1347.01   | 986.628   | NM_016580 | 4339.201  | 4363.973  | NM_002755  | 4975.382  | 5870.318  |
| AF060938    | 22867.479 | 23024.721 | AF169693  | 3782.043  | 3941.878  | NM_007271  | 3372.463  | 4071.022  |
| NM_001973   | 4469.125  | 3941.139  | L23206    | 19238.236 | 18859.701 | NM_006255  | 4485.527  | 6174.586  |
| NM_014465   | 14479.328 | 12823.459 | NM_012192 | 7037.04   | 7694.465  | BE392143   | 6792.514  | 7706.858  |
| NM_006855   | 14030.97  | 15129.602 | NM_006293 | 4764.664  | 4669.209  | NM_005813  | 5039.815  | 4199.102  |
| X52350      | 54569.742 | 56685.285 | NM_007229 | 11025.237 | 14329.2   | AB037718   | 11287.431 | 10533.518 |
| AF071554    | 972.318   | 1075.08   | AB011105  | 6703.347  | 6443.876  | AL389994   | 2197.741  | 2487.206  |
| NM_002147   | 461.644   | 361.422   | NM_002213 | 2594.363  | 2148.348  | NM_003905  | 6958.667  | 8291.277  |
| NM_017685   | 1739.709  | 1789.182  | NM_018970 | 925.247   | 1017.432  | NM_001277  | 17738.252 | 16007.299 |
| AK025612    | 8645.313  | 10474.791 | NM_004814 | 6336.913  | 7015.676  | NM_003655  | 8345.966  | 7684.881  |
| NM_012265   | 3934.753  | 4432.842  | D86976    | 22317.922 | 17400.871 | NM_007072  | 5038.304  | 4633.101  |
| NM_012203   | 2508.987  | 3272.548  | AF307080  | 2320.381  | 2506.562  | NM_012320  | 4233.629  | 4789.403  |
| NM_003295   | 975.917   | 886.786   | NM_004057 | 8055.568  | 8224.03   | AB029021   | 50465.801 | 56521.711 |
| NM_004735   | 16672.123 | 22445.639 | NM_018971 | 3147.06   | 3030.63   | NM_002101  | 2763.596  | 2491.06   |
| NM_006895   | 1152.698  | 1507.714  | K03175    | 2041.785  | 1770.39   | NM_005423  | 1413.323  | 1765.224  |
| NM_006455   | 6038.304  | 7390.65   | NM_003015 | 5304.901  | 5211.052  | Z36789     | 724.446   | 837.887   |
| AA427949    | 432.469   | 491.345   | NM_003711 | 2217.132  | 2161.508  | J02874     | 14496.449 | 17422.568 |
| D50373      | 1370.67   | 2050.955  | NM_006495 | 7963.25   | 8180.934  | BF310427   | 18012.266 | 19114.584 |
| AA488757    | 2404.51   | 3298.566  | NM_000825 | 1125.845  | 1181.821  | N94424     | 1531.812  | 1499.357  |
| AI394286    | 204.884   | 494.731   | NM_004825 | 7940.423  | 7321.387  | AA045192   | 5467.091  | 6049.372  |
| H07071      | 681.33    | 919.47    | NM_013314 | 5720.91   | 6050.977  | H45617     | 1297.238  | 1424.745  |
| M25322      | 1569.703  | 1932.026  | NM_002072 | 802.608   | 623.606   | M92642     | 11370.767 | 15140.219 |
| AA436187    | 303.72    | 466.764   | NM_003182 | 1251.283  | 872.798   | H-U 44385  | 41302.328 | 42521.402 |
| H-L 27586 I | 5051.824  | 5338.434  | NM_004431 | 38026.898 | 47795.133 | ID 1654970 | 17324.594 | 20028.182 |
| ID 214180   | 1867.198  | 1350.154  | NM_002012 | 7918.525  | 7811.743  | ID 2531132 | 21398.842 | 24548.277 |
| ID 1867426  | 8645.238  | 7745.502  | NM_002070 | 34735.371 | 40523.613 | ID 4365538 | 2558.248  | 3363.483  |
| ID 396450   | 718.358   | 747.104   | AF227969  | 10174.774 | 14235.323 | AA485665   | 947.857   | 1282.223  |
| W99328      | 3625.625  | 3032.993  | AF116657  | 4023.031  | 5492.041  | BF125928   | 20376.316 | 19591.824 |
| AI434176    | 2347.756  | 2719.497  | NM_004102 | 2097.115  | 2152.698  | BG571026   | 5061.185  | 4876.548  |
| H08563      | 567.857   | 590.127   | NM_003944 | 57130.801 | 59485.137 | AA489017   | 21741.045 | 21086.793 |
| BE735403    | 2555.214  | 2237.402  | NM_016120 | 61896.047 | 62879.313 | NM_000025  | 24092.807 | 21494.211 |
| NM_002631   | 26471.199 | 23728.234 | NM_002893 | 2982.844  | 3411.357  | D38521     | 8088.224  | 18078.16  |
| AB033109    | 5698.403  | 5638.327  | NM_002393 | 48623.836 | 55603.066 | NM_018152  | 1855.276  | 1595.484  |
| NM_002053   | 9124.192  | 12921.835 | NM_002665 | 7440.366  | 6819.39   | NM_000315  | 8349.403  | 8481.516  |
| NM_006885   | 8063.184  | 8542.892  | AB014600  | 12762.606 | 13760.404 | NM_003257  | 923.645   | 1339.502  |
| NM_002435   | 3680.797  | 3775.174  | NM_018312 | 9941.627  | 9755.782  | NM_012461  | 8209.278  | 9312.68   |
| NM_014585   | 1593.387  | 2238.37   | X98259    | 3140.324  | 2851.286  | AK001379   | 3855.264  | 4564.92   |
| NM_000755   | 1108.989  | 1051.904  | NM_014792 | 1130.146  | 1167.654  | NM_017450  | 5181.86   | 5607.328  |
| AK023334    | 3036.152  | 3352.353  | U05255    | 2344.028  | 2149.795  | NM_002023  | 1756.864  | 2083.388  |
| NM_002563   | 50378.852 | 49599.199 | X98260    | 13244.231 | 12623.289 | NM_002835  | 2596.906  | 2726.114  |
| NM_002437   | 4175.543  | 3608.607  | NM_007217 | 11619.354 | 10693.362 | AF190500   | 1803.898  | 2387.89   |
| D79991      | 5100.71   | 5805.045  | NM_014777 | 52246.008 | 54580.277 | NM_005904  | 1355.839  | 1464.916  |
| AK022425    | 6913.743  | 9775.331  | NM_001102 | 8383.356  | 8270.045  | NM_005273  | 40282.031 | 38968.227 |
| NM_000054   | 4198.415  | 6602.267  | NM_003803 | 16814.348 | 22007.008 | NM_000524  | 1185.321  | 1527.978  |
| NM_014713   | 19502.32  | 24834.643 | NM_002815 | 64195.492 | 61141.105 | NM_006575  | 16140.718 | 19678.139 |

|           |           |           |           |           |           |           |           |           |
|-----------|-----------|-----------|-----------|-----------|-----------|-----------|-----------|-----------|
| NM_001812 | 3702.071  | 3627.26   | NM_001937 | 25377.793 | 28476.57  | AB035266  | 20693.682 | 25624.197 |
| NM_014785 | 2041.127  | 2811.154  | AK024778  | 1518.119  | 1311.053  | NM_003744 | 8059.113  | 7209.716  |
| AK025175  | 504.197   | 816.634   | AL157500  | 523.872   | 599.206   | NM_006378 | 4113.144  | 3991.913  |
| NM_005811 | 6833.487  | 6787.776  | AK025498  | 4251.59   | 4511.325  | NM_018132 | 1429.895  | 1514.029  |
| NM_005764 | 770.835   | 786.515   | NM_001395 | 48860.676 | 56254.93  | NM_018207 | 4344.504  | 3792.579  |
| NM_016362 | 4479.352  | 4165.175  | NM_002068 | 1972.286  | 2764.916  | NM_000345 | 53718.066 | 64586.77  |
| NM_004214 | 15847.815 | 11135.722 | NM_019854 | 1707.105  | 1926.497  | NM_001862 | 53687.082 | 63422.07  |
| NM_004329 | 8372.932  | 7019.139  | NM_013338 | 4846.526  | 4817.384  | NM_006531 | 4065.838  | 8767.727  |
| NM_002836 | 6339.82   | 5411.643  | NM_014671 | 23938.273 | 25186.979 | NM_002779 | 8211.062  | 8215.973  |
| NM_020167 | 928.548   | 743.878   | NM_001814 | 11919.988 | 12707.083 | L40397    | 25179.918 | 25986.539 |
| NM_016058 | 24804.686 | 22346.918 | NM_018439 | 1218.441  | 1427.335  | NM_020198 | 41786.965 | 56400.02  |
| NM_014005 | 1538.982  | 1298.333  | NM_005656 | 6323.692  | 6083.347  | AA098879  | 1183.69   | 1258.318  |
| NM_006033 | 2108.274  | 2955.332  | NM_006012 | 13118.188 | 12960.646 | AF070525  | 14291.313 | 16277.089 |
| NM_004837 | 9683.771  | 10832.215 | NM_002151 | 4685.33   | 5159.657  | NM_001177 | 4606.444  | 5069.735  |
| NM_000370 | 3202.466  | 3918.148  | NM_014889 | 4918.274  | 5248.423  | NM_014447 | 2407.254  | 2881.798  |
| BE865893  | 1832.589  | 1616.3    | AF173935  | 1407.873  | 1174.383  | NM_002356 | 2344.912  | 3013.496  |
| NM_003123 | 32184.879 | 33009.996 | AK025322  | 50066.91  | 51528.594 | NM_006691 | 4365.362  | 5650.883  |
| AY005822  | 1763.855  | 1761.286  | NM_017887 | 7692.309  | 6808.942  | NM_001505 | 3118.622  | 3787.3    |
| NM_018129 | 11474.364 | 12566.05  | NM_017650 | 1079.282  | 1113.726  | NM_003710 | 13626.875 | 14900.564 |
| AF289022  | 8861.166  | 9227.138  | NM_000526 | 16759.016 | 18322.318 | Z83805    | 1346.761  | 1548.814  |
| AB002326  | 695.236   | 867.687   | AF007152  | 4217.488  | 3848.82   | NM_004666 | 1706.611  | 1858.444  |
| M17252    | 444.951   | 685.465   | NM_017575 | 1553.439  | 1672.232  | NM_003614 | 14510.364 | 17846.639 |
| NM_016025 | 20780.633 | 21715.283 | AL122100  | 8002.428  | 8026.636  | NM_014257 | 15011.14  | 17725.777 |
| NM_013319 | 7181.778  | 10454.737 | NM_005310 | 12598.891 | 10869.571 | NM_001140 | 1913.885  | 2366.618  |
| NM_020410 | 9183.938  | 12258.251 | NM_014423 | 16906.361 | 14719.242 | NM_016059 | 490.555   | 634.417   |
| NM_000453 | 2619.833  | 2853.077  | BE904126  | 62993.418 | 57912.363 | NM_004843 | 2267.612  | 2556.847  |
| J03048    | 9046.488  | 16111.08  | AF272380  | 62737.234 | 54987.254 | AK022845  | 1438.006  | 1429.166  |
| NM_004583 | 1677.939  | 2302.862  | NM_033288 | 809.597   | 1004.805  | NM_003004 | 485.962   | 1151.749  |
| NM_001103 | 677.437   | 794.939   | NM_003269 | 742.367   | 753.253   | S77835    | 1406.737  | 2080.637  |
| AF228710  | 11182.611 | 11935.257 | AK000102  | 3366.221  | 3444.18   | NM_002985 | 2800.491  | 2952.051  |
| NM_018399 | 1024.022  | 967.936   | AB040916  | 7658.324  | 7725.198  | AB018347  | 37494.059 | 33494.242 |
| AY007131  | 45081.941 | 42169.344 | NM_005587 | 5877.26   | 5820.643  | AB033073  | 14051.97  | 13505.38  |
| U61735    | 9086.459  | 6336.065  | AF038362  | 6997.914  | 6298.212  | NM_003284 | 8932.208  | 10916.983 |
| NM_001144 | 36658.145 | 29294.854 | NM_005195 | 48761.582 | 56859.496 | NM_003909 | 6858.035  | 8590.095  |
| AK023766  | 20799.236 | 17353.387 | NM_005481 | 3464.486  | 3378.551  | NM_001277 | 23571.213 | 22789.295 |
| NM_001897 | 1307.346  | 1281.42   | NM_004715 | 15434.518 | 16002.595 | NM_003659 | 10621.938 | 12716.948 |
| NM_003853 | 1185.972  | 1273.915  | L40392    | 5333.459  | 3998.671  | NM_007072 | 6713.999  | 9658.923  |
| NM_018376 | 9938.605  | 11533.64  | BF541482  | 1475.384  | 1367.268  | NM_012320 | 5125.834  | 4544.976  |
| NM_017615 | 2565.718  | 2510.25   | NM_001007 | 57933.273 | 56907.371 | NM_018208 | 4157.315  | 3825.579  |
| NM_017438 | 11168.121 | 9552.852  | NM_003017 | 13494.896 | 13540.355 | NM_015929 | 5638.267  | 6231.428  |
| U59209    | 12163.629 | 13014.747 | NM_020366 | 8346.48   | 7683.015  | U90653    | 13206.664 | 16541.664 |
| NM_020195 | 11988.344 | 8753.937  | AK021608  | 5191.679  | 6337.767  | NM_000196 | 1468.004  | 2167.212  |
| BC002753  | 1285.319  | 955.738   | NM_004297 | 4841.845  | 4163.062  | NM_018339 | 6260.647  | 7456.137  |
| AK023824  | 3939.594  | 4913.219  | NM_006044 | 17395.332 | 16945.525 | NM_006745 | 24596.057 | 30937.607 |
| AL133069  | 9872.61   | 10100.959 | NM_003635 | 13977.441 | 12261.879 | NM_000275 | 1893.265  | 2055.827  |
| AL117574  | 1435.622  | 1540.143  | NM_000662 | 3244.314  | 3036.606  | AK000037  | 3173.809  | 3059.184  |
| AK026055  | 17365.48  | 20018.678 | NM_000292 | 4199.18   | 4737.335  | NM_014760 | 4069.505  | 4591.765  |
| AK024126  | 1726.237  | 2525.101  | NM_003689 | 61689.492 | 60115.152 | NM_018398 | 2328.945  | 2633.521  |
| NM_001516 | 9405.51   | 10666.352 | NM_016173 | 2000.94   | 2402.566  | NM_002560 | 53467.48  | 61883.883 |
| NM_002744 | 7016.076  | 7319.855  | NM_002875 | 8009.654  | 9677.739  | NM_014404 | 5564.729  | 6008.27   |
| NM_015917 | 25336.59  | 23921.447 | NM_004427 | 21467.434 | 23721.297 | NM_018713 | 1895.082  | 2387.733  |
| NM_020397 | 1343.134  | 1791.914  | U90549    | 12204.973 | 11555.871 | NM_015947 | 15397.736 | 16048.213 |
| NM_000061 | 13559.099 | 12706.526 | NM_013240 | 22803.824 | 21861.545 | NM_002042 | 53927.746 | 60020.441 |

|             |           |           |           |           |           |           |           |           |
|-------------|-----------|-----------|-----------|-----------|-----------|-----------|-----------|-----------|
| AB046859    | 3642.645  | 3888.326  | NM_015874 | 29320.572 | 27724.139 | AB028944  | 919.04    | 843.89    |
| NM_005109   | 8455.213  | 8944.084  | NM_004965 | 60768.648 | 56675.781 | AJ006268  | 1685.387  | 1729.797  |
| AK023573    | 11754.157 | 9981.818  | AF312393  | 54803.879 | 50468.41  | M74089    | 7666.653  | 7080.814  |
| NM_002730   | 5755.95   | 4527.741  | AF272898  | 23912.793 | 23902.939 | AF190864  | 9396.823  | 9212.68   |
| NM_004828   | 6338.519  | 5464.091  | AB037817  | 2678.537  | 2672.676  | NM_000025 | 31599.678 | 37811.98  |
| AB011540    | 7901.298  | 7539.099  | AB032951  | 27149.471 | 27870.051 | D38521    | 6309.558  | 6128.263  |
| NM_000040   | 1751.366  | 1604.864  | NM_003417 | 597.934   | 747.205   | NM_000403 | 31297.252 | 28673.658 |
| NM_004631   | 7482.856  | 8350.936  | NM_005149 | 17034.344 | 15224.311 | NM_018127 | 20504.848 | 24358.43  |
| NM_012268   | 3480.309  | 5101.172  | AK024073  | 1794.932  | 1636.133  | AB020677  | 18260.537 | 21298.641 |
| NM_012203   | 2562.545  | 3043.056  | NM_018083 | 5672.677  | 4876.965  | AB033097  | 6765.589  | 8470.254  |
| NM_003296   | 770.656   | 676.897   | AL110188  | 19665.604 | 18303.621 | NM_000135 | 5478.43   | 6221.619  |
| NM_004736   | 14573.639 | 17396.285 | D70834    | 47552.008 | 45473.707 | AJ223948  | 10260.829 | 13454.273 |
| NM_006895   | 842.087   | 1102.496  | NM_000970 | 62418.902 | 58159.238 | NM_016218 | 1566.241  | 1864.632  |
| NM_006458   | 5809.608  | 6268.51   | NM_012465 | 4384.953  | 4299.479  | AK022947  | 2703.989  | 2704.384  |
| AA427949    | 337.111   | 791.013   | M60499    | 3950.706  | 4139.711  | AL050029  | 2604.626  | 3035.326  |
| D50373      | 1329.019  | 1765.63   | NM_001614 | 59747.746 | 64541.113 | AL049966  | 864.371   | 1153.019  |
| AA488757    | 1602.398  | 2042.674  | NM_000366 | 1329.33   | 1513.5    | NM_005204 | 11404.953 | 12955.759 |
| AA205399    | 342.64    | 351.551   | NM_003833 | 56114.348 | 58047.484 | NM_016203 | 1818.394  | 1838.068  |
| H07071      | 901.011   | 935.237   | AK000868  | 29379.904 | 30120.881 | NM_002758 | 4699.756  | 4139.628  |
| M25322      | 1285.933  | 1497.653  | NM_001233 | 5508.327  | 6356.976  | NM_007271 | 3528.099  | 3551.065  |
| H-L 27586 I | 4997.073  | 5387.809  | NM_001234 | 2873.406  | 3140.22   | NM_006255 | 4920.398  | 5185.486  |
| ID 214180   | 1896.798  | 2517.348  | BF679789  | 16975.4   | 18738.262 | BE392143  | 6186.387  | 6026.78   |
| ID 1867426  | 8516.663  | 7431.72   | H97792    | 28255.908 | 32963.617 | NM_005813 | 5788.202  | 4701.124  |
| ID 396450   | 741.68    | 1042.058  | L33404    | 1442.43   | 1253.161  | AB037718  | 12967.561 | 11157.724 |
| W99328      | 2706.565  | 3797.829  | M13509    | 9128.11   | 8589.799  | AL389994  | 2172.145  | 2386.337  |
| AI434176    | 2558.308  | 3669.801  | X04076    | 8823.521  | 11413.173 | CY3Cy5    | 5457.157  | 266.519   |
| H08563      | 538.455   | 541.499   | W95082    | 614.086   | 597.926   | NM_000588 | 28941.365 | 23651.025 |
| BE735403    | 2385.417  | 2148.85   | AA485362  | 5251.338  | 4534.357  | AF143872  | 37531.805 | 23755.061 |
| NM_001718   | 1435.361  | 1322.607  | AJ222801  | 22244.043 | 20837.826 | AF143326  | 4083.472  | 1598.572  |
| AF116659    | 2527.916  | 1888.482  | W72207    | 32106.709 | 28869.742 | AL049229  | 3976.838  | 2326.057  |
| NM_000317   | 20900.471 | 12753.462 | BI772354  | 2584.995  | 2271.671  | NM_018306 | 81565.047 | 63143.184 |
| NM_006889   | 6956.958  | 6840.917  | AA733033  | 3821.678  | 3195.706  | AK000155  | 1693.54   | 1539.811  |
| NM_002438   | 3347.401  | 2839.299  | AA583574  | 3901.622  | 3039.934  | AL389937  | 5268.224  | 8307.672  |
| NM_014589   | 1309.107  | 1221.601  | U67733    | 901.503   | 687.949   | AK025201  | 5891.854  | 6367.856  |
| NM_000758   | 943.468   | 891.036   | AI690184  | 62520.785 | 59525.75  | AK021927  | 1139.703  | 1687.667  |
| AK023334    | 2704.696  | 2311.612  | T48692    | 1365.51   | 1165.488  | AK022995  | 3526.117  | 6164.913  |
| NM_002563   | 43167.063 | 38339     | AA927490  | 4181.851  | 3703.668  | NM_000588 | 27412.529 | 37141.359 |
| NM_002437   | 3216.936  | 2961.352  | NM_003779 | 1805.318  | 1569.556  | NM_000710 | 726.142   | 1261.028  |
| D79991      | 5328.347  | 4940.85   | NM_020164 | 23117.293 | 21381.219 | SR3       | 44745.516 | 61459.832 |
| AK022425    | 5748.351  | 5797.015  | AK023521  | 20735.793 | 22489.244 | CY3Cy5    | 5455.97   | 216.992   |
| NM_000054   | 3666.738  | 3958.225  | NM_014267 | 35153.496 | 35725.188 | L33813    | 575.385   | 670.747   |
| NM_014713   | 18502.961 | 18523.447 | NM_001481 | 918.96    | 719.279   | L13433    | 2876.015  | 1633.049  |
| NM_001812   | 3946.872  | 3396.955  | U30872    | 4163.882  | 5116.203  | NM_007220 | 2383.609  | 1775.723  |
| NM_014785   | 2100.121  | 2808.462  | AF111783  | 869.229   | 602.913   | NM_017777 | 3246.138  | 2463.491  |
| NM_005811   | 7069.119  | 8091.92   | NM_020469 | 12361.441 | 12731.388 | AK001499  | 6456.093  | 4275.58   |
| NM_005764   | 1121.596  | 1337.071  | NM_002639 | 3204.966  | 3611.383  | AK026852  | 2317.323  | 2637.622  |
| NM_016362   | 4646.871  | 6190.401  | NM_014734 | 6879.316  | 6695.883  | AK021629  | 2289.588  | 2663.79   |
| NM_004214   | 16895.482 | 20579.365 | NM_002289 | 4406.64   | 3975.71   | AL110257  | 67962.453 | 64447.852 |
| NM_004329   | 8969.053  | 11525.595 | AK026408  | 4470.464  | 4987.634  | AB013384  | 6400.054  | 8607.524  |
| NM_002836   | 6098.486  | 6208.687  | NM_005025 | 884.256   | 930.247   | AK024824  | 5165.858  | 8323.815  |
| NM_020167   | 897.822   | 985.663   | NM_006307 | 2438.387  | 2288.133  | AK024270  | 7779.2    | 10009.073 |
| NM_016058   | 22053.314 | 19244.086 | M74782    | 13186.31  | 9588.367  | AK023060  | 5547.049  | 11268.722 |
| NM_000370   | 3739.734  | 3667.014  | NM_017818 | 7130.309  | 6345.415  | AK024242  | 35491.648 | 31918.221 |

|           |           |           |           |           |           |           |           |           |
|-----------|-----------|-----------|-----------|-----------|-----------|-----------|-----------|-----------|
| BE865893  | 1125.904  | 1159.355  | NM_020433 | 2995.362  | 2800.551  | AK024559  | 2783.595  | 2676.591  |
| NM_003123 | 25422.586 | 21797.424 | NM_001767 | 979.444   | 1045.893  | AK024851  | 3009.901  | 2372.952  |
| AY005822  | 1666.172  | 1741.765  | AF028823  | 10885.426 | 11815.695 | AK024943  | 1026.904  | 718.706   |
| NM_018129 | 11456.72  | 12646.671 | NM_004970 | 625.812   | 492.172   | AK024995  | 829.241   | 673.614   |
| AF289022  | 9771.2    | 10095.93  | NM_004295 | 61175.23  | 56831.559 | AK022628  | 65863.453 | 65463.207 |
| AB002326  | 892.414   | 886.081   | NM_002087 | 40879.738 | 47377.031 | AK021737  | 18654.865 | 12946.018 |
| M17252    | 469.628   | 528.515   | AB023154  | 2660.928  | 1998.105  | AL357454  | 1127.928  | 1358.877  |
| NM_016025 | 21396.008 | 19402.691 | NM_014585 | 5509.109  | 5698.671  | AK026295  | 3220.904  | 4152.333  |
| NM_013319 | 6839.84   | 6962.601  | AF200815  | 1572.078  | 1432.71   | AK022346  | 1007.61   | 1202.456  |
| NM_020410 | 7971.639  | 7531.205  | NM_001056 | 1972.363  | 2107.78   | AK025007  | 4340.405  | 4556.926  |
| NM_000453 | 2287.789  | 2261.421  | AY026461  | 6210.692  | 6687.5    | NM_016486 | 14330.148 | 20635.313 |
| J03048    | 6344.32   | 9570.295  | AK025708  | 8598.68   | 9450.891  | AL117601  | 1250.302  | 2420.375  |
| NM_004583 | 2145.004  | 2415.33   | NM_000405 | 2340.06   | 2834.638  | AK026490  | 67108.875 | 64404.551 |
| NM_001103 | 801.798   | 917.473   | NM_005564 | 60347.375 | 60674.535 | AJ227861  | 6782.435  | 9658.405  |
| AF228710  | 10326.736 | 12917.326 | NM_004508 | 6311.145  | 6779.735  | AJ001020  | 1191.878  | 1783.772  |
| NM_018399 | 1091.897  | 1285.174  | AL137619  | 16308.784 | 16747.838 | AJ001875  | 5498.455  | 6787.254  |
| AY007131  | 43763.492 | 55797.57  | NM_000085 | 475.05    | 452.639   | AK002028  | 61002.984 | 56580.301 |
| U61735    | 8508.163  | 11412.831 | AB007859  | 2117.545  | 2493.661  | AL050127  | 7125.636  | 4929.876  |
| NM_001144 | 41396.008 | 47640.078 | NM_006754 | 1326.075  | 1360.046  | AK024805  | 13570.321 | 8103.849  |
| AK023766  | 23244.51  | 23635.959 | NM_001127 | 5754.148  | 6176.42   | AK001423  | 3152.772  | 1129.518  |
| AB033109  | 5427.988  | 5104.367  | NM_012430 | 6118.104  | 7444.054  | AK021989  | 1304.994  | 793.151   |
| NM_002053 | 8360.123  | 7954.518  | NM_003917 | 60002.602 | 55283.633 | NM_018625 | 4536.716  | 4996.907  |
| NM_017438 | 10599.474 | 9723.924  | NM_007077 | 9061.349  | 8505.493  | AK023407  | 839.249   | 1350.505  |
| U59209    | 11462.425 | 9644.181  | NM_002956 | 5818.556  | 6009.959  | AK022298  | 10890.083 | 16578.406 |
| NM_020195 | 11699.384 | 9221.055  | AB018739  | 4019.929  | 3764.131  | AJ277441  | 65836.414 | 64493.367 |
| BC002753  | 1010.192  | 671.824   | NM_006750 | 61539.875 | 56169.414 | AK025784  | 64784.656 | 57661.266 |
| AK023824  | 3900.973  | 4379.191  | AK001913  | 6416.951  | 6712.209  | U07199    | 10234.471 | 7384.942  |
| AL133069  | 10142.225 | 11323.406 | NM_004292 | 3859.068  | 3918.841  | AK023713  | 2566.968  | 1973.062  |
| AL117574  | 1300.708  | 1956.922  | NM_015484 | 8051.328  | 8336.154  | X81445    | 2494.533  | 1602.703  |
| AK026055  | 16784.723 | 23195.934 | NM_018046 | 2157.057  | 2745.483  | U95091    | 3393.063  | 2438.716  |
| AK024126  | 1764.112  | 2132.61   | NM_013316 | 7690.439  | 8920.928  | NM_017900 | 57492.617 | 31498.412 |
| NM_001516 | 10029.259 | 10860.652 | M20701    | 47439.176 | 46913.645 | S50182    | 2519.926  | 998.97    |
| NM_002744 | 6402.99   | 6401.39   | NM_002912 | 3158.781  | 4163.962  | AL360145  | 2286.252  | 1118.683  |
| NM_015917 | 23023.277 | 20834.102 | NM_013284 | 6040.907  | 6670.98   | Y12016    | 5385.892  | 4395.032  |
| NM_020397 | 1163.75   | 1438.148  | NM_006739 | 3911.288  | 4531.019  | S75763    | 71186.078 | 64127.465 |
| NM_000061 | 13025.367 | 12822.179 | NM_013274 | 7274.259  | 7786.304  | AL359943  | 64123.223 | 63107.512 |
| AB046859  | 3292.276  | 2215.571  | AL050187  | 1578.325  | 1672.688  | NM_000534 | 5481.379  | 7527.926  |
| NM_005109 | 8251.077  | 8382.416  | NM_007127 | 825.35    | 792.311   | L10140    | 1493.628  | 3546.102  |
| AK023573  | 9707.599  | 11501.98  | NM_012387 | 36670.441 | 38272.73  | L37700    | 2595.299  | 2570.042  |
| NM_002730 | 5732.106  | 7971.852  | NM_014735 | 3554.942  | 3857.048  | NM_017665 | 8644.048  | 7047.809  |
| NM_004828 | 4591.612  | 5987.205  | NM_004252 | 34852.883 | 41097.355 | AB007966  | 757.142   | 542.282   |
| AB011540  | 5707.196  | 8401.727  | AF172929  | 11021.561 | 8851.334  | AB007976  | 1019.941  | 733.154   |
| NM_000040 | 2056.12   | 2357.003  | NM_006398 | 30335.387 | 33722.039 | AK024819  | 1409.375  | 692.886   |
| NM_004837 | 8352.876  | 7724.908  | AK025655  | 4370.468  | 4109.012  | AF052106  | 6429.646  | 2838.431  |
| NM_003296 | 702.816   | 793.563   | NM_001362 | 4905.446  | 3360.361  | AK000441  | 1156.349  | 663.878   |
| NM_004736 | 15052.114 | 17328.408 | NM_004056 | 1572.051  | 1460.518  | AK022391  | 2544.954  | 1485.996  |
| NM_006895 | 815.495   | 1120.519  | NM_001614 | 59750.961 | 62143.723 | NM_016167 | 10471.98  | 10419.04  |
| NM_006459 | 6047.822  | 6604.646  | NM_000366 | 1364.391  | 1434.257  | AK024090  | 36221.719 | 44820.844 |
| D50373    | 946.076   | 1552.738  | NM_003833 | 53501.777 | 57009.707 | AL133574  | 11518.998 | 15207.423 |
| AA488757  | 1576.269  | 2242.977  | AK000868  | 27978.787 | 29733.367 | AK021936  | 3192.413  | 4555.082  |
| AA205399  | 361.292   | 529.21    | NM_001233 | 5115.155  | 5512.884  | AF147339  | 61303.672 | 62726.891 |
| AI394286  | 424.172   | 634.382   | NM_001234 | 2754.771  | 2894.372  | AL390181  | 64450.148 | 63137.34  |
| H07071    | 902.993   | 1119.053  | BF679789  | 15513.068 | 17061.242 | NM_017914 | 61540.813 | 59974.684 |

|             |           |           |           |           |           |           |           |           |
|-------------|-----------|-----------|-----------|-----------|-----------|-----------|-----------|-----------|
| M25322      | 1114.906  | 977.346   | H97792    | 28601.467 | 37888.617 | NM_00635C | 1113.563  | 1764.74   |
| H-L 27586 I | 4903.689  | 4376.203  | L33404    | 1620.86   | 1445.214  | NM_00315C | 2945.103  | 2644.304  |
| ID 214180   | 1722.292  | 1575.095  | M13509    | 8763.472  | 9203.49   | NM_014784 | 5595.704  | 4217.548  |
| ID 1867426  | 8116.632  | 6097.342  | X04076    | 9152.365  | 11030.043 | AK026383  | 9627.849  | 8135.342  |
| ID 396450   | 727.968   | 614.079   | W95082    | 501.755   | 466.379   | AK023821  | 409.433   | 552.688   |
| W99328      | 2721.697  | 3130.745  | AA485362  | 4666.7    | 4689.588  | AB014594  | 6135.813  | 4344.503  |
| AI434176    | 2552.073  | 3486.18   | AJ222801  | 16255.776 | 14175.873 | M94547    | 1842.148  | 1063.244  |
| H08563      | 627.745   | 853.175   | W72207    | 31545.963 | 28100.01  | NM_005087 | 24923.078 | 12701.748 |
| BE735403    | 2322.375  | 2394.585  | BI772354  | 2664.899  | 2170.546  | NM_01209E | 6619.661  | 3146.267  |
| NM_00171E   | 1269.308  | 1528.266  | AA733033  | 4676.039  | 4480.475  | NM_01809E | 3068.598  | 3519.051  |
| AF116659    | 2052.615  | 2186.569  | AA583574  | 4073.052  | 4461.302  | AB023164  | 7988.242  | 8287.989  |
| NM_01837E   | 8118.66   | 6843.628  | U67733    | 857.413   | 701.804   | NM_000704 | 3561.409  | 5281.672  |
| NM_01761E   | 2231.214  | 2625.211  | AI690184  | 62410.543 | 57906.547 | NM_015987 | 1705.007  | 2174.005  |
| AK022425    | 6261.181  | 6440.737  | T48692    | 1157.183  | 1183.835  | NM_01960E | 4680.021  | 6552.946  |
| NM_000054   | 3292.811  | 3218.03   | AA927490  | 4338.534  | 3846.199  | NM_01536E | 1987.589  | 3206.597  |
| NM_01471E   | 18691.303 | 18201.918 | NM_005052 | 14260.16  | 11361.009 | Z49090    | 30797.033 | 39146.734 |
| NM_00181E   | 3758.802  | 3265.06   | BF038439  | 2146.913  | 1847.125  | AK025467  | 10544.36  | 16363.388 |
| NM_01478E   | 2091.374  | 2394.238  | AF319476  | 1929.434  | 1347.262  | AK026593  | 13156.844 | 20638.936 |
| AK025175    | 628.071   | 984.853   | NM_014267 | 36483.586 | 37924.078 | AL117666  | 3136.532  | 2647.29   |
| NM_005811   | 7843.454  | 10278.141 | NM_001481 | 1058.957  | 1239.192  | Y17865    | 6940.403  | 5874.531  |
| NM_005764   | 1089.952  | 1417.956  | U30872    | 3870.332  | 4057.647  | NM_00582E | 50999.285 | 34373.996 |
| NM_01636E   | 4596.073  | 5172.121  | AF111783  | 1011.449  | 1116.057  | NM_00275E | 14201.859 | 10124.753 |
| NM_004214   | 16894.93  | 15163.445 | NM_00025E | 465.108   | 466.966   | U79299    | 596.06    | 568.466   |
| NM_00432E   | 7160.852  | 6293.149  | NM_02046E | 11656.975 | 10904.548 | AJ000414  | 2024.163  | 1371.489  |
| NM_00283E   | 5178.872  | 3587.435  | NM_00263E | 3221.027  | 2761.548  | AK025674  | 36065.641 | 20771.484 |
| NM_020167   | 904.942   | 555.4     | NM_014734 | 6700.842  | 5958.162  | AF007194  | 21843.658 | 11783.979 |
| AL049963    | 30570.125 | 21567.748 | NM_00228E | 4340.132  | 4218.22   | NM_01906E | 3693.439  | 3106.68   |
| NM_01605E   | 20660.707 | 13107.978 | AK026408  | 4208.438  | 4465.185  | NM_004761 | 9721.284  | 10837.654 |
| NM_01400E   | 1269.026  | 936.837   | NM_00502E | 890.186   | 1072.778  | Z25424    | 10616.076 | 18729.598 |
| NM_00463E   | 3967.109  | 4221.394  | NM_006307 | 2402.597  | 2425.941  | U79458    | 11925.865 | 22749.662 |
| AK022603    | 618.058   | 647.062   | M74782    | 12384.15  | 10417.063 | NM_01492C | 1105.04   | 1740.325  |
| NM_00489E   | 13950.137 | 15947.715 | NM_01781E | 7121.321  | 6195.261  | NM_002961 | 7170.496  | 13444.203 |
| NM_01337E   | 807.008   | 1085.864  | NM_02043E | 3212.563  | 2957.954  | NM_01829E | 2816.939  | 4733.673  |
| NM_00397E   | 584.639   | 604.691   | NM_001767 | 715.609   | 702.933   | NM_00067E | 7926.048  | 11833.807 |
| NM_01768E   | 1819.065  | 2108.772  | AF028823  | 12162.016 | 15585.869 | AF064770  | 1452.083  | 2588.838  |
| AK025612    | 6519.179  | 7384.8    | NM_00497C | 814.879   | 881.474   | NM_00576E | 3455.057  | 5976.818  |
| NM_01226E   | 3025.885  | 2919.393  | NM_00429E | 60114.18  | 54992.484 | NM_004127 | 56725.48  | 68428.563 |
| NM_01220E   | 2750.98   | 2869.554  | NM_002087 | 39505.129 | 39927.961 | NM_013324 | 8293.102  | 10519.499 |
| AL157469    | 963.608   | 929.603   | AB023154  | 2660.333  | 1942.517  | AL133022  | 2126.455  | 2790.274  |
| NM_00286E   | 5341.385  | 6908.354  | NM_01458E | 5137.836  | 5609.211  | NM_00395E | 7999.907  | 13740.546 |
| AK024100    | 9800.537  | 14652.53  | AF200815  | 1582.902  | 1501.657  | NM_006301 | 2507.186  | 2465.021  |
| NM_00513E   | 1290.476  | 1368.315  | NM_01246E | 4149.353  | 3804.925  | NM_01221E | 1746.058  | 1387.589  |
| NM_003827   | 14002.873 | 16744.254 | M60499    | 3762.005  | 3639.906  | X72887    | 2396.204  | 2107.496  |
| NM_00458E   | 1585.035  | 2145.419  | AY026461  | 7577.561  | 7508.535  | NM_00452E | 3180.501  | 2897.802  |
| NM_001103   | 808.982   | 952.93    | AK025708  | 9849.564  | 8781.023  | NM_000127 | 2279.229  | 1697.078  |
| AF228710    | 10419.543 | 12704.183 | NM_00040E | 3637.517  | 3188.513  | Y10483    | 40315.535 | 30532.984 |
| NM_01839E   | 930.117   | 1055.769  | NM_00542C | 310.501   | 435.71    | NM_006784 | 3290.703  | 1897.732  |
| AY007131    | 46496.203 | 47555.27  | NM_005564 | 58861.938 | 56897.895 | NM_01787E | 4602.147  | 2183.662  |
| U61735      | 8142.797  | 5337.177  | NM_00450E | 6924.351  | 7063.695  | NM_001087 | 60520.469 | 61667.281 |
| NM_001144   | 34144.188 | 22839.67  | AL137619  | 16001.981 | 17301.818 | NM_00182E | 1330.93   | 867.381   |
| AK023766    | 21037.695 | 14454.473 | AB007859  | 2025.575  | 2525.734  | AK025352  | 1248.014  | 1589.481  |
| NM_001897   | 1084.974  | 736.272   | NM_006754 | 1177.624  | 1378.319  | NM_003721 | 15145.291 | 21245.785 |
| NM_00385E   | 1115.68   | 943.225   | NM_001127 | 5868.827  | 6259.905  | NM_004724 | 3074.259  | 4717.029  |

|           |           |           |           |           |           |           |           |           |
|-----------|-----------|-----------|-----------|-----------|-----------|-----------|-----------|-----------|
| AB033109  | 4695.633  | 3093.701  | NM_012430 | 5445.228  | 5192.474  | NM_001431 | 10397.252 | 14670.497 |
| NM_002053 | 6204.856  | 6428.606  | NM_003917 | 59206.988 | 56040.387 | AK022666  | 563.984   | 346.794   |
| NM_006889 | 7559.113  | 7643.014  | NM_007077 | 9129.721  | 9357.311  | NM_000381 | 2646.989  | 3289.171  |
| NM_002438 | 2837.932  | 4284.907  | NM_002956 | 5741.023  | 5678.353  | NM_018192 | 935.549   | 1126.885  |
| NM_014589 | 1031.411  | 1132.474  | AB018739  | 4006.792  | 3774.485  | NM_000427 | 4156.46   | 6523.553  |
| NM_000759 | 1162.656  | 927.505   | NM_006750 | 59016.109 | 54013.02  | NM_014924 | 1627.366  | 2816.584  |
| AK023334  | 2497.357  | 2056.194  | NM_020164 | 26736.629 | 21653.324 | NM_006946 | 3051.716  | 5396.227  |
| NM_002563 | 51903.188 | 52650.578 | AK023521  | 24642.941 | 20268.648 | NM_000174 | 63481.363 | 64225.926 |
| NM_002437 | 3013.444  | 3662.098  | NM_004292 | 3528.92   | 3470.431  | NM_002508 | 2287.288  | 3232.958  |
| D79991    | 5289.282  | 5145.823  | NM_015484 | 8179.238  | 7487.876  | NM_014343 | 8659.142  | 13590.213 |
| AB011540  | 6713.534  | 6580.795  | NM_018046 | 1853.083  | 1653.738  | D25303    | 2522.622  | 2752.386  |
| NM_000040 | 4079.362  | 4101.062  | NM_013316 | 8476.919  | 9978.631  | NM_002338 | 14237.469 | 13876.884 |
| NM_004631 | 6104.696  | 6870.199  | M20701    | 44639.023 | 44055.445 | AF022913  | 4103.73   | 3004.007  |
| NM_006033 | 1215.53   | 1596.078  | NM_002912 | 3146.391  | 3893.785  | NM_000028 | 2690.503  | 2466.663  |
| NM_004837 | 9776.193  | 10803.169 | NM_013284 | 5635.578  | 6224.522  | NM_001382 | 15545.72  | 10635.614 |
| NM_000370 | 3491.974  | 3150.463  | NM_006739 | 3497.9    | 4223.565  | M93718    | 12076.351 | 11031.186 |
| BE865893  | 2785.855  | 2498.083  | NM_013274 | 7533.98   | 8610.96   | NM_005386 | 4280.529  | 3029.303  |
| NM_003123 | 27407.729 | 37471.977 | AL050187  | 1827.546  | 2094.668  | AK023807  | 26056.205 | 15259.552 |
| AY005822  | 1552.525  | 1785.539  | NM_007127 | 617.232   | 636.808   | NM_018188 | 34124.414 | 27908.598 |
| NM_018129 | 10998.957 | 10371.617 | NM_012387 | 29991.105 | 38735.91  | AK024273  | 3689.191  | 2437.608  |
| AF289022  | 8545.795  | 5467.73   | NM_014735 | 2556.192  | 3394.004  | X59417    | 30676.236 | 19601.791 |
| AB002326  | 772.922   | 393.262   | NM_004252 | 30946.914 | 40052.418 | NM_005659 | 63525.117 | 61780.203 |
| M17252    | 546.625   | 722.489   | AF172929  | 13437.695 | 15595.732 | D28476    | 8543.169  | 8850.79   |
| NM_016025 | 18297.539 | 8676.42   | NM_006398 | 32745.188 | 39115.668 | NM_016263 | 9336.754  | 11275.809 |
| NM_013319 | 6359.24   | 4374.622  | AK025655  | 4723.368  | 4624.021  | NM_003335 | 60063.551 | 58064.59  |
| NM_000746 | 1814.263  | 1214.451  | NM_001362 | 5035.518  | 3995.248  | AB002376  | 16275.789 | 25123.715 |
| NM_000722 | 803.764   | 778.664   | NM_004056 | 1812.719  | 1395.261  | NM_018249 | 2102.388  | 3747.501  |
| NM_006030 | 1435.528  | 1563.697  | NM_001056 | 2242.24   | 2069.693  | NM_005558 | 5366.609  | 5849.389  |
| NM_020410 | 9261.058  | 12087.008 | NM_003833 | 56885.164 | 55964.34  | NM_016631 | 2537.653  | 3525.501  |
| AF000143  | 4344.984  | 4144.429  | AK000868  | 25090.465 | 26191.186 | AB015617  | 43273.879 | 54814.477 |
| NM_014211 | 618.977   | 616.938   | NM_001233 | 5054.72   | 5173.103  | AK022730  | 4100.163  | 7155.034  |
| NM_000814 | 593.837   | 479.443   | NM_001234 | 2987.312  | 3031.173  | NM_002256 | 14633.673 | 24497.109 |
| NM_000453 | 2705.859  | 2390.164  | BF679789  | 17029.834 | 18129.104 | AF064839  | 62018.555 | 60494.539 |
| J03077    | 50712.516 | 55645.473 | H97792    | 28899.59  | 28952.264 | NM_005439 | 36509.746 | 47775.344 |
| J03048    | 6511.505  | 8823.896  | L33404    | 1704.984  | 1324.774  | AB037810  | 4766.941  | 4555.033  |
| NM_001718 | 1046.881  | 967.248   | M13509    | 9632.881  | 9888.504  | AF222694  | 1660.411  | 1781.233  |
| AF116659  | 1965.703  | 2644.282  | X04076    | 8493.869  | 10814.969 | AL049925  | 7875.206  | 5022.581  |
| NM_000317 | 14973.146 | 10877.519 | W95082    | 576.098   | 777.621   | NM_016153 | 1650.788  | 1647.224  |
| NM_018376 | 8602.366  | 7055.298  | AA485362  | 5017.406  | 4631.589  | AK027089  | 7590.135  | 5864.796  |
| NM_017615 | 1902.753  | 1937.963  | AJ222801  | 23048.09  | 22771.703 | X59845    | 2332.622  | 1597.657  |
| NM_017438 | 11882.223 | 13203.514 | W72207    | 33828.777 | 33003.871 | NM_006284 | 27050.203 | 20610.707 |
| U59209    | 13047.638 | 13222.141 | BI772354  | 2252.044  | 2212.198  | U18909    | 5849.021  | 4279.475  |
| NM_020195 | 13646.328 | 15363.7   | AA733033  | 3586.331  | 3539.704  | NM_003489 | 6282.363  | 4823.056  |
| BC002753  | 963.211   | 977.003   | AA583574  | 3741.845  | 4162.504  | NM_016589 | 24839.852 | 19463.01  |
| AK023824  | 3637.689  | 3446.833  | U67733    | 1202.548  | 1345.056  | NM_003597 | 2150.609  | 1277.601  |
| AL133069  | 8643.528  | 4275.472  | AI690184  | 58438.801 | 58442.809 | NM_002568 | 62815.773 | 62335.543 |
| AL117574  | 1268.497  | 741.105   | T48692    | 1145.741  | 1379.26   | NM_006561 | 1701.24   | 1087.083  |
| AK026110  | 206.449   | 257.783   | AA927490  | 4494.629  | 4346.768  | NM_017521 | 2654.809  | 2407.163  |
| AK026055  | 16879.123 | 9479.035  | NM_005052 | 14958.618 | 13004.893 | AK025200  | 41686.57  | 40970.746 |
| AK024126  | 1660.945  | 1128.264  | BF038439  | 1953.983  | 1637.086  | NM_001383 | 18319.639 | 28369.977 |
| NM_001516 | 8820.688  | 4933.181  | AF319476  | 1887.726  | 1426.891  | NM_001029 | 64541.43  | 65301.414 |
| NM_002744 | 7206.963  | 7381.726  | AK001913  | 7257.72   | 5952.314  | L34071    | 18158.184 | 9923.408  |
| NM_015917 | 24661.703 | 20969.68  | NM_002289 | 4163.868  | 3303.789  | AB043007  | 45025.875 | 32695.791 |

|           |           |           |           |           |           |           |           |           |
|-----------|-----------|-----------|-----------|-----------|-----------|-----------|-----------|-----------|
| NM_020397 | 1969.688  | 2373.372  | AK026408  | 3859.812  | 3852.801  | NM_004861 | 13119.826 | 8686.594  |
| NM_000061 | 15268.209 | 12583.398 | NM_005025 | 885.697   | 821.501   | NM_016161 | 815.683   | 842.482   |
| AB046859  | 3339.743  | 2369.739  | NM_006307 | 2415.48   | 2501.537  | AV718258  | 1936.201  | 1565.942  |
| NM_005109 | 9430.515  | 7308.83   | M74782    | 14400.796 | 10849.492 | NM_005165 | 12157.503 | 11212.765 |
| AK023573  | 12008.878 | 8765.274  | NM_017818 | 6906.893  | 5295.954  | NM_005138 | 60183.406 | 58533.961 |
| NM_002730 | 7319.928  | 6543.12   | NM_020433 | 3251.559  | 3079.923  | NM_002115 | 64506.527 | 61840.648 |
| NM_004828 | 4919.673  | 5259.461  | NM_001767 | 906.406   | 678.742   | AK023162  | 5713.612  | 2914.679  |
| NM_002964 | 822.959   | 2183.117  | AF028823  | 13164.067 | 15028.59  | NM_006396 | 10027.221 | 8369.693  |
| AF052087  | 2644.844  | 2163.009  | NM_004970 | 695.644   | 881.03    | NM_018648 | 11010.846 | 7119.65   |
| AK023656  | 2167.521  | 1735.335  | NM_004295 | 61457.742 | 55843.492 | NM_018263 | 1463.748  | 701.483   |
| AF086497  | 948.451   | 676.916   | NM_002087 | 46002.617 | 53658.008 | NM_013448 | 4589.453  | 3212.078  |
| NM_020141 | 5044.777  | 3755.167  | AB023154  | 2730.983  | 2933.767  | NM_004537 | 4718.123  | 3855.826  |
| NM_006482 | 2083.559  | 3373.515  | NM_001714 | 1004.2    | 1104.643  | AL390134  | 2434.892  | 1814.144  |
| NM_001824 | 14053.063 | 12762.776 | NM_014585 | 4741.287  | 7284.558  | NM_020226 | 10593.517 | 5290.566  |
| NM_002964 | 310.929   | 238.631   | AF200815  | 1389.273  | 1648.771  | NM_017865 | 11873.161 | 6102.755  |
| SR3       | 42530.586 | 49484.305 | NM_014564 | 902.627   | 1175.01   | NM_003427 | 5925.089  | 3844.869  |
| SR5       | 3125.206  | 3436.427  | NM_013441 | 10610.25  | 10780.294 | NM_005920 | 6096.715  | 4394.007  |
| SR7       | 5492.745  | 68291.445 | NM_014421 | 12825.854 | 13053.648 | Y09321    | 4144.241  | 2996.042  |
| SR9       | 17240.033 | 3568.281  | AB033028  | 874.958   | 1125.57   | NM_006593 | 2621.199  | 2547.724  |
| CY3Cy5    | 2663.348  | 666.067   | NM_017680 | 1807.364  | 1600.826  | NM_000376 | 53030.43  | 46735.02  |
| NM_005887 | 5897.607  | 6293.502  | NM_012465 | 4175.118  | 3302.522  | NM_000475 | 17702.275 | 17432.695 |
| AK024921  | 355.956   | 226.761   | M60499    | 4188.419  | 3994.316  | M61872    | 33131.816 | 29096.193 |
| NM_016353 | 4964.937  | 4784.917  | NM_001614 | 63691.527 | 59138.676 | NM_005721 | 5957.332  | 5018.941  |
| S77357    | 641.115   | 567.995   | NM_000366 | 2112.756  | 2176.214  | AF284223  | 4494.576  | 3761.779  |
| AL080280  | 752.7     | 617.482   | NM_004300 | 4623.889  | 3268.004  | AF176012  | 1576.383  | 1256.561  |
| AB028947  | 375.273   | 278.669   | NM_000052 | 628.479   | 389.59    | BE743838  | 14387.626 | 10110.014 |
| AK022556  | 862.595   | 1515.099  | NM_000085 | 645.041   | 416.467   | AF273046  | 14212.508 | 11205.507 |
| AK023437  | 855.687   | 1218.8    | AB007859  | 2175.382  | 2120.69   | NM_001081 | 7754.211  | 5141.007  |
| AK025872  | 740.028   | 856.769   | NM_006754 | 882.374   | 971.358   | NM_002483 | 14254.556 | 11569.991 |
| AF131762  | 4370.007  | 5061.781  | NM_001127 | 6504.286  | 8414.314  | BF002026  | 4710.178  | 2795.255  |
| D43770    | 27217.865 | 37358.707 | NM_012430 | 5828.432  | 7195.704  | L35594    | 2044.971  | 1901.985  |
| AF085960  | 911.286   | 885.278   | NM_003917 | 60940.184 | 57932.402 | BE790116  | 6947.406  | 6248.212  |
| AF087976  | 326.206   | 275.829   | NM_007077 | 8653.731  | 9589.507  | AI922341  | 15035.158 | 14585.51  |
| AK021519  | 1622.336  | 1583.15   | NM_002956 | 6093.56   | 5225.778  | S57283    | 1371.697  | 1107.882  |
| NM_014254 | 7908.798  | 7222.387  | AB018739  | 3856.429  | 4098.56   | AA410517  | 2406.813  | 1815.411  |
| AF086036  | 317.126   | 227.478   | NM_006750 | 61541.527 | 55928.402 | M12824    | 6567.701  | 4079.172  |
| AF086010  | 310.725   | 261.112   | NM_020164 | 24806.303 | 22756.555 | W60100    | 3553.563  | 2463.142  |
| U09197    | 2078.965  | 1278.577  | AK023521  | 22550.469 | 22669.658 | M24898    | 4762.755  | 3594.2    |
| AK025218  | 1073.293  | 1938.404  | NM_014267 | 40301.867 | 44513.848 | U72508    | 3556.192  | 2751.643  |
| AJ227899  | 2574.698  | 4117.072  | NM_001481 | 1182.179  | 977.334   | AA457153  | 10631.936 | 10862.027 |
| AL359607  | 762.181   | 1130.28   | U30872    | 4431.852  | 4890.826  | AA283122  | 55452.469 | 49718.809 |
| AF161371  | 9369.715  | 17773.508 | AF111783  | 1022.975  | 921.666   | AA868504  | 4584.621  | 3346.279  |
| AK023408  | 3575.107  | 4127.363  | NM_000256 | 550.646   | 149.161   | AA877845  | 10309.739 | 10153.605 |
| AK026036  | 1847.257  | 1497.278  | NM_020469 | 13966.243 | 12835.638 | AI016456  | 12941.575 | 15865.246 |
| AK023422  | 349.049   | 198.622   | NM_002639 | 3389.797  | 2920.423  | NM_006066 | 51484.141 | 45881.25  |
| AK022796  | 1352.682  | 1259.218  | NM_014734 | 7430.249  | 6535.282  | AK022230  | 31460.342 | 27887.252 |
| AF090910  | 581.793   | 918.778   | NM_001362 | 4327.137  | 3071.497  | AK022147  | 30025.117 | 27675.051 |
| AK095193  | 322.079   | 308.871   | NM_004056 | 1340.365  | 1185.41   | L25664    | 22208.625 | 19988.152 |
| AK025081  | 312.696   | 327.05    | NM_001056 | 1860.597  | 1684.976  | NM_014940 | 6993.387  | 4710.326  |
| AL122088  | 2084.29   | 1719.917  | AY026461  | 7578.464  | 6829.815  | NM_005783 | 1894.826  | 1171.749  |
| AF119912  | 467.986   | 553.017   | AK025708  | 11416.215 | 13334.455 | AK000851  | 2155.821  | 1475.654  |
| AL137518  | 1641.578  | 2367.183  | NM_000405 | 3216.487  | 3422.177  | NM_006900 | 11932.333 | 9288.177  |
| AK023134  | 591.069   | 1248.869  | NM_005564 | 55389.273 | 53000.719 | AJ289111  | 33790.477 | 30623.973 |



|           |           |           |           |           |           |           |           |           |
|-----------|-----------|-----------|-----------|-----------|-----------|-----------|-----------|-----------|
| T99941    | 1079.007  | 2120.253  | NM_004508 | 7233.502  | 7112.344  | NM_016356 | 48995.988 | 39804.883 |
| AF113678  | 528.946   | 949.868   | NM_006405 | 58567.117 | 63211.777 | NM_006406 | 18280.092 | 14674.109 |
| AL137313  | 2362.188  | 3552.55   | AJ245946  | 1103.307  | 1422.681  | AF216292  | 56229.73  | 56461.109 |
| Z83951    | 636.224   | 669.275   | NM_006749 | 1606.561  | 2408.867  | NM_000952 | 13333.171 | 15099.736 |
| NM_005284 | 580.345   | 540.097   | NM_005639 | 855.119   | 1554.715  | NM_005894 | 893.95    | 806.328   |
| AF086351  | 449.534   | 595.554   | NM_004694 | 3870.297  | 4132.813  | NM_014584 | 8735.379  | 7796.044  |
| D83199    | 21233.484 | 18114.16  | NM_000324 | 1792.31   | 1947.624  | M30627    | 1356.291  | 674.582   |
| AK025957  | 1155.64   | 1591.006  | NM_012206 | 502.904   | 622.678   | NM_005810 | 49528.344 | 44154.945 |
| NM_019040 | 4579.882  | 4695.786  | AL137619  | 18010.313 | 17553.303 | M28170    | 40384.898 | 32526.188 |
| NM_005978 | 1280.529  | 905.869   | NM_003615 | 1220.858  | 866.236   | NM_001555 | 2507.578  | 2574.693  |
| Y16711    | 1274.62   | 942.976   | NM_005052 | 11894.733 | 10248.148 | AK026223  | 16524.385 | 13896.888 |
| AJ272179  | 11086.073 | 8504.119  | BF038439  | 1538.938  | 1248.382  | NM_000874 | 10764.342 | 8292.159  |
| AJ007015  | 3630.335  | 3308.318  | AF319476  | 1511.12   | 1026.18   | NM_005854 | 2753.22   | 3140.328  |
| AL049317  | 3271.19   | 2949.829  | AK001913  | 6460.904  | 5604.141  | D31887    | 5736.436  | 7907.85   |
| AL050090  | 1833.057  | 2111.805  | NM_004292 | 3547.121  | 3078.217  | NM_016646 | 8633.525  | 6784.635  |
| AF086309  | 839.384   | 913.739   | NM_015484 | 8557.09   | 7019.64   | AK090536  | 31397.49  | 24213.455 |
| AF238870  | 734.022   | 849.669   | NM_018046 | 1739.365  | 1752.99   | D63477    | 1560.894  | 1116.77   |
| AK026279  | 4258.385  | 3798.035  | NM_013316 | 7837.199  | 7751.217  | NM_020243 | 39359.379 | 31958.828 |
| AF130094  | 8282.119  | 7503.396  | M20701    | 47033.16  | 43330.836 | NM_014051 | 10679.895 | 8640.434  |
| AK026673  | 3013.783  | 2875.074  | NM_002912 | 3327.493  | 3664.751  | AK025398  | 5822.279  | 3832.125  |
| AF170935  | 16709.129 | 16882.24  | NM_013284 | 5487.528  | 5358.205  | AK023056  | 2450.753  | 2581.936  |
| AB007978  | 1097.326  | 1733.431  | NM_006739 | 3128.627  | 3586.708  | AK022207  | 2767.193  | 2808.041  |
| AF217970  | 2704.188  | 3944.463  | NM_013274 | 7278.317  | 7405.789  | NM_004996 | 5423.893  | 4577.262  |
| AF086297  | 1609.956  | 1965.562  | AL050187  | 2109.737  | 2192.42   | NM_017435 | 1565.856  | 2747.756  |
| AK025455  | 3548.75   | 3461.239  | NM_007127 | 1314.711  | 1419.796  | NM_014037 | 23880.156 | 23817.09  |
| AK026799  | 13529.852 | 8542.897  | NM_012387 | 26976.018 | 30963.756 | NM_004866 | 46282.293 | 46948.254 |
| AK022549  | 1968.682  | 2173.432  | NM_014735 | 2063.755  | 2485.225  | NM_018688 | 3520.25   | 5256.161  |
| NM_018157 | 727.856   | 670.181   | NM_004252 | 30955.494 | 38415.98  | AK056652  | 13169.017 | 15612.567 |
| Z70714    | 5777.122  | 4610.231  | AF172929  | 11150.787 | 10082.154 | NM_015836 | 1039.358  | 1000.423  |
| AK021640  | 828.543   | 1016.656  | NM_006398 | 32351.807 | 33963.684 | AL137438  | 2915.877  | 2710.693  |
| NM_016565 | 46973.137 | 44289.414 | L11285    | 1137.298  | 1035.81   | NM_013248 | 10015.444 | 18565.502 |
| U84509    | 702.487   | 884.726   | AK025655  | 5230.914  | 7679.322  | NM_012436 | 59489.387 | 65434.789 |
| AL110201  | 279.846   | 277.352   | CY3Cy5    | 1835.842  | 153.131   | AK001299  | 62784.977 | 59323.973 |
| AK002036  | 4297.773  | 2908.229  | NM_012245 | 55116.852 | 46055.137 | AB014559  | 34589.789 | 26412.682 |
| U84512    | 580.929   | 414.589   | NM_133263 | 2775.538  | 2535.335  | NM_016486 | 18583.775 | 16159.044 |
| AK025775  | 4873.289  | 3845.276  | AF086176  | 935.479   | 983.967   | NM_005033 | 10674.896 | 10605.482 |
| AB046791  | 261.21    | 377.619   | AF086232  | 566.556   | 504.626   | NM_015932 | 63090.609 | 56951.145 |
| AF043469  | 3356.322  | 6177.845  | NM_017742 | 1559.938  | 1386.821  | NM_017946 | 1369.873  | 1617.731  |
| AL109671  | 497.081   | 423.894   | NM_005108 | 814.526   | 1056.406  | AK022169  | 2954.573  | 2030.475  |
| NM_012375 | 818.999   | 840.919   | AK022292  | 2985.272  | 2842.759  | AF015592  | 5293.249  | 6247.949  |
| AK022008  | 2212.422  | 2171.41   | AB051436  | 2620.908  | 2956.479  | AK026795  | 1553.175  | 1466.486  |
| NM_018186 | 3757.68   | 6685.017  | AK026482  | 8770.46   | 8461.542  | NM_016396 | 8159.702  | 7924.626  |
| AL080188  | 3546.626  | 2810.185  | AL137473  | 3418.031  | 3336.457  | NM_016617 | 19027.311 | 14400.213 |
| NM_002390 | 7444.654  | 11436.767 | AJ001873  | 1380.337  | 1464.859  | NM_002027 | 14046.837 | 16660.547 |
| NM_006142 | 1789.59   | 2181.055  | AL137476  | 2839.5    | 2666.994  | AL162078  | 15510.229 | 15476.191 |
| NM_014910 | 3565.891  | 4249.738  | AF052174  | 4485.084  | 5222.151  | NM_000916 | 1064.287  | 967.594   |
| AK001064  | 6498.974  | 5362.105  | AF070590  | 1247.459  | 1208.74   | NM_013382 | 21725.625 | 22798.018 |
| AB029031  | 6214.609  | 5842.699  | NM_012245 | 16773.189 | 11438.576 | AB002314  | 2593.551  | 3200.255  |
| NM_001294 | 12751.165 | 12720.842 | NM_133263 | 1483.694  | 1114.365  | NM_014043 | 9545.917  | 10539.857 |
| NM_014241 | 457.234   | 503.532   | SR2       | 32531.246 | 33157.051 | NM_014622 | 1367.786  | 1235.586  |
| AF302786  | 4356.579  | 4833.147  | SR4       | 8590.177  | 9078.114  | AF176012  | 1358.648  | 1469.239  |
| AL122083  | 1878.918  | 1892.128  | SR6       | 1188.531  | 1253.187  | BE743838  | 14634.689 | 10984.795 |
| NM_019096 | 8372.367  | 8803.459  | SR8       | 4203.172  | 14681.781 | AF273046  | 14486.826 | 10308.733 |

|           |           |           |           |           |           |           |           |           |
|-----------|-----------|-----------|-----------|-----------|-----------|-----------|-----------|-----------|
| AK022212  | 20503.811 | 23906.295 | SR10      | 15062.855 | 5887.979  | NM_001081 | 8495.391  | 6989.684  |
| X64974    | 7210.273  | 14318.587 | CY3Cy5    | 1736.918  | 157.484   | NM_002483 | 14985.6   | 17726.508 |
| NM_000834 | 12413.716 | 15691.688 | AK024432  | 5267.777  | 4992.723  | BF002026  | 4436.137  | 4418.644  |
| NM_006485 | 842.879   | 649.713   | AL137513  | 1942.543  | 1522.67   | L35594    | 2423.707  | 2935.625  |
| NM_012459 | 5557.54   | 4745.766  | AF088001  | 1201.883  | 1278.459  | BE790116  | 7321.861  | 5377.783  |
| AL137268  | 2276.665  | 2646.902  | NM_018067 | 7665.083  | 8797.028  | AI922341  | 15489.667 | 14390.557 |
| AK001130  | 576.344   | 759.351   | NM_018956 | 6296.572  | 7051.519  | S57283    | 1848.983  | 2502.203  |
| AK024109  | 4576.404  | 3690.61   | NM_014787 | 1703.388  | 1702.366  | AA410517  | 2333.43   | 2376.366  |
| AF088048  | 5714.81   | 5861.001  | AL122109  | 525.027   | 674.464   | M12824    | 7176.984  | 5610.032  |
| AK001143  | 3823.066  | 3198.998  | AF074988  | 2237.11   | 2257.008  | W60100    | 3350.186  | 3744.303  |
| AK001701  | 6528.29   | 4306.995  | AK024946  | 1418.845  | 2502.56   | M24898    | 4738.458  | 5332.36   |
| AK022205  | 395.665   | 277.923   | AK026375  | 3958.422  | 3964.668  | U72508    | 3370.445  | 2974.241  |
| AK024955  | 12440.476 | 19935.008 | U85992    | 1084.456  | 1067.921  | AA457153  | 10690.493 | 14716.441 |
| NM_016580 | 276.416   | 569.889   | AL110152  | 1191.328  | 1149.273  | AA283122  | 53934.957 | 58102.203 |
| AF169693  | 840.896   | 1826.656  | AF131745  | 4003.908  | 3055.935  | AA868504  | 4299.127  | 4299.749  |
| L23206    | 4022.808  | 4667.883  | AL117565  | 4650.099  | 3817.664  | AA877845  | 8914.585  | 12146.547 |
| NM_012192 | 6876.541  | 5284.254  | AK022109  | 1533.622  | 1084.167  | AA664241  | 58649.641 | 70449.438 |
| NM_006293 | 5983.286  | 4973.958  | NM_007030 | 594.974   | 355.472   | AI016456  | 10351.561 | 10109.982 |
| NM_007229 | 4707.435  | 3839.783  | AF143882  | 1016.586  | 685.599   | L25664    | 20646.639 | 18972.008 |
| AB011105  | 2553.324  | 2629.783  | U00953    | 674.019   | 511.917   | NM_014940 | 6723.542  | 4490.087  |
| NM_002213 | 1621.96   | 2894.856  | AK025650  | 7859.777  | 7111.699  | NM_005783 | 1958.738  | 1267.602  |
| NM_018970 | 262.768   | 276.019   | AK026401  | 3805.415  | 4442.335  | AK000851  | 1968.091  | 1731.306  |
| NM_004814 | 4257.461  | 3691.385  | AK026773  | 595.974   | 816.569   | NM_006900 | 12072.036 | 11128.385 |
| D86976    | 20370.217 | 16524.771 | AK025252  | 482.754   | 464.293   | AJ289111  | 24756.926 | 23992.57  |
| AF307080  | 613.991   | 1042.386  | AK022604  | 902.78    | 1036.66   | NM_016356 | 50114.816 | 55192.004 |
| NM_004057 | 1150.688  | 1556.653  | U66048    | 872.872   | 882.817   | NM_006406 | 18212.623 | 16854     |
| NM_018971 | 446.139   | 440.756   | AL080095  | 489.867   | 640.711   | AF216292  | 48418.594 | 48356.977 |
| K03175    | 1207.685  | 964.743   | AK023401  | 4732.558  | 4564.261  | NM_000952 | 12262.449 | 10419.273 |
| NM_003015 | 339.774   | 285.555   | AK001865  | 2390.02   | 1634.428  | NM_005810 | 49194.363 | 51088.953 |
| NM_003711 | 2703.945  | 2511.074  | AK024035  | 15368.326 | 14080.958 | M28170    | 37804.48  | 30605.549 |
| NM_006496 | 6883.296  | 6225.473  | AL050079  | 1031.637  | 674.167   | NM_001555 | 2284.97   | 2455.064  |
| NM_000828 | 506.713   | 397.168   | AL080233  | 1028.825  | 837.17    | AK026223  | 15677.34  | 17682.043 |
| NM_004826 | 740.63    | 534.642   | AL117663  | 896.324   | 674.192   | NM_000874 | 10069.396 | 11761.646 |
| NM_013314 | 6600.932  | 9374.571  | NM_014293 | 4441.871  | 3148.185  | NM_005854 | 2538.893  | 3936.474  |
| NM_002072 | 499.812   | 594.846   | AK023429  | 944.626   | 986.08    | AB007863  | 61423.305 | 61990.891 |
| NM_003182 | 1206.265  | 773.649   | AK026881  | 732.848   | 740.615   | NM_017786 | 2993.029  | 2931.334  |
| NM_004431 | 1856.508  | 2496.371  | AK023774  | 776.844   | 828.952   | D31887    | 5539.835  | 5546.684  |
| NM_002012 | 4507.247  | 6291.289  | AL049377  | 322.044   | 628.468   | NM_005721 | 4384.146  | 4713.711  |
| NM_002070 | 43402.938 | 41412.695 | AK001432  | 400.491   | 571.591   | AF284223  | 4545.268  | 4556.456  |
| AF227969  | 11897.73  | 14478.003 | AL133568  | 3551.145  | 3995.879  | D63477    | 1581.513  | 1370.496  |
| AF116657  | 838.848   | 1076.06   | AF009265  | 3413.951  | 3403.763  | NM_020243 | 40538.543 | 34790.984 |
| NM_004102 | 1098.848  | 926.051   | AF009309  | 2066.25   | 2494.353  | AK025398  | 6115.445  | 4982.246  |
| NM_003944 | 6591.779  | 5953.383  | NM_002360 | 1009.715  | 1141.276  | AK027082  | 838.151   | 865.797   |
| NM_016120 | 39133.473 | 31949.168 | AF009322  | 570.067   | 577.363   | AB037750  | 801.301   | 628.612   |
| NM_002893 | 2255.402  | 3868.038  | AF056425  | 998.667   | 835.987   | AK023056  | 2200.021  | 1634.986  |
| NM_002393 | 5902.284  | 5819.087  | AF090893  | 435.327   | 338.817   | AK022207  | 2389.024  | 1995.91   |
| NM_002669 | 5750.354  | 4305.23   | NM_018033 | 9307.363  | 6406.641  | NM_004996 | 5760.855  | 5128.069  |
| AB014600  | 3195.151  | 3773.656  | AK001147  | 383.156   | 272.133   | NM_017435 | 1011.049  | 2475.947  |
| NM_018312 | 3788.489  | 4019.027  | AK021630  | 680.647   | 382.145   | NM_014037 | 22423.641 | 22313.57  |
| X98259    | 1216.835  | 2110.555  | AK021831  | 754.748   | 742.137   | NM_004866 | 48309.914 | 57009.258 |
| NM_014792 | 777.217   | 657.326   | NM_020153 | 1153.063  | 1440.59   | NM_018688 | 3062.11   | 3684.618  |
| U05255    | 448.087   | 440.54    | NM_005321 | 2285.374  | 1910.023  | AK056652  | 13117.21  | 22392.432 |
| X98260    | 10836.701 | 8654.958  | AF143885  | 631.62    | 725.996   | NM_015835 | 861.323   | 1193.991  |

|           |           |           |           |           |           |           |           |           |
|-----------|-----------|-----------|-----------|-----------|-----------|-----------|-----------|-----------|
| NM_007217 | 11144.893 | 10447.936 | NM_014015 | 6817.163  | 8382.879  | AL137438  | 2821.734  | 3057.992  |
| NM_014777 | 6213.467  | 10177.56  | AK026839  | 1266.773  | 1272.866  | NM_017957 | 23836.752 | 31709.664 |
| NM_001102 | 10717.558 | 14606.021 | AJ008123  | 4364.48   | 3839.355  | NM_003024 | 6107.145  | 7340.921  |
| NM_002818 | 56269.988 | 57643.488 | AJ008156  | 924.966   | 1205.985  | NM_013248 | 9975.1    | 13260.729 |
| NM_001937 | 974.064   | 725.37    | AF147321  | 388.353   | 405.637   | NM_000034 | 63317.625 | 63611.785 |
| AK024778  | 1642.802  | 1102.739  | AF161437  | 3970.645  | 3473.363  | AK022230  | 26805.697 | 26401.539 |
| AL157500  | 775.89    | 726.705   | AF086158  | 7825.643  | 7813.895  | AK022147  | 32998.016 | 30880.572 |
| AK025498  | 4506.219  | 6245.049  | AF086050  | 2032.156  | 2326.013  | AK001299  | 61196.457 | 58980.539 |
| NM_001395 | 1160.222  | 1535.889  | AF147375  | 1267.599  | 1126.512  | AB014559  | 35685.898 | 29308.588 |
| NM_002068 | 2544.287  | 4658.73   | X51524    | 3125.819  | 2789.048  | NM_016488 | 19795.285 | 15524.004 |
| NM_013338 | 6324.794  | 4488.569  | AK025759  | 2718.382  | 2409.654  | NM_005033 | 10083.479 | 9581.573  |
| NM_014671 | 6710.401  | 5940.385  | AK024105  | 653.738   | 566.8     | NM_015932 | 62821.496 | 59554.055 |
| NM_001814 | 12406.641 | 9815.193  | AJ238556  | 984.45    | 635.802   | NM_017948 | 1383.806  | 1819.868  |
| NM_005658 | 2133.934  | 1633.961  | Z70699    | 678.505   | 628.853   | AK022169  | 3268.857  | 2378.819  |
| NM_006012 | 20005.557 | 14530.407 | NM_006898 | 2736.597  | 2270.361  | AF015592  | 4864.584  | 4004.172  |
| NM_002151 | 803.856   | 675.155   | AL080066  | 19525.439 | 18889.578 | AK026795  | 1335.818  | 1278.477  |
| NM_014888 | 2655.109  | 2682.331  | AJ227870  | 491.807   | 642.699   | NM_016398 | 8282.251  | 6612.01   |
| AF173935  | 1318.051  | 1555.217  | NM_005294 | 1641.774  | 1904.219  | NM_016617 | 18668.713 | 13460.215 |
| AK025322  | 2603.189  | 2539.793  | AF085826  | 1877.24   | 1986.985  | NM_002027 | 14525.519 | 14681.937 |
| NM_017887 | 10214.688 | 9888.533  | AK024362  | 1157.648  | 1342.663  | AL162078  | 15418.178 | 14433.34  |
| NM_017650 | 325.57    | 453.198   | AF118068  | 5746.378  | 5442.45   | NM_000918 | 760.946   | 775.001   |
| AF007152  | 7010.813  | 11051.528 | NM_004164 | 809.357   | 643.34    | NM_013382 | 20925.691 | 18310.277 |
| NM_017575 | 744.98    | 870.284   | NM_019018 | 2029.865  | 2001.233  | AB002314  | 2377.646  | 2226.904  |
| NM_005310 | 1553.709  | 1077.479  | M87931    | 757.725   | 1027.625  | NM_014043 | 8924.176  | 9520.951  |
| NM_014423 | 20255.406 | 17289.447 | NM_003544 | 59237.441 | 58116.859 | NM_014622 | 1374.591  | 1550.549  |
| BE904126  | 3385.689  | 3101.483  | AK001187  | 845.808   | 802.856   | AB011114  | 64501.887 | 63865.715 |
| AF272380  | 22219.23  | 14335.669 | NM_003529 | 16642.865 | 20235.799 | D11466    | 45537.293 | 51693.477 |
| NM_033288 | 1364.757  | 1860.204  | AF056436  | 1728.417  | 1496.943  | NM_014058 | 53562.816 | 60130.883 |
| NM_003268 | 399.047   | 484.604   | AB023191  | 1122.311  | 954.771   | D31885    | 60721.836 | 59780.445 |
| AK000102  | 3944.565  | 4945.267  | AK027212  | 5193.995  | 4389.509  | NM_016648 | 7048.463  | 6369.388  |
| AB040916  | 7154.218  | 8928.257  | X56197    | 931.295   | 778.67    | AK090536  | 28101.77  | 24362.957 |
| NM_005587 | 4042.389  | 3285.644  | NM_005198 | 2730.168  | 2021.843  | BE743838  | 16526.736 | 15635.019 |
| AF038362  | 3679.884  | 3253.216  | U90905    | 826.491   | 1006.635  | AF273046  | 15926.885 | 13062.749 |
| NM_005195 | 7460.513  | 7201.425  | AF161422  | 1299.449  | 1062.857  | NM_001081 | 9023.335  | 6517.411  |
| NM_005481 | 4317.761  | 8128.768  | AL137384  | 1182.839  | 418.252   | NM_002483 | 15920.068 | 16724.693 |
| NM_004715 | 7627.319  | 6739.124  | AF070619  | 1751.077  | 1415.414  | BF002026  | 4651.063  | 4594.642  |
| L40392    | 4170.603  | 3008.65   | NM_000787 | 2197.004  | 2878.13   | L35594    | 2361.714  | 2446.135  |
| BF541482  | 1201.587  | 1717.876  | U57962    | 6205.151  | 6062.506  | BE790116  | 9216.143  | 7390.245  |
| NM_001007 | 52062.375 | 70362.258 | NM_005574 | 16751.523 | 14700.914 | AI922341  | 17266.258 | 14574.304 |
| NM_003017 | 19540.883 | 18381.363 | NM_017895 | 10616.099 | 9935.492  | S57283    | 1533.247  | 1502.893  |
| NM_020368 | 11848.998 | 9560.819  | NM_004610 | 1882.793  | 2227.859  | AA410517  | 2343.388  | 1932      |
| AK021608  | 5572.136  | 5624.282  | NM_001612 | 1950.338  | 2377.34   | M12824    | 7683.46   | 6662.845  |
| NM_004297 | 1638.461  | 2236.078  | AK027002  | 3168.078  | 3905.14   | W60100    | 3592.445  | 3393.644  |
| NM_006044 | 7326.664  | 7779.53   | AB025254  | 2045.609  | 2186.121  | M24898    | 5107.052  | 5205.083  |
| NM_003635 | 3789.991  | 5286.388  | NM_004081 | 1015.769  | 1174.542  | U72508    | 3397.331  | 3321.694  |
| NM_000662 | 4843.211  | 8127.746  | AK001039  | 3237.049  | 3790.518  | AA457153  | 10568.2   | 10529.356 |
| NM_000292 | 4499.72   | 3597.141  | AK026465  | 1032.151  | 965.766   | AA283122  | 51127.305 | 46791.824 |
| NM_002875 | 7591.5    | 7474.41   | U52834    | 333.967   | 514.569   | AA868504  | 4740.455  | 4400.897  |
| NM_004427 | 9037.744  | 7941.768  | NM_003532 | 599.002   | 670.476   | AA877845  | 9856.729  | 11673.41  |
| U90549    | 13203.546 | 8752.46   | NM_017869 | 6172.361  | 4665.274  | AA664241  | 56712.309 | 65643.5   |
| NM_013240 | 22802.088 | 16513.373 | AF075100  | 698.924   | 534.894   | AI016456  | 11170.838 | 13116.672 |
| NM_015874 | 26156.303 | 19806.393 | AF203447  | 7244.183  | 7075.359  | AK026281  | 2853.303  | 3485.5    |
| NM_004965 | 48060.402 | 60336.43  | NM_018502 | 1579.543  | 1473.987  | U23862    | 1049.594  | 1062.938  |

|           |           |           |           |           |           |           |           |           |
|-----------|-----------|-----------|-----------|-----------|-----------|-----------|-----------|-----------|
| AF312393  | 21875.121 | 17170.184 | AB040976  | 20124.133 | 20684.328 | AK026680  | 20267.313 | 22071.109 |
| AF272898  | 8069.812  | 7325.205  | NM_002221 | 5273.7    | 3394.877  | NM_012436 | 61852.52  | 64990.375 |
| AB037817  | 632.853   | 659.26    | NM_002371 | 749.846   | 789.026   | AF216292  | 45725.18  | 49978.199 |
| AB032951  | 3387.764  | 3143.75   | NM_002562 | 209.218   | 454.773   | NM_000952 | 11237.647 | 9729.046  |
| NM_003417 | 784.088   | 830.702   | AK024502  | 9575.169  | 10539.982 | NM_005894 | 929.098   | 987.928   |
| NM_005149 | 8025.231  | 6515.662  | NM_001124 | 657.2     | 729.891   | NM_014584 | 10288.283 | 7783.999  |
| AK024073  | 1564.355  | 1532.448  | NM_004586 | 2895.349  | 2680.917  | M30627    | 1084.848  | 974.187   |
| NM_018083 | 7783.503  | 6495.903  | NM_004844 | 4595.598  | 4829.268  | NM_005810 | 48849.781 | 47608.398 |
| AL110188  | 5616.192  | 4678.87   | NM_000051 | 2872.859  | 2507.215  | M28170    | 40476.688 | 34002.531 |
| D70834    | 35550.355 | 25463.395 | NM_005709 | 380.742   | 363.596   | NM_001555 | 2567.667  | 2472.263  |
| NM_000970 | 50993.434 | 68236.891 | NM_004180 | 7877.876  | 10136.272 | AK026223  | 15788.654 | 14794.589 |
| NM_012465 | 1340.821  | 1226.885  | NM_004786 | 27643.943 | 25552.76  | NM_000874 | 10961.42  | 10036.977 |
| M60499    | 4458.147  | 6206.696  | AF302109  | 548.352   | 335.372   | NM_005854 | 2668.587  | 2353.986  |
| NM_001614 | 49999.043 | 71974.508 | AL117485  | 6472.276  | 5598.3    | AB007863  | 55005.344 | 60620.48  |
| NM_000366 | 1245.667  | 2492.722  | NM_003505 | 671.461   | 551.065   | AK024456  | 19399.643 | 22962.742 |
| NM_003833 | 11001.796 | 10791.493 | NM_007191 | 947.347   | 925.364   | NM_017789 | 2886.868  | 2697.741  |
| AK000868  | 8633.937  | 6663.09   | NM_000840 | 445.136   | 239.629   | D31887    | 6298.257  | 6158.782  |
| NM_001233 | 4202.119  | 4510.985  | AJ008142  | 65086.961 | 61559.051 | NM_002313 | 5319.924  | 7335.696  |
| BF679789  | 1062.242  | 1292.28   | AL035289  | 929.265   | 947.054   | NM_004459 | 5369.583  | 7583.754  |
| H97792    | 768.733   | 1026.401  | NM_007275 | 14161.903 | 15517.033 | NM_005503 | 1024.917  | 2097.438  |
| L33404    | 536.17    | 487.911   | NM_019025 | 10884.2   | 13236.522 | NM_001502 | 7474.829  | 9094.192  |
| M13509    | 488.657   | 366.252   | NM_018461 | 3133.667  | 3462.03   | NM_005721 | 4719.147  | 8093.515  |
| X04076    | 6432.217  | 5956.623  | AF235023  | 3687.776  | 4887.185  | AF284223  | 4488.17   | 4986.795  |
| W95082    | 569.869   | 329.336   | NM_006910 | 5568.313  | 6338.538  | AF176012  | 1327.661  | 1522.242  |
| AA485362  | 1289.497  | 1547.01   | AF162667  | 3465.625  | 3986.144  | NM_013386 | 1034.342  | 1444.442  |
| AJ222801  | 1446.238  | 1464.463  | AB046847  | 3395.835  | 3335.985  | NM_006517 | 566.316   | 691.72    |
| W72207    | 26655.16  | 25931.869 | NM_000447 | 1349.038  | 1568.303  | NM_004171 | 6498.565  | 4633.865  |
| BI772354  | 1612.392  | 1259.059  | NM_006354 | 3753.508  | 4374.408  | NM_014037 | 22489.027 | 22568.014 |
| AA733033  | 2766.329  | 2462.478  | AF303378  | 3340.122  | 3565.926  | NM_004866 | 47381.973 | 44185.191 |
| AA583574  | 2110.132  | 2004.162  | NM_016037 | 13459.063 | 13725.31  | NM_018688 | 3227.435  | 2936.539  |
| AI690184  | 47064.648 | 55455.891 | NM_000043 | 6534.779  | 8987.547  | AK056652  | 13937.615 | 14244.012 |
| AA927490  | 4069.158  | 4074.025  | NM_015965 | 1075.519  | 781.929   | NM_015839 | 940.615   | 895.442   |
| NM_003779 | 789.265   | 549.491   | NM_000417 | 3439.333  | 3280.773  | AL137438  | 2780.332  | 2564.802  |
| NM_020164 | 24738.617 | 30011.148 | NM_020356 | 2411.522  | 1601.992  | NM_017957 | 24550.777 | 25535.949 |
| AK023521  | 15455.286 | 24403.115 | NM_004063 | 581.321   | 456.806   | NM_003024 | 6383.764  | 6644.279  |
| NM_014267 | 42118.266 | 37342.488 | NM_006144 | 3994.355  | 5537.979  | NM_013248 | 10442.277 | 9797.777  |
| NM_001481 | 1327.826  | 2271.678  | AL136549  | 24787.527 | 27776.184 | NM_000034 | 56310.824 | 61044.055 |
| U30872    | 4030.369  | 3801.051  | NM_007038 | 795.181   | 1209.948  | AK022230  | 32485.061 | 30977.086 |
| AF111783  | 1006.759  | 662.41    | AF311324  | 7392.827  | 8355.185  | AK022147  | 26663.404 | 32786.762 |
| NM_020469 | 8646.861  | 8941.459  | AF124433  | 1735.528  | 2083.007  | L25664    | 22940.133 | 30949.742 |
| NM_002639 | 3160.326  | 5824.203  | AK001647  | 397.209   | 432.712   | NM_014940 | 6199.793  | 7150.494  |
| NM_014734 | 5517.208  | 7469.069  | NM_001461 | 658.613   | 812.122   | NM_005783 | 2077.76   | 3196.142  |
| NM_002289 | 2953.147  | 2579.422  | AF061556  | 1515.024  | 1917.493  | AK000851  | 1754.905  | 2559.633  |
| AK026408  | 2632.764  | 1975.978  | AL162049  | 3420.197  | 4084.478  | NM_006900 | 14049.939 | 18286.002 |
| NM_005025 | 496.232   | 469.218   | AF036144  | 1230.111  | 1027.337  | AJ289111  | 31652.674 | 42261.762 |
| NM_006307 | 378.355   | 367.835   | NM_001823 | 515.442   | 690.937   | NM_016356 | 53049.473 | 59807.074 |
| M74782    | 3274.69   | 1283.554  | NM_005032 | 1173.375  | 1736.4    | NM_006406 | 17839.93  | 20834.559 |
| NM_017818 | 5112.383  | 4159.794  | NM_004160 | 2796.992  | 3545.564  | D11466    | 51413.121 | 55196.824 |
| NM_020433 | 737.505   | 742.957   | AL109677  | 1538.857  | 1460.268  | NM_014056 | 52972.961 | 53858.238 |
| NM_001767 | 1321.209  | 1170.357  | NM_003941 | 23566.141 | 26288.818 | D31885    | 54997.656 | 57945.063 |
| AF028823  | 4091.019  | 4257.419  | AF177909  | 498.083   | 556.622   | NM_016649 | 7838.054  | 6748.991  |
| NM_004295 | 18031.988 | 16906.391 | NM_002664 | 20146.918 | 13484.929 | AK090536  | 29342.148 | 24362.418 |
| NM_002087 | 31986.748 | 24117.297 | AB018271  | 1792.837  | 1272.937  | D63477    | 2252.287  | 2041.35   |

|           |           |           |           |           |           |           |           |           |
|-----------|-----------|-----------|-----------|-----------|-----------|-----------|-----------|-----------|
| AB023154  | 2297.624  | 1947.129  | AL137665  | 3280.511  | 2148.354  | NM_020243 | 36909.633 | 30557.865 |
| NM_014585 | 660.979   | 1635.177  | NM_016434 | 1476.525  | 1065.142  | NM_014051 | 10951.569 | 9391.774  |
| AF200815  | 1056.305  | 1977.799  | U36561    | 64735.711 | 55998.688 | AK025398  | 5355.813  | 3966.809  |
| NM_001056 | 2647.111  | 3847.635  | AF205437  | 1582.35   | 1322.892  | AK027082  | 784.408   | 735.701   |
| AY026461  | 5450.416  | 6513.037  | AF034102  | 33613.469 | 26021.15  | AB037750  | 776.868   | 813.724   |
| AK025708  | 7057.246  | 6233.742  | AB037748  | 3240.86   | 3051.911  | AK023056  | 2353.503  | 2051.655  |
| NM_000405 | 658.25    | 758.304   | AB002306  | 4009.074  | 5449.976  | NM_001120 | 59160.879 | 60643.77  |
| NM_005564 | 30760.604 | 26008.414 | NM_001300 | 4719.933  | 4608.845  | NM_017885 | 6303.565  | 6892.517  |
| NM_004505 | 2899.683  | 2229.693  | NM_018187 | 8136.459  | 11189.391 | NM_004915 | 12957.578 | 15118.063 |
| AL137619  | 1140.94   | 1098.95   | NM_003016 | 29531.713 | 40918.016 | AK022207  | 2817.486  | 4870.44   |
| NM_000085 | 450.032   | 509.469   | NM_005463 | 46154.656 | 56800.957 | AV708752  | 5563.239  | 8596.891  |
| AB007859  | 1484.19   | 1216.701  | NM_001325 | 2528.738  | 3439.258  | AF119885  | 4928.843  | 6829.434  |
| NM_006754 | 1351.269  | 1159.489  | NM_018282 | 14335.759 | 15279.522 | NM_000750 | 2548.142  | 2562.781  |
| NM_001127 | 6105.51   | 5685.821  | BC019932  | 2218.553  | 2813.17   | NM_004996 | 6472.687  | 9529.939  |
| NM_012430 | 3611.682  | 2943.913  | AF114818  | 3261.657  | 3731.356  | NM_005971 | 8420.975  | 10752.472 |
| NM_003917 | 5158.111  | 4527.017  | AK025106  | 2414.511  | 3698.819  | NM_017435 | 900.59    | 2596.292  |
| NM_007077 | 1317.112  | 1278.807  | NM_020144 | 4024.784  | 6327.495  | AK026281  | 2743.236  | 3145.748  |
| NM_002956 | 3578.724  | 2744.138  | NM_003905 | 49500.727 | 52490.477 | U23862    | 1239.779  | 1303.612  |
| AB018739  | 4887.839  | 4491.464  | BE893142  | 3687.474  | 4366.168  | AK026680  | 19046.645 | 21807.9   |
| NM_006750 | 43044.457 | 34303.469 | NM_003103 | 8106.09   | 12193.779 | NM_012436 | 59266.109 | 66542.984 |
| NM_005535 | 441.623   | 833.696   | NM_015340 | 7410.831  | 7921.595  | AK001299  | 61636.836 | 59301.039 |
| AK001913  | 9776.603  | 14805.149 | NM_006451 | 6278.761  | 5579.309  | AB014559  | 34897.535 | 29648.318 |
| NM_004292 | 4295.662  | 7359.34   | NM_002094 | 2822.633  | 1964.933  | NM_016485 | 19361.348 | 17725.674 |
| NM_015484 | 6384.647  | 6696.237  | NM_002937 | 1358.256  | 830.618   | NM_005033 | 9992.354  | 9392.199  |
| NM_018046 | 3155.648  | 4467.147  | NM_003191 | 6535.583  | 6059.544  | NM_015932 | 57801.465 | 56593.344 |
| NM_013316 | 1994.189  | 2099.581  | NM_018235 | 48744.352 | 45024.805 | NM_017945 | 1390.95   | 1558.087  |
| M20701    | 6544.051  | 4717.797  | NM_002424 | 476.219   | 455.758   | AK022169  | 2915.853  | 2255.928  |
| NM_002912 | 3181.013  | 4589.783  | NM_012104 | 42776.527 | 31585.074 | AF015592  | 4490.914  | 3904.079  |
| NM_013284 | 7275.741  | 15585.234 | NM_000761 | 60851.961 | 55289.602 | AK026795  | 1268.834  | 1289.937  |
| NM_006739 | 4978.318  | 4998.614  | NM_020142 | 10649.966 | 11132.616 | NM_016395 | 8497.537  | 7697.417  |
| NM_013274 | 7130.11   | 5658.915  | NM_000774 | 4278.381  | 5554.021  | NM_016617 | 18750.498 | 14446.072 |
| AL050187  | 1534.035  | 1154.88   | NM_017781 | 33718.348 | 39209.012 | NM_002027 | 13511.842 | 15463.348 |
| NM_012387 | 31812.916 | 26739.316 | NM_006004 | 56441.879 | 51888.758 | AL162078  | 15693.377 | 16123.831 |
| NM_014735 | 1124.491  | 935.461   | NM_004894 | 35294.914 | 37182.016 | NM_000915 | 1019.308  | 1346.732  |
| NM_004252 | 16635.492 | 14550.264 | AB028960  | 739.707   | 961.649   | NM_013382 | 24689.518 | 28933.039 |
| AF172929  | 10624.163 | 7877.259  | NM_005645 | 42284.188 | 46701.895 | AB002314  | 2929.049  | 3644.642  |
| NM_006395 | 16109.734 | 19715.521 | NM_006943 | 12191.805 | 12871.156 | NM_014043 | 8633.557  | 8953.976  |
| AK025655  | 4822.23   | 3921.614  | NM_006741 | 3694.496  | 4269.023  | NM_014622 | 3811.03   | 3505.148  |
| NM_004056 | 1443.516  | 819.488   | NM_014166 | 10098.912 | 10692.632 | AB011114  | 66057.992 | 66385.414 |
| NM_001614 | 50607.57  | 72663.078 | AL117606  | 8762.538  | 11083.933 | CY3Cy5    | 3398.544  | 140.143   |
| NM_000366 | 1041.297  | 1604.956  | NM_012330 | 3073.821  | 3409.277  | NM_019884 | 8290.992  | 4823.607  |
| NM_003833 | 14544.94  | 22897.709 | AF294278  | 994.595   | 981.213   | AF088051  | 5211.764  | 2926.655  |
| AK000868  | 10536.725 | 15846.68  | NM_018211 | 598.926   | 749.166   | AF086366  | 2071.894  | 1529.295  |
| NM_001233 | 4399.147  | 5248.408  | NM_014520 | 4713.288  | 4762.88   | AF086360  | 9948.398  | 11496.663 |
| NM_001234 | 2245.912  | 2922.279  | NM_002616 | 3630.607  | 2914.09   | AF086436  | 904.733   | 746.212   |
| BF679789  | 1083.933  | 1077.207  | AK025712  | 22037.939 | 19014.494 | AF087993  | 7639.795  | 5887.909  |
| H97792    | 826.64    | 897.206   | NM_005634 | 2766.921  | 2363.897  | AF035282  | 1172.821  | 1517.872  |
| L33404    | 613.818   | 562.635   | NM_017757 | 7963.568  | 7345.897  | AK021966  | 4643.179  | 4939.162  |
| M13509    | 600.409   | 932.564   | NM_002146 | 41298.039 | 41340.652 | AB018292  | 30421.596 | 24618.234 |
| X04076    | 7134.843  | 7240.425  | AB007892  | 2371.995  | 2443.096  | AK022842  | 2621.204  | 3818.231  |
| AA485362  | 1158.552  | 801.76    | NM_018207 | 7520.631  | 7946.051  | NM_007006 | 21276.262 | 17058.6   |
| AJ222801  | 1220.535  | 910.697   | NM_000345 | 54800.738 | 55313.824 | NM_019884 | 8595.814  | 7001.277  |
| W72207    | 22666.273 | 16010.929 | NM_001862 | 53093.453 | 54624.145 | SR2       | 47449.773 | 40676.301 |

|           |           |           |            |           |           |           |           |           |
|-----------|-----------|-----------|------------|-----------|-----------|-----------|-----------|-----------|
| BI772354  | 1735.419  | 1426.72   | NM_006531  | 2895.178  | 3618.345  | SR4       | 16015.344 | 12930.617 |
| AA733033  | 2534.821  | 1936.631  | AB029021   | 11605.552 | 15039.232 | SR6       | 1945.262  | 1972.598  |
| AA583574  | 2216.466  | 1737.316  | NM_002101  | 1255.122  | 1580.675  | SR8       | 6364.064  | 19194.693 |
| AI690184  | 46856.926 | 51237.719 | NM_005423  | 888.975   | 868.321   | SR10      | 19493.246 | 6037.206  |
| T48692    | 385.838   | 570.882   | Z36789     | 644.214   | 841.289   | CY3Cy5    | 2949.507  | 126.719   |
| AA927490  | 4505.799  | 3815.539  | J02874     | 3340.237  | 4303.617  | AF086054  | 7540.797  | 9510.167  |
| NM_005052 | 15132.836 | 11315.826 | BF310427   | 3081.25   | 3627.651  | AF086089  | 658.201   | 939.536   |
| AF319476  | 1418.183  | 1100.368  | N94424     | 574.955   | 674.174   | AK022259  | 66375.891 | 64096.84  |
| NM_014267 | 40948.793 | 34352.813 | AA045192   | 698.551   | 570.662   | AK022461  | 1188.748  | 1160.322  |
| NM_001481 | 1524.119  | 1597.838  | H45617     | 385.179   | 511.922   | NM_01601C | 9772.747  | 9053.381  |
| U30872    | 4615.529  | 5529.135  | H-U 44385  | 24718.076 | 42514.277 | AF147401  | 2111.667  | 1424.501  |
| AF111783  | 994.428   | 1071.357  | ID 1654970 | 5744.095  | 6302.385  | AJ001904  | 1112.436  | 992.494   |
| NM_000256 | 392.155   | 363.408   | ID 2531132 | 15097.674 | 14316.595 | AF075022  | 3308.194  | 2884.465  |
| NM_020469 | 9282.763  | 10902.832 | ID 4365538 | 581.418   | 450.424   | AF075060  | 4734.512  | 3923.638  |
| NM_002639 | 2591.303  | 2267.761  | AA485665   | 596.032   | 414.92    | AB002438  | 2523.555  | 2015.348  |
| NM_014734 | 5054.375  | 3723.166  | BF125928   | 14541.401 | 12722.761 | AF147436  | 1179.148  | 1040.216  |
| NM_002289 | 2650.881  | 1430.354  | BG571026   | 4266.126  | 4277.314  | AF085846  | 3479.854  | 3400.072  |
| AK026408  | 3003.286  | 2571.51   | AA489017   | 23250.533 | 29601.633 | AK023901  | 21639.568 | 15142.509 |
| NM_005025 | 582.106   | 474.184   | NM_001140  | 2248.379  | 2723.729  | AL109705  | 1584.633  | 1186.554  |
| NM_006307 | 411.223   | 422.253   | NM_016059  | 444.822   | 448.175   | AF147392  | 552.298   | 384.925   |
| M74782    | 2685.675  | 570.49    | NM_004843  | 3564.165  | 3829.062  | AF088057  | 13139.643 | 10859.691 |
| NM_017818 | 4456.367  | 2864.413  | AK022845   | 2037.325  | 2177.203  | AF086255  | 56532.715 | 32460.986 |
| NM_020433 | 511.237   | 369.586   | NM_003004  | 469.45    | 821.612   | AK022660  | 1131.314  | 703.875   |
| NM_001767 | 1239.011  | 1262.796  | S77835     | 1084.826  | 1623.934  | AK026847  | 2746.951  | 2599.566  |
| AF028823  | 3818.856  | 3707.922  | NM_002985  | 2454.095  | 2740.339  | AK023048  | 920.622   | 656.318   |
| NM_00497C | 236.87    | 220.085   | AB018347   | 13287.47  | 17568.486 | AK026891  | 3628.808  | 2231.708  |
| NM_004295 | 18580.895 | 17086.498 | AB033073   | 4920.701  | 5607.1    | AK024595  | 1595.013  | 1500.058  |
| NM_002087 | 33085.938 | 24798.152 | NM_003284  | 3281.777  | 3495.513  | AF075032  | 1241.354  | 1209.281  |
| AB023154  | 2574.74   | 2531.157  | NM_018152  | 754.514   | 925.111   | AF085971  | 2180.689  | 1936.552  |
| NM_014585 | 581.641   | 737.857   | NM_000319  | 6880.706  | 8589.196  | AF147302  | 5439.846  | 4588.419  |
| AF200815  | 701.754   | 733.177   | NM_003257  | 448.414   | 731.869   | AF085929  | 6554.137  | 5908.328  |
| NM_012465 | 893.347   | 576.067   | NM_012461  | 7980.078  | 7810.42   | AK001126  | 9531.347  | 6873.214  |
| M60499    | 4396.966  | 4008.855  | AK001379   | 2591.218  | 2604.53   | AF085976  | 5769.88   | 4582.586  |
| AY026461  | 4862.502  | 5110.737  | NM_01745C  | 1760.651  | 2211.618  | AF075104  | 9063.449  | 8537.302  |
| AK025708  | 7942.387  | 7358.062  | NM_002023  | 599.332   | 624.78    | AK021724  | 582.336   | 572.976   |
| NM_000405 | 907.284   | 1458.488  | NM_001616  | 407.639   | 297.685   | AL133025  | 1614.205  | 1835.24   |
| NM_00542C | 291.025   | 734.801   | NM_005904  | 833.113   | 701.33    | AL137402  | 12759.667 | 12579.131 |
| NM_005564 | 29270.287 | 20954.896 | NM_005273  | 19295.404 | 17053.313 | AL137617  | 5628.43   | 3829.714  |
| NM_004508 | 2977.783  | 2424.244  | NM_000524  | 637.851   | 780.822   | AL359568  | 33279.539 | 23614.99  |
| AL137619  | 1190.225  | 1001.23   | NM_007072  | 5171.589  | 5827.151  | AL133564  | 17019.258 | 13298.988 |
| AB007859  | 1219.755  | 974.726   | NM_01232C  | 10569.916 | 7422.276  | AL137428  | 2214.978  | 2645.675  |
| NM_006754 | 1391.875  | 1090.798  | NM_018208  | 5269.017  | 4839.12   | AL157462  | 2420.375  | 1872.911  |
| NM_001127 | 5543.765  | 5237.92   | NM_015929  | 7710.306  | 8627.095  | AL359602  | 14305.459 | 9677.063  |
| NM_01243C | 3758.889  | 2673.675  | U90653     | 11319.951 | 14159.222 | NM_01819C | 66446.398 | 54495.063 |
| NM_003917 | 5730.402  | 4697.9    | NM_000196  | 753.75    | 876.604   | AK021744  | 3319.001  | 3233.716  |
| NM_007077 | 1433.301  | 1661.347  | NM_018339  | 3851.532  | 5009.805  | NM_01843C | 17145.557 | 18063.096 |
| NM_002956 | 3896.3    | 4308.198  | NM_006745  | 13475.317 | 18737.35  | AL110200  | 9030.065  | 6986.721  |
| AB018739  | 7364.258  | 13132.134 | NM_000275  | 1174.301  | 1428.597  | AL133640  | 5341.812  | 4751.686  |
| NM_00675C | 42991.238 | 39538.352 | AK000037   | 1518.817  | 1992.291  | AK023783  | 1352.445  | 1033.458  |
| NM_020164 | 19133.637 | 14846.557 | NM_01476C  | 3661.354  | 5023.947  | AL358312  | 2530.571  | 2802.079  |
| AK023521  | 13366.439 | 9339.619  | NM_018713  | 508.154   | 808.117   | AF070647  | 58791.387 | 45191.027 |
| NM_004292 | 4153.066  | 4811.273  | AJ006268   | 844.249   | 1407.816  | AF116649  | 1980.64   | 1746.299  |
| NM_015484 | 6626.918  | 6185.465  | AF190864   | 6563.234  | 7863.364  | AF174394  | 3788.089  | 2430.032  |

|           |           |           |            |           |           |           |           |           |
|-----------|-----------|-----------|------------|-----------|-----------|-----------|-----------|-----------|
| NM_018046 | 2893.239  | 2327.536  | NM_001177  | 4154.73   | 5256.625  | AF083121  | 749.709   | 1022.722  |
| NM_013316 | 1760.916  | 1841.255  | NM_014447  | 2165.231  | 2520.514  | AF144054  | 1821.058  | 2286.024  |
| M20701    | 7718.017  | 10242.493 | NM_002356  | 462.969   | 565.219   | AK025924  | 1466.209  | 1534.792  |
| NM_002912 | 2747.825  | 2458.222  | NM_006691  | 1097.24   | 1393.248  | AK021876  | 45902.652 | 31349.885 |
| NM_013284 | 5584.943  | 4582.222  | NM_001505  | 1007.455  | 921.38    | AK022017  | 1878.42   | 1422.421  |
| NM_006739 | 3940.258  | 2916.628  | NM_003710  | 3161.702  | 2893.609  | AK022160  | 4540.264  | 3453.698  |
| NM_013274 | 8892.275  | 14121.584 | Z83805     | 768.333   | 581.091   | AK022295  | 1500.084  | 1093.965  |
| AL050187  | 1407.896  | 1149.98   | NM_004666  | 1258.474  | 1241.21   | AK021935  | 6893.293  | 6261.596  |
| NM_007127 | 336.048   | 273.757   | NM_003614  | 10020.897 | 9422.062  | AK022187  | 16155.893 | 11755.418 |
| NM_012387 | 28440.795 | 18545.264 | NM_014257  | 18897.457 | 15595.478 | AK022337  | 7123.265  | 5282.761  |
| NM_014735 | 1063.973  | 909.078   | NM_000025  | 44223.02  | 45327.059 | AL133618  | 13295.466 | 13859.908 |
| NM_004252 | 16950.871 | 16639.82  | D38521     | 7420.914  | 6798.002  | AF230314  | 4153.472  | 3440.778  |
| AF172929  | 11202.929 | 7422.338  | NM_000403  | 35318.711 | 35880.316 | AK001086  | 2391.958  | 1886.143  |
| NM_006396 | 14789.598 | 12756.566 | AB020677   | 4459.685  | 5804.92   | AJ131610  | 7068.567  | 7270.872  |
| AK025655  | 5438.002  | 6222.214  | AB033097   | 2555.891  | 3162.256  | S50207    | 526.532   | 644.527   |
| NM_004056 | 1903.836  | 3235.344  | NM_000135  | 2555.27   | 2955.156  | AF119872  | 24445.725 | 25067.695 |
| NM_001056 | 2328.811  | 2379.117  | AJ223948   | 7040.084  | 8380.254  | X99687    | 1735.033  | 1931.938  |
| NM_003833 | 12204.214 | 16166.549 | NM_016218  | 1072.099  | 1052.069  | AI275123  | 956.362   | 1609.681  |
| AK000868  | 8896.703  | 8477.33   | AK022947   | 2787.264  | 4682.89   | NM_002622 | 25512.406 | 31418.613 |
| NM_001233 | 4534.728  | 5379.942  | AL050029   | 2308.756  | 3191.964  | AK024185  | 3332.474  | 3719.02   |
| NM_001234 | 2193.163  | 2322.243  | AL049966   | 702.114   | 846.883   | NM_015417 | 1009.695  | 1203.302  |
| BF679789  | 1040.744  | 993.334   | NM_005204  | 9211.307  | 9835.927  | AL137562  | 9296.514  | 10393.643 |
| H97792    | 1007.077  | 1086.372  | NM_016203  | 1685.225  | 1945.381  | M90355    | 62624.836 | 60454.852 |
| L33404    | 676.683   | 467.07    | NM_002759  | 4461.096  | 4168.324  | AK022495  | 4284.155  | 3282.96   |
| M13509    | 680.821   | 772.869   | NM_007271  | 2800.144  | 3449.721  | AK021632  | 1543.351  | 1731.375  |
| X04076    | 6906.367  | 6054.019  | NM_006255  | 3238.305  | 4011.705  | AK023143  | 1727.791  | 1003.488  |
| W95082    | 259.434   | 384.754   | BE392143   | 3927.604  | 5066.913  | AK026373  | 14253.767 | 10426.64  |
| AA485362  | 1268.817  | 1484.176  | NM_005813  | 2870.224  | 1953.659  | AK021581  | 7371.855  | 5615.398  |
| AJ222801  | 1404.593  | 1155.786  | AB037718   | 5505.759  | 4619.365  | NM_006687 | 10013.218 | 9203.552  |
| W72207    | 23251.621 | 16371.85  | AL389994   | 1293.031  | 1293.506  | NM_013301 | 6721.53   | 5890.141  |
| BI772354  | 1494.761  | 1060.698  | NM_003909  | 6305.314  | 6198.291  | NM_017673 | 3413.722  | 2629.238  |
| AA733033  | 2944.439  | 2382.84   | NM_001277  | 20731.131 | 17682.598 | AB046857  | 2318.201  | 2288.911  |
| AA583574  | 2365.585  | 2259.939  | NM_003659  | 12214.522 | 16965.197 | AK024408  | 50390.395 | 48106.055 |
| AI690184  | 45691.574 | 51999.707 | NM_001862  | 52290.328 | 55714.309 | AJ227905  | 809.426   | 874.761   |
| AA927490  | 4262.481  | 3985.5    | NM_006531  | 10666.625 | 10632.155 | L19364    | 7164.581  | 8946.447  |
| NM_005052 | 16427.436 | 14711.012 | AB029021   | 57651.531 | 57025.371 | NM_005390 | 6619.346  | 7184.554  |
| BF038439  | 456.774   | 429.647   | NM_002101  | 3176.385  | 2726.441  | AJ012502  | 28617.205 | 30660.275 |
| NM_002289 | 3632.804  | 4070.017  | Z36789     | 713.333   | 1108.968  | AK024170  | 925.499   | 1229.147  |
| AK026408  | 3715.354  | 3789.716  | J02874     | 9293.32   | 10619.033 | AK021722  | 1533.786  | 2065.348  |
| NM_005025 | 717.789   | 657.036   | BF310427   | 6471.504  | 7719.104  | NM_000681 | 1136.797  | 1525.265  |
| NM_006307 | 474.656   | 376.168   | N94424     | 684.184   | 828.294   | AF147445  | 4909.181  | 5181.094  |
| M74782    | 3048.524  | 1076.137  | AA045192   | 2880.469  | 3356.979  | Y10508    | 35033.422 | 35576.355 |
| NM_017818 | 5074.093  | 3591.86   | H45617     | 552.898   | 840.546   | NM_005182 | 67581.883 | 63833.777 |
| NM_020433 | 599.158   | 523.235   | M92642     | 4980.48   | 5105.467  | D17074    | 3362.106  | 3477.595  |
| NM_001767 | 1473.571  | 897.114   | H-U 44385  | 28429.691 | 32516.447 | AF039944  | 6932.895  | 5920.261  |
| AF028823  | 4157.581  | 4356.886  | ID 1654970 | 9814.873  | 9280.856  | AJ276252  | 2042.616  | 2200.01   |
| NM_004295 | 20733.766 | 20218.342 | ID 2531132 | 16759.797 | 15587.313 | AK021716  | 12582.649 | 9978.508  |
| NM_002087 | 45808.57  | 50519.004 | ID 4365538 | 1103.094  | 1591.694  | AK025035  | 14732.216 | 13040.993 |
| AB023154  | 2066.179  | 1884.208  | AA485665   | 769.727   | 896.45    | AK002085  | 6281.5    | 5375.826  |
| NM_001714 | 1000.158  | 877.957   | BF125928   | 12254.177 | 10506.459 | NM_004923 | 2646.226  | 2688.659  |
| NM_014585 | 549.789   | 821.171   | BG571026   | 3082.543  | 2609.713  | NM_003971 | 7467.954  | 6767.431  |
| AF200815  | 939.861   | 1009.598  | AA489017   | 17212.912 | 11188.158 | AK026973  | 1409.814  | 1430.829  |
| NM_014564 | 1047.257  | 1123.353  | NM_004843  | 3790.434  | 3966.934  | NM_005822 | 1922.258  | 1980.088  |

|           |           |           |           |           |           |           |           |           |
|-----------|-----------|-----------|-----------|-----------|-----------|-----------|-----------|-----------|
| NM_013441 | 1308.766  | 1312.9    | AK022845  | 2810.417  | 2390.295  | U81002    | 10229.853 | 12052.679 |
| NM_014421 | 595.732   | 549.124   | NM_003004 | 881.557   | 966.614   | NM_016295 | 21054.152 | 22177.582 |
| NM_017680 | 506.47    | 310.041   | S77835    | 1437.443  | 1705.281  | NM_014185 | 33512.008 | 33831.418 |
| NM_012465 | 940.397   | 1058.354  | NM_002985 | 2874.747  | 3236.374  | L38517    | 12776.979 | 13171.691 |
| M60499    | 4637.073  | 6726.458  | AB018347  | 19528.15  | 29338.512 | AK026101  | 39591.086 | 38223.738 |
| NM_004300 | 6631.427  | 5122.599  | AB033073  | 9372.041  | 11136.197 | AK022194  | 58969.07  | 56524.391 |
| AB007859  | 1562.002  | 1386.284  | NM_003284 | 6306.689  | 8545.1    | AF085963  | 5670.11   | 5937.677  |
| NM_006754 | 1341.633  | 929.985   | NM_018152 | 1310.082  | 1411.192  | AF131851  | 1382.24   | 1863.777  |
| NM_001127 | 6280.437  | 5068.046  | NM_000319 | 7826.244  | 9213.378  | AK021436  | 6928.495  | 7731.736  |
| NM_012430 | 4271.028  | 3715.45   | NM_003257 | 608.199   | 1009.327  | U58664    | 3926.265  | 4656.409  |
| NM_003917 | 5988.461  | 5381.39   | NM_012461 | 8121.753  | 7478.482  | AF085937  | 1243.611  | 1257.163  |
| NM_007077 | 1404.743  | 1016.964  | AK001379  | 3304.287  | 3286.232  | AL137569  | 19049.576 | 21638.889 |
| NM_002956 | 4270.394  | 5796.615  | NM_017450 | 5278.863  | 8024.021  | AK021920  | 7699.92   | 8154.088  |
| AB018739  | 5247.833  | 5101.781  | NM_002023 | 1431.438  | 1520.924  | AL049415  | 11706.737 | 12576.414 |
| NM_006750 | 38446.41  | 24627.895 | NM_002839 | 1463.632  | 1516.842  | AK022375  | 3420.896  | 3585.381  |
| NM_020164 | 18069.697 | 10590.631 | AF190500  | 1105.71   | 1044.799  | NM_003375 | 62217.348 | 62295.723 |
| AK023521  | 13126.756 | 12936.307 | NM_001616 | 1026.969  | 1233.767  | AL110194  | 19845.4   | 21290.01  |
| NM_014267 | 36317.879 | 25140.891 | NM_005904 | 984.314   | 1133.51   | AF138860  | 3080.952  | 2837.485  |
| NM_001481 | 1100.685  | 771.154   | NM_005273 | 26846.539 | 20173.885 | AF200348  | 5515.205  | 2768.144  |
| U30872    | 3775.204  | 2997.447  | NM_000524 | 645.528   | 441.307   | Y11710    | 1476.45   | 1045.619  |
| AF111783  | 1102.937  | 489.808   | NM_018207 | 5118.626  | 3748.316  | J03756    | 1277.998  | 991.653   |
| NM_020469 | 9813.961  | 11670.895 | NM_000345 | 59306.734 | 53016.336 | NM_002650 | 5430.297  | 3164.566  |
| NM_002639 | 3048.819  | 3257.198  | NM_018208 | 5467.983  | 4679.063  | NM_003260 | 46864.844 | 35624.641 |
| NM_014734 | 5931.083  | 7402.627  | NM_015929 | 6761.603  | 6531.589  | AK024071  | 3346.162  | 2617.304  |
| NM_001362 | 539.219   | 651.262   | U90653    | 12519.711 | 13901.789 | AF056490  | 5532.088  | 5137.585  |
| NM_004056 | 1346.417  | 1246.168  | NM_000196 | 1115.355  | 1287.254  | NM_005539 | 7031.232  | 7081.142  |
| NM_018085 | 982.813   | 900.139   | NM_018339 | 5171.364  | 5222.035  | BF341504  | 883.788   | 955.818   |
| NM_001056 | 3787.081  | 5882.263  | NM_006745 | 17870.936 | 25285.664 | NM_005541 | 11276.958 | 12147.342 |
| NM_002539 | 318.089   | 334.238   | NM_000275 | 1837.615  | 2356.292  | AB002319  | 5941.505  | 5974.034  |
| AY026461  | 5226.589  | 4198.812  | AK000037  | 2116.492  | 1936.242  | AF039942  | 7114.066  | 6171.7    |
| AK025708  | 6847.118  | 6581.903  | NM_014760 | 3698.946  | 3663.342  | NM_004421 | 7192.242  | 6767.482  |
| NM_000405 | 771.697   | 900.363   | NM_018713 | 1108.324  | 1313.88   | AB046863  | 37067.949 | 40506.172 |
| NM_005564 | 29614.146 | 22262.967 | AJ006268  | 1090.355  | 1384.288  | M62403    | 21759.432 | 20254.992 |
| NM_004508 | 2693.673  | 1933.024  | AF190864  | 6953.799  | 7454.389  | NM_017883 | 9922.821  | 11584.065 |
| NM_006405 | 5063.209  | 3500.264  | NM_001177 | 4553.435  | 5315.237  | AK025131  | 8306.254  | 9218.438  |
| AJ245946  | 389.952   | 648.56    | NM_014447 | 2645.455  | 2403.931  | NM_000754 | 53279.27  | 52779.359 |
| NM_006749 | 712.84    | 556.061   | NM_002356 | 1280.738  | 1172.663  | NM_014619 | 4259.552  | 4454.236  |
| NM_004694 | 3064.45   | 2860.45   | NM_006691 | 1747.444  | 1299.855  | NM_005629 | 52129.277 | 51584.59  |
| NM_000324 | 237.467   | 221.6     | NM_001505 | 1167.837  | 1341.435  | J04621    | 1620.424  | 1870.475  |
| AL137619  | 1773.33   | 1892.98   | NM_003710 | 7729.806  | 8050.897  | NM_000718 | 7584.195  | 8205.84   |
| NM_003615 | 1566.649  | 1098.467  | Z83805    | 895.216   | 576.532   | NM_000161 | 8989.93   | 9390.029  |
| NM_005052 | 17068.73  | 16781.658 | NM_004666 | 1254.288  | 951.363   | NM_001972 | 1084.957  | 365.046   |
| BF038439  | 425.572   | 362.835   | NM_003614 | 6335.066  | 4042.651  | NM_001445 | 2680.076  | 1940.901  |
| AF319476  | 1621.588  | 1219.187  | NM_014257 | 15958.552 | 10447.04  | AK024455  | 705.969   | 478.846   |
| AK001913  | 7700.444  | 5442.461  | NM_001140 | 2056.137  | 1441.761  | NM_002006 | 54955.633 | 49368.539 |
| NM_004292 | 3821.823  | 4767.979  | NM_000403 | 35736.793 | 33436.316 | NM_007111 | 18061.484 | 16142.192 |
| NM_015484 | 7084.947  | 8549.971  | NM_018127 | 23862.236 | 33670.027 | NM_002048 | 752.715   | 665.521   |
| NM_018046 | 2869.01   | 2823.533  | AB020677  | 35406.535 | 44410.758 | NM_004702 | 1595.954  | 1144.91   |
| NM_013316 | 2079.929  | 2302.406  | AB033097  | 7845.019  | 8229.433  | NM_007109 | 5245.976  | 3115.272  |
| M20701    | 6029.153  | 4839.658  | NM_000135 | 4345.419  | 4173.646  | AK023404  | 21742.977 | 11620.224 |
| NM_002912 | 2681.845  | 1697.485  | AJ223948  | 8266.169  | 8431.046  | NM_013239 | 2731.746  | 2441.97   |
| NM_013284 | 5341.752  | 4886.274  | NM_016218 | 848.044   | 806.344   | NM_001789 | 4433.806  | 4355.51   |
| NM_006739 | 4160.031  | 3140.586  | AK022947  | 2265.438  | 2323.215  | NM_016004 | 8464.696  | 6250.109  |



|           |           |           |            |           |           |           |           |           |
|-----------|-----------|-----------|------------|-----------|-----------|-----------|-----------|-----------|
| NM_013274 | 6339.044  | 4796.968  | AL050029   | 2190.06   | 2147.695  | NM_00265E | 2471.971  | 2243.003  |
| AL050187  | 1654.223  | 1411.054  | AL049966   | 740.26    | 726.445   | AB028955  | 48465.367 | 47266.285 |
| NM_012387 | 28663.992 | 22449.17  | NM_005204  | 9500.269  | 10244.41  | U66879    | 46142.543 | 38518.992 |
| NM_01473E | 1128.768  | 933.672   | NM_016203  | 1741.472  | 2080.535  | NM_016022 | 8651.709  | 8157.786  |
| NM_004252 | 17850.268 | 15869.483 | NM_002759  | 4723.831  | 4234.928  | NM_004874 | 2768.193  | 2744.438  |
| AF172929  | 10899.704 | 7706.64   | NM_007271  | 3072.845  | 3179.855  | NM_014204 | 4345.343  | 4232.413  |
| NM_00639E | 16707.205 | 18418.1   | NM_006255  | 3614.213  | 3700.777  | S70385    | 40885.742 | 38929.891 |
| L11285    | 2425.042  | 1411.483  | BE392143   | 5094.072  | 4371.339  | M34671    | 10751.656 | 13067.513 |
| AK025655  | 4859.746  | 3925.774  | NM_005813  | 4241.065  | 2950.097  | NM_001941 | 648.075   | 671.21    |
| CY3Cy5    | 1245.713  | 244.062   | AB037718   | 8174.35   | 6964.26   | NM_01850E | 13158.977 | 15839.479 |
| NM_01224E | 18143.189 | 13770.343 | AL389994   | 1568.009  | 1097.401  | NM_00408E | 1658.374  | 1757.805  |
| NM_133263 | 2895.573  | 2858.709  | NM_003909  | 5886.86   | 4360.466  | NM_014944 | 27166.457 | 25917.613 |
| AF086232  | 450.317   | 414.397   | NM_001277  | 11510.007 | 7317.453  | NM_007352 | 1014.184  | 618.103   |
| NM_017742 | 2023.049  | 1753.13   | NM_003659  | 9296.906  | 7256.819  | AF176706  | 7744.763  | 5322.747  |
| NM_00510E | 844       | 892.068   | NM_007072  | 9108.239  | 7377.871  | NM_014484 | 1325.006  | 1276.337  |
| AK022292  | 3453.64   | 3226.997  | NM_012320  | 8406.685  | 6348.922  | AF163762  | 551.161   | 376.291   |
| AB051436  | 3733.433  | 3984.132  | AB029021   | 58121.176 | 58050.348 | NM_00108E | 5775.538  | 6381.817  |
| AK026482  | 6000.717  | 6150.002  | NM_002101  | 3190.137  | 2430.27   | NM_014670 | 11679.464 | 11833.944 |
| AL137473  | 4667.652  | 4667.634  | NM_005423  | 2093.435  | 2012.531  | NM_01904E | 11565.605 | 11769.419 |
| AJ001873  | 508.076   | 393.377   | Z36789     | 596.145   | 568.753   | NM_001040 | 4341.947  | 3607.456  |
| AL137476  | 1206.396  | 734.513   | J02874     | 14699.395 | 15399.056 | AF279698  | 10575.382 | 11854.02  |
| AF052174  | 4556.772  | 3633.055  | BF310427   | 13706.397 | 14071.764 | NM_01984E | 6565.461  | 8736.036  |
| AF070590  | 1758.888  | 1626.283  | N94424     | 1150.731  | 961.248   | AB032996  | 58141.648 | 59920.254 |
| NM_00470E | 420.558   | 470.014   | AA045192   | 3978.481  | 3763.666  | AB040881  | 13797.358 | 10856.875 |
| NM_01224E | 18843.506 | 16234.389 | H45617     | 1088.41   | 817.704   | AY007121  | 5992.889  | 4069.784  |
| NM_133263 | 2820.485  | 2458.278  | M92642     | 10477.106 | 9963.974  | NM_003372 | 16672.834 | 13015.979 |
| SR2       | 42226.082 | 55975.855 | H-U 44385  | 35421.852 | 45011.996 | NM_007317 | 12442.473 | 9783.569  |
| SR4       | 9794.124  | 9024.477  | ID 1654970 | 16615.561 | 15481.43  | AB037826  | 1861.422  | 1007.018  |
| SR6       | 1491.211  | 1176.931  | ID 2531132 | 20806.916 | 17939.861 | AK021466  | 4468.792  | 3032.247  |
| SR8       | 5432.466  | 11994.8   | ID 4365538 | 1812.875  | 1623.668  | Z36796    | 65055.348 | 62869.23  |
| SR10      | 17099.912 | 4669.386  | AA485665   | 811.705   | 715.439   | NM_006443 | 63475.988 | 46845.008 |
| CY3Cy5    | 1038.451  | 187.783   | BF125928   | 18539.451 | 19501.441 | NM_00155E | 927.594   | 550.279   |
| AK024432  | 307.158   | 419.011   | BG571026   | 4217.131  | 3076.052  | NM_002634 | 40417.047 | 29718.361 |
| AL137513  | 643.706   | 558.198   | AA489017   | 17253.975 | 8549.033  | NM_01774E | 6068.094  | 5850.922  |
| AF088001  | 423.135   | 537.173   | NM_018152  | 2297.643  | 2206.044  | NM_00293E | 18179.523 | 14259.686 |
| NM_018067 | 12286.419 | 11252.362 | NM_000319  | 9123.063  | 7630.768  | AK023652  | 40291.133 | 28666.449 |
| NM_01895E | 3856.782  | 3470.866  | NM_003257  | 817.841   | 995.567   | AF099032  | 2648.708  | 2320.673  |
| NM_014787 | 2275.998  | 2368.698  | NM_012461  | 9983.934  | 9359.925  | NM_003070 | 8071.897  | 7028.125  |
| AL122109  | 720.02    | 683.632   | AK001379   | 4939.398  | 4678.604  | AL122101  | 32397.486 | 27239.475 |
| AF074988  | 2913.864  | 3391.637  | NM_017450  | 6221.256  | 5931.343  | NM_004780 | 614.34    | 639.328   |
| AK024946  | 1567.93   | 1248.11   | NM_002023  | 2161.111  | 2267.233  | NM_01621E | 17385.08  | 16165.624 |
| AK026375  | 4410.264  | 4659.988  | NM_002839  | 2258.668  | 2060.333  | AK001649  | 695.589   | 1091.163  |
| NM_014710 | 403.201   | 779.175   | AF190500   | 1289.514  | 1914.106  | NM_01663E | 39650.316 | 37558.082 |
| U85992    | 1629.712  | 1521.522  | NM_00161E  | 665.394   | 658.347   | AB018274  | 25614.824 | 26544.23  |
| AL110152  | 362.365   | 254.963   | NM_005904  | 1131.502  | 973.644   | NM_005871 | 13771.628 | 12532.209 |
| AF131745  | 5539.2    | 7702.001  | NM_005273  | 35729.414 | 38731.398 | NM_007042 | 9034.432  | 8304.438  |
| AL117565  | 4186.68   | 4576.608  | NM_000524  | 937.319   | 1183.867  | NM_016333 | 24059.541 | 17641.512 |
| AF147305  | 407.833   | 349.065   | NM_00657E  | 11259.902 | 11943.836 | BE875028  | 11373.199 | 9862.167  |
| NM_007030 | 655.739   | 462.236   | AB035266   | 14105.111 | 11949.777 | AK000511  | 13492.164 | 11106.119 |
| AK022111  | 272.46    | 162.09    | NM_003744  | 6569.818  | 4835.9    | AF121255  | 7129.896  | 7222.903  |
| AK021527  | 377.16    | 204.159   | NM_00637E  | 3655.729  | 2751.765  | NM_005494 | 13594.299 | 12646.771 |
| AF143882  | 1711.423  | 1018.275  | NM_018132  | 1270.38   | 992.096   | NM_01794E | 1515.143  | 1265.65   |
| U00953    | 535.385   | 345.3     | NM_018207  | 3953.059  | 2251.283  | NM_004953 | 14840.786 | 12376.692 |

|           |           |           |           |           |           |           |           |           |
|-----------|-----------|-----------|-----------|-----------|-----------|-----------|-----------|-----------|
| AK026401  | 950.128   | 1103.438  | NM_000345 | 61381.668 | 55684.719 | NM_012195 | 5827.859  | 4546.779  |
| AK022604  | 1267.112  | 1088.161  | NM_002779 | 12805.439 | 12918.335 | AL049682  | 2682.674  | 2272.59   |
| U66048    | 926.154   | 860.334   | L40397    | 28743.73  | 28961.846 | NM_005525 | 18547.609 | 14307.068 |
| AK023401  | 569.583   | 495.17    | NM_020198 | 53571.063 | 55467.676 | AL050199  | 7855.865  | 4392.328  |
| AK001865  | 2607.317  | 1774.02   | AA098879  | 1072.994  | 1052.281  | NM_004901 | 2538.203  | 1657.256  |
| AK024035  | 3892.995  | 3431.979  | AF070525  | 15727.976 | 17420.545 | U77088    | 1040.794  | 975.286   |
| AL049331  | 432.426   | 348.541   | NM_001177 | 5047.56   | 6034.577  | NM_006721 | 27604.248 | 22591.129 |
| AL080233  | 432.895   | 295.87    | NM_014447 | 2792.338  | 3230.153  | NM_016282 | 44459.832 | 42782.543 |
| AL050132  | 429.771   | 264.037   | NM_002356 | 2718.235  | 2552.256  | NM_002765 | 12748.64  | 14081.097 |
| AL117663  | 321.053   | 180.045   | NM_006691 | 2741.816  | 2320.545  | NM_001905 | 7517.399  | 6934.354  |
| NM_014293 | 1016.311  | 713.561   | NM_001505 | 1535.038  | 1810.403  | AF292100  | 13365.874 | 13368.26  |
| AK023429  | 435.258   | 433.172   | NM_003710 | 12513.185 | 13355.107 | NM_003434 | 58966.215 | 61400.68  |
| AK022276  | 630.262   | 757.224   | Z83805    | 1084.022  | 1175.415  | NM_018181 | 1031.695  | 1325.8    |
| AK026881  | 557.984   | 728.973   | NM_004666 | 1688.246  | 1724.186  | X68880    | 949.891   | 1162.918  |
| AK023774  | 1207.352  | 1168.055  | NM_003614 | 8823.623  | 9167.045  | NM_005654 | 942.167   | 1466.942  |
| AL049377  | 402.302   | 336.984   | NM_014257 | 10237.557 | 9375.855  | AF024698  | 59670.879 | 63632.309 |
| AK001432  | 318.395   | 320.08    | NM_001140 | 1764.865  | 2441.075  | BE904617  | 55049.992 | 59605.75  |
| AL133568  | 5132.921  | 4830.941  | NM_004843 | 1744.751  | 1673.276  | AK024495  | 3351      | 4117.765  |
| AF009265  | 3693.678  | 4394.98   | AK022845  | 1346.665  | 1124.122  | AF024694  | 5290.646  | 5023.512  |
| AF009309  | 451.34    | 593.073   | NM_003004 | 573.796   | 420.806   | AF091081  | 33013.402 | 29423.758 |
| NM_002360 | 1669.556  | 1837.033  | S77835    | 1389.381  | 805.693   | AK001758  | 5150.434  | 3524.759  |
| AF009322  | 855.759   | 742.029   | NM_002985 | 2308.289  | 1447.041  | U90842    | 2111.999  | 1569.899  |
| AF056425  | 731.772   | 768.359   | AB018347  | 50384.363 | 38584.035 | AF086325  | 13766.423 | 11489.563 |
| AF090893  | 394.034   | 496.02    | AB033073  | 29688.357 | 25578.764 | NM_004925 | 2693.188  | 2432.879  |
| NM_018033 | 1153.125  | 956.537   | NM_003284 | 19214.709 | 16213.938 | NM_005081 | 888.427   | 791.399   |
| AK021541  | 307.762   | 376.314   | NM_003909 | 8871.649  | 9589.179  | NM_004955 | 1817.958  | 1669.077  |
| AK021766  | 341.813   | 385.296   | NM_001277 | 29357.82  | 31420.576 | AK026022  | 58443.68  | 58141.395 |
| AK021630  | 633.719   | 431.613   | NM_003659 | 14510.548 | 15198.945 | NM_003195 | 14052.753 | 13338.015 |
| AK021831  | 858.104   | 442.75    | NM_007072 | 11490.587 | 11206.386 | NM_004306 | 57803.422 | 64460.219 |
| NM_020153 | 693.245   | 933.401   | NM_012320 | 6554.108  | 5058.331  | NM_001153 | 1314.528  | 1221.825  |
| NM_005321 | 1649.574  | 1943.274  | NM_018208 | 3488.217  | 3052.793  | NM_006786 | 19957.617 | 18305.031 |
| AF073520  | 5383.481  | 4407.111  | NM_015929 | 6127.751  | 5784.605  | NM_006205 | 3586.989  | 3800.233  |
| NM_014015 | 1595.464  | 1654.057  | U90653    | 12080.41  | 11974.808 | NM_004034 | 26875.627 | 28052.055 |
| AK026839  | 1494.195  | 1417.574  | NM_000196 | 1252.673  | 1506.22   | NM_000130 | 29865.457 | 29117.365 |
| AJ008123  | 3668.03   | 3650.868  | NM_018339 | 5689.731  | 5628.486  | AF193756  | 1492.799  | 1673.548  |
| AJ008156  | 1308.029  | 1612.919  | NM_006745 | 18680.326 | 22388.674 | NM_004183 | 1298.779  | 1347.569  |
| AF147321  | 406.439   | 418.592   | NM_000275 | 2069.715  | 2875.156  | AI492087  | 1583.498  | 1723.308  |
| AF161437  | 3293.505  | 2827.777  | AK000037  | 2232.419  | 2131.754  | R72122    | 11841.675 | 15102.094 |
| U73530    | 603.074   | 539.958   | NM_014760 | 3673.623  | 3190.058  | Z35309    | 15692.096 | 16943.6   |
| AF086158  | 11542.136 | 9714.48   | NM_018398 | 1802.944  | 1435.331  | X04571    | 3268.707  | 4098.587  |
| AF086050  | 2445.82   | 2724.419  | NM_002560 | 57151.121 | 47611.34  | AA700005  | 3571.594  | 3971.705  |
| AF147375  | 1228.137  | 1081.587  | NM_014404 | 4673.77   | 3659.018  | AA292025  | 6788.622  | 7570.875  |
| X51524    | 1304.274  | 1130.677  | NM_018713 | 1375.23   | 1240.093  | AA437226  | 11122.168 | 12457.54  |
| AK025759  | 5408.947  | 6059.536  | NM_015947 | 10834.45  | 7214.906  | R36143    | 5405.072  | 4565.76   |
| AK024105  | 911.589   | 1180.811  | NM_002042 | 58086.414 | 52000.676 | XM_056359 | 2842.637  | 3225.998  |
| AJ238556  | 1186.312  | 874.145   | AB028944  | 759.77    | 535.919   | D10353/NM | 48193.777 | 46177.066 |
| Z70699    | 370.744   | 233.178   | AJ006268  | 1430.527  | 1014.359  | M15042    | 17440.992 | 16207.002 |
| AL049919  | 486.727   | 320.544   | M74089    | 6074.926  | 3674.331  | AK056843  | 19769.668 | 18303.012 |
| NM_006895 | 1122.664  | 730.971   | AF190864  | 7198.709  | 3888.528  | U49928    | 57251.488 | 61465.016 |
| AL080066  | 16126.138 | 14435.517 | NM_000025 | 43698.121 | 43577.113 | AK096645  | 58368.672 | 56002.742 |
| AJ227870  | 639.617   | 852.641   | D38521    | 7073.783  | 5451.603  | AK092859  | 2804.232  | 2322.932  |
| AL137620  | 1028.612  | 995.568   | NM_000403 | 29986.559 | 24984.588 | NM_005793 | 19311.742 | 19211.662 |
| NM_005294 | 628.916   | 738.048   | NM_018127 | 18842.742 | 17506.34  | M55646    | 51125.129 | 49490.789 |

|           |           |           |           |           |           |           |           |           |
|-----------|-----------|-----------|-----------|-----------|-----------|-----------|-----------|-----------|
| AK026879  | 389.903   | 389.376   | AB020677  | 11635.218 | 10385.714 | NM_006112 | 42531.465 | 39754.289 |
| AF085826  | 2000.683  | 2364.579  | AB033097  | 6872.986  | 6864.913  | M12807    | 4176.893  | 4187.024  |
| AK024362  | 1498.742  | 1520.25   | NM_000135 | 4816.608  | 3924.822  | NM_001765 | 6000.479  | 5973.099  |
| AF118068  | 5527.555  | 6546.535  | AJ223948  | 8702.644  | 7779.513  | NM_003361 | 5009.114  | 6469.391  |
| NM_004164 | 1035.578  | 1017.469  | NM_016218 | 785.831   | 635.381   | NM_012095 | 28348.633 | 29848.451 |
| NM_019018 | 2571.116  | 2635.779  | AK022947  | 1978.777  | 1689.056  | NM_018684 | 56668.734 | 59399.203 |
| M87931    | 911.285   | 1271.172  | AL050029  | 1967.469  | 1595.41   | NM_017983 | 2336.825  | 2585.785  |
| NM_003544 | 47362.824 | 56557.039 | AL049966  | 667.115   | 596.084   | AF116909  | 1980.364  | 2274.189  |
| AK001187  | 890.603   | 817.664   | NM_005204 | 8988.966  | 6605.734  | BE906724  | 2800.648  | 2850.915  |
| NM_003529 | 6081.862  | 5729.512  | NM_016203 | 1547.089  | 1169.287  | NM_002283 | 33306.008 | 36505.996 |
| AF056436  | 2092.732  | 1877.562  | NM_002759 | 4035.182  | 2565.25   | NM_007184 | 5627.237  | 7768.914  |
| AB023191  | 1214.353  | 1166.079  | NM_007271 | 3358.859  | 2889.097  | NM_005291 | 56547.031 | 55394.07  |
| AK027212  | 7822.653  | 6943.114  | NM_006255 | 4102.721  | 3388.311  | AF253316  | 1077.947  | 1007.359  |
| X56197    | 1601.51   | 1557.223  | BE392143  | 6329.075  | 3357.771  | NM_005855 | 1924.794  | 1965.446  |
| NM_005195 | 1419.966  | 1442.703  | NM_005813 | 4708.34   | 2069.145  | NM_002923 | 4888.725  | 5596.245  |
| U90905    | 1090.646  | 1104.844  | AB037718  | 15377.711 | 7482.885  | NM_006794 | 5007.473  | 4629.569  |
| AF161422  | 1804.229  | 1163.598  | AL389994  | 1961.419  | 991.015   | NM_018653 | 1597.124  | 1650.722  |
| AL137384  | 1211.94   | 360.76    | CY3Cy5    | 492.815   | 222.32    | NM_005388 | 21108.787 | 20404.924 |
| AF070619  | 1608.399  | 871.378   | NM_000588 | 15826.041 | 9638.383  | NM_007232 | 57209.258 | 58286.941 |
| NM_000787 | 834.895   | 662.326   | AF143872  | 12140.066 | 8554.414  | NM_016257 | 2492.43   | 1839.825  |
| U57962    | 1289.477  | 1638.204  | AF143326  | 1697.683  | 1412.091  | NM_002717 | 7471.513  | 10994.474 |
| NM_016176 | 12131.383 | 11611.514 | AL049229  | 1839.183  | 1362.379  | AF231916  | 17984.598 | 18739.482 |
| NM_005574 | 14695.036 | 11388.425 | NM_018306 | 45162.016 | 31842.17  | NM_003501 | 16377.09  | 16164.829 |
| NM_017895 | 7185.865  | 6733.764  | AK026146  | 2458.167  | 2107.107  | AK022654  | 59966.387 | 60556.938 |
| NM_004610 | 1724.661  | 1830.638  | AK023152  | 3370.735  | 2847.337  | BC002905  | 14175.234 | 13014.146 |
| NM_001612 | 2932.282  | 3256.905  | AK000155  | 573.332   | 566.333   | NM_018091 | 22166.572 | 22709.85  |
| AK027002  | 2645.113  | 3043.355  | AL389937  | 1605.771  | 1680.51   | NM_001108 | 15056.992 | 13669.103 |
| AB025254  | 1266.896  | 1555.343  | AK025201  | 2797.422  | 2580.523  | NM_001637 | 1961.282  | 1861.655  |
| NM_004081 | 624.07    | 875.742   | AK021927  | 480.611   | 436.506   | NM_016630 | 34268.34  | 35590.34  |
| AK001039  | 2345.695  | 2146.295  | AK022995  | 1550.565  | 1692.014  | NM_014291 | 16372.961 | 20679.438 |
| AK026465  | 1235.604  | 1355.878  | NM_000588 | 16848.117 | 17581.254 | NM_014631 | 1319.145  | 1739.712  |
| U52834    | 493.454   | 548.059   | SR3       | 19063.369 | 24385.287 | NM_001085 | 16238.215 | 16542.723 |
| AJ227898  | 301.559   | 364.368   | SR5       | 2231.481  | 3776.32   | NM_000120 | 3477.715  | 3827.851  |
| M34428    | 495.204   | 439.956   | SR7       | 2106.066  | 23333.992 | NM_002803 | 18995.615 | 21111.361 |
| NM_003532 | 1055.259  | 812.7     | SR9       | 7814.268  | 2512.594  | NM_005508 | 5854.48   | 6439.869  |
| NM_017869 | 6967.953  | 5509.87   | CY3Cy5    | 1240.083  | 431.57    | NM_018485 | 903.94    | 1332.866  |
| U17627    | 223.736   | 233.282   | L13433    | 1031.513  | 827.151   | NM_006788 | 3174.248  | 3271.02   |
| AF075100  | 679.678   | 499.553   | NM_007220 | 733.434   | 730.941   | NM_016568 | 2955.263  | 3137.18   |
| AF203447  | 10499.803 | 6832.061  | NM_017777 | 1283.61   | 1078.767  | NM_002987 | 670.805   | 798.977   |
| NM_018502 | 1967.105  | 956.086   | AK001499  | 2598.389  | 1613.03   | AB033102  | 58669.961 | 57923.973 |
| AB040976  | 2286.377  | 2814.843  | AK023568  | 322.314   | 306.679   | NM_014774 | 4542.56   | 4081.252  |
| NM_018641 | 3555.476  | 3503.733  | AK026852  | 955.637   | 877.374   | NM_014143 | 30741.107 | 39051.68  |
| NM_002371 | 757.264   | 728.137   | AK021629  | 805.492   | 610.829   | NM_012200 | 6483.121  | 5492.075  |
| NM_002562 | 461.887   | 514.471   | AL110257  | 46971.902 | 32114.834 | NM_001724 | 5604.888  | 4331.372  |
| AK024502  | 12725.025 | 11331.728 | AB013384  | 2328.568  | 2960.302  | NM_000150 | 9107.582  | 8308.897  |
| NM_001124 | 604.93    | 390.497   | AK024824  | 1490.977  | 1730.203  | AB023152  | 1329.445  | 1194.149  |
| NM_004586 | 3158.927  | 3017.287  | AK024270  | 3811.41   | 4500.459  | NM_006212 | 4853.24   | 4631.071  |
| NM_004844 | 6717.294  | 6418.784  | AK023060  | 1510.227  | 1758.01   | AK022872  | 7305.114  | 5976.362  |
| NM_013447 | 436.285   | 480.118   | NM_014870 | 585.919   | 849.956   | AK024272  | 9705.701  | 8288.762  |
| NM_000051 | 3586.077  | 3243.823  | AK021917  | 666.319   | 825.313   | NM_016381 | 2321.676  | 2606.373  |
| NM_005709 | 655.914   | 750.284   | AF052146  | 48421.125 | 46813.781 | AL591715  | 3045.769  | 3159.213  |
| NM_004180 | 7419.53   | 6997.718  | NM_004870 | 4700.096  | 5478.619  | BF030555  | 57267.754 | 61213.574 |
| NM_004786 | 31335.609 | 25883.012 | AK024242  | 14057.998 | 9104.953  | NM_012433 | 13109.489 | 13587.659 |

|           |           |           |           |           |           |           |           |           |
|-----------|-----------|-----------|-----------|-----------|-----------|-----------|-----------|-----------|
| AF302109  | 1063.027  | 1082.787  | AK024559  | 997.573   | 856.15    | NM_005605 | 9579.685  | 9868.086  |
| AL117485  | 4641.36   | 4116.276  | AK024851  | 759.803   | 655.225   | NM_002576 | 5283.932  | 5500.174  |
| NM_003505 | 1042.475  | 1079.992  | AK024943  | 315.191   | 197.557   | NM_003582 | 3858.04   | 3806.786  |
| NM_007191 | 873.436   | 574.94    | AK022628  | 48575.98  | 31038.568 | AF057354  | 1715.67   | 1787.543  |
| AL109667  | 332.257   | 298.886   | AK021737  | 7393.902  | 5421.01   | AF169351  | 20788.906 | 20610.59  |
| NM_000840 | 342.887   | 273.846   | AL357454  | 446.471   | 308.739   | M14200    | 62295.305 | 60015.113 |
| AJ008142  | 5376.605  | 4698.588  | AK026295  | 1616.678  | 1342.094  | NM_000282 | 3826.927  | 3327.382  |
| AL035289  | 594.06    | 563.15    | AK022346  | 386.27    | 343.542   | NM_000532 | 22278.031 | 20770.135 |
| NM_001343 | 3446.306  | 3284.148  | AK025007  | 2524.861  | 2496.335  | NM_016341 | 1889.191  | 1761.965  |
| NM_007275 | 10081.66  | 8413.243  | NM_016486 | 5372.753  | 4821.063  | NM_006786 | 18475.451 | 17349.197 |
| NM_018461 | 3044.927  | 2442.465  | AL117601  | 301.602   | 238.671   | NM_006205 | 3721.313  | 4577.555  |
| AF235023  | 4558.019  | 4320.896  | AK026490  | 45983.945 | 42474.965 | NM_004034 | 26189.906 | 32576.24  |
| NM_006910 | 4796.957  | 4802.324  | AJ227861  | 2389.731  | 2812.771  | NM_000130 | 27253.219 | 31555.061 |
| AF162667  | 4110.953  | 4230.78   | AJ001020  | 323.423   | 403.64    | AF193756  | 1577.487  | 1568.775  |
| AB046847  | 2493.972  | 2476.673  | AJ001875  | 1889.31   | 2309.875  | AI492087  | 1566.287  | 1624.029  |
| NM_000447 | 1430.081  | 1365.975  | X64985    | 517.255   | 764.578   | R72122    | 11472.342 | 13323.658 |
| NM_006354 | 4626.548  | 4751.995  | Y10507    | 429.731   | 816.627   | Z35309    | 18864.666 | 18379.855 |
| AF303378  | 3707.061  | 3345.07   | AK002028  | 32124.451 | 20659.125 | X04571    | 2435.687  | 3123.489  |
| NM_016037 | 12695.521 | 10888.438 | AL050127  | 2425.442  | 1538.37   | AA700005  | 2506.926  | 3723.232  |
| NM_000043 | 6165.929  | 6600.867  | AK024805  | 8205.119  | 5499.302  | AA292025  | 6232.285  | 8676.682  |
| NM_016140 | 355.127   | 421.133   | AK001423  | 1293.455  | 851.145   | AA437226  | 10947.962 | 12687.613 |
| NM_015965 | 2425.98   | 2074.311  | AK021989  | 435.444   | 377.34    | R36143    | 5281.346  | 4995.913  |
| NM_000417 | 5557.729  | 5307.774  | NM_018629 | 1816.293  | 1215.47   | XM_056359 | 2694.584  | 3539.604  |
| NM_020356 | 366.44    | 420.091   | AK022298  | 4682.875  | 6710.859  | D10353/NM | 44566.613 | 48112.387 |
| AF152527  | 301.154   | 291.849   | AJ277441  | 47536.328 | 48459.195 | M15042    | 16857.127 | 17720.596 |
| NM_006144 | 331.42    | 320.928   | NM_006057 | 2147.008  | 2538.088  | AK056843  | 16891.322 | 16822.844 |
| AL136549  | 17343.42  | 17609.047 | AK025784  | 24626.848 | 16264.284 | U49928    | 59198.848 | 63769.727 |
| NM_012168 | 412.387   | 589.061   | U07199    | 3996.321  | 2594.821  | AK096645  | 60373.773 | 62319.617 |
| NM_002216 | 434.332   | 397.869   | AK023713  | 1115.537  | 816.75    | AK092859  | 3077.168  | 2942.798  |
| NM_007038 | 678.69    | 606.219   | X81445    | 780.807   | 531.457   | NM_018291 | 30588.805 | 26275.018 |
| AF311324  | 7580.489  | 6860.022  | U95091    | 1493.841  | 1190.488  | NM_005530 | 15292.874 | 10923.944 |
| AF124433  | 2092.56   | 1393.316  | NM_017900 | 26413.193 | 20129.164 | NM_006895 | 9731.954  | 7827.137  |
| AK001647  | 364.836   | 477.488   | S50182    | 1168.252  | 1150.577  | NM_000875 | 705.221   | 1808.808  |
| NM_001461 | 762.73    | 552.146   | AL360145  | 962.268   | 673.929   | M12807    | 3865.828  | 4906.99   |
| AF061556  | 1344.012  | 1059.696  | Y12016    | 2110.038  | 1824.062  | NM_001765 | 6001.653  | 8534.621  |
| AL162049  | 4197.418  | 4379.7    | S75763    | 58203.016 | 50642.223 | NM_003361 | 5364.385  | 6660.411  |
| AF036144  | 1446.952  | 1608.866  | AL117431  | 222.187   | 99.89     | NM_012095 | 28004.934 | 32074.332 |
| NM_001823 | 659.335   | 665.784   | AL359943  | 60201.77  | 55406.742 | NM_018684 | 53184.043 | 58285.426 |
| NM_005032 | 1930.376  | 1969.746  | NM_000534 | 2559.025  | 3117.681  | NM_017983 | 2816.903  | 2625.166  |
| NM_004160 | 5590.721  | 6510.297  | L10140    | 760.71    | 1145.812  | AF116909  | 2079.621  | 2772.925  |
| AL109677  | 2710.312  | 3020.491  | AL133447  | 1182.341  | 1728.417  | BE906724  | 2960.688  | 2778.314  |
| NM_003941 | 21684.875 | 24275.164 | AB037853  | 53479.891 | 57106.969 | NM_002283 | 34564.289 | 39198.836 |
| AF177909  | 891.416   | 845.374   | D28450    | 49990.863 | 48125.637 | AJ276095  | 21489.158 | 22493.887 |
| NM_002664 | 30308.414 | 19359.379 | AK056222  | 2345.358  | 4030.422  | NM_004815 | 6801.386  | 7847.677  |
| AB018271  | 2422.207  | 1952.711  | L37700    | 873.877   | 544.876   | NM_007184 | 4853.227  | 5431.977  |
| AL137665  | 3363.713  | 2384.022  | NM_017665 | 3399.158  | 2386.285  | NM_005291 | 56206.996 | 58312.031 |
| NM_016434 | 1703.597  | 1369.397  | AB007976  | 627.511   | 406.291   | AF253316  | 1058.072  | 997.702   |
| U36561    | 51515.938 | 85320.078 | AK024819  | 317.258   | 158.17    | NM_006794 | 3953.554  | 3795.467  |
| AF205437  | 2043.142  | 1382.612  | AF052106  | 3070.037  | 2457.966  | NM_018653 | 1065.749  | 1376.022  |
| AF034102  | 40962.906 | 30249.854 | AK022391  | 2008.885  | 1502.387  | NM_005388 | 20402.486 | 20631.225 |
| AB037748  | 2371.288  | 2038.556  | NM_016167 | 3404.059  | 2306.263  | NM_007232 | 58874.598 | 59445.879 |
| AB002306  | 3884.041  | 4432.152  | NM_016125 | 532.713   | 412.307   | NM_016257 | 2237.067  | 1757.452  |
| NM_001300 | 3451.255  | 2875.366  | AK024090  | 15284.907 | 14422.191 | NM_002717 | 7431.009  | 5450.292  |

|           |           |           |           |           |           |           |           |           |
|-----------|-----------|-----------|-----------|-----------|-----------|-----------|-----------|-----------|
| NM_012472 | 1055.083  | 1173.354  | AL133574  | 4514.095  | 4723.91   | NM_004306 | 58416.637 | 59405.184 |
| NM_018187 | 8528.647  | 8859.181  | AK021936  | 978.344   | 1047.682  | NM_001153 | 671.313   | 278.622   |
| NM_003016 | 28705.713 | 31259.512 | AF147339  | 47128.957 | 44550.266 | AK022654  | 60817.293 | 60118.121 |
| NM_005463 | 8838.396  | 9705.038  | AL390181  | 41419.563 | 41458.199 | BC002905  | 12366.477 | 11891.176 |
| NM_001325 | 2735.925  | 3224.377  | NM_017914 | 41402.695 | 41844.637 | NM_018091 | 21870.959 | 27364.559 |
| NM_018282 | 9099.514  | 7818.965  | AK024953  | 9004.903  | 12975.523 | NM_001108 | 15458.983 | 14356.486 |
| BC019932  | 3861.225  | 3909.492  | AK024276  | 3925.689  | 5616.522  | NM_001637 | 2012.541  | 1499.597  |
| AF114818  | 6355.159  | 5984.942  | S83374    | 4126.261  | 5481.851  | NM_016630 | 33249.078 | 36015.289 |
| AK025106  | 3287.261  | 3485.806  | AL161979  | 447.563   | 586.639   | NM_014291 | 18684.395 | 21573.68  |
| NM_020144 | 6699.461  | 6690.63   | NM_003150 | 1412.189  | 1021.344  | NM_014631 | 1619.686  | 3247.335  |
| NM_003908 | 41419.711 | 52253.012 | NM_014784 | 1798.604  | 1140.461  | NM_001088 | 16454.359 | 19001.162 |
| BE893142  | 5292.867  | 5130.71   | AK026383  | 2674.578  | 2041.697  | NM_000120 | 4507.818  | 6839.896  |
| NM_003103 | 7479.01   | 7123.318  | AB014594  | 2433.603  | 1733.257  | NM_004519 | 711.367   | 1312.822  |
| NM_015340 | 12156.028 | 11886.686 | M94547    | 1041.47   | 847.806   | U09384    | 3602.68   | 4832.05   |
| NM_006451 | 9905.932  | 10178.52  | NM_005087 | 9996.241  | 7064.784  | NM_004794 | 17704.92  | 23966.486 |
| NM_002094 | 4406.339  | 3214.858  | NM_012098 | 2029.45   | 1605.491  | NM_002803 | 19335.344 | 26773.107 |
| NM_002937 | 2003.8    | 1503.784  | NM_018095 | 1385.7    | 1235.295  | NM_005508 | 5896.671  | 7341.669  |
| NM_003191 | 7504.354  | 5995.316  | AB023164  | 2628.977  | 1982.586  | AK025039  | 910.628   | 1340.063  |
| NM_018235 | 14579.882 | 12875.354 | NM_001178 | 480.54    | 411.548   | NM_016568 | 3271.451  | 4143.943  |
| NM_002424 | 552.2     | 360.359   | AK023696  | 10495.57  | 7856.079  | NM_002987 | 984.325   | 1022.372  |
| NM_012104 | 1992.228  | 1598.868  | NM_000704 | 1431.462  | 1701.866  | AB033102  | 57246.152 | 58332.355 |
| NM_000761 | 19367.402 | 22554.043 | NM_015987 | 710.056   | 806.74    | NM_014774 | 5346.553  | 4999.285  |
| NM_020142 | 2970.586  | 2932.318  | NM_019605 | 2164.475  | 2649.825  | NM_014143 | 27784.396 | 24211.996 |
| NM_000774 | 3710.103  | 3605.108  | NM_015369 | 847.294   | 1149.644  | M55646    | 49290.156 | 42461.918 |
| NM_017781 | 6646.51   | 6605.446  | Z49090    | 9895.354  | 11757.465 | NM_006112 | 36646.809 | 30750.547 |
| NM_006004 | 42397.145 | 51660.16  | AK021592  | 8724.861  | 11362.964 | NM_000150 | 8661.474  | 7052.843  |
| NM_004894 | 33871.742 | 26720.98  | AK025467  | 5113.643  | 7263.937  | AB023152  | 997.407   | 686.352   |
| AB028960  | 832.878   | 927.361   | AK026593  | 6358.079  | 11334.388 | NM_006212 | 5339.512  | 5248.653  |
| NM_005648 | 38213.234 | 37163.742 | AL117666  | 1110.209  | 975.603   | AK022872  | 7026.819  | 7275.1    |
| AK000689  | 477.72    | 257.942   | Y17865    | 2002.668  | 1242.377  | AK024272  | 9853.204  | 8575.2    |
| NM_006943 | 11664.414 | 11491.571 | NM_005825 | 18018.766 | 10977.405 | NM_016381 | 2575.385  | 2462.403  |
| NM_006741 | 4384.557  | 5220.245  | NM_002756 | 5651.33   | 4099.319  | AL591715  | 2861.967  | 2871.856  |
| NM_014166 | 10468.512 | 10979.685 | U79299    | 301.057   | 196.724   | NM_007254 | 269.83    | 444.688   |
| AL117606  | 10135.713 | 10061.737 | AJ000414  | 806.564   | 738.639   | NM_018042 | 30559.662 | 32184.736 |
| NM_012330 | 4781.546  | 3954.606  | AK025674  | 12292.866 | 9773.244  | BE741525  | 2381.733  | 3059.869  |
| AF294278  | 1337.26   | 1129.384  | AF007194  | 7765.518  | 5932.605  | BF030555  | 55922.355 | 60306.406 |
| NM_018211 | 950.466   | 1087.214  | NM_019069 | 1295.74   | 885.061   | NM_012433 | 13941.229 | 15258.253 |
| NM_014520 | 6997.994  | 6510.499  | NM_004761 | 3907.83   | 2990.187  | NM_005605 | 10102.884 | 9704.122  |
| AL117508  | 450.149   | 646.846   | Z25424    | 3854.787  | 3389.765  | NM_002576 | 4989.627  | 5619.259  |
| NM_002616 | 5184.265  | 4414.653  | U79458    | 4911.44   | 4446.361  | NM_003582 | 3430.76   | 3409.479  |
| AK025712  | 33431.266 | 24462.547 | NM_014920 | 434.566   | 497.298   | AF057354  | 1379.478  | 1751.317  |
| NM_005634 | 4361.129  | 4383.043  | NM_002961 | 2558.106  | 3699.565  | AF169351  | 23905.207 | 24936.523 |
| NM_017757 | 11031.89  | 8762.603  | NM_018298 | 1011.022  | 905.809   | M14200    | 60108.766 | 62429.383 |
| NM_002146 | 6651.927  | 5130.837  | NM_000676 | 3145.271  | 4122.893  | NM_000282 | 4811.259  | 4299.3    |
| AB007892  | 3158.767  | 2911.254  | NM_005766 | 1260.863  | 1511.922  | NM_000532 | 23121.277 | 23276.402 |
| NM_018207 | 2732.9    | 6268.453  | NM_004127 | 59029.809 | 60213.074 | NM_016341 | 1696.484  | 1608.017  |
| NM_000345 | 6124.967  | 9434.422  | NM_013324 | 3715.717  | 4586.344  | AF231916  | 17356.84  | 14447.57  |
| NM_001862 | 43380.398 | 57134.613 | AL133022  | 895.715   | 1291.668  | NM_003501 | 12773.017 | 11024.507 |
| NM_006531 | 1218.093  | 1478.231  | NM_003953 | 3480.859  | 6253.385  | NM_004034 | 27821.172 | 28491.67  |
| AB029021  | 6568.398  | 7587.381  | NM_006301 | 794.193   | 1398.554  | NM_000130 | 30411.295 | 28757.229 |
| NM_002101 | 1451.925  | 1642.705  | NM_012219 | 503.74    | 319.796   | AF193756  | 1938.827  | 1788.166  |
| NM_005423 | 1312.041  | 1922.155  | X72887    | 700.631   | 372.865   | AI492087  | 1548.426  | 1950.333  |
| Z36789    | 848.783   | 985.542   | NM_004529 | 1269.007  | 1063.27   | R72122    | 13444.313 | 15956.906 |

|            |           |           |           |           |           |           |           |           |
|------------|-----------|-----------|-----------|-----------|-----------|-----------|-----------|-----------|
| J02874     | 984.82    | 1066.066  | NM_000127 | 858.17    | 567.419   | X04571    | 2273.793  | 2419.76   |
| BF310427   | 1013.394  | 1057.75   | Y10483    | 15664.001 | 11604.868 | AA700005  | 2008.35   | 2259.895  |
| N94424     | 564.338   | 592.314   | NM_006784 | 1894.45   | 1376.066  | AA292025  | 7815.147  | 8235.98   |
| AA045192   | 709.901   | 864.594   | NM_017876 | 1888.879  | 1321.386  | AA437226  | 11476.856 | 12111.683 |
| H45617     | 319.74    | 540.884   | NM_001087 | 55416.867 | 52924.578 | R36143    | 6679.767  | 6558.063  |
| H-U 44385  | 24807.697 | 21894.43  | NM_001826 | 274.178   | 152.809   | XM_056359 | 3223.399  | 4348.154  |
| ID 1654970 | 8195.378  | 7760.73   | AK025352  | 389.715   | 366.391   | D10353/NM | 54217.965 | 51733.793 |
| ID 2531132 | 19571.533 | 16204.373 | NM_003721 | 5973.003  | 4757.217  | M15042    | 18750.072 | 18476.613 |
| ID 4365538 | 397.364   | 286.306   | NM_004724 | 1109.62   | 984.422   | AK056843  | 20866.887 | 29423.326 |
| AA485665   | 544.313   | 508.691   | NM_001431 | 4635.389  | 4954.483  | U49928    | 55799.34  | 58998.926 |
| BF125928   | 16684.254 | 14640.011 | NM_000381 | 740.649   | 656.164   | NM_018291 | 32657.783 | 33674.656 |
| BG571026   | 3041.384  | 2139.623  | NM_018192 | 193.46    | 176.301   | NM_005530 | 15753.127 | 14730.573 |
| AA489017   | 24014.264 | 12824.238 | NM_000427 | 1952.049  | 2451.772  | NM_006899 | 9696.877  | 7925.436  |
| NM_001140  | 1214.817  | 1981.708  | NM_014924 | 724.274   | 901.635   | NM_012200 | 5334.946  | 3657.782  |
| NM_016059  | 491.807   | 551.452   | NM_006946 | 1152.398  | 1917.23   | NM_001724 | 4969.438  | 3549.949  |
| NM_004843  | 1262.01   | 1555.076  | NM_000174 | 59986.988 | 60643.676 | BE906724  | 2936.726  | 4846.806  |
| AK022845   | 593.844   | 474.001   | NM_002508 | 941.613   | 1144.679  | NM_002283 | 36669.703 | 36833.004 |
| NM_003004  | 684.142   | 555.005   | NM_014343 | 4585.998  | 6032.521  | AJ276095  | 22526.598 | 24361.766 |
| S77835     | 1896.261  | 1962.985  | D25303    | 1359.433  | 2278.859  | NM_004819 | 8098.001  | 11008.223 |
| NM_002985  | 3101.138  | 3949.23   | NM_002338 | 5940.491  | 8877.231  | NM_002923 | 5634.989  | 7210.825  |
| AB018347   | 4367.461  | 4885.336  | AF022913  | 1615.511  | 1110.756  | NM_006794 | 6063.531  | 9278.709  |
| AB033073   | 1752.678  | 1855.552  | NM_000028 | 1241.099  | 906.429   | NM_018653 | 1405.359  | 1928.159  |
| NM_003284  | 1189.402  | 1159.272  | NM_001382 | 5624.686  | 3722.755  | NM_005388 | 21421.074 | 24783.4   |
| NM_018152  | 767.176   | 895.748   | M93718    | 5139.221  | 4389.706  | NM_007232 | 57116.496 | 57854.914 |
| NM_000319  | 8836.528  | 10735.615 | NM_005386 | 1454.459  | 1040.794  | NM_003027 | 1963.876  | 2178.894  |
| NM_003257  | 729.384   | 959.145   | AK023807  | 13077.085 | 9614.33   | NM_016257 | 1918.479  | 1751.772  |
| NM_012461  | 8278.937  | 7366.585  | NM_018188 | 11382.232 | 10007.236 | NM_002717 | 8649.252  | 7601.093  |
| AK001379   | 2939.012  | 2833.544  | AK024273  | 1182.559  | 1029.474  | NM_012114 | 1594.588  | 1853.235  |
| NM_017450  | 2856.138  | 2866.277  | X59417    | 12845.369 | 9660.634  | NM_014486 | 1196.969  | 1338.517  |
| NM_002023  | 866.357   | 1069.914  | NM_005659 | 54872.367 | 48017.992 | NM_003025 | 56655.973 | 64030.328 |
| NM_002839  | 402.375   | 471.519   | D28476    | 4082.514  | 3433.283  | NM_020179 | 19855.465 | 21419.871 |
| NM_001616  | 761.87    | 572.992   | NM_016263 | 3586      | 3341.376  | NM_004306 | 57990.863 | 66416.289 |
| NM_005904  | 1106.998  | 771.414   | NM_003335 | 38266.691 | 31667.586 | NM_001153 | 913.79    | 1335.005  |
| NM_005273  | 25210.494 | 20379.6   | AB002376  | 7470.63   | 8419.877  | NM_006786 | 18039.668 | 16299.866 |
| NM_000524  | 829.572   | 673.051   | NM_018249 | 754.656   | 861.606   | NM_006205 | 3110.53   | 3302.607  |
| NM_007072  | 3477.677  | 9374.914  | NM_005558 | 1842.454  | 1970.536  | NM_004283 | 2772.828  | 2918.491  |
| NM_012320  | 3039.234  | 3733.065  | NM_016631 | 900.648   | 1314.107  | NM_004163 | 53409.988 | 58502.406 |
| NM_018208  | 3335.137  | 3054.335  | AB015617  | 17525.781 | 24403.744 | AK026308  | 3838.544  | 4392.869  |
| NM_015929  | 5655.352  | 5945.366  | AK022730  | 1935.9    | 3068.355  | NM_004193 | 4781.819  | 6946.25   |
| U90653     | 11235.826 | 12625.195 | NM_002256 | 7454      | 9958.723  | NM_006788 | 4161.236  | 4228.643  |
| NM_000196  | 1001.659  | 1059.013  | AF064839  | 34947.281 | 38166.867 | AK025039  | 1564.673  | 2672.403  |
| NM_018339  | 5631.053  | 6262.455  | NM_005439 | 14168.023 | 17574.918 | NM_016568 | 2986.647  | 5188.77   |
| NM_006745  | 24056.252 | 27412.924 | AB037810  | 1533.201  | 2127.116  | NM_002987 | 529.676   | 1194.452  |
| NM_000275  | 1806.848  | 2007.818  | AF222694  | 890.256   | 1542.245  | AB033102  | 53030.336 | 55705.383 |
| AK000037   | 1718.425  | 1550.468  | AL049925  | 3899.652  | 6131.785  | NM_014774 | 4862.674  | 5075.761  |
| NM_014760  | 3317.826  | 3524.342  | NM_016153 | 622.333   | 490.705   | NM_014143 | 29822.109 | 30098.316 |
| NM_018713  | 591.356   | 1046.099  | AK027089  | 2801.095  | 2199.816  | M55646    | 48837.672 | 49605.41  |
| AJ006268   | 1344.009  | 1646.719  | X59845    | 478.943   | 369.776   | NM_006112 | 38778.148 | 36992.82  |
| AF190864   | 6793.438  | 7572.03   | NM_006284 | 11304.921 | 7057.575  | M12807    | 3948.002  | 4912.704  |
| NM_001177  | 4291.833  | 5818.669  | U18909    | 2109.077  | 1540.295  | NM_001765 | 6984.4    | 8627.799  |
| NM_014447  | 2739.623  | 2793.098  | NM_003489 | 2645.779  | 2168.702  | NM_003361 | 5585.757  | 6609.386  |
| NM_002356  | 560.656   | 645.605   | NM_016589 | 10772.088 | 8942.531  | NM_012099 | 36948.016 | 39696.934 |
| NM_006691  | 1656.949  | 1540.305  | NM_003597 | 542.212   | 498.632   | NM_018684 | 58289.344 | 56794.68  |

|            |           |           |           |           |           |           |           |           |
|------------|-----------|-----------|-----------|-----------|-----------|-----------|-----------|-----------|
| NM_00150E  | 1188.447  | 1358.512  | NM_00256E | 50342.918 | 37479.008 | NM_01798E | 2710.943  | 2443.024  |
| NM_00371C  | 1650.25   | 1372.615  | NM_006561 | 670.965   | 520.051   | AF116909  | 1423.288  | 1558.413  |
| Z83805     | 735.38    | 697.197   | NM_017521 | 1289.755  | 1112.624  | NM_00028E | 4408.244  | 4238.616  |
| NM_00466E  | 2215.298  | 1952.038  | NM_00674E | 270.587   | 207.527   | NM_00053E | 24254.164 | 23386.377 |
| NM_003614  | 1152.011  | 940.189   | AK025200  | 15535.668 | 14996.885 | NM_016341 | 2159.769  | 1934.401  |
| NM_014257  | 2614.775  | 3257.491  | NM_00138E | 7446.357  | 6324.049  | NM_00110E | 14288.295 | 14620.224 |
| NM_00002E  | 10475.715 | 20908.641 | NM_00102E | 53241.883 | 61042.789 | NM_001637 | 2283.465  | 3448.864  |
| D38521     | 7042.288  | 7297.307  | NM_00500E | 22811.191 | 22648.238 | NM_01663C | 36856.996 | 40303.098 |
| NM_00040E  | 5647.2    | 4344.606  | NM_016304 | 34519.41  | 39613.398 | NM_014291 | 17036.57  | 20121.924 |
| NM_018127  | 14988.642 | 15436.271 | NM_00601E | 15953.492 | 19610.4   | NM_014631 | 1161.898  | 1829.227  |
| AB020677   | 2257.135  | 2504.379  | NM_01404E | 18456.68  | 21879.953 | NM_00108E | 17862.051 | 18894.43  |
| AB033097   | 1974.23   | 2392.455  | L34071    | 10265.379 | 14205.938 | NM_00012C | 3997.435  | 5303.941  |
| NM_00013E  | 1717.848  | 1895.823  | AB043007  | 22658.361 | 32229.146 | AF172327  | 58373.613 | 59615.016 |
| AJ223948   | 7544.602  | 8559.853  | NM_004861 | 6127.254  | 8570.805  | NM_00167E | 20285.189 | 18432.439 |
| NM_01621E  | 1405.804  | 1170.781  | NM_016161 | 509.301   | 693.501   | NM_00022C | 2786.442  | 2398.029  |
| AK022947   | 2985.134  | 3075.304  | AV718258  | 581.727   | 381.442   | NM_00451E | 599.958   | 640.171   |
| AL050029   | 2618.297  | 2839.221  | NM_00516E | 4563.007  | 3703.876  | NM_00167E | 53138.848 | 55186.004 |
| AL049966   | 1046.995  | 1063.888  | NM_00513E | 38818.535 | 24545.064 | NM_00404E | 59729.074 | 62004.449 |
| NM_005204  | 9918.353  | 10069.678 | NM_00211E | 42355.867 | 34114.555 | NM_00498E | 6752.273  | 7594.038  |
| NM_01620E  | 1981.149  | 2218.179  | AK023162  | 2118.181  | 1616.747  | U09384    | 3315.544  | 2992.473  |
| NM_00275E  | 4088.389  | 4643.352  | NM_00639E | 3976.982  | 3124.32   | NM_00686C | 15878.615 | 15343.482 |
| NM_007271  | 3110.955  | 3789.47   | NM_01864E | 4251.589  | 3427.345  | NM_004794 | 18770.215 | 18584.371 |
| NM_00625E  | 4214.767  | 5330.27   | NM_01826E | 558.49    | 688.593   | NM_018291 | 31542.678 | 26722.703 |
| BE392143   | 4855.168  | 6858.869  | NM_01344E | 1595.499  | 1401.491  | NM_00553C | 16718.781 | 12837.263 |
| NM_00581E  | 4634.129  | 3411.41   | NM_004537 | 2111.105  | 1957.184  | NM_00689E | 10962.117 | 10235.09  |
| AB037718   | 5530.756  | 4819.631  | AL390134  | 846.104   | 959.98    | NM_01220C | 5861.745  | 6345.065  |
| AL389994   | 2442.262  | 2721.911  | NM_02022E | 4847.325  | 4811.363  | NM_001724 | 6144.043  | 6961.12   |
| NM_00390E  | 8293.033  | 7497.543  | NM_01786E | 5258.622  | 4829.02   | NM_00015C | 9345.284  | 11308.135 |
| NM_001277  | 5704.764  | 5648.591  | NM_003427 | 2441.518  | 2858.25   | AB023152  | 1947.444  | 2631.814  |
| NM_00365E  | 4034.665  | 3596.553  | AK021842  | 230.353   | 540.327   | NM_00621E | 5158.515  | 4628.716  |
| NM_00186E  | 44462.102 | 54241.418 | NM_00592C | 2427.593  | 3706.182  | AK022872  | 6533.395  | 5945.227  |
| NM_006531  | 1177.24   | 1386.433  | Y09321    | 1858.887  | 3154.789  | AK024272  | 10259.962 | 8136.691  |
| AB029021   | 5756.409  | 6858.607  | NM_00659E | 1190.561  | 1949.113  | NM_016381 | 2338.607  | 2533.863  |
| NM_002101  | 1337.017  | 1343.744  | NM_00037E | 23533.617 | 31020.223 | AL591715  | 4075.717  | 4849.526  |
| NM_00542E  | 1189.542  | 1286.42   | NM_00047E | 8796.909  | 15182.13  | NM_007254 | 240.787   | 349.327   |
| Z36789     | 781.886   | 814.067   | M61872    | 15141.094 | 18654.148 | NM_01804E | 31449.91  | 28230.236 |
| J02874     | 1149.885  | 1216.113  | NM_005721 | 2470.943  | 1653.495  | BE741525  | 2197.49   | 2293.282  |
| BF310427   | 766.893   | 906.414   | AF284223  | 2177.221  | 1372.415  | BF030555  | 59529.086 | 58638.934 |
| N94424     | 617.867   | 519.051   | AF176012  | 655.135   | 541.649   | NM_01243E | 13803.21  | 13712.879 |
| AA045192   | 587.024   | 758.164   | BE743838  | 6504.177  | 4278.337  | NM_00560E | 12305.706 | 12453.479 |
| H45617     | 338.931   | 455.558   | AF273046  | 4943.471  | 4014.042  | NM_00257E | 5376.924  | 5731.426  |
| M92642     | 334.705   | 302.133   | NM_001081 | 3552.786  | 2361.584  | NM_00358E | 3077.749  | 3680.38   |
| H-U 44385  | 23712.016 | 21789.246 | NM_00248E | 5744.478  | 5274.417  | AF057354  | 1243.228  | 1048.851  |
| ID 1654970 | 8656.305  | 8690.284  | BF002026  | 1710.578  | 1610.228  | AF169351  | 17204.193 | 16413.039 |
| ID 2531132 | 20425.754 | 19424.299 | L35594    | 707.626   | 837.924   | M14200    | 64911.684 | 63368.316 |
| ID 4365538 | 402.114   | 268.275   | BE790116  | 2612.37   | 1923.503  | CY3Cy5    | 7623.428  | 359.599   |
| AA485665   | 489.79    | 318.491   | AI922341  | 6617.487  | 5863.327  | NM_00062E | 1278.863  | 1530.161  |
| BF125928   | 17101.951 | 15356.882 | S57283    | 432.485   | 447.973   | AK026735  | 8300.633  | 6533.917  |
| BG571026   | 3278.014  | 2647.584  | AA410517  | 864.131   | 733.426   | AL110104  | 59461.711 | 39573.816 |
| AA489017   | 26165.227 | 17997.904 | M12824    | 2413.423  | 2592.953  | AF240633  | 3331.835  | 4201.28   |
| NM_00484E  | 1130.719  | 985.01    | W60100    | 1542.185  | 1587.747  | AK027056  | 9253.033  | 5885.987  |
| AK022845   | 768.609   | 761.291   | M24898    | 1918.285  | 2661.879  | AK024294  | 1940.547  | 1664.955  |
| NM_003004  | 731.512   | 837.673   | U72508    | 1435.661  | 2028.506  | AL110126  | 4623.078  | 4096.017  |

|           |           |           |           |           |           |           |           |           |
|-----------|-----------|-----------|-----------|-----------|-----------|-----------|-----------|-----------|
| S77835    | 1872.974  | 1733.692  | AA457153  | 5485.994  | 7478.281  | AF052172  | 85356.82  | 57649.453 |
| NM_002985 | 3142.49   | 3530.947  | AA283122  | 25863.633 | 32049.465 | AB014573  | 11513.385 | 9416.321  |
| AB018347  | 4203.313  | 4648.028  | AA868504  | 2329.959  | 3332.016  | AK025418  | 6024.075  | 4830.708  |
| AB033073  | 1672.006  | 2011.644  | AA877845  | 7559.088  | 11777.915 | AB020643  | 621.151   | 650.734   |
| NM_003284 | 1247.992  | 1209.511  | AA664241  | 58272.469 | 67544.203 | AK025496  | 14946.67  | 11513.267 |
| NM_018152 | 788.17    | 816.797   | AI016456  | 4937.446  | 8083.306  | NM_000623 | 366.521   | 343.583   |
| NM_000319 | 8642.963  | 10844.189 | NM_006066 | 29531.699 | 32165.678 | NM_000941 | 3699.214  | 2413.496  |
| NM_003257 | 665.671   | 724.603   | AK022230  | 11083.463 | 6884.339  | SR1       | 75866.219 | 63747.961 |
| NM_012461 | 8625.18   | 7882.714  | AK022147  | 11091.019 | 7587.553  | SR3       | 44594.625 | 36664.68  |
| AK001379  | 3072.38   | 2861.346  | L25664    | 8416.262  | 6504.209  | SR5       | 4979.894  | 4241.891  |
| NM_017450 | 2558.846  | 2968.167  | NM_014940 | 2766.443  | 1406.362  | SR7       | 5069.411  | 37199.289 |
| NM_002023 | 715.961   | 738.383   | NM_005783 | 886.686   | 728.592   | SR9       | 17797.93  | 2947.999  |
| NM_002839 | 371.754   | 250.333   | AK000851  | 1080.242  | 732.985   | CY3Cy5    | 6175.944  | 256.817   |
| NM_001616 | 758.735   | 749.041   | NM_006900 | 4457.88   | 4138.791  | L10404    | 1930.407  | 2527.025  |
| NM_005904 | 1380.307  | 1048.259  | AJ289111  | 14877.438 | 14096.707 | AF283776  | 5894.093  | 8076.07   |
| NM_005273 | 27408.035 | 26074.521 | NM_016356 | 24161.828 | 22894.541 | D16877    | 11915.573 | 10530.615 |
| NM_000524 | 886.769   | 837.404   | NM_006406 | 8126.463  | 5943.788  | AL049992  | 997.106   | 1106.791  |
| NM_014682 | 327.222   | 316.252   | AF216292  | 24393.408 | 20802.686 | AL109781  | 6539.491  | 4889.647  |
| NM_018207 | 2327.501  | 1770.29   | NM_000952 | 6420.49   | 6221.907  | AL079289  | 1423.912  | 1488.23   |
| NM_000345 | 7564.999  | 5784.562  | NM_005894 | 499.214   | 408.695   | NM_018484 | 1415.398  | 1137.855  |
| NM_018208 | 3016.535  | 2637.923  | NM_014584 | 4933.122  | 4374.874  | NM_017594 | 1383.079  | 1269.3    |
| NM_015929 | 5179.973  | 5362.445  | M30627    | 625.938   | 690.964   | AK027237  | 1082.071  | 1008.958  |
| U90653    | 10476.423 | 12307.507 | NM_005810 | 20781.029 | 22875.609 | AK027104  | 4329.059  | 2995.819  |
| NM_000196 | 1159.226  | 885.975   | M28170    | 20867.494 | 23583.697 | AL133090  | 66233.469 | 44810.227 |
| NM_018339 | 5743.165  | 5910.077  | NM_001555 | 1142.24   | 1880.431  | AF085867  | 5279.831  | 4119.703  |
| NM_006745 | 23335.225 | 27178.98  | AK026223  | 8722.842  | 14328.591 | AK026158  | 684.16    | 699.923   |
| NM_000275 | 1796.273  | 2134.677  | NM_000874 | 5407.057  | 6377.734  | AF086510  | 6333.417  | 4281.423  |
| AK000037  | 1815.04   | 1534.217  | NM_005854 | 960.38    | 1550.832  | Z36779    | 9521.141  | 6698.795  |
| NM_014760 | 3513.536  | 3519.04   | AB007863  | 56733.977 | 57249.484 | NM_018422 | 683.063   | 697.672   |
| NM_018713 | 582.543   | 932.616   | NM_017789 | 1741.885  | 3226.032  | NM_002816 | 3302.103  | 2433.728  |
| AJ006268  | 1289.135  | 1625.153  | D31887    | 3593.599  | 5135.218  | NM_017513 | 1117.828  | 1008.475  |
| AF190864  | 6885.441  | 6639.213  | NM_016649 | 3580.699  | 2374.339  | NM_017822 | 10736.445 | 6059.415  |
| NM_001177 | 3954.123  | 4322.809  | AK090536  | 13174.677 | 7860.347  | AK024520  | 11194.622 | 9360.924  |
| NM_014447 | 2735.311  | 2983.147  | D63477    | 678.341   | 404.085   | AK091109  | 64636.574 | 60904.699 |
| NM_002356 | 551.497   | 573.305   | NM_020243 | 16693.58  | 12118.435 | AF032897  | 1124.947  | 1189      |
| NM_006691 | 1958.639  | 1904.894  | NM_014051 | 4804.07   | 4495.529  | NM_014967 | 6821.73   | 4459.806  |
| NM_001505 | 1315.199  | 1673.434  | AK025398  | 2546.939  | 1973.428  | AK022915  | 6446.646  | 5249.651  |
| NM_003710 | 1458.738  | 1344.227  | AK027082  | 277.636   | 262.659   | AK021736  | 819.849   | 848.423   |
| Z83805    | 1237.509  | 1481.042  | AK023056  | 1012.064  | 1161.331  | AF131834  | 2386.771  | 1903.505  |
| NM_004666 | 2092.847  | 2092.643  | AK022207  | 1171.911  | 1190.46   | AL355711  | 1972.429  | 1762.772  |
| NM_003614 | 1018.869  | 1019.4    | NM_004996 | 3769.272  | 3490.997  | AK025851  | 2414.007  | 2065.252  |
| NM_014257 | 2669.602  | 2503.383  | NM_017435 | 464.163   | 1239.994  | AJ011409  | 47661.414 | 34759.359 |
| NM_001140 | 1354.032  | 1342.003  | NM_014037 | 9900.261  | 11739.754 | AJ227906  | 4396.3    | 3528.171  |
| NM_016059 | 435.241   | 230.839   | NM_004866 | 24599.992 | 33240.281 | AJ011598  | 722.216   | 626.089   |
| NM_000454 | 1622.409  | 1707.007  | NM_018688 | 1792.706  | 2873.138  | AJ001906  | 798.699   | 726.634   |
| NM_000403 | 5305.327  | 5404.357  | AK056652  | 6489.868  | 11206.016 | U17633    | 1969.969  | 1624.89   |
| NM_018127 | 14988.771 | 17255.754 | NM_015839 | 499.135   | 961.233   | AK021895  | 8503.286  | 5805.581  |
| AB020677  | 2485.66   | 2743.69   | AL137438  | 1319.746  | 2161.501  | AK024293  | 915.616   | 476.013   |
| AB033097  | 2235.078  | 2769.759  | NM_017957 | 10500.392 | 17495.422 | AL080107  | 427.623   | 384.931   |
| NM_000135 | 1768.061  | 2059.418  | NM_003024 | 3695.365  | 5100.497  | AK000036  | 14688.293 | 12870.23  |
| AJ223948  | 7626.502  | 9509.757  | NM_013248 | 5553.859  | 10081.204 | AK000769  | 1059.566  | 736.865   |
| NM_016218 | 1190.865  | 1058.819  | NM_000034 | 60332.188 | 68532.023 | AK000924  | 1914.003  | 1366.161  |
| AK022947  | 3475.492  | 4295.313  | NM_012436 | 53080.805 | 55978.121 | AK022252  | 1140.071  | 1104.788  |



|            |           |           |           |           |           |           |           |           |
|------------|-----------|-----------|-----------|-----------|-----------|-----------|-----------|-----------|
| AL050029   | 2363.596  | 2873.633  | AK001299  | 33216.129 | 20943.586 | AK000114  | 4613.482  | 3493.981  |
| AL049966   | 1070.961  | 1255.318  | AB014559  | 12170.499 | 7731.614  | AK000952  | 29396.342 | 15401.412 |
| NM_005204  | 9564.671  | 10143.435 | NM_016489 | 7655.386  | 5575.083  | AF119862  | 32472.459 | 22706.584 |
| NM_016203  | 1942.118  | 1842.798  | NM_005033 | 4196.996  | 4592.207  | AF086318  | 28201.127 | 21895.576 |
| NM_002759  | 3870.196  | 3101.922  | NM_015932 | 36555.512 | 28033.604 | AF088012  | 1051.097  | 725.852   |
| NM_007271  | 3077.073  | 3287.06   | NM_017949 | 543.797   | 652.268   | NM_018121 | 2156.178  | 1516.112  |
| NM_006255  | 4190.137  | 5649.226  | AK022169  | 961.66    | 937.668   | AL355692  | 1097.449  | 1688.129  |
| BE392143   | 4663.107  | 5844.012  | AF015592  | 1921.926  | 1582.78   | AB050477  | 10943.432 | 15693.669 |
| NM_005813  | 4646.946  | 3575.926  | AK026795  | 509.652   | 641.299   | AK000152  | 2951.386  | 2410.706  |
| AB037718   | 5628.324  | 6700.853  | NM_016399 | 3900.373  | 4334.082  | AK024300  | 4802.451  | 3291.411  |
| AL389994   | 2427.622  | 2780.642  | NM_016617 | 8081.262  | 6929.281  | L09092    | 1700.404  | 1492.836  |
| NM_003909  | 8620.356  | 7834.753  | NM_002027 | 7080.228  | 9292.686  | NM_012132 | 1616.592  | 1260.372  |
| NM_001277  | 5543.123  | 5699.691  | AL162078  | 6765.033  | 7952.541  | NM_012129 | 1833.656  | 1218.813  |
| NM_003659  | 4495.228  | 4164.17   | NM_000919 | 326.165   | 351.75    | AK025716  | 3566.587  | 2434.738  |
| NM_007072  | 2499.036  | 1918.85   | NM_013382 | 9078.749  | 12837.423 | X58162    | 34498.848 | 20213.877 |
| NM_012320  | 3041.406  | 2054.619  | AB002314  | 1076.47   | 1979.773  | AK022825  | 3407.588  | 2629.172  |
| AB029021   | 6338.173  | 14615.958 | NM_014043 | 4872.528  | 6579.537  | AK001937  | 66450.875 | 65288.949 |
| NM_002101  | 1399.444  | 1737.573  | NM_014622 | 643.676   | 931.392   | AL365517  | 3066.315  | 5259.688  |
| NM_005423  | 1332.918  | 1571.426  | AB011114  | 54153.598 | 61816.961 | AK021988  | 25115.66  | 29285.578 |
| Z36789     | 843.197   | 752.831   | D11466    | 23150.291 | 33884.398 | AF086494  | 59817.547 | 51027.195 |
| J02874     | 1123.204  | 1035.398  | NM_014056 | 26957.633 | 40636.996 | BI769977  | 1663.96   | 1315.198  |
| BF310427   | 839.931   | 1215.174  | D31885    | 36284.344 | 47986     | AL137567  | 1817.255  | 1223.718  |
| N94424     | 1120.637  | 1230.989  | AF176012  | 757.56    | 610.607   | AK024913  | 5884.35   | 4189.279  |
| AA045192   | 559.699   | 817.312   | BE743838  | 6470.401  | 3836.765  | AB007961  | 13496.413 | 8402.333  |
| H45617     | 421.995   | 348.896   | AF273046  | 4551.24   | 2899.649  | NM_005547 | 2447.607  | 1531.466  |
| M92642     | 353.214   | 431.345   | NM_001081 | 3436.712  | 2396.908  | AB020656  | 2137.448  | 2369.111  |
| H-U 44385  | 23537.605 | 20774.432 | NM_002483 | 5701.848  | 5654.564  | NM_004991 | 1936.235  | 1525.288  |
| ID 1654970 | 8484.991  | 6723.013  | BF002026  | 1756.286  | 1651.245  | AK026708  | 16630.107 | 14313.654 |
| ID 2531132 | 19111.217 | 16534.852 | L35594    | 818.758   | 872.553   | NM_017903 | 7565.596  | 5654.617  |
| ID 4365538 | 403.959   | 436.355   | BE790116  | 2461.531  | 2140.301  | NM_018074 | 5445.844  | 5147.096  |
| AA485665   | 639.474   | 743.578   | AI922341  | 5192.117  | 3786.406  | NM_000909 | 9359.747  | 8851.253  |
| BF125928   | 18252.377 | 20348.451 | S57283    | 549.569   | 473.395   | U31737    | 1023.709  | 1166.268  |
| BG571026   | 3068.673  | 2319.38   | AA410517  | 839.619   | 771.319   | AK024828  | 3844.258  | 4463.037  |
| AA489017   | 26458.973 | 20023.314 | M12824    | 2524.896  | 2561.178  | AF009315  | 5557.588  | 4547.376  |
| NM_000025  | 7501.094  | 5804.839  | W60100    | 1630.101  | 2048.551  | NM_019013 | 1948.054  | 1626.28   |
| D38521     | 5672.992  | 3694.058  | M24898    | 1811.898  | 2433.716  | NM_006783 | 1338.1    | 1008.44   |
| NM_018152  | 752.842   | 745.56    | U72508    | 1531.476  | 1399.274  | L37711    | 1728.119  | 1098.052  |
| NM_000319  | 9410.513  | 12556.543 | AA457153  | 5079.354  | 6055.65   | S70313    | 30637.18  | 18093.832 |
| NM_003257  | 584.124   | 725.768   | AA283122  | 24587.381 | 27089.271 | AK021607  | 1855.138  | 1649.914  |
| NM_012461  | 8286.336  | 7464.74   | AA868504  | 2229.831  | 3016.94   | AK025860  | 979.489   | 829.529   |
| AK001379   | 2884.345  | 3012.552  | AA877845  | 7699.529  | 9765.35   | NM_018494 | 66552.094 | 70622.148 |
| NM_017450  | 2475.742  | 2281.645  | AA664241  | 56879.004 | 65840.023 | AK000006  | 1689.626  | 1641.169  |
| NM_002023  | 729.013   | 935.628   | AI016456  | 4565.698  | 6486.748  | NM_001115 | 5104.146  | 3220.461  |
| NM_002839  | 419.771   | 392.924   | AK026281  | 1204.523  | 2185.528  | NM_014921 | 1545.692  | 1366.371  |
| NM_001616  | 742.851   | 867.164   | U23862    | 480.901   | 854.466   | NM_016581 | 64575.891 | 64701.434 |
| NM_005904  | 1238.946  | 883.92    | AK026680  | 8765.284  | 13456.464 | NM_013255 | 3749.762  | 2272.859  |
| NM_005273  | 26411.041 | 22286.186 | L25664    | 8940.863  | 6019.158  | NM_007183 | 1008.641  | 802.912   |
| NM_000524  | 893.35    | 979.12    | NM_014940 | 2874.468  | 1498.964  | AJ238243  | 31380.949 | 25459.723 |
| NM_006576  | 1959.402  | 1725.83   | NM_005783 | 642.615   | 404.905   | J05046    | 60968.375 | 59312.559 |
| AB035266   | 1859.466  | 1782.533  | AK000851  | 816.041   | 641.92    | NM_012318 | 6093.734  | 5710.259  |
| NM_003744  | 4390.811  | 4301.895  | NM_006900 | 4239.469  | 3575.434  | NM_002751 | 30697.938 | 24612.578 |
| NM_006378  | 3101.892  | 3049.59   | AJ289111  | 15348.259 | 14092.093 | NM_004291 | 6666.874  | 5698.141  |
| NM_018132  | 1835.999  | 2099.875  | NM_016356 | 22968.131 | 20568.947 | NM_003816 | 13645.27  | 11824.972 |

|           |           |           |           |           |           |           |           |           |
|-----------|-----------|-----------|-----------|-----------|-----------|-----------|-----------|-----------|
| NM_018207 | 2440.988  | 2177.246  | NM_006406 | 8577.06   | 6734.597  | AK022635  | 877.725   | 662.026   |
| NM_000345 | 7461.003  | 7472.401  | AF216292  | 22559.137 | 20510.021 | NM_004912 | 5083.363  | 3634.089  |
| NM_001862 | 41224.379 | 39174.734 | NM_000952 | 5533.953  | 4752.479  | U79304    | 29742.09  | 19819.615 |
| NM_006531 | 1042.754  | 1190.019  | NM_005894 | 391.208   | 496.044   | NM_016267 | 11183.318 | 9146.735  |
| NM_002779 | 6645.27   | 13871.284 | NM_014584 | 4948.749  | 4649.155  | NM_004671 | 12898.768 | 9651.969  |
| L40397    | 20379.521 | 26378.82  | M30627    | 561.667   | 567.725   | NM_016231 | 6618.426  | 7208.056  |
| NM_020198 | 7956.872  | 10002.171 | NM_005810 | 24077.793 | 26934.523 | NM_002093 | 7200.652  | 8581.934  |
| AA098879  | 628.712   | 761.92    | M28170    | 19768.385 | 18646.094 | AB042555  | 36045.441 | 36255.141 |
| AF070525  | 12851.644 | 14415.593 | NM_001555 | 968.787   | 1063.74   | NM_001729 | 3575.201  | 4411.239  |
| NM_001177 | 3962.817  | 5176.502  | AK026223  | 7827.926  | 9361.627  | NM_017763 | 4346.523  | 5363.456  |
| NM_014447 | 2935.828  | 3444.654  | NM_000874 | 5026.726  | 5369.109  | NM_013975 | 5623.293  | 6621.583  |
| NM_002356 | 491.613   | 559.962   | NM_005854 | 1110.746  | 1385.417  | NM_003843 | 22217.6   | 24227.428 |
| NM_006691 | 1734.043  | 1743.978  | AB007863  | 56444.145 | 60786.414 | NM_012216 | 4963.922  | 6865.496  |
| NM_001505 | 1138.046  | 1403.751  | NM_017789 | 1406.461  | 2872.899  | NM_005338 | 1707.267  | 2493.087  |
| NM_003710 | 1350.698  | 1293.066  | D31887    | 3093.663  | 4151.618  | X73502    | 7228.188  | 8732.07   |
| Z83805    | 910.436   | 1026.561  | NM_005721 | 2535.774  | 3558.26   | NM_020445 | 62740.137 | 60536.355 |
| NM_004666 | 2087.112  | 2200.213  | AF284223  | 2241.774  | 3135.441  | NM_016376 | 60484.43  | 61121.703 |
| NM_003614 | 873.428   | 1161.572  | D63477    | 662.085   | 396.515   | AB046848  | 32302.65  | 37058.684 |
| NM_014257 | 3806.116  | 5801.077  | NM_020243 | 18152.365 | 11511.09  | AL133057  | 12522.103 | 13561.224 |
| NM_001140 | 1500.552  | 1746.111  | AK025398  | 2315.503  | 1681.684  | U04845    | 16358.933 | 15471.12  |
| NM_016059 | 512.168   | 520.596   | AK023056  | 838.885   | 939.639   | NM_018103 | 13842.998 | 13009.829 |
| NM_004843 | 1067.819  | 1164.12   | AK022207  | 1139.588  | 1157.094  | NM_014109 | 12778.591 | 12984.353 |
| AK022845  | 805.236   | 731.771   | NM_004996 | 3470.379  | 4092.76   | NM_012160 | 6274.869  | 6516.747  |
| NM_003004 | 762.556   | 453.57    | NM_017435 | 459.184   | 1772.141  | NM_006357 | 62041.219 | 65943.305 |
| S77835    | 1668.167  | 1696.621  | NM_014037 | 9924.233  | 12675.26  | NM_014248 | 60883.844 | 63095.777 |
| NM_002985 | 3271.491  | 3591.783  | NM_004866 | 23158.979 | 25528.746 | AK027070  | 4363.669  | 4934.051  |
| AB018347  | 4649.221  | 4626.825  | NM_018688 | 1429.376  | 1485.941  | AF129533  | 1764.426  | 1971.79   |
| AB033073  | 1790.652  | 1254.211  | AK056652  | 5861.084  | 7259.68   | NM_003341 | 27024.381 | 26349.35  |
| NM_003284 | 1167.968  | 967.469   | AL137438  | 1273.712  | 1652.956  | NM_017785 | 2679.271  | 3802.085  |
| NM_003909 | 6490.974  | 7478.558  | NM_017957 | 10228.571 | 14376.489 | NM_006249 | 14856.957 | 16452.799 |
| NM_001277 | 5715.994  | 6418.482  | NM_003024 | 3251.595  | 4509.386  | NM_018318 | 828.279   | 1406.881  |
| NM_003659 | 5213.749  | 6135.648  | NM_013248 | 5223.709  | 8702.837  | AB020640  | 27904.518 | 31110.949 |
| NM_007072 | 2391.829  | 2874.018  | NM_000034 | 61585.367 | 65613.594 | D29954    | 33563.84  | 33680.699 |
| NM_012320 | 2990.938  | 2619.204  | AK022230  | 13632.217 | 18372.436 | AF007131  | 14312.663 | 15167.868 |
| NM_018208 | 3084.826  | 2884.209  | AK022147  | 14394.984 | 19411.746 | NM_006839 | 3270.03   | 4213.792  |
| NM_015929 | 6520.954  | 6745.295  | AK001299  | 32610.59  | 18937.936 | NM_000223 | 1511.336  | 1855.151  |
| U90653    | 11518.464 | 12686.926 | AB014559  | 12577.993 | 7300.383  | NM_005851 | 3237.631  | 3526.92   |
| NM_000196 | 1212.35   | 1650.528  | NM_016489 | 7392.615  | 4702.398  | AF119256  | 3966.107  | 4668.036  |
| NM_018339 | 5703.083  | 6765.322  | NM_005033 | 3997.23   | 3204.506  | NM_007015 | 540.555   | 898.951   |
| NM_006745 | 23751.881 | 26732.32  | NM_015932 | 36805.758 | 25563.742 | NM_005180 | 12642.272 | 13247.785 |
| NM_000275 | 1812.406  | 2239.218  | NM_017949 | 777.673   | 661.414   | NM_003410 | 15682.726 | 14306.695 |
| AK000037  | 1747.322  | 1578.101  | AK022169  | 898.338   | 767.897   | AK026290  | 11820.724 | 14754.431 |
| NM_014760 | 3434.251  | 3079.317  | AF015592  | 2067.323  | 1620.791  | AB014589  | 4114.524  | 4479.44   |
| NM_018398 | 1021.976  | 841.923   | AK026795  | 502.965   | 477.582   | AF248649  | 2176.378  | 2385.016  |
| NM_002560 | 14401.112 | 12840.869 | NM_016399 | 3580.049  | 3119.903  | U37146    | 60757.078 | 60330.684 |
| NM_014404 | 1802.577  | 1775.753  | NM_016617 | 8082.837  | 6150.969  | NM_012086 | 5186.909  | 5197.886  |
| NM_018713 | 568.766   | 968.566   | NM_002027 | 6905.919  | 8242.902  | AB040431  | 29548.676 | 27579.432 |
| NM_015947 | 10419.215 | 11435.029 | AL162078  | 5685.863  | 6409.027  | NM_000991 | 62607.922 | 66573.727 |
| NM_002042 | 1735.982  | 1772.056  | NM_000919 | 427.023   | 580.293   | NM_016034 | 58013.82  | 60890.531 |
| AB028944  | 711.886   | 681.263   | NM_013382 | 9090.207  | 9221.99   | NM_016067 | 61360.797 | 61834.184 |
| AJ006268  | 1350.808  | 1346.127  | AB002314  | 1042.065  | 1076.866  | NM_018285 | 52080.305 | 53214.207 |
| M74089    | 6036.571  | 5445.993  | NM_014043 | 4771.557  | 5184.306  | AK022393  | 35718.078 | 39228.961 |
| AF190864  | 6480.338  | 5212.238  | NM_014622 | 578.122   | 581.976   | AK026302  | 32027.641 | 35349.434 |

|           |           |           |           |           |           |           |           |           |
|-----------|-----------|-----------|-----------|-----------|-----------|-----------|-----------|-----------|
| NM_000025 | 7842.778  | 7226.985  | AB011114  | 58893.152 | 63236.621 | NM_012214 | 8457.063  | 8805.383  |
| D38521    | 6256.305  | 5042.906  | D11466    | 23127.176 | 30924.012 | NM_001966 | 3907.502  | 3782.179  |
| NM_000403 | 5461.942  | 5041.832  | NM_014056 | 25147.072 | 31140.662 | NM_016138 | 7434.396  | 7642.296  |
| NM_018127 | 15217.981 | 17135.527 | D31885    | 34548.293 | 39646.141 | Z36833    | 66399.445 | 72219.109 |
| AB020677  | 2554.608  | 3641.989  | NM_016649 | 3839.909  | 4784.267  | L19778    | 1647.113  | 1348.922  |
| AB033097  | 2295.144  | 2832.031  | AK090536  | 13075.751 | 14096.956 | AF174482  | 56336.047 | 50816.863 |
| NM_000135 | 1733.031  | 2321.894  | BE743838  | 7032.043  | 3652.432  | Y08836    | 547.904   | 679.348   |
| AJ223948  | 7602.66   | 8846.887  | AF273046  | 4641.179  | 2953.689  | NM_003528 | 8572.597  | 11791.325 |
| NM_016218 | 1411.805  | 2237.615  | NM_001081 | 3572.142  | 2028.222  | NM_017768 | 2301.387  | 2763.932  |
| AK022947  | 3239.909  | 2764.396  | NM_002483 | 5341.379  | 3891.491  | D85131    | 27993.906 | 30153.99  |
| AL050029  | 2829.865  | 2487.97   | BF002026  | 1776.377  | 1359.361  | NM_004956 | 2286.555  | 2708.319  |
| AL049966  | 1085.074  | 1364.198  | L35594    | 1081.193  | 958.069   | D30612    | 15725.593 | 18529.42  |
| NM_005204 | 10219.541 | 11380.609 | BE790116  | 2562.296  | 2137.248  | NM_002163 | 16769.729 | 18019.664 |
| NM_016203 | 2247.953  | 2525.309  | AI922341  | 6057.15   | 4536.343  | U52097    | 38178.543 | 42608.789 |
| NM_002759 | 3670.679  | 3498.703  | S57283    | 486.856   | 444.669   | NM_003416 | 5432.127  | 7640.251  |
| NM_007271 | 3092.308  | 3467.501  | AA410517  | 618.281   | 489.422   | X74497    | 10106.851 | 14675.541 |
| NM_006255 | 5642.349  | 6148.988  | M12824    | 2328.899  | 2563.784  | NM_012210 | 4669.632  | 5669.669  |
| BE392143  | 4858.527  | 4641.883  | W60100    | 1515.741  | 1509.831  | U10072    | 7400.7    | 8074.577  |
| NM_005813 | 5216.889  | 2940.362  | M24898    | 1914.063  | 2181.258  | NM_001321 | 15268.798 | 14449.735 |
| AB037718  | 9234.762  | 7340.267  | U72508    | 1537.926  | 1651.751  | AB018264  | 15951.227 | 16864.766 |
| AL389994  | 2674.597  | 2420.459  | AA457153  | 4887.924  | 4413.474  | NM_006911 | 1603.187  | 2540.037  |
| CY3Cy5    | 4722.873  | 526.996   | AA283122  | 18347.508 | 15411.48  | U92544    | 9779.658  | 7891.71   |
| NM_000588 | 35725.371 | 31036.43  | AA868504  | 2141.748  | 2377.03   | AI285199  | 27017.631 | 24085.559 |
| NM_000710 | 377.634   | 501.141   | AA877845  | 6847.419  | 7939.854  | AA757170  | 525.995   | 913.456   |
| AF143872  | 3336.104  | 2863.428  | AA664241  | 54409.813 | 63660.688 | L07738    | 2752.015  | 2233.132  |
| AK025686  | 983.493   | 779.375   | AI016456  | 3600.775  | 5643.229  | Z48054    | 9349.171  | 7748.656  |
| AF143326  | 635.597   | 584.142   | AK026281  | 1295.455  | 1950.188  | H90415    | 12233.568 | 10229.292 |
| AL049229  | 5020.057  | 3947.168  | AK026680  | 9041.796  | 12130.937 | AA676470  | 53288.855 | 55669.055 |
| NM_018306 | 4883.821  | 4253.842  | NM_012436 | 56613.52  | 60803.629 | AA430512  | 11988.961 | 12651.316 |
| AK026146  | 2236.009  | 1619.726  | AF216292  | 22077.832 | 14861.827 | M38258    | 2651.754  | 2513.021  |
| AK023152  | 5722.972  | 3927.434  | NM_000952 | 5562.501  | 3736.386  | AA457155  | 56615.098 | 55740.129 |
| AK000155  | 351.613   | 200.351   | NM_005894 | 421.42    | 212.775   | BM014365  | 2611.991  | 2110.337  |
| AL389937  | 1858.091  | 1205.918  | NM_014584 | 4717.248  | 2714.762  | H91842    | 1447.519  | 1332.725  |
| AK025201  | 6192.191  | 4574.548  | M30627    | 400.906   | 277.596   | U78045    | 7996.17   | 6365.181  |
| AK021927  | 674.26    | 537.98    | NM_005810 | 16770.982 | 14969.741 | AA878561  | 59774.73  | 58023.668 |
| AK022995  | 3396.479  | 2253.869  | M28170    | 17498.572 | 13198.619 | BF688309  | 1559.401  | 1404.007  |
| NM_000588 | 28398.969 | 15945.673 | NM_001555 | 911.322   | 1025.618  | AI538525  | 2821.271  | 2587.289  |
| SR3       | 45659.559 | 35139.113 | AK026223  | 7005.537  | 4775.712  | NM_005205 | 62013.918 | 61964.621 |
| SR5       | 4483.775  | 5301.681  | NM_000874 | 5007.453  | 3652.489  | BE878426  | 58470.414 | 58274.059 |
| SR7       | 5804.581  | 43672.242 | NM_005854 | 881.627   | 712.944   | NM_001745 | 47572.855 | 50931.984 |
| SR9       | 25812.742 | 8272.969  | AB007863  | 50988.094 | 49950.195 | NM_003825 | 16743.848 | 23507.234 |
| CY3Cy5    | 2879.604  | 393.84    | AK024456  | 9330.277  | 10671.01  | AK025006  | 17267.068 | 18054.178 |
| L77562    | 527.188   | 879.709   | NM_017789 | 1005.16   | 1105.694  | NM_006678 | 12117.456 | 12509.264 |
| Y16183    | 562.221   | 809.459   | D31887    | 2809.889  | 2825.664  | AY007729  | 59010.957 | 55403.461 |
| L13433    | 1114.615  | 1052.529  | NM_002313 | 3509.966  | 4459.017  | NM_014424 | 965.009   | 829.881   |
| NM_007220 | 3091.111  | 2898.566  | NM_004459 | 2689.153  | 3054.904  | AF159092  | 2584.081  | 2159.68   |
| D25271    | 404.962   | 330.222   | NM_005503 | 379.229   | 371.201   | BC007318  | 6660.511  | 5940.001  |
| NM_017777 | 3575.229  | 3927.852  | NM_001502 | 3222.902  | 4633.015  | M36693    | 14970.072 | 13387.883 |
| AK001499  | 7437.419  | 4692.913  | NM_005721 | 2683.063  | 3621.356  | NM_016292 | 28788.225 | 23323.971 |
| AK021728  | 351.886   | 291.135   | AF284223  | 2118.274  | 2618.631  | NM_002601 | 9158.672  | 8476.616  |
| AK026852  | 2530.69   | 1887.261  | AF176012  | 792.373   | 1234.876  | U62858    | 2596.519  | 2602.409  |
| AK021629  | 2733.977  | 1717.936  | NM_006517 | 258.226   | 181.744   | NM_001781 | 2914.566  | 2173.239  |
| AL110257  | 60835.285 | 50694.473 | NM_004171 | 2606.71   | 2019.552  | NM_014432 | 10262.99  | 8043.888  |

|           |           |           |           |           |           |           |           |           |
|-----------|-----------|-----------|-----------|-----------|-----------|-----------|-----------|-----------|
| AB013384  | 5997.582  | 5255.746  | NM_014037 | 8525.85   | 6859.613  | NM_00155E | 8717.765  | 7262.604  |
| AK024824  | 476.861   | 326.304   | NM_00486E | 21668.238 | 17722.834 | NM_00695E | 584.799   | 454.54    |
| AK024270  | 6678.639  | 4626.549  | NM_01868E | 1645.069  | 1648.408  | NM_00253C | 1826.025  | 1764.258  |
| AK023060  | 2483.914  | 1599.181  | AK056652  | 5862.773  | 5617.309  | NM_018941 | 5991.783  | 5624.515  |
| NM_01487C | 1847.763  | 1640.668  | NM_01583E | 271.987   | 347.974   | NM_020241 | 902.55    | 898.617   |
| AK021917  | 784.031   | 764.717   | AL137438  | 1285.428  | 1102.15   | NM_00589E | 34863.754 | 33441.332 |
| AF052146  | 27370.611 | 25407.707 | NM_017957 | 9123.617  | 8483.071  | NM_00288E | 57660.145 | 60442.93  |
| NM_00487C | 10956.646 | 9157.827  | NM_003024 | 3148.458  | 2972.05   | AF078866  | 2685.138  | 2965.885  |
| AK024242  | 45108.266 | 55541.82  | NM_01324E | 4604.825  | 4555.588  | BF311880  | 53773.969 | 41599.18  |
| AK024559  | 2684.826  | 7295.861  | NM_000034 | 58730.25  | 63488.883 | NM_00007E | 873.473   | 1068.086  |
| AK024851  | 347.621   | 815.442   | AK022230  | 11783.499 | 10486.911 | NM_01607E | 956.888   | 1111.761  |
| AK024410  | 525.575   | 750.206   | AK022147  | 14169.88  | 15065.966 | NM_00136C | 19203.445 | 18259.346 |
| AK024995  | 615.465   | 788.164   | L25664    | 9763.104  | 11593.985 | AK026656  | 23084.805 | 20946.221 |
| AK022628  | 60815.75  | 68911.164 | NM_01494C | 3063.072  | 2795.186  | NM_000751 | 56870.473 | 53650.145 |
| AK026295  | 3816.856  | 4011.784  | NM_00578E | 1115.956  | 1206.833  | NM_005071 | 2490.362  | 2701.811  |
| AK022346  | 1513.634  | 2228.254  | AK000851  | 1086.12   | 1619.213  | NM_01673C | 56860.789 | 57971.016 |
| AK025007  | 5760.414  | 6324.448  | NM_00690C | 6152.776  | 8882.86   | AL035297  | 2536.654  | 2899.523  |
| NM_01648E | 16011.915 | 15293.563 | AJ289111  | 16833.115 | 23548.859 | NM_00440E | 13616.616 | 13023.438 |
| AL117601  | 457.453   | 294.447   | NM_01635E | 30671.047 | 36677.066 | AJ131244  | 3802.2    | 3623.558  |
| AK026490  | 65060.652 | 67492.859 | NM_00640E | 9229.06   | 11929.035 | NM_00253E | 12740.48  | 12571.738 |
| AJ227861  | 2501.413  | 2400.694  | D11466    | 21645.703 | 14530.423 | NM_01238E | 12688.456 | 11599.169 |
| NM_00555E | 501.599   | 420.577   | NM_01405E | 22801.861 | 14010.259 | NM_016651 | 4705.903  | 4101.759  |
| AJ001875  | 1406.489  | 1047.858  | D31885    | 26631.354 | 19018.799 | NM_001671 | 1099.128  | 1500.749  |
| AJ227883  | 495.672   | 631.352   | NM_01664E | 3517.877  | 2152.847  | NM_01984E | 7462.082  | 8119.385  |
| Y10204    | 716.656   | 617.959   | AK090536  | 12072.88  | 6624.835  | NM_01619E | 18940.154 | 14492.849 |
| Y10507    | 1134.705  | 1520.174  | D63477    | 1282.003  | 976.282   | AB046774  | 1309.623  | 1540.338  |
| AK002028  | 57869.828 | 58879.965 | NM_02024E | 17003.217 | 14109.931 | AK022385  | 57735.324 | 55879.813 |
| AL050127  | 3777.533  | 3365.161  | NM_014051 | 4921.692  | 4720.083  | NM_00277E | 2004.463  | 2038.883  |
| AK024805  | 18315.229 | 14490.147 | AK025398  | 2417.104  | 1545.018  | AK024584  | 14595.066 | 9502.349  |
| AK000189  | 1511.203  | 2494.121  | AK027082  | 291.322   | 252.917   | NM_003504 | 9040.385  | 8669.854  |
| AK001423  | 1075.873  | 899.618   | AK023056  | 982.002   | 884.227   | NM_01329E | 7778.831  | 11469.295 |
| AF085351  | 301.124   | 222.03    | NM_00112C | 45494.238 | 36474.297 | NM_007267 | 6244.175  | 6938.11   |
| NM_01862E | 1025.395  | 836.637   | NM_01788E | 2515.705  | 3388.652  | Z36816    | 12309.893 | 11611.018 |
| AL110189  | 814.772   | 742.365   | NM_00491E | 3978.698  | 4687.675  | NM_00586E | 17863.496 | 14076.443 |
| AK023407  | 535.783   | 614.147   | AK022207  | 1111.941  | 1405.615  | NM_00641E | 15926.22  | 12980.272 |
| AJ277441  | 16471.711 | 20224.42  | AV708752  | 3646.058  | 5268.912  | NM_017684 | 1026.81   | 991.355   |
| AK000834  | 892.335   | 1065.695  | AF119885  | 3171.257  | 4601.478  | AK025542  | 10283.039 | 11338.244 |
| AK022760  | 702.083   | 910.07    | NM_00075C | 1447.172  | 2206.053  | AF207547  | 2678.108  | 4684.927  |
| NM_006057 | 652.178   | 1127.085  | NM_00499E | 3840.543  | 5139.223  | NM_00276E | 24506.066 | 28875.658 |
| AK025784  | 49582.957 | 32780.219 | NM_005971 | 4931.402  | 7473.084  | NM_003691 | 3766.228  | 4425.199  |
| U07199    | 12146.05  | 6646.68   | NM_01743E | 413.311   | 1709.857  | NM_00295C | 31470.828 | 28039.541 |
| AK023713  | 3121.386  | 1661.104  | AK026281  | 867.772   | 489.389   | NM_00231E | 11861.373 | 11376.684 |
| X81445    | 819.602   | 506.685   | U23862    | 316.057   | 212.729   | NM_00143E | 1161.958  | 1354.331  |
| U95091    | 3304.69   | 2029.033  | AK026680  | 6910.412  | 4368.138  | NM_003134 | 55593.762 | 58712.879 |
| NM_01790C | 48560.254 | 28690.309 | NM_01243E | 53824.242 | 60326.941 | NM_004314 | 7838.69   | 7109.558  |
| S50182    | 4331.134  | 3461.746  | AK001299  | 35736.188 | 25230.252 | NM_018247 | 24507.086 | 25689.766 |
| AL360145  | 1877.49   | 1670.869  | AB014559  | 13009.014 | 9595.8    | NM_01797E | 24965.773 | 29190.104 |
| Y12016    | 5546.215  | 5110.429  | NM_01648E | 7163.573  | 5816.71   | NM_006911 | 2029.09   | 2132.431  |
| S75763    | 56366.902 | 49176.719 | NM_00503E | 4441.117  | 4050.283  | U92544    | 10248.701 | 6765.703  |
| AL117431  | 345.313   | 222.262   | NM_01593E | 34914.594 | 25167.777 | NM_019644 | 1757.371  | 1844.377  |
| AL359943  | 65190.781 | 69199.492 | NM_01794E | 738.19    | 759.753   | NM_006791 | 4533.832  | 5001.424  |
| NM_000534 | 5873.28   | 5067.592  | AK022169  | 1001.704  | 988.552   | AJ278348  | 46307.859 | 50954.813 |
| L10140    | 900.435   | 1037.581  | AF015592  | 2145.232  | 1958.996  | NM_01587E | 1238.328  | 1219.289  |

|           |           |           |           |           |           |           |           |           |
|-----------|-----------|-----------|-----------|-----------|-----------|-----------|-----------|-----------|
| AL133447  | 3042.589  | 2722.093  | AK026795  | 557.944   | 523.373   | AI285199  | 26141.137 | 25180.17  |
| AB037853  | 12752.89  | 9808.618  | NM_016399 | 3250.038  | 3689.346  | L07738    | 2728.459  | 2169.257  |
| D28450    | 63686.996 | 66343.758 | NM_016617 | 7176.719  | 5449.368  | Z48054    | 9152.914  | 8328.985  |
| AK056222  | 4603.448  | 6163.795  | NM_002027 | 6297.671  | 7686.549  | H90415    | 11769.025 | 10668.38  |
| L37700    | 534.519   | 494.45    | AL162078  | 5122.904  | 5816.354  | AA676470  | 55423.348 | 54169.637 |
| NM_017665 | 7251.553  | 4848.543  | NM_000919 | 358.439   | 552.647   | AA430512  | 13389.534 | 19603.418 |
| AB007976  | 1332.689  | 663.855   | NM_013382 | 9513.083  | 12071.785 | M38258    | 2719.571  | 3642.661  |
| AF052106  | 4982.533  | 3288.561  | AB002314  | 943.571   | 1725.287  | AA457155  | 49002.641 | 60461.266 |
| AK000441  | 1567.342  | 764.609   | NM_014043 | 4389.783  | 6128.64   | BM014365  | 1776.904  | 2509.088  |
| AK022391  | 4347.942  | 3234.155  | NM_014622 | 2477.043  | 3308.294  | H91842    | 1354.589  | 1653.498  |
| NM_016167 | 4611.833  | 7484.612  | AB011114  | 49576.676 | 61097.648 | U78045    | 7870.949  | 8581.024  |
| NM_016125 | 1594.885  | 1700.94   | CY3Cy5    | 1534.744  | 183.131   | AA878561  | 56995.555 | 60912.367 |
| AK024090  | 39069.238 | 26687.314 | NM_019884 | 5224.832  | 4380.284  | BF688309  | 1456.971  | 1547.597  |
| AL133574  | 643.459   | 504.468   | AF088051  | 2716.098  | 1945.718  | AI538525  | 2836.868  | 3291.064  |
| AK021936  | 805.465   | 505.741   | AF086366  | 949.418   | 820.8     | AF222980  | 2420.437  | 2227.423  |
| AF147339  | 7655.916  | 6677.135  | AF086360  | 6133.354  | 9135.961  | AK026758  | 8686.603  | 9001.033  |
| AL390181  | 54465.844 | 49519.496 | AF086436  | 551.829   | 488.234   | NM_012201 | 8241.074  | 8594.42   |
| NM_017914 | 28630.566 | 20233.328 | AF087993  | 5476.288  | 5511.987  | NM_001745 | 45955.566 | 43347.891 |
| NM_006350 | 525.748   | 483.807   | AF035282  | 932.569   | 1031.793  | NM_003825 | 15833.94  | 19471.33  |
| AK024953  | 20550.188 | 13787.267 | AK021966  | 3007.407  | 3200.723  | AK025006  | 16326.627 | 14699.665 |
| AK024276  | 2113.478  | 1773.022  | AB018292  | 21959.775 | 22981.484 | AF218014  | 45790.152 | 49390.484 |
| S83374    | 2081.725  | 2773.469  | AK022842  | 1016.02   | 934.337   | NM_006678 | 13223.617 | 11118.045 |
| NM_003150 | 3097.941  | 1981.724  | NM_007006 | 14685.318 | 14558.273 | AY007729  | 55797.543 | 55913.082 |
| NM_014784 | 1635.217  | 1001.639  | AL137346  | 4264.169  | 3754.09   | NM_014424 | 894.818   | 900.165   |
| AK026383  | 1671.337  | 1133.566  | NM_017756 | 44090.293 | 42336.059 | AF159092  | 2647.874  | 2350.264  |
| AK023821  | 568.793   | 578.988   | NM_019884 | 7327.232  | 11471.821 | BC007318  | 5870.911  | 5347.183  |
| AB014594  | 3649.479  | 2443.151  | SR2       | 31168.215 | 37605.375 | M36693    | 16176.769 | 12965.582 |
| M94547    | 2422.841  | 1620.334  | SR4       | 11619.279 | 13477.749 | NM_016292 | 31239.307 | 26864.352 |
| NM_005087 | 15465.95  | 9006.188  | SR6       | 1152.663  | 1741.228  | NM_002601 | 8352.693  | 7944.7    |
| NM_012098 | 912.505   | 610.215   | SR8       | 5431.469  | 33505.773 | NM_001781 | 2728.686  | 2868.667  |
| NM_018095 | 3843.173  | 3660.959  | SR10      | 14964.083 | 7087.842  | AF035121  | 959.676   | 1183.845  |
| AB023164  | 7473.213  | 11224.21  | CY3Cy5    | 874.056   | 157.579   | NM_014432 | 10188.369 | 10562.026 |
| NM_001178 | 1319.005  | 1471.212  | AF086054  | 5072.396  | 5638.474  | NM_001558 | 9107.618  | 8557.118  |
| AK023696  | 23230.006 | 19702.283 | AK022259  | 64807.805 | 63107.785 | NM_006953 | 1402.142  | 1934.14   |
| AF116613  | 378.336   | 341.774   | AK022461  | 656.432   | 534.149   | NM_002530 | 1897.156  | 2263.192  |
| NM_000704 | 5009.401  | 4477.661  | NM_016010 | 5900.32   | 5789.038  | NM_018941 | 5483.174  | 5572.978  |
| NM_015987 | 2319.733  | 1436.362  | AF147401  | 1287.256  | 1214.269  | NM_020241 | 10240.035 | 12726.922 |
| AK025205  | 450.777   | 425.693   | AJ001904  | 568.246   | 745.519   | NM_001321 | 15015.499 | 14506.572 |
| NM_019605 | 7994.216  | 10324.95  | AF075022  | 3716.349  | 3620.054  | AB018264  | 16098.915 | 15140.959 |
| NM_015368 | 2942.047  | 4789.298  | AF075060  | 4079.831  | 4133.786  | AF078866  | 2593.158  | 2182.537  |
| Z49090    | 4069.565  | 5400.114  | AB002438  | 1939.989  | 2055.089  | BF311880  | 54813.813 | 31679.844 |
| AK021592  | 2582.864  | 3328.489  | AF147436  | 1477.536  | 1902.961  | NM_000078 | 1082.603  | 872.237   |
| AF085952  | 367.571   | 502.742   | AK021441  | 2058.738  | 2192.722  | NM_016075 | 1361.828  | 1170.405  |
| AK025467  | 11494.826 | 16201.006 | AF085846  | 2354.89   | 2667.032  | NM_001360 | 17607.463 | 16812.598 |
| AK026593  | 19636.217 | 27579.035 | AK023901  | 15917.42  | 13300.171 | AK026656  | 22207.928 | 16179.294 |
| AL117666  | 2404.234  | 1678.4    | AF088057  | 9390.43   | 10443.425 | NM_000751 | 47002.746 | 50521.887 |
| NM_005825 | 34563.082 | 18770.982 | AF086255  | 39250.371 | 39398.152 | NM_005071 | 2446.761  | 2263.276  |
| NM_002756 | 16372.724 | 8828.716  | AK022660  | 713.005   | 609.693   | NM_016730 | 49500.781 | 53123.027 |
| U79299    | 1094.956  | 630.223   | AK026847  | 1396.9    | 1504.615  | AL035297  | 2715.874  | 3011.515  |
| AJ000414  | 2305.202  | 1795.292  | AK026891  | 1826.158  | 1450.467  | NM_004408 | 14074.464 | 13482.44  |
| AK025674  | 9499.046  | 7424.547  | AK024595  | 961.965   | 895.726   | AJ131244  | 4556.5    | 4757.298  |
| AF007194  | 7118.944  | 5771.763  | AF075032  | 732.584   | 697.072   | NM_002532 | 12845.693 | 13149.2   |
| NM_019068 | 3010.989  | 3545.666  | AF085971  | 1441.328  | 1217.965  | NM_012388 | 13098.817 | 13216.92  |

|           |           |           |           |           |           |           |           |           |
|-----------|-----------|-----------|-----------|-----------|-----------|-----------|-----------|-----------|
| NM_004761 | 10432.483 | 9399.007  | AF147302  | 3774.021  | 3732.021  | NM_016651 | 3646.411  | 2428.223  |
| Z25424    | 12087.597 | 11405.142 | AF085929  | 11792.588 | 13903.635 | NM_001671 | 1024.866  | 1141.536  |
| U79458    | 16723.832 | 13960.056 | AK001126  | 6898.897  | 6549.709  | NM_019843 | 6659.374  | 6703.39   |
| NM_014920 | 971.439   | 921.283   | AF085976  | 4279.85   | 4269.857  | NM_016192 | 17960.209 | 15568.077 |
| NM_002961 | 5939.663  | 8119.209  | AF075104  | 8315.501  | 10078.035 | AK022385  | 49054.344 | 52980.84  |
| NM_018298 | 2805.338  | 2636.249  | AK021724  | 591.968   | 794.821   | NM_002775 | 1939.807  | 1533.289  |
| NM_000676 | 1804.9    | 2111.974  | AL133025  | 1180.071  | 1379.68   | AK024584  | 14048.668 | 7919.484  |
| AF064770  | 852.992   | 1324.069  | AL137402  | 11657.3   | 11661.404 | NM_003504 | 8526.304  | 8525.351  |
| NM_005766 | 788.507   | 895.629   | AL137617  | 6842.759  | 5045.421  | NM_013298 | 8910.312  | 9151.778  |
| NM_004127 | 51052.422 | 60050.313 | AL359568  | 27585.025 | 23937.131 | NM_007267 | 7128.25   | 6235.597  |
| NM_013324 | 9405.636  | 10400.499 | AL133564  | 13986.485 | 13250.305 | AK022830  | 496.261   | 582.29    |
| AL133022  | 2391.113  | 3875.039  | AL137428  | 1542.059  | 1503.697  | Z36816    | 11763.818 | 11798.191 |
| NM_003953 | 7829.775  | 15185.837 | AL157462  | 2152.337  | 1932.111  | NM_005865 | 18242.598 | 14087.95  |
| NM_006301 | 946.184   | 1539.131  | AL359602  | 16385.43  | 15437.146 | NM_006413 | 14775.799 | 11842.079 |
| NM_012219 | 766.522   | 557.727   | NM_018190 | 53433.27  | 50280.594 | NM_017684 | 941.602   | 1051.03   |
| X72887    | 835.597   | 577.815   | AK021744  | 1692.195  | 1505.17   | AK025542  | 9758.003  | 7275.057  |
| NM_004529 | 3729.851  | 2174.785  | NM_018430 | 8294.983  | 8960.91   | AF207547  | 6637.699  | 4638.028  |
| NM_000127 | 1370.336  | 684.179   | AL110200  | 4868.594  | 4546.606  | NM_002768 | 19170.279 | 17174.002 |
| Y10483    | 28864.021 | 18359.01  | AL133640  | 3292.386  | 3401.676  | NM_003691 | 3811.81   | 4139.884  |
| NM_006784 | 5287.874  | 3341.654  | AK023783  | 582.716   | 598.961   | NM_002950 | 28103.598 | 24880.551 |
| NM_017876 | 4670.771  | 2933.689  | AF070647  | 35191.41  | 34747.152 | NM_002318 | 12719.214 | 12282.245 |
| NM_001087 | 25125.203 | 21307.521 | AF116649  | 1044.338  | 1018.844  | NM_001433 | 1676.641  | 1331.26   |
| NM_001826 | 1170.298  | 1910.742  | AF174394  | 2727.782  | 2686.801  | NM_003134 | 56883.34  | 53046.602 |
| AK025352  | 1162.512  | 1632.719  | AK025384  | 580.767   | 528.042   | NM_004314 | 7300.675  | 7030.774  |
| NM_003721 | 11715.933 | 10120.328 | AF144054  | 1801.619  | 2127.029  | NM_018247 | 23200.219 | 21424.254 |
| NM_004724 | 3246.289  | 2989.508  | AF230315  | 367.817   | 367.904   | NM_017979 | 21249.127 | 22148.594 |
| NM_001431 | 11053.252 | 9886.601  | AK025924  | 869.23    | 959.12    | NM_019644 | 2316.238  | 2305.471  |
| AK022666  | 434.977   | 434.275   | AK021876  | 32854.965 | 33801.926 | NM_006791 | 4389.624  | 4489.172  |
| NM_000381 | 739.979   | 624.104   | AK022017  | 1643.567  | 1363.39   | AJ278348  | 51707.047 | 45466.629 |
| NM_018192 | 454.329   | 495.762   | AK022160  | 3932.703  | 3784.569  | NM_015872 | 1502.411  | 1567.449  |
| NM_000427 | 7310.661  | 9038.915  | AK022295  | 1407.954  | 1309.791  | AI285199  | 25994.486 | 32261.646 |
| NM_014924 | 2187.872  | 2892.334  | AK021935  | 8637.884  | 9228.976  | BI906283  | 3833.474  | 4948.749  |
| NM_006946 | 2184.917  | 3313.875  | AK022187  | 9019.271  | 10677.004 | AA757170  | 966.176   | 1065.536  |
| NM_000174 | 23371.053 | 26022.711 | AK022337  | 6737.038  | 6535.77   | L07738    | 2852.01   | 2472.638  |
| NM_002508 | 998.891   | 1256.745  | AL133618  | 8151.619  | 9755.216  | Z48054    | 8943.173  | 8489.092  |
| NM_014343 | 8400.743  | 10750.976 | AF230314  | 2070.182  | 2050.332  | H90415    | 12950.194 | 10455.635 |
| D25303    | 2887.149  | 4368.968  | AK001086  | 1175.185  | 1407.882  | AA676470  | 61148.449 | 59739.844 |
| NM_002338 | 6400.916  | 8759.477  | AJ131610  | 4948.67   | 4126.11   | AA430512  | 12933.276 | 11284.18  |
| AF022913  | 3043.671  | 1828.093  | AF119872  | 12586.29  | 10539.666 | M38258    | 2595.244  | 2155.316  |
| NM_000028 | 2319.613  | 1536.159  | X99687    | 839.452   | 968.954   | AA457155  | 60077.234 | 62684.508 |
| NM_001382 | 6725.149  | 3433.51   | AK023255  | 50611.715 | 52488.449 | BM014365  | 1927.084  | 2651.356  |
| M93718    | 9875.592  | 7121.984  | NM_002622 | 13941.403 | 13331.137 | H91842    | 1433.462  | 1583.28   |
| NM_005386 | 2176.316  | 1159.67   | AK024185  | 1793.28   | 1863.292  | U78045    | 9421.212  | 8784.815  |
| AK023807  | 26915.271 | 15710.929 | NM_015417 | 599.442   | 580.231   | AA878561  | 66568.313 | 70486.641 |
| NM_018188 | 16241.629 | 12833.618 | AL137562  | 6213.476  | 6464.672  | BF688309  | 3210.177  | 3134.13   |
| AK024273  | 1827.214  | 1382.369  | M90355    | 59852.891 | 56444.547 | AI538525  | 2976.115  | 3244.852  |
| X59417    | 38657.594 | 28733.043 | AK022495  | 2883.171  | 2867.329  | AF222980  | 1593.114  | 1931.212  |
| NM_005659 | 30793.559 | 37325.117 | AK021632  | 1230.986  | 1264.607  | AK026758  | 10144.579 | 10290.785 |
| D28476    | 9508.4    | 11726.521 | AK023143  | 1259.947  | 1246.373  | NM_012201 | 8473.049  | 12673.226 |
| NM_016263 | 5446.919  | 6499.313  | AK026373  | 9479.237  | 9121.932  | AB046774  | 2950.814  | 3031.857  |
| NM_003335 | 8920.979  | 8275.498  | AK021581  | 5018.98   | 5148.171  | AF159092  | 3009.892  | 3232.21   |
| AB002376  | 11031.298 | 11536.204 | NM_006687 | 5077.581  | 6029.963  | BC007318  | 5817.361  | 6799.198  |
| NM_018249 | 1218.715  | 1172.157  | NM_013301 | 3695.457  | 4304.473  | M36693    | 17765.766 | 19663.51  |

|           |           |           |           |           |           |           |           |           |
|-----------|-----------|-----------|-----------|-----------|-----------|-----------|-----------|-----------|
| NM_00555E | 4055.338  | 4639.642  | NM_017673 | 2663.577  | 4390.691  | NM_016292 | 35441.012 | 36907.309 |
| NM_016631 | 2475.779  | 3232.447  | AB046857  | 1516.534  | 1413.455  | NM_002601 | 9514.444  | 9683.932  |
| AB015617  | 18722.814 | 24785.223 | AK024408  | 25030.945 | 23363.777 | NM_001781 | 2887.404  | 2506.239  |
| AK022730  | 6772.112  | 9610.05   | AF086307  | 19485.84  | 18891.816 | NM_014432 | 9553.265  | 9894.083  |
| NM_00225E | 18546.619 | 20611.662 | L19364    | 4097.893  | 4487.78   | NM_00155E | 9081.74   | 8561.09   |
| AF064839  | 54032.785 | 55979.207 | NM_00539C | 3119.496  | 3314.101  | NM_006952 | 651.722   | 796.44    |
| NM_00543E | 42511.457 | 39071.047 | AJ012502  | 14955.895 | 16479.918 | NM_00253C | 2333.246  | 2063.02   |
| AB037810  | 910.516   | 1139.339  | AK024170  | 610.774   | 749.996   | U96173    | 3519.205  | 3682.328  |
| AF222694  | 1650.875  | 2661.22   | AK021722  | 824.28    | 939.226   | NM_018941 | 5815.61   | 6154.258  |
| AL049925  | 8325.473  | 12342.596 | NM_000681 | 623.204   | 819.628   | NM_020241 | 699.119   | 1238.501  |
| AK027089  | 6985.742  | 4742.54   | AF147445  | 2535.269  | 3047.947  | BE730585  | 4525.981  | 5428.532  |
| X59845    | 761.816   | 510.658   | Y10508    | 21968.725 | 33932.086 | NM_00198C | 2581.403  | 3525.672  |
| NM_006284 | 30023.137 | 16847.137 | NM_005182 | 67617.859 | 65117.152 | NM_00615E | 1123.242  | 986.87    |
| U18909    | 3280.86   | 2458.769  | D17074    | 1844.652  | 2474.547  | NM_005954 | 3119.708  | 3181.72   |
| NM_00348E | 5791.478  | 4460.625  | AF039944  | 4521.115  | 5407.42   | NM_012471 | 6359.711  | 6906.211  |
| NM_01658E | 23285.734 | 18662.695 | AJ276252  | 961.539   | 1120.667  | NM_001321 | 18194.934 | 15545.152 |
| NM_003597 | 903.222   | 719.524   | AK021716  | 10417.906 | 11238.569 | NM_006911 | 1910.494  | 2870.629  |
| NM_00256E | 56010.043 | 66382.898 | AK025035  | 11302.385 | 11794.036 | U92544    | 16066.728 | 13921.558 |
| NM_006561 | 2737.263  | 4243.282  | AK002085  | 4497.875  | 5430.275  | AB023147  | 5347.678  | 6344.42   |
| NM_017521 | 3169.15   | 4511.26   | AB018338  | 20446.941 | 21551.875 | NM_01661E | 40829.465 | 43474.832 |
| NM_00412E | 508.887   | 410.451   | D80010    | 2297.481  | 2811.268  | NM_00563C | 2885.65   | 4072.74   |
| NM_006742 | 1121.614  | 961.654   | NM_004922 | 1678.49   | 2092.475  | NM_00104E | 894.182   | 995.386   |
| AK025200  | 20803.975 | 18178.461 | NM_003971 | 5378.536  | 7602.418  | AK023106  | 6004.932  | 6161.514  |
| NM_001382 | 22116.326 | 21175.813 | AK026973  | 890.605   | 774.861   | NM_01673C | 61625.109 | 66980.227 |
| NM_00102E | 54849.914 | 65602.734 | NM_005822 | 1002.657  | 959.726   | AL035297  | 2344.619  | 2704      |
| NM_00500E | 54103.621 | 53314.645 | U81002    | 5650.614  | 5071.625  | NM_00440E | 16373.303 | 16683.785 |
| NM_016304 | 54936.719 | 67236.711 | NM_01629E | 10725.633 | 9682.059  | AJ131244  | 3829.175  | 3931.188  |
| NM_006012 | 42115.699 | 43129.543 | NM_01418E | 16118.266 | 15400.005 | NM_002532 | 11998.02  | 12902.48  |
| NM_01404E | 46690.328 | 48492.852 | L38517    | 5745.54   | 5352.173  | NM_01238E | 14373.938 | 15110.662 |
| L34071    | 28082.592 | 30210.279 | AK026101  | 19450.783 | 17273.064 | NM_016651 | 4207.882  | 3738.668  |
| AB043007  | 45280.422 | 55810.227 | AK022194  | 37836.742 | 34151.246 | NM_001671 | 1253.496  | 1422.67   |
| NM_004861 | 2404.44   | 3180.048  | AF085963  | 3611.287  | 3352.072  | NM_019842 | 7746.348  | 8470.279  |
| NM_016161 | 855.201   | 1197.95   | AK021436  | 2167.402  | 2561.378  | NM_016192 | 21223.477 | 20190.414 |
| AV718258  | 1466.737  | 915.35    | U58664    | 1692.777  | 1806.138  | BE878426  | 59849.516 | 60288.699 |
| NM_00516E | 13796.367 | 7472.324  | AF085937  | 591.983   | 516.72    | NM_00174E | 55225.363 | 55435     |
| NM_00513E | 43849.707 | 29801.486 | AL137569  | 10777.682 | 10152.898 | NM_00382E | 17226.098 | 20892.994 |
| NM_00211E | 8517.287  | 7056.22   | AK021920  | 4784.348  | 4283.796  | AK025006  | 19204.518 | 18739.449 |
| AK023162  | 6689.293  | 4739.406  | AL049415  | 8073.2    | 7584.7    | AF218014  | 60727.793 | 63013.633 |
| NM_00639E | 14377.008 | 20738.996 | AK022375  | 1998.132  | 2007.067  | NM_00667E | 19008.922 | 19847.668 |
| NM_01864E | 7591.168  | 9465.349  | NM_00337E | 59429.82  | 54552.828 | NM_014424 | 2834.163  | 3072.424  |
| NM_018262 | 1704.322  | 1687.225  | AL110194  | 11433.588 | 12799.171 | NM_004314 | 7492.13   | 7182.871  |
| NM_01344E | 2552.475  | 2301.651  | AF138860  | 1916.251  | 2097.707  | NM_018247 | 24673.721 | 25972.631 |
| NM_004537 | 4587.341  | 4269.273  | NM_001942 | 491.977   | 435.739   | NM_01797E | 20518.055 | 23981.416 |
| AL390134  | 764.029   | 952.704   | AF200348  | 2695.665  | 2418.823  | NM_00589E | 40949.895 | 44998.484 |
| NM_02022E | 9768.798  | 10402.957 | Y11710    | 1059.734  | 1073.185  | NM_00288E | 60111.219 | 66001.469 |
| NM_01786E | 12104.574 | 9700.34   | J03756    | 477.935   | 600.641   | AF078866  | 4106.746  | 4305.907  |
| NM_003427 | 4730.116  | 5762.547  | NM_00265C | 3248.153  | 3113.109  | BF311880  | 58808.395 | 49544.348 |
| AK021842  | 717.825   | 1209.909  | NM_00326C | 26721.121 | 27049.629 | NM_00007E | 1172.321  | 1198.912  |
| NM_00592C | 4741.541  | 6630.402  | AK024071  | 1999.519  | 2705.641  | NM_01607E | 1337.623  | 1405.637  |
| Y09321    | 4460.682  | 6094.642  | AF056490  | 2916.421  | 3305.056  | NM_00136C | 20310.951 | 21727.559 |
| NM_006592 | 665.93    | 1295.922  | NM_00553E | 3957.188  | 4044.561  | AK026656  | 27717.91  | 27338.91  |
| NM_00037E | 2579.071  | 3365.503  | NM_005541 | 6964.729  | 7289.538  | AJ276207  | 30707.453 | 31205.895 |
| NM_00047E | 16673.01  | 22606.529 | AB002319  | 2665.414  | 2502.825  | AB011131  | 13540.013 | 12440.983 |

|           |           |           |           |           |           |           |           |           |
|-----------|-----------|-----------|-----------|-----------|-----------|-----------|-----------|-----------|
| M61872    | 28073.545 | 33164.367 | AF039942  | 3056.366  | 2768.749  | NM_000745 | 1274.592  | 1716.819  |
| NM_005721 | 3525.07   | 2456.086  | NM_004421 | 3611.199  | 3001.796  | NM_000751 | 64576.395 | 65961.445 |
| AF284223  | 4308.961  | 2313.77   | AB046863  | 20183.033 | 20530.82  | NM_014845 | 12976.96  | 13252.826 |
| AF176012  | 1930.775  | 1144.311  | M62403    | 14984.718 | 11710.83  | NM_001042 | 13901.582 | 13010.514 |
| BE743838  | 14850.438 | 8897.053  | NM_017883 | 5606.112  | 5120.138  | NM_005071 | 3928.411  | 4293.304  |
| AF273046  | 3166.138  | 2711.948  | AK025131  | 3757.407  | 3345.406  | AF222980  | 1898.853  | 1901.101  |
| NM_001081 | 8830.776  | 5518.865  | NM_000754 | 27777.174 | 25546.877 | AK026758  | 10759.781 | 11163.522 |
| NM_002483 | 7625.502  | 7928.132  | NM_014619 | 2310.901  | 2836.779  | NM_012201 | 8734.784  | 9722.296  |
| BF002026  | 1364.41   | 1373.414  | NM_005629 | 31832.008 | 41792.063 | AB046774  | 1621.773  | 2208.02   |
| L35594    | 833.13    | 1472.943  | J04621    | 1180.158  | 1089.438  | AK022385  | 57315.141 | 57425.508 |
| BE790116  | 972.537   | 1220.525  | NM_000718 | 4403.256  | 4683.013  | NM_002775 | 1804.391  | 1574.58   |
| AI922341  | 5928.422  | 7430.27   | NM_000161 | 6486.304  | 6352.628  | AK024584  | 15748.69  | 10756.799 |
| S57283    | 855.953   | 1013.915  | NM_001972 | 588.088   | 439.334   | NM_003504 | 9753.823  | 9183.203  |
| AA410517  | 575.425   | 541.616   | NM_001445 | 1510.093  | 2070.012  | NM_013295 | 9042.554  | 10523.254 |
| M12824    | 1069.355  | 1248.971  | AK024455  | 486.364   | 441.927   | NM_007267 | 6366.651  | 5971.146  |
| W60100    | 3371.076  | 3924.232  | NM_002006 | 38977.086 | 37484.949 | AK022830  | 593.781   | 820.802   |
| M24898    | 861.387   | 1123.561  | NM_007111 | 11997.635 | 10918.979 | Z36816    | 12343.6   | 11929.792 |
| U72508    | 2319.29   | 2989.614  | NM_002048 | 671.63    | 668.497   | NM_005865 | 23309.156 | 19714.783 |
| AA457153  | 14810.3   | 18745.789 | NM_004702 | 855.69    | 1160.282  | NM_006413 | 17317.607 | 16136.188 |
| AA283122  | 1458.805  | 1891.126  | NM_007109 | 3322.533  | 2855.617  | NM_017684 | 1350.895  | 1581.324  |
| AA868504  | 9132.296  | 11624.789 | AK023404  | 10687.712 | 7609.942  | AK025542  | 11584.634 | 12107.646 |
| AA877845  | 18948.781 | 24381.248 | NM_013239 | 1885.3    | 1812.397  | AF207547  | 1965.393  | 2391.618  |
| AA664241  | 19779.586 | 22435.742 | NM_001789 | 2592.25   | 2893.949  | NM_002765 | 26875.277 | 31964.023 |
| AI016456  | 1073.447  | 1643.816  | NM_016004 | 5115.635  | 4553.459  | NM_003691 | 3764.351  | 4791.791  |
| NM_006065 | 45106.492 | 35247.215 | NM_002655 | 1685.562  | 1665.466  | NM_002950 | 30608.898 | 29982.975 |
| AK022230  | 8297.599  | 5128.5    | AB028955  | 51150.461 | 58228.73  | NM_002315 | 16044.519 | 14690.157 |
| AK022147  | 5199.622  | 3432.626  | U66879    | 34351.16  | 35262.125 | NM_001433 | 1474.45   | 1299.442  |
| L25664    | 4074.229  | 2607.809  | NM_016022 | 4909.462  | 5361.459  | NM_003134 | 66189.508 | 64268.441 |
| NM_014940 | 6078.826  | 3500.706  | NM_004874 | 1543.579  | 1681.324  | CY3Cy5    | 4393.329  | 122.129   |
| NM_005783 | 1364.752  | 753.554   | NM_014204 | 2170.521  | 2047.039  | NM_022095 | 2014.611  | 1890.413  |
| AK000851  | 3142.313  | 1874.122  | S70385    | 25288.797 | 26091.049 | AF088061  | 4423.976  | 3201.705  |
| NM_006900 | 885.684   | 782.776   | M34671    | 7278.164  | 8074.796  | AF086425  | 726.007   | 744.353   |
| AJ289111  | 21782.201 | 20929.533 | NM_018509 | 7912.965  | 9553.829  | AF086286  | 4763.317  | 3145.726  |
| NM_016355 | 1248.048  | 1339.993  | NM_004085 | 1493.485  | 1583.577  | AF086376  | 4295.345  | 2625.949  |
| NM_006405 | 38278.762 | 41461.98  | NM_014944 | 15199.793 | 14902.907 | AF086410  | 1360.82   | 1142.803  |
| AF216292  | 46689.293 | 48014.762 | NM_001109 | 495.52    | 623.933   | AK022997  | 20759.955 | 17803.947 |
| NM_000952 | 12720.397 | 14900.269 | NM_007352 | 1115.621  | 842.496   | NM_017617 | 4586.714  | 3699.954  |
| NM_005894 | 1586.472  | 1508.199  | AF176706  | 4462.067  | 4918.288  | AF131830  | 1568.625  | 1412.838  |
| NM_014584 | 11431.825 | 11791.976 | NM_014484 | 1186.992  | 1075.72   | NM_014811 | 801.91    | 742.095   |
| M30627    | 908.277   | 907.796   | AF163762  | 351.207   | 290.415   | AK027232  | 9542.232  | 8232.107  |
| NM_005810 | 7553.97   | 9318.527  | NM_001085 | 4196.192  | 4290.85   | NM_012204 | 775.328   | 930.813   |
| M28170    | 35346.508 | 36895.426 | NM_014670 | 6147.184  | 6213.472  | NM_022095 | 1853.468  | 1946.079  |
| NM_001555 | 2064.78   | 3251.461  | NM_019045 | 7793.441  | 8821.107  | SR2       | 46904.402 | 39856.902 |
| AK026223  | 15493.934 | 20355.186 | NM_001040 | 2693.184  | 2434.185  | SR4       | 14056.954 | 13527.437 |
| NM_000874 | 13571.421 | 17145.461 | AF279698  | 7646.594  | 9142.39   | SR6       | 1747.273  | 1826.387  |
| NM_005854 | 553.651   | 652.874   | NM_019849 | 4413.288  | 4383.16   | SR8       | 6464.897  | 18113.48  |
| AB007863  | 10561.428 | 11081.726 | NM_000049 | 467.749   | 411.004   | SR10      | 21084.377 | 5888.814  |
| NM_017785 | 951.812   | 1164.362  | AB032996  | 58464.254 | 57790.133 | CY3Cy5    | 4496.201  | 147.218   |
| D31887    | 6565.79   | 7688.488  | AB040881  | 9589.445  | 10186.488 | AF086103  | 1742.113  | 1307.326  |
| NM_016645 | 7314.99   | 5077.118  | AY007121  | 3928.253  | 4123.254  | AL080135  | 2067.555  | 1384.289  |
| AK090536  | 26843.063 | 12394.405 | NM_003372 | 10812.521 | 11710.926 | AK023158  | 2668.017  | 1770.055  |
| D63477    | 1958.687  | 795.769   | NM_003980 | 530.488   | 500.162   | AK000580  | 521.665   | 509.786   |
| NM_020243 | 35737.723 | 23455.93  | NM_007317 | 7325.096  | 8233.361  | AF085852  | 9256.027  | 6493.104  |



|           |           |           |           |           |           |           |           |           |
|-----------|-----------|-----------|-----------|-----------|-----------|-----------|-----------|-----------|
| NM_014051 | 11010.373 | 9185.18   | AB037826  | 707.913   | 481.84    | AF042838  | 2502.265  | 2475.827  |
| AK025398  | 5698.846  | 3704.772  | AK021466  | 3291.637  | 2973.014  | AL137511  | 1137.753  | 1063.831  |
| AK027082  | 557.031   | 411.419   | Z36796    | 63086.109 | 59895.098 | AF075031  | 936.175   | 927.529   |
| AB037750  | 417.645   | 868.989   | NM_006443 | 47441.703 | 51045.168 | AF075062  | 14030.061 | 10478.136 |
| AK023056  | 2686.34   | 2922.012  | NM_001559 | 674.209   | 642.207   | NM_004188 | 2846.035  | 2759.607  |
| AK022207  | 1844.378  | 1910.47   | NM_002634 | 23281.344 | 26455.332 | AF147381  | 15708.197 | 13473.002 |
| NM_004996 | 7205.344  | 8139.601  | NM_017749 | 4270.097  | 4090.539  | AK027101  | 36602.688 | 27549.104 |
| NM_017435 | 974.017   | 3177.829  | NM_002938 | 11076.078 | 10142.78  | AK024358  | 4646.532  | 2973.321  |
| NM_014037 | 3852.447  | 5036.714  | AK023652  | 20015.266 | 16586.32  | AF088075  | 2496.11   | 1886.39   |
| NM_004866 | 46926.891 | 47599.504 | AF099032  | 1763.873  | 1522.15   | AK026376  | 3305.919  | 1719.365  |
| NM_018688 | 3508.28   | 4576.862  | NM_003070 | 4554.41   | 4005.134  | AK027097  | 966.634   | 1015.495  |
| AK056652  | 10933.815 | 14809.785 | AL122101  | 16506.959 | 14627.264 | AK024613  | 527.181   | 350.28    |
| NM_015839 | 770.811   | 1415.607  | NM_016216 | 9491.345  | 8969.641  | AK027198  | 3161.082  | 2428.021  |
| AL137438  | 2760.979  | 3899.614  | AK001649  | 763.777   | 1598.804  | AL162077  | 493.018   | 477.895   |
| NM_017957 | 2717.588  | 3957.497  | NM_016638 | 21049.166 | 19824.396 | AK022404  | 890.883   | 601.721   |
| NM_003024 | 5613.157  | 7791.251  | AB018274  | 16115.653 | 19524.455 | AF147426  | 3981.215  | 3704.737  |
| NM_013248 | 14728.43  | 18830.965 | NM_005871 | 8528.039  | 6796.121  | BC019667  | 42956.289 | 35048.824 |
| NM_000034 | 57748.18  | 69091.906 | NM_007042 | 5572.371  | 4884.776  | AK026026  | 29716.01  | 22591.018 |
| NM_012436 | 30659.426 | 19658.33  | NM_016333 | 12918.059 | 10201.86  | AF085941  | 28522.299 | 23452.49  |
| AK001299  | 20555.219 | 11088.716 | BE875028  | 8707.997  | 9224.726  | Z69892    | 18675.309 | 13071.236 |
| AB014559  | 3027.174  | 1898.049  | AK000511  | 9543.989  | 9670.663  | AK023590  | 819.515   | 851.195   |
| NM_016489 | 10071.256 | 7856.909  | AF121255  | 5370.244  | 6594.214  | AF087961  | 1273.676  | 1404.813  |
| NM_005033 | 9661.91   | 8869.707  | NM_005494 | 8875.94   | 9036.002  | AL137309  | 4224.668  | 3620.903  |
| NM_015932 | 50806.254 | 45751.484 | NM_017946 | 1001.149  | 945.386   | AL137475  | 1592.554  | 1502.943  |
| NM_017949 | 1660.119  | 1433.332  | NM_004953 | 10039.575 | 9872.41   | AL161956  | 6932.916  | 4651.364  |
| AK022169  | 1198.077  | 962.879   | NM_012199 | 4174.109  | 3949.95   | AL390176  | 3336.57   | 2720.991  |
| AF015592  | 7253.337  | 10456.482 | AL049682  | 2669.47   | 2855.742  | AL137356  | 1279.207  | 855.844   |
| AK026795  | 1145.848  | 1590.97   | NM_005528 | 13684.36  | 14238.781 | AL137547  | 1900.341  | 1345.608  |
| NM_016399 | 10480.815 | 12486.854 | AL050199  | 5403.266  | 5864.723  | AK021994  | 1743.439  | 1169.522  |
| NM_016617 | 17959.465 | 15513.656 | NM_004901 | 1272.661  | 1187.155  | Z70763    | 1446.703  | 804.483   |
| NM_002027 | 12942.604 | 15982.563 | U77088    | 671.247   | 642.855   | AK023802  | 31768.094 | 14830.509 |
| AL162078  | 3024.471  | 3042.073  | NM_006721 | 15658.957 | 13931.729 | AL359567  | 2717.838  | 2190.49   |
| NM_000919 | 1175.848  | 1381.931  | NM_016282 | 21825.027 | 20487.803 | NM_017726 | 9900.11   | 7139.858  |
| NM_013382 | 4222.519  | 5773.368  | NM_002765 | 6745.489  | 6500.966  | AK021977  | 1178.742  | 1356.406  |
| AB002314  | 1355.805  | 2057.163  | NM_001905 | 4085.796  | 3006.502  | AK026716  | 774.391   | 892.023   |
| NM_014043 | 12095.229 | 14698.604 | AF292100  | 6774.342  | 6930.207  | AL049325  | 26840.289 | 19852.273 |
| NM_014622 | 639.648   | 846.299   | NM_003434 | 56423.43  | 59238.066 | AK023952  | 1341.618  | 1266.585  |
| AB011114  | 53048.066 | 66274.078 | NM_018181 | 523.564   | 485.073   | AK000787  | 2078.205  | 1595.512  |
| D11466    | 39998.422 | 43348.445 | X68880    | 451.53    | 507.666   | AF090885  | 35159.605 | 32139.643 |
| NM_014056 | 52186.281 | 57271.316 | NM_005654 | 690.362   | 641.84    | AF161342  | 825.297   | 1141.177  |
| D31885    | 42252.621 | 49027.652 | AF024698  | 53711.621 | 56602.559 | NM_016646 | 624.858   | 725.895   |
| AF176012  | 2331.507  | 1157.122  | BE904617  | 51926.641 | 52274.848 | NM_014082 | 3456.535  | 3543.117  |
| BE743838  | 13653.709 | 6741.863  | AK024495  | 1569.519  | 1788.783  | AF100636  | 844.557   | 1033.325  |
| AF273046  | 3213.842  | 2600.903  | AF024694  | 5437.542  | 5898.203  | AF161366  | 614.777   | 870.908   |
| NM_001081 | 8486.603  | 5741.171  | AF091081  | 19858.965 | 19007.496 | AK022197  | 3286.828  | 3232.35   |
| NM_002483 | 6577.491  | 6669.129  | AK001758  | 3487.925  | 2948.657  | AK021970  | 1151.896  | 949.656   |
| BF002026  | 1276.522  | 1019.767  | U90842    | 3916.985  | 4129.33   | AK022066  | 69586.82  | 63850.953 |
| L35594    | 567.25    | 652.776   | AK025076  | 344.679   | 281.451   | AK022224  | 2127.928  | 1488.987  |
| BE790116  | 730.52    | 604.762   | AF086325  | 10340.199 | 9775.15   | AK022359  | 1220.747  | 812.165   |
| AI922341  | 6158.746  | 8858.945  | NM_004928 | 1664.357  | 1736.008  | AK022000  | 2028.799  | 1414.165  |
| S57283    | 988.391   | 1013.936  | NM_005081 | 480.415   | 719.5     | AK022129  | 5691.52   | 3213.645  |
| AA410517  | 486.799   | 489.246   | NM_004959 | 1291.565  | 1581.237  | AK022263  | 4419.329  | 2443.696  |
| M12824    | 1139.083  | 1117.124  | AK026022  | 59500.156 | 53289.613 | AK022384  | 1221.628  | 654.101   |

|           |           |           |           |           |           |           |           |           |
|-----------|-----------|-----------|-----------|-----------|-----------|-----------|-----------|-----------|
| W60100    | 3014.977  | 3219.699  | NM_003199 | 9646.929  | 9364.185  | AF086304  | 29087.703 | 24147.623 |
| M24898    | 579.062   | 483.992   | NM_004306 | 62259.145 | 60046.109 | U61094    | 3479.946  | 3102.476  |
| U72508    | 2191.282  | 2072.986  | NM_006786 | 11684.271 | 9524.048  | AB032976  | 2961.071  | 2383.516  |
| AA457153  | 13727.848 | 15213.693 | NM_006205 | 2580.983  | 2247.808  | AF301222  | 25496.654 | 22850.621 |
| AA283122  | 2069.74   | 2988.603  | NM_004034 | 13866.271 | 12726.273 | AF215981  | 21721.266 | 16956.566 |
| AA868504  | 8198.358  | 9940.817  | NM_000130 | 13981.889 | 12384.368 | NM_000732 | 53951.172 | 40613.066 |
| AA877845  | 16719.123 | 20509.158 | AF193756  | 752.867   | 635.293   | AF130044  | 2217.925  | 2324.9    |
| AA664241  | 18361.236 | 22551.334 | AI492087  | 708.972   | 700.61    | AF116709  | 752.334   | 775.163   |
| AI016456  | 903.957   | 1551.575  | R72122    | 6850.477  | 6238.327  | AF087980  | 1281.163  | 1369.294  |
| AK026281  | 1905.399  | 2864.268  | Z35309    | 10333.441 | 8743.445  | AK000257  | 1351.224  | 1583.788  |
| U23862    | 716.738   | 977.406   | X04571    | 1182.005  | 1230.775  | NM_006160 | 12134.108 | 8393.564  |
| AK026680  | 8084.123  | 11138.547 | AA700005  | 1098.163  | 1215.318  | NM_000525 | 3427.602  | 2946.901  |
| L25664    | 4585.871  | 3396.04   | AA292025  | 4256.469  | 4645.995  | AL110159  | 589.607   | 422.39    |
| NM_014940 | 5963.869  | 2925.536  | AA437226  | 9881.603  | 10549.347 | AF009259  | 1484.053  | 1254.712  |
| NM_005783 | 1175.33   | 580.434   | R36143    | 4003.888  | 4517.396  | AF009260  | 1345.704  | 1045.566  |
| AK000851  | 3041.527  | 1889.956  | XM_056359 | 2326.466  | 2523.23   | NM_003075 | 3431.8    | 2527.153  |
| NM_006900 | 915.264   | 649.021   | D10353/NM | 30429.602 | 30486.031 | NM_017902 | 4516.195  | 2955.506  |
| AJ289111  | 20872.779 | 17134.488 | M15042    | 11965.894 | 11912.967 | NM_017835 | 29621.471 | 24739.545 |
| NM_016356 | 1214.514  | 1051.82   | AK056843  | 10744.268 | 12166.895 | NM_018347 | 9410.375  | 5036.368  |
| NM_006406 | 25467.549 | 20048.352 | U49928    | 61031.109 | 59861.621 | AK024986  | 620.836   | 545.61    |
| AF216292  | 40063.449 | 32101.887 | AK096645  | 58323.324 | 52209.91  | AK026730  | 2333.965  | 2181.343  |
| NM_000952 | 11861.403 | 17883.297 | AK092859  | 2104.258  | 2413.509  | AK024739  | 2673.313  | 2588.484  |
| NM_005894 | 1520.623  | 1541.158  | NM_005793 | 13854.451 | 13831.063 | AK098681  | 2088.338  | 2002.495  |
| NM_014584 | 11443.619 | 9858.908  | M55646    | 28705.949 | 29494.822 | AK026772  | 7816.377  | 5515.995  |
| M30627    | 834.562   | 714.881   | NM_006112 | 32142.121 | 26739.209 | NM_014260 | 19605.77  | 17413.949 |
| NM_005810 | 6677.873  | 9144.3    | M12807    | 2679.068  | 2145.193  | AK026458  | 1333.566  | 1323.082  |
| M28170    | 26760.662 | 22689.273 | NM_001765 | 3176.271  | 3001.137  | AK024154  | 15626.502 | 12280.35  |
| NM_001555 | 1857.962  | 2052.056  | NM_003361 | 2959.535  | 2866.333  | AF086341  | 1518.344  | 1491.997  |
| NM_005849 | 416.491   | 615.606   | NM_012099 | 14806.143 | 14598.303 | AK026672  | 1488.696  | 1232.625  |
| AK026223  | 16314.192 | 22498.646 | NM_018684 | 42058.445 | 38700.664 | S83282    | 67888.555 | 63442.57  |
| NM_000874 | 12614.432 | 16435.891 | NM_017983 | 1616.421  | 1246.106  | AK024164  | 56604.41  | 52974.18  |
| NM_005854 | 756.479   | 1126.546  | AF116909  | 1231.205  | 965.799   | AF052130  | 9060.591  | 7205      |
| AB007863  | 8096.596  | 9213.291  | BE906724  | 1552.778  | 1532.279  | AF130090  | 42435.813 | 25813.633 |
| NM_017789 | 1021.371  | 1183.578  | NM_002283 | 19692.16  | 17807.002 | AL096727  | 3255.335  | 2806.511  |
| D31887    | 6252.755  | 8786.476  | AJ276095  | 11587.255 | 11230.917 | AL080110  | 8070.759  | 5418.213  |
| NM_005721 | 3895.589  | 5811.219  | NM_004819 | 5720.596  | 8002.817  | NM_020425 | 1551.244  | 1563.083  |
| AF284223  | 4778.435  | 7018.541  | NM_007184 | 4567.326  | 6937.248  | AK024076  | 5700.486  | 3485.515  |
| D63477    | 2406.632  | 1225.485  | NM_005291 | 54596.684 | 52490.082 | M87940    | 2183.105  | 1431.843  |
| NM_020243 | 34546.215 | 20868.9   | AF253316  | 812.774   | 719.299   | L77588    | 4178.728  | 2220.497  |
| AK025398  | 4820.148  | 3418.096  | NM_005855 | 761.134   | 876.323   | NM_014273 | 27383.951 | 21251.623 |
| AK027082  | 314.329   | 324.398   | NM_002923 | 4101.578  | 4688.565  | AF039442  | 3717.512  | 2509.903  |
| AK023056  | 2811.205  | 3909.594  | NM_006794 | 2959.984  | 3276.014  | NM_004680 | 2351.689  | 1950.635  |
| AK022207  | 1787.3    | 1763.676  | NM_018653 | 1262.855  | 1362.137  | AF104260  | 647.671   | 572.448   |
| NM_004996 | 7581.387  | 7181.764  | NM_005388 | 13964.511 | 16318.762 | NM_005671 | 1934.744  | 1673.897  |
| NM_017435 | 963.028   | 2716.824  | NM_007232 | 58798.73  | 57450.754 | NM_017405 | 1006.035  | 826.95    |
| NM_014037 | 3752.573  | 5699.865  | NM_016257 | 3071.819  | 3512.182  | NM_019625 | 38798.938 | 30461.465 |
| NM_004866 | 44635.781 | 34901.438 | NM_002717 | 5286.22   | 4403.375  | NM_006725 | 6508.303  | 6038.371  |
| NM_018688 | 2663.361  | 2937.225  | AF231916  | 8161.093  | 8769.046  | NM_006071 | 2832.143  | 2985.17   |
| AK056652  | 10611.096 | 11356.637 | NM_003501 | 8866.639  | 8736.297  | NM_012236 | 15377.023 | 13035.436 |
| NM_015839 | 722.045   | 1019.112  | AK022654  | 50763.227 | 55805.223 | NM_013935 | 1078.101  | 1079.764  |
| AL137438  | 2487.417  | 3513.488  | BC002905  | 7830.584  | 7845.986  | AB038651  | 7047.431  | 6582.765  |
| NM_017957 | 2708.628  | 4509.878  | NM_018091 | 13747.739 | 14281.146 | AL359603  | 2462.908  | 2690.345  |
| NM_003024 | 5222.875  | 7389.255  | NM_001108 | 8678.145  | 5769.096  | X84838    | 1273.042  | 1627.64   |

|           |           |           |           |           |           |           |           |           |
|-----------|-----------|-----------|-----------|-----------|-----------|-----------|-----------|-----------|
| NM_01324E | 15650.623 | 22398.379 | NM_001637 | 853.836   | 832.397   | AL117643  | 2580.732  | 2071.105  |
| NM_000034 | 54685.523 | 68575.758 | NM_016630 | 18947.553 | 17435.043 | AF075063  | 1056.991  | 1002.976  |
| AK022230  | 10091.659 | 13407.417 | NM_014291 | 9091.201  | 8432.864  | AF069135  | 13219.548 | 8459.989  |
| AK022147  | 6046.798  | 8295.536  | NM_014631 | 627.952   | 893.686   | AK026524  | 1913.876  | 1381.534  |
| AK001299  | 25337.891 | 17111.242 | NM_001089 | 8296.424  | 8075.22   | AB011157  | 7067.725  | 4801.365  |
| AB014559  | 3206.376  | 2132.92   | NM_000120 | 1608.368  | 1607.268  | U17632    | 1198.222  | 714.263   |
| NM_01648E | 9326.991  | 7041.357  | U09384    | 1919.878  | 2247.431  | AK026764  | 3605.617  | 1950.51   |
| NM_00503E | 8526.422  | 8057.502  | NM_004794 | 13945.561 | 15522.942 | AF113700  | 3796.828  | 2602.097  |
| NM_01593E | 50297.949 | 45087.055 | NM_00280E | 12678.462 | 13814.876 | X91348    | 58033.016 | 54718.984 |
| NM_01794E | 1722.661  | 1314.748  | NM_00550E | 4086.035  | 5181.957  | Z36505    | 6363.112  | 4048.494  |
| AK022169  | 1113.713  | 924.325   | NM_01848E | 740.243   | 924.215   | NM_001854 | 4281.884  | 3044.91   |
| AF015592  | 5275.383  | 4657.706  | NM_00678E | 2988.269  | 2824.843  | NM_01791E | 3316.745  | 2836.731  |
| AK026795  | 912.545   | 981.117   | AK025039  | 274.865   | 565.525   | NM_00275E | 24703.627 | 21429.682 |
| NM_01639E | 10947.348 | 15811.046 | NM_01656E | 1859.639  | 1954.666  | AK024799  | 65193.164 | 64077.277 |
| NM_016617 | 18511.119 | 16164.929 | NM_002987 | 449.514   | 664.646   | NM_000924 | 12981.145 | 13063.703 |
| NM_002027 | 13505.558 | 14142.013 | AB033102  | 53572.102 | 56650.75  | NM_003330 | 12759.636 | 13301.21  |
| AL162078  | 2980.069  | 3568.272  | NM_014774 | 3796.572  | 4436.496  | NM_002481 | 499.183   | 417.565   |
| NM_00091E | 1101.834  | 1852.033  | NM_01414E | 20531.355 | 24944.504 | NM_003647 | 699.306   | 803.407   |
| NM_01338E | 3851.109  | 3991.038  | NM_012200 | 2931.031  | 2724.497  | NM_00169E | 61665.434 | 59498.512 |
| AB002314  | 1155.987  | 1142.748  | NM_001724 | 3019.924  | 1984.654  | AB006589  | 874.925   | 824.107   |
| NM_01404E | 14349.254 | 17085.014 | NM_000150 | 3843.327  | 3152.962  | NM_018351 | 1856.315  | 1908.335  |
| NM_01462E | 721.439   | 653.081   | AB023152  | 798.49    | 770.215   | AK023019  | 1613.288  | 1822.166  |
| AB011114  | 54827.973 | 64174.738 | NM_00621E | 2591.036  | 2330.825  | NM_147171 | 10555.185 | 8764.02   |
| D11466    | 38584.297 | 44878.289 | AK022872  | 3772.441  | 3477.584  | AF238083  | 38397.297 | 30090.857 |
| NM_01405E | 51334.602 | 55540.617 | AK024272  | 5891.967  | 5029.868  | NM_00296E | 581.628   | 586.38    |
| D31885    | 42508.398 | 46949.813 | NM_016381 | 1157.896  | 1181.866  | NM_01638E | 4607.362  | 4000.753  |
| NM_01664E | 8013.639  | 11106.185 | AL591715  | 1314.82   | 1129.043  | AB046783  | 2009.314  | 1952.531  |
| AK090536  | 35111.613 | 37375.992 | NM_01804E | 17171.184 | 15877.521 | NM_00084E | 1575.409  | 1308.735  |
| BE743838  | 15190.335 | 9010.79   | BE741525  | 1591.439  | 1490.562  | NM_004604 | 61884.52  | 60676.172 |
| AF273046  | 2960.86   | 2699.725  | BF030555  | 49654.582 | 47383.652 | NM_01496E | 10821.959 | 7508.548  |
| NM_001081 | 8091.271  | 4904.098  | NM_01243E | 9513.726  | 9320.845  | NM_00488E | 45950.441 | 26845.457 |
| NM_00248E | 6274.432  | 6309.84   | NM_00560E | 5916.223  | 6360.564  | AL390148  | 17350.297 | 9872.402  |
| BF002026  | 1193.274  | 716.402   | NM_00257E | 3126.142  | 3764.118  | AK024055  | 1819.017  | 1261.523  |
| L35594    | 602.275   | 647.481   | NM_00358E | 2281.936  | 2692.514  | NM_01337E | 1485.022  | 1717.388  |
| BE790116  | 582.245   | 538.872   | AF057354  | 937.871   | 916.853   | NM_017964 | 3193.026  | 2378.199  |
| AI922341  | 4713.117  | 4713.748  | AF169351  | 13740.968 | 15447.67  | NM_01627E | 662.443   | 502.974   |
| S57283    | 677.474   | 944.63    | M14200    | 56991.141 | 59531.031 | NM_01642E | 8754.849  | 6746.208  |
| M12824    | 884.37    | 1165.107  | NM_00028E | 3482.757  | 4412.192  | NM_00408E | 19545.521 | 15374.699 |
| W60100    | 3439.943  | 2962.936  | NM_00053E | 14229.038 | 17882.031 | NM_01603E | 57181.23  | 40809.809 |
| M24898    | 677.719   | 759.973   | NM_016341 | 1701.846  | 1905.759  | NM_001184 | 5408.669  | 5497.169  |
| U72508    | 2113.949  | 2870.994  | NM_00678E | 10705.721 | 9385.96   | NM_015530 | 13925.188 | 13586.866 |
| AA457153  | 10903.424 | 9334.938  | NM_00620E | 2263.243  | 2071.714  | NM_01623E | 8733.254  | 7087.301  |
| AA283122  | 1243.623  | 1067.475  | NM_004034 | 14000.609 | 13436.219 | NM_00175E | 1213.272  | 982.637   |
| AA868504  | 6780.393  | 7387.153  | NM_000130 | 15137.368 | 13675.204 | BE546276  | 1403.373  | 1401.969  |
| AA877845  | 15942.046 | 18847.055 | AF193756  | 735.747   | 723.623   | NM_00472E | 15285.345 | 10347.362 |
| AA664241  | 17332.578 | 26494.664 | AI492087  | 767.674   | 718.768   | NM_015997 | 15297.055 | 13345.527 |
| AI016456  | 944.659   | 1448.797  | R72122    | 6361.409  | 6549.703  | NM_001167 | 15151.012 | 12947.617 |
| AK026281  | 1674.977  | 2387.689  | Z35309    | 11152.578 | 10692.906 | NM_01211E | 8196.838  | 7452.063  |
| U23862    | 960.567   | 1175.442  | X04571    | 1258.529  | 1077.219  | NM_00493E | 54457.648 | 53561.746 |
| AK026680  | 8414.055  | 10942.863 | AA700005  | 1051.712  | 907.176   | M96577    | 29532.586 | 28708.992 |
| NM_01243E | 30935.508 | 38977.012 | AA292025  | 3406.788  | 3544.007  | NM_01325E | 59367.316 | 56086.57  |
| AF216292  | 39937.555 | 32093.484 | AA437226  | 6892.731  | 5982.01   | NM_00384E | 7644.948  | 6440.418  |
| NM_00095E | 10105.579 | 8071.681  | R36143    | 3626.817  | 3545.924  | NM_016184 | 3252.709  | 2341.964  |

|           |           |           |           |           |           |           |           |           |
|-----------|-----------|-----------|-----------|-----------|-----------|-----------|-----------|-----------|
| NM_005894 | 1373.826  | 686.456   | XM_056359 | 1948.693  | 2445.189  | L11238    | 29430.959 | 20974.234 |
| NM_014584 | 9346.265  | 5955.817  | D10353/NM | 30041.385 | 31872.221 | AK025684  | 1610.595  | 1359.994  |
| M30627    | 606.205   | 483.362   | M15042    | 12042.271 | 13867.687 | NM_012205 | 17083.834 | 11075.934 |
| NM_005810 | 5361.982  | 4457.064  | AK056843  | 10979.204 | 11941.604 | K02046    | 5732.179  | 3890.12   |
| M28170    | 24004.93  | 17223.895 | U49928    | 60501.918 | 58456.102 | U87223    | 2722.919  | 1477.262  |
| NM_001555 | 1666.575  | 1724.845  | AK096645  | 55545.672 | 56598.156 | NM_002217 | 2320.594  | 2823.987  |
| AK026223  | 14984.712 | 19870.977 | AK092859  | 1880.483  | 2342.906  | NM_004995 | 7672.229  | 8100.965  |
| NM_000874 | 11177.539 | 9753.749  | NM_018291 | 19718.666 | 21525.021 | NM_000386 | 16872.934 | 20746.713 |
| NM_005854 | 510.758   | 360.49    | NM_005530 | 10901.211 | 10831.238 | NM_007231 | 1585.531  | 2013.772  |
| AB007863  | 9539.104  | 9450.363  | NM_006899 | 7022.857  | 6380.429  | NM_001190 | 7192.638  | 7831.711  |
| AK024456  | 12091.472 | 18220.775 | M12807    | 2591.469  | 2021.932  | NM_005271 | 27327.863 | 30465.158 |
| NM_017789 | 677.745   | 709.889   | NM_001765 | 2785.687  | 2986.4    | NM_015654 | 11376.274 | 9844.934  |
| D31887    | 5928.23   | 5913.446  | NM_003361 | 2722.248  | 2735.284  | NM_012244 | 4269.917  | 4443.163  |
| NM_006180 | 497.627   | 564.627   | NM_012099 | 16780.348 | 17254.584 | NM_004341 | 3779.205  | 3455.666  |
| NM_002313 | 8538.827  | 9197.458  | NM_018684 | 40332.809 | 44109.77  | AB082521  | 19703.328 | 15464.257 |
| NM_004459 | 7781.137  | 8855.478  | NM_017983 | 1829.618  | 1728.241  | AK026806  | 492.714   | 599.9     |
| NM_005503 | 280.067   | 750.635   | AF116909  | 1152.049  | 1202.983  | AL050182  | 5231.722  | 4687.145  |
| NM_001502 | 2897.912  | 4155.412  | BE906724  | 1661.566  | 1415.451  | NM_020040 | 2594.667  | 3275.267  |
| NM_005721 | 3347.344  | 4518.878  | NM_002283 | 16917.041 | 14472.563 | NM_002374 | 6860.779  | 10344.128 |
| AF284223  | 4538.22   | 4885.093  | AJ276095  | 10393.646 | 8795.614  | AK026940  | 10212.39  | 11338.308 |
| AF176012  | 2070.01   | 2764.387  | NM_004819 | 4153.962  | 4172.832  | AF155117  | 10782.149 | 7966.027  |
| NM_018018 | 380.134   | 454.709   | NM_007184 | 3236.413  | 3077.206  | AB014527  | 1548.07   | 1254.577  |
| NM_013386 | 1261.576  | 894.076   | NM_005291 | 53461.793 | 49167.57  | NM_004411 | 4267.682  | 2131.84   |
| NM_006517 | 803.818   | 659.694   | AF253316  | 764.024   | 807.163   | NM_015938 | 17651.479 | 9842.513  |
| NM_004171 | 598.846   | 571.383   | NM_005855 | 751.838   | 883.262   | NM_000740 | 1875.994  | 1455.018  |
| NM_014037 | 2339.249  | 1930.718  | NM_002923 | 3849.113  | 4524.642  | NM_017843 | 14804.731 | 9525.913  |
| NM_004866 | 41172.465 | 29452.439 | NM_006794 | 3316.688  | 3755.132  | U10485    | 1748.531  | 1247.269  |
| NM_018688 | 2692.645  | 2710.507  | NM_018653 | 1559.552  | 2093.452  | AK025326  | 44067.078 | 26691.662 |
| AK056652  | 10326.628 | 15175.098 | NM_005388 | 12534.783 | 14131.969 | NM_016328 | 21872.412 | 25825.119 |
| NM_015839 | 480.742   | 988.098   | NM_007232 | 54757.082 | 55792.672 | NM_017544 | 60915.961 | 58989.285 |
| AL137438  | 2140.065  | 2489.924  | NM_016257 | 2498.165  | 2802.446  | NM_003153 | 3786.655  | 4172.487  |
| NM_017957 | 2101.599  | 2543.687  | NM_002717 | 4969.303  | 5214.487  | NM_016285 | 2765.982  | 3612.246  |
| NM_003024 | 4690.891  | 5205.354  | NM_004306 | 59269.457 | 61772.797 | NM_014707 | 2187.386  | 2603.794  |
| NM_013248 | 14819.53  | 18833.877 | NM_001153 | 505.933   | 754.174   | AF025771  | 3476.996  | 4790.316  |
| NM_000034 | 55278.043 | 65934.32  | AK022654  | 46633.676 | 43394.234 | NM_018215 | 4878.909  | 6090.466  |
| AK022230  | 10089.25  | 9931.458  | BC002905  | 6613.268  | 5425.822  | AB033110  | 5354.285  | 5458.478  |
| AK022147  | 5539.563  | 6707.943  | NM_018091 | 13885.713 | 14807.631 | NM_005083 | 58586.117 | 61322.152 |
| L25664    | 5128.594  | 6165.54   | NM_001108 | 9448.116  | 7861.851  | NM_007187 | 23178.676 | 26051.143 |
| NM_014940 | 8542.995  | 9630.262  | NM_001637 | 1186.922  | 1140.06   | NM_001828 | 883.705   | 1259.902  |
| NM_005783 | 1448.444  | 1449.283  | NM_016630 | 22363.492 | 31345.49  | NM_018983 | 25015.619 | 32727.619 |
| AK000851  | 3901.15   | 4112.106  | NM_014291 | 9099.701  | 11126.762 | NM_003096 | 15423.681 | 16080.392 |
| NM_006900 | 1256.271  | 1390.292  | NM_014631 | 795.57    | 1153.192  | NM_007279 | 14998.893 | 16639.369 |
| AJ289111  | 20108.268 | 23938.891 | NM_001089 | 7449.388  | 6521.281  | BE390833  | 52276.926 | 38823.941 |
| NM_016356 | 1159.527  | 1474.318  | NM_000120 | 1582.135  | 1478.41   | NM_004730 | 23317.102 | 17996.936 |
| NM_006406 | 31699.42  | 29787.945 | NM_004519 | 405.856   | 403.487   | NM_000801 | 10594.422 | 8666.307  |
| D11466    | 50162.316 | 41607.668 | U09384    | 2078.668  | 1790.595  | NM_006115 | 57913.75  | 57576.398 |
| NM_014056 | 46908.699 | 32209.732 | NM_004794 | 11708.206 | 13478.189 | NM_005801 | 10609.681 | 7471.8    |
| D31885    | 32196.15  | 25216.91  | NM_002803 | 12399.763 | 12280.456 | NM_018198 | 5926.488  | 4860.766  |
| NM_016649 | 7934.772  | 5956.521  | NM_005508 | 4281.768  | 5145.332  | NM_001539 | 35360.023 | 31208.305 |
| AK090536  | 24638.561 | 13159.503 | NM_018485 | 685.581   | 844.4     | NM_012267 | 1437.056  | 1258.535  |
| D63477    | 4436.026  | 2996.689  | NM_006788 | 2647.32   | 2864.473  | AL110151  | 529.562   | 345.775   |
| NM_020243 | 37194.391 | 23701.566 | NM_016568 | 1785.104  | 3068.236  | NM_003293 | 359.867   | 434.676   |
| NM_014051 | 11205     | 10205.251 | NM_002987 | 520.941   | 713.151   | NM_016616 | 842.818   | 1153.999  |

|           |           |           |           |           |           |           |           |           |
|-----------|-----------|-----------|-----------|-----------|-----------|-----------|-----------|-----------|
| AK025398  | 5544.677  | 5491.118  | AB033102  | 49350.559 | 50449.406 | NM_000022 | 33815.41  | 33878.535 |
| AK027082  | 696.596   | 864.367   | NM_014774 | 3810.946  | 6575.569  | NM_016576 | 13164.264 | 16373.569 |
| AB037750  | 218.207   | 663.209   | NM_014143 | 23003.773 | 37244.863 | NM_004213 | 3874.439  | 4572.887  |
| AK023056  | 3246.27   | 3628.427  | M55646    | 36157.914 | 43172.156 | NM_001925 | 64597.109 | 63999.648 |
| NM_001120 | 58380.121 | 63279.594 | NM_006112 | 30824.102 | 31508.584 | NM_000906 | 5672.302  | 7015.637  |
| NM_017888 | 4856.103  | 5697.124  | NM_000150 | 2767.764  | 2225.505  | NM_000480 | 9684.427  | 12767.634 |
| NM_004915 | 584.931   | 782.152   | AB023152  | 541.194   | 360.228   | AF254084  | 61727.555 | 63976.398 |
| AK022207  | 1853.334  | 2546.113  | NM_006212 | 2533.192  | 2550.531  | AK022648  | 1519.219  | 2470.846  |
| AV708752  | 6850.992  | 6806.027  | AK022872  | 3860.829  | 3535.306  | AK022976  | 2400.951  | 3504.095  |
| AF119885  | 4687.51   | 5253.528  | AK024272  | 6321.176  | 5604.473  | AB048791  | 14163.457 | 14746.373 |
| NM_000750 | 484.195   | 571.527   | NM_016381 | 1348.016  | 1493.641  | NM_003107 | 2726.361  | 3449.054  |
| NM_004996 | 8151.426  | 7913.008  | AL591715  | 1359.178  | 1521.163  | NM_006874 | 9860.363  | 12163.028 |
| NM_005971 | 7066.025  | 9407.921  | NM_018042 | 14987.563 | 13034.287 | AB046777  | 3398.73   | 4980.705  |
| NM_017435 | 805.327   | 2390.566  | BE741525  | 1359.965  | 1192.712  | AJ251844  | 26786.703 | 30320.129 |
| AK026281  | 1972.962  | 4710.98   | BF030555  | 45748.398 | 37274.801 | D16815    | 4474.363  | 5017.753  |
| U23862    | 1088.523  | 2193.509  | NM_012433 | 9511.242  | 7649.407  | NM_001880 | 3932.195  | 5183.549  |
| AK026680  | 9435.598  | 17771.41  | NM_005605 | 6209.512  | 5193.668  | AB028943  | 8683.282  | 10849.086 |
| NM_012436 | 27973.482 | 33959.977 | NM_002576 | 3302.495  | 3504.044  | NM_006194 | 2888.563  | 3046.989  |
| AK001299  | 17728.586 | 14075.906 | NM_003582 | 2683.716  | 2319.066  | AK001603  | 27307.771 | 30077.436 |
| AB014559  | 2386.018  | 2571.47   | AF057354  | 1058.092  | 1060.867  | U71601    | 5906.622  | 6043.941  |
| NM_016489 | 10536.304 | 8979.722  | AF169351  | 14054.418 | 14745.318 | AK025985  | 52101.344 | 61488.863 |
| NM_005033 | 8020.098  | 6751.746  | M14200    | 57948.422 | 57650.59  | NM_013256 | 6789.185  | 6951.143  |
| NM_015932 | 51456.43  | 51809.605 | NM_000282 | 3702.299  | 4396.481  | NM_004143 | 3494.178  | 3229.09   |
| NM_017949 | 1591.212  | 1658.807  | NM_000532 | 15440.856 | 18205.182 | X66087    | 5653.333  | 4142.031  |
| AK022169  | 1197.714  | 936.869   | NM_016341 | 1900.903  | 1971.658  | L09070    | 940.349   | 1164.917  |
| AF015592  | 5081.817  | 3917.824  | AF231916  | 15401.553 | 17639.234 | NM_000062 | 16195.534 | 20744.512 |
| AK026795  | 1011.099  | 811.142   | NM_003501 | 9533.173  | 11144.229 | NM_009590 | 25853.139 | 28566.475 |
| NM_016399 | 9596.699  | 8011.971  | NM_004034 | 13043.596 | 11165.859 | AL133037  | 2328.024  | 2943.918  |
| NM_016617 | 17448.869 | 13666.507 | NM_000130 | 12395.752 | 10310.991 | NM_020350 | 6536.931  | 9020.725  |
| NM_002027 | 13200.721 | 12402.644 | AF193756  | 683.76    | 758.349   | NM_000350 | 13418.976 | 15896.662 |
| AL162078  | 3027.779  | 3278.494  | AI492087  | 963.192   | 917.135   | X91103    | 39294.922 | 39844.301 |
| NM_000919 | 2006.706  | 3344.982  | R72122    | 7271.055  | 9293.95   | AA419164  | 3539.513  | 5383.123  |
| NM_013382 | 4241.042  | 6021.265  | Z35309    | 12530.685 | 19252.467 | L35251    | 9083.308  | 10735.386 |
| AB002314  | 1251.061  | 1989.761  | X04571    | 1292.832  | 1130.123  | BE910395  | 12173.375 | 15569.544 |
| NM_014043 | 12293.688 | 10889.58  | AA700005  | 1244.637  | 1132.937  | N46828    | 22046.99  | 25878.82  |
| NM_014622 | 4594.666  | 4780.968  | AA292025  | 3704.229  | 3498.586  | BI908302  | 57960.949 | 61944.629 |
| AB011114  | 53814.484 | 63871.492 | AA437226  | 7000.875  | 5743.278  | AA460969  | 7944.031  | 9261.2    |
| CY3Cy5    | 2133.502  | 191.172   | R36143    | 2932.718  | 2713.612  | BG695859  | 6480.975  | 7351.405  |
| NM_019884 | 12017.596 | 10999.705 | XM_056359 | 1683.232  | 1581.461  | X07437    | 19149.313 | 20930.461 |
| AF088051  | 843.579   | 761.983   | D10353/NM | 27241.916 | 19485.082 | NM_000641 | 6221.429  | 7721.964  |
| AK023883  | 547.322   | 557.435   | M15042    | 11986.667 | 10639.114 | AE006466  | 35402.898 | 36998.102 |
| AF086366  | 666.979   | 714.998   | AK056843  | 12612.962 | 12877.935 | BC008737  | 59032.609 | 61148.383 |
| AF086360  | 918.021   | 1049.598  | U49928    | 56646.031 | 56520.223 | BC011655  | 8752.635  | 9239.247  |
| AF086436  | 1124.752  | 860.599   | AK096645  | 50246.148 | 53744.434 | BC002396  | 15841.858 | 17540.521 |
| AF087993  | 8329.912  | 5546.59   | AK092859  | 2124.687  | 2162.654  | NM_003613 | 4871.557  | 5556.447  |
| AF035282  | 1179.654  | 393.353   | NM_018291 | 20098.635 | 21634.84  | NM_005385 | 12299.719 | 12877.147 |
| AK021966  | 3537.431  | 752.933   | NM_005530 | 9823.36   | 10245.838 | NM_018985 | 6155.027  | 6099.961  |
| AB018292  | 1209.322  | 472.583   | NM_006899 | 6712.435  | 6888.235  | NM_006074 | 58809.895 | 63757.637 |
| AK022842  | 990.995   | 661.259   | NM_012200 | 3421.771  | 3469.424  | AF208232  | 13242.745 | 13939.43  |
| NM_007006 | 28261.412 | 23631.646 | NM_001724 | 3310.697  | 2407.094  | NM_002988 | 15896.247 | 16108.839 |
| AL137346  | 6301.264  | 5087.024  | BE906724  | 1525.943  | 1490.989  | NM_004186 | 3545.454  | 4470.828  |
| NM_017756 | 2730.101  | 2383.188  | NM_002283 | 16436.488 | 13074.775 | NM_016258 | 12413.804 | 14534.959 |
| NM_019884 | 11339.63  | 10149.242 | AJ276095  | 10002.773 | 9781.57   | AF203032  | 22732.006 | 27613.361 |

|           |           |           |           |           |           |           |           |           |
|-----------|-----------|-----------|-----------|-----------|-----------|-----------|-----------|-----------|
| SR2       | 57309.332 | 51409.613 | NM_004819 | 4204.074  | 4177.759  | AB014542  | 38069.102 | 35788.793 |
| SR4       | 15754.199 | 16682.418 | NM_007184 | 3073.284  | 3389.349  | NM_014640 | 3230.942  | 4158.958  |
| SR6       | 2316.979  | 2465.682  | NM_005291 | 49784.395 | 51466.535 | Y10518    | 56578.672 | 59866.395 |
| SR8       | 8730.027  | 23222.422 | AF253316  | 619.412   | 837.278   | AF155135  | 15734.378 | 19911.91  |
| SR10      | 26320.844 | 7672.964  | NM_005855 | 700.98    | 859.01    | NM_014790 | 4994.815  | 5206.682  |
| CY3Cy5    | 1630.395  | 181.13    | NM_002923 | 3021.658  | 3230.546  | NM_003571 | 46288.922 | 51859.961 |
| AF086054  | 7892.33   | 5670.485  | NM_006794 | 2540.487  | 2423.94   | AB032965  | 59909.152 | 59839.941 |
| AK026794  | 705.145   | 567.891   | NM_018653 | 846.332   | 950.46    | NM_020370 | 1672.299  | 2397.469  |
| AF086089  | 909.073   | 760.547   | NM_005388 | 11649.219 | 12333.344 | BF310159  | 32917.012 | 37337.832 |
| AK022259  | 25421.879 | 27715.232 | NM_007232 | 52063.512 | 51032.453 | NM_000316 | 1336.185  | 1766.919  |
| AF088019  | 415.083   | 468.686   | NM_003027 | 1067.55   | 1194.16   | NM_018986 | 7099.235  | 8238.489  |
| NM_014123 | 393.137   | 290.013   | NM_016257 | 2533.553  | 2236.037  | AB044934  | 1715.354  | 2495.461  |
| AK022461  | 1367.845  | 1149.64   | NM_002717 | 5339.608  | 4047.834  | U27655    | 20179.902 | 19924.039 |
| NM_016010 | 12284.311 | 13902.767 | NM_012114 | 1646.539  | 1327.646  | Z21965    | 55845.906 | 59873.551 |
| AF161442  | 378.08    | 686.081   | NM_014486 | 792.286   | 791.117   | NM_012427 | 3930.89   | 4398.976  |
| AF147401  | 1033.171  | 677.064   | NM_003025 | 42304.445 | 41821.039 | AF133424  | 10449.759 | 15545.268 |
| AF075022  | 291.638   | 132.604   | U52051    | 599.928   | 419.199   | NM_005003 | 45125.934 | 43997.352 |
| AF075060  | 2793.333  | 593.308   | NM_020179 | 24065.369 | 25126.871 | AF084560  | 27066.662 | 26681.25  |
| AB002438  | 1153.073  | 585.846   | NM_004306 | 57160.199 | 57915.59  | NM_015715 | 2390.382  | 2747.834  |
| AK021441  | 3994.761  | 4309.597  | NM_001153 | 467.83    | 571.296   | NM_000032 | 23630.666 | 26011.629 |
| AK026018  | 1401.865  | 1550.013  | NM_006786 | 12153.299 | 12476.787 | NM_002083 | 5285.022  | 5905.24   |
| AF085846  | 4726.313  | 5261.606  | NM_006205 | 2421.158  | 2575.227  | NM_002035 | 10063.399 | 10255.902 |
| AK023901  | 1436.255  | 1789.348  | NM_004283 | 1046.452  | 1257.314  | NM_014900 | 4866.734  | 4852.46   |
| AL109705  | 3334.772  | 4429.072  | NM_004163 | 46605.566 | 39081.785 | BF342908  | 2634.334  | 2939.6    |
| AF147392  | 2170.019  | 2606.353  | AK026308  | 2384.381  | 2320.757  | AF118073  | 811.905   | 775.011   |
| AF088057  | 2779.524  | 3029.462  | NM_013337 | 3908.943  | 4326.218  | AK023510  | 8653.08   | 7148.846  |
| AF086255  | 6438.001  | 6318.952  | NM_004193 | 2810.376  | 3178.571  | NM_004345 | 6190.341  | 5333.321  |
| AK022660  | 1364.424  | 1022.017  | NM_002803 | 12085.647 | 13200.21  | NM_006528 | 359.719   | 595.549   |
| AK026847  | 2401.053  | 1848.606  | NM_005508 | 4350.418  | 5287.886  | NM_002232 | 977.894   | 1088.532  |
| AK023048  | 981.17    | 790.661   | NM_018485 | 837.067   | 995.612   | NM_014570 | 7312.062  | 7169.852  |
| AL359560  | 1085.005  | 799.44    | NM_006788 | 1660.874  | 2078.137  | NM_014822 | 4425.174  | 5016.146  |
| AK026891  | 886.034   | 995.607   | NM_016568 | 1590.265  | 1369.245  | NM_005296 | 5573.085  | 5823.227  |
| AF075032  | 931.39    | 867.798   | NM_002987 | 449.502   | 381.733   | NM_001337 | 1439.336  | 2210.818  |
| AF085971  | 2056.859  | 1435.171  | AB033102  | 49702.305 | 44339.676 | NM_003611 | 9296.144  | 9275.709  |
| AF147302  | 463.086   | 212.436   | NM_014774 | 3121.176  | 2519.422  | AB014538  | 12580.482 | 14144.571 |
| AF085929  | 536.239   | 202.155   | NM_014143 | 20402.643 | 21090.025 | NM_006209 | 1904.522  | 2768.725  |
| AK001126  | 1732.427  | 823.074   | M55646    | 38023.727 | 40578.23  | AK025118  | 12009.419 | 13039.871 |
| AF085976  | 4885.398  | 1343.837  | NM_006112 | 32917.188 | 33460.82  | NM_000727 | 5256.783  | 4796.414  |
| AF075104  | 1485.669  | 628.179   | NM_000879 | 241.242   | 347.62    | NM_002621 | 1065.473  | 1054.593  |
| AK021724  | 365.737   | 236.993   | M12807    | 2760.662  | 2820.928  | NM_002625 | 625.474   | 946.272   |
| AL133025  | 1801.112  | 1707.12   | NM_001765 | 5919.748  | 6508.39   | NM_004135 | 5612.88   | 6000.783  |
| AL137402  | 16969.863 | 12645.802 | NM_003361 | 3586.459  | 3750.642  | NM_000203 | 814.321   | 1089.118  |
| AL137617  | 1695.934  | 1431.522  | NM_012099 | 20924.545 | 23986.266 | NM_013443 | 2609.011  | 2538.938  |
| AL359568  | 40927.285 | 35764.004 | NM_018684 | 50922.297 | 53117.832 | AF116685  | 1047.892  | 1284.32   |
| AL133564  | 1142.993  | 1768.154  | NM_017983 | 1937.573  | 1942.764  | NM_000123 | 4914.595  | 5343.513  |
| AL137428  | 2380.347  | 2485.802  | AF116909  | 1236.097  | 1622.673  | AL137501  | 3182.897  | 3188.912  |
| AL157462  | 3428.633  | 4107.719  | NM_000282 | 2229.09   | 1912.991  | BE858979  | 1075.592  | 1063.183  |
| AL359602  | 703.427   | 699.931   | NM_000532 | 12909.06  | 11680.879 | NM_000122 | 4237.932  | 3372.861  |
| NM_018190 | 59996.105 | 60474.496 | NM_016341 | 1496.141  | 1592.524  | NM_006712 | 57288.332 | 58399.332 |
| AK021744  | 2114.91   | 2397.287  | AF231916  | 8726.135  | 10005.721 | NM_006240 | 6215.151  | 5968.626  |
| NM_018430 | 4675.723  | 4153.662  | NM_003501 | 8767.516  | 10078.894 | NM_007026 | 8358.864  | 9675.221  |
| AL110200  | 1476.969  | 1109.885  | AK022654  | 50801.699 | 58926.625 | M37712    | 15865.055 | 10938.608 |
| AK022308  | 604.513   | 511.238   | BC002905  | 9014.927  | 15324.434 | NM_002648 | 18210.213 | 13849.853 |

|           |           |           |           |           |           |           |           |           |
|-----------|-----------|-----------|-----------|-----------|-----------|-----------|-----------|-----------|
| AL133640  | 6231.589  | 4093.678  | NM_018091 | 11542.939 | 13091.646 | AF070670  | 28620.367 | 21822.789 |
| AK023783  | 653.28    | 724.326   | NM_001108 | 8577.309  | 6888.899  | NM_016156 | 7307.101  | 6227.018  |
| AF070647  | 56595.883 | 27454.754 | NM_001637 | 1098.486  | 1954.412  | NM_016528 | 4170.091  | 4169.738  |
| AF116649  | 313.978   | 144.086   | NM_016630 | 18724.6   | 18021.238 | NM_015974 | 3623.805  | 3438.584  |
| AF174394  | 625.91    | 206.943   | NM_014291 | 7911.215  | 9095.94   | NM_014384 | 3101.66   | 3301.011  |
| AK025384  | 345.808   | 460.457   | NM_014631 | 602.932   | 625.831   | NM_002573 | 6673.069  | 6726.502  |
| AK025924  | 431.972   | 256.241   | NM_001089 | 8936.421  | 6857.336  | NM_017877 | 7302.378  | 10051.162 |
| AK021876  | 10722.714 | 6053.979  | NM_000120 | 2773.565  | 2394.133  | NM_009590 | 22081.834 | 27892.705 |
| AK022017  | 1407.493  | 1023.753  | AF172327  | 48226.461 | 47022.359 | AL133037  | 2418.098  | 3193.933  |
| AK022160  | 1001.762  | 690.985   | NM_001676 | 13524.332 | 12387.974 | NM_020350 | 6049.214  | 5942.599  |
| AK022295  | 841.042   | 855.022   | NM_000220 | 1870.525  | 1546.117  | AA419164  | 2825.584  | 3498.863  |
| AK021935  | 2941.096  | 2677.755  | NM_004519 | 487.185   | 603.38    | L35251    | 7814.091  | 8209.114  |
| AK022187  | 548.013   | 761.63    | NM_001679 | 39263.441 | 35603.996 | BE910395  | 10293.997 | 10899.305 |
| AK022337  | 1280.514  | 603.859   | NM_004046 | 59241.527 | 62761.258 | BI908302  | 56365.672 | 58740.535 |
| AL133618  | 3244.07   | 3274.533  | NM_004983 | 4871.516  | 5534.632  | AA460969  | 6961.905  | 7099.906  |
| AF230314  | 604.66    | 630.685   | U09384    | 2055.091  | 1783.235  | BG695859  | 4910.569  | 4778.615  |
| AK001086  | 840.79    | 833.113   | NM_006860 | 11577.953 | 11705.935 | M85079    | 19643.5   | 22013.729 |
| AJ131610  | 13293.581 | 11393.417 | NM_004794 | 17528.383 | 25778.775 | AA457671  | 30737.189 | 29986.137 |
| S50207    | 913.661   | 1099.543  | NM_018291 | 14217.573 | 13329.326 | X07437    | 23870.791 | 23299.094 |
| AF119872  | 32280.219 | 31463.48  | NM_005530 | 8633.875  | 6423.052  | NM_000641 | 5744.004  | 5318.999  |
| X99687    | 781.958   | 909.534   | NM_006899 | 6541.205  | 5605.78   | AE006466  | 31975.061 | 28630.65  |
| AI275123  | 625.476   | 674.924   | NM_012200 | 3584.606  | 3455.716  | BC008737  | 57286.473 | 58212.313 |
| AK023255  | 63150.27  | 61423.91  | NM_001724 | 3381.352  | 2621.131  | BC011655  | 6883.008  | 6336.965  |
| NM_002622 | 26491.412 | 19403.855 | NM_000150 | 3481.041  | 3502.15   | BC002396  | 12760.003 | 11210.459 |
| AK024185  | 871.699   | 640.8     | AB023152  | 553.057   | 539.386   | AF112219  | 14832.344 | 12815.921 |
| NM_015417 | 543.708   | 395.192   | NM_006212 | 2396.928  | 2462.36   | NM_000521 | 501.964   | 475.34    |
| AL137562  | 10469.818 | 7339.857  | AK022872  | 3177.993  | 3295.249  | NM_006074 | 58852.223 | 62161.09  |
| M90355    | 65669.906 | 53207.84  | AK024272  | 4588.094  | 4649.57   | AF208232  | 11461.403 | 15826.465 |
| AK022495  | 4899.371  | 1592.014  | NM_016381 | 1086.164  | 1177.506  | NM_002988 | 14990.448 | 15930.479 |
| AK021632  | 1686.326  | 888.821   | AL591715  | 1390.038  | 971.816   | NM_004186 | 2379.563  | 3068.505  |
| AK023143  | 2535.68   | 1651.824  | NM_018042 | 19347.891 | 15182.483 | NM_016258 | 10788.912 | 12931.44  |
| AK026373  | 14277.527 | 10544.757 | BE741525  | 1349.866  | 1115.923  | AF203032  | 20050.287 | 23430.445 |
| AF009277  | 444.186   | 435.785   | BF030555  | 48720.613 | 42691.375 | AB014542  | 31558.365 | 32751.611 |
| AK021581  | 17656.096 | 13853.723 | NM_012433 | 10277.372 | 7595.382  | NM_014640 | 2119.389  | 2612.542  |
| NM_006687 | 5822.545  | 3985.95   | NM_005605 | 6181.693  | 5412.469  | Y10518    | 57971.367 | 59846.398 |
| NM_013301 | 8491.939  | 7334.47   | NM_002576 | 3502.671  | 3035.102  | NM_014790 | 4197.138  | 4386.821  |
| NM_017673 | 1745.242  | 1277.235  | NM_003582 | 2522.421  | 2285.949  | NM_003571 | 37391.754 | 36813.742 |
| AB046857  | 3422.051  | 2200.824  | AF057354  | 865.902   | 750.237   | AB032965  | 54259.973 | 59935.359 |
| AK024408  | 2633.047  | 1904.279  | AF169351  | 14155.683 | 14274.947 | NM_020370 | 1480.648  | 1787.314  |
| AF270490  | 479.799   | 501.338   | M14200    | 52042.496 | 58412.883 | NM_004767 | 3151.548  | 4032.538  |
| AJ227905  | 555.718   | 331.425   | CY3Cy5    | 3137.555  | 459.832   | BF310159  | 31436.25  | 32087.184 |
| AF086307  | 21845.992 | 10012.632 | NM_000623 | 390.812   | 508.595   | NM_000316 | 785.9     | 907.753   |
| L19364    | 7874.254  | 3472.204  | NM_000941 | 4088.557  | 5204.192  | NM_018986 | 5856.258  | 5329.245  |
| NM_005390 | 741.969   | 462.028   | AK026844  | 7714.723  | 10399.493 | AB044934  | 1490.641  | 1814.016  |
| AJ012502  | 18259.029 | 12984.628 | AK026735  | 10991.381 | 12970.913 | U27655    | 17665.807 | 16070.474 |
| AK024170  | 547.105   | 424.661   | AL110104  | 52467.813 | 54489.508 | Z21965    | 58605.27  | 58954.891 |
| AK021722  | 1556.65   | 1428.684  | AF240633  | 1740.3    | 1972.826  | NM_012427 | 3220.393  | 3153.533  |
| NM_000681 | 1229.184  | 1461.874  | AK027056  | 8329.714  | 6114.736  | L09070    | 715.497   | 727.812   |
| AF147445  | 1321.581  | 1470.517  | AK024294  | 1914.032  | 1817.067  | NM_000062 | 14725.151 | 11751.686 |
| Y10508    | 7522.893  | 6780.869  | AL110126  | 3722.016  | 4087.95   | AF084560  | 25254.771 | 25988.602 |
| NM_005182 | 63471.691 | 68056.727 | AF052172  | 56656.555 | 57734.688 | NM_015715 | 2150.814  | 2589.448  |
| D17074    | 5079.401  | 6374.613  | AB014573  | 10957.095 | 11411.839 | NM_000032 | 21743.615 | 23889.729 |
| AF039944  | 1636.077  | 1901.22   | AK025418  | 1281.374  | 1098.156  | NM_002083 | 4844.696  | 5430.512  |

|           |           |           |           |           |           |           |           |           |
|-----------|-----------|-----------|-----------|-----------|-----------|-----------|-----------|-----------|
| AJ276252  | 1928.828  | 2176.983  | AB020643  | 537.476   | 526.327   | NM_00203E | 9552.425  | 9366.458  |
| AK021716  | 1900.34   | 2348.358  | AK025496  | 10898.474 | 11036.596 | NM_01490C | 4719.258  | 4786.366  |
| AK025035  | 18403.916 | 18086.463 | NM_000623 | 565.73    | 476.06    | BF342908  | 2419.059  | 3053.413  |
| AK002085  | 7642.054  | 7261.466  | NM_000941 | 2386.545  | 2674.075  | AF118073  | 749.616   | 1093.289  |
| AF086200  | 519.234   | 463.604   | SR1       | 74653.547 | 63883.566 | AK023510  | 7998.59   | 7296.035  |
| AB018338  | 2056.528  | 1909.733  | SR3       | 33427.215 | 43024.309 | NM_00434E | 5650.714  | 6053.787  |
| D80010    | 4082.065  | 2632.242  | SR5       | 4738.397  | 5845.409  | NM_00223Z | 1754.557  | 2808.547  |
| NM_004923 | 1845.82   | 1386.172  | SR7       | 4258.38   | 35966.723 | NM_01457C | 5730.294  | 5942.771  |
| NM_003971 | 6147.042  | 3391.399  | SR9       | 14520.504 | 3475.94   | NM_01482Z | 4067.524  | 4489.513  |
| AK026973  | 1391.55   | 941.394   | CY3Cy5    | 2686.009  | 393.302   | NM_00529E | 4402.445  | 4439.872  |
| NM_00582Z | 1862.026  | 1448.619  | L10404    | 1283.626  | 1458.633  | NM_001337 | 794.442   | 988.867   |
| U81002    | 11997.941 | 6042.826  | AF283776  | 4836.565  | 6472.123  | NM_003611 | 8794.071  | 10294.68  |
| NM_01629E | 9220.885  | 3667.117  | L10123    | 41314.582 | 36403.152 | AB014538  | 9635.059  | 11022.059 |
| NM_01418E | 19159.895 | 6940.879  | D16877    | 11298.821 | 12983.149 | NM_00620E | 3101.716  | 2607.933  |
| L38517    | 1032.051  | 635.203   | AL049992  | 447.478   | 1430.696  | AK025118  | 10678.043 | 9409.309  |
| AK026101  | 8333.381  | 2754.611  | AL109781  | 7362.379  | 6077.009  | NM_000727 | 4296.256  | 3718.507  |
| AK022194  | 3803.351  | 1253.904  | AL079289  | 986.987   | 1137.265  | NM_002621 | 902.773   | 809.574   |
| AF085963  | 734.705   | 293.132   | NM_017594 | 865.414   | 1182.143  | NM_00538E | 9774.168  | 8387.755  |
| AF131851  | 363.924   | 233.534   | AK027237  | 1314.687  | 1138.394  | NM_01898E | 5941.346  | 6471.148  |
| AK021436  | 669.392   | 558.451   | AK027104  | 4262.952  | 5276.325  | NM_000203 | 749.657   | 673.251   |
| U58664    | 446.199   | 493.423   | AL133090  | 43834.723 | 47362.48  | NM_01344Z | 2466.462  | 2549.905  |
| AF085937  | 1103.727  | 858.469   | AF085867  | 4218.162  | 3989.57   | NM_00092E | 20367.199 | 21860.977 |
| AL137569  | 1081.296  | 953.051   | AF086510  | 5523.028  | 5156.088  | NM_00046E | 4453.875  | 6054.558  |
| AK021920  | 4681.937  | 4462.091  | NM_01782Z | 9031.407  | 7700.401  | NM_00012Z | 5417.531  | 6468.474  |
| AL049415  | 5311.159  | 3701.525  | AK024520  | 7285.151  | 6572.724  | AL137501  | 2896.547  | 4042.733  |
| AK022375  | 1997.222  | 1954.388  | AK024592  | 7983.227  | 5898.506  | BE858979  | 1188.053  | 1589.535  |
| AI065056  | 431.548   | 522.695   | AK024904  | 2848.406  | 2102.619  | NM_00012Z | 4404.392  | 3992.415  |
| NM_00337E | 11190.166 | 12161.62  | AK025030  | 2329.181  | 1876.453  | NM_00702E | 9032.295  | 9112.799  |
| AL110194  | 19161.107 | 20486.275 | AK024542  | 4007.22   | 3321.129  | M37712    | 16611.9   | 13052.541 |
| AF138860  | 1415.404  | 1200.615  | AK024915  | 1971.538  | 2358.607  | NM_00264E | 18106.717 | 16098.672 |
| NM_00194Z | 781.645   | 826.971   | AK091109  | 61295.473 | 61257.543 | AF070670  | 29920.98  | 26245.193 |
| AF200348  | 1641.08   | 1517.152  | AF032897  | 654.34    | 595.91    | NM_01615E | 6787.17   | 7036.011  |
| Y11710    | 1170.213  | 975.045   | NM_014967 | 5327.217  | 4561.001  | NM_01652E | 3606.508  | 4849.677  |
| J03756    | 1056.487  | 1161.816  | AK022915  | 5519.624  | 4955.143  | NM_015974 | 3164.278  | 3384.028  |
| NM_00265C | 6117.679  | 5152.94   | AK021736  | 504.652   | 411.907   | NM_014384 | 2991.299  | 2890.85   |
| NM_00326C | 938.762   | 1097.32   | AF131834  | 2194.241  | 3016.869  | NM_00257Z | 5929.149  | 5348.253  |
| AK024071  | 3704.548  | 2741.789  | AL355711  | 2697.216  | 3548.536  | AF133424  | 8699.135  | 7552.327  |
| AF056490  | 4178.716  | 2697.426  | AK025851  | 1704.282  | 1730.777  | NM_00500Z | 41745.867 | 36804.383 |
| NM_00553E | 7817.234  | 5411.004  | AJ011409  | 30874.84  | 30427.094 | AL133037  | 5353.805  | 5856.083  |
| BF341504  | 901.096   | 514.399   | AJ227906  | 7051.295  | 6913.972  | NM_02035C | 5930.965  | 5620.159  |
| NM_005541 | 14318.487 | 9311.57   | U17633    | 2936.046  | 2343.147  | NM_00035C | 11719.284 | 12855.664 |
| AB002319  | 2640.485  | 1996.304  | AF086202  | 23257.945 | 21115.053 | X91103    | 37762.703 | 38333.609 |
| AF039942  | 5766.827  | 3881.7    | AK022352  | 717.846   | 632.162   | AA419164  | 3348.199  | 3902.152  |
| NM_004421 | 4542.983  | 2758.402  | AK023270  | 6626.992  | 5949.728  | L35251    | 8411.856  | 8537.505  |
| NM_018654 | 469.801   | 368.438   | AF085979  | 28033.146 | 23546.098 | BE910395  | 12686.203 | 13438.004 |
| AB046863  | 4440.089  | 3077.185  | AK023112  | 1957.861  | 1566.753  | N46828    | 25072.346 | 26710.289 |
| M62403    | 1855.752  | 1315.373  | NM_01780E | 54929.961 | 48303.566 | BI908302  | 58549.031 | 62697.078 |
| NM_01788Z | 6138.363  | 3089.99   | AK021895  | 8288.604  | 8440.492  | AA460969  | 7205.421  | 7995.654  |
| AK025131  | 2907.612  | 1222.779  | AK024293  | 464.11    | 347.942   | BG695859  | 6310.03   | 6448.228  |
| NM_000754 | 26842.734 | 13786.509 | AK024563  | 1525.551  | 1773.214  | M85079    | 18811.811 | 21999.24  |
| NM_01461E | 1610.027  | 1206.926  | AK000036  | 10899.938 | 12421.336 | NM_000641 | 6572.851  | 6123.955  |
| NM_00562E | 2603.779  | 1422.496  | AK000769  | 961.363   | 816.443   | AE006466  | 36593.008 | 36525.512 |
| J04621    | 1669.588  | 985.019   | AK000924  | 1779.478  | 1800.363  | BC008737  | 59286.34  | 59796.289 |



|           |           |           |           |           |           |           |           |           |
|-----------|-----------|-----------|-----------|-----------|-----------|-----------|-----------|-----------|
| NM_00071E | 9019.248  | 6080.596  | AK022252  | 1045.183  | 1105.228  | BC011655  | 7479.987  | 7902.64   |
| NM_000161 | 6464.166  | 4746.375  | AK000114  | 4383.189  | 3579.021  | BC002396  | 13828.519 | 19818.82  |
| BQ893560  | 733.925   | 898.922   | AK000952  | 38435.66  | 42401.613 | AF112219  | 14815.005 | 16878.527 |
| NM_001972 | 1719.328  | 1702.55   | AF119862  | 27043.461 | 39248.02  | NM_000521 | 465.125   | 511.587   |
| NM_00144E | 3207.996  | 2942.06   | U17628    | 2159.444  | 2115.217  | NM_00413E | 6541.545  | 5879.495  |
| AK024455  | 934.715   | 823.982   | AF119867  | 21514.223 | 17347.234 | Y10518    | 56778.977 | 61456.453 |
| NM_00200E | 56134.621 | 51900.027 | AL357205  | 7087.617  | 14264.843 | AF155135  | 15269.555 | 14227.199 |
| NM_007111 | 23830.756 | 22496.498 | AF124819  | 1102.875  | 997.035   | NM_01479C | 5333.501  | 6330.207  |
| NM_00204E | 2145.472  | 3866.66   | D17091    | 2607.543  | 2337.438  | NM_003571 | 40537.691 | 48619.828 |
| NM_004702 | 2778.267  | 2568.03   | AL133074  | 1225.713  | 1010.308  | AB032965  | 57469.844 | 64088.504 |
| NM_00710E | 8633.91   | 9141.18   | AF086318  | 32616.67  | 29987.281 | NM_02037C | 1274.131  | 1724.053  |
| AK023404  | 1743.583  | 1784.098  | AF088012  | 1072.264  | 947.775   | BF310159  | 29739.268 | 35063.25  |
| NM_01323E | 5924.574  | 6055.486  | NM_018121 | 2370.749  | 2775.588  | NM_00031E | 667.373   | 1199.005  |
| NM_00178E | 5358.122  | 7739.749  | AL355692  | 1642.677  | 2976.082  | NM_01898E | 5522.709  | 6526.52   |
| NM_016004 | 8083.216  | 8359.1    | AB050477  | 7817.708  | 9380.137  | AB044934  | 1047.251  | 1831.702  |
| NM_00265E | 3179.608  | 3436.574  | AK000152  | 2072.138  | 2192.328  | U27655    | 19328.828 | 20960.199 |
| AB028955  | 3592.308  | 3228.267  | AK024300  | 6485.768  | 6140.61   | NM_00336C | 5153.943  | 5991.249  |
| U66879    | 10685.443 | 7972.913  | L09092    | 1289.168  | 1412.024  | Z21965    | 58910.723 | 59308.582 |
| NM_016022 | 10269.509 | 9653.479  | NM_012132 | 1382.252  | 1474.577  | NM_012427 | 3418.319  | 4167.061  |
| NM_004874 | 4076.962  | 2340.321  | NM_01212E | 1470.006  | 1434.758  | AF131857  | 33697.059 | 34726.918 |
| NM_014204 | 3855.634  | 2628.377  | AK024881  | 775.251   | 864.587   | NM_000852 | 775.609   | 1222.213  |
| S70385    | 31371.068 | 21422.869 | AK025716  | 3448.977  | 3091.503  | NM_00039E | 2610.631  | 3479.654  |
| M34671    | 10870.562 | 6111.579  | L09268    | 591.497   | 539.653   | AW797282  | 1329.959  | 2673.648  |
| NM_001941 | 834.483   | 601.344   | NM_02018E | 7818.794  | 8324.08   | NM_002402 | 862.842   | 1475.73   |
| NM_01850E | 11275.393 | 9251.208  | AF090947  | 12701.497 | 11376.782 | L09070    | 5604.145  | 6721.692  |
| NM_00408E | 1311.795  | 731.117   | NM_005047 | 2240.539  | 1818.719  | NM_000062 | 16100.76  | 16685.016 |
| NM_014944 | 14843.997 | 12104.229 | AJ272196  | 19733.65  | 18888.271 | NM_00959C | 16171.614 | 15314.346 |
| NM_001109 | 768.846   | 687.533   | X58162    | 25965.422 | 18614.73  | NM_014747 | 20673.658 | 19213.793 |
| NM_007352 | 598.634   | 517.061   | AK022825  | 2505.711  | 2369.561  | Y19240    | 15502.562 | 15724.324 |
| AF176706  | 7082.626  | 6982.365  | AL365517  | 2332.007  | 2898.749  | AL117235  | 1864.75   | 2051.256  |
| NM_014484 | 2215.721  | 1986.122  | AK021988  | 29944.383 | 40404.629 | NM_001337 | 771.452   | 1048.53   |
| AF163762  | 336.798   | 424.086   | AF086494  | 44286.285 | 54382.813 | NM_003611 | 9553.506  | 9719.303  |
| NM_00108E | 7862.082  | 7500.038  | BI769977  | 1170.783  | 1358.528  | AB014538  | 10694.528 | 12758.259 |
| NM_01467C | 2164.937  | 1998.818  | AL137567  | 1415.342  | 1348.28   | NM_00620E | 2291.342  | 2957.829  |
| NM_01904E | 14676.255 | 13507.926 | AK024913  | 4569.513  | 4749.127  | AK025118  | 11094.676 | 11917.036 |
| NM_00104C | 7664.541  | 8844.072  | AB007961  | 10872.387 | 10903.8   | NM_000727 | 4948.983  | 5304.85   |
| AF279698  | 4586.927  | 5871.832  | NM_005547 | 2446.777  | 2220.069  | NM_002621 | 2433.091  | 2811.062  |
| NM_01984E | 5370.617  | 5838.152  | AF164794  | 11810.27  | 14507.531 | NM_00538E | 11706.932 | 11925.97  |
| NM_00004E | 690.401   | 1107.337  | NM_001173 | 1429.952  | 1370.356  | NM_01898E | 6024.639  | 8909.784  |
| AB032996  | 20057.199 | 20415.338 | AB020656  | 2651.959  | 2074.77   | NM_006074 | 57870.195 | 63424.898 |
| AB040881  | 17116.836 | 15298.823 | AK023648  | 7551.758  | 6809.125  | AF208232  | 10889.189 | 14111.562 |
| AY007121  | 5623.413  | 5546.75   | NM_000412 | 2209.48   | 2455.538  | NM_00298E | 15379.379 | 20563.256 |
| NM_003372 | 20303.061 | 19473.053 | AF077033  | 5264.104  | 4421.983  | NM_00418E | 2881.295  | 4305.893  |
| NM_007317 | 14272.344 | 11407.632 | D50406    | 1051.681  | 955.577   | NM_01625E | 12178.726 | 16099.621 |
| AB037826  | 990.954   | 695.037   | NM_004991 | 2311.109  | 2331.243  | AF203032  | 21246.17  | 25869.404 |
| AK021466  | 2398.019  | 1619.347  | AK026708  | 14931.323 | 20801.461 | AB014542  | 30434.793 | 25344.789 |
| Z36796    | 55764.195 | 61872.316 | NM_017903 | 5206.566  | 5267.602  | NM_01464C | 2494.782  | 2714.937  |
| NM_006443 | 58389.078 | 43037.141 | NM_018074 | 3839.994  | 3705.99   | NM_015974 | 3123.004  | 2864.69   |
| NM_00155E | 835.353   | 641.17    | AK024828  | 3417.107  | 4004.73   | NM_014384 | 3099.925  | 3763.989  |
| NM_002634 | 36468.688 | 25207.072 | AF009315  | 4781.615  | 5737.991  | NM_002573 | 5697.715  | 5671.006  |
| NM_01774E | 6976.306  | 6351.706  | NM_019013 | 1018.105  | 1219.73   | NM_000032 | 23252.803 | 30190.443 |
| NM_00293E | 14181.875 | 19127.102 | NM_006783 | 1051.653  | 1067.767  | NM_002083 | 5955.14   | 6010.484  |
| AK023652  | 4605.521  | 4632.457  | L37711    | 1711.91   | 1643.764  | NM_00203E | 10232.436 | 10540.979 |

|           |           |           |           |           |           |           |           |           |
|-----------|-----------|-----------|-----------|-----------|-----------|-----------|-----------|-----------|
| AF099032  | 3956.315  | 3266.046  | S70313    | 21420.188 | 18178.717 | NM_01490C | 5283.982  | 5505.431  |
| NM_00307C | 8010.033  | 7224.625  | AK021607  | 1630.81   | 1544.661  | BF342908  | 2540.273  | 3549.781  |
| AL122101  | 2565.717  | 2191.718  | AK025860  | 764.786   | 725.761   | AF118073  | 821.14    | 768.11    |
| NM_00478C | 390.789   | 355.222   | NM_000216 | 2325.35   | 2772.506  | AK023510  | 9135.319  | 9264.325  |
| NM_01621E | 6686.198  | 6259.721  | AF135960  | 3158.82   | 2942.927  | NM_00434E | 6484.348  | 6949.605  |
| AK001649  | 1128.093  | 1689.481  | NM_01421E | 31798.123 | 33249.32  | NM_00070Z | 57398.543 | 57998.719 |
| NM_01663E | 32713.311 | 32877.012 | NM_00301C | 3321.173  | 3247.53   | X71490    | 41612.961 | 46204.953 |
| AB018274  | 26914.184 | 28797.844 | NM_006871 | 3010.399  | 4205.094  | AF257081  | 14662.799 | 17447.426 |
| NM_005871 | 18902.6   | 17759.135 | NM_019074 | 14299.62  | 17291.709 | NM_00652E | 620.248   | 1011.128  |
| NM_00704Z | 13607.429 | 13835.372 | NM_018494 | 65907.469 | 63755.789 | NM_00168E | 48555.07  | 49717.473 |
| NM_01633Z | 23541.5   | 22095.705 | AK000006  | 1651.176  | 1893.245  | NM_003631 | 752.412   | 1381.018  |
| BE875028  | 7626.4    | 6479.016  | NM_001115 | 5343.864  | 4936.458  | NM_00021E | 404.935   | 742.852   |
| AK000511  | 10006.507 | 7944.512  | NM_014921 | 940.145   | 979.811   | NM_00223Z | 617.087   | 1110.255  |
| AF121255  | 7926.535  | 9178.044  | NM_016581 | 65189.039 | 61418.742 | NM_01610E | 9808.908  | 8920.628  |
| NM_005494 | 21889.387 | 19558.84  | NM_01325E | 2518.142  | 2374.296  | NM_01457C | 7017.41   | 8257.188  |
| NM_01794E | 2389.291  | 2305.287  | NM_00718Z | 703.484   | 928.565   | AF112219  | 15341.09  | 15680.861 |
| NM_00495Z | 20062.039 | 17379.525 | AJ238243  | 40663.664 | 46420.383 | NM_00262E | 656.362   | 474.649   |
| NM_01219E | 8908.457  | 6558.585  | J05046    | 65075.297 | 59516.191 | NM_00413E | 5620.936  | 5007.282  |
| AL049682  | 3925.382  | 4725.48   | NM_01231E | 5034.411  | 6085.295  | NM_00020Z | 850.005   | 752.404   |
| NM_00552E | 11624.891 | 9631.838  | NM_002751 | 20296.92  | 23152.281 | NM_01344Z | 2625.573  | 2154.117  |
| AL050199  | 5973.021  | 4909.593  | NM_004291 | 7258.832  | 7364.375  | NM_00092E | 20140.203 | 22486.891 |
| NM_004901 | 2052.872  | 2131.459  | NM_00381E | 10186.059 | 11294.949 | NM_00046E | 4355.35   | 5279.022  |
| U77088    | 1079.409  | 1058.476  | NM_00491Z | 3132.961  | 3582.826  | NM_00012Z | 5567.997  | 6451.496  |
| NM_006721 | 28463.314 | 27056.676 | U79304    | 26859.713 | 22763.461 | NM_00671Z | 59982.563 | 60331.082 |
| NM_01628Z | 12760.643 | 13141.124 | NM_016267 | 11937.126 | 11717.602 | NM_00624C | 7195.302  | 7187.993  |
| NM_00276E | 15221.116 | 15837.515 | NM_004671 | 20354.223 | 23398.336 | NM_00702E | 8562.043  | 9819.629  |
| NM_00190E | 10000.29  | 9144.261  | NM_00652E | 6468.616  | 8565.762  | M37712    | 17183.158 | 13017.981 |
| AF292100  | 10202.702 | 10426.148 | U35622    | 1019.314  | 1226.901  | NM_00264E | 18876.832 | 18599.084 |
| NM_003434 | 52126.613 | 63710.602 | NM_00704E | 4116.418  | 5028.611  | AF070670  | 29506.027 | 24005.371 |
| NM_018181 | 2020.182  | 2347.313  | NM_003627 | 8527.84   | 8182.769  | NM_01615E | 7716.488  | 6941.289  |
| X68880    | 1422.291  | 1395.826  | NM_01214E | 22581.037 | 26316.902 | NM_01652E | 3860.001  | 3964.431  |
| NM_005654 | 1223.844  | 1801.038  | AF305779  | 3469.021  | 4135.666  | CY3Cy5    | 8083.923  | 504.159   |
| AF024698  | 52769.582 | 62738.742 | AF225416  | 10329.024 | 14470.801 | NM_00049E | 815.55    | 840.339   |
| BE904617  | 4010.036  | 4168.646  | NM_016231 | 4386.967  | 4826.378  | NM_000664 | 2734.914  | 2414.451  |
| AK024495  | 3786.978  | 4273.156  | NM_00209Z | 5279.474  | 4671.4    | AK026155  | 2131.146  | 1540.877  |
| AF024694  | 1829.577  | 1863.436  | AB042555  | 20882.125 | 19854.428 | NM_01805Z | 52945.25  | 40495.449 |
| AF091081  | 33638.781 | 31276.549 | NM_00172Z | 4599.766  | 4374.488  | AF143322  | 770.663   | 555.39    |
| AK001758  | 5747.974  | 4424.343  | NM_01776Z | 3240.594  | 3022.818  | AK022386  | 17833.199 | 12141.491 |
| U90842    | 637.325   | 662.294   | NM_01397E | 4451.765  | 4314.99   | NM_002767 | 31858.578 | 19825.063 |
| AK025076  | 1147.265  | 1212.036  | NM_00384Z | 16166.326 | 16767.334 | AF131846  | 31771.316 | 23638.652 |
| AF086325  | 2088.076  | 1802.028  | NM_01221E | 2700.368  | 3443.886  | AF088069  | 11226.058 | 7144.68   |
| NM_00492E | 2711.992  | 2061.23   | NM_00533E | 905.063   | 893.923   | AF086551  | 2048.303  | 1516.914  |
| NM_005081 | 923.394   | 866.362   | X73502    | 4674.797  | 4382.343  | NM_01339Z | 7906.598  | 5486.439  |
| NM_00495E | 1659.594  | 1578.978  | NM_02044E | 63778.18  | 58272.594 | AK025082  | 2588.281  | 1883.739  |
| AK026022  | 54626.461 | 54896.063 | NM_01637E | 51593.473 | 55879.539 | AF086535  | 1181.55   | 1051.48   |
| NM_00319E | 13977.214 | 12808.546 | AB046848  | 35696.648 | 43730.145 | AB040901  | 2090.677  | 1375.054  |
| NM_00430E | 46801.207 | 43930.855 | AL133057  | 10817.354 | 9993.488  | AL137406  | 6260.642  | 5274.742  |
| NM_00115Z | 1030.046  | 1009.429  | U04845    | 20502.369 | 23227.396 | NM_00049E | 913.473   | 846.307   |
| NM_00678E | 21336.813 | 20100.375 | NM_01810Z | 12323.327 | 11876.44  | NM_000664 | 2897.587  | 3215.317  |
| NM_00620E | 7698.47   | 8558.27   | NM_00031Z | 7469.324  | 7984.761  | SR1       | 70549.422 | 62360.391 |
| NM_004034 | 7185.141  | 7314.93   | NM_00396Z | 4874.892  | 4198.945  | SR3       | 39630.938 | 51198.73  |
| NM_00013C | 4097.101  | 3486.469  | AC009729  | 903.01    | 855.473   | SR5       | 5117.064  | 9494.608  |
| AF193756  | 358.267   | 445.631   | NM_01659E | 4090.084  | 4400.063  | SR7       | 4380.475  | 59482.742 |

|           |           |           |           |           |           |           |           |           |
|-----------|-----------|-----------|-----------|-----------|-----------|-----------|-----------|-----------|
| NM_004183 | 561.487   | 888.752   | BE874867  | 60235.723 | 62795.621 | SR9       | 12473.403 | 3366.04   |
| AI492087  | 1883.378  | 1900.596  | AL136719  | 6395.435  | 5959.98   | CY3Cy5    | 7677.534  | 527.308   |
| R72122    | 12569.047 | 15097.407 | NM_014109 | 10911.281 | 10909.076 | U54734    | 516.768   | 347.867   |
| Z35309    | 17147.166 | 17628.658 | NM_012160 | 4219.831  | 3383.684  | U84507    | 887.159   | 902.989   |
| X04571    | 2793.928  | 2866.49   | NM_006357 | 62811.859 | 65940.992 | AK000872  | 3142.711  | 2546.815  |
| AA700005  | 2759.844  | 2555.674  | NM_014248 | 44701.969 | 52099.555 | AK027147  | 32035.314 | 25456.018 |
| AA292025  | 5300.805  | 5726.923  | AK027070  | 3819.396  | 3381.573  | AF086285  | 1007.249  | 691.691   |
| AA437226  | 11869.363 | 12492.811 | AF129533  | 1450.907  | 1443.163  | AF085924  | 655.089   | 541.372   |
| R36143    | 1074.525  | 1421.68   | NM_003341 | 23303.818 | 20011.225 | AK023887  | 2233.167  | 1518.198  |
| XM_056359 | 1521.609  | 2304.44   | NM_017785 | 3131.374  | 4534.693  | AF088022  | 21811.662 | 14373.62  |
| D10353/NM | 5359.637  | 5041.52   | NM_006249 | 12182.913 | 11536.781 | AK026537  | 4143.836  | 3621.89   |
| M15042    | 24006.094 | 24212.467 | NM_018318 | 602.227   | 864.366   | NM_015485 | 4506.625  | 3140.064  |
| AK056843  | 1783.603  | 1768.361  | AB020640  | 22435.059 | 25721.807 | AF147411  | 1357.635  | 1830.159  |
| U49928    | 53345.93  | 50503.883 | D29954    | 22483.834 | 20855.295 | S83307    | 493.853   | 989.912   |
| AK096645  | 53782.387 | 54705.621 | AF007131  | 12700.795 | 10859.453 | NM_002666 | 15760.75  | 16727.77  |
| AK092859  | 2264.274  | 1745.247  | NM_006839 | 3119.331  | 4288.352  | AF202145  | 6806.896  | 4621.581  |
| NM_005793 | 25760.268 | 22170.971 | NM_000223 | 1559.549  | 2175.815  | AK022412  | 14848.614 | 13752.259 |
| M55646    | 3512.498  | 3931.949  | NM_005851 | 1994.889  | 2120.556  | AK023073  | 16463.262 | 13299.54  |
| NM_006112 | 47287.906 | 39734.418 | AF119256  | 2851.108  | 2913.886  | AK023922  | 1211.539  | 1072.227  |
| NM_000879 | 387.958   | 597.566   | NM_005180 | 8157.512  | 9142.098  | AK022438  | 1680.921  | 1731.622  |
| M12807    | 4862.673  | 5302.515  | NM_003410 | 12975.445 | 12898.384 | AK023316  | 1858.513  | 1645.09   |
| NM_001765 | 860.092   | 1122.66   | NM_007146 | 2774.122  | 2413.116  | AK023764  | 1181.706  | 1131.237  |
| NM_003361 | 1228.208  | 1368.107  | NM_002229 | 3452.112  | 2815.173  | AK024082  | 1316.37   | 1030.883  |
| NM_012099 | 7550.515  | 7477.358  | S69027    | 8521.405  | 7666.326  | AK025072  | 6851.9    | 5762.721  |
| NM_018684 | 28812.664 | 37352.102 | NM_012119 | 12375.261 | 12975.071 | AK022410  | 1822.122  | 1233.094  |
| NM_017983 | 3955.73   | 3972.013  | X99631    | 31042.568 | 29371.977 | AF086541  | 1811.897  | 1363.53   |
| AF116909  | 3362.774  | 3412.575  | NM_001730 | 4450.205  | 4106.633  | L10378    | 17979.461 | 12206.179 |
| BE906724  | 1813.266  | 2376.904  | AK026290  | 7692.365  | 7962.022  | AK022179  | 2129.82   | 1610.169  |
| NM_002283 | 5174.185  | 6072.342  | AB014589  | 3259.61   | 2718.421  | AK022173  | 868.133   | 757.611   |
| AJ276095  | 6112.851  | 5473.452  | AF248649  | 1401.625  | 1631.286  | AJ227860  | 1461.594  | 1084.951  |
| NM_004819 | 6506.636  | 6301.793  | U37146    | 45046.008 | 47518.336 | AL157448  | 1235.671  | 896.644   |
| NM_007184 | 4742.045  | 5282.45   | NM_012086 | 3657.1    | 3101.02   | AF026942  | 4968.911  | 4854.264  |
| NM_005291 | 5382.33   | 5177.339  | AB040431  | 19200.631 | 15230.245 | AJ276429  | 6284.298  | 6708.385  |
| AF253316  | 1185.323  | 1195.942  | NM_000991 | 63061.941 | 68325.602 | AK021590  | 4015.031  | 5422.154  |
| NM_005855 | 1644.847  | 1526.326  | NM_016034 | 37323.375 | 36505.801 | AB002441  | 820.358   | 830.988   |
| NM_002923 | 6760.77   | 7875.789  | X69150    | 62866.363 | 59639.953 | AK023998  | 1865.564  | 1837.651  |
| NM_006794 | 1354.876  | 1695.784  | NM_001025 | 64197.488 | 62651.355 | AK021643  | 1142.138  | 1078.808  |
| NM_018653 | 1545.346  | 1794.498  | NM_016067 | 58817.715 | 56374.906 | Z11802    | 968.23    | 923.814   |
| NM_005388 | 12578.91  | 11688.459 | NM_018285 | 27942.477 | 27021.127 | NM_014054 | 3846.008  | 3517.64   |
| NM_007232 | 18287.42  | 16957.791 | AK022393  | 24964.563 | 32138.906 | AK021840  | 68432.453 | 65818.93  |
| NM_002717 | 9200.791  | 7918.509  | AK026302  | 17384.791 | 19862.375 | AK022228  | 7023.711  | 6900.443  |
| AF231916  | 2207.793  | 1872.585  | NM_012214 | 9824.326  | 11593.902 | AK022031  | 1058.249  | 1154.211  |
| NM_003501 | 11611.196 | 13529.328 | AF049656  | 26273.383 | 31167.531 | AF003738  | 575.622   | 493.228   |
| AK022654  | 8854.811  | 9994.351  | NM_001966 | 2938.22   | 3121.365  | AF086480  | 4559.857  | 4269.238  |
| BC002905  | 7890.881  | 7636.43   | NM_016138 | 5635.169  | 6857.585  | AK022122  | 1904.807  | 1780.607  |
| NM_018091 | 17687.295 | 22317.557 | Z36833    | 66188.664 | 71158.43  | AK026084  | 537.674   | 611.267   |
| NM_001108 | 16985.676 | 13530.471 | AW963246  | 702.963   | 1178.865  | AK022415  | 64537.223 | 42863.676 |
| NM_001637 | 798.76    | 944.814   | NM_014355 | 10244.324 | 8051.604  | AL137368  | 4383.491  | 3499.219  |
| NM_016630 | 38929.574 | 42695.66  | M21191    | 44576.457 | 46709.008 | AK021932  | 1914.628  | 1602.837  |
| NM_014291 | 8832.587  | 12400.791 | AF072810  | 2886.998  | 2156.454  | AK026787  | 10940.748 | 7034.636  |
| NM_014631 | 3256.4    | 5025.457  | L19778    | 1456.044  | 1162.962  | AK023542  | 1940.096  | 1513.284  |
| NM_001089 | 4662.095  | 6461.521  | AF174482  | 39985.555 | 38055.48  | AK000203  | 2326.857  | 1410.808  |
| NM_000120 | 673.331   | 862.234   | Y08836    | 488.948   | 602.186   | AK021845  | 18775.787 | 15811.574 |

|           |           |           |           |           |           |           |           |           |
|-----------|-----------|-----------|-----------|-----------|-----------|-----------|-----------|-----------|
| U09384    | 5085.102  | 5222.722  | NM_003528 | 4462.934  | 5557.752  | AK022434  | 1016.3    | 744.084   |
| NM_004794 | 15079.823 | 13863.655 | NM_017769 | 1258.593  | 973.633   | NM_018592 | 7087.336  | 10557.144 |
| NM_002803 | 20960.658 | 20584.771 | D85131    | 15119.8   | 13034.313 | AK021465  | 1014.258  | 1229.404  |
| NM_005508 | 8677.98   | 10359.32  | NM_004956 | 1557.922  | 1362.103  | NM_018512 | 46119.859 | 36259.656 |
| NM_018485 | 2289.815  | 2572.524  | D30612    | 8475.009  | 8298.188  | NM_018568 | 1058.858  | 1009.283  |
| NM_006788 | 3049.09   | 3034.576  | NM_002163 | 10571.484 | 9571.935  | AL161991  | 21088.375 | 18677.479 |
| NM_016568 | 2366.008  | 2839.709  | U52097    | 35996.871 | 35882.398 | D17032    | 32143.063 | 28647.023 |
| NM_002987 | 658.131   | 723.775   | NM_003416 | 3777.734  | 4865.264  | AL137292  | 1365.006  | 1571.349  |
| AB033102  | 13713.511 | 15109.177 | X74497    | 5510.727  | 6243.253  | NM_017941 | 3575.178  | 3245.031  |
| NM_014774 | 5967.2    | 5431.867  | NM_012210 | 1932.843  | 2934.868  | BE900527  | 3994.179  | 4125.505  |
| NM_014143 | 38801.383 | 32178.457 | U10072    | 3839.76   | 4049.114  | D28384    | 68036.352 | 62690.813 |
| NM_012200 | 7577.487  | 7866.248  | AF222749  | 19678.557 | 22920.855 | AF118079  | 63310.176 | 56355.832 |
| NM_001724 | 6853.942  | 5319.423  | NM_001321 | 14070.958 | 13957.24  | AF277572  | 816.471   | 790.835   |
| NM_000150 | 650.816   | 614.966   | AB018264  | 21825.609 | 26769.213 | AL365413  | 3327.382  | 2471.823  |
| AB023152  | 1750.649  | 1390.199  | NM_006911 | 1124.342  | 1413.236  | NM_005258 | 16418.42  | 12824.316 |
| NM_006212 | 2447.421  | 2656.848  | U92544    | 12769.245 | 11585.897 | NM_003948 | 1106.548  | 831.597   |
| AK022872  | 6680.951  | 6128.59   | NM_019644 | 1557.334  | 2391.038  | AK025062  | 2021.742  | 1466.914  |
| AK024272  | 6972.506  | 6835.661  | NM_006791 | 4203.012  | 4170.112  | Z27405    | 59015.652 | 52588.477 |
| NM_016381 | 3510.52   | 4523.027  | AJ278348  | 37712.363 | 49840.863 | AK023412  | 2269.158  | 1467.603  |
| NM_016360 | 218.694   | 397.123   | NM_015872 | 2303.589  | 1935.489  | NM_014617 | 61724.496 | 54544.852 |
| AL591715  | 1251.97   | 1571.657  | AI285199  | 33647.34  | 32221.229 | AK074682  | 6401.956  | 7950.78   |
| NM_007254 | 696.273   | 749.613   | AA757170  | 705.599   | 510.328   | BC036692  | 4149.776  | 5285.143  |
| NM_018042 | 5550.185  | 5256.391  | L07738    | 3622.231  | 2874.653  | AJ009640  | 3983.838  | 5352.518  |
| BE741525  | 3287.802  | 3259.041  | Z48054    | 7744.852  | 11133.958 | Y11163    | 1520.764  | 1524.514  |
| BF030555  | 7740.209  | 8175.122  | H90415    | 13637.079 | 12590.334 | AF086391  | 964.767   | 872.889   |
| NM_012433 | 12174.223 | 12151.828 | AA676470  | 56041.301 | 47146.691 | AF147340  | 692.221   | 774.999   |
| NM_005605 | 4379.943  | 4765.669  | AA430512  | 10127.787 | 9358.261  | AK025119  | 1860.233  | 1508.64   |
| NM_002576 | 7128.17   | 7017.392  | M38258    | 2095.684  | 1930.34   | AJ224170  | 4931.856  | 4853.111  |
| NM_003582 | 4180.281  | 4551.007  | AA457155  | 55848.648 | 54233.711 | AF085866  | 12737.542 | 9697.765  |
| AF057354  | 2536.042  | 2431.996  | BM014365  | 1918.587  | 1683.041  | NM_006106 | 917.81    | 602.05    |
| AF169351  | 5276.107  | 6596.735  | H91842    | 1237.99   | 1174.239  | AK000806  | 64697.637 | 58721.527 |
| M14200    | 55151.305 | 62741.371 | U78045    | 7813.926  | 6711.19   | NM_016471 | 7884.982  | 6685.567  |
| NM_000282 | 2789.148  | 2577.871  | AA878561  | 60690.934 | 57163.035 | Z11852    | 587.301   | 468.831   |
| NM_000532 | 25387.896 | 23456.484 | BF688309  | 1555.795  | 1728.378  | NM_001145 | 1234.105  | 788.982   |
| NM_016341 | 2913.765  | 2679.587  | AI538525  | 1775.301  | 2328.932  | NM_005364 | 24886.172 | 19012.211 |
| NM_006786 | 19218.73  | 19077.496 | NM_005205 | 63346.105 | 57448.656 | AK023482  | 9196.347  | 7878.601  |
| NM_006205 | 7006.797  | 7301.839  | BE878426  | 57334.434 | 57128.195 | AK022798  | 841.953   | 1111.808  |
| NM_004034 | 6896.825  | 6993.71   | NM_001745 | 44497.727 | 41977.359 | AL157423  | 1082.305  | 1256.255  |
| NM_000130 | 4006.918  | 3549.046  | NM_003825 | 13993.694 | 17642.357 | AK023115  | 601.172   | 708.311   |
| AF193756  | 324.307   | 601.844   | AK025006  | 15276.449 | 14680.743 | AK023176  | 2757.344  | 2360.347  |
| NM_004183 | 699.122   | 588.857   | AF218014  | 46187.969 | 48004.676 | NM_006826 | 30608.559 | 27211.539 |
| AI492087  | 1533.626  | 1797.468  | NM_006678 | 13033.636 | 13482.818 | AB007973  | 25297.285 | 24732.031 |
| R72122    | 13317.842 | 17167.752 | AY007729  | 59515.543 | 55488.402 | NM_002995 | 1218.897  | 993.905   |
| Z35309    | 16199.123 | 15442.878 | NM_014424 | 906.252   | 766.878   | M96843    | 11822.893 | 10824.576 |
| X04571    | 2529.918  | 3099.93   | AF159092  | 3116.24   | 2602.042  | NM_017791 | 5989.77   | 5592.795  |
| AA700005  | 2484.347  | 2767.871  | BC007318  | 5182.241  | 5651.959  | NM_005882 | 15444.664 | 15993.696 |
| AA292025  | 5906.99   | 7097.972  | M36693    | 13422.548 | 17577.695 | BC012304  | 7821.041  | 7375.386  |
| AA437226  | 11748.847 | 12759.607 | NM_016292 | 22048.664 | 20319.531 | AB046815  | 5512.949  | 4960.839  |
| R36143    | 1059.694  | 1086.041  | NM_002601 | 7056.907  | 5818.191  | NM_000440 | 7674.785  | 6249.709  |
| XM_056359 | 1384.968  | 2241.979  | NM_001781 | 2399.645  | 1830.288  | NM_001297 | 11187.788 | 5249.456  |
| D10353/NM | 4762.628  | 3929.568  | NM_014432 | 8786.196  | 9043.307  | NM_004403 | 21775.633 | 8150.441  |
| M15042    | 22717.625 | 20843.795 | NM_001558 | 11794.067 | 10964.846 | X64993    | 3417.792  | 1386.543  |
| AK056843  | 1898.955  | 2171.764  | NM_002530 | 2124.814  | 2202.526  | NM_004434 | 31199.348 | 15692.262 |

|           |           |           |           |           |           |           |           |           |
|-----------|-----------|-----------|-----------|-----------|-----------|-----------|-----------|-----------|
| U49928    | 53144.828 | 55181.164 | NM_018941 | 2790.868  | 3250.841  | NM_00626E | 1373.969  | 2112.326  |
| AK096645  | 53603.457 | 63162.105 | NM_00589E | 27196.795 | 30231.82  | NM_01623C | 6647.76   | 5647.686  |
| AK092859  | 2156.292  | 2778.897  | NM_00288E | 57902.387 | 61063.961 | NM_00108E | 3925.079  | 3765.479  |
| NM_018291 | 5671.971  | 5605.153  | AF078866  | 2313.269  | 2297.755  | AK023966  | 19254.617 | 16838.805 |
| NM_00553C | 15639.432 | 13161.861 | BF311880  | 39633.957 | 27367.814 | AK025702  | 7389.086  | 5279.32   |
| NM_00689E | 13833.147 | 10178.563 | NM_00007E | 1027.466  | 716.39    | NM_01895E | 3144.345  | 3290.15   |
| M12807    | 4607.557  | 4527.336  | NM_00136C | 15713.469 | 16811.541 | AL050200  | 751.32    | 660.451   |
| NM_00176E | 776.429   | 684.705   | AK026656  | 21920.287 | 19662.607 | NM_002367 | 1100.898  | 1113.098  |
| NM_003361 | 919.715   | 1326.409  | NM_000751 | 55970.375 | 54352.648 | AK022038  | 3167.534  | 2496.96   |
| NM_01209E | 6806.267  | 6882.623  | NM_005071 | 2380.717  | 2283.535  | AF253321  | 5381.925  | 4946.49   |
| NM_01868A | 23770.154 | 25272.984 | NM_00440E | 14158.068 | 13645.574 | U80735    | 11880.373 | 10080.607 |
| NM_01798E | 3987.575  | 3580.451  | AJ131244  | 3767.05   | 3738.655  | NM_01785C | 6985.836  | 5956.926  |
| AF116909  | 2950.615  | 3529.272  | NM_00253E | 9633.548  | 10440.083 | NM_01652E | 3609.768  | 3601.442  |
| BE906724  | 1571.912  | 1902.283  | NM_01238E | 9645.151  | 10644.644 | NM_00222A | 20498.869 | 20534.5   |
| NM_00228E | 3950.069  | 5150.483  | NM_016651 | 4126.074  | 3983.502  | X07979    | 60556.457 | 58428.809 |
| AJ276095  | 6060.566  | 6621.079  | NM_001671 | 803.948   | 1111.344  | NM_00387A | 2325.516  | 2493.395  |
| NM_00481E | 6110.251  | 7476.429  | NM_01984E | 7055.539  | 9092.736  | NM_00008E | 1740.685  | 1407.165  |
| NM_00718A | 4800.421  | 4843.395  | NM_01619E | 14227.655 | 15555.363 | L13857    | 2827.824  | 1768.491  |
| NM_005291 | 3946.282  | 4172.883  | AB046774  | 1292.847  | 1136.825  | NM_01809E | 11926.766 | 8299.379  |
| AF253316  | 1058.287  | 1291.397  | AK022385  | 53624.063 | 49518.5   | AF286164  | 1737.473  | 1052.588  |
| NM_00585E | 1391.026  | 1453.211  | NM_00277E | 1674.523  | 1155.936  | AF146277  | 10513.797 | 6491.943  |
| NM_00292E | 6822.784  | 8124.298  | AK024584  | 11548.313 | 6468.104  | NM_00255E | 1277.816  | 1190.256  |
| NM_00679A | 1574.1    | 1925.964  | NM_00350A | 6119.012  | 5902.333  | AF055033  | 53857.242 | 54164.973 |
| NM_01865E | 1837.874  | 1794.083  | NM_01329E | 7044.906  | 6276.974  | NM_01770C | 1217.62   | 1091.703  |
| NM_00538E | 12314.268 | 13984.699 | NM_007267 | 4550.287  | 4178.842  | M37191    | 35364.285 | 31452.34  |
| NM_00723E | 20609.234 | 22749.83  | AK022830  | 475.574   | 414.447   | J04422    | 327.351   | 540.901   |
| NM_016257 | 387.283   | 550.612   | Z36816    | 11030.323 | 12458.106 | NM_00524E | 1070.466  | 1125.984  |
| NM_002717 | 9440.265  | 9832.994  | NM_00586E | 16759.527 | 16691.17  | NM_00302C | 1164.899  | 1381.586  |
| NM_00430E | 48355.504 | 44079.371 | NM_00641E | 12018.831 | 12381.116 | NM_00340A | 58542.363 | 51829.984 |
| NM_001153 | 718.324   | 941.528   | NM_01768A | 794.331   | 1065.606  | NM_00111A | 2204.638  | 2397.741  |
| AK022654  | 7068.431  | 7169.232  | AK025542  | 11860.632 | 11015.478 | NM_00445E | 1759.813  | 1794.159  |
| BC002905  | 7498.071  | 6837.926  | AF207547  | 1510.829  | 1388.822  | NM_00601C | 24497.027 | 24829.881 |
| NM_018091 | 17447.031 | 20305.539 | NM_00276E | 18575.707 | 19110.035 | K03191    | 6129.957  | 6132.562  |
| NM_00110E | 17350.191 | 13244.514 | NM_00295C | 20376.293 | 19783.703 | NM_00507E | 46820.793 | 37336.656 |
| NM_001637 | 877.383   | 996.303   | NM_00231E | 9577.098  | 8486.462  | NM_00519E | 54932.691 | 47008.617 |
| NM_01663C | 36123.684 | 33727.336 | NM_00143E | 833.596   | 913.419   | NM_00458E | 2815.841  | 3287.957  |
| NM_014291 | 8341.732  | 12139.645 | NM_00313A | 57168.824 | 54880.699 | NM_01503E | 5700.495  | 5606.951  |
| NM_014631 | 2922.49   | 4453.464  | NM_00431A | 5494.228  | 6442.961  | AK022956  | 8673.299  | 9187.106  |
| NM_00108E | 2996.729  | 4412.499  | NM_018247 | 16154.802 | 16996.205 | AK023121  | 2190.94   | 1917.249  |
| NM_00012C | 669.817   | 866.991   | NM_01797E | 18507.641 | 21330.102 | NM_01410A | 62653.098 | 56940.691 |
| U09384    | 4678.206  | 5363.794  | NM_006911 | 1097.869  | 1010.902  | NM_00239E | 2009.936  | 1742.135  |
| NM_00479A | 13560.914 | 13844.189 | U92544    | 12576.163 | 10228.331 | NM_00274E | 59599.082 | 62933.336 |
| NM_00280E | 19290.709 | 17712.605 | NM_01964A | 2415.87   | 2710.796  | NM_01821E | 19325.051 | 19770.666 |
| NM_00550E | 8750.372  | 9114.826  | NM_006791 | 4213.44   | 4412.806  | NM_00339C | 7851.316  | 7936.79   |
| NM_01848E | 2031.283  | 2414.15   | AJ278348  | 32847.496 | 33369.285 | AL137747  | 7573.973  | 6191.294  |
| NM_00678E | 2628.797  | 3253.651  | NM_01587E | 1543.804  | 1609.047  | NM_01475E | 6878.106  | 5587.646  |
| AK025039  | 495.568   | 829.008   | AI285199  | 34073.504 | 33187.727 | AF077188  | 23382.258 | 29592.121 |
| NM_01656E | 2537.542  | 2380.304  | AA757170  | 704.188   | 586.591   | NM_01244E | 6834.57   | 6705.322  |
| NM_002987 | 607.789   | 764.658   | L07738    | 4269.234  | 5666.191  | NM_01833E | 2077.398  | 2044.348  |
| AB033102  | 14587.272 | 16263.819 | Z48054    | 8337.634  | 12399.095 | NM_01868E | 60972.789 | 61725.41  |
| NM_01477A | 6294.517  | 6205.923  | H90415    | 16557.068 | 17217.029 | NM_00698A | 11451.097 | 12455.838 |
| NM_01414E | 39382.43  | 37322.348 | AA676470  | 47687.953 | 49687.871 | AF231919  | 3494.276  | 4158.179  |
| M55646    | 2990.169  | 3924.109  | AA430512  | 9569.476  | 10655.785 | NM_01821A | 3161.197  | 4305.728  |

|           |           |           |           |           |           |           |           |           |
|-----------|-----------|-----------|-----------|-----------|-----------|-----------|-----------|-----------|
| NM_006112 | 42969.77  | 34990.414 | M38258    | 2130.05   | 1870.622  | Y11718    | 528.792   | 790.546   |
| NM_000150 | 648.18    | 766.419   | AA457155  | 55030.188 | 49887.406 | NM_005076 | 31404.078 | 27668.51  |
| AB023152  | 1491.475  | 1116.897  | BM014365  | 1700.206  | 1778.724  | NM_019023 | 57309.016 | 60810.43  |
| NM_006212 | 2311.032  | 2257.689  | H91842    | 1265.151  | 1042.672  | NM_004420 | 1320.927  | 1518.427  |
| AK022872  | 6573.305  | 6044.607  | U78045    | 8260.984  | 6017.388  | NM_002970 | 1661.61   | 1600.15   |
| AK024272  | 7098.182  | 6851.313  | AA878561  | 58079.797 | 53533.445 | NM_005496 | 45059.98  | 40687.242 |
| NM_016381 | 3545.755  | 3027.403  | BF688309  | 1676.969  | 1677.445  | NM_013270 | 3442.743  | 3263.977  |
| AL591715  | 1010.534  | 1176.111  | AI538525  | 2053.489  | 2347.981  | NM_015387 | 7461.508  | 8350.993  |
| NM_007254 | 532.38    | 1027.393  | AF222980  | 2080.885  | 2384.03   | NM_001733 | 14162.374 | 11436.129 |
| NM_018042 | 5043.921  | 5027.391  | AK026758  | 9158.859  | 10044.295 | NM_005065 | 1999.615  | 1298.599  |
| BE741525  | 3272.526  | 3285.087  | NM_012201 | 6889.342  | 7445.223  | NM_017825 | 46611.094 | 41503.68  |
| BF030555  | 6135.799  | 7368.422  | NM_001745 | 45530.473 | 39884.082 | NM_014035 | 4410.491  | 4148.484  |
| NM_012433 | 10976.082 | 11105.139 | NM_003825 | 13204.726 | 14890.789 | NM_020122 | 28950.945 | 20879.373 |
| NM_005605 | 2872.985  | 2792.915  | AK025006  | 16793.703 | 19767.211 | NM_013432 | 28401.111 | 28044.201 |
| NM_002576 | 6560.689  | 6006.535  | AF218014  | 49212.934 | 46156.77  | AB020716  | 1661.735  | 981.57    |
| NM_003582 | 3704.2    | 4007.867  | NM_006678 | 12542.741 | 11299.441 | U57341    | 910.524   | 902.81    |
| AF057354  | 3021.457  | 2467.099  | AY007729  | 60369.492 | 54735.449 | NM_002296 | 58576.105 | 58708.68  |
| AF169351  | 5466.736  | 6462.273  | NM_014424 | 946.826   | 1172.833  | AK027130  | 1774.143  | 2372.854  |
| M14200    | 55381.984 | 61702.863 | AF159092  | 2887.936  | 2943.129  | NM_005479 | 56300.074 | 58522.609 |
| NM_000282 | 3007.271  | 3238.056  | BC007318  | 6044.516  | 8502.873  | NM_005730 | 60456.188 | 63880.25  |
| NM_000532 | 27930.203 | 30408.107 | M36693    | 12913.251 | 12584.352 | X82240    | 22039.311 | 25888.932 |
| NM_016341 | 2813.368  | 3160.305  | NM_016292 | 25685.318 | 24647.99  | NM_013995 | 9804.273  | 9227.348  |
| AF231916  | 2042.635  | 2173.163  | NM_002601 | 8019.151  | 8817.845  | BC021298  | 1922.456  | 1813.707  |
| NM_003501 | 11180.854 | 13037.737 | NM_001781 | 2628.741  | 1588.723  | U52096    | 15416.039 | 14775.667 |
| NM_004034 | 6072.131  | 5086.415  | NM_014432 | 8319.289  | 7688.079  | AB013897  | 4173.185  | 4522.096  |
| NM_000130 | 3977.185  | 2906.901  | NM_001558 | 11216.613 | 8121.811  | NM_005526 | 50645.605 | 43068.363 |
| AF193756  | 364.111   | 408.135   | NM_006953 | 991.529   | 1057.431  | AK001669  | 5151.189  | 4920.917  |
| NM_004183 | 648.561   | 654.583   | NM_002530 | 2190.259  | 2092.775  | NM_006195 | 3340.026  | 3419.278  |
| AI492087  | 1656.213  | 1566.483  | NM_018941 | 4554.291  | 4345.645  | NM_006190 | 41826.43  | 39306.844 |
| R72122    | 11828.139 | 12395.037 | NM_020241 | 788.973   | 796.69    | NM_006366 | 7767.583  | 6024.351  |
| Z35309    | 14937.102 | 14161.007 | NM_001321 | 14663.723 | 13081.729 | NM_004133 | 1675.484  | 1570.125  |
| X04571    | 2443.774  | 2963.909  | AB018264  | 17499.33  | 16076.811 | NM_004433 | 663.369   | 1095.664  |
| AA700005  | 2772.632  | 2608.481  | AF078866  | 2035.442  | 1856.741  | NM_001618 | 22018.914 | 16416.949 |
| AA292025  | 6080.315  | 7515.951  | BF311880  | 42420.242 | 25561.195 | NM_003658 | 388.808   | 450.036   |
| AA437226  | 11327.025 | 13045.46  | NM_000078 | 877.287   | 1075.708  | BC000401  | 21569.199 | 18379.518 |
| R36143    | 1208.657  | 1354.056  | NM_016075 | 927.675   | 682.912   | NM_006425 | 7308.382  | 5824.468  |
| XM_056359 | 1527.385  | 2423.285  | NM_001360 | 15093.612 | 16148.261 | BF344046  | 14598.436 | 9224.58   |
| D10353/NM | 4286.621  | 4485.735  | AK026656  | 21672.102 | 20440.652 | AF432218  | 44614.762 | 58267.449 |
| M15042    | 21491.543 | 20934.041 | NM_000751 | 55620.594 | 55259.727 | NM_004286 | 11854.9   | 15192.788 |
| AK056843  | 1975.005  | 2027.176  | NM_005071 | 2267.461  | 2312.393  | AL133644  | 30386.982 | 27996.098 |
| U49928    | 48802.172 | 57207.625 | NM_016730 | 59484.484 | 60129.004 | NM_002706 | 6479.646  | 7598.622  |
| AK096645  | 50604.539 | 61660.793 | AL035297  | 2384.431  | 2626.11   | NM_004196 | 1245.291  | 1029.165  |
| AK092859  | 2425.822  | 2241.623  | NM_004408 | 14144.302 | 14062.949 | NM_006876 | 3729.379  | 3905.456  |
| NM_018291 | 5977.324  | 6546.729  | AJ131244  | 3837.892  | 3469.027  | NM_000293 | 2738.95   | 2553.087  |
| NM_005530 | 17028.152 | 15503.598 | NM_002532 | 10633.07  | 9700.654  | NM_003748 | 2156.351  | 3180.841  |
| NM_006896 | 14024.503 | 13287.581 | NM_012388 | 10360.272 | 9512.893  | NM_005396 | 550.718   | 677.324   |
| NM_012200 | 6918.042  | 6240.855  | NM_016651 | 5752.133  | 4512.304  | NM_012266 | 2456.79   | 2239.844  |
| NM_001724 | 6489.623  | 5107.2    | NM_001671 | 893.669   | 1014.312  | AF153821  | 6137.89   | 4007.806  |
| BE906724  | 1551.834  | 1510.968  | NM_019843 | 5775.144  | 6323.835  | NM_013370 | 5100.814  | 5669.12   |
| NM_002283 | 4291.53   | 3584.788  | NM_016192 | 13156.91  | 11780.586 | NM_001374 | 3019.807  | 3062.912  |
| AJ276095  | 6217.625  | 5750.733  | BE878426  | 59178.332 | 57458.355 | NM_003310 | 7939.906  | 8336.227  |
| NM_004819 | 6148.775  | 7544.702  | AK022385  | 51062.539 | 46031.133 | AK024461  | 16504.307 | 21426.34  |
| NM_007184 | 4575.215  | 6298.657  | NM_002775 | 1578.954  | 1307.485  | AK025485  | 2875.023  | 2521.436  |

|           |           |           |           |           |           |           |           |           |
|-----------|-----------|-----------|-----------|-----------|-----------|-----------|-----------|-----------|
| NM_005291 | 4236.68   | 4810.495  | AK024584  | 11917.961 | 6590.374  | NM_017635 | 9245.688  | 11668.646 |
| AF253316  | 1163.139  | 1406.16   | NM_003504 | 7086.458  | 7425.439  | X62534    | 3087.13   | 3221.675  |
| NM_005855 | 1621.415  | 1554.266  | NM_013298 | 8494.466  | 7903.122  | AF027147  | 54694.172 | 56065.109 |
| NM_002923 | 7230.656  | 8468.66   | NM_007267 | 4378.085  | 3487.54   | M62399    | 10849.577 | 14348.291 |
| NM_006794 | 1186.453  | 1568.507  | AK022830  | 399.629   | 565.054   | NM_002357 | 2141.166  | 1986.974  |
| NM_018653 | 1609.459  | 1879.451  | Z36816    | 10153.385 | 9315.422  | U71600    | 9374.043  | 12550.524 |
| NM_005385 | 11072.915 | 13817.426 | NM_005865 | 16446.283 | 15196.499 | NM_004472 | 2691.046  | 2231.859  |
| NM_007232 | 11680.642 | 12819.529 | NM_006413 | 13375.543 | 11172.021 | AB037862  | 4659.107  | 4592.344  |
| NM_003027 | 1359.768  | 1635.292  | NM_017684 | 1112.438  | 1155.934  | NM_005392 | 2746.908  | 2830.287  |
| NM_016257 | 336.789   | 351.922   | AK025542  | 13603.511 | 12560.03  | AL133572  | 12096.666 | 13576.737 |
| NM_002717 | 8530.497  | 7507.064  | AF207547  | 1476.44   | 1607.487  | AK022500  | 14382.474 | 14421.494 |
| NM_012114 | 1065.133  | 1681.533  | NM_002768 | 21743.537 | 28168.719 | NM_003447 | 1561.143  | 1312.584  |
| NM_014486 | 992.024   | 1382.712  | NM_003691 | 3146.552  | 2946.647  | NM_005014 | 3891.93   | 4561.727  |
| NM_003025 | 27618.9   | 26918.824 | NM_002950 | 22448.621 | 21509.859 | NM_006944 | 874.915   | 898.18    |
| U52051    | 510.208   | 600.687   | NM_002318 | 10546.45  | 9591.15   | NM_004407 | 2080.925  | 1895.928  |
| NM_020179 | 15404.691 | 15828.267 | NM_001433 | 1208.54   | 882.777   | NM_000070 | 10846.822 | 10600.65  |
| NM_004306 | 46339.879 | 44436.496 | NM_003134 | 58257.555 | 54639.891 | NM_001202 | 3598.006  | 3870.615  |
| NM_001153 | 870.298   | 934.841   | NM_004314 | 6180.826  | 5596.577  | AB037804  | 928.009   | 1174.093  |
| NM_006786 | 19220.744 | 16754.129 | NM_018247 | 18104.846 | 16339.453 | U34249    | 3787.522  | 3702.997  |
| NM_006205 | 6886.359  | 6300.027  | NM_017979 | 22638.943 | 24842.598 | NM_003285 | 55760.418 | 56934.441 |
| NM_004283 | 2276.308  | 2006.836  | NM_005898 | 29229.67  | 32808.113 | AI200114  | 4164.352  | 4236.485  |
| NM_004163 | 9077.131  | 9652.662  | NM_002889 | 57199.168 | 58598.926 | M74220    | 743.462   | 1319.167  |
| AK026308  | 1633.689  | 2022.163  | NM_019644 | 1997.306  | 2218.795  | M23254    | 2492.912  | 3944.163  |
| NM_013337 | 7227.179  | 9631.666  | NM_006791 | 4531.326  | 4814.646  | BE618539  | 16311.775 | 16810.313 |
| NM_004193 | 3645.198  | 5692.274  | AJ278348  | 39157.52  | 57491.957 | R28062    | 10321.65  | 14044.316 |
| NM_002803 | 22083.773 | 22708.748 | NM_015872 | 2638.346  | 2682.966  | U38545    | 860.144   | 1466.626  |
| NM_005508 | 9594.18   | 12992.396 | AI285199  | 35780.828 | 41014.965 | AI627464  | 1534.922  | 1659.584  |
| NM_018485 | 2094.087  | 2743.427  | BI906283  | 471.321   | 269.547   | BI756258  | 8179.296  | 10234.5   |
| NM_006788 | 2695.84   | 3626.974  | AA757170  | 1221.655  | 1486.557  | AI342225  | 52882.695 | 60969.816 |
| NM_016568 | 2226.122  | 2180.867  | L07738    | 3665.034  | 2616.941  | AA634103  | 51516.988 | 62170.191 |
| NM_002987 | 482.172   | 895.216   | Z48054    | 7276.55   | 7030.808  | J04599    | 3656.883  | 3924.913  |
| AB033102  | 10108.57  | 13138.407 | H90415    | 18618.988 | 17322.842 | AF110020  | 11514.381 | 10621.507 |
| NM_014774 | 5633.785  | 6791.273  | AA676470  | 50652.824 | 58183.059 | AA707922  | 418.217   | 458.76    |
| NM_014143 | 30943.275 | 32455.77  | AA430512  | 11478.479 | 10868.793 | AA608557  | 14351.549 | 16224.562 |
| M55646    | 1559.1    | 1801.305  | M38258    | 2773.37   | 2700.888  | AL050095  | 27880.379 | 32159.979 |
| NM_006112 | 43091.242 | 33512.563 | AA457155  | 58337.277 | 59532.133 | U03272    | 1267.878  | 1366.861  |
| NM_000879 | 265.304   | 577.558   | BM014365  | 1769.91   | 1938.408  | NM_012253 | 22284.01  | 20963.549 |
| M12807    | 4948.757  | 4883.02   | H91842    | 1061.528  | 1238.08   | NM_000258 | 56978.031 | 59012.371 |
| NM_001765 | 930.573   | 915.519   | U78045    | 9404.651  | 8150.33   | AB033055  | 47506.328 | 39540.164 |
| NM_003361 | 1084.218  | 1138.301  | AA878561  | 64909.395 | 59699.52  | AF311287  | 34805.797 | 33538.855 |
| NM_012099 | 7428.199  | 7370.289  | BF688309  | 2059.129  | 1875.061  | NM_003098 | 4388.25   | 4385.217  |
| NM_018684 | 23156.006 | 26894.914 | AI538525  | 2316.838  | 2182.299  | NM_014781 | 8221.478  | 7862.507  |
| NM_017983 | 3590.516  | 2787.899  | AF222980  | 1978.404  | 1749.221  | BU629989  | 3314.693  | 2294.261  |
| AF116909  | 2322.898  | 2361.513  | AK026758  | 8537.346  | 8941.646  | X87896    | 4193.474  | 3827.069  |
| NM_000282 | 3535.622  | 3373.016  | NM_012201 | 7082.641  | 7306.622  | M88310    | 5516.678  | 5134.879  |
| NM_000532 | 26901.869 | 28949.008 | AB046774  | 1210.137  | 1370.654  | D16856    | 678.119   | 959.652   |
| NM_016341 | 3391.55   | 4698.146  | AF159092  | 3017.026  | 2790.898  | NM_000042 | 4511.891  | 7382.002  |
| AF231916  | 2376.463  | 3595.613  | BC007318  | 5002.766  | 5134.838  | AF035787  | 18159.375 | 18007.348 |
| NM_003501 | 10038.264 | 12369.398 | M36693    | 14046.727 | 16275.105 | AF090405  | 827.922   | 1460.716  |
| AK022654  | 6901.275  | 9005.219  | NM_016292 | 26575.01  | 27596.643 | NM_005024 | 823.125   | 667.677   |
| BC002905  | 8182.115  | 9584.376  | NM_002601 | 7789.758  | 8065.051  | NM_003403 | 3870.546  | 2611.858  |
| NM_018091 | 17944.549 | 26085.854 | NM_001781 | 2590.591  | 1683.858  | NM_014808 | 8505.724  | 10740.988 |
| NM_001108 | 17640.457 | 18621.143 | NM_014432 | 9318.54   | 8782.361  | AB006627  | 9012.213  | 12267.842 |

|           |           |           |           |           |           |           |           |           |
|-----------|-----------|-----------|-----------|-----------|-----------|-----------|-----------|-----------|
| NM_001637 | 696.792   | 1101.298  | NM_001558 | 12933.443 | 10900.81  | NM_000416 | 15183.293 | 20940.762 |
| NM_016630 | 32705.895 | 36115.012 | NM_006953 | 617.117   | 708.004   | NM_003382 | 897.49    | 1161.036  |
| NM_014291 | 7255.039  | 9995.984  | NM_002530 | 2938.23   | 2756.22   | NM_002965 | 1141.927  | 1530.417  |
| NM_014631 | 2852.256  | 4244.744  | U96173    | 3562.443  | 3799.854  | AB007883  | 20243.688 | 21115.732 |
| NM_001089 | 2898.7    | 3710.648  | NM_018941 | 5509.693  | 6081.028  | NM_006391 | 1395.753  | 1082.257  |
| NM_000120 | 495.107   | 806.219   | NM_020241 | 950.932   | 952.345   | AY009397  | 57236.43  | 62948.121 |
| AF172327  | 54019.008 | 61548.305 | BE730585  | 4660.738  | 4608.833  | NM_007037 | 58013.84  | 59172.137 |
| NM_001676 | 2777.027  | 3991.389  | NM_001980 | 2164.488  | 2418.689  | NM_016335 | 9560.75   | 8897.441  |
| NM_000220 | 2777.42   | 2670.886  | NM_005954 | 1770.657  | 1530.75   | NM_003165 | 11145.249 | 10346.072 |
| NM_001679 | 33625.996 | 31401.098 | NM_012471 | 1691.347  | 1511.178  | NM_003906 | 54922.355 | 53945.203 |
| NM_004046 | 54146.039 | 60252.313 | NM_001321 | 16289.47  | 13369.618 | AL359590  | 55954.723 | 56346.117 |
| NM_004983 | 860.119   | 1075.7    | AB018264  | 18440.068 | 17358.096 | NM_002861 | 19289.607 | 18147.49  |
| U09384    | 4346.656  | 4920.219  | NM_006911 | 1481.514  | 1410.016  | NM_003080 | 16139.54  | 11794.685 |
| NM_006860 | 9252.246  | 8962.606  | U92544    | 16877.678 | 13986.16  | NM_004042 | 620.854   | 508.645   |
| NM_004794 | 13654.508 | 15861.936 | AB023147  | 4507.398  | 5411.614  | NM_013268 | 1099.924  | 1511.184  |
| NM_018291 | 5452.326  | 5802.656  | NM_016615 | 36342.246 | 37884.516 | NM_002645 | 7923.883  | 11127.696 |
| NM_005530 | 17541.184 | 15746.097 | NM_005630 | 2579.107  | 3569.032  | AB033027  | 5091.071  | 5358.543  |
| NM_006899 | 18543.924 | 27183.932 | NM_001046 | 839.49    | 818.474   | AF320293  | 1881.84   | 1542.578  |
| NM_012200 | 7760.089  | 7904.343  | AK023106  | 5108.223  | 5312.807  | NM_001171 | 3246.419  | 3796.953  |
| NM_001724 | 6994.712  | 6367.17   | NM_016730 | 59755.066 | 61892.391 | S81591    | 1162.202  | 1577.395  |
| NM_000150 | 676.08    | 714.273   | AL035297  | 2382.364  | 2773.802  | NM_006323 | 23565.07  | 29672.627 |
| AB023152  | 1611.495  | 1659.219  | NM_004408 | 17115.121 | 17075.91  | NM_016466 | 6203.525  | 8029.475  |
| NM_006212 | 2466.224  | 2773.802  | AJ131244  | 3634.791  | 4101.64   | NM_001493 | 12806.811 | 14303.78  |
| AK022872  | 6577.098  | 8653.327  | NM_002532 | 9670.982  | 10407.771 | NM_003716 | 1420.359  | 1235.212  |
| AK024272  | 7457.164  | 8323.238  | NM_012388 | 11420.307 | 11043.817 | NM_014841 | 1722.71   | 2639.4    |
| NM_016381 | 2846.555  | 3287.523  | NM_016651 | 7052.959  | 5569.436  | NM_014426 | 14013.056 | 13154.405 |
| AL591715  | 959.212   | 1099.217  | NM_001671 | 1221.315  | 1371.545  | NM_006816 | 55612.863 | 53885.992 |
| NM_007254 | 485.869   | 990.542   | NM_019843 | 7675.817  | 9249.348  | AK026518  | 58792.73  | 58763.816 |
| NM_018042 | 4882.498  | 4837.38   | NM_016192 | 17003.709 | 15720.3   | AF132734  | 48401.738 | 43648.23  |
| BE741525  | 3199.169  | 3981.291  | BE878426  | 60671.352 | 58191.285 | NM_018379 | 8492.922  | 7781.433  |
| BF030555  | 9197.058  | 10671.528 | NM_001745 | 45103.141 | 43442.473 | NM_016403 | 51497.109 | 51807     |
| NM_012433 | 12735.385 | 14612.829 | NM_003825 | 12365.103 | 15151.406 | NM_015603 | 2969.732  | 2647.088  |
| NM_005605 | 3442.652  | 2851.85   | AK025006  | 14274.294 | 13684.917 | AK021788  | 1369.269  | 1396.379  |
| NM_002576 | 7564.637  | 7305.146  | AF218014  | 52885.145 | 51667.215 | NM_001921 | 15569.691 | 14758.439 |
| NM_003582 | 3937.086  | 3959.675  | NM_006678 | 14675.675 | 13862.802 | NM_006230 | 17470.117 | 16629.535 |
| AF057354  | 3009.461  | 2148.219  | AY007729  | 62737.602 | 61406.906 | NM_014699 | 26968.621 | 19083.932 |
| AF169351  | 5223.364  | 4356.901  | NM_014424 | 1194.821  | 1136.777  | NM_013400 | 26512.164 | 23938.889 |
| M14200    | 56008.582 | 62491.559 | NM_004314 | 7395.21   | 7810.418  | AK026257  | 5044.426  | 5747.701  |
| CY3Cy5    | 2877.813  | 299.383   | NM_018247 | 17407.143 | 16474.564 | AK023836  | 30306.842 | 38542.219 |
| NM_000623 | 620.574   | 366.87    | NM_017979 | 20457.715 | 22472.58  | NM_018109 | 7082.61   | 10395.228 |
| NM_000941 | 5282.627  | 2735.186  | NM_005898 | 26486.238 | 29988.176 | AJ299442  | 14039.5   | 19183.703 |
| AK026844  | 1313.625  | 542.01    | NM_002889 | 55134.398 | 58752.719 | AB040897  | 1625.026  | 1679.791  |
| AK026735  | 1587.909  | 947.44    | AF078866  | 3509.152  | 3145.1    | NM_000129 | 7024.827  | 8529.97   |
| AL110104  | 29349.561 | 28854.514 | BF311880  | 42738.336 | 32551.648 | NM_003762 | 11354.605 | 13938.478 |
| AK027056  | 3321.392  | 1681.992  | NM_000078 | 1440.793  | 1037.233  | NM_018446 | 6936.004  | 8967.025  |
| AK024294  | 1849.776  | 868.989   | NM_016075 | 937.152   | 762.487   | NM_000187 | 1789.158  | 2640.797  |
| AL110126  | 5711.483  | 2623.477  | NM_001360 | 15443.116 | 15559.764 | NM_014465 | 2960.942  | 3146.709  |
| AF052172  | 3872.92   | 1848.738  | AK026656  | 24090.732 | 22795.367 | D87292    | 3171.031  | 4652.009  |
| AB014573  | 4168.508  | 1943.253  | AJ276207  | 19994.975 | 20749.104 | NM_005498 | 5820.259  | 7884.734  |
| AK025418  | 1253.847  | 739.367   | AB011131  | 10527.639 | 10945.865 | NM_004407 | 1757.417  | 2136.51   |
| AB020643  | 586.985   | 259.943   | NM_000749 | 1266.228  | 1516.259  | NM_000070 | 11541.234 | 12389.026 |
| AK025496  | 4815.476  | 2168.024  | NM_000751 | 48158.27  | 50566.074 | NM_001202 | 3988.992  | 4479.157  |
| NM_000623 | 486.843   | 233.648   | NM_014849 | 11460.468 | 10614.981 | AB037804  | 1081.684  | 1273.642  |



|           |           |           |           |           |           |           |           |           |
|-----------|-----------|-----------|-----------|-----------|-----------|-----------|-----------|-----------|
| NM_000941 | 4651.005  | 2345.903  | NM_001042 | 8458.605  | 7435.978  | U34249    | 3897.889  | 3607.346  |
| SR1       | 67603.117 | 64479.703 | NM_012229 | 4504.909  | 4933.076  | NM_003288 | 57686.043 | 57332.637 |
| CY3Cy5    | 3684.705  | 363.483   | NM_005071 | 2681.649  | 4013.699  | AI200114  | 4163.193  | 4276.821  |
| L10404    | 1268.748  | 613.05    | AF222980  | 2040.979  | 1811.692  | M74220    | 501.655   | 534.542   |
| AF283776  | 4453.557  | 1632.473  | AK026758  | 11382.127 | 11323.439 | M23254    | 2408.404  | 3140.825  |
| L10123    | 13230.32  | 4599.642  | NM_012201 | 6066.454  | 6459.477  | BE618539  | 15038.823 | 17347.383 |
| D16877    | 931.685   | 1314.959  | AB046774  | 1214.858  | 1193.927  | R28062    | 8407.814  | 11070.96  |
| L19363    | 501.681   | 260.631   | AK022385  | 52938.445 | 47662.816 | U38545    | 577.23    | 1106.108  |
| AL049992  | 727.144   | 599.991   | NM_002775 | 1799.337  | 1220.929  | AI627464  | 1749.135  | 3043.673  |
| AL109781  | 2268.986  | 1252.361  | AK024584  | 14246.414 | 10186.918 | BI756258  | 7670.696  | 10069.413 |
| AK027237  | 620.77    | 450.825   | NM_003504 | 7051.778  | 7262.947  | AI342225  | 53584.785 | 58106.434 |
| AF075017  | 440.925   | 212.396   | NM_013298 | 8291.37   | 7066.965  | AA634103  | 55481.668 | 59412.625 |
| AK027104  | 2314.332  | 482.891   | NM_007267 | 4815.967  | 3833.403  | J04599    | 3059.551  | 3669.002  |
| AL133090  | 45157.781 | 12861.737 | AK022830  | 433.524   | 496.791   | AF110020  | 10322.048 | 7372.633  |
| AF085867  | 4384.069  | 1124.908  | Z36816    | 10702.136 | 10019.15  | AA707922  | 525.673   | 709.978   |
| AF086510  | 4293.853  | 1896.96   | NM_005865 | 19154.318 | 21371.938 | AA608557  | 15686.769 | 16269.116 |
| Z36779    | 4320.138  | 2889.977  | NM_006413 | 11470.711 | 10363.925 | AL050095  | 29788.053 | 26593.881 |
| NM_017513 | 945.947   | 1388.254  | NM_017684 | 921.014   | 904.63    | U03272    | 1225.567  | 1280.467  |
| NM_017822 | 10900.633 | 8033.782  | AK025542  | 11959.112 | 10990.051 | AF075085  | 65593.141 | 62442.902 |
| AK024520  | 9598.041  | 4556.997  | AF207547  | 1387.74   | 1536.082  | NM_005892 | 8445.05   | 8611.211  |
| AK024592  | 830.206   | 244.847   | NM_002768 | 16302.788 | 16340.739 | NM_006478 | 1744.601  | 2682.801  |
| AK024904  | 2376.558  | 1045.036  | NM_003691 | 3558.1    | 3488.891  | AF311287  | 38795.129 | 36928.938 |
| AK025030  | 1743.215  | 2494.54   | NM_002950 | 20866.086 | 21034.953 | NM_003098 | 5441.171  | 6718.158  |
| AF032897  | 1508.035  | 2605.813  | NM_002318 | 12601.21  | 14329.581 | NM_014781 | 9264.807  | 8693.898  |
| NM_014967 | 2834.111  | 4977.266  | NM_001433 | 1020.807  | 1389.039  | BU629989  | 4855.371  | 4227.571  |
| AK022915  | 7642.958  | 12438.974 | AK022278  | 667.425   | 509.691   | X87896    | 5169.203  | 5792.513  |
| AL355711  | 391.673   | 158.791   | NM_003134 | 60107.367 | 59580.723 | M88310    | 6611.198  | 6554.472  |
| AK025851  | 1767.979  | 397.429   | CY3Cy5    | 1589.55   | 139.192   | D16856    | 788.982   | 649.657   |
| AJ011409  | 32813.578 | 7859.363  | NM_022095 | 1750.988  | 1872.51   | NM_000042 | 4718.913  | 4489.605  |
| V00541    | 254.919   | 115.439   | AF088061  | 3934.607  | 4207.149  | AF035787  | 20090.613 | 25610.611 |
| AF086202  | 25433.041 | 17179.748 | AF086425  | 924.898   | 1380.467  | AF090405  | 558.606   | 505.678   |
| AK022352  | 566.941   | 367.858   | AF086286  | 3224.911  | 2983.237  | NM_005024 | 630.446   | 889.519   |
| AF085979  | 34096.414 | 19361.279 | AF086376  | 3536.53   | 3163.705  | NM_003403 | 4022.2    | 4061.611  |
| AK024293  | 1576.506  | 1134.982  | AF086410  | 823.921   | 965.677   | NM_014808 | 8564.106  | 11127.094 |
| AK000036  | 15785.558 | 8544.567  | AK022997  | 12970.77  | 13806.115 | AB006627  | 8745.898  | 10171.2   |
| AK000769  | 936.96    | 612.22    | NM_017617 | 3873.646  | 3690.943  | NM_000416 | 15083.055 | 15182.42  |
| AK000924  | 1157.868  | 1112.571  | AF131830  | 1465.877  | 1796.117  | NM_003382 | 787.071   | 962.66    |
| AK022252  | 897.135   | 896.324   | NM_014811 | 722.269   | 1127.025  | NM_002965 | 1051.053  | 1708.321  |
| AK000114  | 4564.316  | 3948.274  | AK027232  | 6880.074  | 6958.366  | AB007883  | 21345.861 | 21838.025 |
| AK000797  | 227.827   | 264.059   | NM_022095 | 1123.544  | 784.406   | NM_006391 | 1221.367  | 794.512   |
| AK000952  | 1247.129  | 807.515   | SR2       | 27748.264 | 26884.523 | AY009397  | 58279.027 | 63770.066 |
| U17628    | 3684.979  | 5126.591  | SR4       | 9768.783  | 8467.756  | NM_007037 | 58794.234 | 58631.332 |
| AF119867  | 5074.686  | 4476.423  | SR6       | 897.512   | 819.89    | NM_005014 | 2911.303  | 3150.845  |
| AL357205  | 13641.708 | 10789.065 | SR8       | 3363.206  | 7964.201  | NM_006944 | 1059.94   | 1346.246  |
| AF124819  | 2720.151  | 3575.321  | SR10      | 11213.085 | 2643.728  | NM_003165 | 12650.725 | 13293.198 |
| AL133074  | 2208.992  | 3260.036  | CY3Cy5    | 723.191   | 118.713   | NM_003906 | 57113.02  | 58215.141 |
| NM_018121 | 3048.131  | 3865.163  | AF086103  | 2732.829  | 2884.315  | AL359590  | 53655.332 | 57696.707 |
| AB050477  | 8944.843  | 2541.235  | AL080135  | 1778.602  | 1620.295  | NM_002861 | 20567.293 | 25199.781 |
| AK000152  | 2054.696  | 749.566   | AK023158  | 2111.905  | 1958.12   | NM_003080 | 18025     | 16049.362 |
| L09092    | 672.585   | 352.118   | AK000580  | 419.963   | 531.107   | NM_004042 | 708.041   | 951.853   |
| NM_012132 | 2922.088  | 2180.897  | AF085852  | 5120.824  | 4930.025  | NM_013268 | 1280.099  | 1585.205  |
| NM_012128 | 1610.453  | 1164.783  | AF042838  | 1993.078  | 2282.825  | NM_002645 | 8174.132  | 7876.603  |
| AK024881  | 795.936   | 1468.398  | AL137511  | 658.052   | 863.879   | AB033027  | 5070.152  | 7479.493  |

|           |           |           |           |           |           |           |           |           |
|-----------|-----------|-----------|-----------|-----------|-----------|-----------|-----------|-----------|
| AK025716  | 3672.675  | 2863.541  | AF075031  | 477.698   | 862.592   | AF320293  | 2179.846  | 2121.931  |
| NM_020186 | 12663.937 | 16611.193 | AF075062  | 9769.179  | 7822.849  | NM_001171 | 4012.41   | 5170.852  |
| AF090947  | 1513.182  | 1603.154  | NM_004188 | 1374.608  | 1262.534  | S81591    | 1298.696  | 2537.155  |
| BC016962  | 515.238   | 506.123   | AF147381  | 9481.356  | 8079.241  | NM_006323 | 26334.752 | 30182.818 |
| AJ272196  | 31702.527 | 25318.766 | AB002452  | 183.044   | 416.943   | NM_016466 | 6065.377  | 5640.059  |
| X58162    | 1004.899  | 1122.643  | AK027101  | 26510.719 | 17839.01  | NM_001493 | 11174.169 | 10703.901 |
| AK022825  | 657.962   | 733.888   | AK024358  | 3800.744  | 2638.283  | NM_003716 | 1268.94   | 1427.421  |
| AV756662  | 710.97    | 890.232   | AF088075  | 1415.151  | 842.021   | NM_014841 | 1329.246  | 1698.042  |
| NM_014702 | 332.005   | 507.319   | AK026376  | 1838.972  | 1000.964  | NM_014426 | 14932.635 | 15025.754 |
| AK001937  | 4545.129  | 5278.767  | AK027097  | 1274.153  | 1859.849  | NM_006816 | 55954.531 | 61705.508 |
| AL365517  | 1196.536  | 1987.479  | AK024613  | 748.417   | 552.006   | AK026518  | 59182.914 | 65441.449 |
| AF086494  | 49321.914 | 18800.357 | AL117437  | 674.526   | 731.264   | NM_000258 | 59471.563 | 63483.355 |
| BI769977  | 1056.723  | 554.74    | AK027198  | 3055.683  | 3014.243  | AB033055  | 47813.633 | 42962.535 |
| AL137567  | 887.369   | 576.448   | AL162077  | 556.03    | 422.957   | NM_016403 | 54387.016 | 55936.188 |
| AK024913  | 4864.868  | 3704.666  | AK022404  | 697.388   | 788.858   | NM_015603 | 3296.584  | 3312.816  |
| AB007961  | 2395.966  | 2135.211  | AF147426  | 2596.848  | 2964.096  | AK021788  | 1919.313  | 2385.688  |
| NM_005547 | 990.238   | 989.079   | BC019667  | 28295.148 | 30290.514 | NM_001921 | 16896.588 | 17399.693 |
| S81973    | 413.227   | 545.753   | AK026026  | 22616.078 | 20791.932 | NM_006230 | 20682.367 | 24299.707 |
| NM_001173 | 1827.383  | 1659.684  | AF085941  | 18589.037 | 19142.172 | NM_014695 | 32912.48  | 30816.891 |
| AB020656  | 5513.048  | 4474.463  | Z69892    | 15147.463 | 14094.484 | NM_013400 | 31398.723 | 28875.859 |
| AK023648  | 944.421   | 693.237   | AK023590  | 732.055   | 519.183   | AK026257  | 5263.867  | 3809.424  |
| NM_000412 | 1347.28   | 1337.183  | AF087961  | 844.966   | 811.281   | AK023836  | 26059.15  | 22957.709 |
| AF077033  | 7337.588  | 5540.608  | AL137309  | 2566.966  | 2349.053  | NM_018105 | 7028.138  | 10422.053 |
| NM_017786 | 539.245   | 392.663   | AL137475  | 1234.929  | 954.801   | AJ299442  | 13405.202 | 21297.244 |
| NM_004991 | 1148.691  | 759.711   | AL161956  | 3797.054  | 2408.926  | AB040897  | 1573.694  | 2109.508  |
| NM_014191 | 347.716   | 367.238   | AL390176  | 2166.898  | 1744.368  | NM_000125 | 6492.086  | 6952.211  |
| AK026708  | 15605.289 | 18398.234 | AL137356  | 1891.487  | 2953.735  | NM_003762 | 11518.751 | 9529.46   |
| NM_017903 | 7208.609  | 6192.342  | AL137547  | 2107.983  | 2146.849  | NM_018446 | 6795.336  | 7122.136  |
| NM_018074 | 10776.473 | 11727.468 | AK021994  | 1220.828  | 798.979   | NM_000187 | 1779.654  | 1853.707  |
| NM_000909 | 13646.602 | 11766.701 | Z70763    | 2287.254  | 1044.818  | NM_014465 | 2589.043  | 2130.715  |
| U31737    | 1523.198  | 1707.071  | AK023802  | 26236.424 | 15375.191 | D87292    | 3425.479  | 3121.646  |
| AK024828  | 6813.847  | 10731.438 | AK021981  | 491.081   | 436.37    | NM_005495 | 5859.542  | 4808.563  |
| AF009315  | 3296.24   | 5256.14   | AL359567  | 3106.147  | 3585.082  | NM_016335 | 13328.588 | 10210.589 |
| NM_019013 | 1447.306  | 813.557   | NM_017726 | 9856.333  | 10995.578 | NM_001202 | 4742.141  | 4793.86   |
| L37711    | 680.285   | 551.488   | AK021977  | 751.819   | 955.665   | AB037804  | 1330.199  | 1324.156  |
| S70313    | 6883.277  | 6612.877  | AK026716  | 718.262   | 778.752   | U34249    | 3849.438  | 4241.129  |
| AK021607  | 2118.747  | 2080.367  | AL049325  | 20823.068 | 20139.131 | NM_003285 | 49679.012 | 54978.391 |
| AK025860  | 837.231   | 1602.935  | AK023952  | 1257.383  | 1504.813  | AI200114  | 4544.46   | 4994.2    |
| NM_000216 | 1927.062  | 4318.286  | AK000787  | 1144.251  | 1297.779  | M74220    | 630.26    | 770.214   |
| NM_014216 | 7215.771  | 6248.088  | AF090885  | 28079.285 | 44835.691 | M23254    | 2497.949  | 2880.726  |
| NM_003010 | 4523.825  | 3140.023  | AF161342  | 513.224   | 795.444   | BE618539  | 16007.845 | 16354.895 |
| NM_006871 | 1385.774  | 1068.948  | NM_016646 | 366.504   | 316.391   | R28062    | 9491.279  | 9050.693  |
| NM_019074 | 3829.104  | 2860.847  | NM_014082 | 2958.266  | 3292.997  | U38545    | 790.738   | 1481.418  |
| NM_018494 | 10116.714 | 8474.046  | AF100636  | 881.99    | 1439.395  | AI627464  | 1893.054  | 2922.702  |
| AK000006  | 1090.498  | 971.677   | AK022197  | 2462.026  | 2494.517  | BI756258  | 7267.767  | 8227.498  |
| NM_001115 | 2226.743  | 1534.809  | AK021970  | 881.76    | 490.657   | AI342225  | 54839.691 | 62245.453 |
| NM_014921 | 1694.55   | 1210.178  | AK022066  | 77956.586 | 63577.949 | J04599    | 3818.512  | 3486.601  |
| NM_016581 | 31170.133 | 22326.174 | AK022224  | 1837.768  | 1265.296  | AF110020  | 7923.656  | 5533.709  |
| NM_013255 | 5030.157  | 2880.063  | AK022359  | 1069.52   | 997.452   | AA707922  | 1428.819  | 1801.99   |
| NM_007183 | 1385.507  | 892.611   | AK022000  | 2963.75   | 2162.667  | AA608557  | 15267.765 | 15225.274 |
| AJ238243  | 11556.706 | 12465.104 | AK022129  | 9099.005  | 6071.376  | AL050095  | 29006.904 | 26440.924 |
| J05046    | 3701.135  | 4867.351  | AK022263  | 4749.312  | 2978.984  | U03272    | 1565.765  | 1321.862  |
| NM_012318 | 6012.596  | 10134.342 | AK022384  | 1381.444  | 1008.171  | AF075085  | 60916.281 | 63739.543 |

|           |           |           |           |           |           |           |           |           |
|-----------|-----------|-----------|-----------|-----------|-----------|-----------|-----------|-----------|
| NM_002751 | 2735.967  | 5980.636  | AF086304  | 32539.83  | 48043.352 | NM_005892 | 11897.246 | 12044.615 |
| NM_003816 | 8542.87   | 3539.087  | AB032976  | 2751.578  | 3644.434  | NM_006478 | 2074.35   | 2038.023  |
| AK022635  | 725.279   | 436.272   | AF301222  | 21155.627 | 22777.783 | AF132734  | 38518.93  | 33338.98  |
| NM_004912 | 5540.742  | 5834.749  | AF215981  | 16180.217 | 19170.664 | NM_018379 | 7757.3    | 6251.836  |
| U79304    | 9711.056  | 11384.434 | NM_000732 | 36561.727 | 42116.336 | NM_000042 | 5370.3    | 6072.808  |
| NM_016267 | 648.235   | 707.572   | AF130044  | 1532.434  | 1638.963  | AF035787  | 17653.791 | 17750.27  |
| NM_004671 | 2994.136  | 3626.522  | AF116709  | 1333.355  | 1161.618  | AF090405  | 626.395   | 1036.434  |
| NM_006526 | 12162.527 | 10119.153 | AF087980  | 1065.603  | 1063.904  | NM_005024 | 705.918   | 926.421   |
| U35622    | 1537.681  | 1570.215  | AK000257  | 1006.208  | 1048.357  | NM_003403 | 4220.024  | 3501.694  |
| NM_007045 | 5139.543  | 5574.309  | NM_006160 | 10849.885 | 9601.347  | NM_014808 | 9686.294  | 11741.283 |
| NM_003627 | 13009.571 | 12281.538 | NM_000529 | 2431.661  | 2710.341  | AB006627  | 7987.206  | 7665.214  |
| NM_012145 | 43477.969 | 34014.492 | AL110159  | 458.974   | 356.999   | NM_000416 | 15525.842 | 13079.16  |
| AF305779  | 6421.35   | 4277.845  | AF009259  | 1158.379  | 1165.756  | NM_003382 | 546.805   | 752.31    |
| AF225416  | 17218.037 | 12170.486 | AF009260  | 1452.348  | 1175.336  | NM_002965 | 1191.531  | 1887.177  |
| NM_016231 | 8850.938  | 5513.363  | NM_003079 | 2037.734  | 1638.742  | AB007883  | 20203.42  | 25651.604 |
| NM_002093 | 7346.683  | 4947.825  | NM_017902 | 3284.961  | 2337.257  | NM_006391 | 1295.416  | 1109.809  |
| AB042555  | 9281.166  | 5956.865  | NM_017835 | 31198.994 | 47273.551 | AY009397  | 57342.926 | 64251.227 |
| NM_001729 | 988.285   | 765.302   | NM_018347 | 9550.094  | 10671.189 | NM_007037 | 55213.785 | 55589.695 |
| NM_017763 | 4788.25   | 3523.45   | AF086223  | 386.045   | 389.353   | NM_001646 | 1179.609  | 1100.408  |
| NM_013975 | 4610.198  | 4687.085  | AK024986  | 555.838   | 687.399   | NM_005492 | 9283.051  | 10469.491 |
| NM_003843 | 13114.203 | 11894.114 | AK026730  | 1908.061  | 2059.985  | AF038196  | 5929.473  | 6611.933  |
| NM_012216 | 8459.91   | 7194.987  | AK024739  | 2335.728  | 2148.167  | NM_004855 | 54789.379 | 56491.801 |
| NM_005338 | 2222.854  | 2736.903  | AK098681  | 2039.179  | 2409.077  | NM_016352 | 8579.347  | 9550.174  |
| X73502    | 4898.181  | 7354.468  | AK026772  | 6018.101  | 5764.646  | NM_005014 | 3023.617  | 4023.761  |
| NM_020445 | 23230.957 | 35372.637 | NM_014260 | 16830.713 | 20423.451 | NM_006944 | 1477.193  | 1821.388  |
| NM_016376 | 28960.771 | 20595.623 | AK026458  | 1235.884  | 1830.48   | NM_004407 | 2247.786  | 1855.601  |
| AB046848  | 3159.343  | 1652.53   | AK022266  | 586.14    | 822.317   | NM_000070 | 14264.558 | 11739.977 |
| AL133057  | 11429.454 | 8894.795  | AK024154  | 12481.795 | 13878.584 | NM_003304 | 994.916   | 734.978   |
| U04845    | 12587.377 | 8956.32   | AF086341  | 1271.212  | 1171.897  | AB023156  | 318.632   | 187.161   |
| NM_018103 | 9819.896  | 10323.144 | AK026672  | 1088.728  | 1236.895  | NM_006323 | 28307.873 | 28611.717 |
| NM_000312 | 1703.949  | 1622.62   | S83282    | 66746.914 | 68177.563 | NM_016466 | 6079.45   | 4963.485  |
| NM_003963 | 2827.503  | 3113.421  | AK024164  | 55339.203 | 52879.055 | NM_001493 | 11929.647 | 7513.547  |
| AC009729  | 1472.538  | 1049.646  | AF052130  | 6427.418  | 7387.222  | NM_003716 | 1462.99   | 1752.991  |
| NM_016598 | 6503.768  | 6054.115  | AF130090  | 31882.631 | 27764.67  | NM_014841 | 1622.204  | 2166.619  |
| AL136719  | 7924.799  | 6384.734  | AL096727  | 2646.408  | 2690.656  | NM_014426 | 15733.21  | 18582.525 |
| NM_014109 | 14995.931 | 11912.364 | AL080110  | 4941.101  | 4883.275  | NM_006816 | 53399.301 | 59136.676 |
| NM_012160 | 6925.708  | 4717.863  | NM_020425 | 1236.643  | 1722.923  | AK026518  | 50155.332 | 56791.793 |
| NM_006357 | 48319.172 | 32826.582 | AK024076  | 6646.171  | 10920.778 | NM_000258 | 50932.645 | 57021.48  |
| NM_014248 | 54607.113 | 45694.039 | M87940    | 1672.759  | 2040.35   | AB033055  | 48013.07  | 44161.109 |
| AK027070  | 2287.975  | 2191.074  | L77588    | 4375.504  | 3193.368  | AF311287  | 41874.305 | 37773.418 |
| AF129533  | 1087.668  | 1302.731  | NM_014273 | 24270.385 | 36398.348 | NM_003098 | 4885.509  | 6912.483  |
| NM_003341 | 9215.813  | 9788.64   | AF039442  | 1997.148  | 2251.395  | NM_014781 | 8807.416  | 10117.948 |
| NM_017785 | 1748.314  | 1263.496  | NM_004680 | 1911.348  | 2342.958  | BU629989  | 5078.801  | 5214.263  |
| NM_006249 | 4590.338  | 4564.354  | AF104260  | 546.638   | 724.527   | M88310    | 5682.904  | 5083.938  |
| NM_018318 | 858.879   | 664.541   | NM_005671 | 1339.156  | 1604.786  | D16856    | 709.792   | 406.278   |
| AB020640  | 1742.271  | 2303.235  | NM_017409 | 995.307   | 1233.409  | NM_014465 | 3268.657  | 3455.639  |
| D29954    | 26600     | 39098.934 | NM_019625 | 29136.701 | 30677.359 | D87292    | 4119.51   | 4016.294  |
| AF007131  | 3490.359  | 6041.642  | NM_006729 | 4878.526  | 5219.22   | NM_005498 | 5589.623  | 5261.047  |
| NM_006839 | 4064.168  | 6974.98   | NM_006071 | 2488.449  | 3071.217  | NM_016335 | 9374.812  | 8191.355  |
| NM_000223 | 1602.321  | 1981.091  | NM_012236 | 12888.589 | 12576.681 | NM_003165 | 12577.229 | 11024.612 |
| NM_005851 | 2359.683  | 1247.712  | NM_013939 | 746.176   | 850.247   | NM_003906 | 47359.484 | 51089.199 |
| AF119256  | 3402.656  | 2411.891  | AB038651  | 4474.241  | 4299.788  | AL359590  | 54636.805 | 56716.309 |
| NM_007015 | 593.195   | 324.838   | AL359603  | 1280.437  | 1423.829  | NM_002861 | 21987.25  | 20184.479 |

|           |           |           |           |           |           |           |           |           |
|-----------|-----------|-----------|-----------|-----------|-----------|-----------|-----------|-----------|
| NM_00518C | 11665.963 | 8272.176  | NM_01394C | 626.022   | 484.203   | NM_00308C | 18192.84  | 22874.016 |
| NM_00341C | 8490.816  | 9225.118  | AL117643  | 2902.827  | 2769.405  | NM_00404C | 775.891   | 897.294   |
| NM_00714E | 4846.288  | 3908.98   | AF075063  | 254.689   | 209.109   | NM_01326E | 1344.141  | 1560.055  |
| NM_00222E | 6584.654  | 5786.737  | AF069135  | 15410.133 | 12110.678 | NM_00264E | 8348.412  | 8184.322  |
| S69027    | 7293.803  | 4881.319  | AK026524  | 1641.813  | 1295.386  | AB033027  | 4556.114  | 4399.06   |
| NM_00173C | 8286.533  | 7955.059  | AB011157  | 5862.762  | 6367.003  | AK021805  | 40020.496 | 41395.637 |
| AK026290  | 13767.798 | 11499.283 | U17632    | 1443.796  | 1229.414  | AB014550  | 5219.039  | 6319.093  |
| AB014589  | 2988.02   | 2888.521  | AK026764  | 2232.694  | 1580.971  | AF320294  | 17661.574 | 19779.246 |
| AF248649  | 2585.954  | 2429.428  | AF113700  | 4594.851  | 3118.062  | AF320293  | 1965.135  | 2030.385  |
| U37146    | 18957.076 | 15694.462 | X91348    | 66007.031 | 71950.984 | AF161436  | 9360.028  | 12513.4   |
| NM_01208E | 4911.399  | 3564.581  | Z36505    | 5432.857  | 7614.709  | NM_02040C | 13515.112 | 18320.316 |
| AB040431  | 22649.41  | 15461.795 | NM_001854 | 3124.184  | 3648.857  | NM_00429E | 4439.228  | 5843.541  |
| NM_000991 | 61284.719 | 67262.438 | NM_017913 | 2740.8    | 3525.13   | NM_001171 | 3090.71   | 3160.569  |
| NM_016034 | 50466.969 | 40808.426 | NM_00275E | 20663.215 | 21834.748 | NM_00225C | 16227.631 | 13418.351 |
| NM_01828E | 53425.359 | 64512.93  | AK024799  | 66645.078 | 66975.227 | S81591    | 935.253   | 498.004   |
| AK022393  | 33243.313 | 21392.027 | NM_000924 | 10072.5   | 11240.889 | AF075085  | 58370.523 | 60222.895 |
| AK026302  | 23376.893 | 12471.276 | NM_00333C | 10049.609 | 11430.684 | NM_00589C | 7491.286  | 6634.948  |
| NM_012214 | 4218.776  | 2613.153  | NM_002481 | 465.904   | 475.657   | NM_00647E | 1548.858  | 1941.792  |
| AF049656  | 9567.401  | 5541.774  | NM_003647 | 749.517   | 708.404   | AF132734  | 44200.23  | 35969.238 |
| NM_00196E | 2147.878  | 2630.718  | NM_00169E | 63295.16  | 59172.688 | NM_01837E | 8589.077  | 7058.008  |
| NM_01613E | 10453.791 | 10147.44  | AB006589  | 339.468   | 349.187   | NM_01640C | 47705.668 | 50552.309 |
| Z36833    | 59228.512 | 65490.469 | NM_018351 | 1526.283  | 1447.394  | NM_01560C | 3289.086  | 2674.431  |
| AW963246  | 1074.22   | 1133.709  | AK023019  | 808.929   | 779.942   | AK021788  | 1598.602  | 1429.57   |
| NM_01435E | 11302.522 | 10512.44  | NM_147171 | 7284.33   | 5307.241  | NM_001921 | 13504.65  | 13107.498 |
| AF072810  | 4966.444  | 4682.963  | AF238083  | 40005.918 | 30425.451 | NM_00623C | 18070.893 | 20018.08  |
| L19778    | 1662.862  | 1687.229  | NM_01638E | 4844.488  | 3234.73   | NM_01469E | 33792.285 | 36315.141 |
| AF174482  | 4427.625  | 4128.388  | AB046783  | 1460.509  | 1132.682  | NM_01340C | 29140.381 | 27809.473 |
| Y08836    | 1390.936  | 1493.127  | NM_00084E | 1835.263  | 1407.075  | AK026257  | 4699.151  | 3360.966  |
| NM_00352E | 920.975   | 920.964   | NM_004604 | 65436.074 | 61118.434 | AK023836  | 24879.584 | 21062.82  |
| NM_01776E | 1396.814  | 1394.337  | NM_01496E | 9594.765  | 8246.155  | NM_01810E | 5688.944  | 6392.696  |
| D85131    | 40226.242 | 32789.273 | NM_00488C | 52663.738 | 48815.387 | AJ299442  | 14284.453 | 15761.879 |
| U52097    | 4528.2    | 8329.112  | AL390148  | 21748.707 | 17541.424 | AB040897  | 1820.308  | 1664.251  |
| NM_00341E | 6381.281  | 14140.592 | AK024055  | 1356.622  | 908.888   | NM_00012E | 7775.948  | 9031.821  |
| X74497    | 696.353   | 727.006   | NM_01337E | 1684.16   | 3157.758  | NM_00376C | 14253.089 | 15991.509 |
| NM_01221C | 2015.22   | 929.041   | NM_017964 | 3274.496  | 4622.69   | NM_01844E | 5873.04   | 4928.538  |
| U10072    | 5490.878  | 2546.97   | NM_01627C | 534       | 446.951   | NM_000187 | 2232.631  | 2426.019  |
| AF222749  | 11306.719 | 6255.769  | NM_01642E | 7010.538  | 8650.619  | CY3Cy5    | 1896.844  | 124.614   |
| NM_001321 | 3761.99   | 5007.462  | NM_00408C | 13818.363 | 11348.125 | NM_01753C | 5639.308  | 5034.111  |
| AB018264  | 2297.421  | 2358.354  | NM_01603E | 43604.941 | 37268.992 | AF086184  | 35216.684 | 28344.896 |
| NM_006911 | 1888.524  | 1693.549  | NM_001184 | 4173.595  | 3930.615  | NM_01827E | 25455.584 | 23436.586 |
| U92544    | 1778.191  | 1507.779  | NM_01553C | 9802.917  | 12017.729 | AL049266  | 8654.094  | 8422.956  |
| NM_019644 | 709.393   | 624.933   | NM_01623E | 6144.698  | 7759.642  | AK021560  | 1973.973  | 1709.438  |
| NM_006791 | 6883.404  | 8792.028  | NM_00175E | 957.015   | 648.015   | AF088045  | 2041.326  | 1831.566  |
| L07738    | 1653.506  | 1385.91   | BE546276  | 932.936   | 749.732   | AF007149  | 3045.565  | 3226.111  |
| Z48054    | 11772.035 | 10361.68  | NM_00472E | 11346.08  | 9097.725  | NM_01470E | 1575.602  | 1857.208  |
| H90415    | 5599.213  | 5014.162  | NM_015997 | 15498.43  | 15739.164 | AK001469  | 7319.643  | 8250.093  |
| AA676470  | 6768.982  | 5541.369  | NM_001167 | 12946.474 | 13629.46  | AF035318  | 1946.111  | 2118.095  |
| AA430512  | 14438.397 | 14025.841 | NM_012115 | 10071.926 | 9669.545  | NM_01545E | 8470.978  | 8736.823  |
| AA457155  | 6518.883  | 10111.107 | NM_00493C | 58661.813 | 52473.527 | AK025056  | 4549.213  | 6166.287  |
| BM014365  | 3131.936  | 5419.29   | M96577    | 20910.1   | 20065.453 | AF140710  | 8713.95   | 8241.69   |
| H91842    | 1934.665  | 3743.021  | NM_01325E | 62935.563 | 51345.41  | NM_01753C | 5704.273  | 7287.661  |
| U78045    | 1068.287  | 2369.234  | NM_00384C | 6513.363  | 5952.125  | SR2       | 48610.914 | 52085.164 |
| AA878561  | 51618.578 | 62047.004 | NM_016184 | 2148.97   | 1984.102  | SR4       | 16349.431 | 17851.027 |

|           |           |           |           |           |           |           |           |           |
|-----------|-----------|-----------|-----------|-----------|-----------|-----------|-----------|-----------|
| BF688309  | 779.267   | 927.173   | L11238    | 16975.205 | 14740.188 | SR6       | 1667.114  | 2218.356  |
| AI538525  | 1943.387  | 1014.01   | AK025684  | 1520.795  | 1698.23   | SR8       | 6065.896  | 25232.543 |
| NM_005205 | 59013.559 | 30835.396 | NM_012205 | 14846.398 | 12879.323 | SR10      | 21648.936 | 9417.609  |
| BE878426  | 48683.414 | 56005.207 | K02046    | 4227.167  | 3518.88   | CY3Cy5    | 1886.069  | 107.519   |
| NM_001745 | 55125.891 | 41388.242 | U87223    | 3456.339  | 1700.248  | AL157477  | 5040.662  | 4372.53   |
| NM_003825 | 16719.877 | 20798.541 | NM_002217 | 1913.463  | 1938.889  | AB002318  | 3057.226  | 2769.759  |
| AK025006  | 18236.363 | 17540.984 | NM_004995 | 5276.18   | 6511.628  | AL357535  | 5398.346  | 5593.16   |
| AF218014  | 8032.266  | 7547.064  | NM_000386 | 13119.123 | 14250.055 | AL049951  | 2963.054  | 2617.971  |
| AF159092  | 712.281   | 621.679   | NM_007231 | 1026.187  | 1033.853  | AK024963  | 1645.002  | 1555.927  |
| M36693    | 17150.236 | 15858.993 | NM_001190 | 5932.419  | 5911.586  | AK023725  | 2402.633  | 2713.692  |
| NM_016292 | 16444.613 | 18627.084 | NM_005271 | 21001.25  | 24047.828 | AK022936  | 15171.195 | 15004.992 |
| NM_002601 | 9137.017  | 10291.776 | NM_015654 | 7906.411  | 10010.275 | AK024385  | 7850.688  | 6816.845  |
| NM_001781 | 2904.381  | 3495.158  | NM_012244 | 2951.837  | 3607.629  | AL137727  | 5112.947  | 4773.068  |
| AF035121  | 1471.312  | 1685.413  | NM_004341 | 2429.631  | 2901.818  | L17327    | 1710.974  | 2738.935  |
| NM_014432 | 12656.894 | 31028.193 | AB082521  | 16725.639 | 14946.521 | AF074986  | 2422.966  | 3094.569  |
| NM_001555 | 4093.654  | 2497.299  | AL050182  | 4836.061  | 4367.611  | AF075004  | 528.992   | 815.581   |
| NM_006953 | 703.831   | 770.057   | NM_020040 | 1760.207  | 2274.218  | AL049240  | 11004.713 | 11692.644 |
| NM_002530 | 620.322   | 489.441   | NM_002374 | 7660.398  | 11847.27  | U80773    | 2450.15   | 2480.206  |
| NM_018941 | 1590.801  | 954.709   | AK026940  | 7318.541  | 7564.004  | AK021745  | 4673.255  | 5796.479  |
| NM_005895 | 36786.398 | 31152.846 | AF155117  | 12223.1   | 10265.806 | L38937    | 8715.721  | 9814.961  |
| NM_002885 | 8933.753  | 8511.137  | AB014527  | 867.926   | 828.255   | U90907    | 1735.343  | 2207.365  |
| AF078866  | 7708.459  | 6275.219  | NM_004411 | 2628.366  | 1950.123  | AK024327  | 2454.414  | 2702.187  |
| BF311880  | 1778.3    | 1526.593  | NM_015935 | 11365.549 | 9686.177  | AK021700  | 1056.516  | 1788.19   |
| NM_000075 | 490.503   | 551.849   | NM_000740 | 1677.91   | 2734.94   | AK024395  | 668.438   | 969.564   |
| NM_016075 | 1459.059  | 1372.62   | NM_017843 | 9131.78   | 9397.091  | AK000801  | 10843.82  | 10318.731 |
| NM_014064 | 1646.609  | 832.654   | U10485    | 1156.715  | 754.659   | AK025109  | 8092.368  | 6824.541  |
| NM_001360 | 25391.529 | 27436.18  | AK025326  | 47601.078 | 18048.395 | AK026057  | 4058.482  | 4696.91   |
| AK026656  | 2893.139  | 2152.457  | NM_016325 | 11989.418 | 15501.797 | AK026666  | 672.314   | 773.181   |
| NM_000751 | 4434.006  | 3443.759  | NM_017544 | 44688.977 | 49201.41  | AK026713  | 1086.406  | 1143.203  |
| NM_005071 | 997.358   | 895.143   | NM_003153 | 2812.246  | 3150.437  | AK021627  | 5557.045  | 5386.295  |
| NM_016730 | 1800.754  | 1529.14   | NM_016285 | 2402.772  | 2598.844  | NM_019595 | 601.669   | 478.966   |
| AL035297  | 2357.016  | 2413.031  | NM_014707 | 1614.435  | 1576.415  | AF085859  | 3374.391  | 2889.409  |
| NM_004405 | 2306.268  | 2287.526  | AF025771  | 2078.566  | 2000.373  | AF085888  | 505.843   | 517.359   |
| AJ131244  | 5688.326  | 9872.423  | NM_018215 | 2662.537  | 2849.041  | AK026307  | 2189.433  | 2139.269  |
| NM_012385 | 3587.835  | 2775.893  | AB033110  | 6909.881  | 6625.974  | AF075047  | 1406.441  | 1471.573  |
| NM_016651 | 877.858   | 989.631   | NM_005083 | 53472.254 | 56802.742 | AL049260  | 659.118   | 815.734   |
| NM_001671 | 399.328   | 576.563   | NM_007187 | 18875.121 | 17846.951 | AL049975  | 1589.155  | 1638.855  |
| NM_019843 | 4042.882  | 2801.372  | NM_001825 | 620.436   | 652.316   | AL080067  | 3263.466  | 2668.825  |
| NM_016192 | 14071.38  | 6419.952  | NM_018983 | 15748.054 | 14985.555 | AL117464  | 6022.771  | 6035.766  |
| AB046774  | 1806.553  | 1484.086  | NM_003096 | 9145.591  | 8272.897  | AL080160  | 2100.977  | 2078.426  |
| AK022385  | 38356.82  | 42255.336 | NM_007275 | 10000.083 | 9698.295  | AL049997  | 28076.053 | 26093.27  |
| NM_002775 | 1442.079  | 1993.238  | BE390833  | 34664.09  | 39542.965 | AK024118  | 3052.73   | 4151.385  |
| AK024584  | 14057.666 | 8200.511  | NM_004730 | 19711.021 | 25062.465 | X89657    | 726.257   | 975.164   |
| NM_003504 | 9664.022  | 9227.178  | NM_000801 | 7600.369  | 7833.109  | AK024509  | 3409.1    | 3005.635  |
| NM_013295 | 9447.847  | 10866.68  | NM_006115 | 61453.773 | 56829.145 | AL050185  | 795.533   | 673.677   |
| NM_007267 | 8789.864  | 11740.745 | NM_005801 | 6523.771  | 4430.094  | NM_017705 | 2131.373  | 1689.563  |
| AK022830  | 411.652   | 733.016   | NM_018195 | 4362.948  | 6026.421  | AF049615  | 2609.607  | 2241.192  |
| Z36816    | 25191.918 | 22990.74  | NM_001535 | 31902.83  | 34323.145 | NM_014355 | 54106.703 | 49681.402 |
| NM_005865 | 3516.82   | 3954.651  | NM_012267 | 896.733   | 984.489   | AF009282  | 18500.65  | 17985.813 |
| NM_006413 | 16091.868 | 14272.755 | NM_016616 | 695.112   | 765.438   | AF024704  | 16005.344 | 15583.188 |
| NM_017684 | 2157.965  | 1850.759  | NM_016576 | 7446.881  | 7711.043  | AF056431  | 1659.241  | 1727.715  |
| AK025542  | 857.337   | 694.134   | NM_004213 | 3865.091  | 4572.6    | NM_016412 | 5956.056  | 5650.635  |
| AF207547  | 459.989   | 371.03    | NM_001925 | 59506.207 | 56760.078 | AF009293  | 2621.271  | 2828.66   |

|           |           |           |           |           |           |           |           |           |
|-----------|-----------|-----------|-----------|-----------|-----------|-----------|-----------|-----------|
| NM_00276E | 6733.698  | 7861.5    | NM_00090E | 3332.066  | 3341.613  | NM_00415E | 59597.102 | 63960.758 |
| NM_003691 | 4777.682  | 9635.588  | NM_00048C | 5829.29   | 6259.087  | AF056444  | 25408.057 | 27831.695 |
| NM_00295C | 29715.938 | 39658.535 | AF254084  | 54204.566 | 55045.121 | AK000989  | 6242.449  | 7220.421  |
| NM_00231E | 3275.594  | 2091.791  | AK022648  | 704.4     | 839.282   | NM_01806E | 609.447   | 564.925   |
| NM_00143E | 1013.226  | 923.387   | AK022976  | 1671.758  | 1999.256  | AK002210  | 10175.852 | 10800.148 |
| NM_003134 | 47741.297 | 54526.129 | AB048791  | 16630.967 | 14536.588 | AK021677  | 7372.641  | 8089.364  |
| NM_004314 | 7357.782  | 5121.029  | NM_003107 | 1705.837  | 1704.121  | AK001057  | 1912.329  | 2298.97   |
| NM_018247 | 17420.643 | 14633.777 | NM_006874 | 6554.106  | 6530.014  | AK001808  | 641.596   | 571.114   |
| NM_01797E | 6342.865  | 4002.817  | AB046777  | 2458.176  | 2260.077  | AK021471  | 1779.844  | 1779.63   |
| NM_006911 | 1848.852  | 2254.697  | AJ251844  | 36410.832 | 38147.613 | AK021709  | 1866.73   | 1747.02   |
| U92544    | 1493.226  | 1430.615  | D16815    | 2843.323  | 2434.546  | AL359563  | 3351.398  | 3323.158  |
| NM_019644 | 688.133   | 691.955   | NM_00188C | 2263.726  | 2010.469  | NM_005304 | 980.242   | 1094.99   |
| NM_006791 | 7691.507  | 15411.339 | AB028943  | 7201.32   | 5559.226  | NM_014477 | 7248.908  | 6391.657  |
| AJ278348  | 48476.199 | 44957.238 | NM_006194 | 6885.458  | 4332.018  | AF086478  | 5609.708  | 5524.442  |
| NM_01587E | 541.054   | 841.372   | AK001603  | 37582.082 | 47243.266 | AF086022  | 1485.042  | 1434.008  |
| AI285199  | 619.44    | 1152.724  | U71601    | 5319.169  | 5936.081  | AK021514  | 68217.469 | 62784.352 |
| AA757170  | 247.013   | 580.154   | AK025985  | 61783.633 | 58831.969 | AJ008134  | 18108.977 | 18301.627 |
| L07738    | 1690.305  | 1887.182  | NM_01325E | 5485.675  | 4114.461  | S71486    | 6818.267  | 6787.742  |
| Z48054    | 12577.011 | 13099.313 | NM_00414E | 3348.011  | 2385.104  | L33808    | 34924.848 | 24376.748 |
| H90415    | 5550.445  | 5118.375  | X66087    | 4217.086  | 4664.714  | AJ008117  | 24913.162 | 19640.881 |
| AA457155  | 5829.188  | 9847.395  | L09070    | 765.551   | 1081.965  | AJ008147  | 58733.879 | 54582.449 |
| BM014365  | 2187.787  | 3534.57   | NM_00959C | 16310.163 | 19160.766 | AK024369  | 2315.26   | 2032.608  |
| H91842    | 1244.47   | 1044.067  | AL133037  | 1431.266  | 1717.522  | AL049244  | 829.739   | 1140.731  |
| U78045    | 769.383   | 769.677   | NM_02035C | 3918.899  | 4535.125  | L43345    | 3486.922  | 5071.116  |
| AA878561  | 52054.027 | 58561.824 | NM_00035C | 12273.087 | 13294.315 | AF180297  | 12157.823 | 12466.931 |
| BF688309  | 859.388   | 881.341   | X91103    | 23520.779 | 24995.535 | AK023245  | 1544.334  | 1681.134  |
| AI538525  | 1899.428  | 1445.161  | AA419164  | 2522.709  | 2995.578  | AF147303  | 1293.441  | 1128.494  |
| AF222980  | 971.758   | 888.087   | L35251    | 8642.949  | 12157.179 | AF086224  | 646.884   | 697.16    |
| AK026758  | 5088.175  | 5379.313  | BE910395  | 11102.202 | 10727.109 | S56365    | 61397.125 | 58635.176 |
| NM_012201 | 8597.552  | 5585.918  | N46828    | 23992.037 | 22973.58  | AF186017  | 491.762   | 610.37    |
| NM_00174E | 49301.723 | 39868.461 | BI908302  | 52705.258 | 58061.602 | AK023607  | 2589.274  | 2094.688  |
| NM_00382E | 15960.37  | 18635.713 | AA460969  | 4707.164  | 4712.857  | AK026874  | 4313.695  | 3640.975  |
| AK025006  | 18511.119 | 18925.643 | BG695859  | 4381.319  | 4264.309  | AK024178  | 1085.387  | 1549.157  |
| AF218014  | 8103.85   | 8193.373  | M85079    | 14573.458 | 15507.351 | AF088033  | 7977.301  | 7509.8    |
| NM_00667E | 1208.524  | 1334.393  | AA457671  | 28553.748 | 24800.701 | NM_02042E | 7926.532  | 6981.757  |
| AY007729  | 20286.254 | 19374.023 | X07437    | 23634.479 | 18573.178 | AJ227897  | 857.23    | 828.072   |
| NM_014424 | 973.254   | 1317.247  | NM_000641 | 4659.231  | 2933.505  | AK023628  | 691.304   | 642.31    |
| AF159092  | 631.369   | 968.526   | AE006466  | 29500.377 | 29501.518 | AY007156  | 2795.556  | 2226.202  |
| BC007318  | 6264.678  | 6744.504  | BC008737  | 62683.684 | 57612.828 | AF086408  | 61227.238 | 57750.648 |
| M36693    | 18802.375 | 23303.922 | BC011655  | 4697.088  | 4256.867  | AK023979  | 9817.075  | 9173.12   |
| NM_01629E | 18558.006 | 23849.268 | BC002396  | 8333.615  | 7366.69   | NM_017847 | 3962.36   | 3549.45   |
| NM_002601 | 8719.55   | 10172.381 | NM_00361E | 3548.403  | 2484.398  | AL049675  | 4910.255  | 4656.838  |
| U62858    | 380.916   | 573.368   | NM_01898E | 3990.303  | 5425.27   | AL050151  | 1770.007  | 1904.887  |
| NM_001781 | 2077.999  | 2443.743  | NM_006074 | 61282.359 | 60252.961 | NM_003537 | 42687.043 | 46509.281 |
| AF035121  | 774.337   | 513.218   | AF208232  | 9777.557  | 11391.204 | AF056419  | 44010.82  | 40355.57  |
| NM_01443E | 9313.18   | 9622.87   | NM_00298E | 14681.776 | 14932.224 | AF074983  | 1781.484  | 1847.109  |
| NM_00155E | 3662.699  | 3370.469  | NM_00418E | 2860.081  | 3011.121  | AK021862  | 1171.469  | 1515.981  |
| NM_00695E | 452.442   | 571.078   | NM_01625E | 8405.501  | 10519.246 | AK024177  | 2075.846  | 1974.822  |
| NM_00253C | 373.835   | 397.314   | AF203032  | 24697.992 | 25590.336 | AK024827  | 14339.171 | 14550.139 |
| NM_018941 | 1999.129  | 1762.969  | AB014542  | 30055.826 | 27247.859 | K01564    | 2851.958  | 3160.579  |
| NM_020241 | 516.154   | 519.026   | NM_01464C | 1959.435  | 2870.458  | AB023175  | 3193.179  | 2861.832  |
| NM_001321 | 1820.661  | 2209.073  | Y10518    | 61382.563 | 60838.664 | NM_000737 | 10489.458 | 8109.786  |
| AB018264  | 1254.535  | 1654.398  | AF155135  | 13092.012 | 13493.51  | NM_00083E | 20565.945 | 19943.949 |

|           |           |           |           |           |           |           |           |           |
|-----------|-----------|-----------|-----------|-----------|-----------|-----------|-----------|-----------|
| AF078866  | 7689.986  | 6433.789  | NM_014790 | 3254.259  | 3597.648  | AK024102  | 38061.621 | 47367.813 |
| BF311880  | 1673.577  | 1311.97   | NM_003571 | 33310.34  | 35085.008 | NM_001290 | 1871.897  | 1948.376  |
| NM_000078 | 504.184   | 382.419   | AB032965  | 62722.551 | 62143.137 | AL079273  | 9439.681  | 8263.228  |
| NM_016075 | 1695.658  | 1650.67   | NM_020370 | 1239.303  | 954.29    | NM_005045 | 669.277   | 543.273   |
| NM_001360 | 25682.383 | 29108.236 | NM_004767 | 3829.265  | 3734.618  | AK026129  | 4330.615  | 3701.408  |
| AK026656  | 3786.716  | 4809.365  | BF310159  | 20242.057 | 13642.607 | NM_001743 | 63176.129 | 60096.594 |
| NM_000751 | 6398.242  | 9145.886  | NM_000316 | 369.112   | 384.935   | AK024200  | 586.024   | 600.088   |
| NM_005071 | 1136.9    | 1566.2    | NM_018986 | 3988.665  | 5042.596  | NM_003713 | 28553.281 | 23697.766 |
| NM_016730 | 1579.279  | 2113.435  | AB044934  | 848.541   | 798.629   | D31886    | 10063.672 | 7292.381  |
| AL035297  | 2578.942  | 3533.229  | U27655    | 19868.305 | 14091.7   | U92024    | 1102.107  | 994.17    |
| NM_004408 | 1290.551  | 1745.841  | Z21965    | 61805.453 | 54520.371 | AK023330  | 12395.81  | 10705.751 |
| AJ131244  | 4568.78   | 5256.625  | NM_012427 | 2765.724  | 2136.391  | AF075071  | 4375.403  | 3933.532  |
| NM_002532 | 12927.153 | 11078.145 | AF133424  | 12916.928 | 15867.429 | AL080213  | 651.714   | 793.852   |
| NM_012388 | 4551.944  | 4716.538  | NM_005003 | 29904.055 | 33411.941 | AF147428  | 602.19    | 666.657   |
| NM_016651 | 1245.304  | 1468.437  | AF084560  | 24345.49  | 26363.455 | AF001892  | 2930.907  | 3530.476  |
| NM_001671 | 468.737   | 612.361   | NM_015715 | 2258.916  | 2422.25   | X93500    | 4466.7    | 5579.381  |
| NM_019843 | 5444.313  | 6562.34   | NM_000032 | 26256.896 | 27706.797 | AK026597  | 799.71    | 1563.194  |
| NM_016192 | 15792.8   | 14363.517 | NM_002083 | 5120.205  | 5831.86   | U79271    | 4485.898  | 5752.425  |
| BE878426  | 52054.398 | 58618.844 | NM_002035 | 8145.973  | 9734.276  | NM_019888 | 2557.464  | 2637.197  |
| AK022385  | 34908.984 | 29474.105 | NM_014900 | 4788.376  | 4870.676  | AK024609  | 10972.285 | 11436.533 |
| NM_002775 | 1284.301  | 1693.221  | BF342908  | 3936.575  | 4385.646  | AK023660  | 717.63    | 932.328   |
| AK024584  | 14780.947 | 9258.991  | AF118073  | 871.018   | 1032.001  | NM_018120 | 37385.25  | 29921.354 |
| NM_003504 | 10131.073 | 10119.371 | AK023510  | 9080.234  | 12142.336 | NM_015991 | 3076.892  | 2391.863  |
| NM_013298 | 11178.638 | 13816.14  | NM_004345 | 5266.85   | 7506.066  | NM_005562 | 1812.807  | 1467.296  |
| NM_007267 | 8286.378  | 7612.062  | NM_002232 | 463.013   | 807.452   | NM_004932 | 3336.923  | 3530.858  |
| AK022830  | 779.375   | 945.146   | NM_014570 | 5331.888  | 4912.13   | NM_002350 | 12259.516 | 14905.061 |
| Z36816    | 26887.787 | 26081.361 | NM_014822 | 3508.789  | 3559.934  | NM_012417 | 4033.818  | 4208.028  |
| NM_005865 | 3414.504  | 4461.957  | NM_005296 | 3482.998  | 3250.684  | NM_002546 | 2126.059  | 2012.369  |
| NM_006413 | 18982.463 | 19099.818 | NM_001337 | 505.05    | 484.298   | NM_002966 | 1060.689  | 920.545   |
| NM_017684 | 2034.049  | 2319.679  | NM_003611 | 7808.455  | 5935.279  | BF246606  | 811.922   | 723.765   |
| AK025542  | 875.642   | 946.584   | AB014538  | 13991.677 | 13305.926 | NM_014288 | 1748.081  | 1875.978  |
| AF207547  | 533.781   | 786.536   | NM_006209 | 2814.053  | 2441.877  | NM_002342 | 1589.922  | 1896.589  |
| NM_002768 | 7542.941  | 11417.37  | AK025118  | 6962.422  | 6606.703  | D13631    | 4196.197  | 4211.551  |
| NM_003691 | 4278.796  | 5287.876  | NM_000727 | 5299.798  | 3969.678  | NM_003712 | 8273.123  | 6053.749  |
| NM_002950 | 26761.602 | 28756.863 | NM_002621 | 962.083   | 664.258   | NM_002184 | 3353.708  | 2950.483  |
| NM_002318 | 4270.968  | 4576.091  | NM_002625 | 403.454   | 512.896   | NM_014883 | 7470.83   | 8958.896  |
| NM_001433 | 1127.951  | 1402.008  | NM_004135 | 3861.003  | 4080.375  | NM_017805 | 9998.684  | 11480.388 |
| NM_003134 | 55014.746 | 58516.656 | NM_000203 | 840.803   | 929.41    | NM_000230 | 677.649   | 667.618   |
| NM_004314 | 7249.948  | 5953.027  | NM_013443 | 2237.481  | 2148.406  | M86841    | 1857.632  | 1770.701  |
| NM_018247 | 19064.67  | 16095.569 | NM_000925 | 15819.637 | 17727.705 | U56387    | 1818.209  | 1703.365  |
| NM_017979 | 8192.322  | 8792.978  | NM_000465 | 3262.352  | 4487.392  | AL049296  | 6413.441  | 4727.939  |
| NM_005898 | 35781.293 | 33447.039 | NM_000123 | 3476.656  | 5668.725  | NM_014471 | 61345.988 | 62997.84  |
| NM_002888 | 8428.563  | 9479.938  | AL137501  | 2538.962  | 2528.841  | NM_004397 | 4276.402  | 3056.237  |
| NM_019644 | 661.524   | 750.128   | BE858979  | 1647.208  | 2238.552  | NM_003188 | 717.766   | 704.61    |
| NM_006791 | 7468.171  | 8705.043  | NM_000122 | 3055.158  | 2930.342  | NM_007110 | 3678.122  | 3184.452  |
| AJ278348  | 50648.727 | 52086.797 | NM_006712 | 62506.09  | 60531.066 | NM_001255 | 17554.238 | 17466.539 |
| NM_015872 | 734.23    | 943.836   | NM_006240 | 9992.125  | 9802.687  | U50383    | 32941.824 | 31207.795 |
| AI285199  | 723.752   | 762.909   | NM_007026 | 5371.192  | 5537.066  | AK025085  | 11068.753 | 12304.481 |
| BI906283  | 381.315   | 722.928   | M37712    | 10297.86  | 5154.995  | NM_016317 | 818.174   | 773.915   |
| L07738    | 2026.451  | 2311.572  | NM_002648 | 10851.456 | 6437.134  | NM_006290 | 13320.429 | 18939.805 |
| Z48054    | 12720.142 | 14399.653 | AF070670  | 23103.344 | 10427.426 | AK022290  | 2474.582  | 3590.3    |
| H90415    | 6532.342  | 7221.422  | NM_016156 | 4617.468  | 3699.915  | NM_003680 | 41841.422 | 43046.859 |
| AA676470  | 8795.828  | 9231.44   | NM_016528 | 2463.9    | 2152.355  | AF118124  | 21631.863 | 25528.494 |

|           |           |           |           |           |           |           |           |           |
|-----------|-----------|-----------|-----------|-----------|-----------|-----------|-----------|-----------|
| AA430512  | 17178.828 | 23925.527 | NM_015974 | 2568.064  | 1622.202  | NM_004848 | 29201.842 | 33360.133 |
| M38258    | 975.889   | 1207.149  | NM_014384 | 1741.722  | 1282.434  | AL137527  | 18633.223 | 19954.711 |
| AA457155  | 7538.974  | 9704.422  | NM_002573 | 3313.946  | 2749.275  | AK026068  | 936.648   | 906.952   |
| BM014365  | 2375.506  | 2937.856  | NM_009590 | 16948.576 | 20083.055 | J04974    | 50997.27  | 51882.773 |
| H91842    | 1219.963  | 1289.431  | AL133037  | 1591.94   | 1844.206  | NM_017675 | 7345.917  | 9819.679  |
| U78045    | 729.835   | 937.396   | NM_020350 | 4409.928  | 4838.007  | NM_007014 | 5454.759  | 3993.768  |
| AA878561  | 60180.586 | 69481.586 | NM_000350 | 15510.146 | 14411.617 | AL096740  | 1869.193  | 1235.394  |
| BF688309  | 988.289   | 1262.67   | X91103    | 26842.178 | 24962.881 | AF191545  | 2354.396  | 1949.456  |
| AI538525  | 2402.145  | 3238.731  | AA419164  | 2887.536  | 3501.124  | AL137484  | 725.566   | 709.22    |
| AF222980  | 1227.18   | 1352.798  | L35251    | 6964.885  | 8059.849  | NM_006102 | 738.669   | 1162.226  |
| AK026758  | 5135.927  | 4795.79   | BE910395  | 11760.448 | 11044.213 | NM_000353 | 1564.337  | 1371.474  |
| NM_012201 | 9479.009  | 9513.247  | N46828    | 23532.24  | 23641.498 | AK025425  | 56220.379 | 56772.41  |
| AB046774  | 1676.026  | 1605.73   | BI908302  | 61642.059 | 58882.543 | AK025974  | 52033.676 | 50826.461 |
| AF159092  | 903.969   | 1119.917  | AA460969  | 4787.19   | 5784.132  | NM_016532 | 8976.801  | 8029.268  |
| BC007318  | 6311.51   | 7992.138  | BG695859  | 4374.027  | 4570.453  | X98115    | 4092.635  | 4654.874  |
| M36693    | 18874.797 | 24168.434 | M85079    | 10782.899 | 12773.434 | NM_005781 | 10714.849 | 11575.122 |
| NM_016292 | 18462.85  | 21191.086 | AA457671  | 24032.123 | 22022.006 | BC036740  | 43718.262 | 43811.801 |
| NM_002601 | 9924.563  | 9510.465  | X07437    | 23658.91  | 19810.053 | NM_001747 | 10929.965 | 13100.067 |
| U62858    | 715.379   | 1102.258  | NM_000641 | 4478.181  | 2942.641  | NM_001148 | 28685.186 | 19934.254 |
| NM_001781 | 2608.496  | 2539.222  | AE006466  | 27060.904 | 18760.832 | AF242522  | 19908.898 | 19798.063 |
| NM_014432 | 12312.509 | 14454.88  | BC008737  | 60662.305 | 52919.828 | AJ008152  | 14099.386 | 12524.839 |
| NM_001558 | 5288.486  | 6110.457  | BC011655  | 4042.881  | 2684.387  | NM_003657 | 3422.32   | 3364.463  |
| NM_006953 | 900.735   | 866.148   | BC002396  | 7883.624  | 5989.53   | NM_000588 | 1305.81   | 1097.23   |
| NM_002530 | 815.988   | 940.619   | AF112219  | 8764.755  | 6138.82   | S67970    | 1356.108  | 967.334   |
| U96173    | 3022.615  | 4633.489  | NM_006074 | 55484.945 | 59683.633 | AF221520  | 6847.294  | 6014.03   |
| NM_018941 | 2195.395  | 3303.404  | AF208232  | 9387.38   | 9007.703  | NM_006941 | 59852.699 | 58227.559 |
| NM_020241 | 417.155   | 655.71    | NM_002988 | 12878.126 | 13653.604 | NM_002092 | 20073.986 | 23846.854 |
| BE730585  | 779.004   | 1003.21   | NM_004186 | 2737.773  | 2493.849  | NM_018077 | 4952.917  | 6096.927  |
| NM_001980 | 2395.474  | 2756.243  | NM_016258 | 8746.647  | 9547.973  | NM_018471 | 21072.223 | 22086.064 |
| NM_005954 | 1680.143  | 1926.186  | AF203032  | 27575.373 | 24066.09  | NM_003819 | 20129.053 | 20222.736 |
| NM_012471 | 1110.385  | 1318.496  | AB014542  | 32905.723 | 25789.361 | NM_006560 | 9744.729  | 9855.582  |
| NM_001321 | 2898.065  | 2768.365  | NM_014640 | 1871.112  | 1654.303  | NM_016183 | 16523.359 | 14899.824 |
| AB018264  | 2394.689  | 2455.315  | Y10518    | 58360.973 | 59985.836 | NM_004872 | 11910.903 | 11242.483 |
| NM_006911 | 1933.112  | 2368.598  | AF155135  | 13331.446 | 12612.079 | NM_001958 | 58732.012 | 53604.617 |
| U92544    | 1618.081  | 1557.175  | NM_014790 | 4344.455  | 5712.39   | NM_004757 | 8024.714  | 9929.684  |
| AB023147  | 4263.591  | 5915.872  | NM_003571 | 32632.566 | 34371.328 | NM_015904 | 14047.749 | 13460.331 |
| NM_016615 | 917.321   | 1399.214  | AB032965  | 63605.961 | 59185.156 | NM_001960 | 56290.414 | 56513.164 |
| NM_005630 | 3317.828  | 3773.907  | NM_020370 | 1113.258  | 1159.959  | NM_018122 | 8870.831  | 9258.119  |
| NM_001046 | 1664.783  | 1458.075  | NM_004767 | 3071.33   | 3063.692  | NM_007058 | 21013.084 | 20524.865 |
| AK023106  | 4852.206  | 5795.606  | BF310159  | 20151.457 | 15188.55  | NM_000396 | 1279.538  | 1001.61   |
| NM_016730 | 1917.262  | 2216.033  | NM_000316 | 453.663   | 369.061   | NM_001528 | 8439.741  | 6565.484  |
| AL035297  | 3081.75   | 3394.102  | NM_018986 | 3158.28   | 1874.567  | NM_017947 | 2851.061  | 2494.935  |
| NM_004408 | 1690.69   | 1861.713  | AB044934  | 719.464   | 348.057   | NM_002494 | 45929.793 | 44967.809 |
| AJ131244  | 4657.102  | 5244.636  | U27655    | 19002.932 | 11274.96  | NM_000782 | 2276.359  | 2754.069  |
| NM_002532 | 12961.456 | 12224.794 | Z21965    | 62542.934 | 53672.859 | AK023300  | 7169.94   | 9185.936  |
| NM_012388 | 7138.099  | 7592.6    | NM_012427 | 2777.909  | 2192.62   | NM_018082 | 4104.883  | 4325.599  |
| NM_016651 | 1189.229  | 1102.948  | L09070    | 547.945   | 385.628   | NM_006234 | 48692.945 | 46633.047 |
| NM_001671 | 613.516   | 657.753   | NM_000062 | 8828.337  | 5747.18   | AK026387  | 2623.071  | 2899.565  |
| NM_019843 | 5673.531  | 6429.214  | AF084560  | 22273.48  | 23519.291 | AB028987  | 23694.008 | 23937.434 |
| NM_016192 | 17618.305 | 14913.496 | NM_015715 | 1912.994  | 2261.963  | NM_003594 | 4480.562  | 4065.232  |
| BE878426  | 54903.672 | 58483.375 | NM_000032 | 24614.68  | 28506.998 | NM_005521 | 19303.359 | 19646.861 |
| NM_001745 | 53736.422 | 52019.117 | NM_002083 | 5428.571  | 5802.105  | AF164438  | 33465.77  | 31750.234 |
| NM_003825 | 17340.734 | 20554.6   | NM_002035 | 9574.234  | 10168.471 | AK022284  | 4366.583  | 4282.344  |



|           |           |           |           |           |           |           |           |           |
|-----------|-----------|-----------|-----------|-----------|-----------|-----------|-----------|-----------|
| AK025006  | 19431.566 | 18802.156 | NM_01490C | 5001.931  | 4645.359  | AF060937  | 1092.688  | 755.22    |
| AF218014  | 9257.937  | 8477.353  | BF342908  | 4067.649  | 4273.543  | AB040893  | 10530.939 | 9911.346  |
| NM_00667E | 1533.256  | 1759.746  | AF118073  | 599.078   | 844.588   | AK025844  | 5128.923  | 5531.466  |
| AY007729  | 19670.076 | 16545.34  | AK023510  | 6675.167  | 7236.165  | NM_004024 | 12342.283 | 13477.666 |
| NM_014424 | 912.198   | 977.291   | NM_00434E | 5307.89   | 6027.685  | AF027142  | 57981.43  | 57701.77  |
| NM_004314 | 9865.61   | 10852.941 | NM_002232 | 424.833   | 485.465   | NM_016372 | 59369.586 | 59552.551 |
| NM_018247 | 19638.275 | 18601.693 | NM_01457C | 4931.676  | 5219.226  | AB020705  | 6934.137  | 11351.753 |
| NM_01797E | 8444.765  | 9684.86   | NM_014822 | 3019.38   | 3703.041  | NM_014333 | 952.268   | 946.067   |
| NM_00589E | 35891.012 | 32511.818 | NM_00529E | 3042.623  | 3275.495  | X60201    | 931.897   | 619.803   |
| NM_00288E | 8853.844  | 11492.451 | NM_001337 | 447.6     | 347.982   | AA397813  | 56432.172 | 55684     |
| AF078866  | 10564.408 | 9655.739  | NM_003611 | 6479.241  | 4904.089  | W47350    | 10287.77  | 10913.597 |
| BF311880  | 1863.99   | 1611.429  | AB014538  | 10283.817 | 7945.022  | AF097935  | 735.352   | 1267.055  |
| NM_00007E | 330.526   | 433.284   | NM_00620E | 2913.094  | 2280.28   | AI160964  | 1908.393  | 2520.048  |
| NM_01607E | 1815.934  | 1540.115  | AK025118  | 6977.189  | 5929.126  | W68291    | 25790.629 | 22331.629 |
| NM_00136C | 23713.424 | 23099.156 | NM_000727 | 4707.926  | 3413.384  | N64384    | 12082.313 | 10207.301 |
| AK026656  | 3563.712  | 3552.184  | NM_002621 | 989.389   | 873.837   | H-X 53655 | 4347.728  | 3982.362  |
| AJ276207  | 32654.334 | 30507.402 | NM_00538E | 11768.835 | 10222.892 | H-U 05770 | 14253.377 | 12826.35  |
| AB011131  | 9011.575  | 10458.839 | NM_01898E | 4264.375  | 3934.861  | H-M 65199 | 44652.992 | 35182.117 |
| NM_00074E | 421.26    | 696.296   | NM_000203 | 619.027   | 790.375   | H-M 32315 | 4364.985  | 3479.547  |
| NM_000751 | 6387.065  | 6439.428  | NM_013443 | 2078.823  | 1713.622  | H-V00536M | 7907.776  | 7506.594  |
| NM_01484E | 2235.803  | 2304.412  | NM_00092E | 15444.632 | 18267.975 | H-D85429M | 18118.93  | 21790.689 |
| NM_00104E | 10358.541 | 8149.88   | NM_00046E | 3235.571  | 4011.827  | BF439832  | 4267.9    | 4508.63   |
| NM_01222E | 5238.84   | 5670.046  | NM_000123 | 3932.841  | 5245.862  | BG819162  | 4266.627  | 4134.879  |
| NM_005071 | 1281.567  | 1471.935  | AL137501  | 2119.73   | 2610.167  | NM_01208E | 56184.836 | 55419.52  |
| AF222980  | 1344.707  | 1737.51   | BE858979  | 1719.088  | 2071.395  | NM_00013E | 1830.513  | 1473.744  |
| AK026758  | 4754.198  | 5879.786  | NM_000122 | 3572.404  | 4598.401  | NM_006664 | 8793.441  | 8035.555  |
| NM_012201 | 9846.784  | 10466.783 | NM_006712 | 60097.574 | 56085.988 | NM_00241E | 1045.683  | 1232.902  |
| AB046774  | 1928.037  | 2135.142  | NM_00624C | 9640.784  | 8368.876  | NM_00272E | 4075.529  | 4241.957  |
| AK022385  | 37909.387 | 34969.051 | NM_00702E | 5666.663  | 5716.763  | NM_01773E | 10889.64  | 9878.271  |
| NM_00277E | 1464.674  | 1546.747  | M37712    | 10572.54  | 6114.371  | AB033044  | 38717.488 | 34805.418 |
| AK024584  | 15068.04  | 9835.494  | NM_00264E | 9682.399  | 4814.248  | AB014564  | 3545.642  | 3916.409  |
| NM_003504 | 9385.105  | 7900.246  | AF070670  | 16049.48  | 4961.838  | NM_02023C | 8340.243  | 10167.134 |
| NM_01329E | 10216.526 | 9877.449  | NM_01615E | 4419.153  | 3697.302  | NM_00676E | 54825.707 | 61762.234 |
| NM_007267 | 8168.058  | 8232.838  | NM_01652E | 2538.434  | 2354.492  | NM_00635E | 3022.708  | 4133.762  |
| AK022830  | 671.839   | 1003.649  | NM_015974 | 2886.515  | 2171.462  | NM_01643C | 2427.417  | 3381.723  |
| Z36816    | 25517.816 | 22381.361 | NM_014384 | 1941.067  | 2173.465  | NM_004447 | 12022.944 | 13404.295 |
| NM_00586E | 3181.847  | 2690.923  | NM_002573 | 4248.753  | 5044.503  | NM_001204 | 9105.149  | 10516.68  |
| NM_006413 | 15662.622 | 13077.454 | AL133037  | 1557.606  | 1985.292  | BF131321  | 5396.361  | 4911.718  |
| NM_017684 | 1922.638  | 1902.783  | NM_02035C | 3980.924  | 4639.953  | NM_01654C | 1065.324  | 897.403   |
| AK025542  | 806.498   | 846.806   | NM_00035C | 14773.448 | 17680.898 | NM_01211E | 6518.078  | 7167.138  |
| AF207547  | 950.584   | 1039.707  | X91103    | 28370.438 | 32385.316 | NM_00002C | 19934.336 | 18894.783 |
| NM_00276E | 8306.899  | 8849.039  | AA419164  | 2904.812  | 3389.085  | AB033091  | 15184.922 | 12081.054 |
| NM_003691 | 4982.421  | 4402.185  | L35251    | 8134.047  | 10022.747 | NM_004557 | 27864.502 | 30338.039 |
| NM_00295C | 29208.709 | 24856.078 | BE910395  | 12522.099 | 12780.277 | NM_00374E | 6654.996  | 4693.727  |
| NM_00231E | 5604.911  | 5427.865  | N46828    | 26127.697 | 28367.564 | NM_005094 | 5816.241  | 4799.043  |
| NM_001433 | 1305.462  | 1157.189  | BI908302  | 52434.832 | 56778.961 | BE382905  | 1470.092  | 1203.247  |
| AK022278  | 1314.882  | 930.689   | AA460969  | 5648.542  | 6443.235  | NM_00215E | 26581.127 | 25348.381 |
| NM_003134 | 57354.559 | 61916.031 | BG695859  | 4998.819  | 5629.881  | NM_001701 | 826.04    | 783.673   |
| CY3Cy5    | 1249.346  | 173.334   | M85079    | 13769.579 | 16699.141 | AK022558  | 5228.173  | 5326.124  |
| NM_02209E | 2574.839  | 1956.376  | AA457671  | 27929.078 | 25124.303 | NM_00647E | 57487.957 | 57114.172 |
| AF088061  | 1505.508  | 1279.996  | X07437    | 21935.973 | 20267.123 | AK023787  | 6271.99   | 5924.477  |
| AF086286  | 4059.386  | 3715.655  | NM_000641 | 4317.61   | 3503.575  | NM_002133 | 6433.124  | 6967.814  |
| AF086376  | 1138.831  | 1155.161  | AE006466  | 22993.582 | 12347.832 | NM_015697 | 11117.394 | 11119.277 |

|           |           |           |           |           |           |           |           |           |
|-----------|-----------|-----------|-----------|-----------|-----------|-----------|-----------|-----------|
| AF086410  | 1033.107  | 1104.064  | BC008737  | 55644.629 | 56965.344 | AF086489  | 1371.529  | 1677.275  |
| AK022997  | 13258.142 | 11589.009 | BC011655  | 4420.891  | 3709.074  | BF337921  | 10678.472 | 10771.447 |
| NM_017617 | 630.884   | 620.344   | BC002396  | 9999.896  | 11459.021 | NM_001740 | 7481.445  | 6282.869  |
| AF131830  | 1174.853  | 1056.274  | AF112219  | 13431.492 | 16296.063 | NM_012484 | 10096.118 | 8264.055  |
| NM_014811 | 719.709   | 665.84    | NM_000521 | 815.197   | 755.88    | AL096732  | 7123.736  | 7372.507  |
| AK027232  | 618.082   | 549.69    | NM_002625 | 492.824   | 690.445   | AB006423  | 1459.895  | 1909.062  |
| NM_012204 | 921.633   | 846.272   | NM_004135 | 3948.328  | 4821.439  | NM_005719 | 57609.555 | 59791.887 |
| NM_004342 | 444.125   | 313.079   | Y10518    | 52432.973 | 58254.781 | AK023915  | 20127.625 | 12908.734 |
| NM_022095 | 2946.35   | 2468.469  | AF155135  | 11245.587 | 12892.513 | AB051453  | 2806.156  | 1977.07   |
| SR2       | 38996.457 | 26337.795 | NM_014790 | 3644.763  | 4103.303  | AK026842  | 830.042   | 655.258   |
| SR4       | 10223.915 | 7941.105  | NM_003571 | 30760.42  | 34633.398 | NM_002395 | 1851.398  | 1337.172  |
| SR6       | 1479.195  | 1243.019  | AB032965  | 53203.031 | 58631.02  | AB023203  | 4200.066  | 2984.195  |
| SR8       | 6266.893  | 23810.885 | NM_020370 | 1266.432  | 1369.018  | NM_014963 | 3781.967  | 3117.282  |
| SR10      | 17126.914 | 4536.826  | NM_004767 | 3560.694  | 3996.846  | NM_004255 | 4505.678  | 3855.522  |
| CY3Cy5    | 1290.441  | 198.019   | BF310159  | 21142.883 | 20675.998 | NM_016271 | 12590.335 | 14984.498 |
| AF088064  | 248.259   | 220.176   | NM_018986 | 4067.552  | 4890.593  | NM_016619 | 2510.811  | 2590.742  |
| AF086103  | 340.175   | 228.621   | AB044934  | 864.257   | 1405.027  | NM_014481 | 2573.372  | 2654.846  |
| AL080135  | 975.378   | 679.125   | U27655    | 18391.463 | 18901.236 | U22172    | 9831.186  | 10373.195 |
| AK023158  | 1762.91   | 1288.574  | NM_003360 | 4156.611  | 3974.534  | AK024793  | 5030.934  | 4024.096  |
| AK000580  | 576.241   | 561.612   | Z21965    | 52484.328 | 55256     | AF208291  | 2015.247  | 1834.31   |
| AF085852  | 5894.292  | 4871.972  | NM_012427 | 2832.752  | 4162.779  | NM_004877 | 50094.008 | 44783.977 |
| AF042838  | 2151.603  | 2094.454  | AF131857  | 16513.301 | 8531.433  | NM_000276 | 3535.038  | 4578.712  |
| AL137511  | 837.542   | 612.255   | NM_000852 | 672.259   | 553.09    | NM_000019 | 60241.977 | 61592.758 |
| X91221    | 401.39    | 361.535   | NM_000399 | 2631.182  | 3214.051  | AK023701  | 4880.828  | 5437.107  |
| AF075062  | 6029.805  | 4866.465  | AW797282  | 1310.129  | 1674.958  | NM_014333 | 767.624   | 767.807   |
| NM_004185 | 1746.529  | 1590.432  | NM_002402 | 720.659   | 1085.302  | NM_002980 | 3854.681  | 2849.656  |
| AF147381  | 11670.81  | 11011.244 | L09070    | 774.421   | 789.304   | NM_015886 | 1504.762  | 1039.104  |
| AB002452  | 403.629   | 506.799   | NM_000062 | 9512.911  | 9621.028  | NM_020355 | 437.044   | 235.289   |
| AK027101  | 7225.888  | 5151.896  | NM_009590 | 17029.59  | 11584.456 | NM_004262 | 489.297   | 533.599   |
| AF010236  | 1217.211  | 949.111   | NM_014747 | 15706.524 | 18404.393 | NM_007102 | 56224.984 | 59667.887 |
| AK024358  | 4037.272  | 2548.988  | Y19240    | 10069.085 | 12397.706 | BG491613  | 14707.145 | 13892.097 |
| D17085    | 230.373   | 206.123   | AF091029  | 18519.543 | 21265.094 | X60201    | 1253.981  | 1205.411  |
| AF088075  | 2034.265  | 1511.565  | X97074    | 53985.523 | 58314.461 | AA397813  | 53037.234 | 58755.805 |
| AK026376  | 2605.919  | 1644.538  | AL117235  | 1621.756  | 2059.371  | W47350    | 8174.323  | 8606.178  |
| AK027097  | 391.187   | 416.621   | NM_014822 | 3180.655  | 3974.963  | AF097935  | 3004.26   | 2787.224  |
| AK027198  | 1068.935  | 793.256   | NM_005296 | 3301.625  | 3629.012  | AI160964  | 1533.04   | 1781.66   |
| AF147426  | 2948.059  | 2683.029  | NM_001337 | 497.113   | 705.017   | W68291    | 29489.5   | 28726.197 |
| BC019667  | 2720.611  | 2710.775  | NM_003611 | 8105.97   | 8167.393  | H-M 32315 | 4318.641  | 3770.197  |
| AK026026  | 4871.439  | 5103.817  | AB014538  | 12027.66  | 16006.756 | H-V00536M | 8302.47   | 6752.16   |
| AF085941  | 20072.395 | 18806.309 | NM_006209 | 3163.927  | 2768.345  | H-D85429M | 19552.869 | 20044.627 |
| Z69892    | 15074.494 | 14409.261 | AK025118  | 6706.003  | 6904.141  | BF439832  | 4202.721  | 4078.373  |
| AK023590  | 443.644   | 444.862   | NM_000727 | 4333.602  | 3320.572  | BG819162  | 5325.073  | 5155.459  |
| AF087961  | 354.186   | 311.802   | NM_002621 | 876.876   | 557.04    | M38449    | 16298.227 | 17553.961 |
| AL137309  | 3236.199  | 3123.269  | NM_005385 | 10160.788 | 7608.568  | AK025495  | 761.682   | 832.511   |
| AL137475  | 818.765   | 780.668   | NM_018985 | 4096.848  | 4484.554  | NM_001091 | 5552.872  | 6103.677  |
| AL161956  | 4625.459  | 3354.902  | NM_006074 | 57461.137 | 58089.957 | NM_002416 | 1168.491  | 1346.395  |
| AL390176  | 2830.419  | 1913.718  | AF208232  | 10809.761 | 15932.791 | NM_002725 | 4606.212  | 3568.326  |
| AL137356  | 796.052   | 592.937   | NM_002985 | 16006.149 | 17289.654 | NM_000450 | 1120.445  | 1296.925  |
| AL137547  | 786.792   | 492.928   | NM_004186 | 3155.637  | 3770.963  | NM_000445 | 3911.02   | 3422.729  |
| AK021994  | 1578.937  | 1162.617  | NM_016255 | 6566.162  | 6422.325  | NM_004513 | 13404.807 | 8883.424  |
| Z70763    | 678.793   | 448.049   | AF203032  | 27365.861 | 19998.195 | NM_001705 | 52083.543 | 46883.359 |
| AK023802  | 7978.819  | 5380.347  | AB014542  | 29066.807 | 17612.006 | NM_017735 | 10575.476 | 8566.738  |
| AK021981  | 556.08    | 467.187   | NM_014640 | 1592.532  | 1409.368  | AB033044  | 45656.988 | 36781.805 |

|           |           |           |           |           |           |           |           |           |
|-----------|-----------|-----------|-----------|-----------|-----------|-----------|-----------|-----------|
| AL359567  | 394.465   | 519.711   | NM_015974 | 2343.237  | 3271.419  | AB014564  | 4037.993  | 4177.936  |
| NM_017726 | 654.459   | 829.848   | NM_014384 | 2093.901  | 2789.72   | NM_020230 | 8572.771  | 9421.219  |
| AK026716  | 567.974   | 563.982   | NM_002573 | 4250.336  | 5561.876  | NM_006762 | 53353.051 | 58656.219 |
| AL049325  | 2261.134  | 2349.298  | AF133424  | 11563.284 | 13044.066 | NM_006352 | 3295.89   | 3278.369  |
| AK023952  | 1251.183  | 958.831   | NM_005003 | 30279.227 | 33946.297 | NM_016430 | 1864.148  | 2511.305  |
| AF090885  | 27656.879 | 21972.826 | AF084560  | 17803.99  | 19004.535 | NM_004447 | 14012.263 | 14274.323 |
| AF161342  | 682.295   | 693.222   | NM_015715 | 1795.05   | 2190.348  | NM_001204 | 9771.003  | 8527.673  |
| NM_016646 | 556.303   | 569.885   | NM_000032 | 23385.162 | 25747.021 | NM_012116 | 7301.229  | 6789.057  |
| NM_014082 | 1916.582  | 2259.424  | NM_002083 | 5087.27   | 5466.079  | NM_000020 | 20441.223 | 16752.961 |
| AF100636  | 300.643   | 269.822   | NM_002035 | 9089.118  | 10163.362 | NM_000956 | 1224.326  | 1292.041  |
| AF161366  | 238.911   | 206.149   | NM_014900 | 4810.991  | 4370.665  | AB033091  | 14532.221 | 11230.613 |
| AK022197  | 628.192   | 585.021   | BF342908  | 3724.304  | 3464.697  | NM_004557 | 30279.43  | 29579.904 |
| AK021970  | 717.844   | 621.918   | AF118073  | 546.567   | 790.439   | NM_016372 | 57186.266 | 60867.289 |
| AK022066  | 16663.838 | 13805.401 | AK023510  | 6832.893  | 4626.366  | AB020705  | 7496.619  | 8699.74   |
| AK022224  | 1130.626  | 802.493   | NM_004345 | 5386.659  | 3909.01   | BE382905  | 1740.993  | 1985.895  |
| AK022359  | 859.099   | 590.797   | NM_000702 | 49345.727 | 39599.645 | NM_002152 | 33155.707 | 36262.598 |
| AK022000  | 308.045   | 285.938   | X71490    | 35632.73  | 46180.465 | NM_001701 | 1303.846  | 1402.804  |
| AK022129  | 605.308   | 343.584   | AF257081  | 14122.07  | 21792.506 | AK022558  | 5378.989  | 5209.043  |
| AK022263  | 711.977   | 424.951   | NM_001688 | 30060.947 | 29432.018 | NM_006476 | 52564.664 | 52805.422 |
| AK022384  | 338.427   | 188.489   | NM_003631 | 518.435   | 596.437   | AK023787  | 6026.174  | 3953.809  |
| AF086304  | 19738.719 | 27760.641 | NM_000219 | 706.98    | 423.333   | NM_002133 | 6455.224  | 6060.848  |
| D55641    | 271.174   | 305.727   | NM_002232 | 431.736   | 288.41    | NM_015697 | 12343.936 | 11646.744 |
| AB032976  | 1823.303  | 1917.422  | NM_016106 | 6127.846  | 4304.913  | AF086489  | 1442.517  | 1256.253  |
| AF301222  | 20189.246 | 18003.492 | NM_014570 | 4359.506  | 2838.57   | AB018258  | 908.695   | 926.061   |
| AF215981  | 577.569   | 508.744   | AF112219  | 10578.368 | 12703.764 | NM_005953 | 13770.63  | 32410.211 |
| NM_000732 | 40996.422 | 33520.762 | NM_002625 | 643.503   | 1462.586  | BF337921  | 15263.927 | 16206.013 |
| AF130044  | 363.676   | 418.831   | NM_004135 | 3709.448  | 4514.459  | U53532    | 5874.573  | 6487.948  |
| AF116709  | 383.566   | 402.29    | NM_000203 | 665.835   | 712.606   | NM_012484 | 10003.571 | 9894.967  |
| AF087980  | 1306.889  | 1524.941  | NM_013443 | 1803.031  | 1666.891  | AL096732  | 7651.995  | 8090.379  |
| AK000257  | 1365.552  | 1683.553  | NM_000925 | 14758.682 | 14481.195 | AB006423  | 1593.351  | 1911.959  |
| NM_006160 | 874.783   | 786.978   | NM_000465 | 3175.234  | 3687.177  | AJ132084  | 678.152   | 929.955   |
| NM_000529 | 238.252   | 151.419   | NM_000123 | 3593.166  | 4214.312  | NM_005719 | 54863.555 | 53703.008 |
| AL110159  | 483.263   | 391.193   | AL137501  | 1831.484  | 1218.17   | NM_003462 | 50940.574 | 52966.488 |
| AF009259  | 638.359   | 500.127   | BE858979  | 1367.208  | 832.113   | NM_006093 | 14973.137 | 15304.124 |
| AF009260  | 685.819   | 597.041   | NM_000122 | 2783.625  | 1460.083  | NM_000139 | 1898.052  | 2080.824  |
| NM_003079 | 4134.48   | 3178.172  | NM_006712 | 60600.516 | 61582.75  | NM_006664 | 9798.244  | 9872.162  |
| NM_017902 | 3216.262  | 2881.052  | NM_006240 | 5218.989  | 7123.645  | AB051453  | 2867.268  | 2636.307  |
| NM_017835 | 16282.074 | 17741.613 | NM_007026 | 5055.922  | 5179.418  | AK026842  | 1240.248  | 833.865   |
| NM_018347 | 3278.007  | 5704.76   | M37712    | 10488.363 | 6737.918  | NM_002395 | 1868.734  | 2418.489  |
| AF086223  | 572.241   | 1113.392  | NM_002648 | 9916.132  | 7518.786  | AB023203  | 4070.174  | 3579.889  |
| AK024986  | 459.451   | 453.066   | AF070670  | 26044.787 | 20688.592 | NM_014963 | 4153.779  | 4342.764  |
| AK026730  | 1923.166  | 1659.454  | NM_016156 | 4761.17   | 3339.392  | NM_004259 | 5185.505  | 4189.813  |
| AK024739  | 1805.595  | 1899.294  | NM_016528 | 2577.854  | 1755.608  | NM_016271 | 16011.216 | 9727.144  |
| AK098681  | 650.919   | 879.851   | CY3Cy5    | 487.623   | 288.706   | NM_016619 | 2568.435  | 2094.483  |
| AK026772  | 5919.643  | 5128.153  | NM_000498 | 297.803   | 203.82    | NM_014481 | 2706.006  | 3042.385  |
| NM_014260 | 10280.771 | 11909.4   | NM_000664 | 1193.225  | 827.333   | U22172    | 11024.102 | 11447.761 |
| AK026458  | 1143.622  | 1369.594  | AK026155  | 1027.217  | 622.758   | AB032960  | 2795.335  | 2776.457  |
| AK022266  | 349.58    | 311.514   | NM_018052 | 17701.297 | 12883.351 | NM_014264 | 23551.064 | 23250.832 |
| AK024154  | 1059.862  | 1420.744  | AF143322  | 308.511   | 274.924   | AF020089  | 4861.596  | 4935.926  |
| AF086341  | 1174.767  | 1465.167  | AK022386  | 6209.108  | 5201.995  | NM_006257 | 2715.735  | 2566.082  |
| AK026672  | 663.093   | 717.344   | NM_002767 | 13974.694 | 9411.132  | NM_016281 | 24614.195 | 23515.498 |
| S83282    | 51700.387 | 73713.156 | AF131846  | 11073.681 | 9344.261  | NM_000276 | 3910.962  | 3679.545  |
| AK024164  | 17622.768 | 19976.857 | AF088069  | 4882.701  | 3741.516  | NM_000019 | 55870.348 | 59215.742 |

|           |           |           |           |           |           |           |           |           |
|-----------|-----------|-----------|-----------|-----------|-----------|-----------|-----------|-----------|
| AF052130  | 6243.187  | 7168.396  | AF086551  | 834.395   | 853.451   | AK023701  | 4798.425  | 4663.799  |
| AF130090  | 34743.816 | 31668.896 | NM_013393 | 3867.763  | 3548.115  | NM_003742 | 7509.3    | 8512.359  |
| AL096727  | 2128.058  | 2478.45   | AK025082  | 1170.872  | 1508.628  | NM_005094 | 6302.263  | 8485.663  |
| AL080110  | 6581.917  | 6639.797  | AF086535  | 787.188   | 815.429   | NM_015886 | 1849.295  | 1687.253  |
| NM_020425 | 1533.033  | 1649.902  | AB040901  | 1014.727  | 1224.752  | NM_020358 | 648.215   | 542.788   |
| AK024076  | 1564.204  | 1392.001  | AL137406  | 3078.689  | 3503.356  | NM_004262 | 679.898   | 1040.776  |
| M87940    | 1459.55   | 1419.355  | NM_000498 | 393.055   | 638.773   | NM_007102 | 58237.527 | 60431.23  |
| L77588    | 656.936   | 707.165   | NM_000664 | 1366.607  | 1903.542  | BG491613  | 17267.51  | 18121.66  |
| NM_014273 | 7825.919  | 8893.676  | SR1       | 56476.195 | 56950.633 | AI160964  | 1470.805  | 1732.931  |
| AF039442  | 1660.272  | 1908.472  | SR3       | 16171.165 | 24309.441 | W68291    | 25195.178 | 24792.625 |
| NM_004680 | 1358.939  | 1748.423  | SR5       | 2066.044  | 3805.245  | N64384    | 14895.288 | 14188.997 |
| AF104260  | 485.289   | 559.789   | SR7       | 1845.779  | 25926.828 | H-X 53655 | 4556.273  | 4385.945  |
| NM_005671 | 1435.716  | 1546.721  | SR9       | 7640.82   | 2622.356  | H-U 05770 | 14569.354 | 15284.79  |
| NM_017409 | 425.073   | 441.717   | CY3Cy5    | 1092.66   | 378.968   | H-M 65199 | 50459.395 | 49774.582 |
| NM_019625 | 2041.309  | 2466.25   | U54734    | 200.409   | 118.042   | H-M 32315 | 4730.458  | 4622.226  |
| NM_006729 | 4117.358  | 3835.109  | AK000872  | 1553.032  | 1328.63   | H-V00536M | 10668.536 | 9577.189  |
| NM_006071 | 2159.451  | 2160.592  | AK027147  | 11627.782 | 10404.736 | M38449    | 14786.677 | 15149.835 |
| NM_012236 | 4165.637  | 3816.621  | AF086285  | 473.359   | 330.576   | AK025495  | 823.242   | 587.773   |
| AF075111  | 312.941   | 277.781   | AF085924  | 261.28    | 395.693   | NM_001091 | 5699.337  | 6295.227  |
| NM_013939 | 817.152   | 798.88    | AK023887  | 980.774   | 1065.268  | AK023915  | 21757.262 | 22658.537 |
| AB038651  | 3261.696  | 3465.847  | AF088022  | 9795.5    | 8793.196  | AB014564  | 3757.291  | 4555.607  |
| AL359603  | 2429.895  | 1883.637  | AK026537  | 1962.605  | 2514.117  | NM_020230 | 8451.591  | 9531.937  |
| X84838    | 1132.385  | 1177.774  | NM_015485 | 2042.961  | 2041.539  | NM_006762 | 57466.637 | 61587.484 |
| NM_013940 | 596.035   | 586.128   | AF147411  | 495.291   | 870.318   | NM_006352 | 3124.921  | 3634.943  |
| AL117643  | 2072.996  | 1909.345  | NM_002666 | 8941.548  | 14504.217 | NM_016430 | 2126.239  | 3497.205  |
| AF075063  | 666.517   | 917.912   | AF202145  | 3205.469  | 3676.968  | NM_016540 | 1286.947  | 1417.845  |
| AF069135  | 385.756   | 409.552   | AK022412  | 5268.48   | 3689.38   | NM_012116 | 7170.169  | 7133.627  |
| AK026524  | 1638.475  | 1436.546  | AK023073  | 4128.749  | 2518.887  | NM_000020 | 27060.295 | 23527.014 |
| AB011157  | 4932.206  | 3965.678  | AK023697  | 153.285   | 121.173   | NM_002845 | 471.714   | 215.914   |
| U17632    | 384.421   | 293.472   | AK023922  | 389.328   | 246.719   | NM_000956 | 1376.597  | 1360.383  |
| AK026764  | 2988.538  | 1907.803  | AK022438  | 771.282   | 635.043   | NM_002442 | 13951.562 | 18940.559 |
| AF113700  | 3014.011  | 2271.426  | AK023316  | 291.623   | 266.889   | AB033091  | 14714.054 | 11999.645 |
| X91348    | 2735.868  | 4669.963  | AK023764  | 631.511   | 450.506   | NM_004557 | 33794.633 | 32426.398 |
| Z36505    | 3555.311  | 3737.258  | AK024082  | 494.145   | 467.979   | AF272357  | 9611.064  | 8567.447  |
| NM_001854 | 543.508   | 676.605   | AK025072  | 2506.826  | 2250.434  | NM_016372 | 58024.145 | 61115.988 |
| NM_017913 | 2624.863  | 2020.735  | AK022410  | 542.667   | 450.311   | AB020705  | 8211.331  | 7334.5    |
| NM_002755 | 12857.713 | 10630.858 | AF086541  | 530.723   | 513.93    | NM_014333 | 545.408   | 756.743   |
| AK024799  | 1100.982  | 1401.748  | L10378    | 8000.345  | 6956.454  | NM_002980 | 3878.864  | 4919.46   |
| NM_000924 | 6709.574  | 7289.725  | AK022179  | 951.742   | 1074.849  | NM_016274 | 6363.607  | 5859.646  |
| NM_003330 | 7049.226  | 8050.705  | AK022173  | 457.282   | 554.837   | NM_014946 | 1988.157  | 1725.566  |
| NM_002481 | 481.928   | 604.955   | AJ227860  | 754.744   | 1096.688  | NM_014251 | 6109.213  | 6534.59   |
| NM_003647 | 497.823   | 646.817   | AL157448  | 770.417   | 732.836   | AK022750  | 12313.539 | 12349.94  |
| NM_001699 | 1369.015  | 1439.976  | AF026942  | 2376.503  | 3045.22   | NM_004251 | 16535.535 | 17008.361 |
| AB006589  | 836.12    | 622.371   | AJ276429  | 2764.079  | 2855.034  | NM_012484 | 9008.258  | 7264.399  |
| NM_018351 | 624.497   | 546.033   | AL117657  | 225.928   | 444.221   | AL096732  | 5466.141  | 4861.595  |
| AK023019  | 865.695   | 622.605   | AK023589  | 908.581   | 1542.825  | AB006423  | 1746.542  | 1292.067  |
| NM_147171 | 3862.822  | 2505.845  | AK021590  | 1229.755  | 1494.877  | AJ132084  | 628.724   | 780.61    |
| AF238083  | 464.679   | 393.545   | AB002441  | 478.439   | 815.622   | NM_005719 | 54212.492 | 55420.023 |
| NM_002962 | 507.803   | 590.416   | AK023998  | 890.618   | 1243.69   | NM_003462 | 55066.711 | 56172.996 |
| NM_016388 | 2817.679  | 2368.611  | AK021643  | 481.221   | 922.513   | NM_006093 | 15676.109 | 15516.946 |
| AB046783  | 1706.821  | 1452.623  | Z11802    | 456.815   | 807.481   | NM_000139 | 2494.834  | 2365.708  |
| NM_000845 | 798.636   | 625.693   | NM_014054 | 1526.081  | 1013.87   | NM_006664 | 10775.285 | 10163.07  |
| NM_004604 | 33180.289 | 21804.236 | AK021840  | 43023.828 | 25490.154 | NM_000448 | 5004.513  | 5619.097  |

|           |           |           |           |           |           |           |           |           |
|-----------|-----------|-----------|-----------|-----------|-----------|-----------|-----------|-----------|
| NM_014965 | 3953.801  | 3227.037  | AK022228  | 2497.512  | 1868.771  | NM_004513 | 16055.441 | 15317.229 |
| NM_004882 | 3788.936  | 2622.288  | AK022031  | 370.258   | 294.728   | NM_001708 | 59801.781 | 62681.813 |
| AL390148  | 5653.815  | 4360.344  | AF086480  | 1424.793  | 1221.852  | NM_017735 | 12545.541 | 10583.638 |
| AK024055  | 1929.661  | 1139.762  | AK022122  | 640.493   | 430.846   | AB033044  | 50638.395 | 50348.383 |
| NM_013376 | 1286.807  | 1556.783  | AK026084  | 244.668   | 153.191   | NM_000276 | 2910.137  | 2785.74   |
| NM_017964 | 1984.586  | 1981.088  | AK022415  | 27020.125 | 18446.404 | NM_000019 | 51907.168 | 58974.754 |
| NM_016272 | 728.45    | 749.131   | AL137368  | 1808.772  | 1799.14   | AK023701  | 4274.646  | 4004.698  |
| NM_016428 | 6901.165  | 4858.813  | AK021932  | 962.089   | 957.81    | NM_003742 | 5924.434  | 5815.139  |
| NM_004083 | 17810.861 | 11575.48  | AK026787  | 3755.29   | 3514.007  | NM_005094 | 5375.82   | 5828.35   |
| NM_016039 | 7389.057  | 5932.009  | AK023542  | 1170.266  | 1225.023  | NM_002152 | 24617.615 | 25525.334 |
| NM_001184 | 4434.416  | 3354.708  | AK000203  | 1235.276  | 1029.494  | NM_001701 | 1298.351  | 738.183   |
| NM_015530 | 10579.124 | 9374.106  | AK021845  | 6557.896  | 7905.368  | AK022558  | 5264.559  | 4151.661  |
| NM_016238 | 7109.513  | 6214.822  | AK022434  | 421.033   | 347.977   | NM_006476 | 51760.77  | 54426.02  |
| NM_001758 | 703.338   | 618.097   | NM_018592 | 3050.955  | 3880.451  | AK023787  | 7069.203  | 5361.259  |
| BE546276  | 582.304   | 527.22    | NM_018503 | 34669.305 | 32577.145 | NM_002133 | 5409.163  | 5790.887  |
| NM_004725 | 11290.302 | 8302.89   | NM_016449 | 21645.107 | 24432.824 | NM_015697 | 12457.163 | 12745.482 |
| NM_015997 | 3478.891  | 3427.262  | AL049670  | 3778.798  | 4489.776  | AF086489  | 1222.227  | 1016.999  |
| NM_001167 | 1595.709  | 1699.715  | AK021465  | 487.542   | 907.916   | NM_032943 | 7456.205  | 8453.666  |
| NM_012115 | 2531.244  | 2240.745  | NM_018512 | 14499.261 | 17858.611 | NM_007177 | 46023.16  | 50426.5   |
| NM_004933 | 5239.152  | 4936.463  | NM_018568 | 365.185   | 420.326   | NM_006078 | 17913.168 | 19074.842 |
| M96577    | 21852.604 | 17037.678 | AL161991  | 8864.442  | 4983.186  | NM_000824 | 631.872   | 766.058   |
| NM_013258 | 4100.82   | 3400.618  | D17032    | 13807.473 | 10121.844 | NM_000482 | 1029.332  | 1043.083  |
| NM_003842 | 5539.19   | 5199.114  | AL137292  | 428.44    | 376.991   | NM_005953 | 15432.972 | 30903.174 |
| NM_016184 | 2774.328  | 2288.776  | NM_017941 | 1143.56   | 776.187   | M38449    | 12731.546 | 10201.212 |
| L11238    | 22714.143 | 15097.122 | AF301016  | 261.29    | 288.885   | AK025495  | 536.23    | 452.601   |
| AK025684  | 1759.544  | 1674.502  | BE900527  | 1552.542  | 1537.952  | NM_001091 | 4320.259  | 3490.969  |
| NM_012205 | 1851.383  | 1358.291  | D28384    | 49349.23  | 42216.473 | AK023915  | 21083.709 | 24675.141 |
| K02046    | 8567.474  | 5887.378  | AF118079  | 38676.984 | 27252.117 | AB051453  | 2869.292  | 2980.527  |
| U87223    | 1249.334  | 869.429   | AF277572  | 326.716   | 199.159   | AK026842  | 982.847   | 1035.957  |
| NM_004995 | 7282.538  | 7222.456  | AL365413  | 1119.442  | 952.674   | NM_002395 | 1644.276  | 2041.436  |
| AK023320  | 271.606   | 133.174   | NM_005258 | 5617.045  | 5963.07   | AB023203  | 3646.646  | 2865.098  |
| NM_000386 | 8661.652  | 7488.896  | NM_003948 | 520.531   | 560.215   | NM_014963 | 3196.762  | 3787.046  |
| NM_007231 | 1351.275  | 1261.473  | AK025062  | 1265.088  | 1214.561  | NM_004259 | 4622.461  | 3633.068  |
| NM_001190 | 4569.77   | 3775.829  | Z27405    | 37620.719 | 34242.008 | NM_016271 | 16244.191 | 12038.833 |
| NM_005271 | 16519.709 | 18524.775 | AK023412  | 1248.983  | 1150.985  | NM_016619 | 1825.254  | 1709.003  |
| NM_015654 | 8318.476  | 7619.132  | NM_014617 | 37675.609 | 35506.629 | NM_014481 | 2415.956  | 2206.336  |
| NM_012244 | 3652.025  | 3333.69   | AK074682  | 3790.723  | 4323.562  | U22172    | 12319.843 | 9903.93   |
| NM_004341 | 3204.936  | 3214.728  | X74605    | 1112.866  | 1482.843  | AB032960  | 2871.6    | 2695.526  |
| AB082521  | 4598.588  | 4234.006  | AK024513  | 785.036   | 1159.506  | NM_014264 | 19875.016 | 17669.803 |
| AK026806  | 331.259   | 357.275   | BC036692  | 1888.331  | 2601.536  | AK024793  | 5414.222  | 4294.149  |
| AL050182  | 1338.717  | 1191.413  | AJ009640  | 1898.164  | 2424.284  | AF208291  | 2289.679  | 1652.026  |
| NM_020040 | 806.914   | 874.899   | Y11163    | 780.542   | 929.954   | NM_004877 | 43594.184 | 37868.211 |
| AK026940  | 7718.39   | 5716.729  | AF086391  | 381.573   | 510.618   | L10284    | 57538.926 | 58793.086 |
| AF155117  | 3812.99   | 3460.505  | AF147340  | 526.14    | 805.114   | CY3Cy5    | 14774.462 | 1346.575  |
| AB014527  | 1933.964  | 1590.82   | AK025119  | 527.524   | 375.96    | NM_000620 | 948.761   | 1023.068  |
| NM_004411 | 2976.333  | 2253.864  | AJ224170  | 2064.672  | 1654.476  | NM_000905 | 10668.612 | 12368.792 |
| NM_015938 | 11236.142 | 9202.395  | AF085866  | 4983.721  | 4215.104  | AK023269  | 3390.208  | 3484.098  |
| NM_000740 | 1377.627  | 1122.051  | NM_006106 | 260.89    | 199.838   | AF070564  | 18252.27  | 15756.649 |
| NM_017843 | 13322.034 | 8914.542  | AK000806  | 48618.355 | 41716.887 | AK021439  | 47787.094 | 32328.727 |
| U10485    | 2600.342  | 1728.039  | NM_016471 | 3532.543  | 4574.796  | AF052099  | 5794.784  | 5123.801  |
| AK025326  | 1354.462  | 1114.121  | Z11852    | 275.157   | 396.061   | AL110111  | 5616.166  | 4730.603  |
| NM_016328 | 2198.438  | 1524.501  | NM_001145 | 425.738   | 371.12    | AF070543  | 1596.907  | 1529.107  |
| NM_017544 | 12066.698 | 10066.441 | NM_005364 | 9075.871  | 9865.041  | AF086525  | 506.08    | 437.222   |

|           |           |           |           |           |           |           |           |           |
|-----------|-----------|-----------|-----------|-----------|-----------|-----------|-----------|-----------|
| NM_003153 | 3448.111  | 3364.334  | AK023482  | 4424.987  | 5072.479  | AF086509  | 3525.952  | 3398.16   |
| NM_016285 | 1771.848  | 2130.269  | AK022798  | 465.881   | 699.599   | NM_014775 | 6124.623  | 6038.6    |
| NM_014707 | 1630.929  | 1076.7    | AL157423  | 507.244   | 616.473   | AK001171  | 33911.93  | 31243.217 |
| AF025771  | 2398.519  | 1714.202  | AK023115  | 278.229   | 341.388   | AF086491  | 8881.87   | 9004.955  |
| NM_018215 | 3762.478  | 3354.962  | AK023176  | 1228.075  | 1828.558  | NM_014855 | 2263.167  | 2269.995  |
| AB033110  | 1743.708  | 1523.289  | NM_006826 | 10978.683 | 7188.711  | NM_003492 | 1826.124  | 1226.788  |
| NM_005083 | 6302.087  | 4005.312  | AB007973  | 8624.146  | 5724.575  | NM_000620 | 895.844   | 931.1     |
| NM_007187 | 10947.648 | 8761.809  | NM_002995 | 354.619   | 369.625   | NM_000905 | 10161.833 | 8260.027  |
| NM_001825 | 849.812   | 771.022   | M96843    | 3282.364  | 2660.431  | SR1       | 73082.648 | 63406.633 |
| NM_018983 | 17053.617 | 13817.831 | NM_017791 | 2177.744  | 1650.916  | SR3       | 44277.844 | 49769.832 |
| NM_003095 | 13401.524 | 10027.643 | NM_005882 | 6195.467  | 4782.594  | SR5       | 4815.736  | 6201.262  |
| NM_007275 | 9041.313  | 7317.263  | BC012304  | 3424.988  | 2568.547  | SR7       | 4758.333  | 49951.953 |
| BE390833  | 42860.379 | 27612.453 | AB046815  | 2131.59   | 1914.677  | SR9       | 16943.197 | 4918.038  |
| NM_004730 | 17362.617 | 13382.014 | NM_000440 | 4232.042  | 3658.549  | CY3Cy5    | 12585.84  | 858.584   |
| NM_000801 | 9249.261  | 7896.261  | NM_001297 | 4452.195  | 3134.146  | U63828    | 5951.947  | 5823.896  |
| NM_006115 | 9591.787  | 10379.273 | NM_004403 | 9521.95   | 5952.92   | Z36794    | 1759.188  | 1774.258  |
| NM_005801 | 7684.029  | 5780.13   | X64993    | 1502.922  | 999.951   | Z36828    | 11004.165 | 8740.223  |
| NM_018195 | 6608.369  | 6049.021  | NM_004434 | 13301.731 | 9935.789  | AF086121  | 41976.223 | 34160.457 |
| NM_001535 | 21888.529 | 19122.393 | NM_006265 | 534.141   | 536.719   | AF086140  | 3262.083  | 4378.318  |
| NM_012267 | 1753.225  | 1072      | NM_016230 | 2832.074  | 2978.531  | NM_015695 | 1075.053  | 1040.063  |
| AL110151  | 467.685   | 316.561   | NM_001083 | 1344.319  | 1382.283  | AK022551  | 5931.474  | 5990.673  |
| NM_003293 | 251.171   | 345.631   | AK023966  | 8016.721  | 9781.828  | AF085968  | 4055.833  | 3499.691  |
| NM_016615 | 339.222   | 283.871   | AK025702  | 2795.795  | 3181.728  | AK023665  | 1400.556  | 1808.475  |
| NM_000022 | 22098.121 | 14312.329 | NM_018955 | 1166.699  | 1674.318  | AB011136  | 5427.802  | 6681.091  |
| NM_016575 | 15455.555 | 16482.957 | AL050200  | 339.638   | 402.885   | AF085898  | 7924.764  | 7322.258  |
| NM_004213 | 2401.844  | 2618.198  | NM_002367 | 410.797   | 752.873   | AL161960  | 3223.904  | 2742.146  |
| NM_001925 | 29286.119 | 21896.248 | AK022038  | 1298.354  | 2322.931  | AL049964  | 4901.498  | 5485.035  |
| NM_000905 | 4576.226  | 4490.915  | AF253321  | 1352.465  | 1120.166  | AF038184  | 765.454   | 739.714   |
| NM_000480 | 8230.395  | 8357.689  | U80735    | 4062.057  | 2437.618  | AK022485  | 2228.913  | 2786.977  |
| AF254084  | 43545.355 | 41324.539 | NM_017850 | 2583.729  | 1873.661  | AK023395  | 15743.115 | 13366.568 |
| AK022648  | 607.156   | 758.263   | NM_016522 | 1121.435  | 729.598   | AK023818  | 12805.023 | 11191.002 |
| AK022976  | 1576.35   | 1415.728  | NM_002224 | 7773.701  | 5683.6    | AK024139  | 659.772   | 791.481   |
| AB048791  | 1432.514  | 1542.04   | X07979    | 26142.35  | 20466.936 | AK023522  | 538.547   | 552.413   |
| NM_003107 | 1422.329  | 1524.486  | NM_003874 | 1104.803  | 947.971   | AK023895  | 1109.095  | 813.296   |
| NM_006874 | 5226.996  | 4352.327  | NM_000082 | 687.177   | 496.09    | AK024206  | 15632.859 | 14421.973 |
| AB046777  | 2830.163  | 2394.039  | L13857    | 1153.208  | 975.091   | AK026273  | 40811.559 | 36894.438 |
| AJ251844  | 2557.13   | 2331.849  | NM_018095 | 4464.034  | 4240.853  | NM_020250 | 59374.73  | 56210.387 |
| D16815    | 3829.353  | 3495.407  | AF286164  | 854.928   | 495.455   | AF055007  | 1639.252  | 1835.246  |
| NM_001880 | 2764.289  | 2728.913  | AF146277  | 4573.71   | 4149.525  | NM_012337 | 2948.507  | 3513.817  |
| AB028943  | 1899.037  | 1739.123  | NM_002555 | 377.905   | 500.502   | AL389879  | 43357.906 | 42940.332 |
| NM_006194 | 905.349   | 783.534   | AF055033  | 19790.164 | 19523.564 | AK022869  | 3685.878  | 4074.901  |
| AK001603  | 2192.57   | 2163.17   | NM_017700 | 635.001   | 645.184   | NM_016111 | 41835.031 | 37710.547 |
| U71601    | 3005.726  | 3057.429  | M37191    | 12361.017 | 15104.356 | AF085958  | 77495.117 | 63083.664 |
| AK025985  | 2229.468  | 2943.434  | NM_005242 | 471.157   | 778.248   | AF086021  | 11845.201 | 16504.117 |
| NM_013255 | 3982.458  | 2993.872  | NM_003020 | 569.61    | 754.617   | AF085982  | 555.981   | 734.056   |
| NM_004143 | 1369.703  | 913.183   | NM_003404 | 24375.926 | 23425.18  | AL117655  | 750.89    | 663.29    |
| X66087    | 4801.943  | 2565.189  | NM_001114 | 1092.372  | 1665.122  | AK024472  | 5498.758  | 4916.634  |
| L09070    | 537.812   | 883.658   | NM_004455 | 450.928   | 307.711   | NM_017975 | 7053.374  | 7625.179  |
| NM_000062 | 26289.932 | 34307.598 | NM_006010 | 9641.289  | 6652.694  | U06700    | 3892.331  | 3944.043  |
| NM_017877 | 1837.634  | 3196.287  | K03191    | 2048.486  | 1855.928  | NM_017915 | 23256.508 | 27421.014 |
| NM_009590 | 6276.767  | 10387.106 | NM_005075 | 14826.276 | 9796.506  | NM_017855 | 66867.117 | 65223.852 |
| AL133037  | 1435.482  | 1978.826  | NM_005192 | 19718.688 | 13973.37  | AB007954  | 7319.249  | 7763.949  |
| NM_020350 | 4406.759  | 3962.67   | NM_004585 | 954.508   | 821.765   | AK026494  | 7612.63   | 10149.177 |

|           |           |           |           |           |           |           |           |           |
|-----------|-----------|-----------|-----------|-----------|-----------|-----------|-----------|-----------|
| NM_00035C | 1071.254  | 1430.51   | NM_015032 | 2493.823  | 1702.204  | AK022067  | 1027.876  | 1829.806  |
| X91103    | 3147.979  | 3299.429  | AK022956  | 3532.28   | 3018.511  | AK023508  | 1358.05   | 1758.55   |
| AA419164  | 2749.819  | 3135.244  | AK023121  | 952.559   | 778.16    | AK025840  | 5169.178  | 5054.406  |
| L35251    | 4819.147  | 4264.181  | NM_014104 | 38531.555 | 29470.602 | AK026915  | 5823.068  | 5229.946  |
| BE910395  | 6011.021  | 5521.527  | NM_002392 | 864.13    | 784.77    | AL110259  | 1109.884  | 900.677   |
| N46828    | 2330.648  | 2204.513  | NM_002749 | 56112.969 | 58823.195 | AB033100  | 61915.918 | 57313.902 |
| BI908302  | 5877.999  | 5843.582  | NM_018216 | 7850.428  | 7364.058  | AF162715  | 500.529   | 435.386   |
| AA460969  | 5235.797  | 4901.235  | NM_003390 | 3296.543  | 3565.142  | AL390138  | 5745.461  | 6410.482  |
| BG695859  | 4759.136  | 4825.416  | AL137747  | 3073.092  | 3057.428  | AL137290  | 10811.955 | 11951.932 |
| M85079    | 1482.739  | 1628.839  | NM_014755 | 3119.721  | 2621.411  | AK021606  | 731.547   | 1095.295  |
| AA457671  | 8695.243  | 9001.98   | AF077188  | 11039.558 | 12975.545 | NM_014124 | 66470.813 | 62680.145 |
| X07437    | 1505.006  | 1652.453  | NM_012446 | 2870.228  | 3234.061  | AF119888  | 1927.166  | 2558.048  |
| NM_000641 | 3164.014  | 2704.5    | NM_018338 | 1074.679  | 1446.72   | AK001551  | 6353.633  | 6040.736  |
| AE006466  | 1040.578  | 1261.721  | NM_018685 | 44146.16  | 43252.16  | AK001825  | 2594.397  | 2228.877  |
| BC008737  | 46864.027 | 66020.625 | NM_006984 | 3824.292  | 4549.729  | AK024714  | 2713.625  | 2648.55   |
| BC011655  | 7179.101  | 6270.033  | AF231919  | 1530.489  | 2079.322  | AK022363  | 2921.809  | 3357.327  |
| BC002396  | 9516.044  | 7140.421  | NM_018214 | 1079.628  | 1640.951  | AL353949  | 549.531   | 615.576   |
| NM_003613 | 3492.706  | 2120.003  | NM_005076 | 11485.185 | 15499.177 | NM_005181 | 3388.362  | 3343.163  |
| NM_005385 | 3272.78   | 3347.181  | NM_019023 | 51270.047 | 50160.133 | AF026945  | 1376.57   | 1185.541  |
| NM_018985 | 4607.917  | 5724.75   | NM_004420 | 618.553   | 487.149   | AF143676  | 6853.91   | 8762.998  |
| NM_006074 | 40401.367 | 53759.082 | NM_002970 | 486.247   | 449.182   | U66044    | 45458.527 | 49702.93  |
| AF208232  | 2881.878  | 3374.354  | NM_005499 | 17504.576 | 11122.989 | NM_005247 | 66919.109 | 66015.367 |
| NM_002985 | 970.19    | 1302.737  | NM_013270 | 999.569   | 923.667   | NM_005283 | 4402.94   | 3911.301  |
| NM_004186 | 826.074   | 896.791   | NM_015387 | 3052.578  | 2455.605  | AL122089  | 1960.206  | 1896.044  |
| NM_016255 | 8936.913  | 12188.104 | NM_001733 | 4776.23   | 4154.638  | AA203665  | 12239.547 | 13438.965 |
| AF203032  | 2706.898  | 2915.857  | NM_005065 | 994.668   | 637.204   | U95646    | 1931.403  | 1906.605  |
| AB014542  | 6202.513  | 4936.884  | NM_017825 | 18968.723 | 19575.232 | Y16705    | 3180.72   | 3384.827  |
| NM_014640 | 1998.285  | 2431.824  | NM_014035 | 1871.245  | 2285.304  | AF279775  | 10683.545 | 11639.379 |
| Y10518    | 9968.312  | 13505.38  | NM_020122 | 12505.169 | 10830.256 | NM_006262 | 5681.252  | 6491.14   |
| AF155135  | 7360.677  | 8252.673  | NM_013432 | 10877.19  | 13103.14  | AK026598  | 4071.575  | 4373.237  |
| NM_014790 | 3778.205  | 3487.295  | AB020716  | 778.711   | 867.429   | AK023602  | 1675.578  | 1672.518  |
| NM_003571 | 10454.762 | 11017.207 | U57341    | 355.612   | 386.7     | NM_018097 | 67601.82  | 63067.223 |
| AB032965  | 7244.801  | 9703.421  | NM_002295 | 45204.344 | 45723.117 | AF130043  | 685.257   | 871.863   |
| NM_020370 | 1287.092  | 1386.465  | AK027130  | 755.093   | 1098.971  | Y11167    | 2765.959  | 2340.705  |
| NM_004767 | 1448.183  | 1856.224  | NM_005479 | 26353.457 | 29808.736 | AK026813  | 1833.409  | 1692.357  |
| BF310159  | 19143.881 | 17402.496 | NM_005730 | 51596.266 | 57665.926 | AK027225  | 2543      | 2314.933  |
| NM_000316 | 545.909   | 602.697   | X82240    | 9614.444  | 15345.107 | AK023083  | 3697.577  | 3714.979  |
| NM_018986 | 9008.913  | 7937.405  | NM_013995 | 6192.972  | 7768.7    | AF130093  | 1209.091  | 1298.528  |
| AB044934  | 1930.205  | 1831.774  | BC021298  | 511.648   | 311.48    | AF116622  | 932.414   | 983.023   |
| U27655    | 7812.354  | 6748.751  | U52096    | 5848.688  | 4038.366  | AF217967  | 2134.438  | 2136.209  |
| NM_005795 | 323.327   | 351.251   | AB013897  | 1487.969  | 1214.639  | NM_017447 | 3791.397  | 3709.227  |
| Z21965    | 5647.033  | 4977.161  | NM_005526 | 17865.738 | 11045.286 | AL049452  | 629.411   | 1110.089  |
| NM_012427 | 1856.506  | 1393.91   | AK001669  | 1872.358  | 1272.252  | NM_016622 | 5642.225  | 5589.839  |
| AF133424  | 1452.761  | 1979.362  | NM_006195 | 1111.659  | 884.742   | AK026976  | 3700.783  | 5403.791  |
| NM_005003 | 31436.268 | 28907.969 | NM_006190 | 14959.208 | 10360.138 | AF070559  | 1346.632  | 1264.513  |
| AF084560  | 7112.202  | 8537.778  | NM_006365 | 2369.958  | 1703.044  | D42043    | 60301.203 | 52471.473 |
| NM_015715 | 2073.419  | 2509.6    | NM_004133 | 430.605   | 337.782   | BC024009  | 6852.012  | 6348.622  |
| NM_000032 | 3027.417  | 3923.251  | NM_001615 | 8291.303  | 7110.546  | AF128543  | 25511.387 | 27767.096 |
| NM_002083 | 337.152   | 388.735   | BC000401  | 10146.539 | 11709.787 | NM_004185 | 2049.843  | 1862.975  |
| NM_002035 | 5929.379  | 6343.333  | NM_006425 | 2855.599  | 3073.161  | X94290    | 3634.136  | 3918.014  |
| NM_014900 | 3133.429  | 3192.392  | BF344046  | 4238.296  | 5528.209  | AK026685  | 50465.02  | 45920.258 |
| BF342908  | 317.696   | 562.482   | AF432218  | 16322.453 | 20028.188 | AF090927  | 63082.926 | 60774.418 |
| AF118073  | 771.066   | 1108.385  | NM_004286 | 5231.978  | 6641.339  | AL137642  | 2115.627  | 1997.89   |

|           |           |           |           |           |           |           |           |           |
|-----------|-----------|-----------|-----------|-----------|-----------|-----------|-----------|-----------|
| AK023510  | 4209.492  | 4831.214  | AL133644  | 9899.48   | 11223.959 | AL133619  | 18064.928 | 17146.145 |
| NM_004345 | 2449.507  | 2942.182  | NM_002706 | 3271.9    | 4437.961  | AK025902  | 6997.849  | 7158.847  |
| NM_006528 | 303.05    | 468.185   | NM_004199 | 425.008   | 591.834   | NM_004517 | 6234.285  | 6492.085  |
| NM_002232 | 399.136   | 412.437   | NM_006876 | 1445.416  | 1139.848  | AI017418  | 1085.158  | 775.399   |
| NM_014570 | 5302.008  | 5327.776  | NM_000293 | 1089.25   | 816.037   | NM_000679 | 5072.758  | 5056.988  |
| NM_014822 | 2451.261  | 3252.776  | NM_003748 | 877.445   | 914.952   | AF218006  | 66644.563 | 64436.078 |
| NM_005296 | 2441.606  | 2779.485  | NM_005398 | 236.628   | 135.225   | AK026935  | 57332.566 | 56369.98  |
| NM_001337 | 1142.935  | 1278.882  | NM_012269 | 576.871   | 434.924   | NM_020162 | 9194.149  | 10043.396 |
| NM_003611 | 2758.145  | 2952.196  | AF153821  | 1879.967  | 1274.204  | AK027124  | 66769.492 | 63604.859 |
| AB014538  | 4258.903  | 4603.21   | NM_013370 | 1673.83   | 1729.867  | M31212    | 29557.371 | 30057.08  |
| NM_004154 | 248.297   | 179.972   | NM_001374 | 1042.709  | 729.458   | NM_001821 | 15504.719 | 9884.87   |
| NM_006209 | 654.277   | 490.469   | NM_003310 | 3031.436  | 2245.368  | NM_005647 | 2637.186  | 2575.938  |
| AK025118  | 9194.282  | 9522.562  | AK024461  | 4801.9    | 3826.219  | X64978    | 27301.207 | 23965.469 |
| NM_000727 | 961.715   | 906.503   | AK025485  | 1154.38   | 1066.624  | NM_000912 | 62060.652 | 57589.371 |
| NM_002621 | 457.401   | 349.641   | NM_017635 | 3237.947  | 3091.799  | NM_002345 | 3637.646  | 2506.586  |
| NM_002625 | 914.966   | 1993.118  | X62534    | 1402.425  | 1928.941  | U57971    | 4152.64   | 4772.506  |
| NM_000203 | 276.974   | 228.724   | AF027147  | 22950.143 | 24432.918 | X89673    | 3201.443  | 3275.979  |
| NM_013443 | 2180.549  | 2125.597  | M62399    | 4907.979  | 6951.8    | AK024593  | 4083.66   | 5436.026  |
| NM_000925 | 15917.194 | 16786.129 | NM_002357 | 873.794   | 1243.802  | Z83934    | 1801.88   | 2364.585  |
| NM_000465 | 3611.244  | 4038.344  | U71600    | 4032.207  | 6472.095  | NM_018355 | 5599.51   | 5497.98   |
| AF116685  | 268.065   | 493.415   | NM_004472 | 1067.504  | 1640.599  | AK022020  | 4588.32   | 3331.332  |
| NM_000123 | 3267.955  | 4798.249  | AB037862  | 1815.43   | 2449.657  | AK000263  | 25245.334 | 21082.424 |
| AL137501  | 3547.82   | 3732.61   | NM_005392 | 1189.962  | 1481.474  | Y13895    | 2240.062  | 2032.289  |
| BE858979  | 343.084   | 457.754   | AL133572  | 5127.504  | 5716.425  | L14723    | 25776.682 | 33907.77  |
| NM_000122 | 4452.777  | 3338.188  | AK022500  | 5550.522  | 8509.479  | AK024462  | 58463.141 | 57685.633 |
| NM_006712 | 43615.918 | 39996.895 | NM_003447 | 798.278   | 1151.581  | NM_019601 | 1634.24   | 1376.009  |
| NM_006240 | 792.746   | 915.533   | NM_005014 | 1357.521  | 971.768   | NM_002206 | 2025.061  | 2133.925  |
| NM_007026 | 5382.878  | 7240.216  | NM_006944 | 269.775   | 284.325   | NM_007074 | 1947.021  | 2963.002  |
| M37712    | 11197.822 | 8457.508  | NM_004407 | 627.793   | 492.317   | NM_006614 | 1697.797  | 2232.172  |
| NM_002648 | 12867.855 | 11898.324 | NM_000070 | 2800.593  | 2076.63   | NM_002230 | 8169.499  | 7398.839  |
| AF070670  | 10746.491 | 9004.763  | NM_001202 | 1202.124  | 992.906   | NM_003815 | 14550.848 | 12417.421 |
| NM_016156 | 5925.537  | 6208.189  | AB037804  | 422.349   | 347.999   | NM_001430 | 2561.538  | 2736.72   |
| NM_016528 | 4034.476  | 3859.14   | U34249    | 1143.304  | 709.551   | AB010098  | 1523.237  | 1589.143  |
| NM_015974 | 2535.721  | 2425.354  | NM_003289 | 49413.219 | 38831.16  | U17989    | 3698.413  | 3736.167  |
| NM_014384 | 2670.536  | 2433.861  | AI200114  | 1297.82   | 1139.811  | U62325    | 3763.479  | 3385.036  |
| NM_002573 | 5455.499  | 4058.831  | M74220    | 763.363   | 330.194   | AL137595  | 1762.959  | 1676.978  |
| AL133037  | 1223      | 1728.259  | M23254    | 853.966   | 980.999   | NM_018028 | 2282.049  | 2224.833  |
| NM_020350 | 4679.208  | 5131.86   | BE618539  | 5228.974  | 5473.63   | AF249267  | 64686.816 | 61792.719 |
| NM_000350 | 2354.069  | 4795.732  | R28062    | 3436.963  | 3669.604  | NM_004113 | 961.838   | 1094.373  |
| X91103    | 2821.009  | 3891.953  | U38545    | 227.925   | 299.868   | X84939    | 7928.822  | 9043.137  |
| AA419164  | 2394.388  | 3000.526  | AI627464  | 865.332   | 1116.234  | NM_018320 | 60704.934 | 56733.781 |
| L35251    | 4465.426  | 4305.209  | BI756258  | 2675.023  | 3885.853  | NM_002069 | 7979.718  | 7704.31   |
| BE910395  | 5809.207  | 5772.599  | AI342225  | 52940.012 | 61373.895 | NM_016056 | 13224.582 | 10138.604 |
| N46828    | 2297.132  | 2302.246  | AA634103  | 51549.586 | 59559.777 | AF188492  | 847.439   | 791.137   |
| BI908302  | 5525.284  | 5775.708  | J04599    | 1173.607  | 2120.185  | M65066    | 26963.795 | 24980.234 |
| AA460969  | 4966.568  | 4782.364  | AF110020  | 2621.091  | 3599.326  | NM_016951 | 3860.601  | 3674.799  |
| BG695859  | 4380.128  | 5140.25   | AA608557  | 6690.872  | 7974.034  | NM_013251 | 2308.773  | 2185.963  |
| M85079    | 1415.261  | 1392.378  | AL050095  | 9472.041  | 11200.574 | NM_012326 | 1742.423  | 2458.252  |
| AA457671  | 8120.166  | 9219.813  | U03272    | 793.663   | 1500.181  | NM_003085 | 67022.57  | 66697.664 |
| X07437    | 1416.948  | 1713.837  | NM_012253 | 10695.431 | 15456.771 | NM_016084 | 37896.793 | 32329.293 |
| NM_000641 | 3256.613  | 2908.42   | NM_000258 | 41441.727 | 22407.875 | AF095289  | 41671.504 | 39839.469 |
| AE006466  | 807.091   | 948.409   | AB033055  | 13186.229 | 8674.078  | NM_005537 | 6171.443  | 5945.804  |
| BC008737  | 48904     | 66377.977 | AF311287  | 9439.226  | 6151.506  | AC003962  | 936.943   | 886.534   |



|           |           |           |           |           |           |           |           |           |
|-----------|-----------|-----------|-----------|-----------|-----------|-----------|-----------|-----------|
| BC011655  | 6726.969  | 6319.461  | NM_003098 | 1804.479  | 1322.464  | NM_019003 | 4955.555  | 5099.361  |
| BC002396  | 9418.137  | 7723.91   | NM_014781 | 3562.529  | 2050.789  | NM_015935 | 27850.588 | 25812.156 |
| AF112219  | 10596.554 | 7478.658  | BU629989  | 1077.345  | 747.764   | AF182412  | 1748.124  | 1877.36   |
| NM_000521 | 429.64    | 247.404   | X87896    | 1704.027  | 1210.87   | AK027200  | 2834.123  | 3644.612  |
| M34423    | 170.674   | 156.313   | M88310    | 2408.682  | 1921.861  | S78372    | 444.057   | 352.493   |
| AF208232  | 3876.033  | 7443.292  | D16856    | 251.802   | 249.546   | U03106    | 17087.416 | 21840.326 |
| NM_002988 | 1053.557  | 1777.154  | NM_000042 | 1874.357  | 1782.726  | NM_000075 | 30533.174 | 29189.162 |
| NM_004188 | 898.413   | 1359.74   | AF035787  | 6223.723  | 5430.222  | NM_006845 | 60200.07  | 58893.156 |
| NM_016255 | 11193.587 | 20698.25  | NM_005024 | 351.801   | 305.828   | NM_014885 | 877.794   | 1102.706  |
| AF203032  | 3521.21   | 5643.969  | NM_003403 | 1552.916  | 1812.151  | M73239    | 1101.964  | 1393.182  |
| AB014542  | 5468.316  | 6393.688  | NM_014808 | 3707.481  | 5875.609  | NM_004945 | 6644.963  | 8231.11   |
| NM_014640 | 1965.374  | 2363.325  | AB006627  | 3286.893  | 5615.647  | NM_020242 | 2539.126  | 2953.903  |
| Y10518    | 9160.483  | 12531.563 | NM_000416 | 6568.502  | 10276.637 | NM_001788 | 43591.254 | 43805.945 |
| AF155135  | 7849.383  | 9188.592  | AB007883  | 7925.188  | 10133.144 | NM_007178 | 61037.867 | 66859.523 |
| NM_014790 | 3889.365  | 3313.741  | NM_006391 | 1076.649  | 748.621   | NM_017682 | 1213.751  | 1377.545  |
| NM_003571 | 9360.613  | 10893.796 | AY009397  | 52530.863 | 62169.207 | NM_002205 | 10327.948 | 10855.174 |
| AB032965  | 5126.516  | 6650.833  | NM_007037 | 47938.738 | 58439.691 | NM_002291 | 791.363   | 715.307   |
| NM_020370 | 996.735   | 1052.79   | NM_016335 | 2137.553  | 1512.177  | AL137477  | 24765.619 | 21051.168 |
| NM_004767 | 1338.42   | 1463.87   | NM_003165 | 4297.706  | 2662.954  | NM_016645 | 17361.463 | 16140.006 |
| BF310159  | 19803.66  | 18979.762 | NM_003906 | 27435.029 | 15534.42  | NM_014256 | 7049.281  | 7611.604  |
| NM_000316 | 458.722   | 389.421   | AL359590  | 32921.445 | 22670.783 | NM_015967 | 4846.734  | 5012.932  |
| NM_018986 | 8393.525  | 8283.819  | NM_002861 | 7077.336  | 5089.208  | NM_012237 | 721.054   | 589.649   |
| AB044934  | 1807.086  | 1949.099  | NM_003080 | 4555.172  | 2690.575  | NM_003595 | 808.859   | 1174.74   |
| U27655    | 7603.582  | 6511.175  | NM_004042 | 218.697   | 166.47    | NM_002405 | 3771.953  | 4036.382  |
| NM_005795 | 339.62    | 379.192   | NM_013268 | 379.737   | 333.938   | NM_004994 | 57209.223 | 54953.047 |
| Z21965    | 4356.492  | 3742.658  | NM_002645 | 3167.312  | 2357.551  | NM_006610 | 48890.008 | 46303.453 |
| NM_012427 | 1655.669  | 1364.643  | AB033027  | 1821.989  | 1597.936  | NM_017626 | 940.767   | 810.664   |
| L09070    | 476.517   | 455.216   | AF320293  | 553.225   | 606.177   | NM_003791 | 8020.522  | 7864.762  |
| NM_000062 | 19221.852 | 11449.601 | NM_001171 | 1157.522  | 1325.097  | NM_018017 | 14474.773 | 13443.699 |
| NM_015715 | 2354.211  | 3661.959  | S81591    | 567.005   | 613.094   | AK001296  | 46490.105 | 41761.723 |
| NM_000032 | 2816.113  | 5168.126  | NM_006323 | 13977.812 | 20111.732 | AK025709  | 3554.4    | 3818.437  |
| NM_002083 | 302.668   | 349.714   | NM_016466 | 2853.893  | 4336.019  | NM_019016 | 50312.988 | 43189.285 |
| NM_002035 | 6068.59   | 8304.065  | NM_001493 | 4762.142  | 6543.899  | NM_012261 | 22731.693 | 21668.811 |
| NM_014900 | 3257.521  | 3859.426  | NM_003716 | 734.472   | 1203.92   | NM_015556 | 16380.239 | 14574.94  |
| BF342908  | 365.652   | 881.977   | NM_014841 | 1120.997  | 1907.121  | NM_006095 | 6152.165  | 6634.382  |
| AF118073  | 660.116   | 970.573   | NM_014426 | 7532.424  | 14948.133 | AF272379  | 10516.842 | 10942.023 |
| AK023510  | 4605.877  | 4714.928  | NM_006816 | 54958.996 | 58113.961 | AK022643  | 2119.61   | 1506.5    |
| NM_004345 | 2687.707  | 2951.145  | AK026518  | 54783.199 | 60366.129 | AB046808  | 3357.468  | 3099.168  |
| NM_006528 | 385.867   | 712.649   | AF132734  | 15889.689 | 11093.163 | AK026265  | 3268.915  | 2896.444  |
| NM_002232 | 415.536   | 559.553   | NM_018379 | 2644.374  | 1920.683  | AK027179  | 1737.271  | 1496.259  |
| NM_014570 | 4985.163  | 4967.063  | NM_016403 | 22856.941 | 16965.684 | AF015313  | 1275.657  | 1490.962  |
| NM_014822 | 2467.467  | 2589.149  | NM_015603 | 837.631   | 420.062   | NM_006466 | 4460.542  | 3497.955  |
| NM_005296 | 2426.861  | 2949.039  | AK021788  | 350.665   | 190.682   | NM_005681 | 4744.792  | 3947.758  |
| NM_001337 | 1194.075  | 1606.978  | NM_001921 | 5796.354  | 4576.916  | NM_015156 | 5066.035  | 4828.348  |
| NM_003611 | 2526.663  | 2798.565  | NM_006230 | 7367.316  | 5659.613  | NM_012384 | 6194.621  | 5278.629  |
| AB014538  | 3598.879  | 4529.157  | NM_014699 | 7825.999  | 4558.134  | NM_004653 | 10004.946 | 8663.309  |
| NM_006205 | 752.601   | 765.495   | NM_013400 | 10980.072 | 7695.707  | AF233453  | 5623.997  | 4952.791  |
| AK025118  | 8621.724  | 8549.592  | AK026257  | 1532.409  | 1235.128  | D87454    | 27815.586 | 29590.889 |
| NM_000727 | 817.166   | 920.901   | AK023836  | 10059.288 | 7939.368  | NM_007020 | 10958.435 | 11382.143 |
| NM_002621 | 424.029   | 428.519   | NM_018109 | 2795.134  | 2490.007  | NM_002936 | 21165.328 | 24635.549 |
| NM_005385 | 3606.059  | 2783.031  | AJ299442  | 5472.58   | 6541.104  | NM_014161 | 8991.387  | 8535.691  |
| NM_018985 | 4724.005  | 3970.366  | AB040897  | 590.529   | 631.49    | BF312817  | 12787.2   | 12956.615 |
| NM_000203 | 441.256   | 474.704   | NM_000129 | 2930.873  | 3879.017  | AF284580  | 2236.819  | 2731.761  |

|           |           |           |           |           |           |           |           |           |
|-----------|-----------|-----------|-----------|-----------|-----------|-----------|-----------|-----------|
| NM_013443 | 2506.559  | 3070.679  | NM_003762 | 5688.102  | 8854.324  | AK024961  | 6546.915  | 6127.85   |
| NM_000925 | 17176.451 | 20292.965 | NM_018446 | 3508.767  | 6193.306  | NM_016068 | 20589.666 | 21020.455 |
| NM_000465 | 4102.178  | 4302.6    | NM_000187 | 893.964   | 1637.025  | NM_002711 | 1092.436  | 1089.929  |
| NM_000123 | 4810.555  | 9184.348  | NM_014465 | 1699.444  | 2368.849  | NM_000195 | 61425     | 59610.66  |
| AL137501  | 3709.617  | 4714.294  | D87292    | 1572.78   | 3085.764  | NM_003778 | 59876     | 61359.035 |
| BE858979  | 385.03    | 388.969   | NM_005498 | 2370.302  | 3619.456  | NM_001041 | 951.454   | 1047.726  |
| NM_000122 | 4726.07   | 3817.771  | NM_004407 | 544.588   | 355.915   | NM_000693 | 719.47    | 623.281   |
| NM_006712 | 42928.445 | 47614.117 | NM_000070 | 3417.814  | 2278.272  | AK023263  | 3165.69   | 3057.834  |
| NM_006240 | 668.588   | 1056.72   | NM_001202 | 1194.729  | 882.13    | NM_004622 | 4396.766  | 4117.27   |
| NM_007026 | 5239.592  | 6710.79   | AB037804  | 301.614   | 365.25    | AK021445  | 4042.659  | 3545.573  |
| M37712    | 12470.528 | 10783.272 | U34249    | 962.171   | 695.452   | NM_017934 | 31911.199 | 30068.912 |
| NM_002648 | 12823.113 | 12448.825 | NM_003289 | 49808.758 | 41448.473 | NM_014168 | 59205.57  | 59172.617 |
| AF070670  | 9460.266  | 8003.787  | AI200114  | 1084.521  | 1129.602  | AF211971  | 12971.536 | 14186.412 |
| NM_016156 | 5481.214  | 5727.403  | M74220    | 229.967   | 121.296   | NM_002931 | 6838.255  | 6541.014  |
| NM_016528 | 4464.808  | 6117.876  | M23254    | 894.86    | 779.769   | NM_013448 | 58104.867 | 66533.773 |
| NM_015974 | 2287.024  | 2160.946  | BE618539  | 4514.488  | 3444.473  | X65232    | 59205.516 | 57424.082 |
| NM_014384 | 2410.631  | 2904.059  | R28062    | 3228.52   | 2957.261  | U12767    | 1025.029  | 1076.715  |
| NM_002573 | 5570.303  | 4638.329  | AI627464  | 755.249   | 750.542   | U17630    | 3914.288  | 4126.875  |
| AF133424  | 1468.321  | 1370.187  | BI756258  | 2847.367  | 2820.537  | M33782    | 5497.511  | 5459.566  |
| NM_005003 | 26609.17  | 15909.733 | AI342225  | 52575.215 | 62368.328 | NM_002196 | 1155.704  | 1241.394  |
| AL133037  | 1141.069  | 2030.751  | AA634103  | 53208.637 | 60846.793 | NM_017755 | 23688.129 | 22780.23  |
| NM_020350 | 4892.678  | 6880.725  | J04599    | 1023.105  | 1596.31   | NM_018416 | 3304.885  | 3132.709  |
| NM_000350 | 1788.866  | 3021.168  | AF110020  | 2218.17   | 2906.095  | NM_004606 | 18466.32  | 24985.729 |
| X91103    | 3208.898  | 4268.227  | AA608557  | 6859.713  | 10490.524 | D70833    | 64737.754 | 62741.813 |
| AA419164  | 2552.239  | 3954.435  | AL050095  | 9528.839  | 15197.084 | NM_002975 | 6310.915  | 5111.21   |
| L35251    | 4538.03   | 8145.759  | U03272    | 637.474   | 1062.236  | AK023511  | 15617.105 | 15332.014 |
| BE910395  | 6769.376  | 11227.638 | AF075085  | 51444.77  | 60464.32  | NM_014556 | 11487.492 | 8866.539  |
| N46828    | 2140.926  | 2464.157  | NM_005892 | 4124.552  | 6299.482  | NM_001615 | 60898.238 | 64869.129 |
| BI908302  | 5768.406  | 6141.171  | NM_006478 | 651.871   | 1205.382  | NM_002725 | 3268.61   | 3233.299  |
| AA460969  | 5642.296  | 5532.956  | AF311287  | 10347.622 | 6284.559  | NM_014375 | 61604.195 | 58499.098 |
| BG695859  | 4723.86   | 5039.386  | NM_003098 | 1726.587  | 1475.685  | NM_017812 | 37173.867 | 32120.826 |
| M85079    | 1484.232  | 1615.765  | NM_014781 | 3287.955  | 1851.193  | AF204173  | 3076.489  | 2775.135  |
| AA457671  | 7907.705  | 8957.771  | BU629989  | 1256.484  | 683.779   | J03260    | 10048.088 | 9222.714  |
| X07437    | 1300.553  | 1649.773  | X87896    | 1869.732  | 1310.361  | U13738    | 4253.439  | 4475.398  |
| NM_000641 | 3393.698  | 2896.527  | M88310    | 2529.203  | 1833.522  | AF068236  | 60016.344 | 65749.016 |
| AE006466  | 686.541   | 827.725   | D16856    | 379.535   | 181.374   | H94487    | 8537.79   | 8169.598  |
| BC008737  | 45826.137 | 64613.563 | NM_000042 | 2035.91   | 1250.273  | BG681747  | 34776.066 | 39086.758 |
| BC011655  | 7248.837  | 8331.572  | AF035787  | 4979.033  | 3253.055  | H63077    | 3691.351  | 3370.002  |
| BC002396  | 9595.898  | 8753.103  | NM_005024 | 224.641   | 259.166   | AA679352  | 12679.989 | 13940.896 |
| AF112219  | 10789.027 | 9053.28   | NM_003403 | 1561.043  | 1228.383  | AA437291  | 2993.327  | 3313.126  |
| NM_000521 | 357.339   | 337.29    | NM_014808 | 3703.628  | 4283.014  | X04503    | 6285.671  | 5495.418  |
| NM_002625 | 246.593   | 210.2     | AB006627  | 2887.96   | 2691.251  | D45917    | 12755.373 | 11994.438 |
| NM_004135 | 6172.171  | 2930.323  | NM_000416 | 6024.707  | 4652.202  | X52001    | 13333.789 | 12536.44  |
| Y10518    | 12456.406 | 22942.295 | NM_003382 | 196.491   | 412.135   | BI823872  | 1100.476  | 1132.528  |
| AF155135  | 9646.039  | 18089.486 | NM_002965 | 425.885   | 606.046   | AA430552  | 16662.482 | 16030.846 |
| NM_014790 | 3696.968  | 5106.215  | AB007883  | 7135.919  | 8763.268  | X66142    | 7705.84   | 6451.975  |
| NM_003571 | 12055.136 | 21135.869 | NM_006391 | 1008.104  | 821.974   | NM_005913 | 2558.555  | 2642.801  |
| AB032965  | 9767.459  | 17924.504 | AY009397  | 53620.645 | 63372.133 | R45054    | 9719.199  | 9429.4    |
| NM_004767 | 1326.441  | 2947.938  | NM_007037 | 41987.824 | 48313.734 | NM_003731 | 53865.512 | 50899.574 |
| BF310159  | 19088.195 | 23005.764 | NM_005014 | 1402.592  | 3001.732  | NM_005446 | 49766.664 | 43508.027 |
| NM_000316 | 424.197   | 432.029   | NM_006944 | 453.567   | 630.85    | NM_013292 | 36739.047 | 30526.848 |
| NM_018986 | 8351.91   | 7931.059  | NM_003165 | 4730.717  | 2946.27   | NM_002387 | 5590.597  | 5302.006  |
| AB044934  | 1696.922  | 1575.509  | NM_003906 | 30327.234 | 16287.819 | NM_000065 | 12934.235 | 12107.075 |

|           |           |           |           |           |           |           |           |           |
|-----------|-----------|-----------|-----------|-----------|-----------|-----------|-----------|-----------|
| U27655    | 7057.815  | 6461.861  | AL359590  | 33459.215 | 22951.268 | AB023217  | 1962.033  | 1663.505  |
| NM_005795 | 329.928   | 416.755   | NM_002861 | 7322.681  | 4800.345  | L08902    | 3339.184  | 2794.939  |
| NM_003360 | 3959.413  | 3833.224  | NM_003080 | 4840.695  | 2664.726  | J02639    | 10499.565 | 9028.783  |
| Z21965    | 3763.201  | 3686.424  | NM_004042 | 235.531   | 179.055   | M58050    | 10070.146 | 10696.469 |
| NM_012427 | 1746.097  | 2089.414  | NM_013268 | 516.673   | 502.344   | NM_007263 | 22808.143 | 23859.178 |
| AF131857  | 34981.387 | 24351.428 | NM_002645 | 3250.542  | 2338.642  | AF206020  | 14224.352 | 12527.764 |
| NM_000852 | 253.387   | 179.112   | AB033027  | 1849.268  | 1053.993  | NM_014410 | 14212.878 | 12756.819 |
| NM_000395 | 1834.972  | 1615.066  | AF320293  | 455.896   | 287.007   | AF305835  | 636.1     | 561.505   |
| AW797282  | 340.24    | 192.659   | NM_001171 | 1199.621  | 929.966   | AF312769  | 3636.016  | 3640.026  |
| NM_002402 | 1013.484  | 997.98    | S81591    | 545.605   | 443.391   | AB020668  | 10379.924 | 11133.354 |
| L09070    | 495.341   | 309.661   | NM_006323 | 11408.122 | 10267.356 | NM_006203 | 58757.82  | 60507.152 |
| NM_000062 | 19216.416 | 13409.189 | NM_016466 | 2118.361  | 1899.627  | NM_013261 | 4089.223  | 3900.565  |
| NM_009590 | 4021.882  | 2383.067  | NM_001493 | 4352.125  | 4354.625  | NM_003555 | 786.068   | 645.35    |
| NM_014747 | 14119.538 | 19880.475 | NM_003716 | 684.547   | 689.735   | AF309553  | 9130.236  | 7974.336  |
| Y19240    | 8821.459  | 14052.707 | NM_014841 | 936.012   | 1403.715  | NM_003605 | 5149.995  | 4385.3    |
| AF091029  | 4119.325  | 6249.985  | NM_014426 | 6818.851  | 11282.922 | NM_006135 | 2077.319  | 2097.635  |
| X97074    | 7967.858  | 14473.353 | NM_006816 | 52597.855 | 60089.883 | NM_001900 | 65578.227 | 67741.258 |
| AL117235  | 1585.513  | 4525.014  | AK026518  | 50476.582 | 56904.969 | NM_003993 | 9182.869  | 9122.612  |
| NM_014822 | 3337.541  | 5120.085  | NM_000258 | 51713.398 | 51407.355 | NM_002150 | 19033.299 | 16890.244 |
| NM_005296 | 2642.862  | 5244.981  | AB033055  | 22630.754 | 44230.707 | NM_004595 | 16579.893 | 15839.525 |
| NM_001337 | 1011.415  | 1589.154  | NM_016403 | 24510.104 | 18521.949 | NM_020178 | 805.14    | 781.453   |
| NM_003611 | 2580.66   | 3151.067  | NM_015603 | 1013.712  | 607.734   | NM_014754 | 44634.203 | 51245.141 |
| AB014538  | 3896.47   | 5943.899  | AK021788  | 393.751   | 268.847   | D49387    | 2566.495  | 2382.581  |
| NM_004154 | 196.296   | 362.252   | NM_001921 | 5557.367  | 3904.855  | AF050146  | 20749.07  | 17836.26  |
| NM_006205 | 720.764   | 674.973   | NM_006230 | 7616.795  | 5360.507  | NM_000116 | 5499.692  | 5695.925  |
| AK025118  | 8724.72   | 8951.782  | NM_014695 | 8787.137  | 5467.374  | NM_006695 | 14140.102 | 16229.189 |
| NM_000727 | 975.133   | 858.593   | NM_013400 | 10954.02  | 7273.25   | NM_006804 | 40727.516 | 38576.98  |
| NM_002621 | 319.068   | 295.729   | AK026257  | 1615.454  | 880.311   | NM_001133 | 570.519   | 491.608   |
| NM_005385 | 4127.061  | 3864.93   | AK023836  | 9954.812  | 6502.145  | AK025641  | 56523.277 | 61204.781 |
| NM_018985 | 5069.195  | 5516.473  | NM_018105 | 2277.7    | 1721.08   | AB040457  | 1113.282  | 873.063   |
| NM_006074 | 36283.039 | 30453.393 | AJ299442  | 5365.044  | 5670.643  | AB014514  | 10576.069 | 10611.101 |
| AF208232  | 2775.137  | 2350.93   | AB040897  | 583.813   | 731.206   | NM_002865 | 15886.842 | 16121.59  |
| NM_002985 | 1166.086  | 1176.69   | NM_000125 | 2597.614  | 2290.528  | NM_003566 | 4998.005  | 3618.257  |
| NM_004186 | 762.571   | 758.759   | NM_003762 | 5207.111  | 6558.94   | NM_004245 | 606.282   | 642.048   |
| NM_016255 | 8740.666  | 7851.121  | NM_018446 | 3222.115  | 4664.204  | AK026315  | 511.558   | 557.975   |
| AF203032  | 2764.739  | 1847.033  | NM_000187 | 839.687   | 1569.371  | NM_007155 | 61549.352 | 62034.137 |
| AB014542  | 5717.5    | 2701.867  | NM_014465 | 1920.521  | 3211.439  | NM_018390 | 3760.408  | 3619.825  |
| NM_014640 | 1781.374  | 1024.822  | D87292    | 1371.785  | 2704.976  | AB037724  | 17172.082 | 16844.82  |
| NM_015974 | 2160.789  | 3385.989  | NM_005495 | 2285.121  | 3312.025  | AK026151  | 23894.963 | 27971.686 |
| NM_014384 | 2794.319  | 4582.549  | NM_016335 | 3853.255  | 5951.552  | NM_014140 | 2515.431  | 3139.438  |
| NM_002573 | 5935.927  | 8751.627  | NM_001202 | 1296.841  | 983.797   | NM_002916 | 6098.979  | 7004.883  |
| AF133424  | 1849.379  | 2839.607  | AB037804  | 298.267   | 272.024   | M20700    | 9284.62   | 9773.948  |
| NM_015715 | 2871.983  | 6448.66   | U34249    | 980.148   | 581.302   | NM_001034 | 11149.292 | 16467.27  |
| NM_000032 | 3092.496  | 4868.676  | NM_003285 | 44113.648 | 36475.797 | NM_002685 | 4478.964  | 6577.738  |
| NM_002083 | 332.111   | 306.445   | AI200114  | 1224.486  | 1039.221  | NM_017686 | 1385.759  | 1527.683  |
| NM_002035 | 7256.097  | 8196.652  | M74220    | 258.858   | 180.302   | AL096734  | 1233.293  | 1368.615  |
| NM_014900 | 3468.616  | 4231.094  | M23254    | 916.309   | 703.229   | AK000800  | 4274.615  | 4980.208  |
| BF342908  | 361.187   | 522.198   | BE618539  | 5548.935  | 3807.942  | NM_018154 | 7575.096  | 9651.146  |
| AF118073  | 746.382   | 1065.452  | R28062    | 3468.677  | 2288.786  | NM_005355 | 998.973   | 923.377   |
| AK023510  | 4268.002  | 4796.806  | AI627464  | 650.983   | 612.327   | BC006287  | 7423.063  | 7365.989  |
| NM_004345 | 2887.177  | 3559.49   | BI756258  | 2770.439  | 2876.095  | AB023198  | 10937.844 | 10463.229 |
| NM_000702 | 41623.035 | 38859.891 | AI342225  | 49933.305 | 59659.941 | AF304163  | 13103.201 | 17080.762 |
| X71490    | 9467.608  | 9958.792  | AA634103  | 48445.898 | 52928.145 | NM_005231 | 11491.17  | 13506.318 |

|           |           |           |           |           |           |           |           |           |
|-----------|-----------|-----------|-----------|-----------|-----------|-----------|-----------|-----------|
| AF257081  | 510.124   | 688.482   | J04599    | 1269.447  | 1532.664  | AF064729  | 4057.672  | 4268.412  |
| NM_006528 | 360.273   | 612.974   | AF110020  | 2124.453  | 1901.908  | NM_005412 | 36809.645 | 29222.945 |
| NM_001688 | 37922.668 | 22469.795 | AA608557  | 6775.003  | 7484.591  | NM_012113 | 3844.216  | 4355.542  |
| NM_003631 | 873.069   | 750.45    | AL050095  | 9302.594  | 10994.556 | NM_014556 | 13079.81  | 10449.191 |
| NM_000219 | 313.444   | 316.608   | U03272    | 570.343   | 829.264   | NM_001615 | 66834.016 | 67255.313 |
| NM_002232 | 478.985   | 479.027   | AF075085  | 48918.023 | 57066.207 | NM_002725 | 3176.57   | 2947.528  |
| NM_016106 | 7351.173  | 3455.535  | NM_005892 | 4059.044  | 6887.884  | NM_017812 | 37243.273 | 41921.785 |
| NM_014570 | 4561.568  | 2190.615  | NM_006478 | 572.333   | 1164.803  | AF204173  | 2882.764  | 3245.106  |
| AF112219  | 12576.01  | 13859.468 | AF132734  | 18088.197 | 25739.541 | J03260    | 10288.175 | 10087.131 |
| NM_000521 | 679.493   | 679.962   | NM_018379 | 2755.942  | 4278.234  | U13738    | 4303.652  | 4309.321  |
| M34423    | 217.999   | 451.77    | NM_000042 | 2143.136  | 1412.562  | AF068236  | 61449.441 | 63700.91  |
| NM_004135 | 7756.176  | 9468.522  | AF035787  | 4411.55   | 2617.842  | H94487    | 9890.386  | 9709.277  |
| NM_000203 | 445.813   | 713.078   | NM_003403 | 1344.62   | 869.133   | BG681747  | 36424.043 | 44131.863 |
| NM_013443 | 2559.345  | 3307.671  | NM_014808 | 3238.986  | 3051.538  | H63077    | 3644.64   | 3518.313  |
| NM_000925 | 18679.248 | 22997.473 | AB006627  | 2569.32   | 2085.738  | AA679352  | 12936.41  | 14637.813 |
| NM_000465 | 3977.791  | 4886.309  | NM_000416 | 5966.517  | 3694.955  | AA437291  | 3620.383  | 4344.927  |
| AF116685  | 455.525   | 818.555   | NM_002965 | 328.363   | 281.223   | X04503    | 6976.618  | 9312.116  |
| NM_000123 | 3380.787  | 5165.604  | AB007883  | 6777.648  | 4791.674  | D45917    | 12963.64  | 16072.02  |
| AL137501  | 3396.78   | 3396.655  | NM_006391 | 1102.825  | 556.34    | X52001    | 10836.188 | 12919.586 |
| BE858979  | 340.341   | 262.957   | AK093780  | 13577.056 | 15856.884 | BI823872  | 1130.964  | 1081.612  |
| NM_000122 | 4484.509  | 3700.541  | AY009397  | 52920.414 | 61924.551 | AA430552  | 16518.354 | 21295.232 |
| NM_003985 | 696.086   | 687.561   | NM_007037 | 39857.945 | 36924.105 | X66142    | 8022.317  | 7473.422  |
| NM_006712 | 44023.668 | 37735.93  | NM_001649 | 468.829   | 779.201   | NM_005913 | 2528.602  | 2070.846  |
| NM_006240 | 846.787   | 872.368   | NM_005492 | 6275.807  | 9098.219  | R45054    | 11627.317 | 10118.325 |
| NM_007026 | 5197.295  | 4944.451  | AF038196  | 2814.482  | 3623.867  | AL117398  | 7473.428  | 7241.322  |
| M37712    | 11397.254 | 6289.53   | NM_004859 | 23995.236 | 32034.42  | AY007158  | 57960.156 | 61539.227 |
| NM_002648 | 11495.86  | 6175.076  | NM_016352 | 3100.845  | 4745.568  | NM_001720 | 11819.078 | 10345.317 |
| AF070670  | 8541.269  | 2966.33   | NM_005014 | 1558.902  | 2999.201  | NM_013292 | 44017.102 | 37576.086 |
| NM_016156 | 6740.106  | 3641.265  | NM_006944 | 449.29    | 727.372   | NM_002387 | 6546.484  | 5325.72   |
| NM_016528 | 3631.438  | 1890.284  | NM_004407 | 701.509   | 1187.326  | NM_000069 | 11797.345 | 10089.666 |
| CY3Cy5    | 10017.05  | 1040.613  | NM_000070 | 5555.838  | 13857.818 | AB023217  | 1992.815  | 1769.011  |
| NM_000498 | 755.46    | 1204.47   | NM_003304 | 478.388   | 89.982    | L08902    | 3416.398  | 2661.639  |
| NM_000664 | 3506.372  | 5158.109  | NM_006323 | 10940.319 | 7165.54   | J02639    | 10237.278 | 8536.041  |
| AK026155  | 3118.545  | 4381.084  | NM_016466 | 2031.827  | 1440.739  | M58050    | 11123.944 | 10162.382 |
| NM_018052 | 9788.612  | 13566.295 | NM_001493 | 4147.374  | 2569.912  | NM_007263 | 23389.008 | 24354.113 |
| AF143322  | 1099.266  | 1447.766  | NM_003716 | 525.933   | 390.808   | AF206020  | 16238.643 | 14856.779 |
| AK022386  | 3712.01   | 3158.898  | NM_014841 | 738.46    | 561.137   | NM_014410 | 15906.561 | 14527.346 |
| NM_002767 | 52047.137 | 33778.305 | NM_014426 | 6796.286  | 6977.831  | AF305835  | 724.264   | 826.258   |
| AF131846  | 6606.999  | 5107.358  | NM_006816 | 44074.578 | 52352.707 | AF312769  | 4164.096  | 4537.053  |
| AF088069  | 15361.268 | 10442.257 | AK026518  | 49553.637 | 56070.676 | AB020668  | 12096.526 | 14255.616 |
| AF086551  | 1833.966  | 1978.594  | NM_000258 | 45808.395 | 40545.238 | NM_006203 | 58089.516 | 66745.063 |
| AF263545  | 739.204   | 553.465   | AB033055  | 16117.546 | 20438.213 | NM_013261 | 4429.482  | 5064.422  |
| NM_013393 | 12293.481 | 10678.331 | AF311287  | 13565.327 | 17561.068 | AF309553  | 8997.437  | 9514.518  |
| AK025082  | 2471.143  | 2691.575  | NM_003098 | 2252.057  | 3958.209  | NM_003605 | 5310.051  | 5440.9    |
| AF086535  | 2218.453  | 1704.892  | NM_014781 | 2780.831  | 5506.447  | NM_006139 | 1672.835  | 2141.85   |
| AB040901  | 3802.712  | 3115.612  | BU629989  | 1691.56   | 2531.844  | NM_001900 | 62133.484 | 71476.813 |
| AL137406  | 8967.979  | 6278.664  | X87896    | 2156.67   | 3340.434  | NM_003993 | 9986.562  | 12394.393 |
| NM_000498 | 760.395   | 553.166   | M88310    | 3002.558  | 4506.883  | NM_002975 | 6372.45   | 6271.036  |
| NM_000664 | 3059.454  | 2468.273  | D16856    | 315.805   | 401.467   | AK023511  | 21006.49  | 21428.836 |
| SR1       | 58126.242 | 64158.031 | NM_014465 | 2019.635  | 1351.396  | NM_020178 | 762.665   | 1125.655  |
| SR3       | 44465.293 | 30943.055 | D87292    | 1430.258  | 1067.694  | NM_002264 | 3017.294  | 3807.05   |
| SR5       | 4411.993  | 3636.345  | NM_005498 | 1784.971  | 1209.573  | NM_014754 | 42915.406 | 40824.555 |
| SR7       | 5846.089  | 32697.01  | NM_016335 | 2044.627  | 1270.077  | D49387    | 2490.562  | 2549.591  |

|           |           |           |           |           |           |           |           |           |
|-----------|-----------|-----------|-----------|-----------|-----------|-----------|-----------|-----------|
| SR9       | 22448.402 | 3645.205  | NM_003165 | 4585.028  | 3116.756  | AF050146  | 22103.838 | 19561.816 |
| CY3Cy5    | 4918.131  | 561.337   | NM_003906 | 32748.674 | 19316.621 | NM_000116 | 6451.134  | 5238.616  |
| U54734    | 727.305   | 922.95    | AL359590  | 30413.873 | 22018.76  | NM_006696 | 16045.856 | 15492.53  |
| U84507    | 490.656   | 490.454   | NM_002861 | 7778.194  | 6466.683  | NM_006804 | 43275.66  | 50727.879 |
| X65706    | 542.009   | 480.769   | NM_003080 | 4499.024  | 2875.908  | AK025641  | 58191.75  | 63946.172 |
| AK000872  | 3879.01   | 3347.057  | NM_004042 | 236.178   | 228.901   | AB040457  | 898.131   | 622.473   |
| AK027147  | 20363.891 | 17976.809 | NM_013268 | 534.766   | 390.236   | AB014514  | 9415.299  | 11283.355 |
| AF086285  | 1369.789  | 1055.276  | NM_002645 | 3307.165  | 3614.001  | NM_002865 | 16681.086 | 19042.594 |
| AF085924  | 1191.959  | 1139.169  | AB033027  | 1814.039  | 2043.289  | NM_003566 | 5172.539  | 4495.73   |
| AK023887  | 822.063   | 512.651   | AK021805  | 11092.336 | 17960.633 | NM_004246 | 504.541   | 562.631   |
| AF088022  | 10739.271 | 6647.363  | AB014550  | 2076.636  | 3036.128  | AK026315  | 688.609   | 1005.577  |
| AK026537  | 7363.824  | 5821.185  | AF320294  | 4151.418  | 5193.235  | NM_007156 | 62319.031 | 66310.172 |
| NM_015485 | 5515.289  | 3515.674  | AF320293  | 528.942   | 747.159   | NM_003731 | 62081.535 | 59908.934 |
| AF085992  | 760.404   | 694.81    | AF161436  | 3833.466  | 7159.64   | NM_005446 | 55185.387 | 55799.918 |
| AF075099  | 721.86    | 351.396   | NM_020402 | 3691.375  | 6827.433  | AB037724  | 20442.41  | 19230.514 |
| S83307    | 633.595   | 137.767   | NM_004299 | 1865.695  | 3509.581  | AK025086  | 5570.731  | 5286.146  |
| NM_002666 | 20439.906 | 19654.469 | NM_001171 | 955.992   | 1875.971  | AK026151  | 23731.813 | 19239.885 |
| AF202145  | 7985.68   | 6858.27   | NM_002250 | 8855.377  | 15637.437 | NM_014140 | 2966.451  | 3182.02   |
| AK022412  | 14580.623 | 10600.882 | S81591    | 541.11    | 823.426   | NM_002916 | 6343.414  | 7601.12   |
| AK023073  | 1323.532  | 813.164   | AF075085  | 44363.781 | 38591.957 | M20700    | 10145.294 | 10768.036 |
| AK023922  | 1180.949  | 1197.14   | NM_005892 | 2650.604  | 1697.43   | NM_001034 | 11191.578 | 12237.999 |
| AK022438  | 2174.857  | 1898.829  | NM_006478 | 464.131   | 353.592   | NM_002686 | 4266.655  | 4789.226  |
| AK023316  | 689.375   | 687.658   | AF132734  | 14098.549 | 8705.618  | NM_017686 | 1604.889  | 1334.17   |
| AK023764  | 1396.524  | 1126.555  | NM_018379 | 2351.348  | 1529.138  | AL096734  | 1456.972  | 1396.503  |
| AK024082  | 784.734   | 482.32    | NM_016403 | 21848.43  | 18273.123 | AK000800  | 4189.871  | 5057.446  |
| AK025072  | 7228.43   | 5848.858  | NM_015603 | 1011.614  | 508.412   | NM_018154 | 8167.419  | 9812.917  |
| AK022410  | 1032.696  | 933.896   | AK021788  | 397.624   | 262.883   | NM_005356 | 754.186   | 950.542   |
| L10378    | 18522.002 | 9679.961  | NM_001921 | 5511.953  | 4333.354  | BC006287  | 7270.647  | 10933.598 |
| AK022179  | 2135.429  | 1275.802  | NM_006230 | 6682.317  | 6276.868  | AB023198  | 10549.177 | 11516.114 |
| AK022173  | 1126.345  | 905.621   | NM_014699 | 6085.41   | 5203.46   | AF304163  | 12263.196 | 15540.261 |
| AJ227860  | 1722.769  | 1308.216  | NM_013400 | 8729.418  | 9733.028  | NM_005231 | 11637.126 | 15229.767 |
| AL157448  | 1249.236  | 860.909   | AK026257  | 1625.285  | 1633.18   | AF064729  | 4372.488  | 3795.879  |
| AF026942  | 5165.329  | 4586.381  | AK023836  | 9364.94   | 9859.229  | NM_005412 | 38338.105 | 32384.223 |
| AJ276429  | 5730.625  | 4016.876  | NM_018109 | 2458.12   | 2916.391  | NM_012113 | 3952.959  | 4271.86   |
| AL117657  | 659.026   | 798.397   | AJ299442  | 6190.176  | 11647.306 | NM_002150 | 20623.051 | 23931.131 |
| AK023589  | 1862.271  | 1727.02   | AB040897  | 467.834   | 832.392   | NM_004596 | 18810.627 | 22657.02  |
| AK021590  | 664.287   | 694.312   | NM_000129 | 1899.679  | 3393.58   | NM_002725 | 3928.981  | 4085.343  |
| AB002441  | 674.68    | 569.984   | NM_003762 | 3727.544  | 6696.479  | NM_014375 | 57851.121 | 60545.16  |
| AK023998  | 2320.04   | 1732.579  | NM_018446 | 3109.137  | 5904.439  | NM_017812 | 37617.305 | 38404.895 |
| AK021643  | 1420.706  | 997.362   | NM_000187 | 1499.401  | 3055.549  | AF204173  | 3480.069  | 4086.892  |
| Z11802    | 1291.693  | 799.106   | NM_017532 | 2472.934  | 2253.148  | J03260    | 10421.581 | 13666.013 |
| NM_014054 | 5158.688  | 3243.719  | AF086184  | 17003.551 | 14073.248 | U13738    | 4636.034  | 5021.203  |
| AK021840  | 60889.141 | 60151.316 | NM_018275 | 12120.946 | 10476.884 | AF068236  | 56083.949 | 60220.707 |
| AK022228  | 7745.804  | 6474.729  | AL049266  | 5214.921  | 4629.006  | H94487    | 11619.361 | 10855.201 |
| AK022031  | 1788.326  | 2032.722  | AK021560  | 913.415   | 1078.313  | BG681747  | 38075.813 | 42697.258 |
| AF003738  | 653.195   | 803.359   | AF088045  | 924.802   | 1264.181  | H63077    | 4350.676  | 4325.306  |
| AF086480  | 1999.543  | 2645.172  | AF007149  | 2014.113  | 3286.252  | AA679352  | 12293.46  | 13744.297 |
| AK022122  | 1367.846  | 1363.268  | NM_014705 | 565.412   | 696.87    | AA437291  | 3775.086  | 4390.732  |
| AK026084  | 366.06    | 205.534   | AK001469  | 4180.129  | 2783.913  | X04503    | 6326.279  | 5604.223  |
| AK022415  | 5546.814  | 4305.913  | AF035318  | 758.901   | 608.447   | D45917    | 11109.1   | 11109.412 |
| AL137368  | 5569.275  | 3949.406  | NM_015456 | 5141.338  | 2975.333  | X52001    | 12046.328 | 13212.665 |
| AK021932  | 2033.434  | 1839.474  | AK025056  | 2135.558  | 1384.698  | BI823872  | 1169.065  | 1182.035  |
| AK026787  | 1309.455  | 976.645   | AF140710  | 6485.511  | 3895.947  | AA430552  | 17915.564 | 16828.002 |

|           |           |           |           |           |           |           |           |           |
|-----------|-----------|-----------|-----------|-----------|-----------|-----------|-----------|-----------|
| AK023542  | 1873.066  | 1301.241  | NM_017532 | 2510.104  | 1720.185  | X66142    | 8020.082  | 6559.144  |
| AK000203  | 2155.454  | 1360.913  | SR2       | 27579.895 | 26892.588 | NM_005913 | 2478.187  | 2041.252  |
| AK021845  | 1439.909  | 1996.744  | SR4       | 9957.818  | 9024.756  | R45054    | 11346.888 | 10671.161 |
| AK022434  | 437.266   | 458.324   | SR6       | 1097.34   | 1304.928  | AL117398  | 7540.832  | 7134.122  |
| NM_018592 | 8277.82   | 10683.674 | SR8       | 4079.094  | 14832.154 | AY007158  | 59246.457 | 65359.246 |
| NM_018503 | 5770.524  | 6459.491  | SR10      | 13484.547 | 5611.3    | NM_001720 | 11007.271 | 10566.611 |
| NM_016449 | 11047.508 | 9872.025  | AL157477  | 2378.601  | 2481.759  | NM_018390 | 4259.537  | 5762.236  |
| AL049670  | 9408.354  | 6045.705  | AB002318  | 1598.421  | 1393.159  | NM_007263 | 24289.582 | 26352.746 |
| AK021465  | 1159.046  | 722.992   | AL357535  | 2333.497  | 2288.859  | AF206020  | 18395.041 | 18112.844 |
| NM_018512 | 2268.549  | 1870.2    | AL049951  | 1398.695  | 1556.427  | NM_014410 | 19150.738 | 15625.853 |
| AL161991  | 22960.791 | 13282.933 | AK024963  | 1220.787  | 1066.058  | AF305835  | 606.922   | 470.481   |
| D17032    | 43911.184 | 34319.613 | AK023725  | 1929.891  | 2349.258  | AF312769  | 4182.885  | 3879.559  |
| AL137292  | 1173.824  | 1134.629  | AK022936  | 10482.027 | 19757.549 | AB020668  | 13007.937 | 12647.26  |
| NM_017941 | 2313.001  | 2854.467  | AK024385  | 3686.943  | 3600.786  | NM_006203 | 57785.242 | 58553.164 |
| BE900527  | 3278.868  | 3174.963  | AL137727  | 3327.696  | 4114.355  | NM_013261 | 3333.769  | 3267.905  |
| D28384    | 56390.238 | 64246.785 | L17327    | 728.63    | 1364.501  | NM_003558 | 755.65    | 635.587   |
| AF118079  | 56609.098 | 59567.742 | AF074986  | 1233.223  | 1570.983  | AF309553  | 9675.667  | 8910.055  |
| AF277572  | 463.409   | 369.864   | AF075004  | 519.244   | 348.419   | NM_003605 | 5796.651  | 6247.499  |
| AL365413  | 1804.07   | 1741.917  | AL049240  | 8949.276  | 5166.408  | NM_006139 | 1571.723  | 2113.769  |
| NM_005258 | 12544.998 | 11348.72  | U80773    | 1301.268  | 1048.36   | NM_000100 | 54665.934 | 55173.188 |
| NM_003948 | 1498.081  | 1619.352  | AK021745  | 2468.829  | 1696.385  | NM_003993 | 9384.288  | 10415.751 |
| AK025062  | 3060.699  | 2347.914  | L38937    | 4791.852  | 3014.579  | NM_018961 | 7174.17   | 6996.079  |
| Z27405    | 6186.513  | 5238.852  | AK024327  | 1227.173  | 718.391   | NM_005588 | 10260.696 | 9523.353  |
| AK023412  | 2569.898  | 2539.125  | AK021700  | 799.024   | 565.71    | NM_012242 | 2881.181  | 2614.555  |
| NM_014617 | 56387.074 | 64552.43  | AK024395  | 518.29    | 244.806   | NM_006890 | 3251.807  | 3346.957  |
| AK074682  | 10422.13  | 9453.609  | AK000801  | 6989.282  | 6054.075  | NM_001130 | 64148.773 | 66810.328 |
| X74605    | 1489.807  | 1606.977  | D85433    | 3552.221  | 3192.904  | NM_002975 | 6632.096  | 6069.91   |
| AK024513  | 1630.77   | 1817.633  | AK025109  | 4730.326  | 4135.745  | AK023511  | 18893.498 | 18998.523 |
| BC036692  | 3912.831  | 4082.509  | AK026057  | 1971.527  | 2049.83   | NM_014550 | 14170.069 | 12794.022 |
| AJ009640  | 5163.71   | 4834.775  | AK026713  | 545.366   | 664.248   | NM_001615 | 67198.109 | 69914.32  |
| Y11163    | 3064.021  | 3435.423  | AK021627  | 2950.653  | 2794.515  | AK025886  | 4529.848  | 3817.985  |
| AF086391  | 923.983   | 941.335   | AF085859  | 1635.692  | 1589.745  | NM_003058 | 2120.048  | 1638.017  |
| AF147340  | 1918.593  | 1680.498  | AK026307  | 1300.557  | 658.94    | AB014514  | 10487.648 | 9996.902  |
| L31901    | 586.599   | 772.576   | AF075047  | 714.937   | 343.716   | NM_002865 | 16592.104 | 18277.986 |
| AK025119  | 1996.793  | 2101.768  | AL049975  | 1034.147  | 795.974   | NM_003560 | 5309.274  | 4291.959  |
| NM_006369 | 982.716   | 975.266   | AL080067  | 1851.979  | 1255.775  | NM_004240 | 620.829   | 585.637   |
| AJ224170  | 10567.439 | 8010.709  | AL117464  | 4285.621  | 2979.561  | AK026315  | 869.663   | 1049.602  |
| AL137389  | 1165.917  | 743.38    | AL080160  | 1673.411  | 1543.279  | NM_003731 | 56352.211 | 59067.777 |
| AF085866  | 9833.99   | 8086.973  | L23849    | 635.347   | 617.534   | NM_005440 | 55334.586 | 57029.309 |
| NM_006100 | 772.972   | 717.757   | AL049997  | 15225.597 | 12248.088 | NM_013292 | 48941     | 39653.711 |
| AK000806  | 8583.081  | 9126.755  | AK024118  | 1893.921  | 1582.05   | NM_002387 | 7645.939  | 5399.967  |
| NM_016471 | 9404.017  | 9608.946  | X89657    | 617.536   | 535.511   | NM_000060 | 14993.801 | 13891.498 |
| Z11852    | 678.704   | 676.106   | AK024509  | 1833.831  | 1606.49   | AB023217  | 2376.188  | 2258.544  |
| NM_001145 | 1143.545  | 1243.062  | AL050185  | 492.198   | 624.375   | L08902    | 3679.268  | 3304.171  |
| NM_005364 | 7444.417  | 8336.182  | NM_017709 | 1097.013  | 906.864   | J02639    | 10538.128 | 10203.177 |
| AK023482  | 10950.831 | 11490.636 | AF049615  | 1138.485  | 1705.879  | M58050    | 10782.654 | 11291.167 |
| AK022798  | 956.909   | 1162      | NM_014358 | 35810.938 | 55767.117 | NM_012113 | 3803.619  | 3942.966  |
| AL157423  | 908.305   | 747.863   | AF009282  | 9768.568  | 9499.088  | NM_002150 | 20952.264 | 17568.297 |
| AK023115  | 874.564   | 1029.545  | AF024704  | 8199.876  | 7283.169  | NM_004595 | 17663.348 | 18024.654 |
| AK023176  | 1912.429  | 1609.801  | AF056431  | 1024.688  | 736.082   | NM_020178 | 770.591   | 726.773   |
| NM_006820 | 41706.516 | 37768.875 | NM_016412 | 2529.826  | 1339.85   | NM_002264 | 3284.675  | 2741.926  |
| AB007973  | 26338.068 | 27144.707 | AF009293  | 1669.346  | 1218.024  | NM_014754 | 41818.191 | 37158.523 |
| M96843    | 4391.643  | 5408.182  | NM_004158 | 60138.746 | 62580.648 | D49387    | 2827.434  | 2790.025  |

|           |           |           |           |           |           |           |           |           |
|-----------|-----------|-----------|-----------|-----------|-----------|-----------|-----------|-----------|
| NM_017791 | 1793.137  | 1352.859  | AF056444  | 21214.654 | 15576.573 | AF050146  | 20647.115 | 19321.527 |
| NM_005882 | 18586.709 | 14864.983 | AK000989  | 3659.266  | 3110.323  | NM_000116 | 5709.413  | 5792.293  |
| BC012304  | 10865.685 | 7627.202  | AK002210  | 6772.284  | 4690.078  | NM_006698 | 14191.975 | 18409.811 |
| AB046815  | 6192.256  | 4730.374  | AK021677  | 5001.916  | 3594.748  | NM_006804 | 45087.273 | 42081.484 |
| NM_000440 | 10603.453 | 9343.039  | AK001057  | 1088.307  | 885.639   | NM_015968 | 18599.852 | 24935.229 |
| NM_001297 | 6701.957  | 8349.36   | AK001808  | 387.414   | 441.213   | NM_003051 | 14361.616 | 12191.315 |
| NM_004403 | 21001.623 | 18406.225 | AK021471  | 1143.153  | 1076.373  | NM_145342 | 19588.547 | 17977.742 |
| X64993    | 3033.174  | 2913.895  | AK021709  | 1667.027  | 1245.129  | AJ278917  | 55720.402 | 56875.758 |
| NM_004434 | 22345.736 | 23404.799 | AL359563  | 2152.43   | 2419.171  | AK025641  | 61033.168 | 61268.469 |
| NM_006268 | 1111.494  | 1168.678  | NM_014477 | 3844.697  | 3614.492  | NM_001038 | 615.889   | 706.927   |
| NM_016230 | 8954.527  | 9311.286  | AF086478  | 3709.801  | 3598.165  | AL117398  | 7121.451  | 6435.24   |
| NM_001083 | 611.883   | 709.668   | AF086022  | 702.994   | 985.977   | AY007158  | 66374.688 | 79668.648 |
| AK023966  | 14881.611 | 15741.163 | AK021514  | 66933.492 | 65640.93  | NM_001720 | 11078.377 | 8033.354  |
| AK025702  | 7100.294  | 6129.153  | AJ008134  | 7811.495  | 8093.173  | NM_018390 | 3934.979  | 3069.493  |
| NM_018958 | 633.463   | 804.547   | S71486    | 3622.621  | 3185.145  | AB037724  | 19168.502 | 15157.35  |
| AL050200  | 1043.555  | 1065.409  | L33808    | 16931.703 | 11921.848 | AK025086  | 4877.011  | 4413.323  |
| NM_002367 | 1555.634  | 1358.37   | AJ008117  | 13346.881 | 8008.696  | AK026151  | 24744.088 | 18398.453 |
| AK022038  | 1443.893  | 1386.368  | AJ008147  | 50781.871 | 37307.906 | NM_014140 | 2757.245  | 2639.377  |
| NM_000090 | 413.858   | 622.287   | AK024369  | 1719.155  | 1179.288  | NM_002916 | 5873.552  | 6623.462  |
| AF253321  | 784.758   | 1129.085  | AL049244  | 585.839   | 208.791   | M20700    | 8804.608  | 9281.045  |
| U80735    | 12764.493 | 14185.371 | L43345    | 2067.817  | 2658.535  | NM_001034 | 10617.844 | 13382.793 |
| NM_017850 | 5685.788  | 5372.964  | AF180297  | 6978.508  | 6811.151  | NM_002688 | 4696.867  | 5064.887  |
| NM_016522 | 1261.636  | 1122.249  | AK023245  | 863.74    | 744.075   | NM_017688 | 1241.007  | 1337.981  |
| NM_002224 | 20564.322 | 15707.176 | AF147303  | 690.016   | 569.696   | AL096734  | 1222.346  | 1538.574  |
| X07979    | 20713.084 | 17403.135 | AF086224  | 585.351   | 366.801   | AK000800  | 4279.535  | 4027.889  |
| NM_003874 | 3039.587  | 2586.499  | S56365    | 58240.445 | 59109.578 | NM_018154 | 9903.054  | 9243.618  |
| NM_000082 | 2459.31   | 2021.411  | AF186017  | 508.782   | 261.352   | NM_005358 | 922.448   | 670.208   |
| L13857    | 3797.594  | 3911.526  | AK023607  | 2526.805  | 1615.215  | BC006287  | 7835.112  | 6547.363  |
| NM_018098 | 7612.63   | 8260.773  | AK026874  | 1616.686  | 1267.679  | AB023198  | 11414.122 | 10034.734 |
| AF286164  | 1015.169  | 892.951   | AF088033  | 4164.78   | 3895.35   | AF304163  | 12665.506 | 12992.003 |
| AF146277  | 8268.287  | 7449.684  | NM_020422 | 5068.09   | 5236.819  | NM_005231 | 11317.83  | 11654.903 |
| NM_002558 | 1317.723  | 1269.998  | AJ227897  | 634.727   | 456.779   | AF064729  | 4197.184  | 3838.845  |
| AF055033  | 776.405   | 1007.657  | AK023628  | 435.614   | 903.012   | NM_005412 | 32412.201 | 21610.338 |
| NM_017700 | 1806.582  | 2171.909  | AY007156  | 1799.412  | 1425.854  | NM_021976 | 6193.235  | 4868.371  |
| M37191    | 10604.784 | 10331.837 | AF086408  | 54548.645 | 55131.098 | AF216077  | 9371.052  | 8697.208  |
| J04422    | 515.025   | 636.24    | AK023979  | 5341.856  | 5473.126  | AF086238  | 2527.625  | 2525.987  |
| NM_005242 | 1052.076  | 953.488   | NM_017847 | 2334.809  | 1933.161  | AK021612  | 30674.34  | 22505.73  |
| NM_003020 | 1555.414  | 1384.48   | AL049675  | 2046.753  | 1752.639  | AF147342  | 2549.37   | 2730.99   |
| NM_003404 | 50768.723 | 43310.891 | AL050151  | 1097.4    | 941.616   | AF088031  | 1240.224  | 1120.522  |
| NM_001114 | 2809.179  | 2659.951  | NM_003537 | 21970.664 | 16754.662 | AK002025  | 81348.008 | 63410.992 |
| NM_004458 | 971.219   | 1102.938  | AF056419  | 26021.48  | 21039.336 | NM_021976 | 5154.814  | 3186.331  |
| NM_006010 | 26648.318 | 29103.023 | AF074983  | 1138.165  | 1200.783  | SR2       | 46383.508 | 55746.715 |
| K03191    | 6923.625  | 8024.968  | AK021862  | 715.286   | 569.851   | SR4       | 15675.903 | 19011.098 |
| NM_005078 | 48293.875 | 41364.77  | AK024177  | 1311.532  | 935.795   | SR6       | 1785.726  | 2067.876  |
| NM_005192 | 49279.918 | 37562.449 | AK024827  | 8866.562  | 5739.696  | SR8       | 6413.493  | 26103.494 |
| NM_004588 | 1816.229  | 2128.729  | K01564    | 2254.207  | 2010.125  | SR10      | 22343.98  | 9642.092  |
| NM_015032 | 4732.328  | 3609.799  | AB023175  | 1719.791  | 1419.023  | CY3Cy5    | 9354.618  | 4087.161  |
| AK022956  | 9594.894  | 9225.96   | NM_000737 | 5467.591  | 4818.36   | Y15167    | 2843.708  | 2277.947  |
| AK023121  | 2727.302  | 2613.687  | NM_000839 | 9250.964  | 9133.049  | AL133080  | 5463.729  | 6315.544  |
| NM_014104 | 33203.66  | 32003.436 | AK024102  | 19417.818 | 19553.215 | NM_017792 | 8003.082  | 7339.165  |
| NM_002392 | 2893.248  | 3419.117  | NM_001290 | 1438.139  | 1694.735  | AK025213  | 4245.7    | 4302.232  |
| NM_002748 | 30794.777 | 31396.805 | AL079273  | 6100.659  | 5588.116  | NM_014948 | 3553.242  | 3396.587  |
| NM_018216 | 17108.033 | 13588.21  | NM_005045 | 396.214   | 767.911   | AL080221  | 2688.761  | 2776.783  |

|           |           |           |           |           |           |           |           |           |
|-----------|-----------|-----------|-----------|-----------|-----------|-----------|-----------|-----------|
| NM_00339C | 7982.583  | 6925.063  | AK026129  | 2187.859  | 2498.277  | AL117613  | 9707.351  | 7073.175  |
| AL137747  | 2615.723  | 2607.635  | NM_001743 | 38671.688 | 40463.523 | AL137753  | 9077.799  | 8371.575  |
| NM_01475E | 9039.388  | 7007.622  | NM_003713 | 15058.349 | 14032.564 | AL110262  | 27186.441 | 28176.285 |
| AF077188  | 26296.902 | 27170.443 | D31886    | 6260.911  | 4593.815  | AK025627  | 15888.157 | 18053.08  |
| NM_01244E | 9548.984  | 8845.851  | U92024    | 574.372   | 408.061   | U00945    | 596.938   | 611.217   |
| NM_01833E | 869.064   | 701.437   | AK023330  | 7017.665  | 5447.732  | AK025191  | 1334.461  | 1529.505  |
| NM_01868E | 53876.703 | 60858.137 | AF075071  | 2329.451  | 1654.188  | AK026763  | 2380.963  | 2351.862  |
| NM_006984 | 754.911   | 557.598   | AF147428  | 803.617   | 1069.974  | AK025246  | 14531.985 | 15350.743 |
| AF231919  | 4978.622  | 4604.039  | AF001892  | 672.785   | 886.682   | AK025847  | 5957.553  | 5683.337  |
| NM_018214 | 1735.098  | 1879.067  | AF075003  | 313.084   | 312.926   | AK026442  | 1212.089  | 1201.517  |
| Y11718    | 583.977   | 561.484   | X93500    | 2456.813  | 2024.483  | AK026816  | 870.753   | 980.381   |
| NM_00507E | 2016.765  | 1700.942  | U79271    | 2304.533  | 2115.469  | AB033031  | 3624.021  | 3971.696  |
| NM_01902E | 14472.045 | 15736.308 | NM_01988E | 1550.395  | 1222.135  | AL050072  | 7033.28   | 6793.141  |
| NM_00442C | 2013.404  | 1726.347  | AK024609  | 6573.973  | 5343.054  | AL117590  | 1683.939  | 1666.184  |
| NM_00297C | 1254.655  | 1662.662  | AK023660  | 973.237   | 837.566   | AL049357  | 20432.889 | 17815.318 |
| NM_00549E | 46840.469 | 31834.422 | NM_01812C | 19214.543 | 12923.216 | AL117659  | 840.376   | 771.501   |
| NM_01327C | 1844.991  | 1615.323  | NM_015991 | 1598.348  | 1666.28   | AK027180  | 5311.332  | 4885.328  |
| NM_015387 | 10834.072 | 11558.57  | NM_005562 | 1162.066  | 1988.126  | unknown ( | 580.579   | 697.324   |
| NM_00173E | 6475.478  | 7339.026  | NM_004932 | 1630.984  | 1711.259  | AK024773  | 1473.554  | 1206.976  |
| NM_00506E | 3295.934  | 2303.853  | NM_00523E | 568.899   | 1040.478  | AL390180  | 1452.325  | 1519.072  |
| NM_01782E | 43459.469 | 30172.197 | NM_006654 | 767.5     | 949.451   | AF009262  | 27428.514 | 31205.715 |
| NM_01403E | 2928.075  | 2914.66   | NM_003162 | 1301.364  | 1388.379  | AF009306  | 2645.678  | 3147.671  |
| NM_02012E | 40250.016 | 34257.496 | NM_00039E | 4205.045  | 4072.191  | AF050198  | 2995.573  | 3349.014  |
| NM_01343E | 16682.076 | 17916.082 | NM_00326E | 1200.901  | 1129.678  | AF090892  | 529.411   | 441.952   |
| AB020716  | 2233.83   | 2369.098  | NM_00235C | 7166.543  | 7040.198  | AK001089  | 2466.833  | 2502.996  |
| U57341    | 455.596   | 355.367   | NM_012417 | 2278.45   | 2251.328  | AK001919  | 1233.961  | 1269.698  |
| NM_00229E | 53365.609 | 61034.016 | NM_00254E | 1393.834  | 1495.009  | AK021535  | 1371.083  | 1256.722  |
| AK027130  | 2549.556  | 2355.942  | NM_00296E | 497.429   | 338.691   | AK021753  | 8125.984  | 7625.072  |
| NM_00547E | 52387.477 | 40876.926 | BF246606  | 500.565   | 456.514   | AK001139  | 6128.323  | 5176.672  |
| NM_00573C | 39146.184 | 31249.346 | NM_01428E | 1309.193  | 1211.945  | AK002090  | 1555.03   | 1437.341  |
| X82240    | 29990.871 | 30549.988 | NM_00234E | 825.545   | 852.27    | AK021618  | 999.868   | 988.113   |
| NM_01399E | 15738.432 | 15016.201 | D13631    | 3072.468  | 2311.629  | AK021822  | 2026.559  | 1397.298  |
| BC021298  | 1410.089  | 1583.203  | NM_00371E | 6285.771  | 4843.952  | AF116620  | 7690.014  | 6823.387  |
| U52096    | 8787.397  | 9960.636  | NM_002184 | 2911.224  | 3014.259  | AF293335  | 68186.297 | 63951.113 |
| AB013897  | 4517.796  | 5336.56   | NM_01488E | 5365.53   | 6431.131  | X96644    | 5957.517  | 8103.792  |
| NM_00552E | 41304.984 | 34941.488 | NM_01780E | 7210.659  | 7952.531  | NM_01867E | 63474.359 | 62158.031 |
| AK001669  | 2284.035  | 2042.424  | M86841    | 1279.218  | 1107.362  | AK022667  | 12457.491 | 11088.017 |
| NM_00619E | 2363.846  | 2287.021  | U56387    | 1096.844  | 845.931   | AK026667  | 1135.806  | 1209.237  |
| NM_00619C | 42471.715 | 30489.604 | AL049296  | 3752.605  | 3167.478  | AK026981  | 5810.44   | 5183.586  |
| NM_00636E | 5654.518  | 4111.164  | NM_014471 | 51875.387 | 57699.098 | AK023819  | 1726.632  | 1401.569  |
| NM_00413E | 646.702   | 377.879   | NM_004397 | 2302.733  | 2047.717  | AF075067  | 648.009   | 531.771   |
| NM_00161E | 12896.55  | 8820.78   | NM_00318E | 433.642   | 320.457   | AL133656  | 4025.513  | 3554.996  |
| NM_00365E | 585.197   | 669.923   | NM_02023E | 4909.884  | 2824.393  | AL050037  | 12161.792 | 10625.952 |
| BC000401  | 26715.496 | 27552.58  | D49356    | 757.431   | 1075.407  | NM_001417 | 62104.656 | 46579.523 |
| NM_00642E | 8985.706  | 10175.376 | AJ250475  | 2135.764  | 4222.416  | AK023557  | 1797.187  | 2322.116  |
| BF344046  | 5907.745  | 5792.233  | NM_007110 | 2290.42   | 2310.701  | AK027107  | 3361.312  | 2867.346  |
| AF432218  | 48485.758 | 39097.473 | NM_00125E | 10525.941 | 9802.135  | AJ227879  | 1085.983  | 1366.499  |
| NM_00428E | 19204.801 | 17555.455 | U50383    | 18127.473 | 14833.435 | AF531295  | 2640.191  | 2713.192  |
| AL133644  | 12028.395 | 12840.67  | AK025085  | 6720.348  | 5377.371  | X60484    | 1438.122  | 1448.02   |
| NM_00270E | 7304.007  | 6867.262  | NM_016317 | 1032.345  | 804.582   | AF055019  | 2506.325  | 2383.481  |
| NM_00419E | 993.127   | 679.103   | NM_00629C | 8263.784  | 9366.163  | NM_00352E | 10173.512 | 8139.018  |
| NM_00687E | 4277.589  | 4133.505  | AK022290  | 1296.262  | 1526.808  | AF056432  | 4842.081  | 4103.861  |
| NM_00029E | 3725.835  | 4453.088  | NM_00368C | 29614.439 | 31303.986 | AK001987  | 43746.07  | 32623.592 |



|           |           |           |           |           |           |           |           |           |
|-----------|-----------|-----------|-----------|-----------|-----------|-----------|-----------|-----------|
| NM_00374E | 2736.572  | 3182.385  | AF118124  | 13836.97  | 16038.567 | NM_01333Z | 5714.966  | 5542.129  |
| NM_00539E | 878.969   | 631.438   | NM_004849 | 19846.721 | 22872.838 | X56199    | 5937.069  | 4605.607  |
| NM_01226E | 1876.884  | 1694.635  | AL137527  | 11048.172 | 12803.218 | NM_00519Z | 8550.055  | 8077.204  |
| AF153821  | 1267.839  | 1170.901  | AK026068  | 1013.477  | 908.111   | AL162006  | 1688.294  | 1615.674  |
| NM_01337C | 3321.373  | 4018.969  | J04974    | 34202.797 | 22979.375 | NM_017971 | 46766.574 | 41612.766 |
| NM_001374 | 1564.304  | 1586.596  | NM_01767E | 4974.639  | 3789.862  | AF090097  | 3005.956  | 2457.405  |
| NM_00331C | 9667.294  | 11002.91  | NM_007014 | 2681.857  | 2389.39   | AF054998  | 896.3     | 780.636   |
| AK024461  | 10261.301 | 9318.265  | AL096740  | 1201.867  | 889.44    | NM_00688E | 40320.934 | 50175.098 |
| AK025485  | 3964.88   | 3272.638  | AF191545  | 961.288   | 829.714   | AL137423  | 7670.037  | 8260.919  |
| NM_01763E | 9348.961  | 10511.176 | NM_014554 | 5254.953  | 3003.167  | AB018322  | 10464.286 | 12147.9   |
| X62534    | 4015.75   | 4562.943  | AL137484  | 2890.632  | 5584.167  | NM_00706E | 51722.969 | 51221.395 |
| AF027147  | 39290.703 | 41941.359 | AK023968  | 2707.772  | 6155.575  | AF113211  | 2430.918  | 2647.304  |
| M62399    | 11872.371 | 13183.548 | NM_00465Z | 1626.183  | 3215.895  | AL117568  | 5268.292  | 4969.608  |
| NM_002357 | 2096.711  | 2530.049  | NM_00035Z | 787.752   | 812.397   | NM_00084Z | 3234.814  | 2789.964  |
| U71600    | 7147.06   | 8490.688  | AK025425  | 50562.262 | 49662.727 | S71805    | 2621.895  | 1778.075  |
| NM_00447Z | 1670.705  | 2277.427  | AK025974  | 29373.236 | 32753.877 | NM_018391 | 3833.065  | 3553.29   |
| AB037862  | 3854.946  | 4045.902  | NM_01653Z | 5805.626  | 3928.489  | U90917    | 1400.956  | 1112.912  |
| NM_00539Z | 2692.403  | 2859.937  | X98115    | 2390.855  | 2326.139  | AK022140  | 8838.075  | 7342.655  |
| AL133572  | 13401.993 | 14707.09  | NM_005781 | 8867.788  | 7623.09   | AK023372  | 62590.742 | 53564.039 |
| AK022500  | 7694.174  | 6826.297  | BC036740  | 28222.598 | 22808.709 | U21072    | 2855.493  | 2444.749  |
| NM_003447 | 1780.679  | 1243.033  | NM_001747 | 7627.546  | 6013.94   | AK024377  | 1915.424  | 1540.324  |
| NM_005014 | 3946.186  | 4888.439  | NM_001148 | 19274.721 | 14871.787 | AL137461  | 2042.27   | 1765.25   |
| NM_006944 | 740.007   | 937.988   | AF242522  | 11667.868 | 15273.152 | AB037828  | 2063.278  | 2208.808  |
| NM_004407 | 1153.399  | 1193.453  | AJ008152  | 9631.39   | 8414.859  | AB023210  | 1235.456  | 1153.04   |
| NM_00007C | 1603.988  | 1749.128  | NM_003657 | 2375.903  | 2473.46   | AB037786  | 4607.975  | 4349.225  |
| NM_00120Z | 3023.043  | 2795.502  | NM_00058E | 845.845   | 998.488   | NM_00364E | 22792.643 | 22340.316 |
| AB037804  | 556.415   | 618.862   | S67970    | 754.598   | 826.18    | AB037735  | 1942.154  | 2360.857  |
| U34249    | 1010.024  | 1096.958  | AF221520  | 4513.098  | 3354.019  | AK002177  | 11424.38  | 10019.699 |
| NM_00328E | 44667.52  | 46879.715 | NM_006941 | 51072.855 | 47701.551 | AK024429  | 3682.88   | 3334.774  |
| M74220    | 809.611   | 993.863   | AB037852  | 1556.162  | 2577.199  | NM_00349E | 64123.852 | 65682.641 |
| M23254    | 1808.578  | 2220.989  | NM_00536C | 2976.365  | 5574.005  | AB000509  | 3914.67   | 3622.491  |
| BE618539  | 2166.115  | 2015.941  | NM_00434E | 6667.913  | 11122.281 | AB018314  | 3065.986  | 2748.136  |
| R28062    | 7429.364  | 7455.62   | NM_00209Z | 17071.201 | 32867.246 | NM_00437E | 1644.105  | 1418.394  |
| U38545    | 365.369   | 477.729   | NM_018077 | 4375.891  | 7241.716  | AJ238899  | 1638.815  | 1346.806  |
| AI627464  | 4243.637  | 4206.14   | NM_01683E | 29657.582 | 40623.961 | NM_018037 | 6522.374  | 6156.978  |
| BI756258  | 4437.925  | 5402.55   | NM_00596E | 54258.207 | 56860.922 | NM_001110 | 4561.353  | 4133.705  |
| AI342225  | 45385.359 | 59969.098 | AK021416  | 1176.768  | 1063.82   | NM_000841 | 15453.936 | 12923.868 |
| AA634103  | 45448.09  | 59503.727 | NM_018471 | 13437.438 | 10585.256 | NM_00124E | 2995.423  | 3124.368  |
| J04599    | 1346.703  | 1515.345  | NM_00656C | 7721.936  | 7755.081  | AJ008139  | 17376.807 | 14858.757 |
| AF110020  | 890.113   | 574.225   | NM_01618Z | 9164.697  | 8526.109  | NM_00432E | 20634.967 | 15082.61  |
| AA707922  | 472.85    | 737.053   | NM_00195E | 56132.684 | 49754.977 | D38553    | 5445.965  | 6122.814  |
| AA608557  | 22943.193 | 22645.338 | NM_004757 | 4100.845  | 4106.497  | NM_00617C | 21286.541 | 20106.555 |
| AL050095  | 3992.505  | 3867.254  | NM_015904 | 8714.596  | 7790.65   | NM_01429E | 13141.832 | 12405.9   |
| U03272    | 1038.689  | 1009.672  | NM_00196C | 55323.559 | 46194.879 | AK001581  | 3727.286  | 4171.123  |
| NM_01225Z | 18488.754 | 14580.304 | NM_00705E | 12435.648 | 10469.917 | NM_00586Z | 7047.183  | 8262.264  |
| NM_00025E | 48296.465 | 55631.445 | NM_00152E | 5473.777  | 4545.45   | NM_00054E | 14973.12  | 14581.951 |
| AB033055  | 24323.41  | 25109.623 | NM_017947 | 1812.013  | 1992.161  | AK022541  | 12320.469 | 12093.354 |
| AF311287  | 12321.995 | 9950.856  | NM_002494 | 20666.738 | 15663.443 | AB002297  | 6312.115  | 6127.398  |
| NM_00309E | 5539.226  | 4959.056  | M58510    | 18537.961 | 22479.908 | NM_00502C | 62470.625 | 62285.828 |
| NM_014781 | 8908.28   | 7035.375  | NM_00336E | 327.939   | 854.32    | NM_014077 | 6463.577  | 6327.381  |
| BU629989  | 1942.775  | 1602.444  | NM_00078Z | 3404.438  | 5327.776  | NM_01841Z | 3667.05   | 2843.863  |
| X87896    | 3907.199  | 3676.345  | BE396003  | 3214.589  | 5331.55   | NM_01232E | 16408.537 | 13992.623 |
| M88310    | 8187.405  | 9422.752  | AK023300  | 6611.758  | 9473.415  | M14087    | 18431.736 | 16257.94  |

|           |           |           |             |           |           |           |           |           |
|-----------|-----------|-----------|-------------|-----------|-----------|-----------|-----------|-----------|
| D16856    | 975.404   | 1135.029  | NM_018082   | 2976.915  | 3480.156  | NM_000885 | 26385.064 | 24000.861 |
| NM_000042 | 5128.772  | 5581.116  | NM_003904   | 7197.945  | 4475.821  | M59040    | 6561.792  | 6837.128  |
| AF035787  | 5813.067  | 4401.172  | NM_006234   | 28275.289 | 18776.654 | X15880    | 66591.516 | 69424     |
| NM_005024 | 589.333   | 737.716   | AK026387    | 1522.191  | 1248.421  | NM_006795 | 837.13    | 916.663   |
| NM_003403 | 3232.11   | 2918.496  | AB028987    | 20193.557 | 18938.307 | NM_003481 | 11231.329 | 10239.49  |
| NM_014805 | 7990.401  | 10228.688 | NM_003594   | 3850.871  | 3084.453  | AB002347  | 527.073   | 764.657   |
| AB006627  | 1096.312  | 1723.626  | NM_005521   | 12213.016 | 11631.361 | AB046814  | 1408.197  | 1896.893  |
| NM_000415 | 16257.731 | 15899.73  | AF164438    | 23014.928 | 20319.641 | NM_017664 | 8579.606  | 8967.62   |
| NM_003382 | 563.885   | 832.143   | AK022284    | 2345.991  | 2016.84   | AK025523  | 1466.419  | 1439.135  |
| NM_002965 | 1153.087  | 1298.109  | AF060937    | 734.645   | 1228.004  | NM_007055 | 12175.131 | 10182.868 |
| AB007883  | 4265.54   | 3607.776  | AB040893    | 5906.326  | 4098.17   | NM_006870 | 11421.437 | 11380.125 |
| NM_003835 | 382.722   | 397.384   | AK025844    | 8229.831  | 9699.483  | NM_007355 | 12726.285 | 9565.98   |
| NM_006391 | 3039.924  | 2290.193  | NM_004024   | 10000.384 | 10294.952 | L13283    | 1960.647  | 1280.315  |
| AY009397  | 37670.758 | 34700.484 | X52345      | 36369.855 | 32619.848 | NM_013327 | 4550.618  | 4032.691  |
| NM_007037 | 7972.145  | 7869.857  | NM_006965   | 6383.99   | 4397.261  | AF303888  | 19729.232 | 16919.406 |
| NM_016335 | 842.22    | 1169.35   | AF027142    | 54568.262 | 51082.371 | NM_000077 | 3184.153  | 3075.143  |
| NM_003165 | 7087.511  | 6341.98   | NM_016372   | 56709.27  | 54240.488 | AF176646  | 1936.81   | 1948.143  |
| NM_003905 | 9027.374  | 7070.362  | AB020705    | 5064.553  | 5464.02   | NM_003672 | 41166.551 | 37067.238 |
| AL359590  | 50989.832 | 51623.156 | NM_014333   | 588.933   | 834.932   | NM_002574 | 71704.898 | 63762.109 |
| NM_002861 | 12074.686 | 12001.412 | NM_002980   | 2800.393  | 2995.311  | NM_012391 | 8975.358  | 8474.612  |
| NM_003080 | 2294.424  | 2296.268  | NM_015885   | 1289.075  | 2346.416  | NM_005254 | 6644.528  | 7641.466  |
| NM_004042 | 1415.936  | 1582.74   | NM_020355   | 219.996   | 877.133   | NM_005611 | 2149.837  | 2155.158  |
| NM_013265 | 1184.977  | 1308.2    | NM_004262   | 305.532   | 810.101   | AF141655  | 8563.646  | 7733.771  |
| NM_002645 | 9055.115  | 10088.331 | BG491613    | 8708.848  | 9098.369  | NM_007345 | 4697.681  | 3794.891  |
| AB033027  | 2473.62   | 2176.464  | AA397813    | 32482.541 | 27491.59  | NM_004830 | 1678.649  | 1424.48   |
| AF320293  | 441.802   | 512.57    | W47350      | 3991.709  | 2382.859  | AF132362  | 60461.434 | 64903.973 |
| NM_001171 | 960.526   | 1390.931  | AI160964    | 936.333   | 812.715   | NM_007007 | 18839.91  | 18629.604 |
| S81591    | 2176.065  | 2018.524  | W68291      | 13739.94  | 11089.772 | NM_006385 | 8154.988  | 7786.683  |
| NM_006323 | 36596.301 | 38356.063 | N64384      | 6383.437  | 5751.603  | NM_006555 | 29722.314 | 35657.875 |
| NM_016465 | 7601.178  | 7755.707  | H-X 53655 I | 2683.441  | 2425.096  | NM_004501 | 54766.008 | 57217.898 |
| NM_001493 | 10127.362 | 13265.644 | H-U 05770 I | 9819.536  | 9675.428  | NM_004965 | 24929.947 | 27373.822 |
| NM_003715 | 1989.735  | 2302.534  | H-M 65199   | 26547.926 | 24067.311 | NM_006700 | 3686.764  | 3090.892  |
| NM_014841 | 2363.172  | 2607.685  | H-M 32315   | 2356.893  | 3138.763  | NM_006445 | 24719.301 | 24086.748 |
| NM_014425 | 21456.922 | 23777.254 | H-V00536M   | 4229.117  | 6391.633  | NM_012105 | 53671.441 | 42676.203 |
| NM_006815 | 25665.055 | 23748.33  | H-D85429M   | 9406.058  | 14141.702 | AF019633  | 7294.826  | 5686.172  |
| AK026518  | 55303.746 | 61081.891 | BF439832    | 2635.771  | 2323.042  | AB002361  | 27042.734 | 19906.811 |
| AF132734  | 45822.73  | 45975.668 | BG819162    | 2547.333  | 2010.253  | NM_018060 | 17232.451 | 11873.328 |
| NM_018375 | 5234.918  | 5688.817  | NM_012085   | 39339.488 | 37438.844 | NM_014235 | 10218.034 | 6904.61   |
| NM_016403 | 18848.523 | 15436.256 | NM_000135   | 1208.805  | 1204.241  | NM_017662 | 15694.878 | 13598.354 |
| NM_015603 | 2281.607  | 1691.906  | NM_006664   | 5610.27   | 4762.528  | U88837    | 4964.007  | 4256.634  |
| AK021788  | 993.273   | 846.115   | NM_002415   | 596.984   | 448.225   | NM_017445 | 39483.199 | 28323.543 |
| NM_001921 | 15481.35  | 15665.794 | NM_002725   | 2905.203  | 3002.048  | NM_017582 | 20679.078 | 18051.199 |
| NM_006230 | 23764.02  | 26569.545 | NM_000450   | 1101.532  | 1699.942  | NM_015235 | 8050.39   | 7701.548  |
| NM_014695 | 5051.103  | 6357.111  | NM_000445   | 1867.086  | 3411.133  | AK026962  | 5521.31   | 5815.681  |
| NM_013400 | 31198.131 | 27975.641 | NM_004513   | 7042.984  | 9275.445  | D00265    | 56629.324 | 58776.758 |
| AK026257  | 5213.998  | 5908.541  | NM_017735   | 5669.153  | 3816.059  | NM_000775 | 1375.032  | 1133.256  |
| AK023836  | 14335.407 | 14857.799 | AB033044    | 16708.217 | 10154.384 | NM_004552 | 67473.445 | 61893.055 |
| NM_018105 | 8349.746  | 9479.055  | AB014564    | 1763.086  | 1390.203  | NM_000143 | 5444.787  | 6145.1    |
| AJ299442  | 12172.121 | 14912.817 | NM_020230   | 4222.921  | 3693.417  | AF317889  | 833.612   | 684.004   |
| BE734914  | 413.94    | 721.63    | NM_006762   | 52239.23  | 38157.18  | NM_006294 | 60794.543 | 62457.137 |
| AB040897  | 1428.367  | 1627.651  | NM_006352   | 1718.42   | 1069.959  | AL137294  | 564.404   | 524.539   |
| NM_000125 | 3958.913  | 5104.772  | NM_016430   | 1243.336  | 1774.918  | NM_003743 | 3957.665  | 3949.777  |
| NM_003762 | 19371.93  | 23132.291 | NM_004447   | 8730.481  | 10123.515 | AB037797  | 1996.978  | 1823.171  |

|           |           |           |           |           |           |            |           |           |
|-----------|-----------|-----------|-----------|-----------|-----------|------------|-----------|-----------|
| NM_018446 | 11187.738 | 12499.54  | NM_001204 | 6846.423  | 6875.252  | NM_001520  | 2943.825  | 2745.788  |
| NM_000187 | 1727.492  | 2466.958  | BF131321  | 2974.065  | 3010.923  | AL050367   | 900.332   | 864.786   |
| NM_014465 | 3277.577  | 3169.687  | NM_016540 | 1463.201  | 1535.602  | NM_017870  | 3847.082  | 3447.505  |
| D87292    | 4464.21   | 3986.392  | NM_012116 | 5398.962  | 5952.469  | AL133633   | 6619.413  | 6033.67   |
| NM_005495 | 1588.462  | 1346.061  | NM_000020 | 11358.903 | 10580.735 | NM_012252  | 4142.344  | 3215.971  |
| NM_004407 | 971.253   | 1163.374  | NM_000956 | 1168.77   | 1085.969  | AK026817   | 8347.207  | 6867.966  |
| NM_000070 | 1369.799  | 1418.748  | AB033091  | 10080.474 | 7963.9    | AL157442   | 63666.199 | 52029.883 |
| NM_001202 | 3008.021  | 2606.053  | NM_004557 | 18964.576 | 20649.684 | AL389938   | 59492.113 | 61669.441 |
| AB037804  | 651.855   | 699.26    | NM_003742 | 5121.03   | 6749.125  | NM_001945  | 67292.016 | 63432.129 |
| U34249    | 822.451   | 918.307   | NM_005094 | 4523.839  | 4262.4    | NM_007084  | 6876.477  | 6026.602  |
| NM_003285 | 39631.293 | 35229.965 | BE382905  | 1071.649  | 665.579   | M97191     | 64814.832 | 61339.078 |
| M74220    | 893.192   | 1003.545  | NM_002152 | 21606.762 | 35202.379 | AK023015   | 14616.868 | 15008.211 |
| M23254    | 2374.463  | 2898.263  | NM_001701 | 653.099   | 1141.623  | NM_003457  | 38436.258 | 38173.703 |
| BE618539  | 2205.55   | 2445.478  | AK022558  | 2882.186  | 4634.854  | AV752086   | 2325.132  | 2807.984  |
| R28062    | 8032.232  | 8498.359  | NM_006476 | 50791.258 | 54455.375 | NM_016102  | 45617.953 | 50121.914 |
| U38545    | 431.918   | 441.009   | AK023787  | 2275.839  | 2513.332  | NM_004376  | 5280.128  | 5671.197  |
| AI627464  | 4314.218  | 6689.463  | NM_002133 | 2781.812  | 2238.382  | NM_000272  | 1284.149  | 1694.763  |
| BI756258  | 4796.243  | 5797.86   | NM_015697 | 5824.466  | 4542.66   | NM_006845  | 60758.281 | 67967.445 |
| AI342225  | 55246.422 | 59867.965 | AF086489  | 624.521   | 476.655   | NM_005603  | 60954.68  | 65141.988 |
| AA634103  | 46569.699 | 58415.836 | AB018258  | 513.361   | 372.713   | NM_001061  | 2485.911  | 2682.585  |
| J04599    | 1720.865  | 2059.737  | BF337921  | 9325.574  | 9355.564  | AI075338   | 4499.197  | 5042.134  |
| AF110020  | 733.55    | 876.401   | U53532    | 4064.019  | 3652.018  | BG744154   | 37309.492 | 37467.738 |
| AA707922  | 621.276   | 733.834   | NM_001740 | 5883.279  | 5057.879  | Z11694     | 27493.645 | 28869.762 |
| AA608557  | 21714.908 | 18709.785 | NM_012484 | 7166.14   | 8250.455  | BF983177   | 6431.264  | 6070.812  |
| AL050095  | 3813.873  | 3688.724  | AL096732  | 5632.252  | 6406.893  | Z26317     | 4661.224  | 4618.79   |
| U03272    | 994.631   | 961.063   | AB006423  | 1037.543  | 1247.843  | X16983     | 57715.297 | 56373.043 |
| AF075085  | 47784.816 | 60324.305 | AJ132084  | 1150.2    | 3749.192  | X56160     | 8291.398  | 7253.648  |
| NM_005892 | 4577.804  | 4253.229  | NM_005719 | 52252.645 | 52810.926 | BG679991   | 3002.361  | 2337.77   |
| NM_006475 | 1057.699  | 1146.176  | NM_003462 | 45699.293 | 46480.035 | H-Y 000971 | 15030.954 | 12462.978 |
| AF311287  | 13254.979 | 12272.155 | NM_006093 | 10023.676 | 10881.415 | H-M 59964  | 1183.149  | 1046.617  |
| NM_003095 | 4963.17   | 4587.743  | AK023915  | 10326.523 | 9211.181  | H-Y 007111 | 65983.508 | 67742.289 |
| NM_014781 | 9249.146  | 6778.014  | AB051453  | 1506.551  | 1715.604  | H-X 167071 | 8923.842  | 10471.359 |
| BU629989  | 2033.385  | 1384.169  | AB023203  | 3060.636  | 5128.043  | AL038354   | 16242.578 | 19335.748 |
| X87896    | 3084.635  | 3568.056  | NM_014963 | 2430.746  | 3949.519  | R14607     | 7093.78   | 7949.684  |
| M88310    | 7861.854  | 7625.318  | NM_004259 | 3405.795  | 4552.781  | W84867     | 1486.474  | 1618.956  |
| D16856    | 978.915   | 674.408   | NM_016271 | 7352.589  | 8648.82   | BF245026   | 858.046   | 1129.797  |
| NM_000042 | 6321.149  | 6895.14   | NM_016619 | 1407.905  | 1649.053  | NM_000592  | 1168.603  | 985.247   |
| AF035787  | 6035.741  | 4884.225  | NM_014481 | 1406.609  | 1285.204  | NM_016584  | 46618.82  | 48892.258 |
| AF090405  | 374.169   | 513.023   | U22172    | 3616.113  | 3303.233  | NM_001815  | 5570.763  | 7838.347  |
| NM_005024 | 725.5     | 536.904   | NM_006257 | 2173.452  | 2311.407  | NM_000064  | 25980.268 | 28066.936 |
| NM_003403 | 3225.818  | 3207.381  | NM_016281 | 16935.502 | 16082.582 | NM_003264  | 1153.465  | 1682.267  |
| NM_014805 | 8014.912  | 10827.69  | NM_004734 | 32619.814 | 29923.777 | NM_006725  | 12259.077 | 13689.766 |
| AB006627  | 1071.734  | 2256.3    | AK024793  | 3537.197  | 4230.247  | NM_003326  | 3580.06   | 3609.965  |
| NM_000416 | 15639.938 | 16385.055 | AF208291  | 2042.649  | 1882.8    | NM_004565  | 60157.738 | 62859.453 |
| NM_003382 | 538.487   | 1065.905  | NM_004877 | 30725.104 | 33973.648 | NM_000202  | 12285.052 | 13033.335 |
| NM_002965 | 1412.377  | 1258.606  | NM_000276 | 4029.647  | 6216.787  | NM_005496  | 16691.172 | 16369.657 |
| AB007883  | 4318.725  | 3672.446  | NM_000019 | 59449.332 | 53402.902 | NM_016605  | 1977.425  | 2124.917  |
| NM_003839 | 360.016   | 538.779   | AK023701  | 2841.095  | 3883.658  | NM_002855  | 9410.236  | 10031.68  |
| NM_006391 | 3013.887  | 2589.129  | NM_014333 | 411.456   | 241.662   | NM_004817  | 4196.786  | 4532.644  |
| AY009397  | 39874.742 | 36415.594 | NM_002980 | 1686.905  | 1485.724  | NM_018975  | 31731.117 | 29345.066 |
| NM_007037 | 8424.433  | 8803.344  | NM_015886 | 915.189   | 1050.145  | AB023215   | 30272.596 | 29191.783 |
| NM_005014 | 3296.917  | 3895.423  | NM_020355 | 294.765   | 512.052   | NM_001284  | 45731.465 | 39023.957 |
| NM_006944 | 737.727   | 1081.493  | BG491613  | 9164.592  | 15335.976 | NM_003242  | 34768.457 | 35983.215 |

|           |           |           |             |           |           |           |           |           |
|-----------|-----------|-----------|-------------|-----------|-----------|-----------|-----------|-----------|
| NM_003165 | 5812.082  | 6273.992  | AA397813    | 39104.016 | 48200.453 | NM_002845 | 1949.779  | 1731.247  |
| NM_003906 | 8550.581  | 7960.926  | W47350      | 4821.069  | 5017.921  | U31099    | 2664.515  | 2474.681  |
| AL359590  | 50393.887 | 50893.348 | N64384      | 7046.329  | 6111.839  | NM_001105 | 27049.824 | 26358.279 |
| NM_002861 | 12370.366 | 11266.24  | H-X 53655 I | 3018.958  | 3087.5    | NM_005585 | 1313.794  | 1772.874  |
| NM_003080 | 1923.339  | 2062.242  | H-U 05770 I | 9469.882  | 10224.072 | NM_002075 | 14789.563 | 15233.402 |
| NM_004042 | 969.08    | 1018.891  | H-M 65199   | 30204.021 | 31161.857 | Y08756    | 60571.75  | 61752.648 |
| NM_013265 | 1186.094  | 1587.404  | H-M 32315   | 2615.509  | 2600.805  | AY007090  | 1761.218  | 2026.217  |
| NM_002645 | 7666.52   | 8724.15   | H-V00536M   | 5085.376  | 5170.894  | NM_006435 | 1288.916  | 1650.122  |
| AB033027  | 2386.404  | 2772.314  | H-D85429M   | 10183.487 | 14298.704 | NM_018073 | 2176.033  | 2324.735  |
| AF320293  | 703.333   | 687.378   | BF439832    | 3899.436  | 5065.402  | AL137529  | 1888.537  | 2433.379  |
| NM_001171 | 997.549   | 1115.448  | BG819162    | 2813.821  | 3550.522  | NM_012332 | 7967.385  | 8920.196  |
| S81591    | 2808.067  | 3864.688  | NM_001091   | 4309.555  | 4806.465  | AK026648  | 3319.103  | 3712.716  |
| NM_006323 | 40760.855 | 39634.164 | NM_002416   | 591.962   | 576.655   | NM_000497 | 2419.563  | 3076.968  |
| NM_016466 | 7759.269  | 8298.466  | NM_002728   | 2246.441  | 1833.811  | NM_017421 | 3849.957  | 4528.883  |
| NM_001493 | 10130.868 | 12775.279 | NM_000450   | 691.769   | 714.832   | NM_000273 | 2536.106  | 2612.518  |
| NM_003716 | 1962.344  | 2138.231  | NM_000448   | 1671.039  | 1663.746  | NM_002895 | 24708.803 | 26710.262 |
| NM_014841 | 2494.783  | 2887.93   | NM_004513   | 7038.66   | 6253.575  | NM_005397 | 7194.059  | 8536.064  |
| NM_014426 | 18417.82  | 21040.861 | NM_006352   | 2031.266  | 3020.712  | AB014511  | 10502.997 | 10939.319 |
| NM_006816 | 24613.6   | 23383.947 | NM_016430   | 1632.288  | 2499.689  | NM_001662 | 27235.857 | 25359.338 |
| AK026518  | 52445.176 | 58243.621 | NM_004447   | 9138.252  | 10875.684 | AB011100  | 5413.458  | 5224.179  |
| NM_000255 | 52747.988 | 43260.582 | NM_001204   | 8554.823  | 9848.18   | U61741    | 3387.43   | 3311.417  |
| AB033055  | 21996.816 | 19957.607 | BF131321    | 3060.938  | 3899.426  | NM_012402 | 14160.861 | 13454.405 |
| NM_016403 | 18206.053 | 17631.898 | NM_016540   | 732.612   | 757.059   | M76676    | 10457.94  | 10356.029 |
| NM_015603 | 2111.546  | 2155.538  | NM_012116   | 4658.909  | 6021.634  | NM_003857 | 1437.856  | 1604.013  |
| AK021788  | 876.512   | 728.735   | NM_000020   | 12432.509 | 12466.229 | AL137690  | 1139.784  | 1401.297  |
| NM_001921 | 16482.604 | 16838.121 | NM_000956   | 1084.953  | 1420.449  | Z83804    | 6448.238  | 6020.205  |
| NM_006230 | 24577.182 | 23777.047 | AB033091    | 10677.395 | 8182.513  | NM_004386 | 4505.758  | 4307.256  |
| NM_014695 | 4840.037  | 4411.911  | NM_004557   | 20621.146 | 22856.305 | U67784    | 3033.31   | 3750.125  |
| NM_013400 | 28005.559 | 25378.311 | NM_016372   | 56568.199 | 52728.504 | NM_007366 | 5198.511  | 6130.075  |
| AK026257  | 4585.166  | 5395.845  | AB020705    | 4988.255  | 5886.856  | NM_014580 | 2691.571  | 2765.782  |
| AK023836  | 14860.836 | 15089.237 | BE382905    | 1002.13   | 655.869   | AB028998  | 1218.795  | 1531.126  |
| NM_018105 | 8271.41   | 8775.926  | NM_002152   | 17852.156 | 16452.398 | NM_000153 | 1045.55   | 1268.524  |
| AJ299442  | 12208.737 | 14713.274 | NM_001701   | 627.418   | 555.919   | NM_002033 | 1231.86   | 1276.657  |
| BE734914  | 327.881   | 425.608   | AK022558    | 3666.947  | 3400.793  | AK091794  | 604.887   | 707.601   |
| AB040897  | 1533.044  | 1562.161  | NM_006476   | 50278.094 | 47155.148 | NM_004111 | 6909.678  | 6750.301  |
| NM_000125 | 4189.332  | 5871.412  | AK023787    | 2932.57   | 2356.706  | AF085966  | 8149.622  | 7584.728  |
| NM_003762 | 21208.262 | 25670.695 | NM_002133   | 3369.176  | 4247.501  | NM_005316 | 8628.363  | 8836.341  |
| NM_018446 | 11607.546 | 12529.971 | NM_015697   | 6551.295  | 6278.567  | NM_016316 | 7892.342  | 7887.177  |
| NM_000187 | 1597.211  | 2000.239  | AF086489    | 806.98    | 505.625   | NM_003365 | 29989.574 | 26746.084 |
| NM_014465 | 3665.124  | 3291.828  | AB018258    | 601.33    | 379.132   | NM_000057 | 3046.615  | 3491.752  |
| D87292    | 4544.079  | 4179.487  | NM_005953   | 8526.368  | 19714.473 | NM_018343 | 11257.537 | 11099.542 |
| NM_005495 | 1402.168  | 1251.601  | BF337921    | 10627.905 | 11315.269 | AK095793  | 2448.656  | 1948.251  |
| NM_016335 | 947.175   | 987.734   | U53532      | 3686.783  | 4986.859  | NM_003177 | 7865.962  | 7445.702  |
| NM_001202 | 3045.797  | 3060.502  | NM_001740   | 6219.042  | 6778.798  | NM_017715 | 1597.987  | 1761.368  |
| AB037804  | 397.328   | 714.066   | NM_012484   | 7280.138  | 6729.684  | AF064078  | 3748.269  | 5098.683  |
| U34249    | 913.667   | 1041.326  | AL096732    | 6408.926  | 6569.43   | AL049688  | 4413.758  | 5031.168  |
| NM_003285 | 38893.387 | 35018.355 | AB006423    | 1194.087  | 1382.056  | NM_002737 | 4843.418  | 4908.229  |
| M74220    | 825.316   | 1043.366  | AJ132084    | 470.638   | 678.993   | Z25427    | 5834.239  | 5195.62   |
| M23254    | 2189.584  | 2600.113  | NM_005719   | 54745.918 | 52171.207 | NM_004672 | 18904.568 | 20280.992 |
| BE618539  | 2261.56   | 2605.712  | NM_003462   | 46956.836 | 45042.121 | NM_001353 | 7387.014  | 7477.646  |
| R28062    | 8226.558  | 9169.564  | NM_006093   | 10049.667 | 10162.763 | NM_006214 | 3752.772  | 4299.676  |
| AI627464  | 3999.336  | 4131.257  | NM_000135   | 1493.719  | 1427.704  | AJ010228  | 18183.176 | 18840.662 |
| BI756258  | 4870.071  | 6596.467  | NM_006664   | 8555.944  | 11773.416 | NM_005195 | 5966.579  | 6210.962  |

|           |           |           |             |           |           |             |           |           |
|-----------|-----------|-----------|-------------|-----------|-----------|-------------|-----------|-----------|
| AI342225  | 48560.023 | 56243.074 | AB051453    | 1523.674  | 1596.059  | NM_004376   | 5369.09   | 5384.179  |
| AA634103  | 46270.895 | 55858.367 | AK026842    | 507.773   | 242.371   | NM_000272   | 1461.798  | 1365.173  |
| J04599    | 1887.588  | 2270.148  | NM_002395   | 855.262   | 1128.249  | NM_006061   | 857.221   | 645.277   |
| AF110020  | 646.841   | 917.662   | AB023203    | 3046.982  | 2574.75   | NM_006848   | 58508.039 | 67590.719 |
| AA707922  | 484.214   | 842.374   | NM_014963   | 2462.598  | 2076.244  | NM_005603   | 60718.762 | 62353.902 |
| AA608557  | 23037.814 | 22455.697 | NM_004259   | 3182.897  | 2435.006  | NM_001061   | 3172.606  | 2514.369  |
| AL050095  | 3746.81   | 4404.459  | NM_016271   | 7483.766  | 6807.365  | AI075338    | 5154.195  | 5095.001  |
| U03272    | 965.182   | 1292.062  | NM_016619   | 1727.514  | 1522.512  | BG744154    | 37868.039 | 35470.137 |
| AF075085  | 51848.902 | 61512.855 | NM_014481   | 1946.715  | 3384.061  | Z11694      | 26176.588 | 25468.576 |
| NM_005892 | 4901.063  | 5790.052  | U22172      | 4607.774  | 5270.312  | BF983177    | 8532.894  | 6634.777  |
| NM_006478 | 1118.446  | 1091.904  | AB032960    | 1785.005  | 1851.374  | Z26317      | 5674.577  | 5303.598  |
| AF132734  | 48360.059 | 39332.426 | NM_014264   | 13500.813 | 13303.072 | X16983      | 57799.152 | 58332.227 |
| NM_018379 | 5007.311  | 5714.75   | AF020089    | 3808.237  | 3922.87   | X56160      | 9092.606  | 7615.854  |
| NM_000042 | 5662.098  | 4794.3    | NM_006257   | 2554.513  | 2737.311  | BG679991    | 2872.14   | 2641.03   |
| AF035787  | 5136.936  | 4400.51   | NM_016281   | 19724.082 | 20273.066 | H-Y 00097 I | 13975.366 | 12211.311 |
| NM_005024 | 625.987   | 651.275   | NM_004734   | 36357.629 | 40202.984 | H-M 59964   | 1252.019  | 1196.604  |
| NM_003403 | 2835.368  | 2921.401  | AK024793    | 3945.973  | 3896.509  | H-Y 00711 I | 61606.402 | 65281.043 |
| NM_014808 | 7959.522  | 9467.927  | AF208291    | 3494.73   | 2619.218  | H-X 16707 I | 6501.871  | 6392.227  |
| AB006627  | 1279.742  | 2267.1    | NM_004877   | 31553.559 | 31715.791 | AL038354    | 16547.111 | 18513.988 |
| NM_000416 | 15174.935 | 17613.027 | L10284      | 56546.23  | 52326.656 | R14607      | 4688.066  | 4288.069  |
| NM_003382 | 662.073   | 702.236   | NM_000276   | 2237.403  | 2257.549  | W84867      | 1077.873  | 1256.969  |
| NM_002965 | 1061.07   | 1333.047  | NM_000019   | 54991.887 | 52677.414 | NM_005718   | 9875.942  | 9939.617  |
| AB007883  | 3757.863  | 3419.777  | AK023701    | 3100.69   | 3852.127  | NM_018264   | 2905.521  | 2613.105  |
| NM_003839 | 555.848   | 546.07    | NM_003742   | 5517.366  | 6753.479  | NM_001815   | 8497.135  | 10450.343 |
| NM_006391 | 2820.227  | 2111.798  | NM_005094   | 5053.541  | 6681.362  | NM_000064   | 45731.004 | 43156.883 |
| AK093780  | 34087.727 | 37390.883 | NM_015886   | 646.137   | 716.658   | NM_003264   | 1375.59   | 1530.07   |
| AY009397  | 35126.063 | 34027.512 | NM_007102   | 49474.605 | 59346.383 | NM_006725   | 19454.563 | 19586.174 |
| NM_007037 | 9331.479  | 11641.872 | BG491613    | 9436.078  | 8900.441  | NM_003326   | 5738.043  | 4954.017  |
| NM_001649 | 598.874   | 956.246   | AA397813    | 42112.371 | 44763.883 | NM_000202   | 13793.841 | 13437.496 |
| NM_005492 | 5373.461  | 5959.806  | W47350      | 6576.751  | 7106.317  | NM_005496   | 18878.445 | 16446.701 |
| AF038196  | 7520.169  | 7287.372  | AI160964    | 1009.013  | 1299.751  | NM_016608   | 2407.707  | 2573.567  |
| NM_004859 | 7316.891  | 8790.995  | W68291      | 16399.07  | 17162.734 | NM_002858   | 8674.752  | 9401.922  |
| NM_016352 | 898.739   | 993.732   | N64384      | 6724.01   | 7310.485  | NM_004817   | 5232.869  | 4874.695  |
| NM_005014 | 3877.18   | 5173.912  | H-X 53655 I | 3133.335  | 3050.05   | NM_018975   | 36257.578 | 31319.818 |
| NM_006944 | 752.706   | 823.574   | H-U 05770 I | 9945.566  | 10246.954 | AB023215    | 38851.387 | 33798.211 |
| NM_004407 | 1122.111  | 1120.598  | H-M 65199   | 35568.648 | 39794.41  | NM_001284   | 42601.656 | 41907.711 |
| NM_000070 | 1596.641  | 1584.499  | H-M 32315   | 3255.255  | 3528.38   | NM_003242   | 34698.973 | 36390.297 |
| NM_003304 | 949.879   | 800.893   | H-V00536M   | 6498.522  | 7529.277  | NM_002849   | 2109.2    | 1835.367  |
| AB023156  | 623.56    | 348.313   | H-D85429M   | 11875.824 | 20286.035 | U31099      | 2362.871  | 2566.172  |
| NM_006323 | 27107.729 | 26625.475 | BF439832    | 2909.648  | 3187.902  | NM_001105   | 30278.346 | 27164.285 |
| NM_016466 | 6963.342  | 6902.391  | BG819162    | 2925.233  | 2959.213  | NM_005585   | 1087.518  | 934.432   |
| NM_001493 | 9026.818  | 8808.245  | M38449      | 9708.353  | 9049.167  | NM_002075   | 11651.379 | 11753.074 |
| NM_003716 | 1766.771  | 1568.575  | AK025495    | 541.517   | 656.091   | Y08756      | 46659.355 | 47354.406 |
| NM_014841 | 2191.253  | 2637.349  | NM_001091   | 4397.013  | 4292.438  | AY007090    | 867.401   | 905.396   |
| NM_014426 | 18770.998 | 22724.529 | AK023915    | 17524.229 | 17875.58  | NM_006439   | 789.702   | 736.003   |
| NM_006816 | 25985.609 | 30334.221 | AB014564    | 1912.636  | 2158.941  | AV752086    | 1700.34   | 1490.89   |
| AK026518  | 47633.152 | 56372     | NM_020230   | 4606.886  | 4666.407  | NM_016102   | 17423.486 | 21488.018 |
| NM_000258 | 51386.844 | 51186.242 | NM_006762   | 53797.453 | 56710.313 | AL137529    | 1779.363  | 2149.661  |
| AB033055  | 25238.643 | 25161.813 | NM_006352   | 2246.019  | 3152.995  | NM_012332   | 9139.121  | 9015.058  |
| AF311287  | 12641.362 | 11811.386 | NM_016430   | 1208.564  | 1778.669  | AK026648    | 4199.133  | 4041.561  |
| NM_003098 | 5547.084  | 5902.188  | NM_004447   | 8782.103  | 8259.234  | NM_000497   | 3488.016  | 3489.747  |
| NM_014781 | 9433.013  | 9130.397  | NM_001204   | 4744.036  | 4328.276  | NM_017421   | 4992.719  | 5999.235  |
| BU629989  | 2516.995  | 2540.739  | BF131321    | 2615.247  | 2708.969  | AK023130    | 9445.794  | 10410.727 |

|           |           |           |           |           |           |             |           |           |
|-----------|-----------|-----------|-----------|-----------|-----------|-------------|-----------|-----------|
| X87896    | 3502.022  | 4559.878  | NM_016540 | 2034.782  | 1015.782  | NM_000273   | 3973.699  | 4494.376  |
| M88310    | 6671.283  | 7018.375  | NM_012116 | 4411.65   | 5663.18   | NM_002895   | 34380.371 | 38072.457 |
| D16856    | 798.104   | 732.79    | NM_000020 | 12242.547 | 13704.209 | NM_005397   | 7924.99   | 9910.896  |
| NM_014465 | 8159.403  | 6703.057  | NM_000956 | 1160.206  | 1404.603  | AB014511    | 11466.285 | 12359.357 |
| D87292    | 4341.454  | 3739.584  | NM_002442 | 7557.72   | 7919.586  | NM_001662   | 26369.84  | 25432.807 |
| NM_005495 | 3261.28   | 3062.152  | AB033091  | 9081.298  | 7060.687  | AB011100    | 6187.439  | 6274.245  |
| NM_016335 | 1268.893  | 1148.232  | NM_004557 | 21928.725 | 26513.602 | U61741      | 3600.086  | 3532.875  |
| NM_000372 | 1178.362  | 844.924   | NM_014757 | 9241.368  | 14737.172 | NM_012402   | 15377.941 | 16059.189 |
| NM_003165 | 7373.584  | 7399.78   | NM_017893 | 973.847   | 1821.261  | M76676      | 11764.725 | 12373.625 |
| NM_003906 | 9832.734  | 8753.407  | NM_001584 | 7122.97   | 8148.43   | NM_003857   | 1286.535  | 1656.424  |
| AL359590  | 49308.086 | 51866.945 | NM_012259 | 55224.656 | 52698.859 | AL137690    | 1077.537  | 1361.333  |
| NM_002861 | 13419.248 | 13350.905 | AF272357  | 4782.888  | 4301.129  | Z83804      | 6240.489  | 6311.266  |
| NM_003080 | 2495.039  | 2577.14   | NM_016372 | 53074.309 | 54185.602 | NM_004386   | 3746.942  | 4138.477  |
| NM_004042 | 1057.686  | 809.245   | AB020705  | 4775.038  | 5569.817  | U67784      | 2897.468  | 3331.014  |
| NM_013265 | 1184.332  | 1307.454  | NM_014333 | 337.341   | 559.698   | NM_007366   | 3892.361  | 4080.56   |
| NM_002645 | 8204.138  | 9808.046  | NM_002980 | 2504.924  | 2428.608  | NM_000592   | 1133.36   | 1454.356  |
| AB033027  | 2443.782  | 2266.618  | NM_016274 | 3520.946  | 3483.471  | NM_016584   | 26988.227 | 31384.443 |
| AK021805  | 9577.452  | 13255.644 | NM_014946 | 1487.956  | 1708.475  | NM_000153   | 1024.565  | 861.331   |
| AB014550  | 3902.127  | 4533.585  | NM_014251 | 3945.51   | 5109.929  | NM_002033   | 1460.768  | 1135.508  |
| AF320294  | 2023.967  | 2302.699  | AK022750  | 7074.708  | 8014.231  | AK091794    | 541.686   | 626.563   |
| AF320293  | 772.329   | 742.675   | NM_004251 | 10291.774 | 8947.721  | NM_004111   | 7184.649  | 8239.955  |
| AF161436  | 6612.255  | 8504.637  | BF337921  | 4218.283  | 4334.877  | AF085966    | 8226.735  | 12115.474 |
| NM_020402 | 3021.277  | 4156.96   | U53532    | 3093.896  | 3093.548  | NM_005316   | 8479.834  | 9977.467  |
| NM_004295 | 4474.438  | 5371.256  | NM_001740 | 4000.271  | 4238.462  | NM_016316   | 9157.448  | 12440.516 |
| NM_001171 | 958.636   | 1248.909  | NM_012484 | 5568.269  | 5640.257  | NM_003365   | 32225.773 | 43094.617 |
| NM_002250 | 18956.492 | 18125.488 | AL096732  | 4227.438  | 5557.302  | NM_000057   | 3460.997  | 4653.05   |
| S81591    | 2295.262  | 2028.326  | AB006423  | 1085.249  | 1492.282  | NM_018343   | 12376.01  | 13072.026 |
| AF075085  | 48373.457 | 60186.824 | AJ132084  | 487.293   | 638.878   | AK095793    | 2684.17   | 2847.031  |
| NM_005892 | 4181.751  | 4210.596  | NM_005719 | 45819.203 | 50444.566 | NM_003177   | 8219.61   | 6514.155  |
| NM_006475 | 967.997   | 895.492   | NM_003462 | 46233.574 | 43748.168 | NM_017715   | 1820.221  | 1787.409  |
| AF132734  | 43797.504 | 32692.768 | NM_006093 | 10657.356 | 10927.448 | AF064078    | 4432.54   | 5158.557  |
| NM_018375 | 5350.009  | 5271.865  | NM_000139 | 1522.194  | 1668.574  | AL049688    | 7176.915  | 6596.959  |
| NM_016403 | 18242.568 | 16247.367 | NM_006664 | 7324.4    | 6738.889  | NM_002737   | 7308.113  | 7569.313  |
| NM_015603 | 2184.91   | 2307.619  | NM_002416 | 893.152   | 1257.411  | Z25427      | 6573.566  | 6269.399  |
| AK021788  | 1173.061  | 913.245   | NM_002725 | 3527.558  | 3519.56   | NM_004672   | 20024.379 | 22246.029 |
| NM_001921 | 14670.975 | 13413.738 | NM_000450 | 840.195   | 762.323   | NM_001353   | 7997.871  | 8928.03   |
| NM_006230 | 23143.025 | 22887.1   | NM_000445 | 3951.098  | 4098.889  | NM_006214   | 4105.337  | 4771.209  |
| NM_014695 | 4676.471  | 4808.095  | NM_004513 | 9656.02   | 9675.149  | AJ010228    | 14455.319 | 17148.67  |
| NM_013400 | 29510.246 | 26669.219 | NM_001705 | 49731.234 | 48675.992 | NM_005195   | 5335.905  | 7073.969  |
| AK026257  | 5298.618  | 6892.804  | NM_017735 | 7784.186  | 7276.456  | NM_018073   | 2255.721  | 2695.966  |
| AK023836  | 14284.128 | 13955.548 | AB033044  | 25788.172 | 25408.689 | NM_006061   | 664.647   | 713.801   |
| NM_018105 | 8163.6    | 9510.317  | NM_000276 | 1879.222  | 1460.918  | NM_006845   | 59151.98  | 66184.172 |
| AJ299442  | 16147.209 | 19696.838 | NM_000019 | 51429.508 | 52646.391 | NM_005603   | 60366.883 | 61495.961 |
| BE734914  | 762.599   | 618.947   | AK023701  | 2764.385  | 3184.889  | NM_001061   | 3194.806  | 3050.812  |
| AB040897  | 1240.635  | 1431.5    | NM_003742 | 4426.806  | 4084.474  | AI075338    | 5435.305  | 5714.468  |
| NM_000125 | 5849.825  | 6939.567  | NM_005094 | 3785.742  | 3738.732  | BG744154    | 43526.16  | 55016.477 |
| NM_002156 | 533.354   | 464.559   | BE382905  | 1154.394  | 1817.495  | Z11694      | 28545.506 | 34358.332 |
| NM_003762 | 25023.578 | 24833.037 | NM_002152 | 16756.203 | 18438.314 | BF983177    | 9654.753  | 9309.879  |
| NM_004375 | 651.393   | 370.57    | NM_001701 | 505.27    | 463.899   | Z26317      | 7299.153  | 8006.345  |
| NM_018446 | 10760.708 | 11798.382 | AK022558  | 3254.358  | 3451.282  | X16983      | 66034.352 | 66223.664 |
| NM_000187 | 4745      | 5525.272  | NM_006476 | 49061.555 | 48742.668 | X56160      | 11521.278 | 11612.031 |
| CY3Cy5    | 1582.856  | 148.871   | AK023787  | 3659.73   | 3481.547  | BG679991    | 3565.576  | 3087.372  |
| NM_017532 | 3847.07   | 3469.511  | NM_002133 | 5879.459  | 8167.613  | H-Y 00097 I | 15982.891 | 12823.402 |

|           |           |           |           |           |           |             |           |           |
|-----------|-----------|-----------|-----------|-----------|-----------|-------------|-----------|-----------|
| AF086184  | 2194.797  | 1963.984  | NM_015697 | 8984.113  | 7999.468  | H-M 59964   | 1449.249  | 1087.38   |
| NM_018275 | 1860.803  | 2115.943  | AF086489  | 868.314   | 672.856   | H-Y 00711 I | 61308.578 | 62407.105 |
| AL049266  | 9392.845  | 7924.956  | NM_032943 | 5186.186  | 5376.954  | H-X 16707 I | 12116.216 | 11086.899 |
| AF007149  | 3248.082  | 2191.523  | NM_007177 | 32238.086 | 33193.449 | H-U76456M   | 431.373   | 496.918   |
| NM_014705 | 941.152   | 611.159   | NM_000809 | 696.046   | 832.188   | AL038354    | 18505.723 | 16834.754 |
| AK001469  | 9544.332  | 6774.007  | AB018258  | 677.282   | 976.11    | R14607      | 9627.048  | 8260.111  |
| AF035318  | 2303.888  | 1440.851  | AL359592  | 1250.39   | 1750.835  | W84867      | 2154.198  | 2177.659  |
| NM_015456 | 9601.724  | 7117.636  | NM_006078 | 11475.089 | 13311.481 | NM_005718   | 9823.742  | 16343.206 |
| AK025056  | 4834.168  | 3486.644  | NM_000824 | 422.544   | 827.06    | NM_018264   | 2526.508  | 2922.888  |
| AF140710  | 1892.292  | 1638.171  | NM_000482 | 817.809   | 933.536   | NM_014580   | 1784.332  | 2339.754  |
| NM_017532 | 2254.194  | 1605.712  | NM_005953 | 9855.979  | 21814.395 | AB028998    | 1439.54   | 1852.833  |
| SR2       | 51972.922 | 38084.367 | M38449    | 8968.309  | 8616.513  | NM_016608   | 2430.105  | 2759.856  |
| SR4       | 14758.846 | 13026.177 | AK025495  | 380.925   | 190.187   | NM_002858   | 7353.873  | 7525.369  |
| SR6       | 2408.44   | 2161.502  | NM_001091 | 1857.427  | 1893.14   | NM_004817   | 4422.388  | 4688.869  |
| SR8       | 8730.189  | 20452.596 | AK023915  | 10934.617 | 9759.923  | NM_018975   | 32494.068 | 27760.494 |
| SR10      | 27109.635 | 8685.223  | AB051453  | 1451.374  | 1465.623  | AB023215    | 42560.719 | 40290.094 |
| CY3Cy5    | 1265.406  | 304.95    | AK026842  | 754.823   | 717.309   | NM_001284   | 47653.969 | 48035.438 |
| AL157477  | 5426.96   | 6911.907  | NM_002395 | 1020.604  | 921.418   | NM_003242   | 41908.789 | 52571.383 |
| AB002318  | 3100.564  | 2837.721  | AB023203  | 2275.075  | 2375.952  | NM_002848   | 1771.424  | 1972.347  |
| AL049951  | 3207.059  | 3601.745  | NM_014963 | 2115.62   | 2195.349  | U31099      | 3728.274  | 4370.751  |
| AK024963  | 1880.575  | 2378.804  | NM_004259 | 3133.02   | 2789.114  | NM_001105   | 43802.16  | 39336.445 |
| AK023725  | 2437.556  | 3113.838  | NM_016271 | 10658.923 | 13380.68  | NM_005585   | 1270.855  | 1539.84   |
| AK022936  | 19155.615 | 21408.064 | NM_016619 | 1345.505  | 1853.438  | NM_002075   | 19528.52  | 19835.984 |
| AK024385  | 3077.046  | 3070.56   | NM_014481 | 1509.485  | 2283.243  | Y08756      | 62186.395 | 62449.563 |
| AL137727  | 9871.987  | 10188.839 | U22172    | 6679.296  | 6529.823  | NM_005563   | 16555.965 | 18791.514 |
| L17327    | 1523.787  | 1612.503  | AB032960  | 1705.058  | 1801.782  | AY007090    | 2022.856  | 1797.314  |
| AF074986  | 1276.234  | 1077.505  | NM_014264 | 13039.941 | 12759.177 | NM_006438   | 2602.608  | 2171.715  |
| AF075004  | 891.339   | 618.864   | AF020089  | 3460.77   | 3444.782  | NM_005102   | 5850.791  | 5325.77   |
| AL049240  | 8273.618  | 7780.404  | NM_006257 | 1992.293  | 1818.255  | NM_004518   | 7381.632  | 4869.93   |
| U80773    | 3595.75   | 2539.337  | NM_016281 | 17922.637 | 16346.899 | NM_006501   | 2821.523  | 2611.718  |
| AK021745  | 4297.481  | 3407.797  | NM_004734 | 33184.352 | 33579.586 | NM_002718   | 27293.785 | 26614.939 |
| L38937    | 5932.02   | 4585.021  | AK024793  | 3360.104  | 3408.146  | AV752086    | 1996.399  | 1618.827  |
| U90907    | 1267.571  | 896.856   | AF208291  | 1977.597  | 2076.769  | NM_016102   | 24343.182 | 29690.375 |
| AK024327  | 2376.098  | 1523.684  | NM_004877 | 29282.1   | 30539.219 | NM_004376   | 5197.616  | 5904.216  |
| AK021700  | 605.562   | 459.912   | L10284    | 52712.941 | 48877.324 | NM_000272   | 1039.509  | 896.893   |
| NM_014135 | 552.698   | 368.138   | CY3Cy5    | 3879.564  | 847.525   | NM_016131   | 17148.26  | 15215.717 |
| AK024395  | 1515.027  | 802.339   | NM_000620 | 649.429   | 731.925   | NM_006822   | 2660.885  | 2110.922  |
| AK000801  | 13280.665 | 10930.503 | NM_000905 | 9817.155  | 11806.951 | NM_012142   | 13243.173 | 10808.596 |
| D85433    | 6925.577  | 4909.568  | AK023269  | 2914.21   | 2621.489  | NM_016428   | 2365.417  | 2196.954  |
| AK025109  | 7225.725  | 6792.531  | AF070564  | 16164.346 | 14568.319 | AB011100    | 6585.629  | 6760.225  |
| AK026057  | 1648.753  | 1486.891  | AK021439  | 38913.664 | 25494.055 | U61741      | 3367.622  | 3947.032  |
| AK021627  | 6233.129  | 6660.211  | AF052099  | 6027.288  | 5592.649  | NM_012402   | 15005.077 | 17555.438 |
| NM_019596 | 869.13    | 712.013   | AL110111  | 5542.687  | 4292.608  | M76676      | 13968.916 | 20849.746 |
| AF085859  | 1079.077  | 1010.183  | AF070543  | 1383.366  | 1278.335  | NM_003857   | 1559.401  | 2082.315  |
| AF085888  | 1001.695  | 918.858   | AF086525  | 268.302   | 366.153   | AL137690    | 1058.97   | 1608.683  |
| AJ420504  | 602.922   | 437.864   | AF086509  | 648.454   | 880.773   | Z83804      | 6146.622  | 5273.847  |
| AF075047  | 1212.062  | 1717.13   | NM_014778 | 4603.434  | 4553.414  | NM_004386   | 5865.298  | 5060.743  |
| AL049260  | 1003.083  | 1056.201  | AK001171  | 27652.42  | 34768.328 | U67784      | 4215.283  | 4569.746  |
| AL049975  | 1202.024  | 906.505   | AF086491  | 8122.396  | 6745.071  | NM_007366   | 7682.645  | 7161.538  |
| AL117464  | 1350.901  | 1642.249  | NM_014856 | 1521.117  | 1364.51   | NM_000592   | 1354.937  | 1450.129  |
| AL080160  | 411.898   | 502.549   | NM_003492 | 1135.035  | 1034.362  | NM_016584   | 49356.977 | 52384.574 |
| L23849    | 1809.815  | 1841.241  | NM_000620 | 611.764   | 540.851   | NM_001815   | 8796.543  | 7587.499  |
| AL049997  | 34752.375 | 30598.594 | NM_000905 | 7351.041  | 6185.662  | NM_000064   | 44036.277 | 35691.527 |

|           |           |           |           |           |           |           |           |           |
|-----------|-----------|-----------|-----------|-----------|-----------|-----------|-----------|-----------|
| AK024118  | 3102.851  | 2832.754  | SR1       | 74092.883 | 65260.07  | NM_003264 | 1979.477  | 1756.595  |
| X89657    | 1091.141  | 960.974   | SR3       | 33118.852 | 53124.02  | NM_006725 | 14292.615 | 14124.809 |
| AK024509  | 1362.519  | 1792.829  | SR5       | 3833.814  | 4525.699  | NM_003326 | 36324.938 | 25646.207 |
| AL050185  | 664.94    | 586.837   | SR9       | 12041.645 | 2828.772  | NM_004568 | 64877.035 | 67601.188 |
| AF049615  | 1224.059  | 1117.729  | CY3Cy5    | 3757.011  | 764.764   | NM_000202 | 11161.66  | 13087.407 |
| NM_014358 | 50095.527 | 45865.16  | U63828    | 6997.018  | 5587.934  | NM_005496 | 17465.018 | 17731.398 |
| AF009282  | 13895.544 | 13014.426 | Z36794    | 9428.129  | 11051.896 | NM_006214 | 3011.628  | 2639.617  |
| AF024704  | 1014.472  | 964.971   | Z36828    | 12293.527 | 10449.38  | AJ010228  | 18595.715 | 11906.435 |
| AF056431  | 3180.54   | 2480.787  | AF086121  | 28444.598 | 25759.131 | NM_005198 | 6805.141  | 5772.494  |
| NM_016412 | 851.286   | 678.581   | AF086140  | 2379.981  | 2024.909  | NM_018073 | 3337.057  | 3217.891  |
| AF009293  | 3908.906  | 3895.313  | NM_015696 | 567.168   | 531.964   | AL137529  | 2622.635  | 2923.454  |
| NM_004158 | 52666.918 | 55563.977 | AK022551  | 4269.42   | 3879.919  | NM_012332 | 10115.75  | 12072.999 |
| AF056444  | 5388.882  | 6341.709  | AF085968  | 5466.617  | 3870.347  | AK026648  | 3921.467  | 4837.932  |
| AK000989  | 5196.021  | 5794.809  | AB011136  | 3803.649  | 3186.389  | NM_000497 | 2752.394  | 3980.433  |
| AK002210  | 6092.389  | 7050.395  | AF085898  | 9877.903  | 11938.28  | NM_017421 | 4656.779  | 5216.648  |
| AK021677  | 1778.326  | 1712.354  | AL161960  | 2067.431  | 2158.56   | AK025977  | 57694.84  | 61598.004 |
| AK001057  | 2179.372  | 2001.451  | AL049964  | 4234.936  | 4413.134  | AK023130  | 8997.785  | 9166.048  |
| AK001808  | 544.026   | 702.445   | AK022485  | 1197.963  | 1086.786  | NM_000273 | 3591.742  | 3517.756  |
| AK021471  | 1306.269  | 984.98    | AK023395  | 11120.571 | 8731.362  | NM_002896 | 36893.09  | 43840.434 |
| AL359563  | 4768.931  | 5118.376  | AK023818  | 19745.354 | 17698.016 | NM_000486 | 3087.739  | 2917.672  |
| NM_014477 | 396.198   | 487.136   | AK024139  | 859.606   | 827.067   | BE876237  | 3649.698  | 3653.647  |
| L40521    | 401.251   | 778.884   | AK023895  | 629.322   | 613.53    | NM_005397 | 7278.688  | 8373.78   |
| AF086478  | 6460.883  | 8275.186  | AK024206  | 14669.07  | 12520.535 | NM_000806 | 22591.043 | 22159.047 |
| AF086022  | 778.409   | 780.992   | AK026273  | 29779.734 | 30551.615 | NM_006320 | 4747.558  | 4154.235  |
| AK021514  | 62498.398 | 73691.609 | NM_020250 | 33533.582 | 35131.953 | AB014511  | 10604.423 | 13800.061 |
| AJ008134  | 1045.079  | 1255.108  | AF055007  | 1097.462  | 1146.43   | NM_014252 | 8922.736  | 9920.82   |
| S71486    | 5348.093  | 5798.444  | NM_012337 | 2549.13   | 3662.072  | NM_001662 | 21851.27  | 27435.613 |
| L33808    | 6893.873  | 6214.915  | AL389879  | 28135.926 | 24608.715 | NM_005718 | 8609.438  | 5428.411  |
| AJ008117  | 2235.897  | 1807.224  | AK022869  | 3619.034  | 3232.624  | NM_018264 | 2001.809  | 1480.902  |
| AJ008147  | 16140.285 | 14614.593 | NM_016111 | 37959.117 | 45372.523 | NM_014580 | 2868.091  | 1956.34   |
| AK024369  | 865.104   | 971.765   | AF085958  | 67857.883 | 65102.402 | AB028998  | 978.223   | 937.744   |
| AL049244  | 471.353   | 538.706   | AF086021  | 6925.438  | 6998.783  | NM_000153 | 1135.207  | 1141.762  |
| L43345    | 3741.865  | 3664.791  | AL117655  | 387.721   | 384.194   | NM_002033 | 1180.888  | 1136.401  |
| AF180297  | 6043.045  | 7618.34   | AK024472  | 5263.258  | 3540.924  | NM_004111 | 8051.145  | 8409.325  |
| AK023245  | 1956.934  | 2350.696  | AF087981  | 369.614   | 528.265   | AF085966  | 8669.765  | 8420.968  |
| AF086224  | 1022.976  | 1452.295  | NM_017976 | 4785.494  | 5535.061  | NM_005316 | 9533.97   | 9554.503  |
| S56365    | 19736.541 | 17562.711 | U06700    | 3252.456  | 3381.936  | NM_016316 | 8462.273  | 6736.991  |
| AF186017  | 837.8     | 972.29    | NM_017918 | 14971.757 | 13671.259 | NM_003366 | 31539.188 | 32230.623 |
| AK023607  | 2090.79   | 1448.022  | NM_017855 | 56483.129 | 53624.488 | NM_000057 | 3956.633  | 6730.803  |
| AK027209  | 767.184   | 761.081   | AB007954  | 4676.823  | 4288.553  | NM_018343 | 11813.659 | 12685.461 |
| AK026874  | 894.665   | 860.202   | AK026494  | 7906.497  | 6107.756  | AK095793  | 2843.934  | 2701.736  |
| AK024178  | 382.907   | 678.401   | AK022067  | 561.918   | 684.61    | NM_003177 | 7647.244  | 6543.084  |
| AF088033  | 1558.514  | 1756.523  | AK023508  | 1508.295  | 1319.557  | NM_017719 | 1931.442  | 1898.24   |
| NM_020422 | 15529.284 | 18423.17  | AK025840  | 3765.695  | 3657.672  | AF064078  | 4441.763  | 4331.884  |
| AJ227897  | 575.613   | 841.395   | AK026915  | 4077.701  | 4240.54   | AL049688  | 6778.249  | 6587.946  |
| AK023628  | 698.016   | 700.451   | AL110259  | 1798.38   | 2731.99   | NM_002737 | 7717.686  | 8967.56   |
| AY007156  | 2769.117  | 2840.069  | AB033100  | 45698.145 | 55968.949 | Z25427    | 7111.6    | 6520.833  |
| AF086408  | 62775.359 | 71735.188 | AL390138  | 7393.644  | 9051.226  | NM_004672 | 21972.467 | 18655.271 |
| AK023979  | 4222.219  | 4679.874  | AL137290  | 8869.371  | 8565.876  | NM_001353 | 5248.89   | 6373.006  |
| NM_017847 | 3808.323  | 4427.596  | AK023458  | 618.251   | 518.432   | CY3Cy5    | 7018.121  | 429.573   |
| AL049675  | 2022.453  | 3101.15   | AK021606  | 1173.531  | 2151.816  | AF252284  | 5047.541  | 4503.035  |
| AL050151  | 2873.547  | 3449.28   | NM_014124 | 52974.008 | 51634.969 | BU727558  | 2791.955  | 2405.339  |
| NM_003537 | 6790.767  | 8277.584  | AF119888  | 1266.757  | 1530.708  | AK025794  | 14633.299 | 12192.666 |



|           |           |           |           |           |           |           |           |           |
|-----------|-----------|-----------|-----------|-----------|-----------|-----------|-----------|-----------|
| AF056419  | 14620.419 | 15138.012 | AK001551  | 6654.817  | 7594.44   | NM_003541 | 2989.753  | 2492.409  |
| AF074983  | 1783.223  | 2009.538  | AK001825  | 1935.472  | 1730.412  | AF131835  | 342.082   | 529.057   |
| AK021862  | 1507.105  | 2054.082  | AK024714  | 519.531   | 736.413   | AK024522  | 2711.067  | 2501.984  |
| AK024177  | 862.049   | 972.365   | AK022363  | 2090.869  | 1966.229  | NM_00719E | 4287.02   | 4320.676  |
| AK024827  | 557.23    | 563.56    | AL353949  | 381.591   | 352.9     | NM_01495E | 998.02    | 1097.12   |
| AK021952  | 936.529   | 612.036   | NM_005181 | 2379.042  | 1962.655  | M33197    | 93108.906 | 62273.43  |
| AF090102  | 576.091   | 439.197   | AF026945  | 1105.784  | 775.861   | AK023220  | 1152.905  | 1719.764  |
| K01564    | 2643.103  | 2565.033  | AF143676  | 7553.388  | 8224.03   | AK024566  | 1170.53   | 1007.48   |
| AB023175  | 2542.376  | 1465.256  | U66044    | 40944.102 | 40646.254 | AF038182  | 2988.916  | 3228.171  |
| NM_000737 | 2072.68   | 2103.8    | NM_005247 | 58795.773 | 56486.543 | NM_01647E | 4864.979  | 4689.061  |
| NM_00083E | 1962.056  | 1652.691  | NM_00528E | 3997.991  | 3853.688  | AF086472  | 1716.811  | 1627.692  |
| AK024102  | 43171.707 | 41855.871 | AL122089  | 1357.562  | 1748.508  | AF252284  | 5155.577  | 7237.12   |
| NM_00129C | 1204.794  | 1054.681  | AA203665  | 20345.59  | 20526.1   | BU727558  | 4853.713  | 7515.003  |
| AL079273  | 4711.369  | 6411.853  | U95646    | 1380.521  | 1273.602  | SR3       | 40635.449 | 60683.16  |
| NM_00504E | 1350.833  | 1678.09   | Y16705    | 2563.848  | 2561.129  | SR5       | 4784.853  | 8501.436  |
| AK026129  | 1215.903  | 1446.933  | AF279775  | 8370.902  | 8573.468  | SR7       | 4329.375  | 58647.703 |
| NM_00174E | 52222.238 | 56390.09  | NM_00626E | 4093.513  | 3839.224  | SR9       | 10581.224 | 2860.448  |
| AK024200  | 953.179   | 1219.563  | AK026598  | 3073.955  | 2874.669  | CY3Cy5    | 5864.03   | 415.412   |
| NM_00371E | 696.936   | 946.699   | AK023602  | 1404.096  | 1389.671  | L33811    | 464.299   | 532.708   |
| D31886    | 9779.032  | 7984.19   | NM_018097 | 47098.32  | 50996.43  | L77559    | 1082.146  | 1289.216  |
| U92024    | 887.555   | 1265.356  | AF130043  | 560.108   | 767.055   | NM_00559E | 3511.404  | 2947.273  |
| AK023330  | 3468.435  | 3649.712  | Y11167    | 1848.569  | 2227.572  | Y10515    | 1642.997  | 1571.676  |
| AF075071  | 1282.688  | 1644.178  | AK026813  | 1450.8    | 1603.855  | M87942    | 527.057   | 501.013   |
| AL080213  | 710.73    | 836.49    | AK027225  | 1877.77   | 2393.751  | AK023636  | 11623.359 | 9534.086  |
| AF001892  | 817.418   | 961.601   | AK023083  | 3714.371  | 5801.154  | D25272    | 3898.54   | 3291.986  |
| AF075003  | 1517.077  | 1987.569  | AF130093  | 1366.501  | 1468.427  | M33197    | 87425.008 | 62599.438 |
| X93500    | 5630.302  | 6203.571  | AF116622  | 1279.946  | 1280.927  | NM_02016E | 2684.288  | 2335.427  |
| AK026597  | 921.693   | 965.785   | AF217967  | 1451.665  | 2184.821  | AF075013  | 449.204   | 794.178   |
| U79271    | 2299.265  | 2485.148  | NM_017447 | 2989.713  | 2339.953  | AL832699  | 8451.021  | 6736.795  |
| NM_01988E | 2167.781  | 2527.574  | AL049452  | 457.42    | 797.061   | NM_012191 | 2380.432  | 2087.801  |
| AK024609  | 12220.336 | 13581.51  | NM_01662E | 4299.763  | 4674.056  | M33197    | 73207.18  | 63765.512 |
| AK023660  | 1206.109  | 1132.772  | AK026976  | 2861.478  | 3596.67   | AK000757  | 1728.665  | 2358.274  |
| NM_01812C | 10305.604 | 11107.96  | AF070559  | 1605.699  | 1586.339  | AL359577  | 2041.687  | 4592.721  |
| NM_015991 | 1038.18   | 876.332   | D42043    | 32562.635 | 30138.143 | NM_01813E | 8501.041  | 13542.323 |
| NM_00556E | 672.292   | 560.216   | BC024009  | 7876.265  | 6754.323  | AF052120  | 3061.952  | 4672.96   |
| NM_00493E | 768.044   | 990.963   | AF128543  | 15269.416 | 14398.301 | NM_014871 | 2816.852  | 3184.705  |
| NM_00523E | 964.247   | 1070.968  | NM_00418E | 1281.931  | 1192.86   | M33197    | 90951.531 | 62398.145 |
| X99658    | 753.754   | 858.309   | X94290    | 3199.858  | 3564.214  | AL137552  | 6297.821  | 4762.675  |
| NM_006654 | 2053.055  | 2225.955  | AK026685  | 33956.77  | 35725.973 | M33197    | 71317.422 | 64165.09  |
| NM_00316E | 1832.985  | 2245.124  | AF090927  | 44717.469 | 50694.371 | AK024779  | 3086.76   | 2432.999  |
| NM_00039E | 5182.078  | 5550.901  | AL137642  | 1706.076  | 1789.807  | AK024940  | 520.896   | 742.731   |
| NM_00326E | 2507.531  | 2571.823  | AL133619  | 12953.956 | 13459.814 | AK024406  | 1966.571  | 2267.571  |
| NM_00235C | 12650.214 | 14854.644 | AK025902  | 6898.297  | 6846.562  | AK024568  | 40282.059 | 34588.746 |
| NM_012417 | 2982.337  | 3890.615  | NM_004517 | 4131.545  | 3459.606  | AK024873  | 1945.497  | 1723.08   |
| NM_00254E | 2391.756  | 2287.943  | AI017418  | 801.715   | 648.713   | M33197    | 69649.938 | 64188.375 |
| NM_00296E | 513.469   | 540.982   | NM_00067E | 5123.357  | 4031.662  | AK024981  | 46832.223 | 38675.512 |
| BF246606  | 711.104   | 737.765   | AF218006  | 58826.578 | 55015.512 | AK027246  | 1900.083  | 2712.766  |
| NM_01428E | 1131.043  | 1486.704  | AK026935  | 33381.695 | 30431.953 | U80766    | 8026.449  | 7520.085  |
| NM_00234E | 1688.765  | 1625.627  | NM_02016E | 6486.644  | 5899.121  | AK001638  | 2518.297  | 2422.858  |
| D13631    | 6852.209  | 5449.062  | AK027124  | 67320.289 | 64990.285 | AF161386  | 21256.781 | 16323.094 |
| NM_00371E | 4338.714  | 4390.391  | AB037813  | 588.094   | 694.722   | AL365369  | 5194.757  | 3906.775  |
| NM_002184 | 2695.84   | 2612.528  | M31212    | 19486.865 | 24067.643 | AK025454  | 11054.76  | 11558.245 |
| NM_01488E | 8702.463  | 10208.321 | NM_001821 | 10598.908 | 8335.92   | M33197    | 67714.82  | 64235.641 |

|           |           |           |           |           |           |           |           |           |
|-----------|-----------|-----------|-----------|-----------|-----------|-----------|-----------|-----------|
| NM_01780E | 1004.715  | 922.33    | NM_005647 | 2071.363  | 2050.076  | X05826    | 22409.875 | 41927.566 |
| M86841    | 1063.963  | 1142.131  | X64978    | 25704.232 | 23204.023 | Y11608    | 2098.501  | 3816.699  |
| U56387    | 1829.781  | 2008.122  | NM_000912 | 51958.582 | 49727.098 | AJ001872  | 24419.471 | 34815.746 |
| AJ012370  | 336.088   | 682.505   | NM_002345 | 2481.541  | 2327.89   | AJ227882  | 928.706   | 1374.367  |
| AL049296  | 8900.165  | 6501.669  | U57971    | 3022.563  | 3672.376  | M33197    | 87054.422 | 62735.828 |
| NM_014471 | 3721.935  | 3014      | X89673    | 3297.49   | 4195.331  | M33197    | 72846.883 | 63909.398 |
| D49356    | 2119.697  | 2320.857  | AK024593  | 4998.429  | 5194.354  | AL137556  | 3487.777  | 3896.929  |
| AJ250475  | 2308.87   | 3050.703  | Z83934    | 1222.083  | 1429.261  | NM_01469E | 16152.839 | 14570.532 |
| NM_00080C | 2657.292  | 3180.93   | NM_018359 | 4540.304  | 4160.895  | AL359055  | 4990.872  | 5144.785  |
| NM_01857E | 5499.832  | 5683.625  | AK022020  | 3175.437  | 3305.487  | NM_01490E | 4482.118  | 4433.052  |
| NM_006201 | 3616.883  | 4405.87   | AK000263  | 17281.723 | 16542.029 | AK025931  | 67027.766 | 62217.66  |
| NM_007110 | 2961.005  | 2632.957  | Y13895    | 1359.625  | 1279.902  | M33197    | 5200.634  | 4280.904  |
| NM_00125E | 15474.888 | 15898.826 | L14723    | 22104.914 | 20433.088 | AK021972  | 3472.995  | 3077.518  |
| U50383    | 25332.723 | 24713.848 | AK024462  | 39889.117 | 35003.941 | AK001083  | 4377.3    | 7054.762  |
| AK025085  | 12907.99  | 13324.409 | NM_005711 | 409.699   | 351.763   | AK000185  | 4745.749  | 7814.232  |
| NM_016317 | 1286.507  | 1232.775  | NM_019601 | 1278.291  | 874.943   | NM_01796Z | 2322.557  | 3465.377  |
| AK022290  | 1470.818  | 1459.917  | NM_00220E | 1790.184  | 2186.048  | AK027227  | 880.124   | 913.138   |
| NM_00368C | 42014.324 | 33456.926 | NM_007074 | 990.604   | 933.027   | NM_017834 | 1235.994  | 1185.775  |
| AF118124  | 21003.336 | 21919.373 | NM_006614 | 1115.474  | 960.415   | M33197    | 65869.445 | 65275.965 |
| NM_00484E | 14106.684 | 15177.2   | NM_00223C | 6302.781  | 4963.812  | AF147349  | 21652.615 | 21778.863 |
| AL137527  | 22213.639 | 21873.25  | NM_00381E | 13348.407 | 11544.223 | AL050346  | 55858.301 | 49839.906 |
| AK024186  | 448.76    | 812.57    | NM_00143C | 2126.958  | 1998.81   | AK001520  | 15480.458 | 16226.567 |
| J04974    | 2004.617  | 2127.066  | AB010098  | 1481.708  | 2015.133  | AK021731  | 1073.929  | 1304.908  |
| NM_01767E | 561.539   | 757.799   | U17989    | 2949.033  | 3343.901  | D90070    | 34502.922 | 29860.762 |
| NM_007014 | 2506.94   | 1891.54   | U62325    | 2285.141  | 2286.164  | Y12235    | 1744.23   | 1906.534  |
| AL096740  | 1699.394  | 1706.015  | AL137595  | 1471.254  | 1296.139  | AF132601  | 698.005   | 670.655   |
| NM_014554 | 6123.561  | 5818.379  | NM_01802E | 1636.449  | 1426.482  | M33197    | 72816.695 | 63253.453 |
| NM_00465Z | 3353.722  | 3106.865  | AF249267  | 60947.859 | 57487.539 | AF086179  | 6360.963  | 5590.676  |
| AB040948  | 924.518   | 983.385   | NM_004113 | 815.613   | 713.246   | AK025807  | 8339.098  | 7756.369  |
| NM_00035E | 468.827   | 337.094   | X84939    | 5739.268  | 7300.858  | AK022478  | 834.993   | 929.688   |
| AK025425  | 48759.195 | 46059.992 | NM_01832C | 45991.984 | 50987.32  | NM_018381 | 1846.224  | 1473.928  |
| AK025974  | 9830.068  | 9529.002  | NM_00206E | 5223.191  | 6018.497  | U10509    | 3944.734  | 4878.202  |
| X98115    | 4203.44   | 3977.976  | NM_01605E | 8965.956  | 7477.767  | NM_00716E | 65789.266 | 65640.859 |
| NM_005781 | 5049.399  | 4485.02   | AF188492  | 495.031   | 400.621   | NM_01401E | 15538.982 | 23889.621 |
| BC036740  | 10412.954 | 10293.147 | M65066    | 17605.715 | 17887.313 | AF085956  | 3328.254  | 4323.346  |
| NM_001747 | 13725.259 | 12931.575 | NM_016951 | 2899.029  | 3043.336  | NM_01911E | 2999.298  | 3613.868  |
| NM_001148 | 34198.813 | 32150.188 | NM_013251 | 1152.784  | 1128.696  | AF147318  | 2812.555  | 3361.516  |
| AF242522  | 28351.928 | 30301.023 | NM_01232E | 1048.714  | 497.451   | L37699    | 2852.629  | 2834.255  |
| AJ008152  | 1715.683  | 1687.494  | NM_00308E | 61533.898 | 46643.82  | M33197    | 69598.891 | 64206.359 |
| NM_003657 | 5001.524  | 4841.696  | NM_016084 | 22911.141 | 10838.357 | AL050173  | 3810.477  | 4008.572  |
| NM_00058E | 707.514   | 465.627   | AF095289  | 26301.488 | 16448.074 | D80002    | 3975.4    | 3694.336  |
| S67970    | 1095.4    | 920.838   | NM_005537 | 4104.588  | 2568.239  | U17637    | 19848.869 | 22102.055 |
| AF221520  | 9567.339  | 9782.399  | AC003962  | 602.822   | 477.154   | AF207831  | 2889.248  | 3067.745  |
| NM_00209Z | 27114.01  | 27822.793 | NM_01900E | 3524.698  | 2273.916  | AK023174  | 825.799   | 1170.615  |
| NM_018077 | 7471.436  | 8553.345  | NM_01593E | 20108.568 | 14252.264 | NM_00354E | 1174.305  | 1393.694  |
| NM_01683E | 3883.611  | 4412.234  | AF182412  | 1728.371  | 1641.675  | M33197    | 72775.445 | 63904.113 |
| NM_00596E | 39905.73  | 40807.938 | AK027200  | 2002.184  | 1465.157  | NM_01827Z | 4886.138  | 5846.248  |
| AK021416  | 1874.573  | 1840.237  | U03106    | 13933.743 | 14200.658 | AF086125  | 2566.616  | 2033.636  |
| NM_018471 | 24068.654 | 20672.969 | NM_00007E | 18329.254 | 14990.062 | AL079279  | 646.119   | 906.728   |
| NM_00381E | 32034.885 | 26098.859 | NM_00684E | 52337.641 | 41845.809 | AK023547  | 915.028   | 973.593   |
| NM_00656C | 11712.071 | 13743.273 | NM_01488E | 425.534   | 278.256   | U67847    | 3774.329  | 2717.15   |
| NM_01618E | 8931.947  | 7733.444  | M73239    | 581.439   | 373.945   | AK021933  | 1592.913  | 1071.643  |
| NM_00487Z | 13437.471 | 14126.292 | NM_00494E | 4498.951  | 3218.825  | M33197    | 67993     | 64312.324 |

|           |           |           |           |           |           |           |           |           |
|-----------|-----------|-----------|-----------|-----------|-----------|-----------|-----------|-----------|
| NM_00195E | 9931.086  | 11558.161 | NM_02024E | 1825.497  | 1228.233  | AK024207  | 10269.299 | 13754.87  |
| NM_004757 | 7790.16   | 7766.455  | NM_00178E | 26550.791 | 19904.455 | AK021843  | 2582.027  | 3698.649  |
| NM_015904 | 17824.779 | 16757.992 | NM_00717E | 62383.855 | 58116.137 | AF075025  | 1541.667  | 2471.191  |
| NM_00196C | 51969.52  | 58437.238 | NM_01768E | 745.434   | 763.114   | AF116623  | 955.944   | 1426.534  |
| NM_01812E | 10949.023 | 11873.008 | NM_00220E | 6548.731  | 4917.254  | AF088008  | 3988.775  | 5348.11   |
| NM_00705E | 20329.768 | 21230.051 | NM_002291 | 714.134   | 638.29    | AK023528  | 1109.374  | 1300.259  |
| NM_00039E | 344.319   | 626.646   | AL137477  | 16639.051 | 11720.723 | AK023043  | 1284.296  | 1072.638  |
| NM_00152E | 730.207   | 791.798   | NM_01664E | 10233.547 | 7171.483  | NM_00468E | 9724.201  | 8524.916  |
| NM_017947 | 3292.262  | 3241.204  | NM_01425E | 7365.041  | 6148.143  | AB037725  | 1319.962  | 1454.247  |
| BE396003  | 8282.261  | 8462.996  | NM_015967 | 4581.764  | 3029.581  | M33197    | 66208.539 | 64465.707 |
| AK023300  | 2029.281  | 2217.531  | NM_00240E | 2862.657  | 1920.053  | NM_01771E | 1080.456  | 846.232   |
| NM_01808E | 3029.654  | 2879.377  | NM_004994 | 36786.809 | 24194.594 | NM_00486C | 8272.061  | 8728.441  |
| NM_003904 | 13443.876 | 11707.751 | NM_00661C | 30477.715 | 20965.256 | AF217190  | 15290.931 | 13700.55  |
| NM_006234 | 47345.246 | 40026.645 | NM_01762E | 636.424   | 355.989   | AB028981  | 58630.383 | 62064.566 |
| AK026387  | 592.842   | 603.504   | NM_003791 | 6088.087  | 4406.637  | NM_00680C | 7974.943  | 7779.024  |
| AB028987  | 9287.839  | 7519.981  | NM_018017 | 11056.012 | 8470.109  | NM_00247E | 1687.985  | 2072.187  |
| NM_003594 | 4720.405  | 4833.717  | AK001296  | 30222.305 | 25287.52  | NM_00272E | 10889.212 | 10762.234 |
| NM_005521 | 12029.119 | 13033.279 | AK000173  | 1045.261  | 925.813   | M33197    | 65562.992 | 63522.375 |
| AF164438  | 1768.034  | 2205.895  | NM_01836E | 3522.976  | 2694.206  | AK025266  | 4864.558  | 4049.018  |
| AK022284  | 1801.347  | 1491.817  | NM_00658E | 50701.738 | 44966.406 | AK001843  | 2874.328  | 3204.089  |
| AF060937  | 1517.338  | 1051.772  | AJ272180  | 2663.729  | 2336.468  | AK000548  | 53598.559 | 38382.773 |
| AB040893  | 3450.991  | 3235.724  | AK025709  | 2269.592  | 2299.502  | NM_00392C | 46706.816 | 32026.543 |
| AK025844  | 677.77    | 694.329   | NM_01901E | 37903.477 | 41114.715 | NM_004787 | 62154.223 | 56638.273 |
| NM_004024 | 2045.99   | 1711.147  | NM_012261 | 18295.283 | 18784.344 | AF087984  | 7167.286  | 10447.136 |
| X52345    | 27501.221 | 28811.109 | NM_01555E | 11071.423 | 11119.339 | AF009302  | 2630.091  | 3906.529  |
| NM_00696E | 11488.551 | 11581.36  | NM_00609E | 4257.063  | 4430.541  | M33197    | 66302.766 | 67865.031 |
| AF027142  | 49007.023 | 53020.266 | AF272379  | 7808.238  | 7851.765  | AK022273  | 18441.746 | 26235.506 |
| NM_01637E | 20838.639 | 17267.586 | AK022643  | 1401.768  | 923.126   | NM_01588E | 4726.475  | 6783.495  |
| NM_00710E | 30595.357 | 28370.1   | AB046808  | 2914.449  | 2154.11   | AK027161  | 1194.365  | 1696.336  |
| BG491613  | 11272.926 | 13292.511 | AK026265  | 2466.802  | 2409.592  | AK024271  | 2591.819  | 2838.26   |
| AA397813  | 51834.488 | 60942.82  | AK027179  | 1926.648  | 2045.01   | AK021650  | 37897.344 | 29695.75  |
| W47350    | 2579.487  | 2448.734  | AF015313  | 1034.85   | 1162.296  | AL050210  | 12676.769 | 7946.854  |
| AI160964  | 2395.548  | 2436.217  | NM_00646E | 3026.993  | 2618.296  | NM_00413E | 11411.303 | 11018.354 |
| W68291    | 20164.656 | 16913.469 | NM_005681 | 3601.546  | 2872.117  | NM_014844 | 6016.311  | 6023.833  |
| N64384    | 1394.368  | 1458.903  | NM_01515E | 4536.97   | 4443.228  | M33197    | 69101     | 64252.961 |
| H-X 53655 | 853.261   | 878.966   | NM_012384 | 4247.263  | 3376.877  | NM_01849E | 6766.554  | 7893.188  |
| H-U 05770 | 12160.032 | 11865.009 | NM_00465E | 6794.542  | 5689.622  | NM_00134E | 8016.872  | 8911.445  |
| H-M 65199 | 10661.131 | 9281.601  | AF233453  | 6185.639  | 5654.183  | NM_00314E | 4826.578  | 5188.199  |
| H-M 32315 | 2171.036  | 1929.797  | D87454    | 19662.457 | 20786.662 | NM_003377 | 15339.229 | 15469.6   |
| H-V00536M | 5502.68   | 6280.371  | NM_00702C | 7914.644  | 6510.087  | NM_00222C | 12265.055 | 10447.517 |
| H-D85429M | 19333.193 | 23250.244 | NM_00071E | 36809.418 | 39984.266 | AB033034  | 6203.085  | 5567.392  |
| BF439832  | 4241.462  | 4850.242  | NM_01605E | 33830.891 | 33235.992 | D38169    | 13383.574 | 15900.755 |
| BG819162  | 938.318   | 817.727   | NM_013291 | 12859.021 | 11534.349 | M33197    | 63614.836 | 63570.238 |
| NM_01208E | 41919.66  | 39045.977 | NM_00293E | 13641.88  | 13225.657 | AJ293294  | 7841.386  | 9341.684  |
| NM_00013E | 1217.182  | 1641.387  | NM_014161 | 6242.523  | 8706.4    | NM_018171 | 2219.658  | 1969.271  |
| NM_006664 | 2730.005  | 3068.789  | BF312817  | 8675.452  | 10744.942 | NM_002447 | 47140.961 | 27198.275 |
| NM_00241E | 689.701   | 654.068   | AF284580  | 1688.975  | 2085.379  | NM_01414E | 21601.777 | 31508.24  |
| NM_00272E | 1583.149  | 1608.583  | AK024961  | 4920.438  | 5981.621  | X63454    | 648.22    | 1201.352  |
| NM_00045C | 1667.857  | 1604.847  | NM_01606E | 14008.085 | 17306.277 | NM_014141 | 25837.572 | 33702.934 |
| NM_00676E | 45389.531 | 42226.48  | NM_002711 | 900.827   | 735.511   | NM_00222E | 7366.529  | 10867.681 |
| NM_00635E | 3680.733  | 3394.326  | NM_00019E | 55003.508 | 47435.785 | M33197    | 70162.352 | 63999.164 |
| NM_01643C | 1471.708  | 1850.261  | NM_00377E | 56658     | 58261.602 | NM_00549C | 57522.313 | 61555.316 |
| NM_004447 | 14359.323 | 14492.575 | NM_001041 | 957.255   | 738.664   | NM_003151 | 5840.846  | 7286.001  |

|           |           |           |           |           |           |           |           |           |
|-----------|-----------|-----------|-----------|-----------|-----------|-----------|-----------|-----------|
| NM_001204 | 2653.668  | 2632.69   | NM_000693 | 720.139   | 789.525   | NM_006811 | 10833.154 | 14845.409 |
| BF131321  | 930.829   | 1188.137  | AK023263  | 2359.133  | 1910.644  | NM_005601 | 5422.704  | 2743.152  |
| NM_012116 | 2532.503  | 2651.697  | NM_004622 | 3996.086  | 2870.28   | NM_016151 | 45918.992 | 20764.93  |
| NM_000020 | 2257.823  | 2363.788  | AK021445  | 4652.768  | 4147.36   | AK026270  | 2571.44   | 2193.259  |
| NM_000956 | 552.669   | 511.775   | NM_017934 | 31732.922 | 22396.168 | NM_004556 | 21201.939 | 20085.021 |
| AB033091  | 7912.385  | 4825.938  | NM_014168 | 58672.207 | 55595.152 | D90075    | 4485.13   | 5103.994  |
| NM_004557 | 2430.395  | 2584.775  | AF211971  | 8922.736  | 6660.296  | M33197    | 65261.762 | 65322.559 |
| NM_003742 | 5779.503  | 5336.365  | NM_002931 | 4809.396  | 4281.664  | NM_014857 | 2412.489  | 2435.204  |
| NM_005094 | 6743.302  | 7063.576  | NM_013448 | 63031.086 | 60703.66  | AK023827  | 17403.34  | 15888.002 |
| BE382905  | 888.016   | 949.643   | X65232    | 43877.234 | 43973.711 | AK021702  | 6622.15   | 6141.826  |
| NM_002152 | 9595.009  | 10498.96  | U12767    | 507.621   | 578.182   | NM_003885 | 5464.748  | 5001.308  |
| NM_006476 | 54311.887 | 56212.289 | U17630    | 2479.821  | 2596.326  | AL161977  | 1670.998  | 1314.274  |
| AK023787  | 2459.358  | 2639.929  | M33782    | 3704.973  | 3442.844  | NM_016448 | 21212.037 | 23723.15  |
| NM_002133 | 1433.747  | 1200.077  | NM_002196 | 1973.686  | 2234.257  | NM_003936 | 3337.46   | 3055.357  |
| NM_015697 | 8211.064  | 8192.06   | NM_017755 | 16078.166 | 13836.108 | M33197    | 64582.48  | 66071.563 |
| AF086489  | 2129.058  | 1662.887  | NM_018416 | 2504.406  | 1823.288  | NM_002688 | 2203.746  | 1961.869  |
| AB018258  | 842.373   | 652.469   | NM_004606 | 11084.212 | 7695.278  | NM_020366 | 432.437   | 316.004   |
| NM_005953 | 7524.146  | 25360.787 | D70833    | 67186.109 | 65240.941 | NM_004415 | 15839.077 | 19459.813 |
| BF337921  | 1454.735  | 1266.14   | NM_016621 | 3956.918  | 2864.478  | NM_014262 | 1104.127  | 1616.402  |
| U53532    | 6496.556  | 6930.943  | NM_002975 | 5022.804  | 4987.827  | NM_007278 | 34926.402 | 38260.082 |
| NM_001740 | 2620.3    | 2571.624  | AK023511  | 12672.018 | 8537.591  | NM_005219 | 32280.076 | 40179.723 |
| NM_012484 | 10003.167 | 8822.652  | NM_014556 | 13882.14  | 7664.73   | NM_004723 | 8829.696  | 14390.136 |
| AL096732  | 1480.198  | 1507.302  | NM_001615 | 61922.094 | 58676.082 | M33197    | 65785.984 | 65238.535 |
| AB006423  | 1020.128  | 793.007   | NM_002725 | 2423.792  | 1516.35   | NM_018413 | 3841.935  | 5501.497  |
| AJ132084  | 732.777   | 848.006   | NM_014375 | 59615.078 | 51671.172 | AB018299  | 57905.105 | 61142.121 |
| AK023915  | 7581.094  | 8553.409  | NM_017812 | 36063.777 | 26751.35  | NM_005245 | 5328.241  | 3329.136  |
| AB051453  | 2739.149  | 3261.26   | AF204173  | 2009.16   | 1661.719  | NM_002941 | 1258.965  | 706.336   |
| AK026842  | 962.889   | 1016.519  | J03260    | 6751.004  | 4658.891  | AK025605  | 4626.695  | 5734.255  |
| NM_002395 | 532.753   | 661.611   | U13738    | 3246.379  | 2231.06   | NM_003783 | 1830.234  | 2212.906  |
| AB023203  | 5157.331  | 4623.578  | AF068236  | 59961.832 | 59195.461 | NM_007000 | 11550.652 | 11234.591 |
| NM_014963 | 3440.863  | 3146.474  | H94487    | 13369.256 | 8812.169  | M23161    | 16097.283 | 17289.5   |
| NM_004259 | 4994.839  | 4084.575  | BG681747  | 24151.48  | 22140.807 | NM_006100 | 1663.966  | 1702.161  |
| NM_016271 | 4415.1    | 4223.445  | H63077    | 2958.29   | 2060.653  | NM_003197 | 13299.376 | 13283.221 |
| NM_016619 | 4245.505  | 4607.555  | AA679352  | 8322.677  | 7982.028  | AF176705  | 15147.459 | 12444.18  |
| NM_014481 | 4788.733  | 4936.507  | AA437291  | 2567.567  | 2163.756  | D29012    | 25492.605 | 24744.271 |
| U22172    | 1025.777  | 1155.917  | X04503    | 4767.849  | 3407.785  | NM_017414 | 4699.654  | 6751.508  |
| AB032960  | 3091.223  | 3100.56   | D45917    | 10210.644 | 8465.969  | NM_012179 | 24021.119 | 23503.342 |
| NM_014264 | 21932.443 | 20752.33  | X52001    | 16206.506 | 12487.578 | NM_002793 | 6605.952  | 6543.558  |
| AF020089  | 1315.223  | 1226.666  | BI823872  | 817.342   | 521.157   | NM_004788 | 2938.404  | 2863.9    |
| NM_006257 | 4473.011  | 3977.296  | AA430552  | 8751.459  | 5787.005  | M33197    | 65034.648 | 65589.961 |
| NM_016281 | 10513.467 | 7893.28   | X66142    | 5732.998  | 3944.795  | AL442083  | 10633.593 | 7101.507  |
| NM_004734 | 25305.115 | 24172.977 | NM_005913 | 1490.569  | 1107.353  | D63487    | 12107.084 | 21553.141 |
| AK024793  | 1857.862  | 2442.712  | R45054    | 8074.917  | 5056.156  | AK097791  | 21577.748 | 32086.867 |
| AF208291  | 348.329   | 627.758   | NM_003780 | 65230.055 | 63675.77  | NM_020367 | 1639.234  | 2618.657  |
| NM_004877 | 14916.443 | 12763.336 | NM_003731 | 40254.715 | 37547.512 | AK022705  | 4520.439  | 7333.374  |
| L10284    | 54995.723 | 60646.102 | NM_005446 | 32457.189 | 31433.699 | NM_016404 | 23485.49  | 35705.824 |
| NM_000019 | 34042.16  | 32588.236 | NM_013292 | 22693.156 | 23081.666 | L03426    | 4917.099  | 6577.274  |
| NM_014333 | 1132.084  | 910.136   | NM_002387 | 5052.596  | 5708.443  | M33197    | 66087     | 66771.563 |
| NM_002980 | 2756.661  | 3319.672  | NM_000069 | 10307.755 | 8142.222  | NM_020163 | 5782.738  | 6584.512  |
| NM_015886 | 1694.824  | 1674.196  | AB023217  | 1978.305  | 1929.178  | NM_004324 | 3806.195  | 2288.51   |
| NM_020358 | 465.201   | 571.701   | L08902    | 2976.063  | 2004.141  | NM_005614 | 28707.99  | 17174.699 |
| NM_007102 | 31928.301 | 27837.27  | J02639    | 8475.434  | 5789.84   | AJ133115  | 13205.812 | 13267.446 |
| BG491613  | 11305.818 | 11531.854 | M58050    | 8433.803  | 5533.379  | AF042831  | 1180.953  | 1424.092  |

|           |           |           |           |           |           |           |           |           |
|-----------|-----------|-----------|-----------|-----------|-----------|-----------|-----------|-----------|
| AA397813  | 51031.559 | 57883.301 | NM_007263 | 16260.347 | 11559.437 | X51630    | 21693.275 | 23362.48  |
| W47350    | 2576.575  | 3008.357  | AF206020  | 15832.826 | 10057.699 | NM_005056 | 5175.091  | 5447.03   |
| AF097935  | 418.423   | 488.913   | NM_014410 | 12852.816 | 10970.86  | NM_001965 | 3096.448  | 3074.202  |
| AI160964  | 2669.707  | 3032.567  | AF305835  | 538.558   | 496.784   | AF208502  | 26050.318 | 24027.445 |
| W68291    | 18424.764 | 17144.98  | AF312769  | 2745.967  | 3762.011  | M33197    | 62715.438 | 67915.547 |
| N64384    | 868.531   | 1007.717  | AB020668  | 7343.18   | 8784.212  | AF264750  | 55634.512 | 59018.379 |
| H-X 53655 | 883.116   | 767.889   | NM_006203 | 62380.926 | 61386.82  | NM_006980 | 3381.5    | 3213.045  |
| H-U 05770 | 10937.678 | 9611.433  | NM_013261 | 3557.385  | 4827.721  | AK023904  | 18095.932 | 13985.514 |
| H-M 65199 | 9891.674  | 9132.188  | NM_003558 | 360.047   | 575.78    | NM_017956 | 25244.941 | 23266.424 |
| H-M 32315 | 2011.409  | 1648.09   | AF309553  | 6637.581  | 10252.065 | NM_017826 | 917.321   | 1275.51   |
| H-V00536M | 4956.601  | 4683.329  | NM_003605 | 3058.214  | 3379.013  | NM_016496 | 3079.697  | 2952.421  |
| H-D85429M | 19162.521 | 23049.527 | NM_006139 | 1094.512  | 1233.228  | NM_014306 | 15933.886 | 9714.365  |
| BF439832  | 4878.657  | 4165.506  | NM_001900 | 64519.578 | 65085.309 | M33197    | 58832.977 | 60928.238 |
| BG819162  | 1278.958  | 1199.599  | NM_003993 | 5727.064  | 6468.224  | NM_004094 | 6462.036  | 12797.877 |
| NM_002416 | 548.514   | 563.387   | NM_002150 | 18068.281 | 15812.772 | NM_020236 | 5460.487  | 8726.818  |
| NM_002728 | 1610.783  | 1626.372  | NM_004595 | 13183.303 | 16819.416 | AK027059  | 25087.826 | 42411.461 |
| NM_000450 | 1190.446  | 1030.597  | NM_020178 | 769.631   | 735.987   | AF151109  | 46327.188 | 53935.176 |
| NM_000448 | 771.66    | 843.08    | NM_002264 | 2365.301  | 2620.73   | NM_015414 | 61734.762 | 67159.32  |
| NM_004513 | 4279.757  | 4481.477  | NM_014754 | 34535.621 | 47109.262 | L34070    | 21506.77  | 34271.855 |
| NM_001708 | 48601.617 | 56437.531 | D49387    | 1889.328  | 1878.148  | M33197    | 63194.852 | 63992.727 |
| NM_017735 | 5711.445  | 5058.933  | AF050146  | 18131.584 | 17600.246 | NM_016219 | 35617.652 | 16654.396 |
| AB033044  | 5973.815  | 5553.941  | NM_000116 | 4846.594  | 4605.378  | NM_004751 | 2532.121  | 1174.996  |
| NM_020230 | 8717.886  | 10368.758 | NM_006698 | 12859.777 | 13636.344 | NM_001865 | 63919.832 | 62202.445 |
| NM_006762 | 47085.254 | 50143.406 | NM_006804 | 31616.279 | 37278.699 | NM_006241 | 529.134   | 763.469   |
| NM_006352 | 3903.579  | 3939.093  | AK025641  | 56429.113 | 58955.07  | NM_006441 | 16067.97  | 13693.634 |
| NM_016430 | 2930.215  | 3074.648  | AB040457  | 857.264   | 1169.895  | NM_001918 | 5485.798  | 5440.271  |
| NM_004447 | 14371.22  | 13947.764 | AB014514  | 9607.403  | 16205.851 | NM_018245 | 33912.066 | 33645.008 |
| NM_001204 | 2279.28   | 2315.992  | NM_002865 | 13972.341 | 16131.837 | M33197    | 61010.297 | 63512.176 |
| BF131321  | 480.405   | 641.206   | NM_003566 | 4316.388  | 3229.047  | AF252390  | 5031.069  | 4622.319  |
| NM_012116 | 2582.997  | 2333.66   | AK026315  | 448.46    | 424.113   | NM_012117 | 12661.584 | 10693.338 |
| NM_000020 | 1991.992  | 2312.705  | NM_007159 | 63769.023 | 63612.016 | D17130    | 58702.484 | 61604.504 |
| NM_002845 | 611.862   | 857.657   | NM_018390 | 3463.54   | 4917.396  | X76302    | 7312.042  | 6657.1    |
| NM_000956 | 626.613   | 836.59    | AB037724  | 18072.502 | 25945.266 | AK026276  | 2483.285  | 1326.486  |
| AB020705  | 7484.64   | 7090.009  | AK025086  | 3737.685  | 3587.868  | M33197    | 62971.383 | 71980.828 |
| BE382905  | 1127.082  | 1139.226  | AK026151  | 15789.911 | 14050.658 | X52354    | 4390.942  | 8518.328  |
| NM_002152 | 11224.546 | 13389.716 | NM_014140 | 2085.713  | 2334.078  | NM_005413 | 2636.173  | 4377.509  |
| NM_001701 | 781.233   | 653.963   | NM_002916 | 5029.875  | 7930.309  | NM_002315 | 14777.782 | 23609.953 |
| AK022558  | 5324.603  | 5555.082  | M20700    | 7250.701  | 8509.202  | AK024191  | 2999.374  | 5353.646  |
| NM_006476 | 52881.652 | 58781.348 | NM_001034 | 8390.155  | 9663.541  | AV693985  | 455.705   | 482.227   |
| AK023787  | 2579.111  | 2578.388  | NM_002689 | 3037.651  | 3430.874  | NM_006608 | 13113.447 | 17811.584 |
| AF086489  | 1850.061  | 1520.073  | NM_017686 | 1008.045  | 1129.263  | NM_000457 | 9656.677  | 5277.677  |
| AB018258  | 656.487   | 746.189   | AL096734  | 1090.712  | 1555.8    | M33197    | 1323.827  | 443.124   |
| NM_005953 | 7537.44   | 21944.135 | AK000800  | 3535.877  | 5253.898  | M34356    | 2698.023  | 1904.33   |
| BF337921  | 1278.419  | 1108.316  | NM_018154 | 5928.951  | 8522.197  | M33197    | 61906.266 | 66043.039 |
| U53532    | 5302.901  | 4692.151  | NM_005358 | 527.482   | 721.474   | NM_014623 | 18010.404 | 20717.803 |
| NM_001740 | 2604.406  | 2216.435  | BC006287  | 6800.382  | 8898.939  | NM_007244 | 49924.055 | 49835.039 |
| NM_012484 | 9396.094  | 7755.52   | AB023198  | 11522.387 | 14503.729 | M30629    | 20663.713 | 20296.102 |
| AL096732  | 1683.445  | 1415.269  | AF304163  | 11662.705 | 14250.157 | BE539299  | 1027.468  | 966.77    |
| AB006423  | 1009.965  | 1032.38   | NM_005231 | 9052.867  | 11365.162 | AF193873  | 21028.191 | 18479.348 |
| AJ132084  | 658.226   | 783.987   | AF064729  | 3006.055  | 3879.549  | NM_002628 | 7804.469  | 7018.042  |
| NM_005719 | 52690.629 | 57373.23  | NM_005412 | 28291.133 | 36353.055 | M23575    | 3334.428  | 3096.268  |
| NM_006664 | 2531.841  | 2760.785  | NM_012113 | 4278.118  | 4288.888  | AA190729  | 5004.342  | 4728.945  |
| AB051453  | 3206.559  | 3213.481  | NM_014556 | 14972.839 | 14759.411 | BF974315  | 15647.798 | 10426.829 |

|           |           |           |           |           |           |           |           |           |
|-----------|-----------|-----------|-----------|-----------|-----------|-----------|-----------|-----------|
| AK026842  | 1169.744  | 1421.838  | NM_001615 | 61938.676 | 61867.438 | T74985    | 573.811   | 457.5     |
| NM_002395 | 658.391   | 838.23    | NM_002725 | 2242.014  | 2015.888  | AI652705  | 10928.09  | 9191.995  |
| AB023203  | 4716.615  | 4859.457  | NM_014375 | 60633.875 | 55087.402 | AA973397  | 5128.455  | 4390.213  |
| NM_014963 | 3429.611  | 3614.164  | NM_017812 | 37967.395 | 39999.039 | AA569974  | 2166.452  | 2513.018  |
| NM_004259 | 4227.259  | 3979.528  | AF204173  | 1876.678  | 2065.165  | AA923615  | 3157.049  | 5550.573  |
| NM_016271 | 4207.798  | 4145.629  | J03260    | 6948.843  | 6398.36   | AA446028  | 1752.593  | 3212.335  |
| NM_016619 | 4149.742  | 3812.779  | U13738    | 3043.221  | 3576.09   | M80583    | 2206.695  | 3786.43   |
| NM_014481 | 4533.351  | 4772.669  | AF068236  | 60797.09  | 65626.078 | AW009565  | 10392.155 | 18186.471 |
| U22172    | 908.564   | 978.354   | H94487    | 14966.949 | 14744.757 | AW451878  | 569.072   | 1375.19   |
| AB032960  | 2590.401  | 2068.359  | BG681747  | 27246.117 | 39172.863 | X07767    | 5296.526  | 2716.108  |
| NM_014264 | 20375.848 | 19398.453 | H63077    | 3358.027  | 4586.721  | X65293    | 1151.68   | 905.228   |
| AF020089  | 942.695   | 921.883   | AA679352  | 9612.849  | 11866.749 | M33197    | 1816.134  | 1783.847  |
| NM_006257 | 4312.97   | 3584.387  | AA437291  | 2977.664  | 4258.213  | NM_000853 | 23880.326 | 26387.971 |
| NM_016281 | 9431.154  | 6039.851  | X04503    | 5006.82   | 4977.315  | NM_000846 | 1159.211  | 1418.712  |
| NM_004734 | 27027.754 | 22227.146 | D45917    | 11237.911 | 12821.4   | AF016903  | 63523.762 | 65217.313 |
| AK024793  | 1781.763  | 1866.096  | X52001    | 18010.434 | 22893.48  | NM_015675 | 28085.014 | 28105.223 |
| AF208291  | 433.955   | 365.881   | BI823872  | 1088.965  | 1096.218  | AK022267  | 2311.8    | 2582.596  |
| NM_004877 | 13691.695 | 10336.535 | AA430552  | 13568.834 | 14021.211 | NM_016040 | 7472.571  | 7049.924  |
| L10284    | 56683.82  | 56190.578 | X66142    | 7854.829  | 7613.188  | M33197    | 63152.027 | 64954.965 |
| NM_000276 | 1067.38   | 1404.707  | NM_005913 | 1932.407  | 2284.939  | AF031136  | 63710.742 | 65253.785 |
| NM_000019 | 37385.332 | 36386.168 | R45054    | 9253.067  | 9690.669  | NM_006597 | 54074.488 | 44150.691 |
| AK023701  | 2900.245  | 2649.675  | AL117398  | 5812.902  | 6578.247  | NM_007329 | 595.469   | 685.2     |
| NM_003742 | 6525.331  | 7476.596  | AY007158  | 59321.289 | 60386.629 | NM_012483 | 51130.727 | 41519.477 |
| NM_005094 | 6695.019  | 7227.93   | NM_001720 | 9866.851  | 9879.435  | NM_003498 | 15195.283 | 13619.919 |
| NM_015886 | 1674.544  | 1656.928  | NM_013292 | 26324.629 | 26961.129 | AB023420  | 43144.973 | 46832.254 |
| NM_020358 | 450.178   | 596.304   | NM_002387 | 4744.554  | 5296.635  | M33197    | 64723.117 | 71072.781 |
| NM_004262 | 653.763   | 666.485   | NM_000069 | 9909.998  | 9163.861  | NM_007264 | 62668.816 | 68096.258 |
| NM_007102 | 33563.59  | 32444.74  | AB023217  | 1649.782  | 1296.253  | NM_002262 | 2276.483  | 4646.033  |
| BG491613  | 10413.61  | 10329.736 | L08902    | 2411.808  | 2048.965  | NM_016511 | 63983.641 | 70349.68  |
| AA397813  | 52170.48  | 50488.121 | J02639    | 7848.148  | 6746.475  | NM_003559 | 7862.661  | 12403.053 |
| W47350    | 3191.063  | 2973.895  | M58050    | 8539.633  | 8646.029  | NM_002543 | 1629.715  | 1550.859  |
| AI160964  | 2209.583  | 1872.002  | NM_007263 | 16062.385 | 17110.32  | M55337    | 4209.831  | 2636.135  |
| W68291    | 20911.236 | 16670.383 | AF206020  | 16453.818 | 15156.31  | NM_013229 | 2596.928  | 2614.684  |
| N64384    | 1340.908  | 1285.641  | NM_014410 | 12030.189 | 10843.418 | NM_016533 | 66303.078 | 69057.992 |
| H-X 53655 | 813.016   | 666.318   | AF305835  | 418.449   | 537.918   | NM_007342 | 10821.148 | 16058.125 |
| H-U 05770 | 12539.324 | 10391.417 | AF312769  | 2778.049  | 3193.091  | NM_005672 | 4964.542  | 4783.447  |
| H-M 65199 | 9730.965  | 7645.896  | AB020668  | 7577.933  | 8701.002  | D25217    | 5527.393  | 5978.731  |
| H-M 32315 | 2081.719  | 1694.622  | NM_006203 | 59534.27  | 60764.133 | NM_006351 | 25797.844 | 25097.4   |
| H-V00536M | 4928.871  | 4588.657  | NM_013261 | 3620.586  | 3664.831  | M33197    | 60165.152 | 62469.086 |
| H-D85429M | 17003.676 | 18901.211 | NM_003558 | 646.473   | 797.667   | NM_000103 | 5957.756  | 4982.744  |
| BF439832  | 3993.762  | 4355.616  | AF309553  | 5827.645  | 6640.252  | NM_004683 | 23198.91  | 20809.352 |
| BG819162  | 999.886   | 967.509   | NM_003605 | 3642.893  | 3860.212  | AK023226  | 3902.362  | 2321.985  |
| M38449    | 23819.625 | 24871.811 | NM_006139 | 1005.059  | 1495.731  | AK025263  | 1323.435  | 929.769   |
| AK025495  | 578.603   | 755.49    | NM_001900 | 62777.004 | 60812.535 | NM_006931 | 22951.754 | 16992.932 |
| NM_001091 | 951.64    | 1088.962  | NM_003993 | 6464.686  | 7037.549  | AJ133127  | 544.034   | 421.211   |
| AK023915  | 7038.795  | 8323.88   | NM_002975 | 5669.813  | 6252.356  | NM_018057 | 12126.298 | 17453.293 |
| AB014564  | 4662.062  | 5407.2    | AK023511  | 13869.395 | 14891.513 | M33197    | 61403.078 | 66719.195 |
| NM_020230 | 7470.024  | 9530.544  | NM_020178 | 668.283   | 954.887   | NM_015717 | 9510.655  | 16278.673 |
| NM_006762 | 45857.973 | 39198.238 | NM_002264 | 2430.845  | 3549.298  | NM_015925 | 10855.712 | 17186.969 |
| NM_006352 | 3538.044  | 3356.871  | NM_014754 | 31490.027 | 39542.715 | NM_003665 | 3780.774  | 4772.004  |
| NM_016430 | 1802.399  | 1758.496  | D49387    | 1643.579  | 1761.176  | AF220217  | 3118.955  | 2452.498  |
| NM_004447 | 15018.825 | 13410.67  | AF050146  | 17911.566 | 16263.044 | NM_013323 | 56133.094 | 55680.137 |
| NM_001204 | 2410.524  | 2594.518  | NM_000116 | 4570.879  | 4218.202  | NM_014937 | 1953.391  | 2394.17   |

|           |           |           |           |           |           |           |           |           |
|-----------|-----------|-----------|-----------|-----------|-----------|-----------|-----------|-----------|
| BF131321  | 1026.264  | 1157.162  | NM_006698 | 13062.81  | 13906.915 | NM_017426 | 4231.27   | 5007.611  |
| NM_016540 | 422.732   | 517.573   | NM_006804 | 31101.369 | 38149.762 | M33197    | 19119.225 | 20454.539 |
| NM_012116 | 2338.272  | 2628.812  | AK025641  | 61238.113 | 57510.117 | NM_004558 | 37322.777 | 39671.867 |
| NM_000020 | 2069.657  | 2215.62   | AB040457  | 588.612   | 618.876   | AL079296  | 2045.839  | 2533.076  |
| NM_002442 | 11995.659 | 11937.801 | AB014514  | 6356.623  | 6255.913  | NM_014770 | 24216.506 | 16081.138 |
| AB033091  | 6712.64   | 3555.504  | NM_002865 | 12398.729 | 13380.306 | AB037737  | 3774.402  | 3915.521  |
| NM_004557 | 2093.471  | 2324.217  | NM_003566 | 4321.449  | 3236.901  | M33197    | 63885.141 | 65266.703 |
| NM_014757 | 2693.123  | 2867.794  | AK026315  | 657.632   | 472.001   | AK023103  | 4452.333  | 3897.116  |
| NM_001584 | 8514.623  | 8752.102  | NM_007159 | 59611.801 | 56511.43  | NM_017858 | 5256.653  | 3836.117  |
| NM_012259 | 13745.204 | 12298.657 | NM_003731 | 45969.625 | 47779.141 | NM_019058 | 58706.355 | 53648.145 |
| AF272357  | 1171.944  | 1262.718  | NM_005446 | 39334.414 | 38103.152 | NM_013347 | 1181.65   | 792.098   |
| NM_016372 | 18501.906 | 18066.471 | AB037724  | 15956.985 | 18567.406 | D80008    | 2834.85   | 1853.591  |
| AB020705  | 7079.124  | 7274.46   | AK025086  | 3881.88   | 5901.455  | X56789    | 6921.459  | 4601.887  |
| NM_014333 | 955.746   | 926.515   | AK026151  | 16784.555 | 22389.434 | AK001069  | 61248.438 | 62332.609 |
| NM_002980 | 2983.563  | 4536.225  | NM_014140 | 2020.203  | 2255.174  | M33197    | 63487.523 | 62408.465 |
| NM_016274 | 1132.473  | 1532.209  | NM_002916 | 4303.513  | 5636.059  | NM_000938 | 5323.989  | 4956.156  |
| NM_014946 | 2454.836  | 2639.411  | M20700    | 6854.995  | 8338.451  | NM_000358 | 56532.902 | 57550.461 |
| NM_014251 | 2885.318  | 2842.929  | NM_001034 | 8767.67   | 11627.636 | NM_006398 | 7964.924  | 12133.406 |
| AK022750  | 2784.954  | 2290.028  | NM_002689 | 3448.356  | 4921.448  | NM_014306 | 12541.309 | 19551.432 |
| NM_004251 | 9366.249  | 7037.508  | NM_017686 | 1127.371  | 1750.941  | NM_001084 | 12773.512 | 12436.405 |
| BF337921  | 1399.595  | 1227.433  | AL096734  | 1381.269  | 1878.624  | NM_015983 | 19170.773 | 7065.004  |
| U53532    | 6051.863  | 6200.524  | AK000800  | 3040.956  | 3439.009  | NM_018622 | 9988.354  | 5186.257  |
| NM_001740 | 2463.796  | 2628.638  | NM_018154 | 4786.07   | 6690.34   | M33197    | 60249.215 | 61998.285 |
| NM_012484 | 9907.855  | 10962.703 | NM_005358 | 567.805   | 524.734   | NM_005867 | 12767.62  | 13619.274 |
| AL096732  | 1586.896  | 1813.182  | BC006287  | 5538.039  | 7284.935  | AK026031  | 55438.137 | 61342.098 |
| AB006423  | 890.764   | 735.686   | AB023198  | 9209.765  | 10518.724 | NM_016468 | 15925.521 | 19352.67  |
| AJ132084  | 749.519   | 543.405   | AF304163  | 9810.938  | 12855.823 | NM_007244 | 53254.855 | 55472.707 |
| NM_005719 | 54509.949 | 55323.203 | NM_005231 | 8145.026  | 9951.521  | M30629    | 27184.387 | 28188.018 |
| NM_003462 | 3519.663  | 3127.569  | AF064729  | 2879.591  | 3399.509  | BE539299  | 1077.795  | 1032.484  |
| NM_006093 | 8071.331  | 7409.385  | NM_005412 | 27170.791 | 25854.289 | AF193873  | 25568.445 | 17689.654 |
| NM_000139 | 1013.783  | 776.687   | NM_012113 | 3726.512  | 4091.677  | NM_002628 | 9252.846  | 7454.936  |
| NM_006664 | 2041.623  | 2427.654  | NM_002150 | 19587.449 | 16599.521 | M23575    | 4336.974  | 3702.922  |
| NM_002728 | 1714.617  | 1247.681  | NM_004598 | 13588.56  | 16340.298 | AA190729  | 6231.43   | 5854.921  |
| NM_000450 | 1247.093  | 953.118   | NM_002725 | 2696.471  | 2552.415  | BF974315  | 18123.965 | 11516.692 |
| NM_000448 | 800.698   | 807.72    | NM_014375 | 57682.574 | 60263.324 | T74985    | 632.244   | 380.721   |
| NM_004513 | 4539.784  | 4215.295  | NM_017812 | 44134.797 | 55063.453 | AI652705  | 11753.91  | 8160.163  |
| NM_001708 | 55501.152 | 53813.578 | AF204173  | 2380.989  | 3118.608  | AA973397  | 5742.375  | 5121.401  |
| NM_017738 | 4973.532  | 4517.697  | J03260    | 7680.583  | 9493.631  | AA569974  | 1766.654  | 1611.765  |
| AB033044  | 6189.546  | 7821.413  | U13738    | 2986.214  | 3657.145  | AA923615  | 2708.144  | 3669.14   |
| NM_000276 | 1772.043  | 1499.542  | AF068236  | 58625.047 | 58835.547 | AA446028  | 1205.163  | 1611.003  |
| NM_000019 | 33939.059 | 31856.707 | H94487    | 13730.786 | 13649.579 | M80583    | 2326.297  | 1585.398  |
| AK023701  | 2843.163  | 2235.553  | BG681747  | 25143.088 | 30028.086 | AW009565  | 10462.848 | 12425.241 |
| NM_003742 | 4901.167  | 3794.762  | H63077    | 3074.413  | 3308.232  | AW451878  | 438.845   | 737.118   |
| NM_005094 | 6044.056  | 5637.836  | AA679352  | 9658.279  | 10984.925 | X07767    | 6979.848  | 5387.409  |
| BE382905  | 1219.714  | 1435.34   | AA437291  | 2544.755  | 3801.18   | X65293    | 1800.648  | 3165.106  |
| NM_002152 | 9933.39   | 13202.95  | X04503    | 4774.356  | 4253.735  | M33197    | 35920.211 | 39579.891 |
| NM_001701 | 727.821   | 1116.512  | D45917    | 10234.671 | 12641.001 | AL050139  | 15963.398 | 20498.654 |
| AK022558  | 5125.754  | 5387.878  | X52001    | 17180.555 | 20791.211 | NM_002593 | 2283.443  | 2983.459  |
| NM_006476 | 52141.207 | 51833.121 | BI823872  | 1244.189  | 1500.012  | NM_006820 | 730.367   | 522.397   |
| AK023787  | 2398.51   | 1777.434  | AA430552  | 14259.537 | 14491.565 | AF016903  | 62166.578 | 65312.02  |
| NM_002133 | 1292.817  | 988.944   | X66142    | 7147.255  | 6219.41   | NM_015678 | 37401.578 | 31693.131 |
| NM_015697 | 7439.646  | 6643.791  | NM_005913 | 2396.174  | 3024.714  | AK022267  | 2862.246  | 2331.644  |
| AF086489  | 1615.575  | 1204.009  | R45054    | 9056.531  | 8042.053  | NM_016040 | 8021.227  | 6305.727  |

|           |           |           |           |           |           |           |           |           |
|-----------|-----------|-----------|-----------|-----------|-----------|-----------|-----------|-----------|
| NM_032943 | 7408.821  | 8487.812  | AL117398  | 5611.484  | 5658.188  | M33197    | 61786.449 | 65400.18  |
| NM_007177 | 5255.424  | 5362.996  | AY007158  | 57947.293 | 64330.258 | AF031136  | 63154.809 | 66179.313 |
| NM_000809 | 732.875   | 714.579   | NM_001720 | 9872.969  | 9935.827  | NM_006597 | 58179.32  | 48404.551 |
| AB018258  | 697.993   | 620.708   | NM_018390 | 3342.776  | 3804.477  | NM_007329 | 739.562   | 741.571   |
| AL359592  | 744.279   | 662.7     | NM_007263 | 17313.74  | 19352.117 | NM_012483 | 57434.402 | 49772.844 |
| NM_006078 | 9775.177  | 11692.791 | AF206020  | 17286.236 | 20371.498 | NM_003498 | 16081.799 | 14610.854 |
| NM_000824 | 532.928   | 632.115   | NM_014410 | 14920.172 | 15723.167 | AB023420  | 42292.551 | 38861.223 |
| NM_000482 | 621.481   | 826.756   | AF305835  | 553.221   | 743.719   | M33197    | 64067.781 | 69147.336 |
| NM_005953 | 7268.26   | 22439.635 | AF312769  | 3209.006  | 4049.201  | NM_007264 | 65213.852 | 67782.508 |
| M38449    | 24601.252 | 21562.203 | AB020668  | 7804.916  | 10642.182 | NM_002262 | 2146.954  | 2156.168  |
| AK025495  | 600.035   | 826.457   | NM_006203 | 60867.09  | 59763.906 | NM_016511 | 56492.805 | 60707.816 |
| NM_001091 | 596.307   | 596.046   | NM_013261 | 3134.985  | 3238.535  | NM_003559 | 6895.553  | 4604.955  |
| AK023915  | 6981.403  | 6474.331  | NM_003558 | 503.368   | 577.733   | NM_002185 | 1091.577  | 977.936   |
| AB051453  | 2330.467  | 2869.72   | AF309553  | 6087.901  | 7893.537  | M55337    | 4891.878  | 4820.427  |
| AK026842  | 1270.1    | 1063.59   | NM_003605 | 3929.01   | 5961.962  | NM_013229 | 1415.522  | 1942.797  |
| NM_002395 | 431.857   | 772.508   | NM_006139 | 1229.58   | 1848.257  | NM_016533 | 66375.805 | 68832.039 |
| AB023203  | 5141.883  | 5059.212  | NM_000100 | 36378.617 | 43001.02  | M33197    | 66219.68  | 67782.125 |
| NM_014963 | 3167.062  | 3357.905  | NM_001900 | 64056.852 | 65422.906 | NM_014623 | 13820.945 | 15242.323 |
| NM_004259 | 3909.402  | 3544.644  | NM_003993 | 6310.475  | 6965.888  | D25217    | 6311.631  | 6588.166  |
| NM_016271 | 3550.512  | 3310.922  | NM_018961 | 5683.483  | 6312.578  | NM_006351 | 30829.088 | 28889.746 |
| NM_016619 | 2895.646  | 2709.752  | NM_005586 | 6889.537  | 7906.274  | M33197    | 61477.398 | 64023.336 |
| NM_014481 | 3926.051  | 3836.734  | NM_012242 | 2669.68   | 3329.447  | NM_000103 | 2110.559  | 1582.232  |
| U22172    | 760.303   | 753.747   | NM_006896 | 2015.309  | 2091.656  | NM_004683 | 32943.563 | 35549.422 |
| AB032960  | 2926.403  | 2454.184  | NM_001130 | 57163.023 | 59744.746 | AK023226  | 4741.355  | 2708.52   |
| NM_014264 | 20941.027 | 19001.639 | NM_002975 | 5424.91   | 6185.091  | AK025263  | 1803.569  | 1047.666  |
| AF020089  | 1298.726  | 1317.837  | AK023511  | 14573.915 | 14401.072 | NM_006931 | 27848.957 | 25618.9   |
| NM_006257 | 4003.348  | 4524.8    | NM_014556 | 17331.652 | 20442.014 | AJ133127  | 821.391   | 762.92    |
| NM_016281 | 9159.298  | 6985.523  | NM_001615 | 58876.422 | 60494.184 | NM_018057 | 11932.531 | 12429.313 |
| NM_004734 | 27253.232 | 25141.318 | AK025886  | 2278.8    | 1954.612  | M33197    | 62550.809 | 67178.969 |
| AK024793  | 1963.301  | 2165.444  | NM_003058 | 964.042   | 955.73    | NM_015717 | 9582.66   | 9813.61   |
| AF208291  | 460.042   | 642.201   | AB014514  | 7826.812  | 8745.882  | NM_015925 | 8722      | 7097.194  |
| NM_004877 | 13844.331 | 9704.655  | NM_002865 | 12268.596 | 15281.306 | NM_003665 | 3202.178  | 2308.964  |
| L10284    | 56375.984 | 55586.809 | NM_003566 | 4175.813  | 2830.76   | AF220217  | 2742.862  | 2496.072  |
| CY3Cy5    | 9138.69   | 1051.562  | AK026315  | 452.944   | 425.099   | NM_013323 | 60439.547 | 61365.625 |
| NM_000620 | 1953.257  | 1958.441  | NM_007159 | 60391.34  | 58880.09  | NM_014937 | 2048.408  | 1653.544  |
| AF070564  | 1321.397  | 1183.401  | NM_003731 | 43931.125 | 42145.492 | M33197    | 20973.873 | 20257.607 |
| AK021439  | 13259.508 | 11350.728 | NM_005446 | 38559.84  | 36989.895 | NM_000853 | 18542.537 | 17056.887 |
| AF052099  | 3043.223  | 2822.894  | NM_013292 | 28438.369 | 28173.521 | NM_000846 | 995.023   | 1524.757  |
| AL110111  | 1883.213  | 2049.238  | NM_002387 | 4761.629  | 4366.294  | NM_014770 | 27591.742 | 18095.488 |
| AF070543  | 3096.654  | 2049.98   | NM_000069 | 11362.882 | 9461.431  | AB037737  | 3267.759  | 2489.53   |
| AF086525  | 1494.895  | 494.457   | AB023217  | 1618.998  | 1483.101  | M33197    | 59699.863 | 66173.414 |
| NM_014778 | 7570.387  | 6937.053  | L08902    | 2958.011  | 2377.964  | AK023103  | 4675.653  | 4339.313  |
| AK001171  | 20167.703 | 20702.305 | J02639    | 9372.525  | 10416.62  | NM_017858 | 5710.061  | 3416.015  |
| AF086491  | 1140.328  | 1085.547  | M58050    | 10840.125 | 14819.93  | NM_019059 | 54826.531 | 53583.941 |
| NM_014856 | 2848.381  | 3036.994  | NM_012113 | 3870.688  | 4768.817  | NM_013347 | 1282.707  | 836.679   |
| AK021611  | 686.294   | 912.756   | NM_015396 | 470.411   | 664.327   | D80008    | 3108.482  | 1581.468  |
| NM_003492 | 791.419   | 816.725   | NM_002150 | 17845.32  | 18035.145 | X56789    | 7646.268  | 6400.532  |
| NM_000620 | 1627.305  | 1293.379  | NM_004595 | 12270.211 | 14369.355 | NM_000935 | 5903.365  | 12982.459 |
| NM_000905 | 7334.844  | 7381.553  | NM_020178 | 571.322   | 609.255   | NM_000359 | 58122.68  | 62566.816 |
| SR1       | 65581.969 | 69466.57  | NM_002264 | 2147.685  | 2412.499  | NM_006395 | 7275.272  | 7276.735  |
| SR3       | 49483.66  | 44544.395 | NM_014754 | 30267.682 | 40650.168 | NM_014306 | 10645.333 | 7890.406  |
| SR5       | 4193.466  | 4594.367  | D49387    | 1660.818  | 2028.2    | NM_001084 | 11077.715 | 6691.716  |
| SR7       | 6021.364  | 50551.848 | AF050146  | 18090.35  | 18388.318 | NM_015983 | 18167.402 | 8709.627  |



|           |           |           |           |           |           |           |           |           |
|-----------|-----------|-----------|-----------|-----------|-----------|-----------|-----------|-----------|
| SR9       | 24672.652 | 6291.272  | NM_000116 | 5237.569  | 4539.814  | NM_018622 | 11063.673 | 9427.679  |
| CY3Cy5    | 12279.798 | 1954.765  | NM_006698 | 13607.913 | 18313.24  | M33197    | 65150.539 | 65388.387 |
| U50525    | 857.019   | 759.526   | NM_006804 | 34110.598 | 33913.105 | NM_005867 | 23507.971 | 20114.506 |
| U63828    | 1911.976  | 1436.675  | NM_015969 | 13351.022 | 13231.492 | NM_016468 | 16234.633 | 16138.245 |
| Z36828    | 3441.725  | 2842.236  | NM_003051 | 12125.575 | 11986     | NM_007342 | 8445.194  | 10179.289 |
| AF086121  | 42102.215 | 30395.336 | NM_145342 | 12663.48  | 11885.323 | NM_005672 | 5252.133  | 4436.543  |
| AF086140  | 2653.415  | 1324.439  | AJ278917  | 49663.336 | 53767.344 | BE539299  | 1181.633  | 838.765   |
| NM_015696 | 1072.781  | 678.42    | AK025641  | 62911.074 | 60219.523 | AF193873  | 26758.688 | 18870.531 |
| AK022551  | 9286.381  | 8166.142  | NM_001038 | 583.623   | 597.084   | NM_002628 | 9918.494  | 7956.035  |
| AF085968  | 662.387   | 409.984   | AL117398  | 5400.607  | 4796.854  | M23575    | 4669.979  | 3998.009  |
| AF086162  | 421.798   | 363.883   | AY007158  | 55918.758 | 62710.934 | AA190729  | 6724.889  | 4394.084  |
| AK023665  | 1044.179  | 1004.465  | NM_001720 | 9583.553  | 9703.591  | BF974315  | 19330.541 | 11325.041 |
| AB011136  | 3174.565  | 4047.12   | NM_018390 | 2612.249  | 2600.192  | T74985    | 603.019   | 573.058   |
| AF085898  | 4704.352  | 5254.442  | AB037724  | 15408.16  | 15385.332 | AI652705  | 12735.046 | 9677.677  |
| AK021674  | 550.106   | 525.087   | AK025086  | 3555.848  | 3374.24   | AA973397  | 5784.91   | 6224.548  |
| AL161960  | 3696.631  | 3591.357  | AK026151  | 15781.209 | 14110.54  | AA446028  | 2222.267  | 4663.7    |
| AL049964  | 6065.989  | 5092.962  | NM_014140 | 2121.285  | 1863.315  | M80583    | 2760.677  | 3400.347  |
| AF038184  | 1210.629  | 1432.084  | NM_002916 | 4045.588  | 4892.623  | AW009565  | 10082.505 | 7934.213  |
| AK022485  | 1412.042  | 1291.95   | M20700    | 5570.761  | 5401.679  | AW451878  | 489.812   | 451.671   |
| AK023395  | 1192.474  | 1032.215  | NM_001034 | 7144.675  | 7626.313  | X07767    | 6750.188  | 6914.966  |
| AK024139  | 429.936   | 330.368   | NM_002689 | 3015.551  | 2809.397  | X65293    | 1837.942  | 1573.625  |
| AK023895  | 1587.244  | 1244.292  | NM_017686 | 1535.908  | 1626.207  | M33197    | 44795.582 | 40023.754 |
| AK024206  | 2184.785  | 1601.654  | AL096734  | 1106.524  | 1532.647  | AL050139  | 22591.275 | 27271.578 |
| AK026273  | 1799.48   | 1335.621  | AK000800  | 3709.126  | 3538.331  | NM_002593 | 2855.573  | 3369.821  |
| NM_020250 | 25099.516 | 17254.498 | NM_018154 | 7715.775  | 9033.375  | NM_004558 | 38178.816 | 40972.453 |
| AF055007  | 2014.781  | 1649.848  | NM_005358 | 841.455   | 972.069   | AL079296  | 2052.144  | 2536.737  |
| NM_012337 | 2371.702  | 1953.169  | BC006287  | 5714.129  | 4968.198  | NM_006597 | 60854.566 | 62724.117 |
| AL389879  | 1907.57   | 1403.361  | AB023198  | 7670.165  | 6532.664  | NM_007328 | 968.948   | 1585.817  |
| AK021542  | 555.977   | 628.516   | AF304163  | 9712.4    | 8626.448  | NM_012483 | 57025.184 | 49741.301 |
| AK022869  | 2323.571  | 2066.185  | NM_005231 | 9479.306  | 10333.822 | NM_003498 | 17121.473 | 10856.705 |
| NM_016111 | 5746.558  | 6187.562  | AF064729  | 3003.858  | 2861.601  | AB023420  | 45525.352 | 26575.537 |
| AF085958  | 28582.658 | 24344.273 | NM_005412 | 29075.857 | 30046.984 | M33197    | 65491.914 | 66162.758 |
| AF086021  | 2715.971  | 2276.371  | NM_021976 | 3391.077  | 2399.149  | NM_007264 | 56703.363 | 46905.309 |
| AF085982  | 443.728   | 481.289   | AF216077  | 6096.436  | 6107.987  | NM_002262 | 2285.545  | 1560.314  |
| AL117655  | 823.411   | 375.785   | AF086238  | 783.146   | 751.713   | NM_016511 | 63146.492 | 61958.051 |
| AK024472  | 4111.595  | 2611.611  | AK021612  | 25851.166 | 21224.951 | NM_003558 | 9455.326  | 10763.701 |
| AF087981  | 498.862   | 397.263   | AF147342  | 1139.213  | 1524.975  | NM_002543 | 924.977   | 1533.856  |
| NM_017976 | 5653.586  | 4849.47   | AF088031  | 810.435   | 632.079   | NM_002188 | 1724.972  | 2885.809  |
| U06700    | 1057.288  | 953.052   | AK002025  | 57787.914 | 51117.738 | M55337    | 6079.812  | 11206.478 |
| NM_017918 | 26422.678 | 20143.014 | AK026299  | 2114.875  | 1771.829  | M33197    | 65005.816 | 66952.672 |
| NM_017858 | 54810.199 | 56828.918 | NM_017794 | 2026.683  | 1757.787  | NM_013228 | 1313.566  | 1112.988  |
| AB007954  | 6132.741  | 4644.578  | AK025170  | 3080.024  | 2318.41   | NM_016533 | 62778.723 | 64914.906 |
| AK026494  | 1831.146  | 1853.768  | AK025697  | 6470.066  | 4438.517  | NM_014751 | 62249.727 | 61967.988 |
| AK026915  | 1659.86   | 1541.358  | AK021734  | 3168.548  | 4619.277  | NM_002347 | 62247.016 | 64043.535 |
| AL110259  | 684.649   | 569.786   | NM_021976 | 3252.66   | 3146.345  | AB046807  | 4904.757  | 3936.901  |
| AB033100  | 52439.152 | 42752.605 | SR2       | 24796.609 | 24457.779 | NM_018176 | 1464.055  | 1047.587  |
| AL390138  | 1135.017  | 1059.924  | SR4       | 9694.223  | 9925.523  | NM_003508 | 1193.492  | 1417.326  |
| AL137290  | 2265.478  | 2364.618  | SR8       | 3581.314  | 10339.669 | M33197    | 65915.367 | 67844.672 |
| AK022095  | 580.692   | 422.313   | SR10      | 13092.255 | 4087.301  | NM_014623 | 16948.094 | 21947.617 |
| AK024180  | 505.926   | 534.241   | CY3Cy5    | 6281.9    | 1870.328  | NM_007244 | 58637.902 | 62762.641 |
| AK023458  | 495.952   | 534.284   | AK026802  | 627.299   | 663.76    | M30629    | 22479.938 | 29446.932 |
| AK021606  | 1027.06   | 649.054   | NM_004544 | 10177.09  | 10723.616 | NM_018976 | 22544.313 | 29908.721 |
| NM_014124 | 10623.643 | 7861.915  | AF086041  | 1646.323  | 1626.445  | NM_003358 | 24412.689 | 22625.873 |

|           |           |           |            |           |           |           |           |           |
|-----------|-----------|-----------|------------|-----------|-----------|-----------|-----------|-----------|
| AF119888  | 808.945   | 614.129   | Y15167     | 1454.548  | 1208.553  | NM_005074 | 5169.657  | 4497.605  |
| AK001551  | 1655.498  | 1186.485  | AL133080   | 2202.918  | 2265.54   | NM_013272 | 4553.384  | 2183.029  |
| AK001825  | 4090.588  | 2594.119  | NM_017792  | 6898.458  | 6151.034  | NM_004170 | 11575.494 | 7495.959  |
| AK024714  | 540.273   | 596.98    | AK025213   | 3295.334  | 3219.116  | NM_018057 | 11704.273 | 9549.127  |
| AK022363  | 1811.21   | 1308.604  | NM_014949  | 2570.873  | 2489.924  | M33197    | 64995.922 | 71846.344 |
| AL353949  | 967.271   | 745.6     | AL080221   | 1670.134  | 1769.576  | NM_015717 | 11069.303 | 11624.01  |
| NM_005181 | 2427.256  | 1937.189  | AK026591   | 984.588   | 868.281   | NM_015925 | 11152.279 | 9318.349  |
| AF026945  | 2970.438  | 2104.371  | AK001889   | 2121.17   | 1390.86   | NM_003665 | 3627.432  | 3792.381  |
| AF143676  | 6128.439  | 5775.334  | AK025726   | 16684.008 | 12580.229 | AF220217  | 3830.409  | 6535.782  |
| NM_005247 | 4611.224  | 5766.151  | AJ227869   | 3007.391  | 1469.595  | NM_013323 | 59638.457 | 65324.406 |
| AL122089  | 1852.076  | 1526.254  | AK026189   | 668.313   | 965.592   | NM_014937 | 2499.044  | 3728.129  |
| AA203665  | 2701.272  | 2457.813  | AL117613   | 6936.471  | 6790.749  | NM_017426 | 5459.686  | 5507.164  |
| U95646    | 2450.898  | 1738.493  | AL137753   | 5498.106  | 4900.677  | M33197    | 26632.996 | 17570.9   |
| Y16705    | 2227.333  | 1813.301  | AL110262   | 16131.841 | 9889.941  | NM_000853 | 26632.066 | 34317.09  |
| AF279775  | 1956.136  | 1378.855  | AK025627   | 24016.086 | 15118.612 | NM_000846 | 1145.667  | 933.516   |
| NM_006262 | 2081.017  | 1383.909  | AK025191   | 1186.342  | 1390.247  | AF016903  | 62802.512 | 64880.605 |
| AK026598  | 4089.511  | 3560.98   | AK026763   | 463.166   | 424.072   | NM_015675 | 41621.473 | 39537.902 |
| AK023602  | 872.846   | 846.059   | AK025246   | 14644.098 | 14679.021 | AK022267  | 2589.04   | 2501.709  |
| NM_018097 | 58228.457 | 64442.828 | AK025847   | 5768.728  | 5013.064  | NM_016040 | 8830.089  | 10794.623 |
| AF130043  | 1085.323  | 1147.134  | AK026442   | 497.317   | 457.211   | M33197    | 66794.609 | 74358     |
| Y11167    | 3327.257  | 3246.574  | AK026816   | 648.378   | 639.621   | AF031136  | 64568.363 | 70175.375 |
| AK026813  | 921.06    | 974.32    | AB033031   | 2858.668  | 2575.624  | NM_005867 | 31702.455 | 23599.053 |
| AK027225  | 2515.09   | 3000.967  | AF085872   | 20099.484 | 16413.623 | AK026031  | 55487.465 | 54454.824 |
| AK023083  | 5100.852  | 3639.109  | AK022538   | 43288.129 | 36264.313 | NM_016466 | 28695.305 | 16937.447 |
| AF130093  | 988.468   | 1002.413  | AL360257   | 590.402   | 355.589   | NM_007342 | 11480.377 | 11289.712 |
| AF116622  | 1092.355  | 796.09    | AK022342   | 1570.307  | 2055.093  | NM_005672 | 5535.619  | 2694.212  |
| AF217967  | 1063.374  | 1031.951  | AF147420   | 4401.545  | 5386.173  | D25217    | 5883.078  | 4303.41   |
| NM_017447 | 6428.373  | 4391.658  | AL049312   | 2920.618  | 3552.805  | NM_006351 | 30724.809 | 25007.861 |
| NM_016622 | 4942.864  | 5081.766  | AL050072   | 5317.978  | 6343.713  | M33197    | 64488.52  | 64295.992 |
| AK026976  | 5237.35   | 7364.558  | AL117590   | 1222.916  | 1163.611  | NM_000103 | 2705.247  | 2421.049  |
| D42043    | 33849.93  | 26180.699 | AL049357   | 6762.783  | 5257.644  | NM_004683 | 27269.393 | 18458.646 |
| BC024009  | 885.678   | 770.818   | AL050129   | 687.006   | 560.54    | AK023226  | 4308.923  | 3323.361  |
| AF128543  | 1107.633  | 1105.172  | AK027180   | 3761.451  | 2250.791  | AK025263  | 1845.594  | 1568.919  |
| AK022071  | 424.77    | 418.032   | unknown (4 | 444.921   | 492.085   | M33197    | 63138.039 | 66781.766 |
| NM_004189 | 607.148   | 488.012   | AK022236   | 6305.274  | 7269.557  | NM_001467 | 8187.091  | 6367.253  |
| X94290    | 4373.13   | 3715.868  | AK000073   | 3866.878  | 3907.568  | NM_018066 | 59474.496 | 63329.516 |
| AK026685  | 3546.498  | 3351.47   | AK000618   | 1726.359  | 1727.09   | NM_006931 | 25843.734 | 24963.883 |
| AF090927  | 17664.414 | 19380.898 | AK024773   | 903.552   | 811.567   | NM_020344 | 24211.039 | 29943.967 |
| AL137642  | 2387.361  | 1715.094  | AL390180   | 1296.001  | 1361.983  | AF119868  | 1281.292  | 2155.432  |
| AL133619  | 17360.693 | 15139.563 | AF009262   | 18487.385 | 18085.926 | NM_005050 | 13081.469 | 13406.102 |
| AK025902  | 5898.745  | 4438.042  | AF009306   | 2205.495  | 1849.829  | M33197    | 63618.852 | 67344.023 |
| NM_004517 | 11397.22  | 11624.921 | AF050198   | 2425.656  | 1656.263  | M33197    | 33561.859 | 22289.146 |
| AI017418  | 659.809   | 684.506   | AK024346   | 4498.127  | 3337.521  | AL050139  | 24295.4   | 12491.103 |
| NM_000679 | 783.608   | 872.348   | AF056422   | 4716.936  | 6603.281  | NM_002593 | 2345.06   | 1441.5    |
| AF218006  | 18509.746 | 21002.148 | AF090892   | 813.731   | 875.267   | NM_004556 | 40777.25  | 33766.039 |
| AK026935  | 4918.133  | 4836.647  | AK001089   | 2247.218  | 2305.722  | AL079296  | 2294.528  | 4525.343  |
| AK027124  | 32640.141 | 34489.641 | AK001919   | 762.032   | 513.284   | NM_014770 | 27869.209 | 13725.667 |
| AB037813  | 995.533   | 1341.167  | AK021535   | 717.479   | 443.388   | AB037737  | 2685.286  | 2111.58   |
| M31212    | 32809.766 | 30466.506 | AK021753   | 7295.627  | 4651.135  | M33197    | 59286.117 | 67074.703 |
| NM_001821 | 4296.648  | 5136.546  | AK001139   | 5105.138  | 3915.094  | AK023103  | 5122.017  | 6367.432  |
| NM_005647 | 3120.256  | 3255.001  | AK002090   | 854.932   | 501.974   | NM_017856 | 5143.177  | 4217.32   |
| X64978    | 11133.19  | 12245.959 | AK021618   | 794.666   | 633.498   | NM_019059 | 59448.266 | 58927.391 |
| NM_000912 | 16801.904 | 17944.623 | AK021822   | 1364.527  | 794.729   | NM_013347 | 1326.76   | 873.033   |

|           |           |           |           |           |           |           |           |           |
|-----------|-----------|-----------|-----------|-----------|-----------|-----------|-----------|-----------|
| NM_00234E | 1528.16   | 1977.126  | AF116620  | 7588.606  | 7153.109  | D80008    | 3026.838  | 2258.192  |
| U57971    | 758.405   | 686.446   | AF293335  | 66635.445 | 64938.355 | X56789    | 7542.634  | 6980.082  |
| X89673    | 929.847   | 1026.558  | AK024431  | 15272.295 | 21286.748 | AK001069  | 61124.48  | 66012.531 |
| AK024593  | 629.794   | 713.191   | X96644    | 3894.009  | 4283.058  | M33197    | 62433.68  | 64005.883 |
| Z83934    | 2384.999  | 2411.457  | Z34281    | 37326.043 | 43222.59  | NM_00093E | 6264.773  | 4792.438  |
| NM_01835E | 6800.217  | 4574.868  | NM_01867E | 66619.297 | 66622.781 | NM_00035E | 53693.871 | 56036.195 |
| AK022020  | 5252.043  | 4212.411  | AJ008122  | 46880.09  | 47575.039 | NM_00639E | 8412.533  | 9342.403  |
| AF147399  | 750.309   | 733.858   | NM_00622C | 4230.953  | 3728.585  | NM_01430E | 12816.866 | 14437.578 |
| U17634    | 913.587   | 1111.422  | AK022667  | 8836.363  | 5714.295  | NM_001084 | 12370.031 | 13304.574 |
| AK000263  | 19450.109 | 16716.313 | AK026667  | 865.642   | 769.632   | NM_01598E | 17024.658 | 14479.985 |
| Y13895    | 1752.001  | 1399.681  | NM_014174 | 6145.344  | 6110.696  | NM_01862E | 6464.775  | 6144.537  |
| L14723    | 4412.241  | 4807.072  | AF147337  | 3932.858  | 5020.485  | M33197    | 59998.473 | 61527.207 |
| AK024462  | 4842.835  | 5659.653  | AK026981  | 5001.02   | 5534.771  | CY3Cy5    | 4184.96   | 193.447   |
| NM_005711 | 748.208   | 980.047   | NM_006394 | 444.04    | 559.922   | NM_006981 | 2262.844  | 1308.838  |
| NM_019601 | 2580.832  | 2766.498  | AK023819  | 1107.357  | 1095.391  | AF086354  | 467.11    | 931.153   |
| NM_00220E | 1851.213  | 2140.944  | AF075067  | 615.625   | 369.212   | AF086429  | 5897.318  | 7544.642  |
| NM_007074 | 4396.245  | 3949.888  | AL133656  | 3212.073  | 1825.945  | NM_01906C | 775.206   | 994.228   |
| NM_006614 | 1051.217  | 1071.896  | AL050037  | 7990.108  | 5353.587  | AF086302  | 1006.365  | 857.371   |
| NM_00223C | 19243.41  | 17446.039 | NM_001417 | 39671.895 | 21166.434 | AF086439  | 2473.792  | 2933.835  |
| NM_00381E | 7561.369  | 7576.103  | AK023557  | 1164.509  | 1958.896  | M33197    | 73230.539 | 63582.684 |
| NM_00143C | 2013.149  | 2700.478  | AK027107  | 2350.631  | 2632.702  | AF038171  | 2495.747  | 3473.368  |
| AB010098  | 2397.64   | 2731.148  | AB040887  | 12179.022 | 13111.699 | AF052160  | 838.443   | 955.519   |
| U17989    | 2188.754  | 2853.087  | AK025196  | 14204.534 | 13826.293 | AK026512  | 2587.119  | 3301.004  |
| U62325    | 3450.152  | 3429.317  | AJ227879  | 732.751   | 1063.632  | NM_01848E | 3477.014  | 2731.511  |
| AL137595  | 2900.723  | 3065.471  | AK024800  | 1303.863  | 1521.545  | NM_01788C | 2183.888  | 2145.867  |
| NM_01802E | 2701.849  | 3262.471  | AK000401  | 3800.805  | 3689.932  | AF090945  | 8421.37   | 6394.607  |
| AF249267  | 18896.498 | 19049.621 | AF305068  | 1743.892  | 1714.446  | NM_006981 | 2303.047  | 2212.886  |
| NM_004113 | 1435.466  | 1443.569  | D17231    | 50898.34  | 57299.281 | SR4       | 17796.648 | 26218.176 |
| X84939    | 4591.881  | 4172.621  | AF531295  | 2190.791  | 2341.66   | SR6       | 1658.33   | 2050.812  |
| NM_01832C | 4372.187  | 3664.102  | X60484    | 1112.66   | 1260.037  | SR8       | 5293.337  | 21133.902 |
| NM_00206E | 10230.571 | 7973.313  | AF055019  | 1105.238  | 1354.908  | SR10      | 18583.027 | 8517.444  |
| NM_01605E | 13971.02  | 11410.064 | NM_00352E | 7325      | 8531.972  | CY3Cy5    | 3970.664  | 224.463   |
| AF188492  | 1222.743  | 1073.642  | AF056432  | 2945.317  | 3520.708  | AK026718  | 3078.017  | 2867.229  |
| M65066    | 36155.102 | 31479.602 | AK001987  | 24139.07  | 21620.518 | AF085899  | 1353.543  | 1278.466  |
| NM_016951 | 5190.975  | 5290.086  | NM_01333E | 2702.28   | 3647.41   | AK022035  | 9044.609  | 7768.506  |
| NM_013251 | 914.052   | 796.227   | X56199    | 5527.789  | 3462.955  | M33197    | 75840.609 | 63504.621 |
| NM_01232E | 3425.303  | 4564.308  | NM_00519E | 6307.802  | 4421.439  | NM_004337 | 5138.151  | 5477.873  |
| NM_00308E | 11443.935 | 11346.042 | AL162006  | 718.049   | 533.814   | AL080215  | 1178.304  | 1836.885  |
| NM_016084 | 50018.906 | 45523.07  | NM_017971 | 43211.762 | 25299.521 | AF075016  | 620.535   | 499.159   |
| AF095289  | 47922.969 | 50678.141 | AF090097  | 2736.72   | 2276.87   | AK023612  | 728.781   | 490.865   |
| NM_005537 | 8451.69   | 8759.38   | NM_01475C | 2771.276  | 2940.681  | AF147437  | 6054.573  | 4684.857  |
| AC003962  | 1013.19   | 843.247   | NM_01591E | 1982.398  | 2461.273  | M33197    | 70665.008 | 63845.945 |
| NM_01900E | 5935.521  | 6060.619  | NM_00046C | 3001.686  | 2943.702  | AF147360  | 1075.028  | 1898.538  |
| NM_01593E | 9396.498  | 10860.015 | AB002339  | 5512.254  | 5694.078  | AL137269  | 5764.839  | 5663.726  |
| AF182412  | 1566.686  | 1933.943  | NM_005104 | 15673.482 | 16544.414 | AL110135  | 10924.352 | 14279.851 |
| AK027200  | 3601.013  | 4599.934  | NM_00688E | 25661.934 | 31866.867 | NM_00699E | 24237.881 | 21594.014 |
| S78372    | 687.662   | 903.448   | AL137423  | 5359.133  | 5466.048  | M33197    | 73795.453 | 64103.766 |
| U03106    | 17102.674 | 21743.367 | AB018322  | 13416.373 | 15762.173 | AF086316  | 774.659   | 527.348   |
| NM_00007E | 28917.328 | 29068.664 | NM_00706E | 34324.094 | 33217.363 | M33197    | 69471.055 | 64368.035 |
| NM_00684E | 9442.433  | 10500.756 | AF113211  | 1940.567  | 1870.393  | AK022084  | 407.223   | 522.358   |
| NM_01488E | 1011.077  | 1323.313  | AL117568  | 3729.986  | 3039.659  | AK026878  | 2036.12   | 1948.365  |
| M73239    | 1635.1    | 2146.504  | NM_00084E | 2528.637  | 1725.301  | AK023357  | 776.939   | 379.043   |
| NM_00494E | 8546.05   | 8898.003  | S71805    | 1426.308  | 839.733   | AK000777  | 1425.323  | 2046.992  |

|           |           |           |           |           |           |           |           |           |
|-----------|-----------|-----------|-----------|-----------|-----------|-----------|-----------|-----------|
| NM_020242 | 3292.16   | 3032.679  | NM_018391 | 3223.641  | 2304.095  | AK021589  | 7905.215  | 18869.314 |
| NM_00178E | 36711.926 | 36332.164 | U90917    | 813.891   | 830.234   | M33197    | 60370.922 | 57577.879 |
| NM_00717E | 54229.25  | 61802.109 | AK022140  | 7993.937  | 8113.221  | AF085969  | 1094.137  | 1817.267  |
| NM_017682 | 1325.593  | 2073.238  | AK023372  | 32205.635 | 29170.641 | AF144233  | 4785.043  | 3677.158  |
| NM_00220E | 9710.76   | 8270.337  | U21072    | 1663.393  | 1094.688  | AF085925  | 810.126   | 651.486   |
| NM_002291 | 709.37    | 748.138   | AK024377  | 580.258   | 365.811   | AK022986  | 551.898   | 575.086   |
| AL137477  | 21208.715 | 20590.037 | AL137461  | 1169.234  | 787.617   | AF085975  | 15177.104 | 16083.554 |
| NM_01664E | 16968.283 | 19383.348 | AF114264  | 14982.186 | 14822.113 | AF075103  | 1113.962  | 1679.684  |
| NM_01425E | 2246.587  | 2622.09   | NM_017514 | 477.397   | 328.979   | AF085943  | 5664.097  | 15997.263 |
| NM_015967 | 6169.527  | 6930.813  | NM_018972 | 4432.57   | 4072.406  | M33197    | 72491.352 | 63648.742 |
| NM_012237 | 1343.49   | 1285.589  | AB037828  | 1315.065  | 1309.789  | AL137390  | 3933.993  | 4044.373  |
| NM_00359E | 1370.765  | 1693.406  | AB023210  | 1144.335  | 1006.372  | AL137427  | 7996.133  | 7659.469  |
| NM_00240E | 3850.388  | 4423.204  | AB037786  | 4021.501  | 3362.979  | AL157460  | 2638.676  | 1960.413  |
| NM_004994 | 53839.574 | 57176.195 | NM_00364E | 14319.868 | 13450.952 | M33197    | 64614.375 | 57486.676 |
| NM_00661C | 4621.777  | 5029.999  | AB037735  | 1357.411  | 1288.572  | M33197    | 69142.664 | 60044.594 |
| NM_01762E | 593.823   | 624.364   | AK002177  | 17593.361 | 13405.497 | AL049846  | 2277.076  | 1537.469  |
| NM_00133E | 435.827   | 596.626   | AK024429  | 2930.187  | 2207.573  | AK024161  | 1630.385  | 1085.175  |
| NM_003791 | 5725.206  | 5956.31   | NM_00349E | 67304.406 | 63553.77  | AK021682  | 63264.242 | 52462.891 |
| NM_018017 | 5587.854  | 5803.744  | AB000509  | 2519.58   | 1603.372  | AK022141  | 1052.124  | 932.866   |
| AK001296  | 21340.85  | 20424.236 | AB018314  | 2046.439  | 1651.469  | AK023942  | 64049.961 | 57166.07  |
| AK000173  | 1090.064  | 1485.227  | NM_00437E | 1065.338  | 757.258   | M33197    | 62327.156 | 57418.27  |
| NM_01836E | 9328.191  | 8910.613  | AJ238899  | 1190.349  | 813.55    | AK022046  | 1139.064  | 1044.48   |
| NM_00658E | 13855.372 | 14319.348 | NM_018037 | 4571.064  | 2704.599  | AK027207  | 1751.819  | 1677.093  |
| AJ272180  | 5780.15   | 6719.804  | NM_001110 | 2702.339  | 1782.721  | AF083120  | 900.496   | 1209.626  |
| AK025709  | 3506.513  | 4115.452  | NM_000841 | 10318.401 | 6084.94   | AF143323  | 1441.491  | 1788.564  |
| NM_01901E | 10368.845 | 10496.38  | NM_00124E | 1813.884  | 972.37    | AL050298  | 944.951   | 1652.722  |
| NM_012261 | 26787.615 | 28857.539 | AJ008139  | 11037.011 | 10208.758 | AJ227892  | 12176.337 | 13777.488 |
| NM_01555E | 29126.225 | 29311.699 | NM_00432E | 13720.112 | 15005.478 | M33197    | 68729.836 | 63972.121 |
| NM_00609E | 5449.586  | 6640.013  | NM_000882 | 699.859   | 1013.853  | AK022013  | 3916.169  | 3180.405  |
| AF272379  | 11221.395 | 14077.889 | NM_004577 | 6897.842  | 7464.221  | AK022155  | 8323.945  | 6571.873  |
| AK022643  | 1212.425  | 1318.547  | NM_015507 | 1119.753  | 916.742   | AK022288  | 2036.423  | 1764.395  |
| AB046808  | 5127.564  | 5592.065  | AF007157  | 46500.691 | 46967.488 | AK021916  | 729.517   | 580.285   |
| AK026265  | 4785.62   | 4704.362  | D38553    | 4461.288  | 5712.358  | AK024201  | 1425.421  | 1068.13   |
| AF015313  | 1413.572  | 1774.874  | NM_00617C | 14004.681 | 14737.504 | AK022174  | 1473.145  | 1346.846  |
| NM_00646E | 4564.317  | 4814.054  | NM_01429E | 9159.229  | 8080.102  | AL117236  | 2658.622  | 2691.656  |
| NM_005681 | 2979.185  | 3083.909  | AK001581  | 2522.574  | 2523.9    | AL049299  | 1240.913  | 890.105   |
| NM_01515E | 6021.691  | 6650.217  | NM_005862 | 11260.086 | 10044.583 | NM_00608E | 69960.711 | 64287.711 |
| NM_012384 | 6916.82   | 6301.298  | NM_00054E | 10922.199 | 8658.866  | NM_01826E | 2414.162  | 2715.477  |
| NM_00465E | 16505.42  | 15267.089 | AK022541  | 8932.471  | 7810.433  | AF130086  | 10339.675 | 8318.861  |
| AF233453  | 7101.327  | 6638.738  | AB002297  | 4029.485  | 3187.259  | AK023858  | 9065.134  | 7309.91   |
| D87454    | 37723.625 | 34269.254 | NM_00502C | 56897.008 | 46524.57  | M33197    | 64738.965 | 61654.609 |
| NM_00702C | 23365.771 | 17528.623 | NM_014077 | 3379.11   | 2429.932  | AF250920  | 7493.402  | 5611.991  |
| NM_00071E | 23181.566 | 24231.318 | NM_01841E | 2308.502  | 1531.447  | NM_01773E | 3373.409  | 1878.986  |
| NM_01605E | 4542.167  | 4837.18   | M14087    | 12272.046 | 10977.186 | NM_01404E | 12378.714 | 7414.23   |
| NM_013291 | 31663.756 | 30284.652 | AJ272324  | 456.621   | 364.244   | D17152    | 35247.059 | 22199.211 |
| NM_00293E | 27600.791 | 27853.232 | NM_00088E | 20891.723 | 13049.228 | AK024464  | 25814.857 | 17120.055 |
| NM_014161 | 17015.557 | 16998.545 | M59040    | 6445.591  | 3526.516  | AK026748  | 816.295   | 735.229   |
| BF312817  | 9818.334  | 11657.813 | X15880    | 64698.742 | 57234.102 | AK023638  | 458.06    | 968.215   |
| AF284580  | 3789.108  | 4603.854  | NM_00679E | 696.12    | 1027.645  | M33197    | 4026.833  | 3490.364  |
| AK024961  | 10713.002 | 10491.825 | X04366    | 2799.179  | 3013.732  | AL050022  | 629.896   | 706.184   |
| NM_01606E | 24108.305 | 22704.086 | NM_00050E | 56053.805 | 59307.82  | AF009272  | 750.052   | 899.907   |
| NM_002711 | 1607.391  | 1878.564  | NM_00066E | 3630.796  | 3543.407  | D16888    | 2288.873  | 2664.846  |
| NM_00019E | 30576.07  | 26891.84  | NM_003481 | 7266.342  | 7088.62   | AF068298  | 8600.531  | 10136.391 |

|           |           |           |           |           |           |           |           |           |
|-----------|-----------|-----------|-----------|-----------|-----------|-----------|-----------|-----------|
| NM_00377E | 48731.156 | 54186.227 | AB046814  | 847.288   | 837.708   | Z70770    | 3106.319  | 2921.059  |
| NM_001041 | 998.395   | 900.501   | NM_017664 | 5525.989  | 5023.27   | AJ227900  | 5447.023  | 5200.018  |
| NM_000693 | 392.811   | 682.424   | AK025523  | 636.28    | 700.822   | M33197    | 64010.621 | 62830.336 |
| AK023263  | 3591.964  | 3904.007  | NM_007059 | 13261.748 | 9564.204  | AJ012500  | 7894.251  | 7995.747  |
| NM_004622 | 5117.938  | 5357.356  | NM_006870 | 7845.366  | 5827.484  | AF085833  | 1710.79   | 1567.737  |
| AK021445  | 1516.486  | 1942.147  | L13283    | 3315.477  | 3067.215  | L19368    | 925.923   | 774.016   |
| NM_017934 | 8174.867  | 8192.07   | NM_013327 | 2361.405  | 2600.819  | U00944    | 1688.85   | 1334.059  |
| NM_01416E | 41580.387 | 40599.277 | AF303888  | 13961.964 | 13750.379 | BC035058  | 1973.218  | 1620.588  |
| AF211971  | 13502.247 | 11485.387 | NM_000077 | 2174.025  | 1757.932  | X57566    | 21693.047 | 10296.592 |
| NM_002931 | 4116.569  | 4211.189  | AF176646  | 1306.135  | 1420.525  | M33197    | 65209.035 | 62076.477 |
| NM_01344E | 19352.797 | 19298.666 | NM_003672 | 23480.24  | 13451.718 | NM_01861E | 22959.652 | 14339.801 |
| X65232    | 29277.623 | 32719.586 | NM_002574 | 64400.43  | 50063.055 | AK023809  | 3628.872  | 2093.363  |
| U12767    | 1478.101  | 1640.481  | NM_012391 | 5596.751  | 5529.563  | M87943    | 64077.719 | 60227     |
| U17630    | 1639.008  | 2323.118  | NM_005254 | 4793.667  | 5258.932  | AL360137  | 1819.777  | 891.242   |
| M33782    | 8470.886  | 9003.054  | NM_005611 | 1811.768  | 2418.483  | U28131    | 60265.047 | 57052.43  |
| NM_00219E | 1185.568  | 1202.414  | AF141655  | 6669.231  | 6779.589  | AY007106  | 4905.154  | 3631.275  |
| NM_01775E | 19790.879 | 22079.832 | NM_00734E | 3048.526  | 2956.253  | AF015910  | 65931.961 | 66216.891 |
| NM_01841E | 3278.892  | 3093.899  | NM_004830 | 1064.056  | 1213.697  | M33197    | 60551.824 | 59238.309 |
| NM_00460E | 14384.705 | 16606.848 | AF132362  | 59919.266 | 59600.363 | NM_016824 | 9024.361  | 5165.331  |
| D70833    | 56178.984 | 61876.664 | NM_007007 | 12755.615 | 12984.131 | NM_003031 | 10753.376 | 7881.935  |
| NM_016621 | 5941.478  | 6118.985  | NM_00638E | 5807.778  | 4557.44   | X89674    | 880.046   | 936.641   |
| NM_00297E | 2088.101  | 2522.448  | NM_00655E | 20084.355 | 17953.619 | NM_00717C | 2066.385  | 1620.309  |
| AK023511  | 17518.656 | 17080.242 | NM_004501 | 33799.664 | 26112.873 | NM_00300E | 3168.901  | 1903.658  |
| NM_01455E | 10586.425 | 8757.77   | NM_00496E | 17065.895 | 15004.829 | M33197    | 60665.945 | 58480.383 |
| NM_00161E | 56252.828 | 65783.055 | NM_006700 | 3166.906  | 2630.617  | AK025416  | 921.141   | 1120.09   |
| NM_00272E | 1566.74   | 1633.075  | NM_00644E | 15005.246 | 11112.72  | AK022165  | 1694.489  | 2100.993  |
| NM_01437E | 3804.48   | 4140.197  | NM_01210E | 29009.375 | 18072.979 | U58662    | 507.566   | 656.87    |
| NM_01781E | 28275.066 | 28251.572 | AF019633  | 5256.435  | 3986.793  | AF090883  | 2367.052  | 1757.817  |
| AF204173  | 2435.926  | 2662.706  | AB002361  | 19484.826 | 17773.336 | U23860    | 2226.025  | 3447.386  |
| J03260    | 3796.855  | 4189.187  | NM_018060 | 11969.796 | 16001.945 | M33197    | 61229.336 | 59362.383 |
| U13738    | 5894.454  | 7000.245  | NM_01423E | 6574.325  | 8448.365  | AL049263  | 601.678   | 375.696   |
| AF068236  | 25841.1   | 31540.227 | NM_01766E | 11897.22  | 11979.031 | AK022372  | 4537.889  | 4068.143  |
| H94487    | 791.265   | 914.122   | U88837    | 4304.303  | 4240.008  | AF086258  | 871.231   | 646.323   |
| BG681747  | 30183.029 | 37123.605 | NM_01744E | 21205.713 | 16813.221 | NM_01591E | 4899.853  | 4080.145  |
| H63077    | 348.726   | 484.749   | NM_01758E | 12071.726 | 8481.985  | NM_00352C | 1199.773  | 1135.458  |
| AA679352  | 13591.181 | 14510.24  | NM_01523E | 4978.115  | 3234.251  | NM_01588E | 58983.234 | 54646.477 |
| AA437291  | 877.616   | 1014.527  | AK026962  | 4170.117  | 2993.02   | M33197    | 69601.445 | 63809.148 |
| X04503    | 4321.639  | 4074.911  | D00265    | 37404.863 | 31184.461 | NM_00427E | 4269.801  | 2839.893  |
| D45917    | 4920.942  | 5832.229  | NM_00077E | 1715.855  | 1694.526  | NM_00233E | 27224.121 | 18169.137 |
| X52001    | 4589.32   | 5745.071  | NM_00455E | 44571.055 | 33604.176 | NM_00285E | 4216.032  | 2640.425  |
| BI823872  | 418.111   | 504.638   | NM_00014E | 3307.49   | 2523.465  | NM_00524E | 4293.689  | 2358.077  |
| AA430552  | 2197.865  | 2579.045  | AF317889  | 821.747   | 601.751   | AF161339  | 2300.444  | 1240.027  |
| X66142    | 5531.963  | 5444.735  | NM_006294 | 62764.145 | 55769.5   | M33197    | 61230.508 | 56355.461 |
| NM_00591E | 576.25    | 551.515   | AL137294  | 498.56    | 538.695   | AK000354  | 11609.542 | 8023.657  |
| R45054    | 6490.977  | 6034.158  | NM_00374E | 2452.232  | 1898.636  | AL161984  | 1311.975  | 816.914   |
| NM_00378C | 31111.924 | 34699.477 | AB037797  | 1396.572  | 1394.341  | NM_00395C | 737.202   | 606.418   |
| NM_003731 | 39377.539 | 37116.391 | NM_00152C | 1964.039  | 1778.737  | NM_01488E | 4185.052  | 3447.893  |
| NM_00544E | 14166.472 | 13121.596 | AL050367  | 733.782   | 748.442   | NM_00083E | 2179.719  | 2476.678  |
| NM_01329E | 10687.689 | 9122.86   | NM_01787C | 2975.982  | 3273.09   | M33197    | 62177.344 | 59525.477 |
| NM_00238E | 6771.412  | 6119.73   | AL133633  | 4233.954  | 5646.679  | NM_00151C | 3242.499  | 2644.989  |
| NM_00006E | 2006.462  | 1937.268  | NM_01225E | 2252.076  | 2559.477  | AK024474  | 17515.088 | 12932.695 |
| AB023217  | 2998.115  | 2810.038  | AK026817  | 7144.018  | 8469.814  | NM_00686E | 1453.619  | 1080.33   |
| L08902    | 1815.896  | 1575.896  | AL157442  | 54254.16  | 57736.883 | NM_017901 | 4031.862  | 3488.521  |

|           |           |           |             |           |           |           |           |           |
|-----------|-----------|-----------|-------------|-----------|-----------|-----------|-----------|-----------|
| J02639    | 22977.852 | 22304.656 | AL389938    | 59738.586 | 58718.781 | NM_004272 | 4606.923  | 3432.801  |
| M58050    | 9228.068  | 11237.753 | NM_001949   | 57101.566 | 57076.863 | NM_00035E | 3423.537  | 1960.078  |
| NM_007263 | 36893.469 | 36458.473 | NM_007084   | 4641.597  | 5051.513  | NM_00193C | 3394.555  | 3419.564  |
| AF206020  | 1803.803  | 1766.091  | M97191      | 56099.148 | 49528.648 | AK025270  | 620.939   | 582.556   |
| NM_01441C | 701.714   | 742.585   | AK023015    | 8298.24   | 8894.081  | NM_001564 | 1779.55   | 1514.303  |
| AF305835  | 727.661   | 710.396   | NM_003457   | 33018.605 | 29057.971 | M33197    | 61550.988 | 59313.629 |
| AB020668  | 981.602   | 913.514   | AV752086    | 1614.09   | 2241.492  | AF263537  | 2962.479  | 1441.596  |
| NM_006203 | 2786.739  | 2876.955  | NM_016102   | 32323.027 | 44524.031 | NM_01589E | 507.105   | 778.897   |
| NM_013261 | 1749.981  | 1662.557  | NM_004376   | 4178.747  | 5039.732  | AL050050  | 990.661   | 831.101   |
| AF309553  | 11234.131 | 10844.947 | NM_000272   | 814.603   | 928.079   | NM_00469C | 1220.234  | 1157.443  |
| NM_00360E | 3736.813  | 3758.831  | NM_00684E   | 62940.988 | 61466.402 | M33197    | 62216.293 | 61452.664 |
| NM_00613E | 1508.016  | 2161.011  | NM_005603   | 62433.711 | 62589.277 | NM_013374 | 60995.773 | 42749.77  |
| NM_00190C | 58188.578 | 66218.547 | NM_001061   | 1783.133  | 2126.672  | NM_003252 | 6987.079  | 3709.73   |
| NM_003993 | 8739.78   | 9358.089  | AI075338    | 5997.11   | 6256.178  | NM_00122E | 2852.007  | 1351.006  |
| NM_00215C | 2484.143  | 2373.892  | BG744154    | 24060.574 | 27090.244 | AK026607  | 1016.897  | 666.146   |
| NM_00459E | 16030.775 | 18905.184 | Z11694      | 17789.158 | 18756.109 | NM_016561 | 38761.734 | 22683.941 |
| NM_02017E | 1245.101  | 1166.911  | BF983177    | 7765.434  | 5828.654  | NM_00122E | 796.9     | 263.083   |
| NM_002264 | 4713.877  | 4390.705  | Z26317      | 11885.277 | 10474.48  | NM_01424E | 56591.953 | 34655.301 |
| NM_014754 | 42129.012 | 35552.523 | X16983      | 59657.957 | 55354.727 | L36531    | 812.536   | 437.287   |
| D49387    | 979.827   | 1112.123  | X56160      | 6031.373  | 4986.691  | AB046822  | 1006.179  | 963.421   |
| AF050146  | 4175.635  | 4566.381  | BG679991    | 2946.71   | 3375.888  | NM_01588E | 6260.33   | 4325.763  |
| NM_000116 | 4515.336  | 4689.364  | H-Y 00097 I | 11308.708 | 16051.803 | AK024809  | 873.773   | 492.601   |
| NM_00669E | 12024.057 | 12034.095 | H-M 59964   | 1042.476  | 1250.807  | NM_00030E | 4405.932  | 3680.568  |
| NM_006804 | 10558.313 | 11007.903 | H-Y 00711 I | 64307.855 | 64453.98  | X69636    | 7100.297  | 5151.537  |
| NM_001133 | 493.515   | 666.757   | H-X 16707 I | 5868.87   | 8329.311  | M33197    | 61780.949 | 59583.336 |
| AK025641  | 11961.55  | 11999.847 | H-U76456M   | 518.243   | 663.794   | NM_004173 | 61661.82  | 50759.363 |
| AB040457  | 460.159   | 486.578   | AL038354    | 12180.16  | 15710.305 | NM_013974 | 864.439   | 809.284   |
| AB014514  | 4424.329  | 4336.548  | R14607      | 3550.907  | 3793.214  | NM_017547 | 594.827   | 621.396   |
| NM_00286E | 15312.618 | 15634.415 | W84867      | 1870.93   | 1597.096  | NM_003983 | 1776.416  | 1668.087  |
| NM_00356E | 5170.925  | 4241.062  | BF245026    | 872.682   | 847.725   | AK023708  | 543.188   | 736.778   |
| NM_00424E | 724.674   | 697.279   | NM_000592   | 711.163   | 964.026   | NM_00210E | 1890.074  | 1757.668  |
| AK026315  | 1009.792  | 1051.474  | NM_016584   | 40911.172 | 46077.961 | M33197    | 63080.203 | 60732.117 |
| NM_00715E | 53951.859 | 60032.066 | NM_00181E   | 4856.848  | 5742.065  | NM_018464 | 26102.141 | 18813.129 |
| NM_01839C | 6738.916  | 7901.112  | NM_000064   | 34924.5   | 41818.145 | D43948    | 4007.899  | 2789.652  |
| AB037724  | 6119.218  | 6250.486  | NM_003264   | 1615.683  | 2095.659  | NM_01231C | 20071.771 | 13039.22  |
| AK025086  | 2426.323  | 2773.666  | NM_00672E   | 15976.06  | 16920.572 | BE410824  | 262.88    | 179.29    |
| AK026151  | 5163.548  | 4293.004  | NM_00332E   | 4074.583  | 4284.767  | BF382116  | 4607.85   | 1829.669  |
| NM_01414C | 3568.447  | 3490.094  | NM_00456E   | 61468.598 | 59376.305 | NM_003193 | 16389.826 | 9931.493  |
| NM_00291E | 7379.83   | 9052.112  | NM_000202   | 9577.653  | 12015.655 | AF113216  | 4180.964  | 4006.958  |
| M20700    | 7638.071  | 7277.5    | NM_00549E   | 13264.689 | 11700.669 | NM_01758E | 4079.207  | 4073.35   |
| NM_001034 | 12077.44  | 13921.82  | NM_01660E   | 1539.166  | 1628.064  | AK023582  | 2461.031  | 2174.952  |
| NM_00268E | 5990.571  | 6688.774  | NM_00285E   | 6810.803  | 6141.104  | NM_000124 | 1873.681  | 1534.667  |
| NM_01768E | 1562.145  | 1621.686  | NM_004817   | 3358.681  | 2834.152  | NM_01799E | 9730.218  | 7466.006  |
| AL096734  | 2143.054  | 2137.143  | NM_01897E   | 18271.23  | 12854.951 | NM_014517 | 5255.063  | 4376.516  |
| AK000800  | 4712.918  | 4752.045  | AB023215    | 28551.404 | 23997.154 | NM_00546E | 3541.597  | 2924.817  |
| NM_018154 | 7589.563  | 8830.726  | NM_001284   | 30749.74  | 29695.879 | NM_00426E | 4808.119  | 4158.788  |
| NM_00535E | 766.552   | 881.18    | NM_003242   | 20509.213 | 23349.264 | NM_00340E | 1018.233  | 852.969   |
| BC006287  | 7919.437  | 7751.267  | NM_00284E   | 1903.769  | 1290.498  | M33197    | 54796.516 | 59041.008 |
| AB023198  | 17526.014 | 16634.684 | U31099      | 2521.172  | 2035.492  | D31765    | 2529.415  | 1914.909  |
| AF304163  | 26113.215 | 26070.891 | NM_001105   | 21971.744 | 15934.361 | NM_006107 | 9197.342  | 7902.148  |
| NM_005231 | 12321.321 | 14377.42  | NM_00558E   | 419.206   | 404.963   | NM_00417E | 1663.853  | 1729.961  |
| AF064729  | 2205.639  | 2594.508  | NM_00207E   | 6955.565  | 5720.373  | AF288288  | 55334.227 | 56912.699 |
| NM_005412 | 42525.637 | 32296.045 | Y08756      | 51008.234 | 49440.852 | NM_01764E | 22029.283 | 19091.123 |

|           |           |           |           |           |           |           |           |           |
|-----------|-----------|-----------|-----------|-----------|-----------|-----------|-----------|-----------|
| NM_012113 | 4999.529  | 4741.81   | AY007090  | 1743.064  | 1659.221  | AL050368  | 1864.963  | 1493.799  |
| NM_014556 | 10405.729 | 10014.445 | NM_006439 | 706.079   | 495.693   | NM_003092 | 23883.133 | 18667.201 |
| NM_001615 | 55303.563 | 64293.77  | AK021426  | 534.141   | 529.454   | M33197    | 57972.02  | 57673.949 |
| NM_002725 | 1304.604  | 1462.706  | NM_018073 | 2334.301  | 2621.056  | NM_005861 | 8484.394  | 4897.689  |
| NM_014375 | 3325.73   | 3959.111  | AL137529  | 2082.646  | 2154.366  | NM_018845 | 1763.764  | 1395.248  |
| NM_017812 | 25076.266 | 25885.789 | NM_012332 | 7319.344  | 8249.355  | NM_003760 | 19872.896 | 16019.345 |
| AF204173  | 2802.697  | 3008.033  | NM_000497 | 1889.888  | 2162.039  | AB037759  | 1216.174  | 851.53    |
| J03260    | 3984.253  | 4213.05   | NM_017421 | 2839.155  | 3763.827  | M33197    | 4215.796  | 3523.366  |
| U13738    | 5969.133  | 6519.686  | AK025977  | 63473.266 | 74083.117 | NM_001161 | 20894.443 | 16239.257 |
| AF068236  | 22331.156 | 27261.762 | AK023130  | 11607.378 | 10663.593 | NM_004044 | 21059.367 | 18446.785 |
| H94487    | 841.405   | 868.283   | NM_000273 | 2661.739  | 3498.946  | NM_000221 | 59676.008 | 57888.215 |
| BG681747  | 32577.139 | 37053.309 | NM_002899 | 26678.646 | 33914.652 | H75678    | 5589.409  | 4934.979  |
| H63077    | 292.144   | 598.485   | NM_005397 | 5156.725  | 6085.48   | NM_002535 | 2064.327  | 2506.122  |
| AA679352  | 13992.467 | 14072.872 | AB014511  | 7696.897  | 7303.223  | NM_006452 | 25301.99  | 27338.818 |
| AA437291  | 642.983   | 627.954   | NM_001662 | 16556.662 | 14101.082 | AB002359  | 6917.604  | 7365.542  |
| X04503    | 3782.313  | 2929.67   | AB011100  | 4303.272  | 3833.592  | M33197    | 24404.342 | 23524.428 |
| D45917    | 4313.163  | 4602.667  | U61741    | 4033.865  | 3362.496  | AB007864  | 3983.24   | 3770.634  |
| X52001    | 4248.473  | 4608.21   | NM_012402 | 9660.805  | 8334.86   | NM_002195 | 7086.25   | 6484.701  |
| BI823872  | 355.27    | 516.348   | M76676    | 6815.951  | 6281.204  | AK025905  | 2050.841  | 1812.63   |
| AA430552  | 1834.717  | 2283.12   | AL137690  | 1796.782  | 1177.986  | AL121733  | 1759.232  | 1345.393  |
| X66142    | 4517.604  | 4865.018  | Z83804    | 3370.312  | 2960.258  | BE958072  | 2222.514  | 1674.723  |
| NM_005913 | 480.341   | 469.927   | NM_004386 | 3549.516  | 3177.417  | M33197    | 55766.363 | 56031.098 |
| R45054    | 5732.966  | 4987.572  | U67784    | 2608.63   | 2783.974  | NM_017532 | 1644.934  | 1698.057  |
| AL117398  | 5538.681  | 6081.551  | NM_007366 | 5974.855  | 4666.193  | NM_014480 | 6708.116  | 5094.957  |
| AY007158  | 31937.691 | 33392.422 | NM_014580 | 2300.363  | 2262.922  | NM_005935 | 1527.72   | 1521.504  |
| NM_013292 | 10694.748 | 11631.286 | NM_002033 | 624.228   | 1286.773  | NM_014165 | 8232.492  | 10914.828 |
| NM_002387 | 5227.688  | 5487.133  | AK091794  | 388.165   | 724.554   | NM_004964 | 11716.729 | 8444.724  |
| NM_000069 | 1986.431  | 2401.613  | NM_004111 | 4830.783  | 5630.641  | NM_005197 | 12735.282 | 9350.428  |
| AB023217  | 2551.888  | 2570.234  | AF085966  | 5839.344  | 6944.827  | AL137421  | 58280.512 | 56465.008 |
| L08902    | 2031.648  | 2308.818  | NM_005316 | 6786.437  | 6660.863  | M33197    | 59019.027 | 59576.934 |
| J02639    | 23760.959 | 25137.773 | NM_016316 | 7624.274  | 9244.126  | NM_007241 | 1244.718  | 1169.584  |
| M58050    | 9359.184  | 11104.644 | NM_003369 | 23831.16  | 30613.1   | M33197    | 61407.063 | 61666.5   |
| NM_007263 | 37197.488 | 35517.574 | NM_000057 | 2705.178  | 3024.619  | NM_001154 | 14379.179 | 14912.889 |
| AF206020  | 1596.313  | 1736.98   | NM_018343 | 8517.316  | 8652.915  | NM_001815 | 4992.486  | 5448.703  |
| NM_014410 | 762.318   | 649.111   | AK095793  | 1407.747  | 1537.379  | NM_016935 | 1397.32   | 1555.013  |
| AF305835  | 742.239   | 834.358   | NM_003177 | 5479.481  | 4370.098  | NM_001993 | 3349.518  | 3684.038  |
| AF312769  | 495.064   | 549.026   | NM_017719 | 1476.137  | 1214.963  | BF575833  | 1410.936  | 2963.848  |
| AB020668  | 923.525   | 808.594   | AF064078  | 2756.617  | 3037.612  | NM_015725 | 18797.975 | 22017.273 |
| NM_006203 | 2316.746  | 2595.675  | AL049688  | 4347.608  | 4213.352  | R61452    | 2328.729  | 2738.536  |
| NM_013261 | 487.526   | 543.821   | NM_002737 | 4448.998  | 5104.841  | R19938    | 33857.824 | 38214.266 |
| AF309553  | 10548.255 | 11007.701 | NM_006214 | 3488.25   | 2678.635  | N94487    | 36242.293 | 37911.066 |
| NM_003605 | 3899.361  | 4255.796  | AJ010228  | 12995.304 | 12894.401 | AI886795  | 12043.126 | 12272.502 |
| NM_006139 | 1341.118  | 1530.251  | NM_005195 | 4151.78   | 3969.111  | D10495    | 5268.993  | 6328.181  |
| NM_001900 | 56971.852 | 64369.059 | NM_004376 | 4179.461  | 4297.735  | BF344679  | 5020.145  | 4802.362  |
| NM_003993 | 8980.589  | 7638.463  | NM_000272 | 730.857   | 1523.781  | BG743223  | 771.064   | 687.638   |
| NM_002975 | 1931.274  | 2052.99   | NM_006845 | 58361.047 | 58598.605 | M36634    | 1109.454  | 1457.472  |
| AK023511  | 19317.545 | 18587.211 | NM_005603 | 62293.676 | 61455.813 | M14156    | 51997.707 | 46727.996 |
| NM_020175 | 1221.349  | 1290.812  | NM_001061 | 1716.373  | 2104.119  | U87939    | 1760.152  | 1627.725  |
| NM_002264 | 4268.356  | 4225.592  | AI075338  | 5367.268  | 6267.098  | U86961    | 2591.734  | 2648.311  |
| NM_014754 | 38581.52  | 38899.555 | BG744154  | 24585.375 | 27991.74  | U47924    | 886.62    | 740.613   |
| D49387    | 718.331   | 762.044   | Z11694    | 18064.055 | 21176.063 | NM_005191 | 3807.12   | 4001.597  |
| AF050146  | 4554.464  | 5330.813  | BF983177  | 6716.829  | 5261.022  | AK094237  | 7154.225  | 5669.701  |
| NM_000116 | 4218.99   | 4830.637  | Z26317    | 10444.335 | 10062.829 | M33197    | 57286.285 | 57743.223 |

|           |           |           |             |           |           |           |           |           |
|-----------|-----------|-----------|-------------|-----------|-----------|-----------|-----------|-----------|
| NM_00669E | 11861.934 | 12398.591 | X16983      | 54793.141 | 51280.285 | NM_00298E | 23289.477 | 20304.85  |
| NM_00680A | 10607.986 | 9377.71   | X56160      | 6760.417  | 6177.575  | NM_00007A | 40598.043 | 43657.371 |
| NM_001133 | 449.326   | 410.827   | BG679991    | 2275.698  | 1985.864  | NM_02039E | 1215.914  | 2049.905  |
| AK025641  | 10857.91  | 11807.804 | H-Y 00097 I | 9701.93   | 7223.274  | BF434335  | 60445.477 | 61682.066 |
| AB040457  | 439.09    | 633.417   | H-M 59964   | 909.761   | 669.853   | M57627    | 1596.829  | 1874.093  |
| AB014514  | 3758.248  | 3430.92   | H-Y 00711 I | 63464.992 | 63026.371 | NM_00299E | 2480.081  | 3630.761  |
| NM_00286E | 14564.869 | 14432.183 | H-X 16707 I | 4148.176  | 4765.282  | AK026946  | 4309.562  | 6076.202  |
| NM_00356E | 5223.665  | 4252.478  | H-U76456M   | 1313.608  | 1563.559  | M33197    | 55414.59  | 62530.738 |
| NM_00424E | 566.914   | 507.797   | AL038354    | 8586.001  | 10667.528 | NM_00319E | 6759.004  | 8571.375  |
| AK026315  | 622.272   | 749.701   | W84867      | 1301.208  | 930.622   | NM_01844E | 10927.093 | 14658.748 |
| NM_00715E | 53437.047 | 53442.504 | NM_00571E   | 6521.759  | 6205.076  | AF086129  | 3297.573  | 4448.732  |
| NM_003731 | 41666.125 | 32152.477 | NM_01826A   | 2019.862  | 1375.543  | D79994    | 4169.063  | 4669.169  |
| NM_00544E | 16228.192 | 14437.936 | NM_00181E   | 4401.947  | 5348.447  | NM_01445E | 34143.914 | 36665.832 |
| NM_01414C | 3102.498  | 3175.305  | NM_00006A   | 33281.836 | 36089.691 | L10333    | 611.019   | 1616.126  |
| NM_00291E | 7002.864  | 7974.741  | NM_00326A   | 1850.759  | 1789.661  | AF235049  | 12915.459 | 12361.746 |
| M20700    | 8076.211  | 9279.949  | NM_00672E   | 15936.919 | 17009.34  | M33197    | 61342.176 | 62533.938 |
| NM_00103A | 12331.412 | 13675.726 | NM_00332E   | 4539.201  | 4486.966  | NM_00736E | 2473.867  | 2627.121  |
| NM_00268E | 6027.272  | 6277.745  | NM_00456E   | 61146.84  | 59668.629 | NM_01477E | 4829.398  | 4034.779  |
| NM_01768E | 1616.112  | 1660.075  | NM_00020E   | 9325.997  | 13799.018 | NM_00648C | 58293.965 | 60976.25  |
| AL096734  | 1685.509  | 2064.91   | NM_00549E   | 13726.178 | 13310.657 | NM_00722E | 62119.172 | 60668.883 |
| AK000800  | 4831.426  | 4950.463  | NM_01660E   | 1771.61   | 3009.65   | NM_00014E | 1275.221  | 869.361   |
| NM_01815A | 7707.183  | 8856.703  | NM_00285E   | 7141.959  | 8528.1    | AF030107  | 49864.711 | 47455.488 |
| NM_00535E | 952.527   | 827.847   | NM_004817   | 3901.769  | 4678.821  | NM_000871 | 4790.895  | 6987.047  |
| BC006287  | 7579.428  | 5795.553  | NM_01897E   | 23437.721 | 23742.768 | NM_01896E | 5928.583  | 6613.576  |
| AB023198  | 17043.563 | 13150.018 | AB023215    | 31322.887 | 33768.309 | AF086924  | 60524.086 | 58310.996 |
| AF304163  | 23502.063 | 18967.938 | NM_00128A   | 29216.008 | 30408.643 | NM_00516A | 1222.395  | 1580.641  |
| NM_005231 | 12375.931 | 11845.364 | NM_00324E   | 20438.594 | 20777.541 | NM_00199E | 7489.259  | 11680.221 |
| AF064729  | 2261.114  | 2575.43   | NM_00284E   | 1625.902  | 1261.564  | NM_00018E | 18204.41  | 20924.467 |
| NM_00541E | 45613.656 | 33076.242 | U31099      | 1675.023  | 1848.722  | AY004175  | 5966.711  | 5875.34   |
| NM_012113 | 5122.721  | 4557.005  | NM_00110E   | 16956.68  | 17461.438 | M33197    | 60895.984 | 61167.961 |
| NM_00215C | 3354.918  | 3305.804  | NM_00558E   | 1392.4    | 1999.08   | NM_012327 | 7279.046  | 7100.061  |
| NM_00459E | 17015.17  | 18112.252 | NM_00207E   | 5162.035  | 6257.477  | NM_00090A | 9372.159  | 9239.466  |
| NM_01437E | 3921.717  | 4110.126  | Y08756      | 41812.363 | 51454.727 | NM_01604E | 4267.894  | 5252.357  |
| NM_01781E | 23310.438 | 23226.695 | AY007090    | 982.101   | 1132.228  | NM_00037E | 8950.072  | 9900.664  |
| AF204173  | 2453.921  | 2247.447  | NM_00643E   | 1141.521  | 984.384   | NM_00026E | 49125.813 | 50065.328 |
| J03260    | 3725.671  | 3536.729  | AV752086    | 1321.821  | 1089.234  | NM_01884E | 13301.864 | 13091.717 |
| U13738    | 5469.118  | 6349.256  | NM_01610E   | 15339.233 | 16861.998 | NM_00223E | 11148.1   | 11421.386 |
| AF068236  | 24183.842 | 27672.879 | AL137529    | 1979.892  | 2129.165  | NM_01790E | 43180.457 | 38743.051 |
| H94487    | 663.587   | 879.099   | NM_01233E   | 7044.028  | 7005.428  | NM_00681E | 47931.051 | 46346.332 |
| BG681747  | 27930.094 | 30056.801 | AK026648    | 2580.198  | 2748.782  | NM_00280E | 18294.709 | 18151.672 |
| H63077    | 433.882   | 499.203   | NM_000497   | 1959.13   | 2763.988  | M33197    | 61015.223 | 66623.055 |
| AA679352  | 13604.388 | 12770.645 | NM_017421   | 3323.297  | 3786.526  | NM_00607E | 1413.488  | 1927.051  |
| AA437291  | 479.271   | 401.89    | NM_00027E   | 1882.379  | 2549.764  | NM_004951 | 1776.931  | 1599.436  |
| X04503    | 4264.614  | 3177.916  | NM_00289E   | 26630.607 | 36309.477 | NM_00656A | 6721.165  | 6051.963  |
| D45917    | 5025.146  | 4477.03   | NM_005397   | 6096.654  | 8301.309  | NM_00480E | 2425.131  | 2249.642  |
| X52001    | 3905.299  | 3452.171  | AB014511    | 8330.167  | 10238.521 | M33197    | 59549.16  | 59727.051 |
| BI823872  | 439.841   | 465.151   | NM_00166E   | 16338.372 | 18837.465 | NM_00668C | 706.987   | 1114.63   |
| AA430552  | 1960.669  | 1743.859  | AB011100    | 4218.855  | 4586.892  | NM_00263E | 32332.273 | 39976.75  |
| X66142    | 3963.972  | 3436.336  | U61741      | 3657.987  | 4101.528  | U11036    | 762.621   | 970.004   |
| NM_00591E | 405.116   | 502.008   | NM_01240E   | 7279.072  | 8124.061  | M33197    | 61597.559 | 59467     |
| R45054    | 5672.199  | 4826.642  | M76676      | 5961.091  | 5984.844  | NM_00287E | 14907.624 | 14446.804 |
| AL117398  | 5967.441  | 5261.882  | NM_003857   | 656.187   | 800.441   | NM_01772E | 4880.042  | 4285.624  |
| AY007158  | 40025.996 | 40730.918 | AL137690    | 1255.204  | 1912.319  | AK022922  | 2151.018  | 2082.102  |



|           |           |           |             |           |           |           |           |           |
|-----------|-----------|-----------|-------------|-----------|-----------|-----------|-----------|-----------|
| NM_01839C | 7494.693  | 9361.205  | Z83804      | 4210.61   | 3504.651  | NM_00646Z | 9062.07   | 7839.438  |
| NM_00726Z | 31843.541 | 31689.551 | NM_00438E   | 3647.049  | 3647.861  | AK024750  | 14724.807 | 11837.731 |
| AF206020  | 1845.749  | 1659.674  | U67784      | 2615.105  | 3115.173  | NM_00040C | 43583.996 | 37639.5   |
| NM_01441C | 917.958   | 909.738   | NM_00736E   | 4372.706  | 4477.875  | M33197    | 59971.082 | 59455.652 |
| AF305835  | 669.448   | 857.271   | NM_00059Z   | 1135.076  | 842.747   | NM_00261Z | 7482.85   | 7084.74   |
| AF312769  | 407.009   | 312.055   | NM_016584   | 18557.908 | 15952.433 | NM_00441Z | 17158.053 | 14297.828 |
| AB020668  | 978.749   | 833.865   | NM_00015Z   | 672.906   | 568.6     | AK026945  | 15208.989 | 10096.37  |
| NM_00620Z | 2437.456  | 2945.118  | NM_00203Z   | 797.331   | 1000.483  | NM_00282Z | 4674.829  | 4783.45   |
| NM_013261 | 1296.324  | 1430.261  | AK091794    | 410.017   | 494.409   | NM_01436Z | 2710.477  | 2720.958  |
| AF309553  | 10562.847 | 10537.079 | NM_004111   | 5221.824  | 5487.271  | M33197    | 56911.695 | 59258     |
| NM_00360Z | 3776.775  | 3490.057  | AF085966    | 6347.913  | 6430.833  | NM_00139Z | 25327.285 | 22170.137 |
| NM_00613Z | 1097.17   | 1430.47   | NM_00531E   | 6527.432  | 7031.952  | AB050049  | 13166.674 | 12455.35  |
| NM_00010C | 53326.957 | 44004.582 | NM_01631E   | 6852.331  | 8954.896  | J05125    | 1077.592  | 1373.339  |
| NM_00190C | 57227.777 | 59315.391 | NM_00336Z   | 22467.885 | 27705.066 | NM_00181Z | 5177.286  | 5896.784  |
| NM_00399Z | 8264.815  | 7472.592  | NM_00005Z   | 2771.349  | 3563.125  | NM_01693Z | 1680.354  | 1968.785  |
| NM_018961 | 3147.43   | 2916.075  | NM_01834Z   | 9375.974  | 12717.438 | NM_00199Z | 4564.604  | 7361.557  |
| NM_00558E | 1935.302  | 1764.539  | AK095793    | 1422.138  | 1606.078  | BF575833  | 3212.619  | 3312.047  |
| NM_01224Z | 3471.79   | 2775.419  | NM_00317Z   | 5299.045  | 5349.647  | NM_00017Z | 1613.002  | 3386.772  |
| NM_00689E | 730.664   | 910.668   | NM_01771Z   | 1119.769  | 1480.65   | NM_01572Z | 20425.527 | 22275.65  |
| NM_00113C | 26932.529 | 24531.5   | AF064078    | 2636.791  | 3642.474  | R61452    | 2382.2    | 2906.802  |
| NM_00297Z | 2079.969  | 1954.195  | AL049688    | 3563.708  | 4100.685  | R19938    | 31362.666 | 29046.305 |
| AK023511  | 20334.479 | 20821.457 | NM_00273Z   | 3695.259  | 3840.365  | N94487    | 28352.135 | 30501.051 |
| NM_01455E | 10587.674 | 11090.638 | Z25427      | 3508.112  | 3656.036  | AI886795  | 9664.545  | 14851.167 |
| NM_00161Z | 53969.969 | 63880.285 | NM_00467Z   | 12419.541 | 13820.814 | D10495    | 4755.945  | 5920.451  |
| AK025886  | 1107.52   | 1148.174  | NM_00135Z   | 7172.909  | 9614.756  | BF344679  | 5186.485  | 5340.604  |
| NM_00305Z | 1690.096  | 1563.791  | NM_006214   | 3822.996  | 4180.133  | BG743223  | 1434.018  | 1058.071  |
| AB014514  | 3780.573  | 3980.776  | AJ010228    | 9933.759  | 10684.572 | M36634    | 2966.316  | 4711.635  |
| NM_00286Z | 14919.424 | 14750.926 | NM_00519E   | 4302.19   | 4861.21   | M14156    | 51843.852 | 51567.016 |
| NM_00356E | 5280.952  | 3905.051  | NM_01807Z   | 1174.57   | 1192.145  | U87939    | 1958.257  | 1983.439  |
| NM_00424Z | 652.463   | 664.011   | NM_006061   | 352.505   | 390.342   | U86961    | 3116.294  | 3432.62   |
| AK026315  | 629.083   | 559.021   | NM_00684E   | 56284.215 | 60632.398 | U47924    | 834.333   | 1296.457  |
| NM_00715Z | 51816.73  | 53015.172 | NM_00560Z   | 60193.641 | 62315.59  | NM_005191 | 4710.097  | 4539.739  |
| NM_003731 | 38007.105 | 28779.352 | NM_001061   | 2058.05   | 2256.19   | AK094237  | 9669.849  | 7801.453  |
| NM_00544E | 13980.196 | 11130.637 | AI075338    | 6162.067  | 5772.608  | AK056794  | 706.955   | 513.733   |
| NM_01329Z | 9882.882  | 8612.327  | BG744154    | 26756.211 | 25562.252 | L07592    | 2159.557  | 2583.293  |
| NM_00238Z | 5935.282  | 5076.161  | Z11694      | 18116.459 | 19286.004 | M33197    | 52274.91  | 57941.793 |
| NM_00006Z | 2389.641  | 2033.918  | BF98317Z    | 7087.402  | 5686.69   | AK027244  | 769.057   | 965.847   |
| AB023217  | 2601.588  | 2080.492  | Z26317      | 10782.155 | 13208.954 | L40520    | 4290.433  | 4401.455  |
| L08902    | 1708.207  | 1454.45   | X16983      | 55843.68  | 56537.281 | NM_02039Z | 772.414   | 1053.071  |
| J02639    | 24734.459 | 24415.84  | X56160      | 5223.059  | 5430.486  | BF434335  | 51905.496 | 59017.32  |
| M58050    | 9041.088  | 9457.631  | BG679991    | 2140.643  | 2250.127  | M57627    | 1456.026  | 2468.938  |
| NM_00417Z | 1298.861  | 1201.744  | H-Y 00097 I | 8454.864  | 8318.81   | NM_00299Z | 4085.58   | 6942.915  |
| NM_01211Z | 4549.875  | 4666.726  | H-M 59964   | 552.541   | 493.801   | AK026946  | 6228.921  | 7048.559  |
| NM_01539Z | 2464.168  | 3094.439  | H-Y 00711 I | 61304.996 | 59714.602 | NM_01844Z | 11590.465 | 13849.685 |
| NM_00215C | 3518.38   | 3615.219  | H-X 16707 I | 4729.578  | 5569.43   | AF086129  | 3081.133  | 4626.168  |
| NM_00459Z | 15946.11  | 17273.979 | H-U76456M   | 257.48    | 550.332   | D79994    | 3640.457  | 4310.598  |
| NM_02017Z | 962.454   | 1196.467  | AL038354    | 11782.113 | 12704.188 | NM_01445Z | 31600.914 | 35593.633 |
| NM_002264 | 4662.428  | 4536.902  | R14607      | 3589.509  | 3388.781  | AF235049  | 10811.978 | 10051.646 |
| NM_014754 | 40254.434 | 32488.477 | W84867      | 1148.024  | 1165.279  | M33197    | 60413.98  | 63842.715 |
| D49387    | 635.667   | 865.577   | NM_00571E   | 6815.603  | 6767.087  | NM_00736Z | 2898.921  | 3155.884  |
| AF050146  | 4063.447  | 3883.788  | NM_018264   | 1670.965  | 1373.597  | NM_01477Z | 6233.012  | 6096.014  |
| NM_00011E | 4439.489  | 4080.202  | NM_01458C   | 1085.641  | 674.115   | NM_00722Z | 56038.219 | 59109.684 |
| NM_00669Z | 11041.829 | 9684.87   | AB028998    | 708.738   | 518.02    | NM_00014Z | 2323.631  | 2409.667  |

|           |           |           |           |           |           |           |           |           |
|-----------|-----------|-----------|-----------|-----------|-----------|-----------|-----------|-----------|
| NM_006804 | 8776.223  | 7696.429  | NM_016608 | 2095.753  | 1992.055  | AF030107  | 53579.68  | 47820.504 |
| NM_015969 | 13328.352 | 13745.923 | NM_002858 | 6348.053  | 6645.456  | NM_000871 | 5790.087  | 5636.375  |
| NM_003051 | 3406.547  | 2933.996  | NM_004817 | 3272.152  | 3630.995  | NM_018968 | 9014.009  | 8591.828  |
| NM_145342 | 4765.537  | 4817.759  | NM_018975 | 21980.143 | 21719.881 | NM_001154 | 14565.511 | 15560.677 |
| AJ278917  | 937.713   | 933.788   | AB023215  | 32726.033 | 35754.242 | NM_000183 | 15180.328 | 14029.269 |
| AK025641  | 9728.457  | 9521.505  | NM_001284 | 29529.217 | 33803.285 | AY004175  | 5344.173  | 7134.635  |
| NM_001038 | 377.178   | 301.43    | NM_003242 | 14114.456 | 25522.621 | M33197    | 58316.016 | 63383.863 |
| AB040457  | 461.357   | 425.728   | NM_002849 | 1212.24   | 1231.718  | NM_012327 | 9834.783  | 11909.19  |
| AL117398  | 5148.771  | 4881.94   | U31099    | 1136.378  | 1226.938  | NM_018848 | 16165.274 | 14623.805 |
| AY007158  | 39050.57  | 41031.02  | NM_001105 | 20059.865 | 21635.9   | NM_002238 | 13318.431 | 12689.741 |
| NM_001720 | 577.46    | 968.496   | NM_005585 | 621.153   | 771.185   | NM_017905 | 39932.105 | 38906.492 |
| NM_018390 | 7292.277  | 9210.552  | NM_002075 | 6130.222  | 7715.735  | NM_006815 | 48374.66  | 53721.656 |
| AB037724  | 5694.208  | 6327.478  | Y08756    | 46188.477 | 54135.324 | NM_002808 | 18049.869 | 20084.555 |
| AK025086  | 2245.587  | 2229.58   | NM_005563 | 9637.924  | 14624.277 | NM_001718 | 21772.008 | 27618.803 |
| AK026151  | 4962.391  | 4795.337  | AY007090  | 625.439   | 820.708   | NM_002030 | 1517.386  | 1603.092  |
| NM_014140 | 2974.321  | 2536.99   | NM_006439 | 529.533   | 854.415   | NM_006073 | 1337.388  | 1275.572  |
| NM_002918 | 6448.834  | 6370.895  | NM_005102 | 3648.02   | 3322.04   | NM_004951 | 1905.075  | 1927.59   |
| M20700    | 7539.768  | 6070.175  | NM_004518 | 1401.535  | 1400.32   | NM_006564 | 15230.913 | 14328.298 |
| NM_001034 | 11853.893 | 11302.436 | NM_006501 | 1389.303  | 1384.771  | NM_004802 | 5036.179  | 5723.153  |
| NM_002688 | 5310.708  | 5119.038  | NM_002719 | 12078.785 | 12566.25  | NM_002983 | 23911.014 | 23159.018 |
| NM_017688 | 1174.084  | 1138.994  | AB035356  | 444.687   | 504.027   | NM_000074 | 36633.211 | 38938.605 |
| AL096734  | 1347.996  | 1589.101  | AV752086  | 1093.756  | 945.005   | U11036    | 595.582   | 595.899   |
| AK000800  | 4479.819  | 4474.622  | NM_016102 | 14516.737 | 15630.223 | NM_002412 | 619.548   | 590.488   |
| NM_018154 | 8025.764  | 8847.272  | NM_004376 | 2341.898  | 1429.31   | NM_017723 | 5850.159  | 5854.008  |
| NM_005358 | 759.273   | 632.388   | NM_000272 | 578.62    | 505.391   | NM_006462 | 8954.806  | 9616.4    |
| BC006287  | 7618.4    | 6085.549  | NM_016131 | 12449.699 | 14542.294 | AK024750  | 14675.533 | 17875.301 |
| AB023198  | 14594.34  | 12318.842 | NM_006822 | 2699.897  | 2470.501  | NM_000400 | 55133.453 | 49717.285 |
| AF304163  | 22865.646 | 18676.586 | NM_012142 | 14428.459 | 18017.18  | M33197    | 55338.918 | 57882.828 |
| NM_005231 | 10993.862 | 10685.043 | NM_016429 | 2509.718  | 2264.227  | NM_002613 | 9238.798  | 8593.198  |
| AF064729  | 1941.811  | 2002.752  | AB011100  | 3137.366  | 3811.289  | NM_004418 | 21567.922 | 19325.861 |
| NM_005412 | 43441.285 | 29793.217 | U61741    | 2771.96   | 3175.477  | U47635    | 5062.923  | 5358.527  |
| SB        | 611.173   | 173.079   | NM_012402 | 7911.76   | 9255.217  | NM_018650 | 4825.013  | 5194.196  |
| NM_021978 | 6152.98   | 5651.303  | M76676    | 6453.923  | 7465.325  | AK026945  | 14748.081 | 11957.305 |
| AF216077  | 583.297   | 631.031   | NM_003857 | 546.351   | 959.779   | NM_002828 | 5129.426  | 5555.61   |
| AK021612  | 2064.448  | 2095.679  | AL137690  | 717.681   | 1013.74   | NM_014368 | 3044.836  | 3257.95   |
| AF147342  | 1034.5    | 1244.593  | Z83804    | 3729.899  | 3894.099  | M33197    | 58185.602 | 59327.66  |
| AF088031  | 1175.509  | 1020.05   | NM_004388 | 3601.235  | 4729.792  | NM_001398 | 34395.563 | 29727.031 |
| AK002025  | 71698.508 | 71304.93  | U67784    | 2478.591  | 3258.5    | AB050049  | 13962.03  | 15312.04  |
| AK026299  | 4292.334  | 3549.78   | NM_007366 | 4743.544  | 5428.491  | J05125    | 1024.801  | 1035.262  |
| NM_017794 | 2676.692  | 2203.554  | NM_000592 | 643.325   | 741.179   | NM_005164 | 692.951   | 1027.388  |
| AK025170  | 401.627   | 298.927   | NM_016584 | 24089.287 | 27735.76  | NM_001995 | 8033.315  | 9758.327  |
| AK001478  | 499.282   | 433.075   | NM_001815 | 2869.544  | 3227.036  | NM_001993 | 2724.354  | 2622.537  |
| AK025697  | 7229.343  | 4338.513  | NM_000064 | 19665.121 | 19659.934 | BF575833  | 1053.32   | 1007.391  |
| AK021734  | 427.892   | 442.699   | NM_003264 | 677.075   | 1057.92   | R19938    | 36098.004 | 41496.969 |
| AF075028  | 540.244   | 300.571   | NM_006725 | 8781.501  | 8032.929  | D10495    | 5057.112  | 5357.957  |
| NM_021978 | 4913.221  | 1851.008  | NM_003326 | 2779.528  | 2406.479  | BF344679  | 6381.821  | 6014.45   |
| SR2       | 42419.117 | 17839.928 | NM_004568 | 55866.027 | 52786.219 | BG743223  | 1889.245  | 1582.896  |
| SR8       | 6459.321  | 3946.887  | NM_000202 | 6657.237  | 4341.43   | M36634    | 2860.338  | 3344.277  |
| SR10      | 19178.5   | 1405.589  | NM_005496 | 10249.091 | 6494.229  | M14156    | 54919.191 | 57520.164 |
| CY3Cy5    | 13978.003 | 797.8     | NM_006214 | 2602.653  | 3571.65   | U87939    | 2854.113  | 3272.635  |
| AF086041  | 2542.256  | 3230.204  | AJ010228  | 17008.902 | 16746.082 | U86961    | 4040.669  | 3969.578  |
| Y15167    | 2294.807  | 2935.605  | NM_005198 | 7378.52   | 8834.216  | U47924    | 973.879   | 1090.605  |
| AL133080  | 4611.505  | 6171.416  | AK021426  | 466.178   | 757.558   | NM_005191 | 6168.298  | 6962.002  |

|            |           |           |           |           |           |           |           |           |
|------------|-----------|-----------|-----------|-----------|-----------|-----------|-----------|-----------|
| NM_017792  | 8361.763  | 8303.349  | NM_018073 | 1841.485  | 2239.451  | AK094237  | 6831.99   | 9106.324  |
| AK025213   | 4211.573  | 3454.062  | AL137529  | 1941.948  | 2217.101  | AK056794  | 2497.057  | 2385.65   |
| NM_014949  | 3207.395  | 2987.195  | NM_012332 | 6730.284  | 7972.416  | L07592    | 2692.631  | 2546.544  |
| AL080221   | 4371.253  | 3245.844  | AK026648  | 2530.727  | 2962.851  | M33197    | 56355.293 | 56931.637 |
| AK026591   | 1675.803  | 1572.258  | NM_000497 | 1573.084  | 1812.473  | AK027244  | 775.789   | 875.534   |
| AK001889   | 4486.712  | 5472.813  | NM_017421 | 2692.874  | 3245.562  | L40520    | 3670.469  | 3577.437  |
| AK025726   | 6761.745  | 4564.428  | AK025977  | 51010.75  | 56536.832 | NM_002633 | 29916.516 | 33407.156 |
| AJ227869   | 4294.215  | 2110.07   | AK023130  | 6308.262  | 7043.536  | AF086129  | 3178.568  | 3105.047  |
| AK026189   | 772.224   | 424.686   | NM_000273 | 1045.747  | 1342.502  | D79994    | 3092.93   | 2437.757  |
| AL117613   | 5593.377  | 2667.904  | NM_002899 | 17238.025 | 22418.498 | NM_014458 | 45448.324 | 47738.43  |
| AL137753   | 7704.875  | 3643.136  | NM_000486 | 1822.079  | 2251.828  | AF235049  | 16020.931 | 19623.408 |
| AL110262   | 11126.925 | 2798.191  | BE876237  | 2311.713  | 2708.963  | M33197    | 57230.559 | 65219.238 |
| AK025627   | 1984.3    | 618.601   | NM_005397 | 3990.931  | 5726.858  | NM_007369 | 3660.994  | 4263.125  |
| AK025246   | 1847.093  | 2296.812  | NM_000806 | 8535.013  | 9862.151  | NM_014776 | 7599.012  | 7453.38   |
| AK026442   | 1079.779  | 1554.81   | NM_006320 | 2038.584  | 1809.043  | NM_006480 | 51186.539 | 55118.074 |
| AB033031   | 4577.581  | 3950.822  | AB014511  | 5190.486  | 5210.194  | NM_007223 | 56770.766 | 59076.98  |
| AK022538   | 4302.711  | 3677.341  | NM_014252 | 5349.176  | 4017.68   | NM_000145 | 2955.409  | 2551.528  |
| AK022342   | 385.062   | 338.278   | NM_001662 | 11961.808 | 10041.101 | AF030107  | 50789.832 | 50083.051 |
| AL049312   | 1265.575  | 714.738   | NM_005718 | 8312.781  | 7942.432  | NM_000871 | 7005.122  | 7955.333  |
| AL117590   | 595.573   | 224.373   | NM_018264 | 2082.321  | 2271.737  | NM_018968 | 10837.844 | 11222.498 |
| AL049357   | 4751.201  | 2103.484  | NM_014580 | 1837.877  | 2794.998  | AF086924  | 53728.016 | 58181.582 |
| unknown (4 | 1710.383  | 958.909   | AB028998  | 833.579   | 1203.389  | NM_000264 | 1061.387  | 1711.19   |
| AK022236   | 10801.104 | 8104.265  | NM_000153 | 509.588   | 490.025   | AB058740  | 45287.871 | 48814.141 |
| AK000073   | 4234.296  | 2801.505  | NM_002033 | 726.062   | 793.351   | NM_003385 | 2435.042  | 2483.141  |
| AK024773   | 605.334   | 590.758   | NM_004111 | 3208.773  | 3608.957  | NM_001888 | 2137.996  | 2268.205  |
| AF009262   | 27741.883 | 18766.176 | AF085966  | 5325.473  | 6654.974  | NM_004392 | 1552.624  | 1506.421  |
| AF050198   | 3389.303  | 2207.961  | NM_005316 | 5933.116  | 6539.02   | M33197    | 57058.984 | 61573.504 |
| AK024346   | 6276.876  | 3823.992  | NM_016316 | 4342.908  | 4929.595  | NM_001154 | 13554.292 | 15848.473 |
| AF056422   | 1122.225  | 631.697   | NM_003369 | 15405.571 | 16003.688 | NM_001819 | 4466.488  | 3877.754  |
| AK001919   | 886.906   | 321.646   | NM_000057 | 1863.113  | 2211.635  | NM_016938 | 1453.916  | 1838.115  |
| AK021535   | 884.673   | 385.169   | NM_018343 | 7253.783  | 7677.484  | NM_001663 | 4249.67   | 4449.577  |
| AK021753   | 1205.666  | 1131.936  | AK095793  | 1020.51   | 1083.684  | NM_004218 | 11696.556 | 12192.959 |
| AF116620   | 11249.771 | 7061.486  | NM_003177 | 4792.32   | 4936.226  | NM_016530 | 5146.179  | 4805.395  |
| AF293335   | 4092.24   | 3731.745  | NM_017719 | 1073.183  | 1368.219  | NM_014804 | 2149.049  | 2095.336  |
| AK024431   | 14898.195 | 12780.436 | AF064078  | 2201.599  | 3029.149  | NM_012455 | 16755.719 | 17968.877 |
| NM_018678  | 3542.672  | 3267.962  | AL049688  | 2725.119  | 2915.191  | NM_002806 | 20229.879 | 24052.596 |
| AJ008122   | 12398.646 | 8866.661  | NM_002737 | 1392.443  | 1536.099  | M33197    | 57589.152 | 63211.047 |
| NM_006220  | 2767.326  | 1859.726  | Z25427    | 2052.924  | 2014.845  | NM_001716 | 23726.754 | 31696.621 |
| AK022667   | 13618.468 | 9286.707  | NM_004672 | 9808.096  | 7591.677  | NM_002030 | 2172.741  | 2560.874  |
| AK026667   | 556.525   | 403.654   | NM_001353 | 6024.033  | 6310.963  | NM_006073 | 1576.582  | 1813.955  |
| NM_014174  | 8775.598  | 4796.494  | AF252284  | 1894.154  | 1116.846  | NM_004951 | 1913.362  | 2178.778  |
| AF147337   | 2696.492  | 1955.349  | BU727558  | 722.369   | 346.43    | NM_006564 | 19769.689 | 21529.123 |
| AK025203   | 22206.027 | 16454.758 | AK025794  | 6338.408  | 2847.134  | NM_004802 | 7407.164  | 7715.185  |
| AK026981   | 2679.688  | 1663.757  | NM_003541 | 1102.933  | 484.009   | M33197    | 56558.16  | 60931.871 |
| AL133656   | 1233.885  | 1055.87   | AK024522  | 752.057   | 515.607   | NM_002983 | 28751.684 | 23079.432 |
| AL050037   | 14588.175 | 16842.988 | NM_007198 | 1792.345  | 1344.208  | NM_000074 | 34025.473 | 32800.359 |
| AK023557   | 2310.625  | 2231.533  | M33197    | 75104.898 | 54456.324 | NM_020393 | 481.651   | 691.501   |
| AK027107   | 1023.413  | 1523.967  | AK023220  | 346.519   | 330.695   | BF434335  | 54803.531 | 56510.438 |
| AB040887   | 3706.251  | 4070.018  | AF038182  | 1243.761  | 1176.902  | M57627    | 1529.025  | 2090.977  |
| AK025196   | 1592.408  | 1672.95   | NM_016475 | 2145.738  | 1918.405  | NM_002993 | 3149.28   | 4074.842  |
| AJ227879   | 3347.021  | 3948.45   | AF086472  | 534.099   | 624.127   | AK026946  | 5715.001  | 6820.314  |
| AK024800   | 1783.953  | 1904.816  | AF252284  | 1663.627  | 1586.241  | M33197    | 58356.684 | 63379.879 |
| AK000401   | 7251.599  | 7823.832  | BU727558  | 915.329   | 799.068   | NM_003192 | 7430.347  | 8496.621  |

|           |           |           |           |           |           |           |           |           |
|-----------|-----------|-----------|-----------|-----------|-----------|-----------|-----------|-----------|
| AF305068  | 1219.965  | 1399.523  | SR3       | 17951.227 | 22672.732 | NM_01844  | 12016.277 | 15296.705 |
| D17231    | 67800.172 | 71087.906 | SR5       | 1739.696  | 2713.824  | NM_00139  | 34832.816 | 29412.611 |
| AF531295  | 2126.373  | 2454.614  | SR7       | 1874.948  | 23252.479 | AB050049  | 11005.311 | 10504.784 |
| X60484    | 1016.873  | 1184.557  | SR9       | 7517.104  | 3059.831  | J05125    | 959.785   | 1115.385  |
| AF055019  | 2040.048  | 2387.788  | CY3Cy5    | 972.807   | 203.494   | NM_005164 | 1157.731  | 1225.736  |
| NM_00352  | 14567.625 | 16163.096 | L77559    | 289.249   | 242.49    | NM_00199  | 9186.081  | 9933.107  |
| AK000229  | 2072.686  | 2078.572  | NM_00559  | 798.801   | 469.411   | NM_00018  | 18337.537 | 17116.084 |
| AF056432  | 6169.148  | 7041.014  | AK023636  | 3395.213  | 2234.206  | AY004175  | 7197.409  | 9678.474  |
| NM_01333  | 7782.026  | 9003.106  | D25272    | 547.593   | 441.463   | M33197    | 54141.477 | 60955.84  |
| X56199    | 910.317   | 727.574   | M33197    | 83088.438 | 62568.402 | NM_012327 | 10086.772 | 10479.97  |
| NM_00519  | 4768.463  | 3853.853  | NM_02016  | 508.808   | 339.574   | NM_000904 | 11147.144 | 11112.404 |
| AL162006  | 1582.511  | 1680.286  | AL832699  | 4018.432  | 3058.621  | NM_01604  | 6034.666  | 6984.53   |
| NM_017971 | 4570.787  | 5184.003  | NM_012191 | 590.206   | 452.682   | NM_00037  | 7203.285  | 6532.731  |
| AF054998  | 655.469   | 738.326   | M33197    | 68968.203 | 54400.32  | NM_00026  | 44490.297 | 50569.746 |
| NM_00083  | 789.19    | 1058.695  | AL359577  | 632.514   | 807.205   | NM_01884  | 18164.926 | 12611.283 |
| NM_01475  | 5746.689  | 8514.635  | NM_01813  | 3067.542  | 2972.965  | M33197    | 55643.699 | 61103.07  |
| NM_01591  | 1839.608  | 1925.87   | NM_014871 | 1256.446  | 1262.195  | M16796    | 1057.406  | 763.681   |
| NM_00046  | 3433.156  | 2589.494  | M33197    | 79702.797 | 67975.977 | AF279890  | 20800.984 | 22035.75  |
| AB002339  | 8927.551  | 9418.315  | AL137552  | 2275.26   | 3036.229  | NM_00223  | 14303.817 | 14785.445 |
| NM_005104 | 27134.256 | 25871.797 | M33197    | 59899.918 | 39435.68  | NM_01206  | 12837.013 | 14627.54  |
| NM_00688  | 49262.605 | 42808.398 | AK024779  | 624.776   | 341.993   | NM_00168  | 57253.449 | 62379.578 |
| AL137423  | 10705.755 | 10952.046 | AK024406  | 399.541   | 425.406   | NM_016601 | 5044.368  | 5396.2    |
| NM_00706  | 4016.561  | 5348.63   | AK024568  | 6659.759  | 5531.688  | NM_01790  | 43649.367 | 43835.688 |
| AL117568  | 8053.921  | 10194.982 | AK024873  | 450.63    | 304.405   | NM_00681  | 50521.906 | 54661.785 |
| NM_00084  | 599.347   | 1130.512  | M33197    | 67774.438 | 62435.215 | M33197    | 54119.484 | 58783.211 |
| S71805    | 2169.79   | 3519.875  | AK024981  | 17072.84  | 10876.286 | AK027244  | 967.017   | 974.921   |
| NM_018391 | 4930.771  | 5562.352  | AK027246  | 597.103   | 629.053   | L40520    | 3640.413  | 3292.151  |
| U90917    | 1564.368  | 1292.628  | U80766    | 1828.008  | 1718.363  | NM_00263  | 34842.113 | 34544.961 |
| AK023372  | 13657.476 | 9374.619  | AK001638  | 712.195   | 898.11    | U11036    | 844.124   | 1589.085  |
| AF086527  | 872.944   | 529.276   | AF161386  | 8847.693  | 7948.001  | M33197    | 53428.613 | 56667.285 |
| U21072    | 2910.613  | 2418.766  | AL365369  | 1999.393  | 1851.243  | NM_00287  | 16570.961 | 17587.621 |
| AK024377  | 1183.277  | 1028.965  | AK025454  | 2735.009  | 2666.936  | NM_01772  | 6094.53   | 5343.202  |
| U38438    | 673.744   | 624.477   | M33197    | 69158.414 | 67578.594 | AK022922  | 2888.479  | 1816.018  |
| AL137461  | 453.216   | 534.467   | X05826    | 8149.584  | 9567.182  | NM_00646  | 12212.132 | 10940.251 |
| AF114264  | 3231.209  | 4722.312  | Y11608    | 322.008   | 332.006   | AK024750  | 15124.96  | 11495.17  |
| NM_017514 | 1004.14   | 542.385   | AJ001872  | 3430.558  | 3814.405  | NM_00040  | 50784.191 | 50195.695 |
| NM_01897  | 5600.446  | 5307.242  | M33197    | 67791.25  | 68589.594 | M33197    | 55454.488 | 57709.715 |
| AB037828  | 1513.743  | 1948.418  | M33197    | 64093.09  | 50965.766 | NM_00261  | 9532.704  | 9821.777  |
| AB023210  | 3075.341  | 2535.103  | AL137556  | 836.588   | 481.796   | NM_00441  | 23188.146 | 22407.283 |
| AB037786  | 2257.35   | 1860.155  | NM_01469  | 3027.945  | 1937.642  | U47635    | 6841.139  | 7041.387  |
| NM_00364  | 20542.455 | 19888.693 | AL359055  | 1256.925  | 956.313   | NM_01865  | 8890.157  | 10239.331 |
| AB037735  | 1711.093  | 1572.387  | NM_01490  | 1589.45   | 1189.54   | AK026945  | 17774.26  | 13710.369 |
| AK002177  | 2946.03   | 2425.742  | AK025931  | 36129.715 | 19282.078 | NM_00282  | 5065.543  | 5897.346  |
| AK024429  | 2052.818  | 1963.775  | M33197    | 1920.855  | 1365.839  | NM_01436  | 3481.456  | 4165.312  |
| NM_00349  | 29623.494 | 35123.762 | AK021972  | 415.151   | 372.502   | M33197    | 58701.953 | 59242.762 |
| AB000509  | 5474.008  | 7030.956  | M33197    | 67361.859 | 68433.078 | CY3Cy5    | 8351.76   | 767.317   |
| AB018314  | 3455.972  | 4738.768  | AK001083  | 1797.553  | 2526.099  | AL834159  | 6701.712  | 8200.161  |
| NM_00437  | 1058.302  | 1222.732  | AK000185  | 1139.938  | 1385.162  | NM_000164 | 55381.262 | 48983.563 |
| AJ238899  | 1543.44   | 1581.058  | NM_01796  | 549.444   | 831.716   | AK025253  | 2277.552  | 2099.713  |
| NM_018037 | 8605.568  | 5678.038  | NM_017834 | 399.927   | 540.208   | AF131777  | 1390.996  | 1653.954  |
| NM_001110 | 5674.629  | 3679.31   | AK000865  | 1005.051  | 1588.157  | AK025004  | 1991.219  | 2521.486  |
| NM_00322  | 565.4     | 635.378   | M33197    | 60193.668 | 41724.59  | AL136818  | 3457.241  | 5789.411  |
| NM_000841 | 1810.049  | 1136.254  | AF147349  | 6857.026  | 3959.782  | AF146798  | 7699.791  | 10449.399 |

|           |           |           |           |           |           |           |           |           |
|-----------|-----------|-----------|-----------|-----------|-----------|-----------|-----------|-----------|
| NM_00124E | 3632.454  | 1785.081  | AL050346  | 10157.048 | 7177.026  | AK022049  | 1429.819  | 2183.863  |
| AJ008139  | 12754.247 | 15193.163 | AK001520  | 5047.113  | 3419.168  | AF086517  | 23129.252 | 24070.313 |
| NM_00432E | 8928.293  | 8208.198  | AK021731  | 282.551   | 325.914   | AK025740  | 35912.832 | 31951.566 |
| NM_00088E | 1033.411  | 1656.718  | D90070    | 14859.33  | 8127.923  | AK000311  | 5293.545  | 5144.41   |
| NM_004577 | 10549.437 | 10280.107 | M33197    | 52111.297 | 29131.482 | AK021747  | 2756.279  | 2657.838  |
| NM_015507 | 382.971   | 430.706   | AF086179  | 2218.985  | 1544.914  | AK025640  | 11471.482 | 9607.706  |
| AF007157  | 14486.948 | 13618.521 | AK025807  | 2688.673  | 1876.724  | AF131772  | 425.101   | 379.181   |
| D38553    | 6169.688  | 7301.651  | AK022478  | 264.055   | 245.763   | AL834159  | 6933.616  | 6230.745  |
| NM_00617C | 11983.177 | 13018     | NM_018381 | 765.518   | 706.535   | NM_000164 | 53444.41  | 45693.344 |
| NM_01429E | 16928.762 | 12398.864 | M33197    | 67554.602 | 68143.516 | SR3       | 43157.199 | 61804.613 |
| AK001581  | 3356.93   | 2441.17   | AK026277  | 4934.401  | 5836.425  | SR5       | 5531.622  | 9183.876  |
| NM_00586E | 2201.06   | 1009.316  | U10509    | 1595.747  | 2250.121  | SR7       | 4299.033  | 49105.09  |
| NM_00054E | 4711.603  | 2954.492  | NM_00716E | 28647.887 | 31786.535 | SR9       | 11564.164 | 2621.687  |
| AK022541  | 10500.525 | 6215.915  | NM_01401E | 7337.167  | 9469.523  | CY3Cy5    | 7089.633  | 606.421   |
| AB002297  | 8138.985  | 4937.341  | AF085956  | 2045.918  | 3301.642  | L33807    | 2503.042  | 2939.424  |
| NM_00502C | 13248.959 | 8903.21   | NM_01911E | 1405.431  | 2117.407  | NM_016534 | 4503.416  | 4685.17   |
| NM_014077 | 11466.041 | 11996.51  | AF147318  | 1012.732  | 2022.348  | AB021923  | 4565.212  | 4118.871  |
| NM_01841E | 5483.592  | 5966.681  | L37699    | 1144.614  | 509.854   | AK024240  | 1641.487  | 1197.9    |
| NM_01232E | 9966.181  | 11241.697 | M33197    | 56838.723 | 54946.066 | NM_01645E | 75244.273 | 64222.141 |
| M14087    | 6048.696  | 5177.229  | AL050173  | 1153.127  | 627.653   | AK022677  | 4231.268  | 5134.937  |
| AJ272324  | 464.791   | 514.162   | D80002    | 1138.082  | 726.808   | AL137645  | 38672.266 | 33113.453 |
| NM_00088E | 5032.787  | 4272.681  | U17637    | 4127.3    | 3997.198  | AK022894  | 2782.839  | 2966.092  |
| X15880    | 35449.227 | 21937.678 | AF207831  | 964.263   | 839.407   | AF217993  | 6761.521  | 6456.12   |
| X04366    | 5358.07   | 5196.502  | AK023174  | 235.149   | 166.253   | AF131823  | 1091.357  | 955.394   |
| NM_00050E | 6666.534  | 10744.94  | NM_00354E | 253.229   | 227.856   | AK026324  | 14481.681 | 14956.855 |
| NM_01865E | 2704.71   | 3353.305  | M33197    | 58606.949 | 35552.555 | AK024518  | 27743.844 | 21340.463 |
| NM_00066E | 7261.335  | 5912.256  | NM_01827E | 819.8     | 576.762   | AK024586  | 1924.172  | 1190.509  |
| NM_003481 | 9736.491  | 13100.26  | AF086125  | 498.365   | 489.847   | AK025017  | 8423.405  | 8798.014  |
| AB002347  | 656.913   | 543.088   | AK023547  | 325.532   | 433.619   | AK024534  | 599.331   | 664.173   |
| AB046814  | 2209.818  | 2200.263  | U67847    | 1128.624  | 1224.912  | AK024914  | 5811.831  | 5597.626  |
| NM_01777E | 581.397   | 836.506   | AL137321  | 5326.748  | 5007.153  | AK025346  | 65124.422 | 66005.961 |
| NM_017664 | 9224.075  | 6631.938  | M33197    | 67804.125 | 68368.609 | AK022583  | 9044.265  | 9062.696  |
| AK025523  | 1278.148  | 1136.87   | AK024207  | 4529.743  | 6066.191  | AL359062  | 8333.337  | 7347.633  |
| NM_00705E | 7724.583  | 5412.909  | AK021843  | 1060.438  | 1544.318  | AK026869  | 4776.85   | 3734.209  |
| NM_00687C | 12767.464 | 12529.087 | AF075025  | 544.687   | 1128.311  | AK023150  | 668.755   | 626.041   |
| NM_00735E | 10393.507 | 8959.97   | AF116623  | 263.694   | 484.171   | AK022192  | 755.953   | 1012.067  |
| L13283    | 6872.497  | 4332.203  | AF088008  | 1800.899  | 2596.88   | NM_01909E | 64704.801 | 64336.344 |
| NM_013327 | 6475.163  | 7987.511  | AK023043  | 478.418   | 910.351   | Y12020    | 65887.547 | 60758.281 |
| AF303888  | 19491.811 | 16414.475 | NM_00468E | 4181      | 2182.066  | AJ001905  | 5376.151  | 4998.599  |
| NM_000077 | 1632.081  | 1379.859  | AB037725  | 419.626   | 252.055   | U17635    | 1675.828  | 1348.177  |
| AF176646  | 402.863   | 391.022   | M33197    | 57411.27  | 34681.645 | AF086198  | 34992.809 | 29445.553 |
| NM_00367E | 2990.892  | 2144.094  | NM_01771E | 341.625   | 217.015   | AL137382  | 68459.93  | 65148.066 |
| NM_002574 | 68388.008 | 59259.258 | NM_00486C | 3276.934  | 2505.761  | AK024599  | 4131.87   | 3810.256  |
| NM_012391 | 4810.671  | 6101.922  | AF217190  | 7035.72   | 4194.998  | NM_01445C | 9632.949  | 11600.37  |
| NM_005254 | 7999.846  | 12242.663 | AB028981  | 36054.656 | 22231.998 | AB007975  | 988.159   | 1072.037  |
| NM_005611 | 3184.859  | 3836.797  | NM_00680C | 1810.665  | 995.559   | AK024152  | 2902.549  | 2446.078  |
| AF141655  | 1923.533  | 2673.099  | NM_00272E | 3728.482  | 3347.356  | AL137603  | 731.917   | 496.269   |
| NM_00734E | 3370.927  | 3066.522  | M33197    | 59357.992 | 58450.285 | AK021821  | 1379.877  | 1316.64   |
| NM_00483C | 1647.756  | 1954.378  | AK025266  | 2171.171  | 1790.272  | AL049328  | 1550.322  | 1681.091  |
| AF132362  | 65020.426 | 71921.672 | AK001843  | 1775.02   | 1467.248  | AK000030  | 1429.09   | 1771.008  |
| NM_007007 | 21287.488 | 22634.178 | AK000548  | 27099.211 | 22419.07  | NM_01793E | 1630.282  | 1799.981  |
| NM_00638E | 2855.271  | 3417.903  | NM_00392C | 13735.947 | 13907.417 | AK000910  | 5204.085  | 4806.416  |
| NM_00655E | 36691.594 | 32918.348 | NM_004787 | 18608.119 | 16914.275 | AF252280  | 41030.555 | 34290.551 |

|             |           |           |           |           |           |           |           |           |
|-------------|-----------|-----------|-----------|-----------|-----------|-----------|-----------|-----------|
| NM_004501   | 51479.137 | 41139.203 | AF087984  | 3070.225  | 3860.782  | AK000107  | 869.516   | 699.83    |
| NM_004966   | 25550.711 | 24149.623 | AF009302  | 1195.382  | 1509.067  | AK000951  | 1701.033  | 1050.543  |
| NM_00670C   | 3352.46   | 3311.176  | M33197    | 68522.266 | 68368.453 | AF130064  | 58628.613 | 46330.945 |
| NM_00644E   | 25107.119 | 20663.955 | AK022273  | 4516.27   | 7191.553  | AK025184  | 1119.195  | 738.931   |
| NM_01210E   | 19472.441 | 13878.896 | NM_015882 | 972.549   | 1315.424  | AK001959  | 18658.801 | 20094.027 |
| AF019633    | 4978.275  | 3852.953  | AK024271  | 1011.88   | 1517.163  | U36217    | 7748.477  | 9544.817  |
| AB002361    | 2417.628  | 2041.415  | AK021650  | 4296.153  | 8602.105  | AL389880  | 565.766   | 807.444   |
| NM_01806C   | 17237.045 | 12481.01  | AL050210  | 5469.819  | 9484.34   | AL157452  | 649.098   | 620.855   |
| NM_01423E   | 13107.251 | 8927.07   | NM_004132 | 1625.179  | 1064.371  | AK024155  | 52080.293 | 43430.438 |
| NM_017662   | 11109.919 | 7981.007  | NM_014844 | 1714.611  | 1160.322  | AL359334  | 30740.805 | 26771.857 |
| U88837      | 5698.327  | 6003.181  | M33197    | 63978.227 | 57690.16  | AK027095  | 2304.695  | 2307.382  |
| NM_01744E   | 44849.875 | 21831.215 | NM_018492 | 2780.345  | 2054.634  | AF062097  | 3643.909  | 3592.793  |
| NM_017582   | 23087.861 | 18612.082 | NM_001346 | 1537.292  | 1176.678  | BC030949  | 5579.84   | 7778.069  |
| NM_01523E   | 8617.508  | 5826.211  | NM_003149 | 895.071   | 738.02    | AF116615  | 4910.812  | 6586.159  |
| AK026962    | 4925.744  | 2977.697  | NM_003377 | 6138.128  | 4035.871  | U17636    | 63877.172 | 68005.438 |
| D00265      | 62664.844 | 69738.938 | NM_00222C | 2798.073  | 2035.428  | NM_01854E | 11460.511 | 16589.27  |
| NM_00077E   | 784.751   | 1147.363  | AB033034  | 3553.924  | 2281.015  | U52699    | 63483.215 | 64940.066 |
| NM_004552   | 74226.648 | 68915.188 | D38169    | 3604.392  | 2895.093  | S71613    | 2190.474  | 2171.636  |
| NM_000143   | 5269.856  | 7369.091  | M33197    | 60115.406 | 64462.563 | AJ011910  | 17157.113 | 13684.017 |
| AF317889    | 1175.989  | 1577.112  | AJ293294  | 3701.19   | 4438.775  | AK024378  | 2044.567  | 1676.329  |
| NM_006294   | 66943.336 | 71695.289 | NM_018171 | 966.455   | 1096.504  | NM_01402E | 7118.304  | 7180.759  |
| NM_003743   | 2670.771  | 3095.673  | NM_002447 | 12040.412 | 12210.007 | D61703    | 20618.639 | 22500.943 |
| AB037797    | 2784.087  | 2782.599  | NM_01414E | 7981.542  | 8289.298  | AL050376  | 1700.584  | 2111.162  |
| NM_00152C   | 5098.096  | 5220.089  | NM_014141 | 4798.964  | 6303.458  | AL359652  | 2536.163  | 3484.904  |
| AL050367    | 750.497   | 685.332   | NM_002223 | 2315.772  | 3541.028  | AK022423  | 3203.447  | 3303.519  |
| NM_01787C   | 910.963   | 876.214   | M33197    | 61965.754 | 69230.391 | BF509267  | 3951.398  | 3749.433  |
| AL133633    | 7503.569  | 6422.048  | NM_00549C | 17762.867 | 27056.613 | NM_00245E | 8089.705  | 8926.756  |
| NM_012252   | 4304.629  | 3637.359  | NM_003151 | 2254.487  | 2977.17   | NM_00295E | 11176.131 | 13076.015 |
| AK026817    | 3314.7    | 2736.488  | NM_006811 | 4533.557  | 7709.417  | AB046773  | 579.864   | 908.728   |
| AL157442    | 44172.5   | 29165.662 | NM_005601 | 2512.616  | 4746.247  | AK000899  | 22000.488 | 29997.328 |
| AB011148    | 4968.447  | 4688.213  | NM_016151 | 22910.025 | 31808.453 | NM_017991 | 2020.9    | 2509.788  |
| AL389938    | 11832.907 | 10060.873 | AK026270  | 731.352   | 527.192   | L37198    | 3235.557  | 3216.946  |
| NM_00194E   | 65428.594 | 71316.406 | NM_00455E | 8026.643  | 5351.398  | U67822    | 1499.378  | 1576.887  |
| NM_007084   | 1818.51   | 1752.611  | D90075    | 1480.666  | 1072.018  | AK021921  | 884.508   | 1086.344  |
| M97191      | 16479.639 | 15469.342 | M33197    | 60970.402 | 49621.852 | AK025431  | 801.387   | 814.061   |
| AK023015    | 17997.863 | 9285.616  | NM_014857 | 825.893   | 651.097   | AK023662  | 3015.885  | 3281.441  |
| NM_003457   | 17540.43  | 10440.215 | AK023827  | 3511.967  | 2444.609  | AF086274  | 62191.359 | 62866.164 |
| AV752086    | 2271.561  | 3079.271  | AK021702  | 3003.168  | 1961.056  | AK023682  | 2473.645  | 2359.78   |
| NM_016102   | 8058.414  | 15010.426 | NM_00388E | 2029.023  | 1490.912  | AK024024  | 2827.604  | 3276.703  |
| NM_00437E   | 6400.542  | 8130.634  | AL161977  | 646.137   | 462.201   | AF000991  | 726.998   | 759.489   |
| NM_000272   | 923.367   | 995.263   | NM_01644E | 4182.707  | 3737.051  | AK000685  | 16685.838 | 15858.252 |
| NM_006061   | 463.428   | 680.448   | NM_00393E | 1394.78   | 1556.646  | AK023543  | 1093.271  | 1398.031  |
| NM_00684E   | 57973.035 | 70205.938 | M33197    | 63286.625 | 68013.07  | BE706519  | 1550.643  | 1859.48   |
| NM_005603   | 13259.094 | 13408.317 | NM_00268E | 1137.869  | 1153.894  | NM_01909E | 13657.59  | 13430.225 |
| NM_001061   | 1558.445  | 1879.287  | NM_02036E | 245.733   | 342.036   | NM_01472E | 2440.743  | 2568.5    |
| BG744154    | 40501.625 | 33896.582 | NM_00441E | 3311.508  | 3168.244  | NM_006892 | 5599.287  | 7899.122  |
| Z11694      | 27980.961 | 27284.408 | NM_00727E | 14534.07  | 13722.395 | NM_019117 | 2767.014  | 2590.202  |
| X16983      | 5639.464  | 5401.405  | NM_00521E | 9299.193  | 12265.277 | NM_01830E | 4141.331  | 4004.302  |
| X56160      | 687.708   | 684.539   | NM_004723 | 3055.258  | 4588.855  | NM_01765E | 12265.081 | 7890.315  |
| H-Y 00097 I | 14765.834 | 10600.439 | M33197    | 60582.016 | 64512.113 | NM_01867E | 26871.451 | 23321.477 |
| H-M 59964   | 438.708   | 448.702   | NM_018413 | 1365.428  | 2763.578  | NM_016643 | 1011.41   | 775.33    |
| H-Y 00711 I | 66599.367 | 71318.328 | AB018299  | 20591.809 | 26391.92  | NM_00677E | 10618.204 | 8910.015  |
| H-X 16707 I | 2495.735  | 1896.145  | NM_00524E | 4980.807  | 7371.553  | NM_019847 | 2846.197  | 2705.002  |

|           |           |           |           |           |           |           |           |           |
|-----------|-----------|-----------|-----------|-----------|-----------|-----------|-----------|-----------|
| H-U76456M | 366.677   | 367.896   | NM_002941 | 1077.137  | 1804.096  | D17093    | 26658.398 | 23250.18  |
| AL038354  | 17802.486 | 17603.363 | AK025605  | 1778.219  | 1300.293  | AK022784  | 673.793   | 563.355   |
| W84867    | 830.933   | 847.957   | NM_003783 | 547.558   | 367.654   | AL117521  | 7009.523  | 7023.134  |
| BF245026  | 1118.272  | 897.21    | NM_007000 | 2986.489  | 1804.31   | NM_000731 | 680.435   | 679.588   |
| NM_000592 | 1034.217  | 1549.603  | M23161    | 5635.405  | 3769.193  | AK021913  | 30897.955 | 28869.441 |
| NM_016584 | 7975.694  | 8258.631  | NM_006100 | 596.099   | 532.821   | AL137489  | 38910.559 | 40190.945 |
| NM_001815 | 1712.262  | 1790.822  | NM_003197 | 5749.113  | 3610.971  | AF009311  | 13976.162 | 14313.77  |
| NM_000064 | 4890.547  | 5412.89   | AF176705  | 5893.561  | 3590.282  | S73397    | 4619.046  | 5295.799  |
| NM_003264 | 1250.131  | 1485.425  | D29012    | 12824.531 | 9334.342  | AK023939  | 554.061   | 614.327   |
| NM_006725 | 1065.188  | 1225.953  | NM_012179 | 12441.489 | 9709.618  | AL050219  | 1259.411  | 1139.139  |
| NM_003326 | 3142.148  | 3628.532  | NM_002793 | 3492.826  | 3812.749  | AK023856  | 2363.166  | 2321.304  |
| NM_004566 | 55902.758 | 63053.035 | NM_004788 | 1622.13   | 1832.011  | AB014557  | 6119.937  | 6497.085  |
| NM_000202 | 18778.494 | 18006.385 | M33197    | 57674.992 | 64231.504 | NM_005578 | 7919.168  | 5290.281  |
| NM_005496 | 20532.904 | 16793.77  | AL442083  | 4506.98   | 5126.95   | NM_003653 | 22446.367 | 20164.691 |
| NM_016608 | 1004.341  | 1168.914  | D63487    | 4672.903  | 5074.706  | NM_002953 | 12102.84  | 9116.653  |
| NM_002858 | 10526.01  | 10120.335 | AK097791  | 5222.716  | 7371.233  | NM_002187 | 2010.658  | 1735.537  |
| NM_004817 | 3985.361  | 4252.103  | NM_020367 | 475.25    | 815.986   | NM_014246 | 23875.775 | 25555.549 |
| NM_018975 | 30649.34  | 22756.219 | AK022705  | 1642.44   | 2222.499  | NM_014856 | 1392.563  | 1192.909  |
| AB023215  | 7141.151  | 6618.343  | NM_016404 | 9650.683  | 12420.093 | AF311912  | 720.052   | 542.336   |
| NM_001284 | 48268.184 | 35749.367 | L03426    | 1899.136  | 3377.044  | NM_001116 | 754.329   | 615.004   |
| NM_003242 | 8406.384  | 8552.108  | M33197    | 64826.938 | 68709.109 | BC035395  | 19632.449 | 14448.303 |
| NM_002849 | 1001.112  | 777.394   | NM_020163 | 2115.275  | 2804.315  | NM_001703 | 41587.629 | 28612.293 |
| U31099    | 456.276   | 997.679   | NM_004324 | 2291.828  | 3336.339  | NM_020126 | 8195.96   | 5661.898  |
| NM_001105 | 2319.889  | 1518.769  | NM_005614 | 17470.311 | 27577.852 | NM_013982 | 8773.22   | 7113.506  |
| NM_005585 | 1205.867  | 1087.091  | AJ133115  | 4472.463  | 3248.542  | NM_005046 | 7296.727  | 6018.465  |
| NM_002075 | 1919.991  | 1711.96   | X51630    | 7878.852  | 5786.904  | NM_003882 | 748.391   | 630.812   |
| Y08756    | 1160.191  | 1169.697  | NM_005056 | 1565.245  | 977.94    | NM_004630 | 17595.184 | 14644.762 |
| AY007090  | 1475.355  | 519.34    | NM_001965 | 611.789   | 451.409   | AK023001  | 15711.088 | 12729.665 |
| NM_006439 | 756.782   | 1394.126  | AF208502  | 10482.552 | 6761.125  | NM_014826 | 23441.451 | 21059.586 |
| NM_018073 | 2104.775  | 2754.701  | M33197    | 58860.16  | 64711.574 | AF201947  | 2500.703  | 3071.802  |
| AL137529  | 2796.01   | 3347.447  | AF264750  | 27198.283 | 18440.275 | U01147    | 4363.051  | 3309.993  |
| NM_012332 | 7254.012  | 8130.567  | NM_006980 | 1781.43   | 1560.178  | NM_004040 | 38092.035 | 30282.262 |
| AK026648  | 4756.172  | 7440.495  | AK023904  | 6696.047  | 5465.048  | NM_006116 | 10965.382 | 8452.776  |
| NM_000497 | 2790.203  | 3678.325  | NM_017956 | 6632.168  | 7138.826  | NM_005456 | 1177.557  | 1101.985  |
| NM_017421 | 6017.469  | 6060.536  | NM_017826 | 337.825   | 426.396   | BF219403  | 58417.516 | 61102.102 |
| NM_000273 | 471.023   | 835.703   | NM_016496 | 1252.496  | 1319.589  | NM_016119 | 8486.857  | 7135.261  |
| NM_002896 | 7517.652  | 8241.037  | NM_014309 | 7675.783  | 7783.759  | AK075450  | 6820.566  | 5527.078  |
| NM_005397 | 8235.599  | 8602.943  | M33197    | 58176.031 | 52082.176 | AB037795  | 2907.712  | 1646.346  |
| AB014511  | 11811.098 | 11499.738 | NM_004094 | 2515.542  | 3467.158  | D43949    | 5586.531  | 2585.707  |
| NM_001662 | 28125.996 | 26087.879 | NM_020236 | 2755.216  | 3023.062  | AF111849  | 33557.43  | 21489.752 |
| AB011100  | 3832.859  | 3867.48   | AK027059  | 11882.23  | 15176.759 | AK022975  | 1702.032  | 1047.603  |
| U61741    | 2989.368  | 2706.643  | AF151109  | 22707.117 | 24203.623 | NM_015344 | 2592.105  | 1923.908  |
| NM_012402 | 10353.141 | 9270.712  | NM_015414 | 58879.078 | 66193.75  | NM_004288 | 6418.789  | 5931.74   |
| M76676    | 8290.556  | 7314.725  | L34070    | 11413.423 | 15220.604 | X07695    | 1433.415  | 1245.938  |
| NM_003857 | 1441.835  | 1234.882  | M33197    | 63518.156 | 68531.797 | D87458    | 4737.035  | 5241.169  |
| AL137690  | 1913.807  | 1474.753  | NM_016219 | 13497.703 | 19758.477 | AK021750  | 18997.889 | 16701.076 |
| Z83804    | 5844.526  | 3867.743  | NM_004751 | 972.471   | 1800.714  | NM_003626 | 3228.694  | 2694.484  |
| NM_004386 | 2921.377  | 2241.117  | NM_001865 | 55224.777 | 46866.703 | NM_006932 | 1083.641  | 718.977   |
| U67784    | 2749.616  | 2496.202  | NM_006441 | 6844.254  | 4273.537  | AK023594  | 5246.035  | 4693.275  |
| NM_007366 | 3266.707  | 1896.69   | NM_001918 | 2472.857  | 1795.195  | AB032989  | 1914.24   | 1944.638  |
| NM_014580 | 1422.386  | 1674.095  | NM_018245 | 9540.184  | 6896.881  | AB010099  | 56280.48  | 53617.035 |
| AB028998  | 2966.838  | 3852.187  | M33197    | 59182.164 | 56256.391 | AB039920  | 25373.459 | 21536.67  |
| NM_000153 | 1685.649  | 1800.327  | AF252390  | 1391.555  | 1039.97   | AB046782  | 4541.934  | 3459.223  |

|             |           |           |           |           |           |           |           |           |
|-------------|-----------|-----------|-----------|-----------|-----------|-----------|-----------|-----------|
| NM_002033   | 1636.058  | 2112.854  | NM_012117 | 5665.626  | 4756.143  | AF300612  | 64526.977 | 64910.48  |
| AK091794    | 865.809   | 1222.566  | D17130    | 57371.203 | 48129.793 | AF208005  | 2984.553  | 3110.665  |
| NM_004111   | 1658.108  | 2199.255  | X76302    | 3669.65   | 3160.779  | NM_002643 | 5312.295  | 3107.511  |
| AF085966    | 7714.405  | 8570.426  | AK026276  | 1047.955  | 933.115   | NM_017807 | 6158.009  | 3619.603  |
| NM_005316   | 9089.133  | 10416.509 | M33197    | 58331.793 | 64248.543 | NM_014746 | 1226.355  | 896.44    |
| NM_016316   | 5910.198  | 6791.117  | X52354    | 1755.562  | 2828.988  | NM_002786 | 53410.598 | 44943.648 |
| NM_003366   | 17790.955 | 21197.736 | NM_005413 | 564.335   | 678.767   | NM_000462 | 26557.902 | 23972.107 |
| NM_000057   | 3475.958  | 3510.112  | NM_002315 | 3720.615  | 5206.921  | NM_003336 | 14091.71  | 8262.063  |
| NM_018343   | 10123.618 | 8647.498  | AK024191  | 1147.643  | 1597.822  | NM_005805 | 40907.141 | 28775.123 |
| AK095793    | 1268.609  | 1003.529  | NM_006606 | 4067.031  | 6028.055  | NM_004181 | 41090.961 | 24780.936 |
| NM_003177   | 8842.684  | 6277.512  | NM_000457 | 3641.759  | 6777.949  | NM_003900 | 25825.928 | 18956.598 |
| NM_017719   | 1782.156  | 1760.069  | M33197    | 252.132   | 368.125   | NM_003337 | 4815.046  | 3892.586  |
| AF064078    | 4962.351  | 5970.401  | M34356    | 1461.891  | 2344.954  | AF298152  | 6166.648  | 3524.748  |
| AL049688    | 2946.662  | 2636.385  | M33197    | 60469.828 | 64709.207 | AF117233  | 12203.246 | 10112.431 |
| NM_002737   | 2194.681  | 2117.969  | NM_014623 | 7799.923  | 5962.142  | NM_015846 | 2750.509  | 2768.932  |
| Z25427      | 5048.267  | 5131.704  | NM_007244 | 11682.383 | 8088.028  | NM_001723 | 3636.757  | 3988.46   |
| NM_004672   | 18596.838 | 17430.914 | M30629    | 5536.275  | 4245.353  | NM_016016 | 2454.782  | 3040.314  |
| NM_001353   | 3141.707  | 2261.238  | AF193873  | 4028.994  | 2901.089  | M94362    | 47582.598 | 44744.191 |
| NM_006214   | 5282.188  | 4368.788  | NM_002626 | 2118.101  | 1544.917  | AK024707  | 2905.31   | 3289.655  |
| AJ010228    | 12717.302 | 8449.411  | M23575    | 757.772   | 651.551   | NM_014255 | 2312.898  | 2394.211  |
| NM_005196   | 4719.057  | 5206.505  | AA190729  | 2410.591  | 2278.759  | AK022909  | 5264.266  | 5495.191  |
| NM_004376   | 6825.757  | 6429.846  | BF974315  | 6710.708  | 5806.041  | NM_006530 | 16608.783 | 17803.418 |
| NM_000272   | 1102.002  | 1216.177  | AI652705  | 3359.093  | 3747.856  | NM_003587 | 64728.992 | 68613.172 |
| NM_006061   | 529.467   | 741.619   | AA973397  | 2246.373  | 2339.536  | X90978    | 1757.882  | 1775.09   |
| NM_006846   | 63454.27  | 71250.75  | AA569974  | 754.479   | 1023.077  | AF217226  | 28532.305 | 24379.209 |
| NM_005603   | 11513.017 | 11238.731 | AA923615  | 857.271   | 1985.291  | AL359578  | 841.644   | 804.888   |
| NM_001061   | 2572.195  | 4261.51   | AA446028  | 559.909   | 1014.92   | NM_005522 | 825.739   | 746.941   |
| BG744154    | 44814.34  | 50648.344 | M80583    | 1087.371  | 932.932   | NM_005760 | 20987.668 | 21275.186 |
| Z11694      | 23456.588 | 27290.459 | AW009565  | 4031.811  | 5388.679  | NM_014212 | 3639.325  | 3451.73   |
| X16983      | 6153.894  | 6460.26   | X07767    | 2882.33   | 4377.38   | NM_007265 | 5122.123  | 6818.171  |
| X56160      | 900.565   | 605.541   | X65293    | 668.012   | 1188.498  | AK023639  | 23116.783 | 31746.957 |
| H-Y 00097 I | 14318.188 | 10834.902 | M33197    | 1052.998  | 1771.499  | AL137700  | 1532.634  | 1441.606  |
| H-M 59964   | 514.238   | 488.083   | NM_000853 | 6162.46   | 4748.963  | NM_004904 | 3110.819  | 2328.547  |
| H-Y 00711 I | 65355.43  | 70993.672 | AF016903  | 34291.691 | 25203.951 | NM_003083 | 22838.291 | 19831.945 |
| H-X 16707 I | 2185.254  | 1688.874  | NM_015675 | 7758.784  | 5831.304  | NM_006786 | 7961.986  | 5967.828  |
| H-U76456M   | 394.164   | 311.805   | AK022267  | 721.329   | 495.225   | NM_000982 | 7814.134  | 5622.121  |
| AL038354    | 17255.293 | 15130.809 | NM_016040 | 3265.643  | 2217.283  | NM_001024 | 56653.215 | 60644.414 |
| W84867      | 594.244   | 576.442   | M33197    | 57444.066 | 58958.582 | NM_016093 | 55868.625 | 58901.75  |
| NM_005716   | 12479.274 | 7464.196  | AF031136  | 57871.332 | 52929.848 | NM_012423 | 59054.734 | 56793.102 |
| NM_018264   | 3103.725  | 1702.475  | NM_006597 | 30540.723 | 24425.654 | AK026367  | 44245.367 | 30521.008 |
| NM_001815   | 1254.472  | 1468.651  | NM_012483 | 19647.547 | 16685.311 | AK026491  | 34232.238 | 31247.578 |
| NM_000064   | 4760.668  | 5325.052  | NM_003496 | 5608.566  | 6380.409  | NM_001015 | 55833.918 | 60737.531 |
| NM_003264   | 1451.647  | 1851.327  | AB023420  | 15722.442 | 14177.784 | AL110170  | 57028.52  | 60917.449 |
| NM_006725   | 1407.03   | 3302.612  | M33197    | 62202.723 | 68282.789 | NM_004190 | 53478     | 50482.352 |
| NM_003326   | 3500.452  | 4036.559  | NM_007264 | 19064.643 | 21307.678 | NM_014275 | 18334.615 | 16591.742 |
| NM_000202   | 19716.854 | 23504.707 | NM_002262 | 529.403   | 643.363   | NM_000406 | 15379.187 | 11984.772 |
| NM_005496   | 21581.729 | 25794.34  | NM_016511 | 16970.402 | 16440.408 | AB044137  | 1197.613  | 1336.976  |
| NM_016606   | 1347.092  | 1645.886  | NM_003559 | 2660.114  | 3353.658  | NM_000920 | 3512.401  | 3526.694  |
| NM_002856   | 11163.448 | 15786.71  | NM_002185 | 394.837   | 693.833   | NM_020375 | 21614.619 | 22108.5   |
| NM_004817   | 4595.771  | 5884.732  | M55337    | 1485.325  | 1959.821  | NM_016046 | 26949.016 | 33313.418 |
| NM_018975   | 35521.199 | 29973.783 | NM_013229 | 613.171   | 1198.013  | NM_013311 | 13648.019 | 16940.316 |
| AB023215    | 7808.89   | 7059.928  | NM_016533 | 58195.035 | 64683.531 | NM_000291 | 56709.699 | 61223.402 |
| NM_001284   | 47353.422 | 36218.555 | NM_007342 | 4334.862  | 3936.316  | NM_018081 | 5632.82   | 5541.039  |



|           |           |           |           |           |           |           |           |           |
|-----------|-----------|-----------|-----------|-----------|-----------|-----------|-----------|-----------|
| NM_003242 | 8038.695  | 8608.682  | NM_005672 | 1215.745  | 629.394   | NM_014645 | 6115.212  | 5584.639  |
| NM_002845 | 1267.255  | 1069.106  | D25217    | 1987.766  | 1308.55   | AL117488  | 4796.797  | 3983.465  |
| NM_001105 | 2269.113  | 1677.294  | NM_006351 | 12042.957 | 6770.912  | NM_012240 | 6520.399  | 6240.745  |
| NM_005585 | 1179.273  | 1228.584  | M33197    | 58222.602 | 46313.789 | NM_019005 | 10367.362 | 8751.51   |
| NM_002075 | 1989.219  | 1815.837  | NM_004683 | 6689.85   | 4524.742  | NM_004735 | 27002.328 | 26237.023 |
| Y08756    | 1220.961  | 945.366   | AK023226  | 1962.524  | 1168.113  | AV752216  | 2593.677  | 2622.825  |
| AV752086  | 2007.63   | 1135.212  | AK025263  | 464.255   | 344.554   | NM_005341 | 6329.861  | 6315.107  |
| NM_016102 | 8240.074  | 6699.749  | NM_006931 | 5908.798  | 6822.083  | AF181999  | 3633.282  | 3301.407  |
| AL137529  | 2363.112  | 2276.307  | NM_018057 | 2656.113  | 3269.511  | NM_001934 | 5657.038  | 5644.046  |
| NM_012332 | 5794.159  | 7012.292  | M33197    | 59041.031 | 61892.707 | AB011090  | 3316.223  | 3000.108  |
| AK026648  | 4791.478  | 6055.393  | NM_015717 | 2651.744  | 2652.012  | NM_018682 | 8331.075  | 8471.82   |
| NM_000497 | 2704.75   | 3579.872  | NM_015925 | 2790.48   | 3058.48   | AB033024  | 4213.156  | 4321.077  |
| NM_017421 | 6719.841  | 9707.01   | NM_003665 | 1118.287  | 1645.22   | NM_018942 | 15809.654 | 15948.541 |
| NM_000273 | 693.537   | 1126.441  | AF220217  | 1445.782  | 2310.435  | NM_005531 | 14848.12  | 15856.508 |
| NM_002895 | 7331.45   | 11713.497 | NM_013323 | 30220.822 | 35483.672 | NM_006977 | 1550.968  | 1575.534  |
| NM_005397 | 7669.563  | 11056.584 | NM_014937 | 765.79    | 1235.713  | NM_002475 | 3043.932  | 2651.101  |
| AB014511  | 11818.974 | 15818.501 | NM_017426 | 2066.235  | 4662.867  | NM_000345 | 46332.43  | 39390.633 |
| NM_001662 | 29862.836 | 32650.367 | M33197    | 9060.144  | 11460.723 | NM_005055 | 24124.051 | 25867.096 |
| AB011100  | 3842.162  | 4116.987  | NM_004555 | 4909.882  | 3947.46   | NM_004950 | 5997.374  | 5706.081  |
| U61741    | 2521.721  | 2731.048  | AL079296  | 519.268   | 454.549   | NM_000724 | 6536.018  | 6418.847  |
| NM_012402 | 9431.064  | 10701.665 | NM_014770 | 3761.885  | 1939.804  | NM_000553 | 520.569   | 761.579   |
| M76676    | 7727.91   | 9112.026  | AB037737  | 1187.737  | 735.12    | NM_002557 | 31375.637 | 27056.65  |
| NM_003857 | 1712.023  | 1468.976  | M33197    | 59629.281 | 61891.094 | NM_004477 | 892.957   | 728.728   |
| AL137690  | 1767.887  | 1812.232  | AK023103  | 1741.227  | 1664.37   | BE728156  | 657.418   | 629.75    |
| Z83804    | 5760.393  | 4395.732  | NM_017855 | 2718.255  | 1878.86   | AI417775  | 922.19    | 955.69    |
| NM_004385 | 2703.352  | 2209.853  | NM_019055 | 45006.141 | 32405.598 | BI762229  | 16520.664 | 15378.081 |
| U67784    | 3057.535  | 2627.237  | NM_013347 | 364.699   | 389.277   | AA131406  | 802.033   | 635.475   |
| NM_007365 | 2683.444  | 1760.523  | D80008    | 1198.291  | 929.77    | BG618320  | 58409.395 | 60712.066 |
| NM_000592 | 1261.016  | 683.345   | X56789    | 1707.851  | 1694.616  | M28983    | 441.827   | 660.306   |
| NM_016584 | 8597.141  | 4465.921  | AK001069  | 53523.465 | 51142.082 | Y00787    | 6590.25   | 6105.841  |
| NM_000153 | 1890.394  | 1925.699  | M33197    | 61056.918 | 68371.602 | NM_007275 | 8884.638  | 7945.388  |
| NM_002033 | 1730.149  | 2469.725  | NM_000935 | 1335.497  | 1612.73   | N34462    | 13856.155 | 13929.466 |
| AK091794  | 673.769   | 908.992   | NM_000355 | 18014.516 | 18690.922 | AI658778  | 8220.775  | 7613.657  |
| NM_004111 | 1760.235  | 2062.242  | NM_006395 | 2175.602  | 3223.872  | L19067    | 9938.473  | 9442.103  |
| AF085966  | 8805.367  | 10699.946 | NM_014305 | 4630.548  | 5924.107  | Z48482    | 1135.109  | 1119.82   |
| NM_005315 | 9366.051  | 10702.482 | NM_001084 | 3548.344  | 4477.41   | W60413    | 7021.048  | 6850.251  |
| NM_016315 | 6397.731  | 6717.962  | NM_015983 | 6617.738  | 8858.83   | BI823365  | 7742.396  | 7779.527  |
| NM_003365 | 16355.076 | 19119.566 | NM_018622 | 3889.213  | 5668.392  | X06318    | 1514.852  | 1615.434  |
| NM_000057 | 3369.566  | 4639.339  | M33197    | 61046.523 | 67727.891 | NM_019101 | 2397.581  | 2483.813  |
| NM_018343 | 11191.259 | 13708.348 | NM_005867 | 9086.115  | 12613.542 | NM_013247 | 8219.126  | 8792.646  |
| AK095793  | 1499.843  | 1714.93   | AK026031  | 18237.777 | 28067.219 | NM_006770 | 6976.924  | 8325.64   |
| NM_003177 | 9037.489  | 9803.235  | NM_016465 | 7287.25   | 9891.053  | BE394704  | 1089.704  | 1447.442  |
| NM_017715 | 2001.228  | 2743.644  | NM_007244 | 10121.021 | 6390.642  | NM_004703 | 9677.387  | 11069.95  |
| AF064078  | 5121.549  | 7694.543  | M30629    | 4725.98   | 3626.067  | NM_001512 | 1464.185  | 1450.232  |
| AL049688  | 3134.793  | 3784.829  | AF193873  | 3026.119  | 1754.017  | NM_014705 | 9146.802  | 10264.575 |
| NM_002737 | 2483.975  | 3077.331  | NM_002625 | 1614.488  | 1117.151  | AK023172  | 980.725   | 937.587   |
| Z25427    | 5301.058  | 6550.774  | M23575    | 646.072   | 505.568   | AJ001348  | 3335.979  | 3559.091  |
| NM_004672 | 19014.447 | 23284.34  | AA190729  | 2844.785  | 2365.112  | NM_014007 | 2747.839  | 3434.722  |
| NM_001353 | 2842.294  | 2978.413  | BF974315  | 7148.883  | 5737.362  | AB033006  | 7290.07   | 6933.294  |
| NM_006214 | 5081.496  | 5091.625  | AI652705  | 3170.907  | 2660.439  | AF020314  | 8944.379  | 9377.966  |
| AJ010228  | 12833.781 | 11129.194 | AA973397  | 2300.271  | 2086.202  | NM_016332 | 37195.152 | 33706.094 |
| NM_005195 | 4759.596  | 5022.756  | AA569974  | 816.541   | 777.677   | AK023936  | 1276.448  | 1166.678  |
| NM_018073 | 2255.327  | 1506.176  | AA923615  | 1138.029  | 2580.122  | NM_006457 | 3745.472  | 4329.128  |

|             |           |           |           |           |           |           |           |           |
|-------------|-----------|-----------|-----------|-----------|-----------|-----------|-----------|-----------|
| NM_006061   | 589.66    | 581.181   | AA446028  | 575.957   | 944.702   | NM_003682 | 2878.729  | 2447.902  |
| NM_006848   | 56145.715 | 69358     | M80583    | 875.155   | 631.341   | NM_000207 | 2514.792  | 2381.923  |
| NM_005603   | 10415.336 | 10618.148 | AW009565  | 4787.536  | 5355.122  | NM_002531 | 3735.542  | 3950.101  |
| NM_001061   | 1784.946  | 2043.602  | X07767    | 2525.748  | 4114.95   | NM_006314 | 51406.863 | 50798.598 |
| BG744154    | 37982.055 | 33041.582 | X65293    | 659.947   | 937.808   | NM_001782 | 7977.516  | 7640.589  |
| Z11694      | 26459.834 | 29975.457 | M33197    | 17595.637 | 19006.131 | NM_002754 | 634.688   | 735.411   |
| X16983      | 5680.051  | 7011.703  | AL050139  | 6785.322  | 10659.806 | NM_000797 | 22369.527 | 22497.83  |
| X56160      | 646.682   | 1102.562  | NM_002593 | 716.151   | 1224.121  | NM_014927 | 319.59    | 397.007   |
| H-Y 00097 I | 14401.472 | 11704.025 | AF016903  | 27226.254 | 19945.418 | AF217525  | 1337.739  | 1142.474  |
| H-M 59964   | 639.671   | 713.409   | NM_015675 | 6923.142  | 4945.997  | AL080148  | 61410.578 | 62130.656 |
| H-Y 00711 I | 62390.516 | 72143.336 | AK022267  | 502.998   | 382.283   | AF000381  | 9545.337  | 8960.945  |
| H-X 16707 I | 2494.957  | 2468.26   | NM_016040 | 3337.801  | 2036.217  | S82470    | 7199.203  | 6777.365  |
| H-U76456M   | 501.672   | 545.051   | M33197    | 58791.766 | 66063.477 | AB028982  | 3167.562  | 3386.357  |
| AL038354    | 17926.191 | 20010.514 | AF031136  | 52391.176 | 56067.094 | NM_002004 | 7015.762  | 6560.167  |
| W84867      | 1253.04   | 2207.261  | NM_006597 | 29749.656 | 23180.301 | NM_005121 | 1463.147  | 1954.266  |
| NM_005718   | 14143.937 | 17236.164 | NM_012483 | 15119.976 | 11349.442 | NM_000747 | 7341.611  | 8031.831  |
| NM_018264   | 2992.707  | 2840.988  | NM_003498 | 5310.229  | 4793.847  | AJ275973  | 19097.268 | 21825.23  |
| NM_014580   | 1629.69   | 1160.051  | AB023420  | 16163.073 | 14364.45  | U76362    | 21712.068 | 25579.428 |
| AB028998    | 2364.177  | 1852.617  | M33197    | 58659.918 | 66537.375 | NM_003060 | 1240.466  | 1610.394  |
| NM_016608   | 818.869   | 854.472   | NM_007264 | 21509.008 | 22829.092 | AK021489  | 49306.887 | 51012.375 |
| NM_002858   | 9774.265  | 9814.431  | NM_002262 | 430.29    | 556.126   | NM_004525 | 1076.243  | 923.843   |
| NM_004817   | 4278.422  | 4560.604  | NM_016511 | 24849.063 | 21585.367 | NM_003895 | 805.816   | 734.338   |
| NM_018975   | 32373.24  | 29739.523 | NM_003559 | 3079.999  | 3602.973  | NM_004317 | 7338.495  | 7464.604  |
| AB023215    | 6734.411  | 7865.791  | NM_002185 | 560.366   | 915.451   | NM_014645 | 6137.869  | 6184.589  |
| NM_001284   | 46207.707 | 38755.234 | M55337    | 1310.549  | 1910.697  | NM_014708 | 4545.552  | 4348.917  |
| NM_003242   | 8494.313  | 11205.602 | NM_013229 | 381.976   | 513.621   | NM_003693 | 5900.313  | 5870.559  |
| NM_002849   | 1110.007  | 1198.768  | NM_016533 | 53387.703 | 65069.676 | NM_000356 | 60463.48  | 64765.758 |
| U31099      | 355.709   | 652.213   | M33197    | 58763.992 | 66727.016 | NM_018134 | 59379.383 | 61723.418 |
| NM_001105   | 2402.741  | 1705.406  | NM_014623 | 6823.07   | 11720.284 | L27479    | 1497.746  | 1808.984  |
| NM_005585   | 1498.848  | 1233.768  | D25217    | 2022.26   | 1145.757  | NM_002193 | 2424.428  | 2406.784  |
| NM_002075   | 1674.442  | 1748.196  | NM_006351 | 11405.45  | 6056.579  | NM_001388 | 11702.971 | 12416.836 |
| Y08756      | 1120.75   | 1221.036  | M33197    | 52718.539 | 39589.223 | X76770    | 7539.936  | 8251.112  |
| NM_005563   | 18020.473 | 20734.471 | NM_004683 | 6347.061  | 3908.449  | AB037808  | 2443.781  | 2639.476  |
| NM_006439   | 483.973   | 413.356   | AK023226  | 2249.286  | 1443.74   | NM_016038 | 957.329   | 912.847   |
| NM_005102   | 5934.237  | 4961.424  | AK025263  | 442.589   | 322.748   | Z36821    | 23186.701 | 29346.711 |
| NM_004518   | 698.683   | 733.1     | NM_006931 | 5380.793  | 5295.721  | AF289485  | 7934.629  | 8843.309  |
| NM_006501   | 1227.845  | 1221.745  | NM_018057 | 2480.175  | 2971.978  | AF130092  | 13056.092 | 13152.083 |
| NM_002719   | 23824.924 | 28942.18  | M33197    | 59284.203 | 67466.109 | NM_016095 | 8175.369  | 9566.797  |
| AB035356    | 681.831   | 894.749   | NM_015717 | 2844.368  | 2878.686  | AK024794  | 3448.786  | 3665.278  |
| AV752086    | 2043.678  | 2358.781  | NM_015925 | 3253.674  | 3400.819  | NM_019853 | 10820.981 | 11888.323 |
| NM_016102   | 7996.292  | 9819.027  | NM_003665 | 1344.679  | 1461.502  | NM_017992 | 2625.791  | 2448.493  |
| NM_004376   | 7689.647  | 8435.359  | AF220217  | 1480.525  | 2558.148  | NM_005400 | 1277.602  | 999.681   |
| NM_000272   | 1057.559  | 1181.566  | NM_013323 | 36511.391 | 45812.559 | AK023061  | 1353.148  | 1083.271  |
| NM_016131   | 15699.981 | 18086.277 | NM_014937 | 679.183   | 958.991   | NM_007255 | 6475.972  | 5349.808  |
| NM_006822   | 864.884   | 1054.183  | NM_017426 | 2202.316  | 3712.092  | NM_003668 | 8975.939  | 8984.338  |
| NM_012142   | 13219.648 | 12653.507 | M33197    | 7610.218  | 8772.404  | NM_013384 | 57951.703 | 59992.141 |
| NM_016429   | 4204.906  | 4493.32   | NM_000853 | 7158.548  | 11233.563 | NM_001187 | 2347.932  | 2082.544  |
| AB011100    | 3746.961  | 4265.025  | NM_014770 | 4085.303  | 1690.37   | NM_018241 | 4408.213  | 3817.196  |
| U61741      | 2422.901  | 2728.971  | AB037737  | 1185.667  | 639.328   | NM_005834 | 9576.923  | 8845.304  |
| NM_012402   | 10106.745 | 13105.797 | M33197    | 58468.195 | 61634.191 | NM_005059 | 24099.041 | 33305.949 |
| M76676      | 8160.273  | 9351.706  | AK023103  | 1670.714  | 1321.676  | NM_004950 | 6352.916  | 6733.336  |
| NM_003857   | 1336.427  | 1325.359  | NM_017858 | 2650.971  | 2304.372  | NM_000724 | 6765.369  | 6720.875  |
| AL137690    | 1893.233  | 1870.639  | NM_019059 | 43042.645 | 35410.781 | NM_000553 | 692.449   | 1517.32   |

|           |           |           |           |           |           |           |           |           |
|-----------|-----------|-----------|-----------|-----------|-----------|-----------|-----------|-----------|
| Z83804    | 5428.778  | 3647.085  | NM_013347 | 315.681   | 304.292   | NM_002557 | 29555.654 | 35960.207 |
| NM_004386 | 2522.566  | 2027.589  | D80008    | 1355.459  | 922.878   | NM_004477 | 788.501   | 993.346   |
| U67784    | 2553.574  | 2451.712  | X56789    | 1200.353  | 1098.171  | AI417775  | 1322.618  | 1374.787  |
| NM_007366 | 3170.908  | 2786.297  | AK001069  | 46195.305 | 42754.012 | BI762229  | 15969.598 | 19423.176 |
| NM_000592 | 1458.872  | 1203.718  | M33197    | 58588.051 | 63199.121 | AA131406  | 711.362   | 567.852   |
| NM_016584 | 9444.04   | 6764.716  | NM_000935 | 1139.837  | 1061.279  | BG618320  | 51977.926 | 57756.215 |
| NM_001815 | 1712.597  | 1769.742  | NM_000359 | 21251.34  | 19301.969 | Y00787    | 8201.12   | 6751.247  |
| NM_000064 | 5987.475  | 5538.328  | NM_006395 | 2127.786  | 2250.284  | NM_007276 | 8190.342  | 6323.188  |
| NM_003264 | 1642.259  | 2132.251  | NM_014306 | 4459.991  | 3719.919  | N34462    | 16461.039 | 14671.259 |
| NM_006725 | 1678.425  | 2561.363  | NM_001084 | 4139.214  | 4652.917  | AI658778  | 11523.1   | 10807.948 |
| NM_003326 | 3372.563  | 3155.228  | NM_015983 | 7004.76   | 6790.016  | L19067    | 11501.686 | 13489.92  |
| NM_004566 | 54462.781 | 54934.688 | NM_018622 | 4088.065  | 4942.66   | Z48482    | 1380.077  | 1699.273  |
| NM_000202 | 17392.555 | 18010.244 | M33197    | 60182.086 | 67915.539 | W60413    | 7217.232  | 8840.879  |
| NM_005496 | 20195.725 | 19888.223 | NM_005867 | 9783.784  | 13556.804 | BI823365  | 8105.168  | 8318.856  |
| NM_006214 | 3957.067  | 3913.892  | AK026031  | 22703.262 | 28989.32  | X06318    | 1817.625  | 1656.118  |
| AJ010228  | 12196.561 | 12934.138 | NM_016466 | 6716.03   | 9348.491  | NM_016217 | 52462.16  | 59553.91  |
| NM_005196 | 5959.734  | 6748.107  | NM_007342 | 4229.882  | 8519.401  | AK025971  | 8573.974  | 8764.367  |
| AK021426  | 1276.578  | 1364.623  | NM_005672 | 1688.094  | 2541.988  | NM_002616 | 17382.143 | 18246.057 |
| NM_018073 | 3269.874  | 3526.092  | AF193873  | 3003.347  | 1538.596  | BE394704  | 1359.29   | 1525.874  |
| AL137529  | 2670.535  | 2946.89   | NM_002626 | 1609.164  | 960.554   | NM_004703 | 9689.583  | 9859.929  |
| NM_012332 | 7686.496  | 8785.461  | M23575    | 643.566   | 557.583   | NM_001512 | 1657.783  | 1408.438  |
| AK026648  | 4976.225  | 5315.745  | AA190729  | 2374.391  | 1913.696  | NM_014706 | 9522.239  | 11480.142 |
| NM_000497 | 2839.067  | 3880.083  | BF974315  | 6760.646  | 6806.573  | AK023172  | 712.216   | 972.396   |
| NM_017421 | 6224.661  | 5967.82   | T74985    | 286.068   | 336.406   | AF139768  | 499.615   | 793.383   |
| AK025977  | 25377.504 | 26459.813 | AI652705  | 2692.248  | 2409.592  | AJ001348  | 2542.501  | 2641.624  |
| AK023130  | 11762.198 | 10911.279 | AA973397  | 1857.786  | 1434.655  | NM_014007 | 2439.81   | 3195.106  |
| NM_000273 | 544.975   | 543.343   | AA569974  | 703.137   | 757.735   | AB033006  | 6307.573  | 6136.59   |
| NM_002896 | 7055.608  | 8189.738  | AA923615  | 1153.321  | 2421.945  | AF020314  | 5899.085  | 8807.77   |
| NM_000486 | 1661.499  | 1648.419  | AA446028  | 478.769   | 670.491   | NM_016332 | 19592.441 | 16314.66  |
| BE876237  | 1908.819  | 1833.396  | M80583    | 820.716   | 508.221   | NM_006457 | 3783.16   | 5250.839  |
| NM_005397 | 7934.791  | 11344.946 | AW009565  | 3787.836  | 4417.571  | NM_003682 | 2340.942  | 2506.354  |
| NM_000806 | 2451.716  | 3193.368  | X07767    | 3032.342  | 4535.223  | NM_000207 | 1997.57   | 1882.587  |
| NM_006320 | 6866.567  | 8173.574  | X65293    | 1051.132  | 1513.634  | NM_002531 | 4493.561  | 4047.687  |
| AB014511  | 12394.558 | 13417.721 | M33197    | 19217.01  | 21730.398 | NM_006314 | 54478.863 | 57404.59  |
| NM_014252 | 10748.95  | 13210.517 | AL050139  | 7158.416  | 11561.225 | NM_001782 | 12239.836 | 11506.059 |
| NM_001662 | 30426.83  | 35544.648 | NM_002593 | 612.648   | 1091.332  | NM_002754 | 976.397   | 1126.672  |
| NM_005716 | 11979.261 | 13627.93  | NM_004556 | 13086.394 | 21924.098 | NM_000797 | 24179.654 | 24599.334 |
| NM_018264 | 2439.67   | 2524.379  | AL079296  | 1151.993  | 2714.132  | NM_014927 | 618.433   | 995.33    |
| NM_014580 | 798.563   | 906.598   | NM_006597 | 30979.633 | 17750.826 | AF217525  | 1346.197  | 1373.329  |
| AB028998  | 2178.358  | 2777.79   | NM_012483 | 12955.421 | 7346.083  | AL080148  | 59054.168 | 60763.559 |
| NM_000153 | 1348.94   | 1572.488  | NM_003496 | 4801.611  | 3225.012  | NM_002476 | 4541.035  | 4643.897  |
| NM_002033 | 1581.766  | 1934.47   | AB023420  | 11764.631 | 8511.399  | NM_000346 | 45867.711 | 44273.039 |
| AK091794  | 569.262   | 551.48    | M33197    | 55480.719 | 65622.508 | NM_012105 | 6042.706  | 8089.299  |
| NM_004111 | 1519.737  | 1655.233  | NM_007264 | 12109.717 | 10131.81  | S82470    | 6660.844  | 5984.913  |
| AF085966  | 7252.758  | 8032.885  | NM_002262 | 265.968   | 302.557   | AB028982  | 2847.213  | 2428.66   |
| NM_005316 | 8418.291  | 8329.86   | NM_016511 | 15941.689 | 16178.245 | NM_002004 | 6249.661  | 6436.556  |
| NM_016316 | 5720.87   | 5456.784  | NM_003559 | 1851.495  | 1758.552  | NM_005121 | 1522.994  | 1916.802  |
| NM_003366 | 15520.284 | 12203.774 | NM_002185 | 368.582   | 401.288   | NM_000747 | 6325.783  | 6121.55   |
| NM_000057 | 3285.071  | 3189.556  | M55337    | 1245.767  | 1036.19   | AJ275973  | 15443.284 | 15748.02  |
| NM_018343 | 11530.274 | 14737.797 | M33197    | 56529.066 | 64005.391 | U76362    | 24745.156 | 22153.51  |
| AK095793  | 2356.82   | 2477.572  | NM_013229 | 482.692   | 556.808   | AK021489  | 40921.531 | 38383.555 |
| NM_003177 | 8672.119  | 9191.146  | NM_016533 | 55397.242 | 55750.23  | NM_004525 | 1781.949  | 1941.542  |
| NM_017716 | 1972.102  | 2458.056  | NM_014751 | 24475.027 | 31523.717 | NM_003895 | 799.185   | 1130.339  |

|           |           |           |           |           |           |           |           |           |
|-----------|-----------|-----------|-----------|-----------|-----------|-----------|-----------|-----------|
| AF064078  | 5000.786  | 6851.893  | NM_002347 | 54012.777 | 63955.809 | NM_004317 | 7478.758  | 10406.729 |
| AL049688  | 2950.243  | 3718.947  | AB046807  | 1898.344  | 3100.033  | NM_014645 | 6349.526  | 9184.953  |
| NM_002737 | 2364.176  | 2836.792  | NM_003508 | 577.218   | 1322.677  | NM_014708 | 4891.679  | 6476.966  |
| Z25427    | 5756.714  | 6934.302  | M33197    | 60547.051 | 66539.414 | NM_003693 | 5622.62   | 5474.516  |
| NM_004672 | 18404.52  | 25601.273 | NM_014623 | 6645.32   | 10785.009 | NM_000356 | 61150.293 | 63278.508 |
| NM_001353 | 3203.734  | 3759.675  | NM_007244 | 20158.189 | 30182.373 | NM_018134 | 59036.371 | 61886.145 |
| CY3Cy5    | 4536.309  | 502.634   | M30629    | 8040.821  | 15328.745 | NM_013247 | 9532.706  | 7090.215  |
| AF252284  | 3293.654  | 3665.379  | NM_018976 | 6828.569  | 4343.46   | NM_006770 | 11937.116 | 9840.889  |
| AK025794  | 11738.7   | 9096.858  | NM_003355 | 7759.597  | 5118.087  | NM_001388 | 12968.239 | 14973.824 |
| NM_003541 | 3279.312  | 2708.034  | NM_005074 | 634.583   | 493.223   | X76770    | 8314.214  | 7759.049  |
| AF131835  | 539.673   | 520.066   | NM_013272 | 1636.862  | 809.788   | AB037808  | 2945.377  | 2451.298  |
| NM_007198 | 4260.069  | 3994.968  | NM_004170 | 2043.816  | 1336.721  | NM_016038 | 8229.84   | 15406.885 |
| NM_014958 | 595.685   | 679.47    | NM_018057 | 1415.862  | 1521.284  | AF090911  | 1072.991  | 831.667   |
| M33197    | 63605.973 | 65155.121 | M33197    | 49416.84  | 64357.926 | Z36821    | 24131.834 | 24957.215 |
| AK023220  | 1339.218  | 1131.218  | NM_015717 | 1532.773  | 1891.458  | AF289485  | 8014.095  | 8017.009  |
| AK024566  | 837.838   | 811.654   | NM_015925 | 2483.931  | 2670.643  | AF130092  | 9605.978  | 10940.342 |
| AF038182  | 3054.156  | 4025.054  | NM_003665 | 710.659   | 709.199   | NM_016095 | 6849.399  | 9265.453  |
| NM_016475 | 6533.03   | 7384.576  | AF220217  | 1190.483  | 1523.371  | AK024794  | 3227.821  | 3317.015  |
| AF086472  | 2134.337  | 2391.301  | NM_013323 | 29871.072 | 26819.234 | NM_019853 | 10471.957 | 13591.038 |
| NM_014917 | 364.903   | 552.429   | NM_014937 | 727.397   | 869.498   | NM_017992 | 2494.381  | 2393.431  |
| AF252284  | 3740.141  | 4421.623  | NM_017426 | 2458.456  | 2850.175  | AK023061  | 483.551   | 1081.649  |
| SR1       | 62714.578 | 64166.012 | M33197    | 8298.727  | 7913.966  | NM_007255 | 4778.424  | 6105.984  |
| SR3       | 44040.871 | 38153.898 | NM_000853 | 7667.739  | 6743.439  | NM_003668 | 7478.952  | 10059.651 |
| SR5       | 3902.22   | 5275.088  | NM_000846 | 411.33    | 687.113   | NM_013384 | 61094.043 | 64909.875 |
| SR7       | 4682.375  | 43763.348 | AF016903  | 45517.031 | 61594.949 | NM_001187 | 1872.641  | 2109.709  |
| SR9       | 19656.725 | 3964.367  | NM_015675 | 12909.339 | 20789.199 | NM_018241 | 4488.396  | 4363.219  |
| CY3Cy5    | 3595.577  | 393.393   | AK022267  | 1249.975  | 2026.762  | NM_005834 | 9241.011  | 9104.669  |
| L77559    | 1366.159  | 1445.689  | NM_016040 | 2864.199  | 4846.22   | AF000381  | 13341.117 | 10065.681 |
| NM_005598 | 602.832   | 599.184   | M33197    | 53792.82  | 65428.73  | NM_000724 | 6199.114  | 7193.969  |
| Y10515    | 863.905   | 844.964   | AF031136  | 55902.375 | 66224.367 | NM_002557 | 26491.771 | 38782.453 |
| M87942    | 438.93    | 274.07    | NM_005867 | 9649.099  | 5843.454  | NM_004477 | 942.643   | 2430.45   |
| AK023636  | 2751.4    | 2830.233  | AK026031  | 16265.504 | 8821.052  | BI762229  | 14667.433 | 14927.115 |
| D25272    | 832.456   | 785.085   | NM_016468 | 10977.983 | 5802.757  | BG618320  | 58319.387 | 66174.781 |
| M33197    | 68611.563 | 65055.555 | NM_007342 | 3866.544  | 3376.022  | Y00787    | 6305.451  | 6554.684  |
| NM_020168 | 768.193   | 547.537   | NM_005672 | 891.223   | 545.926   | NM_007276 | 7241.693  | 6660.698  |
| D83781    | 2393.774  | 1996.805  | D25217    | 1800.172  | 1652.321  | N34462    | 14511.255 | 15558.017 |
| AF075013  | 723.837   | 806.223   | NM_006351 | 12421.046 | 8545.817  | L19067    | 9975.572  | 11547.735 |
| AF085825  | 466.871   | 486.092   | M33197    | 54217.906 | 48763.68  | Z48482    | 1278.839  | 1799.72   |
| AL832699  | 10787.998 | 11312.172 | NM_004683 | 4043.849  | 3574.453  | W60413    | 6211.493  | 9254.053  |
| NM_012191 | 1827.8    | 1643.097  | AK023226  | 1991.222  | 1664.627  | BI823365  | 8184.329  | 9912.541  |
| M33197    | 62759.434 | 64837.016 | AK025263  | 467.346   | 453.691   | X06318    | 2120.096  | 1950.32   |
| AK000757  | 1214.197  | 1226.955  | M33197    | 54828.102 | 61854.031 | NM_016217 | 51737.234 | 52812.398 |
| AL359577  | 2884.308  | 2962.78   | NM_001467 | 2922.153  | 3623.693  | AK025971  | 8348.101  | 7391.968  |
| NM_018138 | 9668.07   | 9608.668  | NM_018066 | 46284.539 | 57374.238 | NM_002618 | 11110.93  | 10962.376 |
| NM_014805 | 5743.878  | 6467.601  | NM_006931 | 7969.612  | 13195.833 | L27479    | 2211.821  | 1710.951  |
| AF052120  | 3419.668  | 3379.126  | NM_020344 | 11169.11  | 20418.623 | NM_002193 | 3934.738  | 3474.219  |
| NM_014871 | 3785.004  | 3872.521  | AF119868  | 456.659   | 812.124   | AB033006  | 5507.741  | 5427.982  |
| AK026754  | 1136.072  | 866.083   | NM_005050 | 4399.667  | 7703.477  | AF020314  | 8169.889  | 8919.629  |
| M33197    | 69499.109 | 64806.617 | M33197    | 58243.391 | 64838.023 | NM_016332 | 28679.574 | 42330.656 |
| AL137552  | 864.641   | 989.447   | NM_019844 | 656.475   | 811.364   | AK023936  | 1641.587  | 2400.786  |
| M33197    | 65222.633 | 66651.625 | M33197    | 18020.902 | 8895.866  | NM_006457 | 3354.836  | 7887.028  |
| AK024558  | 836.051   | 882.079   | AL050139  | 6593.196  | 3524.412  | NM_003682 | 2140.366  | 3084.154  |
| AK024779  | 788.501   | 845.167   | NM_002593 | 302.727   | 263.869   | NM_000207 | 2192.195  | 2968.833  |

|           |           |           |           |           |           |           |           |           |
|-----------|-----------|-----------|-----------|-----------|-----------|-----------|-----------|-----------|
| AK024406  | 677.358   | 737.528   | NM_004558 | 5849.804  | 3374.729  | NM_002531 | 4264.997  | 3624.384  |
| AK024568  | 715.82    | 928.732   | AL079296  | 396.214   | 313.425   | NM_006314 | 47273.086 | 45000.664 |
| M33197    | 64752.664 | 65470.363 | NM_014770 | 2585.624  | 1811.383  | NM_001782 | 12484.526 | 12690.066 |
| AK024981  | 45100.344 | 34130.539 | AB037737  | 1262.855  | 1158.776  | NM_002754 | 1252.648  | 1115.465  |
| AK027246  | 2017.399  | 2231.578  | M33197    | 55939.063 | 63868.242 | NM_000797 | 26097.531 | 26726.619 |
| U80766    | 2826.487  | 2608.823  | AK023103  | 1439.528  | 1446.571  | NM_016293 | 14925.845 | 16768.883 |
| AK001638  | 2770.221  | 2977.115  | NM_017858 | 2342.234  | 2417.407  | AL080148  | 54069.324 | 57345.953 |
| AF161386  | 23767.287 | 25141.697 | NM_019059 | 41661.098 | 35619.344 | NM_006731 | 1227.551  | 1731.932  |
| AL365369  | 6642.139  | 7597.388  | NM_013347 | 419.96    | 352.491   | NM_018487 | 2154.159  | 3555.957  |
| AK025454  | 1864.527  | 2093.61   | D80008    | 1220.629  | 1246.416  | NM_020134 | 5318.388  | 5698.154  |
| M33197    | 61353.477 | 64113.16  | X56789    | 1856.536  | 1659.304  | NM_014061 | 2855.308  | 2550.791  |
| X05826    | 21480.529 | 23872.85  | AK001069  | 52203.059 | 52993.477 | BC034395  | 14092.374 | 13721.013 |
| Y11608    | 651.899   | 761.239   | M33197    | 61807.957 | 67227.289 | NM_002479 | 3874.365  | 4434.811  |
| AJ001872  | 521.609   | 691.957   | NM_000935 | 1602.605  | 1909.41   | NM_000348 | 30136.014 | 28655.479 |
| AJ227882  | 512.862   | 540.876   | NM_000359 | 22183.795 | 24700.18  | NM_005059 | 26119.295 | 28222.334 |
| M33197    | 69190.141 | 64976.172 | NM_006395 | 2232.756  | 2923.727  | NM_004950 | 8357.73   | 7394.178  |
| M33197    | 58043.582 | 66122.711 | NM_014306 | 4604.782  | 6958.188  | AF040248  | 3122.674  | 3194.004  |
| AL137556  | 1915.757  | 1794.931  | NM_001084 | 4056.165  | 5598.439  | NM_014228 | 2942.232  | 3277.253  |
| NM_014698 | 5725.971  | 4475.122  | NM_015983 | 8570.762  | 12723.64  | AL832292  | 6605.573  | 12929.699 |
| AL359055  | 2364.467  | 2418.456  | NM_018622 | 4806.099  | 7425.103  | NM_003045 | 27784.752 | 49767.316 |
| NM_014908 | 3659.102  | 3413.502  | M33197    | 53155.352 | 58491.953 | NM_005662 | 15639.37  | 29233.482 |
| AB037771  | 465.635   | 663.474   | CY3Cy5    | 1481.357  | 238.896   | NM_003060 | 779.836   | 950.114   |
| AK025931  | 4442.332  | 3843.74   | NM_006981 | 1146.083  | 910.846   | AK021489  | 56200.813 | 59966.262 |
| M33197    | 5570.377  | 4312.373  | AF086429  | 2098.522  | 2065.592  | NM_004525 | 1636.802  | 1488.202  |
| AK001083  | 4692.257  | 5148.711  | AF086439  | 1553.165  | 1700.839  | NM_003895 | 1183.319  | 1048.365  |
| AK000185  | 2073.027  | 2156.303  | M33197    | 79612.5   | 64610.656 | NM_004317 | 8200.91   | 7794.09   |
| NM_017962 | 1145.241  | 1298.997  | AF038171  | 1469.424  | 1823.987  | NM_014645 | 8453.854  | 7221.747  |
| AK027227  | 699.185   | 824.462   | AF052160  | 669.919   | 739.19    | NM_014708 | 5482.44   | 5048.657  |
| NM_016380 | 515.095   | 368.714   | AK026512  | 1848.482  | 1748.059  | NM_003693 | 6869.731  | 5548.503  |
| NM_017834 | 905.466   | 965.892   | NM_018482 | 2503.924  | 1918.823  | NM_000356 | 52521.184 | 58316.867 |
| AK000865  | 1839.173  | 1665.883  | NM_017880 | 1689.695  | 1737.853  | NM_018134 | 56900.172 | 62373.414 |
| M33197    | 59154.527 | 64503.734 | AF090945  | 4708.555  | 3993.277  | NM_013247 | 8958.578  | 8503.782  |
| AF147349  | 24072.299 | 22412.064 | NM_006981 | 1897.501  | 1969.656  | NM_006770 | 7680.555  | 6937.219  |
| AL050346  | 10596.054 | 9316.43   | SR2       | 29442.021 | 39549.023 | BE394704  | 1505.838  | 1469.501  |
| AK001520  | 16783.836 | 15553.717 | SR4       | 11775.933 | 15760.771 | NM_004703 | 11823.748 | 11209.073 |
| AK021731  | 1235.566  | 1317.245  | SR6       | 1167.084  | 1748.029  | NM_001512 | 2414.413  | 2457.647  |
| D90070    | 28011.412 | 21579.381 | SR8       | 4068.736  | 18221.971 | NM_014706 | 11951.51  | 12796.32  |
| Y12235    | 600.299   | 628.688   | SR10      | 12035.219 | 5216.844  | AK023172  | 1516.664  | 1598.963  |
| AF132601  | 497.176   | 389.299   | CY3Cy5    | 759.518   | 127.698   | AJ001348  | 2411.643  | 2079.405  |
| M33197    | 60817.652 | 61038.207 | AK026718  | 2050.139  | 1991.095  | NM_014007 | 3428.697  | 3479.623  |
| AF086179  | 7383.204  | 7883.384  | AK022035  | 5507.626  | 4338.176  | NM_001187 | 2041.276  | 1961.573  |
| AK025807  | 7505.482  | 6357.131  | M33197    | 77141.75  | 65088.535 | NM_018241 | 3869.768  | 4451.948  |
| AK022478  | 1605.305  | 1954.276  | NM_004337 | 3113.929  | 3136.049  | NM_005834 | 7709.405  | 9706.471  |
| NM_018381 | 2975.667  | 2486.771  | AF075016  | 600.165   | 665.767   | AF000381  | 8608.001  | 15101.879 |
| AK022769  | 974.393   | 834.263   | AK023612  | 669.76    | 734.533   | NM_018075 | 390.738   | 1059.87   |
| U10509    | 3462.828  | 3582.43   | AF147437  | 3650.514  | 3267.896  | NM_012105 | 6238.482  | 10462.524 |
| NM_007165 | 18461.617 | 18917.676 | M33197    | 80381.461 | 64573.59  | S82470    | 9111.165  | 8904.312  |
| NM_014018 | 17393.898 | 16633.912 | AL137269  | 4125.669  | 4875.826  | AB028982  | 3837.545  | 2823.73   |
| AF085956  | 8846.729  | 8477.499  | AK021983  | 3140.614  | 3653.776  | NM_002004 | 5679.002  | 4443.717  |
| NM_019116 | 2582.628  | 3003.639  | Y11681    | 14261.053 | 16251.458 | NM_005121 | 1653.065  | 1636.521  |
| AF147318  | 997.377   | 1154.637  | AL110135  | 11160.13  | 14756.409 | NM_001643 | 54826.691 | 56060.914 |
| L37699    | 2252.733  | 1998.685  | NM_006993 | 18947.17  | 18122.365 | NM_020221 | 1827.61   | 1937.544  |
| M33197    | 57597.941 | 63338.5   | M33197    | 73615.07  | 65175.867 | NM_000747 | 7399.712  | 6449.142  |

|           |           |           |           |           |           |           |           |           |
|-----------|-----------|-----------|-----------|-----------|-----------|-----------|-----------|-----------|
| AL050173  | 2411.127  | 1941.627  | AF086316  | 608.704   | 600.435   | NM_005415 | 6514.567  | 6673.397  |
| D80002    | 2735.423  | 3341.923  | M33197    | 65388.832 | 71128.648 | AK026841  | 3137.028  | 2390.512  |
| U17637    | 739.287   | 752.921   | AK026878  | 1231.427  | 1444.083  | AL137708  | 1243.893  | 958.641   |
| AF207831  | 3352.79   | 2859.633  | AK000777  | 677.6     | 887.203   | AJ275973  | 20152.717 | 16198.311 |
| AK023174  | 989.059   | 1192.502  | M33197    | 62799.965 | 64966.754 | NM_006493 | 1666.482  | 1186.459  |
| NM_003545 | 1087.111  | 972.391   | AF144233  | 3903.373  | 3833.645  | U76362    | 37755.539 | 30173.531 |
| M33197    | 64998.875 | 65224.055 | AF085925  | 1024.1    | 926.582   | NM_016217 | 48932.078 | 55359.41  |
| NM_018272 | 776.039   | 706.704   | AF085975  | 10824.217 | 10638.467 | AK025971  | 6111.076  | 7597.063  |
| AF086125  | 1499.532  | 1846.211  | AF075103  | 501.343   | 549.166   | NM_002615 | 9166.086  | 10901.374 |
| AL079279  | 605.245   | 573.285   | M33197    | 62060.969 | 56647.375 | L27479    | 1641.499  | 1963.133  |
| AK023547  | 1102.106  | 1175.25   | AL137390  | 2580.072  | 3936.454  | NM_002193 | 2704.082  | 3503.958  |
| U67847    | 3197.857  | 4140.198  | AL137611  | 5425.914  | 6186.582  | NM_001385 | 12161.183 | 15437.599 |
| AK021933  | 734.738   | 734.273   | AL359566  | 24108.162 | 31517.08  | X76770    | 7948.178  | 11720.47  |
| M33197    | 60299.703 | 64150.102 | AL133110  | 540.734   | 675.265   | AB037808  | 3116.944  | 4115.941  |
| AK024207  | 10672.068 | 10144.676 | AL137427  | 4331.045  | 5116.874  | NM_016035 | 9316.781  | 6966.836  |
| AK021843  | 2333.286  | 2462.396  | AL157460  | 1996.99   | 2102.591  | Z36821    | 30469.68  | 30997.855 |
| AF075025  | 1000.658  | 1120.815  | M33197    | 62989.234 | 59549.234 | AF289485  | 7130.046  | 6342.275  |
| AF116623  | 487.35    | 721.027   | M33197    | 65159.266 | 67395.961 | AF130092  | 9616.189  | 9000.696  |
| AK023043  | 803.621   | 703.794   | AL049846  | 1158.839  | 1098.503  | NM_016095 | 6666.862  | 6617.833  |
| NM_004685 | 9676.852  | 5883.944  | AK024161  | 1088.016  | 1032.512  | AK024794  | 3917.903  | 3910.208  |
| AB037725  | 1777.596  | 1504.565  | AK021682  | 44050.063 | 53611.27  | NM_019853 | 10525.734 | 10898.908 |
| M33197    | 63545.832 | 56920.395 | AK022141  | 696.652   | 1256.692  | NM_017992 | 2579.12   | 2037.487  |
| NM_017715 | 1335.995  | 812.572   | AK023942  | 53911.004 | 51560.125 | NM_005400 | 1332.541  | 1172.696  |
| NM_004860 | 7319.497  | 6112.046  | M33197    | 63116.559 | 62983.516 | AK023061  | 842.331   | 938.971   |
| AF217190  | 15437.246 | 10733.671 | AK022046  | 619.787   | 750.8     | NM_007255 | 8630.533  | 5879.833  |
| AB028981  | 21076.9   | 20070.105 | AK027207  | 2008.376  | 1836.848  | NM_003665 | 9320.234  | 9824.243  |
| NM_006800 | 1949.807  | 1651.785  | AF083120  | 1586.605  | 2368.886  | NM_013384 | 60547.148 | 62926.641 |
| NM_002475 | 724.083   | 603.527   | AF143323  | 1345.091  | 1593.213  | CY3Cy5    | 4805.842  | 281.706   |
| NM_002725 | 12199.717 | 12445.846 | AJ227892  | 8518.522  | 8632.898  | NM_016345 | 3953.687  | 4108.492  |
| M33197    | 61885.348 | 62463.164 | M33197    | 62747.531 | 60088.441 | AF086445  | 1488.546  | 2513.033  |
| AK025266  | 6059.766  | 6886.47   | AK022013  | 4513.783  | 4886.212  | AF086281  | 2766.676  | 2308.252  |
| AK001843  | 4420.843  | 4630.845  | AK022155  | 7810.593  | 9396.371  | AF086393  | 744.472   | 700.651   |
| AK000548  | 60223.785 | 49202.566 | AK022288  | 1190.592  | 1498.832  | AF086453  | 1032.349  | 852.555   |
| NM_003920 | 18237.422 | 18599.047 | AK021916  | 523.07    | 701.717   | AF070621  | 14293.654 | 11440.146 |
| NM_004787 | 7565.228  | 7235.218  | AK024201  | 1255.01   | 1136.722  | NM_020240 | 4210.608  | 3262.622  |
| AF087984  | 8236.91   | 8046.892  | AK022174  | 1447.503  | 1371.143  | AL355730  | 2426.498  | 1651.984  |
| AF009302  | 6245.753  | 5811.088  | M33197    | 65315.406 | 67985.359 | U79273    | 3699.277  | 1943.779  |
| M33197    | 66243.891 | 63492.703 | AL049299  | 1077.409  | 1225.065  | AK022050  | 5181.278  | 3443.957  |
| AK022273  | 1476.15   | 1465.432  | NM_006085 | 62594.145 | 63131.008 | NM_016345 | 5636.722  | 5552.785  |
| AK027161  | 1613.727  | 1428.537  | NM_018265 | 1237.992  | 970.376   | SR2       | 50066.258 | 61316.449 |
| AL050210  | 5973.594  | 6439.698  | AF130086  | 7565.779  | 11019.07  | SR4       | 15063.012 | 25500.291 |
| NM_014844 | 1857.244  | 1643.56   | AK023858  | 4376.439  | 4875.182  | SR6       | 1632.971  | 3288.824  |
| M33197    | 64789.684 | 62780.086 | M33197    | 62266.656 | 61914.016 | SR8       | 5526.198  | 25343.379 |
| NM_018492 | 7686.336  | 6379.08   | AF250920  | 5756.375  | 6957.564  | SR10      | 16968.42  | 5523.694  |
| NM_001345 | 555.313   | 506.484   | NM_017733 | 2310.632  | 3201.549  | CY3Cy5    | 3809.073  | 135.394   |
| NM_003145 | 705.887   | 709.098   | NM_014042 | 8534.08   | 11079.977 | AB042410  | 1799.681  | 1565.508  |
| NM_003377 | 13337.938 | 10860.973 | D17152    | 24969.244 | 26623.223 | AF086102  | 4082.842  | 3765.565  |
| NM_002220 | 704.997   | 601.931   | AK024464  | 19824.496 | 25044.191 | AF116682  | 38420.949 | 25404.973 |
| AB033034  | 7265.003  | 6089.643  | AK026748  | 2247.349  | 3415.514  | AL137259  | 4233.127  | 3332.563  |
| D38169    | 3659.099  | 3535.788  | AK023638  | 2023.844  | 2714.277  | AF086079  | 773.002   | 749.161   |
| M33197    | 61664.73  | 63185.402 | M33197    | 3235.086  | 2699.906  | AL122107  | 16133.193 | 13504.122 |
| AJ293294  | 8600.056  | 10113.696 | AK025423  | 2558.639  | 2321.574  | AF075021  | 1900.506  | 1576.001  |
| NM_018171 | 2417.961  | 2587.115  | AL050022  | 497.129   | 498.109   | AK025140  | 10048.488 | 6035.843  |

|           |           |           |           |           |           |           |           |           |
|-----------|-----------|-----------|-----------|-----------|-----------|-----------|-----------|-----------|
| NM_002447 | 5904.283  | 5105.906  | AF009272  | 470.469   | 590.189   | AK001503  | 16465.455 | 13974.657 |
| NM_014145 | 22079.988 | 22834.471 | AL137380  | 603.596   | 586.606   | AK022880  | 4754.443  | 3527.804  |
| X63454    | 447.787   | 354.318   | M33197    | 61620.082 | 59699.137 | NM_003601 | 21879.936 | 14367.141 |
| NM_014141 | 2474.158  | 2733.315  | AL137658  | 18474.879 | 17488.52  | AF086375  | 666.582   | 388.939   |
| NM_002223 | 2019.057  | 1927.886  | D16888    | 1565.202  | 1729.889  | AK001228  | 3061.16   | 2001.519  |
| M33197    | 67491.844 | 65017.926 | U79277    | 1283.696  | 1441.048  | AK026778  | 3516.265  | 2361.586  |
| NM_005490 | 19042.154 | 17450.869 | AF068298  | 4179.363  | 4723.815  | AF074987  | 6123.733  | 3711.664  |
| NM_003151 | 4485.935  | 4386.479  | Z70770    | 2246.434  | 2573.142  | AK001058  | 49041.793 | 26794.527 |
| NM_005601 | 1981.505  | 1899.562  | AJ227900  | 4187.456  | 3965.565  | AK026239  | 3612.757  | 2752.371  |
| NM_016151 | 7500.978  | 6613.767  | AK023242  | 1143.3    | 2109.852  | AF086283  | 2359.27   | 3088.768  |
| AK026270  | 1328.194  | 1544.462  | M33197    | 67439.109 | 65230.691 | AK027041  | 2418.241  | 2672.52   |
| NM_004550 | 17360.588 | 13732.776 | AJ012500  | 5376.318  | 6105.893  | NM_005355 | 59671.738 | 44273.391 |
| D90075    | 4459.573  | 5268.443  | AF085833  | 1088.572  | 1176.635  | AK000937  | 1665.208  | 1241.985  |
| M33197    | 59644.309 | 63005.273 | L19368    | 769.821   | 644.955   | AK023718  | 15787.021 | 16628.512 |
| NM_014857 | 1659.325  | 1383.168  | U00944    | 1266.664  | 1146.805  | AF075089  | 7719.834  | 9131.318  |
| AK023827  | 1851.644  | 1441.032  | BC035058  | 2267.559  | 2122.319  | AF241255  | 1788.011  | 2436.895  |
| AK021702  | 5785.908  | 4612.266  | X57566    | 12648.438 | 8683.426  | AF086007  | 65978.898 | 64044.914 |
| NM_003885 | 5529.342  | 5684.115  | M33197    | 67103.055 | 64515.078 | AK000803  | 6699.31   | 6406.595  |
| AL161977  | 3385.886  | 2077.051  | NM_018616 | 14608.223 | 13426.922 | AK022374  | 2099.524  | 2233.182  |
| NM_016445 | 3877.225  | 6115.43   | AK023809  | 2538.752  | 2007.319  | AF085926  | 38897.859 | 35991.805 |
| NM_003930 | 5279.268  | 4904.566  | M87943    | 58189.652 | 60158.602 | AF085948  | 2205.209  | 2389.917  |
| M33197    | 60696.992 | 62518.113 | AL360137  | 1180.509  | 1486.446  | AL137307  | 8980.153  | 7951.696  |
| NM_002685 | 3346.289  | 3839.762  | U28131    | 60594.367 | 55665.207 | AL137468  | 9027.921  | 6240.744  |
| NM_020360 | 1093.717  | 960.504   | AY007106  | 2565.996  | 3134.431  | AL162007  | 32674.121 | 20234.59  |
| NM_004415 | 1773.243  | 1873.779  | AF015910  | 60837.387 | 63214.457 | AL390137  | 46987.758 | 25458.615 |
| NM_007275 | 39589.078 | 27803.73  | BC009993  | 856.996   | 780.477   | AL137340  | 837.399   | 718.162   |
| NM_005210 | 14152.905 | 12731.959 | M33197    | 65788.523 | 65195.688 | AL137542  | 973.725   | 585.904   |
| NM_004723 | 9403.275  | 8233.099  | AB049150  | 1480.945  | 1758.968  | AL162045  | 1761.392  | 1530.958  |
| M33197    | 60106.516 | 63309.508 | NM_016824 | 5543.28   | 7189.547  | AK022437  | 45477.328 | 25901.854 |
| NM_018413 | 2279.993  | 2261.816  | NM_003031 | 6096.094  | 5112.359  | AK024213  | 58479.063 | 58508.691 |
| AB018299  | 8327.44   | 7379.627  | X89674    | 1010.132  | 1092.348  | AK022184  | 2597.984  | 1844.138  |
| NM_005245 | 8453.518  | 6839.717  | NM_007170 | 1704.042  | 1723.918  | AB007959  | 2094.976  | 1498.093  |
| NM_002941 | 2376.531  | 1899.307  | NM_003005 | 2010.637  | 1828.664  | AK026002  | 1007.589  | 1087.167  |
| AK025605  | 3827.493  | 3485.503  | M33197    | 63031.184 | 60502.277 | AK024360  | 453.03    | 616.339   |
| NM_003783 | 1984.003  | 1758.216  | AF317550  | 441.734   | 421.453   | AK023394  | 585.734   | 558.285   |
| NM_007000 | 5445.19   | 4560.279  | AK025416  | 1857.259  | 1969.998  | AF090093  | 42811.109 | 39229.66  |
| M23161    | 14747.164 | 13688.503 | AK022165  | 1426.337  | 1655.506  | AF161340  | 19786.85  | 21378.074 |
| NM_006100 | 1880.402  | 1990.57   | U58662    | 442.32    | 323.859   | AF242771  | 2870.633  | 3015.915  |
| NM_003197 | 13042.633 | 9769.566  | AF090883  | 1318.255  | 1279.209  | NM_018562 | 31516.184 | 34487.332 |
| AF176705  | 15897.926 | 13082.773 | U23860    | 848.85    | 994.818   | AF098666  | 3660.516  | 3981.064  |
| D29012    | 32501.275 | 26178.111 | M33197    | 62114.27  | 56023.926 | AF161365  | 2118.299  | 2252.903  |
| NM_017414 | 1187.466  | 891.211   | AL049263  | 648.888   | 535.192   | AF290544  | 1102.52   | 765.987   |
| NM_012170 | 29944.799 | 28113.414 | AK022372  | 3092.803  | 2542.848  | AK021969  | 2215.021  | 1817.305  |
| NM_002793 | 8116.473  | 7052.041  | AJ227863  | 507.326   | 419.022   | AK022065  | 2030.542  | 1932.425  |
| NM_004785 | 4775.936  | 4528.45   | NM_015916 | 2996.13   | 2746.091  | AK022221  | 24893.477 | 18452.264 |
| M33197    | 54525.793 | 62034.254 | NM_003520 | 544.803   | 685.71    | AK022356  | 3321.86   | 4271.675  |
| AL442083  | 10507.168 | 10124.189 | NM_015889 | 54699.301 | 56877.008 | AK021998  | 5749.719  | 9932.95   |
| D63487    | 10994.988 | 12011.353 | NM_000212 | 660.601   | 669.422   | AK022126  | 5421.463  | 9168.599  |
| AK097791  | 6649.136  | 6148.977  | M33197    | 60979.805 | 64398.375 | AK022256  | 1699.074  | 1938.574  |
| NM_020367 | 978.827   | 1243.737  | NM_004270 | 2883.249  | 4042.781  | AK022383  | 4083.554  | 4639.011  |
| AK022705  | 4137.783  | 3644.938  | NM_002332 | 18454.207 | 19297.801 | AF086262  | 2775.327  | 3070.572  |
| NM_016404 | 18215.021 | 17116.166 | NM_002850 | 3835.791  | 3909.494  | AF086292  | 19369.285 | 21772.055 |
| L03426    | 4052.297  | 3845.997  | NM_005240 | 4725.265  | 5362.076  | AK024342  | 47143.5   | 37319.637 |

|           |           |           |           |           |           |           |           |           |
|-----------|-----------|-----------|-----------|-----------|-----------|-----------|-----------|-----------|
| M33197    | 62938.535 | 63997.516 | NM_017651 | 2204      | 2528.951  | AL137712  | 10844.975 | 9424.672  |
| NM_020163 | 2532.262  | 2824.774  | AF161339  | 3457.874  | 2241.613  | AL137606  | 531.565   | 440.465   |
| NM_004324 | 5536.24   | 5422.14   | M33197    | 61564.781 | 59522.793 | L77599    | 66503.086 | 64857.059 |
| NM_005614 | 34541.98  | 32096.17  | AK000354  | 9818.785  | 12556.741 | AK021673  | 56702.883 | 50269.262 |
| AJ133115  | 10833.926 | 9259.845  | AL161984  | 1034.238  | 1505.82   | AB014543  | 14547.234 | 15289.996 |
| AF042831  | 1030.592  | 884.905   | NM_003950 | 533.692   | 395.588   | NM_018445 | 6028.021  | 5337.726  |
| X51630    | 20749.904 | 18307.252 | NM_014882 | 2819.459  | 2129.395  | AK022743  | 14619.094 | 17710.959 |
| NM_005056 | 2891.414  | 2814.684  | M33197    | 61126.355 | 63371.641 | AF035306  | 5977.271  | 5977.888  |
| NM_001965 | 1136.947  | 1124.784  | NM_001510 | 2242.227  | 2118.843  | AK091662  | 1815.172  | 2072.76   |
| AF208502  | 17969.4   | 13912.873 | AK024474  | 8073.863  | 8520.067  | AB038318  | 1255.116  | 1130.421  |
| M33197    | 58357.512 | 62961.492 | NM_006862 | 500.422   | 552.882   | NM_003954 | 3112.433  | 2557.329  |
| AF264750  | 51676.379 | 42498.934 | NM_017901 | 3279.715  | 3866.798  | NM_016345 | 2197.194  | 1829.67   |
| NM_006980 | 3557.273  | 3630.672  | NM_004272 | 2820.776  | 2644.542  | AK022003  | 810.682   | 1264.564  |
| AK023904  | 7512.177  | 5707.271  | NM_000355 | 1498.984  | 1745.679  | AK023877  | 1046.228  | 2165.968  |
| NM_017956 | 5808.976  | 6594.038  | NM_001930 | 6827.961  | 7631.702  | AK023640  | 699.149   | 1147.162  |
| NM_017826 | 1222.333  | 1210.186  | AK025270  | 993.952   | 976.301   | AK024046  | 3610.523  | 2847.017  |
| NM_016496 | 2568.045  | 2752.581  | NM_001564 | 3424.102  | 3393.723  | NM_017931 | 7190.611  | 8624.763  |
| NM_014305 | 20336.145 | 20999.139 | M33197    | 57831.723 | 60378.945 | AK022793  | 1829.262  | 2076.445  |
| M33197    | 57920.52  | 61226.594 | AF263537  | 8657.306  | 9481.702  | AJ227910  | 2613.919  | 2536.195  |
| NM_004094 | 6616.383  | 7403.005  | NM_015895 | 4362.777  | 3134.898  | AF001893  | 7515.891  | 4601.981  |
| NM_020236 | 7477.006  | 6976.614  | NM_000189 | 1556.05   | 1721.999  | X04236    | 13375.03  | 8692.408  |
| AK027059  | 47665.57  | 37176.004 | AL050050  | 2501.299  | 1356.485  | AK093746  | 26355.447 | 28561.098 |
| AF151109  | 53679.324 | 46775.18  | NM_004690 | 2016.263  | 1959.649  | D16875    | 782.179   | 1051.04   |
| NM_015414 | 59078.242 | 59901.461 | M33197    | 62482.656 | 62203.332 | AK027171  | 3421.55   | 4640.185  |
| L34070    | 24345.396 | 21954.461 | NM_013374 | 49120.566 | 43740.328 | AK021945  | 9985.969  | 12713.588 |
| M33197    | 58152.824 | 62232.445 | NM_003252 | 8249.688  | 9274.642  | L23545    | 1822.562  | 2485.697  |
| NM_016219 | 16980.826 | 16703.98  | NM_001225 | 4019.849  | 3270.129  | AK024153  | 3594.033  | 4111.064  |
| NM_004751 | 1809.522  | 1680.344  | AK026607  | 941.436   | 1052.391  | Y10516    | 11868.399 | 11703.267 |
| NM_001865 | 61902.273 | 60448.984 | NM_016561 | 21805.664 | 19044.568 | AF056451  | 19523.475 | 16180.672 |
| NM_006241 | 1097.731  | 854.99    | NM_014245 | 28817.121 | 28260.465 | AF015039  | 13311.865 | 11440.207 |
| NM_006441 | 15029.138 | 12402.154 | M33197    | 62185.957 | 57559.934 | U50528    | 4152.326  | 3258.289  |
| NM_001915 | 5132.261  | 4112.462  | L36531    | 492.475   | 523.499   | AB020632  | 4840.081  | 3440.017  |
| NM_018245 | 3651.739  | 3420.955  | AL110226  | 56962.313 | 61151.25  | NM_018614 | 70120.297 | 61363.113 |
| M33197    | 62028.688 | 62596.301 | AB046822  | 481.242   | 547.038   | AL117549  | 4114.399  | 5900.854  |
| AF252390  | 1301.851  | 1764.509  | NM_015885 | 3943.221  | 3722.511  | NM_005222 | 14349.989 | 22864.508 |
| NM_012117 | 11362.663 | 9392.119  | AK024809  | 536.691   | 913.049   | BC024308  | 5098.266  | 7249.468  |
| D17130    | 62984.207 | 62260.289 | NM_000305 | 2069.835  | 3754.082  | NM_000535 | 4776.749  | 7389.272  |
| X76302    | 8008.234  | 6798.531  | X69636    | 4302.133  | 5972.695  | AK001838  | 66376.992 | 63762.094 |
| AK026276  | 2572.129  | 2766.742  | M33197    | 63511.754 | 63804.672 | NM_018295 | 3620.125  | 5693.578  |
| M33197    | 58715.367 | 63041.789 | NM_004173 | 53407.379 | 47736.391 | AF070574  | 1422.18   | 1340.188  |
| X52354    | 7146.575  | 7862.57   | NM_013974 | 2389.743  | 1828.211  | AF190900  | 3188.863  | 3205.404  |
| NM_005413 | 731.135   | 909.909   | NM_017547 | 2613.163  | 3077.149  | NM_020404 | 49741.105 | 47129.195 |
| NM_002315 | 2408.772  | 2350.012  | NM_003983 | 5908.656  | 7414.441  | BE972401  | 12778.839 | 12347.473 |
| AK024191  | 2956.022  | 2985.115  | AK023708  | 889.198   | 837.716   | NM_017425 | 841.152   | 980.01    |
| AV693985  | 691.503   | 653.51    | NM_002105 | 2118.384  | 2098.661  | AB007922  | 1228.267  | 1203.004  |
| NM_006605 | 3149.012  | 4540.988  | M33197    | 63660.086 | 62077.793 | NM_015982 | 6596.505  | 5612.57   |
| NM_000457 | 2201.952  | 2111.791  | NM_018464 | 21460.516 | 21430.025 | NM_003745 | 53840.48  | 49379.141 |
| M34356    | 3669.132  | 3973.26   | D43948    | 5125.831  | 4715.446  | NM_002910 | 62534.766 | 63571.594 |
| M33197    | 57490.988 | 61845.867 | NM_012310 | 21965.607 | 25871.344 | AC096970  | 50764.008 | 61311.898 |
| NM_014623 | 15162.647 | 14400.686 | BE410824  | 743.687   | 656.141   | NM_014627 | 9639.519  | 13563.445 |
| NM_007244 | 5629.911  | 5357.412  | BF382116  | 9425.499  | 6744.43   | NM_013935 | 45474.383 | 46564.949 |
| M30629    | 7218.523  | 6922.826  | NM_003193 | 12127.208 | 11331.482 | U55055    | 1747.134  | 1734.716  |
| BE539299  | 681.079   | 892.307   | M33197    | 67515.453 | 64907.465 | AK022186  | 654.212   | 388.463   |



|           |           |           |           |           |           |           |           |           |
|-----------|-----------|-----------|-----------|-----------|-----------|-----------|-----------|-----------|
| AF193873  | 1137.214  | 1073.006  | AF113216  | 2715.956  | 2646.313  | AK021485  | 632.227   | 250.464   |
| NM_00262E | 2552.997  | 2097.239  | NM_017589 | 1976.603  | 1983.526  | AB018319  | 9393.303  | 5623.939  |
| M23575    | 1128.975  | 1193.033  | AK023582  | 1505.569  | 973.7     | AK001101  | 5962.542  | 5037.376  |
| AA190729  | 5854.865  | 5445.485  | NM_000124 | 1238.485  | 1394.551  | BM973473  | 2385.543  | 4534.033  |
| BF974315  | 20062.836 | 27294.982 | NM_017996 | 5962.244  | 7466.037  | AK021637  | 2168.815  | 2806.453  |
| T74985    | 879.896   | 771.963   | NM_014517 | 3096.305  | 4759.396  | AK021658  | 1846.38   | 1461.672  |
| AI652705  | 3648.421  | 3643.5    | NM_005466 | 2158.939  | 2325.369  | D61705    | 853.688   | 903.212   |
| AA973397  | 5191.204  | 6229.449  | NM_004269 | 3146.672  | 4325.123  | U17631    | 2803.374  | 3011.823  |
| AA569974  | 2155.482  | 2366.43   | NM_003409 | 803.706   | 1070.255  | AL137723  | 4493.87   | 5075.268  |
| AA923615  | 518.007   | 1076.295  | M33197    | 61069.02  | 60721.652 | AK000774  | 1597.602  | 1242.245  |
| AA446028  | 2209.856  | 2487.925  | D31765    | 6117.083  | 4959.594  | NM_01428E | 12362.837 | 10855.159 |
| M80583    | 1580.858  | 1198.775  | NM_006107 | 11198.742 | 9076.743  | AF035300  | 2139.091  | 2165.443  |
| AW009565  | 10383.449 | 11879.697 | NM_004175 | 1881.023  | 1740.42   | NM_017703 | 7959.896  | 5816.076  |
| AW451878  | 838.771   | 729.256   | AF288288  | 55252.891 | 50955.477 | NM_01532C | 5176.912  | 3509.939  |
| AI570478  | 740.211   | 825.178   | NM_017646 | 19376.311 | 16875.49  | NM_00405E | 3401.705  | 2095.637  |
| H18633    | 720.843   | 914.631   | AL050368  | 2449.236  | 2071.157  | NM_01472E | 38294.613 | 27110.268 |
| X07767    | 6927.996  | 6646.384  | NM_003092 | 18184.145 | 17454.938 | AJ297349  | 1892.135  | 1614.917  |
| X65293    | 1916.071  | 1918.739  | M33197    | 61953.313 | 59609.332 | NM_00582E | 5258.121  | 4724.996  |
| M33197    | 2204.708  | 1914.163  | NM_005861 | 9253.056  | 9133.95   | NM_00161E | 7017.304  | 6454.924  |
| NM_000853 | 9700.218  | 9258.742  | NM_01884E | 4868.334  | 5237.337  | NM_004463 | 937.133   | 690.801   |
| NM_00084E | 807.564   | 1024.998  | NM_00376C | 19206.762 | 22398.836 | NM_00593E | 4362.426  | 2558.933  |
| NM_00682C | 572.876   | 394.987   | AB037759  | 1671.408  | 1107.708  | U43586    | 3565.561  | 2700.557  |
| AF016903  | 7310.786  | 8672.576  | AL080080  | 7831.565  | 8292.931  | NM_006271 | 13865     | 10714.789 |
| NM_01567E | 7338.057  | 8189.402  | M33197    | 5707.618  | 5576.378  | NM_018647 | 1697.911  | 2415.351  |
| AK022267  | 1014.814  | 832.547   | NM_001161 | 17255.148 | 23010.881 | NM_00302E | 959.915   | 981.133   |
| NM_01604C | 7022.123  | 6265.923  | NM_004044 | 11588.106 | 12828.9   | NM_000721 | 61864.566 | 63547.145 |
| M33197    | 56717.629 | 62870.961 | NM_000221 | 51101.398 | 49006.883 | NM_003933 | 3601.204  | 3740.83   |
| AF031136  | 10587.454 | 11257.582 | H75678    | 4034.174  | 4592.227  | NM_01864C | 576.469   | 792.717   |
| NM_006597 | 52802.383 | 48908.043 | NM_00253E | 1578.065  | 1638.519  | NM_00509E | 4347.479  | 5617.101  |
| NM_012483 | 4575.118  | 4964.277  | NM_006452 | 18194.98  | 23835.523 | NM_00005E | 1175.086  | 1301.127  |
| NM_00349E | 9864.303  | 11362.04  | AB002359  | 4659.406  | 4132.721  | NM_003163 | 32581.148 | 34235.996 |
| AB023420  | 20133.109 | 23940.146 | M33197    | 12586.27  | 8833.631  | NM_01620E | 7615.915  | 4771.569  |
| M33197    | 59596.535 | 62442.457 | AB007864  | 5069.059  | 3443.199  | NM_00575E | 5015.778  | 3689.501  |
| NM_007264 | 6499.278  | 8450.905  | NM_00219E | 6917.091  | 8562.022  | AF149724  | 3086.819  | 2134.799  |
| NM_016511 | 8259.815  | 9708.61   | AF024693  | 379.163   | 457.055   | BC020745  | 1219.016  | 685.962   |
| NM_00355E | 4642.539  | 6006.135  | AK025905  | 3095.68   | 2894.811  | NM_006367 | 24317.301 | 15686.426 |
| NM_002543 | 691.739   | 636.164   | AL121733  | 2820.413  | 2830.654  | NM_006732 | 75557.836 | 63350.074 |
| NM_00218E | 1435.026  | 1425.093  | BE958072  | 3562.165  | 3921.164  | NM_004354 | 11069.199 | 8598.912  |
| M55337    | 754.514   | 731.134   | M33197    | 58450.551 | 54062.387 | NM_004661 | 4872.209  | 3284.109  |
| NM_01322E | 1352.505  | 1877.384  | NM_017532 | 1393.562  | 1803.79   | NM_00200E | 1401.816  | 890.416   |
| NM_016533 | 55783.363 | 57851.805 | NM_01448C | 6190.512  | 6473.529  | NM_00161C | 4431.503  | 2947.558  |
| NM_007342 | 8958.852  | 11241.042 | NM_00593E | 923.821   | 829.237   | NM_001241 | 2542.427  | 1512.71   |
| NM_005672 | 1504.445  | 1517.017  | NM_01416E | 9456.183  | 12602.386 | AF217504  | 5570.634  | 3257.973  |
| D25217    | 4002.455  | 2810.361  | NM_004964 | 18226.908 | 18135.721 | AK027102  | 19840.609 | 11770.28  |
| NM_006351 | 20355.82  | 15865.577 | NM_005197 | 15598.93  | 15972.79  | AL109714  | 1347.37   | 1150.508  |
| M33197    | 58063.133 | 60409.57  | AL137421  | 56739.348 | 57800.391 | NM_004632 | 8308.503  | 5629.655  |
| NM_004683 | 3077.934  | 3003.399  | M33197    | 62095.629 | 59786.52  | NM_01791E | 12532.924 | 8896.333  |
| AK023226  | 4215.327  | 4458.291  | NM_007241 | 1421.239  | 1750.207  | NM_01445E | 11674.604 | 11195.563 |
| AK025263  | 1286.913  | 1522.666  | M33197    | 62134.695 | 63294.27  | NM_00474C | 20381.547 | 18258.084 |
| NM_006931 | 5673.412  | 7082.342  | NM_001154 | 7901.452  | 9250.742  | NM_00380E | 4695.552  | 4144.971  |
| AJ133127  | 592.156   | 516.555   | NM_00181E | 2087.76   | 2064.994  | NM_01988E | 9001.128  | 11151.005 |
| NM_019844 | 548.928   | 780.489   | NM_01693E | 737.202   | 785.554   | NM_00327E | 65334.398 | 63636.539 |
| NM_018057 | 573.728   | 644.023   | NM_001993 | 1028.412  | 1220.403  | NM_00042E | 1210.663  | 1223.343  |

|           |           |           |           |           |           |           |           |           |
|-----------|-----------|-----------|-----------|-----------|-----------|-----------|-----------|-----------|
| M33197    | 57396.797 | 62976.191 | BF575833  | 344.333   | 312.209   | AK021957  | 66615.516 | 66584.797 |
| NM_015717 | 1916.958  | 2727.964  | NM_015725 | 11341.787 | 10911.1   | U95031    | 2786.649  | 3073.1    |
| NM_015925 | 6531.61   | 7525.741  | R61452    | 2874.681  | 2775.761  | NM_004771 | 3301.256  | 4330.062  |
| NM_003665 | 1164.093  | 1542.129  | R19938    | 20478.967 | 16599.199 | AL365514  | 2256.606  | 2215.266  |
| AF220217  | 3732.074  | 5660.12   | N94487    | 23173.984 | 20626.938 | NM_018295 | 3693.995  | 4808.01   |
| NM_013323 | 14480.786 | 15370.47  | AI886795  | 9198.039  | 10162.68  | NM_002104 | 2011.088  | 2005.422  |
| NM_014937 | 2444.187  | 2784.09   | D10495    | 3683.072  | 4041.323  | NM_005504 | 27233.426 | 23720.65  |
| NM_017426 | 10180.526 | 13896.563 | BF344679  | 4829.564  | 4963.313  | AF234654  | 3030.254  | 3156.287  |
| M33197    | 20768.074 | 18118.549 | BG743223  | 1190.353  | 1113.542  | NM_000110 | 6067.771  | 5624.211  |
| NM_004555 | 2168.786  | 2456.898  | M36634    | 2540.858  | 3206.746  | NM_016002 | 50563.609 | 47429.684 |
| AL079296  | 1292.084  | 1387.742  | M14156    | 42628.309 | 41299.879 | NM_014545 | 2817.196  | 2496.67   |
| NM_014770 | 1134.37   | 1227.49   | U87939    | 1948.474  | 1711.508  | NM_000531 | 1390.57   | 1612.117  |
| AB037737  | 2483.068  | 3194.341  | U86961    | 2301.399  | 2236.357  | NM_017832 | 4403.976  | 4298.169  |
| M33197    | 59983.941 | 55502.309 | U47924    | 1086.042  | 715.269   | NM_001713 | 12184.437 | 10849.099 |
| AK023103  | 3216.596  | 2740.687  | NM_005191 | 3700.875  | 4191.035  | NM_015367 | 23288.701 | 21301.57  |
| NM_019055 | 57179.242 | 51777.566 | AK094237  | 6080.375  | 5539.875  | NM_014495 | 14312.947 | 12840.038 |
| NM_013347 | 1551.907  | 1872.758  | L07592    | 1752.568  | 1403.038  | NM_002375 | 50228.305 | 43027.902 |
| D80008    | 3374.424  | 3340.189  | M33197    | 61028.359 | 58048.402 | NM_000985 | 60863.363 | 63899.859 |
| X56789    | 2920.493  | 2538.945  | NM_002983 | 17737.416 | 13901.02  | NM_001813 | 5544.587  | 6508.503  |
| AK001069  | 25314.721 | 23657.893 | NM_000074 | 18139.898 | 19116.391 | AF055016  | 11716.635 | 11085.812 |
| M33197    | 60076.762 | 59174.738 | NM_020393 | 450.283   | 416.55    | NM_007234 | 22223.586 | 28270.652 |
| NM_000935 | 621.829   | 1013.846  | BF434335  | 44895.281 | 44889.547 | Y16704    | 65215.527 | 63322.027 |
| NM_000355 | 4970.908  | 9110.089  | M57627    | 647.418   | 994.698   | NM_014567 | 11527.16  | 14181.26  |
| NM_006395 | 2766.115  | 4349.927  | NM_002993 | 1792.306  | 1950.388  | NM_017842 | 3929.271  | 5166.411  |
| NM_014305 | 12158.184 | 22929.998 | AK026946  | 3738.902  | 3481.624  | NM_019057 | 17699.83  | 21463.109 |
| NM_001084 | 5321.201  | 7379.082  | M33197    | 54645.125 | 61117.281 | NM_002677 | 3504.866  | 4407.726  |
| NM_015983 | 5696.876  | 7456.4    | NM_003192 | 5614.437  | 5878.592  | NM_012082 | 823.777   | 798.65    |
| NM_018622 | 9352.485  | 9276.488  | NM_018445 | 9424.298  | 10280.288 | NM_001537 | 7060.269  | 6260.975  |
| M33197    | 56800.281 | 61352.574 | AF086129  | 2296.693  | 2259.022  | U80743    | 1848.308  | 1452.432  |
| NM_005867 | 20771.299 | 24658.91  | D79994    | 3159.249  | 3112.779  | NM_001352 | 6496.215  | 6446.627  |
| AK026031  | 9276.704  | 11919.182 | NM_014455 | 36293.836 | 38968.559 | D15050    | 1731.886  | 1082.058  |
| NM_016465 | 12296.531 | 13013.636 | L10333    | 451.35    | 638.799   | NM_014724 | 395.843   | 201.498   |
| NM_007244 | 4677.621  | 4127.412  | AF235049  | 15331.361 | 17426.178 | NM_006527 | 15945.334 | 14024.849 |
| M30629    | 6264.355  | 4767.891  | M33197    | 63420.922 | 63465.199 | NM_006627 | 5155.959  | 3930.45   |
| BE539299  | 710.689   | 439.73    | NM_007365 | 2836.336  | 2968.612  | NM_007363 | 28216.076 | 20663.297 |
| AF193873  | 1000.428  | 970.389   | NM_014776 | 5972.541  | 6094.365  | NM_003093 | 53739.039 | 48647.359 |
| NM_002625 | 2202.561  | 2543.537  | NM_006480 | 56854.555 | 60816.902 | U05589    | 2901.513  | 2187.931  |
| M23575    | 922.302   | 917.418   | NM_007223 | 56493.352 | 60435.328 | NM_014473 | 26499.537 | 22576.488 |
| AA190729  | 4898.519  | 3530.133  | NM_000145 | 2158.812  | 2350.203  | NM_003095 | 55320.945 | 61087.895 |
| AI652705  | 3125.412  | 2756.597  | AF030107  | 33315.574 | 41496.02  | NM_016385 | 8410.914  | 6304.907  |
| AA973397  | 3897.688  | 2944.157  | NM_000871 | 5253.225  | 4442.352  | NM_002295 | 55627.535 | 62168.09  |
| M80583    | 1161.756  | 691.002   | NM_018965 | 7018.927  | 7488.935  | NM_003133 | 25478.379 | 23578.836 |
| AW009565  | 9139.989  | 7296.183  | AF086924  | 57780.992 | 60694.402 | NM_001762 | 26394.162 | 30614.414 |
| AW451878  | 655.02    | 507.546   | NM_005164 | 828.947   | 838.863   | NM_016305 | 23680.02  | 29222.229 |
| X07767    | 6616.325  | 8738.079  | NM_001995 | 5682.243  | 7519.894  | NM_003755 | 1872.426  | 2973.94   |
| X65293    | 1871.231  | 2821.585  | NM_000183 | 11529.658 | 14384.611 | NM_013235 | 7003.378  | 9869.611  |
| M33197    | 39625.469 | 44516.117 | AY004175  | 3789.365  | 4760.058  | BE258640  | 47050.313 | 52311.418 |
| AL050139  | 10576.943 | 13190.179 | M33197    | 60324.719 | 59094.313 | NM_003314 | 13063.181 | 17205.596 |
| NM_002593 | 529.769   | 944.056   | NM_012327 | 5275.603  | 4770.348  | NM_016623 | 25180.498 | 36150.602 |
| NM_006820 | 557.23    | 247.186   | NM_000904 | 7542.674  | 7371.169  | NM_001334 | 35163.941 | 33592.301 |
| AF016903  | 5668.44   | 4577.704  | NM_016045 | 4173.618  | 4512.507  | NM_001245 | 2418.25   | 2366.411  |
| NM_015675 | 6362.864  | 5031.031  | NM_000375 | 7566.522  | 8820.401  | AL365411  | 7305.209  | 6395.132  |
| AK022267  | 1052.955  | 697.477   | NM_000265 | 36228.965 | 43030.781 | M24470    | 1332.913  | 1131.231  |

|           |           |           |           |           |           |           |           |           |
|-----------|-----------|-----------|-----------|-----------|-----------|-----------|-----------|-----------|
| NM_01604C | 6157.643  | 4265.104  | NM_018849 | 12270.154 | 10787.065 | NM_01606E | 22513.57  | 28500.227 |
| M33197    | 59712.93  | 58989.438 | NM_002236 | 12189.075 | 12547.915 | NM_00124E | 1265.028  | 1998.681  |
| AF031136  | 11866.461 | 23296.318 | NM_01790E | 35481.77  | 31845.652 | AK024677  | 1564.784  | 2023.61   |
| NM_006597 | 45285.512 | 24718.375 | NM_00681E | 29018.83  | 41695.363 | NM_00003E | 1558.906  | 1496.456  |
| M33197    | 56583.723 | 58516.266 | NM_00280E | 13077.232 | 13241.114 | AF254082  | 54157.941 | 49303.969 |
| NM_007264 | 4700.01   | 4838.068  | M33197    | 60218.113 | 59894.711 | AF205718  | 20015.688 | 13058.133 |
| NM_016511 | 4646.561  | 4103.49   | NM_00171E | 15804.088 | 21388.637 | NM_00342C | 1507.847  | 1293.84   |
| NM_00355E | 3628.639  | 3050.346  | NM_00203C | 1552.723  | 1929.4    | AY004252  | 1842.52   | 1283.47   |
| NM_00254E | 421.123   | 460.681   | NM_00607E | 2265.389  | 2853.203  | NM_006261 | 8754.84   | 6300.976  |
| NM_00218E | 942.014   | 901.248   | NM_004951 | 1703.376  | 1360.421  | AK027045  | 2183.644  | 1197.306  |
| M55337    | 983.1     | 881.445   | NM_006564 | 10924.372 | 11305.333 | AF169796  | 7085.166  | 4533.11   |
| NM_01322E | 1567.828  | 2559.712  | NM_00480E | 5759.273  | 8061.29   | AK026157  | 897.871   | 588.803   |
| NM_01653E | 49422.66  | 44421.734 | M33197    | 58619.855 | 61345.828 | AK001814  | 13436.915 | 9298.358  |
| M33197    | 55070.121 | 61921.523 | NM_00263E | 19755.223 | 18846.436 | NM_00722E | 3252.945  | 4151.953  |
| NM_01462E | 12803.634 | 14739.43  | M33197    | 62042.91  | 60389.387 | NM_00343E | 8685.033  | 7282.06   |
| D25217    | 3808.989  | 3824.406  | NM_00287E | 11514.53  | 12226.535 | NM_016291 | 13428.525 | 13985.768 |
| NM_006351 | 18925.973 | 17823.041 | NM_01772E | 4385.093  | 4351.5    | NM_005937 | 56301.93  | 59404.055 |
| M33197    | 53197.762 | 60033.512 | AK022922  | 2031.099  | 1361.935  | AB037809  | 4147.225  | 4422.192  |
| NM_00468E | 2705.974  | 5792.917  | NM_00646E | 7933.893  | 6823.33   | AB011129  | 2660.055  | 2388.989  |
| AK023226  | 4577.348  | 9149.296  | AK024750  | 17179.496 | 15460.795 | NM_014391 | 34458.418 | 31007.301 |
| AK025263  | 1250.438  | 2122.413  | NM_00040C | 45955.52  | 46799.938 | NM_00427C | 3595.513  | 3682.633  |
| NM_006931 | 5424.805  | 11572.541 | M33197    | 61881.457 | 59682.152 | L09102    | 65400.273 | 65194.145 |
| AJ133127  | 344.718   | 352.072   | NM_00261E | 4036.124  | 4360.793  | U68488    | 1059.608  | 1135.748  |
| NM_019844 | 569.888   | 484.079   | NM_00441E | 9754.05   | 9822.829  | NM_00067E | 540.118   | 831.606   |
| NM_018057 | 416.582   | 736.373   | U47635    | 4423.735  | 4717.739  | NM_016247 | 19036.451 | 25049.535 |
| M33197    | 57509.398 | 62634.777 | NM_01865C | 5472.361  | 6811.609  | NM_001157 | 656.675   | 654.128   |
| NM_015717 | 1491.091  | 2726.106  | AK026945  | 15730.745 | 11452.016 | NM_01228E | 1050.091  | 1025.104  |
| NM_01592E | 5621.555  | 12584.06  | NM_00282E | 4414.726  | 5133.581  | NM_00671C | 1416.689  | 1697.861  |
| NM_00366E | 1063.97   | 2898.877  | NM_01436E | 2564.078  | 2517.264  | NM_00332E | 20669.762 | 19906.768 |
| AF220217  | 3590.414  | 6011.057  | M33197    | 61805.953 | 61311.461 | BG685310  | 4032.533  | 3443.668  |
| NM_01332E | 11317.757 | 6697.895  | NM_00139E | 21633.406 | 21461.566 | AW300857  | 57377.719 | 56897.617 |
| NM_014937 | 1410.674  | 1135.614  | AB050049  | 10034.789 | 10220.763 | H85962    | 56970.418 | 47485.199 |
| NM_01742E | 4765.632  | 3762.183  | J05125    | 977.075   | 1313.813  | BG742446  | 3008.154  | 2418.844  |
| NM_00085E | 8135.562  | 4784.808  | NM_00181E | 2513.892  | 2554.317  | AA864554  | 1683.193  | 1351.561  |
| NM_00084E | 896.912   | 302.366   | NM_01693E | 941.476   | 1054.589  | X66945    | 11620.229 | 7026.036  |
| NM_01477C | 924.413   | 1281.955  | NM_00199E | 1525.658  | 1777.01   | AI160703  | 1287.401  | 1119.205  |
| AB037737  | 2240.26   | 2307.613  | BF575833  | 563.752   | 731.978   | X12830    | 6493.277  | 5630.973  |
| M33197    | 57864.059 | 56255.895 | NM_01572E | 12036.386 | 13827.13  | U00482    | 4629.458  | 6794.74   |
| AK023103  | 4157.155  | 8284.537  | R61452    | 3293.333  | 4009.116  | K01904    | 33195.043 | 29576.619 |
| NM_01785E | 6221.319  | 8691.474  | R19938    | 24026.461 | 24162.303 | BE538886  | 2314.898  | 2504.662  |
| NM_01905E | 57452.566 | 49265.824 | N94487    | 23456.975 | 22166.301 | NM_00222E | 1143.385  | 1035.656  |
| NM_013347 | 1286.755  | 805.486   | AI886795  | 8628.154  | 8488.413  | M57650    | 59337.434 | 58530.355 |
| X56789    | 2346.025  | 1533.678  | D10495    | 4260.398  | 3797.985  | BC023978  | 2343.299  | 2242.434  |
| AK001069  | 28974.881 | 37990.473 | BF344679  | 4468.24   | 4118.705  | M21302    | 13114.12  | 12253.747 |
| M33197    | 60516.801 | 53531.863 | BG743223  | 1220.387  | 760.725   | NM_00251E | 59022.051 | 63013.254 |
| NM_00093E | 488.647   | 474.203   | M36634    | 3262.005  | 2679.792  | NM_00490E | 585.702   | 563.544   |
| NM_00035E | 3532.376  | 4246.671  | M14156    | 36616.973 | 32125.215 | NM_016171 | 59930.676 | 66845.648 |
| NM_00639E | 1826.736  | 1482.247  | U87939    | 1849.739  | 2093.747  | NM_01444E | 10192.614 | 9616.969  |
| NM_01430E | 8721.521  | 6345.19   | U86961    | 2775.895  | 3128.9    | NM_00521E | 7415.048  | 9149.772  |
| NM_001084 | 4870.07   | 9662.271  | U47924    | 581.843   | 768.081   | M14584    | 1530.503  | 2187.019  |
| NM_01598E | 6139.975  | 13543.13  | NM_005191 | 4265.915  | 5305.391  | NM_00641E | 2758.413  | 3879.975  |
| NM_01862E | 10022.328 | 23271.785 | AK094237  | 6432.116  | 6365.092  | AF035035  | 1110.86   | 812.281   |
| M33197    | 59874.121 | 63061.828 | AK056794  | 854.775   | 817.575   | AB020676  | 3865.108  | 4811.114  |

|           |           |           |           |           |           |           |           |           |
|-----------|-----------|-----------|-----------|-----------|-----------|-----------|-----------|-----------|
| NM_005867 | 20777.699 | 37534.285 | L07592    | 2146.913  | 1852.738  | AK024715  | 1723.58   | 1713.907  |
| AK026031  | 7932.383  | 13648.89  | M33197    | 59077.809 | 62533.762 | U90942    | 57044.43  | 60491.355 |
| NM_016468 | 10809.803 | 15710.181 | AK027244  | 416.555   | 503.307   | NM_014942 | 1361.399  | 1165.163  |
| NM_007342 | 7467.122  | 8426.074  | L40520    | 3426.036  | 4624.465  | NM_018360 | 6498.756  | 5676.697  |
| NM_005672 | 1728.064  | 1455.583  | BF434335  | 45615.023 | 43166.559 | AL365415  | 1511.435  | 1370.621  |
| BE539299  | 851.595   | 829.79    | M57627    | 1142.539  | 1491.459  | L29147    | 58842.684 | 58724.418 |
| AF193873  | 1228.722  | 922.662   | NM_002993 | 1838.39   | 2524.966  | NM_001525 | 56481.707 | 55232.902 |
| NM_002628 | 2706.352  | 1848.724  | AK026946  | 3266.889  | 3479.774  | NM_006055 | 11142.081 | 17041.164 |
| M23575    | 1080.528  | 811.5     | M33197    | 56125.004 | 60262.199 | NM_004296 | 2083.793  | 2584.685  |
| AA190729  | 5402.993  | 4691.29   | NM_003192 | 5300.333  | 6595.499  | NM_005048 | 1640.092  | 1930.083  |
| BF974315  | 16854.203 | 19376.287 | NM_018449 | 9226.854  | 10562.564 | NM_005972 | 3998.539  | 3620.252  |
| T74985    | 788.161   | 678.124   | AF086129  | 2476.814  | 2748.758  | NM_001060 | 1074.113  | 1274.8    |
| AI652705  | 3233.645  | 3223.479  | D79994    | 4255.392  | 3446.12   | NM_018841 | 11421.337 | 13933.163 |
| AA973397  | 4099.128  | 4284.358  | NM_014458 | 40935.453 | 27543.547 | NM_005226 | 1868.714  | 2608.593  |
| AA569974  | 1424.685  | 1379.373  | AF235049  | 19544.322 | 21543.334 | AK022859  | 3737.644  | 3835.915  |
| AA446028  | 1504.682  | 1306.173  | M33197    | 62332.813 | 62428.805 | NM_020228 | 20213.646 | 24449.531 |
| M80583    | 1122.037  | 607.917   | NM_007369 | 2428.235  | 2289.665  | AK024685  | 5862.1    | 7402.333  |
| AW451878  | 616.762   | 421.887   | NM_014776 | 5973.925  | 4595.68   | NM_003676 | 9389.931  | 13953.3   |
| X07767    | 5567.884  | 5592.286  | NM_006480 | 58705.113 | 59482.504 | AF113007  | 23206.1   | 26990.555 |
| X65293    | 1541.207  | 1767.352  | NM_007223 | 59117.461 | 59620.551 | NM_000688 | 3616.204  | 4320.67   |
| M33197    | 27690.342 | 18370.381 | NM_000145 | 2240.25   | 2339.308  | U39573    | 2196.812  | 2725.541  |
| AL050139  | 8874.372  | 10450.896 | AF030107  | 33672.961 | 36641.09  | D82061    | 7954.951  | 8908.002  |
| NM_002593 | 969.016   | 723.318   | NM_000871 | 5227.038  | 5618.813  | AJ293009  | 5273.105  | 6216.32   |
| NM_004558 | 1990.727  | 1476.613  | NM_018968 | 7551.354  | 8873.352  | NM_000374 | 4424.018  | 4931.152  |
| AL079296  | 920.755   | 1142.169  | AF086924  | 61031.395 | 62549.48  | NM_000502 | 30194.162 | 32861.039 |
| NM_006597 | 52383.566 | 43539.777 | M33197    | 57361.625 | 62365.941 | NM_001358 | 25550.008 | 28130.488 |
| NM_007329 | 409.959   | 543.483   | NM_001154 | 10049.149 | 12231.535 | NM_002245 | 1801.804  | 1287.268  |
| NM_012483 | 4628.903  | 4080.707  | NM_000183 | 9569.491  | 9767.754  | NM_004980 | 50729.988 | 53279.242 |
| NM_003498 | 8644.305  | 7501.234  | AY004175  | 3128.776  | 2572.893  | NM_003224 | 3527.712  | 3275.264  |
| AB023420  | 18361.43  | 16895.646 | M33197    | 59847.273 | 63615.301 | NM_004227 | 2907.86   | 2885.664  |
| M33197    | 59573.578 | 63392.402 | NM_012327 | 4907.362  | 4794.619  | NM_005282 | 9121.621  | 13759.354 |
| NM_007264 | 6047.612  | 6239.362  | NM_000904 | 6543.101  | 6719.829  | NM_001736 | 5437.585  | 7948.387  |
| NM_016511 | 5059.311  | 6162.846  | NM_016048 | 3589.117  | 3897.665  | AB028949  | 925.323   | 1670.432  |
| NM_003559 | 3908.33   | 7024.394  | NM_000375 | 7665.815  | 7659.464  | AL137580  | 1984.335  | 2334.313  |
| NM_002543 | 519.844   | 871.654   | NM_000265 | 34749.566 | 37916.75  | NM_004101 | 1899.771  | 2111.196  |
| NM_002185 | 1208.979  | 1813.922  | NM_018849 | 10449     | 8945.324  | NM_002995 | 57064.52  | 59157.453 |
| M55337    | 900.305   | 1440.933  | NM_002236 | 10971.183 | 10260.329 | AB033114  | 772.583   | 973.645   |
| M33197    | 57535.387 | 62187.039 | NM_017905 | 34119.48  | 29063.123 | NM_015978 | 11370.301 | 13912.984 |
| NM_013229 | 1350.93   | 2353.362  | NM_006815 | 30292.42  | 40321.133 | NM_003810 | 3084.792  | 3836.506  |
| NM_016533 | 52741.43  | 54980.629 | NM_002806 | 12493.421 | 11372.845 | NM_018973 | 13053.672 | 15178.024 |
| NM_014751 | 1395.31   | 2298.982  | M33197    | 59272.23  | 62240.895 | NM_002591 | 51777.414 | 55395.992 |
| NM_002347 | 21897.654 | 21249.658 | NM_001716 | 16217.52  | 19146.58  | NM_020216 | 3633.054  | 4063.993  |
| AB046807  | 1243.813  | 2069.51   | NM_002030 | 1626.956  | 1396.376  | AK021860  | 4739.417  | 4126.05   |
| NM_018176 | 403.781   | 765.707   | NM_006073 | 1777.059  | 1765.988  | AB046816  | 1882.935  | 1601.819  |
| M33197    | 56245.465 | 59573.707 | NM_004951 | 1734.825  | 1214.425  | AL137266  | 9192.342  | 12227.606 |
| NM_014623 | 11542.714 | 8777.828  | NM_006564 | 11879.24  | 11575.534 | NM_016457 | 1882.782  | 1922.915  |
| NM_007244 | 4357.822  | 4413.159  | NM_004802 | 5896.402  | 6526.392  | NM_005057 | 2400.635  | 1943.272  |
| M30629    | 5745.397  | 5360.676  | M33197    | 62180.578 | 62692.449 | AF143321  | 1477.293  | 1123.364  |
| NM_018976 | 14605.115 | 14245.975 | NM_002983 | 20461.568 | 14936.893 | AB046842  | 4524.921  | 6240.221  |
| NM_003355 | 17440.459 | 11036.946 | NM_000074 | 32550.65  | 33555.598 | NM_004850 | 3060.256  | 4231.992  |
| NM_005074 | 727.312   | 439.107   | M33197    | 58817.145 | 55602.246 | NM_002822 | 23662.592 | 24456.529 |
| NM_013272 | 3889.701  | 2040.065  | NM_002878 | 7270.093  | 6379.401  | BF306955  | 3920.466  | 4589.501  |
| NM_004170 | 1561.43   | 1211.299  | NM_017723 | 4436.104  | 3966.543  | NM_001394 | 16425.059 | 17174.762 |

|           |           |           |           |           |           |           |           |           |
|-----------|-----------|-----------|-----------|-----------|-----------|-----------|-----------|-----------|
| NM_018057 | 460.423   | 259.649   | AK022922  | 2272.87   | 2213.036  | NM_018441 | 25723.275 | 28327.072 |
| M33197    | 55470.797 | 60137.258 | NM_006462 | 7071.428  | 7027.087  | NM_000778 | 26711.428 | 32100.586 |
| NM_015717 | 1695.237  | 1944.866  | AK024750  | 13782.624 | 13860.435 | NM_001609 | 3925.947  | 4973.153  |
| NM_015925 | 4828.552  | 5143.611  | NM_000400 | 42709.691 | 41421.637 | BE733234  | 1821.867  | 2260.455  |
| NM_003665 | 1098.857  | 1390.837  | M33197    | 61673.484 | 61363.301 | NM_016247 | 18975.984 | 23017.006 |
| AF220217  | 4293.425  | 4612.515  | NM_002613 | 6800.195  | 6227.861  | NM_001157 | 699.453   | 788.174   |
| NM_013323 | 13571.01  | 13707.045 | NM_004419 | 11585.188 | 8374.362  | NM_012282 | 1272.211  | 1639.558  |
| NM_014937 | 1977.852  | 1918.287  | U47635    | 4604.258  | 3822.194  | NM_006710 | 1379.781  | 1692.894  |
| NM_017426 | 5903.179  | 5694.907  | NM_018650 | 4625.514  | 3917.007  | NM_003323 | 23821.846 | 29792.313 |
| M33197    | 15935.389 | 13651.531 | AK026945  | 12151.942 | 7528.058  | BG685310  | 4204.947  | 6130.169  |
| NM_000853 | 9926.809  | 8891.489  | NM_002828 | 3834.747  | 4978.632  | AW300857  | 58267.426 | 60811.199 |
| NM_000846 | 702.701   | 933.552   | NM_014369 | 2757.84   | 2256.66   | H85962    | 59797.344 | 60828.48  |
| NM_006820 | 693.527   | 631.631   | M33197    | 60270.828 | 59016.617 | BG742446  | 3082.967  | 3101.832  |
| AF016903  | 11976.751 | 22134.121 | NM_001398 | 24861.105 | 23606.129 | AA864554  | 2642.029  | 2880.174  |
| NM_015675 | 8079.096  | 16349.152 | AB050049  | 9871.445  | 11410.532 | X66945    | 12457.938 | 10208.516 |
| AK022267  | 1350.984  | 2059.543  | J05125    | 1251.939  | 1428.585  | AI160703  | 1620.601  | 1435.211  |
| NM_016040 | 7237.877  | 11005.498 | NM_005164 | 885.214   | 858.11    | X12830    | 8308.506  | 5961.207  |
| M33197    | 59479.719 | 61888.082 | NM_001995 | 6898.951  | 7623.321  | U00482    | 4733.842  | 3981.721  |
| AF031136  | 10705.513 | 16843.906 | NM_001993 | 1771.854  | 2386.108  | K01904    | 36167.445 | 34440.258 |
| NM_005867 | 21191.512 | 17947.539 | BF575833  | 1101.677  | 1496.107  | BE538886  | 2962.723  | 3911.647  |
| AK026031  | 9540.777  | 10905.109 | NM_015725 | 9804.826  | 11923.142 | NM_002228 | 1466.196  | 1683.357  |
| NM_016468 | 28081.643 | 15854.719 | R61452    | 2027.117  | 1955.577  | M57650    | 61327.539 | 61257.434 |
| NM_007342 | 8103.524  | 4372.125  | R19938    | 16941.873 | 15197.677 | BC023978  | 3411.839  | 3287.894  |
| NM_005672 | 1839.113  | 933.535   | N94487    | 25198     | 21168.566 | M21302    | 15286.136 | 15688     |
| D25217    | 4077.104  | 2418.598  | AI886795  | 9737.604  | 8701.387  | AK024865  | 3975.545  | 5647.653  |
| NM_006351 | 23151.092 | 13714.041 | D10495    | 3711.15   | 3891.249  | NM_007210 | 2384.384  | 2994.024  |
| M33197    | 55606.609 | 54357.434 | BF344679  | 4236.831  | 4261.709  | NM_001483 | 9600.31   | 15808.906 |
| NM_004683 | 4909.319  | 4277.83   | BG743223  | 1098.737  | 699.34    | NM_014443 | 12556.834 | 11309.027 |
| AK023226  | 3970.321  | 3198.189  | M36634    | 2563.077  | 2718.106  | NM_005212 | 7944.563  | 9338.054  |
| AK025263  | 1165.817  | 936.872   | M14156    | 43132.395 | 36772.359 | M14584    | 1461.339  | 1835.061  |
| M33197    | 60877.703 | 62533.695 | U87939    | 1739.795  | 1496.157  | NM_006419 | 2967.828  | 4863.265  |
| NM_001467 | 5499.177  | 4542.461  | U86961    | 2435.767  | 2442.267  | AF035035  | 1115.626  | 1318.72   |
| NM_018066 | 9704.779  | 10072.48  | U47924    | 698.769   | 643.136   | AB020676  | 3894.836  | 4209.738  |
| NM_006931 | 5039.38   | 6703.524  | NM_005191 | 3439.6    | 4181.237  | AK024715  | 1463.614  | 2004.97   |
| NM_020344 | 7265.076  | 9088.989  | AK094237  | 6491.307  | 6157.817  | U90942    | 58315.023 | 64674.828 |
| AF119868  | 1630.702  | 1589.969  | L07592    | 1807.677  | 1601.143  | NM_014942 | 1533.006  | 1836.133  |
| NM_005050 | 9434.455  | 9109.329  | M33197    | 56533.664 | 61492.234 | NM_018360 | 8163.612  | 9242.631  |
| M33197    | 58021.023 | 62154.934 | AK027244  | 715.655   | 552.687   | AK022489  | 788.372   | 982.251   |
| NM_019844 | 718.371   | 807.896   | L40520    | 3287.64   | 3422.247  | AL365415  | 1925.249  | 2356.187  |
| M33197    | 28081.047 | 13750.77  | NM_002633 | 22051.518 | 26922.076 | L29147    | 57911.203 | 60771.121 |
| AL050139  | 9192.701  | 4219.258  | AF086129  | 2741.992  | 3502.506  | NM_001525 | 58861.488 | 61784.836 |
| NM_002593 | 510.63    | 460.374   | D79994    | 4133.487  | 4316.296  | NM_006055 | 12479.108 | 11133.359 |
| NM_004558 | 2463.365  | 1992.358  | NM_014458 | 19712.055 | 27362.762 | NM_004296 | 2415.025  | 1742.646  |
| AL079296  | 1174.596  | 743.305   | AF235049  | 13084.097 | 15408.666 | NM_005048 | 2163.265  | 2059.421  |
| NM_014770 | 900.906   | 498.141   | M33197    | 59324.047 | 64513.691 | NM_005972 | 4937.76   | 6680.605  |
| AB037737  | 2376.907  | 1138.851  | NM_007369 | 2840.767  | 2698.77   | NM_001060 | 1326.183  | 1865.294  |
| M33197    | 65829.063 | 59137.551 | NM_014776 | 6203.124  | 5777.736  | NM_018841 | 11021.033 | 12212.269 |
| AK023103  | 3667.54   | 2716.696  | NM_006480 | 57549.973 | 61108.043 | NM_005226 | 2428.918  | 2329.095  |
| NM_017858 | 5164.68   | 4401.746  | NM_007223 | 57472.41  | 61731.594 | AK022859  | 3899.23   | 3748.524  |
| NM_019058 | 54614.715 | 48199.504 | NM_000145 | 1940.236  | 1889.796  | L09102    | 66711.695 | 70854.609 |
| NM_013347 | 1602.633  | 1609.037  | AF030107  | 29476.641 | 29901.178 | U68488    | 926.399   | 1345.203  |
| D80008    | 3260.106  | 4079.877  | NM_000871 | 5975.579  | 5313.224  | NM_003676 | 12216.934 | 14688.606 |
| X56789    | 2763.785  | 2154.869  | M33197    | 52105.707 | 56310.191 | AF113007  | 28213.256 | 23639.219 |

|           |           |           |           |           |           |           |           |           |
|-----------|-----------|-----------|-----------|-----------|-----------|-----------|-----------|-----------|
| AK001069  | 27464.084 | 17723.139 | NM_018968 | 8266.602  | 4778.634  | NM_00068E | 4611.075  | 4962.3    |
| M33197    | 75273.82  | 64432.59  | AF086924  | 55715.68  | 58213.219 | U39573    | 2164.562  | 2161.888  |
| NM_00093E | 3040.161  | 2437.121  | NM_000264 | 1111.415  | 737.394   | D82061    | 8625.449  | 8362.928  |
| NM_00035E | 4947.706  | 5671.572  | AB058740  | 40945.684 | 27397.988 | AJ293009  | 6779.159  | 6562.786  |
| NM_00639E | 2512.448  | 3116.989  | NM_00338E | 1820.532  | 907.606   | NM_000374 | 4879.008  | 4131.805  |
| NM_01430E | 10410.922 | 11045.643 | NM_00188E | 2182.631  | 1288.426  | NM_00050E | 29529.893 | 28913.795 |
| NM_001084 | 5086.947  | 5834.992  | NM_00439E | 1936.76   | 1193.407  | BF088089  | 645.415   | 967.872   |
| NM_01598E | 5373.738  | 4072.261  | M33197    | 57096.293 | 60272.254 | NM_00135E | 29422.895 | 32429.484 |
| NM_01862E | 9684.374  | 12167.182 | NM_001154 | 10619.515 | 7455.857  | NM_00224E | 2746.066  | 4070.062  |
| M33197    | 60980.23  | 61799.879 | NM_00181E | 5269.452  | 3729.047  | NM_00498E | 53474.816 | 57646.512 |
| CY3Cy5    | 2836.554  | 202.37    | NM_01693E | 1106.173  | 920.988   | NM_003224 | 4108.813  | 4320.485  |
| NM_006981 | 1822.789  | 1770.665  | NM_00166E | 4099.405  | 7402.904  | NM_004227 | 2605.68   | 3117.345  |
| AF086354  | 603.099   | 438.365   | NM_00421E | 10586.764 | 16006.841 | NM_00528E | 9344.448  | 10234.436 |
| AF086429  | 393.678   | 434.479   | NM_01653E | 4529.771  | 6004.3    | NM_00173E | 5693.099  | 6477.724  |
| NM_01906E | 729.908   | 799.366   | NM_014804 | 1820.034  | 1572.64   | AB028949  | 956.305   | 851.375   |
| AF086377  | 637.291   | 608.506   | NM_01245E | 13003.313 | 11713.315 | AL137580  | 2429.695  | 2294.204  |
| AF086302  | 429.231   | 469.795   | NM_00280E | 12630.306 | 10027.301 | NM_004101 | 2437.019  | 3184.111  |
| AF086439  | 484.099   | 402.306   | M33197    | 54109.109 | 61765.898 | NM_00299E | 58799.195 | 63037.438 |
| M33197    | 60359.32  | 61367.668 | NM_00171E | 16458.357 | 16440.33  | AB033114  | 964.325   | 1269.739  |
| AF038171  | 2286.018  | 1999.778  | NM_00203E | 1520.707  | 753.83    | NM_01597E | 12994.585 | 13014.772 |
| AF052160  | 604.05    | 705.14    | NM_00607E | 1626.388  | 967.502   | NM_00381E | 2970.06   | 2643.315  |
| AK026512  | 1420.913  | 1305.565  | NM_004951 | 1382.316  | 563.536   | NM_00490E | 944.359   | 645.985   |
| NM_01848E | 3267.809  | 3249.49   | NM_006564 | 11205.527 | 7321.829  | NM_016171 | 61554.191 | 66253.195 |
| NM_01788E | 2414.815  | 2099.5    | NM_00480E | 5848.204  | 3913.814  | NM_01897E | 13541.952 | 14403.804 |
| AF090945  | 2674.956  | 3325.398  | M33197    | 50585.125 | 55942.535 | NM_002591 | 45845.992 | 54961.445 |
| NM_006981 | 1530.731  | 1804.16   | NM_00298E | 19403.834 | 9260.779  | NM_02021E | 3576.497  | 2853.539  |
| SR2       | 42350.602 | 37984.285 | NM_000074 | 29440.381 | 20880.727 | AK021860  | 5209.87   | 3807.165  |
| SR4       | 11538.711 | 14449.088 | NM_02039E | 930.064   | 657.763   | AB046816  | 1566.992  | 1645.969  |
| SR6       | 1694.588  | 2241.836  | BF434335  | 46737.254 | 50460.676 | AL137266  | 8715.062  | 8087.145  |
| SR8       | 6265.997  | 25026.57  | M57627    | 1422.197  | 1216.751  | NM_01645E | 1876.727  | 1835.415  |
| SR10      | 22092.887 | 9333.449  | NM_00299E | 3650.982  | 2741.351  | NM_00505E | 2412.265  | 1907.617  |
| CY3Cy5    | 3635.776  | 372.322   | AK026946  | 4213.229  | 3853.465  | AF143321  | 2434.952  | 2302.919  |
| AF088010  | 705.152   | 584.668   | M33197    | 53839.313 | 59015.125 | NM_00485E | 3653.645  | 2781.499  |
| AK026718  | 3662.469  | 3835.363  | NM_00319E | 5730.372  | 4995.169  | NM_00282E | 23237.373 | 18934.1   |
| AF085899  | 571.393   | 777.275   | NM_01844E | 8339.329  | 8639.521  | BF306955  | 4471.632  | 4430.119  |
| AK022035  | 1390.38   | 1383.493  | NM_00139E | 22727.559 | 22386.91  | NM_001394 | 16291.975 | 13638.718 |
| M33197    | 59218.777 | 57247.254 | AB050049  | 7522.424  | 6793.722  | NM_018441 | 26135.209 | 32010.795 |
| NM_004337 | 5159.631  | 5199.457  | J05125    | 631.162   | 610.518   | NM_00077E | 26540.922 | 30113.307 |
| AL117497  | 1202.457  | 1071.875  | NM_005164 | 872.457   | 423.995   | NM_00160E | 4234.251  | 4130.458  |
| AF085848  | 495.73    | 387.275   | NM_00199E | 6312.862  | 3382.443  | BE733234  | 1813.428  | 1771.438  |
| AK023612  | 378.76    | 312.269   | NM_00018E | 12424.91  | 8563.443  | NM_02022E | 17313.828 | 17086.494 |
| M33197    | 59629.063 | 55226.609 | AY004175  | 5569.182  | 2704.439  | AK024685  | 6953.478  | 7153.523  |
| AF147360  | 1140.38   | 984.723   | M33197    | 57151.332 | 59809.852 | NM_001157 | 887.882   | 919.085   |
| AL137269  | 6721.342  | 7078.012  | NM_012327 | 8721.803  | 5382.965  | NM_01228E | 1574.312  | 1497.58   |
| AK021983  | 4326.794  | 5117.269  | NM_000904 | 8201.577  | 4640.359  | NM_00671E | 1190.049  | 1311.974  |
| Y11681    | 19321.859 | 18808.477 | NM_01604E | 4212.338  | 2979.49   | NM_00332E | 23339.705 | 19359.064 |
| AL110135  | 9425.207  | 10401.228 | NM_00037E | 7934.146  | 6593.766  | BG685310  | 3436.714  | 3619.813  |
| NM_00699E | 22150.826 | 18324.334 | NM_00026E | 30867.143 | 28717.037 | AW300857  | 55348.691 | 58879.102 |
| M33197    | 61313.586 | 58346.273 | NM_01884E | 11411.008 | 6790.622  | H85962    | 55569.285 | 55382.352 |
| M33197    | 56674.176 | 60344.945 | M33197    | 52336.324 | 53995.848 | BG742446  | 3779.472  | 4133.891  |
| AK000777  | 556.443   | 644.668   | M16796    | 575.75    | 333.349   | AA864554  | 2385.667  | 2249.187  |
| AK021589  | 508.786   | 653.467   | AF279890  | 16771.645 | 11573.051 | X66945    | 10985.823 | 10098.891 |
| M33197    | 58532.516 | 59241.867 | NM_00223E | 11147.872 | 6578.595  | AI160703  | 1897.183  | 1957.867  |

|           |           |           |           |           |           |           |           |           |
|-----------|-----------|-----------|-----------|-----------|-----------|-----------|-----------|-----------|
| AF085969  | 581.513   | 566.7     | NM_012069 | 12182.805 | 9349.58   | X12830    | 8719.582  | 9367.057  |
| AF144233  | 1141.142  | 1171.913  | NM_001689 | 51084.32  | 39191.527 | U00482    | 6135.078  | 4469.909  |
| AF085925  | 506.064   | 543.633   | NM_016601 | 4116.018  | 2879.015  | Z80998    | 1993.661  | 2773.551  |
| AK022986  | 406.008   | 537.967   | NM_017905 | 40750.586 | 32272.084 | BE538886  | 3199.605  | 2473.535  |
| AF085975  | 1459.578  | 1463.263  | M33197    | 59217.773 | 58556.289 | NM_002228 | 1364.868  | 890.092   |
| AF075103  | 1270.343  | 1402.137  | NM_006815 | 32698.453 | 27951.377 | M57650    | 53479.031 | 55486.438 |
| AF085943  | 801.775   | 749.62    | M33197    | 57540.953 | 62475.891 | BC023978  | 2849.345  | 2094.68   |
| M33197    | 58448.469 | 57251.68  | AK027244  | 1049.42   | 1065.199  | M21302    | 17356.029 | 12074.521 |
| AL137390  | 3612.243  | 4067.32   | L40520    | 2394.079  | 1579.479  | AK024865  | 4229.268  | 4805.249  |
| AL137611  | 6388.597  | 5606.292  | NM_002633 | 21136.129 | 15847.287 | NM_007210 | 2368.572  | 2450.192  |
| AL359566  | 25959.209 | 21489.236 | M33197    | 56038.262 | 56516.938 | NM_001483 | 8303.345  | 9361.516  |
| AL133110  | 347.731   | 378.272   | NM_002878 | 12496.254 | 9567.517  | NM_014942 | 1573.607  | 1334.363  |
| AL137427  | 3360.271  | 2887.698  | NM_017723 | 4073.435  | 2644.794  | NM_018360 | 8357.699  | 7147.03   |
| AL157460  | 822.247   | 833.676   | AK022922  | 2110.426  | 1343.496  | AK022489  | 675.726   | 357.234   |
| AL359595  | 1126.455  | 1066.517  | NM_006462 | 6874.944  | 4334.345  | AL365415  | 1634.689  | 1773.692  |
| M33197    | 52044.133 | 56581.227 | AK024750  | 13641.152 | 8967.906  | L29147    | 61516.574 | 62206.891 |
| M33197    | 55399.395 | 61302.789 | NM_000400 | 41703.82  | 25209.822 | NM_001525 | 56714.402 | 53396.441 |
| AL049846  | 695.229   | 902.915   | M33197    | 57071.16  | 54681.332 | NM_006055 | 11711     | 10269.132 |
| AK024161  | 2551.944  | 3060.885  | NM_002613 | 5446.333  | 3510.614  | NM_004296 | 1917.992  | 1841.708  |
| AK021682  | 2869.046  | 2964.933  | NM_004419 | 12005.055 | 9110.491  | NM_005048 | 1853.923  | 1961.606  |
| AK022141  | 809.665   | 610.143   | U47635    | 4195.651  | 2867.156  | NM_005972 | 4196.318  | 3407.681  |
| AK023942  | 2290.583  | 2628.065  | NM_018650 | 7588.219  | 6080.624  | NM_001060 | 1362.497  | 1379.921  |
| M33197    | 59656.184 | 60338.703 | AK026945  | 12422.197 | 5595.883  | NM_018841 | 13257.118 | 12913.78  |
| AK022046  | 1088.426  | 1017.338  | NM_002828 | 3416.079  | 2581.31   | NM_005226 | 3071.631  | 3022.658  |
| AK027207  | 795.623   | 666.559   | NM_014369 | 2895.777  | 2096.594  | AL133105  | 14547.438 | 16421.367 |
| AJ227892  | 6921.727  | 7085.209  | M33197    | 59170.957 | 59497.277 | AK022859  | 5336.637  | 6178.548  |
| M33197    | 56080.688 | 56052.152 | CY3Cy5    | 2605.268  | 402.571   | NM_000214 | 941.257   | 935.687   |
| AK022013  | 1126.209  | 950.214   | AL834159  | 6066.365  | 7229.848  | NM_014864 | 8815.546  | 10425.073 |
| AK022155  | 1718.833  | 1640.325  | NM_000164 | 52700.922 | 42360.148 | NM_003728 | 57799.02  | 57139.863 |
| AK022288  | 676.218   | 466.925   | AK025253  | 2965.858  | 2489.698  | NM_014352 | 35445.145 | 30788.686 |
| AK021916  | 979.633   | 770.387   | AK025004  | 1746.16   | 1828.599  | NM_012481 | 10724.117 | 10142.049 |
| AK024201  | 566.316   | 316.569   | AL136818  | 1422.893  | 1466.574  | L09102    | 65900.305 | 65263.34  |
| AK022174  | 494.465   | 594.218   | AF146798  | 4023.506  | 4791.893  | U68488    | 1072.631  | 1463.842  |
| M33197    | 63711.758 | 62603.473 | AK022049  | 1222.422  | 1583.782  | NM_000675 | 1085.927  | 1692.147  |
| AF048848  | 630.777   | 830.092   | AF086517  | 19674.357 | 16541.07  | NM_016247 | 25274.807 | 35170.43  |
| AL049299  | 731.868   | 989.937   | AK025740  | 28080.523 | 23161.762 | NM_006827 | 40080.98  | 34524.203 |
| NM_006088 | 29543.531 | 32991.813 | AK000311  | 3947.833  | 4178.191  | AK021761  | 24525.73  | 23401.58  |
| NM_018265 | 1702.641  | 1627.206  | AK021747  | 2203.395  | 2653.363  | AK024536  | 8678.328  | 9804.437  |
| AF130086  | 3265.729  | 3322.955  | AK025640  | 9891.553  | 11498.419 | NM_018668 | 11736.061 | 12462.646 |
| AK023858  | 1338.738  | 1517.398  | AL834159  | 5162.032  | 4911.352  | NM_004227 | 2506.543  | 2880.516  |
| AF250920  | 13225.359 | 14258.183 | NM_000164 | 48087.719 | 33875.414 | NM_005282 | 8463.51   | 9776.496  |
| NM_017733 | 3198.792  | 2967.682  | SR1       | 66593.109 | 59071.621 | NM_001736 | 4667.341  | 6193.006  |
| NM_014042 | 10019.998 | 8509.59   | SR3       | 29024.771 | 39268.527 | AB028949  | 1321.395  | 1672.163  |
| D17152    | 32821.949 | 28198.41  | SR5       | 3553.891  | 4016.439  | AL137580  | 2050.394  | 2756.234  |
| AK024464  | 14891.445 | 14325.358 | SR7       | 3141.324  | 30415.455 | NM_004101 | 1902.635  | 2183.802  |
| AK023638  | 880.421   | 987.733   | SR9       | 10595.763 | 2687.8    | NM_002995 | 54738.043 | 59494.773 |
| M33197    | 5268.724  | 5401.579  | CY3Cy5    | 2521.912  | 351.699   | AB033114  | 1162.819  | 1312.318  |
| AK025423  | 5805.97   | 4749.993  | D55638    | 893.823   | 790.456   | NM_015978 | 15090.88  | 14404.403 |
| AK024194  | 814.696   | 696.765   | L23870    | 808.074   | 881.263   | NM_003810 | 3871.07   | 3257.423  |
| AL050022  | 1688.055  | 1326.361  | Z97017    | 620.844   | 699.256   | NM_004908 | 1473.945  | 1440.336  |
| AL137380  | 1108.308  | 1200.039  | D16951    | 1443.811  | 1547.703  | NM_016171 | 59007.855 | 60762.652 |
| M33197    | 58041.016 | 62222.672 | L19362    | 995.07    | 1008.31   | NM_014443 | 13251.655 | 8831.51   |
| AL137658  | 20086.492 | 20721.1   | L33807    | 2153.778  | 2529.13   | NM_005212 | 8790.481  | 8163.421  |

|           |           |           |           |           |           |           |           |           |
|-----------|-----------|-----------|-----------|-----------|-----------|-----------|-----------|-----------|
| D16888    | 1182.066  | 1512.089  | NM_006545 | 68451.484 | 63054.211 | M14584    | 2059.1    | 1667.075  |
| U79277    | 848.812   | 942.959   | NM_016534 | 2679.963  | 2116.6    | NM_006419 | 5090.748  | 4878.772  |
| AF068298  | 7803.187  | 8117.056  | AB021923  | 2599.63   | 2154.365  | AF035035  | 1597.295  | 1389.411  |
| Z70770    | 639.174   | 806.721   | AK024240  | 1199.175  | 742.419   | AB020676  | 4267.959  | 3272.807  |
| AJ227900  | 4825.47   | 4421.168  | NM_016456 | 63649.789 | 55846.293 | AK024715  | 2294.291  | 3077.414  |
| M33197    | 66114.164 | 60697.484 | AK022677  | 3971.869  | 3845.888  | U90942    | 63202.379 | 62490.195 |
| AJ012500  | 1958.683  | 2110.238  | AF035288  | 451.015   | 693.438   | BE733234  | 1351.49   | 1735.854  |
| AF085833  | 1650.502  | 1663.829  | AL137645  | 26959.393 | 26513.576 | NM_020228 | 30199.078 | 32690.682 |
| U00944    | 1464.022  | 1508.999  | AK026141  | 1705.268  | 2354.821  | AK024685  | 7600.936  | 7895.251  |
| BC035058  | 1342.161  | 1397.366  | AK022894  | 2599.907  | 2823.482  | NM_003676 | 11999.118 | 15661.439 |
| X57566    | 12163.652 | 11158.549 | AF217993  | 7000.79   | 6715.073  | AF113007  | 28423.592 | 26024.305 |
| M33197    | 58700.699 | 60385.617 | AF131823  | 1027.896  | 1106.662  | NM_000688 | 3649.073  | 4075.924  |
| NM_018616 | 20645.463 | 20402.004 | AK026324  | 12803.978 | 14558.965 | U39573    | 2181.755  | 2476.492  |
| AK023809  | 1755.045  | 1731.394  | AK024518  | 23319.709 | 24687.967 | D82061    | 9403.289  | 12037.692 |
| AL137590  | 469.838   | 461.877   | AK024586  | 3940.206  | 4600.532  | AJ293009  | 6961.313  | 7973.172  |
| M87943    | 59833.516 | 58261.945 | AK025017  | 7720.316  | 7180.967  | NM_000374 | 6764.243  | 8130.981  |
| AL360137  | 1604.599  | 1680.491  | AK024534  | 1167.683  | 1452.541  | NM_000502 | 34494.684 | 34613.766 |
| U28131    | 46258.504 | 36604.672 | AK024616  | 335.348   | 610.174   | BF088089  | 437.366   | 419.979   |
| AY007106  | 3280.602  | 3862.682  | AK024914  | 5866.371  | 6716.097  | NM_001358 | 31689.879 | 32193.59  |
| AF015910  | 8081.776  | 6877.391  | AK025346  | 66511.766 | 71380.211 | NM_005175 | 58022.785 | 63691.035 |
| BC009993  | 2144.556  | 2117.52   | AK022583  | 7395.614  | 7797.304  | NM_001696 | 20839.293 | 20838.396 |
| M33197    | 57018.277 | 60460.469 | AL137534  | 66468.445 | 67559.852 | NM_004975 | 40209.277 | 33745.191 |
| AB049150  | 778.36    | 1121.445  | AF052121  | 10272.011 | 11018.633 | NM_002245 | 1830.603  | 2098.784  |
| NM_016824 | 9030.53   | 11667.722 | AL359062  | 7143.918  | 7276.502  | D87445    | 11937.011 | 11840.586 |
| NM_003031 | 10668.26  | 10472.248 | AK026869  | 3387.022  | 3019.421  | NM_000238 | 17555.75  | 16727.076 |
| X89674    | 574.386   | 717.785   | AK022192  | 525.796   | 830.623   | NM_002247 | 3843.261  | 3641.653  |
| NM_007170 | 971.047   | 1105.998  | NM_019099 | 63292.328 | 57813.699 | NM_004980 | 52716.441 | 55580.77  |
| NM_003008 | 4992.958  | 4590.052  | AJ227904  | 383.431   | 514.379   | AB011094  | 42853.211 | 34729.809 |
| NM_004100 | 651.08    | 619.263   | Y12020    | 64332.105 | 57460.566 | NM_003224 | 4531.016  | 5993.002  |
| M33197    | 55338.797 | 55943.668 | AJ001905  | 3909.196  | 4262.26   | AK024865  | 3002.721  | 3355.606  |
| AF317550  | 1307.138  | 1102.294  | U17635    | 1762.17   | 1882.137  | NM_007210 | 2229.879  | 2293.852  |
| NM_003543 | 695.839   | 536.865   | AL049930  | 1417.328  | 1331.429  | NM_001483 | 7198.932  | 7280.303  |
| AK025416  | 1556.734  | 1255.798  | Z83946    | 718.459   | 1035.586  | NM_018973 | 13655.164 | 13514.915 |
| AK022165  | 1038.469  | 1004.263  | AF086198  | 23638.814 | 24669.369 | NM_002591 | 43916.934 | 48294.52  |
| U58662    | 378.543   | 307.118   | AL137382  | 66399.289 | 68791.641 | NM_020216 | 5273.888  | 6948.75   |
| AF090883  | 1195.608  | 1338.897  | AK024599  | 4205.15   | 3424.115  | AK021860  | 5883.877  | 5639.839  |
| U23860    | 600.133   | 626.641   | NM_014450 | 6589.27   | 6590.13   | AB046816  | 1932.716  | 2148.454  |
| M33197    | 61143.809 | 59317.215 | AB007975  | 1373.124  | 1795.493  | AL137266  | 10719.911 | 12891.394 |
| AL049263  | 436.636   | 391.746   | AK024152  | 2278.545  | 2875.652  | NM_016457 | 2528.168  | 2455.242  |
| AK022372  | 2705.015  | 2539.349  | AL137603  | 563.102   | 316.063   | NM_005057 | 2800.103  | 2726.821  |
| AJ227863  | 624.458   | 400.209   | AK026888  | 2022.329  | 1629.858  | AF143321  | 1719.079  | 1382.124  |
| AF086258  | 527.496   | 396.988   | AK021821  | 867.829   | 954.121   | AB046842  | 4880.624  | 4450.805  |
| NM_015916 | 3023.128  | 2795.004  | AL049328  | 1120.069  | 1622.001  | NM_004850 | 3592.161  | 3537.604  |
| NM_003520 | 852.211   | 832.531   | AK000030  | 1540.684  | 1479.091  | NM_002822 | 24996.783 | 19851.49  |
| AK027157  | 536.995   | 598.573   | NM_017932 | 1278.819  | 1336.518  | BF306955  | 6035.031  | 5072.5    |
| NM_015889 | 56778.316 | 58364.516 | AK000910  | 6104.929  | 8875.484  | NM_001394 | 19136.334 | 14911.041 |
| NM_000212 | 1169.056  | 1187.056  | AF252280  | 32019.061 | 50643.68  | NM_018441 | 26555.668 | 21275.574 |
| M33197    | 53128.762 | 57420.586 | AK000107  | 1558.064  | 2390.692  | CY3Cy5    | 8917.585  | 354.521   |
| NM_004276 | 4306.539  | 5414.229  | AK000795  | 529.623   | 793.071   | BM664556  | 3614.456  | 1458.589  |
| NM_002332 | 33957.988 | 30954.451 | AK000951  | 1984.222  | 2307.168  | AL359586  | 1761.983  | 1159.061  |
| NM_002859 | 2440.344  | 3107.3    | AF130064  | 45372.211 | 43278.039 | AF035290  | 2805.25   | 1815.682  |
| NM_005246 | 1148.57   | 1649.63   | U17624    | 1389.793  | 1196.223  | AK023216  | 1418.78   | 1188.206  |
| NM_017651 | 1639.129  | 1822.127  | AK025184  | 1056.418  | 792.656   | M33197    | 76702.93  | 65366.582 |



|           |           |           |           |           |           |           |           |           |
|-----------|-----------|-----------|-----------|-----------|-----------|-----------|-----------|-----------|
| AF161339  | 3608.565  | 2525.673  | D16988    | 46052.117 | 46708.625 | AK023288  | 2819.606  | 1487.64   |
| M33197    | 57168.84  | 59608.063 | AK001959  | 13850.094 | 12462.661 | NM_017986 | 24091.676 | 12431.506 |
| NM_003881 | 578.947   | 514.178   | U36217    | 5326.484  | 4916.184  | AK024846  | 13257.116 | 6350.354  |
| AK000354  | 12576.57  | 11778.297 | AL389880  | 522.782   | 481.346   | BM664556  | 3443.024  | 2739.216  |
| AL161984  | 1760.541  | 1822.118  | AL157452  | 786.518   | 685.858   | SR3       | 44598.852 | 53347.266 |
| NM_003950 | 461.287   | 506.793   | AK024155  | 29856.354 | 27158.285 | SR7       | 4628.255  | 62080.75  |
| NM_014882 | 2902.431  | 2863.851  | AL359334  | 17502.646 | 15407.72  | CY3Cy5    | 9060.074  | 747.506   |
| NM_000836 | 365.814   | 600.801   | AK027095  | 1607.63   | 1737.609  | U52839    | 4676.545  | 1700.503  |
| M33197    | 60040.527 | 59563.367 | AF062097  | 2184.246  | 2343.78   | U58667    | 1674.411  | 2542.386  |
| NM_001510 | 686.632   | 621.759   | BC030949  | 4287.735  | 5534.714  | M33197    | 67363.797 | 65458.711 |
| AK024474  | 2654.485  | 1974.795  | AF116615  | 3444.983  | 4573.396  | AK026984  | 73124.797 | 65333.281 |
| NM_006862 | 1373.877  | 1315.306  | U17636    | 64969.535 | 61030.547 | AK023631  | 481.052   | 238.807   |
| NM_017901 | 2691.155  | 2796.441  | NM_018546 | 9778.289  | 10130.742 | AK021796  | 765.167   | 383.684   |
| NM_004272 | 5772.532  | 5286.104  | U52699    | 53614.793 | 60445.262 | AF007146  | 1077.581  | 1454.214  |
| NM_000358 | 2354.748  | 3265.47   | S71613    | 1824.946  | 1954.34   | AL110283  | 790.004   | 458.957   |
| NM_001930 | 13631.806 | 15467.335 | AJ011910  | 17345.928 | 23254.695 | AL117427  | 31774.316 | 34136.715 |
| AK025270  | 1926.806  | 2084.211  | AK024378  | 2038.329  | 2822.777  | AK023305  | 71905.914 | 65486.23  |
| NM_001564 | 7646.139  | 7736.729  | D61703    | 18258.467 | 18958.766 | AK022428  | 2578.999  | 3506.239  |
| M33197    | 56481.707 | 60021.941 | AL050376  | 783.665   | 658.182   | AK000788  | 1281.56   | 689.068   |
| AF263537  | 12203.424 | 13084.391 | AL359652  | 2723.855  | 3020.361  | AK025089  | 18546.613 | 12236.006 |
| NM_015895 | 9699.559  | 12082.766 | AK022423  | 2901.779  | 3354.6    | AK023298  | 433.242   | 738.084   |
| NM_004675 | 1113.19   | 1017.275  | AF088021  | 11465.106 | 10359.005 | M33197    | 81396.008 | 65273.195 |
| NM_000189 | 2086.925  | 2537.596  | BF509267  | 4629.87   | 4244.399  | AK001279  | 3402.451  | 3559.604  |
| AL050050  | 2783.604  | 1955.542  | NM_002455 | 5208.145  | 4401.84   | AF086407  | 1017.432  | 1346.363  |
| NM_005256 | 592.752   | 630.386   | NM_002959 | 7445.414  | 7218.025  | AF085949  | 749.555   | 1028.166  |
| NM_004690 | 2908.107  | 2668.981  | AB046773  | 806.074   | 682.28    | AK001567  | 1968.494  | 2651.618  |
| M33197    | 59548.285 | 59856.742 | AK000899  | 17616.748 | 20666.936 | AF075006  | 998.965   | 438.861   |
| NM_013374 | 51257.352 | 43288.078 | NM_017991 | 2220.993  | 2579.97   | M33197    | 84435.563 | 65421.75  |
| NM_003252 | 10294.657 | 10531.543 | L37198    | 2854.625  | 3280.177  | AK000903  | 80496.477 | 52556.387 |
| NM_001228 | 4185.233  | 4363.545  | U67822    | 2070.306  | 2429.705  | AK026896  | 1272.145  | 1222.941  |
| AK026607  | 935.872   | 1090.598  | AK021921  | 1778.728  | 2434.595  | AL110169  | 2689.081  | 2801.396  |
| NM_016561 | 47299.402 | 38236.535 | AK025431  | 557.138   | 638.778   | AK022088  | 2618.266  | 2655.396  |
| NM_014245 | 24860.584 | 24821.092 | AK023662  | 1774.063  | 1905.226  | NM_013391 | 1216.379  | 1766.002  |
| M33197    | 58724.754 | 56622.863 | AF086274  | 55984.707 | 59793.816 | M33197    | 71497.758 | 65341.047 |
| L36531    | 393.417   | 351.139   | AK023682  | 1371.153  | 1546.59   | AL157466  | 11385.85  | 11513.231 |
| AL110226  | 42610.742 | 32310.838 | AK024024  | 2737.213  | 2962.27   | AL389981  | 3501.84   | 2261.574  |
| AB046822  | 673.292   | 1004.844  | AF000991  | 460.183   | 567.538   | AK024336  | 3944.621  | 2639.95   |
| NM_015885 | 5132.148  | 5173.093  | D28381    | 22792.123 | 25270.498 | AK023862  | 1134.399  | 813.762   |
| AK024809  | 1439.243  | 1374.043  | NM_019096 | 12124.715 | 12762.605 | NM_018621 | 2628.452  | 2897.868  |
| NM_000308 | 4287.695  | 4738.739  | NM_014725 | 2158.137  | 1722.305  | AK022016  | 1121.351  | 784.645   |
| X69636    | 3612.713  | 3997.905  | NM_006892 | 4090.254  | 4268.985  | AK022118  | 5627.415  | 5987.77   |
| M33197    | 56032.813 | 61924.586 | NM_019117 | 3483.568  | 2969.576  | AK026453  | 22875.664 | 22526.426 |
| NM_004173 | 5237.697  | 6027.649  | NM_018309 | 2635.775  | 2109.245  | AF116678  | 659.93    | 641.012   |
| NM_013974 | 1787.98   | 2390.009  | NM_017658 | 8648.651  | 6704.228  | M33197    | 83696.398 | 65306.98  |
| NM_017547 | 5489.603  | 5326.298  | NM_018679 | 23825.619 | 26378.869 | D17203    | 92067.211 | 54793.164 |
| NM_003983 | 7690.313  | 7243.333  | NM_016643 | 551.878   | 739.634   | NM_006495 | 12640.161 | 12462.164 |
| AK023708  | 1769.374  | 1719.173  | NM_002580 | 456.101   | 736.422   | AK022101  | 867.38    | 967.912   |
| NM_002108 | 708.648   | 590.319   | NM_006779 | 9375.02   | 12135.878 | NM_003251 | 8957.558  | 9521.527  |
| M33197    | 59697.07  | 59547.617 | NM_019847 | 2031.115  | 2652.085  | AF086203  | 920.738   | 1008.518  |
| NM_018464 | 27000.652 | 26190.703 | D17093    | 17998.422 | 21781.121 | AB046772  | 3257.205  | 3150.653  |
| D43948    | 6063.27   | 5659.257  | AK022784  | 492.118   | 502.775   | M33197    | 76084.375 | 65248.863 |
| NM_012310 | 15628.708 | 15812.871 | AL117521  | 6117.928  | 8497.631  | AL442080  | 5810.755  | 5725.924  |
| BE410824  | 1058.845  | 1165.362  | NM_000731 | 328.938   | 584.746   | AY007143  | 39805.879 | 37457.945 |

|           |           |           |           |           |           |           |           |           |
|-----------|-----------|-----------|-----------|-----------|-----------|-----------|-----------|-----------|
| BF382116  | 8435.913  | 7725.137  | AK021913  | 24814.35  | 25359.17  | L15557    | 4268.229  | 2511.859  |
| NM_003193 | 5542.522  | 4920.42   | AL137489  | 30500.859 | 34902.117 | AK022729  | 3831.58   | 2638.744  |
| AK055825  | 62441.723 | 61297.348 | AF009311  | 14299.32  | 15282.46  | NM_006168 | 23189.426 | 15880.289 |
| M33197    | 59787.34  | 59847.723 | S73397    | 3341.039  | 4117.531  | AL050374  | 8208.56   | 6091.03   |
| AF113216  | 2972.285  | 2647.396  | AK023939  | 408.417   | 533.508   | M33197    | 84607.797 | 65312.512 |
| NM_017589 | 5656.8    | 5811.944  | AL050219  | 1709.342  | 1957.563  | AL122073  | 35168.875 | 38462.668 |
| AK023582  | 3266.734  | 3369.255  | AB014557  | 4752.863  | 4795.727  | AF116655  | 8756.136  | 8372.859  |
| NM_000124 | 1954.115  | 1645.001  | NM_005578 | 7328.101  | 5297.682  | AJ243222  | 3835.35   | 4248.493  |
| NM_017996 | 10744.912 | 10442.367 | NM_003653 | 15641.574 | 15488.893 | AK026132  | 5529.203  | 6385.136  |
| NM_014517 | 5920.348  | 7082.386  | NM_018457 | 38162.035 | 44970.438 | Y11162    | 1960.673  | 1692.201  |
| NM_005466 | 5044.204  | 5652.982  | NM_002953 | 7706.355  | 8176.438  | AF070584  | 5236.561  | 4694.851  |
| NM_004269 | 4858.625  | 5421.362  | NM_002187 | 1566.387  | 1639.851  | AF052109  | 4965.525  | 2560.356  |
| NM_003409 | 1546.148  | 1759.122  | NM_014246 | 14504.251 | 14823.794 | M33197    | 71624.516 | 64204.621 |
| M33197    | 59293.727 | 59769.32  | NM_014859 | 1212.146  | 1570.163  | NM_003353 | 65001.41  | 65418.637 |
| D31765    | 5165.669  | 6428.992  | AF311912  | 380.229   | 456.185   | X82127    | 74247.07  | 65354.832 |
| NM_006107 | 18607.23  | 16288.865 | NM_001116 | 821.998   | 895.9     | AL122044  | 13081.312 | 12802.441 |
| NM_004175 | 3381.063  | 3193.444  | BC035395  | 15007.442 | 18685.393 | NM_018296 | 6192.622  | 5351.283  |
| AF288288  | 19637.363 | 17881.984 | NM_001703 | 27541.057 | 29973.26  | NM_005752 | 8570.46   | 8987.914  |
| NM_017646 | 10521.69  | 9776.118  | NM_020126 | 6921.53   | 7197.207  | M33197    | 74870.844 | 65228.367 |
| AL050368  | 4133.25   | 4237.509  | NM_013982 | 6074.644  | 8041.697  | AF070578  | 1061.541  | 1081.984  |
| NM_003092 | 19405.555 | 17622.951 | NM_005049 | 5081.388  | 6186.477  | L13743    | 4042.004  | 3009.018  |
| M33197    | 59590.02  | 59918.305 | NM_003882 | 1413.284  | 1387.578  | U84519    | 15864.13  | 8734.552  |
| BE243152  | 991.669   | 942.666   | NM_004630 | 17356.305 | 23124.691 | Z11849    | 19193.953 | 11174.452 |
| NM_005861 | 1215.239  | 1004.648  | AK023001  | 16394.004 | 20399.354 | M33197    | 70215.32  | 65273.297 |
| NM_018848 | 6664.546  | 6779.136  | NM_014826 | 21132.785 | 29197.182 | AF052103  | 10994.864 | 11359.535 |
| NM_003760 | 5982.095  | 6069.468  | AF201947  | 994.618   | 1205.956  | AF075050  | 4942.803  | 4905.272  |
| AB037759  | 2223.668  | 1755.35   | U01147    | 2931.409  | 3995.165  | AK024842  | 2985.401  | 3455.739  |
| AK025998  | 14048.996 | 13043.587 | NM_005456 | 1726.253  | 2176.493  | NM_018382 | 2284.379  | 2015.919  |
| AL080080  | 10284.984 | 9719.293  | BF219403  | 50091.664 | 46748.566 | AB018327  | 6232.361  | 3336.577  |
| M33197    | 7363.524  | 7041.417  | NM_016119 | 5728.368  | 5844.995  | AF303889  | 1504.891  | 1051.845  |
| NM_001161 | 30800.01  | 28333.934 | AK075450  | 5824.371  | 5739.097  | M33197    | 65076.066 | 73797.719 |
| NM_004044 | 21556.512 | 20378.43  | AF178983  | 20077.744 | 22552.572 | AK022649  | 17021.412 | 14123.618 |
| NM_000221 | 15636.221 | 13771.734 | NM_001324 | 8823.68   | 9196.053  | NM_016507 | 13708.363 | 13135.715 |
| H75678    | 7580.09   | 7922.696  | AB037795  | 2684.546  | 3009.728  | NM_002024 | 19956.758 | 17532.391 |
| NM_002535 | 2698.767  | 3210.421  | D43949    | 5909.206  | 7533.639  | NM_002743 | 17596.781 | 18835.668 |
| NM_006452 | 33159.789 | 35652.945 | AF111849  | 26964.484 | 31804.451 | AF173358  | 37477.684 | 36820.492 |
| AB002359  | 8627.644  | 9746.636  | AK022975  | 2296.233  | 2225.213  | NM_016366 | 18753.379 | 21775.121 |
| M33197    | 21771.164 | 20966.709 | NM_015344 | 2164.19   | 1836.319  | M33197    | 16446.389 | 16358.223 |
| AB007864  | 1710.208  | 1909.915  | NM_004288 | 4377.269  | 5418.959  | NM_001563 | 16777.309 | 18868.172 |
| NM_002198 | 9516.063  | 9863.351  | AL122055  | 13598.16  | 14516.56  | NM_000266 | 5281.244  | 2308.968  |
| AF024693  | 648.737   | 696.588   | NM_005132 | 29296.051 | 31993.662 | X89666    | 7618.6    | 5847.134  |
| AK025905  | 2993.946  | 3050.088  | X07695    | 982.171   | 1321.92   | NM_017429 | 1184.417  | 778.325   |
| AL121733  | 1900.995  | 2520.682  | D87458    | 3543.765  | 4097.735  | NM_003104 | 18108.145 | 15467.143 |
| BE958072  | 1058.093  | 1159.672  | AK021750  | 16183.87  | 16829.818 | NM_014581 | 9757.257  | 9918.868  |
| M33197    | 58782.383 | 57476.238 | NM_003626 | 2603.748  | 4457.667  | NM_000896 | 2900.967  | 3908.324  |
| NM_017532 | 2306.189  | 2229.413  | NM_006932 | 861.277   | 808.887   | NM_014406 | 7367.797  | 9157.979  |
| NM_014480 | 4372.119  | 4412.596  | AK023594  | 4247.747  | 6449.696  | Z11801    | 4485.968  | 4987.159  |
| NM_005938 | 1434.489  | 1313.46   | AB010099  | 46930.922 | 53188.512 | AK027253  | 1867.51   | 2647.296  |
| NM_014169 | 8587.54   | 7979.031  | AB039920  | 29027.031 | 30931.285 | S68954    | 3463.544  | 7018.079  |
| NM_004964 | 15936.849 | 15427.419 | AB046782  | 3196.574  | 3896.768  | S81335    | 7384.247  | 6142.27   |
| NM_005197 | 10415.243 | 9626.359  | AF300612  | 61019.734 | 66767.492 | NM_006197 | 8336.874  | 5404.504  |
| AL137421  | 47091.984 | 37504.887 | AF208005  | 1757.389  | 1820.301  | NM_014181 | 3393.38   | 3373.802  |
| M33197    | 60078.473 | 58152.102 | NM_002231 | 29862.439 | 30276.68  | M29273    | 2800.137  | 2501.709  |

|           |           |           |           |           |           |           |           |           |
|-----------|-----------|-----------|-----------|-----------|-----------|-----------|-----------|-----------|
| NM_007241 | 1377.286  | 1275.362  | NM_020474 | 12200.274 | 9252.765  | NM_004854 | 16158.344 | 14539.624 |
| M33197    | 61048.023 | 59652.629 | NM_002643 | 3301.125  | 3225.831  | AJ245418  | 39092.934 | 31345.504 |
| NM_001154 | 16662.123 | 16628.063 | NM_017807 | 4077.046  | 4265.467  | NM_006377 | 11394.009 | 11254.898 |
| NM_001819 | 965.425   | 1253.126  | NM_014746 | 974.111   | 952.821   | NM_002436 | 3572.174  | 3864.988  |
| NM_016938 | 1138.945  | 1230.24   | NM_002788 | 43774.719 | 53996.359 | NM_018362 | 14708.854 | 12387.066 |
| NM_015725 | 7348.946  | 8457.832  | NM_000462 | 21630.482 | 25319.641 | M33197    | 69537.102 | 65365.063 |
| R61452    | 1949.305  | 1942.547  | NM_003336 | 13778.543 | 14331.584 | NM_004755 | 4304.2    | 3946.783  |
| R19938    | 16459.527 | 16284.49  | NM_005805 | 43546.258 | 56568.07  | NM_002186 | 3804.43   | 3107.753  |
| N94487    | 5456.058  | 5691.732  | NM_004181 | 35533.738 | 38636.184 | NM_006182 | 2413.633  | 3402.503  |
| AI886795  | 9801.11   | 9702.369  | NM_003900 | 22610.359 | 21894.523 | AL137543  | 4196.733  | 4171.584  |
| D10495    | 6855.276  | 6794.517  | NM_003337 | 4038.805  | 4556.64   | M33197    | 1056.097  | 1166.892  |
| BF344679  | 4564.892  | 4212.387  | AF298152  | 5466.335  | 5242.212  | NM_001957 | 5765.619  | 7637.711  |
| M36634    | 720.058   | 709.013   | AF117233  | 8167.694  | 9474.743  | AK024533  | 62689.84  | 52214.762 |
| M14156    | 691.567   | 852.059   | NM_015848 | 2995.832  | 3956.193  | NM_002736 | 34012.652 | 24013.709 |
| U87939    | 1660.453  | 1597.405  | NM_001723 | 2836.684  | 3708.809  | NM_004246 | 15035.744 | 12329.805 |
| U86961    | 1757.99   | 1932.807  | NM_016018 | 1887.898  | 1770.364  | NM_005207 | 4486.793  | 4652.801  |
| NM_005191 | 3514.77   | 4032.255  | M94362    | 31811.068 | 34423.324 | NM_003087 | 17355.928 | 15046.633 |
| AK094237  | 2809.41   | 2532.195  | AK024707  | 2038.604  | 2233.091  | NM_001630 | 7098.287  | 5187.56   |
| L07592    | 1279.568  | 1161.555  | NM_014255 | 2244.517  | 2765.132  | M33197    | 10395.067 | 6822.323  |
| M33197    | 59096.398 | 59548.523 | AK022909  | 4052.559  | 4991.965  | AF305081  | 6741.839  | 7207.925  |
| NM_002983 | 33927.023 | 23685.637 | NM_006530 | 11363.275 | 12204.19  | AF118078  | 5147.938  | 5612.533  |
| NM_000074 | 6020.07   | 7189.685  | NM_003587 | 63395.523 | 60838.195 | NM_020166 | 1403.703  | 1829.654  |
| NM_020393 | 531.569   | 464.205   | X90978    | 2352.063  | 2536.493  | AL157428  | 2344.869  | 2476.501  |
| BF434335  | 42312.855 | 33435.207 | NM_004387 | 357.699   | 318.966   | M33197    | 10326.102 | 9243.797  |
| M57627    | 1492.425  | 2426.052  | AF217226  | 28090.033 | 27059.779 | BE904175  | 1062.454  | 590.901   |
| NM_002993 | 839.602   | 1360.859  | AL359578  | 591.371   | 459.726   | NM_005858 | 8392.644  | 5343.126  |
| AK026946  | 7108.841  | 8569.319  | NM_005522 | 650.032   | 683.758   | NM_014931 | 15215.194 | 14591.354 |
| M33197    | 57711.582 | 59587.621 | NM_005760 | 33361.781 | 29388.104 | NM_014487 | 13993.179 | 13462.963 |
| NM_003192 | 7177.444  | 7473.199  | NM_014212 | 3450.424  | 2533.767  | NM_018070 | 4099.807  | 4365.592  |
| NM_018449 | 9103.047  | 10127.746 | NM_007265 | 3775.004  | 4635.659  | NM_002484 | 25134.746 | 22404.1   |
| AF086129  | 3256.225  | 4094.542  | AK023639  | 18861.652 | 25044.451 | M33197    | 62753.004 | 64156.199 |
| D79994    | 5737.963  | 5268.12   | AL122118  | 444.023   | 643.662   | NM_018240 | 39937.445 | 42951.371 |
| NM_014458 | 5210.959  | 5140.904  | AL137700  | 1145.277  | 1377.376  | AL162052  | 7945.644  | 7265.727  |
| AF235049  | 5984.176  | 5224.307  | NM_004904 | 3062.173  | 3490.644  | AK025941  | 4260.886  | 3799.58   |
| M33197    | 58334.805 | 61479.883 | NM_003083 | 23839.598 | 25183.119 | NM_018179 | 1934.009  | 1613.389  |
| NM_007369 | 1720.156  | 1723.448  | NM_006789 | 7778.057  | 9431.08   | AF059531  | 40300.574 | 32600.869 |
| NM_014776 | 2673.442  | 2506.177  | NM_000982 | 5749.934  | 7156.565  | NM_002707 | 28293.455 | 27505.309 |
| NM_006480 | 7434.011  | 7669.999  | NM_001024 | 60953.094 | 58075.355 | AF029777  | 9494.09   | 6031.731  |
| NM_007223 | 35491.152 | 28868.551 | NM_016093 | 60943.676 | 57098.121 | NM_003352 | 2848.369  | 1928.813  |
| NM_000145 | 3513.616  | 3189.764  | NM_012423 | 57294.328 | 54105.148 | AK026884  | 66236.039 | 64494.453 |
| AF030107  | 41930.359 | 35908.406 | AK026367  | 42971.035 | 53748.383 | S82198    | 5417.968  | 5983.419  |
| NM_000871 | 1305.527  | 1240.709  | AK026491  | 22609.529 | 24862.666 | NM_002594 | 9094.107  | 10750.303 |
| NM_018968 | 1160.483  | 1477.105  | NM_001015 | 58063.406 | 56109.426 | NM_001159 | 8393.809  | 9501.791  |
| AF086924  | 41600.473 | 37463.246 | AL110170  | 56301.262 | 53858.977 | NM_031407 | 15400.419 | 17813.26  |
| NM_005164 | 1458.763  | 1460.142  | NM_004190 | 44607.195 | 55559.355 | M33197    | 66852.484 | 65363.254 |
| NM_001995 | 12587.955 | 17051.09  | NM_014275 | 16411.859 | 21341.266 | AK000410  | 70200.055 | 65307.094 |
| NM_000183 | 15223.937 | 14917.584 | NM_000409 | 13145.086 | 11592.313 | NM_020193 | 4547.29   | 4460.576  |
| AY004175  | 4966.724  | 4957.032  | AB044137  | 1314.361  | 955.948   | D86982    | 1020.739  | 1302.655  |
| M33197    | 55465.996 | 59675.52  | NM_000920 | 2244.413  | 1998.149  | NM_005619 | 2808.64   | 2946.668  |
| NM_012327 | 4287.464  | 5356.448  | NM_020375 | 14483.591 | 13404.297 | D87440    | 24890.889 | 28765.41  |
| NM_000904 | 11790.428 | 12427.834 | NM_016049 | 20222.1   | 18897.547 | AK000332  | 64527.133 | 64927.156 |
| NM_016048 | 6141.242  | 6646.192  | NM_013311 | 10858.214 | 11637.634 | AL080156  | 2270.868  | 1784.336  |
| NM_000375 | 7085.6    | 9062.617  | NM_000291 | 46889.203 | 55851.168 | NM_006738 | 6360.619  | 4922.966  |

|           |           |           |           |           |           |           |           |           |
|-----------|-----------|-----------|-----------|-----------|-----------|-----------|-----------|-----------|
| NM_000265 | 50935.734 | 52984.527 | NM_018081 | 5525.404  | 7348.558  | NM_002285 | 1959.48   | 2108.947  |
| NM_018849 | 3515.278  | 3371.703  | NM_014649 | 4963.688  | 6009.036  | NM_006694 | 28416.402 | 27597.32  |
| NM_002236 | 1603.235  | 1502.67   | AL117488  | 4147.274  | 5635.158  | NM_013351 | 62327.305 | 65454.992 |
| NM_017905 | 6679.985  | 6845.827  | NM_012240 | 5237.472  | 7401.64   | NM_012340 | 33830.637 | 29601.656 |
| NM_006815 | 51503.242 | 45198.113 | NM_019005 | 9561.003  | 10800.535 | NM_006022 | 6101.691  | 5722.28   |
| NM_002806 | 18734.701 | 17012.41  | NM_004739 | 23915.285 | 23331.285 | AK025110  | 2330.407  | 2280.757  |
| M33197    | 59336.887 | 63106.68  | AV752216  | 2064.703  | 2467.261  | X52339    | 65028.641 | 74110.211 |
| NM_001716 | 16140.447 | 19385.461 | NM_005341 | 8314.631  | 8261.968  | M33197    | 65146.289 | 74888.422 |
| NM_002030 | 2010.817  | 1916.791  | AF181999  | 3226.416  | 3240.193  | AB046830  | 6833.855  | 8041.609  |
| NM_006073 | 702.423   | 565.57    | NM_001934 | 5471.324  | 6099.977  | NM_007122 | 6990.857  | 7264.634  |
| NM_004951 | 2133.97   | 2387.28   | AB011090  | 2895.967  | 2858.12   | NM_001488 | 3240.647  | 3673.087  |
| NM_006564 | 3880.544  | 3874.873  | NM_000209 | 477.291   | 447.854   | NM_016202 | 39757.594 | 34129.547 |
| NM_004802 | 2262.671  | 2676.586  | NM_018682 | 6835.581  | 7787.372  | NM_012476 | 5944.207  | 5423.169  |
| M33197    | 59517.73  | 58653.426 | AB033024  | 4725.469  | 5415.698  | NM_016604 | 6190.936  | 6149.453  |
| NM_002633 | 35512.797 | 32970.004 | NM_018942 | 16021.444 | 16733.676 | M33197    | 63983.18  | 66336.328 |
| M33197    | 56367.504 | 59045.707 | NM_005531 | 16288.739 | 15360.399 | NM_006276 | 6326.577  | 7129.015  |
| NM_002878 | 5595.01   | 6060.701  | NM_006977 | 1323.281  | 1514.518  | NM_003407 | 12251.223 | 11818.982 |
| NM_002412 | 633.052   | 715.146   | NM_002479 | 4292.447  | 4076.532  | NM_007209 | 63491.73  | 66138.492 |
| NM_017723 | 3485.306  | 3542.817  | NM_000348 | 35855.938 | 34890.559 | NM_003729 | 9715.333  | 8852.186  |
| AK022922  | 3091.706  | 3146.8    | NM_005059 | 17161.035 | 19972.295 | L05096    | 34088.059 | 24196.99  |
| NM_006462 | 7811.818  | 7192.696  | NM_004950 | 5312.394  | 6458.945  | BC015899  | 21469.619 | 16612.9   |
| AK024750  | 1709.421  | 1795.157  | NM_000724 | 5291.131  | 6246.812  | M33197    | 65095.68  | 68963.695 |
| NM_000400 | 11021.301 | 11011.017 | NM_000553 | 490.467   | 681.67    | NM_002848 | 2404.236  | 2298.649  |
| M33197    | 57784.32  | 59557.586 | NM_002557 | 20387.824 | 26998.037 | NM_015914 | 3542.514  | 3265.15   |
| NM_002613 | 5306.335  | 4147.178  | NM_004477 | 792.218   | 943.933   | NM_007180 | 12826.29  | 15910.345 |
| NM_004419 | 9183.801  | 7565.063  | BE728156  | 316.788   | 697.573   | NM_005609 | 3295.622  | 3118.842  |
| U47635    | 6501.701  | 5686.906  | Y10802    | 857.71    | 759.965   | NM_005476 | 19602.445 | 16333.618 |
| NM_018650 | 2693.297  | 2347.926  | AI417775  | 464.813   | 372.034   | NM_005660 | 16384.264 | 18498.926 |
| AK026945  | 20989.357 | 13762.588 | BI762229  | 14289.96  | 13258.499 | AK023902  | 8773.053  | 11187.291 |
| NM_002828 | 3254.702  | 3835.046  | AA131406  | 778.351   | 589.458   | NM_000401 | 2554.653  | 3647.102  |
| NM_014369 | 3663.332  | 3903.513  | BG618320  | 51634.719 | 56587.406 | NM_005223 | 2158.831  | 2234.511  |
| M33197    | 56716.949 | 59160.496 | M28983    | 678.626   | 817.749   | AB011173  | 10299.372 | 12531.199 |
| NM_001398 | 20620.516 | 20095.373 | Y00787    | 8387.108  | 8928.924  | AB023195  | 6074.372  | 6385.219  |
| AB050049  | 15795.273 | 16858.678 | NM_007276 | 7429.243  | 8100.021  | U43431    | 5461.034  | 4993.345  |
| J05125    | 952.474   | 1222.075  | N34462    | 21684.6   | 20359.377 | X57147    | 1669.45   | 1541.15   |
| NM_001819 | 906.473   | 995.111   | AI658778  | 7328.773  | 7951.967  | AK021563  | 2154.795  | 1959.218  |
| NM_016938 | 1095.733  | 1425.515  | L19067    | 7586.739  | 7639.813  | AB006622  | 3232.912  | 2622.955  |
| BF575833  | 588.065   | 735.62    | Z48482    | 2133.915  | 3102.513  | M33197    | 62524.293 | 61604.902 |
| NM_015725 | 9350.903  | 10012.854 | W60413    | 11032.329 | 11071.376 | AK097041  | 11112.162 | 11472.906 |
| R61452    | 2410.393  | 2254.603  | BI823365  | 9685.01   | 8871.484  | AF068744  | 61676.984 | 66132.633 |
| R19938    | 17180.227 | 17669.709 | X06318    | 1832.345  | 1948.662  | NM_004497 | 921.502   | 1226.871  |
| N94487    | 4745.708  | 4403.649  | NM_019101 | 3516.722  | 3348.068  | AK000762  | 3665.986  | 3360.889  |
| AI886795  | 10657.603 | 9531.129  | NM_013247 | 5264.526  | 5322.608  | NM_004571 | 2009.572  | 1919.121  |
| D10495    | 7292.861  | 7522.186  | NM_006770 | 6397.858  | 7162.667  | NM_016260 | 704.659   | 710.293   |
| BF344679  | 5039.392  | 4934.495  | BE394704  | 830.633   | 739.856   | NM_002895 | 4079.835  | 4736.146  |
| M36634    | 797.398   | 653.49    | NM_004703 | 8873.419  | 10131.507 | AF276513  | 5136.865  | 5679.341  |
| M14156    | 598.465   | 723.163   | NM_001512 | 2290.382  | 2605.798  | M33197    | 65104.363 | 76317.719 |
| U87939    | 1930.147  | 1989.245  | NM_014706 | 7657.423  | 9329.525  | M95610    | 65008.75  | 69379.727 |
| U86961    | 2128.276  | 2274.849  | AK023172  | 708.424   | 821.054   | NM_003118 | 11954.573 | 11606.687 |
| NM_005191 | 3344.256  | 3189.4    | AF139768  | 496.835   | 423.554   | L02922    | 59419.813 | 63632.473 |
| AK094237  | 2861.716  | 2699.81   | AJ001348  | 2605.623  | 2740.117  | NM_001797 | 17567.426 | 21352.953 |
| L07592    | 1518.526  | 1290.557  | NM_014007 | 2015.137  | 2371.931  | NM_003154 | 5932.989  | 6084.8    |
| M33197    | 54797.539 | 59097.777 | AB033006  | 7172.539  | 8649.593  | NM_004235 | 6807.99   | 8473.479  |

|           |           |           |           |           |           |           |           |           |
|-----------|-----------|-----------|-----------|-----------|-----------|-----------|-----------|-----------|
| AK027244  | 1432.508  | 1663.949  | AF020314  | 10258.137 | 12452.661 | AK023459  | 21702.447 | 23255.533 |
| L40520    | 3067.852  | 3953.844  | NM_016332 | 28477.738 | 35099.867 | BI762154  | 5644.663  | 6842.782  |
| NM_020393 | 549.129   | 508.046   | AK023936  | 1262.459  | 1416.549  | U13022    | 5166.487  | 5006.406  |
| BF434335  | 43432.684 | 38645.758 | NM_006457 | 3008.552  | 5296.056  | R23251    | 44562.039 | 41971.965 |
| M57627    | 1465.058  | 2280.442  | NM_003682 | 3033.01   | 4660.397  | AA702640  | 8189.617  | 8231.067  |
| NM_002993 | 959.247   | 1794.658  | NM_000207 | 2350.162  | 2891.522  | T68583    | 21097.621 | 17552.764 |
| AK026946  | 7645.885  | 12281.23  | NM_002531 | 5717.503  | 7377.564  | AA481944  | 60525.215 | 61197.445 |
| M33197    | 52357.402 | 59749.273 | NM_006314 | 50659.758 | 51952.859 | AF038440  | 5368.042  | 5544.43   |
| NM_003192 | 7763.761  | 10886.741 | NM_001782 | 9724.462  | 11163.314 | M31158    | 14512.867 | 14964.871 |
| NM_018449 | 8757.451  | 13222.941 | NM_002754 | 754.72    | 673.785   | H00742    | 6435.55   | 7918.223  |
| AF086129  | 3257.777  | 5145.746  | NM_000797 | 17932.203 | 15728.596 | D42108    | 15257.321 | 16300.803 |
| D79994    | 5606.704  | 5566.973  | NM_014927 | 649.398   | 648.025   | BG700922  | 3594.819  | 3673.844  |
| NM_014458 | 4347.42   | 4196.719  | AF217525  | 881.296   | 902.245   | AI366068  | 4992.807  | 4267.128  |
| L10333    | 478.96    | 622.219   | AL080148  | 58524.793 | 54053.762 | BG565837  | 709.96    | 877.272   |
| AF235049  | 6600.824  | 5157.563  | AF000381  | 11065.963 | 10117.389 | N57553    | 23026.242 | 23353.633 |
| M33197    | 56238.211 | 60049.75  | NM_018075 | 406.272   | 237.175   | M33197    | 65604.344 | 64024.586 |
| NM_007369 | 1610.244  | 1532.445  | NM_012105 | 4448.182  | 4843.434  | NM_018202 | 65003.34  | 66762.109 |
| NM_014776 | 3046.093  | 3206.749  | S82470    | 5165.332  | 4871.923  | AB023197  | 39601.324 | 32246.342 |
| NM_006480 | 8054.19   | 9701.188  | AB020695  | 739.083   | 1029.286  | NM_022173 | 62337.547 | 65078.648 |
| NM_007223 | 33579.328 | 31080.334 | AB028982  | 4146.406  | 4164.736  | AB040970  | 15752.127 | 19494.088 |
| NM_000145 | 2995.182  | 3148.802  | NM_002004 | 4406.876  | 4687.083  | NM_018330 | 10930.637 | 13343.004 |
| AF030107  | 41756.016 | 37828.969 | NM_005121 | 1291.345  | 1582.423  | AB023222  | 6357.422  | 6768.271  |
| NM_000871 | 1254.256  | 1572.16   | NM_000747 | 5144.294  | 6548.505  | AB033088  | 11567.691 | 13948.811 |
| NM_018968 | 1104.579  | 1294.471  | AJ275973  | 16446.801 | 17238.596 | M33197    | 64941.055 | 70748.93  |
| AF086924  | 34808.391 | 34290.785 | U76362    | 24936.258 | 28345.977 | U50342    | 63919.402 | 68146.992 |
| M33197    | 56124.156 | 59890.992 | NM_003060 | 540.653   | 692.686   | NM_000295 | 4570.756  | 5626.567  |
| NM_001154 | 13732.799 | 15599.964 | AK021489  | 45950.988 | 53272.465 | NM_000716 | 2262.767  | 2990.072  |
| NM_012327 | 3664.551  | 3479.3    | NM_004525 | 1691.434  | 1804.558  | AF026932  | 3057.31   | 3031.728  |
| NM_000904 | 11173.872 | 8417.07   | NM_003895 | 950.886   | 1039.545  | AF103795  | 8798.039  | 7289.893  |
| NM_016048 | 5556.607  | 5729.159  | NM_004317 | 6610.355  | 7723.067  | NM_006215 | 2927.868  | 2309.196  |
| NM_000375 | 7309.585  | 9492.773  | NM_014645 | 10208.137 | 12724.63  | M33197    | 63730.637 | 64482.258 |
| NM_000265 | 54993.371 | 55319.117 | NM_014708 | 6377.084  | 8837.496  | NM_007024 | 22227.896 | 21717.842 |
| NM_018849 | 2993.699  | 4083.204  | NM_003693 | 5436.735  | 6302.563  | NM_013231 | 14412.329 | 14722.9   |
| AJ000096  | 354.756   | 496.907   | NM_000356 | 56926.691 | 54619.406 | NM_012106 | 13402.996 | 15453.213 |
| NM_002236 | 432.297   | 506.693   | NM_018134 | 55812.766 | 55695.875 | NM_006254 | 7282.139  | 9588.14   |
| NM_017905 | 7086.309  | 7732.181  | L27479    | 1295.838  | 1340.896  | X95425    | 33567.18  | 31999.48  |
| NM_006815 | 45705.531 | 44186.109 | NM_002193 | 3316.579  | 3853.788  | NM_004422 | 11775.393 | 12359.896 |
| NM_002806 | 20354.645 | 22218.064 | NM_001388 | 15966.187 | 15300.058 | NM_016562 | 5495.188  | 5000.441  |
| M33197    | 56796.086 | 59066.891 | X76770    | 7788.914  | 7233.327  | AY009399  | 37781.516 | 38784.766 |
| NM_001716 | 17543.938 | 25263.053 | AB037808  | 2794.462  | 2492.102  | NM_004895 | 47461.184 | 41688.926 |
| NM_002030 | 1387.781  | 2076.525  | NM_016038 | 7187.737  | 6776.939  | U80018    | 3668.845  | 4840.768  |
| NM_006073 | 619.789   | 716.682   | Z36821    | 22942.107 | 22419.527 | NM_000717 | 4501.787  | 5310.859  |
| NM_004951 | 2219.548  | 1692.902  | AF289485  | 7509.738  | 7474.209  | M33197    | 64882.813 | 71145.359 |
| NM_006564 | 3369.435  | 2894.034  | AF130092  | 13660.455 | 14502.864 | NM_004845 | 27461.746 | 30993.871 |
| NM_004802 | 1885.369  | 1972.79   | NM_016095 | 5471.232  | 7001.56   | NM_007107 | 20380.078 | 23315.283 |
| M33197    | 55909.238 | 56713.992 | AK024794  | 2962.264  | 3330.042  | NM_000047 | 61401.984 | 64437.477 |
| NM_002983 | 22855.93  | 16754.535 | NM_019853 | 9277.1    | 10977.492 | M68874    | 941.539   | 1774.861  |
| NM_000074 | 4674.868  | 6738.453  | NM_017992 | 2903.355  | 2761.754  | NM_006319 | 22368.85  | 23033.209 |
| NM_004566 | 503.236   | 380.748   | NM_005400 | 1507.282  | 2023.211  | NM_018226 | 7516.834  | 7112.885  |
| M33197    | 54771.988 | 57913.176 | BF851643  | 489.382   | 462.535   | NM_004605 | 3817.384  | 3720.98   |
| NM_002878 | 5224.861  | 3785.665  | AK023061  | 1004.195  | 1353.673  | NM_006660 | 22523.813 | 22004.842 |
| NM_017723 | 3200.111  | 2505.967  | NM_007255 | 6866.606  | 8577.952  | NM_006685 | 63174.398 | 61021.813 |
| AK022922  | 3052.679  | 2605.804  | NM_003668 | 8131.066  | 11132.141 | AF154121  | 7056.066  | 7775.467  |

|           |           |           |           |           |           |           |           |           |
|-----------|-----------|-----------|-----------|-----------|-----------|-----------|-----------|-----------|
| NM_006462 | 7122.224  | 5566.351  | NM_013384 | 59969.648 | 60557.043 | NM_012135 | 53932.16  | 55937.672 |
| AK024750  | 1033.472  | 834.479   | NM_001187 | 2360.926  | 2495.633  | AF121856  | 16488.158 | 20147.313 |
| NM_000400 | 9597.112  | 7847.913  | NM_018241 | 3596.559  | 3878.454  | NM_003765 | 33021.656 | 38730.375 |
| M33197    | 57924.715 | 55950.406 | NM_005834 | 7429.9    | 7735.425  | NM_005865 | 2861.553  | 3179.39   |
| NM_002613 | 5293.697  | 4403.311  | NM_005059 | 17669.164 | 17354.824 | M33197    | 64287.406 | 64833.555 |
| NM_004419 | 9438.917  | 7374.447  | NM_004950 | 5542.159  | 5264.147  | NM_001201 | 9915.584  | 6975.31   |
| U47635    | 6769.488  | 3733.558  | NM_000724 | 5912.167  | 5621.247  | NM_016615 | 2857.457  | 2779.249  |
| NM_018650 | 2688.151  | 2035.674  | NM_000553 | 514.76    | 361.783   | AB014568  | 63414.664 | 63521.172 |
| AK026945  | 21067.967 | 13867.853 | NM_002557 | 20719.42  | 19140.496 | AK022238  | 1011.397  | 1240.239  |
| NM_002825 | 3189.247  | 3808.801  | NM_004477 | 823.647   | 919.961   | NM_012245 | 30497.361 | 39031.957 |
| NM_014365 | 3361.25   | 2980.92   | BE728156  | 547.395   | 344.472   | AK022546  | 53380.988 | 55802.539 |
| M33197    | 55881.809 | 57553.465 | Y10802    | 861.801   | 819.892   | NM_014067 | 54108.195 | 56548.738 |
| NM_001395 | 20346.494 | 21299.307 | AI417775  | 402.516   | 502.352   | NM_002914 | 25035.289 | 27524.77  |
| AB050049  | 14950.686 | 13638.63  | BI762229  | 14802.57  | 15531.531 | NM_020385 | 8138.648  | 6378.841  |
| J05125    | 942.583   | 875.169   | AA131406  | 979.173   | 1117.736  | NM_014877 | 910.389   | 1129.032  |
| NM_001995 | 10057.541 | 9299.536  | BG618320  | 57472.824 | 57554.398 | NM_006541 | 2983.3    | 2736.073  |
| BF575833  | 1289.478  | 469.062   | M28983    | 699.715   | 660.264   | M33197    | 65116.5   | 63087.711 |
| NM_015725 | 5754.584  | 3933.732  | Y00787    | 8032.703  | 8611.022  | NM_005705 | 17365.275 | 16819.211 |
| R61452    | 2058.506  | 1365.336  | NM_007275 | 7116.05   | 7904.854  | NM_004325 | 8818.157  | 9488.005  |
| R19938    | 17084.223 | 12454.793 | N34462    | 21629.256 | 21353.066 | NM_004581 | 20091.688 | 22158.301 |
| N94487    | 5126.425  | 3437.323  | AI658778  | 6997.935  | 7637.236  | NM_006817 | 37577.727 | 41471.535 |
| AI886795  | 9305.581  | 7005.197  | L19067    | 8190.612  | 10534.015 | NM_007105 | 40829.77  | 49574.703 |
| D10495    | 6501.626  | 5632.033  | Z48482    | 2230.274  | 2730.282  | NM_015921 | 53798.379 | 59021.352 |
| BF344679  | 4052.339  | 4022.49   | W60413    | 11295.776 | 12379.156 | AB040900  | 28360.537 | 51721.867 |
| M36634    | 772.624   | 985.021   | BI823365  | 9232.482  | 9018.229  | NM_001080 | 10430.582 | 11860.972 |
| M14156    | 852.43    | 781.401   | X06318    | 2097.265  | 2841.707  | NM_001482 | 2553.661  | 2411.958  |
| U87939    | 2145.78   | 1365.627  | NM_016217 | 56855.188 | 59935.754 | NM_003115 | 11801.273 | 11009.709 |
| U86961    | 2238.468  | 1480.1    | AK025971  | 8025.727  | 12787.835 | L02922    | 54025.199 | 61627.621 |
| NM_005191 | 3446.24   | 3178.26   | NM_002615 | 16096.14  | 16862.047 | NM_001797 | 16998.705 | 20986.834 |
| AK094237  | 2569.141  | 1713.247  | BE394704  | 1085.401  | 914.02    | NM_003154 | 5975.155  | 6820.854  |
| AK056794  | 295.709   | 258.708   | NM_004703 | 11018.56  | 8870.762  | NM_004235 | 5788.808  | 7237.243  |
| L07592    | 1369.445  | 1054.584  | NM_001512 | 2164.484  | 2052.39   | AK023459  | 21469.818 | 23495.229 |
| M33197    | 56885.199 | 57592.402 | NM_014705 | 8666.693  | 9495.437  | BI762154  | 5880.983  | 6881.932  |
| AK027244  | 1399.419  | 1406.233  | AK023172  | 1133.313  | 1082.142  | U13022    | 5062.286  | 4986.021  |
| L40520    | 3277.522  | 3056.383  | AF139768  | 569.778   | 796.312   | R23251    | 43009.766 | 52121.406 |
| NM_002633 | 23929.734 | 18246.977 | AJ001348  | 2995.473  | 2912.997  | AA702640  | 8548.552  | 7915.333  |
| AF086129  | 3472.999  | 4004.036  | NM_014007 | 2126.799  | 2055.233  | T68583    | 19768.955 | 18928.08  |
| D79994    | 4872.601  | 3751.74   | AB033006  | 6961.365  | 7692.967  | AA481944  | 59506.895 | 61525.957 |
| NM_014455 | 4291.142  | 3657.002  | AF020314  | 12105.92  | 13859.424 | AF038440  | 5180.841  | 5602.216  |
| M33197    | 54872.898 | 59092.551 | NM_016332 | 28734.42  | 30904.506 | M31158    | 15196.562 | 13735.956 |
| NM_007365 | 1927.071  | 1930.142  | AK023936  | 1327.372  | 1458.613  | H00742    | 6770.062  | 7282.954  |
| NM_014775 | 3392.672  | 3229.178  | NM_006457 | 3076.541  | 3799.603  | D42108    | 15223.966 | 17772.758 |
| NM_006480 | 9103.469  | 7060.565  | NM_003682 | 2787.379  | 2736.632  | BG700922  | 3719.845  | 4539.911  |
| NM_007223 | 33850.168 | 24812.314 | NM_000207 | 2149.104  | 2085.795  | AI366068  | 5124.595  | 7050.577  |
| NM_000145 | 3590.778  | 3364.232  | NM_002531 | 5884.65   | 6449.422  | BG565837  | 936.988   | 1091.063  |
| AF030107  | 44625.535 | 32817.484 | NM_006314 | 51457.055 | 54522.668 | N57553    | 27664.566 | 37540.695 |
| NM_000871 | 1165.669  | 1108.405  | NM_001782 | 9626.956  | 10811.167 | M33197    | 60547.121 | 63721.516 |
| M33197    | 53337.043 | 58160.723 | NM_002754 | 630.859   | 743.675   | NM_016545 | 9350.278  | 10125.654 |
| NM_018965 | 1616.89   | 1302.27   | NM_000797 | 20850.688 | 18896.873 | NM_001440 | 61422.645 | 61743.57  |
| AF086924  | 39966.18  | 27110.891 | AF217525  | 647.172   | 554.98    | NM_022173 | 55052.566 | 54211.375 |
| NM_000264 | 748.947   | 573.035   | AL080148  | 60168.574 | 62349.465 | AB040970  | 15386.113 | 16672.387 |
| AB058740  | 8903.307  | 4888.003  | NM_002479 | 5616.978  | 5972.722  | NM_018330 | 11380.316 | 13899.783 |
| NM_003385 | 633.186   | 789.349   | NM_000345 | 46016.824 | 31135.412 | AB023222  | 5739.283  | 8426.501  |

|           |           |           |           |           |           |           |           |           |
|-----------|-----------|-----------|-----------|-----------|-----------|-----------|-----------|-----------|
| NM_00188E | 1644.793  | 1009.667  | NM_01210E | 4428.434  | 5272.86   | AB033088  | 9877.119  | 13413.646 |
| NM_00439Z | 570.96    | 580.295   | S82470    | 6191.019  | 5592.539  | M33197    | 63478.395 | 67955.023 |
| M33197    | 58288.414 | 56588.773 | AB020695  | 367.312   | 571.144   | U50342    | 61747.676 | 64011.301 |
| NM_00115A | 16558.736 | 10296.744 | AB028982  | 3873.789  | 3738.623  | NM_00029E | 4533.618  | 4138.383  |
| NM_00181E | 917.855   | 585.269   | NM_00200A | 3331.045  | 3373.922  | NM_00071E | 1968.318  | 2756.765  |
| NM_01693E | 695.816   | 760.686   | NM_005121 | 1511.515  | 1596.303  | AF026932  | 1903.036  | 1839.221  |
| NM_00166E | 5167.241  | 7486.667  | NM_000747 | 5097.286  | 6059.284  | AF103795  | 7450.68   | 7095.721  |
| NM_01653C | 4794.022  | 4891.529  | AJ275973  | 15713.927 | 17148.605 | NM_00621E | 2465.715  | 2793.903  |
| NM_01480A | 1970.912  | 1920.002  | U76362    | 23742.707 | 31944.207 | NM_00702A | 21958.396 | 22197.324 |
| NM_01245E | 6264.187  | 6145.704  | NM_00306C | 432.891   | 729.857   | NM_013231 | 14029.956 | 14467.417 |
| NM_00280E | 20132.051 | 19820.857 | AK021489  | 40061.098 | 39539.672 | NM_01210E | 14077.923 | 16068.96  |
| M33197    | 56716.93  | 59763.137 | NM_00452E | 1101.594  | 1108.543  | NM_00625A | 7456.938  | 9783.399  |
| NM_00171E | 16803.434 | 18351.363 | NM_00389E | 826.534   | 1357.168  | X95425    | 34127.781 | 36299.867 |
| NM_00203C | 1663.41   | 1702.964  | NM_004317 | 6081.044  | 6133.621  | NM_00442E | 12789.971 | 11379.051 |
| NM_00607E | 592.298   | 750.653   | NM_01464E | 9868.511  | 7414.953  | NM_01656E | 6183.597  | 5877.753  |
| NM_004951 | 2426.35   | 2360.756  | NM_01470E | 5907.106  | 4797.373  | AY009399  | 35426.949 | 37329.773 |
| NM_00656A | 3864.218  | 4102.239  | NM_00369E | 4756.828  | 3519.878  | NM_00489E | 34213.25  | 35988.715 |
| NM_00480Z | 2341.454  | 2356.27   | NM_00035E | 56312.266 | 52271.625 | M33197    | 62006.813 | 64205.902 |
| M33197    | 57075.449 | 57495.375 | NM_01813A | 56318.875 | 51556.918 | M95610    | 61868.453 | 63510.711 |
| NM_00298E | 27446.039 | 17370.377 | NM_013247 | 6383.91   | 3861.958  | NM_000717 | 3571.945  | 2726.902  |
| NM_00007A | 5327.461  | 5914.218  | NM_00677C | 9648.148  | 6830.592  | M33197    | 64900.762 | 76915.828 |
| NM_02039E | 457.147   | 383.206   | NM_00138E | 17665.029 | 16523.311 | NM_00484E | 24224.125 | 30309.615 |
| BF434335  | 28445.861 | 14746.905 | X76770    | 8331.86   | 8776.293  | NM_007107 | 21943.959 | 29403.299 |
| M57627    | 1105.055  | 1265.008  | AB037808  | 2905.796  | 2735.564  | NM_000047 | 64211.836 | 70937.977 |
| NM_00299E | 769.504   | 639.211   | NM_01603E | 8171.875  | 7140.549  | M68874    | 931.993   | 980.33    |
| AK026946  | 6787.65   | 6099.906  | Z36821    | 18035.387 | 17217.402 | NM_00631E | 20469.393 | 23100.975 |
| M33197    | 57004.973 | 58806.555 | AF289485  | 6267.222  | 6239.07   | NM_01822E | 7559.367  | 7687.043  |
| NM_00319Z | 6740.301  | 7627.232  | AF130092  | 7084.637  | 8091.917  | NM_00460E | 4118.982  | 4182.322  |
| NM_01844E | 8597.546  | 9770.359  | NM_01609E | 4375.331  | 4638.527  | NM_00666C | 22057.324 | 22165.297 |
| NM_00139E | 21472.91  | 30513.248 | AK02479A  | 3062.739  | 3300.561  | NM_00668E | 61864.777 | 63428.508 |
| AB050049  | 14954.4   | 21343.826 | NM_01985E | 8517.885  | 6091.695  | AF154121  | 6664.269  | 6967.92   |
| J05125    | 950.666   | 1278.631  | NM_01799Z | 2154.042  | 1163.37   | NM_01213E | 57005.23  | 55764.141 |
| NM_00199E | 11011.92  | 9862.296  | NM_00540C | 1119.205  | 516.329   | AF121856  | 16742.672 | 17198.461 |
| NM_00018E | 12278.881 | 9752.058  | AK023061  | 497.305   | 422.065   | NM_006421 | 11515.489 | 13349.867 |
| AY004175  | 4625.696  | 4839.415  | NM_00725E | 5637.36   | 3547.616  | NM_017457 | 27140.896 | 33984.176 |
| M33197    | 54367.344 | 60239.602 | NM_00366E | 6317.031  | 4609.682  | NM_00376E | 35926.953 | 32348.463 |
| NM_012327 | 3688.259  | 4013.313  | NM_01338A | 56792.629 | 54884.953 | NM_00586E | 3220.055  | 3656.357  |
| NM_00090A | 10341.523 | 8895.102  | NM_001187 | 1799.886  | 1392.524  | M33197    | 63460.492 | 65269.457 |
| NM_01604E | 4746.544  | 4930.707  | NM_018241 | 2998.354  | 1955.537  | NM_01820Z | 63551.938 | 63924.852 |
| NM_00037E | 6488.479  | 7383.281  | NM_00583A | 5613.241  | 3393.056  | AB023197  | 25255.836 | 29528.65  |
| NM_00026E | 51460.484 | 46101.355 | AF000381  | 14536.304 | 10608.776 | AB014568  | 62729.895 | 65589.25  |
| NM_01884E | 3041.881  | 2623.797  | NM_00072A | 6152.829  | 6709.796  | AK022238  | 820.401   | 1599.203  |
| M33197    | 52885.566 | 58201.813 | NM_002557 | 22934.963 | 19607.299 | NM_01224E | 28959.654 | 36491.828 |
| M16796    | 880.549   | 966.808   | NM_004477 | 913.579   | 893.493   | AK022546  | 51754.223 | 47637.527 |
| AF279890  | 547.585   | 541.249   | BE728156  | 477.86    | 335.86    | NM_014067 | 51465.32  | 50395.945 |
| NM_01206E | 490.188   | 491.056   | Y10802    | 730.904   | 383.417   | NM_00291A | 25468.355 | 27567.584 |
| NM_00168E | 54747.434 | 41813.496 | BI762229  | 11894.077 | 6250.889  | NM_02038E | 6573.788  | 7359.071  |
| NM_016601 | 726.297   | 952.178   | BG618320  | 56183.504 | 40643.164 | NM_014877 | 909.563   | 740.118   |
| NM_01790E | 6083.975  | 7294.404  | M28983    | 519.536   | 293.795   | NM_006541 | 2885.948  | 3189.747  |
| M33197    | 56962.508 | 59818.836 | Y00787    | 7722.034  | 5872.933  | M33197    | 63247.707 | 66997.695 |
| NM_00681E | 44113.352 | 42828.363 | NM_00727E | 6080.691  | 4498.343  | NM_00570E | 17504.74  | 14567.085 |
| M33197    | 53492.352 | 59026.027 | N34462    | 20878.998 | 13296.63  | NM_00432E | 10408.499 | 10937.692 |
| AK027244  | 1719.58   | 1608.54   | AI658778  | 5991.165  | 3876.066  | NM_004581 | 22567.273 | 25038.469 |

|           |           |           |           |           |           |           |           |           |
|-----------|-----------|-----------|-----------|-----------|-----------|-----------|-----------|-----------|
| L40520    | 3446.743  | 3468.021  | L19067    | 6314.853  | 4492.755  | NM_006817 | 39095.184 | 40213.035 |
| NM_002633 | 27919.375 | 26897.072 | Z48482    | 1753.135  | 1315.438  | NM_007108 | 43901.133 | 52313.266 |
| M33197    | 57656.313 | 56552.066 | W60413    | 10747.31  | 8286.942  | NM_015921 | 57345.258 | 61514.246 |
| NM_002878 | 3939.359  | 3492.789  | BI823365  | 9056.191  | 6766.048  | AB040900  | 34695.449 | 38637.75  |
| NM_002412 | 530.493   | 542.569   | X06318    | 1465.306  | 1049.897  | NM_001482 | 2545.533  | 3269.689  |
| NM_017723 | 2853.614  | 2699.888  | NM_016217 | 53663.34  | 50094.105 | NM_001215 | 639.254   | 723.678   |
| AK022922  | 2620.925  | 1911.558  | AK025971  | 6238.83   | 5208.586  | U80018    | 3502.073  | 5047.452  |
| NM_006462 | 6881.718  | 6620.886  | NM_002618 | 12325.311 | 9144.219  | NM_001797 | 10908.372 | 13248.938 |
| AK024750  | 784.623   | 739.857   | L27479    | 1678.375  | 1309.027  | NM_003154 | 5072.355  | 4727.258  |
| NM_000400 | 8531.667  | 6621.638  | NM_002193 | 3314.793  | 2195.398  | NM_004235 | 5614.77   | 5458.196  |
| M33197    | 58594.195 | 51520.699 | AB033006  | 7334.115  | 5767.798  | AK023459  | 20441.941 | 14984.878 |
| NM_002613 | 4051.821  | 2666.326  | AF020314  | 10375.644 | 8419.173  | BI762154  | 4863.189  | 5028.657  |
| NM_004419 | 6805.079  | 4865.926  | NM_016332 | 26433.568 | 15660.111 | U13022    | 4897.421  | 4228.247  |
| U47635    | 5107.323  | 4117.787  | AK023936  | 1110.139  | 762.273   | R23251    | 45489.898 | 51018.426 |
| NM_018650 | 8733.189  | 9654.224  | NM_006457 | 2712.458  | 1695.76   | AA702640  | 8520.221  | 10074.686 |
| AK026945  | 17726.209 | 16370.536 | NM_003682 | 2472.485  | 1628.261  | T68583    | 20383.758 | 20613.91  |
| NM_002828 | 3253.51   | 4683.552  | NM_000207 | 1392.179  | 677.874   | AA481944  | 55719.836 | 59281.586 |
| NM_014369 | 3314.737  | 3388.487  | NM_002531 | 3707.593  | 2927.93   | AF038440  | 5850.566  | 5615.22   |
| M33197    | 57875.414 | 60431.828 | NM_006314 | 37497.852 | 24354.949 | M31158    | 17187.014 | 16288.553 |
| CY3Cy5    | 7201.537  | 927.371   | NM_001782 | 8273.28   | 6215.839  | H00742    | 7682.625  | 6906.538  |
| AL834159  | 3770.543  | 3284.105  | NM_000797 | 19277.867 | 13011.33  | D42108    | 15709.905 | 14465.45  |
| NM_000164 | 679.461   | 665.171   | NM_016293 | 17074.891 | 11645.722 | BG700922  | 4200.199  | 4349.295  |
| AK021971  | 1790.116  | 1601.69   | AF217525  | 594.748   | 359.374   | AI366068  | 4718.027  | 5371.042  |
| AK025253  | 2086.4    | 2121.214  | AL080148  | 52114.777 | 46987.191 | BG565837  | 600.194   | 716.649   |
| AK025004  | 1898.986  | 1525.002  | NM_006731 | 953.657   | 1002.898  | N57553    | 27434.311 | 28537.447 |
| AL136818  | 1593.918  | 1332.635  | NM_018487 | 2251.163  | 1396.317  | NM_016545 | 9943.53   | 10790.015 |
| AF146798  | 1047.436  | 773.445   | NM_020134 | 3834.881  | 2198.48   | NM_001440 | 59589.828 | 63539.984 |
| AK022049  | 1440.171  | 1291.076  | NM_014061 | 1721.317  | 1253.925  | NM_001201 | 7794.811  | 8146.216  |
| AF086517  | 1093.41   | 1008.04   | BC034395  | 9887.248  | 7554.312  | NM_016618 | 1863.088  | 2215.388  |
| AK025740  | 19602.855 | 16440.133 | NM_002479 | 4917.834  | 4656.371  | NM_000716 | 2140.533  | 1765.2    |
| AK000311  | 6429.888  | 5695.452  | NM_000348 | 38935.488 | 30806.307 | AF026932  | 2987.61   | 2339.484  |
| AK021747  | 454.848   | 637.948   | NM_005059 | 16054.045 | 14667.519 | AF103795  | 8816.585  | 5902.063  |
| AK025640  | 5990.202  | 6336.101  | NM_004950 | 6419.688  | 4661.065  | NM_006215 | 2440.278  | 1821.71   |
| AF131772  | 679.5     | 533.417   | AF040248  | 3028.225  | 2290.388  | M33197    | 64034.836 | 68820.578 |
| AL137685  | 430.549   | 469.631   | NM_014228 | 3109.678  | 2921.586  | NM_007024 | 19286.346 | 20277.602 |
| AL834159  | 4019.996  | 4112.868  | AL832292  | 5659.271  | 5314.972  | NM_013231 | 16010.15  | 15717.742 |
| NM_000164 | 586.405   | 548.373   | NM_003045 | 25935.764 | 13589.223 | NM_012106 | 17385.949 | 17460.352 |
| SR3       | 39359.242 | 30652.496 | NM_005662 | 11489.554 | 6772.874  | NM_006254 | 9663.271  | 9527.72   |
| SR5       | 3599.925  | 3856.156  | AK021489  | 33315.469 | 23625.453 | X95425    | 41871.324 | 35896.383 |
| SR7       | 4970.776  | 36525.203 | NM_004525 | 1061.444  | 913.658   | NM_004422 | 15957.614 | 12434.548 |
| SR9       | 20443.563 | 3772.544  | NM_003895 | 925.979   | 504.947   | NM_016562 | 7667.077  | 6211.453  |
| CY3Cy5    | 6321.734  | 636.684   | NM_004317 | 5882.831  | 3900.221  | M33197    | 60042.016 | 61913.07  |
| L23870    | 840.232   | 471.533   | NM_014645 | 8756.331  | 6360.051  | AY009399  | 43348.297 | 37654.445 |
| L33807    | 3870.972  | 3638.809  | NM_014708 | 5249.394  | 4176.934  | NM_004895 | 55917.008 | 52657.695 |
| U80774    | 597.565   | 530.811   | NM_003693 | 4966.436  | 3263.089  | U59748    | 13011.539 | 13176.702 |
| NM_006545 | 8945.881  | 7094.793  | NM_000356 | 51787.148 | 47935.605 | L32537    | 1316.334  | 1760.927  |
| NM_016534 | 4612.656  | 3883.431  | NM_018134 | 56109.648 | 52506.633 | NM_014303 | 51452.039 | 55746.902 |
| AK024240  | 1237.967  | 998.76    | NM_013247 | 5097.841  | 4422.487  | NM_014863 | 1391.843  | 1300.434  |
| NM_016456 | 54537.336 | 51424.023 | NM_006770 | 9542.742  | 7659.647  | M33197    | 58649.109 | 61339.102 |
| AK022677  | 4350.802  | 4342.393  | BE394704  | 1099.657  | 886.117   | M95610    | 59824.895 | 60297.293 |
| AF035288  | 783.06    | 888.284   | NM_004703 | 6513.374  | 4456.965  | NM_003118 | 8977.573  | 9623.44   |
| AL137645  | 1327.76   | 989.35    | NM_001512 | 1624.244  | 1030.804  | L02922    | 50009.484 | 52487.074 |
| AK022894  | 4295.247  | 3823.254  | NM_014706 | 8105.419  | 6881.928  | NM_004045 | 37893.566 | 23038.131 |



|           |           |           |           |           |           |           |           |           |
|-----------|-----------|-----------|-----------|-----------|-----------|-----------|-----------|-----------|
| AF217993  | 3029.878  | 2962.689  | AK023172  | 931.949   | 547.079   | NM_001891 | 7610.782  | 4662.963  |
| AF131823  | 1169.016  | 967.037   | AJ001348  | 2250.584  | 1842.194  | NM_003227 | 681.433   | 435.488   |
| AK026324  | 5358.198  | 4327.904  | NM_014007 | 1794.841  | 1425.247  | NM_012135 | 55903.902 | 58667.262 |
| AK024518  | 29272.053 | 24744.977 | NM_001187 | 1727.053  | 1174.657  | AF121856  | 20509.225 | 19681.199 |
| AK025017  | 944.201   | 819.353   | NM_018241 | 2936.717  | 2223.722  | NM_006421 | 12702.7   | 11458.18  |
| AK024914  | 2332.342  | 2219.083  | NM_005834 | 5692.208  | 4419.591  | NM_017457 | 33354.457 | 32105.02  |
| AK025346  | 55646.047 | 64920.438 | AF000381  | 12300.466 | 7405.604  | NM_003765 | 47799.117 | 37886.172 |
| AK022583  | 6004.927  | 4422.04   | NM_018075 | 466.666   | 564.697   | NM_005865 | 3387.338  | 3047.224  |
| AL137534  | 36104.48  | 29268.701 | NM_012105 | 4043.224  | 3347.561  | M33197    | 62067.082 | 63642.078 |
| AF052121  | 797.201   | 483.586   | S82470    | 5472.118  | 4644.203  | NM_018202 | 61059.43  | 62745.469 |
| AL359062  | 3077.201  | 2722.979  | AB028982  | 4754.814  | 3323.074  | AB023197  | 29481.756 | 25025.428 |
| AK026869  | 1407.753  | 1347.714  | NM_002004 | 4994.817  | 3449.294  | NM_022173 | 52654.453 | 49982.43  |
| AK023150  | 439.172   | 425.863   | NM_005121 | 1124.037  | 914.633   | AB040970  | 12977.444 | 15376.986 |
| AK022192  | 487.985   | 404.318   | NM_001643 | 39651.141 | 36483.395 | NM_018330 | 10660.546 | 9910.685  |
| NM_019095 | 57243.465 | 63345.859 | NM_020221 | 1486.842  | 1212.273  | AB023222  | 5209.606  | 5575.266  |
| AJ227904  | 495.071   | 584.309   | NM_000747 | 4185.507  | 3371.943  | AB033088  | 8716.309  | 8227.347  |
| Y12020    | 2121.521  | 1870.681  | NM_005415 | 4425.803  | 3526.904  | M33197    | 65072.043 | 66482.445 |
| AJ011597  | 593.111   | 508.617   | AK026841  | 2348.968  | 1359.748  | U50342    | 63067.941 | 64201.488 |
| AJ001905  | 578.741   | 667.757   | AJ275973  | 13748.771 | 9203.609  | NM_000295 | 3177.504  | 3304.17   |
| U17635    | 1287.218  | 1074.944  | NM_006493 | 1275.672  | 1024.657  | NM_001080 | 14259.831 | 12071.26  |
| AL049930  | 505.307   | 421.108   | U76362    | 20419.459 | 15688.724 | NM_001482 | 3206.692  | 2658.999  |
| AF086198  | 27379.502 | 22008.863 | NM_016217 | 47334.785 | 40547.625 | NM_001215 | 1385.626  | 1214.602  |
| AL137382  | 4880.583  | 4531.684  | AK025971  | 5376.797  | 4757.572  | U80018    | 3620.267  | 4051.864  |
| AK024599  | 4623.075  | 3817.987  | NM_002615 | 12114.26  | 9921.111  | NM_000717 | 4400.337  | 4018.795  |
| AK024928  | 452.294   | 264.267   | L27479    | 1268.934  | 989.927   | M33197    | 60096.195 | 67006.531 |
| NM_014450 | 14091.779 | 13256.3   | NM_002193 | 2918.488  | 2029.59   | NM_004845 | 28229.43  | 25087.408 |
| AB007975  | 1508.789  | 1653.902  | NM_001385 | 15547.821 | 11635.503 | NM_007107 | 19957.988 | 17529.164 |
| AK024152  | 421.273   | 491.232   | X76770    | 6560.685  | 5293.027  | NM_000047 | 54999.023 | 59274.625 |
| AL137603  | 1284.166  | 853.678   | AB037808  | 2644.448  | 1696.677  | M68874    | 901.651   | 1192.641  |
| AK026888  | 4181.538  | 3028.654  | NM_016035 | 6463.87   | 4847.674  | NM_006315 | 28402.586 | 26559.076 |
| AK021821  | 1024.431  | 1196.638  | Z36821    | 24544.342 | 15460.699 | NM_018225 | 7916.399  | 6272.862  |
| AL049328  | 1908.101  | 1798.97   | AF289485  | 6393.205  | 3859.441  | NM_004605 | 4138.129  | 4044.268  |
| AK000030  | 1177.717  | 1061.283  | AF130092  | 10316.496 | 9020.702  | Z36813    | 17867.975 | 13213.441 |
| NM_017932 | 1010.924  | 1057.187  | NM_016095 | 4636.161  | 4650.834  | NM_006660 | 20333.543 | 20793.844 |
| AK000910  | 1462.992  | 1172.52   | AK024794  | 4082.454  | 2892.68   | NM_001485 | 1545.383  | 1817.594  |
| AF252280  | 1078.594  | 1309.277  | NM_019853 | 7870.636  | 5631.031  | NM_004727 | 1998.963  | 2630.602  |
| AK000107  | 818.559   | 870.595   | NM_017992 | 2291.848  | 1646.763  | NM_000555 | 4830.788  | 4714.225  |
| AK000795  | 579.812   | 570.804   | NM_005400 | 1070.195  | 644.608   | NM_006685 | 62035.305 | 64562.297 |
| AK000951  | 1279.553  | 1101.266  | AK023061  | 635.572   | 759.571   | M33197    | 59118.688 | 59921.801 |
| AF130064  | 51879.84  | 41676.117 | NM_007255 | 6495.2    | 4687.881  | AF154121  | 5731.193  | 5473.513  |
| U17624    | 2160.08   | 1741.201  | NM_003665 | 6209.564  | 5007.813  | M33197    | 64549.672 | 72666.266 |
| AK025184  | 809.739   | 777.933   | NM_013384 | 59510.398 | 52500.113 | NM_016545 | 12992.513 | 11544.473 |
| AK001959  | 21753.447 | 16717.039 | CY3Cy5    | 1999.547  | 139.372   | NM_001440 | 58112.133 | 62983.184 |
| U36217    | 8405.875  | 6367.716  | NM_016346 | 3845.007  | 4118.654  | NM_001201 | 9804.634  | 7578.272  |
| AL389880  | 668.197   | 820.024   | AF086281  | 1227.875  | 1292.3    | NM_016615 | 2940.636  | 2670.637  |
| AL157452  | 678.705   | 535.946   | AF086393  | 450.844   | 469.135   | AB014568  | 55859.441 | 60647.004 |
| AK024155  | 37285.586 | 29945.418 | AF086453  | 582.342   | 607.758   | AK022238  | 904.041   | 1315.936  |
| AL359334  | 18999.898 | 19681.902 | AF070621  | 8606.477  | 9580.274  | NM_012245 | 25438.215 | 25408.314 |
| AK027095  | 2371.514  | 2119.342  | NM_020240 | 2484.744  | 2738.472  | M33197    | 428.76    | 313.543   |
| AF062097  | 3492.058  | 2941.442  | AK023678  | 23135.354 | 20827.803 | AK022546  | 48266.98  | 39149.844 |
| BC030949  | 5183.832  | 4331.581  | AF052090  | 6141.844  | 5670.158  | NM_014067 | 50643.715 | 47159.035 |
| AF116615  | 2023.289  | 2286.402  | AL355730  | 507.736   | 569.479   | NM_002914 | 24791.57  | 21645.68  |
| U17636    | 56772.547 | 64781.094 | U79273    | 2126.46   | 1889.419  | NM_020385 | 11157.684 | 9770.166  |

|           |           |           |           |           |           |           |           |           |
|-----------|-----------|-----------|-----------|-----------|-----------|-----------|-----------|-----------|
| NM_018546 | 5082.847  | 5546.203  | AK022050  | 2991.817  | 3162.708  | NM_014877 | 903.94    | 860.613   |
| U52699    | 20367.041 | 23211.682 | NM_016346 | 1694.024  | 1848.726  | NM_006541 | 2319.722  | 2357.098  |
| S71613    | 2239.875  | 2646.087  | SR6       | 1323.535  | 1986.834  | M33197    | 60197.945 | 66258.977 |
| AJ011910  | 6129.878  | 6095.448  | SR8       | 3524.455  | 13345.894 | NM_005705 | 14315.589 | 10164.647 |
| AK024378  | 451.674   | 546.472   | SR10      | 11919.344 | 5491.582  | NM_004326 | 9648.012  | 7301.465  |
| NM_014026 | 10080.803 | 8944.337  | CY3Cy5    | 1168.638  | 187.315   | NM_004581 | 21556.98  | 16907.443 |
| D61703    | 1211.725  | 1384.863  | AB042410  | 1522.27   | 1919.788  | NM_006817 | 43860.699 | 32943.859 |
| AL050376  | 767.537   | 502.967   | AF086102  | 10572.012 | 12187.728 | NM_007106 | 42379.879 | 41556.531 |
| AL359652  | 1320.079  | 1021.095  | AF116682  | 28705.564 | 34184.035 | NM_015921 | 46799.625 | 51069.004 |
| AK022423  | 1738.692  | 1552.054  | AL137259  | 3829.757  | 4223.085  | AB040900  | 31227.373 | 30623.643 |
| BF509267  | 2486.786  | 1533.52   | AL122107  | 8606.015  | 9800.156  | CY3Cy5    | 4551.758  | 234.157   |
| NM_002455 | 9706.641  | 7502.883  | AF075021  | 1109.488  | 1419.627  | NM_006917 | 5374.85   | 4327.312  |
| NM_002955 | 10645.395 | 9387.778  | AK025140  | 7627.984  | 6664.801  | AF086225  | 4525.418  | 4283.104  |
| AB046773  | 1291.355  | 837.602   | AK001503  | 5544.141  | 5917.102  | NM_005844 | 29841.127 | 28133.34  |
| AK000899  | 11421.991 | 9880.103  | AK022880  | 1832.364  | 2088.553  | AK024941  | 5309.188  | 5195.32   |
| NM_017991 | 1328.998  | 1203.769  | NM_003601 | 11885.378 | 14002.091 | AF056434  | 17716.707 | 19018.6   |
| L37198    | 1305.154  | 1212.127  | AK001228  | 2126.211  | 2157.147  | AF086199  | 1940.246  | 1719.035  |
| U67822    | 1043.206  | 1013.368  | AK026778  | 2118.13   | 2042.882  | M33197    | 76654.852 | 65343.219 |
| AK021921  | 371.899   | 331.175   | AF074987  | 4266.314  | 6923.757  | AK025489  | 3878.256  | 3415.001  |
| AK025431  | 989.558   | 868.441   | AK001058  | 37665.094 | 49426.176 | AB075853  | 815.135   | 1024.453  |
| AK023662  | 2188.304  | 1952.812  | AK026239  | 3425.639  | 4218.089  | AL390152  | 18587.916 | 17515.297 |
| AF086274  | 57396.383 | 64744.023 | AF086283  | 1602.61   | 1777.912  | AK026721  | 4299.293  | 3622.409  |
| AK023682  | 1651.222  | 1732.495  | AK027041  | 2500.906  | 2987.414  | AK023027  | 14381.257 | 11552.217 |
| AK024024  | 2024.278  | 1713.623  | AK022064  | 425.844   | 490.665   | AK025598  | 2548.112  | 2496.937  |
| AF000991  | 654.847   | 661.302   | AK024332  | 614.659   | 986.598   | AB002348  | 74015.93  | 65143.242 |
| AK000685  | 14099.066 | 16106.273 | NM_005355 | 27435.893 | 35474.199 | NM_006917 | 3449.667  | 2518.29   |
| D28381    | 21852.385 | 20596.855 | AK000937  | 1032.282  | 1464.98   | SR2       | 42715.352 | 49446.715 |
| AK023543  | 536.066   | 460.073   | AK023718  | 10303.982 | 12074.804 | SR4       | 15152.415 | 17421.605 |
| BE706519  | 765.869   | 783.731   | AF075089  | 3484.083  | 4223.136  | SR6       | 1424.968  | 1838.65   |
| NM_019096 | 5779.846  | 4198.29   | AF241255  | 543.783   | 913.55    | SR8       | 5426.309  | 25293.342 |
| NM_014725 | 491.941   | 219.602   | AF086007  | 63989.699 | 61709.609 | SR10      | 21104.846 | 10891.877 |
| NM_006892 | 6413.076  | 5896.84   | AK000803  | 4115.532  | 4541.219  | CY3Cy5    | 3891.71   | 197.124   |
| NM_018309 | 2350.142  | 2319.011  | AK022374  | 1078.224  | 1300.248  | AK025948  | 1324.019  | 990.846   |
| NM_017658 | 1137.835  | 999.33    | AF085926  | 21695.74  | 25143.357 | AJ238555  | 2375.475  | 2792.697  |
| NM_018679 | 751.529   | 866.654   | AF085948  | 407.507   | 600.699   | L23850    | 1650.896  | 1432.841  |
| NM_016643 | 782.555   | 578.645   | AL137307  | 6512.339  | 12847.159 | M33197    | 83790.898 | 64915.766 |
| NM_002580 | 1397.764  | 1064.504  | AL137468  | 6435.849  | 8807.208  | AL050088  | 16726.633 | 15368.712 |
| NM_006779 | 4724.457  | 4335.141  | AL162007  | 22489.889 | 19451.764 | AK024939  | 4875.425  | 4475.592  |
| NM_019847 | 3550.764  | 3947.491  | AL390137  | 27540.158 | 24861.609 | AK001561  | 22241.492 | 18349.826 |
| D17093    | 33201.699 | 27626.18  | AL137340  | 1038.978  | 1933.066  | AB007880  | 10521.729 | 9845.465  |
| AK022784  | 511.853   | 440.228   | AL137542  | 1008.169  | 1905.232  | AK024950  | 6621.671  | 5667.867  |
| AL117521  | 6030.452  | 5984.728  | AL162045  | 1243.629  | 1277.576  | M33197    | 78890.266 | 65098.262 |
| NM_000731 | 764.909   | 728.867   | AK022437  | 18095.281 | 14485.196 | NM_014146 | 17195.449 | 12815.551 |
| AK021913  | 2949.996  | 2516.574  | AK024213  | 43649.402 | 48108.273 | NM_018843 | 2852.429  | 2380.199  |
| AL137489  | 32980.465 | 31570.219 | AK025093  | 1136.673  | 1183.312  | AL049461  | 866.699   | 1055.513  |
| AF009311  | 1433.469  | 1252.203  | AK022184  | 1645.4    | 2277.809  | AL109782  | 17890.313 | 18337.965 |
| S73397    | 5490.263  | 6091.69   | AB007959  | 1070.6    | 1427.969  | M33197    | 72972.891 | 65635.523 |
| AK023939  | 799.939   | 671.165   | AK023394  | 435.651   | 427.937   | AK026052  | 826.817   | 792.641   |
| AL050219  | 561.12    | 439.609   | AF090093  | 24962.59  | 33175.332 | AK026601  | 907.786   | 707.885   |
| AK024433  | 3975.074  | 3687.922  | AF161340  | 10886.302 | 14473.971 | AK024506  | 17228.32  | 16043.63  |
| U82321    | 1102.684  | 1021.094  | AF242771  | 1230.118  | 1512.997  | NM_014175 | 4825.541  | 4029.218  |
| AK023856  | 3061.347  | 2529.071  | NM_018562 | 18392.98  | 22264.607 | AF086326  | 9151.472  | 8421.372  |
| AB014557  | 524.024   | 368.365   | AF098666  | 831.709   | 1284.014  | M33197    | 83880.094 | 64934.441 |

|           |           |           |           |           |           |           |           |           |
|-----------|-----------|-----------|-----------|-----------|-----------|-----------|-----------|-----------|
| NM_00557E | 5026.461  | 2749.354  | AF161365  | 841.968   | 1428.353  | AL049937  | 3197.302  | 6562.656  |
| NM_00365E | 22167.201 | 19765.471 | AK021969  | 1473.828  | 1639      | AL080057  | 1570.271  | 1972.141  |
| NM_018457 | 8031.857  | 6985.026  | AK022065  | 1202.125  | 1284.364  | M33197    | 68816.734 | 65433.102 |
| NM_00295E | 13272.65  | 13691.604 | AK022221  | 16612.818 | 16306.493 | M33197    | 75899.039 | 65350.664 |
| NM_002187 | 785.438   | 811.112   | AK022356  | 2287.507  | 2513.914  | AK024470  | 9431.252  | 11684.75  |
| NM_01424E | 1900.517  | 1550.375  | AK021998  | 9255.985  | 7500.252  | NM_01793E | 1344.754  | 1381.369  |
| NM_01485E | 1203.846  | 1353.873  | AK022126  | 3330.796  | 3568.451  | NM_00422E | 7755.99   | 7639.729  |
| AF311912  | 934.164   | 676.446   | AK022256  | 1335.193  | 1280.116  | AK023961  | 848.742   | 762.962   |
| NM_001116 | 414.53    | 321.75    | AK022383  | 5258.342  | 3337.37   | M33197    | 76566.992 | 65318.723 |
| BC035395  | 23240.748 | 23803.168 | AF086262  | 2938.832  | 4445.642  | AF056430  | 1639.804  | 1839.092  |
| NM_00170E | 16337.665 | 18238.67  | AF086292  | 14340.953 | 18746.371 | AF009291  | 526.043   | 589.961   |
| NM_02012E | 4357.898  | 3513.008  | AK023769  | 492.173   | 560.557   | M33197    | 69060.352 | 64887.219 |
| NM_01398E | 9280.634  | 9785.701  | AK024342  | 37535.121 | 44503.68  | NM_01805E | 7901.645  | 13445.063 |
| NM_00504E | 8741.614  | 9052.046  | AL137712  | 8979.599  | 10605.26  | AK001802  | 1260.868  | 1125.236  |
| NM_00388E | 775.829   | 732.843   | AL137606  | 348.251   | 426.415   | AK021469  | 3175.664  | 2639.097  |
| NM_00463C | 13716.521 | 15003.903 | L77599    | 46005.469 | 54202.207 | M33197    | 69783.391 | 65670.953 |
| AK023001  | 2861.029  | 2981.673  | AK021673  | 27816.832 | 35086.938 | AK023633  | 8237.684  | 10642.864 |
| NM_01482E | 23960.789 | 23589.516 | AB014543  | 5463.673  | 6683.98   | M84507    | 855.197   | 620.389   |
| AF201947  | 1346.338  | 1212.069  | NM_01844E | 3544.235  | 4034.458  | NM_00617E | 4561.821  | 4909.862  |
| U01147    | 5949.952  | 6358.34   | AK022743  | 6601.159  | 7846.909  | AL360165  | 4435.287  | 4166.5    |
| NM_00404C | 3981.426  | 3927.172  | AF035306  | 2333.48   | 2961.946  | M33197    | 82279.227 | 65150.449 |
| NM_00611E | 3015.213  | 2758.129  | AK091662  | 578.132   | 1209.382  | AJ008132  | 22079.863 | 24593.135 |
| NM_00545E | 269.036   | 348.729   | AB038318  | 758.27    | 1098.317  | NM_005281 | 10289.011 | 9972.705  |
| BF219403  | 7481.107  | 6454.309  | NM_003954 | 1449.015  | 1705.935  | NM_00554E | 3541.829  | 3931.151  |
| NM_01611E | 9767.39   | 7796.082  | NM_01634E | 1588.803  | 1627.99   | AJ008115  | 52756.922 | 50836.063 |
| AK075450  | 638.213   | 594.781   | AK023877  | 749.288   | 619.392   | AF083125  | 2590.498  | 2233.317  |
| AF178983  | 1763.145  | 1742.297  | AK023640  | 592.079   | 473.831   | AK022970  | 2369.284  | 3849.646  |
| NM_001324 | 15508.645 | 15790.562 | AK024046  | 3581.718  | 5679.325  | AF086415  | 11490.67  | 9792.025  |
| AB037795  | 4222.327  | 5152.352  | NM_017931 | 5533.502  | 7643.262  | D28391    | 64780.137 | 72204.602 |
| D43949    | 4421.877  | 4477.678  | AK022793  | 1949.687  | 2477.088  | M33197    | 64630.777 | 67349.523 |
| AF111849  | 32082.482 | 26176.271 | AJ227910  | 2250.154  | 3109.721  | AJ227885  | 2173.717  | 2735.937  |
| AK022975  | 3240.538  | 2552.964  | AF001893  | 5483.223  | 4987.36   | AK026859  | 3191.77   | 3474.697  |
| NM_015344 | 2669.608  | 1840.214  | X04236    | 7767.704  | 6995.936  | D86961    | 3688.597  | 4308.913  |
| NM_00428E | 8870.35   | 8130.632  | AK093746  | 18414.762 | 23123.762 | AJ227896  | 48734.895 | 44732.652 |
| AL122055  | 7459.688  | 7821.529  | AK027171  | 2123.458  | 2639.89   | L32841    | 10414.578 | 11184.596 |
| NM_00513E | 44793.676 | 47124.949 | AK021945  | 6754.732  | 9264.384  | M33197    | 68106.094 | 65579.078 |
| X07695    | 1115.817  | 1218.855  | L23545    | 1640.052  | 2485.041  | AF131770  | 5455.752  | 5966.612  |
| D87458    | 2821.032  | 3180.607  | AK024153  | 2387.225  | 3952.105  | NM_00643E | 8574.075  | 7656.749  |
| NM_00139E | 400.471   | 271.813   | Y10516    | 6545.43   | 8729.858  | AF025441  | 1091.802  | 1324.425  |
| AK021750  | 5989.516  | 6030.998  | AF056451  | 6788.182  | 8528.758  | U62823    | 1302.472  | 1239.922  |
| NM_00362E | 3747.755  | 3976.311  | AF015039  | 6591.582  | 7835.445  | NM_00353E | 24796.887 | 21516.254 |
| NM_00693E | 1253.484  | 1072.317  | U50528    | 2645.313  | 3129.824  | AF086194  | 39840.262 | 45144.91  |
| AK023594  | 2561.285  | 2734.698  | AB020632  | 2668.561  | 2852.771  | AK026811  | 9085.176  | 7841.484  |
| AB010099  | 4477.061  | 4597.577  | NM_018614 | 62014.543 | 60324.234 | NM_01774E | 1898.675  | 1795.209  |
| AB039920  | 2558.386  | 2303.415  | AL117549  | 2480.859  | 3097.626  | NM_00030C | 5967.335  | 5115.906  |
| AB046782  | 3320.642  | 3064.118  | NM_00522E | 16114.585 | 16704.971 | M33197    | 74468.711 | 65474.711 |
| AF300612  | 17795.178 | 21267.916 | BC024308  | 6390.301  | 6274.637  | AV756917  | 9102.721  | 9798.127  |
| AF208005  | 3211.271  | 3105.742  | NM_00053E | 2729.214  | 3364.423  | NM_01838C | 24916.018 | 26838.402 |
| NM_002231 | 32864.258 | 29227.813 | NM_01829E | 2248.279  | 3917.138  | AK001442  | 2933.146  | 3497.029  |
| NM_020474 | 17518.57  | 15473.859 | AF070574  | 1276.122  | 2120.937  | NM_01207C | 2616.239  | 3225.606  |
| NM_00264E | 5579.737  | 5818.723  | AF190900  | 3748.032  | 4449.807  | AF183423  | 1704.691  | 1723.072  |
| NM_017807 | 5961.579  | 5480.663  | NM_020404 | 30430.912 | 42122.34  | M33197    | 69159.633 | 65646.875 |
| NM_01474E | 2381.31   | 2250.62   | BE972401  | 10808.824 | 16822.287 | U12129    | 4323.256  | 3388.831  |

|           |           |           |           |           |           |           |           |           |
|-----------|-----------|-----------|-----------|-----------|-----------|-----------|-----------|-----------|
| NM_00278E | 51017.379 | 43522.277 | NM_01742E | 980.445   | 1442.397  | S81242    | 68613.578 | 65768.711 |
| NM_00046E | 11820.888 | 10378.753 | AB007922  | 938.863   | 1031.259  | AF230801  | 1804.438  | 1184.367  |
| NM_00333E | 13331.943 | 11595.248 | NM_01598E | 6022.181  | 7428.167  | AF075072  | 2484.506  | 1778.462  |
| NM_00580E | 17665.908 | 14873.344 | NM_00374E | 35871.242 | 42419.781 | M33197    | 64229.063 | 65970.672 |
| NM_004181 | 21787.695 | 15819.157 | NM_00291C | 57662.324 | 62189.047 | NM_00250E | 10736.596 | 11436.292 |
| NM_00390C | 32852.004 | 27251.352 | NM_014627 | 9072      | 13924.5   | AF110136  | 3636.5    | 4112.199  |
| NM_003337 | 6247.88   | 6138.761  | NM_01393E | 29697.58  | 39423.496 | AK026706  | 4258.56   | 3195.285  |
| AF298152  | 4936.079  | 3820.839  | NM_01398E | 61426.941 | 60310.27  | AB007936  | 74029.031 | 65501.871 |
| AF117233  | 13023.81  | 13993.923 | U55055    | 1250.347  | 1593.985  | AF005258  | 2502.459  | 2038.278  |
| NM_00172E | 2363.367  | 2311.372  | AB018319  | 5333.025  | 4502.615  | NM_000887 | 3497.121  | 2929.865  |
| NM_01601E | 2318.293  | 1840.766  | AK001101  | 3769.843  | 3318.228  | M33197    | 70889.797 | 65398.176 |
| M94362    | 13093.908 | 13951.036 | BM973473  | 1996.406  | 1761.581  | NM_01541E | 8575.434  | 8381.968  |
| AK024707  | 2179.82   | 1775.472  | AK021637  | 2214.354  | 2158.678  | NM_002731 | 660.68    | 1130.753  |
| NM_01425E | 758.772   | 656.022   | AK021658  | 3482.189  | 2216.726  | NM_00389E | 3968.257  | 4005.734  |
| AK022909  | 2929.581  | 3126.353  | D61705    | 515.105   | 541.82    | X99662    | 6790.088  | 6434.374  |
| NM_00653C | 11571.361 | 10450.695 | AL137723  | 3415.615  | 3837.864  | NM_00347E | 55779.988 | 56716.016 |
| NM_003587 | 1702.437  | 1697.137  | AK000774  | 1075.529  | 1529.9    | M33197    | 64626.676 | 66090.063 |
| X90978    | 2842      | 2986.149  | AL137311  | 1258.862  | 1631.463  | NM_00601E | 32690.479 | 29794.74  |
| AF217226  | 7111.397  | 5813.455  | NM_01428E | 9999.113  | 16663.879 | NM_00124E | 46364.246 | 41292.953 |
| AL359578  | 505.396   | 260.725   | AF035300  | 1619.059  | 2239.953  | NM_014891 | 7517.134  | 7500.389  |
| NM_00552E | 1143.75   | 993.091   | NM_01770E | 6629.576  | 8852.757  | NM_01339E | 20309.49  | 14168.748 |
| NM_00576C | 12718.596 | 10937.876 | NM_01532C | 5703.683  | 7545.406  | M33197    | 69592.664 | 65445.27  |
| NM_01421E | 4127.854  | 3707.803  | NM_00405E | 4523.667  | 4726.971  | NM_00323E | 4822.978  | 3866.635  |
| NM_00726E | 5370.915  | 4874.504  | NM_01472E | 25173.025 | 32216.951 | NM_00345E | 1325.379  | 1261.776  |
| AK023639  | 25336.432 | 22634.682 | AJ297349  | 2193.143  | 2760.354  | AF052692  | 1832.455  | 1686.166  |
| AL122118  | 1104.779  | 1060.023  | NM_013377 | 683.446   | 1526.309  | NM_00017E | 5996.139  | 4666.066  |
| AL137700  | 3017.181  | 2503.281  | NM_00659E | 3997.529  | 5619.716  | AF062739  | 6435.099  | 7376.438  |
| NM_004904 | 4870.699  | 3462.97   | NM_00446E | 1193.894  | 1326.801  | NM_00660E | 5048.988  | 4240.027  |
| NM_00308E | 5847.153  | 5555.283  | NM_00593E | 2045.347  | 2197.63   | AL079314  | 3536.888  | 4667.298  |
| NM_00678E | 11357.086 | 10209.724 | U43586    | 2289.639  | 2999.986  | NM_00126C | 2651.337  | 2887.716  |
| NM_00098E | 2933.369  | 2322.447  | NM_006271 | 8713.066  | 8827.388  | NM_00195C | 5375.933  | 5901.092  |
| NM_001024 | 52675.313 | 62578.789 | NM_018647 | 839.624   | 1035.873  | AK026364  | 2318.92   | 2101.886  |
| NM_01609E | 50532.359 | 60453.039 | NM_00302E | 758.18    | 709.812   | M33197    | 64636.879 | 67845.633 |
| NM_01242E | 52687.703 | 61190.898 | NM_000721 | 56864.828 | 60235.594 | NM_004331 | 3392.36   | 3195.852  |
| AK026367  | 47206.996 | 44541.32  | NM_00393E | 5711.021  | 5755.685  | NM_01570E | 20473.836 | 14111.299 |
| AK026491  | 36624     | 32769.973 | NM_01864C | 486.445   | 585.357   | AB018337  | 2750.265  | 2371.854  |
| NM_00101E | 53551.402 | 64572.73  | NM_00509E | 3341.115  | 4726.836  | NM_01448E | 2821.18   | 3009.173  |
| AL110170  | 46928.563 | 47084.363 | NM_00005E | 1386.766  | 1933.996  | AK025273  | 5414.623  | 4695.635  |
| NM_00419C | 45478.211 | 47042.707 | NM_00316E | 25113.223 | 26810.221 | M33197    | 72150.164 | 65509.934 |
| NM_01427E | 17368.285 | 18648.926 | NM_01620E | 3851.126  | 5264.208  | NM_00220E | 5018.386  | 3879.514  |
| NM_00040E | 1689.578  | 1747.739  | NM_00575E | 3648.3    | 4831.771  | NM_002214 | 8778.187  | 8121.803  |
| NM_00092C | 2519.414  | 2579.016  | AF149724  | 1822.022  | 2340.107  | NM_001911 | 5184.424  | 3639.978  |
| NM_02037E | 20413.563 | 19081.039 | BC020745  | 935.596   | 1055.741  | NM_000537 | 2526.258  | 2106.379  |
| NM_01604E | 31171.285 | 31415.609 | NM_006367 | 19662.002 | 23511.506 | NM_00650E | 3722.767  | 3684.681  |
| NM_013311 | 16118.527 | 20406.398 | NM_00673E | 62068.047 | 59808.344 | AB002321  | 826.894   | 1241.949  |
| NM_000291 | 53061.512 | 61453.09  | NM_004354 | 6910.807  | 8595.971  | M33197    | 6682.513  | 7779.784  |
| NM_018081 | 4956.513  | 4690.04   | NM_004661 | 3351.221  | 4023.258  | AB020698  | 1749.168  | 1964.994  |
| NM_01464E | 6882.459  | 6729.872  | NM_00200E | 1794.396  | 2245.059  | U68382    | 8327.955  | 7385.68   |
| AL117488  | 1886.682  | 1553.772  | NM_00161C | 3444.046  | 4512.52   | NM_00396E | 2101.102  | 1334.122  |
| NM_01224C | 6623.867  | 5805.087  | NM_001241 | 1767.451  | 2085.822  | NM_004651 | 1079.778  | 937.439   |
| NM_01900E | 9471.403  | 7483.333  | AF217504  | 3914.229  | 4817.835  | M33197    | 64730.414 | 68808.172 |
| NM_00473E | 4801.234  | 5877.024  | AK027102  | 10800.372 | 12484.849 | NM_01756E | 23605.283 | 24997.486 |
| AV752216  | 3729.741  | 3624.59   | AL109714  | 600.139   | 839.092   | NM_00145E | 2187.689  | 1625.304  |

|           |           |           |           |           |           |           |           |           |
|-----------|-----------|-----------|-----------|-----------|-----------|-----------|-----------|-----------|
| NM_005341 | 3563.096  | 4097.419  | NM_004632 | 5055.083  | 5211.701  | AK024480  | 2961.647  | 2208.756  |
| AF181999  | 2053.701  | 2243.426  | NM_017919 | 8254.543  | 9248.229  | Y13871    | 57714.613 | 52676.02  |
| NM_001934 | 3971.098  | 4144.614  | NM_014456 | 6934.725  | 7945.506  | AL137725  | 24210.287 | 18334.049 |
| AB011090  | 3013.393  | 3000.588  | NM_004740 | 12644.96  | 11479.6   | M33197    | 67078.758 | 65569.852 |
| NM_000209 | 619.782   | 529.114   | NM_003805 | 3403.77   | 3836.824  | AJ008151  | 48583.305 | 46450.98  |
| NM_018682 | 7979.831  | 8598.757  | NM_019886 | 7527.366  | 8463.728  | NM_005228 | 2098.522  | 1434.912  |
| AB033024  | 591.485   | 649.01    | NM_003278 | 64114.488 | 63731.387 | NM_002354 | 4812.894  | 4893.667  |
| NM_018942 | 3487.466  | 4093.032  | NM_000426 | 1193.982  | 1512.501  | NM_004091 | 6558.641  | 6805.201  |
| NM_005531 | 13365.486 | 12288.883 | AK021957  | 62541.965 | 60450.75  | X74070    | 65212.637 | 77747.477 |
| NM_006977 | 1443.71   | 1720.443  | U95031    | 1420.41   | 1552.662  | AF027219  | 3260.752  | 2854.635  |
| NM_002479 | 856.943   | 939.155   | NM_004771 | 2673.934  | 4549.282  | NM_006333 | 11519.738 | 9919.787  |
| NM_000348 | 1909.285  | 1645.552  | AL365514  | 1880.994  | 2288.269  | M33197    | 64862.648 | 68865.68  |
| NM_005059 | 22685.746 | 22743.773 | NM_018299 | 2285.176  | 3012.926  | NM_002898 | 17073.582 | 16768.209 |
| NM_004950 | 1358.87   | 1478.516  | NM_002104 | 1944.086  | 2517.541  | AK022749  | 20041.572 | 20128.484 |
| NM_000724 | 6475.496  | 7004.279  | NM_005504 | 16100.746 | 20398.697 | BF031409  | 12310.063 | 12083.005 |
| NM_000553 | 374.048   | 441.232   | AF234654  | 1887.905  | 2325.115  | BE378791  | 760.915   | 845.307   |
| NM_002557 | 7948.343  | 9261.686  | NM_000110 | 3908.75   | 4105.235  | U94388    | 1838.503  | 1692.933  |
| NM_004477 | 726.461   | 912.412   | NM_016002 | 42144.426 | 50891.766 | NM_004888 | 61608.375 | 60612.781 |
| BE728156  | 920.135   | 1024.247  | NM_014549 | 1959.053  | 2042.495  | AK025314  | 8693.717  | 7921.043  |
| BI762229  | 19026.166 | 19049.168 | NM_000531 | 784.869   | 969.932   | NM_002109 | 7494.541  | 6861.917  |
| BG618320  | 733.593   | 884.815   | NM_017832 | 3400.941  | 5030.776  | NM_000984 | 61508.141 | 64281.805 |
| NM_007276 | 4662.148  | 4665.983  | NM_001713 | 10090.964 | 11726.103 | NM_002453 | 25907.691 | 24958.236 |
| N34462    | 2099.939  | 2151.667  | NM_015367 | 14233.646 | 15241.738 | AK000780  | 59952.543 | 60173.949 |
| AI658778  | 10161.524 | 11466.045 | NM_014498 | 11819.145 | 12659.655 | M33197    | 63718.719 | 65583.93  |
| L19067    | 7934.654  | 10485.944 | NM_002375 | 36575.703 | 38264.453 | NM_000131 | 2006.016  | 1993.329  |
| Z48482    | 414.151   | 630.311   | NM_000988 | 61146.504 | 60662.523 | NM_001836 | 1104.151  | 1509.499  |
| W60413    | 737.691   | 812.434   | NM_001813 | 2858.472  | 2722.389  | M64714    | 821.591   | 1051.317  |
| BI823365  | 2716.543  | 2238.657  | AF055016  | 6225.083  | 4326.902  | AK026043  | 1665.018  | 2058.859  |
| X06318    | 618.121   | 749.641   | NM_007234 | 11845.986 | 12611.908 | NM_005006 | 6917.654  | 6916.981  |
| NM_019101 | 1096.781  | 1259.699  | Y16704    | 61580.551 | 62070.063 | AK027033  | 1777.678  | 2037.889  |
| NM_013247 | 9270.22   | 7315.943  | NM_014567 | 7694.325  | 9416.731  | NM_000106 | 10787.067 | 9271.532  |
| NM_006770 | 1204.764  | 1216.411  | NM_017842 | 2026.282  | 2094.47   | NM_003000 | 40290.133 | 33782.656 |
| BE394704  | 1196.903  | 1200.348  | NM_019057 | 11886.168 | 10944.915 | NM_002495 | 27090.123 | 27443.043 |
| NM_004703 | 6609.322  | 7439.903  | NM_002677 | 2063.19   | 2073.925  | NM_014593 | 8045.786  | 5884.074  |
| NM_001512 | 439.906   | 474.078   | NM_001537 | 6047.963  | 13154.721 | NM_006833 | 23259.172 | 20103.4   |
| NM_014706 | 8530.165  | 8939.808  | U80743    | 1599.214  | 2395.799  | NM_012257 | 3492.669  | 4331.017  |
| AK023172  | 1482.705  | 1790.673  | NM_001352 | 8211.604  | 11955.868 | U37690    | 57260.93  | 58730.016 |
| AF139768  | 903.858   | 1046.756  | D15050    | 1558.228  | 1792.726  | NM_005120 | 1925.021  | 1693.148  |
| AJ001348  | 500.993   | 648.497   | NM_014724 | 475.301   | 449.424   | M33197    | 62290.035 | 63025.336 |
| NM_014007 | 2210.603  | 2337.788  | NM_006527 | 11039.646 | 13096.602 | NM_006298 | 4187.958  | 3497.284  |
| AB033006  | 2299.896  | 2416.637  | NM_006627 | 3188.771  | 3691.954  | AF060936  | 42889.18  | 36500.195 |
| AF020314  | 759.439   | 817.409   | NM_007363 | 18419.172 | 19626.785 | NM_005568 | 3496.752  | 2939.929  |
| NM_016332 | 6580.995  | 7178.039  | NM_003093 | 37494.293 | 41149.855 | NM_018167 | 1388.594  | 1162.016  |
| AK023936  | 1324.423  | 1338.806  | U05589    | 1688.698  | 2224.129  | AK024149  | 1823.408  | 2026.478  |
| NM_006457 | 3128.264  | 3769.601  | NM_014473 | 14243.52  | 14915.111 | AK023094  | 2291.227  | 1741.636  |
| NM_003682 | 2322.73   | 2373.082  | NM_003095 | 59970.965 | 63318.227 | M33197    | 62240.16  | 63134.453 |
| NM_000207 | 948.242   | 971.293   | NM_016389 | 6386.325  | 5766.293  | M33197    | 64755.02  | 69018.859 |
| NM_002531 | 428.29    | 532.751   | NM_002295 | 57243.871 | 59018.102 | AJ011129  | 22317.297 | 27411.314 |
| NM_006314 | 3043.702  | 3365.301  | NM_003133 | 13670.422 | 15611.945 | NM_001038 | 873.321   | 1340.067  |
| NM_001782 | 7737.57   | 8576.17   | NM_001762 | 15915.086 | 16199.523 | NM_006387 | 9240.425  | 11584.369 |
| NM_002754 | 875.772   | 928.758   | NM_016306 | 16588.955 | 17373.432 | NM_005646 | 3369.891  | 3424.745  |
| NM_000797 | 1449.051  | 1389.474  | NM_003755 | 1356.805  | 1218.501  | NM_006638 | 2054.815  | 1705.099  |
| NM_014927 | 435.346   | 597.161   | NM_013238 | 4548.041  | 5386.781  | AA418907  | 2815.457  | 2359.642  |

|           |           |           |           |           |           |            |           |           |
|-----------|-----------|-----------|-----------|-----------|-----------|------------|-----------|-----------|
| AF217525  | 491.308   | 502.639   | BE258640  | 31211.129 | 42794.734 | M65291     | 1112.212  | 1180.194  |
| AL080148  | 1800.022  | 1765.979  | NM_003314 | 8864.902  | 14946.637 | AA115473   | 14444.752 | 16654.799 |
| AF000381  | 5439.019  | 4779.194  | NM_016623 | 12874.248 | 15559.993 | AA872397   | 16061.375 | 17349.551 |
| NM_018075 | 655.476   | 501.577   | NM_001334 | 21311.131 | 16870.693 | M24283     | 12094.43  | 10369.026 |
| NM_012105 | 5653.862  | 6279.997  | AL365411  | 7207.243  | 11455.725 | AA709414   | 5535.667  | 5338.731  |
| S82470    | 7673.812  | 7086.631  | M24470    | 1353.354  | 1970.719  | D12676     | 12577.488 | 11760.344 |
| AB028982  | 1395.964  | 1196.782  | NM_016066 | 16931.119 | 20052.611 | NM_000935  | 60813.453 | 61708.422 |
| NM_002004 | 3782.926  | 3540.211  | AK024677  | 1539.548  | 1826.906  | NM_004295  | 56410.695 | 57753.695 |
| NM_005121 | 1854.28   | 2385.234  | NM_000036 | 1698.5    | 2184.082  | H-X 028121 | 5525.996  | 5998.444  |
| NM_000747 | 2704.996  | 2726.618  | AF254082  | 52067.363 | 57064.344 | U75898     | 20354.053 | 18566.518 |
| AJ275973  | 13608.797 | 12067.896 | AF205718  | 25350.092 | 28452.186 | M29039     | 2204.603  | 2132.224  |
| U76362    | 470.458   | 481.435   | NM_003420 | 1166.634  | 1616.723  | M59815     | 1891.786  | 1181.824  |
| NM_003060 | 488.533   | 457.53    | AY004252  | 1356.808  | 1634.253  | M33197     | 58941.699 | 58473.211 |
| AK021489  | 37169.094 | 38967.004 | NM_006261 | 8685.081  | 10443.604 | NM_007255  | 2038.591  | 2241.333  |
| NM_004525 | 1017.572  | 1213.357  | AK027045  | 1701.975  | 2226.568  | NM_018402  | 2125.523  | 3179.495  |
| NM_003895 | 455.349   | 731.876   | AF169796  | 6725.292  | 7474.576  | NM_018005  | 5541.582  | 6324.057  |
| NM_004317 | 6894.272  | 7475.242  | AK026157  | 659.324   | 803.442   | AK075081   | 3111.848  | 3796.385  |
| NM_014645 | 2214.765  | 2069.204  | AK001814  | 8876.251  | 8675.575  | NM_000895  | 19585.037 | 22036.158 |
| NM_014705 | 2921.604  | 3256.091  | NM_007222 | 2274.628  | 2504.258  | NM_003820  | 63875.785 | 65051.145 |
| NM_003693 | 1153.412  | 1338.347  | NM_003435 | 9967.47   | 11092.913 | NM_015915  | 6465.134  | 5907.775  |
| NM_000355 | 15661.825 | 17396.965 | NM_016291 | 12027.389 | 18681.664 | M33197     | 64558.305 | 70079.484 |
| NM_018134 | 1668.119  | 2107.787  | NM_005937 | 55928.27  | 59495.371 | NM_016515  | 33796.578 | 33743.695 |
| L27479    | 2159.393  | 2249.999  | AB037809  | 4436.149  | 6200.986  | NM_006185  | 61426.742 | 62422.902 |
| NM_002193 | 588.908   | 530.145   | AB011129  | 1947.287  | 1750.756  | NM_014800  | 4883.313  | 5661.39   |
| NM_001385 | 6601.542  | 6558.285  | NM_014391 | 27244.334 | 24155.516 | NM_001557  | 1055.055  | 961.26    |
| X76770    | 8696.328  | 8903.89   | NM_004270 | 2073.835  | 1785.992  | AF147311   | 8673.36   | 8866.326  |
| AB037808  | 4158.72   | 4099.541  | L09102    | 52508.898 | 63100.938 | NM_002131  | 62600.305 | 63446.457 |
| NM_016035 | 19128.822 | 18229.525 | U68488    | 830.117   | 1243.925  | NM_017927  | 14797.367 | 14956.685 |
| AF090911  | 580.828   | 444.449   | NM_000675 | 577.915   | 870.199   | M33197     | 64751.906 | 66371.172 |
| Z36821    | 7046.389  | 6896.788  | NM_016247 | 21199.256 | 30138.525 | NM_001203  | 8778.797  | 8814.042  |
| AF289485  | 13325.54  | 13047.546 | NM_001157 | 1270.974  | 1595.632  | NM_004795  | 61873.379 | 63473.082 |
| AF130092  | 1326.331  | 1695.614  | NM_012282 | 1549.201  | 2398.221  | NM_002035  | 509.713   | 2311.191  |
| NM_016095 | 10335.45  | 10691.134 | NM_006710 | 1058.585  | 1217.761  | NM_014047  | 32928.887 | 31404.201 |
| AK024794  | 3877.718  | 4274.702  | NM_003323 | 16747.326 | 19462.084 | AK022901   | 4439.602  | 4259.243  |
| NM_019853 | 9180.826  | 8908.176  | BG685310  | 3057.374  | 3479.282  | AF037332   | 8049.326  | 7521.006  |
| NM_017992 | 2075.782  | 2304.093  | AW300857  | 54517.969 | 56735.969 | NM_014571  | 806.153   | 772.907   |
| NM_005400 | 1068.671  | 1358.952  | H85962    | 52942.645 | 53990.723 | NM_020151  | 25013.678 | 27512.721 |
| AK023061  | 848.821   | 1033.651  | BG742446  | 2609.742  | 3420.158  | NM_005891  | 35545.027 | 40318.336 |
| NM_007255 | 1740.334  | 1905.912  | AA864554  | 1364.126  | 1748.56   | NM_001645  | 2413.971  | 3381.593  |
| NM_003665 | 3693.55   | 4375.329  | X66945    | 7952.57   | 8355.85   | NM_003955  | 2930.65   | 3782.839  |
| NM_013384 | 53672.676 | 58211.688 | AI160703  | 1238.677  | 1281.093  | M33197     | 63163.941 | 69795.945 |
| NM_001187 | 2268.92   | 2577.918  | X12830    | 7860.319  | 9376.126  | NM_003500  | 15267.813 | 20593.479 |
| NM_018241 | 4736.777  | 5376.954  | U00482    | 4134.886  | 4423.402  | NM_014317  | 5355.141  | 7365.925  |
| NM_005834 | 12742.611 | 13745.258 | Z80998    | 422.263   | 744.925   | L09234     | 25751.303 | 29302.289 |
| NM_005055 | 19340.264 | 19669.994 | K01904    | 25010.537 | 33035.027 | NM_000055  | 3318.511  | 4255.004  |
| NM_004950 | 1019.67   | 1280.99   | BE538886  | 3955.073  | 5587.307  | AK026740   | 1875.851  | 2211.236  |
| NM_000724 | 5618.405  | 6336.737  | NM_002225 | 1129.993  | 1718.105  | NM_017881  | 8080.791  | 7518.57   |
| NM_002557 | 7448.98   | 8088.982  | M57650    | 55910.863 | 54650.758 | NM_018895  | 4049.604  | 5081.936  |
| NM_004477 | 740.687   | 681.045   | BC023978  | 1923.934  | 2140.92   | AF069307   | 4988.188  | 5445.817  |
| BE728156  | 816.984   | 783.819   | M21302    | 11147.713 | 10374.332 | U92978     | 4943.387  | 5133.462  |
| BI762229  | 19456.367 | 20701.561 | NM_002512 | 54686.527 | 56011.512 | NM_018034  | 13146.024 | 15084.067 |
| BG618320  | 901.629   | 981.758   | NM_004905 | 597.489   | 977.493   | M33197     | 63172.699 | 66647.789 |
| Y00787    | 387.223   | 601.961   | NM_016171 | 53688.531 | 61269.219 | AB037831   | 9836.615  | 10952.446 |

|           |           |           |           |           |           |             |           |           |
|-----------|-----------|-----------|-----------|-----------|-----------|-------------|-----------|-----------|
| NM_007276 | 4980.514  | 5368.355  | NM_014443 | 14640.818 | 14374.232 | NM_012103   | 29019.186 | 30249.184 |
| N34462    | 2009.739  | 2209.233  | NM_005212 | 6438.554  | 7246.337  | AL122077    | 35800.523 | 34716.426 |
| AI658778  | 9751.758  | 11656.462 | M14584    | 1726.75   | 2733.441  | NM_014632   | 2051.051  | 2582.82   |
| L19067    | 6835.95   | 7807.915  | NM_006419 | 2420.532  | 3050.97   | NM_006422   | 2810.397  | 2590.581  |
| W60413    | 757.929   | 889.653   | AF035035  | 793.802   | 1147.829  | NM_016946   | 1978.769  | 1874.996  |
| BI823365  | 2276.064  | 3112.849  | AB020676  | 3658.905  | 4377.47   | M33197      | 63621.438 | 66161.602 |
| X06318    | 586.644   | 595.067   | AK024715  | 865.485   | 1121.27   | NM_005326   | 46470.625 | 46008.148 |
| NM_016217 | 15538.294 | 17657.531 | U90942    | 59117.875 | 59973.145 | NM_007286   | 1225.61   | 1768.477  |
| AK025971  | 6109.353  | 7628.109  | NM_014942 | 995.572   | 1173.476  | NM_014066   | 2433.68   | 2382.598  |
| NM_002618 | 2697.627  | 3018.413  | NM_018360 | 5365.714  | 6899.367  | AB035130    | 3698.548  | 4130.815  |
| BE394704  | 922.085   | 1088.766  | AK022489  | 489.741   | 2057.447  | NM_003356   | 4591.61   | 5243.276  |
| NM_004703 | 5380.798  | 4303.414  | AL365415  | 1061.728  | 1563.098  | M33197      | 63313.148 | 68069.289 |
| NM_001512 | 407.524   | 487.848   | L29147    | 59011.734 | 58405.941 | AF119917    | 1406.507  | 1884.704  |
| NM_014706 | 7301.115  | 7962.842  | NM_001525 | 46174.586 | 52080.309 | NM_017915   | 3487.34   | 3027.748  |
| AK023172  | 1064.221  | 1197.933  | NM_006055 | 7717.63   | 8556.206  | AL050097    | 878.973   | 866.543   |
| AJ001348  | 1373.803  | 1483.638  | NM_004296 | 1596.138  | 1915.924  | NM_003579   | 3540.378  | 3905.484  |
| NM_014007 | 2236.056  | 2149.262  | NM_005048 | 1535.356  | 2000.891  | AL049283    | 2975.902  | 3298.65   |
| AB033006  | 2357.931  | 2499.452  | NM_005972 | 4442.493  | 5606.875  | M33197      | 61706.598 | 62232.504 |
| AF020314  | 730.677   | 732.905   | NM_001060 | 1063.849  | 1235.607  | NM_002401   | 60258.547 | 61772.09  |
| NM_016332 | 9933.468  | 10928.47  | NM_018841 | 7363.831  | 8694.766  | NM_001274   | 5214.614  | 6094.635  |
| AK023936  | 1696.035  | 2335.013  | NM_005226 | 2635.758  | 3157.033  | NM_003913   | 1069.773  | 1315.584  |
| NM_006457 | 3141.344  | 4217.582  | AK022859  | 2637.208  | 3054.234  | NM_002227   | 5095.448  | 4570.748  |
| NM_003682 | 2070.091  | 2441.319  | NM_020228 | 18405.498 | 20465.67  | NM_007196   | 2622.471  | 2383.135  |
| NM_000207 | 813.689   | 889.552   | AK024685  | 5239.192  | 8214.935  | AB002301    | 795.422   | 764.593   |
| NM_002531 | 488.03    | 483.744   | NM_003676 | 8730.792  | 13427.97  | AB014530    | 14272.938 | 15922.251 |
| NM_006314 | 3673.98   | 4619.099  | AF113007  | 21549.217 | 29291.707 | M33197      | 61597.551 | 62481.285 |
| NM_001782 | 8032.23   | 9930.532  | NM_000688 | 3733.732  | 4287.341  | NM_005986   | 22591.203 | 26825.576 |
| NM_002754 | 972.684   | 981.242   | U39573    | 2604.925  | 2890.787  | AB014607    | 17023     | 12987.336 |
| NM_000797 | 1579.207  | 1757.894  | D82061    | 7624.123  | 8375.586  | AF134401    | 3111.25   | 2196.754  |
| NM_014927 | 351.541   | 485.587   | AJ293009  | 4643.276  | 5853.896  | NM_001036   | 1604.226  | 2339.709  |
| AF217525  | 523.358   | 745.497   | NM_000374 | 6892.838  | 9779.71   | NM_006387   | 9353.186  | 14892.675 |
| AL080148  | 1558.546  | 1697.684  | NM_000502 | 28332.723 | 37792.105 | NM_005646   | 5742.699  | 7538.729  |
| NM_002479 | 580.319   | 582.998   | NM_001359 | 25322.389 | 27242.611 | NM_006636   | 2583.582  | 2791.89   |
| NM_000348 | 1490.446  | 1761.747  | NM_002245 | 1557.931  | 1468.559  | NM_001692   | 1206.997  | 1178.641  |
| NM_018075 | 490.197   | 422.031   | NM_004980 | 45430.863 | 47495.145 | BI767871    | 22496.078 | 17704.58  |
| NM_012105 | 4246.296  | 4053.104  | NM_003224 | 2001.096  | 2177.975  | AA418907    | 3517.518  | 3371.302  |
| S82470    | 6875.464  | 6920.281  | NM_004227 | 1759.547  | 1902.519  | M65291      | 1524.285  | 1575.788  |
| AB028982  | 1390.576  | 1712.974  | NM_005282 | 6333.144  | 5341.42   | AA115473    | 13403.139 | 13415.208 |
| NM_002004 | 3214.602  | 4963.548  | NM_001736 | 3482.325  | 3036.273  | AA872397    | 15175.614 | 17694.729 |
| NM_005121 | 1678.922  | 2079.816  | AB028949  | 822.003   | 746.967   | M24283      | 12983.03  | 14012.65  |
| NM_000747 | 3573.61   | 3468.732  | AL137580  | 1626.859  | 1363.427  | AA709414    | 4467.603  | 4288.741  |
| AJ275973  | 13300.38  | 12465.662 | NM_004101 | 1777.689  | 1581.273  | D12676      | 9845.829  | 9824.606  |
| NM_003060 | 317.964   | 674.919   | NM_002995 | 56425.402 | 57482.832 | NM_000936   | 41987.18  | 45297.027 |
| AK021489  | 25922.912 | 27039.543 | AB033114  | 849.901   | 708.239   | NM_004295   | 52925.902 | 58876.543 |
| NM_004525 | 676.975   | 1018.859  | NM_015978 | 10804.079 | 9269.09   | H-X 02812 I | 4024.157  | 4431.384  |
| NM_003895 | 679.973   | 646.269   | NM_003810 | 2657.486  | 1906.766  | U75898      | 13263.888 | 11672.501 |
| NM_004317 | 5941.945  | 7268.391  | NM_018973 | 10347.198 | 6945.91   | M29039      | 3468.212  | 2954.217  |
| NM_014645 | 1653.986  | 2036.914  | NM_002591 | 46475.23  | 39266.113 | M33197      | 2826.346  | 2414.725  |
| NM_014708 | 2470.295  | 3268.135  | AL049334  | 424.237   | 234.839   | AB011146    | 7249.77   | 6189.768  |
| NM_003693 | 982.483   | 1366.13   | NM_020216 | 2406.044  | 1863.708  | NM_003679   | 564.206   | 864.747   |
| NM_000356 | 11985.459 | 14548.114 | AK021860  | 3424.809  | 2283.36   | NM_018006   | 3255.66   | 2361.063  |
| NM_018134 | 1133.542  | 1523.325  | AB046816  | 1197.54   | 736.709   | AK075081    | 5150.88   | 5319.46   |
| NM_013247 | 5989.94   | 5037.541  | AL137266  | 6225.787  | 4538.876  | NM_000895   | 20171.529 | 25173.732 |

|           |           |           |           |           |           |           |           |           |
|-----------|-----------|-----------|-----------|-----------|-----------|-----------|-----------|-----------|
| NM_00677C | 895.164   | 856.873   | NM_016457 | 1354.628  | 918.67    | NM_00382C | 63258.422 | 65709.766 |
| NM_00138E | 5832.511  | 4567.489  | NM_005057 | 1413.575  | 954.976   | NM_01591E | 10055.03  | 11054.405 |
| X76770    | 6910.294  | 7379.228  | AF143321  | 1230.24   | 1013.099  | M33197    | 59499.813 | 63525.234 |
| AB037808  | 3844.39   | 3482.491  | AB046842  | 3361.141  | 2768.535  | NM_01651E | 38652.117 | 37422.078 |
| NM_00591E | 688.519   | 422.584   | NM_00485C | 2255.682  | 1776.687  | NM_00618E | 55175.227 | 54212.727 |
| NM_01603E | 15757.989 | 12865.854 | NM_00282E | 14052.893 | 10798.7   | NM_01480C | 6473.66   | 5877.558  |
| AF090911  | 689.366   | 475.013   | BF306955  | 3727.686  | 3047.19   | NM_001557 | 1852.658  | 1891.971  |
| Z36821    | 5361.108  | 5302.002  | NM_001394 | 9835.245  | 7279.279  | AF147311  | 8504.811  | 8834.415  |
| AF289485  | 10447.944 | 10031.503 | NM_018441 | 19417.359 | 15405.602 | NM_002131 | 59303.309 | 59882.926 |
| AF130092  | 828.767   | 1493.45   | NM_00077E | 17715.469 | 15776.973 | NM_017927 | 11227.049 | 15835.595 |
| NM_01609E | 7581.812  | 12283.508 | NM_00160E | 2260.705  | 2678.521  | M33197    | 62685.863 | 64677.379 |
| AK024794  | 2736.271  | 3612.648  | BE733234  | 1464.029  | 1243.289  | NM_00120E | 11140.181 | 12298.598 |
| NM_01985E | 7461.143  | 11504.936 | NM_00067E | 575.129   | 497.555   | NM_00479E | 58256.867 | 58957.992 |
| NM_01799E | 1498.168  | 1849.078  | NM_016247 | 18755.275 | 19438.521 | NM_014047 | 32143.975 | 26102.904 |
| NM_00540C | 1674.219  | 2440.501  | NM_001157 | 1092.65   | 734.365   | AK022901  | 4567.34   | 4133.222  |
| NM_00725E | 1131.984  | 1393.615  | NM_01228E | 1272.938  | 974.926   | NM_00150E | 1698.805  | 1842.835  |
| NM_00366E | 1663.316  | 2832.693  | NM_00671C | 1071.544  | 844.454   | AF037332  | 7828.949  | 7358.415  |
| NM_01338A | 33663.359 | 38056.016 | NM_00332E | 16863.127 | 14023.282 | NM_014571 | 2107.389  | 600.508   |
| NM_001187 | 1830.453  | 1609.526  | BG685310  | 3143.479  | 3206.353  | M33197    | 62487.266 | 63711.082 |
| NM_018241 | 3247.591  | 3438.504  | AW300857  | 50637.063 | 40641.043 | AJ011129  | 36748.598 | 23773.531 |
| NM_005834 | 6574.661  | 8335.9    | H85962    | 50729.727 | 45982.063 | NM_00164E | 830.517   | 905.748   |
| AF000381  | 3787.616  | 3951.579  | BG742446  | 2727.508  | 1965.116  | NM_00395E | 3155.587  | 4013.532  |
| NM_000724 | 5231.567  | 5268.109  | AA864554  | 1179.64   | 824.089   | M33197    | 64067.594 | 74108.742 |
| NM_002557 | 6907.697  | 5150.918  | X66945    | 7447.929  | 5846.24   | NM_00350C | 15464.287 | 18379.344 |
| NM_004477 | 769.104   | 382.773   | AI160703  | 953.478   | 1000.34   | NM_014317 | 5377.911  | 6430.553  |
| BE728156  | 856.468   | 480.882   | X12830    | 7312.642  | 6152.267  | L09234    | 26507.061 | 31910.209 |
| BI762229  | 14557.029 | 14150.931 | U00482    | 3966.812  | 2712.304  | NM_00005E | 1639.729  | 1825.801  |
| BG618320  | 553.559   | 570.797   | K01904    | 21146.127 | 16095.578 | AK026740  | 1448.962  | 2010.556  |
| Y00787    | 457.03    | 663.557   | BE538886  | 2985.592  | 2187.381  | NM_017881 | 11001.459 | 12288.037 |
| NM_00727E | 2514.841  | 3090.102  | NM_00222E | 1084.554  | 884.388   | NM_01889E | 3644.391  | 4353.399  |
| N34462    | 1547.313  | 1362.149  | M57650    | 51277.473 | 35350.77  | AF069307  | 4358.914  | 4579.479  |
| AI658778  | 6010.823  | 7426.324  | BC023978  | 2444.057  | 1651.63   | U92978    | 5772.729  | 5250.803  |
| L19067    | 3415.889  | 4837.811  | M21302    | 11834.378 | 8138.107  | NM_018034 | 9551.405  | 8467.073  |
| BI823365  | 1410.397  | 1803.469  | AK024865  | 2226.365  | 1645.403  | M33197    | 59584.242 | 62226.148 |
| X06318    | 396.964   | 615.647   | NM_00721C | 1642.951  | 1168.467  | AB037831  | 8953.804  | 10169.349 |
| NM_016217 | 9809.36   | 9823.697  | NM_00148E | 5581.678  | 4630.996  | NM_01210E | 26395.043 | 28810.582 |
| AK025971  | 3840.463  | 4917.271  | NM_01444E | 14443.976 | 8490.01   | AL122077  | 32853.066 | 35437.422 |
| NM_00261E | 2019.929  | 2381.881  | NM_00521E | 6632.492  | 4827.297  | NM_01463E | 2196.011  | 2911.639  |
| L27479    | 1267.714  | 1462.73   | M14584    | 1721.704  | 1149.466  | NM_00642E | 2927.794  | 2659.981  |
| NM_00219E | 601.058   | 712.994   | NM_00641E | 2246.947  | 1786.387  | NM_01694E | 2488.493  | 1382.892  |
| AB033006  | 2260.157  | 1505.84   | AF035035  | 910.778   | 633.854   | M33197    | 59546.242 | 63230.605 |
| AF020314  | 687.667   | 563.688   | AB020676  | 3196.662  | 2327      | NM_00725E | 1196.489  | 850.943   |
| NM_01633E | 7680.803  | 5809.707  | AK024715  | 1061.191  | 763.926   | NM_01406E | 1462.517  | 1231.346  |
| AK023936  | 1415.953  | 1210.654  | U90942    | 53185.867 | 56582.379 | AB035130  | 2673.92   | 2517.059  |
| NM_006457 | 3636.785  | 3997.784  | NM_01494E | 1109.536  | 870.789   | NM_00335E | 3602.319  | 4096.727  |
| NM_00368E | 2493.007  | 1948.923  | NM_01836C | 6581.002  | 5551.211  | M33197    | 62353.695 | 64622.367 |
| NM_000207 | 1072.877  | 779.023   | AL365415  | 1467.997  | 1439.02   | AF119917  | 1384.034  | 1365.944  |
| NM_002531 | 482.379   | 484.307   | L29147    | 54718.781 | 53102.723 | NM_01791E | 2823.368  | 3352.456  |
| NM_006314 | 3610.935  | 3563.06   | NM_00152E | 46101.043 | 32750.82  | AL050097  | 881.328   | 890.166   |
| NM_00178E | 10248.541 | 9343.795  | NM_00605E | 8704.275  | 8189.563  | AK021513  | 473.142   | 537.17    |
| NM_002754 | 1071.76   | 1098.654  | NM_00429E | 1446.716  | 1141.01   | NM_00357E | 3990.44   | 4836.876  |
| NM_000797 | 1426.844  | 1075.061  | NM_00504E | 1128.469  | 910.461   | AL049283  | 3181.541  | 3457.869  |
| NM_01629E | 352.801   | 521.436   | NM_00597E | 3449.198  | 2313.729  | NM_002401 | 55125.824 | 62450.461 |



|           |           |           |           |           |           |             |           |           |
|-----------|-----------|-----------|-----------|-----------|-----------|-------------|-----------|-----------|
| AL080148  | 535.356   | 875.65    | NM_001060 | 1301.307  | 1161.861  | NM_001274   | 4863.248  | 5720.857  |
| NM_014061 | 524.892   | 792.923   | NM_018841 | 7224.685  | 5844.834  | NM_002227   | 5072.614  | 4431.294  |
| NM_000348 | 1256.276  | 1071.079  | NM_005226 | 2817.5    | 2026.44   | NM_007195   | 2018.372  | 1889.634  |
| NM_005055 | 10855.696 | 11511.892 | AK022859  | 3075.554  | 2291.208  | AB002301    | 613.749   | 608.787   |
| NM_004950 | 824.591   | 978.505   | L09102    | 54773.953 | 52843.973 | AB014530    | 11575.109 | 10552.941 |
| AF040248  | 645.66    | 597.301   | U68488    | 724.954   | 647.482   | M33197      | 63426.727 | 65351.203 |
| NM_014228 | 1387.477  | 1423.552  | NM_003676 | 7556.495  | 7740.551  | NM_005985   | 12078.307 | 10218.346 |
| AL832292  | 5245.038  | 5667.457  | AF113007  | 18392.711 | 14125.07  | AB014607    | 14541.329 | 7927.127  |
| NM_003045 | 5579.28   | 7277.947  | NM_000688 | 3649.616  | 3127.262  | AF134401    | 1362.065  | 1046.782  |
| NM_005662 | 11219.872 | 10235.186 | U39573    | 1847.311  | 1109.863  | NM_020151   | 14644.479 | 11145.201 |
| NM_003060 | 601.647   | 520.668   | D82061    | 6407.866  | 5606.356  | NM_005891   | 15739.503 | 11115.989 |
| AK021489  | 36199.98  | 28226.912 | AJ293009  | 4718.825  | 3786.204  | NM_006387   | 3838.732  | 4859.217  |
| NM_004525 | 1180.774  | 1031.201  | NM_000374 | 7080.755  | 5781.581  | NM_005646   | 3665.137  | 3521.392  |
| NM_003895 | 606.086   | 809.223   | NM_000502 | 25925.496 | 19480.049 | NM_006635   | 2512.213  | 2667.621  |
| NM_004317 | 6776.158  | 7830.768  | NM_001359 | 28682.672 | 23411.215 | NM_001692   | 1241.857  | 1311.977  |
| NM_014645 | 1990.625  | 1648.947  | NM_002245 | 1488.06   | 1389.54   | BI767871    | 20018.225 | 17447.117 |
| NM_014708 | 2446.492  | 1879.185  | NM_004980 | 46114.297 | 37467.461 | AA418907    | 4489.111  | 4533.092  |
| NM_003693 | 446.557   | 522.808   | NM_003224 | 2433.132  | 1910.96   | M65291      | 1254.677  | 1277.341  |
| NM_000356 | 5981.85   | 4985.83   | NM_004227 | 1618.419  | 1527.575  | AA115473    | 19939.813 | 16866.244 |
| NM_018134 | 897.98    | 948.073   | NM_005282 | 7466.327  | 4386.369  | AA872397    | 18439.492 | 19281.99  |
| NM_013247 | 1761.291  | 1557.059  | NM_001736 | 3713.568  | 2213.349  | M24283      | 13882.08  | 14431.616 |
| AK023172  | 692.776   | 554.953   | AB028949  | 656.932   | 399.867   | AA709414    | 4664.129  | 4711.664  |
| NM_014007 | 1295.557  | 1625.495  | AL137580  | 1521.862  | 940.712   | NM_000935   | 54379.133 | 57572.609 |
| NM_001187 | 3011.692  | 3238.121  | NM_004101 | 1855.502  | 1696.128  | NM_004295   | 56351.781 | 67528.781 |
| NM_018241 | 4129.08   | 5098.567  | NM_002995 | 54692.68  | 53804.918 | H-X 02812 I | 4330.373  | 6638.475  |
| NM_005834 | 10762.17  | 11076.777 | AB033114  | 754.504   | 573.176   | U75898      | 12954.326 | 12142.924 |
| AF000381  | 5632.309  | 5201.659  | NM_015978 | 10936.417 | 7607.314  | M29039      | 2374.065  | 2595.956  |
| NM_018075 | 898.391   | 858.812   | NM_003810 | 2561.68   | 1631.255  | M33197      | 3151.682  | 3415.589  |
| NM_012105 | 3716.864  | 4574.324  | NM_004908 | 513.987   | 261.862   | AB011146    | 5665.913  | 4361.433  |
| S82470    | 3894.678  | 3301.346  | NM_016171 | 56797.473 | 60179.156 | NM_005326   | 37176.613 | 23943.184 |
| AB028982  | 1047.18   | 734.88    | NM_018973 | 8776.24   | 8365.733  | NM_014800   | 4316.426  | 4397.955  |
| NM_002004 | 1894.729  | 2000.395  | NM_002591 | 39320.043 | 27932.441 | NM_001557   | 1339.55   | 1117.167  |
| NM_005121 | 477.938   | 758.434   | NM_020216 | 2295.207  | 2240.969  | AF147311    | 9446.257  | 10848.841 |
| NM_001643 | 10278.298 | 10787.847 | AK021860  | 3299.523  | 2406.208  | NM_002131   | 60613.613 | 65023.438 |
| NM_000747 | 1425.588  | 1485.693  | AB046816  | 936.7     | 930.469   | NM_017927   | 16331.229 | 16600.168 |
| NM_005415 | 3661.594  | 4170.988  | AL137266  | 5440.957  | 4534.77   | M33197      | 61932.535 | 68120.414 |
| AJ275973  | 3740.895  | 2834.447  | NM_016457 | 1402.384  | 918.755   | NM_001203   | 13436.218 | 15835.319 |
| NM_006493 | 1250.879  | 1267.151  | NM_005057 | 1530.908  | 1158.237  | NM_004795   | 56644.746 | 61221.344 |
| U76362    | 385.214   | 838.481   | AF143321  | 1181.778  | 913.291   | NM_006733   | 650.695   | 789.711   |
| NM_016217 | 14287.604 | 14275.525 | AB046842  | 3195.864  | 2302.577  | NM_002035   | 529.748   | 588.449   |
| AK025971  | 6147.865  | 7425.708  | NM_004850 | 2031.683  | 1545.086  | NM_014047   | 45158.484 | 39188.645 |
| NM_002618 | 3144.447  | 3919.853  | NM_002822 | 13814.898 | 8199.759  | AK022901    | 6776.891  | 6409.486  |
| L27479    | 1485.547  | 1983.558  | BF306955  | 3540.913  | 2313.828  | NM_001508   | 1542.659  | 1429.614  |
| NM_002193 | 603.975   | 475.659   | NM_001394 | 8998.182  | 7327.368  | M33197      | 58589.438 | 63051.93  |
| NM_001388 | 4746.936  | 5057.166  | NM_018441 | 18152.023 | 11688.126 | AF037332    | 9560.687  | 12027.803 |
| X76770    | 6258.403  | 7422.414  | NM_000778 | 16157.786 | 12374.979 | NM_014571   | 597.184   | 1611.317  |
| AB037808  | 2647.863  | 2364.941  | NM_001609 | 2262.882  | 1513.576  | NM_006052   | 1737.363  | 1991.201  |
| NM_016035 | 13924.217 | 13322.594 | BE733234  | 1225.08   | 819.392   | AB040912    | 8854.241  | 9269.329  |
| Z36821    | 4789.462  | 4272.675  | NM_020228 | 12800.101 | 8498.777  | NM_003871   | 4203.209  | 4219.31   |
| AF289485  | 4413.258  | 4291.988  | AK024685  | 3562.008  | 2860.858  | NM_006243   | 3924.293  | 3552.099  |
| NM_016095 | 373.308   | 643.046   | NM_001157 | 994.85    | 970.561   | M33197      | 57375.949 | 61130.168 |
| AK024794  | 2128.105  | 1459.997  | NM_012282 | 1109.175  | 1243.435  | AJ011129    | 26192.094 | 17958.014 |
| NM_019853 | 4824.954  | 4836.602  | NM_006710 | 909.927   | 791.532   | NM_001035   | 3598.497  | 1631.818  |

|           |           |           |           |           |           |           |           |           |
|-----------|-----------|-----------|-----------|-----------|-----------|-----------|-----------|-----------|
| NM_017992 | 1374.255  | 1595.204  | NM_003323 | 17298.781 | 14989.375 | NM_00573E | 864.175   | 1017.752  |
| NM_00540C | 765.68    | 1149.871  | BG685310  | 3378.919  | 2522.364  | NM_01448E | 1606.667  | 2177.175  |
| AK023061  | 592.767   | 1000.656  | AW300857  | 49478.352 | 37976.027 | NM_01338E | 13354.139 | 12994.458 |
| NM_00725E | 1523.88   | 1899.192  | H85962    | 49911.348 | 37490.645 | AB014567  | 599.479   | 757.259   |
| NM_00366E | 2338.089  | 2545.949  | BG742446  | 2644.155  | 2001.471  | AK022817  | 5815.767  | 4990.484  |
| NM_013384 | 31831.436 | 35160.801 | AA864554  | 1422.223  | 767.803   | NM_018034 | 14890.114 | 13850.458 |
| CY3Cy5    | 5962.123  | 215.229   | X66945    | 7740.234  | 4516.112  | M33197    | 60066.133 | 65562.547 |
| NM_01634E | 2889.971  | 2933.075  | AI160703  | 956.078   | 692       | AB037831  | 12325.446 | 14872.66  |
| AF086281  | 696.569   | 644.701   | X12830    | 7081.471  | 5218.519  | NM_01210E | 35426.004 | 37330.402 |
| AF086453  | 512.818   | 765.619   | U00482    | 3436.04   | 2474.021  | AL122077  | 41535.777 | 44240.238 |
| AF070621  | 17028.16  | 17682.6   | K01904    | 18958.482 | 12979.72  | NM_01463E | 3234.636  | 3489.016  |
| NM_02024C | 7626.768  | 6838.261  | BE538886  | 2474.589  | 1907.313  | NM_00642E | 4219.728  | 4773.132  |
| AK023678  | 20112.316 | 17511.902 | NM_00222E | 754.108   | 574.588   | BE789195  | 752.51    | 1155.64   |
| AF052090  | 4014.834  | 2695.664  | M57650    | 51741.215 | 31139.113 | NM_01694E | 1867.465  | 2849.379  |
| AL355730  | 640.585   | 705.482   | BC023978  | 2220.601  | 1338.887  | M33197    | 56527.25  | 62500.211 |
| U79273    | 3240.232  | 3127.327  | M21302    | 10332.544 | 7952.243  | NM_00725E | 2225.064  | 2292.659  |
| AK022050  | 578.764   | 499.608   | AK024865  | 2326.12   | 1607.885  | NM_01840E | 1765.444  | 928.559   |
| NM_01634E | 3053.74   | 2897.045  | NM_00721C | 1333.458  | 856.751   | NM_01800E | 4367.807  | 4054.942  |
| SR4       | 13545.01  | 15130.809 | NM_00148E | 4995.083  | 3862.575  | AK075081  | 3542.635  | 3490.804  |
| SR6       | 2307.1    | 2007.753  | NM_01494E | 1073.94   | 859.996   | NM_00089E | 16715.268 | 14891.832 |
| SR8       | 8026.999  | 21310.916 | NM_01836C | 6696.965  | 5892.82   | NM_00382C | 50579.441 | 55725.668 |
| SR10      | 24945.42  | 8637.008  | AL365415  | 1293.006  | 1226.369  | NM_01591E | 18930.521 | 13467.992 |
| CY3Cy5    | 2208.833  | 108.26    | L29147    | 56993.977 | 53120.48  | M33197    | 62667.578 | 63416.137 |
| AB042410  | 947.182   | 1112.72   | NM_00152E | 44798.531 | 33635.375 | NM_01651E | 37663.793 | 25871.324 |
| AF116682  | 45529.363 | 41512.73  | NM_00605E | 8567.073  | 7667.66   | NM_00618E | 53096.73  | 58019.484 |
| AL137259  | 1618.844  | 1411.139  | NM_00429E | 1409.312  | 1221.955  | NM_00598E | 14909.401 | 14339.851 |
| AL122107  | 1618.179  | 1545.726  | NM_00504E | 1137.236  | 1294.333  | AB014607  | 13769.256 | 12429.003 |
| AF075021  | 2232.448  | 2155.273  | NM_00597E | 3635.075  | 2579.845  | AF134401  | 2294.393  | 2706.941  |
| AK025140  | 11361.188 | 8263.898  | NM_00106C | 759.792   | 736.638   | NM_020151 | 24787.236 | 25320.014 |
| AK023259  | 587.797   | 584.636   | NM_018841 | 6984.498  | 5509.873  | NM_005891 | 36304.863 | 34718.605 |
| AK001503  | 1016.576  | 1084.693  | NM_00522E | 2337.735  | 1743.939  | NM_00164E | 2889.937  | 2338.365  |
| AF075027  | 581.932   | 786.78    | AL133105  | 7990.17   | 5520.285  | NM_00395E | 4085.288  | 3693.892  |
| AK021812  | 600.289   | 542.479   | AK022859  | 2597.102  | 2126.039  | M33197    | 55735.898 | 66205.328 |
| AK022880  | 1304.492  | 1176.58   | NM_000214 | 428.656   | 210.048   | NM_00350C | 17309.66  | 19470.344 |
| NM_003601 | 31867.844 | 28800.17  | NM_014864 | 5394.171  | 3151.554  | NM_014317 | 5910.642  | 7029.651  |
| AF086375  | 1042.738  | 888.548   | NM_00372E | 46793.203 | 33535.473 | L09234    | 26832.588 | 30046.188 |
| AK001228  | 4536.067  | 4000.687  | NM_01435E | 17871.467 | 13509.53  | NM_00005E | 1775.872  | 1966.291  |
| AF074987  | 7159.291  | 5521.159  | NM_012481 | 6360.871  | 4210.618  | AK026740  | 1712.289  | 1988.657  |
| AK001058  | 5681.275  | 4492.341  | L09102    | 53379.992 | 48762.379 | NM_017881 | 10944.199 | 8791.739  |
| AK026239  | 4187.838  | 2828.865  | U68488    | 849.983   | 729.341   | M33197    | 59604.078 | 64013.273 |
| AF086283  | 1679.806  | 930.582   | NM_016247 | 15849.869 | 13636.723 | NM_017634 | 4855.883  | 5818.434  |
| AK027041  | 3246.974  | 3103.754  | NM_006827 | 21480.182 | 14883.961 | NM_00081E | 1052.551  | 1081.709  |
| AK024332  | 1190.526  | 975.24    | AK021761  | 13336.775 | 9339.245  | NM_01889E | 2425.196  | 2447.303  |
| NM_00535E | 5581.313  | 4679.556  | AK024536  | 7610.598  | 5688.918  | AJ300465  | 3652.908  | 2902.508  |
| AK023718  | 19029.029 | 16725.469 | NM_01866E | 10483.008 | 8177.251  | X86400    | 3596.701  | 3583.39   |
| AF075089  | 683.889   | 489.292   | NM_004227 | 1743.16   | 1455.699  | NM_00081C | 5323.582  | 3287.76   |
| AF086007  | 12012.376 | 9889.569  | NM_00528E | 7940.805  | 5566.809  | AF069307  | 6075.115  | 3109.482  |
| AK000803  | 7842.485  | 7006.21   | NM_00173E | 3644.907  | 2540.73   | M33197    | 57921.145 | 61849.406 |
| AK022374  | 1315.365  | 1002.91   | AB028949  | 562.224   | 302.906   | U92978    | 4868.963  | 4623.231  |
| AF085926  | 1662.535  | 1304.128  | AL137580  | 1210.323  | 1082.128  | M33197    | 5427.41   | 6352.745  |
| AF085948  | 870.906   | 779.361   | NM_004101 | 1535.292  | 1363.571  | AB011146  | 4427.236  | 4751.743  |
| AL137307  | 10924.037 | 10524.779 | NM_00299E | 55911.93  | 44304.762 | NM_00532E | 41422.402 | 39802.898 |
| AL137468  | 12003.271 | 10370.221 | AB033114  | 583.306   | 372.778   | NM_00728E | 1653.652  | 2245.505  |

|           |           |           |           |           |           |           |           |           |
|-----------|-----------|-----------|-----------|-----------|-----------|-----------|-----------|-----------|
| AL162007  | 29932.586 | 21902.385 | NM_015978 | 10498.107 | 7862.584  | NM_014065 | 3165.475  | 2915.62   |
| AL390137  | 5065.215  | 3682.34   | NM_003810 | 2608.926  | 2137.333  | AB035130  | 4284.855  | 3402.835  |
| AL137340  | 1197.088  | 936.154   | NM_004908 | 545.387   | 300.262   | NM_003355 | 5490.529  | 5213.963  |
| AL137542  | 1028.006  | 574.757   | NM_016171 | 58217.063 | 59371.129 | M33197    | 53898.27  | 60021.418 |
| AL162045  | 1710.758  | 977.118   | NM_014443 | 12453.154 | 6833.503  | AF119917  | 1168.856  | 1496.472  |
| AK022437  | 38293.605 | 20081.461 | NM_005212 | 5753.126  | 3997.445  | AK021834  | 516.076   | 599.009   |
| AK024213  | 49881.84  | 44722.695 | M14584    | 1680.842  | 1200.293  | NM_017915 | 3077.698  | 3183.393  |
| AB007959  | 1949.03   | 1484.825  | NM_006419 | 2465.573  | 2644.427  | AL050097  | 718.527   | 850.684   |
| AK026002  | 695.056   | 672.204   | AF035035  | 738.613   | 789.961   | NM_003575 | 4454.936  | 3323.858  |
| AK024360  | 561.606   | 524.116   | AB020676  | 3454.806  | 2840.018  | AL049283  | 3076.361  | 2342.395  |
| AK026628  | 658.086   | 344.863   | AK024715  | 1194.648  | 1010.023  | M33197    | 56987.285 | 60130.559 |
| AK023394  | 867.628   | 612.474   | U90942    | 58177.715 | 55204.367 | NM_002401 | 58006.535 | 59800.586 |
| AF090093  | 44121.391 | 35283.586 | NM_001609 | 2493.348  | 1875.944  | NM_001274 | 5374.656  | 4408.737  |
| AF161340  | 11794.622 | 9720.733  | BE733234  | 1109.181  | 739.43    | NM_003913 | 682.024   | 607.985   |
| AF242771  | 454.746   | 324.101   | NM_020228 | 15616.393 | 12112.582 | NM_002227 | 4853.761  | 3199.134  |
| NM_018562 | 32466.875 | 27162.191 | AK024685  | 3997.687  | 3040.626  | NM_007195 | 2908.341  | 1420.297  |
| AF098666  | 478.72    | 588.303   | NM_003676 | 7459.45   | 7503.113  | AB002301  | 646.297   | 517.06    |
| NM_014134 | 546.257   | 494.502   | AF113007  | 16874.418 | 13757.328 | AB014530  | 15169.615 | 12152.722 |
| AK021969  | 2619.031  | 1876.883  | NM_000688 | 3116.474  | 2811.906  | M33197    | 62234.07  | 70875.852 |
| AK022065  | 3029.994  | 2332.54   | U39573    | 2366.118  | 2146.561  | CY3Cy5    | 9953.164  | 1491.73   |
| AK022221  | 8051.662  | 6993.812  | D82061    | 6684.013  | 6082.683  | AK054960  | 35186.449 | 35971.82  |
| AK022356  | 877.07    | 579.772   | AJ293009  | 4545.8    | 4293.393  | L15344    | 1545.185  | 1802.758  |
| AK021998  | 721.902   | 342.963   | NM_000374 | 6702.786  | 5439.836  | AK024150  | 2106.203  | 2527.096  |
| AK022126  | 2926.509  | 2089.22   | NM_000502 | 25930.834 | 19883.242 | AF070536  | 3616.023  | 5268.177  |
| AK022256  | 543.436   | 568.036   | NM_001359 | 25578.564 | 22984.045 | U79300    | 3061.123  | 3564.591  |
| AK022383  | 677.526   | 508.656   | NM_005175 | 49562.441 | 42220.418 | AK025151  | 26155.229 | 27162.969 |
| AF086262  | 5371.465  | 4743.373  | NM_001696 | 11672.44  | 10420.205 | AK025550  | 6149.312  | 6835.919  |
| AF086292  | 1107.084  | 1071.3    | NM_004975 | 38166.301 | 23156.305 | AF088076  | 46666.457 | 54024.77  |
| AK023769  | 835.058   | 750.899   | NM_002245 | 1565.583  | 1408.452  | AF086543  | 6309.209  | 5730.064  |
| AK024342  | 4643.621  | 4701.811  | D87445    | 7748.479  | 6704.951  | AB046797  | 773.146   | 827.6     |
| AL137712  | 1514.456  | 1406.026  | NM_000238 | 9294.842  | 7316.345  | AK002098  | 2737.78   | 2858.061  |
| AL137606  | 722.416   | 415.232   | NM_002247 | 2350.752  | 1790.427  | AB011128  | 50395.742 | 39389.016 |
| L77599    | 11051.147 | 10706.119 | NM_004980 | 45244.004 | 35579.199 | AK026742  | 788.448   | 814.289   |
| AK021673  | 45730.551 | 41432.613 | AB011094  | 23759.213 | 20192.641 | AK025074  | 6543.438  | 5981.065  |
| AB014543  | 7306.669  | 7100.727  | NM_003224 | 2594.379  | 2015.178  | L15344    | 2646.743  | 2283.05   |
| NM_018445 | 7480.067  | 5969.1    | AK024865  | 1864.869  | 1305.822  | SR3       | 40747.34  | 44642.855 |
| AK022743  | 3957.79   | 3106.284  | NM_007210 | 1317.724  | 1223.178  | SR5       | 4808.563  | 5770.659  |
| AF035306  | 2505.135  | 1939.557  | NM_001483 | 5092.549  | 4488.398  | SR7       | 3877.587  | 43672.973 |
| AK091662  | 1777.257  | 1723.456  | NM_018973 | 9562.356  | 7705.187  | SR9       | 12430.693 | 3232.091  |
| NM_003954 | 3645.276  | 2327.562  | NM_002591 | 42988.094 | 33217.066 | CY3Cy5    | 7929.161  | 519.741   |
| NM_016348 | 1616.551  | 1201.109  | NM_020216 | 2363.682  | 2000.918  | U52050    | 1456.632  | 1418.458  |
| AK022003  | 727.855   | 647.767   | AK021860  | 3590.751  | 2437.762  | U73799    | 8969.847  | 11008.986 |
| AK023877  | 829.791   | 485.371   | AB046816  | 979.241   | 697.159   | Z36826    | 1011.125  | 1303.086  |
| AF009299  | 473.904   | 561.76    | AL137266  | 5879.063  | 4859.996  | AK021668  | 69780.016 | 66368.75  |
| AK024046  | 5929.426  | 5793.476  | NM_016457 | 1211.631  | 781.669   | AK002195  | 1151.811  | 1140.396  |
| NM_017931 | 2905.934  | 2805.511  | NM_005057 | 1487.339  | 885.118   | AK022850  | 3036.859  | 2635.666  |
| AK022793  | 2065.131  | 2174.872  | AF143321  | 1210.026  | 933.285   | NM_016490 | 8609.595  | 7822.864  |
| AJ227910  | 4745.567  | 5069.914  | AB046842  | 3407.771  | 2562.657  | AL137498  | 13141.073 | 15064.401 |
| AF001893  | 3749.115  | 4305.805  | NM_004850 | 1720.281  | 1307.878  | S66168    | 44012.07  | 39458.852 |
| X04236    | 10276.224 | 8740.528  | NM_002822 | 12594.594 | 8789.757  | AF131837  | 669.419   | 607.692   |
| AK093746  | 3952.867  | 3963.575  | BF306955  | 3588.95   | 2858.666  | NM_003851 | 43982.367 | 40778.957 |
| D16875    | 686.07    | 756.368   | NM_001394 | 8700.64   | 6777.156  | U79244    | 673.788   | 746.407   |
| AK027171  | 3970.331  | 3495.179  | NM_018441 | 16063.899 | 12113.466 | AK022482  | 5987.874  | 6336.029  |

|           |           |           |           |           |           |           |           |           |
|-----------|-----------|-----------|-----------|-----------|-----------|-----------|-----------|-----------|
| AK021945  | 11248.149 | 9770.301  | CY3Cy5    | 557.026   | 219.484   | AK024135  | 1618.399  | 1752.077  |
| L23545    | 1571.453  | 1251.589  | BM664556  | 1065.886  | 618.377   | AK022803  | 14037.494 | 15805.004 |
| AK024153  | 4960.104  | 4723.332  | AL359586  | 503.697   | 344.468   | AK023517  | 3696.781  | 5246.787  |
| Y10516    | 13141.687 | 11118.839 | AF035290  | 855.368   | 553.414   | AK023869  | 10016.969 | 12786.403 |
| AF056451  | 1196.679  | 820.81    | M33197    | 67040.742 | 59756.207 | AK022116  | 14434.723 | 14514.313 |
| AF015039  | 10912.546 | 8383.376  | AK023288  | 978.649   | 716.073   | AF026526  | 4095.821  | 4083.674  |
| U50528    | 3251.085  | 2470.176  | NM_017986 | 6585.194  | 7157.766  | AK026207  | 5340.062  | 5787.114  |
| AB020632  | 5264.166  | 4372.431  | AK024846  | 4794.329  | 3625.242  | AK024984  | 50097.641 | 50691.66  |
| NM_018614 | 53633.266 | 63663.535 | BM664556  | 890.668   | 1111.402  | AL110236  | 1384.72   | 1341.279  |
| AL117549  | 4587.404  | 4815.354  | SR3       | 13683.412 | 18329.803 | AF085955  | 878.652   | 1041.703  |
| NM_005222 | 979.699   | 802.3     | SR7       | 2186.661  | 31308.109 | AF075106  | 19391.389 | 19700.156 |
| BC024308  | 1175.242  | 1024.402  | SR9       | 2685.261  | 743.983   | AK023339  | 14471.736 | 15755.838 |
| NM_018295 | 629.379   | 924.547   | CY3Cy5    | 2016.715  | 548.335   | AF085981  | 1011.508  | 1053.675  |
| AF070574  | 1206.931  | 1072.597  | U52839    | 662.932   | 505.124   | AF086008  | 5877.555  | 7124.444  |
| AF190900  | 5778.355  | 5166.058  | M33197    | 60273.699 | 39290.977 | AF087970  | 669.492   | 854.739   |
| NM_020404 | 2247.636  | 2264.128  | AK026984  | 22701.896 | 16958.863 | AF086029  | 669.225   | 801.247   |
| BE972401  | 7209.435  | 6223.1    | AF007146  | 371.959   | 677.448   | AF075115  | 683.023   | 803.313   |
| NM_017425 | 2285.178  | 2010.394  | S79912    | 1539.723  | 1077.073  | U05597    | 2644.302  | 2506.126  |
| AB007922  | 1209.723  | 1035.877  | AL117427  | 8405.744  | 10933.879 | AK026366  | 76121.953 | 67064.375 |
| NM_015982 | 683.378   | 772.944   | AK023305  | 28266.393 | 17756.891 | AK024229  | 51982.676 | 52740.859 |
| NM_003746 | 50024.047 | 54260.09  | AK022428  | 594.574   | 414.854   | AK021467  | 20978.514 | 17729.498 |
| NM_002910 | 3473.74   | 3954.752  | AK025089  | 6601.549  | 6863.03   | NM_020371 | 2853.644  | 2746.436  |
| AC096970  | 4675.191  | 4558.606  | M33197    | 70777.031 | 66722.234 | AK022498  | 3975.102  | 4163.26   |
| NM_014627 | 7143.42   | 6815.431  | AK001279  | 1329.922  | 1410.475  | AJ245433  | 70228.805 | 67249.5   |
| NM_013936 | 10166.873 | 8461.014  | AF086407  | 421.695   | 679.497   | AK021942  | 62578.844 | 62413.961 |
| NM_013986 | 52043.656 | 50987.047 | AF085949  | 289.415   | 302.647   | NM_014127 | 2557.493  | 2536.891  |
| U55055    | 2757.439  | 1943.191  | AK001567  | 589.001   | 800.052   | AL360187  | 2967.614  | 3407.822  |
| AK022186  | 568.775   | 380.604   | AL109707  | 742.931   | 719.671   | AK021878  | 2495.269  | 3009.979  |
| AK021485  | 643.774   | 252.493   | AF075006  | 379.973   | 97.398    | AK021817  | 13945.973 | 14393.309 |
| AB018319  | 7601.939  | 5261.298  | M33197    | 58770.789 | 40526.918 | AL080103  | 1564.218  | 1660.094  |
| AK001101  | 3941.469  | 2980.885  | AK000903  | 28702.537 | 15221.342 | AK023217  | 2930.027  | 3309.301  |
| BM973473  | 2985.852  | 2628.293  | AK023938  | 1048.306  | 464.841   | AF090902  | 14268.518 | 15943.685 |
| AK021637  | 623.122   | 533.474   | AL110169  | 673.37    | 411.67    | AF119887  | 70661.031 | 66978.32  |
| D61705    | 628.369   | 231.367   | AK022088  | 543.396   | 298.147   | AK091038  | 2533.121  | 2810.708  |
| AL137723  | 4725.813  | 3415.045  | NM_013391 | 378.363   | 90.552    | AK024193  | 4868.061  | 6150.355  |
| AL137311  | 731.976   | 790.173   | M33197    | 60416.543 | 56984.137 | NM_018576 | 783.699   | 942.914   |
| NM_014286 | 14611.62  | 16352.076 | AL157466  | 3418.406  | 2623.188  | NM_018543 | 610.456   | 837.301   |
| AF035300  | 3509.305  | 3669.169  | AL389981  | 637.935   | 609.7     | AK024438  | 46383.82  | 47138.852 |
| NM_017703 | 11633.498 | 11598.546 | AK024336  | 1226.443  | 1368.978  | AL390170  | 2397.506  | 2826.106  |
| NM_015320 | 1339.162  | 1200.028  | AK023862  | 352.146   | 304.769   | AK022887  | 1414.648  | 1440.746  |
| NM_004055 | 1003.128  | 895.596   | NM_018621 | 924.755   | 875.744   | AK000745  | 50280.379 | 43842.691 |
| NM_014726 | 34879.828 | 32075.451 | AK022016  | 231.721   | 455.338   | NM_005296 | 1436.43   | 1532.753  |
| AJ297349  | 3203.083  | 2812.741  | M33197    | 62629.813 | 64482.191 | NM_015901 | 2099.898  | 1894.126  |
| NM_005826 | 5372.289  | 5103.736  | AK022118  | 1543.104  | 2774.559  | AF130065  | 1520.53   | 1476.995  |
| NM_001619 | 921.798   | 935.99    | AK026453  | 8747.133  | 15002.272 | Z83935    | 3466.382  | 3560.672  |
| NM_006596 | 2033.377  | 1694.957  | AF116678  | 881.011   | 953.552   | NM_006365 | 573.347   | 696.751   |
| NM_005936 | 1631.905  | 1384.882  | M33197    | 63651.063 | 52458.395 | AF093744  | 41702.109 | 44583.922 |
| U43586    | 2740.032  | 2236.981  | D17203    | 30774.262 | 19391.396 | M57417    | 63887.094 | 57078.145 |
| NM_006271 | 5814.609  | 4691.095  | NM_006495 | 3675.934  | 2047.29   | NM_017726 | 1072.906  | 1112.848  |
| NM_018647 | 2211.854  | 2169.305  | NM_003251 | 1617.094  | 1003.678  | U80772    | 1355.475  | 1752.129  |
| NM_003026 | 683.966   | 640.672   | AB046772  | 965.937   | 529.611   | NM_006186 | 7196.754  | 7954.026  |
| NM_018640 | 770.174   | 827.661   | M33197    | 67296.047 | 65707.875 | AJ272177  | 2449.073  | 2579.179  |
| NM_005095 | 4759.959  | 4962.796  | AL442080  | 1407.784  | 1068.231  | AK026402  | 69862.742 | 64356.016 |

|           |           |           |           |           |           |           |           |           |
|-----------|-----------|-----------|-----------|-----------|-----------|-----------|-----------|-----------|
| NM_00005E | 457.547   | 378.42    | AY007143  | 8497.85   | 6937.006  | AF111846  | 3109.333  | 3590.985  |
| NM_003163 | 776.176   | 492.42    | L15557    | 1323.953  | 1039.032  | M11948    | 68231.539 | 67614.602 |
| NM_01620E | 1754.905  | 2080.655  | AK022729  | 1099.862  | 1014.382  | Z36850    | 692.105   | 599.896   |
| NM_00575E | 5607.958  | 5990.896  | NM_00616E | 6712.251  | 5251.927  | AK024618  | 4545.285  | 4204.898  |
| AF149724  | 3267.117  | 3544.538  | AL050374  | 1946.649  | 1543.924  | AL049969  | 1510.24   | 1863.926  |
| BC020745  | 1918.994  | 2047.368  | M33197    | 65663.414 | 67038.711 | NM_00522C | 7177.661  | 6996.367  |
| NM_006367 | 31842.744 | 25044.746 | M28639    | 4808.286  | 5358.146  | X79308    | 6080.482  | 5731.634  |
| NM_006732 | 17069.621 | 14380.527 | AL122073  | 11731.217 | 14185.795 | AF086476  | 1051.869  | 1669.542  |
| NM_004354 | 9499.984  | 9272.469  | AF116655  | 3216.502  | 4038.749  | NM_01766C | 10906.469 | 14435.579 |
| NM_004661 | 5882.573  | 6058.92   | AJ243222  | 1612.969  | 2664.635  | AB011151  | 41230.809 | 37542.043 |
| NM_00200E | 798.478   | 902.028   | AK026132  | 2714.671  | 3626.444  | U92995    | 7133.458  | 8972.621  |
| NM_00161C | 2854.72   | 2499.963  | Y11162    | 1180.211  | 1727.279  | Z70769    | 615.357   | 735.968   |
| NM_001241 | 3050.056  | 2581.033  | AF070584  | 1866.47   | 1816.506  | NM_00710E | 2897.537  | 3332.25   |
| AF217504  | 4038.229  | 3614.077  | AF052109  | 594.677   | 451.739   | AL133017  | 3010.374  | 3356.688  |
| AK027102  | 11161.362 | 11027.723 | M33197    | 37543.281 | 16575.979 | U84506    | 5213.207  | 5798.178  |
| AL109714  | 1915.113  | 1708.511  | NM_003353 | 45597.945 | 24227.342 | U21556    | 65074.945 | 67785.117 |
| NM_004632 | 6427.541  | 5595.204  | X82127    | 14145.714 | 8363.598  | AB002444  | 1234.753  | 1130.738  |
| NM_01791E | 5083.891  | 4344.827  | AL122044  | 2812.268  | 1905.028  | AB002344  | 11805.295 | 8933.512  |
| NM_01445E | 12237.146 | 9739.233  | NM_01829E | 984.547   | 720.35    | BF210352  | 1810.163  | 2619.94   |
| NM_00474C | 15906.405 | 14190.339 | NM_005752 | 1925.831  | 1489.921  | NM_00682E | 4972.478  | 7281.832  |
| NM_00380E | 2631.795  | 2544.95   | M33197    | 63660.266 | 69549.688 | NM_01766E | 30909.951 | 32200.791 |
| NM_01988E | 6680.596  | 6385.149  | AF070578  | 366.316   | 215.754   | AF147379  | 62631.539 | 67867.195 |
| NM_00327E | 10524.607 | 12012.453 | L13743    | 921.875   | 804.005   | AK023760  | 11998.491 | 12314.31  |
| NM_00042E | 775.871   | 854.96    | U84519    | 4652.396  | 3291.801  | X98415    | 64635.316 | 67886.094 |
| M29540    | 817.437   | 571.207   | Z11849    | 6248.465  | 4764.729  | AK024205  | 3432.783  | 3948.772  |
| AK021957  | 54826.852 | 59107.625 | M33197    | 61584.992 | 61643.039 | AF086034  | 28365.359 | 29098.646 |
| U95031    | 519.493   | 474.558   | AF052103  | 2311.614  | 3838.959  | AK000174  | 907.535   | 1510.64   |
| NM_004771 | 7638.466  | 8362.963  | AF075050  | 2287.873  | 3942.182  | AF130071  | 4390.306  | 4853.315  |
| AL365514  | 3055.561  | 3310.625  | AK024842  | 1044.421  | 1445.117  | AJ272057  | 5968.618  | 5268.042  |
| NM_01829E | 4122.341  | 3954.132  | NM_018382 | 863.946   | 656.38    | NM_004402 | 1324.79   | 1348.978  |
| NM_002104 | 2358.334  | 2370.985  | AB018327  | 1982.649  | 1334.858  | AK024216  | 41551.426 | 40945.477 |
| NM_005504 | 18315.84  | 18262.25  | M33197    | 58845.555 | 52312.473 | Y16752    | 15405.839 | 16200.958 |
| AF234654  | 3386.47   | 2920.554  | AK022649  | 4164.097  | 2465.768  | NM_02015E | 1698.342  | 1926.026  |
| NM_000110 | 6149.08   | 6776.432  | NM_016507 | 3209.17   | 2197.448  | NM_01483C | 3063.761  | 3473.965  |
| NM_016002 | 11451.364 | 11542.006 | NM_002024 | 4852.497  | 2964.427  | AF355402  | 11962.114 | 11810.772 |
| NM_01454E | 2176.567  | 2083.011  | NM_002743 | 6031.217  | 5203.836  | AK000407  | 6177.408  | 5788.685  |
| NM_000531 | 661.866   | 408.424   | AF173358  | 8253.409  | 7659.708  | NM_020524 | 22992.424 | 22529.193 |
| NM_017832 | 3348.403  | 2753.741  | NM_01636E | 4154.792  | 4503.97   | NM_00199E | 10768.972 | 7200.858  |
| NM_001713 | 1732.275  | 1312.375  | NM_001563 | 5108.342  | 5165.375  | X64977    | 5054.818  | 4393.154  |
| NM_015367 | 19667.295 | 17829.459 | NM_00026E | 1467.091  | 928.584   | AF064851  | 2271.46   | 2196.482  |
| NM_01449E | 6107.538  | 4017.938  | X89666    | 3049.34   | 3683.648  | NM_002602 | 44986.613 | 27383.961 |
| NM_00237E | 12295.599 | 10977.231 | NM_01742E | 365.271   | 400.253   | NM_01623E | 1443.346  | 1778.05   |
| NM_00098E | 55235.703 | 69725.469 | NM_003104 | 5934.06   | 6598.956  | NM_00338E | 910.4     | 925.439   |
| NM_001813 | 5128.847  | 3951.191  | NM_014581 | 2616.02   | 2942.954  | D17271    | 16388.975 | 19737.924 |
| AF055016  | 6700.612  | 5920.932  | NM_00089E | 442.316   | 619.037   | X91648    | 2354.023  | 2810.94   |
| NM_007234 | 12088.92  | 13183.546 | M33197    | 67771.711 | 65101.16  | AK026658  | 1358.6    | 1414.103  |
| NM_014567 | 1846.532  | 1453.962  | AK024448  | 4473.429  | 7340.999  | AF282264  | 13743.058 | 14189.547 |
| NM_017842 | 2488.276  | 2024.828  | NM_01440E | 2837.993  | 3303.455  | AF086322  | 1762.545  | 1936.048  |
| NM_019057 | 2549.354  | 1812.482  | Z11801    | 1820.228  | 2578.967  | Z70717    | 2269.77   | 2390.146  |
| NM_002677 | 1818.818  | 2083.273  | AK027253  | 372.243   | 499.897   | AK024736  | 5891.485  | 7229.016  |
| NM_012082 | 1130.229  | 1170.45   | S68954    | 1280.207  | 2729.074  | NM_01823E | 1276.507  | 1441.884  |
| NM_001537 | 10429.57  | 13058.473 | S81335    | 3401.141  | 3419.577  | U88892    | 4030.833  | 4610.795  |
| U80743    | 3191.084  | 3488.143  | NM_006197 | 2824.063  | 946.304   | AK023755  | 1335.028  | 1238.31   |

|           |           |           |           |           |           |           |           |           |
|-----------|-----------|-----------|-----------|-----------|-----------|-----------|-----------|-----------|
| NM_001352 | 10707.949 | 11786.618 | NM_014181 | 731.51    | 479.146   | NM_005725 | 1575.261  | 1705.807  |
| D15050    | 2976.435  | 2255.636  | M29273    | 443.489   | 143.291   | NM_012211 | 2786.578  | 2625.869  |
| NM_014724 | 633.435   | 739.84    | M33197    | 39377.141 | 27823.764 | AB040877  | 11008.97  | 15431.635 |
| NM_006527 | 15664.683 | 18193.355 | NM_004854 | 2524.309  | 1911.203  | AB040927  | 2988.971  | 3708.773  |
| NM_006627 | 7649.46   | 7279.762  | AJ245418  | 6648.788  | 4642.101  | AK026737  | 12758.59  | 12036.564 |
| NM_007363 | 37016.781 | 29968.35  | NM_006377 | 2331.287  | 1932.723  | NM_00021C | 990.244   | 1446.533  |
| NM_003093 | 45337.547 | 42185.094 | NM_002436 | 703.468   | 1002.824  | NM_006285 | 9635.369  | 8382.458  |
| U05589    | 3216.423  | 3018.339  | NM_018362 | 4989.317  | 4981.849  | NM_019067 | 4210.534  | 4436.591  |
| NM_014473 | 22665.762 | 18758.477 | M33197    | 60519.598 | 68694.945 | AF251025  | 932.404   | 1105.88   |
| NM_003095 | 40654.922 | 38078.965 | NM_004755 | 1458.021  | 1515.635  | NM_015677 | 13203.449 | 14273.391 |
| NM_016385 | 2964.109  | 2253.757  | NM_002186 | 867.097   | 1011.041  | NM_001772 | 14102.298 | 14289.878 |
| NM_002295 | 52047.742 | 66269.32  | NM_006182 | 517.054   | 542.337   | AB011087  | 1767.344  | 2046.24   |
| NM_003133 | 23596.459 | 20530.684 | AL137543  | 1300.445  | 1293.145  | AF161341  | 10752.958 | 10372.323 |
| NM_001762 | 28445.254 | 24457.809 | NM_004444 | 15162.813 | 18428.416 | AJ249902  | 5005.414  | 5486.412  |
| NM_016306 | 19061.662 | 18007.914 | NM_001957 | 2537.729  | 3362.087  | NM_004384 | 6363.134  | 7104.116  |
| NM_003755 | 1088.939  | 812.421   | AK024533  | 17450.324 | 23109.486 | L05500    | 21142.916 | 23514.795 |
| NM_013235 | 4935.723  | 4986.127  | NM_002736 | 13452.252 | 15739.018 | NM_012306 | 20879.482 | 21072.766 |
| NM_003314 | 11290.09  | 10512.439 | NM_004246 | 6455.135  | 7466.78   | AF222903  | 6316.362  | 6960.091  |
| NM_016623 | 20035.172 | 20882.621 | NM_004961 | 319.955   | 295.613   | NM_006226 | 11054.161 | 10474.743 |
| NM_001334 | 494.864   | 285.68    | NM_005207 | 1273.137  | 975.989   | L10374    | 22974.543 | 22404.988 |
| NM_001246 | 931.555   | 1121.652  | NM_003087 | 1876.387  | 1207.176  | NM_000245 | 11721.475 | 13014.398 |
| AL365411  | 10745.76  | 11811.694 | NM_001630 | 1459.76   | 848.39    | NM_01431C | 1730.795  | 1827.92   |
| M24470    | 1265.704  | 1373.95   | AF305081  | 2273.292  | 1905.209  | NM_00586C | 16425.229 | 15256.419 |
| NM_016066 | 11448.224 | 12830.473 | AF118078  | 1248.684  | 1328.154  | AF095288  | 52917.668 | 51270.445 |
| NM_001245 | 962.506   | 941.745   | NM_020169 | 637.628   | 719.121   | AK025116  | 729.959   | 1390.745  |
| AK024677  | 4125.558  | 3425.024  | AL157428  | 701.234   | 1033.138  | AF130114  | 516.619   | 1301.092  |
| NM_000036 | 3237.466  | 3902.934  | NM_005855 | 2826.227  | 2611.473  | AK026271  | 16541.598 | 22407.563 |
| AF254082  | 50657.813 | 58027.129 | NM_014931 | 4467.955  | 4049.778  | NM_001795 | 25179.01  | 26874.535 |
| AF205718  | 3035.985  | 3171.901  | NM_014487 | 4278.462  | 4223.051  | AF090895  | 4257.943  | 3928.212  |
| NM_00342C | 1514.406  | 1596.37   | NM_01807C | 1620.714  | 2542.354  | NM_00561C | 4077.924  | 3641.763  |
| AY004252  | 1945.278  | 1699.167  | NM_002484 | 8440.883  | 10518.739 | AL133651  | 2844.149  | 3323.766  |
| NM_006261 | 2074.71   | 1799.199  | M33197    | 55775.648 | 60061.922 | AB014532  | 15632.96  | 15684.113 |
| AK027045  | 2838.283  | 3000.039  | AL162052  | 3768.725  | 5600.024  | NM_003475 | 5302.963  | 4800.133  |
| AF169796  | 4032.116  | 4239.294  | AK025941  | 2435.029  | 3781.105  | BE275227  | 1586.322  | 1419.947  |
| AK026157  | 1220.147  | 1020.879  | NM_018179 | 1675.881  | 1864.869  | NM_016237 | 11420.649 | 12522.323 |
| AK001814  | 10530.204 | 8745.782  | AF059531  | 8214.54   | 3960.908  | NM_004924 | 6605.616  | 8976.14   |
| NM_007222 | 3217.214  | 2740.376  | NM_002707 | 7126.922  | 4979.901  | NM_001795 | 4283.813  | 5138.564  |
| NM_003435 | 2049.848  | 1957.963  | AF029777  | 1696.036  | 1042.09   | NM_001211 | 9839.323  | 10139.763 |
| NM_016291 | 7349.777  | 10762.528 | NM_003352 | 733.236   | 449.853   | NM_006505 | 1705.574  | 1155.257  |
| NM_005937 | 43346.043 | 38156.559 | AK026884  | 17682.119 | 12979.67  | AB033050  | 2735.1    | 3546.645  |
| AB037809  | 1237.89   | 851.395   | S82198    | 927.332   | 605.401   | NM_004356 | 35761.336 | 35695.016 |
| AB011129  | 1354.363  | 1354.496  | NM_002594 | 1490.156  | 1512.365  | NM_001855 | 646.206   | 422.289   |
| NM_014391 | 7714.339  | 8332.594  | NM_001159 | 771.378   | 1251.09   | BC015022  | 6778.047  | 7262.29   |
| NM_00427C | 2470.591  | 2565.216  | NM_031407 | 4841.692  | 4862.99   | AB033086  | 936.083   | 901.65    |
| L09102    | 7171.09   | 10271.098 | M33197    | 56302.148 | 63958.281 | NM_002406 | 62432.859 | 69045.156 |
| U68488    | 793.958   | 957.462   | AK000410  | 46780.918 | 41655.078 | U87169    | 4523.778  | 5479.75   |
| NM_000675 | 847.392   | 967.398   | NM_020193 | 1319.507  | 1146.179  | NM_002073 | 5084.563  | 5742.265  |
| NM_016247 | 3689.036  | 4028.512  | D86982    | 331.1     | 372.089   | AF117222  | 950.139   | 1267.039  |
| NM_001157 | 1149.655  | 990.299   | NM_005619 | 910.003   | 1427.317  | NM_001935 | 65173.859 | 67828.711 |
| NM_012282 | 2310.514  | 2398.548  | D87440    | 8684.835  | 16816.645 | NM_001745 | 1305      | 1879.729  |
| NM_00671C | 1137.748  | 1015.713  | AK000332  | 43913.594 | 46261.004 | AF090327  | 1788.174  | 1761.256  |
| NM_003323 | 23897.633 | 22077.377 | AL080156  | 886.312   | 951.297   | NM_003291 | 8872.857  | 10841.433 |
| BG685310  | 4890.445  | 4450.229  | NM_006735 | 2855.254  | 2916.754  | AK022950  | 4029.91   | 3774.213  |

|           |           |           |           |           |           |           |           |           |
|-----------|-----------|-----------|-----------|-----------|-----------|-----------|-----------|-----------|
| AW300857  | 15194.012 | 13833.898 | NM_002285 | 1142.86   | 1739.446  | S75755    | 11343.916 | 10895.936 |
| H85962    | 18885.219 | 19852.324 | NM_006694 | 13797.177 | 15185.842 | AF176518  | 1221.654  | 1206.417  |
| BG742446  | 1805.868  | 2151.751  | NM_013351 | 14683.636 | 7502.065  | AB014576  | 46293.348 | 38783.551 |
| AA864554  | 3054.184  | 3019.515  | NM_012340 | 3148.291  | 1432.979  | NM_019044 | 27937.705 | 28844.418 |
| X66945    | 5634.268  | 6553.127  | NM_006022 | 1067.987  | 704.179   | AK000145  | 1378.816  | 1302.351  |
| AI160703  | 643.82    | 776.57    | AK025110  | 727.629   | 330.885   | AF174601  | 8513.491  | 9388.946  |
| X12830    | 1261.684  | 1215.688  | X52339    | 26743.254 | 12415.403 | AF279865  | 1225.568  | 1157.412  |
| K01904    | 20814.953 | 22404.336 | M33197    | 59821.875 | 64573.965 | NM_014700 | 2600.918  | 2698.59   |
| BE538886  | 871.697   | 618.569   | AB046830  | 1678.307  | 1079.528  | NM_014714 | 1459.865  | 1170.234  |
| NM_002228 | 980.075   | 818.684   | NM_007122 | 1218.137  | 1348.712  | NM_015644 | 2837.597  | 2603.553  |
| M57650    | 33185.52  | 25799.793 | NM_001488 | 893.114   | 889.02    | NM_005687 | 12531.354 | 12308.119 |
| BC023978  | 1100.31   | 808.196   | NM_016202 | 7063.968  | 6752.429  | NM_005983 | 6871.194  | 8973.347  |
| M21302    | 1034.791  | 764.891   | NM_012476 | 1268.262  | 1441.733  | AB016902  | 13812.667 | 15131.174 |
| NM_002512 | 32582.121 | 31494.355 | NM_016604 | 1679.457  | 1111.785  | AF272378  | 67719.133 | 67750.922 |
| NM_004908 | 1080.916  | 1434.49   | M33197    | 58383.824 | 60022.5   | M61870    | 3502.255  | 3637.059  |
| NM_016171 | 55072.582 | 73053.297 | NM_006276 | 2351.717  | 2046.694  | AK026980  | 2980.393  | 2716.377  |
| NM_014443 | 3577.729  | 2876.406  | NM_003407 | 2999.092  | 2733.661  | AJ277915  | 777.066   | 691.584   |
| NM_005212 | 4215.116  | 4852.764  | NM_007209 | 57352.922 | 56514.805 | NM_020368 | 5059.549  | 4889.563  |
| M14584    | 1165.517  | 1014.415  | NM_003729 | 3379.389  | 2939.029  | AF024708  | 52312.375 | 44863.594 |
| NM_006419 | 4072.803  | 5119.688  | L05096    | 13664.768 | 13231.009 | NM_006467 | 10782.447 | 10812.148 |
| AF035035  | 1191.812  | 1601.201  | BC015899  | 15058.478 | 18158.646 | NM_017566 | 15637.165 | 12573.83  |
| AB020676  | 1741.322  | 1794.054  | M33197    | 59014.598 | 59289.758 | NM_006582 | 2406.723  | 1500.806  |
| AK024715  | 1001.948  | 1170.385  | NM_002848 | 1168.727  | 1524.41   | AB033019  | 9988.569  | 6421.565  |
| U90942    | 33190.801 | 32317.926 | NM_015914 | 1480.652  | 1913.469  | NM_001452 | 1355.468  | 965.987   |
| NM_014942 | 691.214   | 643.82    | NM_007180 | 2705.489  | 1979.964  | NM_006162 | 3237.847  | 2910.935  |
| NM_018360 | 4776.398  | 5752.726  | NM_005609 | 572.359   | 480.981   | NM_014764 | 15569.491 | 13570.097 |
| AL365415  | 1186.596  | 1435.591  | NM_005476 | 4897.628  | 2656.242  | NM_018078 | 6116.688  | 6218.413  |
| L29147    | 3005.997  | 4887.757  | NM_005660 | 3268.803  | 1535.362  | NM_016013 | 697.504   | 628.516   |
| NM_001525 | 41648.586 | 40112.371 | AK023902  | 2092.389  | 1306.909  | NM_016050 | 1421.576  | 2065.779  |
| NM_006055 | 7598.025  | 7497.453  | NM_000401 | 470.456   | 488.824   | NM_007080 | 20296.082 | 21210.27  |
| NM_004296 | 964.147   | 853.43    | NM_005223 | 474.69    | 291.251   | AK026912  | 10455.559 | 10172.54  |
| NM_005048 | 400.91    | 669.678   | AB011173  | 3080.782  | 2910.021  | AK023531  | 32487.461 | 35842.621 |
| NM_005972 | 640.173   | 588.994   | AB023195  | 1918.389  | 2052.414  | NM_006697 | 18368.777 | 20968.201 |
| NM_001060 | 768.044   | 963.274   | U43431    | 1124.327  | 1548.422  | M19182    | 1716.123  | 2311.413  |
| NM_018841 | 3987.599  | 3856.447  | X57147    | 495.429   | 544.343   | AK025707  | 3939.209  | 3945.974  |
| AK022859  | 537.599   | 711.925   | AB006622  | 926.706   | 1085.423  | NM_006242 | 2855.525  | 2487.674  |
| NM_020228 | 2116.451  | 2734.562  | M33197    | 59074.918 | 53911.977 | AF282887  | 548.057   | 791.266   |
| AK024685  | 1048.861  | 1074.734  | AK097041  | 4149.313  | 5705.379  | X78712    | 3168.149  | 4215.735  |
| NM_003676 | 12515.903 | 13409.741 | AF068744  | 56677.203 | 62508.191 | NM_001497 | 1934.934  | 2264.556  |
| AF113007  | 28432.346 | 27038.918 | NM_004497 | 396.772   | 504.64    | NM_004130 | 8983.421  | 9050.643  |
| NM_000688 | 8834.382  | 10292.738 | AK000762  | 1760.767  | 1769.561  | NM_006348 | 3924.173  | 3347.372  |
| U39573    | 951.308   | 1101.358  | NM_004571 | 640.078   | 729.973   | AF067972  | 43792.523 | 38666.297 |
| D82061    | 5509.364  | 7542.609  | NM_002895 | 1794.852  | 2624.604  | NM_004958 | 4167.654  | 4124.159  |
| AJ293009  | 3971.44   | 4828.243  | AF276513  | 2023.556  | 2012.575  | D87076    | 8273.401  | 8614.69   |
| NM_000374 | 1666.344  | 2816.133  | M33197    | 56244.402 | 58388.457 | NM_014148 | 5507.83   | 4744.338  |
| NM_000502 | 1582.963  | 1857.298  | M95610    | 27999.35  | 16797.893 | AB020635  | 15927.607 | 11930.521 |
| NM_001358 | 10046.896 | 11955.113 | NM_003118 | 1172.749  | 635.744   | NM_006515 | 2368.331  | 2518.213  |
| NM_002245 | 664.982   | 469.855   | L02922    | 14848.662 | 7801.133  | NM_005224 | 1269.538  | 1191.476  |
| NM_004980 | 2430.729  | 3067.554  | NM_001797 | 1784.419  | 1091.537  | NM_012144 | 15175.949 | 13910.756 |
| NM_003224 | 4274.738  | 4357.147  | NM_003154 | 687.828   | 522.059   | X65231    | 58268.48  | 65173.48  |
| NM_004227 | 2124.279  | 2557.316  | NM_004235 | 526.935   | 289.167   | NM_002908 | 7475.312  | 8920.544  |
| NM_005282 | 3609.159  | 3529.557  | AK023459  | 5859.52   | 3842.579  | AF205632  | 10039.122 | 10192.715 |
| NM_001738 | 4929.191  | 4303.831  | U13022    | 773.172   | 909.417   | NM_005378 | 61590.293 | 67285.672 |

|           |           |           |           |           |           |           |           |           |
|-----------|-----------|-----------|-----------|-----------|-----------|-----------|-----------|-----------|
| AB028949  | 526.736   | 734.615   | R23251    | 13745.621 | 16587.857 | NM_002397 | 4111.762  | 4767.777  |
| AL137580  | 848.561   | 1044.188  | AA702640  | 2430.866  | 3410.165  | AF000672  | 3892.943  | 3593.535  |
| NM_004101 | 913.242   | 1133.228  | T68583    | 4822.906  | 6138.215  | NM_017652 | 35138.043 | 33747.504 |
| NM_002995 | 9582.979  | 10567.516 | AA481944  | 53309.637 | 54400.281 | X59268    | 6157.238  | 7569.56   |
| AB033114  | 455.639   | 631.545   | AF038440  | 1628.837  | 2730.084  | D70832    | 58615.797 | 64440.531 |
| NM_015978 | 1878.626  | 1914.208  | M31158    | 5403.919  | 5772.134  | NM_001425 | 25779.098 | 28047.635 |
| NM_003810 | 891.911   | 1015.457  | H00742    | 2294.952  | 2850.274  | NM_002375 | 40510.328 | 43711.121 |
| NM_018973 | 9989.241  | 10958.842 | D42108    | 5690.169  | 5836.853  | AB007929  | 8854.439  | 10324.344 |
| NM_002591 | 1277.78   | 1554.85   | BG700922  | 1399.439  | 1655.901  | NM_004575 | 17113.406 | 15831.402 |
| AL049334  | 916.341   | 1276.788  | AI366068  | 1834.635  | 2731.486  | AA203126  | 3412.839  | 3920.414  |
| NM_020216 | 2284.985  | 2523.012  | BG565837  | 282.024   | 351.808   | L12347    | 54498.527 | 57581.176 |
| AK021860  | 1982.156  | 1888.612  | N57553    | 11045.828 | 12660.791 | NM_001622 | 33347.961 | 29137.596 |
| AB046816  | 1909.131  | 1995.637  | M33197    | 54920.191 | 49410.43  | Z36788    | 15294.571 | 15099.87  |
| AL137266  | 9207.365  | 10919.922 | NM_018202 | 28711.783 | 14130.677 | NM_018477 | 19030.604 | 19535.02  |
| NM_016457 | 2065.583  | 1886.611  | AB023197  | 7599.977  | 3846.947  | U20536    | 1439.977  | 1319.343  |
| NM_005057 | 2159.275  | 2065.352  | NM_022173 | 8185.18   | 4355.545  | AI298534  | 5457.404  | 4723.366  |
| AB046842  | 1530.404  | 1478.266  | AB040970  | 4363.594  | 2049.72   | R71691    | 13457.18  | 16161.547 |
| NM_004850 | 1332.719  | 1236.068  | NM_018330 | 2756.51   | 1719.593  | AW167715  | 6038.665  | 5262.806  |
| NM_002822 | 6077.437  | 5052.187  | AB023222  | 1786.301  | 1020.054  | AA424735  | 17746.85  | 17628.676 |
| BF306955  | 754.147   | 705.328   | AB033088  | 3480.058  | 2216.539  | U78294    | 6260.865  | 8529.504  |
| NM_001394 | 2763.542  | 2951.332  | M33197    | 52852.824 | 57412.066 | AA171613  | 1020.708  | 1340.435  |
| NM_018441 | 10226.822 | 10307.973 | U50342    | 38504.574 | 27677.641 | BI760394  | 4360.364  | 4686.365  |
| NM_000778 | 13617.079 | 13635.478 | NM_000295 | 1075.325  | 859.127   | U09117    | 61418.887 | 64156.051 |
| NM_001605 | 3077.825  | 3040.608  | NM_000716 | 456.017   | 452.044   | M21054    | 1870.921  | 2524.659  |
| BE733234  | 1610.854  | 1332.685  | AF026932  | 551.136   | 778.959   | M18468    | 2031.009  | 2363.465  |
| NM_000675 | 851.248   | 858.315   | AF103795  | 1866.746  | 2864.99   | H66070    | 39939.902 | 40522.82  |
| NM_016247 | 2981.543  | 3722.874  | NM_006215 | 869.703   | 1479.375  | AA164741  | 1097.865  | 890.261   |
| NM_001157 | 555.431   | 366.988   | M33197    | 60102.57  | 62542.449 | AI189375  | 3780.043  | 3988.699  |
| NM_012282 | 1902.235  | 1933.102  | NM_007024 | 7128.466  | 6597.12   | AI978885  | 10316.465 | 10466.212 |
| NM_006710 | 998.35    | 1099.147  | NM_013231 | 4501.489  | 4442.898  | NM_000303 | 17395.934 | 19766.498 |
| NM_003323 | 23335.072 | 24370.504 | NM_012106 | 5383.584  | 5427.192  | NM_001935 | 26186.029 | 29795.354 |
| BG685310  | 3823.809  | 3721.749  | NM_006254 | 3020.964  | 3329.862  | NM_003275 | 60533.191 | 66857.531 |
| AW300857  | 12472.629 | 13340.359 | X95425    | 13172.933 | 17086.08  | AB014599  | 11292.313 | 10864.278 |
| H85962    | 11814.396 | 14363.837 | NM_004422 | 4523.253  | 6398.194  | NM_004393 | 1384.697  | 1516.207  |
| BG742446  | 1306.248  | 1432.104  | NM_016562 | 1533.293  | 2069.88   | AB018345  | 1209.783  | 968.031   |
| AA864554  | 1799.581  | 2160.646  | AY009399  | 15326.59  | 23261.027 | NM_005832 | 2638.816  | 2977.161  |
| X66945    | 5980.919  | 6508      | NM_004895 | 21151.574 | 28881.979 | AW407841  | 11296.365 | 10912.194 |
| AI160703  | 706.704   | 969.684   | U80018    | 671.742   | 322.585   | U15197    | 2138.786  | 2327.781  |
| X12830    | 1095.556  | 1396.653  | NM_000717 | 1040.673  | 455.67    | NM_001875 | 7346.192  | 8299.878  |
| U00482    | 598.114   | 539.321   | M33197    | 60351.25  | 63719.797 | AF264014  | 27140.777 | 30183.102 |
| K01904    | 18496.281 | 20241.982 | NM_004845 | 3175.837  | 2464.868  | L09098    | 587.236   | 544.269   |
| BE538886  | 617.846   | 409.573   | NM_007107 | 7486.629  | 5545.696  | NM_004155 | 7508.277  | 6852.401  |
| NM_002228 | 796.489   | 857.189   | NM_000047 | 15886.617 | 12097.762 | NM_001831 | 3891.179  | 3673.785  |
| M57650    | 26490.238 | 22135.092 | NM_018226 | 6404.447  | 10798.733 | NM_014586 | 13839.45  | 14740.825 |
| BC023978  | 730.396   | 583.992   | NM_004605 | 1291.251  | 1033.885  | NM_014366 | 29423.861 | 32763.033 |
| M21302    | 736.576   | 635.705   | NM_006660 | 7676.745  | 9751.654  | NM_000923 | 2699.846  | 3444.016  |
| AK024865  | 2106.691  | 1545.268  | NM_006685 | 38383.598 | 36910.766 | NM_006453 | 3636.443  | 4880.27   |
| NM_007210 | 1418.042  | 1231.707  | AF154121  | 1646.068  | 2168.94   | NM_018096 | 2448.116  | 2909.306  |
| NM_001483 | 2793.657  | 2089.284  | NM_012139 | 16351.088 | 12921.452 | AL390078  | 3933.097  | 4298.156  |
| NM_014443 | 2540.548  | 2853.125  | AF121856  | 5949.305  | 5235.994  | NM_004036 | 7301.619  | 6072.185  |
| NM_005212 | 3197.747  | 3900.549  | NM_006421 | 3969.43   | 3178.193  | NM_015986 | 4358.014  | 4392.687  |
| M14584    | 492.763   | 625.205   | NM_017457 | 10960.363 | 12893.172 | NM_014955 | 24475.145 | 26086.289 |
| NM_006419 | 3602.428  | 4675.617  | NM_003765 | 13511.476 | 16173.154 | NM_003992 | 12477.56  | 14388.185 |



|           |           |           |           |           |           |           |           |           |
|-----------|-----------|-----------|-----------|-----------|-----------|-----------|-----------|-----------|
| AF035035  | 1102.045  | 1228.424  | NM_005868 | 1142.096  | 1180.018  | NM_000137 | 3630.545  | 3517.411  |
| AB020676  | 1539.88   | 1789.412  | M33197    | 54769.004 | 63120.359 | NM_012102 | 30699.906 | 26288.514 |
| AK024715  | 974.246   | 993.29    | NM_001201 | 931.996   | 362.675   | NM_005017 | 58471.391 | 63817.836 |
| U90942    | 28774.443 | 29896.332 | NM_016618 | 900.506   | 495.62    | AF163572  | 47151.918 | 38160.844 |
| NM_014942 | 659.48    | 578.766   | AB014568  | 16357.022 | 7633.317  | NM_000897 | 20909.254 | 14089.511 |
| NM_018360 | 3853.862  | 4846.491  | NM_012249 | 4044.709  | 2053.445  | NM_000487 | 3073.063  | 1697.424  |
| AL365415  | 1135.945  | 1728.226  | AK022546  | 10945.081 | 7782.177  | NM_006411 | 44471.129 | 35135.621 |
| L29147    | 2472.049  | 3500.678  | NM_014067 | 11554.928 | 11809.272 | NM_014182 | 4692.815  | 3937.975  |
| NM_001525 | 37736.523 | 40789.066 | NM_002914 | 7328.82   | 9246.859  | AB040884  | 1341.87   | 1221.594  |
| NM_006055 | 6921.026  | 6981.257  | NM_020385 | 1676.26   | 1365.296  | NM_001170 | 18153.668 | 15287.359 |
| NM_004296 | 879.455   | 961.296   | NM_006541 | 706.118   | 1037.792  | NM_014342 | 5156.832  | 5924.512  |
| NM_005048 | 615.239   | 603.884   | M33197    | 57967.281 | 58125.398 | NM_004853 | 14485.277 | 17526.098 |
| NM_005972 | 1065.577  | 1129.17   | NM_005705 | 4855.423  | 4516.107  | NM_001494 | 31032.225 | 39053.191 |
| NM_001060 | 972.466   | 1015.489  | NM_004328 | 3271.567  | 3140.831  | NM_017707 | 1248.625  | 1769.403  |
| NM_018841 | 3514.897  | 3570.688  | NM_004581 | 6889.494  | 6146.853  | NM_004206 | 5054.003  | 6414.041  |
| L09102    | 4608.756  | 4815.865  | NM_006817 | 12949.813 | 10576.54  | NM_004603 | 49720.906 | 58039.383 |
| NM_003676 | 6374.362  | 8204.979  | NM_007108 | 14699.587 | 11460.913 | AK022849  | 7117.15   | 9516.961  |
| AF113007  | 16393.418 | 17194.373 | NM_015921 | 24419.123 | 20046.043 | AF040964  | 18266.016 | 30014.369 |
| NM_000688 | 6279.568  | 6893.806  | AB040900  | 14710.623 | 15338.282 | NM_001773 | 1207.722  | 895.073   |
| U39573    | 897.983   | 858.362   | NM_001080 | 3823.853  | 2119.83   | Z70704    | 5379.893  | 4753.499  |
| D82061    | 4676.761  | 6852.389  | NM_001482 | 1101.221  | 1179.783  | NM_014363 | 3963.635  | 3647.097  |
| AJ293009  | 3591.688  | 4318.225  | NM_003118 | 814.165   | 389.494   | NM_000557 | 17188.83  | 15121.131 |
| NM_000374 | 1622.279  | 2080.245  | L02922    | 12508.795 | 5851.469  | NM_003236 | 1748.497  | 1347.617  |
| NM_000502 | 1521.737  | 1786.216  | NM_001797 | 2191.602  | 2971.477  | NM_001375 | 23967.445 | 18218.453 |
| NM_001359 | 7292.669  | 8451.04   | NM_003154 | 886.584   | 1934.129  | NM_002312 | 7068.156  | 4841.774  |
| NM_004980 | 3200.483  | 4474.338  | NM_004235 | 642.141   | 948.173   | M20699    | 2956.928  | 2505.641  |
| NM_003224 | 3975.992  | 3173.847  | AK023459  | 7928.975  | 7273.083  | NM_004774 | 8736.835  | 6422.563  |
| NM_004227 | 2199.818  | 1763.418  | BI762154  | 640.393   | 788.52    | NM_016937 | 6293.488  | 4370.407  |
| NM_005282 | 3331.229  | 3484.422  | U13022    | 1161.693  | 909.873   | NM_002690 | 4380.411  | 3276.533  |
| NM_001736 | 4506.598  | 4544.465  | R23251    | 17877.199 | 19938.797 | NM_012328 | 6721.528  | 5288.961  |
| AB028949  | 517.361   | 615.488   | AA702640  | 2647.282  | 3508.767  | NM_007341 | 2532.451  | 2436.178  |
| AL137580  | 640.31    | 712.026   | T68583    | 2850.683  | 3139.542  | NM_016508 | 2573.531  | 2067.767  |
| NM_004101 | 820.294   | 906.881   | AA481944  | 11871.223 | 13620.304 | NM_006456 | 33771.91  | 26153.381 |
| NM_002995 | 5800.751  | 7396.79   | AF038440  | 1390.037  | 1597.252  | AK026062  | 7278.321  | 6623.532  |
| NM_015978 | 1213.064  | 1218.501  | M31158    | 5773.278  | 4920.057  | AF047002  | 35000.402 | 36241.531 |
| NM_003810 | 721.907   | 842.286   | H00742    | 2053.414  | 1836.654  | AL050082  | 4078.667  | 4432.78   |
| NM_016171 | 49118.586 | 55657.918 | D42108    | 4431.445  | 4025.684  | NM_006623 | 58768.898 | 66402.398 |
| NM_018973 | 1632.818  | 2388.296  | BG700922  | 1508.758  | 1285.23   | NM_016588 | 4966.979  | 5565.308  |
| NM_002591 | 1094.018  | 964.665   | AI366068  | 2150.547  | 2321.325  | NM_003135 | 14771.587 | 14221.11  |
| AL049334  | 700.635   | 1362.072  | N57553    | 10017.405 | 9148.479  | NM_004579 | 10802.646 | 8119.844  |
| NM_020216 | 1666.68   | 2591.067  | M33197    | 55812.398 | 59995.324 | AA203126  | 2805.855  | 2104.271  |
| AK021860  | 2041.688  | 1524.99   | NM_016545 | 4090.446  | 6033.869  | L12347    | 47004.152 | 46943.258 |
| AL137266  | 1954.763  | 3378.034  | NM_001440 | 36645.949 | 40355.254 | NM_001622 | 24067.725 | 19155.896 |
| NM_016457 | 2232.787  | 3276.07   | NM_022173 | 6590.937  | 4328.218  | Z36788    | 12294.32  | 10050.185 |
| NM_005057 | 2164.625  | 2935.465  | AB040970  | 5975.794  | 9456.062  | NM_018477 | 16453.768 | 13261.124 |
| AB046842  | 1266.961  | 1947.507  | NM_018330 | 2937.225  | 1792.194  | U20536    | 1212.818  | 1161.842  |
| NM_004850 | 1751.419  | 2589.527  | AB023222  | 1838.333  | 1387.536  | AI298534  | 4806.308  | 3816.236  |
| NM_002822 | 6416.055  | 9167.286  | AB033088  | 4306.688  | 5756.016  | R71691    | 9636.128  | 9112.749  |
| BF306955  | 410.458   | 1074.074  | M33197    | 56282.77  | 64726.719 | AW167715  | 5640.735  | 4010.663  |
| NM_001394 | 1087.87   | 1399.844  | U50342    | 50190.086 | 45506.301 | AA424735  | 12657.789 | 8187.955  |
| NM_018441 | 8640.929  | 12986.654 | NM_000295 | 1400.405  | 2043.509  | U78294    | 4439.83   | 2863.567  |
| NM_000778 | 13452.887 | 18949.008 | NM_000716 | 493.017   | 458.026   | AA171613  | 1075.153  | 803.238   |
| NM_001609 | 2867.47   | 3576.408  | AF026932  | 669.75    | 855.195   | BI760394  | 5088.259  | 3400.531  |

|           |           |           |           |           |           |           |           |           |
|-----------|-----------|-----------|-----------|-----------|-----------|-----------|-----------|-----------|
| BE733234  | 1407.43   | 1836.09   | AF103795  | 1521.901  | 1435.146  | AA555216  | 858.143   | 524.824   |
| NM_02022E | 681.644   | 934.102   | NM_006215 | 481.761   | 453.319   | U09117    | 48254.902 | 45134.855 |
| AK024685  | 455.894   | 510.928   | M33197    | 57128.488 | 61389.543 | M21054    | 1408.835  | 1367.931  |
| NM_012282 | 1328.43   | 1451.266  | NM_007024 | 6141.351  | 6479.031  | M18468    | 1631.694  | 1066.213  |
| NM_00671C | 468.208   | 597.058   | NM_013231 | 4660.424  | 5259.621  | H66070    | 30561.404 | 23977.258 |
| NM_003323 | 15851.382 | 16455.566 | NM_012106 | 5633.25   | 6350.634  | AA164741  | 2032.751  | 1518.509  |
| BG685310  | 2393.324  | 2496.583  | NM_006254 | 2896.735  | 3659.448  | AI189375  | 5025.885  | 3846.167  |
| AW300857  | 8277.346  | 8793.425  | X95425    | 8989.828  | 8352.852  | NM_00166E | 39297.738 | 31480.787 |
| H85962    | 13208.788 | 14041.033 | NM_004422 | 3706.759  | 4602.439  | AF097645  | 1272.587  | 1135.96   |
| BG742446  | 1024.763  | 1044.731  | NM_016562 | 1854.756  | 1904.398  | NM_00327E | 50500.238 | 52602.16  |
| AA864554  | 1482.045  | 1554.615  | AY009399  | 15145.539 | 16731.717 | AB014599  | 8755.862  | 9076.843  |
| X66945    | 2460.276  | 3753.989  | NM_00489E | 16003.151 | 20832.43  | NM_00439E | 1522.041  | 1645.404  |
| X12830    | 784.396   | 929.007   | M33197    | 58812.395 | 63309.516 | AB018345  | 997.437   | 929.786   |
| U00482    | 446.726   | 677.178   | M95610    | 45630.199 | 52481.02  | NM_00583E | 1735.108  | 1253.994  |
| K01904    | 13483.336 | 15338.946 | NM_000717 | 1695.033  | 3112.928  | AW407841  | 7085.732  | 6692.422  |
| BE538886  | 693.532   | 609.071   | M33197    | 54818.34  | 64138.621 | U15197    | 1556.103  | 1153.454  |
| NM_00222E | 752.467   | 1085.007  | NM_00484E | 2318.142  | 2482.417  | NM_00187E | 4371.049  | 3838.964  |
| M57650    | 11232.635 | 11979.331 | NM_007107 | 8604.872  | 9659.447  | AF264014  | 18435.793 | 15050.155 |
| AK024865  | 1550.625  | 2329.687  | NM_000047 | 7058.065  | 10556.012 | NM_00415E | 6586.681  | 4701.428  |
| NM_00721C | 852.418   | 1498.063  | NM_00631E | 6125.513  | 6761.238  | NM_001831 | 2008.385  | 1504.54   |
| NM_00148E | 1680.342  | 1497.803  | NM_01822E | 2505.306  | 3381.765  | NM_01458E | 17687.34  | 13598.046 |
| NM_01836C | 3186.735  | 3297.976  | NM_00460E | 1895.001  | 2439.1    | NM_01436E | 30703.459 | 24346.674 |
| AL365415  | 1007.781  | 1439.385  | NM_00666C | 9123.513  | 11738.877 | NM_00092E | 2083.432  | 1454.877  |
| L29147    | 1994.186  | 2596.695  | NM_00668E | 27866.568 | 30934.553 | NM_00645E | 4067.941  | 3483.938  |
| NM_00152E | 35602.449 | 35366.953 | NM_01213E | 15027.045 | 15767.486 | NM_01809E | 2103.245  | 1547.301  |
| NM_00605E | 6518.202  | 6069.464  | AF121856  | 6829.154  | 6968.959  | AL390078  | 2925.488  | 1797.996  |
| NM_00429E | 732.934   | 829.672   | NM_006421 | 4147.406  | 3488.34   | NM_00403E | 5271.878  | 4337.977  |
| NM_018841 | 1902.57   | 2409.567  | NM_017457 | 11046.097 | 9272.892  | NM_01598E | 5084.106  | 3989.264  |
| AL133105  | 1789.394  | 1976.864  | NM_00376E | 13165.5   | 12599.619 | NM_01495E | 18640.178 | 13110.407 |
| NM_014864 | 3307.741  | 3945.608  | NM_00586E | 883.664   | 586.04    | NM_00399E | 12084.544 | 7572.154  |
| NM_00372E | 1244.463  | 1667.361  | M33197    | 58270.742 | 60712.082 | NM_00237E | 50703.859 | 46319.527 |
| NM_01435E | 1092.307  | 1396.723  | NM_01820E | 38280.988 | 40987.004 | AB007929  | 8770.847  | 7609.454  |
| NM_012481 | 1949.793  | 2676.51   | AB023197  | 13782.021 | 23797.971 | NM_01210E | 19929.309 | 17635.918 |
| L09102    | 3767.516  | 4966.792  | AB014568  | 16007.894 | 12673.011 | NM_005017 | 55522.785 | 59272.551 |
| U68488    | 569.622   | 587.403   | AK022238  | 307.294   | 354.424   | AF163572  | 38769.684 | 35667.621 |
| NM_016247 | 1976.565  | 1824.338  | NM_01224E | 3268.043  | 2104.115  | NM_000897 | 20903.084 | 17321.725 |
| NM_00165E | 21104.564 | 23447.172 | AK022546  | 9663.331  | 7523.394  | NM_000487 | 2023.226  | 1909.97   |
| NM_006827 | 21033.033 | 20415.461 | NM_014067 | 5962.745  | 5812.124  | NM_006411 | 41265.605 | 31659.119 |
| AK021761  | 4380.582  | 4863.626  | NM_002914 | 6010.658  | 6128.487  | NM_01418E | 4336.491  | 3326.659  |
| NM_01866E | 1281.274  | 1167.934  | NM_02038E | 1821.494  | 2005.544  | AB040884  | 849.583   | 629.284   |
| NM_004227 | 2007.245  | 2309.154  | NM_006541 | 814.866   | 1172.565  | NM_00117C | 16698.766 | 10493.946 |
| NM_00528E | 4054.376  | 4235.19   | M33197    | 53610.109 | 57310.027 | NM_01434E | 4952.191  | 3597.156  |
| NM_00173E | 5422.84   | 5269.461  | NM_00570E | 3086.362  | 2953.874  | NM_00485E | 14632.402 | 10508.177 |
| AB028949  | 533.757   | 431.157   | NM_00432E | 3084.328  | 3211.415  | NM_001494 | 31813.813 | 22144.77  |
| AL137580  | 708.885   | 794.867   | NM_004581 | 7106.053  | 7492.6    | NM_017707 | 1358.732  | 1440.837  |
| NM_00299E | 7626.206  | 8854.491  | NM_006817 | 15185.348 | 12842.923 | NM_00420E | 4289.07   | 4412.294  |
| AB033114  | 388.815   | 551.521   | NM_00710E | 16023.31  | 19776.801 | NM_00460E | 44134.125 | 38488.148 |
| NM_01597E | 1059.218  | 1127.933  | NM_015921 | 22666.051 | 20643.977 | AK022849  | 6698.292  | 5366.384  |
| NM_00381C | 643.999   | 662.074   | AB040900  | 12620.087 | 12276.18  | AF040964  | 19100.418 | 16198.633 |
| NM_00490E | 622.404   | 620.826   | NM_00108C | 4135.634  | 2574.791  | NM_00193E | 33007.926 | 25750.699 |
| NM_016171 | 35985.887 | 33602.449 | NM_00148E | 1167.71   | 1105.584  | NM_01436E | 4269.284  | 3684.427  |
| NM_01444E | 1364.122  | 1534.989  | NM_00121E | 342.638   | 251.155   | NM_000557 | 15747.602 | 13908.572 |
| NM_00521E | 1307.836  | 1486.773  | U80018    | 1832.552  | 4024.072  | NM_00323E | 1167.581  | 1729.209  |

|           |           |           |           |           |           |           |           |           |
|-----------|-----------|-----------|-----------|-----------|-----------|-----------|-----------|-----------|
| NM_006419 | 2179.826  | 3040.798  | NM_001797 | 1738.739  | 1867.565  | NM_001375 | 20572.813 | 28088.633 |
| AF035035  | 540.167   | 732.086   | NM_003154 | 591.83    | 736.635   | NM_002312 | 6984.53   | 9453.459  |
| AB020676  | 672.283   | 646.265   | NM_004235 | 553.34    | 634.713   | M20699    | 2971.123  | 4346.356  |
| U90942    | 12588.84  | 8967.404  | AK023459  | 6945.752  | 5725.849  | NM_004774 | 11539.472 | 14175.739 |
| NM_000778 | 11594.304 | 11569.745 | BI762154  | 433.559   | 167.603   | NM_016937 | 7301.86   | 6854.252  |
| NM_001609 | 2967.765  | 3562.767  | U13022    | 1042.611  | 1054.504  | NM_002690 | 4204.683  | 3510.028  |
| BE733234  | 1139.496  | 1204.052  | R23251    | 18090.209 | 16076.907 | NM_012328 | 5333.363  | 4480.968  |
| NM_020228 | 645.651   | 655.037   | AA702640  | 2343.079  | 2535.993  | NM_007341 | 3665.122  | 2660.792  |
| NM_003676 | 7206.065  | 7841.265  | T68583    | 3657.653  | 3608.151  | NM_016508 | 2459.388  | 1779.342  |
| AF113007  | 16102.415 | 15983.562 | AA481944  | 30112.221 | 29069.496 | NM_006456 | 43545.445 | 35284.855 |
| NM_000688 | 6382.146  | 7753.902  | AF038440  | 1240.18   | 1361.059  | AK026062  | 7770.066  | 5560.681  |
| D82061    | 1987.865  | 1768.94   | M31158    | 5998.621  | 6494.835  | AF047002  | 36245.43  | 29545.656 |
| AJ293009  | 1311.061  | 1565.588  | H00742    | 2230.32   | 2325.048  | AL050082  | 4862.703  | 4531.553  |
| NM_000374 | 795.052   | 963.747   | D42108    | 5043.344  | 4374.115  | NM_006623 | 57091.145 | 64576.074 |
| NM_000502 | 557.155   | 573.988   | BG700922  | 1554.133  | 1537.615  | NM_016588 | 3915.851  | 2849.179  |
| NM_001359 | 3175.65   | 3196.187  | AI366068  | 2119.852  | 1751.099  | NM_003135 | 12824.765 | 8838.112  |
| NM_005175 | 23511.357 | 20140.977 | N57553    | 11126.531 | 12864.754 | NM_000137 | 2636.365  | 1662.364  |
| NM_001696 | 6538.202  | 6112.682  | M33197    | 51999.707 | 61544.445 | L12347    | 43952.703 | 57071.23  |
| D87445    | 2921.176  | 2380.049  | NM_016545 | 3747.907  | 4218.339  | NM_001622 | 22619.27  | 28742.131 |
| NM_002247 | 1164.324  | 1303.43   | NM_001440 | 33688.715 | 29488.049 | Z36788    | 12325.858 | 17072.105 |
| NM_004980 | 1645.252  | 1347.906  | NM_001201 | 3164.402  | 4460.277  | NM_018477 | 15485.907 | 24619.479 |
| AB011094  | 11567.517 | 7859.831  | NM_016618 | 829.107   | 1034.077  | U20536    | 1117.839  | 1865.908  |
| NM_003224 | 2281.401  | 2093.277  | NM_000716 | 598.765   | 506.983   | AI298534  | 6457.505  | 11504.404 |
| AK024865  | 560.872   | 572.319   | AF026932  | 576.474   | 399.204   | R71691    | 7885.512  | 17360.715 |
| NM_007210 | 740.835   | 582.016   | AF103795  | 1145.325  | 871.617   | AW167715  | 7261.546  | 8900.211  |
| NM_001483 | 1041.646  | 1000.109  | M33197    | 59543.551 | 64229.02  | AA424735  | 21036.959 | 25071.053 |
| NM_018973 | 2942.914  | 3684.107  | NM_007024 | 4293.426  | 3375.049  | U78294    | 8630.813  | 7025.701  |
| AL137266  | 4019.339  | 4793.132  | NM_013231 | 1370.555  | 1315.289  | AA171613  | 1728.882  | 1053.518  |
| NM_016457 | 1465.093  | 1575.334  | NM_012106 | 5298.546  | 5651.037  | BI760394  | 8035.952  | 5544.853  |
| NM_005057 | 1517.922  | 1595.628  | NM_006254 | 3503.646  | 3715.088  | AA555216  | 1041.182  | 877.851   |
| AB046842  | 935.326   | 905.781   | X95425    | 4578.678  | 4427.13   | U09117    | 41562.176 | 30849.432 |
| NM_004850 | 881.227   | 800.316   | NM_004422 | 2944.35   | 3094.547  | M21054    | 3028.008  | 2612.352  |
| NM_002822 | 2232.451  | 2441.273  | NM_016562 | 2088.865  | 1842.489  | M18468    | 1504.3    | 1086.013  |
| BF306955  | 1204.815  | 842.278   | M33197    | 55200.484 | 59214.75  | H66070    | 37065.684 | 29875.314 |
| CY3Cy5    | 9272.083  | 1385.481  | AY009399  | 15433.522 | 16980.721 | AA164741  | 1190.156  | 851.536   |
| BM664556  | 2101.294  | 1322.9    | NM_004895 | 19086.598 | 21047.002 | AI189375  | 4368.606  | 3315.41   |
| AL359586  | 1147.789  | 739.193   | U59748    | 4803.011  | 6072.674  | NM_001665 | 36339.039 | 28180.254 |
| AF035290  | 2188.613  | 1864.723  | NM_014303 | 18260.256 | 15549.889 | AF097645  | 1002.231  | 746.638   |
| AK023216  | 1357.858  | 1287.186  | NM_014863 | 405.512   | 391.438   | NM_001773 | 985.383   | 873.884   |
| M33197    | 62452.723 | 72105.039 | M33197    | 62154.703 | 65704.734 | Z70704    | 6451.854  | 4482.343  |
| AK023288  | 2095.103  | 2168.5    | M95610    | 48412.59  | 53795.625 | AF264014  | 18505.66  | 28237.576 |
| NM_017986 | 1474.86   | 1831.05   | NM_003118 | 3659.933  | 5610.885  | L09098    | 688.692   | 1009.683  |
| AK024846  | 10967.838 | 14103.786 | L02922    | 24536.873 | 25944.555 | NM_004155 | 5963.032  | 8803.814  |
| BM664556  | 2197.651  | 2761.775  | NM_004045 | 15001.839 | 17959.576 | NM_001831 | 3769.936  | 5611.292  |
| SR1       | 26723.428 | 39528.32  | NM_001891 | 892.438   | 1033.414  | NM_014586 | 12868.618 | 25188.24  |
| SR3       | 31840.484 | 29069.361 | NM_012139 | 7641.276  | 8162.016  | NM_014366 | 24877.109 | 46104.207 |
| SR7       | 3989.134  | 38812.402 | AF121856  | 7275.268  | 6999.758  | NM_000923 | 2413.078  | 4537.714  |
| CY3Cy5    | 3859.922  | 960.426   | NM_006421 | 3533.256  | 3373.74   | NM_006453 | 3793.299  | 5955.689  |
| U52839    | 377.656   | 308.43    | NM_017457 | 11436.69  | 12007.898 | NM_018096 | 2190.722  | 3077.362  |
| M33197    | 58181.684 | 71742.102 | NM_003765 | 6202.644  | 4163.615  | AL390078  | 6818.341  | 6065.447  |
| AK026984  | 62571.816 | 68484.016 | NM_005868 | 1249.471  | 1861.623  | NM_004036 | 7187.75   | 8416.785  |
| AJ345030  | 1785.736  | 3153.448  | M33197    | 57068.09  | 62010.57  | NM_015986 | 5878.928  | 8198.403  |
| AK023631  | 884.41    | 1863.405  | NM_018202 | 39573.668 | 31290.664 | NM_006546 | 875.768   | 1249.25   |

|           |           |           |           |           |           |           |           |           |
|-----------|-----------|-----------|-----------|-----------|-----------|-----------|-----------|-----------|
| AK021796  | 1021.997  | 1182.294  | AB023197  | 12189.844 | 10658.968 | NM_01495  | 13775.795 | 12448.388 |
| AF007146  | 699.846   | 758.197   | NM_022173 | 19227.936 | 20737.436 | NM_003992 | 9353.502  | 8266.011  |
| AL110283  | 461.873   | 424.788   | AB040970  | 4919.351  | 4838.137  | AF279265  | 4644.042  | 4633.209  |
| AL117427  | 6075.365  | 7514.073  | AB023222  | 2031.608  | 1918.545  | NM_005213 | 35764.91  | 27063.742 |
| AF052118  | 28431.094 | 33043.934 | AB033088  | 3506.531  | 3510.941  | AB040914  | 3860      | 3104.833  |
| M33197    | 7141.953  | 4388.024  | M33197    | 62049.352 | 66718.477 | NM_002997 | 21158.193 | 16312.974 |
| AK023305  | 3163.821  | 2111.896  | U50342    | 45325.914 | 36561.07  | NM_002379 | 49398.383 | 39275.691 |
| AK022428  | 1379.535  | 1697.949  | NM_000295 | 1723.721  | 1785.162  | AB007929  | 8700.435  | 6199.974  |
| AK025089  | 16286.521 | 34536.266 | NM_001080 | 5908.005  | 5069.811  | NM_004579 | 16062.955 | 9433.436  |
| AK023298  | 438.22    | 438.64    | NM_001482 | 1024.294  | 857.531   | AA203126  | 4108.153  | 2696.322  |
| M33197    | 61400.719 | 68798.984 | NM_001215 | 442.34    | 540.066   | AB043997  | 1274.205  | 2487.436  |
| AK001279  | 2476.635  | 5358.375  | U80018    | 720.074   | 769.29    | NM_001062 | 769.869   | 646.946   |
| AF086407  | 542.66    | 886.477   | NM_000717 | 1042.198  | 1235.608  | NM_004853 | 11672.364 | 22767.756 |
| AK001567  | 1264.743  | 2305.313  | M33197    | 54644.781 | 60182.988 | NM_001494 | 21986.365 | 40062.031 |
| AL109707  | 518.431   | 668.08    | NM_004845 | 1648.022  | 1720.59   | NM_017707 | 1148.713  | 1728.093  |
| M33197    | 55650.789 | 66332.047 | NM_007107 | 7619.465  | 6592.484  | NM_004206 | 3986.218  | 6367      |
| M33197    | 62944.145 | 57725.848 | NM_000047 | 13102.988 | 11205.328 | NM_004603 | 43303.859 | 40773.086 |
| AK000903  | 46758.047 | 23280.008 | NM_006319 | 6853.998  | 6408.083  | AK022849  | 6821.949  | 6633.841  |
| AK023938  | 2610.845  | 1654.351  | NM_018226 | 3129.608  | 4285.242  | AF040964  | 14872.137 | 26812.916 |
| AL110169  | 1506.458  | 1173.474  | NM_004605 | 1796.479  | 2127.892  | AK023527  | 403.882   | 313.044   |
| NM_013391 | 979.003   | 640.535   | Z36813    | 4803.281  | 7122.56   | NM_001939 | 31062.625 | 30600.361 |
| M33197    | 56856.398 | 56030.953 | NM_006660 | 8333.389  | 9125.96   | NM_003279 | 43053.805 | 47581.961 |
| AL157466  | 7228.433  | 7942.576  | NM_001486 | 459.586   | 597.282   | AB014599  | 11514.783 | 9625.525  |
| AL389981  | 599.855   | 1141.731  | NM_004727 | 523.246   | 825.542   | NM_004393 | 1987.915  | 1460.189  |
| AK024336  | 2761.553  | 6456.391  | NM_000559 | 1771.659  | 3247.755  | AB018345  | 974.979   | 1261.739  |
| AK023862  | 689.32    | 2106.585  | NM_006685 | 53732.336 | 59412.797 | NM_005832 | 1583.286  | 2520.928  |
| NM_018621 | 2445.632  | 5969.034  | M33197    | 34324.371 | 31464.703 | AW407841  | 12418.449 | 15667.445 |
| AK022016  | 397.556   | 750.718   | AF154121  | 2758.001  | 5728.553  | U15197    | 1950.368  | 2136.884  |
| AK022118  | 2410.849  | 4713.353  | M33197    | 54354.531 | 64527.711 | NM_001879 | 9761.442  | 9004.997  |
| AK026453  | 11205.76  | 13218.324 | NM_016545 | 4226.452  | 4576.442  | NM_016588 | 1461.466  | 2339.729  |
| M33197    | 66874.836 | 64743.098 | NM_001440 | 36776.668 | 28639.391 | NM_003135 | 7532.411  | 12430.539 |
| D17203    | 61494.953 | 45048.07  | NM_001201 | 724.26    | 881.857   | NM_006765 | 844.461   | 856.739   |
| NM_006495 | 7761.571  | 6253.492  | NM_016618 | 783.849   | 642.015   | NM_000137 | 3129.853  | 4269.375  |
| AK022101  | 408.299   | 250.054   | AB014568  | 9870.413  | 9189.35   | NM_012102 | 18781.359 | 30677.939 |
| AF086203  | 348.03    | 359.228   | NM_012249 | 2030.017  | 1892.535  | NM_005017 | 50868.844 | 61539.129 |
| AB046772  | 1830.64   | 1421.446  | AK022546  | 10573.303 | 13331.234 | AF163572  | 30973.258 | 42613.035 |
| M33197    | 67921.922 | 61789.805 | NM_014067 | 8323.484  | 6368.425  | NM_000897 | 17555.318 | 22698.398 |
| AL442080  | 3949.687  | 8407.568  | NM_002914 | 5932.684  | 6158.869  | NM_000487 | 1979.316  | 2392.622  |
| AY007143  | 6843.986  | 21003.74  | NM_020385 | 2527.158  | 1988.719  | NM_006411 | 44950.781 | 42876.746 |
| L15557    | 2353.024  | 3230.584  | NM_014877 | 464.632   | 306.966   | NM_014182 | 3678.206  | 3370.307  |
| AK022729  | 2003.083  | 2559.372  | NM_006541 | 808.152   | 981.745   | AB040884  | 978.937   | 1799.013  |
| NM_006168 | 4027.547  | 12189.869 | M33197    | 58116.746 | 62264.352 | NM_000492 | 24332.213 | 22973.5   |
| AL050374  | 2448.096  | 4465.233  | NM_005705 | 5446.541  | 5387.732  | NM_012089 | 1950.154  | 1760.404  |
| M33197    | 65413.93  | 71828.953 | NM_004328 | 4515.313  | 5835.975  | NM_001170 | 17765.623 | 15873.655 |
| AL122073  | 26751.713 | 21604.549 | NM_004581 | 6481.667  | 6918.672  | AL137716  | 1752.064  | 1338.813  |
| AF116655  | 8142.436  | 11722.967 | NM_006817 | 13458.825 | 13613.464 | NM_004696 | 4454.606  | 6793.725  |
| AJ243222  | 1177.566  | 1829.659  | NM_007108 | 19178.793 | 28557.633 | NM_014342 | 5782.002  | 7438.723  |
| AK026132  | 4574.25   | 6533.329  | NM_015921 | 24488.346 | 22588.002 | Z50169    | 2827.135  | 3222.23   |
| Y11162    | 1140.461  | 1509.378  | AB040900  | 14059.843 | 15903.294 | NM_014470 | 2132.724  | 2513.501  |
| AF070584  | 3705.258  | 4381.075  | NM_006917 | 1388.159  | 1047.587  | NM_001665 | 24319.268 | 27285.332 |
| AF052109  | 1141.272  | 1500.88   | AF086225  | 2748.181  | 2435.638  | AF097645  | 868.867   | 829.235   |
| M33197    | 58911.418 | 54251.813 | NM_005844 | 15812.677 | 8158.366  | NM_001773 | 1048.54   | 914.292   |
| NM_003353 | 46996.754 | 29874.477 | AK024941  | 3999.034  | 1765.922  | Z70704    | 3094.343  | 2861.776  |

|           |           |           |           |           |           |           |           |           |
|-----------|-----------|-----------|-----------|-----------|-----------|-----------|-----------|-----------|
| AK026502  | 458.045   | 354.533   | AF056434  | 5863.753  | 2744.718  | NM_014363 | 2003.4    | 1832.407  |
| X82127    | 4095.057  | 3268.844  | AF086199  | 1010.556  | 491.203   | NM_000557 | 10809.069 | 9988.768  |
| AL122044  | 3149.613  | 2646.604  | M33197    | 58765.809 | 40159.629 | NM_003233 | 907.567   | 1106.802  |
| NM_018296 | 828.774   | 1071.218  | AK025489  | 3499.573  | 1749.891  | NM_001375 | 15295.812 | 22349.531 |
| M33197    | 62982.926 | 72056.141 | AL390152  | 11475.583 | 6247.773  | NM_002312 | 4454.964  | 9196.811  |
| AF070578  | 796.629   | 1100.72   | AK026721  | 2885.439  | 1588.101  | M20699    | 2308.248  | 4911.117  |
| L13743    | 566.781   | 1422.448  | AK023027  | 20824.809 | 12362.443 | NM_004774 | 6109.047  | 7684.597  |
| U84519    | 883.287   | 1021.442  | AK025598  | 1459.397  | 982.586   | NM_016937 | 4191.191  | 4046.515  |
| Z11849    | 12368.573 | 13763.925 | AB002348  | 58628.336 | 36866.254 | NM_002690 | 3964.949  | 3567.125  |
| AJ002788  | 379.396   | 999.622   | NM_006917 | 2092.085  | 1427.148  | NM_012328 | 6258.703  | 6243.014  |
| M33197    | 61543.02  | 68107.211 | SR2       | 22571.025 | 20236.645 | NM_007341 | 7660.274  | 7205.026  |
| AF075050  | 3161.737  | 2294.919  | SR4       | 9786.511  | 8175.715  | NM_016508 | 2577.013  | 1674.982  |
| AK024842  | 1930.575  | 2705.196  | SR6       | 781.641   | 996.86    | NM_006456 | 34666.484 | 25715.955 |
| AK022962  | 473.913   | 581.348   | SR8       | 3410.425  | 10719.801 | AK026062  | 8249.342  | 7785.673  |
| NM_018382 | 1559.871  | 1740.046  | SR10      | 12921.493 | 5179.989  | AF047002  | 34817.543 | 45766.941 |
| AB018327  | 3578.594  | 4048.971  | AK025948  | 765.602   | 467.725   | AL050082  | 4139.643  | 5773.351  |
| AF303889  | 1154.815  | 1041.962  | AJ238555  | 1478.278  | 931.674   | NM_006623 | 56925.84  | 66390.023 |
| M33197    | 56497.582 | 64479.211 | AL353948  | 49058.738 | 37062.512 | CY3Cy5    | 4638.223  | 214.258   |
| AK022649  | 8978.171  | 7900.524  | M33197    | 70473.875 | 63337.781 | NM_016134 | 1862.279  | 1998.302  |
| AF180736  | 403.173   | 305.46    | AK025869  | 18197.918 | 8582.089  | AL390185  | 13172.175 | 15356.058 |
| NM_016507 | 2968.712  | 2596.147  | AL050088  | 8102.027  | 4641.979  | AF086235  | 19431.764 | 24131.426 |
| NM_002024 | 5341.091  | 5034.458  | AK024939  | 2366.193  | 1331.101  | AF143886  | 2904.685  | 2400.525  |
| NM_001563 | 10803.325 | 17046.303 | AK001561  | 16738.248 | 8020.039  | AK025975  | 8193.7    | 7939.028  |
| NM_000266 | 1934.656  | 7485.571  | AB007880  | 6380.745  | 3606.026  | AK025583  | 69716.18  | 62541.16  |
| X89666    | 4979.611  | 9148.821  | AK024950  | 6704.799  | 3931.711  | NM_014664 | 3265.109  | 3856.969  |
| NM_017429 | 769.731   | 1792.93   | M33197    | 77078.898 | 65151.148 | NM_017653 | 10863.091 | 9520.179  |
| NM_003104 | 12172.613 | 23105.723 | NM_014146 | 11257.454 | 5940.79   | AL109695  | 33509.535 | 25629.857 |
| M33197    | 62408.543 | 67323.609 | NM_018843 | 4277.374  | 3539.734  | NM_016134 | 1299.641  | 1221.932  |
| NM_014406 | 4405.851  | 4393.865  | AK024275  | 1887.744  | 1011.656  | SR2       | 51185.496 | 54222.852 |
| Z11801    | 1581.122  | 2671.28   | M33197    | 75906.484 | 65620.461 | SR4       | 18220.486 | 21938.453 |
| AK027253  | 738.909   | 1109.367  | AL109782  | 10998.858 | 7628.657  | SR6       | 2002.455  | 2769.496  |
| S68954    | 4231.279  | 12316.777 | M33197    | 61832.281 | 51032.246 | SR8       | 6281.622  | 21058.236 |
| S81335    | 1621.801  | 1825.323  | AK026259  | 65368.324 | 62235.895 | SR10      | 20721.818 | 8890.934  |
| NM_006197 | 4699.562  | 2699.166  | M33197    | 70254.461 | 65551.148 | CY3Cy5    | 2726.958  | 114.432   |
| M29273    | 499.459   | 600.915   | NM_018126 | 2278.87   | 1836.575  | NM_014819 | 8930.345  | 10019.271 |
| M33197    | 34736.883 | 31686.617 | AK024506  | 9984.976  | 5618.08   | NM_017609 | 2356.602  | 2332.041  |
| NM_004854 | 3325.487  | 4428.89   | NM_014179 | 5806.046  | 3281.502  | AF086040  | 2413.495  | 2804.512  |
| NM_002436 | 964.643   | 2315.684  | AF086326  | 7873.933  | 3979.254  | AB032988  | 3601.692  | 4687.912  |
| NM_018362 | 8754.453  | 13635.613 | M33197    | 73327.953 | 65595.164 | AK023559  | 36369.02  | 38809.184 |
| M33197    | 63213.773 | 70092.969 | AL080057  | 785.156   | 608.211   | AB037859  | 67717.695 | 64513.668 |
| NM_004755 | 4171.494  | 9613.461  | M33197    | 69252.836 | 65065     | AL049233  | 7451.657  | 6769.917  |
| NM_002186 | 795.881   | 924.977   | M33197    | 61194.086 | 44286.48  | NM_017696 | 13250.648 | 13100.457 |
| NM_006182 | 622.897   | 1626.716  | AK024470  | 3818.31   | 1940.775  | AL050166  | 5766.939  | 5236.219  |
| NM_004444 | 2979.037  | 3220.096  | NM_017935 | 1414.179  | 994.606   | AK024254  | 3856.752  | 3853.798  |
| NM_001957 | 4349.395  | 4411.782  | NM_004226 | 4784.043  | 3130.687  | NM_018456 | 8536.504  | 8347.742  |
| AK024533  | 2841.258  | 3355.317  | M33197    | 63168.344 | 48037.129 | NM_018996 | 1763.741  | 1533.66   |
| NM_002736 | 28105.334 | 30517.053 | AF056430  | 1537.143  | 1027.156  | AL137304  | 4586.832  | 3860.531  |
| NM_004246 | 3918.135  | 5568.671  | AF009291  | 1370.83   | 1275.476  | AL049274  | 1396.302  | 1580.484  |
| NM_005207 | 2953.93   | 2428.881  | M33197    | 71499.234 | 65578.867 | NM_018279 | 5917.92   | 6412.895  |
| NM_003087 | 2321.85   | 2670.025  | NM_018055 | 7653.931  | 5784.558  | AK026883  | 5207      | 4424.4    |
| NM_001630 | 3054.22   | 7310.845  | AK002199  | 1545.339  | 1263.905  | NM_014350 | 21846.078 | 15722.272 |
| AF305081  | 4789.889  | 5073.96   | AK021662  | 3235.028  | 2440.202  | U00925    | 28222.309 | 23889.539 |
| AF118078  | 2584.999  | 2733.602  | AK001038  | 1350.218  | 995.522   | AK025190  | 568.192   | 794.213   |

|           |           |           |           |           |           |           |           |           |
|-----------|-----------|-----------|-----------|-----------|-----------|-----------|-----------|-----------|
| NM_020169 | 1566.253  | 1745.494  | AK001802  | 2015.261  | 1270.235  | AK026743  | 551.177   | 766.155   |
| M33197    | 31738.59  | 48970.316 | AK021469  | 2069.671  | 1289.355  | AK025214  | 1377.273  | 1401.608  |
| BE904175  | 1245.273  | 1517.003  | AK021706  | 2061.593  | 1366.527  | AK025846  | 3184.111  | 3795.086  |
| NM_005858 | 4788.568  | 6474.049  | M33197    | 59532.949 | 52268.203 | AK026805  | 16575.371 | 16690.818 |
| NM_014931 | 8782.224  | 14018.582 | M84507    | 842.747   | 374.123   | AB037765  | 2592.571  | 3255.857  |
| NM_014487 | 8695.932  | 10241.831 | NM_005372 | 809.87    | 762.257   | AK025068  | 4174.264  | 5424.592  |
| NM_018070 | 1924.807  | 3396.89   | NM_006179 | 3084.385  | 2002.672  | AK026720  | 2315.321  | 3206.048  |
| NM_002484 | 9236.568  | 7464.35   | AL360165  | 3570.795  | 2553.926  | AF085870  | 23358.418 | 25420.82  |
| M33197    | 50270.5   | 46542.484 | M33197    | 73346.805 | 64191.086 | AL050063  | 1756.594  | 1728.635  |
| NM_018240 | 10972.646 | 7508.169  | AJ008132  | 12736.96  | 10108.64  | AL080217  | 741.561   | 804.454   |
| AL162052  | 4668.482  | 7925.694  | NM_005281 | 6855.408  | 5067.778  | AL117580  | 34224.066 | 34148.676 |
| AK025941  | 5111.489  | 9414.195  | NM_005549 | 5642.037  | 4521.566  | AL049355  | 651.725   | 787.145   |
| NM_018179 | 2376.478  | 2565.071  | AJ008115  | 36802.594 | 30019.869 | AL110190  | 7886.281  | 5815.275  |
| AF059531  | 11032.164 | 5722.242  | AF083125  | 4086.798  | 2319.105  | AL117656  | 1523.962  | 1212.595  |
| NM_002707 | 15213.014 | 9445.076  | U72851    | 1199.632  | 995.106   | AJ001893  | 7206.535  | 6512.157  |
| AF029777  | 3076.425  | 3255.704  | AK022970  | 910.492   | 468.8     | NM_018225 | 53107.676 | 49011.785 |
| NM_003352 | 1717.111  | 2159.711  | AK026212  | 1639.18   | 1016.474  | AK025534  | 2319.88   | 2463.83   |
| AK026884  | 32688.916 | 24671.16  | AF086222  | 932.478   | 794.568   | AK022577  | 701.092   | 893.048   |
| S82198    | 1232.612  | 1312.701  | AF086415  | 7354.789  | 4628.653  | AF091526  | 10848.578 | 13841.489 |
| NM_002594 | 2055.347  | 2362.283  | D28391    | 40124.281 | 25720.813 | AK026705  | 9037.42   | 9261.656  |
| M33197    | 59087.145 | 63528.781 | M33197    | 58710.324 | 45039.953 | NM_003602 | 6057.63   | 5928.585  |
| NM_020193 | 3034.877  | 11155.457 | AK026859  | 2439.355  | 1741.491  | AF009258  | 67316.406 | 62101.148 |
| NM_005619 | 1245.934  | 1996.938  | D86961    | 2641.068  | 2944.391  | AF009305  | 8683.496  | 9143.62   |
| D87440    | 4911.233  | 7548.671  | AJ227896  | 29148.279 | 23672.242 | NM_006193 | 3627.499  | 3333.525  |
| AK000332  | 2883.253  | 3832.26   | L32841    | 7299.204  | 4967.688  | AF009270  | 3942.814  | 4629.16   |
| AL080156  | 1073.521  | 797.086   | M33197    | 64368.707 | 68438.586 | AF009318  | 5318.248  | 6029.883  |
| NM_006738 | 6659.594  | 5884.339  | AF131770  | 5312.339  | 3073.575  | AF056421  | 5718.79   | 6302.51   |
| NM_002285 | 1607.631  | 2419.782  | NM_006432 | 15129.479 | 9539.439  | AF090889  | 604.686   | 1455.04   |
| NM_006694 | 31756.027 | 37690.055 | AF025441  | 1872.375  | 1382.732  | AK001085  | 5308.632  | 7739.608  |
| NM_013351 | 18397.324 | 10638.327 | U62823    | 5375.284  | 4441.555  | AK001906  | 10028.962 | 10617.732 |
| NM_012340 | 2270.252  | 1436.885  | NM_003535 | 25943.658 | 16277.594 | AK021528  | 1813.637  | 2030.97   |
| NM_006022 | 1779.389  | 1491.151  | M33197    | 68730.094 | 63592.57  | AK021746  | 2442.909  | 2524.404  |
| AK025110  | 1093.415  | 881.239   | AK000852  | 37654.785 | 22407.564 | AK001136  | 2258.124  | 2681.46   |
| X52339    | 40548.66  | 22162.617 | AF251188  | 7948.032  | 5752.076  | AK021617  | 676.18    | 608.115   |
| M33197    | 47853.957 | 40909.07  | AK026418  | 6347.742  | 4156.408  | AK021810  | 2939.039  | 2332.205  |
| AB046830  | 3877.585  | 2845.398  | AF086194  | 26487.957 | 15924.95  | AF086317  | 8043.082  | 8200.583  |
| NM_001488 | 1978.764  | 1690.604  | AK026811  | 7192.852  | 4265.112  | U16850    | 10518.253 | 10395.305 |
| NM_016202 | 6158.364  | 7104.89   | NM_017743 | 1469.947  | 1369.005  | AL390178  | 4425.171  | 3573.75   |
| NM_012476 | 1375.921  | 1314.474  | NM_000300 | 3939.044  | 2550.105  | NM_005383 | 1523.072  | 1751.008  |
| NM_016604 | 4127.284  | 2082.398  | M33197    | 64771.891 | 67519.359 | Z36806    | 809.345   | 1018.275  |
| M33197    | 54743.051 | 66330.563 | AV756917  | 5052.6    | 3420.07   | NM_005368 | 2772.955  | 2943.215  |
| NM_006276 | 4471.387  | 5629.61   | NM_018380 | 24440.393 | 14873.564 | NM_018618 | 1624.454  | 1789.772  |
| NM_003407 | 1957.788  | 3353.796  | AK001442  | 4219.706  | 3403.652  | AJ008121  | 69030.039 | 62249.543 |
| NM_007209 | 52009.246 | 67850.023 | NM_012070 | 1943.796  | 1375.048  | AJ008153  | 10282.139 | 10368.295 |
| NM_003729 | 10199.021 | 9988.162  | AF183423  | 2063.92   | 934.061   | AK023739  | 3406.97   | 3668.517  |
| L05096    | 30443.441 | 24766.229 | M33197    | 64347.324 | 64194.453 | NM_005830 | 14007.191 | 14715.456 |
| BC015899  | 16699.83  | 13500.583 | U92023    | 1287.662  | 816.515   | AL389983  | 7105.987  | 7912.743  |
| M33197    | 49105.945 | 45381.875 | U12129    | 10498.809 | 6417.946  | AJ008159  | 8184.641  | 8762.438  |
| NM_015914 | 2828.782  | 5337.515  | S81242    | 64558.012 | 66696.477 | AK000995  | 6505.653  | 6045.114  |
| NM_007180 | 3310.691  | 2396.271  | AF230801  | 3163.028  | 2498.51   | U00959    | 7043.301  | 8438.566  |
| NM_005609 | 1580.75   | 1039.052  | AF075072  | 4309.878  | 2621.219  | NM_014578 | 61993.414 | 58038.211 |
| NM_005476 | 6597.389  | 3819.259  | M33197    | 64148.348 | 63961.684 | AF147306  | 12743.716 | 14302.681 |
| NM_005660 | 4749.876  | 3600.766  | NM_002509 | 8331.938  | 8337.323  | AF086267  | 15057.113 | 16098.563 |

|           |           |           |           |           |           |           |           |           |
|-----------|-----------|-----------|-----------|-----------|-----------|-----------|-----------|-----------|
| AK023902  | 3976.479  | 3165.902  | U38442    | 1136.646  | 1720.366  | X74606    | 1624.106  | 2200.396  |
| NM_000401 | 1907.032  | 1509.659  | AF110136  | 2252.672  | 2435.25   | NM_012183 | 13291.853 | 14524.525 |
| NM_005223 | 958.97    | 774.544   | AK026706  | 3660.041  | 2761.562  | AK026785  | 4081.171  | 4459.396  |
| AB011173  | 5876.333  | 6540.402  | AB007936  | 62844.508 | 58619.223 | AK022994  | 1026.108  | 898.059   |
| AB023195  | 4185.849  | 4023.023  | AF005258  | 1504.458  | 1303.031  | AL049466  | 5039.922  | 6375.134  |
| U43431    | 1898.221  | 1813.458  | NM_000887 | 2959.662  | 1661.932  | AB037802  | 1537.425  | 1746.609  |
| X57147    | 1236.112  | 1600.151  | AF277292  | 1562.281  | 1165.836  | AL137450  | 7079.808  | 9061.31   |
| AK021563  | 492.946   | 418.63    | M33197    | 64742.805 | 79900.695 | AK023058  | 10453.228 | 11773.882 |
| AB006622  | 529.194   | 620.239   | NM_015416 | 6614.744  | 4386.874  | AJ227878  | 964.729   | 1003.081  |
| M33197    | 52700.52  | 67170.203 | NM_002731 | 681.807   | 313.684   | NM_012064 | 27141.777 | 24856.604 |
| AK097041  | 2660.751  | 6460.777  | NM_003899 | 7821.325  | 4666.417  | AK001460  | 1768.826  | 1857.629  |
| AF068744  | 15988.255 | 28445.982 | X99662    | 9417.013  | 5142.172  | AK092508  | 14611.277 | 15174.729 |
| NM_004497 | 730.477   | 1250.955  | NM_003473 | 55259.535 | 49266.566 | AK027111  | 68311.672 | 67614.672 |
| AK000762  | 2339.313  | 3002.778  | NM_014325 | 2532.762  | 1993.18   | NM_003518 | 1325.314  | 1603.94   |
| NM_004571 | 1371.126  | 1444.286  | M33197    | 60928.586 | 64824.898 | M60749    | 7106.792  | 7853.375  |
| NM_016260 | 430.564   | 552.327   | NM_017753 | 868.489   | 964.665   | X79986    | 9044.928  | 10084.818 |
| NM_002895 | 1320.023  | 996.794   | NM_001882 | 1131.381  | 1107.372  | NM_003523 | 28076.789 | 28582.078 |
| AF276513  | 3571.4    | 3959.389  | NM_014891 | 10153.164 | 14152.951 | X01448    | 3637.748  | 3422.016  |
| M33197    | 48896.152 | 37740.746 | NM_013392 | 16187.807 | 17459.711 | NM_016503 | 13160.041 | 16977.527 |
| M95610    | 30086.504 | 14810.841 | M33197    | 64281.176 | 70150.734 | AK056351  | 58517.32  | 60211.805 |
| NM_003118 | 350.172   | 172.23    | NM_003236 | 3695.27   | 4768.634  | NM_014690 | 33568.699 | 33664.473 |
| L02922    | 18900.121 | 9419.642  | NM_003458 | 953.954   | 1420.771  | NM_017698 | 6073.131  | 8008.294  |
| NM_001797 | 1521.316  | 1075.605  | AF052692  | 1548.148  | 2363.96   | AF086490  | 3992.834  | 4988.938  |
| NM_003154 | 570.678   | 450.947   | NM_000179 | 4726.436  | 2883.608  | AF131738  | 49845.961 | 41767.016 |
| AK023459  | 6936.351  | 4547.789  | AF062739  | 5429.354  | 3455.128  | AK021666  | 28690.336 | 25738.738 |
| U13022    | 1578.455  | 1563.024  | NM_006602 | 5222.632  | 3196.636  | AK024081  | 4049.673  | 4135.664  |
| R23251    | 21758.734 | 12678.192 | AL079314  | 2329.6    | 1784.063  | AK024825  | 8914.037  | 8594.325  |
| AA702640  | 4508.805  | 4427.765  | NM_001260 | 3154.62   | 2826.631  | NM_000795 | 840.164   | 1200.24   |
| AA481944  | 5507.312  | 8023.764  | NM_001950 | 4068.21   | 4257.184  | AB037761  | 43517.371 | 49800.223 |
| AF038440  | 840.131   | 2111.898  | AK026364  | 2800.168  | 2690.383  | NM_014008 | 67999.727 | 66400.992 |
| M31158    | 8562.226  | 13714.016 | NM_018117 | 2379.179  | 2184.154  | NM_014731 | 20241.129 | 24138.141 |
| H00742    | 1117.779  | 1422.367  | NM_006999 | 2059.775  | 2102.092  | AF035191  | 21199.371 | 26038.932 |
| D42108    | 1391.619  | 3227.443  | NM_006286 | 1926.137  | 1886.643  | NM_004058 | 2481.196  | 2384.174  |
| BG700922  | 1954.973  | 1538.477  | M33197    | 64672.168 | 66811.016 | NM_004527 | 3445.938  | 3938.533  |
| AI366068  | 3027.553  | 2730.51   | NM_004331 | 9754.135  | 14465.565 | NM_012062 | 17769.77  | 20196.215 |
| N57553    | 17702.416 | 12016.412 | NM_015996 | 1513.721  | 1786.431  | AK026717  | 1642.546  | 1737.685  |
| M33197    | 53201.871 | 43958.641 | NM_015703 | 25328.607 | 23217.641 | NM_001507 | 4832.793  | 4819.579  |
| NM_018202 | 38565.664 | 17110.637 | AB018337  | 2893.258  | 3339.036  | X92108    | 1695.488  | 1522.264  |
| AB023197  | 12070.506 | 6623.274  | NM_014489 | 2187.395  | 2982.669  | AL389876  | 6626.576  | 5914.596  |
| NM_022173 | 8060.356  | 4513.975  | AK025273  | 3833.681  | 4441.184  | AK022120  | 8403.439  | 7251.505  |
| AB040970  | 6203.319  | 4527.997  | M33197    | 63773.25  | 64409.918 | Z70762    | 1567.788  | 1713.089  |
| NM_018330 | 4232.411  | 2885.159  | NM_001794 | 800.634   | 1198.997  | D17099    | 1389.601  | 1568.178  |
| AB023222  | 3166.563  | 1899.944  | NM_002205 | 2693.938  | 3129.348  | BF037206  | 10297.932 | 10502.263 |
| AB033088  | 9965.137  | 6579.414  | NM_002214 | 5996.763  | 6751.021  | AK021474  | 57966.973 | 60699.219 |
| M33197    | 51590.781 | 40693.902 | NM_001911 | 4722.1    | 3635.903  | AK023642  | 1836.025  | 1559.652  |
| U50342    | 46931.953 | 30156.748 | NM_000537 | 3021.361  | 2306.239  | U52827    | 6964.967  | 6286.66   |
| NM_000295 | 2357.581  | 1902.345  | NM_006503 | 2302.592  | 1565.974  | AB031547  | 8358.905  | 7566.618  |
| NM_000716 | 1553.661  | 1675.18   | AB002321  | 1000.435  | 1032.58   | NM_003970 | 5096.568  | 5162.157  |
| AF026932  | 825.671   | 864.517   | NM_002515 | 603.763   | 420.526   | AK022496  | 3780.3    | 4544.556  |
| NM_006215 | 781.986   | 752.372   | M33197    | 3669.267  | 2923.86   | AB042636  | 2087.256  | 3255.895  |
| M33197    | 54950.949 | 65278.25  | AB020698  | 1571.781  | 1141.47   | AB033035  | 5115.323  | 6222.226  |
| NM_007024 | 6339.671  | 15746.368 | U68382    | 9072.905  | 7131.764  | NM_002883 | 9099.716  | 11715.81  |
| X95425    | 737.103   | 756.579   | NM_003969 | 7556.139  | 6035.382  | NM_019012 | 1905.943  | 1976.763  |

|           |           |           |           |           |           |           |           |           |
|-----------|-----------|-----------|-----------|-----------|-----------|-----------|-----------|-----------|
| NM_004422 | 3736.527  | 3272.889  | NM_004651 | 5223.833  | 4609.167  | NM_000141 | 1365.451  | 1263.169  |
| NM_016562 | 1629.89   | 1902.36   | NM_003363 | 654.816   | 753.262   | NM_016150 | 22826.527 | 22452.34  |
| AY009399  | 22670.219 | 14980.704 | M33197    | 59105.195 | 63098.828 | U57058    | 2275.782  | 2305.037  |
| NM_004895 | 2886.889  | 2059.405  | NM_017569 | 23152.146 | 28982.461 | AL137452  | 3154.57   | 3721.003  |
| U80018    | 1260.531  | 502.047   | NM_001456 | 2428.427  | 2399.76   | NM_004312 | 56972.934 | 60888.805 |
| NM_000717 | 2008.696  | 1133.347  | NM_002906 | 2143.183  | 2067.817  | NM_001347 | 13688.499 | 14189.586 |
| M33197    | 46495.359 | 43368.469 | AK024480  | 2376.782  | 2117.343  | AK024549  | 57956.277 | 60822.254 |
| NM_004845 | 1709.747  | 885.924   | Y13871    | 44466.25  | 46838.77  | NM_006335 | 54654.738 | 56423.906 |
| NM_007107 | 9382.09   | 5337.074  | NM_012134 | 502.815   | 627.535   | NM_007164 | 42687.41  | 39411.906 |
| NM_000047 | 447.531   | 235.139   | AL137725  | 16764.227 | 12455.747 | NM_000261 | 2489.979  | 2866.276  |
| M68874    | 420.426   | 336.221   | M33197    | 63510.41  | 64564.418 | NM_002606 | 2126.191  | 2283.187  |
| NM_006319 | 10568.592 | 6628.711  | AJ008151  | 38090.234 | 43445.113 | NM_002570 | 5680.878  | 6930.579  |
| NM_018226 | 5230.305  | 3645.735  | NM_005228 | 3422.95   | 4141.674  | NM_003183 | 5206.651  | 5637.813  |
| NM_004605 | 3986.594  | 3385.67   | NM_002354 | 2764.417  | 4260.759  | NM_001657 | 496.486   | 613.779   |
| NM_006660 | 9483.492  | 7015.077  | NM_004091 | 6476.823  | 4727.241  | NM_003585 | 2059.678  | 1979.108  |
| NM_006685 | 5104.784  | 4477.738  | X74070    | 62520.363 | 62133.703 | NM_019851 | 8261.762  | 7763.412  |
| AF121856  | 11052.502 | 12547.199 | AF027219  | 2603.639  | 2185.337  | NM_003235 | 909.435   | 839.455   |
| NM_006421 | 4276.019  | 4967.457  | NM_006333 | 9199.123  | 9699.587  | NM_014096 | 35684.996 | 32759.455 |
| NM_017457 | 14476.52  | 17771.662 | M33197    | 61215.957 | 61563.121 | NM_005706 | 23930.902 | 22638.553 |
| NM_003765 | 6951.653  | 5013.904  | NM_002898 | 25757.305 | 21441.264 | NM_001261 | 11795.174 | 12893.247 |
| NM_005865 | 1747.27   | 2106.543  | AK022749  | 35167.082 | 31626.988 | NM_001977 | 4656.908  | 6057.945  |
| M33197    | 55133.074 | 58413.66  | BF031409  | 22639.084 | 22898.408 | NM_007219 | 2873.416  | 3374.214  |
| NM_001201 | 568.148   | 301.711   | NM_007043 | 2870.496  | 3725.126  | AK026854  | 5884.241  | 5850.685  |
| NM_016618 | 1458.635  | 722.123   | BE378791  | 1378.478  | 1664.629  | NM_001265 | 31013.803 | 28386.123 |
| AB014568  | 3790.906  | 1954.456  | U94388    | 3129.258  | 3172.866  | NM_002506 | 6698.943  | 8073.454  |
| AK022238  | 754.629   | 363.873   | NM_012322 | 5851.871  | 7021.823  | NM_004906 | 9721.822  | 11097.878 |
| NM_012249 | 4412.804  | 2620.711  | M33197    | 60320.152 | 61824.328 | X98261    | 1042.662  | 1108.938  |
| AK022546  | 7793.965  | 4924.273  | NM_004889 | 53694.816 | 57781.055 | NM_012447 | 31534.168 | 28475.684 |
| NM_014067 | 7361.324  | 5124.697  | AK025314  | 10911.701 | 11982.395 | NM_006366 | 4580.378  | 4781.684  |
| NM_002914 | 7836.667  | 7927.16   | NM_002109 | 6301.846  | 6769.481  | AK027013  | 41214.176 | 45102.004 |
| NM_006541 | 1096.485  | 933.32    | NM_002453 | 22717.229 | 23416.604 | NM_001344 | 45256.18  | 42288.031 |
| M33197    | 50751.273 | 44072.922 | AK000780  | 55112.637 | 57529.648 | NM_018294 | 5175.34   | 4857.706  |
| NM_005705 | 3087.258  | 2249.757  | M33197    | 62276.012 | 57393.371 | AL389934  | 24208.447 | 22238.309 |
| NM_004325 | 3590.254  | 2888.011  | NM_000131 | 1772.862  | 2272.68   | NM_004330 | 11537.653 | 10358.281 |
| NM_004581 | 7619.418  | 7547.043  | NM_001836 | 475.417   | 552.988   | AF151802  | 20681.813 | 18140.369 |
| NM_007105 | 48976.805 | 57536.313 | M64714    | 919.089   | 1151.749  | AB006746  | 3861.54   | 3267.965  |
| NM_015921 | 53061.035 | 49092.816 | AK026043  | 2764.016  | 2017.717  | NM_006495 | 11943.77  | 13321.4   |
| AB040900  | 34692.336 | 45888.445 | NM_005006 | 10634.247 | 9826.157  | AB023233  | 6120.291  | 6383.759  |
| NM_001080 | 8501.354  | 6212.704  | AK027033  | 2792.102  | 2607.781  | AL133071  | 1286.547  | 1432.789  |
| NM_001482 | 1380.882  | 831.309   | NM_000106 | 17107.84  | 17377.715 | NM_004365 | 11284.493 | 11198.85  |
| NM_003118 | 410.625   | 425.528   | NM_003000 | 24112.689 | 17008.344 | NM_004370 | 1827.528  | 1606.568  |
| L02922    | 21675.242 | 20773.184 | NM_002495 | 26776.506 | 23506.92  | AB040898  | 4728.457  | 3489.483  |
| NM_003154 | 614.481   | 539.361   | M33197    | 57559.07  | 61610.496 | NM_016155 | 17752.844 | 16601.508 |
| AK023459  | 7226.508  | 4265.91   | NM_016284 | 5456.597  | 5958.767  | NM_001224 | 26301.93  | 23576.469 |
| U13022    | 1910.905  | 1483.606  | NM_014593 | 8525.878  | 8269.981  | NM_017811 | 16751.707 | 21087.883 |
| R23251    | 19981.758 | 11614.884 | NM_006833 | 23328.439 | 24637.641 | NM_001565 | 8597.254  | 11144.188 |
| AA702640  | 4013.132  | 3061.568  | NM_012257 | 2835.118  | 3634.412  | NM_004131 | 2470.039  | 2651.444  |
| T68583    | 2343.125  | 2187.646  | U37690    | 54664.988 | 55888.16  | AK023284  | 2628.054  | 2653.54   |
| AA481944  | 3899.683  | 3164.721  | NM_005120 | 1565.224  | 2272.773  | AF106069  | 724.678   | 718.39    |
| AF038440  | 674.753   | 470.104   | AB029012  | 38129.297 | 44006.48  | NM_005101 | 13657.158 | 12249.161 |
| M31158    | 6758.013  | 4779.299  | M33197    | 61578.621 | 60933.727 | NM_004205 | 670.523   | 501.64    |
| D42108    | 1601.364  | 1163.135  | AJ010278  | 566.924   | 915.702   | AF130060  | 63190.988 | 62398.082 |
| BG700922  | 2181.841  | 1951.643  | NM_006299 | 3078.812  | 3612.193  | NM_007057 | 53978.043 | 48288.734 |



|           |           |           |             |           |           |           |           |           |
|-----------|-----------|-----------|-------------|-----------|-----------|-----------|-----------|-----------|
| AI366068  | 3096.827  | 3688.423  | NM_005568   | 2485.108  | 2080.033  | NM_000177 | 6191.569  | 5844.815  |
| N57553    | 19462.855 | 25820.488 | NM_018167   | 1211.246  | 1459.221  | NM_003387 | 41847.703 | 38370.59  |
| M33197    | 51910.59  | 67821.922 | AK024149    | 2233.148  | 2894.955  | U60665    | 6455.658  | 5606.355  |
| NM_016545 | 7740.404  | 15792.433 | M33197      | 59811.777 | 58066.203 | NM_005507 | 62189.172 | 61146.07  |
| NM_001440 | 61580.188 | 46760.328 | M33197      | 62428.402 | 70188.633 | AY014403  | 3971.609  | 3709.513  |
| NM_022173 | 8000.997  | 4753.281  | AJ011129    | 32401.426 | 37855.367 | NM_006912 | 39603.797 | 43947.297 |
| AB040970  | 6204.041  | 3564.304  | NM_001039   | 1418.988  | 1766.799  | X12534    | 9463.913  | 9763.438  |
| NM_018330 | 4109.792  | 2222.66   | NM_006387   | 6970.738  | 7867.132  | NM_018367 | 2118.611  | 2478.813  |
| AB023222  | 2737.202  | 1623.606  | NM_005646   | 5297.267  | 5197.964  | NM_001363 | 24214.742 | 22269.857 |
| AB033088  | 9943.618  | 5654.183  | NM_006639   | 4186.936  | 4070.269  | NM_014323 | 14244.532 | 13070.118 |
| M33197    | 47742.801 | 37764.246 | NM_001692   | 2133.099  | 2005.09   | NM_003205 | 3279.017  | 3832.933  |
| U50342    | 42416.672 | 25209.521 | BI767871    | 20136.736 | 16552.143 | AB002324  | 5210.066  | 5111.901  |
| NM_000295 | 2184.373  | 1330.524  | AA418907    | 3906.152  | 3981.867  | AL359938  | 1215.259  | 1288.936  |
| NM_000716 | 1414.077  | 984.491   | M65291      | 1030.815  | 1016.182  | AK026231  | 3901.322  | 3946.595  |
| AF026932  | 748.52    | 287.468   | AA115473    | 11318.141 | 11835.206 | NM_002140 | 45956.461 | 41579.121 |
| AF103795  | 1719.177  | 1150.016  | AA872397    | 15463.382 | 18923.73  | NM_020143 | 13639.076 | 13153.718 |
| NM_006215 | 556.919   | 479.607   | M24283      | 10656.44  | 11996.517 | NM_012465 | 9058.35   | 8882.251  |
| M33197    | 43671.535 | 29540.766 | AA709414    | 5048.753  | 6200.769  | NM_005131 | 4568.157  | 4278.396  |
| NM_007024 | 4454.561  | 3154.728  | D12676      | 9635.714  | 10623.367 | NM_007056 | 6902.225  | 6384.668  |
| NM_013231 | 1095.263  | 960.441   | NM_000939   | 51647.961 | 52224.07  | AF083383  | 3909.219  | 5130      |
| NM_012106 | 6795.036  | 6246.221  | NM_004295   | 63247.027 | 60078.418 | NM_006925 | 7771.281  | 6990.167  |
| NM_006254 | 5378.602  | 7058.472  | H-X 02812 I | 4352.045  | 4850.463  | NM_004890 | 59380.848 | 63362.945 |
| X95425    | 773.546   | 1819.116  | U75898      | 15022.07  | 14846.922 | AK023181  | 16062.163 | 20221.943 |
| NM_004422 | 3601.002  | 1986.284  | M29039      | 2393.773  | 2585.544  | NM_004294 | 18682.08  | 17042.279 |
| AY009399  | 23617.393 | 18242.666 | M33197      | 54138.18  | 57839.172 | NM_005051 | 50254.57  | 41104.676 |
| NM_004895 | 2509.059  | 1198.977  | NM_007259   | 1804.055  | 2056.186  | NM_001968 | 44819.566 | 46242.285 |
| M33197    | 58104.66  | 66729.227 | NM_018402   | 1573.494  | 1675.733  | AF264627  | 58993.914 | 59912     |
| M95610    | 32745.402 | 39836.594 | NM_018009   | 3988.483  | 4571.944  | NM_018130 | 24029.645 | 28183.912 |
| NM_000717 | 1943.684  | 994.369   | AK075081    | 5349.131  | 6100.55   | AF085878  | 4792.114  | 4868.745  |
| M33197    | 45153.379 | 32477.824 | NM_000895   | 13284.912 | 13631.242 | AB006630  | 2865.261  | 2335.738  |
| NM_004845 | 1510.363  | 821.996   | NM_003820   | 60688.863 | 63329.168 | NM_004453 | 4703.537  | 4761.913  |
| NM_007107 | 8876.813  | 5203.989  | NM_015915   | 13952.585 | 13146.985 | NM_016229 | 27469.635 | 29151.574 |
| M68874    | 283.937   | 222.676   | M33197      | 56215.563 | 63695.395 | NM_018244 | 9615.105  | 10733.289 |
| NM_006319 | 9348.349  | 5402.776  | NM_016518   | 28965.885 | 27537.734 | NM_002492 | 54941.199 | 58104.902 |
| NM_018226 | 5053.436  | 3520.083  | NM_006185   | 50923.625 | 52855.461 | AB046855  | 1644.07   | 1856.077  |
| NM_004605 | 4082.148  | 2298.054  | NM_014800   | 4907.85   | 5961.34   | NM_005642 | 10808.29  | 12140.301 |
| NM_006660 | 10227.997 | 6078.646  | NM_001557   | 1807.376  | 2397.442  | NM_018105 | 3501.951  | 2886.217  |
| NM_006685 | 4320.835  | 3535.097  | AF147311    | 8199.623  | 11823.088 | AK023452  | 15194.886 | 15589.552 |
| NM_012139 | 4782.081  | 4276.392  | NM_002131   | 52358.387 | 56762.434 | AF155065  | 881.795   | 962.759   |
| AF121856  | 9174.333  | 7697.04   | NM_017927   | 9546.803  | 12253.158 | NM_000332 | 2079.19   | 1714.737  |
| NM_006421 | 4531.187  | 11705.048 | M33197      | 62033.242 | 61171.676 | AK022215  | 13179.222 | 12959.486 |
| NM_017457 | 15982.056 | 19393.49  | NM_001203   | 8309.288  | 10635.722 | U90305    | 3826.754  | 3943.244  |
| NM_003765 | 8749.583  | 10033.151 | NM_004799   | 48760.832 | 53263.43  | NM_001527 | 39991.313 | 33602.359 |
| NM_005868 | 2125.782  | 989.101   | NM_002039   | 736.922   | 444.784   | AK025269  | 44332.188 | 53371.117 |
| M33197    | 56366.859 | 64639.066 | NM_014047   | 29759.881 | 28578.934 | NM_001438 | 1837.115  | 2384.565  |
| NM_018202 | 48263.168 | 46448.824 | AK022901    | 3905.851  | 3905.321  | AB040971  | 3206.874  | 3107.13   |
| AB023197  | 10982.18  | 7999.478  | NM_001508   | 851.048   | 802.911   | NM_006562 | 17766.928 | 16902.377 |
| AB014568  | 3343.258  | 1434.556  | AF037332    | 7120.097  | 9717.362  | X65665    | 1188.727  | 1583.902  |
| AK022238  | 421.147   | 241.247   | NM_020151   | 18383.219 | 24329.346 | NM_003112 | 3706.678  | 3486.559  |
| NM_012249 | 3572.991  | 2120.944  | NM_005891   | 24887.65  | 29835.982 | AL080170  | 7278.182  | 9662.912  |
| AK022546  | 6629.117  | 4502.931  | NM_001645   | 2040.555  | 2810.9    | AB039903  | 11967.429 | 16107.078 |
| NM_014067 | 6237.92   | 3721.632  | NM_003956   | 3611.604  | 4768.718  | NM_000542 | 55541.938 | 58125.602 |
| NM_002914 | 7512.149  | 4172.37   | M33197      | 61413.543 | 62531.281 | NM_014625 | 984.728   | 1117.176  |

|           |           |           |           |           |           |           |           |           |
|-----------|-----------|-----------|-----------|-----------|-----------|-----------|-----------|-----------|
| NM_02038E | 2143.732  | 1519.957  | NM_00350C | 13268.795 | 14919.824 | NM_006851 | 3353.476  | 4178.583  |
| NM_014877 | 712.021   | 606.612   | NM_014317 | 4430.56   | 5873.711  | AK001560  | 5314.781  | 5721.023  |
| NM_006541 | 1347.308  | 920.363   | L09234    | 20699.258 | 25870.752 | AB001328  | 4029.289  | 4635.599  |
| M33197    | 48195.266 | 50861.824 | NM_000059 | 1743.17   | 1883.025  | NM_00094E | 761.023   | 1086.807  |
| NM_00570E | 2660.967  | 1838.171  | AK026740  | 1676.686  | 2024.128  | X00588    | 14553.373 | 17210.813 |
| NM_00432E | 3247.058  | 2297.336  | NM_017881 | 8969.566  | 11020.062 | AI359037  | 55255.859 | 59279.977 |
| NM_004581 | 5091.613  | 3904.341  | NM_01889E | 3170.726  | 4528.234  | J04513    | 1838.084  | 1958.048  |
| NM_006817 | 21504.531 | 13858.136 | AF069307  | 4062.263  | 5253.417  | BI754285  | 4559.691  | 3686.385  |
| NM_00710E | 35182.406 | 27679.957 | U92978    | 4476.475  | 6378.054  | X15998    | 23621.828 | 21802.129 |
| NM_015921 | 42809.934 | 50600.406 | NM_018034 | 13302.689 | 16354.69  | M76482    | 1547.467  | 1631.808  |
| AB040900  | 37528.504 | 34000.199 | M33197    | 57913.871 | 59278.418 | X17519    | 622.667   | 809.844   |
| NM_00108C | 10341.708 | 12412.369 | AB037831  | 5701.294  | 7692.027  | NM_00188E | 10299.338 | 9959.032  |
| NM_00148E | 1722.882  | 3733.403  | NM_01210E | 24005.613 | 27025.539 | NM_00462E | 9193.401  | 10020.304 |
| U80018    | 1333.169  | 3475.309  | AL122077  | 31781.721 | 36432.203 | L31785    | 3812.838  | 4401.599  |
| NM_001797 | 1686.576  | 631.964   | NM_01463E | 2928.833  | 2761.429  | H-M 69043 | 25683.637 | 25620.02  |
| NM_003154 | 378.582   | 312.251   | NM_00642E | 2692.58   | 2445.673  | AF077374  | 4846.719  | 4063.328  |
| AK023459  | 6583.257  | 3151.703  | BE789195  | 618.24    | 856.199   | U43901    | 1839.56   | 1699.069  |
| U13022    | 1785.934  | 1033.148  | NM_01694E | 1450.583  | 1353.903  | X59065    | 4662.024  | 4195.125  |
| R23251    | 20533.043 | 11053.661 | M33197    | 58000.504 | 59116.645 | M59828    | 43829.758 | 39499.539 |
| AA702640  | 3500.665  | 2257.077  | NM_00532E | 42169.727 | 49383.027 | NM_00216E | 8567.575  | 9771.75   |
| T68583    | 1827.98   | 1327.017  | NM_00728E | 1229.424  | 571.62    | NM_01565E | 1346.095  | 1818.883  |
| AA481944  | 3215.522  | 2410.809  | NM_01406E | 3424.35   | 3384.886  | NM_00058E | 6330.447  | 8908.035  |
| AF038440  | 645.551   | 455.921   | AB035130  | 5390.65   | 5894.616  | NM_01654E | 35571.637 | 43152.27  |
| M31158    | 6387.642  | 4531.82   | NM_00335E | 4788.743  | 5765.702  | AF309653  | 8926.455  | 8326.687  |
| H00742    | 722.563   | 348.573   | M33197    | 59036.441 | 54397.031 | NM_00262C | 58474.496 | 59498.422 |
| D42108    | 1609.003  | 1235.833  | AF119917  | 1186.973  | 1771.437  | S79267    | 3202.253  | 3250.796  |
| BG700922  | 2305.316  | 5124.867  | NM_01791E | 2560.942  | 2425.615  | NM_00181E | 1907.406  | 1816.634  |
| AI366068  | 3077.241  | 4510.878  | AL050097  | 1078.254  | 1106.391  | NM_01489E | 4488.071  | 5544.291  |
| BG565837  | 316.362   | 541.461   | AK021513  | 500.198   | 590.506   | NM_00363C | 13215.846 | 14167.328 |
| N57553    | 18469.463 | 15858.848 | NM_00357E | 5629.985  | 6545.469  | NM_00004E | 7935.144  | 7761.718  |
| M33197    | 49636.121 | 61767.719 | AL049283  | 3048.611  | 3598.286  | NM_00321E | 7403.741  | 7267.29   |
| NM_01654E | 5913.533  | 7800.32   | M33197    | 60508.551 | 56230.461 | NM_00670E | 17848.709 | 18900.344 |
| NM_00144C | 46596.781 | 59633.965 | NM_002401 | 57536.375 | 57816.348 | NM_00061E | 47700.688 | 46025.188 |
| NM_001201 | 484.741   | 1399.602  | NM_001274 | 4667.403  | 4988.293  | NM_004257 | 50396.074 | 48136.719 |
| NM_01661E | 1328.049  | 635.161   | NM_00391E | 789.695   | 652.431   | NM_002844 | 417.256   | 836.473   |
| NM_00071E | 893.784   | 625.699   | NM_002227 | 4518.432  | 3379.373  | NM_00068E | 6215.17   | 6677.586  |
| AF026932  | 624.351   | 570.991   | NM_00719E | 2708.983  | 2758.838  | NM_00362E | 12959.061 | 12835.656 |
| AF103795  | 1711.086  | 769.273   | AB002301  | 778.168   | 834.486   | NM_005901 | 11702.366 | 12456.847 |
| NM_00621E | 467.507   | 343.089   | AB014530  | 18507.723 | 18001     | NM_00424E | 20773.541 | 21405.967 |
| M33197    | 48092.109 | 44175.066 | M33197    | 59626.398 | 57708.852 | NM_00095E | 776.525   | 846.017   |
| NM_007024 | 4089.637  | 2590.199  | NM_00598E | 9465.55   | 10220.203 | NM_01906E | 436.4     | 535.387   |
| NM_013231 | 722.028   | 487.955   | AB014607  | 12817.394 | 12220.675 | NM_00491C | 4747.296  | 4893.105  |
| NM_01210E | 5944.698  | 4496.221  | AF134401  | 1572.223  | 1901.155  | AB013452  | 4483.48   | 4895.353  |
| NM_006254 | 4813.618  | 3890.852  | NM_00103E | 2021.203  | 2061.064  | M93107    | 10241.721 | 11762.721 |
| NM_00442E | 3316.527  | 2741.85   | NM_006387 | 8157.634  | 10181.966 | BC001479  | 29264.063 | 33239.441 |
| NM_01656E | 1371.309  | 807.075   | NM_00564E | 4593.47   | 5460.095  | NM_002461 | 61077.793 | 61707.859 |
| M33197    | 47733.293 | 38637.797 | NM_00663E | 2488.936  | 2736.025  | NM_005771 | 1920.795  | 1754.049  |
| AY009399  | 20302.422 | 13162.117 | NM_00169E | 947.789   | 847.661   | AB032986  | 60043.848 | 60989.508 |
| NM_00489E | 3151.942  | 2946.098  | BI767871  | 20022.699 | 18332.352 | NM_014324 | 49361.992 | 57400.508 |
| U59748    | 1509.226  | 4099.377  | AA418907  | 5950.587  | 7609.222  | NM_00345E | 24542.625 | 28304.205 |
| L32537    | 560.659   | 744.012   | M65291    | 1726.572  | 1989.799  | NM_01334E | 57490.387 | 60179.574 |
| NM_01430E | 9939.663  | 12243.253 | AA115473  | 15226.906 | 15700.079 | NM_006861 | 7188.381  | 7454.733  |
| M33197    | 53980.719 | 63430.313 | AA872397  | 16910.988 | 16206.251 | AK023142  | 4811.085  | 5130.707  |

|           |           |           |             |           |           |           |           |           |
|-----------|-----------|-----------|-------------|-----------|-----------|-----------|-----------|-----------|
| M95610    | 25736.846 | 19328.563 | M24283      | 12123.684 | 10922.27  | U61740    | 56057.137 | 58863.25  |
| L02922    | 18891.988 | 14526.571 | AA709414    | 4546.376  | 4912.465  | NM_006409 | 55492.652 | 59566.441 |
| NM_004045 | 19285.949 | 10002.636 | D12676      | 11062.42  | 10639.731 | AB049054  | 16757.727 | 17934.092 |
| NM_001891 | 995.982   | 784.531   | NM_000939   | 56785.773 | 58688.082 | NM_015071 | 5516.635  | 5604.663  |
| NM_012139 | 4259.01   | 3334.551  | NM_004295   | 58026.133 | 59859.902 | NM_013227 | 9364.147  | 11618.401 |
| AF121856  | 8858.789  | 5870.742  | H-X 02812 I | 5016.102  | 7582.939  | Z83803    | 2511.838  | 3104.124  |
| NM_006421 | 3512.319  | 2233.263  | U75898      | 14817.41  | 15604.539 | AF027205  | 49463.391 | 53003.266 |
| NM_017457 | 13638.846 | 9285.373  | M29039      | 2825.379  | 2720.692  | AF075012  | 3940.063  | 4900.952  |
| NM_003765 | 5350.921  | 2917.251  | M59815      | 678.992   | 800.496   | NM_001570 | 3264.084  | 3905.973  |
| NM_005865 | 1644.276  | 1439.985  | M33210      | 656.23    | 1124.696  | AB040672  | 14887.794 | 15670.358 |
| M33197    | 47368.68  | 36070.441 | M33197      | 2730.688  | 3131.44   | NM_002192 | 13237.135 | 12240.039 |
| NM_018202 | 39967.574 | 24048.674 | AB011146    | 5847.143  | 7006.319  | NM_005491 | 20845.963 | 20033.152 |
| AB023197  | 13895.576 | 26773.961 | NM_003679   | 539.634   | 624.41    | NM_003865 | 15968.972 | 16951.021 |
| NM_022173 | 8383.171  | 9391.752  | NM_018009   | 5455.11   | 5185.97   | AK025599  | 2153.38   | 2644.935  |
| AB040970  | 7162.465  | 8019.29   | AK075081    | 7372.513  | 9210.123  | X63417    | 6407.384  | 6487.4    |
| NM_018330 | 4271.165  | 4475.358  | NM_000895   | 15883.709 | 17255.732 | S94539    | 54914.883 | 55372.121 |
| AB023222  | 3191.621  | 2918.994  | NM_003820   | 61098.43  | 65789.609 | NM_018245 | 5838.76   | 7629.598  |
| AB033088  | 11202.632 | 21482.83  | NM_015915   | 13369.446 | 14151.56  | AK001695  | 21051.635 | 18667.445 |
| M33197    | 54175.605 | 66772.359 | M33197      | 63834.859 | 68227.727 | NM_017885 | 22094.053 | 21176.236 |
| U50342    | 61849.926 | 55364.527 | NM_016515   | 35709.383 | 39511.383 | NM_006252 | 8638.756  | 8086.722  |
| NM_000295 | 2178.078  | 2228.147  | NM_006185   | 56464.477 | 52398.188 | NM_001721 | 2265.739  | 3000.415  |
| NM_001080 | 10700.963 | 11480.655 | NM_014800   | 6768.856  | 6649.976  | NM_014397 | 24868.117 | 33076.688 |
| NM_001482 | 1716.411  | 1341.318  | NM_001557   | 2465.513  | 2873.815  | AB023182  | 6783.453  | 6935.015  |
| NM_001215 | 1831.692  | 1183.981  | AF147311    | 10212.595 | 11216.494 | NM_003607 | 3039.707  | 3087.915  |
| U80018    | 1211.474  | 620.435   | NM_002131   | 50350.371 | 58489.766 | NM_006575 | 6169.829  | 6454.463  |
| NM_000717 | 1696.921  | 1142.687  | NM_017927   | 9818.558  | 10725.979 | NM_013254 | 7907.939  | 10112.759 |
| M33197    | 46499.52  | 40978.121 | M33197      | 60085.801 | 64792.875 | NM_000437 | 46409.398 | 49326.316 |
| NM_004845 | 1212.032  | 588.604   | NM_001203   | 8972.072  | 11653.607 | AB046819  | 51664.426 | 54840.59  |
| NM_007107 | 7711.392  | 5696.207  | NM_004799   | 54708.832 | 51384.375 | NM_006090 | 22728.117 | 26320.414 |
| M68874    | 235.321   | 418.848   | NM_002039   | 857.86    | 1138.291  | NM_002900 | 41180.645 | 43800.109 |
| NM_006319 | 8051.952  | 5210.165  | NM_014047   | 25424.826 | 41766.805 | NM_000542 | 42633.75  | 38608.277 |
| NM_018225 | 2392.189  | 1725.898  | AK022901    | 3916.091  | 5115.274  | NM_014625 | 856.451   | 770.502   |
| NM_004605 | 3236.823  | 2432.184  | NM_001505   | 898.752   | 1525.183  | NM_006851 | 3668.974  | 2749.811  |
| NM_006660 | 10975.721 | 10756.378 | AF037332    | 7551.911  | 7739.716  | AK001560  | 5301.597  | 3925.785  |
| NM_004727 | 422.337   | 675.804   | NM_014571   | 726.962   | 631.09    | AB001328  | 4717.624  | 4370.331  |
| NM_006685 | 4276.936  | 4957.147  | M33197      | 59021.777 | 63284.191 | NM_000945 | 816.655   | 666.067   |
| M33197    | 60421.164 | 44181.637 | AJ011129    | 34129.48  | 34979     | H99588    | 2298.814  | 1650.32   |
| NM_016545 | 4598.622  | 3274.677  | NM_001645   | 2272.476  | 2556.313  | X00588    | 12735.505 | 13018.316 |
| NM_001440 | 40986.23  | 20495.992 | NM_003956   | 3751.453  | 3889.849  | AI359037  | 51634.656 | 56320.051 |
| NM_001201 | 479.408   | 321.846   | M33197      | 59414.094 | 68506.703 | J04513    | 1439.49   | 1896.875  |
| NM_016615 | 1321.474  | 739.793   | NM_003500   | 13345.917 | 20154.889 | BI754285  | 5216.1    | 6081.623  |
| AB014568  | 3011.727  | 2071.323  | NM_014317   | 5647.113  | 7918.286  | X15998    | 19873.246 | 19111.561 |
| AK022238  | 491.499   | 292.368   | L09234      | 23732.469 | 32255.141 | M76482    | 1251.804  | 1068.786  |
| NM_012249 | 3164.945  | 2104.641  | NM_000059   | 1983.701  | 2209.589  | X17519    | 650.786   | 726.608   |
| AK022546  | 5928.354  | 3875.858  | AK026740    | 1797.521  | 2422.223  | NM_001883 | 8417.886  | 8737.373  |
| NM_014067 | 4900.263  | 3716.841  | NM_017881   | 9244.466  | 10256.356 | NM_004625 | 9650.512  | 12069.874 |
| NM_002914 | 6321.36   | 4960.847  | NM_018896   | 4447.986  | 5208.681  | L31785    | 3670.689  | 3999.526  |
| NM_020385 | 1496.944  | 1035.587  | AF069307    | 4071.042  | 3940.103  | H-M 69043 | 22348.629 | 23592.75  |
| NM_014877 | 783.115   | 623.938   | U92978      | 4537.446  | 6182.428  | AF077374  | 4251.675  | 4098.45   |
| NM_006541 | 1302.939  | 1062.938  | NM_018034   | 12397.868 | 22856.541 | U43901    | 2092.702  | 1709.472  |
| M33197    | 51953.766 | 58835.59  | M33197      | 55685.684 | 56998.227 | X59065    | 5196.611  | 5415.539  |
| NM_005705 | 4261.505  | 4815.353  | AB037831    | 7840.11   | 8539.092  | M59828    | 40471     | 41122.543 |
| NM_004325 | 5998.62   | 6441.613  | NM_012103   | 19831.691 | 14144.191 | AJ010482  | 5980.532  | 6608.83   |

|           |           |           |             |           |           |           |           |           |
|-----------|-----------|-----------|-------------|-----------|-----------|-----------|-----------|-----------|
| NM_004581 | 6995.452  | 7896.313  | AL122077    | 21468.609 | 19220.205 | NM_000896 | 2169.476  | 2433.526  |
| NM_015921 | 32989.906 | 15243.44  | NM_014632   | 1819.589  | 2389.326  | NM_016546 | 24751.037 | 22361.275 |
| AB040900  | 30335.945 | 28556.699 | NM_006422   | 2243.877  | 2662.321  | AF309653  | 7847.246  | 5263.534  |
| CY3Cy5    | 2095.479  | 219.09    | NM_016946   | 1375.364  | 1921.503  | NM_002620 | 55612.098 | 51908.766 |
| AF086225  | 4021.04   | 3426.847  | M33197      | 57744.691 | 59007.328 | S79267    | 3653.204  | 2911.861  |
| NM_005844 | 1022.628  | 1189.816  | NM_007259   | 1615.756  | 1889.786  | NM_001816 | 2292.599  | 1841.344  |
| AK024941  | 6016.187  | 5631.358  | NM_018402   | 1817.031  | 2127.671  | NM_003784 | 55860.449 | 56435.117 |
| AB075853  | 943.036   | 1003.483  | NM_014069   | 4634.012  | 4591.827  | NM_000195 | 54880.82  | 56843.918 |
| AL390152  | 1048.217  | 1248.413  | AB035130    | 5170.046  | 4879.88   | NM_005445 | 25769.115 | 22469.432 |
| AK026721  | 4598.87   | 4244.714  | NM_003359   | 4588.862  | 5214.451  | NM_014895 | 4148.908  | 4184.985  |
| AK023027  | 530.866   | 665.344   | M33197      | 61705.34  | 60101     | NM_003630 | 15380.759 | 16629.18  |
| AK025598  | 1860.673  | 1952.468  | AF119917    | 1807.762  | 2336.066  | NM_000046 | 9872.833  | 8765.35   |
| AB002348  | 14426.495 | 14215.693 | NM_017915   | 2548.017  | 2549.241  | NM_003219 | 7307.067  | 4933.718  |
| SR2       | 44454.641 | 43471.504 | AL050097    | 1048.298  | 805.011   | NM_006709 | 16076.442 | 12309.783 |
| SR4       | 9876.119  | 12803.929 | NM_003579   | 5906.745  | 6221.707  | NM_000612 | 45201.199 | 33400.754 |
| SR6       | 1341.405  | 1855.824  | AL049283    | 2998.728  | 2620.095  | NM_004257 | 51620.664 | 37478.105 |
| SR8       | 4827.382  | 19522.184 | M33197      | 60615.113 | 56498.184 | NM_000683 | 6653.846  | 6676.526  |
| SR10      | 16804.643 | 7419.563  | NM_002401   | 57344.816 | 58575.242 | NM_003629 | 12440.324 | 9791.505  |
| CY3Cy5    | 2530.272  | 197.22    | NM_001274   | 3724.607  | 5813.488  | NM_005901 | 11607.162 | 10417.463 |
| AK025948  | 1871.291  | 2195.872  | NM_002227   | 3863.76   | 3279.678  | NM_004248 | 23196.068 | 20404.137 |
| AK000674  | 638.913   | 602.361   | NM_007199   | 1805.382  | 2439.085  | NM_000955 | 696.56    | 837.55    |
| AJ238555  | 1523.417  | 1872.828  | AB014530    | 9972.081  | 11260.498 | AL080170  | 8809.049  | 9334.013  |
| L23850    | 381.215   | 297.592   | M33197      | 61525.867 | 60715.191 | AB039903  | 13895.063 | 13641.106 |
| AL353948  | 3443.591  | 3927.448  | NM_005989   | 7118.245  | 7781.57   | M93107    | 10722.527 | 8606.771  |
| M33197    | 71670.391 | 62984.992 | AB014607    | 12944.36  | 13384.87  | BC001479  | 28400.1   | 21802.895 |
| AL050088  | 793.905   | 762.212   | AF134401    | 1885.875  | 3045.69   | NM_002461 | 58533.512 | 58809.785 |
| AK024939  | 4954.125  | 4249.635  | NM_020151   | 19716.484 | 24447.682 | NM_005771 | 2406.892  | 1774.169  |
| AK001561  | 742.452   | 733.413   | NM_005891   | 26869.883 | 32518.545 | AB032986  | 58859.051 | 58302.434 |
| AB007880  | 2302.167  | 1771.091  | NM_006387   | 7472.732  | 8834.59   | NM_017528 | 59556.035 | 61625.184 |
| AK024950  | 462.549   | 505.717   | NM_005646   | 6025.69   | 5883.833  | NM_016032 | 11925.891 | 8894.377  |
| M33197    | 65237.605 | 63189.906 | NM_006639   | 4434.138  | 4664.865  | NM_014324 | 57499.617 | 61146.961 |
| NM_014146 | 18389.807 | 15678.323 | NM_001692   | 1801.267  | 1888.723  | NM_001687 | 56696.871 | 53718.879 |
| AF147356  | 903.706   | 1205.954  | BI767871    | 20872.729 | 17213.596 | AK026374  | 6842.532  | 6934.258  |
| NM_018843 | 2082.349  | 1551.255  | AA418907    | 5204.968  | 4328.105  | NM_003455 | 16096.768 | 20554.402 |
| AK096204  | 584.035   | 426.114   | M65291      | 1324.801  | 1331.351  | NM_013345 | 58325.793 | 59563.668 |
| AK024275  | 640.81    | 620.78    | AA115473    | 13621.383 | 12055.583 | NM_006861 | 6706.966  | 5090.3    |
| AL049461  | 1064.837  | 1117.402  | AA872397    | 17392.359 | 14721.312 | AK023142  | 4239.406  | 3001.851  |
| M33197    | 67604.969 | 63495.688 | M24283      | 9954.797  | 8404.004  | U61740    | 60907.27  | 57277.066 |
| AL109782  | 10312.585 | 11777.64  | AA709414    | 4448.62   | 4353.667  | NM_006409 | 59105.191 | 58146.023 |
| M33197    | 61211.547 | 62573.547 | D12676      | 11024.743 | 10833.892 | AB049054  | 18513.834 | 15713.276 |
| AK026259  | 6679.189  | 6591.534  | NM_000939   | 50623.363 | 55810.75  | NM_015071 | 4345.865  | 3758.364  |
| NM_018126 | 3156.997  | 2839.361  | NM_004295   | 56052.168 | 51357.887 | NM_013227 | 12009.016 | 8400.255  |
| AK024506  | 6744.925  | 6000.234  | H-X 02812 I | 4201.376  | 4599.354  | Z83803    | 2121.248  | 1771.504  |
| NM_014179 | 2448.983  | 2557.908  | U75898      | 8639.543  | 8110.378  | AF027205  | 52925.582 | 48428.734 |
| AF086326  | 11352.343 | 10736.803 | M29039      | 1482.175  | 1608.32   | AF075012  | 4193.972  | 3554.671  |
| M33197    | 60331.902 | 63296.305 | M33197      | 2856.133  | 3239.974  | NM_001570 | 2961.698  | 2400.782  |
| AL080057  | 1001.842  | 692.505   | AB011146    | 7094.206  | 8640.765  | NM_015658 | 1940.576  | 1104.417  |
| M33197    | 65619.68  | 64692     | NM_003679   | 504.082   | 830.895   | NM_000585 | 9052.826  | 7585.712  |
| AK024470  | 2794.358  | 2386.83   | NM_005326   | 37862.355 | 40848.469 | NM_005491 | 20242.754 | 11821.283 |
| NM_017935 | 1363.994  | 920.73    | NM_007286   | 706.188   | 1126.922  | NM_003865 | 11854.125 | 7078.914  |
| NM_004226 | 7158.086  | 6574.984  | NM_014800   | 6400.213  | 5824.535  | AK025599  | 2683.942  | 2557.213  |
| AL137436  | 423.206   | 467.409   | NM_001557   | 2358.704  | 2322.419  | X63417    | 7486.612  | 7470.434  |
| AK023400  | 1041.196  | 1064.633  | AF147311    | 11592.003 | 12610.648 | S94539    | 54597.625 | 59649.793 |

|           |           |           |           |           |           |           |           |           |
|-----------|-----------|-----------|-----------|-----------|-----------|-----------|-----------|-----------|
| M33197    | 62407.348 | 63897.633 | NM_002131 | 49708.605 | 57111.246 | S45570    | 850.972   | 1064.762  |
| AF056430  | 1115.234  | 1013.885  | NM_017927 | 10706.955 | 10747.988 | NM_006402 | 7779.061  | 7510.486  |
| NM_014906 | 710.849   | 753.251   | M33197    | 57689.813 | 62050.324 | NM_005785 | 7046.614  | 5780.676  |
| AF009291  | 1370.249  | 1245.014  | NM_001203 | 9600.328  | 10170.406 | NM_018248 | 6785.717  | 5733.85   |
| M33197    | 62331.219 | 63477.777 | NM_004799 | 57497.258 | 56222.832 | AK001695  | 22390.143 | 24286.025 |
| AK021662  | 652.441   | 868.095   | NM_006733 | 946.449   | 919.129   | NM_017886 | 20801.75  | 21244.861 |
| AK001038  | 2169.632  | 2904.524  | NM_002039 | 646.989   | 507.637   | NM_006252 | 7418.184  | 6524.054  |
| AK021469  | 1724.686  | 1642.239  | NM_014047 | 29112.141 | 26437.307 | NM_001721 | 2054.365  | 2130.949  |
| AK021706  | 443.413   | 494.784   | AK022901  | 4523.162  | 4822.596  | NM_014397 | 25393.352 | 26321.326 |
| AF085967  | 787.751   | 1022.405  | NM_001508 | 1069.202  | 1906.212  | AB023182  | 7208.693  | 7802.014  |
| NM_006179 | 1289.728  | 1439.368  | M33197    | 57247.836 | 59880.48  | NM_003607 | 3279.76   | 3738.592  |
| AL360165  | 6077.465  | 5105.194  | AF037332  | 7611.871  | 6820.454  | NM_006575 | 5818.528  | 5121.812  |
| M33197    | 67980.055 | 63819.648 | NM_006052 | 1534.227  | 1342.969  | NM_013254 | 8165.458  | 7186.667  |
| AJ008132  | 21759.994 | 19233.084 | AB040912  | 8842.758  | 9044.28   | NM_000437 | 50222.672 | 42595.211 |
| NM_005281 | 1666.552  | 1637.262  | NM_003871 | 2799.856  | 3330.127  | AB046819  | 55177.391 | 54640.145 |
| NM_005549 | 2147.042  | 1859.376  | NM_006243 | 4835.135  | 5973.613  | NM_006090 | 22878.373 | 21244.25  |
| AJ008115  | 13167.435 | 14402.256 | NM_007252 | 781.19    | 1075.163  | NM_002900 | 45617.574 | 35104.18  |
| AF083125  | 7685.646  | 5952.849  | M33197    | 58223.227 | 60910.512 | NM_004910 | 5678.703  | 4192.303  |
| U72851    | 803.5     | 1170.789  | AJ011129  | 26250.959 | 27971.016 | AB013452  | 4797.277  | 4015.387  |
| AK022970  | 1396.579  | 1459.063  | NM_001039 | 1224.748  | 956.616   | NM_006851 | 3122.033  | 2776.953  |
| AK026212  | 2553.919  | 2598.804  | NM_005738 | 866.529   | 925.259   | AK001560  | 4087.854  | 3106.112  |
| AF086222  | 1457.067  | 1849.176  | NM_014488 | 2983.497  | 2997.161  | AB001328  | 5416.128  | 4304.236  |
| AF143866  | 712.822   | 736.957   | NM_013389 | 18730.225 | 21264.734 | NM_000948 | 1130.454  | 1084.288  |
| AF086415  | 18302.025 | 19102.303 | AB014567  | 700.666   | 741.102   | H99588    | 3386.326  | 2927.333  |
| M33197    | 56059.465 | 51195.406 | AK022817  | 3802.829  | 4960.768  | X00588    | 11839.063 | 9121.427  |
| AK026859  | 639.108   | 523.955   | NM_018034 | 10298.723 | 10581.104 | AI359037  | 44269.371 | 41445.508 |
| D86961    | 2345.97   | 3520.102  | M33197    | 58743.063 | 63354.711 | J04513    | 1070.452  | 922.767   |
| AJ227896  | 920.965   | 1238.9    | AB037831  | 7598.922  | 7279.948  | BI754285  | 4539.172  | 4434.914  |
| L32841    | 13390.861 | 11848.74  | NM_012103 | 25296.682 | 23017.477 | X15998    | 20114.941 | 18424.973 |
| AK025371  | 717.656   | 529.125   | AL122077  | 37858.223 | 43394.293 | M76482    | 1653.006  | 1648.331  |
| M33197    | 68008.563 | 63960.516 | NM_014632 | 2934.907  | 3773.546  | X17519    | 869.356   | 630.95    |
| AF131770  | 9742.994  | 8724.993  | NM_006422 | 3158.015  | 3462.349  | NM_001883 | 10493.182 | 9801.749  |
| NM_006432 | 22321.178 | 22419.541 | BE789195  | 1091.71   | 1392.741  | NM_004628 | 10467.289 | 9699.205  |
| AF025441  | 4715.353  | 5139.761  | NM_016946 | 1586.641  | 1721.048  | L31785    | 4097.86   | 3896.276  |
| U62823    | 4809.265  | 4696.687  | M33197    | 57656.27  | 60521.887 | H-M 69043 | 19624.117 | 18349.871 |
| NM_003535 | 15224.612 | 13738.495 | NM_007259 | 1334.402  | 1432.205  | AF077374  | 3535.583  | 2763.845  |
| M33197    | 61967.191 | 63149.027 | NM_018402 | 1241.114  | 967.424   | U43901    | 2061.075  | 1673.172  |
| AK000852  | 9283.149  | 8447.677  | NM_018009 | 3250.993  | 3669.666  | X59065    | 4739.394  | 4149.795  |
| AF251188  | 8049.746  | 11536.323 | AK075081  | 3679.782  | 4680.497  | M59828    | 48381.48  | 40957.188 |
| AK026418  | 7981.111  | 9731.323  | NM_000895 | 14030.573 | 17490.088 | AJ010482  | 6581.474  | 6466.121  |
| AF086194  | 40287.223 | 40130.867 | NM_003820 | 53815.555 | 57198.684 | NM_000896 | 2676.086  | 2336.403  |
| AK026811  | 8185.634  | 9990.618  | NM_015915 | 13228.825 | 15665.135 | AB040672  | 16219.188 | 14874.96  |
| AL049973  | 786.814   | 1190.365  | M33197    | 62240.566 | 64658.637 | NM_002192 | 14091.328 | 9394.532  |
| NM_017743 | 2701.84   | 2584.724  | NM_016518 | 27721.488 | 35260.969 | NM_014895 | 3403.749  | 3172.1    |
| NM_000300 | 2370.275  | 2476.961  | NM_006185 | 49550.961 | 54288.168 | NM_003630 | 13191.353 | 12424.397 |
| M33197    | 59747.203 | 61237.816 | NM_005989 | 11537.68  | 11269.669 | NM_000046 | 7546.73   | 5493.158  |
| AV756917  | 10023.18  | 7871.982  | AB014607  | 17872.898 | 12694.552 | NM_003219 | 6759.239  | 4978.75   |
| NM_018380 | 9502.488  | 9594.634  | AF134401  | 2909.306  | 3624.424  | NM_006709 | 16293.392 | 11773.43  |
| AK001442  | 1421.629  | 1420.181  | NM_020151 | 19977.713 | 20963.4   | NM_000612 | 40371.234 | 33380.754 |
| NM_012070 | 3309.925  | 3110      | NM_005891 | 26620.014 | 27122.672 | NM_004257 | 26696.5   | 20174.891 |
| NM_019038 | 1363.983  | 1148.467  | NM_001645 | 2275.466  | 2031.904  | NM_002844 | 2687.965  | 3782.992  |
| NM_001351 | 978.19    | 1054.938  | NM_003956 | 3883.295  | 3630.858  | NM_000683 | 6530.494  | 6071.673  |
| M33197    | 58853.598 | 60408.352 | M33197    | 56962.957 | 61689.34  | NM_003625 | 13667.45  | 9850.726  |

|           |           |           |           |           |           |           |           |           |
|-----------|-----------|-----------|-----------|-----------|-----------|-----------|-----------|-----------|
| U92023    | 1105.001  | 1147.905  | NM_00350C | 13807.89  | 12853.015 | NM_005901 | 13222.064 | 11072.957 |
| U12129    | 2412.393  | 1891.21   | NM_014317 | 5478.188  | 6580.77   | NM_00424E | 23081.176 | 16489.404 |
| S81242    | 61229.215 | 62390.152 | L09234    | 16501.85  | 19992.33  | NM_00095E | 682.303   | 424.353   |
| AF230801  | 1198.764  | 1053.522  | NM_00005E | 1437.696  | 1585.521  | NM_00131E | 2853.633  | 1935.073  |
| AF075072  | 663.278   | 1044.409  | AK026740  | 1485.25   | 2168.768  | NM_00479E | 1274.003  | 924.918   |
| M33197    | 60019.785 | 61789.117 | NM_017881 | 7323.954  | 8158.968  | NM_00043E | 17630.854 | 14507.686 |
| U38442    | 1141.464  | 1180.824  | M33197    | 56848.93  | 53720.695 | NM_00184E | 53822.496 | 57288.563 |
| AF110136  | 711.737   | 899.024   | NM_017634 | 3278.93   | 3649.084  | NM_007281 | 702.714   | 567.947   |
| AK026706  | 1651.577  | 2049.083  | NM_00081E | 1173.052  | 1134.896  | AB017169  | 2893.867  | 2272.356  |
| AB007936  | 14945.649 | 19464.367 | NM_01889E | 2742.633  | 3459.153  | AL080170  | 9215.893  | 9023.726  |
| AF005258  | 769.619   | 547.993   | AJ300465  | 2830.248  | 3811.451  | AB039903  | 16887.424 | 14488.156 |
| NM_000887 | 597.094   | 457.385   | X86400    | 1970.649  | 3213.839  | NM_00054E | 52984.766 | 50853.91  |
| AF277292  | 369.391   | 375.315   | NM_00081C | 1692.253  | 2177.167  | NM_01462E | 1584.183  | 1112.613  |
| M33197    | 61864.406 | 60908.879 | AF069307  | 3527.436  | 4523.308  | NM_00582E | 3492.211  | 3198.915  |
| X99659    | 18390.721 | 17760.598 | M33197    | 56714.895 | 62935.785 | NM_00046E | 6724.442  | 7868.095  |
| NM_01541E | 12635.147 | 11009.985 | U92978    | 3774.74   | 3931.033  | NM_01590E | 25760.916 | 25651.381 |
| NM_002731 | 1064.096  | 913.899   | M33197    | 3560.956  | 3315.098  | AK022600  | 49714.723 | 48380.992 |
| NM_00389E | 4927.442  | 4413.63   | AB011146  | 7658.845  | 6779.849  | AK023142  | 3899.477  | 3743.959  |
| X99662    | 5848.037  | 5678.698  | NM_00532E | 40403.359 | 40150.25  | U61740    | 55836.047 | 57778.66  |
| NM_00347E | 17489.871 | 16589.891 | NM_01406E | 3302.145  | 2462.987  | NM_00640E | 59096.359 | 61502.281 |
| NM_01432E | 4869.821  | 5199.635  | AB035130  | 5372.845  | 4859.937  | AB049054  | 16975.465 | 17626.662 |
| M33197    | 59624.246 | 61956.406 | NM_00335E | 4354.821  | 3810.777  | NM_015071 | 5078.081  | 5387.742  |
| NM_01775E | 488.355   | 372.804   | M33197    | 56668.906 | 56415.707 | NM_013227 | 12820.472 | 8851.953  |
| NM_01245E | 572.895   | 695.319   | AF119917  | 1868.712  | 2003.204  | Z83803    | 2703.017  | 2145.809  |
| NM_00601E | 42676.645 | 30801.035 | NM_01791E | 2225.174  | 2208.076  | AF027205  | 50295.492 | 44020.664 |
| NM_00124E | 54706.105 | 41120.762 | AL050097  | 962.596   | 1059.903  | AF075012  | 4307.154  | 3729.981  |
| NM_014891 | 11027.737 | 13162.197 | NM_00357E | 5096.698  | 6090.312  | NM_00157C | 3469.447  | 2927.757  |
| NM_01339E | 5844.661  | 6493.706  | AL049283  | 2653.506  | 2754.066  | NM_01565E | 1902.197  | 1218.501  |
| NM_00345E | 403.954   | 681.9     | M33197    | 61061.957 | 53662.641 | NM_00058E | 7790.339  | 7174.521  |
| AF052692  | 1158.272  | 1882.285  | NM_002401 | 55397.516 | 59590.961 | NM_01654E | 32946.613 | 28572.367 |
| NM_00282C | 424.948   | 892.223   | NM_001274 | 3829.465  | 5410.544  | AF309653  | 10683.941 | 6000.35   |
| NM_00017E | 6352.416  | 5179.716  | NM_00391E | 709.933   | 1388.738  | NM_00262C | 52572.836 | 54909.969 |
| NM_00521E | 1152.659  | 960.946   | NM_002227 | 4113.423  | 4492.043  | S79267    | 5591.252  | 4611.301  |
| AF062739  | 1728.482  | 1307.17   | NM_00719E | 5053.348  | 6289.083  | NM_00181E | 3086.353  | 2652.95   |
| NM_00660E | 2317.978  | 2415.4    | AB002301  | 727.98    | 660.126   | NM_003784 | 57695.918 | 57970.617 |
| M33197    | 67498.57  | 64557.977 | AB014530  | 12468.727 | 13861.921 | NM_00019E | 60016.883 | 59013.051 |
| AL079314  | 5852.827  | 6355.376  | M33197    | 58709.363 | 63208.254 | NM_00544E | 36450.824 | 23605.523 |
| NM_00126C | 3119.286  | 3791.775  | CY3Cy5    | 3348.125  | 325.326   | AB046819  | 52123.32  | 49769.316 |
| NM_00195C | 7271.677  | 8043.986  | AK054960  | 26316.789 | 16271.103 | NM_00609C | 16420.236 | 17959.387 |
| AK026364  | 4294.755  | 4419.524  | L15344    | 1513.514  | 949.842   | NM_00290C | 24447.816 | 23456.611 |
| NM_018117 | 2788.123  | 3009.625  | AK024150  | 2087.06   | 1092.688  | NM_00491C | 4841.635  | 4687.879  |
| NM_00699E | 2833.152  | 2571.477  | AF070536  | 3004.309  | 1131.581  | AB013452  | 4602.541  | 4383.663  |
| NM_00628E | 4169.092  | 4460      | AK022297  | 1216.651  | 872.844   | M93107    | 10192.555 | 8913.893  |
| M33197    | 61483.418 | 62084.355 | U79300    | 2438.151  | 1525.181  | BC001479  | 33869.324 | 31819.23  |
| NM_004331 | 12224.197 | 14724.719 | AK025151  | 27414.762 | 13877.465 | NM_002461 | 58007.227 | 59313.664 |
| NM_01599E | 2082.667  | 2734.667  | AK025550  | 5407.105  | 3348.341  | NM_005771 | 2105.275  | 1908.088  |
| NM_01570E | 14445.521 | 15974.668 | AF088076  | 30971.576 | 19820.982 | AB032986  | 57470.977 | 63267.414 |
| AB018337  | 4034.495  | 4437.353  | AF086543  | 6883.254  | 3422.987  | NM_01752E | 59139.246 | 61218.156 |
| NM_01448E | 4102.47   | 5415.759  | AB046797  | 1166.418  | 760.235   | NM_01603E | 17777.738 | 23277.389 |
| AK025273  | 7776.468  | 8213.546  | AK002098  | 2489.46   | 1550.648  | NM_014324 | 51769.316 | 58216.582 |
| M33197    | 57668.242 | 59215.516 | AB011128  | 39955.324 | 25819.088 | NM_001687 | 54755.184 | 57435.32  |
| NM_001911 | 3743.844  | 3043.649  | AK026742  | 944.588   | 848.963   | AK026374  | 9085.696  | 8258.939  |
| NM_000537 | 649.801   | 717.144   | AK025074  | 5827.806  | 3597.421  | NM_00116E | 7293.979  | 7559.634  |

|           |           |           |           |           |           |           |           |           |
|-----------|-----------|-----------|-----------|-----------|-----------|-----------|-----------|-----------|
| NM_006503 | 2612.29   | 2401.761  | AK054960  | 29931.004 | 18217.447 | AK024648  | 50214.422 | 46959.152 |
| AB002321  | 2058.469  | 2007.557  | L15344    | 1627.057  | 1430.045  | NM_000719 | 1684.895  | 1692.434  |
| NM_002515 | 719.717   | 433.475   | SR1       | 76559.75  | 65741.172 | NM_003459 | 22152.398 | 25348.439 |
| M33197    | 7457.302  | 6816.023  | SR3       | 28981.041 | 26612.254 | AB032526  | 681.581   | 436.939   |
| AB020698  | 3593.329  | 3948.608  | SR5       | 4078.372  | 3160.719  | NM_000171 | 9467.264  | 10803.29  |
| U68382    | 12441.345 | 12554.022 | SR7       | 3066.32   | 24875.406 | AL354615  | 2931.015  | 2787.096  |
| NM_003969 | 15657.299 | 16010.831 | SR9       | 12747.504 | 2771.39   | NM_013349 | 59977.734 | 58726.902 |
| NM_004651 | 8499.235  | 7225.166  | CY3Cy5    | 3850.822  | 325.207   | NM_003705 | 13598.549 | 9736.455  |
| NM_003363 | 2073.367  | 1994.701  | U50524    | 551.814   | 258.16    | NM_006861 | 7914.053  | 6073.543  |
| AK022377  | 280.716   | 430.015   | U52050    | 926.167   | 516.7     | AJ010482  | 3044.25   | 2520.443  |
| M33197    | 53814.793 | 60644.055 | U73799    | 7887.295  | 3657.478  | NM_000899 | 1235.794  | 1186.916  |
| NM_017569 | 7251.156  | 9068.062  | Z36826    | 717.794   | 360.393   | AB040672  | 15162.876 | 12828.378 |
| NM_001456 | 3029.107  | 3723.139  | AK021668  | 44543.879 | 27520.502 | NM_002192 | 14404.921 | 11257.43  |
| NM_002906 | 2512.798  | 1837.47   | AF086148  | 34171.398 | 22275.66  | NM_005491 | 21651.732 | 15606.995 |
| AK024480  | 1441.664  | 1528.604  | AK002195  | 562.954   | 735.084   | NM_003869 | 15414.191 | 12226.563 |
| Y13871    | 14966.701 | 15659.04  | NM_016490 | 8280.625  | 5819.572  | AK025599  | 2412.624  | 2452.782  |
| NM_012134 | 1075.856  | 846.647   | AL137498  | 9760.526  | 7555.607  | X63417    | 7292.018  | 8061.841  |
| AL137725  | 15672.043 | 15682.71  | AK024289  | 5417.831  | 3204.752  | S94539    | 46064.535 | 53065.746 |
| M33197    | 59098.949 | 62128.297 | S66168    | 28069.426 | 16262.287 | NM_006402 | 7951.414  | 8541.479  |
| AJ008151  | 14882.698 | 19004.133 | AF131837  | 915.33    | 773.817   | NM_005785 | 6668.927  | 6416.464  |
| NM_005228 | 1726.617  | 1982.213  | NM_003851 | 38069.707 | 18851.25  | NM_018248 | 6653.15   | 6099.487  |
| NM_002354 | 1470.975  | 1823.804  | AK022482  | 5030.07   | 3070.199  | AK001695  | 24630.49  | 20728.74  |
| NM_004091 | 2645.437  | 3081.508  | AK024135  | 1223.91   | 812.832   | NM_017886 | 24154.09  | 21295.01  |
| X74070    | 57530.398 | 58687.551 | AK022803  | 12975.073 | 7349.194  | NM_006252 | 7407.041  | 7176.413  |
| AF027219  | 2017.424  | 1744.896  | AK023517  | 3255.206  | 2178.75   | NM_001721 | 2303.609  | 2489.167  |
| NM_014828 | 1170.372  | 799.395   | AK023869  | 9603.608  | 7218.623  | NM_014397 | 26731.805 | 34249.633 |
| BC022846  | 553.197   | 751.09    | AK025156  | 44508.133 | 34596.914 | AB023182  | 8423.633  | 11043.749 |
| NM_006333 | 8948.982  | 8451.89   | AK022116  | 16150.307 | 11024.815 | NM_003607 | 4096.432  | 4760.652  |
| M33197    | 57861.258 | 61492.332 | AF026526  | 3471.407  | 2386.756  | NM_006575 | 5454.064  | 5435.857  |
| NM_002899 | 13675.944 | 11852.125 | AK026207  | 4973.643  | 3347.409  | NM_013254 | 8316.29   | 8759.455  |
| AK022749  | 7240.11   | 7191.764  | AK024984  | 44300.043 | 34597.809 | NM_000437 | 49401.543 | 42838.652 |
| BF031409  | 17781.691 | 19866.967 | AL110236  | 876.262   | 789.834   |           |           |           |
| NM_007043 | 4291.375  | 5093.954  | AF085955  | 2120.049  | 1574.906  |           |           |           |
| BE378791  | 1718.521  | 2157.581  | AF075106  | 14790.273 | 11088.068 |           |           |           |
| U94388    | 1879.612  | 2149.265  | AK023339  | 10666.476 | 5585.367  |           |           |           |
| NM_012322 | 7860.79   | 9514.814  | AF085981  | 1122.128  | 744.451   |           |           |           |
| M33197    | 56285.926 | 59026.879 | AF086008  | 7537.507  | 3630.302  |           |           |           |
| NM_004889 | 56532.02  | 59868.543 | AF087970  | 818.591   | 590.965   |           |           |           |
| AK025314  | 2618.537  | 2981.591  | AF086029  | 876.677   | 615.489   |           |           |           |
| NM_002109 | 8250.267  | 9461.62   | AF075115  | 843.485   | 575.475   |           |           |           |
| NM_000984 | 55404.77  | 56984.516 | U05597    | 2217.347  | 1659.266  |           |           |           |
| NM_002453 | 15885.813 | 14091.859 | AK026366  | 66369.867 | 58460.426 |           |           |           |
| AK000780  | 51037.27  | 54112.762 | AK024229  | 34150.801 | 20653.074 |           |           |           |
| M33197    | 55393.738 | 60067.234 | AK021467  | 11093.798 | 8038.764  |           |           |           |
| NM_000131 | 721.675   | 950.465   | NM_020371 | 2515.185  | 1643.417  |           |           |           |
| NM_001836 | 715.366   | 932.351   | AK022498  | 3713.03   | 2392.981  |           |           |           |
| M64714    | 1612.213  | 1589.016  | AJ245433  | 51972.145 | 30800.387 |           |           |           |
| AK026043  | 1193.723  | 1269.272  | AK021942  | 53748.738 | 35429.391 |           |           |           |
| NM_005006 | 12336.964 | 9604.112  | NM_014127 | 1947.67   | 1274.678  |           |           |           |
| AK027033  | 4111.653  | 3557.195  | AL360187  | 2697.059  | 1632.981  |           |           |           |
| NM_000106 | 3787.278  | 3347.325  | AK021878  | 1707.351  | 1103.288  |           |           |           |
| NM_003000 | 37593.406 | 26306.762 | AK021817  | 10871.65  | 6762.744  |           |           |           |
| NM_002495 | 30598.848 | 24256.268 | AL080103  | 1775.354  | 1468.479  |           |           |           |

|             |           |           |           |           |           |
|-------------|-----------|-----------|-----------|-----------|-----------|
| M33197      | 56854.434 | 57852.914 | AK023217  | 2596.753  | 2347.039  |
| NM_016284   | 10419.134 | 9748.432  | AF090902  | 15913.274 | 8588.586  |
| NM_014593   | 7504.838  | 6477.167  | AF119887  | 73449.102 | 52370.766 |
| NM_006833   | 37461.094 | 27601.848 | AK091038  | 1639.029  | 1243.188  |
| NM_012257   | 3404.675  | 3892.271  | AK024193  | 4204.995  | 3152.125  |
| U37690      | 41834.098 | 39698.238 | NM_018578 | 949.912   | 1108.813  |
| NM_005120   | 2432.425  | 3991.854  | NM_018543 | 697.592   | 974.462   |
| AB029012    | 6070.924  | 6604.186  | AK024438  | 35378.324 | 29316.65  |
| M33197      | 54960.766 | 57987.691 | AF161337  | 586.626   | 567.86    |
| AJ010278    | 525.244   | 359.395   | AL390170  | 1318.774  | 954.326   |
| NM_006299   | 2585.668  | 3149.408  | AK022887  | 952.561   | 500.405   |
| AF060936    | 6108.012  | 6378.828  | AK000745  | 33270.035 | 14654.084 |
| NM_005568   | 402.877   | 578.158   | NM_005299 | 527.889   | 364.912   |
| NM_018167   | 1322.879  | 1532.698  | NM_015901 | 709.181   | 428.515   |
| AK024149    | 541.061   | 850.75    | Z83935    | 1573.884  | 882.681   |
| AK023094    | 530.582   | 641.232   | AF093744  | 26560.99  | 14970.716 |
| M33197      | 56254.266 | 56537.859 | NM_018687 | 41701.227 | 22885.135 |
| M33197      | 58379.023 | 59114.727 | NM_017728 | 2097.498  | 1684.619  |
| AJ011129    | 1235.446  | 1242.691  | U80772    | 1108.739  | 1050.493  |
| NM_001039   | 1758.974  | 1819.54   | NM_006189 | 7220.293  | 6966.843  |
| NM_006387   | 10213.183 | 9485.834  | AJ272177  | 2505.689  | 2050.436  |
| NM_005646   | 4808.367  | 4006.687  | AK026402  | 46330.695 | 45009.609 |
| NM_006639   | 1817.228  | 1983.47   | AF111846  | 2792.398  | 3100.94   |
| NM_001692   | 784.67    | 772.379   | M11948    | 61508.527 | 59764.539 |
| BI767871    | 623.105   | 994.031   | Z36850    | 551.556   | 908.85    |
| AA418907    | 500.851   | 900.86    | AK024618  | 4884.087  | 3868.719  |
| M65291      | 1183.644  | 1156.165  | AL049969  | 1723.183  | 1922.969  |
| AA115473    | 4119.194  | 5240.232  | NM_005220 | 8878.711  | 8435.575  |
| AA872397    | 4061.949  | 4888.19   | NM_018619 | 491.518   | 1178.529  |
| M24283      | 19123.363 | 21950.789 | X79308    | 4248.901  | 2000.047  |
| AA709414    | 1310.869  | 1497.61   | AF086476  | 988.306   | 595.442   |
| D12676      | 2550.045  | 3088.521  | NM_017660 | 7045.73   | 3799.718  |
| NM_000939   | 53113.598 | 55980.477 | AB011151  | 16544.912 | 8742.358  |
| NM_004295   | 17789.398 | 23704.758 | U92995    | 3667.438  | 2252.519  |
| H-X 02812 I | 11651.837 | 14430.87  | Z70769    | 438.056   | 398.17    |
| M29039      | 3174.956  | 4231.585  | NM_007106 | 2720.324  | 2470.387  |
| M59815      | 505.203   | 469.116   | AL137555  | 9702.013  | 9959.295  |
| M33210      | 554.445   | 856.154   | AL133017  | 2397.376  | 2114.867  |
| M33197      | 33486.676 | 38039.391 | U21556    | 63541.879 | 66174.156 |
| NM_007259   | 2411.072  | 2198.973  | AB002444  | 1981.156  | 2035.161  |
| NM_018402   | 1110.412  | 845.764   | AB002344  | 10935.881 | 9639.698  |
| NM_018009   | 2731.317  | 2550.796  | NM_017669 | 27139.938 | 28515.688 |
| AK075081    | 2837.477  | 3212.339  | AF147379  | 61759.754 | 62529.445 |
| NM_000895   | 19923.928 | 16725.391 | AK023760  | 10663.397 | 9119.459  |
| NM_003820   | 25874.18  | 23216.641 | X98415    | 62272.281 | 58627.621 |
| NM_015915   | 5434.33   | 5273.558  | AK024205  | 4713.486  | 4071.862  |
| M33197      | 54763.855 | 59505.633 | AF086034  | 21993.555 | 17699.383 |
| NM_016518   | 26613.322 | 26021.48  | AK000174  | 1175.552  | 1241.404  |
| NM_006185   | 14334.756 | 16334.096 | AF130071  | 3457.442  | 3662.697  |
| NM_014800   | 5764.405  | 6252.325  | AJ272057  | 5103.428  | 2903.278  |
| NM_001557   | 1398.25   | 1425.849  | NM_004402 | 826.163   | 721.077   |
| AF147311    | 8538.627  | 11981.155 | AK024216  | 28744.428 | 26559.699 |
| NM_002131   | 55689.105 | 56929.52  | Y16752    | 14409.433 | 16184.527 |



|           |           |           |           |           |           |
|-----------|-----------|-----------|-----------|-----------|-----------|
| NM_017927 | 6335.573  | 9019.918  | NM_020156 | 1496.714  | 1837.08   |
| M33197    | 56234.586 | 60407.094 | NM_014830 | 2975.17   | 3280.084  |
| NM_001203 | 6336.916  | 11487.438 | AF355402  | 9803.706  | 8372.62   |
| NM_004799 | 7564.983  | 8672.082  | AK000407  | 5328.655  | 5060.275  |
| NM_006733 | 704.31    | 1015.695  | NM_020524 | 22988.488 | 22543.398 |
| NM_002039 | 482.245   | 556.725   | NM_001999 | 9139.571  | 6741.764  |
| NM_014047 | 24127.461 | 24885.934 | X64977    | 4365.089  | 3893.879  |
| AK022901  | 1529.648  | 2088.479  | AF064851  | 3415.097  | 3532.238  |
| AF037332  | 8429.556  | 7938.77   | NM_002602 | 30274.016 | 22956.271 |
| NM_014571 | 447.766   | 411.256   | NM_003383 | 2867.827  | 3514.79   |
| NM_020151 | 17053.736 | 17002.188 | D17271    | 17104.982 | 27765.707 |
| NM_005891 | 30434.486 | 26222.305 | X91648    | 2344.401  | 2399.198  |
| NM_001645 | 1797.767  | 1695.983  | AK026658  | 1620.172  | 1512.505  |
| NM_003956 | 2718.856  | 2842.608  | AF282264  | 12179.692 | 13156.865 |
| M33197    | 51522.738 | 55282.813 | AF086322  | 1698.705  | 2285.915  |
| NM_003500 | 14201.49  | 12392.71  | Z70717    | 2097.247  | 2154.921  |
| NM_014317 | 4749.801  | 4672.772  | AK024736  | 6232.338  | 7666.669  |
| L09234    | 37576.121 | 30265.322 | NM_018239 | 1606.355  | 1839.824  |
| NM_000059 | 2015.668  | 2300.273  | U88892    | 4072.124  | 4115.989  |
| AK026740  | 2679.138  | 3617.006  | AK023755  | 1457.71   | 1271.524  |
| NM_017881 | 2692.165  | 4271.535  | NM_005725 | 1352.562  | 1614.12   |
| NM_018896 | 1297.246  | 1225.937  | NM_012211 | 1291.55   | 1257.099  |
| AF069307  | 4785.291  | 5583.69   | AB040877  | 11413.463 | 9735.427  |
| U92978    | 2980.843  | 3452.88   | AB040927  | 2800.105  | 2729.719  |
| NM_018034 | 3420.798  | 3832.421  | AK026737  | 13686.004 | 13269.296 |
| M33197    | 51946.785 | 57221.309 | NM_000210 | 1071.028  | 1336.644  |
| AB037831  | 3352.963  | 4231.166  | NM_006289 | 8771.505  | 9687.265  |
| NM_012103 | 25995.986 | 26494.537 | NM_019067 | 6276.139  | 5608.635  |
| AL122077  | 1949.024  | 2848.89   | AF251025  | 1202.247  | 1474.435  |
| NM_014632 | 1008.736  | 1564.427  | NM_015677 | 14105.84  | 17105.791 |
| NM_006422 | 4498.271  | 5702.358  | NM_001772 | 15699.984 | 16796.629 |
| BE789195  | 661.505   | 671.222   | AB011087  | 1826.541  | 2034.96   |
| NM_016946 | 1716.803  | 2022.13   | AF161341  | 17025.238 | 15388.183 |
| M33197    | 52357.957 | 57297.602 | AJ249902  | 6552.694  | 8290.123  |
| NM_005326 | 7984.507  | 6641.222  | NM_004384 | 7828.868  | 10770.159 |
| NM_007286 | 1865.131  | 1881.67   | L05500    | 22800.305 | 22574.83  |
| NM_014069 | 2830.657  | 3815.242  | NM_012306 | 34764.141 | 36889.633 |
| NM_003359 | 3608.831  | 4112.212  | AF222903  | 5513.007  | 5413.76   |
| M33197    | 57193.371 | 58257.824 | NM_006226 | 9428.762  | 9416.752  |
| AF119917  | 1237.503  | 1624.184  | L10374    | 33407.641 | 39290.082 |
| NM_017915 | 5424.458  | 7754.997  | NM_000249 | 8753.689  | 8684.031  |
| AL050097  | 517.634   | 546.274   | NM_014310 | 821.57    | 876.282   |
| AK021513  | 783.092   | 788.319   | NM_005860 | 11824.829 | 10570     |
| NM_003579 | 3028.722  | 3716.437  | AF095288  | 32704.447 | 30713.32  |
| AL049283  | 3097.481  | 2872.255  | AK025116  | 1148.63   | 1413.061  |
| M33197    | 55433.883 | 57383.738 | AK026271  | 15362.996 | 13392.729 |
| NM_002401 | 16011.642 | 15908.933 | NM_001799 | 18787.781 | 15676.572 |
| NM_001274 | 7437.145  | 6943.997  | AF090895  | 3286.376  | 3533.255  |
| NM_003913 | 1079.715  | 1300.431  | NM_005610 | 3132.944  | 2320.597  |
| NM_002227 | 4274.424  | 4247.739  | AL133651  | 2446.146  | 2926.811  |
| NM_007199 | 2480.158  | 2410.666  | AB014532  | 14802.313 | 15554.165 |
| AB002301  | 1353.891  | 1403.698  | NM_003478 | 5930.101  | 5025.296  |
| AB014530  | 4442.195  | 6558.695  | BE275227  | 1675.28   | 1883.402  |

|             |           |           |           |           |           |
|-------------|-----------|-----------|-----------|-----------|-----------|
| M33197      | 51595.68  | 57908.348 | NM_016237 | 10334.28  | 12146.471 |
| NM_00598E   | 1917.052  | 2313.67   | NM_004924 | 8033.305  | 9852.619  |
| AB014607    | 4384.907  | 4389.908  | NM_00179E | 11607.668 | 12547.65  |
| AF134401    | 1780.784  | 2076.487  | NM_001211 | 12858.467 | 13900.333 |
| NM_006387   | 7673.105  | 6591.862  | NM_00650E | 1173.98   | 1307.982  |
| NM_00564E   | 4046.551  | 9738.902  | AB033050  | 3770.318  | 3758.757  |
| NM_00663E   | 1745.127  | 1771.951  | NM_00435E | 35624.047 | 37591.535 |
| NM_00169Z   | 698.274   | 806.701   | NM_00185E | 470.889   | 653.553   |
| BI767871    | 812.132   | 842.163   | BC015022  | 6055.698  | 5264.933  |
| M65291      | 444.404   | 645.646   | AB033086  | 1485.379  | 1453.972  |
| AA115473    | 3132.4    | 4286.193  | NM_00240E | 61612.672 | 63656.938 |
| AA872397    | 3222.275  | 2927.226  | U87169    | 3563.222  | 4065.231  |
| M24283      | 17403.148 | 14543.211 | NM_00207E | 3135.803  | 3352.757  |
| AA709414    | 1231.81   | 1049.346  | AF117222  | 944.483   | 848.19    |
| D12676      | 2065.656  | 1616.619  | NM_00193E | 60075.938 | 60731.672 |
| NM_00093E   | 46325.891 | 29027.729 | NM_00174E | 1283.518  | 1232.521  |
| NM_00429E   | 17263.422 | 14228.517 | AF090327  | 1699.109  | 1329.856  |
| H-X 02812 I | 11070.271 | 9164.666  | NM_003291 | 7622.814  | 6408.464  |
| M29039      | 3133.581  | 2238.383  | AK022950  | 4077.038  | 3334.148  |
| M59815      | 479.567   | 355.011   | S75755    | 11409.177 | 10070.774 |
| AB011146    | 4257.361  | 3790.845  | AF176518  | 1791.041  | 1748.577  |
| NM_00367E   | 469.234   | 727.025   | AB014576  | 36483.879 | 37571.414 |
| NM_01800E   | 1960.767  | 1053.334  | NM_019044 | 22081.094 | 22475.279 |
| NM_00089E   | 16141.431 | 13914.119 | AK000145  | 1468.817  | 1441.999  |
| NM_00382E   | 19959.785 | 17632.201 | AF174601  | 7958.232  | 8500.872  |
| NM_01591E   | 4818.626  | 3575.396  | AF279865  | 1659.824  | 2192.283  |
| M33197      | 51631.066 | 53029.605 | NM_01470E | 3095.23   | 2857.075  |
| NM_001557   | 1235.375  | 1358.884  | NM_014714 | 1394.042  | 1251.589  |
| NM_002131   | 52395.703 | 49474.375 | NM_015644 | 4317.293  | 4648.716  |
| NM_017927   | 6197.906  | 8033.15   | NM_005687 | 11536.104 | 11116.019 |
| M33197      | 52728.93  | 57117.207 | NM_00598E | 7863.424  | 9587.358  |
| NM_00479E   | 8455.284  | 10176.873 | AB016902  | 12716.746 | 11394.344 |
| NM_00673E   | 743.348   | 798.701   | AF272378  | 63900.16  | 64570.566 |
| NM_00203E   | 355.922   | 370.781   | M61870    | 2033.502  | 2637.692  |
| NM_014047   | 21840.996 | 15087.292 | AK026980  | 2929.676  | 3382.154  |
| AK022901    | 1326.859  | 1116.706  | AJ277915  | 965.891   | 1025.342  |
| AF037332    | 9120.498  | 5663.768  | NM_02036E | 5527.313  | 4608.004  |
| NM_014571   | 579.299   | 539.892   | AF024708  | 39086.066 | 40699.941 |
| M33197      | 54371.68  | 52422.309 | NM_006467 | 9424.41   | 8502.413  |
| AJ011129    | 708.866   | 628.943   | NM_01756E | 12556.232 | 13306.194 |
| NM_00164E   | 1700.702  | 808.992   | NM_00658E | 2567.275  | 2474.771  |
| NM_00395E   | 2989.119  | 3295.276  | AB033019  | 10073.215 | 9731.771  |
| M33197      | 51304.445 | 57742.066 | NM_00145E | 1076.692  | 979.783   |
| NM_00350E   | 12470.093 | 12129.829 | NM_00616E | 2508.921  | 2426.394  |
| NM_014317   | 4201.68   | 4389.674  | NM_014764 | 11171.788 | 12210.638 |
| L09234      | 32544.264 | 25722.746 | NM_01807E | 4518.442  | 3592.631  |
| NM_00005E   | 1823.972  | 2135.412  | NM_01601E | 1091.531  | 956.991   |
| AK026740    | 2120.972  | 2883.976  | NM_01605E | 1525.733  | 1648.143  |
| NM_017881   | 2416.935  | 2135.253  | NM_00708E | 14579.578 | 15256.549 |
| NM_01889E   | 1244.607  | 1066.048  | AK026912  | 9675.819  | 8692.547  |
| AF069307    | 4951.713  | 4183.817  | AK023531  | 35928.078 | 35211.738 |
| U92978      | 2964.693  | 3137.46   | NM_006697 | 23694.945 | 25459.17  |
| NM_018034   | 3768.297  | 2701.289  | M19182    | 2633.782  | 2648.833  |

|             |           |           |           |           |           |
|-------------|-----------|-----------|-----------|-----------|-----------|
| M33197      | 52257.762 | 55359.418 | AK025707  | 3466.276  | 3164.43   |
| AB037831    | 3941.509  | 3155.512  | NM_006242 | 1274.233  | 1268.746  |
| NM_012103   | 27391.055 | 18782.637 | X78712    | 2684.064  | 2753.945  |
| AL122077    | 2421.871  | 1806.227  | NM_001497 | 1115.621  | 1026.204  |
| NM_014632   | 968.303   | 685.188   | NM_004130 | 5531.003  | 5451.317  |
| NM_006422   | 4376.653  | 3043.319  | NM_006348 | 3101.603  | 2280.893  |
| BE789195    | 416.162   | 342.837   | AF067972  | 34601.141 | 39730.18  |
| NM_016946   | 1543.937  | 1083.968  | NM_004958 | 2223.05   | 2457.394  |
| M33197      | 50690.563 | 40351.328 | D87076    | 6599.223  | 6881.664  |
| NM_007259   | 1480.784  | 978.649   | NM_014149 | 3946.865  | 4425.839  |
| NM_018402   | 512.972   | 499.245   | AB020635  | 14588.811 | 14530.311 |
| NM_014069   | 2894.422  | 2242.112  | NM_006515 | 1850.627  | 2029.536  |
| AB035130    | 1059.019  | 1083.825  | NM_005224 | 883.789   | 1093.892  |
| NM_003359   | 3644.103  | 3456.277  | NM_012144 | 22232.574 | 19528.422 |
| M33197      | 50757.207 | 53091.027 | X65231    | 60828.473 | 59654.023 |
| AF119917    | 1220.87   | 1242.709  | NM_002908 | 5565.028  | 6088.037  |
| NM_017915   | 3133.289  | 2713.736  | AF205632  | 8602.287  | 7663.012  |
| AL050097    | 531.737   | 377.12    | NM_005378 | 62980.332 | 60486.957 |
| AK021513    | 855.782   | 641.716   | NM_002397 | 4016.102  | 3593.655  |
| NM_003579   | 2894.624  | 2428.735  | AF000672  | 3152.451  | 3135.722  |
| AL049283    | 2723.422  | 1912.936  | NM_017652 | 44066.949 | 45857.797 |
| M33197      | 51479.676 | 54162.113 | X59268    | 6413.145  | 6943.351  |
| NM_002401   | 13698.075 | 15187.145 | D70832    | 71284.797 | 65648.539 |
| NM_001274   | 6937.88   | 7293.244  | NM_001429 | 27322.148 | 24280.238 |
| NM_002227   | 4906.714  | 3767.195  | NM_002379 | 32154.895 | 33199.766 |
| NM_007199   | 3125.664  | 2976.205  | AB007929  | 6940.232  | 7273.342  |
| AB002301    | 1045.377  | 740.53    | NM_004579 | 10557.901 | 11090.677 |
| AB014530    | 4574.981  | 3332.758  | AA203126  | 2843.707  | 4526.948  |
| M33197      | 49822.176 | 54696.617 | L12347    | 43163.609 | 53863.762 |
| NM_005989   | 1386.012  | 1104.103  | NM_001622 | 16066.75  | 21266.615 |
| AB014607    | 3746.763  | 2210.814  | Z36788    | 9874.751  | 8405.925  |
| AF134401    | 1879.56   | 1528.814  | U20536    | 1630.901  | 1181.524  |
| NM_020151   | 13128.815 | 9381.338  | AI298534  | 5984.306  | 6028.363  |
| NM_005891   | 21408.154 | 14860.048 | R71691    | 10599.122 | 13714.746 |
| NM_006387   | 8255.109  | 5147.246  | AW167715  | 6358.477  | 6416.855  |
| NM_005646   | 4078.805  | 3060.961  | AA424735  | 15935.268 | 18245.275 |
| NM_006639   | 1562.09   | 1522.926  | U78294    | 8341.58   | 7319.563  |
| NM_001692   | 571.099   | 648.275   | AA171613  | 1172.164  | 1226.895  |
| BI767871    | 624.032   | 853.387   | BI760394  | 5823.41   | 6063.972  |
| AA115473    | 3777.163  | 2899.315  | AA555216  | 973.924   | 992.488   |
| AA872397    | 3147.916  | 2455.365  | U09117    | 60604.613 | 60631.551 |
| M24283      | 17731.141 | 13302.602 | M21054    | 2596.493  | 3256.357  |
| AA709414    | 887.793   | 565.79    | M18468    | 2067.123  | 1794.926  |
| D12676      | 1821.22   | 1615.399  | H66070    | 31438.01  | 31307.316 |
| NM_000939   | 51700.754 | 43250.582 | AA164741  | 1099.225  | 1036.498  |
| NM_004295   | 19217.602 | 19654.932 | AI189375  | 4513.602  | 4182.732  |
| H-X 02812 I | 12677.269 | 12725.39  | AI978885  | 10077.277 | 9431.251  |
| U75898      | 383.249   | 431.893   | NM_000303 | 21247.791 | 20685.971 |
| M29039      | 3013.84   | 2762.852  | NM_001939 | 17046.725 | 20929.637 |
| M59815      | 490.471   | 350.609   | NM_003279 | 47293.137 | 53092.5   |
| M33197      | 872.675   | 847.79    | AB014599  | 7502.066  | 8501.657  |
| AB011146    | 4250.76   | 3905.219  | NM_004393 | 1134.809  | 1366.22   |
| NM_003679   | 560.867   | 621.533   | AB018345  | 981.874   | 1414.002  |

|           |           |           |           |           |           |
|-----------|-----------|-----------|-----------|-----------|-----------|
| NM_005326 | 4966.503  | 4539.474  | NM_005832 | 1415.114  | 1299.786  |
| NM_014800 | 5144.79   | 6368.362  | AW407841  | 8635.433  | 8649.236  |
| NM_001557 | 929.624   | 642.849   | U15197    | 2597.359  | 2406.016  |
| AF147311  | 7525.668  | 5962.868  | NM_001879 | 6961.37   | 6060.994  |
| NM_002131 | 48165.723 | 29069.748 | AF264014  | 22746.715 | 24649.52  |
| NM_017927 | 5197.446  | 5863.747  | L09098    | 530.885   | 551.073   |
| M33197    | 57842.352 | 58008.758 | NM_004155 | 6161.533  | 5555.049  |
| NM_001203 | 7922.002  | 7126.896  | NM_001831 | 3099.183  | 2873.959  |
| NM_004799 | 8189.634  | 6669.64   | NM_014586 | 13289.085 | 12803.943 |
| NM_006733 | 632.942   | 824.433   | NM_014366 | 22250.707 | 20719.391 |
| NM_002039 | 465.039   | 509.313   | NM_000923 | 2310.499  | 2618.228  |
| NM_014047 | 31253.475 | 20701.822 | NM_006453 | 4663.73   | 4603.832  |
| AK022901  | 1874.02   | 1538.653  | NM_018096 | 1915.581  | 2016.552  |
| M33197    | 53101.242 | 54622.016 | AL390078  | 5545.284  | 5051.975  |
| AF037332  | 10092.925 | 8223.751  | NM_004036 | 7175.462  | 6589.466  |
| NM_014571 | 530.144   | 607.926   | NM_015986 | 5158.198  | 4429.743  |
| NM_006052 | 3088.324  | 3118.227  | NM_014959 | 17779.412 | 16352.785 |
| AB040912  | 5618.01   | 5013.264  | NM_003992 | 6213.055  | 5745.929  |
| NM_006243 | 2819.609  | 2777.299  | NM_000137 | 2415.127  | 2582.873  |
| NM_007252 | 727.065   | 842.393   | NM_012102 | 18849.695 | 17477.621 |
| M33197    | 53026.816 | 54790.754 | NM_005017 | 49569.113 | 47283.883 |
| AJ011129  | 830.876   | 732.666   | AF163572  | 27571.008 | 25941.301 |
| NM_001039 | 489.459   | 814.063   | NM_000897 | 16153.178 | 16141.046 |
| NM_005738 | 591.388   | 590.619   | NM_000487 | 1810.086  | 1933.911  |
| NM_014488 | 3578.221  | 5130.767  | NM_006411 | 34029.645 | 33617.953 |
| NM_013389 | 894.107   | 731.192   | NM_014182 | 3345.14   | 3275.263  |
| AB014567  | 1263.272  | 1222.71   | AB040884  | 886.289   | 1029.523  |
| AK022817  | 3345.12   | 2593.45   | NM_001170 | 14189.896 | 15092.102 |
| NM_018034 | 3130.099  | 2826.1    | NM_014342 | 4086.353  | 5078.097  |
| M33197    | 55024.035 | 58517.785 | NM_004853 | 10611.026 | 9886.433  |
| AB037831  | 4198.543  | 3562.653  | NM_001494 | 24008.627 | 21769.463 |
| NM_012103 | 32226.273 | 21944.09  | NM_017707 | 1297.356  | 1640.45   |
| AL122077  | 2232.144  | 2248.108  | NM_004206 | 3966.982  | 4509.788  |
| NM_014632 | 1193.985  | 982.066   | NM_004603 | 50627.059 | 49902.207 |
| NM_006422 | 5646.116  | 4590.174  | AK022849  | 5894.47   | 5110.589  |
| BE789195  | 566.117   | 558.031   | AF040964  | 14296.264 | 12468.389 |
| NM_016946 | 2349.247  | 2492.806  | NM_001773 | 1011.431  | 834.38    |
| M33197    | 56536.977 | 57023.652 | Z70704    | 3283.315  | 2920.772  |
| NM_007259 | 2270.73   | 1886.52   | NM_014363 | 3350.24   | 3484.156  |
| NM_018402 | 760.125   | 686.627   | NM_000557 | 14642.471 | 13026.84  |
| NM_018009 | 1584.109  | 1671.459  | NM_003239 | 964.436   | 1109.493  |
| AK075081  | 2153.317  | 2185.136  | NM_001375 | 18414.783 | 17210.869 |
| NM_000895 | 13688.465 | 11967.846 | NM_002312 | 5489.381  | 5992.259  |
| NM_003820 | 18104.092 | 22925.963 | M20699    | 2669.898  | 3109.601  |
| NM_015915 | 2597.793  | 2300.103  | NM_004774 | 10725.951 | 8710.936  |
| M33197    | 53002.352 | 56717.066 | NM_016937 | 5092.067  | 5106.117  |
| NM_016518 | 10965.306 | 12060.011 | NM_002690 | 2829.061  | 3024.14   |
| NM_006185 | 7292.477  | 10137.341 | NM_012328 | 4657.837  | 5607.227  |
| NM_005989 | 2602.064  | 5774.504  | NM_007341 | 3393.165  | 3656.029  |
| AB014607  | 5962.728  | 3752.886  | NM_016508 | 2531.77   | 3216.501  |
| NM_020151 | 18527.084 | 29562.271 | NM_006456 | 39277.648 | 42238.676 |
| NM_001645 | 1760.401  | 1555.186  | AK026062  | 6328.268  | 5608.174  |
| NM_003956 | 2742.039  | 2089.137  | AF047002  | 28393.41  | 29917.471 |

|           |           |           |           |           |           |
|-----------|-----------|-----------|-----------|-----------|-----------|
| M33197    | 51339.035 | 55950.848 | AL050082  | 4937.285  | 5673.447  |
| NM_00350C | 13107.521 | 10000.469 | NM_006623 | 61833.797 | 62576.508 |
| NM_014317 | 3862.178  | 3470.553  | NM_016588 | 3867.807  | 3462.502  |
| L09234    | 29016.711 | 22103.727 | NM_003135 | 10358.015 | 10529.998 |
| NM_000059 | 1395.493  | 1531.845  | NM_004579 | 12923.204 | 12500.728 |
| AK026740  | 1977.328  | 2666.865  | AA203126  | 3097.638  | 3908.897  |
| NM_017881 | 2066.812  | 2415.029  | L12347    | 43935.574 | 42669.969 |
| M33197    | 55541.391 | 58399.695 | NM_001622 | 17285.713 | 19620.451 |
| NM_017634 | 2330.69   | 2009.785  | Z36788    | 9350.231  | 10144.177 |
| NM_000813 | 679.673   | 520.941   | NM_018477 | 15217.507 | 14069.651 |
| NM_018896 | 593.756   | 592.591   | U20536    | 1056.536  | 1156.473  |
| X86400    | 2212.494  | 2248.783  | AI298534  | 5615.7    | 5308.81   |
| AF069307  | 3342.047  | 3593.447  | R71691    | 10518.136 | 13306.181 |
| M33197    | 53556.645 | 57817.215 | AW167715  | 6378.739  | 6384.574  |
| U92978    | 1785.151  | 2036.804  | AA424735  | 14076.427 | 14991.459 |
| AB011146  | 6875.585  | 6419.201  | U78294    | 7115.574  | 7743.954  |
| NM_003679 | 753.849   | 1024.609  | BI760394  | 5604.722  | 6040.169  |
| NM_007286 | 1286.097  | 658.725   | AA555216  | 1084.792  | 1476.395  |
| NM_014069 | 1790.761  | 1170.433  | U09117    | 58874.262 | 58805.52  |
| AB035130  | 947.75    | 954.963   | M21054    | 2445.681  | 3262.104  |
| NM_003359 | 3217.598  | 2473.88   | M18468    | 2094.068  | 1997.969  |
| M33197    | 50411.844 | 47920.551 | H66070    | 30731.297 | 37850.324 |
| AF119917  | 1223.363  | 934.773   | AA164741  | 947.176   | 1082.542  |
| NM_017915 | 2454.558  | 2522.64   | AI189375  | 2769.021  | 2519.209  |
| AL050097  | 349.849   | 341.241   | NM_001665 | 29477.02  | 26711.621 |
| AK021513  | 552.757   | 527.549   | AF097645  | 1234.476  | 1281.374  |
| NM_003579 | 2409.233  | 2009.001  | NM_003279 | 53408.688 | 60568.953 |
| AL049283  | 1700.767  | 1287.11   | AB014599  | 7895.403  | 8532.489  |
| M33197    | 57074.176 | 49996.852 | NM_004393 | 810.321   | 826.943   |
| NM_002401 | 11362.908 | 10231.452 | AB018345  | 879.014   | 1094.079  |
| NM_001274 | 4317.447  | 4029.448  | NM_005832 | 1890.62   | 2502.283  |
| NM_003913 | 1406.593  | 1435.199  | AW407841  | 8869.039  | 8444.072  |
| NM_002227 | 3971.132  | 3097.29   | U15197    | 1791.75   | 1557.54   |
| NM_007199 | 1891.12   | 2278.75   | NM_001879 | 7472.834  | 7866.378  |
| AB002301  | 818.767   | 890.929   | AF264014  | 23535.563 | 28728.635 |
| AB014530  | 4114.788  | 5371.365  | L09098    | 555.707   | 748.129   |
| M33197    | 52302.715 | 55073.848 | NM_004155 | 5871.981  | 5481.361  |
| CY3Cy5    | 6843.584  | 631.021   | NM_001831 | 3187.106  | 2927.836  |
| AK054960  | 9400.174  | 7825.68   | NM_014586 | 14100.739 | 14411.584 |
| L15344    | 809.274   | 827.223   | NM_014366 | 23150.08  | 25922.223 |
| AK024150  | 792.662   | 990.866   | NM_000923 | 2092.017  | 2227.486  |
| AF070536  | 347.029   | 589.896   | NM_006453 | 4211.978  | 5155.832  |
| AK025151  | 1505.456  | 1342.17   | NM_018096 | 1632.349  | 1766.843  |
| AK025550  | 2829.148  | 2742.967  | AL390078  | 5132.846  | 5535.855  |
| AF088076  | 12768.853 | 11782.885 | NM_004036 | 6297.365  | 7192.009  |
| AF086543  | 3580.477  | 3003.518  | NM_015986 | 4333.704  | 5029.298  |
| AK002098  | 439.768   | 347.926   | NM_014959 | 17436.92  | 17902.729 |
| AB011128  | 562.292   | 580.456   | NM_003992 | 8509.412  | 9044.106  |
| AK025074  | 319.703   | 446.076   | NM_002379 | 38675.008 | 46133.523 |
| AK054960  | 1054.49   | 1283.385  | AB007929  | 7972.746  | 7900.385  |
| SR5       | 630.646   | 1278.893  | NM_012102 | 16008.649 | 17230.463 |
| SR7       | 670.338   | 9735.104  | NM_005017 | 50694.125 | 55352.352 |
| CY3Cy5    | 9176.065  | 667.32    | AF163572  | 27136.291 | 36166.375 |

|           |           |           |           |           |           |
|-----------|-----------|-----------|-----------|-----------|-----------|
| U63332    | 227.461   | 246.934   | NM_000897 | 13764.463 | 16266.232 |
| U52050    | 412.509   | 312.62    | NM_000487 | 1640.023  | 1683.274  |
| AK021668  | 24694.105 | 22345.674 | NM_006411 | 32777.555 | 33763.977 |
| AK002195  | 735.926   | 875.138   | NM_014182 | 3725.21   | 3799.886  |
| AF086128  | 352.234   | 165.325   | AB040884  | 1199.606  | 1387.549  |
| AK022850  | 162.881   | 160.025   | NM_001170 | 20147.912 | 25281.045 |
| AL137498  | 238.44    | 56.93     | NM_014342 | 4388.583  | 5694.755  |
| AK001942  | 500.084   | 588.73    | NM_004853 | 11197.72  | 12530.395 |
| NM_003851 | 545.308   | 627.928   | NM_001494 | 21450.361 | 23304.008 |
| AK022482  | 794.052   | 792.483   | NM_017707 | 1081.654  | 1234.65   |
| AK022803  | 493.63    | 538.336   | NM_004206 | 3934.612  | 4490.503  |
| AK023517  | 3022.094  | 3445.471  | NM_004603 | 44907.734 | 54009.398 |
| AK023869  | 6946.946  | 7136.504  | AK022849  | 5378.734  | 5284.456  |
| AK024195  | 293.361   | 204.462   | AF040964  | 13958.919 | 13274.882 |
| AK022116  | 475.071   | 498.348   | AK023527  | 371.254   | 431.139   |
| AF026526  | 1899.854  | 1561.326  | NM_001939 | 27535.115 | 25508.918 |
| AK026207  | 2339.113  | 2465.891  | NM_014363 | 2607.367  | 3137.822  |
| AK024984  | 220.623   | 220.239   | NM_000557 | 11418.432 | 12445.16  |
| AK023339  | 466.95    | 538.727   | NM_003239 | 1231.825  | 1659.053  |
| AF086008  | 164.914   | 399.173   | NM_001375 | 13993.286 | 16922.271 |
| AF086029  | 323.25    | 719.848   | NM_002312 | 4501.454  | 6758.848  |
| AK026366  | 48939.156 | 59834.805 | M20699    | 2803.433  | 3601.802  |
| AK024229  | 19749.262 | 19070.908 | NM_004774 | 10074.736 | 10554.607 |
| AK021824  | 544.473   | 672.812   | NM_016937 | 4802.291  | 5376.154  |
| AK021467  | 410.769   | 484.864   | NM_002690 | 3166.739  | 3488.04   |
| NM_020371 | 2036.587  | 1535.702  | NM_012328 | 4856.824  | 6751.435  |
| AK022498  | 3123.176  | 2966.115  | NM_007341 | 3720.462  | 4174.013  |
| NM_018363 | 546.334   | 272.989   | NM_016508 | 2169.874  | 2347.387  |
| AJ245433  | 1444.011  | 1250.195  | NM_006456 | 41349.891 | 44787.316 |
| AK021942  | 33466.617 | 27268.199 | AK026062  | 5757.435  | 5867.593  |
| NM_014127 | 1516.498  | 1218.608  | AF047002  | 27486.895 | 32179.885 |
| AL360187  | 536.071   | 493.499   | AL050082  | 3857.211  | 4599.513  |
| AK021878  | 333.907   | 364.604   | NM_006623 | 58692.273 | 58519.57  |
| AK021817  | 197.153   | 393.351   | NM_016588 | 3143.14   | 2770.032  |
| AK023217  | 845.186   | 1154.68   | NM_003135 | 10253.536 | 9742.734  |
| AF090902  | 974.445   | 1203.68   | NM_000137 | 2678.351  | 2285.112  |
| NM_018543 | 160.099   | 552.071   | L12347    | 34083.953 | 45199.609 |
| AK024438  | 731.672   | 1009.916  | NM_001622 | 18043.004 | 19768.777 |
| AK022887  | 1257.952  | 1340.188  | Z36788    | 9493.031  | 11366.36  |
| AK000745  | 30525.637 | 26831.451 | NM_018477 | 13307.524 | 17014.287 |
| NM_005299 | 706.539   | 941.092   | U20536    | 882.263   | 1224.086  |
| NM_015901 | 668.387   | 780.334   | AI298534  | 4128.777  | 5202.889  |
| NM_006365 | 636.725   | 379.871   | R71691    | 9978.968  | 15577.51  |
| AF093744  | 19643.256 | 16944.135 | AW167715  | 5200.552  | 5197.474  |
| NM_018687 | 9084.76   | 8258.597  | AA424735  | 15042.279 | 15883.619 |
| M57417    | 5758.686  | 5854.971  | U78294    | 6784.088  | 7431.778  |
| NM_017728 | 366.26    | 360.402   | AA171613  | 1266.302  | 1355.6    |
| AK026402  | 2576.003  | 3031.175  | BI760394  | 6313.343  | 7662.943  |
| AF111846  | 609.846   | 524.272   | AA555216  | 1007.776  | 1326.301  |
| M11948    | 12917.365 | 15053.304 | U09117    | 54150.734 | 59739.48  |
| AL049969  | 469.754   | 718.699   | M21054    | 1374.64   | 1635.862  |
| AF086476  | 779.04    | 822.159   | M18468    | 1889.33   | 1771.693  |
| NM_017660 | 8707.251  | 9014.304  | H66070    | 27293.336 | 25120.938 |

|           |           |           |           |           |           |
|-----------|-----------|-----------|-----------|-----------|-----------|
| AB011151  | 2267.88   | 2075.501  | AA164741  | 846.677   | 925.62    |
| U92995    | 3055.18   | 3140.608  | AI189375  | 2760.658  | 2392.176  |
| Z70769    | 546.462   | 524.691   | NM_001665 | 27001.381 | 25382.641 |
| NM_007106 | 2397.544  | 2355.488  | AF097645  | 852.186   | 1097.711  |
| AL137555  | 2558.478  | 2531.071  | NM_001773 | 665.165   | 725.242   |
| AL133017  | 1521.417  | 1391.259  | Z70704    | 5056.475  | 4671.653  |
| U21556    | 11369.941 | 15799.743 | AF264014  | 19375.615 | 25236.205 |
| AB002344  | 1165.13   | 1065.371  | L09098    | 486.047   | 711.305   |
| BF210352  | 731.707   | 752.836   | NM_004155 | 5706.552  | 6414.275  |
| NM_006829 | 1497.145  | 1776.743  | NM_001831 | 3062.511  | 3146.064  |
| NM_017669 | 2238.244  | 2500.839  | NM_014586 | 7525.798  | 7465.384  |
| AF147379  | 3936      | 5021.955  | NM_014366 | 17856.658 | 17244.988 |
| AK023760  | 2034.725  | 2071.671  | NM_000923 | 2061.606  | 1957.07   |
| X98415    | 12534.192 | 20263.613 | NM_006453 | 4324.524  | 4568.475  |
| AK000174  | 667.029   | 740.241   | NM_018096 | 1521.97   | 1669.198  |
| NM_004402 | 1201.558  | 1505.271  | AL390078  | 4586.416  | 5309.484  |
| Y16752    | 2251.539  | 2365.688  | NM_004036 | 7187.381  | 7388.792  |
| NM_014694 | 596.164   | 777.438   | NM_015986 | 5516.031  | 6334.697  |
| NM_020156 | 1183.594  | 1521.58   | NM_006546 | 681.853   | 784.222   |
| NM_014830 | 2701.867  | 2861.17   | NM_014959 | 22396.701 | 25746.965 |
| AF355402  | 6825.021  | 7328.214  | NM_003992 | 8369.156  | 9472.42   |
| AK000407  | 3483.936  | 4257.939  | AF279265  | 5582.293  | 5931.502  |
| NM_020524 | 9441.943  | 8321.966  | NM_007350 | 978.778   | 768.987   |
| NM_001999 | 5137.874  | 6418.914  | NM_005213 | 24144.213 | 22174.268 |
| X64977    | 1723.688  | 2770.395  | AB040914  | 2952.537  | 2630.252  |
| AF064851  | 317.265   | 326.071   | NM_002997 | 14934.79  | 15873.829 |
| NM_002602 | 4974.18   | 5783.111  | NM_002379 | 35381.895 | 42716.375 |
| X89672    | 181.661   | 278.707   | AB007929  | 4250.33   | 3932.919  |
| D17271    | 1242.821  | 1704.675  | NM_004579 | 10716.913 | 10715.357 |
| X91648    | 754.81    | 870.756   | AA203126  | 2916.367  | 3485.515  |
| AK026658  | 559.305   | 550.749   | AB043997  | 1337.797  | 1623.264  |
| AF282264  | 1799.11   | 2096.247  | NM_001062 | 486.109   | 504.011   |
| AF086322  | 760.854   | 1187.996  | NM_004853 | 8052.297  | 8115.313  |
| Z70717    | 547.644   | 615.964   | NM_001494 | 15244.258 | 12593.142 |
| NM_018239 | 1445.118  | 1526.501  | NM_017707 | 746.502   | 1146.504  |
| U88892    | 844.998   | 1014.485  | NM_004206 | 3098.062  | 3298.641  |
| NM_005725 | 1288.673  | 1514.393  | NM_004603 | 36363.426 | 44592.582 |
| AB040877  | 833.298   | 843.765   | AK022849  | 6066.428  | 5699.925  |
| AB040927  | 952.51    | 813.664   | AF040964  | 16201.137 | 17325.719 |
| AK026737  | 1557.488  | 1210.234  | NM_001939 | 22462.938 | 31143.275 |
| NM_000210 | 1143.037  | 996.447   | NM_003279 | 38369.777 | 45924.336 |
| NM_006289 | 5735.276  | 5879.485  | AB014599  | 6872.283  | 11473.594 |
| NM_019067 | 5230.683  | 5401.096  | NM_005832 | 1538.723  | 1953.193  |
| AF251025  | 805.475   | 721.605   | AW407841  | 9489.016  | 7224.927  |
| NM_015677 | 2104.077  | 2719.74   | U15197    | 2007.623  | 2111.143  |
| NM_001772 | 922.025   | 1264.912  | NM_001879 | 6682.832  | 8496.211  |
| AB011087  | 1451.626  | 1233.035  | NM_016588 | 1645.874  | 1622.564  |
| AF161341  | 973.03    | 922.65    | NM_003135 | 7262.609  | 7438.201  |
| AJ249902  | 338.006   | 296.396   | NM_006765 | 1520.994  | 1375.874  |
| NM_004384 | 2664.097  | 2785.002  | NM_000137 | 2388.462  | 2452.393  |
| L05500    | 1994.196  | 2037.324  | NM_012102 | 14717.283 | 14254.71  |
| NM_012306 | 1611.772  | 1657.712  | NM_005017 | 51934.75  | 56212.551 |
| AF222903  | 1486.696  | 1440.375  | AF163572  | 25825.402 | 27409.377 |

|           |           |           |           |           |           |
|-----------|-----------|-----------|-----------|-----------|-----------|
| NM_006226 | 889.076   | 1020.767  | NM_000897 | 12667.4   | 12066.257 |
| L10374    | 813.605   | 1075.613  | NM_000487 | 1421.588  | 2345.798  |
| NM_000249 | 5758.806  | 5861.12   | NM_006411 | 26792.006 | 26532.855 |
| NM_014310 | 931.762   | 1009.986  | NM_014182 | 3043.01   | 3419.416  |
| NM_005860 | 3941.74   | 3713.302  | AB040884  | 841.992   | 1094.383  |
| AF095288  | 21142.406 | 19734.861 | NM_000492 | 19078.391 | 25770.688 |
| AK025116  | 391.332   | 359.884   | NM_012089 | 1495.407  | 1749.501  |
| AF130114  | 181.684   | 595.748   | AK024382  | 617.046   | 1286.188  |
| AK026271  | 7785.806  | 7971.429  | AL137716  | 1181.182  | 1137.341  |
| NM_001799 | 10755.933 | 8574.367  | NM_004696 | 2796.03   | 2820.021  |
| AF090895  | 2426.99   | 2307.325  | NM_014342 | 4045.314  | 3743.86   |
| NM_005610 | 4707.07   | 4260.301  | Z50169    | 2814.404  | 3189.121  |
| AL133651  | 2451.101  | 2899.445  | NM_014470 | 2398.837  | 2326.051  |
| AB014532  | 3792.29   | 3895.58   | NM_001665 | 20472.932 | 24012.813 |
| NM_003478 | 1299.477  | 1363.973  | AF097645  | 652.493   | 1008.685  |
| BE275227  | 217.519   | 420.453   | NM_001773 | 758.409   | 859.79    |
| NM_016237 | 5061.516  | 6509.647  | Z70704    | 2426.156  | 2552.846  |
| NM_004924 | 3059.793  | 3713.517  | NM_014363 | 2181.664  | 1710.758  |
| NM_001798 | 742.782   | 750.104   | NM_000557 | 9894.883  | 9160.456  |
| NM_001211 | 1726.538  | 2358.735  | NM_001375 | 13930.033 | 16424.902 |
| AB033050  | 760.67    | 803.444   | NM_002312 | 2691.7    | 2424.941  |
| NM_004356 | 7908.382  | 9173.321  | M20699    | 1955.419  | 2047.344  |
| AB033086  | 486.902   | 757.532   | NM_004774 | 9093.012  | 8566.045  |
| NM_002406 | 14155.816 | 14599.842 | NM_016937 | 4380.315  | 5012.585  |
| U87169    | 2981.902  | 3296.828  | NM_002690 | 3004.647  | 3413.008  |
| NM_002073 | 1412.92   | 1535.666  | NM_012328 | 4199.752  | 6394.182  |
| NM_006043 | 210.793   | 400.177   | NM_007341 | 7984.205  | 8496.459  |
| AF117222  | 247.585   | 53.494    | NM_016508 | 1747.767  | 2647.616  |
| NM_001935 | 19184.658 | 20665.227 | NM_006456 | 21055.828 | 23487.82  |
| NM_003291 | 2309.921  | 2019.788  | AK026062  | 5621.668  | 4929.105  |
| AK022950  | 2163.532  | 2544.869  | AF047002  | 24328.598 | 29467.707 |
| S75755    | 1368.022  | 1500.529  | AL050082  | 4316.216  | 4791.936  |
| AB014576  | 1510.589  | 2329.387  | NM_006623 | 58311.07  | 57918.637 |
| NM_019044 | 3165.176  | 3957.498  | CY3Cy5    | 1291.836  | 449.855   |
| AK000145  | 295.078   | 228.465   | NM_016134 | 854.441   | 602.16    |
| AF174601  | 3450.677  | 3277.672  | AL390185  | 9285.77   | 7854.228  |
| AF279865  | 409.266   | 538.768   | AF086235  | 11406.314 | 10266.017 |
| NM_014700 | 559.184   | 823.093   | AF143886  | 2289.481  | 2891.064  |
| NM_015644 | 583.87    | 881.92    | AK025975  | 10295.38  | 12511.913 |
| NM_005687 | 3317.14   | 3486.98   | AK025583  | 63835.656 | 61566.359 |
| NM_005983 | 2157.253  | 2284.709  | NM_014664 | 2930.159  | 5141.888  |
| AB016902  | 180.414   | 420.485   | AL109788  | 10810.86  | 12505.965 |
| AF272378  | 1124.156  | 1712.391  | AL133053  | 1500.362  | 1532.99   |
| M61870    | 942.644   | 804.084   | NM_018142 | 14004.586 | 12761.718 |
| AK026980  | 2169.258  | 2719.443  | NM_017653 | 5021.142  | 5081.033  |
| AJ277915  | 434.596   | 411.308   | AL109695  | 22459.438 | 18988.045 |
| NM_020368 | 3717.929  | 4467.927  | NM_016134 | 740.065   | 629.841   |
| AF024708  | 16497.066 | 20356.945 | SR2       | 21103.658 | 19967.748 |
| NM_006467 | 1718.037  | 1719.014  | SR4       | 9660.138  | 9868.858  |
| NM_017566 | 1667.756  | 1789.281  | SR6       | 829.692   | 1038.232  |
| NM_006582 | 2185.527  | 2322.447  | SR8       | 3137.428  | 10038.597 |
| AB033019  | 1688.407  | 1635.96   | SR10      | 9477.649  | 3603.822  |
| NM_001452 | 805.137   | 824.322   | CY3Cy5    | 1032.245  | 149.981   |



|           |           |           |           |           |           |
|-----------|-----------|-----------|-----------|-----------|-----------|
| NM_006162 | 1368.751  | 1633.83   | NM_014819 | 5680.304  | 5837.055  |
| NM_014764 | 4109.855  | 5733.985  | NM_017609 | 1694.09   | 1628.121  |
| NM_018078 | 2567.889  | 3055.813  | AF086040  | 1971.908  | 2418.288  |
| NM_016050 | 699.345   | 801.538   | AB032988  | 2451.557  | 2646.76   |
| NM_007080 | 1474.698  | 1882.711  | AK023559  | 24080.848 | 25799.152 |
| AK026912  | 538.595   | 507.303   | AL049233  | 10159.805 | 9330.964  |
| NM_007104 | 167.949   | 47.886    | NM_017696 | 16871.254 | 25908.801 |
| AK023531  | 560.733   | 787.16    | AL050166  | 7936.594  | 12664.091 |
| NM_006697 | 1609.777  | 2039.615  | AK024254  | 4548.948  | 7120.116  |
| M19182    | 310.92    | 488.374   | NM_018456 | 4860.158  | 8233.649  |
| AK025707  | 1156.418  | 1345.43   | AK026697  | 1557.82   | 1829.271  |
| NM_006242 | 426.586   | 316.967   | NM_004717 | 1398.628  | 1075.823  |
| X78712    | 2230.12   | 2672.653  | AK002183  | 1076.043  | 1076.229  |
| NM_001497 | 1148.751  | 1149.437  | NM_018996 | 1270.184  | 1302.694  |
| NM_004130 | 758.458   | 540.418   | AL137304  | 2236.761  | 1821.568  |
| NM_006348 | 802.252   | 739.078   | AL049274  | 915.397   | 758.862   |
| AF067972  | 10388.641 | 10545.107 | NM_018279 | 2689.27   | 1780.719  |
| NM_004958 | 1087.955  | 1068.226  | AK026883  | 3277.569  | 2467.381  |
| D87076    | 3994.841  | 3833.524  | NM_014350 | 9612.396  | 8531.304  |
| NM_014149 | 1297.135  | 1408.555  | U00925    | 13176.212 | 10840.264 |
| AB020635  | 2191.282  | 2654.045  | AK025190  | 654.675   | 781.087   |
| NM_006515 | 192.514   | 331.981   | AK025214  | 1047.916  | 1508.04   |
| NM_005224 | 679.554   | 760.377   | AK026805  | 16660.83  | 28539.115 |
| NM_012144 | 342.046   | 523.517   | AB037765  | 2217.18   | 4388.333  |
| X65231    | 26570.916 | 26367.342 | AK025068  | 3148.97   | 5589.641  |
| NM_002908 | 3609.812  | 4079.743  | AK026720  | 1761.203  | 3235.952  |
| AF205632  | 2758.279  | 2918.894  | AL137566  | 5648.567  | 8024.429  |
| NM_005378 | 2549.607  | 3051.49   | AF087962  | 12741.381 | 15707.619 |
| NM_002397 | 993.306   | 1227.191  | AL050197  | 4012.241  | 3382.518  |
| AF000672  | 343.734   | 736.351   | AF085870  | 26334.566 | 25464.166 |
| NM_017652 | 375.59    | 638.173   | AL050063  | 2583.505  | 2099.086  |
| D70832    | 6614.035  | 9341.352  | AL080217  | 489.585   | 399.218   |
| NM_001429 | 814.012   | 874.352   | AL117580  | 22940.26  | 15289.402 |
| NM_002379 | 23390.574 | 28194.928 | AL110190  | 3739.874  | 2334.953  |
| AB007929  | 4429.976  | 4865.471  | AL117656  | 2029.487  | 1620.745  |
| NM_004579 | 7181.28   | 7745.374  | AJ001893  | 3292.107  | 3142.95   |
| AA203126  | 2209.719  | 2368.319  | NM_018225 | 28094.568 | 26309.75  |
| L12347    | 552.362   | 596.029   | AK025534  | 1437.468  | 1786.487  |
| NM_001622 | 1397.377  | 1753.406  | AK022577  | 890.034   | 1348.695  |
| Z36788    | 521.579   | 568.038   | AF091526  | 6414.458  | 6440.844  |
| NM_018477 | 8555.261  | 8800.635  | AK022170  | 305.204   | 413.761   |
| U20536    | 925.56    | 801.479   | AK026705  | 9050.994  | 15864.607 |
| R71691    | 1390.859  | 2046.576  | NM_003602 | 3929.24   | 7291.31   |
| AW167715  | 757.327   | 759.952   | AF009258  | 49593.715 | 60837.398 |
| AA424735  | 428.053   | 537.4     | AF009305  | 10016.064 | 15551.182 |
| AA171613  | 372.846   | 271.465   | NM_006193 | 3034.692  | 4674.232  |
| BI760394  | 1164.103  | 1394.604  | AF056454  | 446.886   | 778.42    |
| AA555216  | 266.087   | 251.017   | AF009270  | 2633.025  | 3362.724  |
| U09117    | 1368.666  | 1596.371  | AF056421  | 7161.789  | 5989.002  |
| AI189375  | 371.235   | 266.229   | AF090889  | 557.045   | 449.104   |
| NM_000303 | 748.207   | 910.114   | AK001085  | 3366.067  | 3631.229  |
| NM_001939 | 7230.319  | 7294.403  | AK001906  | 9884.414  | 8482.57   |
| NM_003279 | 833.451   | 1081.428  | AK021528  | 1266.959  | 935.366   |

|           |           |           |           |           |           |
|-----------|-----------|-----------|-----------|-----------|-----------|
| AB014599  | 4321.374  | 4833.907  | AK021746  | 3344.608  | 2657.062  |
| NM_004393 | 1407.614  | 1390.517  | AK001136  | 1447.923  | 991.185   |
| AB018345  | 556.371   | 542.391   | AK021810  | 1982.428  | 1721.714  |
| NM_005832 | 628.496   | 627.049   | AF086317  | 5549.545  | 5754.09   |
| AW407841  | 1989.035  | 1952.34   | U16850    | 7486.32   | 6056.782  |
| U15197    | 771.067   | 597.862   | AL390178  | 1809.428  | 1490.233  |
| NM_001879 | 478.094   | 602.992   | NM_005383 | 1472.041  | 1936.026  |
| AF264014  | 9683.55   | 13295.331 | NM_005368 | 2614.896  | 2078.071  |
| NM_004155 | 3008.972  | 4402.502  | NM_018618 | 1569.317  | 2865.918  |
| NM_014586 | 2768.698  | 2871.821  | AJ008153  | 7100.496  | 12905.246 |
| NM_014366 | 4976.655  | 5613.547  | AK023739  | 1949.075  | 3130.646  |
| NM_000923 | 707.601   | 849.106   | NM_005830 | 9323.065  | 11627.707 |
| NM_006453 | 632.609   | 576.141   | AL389983  | 6159.974  | 6793.771  |
| NM_018096 | 264.368   | 293.124   | AJ008159  | 2138.498  | 2081.052  |
| NM_004036 | 706.241   | 945.487   | AK000995  | 4317.332  | 3119.422  |
| NM_015986 | 783.678   | 858.67    | U00959    | 4298.101  | 3762.092  |
| NM_014959 | 840.59    | 1253.325  | NM_014578 | 31198.621 | 20459.732 |
| NM_003992 | 3081.003  | 3347.411  | AF147306  | 6240.547  | 4853.341  |
| NM_000137 | 517.486   | 372.907   | AF086267  | 9219.07   | 6880.014  |
| NM_012102 | 6243.143  | 7223.876  | X74606    | 768.756   | 655.145   |
| NM_005017 | 11033.563 | 12443.34  | NM_012183 | 8048.798  | 6419.594  |
| AF163572  | 3217.9    | 3375.626  | AK026785  | 2240.238  | 1578.233  |
| NM_000897 | 700.061   | 723.297   | AK022994  | 375.509   | 288.67    |
| NM_000487 | 458.151   | 693.264   | AL049466  | 3913.986  | 4450.582  |
| NM_006411 | 4626.717  | 4311.593  | AB037802  | 835.971   | 1041.777  |
| NM_014182 | 1029.901  | 1005.453  | U17623    | 412.968   | 601.121   |
| NM_001170 | 1144.55   | 1273.653  | AL137450  | 3580.612  | 3501.6    |
| NM_014342 | 490.822   | 724.096   | AK023058  | 6232.182  | 6360.353  |
| NM_004853 | 977.58    | 965.052   | AJ227878  | 457.306   | 624.278   |
| NM_001494 | 6752.15   | 7268.076  | NM_012064 | 15226.617 | 11516.43  |
| NM_017707 | 926.312   | 780.874   | AK001460  | 898.124   | 749.225   |
| NM_004206 | 1906.425  | 2407.261  | AK027111  | 56378.074 | 62406.73  |
| Y08991    | 23.529    | 454.81    | NM_003518 | 1151.077  | 1682.047  |
| NM_004603 | 1397.055  | 1988.686  | M60749    | 3359.128  | 5854.564  |
| AK022849  | 902.146   | 1059.77   | X79986    | 2810.608  | 3141.894  |
| AF040964  | 532.336   | 681.118   | NM_003523 | 18063.84  | 13844.54  |
| NM_001773 | 243.507   | 381.206   | X01448    | 1623.806  | 1152.774  |
| Z70704    | 970.563   | 979.44    | NM_016503 | 9378.579  | 7129.081  |
| NM_014363 | 1234.623  | 962.094   | AK056351  | 38029.195 | 26499.688 |
| NM_000557 | 1436.652  | 1217.978  | NM_014690 | 17017.424 | 13192.136 |
| NM_001375 | 10606.581 | 10001.155 | NM_017698 | 3234.839  | 2912.654  |
| NM_002312 | 800.182   | 719.782   | AF086490  | 2089.202  | 1685.255  |
| M20699    | 2496.134  | 2554.45   | AF131738  | 23597.094 | 15063.586 |
| NM_004774 | 2454.438  | 2096.294  | AK021666  | 13531.928 | 11150.804 |
| NM_016937 | 1454.808  | 1264.589  | AK024081  | 1932.918  | 1664.325  |
| NM_003479 | 213.587   | 102.55    | AK024825  | 3980.833  | 3707.32   |
| NM_002690 | 237.436   | 154.056   | NM_000795 | 508.552   | 649.217   |
| NM_012328 | 386.825   | 277.62    | NM_014008 | 55710.066 | 53715.488 |
| NM_016508 | 293.58    | 335.311   | NM_014731 | 12191.031 | 9769.797  |
| NM_006456 | 631.671   | 664.282   | AF035191  | 11665.157 | 10885.435 |
| AK026062  | 380.726   | 459.932   | NM_004058 | 2021.615  | 2094.311  |
| AF047002  | 10274.635 | 9809.404  | NM_004527 | 3409.518  | 5016.345  |
| AL050082  | 1615.877  | 1636.432  | NM_012062 | 10558.581 | 11312.717 |

|           |           |           |           |           |           |
|-----------|-----------|-----------|-----------|-----------|-----------|
| NM_006623 | 9303.402  | 9757.658  | AK026717  | 1035.153  | 1166.924  |
| NM_016588 | 785.771   | 927.615   | NM_001507 | 3392.078  | 2182.535  |
| NM_003135 | 5144.774  | 5387.129  | X92108    | 1068.495  | 796.363   |
| NM_004579 | 7737.527  | 8071.632  | AL389876  | 3216.12   | 3155.066  |
| AA203126  | 1612.227  | 1974.177  | AK022120  | 5678.879  | 5803.417  |
| L12347    | 454.309   | 381.66    | NM_016206 | 454.37    | 410.373   |
| NM_001622 | 1478.785  | 1848.916  | Z70762    | 745.907   | 1044.936  |
| Z36788    | 678.581   | 955.208   | D17099    | 722.081   | 977.933   |
| NM_018477 | 7526.26   | 8160.179  | BF037206  | 4222.846  | 3622.369  |
| U20536    | 583.402   | 575.922   | AK021474  | 48990.938 | 37907.453 |
| AI298534  | 245.432   | 225.032   | AK023642  | 661.698   | 620.031   |
| R71691    | 5412.389  | 7739.546  | U52827    | 2813.993  | 2275.151  |
| AW167715  | 1039.648  | 1240.189  | AB031547  | 3873.035  | 4135.738  |
| AA424735  | 939.438   | 883.849   | NM_003970 | 2815.614  | 3587.912  |
| U78294    | 292.93    | 157.383   | AK022496  | 2387.797  | 2677.778  |
| AA171613  | 171.594   | 231.539   | AB042636  | 1778.902  | 1987.244  |
| U09117    | 459.913   | 631.586   | AB033035  | 3114.336  | 2953.449  |
| M21054    | 318.463   | 209.922   | NM_002883 | 5656.626  | 5649.174  |
| M18468    | 464.718   | 382.49    | NM_019012 | 1829.369  | 1719.185  |
| AI189375  | 255.468   | 229.541   | NM_000141 | 915.889   | 1146.058  |
| NM_014470 | 937.154   | 714.086   | NM_016150 | 13344.945 | 11909.346 |
| NM_001665 | 8333.647  | 8020.714  | U57058    | 1201.05   | 1348.849  |
| NM_003279 | 1206.893  | 970.385   | AL137452  | 2219.985  | 2622.795  |
| AB014599  | 3431.084  | 2732.974  | NM_004312 | 61008.254 | 60626.906 |
| NM_004393 | 934.768   | 1029.871  | NM_001347 | 8811.63   | 7578.149  |
| AB018345  | 750.907   | 612.307   | AK024549  | 52767.406 | 48487.633 |
| NM_005832 | 442.503   | 476.768   | NM_006338 | 45858.676 | 52789.66  |
| AW407841  | 653.363   | 631.862   | NM_007164 | 28403.063 | 38204.773 |
| U15197    | 1398.567  | 1289.797  | NM_000261 | 1660.843  | 2498.906  |
| NM_001879 | 1114.165  | 1121.793  | NM_002606 | 1433.099  | 1908.804  |
| AF264014  | 11521.322 | 13689.677 | NM_002570 | 2609.355  | 2508.693  |
| NM_004155 | 3066.631  | 2657.653  | NM_003183 | 2389.43   | 1731.796  |
| NM_014586 | 1521.818  | 1248.819  | NM_003585 | 775.287   | 751.916   |
| NM_014366 | 6569.934  | 5582.983  | NM_019851 | 3515.313  | 3273.882  |
| NM_000923 | 436.892   | 445.643   | NM_003238 | 287.346   | 364.986   |
| NM_006453 | 657.676   | 642.345   | NM_014096 | 24311.855 | 25862.945 |
| NM_018096 | 572.175   | 452.272   | NM_005706 | 15852.352 | 21259.572 |
| NM_004036 | 1330.886  | 1512.646  | NM_001261 | 8071.912  | 8209.722  |
| NM_015986 | 1415.572  | 1488.183  | NM_001977 | 3302.731  | 3859.851  |
| NM_014959 | 666.034   | 813.275   | NM_007219 | 1803.243  | 1857.583  |
| NM_003992 | 2141.52   | 1995.175  | AK026854  | 3594.689  | 3061.525  |
| NM_002379 | 7199.15   | 8425.203  | NM_001269 | 18229.111 | 15487.467 |
| AB007929  | 2351.899  | 2162.48   | NM_002506 | 5067.101  | 5209.273  |
| NM_012102 | 4242.664  | 3007.637  | NM_004906 | 6039.33   | 5383.178  |
| NM_005017 | 9658.467  | 6573.589  | X98261    | 629.232   | 814.854   |
| AF163572  | 2542.396  | 2194.397  | NM_012447 | 19437.016 | 19833.715 |
| NM_000897 | 495.376   | 469.649   | NM_006366 | 2430.308  | 2853.979  |
| NM_000487 | 500.946   | 377.76    | AK027013  | 26000.256 | 27991.252 |
| NM_006411 | 5785.863  | 4973.391  | NM_001344 | 25102.664 | 25804.707 |
| NM_014182 | 1898.722  | 1561.904  | NM_018294 | 3039.581  | 3538.652  |
| AB040884  | 383.729   | 591.123   | AL389934  | 13308.305 | 11379.353 |
| NM_001170 | 1353.263  | 1444.167  | NM_004330 | 6938.082  | 5826.538  |
| NM_014342 | 2472.986  | 2528.605  | AF151802  | 14881.663 | 24274.809 |

|           |           |           |           |           |           |
|-----------|-----------|-----------|-----------|-----------|-----------|
| NM_004853 | 768.025   | 655.116   | AB006746  | 2252.392  | 3159.419  |
| NM_001494 | 8744.036  | 7914.165  | NM_006498 | 8362.479  | 11753.605 |
| NM_017707 | 353.065   | 262.056   | AB023233  | 2806.779  | 2674.844  |
| NM_004206 | 1425.728  | 1684.25   | NM_004369 | 4008.551  | 4059.984  |
| NM_004603 | 1463.35   | 2383.875  | NM_004370 | 1085.421  | 995.211   |
| AK022849  | 1139.697  | 1090.228  | AB040898  | 1573.356  | 1428.202  |
| AF040964  | 1312.658  | 1178.211  | NM_016155 | 14357.671 | 16089.706 |
| NM_001939 | 3021.671  | 2726.872  | NM_001224 | 18981.346 | 20513.797 |
| NM_014363 | 933.147   | 679.088   | NM_017811 | 10678.3   | 10176.203 |
| NM_000557 | 918.012   | 507.67    | NM_001569 | 6018.965  | 5225.257  |
| NM_001375 | 9674.704  | 6175.369  | NM_004131 | 3380.021  | 2865.2    |
| NM_002312 | 954.659   | 436.27    | AK023284  | 1551.158  | 1469.233  |
| M20699    | 2381.272  | 1380.904  | AF106069  | 977.104   | 814.327   |
| NM_004774 | 2999.923  | 1626.217  | NM_005101 | 8740.13   | 5849.182  |
| NM_016937 | 1619.954  | 1076.59   | NM_004205 | 439.813   | 388.527   |
| NM_002690 | 1294.391  | 741.318   | AF130060  | 57596.91  | 58409.375 |
| NM_012328 | 2137.799  | 1568.38   | NM_007057 | 39250.691 | 42478.148 |
| NM_007341 | 352.582   | 136.676   | NM_000177 | 4096.971  | 4419.825  |
| NM_006456 | 606.859   | 590.68    | NM_003387 | 29898.9   | 27429.279 |
| AK026062  | 897.475   | 573.386   | U60665    | 4103.407  | 2688.684  |
| AF047002  | 10759.649 | 9997.142  | AL080133  | 15557.52  | 25010.297 |
| AL050082  | 1092.082  | 1112.24   | AY014403  | 2106.93   | 2408.06   |
| NM_006623 | 6424.345  | 6096.51   | NM_006912 | 6659.276  | 6607.146  |
| NM_016588 | 1010.885  | 982.391   | X12534    | 2031.87   | 2353.807  |
| NM_003135 | 5722.106  | 5218.799  | NM_018367 | 724.056   | 583.877   |
| L12347    | 438.061   | 219.881   | NM_001363 | 8553.303  | 7971.768  |
| NM_001622 | 1558.289  | 903.361   | NM_014323 | 9251.919  | 8637.099  |
| Z36788    | 443.526   | 291.141   | NM_003205 | 2645.857  | 2704.17   |
| NM_018477 | 8090.105  | 4733.638  | AB002324  | 4334.583  | 4173.216  |
| U20536    | 666.02    | 249.859   | AL359938  | 1249.307  | 1026.716  |
| AI298534  | 336.761   | 108.107   | NM_002165 | 503.71    | 409.068   |
| R71691    | 4791.052  | 4022.644  | AK026231  | 2981.354  | 2882.409  |
| AW167715  | 1011.876  | 652.865   | NM_002140 | 29146.176 | 29380.232 |
| AA171613  | 260.575   | 72.311    | NM_020143 | 7803.208  | 6841.071  |
| BI760394  | 568.908   | 278.963   | NM_012469 | 6145.667  | 5911.817  |
| U09117    | 818.651   | 616.276   | NM_005131 | 3161.491  | 2795.706  |
| M21054    | 235.024   | 140.188   | NM_007056 | 4021.601  | 4165.704  |
| M18468    | 434.964   | 188.248   | AF083383  | 3226.131  | 3748.499  |
| H66070    | 379.204   | 179.88    | NM_006925 | 3801.265  | 3928.623  |
| AI189375  | 249.564   | 143.632   | NM_004890 | 59454.816 | 56657.16  |
| NM_014470 | 871.212   | 619.533   | AK023181  | 10857.379 | 10739.047 |
| NM_001665 | 3165.103  | 2887.773  | NM_004294 | 13979.977 | 14058.17  |
| AF264014  | 12136.232 | 10839.304 | NM_001968 | 29139.48  | 22148.164 |
| L09098    | 263.981   | 148.007   | D17259    | 58962.098 | 57238.488 |
| NM_004155 | 4438.799  | 3655.489  | AB002366  | 706.301   | 1044.037  |
| NM_014586 | 6696.6    | 4222.769  | AF264627  | 49835.117 | 50741.348 |
| NM_014366 | 10612.483 | 7200.025  | NM_018130 | 10891.422 | 10433.272 |
| NM_000923 | 742.774   | 441.179   | AF085878  | 561.915   | 488.315   |
| NM_006453 | 634.212   | 382.535   | AB006630  | 1071.832  | 1074.066  |
| NM_018096 | 495.015   | 341.779   | NM_004453 | 3368.351  | 2931.597  |
| AL390078  | 177.875   | 39.693    | NM_016229 | 22014.66  | 18190.631 |
| NM_004036 | 1610.944  | 917.802   | NM_018244 | 10112.834 | 10663.551 |
| NM_015986 | 620.799   | 366.383   | NM_002492 | 55777.523 | 56357.234 |

|           |          |          |           |           |           |
|-----------|----------|----------|-----------|-----------|-----------|
| NM_006546 | 435.316  | 378.951  | AB046855  | 1281.032  | 1262.951  |
| NM_014959 | 518.835  | 366.206  | NM_005642 | 6397.858  | 6763.953  |
| NM_003992 | 2196.312 | 1163.78  | NM_018105 | 2329.314  | 1781.708  |
| AF279265  | 1243.375 | 1112.59  | AK023452  | 8341.553  | 7711.139  |
| NM_005213 | 4845.046 | 2420.536 | AF155065  | 453.11    | 597.118   |
| AB040914  | 289.07   | 128.602  | NM_000332 | 1227.44   | 1326.511  |
| NM_002997 | 2488.883 | 1489.542 | AK022215  | 7600.469  | 6806.49   |
| NM_002379 | 7826.764 | 6535.106 | U90305    | 3576.078  | 4065.2    |
| AB007929  | 2127.002 | 1367.266 | NM_001527 | 23485.27  | 20582.107 |
| NM_004579 | 3005.8   | 1993.497 | NM_001438 | 762.592   | 1705.547  |
| AA203126  | 583.99   | 327.361  | AB040971  | 897.549   | 369.276   |
| AB043997  | 531.28   | 431.271  | NM_006562 | 1698.156  | 3040.351  |
| AL133041  | 269.12   | 190.604  | NM_003112 | 979.535   | 971.247   |
| NM_004853 | 2648.119 | 1549.244 | AL080170  | 6080.798  | 7820.336  |
| NM_001494 | 6333.784 | 3555.679 | AB039903  | 10276.392 | 10429.915 |
| NM_017707 | 366.82   | 275.209  | NM_000542 | 39937.125 | 45923.383 |
| NM_004206 | 864.672  | 641.303  | NM_014625 | 766.619   | 866.228   |
| NM_004603 | 1693.172 | 1490.557 | NM_006851 | 2077.651  | 1881.56   |
| AK022849  | 602.623  | 611.737  | AK001560  | 5240.131  | 5447.977  |
| AF040964  | 3338.401 | 1494.508 | AB001328  | 3696.013  | 3995.414  |
| NM_001939 | 4003.218 | 2634.101 | NM_000948 | 801.175   | 1048.889  |
| NM_003279 | 386.801  | 225.426  | H99588    | 2719.855  | 3193.115  |
| AB014599  | 1337.15  | 1285.445 | X00588    | 10379.396 | 12047.949 |
| NM_004393 | 497.296  | 283.018  | AI359037  | 36737.879 | 39932.18  |
| U15197    | 1137.777 | 516.985  | J04513    | 1184.287  | 1752.997  |
| NM_001879 | 1042.65  | 770.317  | BI754285  | 3382.957  | 3561.909  |
| NM_016588 | 1718.148 | 1351.062 | X15998    | 20563.73  | 24118.424 |
| NM_003135 | 9000.838 | 7159.778 | M76482    | 1226.266  | 1419.386  |
| NM_006765 | 553.792  | 414.944  | X17519    | 579.033   | 626.502   |
| NM_000137 | 396.669  | 311.17   | NM_004628 | 2884.292  | 3226.138  |
| NM_012102 | 810.906  | 875.35   | L31785    | 1525.574  | 1892.105  |
| NM_005017 | 2965.226 | 2077.497 | H-M 69043 | 10129.312 | 10846.915 |
| AF163572  | 1392.04  | 941.844  | AF077374  | 1574.601  | 2335.664  |
| NM_000487 | 314.221  | 342.859  | U43901    | 743.003   | 1473.309  |
| NM_006411 | 2302.958 | 2395.481 | X59065    | 617.343   | 679.94    |
| NM_014182 | 815.662  | 668.1    | M59828    | 9118.12   | 14724.555 |
| AB040884  | 300.433  | 263.076  | NM_002168 | 3963.996  | 4116.328  |
| NM_000492 | 6680.57  | 4356.438 | NM_015658 | 1157.744  | 1730.758  |
| NM_012089 | 800.086  | 496.81   | NM_000589 | 4505.506  | 5521.368  |
| NM_001170 | 1242.745 | 854.525  | NM_016546 | 24445.357 | 27264.375 |
| AL137716  | 337.584  | 150.064  | AF309653  | 7449.927  | 6132.048  |
| NM_014342 | 1946.055 | 1096.811 | NM_001816 | 1532.345  | 1911.22   |
| Z70704    | 206.542  | 103.236  | NM_003784 | 53487.844 | 56821.359 |
| NM_014363 | 341.528  | 299.54   | NM_000195 | 58033.59  | 55728.336 |
| NM_000557 | 392.441  | 344.818  | NM_005445 | 22168.125 | 15921.694 |
| NM_001375 | 5254.258 | 4387.455 | NM_014899 | 4289.286  | 4247.949  |
| NM_002312 | 308.305  | 260.993  | NM_003630 | 8737.257  | 10079.397 |
| M20699    | 786.079  | 749.529  | NM_000046 | 5148.488  | 6067.222  |
| NM_004774 | 1168.05  | 1522.168 | NM_003219 | 4781.304  | 4294.307  |
| NM_016937 | 336.798  | 280.501  | NM_006709 | 10949.876 | 12105.898 |
| NM_003479 | 173.577  | 147.205  | NM_000612 | 29003.473 | 30611.48  |
| NM_002690 | 1093.398 | 768.214  | NM_000683 | 434.07    | 604.712   |
| NM_012328 | 812.924  | 491.277  | NM_003629 | 1016.38   | 1005.552  |

|           |           |           |           |           |           |
|-----------|-----------|-----------|-----------|-----------|-----------|
| NM_007341 | 2669.613  | 2266.62   | NM_005901 | 4737.567  | 4393.826  |
| NM_01650E | 808.966   | 585.558   | NM_00424E | 761.901   | 1150.961  |
| NM_00645E | 666.43    | 533.389   | NM_00491C | 3659.902  | 4285.488  |
| AF047002  | 4808.767  | 4490.446  | AB013452  | 3210.794  | 4262.089  |
| AL050082  | 1204.175  | 1009.22   | M93107    | 8082.087  | 7656.312  |
| NM_00662E | 11941.431 | 8876.374  | BC001479  | 31963.275 | 37684.676 |
| CY3Cy5    | 6088.751  | 190.684   | NM_005771 | 1689.84   | 1423.048  |
| AL390185  | 185.511   | 472.368   | AB032986  | 48311.691 | 54876.207 |
| AF086235  | 1597.432  | 2570.497  | NM_01752E | 57789.992 | 51625.965 |
| AK025583  | 1950.303  | 2428.541  | NM_014324 | 51153.254 | 55597.941 |
| NM_014664 | 317.148   | 420.637   | NM_001687 | 36028.961 | 25550.547 |
| AL109788  | 1713.475  | 3027.777  | AK026374  | 6009.388  | 5204.596  |
| NM_01495E | 1201.871  | 2192.344  | NM_00345E | 16534.92  | 15707.583 |
| AL133053  | 799.291   | 1169.384  | NM_01334E | 52609.578 | 55285.559 |
| NM_01814E | 3312.239  | 4701.378  | NM_006861 | 3861.633  | 2294.02   |
| NM_01765E | 2099.86   | 2938.708  | AK023142  | 3917.804  | 2314.69   |
| AL109695  | 3809.923  | 5471.553  | NM_00640E | 55110.25  | 50783.656 |
| SR2       | 9783.014  | 18556.283 | AB049054  | 3210.955  | 2280.529  |
| SR4       | 2278.993  | 2321.942  | NM_015071 | 1386.617  | 858.107   |
| SR8       | 672.361   | 1952.037  | NM_013227 | 2375.038  | 1450.549  |
| SR10      | 1648.843  | 483.665   | Z83803    | 1319.714  | 999.566   |
| CY3Cy5    | 3472.912  | 167.581   | AF027205  | 16967.021 | 13389.436 |
| NM_01481E | 1040.524  | 1300.228  | AF075012  | 1721.108  | 1525.783  |
| NM_01760E | 215.606   | 354.878   | NM_00157C | 1628.344  | 1370.491  |
| AB032988  | 1434.829  | 2368.645  | AB040672  | 14697.729 | 12346.177 |
| AK023559  | 1500.256  | 2713.774  | NM_00219E | 11761.33  | 8954.522  |
| AB037859  | 8469.954  | 11780.02  | NM_005491 | 13772.859 | 15586.589 |
| NM_01769E | 1050.084  | 1072.14   | NM_00386E | 11248.022 | 8915.45   |
| AL050166  | 1404.109  | 1504.312  | AK025599  | 1744.097  | 1369.888  |
| AK024254  | 259.572   | 257.947   | X63417    | 4774.603  | 4164.239  |
| NM_019021 | 962.412   | 1743.94   | S94539    | 52827.469 | 40603.93  |
| AK002183  | 544.09    | 1062.402  | NM_00640E | 5179.003  | 3549.895  |
| NM_01899E | 176.096   | 522.526   | NM_00578E | 4376.786  | 3592.803  |
| AL137304  | 1737.838  | 2709.523  | NM_01824E | 5106.603  | 4196.94   |
| AL049274  | 214.827   | 391.438   | AK001695  | 12919.8   | 7213.108  |
| NM_01827E | 633.422   | 509.958   | NM_01788E | 16271.437 | 10137.222 |
| NM_01435C | 2031.733  | 1192.518  | NM_00625E | 6409.221  | 4072.233  |
| U00925    | 4831.946  | 4592.11   | NM_001721 | 1445.992  | 1210.799  |
| AK025846  | 174.94    | 360.948   | AB023182  | 2305.762  | 1791.981  |
| AK026805  | 248.7     | 419.862   | NM_003607 | 683.807   | 658.751   |
| AB037765  | 854.847   | 1094.915  | NM_00657E | 1264.596  | 1139.812  |
| AK025068  | 1041.347  | 1372.912  | NM_013254 | 3349.129  | 2317.909  |
| AL137566  | 655.929   | 1193.125  | NM_000437 | 21627.521 | 16724.617 |
| AF087962  | 1525.768  | 1335.076  | AB046819  | 26743.453 | 17095.623 |
| AL050197  | 771.628   | 619.578   | NM_00054E | 45624.375 | 49639.629 |
| AL049355  | 626.211   | 434.108   | NM_01462E | 700.586   | 755.211   |
| AL110190  | 417.499   | 347.505   | NM_006851 | 2324.035  | 2615.464  |
| AJ001893  | 1507.847  | 1441.148  | AK001560  | 4692.923  | 3999.329  |
| NM_01822E | 2163.592  | 3384.007  | AB001328  | 3455.699  | 3136.531  |
| AK025534  | 303.625   | 748.017   | H99588    | 1843.284  | 1550.225  |
| AK022577  | 385.246   | 723.537   | AI359037  | 35994.164 | 27864.678 |
| AF091526  | 418.929   | 819.266   | J04513    | 1127.928  | 826.279   |
| AK026705  | 169.726   | 376.074   | BI754285  | 4073.277  | 2388.108  |

|           |          |           |           |           |           |
|-----------|----------|-----------|-----------|-----------|-----------|
| AF009258  | 3198.512 | 3468.528  | X15998    | 17997.555 | 11963.67  |
| AF009270  | 524.057  | 629.586   | M76482    | 988.358   | 709.547   |
| AF009318  | 343.336  | 454.494   | X17519    | 791.572   | 559.532   |
| AK001136  | 481.068  | 561.226   | NM_001883 | 7496.418  | 5381.757  |
| AK021810  | 135.819  | 327.127   | NM_004628 | 5564.462  | 4003.01   |
| AF086317  | 473.055  | 993.316   | L31785    | 2042.478  | 1787.207  |
| U16850    | 755.077  | 969.636   | AF077374  | 1192.149  | 1202.171  |
| AL390178  | 340.412  | 501.56    | U43901    | 707.732   | 715.176   |
| NM_005383 | 255.203  | 446.617   | X59065    | 908.149   | 814.917   |
| AF147326  | 362.69   | 60.058    | M59828    | 11437.845 | 11243.221 |
| Z36806    | 247.95   | 457.287   | AJ010482  | 3540.587  | 2750.318  |
| AJ008121  | 7737.326 | 12381.773 | NM_000896 | 581.932   | 647.966   |
| AJ008153  | 841.383  | 1250.731  | NM_016546 | 26701.557 | 34168.523 |
| NM_005830 | 2640.463 | 3161.62   | AF309653  | 6660.695  | 5972.834  |
| AK000995  | 545.982  | 641.079   | NM_002620 | 48852.254 | 52020.496 |
| U00959    | 1541.204 | 1771.316  | S79267    | 3534.389  | 3220.469  |
| NM_014578 | 6489.629 | 5914.839  | NM_001816 | 1368.825  | 1054.8    |
| AF147306  | 1840.473 | 1693.226  | NM_003784 | 51797.574 | 51533.43  |
| AF086267  | 538.814  | 615.376   | NM_000195 | 55269.871 | 54768.289 |
| X74606    | 309.397  | 230.203   | NM_005445 | 18365.928 | 11920.758 |
| AK001938  | 253.958  | 452.484   | NM_014899 | 3939.704  | 2480.494  |
| AK022994  | 328.4    | 280.292   | NM_003630 | 8940.429  | 6491.45   |
| AL049466  | 477.105  | 662.179   | NM_000046 | 5205.709  | 4084.979  |
| AL137450  | 2111.349 | 2100.474  | NM_003219 | 4953.397  | 3602.412  |
| AK023058  | 559.087  | 688.081   | NM_006709 | 9548.576  | 5912.429  |
| AJ227878  | 278.679  | 91.561    | NM_000612 | 25897.848 | 20428.066 |
| NM_012064 | 487.168  | 739.749   | NM_004257 | 30467.717 | 21913.479 |
| AK092508  | 345.485  | 701.63    | NM_000683 | 3288.438  | 2698.077  |
| AK027111  | 1890.099 | 5048.643  | NM_005901 | 4805.275  | 4065.77   |
| M60749    | 1227.125 | 2810.879  | NM_004248 | 922.19    | 637.061   |
| AF056424  | 273.66   | 239.178   | AL080170  | 4383.646  | 5301.547  |
| AK056351  | 8268.498 | 20208.289 | AB039903  | 5505.818  | 5031.219  |
| NM_014690 | 2243.032 | 7669.651  | M93107    | 8086.445  | 10114.038 |
| AK024825  | 1120.433 | 1036.083  | BC001479  | 28664.377 | 30909.105 |
| AB037761  | 4471.624 | 5468.587  | NM_002461 | 46010.711 | 51089.055 |
| NM_014008 | 8958.847 | 10533.857 | NM_005771 | 1572.231  | 1662.695  |
| NM_014731 | 4592.776 | 5612.029  | AB032986  | 57756.668 | 42714.281 |
| AF035191  | 6130.706 | 8057.955  | NM_017528 | 57538.625 | 55762.188 |
| NM_004058 | 265.138  | 529.58    | NM_016032 | 10547.915 | 8936.427  |
| NM_004527 | 185.52   | 450.285   | NM_014324 | 52182.055 | 49097.656 |
| NM_012062 | 2313.365 | 3991.328  | NM_001687 | 36235.949 | 29018.668 |
| X92108    | 435.504  | 569.657   | AK026374  | 6205.252  | 4759.459  |
| AL389876  | 301.885  | 548.087   | NM_003459 | 15152.531 | 12067.703 |
| AK022120  | 529.048  | 359.903   | NM_013349 | 56507.41  | 46843.684 |
| U52827    | 487.097  | 422.889   | NM_006861 | 3726.999  | 3021.727  |
| AK022496  | 483.812  | 827.407   | AK023142  | 3477.554  | 3549.34   |
| AB033035  | 1624.619 | 2380.14   | U61740    | 53911.527 | 41749.684 |
| NM_016150 | 169.716  | 412.873   | NM_006409 | 57106.148 | 54795.848 |
| AL137452  | 471.859  | 637.642   | AB049054  | 8814.058  | 5763.92   |
| AK024549  | 3901.698 | 3429.397  | Z83803    | 1082.35   | 763.639   |
| NM_006338 | 1073.939 | 1057.54   | AF027205  | 9061.3    | 7956.217  |
| NM_007164 | 1351.732 | 1497.63   | AF075012  | 2160.104  | 2490.762  |
| NM_000261 | 286.026  | 210.302   | NM_001570 | 1783.21   | 1735.14   |

|           |          |          |           |           |           |
|-----------|----------|----------|-----------|-----------|-----------|
| NM_00260E | 143.375  | 431.067  | NM_01565E | 1078.72   | 925.094   |
| NM_00323E | 384.975  | 748.202  | NM_00058E | 3646.696  | 3875.328  |
| NM_01409E | 2712.948 | 4237.902 | NM_005491 | 14572.25  | 14154.345 |
| NM_00570E | 264.477  | 543.211  | NM_00386E | 12906.812 | 11923.751 |
| NM_001261 | 308.891  | 789.201  | AK025599  | 1906.871  | 2402.378  |
| NM_00721E | 207.609  | 414.804  | X63417    | 4634.405  | 6670.554  |
| AK026854  | 991.912  | 1675.186 | S94539    | 55619.949 | 52629.098 |
| NM_00126E | 1486.169 | 1851.61  | NM_006402 | 4724.01   | 3349.967  |
| NM_00490E | 914.624  | 1466.493 | NM_00578E | 3879.766  | 3657.038  |
| X98261    | 226.994  | 548.117  | AK001695  | 13396.985 | 9513.233  |
| NM_012447 | 459.399  | 831.058  | NM_01788E | 13606.852 | 14110.952 |
| NM_00433C | 1579.877 | 1763.457 | NM_00625E | 4963.691  | 6385.82   |
| AF151802  | 1184.279 | 1122.021 | NM_001721 | 1599.777  | 2215.541  |
| AB006746  | 308.542  | 189.906  | NM_014397 | 12861.129 | 14048.128 |
| NM_001224 | 1345.575 | 1407.309 | AB023182  | 4046.707  | 4652.468  |
| NM_017811 | 1212.236 | 2235.155 | NM_003607 | 2015.625  | 1700.703  |
| NM_00156E | 1913.966 | 2839.96  | NM_00657E | 2952.119  | 2630.931  |
| AK023284  | 557.347  | 929.431  | AB046819  | 23088.279 | 25787.484 |
| NM_003387 | 6942.699 | 5947.164 | NM_00609C | 10738.283 | 12327.221 |
| U60665    | 1486.273 | 993.062  | NM_00290C | 8486.865  | 9624.359  |
| NM_005507 | 3665.666 | 4342.01  | NM_00491C | 1829.787  | 1115.693  |
| AL080133  | 545.343  | 549.782  | AB013452  | 2146.633  | 2193.196  |
| NM_00691E | 344.252  | 187.087  | NM_006851 | 2257.158  | 2693.377  |
| NM_00320E | 565.174  | 978.238  | AK001560  | 6189.853  | 6510.415  |
| AK026231  | 446.601  | 232.598  | AB001328  | 4228.013  | 5841.719  |
| NM_00214C | 2671.127 | 3177.021 | NM_00094E | 1795.441  | 2073.714  |
| NM_02014E | 3307.861 | 4275.147 | H99588    | 2586.597  | 3472.256  |
| NM_01246E | 1538.185 | 1920.477 | X00588    | 10936.308 | 11563.984 |
| NM_005131 | 74.809   | 332.699  | AI359037  | 36072.52  | 34891.695 |
| NM_00705E | 805.935  | 1067.624 | J04513    | 1216.404  | 1316.138  |
| AF083383  | 1418.715 | 1363.185 | BI754285  | 3974.202  | 3853.669  |
| NM_00692E | 1754.156 | 1279.81  | X15998    | 19051.518 | 15691.527 |
| NM_00489C | 8912.494 | 7431.825 | M76482    | 1057.467  | 969.224   |
| AK023181  | 1582.14  | 1161.074 | X17519    | 773.422   | 693.526   |
| NM_004294 | 886.475  | 550.131  | NM_00188E | 5923.428  | 6738.742  |
| NM_005051 | 3091.461 | 1988.954 | NM_00462E | 3930.197  | 4550.52   |
| NM_00196E | 2906.027 | 1844.162 | L31785    | 2579.341  | 2456.222  |
| D17259    | 2389.449 | 2578.9   | H-M 69043 | 12564.681 | 12069.126 |
| AF264627  | 814.721  | 492.553  | AF077374  | 2277.62   | 2053.511  |
| NM_01813C | 516.312  | 231.942  | U43901    | 1037.11   | 673.076   |
| NM_00445E | 395.697  | 659.889  | X59065    | 2554.108  | 2306.591  |
| NM_018244 | 465.018  | 668.29   | M59828    | 19515.32  | 27698.971 |
| NM_00249E | 713.493  | 1412.938 | AJ010482  | 3032.599  | 4050.262  |
| NM_00564E | 3739.599 | 5152.059 | NM_00089E | 442.079   | 527.334   |
| NM_01810E | 450.214  | 557.05   | AB040672  | 838.664   | 557.887   |
| AK023452  | 1059.019 | 1804.977 | NM_00219E | 1454.021  | 1175.778  |
| AK022215  | 3418.568 | 1942.601 | NM_01489E | 4736.399  | 7278.508  |
| U90305    | 331.804  | 545.468  | NM_00363C | 10644.1   | 14008.72  |
| NM_001527 | 9354.199 | 5317.839 | NM_00004E | 6411.374  | 9244.92   |
| AK025269  | 1481.45  | 1030.357 | NM_00321E | 6432.095  | 7047.739  |
| NM_00656E | 394.666  | 255.005  | NM_00670E | 14333.131 | 19179.867 |
| NM_00311E | 433.275  | 294.847  | NM_00061E | 29377.92  | 42615.355 |
| AL080170  | 387.084  | 405.437  | NM_004257 | 29665.873 | 37126.078 |



|           |           |           |           |           |           |
|-----------|-----------|-----------|-----------|-----------|-----------|
| NM_000542 | 1597.858  | 2503.005  | NM_000683 | 6495.941  | 8478.869  |
| NM_006851 | 369.77    | 567.027   | NM_003629 | 9429.871  | 10872.956 |
| H99588    | 383.396   | 548.116   | NM_005901 | 6606.836  | 9749.522  |
| X00588    | 307.726   | 363.801   | NM_004248 | 8521.42   | 11431.977 |
| AI359037  | 801.792   | 1144.905  | NM_000959 | 374.739   | 860.817   |
| NM_001883 | 324.254   | 165.041   | NM_001313 | 2009.974  | 2566.405  |
| NM_004628 | 1163.162  | 743.309   | NM_004796 | 854.323   | 1754.649  |
| L31785    | 1109.946  | 698.082   | NM_000435 | 18402.695 | 14322.825 |
| H-M 69043 | 2518.124  | 1174.142  | NM_001842 | 57017.402 | 53964.066 |
| U43901    | 380.775   | 187.186   | NM_007281 | 867.635   | 1312.151  |
| X59065    | 389.239   | 103.266   | AB017169  | 1269.394  | 1544.13   |
| M59828    | 4888.189  | 3321.178  | AL080170  | 4792.2    | 6304.363  |
| NM_015658 | 470.471   | 73.765    | AB039903  | 6731.449  | 8259.937  |
| NM_000589 | 1154.969  | 1904.123  | NM_000542 | 25907.621 | 28332.947 |
| NM_016546 | 3741.692  | 4881.289  | NM_014625 | 513.604   | 428.426   |
| NM_002620 | 1234.58   | 2140.848  | NM_005829 | 3171.222  | 4227.708  |
| S79267    | 345.77    | 837.358   | NM_000466 | 8545.137  | 12408.571 |
| NM_001816 | 306.694   | 338.612   | NM_015908 | 13764.28  | 20527.67  |
| NM_003784 | 6752.709  | 8252.739  | AK022600  | 43568.336 | 50559.164 |
| NM_005445 | 7175.371  | 7092.414  | AK023142  | 4877.235  | 5735.151  |
| NM_014899 | 324.567   | 503.258   | U61740    | 58116.707 | 58810.867 |
| NM_000046 | 3093.063  | 2743.408  | NM_006409 | 54555.777 | 60320.105 |
| NM_003219 | 767.404   | 402.009   | AB049054  | 11776.686 | 15903.394 |
| NM_006709 | 1519.981  | 1118.763  | NM_015071 | 5611.156  | 7661.339  |
| NM_000612 | 4791.221  | 4133.41   | NM_013227 | 8017.151  | 8702.855  |
| NM_004257 | 6920.762  | 4548.853  | Z83803    | 1555.657  | 1817.498  |
| NM_000683 | 362.364   | 239.654   | AF027205  | 37378.227 | 35058.012 |
| NM_003629 | 695.821   | 317.979   | AF075012  | 3743.044  | 4877.447  |
| NM_005901 | 2720.608  | 1219.47   | NM_001570 | 2345.38   | 3199.115  |
| NM_004248 | 333.151   | 160.988   | NM_015658 | 1407.358  | 1517.187  |
| NM_019066 | 456.733   | 268.596   | NM_000589 | 6088.176  | 11104.783 |
| AB013452  | 1264.005  | 1770.763  | NM_016546 | 30459.82  | 27742.486 |
| M93107    | 347.107   | 638.863   | AF309653  | 6602.762  | 4812.507  |
| BC001479  | 396.273   | 789.302   | NM_002620 | 47825.008 | 45028.875 |
| NM_002461 | 3019.876  | 4059.866  | S79267    | 2609.275  | 2999.288  |
| NM_005771 | 290.002   | 380.803   | NM_001816 | 1316.263  | 1626.845  |
| AB032986  | 4770.261  | 6426.74   | NM_003784 | 60115.867 | 56670.395 |
| NM_017528 | 10782.971 | 10652.365 | NM_000195 | 56059.086 | 55291.902 |
| NM_014324 | 7590.965  | 10779.812 | NM_005445 | 17926.854 | 12291.208 |
| NM_001687 | 1291.691  | 2028.024  | AB046819  | 46268.512 | 50703.305 |
| NM_003459 | 2492.399  | 3636.613  | NM_006090 | 13884.144 | 16587.061 |
| NM_013349 | 8935.469  | 6897.381  | NM_002900 | 33512.598 | 40906.473 |
| NM_006861 | 2215.182  | 1522.569  | NM_004910 | 3967.972  | 4430.072  |
| AK023142  | 593.284   | 611.758   | AB013452  | 3320.305  | 4662.154  |
| U61740    | 6288.326  | 5467.014  | M93107    | 10017.107 | 10661.865 |
| NM_006409 | 34659.469 | 40664.391 | BC001479  | 40653.84  | 42699.926 |
| AB049054  | 679.2     | 730.494   | NM_002461 | 52566.875 | 57455.414 |
| NM_015071 | 873.489   | 473.98    | NM_005771 | 1815.177  | 2173.69   |
| NM_013227 | 1301.828  | 263.542   | AB032986  | 60073.637 | 59801.238 |
| AF027205  | 3378.57   | 1331.998  | NM_017528 | 56213.063 | 57878.766 |
| AF075012  | 577.494   | 151.501   | NM_016032 | 10204.873 | 14522.435 |
| NM_001570 | 482.329   | 132.892   | NM_014324 | 52307.426 | 54216.98  |
| NM_005491 | 767.943   | 1219.134  | NM_001687 | 38815.879 | 39196.875 |

|           |           |           |           |           |           |
|-----------|-----------|-----------|-----------|-----------|-----------|
| NM_00386  | 51.754    | 281.892   | AK026374  | 4771.84   | 5181.014  |
| X63417    | 681.09    | 1044.072  | NM_001169 | 4895.822  | 6349.751  |
| S94539    | 494.138   | 852.679   | AK024648  | 28993.932 | 33577.078 |
| NM_00578  | 255.037   | 275.276   | NM_00071  | 1168.98   | 1362.327  |
| NM_01824  | 335.571   | 496.554   | NM_00345  | 15824.47  | 19878.092 |
| AK001695  | 2640.307  | 1833.858  | AB032526  | 1075.629  | 743.189   |
| NM_01788  | 1980.246  | 1659.273  | NM_000171 | 4747.953  | 4911.608  |
| NM_00625  | 941.019   | 756.432   | AL354615  | 1390.554  | 1050.484  |
| NM_001721 | 872.531   | 527.8     | NM_01334  | 57464.531 | 55885.355 |
| NM_014397 | 6041.661  | 5165.081  | NM_00370  | 8357.155  | 8123.908  |
| AB023182  | 872.173   | 406.877   | NM_006861 | 4325.379  | 2936.647  |
| NM_003607 | 289.611   | 278.546   | AJ010482  | 4311.37   | 4768.292  |
| NM_00657  | 815.456   | 514.625   | NM_00089  | 1805.35   | 2319.245  |
| NM_01325  | 1924.439  | 488.837   | AB040672  | 16530.814 | 19218.498 |
| NM_000437 | 7365.701  | 2878.667  | NM_00219  | 12513.288 | 13436.936 |
| AB046819  | 6484.938  | 1543.003  | NM_005491 | 16188.942 | 13721.329 |
| NM_00609  | 3974.844  | 1381.912  | NM_00386  | 13403.408 | 12841.62  |
| NM_00290  | 1427.616  | 886.61    | AK025599  | 1947.307  | 2294.738  |
| NM_00054  | 362.627   | 638.489   | X63417    | 5701.538  | 6924.814  |
| NM_006851 | 275.46    | 247.992   | S94539    | 54406.895 | 55386.441 |
| AK001560  | 179.622   | 310.041   | S45570    | 552.203   | 601.417   |
| AB001328  | 306.138   | 332.809   | NM_00640  | 5322.259  | 4650.434  |
| H99588    | 89.201    | 510.88    | NM_00578  | 4042.142  | 3361.533  |
| AI359037  | 2968.592  | 3489.523  | NM_01824  | 5187.963  | 4773.63   |
| X15998    | 283.859   | 303.555   | AK001695  | 14925.065 | 15428.669 |
| M76482    | 317.166   | 35.978    | NM_01788  | 16685.432 | 15607.136 |
| NM_00462  | 678.179   | 450.986   | NM_00625  | 5876.501  | 4850.764  |
| L31785    | 861.784   | 616.321   | NM_001721 | 1578.221  | 1504.054  |
| H-M 69043 | 2190.832  | 1442.945  | NM_014397 | 14505.734 | 18436.965 |
| M59828    | 2057.558  | 1089.96   | AB023182  | 4271.928  | 4149.613  |
| AJ010482  | 1013.485  | 169.567   | NM_003607 | 2875.53   | 2549.739  |
| NM_00089  | 290.877   | 139.544   | NM_00657  | 3612.948  | 3729.168  |
| NM_01654  | 2297.568  | 4193.51   | NM_01325  | 4093.094  | 3164.527  |
| AF309653  | 735.214   | 870.659   | NM_000437 | 26006.42  | 21382.65  |
| NM_00262  | 3006.527  | 2970.719  |           |           |           |
| S79267    | 468.319   | 501.469   |           |           |           |
| NM_00378  | 11717.129 | 11400.373 |           |           |           |
| NM_00019  | 4942.155  | 5273.533  |           |           |           |
| NM_00544  | 4853.927  | 4516.451  |           |           |           |
| NM_01489  | 564.164   | 704.844   |           |           |           |
| NM_00363  | 2631.237  | 2499.954  |           |           |           |
| NM_00004  | 2607.355  | 2464.794  |           |           |           |
| NM_00321  | 724.405   | 406.068   |           |           |           |
| NM_00670  | 956.837   | 717.825   |           |           |           |
| NM_00061  | 7019.487  | 3823.543  |           |           |           |
| NM_004257 | 6713.299  | 3695.751  |           |           |           |
| NM_00068  | 262.991   | 229.633   |           |           |           |
| NM_00362  | 547.193   | 249.775   |           |           |           |
| NM_005901 | 1933.083  | 1148.978  |           |           |           |
| NM_00424  | 363.079   | 109.224   |           |           |           |
| AL080170  | 662.801   | 561.973   |           |           |           |
| AB039903  | 1168.639  | 556.369   |           |           |           |
| M93107    | 1301.965  | 1484.787  |           |           |           |

|           |           |           |
|-----------|-----------|-----------|
| BC001479  | 1486.985  | 1670.018  |
| NM_005771 | 561.488   | 433.37    |
| AB032986  | 11793.988 | 11466.449 |
| NM_017528 | 13904.309 | 14512.778 |
| NM_014324 | 4951.208  | 7066.206  |
| NM_001687 | 3278.41   | 4129.143  |
| AK026374  | 180.038   | 455.298   |
| NM_003459 | 1778.265  | 2067.963  |
| NM_013349 | 4716.141  | 4804.034  |
| NM_006861 | 1167.406  | 839.904   |
| AK023142  | 598.082   | 344.156   |
| U61740    | 5022.81   | 3664.605  |
| NM_006409 | 28065.252 | 32560.463 |
| AB049054  | 602.65    | 672.171   |
| NM_015071 | 533.885   | 271.182   |
| NM_013227 | 542.692   | 295.173   |
| AF075012  | 427.829   | 200.744   |
| NM_015658 | 339.858   | 391.253   |
| NM_000589 | 613.137   | 315.845   |
| NM_005491 | 1249.566  | 1554.609  |
| NM_003869 | 145.418   | 272.856   |
| AK025599  | 557.798   | 794.468   |
| X63417    | 1787.097  | 1941.85   |
| S94539    | 1726.792  | 1806.201  |
| NM_006402 | 418.562   | 524.617   |
| NM_005785 | 394.508   | 417.461   |
| NM_018248 | 469.56    | 573.737   |
| AK001695  | 1755.992  | 1345.11   |
| NM_017886 | 1320.658  | 1169.546  |
| NM_006252 | 658.849   | 359.699   |
| NM_001721 | 738.262   | 291.07    |
| NM_014397 | 3404.585  | 2477.968  |
| NM_006575 | 593.548   | 653.092   |
| AB013452  | 1258.962  | 789.242   |
| AB001328  | 355.252   | 79.458    |
| NM_000948 | 423.286   | 141.628   |
| H99588    | 551.463   | 320.816   |
| X00588    | 622.587   | 342.005   |
| AI359037  | 12385.726 | 8088.301  |
| NM_001883 | 281.754   | 72.359    |
| NM_004628 | 727.755   | 241.993   |
| L31785    | 763.936   | 484.484   |
| M59828    | 1473.569  | 1334.93   |
| AJ010482  | 315.1     | 300.501   |
| NM_014899 | 298.033   | 270.818   |
| NM_003630 | 2077.488  | 1417.092  |
| NM_000046 | 1866.497  | 1257.828  |
| NM_003219 | 319.889   | 153.935   |
| NM_006709 | 856.13    | 574.847   |
| NM_000612 | 8054.563  | 5021.978  |
| NM_004257 | 5827.3    | 3577.997  |
| NM_003629 | 743.341   | 446.134   |
| NM_005901 | 3079.107  | 1697.613  |

|           |           |           |
|-----------|-----------|-----------|
| NM_00424E | 300.077   | 193.981   |
| NM_00095E | 173.115   | 91.062    |
| NM_00131E | 301.792   | 203.991   |
| NM_00184E | 389       | 82.919    |
| AB017169  | 322.246   | 351.896   |
| AL080170  | 1427.432  | 1008.66   |
| AB039903  | 3601.94   | 3191.067  |
| NM_00582E | 1557.444  | 992.171   |
| NM_00046E | 1109.482  | 779.678   |
| NM_01590E | 2864.851  | 2243.525  |
| AK023142  | 313.696   | 187.99    |
| U61740    | 3098.148  | 2445.633  |
| NM_00640E | 19353.566 | 11194.776 |
| AB049054  | 444.472   | 406.019   |
| NM_015071 | 637.067   | 490.5     |
| NM_013227 | 624.312   | 225.511   |
| Z83803    | 445.705   | 35.758    |
| AF027205  | 4711.209  | 3574.898  |
| AF075012  | 432.149   | 520.429   |
| NM_00157C | 835.78    | 964.03    |
| NM_01654E | 5178.235  | 3130.246  |
| AF309653  | 557.36    | 214.412   |
| NM_00262C | 4082.871  | 2437.886  |
| S79267    | 423.896   | 436.447   |
| NM_00181E | 422.653   | 140.163   |
| NM_00378A | 23374.6   | 14585.499 |
| NM_00019E | 6150.313  | 5108.46   |
| AB046819  | 5782.544  | 3095.93   |
| NM_00609C | 4319.419  | 2488.637  |
| NM_00290C | 1410.173  | 1195.201  |
| NM_00491C | 501.652   | 233.284   |
| AB013452  | 1154.219  | 1129.745  |
| M93107    | 485.313   | 460.396   |
| BC001479  | 500.337   | 509.728   |
| NM_002461 | 1508.689  | 1088.264  |
| NM_005771 | 290.578   | 154.626   |
| AB032986  | 12072.221 | 6287.989  |
| NM_01752E | 5434.855  | 4363.087  |
| NM_01432A | 4836.577  | 6847.796  |
| NM_001687 | 4983.182  | 2931.166  |
| AK024648  | 8429.678  | 5134.347  |
| NM_00071E | 389.241   | 76.205    |
| NM_00345E | 1739.974  | 1202.014  |
| AB032526  | 322.333   | 98.811    |
| NM_000171 | 276.315   | 198.07    |
| AL354615  | 853.239   | 377.773   |
| NM_01334E | 10659.766 | 7473.777  |
| NM_00370E | 1818.916  | 1335.352  |
| AJ010482  | 1929.662  | 1170.8    |
| NM_005491 | 816.475   | 773.74    |
| X63417    | 768.133   | 795.256   |
| S94539    | 566.037   | 417.484   |
| NM_00640E | 834.876   | 368.172   |

|                  |          |          |
|------------------|----------|----------|
| <b>NM_005785</b> | 695.149  | 87.884   |
| <b>NM_017886</b> | 2167.266 | 959.638  |
| <b>NM_006252</b> | 530.883  | 351.907  |
| <b>NM_001721</b> | 667.713  | 358.04   |
| <b>NM_014397</b> | 6072.136 | 4298.413 |
| <b>AB023182</b>  | 883.029  | 484.51   |
| <b>NM_003607</b> | 757.346  | 486.895  |
| <b>NM_006575</b> | 1014.714 | 710.723  |
| <b>NM_013254</b> | 2005.402 | 2046.308 |

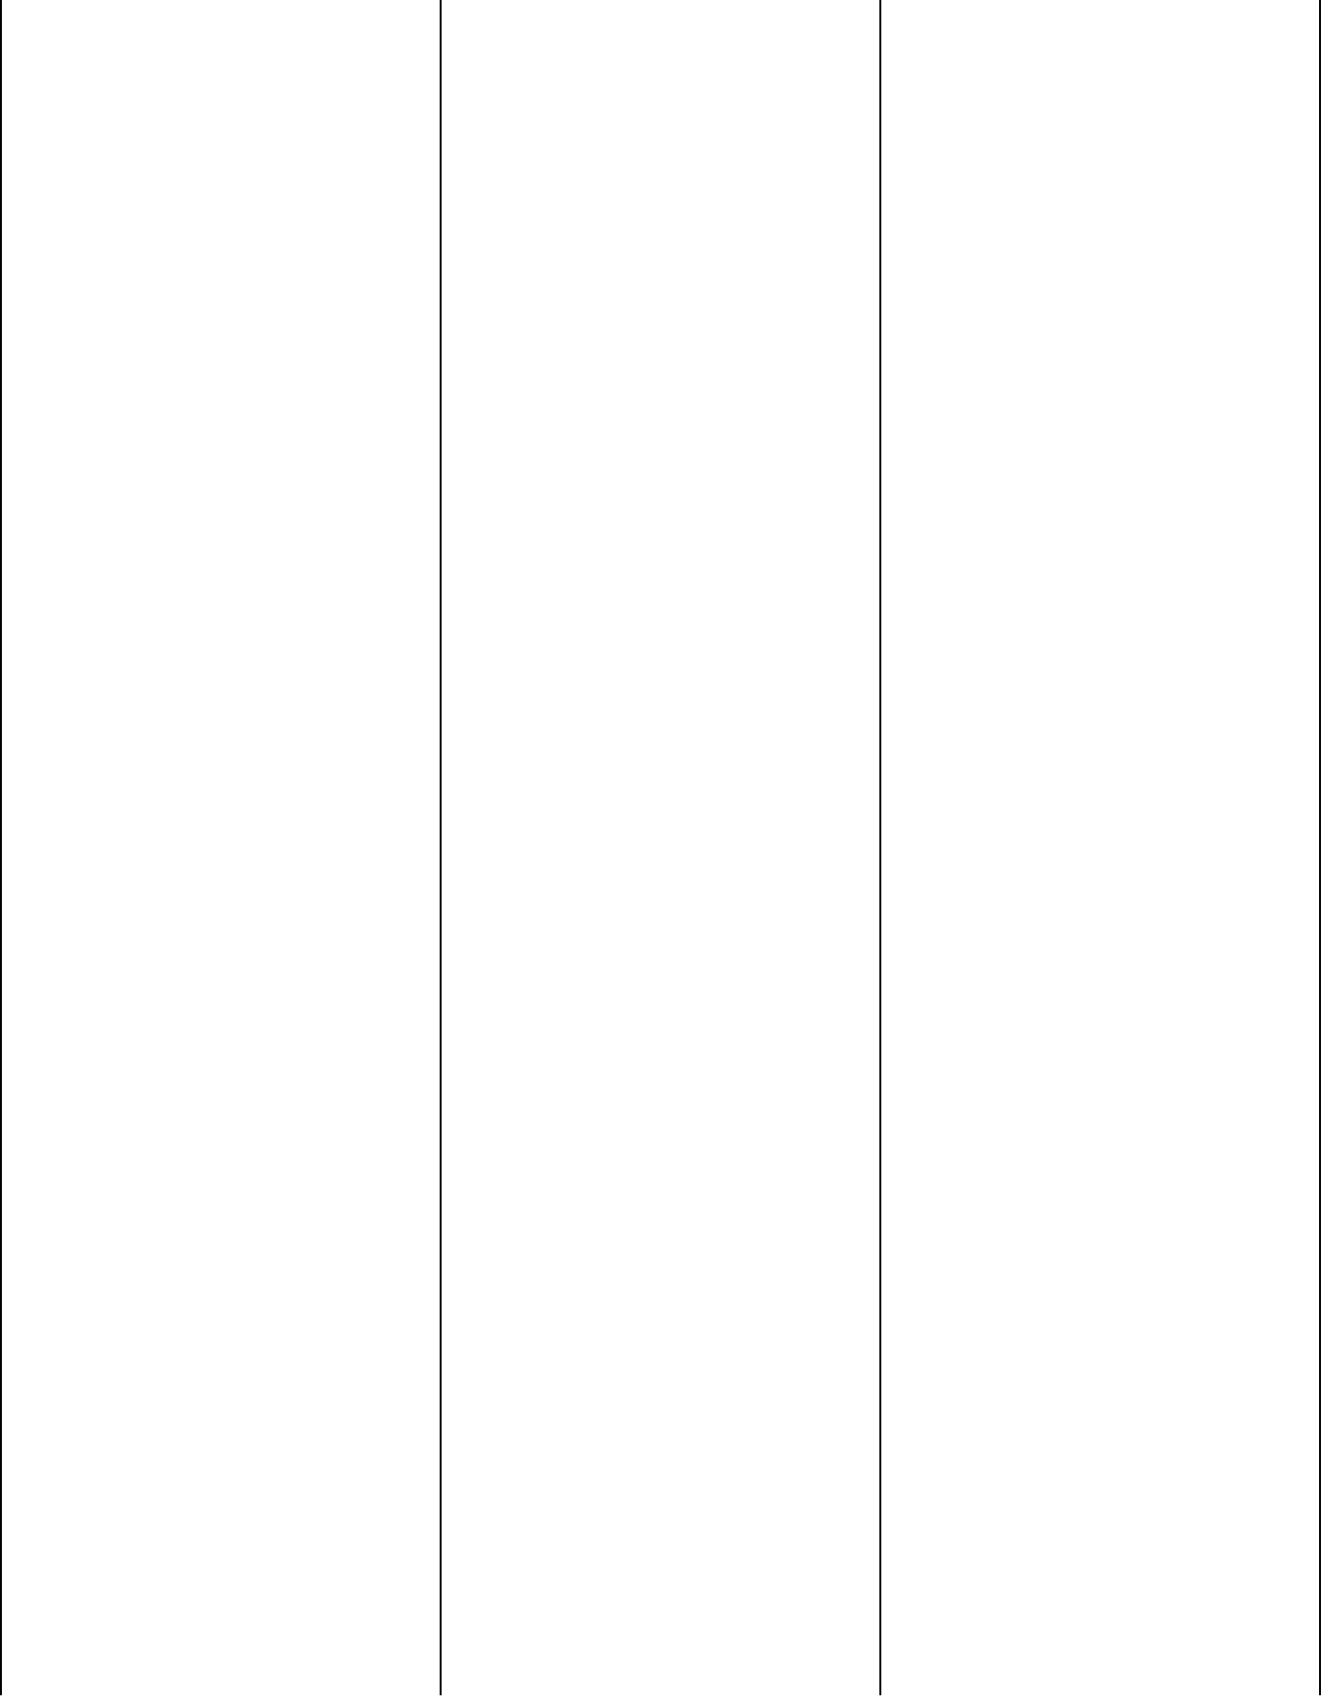





















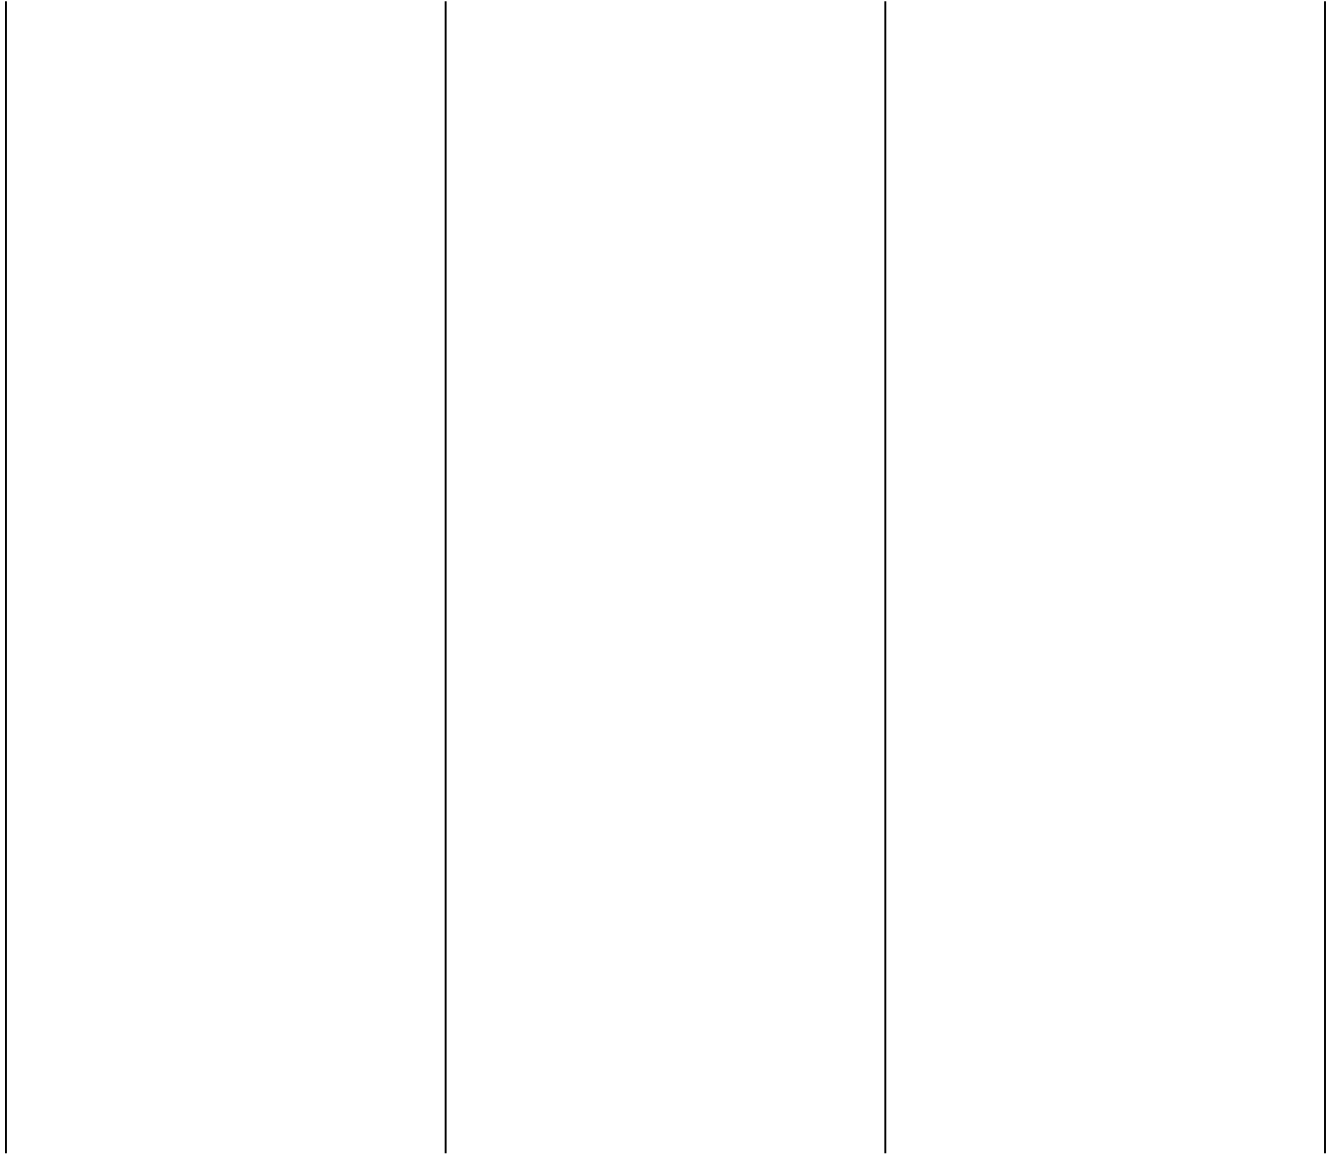



| <i>Replicate 1</i> |                  |           | <i>Replicate 2</i> |                  |           | <i>Replicate 3</i> |                  |           |
|--------------------|------------------|-----------|--------------------|------------------|-----------|--------------------|------------------|-----------|
| <i>control</i>     | <i>50uM zinc</i> |           | <i>control</i>     | <i>50uM zinc</i> |           | <i>control</i>     | <i>50uM zinc</i> |           |
| ID                 | AMPCH1           | AMPCH2    | ID                 | AMPCH1           | AMPCH2    | ID                 | AMPCH1           | AMPCH2    |
| CY3Cy5             | 11521.277        | 275.413   | CY3Cy5             | 20295.354        | 687.413   | CY3Cy5             | 4694.256         | 151.718   |
| NM_006003          | 23919.58         | 24884.416 | NM_006003          | 26132.26         | 47576.449 | NM_006003          | 13865.963        | 9284.865  |
| NM_006555          | 6448.608         | 7941.883  | NM_006555          | 7325.232         | 11947.909 | NM_006555          | 3325.882         | 2292.547  |
| NM_004271          | 51192.781        | 55020.199 | AF129928           | 2321.767         | 5694.868  | NM_004271          | 15141.897        | 11798.985 |
| AF129928           | 2755.654         | 2905.26   | AK022282           | 1279.672         | 1076.808  | AK022282           | 257.306          | 303.19    |
| AK022282           | 1686.987         | 1656.693  | NM_018266          | 3144.084         | 1715.313  | NM_018266          | 1494.172         | 1187.427  |
| NM_018266          | 2892.316         | 3690.32   | NM_004867          | 1046.566         | 654.075   | NM_004867          | 266.867          | 743.038   |
| NM_004867          | 1426.128         | 1882.566  | AL050021           | 24027.258        | 15471.137 | AL050021           | 11983.459        | 7770.64   |
| AL050021           | 24629.643        | 33447.223 | AB002448           | 963.17           | 847.357   | AB002448           | 400.921          | 339.28    |
| AB002448           | 1239.15          | 1877.086  | NM_003838          | 6922.101         | 3181.608  | NM_003838          | 1059.014         | 597.72    |
| AF070580           | 880.541          | 1036.224  | AB032991           | 3039.15          | 1682.458  | AB032991           | 1820.226         | 1583.483  |
| NM_003838          | 10231.562        | 10475.471 | AK026985           | 7000.01          | 3728.093  | AK026985           | 2556.911         | 5474.729  |
| AB032991           | 4039.634         | 7619.447  | AK000855           | 1861.247         | 1381.816  | NM_006003          | 14063.986        | 11105.177 |
| AK026985           | 7763.344         | 11654.652 | NM_006003          | 22809.455        | 14188.929 | NM_006555          | 3433.094         | 1663.979  |
| AF007153           | 436.446          | 1114.191  | NM_006555          | 6010.197         | 4492.049  | SR1                | 74717.375        | 55233.484 |
| AK000855           | 1650.464         | 1899.442  | SR1                | 69711.75         | 66019.875 | SR3                | 31761.953        | 20152.799 |
| NM_006003          | 25130.928        | 26181.643 | SR3                | 49907.863        | 39539.141 | SR5                | 3660.011         | 2798.048  |
| NM_006555          | 6974.438         | 6056.861  | SR5                | 7279.487         | 6072.429  | SR7                | 3912.683         | 19916.391 |
| SR1                | 75757.734        | 64009.32  | SR7                | 7291.917         | 43790.289 | SR9                | 10273.132        | 653.492   |
| SR3                | 52634.27         | 51913.113 | SR9                | 24593.301        | 4628.386  | CY3Cy5             | 5815.144         | 117.519   |
| SR5                | 7382.469         | 9081.863  | CY3Cy5             | 17633.531        | 331.47    | NM_014029          | 35961.273        | 27503.637 |
| SR7                | 7695.909         | 41207.816 | M87941             | 593.946          | 983.624   | Z83937             | 1382.632         | 2134.018  |
| SR9                | 23808.531        | 7633.123  | M21536             | 832.021          | 3319.681  | L08443             | 3197.275         | 2725.618  |
| CY3Cy5             | 14557.107        | 466.325   | NM_014029          | 60083.094        | 68356.711 | L38936             | 767.076          | 1151.338  |
| M21536             | 2120.097         | 4035.412  | L08443             | 11963.24         | 27782.537 | D55643             | 3203.404         | 2441.334  |
| NM_014029          | 61049.898        | 62015.035 | L38936             | 2472.691         | 4166.305  | AK025818           | 1975.523         | 1367.821  |
| L08443             | 16575.609        | 17476.25  | D55643             | 5182.076         | 2373.472  | AK023185           | 2995.763         | 1600.149  |
| L38936             | 2118.78          | 2272.241  | AK025818           | 4435.423         | 1684.804  | AL050204           | 3006.004         | 1496.12   |
| D55643             | 5234.459         | 5600.327  | AK023185           | 5435.674         | 2606.031  | AF085999           | 703.588          | 534.099   |
| AK025818           | 4555.125         | 5008.765  | AL359622           | 1928.929         | 974.979   | AK025316           | 1489.416         | 954.753   |
| AK023185           | 5962.482         | 7365.688  | AL050204           | 6005.735         | 2628.49   | AK026357           | 1884.738         | 1050.131  |
| AL359622           | 2344.308         | 2712.293  | AF085999           | 1300.588         | 781.836   | NM_018323          | 3389.305         | 3871.4    |
| AL050204           | 8606.454         | 8098.459  | AK025316           | 3399.218         | 1438.622  | NM_014235          | 4337.323         | 4989.434  |
| AF085999           | 1716.099         | 2555.541  | AK026357           | 3917.986         | 3004.979  | AK026922           | 2465.74          | 1836.832  |
| AK025316           | 3790.719         | 6753.071  | NM_018323          | 8633.72          | 7437.234  | AK022426           | 2337.52          | 1121.306  |
| AK026357           | 4954.684         | 7225.308  | NM_014235          | 13082.646        | 8095.063  | AF070552           | 4408.097         | 1788.102  |
| NM_018323          | 9734.329         | 13054.257 | AK026922           | 2878.143         | 2240.269  | AK024517           | 1475.147         | 2045.973  |
| NM_014235          | 14246.889        | 16243.628 | AK022426           | 1438.281         | 1097.984  | AK024585           | 709.802          | 1064.85   |
| AK026922           | 3616.218         | 4122.025  | AF070552           | 13439.213        | 17106.393 | AK024887           | 1776.821         | 2357.224  |
| AK022426           | 1712.175         | 1372.321  | AK024868           | 519.167          | 1379.408  | AK025005           | 806.812          | 652.991   |
| AF070552           | 14532.998        | 16168.196 | AK024517           | 5367.791         | 11536.682 | AK023089           | 2234.521         | 1558.432  |
| AK024517           | 5471.996         | 6095.796  | AK024585           | 2285.914         | 1778.092  | AK026059           | 55911.906        | 53548.656 |
| AK024585           | 3038.035         | 3150.965  | AK024887           | 7012.035         | 3332.888  | AK026942           | 870.744          | 538.987   |
| AK024887           | 8325.801         | 8297.421  | AK025005           | 1440.627         | 638.878   | AK025814           | 2376.368         | 1766.421  |
| AK025005           | 1583.529         | 1906.983  | AK023089           | 4986.934         | 2860.365  | AK000655           | 5749.647         | 3261.765  |
| AK023089           | 4416.729         | 6104.615  | AK026059           | 63421.395        | 61453.457 | NM_017936          | 2298.541         | 1466.639  |
| AK026059           | 64235.434        | 67534.75  | AK026942           | 2747.42          | 1239.524  | X64983             | 422.959          | 298.403   |
| AK026942           | 3412.301         | 3555.771  | AK025814           | 5250.738         | 2710.279  | D63134             | 844.076          | 355.984   |

|           |           |           |           |           |           |           |           |           |
|-----------|-----------|-----------|-----------|-----------|-----------|-----------|-----------|-----------|
| AK025814  | 5806.905  | 7068.95   | AK000655  | 19175.326 | 13756.507 | Y10513    | 3022.323  | 1516.216  |
| AK000655  | 21569.293 | 31714.635 | AL117611  | 1965.794  | 4350.517  | AK055950  | 934.341   | 545.347   |
| AL117611  | 1761.751  | 2176.236  | AF131841  | 1277.047  | 2359.838  | AK000839  | 6893.43   | 10358.892 |
| NM_017936 | 8928.442  | 9894.494  | NM_017936 | 7848.181  | 12749.188 | AF086195  | 273.718   | 867.216   |
| Y10209    | 936.81    | 932.435   | X64983    | 2586.48   | 2187.096  | AK026345  | 1521.602  | 653.63    |
| X64983    | 2884.4    | 3358.441  | D63134    | 1954.282  | 1838.018  | NM_018276 | 3497.09   | 1262.267  |
| D63134    | 2484.975  | 2600.093  | Y10513    | 8665.39   | 10579.516 | AK026328  | 751.64    | 271.66    |
| AJ227893  | 1022.323  | 1248.557  | AK055950  | 2385.572  | 4160.936  | AK000417  | 939.932   | 412.741   |
| Y10513    | 9662.618  | 12086.854 | AL050122  | 1163.973  | 3663.686  | AK000864  | 6288.738  | 1940.702  |
| AK055950  | 2230.688  | 2286.087  | AK000839  | 20145.814 | 33861.84  | AK022414  | 2294.595  | 795.23    |
| AL050122  | 1248.425  | 1200.372  | AF086195  | 952.769   | 929.481   | NM_017624 | 6080.746  | 3486.993  |
| AK000839  | 20359.455 | 22576.287 | AK022183  | 690.728   | 389.94    | NM_017926 | 809.555   | 426.396   |
| AF086195  | 1122.595  | 1055.911  | AK026345  | 5340.168  | 2175.064  | AK000907  | 5865.722  | 3874.538  |
| AK021963  | 1095.566  | 859.001   | NM_004803 | 2001.611  | 2523.222  | NM_016094 | 4408.403  | 2142.403  |
| AK022183  | 2332.652  | 2556.438  | AB007971  | 1680.223  | 1087.812  | AK025003  | 2034.701  | 1400.29   |
| NM_018166 | 647.093   | 505.365   | NM_018276 | 20352.615 | 29890.256 | NM_001427 | 2292.066  | 2693.014  |
| AK026345  | 7004.046  | 6371.317  | AK026328  | 1314.529  | 2172.271  | NM_016175 | 1422.152  | 1840.062  |
| AB007971  | 1493.833  | 1675.93   | AK000417  | 2095.932  | 1618.948  | M15639    | 5926.655  | 10173.1   |
| NM_018276 | 12532.143 | 11455.66  | AK000864  | 12635.187 | 12052.55  | AF130084  | 2247.187  | 2718.137  |
| AK026328  | 1499.707  | 1283.032  | AK022414  | 3162.397  | 3668.154  | AF133334  | 11005.619 | 9528.855  |
| AK000417  | 1895.98   | 1820.153  | NM_017624 | 14650.347 | 14822.122 | NM_016290 | 2582.851  | 1158.971  |
| AK000864  | 13783.152 | 12133.909 | NM_017926 | 1302.154  | 1787.475  | AK026498  | 1374.825  | 589.346   |
| AK022414  | 2970.07   | 3767.078  | AK000907  | 16070.933 | 20428.582 | AK095587  | 4277.3    | 1541.296  |
| NM_017624 | 15671.597 | 17329.52  | NM_016094 | 8644.533  | 17270.123 | AF086043  | 658.538   | 398.836   |
| NM_017926 | 1207.604  | 1822.725  | AK025003  | 5681.288  | 13382.467 | AK024174  | 901.032   | 300.663   |
| AK000907  | 17022.363 | 21388.234 | AK023601  | 550.391   | 1722.862  | AK000038  | 2552.887  | 767.887   |
| NM_016094 | 8884.235  | 7588.316  | NM_001427 | 4966.319  | 9196.47   | BC010084  | 923.077   | 543.091   |
| AK025003  | 4892.713  | 4645.695  | NM_016175 | 2710.62   | 2167.929  | U10513    | 1972.232  | 522.953   |
| AK023601  | 655.968   | 553.409   | M15639    | 11559.998 | 7523.11   | L10151    | 43308.672 | 16112.238 |
| NM_001427 | 4840.662  | 5344.592  | AF130084  | 5879.353  | 3454.426  | AK022203  | 955.995   | 512.973   |
| NM_016175 | 3376.128  | 3273.671  | AF133334  | 26369.771 | 18098.689 | AK023037  | 822.608   | 594.156   |
| M15639    | 11838.575 | 15374.345 | NM_016290 | 7905.761  | 3823.442  | L37704    | 453.927   | 381.852   |
| AF130084  | 5666.015  | 6988.691  | AK026498  | 3690.68   | 1999.31   | AB007968  | 1729.353  | 2122.095  |
| AF133334  | 25126.773 | 23861.953 | AF086151  | 835.106   | 1154.273  | AL117544  | 769.989   | 902.306   |
| NM_016290 | 9633.499  | 10114.199 | AK095587  | 9204.552  | 24033.43  | NM_005664 | 19278.932 | 26327.836 |
| AK026498  | 4975.125  | 5484.934  | AF086043  | 1959.087  | 4965.407  | NM_006270 | 33072.188 | 41943.18  |
| AK095587  | 9984.209  | 10374.095 | AK024174  | 3986.613  | 4879.445  | U50277    | 999.893   | 1460.571  |
| AF086043  | 2083.461  | 2633.476  | AK000038  | 7344.689  | 6510.23   | Z48633    | 3024.876  | 2641.677  |
| AK024174  | 1791.645  | 1711.748  | BC010084  | 6584.627  | 8861.477  | M62627    | 14049.085 | 11009.077 |
| AK000038  | 5073.888  | 6435.221  | U10513    | 9960.268  | 11043.569 | NM_006686 | 3543.365  | 1882.405  |
| BC010084  | 3740.562  | 4279.948  | L10151    | 61443.594 | 58220.18  | AK002209  | 567.381   | 371.967   |
| U10513    | 3937.8    | 4028.193  | AK022203  | 2272.818  | 2302.1    | NM_017854 | 56908.543 | 32822.625 |
| L10151    | 61540.184 | 58467.262 | BC032236  | 825.528   | 1176.518  | NM_014354 | 1271.716  | 508.556   |
| AK022203  | 1816.973  | 2139.061  | AK023037  | 2535.043  | 2994.628  | AL137548  | 6755.202  | 2454.52   |
| BC032236  | 784.715   | 1053.166  | S71611    | 673.117   | 959.828   | AK095051  | 1021.979  | 371.732   |
| AK023037  | 2827.462  | 3257.878  | L37704    | 1180.395  | 2938.14   | AF088062  | 1004.774  | 452.739   |
| S71611    | 708.003   | 872.186   | AB007968  | 3304.163  | 4832.374  | AK024929  | 1623.872  | 597.725   |
| L37704    | 1275.03   | 1137.747  | AL117544  | 1073.971  | 756.572   | D17232    | 19695.334 | 7801.3    |
| AB007968  | 2760.466  | 2364.134  | NM_005664 | 50987.73  | 21129.922 | NM_005260 | 5036.344  | 2890.071  |
| AL117544  | 1374.188  | 1520.733  | NM_006270 | 59466.168 | 44509.406 | AF085880  | 7562.076  | 3676.058  |
| NM_005664 | 50987.484 | 48530.109 | U50277    | 2636.926  | 1737.946  | NM_016156 | 516.45    | 1387.799  |
| NM_006270 | 59265.949 | 58295.281 | Z48633    | 7606.003  | 4296.059  | AF000990  | 1218.941  | 848.346   |
| U50277    | 2872.704  | 3086.162  | M62627    | 28861.102 | 18370.615 | AK026663  | 590.357   | 588.068   |

|           |           |           |           |           |           |           |           |           |
|-----------|-----------|-----------|-----------|-----------|-----------|-----------|-----------|-----------|
| Z48633    | 8560.741  | 8831.733  | NM_006686 | 11682.484 | 6881.711  | NM_001174 | 884.67    | 1247.728  |
| M62627    | 31939.516 | 45413.434 | AK002209  | 1857.134  | 1140.443  | U69645    | 756.832   | 1007.223  |
| NM_006686 | 14079.092 | 14778.568 | NM_017854 | 63537.137 | 68457.477 | NM_019082 | 5684.512  | 8095.166  |
| AK002209  | 2510.203  | 3129.855  | NM_014354 | 3364.71   | 7706.724  | NM_001424 | 1005.598  | 2205.077  |
| NM_017854 | 66493.508 | 66663.844 | AL137548  | 14888.221 | 34652.688 | AB040950  | 874.336   | 1830.186  |
| NM_014354 | 4254.158  | 4633.576  | AK095051  | 2235.448  | 2591.947  | NM_014003 | 2746.39   | 6743.984  |
| AL137548  | 18081.387 | 19328.869 | AK024929  | 4941.399  | 6235.46   | NM_001356 | 905.227   | 1379.953  |
| AK095051  | 2712.355  | 2972.137  | NM_017779 | 1085.95   | 926.408   | AB002282  | 58964.973 | 67544.703 |
| AF088062  | 2357.608  | 2778.586  | D17232    | 34735.922 | 28649.139 | AB037805  | 2976.068  | 2240.685  |
| AK024929  | 3282.84   | 3893.143  | NM_005260 | 18328.449 | 19472.389 | NM_006373 | 3960.81   | 2793.479  |
| NM_017779 | 762.42    | 1147.349  | AF085880  | 13925.958 | 12662.515 | AK001007  | 1116.952  | 328.235   |
| D17232    | 29234.604 | 29916.182 | NM_016158 | 1635.539  | 3068.956  | AF116655  | 13140.486 | 3948.683  |
| NM_005260 | 16258.125 | 18167.035 | AF000990  | 2305.137  | 2719.521  | AF009308  | 24538.627 | 7501.895  |
| AF085880  | 12331.398 | 14127.367 | AK026663  | 2846.446  | 2773.464  | AB032969  | 54448.371 | 28981.717 |
| NM_016158 | 1425.401  | 1902.894  | NM_001174 | 1953.535  | 1768.451  | Y11610    | 2891.625  | 1439.718  |
| AF000990  | 2268.415  | 2707.246  | U69645    | 1743.289  | 941.762   | L37695    | 896.87    | 579.579   |
| AK026663  | 3185.773  | 2248.923  | NM_019082 | 10461.656 | 3807.929  | NM_004627 | 7322.087  | 5684.566  |
| NM_001174 | 1967.713  | 1928.983  | NM_001424 | 2840.494  | 1703.796  | AK026523  | 11937.473 | 8913.569  |
| U69645    | 2668.469  | 2301.293  | AB040950  | 3157.291  | 2386.411  | AL050217  | 20460.523 | 16715.266 |
| NM_019082 | 11100.092 | 10536.847 | NM_014003 | 8477.77   | 4702.416  | NM_005928 | 2288.639  | 3087.296  |
| NM_001424 | 2869.359  | 2964.274  | NM_001356 | 3059.527  | 2151.709  | NM_005424 | 1788.28   | 4350.972  |
| AB040950  | 3543.664  | 3897.619  | AB037805  | 16677.799 | 9438.608  | NM_005975 | 2862.94   | 6961.587  |
| NM_014003 | 8786.087  | 8356.63   | NM_006373 | 6260.709  | 4313.247  | AY007220  | 8107.334  | 15001.158 |
| NM_001356 | 3641.793  | 3687.185  | AF085922  | 984.734   | 989.593   | NM_004438 | 1949.699  | 3644.734  |
| AB002282  | 66484.672 | 72169.844 | AK001007  | 2129.029  | 4487.88   | NM_003808 | 2424.292  | 2303.47   |
| AB037805  | 25044.805 | 23160.355 | NM_014485 | 1409.745  | 2720.555  | AK023666  | 844.735   | 745.528   |
| NM_006373 | 12755.299 | 13562.956 | AF116655  | 23265.039 | 14299.813 | NM_005396 | 1541.738  | 530.689   |
| AK001007  | 2547.427  | 2464.585  | AB032969  | 62457.32  | 57723.691 | NM_005118 | 506.313   | 182.502   |
| NM_014485 | 1062.4    | 1529.482  | Y11610    | 4417.529  | 4274.504  | NM_015185 | 3659.346  | 983.686   |
| AF009308  | 41414.23  | 53352.105 | AF085940  | 954.974   | 784.601   | NM_005374 | 304.755   | 240.981   |
| AB032969  | 66203.43  | 67903.891 | L37695    | 2466.193  | 2300.301  | NM_003632 | 1522.523  | 907.026   |
| Y11610    | 4507.007  | 5339.665  | NM_004627 | 14215.65  | 15675.97  | NM_002194 | 2807.507  | 1014.502  |
| AF085940  | 938.121   | 1136.307  | AK026523  | 14283.234 | 14533.146 | AB028989  | 657.643   | 513.343   |
| L37695    | 2559.232  | 2368.163  | AL050217  | 43416.473 | 47152.172 | NM_016166 | 14418.405 | 8298.402  |
| NM_004627 | 12922.046 | 18002.861 | NM_005928 | 4074.298  | 1848.764  | NM_002086 | 14527.759 | 7079.659  |
| AK026523  | 14330.382 | 15951.761 | NM_005424 | 5786.689  | 4531.545  | NM_016248 | 2343.541  | 1855.047  |
| AL050217  | 42031.855 | 48501.824 | NM_005975 | 5187.195  | 4709.347  | NM_005488 | 42423.984 | 32240.453 |
| NM_005928 | 4228.581  | 3812.679  | AY007220  | 22554.219 | 18350.646 | NM_002396 | 595.93    | 2271.122  |
| NM_005424 | 6183.611  | 5578.009  | NM_003808 | 3295.755  | 2808.745  | NM_005417 | 1192.85   | 3007.55   |
| NM_005975 | 6255.911  | 5821.333  | AK023666  | 2176.234  | 1647.333  | NM_002646 | 2226.327  | 7996.147  |
| AY007220  | 20456.045 | 17682.178 | NM_005396 | 2928.253  | 1591.471  | AK025329  | 14111.161 | 36450.203 |
| NM_004438 | 4324.197  | 3433.055  | NM_006573 | 1755.362  | 2776.532  | NM_001256 | 656.093   | 1271.084  |
| NM_003808 | 3335.881  | 3495.162  | NM_005118 | 1208.578  | 2225.037  | AL137679  | 2672.346  | 4594.118  |
| AK023666  | 2519.104  | 2507.158  | NM_015185 | 6603.75   | 6943.182  | NM_001786 | 10690.448 | 15197.265 |
| NM_005396 | 3197.45   | 2490.307  | NM_005374 | 996.127   | 750.482   | AB040965  | 538.409   | 800.151   |
| NM_006573 | 722.963   | 898.76    | AF011757  | 2478.652  | 3786.266  | AK025026  | 1786.949  | 1810.732  |
| NM_005118 | 1205.434  | 1276.118  | NM_003632 | 5845.621  | 7302.871  | AK023052  | 1913.971  | 1461.228  |
| NM_015185 | 7316.724  | 7430.349  | NM_002194 | 5917.433  | 6866.9    | AB018350  | 962.182   | 507.873   |
| NM_005374 | 1470.265  | 1820.411  | AB028989  | 1425.17   | 1435.259  | NM_006455 | 56706.285 | 57546.27  |
| AF011757  | 2684.031  | 3354.965  | NM_016166 | 30033.559 | 27474.795 | NM_018460 | 3987.145  | 939.205   |
| NM_003632 | 6140.014  | 7151.417  | NM_002086 | 22719.479 | 20597.465 | NM_002705 | 13656.561 | 3167.411  |
| NM_002194 | 6247.391  | 5523.096  | NM_016248 | 4055.842  | 5809.472  | NM_005591 | 17304.188 | 5405.286  |
| AB028989  | 1330.371  | 1441.409  | NM_005489 | 61706.012 | 56009.598 | NM_002373 | 1212.429  | 992.213   |

|           |           |           |           |           |           |           |           |           |
|-----------|-----------|-----------|-----------|-----------|-----------|-----------|-----------|-----------|
| NM_01616E | 23592.596 | 23376.412 | NM_00239E | 1193.048  | 950.719   | NM_00312E | 528.966   | 740.669   |
| NM_00208E | 21046.266 | 19180.582 | NM_005417 | 2941.002  | 2297.52   | AK024251  | 720.626   | 693.345   |
| NM_01624E | 4089.773  | 4707.596  | NM_00264E | 6460.955  | 4528.72   | NM_00254E | 2285.69   | 1856.835  |
| NM_00548E | 66706.242 | 63514.094 | AK025329  | 23716.299 | 20711.104 | NM_00668E | 58105.918 | 52998.723 |
| NM_004464 | 618.612   | 568.182   | NM_00125E | 1328.401  | 1334.036  | NM_005411 | 4915.034  | 3458.054  |
| NM_00239E | 1283.459  | 1016.137  | AL137679  | 4160.391  | 3652.205  | NM_00438E | 754.839   | 640.849   |
| NM_005417 | 2054.365  | 1744.001  | NM_00178E | 21243.234 | 18081.025 | NM_00480E | 649.902   | 2186.771  |
| NM_00264E | 6730.878  | 6665.795  | AB040965  | 1315.797  | 1101.861  | NM_004617 | 1784.535  | 5501.294  |
| AK025329  | 24088.896 | 21443.662 | AK025026  | 3774.327  | 3701.114  | NM_00566E | 2892.914  | 10174.539 |
| NM_00125E | 1391.562  | 1440.656  | AK023052  | 2827.466  | 2508.533  | NM_00674E | 469.781   | 1359.243  |
| AL137679  | 4567.958  | 4853.704  | AB018350  | 1429.198  | 1235.128  | NM_012177 | 5299.753  | 12427.911 |
| NM_00178E | 21508.525 | 18240.445 | NM_00645E | 63553.078 | 62202.012 | NM_00666E | 29047.057 | 61331.875 |
| AB040965  | 1303.025  | 1311.123  | NM_01846C | 6790.804  | 5324.152  | NM_002807 | 10217.3   | 17969.547 |
| AK025026  | 9424.427  | 8004.716  | NM_00270E | 15531.437 | 11082.225 | NM_00279E | 53704.637 | 60095.715 |
| AK023052  | 5936.688  | 4733.041  | NM_005591 | 26232.449 | 23768.082 | NM_00279C | 20956.82  | 33476.422 |
| AB018350  | 2116.528  | 2305.925  | NM_00237E | 1782.089  | 1943.936  | NM_01838E | 5356.34   | 8127.017  |
| NM_00645E | 65137.301 | 61891.414 | NM_00312E | 786.268   | 1032.979  | NM_01494E | 1295.424  | 1338.269  |
| NM_01846C | 7273.682  | 6914.451  | AK024251  | 1341.13   | 1560.582  | BF217579  | 12651.776 | 11438.959 |
| NM_00270E | 23383.801 | 21367.912 | NM_00254E | 5438.229  | 5572.45   | NM_00433E | 8298.702  | 2888.177  |
| NM_005591 | 26803.605 | 27664.238 | NM_00668E | 60956.582 | 61304.117 | AF040965  | 21092.875 | 5094.282  |
| NM_00237E | 2332.24   | 3000.607  | NM_005411 | 13874.724 | 13626.986 | AB037840  | 6125.681  | 2191.449  |
| NM_00312E | 1013.405  | 1155.375  | NM_00438E | 898.169   | 1230.962  | NM_007011 | 1544.876  | 626.171   |
| AK024251  | 1119.704  | 1202.998  | NM_00480E | 1246.676  | 682.814   | Y10210    | 7893.824  | 5562.006  |
| NM_00254E | 5311.785  | 5151.648  | NM_004617 | 5081.53   | 4714.224  | AB020689  | 3643.442  | 2919.997  |
| NM_00668E | 64835.133 | 62263.684 | NM_00566E | 5498.743  | 3954.726  | AK023916  | 663.597   | 307.5     |
| NM_005411 | 12817.999 | 12867.69  | NM_00674E | 638.281   | 909.242   | NM_00320E | 4064.125  | 3090.731  |
| NM_00438E | 846.688   | 1193.746  | NM_012177 | 11275.005 | 9029.973  | NM_002514 | 1173.819  | 1106.594  |
| NM_00480E | 1460.267  | 1001.778  | NM_00666E | 55235.422 | 57857.402 | AF177238  | 1227.199  | 909.387   |
| NM_004617 | 5112.409  | 4116.282  | NM_002807 | 16220.1   | 15228.49  | NM_02048E | 3873.04   | 2682.826  |
| NM_00566E | 5761.532  | 4454.336  | NM_00279E | 59922.797 | 57737.855 | NM_01494E | 57768.391 | 81680.813 |
| NM_00674E | 864.731   | 798.262   | NM_00279C | 35557.281 | 33086.184 | AB033112  | 1918.762  | 5111.136  |
| NM_012177 | 12334.215 | 10344.698 | NM_01838E | 8947.787  | 8620.161  | NM_005674 | 172.758   | 1166.973  |
| NM_00666E | 62869.637 | 56454.711 | NM_01494E | 1609.918  | 1539.719  | AK023243  | 2594.3    | 6537.588  |
| NM_002807 | 16458.65  | 16138.091 | BF217579  | 16008.911 | 14292.88  | NM_01440E | 1718.027  | 3286.415  |
| NM_00279E | 66150.984 | 62905.125 | NM_00433E | 13440.344 | 10939.182 | BE791857  | 297.376   | 1044.66   |
| NM_00279C | 39011.844 | 44850.402 | AF040965  | 19421.896 | 16066.101 | NM_006867 | 451.927   | 920.18    |
| NM_01838E | 10169.35  | 10002.375 | AB037840  | 5651.339  | 5785.048  | NM_00142E | 4896.246  | 8178.939  |
| NM_01494E | 2986.923  | 2975.842  | NM_007011 | 3106.875  | 3850.5    | NM_00551E | 267.958   | 325.51    |
| BF217579  | 45000.719 | 45669.859 | Y10210    | 15180.908 | 15491.188 | AK022358  | 7606.795  | 3041.965  |
| NM_00433E | 20716.447 | 19034.73  | AB020689  | 7473.931  | 7639.939  | NM_01420E | 51306.457 | 15209.186 |
| AF040965  | 35046.059 | 34436.52  | AK023916  | 1174.928  | 1144.489  | NM_018141 | 17686.816 | 7574.904  |
| AB037840  | 13710.006 | 14228.016 | NM_00320E | 8075.711  | 9249.096  | NM_016504 | 56847.848 | 40490.723 |
| NM_007011 | 3416.877  | 4672.362  | NM_002514 | 1928.717  | 1976.66   | U25752    | 58224.281 | 62793.473 |
| Y10210    | 15005.966 | 15909.989 | AF177238  | 1798.045  | 1473.682  | X96646    | 56736.016 | 52560.43  |
| AB020689  | 7005.126  | 8680.083  | AF191770  | 495.924   | 767.46    | NM_00485E | 8780.684  | 7325.967  |
| AK023916  | 1249.276  | 1688.323  | NM_02048E | 11236.679 | 13057.752 | NM_00695E | 476.411   | 506.525   |
| NM_00320E | 7838.486  | 8657.574  | NM_01494E | 60097.961 | 61840.859 | NM_00505E | 459.278   | 288.236   |
| NM_002514 | 2168.185  | 2211.74   | AB033112  | 4434.32   | 3169.324  | NM_00319E | 14215.401 | 33790.535 |
| AF177238  | 1655.948  | 1488.45   | NM_005674 | 562.174   | 590.29    | AF220415  | 1518.468  | 3550.818  |
| AF191770  | 636.787   | 1063.691  | AK023243  | 4982.009  | 5461.928  | NM_005174 | 58716.176 | 67187.336 |
| NM_02048E | 10267.299 | 13266.668 | NM_01440E | 5705.956  | 5340.111  | NM_00036E | 6318.137  | 12160.683 |
| NM_01494E | 60801.305 | 60396.988 | BE791857  | 1102.154  | 1081.756  | NM_01345C | 3422.819  | 5592.383  |
| AB033112  | 4226.647  | 3125.187  | NM_006867 | 714.512   | 684.542   | NM_00453E | 2211.819  | 3362.123  |

|           |           |           |           |           |           |           |           |           |
|-----------|-----------|-----------|-----------|-----------|-----------|-----------|-----------|-----------|
| NM_005674 | 567.388   | 903.803   | NM_001422 | 7435.53   | 6676.102  | NM_003077 | 4380.833  | 4749.085  |
| AK023243  | 5811.033  | 5970.186  | AK022358  | 14239.538 | 13686.881 | NM_002105 | 4737.983  | 933.313   |
| NM_014409 | 6989.37   | 6288.028  | NM_014205 | 58098.836 | 53812.004 | NM_018489 | 2753.4    | 457.08    |
| BE791857  | 1384.952  | 1326.092  | NM_018141 | 26345.762 | 23171.322 | L13203    | 8140.733  | 3259.794  |
| NM_006867 | 1331.883  | 1834.308  | NM_016504 | 62735.984 | 60005.23  | NM_018040 | 1694.008  | 514.114   |
| NM_001422 | 12068.355 | 14473.109 | U25752    | 63100.5   | 65807.156 | AB042646  | 29005.682 | 18373.141 |
| NM_005513 | 981.222   | 808.988   | X96646    | 62443.352 | 58182.418 | NM_003431 | 2395.295  | 1767.801  |
| AK022358  | 16063.449 | 18157.932 | NM_004855 | 13690.664 | 14188.489 | M29581    | 5728.819  | 3682.506  |
| NM_018141 | 26386.891 | 32133.625 | NM_006952 | 834.705   | 1223.708  | AL096747  | 1887.778  | 1565.887  |
| BE790474  | 471.747   | 825.643   | NM_005055 | 683.37    | 1398.408  | AB021641  | 601.568   | 622.942   |
| NM_000969 | 611.352   | 505.904   | NM_003198 | 26276.186 | 16648.029 | NM_012406 | 8526.014  | 7551.916  |
| NM_016504 | 62394.785 | 64165.199 | AF220415  | 2173.419  | 1189.237  | NM_012278 | 962.533   | 2162.635  |
| U25752    | 62514.895 | 66198.117 | NM_005174 | 61972.488 | 57504.125 | AF023142  | 745.364   | 1664.198  |
| X96646    | 62100.871 | 64549.121 | NM_000365 | 11229.363 | 8542.771  | NM_016100 | 726.729   | 2097.751  |
| NM_004855 | 15023.275 | 17632.664 | NM_013450 | 8860.002  | 5412.36   | NM_014057 | 2315.296  | 4599.157  |
| NM_006952 | 1083.098  | 1342.636  | NM_004538 | 2491.576  | 2107.908  | NM_001550 | 12733.636 | 27614.463 |
| NM_005055 | 1155.484  | 1328.837  | NM_003077 | 7688.158  | 5281.244  | AK026849  | 10289.039 | 21144.035 |
| NM_003198 | 27715.254 | 17192.402 | NM_002105 | 6723.512  | 5775.402  | NM_018677 | 2426.754  | 5216.283  |
| AF220415  | 2129.148  | 1602.879  | NM_018489 | 3582.326  | 2038.827  | NM_002785 | 2000.846  | 4634.299  |
| NM_005174 | 63275.852 | 61599.277 | L13203    | 10448.741 | 7448.512  | X78947    | 367.001   | 1002.615  |
| NM_000365 | 11551.597 | 9881.218  | AB042646  | 60344.379 | 50445.711 | NM_000041 | 48550.563 | 58126.973 |
| NM_013450 | 14791.23  | 18041.07  | NM_003431 | 4350.179  | 4147.844  | W69211    | 1348.242  | 2263.528  |
| NM_004538 | 6166.46   | 8770.314  | M29581    | 16659.666 | 15453.253 | AA449931  | 13189.946 | 10907.267 |
| NM_003077 | 10444.299 | 9621.891  | AL096747  | 2182.035  | 2624.64   | AA877347  | 38113.426 | 19921.926 |
| NM_002105 | 10047.523 | 9055.274  | AB021641  | 1142.652  | 1622.992  | R54049    | 718.091   | 196.924   |
| NM_018489 | 4406.737  | 4798.075  | NM_012406 | 20085.654 | 23990.662 | S57235    | 22768.787 | 15111.21  |
| AB042646  | 54890.664 | 57268.582 | NM_012278 | 1435.505  | 1430.031  | AI376272  | 5496.212  | 3101.101  |
| NM_003431 | 4150.015  | 4394.98   | AF023142  | 685.652   | 728.505   | BF242229  | 1972.166  | 1197.443  |
| M29581    | 9364.908  | 10134.208 | NM_016100 | 934.115   | 635.673   | X75756    | 58220.773 | 60327.918 |
| AL096747  | 2778.893  | 3129.516  | NM_014057 | 3258.393  | 2693.106  | AI754623  | 5790.684  | 2892.88   |
| AB021641  | 1584.852  | 2177.931  | NM_001550 | 20615.953 | 15840     | AA401326  | 38059.207 | 36195.809 |
| NM_012406 | 21492.525 | 24890.965 | AK026849  | 34050.797 | 26770.281 | N55461    | 850.714   | 973.914   |
| NM_012278 | 1602.354  | 1691.482  | NM_018677 | 4304.535  | 3834.5    | AA504482  | 7783.125  | 7355.226  |
| AF023142  | 882.783   | 689.951   | NM_002785 | 2763.105  | 3222.406  | BI602175  | 1397.987  | 1937.694  |
| NM_016100 | 1038.529  | 791.075   | X78947    | 1073.156  | 722.733   | NM_004109 | 9178.143  | 9434.52   |
| NM_014057 | 3516.649  | 3751.286  | NM_000041 | 48022.625 | 39710.332 | BF307652  | 1660.605  | 4156.892  |
| NM_001550 | 30210.529 | 25906.771 | W69211    | 1417.205  | 1027.943  | NM_017772 | 2018.847  | 5322.613  |
| AK026849  | 38033.805 | 38555.223 | AA449931  | 14678.735 | 10865.128 | AF116574  | 1762.018  | 3631.885  |
| NM_018677 | 4114.286  | 3546.232  | AA877347  | 35564.672 | 29370.541 | NM_005529 | 1119.19   | 2551.163  |
| NM_002785 | 6662.627  | 5460.605  | R54049    | 2251.876  | 1641.771  | NM_005869 | 4938.592  | 11511.487 |
| X78947    | 2158.18   | 1980.719  | S57235    | 34251.512 | 30895.316 | AF105067  | 3058.292  | 8132.928  |
| NM_000041 | 59701.68  | 59079.145 | BF242229  | 6097.197  | 5651.899  | NM_018676 | 1261.506  | 3078.219  |
| W69211    | 3418.252  | 2978.972  | X75756    | 60426.043 | 66808     | NM_012072 | 1078.42   | 2101.53   |
| AA449931  | 38566.684 | 39891.898 | AI754623  | 10272.324 | 8578.882  | NM_006014 | 2255.148  | 4609.625  |
| AA877347  | 57537.891 | 56986.871 | AA401326  | 61074.484 | 60874.41  | NM_006280 | 52324.191 | 59676     |
| R54049    | 1910.858  | 2020.292  | N55461    | 1655.056  | 2315.272  | NM_002155 | 1421.438  | 1924.789  |
| BF242229  | 5976.968  | 7045.711  | AA504482  | 14032.021 | 17961.471 | NM_001771 | 23857.914 | 22485.877 |
| X75756    | 62126.113 | 60207.41  | BI602175  | 3455.509  | 5076.163  | NM_002066 | 1539.968  | 561.042   |
| AI754623  | 9805.024  | 11786.398 | NM_004109 | 14780.552 | 21644.563 | NM_007355 | 56912.707 | 31805.641 |
| AA401326  | 62597.645 | 61968.02  | BF307652  | 5938.477  | 4029.614  | NM_006096 | 1023.725  | 457.413   |
| N55461    | 1574.584  | 1791.849  | NM_017772 | 2950.422  | 2404.956  | NM_006869 | 57862.68  | 49322.887 |
| AA504482  | 16181.372 | 19989.699 | AF116574  | 4118.324  | 3518.283  | NM_015364 | 12092.923 | 8179      |
| BI602175  | 2677.49   | 3876.435  | NM_005529 | 1678.175  | 1972.378  | NM_006611 | 277.595   | 371.598   |

|           |           |           |           |           |           |           |           |           |
|-----------|-----------|-----------|-----------|-----------|-----------|-----------|-----------|-----------|
| NM_004109 | 9218.344  | 11077.465 | NM_005869 | 9428.522  | 8513.21   | NM_004963 | 2862.137  | 1893.325  |
| BF307652  | 6904.606  | 4414.913  | AF105067  | 5418.917  | 4734.018  | NM_001181 | 501.019   | 669.852   |
| NM_017772 | 2987.992  | 2972.373  | NM_018676 | 2725.062  | 2841.558  | NM_005535 | 57586.172 | 54401.672 |
| AF116574  | 4047.303  | 3227.05   | NM_012072 | 1119.173  | 1368.667  | AB037857  | 3642.227  | 3210.173  |
| NM_005529 | 2040.066  | 2207.8    | NM_006014 | 3697.206  | 2880.951  | NM_013262 | 8916.06   | 9572.231  |
| NM_005869 | 10166.697 | 10389.894 | NM_006280 | 61410.629 | 51297.715 | NM_007185 | 12855.361 | 16466.791 |
| AF105067  | 6032.059  | 5968.574  | NM_002155 | 2686.232  | 2466.154  | NM_012288 | 3359.618  | 8153.162  |
| NM_018676 | 3390.809  | 3071.4    | NM_001771 | 34706.281 | 27020.322 | NM_005264 | 1901.983  | 5327.997  |
| NM_012072 | 2245.139  | 1704.896  | NM_002066 | 2803.461  | 2588.273  | NM_020373 | 1568.292  | 3595.977  |
| NM_006014 | 4502.304  | 4880.684  | NM_007355 | 58498.371 | 37973.598 | NM_000714 | 8503.415  | 23776.938 |
| NM_006280 | 61483.719 | 60269.922 | NM_006869 | 57545.418 | 49119.875 | NM_002556 | 2730.328  | 6672.243  |
| NM_002155 | 2956.091  | 2325.586  | NM_006611 | 945.696   | 672.26    | AB014524  | 314.374   | 1243.273  |
| NM_001771 | 43247.82  | 48995.43  | NM_004963 | 7058.074  | 6638.044  | NM_018089 | 5896.15   | 12722.086 |
| NM_002066 | 3335.958  | 3345.967  | NM_001181 | 1268      | 2164.317  | L21934    | 1023.531  | 856.68    |
| NM_007355 | 64709.906 | 61725.844 | NM_005535 | 61576.543 | 61229.305 | AL117442  | 13797.634 | 6588.461  |
| NM_006096 | 2710.66   | 2910.874  | AB037857  | 10238.744 | 12158.129 | NM_007185 | 3807.138  | 1035.923  |
| NM_006869 | 63562.59  | 59688.754 | NM_005012 | 670.873   | 1123.856  | NM_014341 | 6961.301  | 1705.269  |
| NM_015364 | 19560.611 | 30667.428 | NM_013262 | 15751.556 | 18388.91  | NM_014229 | 2590.89   | 1594.878  |
| NM_006611 | 951.784   | 1231.272  | NM_007185 | 28547.744 | 39814.883 | NM_013265 | 29791.855 | 23489.766 |
| NM_004963 | 6299.282  | 7360.498  | NM_012288 | 5772.146  | 4963.069  | NM_014964 | 4858.05   | 3679.674  |
| NM_001181 | 1290.293  | 1555.911  | NM_005264 | 4848.221  | 5620.125  | NM_014016 | 9278.529  | 6834.172  |
| NM_005535 | 60857.301 | 59932.289 | NM_020373 | 2748.072  | 1809.787  | NM_013433 | 2614.81   | 1964.873  |
| AB037857  | 8124.507  | 7561.804  | NM_000714 | 17327.586 | 19074.965 | AJ224867  | 481.458   | 589.1     |
| NM_005012 | 471.325   | 1362.687  | NM_002556 | 4625.559  | 3905.053  | NM_003794 | 10477.42  | 9427.256  |
| NM_012288 | 5674.475  | 5138.894  | NM_018089 | 10948.026 | 8056.019  | NM_019892 | 8330.193  | 12327.63  |
| NM_005264 | 4103.365  | 5537.623  | L21934    | 1995.72   | 1375.665  | NM_016169 | 7716.057  | 12199.245 |
| NM_020373 | 3695.952  | 3001.735  | AL117442  | 10352.768 | 7781.562  | NM_004533 | 666.586   | 1383.262  |
| NM_000714 | 18517.104 | 21336.414 | NM_007185 | 5453.877  | 4916.906  | NM_012135 | 813.24    | 1778.116  |
| NM_002556 | 5659.147  | 4150.901  | NM_014341 | 5029.637  | 4250.16   | M37190    | 421.593   | 1440.585  |
| NM_018089 | 20291.76  | 19652.195 | NM_006446 | 1561.461  | 1576.678  | NM_006812 | 5804.164  | 14711.021 |
| L21934    | 2474.287  | 2947.979  | NM_014229 | 2712.064  | 2958.391  | AK024434  | 9392.347  | 20348.625 |
| AL117442  | 30165.375 | 28998.479 | NM_014964 | 13904.833 | 12380.72  | NM_002388 | 8574.147  | 16838.934 |
| NM_007185 | 6975.398  | 8024.869  | NM_014016 | 24253.861 | 24438.127 | NM_016069 | 33256.93  | 59253.164 |
| NM_014341 | 13118.713 | 11740.481 | NM_013433 | 4376.511  | 6923.945  | NM_017612 | 2579.007  | 7582.924  |
| NM_014229 | 5961.124  | 7243.3    | AJ224867  | 1185.082  | 2454.628  | NM_013236 | 10037.438 | 5643.165  |
| NM_013265 | 53263.145 | 54781.184 | NM_003794 | 23794.086 | 29685.309 | NM_017841 | 6507.267  | 1289.532  |
| NM_014964 | 10931.264 | 11371.57  | NM_019892 | 18015.346 | 27193.777 | NM_001254 | 5180.422  | 918.013   |
| NM_014016 | 24481.977 | 23323.262 | NM_016169 | 23721.98  | 35642.973 | NM_020412 | 27472.801 | 14230.391 |
| NM_013433 | 4947.537  | 4965.435  | NM_004533 | 1076.091  | 2638.643  | NM_003032 | 24906.818 | 15124.369 |
| AJ224867  | 462.576   | 609.712   | NM_012135 | 1665.471  | 1318.927  | NM_017453 | 16170.913 | 10567.904 |
| NM_003794 | 9450.767  | 8011.334  | M37190    | 1256.958  | 934.839   | AF038564  | 6278.487  | 4188.71   |
| NM_019892 | 6988.82   | 6758.338  | NM_006812 | 15960.376 | 10175.081 | AB033768  | 658.112   | 1003.183  |
| NM_016169 | 17467.27  | 20280.773 | AK024434  | 28696.645 | 17799.361 | NM_017659 | 4482.734  | 3587.775  |
| NM_004533 | 843.038   | 1122.973  | NM_002388 | 15488.807 | 10228.832 | NM_006904 | 13521.52  | 9350.857  |
| NM_012135 | 2222.246  | 1559.561  | NM_016069 | 57822.84  | 46674.895 | NM_004217 | 15969.21  | 14852.461 |
| M37190    | 1746.269  | 1434.836  | NM_017612 | 3699.74   | 4535.466  | NM_006347 | 14739.355 | 16535.799 |
| NM_006812 | 16447.432 | 13344.006 | NM_013236 | 15022.918 | 12238.002 | NM_020406 | 2302.009  | 3635.861  |
| AK024434  | 29847.463 | 24260.17  | NM_017841 | 9081.141  | 5936.531  | NM_016100 | 899.431   | 1816.719  |
| NM_002388 | 16322.568 | 13014.185 | NM_001254 | 4088.176  | 1780.271  | NM_014057 | 2052.969  | 4407.684  |
| NM_016069 | 61218.051 | 58897.195 | NM_020412 | 18525.945 | 16779.877 | NM_001550 | 7550.081  | 15666.903 |
| NM_017612 | 5534.44   | 5699.258  | NM_003032 | 31476.645 | 28205.676 | AK026849  | 4576.875  | 9811.688  |
| NM_013236 | 18618.391 | 17112.043 | AF038564  | 12435.161 | 10781.874 | NM_018677 | 2192.745  | 4684.06   |
| NM_017841 | 10744.875 | 10533.373 | AB033768  | 1124.725  | 2184.566  | NM_002785 | 1788.787  | 3308.054  |

|           |           |           |           |           |           |           |           |           |
|-----------|-----------|-----------|-----------|-----------|-----------|-----------|-----------|-----------|
| NM_001254 | 9947.92   | 8530.399  | NM_017659 | 8910.444  | 8633.374  | X78947    | 639.416   | 1948.665  |
| NM_020412 | 56700.848 | 58705.996 | NM_006904 | 24656.758 | 28738.096 | NM_000041 | 33782.809 | 58906.227 |
| NM_003032 | 46816.801 | 53648.82  | NM_004217 | 34331.348 | 44566.906 | W69211    | 1045.701  | 2771.184  |
| NM_017453 | 28367.033 | 32305.117 | NM_006347 | 24385.199 | 32640.402 | AA449931  | 11696.934 | 18206.197 |
| AF038564  | 12186.861 | 13453.455 | NM_020406 | 4230.302  | 6791.944  | AA877347  | 37220.836 | 20440.193 |
| AB033768  | 1490.683  | 1635.793  | NM_014685 | 38879.055 | 50026.426 | R54049    | 766.6     | 168.404   |
| NM_017659 | 6911.911  | 6338.597  | NM_016100 | 889.639   | 712.921   | S57235    | 20997.648 | 7614.708  |
| NM_006904 | 22672.559 | 23812.078 | NM_014057 | 3627.49   | 2593.54   | AI376272  | 4704.331  | 2789.73   |
| NM_004217 | 15725.574 | 13707.118 | NM_001550 | 30270.816 | 19770.303 | BF242229  | 2414.011  | 1317.901  |
| NM_006347 | 15519.394 | 15596.543 | AK026849  | 32918.531 | 23916.379 | X75756    | 51629.078 | 59584.73  |
| NM_020406 | 3401.177  | 3429.835  | NM_018677 | 3772.296  | 2869.839  | AI754623  | 5425.115  | 2977.624  |
| NM_014685 | 38638.789 | 40487.527 | NM_002785 | 5679.443  | 4800.891  | AA401326  | 31096.75  | 29782.4   |
| NM_016100 | 1132.307  | 837.832   | X78947    | 1358.536  | 1233.546  | N55461    | 594.891   | 828.862   |
| NM_014057 | 3849.123  | 3219.329  | NM_000041 | 57581.801 | 53793.105 | AA504482  | 6796.794  | 6831.234  |
| NM_001550 | 30204.816 | 21755.637 | W69211    | 1188.79   | 1139.208  | BI602175  | 1616.845  | 2062.715  |
| AK026849  | 36615.121 | 33579.039 | AA449931  | 17110.398 | 14449.392 | NM_016516 | 1886.144  | 3150.223  |
| NM_018677 | 4705.332  | 3273.367  | AA877347  | 38224.555 | 30635.375 | AF116574  | 1577.759  | 3669.336  |
| NM_002785 | 6223.649  | 4584.396  | R54049    | 1533.245  | 1189.448  | NM_005529 | 1299.944  | 3028.519  |
| X78947    | 2183.319  | 1694.052  | S57235    | 29120.018 | 27019.27  | NM_005869 | 5091.65   | 12787.377 |
| NM_000041 | 59251.895 | 56513.969 | AI376272  | 8031.022  | 6691.77   | AF105067  | 2748.276  | 5442.076  |
| W69211    | 3143.506  | 2920.039  | X75756    | 59854.34  | 64976.563 | NM_018676 | 1120.114  | 2163.533  |
| AA449931  | 38031.699 | 39840.348 | AI754623  | 11217.867 | 11111.259 | NM_012072 | 891.239   | 2460.859  |
| AA877347  | 57351.285 | 54264.305 | AA401326  | 60402.273 | 57331.215 | NM_006014 | 2468.008  | 5375.969  |
| R54049    | 1725.463  | 1514.021  | N55461    | 1575.074  | 2083.342  | NM_006280 | 44209.734 | 59919.383 |
| S57235    | 46280.41  | 48281.191 | AA504482  | 14878.079 | 18539.291 | NM_002155 | 1538.81   | 3265.674  |
| AI376272  | 13535.319 | 14054.402 | BI602175  | 3820.706  | 5607.369  | NM_001771 | 25604.215 | 30066.148 |
| BF242229  | 5471.332  | 5754.444  | NM_016516 | 3073.411  | 4934.727  | NM_002066 | 1883.406  | 436.993   |
| X75756    | 61590.426 | 64958.707 | AF263538  | 7844.231  | 12786.115 | NM_007355 | 57831.16  | 19474.266 |
| AI754623  | 8626.044  | 7746.525  | NM_004962 | 357.912   | 1725.681  | NM_006096 | 931.266   | 329.951   |
| AA401326  | 52221.285 | 50583.988 | AF116574  | 3584.938  | 2804.513  | NM_006869 | 57145.273 | 42371.879 |
| N55461    | 985.607   | 939.926   | NM_005529 | 2052.091  | 2172.014  | NM_015364 | 11818.313 | 8096.157  |
| AA504482  | 10123.566 | 10782.488 | NM_005869 | 10968.5   | 7018.804  | NM_004963 | 2815.672  | 1795.264  |
| BI602175  | 2483.68   | 2217.117  | AF105067  | 5212.396  | 4050.422  | NM_001181 | 795.145   | 1090.576  |
| NM_016516 | 2076.283  | 2140.941  | NM_018676 | 2977.336  | 2672.058  | NM_005535 | 53993.414 | 51924.82  |
| AF263538  | 6177.446  | 6761.856  | NM_012072 | 1762.932  | 1334.248  | AB037857  | 3297.151  | 2209.548  |
| AF116574  | 4302.375  | 3333.876  | NM_006014 | 4011.705  | 4487.095  | NM_013262 | 8535.835  | 9008.971  |
| NM_005529 | 1872.499  | 1677.975  | NM_006280 | 60476.273 | 60066.105 | NM_007185 | 13388.874 | 20196.945 |
| NM_005869 | 10589.252 | 7721.611  | NM_002155 | 2611.31   | 1737.559  | NM_012278 | 1103.11   | 1747.013  |
| AF105067  | 5567.418  | 5225.328  | NM_001771 | 35783.086 | 41655.148 | AF023142  | 477.736   | 936.554   |
| NM_018676 | 3238.433  | 2624.449  | NM_002066 | 4739.18   | 5106.514  | NM_020373 | 1508.097  | 3255.12   |
| NM_012072 | 2130.638  | 1916.033  | NM_007355 | 54786.496 | 49093.309 | NM_000714 | 9384.775  | 28713.242 |
| NM_006014 | 4043.745  | 4497.633  | NM_006096 | 3510.198  | 7939.662  | NM_002556 | 2659.142  | 4469.276  |
| NM_006280 | 59209.664 | 56033.93  | NM_006611 | 927.036   | 1159.748  | AB014524  | 220.108   | 1342.067  |
| NM_002155 | 2317.291  | 2185.622  | NM_004963 | 4553.243  | 5237.611  | NM_018089 | 4612.424  | 11769.444 |
| NM_001771 | 42704.281 | 46066.473 | NM_001181 | 2439.687  | 3778.408  | L21934    | 1257.821  | 2385.058  |
| NM_002066 | 3121.272  | 2954.781  | NM_005535 | 60509.883 | 63694.215 | AL117442  | 11697.185 | 5002.427  |
| NM_007355 | 62441.32  | 61102.434 | AB037857  | 10225.504 | 11655.056 | NM_007186 | 3736.248  | 871.028   |
| NM_006096 | 2586.777  | 2345.725  | NM_005012 | 1006.969  | 1363.261  | NM_014341 | 7153.619  | 1657.079  |
| NM_006869 | 60747.031 | 61314.273 | NM_013262 | 15774.247 | 20220.055 | NM_014229 | 2412.449  | 1376.516  |
| NM_015364 | 20273.84  | 27441.031 | NM_007185 | 30300.809 | 41914.316 | NM_013265 | 31115.336 | 21554.719 |
| NM_006611 | 788.295   | 955.967   | NM_012278 | 2205.98   | 3483.762  | NM_014964 | 5389.414  | 3389.049  |
| NM_004963 | 5988.851  | 5980.905  | AF023142  | 1046.554  | 2259.515  | NM_014016 | 9977.47   | 5631.43   |
| NM_001181 | 1172.282  | 1173.104  | NM_020373 | 2112.661  | 1970.951  | NM_013433 | 2881.036  | 2349.781  |

|           |           |           |           |           |           |           |           |           |
|-----------|-----------|-----------|-----------|-----------|-----------|-----------|-----------|-----------|
| NM_00553E | 57497.41  | 56462.828 | NM_000714 | 17483.363 | 18595.359 | AJ224867  | 664.733   | 559.349   |
| AB037857  | 6378.525  | 5442.5    | NM_00255E | 5000.981  | 3606.126  | NM_003794 | 11005.684 | 7400.327  |
| NM_01326E | 13464.937 | 12655.326 | NM_01808E | 15528.613 | 15812.021 | NM_01989E | 8623.697  | 11118.823 |
| NM_00718E | 24112.27  | 25612.973 | L21934    | 2060.597  | 2054.416  | NM_01616E | 8756.969  | 10123.362 |
| NM_01227E | 1716.853  | 1858.693  | AL117442  | 26010.045 | 22557.813 | NM_00453E | 762.859   | 1331.176  |
| AF023142  | 812.411   | 749.621   | NM_00718E | 7499.503  | 6859.453  | BF307652  | 3879.829  | 4390.925  |
| NM_02037E | 3346.349  | 2684.145  | NM_014341 | 8937.658  | 6296.34   | NM_01777E | 1902.829  | 2283.456  |
| NM_000714 | 18429.695 | 19155.246 | NM_00644E | 1885.034  | 3271.553  | NM_00681E | 6645.428  | 16778.035 |
| NM_00255E | 5726.993  | 4152.528  | NM_01422E | 5957.146  | 8887.743  | AK024434  | 6436.346  | 17067.781 |
| NM_01808E | 16504.578 | 15352.924 | NM_01326E | 54237.109 | 56819.121 | NM_00238E | 7741.836  | 15924.86  |
| L21934    | 2098.157  | 2054.881  | NM_014964 | 14677.021 | 16679.502 | NM_01606E | 21011.525 | 49665.527 |
| AL117442  | 25920.404 | 23076.234 | NM_01401E | 16722.875 | 18740.02  | NM_01761E | 2609.874  | 6803.183  |
| NM_00718E | 7427.167  | 7531.481  | NM_01343E | 5399.191  | 7144.962  | NM_017841 | 6516.428  | 1823.952  |
| NM_014341 | 10954.075 | 11932.023 | AJ224867  | 1143.572  | 1805.076  | NM_001254 | 4882.773  | 607.354   |
| NM_01422E | 4731.405  | 5080.06   | NM_003794 | 24204.395 | 28371.209 | NM_02041E | 28084.162 | 7813.604  |
| NM_01326E | 51130.227 | 52640.488 | NM_01989E | 18543.621 | 27416.883 | NM_00303E | 22132.918 | 10223.347 |
| NM_014964 | 9823.308  | 9755.137  | NM_01616E | 23587.768 | 37368.406 | NM_01745E | 12685.261 | 6979.888  |
| NM_01401E | 21913.5   | 20677.871 | NM_00453E | 1446.855  | 2748.518  | AF038564  | 6140.055  | 3612.25   |
| NM_01343E | 2524.251  | 2944.199  | BF307652  | 7141.604  | 10977.541 | AB033768  | 875.658   | 639.145   |
| AJ224867  | 620.752   | 732.578   | NM_01777E | 3871.286  | 7747.256  | NM_01765E | 4586.362  | 2819.092  |
| NM_003794 | 16512.451 | 15413.745 | NM_00681E | 14819.415 | 11777.022 | NM_006904 | 13650.107 | 9324.601  |
| NM_01989E | 15013.286 | 14376.561 | AK024434  | 29480.701 | 22273.551 | NM_004217 | 16046.181 | 15538.614 |
| NM_01616E | 18721.941 | 17619.793 | NM_00238E | 16114.716 | 9580.929  | NM_006347 | 14697.691 | 12003.442 |
| NM_00453E | 964.529   | 1042.96   | NM_01606E | 55803.344 | 48103.527 | NM_02040E | 2401.652  | 2656.777  |
| BF307652  | 5524.184  | 4318.155  | NM_01761E | 4548.982  | 5306.514  | NM_01468E | 29091.389 | 27696.604 |
| NM_01777E | 1840.099  | 1762.283  | NM_01323E | 18040.934 | 14194.144 | NM_01228E | 3905.161  | 4477.177  |
| NM_00681E | 16279.538 | 12605.144 | NM_017841 | 10882.217 | 9577.384  | NM_005264 | 2416.015  | 5082.116  |
| AK024434  | 30667.945 | 22298.244 | NM_001254 | 7034.969  | 4172.866  | NM_00155E | 4802.992  | 10585.182 |
| NM_00238E | 16870.162 | 10791.7   | NM_02041E | 52181.121 | 46779.203 | AK026849  | 2244.888  | 5601.257  |
| NM_01606E | 56628.648 | 49677.102 | NM_00303E | 40556.609 | 51048.336 | NM_018677 | 2050.934  | 4872.877  |
| NM_01761E | 4891.549  | 4622.192  | NM_01745E | 26521.906 | 31402.91  | NM_00278E | 1152.731  | 2662.579  |
| NM_01323E | 18640.191 | 16224.175 | AF038564  | 11359.475 | 13320.115 | X78947    | 302.67    | 1304.435  |
| NM_017841 | 10893.395 | 11425.801 | AB033768  | 1269.807  | 1628.692  | NM_000041 | 16620.885 | 40953.035 |
| NM_001254 | 9931.561  | 7510.552  | NM_01765E | 8357.863  | 9691.801  | W69211    | 573.953   | 1827.328  |
| NM_02041E | 35353.184 | 35633.762 | NM_006904 | 25928.811 | 33477.176 | AA449931  | 6503.498  | 13789.517 |
| NM_00303E | 28650.668 | 30995.002 | NM_004217 | 33518.02  | 46147.68  | R54049    | 638.098   | 154.496   |
| NM_01745E | 23289.438 | 23015.574 | NM_006347 | 23454.076 | 30702.352 | S57235    | 20564.504 | 6950.619  |
| AF038564  | 7749.143  | 8326.281  | NM_02040E | 4394.799  | 7083.555  | AI376272  | 5093.22   | 2037.031  |
| AB033768  | 1141.244  | 1234.405  | NM_01468E | 42253.879 | 52360.137 | BF242229  | 2110.305  | 1075.51   |
| NM_01765E | 6035.125  | 5943.644  | NM_01228E | 6971.646  | 10948.925 | X75756    | 55508.492 | 57244.027 |
| NM_006904 | 18722.094 | 18343.326 | NM_005264 | 5691.084  | 10931.847 | AI754623  | 5361.882  | 3409.117  |
| NM_004217 | 27477.691 | 24497.398 | NM_00155E | 27240.936 | 20277.355 | AA401326  | 34105.137 | 27557.447 |
| NM_006347 | 19275.357 | 17745.867 | AK026849  | 28529.316 | 19209.129 | N55461    | 700.651   | 639.684   |
| NM_02040E | 3729.851  | 3541.35   | NM_018677 | 4018.413  | 2464.138  | AA504482  | 8022.561  | 7512.554  |
| NM_01468E | 38007.402 | 34198.926 | NM_00278E | 5525.92   | 4504.371  | BI602175  | 1673.277  | 1755.247  |
| NM_01228E | 2360.078  | 1881.52   | X78947    | 1433.348  | 1115.734  | NM_01651E | 1726.754  | 2020.532  |
| NM_005264 | 3668.548  | 4262.146  | NM_000041 | 59774.348 | 56745.254 | AF263538  | 2457.314  | 2986.59   |
| NM_00155E | 30682.139 | 20062.879 | W69211    | 2218.33   | 2399.164  | NM_01213E | 769.229   | 914.723   |
| AK026849  | 36412.027 | 28098.971 | AA449931  | 38279.008 | 41700.301 | M37190    | 684.278   | 976.674   |
| NM_018677 | 4102.757  | 2462.197  | AA877347  | 53389.734 | 53812.473 | NM_00215E | 1276.175  | 1871.91   |
| NM_00278E | 5646.059  | 4506.208  | R54049    | 1555.688  | 1625.07   | NM_001771 | 18219.758 | 54511.805 |
| X78947    | 1485.783  | 1248.045  | BI755551  | 1111.938  | 5404.691  | NM_00206E | 743.453   | 2091.449  |
| NM_000041 | 58760.293 | 55478.07  | S57235    | 46818.23  | 51095.926 | NM_00735E | 46593.879 | 63117.852 |



|           |           |           |           |           |           |           |           |           |
|-----------|-----------|-----------|-----------|-----------|-----------|-----------|-----------|-----------|
| W69211    | 2607.712  | 2417.953  | AI376272  | 15457.257 | 15656.191 | NM_00609E | 667.197   | 1526.854  |
| AA449931  | 37565.93  | 35116.133 | BF242229  | 6197.712  | 6604.216  | NM_00686E | 17951.395 | 43651.125 |
| AA877347  | 53496.281 | 60880.066 | X75756    | 57548.039 | 61636.109 | NM_015364 | 10742.372 | 27195.063 |
| R54049    | 1471.262  | 1370.725  | AI754623  | 11376.309 | 16949.516 | NM_006611 | 581.048   | 988.639   |
| S57235    | 29434.451 | 33183.227 | AA401326  | 54194.348 | 54595.234 | NM_001181 | 412.027   | 184.64    |
| AI376272  | 7426.065  | 6834.925  | N55461    | 1969.034  | 3112.031  | NM_00553E | 54387.477 | 15417.001 |
| BF242229  | 3910.517  | 3429.034  | AA504482  | 14822.036 | 18123.785 | AB037857  | 3395.419  | 1418.282  |
| X75756    | 60534.316 | 67136.273 | BI602175  | 3472.466  | 5287.05   | AF218021  | 937.749   | 853.026   |
| AI754623  | 8095.916  | 7244.044  | NM_01651E | 2969.07   | 5207.494  | NM_01326E | 7394.794  | 3951.133  |
| AA401326  | 39662.168 | 44128.68  | AF263538  | 7290.523  | 11224.104 | NM_00718E | 14131.803 | 10856.335 |
| AA504482  | 12523.755 | 11773.76  | NM_01213E | 2439.644  | 3909.589  | NM_003221 | 653.431   | 546.951   |
| BI602175  | 2558.699  | 1910.568  | M37190    | 1566.867  | 2502.548  | NM_003357 | 24346.781 | 21729.936 |
| NM_01651E | 2179.634  | 2412.321  | NM_00215E | 1971.739  | 1248.972  | AF195420  | 698.911   | 747.119   |
| AF263538  | 4121.701  | 4075.899  | NM_001771 | 39710.156 | 36153.051 | AK023261  | 3510.369  | 2876.141  |
| NM_01213E | 761.089   | 664.043   | NM_00206E | 3692.073  | 2728.532  | NM_005097 | 1554.835  | 2007.045  |
| M37190    | 794.425   | 888.58    | NM_00735E | 57191.145 | 57638.32  | NM_01227E | 1093.493  | 1485.729  |
| NM_00215E | 2439.828  | 1622.328  | NM_00609E | 2706.43   | 2292.138  | AF023142  | 491.766   | 822.836   |
| NM_001771 | 40909.805 | 34987.836 | NM_00686E | 61110.559 | 58749.402 | NM_01610C | 558.37    | 735.496   |
| NM_00206E | 2702.103  | 1687.14   | NM_015364 | 19473.129 | 19693.346 | NM_014057 | 2778.15   | 3237.126  |
| NM_00735E | 61700.34  | 57667.273 | NM_006611 | 916.221   | 782.27    | NM_000341 | 1182.92   | 2465.357  |
| NM_00609E | 2686.875  | 1911.667  | NM_00496E | 6335.977  | 5304.281  | AK023533  | 777.185   | 2437.198  |
| NM_00686E | 63165.516 | 60123.555 | NM_001181 | 1128.042  | 1126.583  | NM_01245C | 1822.74   | 4180.375  |
| NM_015364 | 20466.699 | 24151.803 | NM_00553E | 57617.578 | 57605     | NM_007071 | 9485.069  | 24317.104 |
| NM_006611 | 859.596   | 1019.195  | AB037857  | 10292.218 | 10057.984 | NM_01658E | 4123.844  | 9976.206  |
| NM_00496E | 6075.735  | 6406.865  | NM_00501E | 506.472   | 653.662   | NM_01422E | 1768.252  | 3841.482  |
| NM_001181 | 1163.393  | 1028.492  | AF218021  | 2198.448  | 2709.27   | NM_01326E | 14726.47  | 29541.209 |
| NM_00553E | 61534.082 | 60603.473 | NM_01326E | 12915.084 | 18224.914 | NM_014964 | 2857.123  | 3017.716  |
| AB037857  | 5879.225  | 5101.545  | NM_00718E | 27353.568 | 49393.199 | NM_01343E | 2341.958  | 621.723   |
| AF218021  | 2155.665  | 2158.87   | NM_003221 | 1540.313  | 2384.386  | NM_003794 | 10829.908 | 4676.928  |
| NM_01326E | 10879.786 | 10348.875 | NM_003357 | 51243.254 | 57049.328 | NM_01989E | 7609.719  | 5345.769  |
| NM_00718E | 18813.252 | 19024.24  | AF195420  | 1125.324  | 1602.281  | NM_01616E | 7165.108  | 5117.785  |
| NM_003221 | 1216.53   | 1061.384  | AK023261  | 5300.242  | 7720.102  | NM_00453E | 719.049   | 784.083   |
| NM_003357 | 39279.922 | 37936.883 | NM_005097 | 4029.907  | 6326.104  | BF307652  | 3496.918  | 2214.051  |
| AF195420  | 793.505   | 892.895   | NM_01227E | 2049.67   | 3530.639  | NM_01777E | 2637.871  | 1710.429  |
| AK023261  | 4242.911  | 4435.153  | AF023142  | 905.547   | 1559.934  | AF116574  | 2503.266  | 2063.673  |
| NM_005097 | 1752.598  | 1674.602  | NM_01610C | 1384.326  | 2020.661  | NM_00552E | 1685.049  | 1817.429  |
| NM_01227E | 1214.715  | 1251.573  | NM_014057 | 4592.567  | 6523.084  | NM_00586E | 5803.851  | 8921.719  |
| NM_014057 | 570.629   | 810.963   | NM_000341 | 2447.008  | 1770.389  | AF105067  | 4028.564  | 4434.177  |
| NM_000341 | 2016.421  | 1512.85   | AK023533  | 1062.445  | 1183.902  | NM_01867E | 1173.949  | 1889.035  |
| AK023533  | 1173.564  | 931.648   | NM_01245C | 5017.722  | 4994.552  | NM_01207E | 1349.484  | 3160.618  |
| NM_01245C | 3944.964  | 3667.856  | NM_007071 | 20106.994 | 16006.013 | NM_006014 | 2491.594  | 3331.796  |
| NM_007071 | 19229.291 | 15676.911 | NM_01658E | 47712.539 | 44146.094 | NM_00628C | 55087.945 | 60770.457 |
| NM_01658E | 39511.535 | 32834.75  | NM_01422E | 5586.327  | 4386.069  | NM_02040E | 1572.381  | 1847.294  |
| NM_01422E | 4878.689  | 4416.234  | NM_01326E | 50670.734 | 51047.27  | NM_01468E | 23499.666 | 35409.352 |
| NM_01326E | 50479.492 | 44380.098 | NM_014964 | 12721.083 | 11094.149 | NM_01228E | 3166.759  | 5407.135  |
| NM_014964 | 10319.851 | 9823.438  | NM_01401E | 21092.809 | 17079.031 | NM_005264 | 2105.257  | 3845.161  |
| NM_01401E | 20557.25  | 24172.088 | NM_01343E | 3366.763  | 2983.159  | NM_02037E | 1459.821  | 2752.38   |
| NM_01343E | 3256.095  | 4105.251  | AJ224867  | 873.974   | 1119.763  | NM_000714 | 8782.87   | 16633.541 |
| AJ224867  | 819.89    | 721.304   | NM_003794 | 23055.594 | 19434.205 | NM_00255E | 2960.003  | 588.958   |
| NM_003794 | 12589.521 | 9966.639  | NM_01989E | 18266.57  | 20878.133 | NM_01808E | 7164.854  | 4685.721  |
| NM_01989E | 14989.387 | 13570.872 | NM_01616E | 22666.754 | 26907.357 | L21934    | 1394.304  | 875.771   |
| NM_01616E | 19166.256 | 19751.766 | NM_00453E | 1116.166  | 1771.176  | AL117442  | 10830.826 | 6615.221  |
| NM_00453E | 1195.891  | 1606.689  | BF307652  | 8283.318  | 10998.786 | NM_00469E | 879.469   | 723.591   |

|           |           |           |           |           |           |           |           |           |
|-----------|-----------|-----------|-----------|-----------|-----------|-----------|-----------|-----------|
| BF307652  | 5110.704  | 5085.412  | NM_017772 | 3893.472  | 5839.878  | AF299075  | 3410.298  | 2198.992  |
| NM_017772 | 3074.983  | 3799.011  | NM_005529 | 2455.093  | 3443.013  | NM_007188 | 3961.418  | 3320.318  |
| AF116574  | 3213.363  | 3130.323  | NM_005869 | 12148.557 | 16227.107 | NM_001214 | 10100.467 | 12946.35  |
| NM_005529 | 1788.461  | 1639.476  | AF105067  | 7230.82   | 10290.411 | AK022409  | 1171.534  | 1386.043  |
| NM_005869 | 6529.738  | 6596.524  | NM_018676 | 3572.961  | 5370.065  | U16851    | 14637.571 | 14679.496 |
| AF105067  | 2756.581  | 2327.76   | NM_012072 | 2213.275  | 3323.272  | NM_014341 | 4056.491  | 5032.588  |
| NM_018676 | 1149.088  | 1126.596  | NM_006014 | 4059.963  | 7604.106  | NM_020309 | 616.02    | 873.16    |
| NM_006014 | 1037.262  | 1454.606  | NM_006280 | 59947.91  | 61971.531 | NM_006446 | 1198.67   | 985.19    |
| NM_006280 | 63006.844 | 60293.063 | NM_020406 | 3697.635  | 2913.142  | NM_016516 | 1131.701  | 1296.929  |
| NM_020406 | 3945.442  | 2999.092  | NM_014685 | 37425.16  | 26446.02  | AF263538  | 1513.943  | 1198.631  |
| NM_014685 | 41738.609 | 29165.131 | NM_012288 | 5779.726  | 5763.495  | NM_012135 | 418.769   | 427.647   |
| NM_012288 | 6862.807  | 6217.698  | NM_005264 | 4852.456  | 6798.483  | NM_006812 | 7125.919  | 7822.122  |
| NM_005264 | 5454.496  | 5533.102  | NM_020373 | 2877.703  | 2914.023  | AK024434  | 7009.375  | 4499.712  |
| NM_020373 | 1807.664  | 1528.375  | NM_000714 | 16312.68  | 20051.676 | NM_002388 | 9227.898  | 1600.968  |
| NM_000714 | 13231.11  | 17145.01  | NM_002556 | 5579.48   | 5491.667  | NM_016069 | 51129.07  | 18644.547 |
| NM_002556 | 3633.44   | 3235.131  | NM_018089 | 16158.147 | 15621.256 | NM_017612 | 3034.237  | 1513.483  |
| NM_018089 | 14862.836 | 13830.478 | L21934    | 2163.109  | 2270.725  | NM_013236 | 8734.047  | 5392.267  |
| L21934    | 2001.058  | 2343.17   | AL117442  | 24318.484 | 28656.203 | NM_017841 | 5847.374  | 4340.865  |
| AL117442  | 20578.967 | 20201.947 | NM_004695 | 1594.437  | 2464.124  | NM_001254 | 5494.038  | 3163.823  |
| NM_004695 | 1056.998  | 1130.101  | AF299075  | 8422.475  | 9591.102  | NM_020412 | 26883.631 | 21357.734 |
| AF299075  | 5098.062  | 4922.776  | NM_000340 | 1290.149  | 3370.888  | NM_003032 | 25758.854 | 22997.412 |
| NM_000340 | 470.819   | 707.296   | NM_007188 | 7098.125  | 9686.524  | NM_017453 | 12518.527 | 12161.674 |
| NM_007188 | 3297.949  | 3816.903  | NM_001214 | 26738.629 | 39817.797 | AF038564  | 5723.486  | 5257.908  |
| NM_001214 | 12254.213 | 11890.903 | AK022409  | 2862.019  | 4371.251  | AB033768  | 418.341   | 781.356   |
| AK022409  | 1183.449  | 1022.793  | U16851    | 26224.695 | 38174.223 | NM_017659 | 3538.381  | 3261.454  |
| U16851    | 22779.17  | 18612.598 | NM_014341 | 10267.998 | 16183.802 | NM_006904 | 9421.98   | 8903.575  |
| NM_014341 | 5159.69   | 4547.137  | NM_020309 | 2087.349  | 4056.858  | NM_004217 | 14877.988 | 13831.868 |
| NM_016516 | 3035.889  | 1978.029  | NM_016516 | 2396.761  | 2293.099  | NM_006347 | 9440.785  | 6132.888  |
| AF263538  | 4687.727  | 3828.842  | AF263538  | 4943.925  | 4091.725  | CY3Cy5    | 5008.209  | 148.231   |
| NM_012135 | 1185.347  | 1061.22   | NM_012135 | 1585.939  | 1416.139  | AF086332  | 21557.004 | 13631.144 |
| M37190    | 939.274   | 707.347   | M37190    | 1160.237  | 1066.971  | AF086347  | 9260.796  | 8364.958  |
| NM_006812 | 11085.605 | 10765.758 | NM_006812 | 15087.534 | 13655.523 | AF086388  | 956.453   | 720.626   |
| AK024434  | 25247.41  | 32250.43  | AK024434  | 28899.736 | 22892.23  | AK001043  | 12925.844 | 17580.885 |
| NM_002388 | 10987.114 | 8557.748  | NM_002388 | 13103.209 | 6466.375  | AK024535  | 16786.324 | 16693.777 |
| NM_016069 | 58009.207 | 56096.914 | NM_016069 | 60084.777 | 52330.633 | AL359608  | 875.304   | 882.415   |
| NM_017612 | 3116.689  | 3449.154  | NM_017612 | 4787.173  | 5605.903  | NM_016498 | 38580.352 | 35338.008 |
| NM_013236 | 14320.759 | 13085.654 | NM_013236 | 17448.234 | 18476.678 | NM_016551 | 926.563   | 1333.978  |
| NM_017841 | 8202.825  | 8263.71   | NM_017841 | 10841.674 | 12242.369 | AK024631  | 1656.885  | 1774.089  |
| NM_001254 | 4946.367  | 4547.75   | NM_001254 | 9790.738  | 8912.457  | AF087977  | 986.086   | 936.857   |
| NM_020412 | 44612.176 | 47881.352 | NM_020412 | 49255.023 | 51167.066 | AK026949  | 781.487   | 842.023   |
| NM_003032 | 31992.646 | 36024.965 | NM_003032 | 40926.992 | 51072.816 | SR4       | 6660.092  | 6668.921  |
| NM_017453 | 7433.417  | 8388.955  | NM_017453 | 27433.516 | 35970.332 | SR6       | 1330.949  | 1157.946  |
| AF038564  | 4231.822  | 3761.589  | AF038564  | 11346.483 | 15296.966 | SR8       | 4596.409  | 17033.764 |
| NM_017659 | 3854.575  | 3367.008  | AB033768  | 1518.575  | 2534.443  | SR10      | 18491.992 | 4175.167  |
| NM_006904 | 10525.309 | 9910.561  | NM_017659 | 9642.19   | 14023.463 | CY3Cy5    | 6702.647  | 205.188   |
| NM_004217 | 13487.19  | 10211.176 | NM_006904 | 26709.795 | 46829.625 | AF086068  | 1355.59   | 823.874   |
| NM_006347 | 6693.696  | 5486.113  | NM_004217 | 34250.016 | 51190.234 | AK024239  | 1260.006  | 1119.434  |
| CY3Cy5    | 14303.91  | 497.853   | NM_006347 | 24298.025 | 33948.305 | AF075019  | 1168.518  | 1116.518  |
| NM_002054 | 1559.033  | 1416.52   | CY3Cy5    | 15826.235 | 486.349   | AK021498  | 3221.229  | 3346.274  |
| AF086332  | 39301.637 | 45183.477 | NM_002054 | 2052.344  | 1340.054  | AF085874  | 5265.595  | 4746.602  |
| AF086432  | 480.759   | 793.753   | AF086332  | 39934.234 | 40718.613 | NM_004753 | 24367.848 | 28184.207 |
| AJ404614  | 936.748   | 982.786   | AF086347  | 16956.184 | 17445.121 | NM_015462 | 4556.347  | 6833.043  |
| AF086347  | 13315.174 | 15202.283 | AF086388  | 1583.597  | 1571.577  | AK026700  | 715.25    | 1246.207  |

|           |           |           |           |           |           |           |           |           |
|-----------|-----------|-----------|-----------|-----------|-----------|-----------|-----------|-----------|
| AF086388  | 1391.344  | 1478.638  | AK001043  | 12949.429 | 14403.382 | AF086370  | 581.883   | 766.292   |
| AK001043  | 13350.352 | 13348.737 | AK024535  | 27826.707 | 35093.883 | AK026868  | 1529.991  | 532.227   |
| AK024535  | 31062.629 | 27625.982 | AL359608  | 2950.4    | 5159.7    | AK022200  | 4887.188  | 4055.725  |
| AL359608  | 2210.551  | 2675.567  | NM_016498 | 60719.406 | 58130.063 | AK023396  | 692.845   | 443.225   |
| NM_016498 | 54816.383 | 53424.496 | NM_016551 | 4770.837  | 5069.116  | AF264625  | 582.396   | 697.353   |
| NM_016551 | 3864.025  | 4619.934  | AK024631  | 3815.649  | 5201.125  | AF088025  | 594.48    | 1430.429  |
| AK024631  | 603.517   | 810.503   | AF087977  | 1948.976  | 2684.473  | AF085934  | 1195.291  | 924.967   |
| SR2       | 47440.25  | 51146.355 | AK026949  | 2156.49   | 2200.674  | AF147423  | 834.128   | 1050.378  |
| SR4       | 10014.317 | 10800.704 | NM_002054 | 879.347   | 795.604   | AF075088  | 778.831   | 547.484   |
| SR6       | 1326.755  | 1631.098  | SR4       | 25206.141 | 20108.594 | AK023971  | 53955.563 | 41127.434 |
| SR8       | 3049.692  | 13208.002 | SR6       | 3117.904  | 2468.585  | AL133103  | 1193.132  | 1100.939  |
| SR10      | 18893.182 | 6388.169  | SR8       | 11270.934 | 30512.813 | BC015321  | 1198.446  | 1350.092  |
| CY3Cy5    | 14599.96  | 534.596   | SR10      | 43786.543 | 11071.181 | AL137293  | 898.165   | 940.232   |
| NM_014332 | 827.577   | 864.349   | CY3Cy5    | 18713.752 | 471.407   | AL157490  | 6712.775  | 8617.109  |
| AF086068  | 2953.745  | 3095.121  | AF086068  | 2549.916  | 2162.03   | AL390167  | 1425.935  | 1382.93   |
| AF086091  | 1347.992  | 1724.703  | AF086091  | 747.904   | 645.035   | AK023657  | 552.239   | 676.036   |
| AF075018  | 1663.494  | 1012.517  | AF075018  | 959.463   | 1351.126  | AL049351  | 17491.65  | 13301.699 |
| AK024239  | 2604.173  | 2275.375  | AK024239  | 3167.753  | 2984.543  | AK021826  | 3439.781  | 3434.499  |
| AF075019  | 2357.941  | 3080.613  | AF147390  | 1065.463  | 919.954   | AK024541  | 496.618   | 611.555   |
| AF147388  | 686.948   | 1224.752  | AF075019  | 2756.88   | 3231.739  | AK021838  | 19847.072 | 22134.918 |
| AK021498  | 4246.143  | 4037.979  | AK021498  | 10498.12  | 11353.157 | AF083118  | 881.198   | 1062.112  |
| AF085874  | 4965.104  | 4931.537  | AF085874  | 9537.168  | 10987.104 | AF211977  | 776.655   | 2421.812  |
| AF147346  | 820.266   | 945.101   | AF147346  | 1724.226  | 2099.007  | AF089811  | 1597.04   | 1226.637  |
| NM_004753 | 34178.688 | 33755.605 | AK026959  | 1579.425  | 1803.428  | AK021909  | 1205.053  | 1684.825  |
| NM_015462 | 4701.656  | 5003.995  | NM_019556 | 1455.133  | 1491.496  | AK022043  | 969.816   | 1619.543  |
| AK026700  | 955.074   | 1091.368  | AK026700  | 2441.886  | 2192.207  | AK022168  | 616.882   | 717.302   |
| AF086242  | 718.749   | 874.549   | AF086370  | 1069.762  | 740.43    | AK022353  | 3007.285  | 3191.72   |
| AF086370  | 908.485   | 809.72    | AK026868  | 2273.226  | 1897.554  | AF064848  | 21822.172 | 13728.1   |
| AK026868  | 2479.75   | 2488.115  | AK022245  | 769.543   | 654.779   | U61089    | 6539.412  | 4844.763  |
| AK022245  | 750.387   | 844.057   | AK022200  | 11465.259 | 11553.817 | AK001036  | 3111.161  | 2999.086  |
| AK022200  | 11072.753 | 11081.676 | AK026967  | 512.456   | 538.784   | AK024858  | 20657.643 | 18770.166 |
| AK026967  | 740.544   | 1001.854  | AK023396  | 1199.462  | 1263.383  | NM_001048 | 10194.446 | 9884.68   |
| AK023396  | 1128.899  | 1540.506  | AF088025  | 1469.326  | 1545.157  | AK024554  | 1541.868  | 1498.681  |
| AF264625  | 785.52    | 1015.544  | AK024286  | 760.145   | 1157.088  | AF068294  | 4321.637  | 5253.788  |
| AF088025  | 1592.911  | 1525.079  | AF085934  | 2238.343  | 2748.305  | AK025909  | 6172.563  | 5478.883  |
| AK024286  | 813.497   | 564.527   | AF147423  | 1633.983  | 1654.842  | AK026138  | 2939.476  | 3148.716  |
| AF085934  | 1200.257  | 1156.046  | AF075088  | 2149.951  | 2253.744  | NM_018101 | 10121.569 | 6776.867  |
| AF147423  | 546.045   | 889.551   | AK023971  | 66226.93  | 67534.945 | AJ491695  | 6149.842  | 5849.646  |
| AF075088  | 1455.935  | 1616.583  | AK024738  | 3065.479  | 3760.192  | AF052107  | 17279.488 | 20703.822 |
| AK023971  | 67274.945 | 65547.695 | AL133103  | 4066.195  | 4190.092  | AK022430  | 946.826   | 1043.438  |
| AK024738  | 1890.222  | 2319.896  | BC015321  | 2247.265  | 2627.62   | AL137279  | 2387.402  | 1670.514  |
| BC015321  | 1368.369  | 1849.138  | AL359594  | 2146.332  | 2086.868  | AK023981  | 2285.161  | 1825.738  |
| AL157450  | 3139.257  | 3127.216  | AL137293  | 4616.05   | 4255.592  | AK025037  | 1073.798  | 904.928   |
| AL359594  | 1262.749  | 1457.464  | AL137458  | 1360.757  | 1685.685  | AK021874  | 28853.195 | 26116.42  |
| AL137293  | 1978.401  | 2163.677  | AL157490  | 24355.492 | 21798.211 | AF086384  | 68107.992 | 82007.289 |
| AL137458  | 381.603   | 940.077   | AL390167  | 4237.638  | 3395.398  | AF009267  | 3375.205  | 3727.064  |
| AL157490  | 17592.674 | 22404.357 | AK023657  | 1784.938  | 1459.807  | AK027129  | 9220.763  | 9430.173  |
| AL390167  | 3281.178  | 3763.713  | AK001022  | 1089.033  | 1297.969  | NM_015698 | 3377.331  | 3506.935  |
| AK023657  | 1564.741  | 1847.102  | AL049351  | 45159.945 | 47013.863 | AK024138  | 3785.917  | 2940.456  |
| AK001022  | 1164.737  | 1451.142  | AL137508  | 840.482   | 804.039   | Y10505    | 2363.231  | 2373.712  |
| AL049351  | 45413.414 | 40761.352 | AK021826  | 10191.03  | 9941.986  | U00946    | 7589.853  | 7424.911  |
| AL137508  | 1067.055  | 1042.262  | AK024541  | 934.553   | 1131.993  | NM_005615 | 5519.63   | 7273.758  |
| AK021826  | 8566.532  | 8012.829  | AK025341  | 1488.722  | 1416.483  | Z34290    | 1154.452  | 1352.401  |

|           |           |           |           |           |           |           |           |           |
|-----------|-----------|-----------|-----------|-----------|-----------|-----------|-----------|-----------|
| AK024541  | 1011.713  | 973.245   | AK021838  | 36630.977 | 39063.727 | AF070642  | 5090.334  | 6146.869  |
| AK025341  | 1119.644  | 1148.512  | AK021990  | 673.879   | 932.243   | AK027125  | 3929.792  | 4869.428  |
| AK021838  | 35229.973 | 39038.211 | AF083118  | 2971.631  | 3065.849  | D16918    | 2107.64   | 3083.39   |
| AK021990  | 912.259   | 1179.34   | AF211977  | 672.847   | 826.55    | D16467    | 2045.566  | 2822.885  |
| AF083118  | 2922.735  | 3362.422  | AK000957  | 860.799   | 885.87    | AF090932  | 1172.702  | 1290.147  |
| AF211977  | 634.24    | 451.642   | AF089811  | 2790.684  | 3234.54   | AF225425  | 2905.877  | 4228.287  |
| AF089811  | 2230.272  | 2261.881  | AF147444  | 2487.924  | 2973.54   | NM_014737 | 12430.732 | 8749.259  |
| AF147444  | 1559.3    | 1868.817  | NM_016566 | 1374.817  | 1506.432  | NM_003488 | 11520.801 | 9281.102  |
| NM_016566 | 798.589   | 965.25    | AK021909  | 1157.079  | 1314.907  | NM_001454 | 68049.125 | 84387.547 |
| AK021909  | 601.548   | 921.622   | AK022043  | 1477.145  | 1673.119  | NM_006558 | 5099.375  | 5318.353  |
| AK022043  | 1343.72   | 1677.753  | AK022168  | 753.536   | 913.348   | NM_005797 | 1098.212  | 1368.084  |
| AK022201  | 2271.192  | 2456.328  | AK022327  | 1057.009  | 878.294   | M17733    | 68040.602 | 71057.133 |
| AK022353  | 13583.52  | 14206.373 | AK022201  | 2178.239  | 2047.157  | U83191    | 1221.897  | 1188.126  |
| AF064848  | 40340.832 | 43811.988 | AK022353  | 14909.525 | 12545.069 | NM_013952 | 13291.927 | 13016.055 |
| U61089    | 13584.714 | 10191.745 | AF064848  | 46928.785 | 57903.492 | AK021434  | 8601.955  | 8125.248  |
| AK001036  | 7271.554  | 7640.511  | U61089    | 11391.197 | 11457.961 | NM_016478 | 16550.299 | 17812.309 |
| AK024858  | 29275.836 | 28217.006 | AK001036  | 7797.65   | 8015.425  | AK000933  | 18823.988 | 15531.056 |
| Y16697    | 1781.587  | 1537.631  | AK024858  | 31487.545 | 35469.074 | Y10205    | 793.827   | 538.456   |
| NM_001048 | 18533.592 | 16592.799 | Y16697    | 2175.515  | 2271.879  | NM_014628 | 1389.412  | 1862.845  |
| AK024554  | 3359.153  | 3378.52   | NM_001048 | 19144.854 | 17803.67  | AK025277  | 1846.615  | 2370.168  |
| AF068294  | 9213.468  | 9871.783  | AK024554  | 3774.503  | 3775.794  | AF086095  | 1217.767  | 1411.877  |
| AK025909  | 10116.449 | 9866.64   | AF068294  | 10780.695 | 11554.209 | NM_018352 | 1488.384  | 2514.73   |
| AK026138  | 4524.507  | 4041.216  | AK025909  | 11656.249 | 11416.352 | AK026880  | 1959.984  | 2059.561  |
| Z70706    | 599.25    | 664.909   | AK026138  | 8378.878  | 8248.097  | AF086061  | 1483.521  | 1842.37   |
| NM_018101 | 11268.891 | 9776.728  | Z70706    | 1131.72   | 1335.899  | AL080092  | 7528.261  | 7720.647  |
| AF293366  | 1185.299  | 1332.524  | NM_018101 | 21275.611 | 21201.98  | AF075069  | 974.89    | 2640.203  |
| BF526704  | 2296.573  | 2841.026  | AF293366  | 2707.512  | 2684.205  | AK024427  | 6036.417  | 4585.641  |
| AJ491695  | 13732.807 | 12865.692 | BF526704  | 4360.817  | 4257.361  | NM_003008 | 2556.315  | 2088.893  |
| AF052107  | 46850.879 | 49843.895 | AJ491695  | 18411.541 | 16992     | NM_000493 | 1057.74   | 1105.316  |
| AK022430  | 3118.145  | 3097.527  | AF052107  | 60752.699 | 54914.668 | AF272035  | 8236.131  | 8197.955  |
| AL137279  | 6981.286  | 7751.18   | AK022430  | 3253.401  | 3009.358  | AY009133  | 1261.572  | 1111.82   |
| AK023981  | 4652.718  | 3966.195  | AL137279  | 5612.743  | 5449.91   | NM_000965 | 497.19    | 798.592   |
| AK025037  | 2587.341  | 3015.499  | AK023981  | 4628.777  | 4533.255  | NM_013403 | 8951.646  | 10213.575 |
| AK021874  | 39415.781 | 38528.145 | AK025037  | 3494.064  | 2518.63   | NM_000674 | 1034.919  | 865.379   |
| AF086384  | 69087.086 | 72055.242 | AK021874  | 39014.492 | 42886.836 | NM_016232 | 1474.2    | 1443.986  |
| M77818    | 34868.602 | 34273.035 | AF086384  | 65346.707 | 72450.852 | AF178930  | 1338.162  | 1617.205  |
| AF009267  | 5032.974  | 4277.86   | M77818    | 34316.621 | 37495.043 | M74161    | 2421.39   | 2998.356  |
| AK027129  | 8579.732  | 8107.602  | AF009267  | 7236.647  | 6852.761  | NM_016542 | 2618.017  | 2845.262  |
| NM_015698 | 3477.95   | 3936.513  | AK027129  | 16337.604 | 17687.936 | NM_000484 | 1311.198  | 1750.695  |
| AK024138  | 5017.063  | 4448.532  | NM_015698 | 6106.227  | 7082.047  | S40369    | 16578.516 | 20380.572 |
| Y10505    | 3499.033  | 3914.656  | AK024138  | 8936.956  | 8532.871  | NM_015831 | 6380.404  | 8683.946  |
| U00946    | 11050.888 | 12990.808 | Y10505    | 7410.065  | 9058.18   | AK023154  | 5120.352  | 6480.602  |
| NM_005615 | 17649.328 | 17053.234 | U00946    | 17826.781 | 18505.518 | Z36820    | 1097.356  | 1277.454  |
| Z34290    | 2268.273  | 2449.388  | NM_005615 | 27996.922 | 27772.637 | NM_003967 | 5850.619  | 8041.945  |
| AF070642  | 11698.903 | 12713.4   | Z34290    | 3004.912  | 2665.783  | NM_012451 | 3319.362  | 4178.135  |
| AK027125  | 2544.865  | 2914.506  | AF070642  | 15863.856 | 14596.023 | NM_006624 | 16307.068 | 13221.286 |
| AK025311  | 1625.562  | 1913.315  | AK027125  | 7762.08   | 6720.316  | NM_017667 | 2619.72   | 2793.925  |
| D16918    | 5135.605  | 5546.06   | AK025311  | 1373.622  | 1511.717  | AK002211  | 16857.58  | 14727.936 |
| D16467    | 4445.451  | 4624.501  | D16918    | 4607.515  | 5047.603  | NM_012127 | 8892.45   | 8891.547  |
| AF090932  | 8137.409  | 7797.32   | D16467    | 4755.071  | 4947.118  | NM_014454 | 3360.243  | 2806.194  |
| AF166125  | 1761.011  | 1715.821  | AF090932  | 7208.5    | 7057.761  | NM_017488 | 4259.947  | 3267.988  |
| AF225425  | 11329.181 | 11083.731 | AF166125  | 1800.614  | 1503.431  | NM_002824 | 10349.134 | 9842.147  |
| NM_014737 | 27570.826 | 24713.137 | AF225425  | 15074.015 | 12870.779 | NM_006835 | 27664.037 | 25011.039 |

|           |           |           |           |           |           |           |           |           |
|-----------|-----------|-----------|-----------|-----------|-----------|-----------|-----------|-----------|
| NM_00348E | 20977.783 | 18857.779 | NM_014737 | 25557.348 | 23568.719 | NM_00602E | 18934.875 | 16109.493 |
| NM_001454 | 68801.148 | 74263.195 | NM_00348E | 21309.725 | 19210.607 | NM_01467E | 3014.408  | 2434.066  |
| NM_00655E | 10095.048 | 10697.846 | NM_001454 | 64688.988 | 75652.086 | AB002330  | 1684.203  | 867.766   |
| Z22780    | 1088.024  | 989.881   | NM_00655E | 11103.019 | 9815.883  | AL137509  | 12445.925 | 11074.871 |
| NM_005797 | 2475.411  | 1912.497  | Z22780    | 1109.235  | 843.491   | NM_00653E | 4416.388  | 3387.165  |
| NM_004824 | 3926.726  | 3104.11   | NM_005797 | 2377.004  | 2248.339  | NM_019887 | 4715.45   | 4323.724  |
| NM_01395E | 16261.221 | 16056.109 | NM_004824 | 6932.985  | 5799.852  | NM_00405C | 19197.178 | 24656.221 |
| AK021434  | 15253.108 | 13858.709 | M17733    | 65398.168 | 71908.156 | NM_006024 | 6103.293  | 6123      |
| NM_01647E | 33895.207 | 40313.559 | U83191    | 2423.525  | 2374.355  | NM_020191 | 854.779   | 833.796   |
| AK000933  | 25348.023 | 31987.439 | NM_01395E | 21873.416 | 22525.328 | NM_017434 | 9937.521  | 9990.31   |
| Y10205    | 1832.767  | 2237.38   | AK021434  | 18267.361 | 17868.211 | NM_02040E | 1138.586  | 1396.18   |
| NM_01462E | 2940.43   | 3202.523  | NM_01647E | 43402.348 | 50610.707 | NM_02018E | 1627.429  | 1299.955  |
| NM_013937 | 633.828   | 868.724   | AK000933  | 35410.27  | 39620.109 | AL137669  | 1027.419  | 1462.272  |
| AK025277  | 2941.224  | 3017.837  | Y10205    | 2504.326  | 2824.104  | AB032958  | 2542.362  | 4451.561  |
| AF086095  | 1665.215  | 2077.215  | NM_01462E | 4702.361  | 4802.502  | NM_01426E | 4440.668  | 3492.082  |
| NM_01835E | 1035.964  | 1346.085  | AK025277  | 3088.722  | 2806.37   | NM_020361 | 1339.335  | 1380.16   |
| AK026880  | 2745.776  | 2690.83   | AF086095  | 2422.026  | 2278.232  | NM_015907 | 3514.416  | 2983.498  |
| AF086061  | 2264.322  | 2201.775  | NM_01835E | 2991.477  | 3964.283  | NM_00191E | 3454.231  | 3499.431  |
| AL080092  | 21314.322 | 25453.457 | AK026880  | 3786.612  | 3594.234  | NM_013267 | 6402.338  | 5233.289  |
| AF075069  | 1177.625  | 1134.338  | AF086061  | 1588.273  | 1790.386  | NM_002454 | 4620.261  | 3863.275  |
| NM_00542E | 891.136   | 850.733   | AL080092  | 22367.9   | 20313.072 | NM_001917 | 5058.775  | 4048.295  |
| AK024427  | 10403.487 | 11244.484 | AF075069  | 1563.173  | 1332.372  | NM_00595E | 62756.656 | 62895.684 |
| NM_00300E | 5123.344  | 4960.245  | NM_00542E | 993.541   | 948.63    | NM_00304E | 25392.195 | 26169.568 |
| NM_00049E | 2150.882  | 2227.479  | AK024427  | 9747      | 9837.866  | D87077    | 1053.717  | 719.84    |
| AF272035  | 12603.726 | 13522.908 | NM_00300E | 4960.121  | 4236.67   | L07033    | 809.186   | 518.157   |
| AY009133  | 1952.103  | 1626.347  | NM_00049E | 2783.271  | 2024.298  | NM_00599E | 2307.279  | 3005.291  |
| NM_00096E | 726.72    | 660.304   | AF272035  | 15797.921 | 15830.289 | AK026341  | 1441.08   | 1493.953  |
| NM_01340E | 10318.833 | 8326.613  | AY009133  | 3382.621  | 2756.591  | NM_01894E | 2877.868  | 3557.74   |
| NM_000674 | 1346.147  | 939.666   | NM_00096E | 1623.162  | 1580.597  | U01922    | 6556.723  | 6806.284  |
| NM_01623E | 2863.66   | 3118.507  | NM_01340E | 20462.438 | 18125.088 | NM_00399E | 662.251   | 605.062   |
| AF178930  | 2146.909  | 2484.854  | NM_00412E | 1848.681  | 2222.348  | NM_00127C | 2336.161  | 2281.056  |
| M74161    | 5294.81   | 5260.996  | NM_000674 | 1661.386  | 1573.338  | NM_00195E | 29876.76  | 27214.146 |
| NM_01654E | 3324.978  | 4196.486  | AB020671  | 919.579   | 809.108   | NM_00322E | 11985.496 | 13471.193 |
| NM_000484 | 4009.374  | 4125.914  | AK024257  | 926.354   | 920.345   | NM_00671E | 41938.227 | 43694.684 |
| S40369    | 20635.41  | 21739.66  | NM_01623E | 4895.526  | 5190.031  | NM_020201 | 13482.912 | 15152.246 |
| NM_015831 | 10783.368 | 11558.994 | AF178930  | 4157.446  | 4223.247  | U81557    | 1724.374  | 924.7     |
| AK023154  | 11466.463 | 12549.396 | M74161    | 14403.21  | 12333.263 | NM_01487E | 4274.135  | 3727.912  |
| Z36820    | 4080.224  | 3843.97   | NM_01654E | 13697.51  | 14374.394 | NM_01601E | 5825.785  | 3645.534  |
| NM_003967 | 14601.006 | 15784.161 | NM_000484 | 7585      | 7029.616  | NM_01224E | 9449.003  | 5301.361  |
| NM_012451 | 9836.966  | 11299.498 | NM_00385E | 1132.986  | 978.351   | NM_00153E | 20157.012 | 19926.377 |
| NM_006624 | 30534.104 | 32451.389 | S40369    | 24942.277 | 26347.242 | NM_00692E | 33455.609 | 40671.008 |
| NM_00706E | 744.474   | 917.1     | NM_015831 | 10819.776 | 13005.752 | NM_003977 | 51565.961 | 48970.617 |
| AF130079  | 1099.453  | 1029.755  | AK023154  | 12546.775 | 14873.771 | NM_00599E | 27149.525 | 28831.627 |
| NM_017667 | 3964.956  | 3309.541  | Z36820    | 4515.903  | 4027.915  | U28424    | 3410.487  | 3544.243  |
| AK002211  | 14988.99  | 10826.851 | NM_003967 | 18814.209 | 16965.498 | BF541372  | 14610.574 | 15160.896 |
| NM_012127 | 7366.92   | 5877.775  | NM_012451 | 14096.822 | 11207.459 | AF092137  | 13426.049 | 14137.598 |
| NM_014454 | 2350.117  | 1676.704  | NM_006624 | 28026.457 | 30355.488 | NM_00462E | 3036.949  | 4961.431  |
| NM_01748E | 5614.719  | 5126.229  | NM_00706E | 901.016   | 617.405   | NM_00479E | 11651.788 | 15813.067 |
| NM_002824 | 41295.418 | 40674.703 | AF130079  | 1393.248  | 1125.622  | NM_00439C | 11129.619 | 12825.371 |
| NM_00683E | 32747.705 | 34168.512 | NM_017667 | 5810.66   | 5250.3    | AL050028  | 9009.694  | 8368.648  |
| NM_00602E | 22479.887 | 23693.922 | AK002211  | 21529.791 | 18853.443 | BE732255  | 11587.49  | 12671.569 |
| NM_01467E | 9614.692  | 12064.396 | NM_012127 | 15607.053 | 13718.362 | NM_00495E | 7353.529  | 6016.724  |
| AL137509  | 43086.918 | 51142.543 | NM_014454 | 7315.137  | 6704.535  | NM_003364 | 4526.515  | 3498.628  |

|           |           |           |           |           |           |           |           |           |
|-----------|-----------|-----------|-----------|-----------|-----------|-----------|-----------|-----------|
| NM_00653E | 13896.545 | 11086.281 | NM_017489 | 8219.125  | 7605.473  | NM_017803 | 2790.448  | 3043.084  |
| NM_019887 | 15960.704 | 14912.587 | NM_002824 | 43945.809 | 57816.875 | NM_015863 | 436.346   | 413.324   |
| NM_00405C | 34601.406 | 43159.383 | NM_006835 | 42945.102 | 50980.578 | NM_005994 | 17611.828 | 13602.366 |
| NM_006024 | 12533.817 | 13638.945 | NM_006023 | 32867.02  | 39691.348 | AB027508  | 6060.8    | 5546.604  |
| NM_020191 | 3504.629  | 4549.279  | NM_014673 | 15177.456 | 15845.843 | NM_016331 | 3925.074  | 3257.387  |
| NM_017434 | 30216.115 | 30569.215 | AB002330  | 15929.261 | 16265.088 | NM_01436C | 61795.316 | 59454.996 |
| NM_02040E | 812.453   | 898.256   | AL137509  | 51852.152 | 55571.98  | NM_00735E | 5247.189  | 5906.998  |
| NM_020182 | 2285.177  | 2278.578  | NM_00653E | 17643.809 | 16704.93  | NM_001571 | 1476.686  | 1545.498  |
| AL137669  | 7526.728  | 7635.983  | NM_019887 | 25292.27  | 25823.992 | NM_00340E | 2473.689  | 2524.693  |
| AJ275213  | 3333.175  | 3569.45   | NM_00405C | 58550.719 | 58602.027 | NM_00345C | 1854.778  | 1802.144  |
| AB032958  | 7640.571  | 8127.98   | NM_006024 | 28923.99  | 34596.848 | NM_007193 | 395.633   | 377.503   |
| NM_014263 | 9672.98   | 8391.16   | NM_020191 | 6175.427  | 7127.781  | NM_001994 | 13289.701 | 14298.707 |
| NM_020361 | 2364.607  | 2250.306  | NM_017434 | 34950.641 | 44735.871 | J00129    | 30390.975 | 33415.035 |
| NM_015907 | 2954.972  | 1863.026  | NM_02040E | 758.431   | 895.337   | NM_00332C | 5488.264  | 4620.865  |
| NM_001912 | 1607.747  | 1360.188  | NM_020182 | 2506.053  | 2518.259  | L10146    | 7463.968  | 8197.929  |
| NM_013267 | 5719.142  | 4747.433  | AL137669  | 6797.801  | 6831.71   | NM_00068E | 11378.988 | 10453.402 |
| NM_002454 | 7389.184  | 7684.417  | AJ275213  | 3711.828  | 3175.4    | AK025657  | 9311.505  | 7761.86   |
| NM_001917 | 12905.517 | 15253.861 | AB032958  | 8367.336  | 7828.607  | W42849    | 1461.122  | 1115.357  |
| NM_00595E | 65170.387 | 63389.164 | NM_014263 | 8318.978  | 7659.884  | AI889961  | 5831.492  | 5076.548  |
| NM_003043 | 48493.949 | 51033.969 | NM_020361 | 2732.127  | 2856.397  | AI360116  | 10232.75  | 7741.415  |
| D87077    | 3231.382  | 2776.893  | NM_015907 | 4820.855  | 4630.248  | NM_013983 | 866.61    | 640.384   |
| NM_01430E | 988.661   | 1137.257  | NM_001912 | 2960.571  | 3113.271  | AI572835  | 8492.935  | 7960.114  |
| L07033    | 4530.229  | 4475.923  | NM_013267 | 12878.244 | 10816.626 | R20392    | 14110.26  | 15962.015 |
| AK023934  | 881.383   | 849.068   | NM_002454 | 8275.092  | 8937.917  | AA486367  | 2356.56   | 1488.73   |
| AK000142  | 1410.211  | 1374.709  | NM_001917 | 9747.428  | 9902.622  | M55153    | 1691.484  | 1782.488  |
| NM_005993 | 15025.915 | 17454.578 | NM_00595E | 63084.656 | 76050.563 | AF414120  | 588.27    | 732.001   |
| AK026341  | 5275.314  | 6004.396  | NM_003043 | 59449.191 | 61312.059 | AK097322  | 473.484   | 759.886   |
| NM_018943 | 11390.779 | 12495.547 | D87077    | 6278.716  | 6828.402  | AL136131  | 3911.309  | 6317.662  |
| AJ292757  | 1365.245  | 1727.545  | NM_01430E | 670.961   | 982.865   | NM_003263 | 1966.067  | 6026.36   |
| U01922    | 8703.021  | 9457.841  | L07033    | 6028.175  | 5651.486  | NM_004957 | 4887.097  | 6375.437  |
| NM_00399E | 3251.428  | 3278.681  | AK023934  | 3635.72   | 3551.141  | AV697672  | 672.558   | 489.549   |
| NM_00446E | 1233.273  | 1482.211  | AK000142  | 2054.908  | 2869.435  | NM_000942 | 36188.055 | 37834.934 |
| NM_00251C | 2367.442  | 2467.586  | NM_005993 | 19158.787 | 21054.186 | NM_002982 | 1410.019  | 1059.02   |
| NM_02038E | 1188.956  | 1389.588  | AK026341  | 7468.458  | 7426.188  | NM_00219C | 784.532   | 713.945   |
| NM_00127C | 2546.873  | 1849.991  | NM_018943 | 18936.752 | 19772.91  | AK056773  | 3355.68   | 3389.379  |
| NM_001952 | 42344.703 | 37319.961 | AJ292757  | 2612.755  | 2393.307  | NM_002182 | 29720.787 | 27637.277 |
| NM_003223 | 18693.959 | 15797.056 | AK025239  | 3626.586  | 4665.51   | AL365408  | 61866.926 | 60859.609 |
| NM_006713 | 37811.012 | 40112.836 | U01922    | 7716.041  | 9374.074  | AK026204  | 4343.119  | 3743.108  |
| NM_020201 | 14649.528 | 12239.869 | NM_00399E | 2891.162  | 2657.453  | NM_01463E | 896.947   | 658.146   |
| U81557    | 1569.666  | 1343.524  | NM_00446E | 946.507   | 852.468   | NM_00414E | 7808.762  | 7299.658  |
| NM_01487E | 5715.03   | 5632.793  | NM_00251C | 2666.623  | 2298.025  | AK023196  | 4098.26   | 4841.839  |
| AK023530  | 2062.807  | 1954.512  | NM_02038E | 831.801   | 828.495   | NM_01872E | 1680.163  | 1868.292  |
| NM_01601E | 26864.855 | 22343.441 | NM_00127C | 5173.139  | 6200.581  | AK024014  | 9045.094  | 12164.177 |
| NM_01224E | 32251.975 | 32346.096 | NM_001952 | 42687.367 | 45825.496 | NM_00086E | 1746.134  | 2192.083  |
| NM_00398E | 1065.452  | 1187.469  | NM_003223 | 26700.691 | 26562.572 | AF076642  | 707.164   | 629.544   |
| NM_001533 | 47947.387 | 52258.496 | NM_006713 | 56186.328 | 54348.84  | NM_00238E | 5298.351  | 5859.565  |
| NM_00692E | 55921.75  | 56006.945 | NM_020201 | 21369.926 | 24515.332 | NM_005314 | 3159.482  | 4044.465  |
| NM_003977 | 59811.797 | 58571.73  | U81557    | 2830.759  | 2627.881  | U83115    | 7652.25   | 12774.893 |
| NM_00599E | 57967.281 | 59545.609 | NM_01487E | 8066.131  | 10889.385 | NM_016234 | 16991.668 | 20094.838 |
| U28424    | 8037.294  | 9321.318  | AK023530  | 2394.03   | 2767.123  | NM_00187E | 8363.073  | 10620.722 |
| BF541372  | 20311     | 20802.803 | NM_01601E | 29553.846 | 26965.994 | NM_016144 | 6127.573  | 7601.221  |
| AF092137  | 21865.035 | 28190.484 | NM_01224E | 30759.178 | 34319.57  | AL133099  | 5763.374  | 6289.645  |
| NM_004623 | 10186.622 | 11549.342 | NM_00398E | 817.481   | 1107.15   | NM_016082 | 3353.491  | 2771.957  |

|           |           |           |           |           |           |           |           |           |
|-----------|-----------|-----------|-----------|-----------|-----------|-----------|-----------|-----------|
| NM_004793 | 28376.916 | 33467.867 | NM_001533 | 43226.617 | 47180.234 | NM_000433 | 865.077   | 931.434   |
| NM_004390 | 27334.984 | 38157.824 | NM_006929 | 57166.426 | 52092.488 | NM_000190 | 9463.426  | 9059.106  |
| AL050028  | 9069.215  | 6266.089  | NM_003977 | 62505.676 | 51863.926 | X15667    | 7754.566  | 6783.283  |
| NM_000371 | 1065.249  | 902.3     | NM_005998 | 61686.813 | 53922.586 | NM_017512 | 705.146   | 664.545   |
| BE732255  | 13272.825 | 11476.46  | U28424    | 14404.229 | 15322.017 | NM_002245 | 54144.648 | 56845.285 |
| NM_004955 | 4698.302  | 3158.274  | BF541372  | 20180.369 | 25336.021 | NM_007125 | 60104.746 | 54757.801 |
| NM_003364 | 2753.198  | 2262.629  | AF092137  | 23583.99  | 25144.162 | NM_004311 | 7149.707  | 8286.917  |
| NM_017803 | 3977.777  | 3458.123  | NM_004623 | 8589.872  | 10391.94  | NM_005624 | 3052.183  | 3892.504  |
| NM_015863 | 755.332   | 773.064   | NM_004793 | 26182.811 | 25028.814 | NM_002302 | 1197.658  | 1344.091  |
| NM_005994 | 37939.766 | 37208.914 | NM_004390 | 28349.701 | 28209.119 | AB020672  | 884.936   | 1259.729  |
| AB027508  | 12039.826 | 13746.213 | AL050028  | 18571.809 | 16668.305 | AK026958  | 1041.821  | 1409.367  |
| NM_016331 | 9196.818  | 8536.05   | NM_000371 | 1481.364  | 2202.643  | NM_000575 | 3251.857  | 4067.863  |
| NM_014360 | 63267.773 | 59147.402 | BE732255  | 19017.721 | 24731.404 | AB040962  | 660.433   | 1413.011  |
| NM_018952 | 1405.12   | 1390.788  | NM_004955 | 11010.892 | 10158.006 | NM_015595 | 1631.167  | 1256.751  |
| NM_007355 | 14395.624 | 13154.387 | NM_003364 | 6130.54   | 6873.36   | NM_018695 | 24881.115 | 20261.971 |
| NM_001571 | 4347.573  | 5609.364  | NM_017803 | 5311.014  | 5872.132  | NM_000135 | 19028.662 | 15324.124 |
| AF126749  | 1759.567  | 1952.293  | NM_015863 | 866.992   | 859.754   | AL157456  | 1673.305  | 1500.149  |
| NM_018105 | 3073.173  | 3399.841  | NM_005994 | 40474.961 | 42365.777 | NM_000380 | 23554.746 | 20134.021 |
| NM_003405 | 5102.166  | 5363.674  | AB027508  | 10804.121 | 10575.568 | NM_004625 | 3052.351  | 3363.623  |
| NM_003450 | 3382.254  | 3579.586  | NM_016331 | 10950.266 | 10782.968 | NM_014875 | 5756.486  | 6450.428  |
| NM_003433 | 26439.533 | 28474.334 | NM_014360 | 59002.629 | 54514.418 | NM_005405 | 1987.886  | 3059.752  |
| NM_005221 | 9981.526  | 11649.945 | NM_018952 | 1059.05   | 1527.505  | NM_003325 | 3292.4    | 4416.45   |
| NM_018561 | 4512.655  | 6504.333  | AB033053  | 1089.935  | 997.354   | X93921    | 2725.051  | 3488.924  |
| NM_007193 | 648.093   | 431.815   | NM_007355 | 17004.904 | 17247.311 | AF073482  | 3290.088  | 3837.01   |
| NM_001994 | 27915.424 | 21704.867 | NM_001571 | 6300.269  | 7978.303  | NM_005990 | 7489.739  | 8761.979  |
| J00129    | 35475.539 | 35253.449 | AF126749  | 1336.769  | 1627.624  | NM_016275 | 64839.133 | 65536.625 |
| NM_003320 | 4049.976  | 3430.528  | NM_018105 | 4623.72   | 4797.412  | NM_017762 | 5360.202  | 6209.875  |
| L10146    | 4908.935  | 6072.882  | NM_003405 | 5391.447  | 5871.432  | NM_001863 | 64334.445 | 59448.66  |
| NM_000685 | 21558.232 | 20086.051 | NM_003450 | 5785.98   | 7020.266  | NM_000921 | 11170.762 | 11993.024 |
| AK025657  | 33667.918 | 32635.02  | AK021577  | 3660.694  | 3640.953  | NM_000095 | 3323.404  | 4382.384  |
| AF142063  | 1977.979  | 2223.665  | NM_003433 | 33628.102 | 30009.959 | NM_000015 | 17870.102 | 20860.563 |
| W42849    | 6736.777  | 5501.189  | NM_005221 | 11472.973 | 9867.172  | AK026913  | 3133.149  | 3108.877  |
| AI889961  | 10160.382 | 10562.469 | NM_005870 | 1653.155  | 1227.008  | J00129    | 27955.895 | 33076.602 |
| AI360116  | 27290.238 | 26208.918 | NM_018561 | 3335.146  | 2912.316  | NM_003320 | 5076.669  | 4411.601  |
| NM_013983 | 2175.381  | 2299.375  | NM_007193 | 1297.653  | 1029.097  | L10146    | 6491.321  | 6773.818  |
| AI572835  | 38876.941 | 44394.453 | NM_001994 | 30229.85  | 30863.785 | NM_000685 | 8939.573  | 7399.278  |
| R20392    | 35045.613 | 36275.969 | J00129    | 43108.664 | 46656.938 | AK025657  | 6735.611  | 5596.451  |
| AA486367  | 8833.205  | 6536.677  | NM_003320 | 11366.507 | 11283.903 | W42849    | 2525.564  | 1849.291  |
| N56684    | 1783.653  | 2057.531  | L10146    | 15625.167 | 26140.412 | AI889961  | 2360.396  | 1773.947  |
| M55153    | 4475.631  | 4783.091  | NM_000685 | 22866.932 | 25102.402 | AI360116  | 13476.022 | 9934.012  |
| AF414120  | 2675.246  | 2793.207  | AK025657  | 39416.762 | 39897.051 | NM_013983 | 1393.053  | 1264.578  |
| AK097322  | 2824.796  | 4187.139  | AF142063  | 3114.494  | 2854.802  | AI572835  | 9305.939  | 8498.444  |
| NM_004957 | 14883.433 | 20068.42  | W42849    | 8612.477  | 9114.275  | R20392    | 16431.879 | 15164.806 |
| AV697672  | 1019.937  | 842.339   | AI889961  | 12017.66  | 13906.21  | AA486367  | 3308.559  | 2180.376  |
| NM_000942 | 45133.664 | 41258.984 | AI360116  | 29359.236 | 30039.627 | N56684    | 853.831   | 991.003   |
| NM_002982 | 1639.125  | 1471.796  | NM_013983 | 2314.674  | 2434.372  | M55153    | 2577.087  | 3058.501  |
| NM_002190 | 1279.645  | 1091.801  | AI572835  | 42416.27  | 42572.004 | AF414120  | 1245.314  | 1286.565  |
| AK056773  | 11763.223 | 10243.519 | R20392    | 38952.254 | 37784.039 | AL136131  | 6167.78   | 8529.474  |
| NM_002182 | 57107.219 | 54522.625 | AA486367  | 10930.271 | 7290.639  | NM_033357 | 8009.922  | 8533.795  |
| NM_016470 | 8525.669  | 9064.042  | N56684    | 2743.873  | 3001.015  | AF335109  | 2521.96   | 2937.244  |
| AL365408  | 61082.324 | 57011.465 | M55153    | 5256.677  | 5712.978  | NM_003263 | 2072.78   | 2218.323  |
| AK026204  | 14606.205 | 11536.786 | AF414120  | 2983.05   | 2976.376  | U59911    | 5568.521  | 7039.638  |
| NM_014635 | 4896.775  | 3817.859  | AK097322  | 1942.312  | 1906.667  | NM_004482 | 763.79    | 552.613   |

|           |           |           |           |           |           |           |           |           |
|-----------|-----------|-----------|-----------|-----------|-----------|-----------|-----------|-----------|
| NM_004145 | 30831.898 | 31620.639 | AL136131  | 12847.686 | 15809.898 | NM_000942 | 34989.43  | 35874.727 |
| AK023196  | 13074.046 | 12621.821 | NM_033357 | 17954.535 | 16753.342 | AK056773  | 3183.138  | 2979.272  |
| NM_018728 | 9387.147  | 8152.409  | AF335109  | 6383.413  | 6382.528  | NM_002182 | 30607.838 | 28664.83  |
| AK024014  | 38089.648 | 39871.098 | NM_003263 | 4943.679  | 5022.494  | NM_016470 | 3216.145  | 2533.924  |
| NM_000865 | 9156.133  | 8299.644  | U59911    | 21730.576 | 18969.09  | AL365408  | 57944.949 | 60154.586 |
| NM_000867 | 3117.663  | 4461.611  | NM_004957 | 15971.272 | 13256.66  | AK026204  | 6100.625  | 4683.736  |
| AF076642  | 2299.456  | 2409.581  | AV697672  | 2259.472  | 2190.009  | NM_014635 | 1578.835  | 575.149   |
| NM_002386 | 16879.561 | 17302.703 | NM_000942 | 52477.441 | 53182.785 | NM_004145 | 9819.58   | 9783.723  |
| NM_005314 | 7882.4    | 7798.413  | NM_002982 | 3096.827  | 2970.174  | AK023196  | 6316.145  | 6134.758  |
| NM_004885 | 11458.588 | 14923.636 | NM_002190 | 1755.186  | 2121.052  | NM_018728 | 4032.733  | 3039.606  |
| NM_001940 | 10092.411 | 14223.396 | AK056773  | 10693.548 | 11887.569 | AK024014  | 14561.122 | 17379.738 |
| U83115    | 28896.348 | 40874.859 | NM_002182 | 57758.262 | 57612.621 | NM_000865 | 2734.689  | 3133.45   |
| NM_016234 | 9514.104  | 8386.632  | NM_016470 | 10381.516 | 11161.254 | NM_000867 | 942.496   | 877.131   |
| NM_001876 | 11162.33  | 10561.481 | AL365408  | 61848.434 | 67868.445 | AF076642  | 1540.647  | 1514.832  |
| NM_016144 | 4256.41   | 4694.402  | AK026204  | 16026.018 | 16907.764 | NM_002386 | 4983.626  | 5272.544  |
| AL133099  | 8481.22   | 8358.089  | NM_014635 | 5309.886  | 4701.252  | NM_005314 | 3497.919  | 3989.25   |
| NM_016082 | 4921.516  | 4298.011  | NM_004145 | 36382.355 | 40983.125 | NM_004885 | 4907.35   | 5516.704  |
| NM_000433 | 3781.14   | 3495.497  | AK023196  | 19047.707 | 18758.338 | NM_005145 | 9626.23   | 9147.743  |
| NM_000190 | 26315.766 | 26674.756 | NM_018728 | 11698.884 | 10633.505 | NM_012152 | 15403.751 | 16684.244 |
| X15667    | 23139.445 | 22188.115 | AK024014  | 50043.109 | 52990.086 | NM_001940 | 3061.313  | 2662.162  |
| NM_017512 | 1975.255  | 1889.138  | NM_000865 | 11752.899 | 13773.997 | U83115    | 7874.992  | 9824.96   |
| NM_018661 | 1452.222  | 1239.572  | NM_000867 | 4250.718  | 5623.546  | NM_007193 | 716.211   | 880.159   |
| NM_002249 | 60893.313 | 56129.992 | AF076642  | 2743.961  | 3583.859  | NM_001994 | 5378.308  | 4666.837  |
| AK096507  | 710.412   | 627.562   | NM_002386 | 22491.943 | 22182.248 | NM_016144 | 5004.563  | 5128.018  |
| NM_007126 | 60049.988 | 57640.637 | NM_005314 | 12848.335 | 12156.714 | AL133099  | 4982.807  | 4933.651  |
| NM_004311 | 26441.146 | 32521.346 | NM_004885 | 11271.078 | 10603.397 | NM_016082 | 2589.554  | 2490.125  |
| NM_005624 | 10331.938 | 10497.789 | NM_005145 | 26740.344 | 21238.75  | NM_000190 | 8870.827  | 6684.295  |
| NM_002302 | 2133.895  | 2782.557  | NM_012152 | 61826.035 | 52905.387 | X15667    | 8086.615  | 6802.079  |
| AB020672  | 789.014   | 610.638   | NM_001940 | 10940.562 | 8919.259  | NM_018661 | 922.035   | 728.771   |
| AK026958  | 4994.357  | 5020.466  | U83115    | 29919.064 | 32434.139 | NM_002249 | 56312.375 | 58032.641 |
| AB040962  | 2301.229  | 3132.518  | NM_016234 | 32834.191 | 35099.453 | NM_007126 | 60850.684 | 57874.656 |
| NM_000639 | 2334.427  | 5565.724  | NM_001876 | 17782.678 | 23501.686 | NM_004311 | 12081.734 | 16080.778 |
| NM_015599 | 2626.858  | 2887.142  | NM_016144 | 11826.369 | 17374.625 | NM_005624 | 3382.286  | 3763.665  |
| AB037902  | 3709.915  | 2825.673  | AL133099  | 13904.98  | 17769.545 | NM_002302 | 1815.104  | 2661.344  |
| NM_018696 | 47605.98  | 40548.402 | NM_016082 | 5290.853  | 5833.226  | AB020672  | 589.303   | 844.915   |
| NM_000136 | 52598.531 | 47094.813 | NM_000433 | 4374.753  | 4925.105  | AK026958  | 903.147   | 1102.482  |
| AL157456  | 4968.168  | 3888.999  | NM_000190 | 30228.865 | 30612.045 | NM_000579 | 761.274   | 1856.317  |
| AL162056  | 3230.15   | 2824.962  | X15667    | 24477.414 | 28322.748 | AF263462  | 3932.208  | 3248.162  |
| NM_000380 | 55005.207 | 49925.164 | NM_017512 | 1806.353  | 1873.547  | AB040962  | 2985.184  | 2699.638  |
| NM_004628 | 8757.224  | 8746.141  | NM_018661 | 1927.348  | 2100.135  | NM_018696 | 24048.424 | 17558.393 |
| NM_014876 | 10003.033 | 9519.589  | NM_002249 | 62283.734 | 64254.457 | NM_000136 | 27515.637 | 18653.408 |
| NM_005406 | 7212.391  | 8515.279  | AK096507  | 635.438   | 689.011   | AL157456  | 2011.209  | 1248.677  |
| NM_003328 | 7565.587  | 8957.714  | NM_007126 | 63048.012 | 62373.551 | AL162056  | 1378.431  | 906.676   |
| X93921    | 5171.489  | 6438.135  | NM_004311 | 30257.086 | 43193.086 | NM_000380 | 27725.035 | 20013.143 |
| AF073482  | 8391.556  | 10694.893 | NM_005624 | 13023.924 | 15067.567 | NM_004628 | 3130.229  | 2207.4    |
| NM_005990 | 13817.567 | 15023.451 | NM_002302 | 3843.791  | 4365.04   | NM_014876 | 5018.376  | 4661.369  |
| NM_016276 | 62969.094 | 60251.469 | AB020672  | 1276.42   | 879.68    | NM_005406 | 2494.628  | 2634.75   |
| NM_017762 | 14120.058 | 10957.122 | AK026958  | 4963.663  | 4441.561  | NM_003328 | 2120.584  | 2405.667  |
| NM_000016 | 31060.891 | 41507.461 | NM_000579 | 2276.995  | 2174.98   | X93921    | 1807.928  | 1620.009  |
| AK026913  | 7621.94   | 7969.785  | NM_001480 | 1650.167  | 1432.393  | AF073482  | 2782.964  | 2557.572  |
| J00129    | 25886.328 | 22965.369 | AF263462  | 10232.428 | 9048.769  | NM_005990 | 8401.019  | 8037.469  |
| NM_003320 | 5551.264  | 5795.049  | AB040962  | 2560.971  | 2079.392  | NM_017762 | 6170.892  | 7391.331  |
| L10146    | 11556.636 | 18710.236 | NM_000639 | 1175.749  | 733.157   | NM_001863 | 63957.813 | 58173.363 |



|           |           |           |           |           |           |           |           |           |
|-----------|-----------|-----------|-----------|-----------|-----------|-----------|-----------|-----------|
| NM_000685 | 20280.855 | 21688.779 | NM_015599 | 3517.411  | 3314.964  | NM_000921 | 10093.363 | 11139.581 |
| AK025657  | 28375.137 | 26806.324 | AB037902  | 1348.701  | 1589.481  | NM_000098 | 875.974   | 1077.727  |
| AF142063  | 2602.246  | 2193.885  | NM_018696 | 53575.277 | 47053.719 | NM_000016 | 9084.352  | 9363.115  |
| W42849    | 6160.081  | 6250.872  | NM_000136 | 55120.609 | 48182.574 | AK026913  | 2463.103  | 2653.943  |
| AI889961  | 10086.432 | 9794.56   | AL157456  | 5886.758  | 5992.927  | NM_016234 | 14064.37  | 18705.797 |
| AI360116  | 26253.215 | 26104.92  | AL162056  | 3532.167  | 4001.556  | NM_001876 | 8475.473  | 10218.141 |
| NM_013983 | 2531.387  | 2369.094  | NM_000380 | 61343.762 | 50514.188 | L10146    | 6725.675  | 7230.9    |
| AI572835  | 37971.363 | 38997.492 | NM_004628 | 10717.312 | 11574.016 | NM_000685 | 8689.167  | 6876.152  |
| R20392    | 34250.883 | 32142.551 | NM_014876 | 10778.933 | 11523.056 | AK025657  | 11327.118 | 10222.192 |
| AA486367  | 7895.945  | 5568.788  | NM_005406 | 8128.034  | 8814.452  | AF142063  | 1411.606  | 1418.999  |
| N56684    | 2128.755  | 1911.144  | NM_003328 | 6849.576  | 7537.18   | W42849    | 2683.88   | 2084.085  |
| M55153    | 4725.618  | 5132.389  | X93921    | 5593.455  | 6081.614  | AI889961  | 4174.272  | 2431.439  |
| AF414120  | 2705.649  | 2734.668  | NM_016276 | 63606.629 | 68266.273 | AI360116  | 16486.334 | 9982.127  |
| AK097322  | 2146.06   | 1633.144  | NM_017762 | 14276.422 | 13899.676 | NM_013983 | 1057.137  | 535.521   |
| AL136131  | 8765.654  | 10702.554 | NM_001863 | 65808.359 | 60195.441 | AI572835  | 7762.057  | 6762.317  |
| NM_033357 | 13957.779 | 14712.025 | NM_000921 | 29115.529 | 27371.561 | R20392    | 17639.945 | 14344.82  |
| AF335109  | 6348.845  | 7180.169  | NM_000098 | 6870.727  | 4945.279  | AA486367  | 4066.622  | 2455.368  |
| NM_003263 | 4682.906  | 5216.657  | NM_000016 | 36746.184 | 34515.102 | N56684    | 836.083   | 954.875   |
| U59911    | 16506.035 | 20069.762 | AK026913  | 10911.921 | 8678.079  | M55153    | 2828.694  | 2854.756  |
| NM_004482 | 1915.488  | 2042.073  | J00129    | 48336.855 | 52783.91  | AF414120  | 896.419   | 1256.006  |
| NM_000352 | 833.922   | 999.055   | NM_003320 | 13724.324 | 13666.61  | AL136131  | 5366.43   | 7001.428  |
| NM_000942 | 45051.543 | 47435.668 | L10146    | 15422.52  | 22605.541 | AF335109  | 1988.06   | 2862.367  |
| NM_002982 | 1545.666  | 1281.649  | NM_000685 | 25312.418 | 29385.738 | NM_003263 | 2383.99   | 2090.557  |
| NM_002190 | 912.957   | 1051.543  | AK025657  | 40990.934 | 46262.332 | U59911    | 3697.309  | 4390.764  |
| AK056773  | 8594.759  | 8627.368  | AF142063  | 2555.437  | 2705.837  | NM_015599 | 760.702   | 490.188   |
| NM_002182 | 45532.125 | 51106.23  | W42849    | 7624.034  | 9558.618  | NM_014635 | 2969.104  | 1612.977  |
| NM_016470 | 781.698   | 808.697   | AI889961  | 11150.134 | 12077.303 | NM_004145 | 11213.097 | 9274.18   |
| AL365408  | 63549.016 | 61238.121 | AI360116  | 26794.785 | 26859.932 | AK023196  | 5691.025  | 4419.084  |
| AK026204  | 6837.659  | 6235.094  | NM_013983 | 2704.799  | 2764.613  | NM_018728 | 4382.448  | 2361.637  |
| NM_014635 | 4107.207  | 3142.548  | AI572835  | 41025.688 | 43442.113 | AK024014  | 16197.848 | 11051.969 |
| NM_004145 | 23915.1   | 24801.947 | R20392    | 38229.902 | 35212.656 | NM_000865 | 2602.167  | 1307.225  |
| AK023196  | 13929.692 | 13480.75  | AA486367  | 9874.549  | 6067.661  | NM_000867 | 1746.184  | 827.064   |
| NM_018728 | 9520.316  | 7618.799  | N56684    | 1993.619  | 2033.419  | NM_002386 | 4600.309  | 4065.714  |
| AK024014  | 38491.113 | 40843.715 | M55153    | 5056.412  | 4708.941  | NM_005314 | 3470.733  | 3297.294  |
| NM_000865 | 9506.825  | 9288.436  | AF414120  | 2992.455  | 2931.269  | NM_004885 | 3496.293  | 3436.505  |
| NM_000867 | 3351.538  | 3720.829  | AF335109  | 6280.594  | 6334.912  | NM_005145 | 11328.361 | 10294.798 |
| AF076642  | 2869.526  | 3728.337  | NM_003263 | 4784.528  | 4441.188  | NM_012152 | 22413.705 | 29170.326 |
| NM_002386 | 16898.129 | 16082.378 | U59911    | 20291.529 | 20751.021 | AK024093  | 3506.417  | 4452.04   |
| NM_005314 | 8553.366  | 8194.814  | NM_004482 | 2651.607  | 2318.186  | NM_001940 | 2881.813  | 2832.19   |
| NM_004885 | 12596.75  | 11363.959 | NM_000352 | 1266.475  | 867.394   | U83115    | 10513.075 | 13689.06  |
| NM_005145 | 26994.59  | 25569.641 | NM_000942 | 55940.691 | 56412.121 | NM_001264 | 14409.734 | 18064.754 |
| NM_012152 | 55779.09  | 55693.863 | NM_002982 | 3437.056  | 3031.641  | NM_013364 | 27859.139 | 33971.09  |
| NM_001940 | 9079.092  | 9392.7    | NM_002190 | 2057.738  | 2119.546  | NM_014368 | 1399.925  | 2065.574  |
| U83115    | 29491.963 | 38869.883 | AK056773  | 13463.798 | 14597.778 | NM_004676 | 645.708   | 732.875   |
| NM_007193 | 1018.979  | 1057.051  | NM_002182 | 58269.219 | 56738.602 | NM_001994 | 4310.817  | 4440.975  |
| NM_001994 | 36989.59  | 40512.238 | NM_016470 | 10869.359 | 12211.149 | J00129    | 20513.799 | 20494.293 |
| NM_016144 | 5309.636  | 7346.527  | AL365408  | 62605.586 | 64496.305 | NM_003320 | 1285.012  | 789.666   |
| AL133099  | 6556.682  | 5753.196  | AK026204  | 16655.563 | 15110.142 | AL137631  | 9141.305  | 6929.202  |
| NM_016082 | 2511.829  | 2120.242  | NM_014635 | 6019.699  | 4503.775  | NM_016057 | 9975.434  | 5865.087  |
| NM_000433 | 1121.143  | 1003.196  | NM_004145 | 36046.887 | 39990.398 | NM_014677 | 3309.079  | 2595.229  |
| NM_000190 | 13882.257 | 14718.578 | AK023196  | 19906.809 | 18911.668 | NM_006855 | 1512.91   | 1099.018  |
| X15667    | 10889.521 | 11156.797 | NM_018728 | 9883.088  | 8771.949  | AK022790  | 18962.27  | 14214.265 |
| NM_017512 | 1402.632  | 1794.676  | AK024014  | 44827.348 | 42214.949 | NM_004311 | 17271.1   | 12811.552 |

|           |           |           |           |           |           |           |           |           |
|-----------|-----------|-----------|-----------|-----------|-----------|-----------|-----------|-----------|
| NM_018661 | 1807.295  | 1902.75   | NM_000865 | 10379.802 | 9935.019  | NM_005624 | 4126.816  | 2471.24   |
| NM_002249 | 61543.07  | 58232.359 | NM_000867 | 3447.358  | 3862.337  | AK026958  | 1008.401  | 896.691   |
| AK096507  | 695.273   | 569.143   | AF076642  | 2345.025  | 3286.384  | NM_000579 | 694.808   | 736.53    |
| NM_007126 | 61158.238 | 60193.117 | NM_002386 | 18941.854 | 21853.109 | NM_001480 | 807.904   | 412.461   |
| NM_004311 | 27665.109 | 34323.805 | NM_005314 | 11667.397 | 15139.282 | AF263462  | 3433.256  | 4267.423  |
| NM_005624 | 10427.483 | 10340.274 | NM_005145 | 27727.178 | 24430.043 | AV697672  | 1005.367  | 1117.869  |
| NM_002302 | 2370.015  | 2414.589  | NM_012152 | 60909.656 | 55349.844 | NM_000942 | 29774.014 | 32828.922 |
| AB020672  | 868.295   | 972.226   | NM_001940 | 10975.404 | 9591.902  | AK056773  | 1485.369  | 1437.983  |
| AK026958  | 4560.525  | 4031.319  | U83115    | 33404.719 | 38231.043 | NM_002182 | 9969.698  | 11876.396 |
| NM_000579 | 1726.879  | 1769.963  | NM_007193 | 1425.638  | 1127.287  | NM_016470 | 1464.044  | 1373.608  |
| NM_001480 | 1560.973  | 1334.84   | NM_001994 | 46064.785 | 36816.172 | AL365408  | 63155.711 | 60584.484 |
| AF263462  | 8686.466  | 9002.001  | NM_016144 | 12202.448 | 13411.344 | AK026204  | 4863.626  | 4020.932  |
| AB040962  | 2529.748  | 2481.061  | AL133099  | 14872.545 | 17741.123 | NM_000098 | 2861.729  | 1633.842  |
| NM_000639 | 737.169   | 796.437   | NM_016082 | 7660.25   | 7008.907  | NM_000016 | 21783.32  | 13642.094 |
| AV697672  | 1531.295  | 1303.564  | NM_000433 | 5236.021  | 5639.072  | AK026913  | 5925.86   | 3968.179  |
| AB037902  | 903.884   | 846.598   | NM_000190 | 29936.303 | 35829.941 | NM_016234 | 16264.881 | 11838.606 |
| NM_018696 | 47855.93  | 40791.59  | X15667    | 25247.891 | 26654.326 | NM_001876 | 8239.191  | 6249.482  |
| NM_000136 | 44758.336 | 42037.43  | NM_017512 | 1239.481  | 1291.958  | NM_016144 | 5249.325  | 3483.423  |
| AL157456  | 3388.632  | 2868.727  | NM_018661 | 2164.252  | 2198.986  | AL133099  | 4607.869  | 3546.065  |
| AL162056  | 3174.026  | 5327.865  | NM_002249 | 62076.48  | 61510.844 | NM_016082 | 2292.443  | 858.943   |
| NM_004628 | 6612.18   | 8298.385  | AK096507  | 840.871   | 608.721   | NM_000433 | 1123.515  | 832.185   |
| NM_014876 | 8509.556  | 7968.393  | NM_007126 | 63962.16  | 62358.785 | NM_000190 | 10776.756 | 12091.165 |
| NM_005406 | 5889.405  | 6788.207  | NM_004311 | 27421.807 | 31619.176 | X15667    | 9826.39   | 12177.55  |
| NM_003328 | 7390.867  | 11264.425 | NM_005624 | 11936.528 | 10176.615 | NM_018661 | 802.904   | 819.979   |
| AF073482  | 7576.32   | 7725.131  | NM_002302 | 3213.657  | 3499.137  | AK023078  | 7283.726  | 8707.226  |
| NM_005990 | 14998.705 | 14067.657 | AB020672  | 1303.911  | 909.689   | NM_002239 | 60662.141 | 56695.078 |
| NM_016276 | 63326.52  | 63278.855 | AK026958  | 5287.395  | 5838.029  | NM_002249 | 44277.406 | 40824.336 |
| NM_017762 | 14885.588 | 14404.839 | NM_000579 | 2752.2    | 2342.79   | NM_015684 | 5546.74   | 6037.009  |
| NM_001863 | 63416.883 | 60006.547 | NM_001480 | 2006.776  | 1173.399  | NM_003945 | 9345.63   | 8395.942  |
| NM_000921 | 21345.664 | 23330.854 | AF263462  | 10926.637 | 9608.311  | NM_004981 | 7963.667  | 9003.674  |
| NM_000098 | 5953.12   | 6640.721  | AB040962  | 3192.787  | 3216.042  | NM_016524 | 1616.868  | 1355.771  |
| NM_000016 | 33340.539 | 38980.23  | NM_000639 | 1084.608  | 866.896   | NM_007126 | 43085.004 | 43044.59  |
| AK026913  | 9311.755  | 8294.458  | AV697672  | 2240.537  | 1911.982  | NM_004482 | 1292.675  | 611.068   |
| NM_016234 | 17608.309 | 17966.818 | AB037902  | 1404.939  | 1828.698  | NM_000352 | 879.255   | 80.909    |
| NM_001876 | 17826.398 | 20775.297 | NM_018696 | 55265.32  | 51847.387 | NM_015599 | 1362.41   | 522.871   |
| L10146    | 6568.146  | 5956.844  | NM_000136 | 58853.809 | 50442.023 | NM_018696 | 24970.908 | 12832.028 |
| NM_000685 | 16204.768 | 13084.904 | AL157456  | 6239.711  | 7880.423  | NM_000136 | 24566.742 | 21416.057 |
| AK025657  | 27771.131 | 24362.322 | AL162056  | 3990.06   | 4745.905  | AL157456  | 1353.751  | 822.121   |
| AF142063  | 1412.223  | 1628.677  | NM_000380 | 59670.813 | 51600.25  | AL162056  | 994.43    | 451.792   |
| W42849    | 6527.809  | 6188.3    | NM_004628 | 9305.67   | 9014.372  | NM_000380 | 28164.65  | 28894.051 |
| AI889961  | 10769.37  | 12392.683 | NM_014876 | 9452.071  | 9969.362  | NM_004628 | 2816.344  | 2790.45   |
| NM_013983 | 2118.851  | 2286.324  | NM_005406 | 5802.12   | 5078.356  | NM_014876 | 4561.446  | 4651.502  |
| AI572835  | 28137.314 | 26761.734 | NM_003328 | 7034.008  | 7861.874  | NM_005406 | 2809.499  | 3371.143  |
| R20392    | 28326.258 | 23936.615 | X93921    | 6817.439  | 9072.501  | NM_003328 | 4284.674  | 5709.818  |
| AA486367  | 7334.977  | 4508.99   | AF073482  | 6089.791  | 7022.197  | X93921    | 2648.701  | 2328.817  |
| AK097322  | 1617.755  | 1703.136  | NM_005990 | 15844.225 | 15912.976 | AF073482  | 3698.874  | 3617.828  |
| AL136131  | 12023.387 | 12038.393 | NM_016276 | 65922.617 | 58656.031 | NM_005990 | 5217.392  | 4354.974  |
| NM_033357 | 14833.013 | 13694.002 | NM_017762 | 15316.262 | 16525.846 | NM_016276 | 65194.516 | 62234.137 |
| AF335109  | 5910.112  | 6272.706  | NM_001863 | 64808.004 | 61732.203 | NM_017762 | 2820.818  | 2329.053  |
| NM_003263 | 3635.38   | 4499.285  | NM_000921 | 28811.592 | 26771.906 | NM_001863 | 70001.992 | 62321.043 |
| U59911    | 14875.989 | 16295.681 | NM_000098 | 6346.431  | 5418.007  | NM_000921 | 4108.261  | 3779.181  |
| NM_004482 | 2587.981  | 2339.356  | NM_000016 | 36969.27  | 38654.383 | CY3Cy5    | 15884.771 | 352.062   |
| NM_015599 | 4096.045  | 3284.114  | AK026913  | 12241.198 | 9981.069  | NM_006497 | 15654.677 | 16062.722 |

|           |           |           |           |           |           |           |           |           |
|-----------|-----------|-----------|-----------|-----------|-----------|-----------|-----------|-----------|
| NM_014635 | 2964.596  | 1661.396  | NM_016234 | 35519.398 | 36616.387 | AK023616  | 713.091   | 872.045   |
| NM_004145 | 23003.852 | 17563.043 | NM_001876 | 22284.211 | 22059.098 | AK025665  | 2534.446  | 2599.018  |
| AK023196  | 12276.068 | 10133.02  | L10146    | 15275.73  | 23614.879 | AL355694  | 861.092   | 957.788   |
| NM_018725 | 9788.071  | 7817.944  | NM_000685 | 27311.717 | 30822.92  | BC037530  | 53873.82  | 49667.684 |
| AK024014  | 36288.637 | 34701.863 | AK025657  | 42910.898 | 53133.516 | NM_014851 | 4232.577  | 4587.068  |
| NM_000865 | 8162.664  | 7756.205  | AF142063  | 3178.933  | 3406.656  | AL355743  | 1514.273  | 1843.286  |
| NM_000867 | 3323.38   | 3150.009  | W42849    | 8130.048  | 10265.54  | L77571    | 716.564   | 909.283   |
| AF076642  | 2344.589  | 2604.911  | AI889961  | 13040.204 | 13806.31  | X81896    | 1098.455  | 1582.264  |
| NM_002386 | 16618.311 | 14005.841 | AI360116  | 30401.254 | 33934.063 | AF070595  | 492.202   | 1065.632  |
| NM_005314 | 8550.793  | 9540.433  | NM_013983 | 2669.954  | 2451.782  | NM_006497 | 31314.914 | 36582.223 |
| AK024093  | 9567.382  | 11879.442 | AI572835  | 34140.52  | 34134.523 | NM_006892 | 2107.78   | 2205.545  |
| NM_001940 | 8288.203  | 7973.644  | R20392    | 29479.844 | 26665.066 | SR1       | 93054.172 | 64732.367 |
| U83115    | 28590.447 | 31281.344 | AA486367  | 9490.483  | 6403.91   | SR3       | 46224.871 | 42369.746 |
| NM_001264 | 42192.961 | 40521.184 | N56684    | 2010.475  | 1791.609  | SR5       | 5441.92   | 4956.787  |
| NM_013364 | 55886.969 | 54100.199 | M55153    | 4135.838  | 4350.73   | SR7       | 5454.895  | 30382.342 |
| NM_014365 | 2816.54   | 3085.021  | AF414120  | 2531.156  | 2420.255  | SR9       | 16929.727 | 1821.41   |
| NM_000850 | 3767.662  | 4201.173  | AK097322  | 1591.911  | 1928.015  | CY3Cy5    | 10610.242 | 100.949   |
| NM_004676 | 5357.5    | 4610.062  | AL136131  | 12373.469 | 16580.076 | D17207    | 2087.92   | 1733.25   |
| NM_007193 | 973.943   | 1025.434  | NM_033357 | 16600.402 | 15793.972 | D55640    | 1677.382  | 1195.385  |
| NM_001994 | 33740.539 | 34178.367 | AF335109  | 6951.524  | 7666.878  | AF085822  | 1073.273  | 1063.103  |
| J00129    | 48656.977 | 52983.121 | NM_003263 | 5226.775  | 4827.023  | AK022711  | 1793.792  | 3035.607  |
| NM_003320 | 12283.033 | 11958.384 | U59911    | 19265.963 | 17848.49  | AK025863  | 3018.611  | 3545.576  |
| AL137631  | 12346.527 | 8608.054  | NM_004482 | 2881.359  | 1779.744  | D42044    | 2527.043  | 3659.115  |
| NM_016057 | 17770.178 | 13750.115 | NM_000352 | 1396.152  | 972.109   | AK026149  | 2655.67   | 2795.537  |
| NM_014677 | 3755.723  | 3562.885  | NM_015599 | 4431.255  | 2754.782  | AF038185  | 7371.777  | 10211.009 |
| NM_006855 | 2073.371  | 1841.332  | NM_014635 | 7083.7    | 5861.927  | AB027011  | 21136.738 | 22051.145 |
| AK022790  | 25626.863 | 24007.502 | NM_004145 | 39338.148 | 48035.773 | AL117415  | 18461.336 | 10281.948 |
| NM_004311 | 23212.326 | 22909.906 | AK023196  | 20501.002 | 20788.582 | AK025054  | 822.203   | 623.511   |
| NM_005624 | 7784.939  | 7107.695  | NM_018725 | 11440.89  | 11176.271 | AK024556  | 814.651   | 743.97    |
| NM_002302 | 1733.619  | 1735.351  | AK024014  | 48976.867 | 57063.719 | AK022811  | 1489.031  | 1289.297  |
| AB020672  | 962.98    | 761.693   | NM_000865 | 11960.863 | 13409.94  | AL117635  | 2200.867  | 3353.528  |
| AF263462  | 5642.34   | 5422.885  | NM_000867 | 3622.68   | 4306.057  | AK025332  | 2499.264  | 2693.598  |
| AB040962  | 2105.759  | 1343.22   | AF076642  | 2223.408  | 2929.749  | AJ011596  | 11541.196 | 14651.956 |
| NM_000639 | 837.327   | 523.566   | NM_002386 | 19476.227 | 18292.723 | AL049215  | 65152.184 | 58202.785 |
| AV697672  | 2056.475  | 1433.63   | NM_005314 | 11889.992 | 11401.662 | X51779    | 1466.999  | 1698.122  |
| NM_000942 | 57317.281 | 53079.867 | NM_004885 | 9525.42   | 9686.149  | AL049254  | 2269.143  | 2020.377  |
| NM_002982 | 2611.763  | 2370.798  | NM_005145 | 26470.256 | 22709.777 | Z83954    | 7350.432  | 5407.964  |
| NM_002190 | 1523.862  | 1434.59   | NM_012152 | 55956.285 | 57988.441 | AK024331  | 1056.828  | 1205.463  |
| AK056773  | 12489.009 | 12974.037 | AK024093  | 10382.778 | 12384.471 | AK024452  | 1085.107  | 1535.924  |
| AL365408  | 65846.93  | 62774.203 | NM_001940 | 8044.139  | 12030.165 | AK021551  | 2433.202  | 2844.99   |
| AK026204  | 16495.08  | 14789.673 | U83115    | 25721.512 | 31362.332 | AK025117  | 1149.278  | 1228.191  |
| NM_000095 | 3595.657  | 2371.224  | NM_001264 | 47229.832 | 50382.641 | AK022357  | 499.273   | 1882.358  |
| NM_000016 | 26975.203 | 21061.951 | NM_013364 | 57325.43  | 55966.391 | AK000024  | 21674.809 | 28581.02  |
| AK026913  | 6181.142  | 4184.349  | NM_014365 | 2679.559  | 2793.686  | AK026693  | 2420.903  | 3041.323  |
| NM_016234 | 14072.782 | 13773.483 | NM_000850 | 3469.158  | 2828.985  | NM_012285 | 1343.555  | 1275.014  |
| NM_001876 | 7001.251  | 6533.494  | NM_004676 | 7510.304  | 7193.674  | AK001128  | 962.813   | 1250.069  |
| NM_016144 | 3891.885  | 3499.485  | NM_007193 | 1831.808  | 1351.969  | AK000090  | 1347.389  | 1304.513  |
| AL133099  | 6718.066  | 5796.438  | NM_001994 | 46027.488 | 40968.223 | AK000794  | 13436.09  | 15428.189 |
| NM_016082 | 3639.06   | 3152.071  | J00129    | 56060.332 | 50915.668 | AK000950  | 12168.541 | 12382.7   |
| NM_000433 | 3332.474  | 3104.807  | NM_003320 | 14414.31  | 9401.26   | AK026812  | 8693.947  | 7487.296  |
| NM_000190 | 21131.473 | 20423.791 | AL137631  | 22961.227 | 25778.361 | AK000176  | 6308.645  | 4710.833  |
| X15667    | 20838.676 | 16070.369 | NM_016057 | 25310.105 | 27944.93  | AK000831  | 16688.244 | 12799.986 |
| NM_017512 | 1877.014  | 1623.073  | NM_014677 | 6674.932  | 6761.098  | AK000981  | 4281.067  | 2320.783  |

|           |           |           |           |           |           |           |           |           |
|-----------|-----------|-----------|-----------|-----------|-----------|-----------|-----------|-----------|
| NM_018661 | 1638.883  | 1754.345  | NM_006855 | 2473.361  | 2618.964  | X95095    | 3737.639  | 3643.25   |
| NM_001678 | 1416.62   | 1018.571  | AK022790  | 34484.672 | 43363.223 | AB007902  | 1556.447  | 1993.951  |
| AK023078  | 14017.698 | 13999.623 | NM_004311 | 28950.684 | 37326.691 | AF078528  | 9101.752  | 9142.599  |
| NM_002239 | 64746.598 | 60785.109 | NM_005624 | 10302.03  | 9547.719  | AK000450  | 24532.105 | 26018.072 |
| NM_002249 | 63582.66  | 63144.438 | NM_002302 | 2546.396  | 2315.646  | NM_018224 | 12946.19  | 10033.139 |
| NM_015684 | 20690.287 | 20375.119 | AB020672  | 518.878   | 737.113   | NM_019896 | 3219.491  | 2611.955  |
| NM_003945 | 35251.164 | 42342.43  | AK026958  | 3928.295  | 4090.732  | NM_018569 | 8747.539  | 8658.471  |
| NM_004981 | 48481.141 | 49043.148 | NM_000579 | 2696.078  | 2330.884  | AK025325  | 15804.847 | 21061.73  |
| AK096507  | 507.457   | 697.704   | NM_001480 | 1377.052  | 1330.923  | S75762    | 930.417   | 903.041   |
| NM_016524 | 6520.539  | 6547.673  | AF263462  | 8980.835  | 8326.978  | U50531    | 7388.132  | 9935.202  |
| NM_007126 | 68072.305 | 69961.352 | AB040962  | 1859.455  | 1811.62   | NM_005318 | 2640.857  | 3907.381  |
| NM_004482 | 1594.858  | 955.16    | NM_000639 | 920.193   | 844.791   | L09099    | 64641.762 | 66360.195 |
| NM_015599 | 1390.604  | 1195.479  | AV697672  | 1559.843  | 1468.943  | AL117474  | 1913.394  | 2797.148  |
| NM_018696 | 42280.309 | 31600.826 | NM_000942 | 59750.492 | 54571.836 | NM_005421 | 2758.422  | 3012.45   |
| NM_000136 | 45252.176 | 34388.813 | NM_002982 | 3513.137  | 2841.277  | AK024580  | 63408.41  | 54640.121 |
| AL157456  | 4228.082  | 2729.985  | NM_002190 | 2340.101  | 1872.916  | AL442093  | 6796.088  | 6705.786  |
| AL162056  | 2832.204  | 1918.865  | AK056773  | 15990.722 | 13753.814 | Z36874    | 41166.859 | 44139.551 |
| NM_000380 | 51881.539 | 36900.926 | NM_002182 | 63714.031 | 64780.867 | AK022462  | 659.273   | 399.737   |
| NM_004628 | 9840.604  | 6942.397  | NM_016470 | 12568.499 | 10446.061 | NM_020530 | 1949.643  | 1700.955  |
| NM_014876 | 10902.152 | 7349.218  | AL365408  | 63075.902 | 65283.047 | AK022418  | 4002.021  | 2907.185  |
| NM_005406 | 7095.01   | 5491.25   | AK026204  | 21527.211 | 16991.996 | AK021748  | 60306.598 | 64856.691 |
| NM_003328 | 6851.245  | 6186.186  | NM_000098 | 6312.204  | 6540.426  | AK000543  | 10381.965 | 9415.214  |
| X93921    | 5634.395  | 4440.711  | NM_000016 | 35558.129 | 42276.719 | AK026683  | 4639.38   | 7410.268  |
| AF073482  | 10040.706 | 8869.718  | AK026913  | 10258.762 | 8975.765  | D16906    | 1600.039  | 2195.119  |
| NM_005990 | 14830.742 | 14663.109 | NM_016234 | 31400.672 | 40665.219 | AL079309  | 6098.842  | 10008.367 |
| NM_016276 | 64455.723 | 65659.969 | NM_001876 | 17805.77  | 23259.287 | AK022335  | 1598.491  | 2075.582  |
| NM_017762 | 12985.826 | 14524.505 | NM_016144 | 11774.994 | 14227.934 | AL110280  | 11159.874 | 15273.053 |
| NM_001863 | 68769.32  | 66141.555 | AL133099  | 12334.4   | 13766.936 | AK024235  | 467.147   | 1040.898  |
| NM_000921 | 24792.881 | 27788.396 | NM_016082 | 5437.222  | 5151.859  | NM_017458 | 2138.082  | 2846.024  |
| CY3Cy5    | 25252.633 | 585.073   | NM_000433 | 4257.381  | 4848.596  | AF086196  | 961.814   | 721.921   |
| NM_006497 | 63819.098 | 62054.254 | NM_000190 | 22259.955 | 19856.018 | NM_005542 | 65742.805 | 48270.16  |
| AK023616  | 3170.921  | 3187.959  | X15667    | 19303.422 | 17341.16  | NM_000267 | 2321.889  | 2130.33   |
| AK025665  | 10095.941 | 10956.271 | NM_017512 | 1600.055  | 1750.666  | NM_016603 | 2720.098  | 2417.645  |
| AL355694  | 2060.235  | 2313.401  | NM_018661 | 2076.44   | 1802.697  | NM_004398 | 45123.816 | 52488.984 |
| AL049257  | 558.563   | 1002.945  | NM_001678 | 1354.337  | 1313.968  | NM_014966 | 2484.145  | 1825.435  |
| AF191492  | 1323.583  | 1507.892  | AK023078  | 17150.949 | 15242.425 | NM_014962 | 709.216   | 599.149   |
| BC037530  | 77007.008 | 62870.488 | NM_002239 | 60993.844 | 57518.801 | D87684    | 5136.421  | 3723.028  |
| NM_014851 | 16578.961 | 21071.98  | NM_002249 | 63922.352 | 58626.211 | NM_006317 | 58375.535 | 62153.164 |
| AL355743  | 2958.949  | 3099.08   | NM_015684 | 24496.451 | 20022.002 | NM_001219 | 4260.005  | 5281.829  |
| L77571    | 641.199   | 1168.022  | NM_003945 | 40441.813 | 38077.184 | NM_000730 | 3775.425  | 5381.151  |
| X81896    | 1627.648  | 1443.01   | NM_004981 | 62230.98  | 58078.547 | U31734    | 48864.73  | 58892.609 |
| AF070595  | 1157.079  | 1234.923  | AK096507  | 759.689   | 692.077   | AF085885  | 702.603   | 1413.906  |
| NM_006497 | 46694.098 | 45634.27  | NM_016524 | 8288.681  | 7002.835  | M24751    | 1100.554  | 3141.935  |
| SR5       | 8079.571  | 8979.383  | NM_007126 | 63595.914 | 59564.641 | AK022953  | 446.308   | 913.577   |
| SR7       | 10134.466 | 52090.113 | NM_004482 | 2722.658  | 2553.412  | AF009319  | 7498.285  | 9504.879  |
| SR9       | 31138.873 | 6416.26   | NM_000352 | 898.561   | 842.862   | AL365519  | 1645.9    | 1489.992  |
| CY3Cy5    | 19156.57  | 312.229   | NM_015599 | 3874.958  | 3220.754  | NM_018465 | 11173.374 | 15399.259 |
| M74093    | 3421.107  | 3448.068  | AB037902  | 1028.457  | 1162.607  | Z36845    | 1784.035  | 2412.657  |
| M28219    | 5988.381  | 8138.617  | NM_018696 | 45440.984 | 43127.098 | M73792    | 1554.281  | 1736.112  |
| L17326    | 1655.944  | 2066.444  | NM_000136 | 53839.508 | 46592.41  | NM_016127 | 20246.42  | 20017.09  |
| D17207    | 12536.714 | 13537.617 | AL157456  | 6285.41   | 5231.116  | AF085939  | 1456.143  | 1355.627  |
| D55640    | 9913.842  | 9522.795  | AL162056  | 3304.537  | 2693.128  | NM_006792 | 36324.539 | 29401.398 |
| AF085897  | 3281.344  | 3948.073  | NM_000380 | 60724.977 | 49199.016 | NM_005876 | 62538.531 | 71064.281 |

|           |           |           |           |           |           |           |           |           |
|-----------|-----------|-----------|-----------|-----------|-----------|-----------|-----------|-----------|
| AF085822  | 2625.697  | 3235.833  | NM_004628 | 9128.235  | 7729.607  | U39657    | 7244.059  | 5736.418  |
| AK021510  | 1829.161  | 2233.94   | NM_014876 | 10378.665 | 9576.985  | NM_016340 | 2633.475  | 2391.32   |
| AK022711  | 2001.558  | 2419.793  | NM_005406 | 6442.979  | 5569.231  | NM_006440 | 3349.486  | 3061.814  |
| AK024310  | 9086.659  | 11423.096 | NM_003328 | 7543.498  | 5454.587  | BF216030  | 5138.113  | 4635.134  |
| AL109688  | 11104.037 | 10182.979 | X93921    | 6507.381  | 4461.325  | NM_003684 | 956.896   | 769.846   |
| AF074981  | 2734.377  | 2213.608  | AF073482  | 10455.994 | 7655.454  | NM_005657 | 1311.713  | 3751.35   |
| AK025863  | 4352.203  | 4522.337  | NM_005990 | 21775.074 | 17289.35  | NM_018630 | 442.575   | 674.145   |
| D42044    | 3806.527  | 4391.861  | NM_016276 | 65297.875 | 72160.391 | AF264628  | 808.93    | 1514.456  |
| AK026149  | 9071.756  | 9940.116  | NM_017762 | 16416.686 | 14293.92  | NM_001146 | 1657.149  | 2063.076  |
| AB027011  | 46377.059 | 48520.121 | NM_001863 | 65422.25  | 60466.402 | NM_002663 | 1249.108  | 1260.82   |
| AL117415  | 39321.004 | 30041.188 | NM_000921 | 29724.832 | 25025.881 | NM_006094 | 6982.876  | 6660.103  |
| AK024615  | 737.106   | 575.187   | CY3Cy5    | 32759.188 | 813.05    | AF080158  | 1448.642  | 1662.43   |
| AK025054  | 5261.026  | 5526.797  | NM_006497 | 44464.969 | 53276.48  | AB037794  | 4308.72   | 3801.887  |
| AK024556  | 2121.794  | 2377.677  | NM_006892 | 2525.577  | 3010.026  | NM_014178 | 13621.058 | 12809.553 |
| AK024935  | 3419.538  | 3250.244  | AK023616  | 1597.702  | 2448.368  | NM_001251 | 10778.983 | 13997.807 |
| AK022811  | 2944.855  | 3659.007  | AK025665  | 3824.124  | 5796.442  | AB011112  | 9954.115  | 8542.979  |
| AL117635  | 2204.719  | 2550.072  | AL355694  | 1077.129  | 1391.574  | NM_018660 | 3067.445  | 2318.828  |
| AK025332  | 4386.53   | 5355.372  | AF191492  | 1254.384  | 1887.124  | NM_002623 | 2175.372  | 1870.339  |
| AB040929  | 1120.354  | 1155.231  | BC037530  | 71286.32  | 65461.117 | NM_018844 | 3761.084  | 3360.286  |
| AB020735  | 2394      | 2660.995  | NM_014851 | 19470.861 | 23795.902 | AF279778  | 2216.128  | 1606.455  |
| AJ011596  | 14621.528 | 14011.479 | AL355743  | 2787.907  | 2998.407  | NM_015477 | 2473.073  | 2327.755  |
| U17639    | 2030.488  | 2229.43   | L77571    | 737.15    | 773.571   | AK023212  | 1351.804  | 1496.693  |
| AL049215  | 68230.563 | 64469.852 | X81896    | 1277.834  | 1246.906  | AL353943  | 1619.481  | 2082.617  |
| X51779    | 5621.742  | 5912.518  | AF070595  | 1179.003  | 830.515   | BE568801  | 2943.799  | 2769.258  |
| X81001    | 1095.91   | 807.382   | NM_006497 | 44360.824 | 40427.801 | AB002336  | 2293.41   | 4265.469  |
| AL049254  | 3210.34   | 2569.069  | NM_006892 | 3398.545  | 2251.859  | NM_003127 | 705.64    | 558.462   |
| Z83954    | 11537.842 | 9936.729  | SR5       | 8209.901  | 3893.508  | NM_013280 | 3330.756  | 3407.723  |
| AK024331  | 1259.988  | 1309.978  | SR7       | 7373.664  | 22708.652 | NM_006633 | 341.492   | 534.574   |
| AK021556  | 850.893   | 744.865   | SR9       | 28335.926 | 2820.525  | NM_016262 | 3570.884  | 4713.295  |
| AK021733  | 2182.808  | 2658.153  | CY3Cy5    | 21121.799 | 286.926   | AB011116  | 12222.111 | 15767.557 |
| AK021551  | 4751.019  | 5813.6    | M74093    | 4846.005  | 4727.359  | AB037858  | 3043.673  | 4336.908  |
| AK025117  | 2685.935  | 2753.495  | M28219    | 8494.616  | 9217.998  | NM_005775 | 1266.661  | 1154.019  |
| AK000024  | 30540.385 | 33875.316 | L17326    | 1025.384  | 995.457   | NM_017630 | 1797.443  | 1683.029  |
| AK026693  | 1900.866  | 2212.392  | D17207    | 6793.854  | 6575.262  | NM_004385 | 2799.065  | 1988.53   |
| NM_012285 | 622.618   | 816.497   | D55640    | 4149.225  | 3692.943  | NM_017740 | 3969.905  | 3268.312  |
| AK001128  | 987.291   | 1079.022  | AF085897  | 2470.124  | 2888.681  | AB033052  | 3764.357  | 2972.084  |
| AK000090  | 2529.542  | 2358.158  | AK021510  | 2556.841  | 2163.103  | NM_018227 | 1208.436  | 606.764   |
| AK000794  | 18915.563 | 17396.051 | AK022711  | 4047.887  | 4614.006  | NM_003340 | 27315.564 | 22347.967 |
| AK000950  | 16898.764 | 14478.854 | AK024310  | 5410.803  | 12191.722 | U46752    | 2295.813  | 2119.167  |
| AK026812  | 12141.317 | 10163.231 | AL109688  | 12332.842 | 13067.729 | NM_002794 | 34368.043 | 30956.268 |
| AK000176  | 8277.926  | 7580.282  | AF074981  | 2916.385  | 3744.306  | BF244646  | 61649.02  | 57150.957 |
| AK000831  | 23588.813 | 18832.846 | AK025863  | 4768.649  | 5280.357  | AK024030  | 7022.807  | 6254.884  |
| AK000981  | 6047.783  | 5101.167  | D42044    | 3833.921  | 4168.464  | AF275808  | 1607.263  | 1991.756  |
| X95095    | 16348.6   | 14662.768 | AK026149  | 10149.078 | 11710.213 | AK024038  | 2101.933  | 2027.321  |
| AF078528  | 8134.02   | 8339.524  | AB027011  | 43324.152 | 41952.063 | NM_002055 | 282.962   | 440.087   |
| AF161411  | 5537.441  | 5719.46   | AK024615  | 1103.171  | 1445.054  | NM_015515 | 7164.752  | 7157.028  |
| AK000450  | 51162.211 | 61744.707 | AK025054  | 4382.471  | 4110.421  | AK001579  | 29250.162 | 37568.047 |
| NM_018224 | 34870.215 | 41291.398 | AK024556  | 1573.002  | 1568.66   | NM_002670 | 14264.021 | 16063.024 |
| NM_019890 | 11906.597 | 12320.395 | AK024935  | 2849.945  | 2484.872  | AF163302  | 4349.453  | 6245.742  |
| NM_018560 | 18336.025 | 21473.168 | AK022811  | 3720.878  | 3571.955  | NM_006400 | 6177.003  | 6537.005  |
| J04118    | 2916.415  | 3193.097  | AL117635  | 3106.66   | 4524.929  | NM_002410 | 8773.408  | 8495.658  |
| AK025325  | 28105.266 | 30377.529 | AK025332  | 5790.467  | 4915.19   | NM_012415 | 3150.635  | 2496.213  |
| S75762    | 816.84    | 1065.673  | AB040929  | 1093.887  | 1623.266  | NM_003454 | 596.14    | 619.945   |

|           |           |           |           |           |           |           |           |           |
|-----------|-----------|-----------|-----------|-----------|-----------|-----------|-----------|-----------|
| U50531    | 10274.341 | 11526.317 | AB020735  | 1959.95   | 2729.451  | NM_00341E | 18609.744 | 15977.941 |
| NM_00531E | 4818.058  | 5170.125  | AJ011596  | 13410.103 | 8595.895  | NM_01790E | 1105.912  | 790.117   |
| L09099    | 68096.555 | 63762.488 | AL049215  | 66614.945 | 62852.605 | NM_00688E | 3276.691  | 3513.438  |
| AL117474  | 3658.964  | 2543.061  | X51779    | 7782.127  | 6147.372  | M25077    | 3070.521  | 3048.985  |
| NM_005421 | 4295.221  | 4095.077  | X81001    | 1349.195  | 1158.777  | NM_01870Z | 1737.883  | 1374.058  |
| AK024580  | 73610.664 | 62431.699 | AL049254  | 4048.461  | 3318.203  | M62843    | 697.648   | 961.862   |
| AL442093  | 19713.045 | 17673.223 | AK024331  | 4243.464  | 4801.749  | U96131    | 264.216   | 1576.332  |
| Z36874    | 65321.145 | 73093.891 | AK024452  | 3229.672  | 3341.447  | NM_00459Z | 3562.31   | 3089.221  |
| AK022462  | 9057.428  | 10108.563 | AK021733  | 1360.998  | 1238.922  | NM_00577E | 25456.285 | 23779.289 |
| NM_02053C | 5738.262  | 6868.192  | AK021551  | 5237.854  | 6727.709  | NM_00103Z | 65292.066 | 64841.004 |
| AK022418  | 15102.289 | 16358.364 | AK025117  | 3058.334  | 3514.831  | NM_018084 | 27464.59  | 26004.221 |
| AF279777  | 2777.134  | 2899.806  | AK022357  | 623.483   | 635.424   | AF164797  | 63702.93  | 59069.352 |
| AK021748  | 67451.508 | 72596.172 | AK000024  | 31298.443 | 33256.453 | NM_01784C | 33313.391 | 35675.434 |
| AL137257  | 20601.246 | 23291.791 | AK026693  | 1753.931  | 1166.139  | AK001052  | 64355.156 | 60444.961 |
| AF086503  | 1305.069  | 1870.189  | NM_01228E | 1743.985  | 732.736   | NM_00141E | 64845.754 | 62641.59  |
| AK000543  | 30545.887 | 35200.078 | AK001128  | 1312.074  | 615.734   | NM_004564 | 21053.906 | 24786.834 |
| AK026683  | 11828.26  | 14354.059 | AK000090  | 2634.976  | 1052.427  | NM_00096E | 66572.664 | 63655.383 |
| D16906    | 670.052   | 722.861   | AK000794  | 21280.953 | 13297.741 | NM_00327C | 2557.194  | 2373.246  |
| AL079309  | 8525.563  | 9843.628  | AK000950  | 17559.08  | 14570.286 | NM_016591 | 1366.365  | 1560.733  |
| AK022335  | 2199.239  | 2059.629  | AK026812  | 11494.394 | 8892.289  | AL157437  | 45320.719 | 34922.82  |
| AL110280  | 6599.015  | 7715.191  | AK000176  | 7319.269  | 6690.754  | NM_00600E | 2172.53   | 1621.857  |
| AK024235  | 813.342   | 699.127   | AK000831  | 25994.729 | 21563.018 | NM_00262E | 59710     | 57951.746 |
| NM_01745E | 3782.382  | 3484.693  | AK000981  | 6568.003  | 4898.876  | NM_00168E | 53245.547 | 59485.379 |
| AF086196  | 2058.497  | 2334.986  | X95095    | 23561.189 | 23595.34  | NM_006067 | 34005.855 | 24575.109 |
| NM_00554Z | 68060.992 | 63394.531 | AB007902  | 4560.768  | 5540.053  | NM_000284 | 9306.377  | 6720.633  |
| NM_000267 | 4952.912  | 4568.751  | AF078528  | 20078.992 | 20421.635 | NM_00481Z | 6318.954  | 4144.775  |
| NM_00439E | 66717.953 | 64721.379 | AF161411  | 5639.531  | 4993.844  | AK023008  | 643.317   | 612.772   |
| NM_01496E | 16991.676 | 19500.324 | AK000450  | 45596.98  | 53561.633 | NM_00468E | 9446.328  | 7701.885  |
| NM_01496Z | 2090.915  | 1860.82   | NM_018224 | 34802.824 | 36029.391 | NM_00602E | 2423.333  | 1963.802  |
| D87684    | 19617.234 | 17640.844 | NM_01989E | 11936.339 | 12154.873 | BG339855  | 591.191   | 1522.333  |
| NM_00158E | 1527.776  | 1430.778  | NM_01856E | 20163.371 | 32945.035 | AB040956  | 1758.506  | 1457.264  |
| NM_006317 | 67288.273 | 75951.023 | J04118    | 2412.039  | 2870.828  | NM_016587 | 3440.998  | 2752.637  |
| NM_00121E | 14209.688 | 16955.893 | AK025325  | 30209.373 | 38388.918 | NM_00351E | 3375.96   | 2761.192  |
| NM_00073C | 21126.965 | 23795.695 | S75762    | 920.885   | 1049.914  | NM_01795Z | 2752.919  | 3444.984  |
| U31734    | 67081.766 | 78539.406 | U50531    | 9360.578  | 8365.609  | BC000124  | 2423.47   | 2830.423  |
| AF085885  | 3019.767  | 3018.504  | NM_00531E | 5867.217  | 4468.25   | Z11773    | 1024.484  | 1152.097  |
| M24751    | 2822.91   | 2975.758  | L09099    | 66330.867 | 64247.723 | NM_006914 | 843.211   | 1342.698  |
| AK026569  | 67319.313 | 76379.023 | AL117474  | 3659.331  | 1812.204  | NM_00344E | 61142.746 | 57614.176 |
| AL049974  | 2868.925  | 3117.724  | NM_005421 | 3807.943  | 2295.424  | NM_00148E | 17563.063 | 20025.631 |
| AK022953  | 1773.875  | 1987.134  | AK024580  | 65669.656 | 68181.703 | NM_00270Z | 1561.476  | 2551.431  |
| AF009319  | 9349.108  | 8713.663  | AL442093  | 22360.91  | 21068.223 | NM_00198E | 27264.23  | 34300.129 |
| AL365519  | 2285.999  | 2041.736  | Z36874    | 63831.668 | 72212.438 | NM_00265Z | 29502.201 | 30514.449 |
| NM_01846E | 16420.682 | 16312.743 | AK023326  | 2081.519  | 2358.874  | NM_005604 | 2763.659  | 2574.175  |
| Z36845    | 3781.691  | 2518.441  | AK022462  | 8212.25   | 8015.788  | S69023    | 3469.806  | 2688.55   |
| M73792    | 2895.75   | 2600.533  | NM_02053C | 5500.28   | 5222.719  | NM_003474 | 1180.114  | 788.146   |
| NM_016127 | 31170.096 | 29232.371 | AK022418  | 11770.001 | 10647.205 | NM_00462E | 4522.217  | 3639.916  |
| AF085939  | 2985.155  | 2904.901  | AF279777  | 1971.153  | 2358.663  | NM_00717E | 16095.975 | 14641.659 |
| NM_00679Z | 52011.527 | 48912.84  | AK021748  | 63807.84  | 79089.055 | NM_00130E | 804.53    | 1006.947  |
| NM_00587E | 67499.25  | 72964.344 | AL137257  | 20437.752 | 23140.588 | AF061034  | 17860.811 | 19684.814 |
| NM_004934 | 976.795   | 1996.999  | AF086503  | 887.179   | 1390.456  | X03655    | 717.458   | 626.24    |
| AF284436  | 3074.842  | 3802.656  | AK000543  | 29392.424 | 38610.465 | BG696293  | 2226.002  | 1958.237  |
| NM_00444E | 2822.258  | 2523.404  | AK026683  | 11872.079 | 14616.87  | AA777410  | 434.105   | 1274.781  |
| U39657    | 24462.848 | 28868.949 | D16906    | 1120.25   | 2150.963  | BG113873  | 937.309   | 1102.158  |

|           |           |           |           |           |           |           |           |           |
|-----------|-----------|-----------|-----------|-----------|-----------|-----------|-----------|-----------|
| NM_016340 | 9250.68   | 10146.984 | AL079309  | 8264.483  | 8224.176  | BC013135  | 63854.18  | 61127.766 |
| NM_018373 | 1971.956  | 2642.792  | AK022335  | 1789.821  | 1576.412  | AI625002  | 663.476   | 837.77    |
| NM_006449 | 6292.896  | 6716.572  | AL110280  | 6015.407  | 5422.479  | AA281652  | 6799.615  | 7326.685  |
| BF216030  | 17869.568 | 19260.863 | AF014457  | 1695.096  | 2019.912  | U31905    | 4555.639  | 4265.181  |
| NM_002757 | 1565.379  | 1708.412  | NM_017458 | 4442.623  | 2373.818  | X52479    | 4957.757  | 4678.696  |
| NM_003684 | 3940.579  | 4408.185  | AF086196  | 1857.544  | 1156.76   | BC013200  | 3547.305  | 3634.077  |
| NM_005657 | 4814.93   | 5633.529  | NM_005542 | 67128.773 | 63884.883 | AW408832  | 2590.979  | 4230.486  |
| NM_017671 | 2007.897  | 2742.14   | NM_000267 | 9427.688  | 8637.947  | AA486364  | 38516.246 | 49139.457 |
| AB040883  | 2724.748  | 2967.138  | NM_004398 | 64305.055 | 67705.789 | M15476    | 60160.012 | 57262.195 |
| NM_018639 | 3793.083  | 3459.61   | NM_016181 | 866.409   | 623.612   | U57456    | 2898.895  | 3158.967  |
| AF264628  | 1302.837  | 1259.619  | NM_014966 | 13949.441 | 14151.181 | N70057    | 26114.645 | 27514.223 |
| NM_001715 | 35049.18  | 38601.188 | NM_014962 | 1764.068  | 1631.055  | NM_002202 | 7395.002  | 4837.472  |
| NM_004395 | 22855.016 | 17591.508 | D87684    | 19847.717 | 15899.743 | AL137938  | 9681.451  | 7162.985  |
| NM_002663 | 3555.651  | 2844.877  | NM_001586 | 1246.03   | 1378.454  | AF228704  | 2906.362  | 2690.55   |
| NM_006094 | 14178.354 | 12511.093 | NM_006317 | 64740.246 | 73494.328 | NM_004215 | 4204.173  | 4275.312  |
| AF080158  | 2755.988  | 3004.036  | NM_001219 | 14817.564 | 14653.611 | AK022746  | 1364.712  | 1393.02   |
| AB037794  | 6974.421  | 7246.264  | NM_000730 | 19667.738 | 29951.586 | NM_006568 | 2928.439  | 2659.189  |
| NM_014178 | 29869.193 | 34144.867 | U31734    | 64028.266 | 64695.992 | NM_006440 | 3360.823  | 2604.296  |
| NM_001251 | 60444.77  | 69970.852 | AF085885  | 3124.555  | 2973.835  | NM_004847 | 23887.666 | 23430.502 |
| NM_004789 | 1316.565  | 1535.389  | M24751    | 2887.223  | 3023.199  | NM_002255 | 1828.825  | 1842.303  |
| AB011112  | 22625.805 | 24472.393 | AK026569  | 66416.586 | 62879.957 | AF151889  | 4164.688  | 3547.093  |
| NM_018669 | 14606.743 | 13939.95  | AL049974  | 2759.819  | 2134.483  | BC034483  | 973.201   | 865.206   |
| NM_002623 | 7282.031  | 9364.376  | AK022953  | 998.469   | 1038.134  | NM_003620 | 1415.495  | 1581.197  |
| NM_018844 | 11069.998 | 11765.371 | AF009319  | 9525.229  | 7485.292  | AA586375  | 2596.295  | 3263.3    |
| AF279778  | 5406.956  | 5453.858  | AL365519  | 2288.444  | 1579.558  | BE910339  | 32638.01  | 34005.582 |
| NM_015477 | 9497.729  | 10356.355 | NM_018465 | 16085.264 | 13050.044 | U89715    | 4085.788  | 5987.5    |
| AK023212  | 5656.568  | 6675.798  | Z36845    | 3265.142  | 2486.668  | AF254067  | 17956.508 | 18435.25  |
| AL353943  | 3120.348  | 3082.225  | M73792    | 2737.468  | 1824.352  | NM_016363 | 9216.928  | 10235.961 |
| BE568801  | 7740.278  | 8231.487  | NM_016127 | 24138.494 | 15599.987 | AY009090  | 14595.176 | 17118.271 |
| AB002336  | 2208.759  | 1722.189  | AF085939  | 2333.141  | 1722.586  | NM_005592 | 799.358   | 1042.594  |
| NM_003127 | 2277.586  | 2054.84   | NM_006792 | 51191.938 | 41887.996 | U81380    | 775.191   | 1041.271  |
| NM_013286 | 15985.507 | 19807.014 | NM_005876 | 64756.113 | 73852.102 | NM_002303 | 964.664   | 1351.936  |
| NM_006082 | 68112.281 | 63720.313 | AF039697  | 1439.159  | 2465.266  | NM_016509 | 2856.552  | 3297.677  |
| NM_006633 | 798.32    | 924.786   | NM_004934 | 1800.045  | 1452.076  | NM_012296 | 2157.729  | 2797.366  |
| NM_016262 | 2056.779  | 2282.572  | AF284436  | 3395.189  | 3343.846  | NM_004536 | 6568.682  | 6607.556  |
| AB011116  | 19971.566 | 19478.717 | NM_004445 | 2836.812  | 2292.282  | NM_014672 | 3789.161  | 2973.11   |
| AB037858  | 3671.33   | 3105.66   | U39657    | 20534.285 | 20553.406 | NM_005227 | 2844.336  | 2520.702  |
| NM_000173 | 675.149   | 560.992   | NM_016340 | 9389.199  | 8684.848  | NM_000286 | 14085.677 | 5423.426  |
| NM_005775 | 2939.153  | 2579.881  | NM_018373 | 2144.297  | 2146.335  | NM_016454 | 6630.587  | 5343.58   |
| NM_017639 | 3085.067  | 2119.075  | NM_006449 | 7701.42   | 6779.088  | NM_003469 | 1292.853  | 1760.158  |
| NM_004385 | 7428.818  | 5875.535  | BF216030  | 21785.205 | 18629.449 | NM_016433 | 965.375   | 650.064   |
| L25629    | 2837.07   | 5566.838  | AF131839  | 640.485   | 597.166   | NM_000859 | 949.143   | 1238.261  |
| NM_001490 | 3039.709  | 3589.229  | NM_002757 | 804.274   | 915.378   | NM_005480 | 1019.965  | 804.814   |
| NM_017740 | 12993.593 | 14083.636 | NM_003684 | 3803.597  | 3814.553  | NM_003273 | 1104.023  | 520.317   |
| AB033052  | 13372.685 | 15914.017 | NM_005657 | 4894.804  | 5057.084  | AK026404  | 1310.242  | 1895.483  |
| NM_018227 | 6251.725  | 6949.153  | NM_017671 | 1698.571  | 1905.011  | NM_017948 | 3197.363  | 5399.312  |
| AF050199  | 1439.607  | 1864.877  | AB040883  | 1859.764  | 2134.833  | NM_006744 | 1066.081  | 962.875   |
| NM_003340 | 46587.906 | 51227.191 | NM_018639 | 3418.977  | 2580.957  | NM_018231 | 10366.863 | 10091.56  |
| U46752    | 6957.393  | 7434.703  | AF264628  | 1350.455  | 1144.346  | NM_005833 | 3381.488  | 3406.874  |
| NM_002794 | 65191.297 | 64322.66  | NM_001715 | 37201.133 | 35647.598 | NM_003100 | 11205.896 | 12623.453 |
| BF244646  | 68098.477 | 66847.344 | NM_004395 | 22840.275 | 12542.218 | NM_006768 | 6904.88   | 7944.767  |
| AK024030  | 14465.141 | 14439.149 | NM_002663 | 2990.271  | 1318.906  | NM_013322 | 8209.825  | 11076.706 |
| AF275808  | 4125.385  | 4251.385  | NM_006094 | 16546.102 | 9342.399  | AB020627  | 3895.472  | 4914.953  |

|           |           |           |           |           |           |           |           |           |
|-----------|-----------|-----------|-----------|-----------|-----------|-----------|-----------|-----------|
| AK024038  | 10262.015 | 10538.323 | AF080158  | 2183.524  | 2044.359  | NM_002003 | 3392.821  | 3352.735  |
| NM_002055 | 3835.522  | 4468.774  | AB037794  | 7572.416  | 4604.325  | NM_005387 | 9953.679  | 12760.309 |
| NM_005803 | 22812.188 | 23701.078 | NM_014178 | 40178.789 | 48478.355 | NM_018285 | 1722.628  | 1346.519  |
| NM_015515 | 15735.813 | 13340.767 | NM_001251 | 64712.652 | 73757.07  | AB018260  | 730.512   | 1040.824  |
| AK001579  | 60254.148 | 56838.699 | NM_006605 | 1118.286  | 1509.247  | NM_014766 | 1808.896  | 1611.207  |
| NM_002670 | 22903.381 | 19160.357 | NM_004789 | 1077.215  | 1609.364  | NM_016627 | 7058.495  | 5025.493  |
| AF163302  | 9504.906  | 7756.759  | AB011112  | 23265.23  | 24385.881 | NM_016121 | 1144.296  | 844.863   |
| NM_006405 | 14822.891 | 11537.863 | NM_018669 | 12700.902 | 10800.111 | NM_014765 | 2941.877  | 3164.576  |
| NM_002419 | 16640.77  | 15060.739 | NM_002623 | 6985.862  | 7873.797  | NM_006345 | 41417.973 | 44115.402 |
| NM_005935 | 1540.36   | 1290.026  | NM_018844 | 11515.317 | 11473.671 | AK026264  | 30824.1   | 33706.691 |
| NM_012415 | 6477.087  | 6054.91   | AF279778  | 5586.033  | 4963.006  | AF222927  | 1257.841  | 1421.542  |
| NM_003454 | 1855.185  | 2139.188  | NM_015477 | 9503.416  | 8329.528  | NM_014345 | 4271.263  | 4395.021  |
| NM_003415 | 62167.898 | 69096.391 | AK023212  | 6176.928  | 6199.996  | NM_018217 | 3381.754  | 4682.887  |
| NM_017905 | 5080.804  | 5842.529  | AL353943  | 3639.026  | 3241.87   | AF241831  | 5641.247  | 5652.261  |
| NM_006885 | 6350.895  | 11706.267 | BE568801  | 7995.927  | 6615.885  | NM_003033 | 3108.692  | 3476.162  |
| M25077    | 17688.096 | 16621.271 | AB002336  | 2359.117  | 1871.974  | NM_002733 | 3696.011  | 4135.132  |
| NM_018702 | 11478.815 | 13418.096 | NM_003127 | 1981.894  | 1853.805  | M31008    | 1139.657  | 1439.261  |
| M62843    | 2168.44   | 2235.196  | NM_013286 | 14419.01  | 14159.672 | NM_006285 | 1090.263  | 1111.776  |
| U96131    | 3213.97   | 2934.585  | NM_006082 | 65639.047 | 68278.453 | NM_016224 | 8083.141  | 7379.758  |
| NM_004593 | 7064.755  | 7740.616  | NM_016262 | 1777.975  | 1625.5    | NM_007175 | 32226.73  | 31230.643 |
| NM_005775 | 51232.035 | 56568.629 | AB011116  | 18965.699 | 15819.575 | NM_001306 | 1269.396  | 909.045   |
| NM_001032 | 67794.594 | 69799.609 | AB037858  | 5338.061  | 4066.347  | NM_005940 | 1039.376  | 833.607   |
| NM_018084 | 65644.484 | 64029.035 | NM_005775 | 2418.012  | 1452.63   | AF061034  | 17294.41  | 15662.551 |
| AF164797  | 68782.695 | 62056.883 | NM_017639 | 3186.041  | 3272.322  | X03655    | 1345.291  | 1274.476  |
| NM_017840 | 66990.898 | 64637.859 | NM_004385 | 7731.344  | 6931.588  | BG696293  | 3430.811  | 2524.103  |
| AK001052  | 67935.125 | 66981.734 | L25629    | 1981.048  | 2235.179  | BG113873  | 1749.295  | 1504.261  |
| NM_001415 | 68034.555 | 61858.102 | AJ245539  | 870.789   | 1103.082  | BC013135  | 56688.25  | 60087.328 |
| NM_004564 | 27376.061 | 24497.084 | NM_001490 | 3921.042  | 3938.012  | AI625002  | 871.561   | 614.027   |
| NM_000965 | 68390.734 | 62709.879 | NM_017740 | 13130.288 | 11537.563 | AA281652  | 7344.872  | 8339.338  |
| NM_003270 | 4319.294  | 3938.375  | AB033052  | 13715.388 | 14387.132 | U31905    | 7863.321  | 12898.153 |
| NM_016591 | 2834.313  | 1989.618  | NM_018227 | 5747.239  | 5918.348  | X52479    | 2524.229  | 2476.823  |
| AL157437  | 66466.547 | 59670.641 | AF050199  | 1602.995  | 1974.914  | BC013200  | 3576.7    | 3481.502  |
| NM_006005 | 7942.591  | 8082.84   | NM_003340 | 48446.168 | 49729.398 | AW408832  | 2978.053  | 4313.934  |
| NM_002625 | 66372.102 | 75548.602 | U46752    | 9678.019  | 8550.365  | AA486364  | 36607.102 | 47240.301 |
| NM_014364 | 14044.207 | 16626.977 | NM_002794 | 64019.793 | 66189.469 | M15476    | 62005.547 | 60590.059 |
| NM_001685 | 67472.563 | 70026.555 | BF244646  | 64565.688 | 64935.516 | U57456    | 2974.156  | 3297.118  |
| NM_006067 | 67171.117 | 70464.82  | AK024030  | 15064.11  | 12636.629 | N70057    | 24455.027 | 32086.094 |
| NM_000284 | 29001.477 | 36972.063 | AF275808  | 5191.105  | 4207.884  | AK000124  | 2459.874  | 3287.201  |
| NM_004813 | 20338.174 | 23521.311 | AK024038  | 9662.752  | 8423.681  | NM_004480 | 7393.822  | 7979.157  |
| AK023008  | 4698.245  | 5892.384  | NM_002055 | 3623.8    | 3640.611  | NM_014914 | 7777.948  | 6259.804  |
| NM_004685 | 23366.348 | 23073.551 | NM_005803 | 22731.109 | 22403.545 | NM_004215 | 12051.292 | 12236.717 |
| NM_006025 | 24519.082 | 26766.387 | NM_015515 | 14208.571 | 11562.638 | AK022746  | 2268.839  | 2057.234  |
| BG339855  | 2682.604  | 2975.578  | AK001579  | 62064.949 | 54390.516 | NM_006565 | 3448.26   | 2794.178  |
| AB040956  | 9570.035  | 10529.383 | NM_002670 | 25316.162 | 18992.916 | NM_006440 | 1351.227  | 1198.417  |
| NM_016587 | 6492.442  | 5801.77   | AF163302  | 15384.9   | 10990.752 | NM_004847 | 28201.172 | 24846.285 |
| NM_003516 | 7990.992  | 7948.56   | NM_006405 | 22799.494 | 18611.965 | NM_002255 | 3065.648  | 2343.777  |
| NM_017953 | 9415.973  | 10822.296 | NM_002419 | 14627.718 | 12933.328 | AF151889  | 7282.995  | 5407.042  |
| BC000124  | 8305.576  | 8731.313  | NM_005935 | 1676.547  | 1718.15   | BC034483  | 738.695   | 526.753   |
| Z11773    | 4168.34   | 4628.951  | NM_012415 | 5302.972  | 6436.074  | NM_003620 | 2541.869  | 1300.368  |
| NM_006914 | 2280.908  | 1955.651  | NM_003924 | 868.932   | 805.415   | NM_013285 | 771.223   | 840.246   |
| NM_003445 | 65547.133 | 58497.859 | NM_003454 | 5041.678  | 6038.884  | AA586375  | 2719.764  | 2546.128  |
| NM_001485 | 35802.91  | 31534.297 | NM_003415 | 55596.793 | 53226.352 | BE910339  | 33721.879 | 31239.879 |
| NM_002702 | 3441.335  | 2676.058  | NM_017905 | 5616.541  | 5299.137  | U89715    | 5014.312  | 7203.383  |



|          |           |           |          |           |           |          |           |           |
|----------|-----------|-----------|----------|-----------|-----------|----------|-----------|-----------|
| NM_00198 | 45004.965 | 43111.426 | NM_00688 | 5749.467  | 12316.797 | AF254067 | 20180.268 | 21451.949 |
| NM_00265 | 40438.996 | 45508.316 | M25077   | 19632.1   | 26500.113 | NM_01636 | 10825.931 | 11359.49  |
| NM_00560 | 4423.916  | 3385.439  | NM_01870 | 12122.801 | 13542.19  | AY009090 | 13069.273 | 14654.125 |
| S69023   | 6408.883  | 5232.311  | M62843   | 2072.24   | 2210.973  | U81380   | 737.803   | 1183.268  |
| NM_00347 | 5583.706  | 6010.056  | U96131   | 3893.465  | 2702.464  | NM_00230 | 1302.139  | 2187.674  |
| NM_00462 | 14427.573 | 16588.348 | NM_00459 | 7176.404  | 5637.248  | NM_01650 | 2597.688  | 2765.568  |
| NM_00717 | 62516.719 | 59316.391 | NM_00577 | 44128     | 46540.027 | NM_01229 | 1808.486  | 2532.825  |
| NM_00130 | 9278.994  | 9758.818  | NM_00103 | 65307.359 | 67632.047 | NM_00453 | 6714.535  | 7390.921  |
| AB04686  | 2145.407  | 2634.492  | NM_01808 | 52366.027 | 51773.535 | NM_01467 | 3840.609  | 3438.499  |
| AB02817  | 1616.682  | 2320.392  | AF164797 | 66039.742 | 57702.941 | NM_00347 | 2914.429  | 2659.834  |
| NM_00594 | 2695.385  | 2581.103  | NM_01784 | 58246.27  | 53403.281 | NM_00462 | 11298.769 | 8640.761  |
| AF06103  | 60207.992 | 55384.309 | AK001052 | 65928.008 | 57942.723 | NM_01645 | 13173.751 | 12286.844 |
| X03655   | 3088.422  | 3819.173  | NM_00141 | 65617.461 | 60578.398 | NM_00346 | 3006.948  | 3184.494  |
| BG69629  | 5385.976  | 5910.123  | NM_00456 | 27635.318 | 21841.973 | NM_00548 | 1760.43   | 882.314   |
| AA77741  | 1139.307  | 1176.555  | NM_00096 | 65697.711 | 68294.461 | NM_00327 | 2361.423  | 1414.216  |
| BG11387  | 3844.079  | 4715.392  | NM_00327 | 3869.406  | 3734.009  | AK02640  | 2937.331  | 2187.623  |
| BC01313  | 62707.984 | 60824.332 | NM_01659 | 2938.633  | 2929.048  | NM_01794 | 4750.291  | 4046.683  |
| AI62500  | 1306.529  | 1364.095  | AL157437 | 58423.656 | 53502.219 | NM_00674 | 1176.834  | 1246.333  |
| H07899   | 1467.704  | 1370.216  | NM_00600 | 9310.532  | 8978.173  | NM_01823 | 10104.993 | 8286.905  |
| AA28165  | 18750.385 | 17958.16  | NM_00262 | 60441.781 | 60084.266 | AF202889 | 30253.051 | 26723.25  |
| U31905   | 15600.006 | 14790.203 | NM_00168 | 65261.805 | 61933.699 | NM_00583 | 4224.282  | 4025.686  |
| X52479   | 8938.571  | 7798.783  | NM_00606 | 63329.559 | 52654.102 | NM_00310 | 8325.877  | 7503.282  |
| BC01320  | 6741.511  | 6422.005  | NM_00028 | 28242.906 | 34195.918 | NM_00676 | 6763.914  | 6826.845  |
| AW40883  | 6294.956  | 6158.532  | NM_00481 | 19182.02  | 26323.189 | NM_01332 | 8758.029  | 11082.279 |
| AA48636  | 55690.293 | 50175.695 | NM_00468 | 23287.287 | 28269.268 | AB020627 | 3777.456  | 4406.434  |
| M15476   | 64362.242 | 60024.141 | NM_00602 | 25645.322 | 25881.623 | NM_00200 | 3292.438  | 4110.435  |
| U57456   | 7058.228  | 5484.531  | BG339855 | 2854.953  | 3030.14   | NM_00538 | 10170.788 | 13683.657 |
| N70057   | 44774.051 | 42385.91  | AB040956 | 9791.331  | 8643.201  | NM_00684 | 600.117   | 787.409   |
| NM_00220 | 13003.192 | 9719.766  | NM_01658 | 5695.997  | 4812.479  | AL137938 | 18184.791 | 16668.688 |
| AL13793  | 24529.65  | 28900.654 | NM_00351 | 7528.313  | 5693.25   | AF228704 | 5889.521  | 4509.887  |
| AF22870  | 9498.453  | 11491.095 | NM_01795 | 7969.22   | 7641.815  | NM_01828 | 2795.123  | 2746.253  |
| NM_00421 | 17834.828 | 24179.303 | BC000124 | 11376.99  | 9837.554  | AB018260 | 3380.2    | 2867.107  |
| AK02274  | 8890.345  | 10830.732 | Z11773   | 3970.914  | 4044.194  | NM_01476 | 1489.25   | 824.582   |
| NM_00656 | 15446.3   | 22332.006 | NM_00691 | 2572.321  | 2906.678  | NM_01662 | 11201.78  | 8065.426  |
| NM_00644 | 18634.943 | 26372.5   | NM_00344 | 64898.09  | 60555.035 | NM_01612 | 3062.182  | 2598.389  |
| NM_00484 | 64136.281 | 60372.629 | NM_00148 | 42109.707 | 46865.641 | NM_01476 | 2818.25   | 2257.385  |
| NM_00225 | 7600.28   | 7681.297  | NM_00270 | 3405.287  | 4789.124  | NM_00634 | 42551.324 | 37259.941 |
| AF15189  | 20797.545 | 20398.914 | NM_00198 | 45314.258 | 48470.074 | AK026264 | 26950.289 | 23977.572 |
| BC03448  | 2547.612  | 2496.332  | NM_00265 | 42015.156 | 50620.375 | AF222927 | 1333.766  | 1437.379  |
| NM_00362 | 8350.693  | 7891.127  | NM_00560 | 6440.413  | 5942.105  | NM_01434 | 3957.979  | 3366.494  |
| NM_01328 | 1620.828  | 1813.403  | S69023   | 5877.262  | 4503.796  | NM_01821 | 3997.431  | 3820.193  |
| AA58637  | 6491.673  | 6697.035  | NM_00347 | 4973.921  | 3823.792  | AF241831 | 5091.928  | 3822.896  |
| BE91033  | 57154.824 | 52621.746 | NM_00462 | 24489.049 | 22993.156 | NM_00303 | 3315.656  | 2612.424  |
| U89715   | 10285.549 | 15847.624 | NM_00130 | 8901.64   | 8923.188  | NM_00273 | 4081.336  | 3878.261  |
| AF25406  | 39499.277 | 44633.359 | AB04686  | 2293.285  | 2392.39   | M31008   | 1186.277  | 981.311   |
| NM_01636 | 29548.619 | 31634.57  | AB02817  | 1508.452  | 1636.127  | NM_00628 | 1156.61   | 1063.576  |
| AY00909  | 24659.215 | 26345.154 | NM_00594 | 2952.691  | 3271.199  | NM_01622 | 7730.383  | 7898.547  |
| NM_00559 | 1642.055  | 1251.063  | X03655   | 4515.021  | 4771.732  | NM_00522 | 5588.757  | 6200.25   |
| U81380   | 552.695   | 614.359   | BG69629  | 5802.773  | 5764.778  | NM_00028 | 24837.109 | 10758.425 |
| NM_00230 | 1542.83   | 1297.872  | AA77741  | 1691.169  | 1503.76   | AF06103  | 19017.848 | 17089.775 |
| NM_01650 | 4564.552  | 4102.854  | BG11387  | 4589.17   | 4992.681  | X03655   | 1125.908  | 732.955   |
| NM_01229 | 4671.668  | 4424.029  | BC01313  | 63652.344 | 61237.473 | BG69629  | 4499.508  | 3307.525  |
| NM_00453 | 17019.016 | 12473.402 | AI62500  | 1758.802  | 1260.297  | AA77741  | 418.023   | 1642.1    |

|           |           |           |           |           |           |           |           |           |
|-----------|-----------|-----------|-----------|-----------|-----------|-----------|-----------|-----------|
| NM_014672 | 5816.762  | 4260.267  | H07899    | 1466.597  | 1005.792  | BG113873  | 1616.753  | 1324.177  |
| NM_005227 | 10945.28  | 15941.241 | AA281652  | 19220.676 | 16194.121 | BC013135  | 62874.41  | 63385.289 |
| NM_000286 | 23122.119 | 16101.818 | U31905    | 14890.479 | 16843.143 | AA281652  | 3555.447  | 2715.73   |
| NM_016454 | 23197.063 | 32000.666 | X52479    | 10601.298 | 11567.303 | U31905    | 4273.459  | 3542.084  |
| NM_003469 | 9443.748  | 13690.165 | BC013200  | 7135.207  | 12246.897 | X52479    | 3282.514  | 2285.54   |
| NM_016433 | 2000.846  | 2610.096  | AW408832  | 8865.306  | 11118.313 | BC013200  | 3304.527  | 2494.57   |
| NM_000859 | 4085.378  | 4689.845  | U57456    | 8935.477  | 10450.938 | AW408832  | 2173.794  | 2093.053  |
| NM_005480 | 3790.833  | 4190.499  | N70057    | 50107.273 | 51170.918 | AA486364  | 35907.316 | 32209.709 |
| AB034694  | 1480.69   | 1353.287  | NM_002202 | 13547.603 | 9229.225  | M15476    | 63034.297 | 59608.723 |
| NM_003273 | 4422.688  | 4001.056  | AL137938  | 24991.068 | 20585.021 | U57456    | 2997.515  | 2967.614  |
| AK026404  | 8453.283  | 8703.685  | AF228704  | 8365.15   | 7658.425  | N70057    | 24403.605 | 28251.377 |
| NM_017948 | 13718.598 | 16752.91  | NM_004215 | 18787.107 | 21339.9   | AK000124  | 3004.006  | 3546.031  |
| NM_006744 | 2527.238  | 2742.822  | AK022746  | 9544.03   | 9322.743  | NM_004480 | 7369.343  | 8354.735  |
| NM_018231 | 24186.158 | 22596.154 | NM_006568 | 15983.849 | 15883.777 | NM_014914 | 7487.006  | 7841.601  |
| NM_005833 | 9692.378  | 10172.437 | NM_006440 | 17562.08  | 14884.104 | NM_003620 | 1919.577  | 1345.375  |
| NM_003100 | 23023.773 | 23595.512 | NM_004847 | 63485.438 | 63756.133 | AA586375  | 581.353   | 238.074   |
| NM_006768 | 11675.418 | 10858.752 | NM_002255 | 9835.067  | 12614.77  | BE910339  | 15566.4   | 9463.99   |
| NM_013322 | 12979.26  | 12257.982 | AF151889  | 26741.715 | 23668.975 | U89715    | 3579.91   | 3693.112  |
| AB020627  | 7991.633  | 7155.386  | BC034483  | 3418.978  | 3003.095  | AF254067  | 13108.078 | 10079.315 |
| NM_002003 | 5343.631  | 4457.156  | NM_003620 | 12546.812 | 9803.749  | NM_016363 | 6188.228  | 5089.93   |
| NM_005387 | 17958.08  | 18582.889 | NM_013289 | 1707.257  | 1585.501  | AY009090  | 10167.782 | 8584.149  |
| NM_006846 | 1265.047  | 1178.577  | AA586375  | 7965.28   | 6649.161  | NM_005592 | 2590.604  | 2654.316  |
| NM_018289 | 9713.107  | 11700.226 | BE910339  | 60803.352 | 55215.902 | NM_002303 | 1680.905  | 1402.415  |
| AB018260  | 7043.294  | 10714.557 | U89715    | 11183.132 | 12641.077 | NM_016509 | 2347.121  | 2014.916  |
| NM_015985 | 1052.338  | 1363.434  | AF254067  | 37935.957 | 44445.43  | NM_012296 | 1070.544  | 591.718   |
| NM_014766 | 8793.366  | 11086.759 | NM_016363 | 36638.133 | 42905.762 | AF041038  | 2368.86   | 2279.447  |
| NM_016627 | 24370.709 | 26526.979 | AY009090  | 25935.295 | 37306.543 | NM_004536 | 4773.325  | 3580.283  |
| NM_016121 | 4515.218  | 5715.954  | NM_005592 | 2906.391  | 3368.155  | NM_014672 | 3571.296  | 2688.476  |
| NM_014769 | 15845.754 | 16580.256 | U81380    | 1423.611  | 1482.281  | AB058719  | 4499.584  | 4002.018  |
| NM_006349 | 62785.727 | 59903.91  | NM_002303 | 2314.203  | 2621.441  | AK025935  | 4943.217  | 4179.511  |
| AK026264  | 51025.926 | 52490.633 | NM_016509 | 7920.927  | 9793.648  | AB032953  | 964.648   | 1374.068  |
| AF222927  | 3839.237  | 4669.664  | NM_012296 | 7207.225  | 8617.121  | NM_016441 | 3241.601  | 3764.808  |
| NM_014345 | 13900.038 | 14922.716 | NM_004536 | 22095.674 | 20950.391 | NM_006334 | 1194.707  | 1734.376  |
| NM_018217 | 8761.534  | 9665.807  | NM_014672 | 7787.426  | 5549.736  | NM_003474 | 3383.383  | 2832.038  |
| AF241831  | 7354.918  | 6404.249  | NM_005227 | 10161.772 | 8146.171  | NM_004625 | 12199.519 | 10651.4   |
| NM_003033 | 6310.15   | 5691.633  | NM_000286 | 31665.344 | 17129.656 | NM_007179 | 57524.836 | 50988.473 |
| NM_002733 | 6446.115  | 6631.417  | NM_016454 | 24625.201 | 24366.836 | NM_001306 | 3498.469  | 3233.274  |
| M31008    | 2561.188  | 2005.653  | NM_003469 | 10714.23  | 11994.235 | NM_007163 | 954.734   | 970.701   |
| NM_006288 | 1855.641  | 1747.755  | NM_016433 | 1710.039  | 1164.876  | NM_000583 | 5969.577  | 4560.914  |
| NM_016224 | 16927.428 | 12553.246 | NM_000859 | 3200.151  | 2721.087  | NM_004254 | 852.18    | 591.952   |
| NM_007179 | 60854.133 | 64478.492 | NM_005480 | 3315.442  | 3408.6    | AY007135  | 66175.711 | 67655.344 |
| NM_001306 | 6549.285  | 4508.539  | AB034694  | 1334.088  | 1800.956  | AF202889  | 50849.594 | 55608.73  |
| AB046861  | 1908.772  | 2563.825  | NM_003273 | 4009.645  | 3143.869  | NM_005833 | 2626.589  | 1609.958  |
| AB028173  | 1615.845  | 2815.462  | AK026404  | 8509.813  | 6989.5    | NM_003100 | 4163.389  | 3249.385  |
| NM_005940 | 2481.237  | 2979.132  | NM_017948 | 13845.22  | 14315.398 | NM_006768 | 3433.97   | 2851.081  |
| AF061034  | 61561.492 | 65899.602 | NM_006744 | 2717.196  | 2777.146  | NM_013322 | 5086.58   | 4990.652  |
| X03655    | 3515.077  | 3549.454  | NM_018231 | 23569.221 | 21214.158 | AB020627  | 4178.167  | 3868.061  |
| BG696293  | 5643.701  | 5536.049  | NM_005833 | 8797.635  | 11389.187 | NM_002003 | 1970.332  | 1788.439  |
| AA777410  | 1374.303  | 972.073   | NM_003100 | 21768.088 | 31596.467 | NM_005387 | 6174.084  | 5850.576  |
| BG113873  | 4276.285  | 4247.513  | NM_006768 | 13783.499 | 14055.083 | AL137938  | 14747.612 | 9484.067  |
| BC013135  | 63753.223 | 62484.539 | NM_013322 | 14337.78  | 16437.885 | AF228704  | 4951.528  | 3754.721  |
| AI625002  | 1390.039  | 1049.312  | AB020627  | 8897.595  | 10431.685 | NM_004215 | 10345.519 | 10457.55  |
| H07899    | 1192.184  | 1279.865  | NM_002003 | 7457.014  | 7906.685  | AK022746  | 4602.62   | 5116.312  |

|           |           |           |           |           |           |           |           |           |
|-----------|-----------|-----------|-----------|-----------|-----------|-----------|-----------|-----------|
| AA281652  | 17204.189 | 16348.781 | NM_005387 | 20631.299 | 23626.594 | NM_00656E | 8592.188  | 10271.451 |
| U31905    | 12721.53  | 11800.897 | NM_00684E | 1485.96   | 1352.427  | NM_00644C | 14952.666 | 15224.494 |
| X52479    | 8617.347  | 7404.324  | NM_01828E | 10981.916 | 9323.636  | NM_004847 | 44864.727 | 51805.527 |
| BC013200  | 6751.485  | 6547.931  | AB018260  | 6422.273  | 5673.969  | NM_00225E | 6113.71   | 6951.604  |
| AW408832  | 5227.791  | 5415.681  | NM_01598E | 2674.458  | 3197.944  | AF151889  | 10591.714 | 10625.782 |
| AA486364  | 56626.273 | 57404.801 | NM_01476E | 7969.038  | 5601.633  | BC034483  | 1349.652  | 1985.195  |
| M15476    | 64990.402 | 63842.691 | NM_016627 | 25270.371 | 24955.721 | NM_016224 | 2294.784  | 1282.708  |
| U57456    | 6750.982  | 5534.446  | NM_016121 | 4060.853  | 4564.716  | NM_005227 | 2341.981  | 1507.045  |
| N70057    | 44746.637 | 42931.863 | NM_01476E | 19142.484 | 18656.469 | NM_00028E | 11418.247 | 2123.883  |
| AK000124  | 6257.67   | 4591.677  | NM_00634E | 61046.863 | 53912.223 | NM_016454 | 12069.765 | 7684.435  |
| NM_00448C | 11444.107 | 10090.854 | AK026264  | 59125.988 | 52363.949 | NM_00346E | 1824.923  | 1897.944  |
| NM_014914 | 13415.268 | 9235.014  | AF222927  | 4900.761  | 5320.75   | NM_01643E | 3019.965  | 986.75    |
| NM_00421E | 17818.309 | 21914.717 | NM_01434E | 13085.007 | 13825.81  | NM_00085E | 966.082   | 235.118   |
| AK022746  | 7012.37   | 6875.411  | NM_018217 | 9001.625  | 10938.971 | NM_00548C | 1482.021  | 1061.808  |
| NM_00656E | 13267.093 | 17590.014 | AF241831  | 7617.199  | 7813.812  | AB034694  | 969.467   | 318.722   |
| NM_00644C | 18420.174 | 19995.551 | NM_00303E | 6911.86   | 6905.166  | NM_00327E | 3479.24   | 2497.228  |
| NM_004847 | 62929.57  | 60247.926 | NM_00273E | 6124.392  | 6908.553  | AK026404  | 3314.231  | 2912.097  |
| NM_00225E | 9055.729  | 9395.476  | M31008    | 2636.769  | 3092.482  | NM_01794E | 7276.498  | 7033.546  |
| AF151889  | 20479.031 | 20562.586 | NM_00628E | 1814.25   | 2269.302  | NM_00039E | 2510.942  | 2503.836  |
| BC034483  | 2516.232  | 2104.18   | NM_016224 | 22321.84  | 20505.242 | AF208536  | 1354.759  | 1314.539  |
| NM_00362C | 8473.055  | 7302.743  | NM_00717E | 61416.332 | 56841.332 | AB037848  | 1375.505  | 1219.338  |
| NM_01328E | 1409.383  | 1451.851  | NM_00130E | 8854.138  | 7136.171  | AF082657  | 4730.588  | 5089.437  |
| AA586375  | 6116.878  | 6082.856  | AB046861  | 2443.921  | 2430.235  | NM_006744 | 1625.589  | 1767.505  |
| BE910339  | 57746.57  | 54392.285 | AB028173  | 1586.837  | 1296.406  | AF297659  | 1486.566  | 1878.317  |
| U89715    | 9749.574  | 14091.852 | NM_00594C | 2588.818  | 1901.547  | NM_018231 | 12863.988 | 14669.569 |
| AF254067  | 38927.902 | 43577.75  | AF061034  | 63954.734 | 59412.32  | AK000124  | 782.664   | 385.752   |
| NM_01636E | 25370.094 | 23244.395 | X03655    | 3289.28   | 2905.476  | NM_00448C | 1315.604  | 764.127   |
| AY009090  | 25253.322 | 26071.387 | BG696293  | 5187.142  | 5584.028  | NM_014914 | 2468.066  | 1482.699  |
| NM_00559E | 1669.557  | 1255.149  | AA777410  | 1165.429  | 1972.402  | NM_01828E | 1512.101  | 1201.129  |
| U81380    | 1010.502  | 435.173   | BG113873  | 4358.818  | 4847.387  | AB018260  | 2476.375  | 1789.696  |
| NM_00230E | 1764.52   | 1549.807  | BC013135  | 64164.738 | 63448.609 | NM_01598E | 1839.243  | 1015.031  |
| NM_01650E | 5254.594  | 4556.1    | AI625002  | 1428.978  | 2041.012  | NM_01476E | 1902.329  | 1280.574  |
| NM_01229E | 4103.691  | 3311.742  | H07899    | 1667.219  | 2419.726  | NM_016627 | 11124.176 | 10362.237 |
| NM_00453E | 15637.531 | 11686.29  | AA281652  | 18008.537 | 20406.635 | NM_016121 | 2141.546  | 2653.987  |
| NM_01467E | 5619.026  | 4207.487  | U31905    | 13449.623 | 13527.746 | NM_01476E | 2598.361  | 3500.782  |
| NM_003474 | 6383.807  | 3820.81   | X52479    | 9823.723  | 8845.856  | NM_00634E | 40027.734 | 43331.055 |
| NM_00462E | 21450.545 | 14862.171 | BC013200  | 7383.936  | 6166.83   | AK026264  | 26435.467 | 30376.834 |
| NM_016454 | 24660.885 | 26556.748 | AW408832  | 8383.486  | 8030.493  | AF222927  | 2092.085  | 2810.064  |
| NM_00346E | 7241.126  | 8872.25   | AA486364  | 58353.742 | 54575.605 | NM_01434E | 5222.261  | 5714.232  |
| NM_01643E | 1744.984  | 1844.857  | M15476    | 64407.043 | 64986.82  | NM_018217 | 4396.245  | 7076.887  |
| NM_00085E | 4195.088  | 4184.785  | U57456    | 7980.672  | 8686.489  | AF241831  | 4978.948  | 6686.206  |
| NM_00548C | 3645.606  | 3792.642  | N70057    | 49277.934 | 54771.004 | NM_00303E | 3264.141  | 4852.617  |
| AB034694  | 1624.38   | 1910.726  | AK000124  | 6141.903  | 7970.362  | U96113    | 2591.827  | 4408.08   |
| NM_00327E | 4315.814  | 3910.357  | NM_00448C | 12724.643 | 20301.252 | NM_00273E | 3142.551  | 5236.567  |
| AK026404  | 9143.311  | 8499.288  | NM_014914 | 14643.354 | 15375.392 | M31008    | 1356.069  | 2121.225  |
| NM_01794E | 14754.183 | 16434.432 | NM_00421E | 18750.588 | 18003.398 | CY3Cy5    | 5507.043  | 40.754    |
| NM_006744 | 2543.144  | 2842.658  | AK022746  | 9811.987  | 7158.354  | U93051    | 13569.693 | 7690.048  |
| NM_018231 | 26440.846 | 23610.834 | NM_00656E | 15294.724 | 11411.554 | AK024268  | 1398.809  | 1113.818  |
| NM_00583E | 8648.969  | 9222.87   | NM_00644C | 14636.593 | 11093.406 | AF086295  | 389.898   | 397.056   |
| NM_00310C | 22696.975 | 23326.506 | NM_004847 | 60022.027 | 56826.813 | AF086424  | 837.123   | 641.967   |
| NM_00676E | 12487.646 | 10682.181 | NM_00225E | 7522.257  | 5459.102  | NM_018087 | 4165.83   | 2144.415  |
| NM_01332E | 12808.483 | 14787.77  | AF151889  | 25209.336 | 18266.1   | AL360260  | 1080.169  | 454.166   |
| AB020627  | 8052.676  | 8267.408  | BC034483  | 3202.811  | 2953.06   | AK023647  | 1256.235  | 475.694   |

|           |           |           |           |           |           |           |           |           |
|-----------|-----------|-----------|-----------|-----------|-----------|-----------|-----------|-----------|
| NM_002003 | 5109.121  | 4886.923  | NM_003620 | 11262.983 | 16915.205 | AL096749  | 29171.014 | 14141.36  |
| NM_005387 | 19766.797 | 18818.383 | NM_013289 | 1691.708  | 3418.588  | AK023620  | 2328.011  | 1328.136  |
| NM_006846 | 1396.636  | 1137.448  | AA586375  | 6967.307  | 9357.427  | AF086189  | 4335.53   | 3066.325  |
| AL137938  | 25565.691 | 17868.938 | BE910339  | 60483.516 | 56645.723 | AL050055  | 4089.047  | 3344.454  |
| AF228704  | 11785.316 | 6674.991  | U89715    | 10308.788 | 17324.85  | U93051    | 13497.617 | 6507.335  |
| NM_018289 | 6520.109  | 2941.22   | AF254067  | 38452.461 | 46406.352 | SR2       | 45810.754 | 22634.775 |
| AB018260  | 6239.774  | 8058.711  | NM_016363 | 33398.406 | 37499.551 | SR4       | 12364.965 | 6960.647  |
| NM_015985 | 1270.389  | 977.59    | AY009090  | 26219.65  | 30147.734 | SR6       | 1757.824  | 807.628   |
| NM_014766 | 8362.102  | 9084.045  | NM_005592 | 2427.898  | 2245.385  | SR8       | 7871.583  | 12335.618 |
| NM_016627 | 25511.453 | 29326.533 | U81380    | 997.671   | 937.682   | SR10      | 21766.58  | 4090.648  |
| NM_016121 | 4623.384  | 4966.071  | NM_002303 | 1696.89   | 2028.72   | CY3Cy5    | 5564.99   | 40.682    |
| NM_014769 | 15410.41  | 15733.29  | NM_016509 | 6921.378  | 7073.583  | AL359931  | 1998.308  | 1412.716  |
| NM_006349 | 59672.523 | 58308.211 | NM_012296 | 6636.202  | 7616.514  | AK000954  | 2065.995  | 2348.734  |
| AK026264  | 52094.301 | 51523.73  | NM_004536 | 20718.35  | 22039.047 | AF086099  | 995.583   | 688.929   |
| AF222927  | 4064.067  | 4483.133  | NM_014672 | 7509.18   | 7930.708  | AK025800  | 4880.119  | 2898.386  |
| NM_014345 | 14865.248 | 14193.063 | NM_003474 | 6480.041  | 6177.85   | AK022333  | 1257.502  | 691.636   |
| NM_018217 | 8624.043  | 9487.523  | NM_004625 | 35062.645 | 37341.645 | AL137407  | 5882.95   | 2906.059  |
| AF241831  | 7042.149  | 6524.596  | NM_016454 | 26506.129 | 21743.064 | NM_018175 | 2042.085  | 1211.911  |
| NM_003033 | 5658.939  | 5493.797  | NM_003469 | 11560.245 | 7798.045  | AK025204  | 1875.379  | 1116.624  |
| NM_002733 | 6335.773  | 7198.918  | NM_016433 | 1620.46   | 770.264   | AK027256  | 1022.189  | 931.007   |
| M31008    | 2909.88   | 2017.233  | NM_000859 | 3825.466  | 1457.769  | NM_019000 | 1858.577  | 1629.345  |
| NM_006285 | 2373.806  | 1851.54   | NM_005480 | 2693.708  | 1480.927  | AK025178  | 3003.469  | 2299.083  |
| NM_016224 | 18045.311 | 13878.716 | AB034694  | 1472.871  | 669.938   | NM_014835 | 10736.504 | 9207.313  |
| NM_005227 | 10823.512 | 8313.384  | NM_003273 | 3562.252  | 2093.832  | AK001822  | 6531.422  | 3898.48   |
| NM_000286 | 34165.863 | 14195.394 | AK026404  | 8358.092  | 10187.955 | AK026969  | 4354.496  | 3200.528  |
| AB046861  | 2136.101  | 2096.168  | NM_017945 | 13813.783 | 20386.918 | AF086287  | 647.469   | 802.52    |
| AB028173  | 1355.607  | 1930.468  | NM_006744 | 3277.938  | 4672.104  | AK022613  | 61122.91  | 46386.215 |
| NM_005940 | 2891.457  | 3671.583  | NM_018231 | 25138.434 | 27222.066 | AL359557  | 952.485   | 728.176   |
| AF061034  | 59437.613 | 67018.023 | NM_005833 | 8613.786  | 9212.529  | AK027257  | 587.059   | 353.935   |
| X03655    | 3660.664  | 5176.602  | NM_003100 | 21676.178 | 25657.859 | BC031635  | 1499.271  | 1118.007  |
| BG696293  | 5483.581  | 7506.738  | NM_006765 | 13208.155 | 15321.641 | AF085950  | 847.256   | 313.958   |
| AA777410  | 1241.731  | 1520.184  | NM_013322 | 12974.445 | 15991.854 | AL359598  | 868.205   | 902.513   |
| BG113873  | 4637.79   | 6065.171  | AB020627  | 8439.368  | 9998.54   | AF085980  | 1037.223  | 394.84    |
| BC013135  | 62393.352 | 71669.008 | NM_002003 | 7120.293  | 9809.922  | AF085927  | 1899.049  | 937.391   |
| AI625002  | 1235.382  | 1111.204  | NM_005387 | 20780.756 | 33684.402 | AF085954  | 4513.697  | 5202.907  |
| H07899    | 1228.782  | 1010.799  | NM_006846 | 1356.441  | 2164.33   | AL137337  | 1046.832  | 448.072   |
| AA281652  | 17729.83  | 16310.555 | AL137938  | 28091.76  | 27592.734 | AL161969  | 599.647   | 594.391   |
| U31905    | 15495.083 | 13782.124 | AF228704  | 11076.771 | 9867.748  | AL442095  | 4373.654  | 2658.937  |
| X52479    | 9164.934  | 6565.241  | NM_018289 | 11298.313 | 8148.72   | AL137378  | 2151.5    | 1321.366  |
| BC013200  | 7141.809  | 6665.698  | AB018260  | 6404.156  | 3828.662  | AL137609  | 19671.895 | 11218.115 |
| AW408832  | 6455.629  | 6778.052  | NM_014766 | 9400.866  | 8702.81   | AL353946  | 2442.492  | 2201.688  |
| AA486364  | 57822.289 | 59133.887 | NM_016627 | 24859.883 | 17086.109 | X69081    | 3898.543  | 3307.312  |
| M15476    | 64152.336 | 67822.969 | NM_016121 | 4019.956  | 3764.427  | NM_005714 | 7960.178  | 6035.414  |
| U57456    | 7384.217  | 6204.909  | NM_014769 | 17801.559 | 27045.24  | AL137474  | 2083.012  | 1828.781  |
| N70057    | 49072.164 | 49136.398 | NM_006349 | 59908.328 | 54262.691 | AK021572  | 1120.299  | 1048.683  |
| AK000124  | 5733.968  | 5054.433  | AK026264  | 58335.453 | 53159.832 | AK026757  | 610.218   | 417.608   |
| NM_004480 | 12922.659 | 10202.209 | AF222927  | 4168.783  | 7425.438  | AF095854  | 1831.576  | 905.359   |
| NM_014914 | 15042.961 | 11258.203 | NM_014345 | 13664.334 | 14526.099 | NM_014162 | 1339.265  | 640.211   |
| NM_003620 | 8457.845  | 8115.811  | NM_018217 | 8672.644  | 8897.083  | AF159093  | 3031.259  | 1432.718  |
| NM_013289 | 2649.91   | 3349.524  | AF241831  | 8523.811  | 10462.127 | AF113679  | 1531.708  | 963.723   |
| AA586375  | 6517.755  | 6703.769  | NM_003033 | 6978.7    | 10047.116 | AK021997  | 2147.364  | 1537.643  |
| BE910339  | 55135.145 | 60281.531 | NM_002733 | 6255.708  | 8119.087  | AK022125  | 1301.439  | 416.761   |
| U89715    | 9629.963  | 17421.65  | M31008    | 2458.083  | 3607.133  | AK022244  | 7996.741  | 4202.601  |

|           |           |           |           |           |           |           |           |           |
|-----------|-----------|-----------|-----------|-----------|-----------|-----------|-----------|-----------|
| AF254067  | 36070.57  | 51135.133 | NM_006288 | 1760.711  | 2111.622  | AK022381  | 4090.747  | 2699.159  |
| NM_016363 | 28403.213 | 33169.566 | NM_016224 | 23046.584 | 28259.871 | AK022012  | 802.263   | 610.539   |
| AY009090  | 22069.627 | 22699.779 | NM_005227 | 11752.881 | 13504.602 | AK022286  | 1926.893  | 2617.418  |
| NM_005592 | 1938.432  | 1756.413  | NM_000286 | 34231.668 | 20080.4   | AK022411  | 226.107   | 749.222   |
| NM_002303 | 1641.614  | 1641.889  | AB046861  | 2457.106  | 1690.215  | AL137364  | 995.717   | 763.589   |
| NM_016509 | 5075.01   | 4825.181  | AB028173  | 1845.431  | 738.647   | NM_001052 | 4967.8    | 4051.784  |
| NM_012296 | 4462.412  | 4084.552  | AA777410  | 1598.409  | 561.905   | Z70696    | 1001.505  | 631.674   |
| AF041038  | 4845.9    | 4047.373  | BG113873  | 3467.599  | 2812.918  | NM_005792 | 3159.295  | 2978.742  |
| NM_004536 | 15500.282 | 14197.953 | BC013135  | 62426.145 | 65626.148 | AF048847  | 6025.433  | 5368.295  |
| NM_014672 | 6274.953  | 6005.058  | AI625002  | 1304.714  | 1553.236  | L37718    | 69772.195 | 67284.547 |
| AB058719  | 8282.439  | 7403.04   | H07899    | 1119.594  | 1369.984  | AL137717  | 4034.017  | 2518.305  |
| AK025935  | 8422.422  | 7732.467  | AA281652  | 17780.281 | 19623.959 | AF035297  | 3251.953  | 2056.093  |
| AB032953  | 2148.921  | 1795.72   | U31905    | 14239.86  | 12544.905 | NM_014036 | 3970.897  | 2966.738  |
| NM_016441 | 6490.037  | 6248.984  | X52479    | 10537.694 | 8558.147  | S67154    | 4504.303  | 2162.939  |
| NM_006334 | 2941.159  | 2472.469  | BC013200  | 6743.843  | 5881.482  | AK026181  | 19120.906 | 7781      |
| NM_003474 | 7139.881  | 4242.299  | AW408832  | 7679.321  | 9386.039  | NM_014367 | 1102.77   | 496.805   |
| NM_004625 | 22137.371 | 15616.192 | AA486364  | 60879.77  | 60993.25  | AK024901  | 748.784   | 116.604   |
| NM_007179 | 64614.473 | 54090.32  | M15476    | 64964.637 | 65242.188 | NM_002365 | 1810.168  | 1264.916  |
| NM_001306 | 7566.173  | 5102.483  | U57456    | 6274.42   | 6925.611  | AF161441  | 8412.808  | 4853.021  |
| NM_007163 | 2055.128  | 2270.825  | N70057    | 41462.258 | 49772.641 | AF067777  | 63884.215 | 54335.297 |
| NM_000583 | 20602.326 | 25518.057 | AK000124  | 5876.3    | 8151.764  | AJ299406  | 1212.779  | 892.75    |
| NM_004254 | 6335.136  | 9508.993  | NM_004480 | 12040.385 | 18809.166 | AK021891  | 1541.35   | 1298.084  |
| AB046833  | 1545.186  | 2405.163  | NM_014914 | 16726.66  | 24518.055 | Y10697    | 1855.993  | 1173.99   |
| AY007135  | 60147.773 | 65662.234 | NM_004484 | 991.932   | 947.314   | AY007166  | 38289.367 | 18094.564 |
| AF202889  | 53780.391 | 52391.117 | NM_003620 | 11220.769 | 6866.036  | NM_004937 | 3779.1    | 2555.288  |
| NM_005833 | 8646.293  | 10294.739 | NM_013289 | 1662.686  | 945.344   | L13197    | 7733.155  | 5248.863  |
| NM_003100 | 22797.682 | 22721.342 | U89715    | 9872.055  | 18296.561 | AF056450  | 3840.962  | 3589.183  |
| NM_006768 | 11485.149 | 10395.724 | AF254067  | 34185.098 | 42472.191 | NM_000729 | 15773.541 | 6972.515  |
| NM_013322 | 12956.029 | 13958.464 | AY009090  | 22874.309 | 13473.296 | AK024007  | 3673.135  | 1620.342  |
| AB020627  | 7706.046  | 7787.301  | NM_005592 | 2422.047  | 2940.048  | AF116699  | 1702.203  | 1158.695  |
| NM_002003 | 5589.657  | 5216.59   | U81380    | 925.51    | 1078.708  | U50539    | 854.918   | 537.39    |
| NM_005387 | 18177.117 | 19168.559 | NM_002303 | 1529.051  | 1545.837  | AK000653  | 23193.445 | 12601.695 |
| NM_006846 | 1237.264  | 1175.046  | NM_016509 | 5912.309  | 6095.802  | AK000908  | 1375.188  | 1356.885  |
| AL137938  | 26553.582 | 21223.504 | NM_012296 | 5606.487  | 7305.767  | L77586    | 780.551   | 911.484   |
| AF228704  | 11658.979 | 9195.099  | AF041038  | 5487.806  | 5977.157  | X96660    | 3596.669  | 3814.713  |
| NM_004215 | 18709.631 | 19632.344 | NM_004536 | 18559.617 | 17319.711 | AK000993  | 910.703   | 1317.38   |
| AK022746  | 9959.728  | 8847.288  | NM_014672 | 6272.41   | 6429.875  | AK023519  | 3254.973  | 4324.316  |
| NM_006568 | 16859.129 | 16461.014 | AB058719  | 11896.522 | 13457.806 | NM_016444 | 1579.406  | 1586.281  |
| NM_006440 | 22231.082 | 16896.736 | AK025935  | 8905.791  | 9702.9    | NM_017836 | 867.864   | 742.486   |
| NM_004847 | 64462.941 | 60575.281 | AB032953  | 2490.599  | 3037.01   | NM_003707 | 21050.75  | 11399.563 |
| NM_002255 | 10594.053 | 8367.336  | NM_016441 | 7810.128  | 8874.082  | AL137718  | 1548.276  | 1120.365  |
| AF151889  | 18565.93  | 12260.223 | NM_006334 | 3329.897  | 4830.947  | NM_003460 | 10005.629 | 6093.302  |
| BC034483  | 2106.251  | 1175.184  | NM_003474 | 6347.191  | 7336.567  | NM_002904 | 16844.961 | 9753.604  |
| NM_006288 | 1746.165  | 1960.878  | NM_004625 | 33625.434 | 42577.949 | NM_014186 | 5401.332  | 3262.543  |
| NM_014177 | 1639.943  | 1529.25   | NM_007179 | 60764.887 | 59381.988 | NM_005686 | 6388.986  | 3889.305  |
| NM_016224 | 16240.362 | 21749.408 | NM_001306 | 12778.071 | 14533.771 | NM_006767 | 1177.175  | 638.437   |
| NM_005227 | 10290.142 | 11405.168 | NM_007163 | 2295.918  | 1460.614  | AK021451  | 1370.797  | 841.067   |
| NM_000286 | 30315.689 | 20937.969 | NM_000583 | 23325.164 | 13226.035 | AK001971  | 1342.783  | 618.279   |
| NM_016454 | 26445.213 | 29046.549 | NM_004254 | 6013.316  | 6268.079  | AF086468  | 996.286   | 388.044   |
| NM_003469 | 10602.676 | 11022.419 | AB046833  | 2365.533  | 2629.013  | AK027239  | 2836.965  | 1894.804  |
| NM_016433 | 2159.406  | 1953.372  | AY007135  | 58792.891 | 66717.453 | AF005082  | 24395.416 | 10448.571 |
| NM_000859 | 4593.434  | 3484.069  | AF202889  | 52613.223 | 57835.453 | AL117595  | 4992.497  | 3197.731  |
| NM_005480 | 3719.568  | 3430.579  | NM_005833 | 7977.826  | 11494.23  | AB028988  | 33143.789 | 14423.584 |

|           |           |           |           |           |           |           |           |           |
|-----------|-----------|-----------|-----------|-----------|-----------|-----------|-----------|-----------|
| AB034694  | 2056.038  | 1908.965  | NM_003100 | 18281.973 | 11590.543 | AK023072  | 1070.195  | 400.275   |
| NM_003273 | 4882.149  | 4149.53   | NM_006768 | 11779.555 | 8633.157  | AF086105  | 13048.217 | 6423.821  |
| AK026404  | 8683.438  | 7154.549  | NM_013322 | 12823.433 | 11759.396 | AK026600  | 2321.447  | 1483.515  |
| NM_017948 | 13489.047 | 14504.148 | AB020627  | 7530.897  | 7389.439  | AF251189  | 921.931   | 821.228   |
| NM_000392 | 9914.696  | 8604.016  | NM_002003 | 6577.763  | 9506.03   | AK026733  | 628.029   | 1175.601  |
| AF208536  | 2815.887  | 2517.969  | NM_005387 | 18961.049 | 24477.979 | AF161429  | 10245.775 | 7906.849  |
| AB037848  | 3160.123  | 2547.185  | NM_006846 | 1369.2    | 1887.428  | AK021495  | 5155.943  | 3735.347  |
| AF082657  | 9041.468  | 7744.448  | AL137938  | 26367.521 | 26667.473 | AF064846  | 3303.26   | 3207.973  |
| NM_006744 | 3235.742  | 2440.212  | AF228704  | 11179.865 | 11420.41  | AL110227  | 2938.083  | 2012.723  |
| AF297659  | 1914.194  | 1222.37   | NM_004215 | 19926.703 | 26371.855 | NM_001400 | 16257.878 | 9270.207  |
| NM_018231 | 25520.59  | 15674.874 | AK022746  | 10247.788 | 11110.546 | AB033281  | 6012.121  | 3944.394  |
| AK000124  | 5334.241  | 5683.965  | NM_006568 | 16365.979 | 18683.291 | NM_002882 | 39311.324 | 20481.414 |
| NM_004480 | 10978.951 | 12375.773 | NM_006440 | 24797.67  | 25135.488 | AB011161  | 1149.172  | 545.151   |
| NM_014914 | 12919.76  | 13318.269 | NM_004847 | 58888.125 | 59025.656 | NM_002944 | 14065.669 | 8090.519  |
| NM_018289 | 6718.913  | 6867.891  | NM_002255 | 10886.474 | 14597.98  | AF327354  | 2196.177  | 1187.363  |
| AB018260  | 6703.245  | 6754.636  | AF151889  | 26231.73  | 30852.008 | NM_003961 | 60685.5   | 56859.473 |
| NM_015985 | 933.788   | 627.433   | BC034483  | 3330.621  | 5320.21   | AB014513  | 3963.988  | 1676.405  |
| NM_014766 | 7789.182  | 6636.049  | NM_006288 | 1751.617  | 869.548   | NM_004747 | 3493.386  | 1410.885  |
| NM_016627 | 25773.307 | 26085.158 | NM_005227 | 7878.955  | 8228.061  | AK024430  | 62844.359 | 51733.945 |
| NM_016121 | 4935.586  | 5083.844  | NM_000286 | 29275.424 | 19442.1   | NM_002341 | 23234.57  | 10072.096 |
| NM_014769 | 14404.21  | 13515.676 | NM_016454 | 24516.201 | 38418.07  | AL137651  | 5814.245  | 2501.178  |
| NM_006349 | 60891.766 | 56605.734 | NM_003469 | 9897.795  | 17189.684 | NM_018945 | 6911.903  | 3542.696  |
| AK026264  | 46726.824 | 43261.973 | NM_016433 | 2405.754  | 739.813   | AB029018  | 718.353   | 677.676   |
| AF222927  | 4547.952  | 4913.237  | NM_000859 | 3283.595  | 1558.063  | NM_000818 | 3437.204  | 2428.973  |
| NM_014345 | 14622.534 | 12858.772 | NM_005480 | 3447.355  | 2449.117  | NM_006650 | 3115.02   | 4735.947  |
| NM_018217 | 7546.858  | 7795.684  | AB034694  | 1499.825  | 1269.934  | NM_006648 | 1573.622  | 4318.518  |
| AF241831  | 6976.917  | 5173.842  | NM_003273 | 3966.538  | 2957.628  | NM_000868 | 476.568   | 573.729   |
| NM_003033 | 6206.285  | 5279.086  | AK026404  | 8141.22   | 7812.527  | NM_004711 | 3932.75   | 4735.663  |
| U96113    | 4820.146  | 3876.08   | NM_017948 | 13863.923 | 15720.413 | NM_006463 | 12408.501 | 7803.077  |
| NM_002733 | 6096.698  | 5445.481  | NM_000392 | 9739.097  | 12668.257 | NM_001444 | 58544.5   | 30750.922 |
| M31008    | 2311.41   | 1286.842  | AF208536  | 2542.919  | 2943.704  | AK027208  | 886.591   | 538.588   |
| CY3Cy5    | 7981.801  | 90.814    | AB037848  | 2921.221  | 3097.44   | NM_016521 | 10583.834 | 5245.222  |
| U93051    | 20879.465 | 13015.206 | AF082657  | 10131.142 | 9965.652  | X98494    | 10514.133 | 5269.375  |
| AF086409  | 706.249   | 946.766   | NM_006744 | 2687.191  | 2962.037  | NM_001240 | 7150.272  | 3440.949  |
| AK024268  | 2597.964  | 1383.114  | AF297659  | 2954.909  | 3250.481  | NM_002709 | 12093.626 | 6056.264  |
| AF086295  | 829.411   | 742.401   | NM_018231 | 27846.598 | 29468.242 | NM_001099 | 2032.896  | 1195.63   |
| AF086344  | 2774.489  | 3600.709  | AK000124  | 4689.35   | 3677.728  | NM_006823 | 4272.885  | 2183.427  |
| AF086424  | 1479.285  | 2822.354  | NM_004480 | 10909.724 | 6328.819  | NM_016567 | 12804.936 | 5014.985  |
| AL110130  | 604.831   | 870.591   | NM_018289 | 8022.546  | 11792.888 | NM_007031 | 1363.107  | 362.048   |
| AF052116  | 629.413   | 1538.534  | AB018260  | 6165.704  | 9835.346  | NM_002657 | 1470.482  | 761.203   |
| NM_018087 | 8941.786  | 13019.819 | NM_015985 | 1270.13   | 948.604   | NM_004089 | 15703.568 | 5661.645  |
| AL360260  | 894.779   | 1124.788  | NM_014766 | 8397.88   | 7541.862  | NM_001350 | 12438.866 | 4557.462  |
| AK023647  | 1440.049  | 1039.814  | NM_016627 | 24374.111 | 31434.449 | NM_014809 | 2729.38   | 1363.124  |
| AL096749  | 18905.189 | 20400.422 | NM_016121 | 4074.039  | 4603.593  | NM_016074 | 21926.559 | 8150.326  |
| AK023620  | 3630.373  | 3165.421  | NM_014769 | 18776.264 | 19168.697 | NM_003921 | 4336.517  | 2131.798  |
| AF086189  | 4439.186  | 3718.336  | NM_006349 | 59517.297 | 53392.117 | NM_004208 | 21465.957 | 15743.426 |
| AL050055  | 6395.537  | 11471.41  | AK026264  | 59290.066 | 55249.648 | NM_001843 | 4709.856  | 4147.713  |
| U93051    | 15600.533 | 26364.756 | AF222927  | 5380.331  | 8377.268  | NM_013266 | 685.998   | 803.651   |
| SR2       | 58149.574 | 54946.297 | NM_014345 | 14983.026 | 20107.322 | NM_000419 | 1833.362  | 1746.18   |
| SR4       | 20281.137 | 32442.045 | NM_018217 | 7633.102  | 10319.87  | NM_017768 | 3270.009  | 3385.138  |
| SR6       | 3345.043  | 5113.426  | AF241831  | 9111.933  | 7709.791  | NM_002589 | 7796.884  | 6259.743  |
| SR8       | 11753.802 | 38750.602 | NM_003033 | 6955.983  | 7133.214  | NM_002776 | 7411.414  | 7161.121  |
| SR10      | 35846.152 | 20160.297 | U96113    | 5762.213  | 7850.338  | AK023398  | 4908.936  | 3314.169  |

|           |           |           |           |           |           |           |           |           |
|-----------|-----------|-----------|-----------|-----------|-----------|-----------|-----------|-----------|
| CY3Cy5    | 9152.84   | 111.605   | NM_002733 | 5539.198  | 6463.759  | NM_001907 | 822.021   | 442.068   |
| AL359931  | 2939.052  | 2166.439  | M31008    | 1920.151  | 1924.247  | NM_015711 | 64413.531 | 60041.563 |
| AK000954  | 4384.128  | 4041.72   | CY3Cy5    | 10917.614 | 129.351   | NM_000050 | 2139.06   | 1291.744  |
| AF086099  | 1092.441  | 696.727   | U93051    | 37129.508 | 50758.641 | NM_000481 | 1050.982  | 734.356   |
| AK021922  | 978.222   | 1737.707  | AK024268  | 3168.29   | 4534.431  | AK025681  | 1656.955  | 902.476   |
| AK025800  | 10710.838 | 15453.537 | AF086295  | 691.111   | 1630.751  | NM_014905 | 11039.5   | 4530.629  |
| AK022333  | 1429.357  | 2563.057  | AF086344  | 4603.956  | 8367.416  | NM_012137 | 7872.84   | 3505.09   |
| AL137407  | 6500.437  | 10589.522 | AF086424  | 3523.547  | 7496.979  | NM_004483 | 39807.613 | 12507.502 |
| AF085839  | 843.59    | 798.569   | AL110130  | 681.927   | 1242.612  | NM_001513 | 64410.684 | 51323.691 |
| NM_018178 | 3617.982  | 5897.161  | AF052116  | 1360.103  | 1338.359  | NM_001281 | 7713.938  | 3332.599  |
| AK025204  | 726.313   | 1687.281  | NM_018087 | 8108.415  | 10794.836 | NM_016835 | 918.851   | 347.163   |
| AL365406  | 826.991   | 756.763   | AL360260  | 2121.388  | 3190.041  | NM_003981 | 19637.467 | 7583.526  |
| NM_019000 | 3605.441  | 7424.594  | AK023647  | 2301.044  | 3340.367  | U26596    | 39755.828 | 26436.846 |
| AK025178  | 5550.298  | 4509.131  | AL096749  | 56045.176 | 62164.723 | AF070600  | 64721.105 | 56215.484 |
| NM_014835 | 12084.877 | 16006.038 | AK023620  | 4803.663  | 8223.114  | AB014522  | 14775.549 | 11705.731 |
| AK001822  | 7444.314  | 9621.287  | AF086189  | 11115.048 | 19780.748 | NM_014875 | 8098.531  | 6084.071  |
| AK026969  | 7288.926  | 10476.627 | AL050055  | 7176.457  | 7584.578  | AB033023  | 24540.955 | 24718.449 |
| AF086287  | 1394.373  | 1230.924  | U93051    | 26623.986 | 34576.414 | BC027895  | 1236.804  | 1121.338  |
| AK022613  | 58508.598 | 52087.242 | SB        | 81.614    | 2567.991  | U63542    | 877.94    | 690.321   |
| AK023843  | 586.218   | 346.323   | SR2       | 59562.836 | 52387.648 | AF161361  | 1247.341  | 837.999   |
| AL359557  | 1249.156  | 1127.035  | SR4       | 22903.873 | 34043.484 | AF024703  | 17747.068 | 11541.982 |
| AK027257  | 815.142   | 822.625   | SR6       | 3068.267  | 4881.899  | NM_016531 | 1371.828  | 837.014   |
| AK024582  | 925.133   | 716.837   | SR8       | 11440.447 | 42789.785 | NM_003593 | 9800.275  | 5778.724  |
| AK024143  | 745.289   | 993.529   | SR10      | 37218.059 | 17853.271 | NM_014383 | 62730.441 | 50275.52  |
| AK022099  | 2036.755  | 3232.921  | CY3Cy5    | 14544.371 | 173.598   | NM_000244 | 7819.352  | 6917.885  |
| AL137366  | 679.997   | 1114.092  | AL359931  | 4384.025  | 6848.2    | NM_014285 | 5304.609  | 2821.974  |
| BC031635  | 1446.245  | 1109.263  | AF086052  | 304.938   | 1173.778  | AF026816  | 39122.586 | 15999.07  |
| AF085916  | 523.472   | 488.285   | AK000954  | 4739.438  | 10034.496 | NM_004719 | 3640.675  | 1163.955  |
| AF085950  | 607.455   | 685.162   | AF086099  | 2026.832  | 3956.702  | NM_018553 | 3526.736  | 1322.833  |
| AL359598  | 1559.423  | 3157.87   | AK021922  | 837.396   | 1588.005  | NM_004704 | 6282.115  | 2330.742  |
| AF085980  | 1976.707  | 3297.17   | AK025800  | 10417.883 | 20722.77  | NM_005455 | 5874.429  | 2701.269  |
| AF085927  | 3118.966  | 5219.13   | AK022333  | 3401.556  | 4107.745  | NM_014633 | 3288.024  | 885.338   |
| AF085954  | 6215.012  | 10662.933 | AL137407  | 10955.993 | 15206.442 | NM_001970 | 62333.68  | 27470.641 |
| AL137337  | 1989.392  | 2414.774  | AF085839  | 582.291   | 994.305   | NM_006810 | 18631.361 | 6420.644  |
| AL161969  | 804.482   | 862.519   | NM_018178 | 3810.48   | 6381.163  | AK024054  | 11272.376 | 6163.646  |
| AL442095  | 3790.756  | 2745.074  | AK025204  | 2488.563  | 3713.485  | AL049674  | 763.817   | 711.864   |
| AL137378  | 2103.31   | 3065.733  | AK027256  | 1144.52   | 2546.049  | NM_001969 | 1211.723  | 834.139   |
| AL137609  | 28204.176 | 47085.586 | AL365406  | 1013.339  | 2142.894  | NM_004116 | 6710.573  | 6625.692  |
| AL353946  | 4594.964  | 7043.776  | NM_019000 | 3435.371  | 9299.446  | AK024508  | 6316.038  | 6485.314  |
| X69081    | 6895.499  | 10196.992 | AF143330  | 1256.805  | 1838.481  | AK027213  | 9630.197  | 9343.569  |
| NM_005714 | 6146.524  | 5069.712  | AK025178  | 4683.854  | 5255.606  | NM_014596 | 6234.29   | 4895.064  |
| AL137474  | 3024.488  | 2930.491  | AF147359  | 2020.672  | 3351.667  | NM_006703 | 14815.8   | 7526.424  |
| AL133023  | 1536.669  | 1234.629  | NM_014835 | 21406.834 | 41069.832 | NM_004037 | 3432.244  | 1933.177  |
| AK021572  | 2321.913  | 2858.615  | AK001822  | 11295.317 | 18031.135 | NM_005116 | 4923.758  | 3927.589  |
| AK026757  | 761.107   | 743.726   | AK026969  | 7686.824  | 12709.767 | NM_002766 | 6236.322  | 4445.654  |
| AK023294  | 956.083   | 1635.726  | AF086287  | 1430.119  | 2520.664  | AJ404857  | 562.635   | 176.417   |
| NM_017808 | 590.05    | 457.816   | AK022613  | 65429.961 | 70935.492 | NM_000788 | 15917.828 | 9436.739  |
| AF095854  | 1990.595  | 778.305   | AK023843  | 728.665   | 1549.409  | AF254088  | 2954.342  | 1420.109  |
| NM_014162 | 642.247   | 487.671   | AL359557  | 5526.19   | 10479.737 | NM_001420 | 2307.792  | 1295.78   |
| NM_014133 | 584.396   | 1189.662  | AK027257  | 726.757   | 1664.301  | NM_000248 | 2564.788  | 1192.618  |
| AF159093  | 3791.644  | 5773.131  | AK024582  | 1075.626  | 2571.315  | AB031046  | 2268.284  | 1176.388  |
| AF113679  | 1910.248  | 2712.297  | AK024143  | 1077.306  | 2127.765  | NM_002448 | 55013.148 | 25309.762 |
| AK021997  | 4490.97   | 6865.76   | AK022099  | 1158.532  | 2956.944  | AK025388  | 2828.386  | 988.62    |

|           |           |           |           |           |           |           |           |           |
|-----------|-----------|-----------|-----------|-----------|-----------|-----------|-----------|-----------|
| AK022125  | 1599.769  | 767.68    | AL137366  | 1001.615  | 710.724   | AB006631  | 2271.203  | 1127.766  |
| AK022244  | 8432.936  | 10054.946 | BC031635  | 2903.321  | 3555.413  | AF291181  | 739.257   | 553.257   |
| AK022381  | 5145.253  | 6962.563  | AF085916  | 427.953   | 956.537   | NM_005741 | 4319.1    | 3176.714  |
| AK022012  | 1207.396  | 1710.59   | AF085950  | 1318.363  | 1584.938  | NM_000964 | 6453.72   | 7631.449  |
| AK022149  | 498.96    | 844.556   | AL359598  | 1768.876  | 2643.471  | NM_012185 | 433.855   | 930.361   |
| AK022286  | 3527.994  | 4506      | AF085980  | 1578.915  | 1892.275  | BF343886  | 959.735   | 1661.475  |
| AK022411  | 367.897   | 423.886   | AF085927  | 3123.542  | 4250.359  | NM_013263 | 16873.775 | 22564.184 |
| AL137364  | 1584.719  | 1426.399  | AF085954  | 7831.146  | 11685.308 | AF116238  | 3564.813  | 6638.857  |
| NM_001052 | 3550.219  | 2535.484  | AL137337  | 1672.67   | 1758.205  | NM_006982 | 2194.68   | 3480.262  |
| Z70696    | 2044.256  | 1769.379  | AL137541  | 662.617   | 585.963   | AB033085  | 4133.843  | 3191.807  |
| NM_005792 | 5888.045  | 4309.771  | AL161969  | 1058.338  | 960.357   | L09100    | 2268.485  | 1775.266  |
| AF048847  | 13467.908 | 19553.764 | AL442095  | 10715.551 | 12342.571 | NM_005472 | 3250.286  | 2719.516  |
| L37718    | 67118.617 | 68568.508 | AL137378  | 3515.067  | 4033.711  | NM_013435 | 1210.167  | 1057.379  |
| AL137717  | 6668.788  | 6677.177  | AL137609  | 29704.838 | 43811.098 | NM_000132 | 24159.969 | 16346.542 |
| AF035297  | 5888.345  | 7519.956  | AL353946  | 4738.502  | 7967.292  | NM_001727 | 16701.842 | 9024.42   |
| NM_014039 | 7154.079  | 5959.88   | X69081    | 6764.463  | 10369.008 | NM_004076 | 2985.411  | 2092.636  |
| S67154    | 7728.364  | 7423.331  | NM_005714 | 15892.939 | 26081.162 | NM_007123 | 33394.086 | 20724.305 |
| AK026181  | 16908.658 | 16532.32  | AL137474  | 4233.36   | 9880.622  | BG717460  | 4402.341  | 2506.807  |
| NM_014367 | 2006.078  | 1512.121  | AL133023  | 1314.214  | 3134.399  | AA778392  | 27976.566 | 12756.571 |
| AK024901  | 929.106   | 1825.922  | AK023484  | 716.677   | 1665.187  | AI478178  | 6056.583  | 2705.151  |
| NM_019073 | 673.788   | 793.252   | AK021572  | 3113.711  | 7794.459  | AA101279  | 1865.93   | 900.939   |
| NM_002365 | 2170.877  | 1441.693  | AK021631  | 771.924   | 2117.059  | M19154    | 4784.519  | 2060.584  |
| AF161441  | 11586.876 | 10553.457 | AK026757  | 1744.261  | 3559.737  | AA399410  | 5706.672  | 3812.801  |
| AF067777  | 65936.742 | 69729.188 | AK023294  | 1700.615  | 1718.798  | AA137031  | 1749.757  | 1281.705  |
| U17613    | 896.764   | 782.173   | NM_017808 | 820.427   | 1061.795  | AA292226  | 11143.964 | 9675.944  |
| AK027211  | 767.427   | 765.071   | AF095854  | 3048.875  | 2411.425  | NM_00050C | 1180.571  | 1817.755  |
| AJ299406  | 2376.292  | 1857.263  | NM_014162 | 4013.601  | 2146.005  | M29873    | 251.954   | 755.583   |
| AK021891  | 1394.746  | 734.224   | NM_014133 | 652.325   | 485.32    | J04449    | 471.168   | 637.378   |
| Y10697    | 2802.592  | 2557.341  | AF113689  | 604.097   | 595.988   | BC007031  | 8428.007  | 12588.758 |
| AY007166  | 46473.922 | 37932.113 | AF159093  | 6291.02   | 6105.71   | AF129756  | 43179.668 | 38937.91  |
| NM_004937 | 5040.063  | 5529.181  | AF113679  | 2773.905  | 2858.903  | NM_002957 | 22210.797 | 24555.744 |
| L13197    | 11579.167 | 10689.098 | AK021997  | 3144.503  | 3462.032  | BC036369  | 2734.763  | 5590.573  |
| AF056450  | 3832.376  | 4683.989  | AK022125  | 1093.652  | 840.401   | X12492    | 37258.621 | 49872.676 |
| NM_000729 | 15276.256 | 15858.827 | AK022244  | 15180.056 | 14750.74  | NM_005009 | 24246.973 | 22224.949 |
| AK024007  | 5897.165  | 6203.798  | AK022381  | 5524.662  | 4514.442  | NM_003110 | 4531.603  | 4335.342  |
| AF116699  | 1903.981  | 2919.711  | AK022012  | 1077.34   | 1156.785  | NM_003612 | 3538.883  | 1744.549  |
| AF119908  | 1120.049  | 1733.373  | AK022286  | 2968.392  | 3513.438  | NM_01323C | 2691.45   | 1881.324  |
| U50539    | 1189.698  | 1249.148  | AL137364  | 2605.93   | 2332.882  | X72308    | 9053.271  | 9464.274  |
| AK000653  | 31561.668 | 41910.105 | NM_001052 | 10285.037 | 19953.875 | NM_005408 | 938.323   | 843.287   |
| AK000908  | 2653.357  | 3165.848  | Z70696    | 1927.13   | 4060.672  | BC008376  | 21588.754 | 15210.079 |
| AF086211  | 534.874   | 814.545   | NM_005792 | 6866.919  | 12815.49  | AB041269  | 3645.491  | 2747.049  |
| L77586    | 1267.728  | 1252.794  | AF048847  | 13994.027 | 37140.395 | AK024908  | 6005.56   | 3052.175  |
| X96660    | 5056.797  | 6227.188  | L37718    | 65035.313 | 73155.695 | NM_01827C | 13428.465 | 6025.371  |
| AK000993  | 1131.266  | 1219.36   | AL137717  | 8679.169  | 5298.224  | NM_00026C | 59684.074 | 48816.484 |
| AK023519  | 6526.956  | 6121.904  | AF035297  | 5869.993  | 4738.764  | NM_01416C | 3315.734  | 2239.15   |
| NM_016444 | 2937.623  | 3423.352  | NM_014039 | 7006.273  | 5655.131  | AF230877  | 19870.754 | 16079.13  |
| NM_017839 | 1186.065  | 1349.507  | S67154    | 7201.218  | 4582.582  | NM_017668 | 6823.392  | 6341.321  |
| NM_003707 | 27783.25  | 25210.965 | AK026181  | 36740.668 | 25762.541 | AB033049  | 58896.023 | 49325.625 |
| AL137718  | 3005.334  | 2871.087  | NM_014367 | 2244.207  | 1632.777  | NM_000406 | 785.312   | 1139.83   |
| NM_00346C | 11281.484 | 7579.539  | AK024901  | 826.607   | 926.615   | NM_005682 | 1011.942  | 2022.957  |
| NM_002904 | 25193.82  | 27028.086 | NM_019073 | 769.646   | 776.043   | NM_002926 | 1724.08   | 4038.475  |
| NM_014189 | 8610.711  | 11034.949 | NM_002365 | 3527.612  | 2640.548  | NM_000233 | 656.198   | 1367.363  |
| NM_005686 | 9163.081  | 9389.856  | AF161441  | 12503.257 | 10902.703 | NM_018697 | 2114.353  | 4225.085  |



|           |           |           |           |           |           |           |           |           |
|-----------|-----------|-----------|-----------|-----------|-----------|-----------|-----------|-----------|
| NM_006767 | 1851.711  | 2253.596  | AF067777  | 63556.223 | 76086.953 | AF090116  | 974.215   | 1332.099  |
| AK021451  | 3274.846  | 4974.757  | U17613    | 1056.589  | 735.588   | NM_014030 | 59181.859 | 49006.773 |
| AK001971  | 2494.192  | 4455.167  | AJ299406  | 2190.76   | 1062.018  | NM_004224 | 6886.087  | 13308.805 |
| AF086468  | 1193.016  | 1676.106  | AK021891  | 3726.001  | 2090.124  | Z21967    | 8211.737  | 11368.613 |
| AK027239  | 4288.325  | 6567.382  | Y10697    | 4361.623  | 2433.22   | NM_003738 | 841.167   | 1546.701  |
| AF005082  | 38605.441 | 52731.105 | AY007166  | 57259.621 | 40129.02  | NM_004377 | 9419.095  | 7741.928  |
| AL117595  | 7423.434  | 8199.284  | NM_004937 | 11708.348 | 5032.203  | AB037815  | 36836.336 | 23385.539 |
| AB028988  | 44842.816 | 47563.32  | L13197    | 14581.422 | 14210.64  | NM_003645 | 8902.293  | 6574.531  |
| AK023072  | 2121.568  | 2131.577  | AF056450  | 9435.501  | 9102.802  | AF263613  | 5414.033  | 5451.215  |
| AF086105  | 9572.774  | 8110.708  | NM_000729 | 30613.852 | 24106.729 | NM_000097 | 1670.563  | 1267.833  |
| AK026600  | 4498.031  | 4220.556  | AK024007  | 5689.918  | 4735.238  | NM_001509 | 4178.862  | 2371.177  |
| AF251189  | 1147.9    | 1362.635  | AF116699  | 5109.606  | 4590.538  | AK022878  | 7760.207  | 4881.479  |
| AK026733  | 867.679   | 1038.243  | AF119908  | 1135.465  | 918.522   | AF217187  | 6309.284  | 3823.503  |
| AF161429  | 15114.883 | 14543.59  | U50539    | 1229.386  | 1229.708  | NM_017750 | 2162.57   | 1002.379  |
| AK021495  | 6544.794  | 9646.141  | AK000653  | 33657.074 | 30756.084 | AK027122  | 12830.782 | 6307.86   |
| AF064846  | 4980.999  | 4199.96   | AK000908  | 2363.749  | 2363.147  | AK026196  | 3064.633  | 4342.825  |
| AL110227  | 4944.5    | 5151.1    | AF086211  | 765.71    | 632.517   | NM_004977 | 8918.39   | 11194.75  |
| NM_001400 | 18616.031 | 17074.75  | L77586    | 1559.569  | 1340.617  | NM_004700 | 1305.799  | 1904.73   |
| AB033281  | 10231.962 | 11885.041 | X96660    | 4399.707  | 4414.844  | NM_006868 | 13677.503 | 23596.768 |
| NM_002882 | 53068.809 | 43790.691 | AK000993  | 1228.404  | 1431.795  | NM_004161 | 20082.834 | 41647.969 |
| AB011161  | 1526.708  | 899.485   | AK023519  | 5302.739  | 3531.715  | NM_001295 | 1253.683  | 3458.72   |
| NM_000827 | 1125.477  | 975.547   | NM_016444 | 2327.595  | 2414.984  | NM_005161 | 1258.939  | 2810.835  |
| NM_002944 | 7601.881  | 8875.564  | NM_017839 | 1851.047  | 1221.687  | AB037749  | 1110.647  | 2392.712  |
| AF327354  | 3622.866  | 7006.696  | NM_003707 | 33819.227 | 16664.186 | NM_020347 | 576.424   | 997.866   |
| NM_006259 | 581.331   | 975.448   | AL137718  | 2874.639  | 1418.247  | NM_001462 | 2816.397  | 6971.639  |
| NM_003961 | 59550.992 | 59198.387 | NM_003460 | 22741.764 | 12319.37  | NM_004072 | 1549.057  | 2910.451  |
| AB014513  | 4311.405  | 3925.332  | U94354    | 872.302   | 1117.052  | AF068286  | 1208.974  | 1095.274  |
| NM_004747 | 3611.812  | 3717.488  | NM_002904 | 27642.994 | 18090.418 | AB040957  | 5896.596  | 5976.402  |
| AK024430  | 61328.941 | 62580.18  | NM_014189 | 10332.368 | 6418.511  | NM_006890 | 548.943   | 616.726   |
| NM_002341 | 37016.645 | 51629.441 | NM_005686 | 14354.342 | 11436.039 | NM_005881 | 3452.297  | 1886.647  |
| AL137651  | 4695.96   | 5340.379  | NM_006767 | 1731.683  | 1591.867  | L40519    | 969.326   | 465.13    |
| NM_018945 | 14171.573 | 17713.465 | AK021451  | 3027.17   | 3214.115  | NM_004204 | 2458.702  | 1894.76   |
| AB029018  | 831.312   | 989.903   | AK001971  | 2615.786  | 2608.535  | AK002181  | 1107.901  | 990.836   |
| NM_000818 | 3737.023  | 3942.173  | AF086468  | 1722.553  | 1545.932  | NM_001641 | 24371.979 | 11459.549 |
| NM_006650 | 3310.078  | 2670.17   | AK027239  | 4986.133  | 4345.661  | BC015750  | 59118.223 | 52507.727 |
| AK024436  | 2120.258  | 2166.144  | AF005082  | 39846.793 | 40117.105 | AK025769  | 5846.042  | 3705.6    |
| NM_006648 | 2901.006  | 4139.179  | AL117595  | 11631.75  | 10341.994 | AW945166  | 2198.446  | 1528.42   |
| NM_000868 | 924.271   | 1068.999  | AB028988  | 58129.445 | 50371.984 | NM_005236 | 6041.401  | 6811.77   |
| NM_004711 | 6594.844  | 7471.438  | AK023072  | 1977.02   | 1788.114  | NM_006384 | 13719.974 | 14555.403 |
| NM_006463 | 17811.443 | 18491.445 | AF086105  | 22984.896 | 19849.771 | NM_013257 | 2645.767  | 6249.995  |
| NM_001444 | 59732.617 | 56963.891 | AK026600  | 3890.749  | 3435.17   | AB044546  | 1376.294  | 3516.942  |
| AK027208  | 1556.71   | 1498.053  | AF251189  | 1571.818  | 1303.068  | NM_014225 | 37753.434 | 50215.285 |
| NM_016521 | 19774.734 | 15996.9   | AK026733  | 833.063   | 610.611   | AF163473  | 1773.922  | 4539.108  |
| X98494    | 14049.55  | 6731.25   | AF161429  | 12725.352 | 10842.754 | NM_006256 | 8662.529  | 17448.299 |
| NM_001240 | 7628.567  | 4258.695  | AK021495  | 8710.354  | 8799.826  | NM_002846 | 4180.552  | 27152.15  |
| NM_002709 | 19095.479 | 19196     | AF064846  | 4760.397  | 4491.808  | NM_002837 | 5859.974  | 12347.829 |
| NM_001099 | 3817.025  | 6720.885  | AL110227  | 5034.413  | 4324.25   | AL133077  | 27266.891 | 49340.539 |
| NM_006823 | 6715.708  | 13555.717 | NM_001400 | 54770.59  | 38880.895 | AK025211  | 3986.678  | 11327.887 |
| NM_016567 | 19542.572 | 25763.711 | AB033281  | 10178.189 | 8277.98   | U06715    | 556.473   | 914.344   |
| NM_007031 | 1198.644  | 995.225   | NM_002882 | 55469.027 | 43413.836 | NM_013402 | 4392.546  | 4903.497  |
| NM_002657 | 2466.604  | 2549.406  | AB011161  | 2354.21   | 1763.686  | NM_004313 | 934.871   | 777.224   |
| NM_004089 | 23508.676 | 24954.248 | NM_000827 | 1697.34   | 1469.919  | NM_000132 | 25441.041 | 16649.338 |
| NM_001350 | 17814.344 | 20385.543 | NM_002944 | 27007.914 | 22635.166 | NM_001727 | 15142.221 | 8890.979  |

|           |           |           |           |           |           |           |           |           |
|-----------|-----------|-----------|-----------|-----------|-----------|-----------|-----------|-----------|
| NM_014809 | 5201.495  | 7169.506  | AF327354  | 5027.241  | 4515.662  | NM_004076 | 2974.316  | 2514.703  |
| NM_016074 | 36954.691 | 40414.027 | NM_006259 | 736.742   | 978.673   | NM_007123 | 33862.598 | 20560.027 |
| NM_003921 | 6763.245  | 6753.301  | NM_003961 | 60073.129 | 62725.113 | BG717460  | 3792.719  | 2169.887  |
| NM_004208 | 35314.203 | 34296.184 | AB014513  | 13986.832 | 11601.929 | AA778392  | 28512.922 | 12569.497 |
| NM_006336 | 490.554   | 428.093   | NM_004747 | 9401.305  | 8065.745  | AI478178  | 5300.741  | 3200.453  |
| NM_001843 | 5980.856  | 6212.597  | AK024430  | 59112.539 | 60365.453 | AA101279  | 1682.546  | 1901.574  |
| NM_013266 | 1412.787  | 1503.904  | NM_002341 | 41831.453 | 39875.742 | M19154    | 4618.695  | 7265.818  |
| NM_000419 | 2505.555  | 2340.647  | AL137651  | 9116.06   | 6824.024  | AA399410  | 7478.624  | 9558.007  |
| NM_017768 | 6633.282  | 5395.81   | NM_018945 | 12755.763 | 11143.308 | AA137031  | 2032.314  | 4449.757  |
| NM_002589 | 14275.188 | 8505.636  | AB029018  | 944.211   | 1194.734  | AA292226  | 7704.346  | 17230.799 |
| NM_002776 | 7574.655  | 8302.754  | NM_000818 | 5358.355  | 4506.751  | NM_00050C | 1158.962  | 3069.416  |
| AK023398  | 9308.682  | 9460.246  | NM_00665C | 4580.198  | 3468.189  | M29873    | 398.265   | 1334.482  |
| NM_001907 | 1874.803  | 1994.916  | AK024436  | 2158.029  | 2295.429  | J04449    | 357.916   | 1213.443  |
| NM_015711 | 58449.824 | 53169.617 | NM_006648 | 2759.252  | 3041.576  | BC007031  | 5942.492  | 15120.472 |
| NM_00005C | 2251.487  | 1352.206  | NM_000868 | 628.446   | 938.406   | AF129756  | 38683.016 | 54828.938 |
| NM_000481 | 1434.746  | 1082.154  | NM_004711 | 6006.341  | 5471.727  | NM_002957 | 22234.84  | 42228.168 |
| AK025681  | 3623.096  | 3611.572  | NM_006463 | 16325.784 | 15229.293 | BC036369  | 3436.89   | 8215.276  |
| NM_014905 | 14779.087 | 18030.934 | NM_001444 | 57391.313 | 51456.133 | X12492    | 35093.473 | 54136.656 |
| NM_012137 | 8964.038  | 7740.462  | AK027208  | 1455.644  | 1368.498  | NM_01754C | 1970.792  | 3881.311  |
| NM_004483 | 48725.711 | 51349.09  | NM_016521 | 23366.943 | 15703.309 | NM_006755 | 12264.869 | 7443.145  |
| NM_001513 | 60572.527 | 62185.18  | X98494    | 28277.166 | 22927.168 | NM_01323C | 2364.471  | 2378.117  |
| NM_001281 | 14577.763 | 15021.999 | NM_00124C | 19475.783 | 16134.242 | X72308    | 6456.851  | 5966.776  |
| NM_016835 | 1580.635  | 1761.287  | NM_002709 | 21240.535 | 15349.691 | NM_00540E | 936.823   | 689.938   |
| NM_003981 | 30553.211 | 34314.043 | NM_001099 | 3559.838  | 3997.345  | BC008376  | 18584.627 | 16366.364 |
| U26596    | 52921.508 | 53639.238 | NM_006823 | 8514.039  | 8107.457  | AB041269  | 3261.96   | 2054.781  |
| AF070600  | 62144.48  | 57852.32  | NM_016567 | 20141.213 | 19365.754 | AK024908  | 5372.449  | 2836.032  |
| AB014522  | 25198.666 | 23440.053 | NM_007031 | 2919.366  | 1958.63   | NM_01827C | 13354.333 | 7168.361  |
| NM_014875 | 13973.622 | 11895.149 | NM_002657 | 3060.225  | 3118.89   | NM_00026C | 60952.605 | 56581.762 |
| AB033023  | 32821.938 | 35811.797 | NM_004089 | 29408.023 | 25379.033 | NM_01416C | 4380.958  | 8033.596  |
| BC027895  | 2894.762  | 2082.888  | NM_00135C | 20055.096 | 17144.654 | AF230877  | 16566.137 | 26827.598 |
| U63542    | 1334.919  | 574.954   | NM_014809 | 4956.419  | 4320.076  | NM_01766E | 8253.261  | 15901.611 |
| AF161361  | 1921.857  | 612.622   | NM_016074 | 37814.082 | 33265.367 | AB033049  | 61427.512 | 58265.531 |
| AF024703  | 25764.518 | 24110.527 | NM_003921 | 6890.671  | 5564.203  | NM_00040E | 742.763   | 1820.716  |
| NM_016531 | 2755.372  | 2871.827  | NM_004208 | 34014.113 | 33512.707 | NM_005682 | 861.821   | 2663.583  |
| NM_003593 | 15936.555 | 15692.895 | NM_001843 | 9391.861  | 8118.979  | NM_00292E | 2119.907  | 5210.56   |
| NM_014285 | 8932.491  | 5892.964  | NM_013266 | 1169.439  | 1351.481  | NM_000233 | 583.472   | 1319.307  |
| AF026816  | 39439.875 | 23089.297 | NM_000419 | 2965.6    | 2035.17   | NM_018697 | 1878.299  | 5486.739  |
| NM_004719 | 5465.467  | 2684.311  | NM_017768 | 4844.406  | 3604.152  | AF090116  | 1258.073  | 2590.151  |
| NM_018553 | 7068.439  | 4122.201  | NM_002589 | 15123.772 | 13957.942 | NM_01403C | 62212.695 | 56457.375 |
| NM_004704 | 8336.712  | 7239.313  | NM_002776 | 16127.104 | 14603.75  | NM_004224 | 10332.16  | 32423.031 |
| NM_005455 | 8925.507  | 8821.534  | AK023398  | 18021.453 | 14674.539 | Z21967    | 7497.889  | 16599.18  |
| NM_014633 | 4749.998  | 4787.966  | NM_001907 | 1878.342  | 1761.319  | NM_00373E | 873.424   | 2762.883  |
| NM_00197C | 60533.223 | 57354.855 | NM_015711 | 61180.316 | 59627.168 | L09100    | 1862.149  | 3538.272  |
| NM_00681C | 34254.496 | 36899.617 | NM_00005C | 4395.788  | 4357.324  | NM_005472 | 1927.266  | 2347.357  |
| AK024054  | 22447.158 | 16969.014 | NM_000481 | 2534.241  | 2079.979  | NM_003645 | 10672.245 | 10209.236 |
| AL049674  | 971.725   | 1087.803  | AK025681  | 3776.138  | 3409.802  | AF263613  | 5400.092  | 5643.563  |
| NM_001969 | 1601.037  | 1171.424  | NM_014905 | 17460.596 | 15009.473 | NM_000097 | 1903.808  | 1281.139  |
| NM_004116 | 11383.667 | 13256.463 | NM_012137 | 16817.412 | 16455.877 | NM_001509 | 4153.529  | 2743.013  |
| AK024508  | 11923.855 | 8196.863  | NM_004483 | 53112.473 | 43263.203 | AK022878  | 6175.862  | 3438.676  |
| AK027213  | 15690.859 | 7407.25   | NM_001513 | 62060.598 | 61301.438 | AF217187  | 6553.01   | 3611.321  |
| NM_014596 | 13839.533 | 15818.046 | NM_001281 | 14010.102 | 11621.991 | NM_01775C | 1845.925  | 1427.956  |
| NM_006703 | 23975.01  | 24575.105 | NM_016835 | 1242.814  | 1416.214  | AK027122  | 14598.705 | 14219.563 |
| NM_004037 | 6555.838  | 5609.528  | NM_003981 | 30972.143 | 28658.248 | AK026196  | 3295.508  | 6444.482  |

|           |           |           |           |           |           |           |           |           |
|-----------|-----------|-----------|-----------|-----------|-----------|-----------|-----------|-----------|
| NM_005116 | 9334.387  | 10543.667 | U26596    | 52543.41  | 46791.848 | NM_004977 | 6512.96   | 16534.486 |
| NM_002766 | 10609.212 | 11940.933 | AF070600  | 62965.516 | 57686.703 | NM_00470C | 1049.939  | 2670.729  |
| AJ404857  | 695.333   | 515.824   | AB014522  | 25731.674 | 22602.965 | NM_00686E | 15310.959 | 34296.98  |
| NM_00078E | 26546.51  | 24951.328 | NM_014875 | 14109.923 | 11173.4   | NM_004161 | 18513.715 | 37616.828 |
| AF254088  | 4258.339  | 2645.457  | AB033023  | 34655.063 | 34993.813 | NM_00129E | 795.368   | 2865.165  |
| NM_00142C | 2499.739  | 1330.311  | BC027895  | 2165.75   | 1668.319  | NM_005161 | 922.135   | 2440.5    |
| NM_00024E | 2949.083  | 2381.154  | NM_016529 | 514.913   | 545.999   | AB037749  | 1091.756  | 2312.24   |
| AB031046  | 1356.058  | 1786.305  | U63542    | 1368.988  | 1069.687  | NM_020347 | 507.706   | 1388.045  |
| NM_00244E | 49368.637 | 56496.383 | AF161361  | 1405.72   | 1432.453  | NM_00146E | 2632.238  | 7851.768  |
| AK025388  | 4014.564  | 4476.35   | AF024703  | 35615.863 | 32767.781 | NM_00407E | 1737.875  | 4097.138  |
| NM_006147 | 654.148   | 623.386   | NM_016531 | 2400.913  | 2105.256  | AF068286  | 982.664   | 2159.579  |
| AB006631  | 4968.704  | 6950.266  | NM_00359E | 16253.04  | 15057.57  | AB040957  | 6161.306  | 10379.188 |
| AF291181  | 1287.435  | 1513.577  | NM_01438E | 61130.707 | 61126.793 | NM_00689C | 723.322   | 1367.318  |
| NM_005741 | 7446.987  | 6449.185  | NM_000244 | 11984.676 | 17666.627 | NM_00311C | 4163.544  | 10580.657 |
| NM_000964 | 8929.851  | 7545.979  | NM_01428E | 8847.979  | 7549.352  | NM_00361E | 2791.397  | 3416.696  |
| NM_01218E | 664.992   | 486.868   | AF026816  | 53858.27  | 46944.402 | L40519    | 1345.856  | 972.592   |
| BF343886  | 1654.015  | 1182.097  | NM_004719 | 5981.819  | 5132.56   | NM_004204 | 2395.543  | 2287.895  |
| NM_01326E | 21407.018 | 9866.904  | NM_01855E | 6339.238  | 5702.564  | AK002181  | 1203.738  | 1172.911  |
| AF116238  | 6146.664  | 1994.217  | NM_004704 | 12787.841 | 10442.82  | NM_001641 | 26483.877 | 12839.286 |
| NM_00698E | 3560.244  | 1218.353  | NM_00545E | 8333.677  | 6598.021  | BC015750  | 61505.652 | 58246.699 |
| NM_00306E | 417.092   | 192.432   | NM_01463E | 5000.821  | 4260.064  | AK025769  | 8210.365  | 7206.341  |
| AB033085  | 7122.65   | 1798.182  | NM_00197C | 59027.977 | 57090.254 | AW945166  | 1978.007  | 1937.535  |
| L09100    | 6591.995  | 7457.549  | NM_00681C | 31808.455 | 26601.602 | NM_00523E | 6594.419  | 10551.728 |
| NM_00547E | 8821.089  | 9198.676  | AK024054  | 17871.139 | 14439.164 | NM_006384 | 11475.923 | 26390.059 |
| NM_00431E | 1211.643  | 1593.387  | AL049674  | 1007.498  | 1251.801  | NM_013257 | 2432.465  | 6688.526  |
| NM_01343E | 1136.942  | 1504.257  | NM_00196E | 1079.509  | 1417.16   | AB044546  | 1564.74   | 3523.345  |
| NM_00013E | 33270.77  | 36590.645 | NM_004116 | 10578.809 | 9446.436  | NM_01422E | 37948.086 | 51153.16  |
| NM_001727 | 22964.096 | 21833.746 | AK024508  | 10567.726 | 9030.481  | AF163473  | 2088.341  | 4676.683  |
| NM_00407E | 4791.647  | 5697.491  | AK027213  | 13889.218 | 11573.128 | NM_00625E | 8461.863  | 18508.188 |
| NM_00712E | 49839.617 | 52629.234 | NM_01459E | 12194.417 | 11885.928 | NM_00284E | 5485.557  | 31082.871 |
| BG717460  | 6933.147  | 3905.28   | NM_00670E | 21946.773 | 21594.641 | NM_002837 | 6202.799  | 12212.617 |
| AA778392  | 35567.309 | 28376.625 | NM_004037 | 6299.79   | 5481.972  | AL133077  | 28023.938 | 51793.891 |
| AI478178  | 8554.313  | 10108.992 | NM_005116 | 8727.464  | 8743.377  | AK025211  | 4420.417  | 11563.952 |
| AA101279  | 3212.55   | 5220.527  | NM_00276E | 12009.442 | 10476.218 | U06715    | 334.121   | 1369.957  |
| M19154    | 8519.116  | 15279.092 | AJ404857  | 693.638   | 747.054   | NM_01340E | 3906.326  | 9037.731  |
| AA399410  | 12373.989 | 13223.436 | NM_00078E | 25746.49  | 29007.941 | NM_00266E | 363.086   | 1155.793  |
| AA137031  | 3207.413  | 3138.007  | AF254088  | 4836.381  | 4100.407  | NM_004377 | 7657.412  | 17494.904 |
| AA292226  | 15786.966 | 18737.15  | NM_00142C | 3844.883  | 4201.77   | AB037815  | 25713.197 | 43010.27  |
| NM_00050C | 2237.944  | 2134.117  | NM_00024E | 9088.959  | 8444.064  | NM_00013E | 28377.219 | 26444.738 |
| M29873    | 990.252   | 1182.951  | AB031046  | 6528.523  | 7452.308  | NM_001727 | 14259.185 | 11830.227 |
| J04449    | 807.574   | 706.464   | NM_00244E | 59939.742 | 53448.629 | NM_00407E | 2998.173  | 3540.365  |
| BC007031  | 11486.864 | 5729.915  | AK025388  | 5217.762  | 4431.067  | NM_00712E | 34131.625 | 25431.34  |
| AF129756  | 53882.969 | 27025.768 | NM_006147 | 794.886   | 961.539   | BG717460  | 4009.169  | 2348.466  |
| NM_002957 | 42864.164 | 19273.811 | AB006631  | 5967.158  | 6166.779  | AA778392  | 24308.438 | 10482.86  |
| BC036369  | 4548.946  | 2020.086  | AF291181  | 1509.771  | 1110.335  | AI478178  | 4866.62   | 2873.191  |
| X12492    | 49104.074 | 25958.33  | NM_005741 | 9495.547  | 7847.183  | AA101279  | 1448.184  | 1643.711  |
| NM_00500E | 31356.236 | 9520.806  | NM_000964 | 13246.806 | 12783.439 | M19154    | 3336.9    | 5512.209  |
| NM_00311C | 7865.229  | 9122.437  | NM_01218E | 685.854   | 1014.25   | AA399410  | 7010.504  | 14499.208 |
| NM_00361E | 9649.305  | 8376.492  | BF343886  | 1648.526  | 1946.727  | AA137031  | 1374.14   | 3797.096  |
| NM_01323C | 4262.219  | 4000.541  | NM_01326E | 18989.154 | 17257.48  | AA292226  | 5441.614  | 12339.376 |
| X72308    | 11181.269 | 12726.109 | AF116238  | 6287.503  | 5977.556  | NM_00050C | 1092.187  | 3064.369  |
| NM_00540E | 2248.072  | 2425.972  | NM_00698E | 3998.27   | 3390.836  | M29873    | 369.638   | 1148.887  |
| BC008376  | 13642.158 | 14168.861 | AB033085  | 7798.981  | 6319.344  | J04449    | 348.673   | 1278.453  |

|           |           |           |           |           |           |           |           |           |
|-----------|-----------|-----------|-----------|-----------|-----------|-----------|-----------|-----------|
| AB041269  | 3527.011  | 2627.846  | L09100    | 7067.304  | 5245.976  | BC007031  | 8162.556  | 18746.221 |
| AK024908  | 8321.286  | 5352.356  | NM_005472 | 13588.131 | 14307.852 | AF129756  | 45925.746 | 54789.793 |
| NM_018270 | 13321.431 | 8991.399  | NM_004313 | 1222.797  | 1517.251  | NM_002957 | 28588.699 | 48864.629 |
| NM_000260 | 61587.758 | 58721.91  | NM_013435 | 2232.556  | 3035.294  | BC036369  | 3543.311  | 8868.947  |
| NM_014160 | 6473.906  | 9033.812  | NM_000132 | 34256.762 | 36185.77  | X12492    | 40675.664 | 51233.137 |
| AF230877  | 31148.672 | 45728.359 | NM_001727 | 31226.92  | 34040.387 | NM_017540 | 1828.826  | 4784.472  |
| NM_017668 | 10576.253 | 10477.163 | NM_004076 | 7536.396  | 8589.685  | NM_002396 | 311.766   | 721.326   |
| AB033049  | 59150.305 | 56128.078 | NM_007123 | 53718.172 | 53987.168 | NM_006755 | 14886.397 | 29245.055 |
| NM_000406 | 1190.794  | 1313.367  | BG717460  | 7289.17   | 8598.7    | NM_005881 | 3351.379  | 8823.363  |
| NM_005682 | 2174.963  | 2256.118  | AA778392  | 54826.949 | 47799.844 | NM_005794 | 208.169   | 912.407   |
| NM_002926 | 3804.407  | 4422.388  | AI478178  | 11401.446 | 11476.802 | NM_000260 | 59797.199 | 66671.172 |
| NM_000233 | 970.614   | 676.627   | AA101279  | 3778.818  | 3513.534  | NM_014160 | 4409.46   | 4892.797  |
| NM_018697 | 3240.755  | 1429.777  | M19154    | 16059.834 | 15032.904 | AF230877  | 19483.006 | 16645.205 |
| AF090116  | 972.083   | 774.042   | AA399410  | 13820.493 | 10383.533 | NM_017668 | 7375.251  | 5219.134  |
| NM_014030 | 59829.484 | 46349.813 | AA137031  | 3929.635  | 3684.696  | AB033049  | 60519.84  | 50009.777 |
| NM_004224 | 7934.649  | 4714.64   | AA292226  | 32681.971 | 27390.197 | NM_005682 | 924.365   | 403.231   |
| Z21967    | 11717.728 | 8827.769  | NM_000500 | 3835.439  | 3911.058  | NM_002926 | 1586.928  | 1798.761  |
| NM_003738 | 1674.194  | 1396.058  | M29873    | 736.039   | 753.268   | NM_000233 | 450.297   | 853.718   |
| NM_004377 | 18547.059 | 16026.412 | J04449    | 713.364   | 718.507   | NM_018697 | 2063.109  | 6562.269  |
| AB037815  | 54194.094 | 52840.469 | BC007031  | 26380.023 | 25004.82  | AF090116  | 837.822   | 2072.658  |
| NM_003645 | 15997.883 | 17562.336 | AF129756  | 57883.121 | 50212.766 | NM_014030 | 45941.246 | 53691.703 |
| AF263613  | 7900.122  | 8733.252  | NM_002957 | 54716.199 | 44706.035 | NM_004224 | 5970.248  | 21177.254 |
| NM_000097 | 3287.662  | 3784.127  | BC036369  | 7869.627  | 7052.839  | NM_000254 | 8968.937  | 21451.416 |
| NM_001509 | 3656.626  | 3494.834  | X12492    | 56205.754 | 47545.293 | Z21967    | 8347.267  | 18341.523 |
| AK022878  | 9728.097  | 11049.518 | NM_005009 | 32907.105 | 25688.084 | NM_003738 | 921.682   | 2422.7    |
| AF217187  | 8530.326  | 4883.155  | NM_003110 | 5760.524  | 8674.354  | NM_016185 | 48824.871 | 51861.043 |
| AK027122  | 24240.441 | 17540.338 | NM_003612 | 13105.083 | 10338.913 | NM_012110 | 15447.98  | 32077.152 |
| AK026196  | 5435.459  | 6174.127  | NM_013230 | 3866.62   | 4644.528  | NM_005461 | 383.192   | 972.759   |
| NM_004977 | 13562.123 | 21988.834 | X72308    | 46292.098 | 54191.336 | AF052693  | 6741.236  | 14030.862 |
| NM_004700 | 1904.441  | 2571.9    | NM_005408 | 2228.684  | 2515.917  | NM_001129 | 37964.039 | 48132.52  |
| NM_006868 | 19072.055 | 20903.133 | BC008376  | 57945.797 | 56545.566 | L09100    | 1874.141  | 4072.99   |
| NM_004161 | 25512.752 | 30469.938 | X87895    | 449.713   | 893.523   | NM_005472 | 2656.02   | 7168.631  |
| NM_001295 | 2013.01   | 2631.556  | AB041269  | 10687.017 | 9766.705  | NM_004313 | 588.761   | 1498.677  |
| NM_005161 | 1721.363  | 1436.925  | AK024908  | 11615.661 | 12129.416 | NM_013435 | 897.233   | 2131.375  |
| AB037749  | 1544.546  | 1015.31   | NM_018270 | 22248.699 | 25113.613 | AB020706  | 4196.463  | 3999.231  |
| NM_020347 | 561.823   | 239.762   | NM_000260 | 58251.512 | 59025.512 | NM_007166 | 8398.517  | 7087.96   |
| NM_001462 | 5518.218  | 2941.649  | NM_014160 | 6754.563  | 7434.798  | NM_016223 | 61086.621 | 55972.563 |
| NM_004072 | 2600.856  | 2530.315  | AF230877  | 52707.652 | 53941.91  | NM_002866 | 6056.667  | 5090.492  |
| AF068286  | 1852.889  | 2495.878  | NM_017668 | 11240.764 | 8627.605  | NM_018086 | 14104.252 | 10130.388 |
| AB040957  | 8516.852  | 11638.995 | AB033049  | 57137.051 | 56818.84  | NM_004161 | 15665.268 | 5866.264  |
| NM_006890 | 977.714   | 1292.044  | NM_000406 | 1213.49   | 1097.552  | NM_001295 | 891.416   | 429.44    |
| NM_005881 | 7454.726  | 6700.354  | NM_005682 | 2338.682  | 2041.093  | NM_005161 | 912.092   | 787.966   |
| NM_005794 | 899.236   | 637.531   | NM_002926 | 3306.695  | 2246.203  | AB037749  | 634.064   | 1121.505  |
| L40519    | 2143.379  | 1993.621  | NM_000233 | 1140.514  | 999.086   | NM_020347 | 501.304   | 1343.513  |
| NM_004204 | 6428.227  | 6386.451  | NM_018697 | 3397.81   | 3327.68   | NM_001462 | 2572.91   | 7181.497  |
| AK002181  | 1924.826  | 1693.846  | AF090116  | 1214.196  | 1412.831  | NM_004072 | 1590.567  | 3961.549  |
| AF118064  | 6418.317  | 10294.001 | NM_014030 | 62958.074 | 62813.566 | AF068286  | 1275.869  | 2568.327  |
| NM_001641 | 38756.492 | 40595.676 | NM_004224 | 30622.33  | 40305.594 | AB040957  | 6568.973  | 10566.501 |
| AK025769  | 13459.059 | 15036.349 | Z21967    | 20566.994 | 14637.042 | NM_006890 | 556.845   | 1359.274  |
| AW945166  | 3982.719  | 2485.945  | NM_003738 | 2006.951  | 1832.01   | NM_003110 | 4456.645  | 11146.438 |
| NM_005236 | 9437.725  | 5359.834  | NM_004377 | 20742.57  | 22519.037 | NM_003612 | 2075.317  | 5581.326  |
| NM_006384 | 21165.369 | 27124.875 | AB037815  | 57815.539 | 61040.266 | NM_013230 | 2656.832  | 5820.824  |
| NM_013257 | 4899.646  | 7247.684  | NM_003645 | 15996.73  | 18682.984 | X72308    | 7326.716  | 15228.801 |

|           |           |           |           |           |           |           |           |           |
|-----------|-----------|-----------|-----------|-----------|-----------|-----------|-----------|-----------|
| AB044546  | 2502.009  | 3614.951  | AF263613  | 9268.532  | 13338.648 | NM_00540E | 981.122   | 2676.23   |
| NM_01422E | 53209.941 | 53829.359 | NM_000097 | 3146.191  | 3833.95   | BC008376  | 19742.922 | 37049.34  |
| AF163473  | 3829.994  | 3130.523  | NM_001509 | 6044.394  | 7591.905  | X87895    | 178.958   | 1117.414  |
| NM_00625E | 12617.413 | 10662.729 | AK022878  | 17317.113 | 22126.373 | AB041269  | 3765.383  | 8231.073  |
| NM_00284E | 10928.238 | 11174.269 | NM_018099 | 203.318   | 1382.608  | AK024908  | 6418.457  | 12353.965 |
| NM_002837 | 9570.624  | 3937.444  | AF217187  | 9465.05   | 11266.166 | NM_01827C | 17527.652 | 29495.838 |
| AL133077  | 40907.758 | 29767.561 | NM_01775C | 3687.676  | 4122.108  | U06715    | 636.139   | 840.487   |
| AK025211  | 7812.676  | 12381.839 | AK027122  | 26642.607 | 33817.551 | NM_01340Z | 6347.757  | 7360.736  |
| U06715    | 1101.253  | 1969.375  | AK026196  | 5803.107  | 7280.567  | NM_00266Z | 586.448   | 819.126   |
| NM_01340Z | 6851.486  | 11339.515 | NM_004977 | 18758.016 | 20510.51  | NM_004377 | 7275.829  | 8725.593  |
| NM_00266Z | 815.818   | 1539.934  | NM_00470C | 1735.438  | 1664.587  | AB037815  | 21794.615 | 22379.369 |
| NM_00431Z | 1327.318  | 1303.915  | NM_00686E | 21569.105 | 25209.117 | NM_00364E | 6738.651  | 6833.764  |
| NM_01343E | 1978.775  | 1934.208  | NM_004161 | 26187.248 | 24659.934 | AF263613  | 5440.619  | 5492.74   |
| NM_00013Z | 34860.809 | 33011.602 | NM_00129E | 2420.763  | 2990.691  | NM_000097 | 1204.269  | 1700.816  |
| NM_001727 | 27683.514 | 28826.969 | NM_005161 | 3108.78   | 2718.308  | NM_00150E | 1633.902  | 2473.604  |
| NM_00407E | 4577.988  | 4922.827  | AB037749  | 1825.426  | 1724.196  | AK022878  | 7565.486  | 18133.635 |
| NM_00712Z | 44080.762 | 46353.527 | NM_020347 | 778.904   | 631.233   | NM_01809E | 262.574   | 847.076   |
| BG717460  | 5136.29   | 5810.24   | NM_00146Z | 6363.475  | 6160.122  | AF217187  | 7372.266  | 14957.093 |
| AA778392  | 35834.48  | 33384.172 | NM_00407Z | 4373.18   | 4361.935  | NM_01775C | 2191.58   | 5545.568  |
| AA101279  | 3764.146  | 3496.328  | AF068286  | 1623.602  | 1262.392  | AK027122  | 16784.215 | 38509.926 |
| M19154    | 7600.031  | 4366.533  | AB040957  | 13790.683 | 15270.068 | AK026196  | 3184.374  | 6397.656  |
| AA399410  | 10596.688 | 7001.646  | NM_00689C | 1381.734  | 1208.475  | AL137668  | 984.171   | 2067.566  |
| AA137031  | 3015.369  | 2405.326  | NM_005881 | 5088.628  | 5826.579  | NM_01334E | 3366.636  | 8315.543  |
| AA292226  | 16871.135 | 25181.266 | NM_005794 | 695.698   | 1087.528  | NM_004977 | 9487.79   | 20736.947 |
| NM_00050C | 2340.174  | 4629.878  | L40519    | 1230.481  | 1375.618  | NM_00488E | 33231.957 | 49196.277 |
| M29873    | 829.898   | 1154.05   | NM_004204 | 9209.268  | 10278.719 | NM_002251 | 389.1     | 919.146   |
| J04449    | 852.953   | 973.73    | AK002181  | 2720.291  | 3851.473  | NM_01228Z | 62659.387 | 65919.031 |
| BC007031  | 13981.275 | 8559.645  | NM_001641 | 35409.309 | 42346.93  | NM_00470C | 829.157   | 2035.974  |
| AF129756  | 56434.957 | 23844.391 | BC015750  | 61622.863 | 58961.648 | NM_00416Z | 28747.191 | 50079.316 |
| NM_002957 | 42555.324 | 21980.053 | AK025769  | 11898.393 | 16928.766 | NM_00686E | 14736.205 | 30246.434 |
| BC036369  | 4699.319  | 5634.806  | AW945166  | 3138.393  | 2831.565  | NM_01754C | 1816.932  | 3749.023  |
| X12492    | 52375.473 | 61197.516 | NM_00523E | 11006     | 9776.529  | NM_00675E | 12632.4   | 19839.332 |
| NM_01754C | 3086.993  | 4349.496  | NM_006384 | 23175.537 | 21768.906 | NM_005881 | 3674.069  | 7126.263  |
| NM_00239E | 602.872   | 1732.197  | NM_013257 | 3445.211  | 3974.413  | NM_005794 | 287.299   | 891.638   |
| NM_00675E | 22405.818 | 46353.395 | AB044546  | 2634.975  | 2039.719  | L40519    | 1209.17   | 2396.634  |
| NM_01323C | 4975.007  | 4678.721  | NM_01422E | 49170.652 | 41893.395 | NM_004204 | 1653.768  | 2930.925  |
| X72308    | 31171.797 | 33765.586 | AF163473  | 3153.127  | 3034.119  | AK002181  | 620.665   | 1348.299  |
| NM_00540E | 2250.417  | 1953.125  | NM_00625E | 12581.101 | 12359.371 | NM_001641 | 27048.928 | 46256.41  |
| BC008376  | 44592.414 | 48456.633 | NM_00284E | 22436.691 | 34336.766 | BC015750  | 57212.293 | 55045.367 |
| AB041269  | 5388.659  | 4606.598  | NM_002837 | 9187.837  | 6598.141  | AK025769  | 8100.435  | 19067.586 |
| AK024908  | 5864.085  | 6183.885  | AL133077  | 38984.063 | 40349.629 | AW945166  | 1975.94   | 4660.438  |
| NM_01827C | 13714.465 | 12947.299 | AK025211  | 6190.416  | 7420.295  | NM_00523E | 6660.714  | 13179.9   |
| NM_01416C | 6694.599  | 4855.398  | U06715    | 1431.192  | 1371.145  | NM_006384 | 11279.738 | 24249.852 |
| AF230877  | 29891.074 | 28639.633 | NM_01340Z | 7663.63   | 6560.839  | NM_013257 | 2341.39   | 5802.631  |
| NM_01766E | 10014.73  | 4586.597  | NM_00266Z | 758.974   | 541.431   | AB044546  | 1409.108  | 3275.42   |
| NM_00040E | 1042.13   | 1331.576  | NM_00431Z | 1349.529  | 2589.2    | NM_01422E | 41098.066 | 51841.07  |
| NM_00568Z | 2235.832  | 3697.681  | NM_01343E | 2238.901  | 2513.702  | AF163473  | 2038.786  | 4599.214  |
| NM_00292E | 3558.658  | 5920.676  | NM_00013Z | 30398.537 | 32101.475 | NM_00625E | 9347.407  | 18504.605 |
| NM_00023Z | 1095.825  | 1215.378  | NM_001727 | 30902.645 | 38603.563 | NM_00284E | 6374.693  | 34324.984 |
| NM_018697 | 3687.048  | 1979.545  | NM_00407E | 7585.879  | 8995.248  | NM_002837 | 5835.519  | 12112.829 |
| AF090116  | 1392.008  | 507.811   | NM_00712Z | 52975.426 | 55459.063 | AL133077  | 30082.014 | 38724.063 |
| NM_01403C | 58931.316 | 53541.879 | BG717460  | 8017.7    | 9905.614  | AK025211  | 4315.659  | 11931.888 |
| NM_004224 | 11594.061 | 16480.352 | AA778392  | 51539.172 | 54293.418 | CY3Cy5    | 4645.914  | 400.25    |

|           |           |           |           |           |           |           |           |           |
|-----------|-----------|-----------|-----------|-----------|-----------|-----------|-----------|-----------|
| Z21967    | 15269.448 | 19970.168 | AI478178  | 10366.87  | 15504.411 | NM_005456 | 476.353   | 402.204   |
| NM_00373E | 1429.702  | 2804.501  | AA101279  | 3480.589  | 4616.729  | NM_006534 | 6404.854  | 5978.407  |
| L09100    | 2192.46   | 4505.205  | M19154    | 13627.464 | 13294.854 | AK001731  | 1197.708  | 948.94    |
| NM_005472 | 3866.178  | 5622.542  | AA399410  | 12721.799 | 10871.025 | AF052108  | 846.682   | 191.703   |
| NM_00364E | 19468.355 | 18641.012 | AA137031  | 3327.115  | 3254.884  | AF086477  | 518.599   | 376.235   |
| AF263613  | 9537.559  | 10332.424 | AA292226  | 25562.648 | 21139.184 | NM_001412 | 3072.15   | 1929.274  |
| NM_000097 | 3960.637  | 3121.822  | NM_000500 | 3154.62   | 3379.997  | AF071111  | 526.784   | 587.973   |
| NM_00150E | 8078.104  | 6510.724  | M29873    | 753.398   | 715.117   | NM_015942 | 3808.017  | 3350.13   |
| AK022878  | 14639.455 | 12273.162 | J04449    | 728.462   | 699.709   | NM_017907 | 5840.597  | 5817.522  |
| NM_01809E | 608.153   | 923.701   | BC007031  | 23712.121 | 23853.715 | NM_005456 | 1100.995  | 989.797   |
| AF217187  | 9010.038  | 9309.7    | AF129756  | 59365.176 | 52472.453 | NM_006534 | 9296.903  | 10511.301 |
| NM_017750 | 3591.62   | 3665.253  | NM_002957 | 54132.48  | 48384.449 | SR1       | 76185.711 | 65034.637 |
| AK027122  | 25764.693 | 24269.445 | BC036369  | 7610.234  | 7121.077  | SR3       | 26743.555 | 24137.404 |
| AK026196  | 5509.109  | 4677.809  | X12492    | 50913.262 | 54038.402 | SR5       | 2556.156  | 3100.682  |
| NM_004977 | 14151.872 | 9891.623  | NM_017540 | 3109.703  | 2304.775  | SR7       | 3410.825  | 29379.961 |
| NM_004700 | 1875.925  | 2041.582  | NM_00675E | 18952.992 | 12604.144 | SR9       | 9333.12   | 1576.191  |
| NM_004161 | 24532.277 | 24316.818 | NM_013230 | 3472.159  | 4804.438  | CY3Cy5    | 5524.15   | 202.712   |
| NM_00129E | 2321.428  | 4766.692  | X72308    | 43525.07  | 38883.848 | AF086110  | 249.408   | 85.543    |
| NM_005161 | 2303.738  | 3257.966  | NM_00540E | 1986.076  | 2226.325  | NM_01641E | 2390.621  | 1102.986  |
| AB037749  | 1684.994  | 1750.021  | BC008376  | 47244.289 | 58693.871 | AK025908  | 4070.758  | 2753.237  |
| NM_020347 | 990.925   | 383.263   | X87895    | 478.753   | 1014.514  | AK022204  | 645.983   | 523.461   |
| NM_001462 | 5717.635  | 3297.899  | AB041269  | 10408.921 | 13427.448 | AK027065  | 2490.557  | 2981.666  |
| NM_004072 | 2784.684  | 2694.19   | AK024908  | 12370.71  | 14534.165 | AK001127  | 912.703   | 1145.696  |
| AF068286  | 1945.783  | 2870.231  | NM_018270 | 20966.676 | 27870.523 | U79256    | 13533.478 | 19858.939 |
| AB040957  | 10399.611 | 11678.587 | NM_000260 | 59242.547 | 66668.18  | AK023963  | 8979.911  | 8866.883  |
| NM_006890 | 1163.289  | 1769.446  | NM_014160 | 7635.45   | 10970.786 | AK022473  | 7594.388  | 4569.332  |
| NM_003110 | 7017.79   | 11961.363 | AF230877  | 47531.137 | 53392.82  | AK024860  | 374.289   | 302.108   |
| NM_003612 | 4221.055  | 5431.512  | NM_01766E | 9960.373  | 9408.938  | AK026723  | 392.942   | 808.868   |
| L40519    | 1959.876  | 1956.633  | AB033049  | 59343.34  | 57764.66  | AK024169  | 480.395   | 783.67    |
| NM_004204 | 7839.61   | 6759.204  | NM_00040E | 1266.187  | 1053.164  | AF147395  | 2872.463  | 4816.023  |
| AK002181  | 1909.081  | 1776.866  | NM_005682 | 2107.367  | 1911.312  | AK026447  | 1186.267  | 2104.1    |
| AF118064  | 276.088   | 410.986   | NM_00292E | 2939.82   | 2644.816  | AF087967  | 181.857   | 778.023   |
| NM_001641 | 39321.582 | 34270.609 | NM_000233 | 936.943   | 1103.874  | AF085985  | 602.086   | 902.62    |
| BC015750  | 57429.207 | 58567.691 | NM_018697 | 3793.1    | 3363.096  | AF086011  | 343.699   | 757.302   |
| AK025769  | 14667.821 | 15687.247 | AF090116  | 1438.19   | 1338.51   | AK025217  | 548.776   | 765.246   |
| AW945166  | 3654.834  | 3029.108  | NM_014030 | 59866.488 | 59319.277 | AF087972  | 2933.46   | 5845.162  |
| NM_00523E | 12501.54  | 12550.339 | NM_004224 | 28126.178 | 38567.988 | AL137342  | 10351.556 | 21197.99  |
| NM_006384 | 21880.617 | 22719.811 | Z21967    | 22225.088 | 20437.586 | AF075105  | 1494.214  | 2813.051  |
| NM_013257 | 3975.74   | 2101.961  | NM_00373E | 2093.208  | 2066.275  | Z11850    | 675.691   | 3635.255  |
| AB044546  | 1740.963  | 760.18    | L09100    | 6572.254  | 5890.073  | AF086562  | 491.179   | 447.651   |
| NM_01422E | 51781.645 | 37049.023 | NM_005472 | 9867.592  | 10296.087 | AK021749  | 584.147   | 888.482   |
| AF163473  | 3553.923  | 2923.987  | NM_00364E | 15039.919 | 18396.924 | AJ011980  | 376.166   | 293.1     |
| NM_00625E | 15670.575 | 24090.15  | AF263613  | 8981.768  | 10972.54  | NM_002237 | 1522.123  | 1851.121  |
| NM_00284E | 12096.704 | 25567.258 | NM_000097 | 3169.342  | 3736.159  | NM_005117 | 2083.752  | 2840.702  |
| NM_002837 | 10257.579 | 4421.052  | NM_00150E | 5127.185  | 3868.551  | AJ007733  | 947.385   | 1870.032  |
| AL133077  | 42596.922 | 24861.98  | AK022878  | 15508.315 | 18052.473 | AK021625  | 1595.429  | 3415.51   |
| AK025211  | 7836.47   | 8321.295  | AF217187  | 9754.559  | 11765.979 | AK001380  | 2485.737  | 4249.97   |
| U06715    | 875.512   | 1774.171  | NM_017750 | 3937.076  | 5123.515  | AK026753  | 425.292   | 1253.353  |
| NM_013402 | 7873.078  | 10924.916 | AK027122  | 26786.768 | 39873.105 | AL117553  | 200.471   | 1128.125  |
| NM_002662 | 1175.783  | 1485.86   | AK026196  | 6172.43   | 8724.742  | AK024938  | 465.774   | 1410.838  |
| NM_004377 | 10399.545 | 14095.164 | NM_004977 | 20517.92  | 26258.627 | AK025312  | 2178.496  | 6025.695  |
| AB037815  | 29010.961 | 39521.793 | NM_004700 | 1925.969  | 2218.952  | AK027205  | 364.231   | 1327.282  |
| NM_000132 | 36369.285 | 37362.555 | NM_00686E | 19568.301 | 21537.381 | NM_01860E | 489.494   | 1179.905  |

|           |           |           |           |           |           |           |           |           |
|-----------|-----------|-----------|-----------|-----------|-----------|-----------|-----------|-----------|
| NM_001727 | 35731.68  | 31255.215 | NM_004161 | 25379.24  | 24075.65  | AK022062  | 308.665   | 976.893   |
| NM_004076 | 7606.786  | 7493.124  | NM_001295 | 2247.131  | 2194.866  | AK026493  | 281.509   | 1151.018  |
| NM_007123 | 53684.813 | 55517.727 | NM_005161 | 2995.175  | 2709.808  | AK002042  | 702.919   | 2698.635  |
| BG717460  | 7942.106  | 6643.896  | AB037749  | 1744.34   | 1761.069  | AL049268  | 468.992   | 2010.745  |
| AA778392  | 47305.07  | 40965.258 | NM_001462 | 6450.739  | 6239.847  | AF085904  | 414.104   | 942.82    |
| AI478178  | 11585.966 | 10846.207 | NM_004072 | 4797.602  | 4629.966  | AK001013  | 1009.497  | 2467.654  |
| AA101279  | 3042.26   | 3224.524  | AF068286  | 1537.02   | 1506.827  | NM_005295 | 2668.369  | 5370.161  |
| M19154    | 10901.241 | 8540.962  | AB040957  | 14599.706 | 15172.232 | AK001394  | 298.001   | 1379.378  |
| AA399410  | 12983.645 | 12393.345 | NM_006890 | 1363.71   | 1132.713  | AF026564  | 969.969   | 2538.335  |
| AA137031  | 3289.156  | 2153.657  | NM_003110 | 7442.119  | 7425.221  | X97301    | 1387.371  | 4048.518  |
| AA292226  | 11938.115 | 6486.968  | NM_003612 | 12456.038 | 8849.017  | AF116636  | 964.642   | 2821.171  |
| NM_000500 | 1575.47   | 707.824   | L40519    | 2092.41   | 2475.129  | U80761    | 15149.858 | 40397.461 |
| M29873    | 631.618   | 533.307   | NM_004204 | 9068.323  | 10868.125 | Y16701    | 3391.72   | 10507.29  |
| BC007031  | 14893.825 | 14295.8   | AK002181  | 2377.5    | 3110.523  | U61100    | 779.486   | 2621.931  |
| AF129756  | 57055.813 | 37547.66  | NM_001641 | 36779.039 | 44420.129 | NM_018582 | 396.31    | 1033.461  |
| NM_002957 | 45762.82  | 20091.164 | BC015750  | 60661.52  | 63585.969 | M21539    | 254.839   | 992.364   |
| BC036369  | 5529.125  | 2832.064  | AK025769  | 13554.858 | 14293.919 | Y11161    | 2207.453  | 6883.606  |
| X12492    | 53362.285 | 60973.348 | AW945166  | 3145.266  | 3256.147  | AF130117  | 416.257   | 1756.459  |
| NM_017540 | 3888.634  | 6247.154  | NM_005236 | 11075.029 | 12988.492 | AB007861  | 1004.238  | 2921.802  |
| NM_002396 | 824.676   | 1262.288  | NM_006384 | 23844.57  | 25014.818 | AK024125  | 430.196   | 1274.713  |
| NM_006755 | 25740.326 | 45453.723 | NM_013257 | 3896.655  | 4134.188  | AK024761  | 3762.463  | 9891.583  |
| NM_005881 | 7778.714  | 11941.403 | AB044546  | 2630.199  | 2423.767  | M55536    | 5176.805  | 9629.787  |
| NM_005794 | 710.337   | 969.078   | NM_014225 | 47101.105 | 48240.98  | AF086067  | 2110.366  | 6116.257  |
| NM_000260 | 59481.641 | 62094.227 | AF163473  | 3037.265  | 2618.188  | AK000660  | 2941.335  | 9847.682  |
| NM_014160 | 7306.098  | 6345.382  | NM_006256 | 12268.659 | 13170.064 | AL049289  | 475.067   | 848.392   |
| AF230877  | 49648.906 | 49100.074 | NM_002846 | 20316.555 | 35633.449 | AK022015  | 1547.304  | 3883.153  |
| NM_017665 | 11567.129 | 8454.952  | NM_002837 | 9772.338  | 8076.546  | D17234    | 453.416   | 1171.1    |
| AB033049  | 55500.27  | 61695.816 | AL133077  | 38622.418 | 40434.145 | AK002208  | 9805.289  | 22917.371 |
| NM_000406 | 1183.722  | 1173.885  | AK025211  | 6257.296  | 6433.915  | D63135    | 1286.635  | 3342.358  |
| NM_005682 | 2788.596  | 2172.172  | U06715    | 1224.588  | 1217.906  | AB033083  | 3753.35   | 10060.53  |
| NM_002926 | 3840.507  | 3280.939  | NM_013402 | 8382.625  | 7807.993  | NM_017825 | 5442.93   | 14055.693 |
| NM_000233 | 1018.01   | 1010.675  | NM_002662 | 796.454   | 519.319   | NM_002700 | 22052.74  | 51640.645 |
| NM_018697 | 3547.443  | 3222.27   | NM_004377 | 20562.496 | 18847.607 | AB002437  | 42834.301 | 59504.988 |
| AF090116  | 1568.945  | 1821.032  | AB037815  | 60636.695 | 56467.582 | AK024013  | 620.602   | 2000.146  |
| NM_014030 | 60130.805 | 56671.863 | NM_000132 | 33332.543 | 42202.77  | AK023496  | 262.42    | 1101.726  |
| NM_004224 | 10053.093 | 10722.246 | NM_001727 | 31993.002 | 38122.816 | NM_006777 | 1067.289  | 2629.206  |
| NM_000254 | 12119.299 | 5800.028  | NM_004076 | 7384.581  | 8427.548  | AK024969  | 2590.411  | 6840.517  |
| Z21967    | 14991.889 | 5452.313  | NM_007123 | 42287.285 | 39109.563 | AL049471  | 1994.234  | 7401.791  |
| NM_003735 | 1987.015  | 1914.462  | BG717460  | 6487.329  | 4284.188  | AK022250  | 1044.87   | 2206.482  |
| NM_016185 | 54729.012 | 34993.145 | AA778392  | 51172.988 | 51894.594 | NM_019595 | 12799.785 | 15387.107 |
| NM_012110 | 22797.729 | 9796.544  | AI478178  | 12308.262 | 13434.233 | NM_006225 | 20658.467 | 37599.352 |
| AF052693  | 12465.458 | 15913.2   | AA101279  | 3976.342  | 3934.707  | NM_003254 | 10016.249 | 16156.592 |
| NM_001129 | 50053.766 | 61559.848 | M19154    | 14638.645 | 16120.669 | NM_014630 | 5070.482  | 7559.18   |
| L09100    | 4020.708  | 5376.476  | AA399410  | 13896.546 | 14353.483 | AK021829  | 518.643   | 694.392   |
| NM_005472 | 3222.095  | 3744.153  | AA137031  | 3537.166  | 3565.556  | NM_014681 | 806.013   | 1520.996  |
| NM_004313 | 1491.622  | 2115.987  | AA292226  | 30403.16  | 29650.232 | NM_007182 | 2598.691  | 4016.057  |
| NM_013435 | 1030.595  | 1973.563  | NM_000500 | 3752.894  | 3371.624  | NM_019063 | 29041.648 | 47770.785 |
| AB020706  | 8709.962  | 6962.542  | M29873    | 1721.629  | 2413.602  | NM_014336 | 1477.719  | 2736.536  |
| NM_007166 | 18061.615 | 14098.202 | J04449    | 768.068   | 808.006   | NM_012456 | 23621.318 | 40275.664 |
| NM_016223 | 54526.113 | 58276.996 | BC007031  | 20853.771 | 23618.934 | NM_003324 | 19926.531 | 44049.402 |
| NM_002869 | 11134.086 | 8947.667  | AF129756  | 59619.395 | 52345.363 | NM_012143 | 5122.093  | 10596.552 |
| NM_018086 | 36006.254 | 34749.613 | NM_002957 | 55725.957 | 50647.918 | NM_006655 | 1189.292  | 2117.613  |
| NM_004161 | 24432.348 | 16701.25  | BC036369  | 7242.94   | 6853.175  | AF085892  | 2096.5    | 3270.188  |

|           |           |           |           |           |           |           |           |           |
|-----------|-----------|-----------|-----------|-----------|-----------|-----------|-----------|-----------|
| NM_001295 | 2365.82   | 2445.786  | X12492    | 53212.727 | 51942.371 | AF075114  | 4377.826  | 7812.981  |
| NM_005161 | 3208.155  | 2062.408  | NM_017540 | 3422.427  | 2849.266  | AL359562  | 2139.788  | 3069.142  |
| AB037749  | 2065.137  | 1627.966  | NM_006755 | 21742.604 | 17587.699 | AK022218  | 48274.203 | 51147.648 |
| NM_020347 | 773.741   | 661.081   | NM_005881 | 5938.217  | 4613.582  | NM_007112 | 1418.65   | 1302.25   |
| NM_001462 | 6282.416  | 6888.811  | NM_000260 | 62564.441 | 78465.211 | AK026037  | 310.805   | 459.152   |
| NM_004072 | 2873.795  | 2428.684  | NM_014160 | 6747.974  | 9626.089  | S82075    | 538.938   | 430.867   |
| AF068286  | 1781.725  | 908.257   | AF230877  | 50911.582 | 54894.309 | AB037745  | 3159.115  | 3347.526  |
| AB040957  | 9438.658  | 6581.163  | NM_017668 | 9898.896  | 9768.736  | NM_017717 | 472.223   | 420.742   |
| NM_006890 | 985.778   | 474.311   | AB033049  | 49390.816 | 56926.02  | AK026201  | 3153.84   | 3264.982  |
| NM_003110 | 6541.875  | 7750.166  | NM_000406 | 1381.215  | 1403.74   | AB028962  | 824.025   | 730.895   |
| NM_003612 | 5437.893  | 2436.79   | NM_005682 | 2622.65   | 2752.709  | U63041    | 2503.193  | 3027.757  |
| NM_013230 | 3418.897  | 1708.808  | NM_002926 | 3561.265  | 3142.523  | NM_000297 | 9334.911  | 10157.206 |
| X72308    | 11961.071 | 10062.468 | NM_000233 | 775.892   | 1220.292  | AF149019  | 15504.153 | 13764.965 |
| NM_005408 | 1636.157  | 2616.139  | NM_018697 | 3839.457  | 4521.471  | NM_013354 | 748.584   | 674.643   |
| BC008376  | 25769.932 | 39425.145 | AF090116  | 1476.199  | 1510.354  | AK023954  | 3585.728  | 4698.643  |
| X87895    | 489.661   | 1363.897  | NM_014030 | 59639.148 | 60878.77  | NM_003930 | 1579.306  | 2109.966  |
| AB041269  | 3187.262  | 4462.755  | NM_004224 | 23978.232 | 36037.492 | NM_013416 | 3182.298  | 5378.665  |
| AK024908  | 8019.15   | 10498.216 | NM_000254 | 13402.978 | 14146.767 | AB040934  | 660.228   | 810.073   |
| NM_018270 | 12345.38  | 20970.002 | Z21967    | 18497.791 | 17086.301 | NM_005092 | 535.245   | 991.458   |
| U06715    | 1379.347  | 1043.735  | NM_003738 | 2044.464  | 2301.198  | NM_001883 | 1600.451  | 1932.732  |
| NM_013402 | 12320.411 | 9141.666  | NM_016185 | 54602.043 | 52124.293 | NM_015722 | 3570.573  | 3351.66   |
| NM_002662 | 1436.186  | 927.147   | NM_012110 | 40766.426 | 44480.879 | NM_004382 | 648.529   | 464.915   |
| NM_004377 | 16214.2   | 12467.767 | NM_005461 | 616.175   | 654.101   | NM_000831 | 453.673   | 377.961   |
| AB037815  | 53557.301 | 46772.195 | AF052693  | 21906.121 | 20165.133 | NM_014618 | 877.316   | 805.603   |
| NM_003645 | 17141.199 | 12598.893 | NM_001129 | 58332.305 | 51590.648 | AA902333  | 10996.397 | 6367.606  |
| AF263613  | 9013.979  | 8611.735  | L09100    | 8249.519  | 6866.879  | NM_015641 | 4669.312  | 3138.513  |
| NM_000097 | 3498.313  | 2439.015  | NM_005472 | 11164.053 | 11267.735 | AF272377  | 3028.507  | 1518.162  |
| NM_001509 | 6762.044  | 4634.042  | NM_004313 | 1430.869  | 1316.857  | NM_006566 | 1020.691  | 885.502   |
| AK022878  | 15371.435 | 10803.327 | NM_013435 | 2048.643  | 2077.035  | NM_017795 | 5936.239  | 4664.702  |
| NM_018095 | 346.006   | 819.43    | AB020706  | 6859.873  | 10237.095 | NM_015216 | 3180.281  | 2601.897  |
| AF217187  | 8435.195  | 7367.056  | NM_007166 | 17496.771 | 19771.242 | NM_018348 | 1917.161  | 1874.236  |
| NM_017750 | 3217.375  | 3355.256  | NM_016223 | 55981.887 | 62240.059 | AF119900  | 10934.034 | 10795.464 |
| AK027122  | 23519.947 | 15594.796 | NM_002869 | 9087.481  | 10659.729 | AF130087  | 2484.214  | 1505.084  |
| AK026196  | 5629.154  | 4515.561  | NM_018086 | 36735.207 | 40814.133 | AK027031  | 10627.871 | 9472.49   |
| AL137668  | 2112.014  | 1589.036  | NM_004161 | 22726.85  | 16970.746 | NM_018383 | 7877.542  | 7292.602  |
| NM_013348 | 5634.348  | 2640.188  | NM_001295 | 3422.729  | 3688.356  | NM_003590 | 6107.141  | 6892.079  |
| NM_004977 | 11827.473 | 12221.354 | NM_005161 | 3281.061  | 2736.105  | AJ278476  | 8231.589  | 8438.114  |
| NM_004888 | 39523.574 | 54267.602 | AB037749  | 2295.626  | 2349.049  | NM_002358 | 967.258   | 1032.001  |
| NM_002251 | 572.461   | 1040.589  | NM_020347 | 805.984   | 684.227   | NM_012225 | 2766.683  | 3615.707  |
| NM_012283 | 58275.324 | 62449.973 | NM_001462 | 7303.957  | 8352.597  | AB014595  | 6283.994  | 6733.552  |
| NM_004700 | 1792.312  | 2817.803  | NM_004072 | 4393.917  | 5341.467  | AB024704  | 36597.969 | 30981.762 |
| NM_004162 | 16773.322 | 20631.693 | AF068286  | 1822.528  | 1453.739  | NM_006322 | 1908.713  | 2198.916  |
| NM_006868 | 16318.24  | 30207.832 | AB040957  | 13017.653 | 14541.18  | AK002081  | 981.144   | 796.687   |
| NM_017540 | 3611.45   | 2759.267  | NM_006890 | 1218.104  | 1307.433  | NM_002210 | 2818.638  | 2433.193  |
| NM_006755 | 21638.672 | 18584.127 | NM_003110 | 6324.166  | 7565.288  | AF231022  | 30249.141 | 18081.754 |
| NM_005881 | 6863.758  | 5149.486  | NM_003612 | 10475.8   | 10341.484 | NM_005500 | 4210.659  | 2881.072  |
| NM_005794 | 652.607   | 536.695   | NM_013230 | 3931.815  | 4317.575  | AK025582  | 3097.423  | 1651.647  |
| L40519    | 2058.646  | 1278.365  | X72308    | 33867.227 | 35663.582 | NM_003884 | 1457.353  | 734.465   |
| NM_004204 | 7203.221  | 4771.075  | NM_005408 | 2178.268  | 1994.119  | NM_014888 | 8242.701  | 5232.307  |
| AK002181  | 2066.357  | 1454.027  | BC008376  | 47571.457 | 49328.512 | NM_003344 | 5705.551  | 3019      |
| NM_001641 | 40050.008 | 32894.523 | X87895    | 602.178   | 599.743   | NM_002772 | 1209.78   | 965.457   |
| BC015750  | 58197.688 | 59231.867 | AB041269  | 10301.301 | 9055.005  | U82970    | 1530.002  | 1190.269  |
| AK025769  | 13407.354 | 12919.425 | AK024908  | 12211.73  | 9657.277  | NM_005925 | 807.318   | 543.501   |



|           |           |           |           |           |           |           |           |           |
|-----------|-----------|-----------|-----------|-----------|-----------|-----------|-----------|-----------|
| AW945166  | 3224.258  | 1473.987  | NM_018270 | 22910.467 | 19275.422 | AJ278478  | 2254.773  | 1623.132  |
| NM_005236 | 10967.494 | 7354.538  | U06715    | 911.56    | 1141.337  | NM_014300 | 17376.045 | 14833.504 |
| NM_006384 | 20049.277 | 13261.195 | NM_013402 | 9225.726  | 11701.084 | NM_014600 | 763.583   | 722.122   |
| NM_013257 | 3785.336  | 2915.924  | NM_002662 | 835.462   | 772.577   | Y19188    | 1526.445  | 1523.386  |
| AB044546  | 2427.383  | 2516.956  | NM_004377 | 16514.529 | 16790.16  | NM_014460 | 1061.877  | 1184.88   |
| NM_014225 | 53787.434 | 57710.41  | AB037815  | 51001.859 | 55634.508 | NM_003732 | 6335.306  | 7393.007  |
| AF163473  | 4140.697  | 4349.019  | NM_003645 | 14846.405 | 17311.557 | AF216381  | 19830.893 | 22688.07  |
| NM_006250 | 12583.957 | 17329.359 | AF263613  | 9053.517  | 9946.123  | AL137614  | 959.604   | 918.012   |
| NM_002840 | 9803.914  | 32901.809 | NM_000097 | 2795.066  | 2705.929  | AK023093  | 2322.429  | 2445.934  |
| NM_002837 | 11574.637 | 14652.889 | NM_001509 | 6551.125  | 6572.398  | AB023163  | 2156.248  | 2357.116  |
| AL133077  | 42046.563 | 56730.543 | AK022878  | 17004.643 | 16093.665 | NM_006610 | 2468.667  | 1822.48   |
| AK025211  | 8057.821  | 13678.542 | NM_018099 | 542.816   | 879.299   | AF272373  | 4326.086  | 2920.899  |
| CY3Cy5    | 9151.943  | 316.691   | AF217187  | 8976.008  | 9445.505  | NM_016327 | 4045.484  | 2039.264  |
| NM_005450 | 1226.773  | 1025.396  | NM_017750 | 3190.88   | 3456.18   | NM_004980 | 4940.317  | 2105.245  |
| NM_006534 | 10351.567 | 7142.1    | AK027122  | 24868.738 | 31183.074 | NM_006230 | 24362.357 | 11923.037 |
| AL832550  | 875.248   | 927.81    | AK026196  | 5545.866  | 6276.286  | AK026353  | 2791.218  | 1436.133  |
| AF131798  | 457.06    | 551.64    | AL137668  | 1690.17   | 1627.358  | L24123    | 6496.847  | 3878.151  |
| AK001731  | 2486.356  | 3101.014  | NM_013340 | 8427.217  | 9096.816  | D80001    | 6156.736  | 4313.007  |
| AF052108  | 854.384   | 1016.753  | NM_004977 | 19648.402 | 22576.941 | AK024288  | 6785.562  | 4428.898  |
| AF052176  | 678.552   | 1079.083  | NM_004880 | 39009.957 | 34259.625 | NM_006521 | 10212.481 | 6753.242  |
| AF086477  | 1389.522  | 1569.501  | NM_012283 | 58851.238 | 60976.543 | NM_002892 | 1759.468  | 918.698   |
| NM_001412 | 5073.697  | 4864.245  | NM_004700 | 1595.54   | 2030.642  | M62324    | 1798.64   | 1593.827  |
| AF071111  | 407.67    | 541.702   | NM_004162 | 29199.096 | 24986     | NM_016200 | 19373.559 | 21151.641 |
| NM_015942 | 4505.005  | 7415.978  | NM_006860 | 20738.625 | 21135.086 | BE082230  | 18923.725 | 22820.641 |
| NM_017907 | 6538.429  | 9980.264  | NM_017540 | 3320.928  | 4799.36   | AK025929  | 25121.121 | 19632.729 |
| NM_005450 | 518.798   | 783.332   | NM_006750 | 17471.322 | 20897.357 | NM_001384 | 1776.495  | 1733.54   |
| NM_006534 | 5292.93   | 5225.157  | NM_005881 | 5565.183  | 7178.641  | NM_018240 | 880.832   | 522.99    |
| SR5       | 1641.017  | 1693.37   | NM_005794 | 673.477   | 698.228   | NM_007030 | 649.13    | 464.74    |
| SR7       | 2157.427  | 23216.832 | L40519    | 1589.467  | 1543.401  | NM_017857 | 4944.517  | 2290.957  |
| SR9       | 4003.75   | 612.66    | NM_004204 | 6280.836  | 4803.177  | NM_006840 | 3367.665  | 2038.909  |
| CY3Cy5    | 10897.634 | 531.489   | AK002181  | 2004.721  | 2447.912  | AJ272267  | 2766.433  | 1755.508  |
| U84521    | 16520.98  | 11514.912 | NM_001641 | 36326.074 | 33443.676 | NM_000670 | 463.732   | 216.033   |
| U62539    | 479.023   | 384.906   | BC015750  | 60481.527 | 62999.582 | NM_002670 | 8601.575  | 6680.635  |
| AF086110  | 619.45    | 799.4     | AK025769  | 11808.553 | 14199.694 | NM_002100 | 2710.524  | 1397.248  |
| NM_016410 | 4976.899  | 5929.215  | AW945166  | 2862.572  | 3011.529  | NM_006660 | 4022.433  | 2487.966  |
| AK025908  | 8184.042  | 7358.546  | NM_005230 | 10974.236 | 11624.46  | AK026256  | 2686.176  | 1994.461  |
| AK022204  | 767.133   | 685.182   | NM_006384 | 21260.443 | 21192.715 | NM_000270 | 18183.889 | 11642.269 |
| AK027065  | 1960.979  | 2322.625  | NM_013257 | 3713.635  | 3845.378  | U83111    | 1017.19   | 703.516   |
| AK001127  | 949.586   | 610.558   | AB044546  | 2506.243  | 2335.031  | U89277    | 3553.213  | 2847.243  |
| U79256    | 17793.197 | 20987.305 | NM_014225 | 45837.777 | 47801.867 | AB046837  | 1494.679  | 1247.842  |
| AK023963  | 17843.635 | 20022.557 | AF163473  | 3477.486  | 2864.676  | NM_002870 | 1090.755  | 1571.629  |
| AK022473  | 14271.303 | 11794.456 | NM_006250 | 12092.135 | 10939.244 | AK022332  | 2368.699  | 3732.457  |
| AK023380  | 395.853   | 518.946   | NM_002840 | 25830.695 | 38391.41  | NM_006460 | 554.45    | 755.766   |
| AK023810  | 1510.624  | 1343.274  | NM_002837 | 8842.609  | 6658.918  | NM_006760 | 6075.554  | 7055.351  |
| AK024860  | 883.913   | 1136.333  | AL133077  | 39499.609 | 38651.711 | NM_001180 | 1427.563  | 1353.624  |
| AF086154  | 539.908   | 491.49    | AK025211  | 6020.88   | 6009.093  | NM_006990 | 1311.638  | 1514.881  |
| AF086205  | 921.73    | 978.576   | CY3Cy5    | 11207.355 | 263.617   | AF055009  | 56480.586 | 52887.422 |
| AK026723  | 642.841   | 602.46    | NM_005450 | 2175.16   | 1373.99   | AL365370  | 1418.522  | 1044.693  |
| AK024169  | 913.703   | 845.283   | NM_006534 | 18784.967 | 11949.07  | AB014593  | 505.117   | 314.501   |
| AF147395  | 1095.327  | 1245.391  | AL832550  | 1133.768  | 681.867   | NM_016300 | 4142.743  | 2172.047  |
| AK026447  | 599.105   | 562.133   | AF131798  | 737.914   | 478.16    | D12485    | 2474.561  | 1937.431  |
| AF086011  | 488.709   | 1443.236  | AK001731  | 2851.407  | 1824.075  | AK023204  | 1387.652  | 852.081   |
| AF087972  | 935.621   | 807.389   | AF052108  | 1241.328  | 742.984   | NM_003440 | 2375.879  | 1309.275  |

|           |           |           |           |           |           |           |           |           |
|-----------|-----------|-----------|-----------|-----------|-----------|-----------|-----------|-----------|
| AL137342  | 4247.378  | 5512.547  | AF052176  | 1192.31   | 1836.863  | NM_002478 | 2751.215  | 1709.226  |
| AF075105  | 698.658   | 773.953   | AF086477  | 1648.886  | 2469.972  | D38163    | 889.973   | 696.806   |
| Z11850    | 3651.526  | 8918.645  | NM_001412 | 8369.014  | 4972.106  | D28449    | 12261.441 | 8600.902  |
| AK025102  | 1411.059  | 1028.842  | AF095771  | 917.213   | 908.713   | NM_003281 | 1535.727  | 764.639   |
| AF086562  | 1697.815  | 1506.27   | AF071111  | 1082.29   | 1400.904  | AA460480  | 1905.198  | 1273.905  |
| AK021749  | 2624.826  | 3078.299  | U00954    | 2039.775  | 3493.3    | AI298884  | 11550.795 | 9499.874  |
| NM_002237 | 2043.696  | 2152.548  | NM_015942 | 12519.826 | 15892.868 | D87845    | 1748.952  | 1771.66   |
| NM_005117 | 5672.891  | 6216.589  | NM_017907 | 13559.788 | 12125.304 | X53279    | 892.116   | 1045.825  |
| AJ007733  | 1001.083  | 1153.692  | NM_005456 | 2516.192  | 2659.487  | M83254    | 4689.18   | 10480.83  |
| AK021625  | 1845.43   | 2035.503  | NM_006534 | 20821.811 | 20494.941 | S56770    | 1562.501  | 3696.961  |
| AK021679  | 671.262   | 1051.678  | SR1       | 69427.648 | 64506.887 | AI193606  | 546.429   | 1332.373  |
| AK001380  | 2250.736  | 2793.421  | SR3       | 53573.813 | 52782.727 | H58872    | 11901.688 | 15175.555 |
| AK025312  | 1789.612  | 1530.56   | SR5       | 7174.793  | 10866.57  | J02938    | 519.982   | 446.883   |
| NM_018606 | 998.013   | 2126.47   | SR7       | 7689.071  | 43473.566 | J04543    | 8470.736  | 8958.335  |
| AK022062  | 802.881   | 2456.682  | SR9       | 25199.15  | 4976.877  | S60415    | 1282.73   | 998.939   |
| AK002042  | 371.596   | 413.366   | CY3Cy5    | 15759.092 | 720.263   | AA456295  | 1875.597  | 1830.632  |
| AK025092  | 1450.088  | 999.861   | U84521    | 29153.445 | 16948.055 | BE733577  | 2459.134  | 2123.671  |
| AF130047  | 517.673   | 495.384   | U03241    | 1169.921  | 724.721   | AI817942  | 1815.24   | 1724.637  |
| AF085904  | 820.501   | 947.513   | U62539    | 948.322   | 539.554   | BG762340  | 685.453   | 350.195   |
| Z83944    | 1445.444  | 1820.982  | AF086110  | 855.009   | 539.073   | AA009484  | 379.066   | 292.91    |
| AF085871  | 1749.344  | 1964.601  | NM_016418 | 5185.247  | 4176.077  | NM_002044 | 7220.982  | 3767.19   |
| AL137284  | 1769.328  | 2022.37   | AK025908  | 10389.114 | 7670.657  | AL137262  | 1752.764  | 1114.803  |
| AK001013  | 874.543   | 818.614   | AK022204  | 1703.949  | 1324.671  | NM_020437 | 2366.159  | 1310.127  |
| NM_005296 | 3700.045  | 2806.304  | AF086147  | 608.048   | 563.7     | NM_018643 | 1390.363  | 1029.493  |
| AF026564  | 801.752   | 948.504   | AL109726  | 482.792   | 697.502   | NM_016186 | 288.399   | 236.324   |
| X97301    | 2199.781  | 2212.458  | AL109716  | 766.086   | 782.757   | M30142    | 3739.642  | 3530.816  |
| AL110141  | 61457.676 | 68328.75  | AK027065  | 4367.976  | 5089.409  | NM_005018 | 612.991   | 755.978   |
| AF116636  | 553.311   | 519.176   | AL353944  | 1299.789  | 1115.997  | NM_006110 | 1795.584  | 4729.076  |
| U80761    | 11893.451 | 12927.754 | S83249    | 683.999   | 827.165   | NM_016453 | 1335.145  | 2261.44   |
| Y16701    | 661.63    | 961.177   | AF085912  | 764.808   | 1081.369  | NM_017701 | 1272.537  | 1375.924  |
| Y11161    | 1242.881  | 1323.149  | AB028963  | 380.81    | 702.143   | NM_014226 | 6160.802  | 6697.57   |
| AB007861  | 578.851   | 391.109   | AK001127  | 3530.283  | 3531.124  | AF142567  | 1586.965  | 1305.693  |
| AK024761  | 1640.204  | 2417.647  | U79256    | 37670.746 | 40589.211 | NM_005621 | 983.717   | 296.805   |
| M55536    | 2772.379  | 3603.204  | AK023761  | 590.475   | 305.498   | NM_006202 | 56033.453 | 37521.078 |
| AK000660  | 2376.025  | 1700.159  | AK023963  | 21134.775 | 16181.069 | NM_017410 | 4893.743  | 2845.95   |
| AL049289  | 367.937   | 483.695   | AK022473  | 22141.125 | 16768.875 | NM_002860 | 6190.084  | 4407.301  |
| NM_014711 | 1709.519  | 1172.775  | AK023380  | 757.565   | 714.798   | NM_006166 | 4216.275  | 2691.833  |
| AK022015  | 2400.175  | 1791.636  | AK023810  | 2656.542  | 1964.453  | NM_001218 | 781.295   | 491.634   |
| D17234    | 566.875   | 437.225   | AK024860  | 617.694   | 730.008   | NM_014183 | 1076.479  | 705.73    |
| AK002208  | 16700.273 | 12129.548 | AF086154  | 825.103   | 534.043   | AB046780  | 23449.166 | 15846.727 |
| D63135    | 1178.277  | 1103.049  | AF086205  | 1850.208  | 1546.382  | NM_018353 | 3396.066  | 1773.604  |
| AB033083  | 4872.512  | 4248.962  | AK026723  | 957.507   | 852.834   | NM_003560 | 15687.028 | 12509.36  |
| NM_017828 | 6660.974  | 5578.458  | AK024169  | 1572.293  | 1406.405  | NM_014403 | 4638.456  | 3736.482  |
| AF130083  | 7603.229  | 5616.087  | AF147395  | 4982.145  | 4850.744  | AL050100  | 940.344   | 963.612   |
| AL110185  | 50617.145 | 47942.84  | AK026447  | 2644.14   | 2429.038  | NM_000748 | 13365.578 | 21525.301 |
| NM_002700 | 11779.518 | 10556.814 | AF087967  | 1761.111  | 1790.836  | NM_004925 | 1754.021  | 4944.079  |
| AB002437  | 17671.367 | 18516.965 | AF085985  | 937.051   | 1182.036  | NM_004922 | 4570.861  | 5691.245  |
| AK024013  | 911.7     | 1203.406  | AF086011  | 1316.36   | 1584.704  | NM_002871 | 639.56    | 563.944   |
| NM_006777 | 842.269   | 820.889   | AK025217  | 1101.187  | 1267.35   | BE873653  | 54691.285 | 55059.977 |
| AK024969  | 1646.513  | 1789.815  | AF087972  | 5443.221  | 6327.022  | NM_006987 | 685.212   | 650.818   |
| AL049471  | 860.216   | 1335.865  | AL137342  | 17011.484 | 22178.73  | NM_001282 | 3734.24   | 2343.601  |
| AK022250  | 459.219   | 497.852   | AF075105  | 2917.936  | 3970.298  | NM_016830 | 9496.568  | 6722.537  |
| NM_019596 | 10902.707 | 8058.359  | AK025102  | 3223.975  | 2521.739  | U44105    | 366.342   | 297.952   |

|           |           |           |           |           |           |           |           |           |
|-----------|-----------|-----------|-----------|-----------|-----------|-----------|-----------|-----------|
| NM_006225 | 52768.801 | 50756.902 | AF086562  | 2398.939  | 1865.239  | NM_016103 | 1524.18   | 852.176   |
| NM_003254 | 28333.309 | 20233.004 | AK021749  | 1275.639  | 893.185   | AL133654  | 3981.586  | 1796.332  |
| NM_017730 | 4470.421  | 4253.331  | AJ011980  | 800.853   | 811.725   | L25080    | 20346.969 | 11674.271 |
| NM_014630 | 8133.989  | 8074.512  | NM_002237 | 2706.625  | 1856.784  | NM_003143 | 47581.125 | 27431.143 |
| AF022728  | 1135.189  | 1161.614  | NM_005117 | 8526.541  | 8214.852  | AK026289  | 3509.069  | 2489.103  |
| AK025813  | 866.909   | 568.124   | AJ007733  | 1648.561  | 2015.261  | NM_003255 | 3193.656  | 1291.231  |
| AK021829  | 488.727   | 411.325   | AK021625  | 3173.888  | 3054.437  | AL133068  | 16120.322 | 13984.376 |
| NM_014681 | 1181.112  | 1263.761  | AK021679  | 1509.145  | 1154.257  | NM_003463 | 3750.561  | 3522.135  |
| NM_007182 | 2491.236  | 2385.907  | AK001380  | 5879.762  | 3562.704  | NM_004944 | 884.83    | 959.822   |
| NM_019063 | 37020.898 | 35976.559 | AK026753  | 646.236   | 749.871   | AK024964  | 1010.118  | 778.337   |
| NM_014336 | 1944.421  | 1672.639  | AK024938  | 981.192   | 1042.334  | M20697    | 687.989   | 806.374   |
| NM_012456 | 17687.865 | 22042.689 | AK025312  | 5116.232  | 4246.02   | NM_015046 | 2256.041  | 2802.071  |
| NM_003324 | 9164.968  | 9838.281  | AK027205  | 919.87    | 812.68    | NM_002014 | 24337.252 | 25792.988 |
| NM_012143 | 2995.23   | 4072.69   | NM_018606 | 1500.176  | 1665.843  | NM_002535 | 8330.629  | 10894.729 |
| NM_006655 | 1745.32   | 2175.521  | AK022062  | 996.568   | 1158.609  | NM_016585 | 14315.536 | 18223.041 |
| AF085892  | 1670.082  | 2100.774  | AK026493  | 1002.601  | 1077.628  | NM_003333 | 58887.977 | 53706.297 |
| AF075114  | 8963.169  | 10896.266 | AK002042  | 1125.481  | 1609.928  | NM_002013 | 8190.239  | 9834.284  |
| AL359562  | 2588.228  | 3678.136  | AF119886  | 732.18    | 786.909   | NM_006927 | 11028.697 | 8363.357  |
| AK022218  | 58978.406 | 61187.293 | AK024333  | 113.682   | 1432.705  | NM_014601 | 1776.275  | 1287.294  |
| NM_007112 | 1393.091  | 1732.701  | AL049268  | 1801.062  | 2195.163  | NM_017761 | 12930.773 | 10015.727 |
| M34571    | 961.996   | 957.61    | AK025092  | 3245.246  | 2629.428  | NM_006925 | 391.76    | 198.282   |
| NM_003246 | 551.361   | 808.717   | AF130047  | 905.377   | 617.889   | AF237700  | 1253.311  | 311.435   |
| AB037745  | 8930.874  | 11333.685 | AF085904  | 619.685   | 465.357   | NM_003445 | 1452.362  | 898.926   |
| NM_017717 | 1260.352  | 1829.437  | Z83944    | 1380.541  | 1160.02   | NM_002475 | 3243.411  | 2527.682  |
| AK026201  | 4539.566  | 5998.839  | AF085871  | 2743.115  | 2612.089  | D38163    | 531.042   | 489.025   |
| AB028962  | 1446.473  | 1684.062  | AL137284  | 2355.37   | 2435.234  | D28449    | 9125.069  | 6150.096  |
| U63041    | 5831.825  | 8132.922  | AK001013  | 1630.761  | 1711.013  | NM_003281 | 918.39    | 603.009   |
| NM_000297 | 25322.09  | 33915.613 | NM_005295 | 3223.762  | 1990.135  | AA460480  | 1689.755  | 1627.22   |
| AF149019  | 42437.605 | 52368.359 | AK001394  | 1893.713  | 3523.188  | AI298884  | 13943.475 | 13823.443 |
| NM_013354 | 654.157   | 1041.157  | AF026564  | 1478.721  | 1376.913  | D87845    | 1580.836  | 1516.042  |
| AK023954  | 4097.961  | 4790.072  | X97301    | 3197.123  | 2425.083  | X53279    | 713.036   | 622.032   |
| NM_003930 | 805.037   | 1118.568  | AL110141  | 58620.031 | 56606.766 | M83254    | 5563.745  | 5402.019  |
| NM_013416 | 4722.342  | 6060.755  | AF116636  | 1692.123  | 1296.497  | S56770    | 1815.616  | 1520.08   |
| AB040934  | 459.785   | 684.262   | U80761    | 26545.1   | 34271.613 | AI193606  | 565.006   | 558.638   |
| NM_005092 | 740.709   | 954.929   | Y16701    | 6448.676  | 7762.322  | H58872    | 12015.1   | 12537.987 |
| NM_001883 | 2803.23   | 3645.052  | U61100    | 1252.318  | 1367.435  | J02938    | 401.65    | 440.043   |
| NM_015722 | 9204.979  | 11079.796 | NM_018582 | 1075.052  | 991.084   | J04543    | 7286.354  | 6882.085  |
| NM_016086 | 1247.922  | 1545.022  | M21539    | 1153.487  | 1227.232  | S60415    | 718.851   | 684.912   |
| NM_014615 | 4507.327  | 5222.149  | Y11161    | 6340.573  | 8149.163  | AA456295  | 1424.429  | 1716.114  |
| AA902333  | 7476.794  | 10703.491 | AF130117  | 1302.281  | 1214.876  | BE733577  | 2497.254  | 2475.672  |
| NM_015641 | 5684.826  | 7633.599  | AB007861  | 2486.946  | 2777.656  | AI817942  | 1682.235  | 1096.062  |
| AF272377  | 4939.422  | 5423.086  | AK024125  | 1111.159  | 1266.984  | BG762340  | 919.362   | 535.889   |
| NM_006566 | 1338.984  | 1817.306  | AK024761  | 7655.186  | 10004.83  | AA009484  | 732.283   | 399.684   |
| NM_017795 | 11605.404 | 13664.207 | M55536    | 15450.703 | 21395.773 | AF209930  | 1226.484  | 429.856   |
| NM_015216 | 5180.395  | 6664.02   | AF086067  | 5089.865  | 7648.215  | NM_018643 | 1204.737  | 979.021   |
| NM_018345 | 2213.431  | 3651.075  | Z70766    | 805.018   | 492.782   | NM_016186 | 360.735   | 261.249   |
| AF119900  | 17393.016 | 26091.994 | AK000660  | 6440.09   | 4903.596  | M30142    | 2657.318  | 2254.198  |
| AF130087  | 4451.284  | 6283.389  | AL049289  | 2673.673  | 1812.065  | NM_005015 | 755.375   | 544.486   |
| AK027031  | 10397.156 | 13470.47  | NM_014711 | 3014.268  | 2139.251  | NM_013375 | 17386.684 | 13953.424 |
| NM_018383 | 5127.169  | 6146.372  | AK022015  | 3526.523  | 2899.491  | NM_001085 | 743.538   | 632.856   |
| NM_003590 | 2186.642  | 4335.141  | D17234    | 776.051   | 558.007   | NM_006110 | 2289.385  | 1278.579  |
| AJ278476  | 4378.586  | 5704.34   | AK002208  | 19529.883 | 17273.678 | NM_016453 | 1234.905  | 1199.25   |
| NM_002355 | 1387.809  | 1968.111  | D63135    | 1819.224  | 1479.303  | NM_017701 | 1106.814  | 1130.023  |

|           |           |           |           |           |           |           |           |           |
|-----------|-----------|-----------|-----------|-----------|-----------|-----------|-----------|-----------|
| NM_012225 | 1656.978  | 1692.244  | AB033083  | 6350.325  | 5982.866  | NM_014226 | 3299.47   | 2998.974  |
| AB014595  | 8607.934  | 10439.876 | NM_017828 | 10808.543 | 10021.901 | AF142567  | 1175.621  | 1016.446  |
| AB024704  | 49058.195 | 54158.211 | AY007113  | 1201.803  | 892.346   | NM_006202 | 59274.395 | 41980.176 |
| NM_006322 | 1883.78   | 2435.656  | AF130083  | 19481.834 | 21135.928 | AB040959  | 467.724   | 1129.099  |
| AK002081  | 1316.184  | 1611.601  | AB002437  | 52028.629 | 53638.023 | NM_017410 | 5131.526  | 3395.966  |
| NM_016369 | 595.23    | 544.553   | AK024013  | 2588.81   | 2785.979  | AY009398  | 352.295   | 208.493   |
| NM_005500 | 6428.943  | 8028.24   | AK023496  | 526.908   | 755.224   | D12485    | 2422.839  | 1402.372  |
| U66702    | 60894.16  | 62160.23  | NM_006777 | 3623.141  | 4015.537  | NM_001218 | 831.882   | 673.919   |
| AK025582  | 4970.222  | 5895.657  | AK024969  | 7436.611  | 9857.492  | NM_014183 | 1011.142  | 702.166   |
| NM_003884 | 2127.22   | 2934.57   | AL049471  | 4609.742  | 7197.359  | AB046780  | 21569.99  | 16656.068 |
| NM_014886 | 11866.819 | 15845.511 | AK022250  | 900.931   | 1453.187  | NM_018353 | 2676.691  | 1980.43   |
| NM_003344 | 9075.795  | 9406.873  | NM_019598 | 27832.48  | 35002.582 | NM_003560 | 12565.701 | 12376.75  |
| NM_002772 | 3269.853  | 4074.659  | J05063    | 1120.512  | 1714.433  | NM_014403 | 3637.812  | 3149.458  |
| U82970    | 1452.474  | 1883.124  | NM_012369 | 619.575   | 1012.694  | NM_000748 | 13449.147 | 10480.963 |
| NM_005925 | 1349.053  | 2090.554  | AF222904  | 1104.716  | 954.794   | NM_004925 | 1625.331  | 1116.176  |
| NM_007173 | 252.001   | 913.113   | NM_006225 | 63970.555 | 59932.723 | NM_004922 | 3316.483  | 2972.184  |
| AJ278478  | 1422.389  | 1931.305  | NM_003254 | 31439.688 | 25247.063 | NM_002871 | 521.8     | 551.363   |
| NM_014300 | 9801.548  | 15848.755 | NM_017730 | 6690.979  | 5494.14   | BE873653  | 53052.746 | 48906.496 |
| Y19188    | 2308.96   | 2965.541  | NM_014630 | 9547.908  | 8187.721  | NM_006987 | 568.687   | 466.413   |
| NM_014466 | 1223.118  | 1351.083  | AF022728  | 1501.837  | 1290.209  | NM_001282 | 4008.919  | 2990.473  |
| NM_003732 | 10135.584 | 13126.611 | AK021829  | 1347.686  | 1663.214  | NM_016830 | 7776.225  | 4681.216  |
| AF216381  | 19332.896 | 29325.631 | NM_014681 | 2019.81   | 1914.093  | U44105    | 601.605   | 580.204   |
| AL137614  | 492.495   | 913.407   | NM_007182 | 4664.627  | 4285.381  | NM_016103 | 1473.889  | 823.008   |
| AK023683  | 459.839   | 595.951   | NM_019063 | 47915.398 | 54192.797 | AL133654  | 3918.191  | 1619.928  |
| AB023163  | 2648.555  | 3479.868  | NM_014336 | 3799.514  | 3820.034  | AL137262  | 1781.386  | 1040.915  |
| AF272373  | 4612.233  | 6462.474  | NM_012456 | 40274.43  | 48581.492 | NM_020437 | 2645.737  | 1563.87   |
| NM_016327 | 5252.298  | 8223.567  | AB002308  | 1562.803  | 2130.393  | L25080    | 21574.492 | 14391.742 |
| AK074832  | 26317.107 | 17038.949 | NM_003324 | 32912.836 | 50999.18  | NM_003143 | 47489.793 | 31285.549 |
| NM_016269 | 959.895   | 833.417   | NM_012143 | 12880.079 | 17769.896 | AK026289  | 3559.197  | 3149.959  |
| NM_006235 | 39900.148 | 29372.275 | NM_017506 | 794.934   | 1063.028  | NM_003463 | 3367.784  | 3858.166  |
| AK026353  | 4160.58   | 2865.561  | NM_006658 | 4005.649  | 4942.345  | NM_004944 | 645.412   | 690.352   |
| L24123    | 9825.385  | 7114.416  | AF085892  | 5580.246  | 5780.011  | NM_015046 | 1744.641  | 1397.854  |
| D80001    | 8207.776  | 6822.024  | AF075114  | 16304.27  | 18649.189 | NM_002014 | 16634.416 | 11648.183 |
| AK024288  | 16969.525 | 12436.386 | AL359562  | 5519.083  | 6258.682  | NM_002538 | 6378.247  | 5650.055  |
| NM_006521 | 23079.844 | 20335.127 | AK022218  | 58583.836 | 54246.348 | NM_016585 | 12356.468 | 13671.619 |
| NM_002892 | 1621.621  | 1209.464  | NM_007112 | 4303.662  | 6334.062  | NM_003333 | 57208.859 | 56930.488 |
| M62324    | 1384.584  | 1118.906  | AK026037  | 1768.149  | 2506.068  | NM_002013 | 8291.505  | 10751.139 |
| NM_016200 | 14470.162 | 13710.804 | S82075    | 1826.995  | 2488.188  | NM_006927 | 9599.855  | 8742.188  |
| BE082230  | 20761.037 | 26607.656 | M34571    | 1284.605  | 1072.147  | NM_014601 | 1939.875  | 1444.756  |
| AK025929  | 32487.504 | 41046.996 | M98457    | 798.703   | 530.069   | NM_017761 | 11603.285 | 7469.743  |
| NM_001384 | 1334.429  | 1959.164  | AB037745  | 9524.261  | 7476.68   | NM_006928 | 302.072   | 272.414   |
| NM_018246 | 1045.67   | 1402.068  | NM_017717 | 1984.614  | 1554.006  | AF237700  | 1526.714  | 369.153   |
| NM_007039 | 892.441   | 1647.198  | AK026201  | 5974.458  | 5873.501  | NM_002860 | 8454.529  | 4482.106  |
| NM_017857 | 3001.105  | 3309.361  | AB028962  | 1425.693  | 1210.173  | NM_006169 | 4498.351  | 2212.378  |
| AJ272267  | 2375.887  | 1508.843  | U63041    | 12196.748 | 24360.039 | D38163    | 776.462   | 734.495   |
| NM_000673 | 484.085   | 343.378   | NM_000297 | 28905.73  | 27781.633 | D28449    | 10072.445 | 7768.501  |
| NM_002676 | 15852.552 | 12154.286 | AF149019  | 45549.668 | 45913.047 | AI298884  | 11783.306 | 15989.438 |
| NM_002103 | 3212.55   | 2575.116  | NM_013354 | 2053.087  | 1842.542  | D87845    | 1516.764  | 1846.424  |
| NM_006665 | 6206.046  | 5648.201  | AK023954  | 8722.313  | 8259.796  | X53279    | 626.455   | 529.775   |
| AK026256  | 3312.867  | 3454.385  | AF171055  | 617.766   | 1374.926  | M83254    | 2743.522  | 2899.295  |
| NM_000270 | 26911.904 | 26561.404 | NM_003930 | 4003.274  | 5587.458  | S56770    | 1136.011  | 798.246   |
| U83111    | 818.209   | 915.4     | NM_013416 | 13876.175 | 25805.865 | AI193606  | 260.965   | 393.39    |
| U89277    | 4398.364  | 4741.148  | AB040934  | 1372.369  | 1881.476  | H58872    | 9557.313  | 7951.563  |

|           |           |           |           |           |           |           |           |           |
|-----------|-----------|-----------|-----------|-----------|-----------|-----------|-----------|-----------|
| AB046837  | 1489.649  | 1281.7    | NM_000598 | 750.906   | 1101.28   | J02938    | 391.005   | 540.09    |
| AK022332  | 1334.833  | 1162.898  | NM_005092 | 1410.886  | 1600.952  | J04543    | 6769.077  | 7265.108  |
| NM_006769 | 4383.902  | 3742.758  | NM_002753 | 556.798   | 542.74    | S60415    | 684.329   | 569.538   |
| NM_001189 | 1121.208  | 910.948   | NM_001883 | 7036.111  | 8247.707  | AA456295  | 1703.573  | 2642.677  |
| NM_006992 | 1296.047  | 1118.049  | NM_015722 | 12928.675 | 14278.815 | BE733577  | 2567.662  | 2825.774  |
| AF055009  | 58657.328 | 48600.082 | NM_000905 | 737.257   | 805.114   | AI817942  | 1655.809  | 1480.756  |
| AL365370  | 1427.592  | 1103.093  | NM_016086 | 3271.639  | 3517.72   | BG762340  | 396.185   | 189.406   |
| AB014593  | 1013.623  | 1562.235  | NM_004382 | 1317.337  | 1992.251  | AF209930  | 924.937   | 408.888   |
| NM_016305 | 3858.821  | 3791.492  | NM_000831 | 1830.495  | 2353.005  | AB051826  | 187.566   | 240.008   |
| D12485    | 2285.745  | 1637.338  | NM_014618 | 11077.686 | 7476.61   | M30142    | 3645.918  | 2362.645  |
| AK023204  | 1562.598  | 1466.204  | AA902333  | 25062.357 | 20521.832 | NM_005018 | 438.612   | 446.535   |
| NM_003449 | 2410.361  | 1522.579  | NM_015641 | 9259.177  | 6134.011  | NM_013378 | 17939.344 | 14711.769 |
| NM_002478 | 6273.049  | 5481.748  | AF272377  | 5452.38   | 3608.026  | NM_001085 | 836.047   | 845.873   |
| D38163    | 1315.967  | 1155.666  | NM_006569 | 2020.704  | 1768.817  | NM_006110 | 2147.884  | 2328.424  |
| D28449    | 15867.122 | 15717.034 | NM_017795 | 11241.084 | 9176.205  | NM_016453 | 1179.474  | 1316.334  |
| NM_003281 | 1849.901  | 1751.945  | AF119900  | 22527.49  | 25120.705 | NM_017701 | 1235.596  | 1341.802  |
| AA460480  | 1749.891  | 1889.257  | AF130087  | 8125.956  | 7048.572  | NM_014226 | 3642.093  | 3789.668  |
| AI298884  | 11057.967 | 13851.773 | AK027031  | 20694.521 | 17713.059 | AF142567  | 1322.343  | 1311.842  |
| D87845    | 555.185   | 685.389   | NM_018383 | 16940.553 | 17585.709 | NM_006202 | 53773.27  | 56494.184 |
| X53279    | 628.44    | 535.855   | NM_003590 | 17913.117 | 25082.008 | NM_017410 | 4101.328  | 9491.308  |
| M83254    | 6526.254  | 6121.583  | AJ278476  | 18296.539 | 20657.078 | AY009398  | 509.612   | 1545.032  |
| S56770    | 2573.177  | 2457.529  | NM_002358 | 4103.585  | 4725.85   | X99680    | 10788.438 | 14205.828 |
| AI193606  | 953.66    | 1157.437  | NM_012225 | 5269.168  | 6986.868  | NM_001448 | 1116.163  | 1305.178  |
| H58872    | 10701.227 | 9828.674  | AB014595  | 22444.57  | 27125.072 | NM_016072 | 5846.807  | 2842.284  |
| J04543    | 7073.637  | 6840.408  | AB024704  | 63297.789 | 55320.906 | AK026349  | 664.257   | 302.779   |
| AA456295  | 2259.637  | 2005.347  | NM_006322 | 5224.869  | 5949.578  | NM_014733 | 757.173   | 420.467   |
| BE733577  | 1475.15   | 1157.162  | AK002081  | 3686.94   | 4263.358  | D12485    | 2527.63   | 1738.889  |
| AI817942  | 1520.609  | 1469.726  | NM_002210 | 8607.274  | 10681.052 | AK023204  | 1478.277  | 438.583   |
| BG762340  | 1504.175  | 2276.674  | NM_016369 | 901.359   | 1277.272  | NM_003449 | 2287.71   | 655.851   |
| AA009484  | 413.105   | 563.224   | AF231022  | 59568.23  | 54246.695 | NM_002478 | 2988.226  | 1306.385  |
| NM_002044 | 12282.342 | 12667.987 | NM_005500 | 10793.251 | 6833      | NM_003234 | 2700.984  | 2100.113  |
| AL137262  | 2382.079  | 1435.851  | U66702    | 67889.406 | 80667.063 | NM_004858 | 2456.787  | 1527.068  |
| NM_020437 | 4350.957  | 4422.157  | AK025582  | 6019.632  | 4165.26   | S78774    | 4901.804  | 3761.841  |
| NM_018643 | 2577.815  | 2377.611  | NM_003884 | 3182.096  | 2271.045  | NM_004922 | 4582.234  | 4247.726  |
| M30142    | 1580.151  | 1379.153  | NM_014888 | 15071.774 | 11895.28  | NM_002871 | 408.775   | 366.893   |
| NM_013378 | 22967.416 | 25702.379 | NM_003344 | 11728.272 | 8482.496  | BE873653  | 45333.594 | 52359.836 |
| NM_001085 | 623.996   | 876.642   | NM_002772 | 2475.765  | 2815.703  | NM_006987 | 682.51    | 463.375   |
| NM_006110 | 2229.192  | 1837.321  | NM_005925 | 1626.127  | 1820.1    | NM_001282 | 3153.359  | 2478.455  |
| NM_016453 | 2129.859  | 2800.346  | NM_007173 | 596.862   | 874.261   | NM_016830 | 7684.508  | 8585.809  |
| NM_017701 | 1934.834  | 2242.209  | AJ278478  | 4638.38   | 3934.73   | U44105    | 1179.522  | 3329.852  |
| NM_014226 | 4151.357  | 3578.317  | NM_014300 | 31814.133 | 36182.441 | NM_016103 | 1829.231  | 4571.37   |
| AF142567  | 716.975   | 649.46    | NM_014606 | 1902.993  | 1906.558  | AL133654  | 5646.394  | 10283.072 |
| NM_006202 | 57630.832 | 57084.203 | Y19188    | 7080.884  | 7714.787  | AL137262  | 1736.946  | 2854.047  |
| NM_017410 | 6712.474  | 7868.712  | NM_014466 | 3130.395  | 3261.479  | NM_020437 | 2941.812  | 3738.964  |
| NM_002860 | 10086.12  | 8199.756  | NM_003732 | 20180.84  | 20323.484 | NM_018643 | 2876.396  | 1202.684  |
| NM_006169 | 8488.167  | 6522.529  | AF216381  | 37360.555 | 46857.031 | NM_016186 | 279.718   | 212.494   |
| NM_001218 | 1303.201  | 785.458   | AL137614  | 3234.924  | 3689.586  | NM_006928 | 516.187   | 325.211   |
| NM_014183 | 1453.913  | 1889.93   | AK023683  | 881       | 879.307   | AF237700  | 1319.354  | 654.222   |
| AB046780  | 31358.561 | 26942.918 | AK023093  | 639.434   | 771.576   | NM_002860 | 6994.726  | 6189.472  |
| NM_018353 | 4969.545  | 3821.704  | AB023163  | 4053.732  | 4876.053  | NM_006169 | 4107.854  | 3613.575  |
| NM_003560 | 18056.256 | 19178.658 | NM_006618 | 7212.762  | 9153.57   | NM_001218 | 806.4     | 638.984   |
| NM_014403 | 2860.886  | 2538.413  | AF272373  | 7011.187  | 8246.857  | NM_014183 | 431.709   | 299.292   |
| AL050100  | 1005.623  | 785.505   | NM_016327 | 12262.167 | 14331.213 | AB046780  | 25032.32  | 19918.936 |

|           |           |           |           |           |           |           |           |           |
|-----------|-----------|-----------|-----------|-----------|-----------|-----------|-----------|-----------|
| NM_00074E | 26669.832 | 36008.066 | NM_00498E | 12125.683 | 13686.712 | NM_01835E | 4060.305  | 2577.352  |
| NM_00492E | 1574.987  | 1762.224  | AK074832  | 35321.055 | 24765.334 | NM_00356C | 17778.811 | 20718.217 |
| NM_00492Z | 7037.855  | 10517.695 | NM_01626E | 1609.487  | 1176.455  | NM_01440E | 4466.449  | 10055.156 |
| BE873653  | 56580.516 | 58139.148 | NM_00623E | 46005.918 | 39827.961 | AL050100  | 1147.883  | 4594.772  |
| NM_00128Z | 4433.326  | 3137.906  | AK026353  | 5837.319  | 4298.387  | NM_02013E | 2394.829  | 3711.906  |
| NM_01683C | 17081.699 | 14954.505 | L24123    | 13326.46  | 11920.717 | NM_00074E | 14171.186 | 7135.346  |
| U44105    | 881.485   | 815.447   | D80001    | 9454.875  | 8159.666  | NM_00004E | 2131.018  | 734.287   |
| NM_01610E | 2122.804  | 2686.449  | AK024288  | 25540.68  | 31428.658 | AF104032  | 29544.023 | 13578.902 |
| AL133654  | 6073.332  | 6706.386  | NM_006521 | 31352.809 | 28508.621 | NM_00492E | 2080.518  | 468.87    |
| AB051826  | 424.73    | 324.132   | NM_00289Z | 5171.437  | 3228.685  | AF209930  | 1554.935  | 1315.807  |
| L25080    | 29442.92  | 20377.4   | NM_00344Z | 837.732   | 507.853   | L25080    | 15167.043 | 10900.777 |
| NM_00314E | 57141.074 | 53407.555 | M62324    | 6473.571  | 6470.818  | NM_00314E | 46881.41  | 32820.957 |
| AK026289  | 6676.816  | 6181.042  | NM_01620C | 31865.814 | 40965.051 | AK026289  | 4064.746  | 3545.698  |
| NM_00325E | 5429.903  | 3771.81   | BE082230  | 31575.779 | 39920.691 | NM_00325E | 3668.988  | 2450.094  |
| AL133068  | 36358.125 | 34547.953 | AK025929  | 42274.23  | 47107.664 | AL133068  | 20630.439 | 16002.603 |
| NM_00346E | 6853.573  | 7354.682  | NM_001384 | 3447.297  | 4999.417  | NM_00346E | 3194.962  | 3507.876  |
| NM_004944 | 488.06    | 634.932   | NM_01824E | 1640.959  | 2048.549  | NM_004944 | 468.154   | 771.534   |
| AK024964  | 627.567   | 574.347   | NM_00703E | 1520.4    | 2169.073  | AK024964  | 422.711   | 568.799   |
| M20697    | 562.955   | 840.393   | NM_01785Z | 13812.153 | 15839.182 | M20697    | 434.73    | 691.518   |
| NM_01504E | 3255.847  | 3559.842  | NM_00684E | 15829.504 | 18781.658 | NM_01504E | 2539.14   | 2465.687  |
| NM_002014 | 19852.85  | 18171.617 | AJ272267  | 4945.392  | 4004.13   | NM_002014 | 23175.645 | 12237.359 |
| NM_00253E | 7803.547  | 8330.479  | NM_00067Z | 1017.626  | 541.047   | NM_00253E | 8949.159  | 4638.883  |
| NM_01658E | 18637.371 | 20763.117 | NM_00267E | 23282.984 | 19087.373 | NM_01658E | 9059.859  | 3398.705  |
| NM_00333E | 59187.27  | 57475.324 | NM_00210E | 5075.962  | 3354.158  | NM_00333E | 52684.191 | 36296.391 |
| NM_00201E | 4486.923  | 5401.819  | NM_00666E | 8040.563  | 6480.927  | NM_00201E | 4942.426  | 2869.773  |
| NM_00692Z | 11786.853 | 9282.204  | NM_00027C | 33668.785 | 37194.105 | NM_00692Z | 12572.93  | 6645.582  |
| NM_014601 | 2817.24   | 2449.087  | U83111    | 1576.935  | 1353.771  | NM_014601 | 2127.983  | 977.673   |
| NM_017761 | 15821.798 | 14857.668 | U89277    | 10950.854 | 9739.067  | NM_017761 | 14032.34  | 4805.401  |
| NM_00692E | 870.871   | 888.988   | AB046837  | 4245.49   | 3556.879  | CY3Cy5    | 1984.04   | 106.864   |
| AF237700  | 696.999   | 943.018   | AK026670  | 927.582   | 1055.531  | NM_00632E | 4515.914  | 3879.717  |
| NM_00344E | 2502.24   | 1887.154  | NM_00287E | 3341.776  | 3355.673  | AK025887  | 927.461   | 831.253   |
| NM_00247E | 4786.791  | 4007.88   | AK022332  | 5027.197  | 6566.959  | AB037719  | 316.064   | 307.701   |
| D38163    | 1267.024  | 891.908   | NM_00646E | 1406.743  | 2655.964  | AK024694  | 760.077   | 950.141   |
| D28449    | 16799.037 | 15574.479 | NM_00676E | 11904.595 | 14695.625 | AK026143  | 1951.785  | 1771.879  |
| NM_003281 | 2199.988  | 1609.828  | NM_00118E | 2977.553  | 3667.571  | AL110252  | 813.763   | 1299.46   |
| AA460480  | 2513.588  | 2504.746  | NM_00699Z | 2064.854  | 2594.232  | AL080059  | 342.304   | 755.343   |
| AI298884  | 20743.332 | 26949.092 | AF055009  | 64767.758 | 56616.777 | AL080219  | 723.855   | 1377.441  |
| D87845    | 2430.187  | 3737.642  | AL365370  | 3567.157  | 6166.884  | AK024165  | 644.909   | 1532.175  |
| X53279    | 995.613   | 1000.828  | L08442    | 706.677   | 1000.813  | NM_00632E | 4002.838  | 6205.104  |
| M83254    | 8306.108  | 7909.264  | AB014593  | 2989.72   | 4180.854  | SR2       | 15635.735 | 21226.932 |
| S56770    | 2951.862  | 2784.984  | NM_01630E | 7941.849  | 10089.236 | SR4       | 5455.853  | 8693.778  |
| AI193606  | 942.602   | 847.969   | D12485    | 5422.148  | 4355.563  | SR6       | 693.244   | 1104.882  |
| H58872    | 10817.721 | 10328.497 | AK023204  | 3002.636  | 2366.826  | SR8       | 1705.23   | 11258.628 |
| J02938    | 343.239   | 538.837   | NM_00344E | 4335.513  | 2670.681  | SR10      | 4863.519  | 2780.687  |
| J04543    | 10066.643 | 10318.531 | NM_00247E | 9437.552  | 7449.165  | CY3Cy5    | 4326.856  | 340.241   |
| S60415    | 623.099   | 890.086   | D38163    | 1787.012  | 1553.098  | L35592    | 3042.021  | 4334.772  |
| AA456295  | 1185.939  | 1507.569  | NM_00496Z | 546.285   | 509.272   | AL360274  | 9076.144  | 13270.82  |
| BE733577  | 2769.231  | 2079.845  | AA460480  | 3417.51   | 2843.132  | NM_01405C | 6340.959  | 9856.39   |
| AI817942  | 1327.925  | 1391.654  | AI298884  | 28950.379 | 29415.285 | NM_017814 | 1863.74   | 3839.411  |
| BG762340  | 1196.434  | 719.323   | D87845    | 4190.276  | 3859.948  | AF074996  | 1009.14   | 2071.019  |
| AA009484  | 761.985   | 535.323   | X53279    | 1818.125  | 1643.974  | AF131811  | 1876.421  | 3063.263  |
| AF209930  | 2044.029  | 2037.984  | M83254    | 21099.693 | 22955.967 | AF293026  | 7767.827  | 17633.309 |
| AL133109  | 1038.012  | 781.063   | S56770    | 5544.283  | 5423.012  | AF236158  | 568.566   | 1534.564  |

|           |           |           |           |           |           |           |           |           |
|-----------|-----------|-----------|-----------|-----------|-----------|-----------|-----------|-----------|
| AF203728  | 406.647   | 846.867   | AI193606  | 1967.546  | 2299.004  | AF217986  | 3457.72   | 7682.898  |
| NM_018643 | 3039.494  | 2825.956  | H58872    | 25623.221 | 27575.842 | AK026320  | 1278.704  | 4244.31   |
| NM_016186 | 466.21    | 523.553   | J02938    | 1251.831  | 1325.587  | AL137530  | 967.122   | 2583.653  |
| M30142    | 6437.19   | 8817.525  | J04543    | 18072.67  | 19669.518 | NM_015953 | 2085.318  | 6788.027  |
| NM_005018 | 705.626   | 1166.906  | S60415    | 1409.917  | 1271.349  | AF147301  | 1757.481  | 4213.481  |
| NM_013378 | 28283.213 | 27145.004 | AA456295  | 4902.73   | 7155.007  | AK024775  | 1341.619  | 3469.442  |
| NM_001085 | 986.54    | 1036.289  | BE733577  | 7754.405  | 8024.291  | AK026699  | 824.017   | 2993.482  |
| NM_006110 | 2977.445  | 2571.996  | AI817942  | 3840.542  | 5509.991  | AK025182  | 631.433   | 1602.06   |
| NM_016453 | 1804.935  | 1636.488  | BG762340  | 3806.336  | 3639.718  | AK025589  | 3167.162  | 5987.342  |
| NM_017701 | 2190.604  | 2260.986  | AA009484  | 1489.224  | 1734.865  | AL137616  | 606.598   | 1983.069  |
| NM_014226 | 6545.881  | 5198.297  | NM_002044 | 21229.523 | 25161.037 | AK021752  | 582.311   | 1505.68   |
| AF142567  | 1125.157  | 1106.029  | AL137262  | 2983.291  | 2519.702  | AL109706  | 4100.993  | 9834.898  |
| NM_006202 | 58475.066 | 59504.824 | NM_020437 | 5749.262  | 5634.292  | AK001118  | 854.875   | 1995.616  |
| NM_017410 | 3972.244  | 3719.181  | NM_018643 | 3981.055  | 2835.358  | AF035291  | 64789.461 | 69350.203 |
| AY009398  | 507.795   | 608.696   | NM_016186 | 720.377   | 578.299   | AK026291  | 7629.745  | 15413.797 |
| D12485    | 3840.779  | 3700.967  | M30142    | 9295.548  | 9168.875  | AL049285  | 1036.581  | 2813.93   |
| AK023204  | 1101.431  | 1376.874  | NM_005018 | 1798.646  | 1667.144  | AL117520  | 1353.308  | 3290.308  |
| NM_001218 | 1313.453  | 933.189   | NM_013378 | 38524.969 | 42300.004 | AL049303  | 605.454   | 1315.251  |
| NM_014183 | 1239.752  | 1097.238  | NM_001085 | 1756.933  | 2287.254  | AK022310  | 264.031   | 1162.132  |
| AB046780  | 31600.133 | 25117.064 | NM_006110 | 4739.919  | 4334.986  | AK021784  | 400.778   | 1152.402  |
| NM_018353 | 4319.763  | 3220.002  | NM_016453 | 2956.399  | 3568.49   | AF230800  | 1835.522  | 4470.617  |
| NM_003560 | 19008.584 | 20815.277 | NM_017701 | 2701.103  | 3281.786  | NM_018520 | 1836.012  | 4451.812  |
| NM_014403 | 6951.545  | 7784.315  | NM_014226 | 9472.663  | 10728.339 | AK026647  | 612.213   | 1409.823  |
| AL050100  | 1972.481  | 3941.66   | AF142567  | 4282.183  | 5515.468  | AK022152  | 1567.072  | 3526.417  |
| NM_000748 | 30436.545 | 28294.209 | NM_005621 | 371.605   | 519.114   | AK027027  | 515.753   | 891.449   |
| NM_004925 | 2670.043  | 2605.052  | NM_006202 | 61973.723 | 54884.945 | NM_014911 | 571.847   | 1358.005  |
| NM_004922 | 7621.955  | 7212.397  | NM_017410 | 13645.306 | 16071.422 | AF009289  | 5310.842  | 11634.952 |
| BE873653  | 55069.313 | 55694.859 | AY009398  | 1659.06   | 1958.967  | AF040247  | 690.407   | 1494.138  |
| NM_001282 | 4629.793  | 3129.74   | NM_002860 | 15726.038 | 11383.991 | AF009303  | 2478.466  | 7744.402  |
| NM_016830 | 11815.172 | 9606.625  | NM_006169 | 10862.735 | 8528.959  | NM_004474 | 3065.336  | 7543.528  |
| NM_016103 | 1404.748  | 1338.751  | NM_001218 | 1836.856  | 1295.381  | AF056449  | 1189.115  | 3339.692  |
| AL133654  | 5777.063  | 4074.697  | NM_014183 | 2412.936  | 1500.741  | AK001033  | 800.768   | 1344.428  |
| AL137262  | 2376.42   | 2025.015  | AB046780  | 40189.16  | 36695.023 | AK001082  | 1785.803  | 2660.401  |
| NM_020437 | 4344.771  | 5139.789  | NM_018353 | 7276.403  | 3980.487  | AK021743  | 1146.62   | 1398.513  |
| L25080    | 32348.17  | 21246.316 | NM_003560 | 29922.303 | 25179.902 | AK024144  | 4407.315  | 10239.163 |
| NM_003143 | 52871.172 | 50460.504 | NM_014403 | 9141.552  | 7669.928  | Y08959    | 974.492   | 2409.767  |
| AK026289  | 6271.97   | 4817.396  | AL050100  | 3596.196  | 3507.8    | NM_005346 | 20586.447 | 36750.102 |
| NM_003258 | 4454.368  | 3241.484  | NM_000748 | 44083.109 | 45905.855 | NM_005343 | 50933.316 | 64735.176 |
| AL133068  | 35957.434 | 33723.621 | NM_004925 | 3902.336  | 4283.457  | AF196865  | 1188.877  | 2516.322  |
| NM_003463 | 5709.76   | 5227.151  | NM_004922 | 12751.432 | 13536.354 | AJ008114  | 64981.625 | 67850.133 |
| NM_004944 | 1063.79   | 1438.983  | NM_002871 | 1203.823  | 1433.106  | AJ008141  | 679.157   | 764.513   |
| AK024964  | 1601.139  | 2399.686  | BE873653  | 63346.82  | 56445.512 | AF147432  | 1857.435  | 2830.338  |
| M20697    | 1255.947  | 1551.355  | NM_006987 | 1666.471  | 1591.221  | AK024690  | 964.565   | 1707.686  |
| NM_015046 | 4419.995  | 4705.249  | NM_001282 | 10156.156 | 10689.465 | NM_016633 | 28324.619 | 37469.586 |
| NM_002014 | 31170.418 | 30923.561 | NM_016830 | 18307.842 | 27334.029 | AK023250  | 4032.344  | 6204.901  |
| NM_002538 | 11687.708 | 12660.663 | U44105    | 1273.164  | 1966.237  | AK024882  | 1774.706  | 3466.639  |
| NM_016585 | 16847.443 | 15354.161 | NM_016103 | 4100.852  | 4979.884  | NM_014062 | 12026.479 | 13890.973 |
| NM_003333 | 56766.945 | 60325.656 | AL133654  | 12619.167 | 13311.957 | NM_006304 | 54243.07  | 48562.723 |
| NM_002013 | 6742.596  | 6704.453  | L25080    | 35622.207 | 27850.459 | X74804    | 628.497   | 922.129   |
| NM_006927 | 10656.562 | 8709.004  | NM_003143 | 63476.168 | 47523.145 | AF293367  | 1805.853  | 1801.608  |
| NM_014601 | 2748.905  | 2318.513  | AK026289  | 9368.625  | 7903.878  | AF086231  | 1040.821  | 955.203   |
| NM_017761 | 10697.715 | 9789.058  | NM_003258 | 7138.538  | 3533.607  | AK001494  | 1169.07   | 1190.241  |
| NM_006928 | 538.688   | 441.945   | AL133068  | 38060.773 | 21931.75  | AK024978  | 12294.461 | 16831.268 |

|           |           |           |           |           |           |           |           |           |
|-----------|-----------|-----------|-----------|-----------|-----------|-----------|-----------|-----------|
| AF237700  | 1807.1    | 1465.953  | NM_003463 | 11872.996 | 10127.148 | NM_020357 | 7142.158  | 9843.917  |
| NM_00286C | 11764.18  | 11610.263 | NM_004944 | 1946.872  | 2420.523  | AK026836  | 566.963   | 1445.064  |
| NM_00616E | 10339.556 | 8828.901  | AK024964  | 2647.096  | 3145.83   | T59562    | 20484.965 | 22998.406 |
| D38163    | 1276.546  | 1071.822  | M20697    | 1529.023  | 1273.936  | NM_01821E | 922.035   | 981.994   |
| D28449    | 16000.255 | 11293.837 | NM_01504E | 7345.5    | 9111.95   | U62822    | 12196.41  | 5155.287  |
| NM_003281 | 1773.622  | 1198.77   | NM_002014 | 39330.816 | 42956.188 | NM_003534 | 18520.588 | 17877.357 |
| AA460480  | 2862.506  | 2736.52   | NM_00253E | 16663.637 | 25164.844 | L08437    | 1301.673  | 1467.98   |
| AI298884  | 19835.285 | 22594.338 | NM_01658E | 31905.295 | 44828.156 | AK057143  | 2118.563  | 2977.015  |
| D87845    | 1888.663  | 2313.075  | NM_00333E | 64687.938 | 53376.605 | NM_015594 | 27611.668 | 34200.699 |
| X53279    | 1041.764  | 1029.304  | NM_00201E | 19435.9   | 24905.525 | AK024399  | 661.969   | 861.04    |
| M83254    | 11294.206 | 12408.951 | NM_006927 | 30069.32  | 34931.055 | AF056423  | 1990.398  | 2499.396  |
| S56770    | 4590.589  | 4637.106  | NM_014601 | 4828.411  | 6435.737  | X04293    | 553.469   | 650.593   |
| AI193606  | 1428.41   | 1345.922  | NM_017761 | 26289.811 | 35345.75  | AK026475  | 463.454   | 582.275   |
| H58872    | 17297.99  | 17513.408 | NM_00692E | 1103.976  | 1673.147  | K01884    | 637.991   | 706.304   |
| J02938    | 778.394   | 673.803   | AF237700  | 3260.178  | 3111.492  | U00962    | 10168.963 | 9126.289  |
| J04543    | 4420.437  | 3647.371  | NM_00344E | 4268.502  | 3040.048  | AK026130  | 13631.669 | 10578.88  |
| S60415    | 317.16    | 294.533   | NM_00247E | 8479.061  | 5913.077  | NM_01248C | 995.411   | 706.08    |
| AA456295  | 2525.804  | 2234.164  | D38163    | 2255.029  | 1385.365  | NM_00464C | 6964.684  | 5186.771  |
| BE733577  | 3154.965  | 2041.415  | D28449    | 21897.225 | 17798.23  | NM_01622E | 1872.462  | 1158.716  |
| AI817942  | 1919.243  | 1817.276  | NM_003281 | 2390.862  | 1412.481  | AB037823  | 3360.544  | 2603.866  |
| BG762340  | 1323.485  | 826.959   | AA460480  | 2186.198  | 1960.417  | NM_01538C | 6436.146  | 5812.436  |
| AA009484  | 874.164   | 785.455   | AI298884  | 27392.402 | 22171.922 | BE254485  | 1159.219  | 1440.764  |
| AF209930  | 1767.703  | 1746.178  | D87845    | 3759.39   | 3732.779  | NM_00273E | 681.09    | 668.684   |
| AL133109  | 877.732   | 888.898   | X53279    | 1501.024  | 1308.089  | AK022694  | 1522.888  | 1828.225  |
| AF203728  | 1203.598  | 1044.103  | M83254    | 19089.389 | 17209.029 | BC005946  | 61128.875 | 63036.832 |
| M30142    | 6481.184  | 5138.04   | S56770    | 4889.304  | 3944.047  | AK021893  | 2935.466  | 3545.696  |
| NM_00501E | 621.423   | 566.575   | AI193606  | 2209.198  | 2292.301  | NM_00104E | 4195.243  | 4927.804  |
| NM_01337E | 27842.721 | 20071.791 | H58872    | 24856.156 | 35755.758 | AK026497  | 2987.492  | 3429.833  |
| NM_00108E | 1241.217  | 1313.974  | J02938    | 2072.035  | 3147.049  | BE958139  | 842.169   | 695.398   |
| NM_006110 | 3766.952  | 3043.328  | J04543    | 16533.705 | 22998.736 | AF086516  | 577.856   | 687.11    |
| NM_01645E | 2108.881  | 2278.615  | S60415    | 1409.32   | 1796.703  | D86978    | 4847.666  | 5102.601  |
| NM_017701 | 2639.877  | 2247.399  | AA456295  | 5575.916  | 7582.989  | AL080060  | 11988.004 | 10113.33  |
| NM_01422E | 10473.607 | 10150.321 | BE733577  | 7192.004  | 7759.192  | NM_00578C | 3781.297  | 3760.79   |
| AF142567  | 3284.546  | 3940.848  | AI817942  | 4264.933  | 4656.299  | NM_00328E | 553.393   | 388.929   |
| NM_005621 | 418.15    | 456.37    | BG762340  | 2829.203  | 2827.54   | NM_00088E | 2520.083  | 1408.563  |
| NM_00620E | 49963.234 | 54720.246 | AA009484  | 1339.593  | 1538.26   | NM_00059E | 15195.512 | 7570.329  |
| NM_01741C | 3823.272  | 3545.373  | AF209930  | 2450.162  | 2821.497  | X99663    | 4341.567  | 2533.606  |
| X99680    | 13017.689 | 9241.266  | AL133109  | 1368.76   | 1493.371  | NM_01655E | 2965.719  | 1984.377  |
| NM_00144E | 1190.921  | 979.906   | AF203728  | 833.241   | 1046.105  | NM_00356E | 876.689   | 766.259   |
| NM_01607E | 5061.755  | 3447.916  | NM_01864E | 2334.33   | 1400.84   | NM_01844C | 5226.529  | 19484.809 |
| AK026349  | 636.18    | 503.646   | NM_01618E | 540.784   | 642.289   | AK025470  | 1125.634  | 1479.792  |
| NM_01473E | 1219.385  | 590.543   | M30142    | 7296.656  | 6576.816  | M35410    | 2904.554  | 3314.525  |
| D12485    | 3120.986  | 2894.751  | NM_00501E | 1776.288  | 1820.398  | AB023227  | 925.907   | 1180.412  |
| AK023204  | 1789.647  | 1321.474  | NM_01337E | 35977.809 | 37939.934 | NM_00577E | 13663.689 | 14692.655 |
| NM_00344E | 2586.905  | 1673.417  | NM_00108E | 1764.222  | 1756.593  | AK023071  | 3508.656  | 4002.315  |
| NM_00247E | 6143.677  | 4660.196  | NM_006110 | 4567.54   | 4266.947  | NM_004041 | 841.656   | 600.369   |
| NM_003234 | 4770.784  | 4390.974  | NM_01645E | 3118.973  | 4309.702  | AK022888  | 1465.403  | 929.043   |
| NM_00485E | 2700.512  | 2028.282  | AB018301  | 316.09    | 681.953   | AK024484  | 3690.268  | 3522.602  |
| S78774    | 10930.04  | 9401.937  | NM_017701 | 3704.335  | 4522.304  | NM_00195E | 52600.965 | 47433.055 |
| NM_00492E | 7403.5    | 6622.515  | NM_01422E | 15086.946 | 15160.95  | NM_00661E | 9262.725  | 3152.467  |
| NM_002871 | 930.113   | 1067.033  | AF142567  | 5314.895  | 6065.726  | NM_00463E | 13483.444 | 5297.992  |
| BE873653  | 51316.586 | 56289.52  | NM_005621 | 336.678   | 647.053   | L40027    | 1387.309  | 535.545   |
| NM_006987 | 1461.004  | 1455.644  | NM_00620E | 63687.348 | 57084.172 | NM_00371E | 37068.766 | 19179.145 |



|           |           |           |           |           |           |           |           |           |
|-----------|-----------|-----------|-----------|-----------|-----------|-----------|-----------|-----------|
| NM_001282 | 6055.776  | 4431.812  | NM_017410 | 11774.998 | 15801.819 | NM_014180 | 5851.946  | 6507.441  |
| NM_016830 | 16070.758 | 15350     | AY009398  | 1197.857  | 1342.131  | NM_017700 | 1615.983  | 1577.161  |
| U44105    | 577.333   | 619.933   | D12485    | 6756.745  | 8250.037  | AF334406  | 998.547   | 826.493   |
| NM_016103 | 1586.579  | 1475.056  | AK023204  | 3437.951  | 3958.163  | NM_017444 | 6317.475  | 6216.947  |
| AL133654  | 3784.913  | 2624.491  | NM_001218 | 1846.791  | 1238.102  | NM_018025 | 1241.125  | 1231.898  |
| AL137262  | 1715.134  | 1236.232  | NM_014183 | 2036.934  | 1821.158  | NM_015990 | 3623.652  | 4137.521  |
| NM_020437 | 2090.461  | 1782.628  | AB046780  | 39267.551 | 28789.008 | NM_003804 | 6058.607  | 7201.17   |
| NM_018643 | 3003.346  | 1972.26   | NM_018353 | 7461.707  | 4457.047  | NM_018453 | 2539.895  | 1903.172  |
| NM_006928 | 737.646   | 611.836   | NM_003560 | 23095.766 | 11013.997 | NM_004708 | 60664.914 | 60217.945 |
| AF237700  | 1310.655  | 759.901   | NM_014403 | 8261.778  | 6662.457  | NM_016001 | 4476.858  | 4444.059  |
| NM_002860 | 12737.68  | 12941.352 | AL050100  | 2554.04   | 1602.982  | NM_016108 | 2919.417  | 2164.765  |
| NM_006160 | 7023.26   | 6043.153  | NM_000748 | 42695.5   | 43313.848 | S49432    | 1300.619  | 838.514   |
| NM_001218 | 1278.253  | 1209.622  | NM_004925 | 3717.311  | 3713.139  | AF217974  | 3123.14   | 2764.527  |
| NM_014183 | 1280.857  | 1809.078  | NM_004922 | 12380.026 | 16294.898 | NM_001910 | 1067.505  | 816.429   |
| AB046780  | 34598.254 | 36853.254 | NM_002871 | 1547.722  | 1640.932  | NM_001900 | 4047.639  | 2330.786  |
| NM_018353 | 6184.3    | 5007.15   | BE873653  | 62262.203 | 54687.84  | NM_012190 | 1977.35   | 979.965   |
| NM_003560 | 24195.875 | 26890.188 | NM_006987 | 1851.459  | 2282.501  | NM_003360 | 1181.145  | 554.297   |
| NM_014403 | 8486.655  | 7059.624  | NM_001282 | 10475.829 | 9494.739  | AB040886  | 767.479   | 599.393   |
| AL050100  | 1972.785  | 1681.307  | NM_016830 | 21171.879 | 20421.969 | AB029020  | 2112.025  | 1554.82   |
| NM_020130 | 4758.759  | 3649.252  | U44105    | 1260.807  | 1221.009  | AK022759  | 3574.095  | 3330.484  |
| NM_000748 | 31427.203 | 22217.121 | NM_016103 | 3654.049  | 4784.385  | NM_012333 | 11561.57  | 8943.447  |
| NM_000048 | 3337.02   | 2917.68   | AL133654  | 11738.447 | 11513.457 | AF217798  | 1851.516  | 1871.695  |
| AF104032  | 49315.918 | 42387.738 | AL137262  | 5135.254  | 6211.929  | AF161472  | 1000.141  | 1067.571  |
| NM_004925 | 2620.796  | 2409.952  | NM_020437 | 7705.765  | 11553.354 | AL133642  | 4024.721  | 4644.234  |
| AF209930  | 1783.222  | 1580.981  | L25080    | 35215.039 | 29463.961 | AB011154  | 1032.676  | 866.006   |
| AL133109  | 549.865   | 421.231   | NM_003143 | 61123.363 | 50412.887 | AF124432  | 1257.156  | 1547.526  |
| L25080    | 33532.082 | 32096.949 | AK026289  | 9214.337  | 6541.979  | NM_006330 | 8418.854  | 7288.798  |
| NM_003143 | 50823.543 | 50315.789 | NM_003250 | 7666.962  | 4019.531  | NM_015873 | 2046.647  | 1514.627  |
| AK026289  | 6803.596  | 6896.744  | AL133068  | 43953.117 | 35861.906 | NM_000377 | 2540.253  | 2062.288  |
| NM_003250 | 6346.391  | 5268.292  | AK024964  | 2050.407  | 2210.492  | NM_016823 | 439.309   | 480.474   |
| AL133068  | 37143.824 | 39533.055 | M20697    | 1997.496  | 2183.616  | U09410    | 1796.002  | 1393.548  |
| NM_003463 | 7221.7    | 6827.449  | NM_015040 | 7138.145  | 8518.939  | NM_020220 | 1077.682  | 416.791   |
| NM_004944 | 1368.313  | 1460.757  | NM_002014 | 38315.551 | 48797.77  | NM_001180 | 4668.864  | 2863.07   |
| AK024964  | 1820.904  | 1841.783  | NM_002530 | 15721.317 | 18592.969 | NM_004502 | 3214.076  | 1499.511  |
| M20697    | 1285.613  | 1377.82   | NM_016580 | 31144.529 | 42202.164 | AF000560  | 5801.715  | 3998.888  |
| NM_015040 | 3154.482  | 3288.129  | NM_003333 | 59312.207 | 63404.473 | NM_013282 | 2163.783  | 1133.009  |
| NM_002014 | 21791.506 | 16989.998 | NM_002013 | 17806.852 | 24801.879 | NM_005777 | 8161.416  | 6650.9    |
| NM_002530 | 8458.952  | 6139.365  | NM_006927 | 34716.016 | 40069.137 | NM_012340 | 2982.073  | 2903.156  |
| NM_016580 | 20097.221 | 14800.504 | NM_014601 | 6323.6    | 7326.923  | NM_005820 | 24547.162 | 23646.066 |
| NM_003333 | 54310.129 | 54230.777 | NM_017761 | 27035.516 | 30904.832 | NM_004592 | 3335.031  | 3923.97   |
| NM_002013 | 10502.208 | 8739.846  | NM_006920 | 1206.542  | 1490.451  | NM_015001 | 13123.931 | 11967.2   |
| NM_006927 | 21624.328 | 19675.688 | AF237700  | 3540.28   | 3104.5    | NM_019027 | 1333.698  | 1473.104  |
| NM_014601 | 3715.854  | 2758.069  | NM_002860 | 20166.867 | 23346.73  | NM_016107 | 6116.235  | 6711.291  |
| NM_017761 | 16780.074 | 15766.014 | NM_006160 | 15450.142 | 18398.012 | NM_002567 | 20475.088 | 18103.99  |
| CY3Cy5    | 4876.951  | 93.766    | D38163    | 1945.686  | 1796.817  | NM_001404 | 3203.77   | 2736.454  |
| NM_006320 | 2048.99   | 1730.505  | NM_004967 | 718.054   | 337.161   | NM_001600 | 15798.484 | 12996.734 |
| AK025887  | 792.139   | 818.554   | D28449    | 22541.07  | 15378.78  | AF225422  | 10507.76  | 8430.207  |
| AB037719  | 1218.59   | 1184.815  | NM_003281 | 3037.068  | 1705.601  | AB040960  | 7158.58   | 5200.646  |
| AK024694  | 1996.49   | 1547.982  | AA460480  | 3166.338  | 2553.158  | NM_015940 | 1465.251  | 922.121   |
| AK026143  | 2896.358  | 1268.536  | AI298884  | 23493.299 | 20695.445 | NM_006303 | 935.938   | 827.944   |
| AL137578  | 1094.107  | 1054.38   | M83254    | 18379.721 | 13787.797 | NM_001980 | 1981.858  | 729.385   |
| AL110252  | 2320.802  | 2565.132  | S56770    | 4906.167  | 4057.844  | NM_000102 | 2809.739  | 1532.963  |
| AL050143  | 1469.019  | 1234.221  | AI193606  | 1903.78   | 1821.264  | NM_002490 | 11028.882 | 5238.989  |

|           |           |           |           |           |           |           |           |           |
|-----------|-----------|-----------|-----------|-----------|-----------|-----------|-----------|-----------|
| AL080059  | 1044.865  | 1683.38   | H58872    | 23643.111 | 24773.75  | BE563532  | 687.304   | 391.375   |
| AL080219  | 2951.08   | 4006.846  | J02938    | 1259.485  | 1308.161  | NM_001916 | 3283.684  | 2164.168  |
| AK026709  | 1001.757  | 1411.093  | J04543    | 17170.096 | 18225.039 | NM_002491 | 709.349   | 671.734   |
| AK024165  | 643.411   | 889.654   | S60415    | 1549.08   | 1533.44   | NM_015425 | 2692.09   | 1974.335  |
| NM_006325 | 10252.505 | 11602.259 | AA456295  | 6403.935  | 9966.379  | NM_015153 | 2185.693  | 1804.067  |
| SR4       | 16722.918 | 23326.211 | BE733577  | 8015.494  | 8009.003  | AB032966  | 34413.734 | 37135.043 |
| SR6       | 2272.7    | 3093.386  | AI817942  | 4356.087  | 4356.434  | M26747    | 1143.481  | 1050.049  |
| SR8       | 9686.703  | 39332.746 | BG762340  | 2982.979  | 3408.603  | NM_014820 | 11055.148 | 8469.344  |
| SR10      | 30492.215 | 18596.07  | AA009484  | 1583.242  | 1411.877  | NM_005035 | 3894.408  | 4702.498  |
| CY3Cy5    | 6834.975  | 1745.34   | AF209930  | 3187.831  | 3662.036  | NM_019014 | 6336.288  | 6883.982  |
| L35592    | 10586.127 | 8306.81   | AL133109  | 1665.732  | 1734.063  | NM_002097 | 23978.463 | 23537.178 |
| AL360274  | 17955.105 | 14783.899 | AF203728  | 982.358   | 1076.161  | X04706    | 15946.303 | 13314.918 |
| NM_014050 | 9361.964  | 8116.77   | AB051826  | 706.731   | 1041.283  | NM_018035 | 803.855   | 774.149   |
| AF085854  | 972.918   | 718.044   | M30142    | 7364.327  | 5507.224  | NM_006494 | 6114.129  | 5511.283  |
| AF074997  | 685.607   | 546.741   | NM_005018 | 1569.379  | 1229.227  | X52343    | 2630.378  | 2079.941  |
| NM_014065 | 1052.733  | 821.778   | NM_013378 | 34719.73  | 27778.26  | NM_005853 | 934.714   | 714.491   |
| AF131811  | 4087.286  | 2871.183  | NM_001085 | 1881.901  | 1471.884  | NM_003120 | 3545.739  | 2689.388  |
| AF236158  | 1245.469  | 2423.938  | NM_006110 | 3495.608  | 2004.452  | X52360    | 1252.506  | 1116.404  |
| AF217986  | 7020.971  | 6773.337  | NM_016453 | 2575.777  | 2110.046  | NM_002636 | 32915.898 | 23406.705 |
| AK026320  | 1456.401  | 1058.805  | NM_017701 | 3027.621  | 3031.978  | NM_016494 | 46239.309 | 27272.934 |
| AL137530  | 2471.046  | 1841.714  | NM_014226 | 13851.083 | 10805.469 | NM_020384 | 3105.731  | 1685.534  |
| U82310    | 3255.645  | 2996.5    | AF142567  | 5135.118  | 5317.962  | NM_006055 | 27644.633 | 13173.278 |
| AF147301  | 1568.302  | 3911.139  | NM_006202 | 62020.266 | 50944.195 | NM_006625 | 7644.091  | 4089.531  |
| AF147310  | 2247.74   | 3335.516  | NM_003391 | 521.209   | 692.393   | M97496    | 36577.41  | 18915.104 |
| AK024775  | 6429.548  | 8213.441  | NM_017410 | 10371.296 | 12714.363 | AK026074  | 495.204   | 383.342   |
| AK025562  | 1362.486  | 2190.301  | AY009398  | 1098.801  | 1448.871  | NM_003172 | 2797.12   | 2278.554  |
| AK026699  | 1222.267  | 959.591   | X99680    | 27543.662 | 30044.379 | NM_004805 | 3485.895  | 3403.637  |
| AK025589  | 5961.738  | 4137.743  | NM_001448 | 2255.905  | 2637.507  | AA903183  | 851.419   | 1151.984  |
| AK026291  | 14296.835 | 17631.664 | NM_016072 | 13145.882 | 13499.551 | H41522    | 4822.719  | 5611.127  |
| AK021924  | 1151.822  | 1295.679  | AK026349  | 1558.887  | 1485.729  | AA460291  | 29946.25  | 24315.998 |
| AL049285  | 756.478   | 530.783   | NM_014733 | 2096.867  | 2295.014  | BI821333  | 10825.382 | 10360.939 |
| AL117520  | 3084.365  | 3209.347  | D12485    | 6743.154  | 8627.677  | X51841    | 58121.926 | 59732.516 |
| AL049303  | 1933.82   | 2937.485  | AK023204  | 3413.327  | 3947.183  | AF051344  | 42482.621 | 44467.031 |
| AL050059  | 2109.913  | 2220.708  | NM_003449 | 5288.891  | 4915.815  | BG506100  | 8473.071  | 8821.921  |
| AL080208  | 1265.569  | 2429.691  | NM_002478 | 12665.799 | 13105.128 | X53586    | 816.907   | 698.102   |
| AL117577  | 7310.649  | 8255.143  | NM_003234 | 5931.903  | 5695.311  | M17176    | 612.865   | 859.427   |
| L23851    | 1604.056  | 2123.913  | NM_004855 | 4795.482  | 3143.488  | M32972    | 4592.183  | 4393.723  |
| AK022310  | 907.706   | 1678.784  | S78774    | 11096.845 | 6338.739  | NM_003001 | 1142.358  | 743.102   |
| AK021784  | 608.013   | 616.964   | NM_004922 | 9366.554  | 5447.146  | NM_005384 | 772.221   | 482.938   |
| AF230800  | 3149.2    | 2320.584  | NM_002871 | 1240.046  | 1279.357  | AF019225  | 1117.757  | 391.347   |
| NM_018520 | 1811.08   | 1404.334  | BE873653  | 60698.344 | 54759.027 | Z36803    | 5056.57   | 4357.27   |
| AK026647  | 845.119   | 749.082   | NM_006987 | 1766.767  | 1756.064  | NM_000707 | 6582.709  | 7067.946  |
| AK022152  | 2728.837  | 1431.753  | NM_001282 | 10032.07  | 7979.5    | AF202092  | 16203.16  | 18102.844 |
| NM_014911 | 1148.131  | 1319.702  | NM_016830 | 19244.695 | 16955.756 | NM_003201 | 11576.289 | 8799.686  |
| AF009289  | 8673.79   | 11197.943 | U44105    | 1112.127  | 957.197   | AB011139  | 3608.051  | 3954.026  |
| AF040247  | 1723.24   | 1684.029  | NM_016103 | 3725.793  | 3634.996  | NM_006915 | 1321.719  | 1499.462  |
| AF009303  | 4413.639  | 5233.277  | AL133654  | 10166.427 | 9718.172  | AK022625  | 37503.434 | 33714.34  |
| NM_004474 | 7453.96   | 5612.601  | AL137262  | 3899.194  | 5080.553  | AK023084  | 6636.996  | 7453.125  |
| AF056449  | 2534.256  | 2049.57   | NM_020437 | 7667.918  | 9771.998  | AK025588  | 6003.566  | 6564.037  |
| AK001033  | 1539.814  | 1555.14   | NM_004010 | 602.297   | 848.966   | NM_003185 | 890.419   | 660.391   |
| AK021463  | 822.432   | 1441.094  | X87888    | 636.31    | 341.4     | U59431    | 12650.409 | 10919.591 |
| AK021698  | 640.489   | 1226.606  | NM_018643 | 5946.051  | 5826.629  | U49349    | 898.132   | 695.078   |
| AK001082  | 5980.26   | 6830.129  | NM_016186 | 779.2     | 775.069   | NM_020152 | 2730.734  | 2202.644  |

|           |           |           |           |           |           |           |           |           |
|-----------|-----------|-----------|-----------|-----------|-----------|-----------|-----------|-----------|
| AK001871  | 852.555   | 2044.262  | NM_006928 | 1493.369  | 1036.715  | NM_013404 | 876.594   | 838.324   |
| AK021521  | 2383.845  | 4551.386  | AF237700  | 2228.949  | 1299.795  | BC012333  | 4076.519  | 2341.574  |
| AK021743  | 9852.393  | 10512.98  | NM_002860 | 17036.773 | 12949.7   | AF237952  | 4615.791  | 3080.554  |
| AK024144  | 7491.694  | 7158.417  | NM_006169 | 7410.997  | 4288.606  | NM_014427 | 3031.608  | 2016.018  |
| Y08959    | 2060.572  | 1828.964  | NM_001218 | 2077.814  | 1731.221  | AB046769  | 3440.992  | 2685.789  |
| NM_005346 | 24771.064 | 16735.227 | NM_014183 | 2380.511  | 1596.314  | NM_015922 | 5395.264  | 4510.048  |
| NM_005343 | 52560.027 | 48109.941 | AB046780  | 39796.988 | 36938.668 | NM_020381 | 2860.491  | 2653.979  |
| AB032985  | 871.758   | 575.919   | NM_018353 | 8475.804  | 5713.696  | NM_002957 | 4846.988  | 4077.432  |
| AF196865  | 3222.738  | 1436.837  | NM_003560 | 28853.17  | 35147.297 | NM_018106 | 7553.872  | 8985.554  |
| AJ008114  | 68591.172 | 68955.57  | NM_014403 | 11161.033 | 9892.048  | NM_003725 | 2851.423  | 3780.138  |
| AJ008141  | 750.937   | 1102.702  | AL050100  | 3726.896  | 3572.848  | BE899154  | 1699.99   | 1770.94   |
| AF147432  | 3503.259  | 3539.059  | NM_020139 | 8821.207  | 10438.691 | NM_004863 | 3711.022  | 3955.527  |
| AK024690  | 2123.698  | 2933.959  | AL080207  | 2403.3    | 2622.098  | AB032963  | 746.79    | 960.976   |
| AK024882  | 3820.35   | 2146.15   | NM_000748 | 47106.266 | 50305.207 | U15688    | 1845.516  | 2338.055  |
| NM_014062 | 26574.043 | 25892.355 | NM_000048 | 6732.076  | 7475.084  | NM_018448 | 6551.058  | 7852.93   |
| NM_006304 | 64243.273 | 62659.328 | AF104032  | 59053.309 | 55472.172 | NM_018184 | 5741.148  | 5905.331  |
| AF086231  | 7846.882  | 9725.882  | U53531    | 1248.1    | 1253.311  | NM_004662 | 773.253   | 922.988   |
| AK001494  | 4456.251  | 4555.559  | NM_004925 | 4693.887  | 6464.306  | NM_016639 | 55591.75  | 53156.203 |
| AL133438  | 5266.756  | 4999.264  | AF209930  | 2234.846  | 2668.279  | U61739    | 25655.545 | 19475.869 |
| AK024978  | 19119.898 | 15138.986 | AL133109  | 997.034   | 1225.564  | AJ132089  | 468.008   | 565.814   |
| U12897    | 2430.744  | 1813.682  | AF203728  | 568.554   | 813.682   | U92819    | 1741.613  | 1639.497  |
| NM_020357 | 17178.672 | 12793.943 | L25080    | 35157.543 | 34610.102 | AB020626  | 704.057   | 635.731   |
| AK026836  | 2892.158  | 2332.877  | NM_003143 | 58100.496 | 48198.359 | NM_002036 | 17551.857 | 10725.949 |
| T59562    | 46503.547 | 21494.609 | AK026289  | 9517.625  | 8246.381  | NM_014305 | 3199.92   | 1174.757  |
| NM_018219 | 2586.419  | 849.997   | NM_003258 | 8288.42   | 4270.319  | NM_012123 | 17982.32  | 8098.708  |
| NM_014114 | 3151.019  | 3935.39   | AL133068  | 47419.008 | 41249.086 | NM_017925 | 1286.464  | 839.506   |
| U62822    | 15971.687 | 7861.972  | NM_003463 | 11860.474 | 13065.63  | AK022208  | 6910.322  | 5185.024  |
| AF056423  | 7107.03   | 6029.175  | NM_004944 | 2157.119  | 2732.573  | NM_003171 | 3831.03   | 3186.833  |
| X04293    | 927.901   | 862.368   | AK024964  | 2320.926  | 2647.676  | NM_006437 | 14755.062 | 11191.079 |
| AK026475  | 1364.841  | 1022.933  | M20697    | 1778.602  | 1785.652  | NM_017890 | 2826.886  | 3800.468  |
| K01884    | 1112.687  | 1322.586  | NM_015046 | 6503.744  | 7142.178  | AK021654  | 1873.159  | 1713.831  |
| NM_012480 | 9870.325  | 10585.97  | NM_002014 | 39254.629 | 43634.797 | NM_016481 | 1063.743  | 1183.357  |
| NM_000842 | 928.864   | 540.037   | NM_002538 | 16916.924 | 18017.42  | NM_003925 | 8908.066  | 9419.452  |
| NM_015642 | 1487.562  | 1233.839  | NM_016585 | 31261.125 | 41159.551 | Z15114    | 5667.648  | 7914.371  |
| NM_004640 | 16639.828 | 18376.988 | NM_003333 | 59720.887 | 58947.504 | AB040812  | 32513.24  | 41355.121 |
| NM_002901 | 1136.413  | 904.997   | NM_002013 | 19302.105 | 20177.039 | NM_006285 | 5369.683  | 5495.703  |
| NM_016222 | 9443.731  | 4271.978  | NM_006927 | 32156.943 | 37204.141 | NM_003656 | 58027.105 | 51162.418 |
| AB037823  | 7229.964  | 5279.218  | NM_014601 | 6415.522  | 6875.419  | NM_001348 | 9223.733  | 7741.522  |
| NM_015380 | 17380.346 | 21735.174 | NM_017761 | 26970.195 | 30668.99  | NM_000215 | 1548.858  | 1356.753  |
| BE254485  | 3663.119  | 4163.366  | CY3Cy5    | 9644.584  | 122.861   | AK027148  | 15046.982 | 11480.272 |
| NM_002732 | 968.792   | 1095.225  | NM_006325 | 14007.239 | 16383.786 | NM_005084 | 2323.887  | 1871.987  |
| AK022694  | 2085.2    | 1919.732  | AF088024  | 1467.736  | 2097.283  | NM_007283 | 4891.4    | 3884.425  |
| AK021893  | 4097.918  | 3700.19   | AK025887  | 1511.939  | 1454.238  | NM_006111 | 2904.147  | 2592.613  |
| AK026497  | 7312.835  | 7717.188  | AB037719  | 3264.637  | 3795.389  | AK026071  | 6112.76   | 5691.896  |
| BE958139  | 2766.974  | 2903.088  | AK024694  | 2845.476  | 3361.241  | NM_006628 | 10629.361 | 5883.384  |
| AF085359  | 1192.847  | 1416.96   | AF086229  | 753.968   | 832.045   | M97496    | 37213.027 | 18137.572 |
| AF086516  | 2277.305  | 2500.439  | AK026143  | 5310.796  | 4804.917  | AK026074  | 1160.454  | 547.094   |
| D86978    | 15309.511 | 21486.686 | AL137578  | 959.291   | 828.991   | NM_003172 | 4327.118  | 2803.521  |
| AF086017  | 2478.094  | 3281.04   | AL110252  | 2693.851  | 3063.87   | NM_004809 | 1474.363  | 1023.341  |
| NM_005780 | 22972.67  | 35863.391 | AL050143  | 1498.44   | 1341.923  | H41522    | 4203.434  | 4286.051  |
| NM_003285 | 1089.609  | 1222.51   | AL080059  | 897.33    | 604.064   | AA460291  | 25435.061 | 22436.02  |
| NM_000888 | 7689.512  | 7297.999  | AL080219  | 3404.627  | 3289.932  | BI821333  | 8835.579  | 9031.266  |
| NM_000595 | 33404.535 | 40075.59  | AK026709  | 774.899   | 651.444   | X51841    | 56398.426 | 57153.402 |

|           |           |           |           |           |           |           |           |           |
|-----------|-----------|-----------|-----------|-----------|-----------|-----------|-----------|-----------|
| X99663    | 9502.844  | 5821.864  | AK024165  | 416.045   | 502.994   | AF051344  | 39793.301 | 34838.16  |
| AK025340  | 694.212   | 1024.382  | NM_006325 | 12655.606 | 10930.987 | BG506100  | 7058.12   | 7973.904  |
| NM_003565 | 4210.608  | 5820.848  | SR2       | 57086.012 | 51897.414 | X53586    | 1455.991  | 2717.666  |
| NM_004841 | 1686.643  | 2353.035  | SR4       | 21811.066 | 17323.961 | M32972    | 3864.631  | 3287.205  |
| NM_004114 | 553.253   | 780.955   | SR6       | 2560.072  | 1857.621  | D11151    | 918.699   | 3860.028  |
| NM_018440 | 8380.109  | 15283.494 | SR8       | 11336.094 | 23826.754 | M97815    | 892.427   | 629.084   |
| AK025470  | 961.796   | 1337.454  | SR10      | 38688.324 | 8307.672  | AF085893  | 866.202   | 620.064   |
| M35410    | 4129.912  | 5120.653  | CY3Cy5    | 8244.1    | 98.661    | AB013103  | 438.573   | 346.276   |
| NM_005776 | 32844.188 | 29131.164 | L35592    | 22097.381 | 28351.012 | AF019225  | 2763.686  | 1572.589  |
| AK023071  | 10925.619 | 12853.282 | NM_012079 | 2070.026  | 2627.547  | Z36803    | 9439.019  | 5819.711  |
| NM_004041 | 2954.367  | 3235.59   | AL360274  | 33314.297 | 44114.078 | NM_013371 | 297.802   | 379.623   |
| AK022888  | 5941.135  | 7131.597  | NM_014050 | 26712.941 | 33787.563 | NM_000707 | 4331.713  | 4134.135  |
| AK024484  | 10038.725 | 13090.731 | AF085854  | 2638.285  | 2481.502  | AF202092  | 10454.908 | 8560.194  |
| NM_002632 | 1098.148  | 1460.271  | AF074997  | 1343.273  | 1659.939  | NM_003201 | 10481.75  | 7492.015  |
| NM_001406 | 1432.529  | 1786.308  | NM_014068 | 1818.586  | 1758.891  | AB011139  | 4111.669  | 4030.323  |
| NM_002292 | 6600.88   | 7881.482  | NM_017814 | 6556.435  | 6501.414  | NM_006919 | 1250.664  | 1191.672  |
| NM_000166 | 2303.707  | 2990.924  | AF074996  | 3071.886  | 2491.237  | AK022625  | 34634.008 | 32409.807 |
| AF305200  | 1573.613  | 2121.633  | AF131811  | 5563.158  | 4113.975  | NM_005425 | 711.854   | 688.209   |
| NM_014583 | 635.647   | 1602.755  | AF293026  | 17761.242 | 17863.496 | AK023084  | 5302.199  | 6695.371  |
| NM_006613 | 13843.247 | 14463.038 | AF236158  | 1298.23   | 1525.962  | AK025588  | 7374.159  | 12934.505 |
| NM_004638 | 13816.901 | 13993.162 | AF217986  | 8504.69   | 6870.673  | NM_003188 | 3361.476  | 11084.08  |
| NM_005373 | 761.783   | 1199.516  | AK026320  | 2276.722  | 1697.314  | NM_007118 | 1448.981  | 4114.366  |
| L40027    | 4194.708  | 2714.521  | AL137530  | 3258.091  | 2121.261  | U59431    | 12825.7   | 10336.519 |
| NM_007062 | 909.168   | 1822.255  | NM_015953 | 7377.543  | 6000.763  | U49349    | 909.337   | 767.123   |
| NM_014180 | 23106.648 | 35475.34  | AF147310  | 2419.406  | 2405.232  | NM_020152 | 1511.651  | 946.874   |
| NM_017706 | 2764.336  | 3792.485  | AK024775  | 9740.641  | 7441.481  | NM_013404 | 1768.951  | 1475.008  |
| AF334406  | 1938.154  | 2911.237  | AK025562  | 1979.535  | 1797.843  | NM_003966 | 418.829   | 567.003   |
| NM_017444 | 11935.784 | 14433.37  | AK026699  | 3298.733  | 3493.072  | NM_020384 | 2372.624  | 2049.932  |
| NM_015999 | 9376.981  | 8108.144  | AK025182  | 1329.318  | 1364.033  | NM_006058 | 22460.76  | 14887.916 |
| NM_003804 | 27925.457 | 34616.109 | AK025589  | 9795.243  | 10627.829 | AL079287  | 2098.704  | 2025.422  |
| NM_018453 | 10849.578 | 13858.215 | AK026734  | 1063.939  | 1372.52   | NM_014427 | 4944.217  | 3378.83   |
| NM_004708 | 64771.793 | 68113.313 | AL137616  | 3503.07   | 4356.892  | AB046769  | 4088.639  | 2479.559  |
| NM_016001 | 19531.17  | 27951.047 | AK021752  | 2363.279  | 3226.818  | NM_015922 | 5765.251  | 3273.627  |
| NM_016108 | 9847.354  | 11726.741 | AL050012  | 918.486   | 1582.931  | NM_020381 | 2510.233  | 1572.792  |
| AL137722  | 776.553   | 1354.16   | AL109706  | 19012.445 | 17451.598 | NM_002957 | 4236.378  | 3560.996  |
| S49432    | 5052.451  | 8021.347  | AK001118  | 1537.732  | 1968.277  | NM_018106 | 5786.762  | 5792.218  |
| AF217974  | 10623.047 | 13809.422 | AF035291  | 65507.102 | 66610.531 | NM_003725 | 3314.281  | 4145.416  |
| NM_001910 | 2117.568  | 2185.091  | AK026291  | 16888.563 | 17993.041 | BE899154  | 1432.464  | 1786.713  |
| NM_001909 | 5138.006  | 4179.544  | AK021924  | 996.961   | 1034.957  | NM_004863 | 3286.288  | 3700.418  |
| NM_012198 | 6798.492  | 4433.381  | AL049285  | 1400.373  | 813.722   | U15688    | 1578.514  | 2187.087  |
| NM_003368 | 3906.966  | 4649.727  | AL117520  | 6418.521  | 5884.367  | NM_018448 | 6649.886  | 9190.758  |
| AB040886  | 1570.203  | 2211.767  | AL049303  | 2346.624  | 2444.554  | NM_018184 | 9069.052  | 17877.908 |
| NM_001460 | 710.074   | 919.017   | AL080208  | 1048.852  | 793.654   | AB046823  | 1520.857  | 2378.481  |
| AB029020  | 3220.429  | 3639.116  | L23851    | 1900.369  | 1449.649  | NM_004929 | 1429.549  | 1922.446  |
| AK022759  | 4487.921  | 5087.127  | AK022310  | 1264.897  | 1840.65   | NM_016639 | 57643.418 | 55319.516 |
| AF217798  | 2839.423  | 2920.548  | AK021784  | 1452.395  | 1630.186  | U61739    | 25738.412 | 21909.307 |
| AF161472  | 6020.429  | 6371.881  | AF230800  | 7293.474  | 7879.045  | AJ132089  | 336.11    | 498.295   |
| AL133642  | 20220.115 | 21150.307 | NM_018520 | 4228.645  | 4058.777  | U92819    | 3118.811  | 2817.548  |
| AB011154  | 4490.271  | 5488.988  | AK026647  | 2412      | 2928.473  | AB020626  | 1339.563  | 994.306   |
| AF124432  | 3306.769  | 3149.981  | AK022152  | 4354.626  | 5483.569  | NM_002036 | 12474.824 | 8674.061  |
| NM_006330 | 40420.363 | 48072.582 | AK097417  | 452.586   | 688.858   | NM_012400 | 304.27    | 456.935   |
| NM_015873 | 8738.563  | 9738.489  | AK027027  | 2516.354  | 2879.629  | NM_005384 | 824.213   | 630.17    |
| NM_000377 | 10458.901 | 15571.733 | AF040247  | 2590.652  | 2827.892  | NM_012123 | 15954.509 | 7475.691  |

|           |           |           |           |           |           |           |           |           |
|-----------|-----------|-----------|-----------|-----------|-----------|-----------|-----------|-----------|
| U09410    | 1623.673  | 1743.557  | AF056439  | 1958.992  | 2167.192  | NM_01792E | 3001.008  | 1512.899  |
| NM_02022E | 844.895   | 638.468   | NM_004474 | 8973.538  | 11443.688 | AK022208  | 7501.736  | 4505.215  |
| NM_001186 | 7302.266  | 8368.119  | AF056449  | 3590.291  | 3969.829  | NM_003171 | 5991.833  | 4961.968  |
| NM_004502 | 4526.35   | 4325.999  | AK001033  | 2512.477  | 2496.272  | NM_006437 | 13956.162 | 9649.884  |
| AF000560  | 9163.798  | 5825.281  | AK001781  | 690.615   | 644.083   | NM_01789C | 2310.726  | 2279.898  |
| NM_01234E | 4656.02   | 3442.025  | AK021463  | 1242.306  | 1470.876  | AK021654  | 2062.717  | 1996.126  |
| NM_00582E | 40855.465 | 39117.582 | AK021698  | 1006.695  | 999.457   | NM_016481 | 1113.093  | 1164.807  |
| NM_004592 | 5276.889  | 3909.985  | AK001082  | 10055.62  | 8733.235  | NM_00392E | 7398.067  | 14222.526 |
| NM_015001 | 34064.652 | 14001.207 | AK001871  | 1107.113  | 823.671   | Z15114    | 6931.377  | 12679.984 |
| NM_019027 | 2011.481  | 1373.242  | AK021521  | 1467.157  | 1010.348  | NM_01762E | 447.654   | 1257.344  |
| NM_016107 | 12649.839 | 13987.675 | AK021743  | 14807.754 | 11117.614 | NM_00628E | 8472.438  | 12553.431 |
| NM_002567 | 43904.902 | 45175.828 | AK024144  | 18008.639 | 18516.801 | NM_00365E | 60590.688 | 59826.027 |
| NM_001404 | 8515.825  | 6526.679  | Y08959    | 3813.26   | 4004.918  | NM_00134E | 12639.887 | 9143.417  |
| NM_00160E | 49233.199 | 38862.527 | NM_00534E | 43852.961 | 45549.91  | NM_00021E | 1070.361  | 1125.232  |
| AF225422  | 29525.088 | 21061.232 | AF086047  | 761.435   | 810.348   | AK027148  | 11479.7   | 8854.103  |
| AB040960  | 28741.279 | 22682.338 | NM_00534E | 65127.809 | 69316.32  | NM_005084 | 1433.398  | 1270.86   |
| NM_01594E | 5547.813  | 5354.611  | AB032985  | 1419.394  | 1999.82   | NM_00728E | 4765.22   | 4660.907  |
| NM_00630E | 22769.408 | 21238.662 | AF116698  | 299.191   | 805.162   | NM_006111 | 3178.585  | 2712.291  |
| NM_00379E | 1764.094  | 2352.577  | AF196865  | 4865.881  | 6283.966  | AK026071  | 4187.845  | 4111.116  |
| NM_00198E | 2760.05   | 1920.265  | AJ008114  | 66017.133 | 68731.586 | BC012333  | 3052.995  | 2577.272  |
| NM_00010E | 971.043   | 863.775   | AJ008141  | 1179.802  | 1522.563  | AF237952  | 5500.521  | 4489.777  |
| NM_00249C | 15165.291 | 9485.116  | AF147432  | 5901.486  | 6458.257  | NM_00230E | 1257.89   | 728.812   |
| BE563532  | 2810.695  | 1576.013  | AK024690  | 3524.78   | 4143.13   | AK026074  | 2011.939  | 935.672   |
| NM_01482C | 13427.245 | 5167.5    | AK024882  | 3353.945  | 4876.993  | NM_00317E | 5817.867  | 3386.437  |
| NM_00503E | 4091.9    | 2283.762  | NM_01406E | 33980.879 | 36858.773 | NM_00480E | 4395.492  | 3309.08   |
| NM_019014 | 11915.026 | 7743.232  | AL109720  | 670.783   | 892.874   | H41522    | 4570.617  | 4519.583  |
| NM_002097 | 45253.781 | 27622.506 | AF293367  | 6164.74   | 6275.781  | AA460291  | 28749.914 | 25507.68  |
| X04706    | 30846.143 | 17580.346 | AF086231  | 9073.811  | 8288.4    | BI821333  | 9044.848  | 8066.686  |
| NM_01803E | 1767.912  | 1134.553  | AK001494  | 5851.427  | 4328.914  | X51841    | 49417.504 | 58326.527 |
| NM_006494 | 15951.816 | 12981.508 | AL133438  | 6306.727  | 4567.241  | AF051344  | 40051.395 | 38054.586 |
| X52343    | 7447.171  | 6071.171  | AK024978  | 37792.723 | 48670.145 | BG506100  | 9572.624  | 22857.541 |
| NM_00585E | 4021.491  | 3502.562  | U12897    | 4716.365  | 6110.114  | M26576    | 544.551   | 617.69    |
| X99681    | 2255.228  | 2058.448  | AJ227894  | 720.547   | 837.104   | M32972    | 7239.324  | 10083.42  |
| NM_00312C | 25709.303 | 26194.689 | NM_020357 | 29961.586 | 33854.902 | D89854    | 524.126   | 373.844   |
| X52360    | 13252.688 | 13678.986 | AK026836  | 4107.555  | 4705.639  | M13207    | 1370.297  | 878.622   |
| NM_00263E | 59269.582 | 58155.484 | T59562    | 53046.156 | 59349.344 | AF085893  | 570.793   | 364.403   |
| NM_016494 | 63332.07  | 60322.906 | NM_01821E | 2911.43   | 3049.671  | NM_01430E | 1494.469  | 953.838   |
| NM_020384 | 3080.87   | 3122.54   | AK026368  | 1047.95   | 1188.453  | AB011139  | 2962.228  | 1008.587  |
| NM_00605E | 40957.578 | 36103.832 | NM_014114 | 4803.6    | 5908.082  | NM_00691E | 596.406   | 419.348   |
| NM_00662E | 11717.851 | 10627.037 | U62822    | 25003.814 | 12247.323 | AK022625  | 33793.398 | 17603.793 |
| M97496    | 40807.098 | 33281.27  | NM_003534 | 60862.137 | 60397.746 | NM_00542E | 581.698   | 526.71    |
| AK026074  | 4295.343  | 2431.469  | AK057143  | 15493.349 | 20961.416 | AK023084  | 6571.326  | 5940.62   |
| NM_00317E | 7812.902  | 4681.986  | NM_015594 | 62752.551 | 57895.84  | AK025588  | 7969.984  | 9336.305  |
| NM_00480E | 6665.362  | 3503.725  | AK024399  | 817.246   | 1167.41   | NM_00318E | 3073.538  | 4689.44   |
| AA903183  | 1903.757  | 1133.463  | AF056423  | 11021.119 | 11500.473 | NM_00711E | 938.354   | 959.485   |
| H41522    | 11724.098 | 6448.415  | U00956    | 1054.052  | 1376.557  | U59431    | 17352.949 | 18171.291 |
| AA460291  | 53090.879 | 26320.063 | AK026475  | 1813.193  | 1896.55   | U49349    | 1582.112  | 1897.138  |
| BI821333  | 14578.118 | 12579.545 | K01884    | 1645.189  | 1565.938  | NM_02015E | 3190.726  | 11261.601 |
| X51841    | 62050.09  | 59573.676 | U00962    | 55162.215 | 52783.461 | NM_00396E | 1001.418  | 1774.03   |
| AF051344  | 59306.105 | 56508.461 | NM_00052E | 754.369   | 475.876   | AK024443  | 50272.621 | 56027.016 |
| BG506100  | 14822.701 | 13770.86  | AK026130  | 57972.488 | 50063.43  | X06710    | 1350.16   | 1222.8    |
| X53586    | 2790.396  | 2940.183  | NM_01248C | 13429.627 | 9796.443  | AK000896  | 1208.916  | 1248.763  |
| M17176    | 2149.527  | 2419.218  | NM_00383C | 1431.432  | 1669.746  | NM_00387E | 381.353   | 301.076   |

|           |           |           |           |           |           |           |           |           |
|-----------|-----------|-----------|-----------|-----------|-----------|-----------|-----------|-----------|
| M26576    | 2024.538  | 1414.695  | NM_000842 | 1514.453  | 1968.746  | NM_020384 | 2582.188  | 2244.249  |
| M32972    | 16888.541 | 15523.01  | NM_015642 | 2092.419  | 2910.533  | NM_006058 | 29941.855 | 18405.781 |
| D11151    | 1167.304  | 1232.424  | NM_004640 | 27099.813 | 34618.188 | NM_006628 | 5402.131  | 4137.697  |
| D89854    | 1842.796  | 1511.665  | NM_002901 | 570.695   | 846.057   | M97496    | 24924.537 | 19710.051 |
| M13207    | 3078.297  | 3024.701  | NM_016222 | 11769.579 | 12751.762 | NM_001658 | 12245.204 | 5021.088  |
| X14885    | 1782.813  | 2590.141  | AB037823  | 8416.48   | 10682.972 | AB020663  | 515.09    | 377.767   |
| M97815    | 1954.276  | 2894.717  | NM_015380 | 27771.539 | 31955.217 | AF297866  | 6267.816  | 4059.568  |
| NM_003001 | 5695.964  | 7785.734  | BE254485  | 5172.158  | 5403.035  | NM_002864 | 2062.535  | 1379.151  |
| NM_012400 | 608.612   | 1251.91   | NM_002732 | 1632.344  | 1594.109  | NM_017817 | 3547.056  | 4813.852  |
| NM_005384 | 1579.987  | 1504.815  | AK022694  | 3179.32   | 3505.207  | NM_018184 | 5516.013  | 11807.229 |
| NM_006850 | 328.716   | 364.186   | BC005946  | 62910.219 | 78697.711 | AB046823  | 1418.704  | 4802.623  |
| AB013103  | 710.869   | 817.742   | AK021893  | 8112.028  | 7463.696  | NM_004928 | 1177.072  | 1685.487  |
| AF019225  | 3702.875  | 3407.082  | NM_001048 | 15819.53  | 16630.326 | NM_004662 | 651.176   | 509.555   |
| Z36803    | 16785.408 | 12003.107 | AK026497  | 9918.496  | 10513.99  | NM_016638 | 52662.422 | 55455.402 |
| NM_013371 | 1466.456  | 824.833   | BE958139  | 3896.115  | 3595.979  | U61739    | 30076.623 | 57954.027 |
| NM_000707 | 12210.852 | 7628.707  | AF085359  | 1772.241  | 1592.573  | AB020626  | 1979.79   | 4062.956  |
| AF202092  | 19374.781 | 10822.471 | AF086516  | 2300.026  | 2983.4    | NM_002038 | 24069.5   | 30242.578 |
| NM_003201 | 12843.656 | 6634.389  | D86978    | 19912.408 | 18446.154 | NM_012400 | 1290.471  | 1234.327  |
| AB011139  | 5924.847  | 3403.202  | AL080060  | 63347.922 | 61500.289 | AB013103  | 760.893   | 736.716   |
| NM_006918 | 3458.153  | 2866.445  | NM_005267 | 11285.77  | 11007.086 | AF019225  | 2901.51   | 2517.795  |
| AK022625  | 41889.695 | 53558.656 | U80763    | 951.463   | 1397.225  | Z36803    | 5295.332  | 4187.133  |
| NM_005428 | 1722.203  | 1807.148  | AF086017  | 2898.152  | 2504.515  | NM_013371 | 1392.158  | 771.513   |
| AK023084  | 22336.049 | 23193.926 | NM_005780 | 24640.754 | 22412.088 | NM_000707 | 7210.263  | 6031.691  |
| AK025588  | 23258.904 | 25216.82  | NM_003285 | 2862.585  | 3576.089  | AF202092  | 7800.487  | 4860.602  |
| NM_003188 | 7270.534  | 8840.54   | NM_000888 | 14140.425 | 14575.951 | NM_003201 | 4243.468  | 2547.582  |
| NM_007118 | 1779.202  | 2148.145  | NM_000595 | 46548.496 | 51935.16  | NM_007283 | 5990.286  | 2499.36   |
| U59431    | 32049.486 | 34815.301 | X99663    | 15870.327 | 18535.322 | NM_006111 | 5435.936  | 2611.586  |
| U49349    | 2733.943  | 2119.284  | NM_016552 | 16944.787 | 19578.768 | AK026071  | 8437.511  | 5160.391  |
| NM_020152 | 5136.276  | 4571.686  | AK025340  | 1852.515  | 2360.892  | BC012333  | 10182.977 | 8088.153  |
| NM_013404 | 6357.608  | 6866.345  | NM_003565 | 5417.698  | 6947.14   | AF237952  | 6710.709  | 11076.179 |
| NM_002364 | 1296.01   | 692.879   | NM_004841 | 4070.713  | 4633.412  | AL079287  | 1486.654  | 6070.567  |
| NM_003966 | 2831.976  | 3485.614  | NM_004114 | 1178.056  | 1352.199  | NM_014427 | 6644.662  | 14128.225 |
| BC012333  | 4396.447  | 5168.095  | NM_018440 | 12874.811 | 27085.832 | AB046769  | 4753.459  | 7100.791  |
| AF237952  | 6070.201  | 8151.246  | AK025470  | 2423.443  | 1878.896  | NM_015922 | 8463.968  | 9543.771  |
| AL079287  | 1744.057  | 2282.566  | M35410    | 5995.217  | 6236.96   | NM_020381 | 3626.396  | 4757.08   |
| NM_014427 | 3321.906  | 3118.059  | AB023227  | 4012.995  | 4284.862  | NM_002957 | 9560.78   | 23033.859 |
| AB046769  | 4381.268  | 3861.379  | NM_005776 | 38645.973 | 41344.617 | NM_003728 | 2672.328  | 8164.801  |
| NM_015922 | 10763.234 | 9066.721  | AK023071  | 20420.439 | 20768.316 | BE899154  | 1588.515  | 2786.796  |
| NM_020381 | 5457.21   | 4555.535  | NM_004041 | 4159.432  | 3310.227  | NM_004863 | 3121.405  | 4596.848  |
| NM_002957 | 16581.68  | 11621.438 | AK022888  | 7903.681  | 6459.719  | AK024573  | 1667.214  | 2072.561  |
| NM_018106 | 9621.423  | 6657.377  | AK024484  | 12793.331 | 11004.353 | NM_002298 | 3294.926  | 2795.195  |
| NM_003728 | 3631.559  | 3261.035  | NM_002632 | 1456.697  | 1152.174  | D79998    | 2519.063  | 1871.895  |
| BE899154  | 3683.503  | 2897.666  | NM_001953 | 62334.125 | 67074.047 | AB032963  | 803.68    | 618.062   |
| NM_004863 | 8014.688  | 7093.795  | NM_001406 | 1537.387  | 1682.605  | NM_000388 | 1777.635  | 1353.609  |
| AB032963  | 940.336   | 1636.446  | NM_002292 | 11550.009 | 13418.986 | NM_018992 | 56669.129 | 55065.32  |
| U15688    | 5534.643  | 5748.857  | NM_000166 | 2147.823  | 2070.02   | U15688    | 1728.635  | 1313.286  |
| NM_018448 | 16448.551 | 19407.748 | AF305200  | 2679.687  | 2117.941  | NM_000483 | 3122.347  | 2142.628  |
| NM_004928 | 2640.867  | 3294.112  | NM_014583 | 970.841   | 997.303   | NM_018448 | 5432.28   | 4095.368  |
| NM_004662 | 1562.78   | 1765.464  | NM_006613 | 31060.119 | 34576.531 | AF085893  | 873.264   | 293.508   |
| NM_016638 | 61329.824 | 61263.41  | NM_004638 | 31755.445 | 36177.539 | NM_003102 | 819.758   | 609.605   |
| U61739    | 30396.072 | 30417.721 | NM_005373 | 784.756   | 1094.075  | NM_014308 | 2982.814  | 2107.641  |
| AJ132089  | 2308.306  | 1971.353  | L40027    | 6238.851  | 7512.799  | NM_012123 | 19729.52  | 26030.688 |
| U92819    | 10133.448 | 11534.959 | NM_003718 | 62955.449 | 61178.141 | U87972    | 2491.697  | 2387.777  |

|           |           |           |           |           |           |           |           |           |
|-----------|-----------|-----------|-----------|-----------|-----------|-----------|-----------|-----------|
| AB020626  | 5872.466  | 7099.127  | NM_007062 | 2423.381  | 3150.826  | NM_01792E | 2933.331  | 2827.515  |
| NM_00203E | 42397.645 | 44212.438 | NM_01418C | 31708.969 | 42719.93  | AK022208  | 13388.883 | 13467.942 |
| NM_01430E | 8928.493  | 11790.713 | NM_01770E | 3497.567  | 4157.068  | NM_01789C | 1846.768  | 4569.187  |
| NM_01212E | 20488.869 | 15039.574 | AF334406  | 3412.678  | 3409.861  | AK021654  | 1955.879  | 2649.476  |
| U87972    | 2669.499  | 3222.579  | NM_017444 | 14384.389 | 12951.095 | NM_016481 | 1374.908  | 1420.292  |
| NM_01792E | 7949.407  | 8171.224  | NM_01802E | 2995.157  | 2769.88   | NM_00392E | 7687.102  | 8777.051  |
| AK022208  | 28971.277 | 22769.461 | NM_01599E | 15044.097 | 14041.33  | Z15114    | 5104.173  | 4307.119  |
| NM_003171 | 12214.023 | 13809.157 | NM_003804 | 30862.641 | 24889.955 | AB040812  | 37591.012 | 25226.68  |
| NM_006437 | 25163.893 | 20424.082 | NM_01845E | 14528.626 | 12744.831 | NM_01762E | 430.874   | 451.419   |
| NM_01789C | 4881.505  | 3447.363  | NM_00470E | 64149.172 | 62195.914 | NM_00628E | 6161.541  | 4912.977  |
| AK021654  | 5909.772  | 4014.444  | NM_016001 | 24616.551 | 20764.469 | NM_00365E | 50071.004 | 34812.957 |
| NM_016481 | 2344.93   | 2146.546  | NM_01610E | 11532.771 | 8976.537  | NM_00134E | 15878.827 | 9491.258  |
| NM_00392E | 16568.121 | 12841.013 | AL137722  | 1066.667  | 677.247   | NM_00021E | 2275.657  | 2457.657  |
| Z15114    | 15849.025 | 15678.779 | S49432    | 7274.661  | 7287.967  | AK027148  | 13871.85  | 7694.389  |
| AB040812  | 55074.754 | 55422.059 | D86984    | 6399.323  | 6278.788  | NM_005084 | 4488.969  | 3173.463  |
| NM_00134E | 29530.543 | 29795.104 | NM_01595E | 2148.937  | 1520.247  | CY3Cy5    | 11505.454 | 546.806   |
| NM_00021E | 8554.64   | 9716.217  | AF217974  | 16738.885 | 13068.686 | NM_00607E | 1439.894  | 4263.81   |
| AK027148  | 51380.898 | 49250.543 | NM_00191C | 10092.741 | 11504.082 | NM_00669E | 490.031   | 1160.966  |
| NM_005084 | 13209.794 | 13403.65  | AK023354  | 531.47    | 841.814   | NM_00276E | 1946.717  | 4779.457  |
| NM_00728E | 15973.009 | 18226.012 | J03210    | 722.986   | 744.895   | AF038194  | 78.966    | 1746.852  |
| NM_006111 | 14063.394 | 17938.361 | NM_00190E | 12573.521 | 15153.279 | NM_015434 | 1301.326  | 3045.314  |
| AK026071  | 24264.461 | 27094.008 | NM_01219E | 16997.996 | 19257.748 | NM_01405E | 1000.583  | 1959.513  |
| NM_00662E | 15313.166 | 18181.137 | NM_00336E | 9350.889  | 9178.669  | AK023940  | 2925.003  | 5904.879  |
| M97496    | 50908.32  | 55236.813 | AB040886  | 2946.167  | 3390.82   | NM_018691 | 4552.253  | 11616.899 |
| NM_00230E | 634.964   | 585.604   | NM_00146C | 1796.196  | 3942.857  | AF086431  | 5358.71   | 14658.117 |
| AK026074  | 2356.158  | 2355.762  | AB029020  | 4718.712  | 4570.499  | NM_01418E | 58310.68  | 58782.648 |
| NM_00317E | 9161.556  | 10004.972 | AK022759  | 6407.628  | 6012.751  | AK026365  | 3456.092  | 9701.864  |
| NM_00480E | 7009.374  | 8279.882  | NM_01233E | 22929.098 | 16466.002 | NM_00607E | 6676.847  | 19922.053 |
| AA460291  | 54797.027 | 53064.148 | AF217798  | 5714.52   | 4896.337  | NM_00669E | 1810.658  | 4467.688  |
| BI821333  | 16573.957 | 15573.448 | AF161472  | 8724.464  | 7803.871  | SR1       | 81865.477 | 65273.387 |
| X51841    | 62656.941 | 55805.211 | AL133642  | 31545.383 | 27857.883 | SR3       | 41769.895 | 61409.633 |
| AF051344  | 59579.098 | 57272.434 | AB011154  | 7321.747  | 5483.439  | SR5       | 3744.076  | 11921.8   |
| BG506100  | 15429.762 | 13134.264 | AF124432  | 4934.969  | 3550.045  | SR7       | 4740.985  | 70111.93  |
| X53586    | 3229.219  | 4498.114  | NM_00633C | 45311.25  | 45499.16  | SR9       | 15523.637 | 8500.694  |
| M17176    | 2372.051  | 2494.797  | NM_01587E | 11665.786 | 9812.108  | CY3Cy5    | 11461.371 | 570.945   |
| M32972    | 18099.938 | 23906.363 | NM_000377 | 10634.348 | 10275.677 | Z36825    | 772.192   | 1620.919  |
| D89854    | 2537.975  | 2195.927  | NM_00681E | 3021.564  | 2956.721  | AF086157  | 1820.74   | 3945.456  |
| M13207    | 2906.681  | 2296.952  | NM_01682E | 10516.216 | 9874.813  | D17018    | 963.026   | 2462.84   |
| X14885    | 1173.499  | 1436.38   | AL570170  | 4762.871  | 3361.925  | AF085891  | 4746.666  | 13919.305 |
| M97815    | 2321.472  | 2241.593  | D56495    | 2052.408  | 1076.56   | AF019618  | 2188.68   | 5878.685  |
| AF085893  | 2278.018  | 2648.048  | U09410    | 8255.752  | 9509.049  | AK025656  | 1821.095  | 5430.441  |
| NM_00310E | 1501.983  | 1590.287  | NM_02022E | 4402.841  | 5040.255  | AF161414  | 6031.667  | 18740.307 |
| AB013103  | 965.492   | 1074.291  | NM_00118E | 14057.278 | 15566.511 | AK025967  | 1079.106  | 3783.678  |
| AF019225  | 4796.753  | 4936.745  | NM_00450E | 13881.288 | 15024.151 | AL110177  | 2382.43   | 6146.829  |
| Z36803    | 14344.133 | 11868.071 | AF000560  | 16411.445 | 18851.127 | AK022686  | 2197.346  | 6833.875  |
| NM_013371 | 884.143   | 981.02    | NM_01328E | 6770.14   | 6636.463  | AK023516  | 892.873   | 3122.52   |
| NM_000707 | 11187.975 | 15456.138 | NM_005777 | 19823.52  | 24243.549 | AK023864  | 4128.095  | 12277.351 |
| AB011139  | 6406.675  | 8820.261  | NM_01234E | 10490.28  | 12871.662 | AK023017  | 1534.923  | 3181.59   |
| NM_00691E | 3206.209  | 3195.754  | U94387    | 686.452   | 1318.204  | AK023908  | 8619.92   | 18163.445 |
| AK022625  | 42132.422 | 39261.164 | NM_00582E | 44733.871 | 51020.379 | AK022098  | 542.851   | 1256.354  |
| NM_00542E | 1806.043  | 1331.906  | NM_00459E | 7802.528  | 8060.809  | AB040933  | 782.953   | 1500.171  |
| AK023084  | 22072.402 | 19953.359 | NM_015001 | 46685.375 | 47592.219 | AK022072  | 526.791   | 1111.4    |
| AK025588  | 25586.846 | 25217.346 | NM_019027 | 3620.722  | 3024.031  | AK025020  | 6089.022  | 11359.822 |

|           |           |           |           |           |           |           |           |           |
|-----------|-----------|-----------|-----------|-----------|-----------|-----------|-----------|-----------|
| NM_00318E | 6983.021  | 8259.55   | NM_016107 | 21055.889 | 17979.033 | AF086009  | 2080.598  | 3818.77   |
| NM_007118 | 1770.082  | 2287.943  | NM_002567 | 50371.508 | 50435.699 | AF086031  | 1834.389  | 3162.037  |
| U59431    | 31969.742 | 38205.91  | NM_001404 | 9742.379  | 8495.64   | AK024130  | 727.3     | 1760.823  |
| U49349    | 2833.778  | 2590.558  | NM_001605 | 52333.426 | 49698.719 | AK024598  | 3406.462  | 5916.562  |
| NM_020152 | 4716.277  | 4715.469  | AF225422  | 42165.211 | 41699.824 | AF087983  | 1138.049  | 2591.14   |
| NM_013404 | 6446.152  | 5926.183  | AB040960  | 33760.332 | 34077.875 | NM_020234 | 2062.233  | 4682.039  |
| NM_002364 | 529.374   | 1112.04   | NM_015946 | 7307.793  | 7731.141  | AJ011377  | 925.259   | 1250.332  |
| NM_003966 | 1706.415  | 3076.497  | NM_006303 | 26842.713 | 37493.621 | AL137734  | 1329.774  | 2766.328  |
| NM_020384 | 10176.79  | 12398.961 | AK026904  | 7056.395  | 7234.178  | AK023784  | 593.259   | 839.796   |
| NM_00605E | 52663.641 | 55686.637 | AB002364  | 1077.57   | 849.06    | AK026323  | 1986.017  | 2073.593  |
| AL079287  | 2718.96   | 2799.352  | NM_003793 | 874.438   | 421.216   | AL109710  | 610.354   | 842.979   |
| NM_014427 | 5581.399  | 5046.013  | NM_001985 | 11132.446 | 11786.313 | AK023793  | 2482.586  | 3606.364  |
| AB046769  | 7038.492  | 6893.265  | NM_000102 | 11801.342 | 12548.365 | AK023286  | 2748.806  | 4266.387  |
| NM_015922 | 11378.476 | 9431.282  | NM_002490 | 27521.791 | 31280.574 | AK021544  | 981.1     | 1366.442  |
| NM_020381 | 4257.106  | 4067.88   | BE563532  | 4351.236  | 5179.201  | AL079282  | 1620.077  | 2035.896  |
| NM_002957 | 9751.353  | 10736.655 | NM_001916 | 25334.555 | 30777.436 | AF116714  | 1121.933  | 1194.359  |
| NM_004863 | 6020.983  | 6981.607  | NM_002491 | 2289.025  | 4632.736  | NM_01405E | 2224.795  | 3236.426  |
| AB032963  | 1221.289  | 1025.124  | NM_015425 | 8777.082  | 12243.731 | AK026340  | 673.747   | 860.538   |
| U15688    | 4473.307  | 4762.746  | NM_015153 | 11892.158 | 15878.27  | AK022388  | 484.969   | 948.873   |
| NM_01844E | 15191.329 | 14079.992 | AB032966  | 59270.824 | 54011.711 | AY007126  | 4374.765  | 2925.53   |
| NM_018184 | 13114.973 | 14940.19  | M26747    | 3107.552  | 2771.545  | AF085951  | 3551.728  | 3702.891  |
| AB046823  | 2584.658  | 3711.816  | NM_014820 | 20502.043 | 18162.078 | NM_018182 | 3181.115  | 2549.814  |
| NM_004929 | 2541.579  | 4594.993  | NM_005035 | 6697.622  | 6933.333  | U80771    | 3456.52   | 3553.995  |
| NM_004662 | 1539.774  | 2122.959  | NM_019014 | 17234.443 | 16349.341 | AJ272173  | 8777.431  | 10353.539 |
| NM_01663E | 62160.488 | 59589.547 | NM_002097 | 52448.648 | 47085.262 | Z24724    | 4762.245  | 5957.163  |
| U61739    | 27614.691 | 27884.594 | X04706    | 45048.527 | 42541.801 | AK022712  | 5142.052  | 6461.165  |
| AJ132089  | 2557.662  | 2363.875  | NM_018039 | 1778.643  | 1490.148  | AK024132  | 2055.431  | 2719.991  |
| U92819    | 9238.018  | 10895.907 | NM_006494 | 32084.332 | 28576.4   | AK021863  | 25791.637 | 27226.912 |
| AB020626  | 5314.089  | 6168.572  | X52343    | 12104.055 | 11519.469 | NM_005684 | 937.348   | 985.451   |
| NM_012123 | 22837.27  | 20302.553 | NM_005853 | 5080.095  | 4689.456  | AK022293  | 681.889   | 541.447   |
| U87972    | 2174.936  | 1702.694  | X99681    | 3279.113  | 2648.233  | AL117439  | 1432.849  | 1598.395  |
| NM_01792E | 5943.244  | 4970.976  | NM_003120 | 27611.299 | 29429.545 | AL133065  | 1433.936  | 2131.886  |
| AK022208  | 24285.186 | 19385.664 | X52360    | 18705     | 17210.141 | NM_005297 | 3567.04   | 4256.85   |
| NM_003171 | 12417.608 | 13295.623 | NM_002636 | 64915.574 | 59354.73  | U80769    | 972.832   | 1202.343  |
| NM_006437 | 24842.09  | 22944.205 | NM_016494 | 63223.738 | 57295.141 | AK025052  | 1769.192  | 1469.712  |
| NM_017890 | 4405.133  | 4728.496  | NM_020384 | 12941.438 | 14803.943 | U85044    | 299.15    | 276.838   |
| AK021654  | 5666.323  | 6967.833  | NM_00605E | 59042.414 | 54166.883 | BC018880  | 1484.972  | 1342.913  |
| NM_016481 | 2613.996  | 2538.829  | NM_00662E | 37603.117 | 46669.926 | AF086090  | 1182.294  | 809.457   |
| NM_00392E | 16196.584 | 13427.979 | M97496    | 64722.875 | 68002.43  | AK002173  | 10927.696 | 7272.688  |
| Z15114    | 13469.648 | 12015.285 | NM_002309 | 827.642   | 1553.254  | NM_01774E | 2359.812  | 1668.031  |
| AB040812  | 55527.738 | 55050.52  | AK026074  | 5841.803  | 8623.181  | NM_02018E | 15737.136 | 8331.703  |
| NM_01762E | 1298.222  | 1676.364  | NM_003172 | 13123.729 | 20394.762 | U88897    | 3376.393  | 3346.966  |
| NM_00628E | 15894.098 | 19111.881 | NM_004809 | 22852.947 | 33320.578 | NM_003493 | 60195.711 | 53372.816 |
| AK027148  | 47838.855 | 47097.461 | AA903183  | 2943.818  | 6821.788  | AL133430  | 18693.064 | 18955.109 |
| NM_005084 | 11502.814 | 11149.652 | H41522    | 19426.574 | 16155.516 | AF070633  | 40421.027 | 36396.758 |
| NM_007283 | 15148.136 | 14176.858 | AA460291  | 56903.758 | 52051.816 | Y16184    | 798.598   | 629.161   |
| NM_006111 | 13222.631 | 17240.029 | BI821333  | 20618.559 | 20432.102 | S51971    | 61168.539 | 57939.945 |
| NM_002309 | 1599.234  | 1172.341  | X51841    | 61295.855 | 61587.5   | AF054996  | 22339.492 | 18400.402 |
| AK026074  | 3473.869  | 2511.078  | AF051344  | 61747.832 | 57108.121 | AF090098  | 3153.54   | 2820.585  |
| NM_003172 | 8230.739  | 7905.04   | BG506100  | 17844.186 | 19493.699 | AF146694  | 2179.952  | 3286.089  |
| NM_00480E | 8328.585  | 7064.062  | X53586    | 4072.617  | 3926.589  | AK057104  | 1454.9    | 1943.634  |
| AA903183  | 1872.507  | 1709.886  | M17176    | 2536.412  | 1934.464  | AL133555  | 552.078   | 420.17    |
| H41522    | 10511.084 | 9570.249  | M26576    | 2030.801  | 1884.765  | AK024979  | 45254.711 | 48634.059 |



|           |           |           |           |           |           |           |           |           |
|-----------|-----------|-----------|-----------|-----------|-----------|-----------|-----------|-----------|
| AA460291  | 46570.676 | 45041.465 | M32972    | 25819.152 | 30877.965 | AF233648  | 1881.279  | 2331.923  |
| BI821333  | 16945.213 | 16457.293 | D11151    | 1315.656  | 937.547   | NM_013439 | 16612.236 | 18147.174 |
| X51841    | 63326.977 | 60275.238 | D89854    | 2849.596  | 1937.396  | NM_003406 | 23120.656 | 20241.152 |
| AF051344  | 61352.98  | 57322.719 | M13207    | 3339.686  | 2905.561  | NM_018316 | 1032.336  | 750.642   |
| BG506100  | 14620.696 | 11194.058 | X14885    | 1783.768  | 1494.505  | AB011180  | 2468.885  | 1314.991  |
| X53586    | 2777.856  | 3131.097  | M97815    | 2871.306  | 2307.504  | NM_007167 | 3178.513  | 2305.326  |
| M17176    | 2285.748  | 2209.307  | NM_003001 | 5180.516  | 3744.354  | NM_002477 | 16691.225 | 14745.858 |
| M26576    | 1010.196  | 1060.927  | NM_012400 | 2401.749  | 2159.829  | NM_004673 | 370.011   | 381.002   |
| M32972    | 18992.475 | 19714.92  | NM_005384 | 6101.184  | 6563.719  | Y17180    | 65134.98  | 72426.172 |
| X14885    | 1291.193  | 1230.09   | NM_006850 | 939.022   | 1001.72   | NM_005649 | 1862.761  | 2348.12   |
| M97815    | 1675.491  | 1761.816  | AB013103  | 2846.377  | 2997.999  | AK021566  | 1033.641  | 1187.47   |
| AF085893  | 2311.702  | 2105.832  | AF019225  | 11581.374 | 12235.946 | NM_002037 | 2036.015  | 2712.522  |
| NM_003102 | 1399.415  | 1995.182  | Z36803    | 25882.273 | 27883.199 | NM_016346 | 2182.315  | 2136.351  |
| AB011139  | 6089.933  | 4382.773  | NM_013371 | 2096.152  | 2689.142  | NM_020157 | 40327.766 | 32143.383 |
| NM_006919 | 3182.067  | 2308.499  | NM_000707 | 23537.105 | 31204.436 | X64991    | 2477.417  | 2785.135  |
| AK022625  | 41824.582 | 35966.887 | AF202092  | 32042.551 | 38698.078 | AK025703  | 5899.645  | 6072.933  |
| NM_005425 | 1629.083  | 1313.475  | NM_003201 | 21293.531 | 18989.756 | NM_018185 | 2522.292  | 2742.104  |
| AK023084  | 20421.219 | 16445.506 | AB011139  | 8782.907  | 8498.804  | AK022598  | 4424.497  | 6394.089  |
| AK025588  | 21247.186 | 18408.096 | NM_006919 | 4267.205  | 4157.311  | AK024306  | 570.578   | 837.282   |
| NM_003188 | 5830.237  | 5575.741  | AK022625  | 52198.98  | 52995.477 | NM_018322 | 9405.647  | 14089.059 |
| NM_007118 | 1771.88   | 1588.218  | NM_005425 | 3035.639  | 4111.409  | AK025862  | 6734.223  | 7276.706  |
| U59431    | 35247.391 | 32333.795 | AK023084  | 34573.988 | 38462.527 | AK026495  | 1334.961  | 1767.681  |
| U49349    | 3002.644  | 2171.473  | AK025588  | 33433.613 | 32285     | AL137493  | 921.729   | 894.561   |
| NM_020152 | 4883.229  | 3748.665  | NM_003188 | 9303.747  | 9082.428  | NM_001338 | 7521.328  | 6265.752  |
| NM_013404 | 6181.998  | 5492.512  | NM_007118 | 2049.266  | 2303.391  | NM_003637 | 337.466   | 489.779   |
| NM_006157 | 653.574   | 649.583   | U59431    | 54118.82  | 51186.355 | BC035133  | 519.875   | 498.529   |
| NM_002364 | 410.119   | 734.281   | U49349    | 4239.37   | 3533.295  | NM_004233 | 5001.335  | 3799.553  |
| X06710    | 4442.636  | 6273.505  | NM_020152 | 6819.369  | 5921.61   | NM_001544 | 2842.95   | 2316.339  |
| AK000896  | 3401.103  | 3731.516  | NM_013404 | 8754.274  | 7602.019  | X58531    | 995.796   | 866.586   |
| NM_003872 | 1990.591  | 2067.886  | NM_002364 | 766.111   | 601.947   | AB011168  | 5556.898  | 6095.108  |
| NM_020384 | 10117.199 | 10184.934 | NM_003966 | 1970.624  | 1507.021  | BE794262  | 6106.883  | 6475.608  |
| NM_006058 | 51980.734 | 55835.613 | BC012333  | 23262.09  | 25096.213 | NM_003212 | 7212.035  | 7118.762  |
| NM_006628 | 25434.699 | 31043.314 | AF237952  | 15865.61  | 20539.777 | NM_006382 | 3308.232  | 3403.497  |
| M97496    | 68392.352 | 69482.961 | AL079287  | 4777.572  | 6073.669  | NM_004811 | 14823.465 | 13759.688 |
| NM_001659 | 32287.73  | 25499.307 | NM_014427 | 16389.055 | 18971.477 | AK021910  | 61731.57  | 59646.336 |
| AB020663  | 1751.873  | 1455.342  | AB046769  | 17007.438 | 19980.191 | NM_004748 | 5247.102  | 6236.875  |
| AF297866  | 8155.575  | 6402.551  | NM_015922 | 19855.578 | 22004.494 | NM_002668 | 26696.262 | 23836.479 |
| NM_002864 | 2686.306  | 2692.068  | NM_020381 | 6883.96   | 8192.088  | NM_001058 | 417.463   | 642.704   |
| NM_017817 | 5624.977  | 5125.316  | NM_002957 | 22793.705 | 21835.385 | NM_014316 | 13157.677 | 13248.212 |
| NM_018184 | 10775.769 | 11085.422 | NM_018106 | 15079.641 | 16372.48  | NM_004054 | 4847.053  | 7664.664  |
| AB046823  | 1825.286  | 1731.363  | NM_003725 | 6461.686  | 6813.624  | NM_001138 | 6582.577  | 9315.699  |
| NM_004929 | 2027.131  | 2157.989  | BE899154  | 4976.395  | 5187.457  | NM_003443 | 58496.547 | 66223.102 |
| NM_004662 | 2285.07   | 2277.234  | NM_004863 | 9440.551  | 10363.184 | NM_002025 | 1435.799  | 1143.761  |
| NM_016639 | 59900.977 | 55597.406 | AB032963  | 1618.323  | 1667.918  | AB015228  | 1308.657  | 643.536   |
| U61739    | 29994.389 | 24145.268 | U15688    | 7585.925  | 10747.404 | AL049685  | 1770.044  | 1068.752  |
| AJ132089  | 1569.126  | 1419.311  | NM_018448 | 21089.48  | 22266.285 | AK026800  | 6683.387  | 6487.982  |
| U92819    | 9796.575  | 8656.005  | NM_018184 | 16711.09  | 18639.24  | NM_001442 | 1085.997  | 852.603   |
| AB020626  | 5327.01   | 5047.911  | AB046823  | 3241.663  | 2534.207  | NM_017775 | 8592.027  | 7475.967  |
| NM_002036 | 41902.223 | 47238.797 | NM_004929 | 3448.098  | 3021.83   | AK001958  | 1057.855  | 969.274   |
| NM_012400 | 1576.137  | 1695.099  | NM_004662 | 1879.243  | 1591.273  | AK025947  | 2548.459  | 2241.125  |
| NM_005384 | 4198.083  | 5151.363  | NM_016639 | 61457.332 | 63875.484 | AF217973  | 6656.946  | 6586.315  |
| NM_006850 | 1354.125  | 1617.569  | U61739    | 42768.855 | 44104.578 | NM_007033 | 9926.435  | 8970.562  |
| AB013103  | 1897.067  | 2916.078  | AJ132089  | 2123.334  | 2189.045  | AF226048  | 6113.844  | 5326.377  |

|           |           |           |           |           |           |           |           |           |
|-----------|-----------|-----------|-----------|-----------|-----------|-----------|-----------|-----------|
| AF019225  | 8716.174  | 10315.031 | U92819    | 13039.25  | 12638.948 | NM_005573 | 6526.968  | 5321.25   |
| Z36803    | 24738.541 | 25888.584 | AB020626  | 10097.715 | 7296.926  | D50918    | 27540.201 | 19162.367 |
| NM_013371 | 1745.889  | 1869.273  | NM_002036 | 56694.848 | 51113.297 | U48734    | 10179.744 | 8858.57   |
| NM_000707 | 16964.611 | 19135.281 | NM_014305 | 7781.687  | 9760.653  | NM_00640C | 7674.041  | 14366.013 |
| AF202092  | 25892.387 | 28752.721 | NM_012123 | 34402.43  | 45921.363 | NM_00220E | 15297.425 | 18089.49  |
| NM_003201 | 15803.246 | 13721.05  | U87972    | 5232.343  | 6049.534  | NM_00721E | 2845.633  | 3675.676  |
| NM_007283 | 13685.332 | 12016.936 | NM_017925 | 10004.976 | 10456.727 | AK023518  | 2375.919  | 2689.591  |
| NM_006111 | 11806.264 | 9880.586  | AK022208  | 36169.387 | 39734.836 | NM_00009E | 5727.57   | 8811.062  |
| AK026071  | 18608.49  | 15683.249 | NM_003171 | 15625.699 | 16495.418 | NM_01339C | 3328.592  | 2743.118  |
| BC012333  | 14361.014 | 12980.543 | NM_006437 | 30364.619 | 23790.783 | J02783    | 26467.131 | 19603.541 |
| AF237952  | 9258.194  | 9389.628  | NM_01789C | 6206.573  | 6291.123  | NM_018137 | 440.797   | 372.122   |
| AL079287  | 3188.605  | 3835.006  | AK021654  | 8012.551  | 8604.829  | NM_006577 | 16033.535 | 11476.63  |
| NM_014427 | 9867.107  | 9014.792  | NM_016481 | 3065.423  | 4082.928  | NM_005317 | 1878.555  | 1207.092  |
| AB046769  | 9821.04   | 9695.396  | NM_003925 | 24246.918 | 24100.971 | AF120493  | 872.986   | 700.759   |
| NM_015922 | 15199.438 | 14131.687 | Z15114    | 22908.605 | 22691.822 | U12597    | 3044.468  | 2311.114  |
| NM_020381 | 7640.921  | 6687.928  | AB040812  | 55227.48  | 58523.672 | U28055    | 615.937   | 488.781   |
| NM_002957 | 20611.348 | 13770.975 | NM_006285 | 19782.449 | 19072.607 | AB044343  | 17583.16  | 13763.26  |
| NM_01810E | 11009.564 | 9917.151  | NM_00365E | 65311.555 | 62700.23  | NM_01840E | 633.804   | 499.834   |
| NM_00372E | 4138.77   | 4325.163  | NM_00134E | 34766.512 | 29084.631 | NM_014662 | 748.144   | 728.556   |
| BE899154  | 4041.086  | 3871.395  | NM_000215 | 13013.464 | 14364.5   | NM_00517E | 16726.854 | 15660.369 |
| NM_004863 | 7787.926  | 8149.969  | AK027148  | 56710.602 | 51147.379 | NM_017702 | 7371.907  | 5943.3    |
| AK024573  | 4302.703  | 3713.316  | NM_005084 | 13902.858 | 13291.035 | AB014516  | 8445.015  | 9170.604  |
| NM_00229E | 7835.382  | 8015.298  | NM_007283 | 18247.031 | 16926.016 | X15262    | 4649.98   | 5688.036  |
| D79998    | 5824.84   | 9364.754  | NM_006111 | 17618.367 | 13373.004 | NM_00547E | 1357.751  | 1683.253  |
| AB032963  | 1186.786  | 1687.251  | AK026071  | 36965.066 | 29199.566 | NM_00728E | 4243.414  | 6443.252  |
| NM_00038E | 4777.087  | 6017.641  | NM_00662E | 36078.324 | 44152.461 | NM_00421E | 62256.785 | 62823.059 |
| AF301013  | 8972.365  | 12875.416 | M97496    | 59233.492 | 74725.797 | AB023232  | 2029.685  | 1719.537  |
| NM_018992 | 60629.246 | 62565.297 | NM_00230E | 896.911   | 1169.549  | NM_01742C | 514.751   | 402.943   |
| U15688    | 5065.554  | 6129.384  | AK026074  | 5395.974  | 6343.745  | AL137589  | 1191.552  | 718.004   |
| NM_000483 | 8727.908  | 7752.522  | NM_003172 | 12212.468 | 13588.381 | AF036943  | 477.583   | 474.794   |
| NM_01844E | 16195.967 | 14550.288 | NM_00480E | 19487.73  | 20449.387 | NM_002502 | 7943.631  | 6750.746  |
| AF085893  | 2533.848  | 2746.968  | AA903183  | 2297.779  | 2663.924  | AF226732  | 13770.249 | 10106.869 |
| NM_003102 | 1345.924  | 1157.253  | H41522    | 12304.462 | 10253.568 | NM_006312 | 5989.802  | 4170.674  |
| NM_01430E | 4909.958  | 4952.165  | AA460291  | 57659.27  | 54016.625 | NM_00280E | 1684.014  | 1568.715  |
| NM_012123 | 24338.766 | 27770.01  | BI821333  | 20752.514 | 20832.785 | NM_00429C | 315.355   | 234.719   |
| U87972    | 4769.76   | 3856.029  | X51841    | 62570.441 | 61219.895 | NM_00293E | 19614.646 | 18066.869 |
| NM_01792E | 7843.823  | 5787.251  | AF051344  | 62150.656 | 59806.832 | NM_01583E | 48015.621 | 31121.963 |
| AK022208  | 29506.6   | 20911.105 | BG506100  | 19288.449 | 19631.418 | NM_000973 | 61830.938 | 60802.332 |
| NM_003171 | 14250.313 | 11352.986 | X53586    | 3888.319  | 3640.177  | NM_000944 | 5273.161  | 5945.343  |
| NM_006437 | 27807.764 | 21892.643 | M17176    | 2333.512  | 1972.934  | NM_01223E | 3429.895  | 4339.968  |
| NM_01789C | 4904.805  | 4358.23   | M26576    | 1528.311  | 1597.355  | NM_012262 | 2068.347  | 2336.892  |
| AK021654  | 6103.875  | 5686.779  | M32972    | 23771.857 | 20247.543 | S70004    | 3392.442  | 2600.864  |
| NM_016481 | 2708.786  | 2836.666  | D89854    | 2685.869  | 1954.392  | AF105378  | 6583.854  | 6421.281  |
| NM_00392E | 16765.842 | 15100.349 | M13207    | 3595.724  | 3934.912  | NM_000167 | 1659.778  | 1166.313  |
| Z15114    | 12975.361 | 11229.261 | X14885    | 1738.069  | 2864.756  | AY007125  | 675.522   | 436.354   |
| AB040812  | 52627.605 | 55775.379 | M97815    | 3246.241  | 3231.645  | AB032987  | 1943.579  | 1591.299  |
| NM_01762E | 1522.808  | 1084.092  | AF085893  | 4102.265  | 2822.869  | NM_017567 | 10910.613 | 8711.675  |
| NM_00628E | 18080.219 | 27347.574 | NM_003102 | 2111.632  | 1596.798  | NM_000691 | 6249.99   | 5984.835  |
| NM_00365E | 62472.066 | 65032.121 | NM_00685C | 972.526   | 1347.979  | D86971    | 14534.455 | 10598.156 |
| NM_00134E | 28306.941 | 33237.125 | AB013103  | 3000.983  | 4703.117  | NM_003073 | 8402.702  | 7217.865  |
| NM_00021E | 9075.417  | 11759.816 | AF019225  | 11947.82  | 15989.111 | NM_01404E | 485.085   | 641.463   |
| AK027148  | 37989.105 | 38659.656 | Z36803    | 29179.596 | 30376.24  | AF274863  | 588.066   | 524.346   |
| NM_005084 | 10671.266 | 10341.752 | NM_013371 | 2068.729  | 1979.97   | AF319458  | 878.857   | 596.522   |

|           |           |           |           |           |           |           |           |           |
|-----------|-----------|-----------|-----------|-----------|-----------|-----------|-----------|-----------|
| CY3Cy5    | 15903.715 | 645.833   | NM_000707 | 21362.205 | 24246.059 | AF024697  | 4510.096  | 3720.271  |
| NM_006079 | 12753.635 | 18192.451 | AF202092  | 29943.947 | 36915.387 | NM_018651 | 780.552   | 507.469   |
| NM_006696 | 4355.094  | 6921.869  | NM_003201 | 15511.523 | 13372.972 | AB040918  | 11363.417 | 13406.742 |
| NM_002763 | 10932.029 | 17958.395 | AB011139  | 9284.729  | 8963.816  | NM_015859 | 5554.468  | 6952.008  |
| AF070628  | 1208.886  | 1496.051  | NM_006919 | 5094.545  | 5411.931  | X60152    | 2286.923  | 3105.594  |
| U79293    | 860.934   | 967.742   | AK022625  | 51806.387 | 52929.012 | NM_002316 | 1475.717  | 2011.475  |
| NM_015434 | 3812.596  | 4155.55   | NM_005425 | 3079.963  | 4596.956  | NM_012421 | 11772.833 | 11223.527 |
| NM_014055 | 2943.21   | 2818.38   | AK023084  | 31370.693 | 36396.059 | AB014601  | 1018.307  | 947.041   |
| AK023940  | 471.453   | 674.763   | AK025588  | 34757.609 | 30074.924 | AK001393  | 8201.29   | 5667.222  |
| NM_018691 | 2068.802  | 2381.166  | NM_003188 | 9265.99   | 8217.677  | NM_000023 | 3740.445  | 2325.7    |
| AK001020  | 1463.609  | 1408.406  | NM_007118 | 1951.907  | 2037.347  | AF022654  | 503.174   | 515.235   |
| AF086431  | 3035.459  | 2688.74   | U59431    | 53037.715 | 47285.902 | NM_001143 | 705.679   | 559.121   |
| AL110204  | 1045.2    | 1106.753  | U49349    | 3844.779  | 2590.626  | NM_003282 | 674.525   | 390.892   |
| NM_014188 | 67741.094 | 64885.816 | NM_020152 | 6646.693  | 5442.894  | AK022638  | 13161.92  | 10190.062 |
| AK026365  | 7103.21   | 8281.876  | NM_013404 | 8295.111  | 8572.276  | BG698409  | 5228.667  | 4120.131  |
| NM_006079 | 13505.765 | 13854.191 | NM_002364 | 1382.101  | 1135.984  | AA220921  | 10725.315 | 11847.595 |
| NM_006696 | 4540.184  | 4238.701  | NM_003966 | 1908.023  | 1704.64   | N67770    | 1676.08   | 1430.088  |
| SR1       | 70555.883 | 62298.68  | NM_020384 | 14282.963 | 11544.298 | AA486200  | 57320.582 | 50842.238 |
| SR3       | 55657.879 | 50524.867 | NM_006058 | 57542.684 | 51311.41  | U90065    | 441.952   | 575.092   |
| SR5       | 6884.053  | 6423.122  | AL079287  | 4714.635  | 6296.521  | AJ005898  | 9092.686  | 9268.938  |
| SR7       | 7991.015  | 46156.645 | NM_014427 | 16238.957 | 19034.143 | X57303    | 6428.604  | 7472.127  |
| SR9       | 26688.594 | 4523.003  | AB046769  | 14742.081 | 19000.236 | AA463224  | 1180.079  | 911.842   |
| CY3Cy5    | 11108.175 | 272.449   | NM_015922 | 17395.939 | 18839.686 | BG248802  | 9145.561  | 7884.097  |
| U70772    | 332.588   | 847.336   | NM_020381 | 6635.289  | 8827.505  | L19605    | 1398.6    | 1186.721  |
| Z36825    | 4288.193  | 6826.095  | NM_002957 | 23952.271 | 30484.838 | AA876532  | 12182.548 | 10891.145 |
| U30889    | 824.133   | 1070.478  | NM_018106 | 14432.258 | 22149.047 | S74349    | 703.683   | 846.76    |
| U52838    | 1270.523  | 1702.851  | NM_003725 | 5876.963  | 8373.263  | X07979    | 45569.719 | 40039.285 |
| U82311    | 208.357   | 650.744   | BE899154  | 4839.049  | 4956.494  | BG744224  | 25271.432 | 29048.91  |
| AF086157  | 3797.976  | 4388.751  | NM_004863 | 10008.386 | 10481.203 | NM_000015 | 861.271   | 821.468   |
| AF088026  | 606.087   | 765.213   | AB032963  | 1379.982  | 2148.076  | NM_006393 | 2440.705  | 1377.929  |
| D17018    | 2564.855  | 2454.685  | U15688    | 7354.063  | 8800.654  | NM_005477 | 20185.982 | 12630.835 |
| AB046852  | 1306.743  | 1332.774  | NM_018448 | 19602.668 | 20674.484 | NM_004318 | 1148.079  | 492.128   |
| AF086167  | 1261.448  | 1579.689  | NM_018184 | 17352.555 | 18907.943 | L09089    | 3279.837  | 2234.957  |
| AL109727  | 738.208   | 819.072   | AB046823  | 3388.697  | 2787.302  | NM_002640 | 1886.909  | 1211.517  |
| AF085891  | 6676.711  | 6166.061  | NM_004929 | 3673.624  | 3355.42   | M15530    | 4723.227  | 3409.945  |
| AF019618  | 3575.934  | 3063.88   | NM_004662 | 1907.548  | 1602.244  | NM_000488 | 1014.46   | 673.259   |
| AK025656  | 4333.575  | 3890.08   | NM_016639 | 62204.488 | 65160.137 | NM_001877 | 3761.795  | 3049.032  |
| AF138859  | 1077.76   | 1460.565  | U61739    | 40320.047 | 37041.227 | NM_014207 | 9327.658  | 8023.671  |
| AF161414  | 14917.253 | 13675.659 | AJ132089  | 2220.858  | 2299.527  | AK002163  | 3572.26   | 2724.994  |
| AK025967  | 1718.4    | 1621.654  | U92819    | 13240.147 | 12228.544 | NM_002287 | 2434.337  | 1823.901  |
| AL110177  | 4904.208  | 3491.974  | AB020626  | 10191.968 | 9798.718  | NM_012344 | 2874.243  | 2330.543  |
| AK022686  | 16158.23  | 17148.074 | NM_002036 | 59609.555 | 51821.543 | NM_002351 | 2958.789  | 2920.315  |
| AK023516  | 8130.203  | 10931.247 | NM_012400 | 2440.855  | 1808.37   | NM_014385 | 3663.961  | 5285.561  |
| AK023864  | 21250.391 | 24216.596 | NM_005384 | 5887.885  | 4394.225  | NM_001704 | 1643.908  | 1837.792  |
| AK023017  | 7217.661  | 9117.094  | NM_012123 | 35598.387 | 39590.398 | AB036432  | 19219.377 | 21876.797 |
| AK023610  | 835.945   | 811.01    | U87972    | 6171.509  | 6923.524  | NM_003643 | 927.956   | 1340.563  |
| AK023908  | 20110.795 | 19645.131 | NM_017925 | 9541.491  | 8750.202  | NM_003480 | 3274.11   | 4298.673  |
| AK024236  | 2576.044  | 2153.474  | AK022208  | 36671.754 | 39408.629 | NM_001634 | 12769.854 | 6801.146  |
| AK022098  | 2092.477  | 2497.834  | NM_003171 | 17312.242 | 30240.391 | NM_002267 | 7685.186  | 4103.616  |
| AB040933  | 2483.437  | 1924.975  | NM_006437 | 33061.535 | 39656.441 | NM_006412 | 2608.037  | 2004.06   |
| AK021875  | 970.793   | 828.133   | NM_017890 | 7139.432  | 9930.07   | NM_003063 | 8788.334  | 6205.482  |
| AK022072  | 1462.048  | 985.02    | AK021654  | 8394.906  | 7835.138  | NM_014041 | 24016.654 | 15837.735 |
| AK026900  | 4832.851  | 4343.413  | NM_016481 | 3452.635  | 3584.588  | NM_007165 | 9140.463  | 6709.68   |

|           |           |           |           |           |           |           |           |           |
|-----------|-----------|-----------|-----------|-----------|-----------|-----------|-----------|-----------|
| AK025020  | 13460.123 | 12406.801 | NM_003925 | 25776.709 | 23467.76  | NM_014313 | 366.997   | 324.285   |
| AF086009  | 1368.54   | 1251.032  | Z15114    | 23778.805 | 22165.967 | AK024966  | 3012.786  | 1937.479  |
| AF086463  | 9087.188  | 11455.698 | AB040812  | 57159.949 | 58949.129 | NM_017585 | 12625.443 | 11473.052 |
| AF086031  | 373.362   | 558.692   | NM_017625 | 1268.877  | 955.39    | NM_000033 | 3203.989  | 3170.52   |
| AK024130  | 1533.744  | 2053.777  | NM_006285 | 18167.006 | 18088.365 | AF224741  | 1135.582  | 849.845   |
| AL137270  | 532.777   | 1188.5    | NM_003656 | 62526.707 | 61266.777 | NM_006594 | 3222.01   | 2510.066  |
| AK024598  | 8400.658  | 13273.085 | NM_001348 | 33959.426 | 35607.461 | NM_004177 | 1262.863  | 648.466   |
| AF087983  | 2368.385  | 5471.281  | NM_000215 | 12308.465 | 13518.208 | NM_012425 | 1694.676  | 1185.633  |
| NM_020234 | 3517.636  | 7698.913  | AK027148  | 52594.77  | 50093.07  | NM_004871 | 6101.492  | 4469.475  |
| U10514    | 465.437   | 633.622   | NM_005084 | 13406.075 | 12222.635 | NM_005695 | 7265.801  | 9248.976  |
| AK021678  | 781.089   | 931.49    | NM_007283 | 17533.104 | 16138.649 | AF202146  | 8218.722  | 8430.766  |
| AJ011377  | 6154.294  | 6775.446  | NM_006111 | 18027.793 | 15297.89  | NM_014865 | 2060.995  | 1529.49   |
| AL137734  | 2359.826  | 2009.348  | AK026071  | 37318.945 | 34987.477 | AL442089  | 15489.844 | 13076.325 |
| AK023784  | 1504.335  | 1084.346  | BC012333  | 23410.385 | 17846.045 | NM_001200 | 2359.101  | 981.064   |
| AK026323  | 5221.799  | 4633.021  | AF237952  | 15261.64  | 13694.338 | AF128541  | 4109.634  | 2994.996  |
| AL109710  | 1286.852  | 1472.34   | NM_002309 | 3940.482  | 4175.291  | AK026305  | 8797.295  | 4751.502  |
| AK021538  | 1436.871  | 1426.501  | AK026074  | 6553.068  | 7370.284  | NM_002552 | 3065.766  | 2259.511  |
| AK023793  | 11307.318 | 12054.836 | NM_003172 | 14488.057 | 14496.276 | NM_014321 | 5594.932  | 3457.009  |
| AK022185  | 904.065   | 873.2     | NM_004809 | 21764.896 | 21798.248 | AK022733  | 1860.557  | 1351.596  |
| AK023286  | 10108.71  | 11225.714 | AA903183  | 2766.962  | 3065.311  | AB011132  | 4249.518  | 3363.454  |
| AK021544  | 1467.739  | 1737.698  | H41522    | 20246.828 | 26329.82  | NM_020362 | 9169.185  | 7147.555  |
| AL079282  | 1758.842  | 2645.92   | AA460291  | 59218.508 | 58578.738 | AB040937  | 2517.179  | 1969.12   |
| AK022079  | 530.664   | 960.562   | BI821333  | 21202.037 | 27469.33  | AF275798  | 34578.07  | 26675.135 |
| AF116714  | 2286.993  | 3177.696  | X51841    | 59736.559 | 66296.984 | NM_005441 | 11210.872 | 9671.524  |
| NM_014055 | 5809.472  | 8438.01   | AF051344  | 60789.445 | 58307.188 | NM_016075 | 25949.498 | 19503.08  |
| AK025045  | 1024.276  | 1113.521  | BG506100  | 21138.426 | 16415.172 | AK023108  | 3541.481  | 2997.976  |
| AK002005  | 716.819   | 1144.531  | X53586    | 3725.618  | 3769.176  | AK026409  | 50579.855 | 39902.727 |
| AK026340  | 1561.055  | 2258.232  | M17176    | 2075.964  | 1774.948  | AF097025  | 8010.172  | 7304.342  |
| AK022388  | 1057.971  | 1409.837  | M26576    | 1350.95   | 1260.819  | Y11339    | 9921.319  | 8957.055  |
| AK027170  | 785.314   | 995.224   | M32972    | 24279.172 | 26045.453 | AB030176  | 1509.314  | 1677.836  |
| AK021781  | 851.48    | 730.58    | D11151    | 1324.724  | 2283.661  | NM_003937 | 808.158   | 733.114   |
| NM_018584 | 1164.609  | 1378.43   | D89854    | 2907.333  | 2832.094  | NM_002537 | 8914.54   | 9853.432  |
| AY007126  | 19343.707 | 22934.359 | M13207    | 3444.85   | 2945.926  | NM_003135 | 4072.416  | 5321.032  |
| AF085951  | 11670.85  | 15439.28  | X14885    | 1757.871  | 1517.453  | NM_012316 | 7217.251  | 8804.107  |
| AF131787  | 819.495   | 880.811   | M97815    | 3136.521  | 2942.969  | AK001393  | 13113.44  | 11215.631 |
| AF087989  | 2972.231  | 5107.375  | AF085893  | 4260.446  | 3979.59   | NM_000023 | 4615.011  | 4036.097  |
| Z70715    | 2543.825  | 4880.777  | NM_003102 | 2406.688  | 3058.398  | AF022654  | 515.881   | 506.463   |
| NM_018182 | 9204.507  | 14720.676 | NM_014305 | 8597.93   | 6169.792  | NM_001143 | 492.79    | 410.632   |
| U80771    | 8788.042  | 12603.76  | AB011139  | 10036.849 | 11300.883 | NM_003282 | 440.965   | 391.109   |
| NM_006185 | 874.449   | 1324.635  | NM_006919 | 5712.763  | 6875.819  | AK022638  | 12840.423 | 8821.341  |
| AJ272173  | 24679.168 | 44432.34  | AK022625  | 51185.441 | 52036.781 | BG698409  | 5532.085  | 3727.491  |
| Z24724    | 16688.727 | 24864.338 | NM_005425 | 2535.955  | 2614.317  | AA220921  | 9881.544  | 9228.249  |
| AK022712  | 16192.38  | 23569.688 | AK023084  | 34406.078 | 36907.504 | N67770    | 1886.069  | 1249.625  |
| AK024132  | 5703.785  | 8402.48   | AK025588  | 36900.984 | 41340.285 | AA486200  | 55725.789 | 45458.27  |
| AK024208  | 1140.361  | 1608.516  | NM_003185 | 10562.006 | 11660.196 | U90065    | 358.888   | 375.196   |
| NM_020425 | 1103.773  | 1799.975  | NM_007118 | 2131.248  | 2434.166  | AJ005898  | 11413.776 | 11268.467 |
| NM_005684 | 1265.058  | 1931.527  | U59431    | 54829.574 | 49188.789 | X57303    | 5655.884  | 6418.656  |
| AK022293  | 1746.634  | 2626.57   | U49349    | 3344.806  | 3491.707  | AA463224  | 5707.28   | 4767.601  |
| AL117439  | 2648.207  | 4510.58   | NM_020152 | 6339.471  | 5550.596  | BG248802  | 9372.993  | 8282.629  |
| AL133065  | 3888.087  | 6374.631  | NM_013404 | 6878.743  | 6800.79   | L19605    | 1257.671  | 897.111   |
| NM_005297 | 9440.299  | 13358.316 | AF300648  | 554.019   | 376.364   | AA876532  | 10074.26  | 8144.603  |
| U80769    | 2440.909  | 3394.454  | NM_006157 | 954.32    | 954.444   | S74349    | 818.115   | 755.658   |
| NM_014565 | 1278.185  | 1632.522  | NM_002364 | 918.21    | 818.889   | X07979    | 48007.438 | 35779.613 |

|           |           |           |           |           |           |           |           |           |
|-----------|-----------|-----------|-----------|-----------|-----------|-----------|-----------|-----------|
| AK025052  | 5866.072  | 7187.112  | NM_003966 | 1913.367  | 2220.087  | BG744224  | 24093.811 | 26313.535 |
| NM_01438E | 2572.877  | 4081.518  | AK024443  | 58030.527 | 59584.867 | NM_01802E | 5742.488  | 6913.61   |
| NM_00254E | 863.243   | 1704.717  | X06710    | 6688.53   | 6207.367  | NM_001707 | 20100.896 | 21152.416 |
| U85044    | 1977.61   | 2837.622  | AK000896  | 6126.803  | 5640.735  | AK022983  | 1009.675  | 1105.19   |
| BC018880  | 1569.469  | 2572.114  | NM_003872 | 1999.173  | 2112.304  | NM_005477 | 17939.783 | 15562.045 |
| AF086090  | 3191.08   | 5010.771  | NM_020384 | 13725.081 | 12549.202 | NM_00431E | 423.915   | 268.957   |
| AK002173  | 48376.488 | 56774.848 | NM_00605E | 54715.152 | 51266.41  | L09089    | 3152.059  | 1778.089  |
| NM_01774E | 6881.873  | 11176.371 | NM_00662E | 38725.676 | 32809.598 | NM_00264C | 1665.004  | 1471.945  |
| NM_02018E | 37230.73  | 54857.68  | M97496    | 61627.563 | 59241.129 | M15530    | 1864.032  | 1740.604  |
| M87929    | 576.601   | 763.396   | NM_00165E | 45784.508 | 47670.117 | NM_00048E | 946.626   | 769.987   |
| U88897    | 9115.506  | 15193.861 | AB020663  | 3359.733  | 3361.544  | NM_001877 | 4557.752  | 4109.739  |
| NM_00349E | 63539.984 | 65477.152 | AF297866  | 16660.299 | 16570.352 | NM_014207 | 12382.515 | 13463.272 |
| AL133430  | 47353.098 | 58225.672 | NM_002864 | 3340.962  | 3064.189  | AK002163  | 7292.754  | 5688.092  |
| AF070633  | 57780.027 | 57642.277 | NM_017817 | 7624.861  | 7175.555  | NM_002287 | 2241.18   | 2381.971  |
| Y16184    | 414.22    | 811.782   | NM_018184 | 15774.823 | 20151.961 | NM_012344 | 2441.595  | 2102.702  |
| NM_01837C | 745.318   | 1079.351  | AB046823  | 3472.397  | 3438.08   | NM_002351 | 2580.402  | 2602.781  |
| AF054996  | 42633.16  | 55897.543 | NM_00492E | 3881.896  | 3384.065  | NM_01438E | 1178.239  | 1256.758  |
| AF090098  | 12709.5   | 15447.269 | NM_004662 | 1719.955  | 1614.593  | NM_001704 | 1651.742  | 1740.525  |
| AF146694  | 5561.235  | 9097.84   | NM_01663E | 59554.336 | 56600.371 | AB036432  | 18103.398 | 20312.811 |
| AK057104  | 2808.837  | 4816.741  | U61739    | 36184.746 | 35989.848 | NM_00364E | 924.745   | 1019.382  |
| AL133555  | 765.418   | 1233.713  | AJ132089  | 2339.005  | 2091.377  | NM_00348C | 3559.32   | 4588.327  |
| AK024979  | 57276.594 | 58731.941 | U92819    | 12713.173 | 11996.42  | NM_012421 | 15204.002 | 18439.967 |
| AF233648  | 4518.752  | 5464.455  | AB020626  | 9776.465  | 7286.535  | AB014601  | 1901.585  | 2129.941  |
| NM_01343E | 64894.93  | 70727.813 | NM_00203E | 47406.434 | 43546.035 | NM_002267 | 7627.843  | 5074.886  |
| NM_00340E | 66131.344 | 68694.195 | NM_01240C | 2693.838  | 2417.269  | NM_00641E | 2167.48   | 1282.188  |
| AB011180  | 5512.455  | 7294.427  | NM_005384 | 5783.398  | 4261.883  | NM_00306E | 6956.981  | 4186.054  |
| NM_007167 | 13347.986 | 18799.723 | NM_00685C | 836.102   | 672.534   | NM_014041 | 22915.717 | 14258.024 |
| NM_01483E | 4423.825  | 7273.283  | AB013103  | 2980.645  | 2713.125  | NM_00716E | 9036.987  | 7460.374  |
| NM_00324E | 611.094   | 1014.063  | AF019225  | 15600.177 | 14001.913 | NM_01431E | 745.198   | 1459.873  |
| NM_002477 | 27095.477 | 40252.387 | Z36803    | 37405.121 | 33311.156 | AK024966  | 3780.74   | 2426.973  |
| NM_00467E | 1054.209  | 1530.735  | NM_013371 | 2830.637  | 2915.017  | NM_01758E | 12473.741 | 11659.723 |
| Y17180    | 65599.07  | 67834.813 | NM_000707 | 25219.02  | 22012.713 | NM_00003E | 2549.581  | 3231.489  |
| NM_00564E | 3921.062  | 7265.481  | AF202092  | 34024.191 | 27898.09  | NM_006594 | 2933.177  | 3365.689  |
| AK021566  | 1244.813  | 1404.725  | NM_003201 | 22620.775 | 15540.191 | NM_004177 | 2049.007  | 2038.409  |
| NM_002037 | 3938.753  | 5676.849  | NM_00728E | 18664.043 | 19541.029 | NM_01242E | 1454.133  | 1459.444  |
| NM_01634E | 5518.236  | 7201.224  | NM_006111 | 16001.725 | 17372.785 | NM_004871 | 5059.551  | 4911.469  |
| NM_020157 | 52949.074 | 57528.895 | AK026071  | 33209.141 | 39590.746 | NM_00569E | 6731.711  | 8932.282  |
| X64991    | 3019.752  | 4807.768  | BC012333  | 21558.377 | 21736.008 | AF202146  | 8200.182  | 9501.731  |
| NM_01432C | 904.069   | 1044.07   | AF237952  | 15242.617 | 15693.892 | NM_00639E | 4112.611  | 3423.792  |
| AK025703  | 14231.091 | 18424.311 | AL079287  | 4889.68   | 5463.073  | NM_00120C | 2102.287  | 1450.477  |
| NM_01818E | 10152.114 | 14775.388 | NM_014427 | 20052.318 | 19254.338 | AF128541  | 3597.883  | 2052.782  |
| AK022598  | 10978.856 | 14338.17  | AB046769  | 19092.406 | 17791.012 | AK026305  | 8447.96   | 3632.826  |
| AK024306  | 1735.55   | 2323.443  | NM_01592E | 22833.82  | 22550.426 | NM_00255E | 2749.021  | 1633.2    |
| NM_01832E | 28357.15  | 40037.859 | NM_020381 | 9061.109  | 10547.686 | NM_014321 | 5838.576  | 3690.592  |
| AK025862  | 13364.477 | 18158.766 | NM_002957 | 27495.449 | 25910.943 | AB040937  | 1904.318  | 2127.784  |
| AK026495  | 2875.92   | 4434.792  | NM_01810E | 15576.25  | 13477.981 | AK023108  | 2817.689  | 4719.779  |
| AL137493  | 2662.908  | 3071.573  | NM_00372E | 5517.49   | 4628.396  | AK026409  | 55650.598 | 53262.758 |
| NM_004797 | 631.345   | 1011.893  | BE899154  | 5887.99   | 5270.924  | AF097025  | 6811.775  | 8332.535  |
| NM_00133E | 27859.033 | 37754.23  | NM_00486E | 11927.267 | 10141.148 | Y11339    | 9586.266  | 14034.004 |
| NM_003637 | 1448.048  | 2005.64   | AK024573  | 6322.084  | 4526.01   | AB030176  | 908.209   | 2125.301  |
| BC035133  | 1848.668  | 2047.55   | NM_00229E | 14349.566 | 11416.926 | NM_00313E | 4334.087  | 6309.026  |
| NM_00423E | 21518.34  | 30900.652 | D79998    | 10779.754 | 7351.721  | NM_01231E | 7667.174  | 10025.853 |
| NM_001544 | 24496.291 | 32672.803 | AB032963  | 1687.868  | 1116.129  | NM_00405E | 732.952   | 690.921   |

|           |           |           |           |           |           |           |           |           |
|-----------|-----------|-----------|-----------|-----------|-----------|-----------|-----------|-----------|
| X58531    | 2402.743  | 3125.298  | NM_000385 | 7994.247  | 6459.014  | NM_001634 | 25899.412 | 19663.484 |
| AB011168  | 20916.051 | 27981.773 | AF301013  | 12115.779 | 11027.213 | NM_001143 | 784.081   | 741.042   |
| BE794262  | 10160.365 | 15109.073 | NM_018992 | 61721.484 | 65161.223 | AK022638  | 13033.662 | 7966.031  |
| NM_003212 | 19797.984 | 26520.709 | U15688    | 6979.714  | 4872.681  | BG698409  | 5199.641  | 3525.938  |
| NM_006382 | 7576.27   | 11871.107 | NM_000483 | 16849.887 | 12137.319 | AA220921  | 10925.578 | 9786.866  |
| NM_004811 | 28642.732 | 47742.055 | NM_018448 | 22475.383 | 15687.56  | L19605    | 1377.447  | 1863.428  |
| M62402    | 1390.819  | 1935.507  | AF085893  | 3162.249  | 3298.646  | AA876532  | 11865.63  | 13939.207 |
| NM_002547 | 707.362   | 1115.343  | NM_003102 | 1535.762  | 1577.592  | S74349    | 756.737   | 845.827   |
| NM_004748 | 12817.302 | 20090.406 | NM_014305 | 6928.048  | 6601.012  | X07979    | 48471.207 | 51252.82  |
| NM_002668 | 44272.637 | 61066.402 | NM_012123 | 34574.375 | 36827.414 | BG324670  | 422.553   | 809.62    |
| NM_001058 | 1430.619  | 1778.33   | U87972    | 5784.633  | 6679.375  | BG744224  | 30124.693 | 61977.344 |
| NM_001380 | 571.597   | 1232.363  | NM_017925 | 9104.556  | 10509.149 | NM_001707 | 21739.986 | 25858.373 |
| NM_014316 | 24745.682 | 28292.717 | AK022208  | 37290.848 | 44663.055 | AK022983  | 967.017   | 1175.498  |
| NM_004054 | 13399.933 | 16361.432 | NM_003171 | 14379.546 | 19512.467 | NM_014868 | 9065.179  | 10851.738 |
| NM_001138 | 26049.313 | 23450.318 | NM_006437 | 31588.535 | 20297.197 | M15530    | 3594.697  | 3491.167  |
| NM_002025 | 5224.93   | 9898.559  | NM_017890 | 6397.527  | 4909.15   | NM_000488 | 961.399   | 658.441   |
| AL049685  | 4112.926  | 7142.998  | AK021654  | 8649.34   | 8121.204  | NM_001877 | 3346.802  | 2052.175  |
| AK026800  | 19514.047 | 27678.271 | NM_016481 | 3863.743  | 3103.225  | NM_014207 | 8455.66   | 6687.626  |
| NM_001442 | 2413.797  | 3965.051  | NM_003925 | 26151.543 | 22412.49  | AK002163  | 3023.216  | 1862.332  |
| NM_017775 | 19350.389 | 28282.424 | Z15114    | 25843.004 | 19227.102 | NM_001704 | 2072.85   | 4261.642  |
| AK001958  | 3226.167  | 5543.336  | AB040812  | 55450     | 56769.988 | AB036432  | 23109.623 | 53713.07  |
| AK025947  | 7508.332  | 12879.487 | NM_017625 | 1397.693  | 889.196   | NM_014872 | 4147.993  | 10438.874 |
| AF217973  | 17774.463 | 24314.357 | NM_006285 | 18801.205 | 15547.718 | NM_003643 | 1071.817  | 1291.656  |
| NM_007033 | 21688.828 | 30440.719 | NM_003656 | 62213.723 | 68778.82  | NM_003480 | 3591.835  | 5086.209  |
| AF226048  | 16001.94  | 20929.4   | NM_001348 | 35757.676 | 33903.551 | NM_000895 | 1417.202  | 1560.573  |
| NM_005573 | 13492.702 | 16508.061 | NM_000215 | 14844.113 | 14130.006 | NM_032951 | 2478.949  | 3700.022  |
| AV723708  | 541.584   | 819.206   | AK027148  | 53484.41  | 48386.738 | NM_000503 | 9848.669  | 20558.248 |
| U48734    | 18058.809 | 21875.582 | NM_005084 | 14823.135 | 11957.338 | NM_002405 | 21691.535 | 41089.031 |
| NM_006400 | 16652.082 | 29392.061 | CY3Cy5    | 16373.235 | 293.322   | AK000004  | 3704.292  | 7754.448  |
| NM_003903 | 9866.471  | 11461.431 | NM_006079 | 12843.914 | 10091.383 | NM_012421 | 17382.084 | 23723.855 |
| NM_017955 | 11842.509 | 9970.316  | NM_006696 | 4295.678  | 2185.184  | AB014601  | 2849.118  | 2823.217  |
| NM_016060 | 11073.646 | 10116.303 | AF070628  | 1751.974  | 3048.482  | NM_012434 | 1893.388  | 1650.668  |
| NM_002208 | 25741.082 | 21932.055 | U79293    | 1039.007  | 2407.123  | NM_005694 | 8348.59   | 3920.356  |
| NM_007216 | 5928.194  | 5214.451  | NM_015434 | 7064.431  | 7393.256  | AF224741  | 871.727   | 482.095   |
| AK023518  | 4672.448  | 3052.102  | NM_014055 | 3557.272  | 3507.009  | NM_006594 | 2838.263  | 1551.817  |
| NM_000095 | 11581.182 | 8212.742  | AK023940  | 787.028   | 1457.622  | NM_012425 | 3975.053  | 2851.738  |
| NM_002825 | 1748.297  | 1686.04   | NM_018691 | 2915.226  | 4414.607  | NM_004871 | 5060.71   | 4197.648  |
| J02783    | 48617.41  | 57738.02  | AK001020  | 1752.363  | 2368.365  | NM_005698 | 6970.592  | 10085.801 |
| NM_018137 | 1191.804  | 1143.97   | AF086431  | 4194.344  | 5333.175  | AF202146  | 7572.65   | 7779.213  |
| NM_006577 | 56771.699 | 59845.703 | AL110204  | 1020.593  | 1795.525  | NM_006393 | 2720.417  | 2385.261  |
| NM_004413 | 1754.599  | 1367.183  | NM_014188 | 67426.266 | 62894.902 | NM_014923 | 797.387   | 819.846   |
| NM_005317 | 5379.32   | 5371.438  | AK026365  | 9096.561  | 14458.194 | NM_005477 | 24668.016 | 31121.91  |
| AF120493  | 1925.472  | 2229.149  | NM_006079 | 15275.827 | 25186.951 | NM_007018 | 637.838   | 1043.092  |
| U12597    | 7293.575  | 7328.498  | NM_006696 | 7210.629  | 11355.991 | NM_004318 | 2250.791  | 2241.715  |
| U28055    | 1721.768  | 1753.436  | SR1       | 66466.961 | 70898.648 | NM_002537 | 6268.686  | 4644.059  |
| AB044343  | 33287.84  | 23222.057 | SR3       | 59862.223 | 57910.684 | NM_003135 | 2211.238  | 1821.323  |
| NM_001285 | 875.806   | 871.441   | SR5       | 8133.308  | 11269.675 | NM_012316 | 6742.904  | 6401.955  |
| NM_018405 | 1612.592  | 1390.271  | SR7       | 9735.05   | 38452.488 | NM_004055 | 482.547   | 494.755   |
| NM_014662 | 2099.239  | 1407.923  | SR9       | 33285.68  | 8890.089  | NM_001634 | 21752.127 | 8360.185  |
| NM_005178 | 33462.777 | 25337.816 | CY3Cy5    | 28080.746 | 686.867   | NM_002267 | 9726.908  | 5188.239  |
| NM_017702 | 13766.879 | 8585.183  | Z36825    | 6319.91   | 4286.672  | NM_006412 | 4527.354  | 3158.51   |
| AB014516  | 23404.242 | 19011.18  | U52838    | 2825.889  | 2808.827  | NM_003063 | 8031.906  | 5635.562  |
| Z83950    | 4337.474  | 2825.712  | Z36846    | 2358.855  | 2607.807  | NM_014041 | 11461.584 | 9824.688  |

|           |           |           |           |           |           |           |           |           |
|-----------|-----------|-----------|-----------|-----------|-----------|-----------|-----------|-----------|
| AL080063  | 5724.598  | 4358.331  | AF086157  | 3979.886  | 2898.476  | NM_007166 | 10145.729 | 8851.323  |
| NM_01659C | 1065.893  | 858.875   | AF088026  | 825.602   | 592.745   | NM_014313 | 1200.35   | 982.172   |
| NM_00562E | 23670.549 | 18551.912 | D17018    | 3811.365  | 3516.629  | AK024966  | 3450.844  | 3106.589  |
| X15262    | 9703.282  | 7173.468  | AB046852  | 1316.621  | 1506.689  | AF178941  | 26648.645 | 27693.389 |
| NM_00547E | 2877.423  | 1981.139  | AF086167  | 1525.249  | 1869.983  | NM_016033 | 10253.643 | 11796.103 |
| NM_00728E | 7280.43   | 6921.614  | AL109727  | 918.27    | 944.302   | NM_01758E | 12394.422 | 15869.952 |
| NM_00421E | 67836.242 | 65923.141 | AF085891  | 10460.017 | 11817.742 | U61737    | 49797.93  | 54976.941 |
| NM_00457E | 1047.12   | 1077.32   | AF019618  | 3609.67   | 4853.668  | X06389    | 3294.439  | 4057.26   |
| AB023232  | 4258.979  | 3242.063  | AK025656  | 4307.926  | 5912.801  | NM_000033 | 3232.361  | 4477.539  |
| NM_01742C | 1768.683  | 1504.663  | AF161414  | 19464.918 | 27151.313 | NM_01802E | 4876.447  | 3302.492  |
| AL137589  | 3669.31   | 3033.673  | AK025967  | 1495.03   | 2565.391  | NM_001707 | 15435.411 | 9367.274  |
| AF036943  | 1159.313  | 797.201   | AL110177  | 6415.439  | 6740.387  | AK022983  | 531.304   | 433.903   |
| NM_002502 | 20980.789 | 19546.748 | AK022686  | 22173.342 | 14624.72  | NM_01486E | 6940.077  | 4160.525  |
| AF226732  | 30541.395 | 22782.002 | AK023516  | 10529.384 | 8530.219  | AL442089  | 21704.58  | 12608.732 |
| NM_006312 | 14667.883 | 12730.901 | AK023864  | 33836.813 | 19260.996 | NM_00120C | 4045.146  | 1757.738  |
| NM_00280E | 2873.675  | 2280.25   | AK023017  | 8570.108  | 8207.015  | AB007964  | 2404.349  | 1520.998  |
| NM_00429C | 887.019   | 586.633   | AK023610  | 2402.122  | 1903.331  | AF128541  | 3781.645  | 2008.739  |
| NM_01613E | 488.383   | 426.568   | AK023908  | 26884.797 | 17911.367 | AK026305  | 4193.842  | 2281.407  |
| NM_003662 | 995.552   | 897.331   | AK024236  | 3143.617  | 1631.867  | NM_002552 | 1571.921  | 1123.312  |
| NM_00293E | 35966.617 | 38357.891 | AK022098  | 2365.369  | 1624.731  | NM_014321 | 5346.63   | 3066.635  |
| NM_01583E | 62723.891 | 57684.602 | AB040933  | 2321.474  | 2424.261  | AK022733  | 2598.361  | 2640.198  |
| NM_004713 | 5028.087  | 4129.645  | AK021875  | 688.756   | 522.346   | AB011132  | 5244.439  | 5309.377  |
| NM_00376E | 2000.076  | 1953.81   | AK022072  | 2222.629  | 2743.942  | NM_020362 | 9985.406  | 12877.083 |
| NM_00169E | 41423.34  | 39382.664 | AK026900  | 5123.757  | 6061.49   | AB040937  | 3592.432  | 4456.984  |
| NM_000944 | 9563.056  | 8645.713  | AK025020  | 12693.28  | 17184.246 | AF275798  | 33216.09  | 32140.336 |
| NM_01223E | 5246.708  | 4208.055  | AF086009  | 1209.801  | 2940.608  | NM_005441 | 10878.386 | 10502.418 |
| NM_012262 | 3564.656  | 2333.891  | AF086463  | 9511.505  | 16782.795 | NM_01607E | 25768.074 | 23141.969 |
| S70004    | 7069.789  | 6987.082  | AF086031  | 2593.844  | 2537.548  | AK023108  | 5547.605  | 6834.046  |
| AF105378  | 9858.64   | 9558.696  | AK024130  | 1322.687  | 1831.476  | AK026409  | 53751.879 | 56127.16  |
| NM_000167 | 8017.47   | 7670.695  | AK024598  | 7403.838  | 8593.593  | AF097025  | 8059.354  | 8006.905  |
| AY007125  | 7113.361  | 6953.572  | AF087983  | 2584.549  | 3700.042  | Y11339    | 11298.446 | 10723.36  |
| AB032987  | 6448.759  | 5865.089  | NM_020234 | 3991.161  | 6329.634  | AB030176  | 1153.607  | 1087.202  |
| NM_017567 | 23454.691 | 20825.627 | AJ011377  | 5944.924  | 4322.386  | NM_003937 | 821.424   | 561.899   |
| NM_000691 | 15543.971 | 15215.539 | AL137734  | 3617.188  | 1769.95   | CY3Cy5    | 6828.666  | 166.012   |
| Y18643    | 1219.93   | 904.816   | AK023784  | 2525.35   | 1103.699  | AK026783  | 728.753   | 1096.928  |
| NM_00030E | 644.674   | 677.258   | AK026323  | 6586.481  | 4100.077  | AF088040  | 398.767   | 2248.821  |
| D86971    | 42811.488 | 36088.051 | AL109710  | 2760.51   | 1474.106  | AK021814  | 1300.832  | 1644.41   |
| NM_003073 | 16108.471 | 16043.143 | AK021538  | 2842.082  | 1993.799  | AF088035  | 1679.272  | 1636.566  |
| NM_01404E | 1597.967  | 1265.344  | AK023793  | 21101.041 | 15915.158 | NM_018092 | 461.307   | 1380.637  |
| AF274863  | 1832.581  | 1751.804  | AK023286  | 13197.069 | 14167.159 | AL109698  | 739.484   | 1332.27   |
| AF319458  | 1532.824  | 1456.376  | AK021544  | 1899.77   | 2146.322  | AF217980  | 6381.2    | 8893.359  |
| AF024697  | 12520.831 | 10282.254 | AL079282  | 2233.537  | 3044.153  | AL117461  | 3009.956  | 4080.189  |
| NM_018651 | 1484.33   | 1253.518  | AK022079  | 433.168   | 704.244   | NM_01649E | 1686.221  | 2498.677  |
| AF164156  | 818.947   | 769.698   | AF116714  | 2638.227  | 3069.489  | NM_17214C | 4796.496  | 7291.19   |
| NM_005612 | 6028.958  | 3905.38   | NM_01405E | 7362.04   | 8605.565  | SR4       | 15159.392 | 19220.115 |
| AK025281  | 1189.588  | 845.765   | AK025045  | 766.74    | 890.957   | SR6       | 2475.401  | 3017.674  |
| AB040918  | 17060.404 | 15406.599 | AK002005  | 877.579   | 802.67    | SR8       | 9289.938  | 34857.27  |
| NM_01585E | 9384.346  | 7330.68   | AK026340  | 1330.556  | 1871.165  | SR10      | 31197.357 | 13158.363 |
| X60152    | 2788.872  | 2621.962  | AK022388  | 888.482   | 1579.69   | CY3Cy5    | 7034.823  | 185.121   |
| NM_00231E | 5405.623  | 4122.084  | AK027170  | 619.654   | 1085.84   | AK000122  | 18518.826 | 22851.857 |
| NM_012421 | 26950.354 | 46908.844 | AK021781  | 920.137   | 598.419   | AK001091  | 5864.063  | 6797.367  |
| AB014601  | 4378.523  | 5715.31   | NM_018584 | 1198.154  | 1061.284  | U80775    | 603.098   | 932.642   |
| AK001393  | 32140.453 | 36441.289 | AY007126  | 21311.299 | 13989.138 | AF086428  | 2479.818  | 2369.348  |

|           |           |           |           |           |           |           |           |           |
|-----------|-----------|-----------|-----------|-----------|-----------|-----------|-----------|-----------|
| NM_000023 | 12495.336 | 12667.546 | AF085951  | 12632.864 | 8790.548  | AK025310  | 2017.215  | 1779.149  |
| AF022654  | 1732.789  | 1948.037  | AF087989  | 3265.948  | 2057.085  | AL117598  | 2495.099  | 3292.745  |
| NM_001143 | 1898.557  | 2894.985  | Z70715    | 3106.815  | 2295.262  | AL109670  | 1331.977  | 2008.774  |
| NM_003282 | 1859.789  | 1820.781  | NM_018182 | 9530.521  | 6295.186  | AF085831  | 1393.311  | 2589.843  |
| AK022638  | 27069.615 | 27705.309 | U80771    | 9037.633  | 6343.102  | AL832149  | 3176.88   | 4966.97   |
| BG698409  | 14163.979 | 15222.521 | NM_006188 | 543.999   | 735.918   | AK025839  | 3205.324  | 4573.209  |
| U36798    | 905.806   | 763.615   | AJ272173  | 35495.137 | 33951.609 | NM_003946 | 2300.402  | 3337.793  |
| AA220921  | 19906.76  | 23964.357 | Z24724    | 15392.836 | 20650.111 | AK025699  | 16561.396 | 21913.09  |
| N67770    | 3769.565  | 3979.267  | AK022712  | 21163.002 | 26674.77  | NM_018024 | 10558.451 | 12963.247 |
| AA486200  | 62715.387 | 62325.5   | AK024132  | 5250.4    | 7485.019  | AK025826  | 1882.65   | 1422.963  |
| U90065    | 1397.085  | 1306.542  | AK021863  | 50181.113 | 55127.52  | AK026439  | 1826.748  | 1455.755  |
| AJ005898  | 24522.781 | 25972.227 | AK024208  | 1312.396  | 1540.186  | AF147419  | 4164.397  | 7614.248  |
| X57303    | 14490.306 | 15690.544 | NM_020426 | 1253.928  | 1586.65   | AK024280  | 1028.702  | 1733.439  |
| AA463224  | 3316.734  | 2900.63   | NM_005684 | 1120.814  | 1387.571  | AF075036  | 2880.782  | 5062.502  |
| BG248802  | 19830.021 | 21240.547 | AK022293  | 1493.992  | 2131.097  | AK027139  | 972.486   | 1896.979  |
| L19605    | 3253.505  | 3305.787  | AL117439  | 3160.023  | 3491.752  | AL831841  | 4087.398  | 6223.647  |
| AA876532  | 25065.045 | 23058.598 | AL133065  | 3286.725  | 4604.623  | AL117652  | 2528.301  | 3692.046  |
| S74349    | 1709.822  | 1854.77   | NM_005297 | 10665.279 | 11382.46  | AL050168  | 4043.702  | 5260.665  |
| X07979    | 61953.523 | 58223.77  | U80769    | 2020.61   | 3697.944  | AL117447  | 1688.872  | 2740.022  |
| BG324670  | 1004.814  | 827.455   | NM_014565 | 1393.243  | 1465.768  | AL122122  | 3293.646  | 5095.784  |
| BG744224  | 36812.5   | 34506.77  | AK025052  | 5426.696  | 3536.1    | AK022135  | 3011.843  | 1716.22   |
| NM_000015 | 502.172   | 459.008   | NM_014388 | 2874.488  | 1865.19   | NM_017555 | 13085.848 | 5949.328  |
| NM_006393 | 2928.144  | 5418.832  | NM_002548 | 1599.443  | 1278.163  | NM_014896 | 768.446   | 712.279   |
| NM_014923 | 1414.536  | 1543.933  | U85044    | 2150.853  | 1632.874  | AF009269  | 970.047   | 944.419   |
| NM_005477 | 30119.959 | 34417.652 | BC018880  | 1897.558  | 1665.574  | AF009313  | 2493.848  | 5282.656  |
| NM_007018 | 939.184   | 1148.839  | AF086090  | 3009.226  | 1961.291  | AF090887  | 1038.963  | 1693.903  |
| NM_004318 | 2768.081  | 4180.087  | AK002173  | 42857.121 | 36455.441 | AF009279  | 853.089   | 1158.85   |
| L09089    | 4998.856  | 4595.893  | NM_017746 | 7095.119  | 5792.878  | NM_015883 | 2601.191  | 3621.672  |
| NM_002640 | 3643.977  | 3789.928  | NM_020188 | 38989.297 | 31412.467 | AF056429  | 772.473   | 1588.069  |
| NM_000949 | 610.963   | 574.259   | U88897    | 10211.853 | 8809.492  | AF070547  | 2760.303  | 3955.709  |
| M15530    | 10905.309 | 13569.192 | NM_003493 | 67130.117 | 66044.094 | AK001110  | 17465.303 | 20595.248 |
| NM_000488 | 3942.166  | 3889.038  | AL133430  | 51619.215 | 63114.07  | AK001153  | 276.459   | 1127.134  |
| NM_001877 | 7611.443  | 7742.151  | AF070633  | 65312.418 | 69603.727 | AK002184  | 1027.821  | 1642.995  |
| NM_014207 | 21365.941 | 23288.672 | Y16184    | 1449.579  | 3346.968  | AK021652  | 1030.047  | 1914.33   |
| AK002163  | 6632.398  | 6579.861  | S51971    | 66572.305 | 69896.68  | AK021859  | 1347.302  | 2169.635  |
| NM_002287 | 4424.124  | 4884.344  | NM_018370 | 2417.934  | 4077.337  | NM_001267 | 877.174   | 409.417   |
| NM_012344 | 7176.471  | 6877.654  | AF054996  | 41916.879 | 52573.539 | L41143    | 9346.863  | 4518.959  |
| NM_002351 | 5528.753  | 5734.578  | AF090098  | 14584.505 | 22570.01  | NM_005331 | 27843.734 | 6798.645  |
| NM_014385 | 3043.607  | 3206.41   | AF146694  | 5905.036  | 8816.255  | AJ008129  | 3144.269  | 1058.415  |
| NM_001704 | 2425.004  | 2340.371  | AK057104  | 2957.33   | 3941.39   | AF161451  | 16719.873 | 23695.193 |
| AB036432  | 50451.047 | 44712.539 | AL133555  | 806.344   | 961.867   | X02067    | 17597.299 | 25153.4   |
| NM_003643 | 1506.471  | 1293.725  | AK024979  | 66669.805 | 61373.863 | AY007163  | 13287.378 | 19565.35  |
| NM_003480 | 7607.491  | 6381.941  | AF233648  | 4814.308  | 5443.258  | NM_006236 | 51148.941 | 51456.078 |
| NM_004059 | 1033.95   | 1614.435  | NM_013439 | 55110.023 | 54885.332 | AK023734  | 1767.536  | 2585.615  |
| NM_001634 | 35204.008 | 27740.271 | NM_003406 | 63202.199 | 61430.258 | AF085827  | 2786.382  | 3233.961  |
| NM_002267 | 16994.406 | 17135.992 | NM_018316 | 9212.662  | 8289.603  | Y08266    | 25022.215 | 34118.453 |
| NM_006412 | 6992.269  | 7299.764  | AB011180  | 5724.262  | 3987.905  | AK002171  | 7891.644  | 12232.953 |
| NM_003063 | 20492.102 | 19697.244 | NM_007167 | 14306.223 | 10075.065 | AJ002572  | 3164.172  | 4390.463  |
| NM_014041 | 37669.082 | 38365.504 | NM_014832 | 4071.618  | 3167.83   | AK026897  | 8768.859  | 11415.452 |
| NM_007169 | 17469.631 | 18008.875 | NM_003243 | 489.031   | 1206.951  | AB037861  | 7089.446  | 9924.646  |
| NM_014313 | 1349.377  | 1124.117  | NM_002477 | 39021.25  | 45804.824 | AK021887  | 8807.407  | 11152.537 |
| AK024966  | 8509.5    | 7943.259  | NM_004673 | 1419.48   | 1110.432  | AF086180  | 36928.617 | 46575.785 |
| NM_017585 | 41318.84  | 40530.121 | Y17180    | 65615.844 | 76794.484 | NM_002503 | 69143.547 | 60032.621 |



|           |           |           |           |           |           |           |           |           |
|-----------|-----------|-----------|-----------|-----------|-----------|-----------|-----------|-----------|
| NM_000033 | 6054.279  | 5842.497  | NM_005649 | 4216.669  | 4049.789  | NM_005319 | 7813.834  | 4519.567  |
| AF224741  | 2417.86   | 1913.027  | AK021566  | 1037.952  | 1492.663  | NM_019058 | 938.703   | 524.023   |
| NM_006594 | 7150.434  | 6281      | NM_002037 | 4111.956  | 6120.907  | AK022351  | 2449.694  | 1381.568  |
| NM_004177 | 2621.405  | 2486.004  | NM_016346 | 6749.201  | 11673.608 | NM_020194 | 6048.324  | 1158.288  |
| NM_012429 | 2530.157  | 2749.1    | NM_020157 | 64796.824 | 63272.105 | AF038183  | 26182.182 | 7358.332  |
| NM_004871 | 10158.321 | 9512.707  | X64991    | 4426.147  | 5083.272  | NM_017882 | 4312.616  | 1696.095  |
| AB040903  | 743.887   | 584.375   | NM_014320 | 665.33    | 1486.26   | NM_003521 | 2526.064  | 3173.57   |
| NM_005698 | 14140.369 | 12129.986 | AK025703  | 14611.612 | 17957.58  | NM_003547 | 2730.251  | 3905.817  |
| AF202146  | 15678.571 | 10784.792 | NM_018185 | 11202.915 | 14048     | AL049980  | 5730.72   | 8978.816  |
| NM_014868 | 15536.165 | 15180.33  | AK022598  | 12287.53  | 14249.181 | AF070529  | 1383.88   | 2561.588  |
| AL442089  | 26578.861 | 27048.277 | AK024306  | 1680.247  | 2141.547  | AK021447  | 5526.447  | 8850.644  |
| NM_001200 | 5236.454  | 6501.439  | NM_018322 | 31569.271 | 32511.66  | AK025096  | 2901.402  | 3846.614  |
| AB007964  | 890.53    | 1029.883  | AK025862  | 12879.549 | 14199.195 | AF131774  | 3406.405  | 5132.779  |
| AF128541  | 6383.715  | 7205.111  | AK026495  | 2734.25   | 5372.603  | AK025793  | 721.243   | 1386.873  |
| AK026305  | 15584.882 | 13187.513 | AL137493  | 3004.492  | 2042.807  | AK000151  | 680.932   | 1463.826  |
| NM_002552 | 5674.55   | 5548.586  | NM_002457 | 1593.526  | 1291.782  | AL389942  | 2473.086  | 4341.191  |
| NM_014321 | 10658.869 | 9084.605  | NM_001338 | 40305.805 | 30534.068 | D17052    | 5888.41   | 9383.174  |
| AK022733  | 3567.005  | 3621.99   | NM_003637 | 1362.157  | 1456.836  | AL137479  | 1043.93   | 640.489   |
| AB011132  | 12316.16  | 12736.163 | BC035133  | 1992.442  | 1819.553  | NM_004211 | 4497.103  | 2554.357  |
| NM_020362 | 17391.605 | 18682.582 | NM_004233 | 23481.455 | 32921.383 | Y10776    | 5269.502  | 2518.978  |
| AB040937  | 6239.564  | 5827.329  | AB011168  | 27031.414 | 29956.859 | AK027241  | 8932.595  | 4841.874  |
| AF275798  | 56775.098 | 50851.793 | BE794262  | 14504.445 | 15497.584 | NM_006978 | 6197.523  | 3208.766  |
| NM_005441 | 24271.57  | 23657.348 | NM_003212 | 20781.908 | 17503.559 | NM_004561 | 1248.113  | 600.126   |
| NM_016079 | 45545.805 | 46341.363 | NM_006382 | 12763.114 | 17394.641 | AK024812  | 4022.671  | 1094.25   |
| AK023108  | 7679.167  | 7330.416  | NM_004811 | 30603.287 | 37740.758 | AK026412  | 1106.923  | 376.132   |
| AF097025  | 22855.264 | 20877.773 | AK021910  | 63848.438 | 68039.156 | X89669    | 1898.919  | 1089.887  |
| Y11339    | 20338.834 | 17831.953 | M62402    | 1363.641  | 1085.849  | AK023965  | 3322.01   | 4959.9    |
| AB030176  | 1804.839  | 1764.328  | NM_004748 | 12897.652 | 14118.425 | AK026211  | 1466.409  | 2057.324  |
| NM_003937 | 1161.504  | 1073.613  | NM_002668 | 43262.707 | 51583.785 | X58968    | 3862.117  | 6135.063  |
| NM_002537 | 15758.144 | 13602.649 | NM_001058 | 1474.503  | 1132.084  | U92020    | 6038.362  | 10524.452 |
| NM_003139 | 8749.805  | 6671.46   | NM_001380 | 642.12    | 807.141   | AL117542  | 2338.471  | 3385.647  |
| NM_012316 | 12088.456 | 10562.155 | NM_014316 | 25391.164 | 19201.096 | AL109712  | 45237.379 | 52990.453 |
| AK001393  | 32741.467 | 34123.605 | NM_004054 | 20040.137 | 21995.006 | X04215    | 1094.569  | 1490.508  |
| NM_000023 | 12427.858 | 12675.103 | NM_001138 | 28009.557 | 31230.734 | NM_017782 | 9488.097  | 13649.356 |
| AF022654  | 1526.345  | 1819.165  | NM_003443 | 61968.387 | 66389.734 | NM_018149 | 6322.107  | 8806.25   |
| NM_001143 | 2046.256  | 2191.811  | NM_002025 | 5442.231  | 6252.928  | D16944    | 1181.016  | 1495.624  |
| NM_003282 | 1420.604  | 1444.249  | AB015228  | 4222.395  | 4096.132  | NM_018468 | 19666.67  | 27729.258 |
| AK022638  | 23965.232 | 21317.098 | AL049685  | 3827.01   | 3217.914  | Z36814    | 1889.906  | 2994.842  |
| BG698409  | 12840.946 | 11872.632 | AK026800  | 16801.98  | 13454.615 | D17045    | 1188.322  | 1995.433  |
| U36798    | 895.459   | 631.118   | NM_001442 | 2760.914  | 2797.459  | AB040878  | 5770.497  | 3382.352  |
| AA220921  | 19370.664 | 22551.545 | NM_017775 | 23292.066 | 32510.742 | S74647    | 1824.599  | 934.386   |
| N67770    | 3170.646  | 3038.269  | AF217973  | 23188.322 | 29433.889 | NM_003506 | 1737.585  | 809.759   |
| AA486200  | 61347.754 | 58159.715 | NM_007033 | 23236.924 | 22070.434 | NM_018093 | 17390.08  | 6770.578  |
| U90065    | 1329.647  | 1320.268  | AF226048  | 15410.632 | 15104.888 | NM_003389 | 557.117   | 260.298   |
| AJ005898  | 23570.365 | 20450.229 | NM_005573 | 21079.807 | 22149.123 | NM_000430 | 1622.858  | 389.674   |
| X57303    | 14649.696 | 15096.515 | AV723708  | 475.851   | 822.809   | AB033030  | 1022.193  | 460.011   |
| AA463224  | 3104.025  | 2938.271  | D50918    | 46219.176 | 48507.305 | NM_016656 | 779.685   | 378.7     |
| BG248802  | 20947.473 | 20873.848 | U48734    | 19518.111 | 17380.297 | AB007871  | 13939.761 | 20653.203 |
| L19605    | 3268.043  | 2895.448  | NM_006400 | 17467.646 | 24219.875 | NM_017813 | 8645.409  | 12780.473 |
| S74349    | 1858.35   | 1697.511  | NM_003903 | 10509.17  | 10884.342 | NM_003840 | 8222.45   | 12206.079 |
| X07979    | 60349.859 | 56250.473 | NM_017955 | 15380.272 | 12585.519 | NM_018378 | 1570.405  | 2773.828  |
| BG324670  | 763.043   | 777.152   | NM_016060 | 11469.813 | 9860.173  | NM_018423 | 2566.124  | 3580.885  |
| BG744224  | 35175.492 | 35293.008 | NM_002208 | 28099.109 | 24957.828 | NM_001741 | 14886.271 | 20193.811 |

|           |           |           |           |           |           |           |           |           |
|-----------|-----------|-----------|-----------|-----------|-----------|-----------|-----------|-----------|
| NM_018026 | 14087.808 | 12904.427 | NM_007216 | 6540.103  | 7191.449  | NM_000745 | 4586.02   | 7654.584  |
| NM_001707 | 39111.605 | 28785.344 | AK023518  | 6037.202  | 5574.856  | AF116705  | 25245.445 | 38214.043 |
| AK022983  | 2082.807  | 1533.119  | NM_000095 | 15820.952 | 18104.732 | NM_00446C | 1102.449  | 1842.677  |
| NM_014923 | 1396.724  | 1476.644  | NM_01339C | 16034.88  | 22732.896 | NM_006072 | 3727.619  | 6563.546  |
| NM_005477 | 28608.869 | 33772.23  | NM_002829 | 3651.203  | 6385.822  | BE794490  | 1550.234  | 2159.965  |
| NM_00701E | 872.856   | 1297.358  | J02783    | 47085.613 | 55301.969 | NM_003561 | 3978.293  | 6093.698  |
| NM_00431E | 2744.107  | 2149.665  | NM_018137 | 932.577   | 855.864   | NM_002991 | 1124.909  | 1280.749  |
| L09089    | 3650.948  | 4448.326  | NM_006577 | 48938.746 | 45139.945 | AJ008149  | 35614.449 | 20367.008 |
| NM_00264C | 3363.238  | 3428.629  | NM_004413 | 776.645   | 1169.766  | NM_001192 | 2076.385  | 1039.163  |
| M15530    | 10469.28  | 11728.895 | NM_005317 | 5398.771  | 5872.874  | NM_002353 | 2280.412  | 1219.939  |
| NM_00048E | 3598.945  | 3439.368  | AF120493  | 3741.403  | 7611.827  | NM_012153 | 3761.879  | 1607.565  |
| NM_001877 | 7871.755  | 7500.644  | U12597    | 9614.316  | 12878.339 | NM_013241 | 2579.031  | 1167.725  |
| NM_014207 | 21267.311 | 21652.563 | U28055    | 2183.898  | 2230.061  | NM_01798E | 72028.336 | 41351.207 |
| AK002163  | 6198.161  | 6253.453  | AB044343  | 59006.184 | 49293.164 | AF161362  | 5590.671  | 779.299   |
| NM_002287 | 4653.385  | 4503.23   | NM_001285 | 1218.024  | 1020.511  | M57399    | 65660.344 | 60291.289 |
| NM_012344 | 7291.272  | 6946.237  | NM_018409 | 2682.723  | 2483.205  | NM_01593E | 13832.589 | 21504.008 |
| NM_002351 | 5317.172  | 5813.753  | NM_014662 | 2767.635  | 2822.74   | AB046840  | 1553.123  | 2511.869  |
| NM_01438E | 2961.494  | 3149.418  | NM_00517E | 46006.121 | 47503.871 | AF174487  | 2842.932  | 3714.843  |
| NM_001704 | 2516.921  | 2624.778  | NM_017702 | 16169.303 | 15122.073 | NM_005041 | 1272.334  | 1600.255  |
| AB036432  | 50085.48  | 42736.938 | AB014516  | 28292.09  | 29349.641 | NM_006407 | 11166.135 | 12199.879 |
| NM_003643 | 1232.224  | 1329.33   | Z83950    | 5204.208  | 5049.875  | NM_007373 | 6534.781  | 5767.32   |
| NM_00348C | 7732.947  | 6751.626  | AL080063  | 8107.713  | 7342.5    | M34572    | 1202.042  | 1491.746  |
| NM_012421 | 32891.691 | 29028.447 | NM_01659C | 1421.228  | 1236.129  | NM_006263 | 56144.863 | 54823.109 |
| AB014601  | 4288.043  | 3603.092  | NM_005625 | 25852.773 | 24572.029 | NM_004791 | 3768.629  | 5788.827  |
| NM_002267 | 16749.758 | 16379.92  | X15262    | 14119.559 | 17217.857 | X55525    | 3060.596  | 4397.744  |
| NM_006412 | 6248.126  | 6808.442  | NM_005475 | 2902.348  | 2494.886  | NM_00504E | 2543.599  | 1642.58   |
| NM_003063 | 17299.625 | 17819.584 | NM_007289 | 9020.371  | 9283.983  | NM_001873 | 1273.208  | 809.062   |
| NM_014041 | 34863.785 | 35810.961 | NM_004219 | 67114.297 | 66757.141 | AB029025  | 1447.103  | 924.284   |
| NM_00716E | 15779.644 | 16537.322 | NM_01742C | 1737.178  | 1916.823  | NM_00130E | 472.839   | 497.73    |
| NM_014313 | 1038.851  | 1041.521  | AL137589  | 4373.936  | 3783.323  | NM_00710C | 67851.18  | 38719.473 |
| AK024966  | 7486.111  | 6288.201  | AF036943  | 1285.786  | 923.172   | NM_002954 | 66830.781 | 57490.617 |
| NM_01758E | 32929.977 | 31555.16  | NM_002502 | 21933.063 | 16380.903 | NM_00394C | 1006.597  | 315.252   |
| NM_000033 | 5575.108  | 5498.115  | AF226732  | 38888.953 | 38373.801 | M26880    | 203.294   | 131.188   |
| AF224741  | 2207.87   | 1909.05   | NM_006312 | 18197.086 | 17042.406 | NM_000027 | 2029.058  | 2954.883  |
| NM_006594 | 6825.349  | 5602.529  | NM_002805 | 3754.378  | 2990.335  | NM_01754E | 47690.457 | 51966.148 |
| NM_004177 | 2611.783  | 2162.697  | NM_003662 | 939.275   | 918.515   | AF134802  | 9556.755  | 14617.118 |
| NM_01242E | 2604.162  | 2511.375  | NM_002939 | 41044.988 | 47175.445 | NM_018222 | 1247.053  | 2160.965  |
| NM_004871 | 10292.191 | 9610.035  | NM_015836 | 64813.133 | 59871.375 | NM_00574C | 3006.384  | 4215.603  |
| AB040903  | 600.963   | 687.38    | NM_004713 | 5857.352  | 6665.034  | NM_00430E | 20991.07  | 27996.941 |
| NM_00569E | 13362.196 | 13128.105 | NM_003769 | 2680.816  | 2343.562  | AF112366  | 2769.246  | 4187.005  |
| AF202146  | 15654.667 | 11507.234 | NM_00169E | 47451.738 | 49234.863 | NM_004274 | 1559.576  | 2684.832  |
| NM_006393 | 4418.567  | 3168.157  | NM_000661 | 65459.957 | 66196.055 | AK024002  | 17389.402 | 25316.324 |
| NM_00120C | 4980.398  | 4763.524  | NM_000973 | 66097.086 | 72483.953 | NM_02039E | 13166.953 | 16587.297 |
| AB007964  | 722.503   | 838.014   | NM_000944 | 9892.336  | 9091.047  | AB011117  | 5230.284  | 8664.323  |
| AF128541  | 8403.366  | 9118.812  | NM_012239 | 6708.533  | 6951.998  | NM_004071 | 4025.481  | 6064.512  |
| AK026305  | 12464.396 | 10449.218 | NM_012262 | 4396.887  | 4172.969  | NM_00131E | 21544.758 | 25259.727 |
| NM_002552 | 5287.44   | 5090.338  | NM_000167 | 8523.408  | 10206.012 | NM_004264 | 2502.646  | 1328.977  |
| NM_014321 | 10664.11  | 8923.352  | AY007125  | 6732.967  | 6343.427  | AK024788  | 5626.056  | 2653.254  |
| AK022733  | 3350.177  | 2338.004  | AB032987  | 6015.09   | 4055.402  | NM_004473 | 840.433   | 459.821   |
| AB011132  | 10938.236 | 9255.594  | NM_017567 | 37969.391 | 20942.844 | AK022696  | 4553.473  | 1735.94   |
| NM_020362 | 15211.326 | 16023.746 | NM_000691 | 23462.482 | 18390.881 | NM_00120E | 2120.789  | 846.854   |
| AB040937  | 5850.327  | 5368.918  | D86971    | 51769.133 | 35787.031 | NM_00501E | 3650.506  | 1161.451  |
| AF275798  | 53460.531 | 48542.512 | NM_003073 | 20134.869 | 18355.465 | NM_01446E | 2360.606  | 683.135   |

|           |           |           |           |           |           |           |           |           |
|-----------|-----------|-----------|-----------|-----------|-----------|-----------|-----------|-----------|
| NM_005441 | 23256.02  | 22077.803 | NM_014048 | 2015.955  | 1773.377  | NM_014852 | 5025.631  | 790.114   |
| NM_016079 | 44095.215 | 41696.25  | AF274863  | 1961.804  | 2439.03   | NM_000344 | 14003.809 | 3409.67   |
| AK023108  | 7109.189  | 6870.949  | AF319458  | 2598.616  | 3945.124  | AF248650  | 8078.658  | 4870.456  |
| AK026409  | 58804.238 | 55713.895 | AF024697  | 14626.89  | 21588.809 | S74678    | 54777.582 | 49986.629 |
| AF097025  | 23149.943 | 20519.738 | NM_018651 | 1759.787  | 3031.343  | AF248651  | 2573.208  | 3755.163  |
| Y11339    | 20608.137 | 16797.172 | AF164156  | 1146.585  | 1016.124  | NM_001358 | 29275.893 | 44287.906 |
| AB030176  | 1737.428  | 1758.827  | NM_005612 | 7456.403  | 6222.075  | NM_004836 | 19459.852 | 30326.23  |
| NM_003937 | 1123.194  | 1142.006  | AK025281  | 1104.37   | 730.828   | AB037751  | 13381.079 | 19798.373 |
| NM_002537 | 16603.711 | 13466.231 | AB040918  | 29068.863 | 26309.768 | S79281    | 14458.927 | 23158.549 |
| NM_003139 | 8818.994  | 7037.581  | NM_015859 | 10236.987 | 9118.443  | AK025585  | 6544.667  | 10885.546 |
| NM_012316 | 11414.73  | 10491.554 | X60152    | 3056.747  | 3297.048  | NM_001414 | 12557.089 | 17488.037 |
| NM_004059 | 899.463   | 957.628   | NM_002316 | 7446.635  | 9652.573  | D16891    | 12261.155 | 15858.019 |
| NM_001634 | 37130.824 | 22373.629 | NM_012421 | 37198.863 | 47809.695 | NM_017760 | 14812.719 | 15145.385 |
| AF022654  | 1666.196  | 1383.179  | AB014601  | 5743.507  | 9441.99   | NM_015936 | 16944.885 | 24045.703 |
| NM_001143 | 1649.003  | 1965.163  | AK001393  | 39434.492 | 44420.469 | Z36876    | 2656.169  | 2747.041  |
| NM_003282 | 1529.182  | 1724.073  | NM_000023 | 18649.102 | 14361.59  | NM_000892 | 1771.233  | 2887.809  |
| AK022638  | 25406.611 | 23857.686 | AF022654  | 1711.02   | 1269.333  | X75363    | 1266.732  | 1323.531  |
| BG698409  | 11592.959 | 10773.276 | NM_001143 | 2495.121  | 1230.662  | NM_000126 | 29526.273 | 17226.049 |
| U36798    | 640.789   | 569.002   | NM_003282 | 3227.516  | 2128.716  | AK022291  | 2201.738  | 1312.149  |
| AA220921  | 18522.596 | 18685.82  | AK022638  | 27435.379 | 14452.913 | BF239974  | 8175.927  | 4839.354  |
| N67770    | 2923.96   | 2157.794  | BG698409  | 25938.098 | 13115.744 | NM_000104 | 1990.513  | 1503.406  |
| AA486200  | 60769.25  | 57999.855 | U36798    | 2370.083  | 1489.65   | NM_005015 | 32050.893 | 13463.615 |
| U90065    | 1353.102  | 1178.679  | AA220921  | 20722.881 | 19070.783 | NM_004255 | 65517.66  | 47355.906 |
| AJ005898  | 21917.414 | 17830.256 | N67770    | 5102.788  | 4051.492  | NM_000269 | 67781.18  | 40851.324 |
| X57303    | 13769.922 | 11879.34  | AA486200  | 64531.863 | 62680.328 | AF182288  | 5499.004  | 1379.934  |
| AA463224  | 2633.37   | 2392.359  | U90065    | 2263.191  | 1989.763  | NM_004491 | 2515.093  | 327.208   |
| BG248802  | 21445.51  | 17823.449 | AJ005898  | 36916.449 | 32580.127 | L14787    | 421.027   | 432.944   |
| L19605    | 3242.363  | 2723.433  | X57303    | 19384.496 | 25049.867 | AK026810  | 5655.746  | 6421.094  |
| AA876532  | 28510.811 | 27758.986 | AA463224  | 4129.069  | 5372.656  | NM_015629 | 14086.02  | 21833.904 |
| S74349    | 2067.69   | 1715.352  | BG248802  | 22821.146 | 37342.531 | AF218032  | 9501.991  | 10934.627 |
| X07979    | 60218.977 | 55529.391 | L19605    | 4586.835  | 4521.752  | NM_017542 | 13868.845 | 20062.422 |
| BG324670  | 816.898   | 757.662   | AA876532  | 28663.137 | 24163.107 | AK024407  | 2794.257  | 5352.771  |
| BG744224  | 39683.039 | 38575.383 | S74349    | 1794.22   | 1908.753  | NM_004182 | 42488.566 | 53190.129 |
| NM_018026 | 13837.329 | 11123.221 | X07979    | 65222.145 | 56609.832 | NM_018419 | 2274.075  | 3547.583  |
| NM_001707 | 40074.27  | 29874.555 | BG324670  | 1089.05   | 829.551   | NM_014240 | 2918.325  | 4570.716  |
| AK022983  | 2442.267  | 1833.749  | BG744224  | 45204.211 | 49828.504 | BE379399  | 2013.033  | 2773.083  |
| NM_014866 | 19172.836 | 14973.724 | NM_000015 | 678.516   | 1217.587  | NM_015877 | 6528.225  | 9870.682  |
| AL442089  | 33159.25  | 27405.922 | NM_006393 | 7119.605  | 7842.881  | AF060935  | 7478.956  | 8404.338  |
| NM_000949 | 532.825   | 606.428   | NM_014923 | 1507.854  | 1543.322  | AK026886  | 1186.18   | 1510.263  |
| M15530    | 9013.108  | 10986.085 | NM_005477 | 40995.824 | 28742.602 | D83778    | 2105.658  | 3012.085  |
| NM_000488 | 2469.321  | 2912.667  | NM_007018 | 1279.949  | 499.166   | NM_006470 | 2603.598  | 2094.56   |
| NM_001877 | 6539.669  | 7098.358  | NM_004318 | 3865.392  | 1238.571  | NM_002855 | 26607.609 | 15832.436 |
| NM_014207 | 18347.602 | 17298.248 | M15530    | 10874.994 | 7494.942  | AB038463  | 2322.405  | 1918.461  |
| AK002163  | 5579.801  | 4963.337  | NM_000488 | 3982.564  | 2867.323  | M30262    | 6102.487  | 3870.357  |
| NM_002287 | 3826.263  | 3301.468  | NM_001877 | 8812.149  | 7046.91   | NM_005460 | 1528.737  | 774.778   |
| NM_012344 | 6523.905  | 5362.44   | NM_014207 | 22988.113 | 18873.445 | AF160477  | 6633.069  | 2899.066  |
| NM_002351 | 4831.416  | 4427.039  | AF169158  | 217.642   | 1385.324  | NM_003226 | 484.263   | 244.953   |
| NM_014385 | 2975.178  | 2732.827  | AK002163  | 7289.716  | 9903.27   | M12883    | 4739.519  | 1251.184  |
| NM_001704 | 2528.652  | 1822.616  | NM_002287 | 5931.186  | 10177.059 | BG288747  | 7689.283  | 1531.981  |
| AB036432  | 47497.914 | 39590.172 | NM_012344 | 8949.24   | 7985.014  | BG617923  | 431.335   | 250.864   |
| NM_014872 | 7264.99   | 7483.167  | NM_002351 | 5527.259  | 5465.017  | U37448    | 2088.87   | 1153.303  |
| NM_003643 | 1284.595  | 1103.264  | NM_014385 | 3904.749  | 3719.36   | BG435851  | 1087.568  | 857.744   |
| NM_003480 | 8776.448  | 7839.579  | NM_001704 | 3691.456  | 3332.145  | AA927698  | 490.758   | 1072.662  |

|           |           |           |           |           |           |           |           |           |
|-----------|-----------|-----------|-----------|-----------|-----------|-----------|-----------|-----------|
| NM_00089  | 1746.048  | 1585.969  | AB036432  | 59613.438 | 53063.352 | AI498426  | 1830.787  | 3191.176  |
| NM_032951 | 4387.098  | 4423.279  | NM_003643 | 1275.786  | 1822.951  | D01038    | 28104.457 | 44428.887 |
| NM_000503 | 20426.486 | 19348.969 | NM_003480 | 8603.464  | 16301.137 | AB019205  | 2537.326  | 3260.916  |
| NM_002405 | 34707.648 | 33572.734 | NM_004059 | 805.504   | 1261.341  | J05008    | 2335.509  | 3064.909  |
| AK000004  | 6633.209  | 6246.814  | NM_001634 | 41618.523 | 39953.813 | U11087    | 3371.91   | 4265.62   |
| NM_012421 | 33042.918 | 31032.539 | NM_002267 | 19355.412 | 12225.023 | D50640    | 1036.793  | 1554.24   |
| AB014601  | 4837.463  | 4345.123  | NM_006412 | 8764.337  | 5101.271  | D43747    | 569.067   | 974.3     |
| AK001393  | 38479.063 | 32477.955 | NM_003063 | 35741.957 | 19013.791 | M98776    | 2265.177  | 3167.251  |
| NM_000023 | 15940.284 | 10680.453 | NM_017585 | 52302.82  | 44060.234 | X99135    | 67744.945 | 64484.469 |
| NM_014861 | 1785.269  | 1318.086  | NM_000033 | 8377.742  | 7612.669  | AF009744  | 3686.365  | 4173.495  |
| NM_012434 | 5282.744  | 4827.711  | AF224741  | 2320.872  | 2224.16   | AF104921  | 36234.262 | 49861.031 |
| NM_005694 | 17553.26  | 16479.002 | NM_006594 | 8733.688  | 9554.342  | NM_000698 | 34397.855 | 25898.752 |
| AF224741  | 1567.245  | 1233.391  | NM_004177 | 2621.979  | 2823.402  | AF031167  | 2144.294  | 1307.777  |
| NM_006594 | 4336.068  | 4200.146  | NM_012429 | 2851.303  | 2967.611  | NM_003204 | 12917.518 | 6784.135  |
| NM_004177 | 2353.207  | 1427.943  | NM_004871 | 12340.61  | 12560.544 | AF254069  | 843.109   | 487.127   |
| NM_012429 | 2361.683  | 2145.176  | AB040903  | 440.724   | 666.625   | AL117600  | 17985.596 | 5834.231  |
| NM_004871 | 8751.344  | 7720.237  | NM_005698 | 14894.09  | 16642.35  | NM_001712 | 1956.188  | 603.859   |
| AB040903  | 375.781   | 626.391   | AF202146  | 17933.016 | 19237.9   | NM_004487 | 37620.227 | 7773.279  |
| NM_005698 | 12823.639 | 11166.137 | NM_014868 | 23808.797 | 36594.129 | AB029000  | 7449.36   | 1447.983  |
| AF202146  | 14533.232 | 10670.36  | AL442089  | 44713.227 | 52423.418 | AK026965  | 22436.664 | 4790.002  |
| NM_006393 | 6198.145  | 4411.483  | NM_001200 | 5230.269  | 3695.63   | AK025859  | 6469.224  | 3695.457  |
| NM_014923 | 1824.807  | 1332.444  | NM_020362 | 18699.559 | 14806.356 | AL117499  | 24571.754 | 30892.502 |
| NM_005477 | 35842.961 | 31164.477 | AB040937  | 6600.743  | 4730.373  | NM_007054 | 3018.546  | 4475.586  |
| NM_007018 | 1143.68   | 1028.674  | AF275798  | 56868.645 | 46908.535 | AB007957  | 1707.026  | 3540.389  |
| NM_004318 | 3205.09   | 2556.497  | NM_005441 | 22615.502 | 19720.646 | AK000160  | 1037.402  | 2099.507  |
| NM_002465 | 17.676    | 2413.669  | NM_016079 | 43796.297 | 41027.59  | NM_005311 | 1795.909  | 2734.545  |
| L09089    | 4993.448  | 4501.712  | AK023108  | 10598.692 | 10829.736 | NM_005905 | 1368.442  | 2307.077  |
| NM_002640 | 3915.153  | 3502.802  | AF097025  | 34531.668 | 42928.223 | NM_016235 | 713.297   | 1000.318  |
| X03084    | 421.416   | 437.26    | AB030176  | 1960.582  | 2596.673  | NM_000960 | 1595.791  | 2399.788  |
| NM_002537 | 12827.356 | 11018.07  | NM_003937 | 1165.229  | 1456.475  | AF172932  | 1191.654  | 1702.934  |
| NM_003139 | 7808.638  | 7623.12   | NM_002537 | 20479.764 | 18029.381 | NM_005355 | 6356.907  | 8949.979  |
| NM_012316 | 10105.466 | 11323.162 | NM_003139 | 9191.612  | 8848.075  | NM_002511 | 1009.429  | 1216.814  |
| NM_004059 | 1329.429  | 1845.887  | NM_012316 | 12159.301 | 13260.191 | NM_004085 | 12600.477 | 15895.172 |
| NM_001634 | 34250.926 | 22335.35  | AK001393  | 41563.453 | 49448.07  | NM_006032 | 7822.158  | 5289.051  |
| NM_014302 | 1368.055  | 1098.308  | NM_000023 | 25646.447 | 40402.316 | NM_014788 | 6892.988  | 4323.11   |
| NM_002267 | 16750.406 | 13181.841 | AF022654  | 14559.427 | 14966.889 | NM_002153 | 3473.699  | 2278.973  |
| NM_006412 | 6060.875  | 4860.837  | NM_001143 | 11754.771 | 8696.803  | AB040890  | 2286.13   | 1802.2    |
| NM_003063 | 19660.584 | 17752.799 | NM_003282 | 2771.091  | 1289.191  | AK024233  | 3358.503  | 1910.486  |
| NM_014041 | 36030.883 | 30377.643 | U90065    | 1891.105  | 1034.674  | AK021870  | 1629.256  | 583.679   |
| NM_007169 | 16140.829 | 12780.893 | AJ005898  | 36549.285 | 27960.9   | U06680    | 3006.074  | 817.187   |
| NM_014313 | 951.584   | 798.38    | X57303    | 21030.352 | 18555.457 | NM_015584 | 17012.412 | 3942.316  |
| AK024966  | 7639.889  | 5667.17   | AA463224  | 4112.176  | 3557.989  | NM_001697 | 61495.039 | 55985.543 |
| AF178941  | 54676.32  | 52195.945 | BG248802  | 20523.898 | 20108.385 | NM_016098 | 49441.266 | 53095.977 |
| NM_016033 | 17377.389 | 14507.962 | L19605    | 4068.384  | 3761.781  | AK025125  | 1021.384  | 1551.873  |
| NM_017585 | 37515.539 | 34605.758 | S74349    | 2664.194  | 4559.61   | AF156548  | 5815.038  | 7688.234  |
| U61737    | 57101.418 | 54090.355 | BG324670  | 880.14    | 1196.07   | NM_004663 | 1751.194  | 2850.291  |
| Y10506    | 599.507   | 598.993   | BG744224  | 49614.105 | 54493.934 | AB024411  | 1168.935  | 2114.15   |
| X06389    | 2323.992  | 1872.882  | NM_018026 | 14530.877 | 13216.797 | NM_002444 | 15825.697 | 20590.359 |
| NM_000033 | 6005.391  | 4860.893  | NM_001707 | 38519.164 | 32629.777 | NM_001104 | 3241.97   | 4058.969  |
| NM_018026 | 11119.611 | 10336.29  | AK022983  | 1480.956  | 1077.409  | NM_002985 | 6798.025  | 8756.869  |
| NM_001707 | 34063.086 | 29625.76  | NM_014923 | 4182.452  | 9822.58   | U88898    | 1230.326  | 1801.391  |
| AK022983  | 1793.457  | 1520.488  | NM_005477 | 43839.617 | 49445.902 | NM_020154 | 27056.1   | 31079.057 |
| NM_014868 | 14419.237 | 13375.523 | NM_004318 | 11410.203 | 7549.188  | NM_004665 | 8884.654  | 11023.438 |

|           |           |           |           |           |           |           |           |           |
|-----------|-----------|-----------|-----------|-----------|-----------|-----------|-----------|-----------|
| AL442089  | 23000.098 | 23098.207 | NM_001877 | 8266.789  | 4810.726  | NM_00530C | 3284.578  | 3788.73   |
| NM_00120C | 4617.826  | 3655.403  | NM_014207 | 22683.574 | 17578.443 | NM_00089C | 1892.528  | 2677.563  |
| AB007964  | 689.717   | 583       | AK002163  | 7131.069  | 6066.034  | NM_01407C | 2629.928  | 1336.537  |
| AF128541  | 9116.227  | 7478.065  | NM_002287 | 5083.913  | 4773.703  | NM_01628C | 3119.061  | 1775.018  |
| AK026305  | 15201.219 | 10375.432 | NM_012344 | 9052.375  | 8903.51   | NM_016027 | 1251.707  | 535.919   |
| NM_002552 | 6184.542  | 4764.213  | NM_002351 | 5159.035  | 5310.681  | NM_014297 | 4998.082  | 1801.338  |
| NM_014321 | 11887.107 | 9042.474  | NM_014385 | 3246.431  | 4845.732  | NM_01815C | 49090.699 | 15004.078 |
| AK022733  | 3501.307  | 2323.334  | NM_001704 | 3983.513  | 5069.109  | X98266    | 3225.27   | 592.507   |
| AB011132  | 11485.964 | 9389.37   | AB036432  | 60278.758 | 56940.133 | U00930    | 30388.578 | 4510.394  |
| NM_020362 | 15812.067 | 15101.899 | NM_003643 | 1862.981  | 1958.293  | AK024958  | 1647.3    | 329.007   |
| AB040937  | 5897.955  | 5076.297  | NM_00348C | 7019.756  | 7147.221  | NM_014575 | 10344.214 | 1996.039  |
| AF275798  | 52676.223 | 45975.012 | NM_012421 | 33399.098 | 30868.779 | NM_00243C | 6995.34   | 4026.392  |
| NM_005441 | 22090.865 | 19262.234 | AB014601  | 3948.296  | 3672.638  | AL117552  | 3428.56   | 4129.744  |
| NM_01607C | 40915.523 | 40090.313 | NM_014302 | 568.17    | 1152.927  | NM_002692 | 12871.78  | 19964.246 |
| AK023108  | 9773.583  | 8815.749  | NM_003063 | 36937.973 | 32990.945 | AB023190  | 54971.289 | 54901.508 |
| AK026409  | 55738.078 | 52240.109 | NM_014041 | 39569.324 | 41699.387 | NM_007064 | 2733.164  | 3658.721  |
| AF097025  | 18771.875 | 16033.563 | NM_000033 | 8453.303  | 6013.705  | NM_006281 | 2626.672  | 3519.018  |
| Y11339    | 19345.184 | 15319.138 | AF224741  | 2443.395  | 1468.751  | NM_00273C | 2177.208  | 2838.042  |
| AB030176  | 1695.781  | 1358.785  | NM_006594 | 9340.79   | 6613.432  | U23460    | 45923.957 | 46648.762 |
| NM_003937 | 1318.166  | 764.547   | NM_004177 | 2449.679  | 2915.622  | NM_00535C | 8191.583  | 10634.24  |
| CY3Cy5    | 4645.68   | 168.6     | NM_01242C | 3132.621  | 3063.483  | Z25434    | 4579.375  | 6198.798  |
| AK026783  | 1034.877  | 1237.605  | NM_004871 | 11104.507 | 13252.331 | NM_005884 | 15638.314 | 21492.863 |
| AK021814  | 2021.409  | 2274.161  | AB040903  | 493.425   | 670.352   | NM_01239C | 14303.352 | 18052.594 |
| AF088035  | 3400.59   | 4891.817  | NM_00569C | 13327.309 | 13711.543 | AF229804  | 31111.424 | 43280.629 |
| AF086251  | 718.47    | 1244.918  | AF202146  | 15769.08  | 10554.364 | AF151638  | 876.172   | 1314.903  |
| NM_018092 | 1551.642  | 2495.994  | NM_006393 | 5622.913  | 4692.192  | U90552    | 7988.891  | 10357.083 |
| AL109698  | 1255.906  | 2537.667  | X83412    | 1157.093  | 1782.281  | AB038463  | 2868.257  | 2031.633  |
| AF217980  | 8593.053  | 14325.512 | AF128541  | 17760.275 | 27207.217 | M30262    | 3791.718  | 2347.298  |
| AL117461  | 2867.037  | 5296.58   | AK026305  | 21574.805 | 33095.449 | NM_00546C | 3321.572  | 2168.04   |
| NM_01649C | 1697.394  | 2639.981  | NM_002552 | 6858.797  | 10710.69  | AF160477  | 5710.317  | 3378.098  |
| NM_17214C | 4960.269  | 6460.738  | AB040937  | 14538.189 | 7465.845  | M12883    | 5342.576  | 2150.394  |
| SR4       | 18661.43  | 40205.813 | AF275798  | 54412.371 | 41418.148 | BG288747  | 8267.177  | 2750.776  |
| SR6       | 2580.24   | 5685.787  | NM_005441 | 22217.324 | 15819.424 | U37448    | 2107.874  | 319.044   |
| SR8       | 10982.588 | 59298.867 | NM_01607C | 43803.852 | 38774.289 | BG435851  | 296.916   | 193.105   |
| SR10      | 36369.582 | 32015.949 | AK023108  | 9972.724  | 8575.018  | AA927698  | 882.106   | 517.552   |
| CY3Cy5    | 8330.09   | 344.656   | AK026409  | 64434.848 | 63960.621 | AI498426  | 2281.695  | 2755.701  |
| AK000122  | 28598.285 | 41270.391 | AF097025  | 36275.109 | 39599.23  | D01038    | 29725.447 | 45978.707 |
| AK001091  | 16543.639 | 24283.941 | Y11339    | 28724.119 | 36940.332 | AB019205  | 2361.033  | 3186.329  |
| U80775    | 1086.17   | 1852.032  | AB030176  | 1905.431  | 1681.605  | J05008    | 1765.011  | 2833.195  |
| AF086428  | 4703.387  | 7487.868  | NM_003937 | 1203.048  | 1316.994  | U11087    | 2936.104  | 2823.685  |
| AK025310  | 3757.298  | 5988.591  | NM_002537 | 18660.012 | 13981.705 | D43747    | 1246.629  | 1576.472  |
| AL049353  | 980.409   | 1713.944  | NM_00313C | 8470.841  | 7330.565  | M98776    | 2032.579  | 2755.404  |
| AL117598  | 4329.432  | 8198.85   | NM_01231C | 13571.309 | 12558.705 | X99135    | 63790.223 | 62257.609 |
| AL109670  | 3049.249  | 5625.248  | NM_00405C | 1079.192  | 1010.762  | AF009744  | 3183.911  | 2996.833  |
| AF085831  | 2044.121  | 4150.72   | NM_001634 | 42017.52  | 27241.801 | NM_001072 | 1613.277  | 2157.138  |
| AL832149  | 5800.452  | 9674.151  | AF022654  | 6407.77   | 11486.98  | NM_003204 | 9804.561  | 6456.892  |
| AK022839  | 4474.598  | 8393.664  | NM_001143 | 3536.099  | 6593.76   | AF254069  | 2883.359  | 1958.266  |
| NM_01835C | 2711.192  | 5396.247  | NM_003282 | 2111.878  | 3575.139  | AL117600  | 18159.582 | 8169.521  |
| AK025839  | 3169.823  | 4628.163  | U36798    | 1401.174  | 2989.733  | NM_001712 | 1389.887  | 763.85    |
| NM_00394C | 1873.286  | 2628.176  | AA220921  | 21146.764 | 29128.361 | NM_004487 | 48079.363 | 20075.678 |
| AB045292  | 3228.911  | 3678.862  | N67770    | 5607.008  | 4693.361  | AB029000  | 7123.445  | 2492.04   |
| AK025699  | 18654.932 | 29974.148 | AA486200  | 62579.168 | 61522.285 | AK026965  | 36173.152 | 6187.235  |
| AF147316  | 493.825   | 1228.442  | U90065    | 9053.771  | 6597.452  | AK025859  | 8277.266  | 1227.451  |

|           |           |           |           |           |           |           |           |           |
|-----------|-----------|-----------|-----------|-----------|-----------|-----------|-----------|-----------|
| AK025826  | 7713.381  | 11840.317 | AJ005898  | 16513.113 | 12100.921 | AL117499  | 24490.449 | 3911.111  |
| AK026439  | 4323.082  | 5904.521  | X57303    | 21856.191 | 16642.205 | NM_007054 | 3208.176  | 1958.385  |
| AK025278  | 1635.815  | 2248.226  | AA463224  | 3386.676  | 2313.507  | AB007957  | 1241.741  | 1370.021  |
| AK026466  | 905.514   | 1412.513  | BG248802  | 21230.828 | 16549.475 | AK000160  | 1473.488  | 2469.711  |
| NM_003787 | 788.144   | 1397.08   | L19605    | 4043.146  | 3063.418  | NM_005311 | 1986.143  | 3195.723  |
| AK024492  | 417.194   | 1303.243  | AA876532  | 30824.893 | 25894.842 | NM_005905 | 1482.46   | 3134.286  |
| AF147419  | 10240.292 | 17444.793 | S74349    | 1759.009  | 1992.967  | NM_016235 | 392.765   | 1183.599  |
| AK024280  | 2675.725  | 4552.843  | X07979    | 65593.469 | 59336.922 | AF172932  | 507.869   | 1253.743  |
| AF075036  | 4788.86   | 6123.207  | BG324670  | 1560.077  | 1116.181  | NM_005355 | 5706.791  | 8920.982  |
| NM_014797 | 6629.933  | 9532.221  | BG744224  | 49551.727 | 51856.293 | NM_002511 | 939.344   | 1673.006  |
| AK027139  | 1398.923  | 2388.173  | NM_018026 | 12763.356 | 12323.298 | NM_004085 | 9582.762  | 13536.809 |
| AL831841  | 5386.014  | 6329.505  | NM_001707 | 38672.047 | 34104.313 | NM_006470 | 2681.193  | 4358.037  |
| AL110165  | 3615.946  | 3860.449  | AK022983  | 2675.513  | 2395.498  | NM_002855 | 19445.674 | 22604.68  |
| AL117652  | 2536.646  | 3086.983  | NM_014865 | 21104.887 | 16299.382 | AB040890  | 2665.596  | 1989.054  |
| AL050168  | 4631.035  | 6097.777  | AL442089  | 35301.035 | 31888.352 | U06680    | 2541.082  | 1311.41   |
| AL117447  | 1342.259  | 2469.252  | NM_000949 | 2090.117  | 3068.155  | NM_015584 | 14806.104 | 3268.502  |
| AK022135  | 4764.344  | 6375.61   | M15530    | 10641.17  | 15972.821 | NM_001697 | 60838.719 | 13137.335 |
| AK022898  | 1152.004  | 2058.472  | NM_000485 | 3590.75   | 4788.166  | NM_016095 | 51533.527 | 8100.3    |
| NM_014895 | 1807.192  | 3102.997  | AK002163  | 7170.388  | 7796.704  | AK025125  | 744.666   | 718.683   |
| AF009269  | 3127.207  | 4630.628  | NM_002287 | 4583.563  | 3719.582  | AF156548  | 3580.433  | 3334.73   |
| AF009313  | 8473.314  | 13288.824 | NM_012344 | 9279.826  | 15164.854 | NM_004663 | 2576.549  | 3476.519  |
| AF056420  | 904.489   | 1433.14   | NM_002351 | 6106.918  | 9637.719  | AB024411  | 1266.168  | 2646.882  |
| AF090887  | 1552.306  | 3185.68   | NM_014385 | 7782.962  | 9972.88   | NM_002444 | 17546.797 | 22593.176 |
| AF009279  | 702.758   | 1328.288  | NM_001704 | 4561.261  | 3796.482  | NM_001104 | 1755.478  | 3013.761  |
| NM_015883 | 4109.207  | 6665.978  | AB036432  | 60414.637 | 55021.313 | NM_002985 | 6683.711  | 9084.581  |
| AF056429  | 1153.487  | 1623.912  | NM_014872 | 7360.379  | 6834.184  | U88898    | 1140.299  | 2521.479  |
| AF070547  | 4940.799  | 6496.502  | NM_003643 | 1395.136  | 1216.271  | NM_020154 | 26662.184 | 40302.043 |
| AK001110  | 15928.253 | 18649.033 | NM_003480 | 10214.507 | 9262.475  | NM_004665 | 8496.427  | 13123.9   |
| AK021801  | 507.709   | 1036.95   | NM_000899 | 2114.209  | 1970.821  | NM_005300 | 2966.422  | 4022.335  |
| AK002184  | 1352.481  | 2726.007  | NM_032951 | 5330.272  | 5982.485  | NM_000893 | 1585.94   | 2283.174  |
| AK021652  | 1261.052  | 3736.978  | NM_000503 | 26382.09  | 23720.734 | NM_000695 | 31708.377 | 44849.336 |
| AK021859  | 1132.117  | 1856.248  | NM_002405 | 35536.672 | 35732.66  | NM_005091 | 673.52    | 1105.984  |
| M64700    | 1166.651  | 2093.47   | AK000004  | 7681.355  | 6803.444  | NM_016027 | 6960.689  | 3303.273  |
| NM_001267 | 1313.05   | 2613.195  | NM_012421 | 36316.977 | 40350.414 | X98266    | 2368.847  | 986.023   |
| NM_014111 | 3028.609  | 4137.491  | AB014601  | 4994.635  | 4737.086  | U00930    | 31249.76  | 9886.703  |
| S85075    | 2112.988  | 3695.453  | AK001393  | 42166.605 | 46083.527 | AK024958  | 1317.428  | 433.035   |
| AJ008129  | 7964.19   | 10883.356 | NM_000023 | 18241.328 | 17378.191 | NM_014575 | 8799.348  | 1757.216  |
| AJ008158  | 1231.427  | 1949.885  | NM_014861 | 2154.745  | 2430.955  | NM_002435 | 9355.55   | 1353.9    |
| AF161451  | 24969.49  | 37641.254 | NM_012434 | 6759.016  | 8039.015  | AL117552  | 2363.792  | 297.166   |
| X02067    | 22004.756 | 40822.262 | NM_005694 | 19041.256 | 22016.137 | NM_002692 | 17178.93  | 8568.087  |
| AK023734  | 3584.325  | 5053.497  | AF224741  | 1925.12   | 1986.247  | NM_007064 | 2920.604  | 4459.997  |
| AF085827  | 3096.598  | 4591.335  | NM_006594 | 8833.196  | 7501.238  | NM_006281 | 2316.904  | 3578.835  |
| Y08266    | 38802.801 | 47104.117 | NM_004177 | 2366.374  | 2153.35   | NM_002735 | 1786.121  | 3028.589  |
| AK002171  | 9624.627  | 13264.238 | AB040903  | 570.37    | 926.112   | U23460    | 47728.34  | 52092.441 |
| AJ002572  | 3526.01   | 4349.929  | NM_005695 | 15524.8   | 11011.643 | NM_005355 | 7819.939  | 10225.892 |
| AK026897  | 9626.979  | 16569.17  | AF202146  | 17476.803 | 12315.693 | Z25434    | 4060.559  | 5537.769  |
| AB037861  | 7893.221  | 13342.152 | NM_006393 | 12545.521 | 8488.768  | NM_005884 | 17501.469 | 23009.502 |
| AK021887  | 11752.729 | 20049.299 | NM_014923 | 1760.548  | 1715.068  | NM_012395 | 15313.921 | 18657.047 |
| NM_002503 | 71699.023 | 65661.914 | NM_005477 | 42364.246 | 38938.961 | AF229804  | 21111.9   | 31320.602 |
| NM_005315 | 10693.918 | 14111.366 | NM_007015 | 1095.712  | 1319.857  | AF151638  | 721.012   | 1073.167  |
| NM_019055 | 1304.767  | 2334.056  | NM_004315 | 3526.662  | 3660.631  | U90552    | 8054.913  | 8958.029  |
| AK022351  | 4547.301  | 6917.012  | L09089    | 7210.822  | 7096.896  | NM_006032 | 6244.402  | 6958.513  |
| NM_020194 | 8201.212  | 11985.53  | NM_002640 | 4184.579  | 4306.968  | NM_014785 | 5977.23   | 5745.899  |

|           |           |           |           |           |           |           |           |           |
|-----------|-----------|-----------|-----------|-----------|-----------|-----------|-----------|-----------|
| AK026853  | 1738.539  | 2905.464  | X03084    | 699.744   | 494.648   | NM_00546C | 3733.622  | 1998.851  |
| AF038183  | 39286.59  | 58415.617 | NM_002537 | 21705.707 | 15257.698 | M12883    | 1993.018  | 910.794   |
| NM_017882 | 9310.955  | 15002.871 | NM_003139 | 9238.13   | 6225.022  | BG288747  | 9693.79   | 4663.093  |
| NM_003521 | 4804.672  | 6952.491  | NM_012316 | 13973.38  | 11188.189 | U37448    | 1933.003  | 482.841   |
| NM_003547 | 5084.065  | 8816.352  | NM_004059 | 1137.272  | 1060.143  | AA927698  | 760.676   | 261.933   |
| AF070529  | 2400.38   | 4278.527  | NM_001634 | 41585.348 | 29457.268 | AI498426  | 1687.21   | 255.947   |
| AK021447  | 9231.466  | 12352.063 | NM_014302 | 1338.134  | 1104.791  | BG824773  | 534.342   | 515.112   |
| AK025096  | 2580.673  | 4061.992  | NM_002267 | 21055.566 | 14948.735 | AB019205  | 2764.557  | 3946.485  |
| AF131774  | 4312.18   | 4816.8    | NM_006412 | 8314.834  | 6789.399  | J05008    | 2043.879  | 2786.356  |
| AK025793  | 1017.991  | 1759.184  | NM_014041 | 40453.09  | 49886.68  | U11087    | 1210.743  | 2156.361  |
| AK000151  | 753.362   | 1395.034  | NM_007169 | 21170.752 | 20329.834 | D50640    | 666.634   | 1364.765  |
| AL389942  | 2015.208  | 4178.3    | NM_014313 | 1284.601  | 902.069   | D43747    | 480.998   | 1193.419  |
| AL137479  | 1502.115  | 2408.897  | AK024966  | 10828.853 | 7729.102  | M98776    | 2240.255  | 3003.386  |
| NM_004211 | 6980.998  | 8892.994  | AF178941  | 62653.023 | 59643.395 | X99135    | 58458.578 | 54012.578 |
| Y10776    | 7047.277  | 12243.329 | NM_016033 | 19253.615 | 17455.551 | AF009744  | 3495.828  | 3654.449  |
| AK027241  | 19564.859 | 30753.865 | NM_017585 | 36887.734 | 30530.844 | NM_001072 | 2276.474  | 2503.972  |
| NM_006978 | 7936.636  | 16024.466 | U61737    | 63194.129 | 58734.121 | NM_01407C | 2321.295  | 2798.634  |
| NM_004561 | 1659.692  | 2658.938  | X06389    | 3212.352  | 3803.209  | AK025859  | 7625.627  | 3630.546  |
| AK024812  | 7081.379  | 13109.046 | NM_000033 | 6613.668  | 7174.15   | NM_007054 | 3911.848  | 1658.227  |
| M20642    | 1713.633  | 2619.658  | NM_018026 | 15543.823 | 12878.92  | AK000160  | 6660.748  | 3431.784  |
| AK026412  | 3185.937  | 4993.054  | NM_001707 | 38970.926 | 23679.555 | NM_005905 | 3865.62   | 1161.394  |
| X89669    | 5312.396  | 6960.167  | AK022983  | 2820.31   | 1640.835  | NM_00096C | 1058.268  | 343.585   |
| U92013    | 45788.539 | 40127.738 | NM_014868 | 25445.488 | 21514.604 | AF172932  | 337.034   | 215.225   |
| AK023965  | 4601.642  | 4895.873  | AL442089  | 46312.68  | 39947.188 | NM_005355 | 9001.257  | 4401.082  |
| AK026211  | 1888.876  | 2210.33   | NM_00120C | 5666.776  | 3431.561  | NM_002511 | 2742.022  | 2361.742  |
| X58968    | 6650.066  | 8120.456  | AB007964  | 1075.076  | 925.09    | NM_000794 | 509.579   | 1105.93   |
| U92020    | 13247.688 | 19628.125 | AF128541  | 14443.888 | 19976.934 | AF295378  | 5485.872  | 7641.41   |
| AL117542  | 2972.315  | 4188.374  | AK026305  | 21724.008 | 28296.412 | NM_004085 | 10296.299 | 14414.172 |
| AL109712  | 38736.027 | 52528.633 | NM_002552 | 7105.878  | 7460.07   | NM_012445 | 39623.363 | 51530.984 |
| X04215    | 1068.541  | 1548.391  | NM_014321 | 13680.266 | 9470.821  | NM_018104 | 3086.455  | 4039.636  |
| NM_017782 | 12014.1   | 17084.725 | AK022733  | 4291.232  | 2913.771  | NM_004425 | 6963.48   | 11034.96  |
| NM_018149 | 8942.822  | 12247.13  | AB011132  | 12602.655 | 8809.196  | U64564    | 2453.816  | 2933.407  |
| D16944    | 1181.024  | 2493.014  | NM_020362 | 18173.494 | 14793.84  | NM_00647C | 2388.311  | 2996.669  |
| NM_018465 | 20092.334 | 42301.188 | AB040937  | 6009.615  | 4710.967  | NM_002855 | 21256.783 | 24062.066 |
| Z36814    | 2385.344  | 3683.488  | AF275798  | 53129.086 | 44695.777 | AB038463  | 2229.712  | 2750.071  |
| D17045    | 1533.55   | 2092.658  | NM_005441 | 20170.66  | 17535.352 | M30262    | 2843.855  | 3219.223  |
| NM_000242 | 1185.503  | 1633.485  | NM_016079 | 40890.641 | 38397.621 | NM_01531C | 1822.358  | 742.642   |
| AB040878  | 6521.06   | 6585.69   | AK023108  | 11378.895 | 10081.006 | NM_005013 | 32563.494 | 19989.506 |
| S74647    | 2203.973  | 3307.932  | AK026409  | 62297.125 | 59524.367 | AB002338  | 3808.531  | 2112.777  |
| NM_003506 | 2433.622  | 2519.927  | AF097025  | 25212.051 | 33636.578 | AI524814  | 2608.817  | 1217.396  |
| NM_018093 | 28208.404 | 29739.729 | Y11339    | 24646.531 | 29297.855 | NM_002444 | 17003.135 | 4559.511  |
| NM_003389 | 2673.149  | 2453.218  | AB030176  | 2363.312  | 4965.253  | NM_001104 | 4092.698  | 696.237   |
| NM_00043C | 2945.552  | 2202.53   | NM_003937 | 922.814   | 1227.485  | NM_002985 | 14134.704 | 2048.653  |
| AB033030  | 2924.017  | 2559.492  | CY3Cy5    | 11958.134 | 778.392   | U88898    | 1070.734  | 546.846   |
| NM_016656 | 1586.552  | 897.165   | AK026783  | 1750.698  | 1998.323  | NM_020154 | 29385.035 | 24949.459 |
| NM_015963 | 18153.617 | 10464.581 | AK021814  | 2260.132  | 4177.015  | NM_004665 | 9326.848  | 15034.539 |
| NM_017813 | 12142.861 | 9574.033  | AF086221  | 890.798   | 1520.629  | NM_00530C | 3334.24   | 4596.076  |
| NM_00384C | 17208.658 | 13855.366 | AF088035  | 3731.258  | 4800.931  | NM_000893 | 2029.708  | 2675.701  |
| NM_018378 | 2616.104  | 2504.946  | AF086251  | 1552.275  | 1457.466  | NM_000695 | 30613.248 | 42875.293 |
| NM_018423 | 2977.037  | 3341.38   | NM_018092 | 1514.221  | 1694.254  | NM_005091 | 649.072   | 952.334   |
| NM_001741 | 19617.494 | 25045.906 | AL109698  | 1356.622  | 1852.491  | AF031167  | 1650.021  | 2075.412  |
| NM_000745 | 7091.246  | 10780.757 | AF217980  | 15371.911 | 17075.826 | NM_003204 | 5709.456  | 8808.551  |
| NM_00446C | 1756.719  | 2201.297  | AL117461  | 3265.927  | 3685.664  | AF254069  | 1127.412  | 1767.081  |

|           |           |           |           |           |           |           |           |           |
|-----------|-----------|-----------|-----------|-----------|-----------|-----------|-----------|-----------|
| NM_006072 | 6595.972  | 12156.427 | NM_016499 | 2552.706  | 2863.888  | AL117600  | 11137.956 | 11487.779 |
| BE794490  | 1968.407  | 3488.903  | NM_172140 | 8007.297  | 9064.545  | NM_001712 | 1546.218  | 1830.156  |
| NM_003561 | 3082.611  | 5868.396  | SR4       | 20383.092 | 17644.039 | NM_004487 | 25528.996 | 27894.846 |
| NM_002991 | 1058.213  | 1579.12   | SR6       | 2663.771  | 2279.615  | AB029000  | 8313.67   | 9177.913  |
| AJ008149  | 50295.785 | 35232.406 | SR8       | 10394.012 | 25209.686 | AK026965  | 20594.959 | 18225.244 |
| NM_001192 | 2753.101  | 1885.162  | SR10      | 33735.344 | 8831.602  | AF229804  | 55924.035 | 47796.824 |
| NM_002353 | 2930.748  | 2149.412  | CY3Cy5    | 6116.494  | 158.987   | NM_006032 | 4304.486  | 2254.887  |
| NM_012153 | 5391.007  | 3833.787  | AK000122  | 36639.145 | 60222.445 | NM_014788 | 6115.71   | 2677.024  |
| NM_013241 | 3014.905  | 2497.183  | AK001091  | 19064.828 | 34831.645 | NM_002153 | 2280.749  | 309.896   |
| AF161362  | 8728.529  | 5092.023  | AF033199  | 424.379   | 880.962   | AK024233  | 3181.462  | 1097.099  |
| NM_015939 | 14452.97  | 11294.479 | U80775    | 1329.815  | 1733.441  | AK021870  | 1009.323  | 266.155   |
| AB046840  | 2505.635  | 2172.07   | AF086428  | 4873.689  | 8269.277  | U06680    | 3377.351  | 353.691   |
| AF174487  | 8142.356  | 6438.136  | AK025310  | 3157.728  | 4395.451  | NM_005123 | 658.435   | 724.791   |
| NM_005041 | 1336.835  | 889.583   | AL049353  | 907.868   | 1525.785  | NM_015584 | 18074.5   | 24443.918 |
| NM_007373 | 8966.82   | 8940.875  | AL117598  | 3853.287  | 6084.744  | NM_001697 | 64806.051 | 63101.02  |
| M34572    | 1197.991  | 2271.925  | AL109670  | 3694.923  | 5661.365  | NM_016098 | 49708.125 | 59500.086 |
| NM_004791 | 2127.511  | 3718.742  | AL832149  | 6622.789  | 11107.145 | AB032525  | 618.148   | 873.195   |
| X55525    | 3658.863  | 6035.179  | AK025839  | 3322.119  | 4601.965  | NM_002063 | 1067.416  | 1135.087  |
| NM_005046 | 691.337   | 647.468   | NM_003946 | 3885.842  | 5408.244  | NM_006667 | 40131.086 | 45355.961 |
| NM_001873 | 1668.098  | 1395.483  | AB045292  | 3511.314  | 4909.422  | AK025125  | 1369.575  | 1728.05   |
| AB029025  | 1528.459  | 1159.656  | AK025699  | 34423.281 | 40431.852 | NM_000815 | 1542.066  | 2234.792  |
| NM_001308 | 438.013   | 389.722   | AF147353  | 1287.454  | 1546.075  | NM_001293 | 772.067   | 1027.794  |
| NM_007100 | 64310.305 | 61826.32  | AK025206  | 634.695   | 1581.253  | AB023173  | 4955.878  | 4452.687  |
| NM_003940 | 1614.747  | 1455.583  | AK025826  | 6739.338  | 12568.4   | AF156548  | 2667.051  | 2309.938  |
| M26880    | 1083.775  | 771.532   | AK026439  | 5097.366  | 8256.42   | NM_000387 | 16068.83  | 14605.219 |
| NM_017548 | 58461.656 | 42174.512 | AK025278  | 1986.562  | 3395.132  | NM_004663 | 1853.303  | 1681.838  |
| AF134802  | 11736.657 | 10092.748 | AK026466  | 1360.085  | 1982.571  | NM_014070 | 2679.57   | 1316.263  |
| NM_018222 | 1778.866  | 1586.916  | NM_003787 | 852.925   | 1374.836  | NM_014297 | 4274      | 945.004   |
| NM_005740 | 4741.153  | 3081.119  | AK024492  | 416.268   | 1719.379  | NM_018156 | 43598.203 | 5843.962  |
| NM_004308 | 22360.461 | 13013.573 | AK024280  | 3499.915  | 5474.748  | X98266    | 2776.81   | 342.351   |
| AF112366  | 5300.715  | 3966.858  | AK027139  | 1861.552  | 2404.97   | U00930    | 33530.566 | 11240.802 |
| NM_004274 | 2886.541  | 3594.593  | AL831841  | 11833.625 | 18619.428 | AK024958  | 1939.058  | 1740.453  |
| AK024002  | 28702.496 | 38188.914 | AL110165  | 10614.242 | 12895.212 | NM_014575 | 11757.842 | 15941.123 |
| NM_020399 | 16922.428 | 30247.719 | AL117652  | 5107.304  | 7197.274  | NM_002439 | 8921.262  | 13154.06  |
| NM_004071 | 5004.552  | 7858.167  | AL050168  | 12917.922 | 15996.824 | AL117552  | 3114.995  | 4170.544  |
| NM_001316 | 25250.828 | 46505.934 | AL117447  | 4156.883  | 4851.184  | NM_002692 | 13219.564 | 16179.424 |
| NM_004264 | 2594.426  | 2148.442  | AF131756  | 1246.706  | 1416.327  | AB023190  | 62456.707 | 58824.371 |
| AK024788  | 4954.804  | 3383.462  | AK022135  | 6377.512  | 7781.126  | NM_007064 | 2052.394  | 3222.257  |
| NM_004473 | 1201.563  | 967.133   | AK022898  | 957.449   | 1389.911  | NM_006281 | 2529.104  | 3412.825  |
| AK022696  | 4678.567  | 3037.96   | AL117592  | 668.024   | 978.162   | NM_002738 | 2493.302  | 2963.471  |
| NM_001206 | 2863.414  | 2281.905  | AK024897  | 480.206   | 1292.53   | U23460    | 36591.449 | 42610.734 |
| NM_005016 | 5506.328  | 4267.305  | NM_014896 | 1128.737  | 953.837   | NM_005356 | 8000.406  | 7887.542  |
| NM_014469 | 6160.657  | 4503.124  | AF009269  | 3461.098  | 4326.039  | Z25434    | 4244.683  | 3707.463  |
| NM_014852 | 11924.215 | 7397.824  | AF009313  | 8889.09   | 12966.091 | NM_005884 | 15411.266 | 16042.494 |
| NM_000344 | 22792.926 | 20772.506 | AF056420  | 1032.342  | 1361.128  | NM_012399 | 14611.248 | 9146.851  |
| AF248650  | 11542.079 | 8314.685  | AF090887  | 1796.671  | 2797.101  | CY3Cy5    | 3616.522  | 229.715   |
| S74678    | 55945.566 | 47055.996 | AF009279  | 1037.505  | 1599.707  | NM_004774 | 2931.54   | 2626.976  |
| AF248651  | 3711.788  | 3274.45   | NM_015883 | 5446.711  | 8932.865  | NM_005234 | 4557.891  | 4223.974  |
| NM_001358 | 38866.016 | 30387.107 | AF056429  | 1686.684  | 2690.833  | NM_015400 | 2647.657  | 3600.077  |
| NM_004836 | 25437.008 | 18000.012 | AF070547  | 11186.949 | 18649.465 | AK026464  | 811.936   | 848.249   |
| AB037751  | 17164.455 | 12021.492 | AK001110  | 45038.395 | 56158.613 | AK001362  | 363.526   | 443.97    |
| S79281    | 19431.719 | 13147.131 | AK001153  | 1395.038  | 1881.007  | AK022400  | 720.422   | 689.834   |
| AK025585  | 8584.778  | 3381.688  | AK002184  | 1544.968  | 1591.106  | AF052100  | 964.014   | 1034.198  |



|           |           |           |           |           |           |           |           |           |
|-----------|-----------|-----------|-----------|-----------|-----------|-----------|-----------|-----------|
| NM_001414 | 16420.051 | 10939.377 | AK021652  | 1384.183  | 2370.108  | AL110235  | 445.305   | 521.38    |
| D16891    | 16508.717 | 12287.399 | AK021859  | 2958.016  | 4244.826  | U79245    | 429.695   | 782.392   |
| NM_017760 | 18850.135 | 29978.869 | M64700    | 1127.494  | 1837.126  | AF085983  | 376.143   | 381.505   |
| NM_015930 | 21866.492 | 42795.078 | NM_001267 | 1604.627  | 1601.44   | AF052105  | 956.472   | 709.627   |
| Z36876    | 3656.922  | 6237.496  | NM_005331 | 69543.602 | 64581.586 | AK001204  | 7723.031  | 3381.338  |
| NM_000892 | 2563.792  | 4799.381  | NM_014111 | 3101.218  | 3398.478  | NM_004774 | 2423.252  | 919.762   |
| X75363    | 615.104   | 1132.252  | S85075    | 1765.275  | 2215.965  | NM_005234 | 3961.978  | 1834.062  |
| NM_000120 | 31932.018 | 24121.619 | AJ008129  | 6571.102  | 5321.173  | SR1       | 83094.383 | 26407.16  |
| AK022291  | 2378.475  | 1979.211  | AJ008158  | 1363.311  | 1236.7    | SR3       | 19557.789 | 6268.011  |
| BF239974  | 10161.532 | 8539.85   | AF161451  | 24060.057 | 22224.15  | SR5       | 1543.959  | 540.316   |
| NM_000104 | 2667.082  | 2759.295  | X02067    | 23093.494 | 30133.178 | SR7       | 2642.787  | 8011.835  |
| NM_005010 | 34838.969 | 27518.469 | NM_006230 | 66506.789 | 64152.266 | SR9       | 6582.302  | 349.022   |
| NM_004250 | 61880.566 | 62045.684 | AK023734  | 5514.068  | 5446.892  | CY3Cy5    | 3037.312  | 145.617   |
| NM_000260 | 64578.422 | 71338.555 | D17265    | 45202.926 | 53214.441 | L34409    | 11707.726 | 11092.532 |
| AF182288  | 9106.491  | 6776.737  | AF085827  | 3510.097  | 3774.809  | U12210    | 1876.772  | 1800.814  |
| NM_004491 | 5074.951  | 2532.897  | Y08266    | 51731.141 | 54898.359 | L08440    | 3679.564  | 3650.047  |
| L14787    | 824.971   | 506.912   | AK002171  | 11766.305 | 15553.016 | M73799    | 1576.203  | 1817.072  |
| AK026810  | 8863.028  | 5824.812  | AJ002572  | 4703.661  | 5154.699  | AF086119  | 920.054   | 790.601   |
| NM_015620 | 20542.156 | 15214.421 | AK026897  | 12913.697 | 14780.351 | NM_018364 | 2442.802  | 2121.699  |
| AF218032  | 14894.148 | 7429.59   | AB037861  | 22348.074 | 29970.436 | NM_007022 | 1747.792  | 1261.278  |
| NM_017542 | 16530.855 | 12298.151 | AK021887  | 12441.045 | 12875.003 | AL049943  | 21619.602 | 13125.539 |
| AK024407  | 2932.865  | 1952.331  | AF086180  | 64659.59  | 60208.723 | AL137303  | 982.4     | 510.863   |
| NM_004182 | 54374.605 | 33965.027 | NM_002503 | 65782.398 | 69781.703 | AL355708  | 507.928   | 93.489    |
| NM_018410 | 1212.923  | 752.369   | NM_005310 | 10471.188 | 12867.775 | AB002449  | 441.704   | 256.719   |
| NM_014240 | 3894.055  | 1855.373  | NM_019050 | 1519.27   | 1452.219  | NM_016480 | 11051.958 | 3241.623  |
| BE379399  | 2306.054  | 1490.737  | AK022351  | 3793.516  | 4369.524  | AK001489  | 297.895   | 133.054   |
| NM_015877 | 9137.622  | 12108.006 | AK022059  | 832.56    | 1701.605  | NM_015681 | 3479.531  | 1215.469  |
| AF060935  | 10262.458 | 16131.832 | NM_020194 | 7382.696  | 9871.688  | AF070582  | 832.214   | 254.956   |
| AK026886  | 1761.891  | 3008.894  | AK026853  | 1748.603  | 1937.768  | NM_006380 | 2666.059  | 1212.882  |
| D83778    | 2455.737  | 4869.193  | AF038183  | 36945.188 | 46233.734 | AK024351  | 975.932   | 1185.74   |
| NM_006470 | 4753.188  | 4279.455  | NM_017882 | 7665.387  | 7769.791  | AK025002  | 1962.143  | 2262.521  |
| NM_002850 | 46929.418 | 39058.836 | NM_003521 | 4658.913  | 4188.49   | AF086124  | 507.283   | 485.192   |
| AB038463  | 2964.612  | 2544.756  | NM_003547 | 4715.29   | 3953.299  | AK024820  | 462.218   | 422.111   |
| M30262    | 11917.114 | 10673.326 | AF070529  | 3357.159  | 3394.706  | AB033105  | 341.377   | 407.335   |
| NM_005460 | 2013.502  | 2031.61   | AK022978  | 6892.241  | 5823.023  | AF038192  | 511.673   | 226.926   |
| AF160477  | 9192.758  | 7187.566  | AK021447  | 19441.373 | 15878.539 | AJ001865  | 1114.427  | 508.755   |
| NM_003220 | 758.975   | 724.597   | AK025096  | 6531.199  | 6838.278  | D61704    | 14130.354 | 9569.087  |
| M12883    | 9703.789  | 7492.919  | AF131774  | 7812.531  | 6354.168  | Y10512    | 1590.547  | 645.119   |
| BG288747  | 10104.179 | 7388.187  | AK025793  | 1290.349  | 1127.327  | AL110175  | 1145.487  | 1421.286  |
| BG617923  | 887.911   | 909.596   | AK000151  | 1569.695  | 1103.441  | AF288406  | 427.176   | 499.611   |
| U37448    | 2592.21   | 1899.572  | AL389942  | 4315.894  | 3326.872  | AK027156  | 6500.131  | 6877.624  |
| BG435851  | 1076.643  | 781.214   | D17052    | 7805.953  | 6229.277  | AL157504  | 1717.269  | 2488.317  |
| AA927698  | 1135.072  | 952.838   | AL137479  | 1694.728  | 2572.638  | AK023328  | 4000.465  | 5277.239  |
| AI498426  | 3119.822  | 2465.131  | NM_004211 | 7560.805  | 9957.688  | AL442096  | 1134.454  | 1050.85   |
| BG824773  | 1019.981  | 515.045   | Y10776    | 6014.583  | 7148.333  | NM_018220 | 1343.612  | 1034.422  |
| D01038    | 52177.152 | 39728.844 | AK027241  | 19601.828 | 26378.902 | AJ270693  | 1380.546  | 1286.743  |
| AB019205  | 3848.512  | 2645.818  | NM_006970 | 7504.31   | 10325.521 | NM_017790 | 2666.28   | 3184.847  |
| J05008    | 2632.86   | 1313.082  | NM_004561 | 1571.993  | 2001.354  | AK000861  | 525.193   | 551.1     |
| U11087    | 1306.238  | 1105.806  | AK024812  | 6143.004  | 7731.317  | AK000023  | 3857.173  | 4186.017  |
| D50640    | 989.841   | 844.823   | M20642    | 2000.032  | 2326.906  | AK000901  | 1113.548  | 917.683   |
| D43747    | 1015.546  | 972.763   | AK026412  | 2615.965  | 4757.156  | AB007866  | 976.388   | 1022.499  |
| M98776    | 3341.752  | 6348.267  | X89669    | 5340.681  | 5424.532  | AF075086  | 38671.48  | 30581.98  |
| X99135    | 58732.434 | 74757.078 | U92013    | 53569.824 | 49382.828 | X77485    | 27072.27  | 21003.869 |

|           |           |           |           |           |           |           |           |           |
|-----------|-----------|-----------|-----------|-----------|-----------|-----------|-----------|-----------|
| AF009744  | 4201.264  | 6367.845  | AK023965  | 4989.457  | 3878.474  | NM_014495 | 1434.931  | 1468.527  |
| AF104921  | 48401.793 | 64475.559 | AK026211  | 2036.895  | 1670.919  | AB046765  | 787.085   | 1002.418  |
| NM_000695 | 59176.172 | 60899.055 | X58968    | 8545.758  | 7850.199  | AF133333  | 3824.181  | 3681.381  |
| NM_005091 | 961.224   | 827.268   | U92020    | 16280.119 | 15872.497 | AK024011  | 286.975   | 148.909   |
| AF031167  | 778.867   | 731.671   | AL117542  | 6833.275  | 5362.307  | AF119913  | 1191.492  | 459.774   |
| NM_003204 | 15745.597 | 14303.992 | AL109712  | 63743.699 | 57829.031 | NM_018340 | 1643.023  | 1767.727  |
| AF254069  | 1551.371  | 1439.993  | X04215    | 1212.901  | 929.102   | AF049883  | 1280.804  | 1121.849  |
| AL117600  | 23163.875 | 17898.977 | NM_017782 | 12785.031 | 11389.271 | L10148    | 55873.41  | 46883.234 |
| NM_001712 | 2155.99   | 2002.803  | NM_018149 | 10076.554 | 8881.266  | AK026247  | 452.154   | 665.265   |
| NM_004487 | 53019.055 | 55056.406 | D16944    | 1145.196  | 935.663   | L37703    | 23115.938 | 22394.096 |
| AB029000  | 11055.146 | 8657.559  | NM_018465 | 21574.588 | 20171.141 | AK023767  | 13932.169 | 13329.452 |
| AK026965  | 56239.336 | 52174.723 | Z36814    | 2665.768  | 1566.127  | AF084516  | 769.211   | 1182.189  |
| AK025859  | 10963.96  | 7697.204  | D17045    | 1684.771  | 1095.13   | AJ001907  | 982.641   | 1195.238  |
| AL117499  | 31012.393 | 26981.322 | NM_000242 | 715.081   | 1183.784  | M32220    | 3377.611  | 3798.76   |
| NM_007054 | 4106.959  | 2872.181  | AB040878  | 4804.818  | 6866.017  | D17188    | 9508.75   | 9674.344  |
| AB007957  | 1692.197  | 1142.423  | S74647    | 1973.175  | 2083.502  | AJ001432  | 30664.412 | 19327.063 |
| AK000160  | 2128.869  | 1495.514  | NM_003506 | 3035.052  | 3794.395  | NM_020435 | 5624.031  | 6105.842  |
| NM_005311 | 2982.843  | 2309.031  | NM_018093 | 27927.498 | 31094.824 | AJ012499  | 57705.078 | 51706.227 |
| NM_005905 | 5656.858  | 3157.78   | NM_003389 | 4020.481  | 4313.999  | AK024900  | 530.875   | 248.52    |
| NM_016235 | 767.888   | 835.821   | NM_000430 | 3322.07   | 3436.169  | AF119879  | 34481.457 | 35993.949 |
| NM_000960 | 1131.139  | 1145.985  | AB033030  | 3614.811  | 3871.132  | L16951    | 247.69    | 430.727   |
| NM_005355 | 7548.45   | 7502.017  | NM_015963 | 19109.506 | 14551.104 | Y10482    | 42561.348 | 62804.797 |
| NM_002511 | 1380.238  | 5073.102  | AB007871  | 59185.555 | 54947.918 | AY007095  | 707.411   | 1914.012  |
| AF320908  | 485.729   | 1047.839  | NM_017813 | 13767.335 | 12306.532 | AF086244  | 2184.42   | 3383.308  |
| NM_004085 | 7771.908  | 12256.675 | NM_003840 | 23694.467 | 20075.553 | AL161992  | 2916.142  | 7701.146  |
| NM_006032 | 17450.539 | 14383.143 | NM_018375 | 3523.499  | 3261.562  | AK023551  | 592.631   | 3005.969  |
| NM_014785 | 10816.858 | 8261.551  | NM_018423 | 3793.746  | 2958.199  | AK023910  | 1920.791  | 5961.038  |
| NM_002153 | 1714.02   | 1964.32   | NM_001741 | 20440.357 | 17134.828 | D16991    | 948.568   | 2327.82   |
| AB040890  | 3170.446  | 3485.15   | NM_000745 | 6200.41   | 4616.952  | AK023538  | 1124.332  | 2187.654  |
| AK024233  | 4201.404  | 3943.36   | AF116705  | 48952.508 | 42721.242 | NM_006695 | 2975.626  | 3139.572  |
| AK021870  | 1849.946  | 1613.599  | NM_004460 | 3522.033  | 2371.526  | NM_004815 | 1223.805  | 1028.976  |
| U06680    | 5110.691  | 3327.38   | NM_006072 | 10936.243 | 8308.837  | NM_004147 | 586.735   | 602.323   |
| NM_005123 | 1067.906  | 855.755   | BE794490  | 4405.669  | 3508.613  | AK000959  | 537.243   | 529.751   |
| NM_015584 | 21229.799 | 17490.125 | NM_003561 | 10963.339 | 9767.262  | AB037743  | 1623.716  | 2164.747  |
| NM_001697 | 61275.477 | 55046.992 | NM_002991 | 1706.269  | 1259.667  | AB046820  | 1102.152  | 1148.665  |
| NM_016095 | 52827.387 | 49767.625 | AJ008149  | 43188.68  | 46004.844 | AK025922  | 947.131   | 1137.913  |
| AK025125  | 1097.515  | 1133.82   | NM_001192 | 2372.32   | 3356.996  | AF123659  | 1666.178  | 1386.051  |
| AF156548  | 3770.217  | 3213.202  | NM_002353 | 2498.842  | 2406.689  | NM_004881 | 13325.584 | 7610.57   |
| NM_004663 | 3256.211  | 2828.636  | NM_012153 | 5073.515  | 6452.423  | U94903    | 391.803   | 286.932   |
| AB024411  | 2748.394  | 2652.742  | NM_013241 | 3786.231  | 4686.645  | AF009300  | 264.905   | 437.171   |
| NM_002444 | 20145.752 | 17788.828 | NM_015535 | 730.682   | 676.964   | NM_005155 | 8521.898  | 12392.203 |
| NM_001104 | 2216.063  | 1573.836  | AF161362  | 9141.036  | 8306.934  | U80764    | 7927.213  | 28411.188 |
| NM_002985 | 7321.76   | 4722.071  | NM_015939 | 16163.645 | 15001.427 | AB020684  | 4976.498  | 17899.125 |
| U88898    | 1127.988  | 1362.56   | AB046840  | 2698.902  | 2427.491  | AF077036  | 45046.449 | 55855.543 |
| NM_020154 | 28106.463 | 39724.465 | AF174487  | 10644.596 | 9342.631  | NM_020421 | 1078.977  | 2756.561  |
| NM_004665 | 10059.487 | 22005.441 | NM_005041 | 929.872   | 583.972   | D17094    | 1398.603  | 6865.226  |
| NM_005300 | 4504.511  | 8647.957  | NM_006407 | 14159.329 | 9269.797  | L37690    | 22682.551 | 55839.625 |
| NM_000893 | 1811.151  | 3280.483  | NM_007373 | 9407.209  | 4341.991  | D61707    | 694.578   | 2968.298  |
| NM_014070 | 3372.711  | 2310.877  | M34572    | 2111.776  | 1483.398  | AK021610  | 1239.631  | 4422.025  |
| NM_016280 | 2262.173  | 1521.82   | NM_006263 | 63851.027 | 49690.273 | Z36835    | 7561.78   | 18037.039 |
| NM_016027 | 1678.519  | 1005.778  | NM_004791 | 8693.473  | 5535.237  | AF029325  | 949.26    | 969.864   |
| NM_014297 | 5856.616  | 3653.645  | X55525    | 5461.249  | 3570.704  | NM_005704 | 965.395   | 1080.565  |
| NM_018156 | 52069.148 | 42651.211 | NM_005046 | 888.939   | 1377.921  | AF097021  | 936.748   | 1093.408  |

|           |           |           |           |           |           |           |           |           |
|-----------|-----------|-----------|-----------|-----------|-----------|-----------|-----------|-----------|
| X98266    | 5342.591  | 3264.908  | NM_001873 | 1796.695  | 2384.08   | NM_001365 | 827.746   | 1054.347  |
| U00930    | 41128.867 | 28821.238 | AB029025  | 1517.33   | 2115.897  | NM_000677 | 4802.817  | 5388.967  |
| AK024958  | 2435.991  | 1583.85   | NM_001308 | 793.006   | 1183.452  | BF308728  | 1959.314  | 2779.734  |
| NM_014575 | 16141.396 | 12293.011 | NM_007100 | 65193.84  | 51466.922 | NM_018315 | 24801.563 | 17490.336 |
| NM_002439 | 13140.893 | 11779.605 | NM_003940 | 1944.507  | 1929.182  | AF051151  | 410.899   | 396.535   |
| AL117552  | 4480.74   | 3450.264  | M26880    | 1324.967  | 837.273   | AF142421  | 2131.487  | 950.378   |
| NM_002692 | 22092.449 | 16761.971 | NM_000027 | 2209.652  | 2158.623  | AB037836  | 1223.422  | 2636.555  |
| AB023190  | 62074.672 | 58857.113 | NM_017548 | 63286.801 | 55465.023 | NM_014247 | 682.841   | 1921.747  |
| NM_007064 | 7439.605  | 5608.435  | AF134802  | 13050.869 | 13480.396 | NM_006343 | 391.96    | 1046.466  |
| NM_006281 | 2868.452  | 2706.281  | NM_018222 | 2662.868  | 2478.404  | NM_014786 | 1170.838  | 2358.988  |
| NM_002738 | 2088.197  | 2297.795  | NM_005740 | 6151.557  | 5512.869  | NM_015716 | 4379.2    | 11959.412 |
| U23460    | 60207.438 | 58892.883 | NM_004308 | 25503.826 | 18796.65  | NM_003955 | 860.413   | 3189.658  |
| NM_005356 | 8691.572  | 4615.2    | AF112366  | 9378.396  | 6399.478  | NM_005739 | 2325.77   | 9025.052  |
| Z25434    | 4158.569  | 2538.438  | NM_004274 | 6851.568  | 4433.029  | AB023166  | 879.041   | 1972.26   |
| NM_005884 | 18350.412 | 22234.18  | AK024002  | 50914.227 | 47600.215 | AB028966  | 8405.98   | 20235.125 |
| NM_012399 | 16675.965 | 21752.33  | NM_020399 | 26297.49  | 19562.17  | NM_005402 | 5255.207  | 6472.6    |
| AF229804  | 30047.369 | 47680.926 | AB011117  | 7213.836  | 5184.587  | AF055027  | 6197.178  | 6422.199  |
| AF151638  | 826.722   | 1852.704  | NM_004071 | 4863.775  | 2895.652  | U63541    | 4514.537  | 4432.408  |
| U90552    | 7980.576  | 15786.264 | NM_001316 | 26609.832 | 16822.148 | AB033045  | 1199.177  | 1298.581  |
| AB038463  | 2757.328  | 3117.664  | NM_004264 | 2451.867  | 3111.499  | AF055006  | 6343.623  | 7529.845  |
| M30262    | 11689.687 | 10196.753 | AK024788  | 5886.695  | 8563.688  | NM_004935 | 2356.47   | 2887.934  |
| NM_005460 | 1737.524  | 1779.869  | NM_004473 | 1639.279  | 1976.508  | NM_006951 | 915.795   | 1184.216  |
| AF160477  | 9183.638  | 6362.408  | AK022696  | 5245.911  | 6071.542  | NM_001896 | 4730.99   | 3916.217  |
| NM_003226 | 419.845   | 455.465   | NM_001206 | 3765.216  | 4442.26   | NM_014023 | 370.917   | 376.508   |
| M12883    | 8546.578  | 6760.192  | NM_005016 | 5535.601  | 5526.145  | NM_002745 | 5256.632  | 3194.77   |
| BG288747  | 9592.848  | 8310.78   | NM_014469 | 7743.54   | 7760.597  | D26488    | 5379.292  | 2135.469  |
| BG617923  | 653.724   | 852.639   | NM_014852 | 16866.096 | 16584.961 | NM_001432 | 334.856   | 298.195   |
| U37448    | 2346.041  | 1708.278  | NM_000344 | 25831.223 | 28977.029 | AB014554  | 1189.402  | 3468.967  |
| BG435851  | 915.366   | 649.839   | AF248650  | 8675.142  | 3983.91   | AF097431  | 1670.185  | 3585.384  |
| AA927698  | 1250.501  | 1007.215  | S74678    | 59741.648 | 52484.188 | NM_001978 | 1080.869  | 2147.619  |
| AI498426  | 2928.938  | 2319.759  | AF248651  | 4075.78   | 3695.275  | NM_004221 | 1132.216  | 4803.254  |
| BG824773  | 1107.447  | 668.012   | NM_001358 | 42760.676 | 37853.855 | NM_003019 | 1173.09   | 2811.132  |
| D01038    | 46870.32  | 36235.219 | NM_004836 | 32099.861 | 29117.438 | AL109790  | 899.005   | 801.794   |
| AB019205  | 3243.774  | 3285.586  | AB037751  | 17097.223 | 13822.047 | NM_003628 | 1012.875  | 1170.56   |
| J05008    | 2148.482  | 1585.102  | S79281    | 18554.264 | 14592.329 | NM_006699 | 2084.336  | 2017.111  |
| U11087    | 1504.876  | 1461.287  | AK025585  | 9538.153  | 7765.62   | AK025645  | 1101.253  | 1361.732  |
| D50640    | 1242.458  | 1008.37   | NM_001414 | 18424.945 | 16146.525 | AK023266  | 525.113   | 857.137   |
| D43747    | 795.375   | 539.202   | D16891    | 16338     | 12796.301 | NM_006814 | 9974.54   | 12646.721 |
| M98776    | 2233.786  | 1343.335  | NM_017760 | 17603.16  | 12537.842 | NM_005067 | 2950.444  | 3368.791  |
| X99135    | 58592.105 | 51203.301 | NM_015936 | 26580.596 | 22490.852 | AB007899  | 425.828   | 424.039   |
| AF009744  | 4513.83   | 4697.877  | Z36876    | 3205.413  | 1866.428  | NM_002817 | 7251.692  | 5509.95   |
| NM_001072 | 2407.237  | 5003.284  | NM_000892 | 8008.575  | 5633.254  | NM_002801 | 11782.005 | 6760.576  |
| AF031167  | 906.425   | 869.592   | NM_000126 | 29620.598 | 53048.504 | BE905810  | 907.965   | 347.234   |
| NM_003204 | 16022.977 | 12628.181 | AK022291  | 2335.636  | 3164.993  | NM_014780 | 890.741   | 2805.715  |
| AF254069  | 1504.565  | 1404.967  | BF239974  | 10789.601 | 11895.855 | NM_014730 | 2112.375  | 4855.971  |
| AL117600  | 21058.313 | 16484.791 | NM_000104 | 2748.629  | 3950.38   | NM_014167 | 655.767   | 1089.116  |
| NM_001712 | 2409.533  | 2092.353  | NM_005015 | 33259.441 | 45344.883 | NM_016063 | 1574.365  | 2667.908  |
| NM_004487 | 53964.313 | 51426.813 | NM_004255 | 61342.648 | 55683.73  | U82987    | 2857.933  | 4087.927  |
| AB029000  | 9785.157  | 8249.793  | NM_000269 | 63613.688 | 60704.91  | NM_014890 | 428.101   | 1231.809  |
| AK026965  | 55679.578 | 51736.125 | AF182288  | 10435.98  | 12049.688 | AK056481  | 2767.457  | 5076.11   |
| AK025859  | 10010.543 | 5496.528  | NM_004491 | 4991.43   | 3846.244  | NM_005433 | 534.277   | 816.624   |
| AL117499  | 30180.902 | 22737.703 | L14787    | 921.949   | 564.521   | AF232000  | 57363.426 | 64064.477 |
| NM_007054 | 4222.316  | 3014.474  | AK026810  | 8264.181  | 7528.581  | NM_005758 | 2981.313  | 2955.441  |

|           |           |           |           |           |           |           |           |           |
|-----------|-----------|-----------|-----------|-----------|-----------|-----------|-----------|-----------|
| AB007957  | 1814.21   | 1332.735  | NM_015629 | 20224.457 | 16971.809 | AF044774  | 824.3     | 1401.175  |
| AK000160  | 2371.072  | 2033.437  | AF218032  | 15255.706 | 10091.788 | NM_00295E | 910.916   | 1077.165  |
| NM_005311 | 2747.043  | 2029.443  | NM_017542 | 17191.277 | 16722.467 | NM_00193E | 2902.4    | 3127.463  |
| NM_00590E | 5090.15   | 3401.309  | AK024407  | 3310.312  | 2940.047  | AF230808  | 4311.667  | 4787.887  |
| NM_01623E | 860.537   | 997.755   | NM_004182 | 61335.461 | 48823.477 | U18910    | 1357.098  | 1537.654  |
| NM_00096C | 1131.888  | 753.378   | NM_018419 | 2070.831  | 1453.8    | NM_00523E | 19519.658 | 18103.047 |
| NM_00535E | 9163.036  | 4633.791  | NM_01424C | 6367.039  | 5038.065  | S83390    | 198.703   | 429.575   |
| NM_002511 | 1344.72   | 630.318   | BE379399  | 2991.845  | 2170.492  | AK075306  | 5999.26   | 5756.581  |
| NM_00408E | 7083.353  | 14071.104 | NM_015877 | 16191.166 | 11997.428 | AB037820  | 939.91    | 460.011   |
| NM_00647C | 3333.079  | 6605.913  | AF060935  | 9650.113  | 6130.414  | NM_00128C | 17940.305 | 32559.564 |
| NM_00285E | 22900.314 | 36390.52  | AK026886  | 2588.958  | 1608.821  | AB019572  | 54704.422 | 57851.199 |
| NM_00215E | 1957.648  | 2123.393  | D83778    | 3706.445  | 1914.933  | NM_00294E | 54344.867 | 62209.453 |
| AB040890  | 3033.431  | 3820.047  | NM_00647C | 4306.951  | 9080.145  | AF113008  | 2152.18   | 2675.119  |
| AK024233  | 3943.584  | 3959.862  | NM_00285E | 50509.836 | 55410.781 | NM_020217 | 2828.528  | 1532.662  |
| AK021870  | 2104.451  | 1442.363  | AB038463  | 2906.692  | 2642.975  | L05093    | 59980.652 | 65936.703 |
| U06680    | 4168.112  | 3149.775  | M30262    | 12274.271 | 18558.869 | NM_00692E | 2648.741  | 5198.401  |
| NM_00512E | 996.663   | 812.629   | NM_00546C | 1604.485  | 2315.656  | AF119889  | 16235.746 | 18009.861 |
| NM_01558A | 20652.717 | 15883.358 | AF160477  | 12116.11  | 18655.262 | J03866    | 9852.746  | 11135.75  |
| NM_001697 | 57370.063 | 54832     | NM_00322E | 743       | 1235.066  | AK022836  | 6624.073  | 6710.931  |
| NM_01609E | 52702.746 | 46588.52  | M12883    | 10179.233 | 12861.427 | NM_01234E | 46791.773 | 39020.875 |
| AK025125  | 933.766   | 1194.322  | BG288747  | 10409.422 | 13069.103 | NM_000397 | 1903.36   | 2255.715  |
| AF156548  | 3667.745  | 3302.458  | BG617923  | 1002.347  | 882.424   | NM_00204E | 59149.734 | 64418.031 |
| NM_00466E | 3512.938  | 2621.767  | U37448    | 2793.477  | 2315.622  | AL157461  | 864.744   | 471.777   |
| AB024411  | 2345.503  | 2545.838  | BG435851  | 852.244   | 960.985   | NM_00307E | 1621.043  | 1457.412  |
| NM_00244A | 19302.605 | 18530.082 | AA927698  | 1565.8    | 1370.867  | AL137703  | 823.007   | 2611.655  |
| NM_001104 | 2458.695  | 2391.466  | AI498426  | 3452.6    | 2726.018  | NM_00180E | 4698.545  | 7044.634  |
| NM_00298E | 11092.586 | 7648.532  | BG824773  | 1467.737  | 1181.536  | NM_01825E | 145.163   | 629.375   |
| U88898    | 1388.045  | 1195.773  | D01038    | 58918.309 | 56663.051 | AL117477  | 3252.664  | 2924.694  |
| NM_02015A | 26863.82  | 14610.756 | AB019205  | 5140.758  | 3914.173  | NM_012107 | 2733.437  | 2245.329  |
| NM_00466E | 10484.735 | 8114.035  | J05008    | 3547.767  | 2761.546  | AB037760  | 2083.898  | 1017.039  |
| NM_00530C | 3972.537  | 3361.868  | U11087    | 2400.639  | 1623.203  | NM_01568C | 4659.013  | 2933.602  |
| NM_00089E | 2050.894  | 3584.116  | D50640    | 1011.479  | 928.986   | M22637    | 3968.899  | 17354.111 |
| NM_00069E | 33094.301 | 53626.73  | D43747    | 844.143   | 925.773   | AB037770  | 541.078   | 3323.876  |
| NM_005091 | 1003.909  | 1932.878  | M98776    | 8786.508  | 5815.785  | NM_01811E | 1207.277  | 1250.235  |
| NM_01628C | 1951.645  | 1370.181  | X99135    | 62158.934 | 63468.676 | L35035    | 4346.335  | 4667.308  |
| NM_016027 | 1688.784  | 984.755   | AF009744  | 4619.813  | 3204.667  | NM_00715E | 2393.203  | 5394.849  |
| NM_014297 | 5951.813  | 3631.019  | AF104921  | 48471.832 | 39751.719 | NM_01829E | 1260.153  | 1801.362  |
| NM_01815E | 54096.598 | 43368.301 | NM_00069E | 53089.891 | 58350.633 | AF073931  | 188.86    | 479.443   |
| X98266    | 4705.218  | 3247.436  | NM_005091 | 1161.845  | 1571.061  | NM_018047 | 1601.664  | 2458.39   |
| U00930    | 36487.355 | 21404.947 | NM_00320A | 18928.941 | 27885.143 | NM_00502E | 1385.4    | 2016.237  |
| AK024958  | 2033.762  | 1607.621  | AF254069  | 1555.289  | 2381.184  | NM_00128E | 606.893   | 721.935   |
| NM_01457E | 13594.404 | 9135.151  | AL117600  | 22405.227 | 30880.736 | NM_00356A | 4332.924  | 7062.248  |
| NM_00243E | 11216.004 | 6964.405  | NM_00171E | 2023.152  | 2516.966  | AK023414  | 255.669   | 513.182   |
| AL117552  | 3296.839  | 2367.494  | NM_004487 | 60888.641 | 65214.148 | AF317516  | 4600.048  | 6058.377  |
| NM_00269E | 19844.541 | 14018.094 | AB029000  | 9572.502  | 11700.827 | NM_002581 | 1877.246  | 1838.412  |
| AB023190  | 60339.645 | 57742.008 | AK026965  | 61805.77  | 59270.68  | AI417964  | 3960.886  | 2043.862  |
| NM_00706A | 7718.177  | 4971.846  | AK025859  | 11494.316 | 10556.199 | J03571    | 28583.029 | 12467.861 |
| NM_006281 | 2542.882  | 2233.578  | AL117499  | 30216.527 | 33293.688 | T57791    | 293.918   | 396.034   |
| NM_00273E | 2374.532  | 2224.033  | NM_00705A | 4379.133  | 3493.469  | T64134    | 289.505   | 1172.468  |
| U23460    | 55588.633 | 53879.676 | AB007957  | 2120.241  | 1537.941  | X56134    | 2163.588  | 4116.348  |
| NM_00535E | 9190.033  | 5960.534  | AK000160  | 4003.125  | 3922.239  | NM_00145E | 902.247   | 1941.733  |
| Z25434    | 6454.223  | 3121.354  | NM_005311 | 3011.196  | 2792.355  | H44784    | 673.031   | 1353.262  |
| NM_00588A | 19099.234 | 22719     | NM_00590E | 9694.875  | 7502.764  | AI421041  | 43898.406 | 32515.941 |

|           |           |           |           |           |           |           |           |           |
|-----------|-----------|-----------|-----------|-----------|-----------|-----------|-----------|-----------|
| NM_01239E | 15095.719 | 9937.896  | NM_016235 | 928.146   | 964.224   | BI759091  | 1865.108  | 1101.681  |
| AF229804  | 32171.199 | 24624.975 | NM_000960 | 2558.665  | 1950.243  | BG685843  | 16055.46  | 5828.608  |
| AF151638  | 906.985   | 587.05    | AF172932  | 579.465   | 461.992   | BI490011  | 2729.513  | 1901.271  |
| U90552    | 8447.358  | 9924.964  | NM_005359 | 14924.104 | 9792.314  | AF035771  | 602.756   | 1826.532  |
| NM_006032 | 6163.529  | 9864.541  | NM_002511 | 5887.489  | 4495.491  | N20475    | 6225.597  | 10655.61  |
| NM_01478E | 8690.128  | 14913.717 | NM_000794 | 764.353   | 1023.454  | BI199286  | 2172.268  | 2618.083  |
| NM_00546C | 1851.056  | 1894.174  | NM_004085 | 23525.807 | 17771.232 | AA026626  | 1389.646  | 2520.397  |
| AF160477  | 9227.269  | 6291.897  | NM_006032 | 15463.683 | 19667.355 | H61726    | 866.494   | 3075.978  |
| NM_00322E | 612.05    | 398.793   | NM_01478E | 10747.889 | 14491.104 | M15465    | 5918.294  | 18985.529 |
| M12883    | 8181.254  | 6074.205  | NM_002153 | 1544.896  | 2515.387  | NM_007181 | 8278.553  | 10735.582 |
| BG288747  | 9192.25   | 7426.361  | AB040890  | 2953.708  | 4925.974  | AB007857  | 904.948   | 1547.815  |
| BG617923  | 689.648   | 436.577   | AK024233  | 3824.099  | 6482.038  | NM_00177E | 39055.863 | 33550.781 |
| U37448    | 2455.038  | 1399.346  | AK021870  | 2392.894  | 4006.939  | NM_004997 | 35349.211 | 34567.59  |
| BG435851  | 706.574   | 617.874   | U06680    | 5573.174  | 8506.689  | NM_005923 | 4070.598  | 4207.451  |
| AA927698  | 1043.475  | 669.567   | NM_017859 | 751.348   | 1100.635  | NM_00346E | 1702.614  | 1595.035  |
| AI498426  | 2617.939  | 2104.538  | NM_005123 | 998.959   | 1531.575  | AF289028  | 1141.442  | 1019.79   |
| BG824773  | 735.05    | 697.337   | NM_015584 | 20671.578 | 25914.002 | NM_005127 | 14179.745 | 13619.693 |
| D01038    | 53888.625 | 36081.871 | NM_001697 | 64428.891 | 63873.008 | NM_005567 | 13914.083 | 6339.102  |
| AB019205  | 4447.932  | 2703.481  | NM_01609E | 51688.625 | 40320.844 | NM_00521E | 5884.192  | 2178.989  |
| J05008    | 2179.368  | 1504.349  | AK025125  | 1360.334  | 1352.672  | NM_00396E | 775.477   | 1763.316  |
| U11087    | 1859.35   | 1509.399  | AF156548  | 4580.424  | 3924.271  | NM_004584 | 2660.712  | 4751.275  |
| D50640    | 1340.739  | 1126.091  | NM_004663 | 4141.835  | 3482.362  | X15183    | 44530.914 | 56699.734 |
| M98776    | 3208.374  | 1709.654  | AB024411  | 4757.006  | 4176.84   | AK023618  | 4470.798  | 4439.061  |
| X99135    | 58990.543 | 56441.066 | NM_002444 | 23001.834 | 20481.996 | AF212842  | 724.129   | 1116.913  |
| AF009744  | 4079.709  | 2781.247  | NM_001104 | 7845.903  | 5719.344  | NM_018404 | 905.822   | 658.994   |
| NM_001072 | 2917.283  | 2546.858  | NM_002989 | 25841.188 | 18086.307 | M27544    | 9820.979  | 3532.122  |
| NM_01407C | 1611.551  | 4248.075  | U88898    | 1171.073  | 982.559   | NM_001118 | 3534.66   | 3860.298  |
| AK025859  | 10445.787 | 7697.682  | NM_020154 | 32426.061 | 25540.645 | AL133097  | 4657.221  | 4520.628  |
| AL117499  | 29596.779 | 23653.551 | NM_00466E | 11990.932 | 9420.816  | NM_00116E | 15065.296 | 14078.976 |
| NM_007054 | 3272.783  | 2729.516  | NM_00530C | 4026.717  | 3261.345  | NM_001381 | 56826.863 | 67223.484 |
| AB007957  | 1634.457  | 1297.968  | NM_000893 | 5192.794  | 3600.365  | NM_00645E | 3936.459  | 12965.982 |
| AK000160  | 2094.508  | 1973.374  | NM_01407C | 4437.136  | 5471.184  | NM_01445E | 1092.17   | 1519.718  |
| NM_005311 | 2814.617  | 1717.663  | NM_01628C | 2712.894  | 3293.922  | NM_001492 | 861.874   | 975.939   |
| NM_00590E | 5861.996  | 3219.362  | NM_016027 | 1623.928  | 1167.83   | AB012643  | 16876.439 | 18941.715 |
| NM_00096C | 1480.386  | 989.393   | NM_014297 | 5503.025  | 9390.459  | AB023170  | 1613.753  | 2198.236  |
| NM_00535E | 12433.175 | 7180.551  | NM_01815E | 53111.832 | 57354.828 | NM_014153 | 7200.72   | 9979.776  |
| NM_002511 | 4914.223  | 3066.849  | X98266    | 4536.41   | 6727.026  | NM_00229E | 14300.065 | 14372.931 |
| NM_000794 | 523.607   | 724.088   | U00930    | 41019.113 | 55182.914 | NM_000414 | 3183.425  | 2909.009  |
| AF295378  | 6307.218  | 4427.196  | AK024958  | 2701.737  | 4508.683  | NM_01884E | 4724.125  | 2779.834  |
| NM_00408E | 10649.592 | 8591.792  | NM_01457E | 15198.044 | 18338.301 | AY008372  | 298.689   | 212.445   |
| NM_01244E | 53428.98  | 49669.426 | NM_002439 | 14091.205 | 15645.921 | NM_00550E | 3305.759  | 1018.333  |
| NM_018104 | 3969.768  | 2652.706  | NM_002692 | 26884.379 | 23712.721 | AK026964  | 719.759   | 500.919   |
| NM_00608C | 700.706   | 552.275   | NM_007064 | 9830.469  | 8479.872  | NM_00007E | 2479.31   | 4955.68   |
| NM_00442E | 7471.827  | 5467.273  | NM_006281 | 3140.343  | 3061.307  | AL110245  | 3336.752  | 2857.685  |
| U64564    | 3251.066  | 1624.699  | NM_00273E | 3141.147  | 2649.373  | NM_01620E | 11614.947 | 4021.654  |
| NM_00647C | 3427.338  | 2161.731  | U23460    | 65089.102 | 72360.102 | NM_00563E | 5280.3    | 2629.874  |
| NM_00285E | 26531.098 | 17009.949 | NM_00535E | 9887.446  | 7359.646  | NM_00726E | 9392.584  | 6580.985  |
| AB038463  | 3729.859  | 5022.005  | Z25434    | 11825.033 | 7350.058  | AK026014  | 10767.385 | 8233.626  |
| M30262    | 3520.055  | 6251.866  | NM_005884 | 18643.855 | 19845.398 | NM_01484E | 4473.875  | 6063.02   |
| NM_01531C | 3336.911  | 2707.779  | NM_01239E | 17513.746 | 13399.457 | NM_00429E | 2800.693  | 2497.444  |
| NM_016154 | 39855.777 | 37087.641 | AF229804  | 60804.457 | 63239.609 | NM_001232 | 2363.192  | 1791.395  |
| NM_005013 | 35206.684 | 39725.426 | AF151638  | 853.364   | 661.568   | X74609    | 52516.496 | 59475.551 |
| AB002338  | 3305.054  | 2660.48   | U90552    | 16791.424 | 13136.159 | AB002316  | 863.589   | 1211.836  |

|           |           |           |           |           |           |           |           |           |
|-----------|-----------|-----------|-----------|-----------|-----------|-----------|-----------|-----------|
| AI524814  | 4659.498  | 4113.297  | AB038463  | 2395.871  | 3061.317  | NM_01899C | 4599.43   | 5888.829  |
| AB024411  | 2854.286  | 2401.855  | M30262    | 11532.945 | 17499.137 | NM_013363 | 736.148   | 932.051   |
| NM_002444 | 19826.295 | 15960.739 | NM_00546C | 1808.373  | 2591.448  | NM_000947 | 1242.709  | 1560.851  |
| NM_001104 | 4371.938  | 2900.186  | AF160477  | 8318.168  | 13112.823 | AL096750  | 50626.754 | 50572.961 |
| NM_00298C | 19600.9   | 15942.198 | NM_00322C | 721.85    | 1204.333  | NM_016061 | 3703.027  | 2710.264  |
| U88898    | 1509.848  | 1339.019  | M12883    | 9773.154  | 15745.607 | NM_016062 | 14285.646 | 7020.855  |
| NM_020154 | 30847.293 | 20262.443 | BG288747  | 8769.68   | 11369.778 | NM_004153 | 2535.151  | 962.279   |
| NM_004665 | 11526.836 | 10408.989 | U37448    | 3265.971  | 4086.414  | AK024740  | 3230.928  | 3295.335  |
| NM_00530C | 4411.02   | 3333.439  | BG435851  | 993.566   | 889.769   | AF078164  | 5251.024  | 11330.542 |
| NM_000893 | 2932.894  | 2458.288  | AA927698  | 1557.969  | 1585.086  | NM_01904C | 697.251   | 616.262   |
| NM_00069E | 46028.633 | 37199.25  | AI498426  | 3123.051  | 2476.8    | AF130101  | 518.079   | 173.279   |
| NM_005091 | 926.136   | 534.979   | BG824773  | 1497.314  | 1118.436  | NM_00465E | 2476.363  | 560.785   |
| AF031167  | 1129.867  | 839.875   | AB019205  | 4682.522  | 3855.876  | AF071569  | 4124.228  | 1759.286  |
| NM_003204 | 10594.213 | 6022.976  | J05008    | 3410.246  | 2328.474  | NM_00226C | 6480.364  | 4108.879  |
| AF254069  | 1243.658  | 869.884   | U11087    | 2870.462  | 2013.682  | NM_005022 | 833.909   | 793.889   |
| AL117600  | 15089.481 | 9370.913  | D50640    | 1221.924  | 1036.523  | NM_00128E | 447.231   | 557.654   |
| NM_001712 | 2087.671  | 1367.019  | D43747    | 764.47    | 609.331   | NM_003564 | 4968.577  | 8110.012  |
| NM_004487 | 32497.529 | 19372.281 | M98776    | 6462.316  | 3719.97   | AK023414  | 264.581   | 676.467   |
| AB029000  | 10051.148 | 10434.877 | X99135    | 61276.645 | 62266.402 | AF317516  | 5855.589  | 7774.112  |
| AK026965  | 28962.906 | 49074.594 | AF009744  | 4070.834  | 2460.875  | NM_002581 | 2109.136  | 2715.565  |
| AF229804  | 59349.551 | 57664.316 | NM_001072 | 2291.679  | 1224.107  | AI417964  | 3256.01   | 3247.958  |
| AF151638  | 828.577   | 679.103   | AF031167  | 802.714   | 1257.007  | J03571    | 30768.758 | 16854.244 |
| U90552    | 10626.537 | 9199.084  | NM_003204 | 19366.908 | 28657.293 | NM_00145E | 894.893   | 1342.71   |
| NM_006032 | 14144.09  | 9670.096  | AF254069  | 1461.309  | 1875.966  | H44784    | 522.86    | 276.338   |
| NM_01478E | 10051.33  | 6078.391  | AL117600  | 21672     | 26496.721 | AI421041  | 25481.891 | 9482.453  |
| NM_002153 | 1628.982  | 1271.437  | NM_001712 | 1655.207  | 2504.709  | BI759091  | 2505.075  | 999.982   |
| AB040890  | 2938.72   | 3439.853  | NM_004487 | 56952     | 59436.727 | BG685843  | 12511.472 | 2574.586  |
| AK024233  | 3859.594  | 3121.411  | AB029000  | 7210.358  | 9050.574  | BI490011  | 2428.419  | 638.4     |
| AK021870  | 2211.416  | 1135.931  | AK026965  | 61015.602 | 64392.668 | AF035771  | 378.9     | 138.428   |
| U06680    | 4224.883  | 2899.361  | AK025859  | 11568.158 | 17639.727 | NM_00177E | 31552.527 | 28863.152 |
| NM_005123 | 1112.891  | 997.034   | AL117499  | 29868.176 | 38089.813 | NM_004997 | 28565.678 | 29134.432 |
| NM_015584 | 20085.209 | 16232.582 | NM_007054 | 3686.522  | 3460.61   | NM_005923 | 4922.174  | 5816.292  |
| NM_001697 | 56627.25  | 49851.836 | AB007957  | 1552.117  | 1355.01   | NM_00346E | 2035.334  | 2662.779  |
| NM_01609E | 51102.449 | 44077.18  | AK000160  | 3510.366  | 2802.537  | AF289028  | 1155.006  | 1072.348  |
| AB032525  | 710.827   | 417.17    | NM_005311 | 3073.284  | 2081.134  | NM_005127 | 12313.55  | 17731.74  |
| NM_002063 | 921.47    | 661.738   | NM_00590E | 9065.315  | 7164.759  | NM_005567 | 12472.389 | 12338.843 |
| NM_006667 | 49512.949 | 38509.57  | NM_01623E | 723.152   | 743.46    | NM_00521E | 6200.841  | 3734.94   |
| AK025125  | 951.906   | 910.646   | NM_00096C | 2722.996  | 2171.182  | NM_00396E | 617.956   | 242.769   |
| NM_00081E | 1653.11   | 1146.852  | AF172932  | 696.218   | 738.769   | NM_004584 | 2795.837  | 3760.339  |
| AB023173  | 7222.333  | 3923.336  | NM_005359 | 13522.36  | 9382.027  | X15183    | 46990.387 | 27576.395 |
| AF156548  | 3174.048  | 1732.868  | NM_002511 | 4676.821  | 3021.096  | AK023618  | 3964.294  | 1669.402  |
| NM_000387 | 13908.153 | 7903.829  | NM_000794 | 541.711   | 628.337   | AF212842  | 899.333   | 555.375   |
| NM_004663 | 3975.315  | 9608.099  | NM_00408E | 16047.041 | 11586.391 | NM_018404 | 729.55    | 194.074   |
| NM_001072 | 2242.361  | 1779.432  | NM_00647C | 3967.719  | 2698.65   | M27544    | 9083.455  | 2451.435  |
| NM_01407C | 2794.101  | 1888.643  | NM_00285E | 51894.727 | 36810.582 | NM_001118 | 2770.391  | 2030.927  |
| NM_01628C | 1686.207  | 1012.386  | NM_002153 | 1412.402  | 3293.127  | AL133097  | 5405.149  | 4718.906  |
| NM_016027 | 1480.297  | 883.911   | AB040890  | 3012.305  | 5921.07   | NM_018047 | 1821.996  | 513.349   |
| NM_014297 | 5682.197  | 2922.01   | AK024233  | 2554.126  | 2821.535  | AB023170  | 901.033   | 1146.52   |
| NM_01815E | 50270.277 | 31038.602 | AK021870  | 1885.489  | 1635.172  | NM_014153 | 6348.539  | 9682.658  |
| X98266    | 5869.077  | 3989.285  | U06680    | 3874.366  | 4624.695  | NM_00229E | 14267.679 | 15842.742 |
| U00930    | 38035.844 | 20347.15  | NM_005123 | 713.778   | 1310.354  | NM_000414 | 3878.668  | 4444.979  |
| AK024958  | 2542.755  | 1487.699  | NM_015584 | 21189.816 | 28897.854 | NM_01884E | 3304.902  | 3031.826  |
| NM_01457E | 15108.167 | 10504.86  | NM_001697 | 57968.125 | 59645.16  | AY008372  | 272.879   | 266.504   |

|           |           |           |           |           |           |           |           |           |
|-----------|-----------|-----------|-----------|-----------|-----------|-----------|-----------|-----------|
| NM_00243E | 11969.721 | 7272.03   | NM_01609E | 56176.621 | 56404.633 | NM_00550E | 3766.597  | 1885.087  |
| AL117552  | 3319.997  | 2000.63   | AK025125  | 1224.187  | 1271.718  | AK026964  | 614.34    | 397.467   |
| NM_00269Z | 14470.036 | 10984.046 | AF156548  | 4111.875  | 4593.671  | NM_00007E | 2806.01   | 1216.568  |
| AB023190  | 55638.352 | 47650.828 | NM_00466Z | 3163.167  | 2473.586  | AL110245  | 4404.538  | 1441.733  |
| NM_007064 | 5116.082  | 2902.981  | AB024411  | 4141.979  | 3284.456  | NM_01620E | 11583.619 | 3637.821  |
| NM_006281 | 2549.759  | 1931.303  | NM_002444 | 22259.244 | 20860.668 | NM_00563E | 4644.61   | 4246.28   |
| NM_00273E | 2036.674  | 1432.063  | NM_001104 | 7172.47   | 5471.543  | NM_00723E | 12690.165 | 9944.872  |
| U23460    | 53413.797 | 48098.578 | NM_00298E | 24987.031 | 21430.852 | NM_00726E | 3028.885  | 1716.151  |
| NM_00535E | 9331.784  | 5845.919  | U88898    | 1544.563  | 1037.914  | AK026014  | 2782.912  | 2011.002  |
| Z25434    | 4762.432  | 1881.167  | NM_020154 | 29984.836 | 19822.879 | NM_01484E | 2405.739  | 1910.152  |
| NM_005884 | 17849.09  | 15235.822 | NM_00466E | 10380.759 | 8123.19   | NM_00429E | 2948.374  | 2489.778  |
| CY3Cy5    | 9502.836  | 428.697   | NM_00530C | 4121.318  | 3289.348  | NM_00123Z | 390.537   | 128.915   |
| NM_004774 | 5111.198  | 4652.458  | NM_00089Z | 4426.658  | 3218.346  | NM_007181 | 8203.805  | 2226.458  |
| NM_005234 | 8620.465  | 8136.351  | NM_00069E | 56550.855 | 51914.031 | AB007857  | 1071.678  | 290.766   |
| NM_01540C | 7900.882  | 8890.854  | NM_005091 | 1165.219  | 611.077   | AB002316  | 614.34    | 1011.245  |
| AK026464  | 2240.383  | 3294.619  | NM_01628C | 2636.271  | 4896.701  | NM_01899C | 2976.935  | 4047.619  |
| AK001362  | 791.17    | 1155.631  | NM_016027 | 1460.724  | 3141.518  | NM_01336E | 703.831   | 1041.729  |
| AK023491  | 396.464   | 608.622   | NM_014297 | 4863.188  | 5056.42   | NM_000947 | 1293.218  | 2111.641  |
| AK022400  | 1328.578  | 1735.82   | NM_01815E | 53563.035 | 50457.191 | AL096750  | 48966.273 | 56251.582 |
| AF052100  | 1584.084  | 1858.306  | X98266    | 4757.165  | 5638.859  | NM_016061 | 3984.426  | 4967.29   |
| AL110235  | 1582.561  | 1667.776  | U00930    | 34594.488 | 37910.383 | NM_01606Z | 14467.378 | 12696.322 |
| U79245    | 1022.315  | 1236.725  | AK024958  | 1996.283  | 2488.81   | NM_00415E | 2480.782  | 1398.193  |
| AF085983  | 707.878   | 787.137   | NM_01457E | 14241.986 | 12637.143 | AK024740  | 2710.042  | 949.104   |
| AF052105  | 1903.962  | 2272.156  | NM_00243E | 13833.02  | 17294.863 | AF078164  | 5127.92   | 1947.769  |
| AK001204  | 9288.139  | 8079.749  | AL117552  | 3662.81   | 3454.569  | NM_01904E | 1695.602  | 826.422   |
| NM_004774 | 3883.087  | 1884.211  | NM_00269Z | 21764.404 | 17928.771 | AF130101  | 600.983   | 185.046   |
| NM_005234 | 7651.017  | 5999.116  | NM_007064 | 7383.246  | 4836.563  | NM_00465E | 2163.384  | 1350.458  |
| SR1       | 81838.805 | 64311.766 | NM_006281 | 2707.853  | 2490.445  | AF071569  | 4026.857  | 1909.687  |
| SR3       | 37113.223 | 26108.193 | NM_00273E | 2962.704  | 2368.622  | NM_00226E | 2456.387  | 1490.334  |
| SR5       | 3306.366  | 2890.416  | U23460    | 63170.59  | 58563.207 | J04948    | 1511.292  | 681.403   |
| SR7       | 4341.565  | 31942.334 | NM_00535E | 9216.051  | 7237.239  | NM_01804E | 989.689   | 879.151   |
| SR9       | 13615.235 | 2453.82   | Z25434    | 12898.275 | 8696.056  | AK022564  | 54903.852 | 50764.969 |
| CY3Cy5    | 9264.727  | 429.29    | NM_005884 | 17991.326 | 14784.139 | NM_00149Z | 798.862   | 153.413   |
| L34409    | 26995.932 | 22066.508 | NM_01239E | 17572.258 | 11265.675 | AB012643  | 15363.52  | 3740.536  |
| U12210    | 2822.71   | 3336.324  | AF229804  | 64172.668 | 60097.195 | NM_003564 | 3840.451  | 6178.479  |
| L08440    | 10974.373 | 10435.583 | AF151638  | 636.506   | 591.779   | AK023414  | 280.451   | 447.213   |
| M73799    | 3111.437  | 3767.199  | U90552    | 15608.076 | 10032.675 | AF317516  | 5909.515  | 8725.932  |
| AF086119  | 2389.591  | 2765.042  | NM_00603Z | 23615.801 | 15384.623 | NM_002581 | 2089.775  | 3792.518  |
| NM_018364 | 4713.958  | 4592.633  | NM_01478E | 10968.995 | 7078.204  | AI417964  | 3702.677  | 4424.92   |
| NM_00677E | 927.897   | 931.749   | NM_00546C | 1431.918  | 3638.942  | J03571    | 39029.734 | 31788.123 |
| NM_00702Z | 3575.025  | 3606.505  | AF160477  | 9184.388  | 17792.943 | T57791    | 354.122   | 191.823   |
| AL049943  | 41152.664 | 34857.148 | NM_00322E | 574.89    | 694.632   | X56134    | 2612.264  | 703.994   |
| AL137303  | 1810.701  | 1894.078  | M12883    | 5509.424  | 6916.907  | NM_00145E | 1220.218  | 624.201   |
| AL355708  | 2357.992  | 2262.444  | BG288747  | 7372.77   | 7801.4    | H44784    | 554.11    | 263.583   |
| AB002449  | 876.524   | 713.502   | BG617923  | 555.127   | 1395.359  | AI421041  | 38259.605 | 11060.617 |
| NM_01648C | 19207.51  | 14564.902 | U37448    | 2679.044  | 3970.363  | BI759091  | 2316.531  | 957.545   |
| NM_015681 | 9674.27   | 9052.817  | BG435851  | 944.856   | 741.165   | BG685843  | 13336.878 | 2640.899  |
| AF070582  | 1288.469  | 1225.164  | AA927698  | 1471.846  | 1555.678  | BI490011  | 2489.004  | 737.708   |
| NM_00638E | 4293.113  | 4283.477  | AI498426  | 2960.483  | 2770.366  | AF035771  | 624.197   | 282.478   |
| AK024351  | 976.227   | 986.781   | BG824773  | 1283.338  | 948.862   | N20475    | 6143.251  | 3571.053  |
| AK024867  | 1114.771  | 1030.353  | AB019205  | 4015.529  | 2811.154  | BI199286  | 2327.652  | 1820.596  |
| AK025002  | 7454.3    | 7733.188  | J05008    | 2765.008  | 1971.801  | AA026626  | 1589.021  | 1724.018  |
| AF086124  | 1265.523  | 1220.261  | U11087    | 2801.495  | 2131.709  | H61726    | 911.696   | 497.563   |

|           |           |           |           |           |           |           |           |           |
|-----------|-----------|-----------|-----------|-----------|-----------|-----------|-----------|-----------|
| AK024820  | 1247.303  | 1419.909  | D50640    | 1301.981  | 1109.141  | AF007190  | 228.4     | 93.239    |
| AF052117  | 685.356   | 750.161   | D43747    | 654.773   | 651.588   | X74609    | 44750.758 | 20237.523 |
| AB033105  | 1652.582  | 2067.402  | M98776    | 8537.802  | 5708.654  | NM_003965 | 597.939   | 813.02    |
| AF038192  | 1207.291  | 1384.76   | X99135    | 62131     | 64394.938 | NM_004584 | 3368.379  | 5209.118  |
| AJ001865  | 590.676   | 526.956   | AF009744  | 4575.899  | 2809.43   | X15183    | 47923.82  | 62619.969 |
| D61704    | 27089.617 | 21942.113 | NM_001072 | 2497.271  | 1257.902  | AK023618  | 7425.127  | 9497.948  |
| AJ227889  | 1239.611  | 1092.13   | NM_014070 | 4334.58   | 2503.477  | AF212842  | 2932.217  | 6121.214  |
| Y12017    | 759.136   | 1878.054  | AK025859  | 11204.724 | 17988.553 | NM_018404 | 1113.982  | 877.332   |
| X64989    | 742.959   | 753.204   | AL117499  | 25815.848 | 44453.82  | M27544    | 11698.126 | 6873.744  |
| Y10512    | 1560.596  | 1429.897  | NM_007054 | 3252.208  | 4024.681  | NM_002255 | 203.136   | 210.058   |
| AL110175  | 1489.925  | 1623.843  | AB007957  | 1263.847  | 1391.742  | NM_001118 | 3865.921  | 3017.812  |
| AF288406  | 990.688   | 1031.866  | AK000160  | 2486.679  | 3401.353  | AL133097  | 5599.875  | 2497.526  |
| AK027156  | 11544.877 | 15264.896 | NM_005311 | 2737.655  | 5965.354  | NM_001165 | 13252.898 | 4250.763  |
| AL157504  | 2523.82   | 4008.484  | NM_005905 | 6827.84   | 10422.99  | NM_001381 | 54212.473 | 58285.453 |
| AK023328  | 7124.706  | 9791.338  | NM_016235 | 724.517   | 1114.367  | NM_006455 | 3262.719  | 2369.137  |
| AL442096  | 3323.851  | 4206.603  | NM_000960 | 2295.819  | 2803.141  | NM_014455 | 331.777   | 397.975   |
| AK023299  | 531.213   | 694.268   | NM_005359 | 12608.545 | 9836.248  | NM_004093 | 1831.656  | 1015.442  |
| NM_018225 | 2147.702  | 1621.418  | NM_002511 | 5357.742  | 5796.258  | NM_001445 | 9248.253  | 8178.519  |
| AJ270693  | 2199.021  | 1437.904  | AF295378  | 7370.126  | 5321.395  | NM_001387 | 905.454   | 914.883   |
| NM_017790 | 5192.261  | 5112.601  | NM_004085 | 21321.521 | 18149.633 | AF086122  | 916.368   | 650.088   |
| AK000861  | 910.685   | 579.304   | NM_012445 | 61978.859 | 60989.363 | AK024397  | 16410.727 | 13255.582 |
| AK025009  | 1137.325  | 3204.272  | NM_018104 | 10551.375 | 8873.695  | NM_018047 | 1700.09   | 1275.679  |
| AK000023  | 6614.424  | 6497.614  | NM_004429 | 16589.486 | 12802.138 | NM_005022 | 1600.587  | 882.791   |
| AK000901  | 2027.11   | 1890.791  | U64564    | 4579.353  | 3166.871  | NM_001285 | 728.482   | 330.88    |
| AB007866  | 1394.81   | 1721.231  | NM_006470 | 4856.377  | 3467.399  | NM_005625 | 12227.521 | 13146.108 |
| X77485    | 58174.566 | 55351.688 | NM_002855 | 48973.703 | 40493.625 | NM_016605 | 45887.93  | 43541.395 |
| NM_014495 | 2470.721  | 3090.865  | AB038463  | 3292.242  | 2220.459  | S78203    | 1969.976  | 2337.029  |
| AK021555  | 477.807   | 596.175   | M30262    | 14288.832 | 11663.284 | NM_016205 | 15304.098 | 12423.473 |
| AB046765  | 1858.984  | 2466.46   | NM_015310 | 3349.346  | 3962.741  | NM_001635 | 1112.077  | 882.46    |
| AF133333  | 9870.151  | 10920.063 | NM_016154 | 40128.367 | 59616.379 | NM_005635 | 5129.928  | 1957.599  |
| NM_018365 | 1989.308  | 1749.012  | NM_005013 | 28543.768 | 42134.043 | NM_007235 | 13020.745 | 11871.104 |
| AK024011  | 1613.99   | 1678.283  | AB002338  | 2762.866  | 3042.319  | NM_007265 | 2561.115  | 1207.296  |
| AL390145  | 893.318   | 512.408   | AI524814  | 4234.285  | 7303.666  | AK026014  | 2605.489  | 896.313   |
| AF119913  | 1645.633  | 1089.29   | AB024411  | 3083.153  | 4876.574  | NM_014845 | 2394.416  | 495.785   |
| NM_018340 | 1981.963  | 2240.342  | NM_002444 | 13916.229 | 17148.543 | NM_004295 | 1143.579  | 450.33    |
| AF049883  | 1898.926  | 1718.224  | NM_001104 | 6704.201  | 8378.528  | NM_007181 | 7899.9    | 4749.764  |
| L10148    | 61316.047 | 63158.293 | NM_002989 | 23463.203 | 25835.619 | AB007857  | 1151.316  | 676.94    |
| AK026247  | 2036.504  | 5183.058  | U88898    | 1746.83   | 1728.584  | NM_001775 | 36467.82  | 24526.541 |
| AK024893  | 641.826   | 622.518   | NM_020154 | 29204.291 | 32482.734 | NM_004997 | 33197.879 | 27537.223 |
| L37703    | 50983.266 | 53056.395 | NM_004665 | 8204.695  | 5958.962  | NM_005923 | 3480.365  | 3345.558  |
| AF084516  | 1084.294  | 1314.859  | NM_005300 | 4473.463  | 4371.054  | NM_003465 | 1765.768  | 1710.821  |
| AL137554  | 460.616   | 446.42    | NM_000893 | 4497.548  | 4232.88   | AF289028  | 1962.353  | 1868.291  |
| AJ001907  | 2394.547  | 2653.836  | NM_000695 | 62118.031 | 59931.594 | NM_005127 | 16045.918 | 27362.486 |
| M32220    | 8869.816  | 10263.189 | NM_005091 | 1299.245  | 856.027   | NM_005567 | 13863.796 | 14039.768 |
| D17188    | 26152.148 | 34610.102 | AF031167  | 949.839   | 887.399   | NM_005210 | 6113.808  | 6566.542  |
| AJ001432  | 55746.695 | 59974.449 | NM_003204 | 20426.475 | 13869.883 | J04948    | 1312.804  | 1752.272  |
| NM_020435 | 20400.982 | 32116.424 | AF254069  | 1493.066  | 906.376   | NM_018043 | 486.973   | 544.85    |
| AF052169  | 2335.526  | 2327.696  | AL117600  | 23100.648 | 14288.666 | AK022564  | 51338.191 | 61637.672 |
| AK026249  | 607.791   | 541.837   | NM_001712 | 2112.946  | 1307.403  | NM_001492 | 880.269   | 1017.387  |
| AF119879  | 60988.035 | 59764.566 | NM_004487 | 57777.227 | 53537.59  | AB012643  | 14205.401 | 14468.102 |
| L16951    | 757.911   | 664.334   | AB029000  | 9166.158  | 6336.551  | AB023170  | 1743.604  | 1973.446  |
| Y10482    | 58489.516 | 46345.652 | AK026965  | 56712.141 | 56333.844 | NM_014153 | 9135.854  | 8989.552  |
| AY007095  | 856.203   | 692.189   | AF229804  | 57956.707 | 59938.336 | NM_002290 | 15379.204 | 6598.123  |



|           |           |           |           |           |           |           |           |           |
|-----------|-----------|-----------|-----------|-----------|-----------|-----------|-----------|-----------|
| AF086244  | 3932.462  | 3201.263  | AF151638  | 747.395   | 1473.855  | NM_000414 | 4663.896  | 1221.792  |
| AL161992  | 4918.666  | 5588.274  | U90552    | 9404.745  | 12997.118 | NM_018845 | 4817.352  | 1596.953  |
| AK023551  | 1378.685  | 1241.974  | NM_006032 | 16121.822 | 20038.182 | NM_005505 | 3259.157  | 960.875   |
| AK023910  | 3926.517  | 3264.488  | NM_014788 | 7820.229  | 13527.81  | AK026964  | 413.284   | 151.319   |
| D16991    | 3330.257  | 3491.966  | NM_002153 | 1495.032  | 3216.895  | NM_001134 | 4687.515  | 4723.788  |
| AK023538  | 2442.784  | 2198.87   | AB040890  | 2982.147  | 4588.45   | AK023497  | 2142.493  | 2636.614  |
| NM_006695 | 6132.371  | 6381.405  | AK024233  | 4546.355  | 5610.317  | NM_016016 | 10596.56  | 12916.302 |
| NM_004815 | 1925.596  | 2227.255  | AK021870  | 1827.02   | 2035.155  | NM_020407 | 1580.735  | 3614.26   |
| NM_004147 | 1328.833  | 1259.437  | U06680    | 4525.784  | 4735.424  | AF118274  | 10515.397 | 23690.785 |
| AK000959  | 1008.612  | 1146.844  | NM_005123 | 761.896   | 840.165   | NM_018344 | 1238.258  | 5218.688  |
| AB037743  | 3020.165  | 3790.485  | NM_015584 | 19557.861 | 17025.309 | NM_000079 | 3652.143  | 11824.29  |
| AB046820  | 2089.122  | 2538.156  | NM_001697 | 60854.281 | 59361.848 | NM_000083 | 953.755   | 2926.557  |
| AK025922  | 2008.295  | 2408.962  | NM_016098 | 52779.32  | 56478.078 | AL110245  | 5936.858  | 15267.544 |
| NM_014646 | 768.508   | 1061.89   | AB032525  | 913.953   | 733.747   | NM_016436 | 222.222   | 203.919   |
| NM_006375 | 980.062   | 1424.425  | NM_002063 | 2009.432  | 1405.673  | AL050355  | 257.274   | 342.295   |
| AF123659  | 4534.279  | 4875.865  | NM_006667 | 62659.453 | 59256.445 | AF007190  | 218.442   | 129.604   |
| U94903    | 1878.778  | 1512.794  | AK025125  | 2094.296  | 1836.88   | X74609    | 47133.035 | 55020.152 |
| AF009300  | 988.403   | 1132.672  | NM_000815 | 3423.032  | 2335.482  | AB002316  | 1010.396  | 1260.82   |
| NM_005155 | 34805.637 | 29386.947 | NM_001293 | 1496.813  | 951.209   | NM_018990 | 4820.027  | 4181.734  |
| NM_019095 | 15205.154 | 12991.747 | AB023173  | 7488.08   | 4502.385  | NM_013363 | 1053.255  | 528.91    |
| U80764    | 17006.236 | 16263.435 | AF156548  | 3918.896  | 3002.878  | NM_000947 | 1699.229  | 753.589   |
| AB020684  | 9762.429  | 7992.361  | NM_000387 | 50726.969 | 37213.672 | AL096750  | 46342.586 | 48723.906 |
| AF077036  | 55319.855 | 42602.578 | NM_004663 | 3685.282  | 2309.893  | NM_016061 | 4091.514  | 3593.026  |
| NM_020421 | 2269.603  | 1714.298  | NM_001072 | 1925.077  | 2755.055  | NM_016062 | 15191.912 | 8930.234  |
| D17094    | 3832.686  | 2883.123  | NM_014070 | 3113.372  | 3841.03   | NM_004153 | 2296.032  | 1195.305  |
| L37690    | 50985.031 | 39029.801 | NM_016280 | 2352.628  | 1976.131  | AK024740  | 2530.42   | 2613.802  |
| D61707    | 1755.267  | 1594.503  | NM_016027 | 1781.209  | 1978.085  | AF078164  | 4621.101  | 7400.279  |
| AK021610  | 2053.708  | 1924.369  | NM_014297 | 5201.086  | 5795.468  | NM_019045 | 1667.778  | 6093.499  |
| Z36835    | 17601.441 | 16627.457 | NM_018156 | 51654.848 | 53046.109 | NM_005447 | 2273.989  | 7346.226  |
| NM_004645 | 514.583   | 440.508   | X98266    | 3609.492  | 3764.869  | NM_012413 | 2204.24   | 7764.91   |
| AF029325  | 1537.197  | 2085.029  | U00930    | 35346.285 | 27538.189 | AF130101  | 1325.97   | 7441.612  |
| NM_005704 | 2446.505  | 2763.338  | AK024958  | 2517.492  | 2035.71   | NM_004656 | 1931.745  | 6619.361  |
| AF097021  | 1953.984  | 1971.122  | NM_014575 | 14873.064 | 12939.633 | NM_005576 | 260.554   | 1957.277  |
| NM_001365 | 2499.323  | 2484.694  | NM_002439 | 13719.146 | 12578.846 | AF071569  | 4387.492  | 8939.424  |
| NM_000677 | 11536.99  | 13308.574 | AL117552  | 3543.427  | 3114.81   | NM_002265 | 2458.056  | 4359.759  |
| BF308728  | 5278.712  | 6568.678  | NM_002692 | 26112.996 | 18423.447 | CY3Cy5    | 1941.446  | 93.923    |
| NM_013280 | 718.627   | 1443.988  | AB023190  | 62014.051 | 56547.617 | AF086328  | 4284.804  | 1731.975  |
| NM_018315 | 46234.504 | 51492.973 | NM_007064 | 9430.525  | 7163.408  | AK023753  | 3652.334  | 2826.448  |
| AF051151  | 1153.313  | 1350.329  | NM_006281 | 2172.044  | 1227.746  | AF086441  | 14596.14  | 10389.25  |
| AF142421  | 6419.138  | 5180.212  | NM_002738 | 2615.933  | 1850.309  | NM_014117 | 2102.215  | 3327.762  |
| AB037836  | 2510.277  | 2331.275  | U23460    | 63227.883 | 62870.063 | AK023609  | 1329.461  | 1608.484  |
| NM_014247 | 2020.165  | 1923.649  | NM_005356 | 8720.704  | 6303.079  | NM_018015 | 2201.249  | 1876.225  |
| NM_018695 | 65885.352 | 66833.398 | Z25434    | 12266.784 | 7301.51   | AK027220  | 875.544   | 1032.802  |
| NM_006343 | 1005.054  | 910.189   | NM_005884 | 19865.543 | 21164.596 | NM_018011 | 6609.862  | 3979.036  |
| NM_014786 | 2017.78   | 1671.365  | NM_012399 | 16199.469 | 10215.931 | NM_080824 | 255.483   | 352.683   |
| NM_001423 | 626.123   | 589.768   | CY3Cy5    | 11476.361 | 428.371   | SR2       | 19502.422 | 6907.681  |
| NM_015716 | 14715.728 | 12433.775 | NM_004774 | 7249.5    | 6312.089  | SR4       | 6174.685  | 2212.009  |
| NM_003955 | 1200.832  | 1010.133  | NM_005234 | 10577.937 | 8455.939  | SR6       | 786.918   | 478.365   |
| NM_005739 | 4398.81   | 4445.196  | NM_015400 | 7606.658  | 5610.962  | SR8       | 5157.778  | 6598.419  |
| AB023166  | 1297.502  | 1233.179  | AL359561  | 3999.421  | 4239.895  | SR10      | 16102.813 | 2425.455  |
| AB028966  | 27880.623 | 24158.334 | AK026464  | 2842.367  | 2034.748  | CY3Cy5    | 2411.025  | 87.697    |
| NM_005402 | 7686.574  | 7376.992  | AK001362  | 1200.453  | 1285.504  | AK023086  | 3618.424  | 4097.505  |
| AF055027  | 13015.908 | 12931.689 | AK023491  | 472.144   | 574.451   | AK002078  | 1125.515  | 2835.844  |

|           |           |           |           |           |           |           |           |           |
|-----------|-----------|-----------|-----------|-----------|-----------|-----------|-----------|-----------|
| U63541    | 8723.055  | 7848.489  | AK022400  | 2505.813  | 2718.021  | AF085837  | 1457.96   | 1940.521  |
| AB033045  | 1773.921  | 1835.426  | AF052100  | 3228.639  | 3017.918  | AK023165  | 855.677   | 783.895   |
| AF055006  | 14806.037 | 13832.538 | AL110235  | 2457.334  | 2521.223  | NM_016115 | 1402.487  | 1482.476  |
| NM_004935 | 5159.796  | 6124.104  | U79245    | 1270.898  | 1632.23   | NM_014950 | 2191.904  | 1694.461  |
| NM_006951 | 1504.123  | 2151.566  | AF085983  | 1396.942  | 1963.839  | AL080180  | 710.524   | 518.299   |
| NM_001896 | 9161.459  | 10745.04  | AF052105  | 2775.344  | 3873.677  | X89067    | 1302.459  | 759.552   |
| NM_014023 | 555.937   | 482.246   | AK001204  | 21747.973 | 21333.219 | AF086259  | 2241.228  | 1050.172  |
| NM_002745 | 10957.837 | 11349.306 | NM_004774 | 8042.863  | 7705.805  | NM_018280 | 1066.428  | 276.114   |
| D26488    | 10852.067 | 7731.171  | NM_005234 | 11120.859 | 10811.269 | AK024381  | 356.37    | 412.638   |
| NM_001432 | 977.098   | 824.113   | SR1       | 72451.484 | 64149.91  | AK026503  | 1251.786  | 1219.815  |
| AK002193  | 493.283   | 456.281   | SR3       | 46029.645 | 49137.137 | AF086087  | 10572.158 | 14837.562 |
| AB014554  | 2538.96   | 1703.657  | SR5       | 5952.122  | 5670.188  | AK000671  | 76184.719 | 65681.219 |
| AF097431  | 2437.132  | 2280.735  | SR7       | 6557.695  | 45412.547 | AL137425  | 398.509   | 372.716   |
| NM_001978 | 1739.877  | 1357.317  | SR9       | 22331.551 | 4991.527  | AL137285  | 1105.423  | 514.062   |
| NM_002579 | 1382.843  | 1078.173  | CY3Cy5    | 13292.062 | 581.532   | AL137456  | 1519.583  | 958.946   |
| NM_004221 | 2898.145  | 2113.311  | L34409    | 30547.309 | 26831.381 | AL390157  | 508.788   | 375.826   |
| NM_003019 | 2743.13   | 2439.188  | U12210    | 3948.6    | 3747.854  | AK021649  | 325.993   | 211.089   |
| AL109790  | 2837.561  | 2347.853  | L08440    | 13045.566 | 9944.856  | AL080151  | 617.061   | 217.383   |
| NM_003628 | 3320.722  | 2770.807  | M19866    | 722.584   | 744.531   | AL050085  | 1021.867  | 259.736   |
| NM_002407 | 2897.43   | 2877.549  | M73799    | 5470.361  | 4548.704  | AK024127  | 1688.64   | 1029.708  |
| M90657    | 841.037   | 847.071   | AF086119  | 3890.369  | 2715.308  | AK024243  | 699.885   | 684.505   |
| NM_006699 | 3536.192  | 3543.712  | NM_018364 | 6283.43   | 5574.094  | AK021574  | 2721.959  | 2888.744  |
| AK025645  | 2109.492  | 2239.125  | NM_006778 | 1809.412  | 1998.498  | NM_017621 | 7864.422  | 10274.987 |
| AK023266  | 488.54    | 594.172   | NM_007022 | 4837.478  | 5433.593  | AK023574  | 1011.636  | 3061.688  |
| NM_006814 | 15555.079 | 16394.684 | AL049943  | 62044.918 | 61331.188 | AF131767  | 6375.655  | 14712.424 |
| NM_005067 | 2807.265  | 2823.455  | AL137303  | 3303.859  | 4266.723  | AK021907  | 1091.986  | 772.025   |
| AB007899  | 699.026   | 872.021   | AL355708  | 1589.594  | 1781.941  | AK022029  | 1236.37   | 1042.843  |
| NM_002817 | 9950.924  | 12162.559 | AB002449  | 1629.295  | 1503.911  | AK022320  | 1467.856  | 996.631   |
| NM_002801 | 23619.889 | 27197.709 | U79248    | 1393.137  | 6190.455  | AK022058  | 1253.359  | 768.581   |
| BE905810  | 1526.205  | 1183.617  | NM_016480 | 28386.699 | 34669.773 | AK024326  | 1869.202  | 557.53    |
| NM_014780 | 2000.517  | 1798.929  | AK001489  | 1752.034  | 1720.767  | U61088    | 2212.855  | 323.543   |
| NM_014730 | 3440.738  | 3221.841  | NM_015681 | 11209.189 | 12688.556 | AF086467  | 966.72    | 226.754   |
| NM_014167 | 1017.665  | 762.51    | AF070582  | 2767.588  | 3943.781  | AL137345  | 2894.657  | 1032.024  |
| NM_016063 | 2472.042  | 2244.683  | NM_006383 | 6649.857  | 8669.718  | AK000967  | 2768.225  | 1574.678  |
| U82987    | 6902.322  | 6252.328  | AK024351  | 1948.015  | 1961.873  | AK021583  | 1966.978  | 2672.105  |
| NM_005732 | 1322.736  | 1730.88   | AK024867  | 1922.534  | 1767.66   | AL137442  | 1391.635  | 2778.679  |
| NM_014890 | 817.161   | 895.187   | AK024952  | 4763.104  | 8526.429  | AL049281  | 488.492   | 1504.104  |
| AK056481  | 5322.746  | 5259.986  | AK025002  | 8742.281  | 6641.204  | AL050061  | 4379.472  | 10516.553 |
| NM_005433 | 1310.645  | 1594.907  | AF086124  | 1522.037  | 1284.195  | AL050206  | 278.477   | 903.614   |
| AF232000  | 62147.82  | 66699.484 | AK024820  | 1819.529  | 1906.58   | AK025522  | 16095.238 | 13486.331 |
| NM_005758 | 6546.604  | 6476.907  | AF052117  | 1183.364  | 1337.844  | AK025464  | 60630.867 | 50411.09  |
| AF044774  | 2691.147  | 2269.799  | AB033105  | 2419.375  | 2560.359  | AL049962  | 3946.084  | 2563.577  |
| NM_002955 | 1620.345  | 1600.763  | AF038192  | 1816.328  | 2302.418  | BE746723  | 577.141   | 259.69    |
| NM_001938 | 4021.943  | 3462.814  | AJ001865  | 2576.817  | 2699.196  | NM_020408 | 728.491   | 372.389   |
| AF230808  | 7027.897  | 6889.068  | AJ227875  | 513.468   | 488.64    | NM_004988 | 15090.484 | 5592.362  |
| U18910    | 1669.509  | 1761.92   | D61704    | 41258.328 | 45936.348 | AF147362  | 554.756   | 303.046   |
| NM_005238 | 30133.1   | 29964.145 | AJ227889  | 2323.384  | 2505.847  | AF147365  | 1451.415  | 411.409   |
| AK075306  | 11131.529 | 16614.027 | Y12017    | 1384.085  | 1441.988  | S72917    | 3259.152  | 549.887   |
| AB037820  | 646.156   | 821.869   | X64989    | 1307.314  | 2064.111  | AF076617  | 61763.223 | 18441.148 |
| NM_001280 | 20830.176 | 17730.268 | Y10512    | 2121.253  | 2805.118  | M91159    | 15312.632 | 4418.5    |
| AB019572  | 59454.23  | 62205.211 | AL110175  | 2765.724  | 2913.82   | AK025129  | 1114.709  | 528.785   |
| NM_002948 | 56897.496 | 54061.465 | AF288406  | 1265.969  | 1149.482  | NM_014392 | 16349.313 | 16023.494 |
| AF113008  | 4222.113  | 4056.512  | AK027156  | 17027.307 | 14726.143 | AK023291  | 6642.805  | 8683.813  |

|           |           |           |           |           |           |           |           |           |
|-----------|-----------|-----------|-----------|-----------|-----------|-----------|-----------|-----------|
| NM_020217 | 6033.05   | 5902.592  | AL353947  | 650.626   | 319.901   | BF541820  | 622.706   | 1548.958  |
| NM_018135 | 57513.457 | 56072.414 | AL442096  | 4320.563  | 4658.987  | AF119911  | 6679.978  | 8940.274  |
| AF205435  | 31068.566 | 27201.299 | AK023299  | 1301.206  | 1263.997  | AF116656  | 4254.834  | 4314.997  |
| L05093    | 58031.91  | 59449.246 | NM_018228 | 2593.609  | 2834.382  | NM_001050 | 5416.558  | 3871.262  |
| NM_006923 | 5557.959  | 5952.426  | AJ270693  | 2515.131  | 2307.794  | AF132206  | 1951.956  | 1399.78   |
| NM_004615 | 338.744   | 484.032   | NM_017790 | 8562.565  | 7883.5    | AJ001869  | 14491.472 | 7765.495  |
| AF119889  | 40039.371 | 37272.766 | AK000861  | 1460.697  | 1421.038  | NM_005295 | 1698.796  | 890.735   |
| J03866    | 15817.893 | 15887.034 | AK025009  | 981.833   | 711.692   | NM_020213 | 3897.775  | 2503.21   |
| AK022836  | 5579.894  | 5570.094  | AK000023  | 8356.196  | 12459.823 | D17267    | 5387.429  | 2894.9    |
| NM_012343 | 53585.867 | 55480.461 | AK000652  | 557.345   | 1118.438  | AF200341  | 2781.357  | 1929.958  |
| NM_000397 | 1569.465  | 1988.086  | AK000901  | 1989.371  | 2435.265  | AJ238214  | 2112.409  | 1298.416  |
| NM_002046 | 55916.824 | 62893.293 | AB007866  | 2127.755  | 2972.811  | AB040944  | 3499.391  | 1706.661  |
| AL157461  | 1280.78   | 1346.209  | AF075086  | 54917.43  | 55689.906 | NM_018145 | 2173.019  | 1221.72   |
| BF217340  | 596.023   | 644.685   | X77485    | 64325.125 | 55782.41  | NM_018476 | 16809.279 | 11578.035 |
| NM_003078 | 3897.367  | 3104.745  | NM_016945 | 996.732   | 1327.085  | AF220492  | 18558.188 | 6430.671  |
| AL137703  | 1663.915  | 1371.545  | NM_014499 | 2487.812  | 2028.15   | X89671    | 4147.527  | 879.088   |
| NM_001809 | 5581.711  | 4448.13   | AK021555  | 781.545   | 643.361   | NM_014941 | 3920.1    | 820.761   |
| AL117477  | 5002.56   | 4523.108  | AB046765  | 2820.8    | 2472.379  | NM_018372 | 4504.954  | 1477.553  |
| NM_012107 | 4270.857  | 4441.736  | AF133333  | 13555.178 | 12341.321 | NM_013253 | 1750.073  | 790.202   |
| AB037760  | 2617.995  | 2465.389  | NM_018368 | 2679.101  | 2399.162  | NM_005895 | 3998.967  | 3842.585  |
| NM_015680 | 6972.687  | 6620.499  | AK024011  | 2088.929  | 2471.325  | D82345    | 747.006   | 1387.751  |
| M22637    | 5643.094  | 5430.282  | AL390145  | 1062.525  | 1153.962  | NM_003814 | 2159.715  | 4417.975  |
| NM_018118 | 815.919   | 800.17    | AF119913  | 2765.245  | 2122.367  | AK026898  | 2559.281  | 3772.069  |
| L35035    | 8022.929  | 8132.903  | NM_018340 | 3306.468  | 3509.74   | NM_006637 | 322.577   | 397.959   |
| NM_007152 | 4002.64   | 3695.456  | AF049883  | 2932.151  | 3060.119  | AK022419  | 2285.182  | 1982.567  |
| NM_018293 | 3794.512  | 3375.385  | U10512    | 578.46    | 729.172   | AJ251832  | 1177.432  | 875.679   |
| NM_018047 | 3080.41   | 3217.579  | L10148    | 65757.164 | 58958.113 | NM_013936 | 2477.907  | 2023.316  |
| NM_005022 | 1641.604  | 1823.306  | AK026247  | 1610.146  | 1574.238  | AF086145  | 1169.703  | 949.616   |
| NM_001288 | 578.742   | 893.071   | AK024893  | 1556.075  | 2210.956  | Z70709    | 2476.468  | 2271.859  |
| NM_003564 | 5105.618  | 7008.78   | AK023302  | 1187.233  | 2127.93   | BC002538  | 2660.133  | 1728.941  |
| AK023414  | 547.372   | 1043.164  | L37703    | 63520.98  | 68386.359 | AK022355  | 816.16    | 663.224   |
| AF317516  | 7584.333  | 8965.494  | AK023767  | 36680.117 | 48033.195 | NM_017836 | 2223.681  | 1579.077  |
| NM_002581 | 1674.076  | 1599.58   | AF084516  | 1020.524  | 1232.406  | AK096584  | 49925.273 | 22637.104 |
| AI417964  | 5741.713  | 5848.912  | AJ001907  | 2984.13   | 2347.294  | Z29070    | 705.075   | 425.576   |
| J03571    | 51573.527 | 47862.648 | M32220    | 8817.709  | 7737.444  | AL078636  | 2545.543  | 1312.036  |
| T57791    | 466.046   | 312.773   | D17188    | 29111.635 | 28545.619 | AK022382  | 677.721   | 354.71    |
| T64134    | 327.311   | 433.574   | AJ001432  | 47176.27  | 47141.93  | AL080128  | 6319.989  | 2999.825  |
| X56134    | 3469.145  | 3327.364  | NM_020435 | 22073.387 | 27887.246 | AB037787  | 8065.786  | 3533.371  |
| NM_001456 | 1626.935  | 1530.044  | AF052169  | 4413.315  | 5161.911  | AB033072  | 1703.132  | 557.826   |
| H44784    | 741.511   | 673.446   | AK024900  | 9410.94   | 13050.94  | AB040892  | 2611.199  | 709.057   |
| AI421041  | 57795.07  | 50382.57  | AK026249  | 890.927   | 1041.193  | NM_018268 | 33626.863 | 22689.98  |
| BI759091  | 3467.508  | 3449.136  | AF119879  | 64153.293 | 59817.852 | AF230904  | 13466.079 | 9553.429  |
| BG685843  | 23840.566 | 21971.355 | L16951    | 939.805   | 1099.611  | NM_014386 | 762.339   | 804.1     |
| BI490011  | 4754.201  | 4425.838  | Y10482    | 63894.785 | 61222.762 | NM_018110 | 1918.497  | 1901.919  |
| AF035771  | 551.648   | 906.706   | AY007095  | 1501.879  | 1577.748  | AF312678  | 485.277   | 617.175   |
| N20475    | 10495.004 | 12400.015 | AF086244  | 7857.654  | 6930.497  | NM_006253 | 3663.33   | 2739.601  |
| BI199286  | 3869.264  | 4138.203  | AL161992  | 8212.177  | 10259.631 | NM_003866 | 786.483   | 691.183   |
| AA026626  | 3374.147  | 3437.335  | AK023551  | 2330.472  | 2726.516  | NM_018262 | 1016.651  | 995.029   |
| H61726    | 1076.349  | 1293.266  | AK023910  | 6388.917  | 6798.731  | NM_006207 | 945.699   | 953.604   |
| M15465    | 14644.294 | 12214.793 | D16991    | 5852.705  | 9430.749  | NM_003220 | 2814.158  | 2738.556  |
| NM_007181 | 4867.686  | 5009.625  | AK023538  | 4026.975  | 7633.212  | AF009674  | 10306.815 | 5678.111  |
| AB007857  | 971.837   | 1286.43   | U17620    | 357.653   | 1145.267  | NM_000360 | 1776.144  | 994.015   |
| NM_001778 | 45483.297 | 40213.836 | NM_006695 | 8801.15   | 8332.636  | NM_000844 | 1355.281  | 950.376   |

|           |           |           |           |           |           |           |           |           |
|-----------|-----------|-----------|-----------|-----------|-----------|-----------|-----------|-----------|
| NM_004997 | 51778.418 | 56297.453 | NM_004815 | 3121.039  | 2377.166  | NM_00551C | 12532.132 | 6913.394  |
| NM_005923 | 3082.103  | 4028.654  | NM_004147 | 1335.679  | 1011.688  | Z36817    | 940.89    | 533.368   |
| NM_003465 | 1304.644  | 1349.916  | AB037743  | 7537.158  | 8306.66   | NM_014505 | 32410.875 | 15071.431 |
| AF289028  | 1516.957  | 1208.473  | AB046820  | 3044.121  | 3071.841  | NM_004205 | 7625.078  | 4352.755  |
| NM_005127 | 14274.99  | 13460.008 | AK025922  | 3790.873  | 4063.764  | NM_002201 | 64690.988 | 69803.93  |
| NM_005567 | 27024.898 | 28022.428 | NM_014646 | 1187.026  | 1043.856  | AK025047  | 2346.459  | 1228.805  |
| NM_005216 | 9159.05   | 9176.316  | NM_006375 | 1303.269  | 1378.126  | NM_006806 | 3362.502  | 1271.898  |
| NM_003965 | 791.943   | 858.692   | AF123659  | 6194.046  | 6376.27   | NM_006763 | 5487.654  | 1112.148  |
| NM_004584 | 3871.925  | 3224.824  | U94903    | 3791.503  | 4564.683  | NM_006119 | 5763.228  | 1456.354  |
| X15183    | 56332.754 | 55842.887 | AF009300  | 2105.393  | 2422.622  | NM_004465 | 1938.002  | 736.319   |
| AK023618  | 7725.182  | 7651.173  | NM_005155 | 48280.383 | 57052.57  | AK026927  | 4150.101  | 2495.653  |
| AF212842  | 1493.759  | 2341.654  | NM_019095 | 20089.135 | 23934.977 | NM_014055 | 10401.488 | 6507.306  |
| NM_018404 | 1316.944  | 1195.258  | U80764    | 21385.305 | 24037.502 | BE884341  | 2663.297  | 2745.083  |
| M27544    | 17102.398 | 16711.98  | AB020684  | 14342.975 | 13113.979 | AF231997  | 2950.095  | 2442.873  |
| NM_001118 | 7040.284  | 9926.764  | AF077036  | 60775.117 | 53016.367 | NM_007125 | 3070.407  | 2557.307  |
| NM_001381 | 58355.168 | 67801.406 | NM_020421 | 3761.26   | 3068.286  | NM_002595 | 8646.385  | 5187.922  |
| NM_006455 | 7259.768  | 6335.123  | D17094    | 5908.799  | 5267.425  | NM_020184 | 1448.545  | 1189.702  |
| NM_014455 | 790.738   | 861.095   | L37690    | 59862.844 | 58617.379 | NM_005815 | 597.349   | 474.516   |
| NM_001492 | 597.165   | 846.344   | D61707    | 2003.475  | 3237.458  | NM_001225 | 1465.259  | 1520.708  |
| AB012643  | 37253.328 | 33248.234 | AK021610  | 3815.322  | 5082.651  | NM_014916 | 975.681   | 815.575   |
| AB023170  | 1764.661  | 1400.628  | Z36835    | 22151.738 | 30642.615 | NM_00025C | 751.73    | 1013.069  |
| NM_014153 | 11168.15  | 12222.857 | NM_004645 | 655.846   | 460.382   | NM_018147 | 12524.368 | 8442.183  |
| NM_002296 | 8868.721  | 10036.162 | AF029325  | 2559.959  | 2327.242  | NM_018967 | 8842.849  | 5478.431  |
| NM_000414 | 7574.816  | 6540.261  | NM_005704 | 2406.128  | 1979.161  | AJ278018  | 373.122   | 237.989   |
| NM_018845 | 5916.506  | 5275.298  | NM_001365 | 2527.889  | 2016.085  | NM_00185C | 1422.521  | 739.351   |
| AY008372  | 540.528   | 427.69    | NM_000677 | 13920.323 | 12858.142 | NM_00216C | 2036.128  | 975.076   |
| NM_005505 | 4054.8    | 3473.9    | BF308728  | 4749.966  | 4694.717  | NM_005675 | 1077.234  | 580.323   |
| AK026964  | 612.275   | 731.149   | NM_01328C | 1233.131  | 1695.349  | NM_003255 | 38500.203 | 20110.709 |
| NM_000079 | 2803.703  | 3708.213  | NM_018315 | 59560.867 | 60266.992 | NM_006587 | 669.459   | 533.822   |
| AL110245  | 9160.441  | 10309.354 | AF051151  | 1876.726  | 1652.817  | NM_002812 | 3695.368  | 505.247   |
| NM_016205 | 19916.004 | 19023.949 | AF142421  | 10658.938 | 9086.666  | NM_020365 | 2372.074  | 1192.962  |
| NM_005635 | 5802.944  | 7349.751  | AF257238  | 605.61    | 661.107   | NM_003982 | 1848.682  | 993.022   |
| NM_007235 | 20222.605 | 26972.9   | AB037836  | 5465.042  | 6564.657  | NM_002075 | 7830.279  | 7035.081  |
| NM_007265 | 4107.971  | 6403.692  | NM_014247 | 4625.439  | 6171.871  | NM_002112 | 8779.08   | 9386.48   |
| AK026014  | 5809.088  | 8955.633  | NM_018695 | 66280.75  | 67510.891 | NM_004121 | 6896.183  | 6440.256  |
| NM_014845 | 2827.049  | 4142.625  | NM_006343 | 1825.253  | 1639.128  | AY007092  | 2611.191  | 1908.565  |
| NM_004295 | 3073.92   | 3343.825  | NM_014786 | 3023.775  | 2853.732  | NM_001902 | 960.505   | 823.591   |
| NM_001232 | 637.356   | 828.078   | NM_001423 | 840.29    | 791.799   | AL137605  | 44611.254 | 26099.986 |
| X74609    | 57028.559 | 58206.305 | NM_015716 | 21221.754 | 20230.688 | NM_016261 | 1067.99   | 1114.8    |
| AB002316  | 308.563   | 449.232   | NM_003955 | 1757.953  | 1703.954  | NM_006515 | 670.49    | 499.227   |
| NM_01899C | 2529.41   | 2739.111  | NM_005739 | 6488.227  | 6670.877  | NM_004607 | 61147.082 | 54004.141 |
| NM_013363 | 723.621   | 682.451   | AB023166  | 1971.754  | 2215.714  | NM_012076 | 1255.695  | 2171.853  |
| NM_000947 | 1094.826  | 1104.099  | AB028966  | 35750.105 | 43005.422 | NM_007285 | 36671.938 | 54795.371 |
| AL096750  | 56948.742 | 54823.34  | NM_005402 | 11694.359 | 9908.578  | D14678    | 5669.563  | 6439.48   |
| NM_016061 | 3807.169  | 4081.32   | AF055027  | 15919.286 | 13471.452 | NM_016221 | 2058.964  | 1570.294  |
| NM_016062 | 18825.33  | 18671.734 | U63541    | 9726.625  | 6993.411  | NM_018113 | 774.367   | 615.594   |
| NM_004153 | 3205.112  | 3164.053  | AF055006  | 13367.634 | 10756.536 | U73377    | 3816.954  | 2072.549  |
| AK024740  | 3305.748  | 3199.297  | NM_004935 | 6298.294  | 5253.455  | NM_016162 | 2570.224  | 1396.235  |
| AF078164  | 5987.781  | 5074.01   | NM_006951 | 3113.922  | 2971.933  | AF130056  | 1648.15   | 1218.57   |
| NM_019045 | 2082.385  | 2086.993  | NM_001896 | 16068.179 | 14964.412 | NM_006662 | 14194.013 | 13803.637 |
| NM_005447 | 856.942   | 465.568   | NM_014023 | 1692.54   | 1434.734  | NM_006163 | 1246.557  | 405.226   |
| NM_012413 | 487.07    | 595.264   | NM_002745 | 17352.336 | 17668.297 | NM_001272 | 13462.048 | 2352.29   |
| AF130101  | 933.258   | 1056.732  | D26488    | 23062.252 | 18516.107 | NM_016303 | 609.619   | 217.915   |

|           |           |           |           |           |           |           |           |           |
|-----------|-----------|-----------|-----------|-----------|-----------|-----------|-----------|-----------|
| NM_004656 | 3843.926  | 3780.066  | NM_001432 | 2142.706  | 1844.911  | NM_006196 | 25038.395 | 10442.892 |
| AF071569  | 6248.193  | 6105.192  | AK002193  | 1351.892  | 1382.262  | AV733560  | 5044.569  | 8781.616  |
| NM_002266 | 3965.767  | 5414.167  | AB014554  | 5974.824  | 5744.046  | D17129    | 57365.297 | 61768.195 |
| J04948    | 6439.005  | 9190.157  | AF097431  | 6003.036  | 6744.031  | NM_003091 | 25539.262 | 16843.17  |
| NM_018043 | 984.375   | 877.01    | NM_001978 | 3237.384  | 2903.686  | NM_004247 | 3954.367  | 2158.6    |
| AK022564  | 63497.629 | 59297.68  | NM_002579 | 797.398   | 660.768   | NM_017722 | 5073.681  | 3606.546  |
| NM_005022 | 1717.32   | 1464.564  | NM_004221 | 3956.492  | 3338.225  | AL137730  | 3431.818  | 1999.444  |
| NM_003564 | 2635.427  | 2638.17   | NM_003019 | 5068.385  | 4812.496  | NM_004500 | 37355.168 | 19105.389 |
| AF317516  | 8084.716  | 7413.979  | AL109790  | 4411.122  | 4267.722  | NM_003276 | 6547.778  | 2001.544  |
| NM_002581 | 1799.507  | 1881.591  | NM_003628 | 4677.918  | 4878.842  | AL137681  | 1828.311  | 2330.085  |
| AI417964  | 5150.325  | 5217.354  | M90657    | 1253.895  | 1383.319  | AK025694  | 60490.766 | 66829.75  |
| J03571    | 40853.449 | 38680.82  | NM_006699 | 5275.754  | 5394.591  | NM_014365 | 933.505   | 1187.462  |
| X56134    | 3084.007  | 3006.172  | AK025645  | 3292.878  | 4075.977  | NM_005147 | 8449.345  | 4480.115  |
| NM_001456 | 1431.64   | 1449      | AK023266  | 3291.403  | 8383.09   | NM_014665 | 5926.924  | 3626.046  |
| H44784    | 859.418   | 661.221   | NM_006814 | 27003.285 | 30088.777 | NM_005588 | 258.346   | 208.482   |
| AI421041  | 54065.082 | 50179.813 | NM_005067 | 9401.756  | 9607.056  | BC030636  | 1120.066  | 687.881   |
| BI759091  | 3146.822  | 3395.295  | AB007899  | 2010.004  | 1832.811  | NM_000476 | 986.811   | 2021.286  |
| BG685843  | 26852.582 | 20530.482 | NM_002817 | 18224.604 | 19171.059 | NM_006187 | 2742.046  | 775.842   |
| BI490011  | 4428.593  | 3926.329  | NM_002801 | 35786.953 | 43832.105 | NM_020354 | 5983.521  | 1492.757  |
| AF035771  | 618.898   | 767.981   | BE905810  | 3123.663  | 3178.196  | AF202637  | 7695.62   | 2574.756  |
| N20475    | 9710.348  | 9791.536  | NM_014780 | 3823.027  | 5057.456  | NM_000026 | 55360.703 | 30985.777 |
| BI199286  | 4411.79   | 4619.629  | NM_018116 | 584.058   | 842.103   | AB033016  | 9028.713  | 6642.536  |
| AA026626  | 3040.256  | 3396.063  | NM_014730 | 7389.546  | 8281.428  | D87452    | 4922.952  | 3301.674  |
| H61726    | 1521.292  | 2405.896  | NM_014167 | 1840.799  | 2033.798  | AB037864  | 3090.725  | 2294.828  |
| NM_016436 | 531.451   | 519.564   | NM_016063 | 5725.278  | 6550.468  | L26494    | 3097.406  | 2393.864  |
| AL050355  | 549.598   | 511.929   | U82987    | 14530.502 | 15570.683 | BF382513  | 13445.943 | 10851.181 |
| NM_001778 | 44856.133 | 33312.516 | NM_005732 | 2563.452  | 2529.36   | AB020713  | 15155.899 | 17131.809 |
| NM_004997 | 47481.949 | 40907.121 | NM_014890 | 1457.917  | 1685.659  | AK025426  | 3029.014  | 6140.086  |
| NM_005923 | 2507.737  | 2215.233  | AK056481  | 8410.875  | 8119.177  | NM_007145 | 4882.584  | 4330.842  |
| NM_003465 | 2218.925  | 2164.727  | NM_005433 | 1312.514  | 1223.561  | AL133112  | 697.279   | 572.06    |
| AF289028  | 2024.682  | 1470.56   | AF232000  | 63439.066 | 65276.035 | NM_002196 | 6366.75   | 4838.661  |
| NM_005127 | 16458.928 | 17276.061 | NM_005758 | 9628.585  | 11026.128 | BC005219  | 3309.883  | 2079.302  |
| NM_005567 | 16754.998 | 20528.598 | AF044774  | 4033.344  | 4143.021  | NM_004268 | 2074.227  | 1524.29   |
| NM_005216 | 10195.289 | 10642.389 | NM_004430 | 558.825   | 634.876   | NM_001546 | 643.453   | 2050.709  |
| NM_003965 | 915.785   | 969.07    | NM_002955 | 1640.076  | 1615.34   | NM_000950 | 64373.355 | 71837.578 |
| NM_004584 | 4648.406  | 3966.214  | NM_001938 | 7711.423  | 5027.29   | NM_005136 | 7997.707  | 12956.589 |
| X15183    | 55368.719 | 57030.344 | NM_005238 | 40637.57  | 44776.48  | NM_001275 | 64816.016 | 77619.195 |
| AK023618  | 8062.586  | 6715.085  | S83390    | 623.652   | 985.546   | NM_000322 | 38655.148 | 14997.267 |
| AF212842  | 2112.486  | 3215.532  | AK075306  | 20701.428 | 23422.814 | L10139    | 3527.53   | 1035.814  |
| NM_018404 | 1427.49   | 1313.779  | AB037820  | 1621.158  | 1640.773  | NM_000036 | 52562.477 | 16485.633 |
| M27544    | 20550.141 | 16579.826 | U37689    | 785.154   | 830.788   | NM_020470 | 12568.209 | 7251.459  |
| NM_002258 | 532.96    | 613.867   | NM_001280 | 34502.574 | 44695.102 | NM_006574 | 1058.552  | 2495.398  |
| NM_001118 | 6303.169  | 6153.961  | AB019572  | 61187.086 | 62268.926 | AA478950  | 5201.436  | 4658.662  |
| AL133097  | 10757.764 | 9672.712  | NM_002948 | 62996.145 | 57893.777 | BF942101  | 9422.33   | 6727.863  |
| NM_001165 | 24618.283 | 27670.211 | AF113008  | 7135.375  | 6966.737  | BI825012  | 49669.227 | 41159.945 |
| NM_018047 | 3052.246  | 3246.354  | NM_020217 | 8601.999  | 7814.155  | M21574    | 1451.173  | 968.687   |
| AB023170  | 1518.073  | 1208.34   | NM_018135 | 62280.469 | 56562.547 | BM051302  | 1742.203  | 1153.603  |
| NM_014153 | 15620.862 | 13729.192 | AF205435  | 34780.566 | 38762.516 | BE314182  | 18576.867 | 11493.88  |
| NM_002296 | 14617.326 | 11089.366 | L05093    | 62778.637 | 65650.758 | AI808029  | 879.92    | 658.686   |
| NM_000414 | 8654.615  | 7529.869  | NM_006923 | 7779.686  | 10274.751 | X03225    | 3179.469  | 3724.834  |
| NM_018845 | 7591.942  | 7202.627  | NM_004615 | 1031.592  | 1023.288  | AK097395  | 29153.914 | 31655.77  |
| NM_005505 | 5559.291  | 5334.19   | AF119889  | 51286.508 | 52998.051 | M12783    | 3599.267  | 4820.598  |
| AK026964  | 1064.7    | 1401.301  | J03866    | 22605.813 | 20683.197 | AK091535  | 1214.727  | 1330.306  |

|           |           |           |           |           |           |           |           |           |
|-----------|-----------|-----------|-----------|-----------|-----------|-----------|-----------|-----------|
| NM_000079 | 3955.217  | 4514.286  | AK022836  | 13898.238 | 10127.642 | AF085357  | 5735.625  | 3868.473  |
| AL110245  | 7941.665  | 6802.717  | NM_012343 | 55317.527 | 51974.449 | NM_003841 | 36409.66  | 25030.025 |
| NM_016208 | 23041.234 | 20629.143 | NM_000397 | 4852.261  | 5153.583  | AF296673  | 5867.314  | 3359.945  |
| NM_001635 | 646.429   | 385.556   | NM_002046 | 61513.18  | 64799.156 | NM_004079 | 17383.467 | 10918.122 |
| NM_005638 | 6637.329  | 8144.857  | AL157461  | 2361.888  | 3053.952  | NM_002996 | 414.546   | 1257.808  |
| NM_007235 | 21000.576 | 24506.748 | BF217340  | 1214.754  | 1191.32   | NM_000383 | 2865.277  | 3138.496  |
| NM_007269 | 4422.701  | 4599.56   | NM_003078 | 7231.904  | 6904.674  | NM_004633 | 2402.414  | 1270.994  |
| AK026014  | 5180.157  | 6903.185  | AL137703  | 2823.591  | 2768.198  | X01394    | 58654.348 | 26937.012 |
| NM_004298 | 3820.57   | 9471.934  | NM_001809 | 10613.769 | 11228.801 | NM_000041 | 57350.996 | 25346.135 |
| NM_007181 | 18159.469 | 20841.049 | AL117477  | 11767.355 | 14260.643 | NM_002984 | 8958.542  | 5115.868  |
| AB007857  | 1840.767  | 1835.631  | NM_012107 | 10166.554 | 11417.265 | AB037752  | 16680.871 | 14420.712 |
| AB002316  | 587.63    | 456.641   | AB037760  | 7387.805  | 7529.081  | AF317425  | 2604.791  | 2077.318  |
| NM_018990 | 7776.967  | 6778.467  | NM_015680 | 14386.749 | 14710.029 | NM_018002 | 3671.401  | 3645.767  |
| NM_013363 | 1032.963  | 765.795   | M22637    | 9317.367  | 10870.168 | AK024821  | 5605.948  | 4625.724  |
| NM_000947 | 2180.568  | 2236.382  | AB037770  | 1013.403  | 1058.102  | AB002340  | 7104.356  | 5091.867  |
| AL096750  | 52985.691 | 53692.164 | NM_018118 | 1157.002  | 1323.733  | NM_000224 | 10210.097 | 6506.516  |
| NM_016061 | 5818.721  | 6271.416  | L35035    | 12648.158 | 27578.695 | NM_014328 | 3331.513  | 2673.204  |
| NM_016062 | 24135.904 | 24559.252 | NM_007152 | 7021.543  | 9522.423  | NM_006414 | 6275.366  | 4137.997  |
| NM_004153 | 3804.401  | 3352.182  | NM_018293 | 6545.644  | 7382.625  | NM_014322 | 13990.996 | 9585.737  |
| AK024740  | 4789.445  | 4591.141  | AF073931  | 858.695   | 683.945   | NM_004122 | 3234.07   | 3041.498  |
| AF078164  | 8563.935  | 7821.436  | NM_018047 | 4904.366  | 3873.108  | NM_002928 | 22421.547 | 18356.543 |
| NM_019049 | 2298.101  | 2464.901  | NM_001288 | 2813.911  | 5679.615  | NM_000160 | 3277.881  | 3397.059  |
| NM_012413 | 1382.273  | 994.264   | NM_003564 | 12749.938 | 18531.789 | NM_003301 | 1163.022  | 990.982   |
| AF130101  | 1179.083  | 803.252   | AK023414  | 820.74    | 1189.844  | NM_000955 | 3158.543  | 1842.032  |
| NM_004656 | 4119.409  | 3748.283  | AF317516  | 16595.988 | 19329.863 | U27768    | 3381.17   | 1579.418  |
| AF071569  | 6422.56   | 5217.482  | NM_002581 | 5708.21   | 5767.146  | U66582    | 9136.529  | 4963.01   |
| NM_002269 | 4690.639  | 6043.331  | AI417964  | 11266.822 | 9644.537  | NM_018479 | 11054.53  | 8494.494  |
| AB012643  | 33495.508 | 41161.398 | J03571    | 59195.832 | 53288.035 | NM_014362 | 1386.894  | 2112.609  |
| NM_003564 | 5066.384  | 4237.506  | T57791    | 1154.481  | 1002.72   | NM_018308 | 2516.038  | 3214.802  |
| AK023414  | 567.825   | 563.708   | T64134    | 705.861   | 1033.016  | NM_001832 | 35982.598 | 19995.9   |
| AF317516  | 11215.895 | 10931.86  | X56134    | 6755.648  | 8893.743  | NM_017774 | 24580.813 | 4006.998  |
| NM_002581 | 3512.365  | 3972.653  | NM_001456 | 3579.809  | 4210.483  | AB037716  | 1783.16   | 723.087   |
| AI417964  | 7518.945  | 7665.738  | H44784    | 2104.582  | 2387.553  | NM_004827 | 1281.137  | 5796.044  |
| J03571    | 49379.148 | 47695.324 | AI421041  | 59817.5   | 56136.402 | NM_001926 | 1308.774  | 5204.266  |
| T57791    | 698.41    | 694.987   | BI759091  | 7686.856  | 8966.115  | NM_016297 | 2673.129  | 2317.345  |
| X56134    | 3345.656  | 3411.9    | BG685843  | 38424.191 | 37345.391 | NM_001752 | 5883.883  | 4243.834  |
| NM_001456 | 1554.837  | 1280.345  | BI490011  | 10137.932 | 9292.413  | BC003406  | 621.352   | 763.126   |
| H44784    | 969.015   | 676.732   | AF035771  | 1396.421  | 1560.08   | AL137672  | 826.942   | 841.135   |
| AI421041  | 54693.18  | 47734.699 | N20475    | 14978.637 | 21563.207 | NM_012281 | 7037.675  | 4604.121  |
| BI759091  | 4924.384  | 4458.721  | BI199286  | 5741.065  | 6406.952  | NM_005509 | 897.283   | 514.968   |
| BG685843  | 31375.439 | 23022.367 | AA026626  | 6192.621  | 8424.395  | AF091034  | 1979.459  | 1350.943  |
| BI490011  | 6551.996  | 5075.689  | H61726    | 2230.244  | 2763.27   | NM_005301 | 50006.961 | 36230.426 |
| AF035771  | 743.826   | 752.128   | M15465    | 23261.482 | 26334.408 | NM_016653 | 1603.93   | 1340.623  |
| N20475    | 11198.385 | 11587.676 | NM_007181 | 18223.779 | 14182.228 | AB035124  | 9146.983  | 5201.041  |
| BI199286  | 4716.124  | 5546.023  | AB007857  | 2524.997  | 1832.298  | AF060170  | 1340.486  | 863.842   |
| AA026626  | 2640.947  | 2832.238  | NM_001778 | 56124.379 | 45673.613 | NM_016602 | 721.426   | 564.987   |
| H61726    | 1331.729  | 1654.857  | NM_004997 | 55748.801 | 52317.52  | NM_004409 | 5658.486  | 3366.83   |
| AL050355  | 693.314   | 509.972   | NM_005923 | 10984.224 | 9284.78   | AK023397  | 1133.298  | 972.495   |
| NM_003965 | 1228.428  | 1066.108  | NM_003465 | 4323.48   | 3460.281  | NM_001725 | 2612.013  | 1762.411  |
| NM_004584 | 5339.828  | 5880.286  | AF289028  | 3019.555  | 1731.798  | NM_000262 | 4313.177  | 3084.637  |
| X15183    | 54684.203 | 61671.473 | NM_005127 | 28401.703 | 28353.363 | NM_005485 | 1582.208  | 5911.738  |
| AK023618  | 9012.921  | 11650.688 | NM_005567 | 39288.734 | 39863.16  | AK024393  | 382.227   | 328.572   |
| AF212842  | 1705.372  | 4192.654  | NM_005216 | 13906.555 | 15268.903 | AK022537  | 7756.876  | 5208.897  |

|           |           |           |           |           |           |           |           |           |
|-----------|-----------|-----------|-----------|-----------|-----------|-----------|-----------|-----------|
| NM_018404 | 1034.19   | 1204.533  | NM_006626 | 1057.074  | 947.656   | AF064597  | 1121.551  | 769.373   |
| M27544    | 11795.634 | 9139.144  | NM_003965 | 2412.575  | 2870.372  | NM_006345 | 3409.767  | 2272.622  |
| NM_002255 | 426.034   | 444.805   | NM_004584 | 9568.614  | 11550.203 | NM_006875 | 12724.354 | 6393.859  |
| NM_001118 | 5469.684  | 5316.74   | X15183    | 61034.012 | 56325.301 | D87119    | 12706.601 | 6630.029  |
| AL133097  | 8761.282  | 6040.414  | AK023618  | 15971.751 | 17310.789 | AB037769  | 350.391   | 288.569   |
| NM_001165 | 23741.377 | 21132.699 | AF212842  | 3597.088  | 6724.424  | AL050040  | 467.09    | 347.688   |
| NM_001381 | 51019.48  | 62598.605 | NM_018404 | 3604.316  | 3794.684  | NM_006555 | 12784.819 | 6995.291  |
| U90908    | 833.047   | 693.054   | M27544    | 38936.664 | 44523.082 | AL133066  | 461.778   | 357.021   |
| NM_006455 | 7145.545  | 5462.827  | NM_002255 | 943.133   | 1057.979  | AF264717  | 1905.628  | 1393.446  |
| NM_014455 | 808.198   | 858.282   | NM_001118 | 13431.76  | 15228.303 | NM_012260 | 11022.036 | 6190.307  |
| NM_004093 | 3471.508  | 3475.092  | AL133097  | 19048.592 | 20738.141 | NM_001141 | 826.143   | 775.964   |
| NM_001445 | 16295.011 | 23823.363 | NM_001165 | 39255.133 | 46814.633 | NM_000015 | 6743.587  | 6518.699  |
| NM_001387 | 1022.438  | 1316.585  | NM_001381 | 60456.98  | 60916.887 | NM_001275 | 64742.305 | 69820.719 |
| AF086122  | 1376.134  | 1861.732  | NM_006455 | 11868.811 | 13744.186 | NM_000322 | 39623.32  | 57920.945 |
| AK024397  | 19979.656 | 20749.322 | NM_014455 | 1358.146  | 1346.089  | L10139    | 3723.88   | 5483.475  |
| AF073931  | 416.698   | 352.846   | NM_001492 | 2152.724  | 1637.303  | NM_000035 | 52398.453 | 32401.197 |
| NM_018047 | 2965.848  | 3268.106  | AB012643  | 40448.359 | 28718.881 | NM_020470 | 11041.993 | 3409.9    |
| NM_005625 | 25567.039 | 22566.689 | AB023170  | 4463.503  | 3024.188  | NM_006574 | 684.646   | 623.362   |
| NM_016605 | 52627.461 | 58610.082 | NM_014153 | 23346.135 | 17578.742 | AA478950  | 5218.061  | 4583.048  |
| S78203    | 2700.875  | 2843.991  | NM_002296 | 29289.289 | 20263.627 | BF942101  | 8975.794  | 6687.345  |
| NM_016205 | 15011.425 | 13656.072 | NM_000414 | 12196.503 | 8600.7    | BI825012  | 51289.691 | 48311.047 |
| NM_005635 | 4526.181  | 5832.997  | NM_018845 | 10455.183 | 8952.652  | M21574    | 1370.848  | 1208.359  |
| NM_007235 | 17390.326 | 18310.123 | AY008372  | 970.337   | 849.536   | BM051302  | 1259.922  | 1186.249  |
| NM_007265 | 2458.241  | 1914.66   | NM_005505 | 8572.556  | 8183.225  | BE314182  | 20475.721 | 12928.269 |
| AK026014  | 3596.193  | 3265.99   | AK026964  | 1697.172  | 1640.842  | AI808029  | 1631.132  | 1153.155  |
| NM_014845 | 2985.836  | 2363.419  | NM_000079 | 7916.236  | 14796.391 | X03225    | 3833.055  | 2948.468  |
| NM_004295 | 3226.572  | 3081.358  | AL110245  | 20695.063 | 25208.576 | AK097395  | 33084.348 | 18935.041 |
| NM_001232 | 846.766   | 740.62    | NM_016205 | 33056.449 | 40611.277 | M12783    | 3268.994  | 1942.557  |
| NM_007181 | 17228.154 | 13147.472 | NM_001635 | 876.531   | 986.879   | AK091535  | 1581.854  | 995.905   |
| AB007857  | 1781.611  | 1787.243  | NM_005635 | 12694.453 | 13777.693 | AF085357  | 5291.281  | 4200.797  |
| NM_003465 | 3215.383  | 2966.85   | NM_007235 | 29445.398 | 47012.211 | NM_003841 | 35799.234 | 32609.633 |
| AF289028  | 2751.275  | 1736.93   | NM_007265 | 7588.212  | 8275.914  | AF296673  | 4947.128  | 4976.487  |
| NM_005127 | 20551.08  | 19941.82  | AK026014  | 8152.104  | 9395.51   | NM_000383 | 2798.894  | 1996.048  |
| NM_005567 | 27437.363 | 29348.674 | NM_014845 | 7001.935  | 7011.337  | NM_004633 | 2674.906  | 4413.195  |
| NM_005215 | 8771.926  | 9919.403  | NM_004295 | 7044.511  | 8401.697  | X01394    | 59243.977 | 74893.094 |
| J04948    | 1905.168  | 1500.638  | NM_001232 | 1391.71   | 1850.113  | NM_000041 | 50890.82  | 54896.473 |
| AK022564  | 51798.875 | 60765.211 | AF007190  | 845.64    | 823.506   | NM_002984 | 8084.288  | 2438.05   |
| NM_001492 | 1638.656  | 2400.698  | X74609    | 61103.523 | 56044.445 | AB037752  | 15477.597 | 10000.797 |
| AB012643  | 27886.322 | 27229.547 | AB002316  | 3194.535  | 6245.36   | AF317425  | 2779.817  | 6017.105  |
| AB023170  | 2843.892  | 2422.808  | NM_018990 | 14472.229 | 21963.555 | NM_018002 | 3367.162  | 4530.724  |
| NM_014153 | 13696.124 | 12016.629 | NM_013363 | 1942.618  | 1305.801  | AK024821  | 5837.619  | 6676.916  |
| NM_002295 | 15457.213 | 11739.933 | NM_000947 | 4205.207  | 3525.106  | AB002340  | 7927.528  | 6974.214  |
| NM_000414 | 8731      | 6780.931  | AL096750  | 61239.672 | 54642.531 | NM_000224 | 8240.308  | 5756.194  |
| NM_018845 | 7180.821  | 4414.606  | NM_016061 | 10895.42  | 9543.421  | NM_014325 | 3731.169  | 2557.461  |
| NM_005505 | 4147.926  | 3008.128  | NM_016062 | 33090.824 | 38305.871 | NM_006414 | 2851.184  | 2299.817  |
| AK026964  | 942.474   | 943.253   | NM_004153 | 7042.541  | 7659.255  | NM_014322 | 9471.661  | 6292.824  |
| NM_001134 | 6321.314  | 5777.321  | AK024740  | 8439.794  | 8444.189  | NM_004122 | 4816.807  | 3741.88   |
| NM_016015 | 19656.084 | 21167.689 | AF078164  | 14579.794 | 27099.824 | NM_002925 | 25458.23  | 19925.314 |
| AF118274  | 22421.564 | 19517.768 | NM_019045 | 4182.26   | 5513.884  | NM_000160 | 2699.153  | 2038.888  |
| NM_018344 | 1955.907  | 1748.803  | NM_005447 | 697.655   | 1024.455  | NM_003301 | 1090.203  | 995.163   |
| NM_000075 | 4095.547  | 4116.267  | NM_012413 | 1240.932  | 1144.316  | NM_000955 | 2870.506  | 2733.277  |
| NM_000083 | 1402.928  | 1362.268  | AF130101  | 2003.43   | 1946.778  | U27768    | 2714.583  | 3144.51   |
| AL110245  | 8204.206  | 7010.441  | NM_004655 | 7180.15   | 6606.077  | U66582    | 10414.605 | 19076.15  |

|           |           |           |           |           |           |           |           |           |
|-----------|-----------|-----------|-----------|-----------|-----------|-----------|-----------|-----------|
| AF007190  | 573.92    | 786.015   | AF071569  | 10565.692 | 11052.998 | NM_00095C | 63425.957 | 65174.191 |
| X74609    | 51697.098 | 55215.023 | NM_002269 | 7647.748  | 9178.607  | NM_00513C | 1982.981  | 3627.158  |
| AB002316  | 1291.339  | 1208.394  | J04948    | 3507.36   | 3553.217  | NM_01830E | 2550.363  | 2189.83   |
| NM_01899C | 2949.329  | 2385.905  | NM_018043 | 1652.542  | 1641.571  | NM_00183Z | 34525.496 | 30850.67  |
| NM_01336Z | 831.276   | 711.474   | AK022564  | 65723.375 | 64615.008 | NM_017774 | 24830.982 | 28887.863 |
| NM_000947 | 2258.469  | 2066.087  | NM_005022 | 4050.825  | 3409.785  | AB037716  | 1931.736  | 1696.183  |
| AL096750  | 50612.691 | 52607.688 | NM_00128E | 1117.18   | 818.863   | NM_004827 | 1269.333  | 436.146   |
| NM_016061 | 5145.4    | 4079.02   | NM_003564 | 16675.865 | 21490.875 | BC003406  | 569.481   | 1356.344  |
| NM_01606Z | 22546.842 | 20177.246 | AK023414  | 2813.742  | 4946.497  | AL137672  | 1026.25   | 1654.511  |
| NM_00415Z | 3606.533  | 2655.409  | AF317516  | 14881.752 | 13584.779 | NM_012281 | 4935.236  | 4474.751  |
| AK024740  | 4094.083  | 3567.893  | NM_002581 | 4704.441  | 4039.23   | AF091034  | 2880.07   | 3227.202  |
| AF078164  | 8347.064  | 6667.229  | AI417964  | 7044.543  | 5347.038  | NM_005301 | 46478.563 | 48458.012 |
| NM_01904E | 2062.115  | 2527.871  | J03571    | 54037.766 | 46993.125 | NM_01665Z | 1705.088  | 2381.179  |
| AF130101  | 2568.948  | 2278.46   | T57791    | 1031.63   | 809.884   | AB035124  | 8330.916  | 9250.794  |
| NM_00465E | 4159.004  | 3331.025  | T64134    | 646.212   | 842.752   | AF060170  | 1473.212  | 2710.065  |
| AF071569  | 6481.198  | 4307.563  | X56134    | 6613.901  | 7397.205  | NM_01660Z | 610.491   | 1780.322  |
| NM_00226E | 4399.492  | 4013.671  | NM_00145E | 3205.869  | 3374.918  | NM_00440E | 7325.58   | 13145.563 |
| CY3Cy5    | 6596.611  | 201.965   | H44784    | 1844.53   | 2038.377  | AK023397  | 1570.657  | 3754.237  |
| NM_080824 | 839.458   | 999.08    | AI421041  | 61811.02  | 60551.164 | NM_00172E | 2841.909  | 4972.83   |
| AF086328  | 7954.548  | 8201.123  | BI759091  | 7621.098  | 8699.476  | NM_00407E | 16493.895 | 21825.521 |
| AF086427  | 2554.965  | 2190.115  | BG685843  | 36759.859 | 41746.602 | NM_00026Z | 3684.711  | 2302.902  |
| AK023753  | 6296.369  | 6303.456  | BI490011  | 10193.35  | 11917.856 | AK022537  | 8288.675  | 21627.479 |
| AF086441  | 32382.631 | 27114.652 | AF035771  | 1557.094  | 1441.745  | AF064597  | 1014.707  | 3119.923  |
| AK027255  | 946.153   | 878.172   | N20475    | 14760.538 | 15032.063 | NM_00634E | 3042.193  | 3849.727  |
| NM_014117 | 7143.917  | 8498.59   | BI199286  | 6371.972  | 8035.896  | NM_00687E | 11080.203 | 11689.407 |
| AK023609  | 4197.338  | 9279.049  | AA026626  | 5704.127  | 6461.058  | D87119    | 19730.748 | 24628.566 |
| NM_01801E | 4974.976  | 9743.845  | H61726    | 1591.994  | 2584.477  | AB037769  | 510.523   | 1058.864  |
| AK027220  | 2079.835  | 2398.916  | NM_00177E | 56459.84  | 51804.609 | AL050040  | 693.323   | 2112.889  |
| NM_018011 | 8989.452  | 8688.817  | NM_004997 | 54815.488 | 42853.93  | NM_00655E | 13690.44  | 26129.529 |
| SR2       | 56954.668 | 57482.742 | NM_00592Z | 9949.457  | 4636.333  | AL133066  | 646.008   | 1784.315  |
| SR4       | 18597.289 | 20499.498 | NM_00346E | 4275.172  | 1976.76   | AF264717  | 1760.093  | 3299.28   |
| SR6       | 2641.361  | 3465.97   | AF289028  | 3008.906  | 1530.323  | NM_01226C | 11191.916 | 17410.738 |
| SR8       | 9674.354  | 30876.893 | NM_005127 | 28652.438 | 23870.244 | NM_001141 | 781.532   | 1534.631  |
| SR10      | 30586.277 | 11591.406 | NM_005567 | 29367.523 | 25293.063 | NM_00001E | 8447.75   | 18671.811 |
| CY3Cy5    | 6050.76   | 145.504   | NM_00521E | 12984.805 | 9751.705  | AB028992  | 413.862   | 912.674   |
| AF086071  | 765.535   | 903.549   | NM_00662E | 891.504   | 860.576   | NM_01847E | 9288.564  | 12387.973 |
| AK021847  | 1437.676  | 1305.166  | NM_00396E | 2048.391  | 1747.426  | NM_01436Z | 1107.8    | 1840.835  |
| AK023086  | 8182.434  | 8800.393  | NM_004584 | 8097.989  | 7166.999  | L10139    | 3287.275  | 3996.439  |
| AF241534  | 1652.955  | 2333.876  | X15183    | 61269.832 | 57588.652 | NM_00003E | 49578.672 | 48408.234 |
| AF085877  | 424.064   | 482.893   | AK023618  | 14685.242 | 16322.138 | NM_02047C | 9639.01   | 15569.595 |
| AK002078  | 2144.864  | 2136.503  | AF212842  | 3319.412  | 7074.788  | BI825012  | 56178.547 | 63676.742 |
| AF085837  | 3848.562  | 4243.369  | NM_018404 | 3481.163  | 2970.201  | BM051302  | 1429.596  | 4090.429  |
| AK023165  | 2066.992  | 3036.811  | M27544    | 31866.744 | 36942.309 | BE314182  | 20295.205 | 40127.543 |
| NM_016115 | 1878.531  | 2055.682  | NM_00225E | 1242.679  | 1877.62   | AI808029  | 1513.536  | 3030.143  |
| NM_01495C | 3548.156  | 3664.532  | NM_001118 | 10739.578 | 13016.354 | AI971217  | 900.273   | 2957.931  |
| AL080180  | 1189.505  | 1303.127  | AL133097  | 15999.702 | 15951.291 | X03225    | 6275.206  | 10447.885 |
| X89067    | 2029.722  | 1964.735  | NM_001165 | 36711.879 | 42147.773 | AK097395  | 42859.742 | 59663.879 |
| AF147376  | 2350.227  | 2865.804  | NM_001381 | 60674.535 | 69462.313 | M12783    | 4576.706  | 8422.116  |
| AK027190  | 2525.684  | 2678.799  | NM_00645E | 8586.977  | 9495.53   | AK091535  | 1693.591  | 3773.842  |
| AL360136  | 1957.818  | 2220.112  | NM_01445E | 998.056   | 1376.621  | AF085357  | 7217.246  | 12127.852 |
| AF086259  | 3348.293  | 3021.68   | AF073931  | 675.543   | 1236.958  | NM_003841 | 42469.285 | 58444.586 |
| NM_01828C | 2319.139  | 2118.221  | NM_018047 | 5065.046  | 6393.361  | AF296673  | 5455.216  | 7850.37   |
| AK026671  | 3047.917  | 3783.127  | AB023170  | 4829.9    | 3697.914  | AL137698  | 346.398   | 898.129   |



|           |           |           |           |           |           |           |           |           |
|-----------|-----------|-----------|-----------|-----------|-----------|-----------|-----------|-----------|
| AF086087  | 18787.428 | 15380.819 | NM_014153 | 20887.908 | 14396.332 | AK024821  | 4892.381  | 4635.086  |
| AF075091  | 977.374   | 985.832   | NM_002296 | 26403.73  | 15036.515 | AB002340  | 6139.021  | 7809.393  |
| AK000671  | 70577.742 | 64466.602 | NM_000414 | 9928.674  | 6458.075  | NM_000224 | 9667.101  | 18168.227 |
| AK094020  | 637.536   | 1021.068  | NM_018845 | 11369.117 | 7523.82   | NM_014328 | 3720.273  | 6693.009  |
| AL137425  | 1578.607  | 1696.071  | AY008372  | 1024.33   | 1241.021  | NM_006414 | 9404.258  | 12869.802 |
| AL137637  | 888.532   | 732.924   | NM_005505 | 8364.945  | 6735.89   | NM_000160 | 3207.038  | 8266.515  |
| AL359584  | 1548.564  | 1547.922  | AK026964  | 1578.376  | 1218.419  | NM_003301 | 1551.244  | 4209.34   |
| AL137285  | 2082.302  | 1828.706  | NM_000079 | 8300.044  | 8447.992  | NM_000955 | 5171.479  | 8247.684  |
| AL137456  | 2081.586  | 2608.786  | AL110245  | 18046.596 | 18960.004 | U27768    | 5842.873  | 9746.489  |
| AL157489  | 1228.765  | 1391.992  | NM_016208 | 31701.348 | 33847.25  | NM_001742 | 839.725   | 2122.849  |
| AL390157  | 1147.604  | 1164.362  | NM_001635 | 973.188   | 758.094   | AF305550  | 5703.34   | 11034.104 |
| AL080151  | 2018.662  | 2105.706  | NM_005638 | 12574.865 | 14932.066 | U66582    | 15297.796 | 29832.967 |
| AL050085  | 1286.938  | 1546.679  | NM_007235 | 28793.15  | 35228.516 | S73288    | 1552.619  | 2898.617  |
| AK001308  | 467.638   | 1261.716  | NM_007269 | 7034.398  | 6100.64   | NM_006198 | 2956.416  | 5451.618  |
| NM_017621 | 19694.104 | 30092.24  | AK026014  | 7115.779  | 6804.253  | NM_003812 | 1328.334  | 2724.806  |
| AK023574  | 1026.509  | 1469.323  | NM_014845 | 6179.469  | 6260.47   | NM_000848 | 223.095   | 709.99    |
| AF083117  | 834.733   | 621.608   | NM_004298 | 5716.373  | 6739.941  | NM_004678 | 1470.632  | 2642.58   |
| AF131767  | 13537.763 | 11783.082 | NM_001232 | 1315.955  | 1674.418  | NM_000950 | 61554.352 | 67144.445 |
| AK021907  | 1974.774  | 2076.51   | NM_007181 | 19610.365 | 40303.637 | NM_005138 | 5148.513  | 8270.335  |
| AK022029  | 2391.794  | 2476.988  | AB007857  | 3201.39   | 4816.934  | NM_001275 | 64274.996 | 67585.805 |
| AK022167  | 980.699   | 1167.681  | AB002316  | 2349.876  | 2489.183  | NM_000322 | 42116.883 | 49999.625 |
| AK022320  | 3139.692  | 3270.125  | NM_018990 | 9415.715  | 5942.846  | NM_152747 | 1419.478  | 2512.46   |
| AK022058  | 3336.245  | 2817.816  | NM_013363 | 3562.679  | 3134.607  | NM_017415 | 1258.263  | 2621.562  |
| AK024326  | 2681.306  | 2223.884  | NM_000947 | 2923.942  | 2346.869  | NM_001667 | 58078.719 | 66735.203 |
| U61088    | 937.46    | 928.301   | AL096750  | 52901.168 | 41757.914 | AB046834  | 912.832   | 1814.647  |
| AF086467  | 1548.728  | 1679.491  | NM_016061 | 10448.536 | 9000.089  | AB029033  | 32919.266 | 39677.27  |
| AL137345  | 9800.729  | 13252.506 | NM_016062 | 31446.668 | 38825.129 | AF091034  | 3238.903  | 6069.266  |
| AL137442  | 3742.99   | 6173.012  | NM_004153 | 6815.908  | 10391.716 | NM_016653 | 2205.389  | 5071.795  |
| AL049281  | 1199.57   | 1681.949  | AK024740  | 8225.989  | 7343.336  | AB035124  | 11414.855 | 19431.959 |
| NM_001208 | 50427.898 | 48386.719 | AF078164  | 13357.55  | 13078.099 | AF060170  | 2004.346  | 4015.355  |
| AL050061  | 5534.054  | 5485.403  | NM_019049 | 3661.795  | 3844.948  | NM_016602 | 1326.056  | 2955.579  |
| AL050206  | 834.939   | 1262.651  | NM_005447 | 634.501   | 721.022   | NM_004408 | 11730.609 | 18983.109 |
| AK025464  | 65792.07  | 65570.023 | NM_012413 | 1173.57   | 1717.441  | AK023397  | 7019.856  | 12420.645 |
| AL049962  | 6577.502  | 6323.745  | AF130101  | 1962.402  | 1875.845  | NM_001725 | 6397.958  | 8790.688  |
| BE746723  | 1304.624  | 1068.401  | NM_004656 | 6497.993  | 5821.962  | NM_004079 | 21794.402 | 31851.486 |
| NM_020408 | 1969.69   | 1826.698  | AF071569  | 10017.896 | 7210.123  | NM_002996 | 677.371   | 1365.462  |
| NM_004988 | 18077.436 | 16547.447 | NM_002269 | 7565.004  | 7014.748  | NM_000383 | 3087.838  | 6814.743  |
| AF147362  | 874.533   | 754.529   | J04948    | 3700.787  | 4286.209  | NM_004633 | 2478.107  | 5011.499  |
| AF147365  | 1230.298  | 1022.666  | NM_018043 | 1601.245  | 1858.744  | X01394    | 55446.898 | 63121.633 |
| S72917    | 790.253   | 1139.331  | AK022564  | 62933.254 | 61953.961 | NM_000041 | 56800.063 | 60108.441 |
| AK025129  | 4351.765  | 4390.866  | NM_001492 | 2559.123  | 3215.308  | NM_002984 | 8816.279  | 11254.362 |
| AK023291  | 11399.676 | 17861.357 | AB012643  | 48413.328 | 55136.316 | AB037752  | 11831.328 | 17550.898 |
| BF541820  | 1210.636  | 1519.974  | NM_003564 | 12559.511 | 13030.616 | AF317425  | 1037.993  | 1663.027  |
| AF119911  | 14591.832 | 16776.619 | AF317516  | 13128.31  | 9484.721  | NM_018002 | 1874.078  | 2738.502  |
| NM_001050 | 9756.89   | 8829.622  | NM_002581 | 3980.936  | 3025.226  | NM_001141 | 1035.265  | 1945.751  |
| AF132206  | 3252.933  | 3120.442  | AI417964  | 9539.357  | 7853.565  | NM_000018 | 10468.729 | 21801.775 |
| AJ001869  | 17595.168 | 15721.579 | J03571    | 53822.988 | 50142.211 | AB028992  | 493.959   | 1010.282  |
| AF070579  | 642.543   | 583.679   | T57791    | 1081.999  | 884.03    | NM_018479 | 11882.353 | 15047.67  |
| NM_005295 | 3258.5    | 2681.848  | T64134    | 1073.081  | 1416.972  | NM_014362 | 3016.899  | 3275.904  |
| NM_020213 | 6155.247  | 5037.923  | X56134    | 6997.102  | 5665.119  | NM_018308 | 1957.751  | 2742.221  |
| D17267    | 9730.7    | 10479.521 | NM_001456 | 3226.047  | 3524.165  | NM_001832 | 36787.855 | 50259.891 |
| AF200341  | 1081.215  | 1267.433  | H44784    | 1860.904  | 1657.618  | NM_017774 | 28730.131 | 44217.48  |
| AJ238214  | 2107.415  | 2527.395  | AI421041  | 58987.063 | 54972.074 | AB037716  | 2305.216  | 5134.384  |

|           |           |           |           |           |           |           |           |           |
|-----------|-----------|-----------|-----------|-----------|-----------|-----------|-----------|-----------|
| AB040944  | 2537.201  | 2653.554  | BI759091  | 7618.827  | 7517.708  | NM_001926 | 139.429   | 746.058   |
| NM_018145 | 2617.771  | 2715.36   | BG685843  | 37242.309 | 39683.195 | NM_016297 | 3237.284  | 6514.841  |
| NM_018476 | 20976.752 | 19957.648 | BI490011  | 10151.085 | 9687.579  | NM_001752 | 6637.378  | 10081.854 |
| AF220492  | 31406.164 | 48252.348 | AF035771  | 1423.432  | 1351.579  | BC003406  | 884.348   | 2183.986  |
| X89671    | 7821.736  | 9310.223  | N20475    | 15327.546 | 16968.432 | AL137672  | 1071.791  | 2504.969  |
| NM_018372 | 6435.959  | 7740.202  | BI199286  | 6376.816  | 6134.64   | X64177    | 1003.367  | 1613.516  |
| NM_013253 | 2828.222  | 3570.41   | AA026626  | 4790.877  | 3711.802  | NM_015994 | 4991.443  | 7865.006  |
| D82345    | 2971.355  | 3843.717  | H61726    | 1974.435  | 2069.951  | NM_002235 | 575.712   | 1609.731  |
| NM_003814 | 3871.337  | 4011.164  | AL050355  | 493.337   | 462.215   | NM_002241 | 326.065   | 1191.67   |
| NM_002968 | 1431.404  | 1324.265  | AF007190  | 1029.759  | 1041.886  | NM_014065 | 1326.99   | 2792.327  |
| AK026898  | 4304.092  | 4255.404  | X74609    | 61885.551 | 59055.574 | NM_001695 | 5812.478  | 8498.93   |
| NM_006637 | 728.454   | 730.999   | NM_006626 | 676.547   | 911.176   | NM_002248 | 2599.454  | 4641.904  |
| AK022419  | 1596.158  | 1470.66   | NM_003965 | 1834.414  | 1577.696  | NM_012281 | 3510.411  | 6346.313  |
| AJ251832  | 1162.942  | 1344.379  | NM_004584 | 5468.559  | 2835.641  | AK025772  | 1687.139  | 2689.031  |
| NM_013936 | 3964.571  | 3526.203  | X15183    | 59781.828 | 55346.5   | NM_005505 | 450.491   | 792.575   |
| AF086145  | 1517.594  | 1926.26   | AK023618  | 12085.326 | 9078.825  | AB032956  | 239.782   | 345.155   |
| Z70709    | 4142.665  | 4241.513  | AF212842  | 2549.148  | 3502.416  | AL137698  | 433.23    | 1027.669  |
| BC002538  | 6188.393  | 6266.473  | NM_018404 | 2528.851  | 1616.774  | NM_015957 | 448.007   | 1160.038  |
| AK022355  | 1380.179  | 1322.45   | M27544    | 33838.441 | 32107.145 | NM_000262 | 4290.916  | 6256.436  |
| NM_017836 | 3954.818  | 4719.071  | NM_002258 | 1549.969  | 1326.13   | NM_017831 | 1211.957  | 2716.041  |
| AK096584  | 42506.285 | 37418.887 | NM_001118 | 8882.956  | 9290.613  | AK024393  | 456.325   | 1428.09   |
| Z29070    | 1454.886  | 1433.883  | AL133097  | 16093.78  | 16445.086 | AK022537  | 8090.921  | 16200.551 |
| AL078636  | 1845.536  | 1825.463  | NM_001165 | 36070.336 | 41842.523 | AF116632  | 149.248   | 930.971   |
| AK022382  | 1134.529  | 1175.448  | NM_001381 | 54563.727 | 63392.23  | AF064597  | 1439.98   | 3415.145  |
| AL080128  | 10523.005 | 10929.199 | U90908    | 1371.08   | 1247.023  | AF198444  | 121.332   | 779.657   |
| AB037787  | 14283.353 | 19152.533 | NM_006458 | 9791.405  | 9467.581  | NM_006345 | 4312.539  | 8064.911  |
| AB033072  | 2498.504  | 3597.444  | NM_014459 | 1470.735  | 1122.386  | NM_006875 | 14650.31  | 23415.838 |
| AB040892  | 4105.276  | 4602.247  | NM_004093 | 4427.466  | 4192.5    | D87119    | 19545.869 | 31987.357 |
| NM_017596 | 9339.34   | 12375.532 | NM_001449 | 22366.297 | 29753.27  | AB037769  | 556.381   | 1295.93   |
| AL157480  | 4516.497  | 5151.281  | NM_001387 | 1367.51   | 1595.953  | AL050040  | 600.14    | 1581.017  |
| NM_014386 | 2323.464  | 1922.133  | AF086122  | 2399.501  | 1797.255  | NM_006556 | 13066.275 | 19762.879 |
| NM_018110 | 4017.889  | 3737.248  | AK024397  | 48649.172 | 52963.359 | AL133066  | 603.243   | 1402.674  |
| AF312678  | 692.656   | 698.33    | AF073931  | 638.973   | 417.606   | AF264717  | 924.721   | 2010.111  |
| NM_006253 | 5909.533  | 6353.316  | NM_018047 | 5387.123  | 5198.152  | NM_012260 | 6729.458  | 8430.232  |
| NM_003866 | 914.671   | 1099.663  | NM_005022 | 5339.08   | 6184.648  | CY3Cy5    | 4132.623  | 163.832   |
| NM_018262 | 2401.963  | 2400.529  | NM_001288 | 1970.016  | 2601.856  | NM_005060 | 939.547   | 848.59    |
| NM_006207 | 1863.237  | 1498.163  | NM_005628 | 28335.637 | 21020.83  | NM_005437 | 5912.675  | 3325.151  |
| NM_003220 | 6301.248  | 4940.334  | NM_016605 | 54174.867 | 52034.809 | NM_018315 | 2376.241  | 1589.729  |
| AF009674  | 15700.915 | 13474.683 | S78203    | 3458.896  | 2725.133  | AK021714  | 1170.446  | 955.862   |
| NM_000360 | 2865.145  | 2313.51   | NM_016208 | 30146.705 | 22370.412 | AK022972  | 513.812   | 599.607   |
| NM_000844 | 2355.85   | 1975.511  | NM_005638 | 11490.423 | 11479.76  | AK025996  | 1018.619  | 680.731   |
| NM_005510 | 16769.678 | 19393.941 | NM_007235 | 26703.594 | 36217.34  | NM_005715 | 6264.397  | 4749.867  |
| Z36817    | 1399.832  | 1478.005  | NM_007269 | 7454.352  | 6449.66   | AK026992  | 3649.656  | 4303.551  |
| NM_014505 | 18120.795 | 16977.525 | AK026014  | 7445.276  | 7426.87   | X81895    | 478.047   | 566.73    |
| NM_004205 | 12492.344 | 16577.145 | NM_014845 | 6742.746  | 7074.072  | AL137343  | 822.327   | 777.881   |
| NM_006806 | 6251.602  | 7940.39   | NM_004298 | 7109.212  | 6699.785  | NM_005060 | 881.848   | 775.687   |
| NM_006763 | 11302.095 | 10417.048 | NM_001232 | 1293.548  | 1310.72   | NM_005437 | 7759.921  | 4546.199  |
| NM_006119 | 10328.608 | 10185.79  | NM_007181 | 21216.391 | 18612.711 | SR5       | 3588.782  | 3923.22   |
| NM_004465 | 3196.77   | 2671.531  | AB007857  | 3326.653  | 2819.178  | SR7       | 4613.119  | 20157.533 |
| AK026927  | 6418.398  | 6741.075  | NM_001778 | 59078.918 | 56706.605 | SR9       | 12510.59  | 1362.958  |
| NM_014058 | 18746.303 | 17457.846 | NM_004997 | 51767.809 | 55988.832 | CY3Cy5    | 5082.736  | 210.976   |
| NM_001761 | 7358.417  | 5827.96   | NM_005923 | 13827.893 | 12704.038 | M32443    | 2459.307  | 2027.625  |
| BE884341  | 6227.107  | 4905.811  | NM_003465 | 5838.827  | 4197.667  | D16908    | 587.069   | 430.292   |

|           |           |           |           |           |           |           |           |           |
|-----------|-----------|-----------|-----------|-----------|-----------|-----------|-----------|-----------|
| AF231997  | 4011.58   | 3188.87   | AF289028  | 4509.556  | 2697.596  | D16477    | 518.636   | 456.724   |
| NM_007125 | 4685.244  | 4407.813  | NM_005127 | 28824.605 | 31432.77  | AK023754  | 605.2     | 320.981   |
| NM_002595 | 15816.962 | 14310.788 | NM_005567 | 49173.625 | 53655.336 | AK024737  | 1179.829  | 901.618   |
| NM_020184 | 3039.373  | 3120.373  | NM_005216 | 15524.711 | 19152.992 | AB007890  | 7665.99   | 4450.573  |
| NM_005815 | 1106.169  | 1244.46   | J04948    | 3352.408  | 2301.649  | AF070591  | 1058.907  | 915.062   |
| NM_001225 | 2382.767  | 2666.973  | NM_018043 | 1821.707  | 1175.993  | NM_020411 | 6894.739  | 5024.38   |
| NM_014916 | 1098.452  | 1070.583  | AK022564  | 59936.563 | 57260.508 | AB020633  | 1526.037  | 1540.626  |
| NM_000250 | 1479.905  | 1212.684  | NM_001492 | 1785.934  | 1349.035  | AL357200  | 2526.619  | 1943.61   |
| NM_018147 | 21041.418 | 18917.371 | AB012643  | 33532.809 | 21535.994 | NM_017727 | 11276.684 | 8192.338  |
| NM_018967 | 12783.872 | 10460.149 | AB023170  | 4291.19   | 2877.261  | AK025051  | 818.36    | 679.367   |
| AJ278018  | 1222.297  | 1197.541  | NM_014153 | 25702.221 | 20864.625 | AK024553  | 45243.352 | 22567.807 |
| NM_001850 | 1044.65   | 1407.164  | NM_002296 | 31568.531 | 22114.404 | NM_017864 | 5791.632  | 3703.023  |
| NM_002160 | 2444.297  | 2426.155  | NM_000414 | 12916.613 | 10088.029 | NM_004865 | 2251.867  | 1724.06   |
| NM_005675 | 1625.685  | 1471.62   | NM_018845 | 12777.118 | 10829.503 | AF136408  | 832.988   | 555.619   |
| NM_003255 | 41664.066 | 45874.395 | AY008372  | 926.816   | 767.369   | AL110203  | 959.122   | 642.509   |
| NM_006587 | 1156.264  | 1198.059  | NM_005505 | 9455.101  | 8544.245  | AJ011595  | 498.916   | 393.888   |
| D21064    | 886.023   | 1103.83   | AK026964  | 1737.967  | 1560.318  | AJ276510  | 3075.519  | 2195.858  |
| NM_002812 | 7174.859  | 5931.452  | NM_001134 | 17644.164 | 16145.073 | AJ011602  | 742.37    | 536.147   |
| NM_020365 | 3785.286  | 4443.785  | NM_016016 | 26857.385 | 22407.957 | AJ002787  | 5653.735  | 3873.923  |
| NM_003982 | 5572.892  | 6093.508  | NM_020407 | 6045.191  | 4982.628  | Z70764    | 892.173   | 911.561   |
| NM_002079 | 11804.396 | 12825.401 | AF118274  | 38477.934 | 41869.082 | Z83948    | 6453.51   | 5140.814  |
| NM_002112 | 12981.957 | 10124.648 | NM_018344 | 3763.201  | 3905.751  | AK026860  | 2666.953  | 1632.531  |
| NM_004121 | 14745.571 | 13303.086 | NM_000079 | 8689.88   | 9682.324  | NM_014895 | 718.783   | 491.851   |
| AY007092  | 4345.989  | 3925.92   | NM_000083 | 2953.012  | 4314.606  | AK023435  | 532.367   | 264.373   |
| NM_001902 | 2029.453  | 1764.197  | AL110245  | 18464.531 | 29582.008 | AK022309  | 6193.702  | 3413.429  |
| AL137605  | 59401.91  | 57181.016 | AF007190  | 1414.915  | 1071.529  | AK000063  | 5327.378  | 3652.929  |
| NM_016261 | 1740.553  | 1817.625  | X74609    | 61511.465 | 53370.133 | AK000792  | 8987.763  | 3243.494  |
| NM_006519 | 1466.101  | 1592.053  | AB002316  | 1995.555  | 1797.274  | AK000949  | 3036.948  | 2192.188  |
| NM_004607 | 61852.98  | 59703.441 | NM_018990 | 10699.706 | 8214.713  | AK027068  | 1703.118  | 1225.463  |
| NM_012076 | 2109.738  | 2455.128  | NM_013363 | 1721.717  | 1438.429  | AK000165  | 651.694   | 599.382   |
| NM_007285 | 44444.758 | 41851.68  | NM_000947 | 3996.984  | 3259.771  | AK000974  | 4323.194  | 2236.823  |
| D14678    | 12522.069 | 10030.43  | AL096750  | 60347.98  | 57646.586 | NM_006233 | 10709.816 | 4932.059  |
| NM_016221 | 4790.829  | 4322.625  | NM_016061 | 10504.439 | 10668.118 | AK000992  | 748.651   | 495.336   |
| NM_018113 | 1354.685  | 1737.155  | NM_016062 | 32644.66  | 45381.844 | L23544    | 11711.679 | 5295.487  |
| U73377    | 4441.378  | 4022.404  | NM_004153 | 7053.085  | 5899.794  | NM_019020 | 1662.308  | 917.05    |
| NM_016162 | 4595.634  | 4758.136  | AK024740  | 7815.063  | 8100.387  | NM_016474 | 462.05    | 407.217   |
| AF130056  | 3569.479  | 4283.271  | AF078164  | 13219.972 | 11065.153 | AF143879  | 5047.733  | 2338.872  |
| NM_006662 | 25110.818 | 20817.289 | NM_019049 | 3810.867  | 3577.082  | AK024621  | 15515.152 | 8276.326  |
| NM_004031 | 3904.736  | 3216.477  | NM_005447 | 671.223   | 886.567   | AL157449  | 27674.711 | 14456.037 |
| NM_004514 | 7866.263  | 6544.544  | NM_012413 | 939.292   | 967.324   | AL117582  | 1648.344  | 935.297   |
| NM_006163 | 2190.885  | 2312.843  | AF130101  | 1572.239  | 1459.231  | AV740891  | 2334.68   | 1887.374  |
| NM_001272 | 19736.088 | 12151.211 | NM_004656 | 6281.327  | 7575.042  | AF090916  | 742.322   | 800.772   |
| NM_016303 | 731.457   | 854.191   | NM_005576 | 1378.611  | 1501.228  | AL390183  | 342.745   | 251.902   |
| NM_006196 | 30061.773 | 25369.604 | AF247820  | 1233.128  | 1221.853  | Y13897    | 663.39    | 467.442   |
| AV733560  | 7300.724  | 7862.063  | AF071569  | 10464.77  | 9469.382  | AK001857  | 829.33    | 672.485   |
| D17129    | 61741.672 | 63197.578 | NM_002269 | 6915.347  | 9138.413  | AL133577  | 2753.145  | 1396.229  |
| NM_003091 | 36479.172 | 29762.92  | CY3Cy5    | 12009.466 | 267.816   | AK025378  | 3637.603  | 2006.293  |
| NM_004247 | 7666.402  | 5299.824  | NM_080824 | 1136.252  | 1236.101  | NM_000475 | 2467.034  | 1129.626  |
| NM_017722 | 11127.351 | 8689.408  | AF086328  | 13481.389 | 13956.352 | AF038199  | 1262.267  | 956.383   |
| AL137730  | 11958.506 | 10107.965 | AF086427  | 629.226   | 871.543   | AF086035  | 6292.586  | 3653.534  |
| NM_004500 | 54700.453 | 50333.523 | AK024196  | 948.149   | 1939.838  | AK022159  | 5096.479  | 2928.634  |
| NM_003276 | 15145.59  | 8984.097  | AK001099  | 1051.795  | 1100.268  | AJ012491  | 944.732   | 534.759   |
| AL137681  | 4274.292  | 4001.176  | AK023753  | 6426.507  | 7399.539  | AF007136  | 811.777   | 579.813   |

|           |           |           |           |           |           |           |           |           |
|-----------|-----------|-----------|-----------|-----------|-----------|-----------|-----------|-----------|
| AK025694  | 62916.613 | 62037.438 | AF086441  | 38692.383 | 41173.816 | AK023691  | 3730.769  | 2357.623  |
| NM_002157 | 62406.535 | 63244.754 | AK027255  | 1305.314  | 1555.379  | AK026744  | 3550.37   | 2027.101  |
| NM_004095 | 13554.225 | 12777.066 | AK022487  | 528.895   | 681.572   | AK002105  | 3659.181  | 2286.909  |
| NM_014365 | 1964.94   | 2091.541  | NM_014117 | 12611.226 | 13547.507 | NM_005234 | 8244.42   | 3741.387  |
| NM_005147 | 12291.322 | 13158.284 | AK023609  | 4656.752  | 5107.561  | BC023536  | 466.029   | 462.432   |
| NM_014665 | 12388.957 | 14787.495 | NM_018019 | 5821.647  | 5381.354  | NM_001803 | 19523.303 | 8569.181  |
| NM_005585 | 582.7     | 564.801   | AK027220  | 2584.352  | 2302.283  | NM_012297 | 10664.039 | 4894.029  |
| BC030636  | 3570.66   | 3394.933  | NM_018011 | 14719.789 | 12286.115 | AB007925  | 48313.426 | 29171.475 |
| NM_000476 | 1846.164  | 1492.447  | NM_080824 | 781.961   | 1304.036  | NM_018180 | 528.526   | 346.428   |
| AF132733  | 5512.9    | 4509.517  | SR2       | 59908.391 | 51778.102 | NM_000361 | 9498.032  | 3860.849  |
| NM_001071 | 14176.145 | 11660.882 | SR4       | 23086.105 | 17411.33  | NM_002475 | 34144.121 | 12752.749 |
| NM_006187 | 6918.277  | 5927.898  | SR6       | 3180.9    | 2407.338  | NM_003836 | 19797.658 | 7297.613  |
| NM_020354 | 13070.063 | 11788.968 | SR8       | 11155.092 | 27779.135 | NM_017987 | 791.333   | 741.408   |
| AF202637  | 13367.411 | 10977.579 | SR10      | 37573.266 | 13309.645 | NM_018203 | 295.486   | 140.395   |
| NM_000026 | 60286.387 | 56932.867 | CY3Cy5    | 13777.688 | 349.826   | NM_014244 | 440.14    | 378.936   |
| AB033016  | 23051.209 | 21032.826 | AK024874  | 914.073   | 1320.184  | NM_000910 | 1545.318  | 1060.082  |
| D87452    | 9427.213  | 7359.265  | AF086071  | 807.111   | 1046.869  | AF086001  | 61043.012 | 44661.254 |
| AB037864  | 3962.091  | 3159.98   | AK021847  | 1564.811  | 1628.214  | AL117560  | 19337.83  | 9123.111  |
| L26494    | 6958.015  | 6036.595  | AK023086  | 8343.899  | 13579.544 | NM_005850 | 56857.125 | 32342.992 |
| NM_000346 | 821.983   | 939.23    | AF241534  | 2548.705  | 3775.711  | NM_000554 | 30962.705 | 12605.962 |
| AK024322  | 1690.538  | 1809.558  | AF085855  | 1259.118  | 1296.803  | AF009317  | 3881.486  | 1724.066  |
| BF382513  | 22113.141 | 19465.533 | AF085877  | 850.718   | 818.443   | AK026583  | 8063.622  | 3724.938  |
| AB020713  | 27292.283 | 22182.109 | AK002078  | 3817.031  | 4819.059  | AF218031  | 3928.137  | 1833.849  |
| AK025426  | 4970.737  | 4433.629  | AF085837  | 5613.244  | 9189.821  | AF085896  | 2296.942  | 1247.217  |
| NM_016555 | 12339.328 | 10582.266 | AK023165  | 2843.953  | 3000.238  | X74613    | 42268.984 | 31954.875 |
| NM_007145 | 11683.782 | 11741.523 | NM_016115 | 3335.56   | 3398.177  | AF075080  | 25423.615 | 14058.461 |
| AL133112  | 1672.084  | 2565.025  | NM_014950 | 6047.73   | 5256.577  | NM_004616 | 323.765   | 283.974   |
| NM_002195 | 8584.171  | 11944.036 | AL080180  | 2113.988  | 2008.186  | NM_004360 | 737.906   | 640.149   |
| BC005219  | 7717.463  | 8223.117  | X89067    | 4027.05   | 3751.654  | NM_003821 | 8720.29   | 3790.272  |
| NM_004265 | 2788.683  | 2802.683  | AF147376  | 3950.27   | 4214.26   | NM_017692 | 2233.038  | 1197.389  |
| NM_001546 | 472.152   | 602.99    | AK027190  | 5279.456  | 5064.618  | NM_003975 | 699.451   | 499.349   |
| NM_000950 | 66095.125 | 68106.625 | AL360136  | 2519.548  | 3085.2    | NM_004834 | 11209.601 | 4292.348  |
| NM_005135 | 8171.683  | 7212.134  | AF086259  | 8897.953  | 11510.742 | NM_000812 | 1204.389  | 608.304   |
| NM_001275 | 65958.242 | 69797.344 | AK022429  | 809.689   | 690.211   | AK024747  | 10050.45  | 3701.928  |
| NM_000322 | 51792.688 | 49463.063 | NM_018280 | 3427.723  | 3951.565  | NM_006390 | 1108.917  | 971.208   |
| L10139    | 5326.687  | 4932.651  | AK024381  | 1237.144  | 1423.556  | NM_003580 | 3480.02   | 1905.346  |
| NM_000035 | 63844.605 | 60961.031 | AK026503  | 2201.604  | 2454.392  | NM_006506 | 591.884   | 452.214   |
| NM_020470 | 17593.545 | 16992.334 | AK026671  | 3699.507  | 5529.145  | NM_016005 | 5611.057  | 2427.04   |
| NM_006574 | 1249.558  | 1106.727  | AF086087  | 19565.217 | 34802.422 | NM_002375 | 3055.871  | 1366.762  |
| AA478950  | 8245.752  | 8827.744  | AF075084  | 1446.954  | 2843.436  | NM_001364 | 1594.93   | 698.41    |
| BF942101  | 16545.217 | 16718.229 | AF075091  | 1758.922  | 1645.562  | NM_006097 | 2529.327  | 1468.786  |
| BI825012  | 56562.422 | 53780.109 | AK000671  | 67547.531 | 61377.793 | NM_015313 | 6983.984  | 3424.376  |
| M21574    | 2563.933  | 1934.826  | AK002016  | 627.452   | 502.641   | AK022287  | 6371.933  | 3906.032  |
| BM051302  | 2317.057  | 1912.988  | AK094020  | 715.97    | 680.57    | NM_015897 | 1704.682  | 1105.039  |
| BE314182  | 25937.701 | 24369.352 | AL137425  | 2369.226  | 1891.568  | AF177473  | 46454.715 | 28769.318 |
| AI808029  | 2167.671  | 2621.737  | AL137637  | 977.453   | 769.694   | NM_000546 | 21575.359 | 14035.938 |
| AI971217  | 695.589   | 910.85    | AL359584  | 2340.733  | 2886.57   | AB023223  | 412.315   | 355.232   |
| X03225    | 7381.053  | 6787.666  | AL137285  | 3084.014  | 2734.265  | AB018257  | 3508.844  | 1555.889  |
| AK097395  | 37623.316 | 28451.234 | AL137456  | 3067.654  | 2958.795  | NM_002705 | 16605.455 | 6498.826  |
| M12783    | 6939.634  | 6859.692  | AL157489  | 1707.027  | 1863.521  | AK001059  | 1521.622  | 879.96    |
| AK091535  | 3113.349  | 4819.827  | AL390157  | 1869.802  | 2822.281  | NM_007282 | 4102.961  | 1987.138  |
| AF085357  | 10446.572 | 17586.604 | AL080151  | 2628.576  | 4775.838  | NM_017610 | 419.696   | 286.237   |
| AK092768  | 653.026   | 1214.611  | AL050085  | 1870.143  | 2609.26   | AK025133  | 24282.711 | 12460.86  |

|           |           |           |           |           |           |           |           |           |
|-----------|-----------|-----------|-----------|-----------|-----------|-----------|-----------|-----------|
| NM_003841 | 22243.314 | 21633.303 | AK001308  | 682.091   | 716.319   | NM_020197 | 8325.197  | 3864.81   |
| AF296673  | 8555.042  | 8574.021  | AK024127  | 1128.021  | 1451.448  | NM_004087 | 3395.632  | 2053.578  |
| AK022132  | 781.69    | 908.542   | AK024243  | 596.041   | 848.318   | NM_01870C | 1810.367  | 1229.565  |
| NM_004079 | 24605.621 | 17456.918 | AK021574  | 6341.024  | 7516.154  | NM_000119 | 3340.829  | 2040.836  |
| NM_002996 | 935.54    | 823.381   | NM_017621 | 23325.18  | 34130.27  | NM_001065 | 2178.979  | 1167.654  |
| NM_000383 | 4899.68   | 5479.682  | AK023574  | 1802.861  | 3687.995  | AK027100  | 1328.409  | 857.334   |
| NM_004633 | 3816.523  | 3730.892  | AF083117  | 698.485   | 1721.78   | NM_003622 | 3321.03   | 1818.19   |
| X01394    | 59072.59  | 61894.387 | AF131767  | 20775.229 | 22321.184 | NM_007115 | 2369.541  | 1514.565  |
| NM_000041 | 62578.41  | 60375.539 | AK021807  | 756.794   | 448.835   | NM_013335 | 1182.261  | 982.639   |
| NM_002984 | 13971.308 | 11273.689 | NM_016637 | 1062.546  | 968.951   | NM_001491 | 2928.348  | 1909.501  |
| AB037752  | 26072.846 | 29217.406 | AK021907  | 2952.468  | 2492.557  | AK026541  | 1845.18   | 1363.16   |
| AF317425  | 4092.298  | 6032.692  | AK022029  | 2735.814  | 2913.659  | NM_005895 | 26113.607 | 10282.232 |
| NM_018002 | 6107.964  | 10907.563 | AK022167  | 1091.666  | 818.952   | D42055    | 5735.279  | 3192.841  |
| AK024821  | 7859.67   | 9972.869  | AK022320  | 6292.093  | 5600.197  | AL137349  | 2876.858  | 1568.885  |
| AB002340  | 10426.47  | 9058.242  | AK022058  | 5511.405  | 5068.393  | NM_003335 | 587.074   | 437.946   |
| NM_000224 | 7287.799  | 6114.86   | AK022196  | 783.911   | 692.169   | NM_016476 | 33092.238 | 12246.222 |
| NM_014328 | 6554.187  | 7030.452  | AK022350  | 636.365   | 1008.738  | NM_015902 | 2694.884  | 1192.214  |
| NM_006414 | 10539.051 | 14009.875 | AK024326  | 3810.284  | 4938.491  | NM_020155 | 5957.281  | 3147.236  |
| NM_014322 | 20284.463 | 16334.065 | U61088    | 1270.334  | 2173.661  | BE874471  | 2031.959  | 1212.171  |
| NM_004122 | 7532.16   | 5961.041  | AK024538  | 960.206   | 1339.406  | NM_007211 | 2393.917  | 1288.232  |
| NM_002928 | 30618.418 | 28043.002 | AF086467  | 2107.749  | 2770.548  | AB011152  | 1472.073  | 952.363   |
| NM_000160 | 5398.979  | 7037.612  | AL137345  | 4535.862  | 5679.037  | NM_014956 | 4104.638  | 1434.931  |
| NM_003301 | 2332.536  | 3517.104  | AK000967  | 9423.347  | 10745.218 | NM_001654 | 5478.478  | 2455.44   |
| NM_000955 | 4399.034  | 8013.656  | AK021583  | 3862.971  | 4994.744  | NM_005436 | 9987.461  | 4980.541  |
| U27768    | 8548.049  | 17834.752 | AL137442  | 4583.378  | 5764.514  | AK024418  | 824.422   | 555.166   |
| NM_001742 | 869.502   | 1204.035  | AL049281  | 1831.463  | 2506.785  | NM_003367 | 7138.718  | 4137.013  |
| U66582    | 23676.68  | 35066.176 | NM_001208 | 56909.91  | 54205.418 | NM_005194 | 6641.458  | 2763.234  |
| NM_018479 | 14155.974 | 10974.109 | AL050061  | 13248.705 | 13388.152 | AB002296  | 1834.804  | 1098.204  |
| NM_014362 | 2402.437  | 1647.971  | AL050206  | 1299.534  | 1310.064  | NM_014315 | 3986.607  | 1514.022  |
| NM_018308 | 6027.44   | 5101.691  | AK025522  | 31054.41  | 30562.484 | NM_012087 | 1510.779  | 735.17    |
| NM_001832 | 53715.801 | 51821.746 | AK025464  | 67562.82  | 64604.926 | AF165520  | 2947.516  | 1113.003  |
| NM_017774 | 35323.215 | 30115.723 | AL049962  | 8237.164  | 7030.126  | NM_004285 | 442.573   | 344.34    |
| AB037716  | 3710.101  | 3109.843  | BE746723  | 1328.337  | 945.719   | NM_015675 | 4487.016  | 2016.141  |
| BC003406  | 1048.271  | 2043.54   | NM_020408 | 1966.842  | 1764.427  | AF299118  | 53801.703 | 61025.355 |
| AL137672  | 1355.277  | 1004.539  | NM_004988 | 43093.348 | 38036.668 | NM_000976 | 56911.086 | 51644.977 |
| NM_002241 | 698.795   | 443.89    | AF147362  | 1119.055  | 1803.382  | NM_001000 | 60913.996 | 60688.543 |
| NM_005509 | 3377.573  | 3949.137  | AF147365  | 1022.972  | 1910.145  | AF288207  | 24736.49  | 11251.144 |
| AF091034  | 4379.155  | 3775.958  | S72917    | 1384.074  | 2532.403  | NM_001001 | 50458.27  | 22311.275 |
| NM_005301 | 58574.148 | 53820.234 | AF076617  | 67336.32  | 64193.652 | NM_001774 | 33931.461 | 15944.911 |
| NM_004167 | 784.897   | 526.441   | M91159    | 1856.668  | 2631.307  | NM_006830 | 54730.406 | 39124.734 |
| NM_016653 | 3857.913  | 5542.035  | AK025129  | 1799.53   | 3036.272  | AK026414  | 19016.992 | 7450.925  |
| AB035124  | 16984.318 | 29033.318 | NM_014392 | 31055.197 | 46324.055 | D17297    | 1032.442  | 791.157   |
| AF060170  | 3428.886  | 7355.048  | AK023291  | 13648.535 | 16549.758 | NM_004074 | 27374.291 | 10089.587 |
| NM_016602 | 1948.618  | 3457.271  | AK001117  | 635.311   | 883.287   | NM_002626 | 54097.633 | 20603.047 |
| NM_004409 | 8634.104  | 12405.084 | BF541820  | 1699.571  | 1982.505  | NM_018436 | 26797.795 | 7152.792  |
| AK023397  | 2892.136  | 5334.939  | AF119911  | 16643.816 | 16865.393 | AF157115  | 6084.349  | 2368.244  |
| NM_001725 | 7859.038  | 8392.17   | AF116656  | 15333.099 | 14289.659 | AJ223353  | 551.69    | 723.046   |
| NM_000262 | 4870.498  | 3774.272  | NM_001050 | 13769.341 | 12103.948 | NM_012241 | 6297.288  | 2318.703  |
| NM_017831 | 2116.365  | 2036.466  | AF132206  | 4570.58   | 4112.53   | AF250288  | 224.293   | 195.627   |
| AK024393  | 866.582   | 1070.477  | AJ001869  | 36985.332 | 36248.895 | NM_018486 | 1520.338  | 762.071   |
| AF064597  | 2131.977  | 3420.293  | AJ002969  | 1097.936  | 1357.313  | NM_005324 | 16682.645 | 6237.587  |
| NM_006556 | 18863.924 | 21231.27  | AF070579  | 3278.561  | 3240.184  | AL080201  | 37453.816 | 17364.369 |
| AL133066  | 1805.387  | 4282.308  | NM_005295 | 8054.907  | 5992.41   | NM_001806 | 7345.534  | 4064.459  |

|           |           |           |           |           |           |           |           |           |
|-----------|-----------|-----------|-----------|-----------|-----------|-----------|-----------|-----------|
| AF264717  | 3443.583  | 5757.147  | NM_020213 | 7107.252  | 6211.358  | AL137241  | 997.638   | 661.254   |
| NM_012260 | 8128.731  | 12674.304 | D17267    | 12082.316 | 10486.21  | AB037742  | 1763.472  | 1226.227  |
| NM_001141 | 1423.111  | 1577.849  | AF200341  | 1260.456  | 1154.458  | AF272375  | 2340.414  | 1398.541  |
| NM_000018 | 15583.559 | 20965.896 | AJ238214  | 1891.683  | 2127.436  | NM_014519 | 4202.545  | 2194.25   |
| AB028992  | 1303.782  | 1589.408  | AB040944  | 7208.521  | 6682.957  | NM_002517 | 7625.661  | 4332.183  |
| NM_001275 | 66063.016 | 67751.547 | NM_018145 | 8042.666  | 8160.042  | NM_007147 | 42397.008 | 38563.781 |
| NM_000322 | 48452.516 | 40634.191 | NM_018476 | 30023.734 | 42332.742 | X65463    | 3169.652  | 2178.213  |
| L10139    | 5656.203  | 4987.722  | AF220492  | 30124.482 | 45930.887 | NM_002238 | 1432.046  | 837.207   |
| NM_000038 | 59078.848 | 57906.555 | X89671    | 7267.527  | 9207.591  | NM_004868 | 1655.104  | 1401.402  |
| NM_020470 | 15890.506 | 14039.89  | NM_014941 | 10497.934 | 15064.85  | NM_004668 | 1697.942  | 1170.568  |
| NM_006574 | 1468.09   | 1532.588  | NM_018372 | 7270.147  | 9176.13   | NM_007028 | 9096.06   | 3689.693  |
| AA478950  | 6845.934  | 6284.194  | NM_013253 | 3065.487  | 3574.616  | AF130728  | 685.572   | 309.725   |
| BF942101  | 15048.229 | 16485.908 | NM_005895 | 9106.994  | 10528.879 | NM_004987 | 385.236   | 230.051   |
| BI825012  | 57624.844 | 61649.191 | D82345    | 1813.053  | 1798.132  | NM_001288 | 23034.813 | 9259.524  |
| M21574    | 3487.609  | 5128.487  | NM_003814 | 4146.36   | 3762.444  | NM_001131 | 52324.094 | 52172.047 |
| BM051302  | 2197.29   | 2458.049  | NM_002968 | 2340.583  | 2363.477  | BG752013  | 354.968   | 413.558   |
| AK091535  | 2981.71   | 3430.711  | AK026898  | 6040.87   | 5906.274  | X07696    | 11234.191 | 4774.453  |
| AF085357  | 10239.295 | 19401.604 | NM_006637 | 1289.844  | 1017.052  | AA481015  | 852.845   | 692.709   |
| NM_003841 | 15514.921 | 23674.789 | AK022419  | 2321.836  | 2021.363  | AI925826  | 9489.947  | 5909.868  |
| AF296673  | 8674.274  | 13036.263 | AJ251832  | 1549.94   | 1953.015  | Z15108    | 1660.998  | 1362.848  |
| AB032956  | 1029.383  | 1038.254  | NM_014624 | 832.438   | 681.819   | M55284    | 2303.324  | 1955.865  |
| AL137698  | 1298.24   | 1323.046  | NM_013936 | 7887.373  | 7009.091  | AA679391  | 3004.51   | 3662.644  |
| NM_000383 | 4296.388  | 3116.968  | AF086145  | 2388.658  | 1894.98   | BG682146  | 2642.717  | 3022.64   |
| NM_004633 | 3585.198  | 3043.541  | Z70709    | 3460.003  | 3347.053  | AA884709  | 1880.712  | 2076.717  |
| NM_002984 | 13019.83  | 9119.111  | BC002538  | 5508.745  | 4133.822  | NM_004541 | 48996.363 | 47830.582 |
| AB037752  | 24121.65  | 21746.164 | AK022355  | 2450.209  | 2254.065  | NM_006705 | 3997.071  | 1659.895  |
| AF317425  | 3893.471  | 3800.011  | NM_017836 | 5139.044  | 5375.33   | NM_012266 | 4897.215  | 2812.821  |
| NM_018002 | 4555.068  | 4691.927  | AK096584  | 63885.77  | 59540.098 | NM_004558 | 3700.18   | 1530.548  |
| AK024821  | 6656.833  | 6744.32   | Z29070    | 1808.633  | 1455.683  | X56692    | 19430.15  | 8358.146  |
| AB002340  | 12917.236 | 10616.942 | AL078636  | 5065.551  | 5136.988  | NM_005838 | 481.771   | 450.323   |
| NM_000224 | 9039.334  | 5981.977  | AK022382  | 2383.816  | 2988.218  | NM_000734 | 6389.43   | 4209.78   |
| NM_014322 | 23878.787 | 42568.168 | AL080128  | 14013.595 | 15463.769 | NM_012331 | 4775.865  | 3929.029  |
| NM_003301 | 2221.078  | 2057.546  | AB037787  | 18933.529 | 21013.352 | NM_006644 | 6776.687  | 4964.422  |
| NM_000955 | 3429.932  | 5455.145  | AB033072  | 2342.729  | 2974.944  | NM_006583 | 47333.84  | 2175.06   |
| U27768    | 6060.309  | 9537.884  | AB040892  | 6409.122  | 11216.211 | NM_002288 | 1220.469  | 2237.203  |
| NM_001742 | 2361.137  | 6629.26   | NM_001822 | 676.978   | 787.575   | NM_004416 | 11808.565 | 17137.469 |
| U66582    | 20886.498 | 30880.424 | NM_018268 | 66417.43  | 74173.164 | NM_000628 | 3943.042  | 6843.265  |
| NM_000950 | 60582.93  | 61589.43  | AF230904  | 23946.301 | 21961.979 | AB005216  | 846.85    | 2461.691  |
| NM_005138 | 9651.145  | 10380.992 | NM_017596 | 10905.096 | 14060.245 | NM_002363 | 775.743   | 2420.252  |
| NM_018308 | 5006.33   | 3527.937  | AL157480  | 6149.819  | 6628.873  | X82693    | 23212.783 | 14571.108 |
| NM_001832 | 47840.996 | 45583.977 | NM_014386 | 4127.333  | 4614.386  | NM_007176 | 6901.884  | 5327.805  |
| NM_017774 | 33942.375 | 28104.262 | NM_018110 | 5324.484  | 5267.229  | NM_002722 | 2075.609  | 2107.347  |
| AB037716  | 3467.235  | 3154.701  | AF312678  | 1091.387  | 878.991   | AF317058  | 718.72    | 1364.736  |
| NM_016297 | 3705.08   | 3121.55   | NM_006253 | 9179.77   | 9759.197  | AL137576  | 6886.733  | 7964.626  |
| NM_001752 | 7262.902  | 5761.47   | NM_003866 | 1845.221  | 2124.667  | NM_006516 | 12295.95  | 24809.15  |
| BC003406  | 957.72    | 1225.228  | NM_018262 | 2882.908  | 2978.708  | NM_000355 | 2812.472  | 5813.068  |
| AL137672  | 1460.628  | 962.777   | NM_006207 | 2541.546  | 1861.318  | NM_013333 | 21851.779 | 40219.672 |
| NM_002241 | 789.11    | 465.451   | NM_003220 | 7212.685  | 5132.262  | NM_002333 | 1264.959  | 4159.101  |
| AF091034  | 5419.016  | 9282.03   | AF009674  | 29570.5   | 18267.57  | NM_003400 | 4042.61   | 9068.805  |
| AB035124  | 17043.967 | 11903.319 | NM_000360 | 2617.519  | 1845.295  | NM_014824 | 1733.372  | 2100.662  |
| AF060170  | 2254.82   | 4128.665  | NM_000844 | 4571.901  | 3718.143  | AK000782  | 199.159   | 796.724   |
| NM_016602 | 1263.745  | 2064.563  | NM_005510 | 20794.912 | 18853.834 | NM_014504 | 2157.687  | 3552.997  |
| NM_004408 | 7962.26   | 11910.049 | Z36817    | 2468.756  | 2733.077  | NM_014408 | 12707.467 | 21099.871 |

|           |           |           |           |           |           |           |           |           |
|-----------|-----------|-----------|-----------|-----------|-----------|-----------|-----------|-----------|
| AK023397  | 3189.809  | 6209.901  | NM_014505 | 60051.121 | 57709.258 | NM_014741 | 4850.044  | 7946.079  |
| NM_001725 | 5062.241  | 5726.943  | NM_002201 | 65059.258 | 68362.141 | AF212247  | 1466.434  | 3302.409  |
| NM_004079 | 23122.545 | 22016.793 | AK025047  | 7584.562  | 9675.763  | AF161407  | 14565.69  | 28000.84  |
| NM_002996 | 1494.831  | 1686.056  | NM_006806 | 7400.319  | 11208.49  | NM_014738 | 3701.447  | 7614.247  |
| NM_000262 | 2722.799  | 2288.344  | NM_006763 | 11742.331 | 26189.738 | NM_016406 | 3158.889  | 7462.31   |
| NM_017831 | 2245.278  | 1992.288  | NM_006119 | 9245.859  | 10321.438 | AL050107  | 451.319   | 1762.343  |
| AK024393  | 767.305   | 607.914   | NM_004465 | 3075.783  | 2697.82   | NM_005713 | 1227.293  | 3111.232  |
| AK022537  | 10271.568 | 8000.737  | AK026927  | 7713.876  | 7019.723  | AK023553  | 5203.349  | 11260.677 |
| AF064597  | 1818.517  | 1128.437  | NM_014059 | 20401.268 | 16311.004 | NM_016733 | 2193.629  | 4272.555  |
| NM_006345 | 4208.965  | 1968.867  | NM_001761 | 9771.256  | 6973.765  | AF181994  | 2101.6    | 4322.063  |
| NM_006875 | 20217.285 | 10672.869 | BE884341  | 8258.833  | 7366.836  | NM_004666 | 2303.129  | 4228.283  |
| AF264717  | 3273.106  | 3309.119  | AF231997  | 6415.285  | 6336.248  | NM_007028 | 8122.748  | 15534.789 |
| NM_012260 | 6619.631  | 7502.432  | NM_007125 | 6431.043  | 8766.222  | AF130728  | 1070.828  | 2759.022  |
| NM_001141 | 1175.866  | 1287.402  | NM_002598 | 18928.365 | 17940.906 | NM_004987 | 548.95    | 1563.935  |
| NM_000018 | 14712.969 | 25645.029 | NM_020184 | 3739.882  | 4075.026  | BG752013  | 821.294   | 2756.29   |
| AB028992  | 857.401   | 1007.24   | NM_005815 | 3745.631  | 3674.273  | X07696    | 9471.716  | 15843.873 |
| NM_018479 | 15094.427 | 16695.262 | NM_001229 | 6738.375  | 8682.754  | AA481015  | 975.082   | 2946.986  |
| NM_014362 | 2989.185  | 2782.161  | NM_014916 | 1725.034  | 2108.387  | U04209    | 11596.229 | 13151.346 |
| L10139    | 5662.971  | 4717.221  | NM_000250 | 1706.764  | 1228.81   | AI393201  | 11106.993 | 21261.277 |
| NM_000039 | 57393.559 | 52792.527 | NM_018147 | 19878.805 | 13157.85  | Z15108    | 3635.544  | 6852.261  |
| NM_020470 | 16576.92  | 12082.413 | NM_018967 | 21785.668 | 16959.305 | NM_005582 | 5877.504  | 10848.762 |
| AA478950  | 6679.112  | 6058.78   | AJ278018  | 1160.091  | 1075.552  | NM_012266 | 4506.167  | 9205.833  |
| BF942101  | 15255.592 | 11304.368 | NM_001850 | 2776.185  | 2087.211  | NM_004559 | 3517.634  | 5025.062  |
| BI825012  | 55308.871 | 53459.512 | NM_002160 | 5668.359  | 5177.809  | NM_000734 | 9213.905  | 14968.345 |
| M21574    | 2394.168  | 2042.643  | NM_005675 | 2152.484  | 2836.515  | NM_012331 | 5342.996  | 9102.832  |
| BM051302  | 2091.073  | 1353.221  | NM_006587 | 1276.009  | 1822.306  | NM_006644 | 6656.104  | 8552.323  |
| BE314182  | 27282.139 | 18151.559 | D21064    | 961.383   | 1418.81   | NM_006583 | 46940.238 | 8085.539  |
| AI808029  | 2145.98   | 1317.333  | NM_002812 | 6214.167  | 4977.426  | NM_006065 | 698.438   | 1999.346  |
| AI971217  | 977.324   | 484.38    | NM_020365 | 5092.178  | 5148.211  | NM_014339 | 24153.078 | 45933.066 |
| X03225    | 6905.952  | 3231.764  | NM_003982 | 5466.386  | 4644.542  | NM_001495 | 2181.684  | 4355.828  |
| AF085357  | 11768.547 | 14045.435 | NM_002079 | 13818.691 | 12321.98  | NM_004416 | 15054.044 | 32544.326 |
| NM_003841 | 15841.364 | 14779.457 | NM_002112 | 17489.414 | 13682.11  | NM_000628 | 3547.348  | 8648.931  |
| AF296673  | 7325      | 6682.408  | NM_004121 | 27358.703 | 23486.471 | AB005216  | 1054.994  | 2705.331  |
| AK024821  | 6691.098  | 4837.126  | AY007092  | 6072.509  | 7858.699  | AF015041  | 2505.171  | 4394.516  |
| AB002340  | 13909.839 | 8581.856  | NM_001902 | 2001.506  | 2540.776  | NM_004868 | 2297.915  | 4853.411  |
| NM_000224 | 9870.362  | 6795.825  | AL137605  | 63888.473 | 60479.73  | NM_007176 | 7085.285  | 11958.067 |
| NM_014328 | 5567.226  | 4265.368  | NM_016261 | 4850.148  | 4511.482  | NM_002722 | 1444.668  | 3465.639  |
| NM_006414 | 9506.426  | 7664.421  | NM_006519 | 1682.651  | 1468.992  | AF317058  | 800.93    | 1268.995  |
| NM_014322 | 23154.043 | 20016.617 | NM_004607 | 65290.461 | 62296.895 | AL137576  | 7706.862  | 12687.515 |
| NM_004122 | 7704.97   | 5550.805  | NM_012076 | 3348.175  | 2468.523  | NM_006516 | 13131.991 | 22680.168 |
| NM_002928 | 30628.268 | 23518.443 | NM_007285 | 44438.227 | 41084.59  | NM_000355 | 3080.808  | 5540.711  |
| NM_000160 | 5170.791  | 3757.074  | D14678    | 17981.154 | 11430.422 | NM_005451 | 2374.755  | 5480.82   |
| NM_003301 | 2240.537  | 1627.993  | NM_016221 | 5296.412  | 3472.723  | NM_013333 | 26372.096 | 52276.777 |
| NM_000955 | 4545.143  | 2630.188  | NM_018113 | 1460.247  | 1509.806  | NM_002333 | 3373.819  | 6366.452  |
| U27768    | 6437.711  | 3963.939  | NM_005187 | 790.785   | 655.682   | NM_003400 | 7016.945  | 11493.307 |
| NM_001742 | 603.192   | 635.483   | U73377    | 10604.112 | 8378.627  | NM_006705 | 6245.72   | 10703.313 |
| AF305550  | 7170.424  | 4327.461  | NM_016162 | 5511.997  | 6031.859  | NM_014439 | 1522.629  | 4255.456  |
| U66582    | 24245.02  | 20250.77  | AF130056  | 4559.743  | 6451.662  | NM_014504 | 1630.413  | 3995.357  |
| S73288    | 2036.488  | 3026.249  | NM_006662 | 37522.785 | 54993.641 | NM_014741 | 4584.209  | 9975.093  |
| NM_003812 | 1310.762  | 2133.005  | NM_004031 | 4801.246  | 6214.001  | AF212247  | 3240.854  | 7538.712  |
| NM_004678 | 2804.92   | 3498.14   | NM_004514 | 9440.856  | 9359.701  | AF161407  | 18123.566 | 42222.492 |
| NM_000950 | 38208.359 | 46502.969 | NM_006163 | 3791.831  | 4528.19   | NM_014738 | 1935.551  | 4343.249  |
| NM_005139 | 20015.795 | 20533.039 | NM_001272 | 26766.695 | 18194.242 | NM_016406 | 3251.591  | 5967.019  |

|           |           |           |           |           |           |           |           |           |
|-----------|-----------|-----------|-----------|-----------|-----------|-----------|-----------|-----------|
| NM_001275 | 60116.988 | 62803.492 | NM_016303 | 2166.294  | 1500.508  | NM_01808C | 7373.586  | 11897.004 |
| NM_000322 | 37484.758 | 40593.598 | NM_006196 | 38888.582 | 33937.594 | AL050107  | 318.226   | 1591.437  |
| NM_152747 | 2037.702  | 1516.534  | AV733560  | 7159.749  | 5683.932  | NM_014453 | 23603.58  | 38467.785 |
| NM_017415 | 1657.633  | 1158.982  | D17129    | 62282.305 | 59658.793 | NM_005713 | 1484.269  | 3476.284  |
| NM_001667 | 58883.117 | 54369.301 | NM_003091 | 40221.609 | 43252.211 | AK021951  | 695.689   | 1869.377  |
| AB046834  | 1143.925  | 783.099   | NM_004247 | 10764.629 | 15494.11  | AK023553  | 2463.578  | 5080.311  |
| AB029033  | 44170.465 | 36473.547 | NM_017722 | 12698.845 | 14143.478 | NM_016733 | 5916.069  | 9209.672  |
| AF091034  | 4854.142  | 3892.614  | AL137730  | 21785.141 | 18826.982 | AF181994  | 3299.833  | 6635.943  |
| NM_005301 | 56273.43  | 53001.559 | NM_004500 | 59392.336 | 55436.852 | NM_018962 | 1943.992  | 5014.339  |
| NM_016653 | 2974.38   | 2231.19   | NM_003276 | 15410.038 | 8129.245  | AF125100  | 3681.531  | 8110.261  |
| AB035124  | 15993.915 | 9516.729  | AL137681  | 4941.139  | 3768.509  | X82693    | 19605.734 | 34692.902 |
| AF060170  | 2153.06   | 1779.278  | AK025694  | 63978.395 | 68328.18  | AF130728  | 459.531   | 1019.814  |
| NM_016602 | 1787.876  | 1589.918  | NM_002157 | 63054.699 | 62293.477 | NM_004987 | 1183.156  | 2592.474  |
| NM_004409 | 11908.854 | 8298.901  | NM_004095 | 23051.441 | 14219.632 | NM_001288 | 22986.254 | 28458.113 |
| AK023397  | 3016.755  | 2223.682  | NM_014365 | 1833.606  | 1235.079  | AA831963  | 468.455   | 2168.555  |
| NM_001725 | 8245.767  | 5552.52   | NM_005147 | 15460.877 | 11289.072 | M54894    | 135.656   | 798.584   |
| NM_004079 | 25360.117 | 17110.303 | NM_014665 | 10888.952 | 7182.741  | X07696    | 8877.886  | 14587.042 |
| NM_002996 | 1576.547  | 1471.405  | NM_005588 | 877.581   | 531.484   | AA481015  | 1151.048  | 2734.763  |
| NM_004633 | 2963.951  | 3974.214  | BC030636  | 3684.61   | 2669.065  | AI925826  | 12570.307 | 17924.334 |
| X01394    | 46102.762 | 48899.57  | NM_000476 | 2839.554  | 3455.221  | U04209    | 11713.656 | 16342.085 |
| NM_000041 | 36199.191 | 41375.094 | AF132733  | 7595.498  | 8281.304  | AI393201  | 13085.062 | 25975.129 |
| NM_002984 | 15294.254 | 15742.454 | NM_001071 | 16504.639 | 14097.297 | M34664    | 52990.039 | 66903.375 |
| AB037752  | 10103.58  | 10322.609 | NM_006187 | 7838.413  | 7423.343  | Z15108    | 5275.687  | 8432.456  |
| AF317425  | 5195.909  | 8098.585  | NM_020354 | 13202.726 | 11797.667 | M55284    | 1078.103  | 2695.992  |
| NM_018002 | 4759.482  | 5353.25   | AF202637  | 14795.265 | 12688.059 | AA001218  | 1015.124  | 2927.251  |
| NM_001141 | 1430.151  | 909.482   | NM_000026 | 62948.719 | 56192.051 | BG682146  | 7049.745  | 11814.902 |
| NM_000018 | 12673.368 | 10678.278 | AB033016  | 28779.67  | 31823.793 | AA884709  | 1498.253  | 2941.124  |
| AB028992  | 614.125   | 495.897   | D87452    | 10857.89  | 13333.1   | AK022417  | 2696.278  | 4760.496  |
| NM_018479 | 12665.417 | 9512.279  | AB037864  | 6880.298  | 8025.81   | U50534    | 3155.404  | 4947.084  |
| NM_014362 | 2402.975  | 1756.814  | L26494    | 10492.16  | 12166.481 | NM_014824 | 2323.565  | 4434.296  |
| NM_018308 | 4197.017  | 2467.344  | NM_000346 | 1244.054  | 1045.688  | NM_005838 | 771.912   | 1761.695  |
| NM_001832 | 45274.008 | 40634.098 | AK024322  | 1781.247  | 1545.484  | NM_000734 | 10455.442 | 18195.324 |
| NM_017774 | 36203.152 | 28099.672 | BF382513  | 37992.273 | 32093.947 | NM_012331 | 4693.28   | 6989.223  |
| AB037716  | 3199.353  | 2418.063  | AB020713  | 30883.271 | 20387.283 | NM_006644 | 8735.887  | 17186.277 |
| NM_016297 | 3619.055  | 2637.376  | AK025426  | 11716.937 | 9574.998  | NM_006583 | 45890.141 | 10464.191 |
| NM_001752 | 7464.501  | 4510.968  | NM_016558 | 12159.384 | 7708.618  | NM_014338 | 20258.141 | 47554.34  |
| BC003406  | 860.626   | 904.796   | NM_007145 | 12373.142 | 7887.774  | NM_001495 | 1269.679  | 3385.724  |
| AL137672  | 1210.702  | 941.532   | AL133112  | 2296.97   | 1475.986  | NM_002288 | 487.76    | 2217.862  |
| X64177    | 1838.471  | 895.115   | NM_002199 | 13719.849 | 9432.666  | NM_004416 | 15818.987 | 22782.033 |
| NM_015994 | 5674.541  | 4950.639  | BC005219  | 9307.628  | 6277.865  | NM_000628 | 2497.703  | 5457.9    |
| NM_014065 | 1794.29   | 1900.977  | NM_004268 | 3081.336  | 2060.258  | AB005216  | 499.1     | 1640.647  |
| NM_001695 | 9958.592  | 8091.101  | NM_001546 | 1004.729  | 544.973   | NM_000325 | 7846.143  | 14682.424 |
| NM_002248 | 3799.318  | 4822.737  | NM_000950 | 67078.664 | 66558.648 | AF015041  | 4594.758  | 8338.155  |
| NM_012281 | 1249.556  | 908.687   | NM_005139 | 10705.964 | 12301.701 | NM_002363 | 711.435   | 2943.713  |
| AK025772  | 3811.633  | 4143.433  | NM_001275 | 64695.656 | 67265.922 | AK000184  | 1678.723  | 4520.616  |
| NM_005509 | 2276.306  | 2692.958  | NM_000322 | 55697.859 | 52891.371 | NM_006986 | 5995.477  | 10444.621 |
| AL137698  | 474.96    | 405.831   | L10139    | 16831.023 | 17299.824 | AF272043  | 2498.05   | 5854.885  |
| NM_000262 | 2625.095  | 1589.852  | NM_000039 | 63563.898 | 58214.133 | NM_002587 | 18476.205 | 36171.758 |
| NM_017831 | 1702.654  | 1463.042  | NM_020470 | 35616.598 | 37501.582 | NM_004669 | 2704.173  | 5830.745  |
| AK024393  | 790.943   | 575.365   | NM_006574 | 1777.265  | 2215.223  | NM_007028 | 8360.154  | 13617.633 |
| AK022537  | 8897.752  | 7162.684  | AA478950  | 11187.707 | 13678.82  | NM_015865 | 549.463   | 1842.619  |
| AF116632  | 382.818   | 349.632   | BF942101  | 18192.783 | 28252.611 | NM_003055 | 10737.398 | 20812.498 |
| AF064597  | 1710.9    | 1398.086  | BI825012  | 61815.57  | 66539.719 | NM_002414 | 14688.421 | 37985.941 |



|           |           |           |           |           |           |           |           |           |
|-----------|-----------|-----------|-----------|-----------|-----------|-----------|-----------|-----------|
| NM_00634E | 4214.723  | 2568.687  | M21574    | 3930.314  | 6559.842  | NM_00035E | 501.542   | 2577.017  |
| NM_00687E | 20839.73  | 17378.885 | BM051302  | 5040.689  | 8116.022  | AL133580  | 101.008   | 1630.441  |
| AL050040  | 1071.071  | 1313.302  | BE314182  | 29799.08  | 38895.078 | NM_01466E | 3207.558  | 8999.585  |
| NM_00655E | 18685.598 | 20443.539 | AI808029  | 2407.952  | 3261.397  | NM_005451 | 1606.958  | 4771.806  |
| AL133066  | 2752.455  | 2638.623  | AI971217  | 1173.544  | 992.508   | NM_00717Z | 2524.837  | 6102.784  |
| AF264717  | 3170.387  | 3170.93   | X03225    | 8038.457  | 6688.314  | NM_00615Z | 36375.484 | 60474.117 |
| NM_01226C | 8004.197  | 8667.603  | AK097395  | 52630.496 | 46095.852 | NM_01333Z | 32552.787 | 53280.945 |
| CY3Cy5    | 11126.893 | 505.53    | M12783    | 7476.529  | 4317.514  | NM_00233Z | 8382.822  | 15133.641 |
| NM_00506C | 1747.983  | 3188.72   | AK091535  | 2545.548  | 2031.783  | NM_00340C | 10236.021 | 18504.422 |
| NM_005437 | 12807.003 | 20590.178 | AF085357  | 10607.628 | 7231.365  | NM_00670E | 9504.86   | 19466.357 |
| NM_01831E | 3841.149  | 7051.465  | AK092768  | 990.111   | 576.868   | NM_01443E | 2015.763  | 4683.567  |
| AL359559  | 767.909   | 1568.475  | AF296673  | 13177.612 | 7136.276  | NM_01226E | 3941.931  | 9467.188  |
| AK024063  | 593.565   | 972.928   | NM_004079 | 33364.152 | 36777.762 | NM_01896Z | 2341.037  | 4909.989  |
| AK021714  | 1952.177  | 2119.237  | NM_00299E | 2006.161  | 2077.189  | AF125100  | 2360.274  | 5196.438  |
| NM_020314 | 4422.334  | 5230.607  | NM_00038Z | 6216.056  | 4988.842  | NM_00717E | 889.339   | 4219.906  |
| AK022972  | 5494.87   | 5793.283  | NM_00463Z | 5172.877  | 5408.969  | NM_00272Z | 326.958   | 1895.298  |
| AK025996  | 2727.884  | 2179.692  | X01394    | 62064.523 | 60488.105 | AF317058  | 317.004   | 723.122   |
| NM_00571E | 10905.275 | 11037.784 | NM_000041 | 62995.922 | 56544.969 | M22538    | 15563.124 | 11356.491 |
| AK026992  | 3710.765  | 5495.943  | NM_002984 | 17529.77  | 17698.783 | NM_00602E | 446.481   | 869.638   |
| X81895    | 961.913   | 903.574   | AB037752  | 41131.738 | 49597.477 | NM_01835E | 2424.259  | 2236.399  |
| AL137343  | 1368.755  | 1496.965  | AF317425  | 7615.85   | 9906.011  | AF131781  | 5583.787  | 3420.788  |
| NM_00506C | 2784.51   | 2528.849  | NM_01800Z | 7700.573  | 17129.146 | NM_00651E | 12672.027 | 4664.028  |
| NM_005437 | 13604.295 | 15293.296 | AK024821  | 9303.278  | 12088.422 | AK022417  | 3827.458  | 8199.283  |
| SR5       | 5967.616  | 6374.476  | AB002340  | 23918.75  | 32232.822 | U50534    | 1746.146  | 4618.976  |
| SR7       | 6901.898  | 55850.164 | NM_000224 | 19513.576 | 29742.32  | NM_014824 | 3232.656  | 6364.69   |
| SR9       | 22423.086 | 5802.011  | NM_01432E | 5498.919  | 5947.33   | NM_014504 | 419.395   | 1619.734  |
| CY3Cy5    | 8827.835  | 342.498   | NM_006414 | 14524.925 | 14853.809 | NM_01440E | 8793.525  | 8222.738  |
| M25785    | 1547.99   | 2729.429  | NM_01432Z | 26415.838 | 29261.793 | NM_014741 | 4415.48   | 4503.365  |
| M32443    | 1989.335  | 3297.874  | NM_00412Z | 11361.535 | 9885.848  | AF212247  | 3649.685  | 3010.696  |
| D16908    | 1300.739  | 2485.338  | NM_00292E | 42009.727 | 44640.613 | AF161407  | 30272.9   | 12951.357 |
| D16477    | 1178.726  | 1713.145  | NM_00016C | 4884.338  | 3170.477  | NM_01473E | 3120.479  | 1379.243  |
| AK024759  | 692.371   | 541.89    | NM_003301 | 3157.199  | 2078.521  | NM_01640E | 3015.065  | 1481.429  |
| AK025078  | 710.479   | 599.426   | NM_00095E | 5379.345  | 3829.9    | NM_01808C | 8633.792  | 3371.219  |
| AK023754  | 1548.184  | 1451.012  | U27768    | 9705.246  | 5941.802  | NM_01445Z | 5801.462  | 2730.158  |
| AK021689  | 901.869   | 809.204   | NM_00174Z | 1123.289  | 488.096   | NM_00571Z | 1900.365  | 554.447   |
| AK024737  | 4092.498  | 3499.917  | U66582    | 26568.752 | 22512.283 | AK023553  | 5741.374  | 1951.576  |
| AB007890  | 21381.121 | 19065.52  | NM_018479 | 18102.266 | 23134.398 | NM_01673Z | 682.493   | 315.962   |
| AF070591  | 2352.779  | 2187.691  | NM_01436Z | 2877.775  | 3157.976  | AF181994  | 2334.346  | 1161.315  |
| NM_020411 | 1100.412  | 983.045   | NM_01830E | 8426.917  | 7209.162  | CY3Cy5    | 5545.85   | 123.74    |
| AB020633  | 2564.496  | 2516.789  | NM_00183Z | 60844.77  | 57066.891 | NM_058197 | 3480.219  | 1389.7    |
| AK025445  | 16746.172 | 16161.456 | NM_017774 | 35673.195 | 36345.82  | AF086461  | 640.828   | 168.462   |
| AL357200  | 2778.554  | 2729.888  | AB037716  | 3809.172  | 3547.741  | AL833296  | 5179.266  | 5360.965  |
| NM_017727 | 13166.88  | 13341.41  | NM_004827 | 767.189   | 843.637   | AL110240  | 5807.145  | 8935.215  |
| AK025051  | 2107.769  | 4149.434  | NM_00192E | 460.527   | 677.46    | AK025695  | 2535.583  | 4486.979  |
| AK024553  | 33169.77  | 42596.785 | NM_016297 | 6710.496  | 8971.781  | AK025442  | 2291.154  | 4310.275  |
| AK024930  | 547.218   | 751.266   | NM_00175Z | 10886.189 | 14730.062 | AL050041  | 869.241   | 1237.902  |
| AF086168  | 1258.825  | 1320.966  | BC003406  | 997.537   | 1565.694  | NM_058197 | 3555.19   | 4397.581  |
| AF007132  | 683.503   | 948.293   | AL137672  | 1453.398  | 1488.942  | SR4       | 12246.405 | 12121.737 |
| AK026711  | 739.732   | 937.372   | NM_002241 | 975.951   | 1154.864  | SR6       | 2387.936  | 2871.03   |
| NM_017864 | 10643.054 | 11899.183 | NM_012281 | 21231.072 | 19715.342 | SR8       | 7236.887  | 15885.482 |
| NM_00486E | 5011.748  | 4561.768  | NM_00550E | 2382.344  | 2406.913  | SR10      | 21483.771 | 2923.663  |
| AF136408  | 1038.946  | 866.287   | AF091034  | 6570.816  | 6145.17   | CY3Cy5    | 2899.877  | 80.322    |
| AL110203  | 1010.184  | 1327.29   | NM_005301 | 64140.711 | 56283.797 | AK023525  | 4594.143  | 2680.997  |

|           |           |           |           |           |           |           |           |           |
|-----------|-----------|-----------|-----------|-----------|-----------|-----------|-----------|-----------|
| AJ011595  | 588.457   | 901.285   | NM_004167 | 781.501   | 647.943   | AF085829  | 1774.426  | 2434.502  |
| X93501    | 505.966   | 833.454   | NM_016653 | 3502.787  | 2577.93   | AF075029  | 509.112   | 1858.186  |
| AJ011602  | 1401.567  | 1535.643  | AB035124  | 17072.273 | 10394.818 | AK021903  | 5321.274  | 9579.239  |
| AJ002787  | 10941.004 | 10405.558 | AF060170  | 2564.309  | 2339.61   | AL390143  | 5191.168  | 8520.872  |
| Z70764    | 3430.418  | 3356.073  | NM_016602 | 1678.01   | 1300.8    | AL162075  | 1527.576  | 3370.791  |
| Z83948    | 2590.382  | 2282.625  | NM_004409 | 11353.104 | 8684.658  | AF147384  | 544.036   | 913.414   |
| AF086214  | 1276.161  | 3062.423  | AK023397  | 3259.847  | 2448.629  | AK021595  | 1145.697  | 1790.508  |
| AK026860  | 5322.66   | 12337.996 | NM_001725 | 9321.211  | 6215.657  | NM_018410 | 2493.82   | 2680.312  |
| AK024211  | 601.876   | 1035.037  | NM_015957 | 1025.278  | 1752.003  | AL110173  | 1341.519  | 533.249   |
| NM_014895 | 1527.311  | 2452.541  | NM_000262 | 4960.49   | 6263.911  | AK024106  | 784.427   | 611.273   |
| AK023435  | 849.441   | 977.237   | NM_017831 | 4118.053  | 3613.025  | AK026297  | 3260.713  | 1070.034  |
| AK026808  | 531.219   | 612.495   | AK024393  | 1075.099  | 1261.505  | AF085933  | 1174.479  | 1551.657  |
| AK022309  | 2748.654  | 2849.011  | AK022537  | 11619.749 | 13989.867 | AF147431  | 1110.179  | 2446.569  |
| AK000063  | 1912.921  | 2029.722  | AF116632  | 625.124   | 908.065   | AK026422  | 8395.015  | 13839.079 |
| AK000792  | 1019.174  | 1128.258  | AF064597  | 1960.675  | 1962.898  | AF085938  | 626.368   | 1485.899  |
| AK000949  | 4064.002  | 3915.273  | NM_006345 | 5347.404  | 5389.285  | AK022264  | 1263.847  | 1700.86   |
| AK027068  | 2348.182  | 2545.021  | NM_006875 | 23783.461 | 28711.861 | AL137331  | 1071.591  | 2067.285  |
| AK000165  | 1291.955  | 1049.358  | D87119    | 30495.721 | 28188.893 | AL162040  | 6981.711  | 9120.588  |
| AK000974  | 6178.802  | 6113.075  | AB037769  | 635.189   | 674.13    | AL442084  | 927.552   | 1433.487  |
| NM_006233 | 17184.963 | 26715.607 | AL050040  | 1182.225  | 1084.285  | AL137371  | 9762.145  | 12796.877 |
| AK021889  | 1103.363  | 2468.863  | NM_006556 | 21633.58  | 18441.166 | AL137596  | 2661.335  | 3348.418  |
| AK000992  | 2184.33   | 3706.903  | AL133066  | 1140.204  | 764.138   | AL353942  | 16438.168 | 16503.188 |
| L23544    | 23797.715 | 34666.426 | AF264717  | 3116.857  | 2474.941  | Z38010    | 7800.02   | 6409.756  |
| NM_019020 | 4039.973  | 4795.87   | NM_012260 | 10303.254 | 8205.533  | AK025799  | 671.147   | 221.42    |
| AF119892  | 708.784   | 855.397   | NM_001141 | 1047.865  | 821.151   | AL110206  | 2554.276  | 937.487   |
| NM_016474 | 1631.318  | 1730.106  | NM_000018 | 14606.611 | 13255.939 | AK024292  | 2081.154  | 589.471   |
| AF143879  | 10050.39  | 9825.246  | AB028992  | 880.985   | 735.013   | NM_014157 | 931.541   | 822.698   |
| AK024621  | 29330.762 | 28984.936 | NM_001275 | 62709.453 | 72397.82  | AF090933  | 1254.786  | 2409.511  |
| AL157449  | 42485.301 | 40722.766 | NM_000322 | 50848.391 | 56913.125 | AF111851  | 4763.171  | 9292.096  |
| AL117582  | 3029.504  | 3195.783  | L10139    | 12921.979 | 18546.213 | AF152529  | 582.515   | 1019.069  |
| AK025525  | 1859.988  | 2047.393  | NM_000039 | 63703.598 | 59885.574 | AL360200  | 477.256   | 1258.485  |
| L09095    | 26799.268 | 30135.291 | NM_020470 | 31403.518 | 35905.121 | AK021992  | 1070.339  | 1534.94   |
| NM_018233 | 40547.613 | 39874.008 | NM_006574 | 1589.246  | 1608.931  | AK022102  | 633.335   | 1001.073  |
| AV740891  | 4480.41   | 4709.852  | AA478950  | 10301.143 | 11378.45  | AK022235  | 873.06    | 1155.241  |
| AF143329  | 930.019   | 1002.71   | BF942101  | 14722.755 | 15406.962 | AK022378  | 2610.079  | 3178.034  |
| AF090916  | 1283.102  | 1393.085  | BI825012  | 62329.168 | 59133.52  | AK022274  | 1352.514  | 1508.667  |
| AL390183  | 931.992   | 930.191   | M21574    | 2675.648  | 2539.948  | NM_020224 | 7864.552  | 2358.585  |
| Y13897    | 1393.527  | 1891.443  | BM051302  | 2363.906  | 2124.541  | BF218888  | 747.224   | 137.47    |
| AK001857  | 1943.158  | 2320.448  | BE314182  | 27864.379 | 26898.186 | AK021770  | 926.325   | 1797.386  |
| AF067801  | 713.65    | 1210.21   | AI808029  | 2512.543  | 2029.271  | AK027248  | 2006.597  | 3605.087  |
| AL133577  | 3749.364  | 5306.442  | AI971217  | 1417.052  | 1297.917  | AK022804  | 12476.618 | 18208.668 |
| AF279773  | 537.647   | 649.895   | X03225    | 5977      | 5693.178  | AF009263  | 1237.792  | 2147.936  |
| AK025378  | 6008.848  | 5480.776  | AK097395  | 33628.867 | 32487.094 | AF009283  | 1087.84   | 1395.318  |
| NM_000479 | 6265.757  | 5702.309  | M12783    | 5399.933  | 3926.856  | AF086329  | 1981.168  | 2954.504  |
| AF038199  | 3191.168  | 3918.732  | AK091535  | 2974.225  | 2741.149  | U92989    | 5103.92   | 1725.748  |
| AF086035  | 15076.815 | 18141.521 | AF085357  | 8558.256  | 6730.016  | AF075102  | 2411.702  | 1075.707  |
| AK022159  | 9842.314  | 10336.094 | NM_003841 | 20047.018 | 17590.994 | NM_018463 | 26144.154 | 8493.482  |
| AJ012491  | 800.281   | 672.859   | AF296673  | 7961.192  | 5542.226  | X74956    | 45723.539 | 18570.986 |
| AF007136  | 747.364   | 778.892   | AL137698  | 630.424   | 625.022   | AL137487  | 2046.906  | 571.645   |
| U25750    | 16257.306 | 15753.201 | NM_000383 | 4736.049  | 7736.511  | AK023800  | 1369.749  | 277.844   |
| AK023691  | 13804.76  | 15255.113 | NM_004633 | 3959.165  | 6119.432  | AK024120  | 2939.556  | 2372      |
| AK023502  | 960.172   | 1017.467  | X01394    | 57573.734 | 51860.5   | U50526    | 1057.304  | 1219.827  |
| AF014456  | 565.862   | 775.763   | NM_000041 | 59221.262 | 59592.418 | AF056455  | 8330.003  | 15857.2   |

|           |           |           |           |           |           |           |           |           |
|-----------|-----------|-----------|-----------|-----------|-----------|-----------|-----------|-----------|
| AK026744  | 1622.552  | 1722.703  | NM_002984 | 15552.559 | 16074.403 | NM_01851C | 1016.833  | 1780.307  |
| AK002105  | 675.648   | 572.707   | AB037752  | 35672.082 | 43899.516 | U50537    | 440.36    | 1203.86   |
| NM_005234 | 14501.153 | 15850.549 | AF317425  | 4963.39   | 6911.361  | AK024988  | 427.503   | 1223.137  |
| BC023536  | 1458.366  | 1257.118  | NM_018002 | 6699.628  | 9915.846  | AF026943  | 2974.957  | 5516.202  |
| NM_001803 | 29156.188 | 27238.918 | AK024821  | 9225.568  | 10398.681 | L77582    | 1279.462  | 2610.313  |
| NM_012297 | 13404.906 | 14116.243 | AB002340  | 16302.172 | 16320.134 | NM_02044E | 1013.688  | 1330.786  |
| AB007925  | 45945.836 | 52521.785 | NM_000224 | 16168.414 | 17233.656 | NM_00541E | 1865.482  | 2825.331  |
| NM_01818C | 882.016   | 967.482   | NM_01432E | 6325.826  | 5730.448  | NM_00347E | 14325.502 | 12691.406 |
| NM_000361 | 18003.885 | 26594.951 | NM_006414 | 10868.204 | 11720.928 | NM_00677E | 4704.377  | 1431.851  |
| NM_00247E | 45980.559 | 53152.859 | NM_01432E | 23041.084 | 26235.84  | AK024439  | 20385.93  | 6188.305  |
| NM_00383E | 12458.973 | 12682.881 | NM_00412E | 5306.998  | 5286.794  | X89676    | 2672.308  | 782.514   |
| NM_017987 | 1738.63   | 1813.232  | NM_00292E | 28716.344 | 33338.398 | NM_012444 | 899.022   | 371.11    |
| NM_01820E | 1084.848  | 1135.229  | NM_00016C | 5254.095  | 4632.412  | NM_01748E | 6517.937  | 2003.738  |
| NM_014244 | 760.386   | 819.333   | NM_003301 | 2042.804  | 1793.659  | AY009400  | 8773.898  | 1511.04   |
| NM_00091C | 3619.474  | 4052.088  | NM_00095E | 3615.099  | 2609.598  | NM_00506E | 4210.918  | 819.211   |
| AL117560  | 36139.531 | 31258.52  | U27768    | 6146.848  | 3839.236  | AF086401  | 4139.328  | 2877.066  |
| M24749    | 10718.444 | 12117.057 | NM_00174E | 262.71    | 638.172   | L23869    | 2077.033  | 2019.402  |
| AF009317  | 9285.373  | 8382.615  | U66582    | 20364.313 | 19384.666 | Z21853    | 2704.176  | 4688.783  |
| AK026583  | 11617.533 | 13202.654 | NM_00095C | 58568.973 | 51676.406 | U80770    | 1075.662  | 1566.23   |
| AF218031  | 12536.271 | 15211.297 | NM_00513E | 8501.073  | 7518.643  | AB075846  | 781.943   | 1117.378  |
| AF210650  | 5955.463  | 5973.562  | NM_01830E | 7348.688  | 8649.364  | NM_01834E | 1715.1    | 2728.127  |
| NM_01835E | 4727.62   | 4894.341  | NM_00183E | 60085.91  | 58537.996 | BC020260  | 2466.359  | 3587.197  |
| AF085896  | 1726.885  | 1540.049  | NM_017774 | 33133.641 | 31235.094 | D17156    | 8588.279  | 14146.213 |
| X74613    | 65572.023 | 64668.969 | AB037716  | 3726.708  | 4138.432  | L04461    | 749.526   | 1236.896  |
| AF075080  | 22546.596 | 19910.938 | NM_00192E | 434.047   | 1079.06   | AK026938  | 13716.492 | 17042.508 |
| NM_00461E | 1268.563  | 1135.112  | NM_016297 | 6529.599  | 12413.342 | AK024373  | 9250.883  | 11875.731 |
| NM_00436C | 737.321   | 862.448   | NM_00175E | 10426.641 | 17643.959 | AK022343  | 5236.659  | 5911.607  |
| NM_003821 | 13672.956 | 24002.912 | BC003406  | 1397.512  | 2078.635  | AK026400  | 1473.349  | 1304.975  |
| NM_01769E | 4910.667  | 6557.34   | AL137672  | 1996.906  | 2281.727  | NM_00414E | 6478.094  | 2148.365  |
| NM_00397E | 1244.318  | 1317.288  | NM_002241 | 1753.027  | 1768.421  | X03168    | 3818.7    | 1068.902  |
| NM_004834 | 14870.153 | 17449.873 | NM_012281 | 15409.705 | 17751.24  | NM_00516E | 9095.819  | 3234.347  |
| NM_01817E | 867.238   | 774.924   | NM_00550E | 2810.333  | 2976.469  | NM_017801 | 9083.868  | 3043.346  |
| NM_00081E | 4505.113  | 4149.51   | AF091034  | 5667.413  | 6679.268  | NM_00734E | 2952.711  | 1033.979  |
| AK024747  | 16874.734 | 17889.607 | NM_005301 | 50046.898 | 53017.625 | U65473    | 6788.849  | 2008.348  |
| NM_00639C | 3796.464  | 4530.307  | NM_004167 | 1108.863  | 1331.578  | D63481    | 15056.71  | 3978.023  |
| NM_00650E | 1642.733  | 1677.775  | NM_01665E | 3493.199  | 3052.85   | AL157424  | 2289.145  | 625.765   |
| NM_00323E | 25759.275 | 21124.75  | AB035124  | 17000.512 | 13525.119 | NM_00267E | 659.747   | 723.078   |
| AB042562  | 1864.607  | 1316.945  | AF060170  | 2834.273  | 2343.231  | NM_00387E | 8416.315  | 9505.117  |
| NM_01600E | 8877.581  | 8827.095  | NM_01660E | 1920.632  | 1484.468  | AJ276310  | 959.517   | 1613.906  |
| NM_00237E | 6397.575  | 6483.095  | NM_00440E | 10841.545 | 10463.629 | NM_01229E | 11304.493 | 13476.258 |
| NM_001364 | 1163.24   | 1002.956  | AK023397  | 2990.316  | 3127.63   | NM_01591C | 955.216   | 1200.235  |
| NM_017431 | 978.295   | 795.643   | NM_00172E | 5767.041  | 6550.873  | NM_00022E | 260.769   | 899.179   |
| NM_006097 | 6104.229  | 5907.517  | NM_00407E | 25663.891 | 16943.395 | AL133666  | 3281.464  | 4204.792  |
| NM_006113 | 1913.834  | 1809.103  | NM_00026E | 5038.917  | 6252.307  | NM_00066E | 1791.142  | 2756.053  |
| NM_01531E | 3641.358  | 3554.489  | NM_017831 | 3805.704  | 4081.81   | NM_00471C | 7179.62   | 8678.339  |
| AK022287  | 12249.946 | 11462.444 | AK024393  | 1525.705  | 1807.376  | NM_00439E | 19052.334 | 20343.541 |
| NM_015897 | 2497.7    | 2458.563  | AK022537  | 11448.042 | 20526.611 | NM_01799E | 3263.046  | 3593.071  |
| AF177473  | 48055.707 | 50535.559 | AF116632  | 1063.925  | 1315.211  | NM_01598E | 49850.484 | 45244.41  |
| NM_00054E | 37340.496 | 42955.715 | AF064597  | 1843.455  | 2586.945  | NM_00104E | 5940.02   | 5379.112  |
| AB023223  | 1163.297  | 1367.505  | NM_00634E | 5107.889  | 5059.251  | AF113685  | 2017.205  | 540.454   |
| AB018257  | 7933.752  | 10325.373 | NM_00687E | 20244.109 | 24124.67  | NM_00547C | 11870.896 | 4002.08   |
| NM_00270E | 28822.73  | 37478.359 | D87119    | 10682.371 | 12378.68  | AF142570  | 2208.165  | 630.433   |
| AK001059  | 3862.365  | 3820.457  | AL133066  | 2472.015  | 2166.167  | NM_00422E | 18709.631 | 5656.411  |

|           |           |           |           |           |           |           |           |           |
|-----------|-----------|-----------|-----------|-----------|-----------|-----------|-----------|-----------|
| NM_007282 | 8685.637  | 7517.152  | NM_002843 | 1274.135  | 653.587   | NM_002873 | 5814.909  | 1298.851  |
| NM_017770 | 890.007   | 850.975   | AF264717  | 4806.638  | 3278.875  | NM_015571 | 21706.912 | 5450.394  |
| NM_017610 | 2207.14   | 1914.359  | NM_012260 | 12555.884 | 8483.505  | NM_004701 | 8104.483  | 1065.983  |
| AL122070  | 909.599   | 847.235   | NM_001141 | 2671.946  | 2413.483  | AK025554  | 2482.673  | 508.551   |
| AK025133  | 36663.422 | 33665.129 | NM_000018 | 14500.563 | 16526.447 | AK021791  | 7526.835  | 6322.685  |
| AB020704  | 1765.396  | 1431.309  | AB028992  | 1117.594  | 1217.944  | NM_005019 | 677.252   | 758.101   |
| NM_020197 | 986.117   | 1225.385  | NM_018479 | 16082.593 | 13706.526 | NM_004052 | 3135.745  | 4739.739  |
| NM_004087 | 5889.975  | 7553.927  | NM_014362 | 2320.189  | 1918.429  | NM_004394 | 11238.282 | 13134.935 |
| NM_018700 | 1255.295  | 1215.097  | L10139    | 10958.389 | 13454.146 | NM_005727 | 42572.355 | 52567.563 |
| NM_000119 | 9549.472  | 9962.397  | NM_000039 | 60279.172 | 61687.504 | AK027242  | 2009.051  | 3082.243  |
| NM_001065 | 3498.736  | 3726.443  | NM_020470 | 29846.854 | 32123.893 | NM_001279 | 23022.5   | 34304.844 |
| AK027100  | 1108.865  | 1065.315  | NM_006574 | 1781.621  | 1763.233  | NM_005010 | 3894.122  | 3428.566  |
| AY010111  | 660.434   | 505.679   | AA478950  | 10267.142 | 8745.2    | NM_019055 | 5863.078  | 6187.561  |
| NM_016950 | 682.094   | 665.415   | BF942101  | 17602.828 | 15976.919 | NM_020199 | 1661.736  | 1208.745  |
| NM_003622 | 6609.4    | 4759.979  | BI825012  | 60778.109 | 62058.469 | NM_017586 | 18376.816 | 10145.86  |
| NM_007115 | 4230.926  | 3592.176  | M21574    | 3110.023  | 4400.427  | NM_005941 | 934.887   | 315.755   |
| AK021645  | 1134.905  | 1130.424  | BM051302  | 4687.088  | 5617.517  | AF201380  | 3352.63   | 1879.717  |
| NM_013339 | 3560.359  | 4436.517  | BE314182  | 29664.053 | 41121.563 | NM_012392 | 4057.209  | 1191.459  |
| NM_001491 | 5299.14   | 6592.317  | AI808029  | 2254.184  | 3410.226  | NM_003878 | 11110.408 | 3398.022  |
| NM_002642 | 833.548   | 1177.446  | AI971217  | 816.809   | 900.432   | NM_004832 | 793.961   | 376.984   |
| AK026541  | 4418.775  | 5713.378  | AF085357  | 9985.068  | 9567.675  | NM_005957 | 1112.738  | 334.603   |
| NM_005899 | 29819.012 | 32736.742 | AK092768  | 2276.646  | 1862.395  | NM_007101 | 2585.736  | 2206.372  |
| D42055    | 11166.581 | 14494.2   | NM_003841 | 31071.973 | 23025.324 | AB033062  | 2675.065  | 3556.179  |
| AL137349  | 5228.059  | 5283.762  | AF296673  | 10338.519 | 5841.792  | NM_016437 | 35773.289 | 46100.004 |
| NM_003339 | 1725.501  | 1828.248  | AB032956  | 1651.055  | 1148.517  | NM_002720 | 10057.366 | 11175.557 |
| NM_004562 | 669.296   | 709.745   | AL137698  | 2026.084  | 1169.388  | AK024716  | 36746.367 | 50729.246 |
| NM_016476 | 50661.57  | 49039.047 | NM_015957 | 1329.631  | 788.439   | X67155    | 2290.293  | 2547.654  |
| NM_015902 | 6795.954  | 3835.453  | AK024821  | 9657.704  | 16582.604 | NM_020380 | 3911.719  | 5510.763  |
| NM_020155 | 9097.342  | 8590.071  | AB002340  | 16568.406 | 25242.566 | AL137519  | 574.018   | 891.735   |
| BE874471  | 4834.765  | 4809.115  | NM_000224 | 19444.217 | 23088.564 | NM_002890 | 56792.898 | 55196.832 |
| NM_006121 | 3983.495  | 3769.069  | NM_014328 | 7279.156  | 8660.704  | NM_001330 | 31275.826 | 36206.93  |
| AK023520  | 9738.683  | 10854.88  | NM_006414 | 14074.071 | 12430.681 | NM_015927 | 632.528   | 819.316   |
| NM_004693 | 912.371   | 1063.601  | NM_014322 | 28023.504 | 26352.602 | NM_004779 | 9525.159  | 8003.739  |
| NM_007211 | 11643.41  | 9943.849  | NM_004122 | 10640.249 | 8892.361  | NM_001913 | 8814.149  | 2678.192  |
| AB011152  | 2436.548  | 2855.632  | NM_002928 | 42283.457 | 54866.723 | AK025594  | 1727.537  | 414.658   |
| NM_014956 | 13186.777 | 13083.485 | NM_000160 | 6281.152  | 11099.146 | AB040931  | 6530.441  | 2497.065  |
| AB014592  | 1348.93   | 1566.48   | NM_003301 | 2564.634  | 6492.528  | NM_003599 | 3173.853  | 1107.619  |
| NM_016952 | 1836.841  | 1738.754  | S73288    | 2022.271  | 1796.476  | NM_015911 | 1937.211  | 758.717   |
| NM_001654 | 6776.242  | 6766.17   | NM_006198 | 5271.178  | 3740.168  | NM_017647 | 5618.23   | 2316.563  |
| U48728    | 562.353   | 454.622   | NM_003812 | 2644.997  | 1803.943  | NM_012091 | 1280.491  | 491.192   |
| NM_005436 | 19979.143 | 20508.254 | NM_000849 | 1447.258  | 776.138   | NM_012321 | 3932.14   | 1983.956  |
| AK024418  | 1848.765  | 2082.398  | NM_004678 | 3570.797  | 2281.716  | D13642    | 5691.496  | 3935.125  |
| NM_003367 | 20379     | 26249.918 | NM_000950 | 59474.137 | 53877.105 | NM_018032 | 6791.913  | 7432.998  |
| NM_005194 | 17696.314 | 23547.744 | NM_005139 | 8722.198  | 6173.78   | NM_003675 | 30488.953 | 33939.406 |
| AB002296  | 5142.196  | 5865.835  | NM_001275 | 62447.719 | 57106.227 | NM_017518 | 4307.922  | 4451.989  |
| NM_014315 | 10493.907 | 10925.065 | NM_000322 | 52659.512 | 41334.699 | NM_004117 | 5665.378  | 4197.96   |
| NM_012087 | 4208.385  | 3612.858  | NM_152747 | 3170.468  | 3534.783  | NM_016594 | 26058.697 | 32003.223 |
| AF165520  | 8040.656  | 7972.954  | NM_017415 | 2756.062  | 3749.7    | NM_030752 | 14027.577 | 16399.113 |
| AK026072  | 2196.896  | 2015.3    | NM_001667 | 60693.016 | 58199.547 | D26068    | 37497.953 | 42792.43  |
| NM_004289 | 2298.36   | 1901.419  | AB046834  | 2389.29   | 3281.092  | NM_018559 | 18718.225 | 20948.514 |
| NM_001521 | 527.334   | 411.844   | AB029033  | 58119.102 | 55483.082 | NM_017593 | 4722.895  | 3725.051  |
| NM_015679 | 8796.457  | 8035.038  | AF091034  | 6775.82   | 5766.331  | NM_004282 | 23363.033 | 21468.234 |
| AK025353  | 38569.824 | 30639.213 | NM_005301 | 61355.617 | 59407.605 | AF188747  | 1652.999  | 1579.358  |

|           |           |           |           |           |           |           |           |           |
|-----------|-----------|-----------|-----------|-----------|-----------|-----------|-----------|-----------|
| AK056896  | 55219.457 | 54723.066 | NM_016653 | 4036.225  | 6255.756  | NM_002773 | 673.014   | 655.635   |
| AK022763  | 46117.68  | 37198.855 | NM_004409 | 8214.683  | 12680.435 | NM_013411 | 3323.535  | 1420.065  |
| NM_000976 | 60396.32  | 65147.676 | AK023397  | 3337.744  | 3107.786  | NM_020200 | 3592.135  | 1615.761  |
| NM_001000 | 60980.219 | 63526.199 | NM_001725 | 4820.999  | 4726.156  | NM_001248 | 976.55    | 573.306   |
| AF288207  | 43010.078 | 47186.102 | NM_000383 | 4867.499  | 3493.88   | NM_000156 | 1080.244  | 596.018   |
| NM_001001 | 60359.105 | 63407.84  | NM_004633 | 4056.542  | 2010.642  | AB037774  | 3141.781  | 2851.494  |
| NM_001774 | 59774.648 | 58191.996 | X01394    | 58800.992 | 48539.418 | NM_005438 | 2386.376  | 1634.133  |
| NM_005023 | 825.508   | 728.067   | NM_000041 | 50380.094 | 40803.875 | AK024361  | 2794.122  | 3450.026  |
| NM_006830 | 58066.152 | 62877.18  | NM_002984 | 13119.445 | 7421.667  | NM_004350 | 12864.881 | 13424.988 |
| AK026414  | 38885.934 | 45706.871 | AB037752  | 17453.793 | 12297.117 | NM_018044 | 10300.263 | 10205.893 |
| D17297    | 2347.853  | 3459.472  | AF317425  | 5647.659  | 2941.338  | NM_004503 | 672.515   | 856.16    |
| NM_004074 | 52390.043 | 58369.418 | NM_018002 | 6897.442  | 5377.829  | NM_001717 | 869.153   | 1083.209  |
| NM_002626 | 54913.172 | 60025.039 | NM_001141 | 3234.886  | 4586.183  | AF274347  | 3009.408  | 4297.785  |
| NM_018436 | 42853.324 | 40035.133 | NM_000018 | 16208.125 | 32019.475 | AK001144  | 305.361   | 920.744   |
| AJ223353  | 14152.688 | 12874.372 | AB028992  | 1431.227  | 2322.989  | NM_018555 | 3091.844  | 2953.817  |
| NM_012241 | 13415.361 | 13315.795 | NM_018479 | 19100.094 | 36849.363 | NM_005122 | 716.672   | 691.218   |
| AF250288  | 890.029   | 1109.341  | NM_014362 | 3301.678  | 2584.945  | AL133055  | 1020.218  | 1222.731  |
| NM_018486 | 3634.713  | 3112.431  | NM_017774 | 33698.031 | 46744.93  | NM_014552 | 3742.264  | 3457.527  |
| AL080201  | 54220.641 | 46077.051 | AB037716  | 4019.749  | 6399.293  | NM_003072 | 17635.063 | 10657.041 |
| NM_015363 | 1827.403  | 1621.977  | NM_016297 | 2349.296  | 3615.058  | L09081    | 22215.064 | 15545.192 |
| NM_001806 | 10465.76  | 11942.796 | NM_001752 | 9650.626  | 9702.752  | NM_000218 | 67746.219 | 69789.203 |
| AB040941  | 8093.173  | 6587.577  | BC003406  | 1894.423  | 1677.459  | NM_016113 | 21727.742 | 21535.236 |
| AL137241  | 1606.016  | 1642.681  | AL137672  | 1040.583  | 957.161   | NM_014222 | 5658.073  | 7000.199  |
| AB037742  | 5065.976  | 4022.885  | X64177    | 1992.892  | 566.034   | L14819    | 1150.612  | 1413.946  |
| AF272375  | 3694.258  | 3194.873  | NM_015994 | 7639.006  | 4269.884  | NM_000505 | 6062.434  | 5855.904  |
| NM_014519 | 6124.777  | 6447.659  | NM_002235 | 1744.997  | 717.235   | AB012701  | 9969.863  | 10174.057 |
| NM_002517 | 3294.094  | 3436.002  | NM_014065 | 2518.464  | 1511.213  | M61156    | 6499.361  | 4730.687  |
| NM_007147 | 56719.785 | 56410.918 | NM_001695 | 10560.766 | 5154.64   | R44005    | 44831.816 | 34228.461 |
| X65463    | 6747.058  | 6035.596  | NM_002248 | 2978.808  | 2230.05   | AI942392  | 6377.811  | 6732.827  |
| NM_002238 | 5148.777  | 5310.296  | NM_012281 | 6268.581  | 2771.138  | M55040    | 1842.85   | 1717.02   |
| NM_004868 | 3614.122  | 5209.396  | AK025772  | 5859.319  | 3517.803  | AW009739  | 2369.843  | 2753.448  |
| NM_004669 | 5818.75   | 7768.656  | NM_005509 | 2331.194  | 1527.681  | BC036805  | 3765.567  | 4362.329  |
| NM_007028 | 16945.908 | 22527.125 | AB032956  | 718.807   | 1220.216  | Z74615    | 58126.793 | 58207.723 |
| AF130728  | 1589.633  | 2124.22   | AL137698  | 1068.909  | 1522.776  | X03884    | 7792.15   | 9068.584  |
| NM_004987 | 885.623   | 1085.06   | NM_015957 | 485.443   | 1068.293  | U36759    | 757.259   | 1204.798  |
| NM_001289 | 39097.75  | 42970.102 | NM_000262 | 4261.231  | 3605.639  | X91625    | 4342.894  | 4648.349  |
| M54894    | 1341.942  | 1337.709  | NM_005485 | 786.006   | 1175.545  | AF090901  | 999.502   | 1030.436  |
| BG752013  | 879.319   | 731.241   | AK024393  | 946.35    | 1338.111  | AF004231  | 917.741   | 1042.69   |
| X07696    | 20147.18  | 15271.896 | AK022537  | 10743.41  | 14169.569 | AF001862  | 7575.117  | 7832.136  |
| AA481015  | 2367.929  | 2026.013  | AF116632  | 1318.325  | 1362.157  | NM_002451 | 7015.199  | 7496.744  |
| AI925826  | 26645.393 | 22395.281 | AF064597  | 2017.413  | 1274.449  | AF119902  | 1196.149  | 1872.872  |
| U04209    | 15048.605 | 9947.747  | NM_006345 | 4491.438  | 2415.301  | NM_020525 | 31393.057 | 44353.031 |
| AI393201  | 22639.629 | 22639.766 | NM_006875 | 10941.161 | 5611.157  | X62468    | 1609.512  | 1715.867  |
| M34664    | 62391.309 | 63692.281 | D87119    | 3954.37   | 2133.31   | NM_003890 | 12800.853 | 17324.822 |
| Z15108    | 7980.696  | 7751.555  | AL050040  | 2266.81   | 891.927   | BF127978  | 4780.139  | 7374.093  |
| M55284    | 1961.72   | 1888.651  | NM_006556 | 20703.203 | 13224.476 | AF110801  | 910.607   | 1373.138  |
| AA001218  | 2457.772  | 2275.325  | AL133066  | 1667.889  | 984.992   | NM_016579 | 52821.133 | 59803.816 |
| AA679391  | 1977.27   | 2195.887  | AF264717  | 4302.233  | 2799.489  | AB018297  | 2901.241  | 3594.648  |
| BG682146  | 8456.343  | 9352.996  | NM_012260 | 10317.029 | 6748.718  | AK022565  | 8789.937  | 11465.495 |
| AA884709  | 1194.151  | 1388.93   | CY3Cy5    | 14416.076 | 669.201   | AK023151  | 5214.523  | 6673.263  |
| NM_004541 | 61895.578 | 51854.668 | NM_005060 | 4021.201  | 5344.342  | AB033076  | 2518.661  | 2295.754  |
| NM_006705 | 8205.1    | 10682.55  | NM_005437 | 14954.014 | 25156.434 | AK022876  | 2886.81   | 2927.835  |
| NM_005582 | 18014.871 | 29773.416 | NM_018319 | 9965.857  | 23032.516 | AF134894  | 39756.359 | 33265.031 |

|           |           |           |           |           |           |           |           |           |
|-----------|-----------|-----------|-----------|-----------|-----------|-----------|-----------|-----------|
| NM_012266 | 9084.448  | 11896.666 | AL359559  | 1602.418  | 4591.487  | NM_00393E | 9770.88   | 8687.12   |
| NM_00455E | 6897.438  | 8215.708  | AY008301  | 1354.825  | 1599.571  | NM_014827 | 11964.119 | 15893.883 |
| X56692    | 34205.961 | 35893.016 | AK024063  | 482.652   | 782.323   | NM_00412E | 6154.542  | 9364.844  |
| NM_01447E | 1075.461  | 1090.864  | AK021714  | 2634.126  | 3144.633  | U87460    | 13371.586 | 15993.919 |
| NM_01427E | 1958.173  | 1511.222  | NM_020314 | 4851.419  | 5047.282  | NM_003617 | 931.792   | 1158.755  |
| NM_00583E | 1413.104  | 1129.465  | AK022972  | 5519.441  | 6525.15   | NM_001841 | 2670.773  | 3092.408  |
| NM_000734 | 12791.469 | 12263.35  | AK025996  | 4887.105  | 5205.931  | NM_002054 | 2832.426  | 4262.39   |
| NM_012331 | 7314.193  | 7006.033  | AF088015  | 650.655   | 730.352   | AF300649  | 7063.488  | 8450.897  |
| NM_006644 | 12102.471 | 8938.72   | NM_00571E | 18231.938 | 19022.871 | NM_00412E | 3404.368  | 4955.768  |
| NM_00658E | 65503.816 | 6844.836  | AK026992  | 4253.418  | 5304.536  | NM_00082E | 1918.772  | 2411.181  |
| NM_00606E | 1636.301  | 1641.584  | X81895    | 1397.637  | 2025.249  | NM_003317 | 4691.128  | 6399.652  |
| NM_01433E | 47125.645 | 43334.078 | AL137343  | 1752.319  | 1963.482  | NM_00113E | 4129.478  | 6214.205  |
| NM_00149E | 2883.803  | 3088.437  | NM_00506C | 2713.243  | 2825.121  | NM_001441 | 3062.804  | 4219.598  |
| NM_00228E | 977.03    | 1091.729  | NM_005437 | 12713.063 | 13292.445 | NM_018324 | 1798.099  | 2400.313  |
| NM_00441E | 26145.051 | 24911.756 | SR9       | 26006.469 | 12766.83  | AF064255  | 60425.469 | 63455.73  |
| NM_00062E | 4495.426  | 5974.725  | CY3Cy5    | 18622.539 | 1209.218  | NM_01636E | 56231.105 | 58383.301 |
| AB005216  | 1434.605  | 1453.884  | M25785    | 1693.037  | 2886.894  | U08853    | 6954.468  | 9331.582  |
| AF015041  | 6342.882  | 6368.803  | M32443    | 6487.239  | 9021.783  | NM_004261 | 33122.84  | 40348.469 |
| NM_00236E | 1378.365  | 1126.126  | M73048    | 3120.972  | 8184.21   | NM_01600E | 1345.349  | 1848.299  |
| X82693    | 33702.984 | 40698.949 | D16477    | 1206.902  | 1688.312  | NM_01624E | 5850.347  | 7501.846  |
| NM_00717E | 14271.459 | 30229.021 | AK024759  | 1290.108  | 1303.275  | AF005632  | 6250.725  | 7706.704  |
| NM_00272E | 7394.958  | 11132.078 | AK025078  | 659.763   | 727.293   | NM_00090E | 3665.009  | 5251.782  |
| AF317058  | 1490.887  | 1463.889  | AK023754  | 2858.135  | 2771.388  | NM_00449E | 20207.395 | 19580.912 |
| AK025965  | 753.921   | 623.96    | AK021689  | 828.718   | 989.408   | AF309489  | 1477.149  | 1176.108  |
| AL137576  | 11812.443 | 11173.277 | AK024737  | 5129.361  | 4800.922  | AF239613  | 1779.928  | 1784.376  |
| NM_00651E | 19305.875 | 16581.549 | AB007890  | 26487.467 | 22170.609 | NM_00028E | 3133.288  | 3952.651  |
| NM_00035E | 4162.786  | 3942.672  | AF070591  | 2387.761  | 2233.396  | NM_00476E | 7646.196  | 9836.229  |
| NM_005451 | 5043.436  | 5857.896  | NM_020411 | 1024.038  | 1171.947  | NM_006641 | 63770.59  | 55801.984 |
| NM_00717E | 5772.946  | 5747.678  | AL357200  | 4546.496  | 9129.332  | NM_000634 | 12586.292 | 13700.566 |
| NM_01333E | 44099.055 | 45773.711 | AK024527  | 634.687   | 1136.49   | NM_01467E | 41499.852 | 47573.195 |
| NM_00233E | 11451.405 | 11694.713 | AK024910  | 605.149   | 2496.847  | AB040969  | 3263.406  | 5232.926  |
| NM_00340C | 16633.797 | 18956.111 | AK024930  | 1649.65   | 2187.939  | NM_003467 | 15905.67  | 20116.195 |
| NM_014824 | 5495.034  | 9038.522  | AK026702  | 1425.354  | 1137.062  | NM_01493E | 3369.486  | 3813.229  |
| NM_014504 | 6736.208  | 10606.574 | AF086168  | 1995.209  | 1540.511  | NM_00394E | 2104.01   | 2567.761  |
| NM_00570E | 519.179   | 671.873   | AF007132  | 691.847   | 1060.957  | NM_01905E | 5481.121  | 7783.016  |
| NM_01440E | 18236.238 | 27073.637 | AK026711  | 1122.351  | 932.049   | NM_00320E | 1093.233  | 1338.779  |
| NM_014741 | 9195.708  | 12887.858 | NM_017864 | 10992.854 | 13539.348 | NM_00028E | 14190.203 | 16363.637 |
| AF212247  | 6189.542  | 6112.801  | NM_00486E | 5173.625  | 4506.246  | NM_00150C | 1403.988  | 1982.039  |
| AF161407  | 26178.566 | 26267.41  | AF136408  | 1241.768  | 1102.557  | NM_00438E | 4084.218  | 5929.373  |
| NM_01473E | 6722.507  | 6504.887  | AL110203  | 1114.902  | 1202.474  | NM_02037E | 779.15    | 1540.149  |
| NM_01640E | 6217.906  | 6629.999  | AJ011595  | 551.256   | 689.182   | AL110127  | 3455.765  | 3944.201  |
| NM_01808C | 11548.661 | 11383.609 | X51527    | 1136.29   | 976.336   | AK001997  | 688.101   | 1076.339  |
| AL050107  | 526.77    | 471.608   | X93501    | 869.819   | 1068.456  | NM_00252E | 5504.1    | 6868.4    |
| NM_00571E | 2591.847  | 2357.9    | AJ011602  | 1270.557  | 1553.309  | D38438    | 8916.897  | 9094.648  |
| AK021951  | 1318.383  | 1424.336  | AJ002787  | 16321.025 | 22540.104 | AV714945  | 1430.892  | 1672.573  |
| AK023553  | 4143.783  | 3783.313  | Z70764    | 3118.097  | 5257.799  | AF007872  | 3209.676  | 2369.85   |
| NM_01460C | 2107.544  | 2002.799  | AL049252  | 575.917   | 947.615   | M30938    | 10536.704 | 6734.681  |
| NM_01673E | 1957.167  | 1912.637  | AF086214  | 529.733   | 1114.248  | NM_01514E | 2232.4    | 1447.9    |
| AF181994  | 5425.797  | 6154.577  | AK026860  | 5702.973  | 10519.713 | NM_004714 | 2603.696  | 3389.903  |
| NM_01896E | 5241.928  | 4543.16   | AK024211  | 2961.659  | 6997.614  | NM_005401 | 587.524   | 851.192   |
| AF125100  | 5311.127  | 5761.024  | AK023435  | 1645.744  | 2120.216  | NM_002497 | 17286.117 | 19108.232 |
| NM_00466E | 5732.68   | 8957.391  | AK026808  | 713.438   | 775.747   | AB025194  | 9685.448  | 12705.148 |
| NM_00702E | 16597.338 | 24893.074 | AK022309  | 2583.944  | 2610.711  | NM_00623E | 1445.376  | 2424.628  |

|           |           |           |           |           |           |           |           |           |
|-----------|-----------|-----------|-----------|-----------|-----------|-----------|-----------|-----------|
| AF130728  | 1637.424  | 2862.192  | AK000063  | 1833.654  | 1670.236  | BC020863  | 1368.331  | 2226.81   |
| NM_001289 | 38987.328 | 56718.785 | AK000792  | 1319.394  | 1415.594  | NM_017897 | 2553.569  | 3266.682  |
| NM_001131 | 57822.246 | 66825.07  | AK000949  | 3945.541  | 3668.148  | NM_004265 | 1336.916  | 1438.408  |
| M54894    | 1135.556  | 1259.289  | AK027068  | 2296.305  | 2593.79   | NM_002572 | 3871.755  | 3967.398  |
| BG752013  | 761.353   | 705.008   | AK000165  | 1061.985  | 1390.867  | NM_016113 | 22633.455 | 29630.494 |
| X07696    | 19107.344 | 14242.135 | AK000974  | 6692.883  | 7384.466  | NM_014222 | 5936.142  | 8387.146  |
| AA481015  | 2097.74   | 1933.801  | NM_006233 | 15595.663 | 14517.164 | L14819    | 821.409   | 1418.199  |
| AI925826  | 25014.236 | 19955.77  | AK021889  | 1020.893  | 1203.569  | NM_000509 | 6148.261  | 5510.252  |
| U04209    | 13951.226 | 7848.596  | AK000992  | 1614.817  | 2997.884  | NM_004542 | 1359.757  | 3201.582  |
| AI393201  | 20521.203 | 17902.893 | L23544    | 17888.738 | 20969.879 | X06182    | 5398.202  | 6122.536  |
| Z15108    | 6510.048  | 6170.076  | NM_019020 | 3301.951  | 3261.146  | BE908993  | 58792.453 | 58447.031 |
| M55284    | 1653.376  | 1533.347  | NM_016474 | 1296.216  | 1524.545  | AB012701  | 10983.542 | 10628.908 |
| AA001218  | 2007.668  | 1916.026  | AF143879  | 10924.42  | 10291.511 | M61156    | 5121.53   | 5727.5    |
| AA679391  | 1733.792  | 1719.858  | AK024621  | 25332.928 | 26244.701 | R44005    | 38150.457 | 38414.223 |
| BG682146  | 7406.619  | 7069.977  | AL157449  | 40456.84  | 40017.461 | AI942392  | 5911.835  | 4710.647  |
| AA884709  | 1182.728  | 1262.831  | AL117582  | 2721.876  | 2325.186  | M55040    | 1782.228  | 1171.646  |
| AK022417  | 6317.396  | 5301.782  | AK025525  | 2495.749  | 2376.575  | AW009739  | 2857.083  | 1575.189  |
| U50534    | 4430.298  | 4266.01   | NM_018166 | 511.231   | 560.276   | BC036805  | 4244.022  | 4705.198  |
| NM_005582 | 17288.137 | 24474.984 | L09095    | 28599.199 | 35750.41  | Z74615    | 59975.457 | 56552.973 |
| NM_012266 | 9284.68   | 21737.795 | NM_018233 | 39440.664 | 40416.137 | X03884    | 10334.458 | 10253.874 |
| NM_004559 | 7791.933  | 12506.356 | AV740891  | 4781.369  | 4978.636  | U36759    | 949.118   | 1309.332  |
| X56692    | 33499.23  | 40519.102 | AF090916  | 1798.79   | 2280.774  | X91625    | 2452.754  | 3195.075  |
| NM_014476 | 850.739   | 853.109   | AL390183  | 1104.911  | 1306.843  | AF090901  | 896.526   | 1214.576  |
| NM_014278 | 1086.555  | 953       | Y13897    | 1531.512  | 1434.508  | AF004231  | 1902.222  | 2674.616  |
| NM_005838 | 1183.168  | 919.496   | AK001857  | 1842.008  | 2070.835  | AF001862  | 9075.703  | 9878.991  |
| NM_000734 | 11092.617 | 9787.536  | AF067801  | 677.623   | 1064.041  | NM_016044 | 2501.436  | 2309.113  |
| NM_012331 | 7034.576  | 6006.509  | AL133577  | 4319.882  | 3298.138  | NM_000520 | 1621.811  | 630.571   |
| NM_006644 | 12681.341 | 9427.887  | AF279773  | 694.884   | 794.352   | X62468    | 1786.264  | 1753.748  |
| NM_006583 | 57460.621 | 5997.098  | AK025378  | 15063.237 | 11724.849 | NM_003890 | 12899.59  | 15599.205 |
| NM_006065 | 1320.629  | 1578.687  | NM_000479 | 5350.608  | 3915.386  | BF127978  | 7006.462  | 8695.094  |
| NM_014339 | 42455.125 | 37975.797 | AF038199  | 3132.896  | 7642.441  | AF110801  | 957.263   | 1311.891  |
| NM_001495 | 2840.6    | 2271.923  | AK022159  | 13113.963 | 17121.27  | NM_016579 | 60418.871 | 61500.652 |
| NM_002288 | 945.108   | 823.163   | D16905    | 1021.273  | 932.553   | AB018297  | 2883.964  | 3836.593  |
| NM_004416 | 25454.762 | 24111.816 | AJ012491  | 828.549   | 611.051   | AK022565  | 9920.573  | 11940.243 |
| NM_000628 | 4370.79   | 5012.593  | AF007136  | 1915.195  | 1360.423  | AK023151  | 5869.701  | 6822.647  |
| AB005216  | 1438.166  | 1370.024  | U25750    | 17183.941 | 16067.833 | AB033076  | 2407.51   | 2215.333  |
| AF015041  | 6028.574  | 5772.13   | AK023691  | 14491.883 | 17126.658 | AK022876  | 2567.789  | 2862.627  |
| NM_002363 | 1194.771  | 1135.562  | AK023502  | 1564.882  | 1553.025  | AF134894  | 42886.594 | 45458.078 |
| NM_002238 | 6249.574  | 5178.945  | AF014456  | 755.579   | 1050.368  | NM_003938 | 10051.362 | 7009.44   |
| NM_004868 | 3597.32   | 3314.866  | AK026744  | 1791.57   | 1312.709  | NM_014827 | 14540.577 | 11596.806 |
| NM_007176 | 12531.644 | 13911.78  | NM_005234 | 13839.858 | 14599.408 | NM_004126 | 6638.409  | 4645.819  |
| NM_002722 | 3560.357  | 5105.221  | BC023536  | 1683.693  | 1857.011  | U87460    | 14254.87  | 16067.425 |
| NM_000349 | 930.798   | 1065.486  | NM_001803 | 28621.145 | 34469.32  | NM_003617 | 1016.6    | 1244.25   |
| AF317058  | 1195.43   | 1237.732  | NM_012297 | 24752.574 | 29064.307 | NM_001841 | 3318.003  | 4173.76   |
| AK025965  | 891.584   | 567.774   | AB007925  | 68319.68  | 71394     | NM_002054 | 3890.927  | 4827.204  |
| AL137576  | 11532.848 | 11045.814 | NM_018180 | 2630.441  | 2773.107  | AF300649  | 7190.938  | 8067.188  |
| NM_006516 | 18504.418 | 15381.461 | NM_000361 | 18689.055 | 22479.955 | NM_004125 | 3586.831  | 4646.684  |
| NM_000355 | 3638.789  | 3180.097  | NM_002475 | 56853.48  | 59555.68  | NM_000823 | 2582.324  | 3699.151  |
| NM_005451 | 4514.916  | 4345.149  | NM_003836 | 27256.406 | 25364.584 | NM_003317 | 4815.146  | 5902.189  |
| NM_007172 | 5921.698  | 4649.037  | NM_017987 | 3055.134  | 2723.107  | NM_001139 | 3772.099  | 4440.275  |
| NM_013333 | 43819.324 | 40752.117 | NM_018203 | 1321.897  | 1573.408  | L09081    | 6157.665  | 5890.457  |
| NM_002333 | 10160.708 | 9803.252  | NM_014244 | 888.565   | 1398.707  | NM_000218 | 66843.352 | 62647.773 |
| NM_003400 | 17332.094 | 17825.32  | NM_000910 | 3326.515  | 7997.622  | AF064255  | 63004.555 | 62418.621 |

|           |           |           |           |           |           |           |           |           |
|-----------|-----------|-----------|-----------|-----------|-----------|-----------|-----------|-----------|
| NM_00670E | 13269.075 | 11312.826 | AL117560  | 30965.148 | 45445.191 | NM_01636E | 60473.594 | 60099.59  |
| NM_01443E | 1297.612  | 1249.047  | M24749    | 10128.737 | 12221.469 | U08853    | 6805.484  | 8834.354  |
| AK000782  | 988.431   | 771.527   | NM_005831 | 58116.68  | 56853.008 | NM_004261 | 33495.305 | 42981.996 |
| NM_014504 | 4263.83   | 4948.699  | NM_005850 | 68455.617 | 64754.059 | NM_01600E | 1448.235  | 1947.38   |
| NM_00570E | 1108.835  | 1238.783  | NM_000554 | 50796.668 | 45324.047 | NM_01624E | 5780.49   | 7912.965  |
| NM_014741 | 9785.319  | 10366.423 | AF009317  | 9030.293  | 9467.32   | AF005632  | 8920.471  | 10382.294 |
| AF212247  | 6574.48   | 6817.878  | AK026583  | 11160.011 | 13084.075 | NM_00090E | 4443.496  | 5042.601  |
| AF161407  | 23020.553 | 22466.592 | AF218031  | 12260.871 | 16326.497 | NM_00449E | 20655.434 | 24596.668 |
| NM_01473E | 7225.052  | 6673.734  | AF210650  | 5324.786  | 4619.335  | AF309489  | 1390.09   | 1821.386  |
| NM_01640E | 6149.472  | 6112.173  | NM_01835E | 3560.612  | 4167.22   | NM_00028E | 4252.563  | 3126.417  |
| NM_018080 | 10764.956 | 9122.808  | AF085896  | 1251.381  | 1323.815  | NM_00476E | 8100.303  | 5270.56   |
| NM_00571E | 2345.012  | 1644.723  | X74613    | 65632.813 | 60916.258 | NM_006641 | 63100.02  | 58894.641 |
| AK021951  | 1302.387  | 1348.688  | AF075080  | 31279.086 | 50288.848 | NM_000634 | 14446.459 | 16276.914 |
| AK023553  | 3635.314  | 3237.963  | NM_00461E | 2816.546  | 4247.147  | NM_01467E | 48839.625 | 53872.52  |
| NM_014600 | 2045.986  | 1449.702  | NM_004360 | 2514.834  | 3625.472  | AB040969  | 3148.261  | 5119.442  |
| NM_01673E | 1820.443  | 1667.862  | NM_003821 | 15268.823 | 18245.621 | NM_003467 | 15165.985 | 19710.115 |
| AF181994  | 5369.719  | 4684.331  | NM_01769E | 5139.539  | 4951.12   | NM_01493E | 2129.103  | 2491.998  |
| NM_01896E | 4482.996  | 3489.245  | NM_00397E | 2251.733  | 1800.868  | NM_00394E | 2064.058  | 3167.61   |
| AF125100  | 4803.262  | 4780.322  | NM_004834 | 20938.029 | 18550.52  | NM_01905E | 5928.778  | 9177.524  |
| X82693    | 42450.027 | 34495.668 | NM_01817E | 5165.547  | 3707.128  | NM_00320E | 963.105   | 1262.352  |
| NM_004987 | 968.827   | 977.813   | AK024747  | 16216.667 | 24404.746 | AF119902  | 759.309   | 999.652   |
| NM_00128E | 35896.195 | 44216.043 | NM_006390 | 3592.012  | 7936.483  | NM_02052E | 10193.667 | 8777.423  |
| M54894    | 1442.627  | 1689.011  | NM_00650E | 1724.178  | 2257.623  | NM_00438E | 3861.855  | 5169.616  |
| BG752013  | 846.899   | 940.22    | NM_00323E | 42520.965 | 45643.395 | NM_02037E | 461.07    | 1079.8    |
| X07696    | 17053.111 | 13351.132 | AB042562  | 2139.292  | 1536.577  | AL110127  | 3062.004  | 4107.185  |
| AA481015  | 2323.791  | 2202.59   | NM_01600E | 8764.382  | 7680.247  | AK001997  | 561.932   | 989.152   |
| AI925826  | 24550.244 | 20402.178 | NM_00237E | 8737.476  | 8586.238  | NM_00252E | 5199.436  | 7036.74   |
| U04209    | 12977.595 | 8474.618  | NM_001364 | 1333.071  | 1077.409  | D38438    | 10824.288 | 12504.496 |
| AI393201  | 19782.221 | 17887.256 | NM_00372E | 1163.401  | 1600.729  | AV714945  | 1362.802  | 1994.986  |
| Z15108    | 5895.557  | 4848.997  | NM_017431 | 677.844   | 783.572   | AF089897  | 590.998   | 1010.118  |
| M55284    | 1818.354  | 1622.987  | NM_006097 | 5559.507  | 4928.636  | AF007872  | 3091.897  | 3868.404  |
| AA001218  | 2160.707  | 1711.398  | NM_00611E | 2487.123  | 2904.34   | M30938    | 10355.065 | 10257.504 |
| AA679391  | 1590.212  | 1450.439  | NM_01531E | 3015.661  | 3878.712  | NM_01514E | 2702.595  | 2844.651  |
| BG682146  | 5914      | 5720.194  | AF177473  | 67901.344 | 70690.289 | NM_004714 | 3874.745  | 3797.549  |
| AA884709  | 952.614   | 1035.927  | NM_00054E | 45536.863 | 53063.441 | NM_005401 | 629.175   | 780.266   |
| AK022417  | 5969.472  | 4296.885  | AB023223  | 1379.848  | 1381.043  | NM_002497 | 17721.07  | 21580.439 |
| U50534    | 3810.155  | 3559.416  | AB018257  | 7554.335  | 7117.907  | AB025194  | 10326.778 | 10903.379 |
| NM_014824 | 5425.154  | 4459.11   | NM_00270E | 26570.441 | 23434.061 | NM_00623E | 1574.771  | 2193.087  |
| NM_000734 | 3553.756  | 4127.419  | AK001059  | 5950.521  | 4281.386  | BC020863  | 880.694   | 1003.661  |
| NM_012331 | 4543.965  | 5275.19   | NM_017610 | 1543.31   | 1413.633  | NM_017897 | 2820.326  | 3276.856  |
| NM_00606E | 1485.974  | 1835.876  | AL122070  | 1046.534  | 1518.784  | NM_00426E | 928.226   | 1379.478  |
| NM_01433E | 35269.688 | 30132.49  | AL133604  | 738.025   | 1426.132  | NM_00257E | 3602.673  | 3493.208  |
| NM_00149E | 2422.161  | 2354.168  | AK025133  | 35640.77  | 41550.605 | NM_001441 | 1622.521  | 1936.155  |
| NM_00441E | 25206.207 | 22132.121 | NM_01664E | 1681.047  | 1536.258  | NM_018324 | 1372.355  | 1213.442  |
| NM_00062E | 4360.562  | 4967.589  | AB020704  | 4470.883  | 3813.173  | L14819    | 1113.826  | 1364.661  |
| AB005216  | 1251.062  | 1207.439  | NM_020197 | 923.192   | 784.359   | NM_00050E | 6320.912  | 4895.95   |
| NM_00032E | 12418.461 | 11824.294 | NM_004087 | 5111.228  | 5654.913  | NM_00454E | 1491.702  | 2042.359  |
| AF015041  | 4761.728  | 3206.661  | NM_018700 | 1693.883  | 2006.954  | X06182    | 6124.916  | 7266.495  |
| NM_00236E | 928.082   | 1035.687  | NM_000119 | 7680.646  | 7682.494  | BE908993  | 59491.703 | 60034.238 |
| AK000184  | 2259.25   | 2002.745  | NM_00106E | 2624.097  | 2727.672  | AB012701  | 12134.229 | 14672.509 |
| AF055020  | 22777.189 | 18970.531 | AK027100  | 862.267   | 538.171   | M61156    | 8163.993  | 8545.226  |
| NM_00698E | 8152.67   | 7349.813  | NM_016950 | 432.799   | 620.175   | R44005    | 48253.723 | 53797.176 |
| AF272043  | 2280.012  | 2146.765  | NM_00362E | 5826.191  | 7708.87   | AI942392  | 6538.371  | 7296.63   |



|           |           |           |           |           |           |           |           |           |
|-----------|-----------|-----------|-----------|-----------|-----------|-----------|-----------|-----------|
| NM_002587 | 58624.344 | 59659.445 | NM_007115 | 3512.677  | 6505.711  | M55040    | 2129.966  | 2478.844  |
| NM_002238 | 6047.274  | 4844.662  | AK021645  | 1199.684  | 1456.955  | AW009739  | 6438.814  | 6393.437  |
| NM_004868 | 4174.287  | 3437.044  | NM_013339 | 2984.035  | 3656.698  | BC036805  | 5557.377  | 4663.915  |
| NM_004668 | 6315.703  | 4901.486  | NM_001491 | 9270.479  | 8431.452  | Z74615    | 60592.75  | 57273.832 |
| NM_007028 | 18208.08  | 13655.835 | NM_002642 | 524.647   | 903.142   | X03884    | 13951.514 | 14601.684 |
| NM_003058 | 8444.575  | 10916.697 | AK026541  | 4837.127  | 6692.152  | U36759    | 997.789   | 1241.441  |
| NM_005078 | 1129.481  | 1323.579  | NM_005899 | 51875.504 | 53706.344 | X91625    | 2860.657  | 3560.992  |
| NM_002414 | 26608.758 | 23232.641 | D42055    | 10029.188 | 8733.023  | AF090901  | 1046.396  | 1010.772  |
| NM_000358 | 1883.115  | 2209.665  | AL137349  | 5433.888  | 4150.39   | AF004231  | 2194.084  | 3112.576  |
| AL133580  | 5979.186  | 9598.438  | NM_003339 | 1851.707  | 1141.969  | AF001862  | 7400.872  | 8017.041  |
| NM_014668 | 8995.444  | 8912.612  | NM_004562 | 883.665   | 836.253   | NM_016044 | 2078.8    | 2636.521  |
| NM_005451 | 4097.469  | 3986.525  | NM_016476 | 55508.793 | 53213.477 | NM_000520 | 1802.061  | 1134.518  |
| NM_007172 | 5562.658  | 5140.72   | NM_015902 | 6053.784  | 4014.562  | NM_000288 | 11340.885 | 5441.552  |
| NM_006152 | 49405.441 | 41929.363 | NM_020155 | 9736.637  | 10327.579 | NM_001500 | 815.346   | 318.165   |
| NM_013333 | 43873.465 | 36760.25  | BE874471  | 4953.893  | 4803.976  | AB033076  | 2729.037  | 2699.053  |
| NM_002333 | 10457.554 | 8550.382  | NM_006121 | 4303.461  | 4047.278  | AK022876  | 3051.458  | 3622.989  |
| NM_003400 | 15630.926 | 13781.533 | AK023520  | 10098.455 | 10449.761 | AF134894  | 45766.07  | 50295.199 |
| NM_006708 | 13113.524 | 10763.76  | NM_004693 | 3192.156  | 2635.784  | NM_003938 | 10082.657 | 6686.018  |
| NM_014438 | 1572.345  | 1248.296  | NM_007211 | 11708.445 | 10398.375 | NM_014827 | 15059.545 | 20001.023 |
| NM_005582 | 22898.254 | 21294.643 | AB011152  | 1869.734  | 2397.19   | NM_004128 | 6750.133  | 5887.29   |
| NM_012268 | 10981.189 | 9820.133  | NM_014956 | 9582.605  | 9063.608  | U87460    | 15262.065 | 9566.601  |
| NM_004558 | 7605.832  | 6222.639  | AB014592  | 1063.086  | 1052.875  | NM_003617 | 1252.413  | 832.158   |
| X56692    | 39229.676 | 31444.254 | NM_016952 | 1284.481  | 1476.114  | NM_001841 | 4017.574  | 2598.84   |
| NM_014478 | 1109.555  | 953.764   | NM_001654 | 5859.42   | 6444.384  | NM_002054 | 6791.763  | 7164.615  |
| NM_014278 | 1617.755  | 986.643   | U48728    | 1159.938  | 1529.317  | AF300649  | 16037.982 | 16326.103 |
| NM_018962 | 1603.395  | 1766.288  | NM_005436 | 19642.547 | 26397.377 | NM_004128 | 5678.599  | 6092.717  |
| AF125100  | 4233.149  | 6599.217  | AK024418  | 3689.704  | 4498.25   | NM_000823 | 5504.763  | 5381.55   |
| NM_007178 | 13180.341 | 13078.416 | NM_003367 | 18669.598 | 24154.455 | NM_004414 | 2998.17   | 2145.571  |
| NM_002722 | 3382.917  | 3302.678  | NM_005194 | 18381.172 | 18918.807 | NM_003317 | 10342.034 | 11655.831 |
| AF317058  | 1144.55   | 855.375   | AB002296  | 5020.25   | 4084.805  | NM_001139 | 5071.7    | 7649.309  |
| AK025965  | 781.065   | 545.533   | NM_014315 | 9994.766  | 6467.341  | NM_004608 | 57877.773 | 65317.387 |
| M22538    | 22631.322 | 18448.043 | NM_012087 | 3713.1    | 2416.238  | NM_003772 | 1307.891  | 2214.168  |
| NM_006028 | 1336.954  | 1041.341  | AF165520  | 8458.753  | 6118.877  | NM_001541 | 5401.061  | 7200.131  |
| NM_014904 | 2336.126  | 1852.294  | AK026072  | 1595.44   | 1389.63   | NM_005418 | 1621.61   | 1790.339  |
| AL137576  | 12681.821 | 11482.754 | NM_004289 | 1503.529  | 1217.908  | L09081    | 4166.361  | 5199.98   |
| NM_018358 | 11544.595 | 10167.249 | NM_015679 | 8415.293  | 8344.316  | NM_000218 | 67327.781 | 68895.375 |
| NM_016321 | 1129.951  | 740.048   | AF299118  | 63932.711 | 61281.465 | NM_016113 | 6628.624  | 6530.352  |
| AF131781  | 10416.316 | 9810.752  | AK025353  | 42197.137 | 34741.695 | NM_014222 | 3897.945  | 4646.811  |
| NM_006518 | 18276.688 | 14041.322 | AK056896  | 56892.125 | 52290.316 | AK026317  | 13541.882 | 6312.209  |
| AK022417  | 1475.675  | 2025.016  | AK022763  | 43005.645 | 33810.813 | X82207    | 55880.219 | 39901.883 |
| U50534    | 1891.469  | 2684.576  | NM_000976 | 66031.68  | 59999.746 | NM_015044 | 9201.528  | 4685.923  |
| NM_014504 | 4041.486  | 3573.453  | NM_001000 | 66265.742 | 61248.973 | NM_002867 | 873.1     | 420.082   |
| NM_014408 | 17764.352 | 15038.136 | AF288207  | 41073.992 | 48130.168 | BF217496  | 14680.273 | 5929.831  |
| NM_014741 | 9374.924  | 8124.536  | NM_001001 | 66448.297 | 62019.199 | NM_004762 | 9009.712  | 4540.559  |
| AF212247  | 6631.134  | 5420.312  | NM_001774 | 61585.68  | 60178.234 | NM_006641 | 63324.844 | 52386.051 |
| AF161407  | 24373.262 | 19002.154 | NM_005023 | 841.539   | 1212.411  | NM_000634 | 26523.262 | 11021.751 |
| NM_014738 | 6761.305  | 4416.082  | NM_006830 | 67606.844 | 74876.438 | NM_014678 | 55508.887 | 23890.611 |
| NM_016408 | 5761.41   | 4766.249  | AK026414  | 39995.844 | 46578.992 | AB040969  | 3544.084  | 1752.692  |
| NM_018080 | 10451.557 | 7620.38   | D17297    | 2609.451  | 3355.017  | NM_003467 | 16541.234 | 9713.281  |
| NM_014453 | 37983.152 | 30734.986 | NM_004074 | 45729.781 | 45940.66  | NM_014938 | 2823.644  | 2973.032  |
| NM_005713 | 2467.779  | 1923.187  | NM_002626 | 64006.676 | 58581.926 | NM_003943 | 3993.653  | 3894.373  |
| AK021951  | 1243.256  | 1398.602  | NM_018436 | 42377.168 | 31562.453 | NM_019052 | 5943.123  | 5677.842  |
| AK023553  | 3807.291  | 2759.917  | AF157115  | 10395.757 | 8060.779  | NM_003202 | 825.48    | 1411.406  |

|           |           |           |           |           |           |           |           |           |
|-----------|-----------|-----------|-----------|-----------|-----------|-----------|-----------|-----------|
| NM_01460C | 2177.87   | 1709.072  | AJ223353  | 14460.855 | 11230.811 | AF119902  | 791.184   | 1352.403  |
| NM_016733 | 1690.669  | 1862.782  | NM_012241 | 14061.392 | 11151.98  | NM_020525 | 17347.305 | 18862.537 |
| AF181994  | 5645.59   | 4473.567  | AF250288  | 1797.089  | 2587.405  | X62468    | 984.279   | 1158.046  |
| CY3Cy5    | 6290.834  | 305.703   | NM_018486 | 3258.042  | 2858.051  | NM_00389C | 4119.662  | 5867.938  |
| NM_058197 | 3781.875  | 5218.818  | NM_005324 | 25817.174 | 19243.877 | BF127978  | 2154.558  | 3161.858  |
| AF086403  | 319.566   | 457.194   | AL080201  | 51619.063 | 46150.523 | AF110801  | 870.776   | 1330.054  |
| AF086452  | 334.705   | 568.013   | NM_015363 | 3204.427  | 1834.319  | NM_016575 | 26916.113 | 33533.219 |
| AF086314  | 689.753   | 699.561   | NM_001806 | 10418.429 | 11165.436 | AB018297  | 2490.93   | 2979.818  |
| NM_016364 | 1031.261  | 821.408   | AB040941  | 7864.72   | 6209.376  | AK022565  | 5005.057  | 5397.16   |
| AF086419  | 4176.819  | 3885.012  | AL137241  | 1630.084  | 1135.178  | AK023151  | 4307.093  | 4939.387  |
| AF086461  | 885.274   | 626.215   | AB037742  | 4175.842  | 4318.321  | NM_017897 | 3777.478  | 1133.123  |
| AF131795  | 527.92    | 528.088   | AF272375  | 3863.205  | 4705.914  | NM_004265 | 1106.083  | 355.099   |
| AL833296  | 4287.538  | 4232.895  | NM_014519 | 5705.965  | 6474.426  | NM_002572 | 3433.905  | 980.665   |
| AL110240  | 5904.35   | 6294.073  | NM_002517 | 3648.749  | 5379.147  | NM_001441 | 2334.678  | 833.577   |
| AF070549  | 367.914   | 433.365   | NM_007147 | 67023.43  | 67806.125 | NM_018324 | 1576.353  | 383.466   |
| AK025695  | 3786.69   | 3324.091  | X65463    | 7875.613  | 10632.687 | AF064255  | 60848.813 | 34448.563 |
| AK025442  | 2848.261  | 3023.461  | NM_002238 | 5893.256  | 15300.997 | NM_016368 | 58491.539 | 30867.299 |
| AL050041  | 1680.882  | 1691.33   | NM_004868 | 5089.491  | 12340.775 | U08853    | 6858.16   | 2147.192  |
| NM_058197 | 3261.175  | 3058.481  | NM_004669 | 5340.002  | 7575.597  | NM_004261 | 32907.16  | 9600.777  |
| SR4       | 13965.066 | 14934.202 | NM_007028 | 15468.083 | 15149.802 | NM_016006 | 1444.152  | 471.686   |
| SR6       | 1937.112  | 1547      | AF130728  | 1998.499  | 2015.867  | NM_016245 | 5070.215  | 2397.741  |
| SR8       | 7917.315  | 18540.02  | NM_004987 | 986.81    | 1175.489  | AF005632  | 7421.249  | 3070.519  |
| SR10      | 22771.625 | 5320.246  | NM_001289 | 35825.719 | 33906.91  | NM_000903 | 4239.484  | 3857.271  |
| CY3Cy5    | 4651.501  | 201.478   | NM_001131 | 64857.648 | 62355.434 | NM_004493 | 20200.584 | 15372.95  |
| AK024713  | 753.902   | 1394.778  | M54894    | 1339.609  | 884.776   | AF309489  | 1468.011  | 2012.143  |
| AK024204  | 838.836   | 840.738   | BG752013  | 1381.965  | 1161.111  | NM_004047 | 28525.145 | 41610.957 |
| AK023737  | 1144.084  | 1062.72   | X07696    | 19809.264 | 15484.942 | NM_004823 | 1704.948  | 2706.485  |
| NM_006609 | 4770.291  | 3660.406  | AA481015  | 2023.373  | 2173.601  | AB013889  | 137.416   | 675.753   |
| NM_014118 | 470.362   | 414.501   | AI925826  | 28569.527 | 26396.471 | Y17179    | 61148.453 | 61765.371 |
| AK023525  | 5799.107  | 5603.555  | U04209    | 14759.308 | 9315.063  | NM_000891 | 2354.679  | 3602.385  |
| AF085829  | 1649.017  | 1175.185  | AI393201  | 23157.857 | 21987.625 | AK026840  | 2697.633  | 2972.504  |
| AF075029  | 883.173   | 1102.595  | M34664    | 63925.141 | 57121.184 | NM_000288 | 3446.177  | 3169.676  |
| AK021903  | 5596.958  | 4036.45   | Z15108    | 6858.394  | 6090.542  | NM_016044 | 2831.018  | 573.955   |
| AL390143  | 5807.013  | 5484.778  | M55284    | 2101.66   | 2003.864  | NM_00052C | 1123.743  | 284.928   |
| AL162075  | 1959.053  | 2013.596  | AA001218  | 2591.55   | 2353.538  | NM_000288 | 10522.964 | 1506.217  |
| AF147384  | 920.824   | 680.809   | AA679391  | 2539.412  | 3397.619  | NM_00150C | 824.486   | 210.659   |
| AK021595  | 1339.443  | 1484.615  | BG682146  | 9068.744  | 11065.152 | NM_004388 | 3271.03   | 726.877   |
| NM_01841C | 3056.308  | 2628.907  | AA884709  | 1453.736  | 1810.245  | AL110127  | 2959.39   | 742.042   |
| AK027174  | 435.277   | 735.764   | NM_004541 | 62982.133 | 57972.07  | NM_002528 | 5145.458  | 1436.635  |
| AL110173  | 1038.324  | 1318.368  | NM_012266 | 7688.783  | 11441.692 | D38438    | 9638.528  | 2104.183  |
| AK024106  | 1222.361  | 1252.51   | NM_004559 | 7009.786  | 7930.882  | AF089897  | 774.751   | 601.875   |
| AK025833  | 413.319   | 374.123   | NM_014476 | 982.792   | 663.326   | AF007872  | 3000.411  | 3811.931  |
| AK027254  | 1897.511  | 1979.757  | NM_014278 | 1784.596  | 1217.751  | M30938    | 8952.63   | 12293.019 |
| AK021772  | 3069.877  | 2791.522  | NM_005838 | 2022.453  | 1568.686  | NM_015148 | 2304.529  | 2321.147  |
| AK026297  | 4505.648  | 3691.867  | NM_000734 | 15728.58  | 14046.911 | NM_004714 | 2162.212  | 2394.204  |
| AF075081  | 604.031   | 455.144   | NM_012331 | 8165.263  | 7844.28   | NM_005401 | 387.42    | 1120.032  |
| NM_015372 | 667.047   | 597.151   | NM_006644 | 10513.06  | 8008.196  | NM_002497 | 15998.826 | 19508.012 |
| AF085919  | 1073.468  | 1467.909  | NM_006583 | 66791.82  | 10116.045 | AB025194  | 9406.853  | 8828.116  |
| AF085933  | 1055.33   | 1287.592  | NM_006065 | 1340.351  | 1087.075  | NM_006238 | 1941.49   | 1936.942  |
| AF147431  | 1038.86   | 1175.798  | NM_014339 | 40125.367 | 40652.422 | BC020863  | 1897.597  | 1427.443  |
| AK026422  | 9360.417  | 7271.147  | NM_001495 | 3514.312  | 2771.944  | CY3Cy5    | 8624.138  | 955.733   |
| AF085938  | 642.265   | 944.239   | NM_002288 | 837.67    | 684.795   | NM_004758 | 313.156   | 947.647   |
| AK022264  | 1368.32   | 1175.071  | NM_004416 | 21767.504 | 20321.273 | NM_005163 | 3613.821  | 9579.546  |

|           |           |           |           |           |           |           |           |           |
|-----------|-----------|-----------|-----------|-----------|-----------|-----------|-----------|-----------|
| AL137331  | 1514.584  | 1288.36   | NM_000628 | 4120.641  | 4890.717  | AL117623  | 396.148   | 1589.114  |
| AL162040  | 5820.391  | 5079.995  | AB005216  | 1418.713  | 1862.581  | AF085988  | 315.351   | 1154.503  |
| AL137371  | 8464.908  | 8705.313  | AF015041  | 9266.118  | 14076.527 | AF143877  | 578.011   | 1626.678  |
| AL137596  | 3287.308  | 3506.665  | NM_002363 | 1438.871  | 2054.781  | NM_000738 | 36661.477 | 43523.488 |
| AL353942  | 13820.739 | 16972.248 | X82693    | 55058.684 | 50468.191 | AF086474  | 500.658   | 1206.458  |
| Z38010    | 7100.174  | 4548.669  | AF317058  | 972.013   | 1718.969  | AF086529  | 460.631   | 739.602   |
| AF088003  | 563.767   | 290.136   | AL137576  | 11583.577 | 12379.904 | AF086023  | 3052.776  | 5745.247  |
| AK025799  | 833.501   | 1292.794  | NM_006516 | 20220.314 | 17813.941 | AF131803  | 7655.337  | 12847.187 |
| AK022857  | 663.378   | 856.609   | NM_000355 | 5514.62   | 4425.568  | NM_004776 | 715.944   | 1866.22   |
| AL110206  | 3236.171  | 3639.218  | NM_005451 | 4036.667  | 3683.611  | AK023353  | 3935.646  | 9169.809  |
| NM_004821 | 1840.128  | 2411.376  | NM_007172 | 4467.032  | 4310.124  | NM_005163 | 1374.431  | 3504.458  |
| AK024292  | 1068.887  | 1269.792  | NM_013333 | 40887.422 | 46278.383 | SR1       | 79193.453 | 65821.75  |
| AK026263  | 2767.332  | 3275.476  | NM_002333 | 11607.464 | 13858.383 | SR3       | 6311.388  | 17392.553 |
| AK023643  | 707.251   | 704.358   | NM_003400 | 16095.361 | 24064.912 | SR5       | 2487.48   | 6186.473  |
| AL390159  | 944.391   | 931.046   | NM_014824 | 3753.052  | 3127.088  | SR7       | 1553.185  | 34065.816 |
| NM_014157 | 842.922   | 1187.973  | NM_014408 | 15335.269 | 21752.201 | SR9       | 3884.845  | 1742.519  |
| AF090933  | 691.395   | 665.805   | NM_014741 | 7450.295  | 8357.223  | CY3Cy5    | 9264.063  | 866.494   |
| AF111851  | 5223.335  | 4401.064  | AF212247  | 8040.378  | 6416.715  | AF182420  | 314.253   | 721.185   |
| AF152529  | 791.935   | 675.28    | AK022609  | 2620.93   | 1947.433  | U84517    | 6828.164  | 19875.689 |
| AL360200  | 763.258   | 997.127   | AF161407  | 40532.57  | 39424.953 | U03237    | 345.821   | 1285.455  |
| AK021992  | 1316.87   | 1250.13   | NM_014738 | 6806.626  | 4976.834  | AB033113  | 974.039   | 2030.547  |
| AK022102  | 889.402   | 976.292   | NM_016406 | 6873.22   | 6119.04   | NM_018148 | 524.915   | 827.295   |
| AK022235  | 1273.105  | 1199.131  | NM_018080 | 9323.734  | 11295.988 | AK001921  | 4389.313  | 7919.092  |
| AK022378  | 3090.55   | 4276.582  | AL050107  | 1470.634  | 1429.374  | AF088004  | 1353.662  | 2948.735  |
| AK022009  | 496.717   | 540.385   | NM_014453 | 44760.891 | 36923.547 | NM_018273 | 1459.037  | 2817.077  |
| AK022401  | 453.259   | 277.052   | NM_005713 | 4858.392  | 3847.826  | AK024944  | 422.739   | 1152.929  |
| AK022078  | 668.693   | 1217.061  | AK021951  | 1356.642  | 1325.325  | S81893    | 4131.646  | 12452.104 |
| AL133104  | 467.357   | 1028.659  | AK023553  | 3838.661  | 3402.607  | NM_007202 | 926.129   | 1806.766  |
| AF075101  | 573.464   | 884.495   | NM_014600 | 2061.873  | 2205.227  | AK021777  | 1117.543  | 1463.945  |
| AF130108  | 634.349   | 856.044   | NM_016733 | 1747.776  | 1855.231  | AF007137  | 487.491   | 560.908   |
| NM_020224 | 10642.305 | 11223.476 | AF181994  | 5177.624  | 5841.348  | AK023292  | 244.326   | 1017.226  |
| U17617    | 3174.701  | 3740.483  | NM_018962 | 6308.496  | 6483.234  | AK022452  | 522.045   | 1847.501  |
| AK022952  | 9192.142  | 8171.462  | AF125100  | 4823.496  | 5534.354  | AK023375  | 1247.025  | 3540.202  |
| BF218888  | 1083.458  | 1093.908  | NM_004669 | 3799.687  | 3463.271  | AK023781  | 522.447   | 940.763   |
| AK021770  | 847.156   | 656.942   | NM_007028 | 13857.397 | 12492.315 | AK024129  | 117.826   | 1079.609  |
| AK027248  | 2799.703  | 2714.645  | AF130728  | 10685.958 | 10463.873 | AK022171  | 1653.709  | 4823.671  |
| AK022804  | 14020.265 | 13878.552 | M54894    | 1921.727  | 1533.388  | AK025913  | 1270.566  | 3416.331  |
| AF009263  | 1689.61   | 2008.426  | BG752013  | 1629.041  | 1408.749  | NM_016500 | 1030.03   | 2306.688  |
| AF009283  | 1180.159  | 1010.798  | X07696    | 21821.184 | 15939.555 | AF087985  | 1160.01   | 3174.692  |
| AF086329  | 2179.549  | 1838.479  | AA481015  | 2261.728  | 2224.547  | AF087971  | 398.135   | 624.831   |
| U92989    | 5213.8    | 7651.059  | AI925826  | 23550.303 | 23405.949 | AF087974  | 1129.994  | 1466.008  |
| AF075102  | 2521.885  | 3436.759  | U04209    | 14520.346 | 10964.915 | X78938    | 1613.589  | 1484.817  |
| NM_018463 | 26420.855 | 28805.725 | AI393201  | 20890.531 | 20138.855 | AK021497  | 756.969   | 2301.022  |
| X74956    | 50169.27  | 52080.961 | M34664    | 60150.125 | 58425.898 | AF124367  | 274.474   | 1101.013  |
| AF132197  | 9121.764  | 12719.874 | Z15108    | 9208.866  | 6941.916  | AK025615  | 17560.957 | 46434.852 |
| AK025546  | 1068.277  | 1494.606  | M55284    | 1855.977  | 1514.984  | AK023803  | 749.527   | 2133.372  |
| AL137487  | 1935.874  | 2105.77   | AA001218  | 2011.663  | 2364.408  | AK022379  | 624.581   | 1560.475  |
| AK023800  | 1316.387  | 1252.741  | AA679391  | 1913.155  | 2632.423  | AK025338  | 2560.866  | 5936.561  |
| AK024120  | 2147.487  | 2357.158  | BG682146  | 7952.304  | 8545.994  | AK001132  | 377.871   | 1243.48   |
| U50526    | 1116.496  | 1518.721  | AA884709  | 1162.175  | 1512.094  | AK022321  | 254.904   | 459.531   |
| AF056455  | 14839.788 | 11573.104 | AK022417  | 8582.506  | 8069.724  | AK023296  | 393.195   | 1006.718  |
| NM_018510 | 1520.084  | 1351.192  | U50534    | 3449.894  | 4437.875  | AK023462  | 957.23    | 3240.805  |
| U50537    | 763.642   | 1418.303  | NM_005582 | 8840.546  | 9669.398  | AF210649  | 354.076   | 690.018   |

|           |           |           |           |           |           |           |           |           |
|-----------|-----------|-----------|-----------|-----------|-----------|-----------|-----------|-----------|
| AK024988  | 991.188   | 877.188   | NM_012266 | 7848.407  | 7521.273  | AK001115  | 1134.286  | 3140.676  |
| AK025719  | 393.373   | 349.882   | NM_004559 | 6172.878  | 10073.545 | NM_014095 | 913.634   | 1124.882  |
| AF026943  | 3443.499  | 4104.043  | NM_000734 | 18369.014 | 15500.118 | AK027233  | 1806.117  | 2068.01   |
| L77582    | 766.47    | 709.067   | NM_012331 | 8802.487  | 8427.42   | AK024131  | 990.757   | 1543.705  |
| NM_020448 | 1934.325  | 2510.932  | NM_006644 | 10860.769 | 6876.678  | AK025323  | 179.517   | 895.07    |
| NM_005419 | 3175.599  | 3624.497  | NM_006583 | 67056.984 | 9286.83   | NM_013326 | 7211.726  | 23100.143 |
| NM_003479 | 12911.891 | 9282.581  | NM_006065 | 1222.614  | 1201.334  | BC037322  | 333.332   | 787.448   |
| NM_006773 | 4786.011  | 6545.467  | NM_014339 | 41915.852 | 39113.055 | Y10202    | 253.675   | 1046.424  |
| AK024439  | 18775.887 | 26202.184 | NM_001495 | 2909.648  | 2604.886  | Y12022    | 903.84    | 2904.432  |
| X89676    | 2259.325  | 2641.524  | NM_002288 | 731.369   | 738.851   | AK001375  | 701.305   | 2254.666  |
| NM_012444 | 1034.729  | 1116.073  | NM_004416 | 21857.377 | 21819.182 | NM_019597 | 4112.437  | 10612.752 |
| Z32684    | 5852.16   | 7055.544  | NM_000628 | 3432.205  | 4440.132  | AL137559  | 775.512   | 1579.961  |
| NM_016512 | 1402.861  | 1355.631  | AB005216  | 1484.805  | 1580.413  | AF026944  | 5437.328  | 6339.151  |
| NM_017488 | 6439.358  | 7314.792  | AF015041  | 9025.706  | 10514.314 | AK021493  | 3303.25   | 4318.014  |
| AY009400  | 9314.431  | 5835.232  | NM_002363 | 1327.952  | 2320.669  | NM_006161 | 13027.599 | 23245.104 |
| NM_005069 | 991.551   | 938.474   | NM_002238 | 4835.021  | 5998.233  | NM_006192 | 305.065   | 836.633   |
| AF086401  | 4256.375  | 4099.501  | NM_004868 | 4361.112  | 6671.531  | AF085881  | 561.294   | 1124.012  |
| L23869    | 2081.083  | 1839.473  | NM_007176 | 10894.959 | 9768.643  | AK022737  | 5052.934  | 11454.071 |
| Z21853    | 3430.676  | 2910.845  | NM_002722 | 2106.294  | 1955.881  | NM_003472 | 24418.918 | 42367.051 |
| U80770    | 1404.669  | 896.029   | AF317058  | 819.712   | 556.281   | U92980    | 682.752   | 1458.029  |
| AB075846  | 989.921   | 606.535   | AL137576  | 12055.905 | 9176.34   | AB048287  | 3572.424  | 4482.547  |
| NM_018342 | 2736.738  | 2355.768  | NM_006516 | 19111.244 | 17095.797 | Y11159    | 649.512   | 707.771   |
| BC020260  | 4659.482  | 3896.796  | NM_000355 | 5199.12   | 4442.633  | AB020648  | 881.043   | 1522.452  |
| D17156    | 7465.448  | 6219.419  | NM_005451 | 3565.704  | 3349.329  | AK025798  | 5043.901  | 3951.006  |
| L04461    | 881.74    | 754.462   | NM_007172 | 4105.451  | 3254.308  | NM_018366 | 2394.441  | 727.885   |
| AK026938  | 14995.324 | 12936.241 | NM_013333 | 40559.195 | 52158.602 | NM_019848 | 7424.78   | 1295.862  |
| AK024373  | 9585.057  | 10498.911 | NM_002333 | 9193.595  | 14680.961 | AL833005  | 1692.776  | 4114.429  |
| AK022343  | 4720.048  | 5490.1    | NM_003400 | 13424.267 | 19324.682 | L43366    | 1269.969  | 1811.19   |
| AK026400  | 1186.012  | 999.146   | NM_006705 | 16960.326 | 23753.006 | AK026124  | 2510.717  | 6895.821  |
| NM_004148 | 6395.666  | 8299.804  | NM_014439 | 2726.086  | 4712.362  | NM_015509 | 3875.557  | 7257.057  |
| X03168    | 3383.647  | 4692.479  | NM_014504 | 2628.357  | 2332.017  | AL110157  | 2868.211  | 3918.225  |
| NM_005168 | 7594.984  | 11665.737 | NM_014741 | 8201.796  | 7349.963  | NM_002319 | 2532.758  | 4699.984  |
| NM_017801 | 8331.242  | 11140.684 | AF212247  | 6815.56   | 4730.974  | U84508    | 971.172   | 809.068   |
| NM_007348 | 4270.156  | 4813.051  | AF161407  | 35107.32  | 36678.395 | NM_017793 | 1965.227  | 1520.364  |
| NM_016953 | 745.217   | 783.905   | NM_014738 | 5774.182  | 4716.277  | NM_012131 | 1672.6    | 793.867   |
| U65473    | 13717.381 | 14504.692 | NM_016406 | 5226.747  | 4818.792  | S41540    | 1452.232  | 628.335   |
| D63481    | 41507.73  | 34853.016 | NM_018080 | 11337.272 | 10715.607 | AK026947  | 45346.559 | 22925.941 |
| AY009951  | 1016.605  | 809.557   | NM_014453 | 44044.32  | 36653.242 | U84526    | 8304.456  | 14689.378 |
| AL157424  | 1470.458  | 1517.253  | NM_005713 | 2540.276  | 2335.062  | L23401    | 1754.973  | 4062.22   |
| AK024422  | 576.583   | 798.955   | AK021951  | 1064.67   | 798.464   | NM_018090 | 56689.074 | 64468.813 |
| NM_002673 | 495.794   | 472.749   | AK023553  | 3846.104  | 3535.447  | AK022728  | 21344.91  | 45616.938 |
| NM_003876 | 7098.898  | 6142.829  | NM_014600 | 1816.652  | 1858.569  | AL109678  | 814.11    | 1880.438  |
| AJ276310  | 752.854   | 568.9     | NM_016733 | 2966.846  | 2673.959  | AL137524  | 3231.95   | 9224.029  |
| NM_012295 | 11769.644 | 9592.161  | AF181994  | 4560.861  | 6060.636  | AF218008  | 1712.466  | 3048.876  |
| NM_000222 | 498.233   | 699.103   | NM_018962 | 5213.855  | 7077.604  | M22404    | 19609.221 | 26141.938 |
| AL133666  | 3969.129  | 2844.377  | AF125100  | 5002.884  | 11051.271 | NM_014019 | 12287.217 | 4809.595  |
| NM_000663 | 1952.353  | 1277.029  | X82693    | 51402.25  | 52453.043 | NM_012368 | 907.015   | 262.847   |
| NM_004710 | 6899.677  | 5434.646  | AF130728  | 890.717   | 852.774   | AK022097  | 6463.241  | 7345.956  |
| NM_004396 | 16847.631 | 15469.003 | NM_004987 | 561.475   | 489.409   | NM_002166 | 15393.515 | 13002.563 |
| NM_017999 | 4009.74   | 4070.698  | NM_001289 | 38190.617 | 32234.393 | NM_004660 | 7462.253  | 6553.696  |
| NM_015989 | 50790.141 | 41379.234 | M54894    | 1455.388  | 1170.64   | NM_006165 | 1239.206  | 1253.338  |
| NM_001043 | 6389.136  | 4746.985  | X07696    | 22151.281 | 14963.061 | AL035307  | 1257.261  | 455.144   |
| NM_014399 | 1078.106  | 1261.843  | AA481015  | 2052.372  | 2036.765  | NM_012234 | 1878.469  | 382.28    |

|           |           |           |           |           |           |           |           |           |
|-----------|-----------|-----------|-----------|-----------|-----------|-----------|-----------|-----------|
| AF113685  | 2338.756  | 3134.678  | AI925826  | 22314.783 | 20517.484 | NM_01215E | 6839.958  | 2871.648  |
| NM_00547C | 11096.947 | 14310.341 | U04209    | 16027.11  | 9657.793  | AF144700  | 2114.217  | 2731.535  |
| AF142570  | 2076.099  | 2355.105  | AI393201  | 23868.504 | 21821.529 | NM_00410E | 5367.215  | 14661.036 |
| NM_00422E | 19904.857 | 21347.66  | M34664    | 60464.031 | 59341.586 | AB046825  | 574.638   | 1402.285  |
| NM_00386E | 2417.456  | 2640.602  | Z15108    | 7834.65   | 7105.117  | X64975    | 1107.081  | 1937.721  |
| NM_00287E | 7188.304  | 6324.305  | M55284    | 2192.195  | 1981.93   | AL050297  | 2319.651  | 3317.531  |
| NM_015571 | 20688.807 | 18732.73  | AA001218  | 4393.392  | 4134.25   | AK026966  | 1870.392  | 2044.511  |
| NM_004701 | 10205.021 | 8565.642  | AA679391  | 2117.882  | 2292.004  | AK025268  | 278.659   | 142.04    |
| AK025554  | 2461.706  | 2669.185  | BG682146  | 7913.62   | 7944.175  | AK026154  | 7128.46   | 5250.088  |
| BI824151  | 5460.565  | 5084.14   | AA884709  | 1044.246  | 1479.482  | AL117546  | 28350.619 | 17717.51  |
| AK021791  | 6949.391  | 7612.294  | AK022417  | 8459.437  | 10528.188 | AK027073  | 507.008   | 370.944   |
| NM_00501E | 686.572   | 436.968   | U50534    | 3549.567  | 4913.533  | NM_000384 | 318.221   | 259.126   |
| NM_00405E | 2892.838  | 2878.11   | NM_014824 | 5203.987  | 5680.903  | AL157482  | 12073.431 | 3110.629  |
| NM_004394 | 10632.773 | 10684.389 | NM_000734 | 7846.454  | 7272.519  | NM_00542E | 3657.412  | 861.991   |
| NM_005727 | 55721.48  | 49094.691 | NM_012331 | 6526.954  | 5446.716  | NM_017974 | 729.914   | 182.413   |
| AK027242  | 3669.428  | 4131.485  | NM_006644 | 11542.963 | 7567.213  | NM_00397E | 789.324   | 251.608   |
| NM_00127E | 24157.113 | 19781.486 | NM_00658E | 55217.871 | 9629.471  | X14677    | 4972.014  | 4820.237  |
| NM_00501C | 4222.799  | 3405.202  | NM_00606E | 1306.583  | 1222.6    | U17077    | 2490.251  | 8648.532  |
| NM_01905E | 5177.021  | 4953.607  | NM_01433E | 43750.539 | 49374.285 | NM_00091E | 1352.916  | 2956.493  |
| NM_02019E | 834.998   | 1013.582  | NM_00149E | 3753.211  | 3139.518  | AJ278865  | 535.116   | 1483.532  |
| U96136    | 678.066   | 712.341   | NM_00228E | 886.767   | 728.793   | AB026542  | 5816.217  | 4972.938  |
| NM_01758E | 10545.387 | 10680.073 | NM_00441E | 24226.201 | 20073.676 | NM_01984E | 4398.286  | 5389.996  |
| NM_005941 | 1323.016  | 1374.886  | NM_00062E | 3576.555  | 3149      | NM_01443E | 954.885   | 578.323   |
| NM_015884 | 1076.343  | 1165.89   | AB005216  | 858.8     | 1027.933  | NM_00206E | 10334.23  | 3168.96   |
| AF201380  | 3748.075  | 5660.876  | NM_00032E | 11640.489 | 13179.957 | NM_014394 | 45418.098 | 10482.34  |
| NM_00361E | 769.737   | 1052.354  | AF015041  | 5985.4    | 4640.742  | NM_01814C | 2171.588  | 1934.992  |
| NM_01239E | 3933.117  | 4846.976  | NM_00236E | 1261.916  | 1120.347  | NM_01694E | 2445.083  | 1792.637  |
| NM_01483E | 37239.5   | 33723.59  | AK000184  | 2668.693  | 2973.336  | NM_00014E | 2008.06   | 1375.882  |
| NM_00004E | 1635.662  | 1694.389  | AF055020  | 38204.086 | 35663.117 | AF272372  | 36272.965 | 21675.23  |
| NM_00387E | 13620.661 | 12623.874 | NM_00698E | 7801.422  | 7636.734  | AK097045  | 1742.73   | 1385.174  |
| NM_00483E | 1849.267  | 1585.394  | AF272043  | 2515.213  | 2758.006  | AF161356  | 65665.211 | 66231.266 |
| NM_005957 | 1212.569  | 1043.345  | NM_002587 | 61373.316 | 64961.723 | AB014548  | 3791.699  | 1695.528  |
| AK024374  | 2643.116  | 2805.375  | NM_00223E | 4795.58   | 5409.846  | NM_01825E | 4051.375  | 701.885   |
| NM_007101 | 1931.831  | 1746.971  | NM_00486E | 4504.982  | 5176.527  | AK025150  | 914.813   | 223.366   |
| NM_018234 | 525.803   | 354.98    | NM_00466E | 6017.616  | 6945.759  | AK024611  | 14214.713 | 4325.823  |
| AB033062  | 2192.305  | 1792.459  | NM_00702E | 16783.217 | 18858.025 | BC010420  | 3842.555  | 1070.101  |
| NM_016437 | 41078.492 | 29149.398 | NM_01586E | 837.5     | 1033.406  | NM_01228C | 27402.549 | 8274.016  |
| NM_00272C | 10231.91  | 7995.595  | NM_00305E | 12736.217 | 10062.469 | NM_01817E | 6366.608  | 6086.899  |
| AK024716  | 37999.477 | 31904.598 | NM_00507E | 609.542   | 428.434   | AK022040  | 797.276   | 2108.464  |
| X67155    | 2507.007  | 1844.107  | NM_006841 | 1781.359  | 1365.894  | AK022722  | 1043.873  | 1642.552  |
| NM_02038C | 5251.903  | 5269.905  | NM_002414 | 25772.896 | 14398.885 | NM_003591 | 9447.839  | 14806.802 |
| AL137519  | 628.039   | 447.078   | NM_00035E | 5739.203  | 3626.945  | AL080111  | 1561.024  | 2558.631  |
| NM_00289C | 52186.324 | 40865.586 | AL133580  | 8243.369  | 8495.442  | NM_00355C | 3749.968  | 4140.172  |
| NM_00133C | 54871.406 | 38746.883 | NM_01466E | 10319.719 | 8986.933  | NM_01464E | 1415.324  | 1328.445  |
| NM_015927 | 1064.607  | 1064.808  | NM_005451 | 4582.805  | 4224.873  | NM_00382E | 1663.81   | 1613.732  |
| NM_00477E | 7221.397  | 7191.391  | NM_00717E | 4805.092  | 3640.319  | AL110168  | 3105.367  | 2621.822  |
| NM_019071 | 5140.45   | 3857.399  | NM_00615E | 48120.793 | 40530.492 | NM_016147 | 4841.813  | 3804.966  |
| NM_00191E | 8247.42   | 10817.215 | NM_01333E | 41973.527 | 31027.221 | NM_00283E | 1108.992  | 1078.371  |
| AK025594  | 1973.78   | 2265.575  | NM_00233E | 11029.496 | 9925.47   | NM_01659E | 796.296   | 908.237   |
| AB040931  | 6133.512  | 6897.596  | NM_00340C | 9264.744  | 10816.667 | NM_018527 | 334.51    | 295.81    |
| NM_00359E | 1423.157  | 2147.458  | NM_00670E | 14240.977 | 11955.069 | NM_01832E | 3922.421  | 2092.105  |
| NM_015911 | 2022.536  | 2260.768  | NM_01443E | 2590.992  | 1966.709  | NM_00186E | 4368.452  | 2379.657  |
| BC011826  | 6368.272  | 5626.046  | NM_00558E | 16020.412 | 13245.907 | NM_01477E | 231.857   | 148.185   |

|           |           |           |           |           |           |           |           |           |
|-----------|-----------|-----------|-----------|-----------|-----------|-----------|-----------|-----------|
| NM_017647 | 5791.146  | 5509.862  | NM_012266 | 8812.695  | 10564.421 | NM_005606 | 3235.997  | 556.814   |
| NM_012091 | 1895.078  | 1679.987  | NM_004559 | 6923.884  | 5841.699  | AF134707  | 447.679   | 198.51    |
| NM_012321 | 7187.771  | 4471.908  | X56692    | 48245.281 | 54271.68  | NM_018162 | 238.544   | 1530.708  |
| D13642    | 8174.723  | 7586.07   | AK024467  | 388.513   | 1099.77   | AK027167  | 1994.591  | 5989.934  |
| NM_004741 | 21796.383 | 17846.895 | NM_014476 | 1342.588  | 1521.678  | AK025265  | 845.646   | 1754.122  |
| NM_018032 | 5738.475  | 5137.132  | NM_014278 | 1926.649  | 1885.917  | NM_018652 | 15362.463 | 22194.604 |
| NM_003675 | 24258.832 | 17772.275 | NM_018962 | 4134.714  | 3421.736  | AB011166  | 1860.684  | 1928.734  |
| NM_017518 | 4693.765  | 4102.759  | AF125100  | 3927.979  | 3536.512  | AK024460  | 2423.121  | 2796.299  |
| NM_004117 | 7047.649  | 4723.326  | NM_007176 | 12071.535 | 7350.859  | NM_006606 | 3537.281  | 3445.34   |
| NM_016594 | 25308.057 | 17697.635 | NM_002722 | 4148.775  | 2684.195  | NM_005243 | 10170.786 | 5707.397  |
| NM_030752 | 13952.457 | 13377.926 | AF317058  | 1107.344  | 1067.336  | NM_006218 | 1239.073  | 570.35    |
| D26068    | 40176.129 | 32962.883 | M22538    | 22131.957 | 16192.912 | NM_016265 | 2631.59   | 2309.528  |
| NM_018559 | 25857.51  | 20653.879 | NM_006028 | 1249.469  | 975.559   | NM_002095 | 7353.92   | 5369.547  |
| NM_017593 | 7151.064  | 6310.515  | NM_014904 | 2703.478  | 2098.01   | AK022814  | 2408.386  | 1581.537  |
| NM_004282 | 20383.301 | 21859.637 | AL137576  | 12031.342 | 9569.021  | NM_006268 | 1833.216  | 970.381   |
| AF188747  | 1981.734  | 2185.597  | NM_018358 | 8018.449  | 7568.427  | X78931    | 396.33    | 242.973   |
| NM_002773 | 918.179   | 648.027   | NM_016321 | 1084.083  | 686.759   | NM_006442 | 45950.234 | 18005.598 |
| NM_013411 | 3781.286  | 5065.879  | AF131781  | 9653.368  | 10965.299 | NM_003902 | 18782.75  | 3792.138  |
| AB007956  | 540.752   | 555.494   | NM_006516 | 19965.424 | 20352.998 | NM_016427 | 3993.848  | 1329.351  |
| NM_020200 | 1942.528  | 2124.421  | AK022417  | 5171.779  | 4100.134  | NM_006706 | 370.952   | 180.715   |
| NM_001248 | 667.338   | 942.668   | U50534    | 2395.685  | 1641.667  | U80741    | 11771.786 | 25930.484 |
| NM_000156 | 730.729   | 935.219   | NM_014824 | 3228.415  | 1889.896  | NM_014497 | 1611.268  | 4566.184  |
| NM_000180 | 42838.508 | 40629.32  | NM_014504 | 3123.829  | 1772.809  | AL133598  | 8393.378  | 18600.422 |
| NM_000858 | 17694.109 | 16194.514 | NM_014408 | 16630.068 | 13716.884 | NM_015511 | 5271.805  | 7644.854  |
| AF254087  | 3903.056  | 3453.423  | NM_014741 | 8515.752  | 6654.615  | NM_006625 | 4053.69   | 4178.199  |
| NM_017715 | 2936.292  | 3118.128  | AF212247  | 6722.419  | 3997.375  | NM_004891 | 13893.987 | 12967.878 |
| AL117607  | 3029.907  | 3449.063  | AF161407  | 40566.172 | 26317.498 | NM_002831 | 7362.942  | 8486.823  |
| AB037774  | 2708.358  | 2628.665  | NM_014738 | 6165.46   | 4137.702  | AL833409  | 2439.636  | 1110.883  |
| NM_005438 | 1716.888  | 1516.843  | NM_016406 | 5390.687  | 4551.39   | NM_000147 | 2110.004  | 1708.113  |
| AK024361  | 2206.89   | 1702.657  | NM_018080 | 10799.563 | 8079.282  | NM_000158 | 3125.525  | 2241.662  |
| NM_004350 | 12211.687 | 10177.37  | NM_014453 | 28404.449 | 21064.072 | NM_000670 | 358.761   | 299.888   |
| NM_018044 | 10208.441 | 8278.9    | NM_005713 | 2628.895  | 2243.586  | NM_006416 | 2387.332  | 1925.763  |
| NM_004503 | 612.434   | 733.888   | AK021951  | 986.521   | 696.148   | NM_000151 | 7387.67   | 4101.094  |
| NM_001717 | 730.836   | 614.381   | AK023553  | 3220.792  | 2004.888  | NM_003773 | 686.477   | 355.017   |
| AF274347  | 6221.978  | 4531.097  | NM_014600 | 1820.624  | 1712.451  | NM_003935 | 518.562   | 254.324   |
| AK001144  | 667.881   | 599.328   | NM_016733 | 1997.98   | 1707.443  | NM_002879 | 777.563   | 248.691   |
| NM_018555 | 5257.587  | 4189.884  | AF181994  | 5408.124  | 5335.253  | AB028999  | 2217.461  | 1424.643  |
| NM_005122 | 1048.599  | 952.291   | CY3Cy5    | 10646.236 | 361.333   | AB018348  | 6259.337  | 1729.124  |
| AL133055  | 486.934   | 263.728   | NM_058197 | 3366.258  | 3594.636  | NM_013369 | 363.944   | 136.024   |
| NM_014552 | 4340.932  | 3778.797  | AF086452  | 535.917   | 772.688   | NM_003686 | 2154.363  | 1665.468  |
| NM_003072 | 16028.646 | 16843.383 | AF086314  | 980.784   | 1143.74   | NM_004641 | 1180.998  | 2488.878  |
| L09081    | 25734.545 | 32421.217 | NM_016364 | 1308.122  | 1742.381  | NM_002049 | 3570.738  | 5911.272  |
| NM_000218 | 60040.406 | 75375.969 | AF086419  | 6424.68   | 10662.237 | AK026312  | 1036.994  | 2175.796  |
| NM_016113 | 22676.789 | 30107.494 | AF086461  | 1422.131  | 1639.038  | NM_017776 | 1380.514  | 2295.142  |
| NM_014222 | 5029.139  | 7672.743  | AF131795  | 625.174   | 770.879   | U81599    | 404.821   | 647.374   |
| L14819    | 565.918   | 817.334   | AL833296  | 6634.725  | 6021.249  | NM_003206 | 910.702   | 989.245   |
| NM_000509 | 5130.48   | 4812.293  | AL110240  | 7285.702  | 6770.392  | AK000564  | 748.706   | 234.448   |
| NM_004542 | 1617.578  | 1861.273  | AK025695  | 5232.298  | 4821.606  | X60155    | 387.588   | 410.496   |
| X06182    | 4620.459  | 3289.018  | AK025442  | 3718.915  | 2988.152  | AB037901  | 5222.986  | 3783.281  |
| BE908993  | 54106.98  | 42246.879 | AL050041  | 1178.223  | 1079.657  | NM_006129 | 1438.645  | 1017.42   |
| AB012701  | 9349.918  | 9532.59   | NM_058197 | 4974.319  | 3314.098  | NM_000582 | 14429.564 | 12497.586 |
| M61156    | 7022.713  | 6301.979  | SR2       | 57386.438 | 34177.461 | NM_005593 | 2675.655  | 2138.113  |
| R44005    | 38412.121 | 31179.75  | SR4       | 18371.334 | 9513.065  | AJ224741  | 823.663   | 688.872   |

|           |           |           |           |           |           |           |           |           |
|-----------|-----------|-----------|-----------|-----------|-----------|-----------|-----------|-----------|
| AI942392  | 4701.471  | 4188.494  | SR6       | 2261.105  | 1498.219  | NM_004684 | 2713.297  | 1345.357  |
| M55040    | 1835.991  | 1723.846  | SR8       | 8535.309  | 13125.424 | BF338709  | 1878.587  | 891.319   |
| AW009739  | 3261.347  | 2588.165  | SR10      | 31198.125 | 5462.009  | AF204171  | 315.143   | 219.012   |
| BC036805  | 5171.564  | 3275.478  | CY3Cy5    | 8298.863  | 219.515   | M18182    | 195.598   | 175.421   |
| Z74615    | 54957.57  | 64478.781 | AK024713  | 2694.981  | 3505.197  | W96179    | 1907.833  | 445.074   |
| X03884    | 14114.733 | 11065.366 | AK024204  | 643.406   | 863.147   | AW247841  | 12263.68  | 3070.506  |
| U36759    | 1098.485  | 1066.368  | AK023737  | 1100.14   | 1379.125  | BG568198  | 1219.231  | 404.014   |
| X91625    | 2859.301  | 3074.436  | NM_006609 | 5438.216  | 7891.535  | M76559    | 4573.188  | 3674.02   |
| AF090901  | 1363.925  | 1363.206  | AK023525  | 7483.573  | 8249.936  | U03884    | 1024.771  | 4041.36   |
| AF004231  | 2907.971  | 2527.267  | AF085829  | 2549.146  | 2142.067  | U11058    | 1029.304  | 2903.311  |
| AF001862  | 9504.297  | 10877.843 | AF075029  | 1028.667  | 1132.621  | AI222585  | 635.566   | 2020.082  |
| NM_002451 | 6490.974  | 7914.574  | AK021903  | 8847.189  | 6176.458  | AA411678  | 4952.738  | 7201.195  |
| AF119902  | 1361.376  | 1843.777  | AL390143  | 9329.507  | 8225.061  | AA862813  | 28221.131 | 43529.813 |
| NM_020525 | 41256.707 | 42691.152 | AL162075  | 2393.241  | 2634.637  | AA398427  | 1489.923  | 1823.585  |
| X62468    | 1026.144  | 1316.732  | AF147384  | 2385.249  | 1369.989  | T55728    | 4472.852  | 3878.202  |
| NM_003890 | 12303.814 | 17000.604 | AK021595  | 1581.892  | 1229.643  | H20856    | 1063.091  | 511.052   |
| BF127978  | 4411.392  | 6368.171  | AF147358  | 12489.16  | 6973.42   | N62586    | 1563.761  | 1932.349  |
| AF110801  | 818.637   | 793.518   | NM_018410 | 3636.148  | 2806.221  | AA242743  | 35338.68  | 25923.906 |
| NM_016579 | 55059.805 | 63572.602 | AK027174  | 491.746   | 729.762   | NM_006759 | 2654.211  | 1491.009  |
| AB018297  | 2765.469  | 3799.728  | AL110173  | 998.082   | 1278.247  | NM_006831 | 3556.113  | 2824.593  |
| AK022565  | 8947.021  | 7932.283  | AK024106  | 1361.919  | 742.951   | AL162044  | 6551.036  | 3868.35   |
| AK023151  | 4657.366  | 5126.871  | AK027254  | 2911.373  | 3769.276  | AK024004  | 747.637   | 518.568   |
| AB033076  | 1841.974  | 1875.953  | AK021772  | 4678.042  | 6535.023  | AK022365  | 397.282   | 352.568   |
| AK022876  | 2484.732  | 2280.515  | AK026297  | 6007.702  | 7779.367  | BE892273  | 53531.723 | 59327.16  |
| AF134894  | 48227.117 | 38001.402 | AF075081  | 887.093   | 1699.482  | AF026929  | 350.85    | 177.524   |
| NM_003938 | 8620.641  | 8112.728  | NM_015372 | 1295.079  | 1987.178  | NM_016734 | 782.81    | 158.426   |
| NM_014827 | 12261.953 | 14223.225 | AF085919  | 1186.749  | 1868.944  | Y08147    | 8840.995  | 5839.629  |
| NM_004126 | 6756.636  | 7208.662  | AF085933  | 1473.385  | 1776.379  | AK023117  | 1747.84   | 4205.386  |
| U87460    | 16141.519 | 17584.754 | AF147431  | 1101.268  | 1426.457  | AL122046  | 1744.362  | 2804.232  |
| NM_003617 | 1168.83   | 1084.89   | AK026422  | 15076.387 | 11480.035 | AF119914  | 686.688   | 2575.018  |
| NM_001841 | 3848.526  | 3416.832  | AF085938  | 1207.622  | 1740.676  | NM_000855 | 2840.226  | 3611.205  |
| NM_002054 | 4341.816  | 3726.167  | AK022264  | 1504.399  | 1171.902  | NM_005536 | 5044.237  | 3916.969  |
| AF300649  | 12493.297 | 12226.317 | AL137331  | 2549.309  | 1847.155  | NM_005077 | 954.83    | 1086.006  |
| NM_004125 | 3625.601  | 3759.957  | AL162040  | 9487.188  | 4584.668  | NM_001990 | 1220.521  | 844.398   |
| NM_000823 | 5433.451  | 5208.358  | AL442084  | 1140.104  | 664.32    | NM_002141 | 1561.117  | 644.519   |
| NM_003317 | 14645.754 | 15182.819 | AL137371  | 11478.903 | 6361.431  | NM_006907 | 1766.833  | 984.139   |
| NM_001139 | 5147.288  | 7873.012  | AL137596  | 4050.217  | 2285.456  | NM_002686 | 340.507   | 275.595   |
| NM_001441 | 2637.627  | 4006.932  | AL353942  | 20164.611 | 10882.458 | NM_006267 | 1427.511  | 897.568   |
| NM_018324 | 1947.766  | 2684.805  | Z38010    | 39531.613 | 25612.152 | NM_002661 | 17820.074 | 12768.669 |
| AF064255  | 52520.934 | 62634.277 | AF088003  | 669.311   | 413.155   | NM_001263 | 149.831   | 222.925   |
| NM_016368 | 53308.746 | 62435.066 | AK025799  | 1129.186  | 1274.878  | AK023982  | 568.16    | 264.608   |
| U08853    | 7316.997  | 9218.556  | AL110206  | 4964.973  | 6111.043  | NM_018466 | 1421.363  | 246.264   |
| NM_004261 | 26411.902 | 26966.076 | NM_004821 | 2366.905  | 2867.112  | Y11312    | 1448.728  | 502.234   |
| NM_016006 | 1579.035  | 2122.927  | AK024292  | 1100.424  | 1400.681  | NM_003039 | 9868.664  | 5221.693  |
| NM_016245 | 4331.405  | 5762.191  | AK026263  | 3780.508  | 5794.375  | AF100756  | 4434.993  | 6904.829  |
| AF005632  | 7435.388  | 5116.483  | AK023643  | 916.25    | 1722.974  | NM_001661 | 941.969   | 840.246   |
| NM_000903 | 3269.2    | 2866.23   | AL390159  | 1921.641  | 3263.708  | NM_014563 | 1220.583  | 702.201   |
| NM_004493 | 16706.215 | 15737.798 | NM_014157 | 684.084   | 977.853   | NM_020150 | 1110.285  | 575.622   |
| AF309489  | 890.405   | 679.758   | AF090933  | 1074.12   | 1292.053  | NM_007150 | 4983.361  | 1840.315  |
| AB013889  | 368.173   | 511.909   | AF111851  | 8195.349  | 7030.139  | NM_016520 | 12513.765 | 6863.718  |
| NM_000288 | 3585.753  | 3477.771  | AF152529  | 1173.863  | 993.128   | AB018353  | 3827.042  | 2194.923  |
| NM_004762 | 7557.667  | 8108.456  | AL360200  | 1076.379  | 732.064   | NM_007036 | 3188.023  | 1848.792  |
| NM_006641 | 54945.016 | 57960.316 | AK021992  | 1785.995  | 1267.097  | NM_002617 | 2335.51   | 1794.51   |

|           |           |           |           |           |           |           |           |           |
|-----------|-----------|-----------|-----------|-----------|-----------|-----------|-----------|-----------|
| NM_000634 | 25101.736 | 21911.244 | AK022102  | 479.194   | 239.578   | NM_003313 | 22686.809 | 13738.857 |
| NM_014679 | 52749.664 | 39151.492 | AK022235  | 954.997   | 687.097   | AF090907  | 2446.539  | 881.37    |
| AB040969  | 3567.807  | 3924.763  | AK022378  | 3038.202  | 1658.701  | AK024476  | 3992.575  | 1387.227  |
| NM_003467 | 15113.437 | 14340.757 | AK022401  | 529.986   | 363.133   | X74794    | 13086.514 | 4018.026  |
| NM_014936 | 2975.496  | 3008.872  | AK022078  | 819.719   | 983.413   | AL050298  | 3360.629  | 2971.386  |
| NM_003943 | 3136.487  | 3646.504  | AF075101  | 946.453   | 1081.998  | NM_007079 | 34634.938 | 41442.535 |
| NM_019052 | 5578.438  | 8751.674  | AF130108  | 611.212   | 1560.349  | M20696    | 2515.093  | 1605.817  |
| NM_003202 | 804.099   | 1283.674  | NM_020224 | 13441.143 | 22764.092 | NM_002915 | 941.138   | 878.034   |
| NM_000289 | 15403.242 | 17292.297 | U17617    | 5667.258  | 9297.066  | NM_014444 | 4641.269  | 11815.756 |
| NM_001500 | 1338.181  | 1277.007  | NM_014100 | 530.142   | 922.096   | NM_012248 | 4992.115  | 9353.382  |
| NM_004388 | 3844.472  | 5478.076  | AK022952  | 12186.53  | 19103.5   | NM_014393 | 2658.275  | 3012.619  |
| NM_020379 | 786.806   | 1047.352  | BF218888  | 1430.68   | 1681.196  | NM_004223 | 17099.736 | 15032.65  |
| AL110127  | 2774.505  | 3250.353  | AK021770  | 821.199   | 628.322   | NM_006813 | 813.751   | 539.483   |
| AK001997  | 742.961   | 797.082   | AK027248  | 3594.943  | 3069.121  | NM_001355 | 19103.07  | 17080.916 |
| NM_002528 | 5625.898  | 5455.865  | AK022804  | 20200.549 | 15788.578 | NM_000582 | 15868.316 | 12746.565 |
| D38438    | 7285.615  | 5652.988  | AF009263  | 4022.202  | 2713.341  | NM_005593 | 2762.751  | 1687.271  |
| AV714945  | 1532.242  | 1287.906  | AF009283  | 1047.172  | 799.643   | AJ224741  | 847.944   | 553.22    |
| AF089897  | 601.564   | 309.203   | AF086329  | 8865.449  | 6043.29   | NM_004684 | 2748.611  | 1348.788  |
| AF007872  | 3244.737  | 3194.611  | U92989    | 6650.093  | 7982.343  | BF338709  | 2057.218  | 1568.457  |
| M30938    | 9785.015  | 7726.68   | AF075102  | 2444.065  | 5372.775  | AF204171  | 313.616   | 204.768   |
| NM_015148 | 1899.128  | 1385.716  | NM_018463 | 32390.246 | 36934.66  | W96179    | 1815.877  | 393.566   |
| NM_004714 | 3154.832  | 2595.646  | X74956    | 60323.77  | 61451.832 | AW247841  | 12391.829 | 4791.985  |
| NM_002497 | 15759.91  | 13391.431 | AF132197  | 9167.433  | 17572.684 | BG568198  | 1986.399  | 1928.628  |
| AB025194  | 14656.379 | 11795.536 | AK025546  | 1198.745  | 3133.242  | M76559    | 3973.655  | 6651.947  |
| NM_006239 | 2401.313  | 3030.157  | AF278761  | 594.98    | 843.526   | U03884    | 781.607   | 664.975   |
| BC020863  | 1365.568  | 1707.109  | AL137487  | 2381.961  | 4054.426  | U11058    | 1544.392  | 2130.057  |
| NM_017897 | 3786.766  | 3276.204  | AK023800  | 1957.356  | 4159.18   | AI222585  | 831.812   | 4025.3    |
| NM_004265 | 1348.794  | 1148.562  | AK024120  | 3975.781  | 5295.085  | AA411678  | 6931.255  | 21158.385 |
| NM_002572 | 3949.276  | 4633.953  | U50526    | 1521.862  | 1774.556  | AA862813  | 28080.213 | 51119.285 |
| NM_016113 | 22246.867 | 30838.188 | AF056455  | 27677.428 | 24615.123 | AA398427  | 2188.469  | 6115.739  |
| NM_014222 | 4643.991  | 7830.137  | NM_018510 | 2035.738  | 1492.488  | T55728    | 6492.657  | 14826.935 |
| L14819    | 558.667   | 849.977   | U50537    | 1029.242  | 1142.887  | H20856    | 1999.823  | 1454.733  |
| NM_000509 | 5234.598  | 5361.442  | AK024988  | 1329.052  | 982.16    | N62586    | 2106.957  | 2383.295  |
| NM_004542 | 1455.978  | 1989.853  | AK025719  | 668.178   | 422.052   | AA242743  | 36807.27  | 26757.098 |
| X06182    | 5086.2    | 5209.934  | AF026943  | 3760.15   | 2542.623  | NM_015361 | 18530.176 | 12586.862 |
| BE908993  | 52732.855 | 46973.043 | L77582    | 1076.397  | 637.555   | NM_004310 | 6753.484  | 4564.382  |
| AB012701  | 9041.091  | 6992.311  | NM_020448 | 1627.657  | 1113.973  | NM_015537 | 7248.439  | 2984.81   |
| M61156    | 6999.813  | 6746.58   | NM_005419 | 3892.89   | 2693.316  | AK024004  | 750.963   | 635.001   |
| R44005    | 37712.094 | 31888.934 | L31956    | 715.437   | 889.911   | AK022365  | 474.971   | 332.241   |
| AI942392  | 4891.981  | 4264.782  | NM_003479 | 20496.719 | 14363.705 | BE892273  | 58024.805 | 59254.824 |
| M55040    | 1606.533  | 1256.847  | NM_006773 | 4951.333  | 5842.823  | AF026929  | 380.17    | 228.867   |
| AW009739  | 2871.823  | 2109.485  | AK024439  | 18881.656 | 28307.355 | NM_016734 | 1085.458  | 309.534   |
| BC036805  | 4971.012  | 3876.902  | X89676    | 1975.74   | 1825.995  | AF035803  | 184.042   | 253.205   |
| Z74615    | 52451.238 | 60764.109 | NM_012444 | 1163.614  | 1137.676  | Y08147    | 7795.377  | 13997.016 |
| X03884    | 12963.797 | 11330.325 | Z32684    | 7142.575  | 11671.363 | D00174    | 19793.896 | 13312.382 |
| U36759    | 936.459   | 848.177   | NM_016512 | 1594.448  | 2621.157  | AB000520  | 8825.586  | 5548.85   |
| X91625    | 2940.594  | 2905.77   | NM_017488 | 7758.587  | 11487.759 | AK023117  | 2848.992  | 8969.008  |
| AF090901  | 1033.765  | 770.483   | AY009400  | 12120.256 | 16132.401 | AL122046  | 2416.583  | 5629.808  |
| AF004231  | 2451.525  | 2472.19   | NM_005069 | 1321.434  | 1600.892  | AF119914  | 495.428   | 880.396   |
| AF001862  | 10501.407 | 12081.814 | AF086401  | 5771.653  | 7189.307  | NM_000855 | 5190.399  | 10054.728 |
| NM_016044 | 2568.107  | 2156.173  | L23869    | 2544.685  | 3239.402  | NM_005536 | 7477.755  | 6965.574  |
| NM_000520 | 1825.39   | 1725.349  | Z21853    | 4217.745  | 3985.547  | NM_005077 | 1703.307  | 1600.855  |
| X62468    | 967.244   | 1164.906  | U80770    | 2190.113  | 1545.437  | NM_001990 | 1818.61   | 1821.235  |



|           |           |           |           |           |           |           |           |           |
|-----------|-----------|-----------|-----------|-----------|-----------|-----------|-----------|-----------|
| NM_00389C | 11787.784 | 16738.043 | AB075846  | 1135.214  | 836.342   | NM_002141 | 2023.705  | 1997.751  |
| BF127978  | 4548.558  | 5127.861  | NM_018342 | 3375.988  | 2483.648  | NM_00612C | 1856.582  | 1062.527  |
| AF110801  | 705.773   | 839.432   | BC020260  | 10123.192 | 6356.125  | NM_006267 | 1415.097  | 800.418   |
| NM_01657E | 52471.281 | 62866.156 | D17156    | 11298.133 | 6302.9    | NM_002661 | 18560.643 | 10314.522 |
| AB018297  | 2714.775  | 3456.582  | L04461    | 1139.395  | 698.676   | NM_00126C | 214.508   | 234.931   |
| AK022565  | 9343.328  | 11018.316 | AK026938  | 39473.023 | 24927.191 | AK023982  | 1084.56   | 574.348   |
| AK023151  | 4631.508  | 5022.928  | AK024373  | 15531.003 | 10316.003 | NM_01846E | 1713.319  | 633.011   |
| AB033076  | 1600.163  | 1158.774  | AK022343  | 22059.285 | 13036.381 | Y11312    | 1465.11   | 407.214   |
| AK022876  | 2209.11   | 2189.403  | AK026400  | 2758.062  | 2340.479  | NM_00303C | 10235.142 | 5253.93   |
| AF134894  | 47823.605 | 39540.863 | NM_00414E | 10708.08  | 10541.264 | NM_00263E | 41629.129 | 16481.666 |
| NM_00393E | 8618.816  | 6860.847  | X03168    | 3376.112  | 4014.998  | AF100756  | 5841.681  | 10849.401 |
| NM_014827 | 12328.063 | 14326.72  | NM_00516E | 7708.487  | 7684.478  | NM_00682E | 6004.443  | 7551.93   |
| NM_00412E | 6526.289  | 6897.584  | NM_017801 | 10393.803 | 12576.486 | NM_00486Z | 1815.432  | 2002.184  |
| U87460    | 15574.525 | 15102.808 | NM_00734E | 4375.732  | 6650.984  | NM_001661 | 1434.034  | 1260.496  |
| NM_003617 | 1015.09   | 1051.179  | NM_01695C | 738.138   | 1123.371  | NM_01456C | 1350.789  | 792.369   |
| NM_001841 | 3815.33   | 3260.017  | U65473    | 16811.508 | 18997.686 | NM_02015C | 1993.958  | 2243.678  |
| NM_002054 | 4408.208  | 4056.785  | D63481    | 57286.188 | 61658.598 | NM_00715C | 6577.258  | 3829.9    |
| AF300649  | 11459.414 | 9281.828  | AY009951  | 1244.218  | 4269.787  | NM_006831 | 4298.473  | 2431.474  |
| NM_00412E | 3273.713  | 2896.2    | AL157424  | 1887.259  | 2658.75   | AL162044  | 6714.157  | 3777.503  |
| NM_00082C | 4908.199  | 5151.02   | AK024422  | 862.761   | 1237.848  | AB018353  | 5011.445  | 3139.954  |
| NM_003317 | 15321.958 | 13030.105 | NM_00267C | 794.29    | 1087.338  | NM_00703E | 3295.706  | 1706.777  |
| NM_001139 | 6076.79   | 5737.11   | NM_00387E | 9284.44   | 9131.626  | NM_002617 | 2490.228  | 1660.538  |
| L09081    | 16744.545 | 17503.494 | AJ276310  | 912.826   | 573.003   | NM_00331C | 24602.395 | 13386.347 |
| NM_00021E | 54828.133 | 66371.875 | NM_01229E | 18732.539 | 15651.217 | AF090907  | 3055.2    | 2190.006  |
| AF064255  | 52171.57  | 63882.43  | NM_01591C | 1685.094  | 1223.307  | AK024476  | 4882.766  | 2938.677  |
| NM_01636E | 52911.273 | 65463.887 | NM_00022Z | 792.267   | 504.677   | X74794    | 15238.675 | 6195.008  |
| U08853    | 6595.656  | 8497.568  | AL133666  | 8603.524  | 5281.3    | AL050298  | 3506.556  | 1203.734  |
| NM_004261 | 27442.4   | 29329.676 | NM_00066C | 2714.29   | 1489.282  | NM_00707E | 29844.141 | 7325.539  |
| NM_01600E | 1479.856  | 2079.778  | NM_00471C | 9692.565  | 6372.791  | M20696    | 2608.131  | 341.643   |
| NM_01624E | 4094.449  | 5911.908  | NM_00439E | 23750.514 | 15674.654 | NM_00291E | 920.061   | 342.791   |
| AF005632  | 9764.535  | 10319.737 | NM_01799E | 4377.767  | 2905.235  | NM_00673E | 2585.734  | 2118.603  |
| NM_00090C | 3403.949  | 3420.683  | NM_01598E | 65681.289 | 59997.328 | NM_00364C | 1420.361  | 907.62    |
| NM_00449C | 16472.471 | 13429.979 | NM_00104C | 9287.578  | 6513.682  | NM_014444 | 4733.153  | 4107.229  |
| AF309489  | 784.607   | 481.608   | NM_01439E | 1031.995  | 1495.886  | NM_01224E | 5506.543  | 10247.958 |
| AB013889  | 377.804   | 422.988   | AF113685  | 2739.471  | 3518.377  | NM_01497C | 6096.878  | 7117.336  |
| AF239613  | 499.61    | 244.802   | NM_00547C | 11982.881 | 15023.954 | NM_01439C | 3105.393  | 3353.23   |
| NM_00028E | 3504.918  | 3089.282  | AF142570  | 2158.63   | 2392.834  | NM_00422C | 18411.139 | 18124.211 |
| NM_00476Z | 7142.333  | 7349.379  | NM_00422E | 20657.873 | 24500.344 | NM_00681C | 1089.618  | 1071.448  |
| NM_006641 | 53388.816 | 57083.883 | NM_00386Z | 2566.409  | 2848.353  | NM_00135E | 24374.23  | 23427.002 |
| NM_000634 | 21527.193 | 19340     | NM_00287C | 9086.182  | 8828.787  | U63336    | 580.31    | 424.224   |
| NM_01467E | 46108.465 | 36451.605 | NM_015571 | 22341.754 | 29100.084 | NM_006907 | 1805.306  | 851.752   |
| AB040969  | 4020.903  | 3835.22   | NM_004701 | 12875.612 | 17812.559 | NM_00268E | 340.535   | 217.197   |
| NM_003467 | 16048.158 | 14319.906 | AK025554  | 3191.591  | 4235.037  | AJ224741  | 939.225   | 625.833   |
| NM_01493E | 3153.145  | 2524.322  | BI824151  | 5831.389  | 4887.827  | NM_004684 | 2896.894  | 1327.167  |
| NM_00394C | 3047.969  | 3518.859  | AK021791  | 8876.579  | 7405.333  | BF338709  | 2269.671  | 1839.94   |
| NM_01905Z | 5666.356  | 8862.574  | NM_00501E | 810.269   | 681.19    | AF204171  | 451.175   | 237.295   |
| NM_00320Z | 1021.727  | 904.722   | NM_00405Z | 3398.921  | 2348.111  | M18182    | 238.103   | 209.544   |
| AF119902  | 1113.606  | 1236.16   | NM_004394 | 13714.438 | 11130.837 | W96179    | 2119.329  | 1460.915  |
| NM_02052E | 28874.824 | 27904.479 | NM_005727 | 56748.699 | 55728.172 | AW247841  | 14334.409 | 7439.417  |
| NM_00438E | 3747.069  | 4865.662  | AK027242  | 5121.383  | 3934.987  | BG568198  | 1866.116  | 602.604   |
| NM_02037E | 513.845   | 1038.92   | NM_00127E | 32978.867 | 22539.557 | M76559    | 4389.478  | 1036.936  |
| AL110127  | 2811.515  | 3646.41   | NM_00501C | 6678.364  | 3776.041  | U03884    | 493.241   | 229.595   |
| AK001997  | 618.651   | 904.88    | NM_01905E | 6574.604  | 4276.464  | U11058    | 900.948   | 584.873   |

|           |           |           |           |           |           |           |           |           |
|-----------|-----------|-----------|-----------|-----------|-----------|-----------|-----------|-----------|
| NM_00252E | 5398.753  | 5528.3    | NM_020199 | 1841.628  | 1076.506  | AI222585  | 1006.634  | 531.058   |
| D38438    | 8269.064  | 8600.596  | U96136    | 1019.365  | 816.078   | AA411678  | 7789.615  | 7587.976  |
| AV714945  | 1411.535  | 1344.441  | NM_017586 | 44783.18  | 34038.297 | AA862813  | 30626.002 | 44481.758 |
| AF089897  | 548.695   | 262.459   | NM_005941 | 1574.08   | 1377.224  | AA398427  | 1838.204  | 4317.643  |
| AF007872  | 3040.979  | 2421.333  | NM_015884 | 830.404   | 946.766   | T55728    | 5003.663  | 6122.128  |
| M30938    | 8779.473  | 7257.218  | AF201380  | 4090.783  | 6299.679  | H20856    | 2062.513  | 1355.011  |
| NM_01514E | 2088.407  | 1489.741  | NM_003619 | 702.806   | 1371.487  | N62586    | 2320.176  | 2657.095  |
| NM_004714 | 2873.639  | 1793.282  | NM_012392 | 4484.74   | 4179.772  | AA242743  | 45152.219 | 55409.664 |
| NM_005401 | 519.017   | 411.838   | NM_014833 | 44597.332 | 51639.582 | NM_015361 | 20676.307 | 16343.439 |
| NM_002497 | 14355.436 | 11715.162 | NM_000045 | 3286.872  | 3724.644  | NM_00431C | 7286.707  | 5105.24   |
| AB025194  | 14532.773 | 12264.505 | NM_00387E | 14806.883 | 13951.643 | NM_015537 | 7514.425  | 4698.595  |
| NM_00623E | 2327.687  | 2371.705  | NM_004832 | 2448.089  | 3400.708  | NM_01652C | 12239.708 | 5801.667  |
| BC020863  | 1174.906  | 988.485   | NM_005957 | 1939.823  | 2038.086  | AF035803  | 302.932   | 138.57    |
| NM_017897 | 3448.581  | 3524.023  | AK024374  | 2978.042  | 3911.667  | Y08147    | 11951.241 | 5766.238  |
| NM_00426E | 1307.114  | 1318.595  | NM_007101 | 3514.7    | 3662.564  | D00174    | 28654.814 | 15497.188 |
| NM_002572 | 3232.505  | 3483.854  | NM_018234 | 722.519   | 716.254   | AB000520  | 5920.588  | 2855.989  |
| NM_001441 | 1687.882  | 2105.649  | AB033062  | 2843.24   | 1974.593  | AK023117  | 2290.286  | 1257.056  |
| NM_018324 | 1505.636  | 1416.439  | NM_016437 | 52781.711 | 47772.875 | AL122046  | 2197.337  | 921.534   |
| L14819    | 572.835   | 994.026   | NM_00272C | 14923.836 | 11087.784 | AF119914  | 283.291   | 175.164   |
| NM_00050E | 5296.351  | 5387.755  | AK024716  | 44619.031 | 34819.277 | NM_00085E | 4003.693  | 589.159   |
| NM_004542 | 1572.96   | 2037.443  | X67155    | 2682.866  | 831.22    | NM_00553E | 6199.712  | 1787.329  |
| X06182    | 4983.854  | 6004.072  | NM_02038C | 5376.657  | 3447.822  | NM_005077 | 1052.436  | 412.688   |
| BE908993  | 50469.27  | 45403.641 | AL137519  | 684.737   | 468.627   | NM_00442E | 8286.179  | 15169.622 |
| AB012701  | 9359.813  | 10793.7   | NM_00289C | 60272.395 | 48416.277 | NM_00199C | 2005.921  | 2446.843  |
| M61156    | 7671.59   | 7989.944  | NM_00133C | 64006.105 | 64870.254 | NM_002141 | 2195.326  | 3138.602  |
| R44005    | 35747     | 27276.074 | NM_015927 | 3120.488  | 1836.253  | NM_003311 | 2207.238  | 1615.033  |
| AI942392  | 5268.139  | 5109.275  | NM_00477E | 16403.572 | 12862.474 | NM_00377E | 3103.703  | 2111.006  |
| M55040    | 1616.223  | 1588.232  | NM_019071 | 8118.875  | 5194.81   | NM_01571E | 482.614   | 961.543   |
| AW009739  | 2882.109  | 2332.167  | NM_001913 | 11014.246 | 9954.424  | NM_00612E | 1364.451  | 782.549   |
| BC036805  | 4897.994  | 3374.402  | AK025594  | 1706.342  | 1884.485  | NM_00058E | 13346.264 | 10447.884 |
| Z74615    | 54870.605 | 56150.328 | AB040931  | 8323.038  | 7842.105  | NM_00559E | 2615.745  | 1666.97   |
| X03884    | 12058.553 | 9046.223  | NM_00359E | 1695.662  | 2106.674  | NM_016077 | 3623.993  | 1826.211  |
| U36759    | 1030.769  | 893.356   | NM_015911 | 2200.651  | 2263.2    | AF100756  | 5147.943  | 2144.903  |
| X91625    | 3006.924  | 2454.576  | BC011826  | 8442.788  | 8641.15   | NM_00682E | 5336.359  | 1457.193  |
| AF090901  | 1014.655  | 773.194   | NM_017647 | 5499.235  | 5974.16   | NM_00486E | 1218.02   | 159.987   |
| AF004231  | 2783.715  | 2057.325  | NM_012091 | 1736.241  | 2253.407  | NM_001661 | 1147.962  | 300.465   |
| AF001862  | 10243.28  | 9190.902  | NM_012321 | 12350.638 | 14979.44  | NM_01456E | 1132.43   | 682.629   |
| NM_016044 | 2482.342  | 1830.479  | D13642    | 9821.239  | 11035.466 | NM_02015C | 1900.459  | 4004.265  |
| NM_00052C | 1978.865  | 1826.073  | NM_004741 | 30427.154 | 30984.391 | NM_00715C | 7142.177  | 7632.535  |
| NM_00028E | 13567.794 | 13458.726 | NM_018032 | 8175.574  | 8246.096  | NM_006831 | 4552.585  | 3388.353  |
| NM_00150C | 1310.549  | 1434.576  | NM_00367E | 36731.27  | 34396.723 | AL162044  | 7065.363  | 7799.833  |
| AB033076  | 1763.406  | 2268.625  | NM_01751E | 6444.347  | 5246.59   | AK024004  | 1682.08   | 1151.51   |
| AK022876  | 2163.395  | 3139.108  | NM_004117 | 9488.911  | 5401.908  | AK022365  | 1179.157  | 797.099   |
| AF134894  | 46575.563 | 47128.758 | NM_016594 | 33748.098 | 21953.432 | BE892273  | 47896.449 | 56329.254 |
| NM_00393E | 9555.615  | 11047.306 | NM_030752 | 17649.074 | 12633.209 | AF026929  | 412.948   | 260.91    |
| NM_014827 | 12503.816 | 19895.947 | D26068    | 45061.996 | 24622.281 | NM_016734 | 1306.261  | 783.835   |
| NM_00412E | 6515.429  | 8573.076  | NM_01855E | 51863.609 | 37482.863 | NM_00135E | 20386.676 | 11844.784 |
| U87460    | 16325.641 | 20414.404 | NM_01759E | 8020.655  | 4341.292  | U63336    | 500.517   | 318.194   |
| NM_003617 | 1191.838  | 998.639   | NM_00428E | 29230.193 | 19531.115 | NM_006907 | 1850.593  | 896.407   |
| NM_001841 | 3761.012  | 2816.609  | AF188747  | 2431.851  | 2127.624  | NM_00268E | 275.15    | 171.887   |
| NM_002054 | 4757.497  | 4570.875  | NM_00277E | 1673.153  | 1308.251  | NM_006267 | 1325.167  | 718.014   |
| AF300649  | 11181.642 | 11010.466 | NM_013411 | 4062.307  | 3661.974  | NM_002661 | 16825.408 | 7408.337  |
| NM_00412E | 3366.472  | 3398.268  | AB007956  | 453.753   | 648.072   | AK023982  | 659.209   | 157.298   |

|           |           |           |           |           |           |           |           |           |
|-----------|-----------|-----------|-----------|-----------|-----------|-----------|-----------|-----------|
| NM_000823 | 4696.43   | 4222.601  | NM_020200 | 3207.589  | 2969.213  | NM_018466 | 1275.944  | 452.283   |
| NM_004414 | 1381.5    | 1041.219  | NM_001248 | 760.342   | 1159.48   | AB014533  | 8477.625  | 10963.764 |
| NM_003317 | 11271.646 | 8242.597  | NM_000180 | 55388.023 | 52058.121 | M11427    | 402.98    | 445.644   |
| NM_001139 | 5723.545  | 5998.418  | NM_000858 | 23192.813 | 23047.473 | NM_000744 | 710.746   | 1626.703  |
| NM_004609 | 53325.863 | 64077.457 | AF254087  | 4669.586  | 4933.178  | NM_003039 | 6660.416  | 4710.906  |
| NM_003772 | 1178.116  | 1202.857  | NM_017715 | 3731.477  | 4926.825  | NM_014509 | 553.386   | 864.174   |
| NM_001541 | 7859.781  | 6694.333  | AL117607  | 5760.928  | 5465.654  | NM_020372 | 17672.686 | 19425.459 |
| NM_005416 | 2482.312  | 1800.168  | AB037774  | 4386.985  | 7341.876  | NM_002635 | 39781.387 | 27770.514 |
| NM_004670 | 222.631   | 319.182   | NM_005438 | 3522.062  | 3452.672  | NM_004979 | 871.065   | 581.98    |
| L09081    | 17655.541 | 19955.674 | AK024361  | 2758.996  | 2192.213  | NM_015361 | 22578.504 | 11994.913 |
| NM_000218 | 49770.156 | 67143.414 | NM_004350 | 17678.408 | 15495.447 | NM_004310 | 6736.833  | 2791.493  |
| NM_016113 | 16716.998 | 23552.676 | NM_018044 | 13644.64  | 9603.75   | NM_015537 | 7832.191  | 3498.461  |
| NM_014222 | 4422.026  | 6969.583  | NM_004503 | 1134.965  | 645.514   | NM_016520 | 11961.45  | 5452.054  |
| AK026317  | 14554.739 | 18107.594 | NM_001717 | 1090.588  | 863.074   | AB018353  | 4032.354  | 2038.728  |
| X82207    | 48269.777 | 57857.461 | AF274347  | 9107.608  | 4237.379  | NM_007036 | 2627.861  | 1186.948  |
| NM_015044 | 10072.152 | 12241.672 | AK001144  | 1003.486  | 859.991   | NM_002617 | 2378.488  | 937.019   |
| NM_002867 | 940.742   | 1113.444  | NM_018555 | 8092.146  | 4681.59   | NM_003313 | 19595.162 | 4958.314  |
| BF217496  | 8638.558  | 11380.329 | NM_005122 | 1614.24   | 1070.303  | AF090907  | 2587.123  | 352.106   |
| NM_004762 | 7936.382  | 8786.562  | NM_014552 | 15274.324 | 15735.411 | AK024476  | 4509.006  | 1263.154  |
| NM_006641 | 49272.363 | 61618.813 | NM_003072 | 25960.439 | 26020.203 | X74794    | 12092.295 | 4718.811  |
| NM_000634 | 24549.588 | 26632.689 | L09081    | 38445.043 | 44746.684 | AL050298  | 3955.624  | 7168.393  |
| NM_014679 | 46659.586 | 33097.305 | NM_000218 | 65954.836 | 70604.391 | NM_007079 | 37463.02  | 33622.969 |
| AB040969  | 3574.657  | 3564.594  | NM_016113 | 34417.035 | 41794.551 | M20696    | 2924.558  | 3930.17   |
| NM_003467 | 15545.414 | 13349.176 | NM_014222 | 6144.839  | 8336.104  | NM_002915 | 1062.295  | 1255.216  |
| NM_014936 | 3074.112  | 2804.344  | L14819    | 701.514   | 1077.362  | NM_006736 | 2924.23   | 3623.024  |
| NM_003943 | 2998.362  | 2776.977  | NM_000509 | 6351.87   | 6014.24   | NM_003640 | 1403.123  | 1044.537  |
| NM_019052 | 5373.957  | 7256.912  | NM_004542 | 1312.476  | 2001.687  | NM_014444 | 3835.73   | 3619.489  |
| NM_003202 | 973.667   | 858.648   | AI742810  | 288.709   | 394.765   | NM_012248 | 1822.275  | 1483.89   |
| AF119902  | 1215.165  | 1019.704  | X06182    | 8073.385  | 10328.656 | NM_014970 | 5748.412  | 6134.105  |
| NM_020525 | 28452.758 | 21926.744 | BE908993  | 62541.625 | 59261.563 | NM_014393 | 3165.398  | 2438.927  |
| X62468    | 944.426   | 1048.638  | AB012701  | 13629.48  | 12514.937 | NM_004223 | 16061.319 | 10245.827 |
| NM_003890 | 10047.867 | 9470.324  | M61156    | 11934.931 | 12721.37  | NM_006813 | 875.593   | 384.102   |
| BF127978  | 4224.72   | 3526.549  | R44005    | 58584.691 | 54831.531 | CY3Cy5    | 1300.962  | 154.915   |
| AF110801  | 818.255   | 664.884   | AI942392  | 5982.64   | 4501.482  | U00684    | 2150.815  | 7949.85   |
| NM_016579 | 51512.098 | 56471.852 | M55040    | 2452.097  | 2272.037  | NM_016459 | 20677.629 | 49180.723 |
| AB018297  | 2472.352  | 3483.655  | AW009739  | 4478.003  | 3871.309  | AF086227  | 841.092   | 4017.597  |
| AK022565  | 9151.916  | 15330.349 | BC036805  | 9713.075  | 6045.126  | AK026246  | 1391.535  | 4720.612  |
| AK023151  | 4350.697  | 14652.473 | Z74615    | 62072.285 | 65178.785 | AF070524  | 194.757   | 670.424   |
| NM_017897 | 3644.475  | 4127.595  | X03884    | 21381.23  | 12590.612 | AF035281  | 696.164   | 2913.901  |
| NM_004265 | 1566.954  | 1700.794  | U36759    | 1586.435  | 893.807   | AF070625  | 1548.549  | 4385.292  |
| NM_002572 | 3563.956  | 3934.702  | X91625    | 3817.263  | 2217.039  | AL365512  | 1040.879  | 4145.6    |
| NM_001441 | 2278.514  | 2876.41   | AF090901  | 1237.989  | 910.186   | AK001740  | 2799.208  | 7143.435  |
| NM_018324 | 1634.128  | 2045.513  | AF004231  | 7090.058  | 6182.025  | AF131793  | 345.726   | 828.294   |
| AF064255  | 50482.117 | 57253.516 | AF001862  | 15424.361 | 13551.049 | NM_078467 | 3274.862  | 5407.42   |
| NM_016368 | 50223.281 | 62690.129 | NM_002451 | 8310.94   | 7181.891  | SR2       | 25235.088 | 28081.84  |
| U08853    | 6792.508  | 6605.432  | AF119902  | 2066.617  | 2161.207  | SR4       | 4903.188  | 6191.857  |
| NM_004261 | 25598.766 | 18720.025 | NM_020525 | 49424.699 | 47563.895 | SR6       | 762.657   | 900.077   |
| NM_016006 | 1240.299  | 1448.975  | X62468    | 1734.911  | 1589.28   | SR8       | 2040.276  | 5104.469  |
| NM_016245 | 4485.029  | 4877.45   | NM_003890 | 18186.563 | 20384.76  | SR10      | 3992.536  | 1114.303  |
| AF005632  | 8138.571  | 5344.592  | BF127978  | 7514.198  | 8074.768  | CY3Cy5    | 847.718   | 79.562    |
| NM_000903 | 3118.55   | 2503.125  | AF110801  | 988.212   | 1130.67   | AF087999  | 1563.338  | 5356.225  |
| NM_004493 | 15794.771 | 13557.375 | NM_016579 | 59485.285 | 59160.125 | NM_003740 | 1060.153  | 3194.028  |
| AF309489  | 671.695   | 558.605   | AB018297  | 3439.704  | 4916.207  | AL050078  | 1399.638  | 3018.394  |

|           |           |           |           |           |           |           |           |           |
|-----------|-----------|-----------|-----------|-----------|-----------|-----------|-----------|-----------|
| NM_004047 | 27430.184 | 22695.086 | AK022565  | 8420.55   | 12274.348 | NM_01853E | 325.449   | 630.842   |
| NM_004823 | 2692.09   | 3431.573  | AK023151  | 6991.142  | 8870.435  | NM_01334E | 566.205   | 970.704   |
| Y17179    | 52882.688 | 60441.039 | AB033076  | 2577.109  | 2296.184  | NM_017851 | 765.296   | 1157.287  |
| NM_000891 | 1302.708  | 1182.215  | AK022876  | 4172.412  | 3389.614  | AK026182  | 72181.359 | 65338.672 |
| AK026840  | 3153.923  | 4535.782  | AF134894  | 57602.887 | 52680.539 | AK025603  | 997.838   | 1441.239  |
| NM_00028E | 3228.818  | 5144.935  | NM_00393E | 10076.799 | 7881.667  | NM_01608E | 6100.549  | 5831.272  |
| NM_016044 | 2621.58   | 2823.249  | NM_014827 | 16795.779 | 19674.01  | AK025768  | 1178.13   | 1457.295  |
| NM_00052C | 1634.682  | 1826.641  | NM_00412E | 9250.011  | 8843.425  | AL117502  | 2114.274  | 2249.252  |
| NM_00028E | 14113.727 | 13190.521 | U87460    | 20377.012 | 15585.396 | AK001846  | 592.887   | 597.515   |
| NM_00150C | 1215.89   | 1198.3    | NM_003617 | 1644.907  | 1553.029  | AK024637  | 2295.464  | 1934.043  |
| NM_00438E | 3638.033  | 3633.673  | NM_001841 | 4489.439  | 2630.526  | AL110293  | 534.306   | 257.057   |
| NM_02037E | 690.849   | 650.864   | NM_002054 | 8023.449  | 5140.832  | AK026238  | 318.957   | 809.547   |
| AL110127  | 2459.667  | 1692.635  | AF300649  | 25831.402 | 20075.174 | AK026731  | 512.3     | 677.53    |
| AK001997  | 616.963   | 551.11    | NM_00412E | 7296.556  | 5955.673  | AL133446  | 1163.157  | 1635.546  |
| NM_00252E | 5088.781  | 4395.396  | NM_000823 | 12378.487 | 9796.87   | NM_006553 | 1017.953  | 2423.887  |
| D38438    | 6808.73   | 4870.205  | NM_003317 | 34923.133 | 37616.789 | U56251    | 1463.152  | 1653.691  |
| AV714945  | 1373.14   | 918.336   | NM_001139 | 9985.189  | 8658.662  | BC035667  | 324.851   | 380.838   |
| AF089897  | 568.305   | 431.94    | NM_001441 | 4138.317  | 5457.025  | AL049277  | 1506.09   | 1201.934  |
| AF007872  | 3200.03   | 2361.843  | NM_018324 | 2424.326  | 2641.419  | AL117506  | 398.815   | 360.837   |
| M30938    | 9182.755  | 7167.219  | AF064255  | 59996.117 | 58529.07  | AL050043  | 504.193   | 307.578   |
| NM_01514E | 2207.524  | 1297.508  | NM_01636E | 60679.715 | 62009.648 | AL117571  | 1196.401  | 1485.502  |
| NM_004714 | 2956.876  | 2130.81   | U08853    | 7607.35   | 9355.581  | AK025010  | 145.449   | 316.486   |
| NM_005401 | 569.053   | 417.131   | NM_004261 | 32058.66  | 37068.164 | NM_01427E | 2048.941  | 1812.341  |
| NM_017677 | 338.446   | 351.195   | NM_01600E | 1870.52   | 1648.588  | AF035303  | 1259.894  | 3302.218  |
| NM_002497 | 15211.138 | 12634.609 | NM_01624E | 6443.915  | 9326.588  | AF056438  | 1041.043  | 1076.74   |
| AB025194  | 13400.47  | 13443.913 | AF005632  | 14430.516 | 28945.129 | AF003737  | 48380.797 | 34478.047 |
| NM_00623E | 1942.633  | 2759.686  | NM_000903 | 4127.129  | 5865.161  | AF009296  | 391.959   | 427.918   |
| BC020863  | 1059.693  | 1764.321  | NM_004493 | 19477.055 | 23234.174 | AK001011  | 3685.242  | 3267.734  |
| CY3Cy5    | 13261.411 | 801.095   | AF309489  | 1838.851  | 1768.054  | AK001398  | 1595.29   | 1134.327  |
| NM_00475E | 550.024   | 600.845   | NM_00028E | 4095.885  | 4022.774  | AK021690  | 271.355   | 265.376   |
| NM_005163 | 5099.835  | 4770.72   | NM_004762 | 12578.897 | 11375.86  | AK001840  | 321.874   | 496.623   |
| AL117623  | 695.153   | 746.697   | NM_006641 | 60436.723 | 60712.465 | NM_005444 | 1434.265  | 1015.98   |
| AF085988  | 618.632   | 645.06    | NM_000634 | 47891.289 | 43177.855 | V00589    | 21669.52  | 32043.564 |
| AK025785  | 5598.219  | 4625.268  | NM_01467E | 61169.824 | 52731.605 | AK024838  | 485.295   | 372.394   |
| AF143877  | 662.234   | 693.967   | AB040969  | 4426.655  | 3766.93   | AK000175  | 1717.256  | 1498.762  |
| NM_00073E | 46342.004 | 36786.41  | NM_003467 | 16343.232 | 13589.771 | AL137736  | 1286.483  | 1388.259  |
| AF086474  | 496.774   | 536.309   | NM_01493E | 4129.688  | 3573.109  | AF143870  | 693.839   | 1188.39   |
| AF086529  | 593.184   | 538.236   | NM_003943 | 5437.942  | 4940.109  | NM_004192 | 4626.949  | 3642.419  |
| AF086023  | 3151.234  | 2962.873  | NM_019052 | 6711.393  | 7955.575  | AK024160  | 690.245   | 823.721   |
| AF086538  | 1741.142  | 2396.364  | NM_003202 | 1366.451  | 1400.336  | AK025077  | 1096.016  | 1038.932  |
| NM_00477E | 1229.125  | 1242.75   | NM_00028E | 16217.976 | 16445.027 | NM_020317 | 1896.408  | 1758.328  |
| AK023353  | 3215.801  | 3470.249  | NM_00150C | 1561.129  | 1561.278  | AL080234  | 2180.391  | 1822.871  |
| NM_00475E | 388.566   | 557.797   | NM_00438E | 4609.26   | 5887.409  | AK027025  | 791.27    | 567.622   |
| NM_005163 | 5823.142  | 4135.763  | NM_02037E | 1234.507  | 2208.232  | AF212220  | 3497.883  | 1507.512  |
| SR1       | 80901.773 | 65726.234 | AL110127  | 3787.763  | 5404.723  | AF147387  | 1023.196  | 602.605   |
| SR3       | 37214.777 | 26253.215 | AK001997  | 888.048   | 952.249   | NM_012081 | 245.954   | 215.219   |
| SR5       | 3556.416  | 2822.516  | NM_00252E | 7979.294  | 11071.776 | AF085909  | 9856.726  | 15062.075 |
| SR7       | 3905.645  | 26827.396 | D38438    | 16162.396 | 25760.754 | AK027193  | 501.97    | 229.899   |
| SR9       | 12407.988 | 1780.899  | AV714945  | 2073.016  | 2935.557  | AF113018  | 446.777   | 468.842   |
| CY3Cy5    | 9413.08   | 473.079   | AF089897  | 491.926   | 596.667   | AK021996  | 454.465   | 488.603   |
| AF182420  | 1076.898  | 821.378   | AF007872  | 4113.313  | 4245.531  | AL049337  | 2335.972  | 2405.49   |
| U84517    | 11449.102 | 9035.65   | M30938    | 12420.88  | 12383.003 | Z27200    | 799.208   | 1242.995  |
| U03237    | 594.982   | 383.756   | NM_01514E | 2326.982  | 1487.795  | AF070571  | 2404.075  | 2771.174  |

|           |           |           |           |           |           |           |           |           |
|-----------|-----------|-----------|-----------|-----------|-----------|-----------|-----------|-----------|
| AK001921  | 4046.556  | 2885.469  | NM_004714 | 5940.453  | 5813.953  | AK023554  | 2151.597  | 1883.576  |
| AF088004  | 1270.84   | 1215.118  | NM_005401 | 847.354   | 757.734   | NM_003513 | 6412.772  | 3919.831  |
| AK024944  | 2141.384  | 2476.885  | NM_002497 | 20106.988 | 14420.003 | AF161427  | 48713.676 | 56278.125 |
| S81893    | 9525.005  | 8309.006  | AB025194  | 26930.725 | 24080.301 | AK021715  | 6399.685  | 3781.782  |
| NM_007202 | 1772.849  | 1113.313  | NM_006239 | 4650.654  | 4805.261  | AK000315  | 3699.121  | 2650.006  |
| AK021777  | 1148.392  | 789.611   | BC020863  | 1994.401  | 1943.452  | AK023248  | 269.159   | 303.301   |
| AF007137  | 1762.058  | 1412.654  | NM_017897 | 6578.534  | 7583.998  | NM_012404 | 12287.249 | 7043.534  |
| AK023292  | 573.478   | 822.466   | NM_004265 | 1974.247  | 1815.08   | AF251190  | 219.946   | 165.64    |
| AK022452  | 564.286   | 610.447   | NM_002572 | 5263.784  | 4362.176  | AF130075  | 3844.61   | 2355.226  |
| AK023375  | 1242.995  | 802.8     | NM_016113 | 36656.871 | 47647.848 | NM_007002 | 4537.415  | 5257.967  |
| AK023781  | 657.29    | 974.812   | NM_014222 | 6879.781  | 10530.992 | NM_012121 | 603.909   | 460.903   |
| AK024366  | 608.56    | 640.993   | L14819    | 754.794   | 1173.662  | NM_014155 | 951.148   | 597.06    |
| AK022171  | 1572.073  | 1265.669  | NM_000509 | 5850.079  | 8289.024  | NM_016338 | 4452.431  | 2999.116  |
| AK025913  | 1046.088  | 999.178   | NM_004542 | 1790.551  | 3320.511  | AF113699  | 13750.882 | 10520.424 |
| NM_016500 | 2728.194  | 3590.054  | AI742810  | 280.722   | 863.816   | AK021897  | 3143.126  | 2845.358  |
| AF087971  | 637.461   | 443.529   | X06182    | 8070.446  | 10783.672 | AK001051  | 519.905   | 492.113   |
| AF087974  | 2814.207  | 1733.233  | BE908993  | 62301.641 | 64980.227 | NM_018317 | 621.905   | 815.274   |
| NM_018004 | 450.046   | 293.716   | AB012701  | 12903.241 | 22846.012 | AF086051  | 449.554   | 426.919   |
| X78938    | 1514.974  | 985.239   | M61156    | 10640.41  | 24325.957 | AL049370  | 1267.358  | 1643.972  |
| AL359056  | 651.057   | 1094.488  | R44005    | 58973.523 | 59577.211 | AL365410  | 3804.67   | 2764.138  |
| AK021497  | 1723.874  | 2436.76   | AI942392  | 8303.521  | 11564.084 | D17082    | 7221.317  | 4949.315  |
| AF124367  | 397.127   | 466.956   | M55040    | 2254.962  | 2409.182  | D17252    | 26549.408 | 16548.494 |
| AK025615  | 23698.605 | 23984.488 | AW009739  | 3919.119  | 3254.82   | NM_003673 | 1733.357  | 1381.268  |
| AK023803  | 670.761   | 651       | BC036805  | 9617.059  | 8223.646  | Z36823    | 9259.25   | 7023.984  |
| AK025168  | 838.075   | 893.247   | Z74615    | 59589.641 | 60011.969 | NM_001845 | 832.227   | 293.382   |
| AK022379  | 634.563   | 649.107   | X03884    | 24868.553 | 17396.582 | NM_003734 | 6164.948  | 3159.232  |
| AK025338  | 3046.681  | 2766.532  | U36759    | 1774.041  | 1487.22   | NM_014935 | 4480.032  | 3717.902  |
| AK023462  | 2355.996  | 2772.969  | X91625    | 3905.482  | 3148.133  | X99660    | 13411.362 | 7131.369  |
| AF210649  | 616.6     | 923.519   | AF090901  | 1908.556  | 1809.34   | X03635    | 1668.511  | 581.5     |
| AL133050  | 582.008   | 750.018   | AF004231  | 7042.421  | 7951.508  | NM_004351 | 2239.219  | 1524.611  |
| AK027233  | 3853.598  | 2992.592  | AF001862  | 15112.422 | 18953.109 | NM_004236 | 4083.079  | 2744.099  |
| AK024131  | 354.331   | 297.266   | NM_016044 | 3295.047  | 2942.793  | AB011093  | 6590.563  | 5292.389  |
| AK023343  | 652.707   | 498.884   | NM_000520 | 2359.303  | 1811.065  | NM_005618 | 195.683   | 241.578   |
| AK025323  | 585.363   | 748.413   | X62468    | 1936.438  | 2967.944  | NM_020533 | 7737.72   | 7027.589  |
| NM_013326 | 12080.456 | 14198.389 | NM_003890 | 21391.455 | 43214.762 | NM_001894 | 9486.199  | 7002.528  |
| BC037322  | 398.082   | 390.95    | BF127978  | 7536.799  | 9574.392  | NM_000614 | 375.436   | 367.273   |
| Y10202    | 372.56    | 340.801   | AF110801  | 790.202   | 1463.824  | AK022884  | 1385.125  | 1016.886  |
| Y12022    | 1499.162  | 1474.299  | NM_016579 | 61646.133 | 66777.367 | NM_006620 | 3227.549  | 2637.988  |
| AK001375  | 792.138   | 630.545   | AB018297  | 2344.472  | 3088.159  | NM_001397 | 419.631   | 314.19    |
| NM_019597 | 4730.828  | 6368.431  | AK022565  | 9320.896  | 15024.801 | NM_004772 | 2117.284  | 1392.1    |
| AL137559  | 744.995   | 701.933   | AK023151  | 6273.942  | 9962.541  | NM_003714 | 1237.319  | 1139.805  |
| AK021493  | 4415.619  | 4803.585  | AB033076  | 2528.009  | 3524.497  | U42977    | 3401.039  | 1101.587  |
| NM_006161 | 17006.826 | 14150.111 | AK022876  | 4224.488  | 6751.366  | NM_002881 | 4733.958  | 2901.917  |
| NM_006192 | 343.588   | 269.739   | AF134894  | 50643.953 | 56795.477 | NM_003666 | 2677.191  | 4128.149  |
| AF085881  | 376.773   | 408.976   | NM_003938 | 12534.938 | 14054.55  | NM_003288 | 2446.169  | 7537.445  |
| AK022737  | 3620.638  | 4261.457  | NM_014827 | 15664.757 | 19087.535 | NM_018242 | 824.427   | 863.251   |
| NM_003472 | 26639.029 | 24766.428 | NM_004126 | 8136.892  | 7126.309  | M83822    | 1160.94   | 498.806   |
| U92980    | 1247.609  | 1604.909  | U87460    | 18492.896 | 19077.16  | NM_003914 | 485.113   | 526.688   |
| AF133658  | 769.629   | 1260.28   | NM_003617 | 1624.907  | 1528.296  | NM_020423 | 730.031   | 518.513   |
| Y11159    | 1126.278  | 923.399   | NM_001841 | 4894.065  | 3672.157  | AK021437  | 669.188   | 532.856   |
| AB020648  | 1988.555  | 2390.427  | NM_002054 | 8546.113  | 6465.642  | NM_003831 | 1375.887  | 1462.835  |
| AK025798  | 14916.331 | 8840.352  | AF300649  | 25970.734 | 23209.178 | NM_001755 | 432.252   | 607.465   |
| AF086173  | 461.863   | 302.397   | NM_004125 | 7274.598  | 6270.138  | AB007965  | 5863.829  | 4588.254  |

|           |           |           |           |           |           |           |           |           |
|-----------|-----------|-----------|-----------|-----------|-----------|-----------|-----------|-----------|
| AK025164  | 402.153   | 379.327   | NM_000823 | 11311.613 | 9444.039  | NM_017645 | 386.627   | 379.661   |
| NM_018366 | 4907.18   | 4318.457  | NM_003317 | 36638.977 | 37304.945 | NM_000066 | 834.593   | 650.502   |
| NM_019845 | 15836.287 | 11594.816 | NM_001139 | 8531.712  | 7471.633  | NM_001196 | 4736.211  | 4667.69   |
| AL833005  | 3820.61   | 3515.044  | L09081    | 35080.375 | 37577.535 | NM_016008 | 981.929   | 1099.903  |
| L43366    | 3265.22   | 3810.765  | NM_000218 | 62176.934 | 58948.078 | NM_001924 | 3347.802  | 3040.927  |
| AK026124  | 3630.391  | 2921.098  | AF064255  | 60773.527 | 61940.207 | NM_017705 | 3146.489  | 2804.212  |
| NM_015505 | 4739.416  | 5781.27   | NM_016368 | 61417.941 | 67589.617 | NM_001796 | 2141.614  | 1663.677  |
| AL110157  | 4405.401  | 3844.907  | U08853    | 7938.923  | 9071.405  | AB040880  | 580.118   | 669.489   |
| NM_002319 | 3063.021  | 2914.006  | NM_004261 | 31811.842 | 40087.777 | NM_009587 | 7953.648  | 5172.84   |
| L38712    | 18696.549 | 13590.347 | NM_016006 | 1747.643  | 3026.307  | NM_017820 | 670.818   | 543.299   |
| U84508    | 1248.187  | 963.268   | NM_016245 | 6488.536  | 10971.134 | NM_002630 | 541.627   | 518.758   |
| NM_017793 | 2617.094  | 2022.432  | AF005632  | 14387.133 | 20440.48  | AJ295149  | 52940.16  | 63499.391 |
| NM_012131 | 2889.18   | 2359.02   | NM_000903 | 4943.386  | 5675.225  | NM_013435 | 2570.455  | 8764.328  |
| S41540    | 1708.285  | 1590.32   | NM_004493 | 21388.752 | 31960.813 | NM_014685 | 3346.782  | 1957.733  |
| AK026947  | 51479.203 | 50639.871 | AF309489  | 1742.227  | 2229.164  | AL359623  | 955.463   | 1082.676  |
| U84526    | 4765.73   | 5463.451  | AB013889  | 251.106   | 881.155   | AK026920  | 4326.13   | 4673.262  |
| L23401    | 1596.898  | 1166.391  | NM_000285 | 4223.486  | 4586.982  | AL137255  | 2465.42   | 2849.338  |
| NM_018090 | 57320.645 | 60968.426 | NM_004762 | 11272.841 | 9078.576  | NM_003370 | 5956.68   | 7179.803  |
| AK022728  | 38776.828 | 31779.768 | NM_006641 | 61188.52  | 67125.922 | AB037715  | 4566.258  | 4674.865  |
| AL109678  | 1592.093  | 1516.495  | NM_000634 | 44949.59  | 47080.992 | AF250924  | 7051.335  | 6609.487  |
| AL137524  | 5383.727  | 5205.438  | NM_014679 | 56182.309 | 52143.82  | D86979    | 1290.449  | 1450.958  |
| AF218008  | 3203.629  | 2228.878  | AB040969  | 5029.619  | 4408.422  | AB023230  | 541.779   | 447.91    |
| M22404    | 27857.572 | 17494.971 | NM_003467 | 20301.324 | 16828.816 | AF018081  | 21970.939 | 14789.276 |
| AF052115  | 430.089   | 440.335   | NM_014936 | 3541.635  | 2770.466  | NM_020202 | 14137.742 | 12065.685 |
| NM_014019 | 31418.221 | 19641.738 | NM_003943 | 3588.355  | 3601.263  | AF024540  | 995.381   | 597.941   |
| Z70711    | 918.908   | 607.859   | NM_019052 | 7368.26   | 8004.141  | NM_002185 | 1794.942  | 1474.765  |
| NM_012365 | 1556.337  | 1494.045  | NM_003202 | 1235.6    | 1308.152  | NM_001665 | 648.706   | 273.114   |
| AK022097  | 9460.259  | 10085.605 | AF119902  | 1838.991  | 1439.276  | AK025362  | 643.106   | 421.368   |
| NM_002166 | 24180.777 | 24215.859 | NM_020525 | 49238.117 | 46919.457 | AK021776  | 355.562   | 606.194   |
| NM_004660 | 9718.236  | 10014.702 | NM_004385 | 5644.861  | 14490.181 | AK026042  | 920.593   | 961.154   |
| NM_006165 | 1654.495  | 1608.643  | NM_020379 | 1296.554  | 4051.421  | NM_014233 | 23863.047 | 8385.378  |
| NM_016011 | 9652.31   | 7596.987  | AL110127  | 3767.077  | 4456.562  | NM_002137 | 39321.668 | 15197.944 |
| AL035307  | 1892.628  | 1614.441  | AK001997  | 1468.906  | 1769.521  | NM_002911 | 1284.956  | 1036.66   |
| AK023772  | 393.516   | 531.434   | NM_002525 | 6727.317  | 9067.141  | U94386    | 577.087   | 461.976   |
| NM_012234 | 2776.081  | 2849.234  | D38438    | 15593.436 | 22862.602 | NM_016000 | 29575.301 | 19164.932 |
| NM_012155 | 8185.503  | 8289.011  | AV714945  | 1827.164  | 2494.562  | NM_006372 | 3399.239  | 2170.672  |
| AF144700  | 2515.05   | 2781.067  | AF089897  | 699.058   | 861.456   | NM_014150 | 577.678   | 789.5     |
| NM_004105 | 9133.973  | 7050.775  | AF007872  | 3163.813  | 5140.842  | NM_006805 | 30089.26  | 20269.785 |
| AB046825  | 1684.438  | 1411.321  | M30938    | 10903.039 | 11266.237 | NM_004681 | 13485.111 | 10722.661 |
| X64975    | 1681.497  | 1650.501  | NM_015145 | 2634.384  | 2384.871  | AB033096  | 7439.243  | 5889.896  |
| AL050297  | 4653.155  | 3257.764  | NM_004714 | 4956.244  | 4630.104  | NM_014885 | 906.437   | 812.683   |
| AK026966  | 3441.343  | 1685.686  | NM_005401 | 666.674   | 855.368   | L31408    | 10124.379 | 7396.028  |
| AF185573  | 418.128   | 237.393   | NM_002497 | 21113.752 | 17034.895 | NM_001545 | 6896.301  | 5133.106  |
| AK025268  | 731.885   | 764.266   | AB025194  | 28793.211 | 23179.359 | NM_004445 | 11924.423 | 9089.516  |
| NM_006565 | 594.084   | 1124.634  | NM_006239 | 5897.487  | 6353.79   | AL133566  | 615.829   | 561.335   |
| AK026154  | 12538.977 | 10601.103 | BC020863  | 1535.601  | 1421.415  | M36118    | 12863.019 | 11805.203 |
| AK027073  | 713.186   | 585.359   | NM_017897 | 5180.864  | 4102.051  | NM_003395 | 6241.607  | 5254.984  |
| NM_000384 | 564.731   | 579.218   | NM_004265 | 1956.598  | 1587.854  | J02625    | 8660.022  | 2454.117  |
| AB018325  | 7396.592  | 5412.874  | NM_002572 | 5381.156  | 4733.78   | Y17175    | 52042.355 | 55198.238 |
| AL157482  | 17383.518 | 12852.034 | NM_001441 | 3866.064  | 4116.118  | NM_004545 | 13085.799 | 13443.098 |
| NM_003603 | 373.251   | 379.631   | NM_018324 | 2758.369  | 2180.062  | NM_005333 | 13847.464 | 36934.574 |
| NM_005425 | 6818.711  | 7139.749  | L14819    | 1631.284  | 2940.146  | AK026161  | 379.375   | 103.762   |
| NM_017974 | 1013.118  | 914.594   | NM_000509 | 7313.095  | 10201.389 | NM_004553 | 26276.156 | 11100.023 |

|           |           |           |           |           |           |           |           |           |
|-----------|-----------|-----------|-----------|-----------|-----------|-----------|-----------|-----------|
| NM_003979 | 1131.76   | 1158.629  | NM_004542 | 1950.137  | 2353.894  | D63484    | 1653.265  | 1014.266  |
| X14677    | 4876.551  | 3956.296  | X06182    | 7401.251  | 8521.667  | AK026745  | 3542.117  | 2485.085  |
| NM_005863 | 2289.27   | 1680.074  | BE908993  | 51309.449 | 48067.891 | AL157440  | 1961.518  | 2035.161  |
| U17077    | 4618.488  | 3902.635  | AB012701  | 14536.743 | 19487.459 | NM_016423 | 4874.935  | 5495.272  |
| NM_000915 | 2581.593  | 1956.196  | M61156    | 9902.477  | 14599.268 | AB040975  | 834.943   | 729.249   |
| AK024475  | 622.637   | 371.652   | R44005    | 56885.836 | 60701.809 | NM_003165 | 6096.153  | 4762.644  |
| AB026542  | 12871.836 | 9924.059  | AI942392  | 7465.474  | 11195.524 | AK055844  | 912.563   | 1034.759  |
| NM_019846 | 6521.671  | 3665.068  | M55040    | 1740.53   | 2544.019  | NM_018285 | 8138.71   | 6901.352  |
| NM_014433 | 1719.688  | 1302.582  | AW009739  | 4223.009  | 4220.515  | NM_003146 | 3510.916  | 3026.991  |
| NM_002062 | 23215.418 | 15325.741 | BC036805  | 7950.159  | 5886.81   | X52342    | 368.228   | 441.149   |
| NM_014394 | 59452.363 | 53751.234 | Z74615    | 58768.281 | 64294.852 | NM_003131 | 6423.815  | 6051.825  |
| NM_018140 | 3214.268  | 2756.055  | X03884    | 24946.139 | 23962.586 | NM_005233 | 5434.127  | 4568.507  |
| NM_016945 | 4064.423  | 4072.309  | U36759    | 2163.565  | 2051.255  | AK022889  | 7169.831  | 5364.388  |
| NM_000142 | 2860.07   | 2195.445  | X91625    | 3936.65   | 2765.149  | X52357    | 28446.424 | 17302.49  |
| AK097045  | 1847.072  | 1699.697  | AF090901  | 1754.088  | 1558.31   | AF211891  | 1009.831  | 609.407   |
| AB014548  | 4391.905  | 3069.744  | AF004231  | 7745.588  | 7044.503  | NM_005641 | 1432.772  | 1062.903  |
| NM_018256 | 5428.93   | 4633.931  | AF001862  | 15963.885 | 14444.452 | NM_003796 | 16746.895 | 7252.919  |
| AK025150  | 1426.589  | 1512.182  | NM_016044 | 3211.679  | 2748.501  | NM_002973 | 2164.604  | 1018.227  |
| AK024611  | 17353.494 | 20609.396 | NM_000520 | 2062.169  | 1580.575  | NM_004436 | 8721.425  | 7762.4    |
| BC010420  | 7467.213  | 10188.997 | NM_000289 | 17710.057 | 13851.929 | NM_006580 | 3968.724  | 4626.055  |
| NM_012280 | 48251.465 | 51793.816 | NM_001500 | 1449.864  | 1203.517  | NM_001305 | 3332.98   | 2343.448  |
| NM_018172 | 5211.489  | 5427.067  | AB033076  | 3291.985  | 3649.875  | NM_005082 | 312.781   | 224.393   |
| U03886    | 3630.297  | 3068.824  | AK022876  | 4522.64   | 7032.112  | D17028    | 24115.859 | 10730.371 |
| AK022040  | 628.886   | 660.517   | AF134894  | 43406.773 | 50866.152 | NM_013442 | 23416.387 | 15835.032 |
| AK022722  | 1158.763  | 815.93    | NM_003935 | 11667.966 | 12678.06  | BG611243  | 4270.436  | 3477.147  |
| NM_003591 | 15758.236 | 15280.911 | NM_014827 | 12238.115 | 15584.187 | AI417481  | 628.374   | 798.911   |
| AL080111  | 3189.764  | 3145.887  | NM_004126 | 9438.149  | 10718.735 | BI906766  | 4390.632  | 3444.582  |
| NM_003550 | 6465.379  | 4020.533  | U87460    | 16669.965 | 20246.473 | U60519    | 255.477   | 489.425   |
| NM_014642 | 4572.537  | 3521.894  | NM_003617 | 1322.215  | 2125.445  | AA282906  | 4561.73   | 5230.663  |
| NM_003829 | 2672.175  | 1937.682  | NM_001841 | 4768.976  | 6785.482  | L02870    | 29167.344 | 21549.211 |
| AL110168  | 7905.97   | 5461.901  | NM_002054 | 7482.402  | 10076.963 | BG755482  | 14379.909 | 14374.611 |
| NM_016147 | 7605.185  | 5904.871  | AF300649  | 25405.686 | 29773.025 | AI480307  | 4785.386  | 4838.878  |
| NM_002833 | 1792.553  | 1727.443  | NM_004125 | 7655.509  | 7660.695  | X51420    | 2180.491  | 2319.313  |
| NM_016592 | 696.634   | 725.578   | NM_000823 | 10411.774 | 9053.886  | D28235    | 877.987   | 3551.891  |
| NM_001865 | 654.51    | 677.952   | NM_004414 | 3493.327  | 3326.948  | L24038    | 1400.394  | 2017.512  |
| NM_014773 | 534.215   | 592.049   | NM_003317 | 32481.553 | 31834.822 | NM_053056 | 692.867   | 1240.468  |
| NM_005606 | 4296.824  | 4278.217  | NM_001139 | 12419.114 | 10411.596 | NM_006186 | 831.156   | 1191.773  |
| AF134707  | 978.118   | 973.25    | NM_004609 | 60023.508 | 62444.5   | NM_002751 | 3513.132  | 3462.62   |
| NM_001223 | 1789.262  | 1841.101  | NM_003772 | 1618.041  | 1809.563  | M55593    | 1340.462  | 1198.585  |
| BE730629  | 1626.975  | 1515.771  | NM_001541 | 25543.842 | 29438.166 | NM_005915 | 25177.813 | 14617.982 |
| AK027167  | 4415.948  | 3882.671  | NM_005416 | 3358.053  | 3744.047  | AK023011  | 19945.852 | 15133.812 |
| AK025265  | 2496.707  | 1898.335  | L09081    | 36671.172 | 42289.535 | NM_016816 | 887.159   | 727.36    |
| NM_013279 | 826.677   | 864.198   | NM_000215 | 58111.523 | 61809.445 | L17325    | 569.043   | 736.472   |
| NM_018652 | 27061.174 | 18199.152 | NM_016113 | 36887.973 | 38049.426 | NM_017716 | 536.336   | 1135.834  |
| AB011166  | 2160.88   | 1450.474  | NM_014222 | 6698.362  | 6825.667  | M58603    | 3257.794  | 2204.592  |
| AK024460  | 3683.323  | 2372.741  | AK026317  | 20285.813 | 22747.898 | NM_003633 | 3803.518  | 1475.245  |
| NM_006606 | 6391.609  | 4127.303  | X82207    | 59218.762 | 61355.758 | NM_001545 | 428.129   | 232.219   |
| S78570    | 818.898   | 518.223   | NM_015044 | 11529.093 | 19628.324 | NM_000115 | 4154.163  | 3228.767  |
| NM_005243 | 17503.551 | 13836.067 | NM_002867 | 1252.753  | 2471.516  | AF308801  | 1499.519  | 1983.616  |
| NM_006215 | 2376.239  | 1695.223  | BF217496  | 14894.201 | 12775.014 | NM_007315 | 49842.781 | 60377.137 |
| NM_016265 | 2154.236  | 1793.018  | NM_004762 | 9536.408  | 8796.596  | NM_014874 | 1322.702  | 1965.809  |
| NM_002095 | 6643.551  | 6213.119  | NM_006641 | 56372.609 | 58963.996 | NM_005765 | 7777.387  | 9050.693  |
| AK022814  | 1542.52   | 1328.151  | NM_000634 | 31788.816 | 41222.605 | NM_002762 | 2235.19   | 3211.795  |

|           |           |           |           |           |           |           |           |           |
|-----------|-----------|-----------|-----------|-----------|-----------|-----------|-----------|-----------|
| NM_00626E | 985.906   | 1001.075  | NM_014679 | 58910.445 | 59358.09  | NM_006324 | 7089.083  | 10464.368 |
| X78931    | 657.418   | 606.616   | AB040969  | 4364.718  | 5649.942  | NM_01684E | 9603.182  | 10362.632 |
| NM_006442 | 52145.492 | 50196.863 | NM_003467 | 19308.025 | 18778.871 | NM_000514 | 8066.203  | 8951.428  |
| NM_003902 | 22398.924 | 16939.834 | NM_014936 | 3603.908  | 3741.315  | AL137432  | 917.354   | 1332.238  |
| NM_016427 | 6566.309  | 6368.251  | NM_003943 | 4331.015  | 4184.002  | NM_000957 | 1976.948  | 2357.649  |
| U80741    | 10729.536 | 8131.124  | NM_019052 | 6950.766  | 7718.518  | NM_019043 | 2979.884  | 4288.119  |
| NM_014497 | 2088.87   | 1697.468  | NM_003202 | 1031.319  | 1488.974  | NM_003240 | 10817.525 | 18829.033 |
| AL133598  | 10225.073 | 7951.057  | AF119902  | 1786.684  | 1590.287  | NM_016564 | 49070.934 | 57623.988 |
| NM_015511 | 7489.027  | 4816.982  | NM_020525 | 53582.859 | 48405.355 | NM_000796 | 300.625   | 561.12    |
| NM_006625 | 7930.958  | 5781.886  | X62468    | 1817.101  | 2035.719  | AK021660  | 2844.368  | 2610.681  |
| NM_004891 | 20394.488 | 12506.696 | NM_003890 | 21218.307 | 30967.996 | AB007933  | 50741.961 | 60246.699 |
| NM_002831 | 11660.113 | 11335.463 | BF127978  | 8808.494  | 11534.083 | NM_005466 | 2643.233  | 5754.028  |
| AL833409  | 6190.484  | 4306.352  | AF110801  | 892.153   | 915.856   | NM_016361 | 1396.886  | 1919.65   |
| NM_015966 | 729.083   | 754.979   | NM_016579 | 61651.977 | 61818.609 | NM_003708 | 49236.723 | 67030.406 |
| NM_000147 | 829.71    | 820.982   | AB018297  | 3436.708  | 3545.466  | NM_014346 | 3649.041  | 13911.713 |
| NM_00015E | 4510.055  | 3852.594  | AK022565  | 11223.943 | 9486.9    | AB040895  | 1138.859  | 643.797   |
| NM_00641E | 1111.98   | 1031.213  | AK023151  | 7278.491  | 7107.419  | NM_004820 | 1797.639  | 241.185   |
| NM_000151 | 9386.806  | 8311.142  | NM_017897 | 6973.423  | 6268.065  | NM_001096 | 3277.456  | 2052.792  |
| NM_003935 | 783.562   | 660.47    | NM_004265 | 1973.208  | 2015.208  | NM_016014 | 1280.992  | 1121.149  |
| NM_002879 | 1209.325  | 1397.81   | NM_002572 | 4921.386  | 4918.542  | NM_018327 | 1435.857  | 1237.669  |
| AB028999  | 1230.432  | 1317.492  | NM_001441 | 4183.913  | 5141.53   | NM_013306 | 1062.356  | 1761.672  |
| AB018348  | 10858.297 | 9808.042  | NM_018324 | 2458.326  | 2374.248  | AF038186  | 3108.922  | 6004.698  |
| NM_013366 | 1212.614  | 1254.867  | AF064255  | 62548.262 | 59774.082 | NM_003664 | 2583.984  | 3167.85   |
| NM_003686 | 1555.635  | 1301.309  | NM_01636E | 59934.762 | 60432.305 | NM_002426 | 1848.094  | 2673.493  |
| NM_014812 | 2455.725  | 2078.398  | U08853    | 6183.993  | 5315.165  | AK027182  | 752.233   | 954.906   |
| NM_004641 | 748.549   | 831.841   | NM_004261 | 31916.715 | 39773.426 | J03651    | 6921.403  | 16227.76  |
| NM_002049 | 5299.469  | 5344.768  | NM_016006 | 2234.822  | 2381.337  | U61738    | 10969.222 | 33982.035 |
| AK026312  | 1622.384  | 1821.185  | NM_016245 | 5824.691  | 5610.058  | AJ132087  | 673.538   | 2002.301  |
| NM_017776 | 1955.677  | 1985.683  | AF005632  | 16187.82  | 15044.089 | U92818    | 1694.481  | 2375.205  |
| U81599    | 1023.781  | 761.279   | NM_000903 | 4507.74   | 3783.232  | NM_000442 | 3597.073  | 4366.45   |
| AF275722  | 992.123   | 484.94    | NM_004493 | 21725.639 | 16659.668 | NM_002934 | 1920.655  | 2134.801  |
| NM_003206 | 896.544   | 613.779   | AF309489  | 1826.3    | 1641.488  | AL050114  | 393.617   | 529.355   |
| AK000564  | 645.33    | 607.711   | NM_004047 | 35296.352 | 32416.781 | AK021492  | 1638.633  | 1049.017  |
| X60155    | 820.75    | 696.812   | AF287303  | 838.229   | 690.349   | AK023794  | 16885.094 | 17371.486 |
| AB037901  | 10039.394 | 8783.023  | NM_004823 | 5540.52   | 6935.521  | NM_01988E | 866.961   | 1183.557  |
| AV762646  | 532.787   | 561.424   | AB013889  | 482.364   | 2605.555  | AB033103  | 467.76    | 156.629   |
| NM_006129 | 1541.053  | 1831.61   | Y17179    | 56467.793 | 63045.234 | NM_002907 | 1232.316  | 436.224   |
| NM_000582 | 13558.827 | 11056.451 | NM_000891 | 2335.926  | 2801.178  | AK024098  | 386.038   | 243.046   |
| NM_005593 | 2242.952  | 1878.01   | AK026840  | 4845.699  | 3626.773  | AK022371  | 4045.015  | 3986.489  |
| AJ224741  | 925.371   | 1157.016  | NM_00028E | 4559.801  | 3838.964  | D42045    | 1801.68   | 2406.197  |
| NM_004684 | 3529.644  | 3883.879  | NM_016044 | 3612.179  | 3137.808  | AB007953  | 1373.524  | 2182.51   |
| BF338709  | 3758.26   | 5685.214  | NM_000520 | 2284.019  | 2002.17   | NM_014002 | 3826.169  | 7670.781  |
| AF204171  | 1021.782  | 1435.652  | NM_000289 | 15706.15  | 13918.37  | NM_004197 | 10517.563 | 35170.867 |
| W96179    | 3624.461  | 5665.843  | NM_001500 | 1524.873  | 1141.102  | NM_00127E | 2846.748  | 4323.954  |
| AW247841  | 22272.557 | 32973.273 | NM_00438E | 4821.782  | 4856.384  | NM_01910E | 5426.328  | 6734.935  |
| BG568198  | 2449.604  | 3041.984  | NM_020379 | 928.512   | 1355.351  | NM_005677 | 4560.308  | 19761.055 |
| M76559    | 4734.408  | 7474.016  | AL110127  | 3467.303  | 3673.344  | AF229803  | 777.544   | 1587.59   |
| U03884    | 1025.715  | 1526.673  | AK001997  | 693.312   | 863.787   | AF151810  | 489.055   | 704.943   |
| U11058    | 1404.201  | 2201.889  | NM_00252E | 7446.605  | 6359.866  | NM_002130 | 13609.193 | 8522.441  |
| AI222585  | 1281.436  | 1815.889  | D38438    | 15445.368 | 13404.308 | NM_004436 | 7405.521  | 3457.605  |
| AA411678  | 9190.371  | 15034.968 | AV714945  | 1867.524  | 1007.617  | NM_006580 | 3803.523  | 3157.071  |
| AA862813  | 41387.859 | 53552.949 | AF089897  | 496.605   | 472.06    | NM_00130E | 2786.831  | 1730.926  |
| AA398427  | 2241.39   | 3706.119  | AF007872  | 3842.247  | 3578.689  | NM_005082 | 482.438   | 314.263   |



|           |           |           |           |           |           |           |           |           |
|-----------|-----------|-----------|-----------|-----------|-----------|-----------|-----------|-----------|
| T55728    | 6960.932  | 8218.944  | M30938    | 11608.986 | 8792.562  | D17028    | 25759.801 | 8113.256  |
| H20856    | 3058.418  | 2676.535  | NM_015148 | 3414.832  | 2912.403  | NM_013442 | 20096.35  | 4404.586  |
| N62586    | 2659.339  | 3930.815  | NM_004714 | 4857.044  | 5047.676  | BG611243  | 2269.69   | 963.487   |
| AA242743  | 36707.063 | 41095.492 | NM_005401 | 775.404   | 1198.469  | AI417481  | 344.587   | 334.768   |
| NM_006759 | 7791.947  | 11295.47  | NM_017677 | 676.499   | 1215.597  | BI906766  | 4038.178  | 2817.07   |
| NM_006831 | 1037.131  | 1337.051  | NM_002497 | 19891.404 | 18870.207 | U60519    | 217.884   | 356.295   |
| AL162044  | 6425.438  | 8378.72   | AB025194  | 22544.951 | 19533.859 | AA282906  | 3900.903  | 4151.627  |
| AK024004  | 830.851   | 557.272   | NM_006239 | 4750.795  | 5154.001  | L02870    | 31676.975 | 26969.41  |
| BE892273  | 52620.098 | 62549.543 | BC020863  | 1767.662  | 1342.554  | BG755482  | 10690.151 | 13812.932 |
| AF026929  | 466.191   | 823.803   | CY3Cy5    | 12640.087 | 653.911   | AI480307  | 4578.033  | 7879.55   |
| NM_016734 | 1880.947  | 2837.894  | NM_004758 | 782.166   | 510.805   | X51420    | 1640.02   | 4569.819  |
| M16006    | 494.146   | 566.855   | NM_005163 | 5871.551  | 4335.642  | D28235    | 289.412   | 745.141   |
| AF035803  | 335.196   | 885.691   | AL117623  | 793.622   | 783.726   | X51757    | 931.154   | 1454.534  |
| Y08147    | 13293.115 | 19465.248 | AF085988  | 948.321   | 762.523   | L24038    | 1819.237  | 2902.176  |
| D00174    | 38029.141 | 49052.449 | AK025785  | 5915.639  | 5692.226  | NM_053056 | 840.861   | 1415.254  |
| AB000520  | 10846.833 | 15925.952 | AF038190  | 768.257   | 1332.132  | M55593    | 1736.506  | 4946.167  |
| AK023117  | 3665.803  | 5111.609  | AF143877  | 1095.216  | 1291.629  | AK001883  | 27608.453 | 24323.773 |
| AL122046  | 3308.943  | 5349.206  | NM_000738 | 56103.66  | 50690.594 | NM_014629 | 1126.966  | 1080.459  |
| AF119914  | 578.617   | 857.742   | AF086474  | 1369.31   | 2100.037  | L17325    | 422.705   | 324.572   |
| NM_000855 | 7536.464  | 9913.878  | AF086529  | 774.623   | 1114.968  | NM_017716 | 372.431   | 474.176   |
| NM_005536 | 8644.311  | 13763.21  | AF086023  | 5001.55   | 6023.602  | M58603    | 3217.931  | 3025.443  |
| NM_005077 | 2186.606  | 2911.843  | AF131803  | 16776.055 | 18400.732 | NM_003639 | 2976.316  | 1106.236  |
| NM_001990 | 2952.829  | 4454.734  | AF086558  | 383.315   | 816.523   | NM_001549 | 256.583   | 90.038    |
| NM_002141 | 2258.745  | 2839.041  | AF086538  | 1825.314  | 1788.939  | NM_000115 | 2327.333  | 625.568   |
| NM_006907 | 402.195   | 1084.134  | NM_004776 | 2330.83   | 2254.495  | AF308801  | 1484.654  | 957.036   |
| NM_002686 | 469.576   | 697.407   | AK023353  | 4851.358  | 6048.825  | NM_007318 | 54659.992 | 60451.746 |
| NM_006267 | 826.716   | 1187.505  | NM_004758 | 839.343   | 1177.473  | NM_014874 | 948.663   | 1041.017  |
| NM_002661 | 22226.082 | 30185.887 | NM_005163 | 5821.682  | 5836.667  | NM_005765 | 9202.048  | 10402.935 |
| NM_001263 | 649.614   | 3883.881  | SR1       | 70248.445 | 61240.063 | NM_002762 | 2154.656  | 2737.697  |
| AK023982  | 1037.564  | 1234.229  | SR3       | 42406.945 | 44894.32  | NM_006324 | 6768.714  | 10168.841 |
| NM_018466 | 1599.116  | 2772.333  | SR5       | 4741.985  | 7603.173  | NM_016848 | 9784.011  | 14623.221 |
| Y11312    | 2445.148  | 3968.691  | SR7       | 5890.52   | 46650.145 | NM_000514 | 9416.951  | 20404.152 |
| NM_003039 | 12859.514 | 18357.939 | SR9       | 18698.74  | 4606.038  | AL137432  | 3955.594  | 10486.875 |
| NM_002635 | 48646.969 | 63080.813 | CY3Cy5    | 15520.311 | 965.344   | NM_000957 | 3088.751  | 4469.722  |
| AF100756  | 8067.116  | 13174.915 | AF182420  | 932.091   | 549.949   | NM_019043 | 3671.146  | 7628.433  |
| NM_006825 | 9101.848  | 14167.255 | U84517    | 14358.376 | 9914.352  | NM_003240 | 10183.188 | 14809.082 |
| NM_004862 | 2405.749  | 3164.239  | AB033113  | 1424.691  | 1324.645  | NM_016564 | 54134.23  | 56402.031 |
| NM_001661 | 1737.859  | 3032.198  | AK025877  | 2415.5    | 3183.389  | NM_000796 | 358.094   | 1034.759  |
| NM_014563 | 2564.629  | 3347.715  | NM_018148 | 1200.585  | 1151.959  | AK021660  | 3516.032  | 4490.266  |
| NM_020150 | 3561.732  | 5259.548  | AK001921  | 6677.643  | 7245.557  | AB007933  | 53552.195 | 61113.684 |
| NM_007150 | 10475.157 | 14641.666 | AF088004  | 3464.084  | 4601.448  | NM_003796 | 19623.5   | 16193.509 |
| NM_016520 | 12640.015 | 16310.491 | AF086149  | 2414.608  | 2626.547  | NM_002973 | 2272.696  | 2185.289  |
| AB018353  | 2930.553  | 3575.296  | NM_018273 | 3623.378  | 4326.302  | NM_003708 | 49922.461 | 62228.949 |
| NM_007036 | 2540.166  | 3161.263  | AK024944  | 4547.937  | 5339.208  | NM_014349 | 5045.855  | 27665.822 |
| NM_002617 | 1596.942  | 2339.458  | S81893    | 10738.747 | 12657.813 | NM_018210 | 357.233   | 159.215   |
| NM_003313 | 42556.793 | 50306.504 | AK022034  | 980.287   | 941.504   | NM_001096 | 3024.846  | 556.791   |
| M20696    | 6099.677  | 8637.22   | NM_007202 | 2954.131  | 2991.077  | NM_016014 | 1590.679  | 772.428   |
| NM_002915 | 966.362   | 1104.397  | NM_003663 | 4914.101  | 7190.141  | NM_018327 | 1302.754  | 1523.248  |
| NM_006736 | 2655.812  | 3985.831  | AK021777  | 2736.833  | 4649.181  | NM_001684 | 444.103   | 748.811   |
| NM_003640 | 1929.979  | 3723.232  | AF007137  | 3110.008  | 6676.539  | NM_013309 | 836.562   | 1469.848  |
| NM_014444 | 6088.48   | 9495.8    | AK023292  | 1949.99   | 3650.055  | AF038186  | 2650.206  | 4014.728  |
| NM_012248 | 7765.005  | 11029.339 | AK023752  | 442.642   | 270.659   | NM_003664 | 2323.425  | 3669.758  |
| NM_014970 | 9399.498  | 13389.078 | AK022452  | 957.853   | 756.222   | NM_002426 | 1846.084  | 3280.974  |

|           |           |           |           |           |           |           |           |           |
|-----------|-----------|-----------|-----------|-----------|-----------|-----------|-----------|-----------|
| NM_014393 | 3906.768  | 6855.173  | AK023375  | 2456.689  | 1927.932  | AK027182  | 448.432   | 706.042   |
| NM_004223 | 26528.66  | 33918.617 | AK023781  | 1209.342  | 919.026   | J03651    | 7565.409  | 33283.48  |
| NM_006813 | 1082.972  | 1437.145  | AK024129  | 611.823   | 601.801   | U61738    | 8810.692  | 13177.711 |
| NM_001355 | 34203.84  | 46036.578 | AK024366  | 1375.746  | 1844.917  | AJ132087  | 558.247   | 702.136   |
| U63336    | 839.252   | 1514.498  | AK022171  | 2991.993  | 4101.94   | U92818    | 1550.856  | 1795.082  |
| NM_000582 | 23098.031 | 31220.773 | AK025913  | 2249.308  | 2512.255  | NM_000442 | 3621.292  | 4200.172  |
| NM_005593 | 2788.848  | 3428.731  | AF147389  | 710.68    | 654.917   | NM_002934 | 2025.634  | 2126.175  |
| AJ224741  | 488.29    | 609.778   | AK021930  | 615.302   | 924.525   | AK023011  | 24904.041 | 17189.768 |
| NM_004684 | 1182.478  | 1173.085  | NM_016500 | 4420.003  | 4711.71   | NM_016816 | 805.507   | 702.724   |
| BF338709  | 2245.448  | 2461.359  | AF087966  | 648.301   | 631.808   | AK023794  | 21047.4   | 14192.001 |
| AF204171  | 532.913   | 855.279   | AF086015  | 529.597   | 374.086   | NM_019885 | 1361.944  | 2926.336  |
| BG568198  | 1616.807  | 1987.065  | AF087971  | 1642.674  | 1702.208  | AB033103  | 560.478   | 164.927   |
| M76559    | 6749.222  | 7333.414  | AF087974  | 3341.689  | 4253.261  | NM_002907 | 906.398   | 175.354   |
| U03884    | 1106.824  | 1432.918  | NM_018004 | 1423.786  | 2663.411  | AK024098  | 641.346   | 218.215   |
| U11058    | 1324.135  | 1341.96   | X78938    | 5267.23   | 12781.264 | AK022371  | 4017.856  | 3933.347  |
| AI222585  | 761.858   | 1138.941  | AL359056  | 975.725   | 1091.072  | D42045    | 2663.26   | 4962.834  |
| AA411678  | 7901.357  | 7700.586  | AK021497  | 2435.307  | 2527.379  | AB007953  | 1816.057  | 2174.498  |
| AA862813  | 35650.039 | 34947.176 | AF124367  | 536.615   | 590.574   | NM_014002 | 6219.442  | 9318.349  |
| AA398427  | 1863.322  | 3466.506  | AK000798  | 498.66    | 239.246   | NM_004197 | 9588.166  | 24964.174 |
| T55728    | 6188.872  | 6974.297  | AK025615  | 26996.734 | 31823.449 | NM_004073 | 1132.216  | 2154.055  |
| H20856    | 2316.358  | 1593.728  | AK023803  | 1154.301  | 1096.793  | NM_001278 | 1827.299  | 2054.622  |
| N62586    | 2768.139  | 3403.794  | AK022379  | 1145.493  | 986.579   | NM_019105 | 4378.823  | 5743.4    |
| AA242743  | 28403.52  | 27824.316 | AK025231  | 67541.953 | 72127.93  | NM_000294 | 5221.611  | 7604.99   |
| NM_015361 | 27348.02  | 25902.229 | AK025338  | 4454.023  | 5558.609  | AJ272212  | 1104.209  | 2175.251  |
| NM_004310 | 9222.691  | 8353.181  | AK001132  | 685.383   | 667.944   | NM_001626 | 42719.211 | 41960.34  |
| NM_015537 | 14572.979 | 13553.811 | AK022321  | 626.97    | 652.459   | NM_005677 | 3952.44   | 5638.117  |
| AK024004  | 675.672   | 967.613   | AK023296  | 640.637   | 750.631   | AF229803  | 798.087   | 883.805   |
| AK022365  | 305.37    | 509.222   | AK001439  | 1054.742  | 1523.565  | AF151810  | 293.955   | 466.59    |
| BE892273  | 50272.211 | 56288.117 | AK023462  | 6460.174  | 7949.948  | NM_002130 | 15123.531 | 7794.915  |
| NM_016734 | 1679.95   | 1360.687  | AF210649  | 631.683   | 721.139   | NM_005465 | 3099.796  | 2480.143  |
| Y08147    | 11202.938 | 8709.662  | AK001115  | 4007.855  | 4738.229  | NM_016361 | 1602.376  | 1336.591  |
| D00174    | 33876.957 | 28264.336 | NM_014099 | 3703.787  | 3712.382  | NM_001305 | 3364.477  | 1247.061  |
| AB000520  | 8004.968  | 5974.961  | AL133050  | 1094.273  | 1247.992  | NM_005082 | 335.253   | 170.076   |
| AK023117  | 2660.634  | 2138.503  | AK027233  | 5299.655  | 6646.685  | D17028    | 29781.934 | 9942.114  |
| AL122046  | 2258.952  | 1649.047  | AK024131  | 635.344   | 674.841   | NM_013442 | 19295.957 | 4556.565  |
| AF119914  | 503.279   | 405.867   | AK023343  | 1331.741  | 1877.105  | BG611243  | 2666.97   | 631.539   |
| NM_000855 | 6687.404  | 6584.577  | AL110172  | 710.38    | 1085.997  | AI417481  | 336.562   | 249.14    |
| NM_014817 | 707.406   | 225.93    | AK025323  | 792.159   | 715.929   | BI906766  | 3467.993  | 1888.101  |
| NM_005536 | 6434.518  | 7668.671  | NM_013326 | 10731.125 | 7772.426  | U60519    | 331.035   | 398.42    |
| NM_005077 | 1698.613  | 1722.051  | BC037322  | 722.577   | 1001.432  | AA282906  | 3409.701  | 2970.033  |
| NM_001990 | 2647.96   | 3207.21   | Y10202    | 527.492   | 932.265   | L02870    | 29124.961 | 22626.443 |
| NM_002141 | 2068.709  | 2227.634  | Y12022    | 2463.983  | 3766.904  | BG755482  | 11952.437 | 13335.997 |
| NM_006129 | 2401.972  | 1778.726  | AK001375  | 1340.89   | 1542.099  | AI480307  | 4283.72   | 5705.853  |
| NM_006267 | 1183.032  | 1194.389  | NM_019597 | 6679.81   | 6077.076  | X51420    | 1547.93   | 2420.124  |
| NM_002661 | 15181.7   | 17332.664 | AL137559  | 1123.137  | 1063.306  | D28235    | 461.556   | 992.772   |
| AK023982  | 382.189   | 367.016   | AF026944  | 8497.03   | 7667.776  | X51757    | 732.227   | 828.821   |
| NM_018466 | 1304.677  | 1190.856  | AK021493  | 6076.745  | 7936.788  | L24038    | 1132.744  | 1259.962  |
| Y11312    | 1821.16   | 1991.796  | NM_006161 | 25843.1   | 24976.574 | NM_053056 | 363.059   | 709.33    |
| NM_003036 | 12023.621 | 7154.336  | NM_006192 | 1174.736  | 1085.325  | NM_006186 | 461.877   | 590.028   |
| NM_002635 | 49097.176 | 44050.523 | AF085881  | 1674.737  | 1754.445  | NM_002751 | 4409.88   | 4512.917  |
| AF100756  | 5955.489  | 5364.499  | AK022737  | 12787.376 | 14429.975 | M55593    | 1488.654  | 1510.877  |
| NM_006825 | 7089.677  | 6261.141  | NM_003472 | 46745.063 | 48154.008 | AK001883  | 25541.43  | 16111.899 |
| NM_004862 | 2096.389  | 1662.752  | U92980    | 2155.954  | 2089.346  | NM_014625 | 1126.914  | 623.313   |

|           |           |           |           |           |           |           |           |           |
|-----------|-----------|-----------|-----------|-----------|-----------|-----------|-----------|-----------|
| NM_001661 | 1490.142  | 2168.951  | AF133658  | 1336.191  | 1779.688  | AL050114  | 457.888   | 472.371   |
| NM_014563 | 1871.263  | 2538.115  | AB048287  | 17047.861 | 18274.285 | AK021492  | 2520.069  | 1518.052  |
| NM_020150 | 5950.908  | 11719.359 | Y11159    | 2002.364  | 1965.303  | NM_014874 | 935.137   | 250.986   |
| NM_007150 | 11867.879 | 14778.321 | AB020648  | 3364.926  | 4224.254  | NM_005765 | 9358.866  | 2003.268  |
| NM_006831 | 6130.134  | 3997.549  | AK025798  | 18348.705 | 18037.119 | NM_002762 | 1599.314  | 297.603   |
| AL162044  | 10514.589 | 7522.919  | AF086173  | 1241.414  | 1216.354  | NM_006324 | 6246.999  | 2469.135  |
| AB018353  | 7632.11   | 9460.796  | AK025164  | 1251.703  | 1214.096  | NM_016848 | 9157.039  | 4391.618  |
| NM_007036 | 3712.053  | 5478.265  | NM_018366 | 8688.061  | 10715.101 | NM_000514 | 6831.066  | 5575.493  |
| NM_002617 | 1943.139  | 2063.891  | NM_019848 | 31637.27  | 43339.004 | AL137432  | 602.906   | 777.371   |
| NM_003313 | 35031.488 | 31201.941 | AL833005  | 4087.459  | 2401.428  | NM_000957 | 2299.629  | 1667.202  |
| AF090907  | 2437.117  | 2305.392  | L43366    | 2760.669  | 1922.311  | NM_019043 | 3155.187  | 2396.322  |
| AK024476  | 5231.832  | 4351.777  | AK026124  | 3862.412  | 2689.73   | NM_003240 | 10617.753 | 10268.686 |
| X74794    | 20552.279 | 19613.463 | NM_015509 | 7293.622  | 6929.773  | NM_016564 | 48356.926 | 51050.648 |
| AL050298  | 4774.519  | 3938.479  | AL110157  | 4999.916  | 4954.91   | NM_000796 | 425.625   | 774.281   |
| NM_007079 | 42081.816 | 35334.277 | NM_002319 | 4023.794  | 6055.613  | AF279656  | 722.922   | 759.595   |
| M20696    | 4136.922  | 3094.24   | L38712    | 25286.045 | 23620.428 | AK021660  | 2159.888  | 2128.587  |
| NM_002915 | 1030.414  | 1051.265  | U84508    | 1827.696  | 2027.959  | AB007933  | 50488.168 | 60351.551 |
| NM_006736 | 3922.335  | 3549.617  | NM_017793 | 3852.599  | 3911.454  | NM_006702 | 3381.033  | 4114.234  |
| NM_003640 | 1284.1    | 1413.106  | NM_012131 | 2810.162  | 3525.668  | NM_001396 | 16709.635 | 16381.765 |
| NM_014444 | 5048.307  | 4108.063  | S41540    | 2884.039  | 3254.518  | NM_014474 | 1119.924  | 1017.555  |
| NM_012248 | 4977.495  | 4212.079  | AK026947  | 60365.094 | 58888.059 | NM_016246 | 1861.818  | 1520.928  |
| NM_014970 | 7494.229  | 6998.952  | U84526    | 16199.178 | 20116.539 | NM_006181 | 1145.807  | 1046.166  |
| NM_014393 | 3116.325  | 3096.736  | L23401    | 3194.395  | 3439.761  | NM_003796 | 19417.172 | 13298.677 |
| NM_004223 | 25123.977 | 22152.486 | NM_018090 | 63524.855 | 59075.625 | NM_002973 | 2337.747  | 2176.118  |
| NM_006813 | 1126.04   | 907.922   | AK022728  | 55690.762 | 60711.156 | NM_004436 | 10058.922 | 5768.021  |
| NM_001355 | 30678.955 | 31503.58  | AL109678  | 2673.21   | 2900.316  | NM_006580 | 4063.665  | 2558.445  |
| U63336    | 672.536   | 692.791   | AL137524  | 9560.619  | 9605.633  | NM_016277 | 1515.098  | 291.194   |
| NM_006907 | 3020.884  | 1990.536  | AF218008  | 4625.131  | 4655.184  | NM_007247 | 2283.553  | 745.272   |
| NM_002686 | 536.928   | 524.794   | M22404    | 43923.664 | 39859.316 | NM_006554 | 3544.206  | 906.341   |
| AJ224741  | 1429.533  | 2223.17   | AF052115  | 1599.573  | 1329.875  | X99962    | 7900.025  | 1738.118  |
| NM_004684 | 4074.644  | 7180.582  | NM_014019 | 34267.359 | 29941.783 | AK023221  | 10430.134 | 5299.65   |
| BF338709  | 2344.908  | 3161.492  | Z70711    | 1995.97   | 1637.912  | NM_003664 | 2041.611  | 1800.566  |
| AF204171  | 403.723   | 419.242   | AF116653  | 607.074   | 657.403   | NM_002426 | 1666.492  | 1872.345  |
| W96179    | 1868.879  | 1888.522  | NM_012368 | 4334.111  | 5071.152  | AK027182  | 455.763   | 588.695   |
| AW247841  | 19822.551 | 21525.527 | AK022097  | 8230.542  | 7446.418  | J03651    | 7192.354  | 6403.133  |
| BG568198  | 1680.524  | 1383.644  | NM_002166 | 31238.51  | 26127.191 | U61738    | 9161.978  | 9351.599  |
| M76559    | 4512.48   | 4203.233  | NM_004660 | 13649.901 | 14765.119 | AJ132087  | 929.98    | 917.059   |
| U03884    | 921.651   | 802.112   | NM_006165 | 2462.143  | 3167.034  | U92818    | 1609.508  | 1311.915  |
| U11058    | 1449.393  | 1784.803  | NM_016011 | 16078.81  | 21471.299 | NM_000442 | 2952.968  | 3585.641  |
| AI222585  | 1086.777  | 951.395   | AL035307  | 3792.4    | 4078.067  | NM_002934 | 1347.967  | 1148.051  |
| AA411678  | 6697.303  | 5614.383  | AK023772  | 1313.32   | 1358.272  | AK023011  | 25942.74  | 18912.891 |
| AA862813  | 34123.887 | 28492.691 | NM_012234 | 4165.831  | 4343.27   | NM_016816 | 281.646   | 392.653   |
| AA398427  | 1773.108  | 1560.424  | NM_006204 | 696.142   | 745.658   | L17325    | 452.533   | 414.372   |
| T55728    | 5998.102  | 5735.412  | NM_012155 | 14379.683 | 15549.053 | NM_017716 | 680.572   | 596.909   |
| H20856    | 2160.179  | 1603.17   | AF144700  | 3992.14   | 4923.147  | M58603    | 4632.696  | 3895.204  |
| N62586    | 1899.32   | 2452.025  | NM_002599 | 365.267   | 859.687   | NM_003636 | 5736.188  | 4167.915  |
| AA242743  | 40389.668 | 37113.098 | NM_004105 | 14575.074 | 15341.645 | NM_001546 | 411.651   | 410.612   |
| NM_015361 | 26827.02  | 21331.938 | AB046825  | 4068.712  | 5570.354  | NM_000115 | 4480.919  | 3463.806  |
| NM_004310 | 8901.183  | 8139.298  | X64975    | 3314.732  | 3683.116  | AF308801  | 1973.138  | 2295.258  |
| NM_015537 | 13824.072 | 11818.688 | AF064876  | 444.268   | 619.746   | NM_007318 | 48633.152 | 48551.813 |
| NM_016520 | 16249.091 | 11437.36  | AF071509  | 529.004   | 451.272   | AF229803  | 656.929   | 484.857   |
| AF035803  | 293.557   | 696.578   | AL050297  | 9466.052  | 7755.703  | AF151810  | 338.513   | 259.745   |
| Y08147    | 11332.459 | 9608.89   | AK026966  | 5304.156  | 4249.97   | NM_002130 | 16344.64  | 1777.183  |

|           |           |           |           |           |           |           |           |           |
|-----------|-----------|-----------|-----------|-----------|-----------|-----------|-----------|-----------|
| D00174    | 35386.727 | 30126.846 | AF147398  | 407.595   | 567.011   | NM_00546E | 2809.977  | 766.779   |
| AB000520  | 7636.513  | 6592.921  | AF185573  | 634.48    | 668.956   | NM_016361 | 2037.56   | 2008.153  |
| AK023117  | 4201.297  | 5083.393  | AJ009817  | 369.491   | 768.132   | NM_00370E | 46547.805 | 45240.832 |
| AL122046  | 2327.728  | 2068.233  | AK025268  | 1702.165  | 1795.556  | NM_01434E | 4016.107  | 4374.398  |
| AF119914  | 574.319   | 731.233   | NM_005203 | 1734.136  | 2351.587  | NM_01821C | 835.556   | 1412.519  |
| NM_00085E | 4085.561  | 3873.313  | NM_00656E | 1065.162  | 1595.489  | NM_00109E | 4402.854  | 2875.13   |
| NM_00553E | 7787.413  | 7753.27   | AK026154  | 15304.711 | 9722.326  | NM_016014 | 1015.596  | 1232.285  |
| NM_005077 | 2109.083  | 1552.654  | AL117546  | 45209.574 | 36895.477 | NM_018327 | 849.232   | 551.451   |
| NM_00442E | 9970.388  | 8126.916  | AK027073  | 1076.997  | 851.034   | NM_017581 | 346.461   | 407.722   |
| NM_00199C | 1912.912  | 1534.715  | NM_000384 | 1008.447  | 1069.674  | AA488804  | 1725.558  | 1567.641  |
| NM_002141 | 2435.686  | 2339.124  | AB018325  | 13613.916 | 28791.295 | NM_01631E | 10595.234 | 7737.909  |
| NM_003311 | 2833.482  | 3032.748  | AL157482  | 31272.275 | 43169.07  | NM_01330E | 465.876   | 411.239   |
| NM_00377E | 5102.382  | 6496.145  | NM_003603 | 922.271   | 1393.086  | NM_019891 | 840.113   | 745.151   |
| NM_01571E | 587.156   | 1048.969  | NM_00542E | 7423.101  | 10676.217 | AF038186  | 1601.927  | 1168.41   |
| NM_00612E | 2064.678  | 1999.147  | NM_017974 | 1802.032  | 1870.065  | AK001883  | 24028.383 | 12055.74  |
| NM_00058E | 22485.176 | 20003.859 | NM_00397E | 2078.137  | 2035.817  | NM_01462E | 825.118   | 158.404   |
| NM_00559E | 4691.023  | 3217.277  | X14677    | 9745.859  | 10478.572 | AL050114  | 318.472   | 136.923   |
| NM_016077 | 4170.102  | 3339.652  | NM_00586E | 6680.648  | 7458.463  | AK021492  | 2228.812  | 1175.46   |
| AF100756  | 6399.981  | 6649.211  | U17077    | 11164.134 | 12025.601 | AK023794  | 16464.576 | 13794.997 |
| NM_00682E | 6460.196  | 6681.239  | NM_00091E | 6668.64   | 9038.093  | NM_01988E | 916.335   | 733.589   |
| NM_00486E | 1306.755  | 1179.327  | NM_002344 | 504.001   | 722.019   | AB033103  | 571.043   | 588.135   |
| NM_001661 | 1586.819  | 1652.495  | AK024475  | 1000.746  | 1166.894  | NM_002907 | 420.126   | 358.253   |
| NM_01456E | 1956.02   | 1595.45   | AB026542  | 19055.877 | 19081.887 | AK024098  | 923.096   | 589.15    |
| NM_02015C | 1894.007  | 1349.493  | NM_01984E | 12514.341 | 11890.685 | AK001116  | 411.492   | 657.882   |
| NM_00715C | 7269.867  | 5847.505  | NM_01443E | 3556.45   | 3904.961  | AK022371  | 3093.744  | 2557.649  |
| NM_006831 | 4559.321  | 3469.319  | NM_00206E | 21260.855 | 26264.752 | D42045    | 1023.997  | 936.629   |
| AL162044  | 7995.187  | 6903.29   | NM_014394 | 59486.199 | 56589.746 | AB007953  | 249.676   | 221.907   |
| AF026929  | 581.26    | 580.012   | NM_01814C | 4625.772  | 3465.664  | NM_01400E | 2962.722  | 2447.983  |
| NM_016734 | 1703.789  | 1047.043  | NM_01694E | 5808.183  | 4166.065  | NM_004197 | 6504.464  | 4916.177  |
| U63336    | 602.504   | 637.696   | NM_00014E | 3410.503  | 2135.51   | NM_00407E | 779.381   | 461.505   |
| NM_006907 | 1959.953  | 1898.616  | AF272372  | 49364.336 | 44623.781 | NM_00127E | 2589.969  | 2302.069  |
| NM_00268E | 312.569   | 395.02    | AK097045  | 2824.804  | 2285.166  | NM_01910E | 3872.422  | 3415.209  |
| NM_006267 | 1824.785  | 2165.144  | AF161356  | 62443.145 | 62782.801 | NM_000294 | 5417.621  | 4343.955  |
| NM_002661 | 12475.79  | 11846.235 | AB014548  | 8921.507  | 11699.139 | AJ272212  | 1393.618  | 762.059   |
| NM_00126E | 675.153   | 1431.465  | NM_01825E | 9645.037  | 9963.729  | NM_00162E | 27766.504 | 21206.59  |
| AK023982  | 748.423   | 551.402   | AK025150  | 2748.134  | 2740.498  | NM_005677 | 2472.668  | 2151.951  |
| NM_01846E | 2093.339  | 1557.139  | AK024611  | 23480.322 | 28581.357 | CY3Cy5    | 3062.019  | 597.192   |
| Y11312    | 1917.613  | 1848.891  | BC010420  | 9792.523  | 11127.655 | NM_004957 | 1562.678  | 3086.517  |
| AB014533  | 15089.543 | 13720.821 | NM_01228C | 48705.211 | 55665.891 | NM_00525E | 1000.568  | 1641.422  |
| M11427    | 464.38    | 395.263   | NM_01817E | 12471.305 | 13042.971 | U79264    | 610.409   | 765.738   |
| NM_000744 | 572.336   | 776.456   | U03886    | 8148.081  | 9776.787  | NM_01569E | 3293.992  | 3879.792  |
| NM_02037E | 18915.33  | 16413.982 | AK022040  | 1273.097  | 1738.749  | AF070530  | 3939.936  | 2955.073  |
| NM_00263E | 48812.469 | 44312.754 | AK022722  | 2040.747  | 2068.049  | NM_00642C | 778.504   | 435.512   |
| NM_00497E | 746.723   | 453.387   | NM_003591 | 23657.037 | 44491.379 | AF131855  | 496.398   | 157.91    |
| NM_00431C | 1119.581  | 1661.863  | AL080111  | 5653.419  | 8641.545  | AF086046  | 1470.499  | 898.872   |
| NM_015537 | 10087.237 | 7827.146  | NM_00355C | 10339.583 | 10082.782 | AK023309  | 349.287   | 260.008   |
| NM_01652C | 15539.485 | 13387.281 | NM_01464E | 9484.698  | 9267.713  | AK000724  | 1332.362  | 947.571   |
| AB018353  | 4701.845  | 3915.017  | AB037821  | 743.314   | 822.498   | NM_00525E | 571.807   | 270.868   |
| NM_00703E | 3931.92   | 3254.534  | NM_00382E | 3853.268  | 3348.347  | SR7       | 1556.561  | 9137.324  |
| NM_002617 | 2210.919  | 1811.557  | AL110168  | 13818.545 | 15540.069 | SR9       | 5488.705  | 666.263   |
| NM_00331E | 28657.5   | 27961.15  | NM_01452E | 1037.733  | 1706.094  | CY3Cy5    | 2105.078  | 285.838   |
| AF090907  | 1889.536  | 2190.552  | AK026015  | 354.202   | 633.047   | Z36818    | 443.212   | 597.618   |
| AK024476  | 3838.576  | 3986.277  | NM_016147 | 9091.413  | 5565.752  | AF086137  | 724.226   | 506.636   |

|           |           |           |           |           |           |           |           |           |
|-----------|-----------|-----------|-----------|-----------|-----------|-----------|-----------|-----------|
| X74794    | 22487.637 | 19401.789 | NM_002833 | 2397.382  | 2720.954  | AF086526  | 549.451   | 220.229   |
| AL050298  | 4561.314  | 4060.079  | NM_016592 | 1217.094  | 1111.834  | AK025788  | 2852.395  | 1516.448  |
| NM_007079 | 45134.059 | 36509.734 | NM_018527 | 799.125   | 510.529   | AF086164  | 541.353   | 343.654   |
| M20696    | 4140.172  | 3223.25   | NM_018326 | 6748.66   | 5237.223  | AK025577  | 1159.888  | 536.44    |
| NM_002915 | 830.43    | 1020.396  | NM_001868 | 1347.7    | 1116.615  | AK000216  | 568.387   | 226.963   |
| NM_006736 | 3524.811  | 2802.857  | NM_014773 | 1406.1    | 1358.374  | AK023440  | 481.123   | 424.785   |
| NM_003640 | 1667.659  | 2153.412  | NM_005606 | 5950.74   | 6613.208  | AB033041  | 13261.45  | 8285.151  |
| NM_014444 | 4859.751  | 7169.521  | AF134707  | 1896.514  | 2094.18   | AK022678  | 630.268   | 755.946   |
| NM_006145 | 1237.619  | 1426.61   | BE730629  | 2418.328  | 2923.811  | AK023835  | 476.519   | 540.141   |
| NM_014970 | 8070.877  | 8057.218  | NM_018162 | 475.605   | 684.784   | AK023906  | 647.731   | 611.072   |
| NM_014393 | 3432.011  | 3299.084  | AK027167  | 8605.892  | 9886.547  | AK024962  | 594.713   | 240.271   |
| NM_004223 | 23760.107 | 14875.827 | AK025265  | 4382.781  | 4951.96   | AK025135  | 3517.371  | 2227.747  |
| NM_006813 | 924.428   | 617.194   | NM_013279 | 873.136   | 1049.043  | NM_017926 | 1108.998  | 587.267   |
| CY3Cy5    | 1874.098  | 183.654   | NM_018652 | 37808.293 | 38595.316 | AY007145  | 1974.049  | 1082.129  |
| NM_078467 | 5387.906  | 3955.18   | AB011166  | 3677.685  | 3116.364  | AK021573  | 406.237   | 103.65    |
| NM_013345 | 1523.818  | 1195.128  | AK024460  | 6596.952  | 6186.898  | D38549    | 1047.592  | 528.623   |
| AL117454  | 20332.764 | 13844.602 | NM_006606 | 8964.329  | 8995.825  | AK024780  | 817.39    | 408.578   |
| AF272890  | 1224.746  | 1061.164  | S78570    | 1094.696  | 992.975   | AK023018  | 1193.703  | 1409.787  |
| U00684    | 1131.682  | 1099.611  | NM_005243 | 19855.033 | 29779.518 | AK023870  | 492.634   | 617.712   |
| NM_016458 | 34169.711 | 34118.645 | NM_006218 | 3561.218  | 5017.148  | NM_014158 | 2103.844  | 601.954   |
| AF086227  | 1802.896  | 3432.553  | NM_016265 | 5166.436  | 3980.417  | AK021795  | 827.348   | 287.466   |
| AK026246  | 3973.257  | 7452.076  | NM_002095 | 13225.8   | 11261.734 | AL162042  | 1882.036  | 1432.869  |
| AF070524  | 1179.033  | 1973.77   | AK022814  | 4083.974  | 3369.297  | AK026131  | 545.044   | 288.337   |
| AF035281  | 1322.684  | 1785.82   | NM_006268 | 3010.165  | 2420.412  | AF131836  | 915.93    | 1142.409  |
| AK026304  | 522.457   | 687.212   | X78931    | 1128.315  | 1013.741  | AF275804  | 1663.577  | 2203.218  |
| AF070625  | 2899.872  | 2770.84   | NM_006442 | 54543.164 | 54194.125 | AL137488  | 270.907   | 338.586   |
| AL365512  | 1482.582  | 1455.773  | NM_003902 | 34666.348 | 27114.424 | AL049447  | 11508.588 | 9218.075  |
| AK001740  | 4351.505  | 3367.406  | NM_016427 | 8196.565  | 7477.866  | NM_020527 | 720.662   | 416.669   |
| AF131793  | 933.922   | 793.669   | NM_006706 | 1184.678  | 755.304   | NM_005286 | 1181.65   | 1045.708  |
| NM_078467 | 6338.635  | 6754.032  | U80741    | 16809.498 | 16517.5   | AK024365  | 2013.103  | 1773.369  |
| SR4       | 13684.066 | 14075.182 | NM_014497 | 3602.983  | 3878.656  | AJ251759  | 503.922   | 462.692   |
| SR8       | 8323.271  | 23370.164 | AL133598  | 15743.164 | 20449.414 | AK024371  | 2084.776  | 1638.615  |
| SR10      | 27367.346 | 9963.847  | NM_015511 | 11370.386 | 9575.207  | NM_005454 | 731.564   | 637.437   |
| CY3Cy5    | 3709.302  | 561.561   | NM_006625 | 10670.486 | 8901.082  | AB019569  | 47626.48  | 56065.285 |
| AK091573  | 570.165   | 509.159   | NM_004891 | 25613.313 | 26404.01  | NM_012408 | 1074.722  | 541.907   |
| AF131814  | 1515.648  | 1210.721  | NM_002831 | 16701.801 | 23182.287 | NM_005691 | 852.215   | 675.09    |
| AL359600  | 1800.178  | 1646.934  | AL833409  | 11286.111 | 15379.097 | AF086528  | 429.1     | 194.08    |
| AL360144  | 1567.507  | 1221.002  | NM_015966 | 1317.641  | 2115.513  | AL162043  | 259.585   | 250.991   |
| AL117653  | 971.993   | 575.731   | NM_000147 | 4058.124  | 3887.905  | NM_006543 | 509.48    | 438.631   |
| AF087999  | 1182.382  | 999.906   | NM_000158 | 6505.501  | 4562.239  | AF086252  | 547.358   | 648.797   |
| NM_003740 | 1988.84   | 2698.289  | NM_006416 | 4630.049  | 3457.585  | NM_017866 | 504.484   | 565.462   |
| AL050078  | 2588.789  | 2711.41   | NM_000151 | 14240.919 | 11518.346 | AF116707  | 2286.081  | 2249.265  |
| AB014526  | 984.084   | 1248.386  | NM_003773 | 1096.436  | 910.736   | U90910    | 3733.706  | 3400.87   |
| NM_018538 | 775.512   | 1474.219  | NM_003935 | 1377.182  | 965.758   | AK025765  | 991.58    | 475.959   |
| NM_013346 | 1209.812  | 1444.382  | NM_002879 | 2297.307  | 1966.288  | AK024263  | 482.015   | 645.115   |
| NM_017851 | 2301.369  | 1767.306  | AB028999  | 2281.779  | 1876.467  | NM_016613 | 1988.212  | 1015.693  |
| AK026182  | 60372.695 | 54459.563 | AB018348  | 15607.893 | 15264.823 | AF086414  | 2681.339  | 1616.62   |
| AK025603  | 3048.483  | 2511.918  | NM_013369 | 1947.005  | 1849.958  | AJ012490  | 5002.253  | 2428.489  |
| NM_016085 | 16927.801 | 9643.967  | NM_003686 | 4277.981  | 3057.588  | AL049270  | 1212.869  | 731.64    |
| AK025768  | 2554.754  | 2322.482  | NM_014812 | 4947.773  | 5605.907  | NM_003533 | 677.786   | 509.014   |
| AK001846  | 1406.754  | 1754.174  | NM_004641 | 2203.602  | 3051.143  | AL157478  | 424.05    | 167.92    |
| AK024637  | 7191.929  | 11045.577 | NM_002049 | 10367.228 | 11873.051 | AK023726  | 4612.227  | 4196.18   |
| AK025148  | 440.074   | 756.878   | AK026312  | 2528.339  | 2369.136  | AK024906  | 405.746   | 384.936   |

|           |           |           |           |           |           |           |           |           |
|-----------|-----------|-----------|-----------|-----------|-----------|-----------|-----------|-----------|
| AK026238  | 1065.37   | 799.432   | NM_017776 | 3598.387  | 3844.191  | NM_005607 | 812.078   | 834.061   |
| AK026694  | 411.136   | 399.475   | U81599    | 1885.021  | 1816.102  | NM_006761 | 13186.336 | 12507.766 |
| AK025564  | 822.106   | 785.852   | AF275722  | 1320.546  | 1602.081  | NM_003453 | 482.431   | 628.493   |
| AK026286  | 1225.279  | 959.262   | NM_003206 | 1620.166  | 2427.675  | NM_018371 | 3002.534  | 3205.736  |
| AK026731  | 2339.493  | 1950.237  | AK000564  | 1252.982  | 1562.412  | NM_014390 | 6340.738  | 6310.993  |
| AL133446  | 2757.624  | 3115.496  | X60155    | 1614.624  | 2154.961  | X78924    | 4675.838  | 4227.413  |
| AF147406  | 689.548   | 708.583   | AB037901  | 18161.779 | 41503.508 | NM_013250 | 626.953   | 529.518   |
| NM_006553 | 1740.407  | 1467.609  | AV762646  | 703.615   | 1054.257  | NM_001883 | 4701.475  | 4671.309  |
| U56251    | 4026.406  | 4014.682  | NM_012464 | 1628.42   | 2296.341  | X89668    | 13623.431 | 11781.636 |
| BC035667  | 2196.512  | 1803.419  | NM_006129 | 2599.909  | 1860.682  | NM_004453 | 993.472   | 1230.923  |
| AL049277  | 3201.509  | 1758.63   | NM_000582 | 34642.543 | 37599.094 | NM_006901 | 837.899   | 653.133   |
| AL080104  | 832.774   | 965.448   | NM_005593 | 6099.176  | 4911.741  | AK022855  | 1764.944  | 2197.7    |
| AL117506  | 742.902   | 1000.73   | AJ224741  | 1867.748  | 1762.368  | AK023816  | 713.209   | 1064.42   |
| AL049302  | 993.485   | 1620.569  | NM_004684 | 4602.193  | 3633.981  | AF085832  | 706.647   | 571.91    |
| AL117571  | 2106.154  | 2403.119  | BF338709  | 5481.698  | 5437.706  | AK025981  | 1417.487  | 951.51    |
| L22263    | 1231.279  | 1185.618  | AF204171  | 963.761   | 864.328   | AF113212  | 257.429   | 308.937   |
| AK025010  | 477.166   | 319.737   | M18182    | 678.165   | 525.912   | AF086266  | 483.498   | 313.112   |
| AL137709  | 2468.842  | 2268.626  | W96179    | 4431.815  | 5130.505  | AK025337  | 368.307   | 373.966   |
| AK023277  | 833.586   | 809.64    | AW247841  | 25703.809 | 26074.887 | NM_003573 | 3854.419  | 4682.702  |
| AK000425  | 4499.765  | 3520.656  | BG568198  | 5177.726  | 5103.63   | NM_000290 | 1134.876  | 2073.346  |
| AK022933  | 655.979   | 801.09    | M76559    | 10038.175 | 9968.1    | NM_017422 | 24669.809 | 20794.809 |
| NM_014270 | 5997.011  | 5878.885  | AF043473  | 255.937   | 742.209   | NM_005870 | 254.651   | 423.412   |
| AF056438  | 2218.054  | 1495.481  | U03884    | 1869.856  | 2409.881  | NM_004112 | 1864.936  | 919.667   |
| AF003737  | 57198.547 | 49558.477 | U11058    | 2384.076  | 3008.17   | AK025592  | 829.069   | 577.791   |
| AF009296  | 1167.201  | 773.812   | AI222585  | 1461.011  | 2362.886  | NM_002650 | 944.15    | 1065.775  |
| AK001011  | 7915.636  | 4478.96   | AA411678  | 13228.897 | 14649.065 | Z36776    | 1241.92   | 942.648   |
| AK001398  | 773.832   | 1104.543  | AA862813  | 36387.426 | 42618.492 | AB029015  | 611.317   | 484.468   |
| AK021457  | 786.002   | 1510.77   | AA398427  | 3315.827  | 5309.921  | NM_002067 | 22418.219 | 11101.581 |
| AK021740  | 1210.448  | 977.444   | T55728    | 9780.765  | 18860.092 | NM_001050 | 53839.156 | 84418.414 |
| NM_005444 | 4232.726  | 4568.23   | H20856    | 4001.473  | 3629.249  | NM_020343 | 413.983   | 368.373   |
| V00589    | 32840.031 | 22709.492 | N62586    | 3638.633  | 5284.062  | NM_012323 | 2560.71   | 3108.138  |
| AL390163  | 967.166   | 997.497   | AA242743  | 55130.02  | 54708.188 | NM_014434 | 591.739   | 1040.115  |
| NM_018572 | 1197.406  | 1041.262  | NM_006759 | 9903.136  | 13547.215 | NM_019607 | 876.134   | 1637.528  |
| AK024838  | 977.993   | 1204.766  | NM_006831 | 5011.902  | 2377.703  | U79260    | 1681.656  | 2298.105  |
| AK000175  | 4797.516  | 4601.486  | AL162044  | 9184.271  | 7338.263  | NM_001893 | 2464.291  | 3551.147  |
| AL137736  | 3515.68   | 3402.906  | AK024004  | 1436.448  | 1539.743  | NM_006447 | 1823.213  | 2237.141  |
| AF143870  | 387.355   | 405.823   | AK022365  | 778.128   | 975.893   | AF119851  | 471.699   | 568.609   |
| NM_004192 | 8949.272  | 4370.561  | BE892273  | 52202.043 | 50807.602 | NM_014120 | 2094.543  | 2234.492  |
| AK024160  | 931.776   | 897.959   | AF026929  | 1295.027  | 977.91    | D87455    | 956.147   | 701.992   |
| AK025077  | 1217.352  | 671.517   | NM_016734 | 2927.636  | 1667.462  | AF080577  | 413.689   | 422.909   |
| NM_006417 | 8210.677  | 4712.127  | AF035803  | 743.205   | 642.917   | L22005    | 4608.33   | 2798.671  |
| L43350    | 1419.216  | 878.942   | Y08147    | 18515.305 | 17936.018 | NM_012291 | 8446.452  | 5066.777  |
| NM_020317 | 4131.898  | 2470.439  | D00174    | 40726.5   | 44967.152 | NM_013360 | 1016.899  | 1087.143  |
| AL080234  | 4448.747  | 4044.892  | AB000520  | 16650.02  | 17508.482 | NM_018243 | 1221.496  | 883.9     |
| AB002446  | 865.008   | 1512.915  | NM_016382 | 442.843   | 540.991   | Y17866    | 522.641   | 446.32    |
| AF212220  | 8751.49   | 7094.939  | AK023117  | 4511.735  | 6390.381  | NM_003000 | 2762.944  | 1790.148  |
| AF147387  | 2943.948  | 2421.365  | AL122046  | 4233.276  | 5102.083  | NM_000873 | 1521.403  | 1111.914  |
| NM_012081 | 1270.14   | 1312.571  | AF119914  | 993.224   | 789.7     | AB033025  | 270.469   | 153.882   |
| AF085909  | 31269.387 | 22414.617 | NM_000855 | 11964.234 | 13230.331 | NM_004410 | 1378.931  | 1486.874  |
| AF090888  | 564.386   | 488.516   | NM_005530 | 11101.021 | 13626.501 | NM_000917 | 2239.168  | 2795.136  |
| AK027193  | 1710.047  | 1753.241  | NM_005077 | 2851.25   | 3355.251  | NM_005380 | 4945.773  | 6093.711  |
| AF086471  | 10530.801 | 12315.202 | NM_001990 | 3498.575  | 3748.612  | NM_014440 | 8581.323  | 9876.784  |
| NM_018450 | 8090.898  | 14925.605 | NM_002141 | 7156.387  | 8448.513  | AL832826  | 686.491   | 978.551   |

|           |           |           |           |           |           |           |           |           |
|-----------|-----------|-----------|-----------|-----------|-----------|-----------|-----------|-----------|
| AF113018  | 1356.929  | 1961.3    | NM_002686 | 587.03    | 742.253   | NM_016123 | 410.607   | 445.726   |
| AK021996  | 1063.009  | 1296.993  | NM_006267 | 3243.737  | 2726.073  | AB048365  | 882.133   | 800.492   |
| AL049337  | 4691.246  | 2953.69   | NM_002661 | 26869.912 | 40993.73  | NM_000391 | 2622.471  | 1967.821  |
| Z27200    | 1586.744  | 1172.226  | NM_001263 | 473.75    | 878.911   | AF229179  | 458.764   | 418.596   |
| AF070571  | 6047.324  | 3579.811  | AK023982  | 1624.388  | 1101.44   | NM_014771 | 1960.434  | 1525.307  |
| AK023554  | 4573.867  | 2940.513  | NM_018466 | 2707.38   | 1345.329  | NM_002275 | 3418.292  | 2006.381  |
| NM_003513 | 12766.653 | 7404.362  | Y11312    | 3403.272  | 3558.971  | NM_014834 | 439.424   | 538.469   |
| AL079294  | 400.07    | 373.186   | NM_003039 | 18490.053 | 14724.814 | NM_017636 | 3828.001  | 2958.787  |
| AK024844  | 1327.524  | 1021.875  | NM_002635 | 45492.043 | 48824.551 | NM_012468 | 331.077   | 281.781   |
| AF161427  | 57218.211 | 58329.824 | AF100756  | 8872.35   | 13174.532 | NM_006150 | 1405.103  | 997.956   |
| AK021715  | 15782.207 | 13935.22  | NM_006825 | 13818.485 | 15602.629 | NM_014943 | 1344.961  | 1888.23   |
| AK000315  | 12591.597 | 17139.182 | NM_004862 | 2490.193  | 2365.433  | NM_018300 | 398.507   | 402.912   |
| AK023248  | 2064.581  | 3936.701  | NM_001661 | 2517.734  | 2346.997  | NM_004875 | 1973.527  | 2295.65   |
| NM_012404 | 33896.168 | 36395.418 | NM_014563 | 2428.072  | 2095.644  | NM_018254 | 8262.209  | 9490.954  |
| AF251190  | 966.674   | 828.423   | NM_020150 | 4358.035  | 4771.708  | NM_017745 | 1292.491  | 1317.567  |
| AF130075  | 7955.673  | 6373.921  | NM_007150 | 9301.699  | 11383.436 | NM_018433 | 1546.681  | 1520.809  |
| NM_000928 | 772.882   | 795.94    | NM_016520 | 19209.631 | 12461.936 | NM_000937 | 325.869   | 252.322   |
| NM_007002 | 10053.162 | 8090.235  | AB018353  | 7867.854  | 5681.072  | AB028451  | 673.815   | 256.309   |
| NM_012121 | 1440.595  | 1132.754  | NM_007036 | 5838.907  | 4037.513  | AK024810  | 5728.786  | 4339.342  |
| NM_003255 | 656.792   | 719.494   | NM_002617 | 4594.037  | 3843.296  | D29958    | 12242.056 | 9736.707  |
| NM_014155 | 2270.658  | 2577.365  | NM_003313 | 44851.09  | 43436.965 | NM_015971 | 8254.376  | 6486.261  |
| AK026331  | 19843.82  | 20088.078 | AF090907  | 5662.022  | 5240.527  | D17257    | 38741.566 | 28547.512 |
| M30773    | 2631.488  | 2661.743  | AK024476  | 12358.388 | 9351.232  | NM_002842 | 1821.126  | 1603.119  |
| NM_016338 | 11682.931 | 9892.305  | X74794    | 27483.867 | 17954.23  | NM_012126 | 407.92    | 165.784   |
| AF113699  | 25877.883 | 12086.657 | AL050298  | 6454.917  | 6829.613  | J03569    | 42524.578 | 69068.953 |
| AK021897  | 8026.22   | 3534.723  | NM_007079 | 49968.715 | 44448.133 | NM_003115 | 3394.985  | 4271.587  |
| AK001051  | 2495.582  | 1431.176  | M20696    | 6253.647  | 4824.064  | NM_000687 | 11907.013 | 12262.734 |
| NM_018317 | 745.687   | 965.635   | NM_002915 | 2144.778  | 2145.675  | NM_000446 | 349.597   | 222.289   |
| AF086051  | 1223.187  | 1459.622  | NM_006736 | 5370.39   | 6383.512  | NM_018200 | 844.848   | 551.464   |
| AK026434  | 405.556   | 1070.261  | NM_003640 | 2650.346  | 3794.048  | NM_014838 | 673.335   | 514.825   |
| AK024356  | 331.447   | 1122.452  | NM_014444 | 8665.082  | 10590.787 | AF005067  | 742.332   | 691.33    |
| AL365410  | 7034.908  | 6747.663  | NM_012248 | 8729.704  | 10401.389 | NM_005710 | 5834.799  | 4964.964  |
| D17082    | 16243.49  | 11052.429 | NM_014970 | 11009.321 | 16488.721 | AF252284  | 991.11    | 1130.067  |
| D17252    | 43946.48  | 22850.232 | NM_014393 | 5544.326  | 5266.807  | NM_001530 | 2355.068  | 2390.405  |
| D16476    | 634.599   | 739.797   | NM_004223 | 35391.137 | 31164.543 | U80232    | 6086.727  | 4549.608  |
| NM_003673 | 5521.123  | 4047.326  | NM_006813 | 1743.304  | 1587.177  | M27877    | 14357.807 | 8584.998  |
| Z36823    | 20679.93  | 15585.899 | NM_001355 | 38229.719 | 42210.176 | D70836    | 23367.322 | 11012.798 |
| AK022110  | 670.957   | 598.312   | U63336    | 697.022   | 1043.537  | D16878    | 548.971   | 117.114   |
| NM_001849 | 2129.704  | 1652.752  | NM_000582 | 36020.625 | 32803.695 | NM_007035 | 1686.814  | 1930.458  |
| NM_003734 | 26501.551 | 16295.808 | NM_005593 | 4924.533  | 4228.206  | AB019562  | 559.835   | 899.216   |
| NM_014935 | 13570.232 | 9242.119  | AJ224741  | 1963.176  | 1487.457  | AF036364  | 593.568   | 591.165   |
| X99660    | 25808.596 | 18063.721 | NM_004684 | 4915.614  | 2864.035  | AK022847  | 1757.443  | 2263      |
| X03635    | 4095.121  | 3123.807  | BF338709  | 5303.367  | 4699.697  | NM_020203 | 1081.5    | 1826.656  |
| X97671    | 711.658   | 380.169   | AF204171  | 853.081   | 621.002   | L40992    | 250.685   | 490.999   |
| NM_004351 | 10431.265 | 7638.453  | W96179    | 4175.411  | 3808.615  | U20582    | 5948.287  | 8161.673  |
| NM_004236 | 9550.462  | 7318.044  | AW247841  | 26860.842 | 21769.02  | NM_000337 | 251.015   | 549.137   |
| AB011093  | 12662.225 | 5988.145  | BG568198  | 5061.159  | 4436.564  | NM_002079 | 3427.684  | 4196.262  |
| NM_002462 | 1080.127  | 730.068   | M76559    | 9466.923  | 7833.224  | U13697    | 391.609   | 576.732   |
| NM_005618 | 729.99    | 1673.856  | U03884    | 1726.546  | 1937.795  | U04270    | 9248.837  | 8212.313  |
| NM_020533 | 17434.871 | 27355.824 | U11058    | 2080.152  | 2272.499  | L02840    | 2705.013  | 1484.222  |
| NM_001894 | 18020.9   | 21282.738 | AI222585  | 1344.146  | 1846.223  | AA629719  | 43262.488 | 48920.012 |
| NM_000614 | 1114.834  | 1616.684  | AA411678  | 13056.932 | 12386.159 | AA927528  | 1929.341  | 2632.088  |
| AK022884  | 2597.168  | 3289.455  | AA862813  | 33733.078 | 45042.879 | X02152    | 47113.012 | 53702.797 |

|           |           |           |           |           |           |           |           |           |
|-----------|-----------|-----------|-----------|-----------|-----------|-----------|-----------|-----------|
| AF305072  | 655.061   | 1435.932  | AA398427  | 3340.795  | 10457.5   | BG676364  | 2828.125  | 2845.373  |
| NM_006620 | 7919.969  | 6891.033  | T55728    | 11075.676 | 15151.743 | BG181154  | 671.414   | 545.459   |
| NM_001397 | 1416.924  | 774.046   | H20856    | 3393.529  | 2367.559  | AA843679  | 5439.804  | 2782.826  |
| NM_005543 | 782.732   | 602.773   | N62586    | 3491.293  | 4075.81   | H68922    | 481.65    | 352.449   |
| Y08770    | 935.336   | 659.493   | AA242743  | 50273.359 | 47085.715 | AF097159  | 751.124   | 501.624   |
| NM_004772 | 4828.394  | 3221.813  | NM_015361 | 43206.797 | 44079.426 | NM_014684 | 552.197   | 405.643   |
| NM_003714 | 1774.614  | 1663.251  | NM_004310 | 12288.101 | 15934.561 | AK027247  | 674.791   | 892.022   |
| NM_004004 | 404.036   | 515.307   | NM_015537 | 16768.658 | 21652.6   | NM_002480 | 1965.393  | 2301.199  |
| U42977    | 10595.063 | 7598.397  | AK024004  | 1327.701  | 901.447   | NM_017571 | 3344.911  | 2831.573  |
| NM_002881 | 14076.212 | 8784.135  | AK022365  | 1342.444  | 1488.164  | L03169    | 574.019   | 565.922   |
| NM_003666 | 8551.937  | 5473.299  | BE892273  | 56659     | 56698.664 | NM_001928 | 962.403   | 1072.112  |
| NM_003288 | 6036.081  | 4137.493  | AF026929  | 1136.051  | 768.394   | NM_006390 | 462.657   | 454.805   |
| NM_018242 | 870.213   | 800.016   | NM_016734 | 2820.806  | 2147.506  | NM_018965 | 393.626   | 635.598   |
| M83822    | 3403.496  | 3821.337  | AF035803  | 578.818   | 424.53    | NM_000185 | 3500.259  | 2893.28   |
| NM_003914 | 762.194   | 710.046   | Y08147    | 16511.672 | 12801.29  | Y00816    | 518.207   | 393.034   |
| NM_020423 | 1618.888  | 1124.632  | D00174    | 43007.063 | 42725.207 | NM_004512 | 7322.359  | 8208.287  |
| AK021437  | 2304.624  | 978.141   | AB000520  | 15933.012 | 12555.873 | NM_004380 | 10683.354 | 10788.122 |
| NM_003831 | 5144.452  | 2802.4    | NM_016382 | 512.421   | 483.512   | NM_004119 | 447.802   | 596.888   |
| NM_001759 | 1179.665  | 1247.254  | AK023117  | 4363.019  | 4406.797  | AY007378  | 1711.233  | 1846.982  |
| AB007965  | 13751.796 | 19360.736 | AL122046  | 4135.651  | 3492.55   | D26070    | 957.821   | 866.334   |
| NM_017649 | 1358.179  | 2379.827  | AF119914  | 948.932   | 882.353   | NM_001642 | 4612.517  | 3412.462  |
| NM_001924 | 8230.072  | 11458.351 | NM_000855 | 13483.945 | 24168.27  | NM_001542 | 365.663   | 515.4     |
| NM_017705 | 10317.25  | 11829.02  | NM_005536 | 11750.921 | 10093.294 | NM_002280 | 612.552   | 419.367   |
| AB002325  | 447.436   | 337.339   | NM_005077 | 2172.5    | 2433.943  | NM_001055 | 10781.936 | 10646.58  |
| NM_001796 | 3992.504  | 2514.251  | NM_001990 | 3530.922  | 3679.488  | NM_002271 | 32551.787 | 30098.822 |
| AB040880  | 1873.928  | 1342.117  | NM_002141 | 5975.548  | 10076.685 | NM_018361 | 1834.572  | 1925.643  |
| NM_009587 | 15306.694 | 9130.275  | NM_006129 | 2865.198  | 4871.781  | NM_019893 | 328.994   | 325.258   |
| NM_017820 | 2105.497  | 1815.632  | NM_006267 | 3593.338  | 3677.968  | AB040966  | 2614.818  | 3864.515  |
| NM_001097 | 523.249   | 403.418   | NM_002661 | 32136.869 | 38293.695 | NM_020132 | 3572.168  | 4244.054  |
| NM_002630 | 2138.313  | 2052.997  | NM_001263 | 521.227   | 780.392   | NM_016467 | 3134.579  | 4329.429  |
| AJ295149  | 63978.801 | 65056.789 | AK023982  | 1617.226  | 1493.888  | NM_007253 | 1259.803  | 1292.354  |
| NM_013438 | 5449.03   | 6076.982  | NM_018466 | 2300.795  | 1665.76   | NM_000558 | 4772.437  | 4364.121  |
| NM_014688 | 9858.011  | 6649.319  | Y11312    | 3324.648  | 2988.827  | NM_006808 | 10146.416 | 9383.166  |
| NM_003370 | 14482.466 | 28211.465 | NM_003039 | 15870.594 | 11721.491 | NM_006634 | 549.267   | 683.432   |
| AB037715  | 4331.038  | 5741.768  | NM_002635 | 49952.938 | 49866.855 | NM_016465 | 1799.295  | 2333.638  |
| AF018081  | 41188.957 | 19317.455 | AF100756  | 8823.463  | 9692.836  | NM_000328 | 478.382   | 237.294   |
| NM_020202 | 26375.16  | 25197.486 | NM_006825 | 12970.355 | 14653.032 | NM_013390 | 851.404   | 785.893   |
| AF024540  | 2838.96   | 1725.911  | NM_004862 | 2355.865  | 3094.871  | NM_002410 | 457.491   | 192.873   |
| NM_002189 | 3817.305  | 3057.301  | NM_001661 | 2334.48   | 2317.784  | AL122120  | 2373.754  | 1144.748  |
| NM_001668 | 2057.064  | 1408.532  | NM_014563 | 2594.851  | 2152.412  | NM_018835 | 1307.336  | 1274.141  |
| AK025362  | 2933.98   | 2442.212  | NM_020150 | 4426.82   | 3839.168  | NM_003401 | 563.182   | 845.985   |
| AK021776  | 2273.158  | 1873.875  | NM_007150 | 9661.973  | 10317.646 | AL137724  | 1070.466  | 1344.665  |
| AK026042  | 2143.619  | 1889.051  | NM_006831 | 5977.359  | 7463.482  | NM_004758 | 909.87    | 990.296   |
| NM_014233 | 50941.512 | 39013.707 | AL162044  | 12512.638 | 17537.771 | NM_002913 | 1315.664  | 1473.579  |
| NM_002137 | 54596.699 | 47751.242 | AB018353  | 8507.257  | 5818.216  | AK022797  | 484.914   | 288.183   |
| NM_002911 | 2701.872  | 2004.593  | NM_007036 | 5866.977  | 3098.81   | NM_007370 | 1381.064  | 1384.545  |
| U94386    | 1419.068  | 1100.328  | NM_002617 | 4946.345  | 5948.798  | NM_006231 | 596.777   | 724.966   |
| NM_006372 | 13500.399 | 16322.619 | NM_003313 | 48684.195 | 47548.91  | AK023471  | 494.982   | 549.453   |
| AF132027  | 53727.461 | 62727.531 | AF090907  | 6409.781  | 5684.166  | AF044578  | 3315.762  | 2356.916  |
| NM_015950 | 440.879   | 604.225   | AK024476  | 12634.834 | 9181.269  | NM_001948 | 1566.234  | 1371.577  |
| NM_004681 | 28900.211 | 48616.676 | X74794    | 29424.041 | 15340.282 | NM_001067 | 4886.208  | 3873.979  |
| NM_001959 | 292.855   | 449.549   | AL050298  | 6971.25   | 4889.157  | NM_014034 | 2100.164  | 1906.882  |
| AB033096  | 20028.357 | 34562.895 | NM_007079 | 47945.832 | 35969.574 | NM_005335 | 9423.327  | 7768.806  |



|           |           |           |           |           |           |           |           |           |
|-----------|-----------|-----------|-----------|-----------|-----------|-----------|-----------|-----------|
| NM_01488E | 3106.97   | 4569.978  | M20696    | 5197.528  | 3945.412  | J04474    | 3763.294  | 3562.72   |
| NM_00444E | 26974.111 | 11229.29  | NM_002915 | 1871.045  | 1296.97   | NM_003761 | 20803.43  | 14420.97  |
| AL133566  | 1465.744  | 1420.529  | NM_00673E | 5329.077  | 5093.141  | NM_00472E | 310.969   | 207.654   |
| M36118    | 15046.612 | 9586.001  | NM_00364C | 2969.514  | 2817.975  | NM_014011 | 2566.147  | 2588.333  |
| NM_00339E | 19467.998 | 13032.057 | NM_014444 | 9210.016  | 9757.424  | AK025994  | 2284.787  | 1775.019  |
| J02625    | 26533.291 | 23449.99  | NM_01224E | 9412.594  | 10347.25  | L29306    | 249.522   | 426.285   |
| Y17175    | 63744.82  | 70111.461 | NM_01497C | 11114.556 | 13700.962 | NM_01398E | 1746.47   | 1107.645  |
| NM_00454E | 25020.066 | 24137.061 | NM_01439E | 5487.89   | 6725.498  | NM_00173E | 764.245   | 756.59    |
| NM_00533E | 37099.246 | 37257.969 | NM_00422E | 34614.18  | 32323.596 | AF036364  | 978.341   | 1590.384  |
| NM_000767 | 877.06    | 1131.866  | NM_00681E | 1489.664  | 1389.899  | AK022847  | 2267.802  | 2696.991  |
| AK026161  | 1669.455  | 2078.523  | NM_00135E | 38312.828 | 38862.031 | NM_02020E | 1755.411  | 2060.289  |
| NM_00455E | 53930.168 | 51194.781 | U63336    | 1013.338  | 1078.186  | L40992    | 455.349   | 516.322   |
| D63484    | 3940.488  | 4165.98   | NM_006907 | 2827.337  | 3628.592  | U20582    | 5642.335  | 7432.606  |
| AK026745  | 6757.563  | 6872.848  | NM_00268E | 1047.45   | 1582.687  | NM_00207E | 3326.015  | 4511.018  |
| NM_01642E | 13849.946 | 17268.113 | AJ224741  | 1612.317  | 1079.055  | U13697    | 500.34    | 791.539   |
| NM_00511E | 19072.57  | 25231.084 | NM_004684 | 4959.725  | 2492.931  | U04270    | 12239.227 | 12161.427 |
| NM_00316E | 12888.788 | 22515.818 | BF338709  | 6057.083  | 6871.678  | L02840    | 4622.316  | 2522.914  |
| AK055844  | 2513.476  | 4394.402  | AF204171  | 824.303   | 939.424   | AA629719  | 41543.172 | 44443.813 |
| NM_01828E | 21114.545 | 35542.637 | M18182    | 599.527   | 453.481   | AA927528  | 2155.197  | 2821.973  |
| NM_00314E | 13297.003 | 18562.289 | W96179    | 4386.007  | 3860.145  | X02152    | 42020.75  | 52607.965 |
| X52342    | 756.453   | 1563.315  | AW247841  | 28596.158 | 23229.375 | BG676364  | 2471.606  | 2890.385  |
| NM_003131 | 11823.091 | 18561.717 | BG568198  | 4994.524  | 3850.15   | BG181154  | 925.958   | 1062.599  |
| AK022889  | 18406.928 | 11779.099 | M76559    | 9245.143  | 7254.886  | AA843679  | 6254.451  | 6200.524  |
| X52357    | 52630.832 | 43155.016 | U03884    | 1652.677  | 1487.394  | H68922    | 414.303   | 280.755   |
| AF211891  | 2341.136  | 1233.247  | U11058    | 2045.382  | 1815.286  | AF090906  | 1252.918  | 825.284   |
| NM_005641 | 4033.193  | 2766.651  | AI222585  | 1620.006  | 1943.295  | AB023219  | 1957.232  | 1150.183  |
| NM_00379E | 41527.699 | 48153.867 | AA411678  | 12714.051 | 13969.935 | NM_01414E | 308.209   | 141.192   |
| NM_00297E | 5847.534  | 11533.185 | AA862813  | 34704.004 | 44728.621 | NM_00248C | 2669.744  | 2759.445  |
| NM_00443E | 19615.877 | 28537.432 | AA398427  | 3365.857  | 4009.608  | NM_017571 | 4302.462  | 3693.163  |
| NM_00658C | 9710.629  | 14827.188 | T55728    | 11578.018 | 11224.152 | L03169    | 583.911   | 831.56    |
| NM_00130E | 7747.356  | 11268.9   | H20856    | 3756.944  | 2959.137  | NM_00192E | 982.477   | 1617.504  |
| NM_00508E | 1318.835  | 2509.807  | N62586    | 3587.238  | 6014.157  | NM_00639E | 531.019   | 647.623   |
| D17028    | 53518.465 | 63687.496 | AA242743  | 54702.406 | 60352.758 | NM_00018E | 4105.477  | 3228.645  |
| NM_01344E | 46287.031 | 57891.094 | NM_015361 | 38792.496 | 37670.691 | Y00816    | 608.226   | 612.022   |
| BG611243  | 7802.454  | 11289.234 | NM_00431C | 12286.081 | 11816.005 | NM_00451E | 7899.29   | 9520.148  |
| AA282906  | 7937.148  | 12595.696 | NM_015537 | 16678.125 | 15321.255 | NM_00438C | 9502.252  | 8420.747  |
| L02870    | 41267.879 | 50407.957 | NM_01652C | 23761.779 | 29375.492 | NM_00411E | 532.209   | 618.795   |
| BG755482  | 27615.914 | 41684.313 | Y08147    | 23447.273 | 21830.814 | AY007378  | 1423.151  | 1558.256  |
| AI480307  | 9201.389  | 14625.032 | D00174    | 40657.367 | 39103.164 | D26070    | 904.454   | 1254.102  |
| X51420    | 4942.252  | 9036.026  | AB000520  | 16081.126 | 11484.268 | NM_00164E | 3868.386  | 4111.88   |
| D28235    | 975.376   | 1887.73   | AK023117  | 5084.394  | 4257.845  | NM_00154E | 295.565   | 401.934   |
| X51757    | 1904.476  | 2919.944  | AL122046  | 4352.958  | 3180.873  | NM_00228C | 608.671   | 793.711   |
| L24038    | 2839.028  | 4834.325  | AF119914  | 826.973   | 514.303   | NM_01745E | 491.466   | 733.05    |
| NM_002751 | 6720.041  | 5054.572  | NM_00085E | 11429.484 | 10278.984 | NM_00703E | 2422.315  | 2674.575  |
| M55593    | 3350.515  | 2134.25   | NM_00553E | 11030.44  | 11830.08  | AB019562  | 1085.173  | 875.896   |
| NM_00591E | 51950.078 | 34272.066 | NM_005077 | 2861.088  | 2523.939  | NM_002271 | 33087.652 | 27224.613 |
| AK023011  | 44128.762 | 49466.777 | NM_00442E | 21001.869 | 23377.779 | NM_018361 | 1379.909  | 1338.358  |
| NM_01681E | 2342.138  | 3879.082  | NM_00199C | 3047.093  | 3554.561  | NM_01989E | 334.229   | 493.276   |
| L17325    | 2203.124  | 3580.78   | NM_002141 | 6635.961  | 7392.787  | AB040966  | 3077.169  | 4439.147  |
| NM_01771E | 2455.698  | 3929.26   | NM_003311 | 4317.826  | 4176.495  | NM_02013E | 3716.258  | 4224.189  |
| M58603    | 12287.537 | 17720.152 | NM_00377E | 6377.39   | 5990.232  | NM_016467 | 3884.667  | 4642.818  |
| NM_00363E | 15103.476 | 19061.529 | NM_00709E | 819.587   | 913.875   | NM_00725E | 1430.684  | 1839.083  |
| NM_00154E | 970.499   | 1306.01   | NM_01571E | 1607.189  | 2022.43   | NM_00055E | 6003.348  | 6574.074  |

|           |           |           |           |           |           |           |           |           |
|-----------|-----------|-----------|-----------|-----------|-----------|-----------|-----------|-----------|
| NM_000115 | 10702.854 | 16134.798 | NM_012464 | 688.682   | 666       | NM_00680E | 9544.6    | 9984.268  |
| AF308801  | 3738.558  | 5177.993  | NM_006129 | 3372.421  | 3612.22   | NM_006634 | 443.133   | 582.201   |
| NM_00576E | 18354.768 | 31685.074 | NM_000582 | 46187.398 | 53409.527 | NM_01646E | 2069.833  | 2760.882  |
| NM_002762 | 4257.356  | 7506.727  | NM_005593 | 6633.329  | 9714.322  | NM_00032E | 487.744   | 333.561   |
| NM_006324 | 13892.402 | 26168.49  | NM_016077 | 6562.935  | 5150.431  | NM_01339E | 712.5     | 760.795   |
| NM_01684E | 22560.229 | 32509.531 | AF100756  | 9917.295  | 7705.974  | NM_00241C | 443.065   | 253.652   |
| NM_000514 | 16022.354 | 23795.924 | NM_00682E | 14195.188 | 9214.094  | AL122120  | 2714.01   | 1251.056  |
| AL137432  | 2444.725  | 5247.383  | NM_004862 | 2466.189  | 1875.547  | NM_014684 | 613.088   | 348.878   |
| NM_000957 | 4743.463  | 7521.839  | NM_001661 | 2125.552  | 1812.195  | AK027247  | 910.415   | 206.866   |
| NM_019043 | 7027.98   | 13370.151 | NM_014563 | 2359.197  | 1777.916  | AL137724  | 1327.982  | 1230.734  |
| NM_00079E | 763.944   | 1074.35   | NM_02015C | 3948.239  | 3549.601  | NM_00475E | 1143.011  | 929.863   |
| AK021660  | 3601.861  | 2825.418  | NM_00715C | 9953.949  | 7701.248  | NM_002913 | 1371.884  | 1198.921  |
| AB007933  | 56725.008 | 60172.77  | NM_006831 | 6160.967  | 4890.486  | AK022797  | 420.635   | 658.661   |
| NM_00546E | 6450.252  | 11345.171 | AL162044  | 11090.559 | 10739.697 | NM_00737C | 1538.418  | 1899.615  |
| NM_016361 | 3014.673  | 4443.343  | AK024004  | 1452.827  | 1135.928  | NM_006231 | 567.442   | 679.055   |
| NM_00370E | 56335.199 | 61877.461 | AK022365  | 829.564   | 856.502   | AK023471  | 614.97    | 1176.91   |
| NM_01434E | 11069.587 | 16901.426 | BE892273  | 51907.762 | 51982.184 | AF044578  | 3525.544  | 2916.865  |
| AB040895  | 737.785   | 1059.119  | AF026929  | 1296.372  | 1541.121  | NM_00194E | 1441.64   | 1876.136  |
| NM_00482C | 311.36    | 472.141   | NM_016734 | 3136.232  | 2681.938  | NM_001067 | 4968.738  | 5327.637  |
| NM_01821C | 2158.128  | 3546.987  | NM_00135E | 35837.023 | 22377.201 | NM_014034 | 2305.991  | 3047.555  |
| NM_00109E | 11236.751 | 15808.515 | U63336    | 937.985   | 728.373   | NM_00533E | 11828.52  | 15225.096 |
| NM_016014 | 2889.355  | 4386.231  | NM_006907 | 2961.749  | 1666.512  | J04474    | 2807.388  | 4637.473  |
| NM_018327 | 3245.4    | 5504.937  | NM_00268E | 908.613   | 707.974   | NM_003761 | 23353.654 | 31796.465 |
| NM_001684 | 1022.433  | 2007.921  | NM_006267 | 3134.194  | 2064.813  | NM_014011 | 2743.138  | 3470.056  |
| NM_01330E | 1670.268  | 2902.042  | NM_002661 | 33997.785 | 29577.178 | AK025994  | 2063.65   | 2618.977  |
| AF038186  | 5405.976  | 9129.223  | NM_001263 | 728.721   | 517.881   | NM_01398E | 1519.18   | 1734.918  |
| NM_003664 | 4143.917  | 7822.685  | AK023982  | 3068.417  | 26167.469 | NM_00173E | 889.197   | 767.54    |
| NM_00242E | 4200.692  | 8650.621  | NM_01846E | 2710.159  | 1578.268  | NM_00105E | 15958.828 | 10294.186 |
| AK027182  | 1541.779  | 3442.3    | Y11312    | 3527.236  | 2923.83   | NM_020203 | 1100.899  | 1145.642  |
| J03651    | 16269.163 | 29290.689 | AB014533  | 22330.383 | 23462.535 | U20582    | 6308.474  | 7927.507  |
| U92818    | 2508.573  | 1714.127  | M11427    | 720.191   | 739.932   | NM_000337 | 206.5     | 374.739   |
| NM_000442 | 8011.851  | 6968.136  | NM_000744 | 1351.374  | 1012.548  | NM_00207E | 3149.122  | 4231.528  |
| NM_002934 | 4054.736  | 3019.598  | NM_00303E | 16676.047 | 11076.864 | AI660957  | 216.111   | 207.107   |
| AL050114  | 1484.479  | 2595.432  | NM_01450E | 1548.787  | 959.699   | U13697    | 279.777   | 443.087   |
| AK021492  | 7238.822  | 12415.585 | NM_020372 | 37698.09  | 31229.043 | U04270    | 14122.017 | 17429.072 |
| AK023794  | 48114.566 | 53921.238 | NM_00263E | 50438.512 | 45625.676 | L02840    | 5191.958  | 3989.35   |
| NM_01988E | 3706.797  | 5869.479  | NM_00497E | 1571.63   | 1575.603  | AA629719  | 40265.395 | 76987.758 |
| NM_00532E | 404.622   | 1102.649  | NM_015361 | 31419.664 | 16935.293 | AA927528  | 1673.989  | 5197.906  |
| AB033103  | 2236.144  | 4174.643  | NM_00431C | 10242.534 | 5516.99   | X02152    | 41430.691 | 81170.742 |
| NM_002907 | 3688.664  | 7066.878  | NM_015537 | 14380.23  | 9938.292  | BG676364  | 2038.895  | 4221.206  |
| AK024098  | 2582.763  | 4252.405  | NM_01652C | 21090.73  | 13553.392 | BG181154  | 685.744   | 1258.236  |
| AB007953  | 4310.925  | 7924.583  | AB018353  | 8521.255  | 5340.576  | AA843679  | 6089.51   | 7310.555  |
| NM_014002 | 12931.61  | 21626.783 | NM_00703E | 7200.136  | 4349.658  | H68922    | 352.244   | 372.319   |
| NM_004197 | 18051.953 | 30192.107 | NM_002617 | 4973.19   | 3991.049  | AF090906  | 1023.602  | 782.292   |
| NM_004073 | 2974.341  | 5392.598  | NM_003313 | 45338.301 | 34857.469 | AB023219  | 2063.28   | 1536.774  |
| NM_00127E | 6047.526  | 13842.141 | AF090907  | 5808.607  | 5314.402  | NM_01414E | 271.142   | 238.475   |
| NM_01910E | 10333.551 | 19072.518 | AK024476  | 12614.128 | 9923.432  | NM_01883E | 1899.168  | 1822.082  |
| NM_000294 | 10360.319 | 18709.459 | X74794    | 24413.096 | 16354.711 | NM_003401 | 1046.411  | 466.632   |
| NM_005677 | 8676.289  | 4994.91   | AL050298  | 6097.433  | 5329.058  | NM_00639E | 351.937   | 200.156   |
| AF229803  | 1739.58   | 1452.71   | NM_00707E | 52713.824 | 44698.063 | NM_01896E | 164.604   | 219.971   |
| AF151810  | 1106.523  | 1060.097  | M20696    | 6444.008  | 6111.47   | NM_00018E | 3939.292  | 3635.724  |
| NM_00213C | 34933.137 | 20949.742 | NM_00291E | 1775.04   | 1932.507  | Y00816    | 645.261   | 808.929   |
| NM_00443E | 17390.504 | 16273.675 | NM_00673E | 4648.145  | 5894.864  | NM_004512 | 5675.119  | 10316.953 |

|           |           |           |           |           |           |           |           |           |
|-----------|-----------|-----------|-----------|-----------|-----------|-----------|-----------|-----------|
| NM_00658C | 7178.968  | 7341.979  | NM_00364C | 2818.736  | 2960.43   | NM_00438C | 14075.883 | 17970.797 |
| NM_00130E | 7393.335  | 7780.34   | NM_014444 | 9170.683  | 7494.844  | U86813    | 259.254   | 468.046   |
| NM_00508Z | 1193.196  | 1386.475  | NM_01224E | 8099.318  | 7424.199  | NM_004119 | 563.289   | 1142.076  |
| D17028    | 49170.07  | 46712.406 | NM_00614E | 980.31    | 692.337   | AY007378  | 1731.92   | 2588.477  |
| NM_01344Z | 40697.879 | 43753.414 | NM_01497C | 10810.913 | 10452.768 | D26070    | 635.192   | 1159.19   |
| BG611243  | 6998.897  | 7562.168  | NM_01439Z | 6004.742  | 4958.17   | NM_00164Z | 3273.608  | 4433.018  |
| AI417481  | 1140.024  | 1200.199  | NM_00422Z | 35984.164 | 42227.031 | NM_00154Z | 394.113   | 774.902   |
| BI906766  | 9164.649  | 6609.686  | NM_00681Z | 1600.042  | 1366.063  | NM_00339Z | 304.921   | 1295.644  |
| U60519    | 2206.935  | 2138.404  | CY3Cy5    | 4047.714  | 156.472   | NM_00050I | 47324.949 | 67279.047 |
| AA282906  | 6808.138  | 7182.317  | NM_078467 | 11605.862 | 18170.82  | NM_000114 | 1639.045  | 2376.67   |
| D28235    | 500.259   | 1216.419  | NM_01334E | 2891.832  | 4497.805  | NM_00515E | 1185.209  | 1685.939  |
| M55593    | 3655.28   | 1940.523  | AL117454  | 36501.699 | 34436.063 | NM_01519Z | 869.536   | 1079.184  |
| AK001883  | 35716.66  | 24322.5   | AF272890  | 2338.583  | 2828.616  | X98834    | 2764.397  | 2959.74   |
| NM_01462E | 3566.394  | 2954.473  | U00684    | 2009.991  | 2245.292  | NM_00703E | 2395.313  | 2301.499  |
| AK025587  | 1022.202  | 692.038   | NM_01645E | 37104.504 | 32497.051 | AB019562  | 863.666   | 578.426   |
| L17325    | 1507.28   | 1095.561  | AF086227  | 1383.772  | 1616.02   | AF036364  | 1447.726  | 1379.943  |
| NM_01771E | 2112.778  | 2346.556  | AK026246  | 2703.573  | 2594.823  | AK022847  | 2463.711  | 1642.094  |
| M58603    | 11121.611 | 9526.901  | AF070524  | 1180.67   | 1123.597  | AK000271  | 480.14    | 507.259   |
| NM_00363E | 14148.448 | 10399.428 | AF035281  | 1506.829  | 1623.563  | NM_00517Z | 365.67    | 594.054   |
| NM_00154E | 1020.666  | 1052.228  | AL365512  | 4564.167  | 3598.256  | NM_00680E | 10963.13  | 16380.404 |
| NM_00011E | 9601.004  | 9494.385  | AK001740  | 5612.381  | 4848.831  | NM_006634 | 628.696   | 948.943   |
| AF308801  | 3474.952  | 3536.183  | AF131793  | 1572.022  | 1096.793  | NM_01646E | 2154.242  | 3481.307  |
| NM_00731E | 55038.988 | 57775     | NM_078467 | 8348.993  | 5155.248  | NM_00032E | 387.766   | 514.993   |
| NM_014874 | 4489.705  | 2823.781  | SR2       | 53103.906 | 23583.904 | NM_01339E | 892.652   | 1509.78   |
| NM_012397 | 4002.252  | 3130.179  | SR4       | 9854.663  | 3536.828  | NM_00241C | 355.787   | 1075.002  |
| NM_00576E | 18264.049 | 13404.328 | SR6       | 1632.1    | 775.96    | NM_014684 | 495.441   | 968.178   |
| NM_00276Z | 3242.646  | 2894.545  | SR8       | 7070.127  | 8373.068  | AK027247  | 514.862   | 584.002   |
| NM_00079E | 559.956   | 360.045   | SR10      | 23235.48  | 3132.174  | NM_00248C | 3684.554  | 4571.499  |
| AK021660  | 4440.01   | 2857.554  | CY3Cy5    | 3071.266  | 170.479   | NM_01757I | 4728.249  | 4790.368  |
| AB007933  | 56919.32  | 59576.926 | AK091573  | 1104.932  | 1626.735  | L03169    | 594.401   | 545.15    |
| NM_00379E | 41999.414 | 31236.5   | AF131814  | 4996.446  | 7269.809  | NM_00192E | 1120.748  | 714.546   |
| NM_00297Z | 6148.735  | 7373.315  | AL359600  | 2113.584  | 3631.682  | NM_01398E | 650.938   | 659.427   |
| NM_00370E | 56378.75  | 57385.93  | AL360144  | 3824.687  | 4863.538  | NM_00173E | 612.515   | 937.129   |
| NM_01434E | 10382.52  | 8890.5    | BC028617  | 1081.4    | 1232.839  | NM_00105E | 11131.775 | 14221.604 |
| AB040895  | 718.381   | 609.545   | AL117653  | 1089.012  | 919.487   | NM_00227I | 33787.082 | 37844.68  |
| NM_01821C | 1719.87   | 1621.95   | AF087999  | 1671.696  | 1515.518  | NM_01836I | 1889.801  | 2975.273  |
| NM_00109E | 10688.742 | 7694.012  | NM_00374C | 2968.114  | 3026.669  | NM_01989Z | 344.393   | 461.321   |
| NM_016014 | 2724.862  | 2712.998  | AL050078  | 1961.893  | 1678.109  | AB040966  | 3034.068  | 4749.553  |
| NM_00019E | 687.76    | 482.376   | AB014526  | 1118.579  | 1167.295  | NM_02013Z | 3717.471  | 5178.221  |
| NM_018327 | 4336.906  | 3321.266  | NM_01853E | 1342.481  | 1657.348  | NM_016467 | 4100.141  | 6718.079  |
| NM_001684 | 3309.474  | 2777.42   | NM_01334E | 1486.944  | 1536.405  | NM_00725Z | 1338.897  | 2923.96   |
| NM_01330E | 1263.527  | 1361.236  | AK026182  | 46212.762 | 39232.035 | NM_01910E | 385.501   | 766.531   |
| AF038186  | 5091.396  | 5315.48   | AK025603  | 2786.368  | 2462.79   | AB033002  | 406.437   | 387.912   |
| NM_003664 | 4220.235  | 5678.445  | NM_01608E | 11085.125 | 7176.291  | NM_00055E | 4099.132  | 5761.047  |
| NM_00242E | 3125.153  | 4495.745  | AK025768  | 3470.25   | 2058.739  | NM_00419E | 435.498   | 409.706   |
| AK027182  | 1055.322  | 1628.959  | AF147323  | 1087.695  | 521.3     | NM_01417C | 1556.249  | 1667.524  |
| J03651    | 14013.506 | 10709.348 | AL117502  | 3634.798  | 2095.644  | AF116652  | 37528.059 | 34536.016 |
| U61738    | 9053.245  | 7689.243  | AK001846  | 5157.306  | 2587.207  | NM_00083E | 271.786   | 277.417   |
| AJ132087  | 1712.678  | 1283.677  | AK024637  | 6569.898  | 3676.43   | AF090906  | 900.127   | 895.497   |
| U92818    | 2226.139  | 1407.568  | AL110293  | 1229.478  | 704.836   | AB023219  | 1613.941  | 1604.871  |
| NM_00044Z | 6981.296  | 6562.085  | AK025148  | 383.475   | 637.706   | NM_01883E | 1726.678  | 2355.398  |
| NM_002934 | 3938.726  | 4053.17   | AK025359  | 2548.448  | 3307.367  | NM_00340I | 653.799   | 1725.606  |
| AK023011  | 46110.984 | 39133.379 | AK026238  | 2901.834  | 3140.837  | AL137724  | 1511.018  | 2542.749  |

|           |           |           |           |           |           |           |           |           |
|-----------|-----------|-----------|-----------|-----------|-----------|-----------|-----------|-----------|
| NM_01681E | 2503.948  | 3281.485  | AK026694  | 1532.465  | 1858.325  | NM_00475E | 1491.81   | 2417.744  |
| AK023794  | 39184.992 | 25148.396 | AK025564  | 1647.963  | 1814.677  | NM_00291E | 1524.102  | 2236.58   |
| NM_01988E | 2857.415  | 1873.242  | AK026286  | 2097.645  | 1925.415  | AK022797  | 530.106   | 529.62    |
| NM_00532E | 368.076   | 345.61    | AK026731  | 2154.701  | 1870.754  | NM_00737C | 1248.865  | 1262.709  |
| AB033103  | 1952.013  | 1552.395  | AK021754  | 970.299   | 752.774   | NM_006231 | 518.21    | 615.854   |
| NM_002907 | 3466.538  | 2137.492  | AK023501  | 899.418   | 812.525   | AK023471  | 720.594   | 1242.761  |
| AK024098  | 2105.217  | 1737.358  | AL133446  | 1322.068  | 1560.955  | AF044578  | 2943.205  | 2906.088  |
| AK001116  | 521.69    | 566.905   | AF147406  | 985.174   | 874.707   | NM_00194E | 1737.414  | 1896.399  |
| AK022371  | 10472.686 | 6668.594  | BC035667  | 1204.977  | 1172.996  | NM_001067 | 4904.625  | 4727.304  |
| D42045    | 5547.491  | 4636.109  | AL049277  | 2149.501  | 3188.833  | NM_014034 | 2241.014  | 2405.06   |
| AB007953  | 4628.17   | 4034.803  | AL050043  | 2052.278  | 1260.123  | NM_00533E | 11739.479 | 14011.685 |
| NM_01400E | 11180.188 | 12243.209 | AL117571  | 1967.787  | 1303.583  | J04474    | 3990.79   | 3607.65   |
| NM_004197 | 16046.375 | 16308.027 | L22263    | 842.905   | 1078.229  | NM_003761 | 22228.916 | 15499.877 |
| NM_00407E | 2562.005  | 3730.686  | AK025010  | 1063.912  | 1425.023  | NM_00472E | 292.776   | 226.195   |
| NM_00127E | 5505.229  | 6398.188  | AL137470  | 961.945   | 1239.528  | NM_014011 | 2473.307  | 1873.183  |
| NM_01910E | 8117.246  | 7127.471  | AL137709  | 3146.089  | 4543.798  | AK025994  | 2057.144  | 2014.393  |
| NM_000294 | 8059.519  | 6571.009  | AK023277  | 1006.172  | 1118.032  | L29306    | 313.776   | 154.706   |
| AJ272212  | 3047.695  | 2327.483  | AK000425  | 5770.96   | 4883.631  | CY3Cy5    | 1251.084  | 188.094   |
| NM_00162E | 55696.188 | 48465.219 | AK021616  | 830.695   | 636.624   | AK022262  | 715.122   | 1343.018  |
| NM_005677 | 7015.035  | 5155.189  | AK022933  | 1146.939  | 1119.015  | AF088039  | 67343.828 | 40951.578 |
| AF229803  | 1597.017  | 1247.497  | NM_01427E | 3391.635  | 3332.036  | AF086220  | 750.588   | 1340.846  |
| AF151810  | 1062.427  | 895.241   | AF009288  | 1368.655  | 1694.127  | AK023941  | 864.469   | 1041.106  |
| NM_00213C | 35063.754 | 29333.779 | AF035303  | 559.571   | 1100.271  | AF086265  | 294.204   | 264.692   |
| NM_00546E | 7550.643  | 8948.419  | AF056438  | 1089.893  | 1395.377  | AL390083  | 3604.647  | 2250.392  |
| NM_016361 | 3764.816  | 4665.682  | AF056448  | 973.871   | 525.045   | AF085905  | 259.643   | 419.38    |
| NM_00130E | 7311.627  | 4815.688  | AK001011  | 4460.963  | 1806.184  | AK075087  | 247.419   | 1173.495  |
| NM_00508E | 1047.349  | 794.293   | AK021690  | 1832.8    | 997.597   | AK026571  | 1900.534  | 6275.346  |
| D17028    | 47826.891 | 33390.574 | AK001078  | 1007.849  | 1457.257  | AK024673  | 2938.825  | 17042.111 |
| NM_01344E | 42722.883 | 33431.148 | AK001840  | 939.879   | 870.559   | AF070618  | 615.598   | 5172.951  |
| BG611243  | 6817.191  | 4925.258  | AK021486  | 617.622   | 1408.576  | SR2       | 38884.504 | 57569.957 |
| AI417481  | 1032.622  | 722.627   | AK021740  | 877.308   | 1972.13   | SR4       | 4772.608  | 15268.107 |
| BI906766  | 9222.109  | 5777.013  | NM_005444 | 5485.964  | 7871.597  | SR6       | 1052.819  | 3138.913  |
| U60519    | 867.468   | 704.499   | V00589    | 53401.973 | 48972.219 | SR8       | 5405.825  | 27727.428 |
| AA282906  | 7215.268  | 5004.346  | AL390163  | 1348.977  | 2031.615  | SR10      | 13856.779 | 11496.438 |
| L02870    | 38744.336 | 30378.453 | NM_01857E | 1561.15   | 1423.392  | CY3Cy5    | 1236.673  | 221.372   |
| BG755482  | 24817.564 | 25919.117 | NM_00531E | 1573.237  | 1642.094  | AL049365  | 7869.423  | 7258.077  |
| X51420    | 4119.391  | 7175.354  | AK024838  | 2156.016  | 2216.184  | AK025132  | 538.642   | 470.152   |
| D28235    | 639.149   | 899.255   | AK000175  | 4627.767  | 3559.411  | AK025157  | 2977.435  | 2690.673  |
| X51757    | 1521.177  | 1642.959  | AL137736  | 3892.861  | 4175.44   | AK022633  | 474.568   | 500.702   |
| L24038    | 3031.052  | 2504.578  | AF143870  | 1136.024  | 1013.565  | AK000079  | 440.675   | 363.842   |
| NM_05305E | 1279.736  | 1583.661  | AK021427  | 1124.438  | 1235.264  | NM_01224E | 1142.302  | 1001.943  |
| NM_00618E | 927.117   | 775.688   | NM_00419E | 9311.084  | 7915.451  | AK025743  | 844.089   | 729.012   |
| NM_002751 | 7490.675  | 5533.332  | AK024160  | 754.217   | 1435.368  | AK023974  | 2222.768  | 2676.424  |
| M55593    | 2982.206  | 1988.446  | AL080234  | 5288.701  | 3156.829  | AK023768  | 968.134   | 3838.262  |
| AK001883  | 34782.789 | 21170.59  | AK027025  | 1240.473  | 1299.603  | AF147335  | 559.551   | 3336.224  |
| NM_01462E | 3731.394  | 2539.092  | AK025105  | 778.88    | 1625.532  | AK000711  | 649.431   | 5674.663  |
| AK025587  | 1029.561  | 1514.7    | AF147387  | 7312.176  | 14735.85  | BI768072  | 1545.652  | 7149.383  |
| AL050114  | 1940.109  | 2585.771  | NM_012081 | 1814.602  | 2858.068  | AK022216  | 1500.784  | 5526.457  |
| AK021492  | 9296.734  | 9217.354  | AL137463  | 672.907   | 870.946   | AK025812  | 682.241   | 3813.39   |
| NM_014874 | 2207.378  | 1541.645  | AF085909  | 52232.367 | 48821.391 | U00960    | 2768.383  | 5411.253  |
| NM_012397 | 519.561   | 287.034   | AF090888  | 1128.161  | 770.082   | AK025670  | 543.586   | 464.801   |
| NM_00576E | 17246.445 | 12782.676 | AK027193  | 2899.947  | 2582.298  | AK026419  | 2140.853  | 1805.027  |
| NM_00276E | 3603.186  | 2510.023  | AF086471  | 11515.253 | 7339.5    | AK025276  | 2325.079  | 1897.649  |

|           |           |           |           |           |           |           |           |           |
|-----------|-----------|-----------|-----------|-----------|-----------|-----------|-----------|-----------|
| NM_006324 | 12668.435 | 9278.064  | NM_018455 | 9967.629  | 6897.724  | AK026027  | 1374.372  | 1258.32   |
| NM_016848 | 18762.346 | 14166.733 | AF113018  | 1861.121  | 1690.598  | AK026457  | 1242.497  | 1045.779  |
| NM_000514 | 13978.913 | 10624.214 | AK021996  | 985.773   | 1052.586  | AK026825  | 673.567   | 761.974   |
| AL137432  | 2228.514  | 2297.133  | AL049337  | 7698      | 6849.172  | NM_013355 | 585.634   | 593.319   |
| NM_000957 | 5096.312  | 2873.938  | AL079294  | 1712.339  | 1207.748  | NM_003847 | 14120.834 | 8080.822  |
| NM_019043 | 6487.308  | 5471.739  | AK024844  | 2116.091  | 920.377   | AK021973  | 601.796   | 2970.241  |
| NM_000796 | 1466.742  | 4589.614  | AL049437  | 1015.37   | 839.814   | AL050165  | 40789.578 | 50380.867 |
| AF279656  | 1367.293  | 2344.56   | AF130075  | 16274.292 | 18365.705 | AL117445  | 614.976   | 2904.556  |
| AK021660  | 1878.39   | 2392.832  | L29496    | 934.951   | 2282.511  | AL122113  | 2266.441  | 8246.298  |
| AB007933  | 53990.223 | 61608.938 | NM_000928 | 1157.189  | 2156.306  | AK024415  | 1561.561  | 2123.581  |
| NM_006702 | 5211.594  | 5189.914  | NM_007002 | 14100.048 | 13523.206 | AK023515  | 235.271   | 262.921   |
| NM_001396 | 14179.487 | 10485.278 | NM_012121 | 1833.724  | 2420.371  | AL137623  | 16838.199 | 9939.698  |
| NM_014474 | 3528.329  | 2678.377  | NM_003255 | 793.902   | 795.406   | AK026485  | 532.234   | 640.258   |
| NM_016249 | 3378.033  | 2445.777  | NM_014155 | 3818.41   | 5115.158  | AJ227874  | 1800.951  | 1856.004  |
| NM_006181 | 2981.471  | 2327.343  | AK026331  | 33281.984 | 33296.27  | AF009268  | 477.907   | 657.745   |
| NM_003796 | 40082.156 | 27239.855 | M30773    | 3384.309  | 2888.658  | AF056418  | 165.385   | 175.406   |
| NM_002973 | 6198.629  | 5830.733  | NM_016338 | 20744.285 | 13760.287 | AF009276  | 329.705   | 384.676   |
| NM_004436 | 21044.457 | 27120.289 | AF113699  | 52301.398 | 47871.383 | AF056428  | 7688.382  | 27237.135 |
| NM_006580 | 11708.333 | 10644.894 | AK021897  | 8223.373  | 7396.056  | AF069136  | 200.366   | 2702.792  |
| NM_016277 | 2680.556  | 1974.961  | AK001051  | 3210.554  | 2513.583  | AK001995  | 263.698   | 2588.699  |
| NM_007247 | 4173.998  | 2610.357  | NM_018317 | 934.258   | 1004.886  | AK021594  | 1647.551  | 5349.869  |
| NM_006554 | 9907.688  | 7067.366  | AF086051  | 1308.313  | 793.747   | AK021635  | 1131.729  | 4565.002  |
| X99962    | 18917.301 | 13736.012 | D16476    | 508.858   | 816.508   | AK021856  | 1244.734  | 1273.075  |
| AK023221  | 20018.396 | 13057.423 | NM_003673 | 6667.654  | 13504.156 | S97393    | 332.703   | 469.92    |
| NM_003664 | 3680.121  | 2813.819  | Z36823    | 27343.473 | 27239.236 | NM_017925 | 469.685   | 483.364   |
| NM_002426 | 3382.367  | 3221.604  | AK022110  | 361.821   | 1171.077  | NM_018472 | 708.634   | 809.818   |
| AK027182  | 1661.215  | 1583.866  | NM_001849 | 4610.181  | 9238.341  | AL133108  | 335.277   | 477.683   |
| U61738    | 10045.641 | 10541.275 | NM_003734 | 38115.016 | 44594.145 | AJ008128  | 33197.539 | 14722.128 |
| AJ132087  | 3385.97   | 5274.064  | NM_014935 | 30238.215 | 23969.66  | AL449243  | 7671.754  | 6875.136  |
| U92818    | 3236.865  | 6043.543  | X99660    | 48320.563 | 50986.352 | M12211    | 2999.373  | 2342.091  |
| NM_000442 | 5704.373  | 8638.541  | X03635    | 8978.952  | 7344.641  | AJ008131  | 17275.717 | 9195.425  |
| NM_002934 | 2930.894  | 3068.28   | X97671    | 587.465   | 451.973   | AK024303  | 606.564   | 4322.277  |
| AK023011  | 40206.453 | 28497.688 | NM_004351 | 25204.176 | 18065.063 | AL160131  | 9507.22   | 28632.746 |
| NM_016816 | 1840.508  | 1381.682  | NM_004236 | 13089.414 | 11517.611 | AF086045  | 1896.952  | 11694.857 |
| L17325    | 1642.887  | 1348.704  | AB011093  | 14785.666 | 11777.486 | AK027028  | 2419.689  | 16221.058 |
| NM_017716 | 1966.626  | 1829.17   | NM_005618 | 621.861   | 507.202   | AK027069  | 384.748   | 2973.734  |
| M58603    | 9999.973  | 7515.375  | NM_020533 | 34848.133 | 26372.811 | AK026916  | 875.338   | 3763.769  |
| NM_003636 | 15579.082 | 10623.39  | NM_001894 | 33250.59  | 17507.262 | AK026914  | 800.599   | 3844.725  |
| NM_001549 | 988.81    | 670.355   | NM_000614 | 1488.84   | 766.737   | Y13808    | 592.949   | 3128.961  |
| NM_000115 | 11756.834 | 9555.979  | AK022884  | 5055.429  | 2979.719  | Y11166    | 2002.777  | 5238.775  |
| AF308801  | 4922.46   | 4736.669  | AF305072  | 1245.463  | 2104.413  | AK024942  | 1551.801  | 1418.98   |
| NM_007318 | 50177.113 | 55015.621 | NM_006620 | 10957.948 | 13516.712 | AJ227873  | 6105.379  | 3772.28   |
| AF229803  | 1356.482  | 915.982   | NM_001397 | 1572.031  | 1980.865  | AK022886  | 2611.025  | 2024.7    |
| AF151810  | 863.074   | 922.051   | NM_005543 | 1047.254  | 1049.964  | AK024665  | 3138.139  | 2680.302  |
| NM_002130 | 26862.805 | 14418.353 | Y08770    | 689.689   | 502.288   | AF147363  | 353.477   | 369.142   |
| NM_005469 | 5811.991  | 5710.801  | NM_004772 | 4821.161  | 2141.273  | AJ227880  | 314.124   | 325.332   |
| NM_016361 | 2251.124  | 1679.452  | NM_003714 | 4685.143  | 3323.906  | AK000691  | 912.464   | 1075.607  |
| NM_003708 | 53542.012 | 54962.41  | U42977    | 16938.67  | 18030.715 | AK001448  | 711.749   | 783.083   |
| NM_014349 | 11232.785 | 9945.784  | NM_002881 | 19246.26  | 18842.201 | AK026890  | 387.736   | 480.593   |
| AB040895  | 579.217   | 470.77    | NM_003666 | 20465.861 | 14678.106 | AF131817  | 1506.117  | 1731.354  |
| NM_001096 | 11501.646 | 8172.909  | NM_003288 | 9085.63   | 7983.28   | AL049321  | 1479.407  | 1262.871  |
| NM_016014 | 2872.094  | 3088.733  | NM_018242 | 1580.912  | 2362.326  | NM_003546 | 2184.932  | 1876.297  |
| NM_000196 | 601.783   | 921.482   | M83822    | 5333.863  | 4097.906  | AF118077  | 1893.204  | 1998.593  |

|           |           |           |           |           |           |           |           |           |
|-----------|-----------|-----------|-----------|-----------|-----------|-----------|-----------|-----------|
| NM_018327 | 2124.468  | 2055.804  | NM_018434 | 748.887   | 783.21    | AL137625  | 257.098   | 378.156   |
| NM_017581 | 1641.133  | 1534.793  | NM_003914 | 1063.801  | 1563.916  | AK025750  | 840.63    | 1505.62   |
| AA488804  | 8695.658  | 7554.465  | NM_020423 | 2982.534  | 3214.953  | BF031253  | 2182.656  | 11280.293 |
| NM_006539 | 600.51    | 614.757   | AK021437  | 4831.401  | 6543.235  | AK025783  | 711.338   | 5700.622  |
| NM_001684 | 688.896   | 656.874   | NM_003831 | 5129.108  | 3857.476  | AF113675  | 500.579   | 4028.928  |
| NM_000808 | 614.291   | 603.571   | NM_001759 | 1050.226  | 1039.161  | AK024514  | 334.55    | 2356.848  |
| NM_016318 | 15245.749 | 10044.121 | AB007965  | 20861.566 | 36683.574 | AK023507  | 394.07    | 2466.22   |
| NM_013309 | 1513.421  | 1236.582  | NM_017649 | 1215.546  | 1844.856  | NM_005169 | 2417.186  | 7932.03   |
| NM_019891 | 2450.153  | 3203.924  | NM_000066 | 6150.241  | 3925.728  | AL109818  | 1683.382  | 1809.495  |
| AF038186  | 5669.718  | 5523.13   | NM_001196 | 11624.327 | 5191.539  | NM_000068 | 984.974   | 965.342   |
| AK001883  | 22207.258 | 11129.38  | NM_016008 | 1835.878  | 1064.004  | AB033046  | 10978.292 | 8177.949  |
| NM_014629 | 2465.74   | 1592.249  | NM_017744 | 1343.311  | 1228.577  | NM_015918 | 4153.447  | 2474.604  |
| AK025587  | 433.75    | 333.166   | NM_001924 | 8960.922  | 9987.505  | NM_013249 | 265.773   | 259.578   |
| AL050114  | 1424.197  | 981.973   | NM_017705 | 11841.738 | 2720.307  | AB029041  | 34515.777 | 14912.462 |
| AK021492  | 7700.897  | 4642.776  | AB002325  | 1011.378  | 324.346   | AK026642  | 460.987   | 452.362   |
| AK023794  | 32438.988 | 21832.211 | NM_001796 | 11347.245 | 5553.499  | AL359063  | 391.758   | 384.326   |
| NM_019885 | 2920.579  | 2419.876  | AB040880  | 1609.523  | 1114.979  | AL079292  | 1516.642  | 1425.535  |
| AB033103  | 1862.724  | 1046.329  | NM_009587 | 28441.447 | 16047.753 | X89667    | 2752.088  | 2476.161  |
| NM_002907 | 3539.205  | 2188.32   | NM_017820 | 2516.427  | 1922.246  | NM_014027 | 2254.966  | 2060.863  |
| AK024098  | 1931.682  | 1475.196  | NM_001097 | 331.735   | 627.065   | AF116621  | 4779.847  | 4215.7    |
| AK001116  | 590.69    | 715.806   | NM_002630 | 2686.152  | 3049.855  | AF086554  | 3125.527  | 3777.491  |
| AK022371  | 9397.447  | 7521.988  | AJ295149  | 55057.156 | 56331.934 | AL390136  | 23506.717 | 33821.641 |
| D42045    | 5057.296  | 4406.935  | NM_013438 | 9930.126  | 10675.765 | AK023156  | 189.338   | 1893.364  |
| AB007953  | 3197.397  | 2514.783  | NM_014688 | 14884.333 | 10873.81  | AF086398  | 61486.668 | 66239.203 |
| NM_014002 | 9422.624  | 8428.153  | AB037784  | 771.43    | 558.959   | AK024545  | 865.01    | 5391.884  |
| NM_004197 | 12192.854 | 8761.697  | AL359623  | 2971.623  | 2886.436  | AK023444  | 520.397   | 3143.7    |
| NM_004073 | 1998.814  | 2042.755  | AK026920  | 10566.139 | 8352.656  | AK025953  | 766.4     | 4661.525  |
| NM_001278 | 5926.399  | 5891.866  | AL137255  | 8494.274  | 3570.952  | AL137581  | 1155.949  | 1224.722  |
| NM_019105 | 8745.519  | 8669.828  | NM_003370 | 16718.043 | 7399.592  | NM_015564 | 555.497   | 472.234   |
| NM_000294 | 9717.491  | 8523.385  | AB037715  | 11436.872 | 5378.288  | AF160476  | 460.018   | 378.559   |
| AJ272212  | 3509.51   | 3068.386  | AF250924  | 29105.496 | 9956.444  | L22650    | 920.078   | 907.498   |
| NM_001626 | 52487.992 | 54291.641 | D86979    | 3963.14   | 1255.343  | AB014520  | 18767.486 | 8563.529  |
| NM_005677 | 7888.445  | 8469.406  | NM_018212 | 1000.536  | 274.691   | AF161420  | 676.051   | 524.988   |
| CY3Cy5    | 11249.229 | 1111.258  | AB023230  | 4155.108  | 3247.448  | NM_004907 | 2005.276  | 1693.999  |
| NM_004957 | 3043.01   | 7837.721  | AF018081  | 54165     | 51134.801 | NM_002891 | 288.484   | 414.986   |
| AL359211  | 1357.505  | 1926.907  | NM_020202 | 35478.281 | 54073.59  | NM_001775 | 1472.583  | 1156.635  |
| AF070526  | 576.029   | 1038.999  | AF024540  | 3369.966  | 4238.791  | X04526    | 16089.619 | 7082.247  |
| U79264    | 2842.643  | 3297.458  | NM_002189 | 5530.258  | 10443.089 | D26067    | 1793.992  | 1426.581  |
| NM_015699 | 10034.968 | 10793.884 | NM_001668 | 3278.469  | 4050.985  | AF227924  | 1857.098  | 1436.965  |
| AK023619  | 673.024   | 761.694   | AK025362  | 2647.684  | 3794.83   | NM_005716 | 17684.389 | 9274.644  |
| AF070530  | 14458.808 | 16530.695 | AK021776  | 3072.081  | 3669.094  | NM_006183 | 1942.953  | 1978.709  |
| AF086487  | 666.215   | 591.34    | AK026042  | 3275.107  | 3146.764  | S59184    | 1273.382  | 5968.195  |
| NM_006420 | 2688.278  | 2911.02   | NM_014233 | 60256.801 | 49496.406 | NM_005130 | 220.846   | 2837.612  |
| AF131855  | 1486.945  | 1479.238  | NM_002137 | 56645.949 | 53637.574 | NM_006661 | 1411.53   | 7527.54   |
| AF086046  | 4775.291  | 4273.895  | NM_002911 | 4458.511  | 3921.81   | NM_005746 | 18631.463 | 44972.438 |
| AK023309  | 692.512   | 618.052   | U94386    | 2155.465  | 1641.92   | NM_004588 | 422.301   | 2987.008  |
| AK000724  | 4801.876  | 4564.037  | NM_016000 | 56060.047 | 53700.434 | U16126    | 906.152   | 3685.934  |
| NM_003720 | 24862.416 | 25861.039 | NM_006372 | 15301.323 | 8464.927  | NM_002172 | 5866.896  | 4946.009  |
| NM_004957 | 3644.28   | 3777.571  | NM_014150 | 2604.228  | 1752.726  | AJ008144  | 437.832   | 339.634   |
| NM_005252 | 1690.471  | 1700.935  | NM_006805 | 56096.863 | 37854.711 | NM_007314 | 3706.63   | 2004.415  |
| SR1       | 79739.031 | 69843.781 | AF132027  | 61247.758 | 48269.66  | NM_016073 | 670.301   | 405.489   |
| SR3       | 43786.949 | 38694.504 | NM_004681 | 35355.148 | 8072.881  | NM_006600 | 8914.686  | 6186.159  |
| SR5       | 4289.912  | 5239.753  | AB033096  | 18031.383 | 3622.726  | AF297709  | 2098.989  | 1538.669  |

|           |           |           |           |           |           |           |           |           |
|-----------|-----------|-----------|-----------|-----------|-----------|-----------|-----------|-----------|
| SR7       | 5305.548  | 48514.563 | NM_014886 | 2954.729  | 1156.823  | L77564    | 636.09    | 549.322   |
| SR9       | 19876.553 | 4619.989  | L31408    | 31532.855 | 27645.953 | NM_015384 | 1565.12   | 992.941   |
| CY3Cy5    | 5551.663  | 395.036   | NM_001545 | 20543.857 | 29830.193 | AK023327  | 2223.138  | 1851.927  |
| U50538    | 1747.327  | 1900.408  | NM_004446 | 33076.516 | 52208.207 | AB046858  | 1249.105  | 1211.84   |
| U70771    | 3121.633  | 7291.058  | AL133566  | 1593.277  | 4619.218  | D50914    | 4125.743  | 2733.801  |
| Z36842    | 1559.628  | 2319.716  | M36118    | 45483.469 | 54811.086 | BE878692  | 290.163   | 215.65    |
| AF086137  | 3394.61   | 3804.32   | NM_003399 | 33181.668 | 51125.105 | NM_002007 | 392.273   | 401.346   |
| AF086526  | 1204.951  | 1505.166  | J02625    | 29576.215 | 34028.121 | NM_002305 | 4605.806  | 2740.505  |
| AK025788  | 8155.39   | 7360.267  | Y17175    | 60819.742 | 61477.133 | AK025439  | 2233.69   | 1874.203  |
| AF086164  | 1671.869  | 1643.156  | NM_004549 | 36918.816 | 25188.127 | NM_001737 | 2889.792  | 3238.804  |
| AK025577  | 3377.687  | 2618.627  | NM_005333 | 41424.465 | 32681.586 | Z36784    | 859.409   | 2666.863  |
| AK000216  | 1492.066  | 1542.104  | NM_000767 | 852.334   | 895.821   | NM_016626 | 10213.204 | 34918.527 |
| AK023440  | 1524.956  | 1566.727  | AK026161  | 2518.456  | 2111.958  | NM_007213 | 729.689   | 5397.148  |
| AB033041  | 37417.457 | 29189.166 | NM_004553 | 53676.816 | 45868.801 | AF131842  | 302.631   | 1795.548  |
| NM_014894 | 76542.867 | 70151.406 | D63484    | 5860.891  | 4388.086  | NM_019064 | 1953.124  | 9649.233  |
| AY007155  | 1742.438  | 1028.769  | AK026745  | 9026.653  | 7027.057  | NM_018939 | 485.021   | 2635.323  |
| AK027160  | 21482.34  | 12356.261 | AL157440  | 6165.79   | 4469.558  | NM_000094 | 3116.986  | 11240.321 |
| AK022678  | 1908.823  | 2449.749  | NM_016423 | 13710.584 | 8985.675  | AK024732  | 5561.303  | 3468.283  |
| AK023835  | 4555.501  | 7530.512  | AB040975  | 2236.649  | 1440.479  | NM_004159 | 11306.947 | 7516.842  |
| AK023012  | 625.648   | 829.822   | NM_005119 | 29819.178 | 9416.628  | NM_003249 | 3652.669  | 2210.897  |
| AK023906  | 4061.314  | 4360.642  | NM_003168 | 12906.115 | 3977.9    | M21897    | 482.878   | 544.7     |
| AK024234  | 631.717   | 709.862   | AK055844  | 2174.112  | 1343.2    | AF301463  | 511.412   | 424.025   |
| AK024962  | 1686.713  | 1861.672  | NM_018288 | 20315.168 | 12188.347 | NM_015984 | 3263.341  | 1848.44   |
| AK022164  | 541.198   | 641.797   | NM_003146 | 11280.373 | 3649.653  | NM_006894 | 1836.77   | 1530.254  |
| AK025135  | 9094.536  | 11363.791 | NM_003131 | 19728.945 | 35432.359 | AK023031  | 1885.725  | 1512.36   |
| NM_017926 | 3342.734  | 3721.045  | NM_005239 | 14654.669 | 32736.996 | NM_005717 | 50421.176 | 24150.318 |
| AY007145  | 3630.163  | 3297.175  | AK022889  | 20714.014 | 43364.309 | NM_012090 | 972.169   | 937.228   |
| AK021573  | 809.448   | 564.309   | X52357    | 57591.281 | 56938.188 | BE793385  | 542.873   | 1882.255  |
| D38549    | 2648.859  | 2201.995  | AF211891  | 3155.504  | 5749.613  | AF177292  | 320.872   | 2022.14   |
| AK024780  | 2132.226  | 2431.081  | NM_005641 | 3915.016  | 11411.673 | NM_003088 | 2482.378  | 18581.969 |
| AF085947  | 992.78    | 931.925   | NM_003796 | 36044.332 | 47517.063 | AF043290  | 667.126   | 3969.401  |
| AL359591  | 499.431   | 509.531   | NM_002973 | 6940.12   | 9624.929  | NM_004082 | 2519.791  | 15403.333 |
| AK022389  | 377.17    | 308.558   | NM_004436 | 24207.813 | 16711.889 | NM_014398 | 2256.267  | 12812.148 |
| AK022123  | 545.417   | 541.944   | NM_006580 | 16528.227 | 12076.262 | NM_005934 | 6176.278  | 18444.162 |
| U10510    | 9781.682  | 8182.126  | NM_001305 | 19363.648 | 16154.811 | NM_002614 | 933.987   | 1865.638  |
| AK023870  | 4499.288  | 5615.059  | NM_005082 | 1468.694  | 1403.227  | NM_005655 | 2911.694  | 1851.429  |
| AK021599  | 1999.662  | 2578.955  | D17028    | 53395.816 | 48508.625 | NM_002698 | 973.896   | 517.003   |
| BC030975  | 664.597   | 904.309   | NM_013442 | 54016.176 | 46538.859 | AF069138  | 494.754   | 479.641   |
| AK025619  | 416.323   | 356.482   | BG611243  | 9803.454  | 8304.395  | NM_002148 | 433.486   | 301.059   |
| AF116677  | 608.889   | 581.572   | AI417481  | 1885.861  | 2013.177  | AL137449  | 1010.442  | 914.832   |
| NM_014159 | 6285.637  | 4605.068  | BI906766  | 10777.94  | 7216.926  | U88153    | 2150.708  | 1437.516  |
| AK021795  | 1315.662  | 1313.9    | U60519    | 1470.03   | 1320.858  | X03910    | 10676.529 | 6534.583  |
| AL162042  | 3796.662  | 4415.82   | AA282906  | 13172.177 | 8216.522  | NM_018428 | 10010.754 | 7496.875  |
| AK026131  | 1088.043  | 1228.12   | L02870    | 51261.758 | 42302.117 | NM_006924 | 17345.854 | 10412.722 |
| AK023312  | 2606.207  | 2138.014  | BG755482  | 41040.703 | 10716.646 | NM_016024 | 3506.288  | 2407.004  |
| AK022483  | 490.702   | 499.914   | AI480307  | 12807.733 | 7122.531  | NM_018107 | 2609.48   | 2427.395  |
| AL133570  | 1635.657  | 1494.97   | X51420    | 5498.909  | 1781.623  | NM_012279 | 499.339   | 348.641   |
| AK021462  | 742.276   | 669.011   | D28235    | 1459.136  | 952.417   | NM_018387 | 14154.694 | 7050.689  |
| AF131836  | 2771.511  | 3441.621  | X51757    | 2253.51   | 1306.394  | BF310673  | 1927.412  | 1205.992  |
| AF275804  | 10965.973 | 14984.608 | L24038    | 4600.952  | 11062.6   | R97012    | 52627.672 | 20079.42  |
| AL137488  | 2306.048  | 2588.866  | NM_053056 | 1505.704  | 4401.658  | U77700    | 7571.604  | 7600.277  |
| AL049447  | 64471.59  | 58711.941 | NM_006186 | 2836.17   | 6967.892  | NM_006567 | 8164.856  | 14377.942 |
| NM_020527 | 3276.103  | 4136.122  | NM_002751 | 14066.278 | 22809.125 | AF038554  | 26327.188 | 58815.406 |

|           |           |           |           |           |           |           |           |           |
|-----------|-----------|-----------|-----------|-----------|-----------|-----------|-----------|-----------|
| AB020637  | 2690.041  | 3246.303  | M55593    | 3994.746  | 7833.642  | AF264621  | 12132.654 | 36004.508 |
| NM_005286 | 7657.269  | 7733.226  | NM_005918 | 50251.27  | 59028.93  | AF176701  | 766.521   | 895.083   |
| AK024365  | 6565.667  | 6199.064  | AK023011  | 49025.891 | 50872.93  | NM_000456 | 1276.482  | 1057.898  |
| AJ251759  | 2413.607  | 2424.64   | NM_016816 | 2646.611  | 3473.053  | NM_002496 | 15778.766 | 9775.779  |
| AK024371  | 3579.463  | 3840.332  | L17325    | 2476.888  | 2199.272  | NM_016243 | 1546.969  | 1257.866  |
| NM_005454 | 878.472   | 957.345   | NM_017716 | 2437.63   | 2575.875  | NM_014402 | 32915.43  | 12211.389 |
| AK021708  | 446.713   | 339.989   | M58603    | 15099.719 | 11675.847 | NM_004646 | 6978.668  | 4243.982  |
| AL050205  | 11261.991 | 9908.89   | NM_003639 | 14374.384 | 10153.145 | NM_006540 | 4100.712  | 2319.854  |
| AK023947  | 670.884   | 725.201   | NM_001549 | 1183.276  | 935.867   | NM_017766 | 1129.482  | 933.146   |
| NM_005691 | 1959.063  | 2167.816  | NM_000115 | 10566.579 | 7947.087  | NM_002811 | 7157.362  | 3528.031  |
| AF086156  | 662.714   | 775.271   | AF308801  | 5177.453  | 4936.36   | NM_020310 | 1655.58   | 1302.639  |
| AK023814  | 797.865   | 974.042   | NM_007318 | 55447.543 | 51293.477 | AK024444  | 362.216   | 331.514   |
| AF130063  | 844.994   | 981.997   | NM_014874 | 3566.635  | 3269.488  | NM_005802 | 3023.683  | 1937.915  |
| AF086528  | 1069.809  | 1003.965  | NM_012397 | 1242.311  | 1235.108  | AB002331  | 2121.203  | 1209.648  |
| AL162043  | 942.022   | 1086.028  | NM_005765 | 23075.928 | 18234.201 | NM_002504 | 2314.285  | 1858.669  |
| NM_006543 | 1457.071  | 1566.975  | NM_002762 | 8314.025  | 6249.357  | AB046775  | 1519.299  | 1027.313  |
| AF086252  | 1783.805  | 2218.249  | NM_006324 | 13710.137 | 5067.756  | X74862    | 642.216   | 714.424   |
| AK026703  | 1315.328  | 1835.834  | NM_016848 | 31367.059 | 7175.568  | X65663    | 3849.893  | 3777.7    |
| AK024367  | 1362.837  | 1774.697  | NM_000514 | 24876.072 | 7267.606  | NM_003185 | 2054.855  | 8018.781  |
| NM_017866 | 10325.847 | 11568.18  | AL137432  | 2786.077  | 2744.609  | NM_004456 | 5307.2    | 23343.371 |
| AJ131244  | 606.017   | 518.162   | NM_000957 | 6941.776  | 12171.661 | AY004253  | 2766.246  | 11225.452 |
| NM_003536 | 2668.786  | 2611.674  | NM_019043 | 8976.146  | 18159.494 | Z46967    | 531.235   | 428.437   |
| AF116707  | 8674.756  | 9787.492  | NM_003240 | 39524.883 | 52420.016 | NM_017583 | 6596.604  | 5630.582  |
| U90910    | 8409.701  | 8106.52   | NM_016564 | 58085.5   | 58262.043 | Y16132    | 8270.676  | 7881.311  |
| AL049979  | 528.679   | 674.624   | NM_000796 | 1128.846  | 2693.519  | NM_016593 | 741.454   | 823.299   |
| AK025765  | 2316.485  | 2190.231  | AK021660  | 10587.615 | 17407.686 | NM_002521 | 792.004   | 662.165   |
| NM_016613 | 7546.907  | 7458.906  | AB007933  | 55421.73  | 64690.715 | NM_001150 | 1164.449  | 1106.242  |
| AF086414  | 4825.773  | 3818.106  | NM_005469 | 9348.046  | 11454.965 | NM_002856 | 4225.383  | 3309.53   |
| AJ012490  | 10348.451 | 8470.71   | NM_016361 | 6145.104  | 7978.034  | NM_003225 | 444.907   | 468.426   |
| U84516    | 19634.68  | 17243.578 | NM_003708 | 56965.422 | 53959.617 | NM_000096 | 552.984   | 655.046   |
| AL049270  | 3129.758  | 2382.336  | NM_014349 | 17335.424 | 18940.311 | AA418251  | 458.237   | 537.248   |
| U88834    | 14735.262 | 12846.123 | AB040895  | 818.74    | 1026.085  | AA143087  | 9827.766  | 6664.751  |
| BC025324  | 1481.095  | 1428.506  | NM_004820 | 547.792   | 669.724   | BI870965  | 7173.79   | 6710.558  |
| NM_003533 | 1768.564  | 2160.047  | NM_018210 | 2583.752  | 2397.644  | BI835536  | 6628.155  | 4994.173  |
| AL157478  | 689.771   | 857.673   | NM_001096 | 12019.722 | 7010.224  | BF205051  | 3940.644  | 3021.006  |
| AK023726  | 9051.489  | 10336.197 | NM_016014 | 4410.599  | 3873.764  | X02761    | 7164.776  | 5892.052  |
| AK024906  | 825.817   | 876.396   | NM_000198 | 995.952   | 936.39    | M91463    | 746.831   | 565.196   |
| NM_005607 | 3785.693  | 4559.094  | NM_018327 | 5347.634  | 4864.946  | U88317    | 309.377   | 355.703   |
| NM_006761 | 49461.727 | 51795.633 | NM_001684 | 1571.414  | 1519.144  | J03060    | 1372.44   | 3239.125  |
| NM_014897 | 2829.441  | 4775.028  | NM_013309 | 2961.234  | 2095.827  | X54156    | 373.335   | 2834.47   |
| NM_003453 | 11551.84  | 11626.76  | AF038186  | 6567.656  | 2561.62   | AA829383  | 9041.088  | 24532.26  |
| NM_018371 | 22558.348 | 21485.674 | NM_003664 | 7492.278  | 2820.944  | AF012434  | 14943.744 | 12189.612 |
| NM_014390 | 23026.258 | 26587.572 | NM_002426 | 4413.913  | 2482.009  | AF131748  | 1917.551  | 974.521   |
| NM_018143 | 1114.273  | 1115.58   | AK027182  | 2994.312  | 2810.49   | NM_002346 | 680.88    | 788.337   |
| X78924    | 10201.315 | 10301.879 | J03651    | 18271.727 | 34547.078 | NM_005080 | 6100.808  | 6666.342  |
| NM_013250 | 2007.628  | 2134.986  | U61738    | 21267.467 | 39111.828 | NM_004887 | 1593.024  | 1592.506  |
| NM_001886 | 14821.417 | 13893.703 | AJ132087  | 3872.135  | 8558.211  | NM_006404 | 441.209   | 490.749   |
| NM_004996 | 413.948   | 368.253   | U92818    | 2971.713  | 6370.5    | NM_014795 | 486.709   | 341.289   |
| X89668    | 30213.971 | 20703.389 | NM_000442 | 9363.008  | 18432.299 | NM_002986 | 511.674   | 725.003   |
| NM_004456 | 3483.212  | 2676.499  | NM_002934 | 4731.909  | 10972.604 | M15330    | 819.828   | 1245.241  |
| NM_006901 | 2353.71   | 2505.245  | AL050114  | 1293.501  | 1841.397  | NM_014396 | 1828.918  | 1133.59   |
| NM_018530 | 7752.973  | 6846.913  | AK021492  | 8716.774  | 9464.391  | AK027201  | 1199.436  | 1130.6    |
| AJ003145  | 890.858   | 701.384   | AK023794  | 54603.676 | 48293.484 | NM_000486 | 15009.494 | 9411.578  |



|           |           |           |           |           |           |           |           |           |
|-----------|-----------|-----------|-----------|-----------|-----------|-----------|-----------|-----------|
| AK022855  | 15241.172 | 16251.421 | NM_019885 | 3970.692  | 5368.569  | X98507    | 5298.769  | 4737.428  |
| AK023816  | 1825.301  | 1615.881  | NM_005328 | 809.837   | 487.778   | NM_016030 | 59863.734 | 42881.641 |
| AF305686  | 6080.528  | 6077.457  | AB033103  | 2654.184  | 2236.229  | NM_014665 | 5916.521  | 6083.455  |
| AF085832  | 2477.148  | 2285.046  | NM_002907 | 4625.527  | 3116.675  | NM_005652 | 21169.922 | 9836.249  |
| AK025981  | 5591.382  | 5294.396  | AK024098  | 3451.075  | 2502.848  | AK026686  | 352.947   | 332.359   |
| AF113212  | 895.244   | 778.776   | AK001116  | 1344.007  | 1068.427  | NM_005902 | 2470.587  | 1747.737  |
| AF086266  | 1447.968  | 1240.742  | AK022371  | 9805.675  | 6676.56   | NM_002850 | 61223.207 | 43356.73  |
| AK025337  | 2457.584  | 2585.361  | D42045    | 6479.832  | 4732.409  | NM_004302 | 425.982   | 1566.441  |
| AB028984  | 2459.131  | 3585.615  | AB007953  | 4866.782  | 5358.357  | NM_019062 | 545.45    | 432.066   |
| NM_005602 | 3185.404  | 3945.048  | NM_014002 | 18740.457 | 13827.869 | AL133064  | 2382.448  | 2060.536  |
| NM_003573 | 21494.955 | 23829.188 | NM_004197 | 40926.25  | 17500.518 | NM_006227 | 3174.251  | 2200.896  |
| NM_000296 | 5930.276  | 6695.255  | NM_004073 | 4142.645  | 2066.384  | NM_002905 | 3714.362  | 2681.089  |
| NM_012302 | 928.599   | 1157.061  | NM_001278 | 8160.782  | 5301.028  | NM_000700 | 1218.132  | 1752.763  |
| NM_017422 | 27206.553 | 25160.797 | NM_019105 | 16715.201 | 25517.791 | NM_019028 | 8253.495  | 6679.054  |
| NM_005879 | 1207.453  | 1629.869  | NM_000294 | 12517.002 | 19211.971 | NM_000431 | 1077.647  | 669.057   |
| AF147790  | 781.079   | 773.518   | AJ272212  | 6224.073  | 13085.099 | NM_013421 | 1498.411  | 1491.004  |
| NM_018969 | 634.762   | 523.701   | NM_005677 | 12975.006 | 22453.262 | NM_012474 | 3811.457  | 2721.926  |
| NM_004112 | 7377.819  | 6020.075  | AF229803  | 2731.478  | 5869.459  | AB033118  | 728.304   | 603.394   |
| AK025592  | 2442.324  | 2449.188  | AF151810  | 1305.298  | 3930.617  | NM_019606 | 2601.332  | 2060.684  |
| NM_004635 | 4485.25   | 4101.95   | NM_002130 | 35416.527 | 43327.539 | NM_001690 | 6630.134  | 5026.978  |
| AK023023  | 8941.438  | 7372.611  | NM_004436 | 23013.055 | 24346.898 | AF034374  | 9633.633  | 8897.212  |
| NM_015993 | 6076.075  | 6760.201  | NM_006580 | 17777.078 | 15559.236 | NM_001682 | 2500.223  | 2086.995  |
| NM_002659 | 4324.569  | 3696.548  | NM_001305 | 19851.861 | 18895.262 | AK025130  | 2307.465  | 2576.769  |
| Z36776    | 3515.478  | 2922.331  | NM_005082 | 1853.273  | 4354.434  | AK023232  | 4794.972  | 4684.035  |
| AB029015  | 2388.709  | 2434.329  | D17028    | 51185.664 | 47010.051 | NM_006380 | 1497.996  | 1104.445  |
| NM_002067 | 54353.66  | 36990.477 | NM_013442 | 54744.473 | 47919.766 | AB020710  | 1382.79   | 856.938   |
| NM_020345 | 1480.156  | 1583.396  | BG611243  | 9299.96   | 7077.468  | NM_016174 | 3947.351  | 2677.076  |
| NM_014434 | 3928.463  | 5743.936  | AI417481  | 1730.883  | 1387.673  | NM_020377 | 863.084   | 1508.592  |
| NM_019607 | 10106.89  | 17091.793 | BI906766  | 12419.097 | 7251.744  | NM_005724 | 7564.827  | 21469.783 |
| U79260    | 6521.687  | 10520.458 | U60519    | 1691.974  | 1491.324  | X58794    | 806.026   | 2881.888  |
| NM_001895 | 12856.445 | 20585.803 | AA282906  | 18513.881 | 13586.42  | NM_001735 | 1143.397  | 1538.129  |
| NM_006447 | 4382.708  | 4715.991  | L02870    | 58508.449 | 54093.91  | Z70701    | 7745.764  | 5049.723  |
| AF119851  | 1486.634  | 1676.286  | BG755482  | 42306.004 | 36414.539 | AB040972  | 2630.88   | 1864.172  |
| NM_014129 | 6915.356  | 10178.503 | AI480307  | 18015.525 | 13222.879 | AF148505  | 1513.25   | 1420.964  |
| D87455    | 2935.486  | 2893.87   | X51420    | 7584.519  | 5075.363  | NM_018686 | 3461.853  | 1987.059  |
| AF080577  | 1550.474  | 2035.358  | X51757    | 4187.602  | 2905.977  | NM_017676 | 759.832   | 561.236   |
| L22005    | 14432.15  | 11933.456 | L24038    | 4349.771  | 7872.12   | AK021764  | 372.767   | 293.164   |
| NM_012291 | 26111.092 | 23095.576 | NM_053056 | 1237.064  | 2242.565  | NM_005431 | 2333.108  | 1481.972  |
| NM_013368 | 2857.949  | 2498.873  | NM_006186 | 2615.711  | 5402.061  | NM_002894 | 7269.834  | 4732.848  |
| NM_003807 | 32708.404 | 23343.002 | M55593    | 4795.443  | 8477.43   | NM_004260 | 6267.416  | 4956.035  |
| NM_004358 | 5781.03   | 4156.595  | AK001883  | 56640.918 | 56985.73  | AL050067  | 1290.238  | 1238.103  |
| NM_001790 | 3552.122  | 3451.917  | NM_014629 | 3218.797  | 6620.828  | NM_004972 | 6027.493  | 6185.074  |
| NM_018243 | 4873.688  | 3772.501  | AK025587  | 644.712   | 754.176   | NM_006251 | 3583.183  | 2676.904  |
| NM_014939 | 4211.894  | 4391.562  | L17325    | 2237.549  | 4603.542  | NM_004103 | 7163.066  | 5333.917  |
| Y17866    | 1670.312  | 1832.617  | NM_017716 | 2712.809  | 4166.108  | NM_002314 | 5606.187  | 4428.766  |
| AK024247  | 500.399   | 592.851   | M58603    | 15828.579 | 15984.766 | NM_001744 | 1357.187  | 1004.194  |
| NM_003005 | 9318.496  | 9101.31   | NM_003639 | 15766.197 | 16234.97  | NM_006296 | 1725.899  | 1231.861  |
| NM_000873 | 5397.815  | 5868.74   | NM_001549 | 1242.769  | 1222.836  | Z25433    | 1251.569  | 1165.843  |
| AB033025  | 774.644   | 962.112   | NM_000115 | 11696.047 | 9106.482  | NM_005922 | 1909.752  | 4363.707  |
| NM_004418 | 15198.578 | 21364.117 | AF308801  | 5261.895  | 4891.854  | AL137593  | 11205.322 | 26949.027 |
| NM_000917 | 15448.738 | 29301.08  | NM_007318 | 54484.406 | 53655.215 | NM_003915 | 2202.305  | 6774.657  |
| NM_005389 | 32282.164 | 48589.121 | NM_014874 | 4315.273  | 3175.741  | NM_000382 | 1430.282  | 1945.246  |
| NM_014445 | 46979.617 | 74868.25  | NM_012397 | 705.717   | 568.89    | NM_016593 | 1314.211  | 952.911   |

|           |           |           |           |           |           |           |           |           |
|-----------|-----------|-----------|-----------|-----------|-----------|-----------|-----------|-----------|
| AL832826  | 2231.687  | 3318.368  | NM_005765 | 23798.9   | 19692.313 | NM_002521 | 698.795   | 727.936   |
| NM_016123 | 1615.626  | 1658.631  | NM_002762 | 8315.07   | 8384.354  | NM_001150 | 1188.807  | 1047.441  |
| AB048365  | 2538.968  | 2148.942  | NM_006324 | 16978.824 | 20088.119 | NM_002856 | 3724.216  | 2614.129  |
| NM_000391 | 7757.194  | 8694.233  | NM_016848 | 34254.48  | 25675.846 | NM_003225 | 292.409   | 409.859   |
| AF229179  | 1235.073  | 1195.365  | NM_000514 | 34665.086 | 17416.65  | NM_000096 | 566.134   | 603.363   |
| NM_014771 | 7322.147  | 6287.557  | NM_019043 | 10361.06  | 18449.049 | AA418251  | 396.512   | 488.656   |
| NM_002275 | 10171.078 | 7076.466  | NM_003240 | 36403.215 | 51391.195 | AA143087  | 9872.606  | 5883.546  |
| AB032945  | 2072.775  | 1412.76   | NM_016564 | 59610.594 | 67898.133 | BI870965  | 6535.102  | 4782.188  |
| AK025215  | 20327.936 | 20087.168 | NM_000796 | 1586.704  | 3739.295  | BI835536  | 5868.459  | 4542.403  |
| BF569160  | 958.223   | 993.864   | AK021660  | 12720.848 | 21579.662 | BF205051  | 3359.699  | 2297.476  |
| AK024625  | 1036.342  | 904.71    | AB007933  | 56005.512 | 65914.023 | X02761    | 9842.311  | 7652.74   |
| NM_018131 | 5122.926  | 4436.152  | NM_003796 | 43638.199 | 57316.98  | M91463    | 811.997   | 615.327   |
| NM_014834 | 782.418   | 801.995   | NM_002973 | 5736.195  | 13494.604 | U88317    | 310.44    | 207.423   |
| NM_017636 | 11153.417 | 9880.212  | NM_003708 | 48654.383 | 54449.637 | J03060    | 1231.208  | 847.471   |
| NM_012468 | 1180.417  | 1352.85   | NM_014349 | 17515.275 | 27223.561 | X54156    | 316.178   | 228.558   |
| NM_002430 | 735.403   | 826.473   | AB040895  | 794.482   | 1483.596  | NM_003743 | 754.123   | 359.165   |
| NM_006150 | 3591.292  | 3470.297  | NM_004820 | 936.037   | 835.245   | AA829383  | 5889.64   | 4078.588  |
| NM_014943 | 9004.805  | 9496.259  | NM_018210 | 2618.417  | 2525.291  | NM_004887 | 3509.647  | 2117.175  |
| AK024392  | 3870.725  | 6534.807  | NM_001096 | 11515.315 | 7952.432  | NM_006404 | 355.757   | 343.441   |
| NM_013260 | 2787.572  | 3974.239  | NM_016014 | 4065.248  | 3233.541  | NM_014795 | 425.892   | 280.346   |
| NM_005249 | 490.082   | 937.877   | NM_000198 | 999.471   | 800.328   | NM_002986 | 606.835   | 717.12    |
| NM_018300 | 1921.143  | 2303.208  | NM_018327 | 4075.205  | 2894.091  | M15330    | 909.628   | 1541.441  |
| NM_004875 | 5916.907  | 6083.205  | NM_001684 | 1751.332  | 2247.251  | NM_014396 | 2031.729  | 1843.645  |
| NM_018254 | 13857.237 | 10827.712 | NM_013309 | 4962.419  | 4294.138  | AK027201  | 1311.298  | 957.444   |
| NM_017745 | 4132.069  | 3958.694  | AF038186  | 5893.88   | 6518.539  | NM_000488 | 16694.715 | 9673.196  |
| NM_018433 | 4232.295  | 3512.83   | NM_003664 | 7140.569  | 7237.779  | X98507    | 5412.204  | 3607.624  |
| NM_000937 | 1149.343  | 929.158   | NM_002426 | 7764.516  | 6320.128  | NM_016030 | 56523.449 | 36320.484 |
| AB028451  | 2875.104  | 2242.594  | AK027182  | 1718.939  | 1298.309  | NM_014666 | 5631.835  | 4429.486  |
| AK024810  | 21009.787 | 16691.021 | U61738    | 22545.695 | 35927.16  | NM_005652 | 20044.094 | 9920.217  |
| AK022615  | 50942.684 | 43892.992 | AJ132087  | 1441.379  | 4114.154  | AK026686  | 358.962   | 492.707   |
| NM_004043 | 11338.91  | 9237.676  | U92818    | 3982.354  | 9152.583  | NM_005902 | 2918.157  | 2427.781  |
| BM458096  | 26488.961 | 24559.617 | NM_000442 | 11407.002 | 22191.426 | NM_002850 | 60370.301 | 49498.988 |
| NM_005626 | 15616.612 | 15709.89  | NM_002934 | 5549.814  | 11572.747 | NM_004302 | 249.085   | 288.339   |
| D29958    | 38525.91  | 30992.74  | AK023011  | 56674.887 | 54397.418 | NM_005903 | 1105.838  | 701.707   |
| NM_015971 | 25751.848 | 23435.549 | NM_016816 | 2941.786  | 6169.576  | NM_019062 | 805.421   | 3793.863  |
| D17257    | 56243.125 | 65557.055 | AK023794  | 56218.082 | 52383.773 | Y16132    | 7739.52   | 18471.834 |
| NM_002842 | 5277.696  | 6130.57   | NM_019885 | 3803.195  | 6474.706  | NM_002905 | 2320.515  | 1451.227  |
| AF290204  | 510.423   | 686.21    | NM_005328 | 432.731   | 1447.838  | NM_000700 | 863.181   | 958.753   |
| NM_012126 | 1531.091  | 1334.406  | AB033103  | 2330.196  | 3303.433  | NM_019028 | 7754.986  | 5602.295  |
| NM_003918 | 680.678   | 741.701   | NM_002907 | 3716.774  | 3401.581  | NM_000431 | 1364.47   | 763.111   |
| NM_004807 | 2179.367  | 2905.527  | AK024098  | 3455.735  | 2649.596  | NM_013421 | 1353.323  | 1777.705  |
| AF219140  | 1408.173  | 3173.629  | AK001116  | 1206.009  | 922.568   | NM_012474 | 3569.224  | 3674.928  |
| J03569    | 49249.289 | 62618.281 | AK022371  | 8884.343  | 6236.939  | AB033118  | 685.17    | 584.6     |
| NM_003115 | 8558.152  | 8673.638  | D42045    | 6095.041  | 5307.308  | NM_019606 | 2913.269  | 2058.488  |
| NM_000694 | 496.952   | 484.922   | AB007953  | 5063.231  | 7007.28   | NM_001690 | 7033.076  | 4696.611  |
| NM_000687 | 29037.465 | 27845.732 | NM_014002 | 18586.824 | 19325.756 | AF034374  | 9357.762  | 7478.316  |
| NM_000446 | 726.958   | 755.791   | NM_004197 | 32717.656 | 24625.762 | NM_001682 | 2151.713  | 1247.546  |
| NM_018200 | 2783.165  | 1999.901  | NM_004073 | 4064.065  | 4392.451  | AK025130  | 2250.563  | 2111.13   |
| NM_014838 | 2485.317  | 2100.194  | NM_001278 | 7717.279  | 6931.424  | AK023232  | 4956.38   | 3926.425  |
| NM_007212 | 604.158   | 602.978   | NM_019105 | 14914.457 | 11664.778 | NM_006380 | 1606.301  | 1220.292  |
| AF005067  | 2795.715  | 2495.808  | NM_001626 | 60254.719 | 58158.188 | AB020710  | 1486.762  | 1195.614  |
| NM_005710 | 14880.101 | 11993.611 | NM_005677 | 13385.349 | 23550.885 | NM_016174 | 5162.423  | 3790.579  |
| AF252284  | 3368.42   | 2341.724  | AF229803  | 3172.765  | 7179.989  | NM_020377 | 817.644   | 798.254   |

|           |           |           |           |           |           |           |           |           |
|-----------|-----------|-----------|-----------|-----------|-----------|-----------|-----------|-----------|
| NM_01493C | 3669.867  | 3005.124  | AF151810  | 1352.707  | 4050.41   | U88896    | 1079.742  | 711.528   |
| NM_00153C | 6458.629  | 5838.236  | NM_00213C | 41577.359 | 50879.43  | AF116702  | 41698.629 | 15821.611 |
| U80232    | 13438.644 | 11619.355 | NM_005469 | 9422.788  | 16312.324 | NM_005724 | 5524.583  | 4656.277  |
| M27877    | 35616.93  | 29256.256 | NM_016361 | 6449.068  | 14509.337 | NM_001735 | 2117.081  | 9233.775  |
| D70836    | 48903.961 | 33929.863 | NM_001305 | 18666.494 | 21052.867 | NM_002345 | 905.147   | 5800.607  |
| D16878    | 1585.242  | 1343.711  | NM_005082 | 1333.315  | 2251.288  | NM_00508C | 10929.972 | 27656.117 |
| NM_00703E | 8155.991  | 10062.43  | D17028    | 58110.402 | 57496.215 | AF148505  | 1033.894  | 589.278   |
| AB019562  | 2259.274  | 3740.7    | NM_013442 | 54752.168 | 55810.148 | NM_01868E | 7978.027  | 5893.803  |
| AF036364  | 4533.01   | 12989.93  | BG611243  | 9989.766  | 8488.8    | NM_01767E | 753.614   | 571.257   |
| AK022847  | 7108.265  | 10183.141 | AI417481  | 2185.731  | 1667.888  | AK021764  | 406.2     | 320.077   |
| NM_020203 | 2763.925  | 3200.398  | BI906766  | 11183.55  | 6634.889  | NM_005431 | 2069.075  | 1623.357  |
| L40992    | 592.74    | 689.352   | U60519    | 1441.906  | 1504.403  | NM_004625 | 1849.45   | 1047.23   |
| U20582    | 16826.943 | 16206.839 | AA282906  | 15399.463 | 13313.996 | NM_00426C | 6093.333  | 4653.668  |
| NM_000337 | 755.197   | 551.745   | L02870    | 59300.762 | 58330.531 | AL050067  | 1235.884  | 944.444   |
| NM_002079 | 8715.275  | 10673.287 | BG755482  | 47020.652 | 48473.32  | NM_004972 | 6170.223  | 5179.962  |
| AI660957  | 568.424   | 625.114   | AI480307  | 19082.73  | 15183.013 | NM_006251 | 3032.45   | 2299.761  |
| U13697    | 1044.434  | 1059.581  | X51420    | 6173.192  | 5536.737  | NM_004103 | 9886.963  | 7480.177  |
| U04270    | 33574.133 | 30525.572 | D28235    | 1255.667  | 1412.726  | NM_002314 | 5441.292  | 6185.142  |
| Z34820    | 612.387   | 548.732   | X51757    | 2550.395  | 2455.169  | NM_001744 | 1219.835  | 1210.694  |
| L02840    | 5130.337  | 3315.358  | L24038    | 3903.045  | 3180.954  | NM_00629E | 1733.453  | 1624.516  |
| AA629719  | 54290.719 | 64321.504 | NM_002751 | 16027.343 | 22859.764 | Z25433    | 1564.831  | 1102.871  |
| AA927528  | 6098.159  | 7282.804  | M55593    | 5356.379  | 10865.381 | NM_005922 | 1546.437  | 1108.613  |
| BG676364  | 8899.722  | 8960.215  | AK001883  | 51221.809 | 52144.227 | NM_01863E | 3670.171  | 2161.917  |
| BG181154  | 2373.823  | 2093.642  | NM_014629 | 3519.117  | 8097.685  | AL137593  | 10315.6   | 6426.73   |
| AA843679  | 11656.218 | 12999.866 | AK025587  | 338.859   | 1112.017  | NM_000382 | 2498.416  | 8191.816  |
| H68922    | 963.047   | 1178.5    | AL050114  | 1815.597  | 3909.336  | NM_006227 | 2948.937  | 13351.621 |
| AF097159  | 1729.323  | 1801.748  | AK021492  | 10523.6   | 16676.43  | NM_00115C | 1046.058  | 685.542   |
| NM_014684 | 1513.79   | 1678.631  | NM_014874 | 4133.839  | 5230.737  | NM_00285E | 2678.271  | 1665.189  |
| AK027247  | 3437.159  | 4368.154  | NM_012397 | 565.147   | 1291.971  | NM_00322E | 324.084   | 233.521   |
| NM_00248C | 10268.747 | 15349.477 | NM_005765 | 23403.561 | 42058.84  | NM_00009E | 454.79    | 403.494   |
| NM_017571 | 12165.579 | 13775.331 | NM_002762 | 10064.569 | 11590.465 | AA418251  | 476.208   | 746.176   |
| L03169    | 1762.603  | 1853.112  | NM_006324 | 16535.736 | 14890.376 | AA143087  | 9500.881  | 6925.768  |
| NM_00192E | 3026.391  | 3261.108  | NM_01684E | 35022.574 | 24789.006 | NM_001903 | 288.484   | 307.238   |
| NM_00639E | 1349.829  | 1337.27   | NM_000514 | 39129.297 | 24162.051 | BI835536  | 6045.844  | 4408.58   |
| NM_01896E | 665.895   | 802.842   | AL137432  | 2853.354  | 3492.495  | BF205051  | 3464.147  | 2141.567  |
| NM_00018E | 9431.28   | 8658.542  | NM_000957 | 9880.972  | 10394.521 | X02761    | 9281.084  | 6917.298  |
| Y00816    | 2592.551  | 2714.132  | NM_019043 | 8547.389  | 12844.604 | M91463    | 680.265   | 445.777   |
| NM_004512 | 13823.538 | 14472.888 | NM_00324C | 43843.008 | 39856.25  | U88317    | 236.071   | 319.919   |
| NM_00293C | 456.913   | 409.752   | NM_016564 | 59999.844 | 54872.77  | J03060    | 1576.01   | 1288.177  |
| NM_00438C | 32485.766 | 26247.383 | NM_00079E | 1138.145  | 1217.95   | X54156    | 334.049   | 510.08    |
| U86813    | 583.346   | 659.191   | AF279656  | 3104.169  | 3968.386  | NM_003743 | 862.247   | 641.581   |
| NM_004119 | 1275.654  | 1220.358  | AK021660  | 8767.216  | 7962.597  | AA829383  | 5866.017  | 5182.671  |
| D26070    | 2362.76   | 2628.031  | AB007933  | 58082.918 | 58782.602 | AF012434  | 16554.742 | 6779.4    |
| NM_001642 | 10202.652 | 10278.461 | NM_006702 | 13385.815 | 11300.583 | NM_018124 | 6540.785  | 5224.356  |
| NM_001542 | 726.197   | 1328.026  | NM_00139E | 56469.633 | 48586.531 | AB040972  | 1693.83   | 6231.269  |
| NM_00228C | 919.212   | 1025.137  | NM_014474 | 4887.944  | 5573.119  | X98507    | 5074.637  | 2042.95   |
| NM_01745E | 394.548   | 722.075   | NM_016249 | 12510.852 | 21600.717 | NM_01603C | 57327.402 | 28154.5   |
| NM_00105E | 37650.844 | 34968.258 | NM_006181 | 3919.361  | 7138.477  | NM_01466E | 4694.371  | 2435.518  |
| NM_002271 | 51117.918 | 63329.949 | NM_00379E | 43585.695 | 54465.512 | NM_005652 | 17630.133 | 8312.194  |
| NM_018361 | 5089.94   | 5925.771  | NM_002973 | 7012.258  | 16031.231 | AK026686  | 213.579   | 498.868   |
| NM_019893 | 643.048   | 633.261   | NM_00443E | 25491.363 | 38717.539 | NM_005902 | 1841.609  | 1467.639  |
| AB040966  | 8678.698  | 9847.01   | NM_00658C | 17791.646 | 24282.455 | NM_00285C | 59574.379 | 55493.871 |
| NM_020132 | 8305.871  | 8967.945  | NM_016277 | 4989.184  | 5722.948  | NM_005302 | 249.007   | 192.908   |

|           |           |           |           |           |           |           |           |           |
|-----------|-----------|-----------|-----------|-----------|-----------|-----------|-----------|-----------|
| NM_016467 | 9977.547  | 10056.159 | NM_007247 | 7427.309  | 10358.904 | NM_004302 | 313.568   | 247.057   |
| NM_007253 | 3481.968  | 3394.221  | NM_006554 | 10651.916 | 11050.768 | NM_005903 | 1051.325  | 754.416   |
| NM_00055E | 14936.461 | 15518.728 | X99962    | 24980.752 | 24185.549 | NM_000861 | 486.562   | 506.87    |
| NM_00083E | 792.445   | 995.337   | AK023221  | 25166.777 | 18092.785 | U77493    | 579.719   | 490.301   |
| NM_00183C | 622.246   | 495.727   | NM_003664 | 8040.496  | 6864.22   | NM_019062 | 757.602   | 755.986   |
| NM_00680E | 30330.971 | 22743.99  | NM_00242E | 8441.645  | 6457.454  | NM_003873 | 575.32    | 686.445   |
| NM_006634 | 1980.881  | 1954.102  | AK027182  | 2271.664  | 2366.966  | NM_000263 | 1581.215  | 1488.278  |
| NM_01646E | 5917.396  | 5689.31   | J03651    | 17418.051 | 35921.738 | AF073519  | 7646.488  | 4301.91   |
| NM_00032E | 1222.494  | 1179.828  | U61738    | 13185.008 | 13608.269 | AB001451  | 365.167   | 520.624   |
| NM_01339E | 1966.427  | 1562.447  | AJ132087  | 1642.413  | 1845.278  | NM_017583 | 7868.209  | 7400.122  |
| NM_00241C | 1440.848  | 1377.278  | U92818    | 3251.538  | 2841.784  | NM_002521 | 1034.627  | 5068.549  |
| AL122120  | 7973.233  | 5903.487  | NM_000442 | 9018.387  | 8588.729  | NM_000271 | 12683.818 | 5458.407  |
| NM_01883E | 5489.525  | 5261.536  | NM_002934 | 6138.729  | 4643.835  | NM_01820E | 1831.483  | 1293.416  |
| NM_003401 | 4609.834  | 6612.553  | AK023011  | 41971.008 | 34788.23  | NM_006184 | 6131.637  | 3337.772  |
| AL137724  | 6739.037  | 8105.353  | NM_01681E | 2830.058  | 2607.53   | AB018268  | 4540.673  | 2430.675  |
| NM_00475E | 4803.117  | 4032.316  | L17325    | 2381.511  | 2179.489  | NM_01904E | 165.622   | 156.782   |
| NM_002913 | 4176.952  | 4720.851  | NM_01771E | 2521.972  | 1897.054  | NM_00638C | 1073.629  | 972.982   |
| AK022797  | 1623.89   | 1508.269  | M58603    | 17085.256 | 24905.268 | AB020710  | 1337.781  | 1233.91   |
| NM_00737C | 4457.869  | 4351.931  | NM_00363E | 17435.857 | 25059.072 | NM_016174 | 6077.456  | 5844.077  |
| NM_006231 | 1822.035  | 1675.104  | NM_00154E | 1358.617  | 3273.901  | NM_020377 | 978.757   | 835.759   |
| AK023471  | 2043.697  | 2305.09   | NM_000115 | 11723.875 | 17783.127 | U88896    | 1124.448  | 776.784   |
| AF044578  | 4229.077  | 3818.816  | AF308801  | 6505.226  | 13443.308 | AF116702  | 44999.531 | 16490.256 |
| NM_00194E | 4759.991  | 4149.981  | NM_00731E | 56978.891 | 54777.199 | NM_005724 | 5039.169  | 3095.774  |
| NM_001067 | 13687.491 | 11960.569 | AF229803  | 4562.897  | 4570.876  | X58794    | 1401.336  | 1706.917  |
| NM_014034 | 6235.477  | 5763.092  | AF151810  | 1779.855  | 2749.507  | NM_00173E | 1537.83   | 1211.213  |
| NM_00533E | 26862.486 | 23461.232 | NM_00213C | 39907.41  | 27533.193 | NM_00234E | 763.504   | 803.026   |
| J04474    | 12501.545 | 9738.039  | NM_00546E | 8778.287  | 9027.929  | NM_00508C | 7811.537  | 7789.968  |
| NM_003761 | 46032.355 | 31777.523 | NM_016361 | 4706.808  | 3843.306  | NM_004887 | 5105.157  | 4889.616  |
| NM_00472E | 618.834   | 656.21    | NM_00370E | 58808.48  | 57952.305 | NM_006404 | 456.614   | 510.284   |
| NM_014011 | 9109.252  | 8340.945  | NM_01434E | 17099.822 | 13079.68  | NM_01479E | 921.304   | 638.771   |
| AK025994  | 6122.753  | 6333.354  | AB040895  | 976.14    | 1225.939  | NM_00298E | 634.499   | 489.096   |
| L29306    | 1177.606  | 1244.413  | NM_01821C | 3122.379  | 5144.697  | M15330    | 1139.623  | 1523.966  |
| NM_01398E | 4945.248  | 5368.629  | NM_00109E | 9854.049  | 8987.776  | NM_00048E | 5754.303  | 21434.008 |
| NM_00173E | 2244.191  | 2277.05   | NM_016014 | 4253.029  | 4743.048  | AL137593  | 15366.266 | 5479.749  |
| NM_00227C | 554.316   | 502.581   | NM_00019E | 915.516   | 1177.582  | NM_00391E | 1525.527  | 680.379   |
| AF036364  | 6751.396  | 8728.564  | NM_018327 | 6530.468  | 5602.092  | NM_000382 | 1368.94   | 709.249   |
| AK022847  | 9171.959  | 12104.956 | NM_017581 | 5354.047  | 4201.512  | AL133064  | 2196.498  | 1394.794  |
| NM_020203 | 6140.948  | 7367.981  | AA488804  | 12861.941 | 9383.098  | NM_006227 | 2721.854  | 1773.288  |
| L40992    | 3599.879  | 3997.35   | NM_00653E | 1887.569  | 1981.091  | NM_00290E | 3032.183  | 2065.829  |
| U20582    | 16553.029 | 20400.951 | NM_001684 | 1679.956  | 2131.712  | NM_00070C | 964.738   | 1125.342  |
| NM_000337 | 691.006   | 899.403   | NM_00080E | 1288.426  | 1998.93   | NM_01902E | 7919.347  | 6108.722  |
| NM_00207E | 8361.102  | 10557.789 | NM_01631E | 36227.988 | 49068.629 | NM_000431 | 1564.319  | 1108.728  |
| U13697    | 840.188   | 1212.807  | NM_01330E | 4052.394  | 6489.582  | NM_013421 | 1510.333  | 1214.941  |
| X75308    | 337.166   | 482.065   | NM_019891 | 3556.564  | 8102.889  | NM_012474 | 3854.344  | 2678.695  |
| U04270    | 32402.738 | 29493.365 | AF038186  | 7570.524  | 14976.999 | AB033118  | 756.215   | 683.407   |
| L02840    | 3826.705  | 1898.505  | AK001883  | 54375.75  | 54398.961 | NM_01960E | 2647.754  | 1665.346  |
| AA629719  | 55366.996 | 63853.625 | NM_01462E | 2487.24   | 2724.55   | NM_00169C | 7052.96   | 4280.097  |
| AA927528  | 5768.354  | 5485.624  | AK025587  | 689.002   | 773.129   | AF034374  | 10797.63  | 8791.454  |
| X02152    | 54141.078 | 63738.664 | AL050114  | 1323.195  | 1514.084  | NM_01611E | 5650.903  | 2836.333  |
| BG676364  | 7909.081  | 7381.737  | AK021492  | 8434.256  | 8603.683  | NM_018674 | 24898.805 | 16859.752 |
| BG181154  | 2047.18   | 1810.486  | AK023794  | 39492.531 | 29760.729 | NM_001683 | 7316.282  | 5696.688  |
| AA843679  | 11160.761 | 10233.775 | NM_01988E | 3563.21   | 2854.379  | NM_001682 | 2623.915  | 1747.093  |
| H68922    | 1012.68   | 1253.651  | NM_00532E | 649.276   | 348.207   | NM_01440E | 1825.144  | 1721.688  |

|           |           |           |           |           |           |           |           |           |
|-----------|-----------|-----------|-----------|-----------|-----------|-----------|-----------|-----------|
| AF090906  | 2762.361  | 2353.062  | AB033103  | 2504.458  | 2619.671  | NM_000816 | 432.061   | 459.892   |
| AB023219  | 5380.327  | 4957.775  | NM_002907 | 4230.165  | 4318.43   | NM_014928 | 486.171   | 423.991   |
| NM_014148 | 622.626   | 496.756   | AK024098  | 2711.029  | 2705.289  | AK025130  | 3022.405  | 3473.268  |
| NM_002480 | 13003.445 | 16683.861 | AK001116  | 945.946   | 1076.959  | AK023232  | 2463.127  | 16051.159 |
| L03169    | 1737.974  | 2174.485  | AK022371  | 7966.95   | 8051.889  | NM_018124 | 6480.673  | 1516.635  |
| NM_001928 | 3014.571  | 2936.946  | D42045    | 6513.698  | 5401.217  | Z70701    | 7874.873  | 3268.871  |
| NM_006398 | 1462.168  | 1242.071  | AB007953  | 4950.801  | 3783.938  | AB040972  | 2413.148  | 983.618   |
| NM_000185 | 8210.434  | 8036.728  | NM_014002 | 19157.986 | 11833.627 | AF148505  | 1382.188  | 1307.615  |
| Y00816    | 2498.469  | 2378.475  | NM_004197 | 42814.148 | 34974.691 | NM_018688 | 9732.492  | 7521.988  |
| NM_004512 | 12752.197 | 11016.932 | NM_004073 | 3967.465  | 4676.688  | NM_017678 | 934.464   | 682.806   |
| NM_002930 | 484.367   | 369.168   | NM_001278 | 8592.471  | 3723.46   | AK021764  | 334.162   | 205.718   |
| NM_004380 | 30709.748 | 24240.986 | NM_019105 | 13953.57  | 4980.396  | NM_005431 | 2472.699  | 1542.394  |
| U86813    | 347.8     | 372.604   | NM_000294 | 16824.141 | 23173.326 | NM_002894 | 7357.795  | 5081.288  |
| NM_004119 | 1228.479  | 916.25    | AJ272212  | 6541.324  | 10487.457 | NM_004628 | 2543.067  | 1458.823  |
| AY007378  | 3867.789  | 3454.97   | NM_001626 | 59148.82  | 58911.523 | NM_004260 | 6850.315  | 5311.534  |
| D26070    | 2272.091  | 2034.526  | NM_005677 | 16744.281 | 28145.629 | AL050067  | 1277.435  | 1118.097  |
| NM_001642 | 9280.317  | 8077.781  | CY3Cy5    | 7198.376  | 307.968   | NM_004972 | 5330.896  | 5187.571  |
| NM_001542 | 860.577   | 677.495   | NM_004957 | 3902.688  | 2811.244  | NM_006251 | 3833.417  | 2660.132  |
| NM_002280 | 851.557   | 707.796   | NM_005252 | 2690.786  | 1706.512  | NM_004103 | 7740.023  | 6413.953  |
| NM_017458 | 613.247   | 782.02    | AL359211  | 460.573   | 386.262   | NM_002314 | 5638.056  | 4493.656  |
| NM_007035 | 8363.327  | 9917.835  | AF070526  | 512.295   | 464.956   | NM_001744 | 1388.997  | 1079.341  |
| AB019562  | 2298.143  | 2016.979  | U79264    | 4882.766  | 2313.871  | NM_006296 | 1675.295  | 1185.293  |
| NM_019893 | 746.211   | 785.673   | NM_015698 | 20062.791 | 8238.571  | Z25433    | 1313.635  | 1306.079  |
| AB040966  | 9239.509  | 10969.355 | AF070530  | 15638.231 | 7944.116  | NM_005922 | 2402.644  | 5026.598  |
| NM_020132 | 8879.71   | 8567.462  | AF086487  | 1338.904  | 1056.042  | NM_018638 | 4576.597  | 21231.469 |
| NM_016467 | 9999.642  | 10746.128 | NM_006420 | 2579.629  | 1666.042  | CY3Cy5    | 2127.67   | 181.172   |
| NM_007253 | 3422.727  | 3118.274  | AF131855  | 1385.209  | 1033.582  | NM_003942 | 1177.157  | 803.638   |
| NM_000558 | 15342.201 | 14587.066 | AF086046  | 4548.016  | 2477.758  | NM_004452 | 945.048   | 716.043   |
| NM_000835 | 675.244   | 850.077   | AK023309  | 1284.656  | 1049.89   | AK022632  | 739.945   | 439.676   |
| NM_001830 | 532.024   | 600.869   | AK000724  | 4215.131  | 2960.451  | AK021554  | 898.483   | 621.86    |
| NM_006808 | 30564.277 | 21005.32  | NM_003720 | 27082.27  | 17321.559 | NM_020235 | 2180.718  | 1067.547  |
| NM_006634 | 1718.094  | 1645.181  | NM_004957 | 3163.014  | 2276.354  | AK000532  | 382.522   | 145.173   |
| NM_016465 | 5400.597  | 4608.967  | NM_005252 | 2091.208  | 1676.358  | AL162039  | 2025.448  | 1895.873  |
| NM_000328 | 1327.198  | 961.563   | SR1       | 83585.016 | 66056.305 | AK024896  | 2306.99   | 6119.315  |
| NM_013398 | 1619.884  | 1355.288  | SR3       | 43284.313 | 19922.301 | AL353952  | 258.451   | 1696.032  |
| NM_002410 | 1466.234  | 1394.305  | SR5       | 7243.844  | 5017.876  | AK021912  | 1804.172  | 2603.102  |
| AL122120  | 8288.378  | 6166.501  | SR7       | 6501.533  | 26443.869 | BU165106  | 927.176   | 2029.276  |
| NM_014684 | 1894.564  | 1653.822  | SR9       | 19389.74  | 2564.951  | AF038202  | 674.7     | 1204.864  |
| AK027247  | 2400.19   | 2176.41   | CY3Cy5    | 9184.592  | 400.973   | AB040925  | 557.815   | 782.278   |
| NM_002913 | 4836.236  | 5683.578  | Z36818    | 1701.21   | 655.874   | NM_003942 | 443.661   | 837.853   |
| AK022797  | 1824.69   | 1585.595  | Z36842    | 3158.797  | 1561.129  | SR1       | 83761.148 | 48017.605 |
| NM_007370 | 4911.927  | 4927.575  | AF086137  | 4158.224  | 2315.169  | SR3       | 17071.357 | 6502.187  |
| NM_006231 | 1734.176  | 1627.037  | AF086155  | 1696.231  | 1375.555  | SR5       | 3786.056  | 3156.687  |
| AK023471  | 1909.149  | 2380.846  | AF086526  | 2270.416  | 1403.545  | SR7       | 4642.136  | 9999.316  |
| AF044578  | 3577.927  | 3318.126  | AK025788  | 8516.945  | 3153.846  | SR9       | 6526.601  | 912.843   |
| NM_001948 | 5016.867  | 4667.171  | AF086164  | 1422.834  | 938.455   | CY3Cy5    | 1160.419  | 99.814    |
| NM_001067 | 13707.106 | 14369.306 | AK025577  | 4056.41   | 1925.42   | M26147    | 256.02    | 320.856   |
| NM_014034 | 6077.07   | 5663.21   | AK000216  | 1515.643  | 1227.743  | AF018254  | 459.938   | 306.886   |
| NM_005335 | 24961.455 | 21934.412 | AK023440  | 1734.033  | 1287.319  | NM_016240 | 951.316   | 291.651   |
| J04474    | 11394.786 | 9424.002  | AB033041  | 33788.801 | 17239.148 | AL049390  | 852.819   | 1516.138  |
| NM_003761 | 45996.324 | 34848.938 | NM_014894 | 71807.141 | 65513.797 | AK000584  | 2508.838  | 7102.959  |
| NM_004726 | 455.917   | 539.639   | AY007155  | 973.44    | 1057.65   | AJ297363  | 600.952   | 955.273   |
| NM_014011 | 9200.158  | 7435.5    | AK027160  | 25267.377 | 12464.401 | AK026379  | 1331.209  | 1412.428  |

|           |           |           |           |           |           |           |           |           |
|-----------|-----------|-----------|-----------|-----------|-----------|-----------|-----------|-----------|
| AK025994  | 5919.393  | 4846.614  | AK023835  | 5121.335  | 2669.003  | AK024278  | 816.204   | 555.316   |
| L29306    | 858.086   | 848.628   | AK023012  | 457.821   | 478.149   | NM_018022 | 487.553   | 476.319   |
| NM_013989 | 4475.471  | 4227.048  | AK023906  | 5866.222  | 2706.892  | AB056722  | 920.457   | 1299.314  |
| NM_001738 | 1988.849  | 2318.744  | AK024234  | 1227.507  | 825.483   | NM_013242 | 1097.581  | 784.968   |
| NM_002270 | 595.115   | 423.775   | AK024962  | 2632.899  | 1798.91   | NM_012066 | 8975.934  | 3566.719  |
| NM_001055 | 41860.699 | 34878.41  | AK022164  | 544.393   | 558.614   | AF052168  | 7445.912  | 4025.559  |
| NM_015878 | 491.424   | 373.3     | AK025135  | 9952.972  | 5971.943  | AK024947  | 2931.432  | 1842.231  |
| NM_000337 | 724.927   | 965.233   | NM_017926 | 3791.352  | 2337.467  | AK024059  | 892.208   | 1477.948  |
| NM_002079 | 8795.596  | 12228.439 | AY007145  | 5479.916  | 2908.251  | AK023663  | 228.876   | 673.744   |
| U13697    | 1057.76   | 1098      | AK021573  | 1287.934  | 831.556   | AB007928  | 502.155   | 1769.499  |
| U04270    | 31273.059 | 27905.299 | D38549    | 5005.229  | 2804.984  | AK023645  | 1982.466  | 3067.023  |
| L02840    | 3947.284  | 2646.96   | AK024780  | 2294.085  | 2084.908  | D83543    | 549.208   | 1507.238  |
| BG569143  | 455.827   | 518.081   | AF085947  | 1118.902  | 1303.114  | NM_016930 | 593.339   | 489.304   |
| AA629719  | 49616.621 | 62941.918 | AK022123  | 438.979   | 615.228   | AJ001861  | 677.266   | 428.27    |
| AA927528  | 5479.892  | 5278.789  | U10510    | 14849.63  | 10204.991 | X64981    | 1244.066  | 979.089   |
| X02152    | 51404.844 | 64711.203 | AK022672  | 2327.708  | 1021.579  | X75692    | 1206.016  | 681.443   |
| BG676364  | 8064.649  | 6818.599  | AK023870  | 7033.169  | 2789.789  | Y10511    | 9004.76   | 4596.381  |
| BG181154  | 2145.482  | 1566.859  | AK021599  | 1965.468  | 1032.933  | AK021832  | 445.69    | 283.03    |
| AA843679  | 11256.882 | 8853.623  | BC030975  | 499.415   | 608.321   | AK021505  | 1894.799  | 1269.52   |
| H68922    | 867.934   | 913.32    | AK025619  | 299.301   | 336.343   | AK021598  | 1700.879  | 929.26    |
| AF090906  | 2307.037  | 1946.514  | AF116677  | 488.349   | 476.633   | AK026416  | 6496.615  | 8054.396  |
| AB023219  | 5347.111  | 3993.166  | NM_014159 | 6055.684  | 1993.589  | AK025797  | 468.521   | 544.953   |
| NM_014148 | 572.862   | 561.582   | AK021795  | 2348.493  | 1611.776  | AK000085  | 988.36    | 967.175   |
| NM_018835 | 6020.486  | 5202.52   | AL162042  | 8002.676  | 5961.796  | AK000019  | 617.586   | 553.906   |
| NM_003401 | 2402.314  | 2500.447  | AK026131  | 1783.622  | 1426.291  | AK000645  | 348.02    | 320.935   |
| NM_006399 | 2430.489  | 1876.167  | AK023312  | 2806.825  | 2037.6    | AK000893  | 6026.687  | 4083.293  |
| Y00816    | 2501.516  | 3134.958  | AK022483  | 1003.18   | 1030.049  | AK024156  | 499.148   | 554.03    |
| NM_004512 | 12593.255 | 14821.396 | AF113687  | 1244.812  | 1119.043  | AF086288  | 1068.233  | 567.477   |
| NM_002930 | 520.365   | 590.813   | AL133570  | 1325.179  | 1255.195  | NM_016944 | 321.229   | 165.088   |
| NM_004380 | 31031.338 | 27386.73  | AK021462  | 795.59    | 1176.23   | AK023109  | 886.338   | 516.079   |
| U86813    | 472.15    | 499.351   | AK023392  | 615.692   | 921.265   | NM_005293 | 15025.829 | 5012.891  |
| NM_004119 | 1155.693  | 998.777   | AF131836  | 4054.215  | 4534.506  | S50185    | 330.547   | 198.718   |
| AY007378  | 3913.746  | 3638.406  | AF275804  | 14819.803 | 13348.863 | AF133332  | 2849.494  | 1062.979  |
| D26070    | 1999.855  | 2344.124  | AL137488  | 3460.886  | 2472.813  | AK022805  | 1606.22   | 1050.879  |
| NM_001642 | 9231.183  | 7822.52   | AL049447  | 52274.715 | 15594.774 | AK024606  | 5661.047  | 4770.161  |
| NM_001542 | 685.41    | 507.76    | NM_020527 | 5524.455  | 1693.713  | NM_016417 | 7341.067  | 6592.78   |
| NM_003392 | 1086.422  | 943.714   | AB020637  | 2333.006  | 964.343   | L10147    | 8911.851  | 7580.444  |
| NM_017459 | 470.411   | 621.328   | NM_005286 | 14947.98  | 5600.244  | AL080118  | 2078.452  | 1878.004  |
| NM_000501 | 56649.328 | 60868.996 | AK024365  | 11434.814 | 4621.936  | AL049378  | 764.618   | 958.058   |
| NM_000114 | 5134.146  | 3685.777  | AJ251759  | 3159.537  | 1700.937  | L09086    | 321.115   | 547.839   |
| NM_005156 | 3621.444  | 2917.129  | AK024371  | 6976.478  | 3537.122  | L37702    | 14761.553 | 6250.42   |
| NM_015193 | 1904.855  | 1643.464  | NM_005454 | 2409.846  | 956.646   | AK022812  | 543.634   | 346.54    |
| X98834    | 6832.085  | 6220.362  | AB019569  | 64974.594 | 60979.785 | AF238318  | 333.066   | 197.511   |
| NM_007035 | 8230.74   | 8518.825  | NM_012409 | 3785.973  | 2216      | U79301    | 3455.723  | 1796.721  |
| AB019562  | 2392.013  | 2577.951  | AL050205  | 10786.403 | 6260.729  | AK022260  | 3314.501  | 1750.14   |
| AF036364  | 4624.642  | 4945.455  | AK023947  | 919.132   | 988.063   | M32219    | 7926.255  | 2996.54   |
| AK022847  | 7240.186  | 6710.736  | NM_005691 | 2608.751  | 1807.854  | BC018868  | 697.71    | 547.697   |
| NM_005173 | 450.133   | 765.765   | AF086156  | 1989.534  | 1446.98   | AF086174  | 358.404   | 626.903   |
| NM_006808 | 29555.488 | 22096.418 | AK023814  | 826.763   | 713.19    | AF007128  | 7208.198  | 12762.979 |
| NM_006634 | 1540.215  | 1610.582  | AF130063  | 1111.489  | 1303.177  | AJ012498  | 503.078   | 1232.766  |
| NM_016465 | 5332.428  | 4924.164  | AF086528  | 1152.183  | 1157.018  | NM_005973 | 7246.189  | 7777.251  |
| NM_000328 | 1403.513  | 1168.788  | AL162043  | 1012.757  | 1060.437  | X04547    | 2803.352  | 2214.853  |
| NM_013399 | 1437.89   | 1228.43   | NM_006543 | 1494.61   | 1599.605  | AL359941  | 565.677   | 835.459   |

|           |           |           |           |           |           |           |           |           |
|-----------|-----------|-----------|-----------|-----------|-----------|-----------|-----------|-----------|
| NM_00241C | 1276.089  | 1023.405  | AF086252  | 2754.049  | 3365.001  | U52076    | 164.002   | 269.702   |
| AL122120  | 7406.854  | 5281.381  | AK026703  | 2122.125  | 2157.912  | AF035278  | 701.176   | 755.065   |
| NM_014684 | 1429.182  | 1202.626  | NM_017866 | 11774.66  | 3151.391  | AF086493  | 1023.659  | 906.847   |
| AK027247  | 2198.278  | 1594.543  | AJ131244  | 422.14    | 336.213   | U32999    | 6514.054  | 4574.543  |
| NM_00248C | 9512.101  | 6752.521  | NM_003536 | 2791.614  | 1611.724  | U66052    | 4146.851  | 2802.357  |
| NM_017571 | 11407.138 | 9008.379  | AF116707  | 9188.273  | 3734.77   | NM_000857 | 855.841   | 458.198   |
| L03169    | 1989.254  | 1871.744  | U90910    | 15764.442 | 6907.137  | L20688    | 37219.863 | 13436.239 |
| M81349    | 495.562   | 408.829   | AK025765  | 3327.968  | 1593.39   | X69111    | 15156.474 | 4705.972  |
| NM_00192E | 3230.744  | 2776.241  | AK024263  | 1680.024  | 1295.49   | AF252283  | 390.084   | 286.392   |
| NM_01398E | 4663.447  | 9255.098  | NM_016613 | 7364.313  | 4332.427  | AB037799  | 2409.052  | 1109.665  |
| NM_00173E | 2004.173  | 3694.69   | AF086414  | 9508.748  | 5695.951  | AB007950  | 8079.128  | 3216.984  |
| NM_00227C | 495.571   | 612.163   | AJ012490  | 16997.498 | 9515.021  | AK025593  | 1218.582  | 650.832   |
| NM_00105E | 35515.191 | 45059.289 | U84516    | 23150.678 | 13303.828 | AB018304  | 1563.385  | 1661.766  |
| NM_002271 | 52665.629 | 55761.121 | AL049270  | 3396.331  | 2035.235  | NM_007061 | 9882.01   | 7514.464  |
| NM_018361 | 5225.684  | 4985.837  | U88834    | 29271.482 | 19605.943 | NM_00108E | 10862.978 | 21978.244 |
| NM_019893 | 653.551   | 512.489   | BC025324  | 1531.291  | 1386.531  | BC015991  | 6279.712  | 8946.092  |
| AB040966  | 8861.211  | 8498.812  | NM_006087 | 68698.953 | 65535.426 | U46214    | 2343.429  | 2154.227  |
| NM_020132 | 8495.455  | 7266.752  | NM_003533 | 1963.877  | 1733.604  | NM_00031C | 7602.565  | 7067.268  |
| NM_016467 | 9838.953  | 8945.446  | AL157478  | 717.458   | 707.115   | AF161343  | 1362.247  | 1262.835  |
| NM_007253 | 3066.673  | 2232.32   | AK023726  | 15890.849 | 11356.293 | NM_00476E | 866.958   | 650.523   |
| NM_01910E | 1345.383  | 1064.297  | AK024906  | 1057.77   | 1382.938  | AK022246  | 663.137   | 462.394   |
| L08436    | 844.603   | 725.077   | NM_005607 | 4290.512  | 7494.607  | X75684    | 876.808   | 1352.544  |
| AB033002  | 692.474   | 376.38    | NM_006761 | 52342.254 | 61700.754 | AF113701  | 13450.604 | 9740.146  |
| NM_00055E | 16097.642 | 12402.618 | NM_014897 | 1807.53   | 2931.875  | NM_006771 | 5917.977  | 3656.151  |
| NM_00419E | 867.592   | 793.081   | NM_003453 | 13652.036 | 10529.119 | NM_01471E | 3014.7    | 1557.655  |
| NM_01417C | 3953.578  | 3428.267  | NM_018371 | 30016.246 | 7741.291  | AB028953  | 341.941   | 138.795   |
| AF116652  | 54561.133 | 64553.266 | NM_01439C | 33176.137 | 12625.209 | NM_000632 | 1434.062  | 668.705   |
| NM_00083E | 877.805   | 854.836   | NM_018143 | 1015.07   | 556.192   | AB002298  | 955.586   | 437.318   |
| AF090906  | 2051.192  | 2654.216  | X78924    | 20233.533 | 9144.097  | AK024488  | 824.383   | 509.791   |
| AB023219  | 4736.149  | 5836.541  | NM_01325C | 1429.214  | 993.781   | AK023249  | 32291.809 | 13585.12  |
| NM_01414E | 529.603   | 674.197   | NM_00188E | 16622.555 | 10154.276 | NM_017442 | 5202.315  | 1992.801  |
| NM_01883E | 5005.946  | 5777.786  | NM_00499E | 1011.704  | 602.901   | NM_000743 | 2134.378  | 3124.825  |
| NM_003401 | 2159.936  | 2534.551  | X89668    | 39657.402 | 33489.992 | NM_00721E | 1921.659  | 4836.994  |
| AL137724  | 3392.179  | 2991.116  | NM_00445E | 3038.202  | 3016.169  | Z25436    | 1471.974  | 3095.797  |
| NM_00475E | 1726.185  | 1355.414  | NM_006901 | 2519.974  | 1794.476  | NM_00527E | 763.21    | 842.518   |
| NM_002913 | 3807.615  | 3673.46   | NM_01853C | 7717.731  | 6283.713  | NM_003844 | 21720.896 | 23579.047 |
| AK022797  | 1939.372  | 1181.142  | AJ003145  | 1107.844  | 1234.121  | NM_00200E | 13444.412 | 14210.036 |
| NM_00737C | 4713.685  | 4067.57   | AK022855  | 20256.006 | 16805.223 | NM_012324 | 1817.092  | 1453.039  |
| NM_006231 | 1530.634  | 1703.53   | AK023816  | 1950.948  | 1596.944  | AK000039  | 286.257   | 247.78    |
| AK023471  | 1843.54   | 2125.834  | AL050102  | 1102.609  | 1893.493  | AL137352  | 891.207   | 290.467   |
| AF044578  | 3902.196  | 3053.659  | AF305686  | 7043.451  | 5003.141  | NM_01474E | 959.281   | 646.476   |
| NM_00194E | 5222.435  | 3702.151  | AF085832  | 2237.256  | 1866.356  | D49958    | 310.34    | 545.811   |
| NM_001067 | 12922.109 | 9993.39   | AK025981  | 5278.535  | 3558.652  | NM_00448E | 2562.706  | 2793.086  |
| NM_014034 | 5982.912  | 4635.08   | AF113212  | 1522.907  | 1440.521  | BF240063  | 658.437   | 786.661   |
| NM_00533E | 25857.861 | 21125.746 | AF086266  | 1536.811  | 1811.065  | BI461699  | 634.992   | 797.833   |
| J04474    | 12885.751 | 9683.24   | AK025337  | 3354.486  | 3273.233  | AF172264  | 627.01    | 477.978   |
| NM_003761 | 43411.75  | 28942.58  | AB028984  | 2161.959  | 4374.707  | U80756    | 47289.512 | 16969.818 |
| NM_00472E | 1342.341  | 942.469   | NM_005602 | 3543.533  | 6225.227  | NM_018161 | 2835.564  | 1589.063  |
| NM_014011 | 9524.141  | 8308.811  | NM_003573 | 39998.41  | 47584.926 | NM_00524E | 25530.881 | 10102.419 |
| AK025994  | 6453.424  | 5494.963  | NM_00029E | 11988.873 | 4924.623  | NM_00481C | 1884.902  | 1415.61   |
| L29306    | 1054.876  | 669.108   | NM_012302 | 769.969   | 413.764   | AL117629  | 3532.222  | 1620.012  |
| CY3Cy5    | 3034.847  | 232.689   | NM_017422 | 62280.563 | 42437.34  | NM_00259E | 827.978   | 821.011   |
| AK022262  | 1548.026  | 2236.463  | NM_00587E | 1153.197  | 962.471   | NM_01572E | 1142.427  | 859.81    |

|           |           |           |           |           |           |           |           |           |
|-----------|-----------|-----------|-----------|-----------|-----------|-----------|-----------|-----------|
| AF088039  | 67724.641 | 74261.922 | AF147790  | 1191.898  | 1109.745  | AF174604  | 1962.921  | 1563.099  |
| AF086220  | 2045.952  | 2899.081  | NM_004112 | 6137.148  | 3322.075  | AB002379  | 5998.435  | 9285.985  |
| AK023941  | 1948.132  | 2413.712  | AK025592  | 2887.202  | 2379.28   | AF113223  | 2485.323  | 3854.144  |
| AF086265  | 416.403   | 472.064   | NM_004635 | 5156.029  | 3625.755  | AB046851  | 1036.013  | 2933.276  |
| AL390083  | 6253.113  | 6003.338  | AK023023  | 9679.279  | 5860.906  | NM_005745 | 12941.544 | 15105.831 |
| AB020702  | 888.344   | 1046.118  | NM_015993 | 3336.327  | 2842.526  | NM_019855 | 53904.289 | 58076.543 |
| AL050227  | 440       | 292.891   | NM_002659 | 5060.91   | 3973.899  | NM_018174 | 289.794   | 307.263   |
| AF085905  | 448.799   | 431.912   | Z36776    | 5076.472  | 3481.484  | NM_014545 | 1977.174  | 3989.271  |
| AK075087  | 1465.172  | 1210.722  | AB029015  | 8244.522  | 6414.419  | NM_004437 | 790.661   | 889.904   |
| AK026571  | 2712.714  | 2508.599  | NM_020345 | 1382.827  | 1204.412  | AK025875  | 475.728   | 291.433   |
| AK024673  | 4783.058  | 4787.128  | NM_003287 | 3220.203  | 2557.093  | BC014152  | 54740.605 | 31445.676 |
| AF070618  | 1516.877  | 1650.981  | NM_012325 | 26063.754 | 33243.742 | NM_012415 | 277.491   | 219.069   |
| SR2       | 43875.07  | 34781.109 | NM_014434 | 3731.895  | 5265.964  | NM_000225 | 292.196   | 466.102   |
| SR4       | 11802.084 | 12196.816 | NM_019607 | 11417.208 | 3936.327  | AB037779  | 54488.266 | 48542.363 |
| SR6       | 1831.931  | 1860.382  | U79260    | 6240.928  | 2234.578  | NM_000655 | 322.64    | 615.614   |
| SR8       | 6624.972  | 20641.02  | NM_001895 | 15931.876 | 8997.348  | NM_000393 | 539.134   | 908.497   |
| SR10      | 20674.529 | 8538.761  | NM_006447 | 4318.735  | 2253.427  | NM_000885 | 4088.189  | 4328.871  |
| CY3Cy5    | 2910.51   | 251.154   | AF119851  | 1506.202  | 1310.013  | NM_012335 | 1046.888  | 427.619   |
| AL049365  | 19745.654 | 26750.156 | NM_014129 | 7813.14   | 6101.53   | NM_005787 | 18839.818 | 8620.586  |
| AK025132  | 962.642   | 1504.508  | D87455    | 2836.725  | 1756.788  | NM_002143 | 2879.763  | 1769.217  |
| AK025157  | 6354.985  | 9314.554  | AF080577  | 1092.627  | 979.437   | AF284421  | 29184.941 | 14499.135 |
| AK022001  | 359.207   | 354.547   | L22005    | 13873.12  | 6470.931  | NM_006045 | 5497.738  | 5220.262  |
| AK022633  | 1030.729  | 1371.08   | NM_012291 | 22918.369 | 11953.712 | NM_006360 | 37383.684 | 31274.889 |
| AK027199  | 445.312   | 371.576   | NM_013365 | 3455.272  | 2437.268  | NM_003965 | 5994.53   | 9987.057  |
| AK000079  | 1145.099  | 801.502   | NM_003807 | 35489.84  | 24967.215 | NM_002785 | 297.373   | 627.009   |
| NM_012243 | 2881.657  | 2434.304  | NM_004355 | 4689.452  | 3077.183  | NM_002810 | 52699.398 | 62121.949 |
| AK025743  | 1953.2    | 1720.192  | NM_001790 | 2923.507  | 2597.507  | NM_003343 | 15545.811 | 24923.381 |
| AL122040  | 733.166   | 684.823   | NM_018243 | 4714.946  | 2495.224  | NM_002785 | 33084.762 | 36310.543 |
| AK023974  | 4680.073  | 4049.365  | NM_014939 | 3523.595  | 3652.333  | NM_003470 | 11096.766 | 9527.655  |
| AK023768  | 2925.603  | 2775.232  | Y17866    | 1717.095  | 1712.746  | AL080137  | 526.401   | 1017.004  |
| NM_014725 | 1004.408  | 860.789   | AK024247  | 1432.59   | 1265.63   | NM_017675 | 4249.17   | 6985.461  |
| AF147335  | 1041.577  | 929.309   | NM_003005 | 13203.739 | 7925.011  | AF155103  | 1564.473  | 2630.598  |
| AK000711  | 1893.878  | 1884.277  | NM_000873 | 5763.647  | 4558.139  | NM_017704 | 1212.28   | 1554.866  |
| BI768072  | 1346.167  | 1225.772  | AB033025  | 1363.474  | 889.137   | BC006359  | 1901.018  | 2392.84   |
| AK022216  | 5742.45   | 5081.929  | NM_004415 | 19427.758 | 11945.426 | AK026127  | 643.818   | 801.95    |
| AK025812  | 4067.837  | 4046.687  | NM_000917 | 30691.371 | 25587.691 | BC016062  | 12145.263 | 15840.51  |
| U00960    | 1640.901  | 1966.465  | NM_005389 | 33984.961 | 42083.449 | NM_002814 | 2220.761  | 3266.041  |
| AK026419  | 495.406   | 724.443   | NM_014445 | 42851.574 | 14444.025 | NM_012250 | 3749.109  | 2920.098  |
| AK025276  | 4604.467  | 5262.898  | AL832826  | 2999.071  | 806.531   | NM_006283 | 9319.028  | 10300.29  |
| AK026457  | 2785.602  | 3025.534  | NM_016123 | 1827.565  | 945.436   | Y08267    | 2096.436  | 2832.176  |
| AK026825  | 1450.731  | 1485.358  | AB048365  | 2766.355  | 1491.401  | NM_017530 | 5654.016  | 2128.943  |
| NM_013355 | 981.061   | 1200.66   | NM_000391 | 7722.094  | 5023.214  | AB029030  | 392.768   | 225.97    |
| NM_003847 | 15754.968 | 11936.752 | AF229179  | 733.518   | 690.542   | AL360183  | 2258.054  | 1446.915  |
| NM_007197 | 1783.263  | 1435.251  | NM_014771 | 7905.713  | 4959.565  | AK027046  | 903.346   | 1042.622  |
| AK021973  | 1068.789  | 749.523   | NM_002275 | 6458.221  | 3936.859  | NM_003113 | 3158.65   | 3083.607  |
| AL050165  | 64162.16  | 74387.578 | AB032945  | 664.694   | 653.347   | NM_016575 | 4821.081  | 9563.912  |
| AL117445  | 1173.45   | 1365.77   | AK025215  | 19417.77  | 14263.637 | NM_003822 | 617.05    | 1684.26   |
| AL122113  | 6327.855  | 9161.792  | BF569160  | 754.019   | 689.969   | NM_015832 | 13219.947 | 22506.756 |
| AK024415  | 1783.325  | 1927.762  | AK024625  | 662.744   | 809.648   | NM_001325 | 11084.645 | 17416.287 |
| AK023515  | 862.617   | 1126.034  | NM_018131 | 5333.596  | 4203.461  | NM_014315 | 1951.521  | 3042.316  |
| AL137544  | 427.393   | 474.797   | NM_014834 | 1059.263  | 812.402   | NM_004865 | 6808.575  | 7843.077  |
| AL137623  | 36751.98  | 31858.094 | NM_017636 | 16833.43  | 10697.678 | NM_017923 | 570.463   | 970.11    |
| AK026485  | 750.071   | 1131.044  | NM_012465 | 1103.245  | 1112.119  | AB019566  | 54107.609 | 59657.93  |



|           |           |           |           |           |           |           |           |           |
|-----------|-----------|-----------|-----------|-----------|-----------|-----------|-----------|-----------|
| AJ227874  | 1793.579  | 2311.424  | NM_002430 | 856.977   | 849.03    | NM_000981 | 47767.695 | 57778.809 |
| AF009312  | 809.09    | 881.894   | NM_006150 | 7389.863  | 5527.88   | NM_002047 | 19456.182 | 11999.634 |
| AF056418  | 318.732   | 484.543   | NM_014943 | 13965.987 | 37771.641 | NM_001031 | 49935.059 | 57031.301 |
| AF127772  | 738.45    | 1237.11   | AK024392  | 4615.356  | 3325.588  | NM_007208 | 10504.171 | 10566.441 |
| AF009276  | 758.545   | 584.926   | NM_013260 | 3404.37   | 3837.292  | NM_000998 | 53842.816 | 57817.367 |
| AF056428  | 11137.642 | 8954.847  | NM_005249 | 607.603   | 457.464   | NM_000985 | 16193.612 | 12833.034 |
| AF069136  | 491.731   | 640.17    | NM_018300 | 2029.922  | 804.636   | BF130622  | 16317.801 | 10752.957 |
| AK001995  | 559.595   | 519.536   | NM_004875 | 7121.289  | 2626.068  | NM_003858 | 9616.473  | 8783.604  |
| AK021594  | 481.602   | 551.647   | NM_018254 | 29152.215 | 9584.445  | NM_000236 | 694.81    | 973.003   |
| AK002150  | 473.041   | 356.254   | NM_017745 | 4926.968  | 3484.152  | NM_002903 | 48421.867 | 27990.736 |
| AK021635  | 1525.213  | 1560.174  | NM_018433 | 3365.896  | 1906.104  | NM_001861 | 1396.899  | 1276.671  |
| AK021856  | 1492.267  | 1423.521  | NM_000937 | 465.542   | 465.945   | AK025558  | 11139.217 | 5863.971  |
| S97393    | 774.128   | 1119.905  | AB028451  | 2365.381  | 1371.03   | AK024355  | 2513.813  | 2944.027  |
| BE698533  | 904.581   | 1082.034  | AK024810  | 23265.348 | 12101.889 | NM_001864 | 41832.434 | 58315.848 |
| NM_017928 | 1176.454  | 1557.756  | AK022615  | 58221.371 | 47748.063 | NM_003477 | 19212.459 | 32858.305 |
| NM_018472 | 1262.742  | 1313.766  | NM_004043 | 12110.083 | 7505.263  | NM_002654 | 44706.645 | 60996.383 |
| AL133108  | 515.799   | 861.017   | BM458096  | 29758.422 | 21538.551 | NM_015478 | 1175.288  | 3132.988  |
| AF085923  | 450.834   | 381.51    | NM_005626 | 16203.575 | 12313.557 | NM_020382 | 5080.6    | 6271.685  |
| AJ008128  | 26874.73  | 21737.143 | D29958    | 37617.703 | 29953.682 | NM_007192 | 11737.66  | 21025.781 |
| AL449243  | 17923.463 | 16176.74  | NM_015971 | 26342.295 | 18335.383 | AB002337  | 8187.601  | 11113.322 |
| M12211    | 3295.719  | 2945.804  | D17257    | 62306.063 | 55859.535 | NM_014933 | 5074.015  | 4764.863  |
| AF086338  | 352.04    | 431.819   | NM_002842 | 10586.969 | 9270.378  | NM_003076 | 31259.305 | 27600.014 |
| NM_006272 | 474.175   | 271.531   | AF290204  | 1002.979  | 847.059   | NM_006385 | 429.53    | 777.371   |
| AK024303  | 1153.073  | 1077.32   | NM_012126 | 1320.071  | 1297.09   | NM_003456 | 7033.806  | 3238.369  |
| AL160131  | 10783.001 | 8649.122  | NM_003918 | 742.272   | 3101.066  | NM_002585 | 4231.581  | 4734.306  |
| AF086045  | 3510.138  | 2713.706  | NM_004807 | 2252.937  | 6006.928  | AB029016  | 1140.562  | 2602.219  |
| AK027028  | 4478.488  | 3996.63   | AF219140  | 1177.563  | 2553.092  | AK000445  | 490.767   | 1066.52   |
| AK027069  | 542.028   | 545.349   | J03569    | 59595.551 | 57307.18  | NM_002701 | 2909.537  | 3355.39   |
| AK026916  | 2068.824  | 1715.411  | NM_003115 | 11895.01  | 2998.601  | NM_005693 | 384.127   | 550.802   |
| AK026914  | 2007.758  | 1887.357  | NM_000687 | 32497.961 | 13415.432 | X97303    | 8112.415  | 3431.228  |
| Y13808    | 703.226   | 679.635   | NM_000446 | 1785.551  | 2599.854  | NM_006148 | 326.557   | 609.931   |
| Y11166    | 2914.685  | 3140.52   | NM_018200 | 2287.988  | 1100.807  | AK025451  | 4168.885  | 8313.058  |
| AK024942  | 3314.221  | 4332.009  | NM_014838 | 2425.383  | 1714.288  | NM_002783 | 5107.931  | 11167.689 |
| AJ227873  | 11206.979 | 13192.117 | NM_007212 | 462.772   | 558.952   | X52005    | 22800.617 | 56434.043 |
| AK022886  | 3812.034  | 4823.795  | AF005067  | 2496.786  | 3180.211  | NM_001047 | 1100.311  | 3166.069  |
| AK024665  | 5974.081  | 8922.148  | NM_005710 | 16785.477 | 14980.549 | AK024396  | 10293.252 | 22187.244 |
| AF147363  | 1054.457  | 1188.996  | AF252284  | 2774.996  | 2595.618  | U58514    | 3167.372  | 6881.581  |
| AJ227880  | 1115.314  | 1014.897  | NM_014930 | 2824.329  | 2878.744  | M57627    | 575.792   | 933.612   |
| AK000691  | 1264.766  | 1396.329  | NM_001530 | 6229.475  | 6325.11   | W74254    | 927.657   | 1259.144  |
| AK001448  | 1958.193  | 2140.361  | U80232    | 17109.174 | 13669.265 | M58603    | 5002.398  | 9081.713  |
| AK026890  | 723.83    | 770.779   | AJ237589  | 1029.826  | 1681.561  | AA443286  | 2240.829  | 2767.149  |
| AF131817  | 1307.745  | 1396.545  | M27877    | 42462.305 | 38431.051 | AB003334  | 8531.915  | 8778.385  |
| AL049321  | 3051.701  | 3426.729  | D70836    | 57945.563 | 47691.348 | AW276315  | 1189.632  | 2129.068  |
| NM_003546 | 4431.77   | 4586.725  | D16878    | 1720.099  | 1773.298  | AA490737  | 3689.037  | 3069.15   |
| AL137625  | 465.043   | 346.689   | NM_007035 | 8728.334  | 17615.768 | AI878886  | 27093.201 | 27213.195 |
| AK025750  | 1654.94   | 1345.306  | AB019562  | 3747.45   | 8184.017  | BG697179  | 9842.404  | 10306.084 |
| BF031253  | 700.265   | 726.298   | AF036364  | 5732.216  | 12832.478 | NM_002136 | 50747.102 | 51492.445 |
| AK025783  | 1596.107  | 1132.737  | AK022847  | 8213.704  | 8682.906  | BM012504  | 7995.046  | 10459.146 |
| AF113675  | 1093.153  | 937.984   | NM_020203 | 6080.224  | 2315.85   | AA664145  | 1885.637  | 2069.063  |
| AK024514  | 915.813   | 862.067   | L40992    | 871.749   | 612.969   | X72308    | 51462.59  | 49692.23  |
| NM_020119 | 2368.407  | 2262.531  | U20582    | 18167.842 | 7432.317  | T50790    | 3681.403  | 2668.896  |
| AL049417  | 2556.064  | 2245.56   | NM_000337 | 779.034   | 480.852   | R48168    | 10029.985 | 8726.095  |
| AK023507  | 811.011   | 673.011   | NM_002079 | 10805.03  | 7465.75   | BC008837  | 1075.064  | 462.951   |

|           |           |           |           |           |           |           |           |           |
|-----------|-----------|-----------|-----------|-----------|-----------|-----------|-----------|-----------|
| NM_00516E | 4572.27   | 4391.207  | U13697    | 821.989   | 866.547   | NM_00681E | 51036.328 | 60452.539 |
| AL109818  | 621.564   | 880.003   | U04270    | 33535.324 | 23864.141 | NM_014744 | 2356.926  | 4555.274  |
| NM_00006E | 3520.476  | 4235.338  | Z34820    | 847.843   | 1125.623  | AF146759  | 2727.359  | 6966.204  |
| AB033046  | 21740.332 | 26403.352 | L02840    | 10821.986 | 9454.875  | AB032993  | 7215.941  | 12921.951 |
| NM_01591E | 7516.071  | 9076.122  | BG569143  | 1068.821  | 2077.801  | NM_000854 | 5065.298  | 10489.537 |
| AK023228  | 561.021   | 1067.037  | AA629719  | 62384.363 | 64484.27  | NM_001901 | 638.443   | 2216.817  |
| NM_01324E | 817.462   | 1062.635  | AA927528  | 6608.696  | 8039.026  | AL117423  | 9101.37   | 16230.159 |
| AK026642  | 1012.419  | 1510.618  | BG676364  | 10144.952 | 12327.152 | NM_00614C | 376.757   | 920.2     |
| AL359063  | 961.186   | 1404.514  | BG181154  | 3027.206  | 4931.435  | NM_002084 | 1764.889  | 2326.715  |
| AL079292  | 2891.323  | 2908.765  | AA843679  | 23404.436 | 26644.201 | D16892    | 9252.229  | 8834.875  |
| X89667    | 4123.63   | 4925.504  | H68922    | 1439.249  | 1664.356  | NM_00475C | 2396.612  | 3393.029  |
| NM_014027 | 4850.148  | 4486.715  | AF097159  | 2050.114  | 1856.021  | NM_00729E | 3904.164  | 3506.265  |
| NM_020467 | 377.675   | 373.407   | NM_014684 | 1523.726  | 4348.606  | NM_003651 | 22049.385 | 16800.9   |
| AF116621  | 5384.408  | 3869.294  | AK027247  | 2762.275  | 6298.717  | NM_01401E | 1095.973  | 2980.57   |
| AF086554  | 5052.98   | 4806.064  | NM_00248C | 15821.89  | 37282.691 | NM_00041E | 1430.277  | 1672.329  |
| AL390136  | 29588.504 | 20871.607 | NM_017571 | 16361.039 | 32175.697 | NM_01324E | 1168.048  | 1773.379  |
| AF086398  | 48867.504 | 42605.859 | L03169    | 1535.616  | 997.141   | NM_018431 | 470.634   | 717.788   |
| AK024545  | 1909.978  | 1434.383  | NM_00192E | 3320.834  | 2475.036  | NM_000591 | 2327.421  | 3542.038  |
| AK023444  | 1119.274  | 1034.02   | NM_00639E | 959.934   | 695.401   | NM_00056E | 1186.321  | 1438.795  |
| AK025953  | 1690.228  | 1722.535  | NM_01896E | 513.813   | 819.892   | AF253318  | 2074.369  | 1674.671  |
| NM_00318C | 1205.855  | 1461.17   | NM_00018E | 8877.304  | 6531.163  | NM_017767 | 14316.639 | 5386.598  |
| AF086406  | 12729.716 | 11732.444 | Y00816    | 2788.666  | 2668.051  | NM_00326E | 4393.359  | 9135.369  |
| D17216    | 5055.53   | 5033.627  | NM_004119 | 2507.362  | 4351.659  | NM_02012E | 541.682   | 2002.595  |
| AL137581  | 2836.388  | 2791.119  | NM_00164E | 14218.881 | 40303.086 | AK022832  | 1724.006  | 5188.917  |
| J05158    | 724.925   | 942.848   | NM_00154E | 1594.472  | 4042.131  | NM_017784 | 916.48    | 3432.343  |
| NM_015564 | 1858.753  | 2437.59   | NM_00228C | 3703.533  | 4625.777  | NM_014641 | 2731.521  | 6473.632  |
| AF160476  | 1436.678  | 1695.671  | NM_01745E | 584.037   | 1432.476  | NM_00446E | 4030.18   | 5228.29   |
| L22650    | 2300.483  | 2746.599  | NM_00105E | 59779.719 | 58749.004 | NM_00034E | 565.785   | 642.21    |
| AB014520  | 39690.324 | 35019.633 | NM_01587E | 240.076   | 1676.034  | NM_02024E | 1924.676  | 2249.872  |
| NM_004907 | 3616.186  | 4635.12   | NM_002271 | 61348.301 | 63531.789 | NM_016354 | 889.497   | 2251.852  |
| NM_002891 | 712.981   | 893.39    | NM_01989E | 524.707   | 333.903   | NM_001044 | 507.874   | 953.675   |
| NM_00177E | 2874.333  | 2636.668  | AB040966  | 11470.977 | 4757.272  | NM_004644 | 785.517   | 1420.673  |
| BE083789  | 545.133   | 698.941   | NM_02013E | 11739.375 | 5740.399  | AV681967  | 735.916   | 2430.841  |
| X04526    | 22419.434 | 15977.729 | NM_016467 | 12437.026 | 6614.704  | NM_01825C | 940.867   | 1700.788  |
| D26067    | 3701.261  | 2814.53   | NM_00725E | 2788.284  | 2143.117  | NM_01655E | 5807.972  | 3822.98   |
| AF227924  | 3865.042  | 3659.557  | NM_00055E | 8718.652  | 6294.403  | AB023136  | 397.248   | 599.208   |
| NM_00571E | 14480.505 | 10597.052 | NM_00083E | 1978.203  | 1606.477  | NM_00379E | 32075.77  | 25086.115 |
| NM_00618E | 4959.538  | 4397.038  | NM_014437 | 466.428   | 327.301   | NM_01423E | 2964.881  | 2650.319  |
| NM_016087 | 569.806   | 552.732   | NM_00183C | 1066.971  | 1848.727  | NM_005701 | 530.766   | 331.591   |
| S59184    | 1776.689  | 1543.841  | NM_001149 | 1311.053  | 1539.815  | NM_001231 | 447.984   | 359.897   |
| NM_00513C | 482.044   | 390.338   | NM_00680E | 33104.34  | 34056.129 | AB023139  | 8650.988  | 18707.104 |
| NM_006661 | 2704.926  | 2305.84   | NM_00032E | 2678.931  | 6212.004  | NM_01788E | 5192.573  | 11187.494 |
| M54886    | 451.483   | 418.171   | NM_01339E | 4796.409  | 8735.084  | D80004    | 661.291   | 2555.427  |
| NM_00574E | 20054.201 | 16539.789 | NM_00241C | 2121.296  | 3226.499  | NM_00094E | 4159.779  | 6956.742  |
| NM_00458E | 1282.26   | 1406.972  | AL122120  | 8486.169  | 5696.249  | NM_01607C | 3457.315  | 6913.664  |
| U16126    | 1012.427  | 955.934   | NM_01883E | 7331.87   | 12121.902 | NM_01639C | 3111.566  | 6334.972  |
| AJ008144  | 1030.425  | 966.874   | NM_003401 | 4711.461  | 10357.573 | NM_016101 | 5850.432  | 4904.472  |
| NM_007314 | 10334.651 | 11509.555 | AL137724  | 5477.709  | 12557.25  | NM_00585E | 48199.461 | 19705.137 |
| NM_01607E | 1359.015  | 1186.682  | NM_00475E | 9012.385  | 12877.285 | NM_02031E | 679.334   | 847.804   |
| NM_00660C | 21033.652 | 21410.672 | NM_00291E | 4366.343  | 1440.654  | NM_01462E | 3287.221  | 3220.99   |
| AF297709  | 5502.381  | 6973.386  | AK022797  | 1863.348  | 881.308   | AK025630  | 1756.608  | 3604.686  |
| L77564    | 1166.627  | 1471.155  | NM_00737C | 5765.897  | 2375.424  | AK022907  | 9339.992  | 25239.156 |
| NM_015384 | 2299.234  | 2975.864  | NM_006231 | 1421.641  | 1224.374  | NM_01479E | 593.872   | 1885.161  |

|           |           |           |           |           |           |           |           |           |
|-----------|-----------|-----------|-----------|-----------|-----------|-----------|-----------|-----------|
| AK023327  | 4549.412  | 4116.005  | AK023471  | 2232.775  | 1845.182  | NM_00424E | 1886.093  | 2716.272  |
| AB046858  | 2535.155  | 2156.287  | AF044578  | 7526.718  | 4179.46   | NM_003241 | 1606.797  | 2499.601  |
| D50914    | 7571.188  | 6922.519  | NM_00194E | 5544.379  | 3343.496  | NM_00268E | 2320.982  | 2479.075  |
| BE878692  | 564.225   | 563.42    | NM_001067 | 16488.998 | 11130.084 | AK024504  | 1392.973  | 826.335   |
| NM_002007 | 1218.142  | 1179.053  | NM_014034 | 8768.506  | 6355.987  | AF039023  | 1426.853  | 1387.831  |
| NM_00230E | 4312.264  | 3279.469  | NM_00533E | 28113.553 | 29228.617 | NM_005511 | 2119.837  | 1789.188  |
| AK025439  | 4315.767  | 3222.444  | J04474    | 12455.416 | 10649.343 | NM_01469E | 30893.076 | 11563.753 |
| NM_001737 | 3675.982  | 2940.009  | NM_00173E | 2300.453  | 3055.463  | NM_01847E | 3266.845  | 1758.531  |
| Z36784    | 1498.53   | 931.454   | NM_00227C | 568.213   | 817.88    | AK025451  | 4539.763  | 10201.188 |
| NM_01662E | 11958.312 | 10932.206 | L40992    | 1514.182  | 3036.296  | NM_00278E | 5489.001  | 11521.707 |
| NM_00721E | 1176.959  | 954.449   | U20582    | 16104.023 | 5717.465  | X52005    | 21959.668 | 54338.805 |
| NM_019064 | 1414.211  | 1224.754  | NM_000337 | 862.109   | 517.469   | NM_001047 | 1057.863  | 3166.836  |
| NM_01893E | 396.792   | 246.545   | NM_00207E | 11793.37  | 6643.067  | AK024396  | 10694.462 | 23151.883 |
| NM_000094 | 9148.992  | 8269.289  | AI660957  | 1632.008  | 1213.082  | U58514    | 3152.202  | 7034.037  |
| NM_01630E | 1909.435  | 2691.735  | U13697    | 790.993   | 753.93    | M57627    | 665.663   | 2349.598  |
| NM_00415E | 23995.387 | 29302.047 | U04270    | 33186.566 | 25628.344 | W74254    | 1009.399  | 3598.304  |
| NM_00324E | 7987.443  | 9083.694  | J03810    | 1188.433  | 1447.824  | M58603    | 5655.066  | 4929.496  |
| M21897    | 1697.483  | 2015.253  | Z34820    | 948.596   | 1358.374  | AA443286  | 1857.44   | 875.931   |
| AF301463  | 1563.929  | 1384.179  | L02840    | 5607.159  | 3125.742  | AB003334  | 8063.977  | 5298.621  |
| NM_015984 | 7464.715  | 7894.036  | BG569143  | 1048.495  | 644.493   | AW276315  | 1475.199  | 1715.261  |
| AK022471  | 369.169   | 359.221   | AA629719  | 60369.313 | 58463.469 | AA490737  | 4292.899  | 5694.148  |
| NM_006894 | 2934.696  | 2285.579  | AA927528  | 4794.634  | 4267.399  | X72308    | 48805.434 | 43918.16  |
| AK023031  | 3701.462  | 3506.994  | BG676364  | 8044.355  | 10567.487 | T50790    | 2694.376  | 2263.457  |
| NM_005717 | 56770.645 | 42760.352 | AB023219  | 8441.927  | 7964.326  | R48168    | 9664.615  | 6379.014  |
| NM_01209C | 1965.243  | 1451.307  | NM_01414E | 1241.366  | 1788.266  | AB040954  | 3481.041  | 1937.863  |
| BE793385  | 1166.52   | 2216.523  | NM_00248C | 14470.997 | 25915.365 | NM_002081 | 615.449   | 284.886   |
| AF177292  | 606.598   | 473.409   | NM_017571 | 14484.357 | 30147.941 | AF146759  | 3068.482  | 5672.195  |
| NM_00308E | 5984.739  | 4631.808  | AB007946  | 319.241   | 1914.311  | AB032993  | 7612.251  | 9232.225  |
| AF043290  | 1237.048  | 854.005   | L03169    | 1511.46   | 788.499   | NM_000854 | 5232.585  | 6225.211  |
| NM_00408E | 4601.296  | 4240.681  | NM_00192E | 4118.798  | 2350.349  | AL117423  | 8588.729  | 16932.789 |
| NM_01439E | 5874.821  | 4803.163  | NM_00639E | 1351.634  | 1020.963  | NM_00614C | 302.786   | 1523.059  |
| NM_005934 | 37293.348 | 27381.793 | NM_01896E | 1123.294  | 1350.142  | NM_00700E | 320.188   | 2055.817  |
| NM_002614 | 1305.751  | 1184.314  | NM_00018E | 8617.479  | 5254.429  | NM_002084 | 2045.828  | 5320.282  |
| NM_00565E | 6735.021  | 7069.324  | Y00816    | 2553.271  | 2162.389  | D16892    | 7475.915  | 6932.44   |
| NM_00269E | 4122.782  | 4182.606  | NM_00451E | 8013.887  | 5731.249  | NM_00475C | 2087.665  | 2179.227  |
| AF069138  | 391.197   | 341.626   | NM_00293C | 975.19    | 806.365   | NM_00729E | 2925.348  | 2754.384  |
| NM_00214E | 1651.62   | 1735.439  | NM_00438C | 25554.24  | 14802.49  | NM_003651 | 20793.207 | 30242.912 |
| AL137449  | 2282.637  | 3274.918  | U86813    | 1699.218  | 1380.126  | NM_01401E | 445.799   | 897.485   |
| U88153    | 4460.215  | 3912.436  | NM_004119 | 2835.694  | 1618.297  | NM_00056E | 1027.496  | 2209.309  |
| X03910    | 20380.424 | 23002.078 | AY007378  | 3829.764  | 3146.625  | AF253318  | 2185.34   | 1753.454  |
| NM_01842E | 16634.262 | 17622.99  | D26070    | 1814.036  | 2727.803  | NM_017767 | 15214.899 | 5283.912  |
| NM_00505E | 593.328   | 562.04    | NM_00164E | 9431.281  | 8725.582  | AJ290954  | 1208.458  | 207.019   |
| NM_006924 | 23475.852 | 25715.441 | NM_00154E | 1753.021  | 2479.601  | AK022832  | 1768.463  | 1519.03   |
| NM_016024 | 6452.112  | 5866.063  | AB019562  | 3537.083  | 5501.424  | NM_017784 | 1074.589  | 653.157   |
| NM_018107 | 4603.809  | 4188.689  | NM_002271 | 52404.57  | 59559.934 | NM_014641 | 2463.885  | 3316.335  |
| NM_01227E | 1464.151  | 1596.955  | NM_018361 | 6968.813  | 17016.064 | NM_00446E | 4492.359  | 7120.153  |
| NM_018387 | 17925.164 | 15010.242 | NM_01989E | 795.897   | 3431.733  | NM_00034E | 593.397   | 844.322   |
| BF310673  | 3875.179  | 3024.764  | AB040966  | 11886.682 | 6861.104  | NM_02024E | 1709.635  | 2335.705  |
| R97012    | 53176.676 | 44993.367 | NM_02013E | 12789.978 | 9748.029  | NM_016354 | 1550.168  | 3133.432  |
| U77700    | 12060.321 | 10449.688 | NM_016467 | 12454.073 | 9482.576  | NM_001044 | 569.022   | 971.164   |
| NM_006567 | 12021.677 | 10150.203 | NM_00725E | 5954.105  | 6966.004  | NM_004644 | 1132.508  | 1795.399  |
| AF038554  | 31120.455 | 21484.846 | NM_00083E | 1973.944  | 1780.134  | AV681967  | 875.206   | 1413.783  |
| AF264621  | 12847.901 | 9970.373  | NM_00183C | 816.982   | 500.314   | NM_01655E | 6951.61   | 16750.686 |

|           |           |           |           |           |           |           |           |           |
|-----------|-----------|-----------|-----------|-----------|-----------|-----------|-----------|-----------|
| NM_005875 | 26693.744 | 21112.564 | NM_006808 | 29803.453 | 16257.995 | AB023136  | 594.466   | 1270.945  |
| NM_004184 | 22957.58  | 19688.373 | NM_006634 | 1811.625  | 1788.218  | NM_003795 | 32194.344 | 26724.314 |
| NM_000439 | 834.381   | 665.917   | NM_016465 | 3273.741  | 3592.224  | NM_014232 | 2676.698  | 2620.651  |
| AJ295148  | 971.443   | 922.972   | NM_000328 | 1555.419  | 2077.259  | NM_005701 | 759.334   | 409.062   |
| AF176701  | 622.72    | 636.722   | NM_013399 | 1456.402  | 1677.785  | NM_001231 | 527.781   | 533.727   |
| NM_000456 | 4850.802  | 6325.247  | AK027247  | 2739.765  | 5267.25   | NM_006819 | 30468.24  | 6177.048  |
| AF190122  | 488.187   | 569.511   | AL137724  | 5262.816  | 11392.637 | NM_014744 | 1260.061  | 159.201   |
| NM_002496 | 29222.313 | 32777.645 | NM_004758 | 9002.171  | 14636.439 | D80004    | 604.777   | 417.891   |
| NM_016243 | 4606.715  | 5355.852  | NM_002913 | 5203.397  | 12277.669 | NM_000946 | 3589.707  | 1952.055  |
| NM_014402 | 45700.871 | 35865.723 | AK022797  | 2519.563  | 2939.801  | NM_016070 | 3031.792  | 2435.524  |
| NM_004649 | 16624.393 | 18026.537 | NM_007370 | 5321.865  | 6081.522  | NM_016390 | 2623.175  | 2893.018  |
| NM_006540 | 8343.684  | 7799.28   | NM_006231 | 1796.204  | 2607.82   | NM_016101 | 6881.776  | 4406.533  |
| NM_017766 | 2350.691  | 2187.875  | AK023471  | 2159.257  | 4294.008  | NM_005859 | 48866.402 | 34558.598 |
| NM_002811 | 13847.363 | 10411.762 | AF044578  | 14023.152 | 20176.684 | NM_020313 | 738.722   | 1182.52   |
| NM_020310 | 4206.416  | 3759.487  | NM_014034 | 7051.305  | 4914.237  | NM_014628 | 4050.013  | 4754.594  |
| AK024444  | 899.374   | 776.505   | J04474    | 11950.822 | 5532.964  | AK025630  | 1979.265  | 3327.139  |
| NM_005802 | 6255.379  | 4985.936  | L29306    | 5014.221  | 5186.938  | AL365404  | 29117.111 | 37053.043 |
| AB002331  | 3861.523  | 2752.684  | NM_013989 | 2711.507  | 2647.925  | AK022907  | 8086.534  | 11116.323 |
| NM_002504 | 3640.697  | 3025.29   | NM_001738 | 3856.859  | 4014.685  | NM_014793 | 1270.845  | 3843.226  |
| AB046775  | 2781.188  | 2020.903  | NM_020203 | 4380.109  | 5584.604  | NM_004245 | 2391.031  | 4008.992  |
| X74862    | 1935.641  | 1889.488  | L40992    | 2453.356  | 4619.272  | NM_003241 | 2024.203  | 4195.187  |
| X65663    | 9342.381  | 5321.12   | U20582    | 18982.105 | 37785.359 | NM_002685 | 3424.22   | 7349.816  |
| NM_003185 | 3517.523  | 2588.442  | NM_000337 | 1363.304  | 3638.586  | AK024504  | 1758.729  | 2647.47   |
| NM_004456 | 8221.962  | 6777.476  | NM_002079 | 14059.707 | 24645.627 | AF039023  | 1627.461  | 1586.173  |
| NM_004284 | 10979.344 | 9273.502  | AI660957  | 1244.128  | 2062.568  | NM_005511 | 2383.565  | 2016.612  |
| NM_007129 | 10475.873 | 8638.419  | U13697    | 2344.109  | 3507.168  | NM_014698 | 31883.701 | 14727.36  |
| AY004253  | 13062.112 | 11378.014 | X75308    | 1280.902  | 2088.923  | NM_018475 | 2534.288  | 481.122   |
| Z46967    | 1105.337  | 1081.487  | U04270    | 41225.395 | 52872.785 | NM_003262 | 1304.026  | 259.978   |
| NM_017583 | 15464.729 | 22957.967 | L02840    | 6170.803  | 4867.375  | NM_020125 | 294.727   | 124.597   |
| Y16132    | 27146.9   | 31019.072 | AA927528  | 11940.131 | 7818.239  | X52005    | 20314.297 | 8817.038  |
| NM_016593 | 3883.559  | 5374.686  | H68922    | 1174.401  | 2510.035  | NM_001047 | 1024.329  | 454.44    |
| NM_002521 | 2197.966  | 2839.564  | AF090906  | 3094      | 3240.663  | AK024396  | 10001.543 | 5504.664  |
| NM_001150 | 1917.762  | 2425.036  | AB023219  | 17420.797 | 10785.49  | U58514    | 2655.575  | 1707.233  |
| NM_002856 | 5263.521  | 6090.799  | NM_006399 | 2103.95   | 2285.863  | M57627    | 662.686   | 528.094   |
| NM_003225 | 1293.664  | 1672.406  | NM_018965 | 942.602   | 2364.157  | W74254    | 1118.471  | 1400.938  |
| NM_000096 | 1598.129  | 2176.109  | NM_000185 | 23450.439 | 49361.527 | M58603    | 5945.233  | 3552.321  |
| AA418251  | 1174.472  | 1089.093  | Y00816    | 2549.53   | 5545.562  | AA443286  | 2065.405  | 1129.664  |
| AA143087  | 15353.652 | 15357.069 | NM_004512 | 37740.664 | 62629.125 | AB003334  | 8378.184  | 3773.044  |
| BI870965  | 8874.937  | 7425.208  | AY007378  | 8647.124  | 11755.511 | AW276315  | 1508.392  | 1136.362  |
| BI835536  | 11121.933 | 10545.632 | NM_001642 | 10716.83  | 15203.242 | AA490737  | 3866.6    | 3114.583  |
| BF205051  | 6210.653  | 5752.669  | NM_001542 | 1460.368  | 2215.989  | AI878886  | 30425.664 | 43933.914 |
| X02761    | 9884.23   | 8692.951  | NM_015193 | 6527.249  | 10672.85  | BG697179  | 13884.35  | 17833.076 |
| M91463    | 1705.918  | 1285.896  | X98834    | 8074.505  | 7175.235  | NM_002136 | 47669.93  | 52636.688 |
| U88317    | 782.421   | 558.632   | AK022847  | 8939.137  | 24970.406 | BM012504  | 10643.401 | 19095.574 |
| J03060    | 2477.286  | 1858.979  | AK000271  | 1633.521  | 5056.823  | AA664145  | 2828.305  | 5893.462  |
| X54156    | 728.657   | 595.576   | NM_005173 | 681.969   | 1951.744  | X72308    | 49763.777 | 56365.219 |
| NM_003743 | 1882.953  | 1351.183  | NM_016465 | 8220.598  | 11803.647 | T50790    | 4038.134  | 4202.399  |
| AA829383  | 12150.946 | 11592.762 | NM_013399 | 1665.646  | 3039.279  | R48168    | 12033.329 | 10216.406 |
| AF012434  | 29669.332 | 24719.363 | NM_014684 | 2095.999  | 3141.787  | AB040954  | 4449.844  | 2555.993  |
| AF131748  | 5430.238  | 4658.086  | AK027247  | 4128.109  | 6428.84   | NM_002081 | 1138.724  | 597.992   |
| NM_002349 | 1297.598  | 2126.705  | NM_002480 | 9419.801  | 16278.867 | AB023139  | 4816.708  | 715.965   |
| NM_005080 | 14990.936 | 25361.799 | NM_017571 | 12497.763 | 22110.313 | NM_017885 | 2123.572  | 262.109   |
| NM_004887 | 11376.148 | 16138.953 | AK026095  | 675.234   | 1478.588  | D16892    | 9719.131  | 2872.822  |

|           |           |           |           |           |           |           |           |           |
|-----------|-----------|-----------|-----------|-----------|-----------|-----------|-----------|-----------|
| NM_006404 | 1143.883  | 1263.902  | NM_013989 | 8521.783  | 15620.053 | NM_00475C | 2343.526  | 978.861   |
| NM_01479E | 1798.192  | 2080.444  | NM_00173E | 2513.109  | 5436.19   | NM_00729E | 3692.967  | 1588.226  |
| NM_00298E | 1396.886  | 1461.29   | NM_00227C | 402.909   | 1478.067  | AK023317  | 428.803   | 426.48    |
| M15330    | 2156.537  | 4841.501  | NM_00105E | 56113.684 | 62175.938 | NM_003651 | 20895.137 | 7741.998  |
| NM_01439E | 3643.974  | 4104.115  | AB040966  | 11536.572 | 15016.307 | NM_014012 | 632.058   | 543.844   |
| AK027201  | 2846.245  | 3093.86   | L08436    | 1270.629  | 2487.526  | NM_00041E | 1845.399  | 1152.3    |
| NM_00048E | 17557.59  | 19373.045 | NM_00055E | 6414.323  | 11247.593 | NM_01324E | 1333.891  | 535.536   |
| X98507    | 11252.114 | 11483.94  | AF090906  | 5054.595  | 10416.617 | NM_018431 | 510.092   | 196.093   |
| NM_01603C | 52457.379 | 65466.836 | AB023219  | 7677.304  | 12959.066 | NM_000591 | 2822.989  | 1634.862  |
| NM_01466E | 12998.774 | 15277.89  | NM_01414E | 1023.707  | 3078.022  | NM_00056E | 1266.767  | 434.475   |
| NM_005652 | 16486.365 | 14903.326 | NM_01883E | 4636.393  | 8971.625  | NM_00201E | 626.99    | 1058.912  |
| AK026686  | 1084.823  | 1234.394  | NM_003401 | 2570.08   | 5808.204  | NM_00079E | 237.723   | 1084.517  |
| NM_005902 | 4712.072  | 4684.205  | AL137724  | 5776.284  | 4526.136  | AF253318  | 2050.438  | 3824.891  |
| NM_00285C | 54786.867 | 68952.188 | NM_002913 | 4304.418  | 6993.624  | NM_017767 | 13592.655 | 32512.301 |
| NM_004302 | 727.982   | 849.76    | AK022797  | 1601.667  | 1602.748  | AK024848  | 13573.27  | 24642.018 |
| NM_005903 | 2223.815  | 1844.143  | NM_00737C | 5561.662  | 6609.179  | NM_004852 | 416.27    | 1079.253  |
| NM_000861 | 1098.568  | 1077.637  | NM_006231 | 1493.822  | 2595.047  | NM_000543 | 727.807   | 1474.941  |
| U77493    | 1270.254  | 930.953   | NM_014034 | 10380.945 | 13489.738 | U06699    | 17528.803 | 15793.981 |
| NM_019062 | 1471.129  | 1376.052  | NM_003761 | 46408.465 | 56798.238 | AJ290954  | 1644.887  | 498.62    |
| AL133064  | 5478.481  | 8112.014  | CY3Cy5    | 5057.905  | 177.373   | AK025451  | 2070.783  | 658.16    |
| NM_006227 | 7291.939  | 10985.14  | AK022262  | 2899.885  | 4361      | NM_002783 | 3799.882  | 1692.765  |
| NM_00290E | 6385.449  | 7949.726  | AF086220  | 3363.946  | 8062.629  | NM_00303E | 1271.056  | 519.934   |
| NM_00070C | 3637.473  | 6382.465  | AK023941  | 2387.68   | 2045.614  | NM_01815E | 7426.029  | 2109.634  |
| NM_01902E | 18307.111 | 21856.061 | AF086265  | 641.804   | 1018.261  | AL050358  | 1499.487  | 909.599   |
| NM_000431 | 4308.182  | 3260.971  | AL390083  | 11038.512 | 12478.677 | NM_004731 | 481.507   | 340.922   |
| NM_013421 | 2767.277  | 3784.71   | AB020702  | 386.625   | 782.027   | NM_000544 | 2386.577  | 1320.354  |
| NM_012474 | 7381.698  | 10411.087 | AL050227  | 802.312   | 658.062   | NM_001044 | 536.939   | 255.995   |
| AB033118  | 2202.507  | 1798.755  | AK075087  | 723.327   | 790.056   | NM_004644 | 1160.763  | 578.156   |
| NM_01960E | 5498.993  | 5017.496  | AK026571  | 5036.542  | 4796.923  | AV681967  | 835.847   | 406.292   |
| NM_00169C | 13886.175 | 11485.038 | AK024673  | 6383.136  | 6415.746  | NM_01825C | 1314.914  | 739.934   |
| AF034374  | 15386.724 | 14170.713 | AF070618  | 2064.38   | 1916.77   | NM_016553 | 5852.415  | 2269.731  |
| NM_001682 | 4759.922  | 4397.854  | SR2       | 51380.336 | 41060.852 | AB023136  | 551.826   | 248.608   |
| AK025130  | 8661.079  | 14187.953 | SR4       | 15878.141 | 12985.641 | NM_00379E | 31621.113 | 12344.313 |
| AK023232  | 7075.765  | 7026.525  | SR6       | 2193.159  | 1606.367  | NM_014232 | 4896.438  | 8583.906  |
| NM_00638C | 2519.441  | 2785.931  | SR8       | 7800.29   | 21035.461 | NM_005701 | 1342.994  | 1707.509  |
| AB020710  | 2436.848  | 2414.723  | SR10      | 25586.715 | 8166.649  | NM_001231 | 1000.03   | 2929.149  |
| Z83801    | 349.469   | 169.824   | CY3Cy5    | 4921.997  | 204.595   | NM_00681E | 49164.906 | 57772.016 |
| NM_016174 | 7346.441  | 6331.551  | AL049365  | 22853.582 | 25841.99  | NM_014744 | 3160.865  | 5542.063  |
| NM_020377 | 1351.156  | 1254.628  | AK025132  | 1640.421  | 4961.082  | AF146759  | 3059.963  | 4241.764  |
| U88896    | 2436.99   | 2480.817  | AK025157  | 7475.607  | 11724.634 | AB032993  | 6330.951  | 5929.625  |
| AF116702  | 53351.504 | 49467.555 | AK022633  | 2064.198  | 2892.767  | NM_000854 | 4535.046  | 3679.713  |
| NM_005724 | 9662.036  | 9033.487  | AK000079  | 951.161   | 611.753   | NM_001901 | 499.229   | 190.325   |
| X58794    | 1924.359  | 2461.419  | NM_012243 | 2925.304  | 2412.411  | AL117423  | 6796.096  | 2208.555  |
| NM_00173E | 3102.111  | 3215.973  | AK025743  | 3922.781  | 4099.382  | NM_00614C | 250.488   | 91.304    |
| Z70701    | 17096.447 | 20972.145 | AK023974  | 5374.473  | 5058.982  | NM_002084 | 1567.049  | 932.329   |
| AB040972  | 4679.662  | 6729.02   | AK023768  | 2045.507  | 2195.622  | NM_005511 | 2715.15   | 1453.33   |
| AF148505  | 4006.092  | 4615.574  | NM_01472E | 1117.398  | 965.333   | NM_01469E | 29526.695 | 8101.8    |
| NM_01868E | 15966.651 | 20602.857 | AF147335  | 2361.57   | 2548.878  | NM_01847E | 4235.894  | 1739.182  |
| NM_01767E | 2318.495  | 2399.97   | AK000711  | 2782.631  | 2499.23   | NM_003262 | 2863.547  | 1126.523  |
| AK021764  | 1065.428  | 1275.311  | BI768072  | 1164.494  | 1494.935  | NM_02012E | 502.441   | 192.748   |
| NM_005431 | 4859.587  | 5255.271  | AK022216  | 11654.333 | 11279.39  | AK022832  | 1662.424  | 753.538   |
| NM_002894 | 13487.195 | 13665.002 | AK025812  | 11047.477 | 11849.072 | NM_017784 | 861.012   | 313.221   |
| NM_00426C | 11366.839 | 9892.559  | U00960    | 2473.865  | 2556.534  | NM_014641 | 1878.459  | 709.543   |

|           |           |           |           |           |           |           |           |           |
|-----------|-----------|-----------|-----------|-----------|-----------|-----------|-----------|-----------|
| AL050067  | 1900.979  | 2029.113  | AK026419  | 1359.787  | 1854.046  | NM_004462 | 3416.8    | 715.17    |
| NM_004972 | 7039.309  | 6739.433  | AK025276  | 11221.772 | 12958.324 | AB020664  | 1397.116  | 2724.544  |
| NM_006251 | 5820.465  | 5389.582  | AK026457  | 4401.881  | 5520.37   | NM_006640 | 20091.215 | 24596.588 |
| NM_004103 | 12598.103 | 11517.572 | AK026825  | 1937.396  | 1738.121  | NM_000860 | 746.334   | 420.58    |
| NM_002314 | 10143.167 | 10256.881 | NM_013355 | 2312.016  | 2667.505  | NM_000343 | 306.784   | 261.627   |
| NM_001744 | 2879.939  | 2919.44   | NM_003847 | 56411.125 | 48929.375 | NM_019112 | 4643.438  | 1625.224  |
| NM_006290 | 2958.364  | 3129.252  | AK021973  | 2163.338  | 2510.726  | NM_012330 | 5101.864  | 1714.918  |
| Z25433    | 2520.536  | 1867.415  | AL050165  | 70558.102 | 64355.957 | NM_020240 | 1687.722  | 865.413   |
| NM_005922 | 3317.314  | 3652.464  | AL117445  | 2711.002  | 3550.535  | NM_000084 | 2638.075  | 1265.229  |
| NM_018630 | 8920.687  | 7540.314  | AL122113  | 12309.247 | 17197.732 | NM_016354 | 1989.595  | 741.792   |
| AL137593  | 25232.213 | 21551.195 | AK024415  | 3434.364  | 3298.385  | AB040954  | 4614.632  | 1827.603  |
| NM_003915 | 3482.648  | 3112.189  | AK023515  | 1038.143  | 1164.125  | NM_002081 | 780.669   | 199.474   |
| NM_000382 | 3219.599  | 2682.682  | AL137623  | 50775.988 | 50305.129 | AB023139  | 6553.863  | 1985.749  |
| NM_016593 | 4113.146  | 6008.866  | AK026485  | 781.053   | 1016.291  | NM_017880 | 4096.297  | 1527.459  |
| NM_002521 | 2229.147  | 2793.259  | AJ227874  | 1803.575  | 3008.45   | D80004    | 498.818   | 498.395   |
| NM_001150 | 1955.788  | 1958.04   | AF009276  | 972.343   | 864.271   | NM_000940 | 3279.881  | 1253.446  |
| NM_002850 | 5601.22   | 7253.197  | AF056428  | 35567.355 | 30982.486 | NM_016070 | 2097.667  | 916.835   |
| NM_003225 | 1307.514  | 1679.944  | AF069136  | 484.443   | 681.289   | NM_016390 | 2262.916  | 1124.801  |
| NM_000090 | 1504.786  | 1650.421  | AK001995  | 502.918   | 913.513   | NM_016101 | 5168.597  | 1517.56   |
| AA418251  | 1157.619  | 1585.401  | AK021594  | 1257.42   | 4039.294  | NM_005850 | 38130.93  | 13710.903 |
| AA143087  | 15376.185 | 14964.376 | AK002150  | 574.168   | 852.527   | NM_020313 | 475.361   | 219.153   |
| BI870965  | 9640.926  | 9986.086  | AK021635  | 2040.659  | 2256.333  | NM_014620 | 2962.518  | 1465.317  |
| BI835536  | 11337.475 | 12813.134 | AK021856  | 3536.676  | 3249.042  | AK025630  | 1628.192  | 1307.039  |
| BF205051  | 6532.716  | 7216.842  | S97393    | 1046.927  | 1833.01   | AL365404  | 32601.234 | 17504.211 |
| X02761    | 7714.941  | 5829.699  | BE698533  | 753.115   | 1058.509  | AK022907  | 12232.848 | 5476.138  |
| M91463    | 1436.923  | 1115.859  | NM_017920 | 1984.359  | 1813.397  | NM_014793 | 1531.586  | 838.156   |
| U88317    | 763.73    | 668.83    | NM_018472 | 2216.468  | 2180.348  | NM_004240 | 4133.489  | 1318.591  |
| J03060    | 2521.529  | 2061.169  | AL133108  | 530.061   | 878.582   | NM_003241 | 2175.594  | 728.602   |
| X54156    | 774.716   | 673.15    | AF085923  | 525.06    | 790.671   | NM_002680 | 2915.042  | 986       |
| NM_003743 | 1683.403  | 1052.271  | AJ008128  | 57822.02  | 58628.379 | AK024504  | 1562.426  | 605.432   |
| AA829383  | 11377.668 | 9883.289  | AL449243  | 19792.033 | 19019.795 | AF039023  | 1416.085  | 1319.929  |
| AF012434  | 29360.967 | 24388.793 | M12211    | 10215.983 | 10702.75  | CY3Cy5    | 636.774   | 146.093   |
| NM_018124 | 12464.548 | 10649.057 | AF086338  | 864.022   | 893.417   | NM_145904 | 11803.94  | 2495.857  |
| NM_004887 | 10884.521 | 16558.674 | AK024303  | 1412.146  | 1310.605  | AK022063  | 3109.437  | 2221.147  |
| NM_006404 | 1105.106  | 1352.801  | AL160131  | 15656.908 | 12270.726 | AF086345  | 1979.398  | 2046.937  |
| NM_014790 | 1924.742  | 1974.724  | AF086045  | 3976.954  | 4223.63   | AL049278  | 653.485   | 660.924   |
| NM_002980 | 1388.468  | 1800.709  | AK027028  | 6375.522  | 9754.1    | AK001595  | 202.419   | 223.087   |
| M15330    | 1851.555  | 4015.655  | AK027069  | 2124.788  | 5988.439  | NM_003710 | 599.773   | 296.952   |
| NM_014390 | 3529.176  | 3806.564  | AK026916  | 3657.975  | 5117.936  | NM_145904 | 7676.103  | 4126.699  |
| AK027201  | 2789.406  | 4216.805  | AK026914  | 3847.781  | 4359.972  | SR2       | 16291.887 | 13016.369 |
| NM_000480 | 16404.74  | 20198.793 | Y13808    | 990.122   | 705.744   | SR4       | 4176.221  | 3115.27   |
| X98507    | 10415.973 | 9568.429  | Y11166    | 3415.477  | 3565.389  | SR6       | 482.664   | 388.404   |
| NM_016030 | 51155.543 | 68854.891 | AK024942  | 5547.601  | 7630.65   | SR8       | 1989.57   | 4895.229  |
| NM_014660 | 11853.287 | 13156.758 | AJ227873  | 19681.373 | 34282.785 | SR10      | 5323.599  | 1248.422  |
| NM_005652 | 27514.473 | 24851.801 | AK022886  | 4799.809  | 4236.719  | CY3Cy5    | 757.538   | 141.2     |
| AK026686  | 805.084   | 1163.839  | AK024665  | 6764.995  | 9074.716  | AF088016  | 3059.992  | 3860.639  |
| NM_005902 | 3964.481  | 3699.004  | AF147363  | 1078.629  | 1082.136  | AF086395  | 2932.674  | 422.266   |
| NM_002850 | 53982.012 | 70333.898 | AK000691  | 1715.522  | 2100.633  | AF086049  | 1438.585  | 961.626   |
| NM_004302 | 573.453   | 448.321   | AK001448  | 1852.117  | 1669.557  | AF088020  | 343.064   | 267.607   |
| NM_005903 | 2287.331  | 1654.351  | AK026890  | 1110.987  | 1208.729  | AF114263  | 379.539   | 624.987   |
| NM_000861 | 881.364   | 678.186   | AF131817  | 1065.856  | 1144.621  | AK026142  | 1655.9    | 1613.617  |
| U77493    | 1271.321  | 773.535   | AL049321  | 3275.725  | 3623.192  | AK021494  | 922.726   | 762.4     |
| NM_019062 | 1295.463  | 1152.75   | NM_003540 | 4326.053  | 4203.455  | AL360160  | 19101.104 | 11278.541 |

|           |           |           |           |           |           |           |           |           |
|-----------|-----------|-----------|-----------|-----------|-----------|-----------|-----------|-----------|
| NM_017583 | 13891.789 | 13681.556 | AK025750  | 2091.3    | 2135.062  | AK001092  | 39543.039 | 24883.707 |
| Y16132    | 20060.611 | 15041.992 | BF031253  | 2665.863  | 2678.263  | NM_014144 | 533.408   | 455.218   |
| NM_002905 | 6284.687  | 9544.559  | AK025783  | 3910.854  | 4116.446  | AF147373  | 1653.643  | 1328.579  |
| NM_000700 | 4030.945  | 5894.744  | AF113675  | 2113.375  | 3070.805  | AK021987  | 340.8     | 171.538   |
| NM_019025 | 20657.189 | 22609.145 | AK024514  | 1120.905  | 1928.97   | AK026905  | 532.676   | 310.334   |
| NM_000431 | 4489.363  | 4381.373  | NM_020119 | 3374.456  | 4763.015  | AF075108  | 354.443   | 349.599   |
| NM_013421 | 2533.343  | 3421.129  | AL049417  | 5257.937  | 5761.606  | AF075097  | 601.193   | 328.204   |
| NM_012474 | 7059.783  | 8695.657  | AK023507  | 1264.052  | 1354.514  | AL133075  | 1752.782  | 1119.542  |
| AB033118  | 2087.955  | 2414.169  | NM_005169 | 13962.402 | 11038.347 | AL137630  | 845.615   | 687.674   |
| NM_019605 | 5695.22   | 5774.18   | AL109818  | 676.546   | 693.828   | AL137277  | 3852.883  | 2313.534  |
| NM_001690 | 14604.915 | 11387.122 | NM_000065 | 5981.694  | 8888.689  | AK024457  | 2816.467  | 656.718   |
| AF034374  | 17521.174 | 21348.156 | AB033046  | 23985.48  | 52237.785 | AK026894  | 774.04    | 694.261   |
| NM_001682 | 4440.468  | 4603.318  | NM_015915 | 9557.088  | 8884.546  | AF161369  | 1170.518  | 1362.338  |
| AK025130  | 4551.481  | 6104.539  | AK023228  | 986.579   | 714.384   | AK027176  | 2046.105  | 1713.908  |
| AK023232  | 7007.752  | 7988.492  | NM_013249 | 659.42    | 1083.901  | AF073328  | 431.566   | 518.815   |
| NM_006380 | 2465.359  | 2265.467  | AL359063  | 912.436   | 913.707   | Y12019    | 166.368   | 118.706   |
| AB020710  | 2241.264  | 1878.635  | AL079292  | 3079.49   | 3647.031  | AK021898  | 1282.988  | 1393.785  |
| Z83801    | 396.914   | 423.3     | X89667    | 9720.284  | 10583.39  | AK022024  | 885.097   | 733.088   |
| NM_016174 | 7004.704  | 5743.961  | NM_014027 | 4053.744  | 3468.229  | AK022301  | 380.725   | 318.558   |
| NM_020377 | 1593.337  | 1213.56   | AF116621  | 9118.396  | 9165.569  | AK021948  | 666.966   | 593.433   |
| U88896    | 2776.173  | 2096.32   | AF086554  | 10193.417 | 10338.635 | AK022054  | 207.53    | 179.683   |
| AF116702  | 49997.988 | 39997.301 | AL390136  | 57461.43  | 49624.023 | AK023806  | 1025.466  | 235.72    |
| NM_005724 | 9517.43   | 7945.56   | AK023156  | 734.73    | 544.073   | Y16696    | 7129.929  | 6899.605  |
| X58794    | 2154.198  | 2691.88   | AF086398  | 66242.313 | 65611.43  | AF161344  | 4791.222  | 4391.665  |
| NM_001735 | 2999.247  | 2947.776  | AK024545  | 3656.174  | 4158.859  | AF086027  | 775.626   | 822.549   |
| NM_002345 | 1198.85   | 1070.775  | AK023444  | 2425.021  | 3891.163  | NM_001207 | 37043.535 | 29643.17  |
| NM_005080 | 12311.117 | 17155.873 | AK025953  | 1996.557  | 2158.38   | AF075075  | 371.551   | 255.767   |
| AF148505  | 3628.597  | 4807.086  | NM_003180 | 2457.202  | 2606.679  | NM_018304 | 1525.427  | 1499.443  |
| NM_018685 | 15499.468 | 20835.914 | AF086406  | 20918.514 | 16114.034 | AK023042  | 749.033   | 262.942   |
| NM_017675 | 2356.906  | 2921.621  | D17216    | 6834.865  | 6290.129  | AJ227909  | 9080.613  | 14806.759 |
| AK021764  | 1113.154  | 1542.962  | AL137581  | 2786.022  | 2369.671  | NM_014185 | 329.862   | 341.47    |
| NM_005431 | 4505.602  | 4160.626  | J05158    | 741.665   | 1323.293  | AK024752  | 15591.426 | 10763.232 |
| NM_002894 | 14391.877 | 14746     | NM_015564 | 2194.047  | 4697.214  | BG117194  | 412.984   | 371.641   |
| NM_004260 | 13416.813 | 14028.501 | AF160476  | 1615.005  | 1488.81   | AF131859  | 1673.342  | 1257.755  |
| AL050067  | 2038.37   | 2057.489  | L22650    | 2939.065  | 3528.631  | AF086118  | 3273.319  | 2543.187  |
| NM_004972 | 8542.992  | 8072.797  | AB014520  | 59879.867 | 61061.098 | NM_014135 | 422.455   | 543.846   |
| NM_006251 | 6472.102  | 7267.68   | NM_004907 | 7021.677  | 6803.424  | AK025044  | 1263.892  | 780.238   |
| NM_004103 | 11023.887 | 10855.118 | NM_002891 | 1033.679  | 889.361   | AK023690  | 210.636   | 226.248   |
| NM_002314 | 10419.231 | 10256.805 | NM_001775 | 3797.703  | 3970.052  | AB011106  | 744.327   | 187.264   |
| NM_001744 | 3061.668  | 3167.442  | X04526    | 28680.186 | 20088.598 | D26362    | 946.209   | 329.149   |
| NM_006295 | 2781.129  | 3023.592  | D26067    | 4196.489  | 3217.329  | NM_013452 | 1265.306  | 824.274   |
| Z25433    | 2575.253  | 2187.782  | AF227924  | 4608.552  | 4403.361  | NM_012443 | 405.136   | 425.306   |
| NM_005922 | 3302.591  | 3359.833  | NM_005715 | 50050.719 | 48547.008 | NM_002584 | 3824.529  | 4733.578  |
| NM_018635 | 8746.018  | 6065.123  | NM_006183 | 4623.723  | 4919.127  | NM_003524 | 628.537   | 381.319   |
| AL137593  | 25670.355 | 21464.4   | NM_016087 | 646.218   | 588.862   | NM_005913 | 476.892   | 508.379   |
| NM_003915 | 3456.85   | 2753.793  | S59184    | 2502.716  | 1614.428  | S39891    | 973.527   | 726.91    |
| NM_000382 | 3272.24   | 2884.06   | NM_005130 | 1060.697  | 974.159   | R17536    | 362.868   | 412.518   |
| AL133064  | 5364.077  | 4682.129  | NM_006661 | 9600.197  | 9569.039  | AK021624  | 261.166   | 186.958   |
| NM_006227 | 7321.391  | 6093.983  | M54886    | 739.525   | 787.865   | AF278605  | 3501.432  | 3158.532  |
| NM_001150 | 2047.031  | 2512.898  | NM_005745 | 24723.271 | 21901.338 | NM_006497 | 21181.516 | 18852.822 |
| NM_002855 | 5809.656  | 6679.562  | NM_004585 | 2221.155  | 2441.303  | AK022329  | 252.446   | 270.112   |
| NM_003225 | 1358.848  | 1946.368  | U16126    | 3518.919  | 2891.536  | AL133599  | 421.244   | 819.337   |
| NM_000095 | 1521.618  | 2348.396  | NM_002172 | 56791.469 | 54373.035 | AF196976  | 3862.211  | 579.765   |

|           |           |           |           |           |           |           |           |           |
|-----------|-----------|-----------|-----------|-----------|-----------|-----------|-----------|-----------|
| AA418251  | 1016.784  | 1422.986  | AJ008144  | 2288.176  | 3209.475  | AL050379  | 1336.189  | 913.047   |
| AA143087  | 16367.801 | 15260.688 | NM_007314 | 10962.713 | 14540.281 | NM_003161 | 245.155   | 197.982   |
| NM_001903 | 677.584   | 273.341   | NM_016073 | 1428.026  | 1279.489  | NM_014496 | 547.704   | 502.423   |
| BI835536  | 11923.147 | 13485.581 | NM_006600 | 24088.055 | 25100.441 | NM_016215 | 14132.567 | 12498.357 |
| BF205051  | 7211.974  | 7499.682  | AF297709  | 7085.019  | 7543.603  | AK026919  | 339.896   | 371.429   |
| X02761    | 11669.056 | 11629.382 | L77564    | 1914.695  | 3081.104  | NM_001501 | 3447.679  | 3528.653  |
| M91463    | 1835.374  | 1529.27   | NM_015384 | 3511.936  | 3351.098  | NM_006176 | 22184.336 | 17998.779 |
| U88317    | 856.217   | 849.55    | AK023327  | 6945.691  | 6329.201  | AL137459  | 837.558   | 962.973   |
| J03060    | 2674.53   | 1962.794  | AB046858  | 2245.609  | 1520.259  | AB007932  | 714.623   | 1151.253  |
| X54156    | 764.955   | 625.213   | D50914    | 9945.188  | 5577.435  | AF219257  | 18842.359 | 16766.324 |
| NM_003743 | 1850.408  | 1137.081  | BE878692  | 616.93    | 572.171   | NM_003978 | 419.452   | 304.746   |
| AA829383  | 11467.855 | 10766.264 | NM_002007 | 1101.526  | 892.579   | NM_002561 | 12838.402 | 10795.197 |
| AF012434  | 29629.965 | 21222.762 | NM_002305 | 17870.086 | 15365.574 | NM_006103 | 29315.369 | 18478.512 |
| NM_018124 | 12951.615 | 10281.634 | AK025439  | 6306.668  | 5580.229  | NM_000805 | 316.644   | 273.358   |
| Z70701    | 15541.739 | 11159.935 | NM_001737 | 11824.401 | 10172.849 | AL359933  | 10705.602 | 9384.911  |
| AB040972  | 3984.521  | 3375.735  | Z36784    | 1545.132  | 969.951   | NM_001302 | 580.883   | 438.915   |
| X98507    | 11647.412 | 16144.796 | NM_016626 | 13137.953 | 13646.138 | M17783    | 3796.1    | 3295.8    |
| NM_014669 | 13135.737 | 16387.766 | NM_007213 | 1353.475  | 1329.074  | NM_018590 | 1832.69   | 1987.284  |
| NM_005652 | 34786.469 | 34951.98  | NM_019064 | 2701.292  | 2240.767  | NM_003178 | 1197.557  | 1431.032  |
| AK026686  | 805.487   | 1032.752  | NM_000094 | 36243.977 | 30290.426 | NM_012437 | 3163.91   | 3750.532  |
| NM_005902 | 4485.732  | 6034.816  | AK024732  | 12180.001 | 10960.023 | NM_018189 | 842.839   | 124.5     |
| NM_005302 | 927.568   | 390.09    | NM_016302 | 2436.691  | 2908.915  | AF116712  | 374.619   | 272.516   |
| NM_004302 | 1022.291  | 926.249   | NM_004159 | 29682.949 | 36035.473 | AF116626  | 652.839   | 334.831   |
| NM_005903 | 2518.767  | 2233.802  | NM_003249 | 9211.013  | 8928.146  | NM_001760 | 8950.062  | 7878.329  |
| NM_000861 | 1200.766  | 1038.811  | M21897    | 2032.64   | 2756.079  | NM_002527 | 796.296   | 694.92    |
| AB037734  | 525.995   | 527.788   | AF301463  | 1715.851  | 2821.087  | NM_005890 | 685.955   | 540.556   |
| U77493    | 1172.475  | 861.051   | NM_015984 | 8195.11   | 11575.96  | NM_007065 | 22751.059 | 13626.46  |
| NM_019062 | 1385.488  | 1175.545  | NM_006894 | 6211.275  | 5188.248  | AF149785  | 3940.749  | 3542.846  |
| NM_003873 | 880.205   | 971.265   | AK023031  | 4661.554  | 4872.556  | NM_012068 | 6544.949  | 8818.916  |
| NM_014253 | 648.572   | 1009.677  | NM_005717 | 64311.621 | 58987.855 | NM_004064 | 4355.454  | 4227.294  |
| NM_000263 | 3091.74   | 2821.85   | NM_012090 | 4503.732  | 4089.051  | NM_014704 | 1449.095  | 1170.026  |
| AF073519  | 12937.764 | 8201.598  | BE793385  | 1365.831  | 2378.283  | NM_020205 | 298.886   | 215.516   |
| AB001451  | 894.164   | 1030.73   | AF177292  | 1307.791  | 1114.171  | NM_001227 | 639.757   | 567.492   |
| NM_017583 | 14635.832 | 14104.725 | NM_003088 | 10694.825 | 10848.511 | NM_001191 | 9301.5    | 8215.83   |
| Y16132    | 24385.957 | 19770.295 | AF043290  | 2004.949  | 1638.325  | U15174    | 333.628   | 286.518   |
| NM_016593 | 3846.174  | 4161.053  | NM_004082 | 5933.914  | 5407.518  | NM_013342 | 1171.477  | 1164.305  |
| NM_002521 | 2125.998  | 1707.829  | NM_014398 | 17376.135 | 15456.738 | NM_014344 | 508.427   | 406.292   |
| NM_000271 | 17083     | 21451.354 | NM_005934 | 56356.063 | 60073.426 | AL110261  | 10658.686 | 10280.144 |
| NM_006184 | 14165.644 | 18775.322 | NM_002614 | 2492.052  | 2514.161  | AA203539  | 367.549   | 601.549   |
| AB018268  | 11713.54  | 14801.027 | NM_005655 | 8643.72   | 7874.176  | AK021786  | 945.852   | 1586.778  |
| NM_019045 | 621.791   | 674.55    | NM_002698 | 6163.837  | 5686.192  | AF245505  | 1392.743  | 2757.258  |
| NM_006380 | 2629.903  | 2818.884  | NM_002148 | 1747.891  | 1532.46   | NM_004279 | 2386.73   | 809.793   |
| AB020710  | 2584.832  | 2800.558  | AL137449  | 2846.675  | 6113.121  | NM_004851 | 4217.125  | 2267.591  |
| Z83801    | 391.791   | 357.913   | U88153    | 7608.344  | 15030.872 | NM_001908 | 3172.778  | 2011.513  |
| NM_016174 | 7567.963  | 6220.007  | X03910    | 28399.205 | 43028.336 | NM_000285 | 6463.87   | 4414.451  |
| NM_020377 | 1468.782  | 1675.19   | NM_018428 | 33109.078 | 32587.396 | NM_005911 | 30462.361 | 23792.527 |
| U88896    | 2455.682  | 3194.053  | NM_005058 | 512.543   | 706.877   | AV702690  | 962.836   | 808.379   |
| NM_005724 | 10190.851 | 11082.251 | NM_006924 | 35082.402 | 34965.25  | AL117452  | 5803.819  | 5671.936  |
| X58794    | 2183.616  | 2307.573  | NM_016024 | 7572.878  | 5497.134  | NM_012230 | 617.767   | 707.724   |
| NM_001735 | 2978.005  | 2913.853  | NM_018107 | 5669.117  | 5661.36   | NM_014038 | 4849.432  | 4448.496  |
| NM_002349 | 1256.609  | 1196.973  | NM_012279 | 1733.66   | 1554.714  | NM_002061 | 502.235   | 2544.959  |
| NM_005080 | 14892.473 | 16832.545 | NM_018387 | 29999.516 | 25811.246 | AF169974  | 874.927   | 991.274   |
| NM_004887 | 10899.402 | 10321.512 | BF310673  | 4735.833  | 3585.02   | NM_004522 | 475.967   | 424.214   |



|           |           |           |           |           |           |           |           |           |
|-----------|-----------|-----------|-----------|-----------|-----------|-----------|-----------|-----------|
| NM_006404 | 1097.026  | 697.332   | R97012    | 63955.828 | 59656.645 | NM_005733 | 942.436   | 587.582   |
| NM_014795 | 1941.802  | 1190.768  | U77700    | 16265.921 | 13339.127 | NM_018133 | 1927.727  | 2147.163  |
| NM_002986 | 1327.37   | 921.764   | NM_006567 | 14757.429 | 11707.432 | NM_019613 | 1915.539  | 1731.316  |
| M15330    | 2036.125  | 3231.525  | AF038554  | 39545.207 | 33943.414 | AF183411  | 1425.903  | 1252.025  |
| NM_014396 | 3387.92   | 2625.48   | AF264621  | 20461.174 | 17773.434 | BF244591  | 574.101   | 499.751   |
| AK027201  | 3179.743  | 2930.252  | NM_005875 | 31477.066 | 27541.334 | NM_005886 | 6000.706  | 8571.295  |
| NM_000489 | 16418.559 | 15613.688 | NM_004184 | 29035.207 | 28255.607 | U63785    | 661.471   | 1160.025  |
| AL137593  | 31414.459 | 32368.643 | NM_000439 | 1946.478  | 2063.906  | NM_005966 | 1109.522  | 1203.544  |
| NM_003915 | 3680.569  | 3585.903  | AJ295148  | 1620.532  | 1815.438  | NM_003156 | 2226.719  | 3637.877  |
| NM_000382 | 3096.741  | 4234.464  | AF176701  | 860.137   | 880.359   | NM_006473 | 362.658   | 164.178   |
| AL133064  | 6054.021  | 7452.498  | NM_000456 | 6226.432  | 6745.991  | NM_005653 | 1023.539  | 423.255   |
| NM_006227 | 7183.466  | 8888.468  | NM_002496 | 41986.922 | 46239.227 | NM_014553 | 1926.359  | 1135.249  |
| NM_002905 | 6229.187  | 6420.268  | NM_016243 | 7007.795  | 10149.159 | NM_003440 | 918.634   | 551.744   |
| NM_000700 | 3880.127  | 6352.203  | X53943    | 1454.229  | 3623.867  | NM_004696 | 2695.664  | 2661.673  |
| NM_019028 | 19353.82  | 22766.725 | NM_014402 | 61197.625 | 65315.992 | U41387    | 23521.842 | 14578.456 |
| NM_000431 | 4095.844  | 2910.263  | NM_004649 | 21239.08  | 29562.916 | NM_004516 | 5790.019  | 4532.736  |
| NM_013421 | 2332.158  | 2626.273  | NM_006540 | 9291.004  | 6160.311  | NM_006513 | 751.948   | 507.373   |
| NM_012474 | 7119.999  | 8548.816  | NM_017766 | 3417.87   | 3557.854  | NM_003685 | 5691.343  | 3950.042  |
| NM_019606 | 5947.463  | 5196.721  | NM_002811 | 14472.416 | 9110.725  | NM_002486 | 173.25    | 144.046   |
| NM_001690 | 13903.718 | 11466.221 | NM_020310 | 4840.166  | 4368.349  | NM_006295 | 4675.206  | 3549.341  |
| AF034374  | 16965.129 | 16492.324 | AK024444  | 905.399   | 836.853   | NM_001540 | 2674.818  | 2441.672  |
| NM_016118 | 9733.072  | 7141.041  | NM_005802 | 6481.843  | 5192.167  | NM_012111 | 10700.273 | 9980.324  |
| NM_018674 | 14637.466 | 14841.626 | AB002331  | 4833.504  | 3623.999  | NM_004470 | 13951.056 | 12567.188 |
| NM_001683 | 21280.693 | 15748.165 | NM_002504 | 6537.951  | 6230.275  | NM_001418 | 5608.831  | 5733.259  |
| NM_001682 | 4511.354  | 3632.125  | AB046775  | 6998.615  | 5222.005  | NM_003756 | 31548.33  | 23201.131 |
| NM_014405 | 3283.525  | 2167.182  | X74862    | 3284.248  | 2514.112  | AL049680  | 2537.474  | 2906.717  |
| NM_000816 | 902.799   | 1017.556  | X65663    | 18449.148 | 13376.854 | AL133660  | 1496.419  | 3958.943  |
| NM_014928 | 1705.715  | 1470.742  | NM_003185 | 4008.71   | 3722.332  | NM_005932 | 575.974   | 823.495   |
| AK025130  | 4805.882  | 5781.078  | NM_004456 | 11467.082 | 10413.81  | BF036874  | 1355.564  | 168.595   |
| NM_017875 | 2257.338  | 2476.881  | NM_004284 | 15959.333 | 14493.022 | BE888487  | 554.403   | 33.784    |
| AK023232  | 7563.687  | 7143.201  | NM_007129 | 14030.548 | 13860.873 | AF182419  | 1043.839  | 664.967   |
| NM_018124 | 12439.062 | 14186.942 | AY004253  | 22198.844 | 27796.881 | NM_007016 | 1750.493  | 1691.515  |
| Z70701    | 17274.434 | 19060.34  | Z46967    | 1516.922  | 1621.595  | NM_002703 | 4844.781  | 5104.415  |
| AB040972  | 5166.732  | 6234.234  | NM_017583 | 19176.604 | 26623.443 | NM_005375 | 1135.5    | 848.407   |
| AF148505  | 3711.856  | 3944.05   | Y16132    | 50937.031 | 51830.344 | NM_005985 | 12667.663 | 12662.854 |
| NM_018686 | 15740.354 | 19760.9   | NM_016593 | 4269.95   | 5726.896  | NM_015906 | 758.064   | 697.738   |
| NM_017676 | 2240.749  | 2032.2    | NM_002521 | 4004.236  | 7498.807  | AK023759  | 1710.391  | 1674.415  |
| AK021764  | 1144.8    | 1461.933  | NM_001150 | 6216.136  | 10951.167 | L25270    | 25012.756 | 17585.34  |
| NM_005431 | 4409.549  | 4196.757  | NM_002856 | 16470.596 | 25935.947 | AB033111  | 786.046   | 429.286   |
| NM_002894 | 14050.001 | 12068.228 | NM_003225 | 1512.455  | 2670.204  | AJ276316  | 1150.729  | 1371.064  |
| NM_004629 | 4679.936  | 5016.982  | NM_000096 | 1744.965  | 1385.274  | AF229246  | 18555.418 | 14061.037 |
| NM_004260 | 12771.751 | 10783.938 | AA418251  | 991.8     | 1368.222  | S64709    | 2325.505  | 2016.635  |
| AL050067  | 1734.583  | 1451.066  | AA143087  | 33253.379 | 28989.781 | NM_018486 | 1788.376  | 1567.681  |
| NM_004972 | 8115.336  | 7377.101  | BI870965  | 22746.729 | 21870.584 | X56465    | 717.201   | 658.341   |
| NM_006251 | 6630.23   | 4997.281  | BI835536  | 15258.093 | 14359.306 | NM_003071 | 9348.797  | 12488.073 |
| NM_004103 | 11733.634 | 9673.978  | BF205051  | 11755.886 | 12451.88  | NM_003108 | 333.452   | 491.448   |
| NM_002314 | 10758.934 | 9121.346  | X02761    | 38936.594 | 34101.668 | NM_005762 | 4298.375  | 11018.868 |
| NM_001744 | 2749.192  | 2555.176  | M91463    | 3213.187  | 2168.366  | X84370    | 4474.903  | 588.082   |
| NM_006296 | 3177.377  | 3006.168  | U88317    | 1029.504  | 905.829   | NM_004036 | 376.109   | 186.121   |
| Z25433    | 2604.514  | 2242.766  | J03060    | 4663.074  | 4101.078  | AB014558  | 559.057   | 665.512   |
| NM_005922 | 4804.324  | 4357.462  | X54156    | 1016.677  | 1166.425  | NM_006287 | 642.244   | 647.17    |
| NM_018638 | 8189.758  | 6439.208  | NM_003743 | 3421.223  | 3391.668  | NM_000118 | 3343.146  | 2979.896  |
| CY3Cy5    | 5702.618  | 243.7     | AA829383  | 15069.781 | 16368.172 | NM_000913 | 516.914   | 551.381   |

|           |           |           |           |           |           |           |           |           |
|-----------|-----------|-----------|-----------|-----------|-----------|-----------|-----------|-----------|
| NM_003942 | 565.866   | 622.309   | AF012434  | 44144.582 | 38785.902 | NM_001296 | 23443.076 | 19924.92  |
| NM_004452 | 1417.239  | 1734.723  | AF131748  | 8297.372  | 7939.125  | BG325046  | 2414.48   | 2304.334  |
| AK022632  | 1122.838  | 1580.638  | NM_002349 | 2714.54   | 3609.475  | AI351740  | 12262.413 | 12431.964 |
| AK021554  | 1591.329  | 1527.954  | NM_005080 | 21238.256 | 33788.855 | AA444051  | 3789.332  | 3832.368  |
| NM_020235 | 3586.723  | 4263.801  | NM_004887 | 13246.007 | 16154.206 | NM_007164 | 6918.552  | 5699.919  |
| AK000532  | 855.062   | 798.614   | NM_006404 | 1756.822  | 2561.667  | BE783826  | 33807.145 | 35546.453 |
| BU165106  | 1452.085  | 1340.298  | NM_014795 | 2117.244  | 2841.476  | X04827    | 1380.355  | 1195.079  |
| AF038202  | 1054.329  | 1101.421  | NM_002986 | 2422.601  | 3823.874  | H07088    | 2174.466  | 1808.708  |
| AB040925  | 1135.205  | 917.8     | M15330    | 2701.015  | 5383.631  | AI004656  | 1535.288  | 1188.755  |
| NM_003942 | 1504.387  | 2237.078  | NM_014396 | 6026.104  | 6321.751  | BC008428  | 792.857   | 3366.816  |
| NM_004452 | 1171.651  | 1943.165  | AK027201  | 3469.095  | 3580.377  | BC020596  | 962.946   | 1616.388  |
| SR5       | 2853.917  | 3789.754  | NM_000489 | 46560.082 | 48060.461 | AF116606  | 37714.887 | 38643.957 |
| SR7       | 4376.717  | 32351.588 | X98507    | 14813.039 | 13079.926 | X98922    | 3117.192  | 5235.729  |
| SR9       | 11466.688 | 1701.477  | NM_016030 | 66300.477 | 69261.305 | AK098435  | 3522.499  | 5352.63   |
| CY3Cy5    | 4852.644  | 221.264   | NM_014669 | 15767.866 | 19176.793 | AK092872  | 2392.132  | 4904.925  |
| AF018254  | 690.256   | 1122.319  | NM_005652 | 47273.242 | 45079.352 | M94065    | 1474.723  | 5431.062  |
| K00627    | 1272.097  | 1433.039  | AK026686  | 991.406   | 1189.551  | NM_006066 | 834.921   | 139.165   |
| NM_016240 | 1622.915  | 1925.384  | NM_005902 | 5982.644  | 5963.893  | U16752    | 402.018   | 287.953   |
| AK026459  | 614.919   | 842.208   | NM_002850 | 60901.789 | 64686.188 | M30134    | 339.592   | 577.95    |
| AL049390  | 2030.745  | 2096.678  | NM_005302 | 581.285   | 608.11    | NM_002036 | 5015.833  | 3885.099  |
| AK000584  | 3379.496  | 4204.271  | NM_004302 | 1263.621  | 1262.341  | NM_005729 | 11411.203 | 11422.757 |
| AJ297363  | 649.68    | 760.114   | NM_005903 | 3645.157  | 3539.596  | NM_015493 | 750.423   | 984.181   |
| AK026379  | 1298.173  | 1696.935  | NM_000861 | 3398.111  | 3233.608  | AB037744  | 808.571   | 789.306   |
| AF075002  | 331.423   | 580.228   | NM_000024 | 486.072   | 723.448   | L29143    | 1614.06   | 1151.138  |
| AK022965  | 1165.881  | 2042.765  | U77493    | 2348.582  | 2002.851  | AF234532  | 1289.382  | 1424.54   |
| AK024278  | 3842.814  | 5095.742  | NM_019062 | 2591.928  | 2784.257  | NM_002416 | 807.583   | 967.645   |
| NM_018022 | 1341.005  | 1382.57   | AL133064  | 7356.929  | 8572.362  | NM_002090 | 441.509   | 498.943   |
| AK023198  | 4284.993  | 4293.629  | NM_006227 | 10900.94  | 13983.787 | NM_004485 | 374.488   | 504.979   |
| NM_012066 | 11728.305 | 11142.774 | NM_002905 | 9935.588  | 10303.059 | NM_013296 | 6355.401  | 8753.578  |
| AF052168  | 10920.893 | 7355.761  | NM_000700 | 6640.692  | 8291.997  | AL117478  | 1376.905  | 1785.863  |
| AK024864  | 503.37    | 427.915   | NM_019026 | 43848.645 | 51153.102 | NM_005307 | 3754.122  | 7271.066  |
| AK024947  | 5157.494  | 6102.598  | NM_000431 | 3908.41   | 5883.367  | NM_005206 | 9228.193  | 36565.098 |
| AK095125  | 529.198   | 603.333   | NM_013421 | 6856.203  | 10107.835 | AF099740  | 349.507   | 169.116   |
| AK024059  | 945.566   | 1120.125  | NM_012474 | 9002.375  | 11012.004 | NM_006117 | 3887.96   | 1705.677  |
| AB007928  | 1153.608  | 1501.53   | AB033118  | 1895.618  | 1012.77   | NM_002225 | 673.242   | 710.38    |
| AK023645  | 1525.829  | 1714.658  | NM_019606 | 6772.586  | 5431.075  | NM_006226 | 317.747   | 487.312   |
| D83543    | 653.606   | 645.746   | NM_001690 | 15252.399 | 8599.913  | NM_015415 | 17077.051 | 13991.987 |
| NM_016930 | 2092.339  | 3434.864  | AF034374  | 34249.281 | 34402.531 | NM_004897 | 1852.032  | 1956.582  |
| AF070575  | 1588.659  | 2995.817  | NM_001682 | 5773.5    | 5639.907  | NM_002555 | 643.107   | 764.447   |
| AJ001861  | 3456.453  | 7766.949  | AK025130  | 6333.724  | 6500.832  | AF225418  | 496.74    | 651.567   |
| AJ227865  | 603.174   | 639.82    | AK023232  | 18875.025 | 20996.279 | NM_000309 | 667.324   | 873.669   |
| NM_005186 | 365.019   | 324.438   | NM_006380 | 3330.484  | 3268.249  | NM_004526 | 7488.998  | 7778.644  |
| X64981    | 1263.819  | 1936.316  | AB020710  | 3465.724  | 2813.695  | AK026381  | 6455.778  | 5878.697  |
| X75692    | 5149.401  | 4106.5    | NM_016174 | 19784.393 | 16502.693 | AK023107  | 3845.323  | 3578.872  |
| X64988    | 607.12    | 489.643   | NM_020377 | 3166.067  | 2551.675  | NM_000647 | 1454.038  | 3175.288  |
| Y10511    | 17121.854 | 13020.683 | U88896    | 4031.344  | 4988.669  | AB046793  | 1695.645  | 402.61    |
| AK021832  | 665.028   | 549.797   | AF116702  | 62794.391 | 64571.309 | NM_017604 | 1878.122  | 2104.27   |
| AK021505  | 4553.734  | 6717.327  | NM_005724 | 14087.872 | 11902.83  | NM_017736 | 8305.796  | 12260.481 |
| AK021598  | 3418.542  | 3269.725  | X58794    | 4379.515  | 5511.058  | NM_016557 | 1185.76   | 1956.466  |
| AK026416  | 13384.6   | 14051.125 | NM_001735 | 4609.384  | 5840.341  | NM_000623 | 1682.637  | 2877.92   |
| AK025797  | 1415.468  | 1219.333  | Z70701    | 26343.668 | 25319.945 | AF161348  | 1111.104  | 4036.977  |
| AK000853  | 548.179   | 334.958   | AB040972  | 10234.574 | 13222.901 | NM_018467 | 14058.593 | 30509.236 |
| AK000085  | 495.929   | 520.567   | AF148505  | 4732.451  | 5183.393  | AF150735  | 4843.899  | 3551.654  |

|           |           |           |           |           |           |           |           |           |
|-----------|-----------|-----------|-----------|-----------|-----------|-----------|-----------|-----------|
| AK000019  | 987.239   | 792.044   | NM_018686 | 25081.924 | 53466     | NM_018183 | 741.424   | 593.455   |
| AK000645  | 711.798   | 581.291   | NM_017676 | 2955.128  | 5108.116  | NM_012382 | 1193.003  | 1100.427  |
| AK000893  | 419.544   | 261.682   | AK021764  | 1264.95   | 1856.35   | BF038366  | 404.806   | 708.179   |
| AK024156  | 890.437   | 1118.681  | NM_005431 | 7125.881  | 7331.834  | NM_002452 | 4803.733  | 4853.625  |
| AF086288  | 1208.439  | 1231.043  | NM_002894 | 14278.414 | 11018.434 | NM_012304 | 2056.771  | 722.094   |
| NM_016944 | 500.48    | 798.665   | NM_004260 | 23851.301 | 23008.115 | NM_016440 | 11285.967 | 7266.446  |
| AK023109  | 1620.821  | 1650.979  | AL050067  | 4610.167  | 4160.015  | NM_000314 | 4596.594  | 2857.145  |
| NM_005293 | 14172.402 | 14616.156 | NM_004972 | 21548.771 | 20907.902 | AB002369  | 495.631   | 250.267   |
| S50185    | 771.066   | 742.091   | NM_006251 | 8558.803  | 7417.035  | S74620    | 408.153   | 388.565   |
| AF133332  | 4311.327  | 3786.774  | NM_004103 | 33624.637 | 29121.242 | AF305239  | 1090.336  | 966.012   |
| AK022805  | 1115.755  | 930.321   | NM_002314 | 12658.352 | 14427.574 | NM_002827 | 10170.548 | 9946.502  |
| NM_017503 | 543.193   | 474.969   | NM_001744 | 3746.125  | 3418.561  | NM_001946 | 357.853   | 334.943   |
| AK024606  | 2564.573  | 2770.78   | NM_006296 | 4001.518  | 4349.851  | BF035425  | 40461.164 | 73567.625 |
| NM_016417 | 18219.889 | 23567.373 | Z25433    | 4360.994  | 3777.87   | NM_000150 | 48673.992 | 90875.477 |
| NM_019108 | 892.386   | 945.664   | NM_005922 | 5331.463  | 5537.705  | NM_014638 | 765.132   | 1176.761  |
| L10147    | 18112.041 | 18264.309 | NM_018638 | 18517.117 | 20248.969 | NM_000508 | 202.756   | 91.88     |
| AL080118  | 4659.544  | 4992.833  | AL137593  | 49255.684 | 46509.289 | AB014558  | 630.49    | 296.209   |
| AL049378  | 3459.254  | 3019.557  | NM_003915 | 5321.902  | 4676.247  | NM_006287 | 711.825   | 569.379   |
| L09086    | 2333.541  | 1958.404  | NM_000382 | 3885.703  | 4207.288  | NM_000118 | 2841.983  | 2790.205  |
| L37702    | 20082.934 | 20408.752 | NM_016593 | 4265.305  | 5800.992  | NM_000913 | 1152.719  | 1170.83   |
| AK022812  | 739.785   | 539.28    | NM_002521 | 3822.729  | 4116.193  | NM_001298 | 32633.912 | 24905.428 |
| AF238318  | 576.584   | 383.561   | NM_001150 | 6278.863  | 5265.99   | BG325046  | 3017.023  | 3374.938  |
| U79301    | 6621.57   | 6501.38   | NM_002856 | 15762.164 | 17416.564 | AI351740  | 11946.021 | 12443.445 |
| AK022260  | 6402.109  | 5447.521  | NM_003225 | 1495.781  | 3374.683  | AA444051  | 4560.479  | 3459.053  |
| M32219    | 10660.803 | 11360.627 | NM_000096 | 1747.107  | 2667.073  | NM_007164 | 10704.533 | 10280.677 |
| BC018868  | 1363.352  | 1271.093  | AA418251  | 1367.936  | 2061.416  | BE783826  | 33500.156 | 33794.316 |
| AF086174  | 531.172   | 496.774   | AA143087  | 33391.219 | 32502.814 | X04827    | 825.065   | 529.389   |
| AF007128  | 6991.049  | 8215.294  | BI870965  | 22603.785 | 17376.67  | H07088    | 1487.251  | 970.071   |
| AJ012498  | 1080.519  | 940.564   | BI835536  | 14409.369 | 12774.352 | AI004656  | 835.422   | 613.06    |
| NM_005973 | 17413.623 | 15974.954 | BF205051  | 10299.737 | 9964.25   | BC020596  | 933.63    | 573.561   |
| X04547    | 2616.806  | 3137.526  | X02761    | 31550.029 | 26852.314 | AF116606  | 35598.07  | 35733.043 |
| AK025823  | 1902.448  | 2357.554  | M91463    | 3328.815  | 2587.59   | X98922    | 2990.979  | 3878.613  |
| AK026691  | 860.306   | 838.234   | U88317    | 1123.589  | 905.012   | AK098435  | 3430.723  | 3587.379  |
| AL359941  | 2844.732  | 2406.991  | J03060    | 4751.584  | 3762.25   | AK092872  | 2449.427  | 2653.515  |
| U52076    | 787.351   | 765.134   | X54156    | 1083.2    | 915.149   | AF230496  | 736.846   | 660.296   |
| AF035278  | 1596.556  | 1612.882  | NM_003743 | 3215.875  | 2063.289  | M16801    | 417.063   | 392.472   |
| AF086493  | 1746.31   | 1498.568  | AA829383  | 14579.395 | 13795.327 | NM_013334 | 10224.846 | 8328.843  |
| AL050202  | 1200.766  | 1072.987  | AF012434  | 42963.176 | 45863.238 | U16752    | 393.796   | 146.233   |
| U32999    | 14678.622 | 11365.692 | NM_018124 | 16156.827 | 18681.619 | M30134    | 215.448   | 196.337   |
| U66052    | 4552.743  | 3695.404  | NM_004887 | 13795.514 | 15713.37  | NM_002038 | 7683.966  | 7598.111  |
| NM_000857 | 1881.517  | 1730.87   | NM_006404 | 1972.392  | 2115.162  | NM_005729 | 11509.671 | 9200.239  |
| L20688    | 49527.316 | 41533.727 | NM_014795 | 2353.92   | 2014.162  | NM_015493 | 740.03    | 802.649   |
| X69111    | 21980.998 | 22553.736 | NM_002986 | 2288.265  | 3333.69   | NM_003747 | 460.403   | 613.589   |
| AF252283  | 683.636   | 789.346   | M15330    | 2624.008  | 5072.174  | AB037744  | 1040.366  | 883.584   |
| AB037799  | 4991.673  | 4672.663  | NM_014396 | 7191.858  | 8197.438  | L29143    | 901.003   | 612.538   |
| AB007950  | 12653.333 | 9131.904  | AK027201  | 4134.369  | 5094.529  | AF234532  | 907.86    | 710.019   |
| AK025593  | 1843.443  | 1936.42   | NM_000489 | 47846.551 | 54272.773 | NM_002418 | 300.806   | 290.59    |
| AB018304  | 1637.472  | 1337.989  | X98507    | 15654.97  | 17122.111 | NM_004485 | 375.625   | 359.875   |
| NM_007061 | 11338.662 | 11001.184 | NM_016030 | 60188.359 | 65788.82  | NM_013296 | 5851.717  | 5919.055  |
| NM_001088 | 17065.967 | 18153.508 | NM_014669 | 14690.735 | 12026.197 | AL117478  | 969.467   | 1037.272  |
| BC015991  | 5406.556  | 5222.364  | NM_005652 | 47587.477 | 48113.531 | NM_005307 | 2873.073  | 2443.296  |
| U94902    | 683.445   | 683.605   | AK026686  | 848.349   | 1215.636  | NM_005958 | 959.568   | 926.436   |
| U46214    | 5542.801  | 6031.008  | NM_005902 | 6072.153  | 6050.631  | AF225426  | 484.9     | 683.909   |

|           |           |           |           |           |           |           |           |           |
|-----------|-----------|-----------|-----------|-----------|-----------|-----------|-----------|-----------|
| NM_00031C | 14577.404 | 16726.428 | NM_00285C | 63206.133 | 69498.641 | NM_00520E | 7119.479  | 6869.255  |
| AF161343  | 5589.854  | 6481.241  | NM_00530E | 538.107   | 568.237   | X84370    | 6253.395  | 5580.07   |
| NM_00476E | 2365.026  | 3099.684  | NM_00430E | 1081.405  | 1115.9    | NM_00403E | 637.156   | 685.48    |
| AF009307  | 1548.438  | 1415.483  | NM_00590E | 3232.109  | 2218.867  | NM_00222E | 611.068   | 185.709   |
| AK022246  | 1833.215  | 2074.087  | NM_00086I | 3332.174  | 3512.745  | NM_00622E | 189.776   | 228.865   |
| X75684    | 1800.401  | 1820.235  | NM_000024 | 609.902   | 2104.668  | NM_01541E | 16260.01  | 12372     |
| D17200    | 431.423   | 429.693   | U77493    | 2729.835  | 2065.583  | NM_004897 | 1370.738  | 1234.464  |
| AF113701  | 18404.395 | 18201.361 | NM_01906E | 2958.948  | 2767.111  | NM_00255E | 721.544   | 658.736   |
| NM_01471E | 4706.083  | 4911.472  | NM_01758E | 19495.184 | 30092.629 | AF225418  | 653.847   | 697.624   |
| AB028953  | 470.528   | 463.159   | Y16132    | 48777.625 | 53270.605 | NM_00030E | 879.391   | 1113.603  |
| NM_00063E | 1984.494  | 2111.99   | NM_00290E | 11239.615 | 11561.171 | NM_00452E | 8338.11   | 8887.105  |
| AB002298  | 1412.46   | 1562.047  | NM_00070C | 6988.349  | 7657.409  | AK026381  | 6370.957  | 5935.322  |
| AK024488  | 1419.825  | 1285.138  | NM_01902E | 40897.727 | 35470.125 | AK023107  | 1282.17   | 996.69    |
| AK023249  | 48921.699 | 39872.281 | NM_00043I | 4484.411  | 3812.74   | NM_017604 | 1574.917  | 1532.619  |
| NM_00736C | 913.338   | 728.473   | NM_01342I | 7281.923  | 8861.309  | NM_01773E | 5637.272  | 5714.705  |
| NM_01744E | 7283.09   | 6547.188  | NM_012474 | 9871.33   | 13105.834 | NM_016557 | 661.243   | 1042.732  |
| NM_00074E | 2076.434  | 1788.818  | AB033118  | 2532.734  | 2664.168  | NM_00062E | 1302.819  | 1271.122  |
| NM_00721E | 2027.553  | 2077.295  | NM_01960E | 8342.183  | 8790.307  | AF161348  | 757.595   | 657.486   |
| Z25436    | 1780.361  | 1833.56   | NM_00169C | 15706.681 | 11702.731 | NM_018467 | 11604.128 | 11606.661 |
| NM_00527E | 3424.71   | 3428.723  | AF034374  | 36679.16  | 35080.645 | NM_00606E | 1634.218  | 1186.673  |
| NM_003844 | 37712.813 | 32268.182 | NM_00168E | 5460.212  | 4098.419  | NM_002704 | 349.944   | 327.11    |
| NM_00200E | 26262.281 | 25699.922 | AK025130  | 6388.924  | 6488.824  | AF150735  | 4594.548  | 2933.642  |
| NM_012324 | 3896.47   | 4371.354  | AK023232  | 17968.973 | 19224.969 | NM_01818E | 1042.072  | 976.326   |
| AK000039  | 1070.305  | 1055.598  | NM_00638C | 3362.066  | 3055.066  | NM_01238E | 2197.717  | 2332.286  |
| AL137352  | 2448.115  | 1625.614  | AB020710  | 3185.49   | 3286.875  | BF038366  | 805.797   | 759.115   |
| NM_01474E | 1767.756  | 1359.799  | NM_016174 | 21721.08  | 20310.68  | NM_00245E | 1774.494  | 1814.226  |
| D49958    | 477.703   | 505.804   | NM_020377 | 3210.625  | 2749.713  | NM_01644C | 2157.946  | 1935.256  |
| NM_00448E | 5108.173  | 4282.693  | U88896    | 4064.882  | 2756.569  | NM_000314 | 624.962   | 406.306   |
| U80756    | 52943.535 | 56871.023 | AF116702  | 61060.902 | 48556.086 | S74620    | 333.349   | 429.603   |
| NM_01816I | 4863.829  | 6322.835  | NM_005724 | 13470.564 | 13550.24  | AF305239  | 473.42    | 411.503   |
| NM_00524E | 33750.797 | 27988.057 | X58794    | 4713.447  | 5864.479  | NM_002827 | 5331.567  | 4767.833  |
| NM_00481C | 2464.953  | 2691.832  | NM_00173E | 4878.599  | 5245.802  | BF035425  | 38202.25  | 53065.641 |
| AL117629  | 5826.096  | 4365.306  | NM_00234E | 3018.502  | 3973.472  | NM_00160E | 214.425   | 232.559   |
| NM_00259E | 1844.519  | 1768.333  | NM_00508C | 22270.318 | 38225.934 | NM_00015E | 39903.82  | 67692.078 |
| NM_01572E | 1832.484  | 1445.829  | AF148505  | 5323.369  | 5169.903  | NM_01463E | 555.468   | 769.723   |
| AF174604  | 2830.501  | 2242.405  | NM_01868E | 20661.646 | 21434.641 | AF099740  | 380.353   | 243.062   |
| AB002379  | 2997.807  | 2691.769  | NM_01767E | 2813.138  | 3322.597  | NM_006117 | 4460.785  | 3977.136  |
| AF113223  | 1773.148  | 1463.205  | AK021764  | 1324.571  | 2610.034  | NM_006287 | 635.996   | 335.702   |
| AB046851  | 1015.783  | 763.935   | NM_00543I | 7759.084  | 9552.406  | NM_00011E | 2472.336  | 2249.59   |
| NM_00574E | 13670.508 | 11351.172 | NM_002894 | 18033.613 | 22281.879 | NM_00091E | 643.578   | 739.994   |
| NM_01985E | 54500.773 | 58223.914 | NM_00462E | 4989.122  | 3363.97   | NM_00129E | 30791.191 | 25414.287 |
| NM_018174 | 1571.589  | 1827.474  | NM_00426C | 25099.525 | 23002.549 | BG325046  | 3214.961  | 2772.398  |
| NM_01454E | 4755.587  | 4904.246  | AL050067  | 4472.007  | 3525.589  | AI351740  | 12315.354 | 11585.516 |
| NM_004437 | 1938.503  | 1913.02   | NM_00497E | 21593.795 | 19710.41  | AA444051  | 8383.147  | 8399.972  |
| AK025875  | 1861.017  | 1542.424  | NM_00625I | 7982.749  | 7004.932  | NM_007164 | 11783.68  | 10988.293 |
| BC014152  | 52548.719 | 58086.211 | NM_00410E | 29867.064 | 25279.354 | BE783826  | 30882.688 | 30947.031 |
| NM_01241E | 621.391   | 423.535   | NM_002314 | 13232.757 | 14885.384 | X04827    | 368.387   | 286.665   |
| NM_00022E | 969.59    | 754.923   | NM_001744 | 3952.864  | 3665.954  | H07088    | 234.748   | 217.641   |
| NM_00039E | 898.007   | 977.587   | NM_00629E | 4647.495  | 4673.033  | AF11660E  | 28497.896 | 23619.652 |
| NM_00088E | 4750.771  | 4791.44   | Z25433    | 4666.041  | 4363.498  | X98922    | 1380.657  | 2032.535  |
| NM_00576I | 586.409   | 738.821   | NM_00592E | 5023.292  | 5088.569  | AK098435  | 1700.698  | 1958.438  |
| NM_00241I | 899.689   | 1956.507  | NM_01863E | 18023.357 | 12336.623 | AK092872  | 1052.501  | 1234.619  |
| NM_01233E | 1740.838  | 4107.26   | AL137593  | 49798.98  | 44516.438 | AF230496  | 207.233   | 107.731   |

|           |           |           |           |           |           |           |           |           |
|-----------|-----------|-----------|-----------|-----------|-----------|-----------|-----------|-----------|
| NM_005787 | 26190.938 | 26753.344 | NM_003915 | 5856.306  | 5769.462  | M16801    | 515.356   | 597.927   |
| NM_002143 | 4344.105  | 4228.518  | NM_000382 | 3942.682  | 3461.932  | NM_013334 | 9867.477  | 7151.227  |
| AF284421  | 46811.352 | 38655.859 | AL133064  | 8143.112  | 8718.05   | AF141901  | 312.799   | 379.856   |
| NM_006048 | 11993.169 | 11778.366 | NM_006227 | 10951.974 | 11990.147 | NM_007008 | 608.89    | 813.748   |
| NM_006360 | 48762.582 | 34683.945 | NM_001150 | 7898.947  | 8991.602  | AL109708  | 271.722   | 446.671   |
| NM_003968 | 1524.564  | 1362.108  | NM_002856 | 16730.861 | 15886.396 | L29143    | 905.277   | 677.694   |
| NM_002810 | 50325.66  | 60190.211 | NM_003225 | 1927.597  | 1894.039  | AF234532  | 1031.874  | 1307.017  |
| NM_003343 | 19475.395 | 19284.516 | NM_000096 | 1862.098  | 1733.634  | NM_002418 | 679.312   | 578.991   |
| NM_002788 | 32597.836 | 31336.889 | AA418251  | 1454.177  | 2685.903  | NM_013296 | 908.28    | 1006.987  |
| NM_003470 | 13512.758 | 15648.869 | AA143087  | 40562.277 | 50304.551 | NM_005307 | 496.912   | 674.606   |
| AL080137  | 1185.901  | 1782.541  | BI870965  | 29466.643 | 26164.969 | NM_005958 | 205.256   | 315.948   |
| NM_017679 | 6324.091  | 8222.719  | NM_001903 | 355.656   | 220.516   | NM_005208 | 2978.457  | 3928.553  |
| AF155103  | 4295.421  | 4518.708  | BI835536  | 14500.868 | 12554.296 | AK025687  | 6565.607  | 7449.728  |
| NM_017704 | 2872.366  | 3129.675  | BF205051  | 10977.824 | 10379.102 | AF218941  | 689.326   | 1363.82   |
| BC006359  | 4458.087  | 4401.866  | X02761    | 35340.113 | 32077.809 | AL137264  | 27517.701 | 29039.279 |
| AK026127  | 1660.139  | 980.275   | M91463    | 3001.948  | 2337.551  | NM_002226 | 354.708   | 378.141   |
| BC016062  | 19511.719 | 20552.83  | U88317    | 1326.742  | 760.563   | X84370    | 6668.114  | 6292.362  |
| NM_012250 | 14629.565 | 20818.943 | J03060    | 5341.369  | 4456.463  | NM_004038 | 646.584   | 697.671   |
| NM_006283 | 10661.143 | 16603.846 | X54156    | 1146.536  | 815.127   | NM_000508 | 330.345   | 245.712   |
| Y08267    | 3337.128  | 3506.963  | NM_003743 | 3616.093  | 2493.529  | AB014558  | 706.286   | 662.911   |
| AB016898  | 539.679   | 462.765   | AA829383  | 15494.688 | 14727.178 | NM_006854 | 7343.053  | 4415.482  |
| NM_017530 | 9524.691  | 21055.189 | AF012434  | 43025.125 | 27820.844 | NM_004580 | 2057.261  | 1659.585  |
| AB029030  | 735.954   | 1171.638  | NM_018124 | 17598.652 | 19378.99  | NM_020387 | 33672.59  | 28295.414 |
| AL360183  | 3420.997  | 3589.437  | Z70701    | 30166.857 | 31219.367 | NM_007246 | 652.62    | 731.243   |
| AK027046  | 1839.629  | 1931.065  | AB040972  | 9359.18   | 10870.246 | AK026248  | 716.808   | 866.443   |
| NM_003113 | 5024.791  | 4336.449  | X98507    | 18905.053 | 26677.488 | NM_000647 | 657.286   | 499.112   |
| NM_016578 | 6695.908  | 6749.449  | NM_016030 | 65915.813 | 67954.953 | NM_017738 | 2983.438  | 2276.614  |
| NM_003822 | 962.476   | 856.688   | NM_014669 | 17059.5   | 15275.654 | NM_018467 | 3671.686  | 3835.345  |
| NM_015832 | 2576.688  | 2438.893  | NM_005652 | 54753.996 | 58802.852 | NM_006068 | 597.453   | 1467.278  |
| NM_001326 | 8570.183  | 6816.08   | AK026686  | 1083.076  | 2142.566  | U16752    | 234.133   | 874.807   |
| NM_014319 | 1486.054  | 1041.371  | NM_005902 | 5767.772  | 8310.824  | M30134    | 379.598   | 479.254   |
| NM_004865 | 6275.964  | 6447.21   | NM_002850 | 66032.586 | 74570.43  | NM_002038 | 10072.854 | 10413.32  |
| NM_017923 | 801.584   | 805.457   | NM_005302 | 762.865   | 497.52    | NM_005728 | 13772.209 | 12153.604 |
| AB019566  | 53740.246 | 64170.762 | NM_004302 | 906.604   | 679.7     | NM_015493 | 985.882   | 1043.878  |
| NM_000981 | 53876.02  | 60020.441 | NM_005903 | 3270.88   | 2589.174  | NM_003747 | 400.639   | 503.35    |
| NM_002047 | 36263.598 | 29489.004 | NM_000861 | 3293.23   | 2975.406  | AB037744  | 1049.57   | 815.242   |
| NM_001031 | 47075.406 | 53401.543 | NM_000024 | 639.992   | 735.337   | NM_001608 | 254.616   | 226.305   |
| NM_007208 | 18036.051 | 12486.929 | AB037734  | 546.816   | 407.442   | NM_000158 | 40269.008 | 71794.492 |
| NM_000998 | 54320.313 | 60982.367 | U77493    | 2211.933  | 1831.091  | NM_014638 | 424.644   | 811.442   |
| NM_000985 | 30048.043 | 30344.402 | NM_019062 | 3227.661  | 3211.972  | AF099740  | 531.309   | 627.025   |
| NM_000236 | 1728.468  | 1806.36   | NM_003873 | 2109.588  | 1984.751  | NM_006117 | 4736.796  | 4037.254  |
| NM_002903 | 48680.43  | 53945.969 | NM_000263 | 4833.93   | 4181.409  | NM_002225 | 910.215   | 878.397   |
| NM_001861 | 2516.281  | 4017.32   | AF073519  | 20579.842 | 14145.556 | NM_006228 | 270.191   | 458.253   |
| AK025558  | 13999.132 | 19857.145 | AB001451  | 1179.519  | 1345.489  | NM_015415 | 7980.067  | 7165.914  |
| AK024355  | 3278.398  | 3241.023  | NM_017583 | 21006.244 | 31364.318 | NM_004897 | 468.291   | 659.402   |
| NM_001864 | 44276.977 | 33362.551 | Y16132    | 50618.785 | 64415.648 | NM_004528 | 3226.878  | 3137.537  |
| NM_003477 | 22665.4   | 19614.836 | NM_016593 | 5580.607  | 6908.96   | AK026381  | 6393.683  | 8114.773  |
| NM_002654 | 45336.93  | 41270.605 | NM_002521 | 4098.184  | 4580.811  | NM_002450 | 1433.508  | 910.562   |
| NM_020382 | 3171.781  | 2233.512  | NM_000271 | 47867.633 | 51023.371 | NM_004978 | 960.664   | 7003.676  |
| NM_007192 | 13303.477 | 14578.851 | NM_018209 | 9996.208  | 11748.173 | AF004711  | 325.331   | 1015.107  |
| AB002337  | 11455.717 | 10049.964 | NM_006184 | 17394.777 | 17449.859 | NM_000705 | 360.042   | 842.612   |
| NM_014933 | 7292.621  | 6433.436  | AB018268  | 20194.947 | 21177.193 | NM_004231 | 39000.484 | 56963.18  |
| NM_003076 | 41387.164 | 32184.709 | NM_019045 | 817.621   | 1461.005  | NM_016577 | 432.626   | 576.489   |

|           |           |           |           |           |           |           |           |           |
|-----------|-----------|-----------|-----------|-----------|-----------|-----------|-----------|-----------|
| NM_00638E | 674.021   | 647.959   | NM_00638C | 3320.458  | 5229.344  | AK023107  | 3615.552  | 2944.776  |
| AK024250  | 1010.86   | 1207.35   | AB020710  | 3455.16   | 4372.057  | NM_013334 | 8059.729  | 6967.862  |
| NM_00345E | 11939.645 | 10311.654 | NM_016174 | 22789.387 | 21062.605 | AF150735  | 575.934   | 591.939   |
| NM_00258E | 6435.1    | 4753.969  | NM_020377 | 3014.065  | 2460.886  | NM_01238E | 570.682   | 404.972   |
| AB029016  | 2630.148  | 3277.385  | U88896    | 3623.041  | 3098.427  | NM_00245E | 1126.332  | 1496.766  |
| AK000445  | 732.341   | 1356.907  | AF116702  | 63207.992 | 53594.945 | NM_01644C | 12462.643 | 15626.525 |
| NM_002701 | 2896.995  | 6218.86   | NM_005724 | 13328.133 | 11938.038 | NM_007194 | 1086.34   | 4098.761  |
| NM_00569E | 1024.054  | 1635.379  | X58794    | 4177.444  | 4687.614  | NM_000314 | 4449.399  | 9275.695  |
| X97303    | 11961.961 | 9942.749  | NM_00173E | 4414.988  | 4518.085  | AB002369  | 527.826   | 1612.054  |
| L32162    | 510.653   | 714.269   | NM_00234E | 3139.796  | 2842.123  | S74620    | 619.232   | 1935.855  |
| NM_00614E | 477.71    | 622.751   | NM_00508C | 22503.336 | 25457.857 | AF305239  | 1043.796  | 1574.539  |
| AJ290954  | 3492.709  | 4400.095  | NM_004887 | 16797.455 | 15620.873 | NM_002827 | 8237.889  | 11147.266 |
| AK025451  | 5250.124  | 5632.84   | NM_006404 | 2239.273  | 1625.701  | NM_00194E | 177.617   | 309.825   |
| NM_00278E | 7243.54   | 7859.362  | NM_01479E | 2434.029  | 1936.25   | BF035425  | 38708.051 | 56062.527 |
| X52005    | 34708.609 | 22586.602 | NM_00298E | 2008.639  | 1648.955  | CY3Cy5    | 1329.538  | 218.574   |
| NM_001047 | 1532.553  | 1272.235  | M15330    | 2743.298  | 4605.459  | NM_00417E | 1910.833  | 2339.745  |
| AK024396  | 10666.625 | 11364.342 | NM_01439E | 8034.614  | 8817.086  | NM_00454E | 14510.871 | 16095.075 |
| M57627    | 440.857   | 429.09    | AK027201  | 5405.74   | 5413.91   | AK027120  | 316.473   | 637.401   |
| W74254    | 880.647   | 873.378   | NM_00048E | 48140.527 | 49766.801 | AB006624  | 1951.044  | 11199.691 |
| M58603    | 5808.576  | 5469.347  | AL137593  | 45883.898 | 48138.367 | AL109717  | 845.571   | 3426.739  |
| AA443286  | 3031.661  | 2142.13   | NM_00391E | 5197.346  | 3542.376  | AK025473  | 564.936   | 1293.292  |
| AB003334  | 7235.605  | 6962.756  | NM_00038E | 3679.497  | 3166.286  | AF146693  | 408.292   | 957.545   |
| AW276315  | 1835.506  | 2383.695  | AL133064  | 8550.407  | 8556.368  | AF271070  | 4199.251  | 6365.003  |
| AA490737  | 6118.027  | 4802.852  | NM_006227 | 9892.557  | 11821.672 | NM_01490E | 291.777   | 239.29    |
| AI878886  | 33061.523 | 28220.773 | NM_00290E | 10831.146 | 12696.097 | AK055959  | 436.754   | 440.409   |
| BG697179  | 20570.408 | 18172.797 | NM_00070C | 6682.856  | 8050.249  | AF052141  | 323.425   | 276.383   |
| NM_00213E | 43688.973 | 48173.188 | NM_01902E | 43758.055 | 46026.598 | AF052149  | 1008.654  | 776.687   |
| BM012504  | 13632.699 | 13864.492 | NM_000431 | 4519.291  | 3310.49   | AK025586  | 359.526   | 347.87    |
| AA664145  | 4109.073  | 3936.157  | NM_013421 | 6333.978  | 4391.497  | AL137512  | 227.248   | 244.746   |
| X72308    | 52523.273 | 56308.953 | NM_012474 | 9650.43   | 8952.263  | NM_00454E | 15069.763 | 13456.006 |
| T70999    | 558.259   | 624.098   | AB033118  | 2223.398  | 1831.926  | SR1       | 67280.344 | 39544.441 |
| T50790    | 5792.022  | 10046.736 | NM_01960E | 8004.559  | 6597.469  | SR3       | 13538.143 | 10439.171 |
| R48168    | 14035.958 | 18678.07  | NM_00169C | 17660.668 | 11060.06  | SR5       | 1297.2    | 1474.697  |
| BC008837  | 2371.021  | 2908.556  | AF034374  | 40109.84  | 39564.918 | SR7       | 1433.428  | 11195.159 |
| NM_00681E | 48774.793 | 54896.23  | NM_016118 | 13210.247 | 9082.466  | SR9       | 4780.815  | 760.376   |
| NM_014744 | 2754.258  | 2738.195  | NM_018674 | 47169.047 | 49790.699 | CY3Cy5    | 1024.368  | 137.366   |
| AF146759  | 3319.927  | 3581.375  | NM_00168E | 38153.371 | 28804.23  | AK091125  | 340.663   | 536.939   |
| AB032993  | 7703.075  | 7249.515  | NM_00168E | 6544.866  | 5029.151  | D16474    | 3176.878  | 8054.097  |
| NM_000854 | 6346.011  | 4643.432  | NM_01440E | 9355.054  | 6861.037  | AL080072  | 477.963   | 933.551   |
| NM_001901 | 1054.565  | 950.546   | NM_00081E | 1096.361  | 878.754   | NM_017687 | 740.127   | 530.991   |
| AL117423  | 6703.196  | 5894.803  | NM_01492E | 4865.032  | 4082.304  | NM_01797E | 1363.724  | 870.318   |
| NM_002084 | 2015.358  | 1844.971  | AK025130  | 6666.704  | 6733.85   | AK025036  | 344.246   | 341.669   |
| D16892    | 7812.291  | 6676.715  | NM_01787E | 3597.564  | 3387.89   | AK024843  | 5674.088  | 3775.411  |
| NM_00475C | 3112.34   | 3204.892  | AK023232  | 19445.277 | 20131.215 | AF074994  | 354.946   | 230.974   |
| NM_00729E | 4002.855  | 4729.49   | NM_018124 | 16807.111 | 20732.947 | NM_01767C | 2388.805  | 1440.019  |
| NM_003651 | 33826.234 | 30609.48  | Z70701    | 26906.465 | 33169.383 | NM_00436E | 6320.478  | 9756.878  |
| NM_01401E | 832.096   | 908.71    | AB040972  | 11148.607 | 13559.536 | AJ296152  | 3610.755  | 3509.216  |
| NM_00041E | 2387.122  | 2062.062  | AF148505  | 5061.837  | 5809.895  | AK027088  | 3973.998  | 2742.84   |
| NM_01324E | 1834.277  | 1434.362  | NM_01868E | 22879.818 | 28935.117 | AB037721  | 3013.65   | 1461.614  |
| NM_018431 | 887.467   | 832.572   | NM_01767E | 2850.722  | 2554.179  | AK024525  | 1996.709  | 1875.753  |
| NM_000591 | 5098.188  | 5551.475  | AK021764  | 990.795   | 889.541   | AK024909  | 280.689   | 405.145   |
| NM_00056E | 2528.677  | 2961.128  | NM_005431 | 7155.416  | 5412.053  | AK024544  | 778.518   | 1239.619  |
| NM_016614 | 278.859   | 600.414   | NM_002894 | 17655.402 | 13354.396 | AK021705  | 1034.993  | 1545.181  |

|           |           |           |           |           |           |           |           |           |
|-----------|-----------|-----------|-----------|-----------|-----------|-----------|-----------|-----------|
| NM_002019 | 1607.814  | 5618.162  | NM_004260 | 26404.396 | 24133.938 | NM_016141 | 14093.015 | 12445.504 |
| AF253318  | 4296.547  | 6019.723  | AL050067  | 6280.101  | 4450.975  | AL109702  | 384.336   | 308.094   |
| NM_017767 | 20993.84  | 20585.957 | NM_004972 | 25512.824 | 20769.355 | AK025624  | 2896.193  | 2345.057  |
| NM_003262 | 5490.11   | 5285.955  | NM_006251 | 8333.98   | 7170.201  | AK026684  | 418.073   | 302.678   |
| NM_020125 | 950.888   | 952.766   | NM_004103 | 34393.117 | 25468.465 | AL110125  | 3916.257  | 3110.15   |
| AK022832  | 2702.574  | 3113.224  | NM_002314 | 14139.38  | 11967.25  | AJ011600  | 830.812   | 1016.553  |
| NM_017784 | 1147.29   | 623.341   | NM_001744 | 2930.702  | 1928.031  | AJ002785  | 970.459   | 834.489   |
| NM_014641 | 624.622   | 735.606   | NM_006296 | 4606.557  | 4922.602  | Z70716    | 344.267   | 270.319   |
| NM_004462 | 2123.052  | 1874.104  | Z25433    | 4827.435  | 4191.107  | Z83945    | 749.217   | 359.911   |
| NM_000343 | 599.479   | 798.605   | NM_005922 | 6523.241  | 6754.902  | AK022422  | 229.696   | 241.864   |
| NM_020246 | 2787.259  | 2876.465  | NM_018638 | 19829.365 | 14797.314 | AK023485  | 279.826   | 388.197   |
| NM_016354 | 3333.981  | 3439.717  | CY3Cy5    | 5583.529  | 299.439   | AK022474  | 5126.596  | 8561.682  |
| NM_001044 | 1836.568  | 1413.962  | NM_003942 | 2146.089  | 2649.404  | AK022392  | 1078.135  | 2033.767  |
| NM_004644 | 2036.221  | 2164.812  | NM_004452 | 2152.197  | 2021.893  | AL117451  | 241.078   | 474.14    |
| AV681967  | 1622.652  | 1881.007  | AK022632  | 1565.216  | 1247.943  | AL049280  | 1787.602  | 2535.006  |
| NM_018250 | 2147.944  | 2502.175  | AK021554  | 2635.784  | 2007.236  | AK025212  | 2082.038  | 2577.297  |
| NM_016553 | 10823.044 | 11587.51  | AF070620  | 518.58    | 495.663   | AL157503  | 2862.082  | 2693.283  |
| AB023136  | 809.615   | 1216.482  | NM_020235 | 4091.843  | 3598.947  | AK000053  | 367.44    | 482.574   |
| NM_003795 | 45660.301 | 52161.582 | AK000532  | 842.042   | 696.369   | AK000786  | 607.975   | 706.113   |
| NM_014232 | 5811.479  | 11395.896 | AL109681  | 504.235   | 580.225   | AK000935  | 643.624   | 688.448   |
| NM_005701 | 2256.172  | 3578.033  | AL162039  | 5021.014  | 5037.576  | AK021458  | 1406.401  | 1275.783  |
| NM_001231 | 977.832   | 728.18    | AK024896  | 3279.51   | 2646.227  | NM_017674 | 4054.812  | 3268.428  |
| AB023139  | 11127.148 | 9761.682  | AL353952  | 400.673   | 607.091   | AK000811  | 427.302   | 395.784   |
| NM_017885 | 5847.032  | 4804.892  | BU165106  | 2120.152  | 2894.173  | AK000966  | 834.003   | 555.037   |
| D80004    | 796.437   | 711.94    | AF038202  | 1366.04   | 1981.128  | NM_018630 | 2072.046  | 3281.76   |
| X63966    | 872.2     | 815.56    | AL360198  | 454.826   | 877.662   | AF086175  | 486.53    | 695.848   |
| NM_000946 | 6122.503  | 5380.508  | AB040925  | 1399.075  | 3338.116  | AK002196  | 353.146   | 305.434   |
| NM_016390 | 1352.658  | 1248.616  | NM_003942 | 1968.676  | 2819.995  | NM_004576 | 1351.581  | 1775.832  |
| NM_016101 | 6556.089  | 5262.063  | NM_004452 | 1816.959  | 2543.912  | AF040097  | 510.443   | 730.876   |
| NM_005855 | 48420.473 | 46038.363 | SR1       | 70700.961 | 64139.965 | NM_020436 | 513.845   | 904.551   |
| NM_020313 | 829.698   | 828.18    | SR3       | 37095.266 | 46153.422 | AK024182  | 746.845   | 1001.99   |
| NM_014628 | 4127.828  | 3758.143  | SR5       | 4030.817  | 4884.458  | NM_006913 | 6365.15   | 10852.232 |
| AK025630  | 2342.24   | 2209.094  | SR7       | 4517.146  | 29500.537 | NM_000495 | 3736.708  | 2517.049  |
| AK022907  | 15320.695 | 14101.054 | SR9       | 13717.27  | 2813.859  | AK001880  | 2411.73   | 1325.266  |
| NM_014793 | 2613.841  | 2403.623  | CY3Cy5    | 7745.702  | 750.133   | AF156166  | 2975.271  | 2585.688  |
| NM_004245 | 6977.59   | 7103.778  | M26147    | 588.449   | 623.146   | NM_014373 | 1647.494  | 853.946   |
| NM_003241 | 3086.36   | 3188.09   | AF018254  | 929.216   | 758.903   | NM_014206 | 8072.842  | 4094.253  |
| NM_002685 | 4206.122  | 4315.064  | L08438    | 306.085   | 159.861   | NM_001651 | 2838.735  | 2408.079  |
| AK024504  | 3722.394  | 3747.515  | NM_016240 | 2599.116  | 1458.505  | L32786    | 726.158   | 696.617   |
| AF039023  | 3514.22   | 3903.215  | AK026459  | 785.285   | 739.928   | U03239    | 257.122   | 506.3     |
| NM_005511 | 4369.6    | 6495.5    | AL049390  | 1987.479  | 1464.635  | AL355720  | 1821.715  | 2484.656  |
| NM_014698 | 49075.68  | 45848.492 | AK000584  | 4146.029  | 4026.309  | AK002023  | 1644.764  | 1873.57   |
| NM_018475 | 7623.646  | 8236.399  | AJ297363  | 970.487   | 1124.02   | AF150156  | 381.281   | 234.336   |
| AK025451  | 5285.781  | 4788.044  | AK026379  | 2543.039  | 2469.686  | NM_016464 | 375.858   | 307.468   |
| NM_002783 | 8385.619  | 8269.432  | AF075002  | 498.634   | 509.95    | L40402    | 908.07    | 1073.483  |
| X52005    | 34482.863 | 22850.947 | AK022965  | 1170.361  | 1746.286  | Z36780    | 1404.945  | 2359.476  |
| NM_001047 | 1614.36   | 1655.974  | AK024278  | 4794.939  | 9319.341  | AK022403  | 720.084   | 920.765   |
| AK024396  | 12763.593 | 12658.899 | NM_018022 | 1539.648  | 2108.699  | AK022955  | 2205.346  | 2748.264  |
| U58514    | 5006.217  | 4863.295  | AB056722  | 7466.371  | 10397.34  | AK021760  | 340.087   | 478.706   |
| M58603    | 4099.124  | 3815.156  | NM_013242 | 5216.275  | 8366.141  | BC035855  | 1884.807  | 2081.467  |
| AA443286  | 2422.663  | 1501.376  | AK023198  | 4134.07   | 5987.064  | AL137408  | 8561.854  | 12242.367 |
| AB003334  | 6898.942  | 6254.771  | NM_012066 | 14290.249 | 15535.937 | AF054995  | 934.937   | 1073.686  |
| AW276315  | 2165.724  | 1989.284  | AF052168  | 16604.203 | 18594.1   | AL080176  | 1188.375  | 1039.587  |

|           |           |           |           |           |           |           |           |           |
|-----------|-----------|-----------|-----------|-----------|-----------|-----------|-----------|-----------|
| AA490737  | 4626.351  | 3615.06   | NM_014650 | 601.79    | 1835.611  | AK023627  | 981.1     | 1010.125  |
| BG697179  | 18969.246 | 19078.725 | AK024864  | 358.249   | 309.443   | AK025949  | 596.232   | 365.465   |
| AA664145  | 3939.87   | 5292.293  | AK024947  | 5821.422  | 4280.371  | Y10259    | 1230.955  | 798.725   |
| X72308    | 49262.824 | 60167.883 | AK095125  | 1047.699  | 1000.354  | AK021725  | 1413.051  | 936.597   |
| T70999    | 562.752   | 775.38    | AK024059  | 1715.358  | 1468.035  | AF119893  | 280.265   | 219.283   |
| T50790    | 6636.65   | 7699.315  | AK023663  | 474.824   | 403.479   | NM_00240E | 2179.736  | 1540.881  |
| R48168    | 14637.692 | 17583.994 | AB007928  | 1063.608  | 1276.453  | AK024282  | 451.359   | 335.254   |
| AB040954  | 6788.293  | 7216.623  | AK023645  | 2109.808  | 1873.189  | AF085838  | 2023.763  | 1640.246  |
| NM_002081 | 1402.39   | 1122.844  | D83543    | 756.616   | 784.473   | NM_018277 | 475.059   | 384.555   |
| AF146759  | 4652.282  | 4380.438  | NM_016930 | 2532.313  | 2635.787  | AF014455  | 343.999   | 328.788   |
| AB032993  | 8393.613  | 6553.114  | AJ001861  | 3314.683  | 4857.802  | AF086335  | 996.427   | 1018.711  |
| NM_000854 | 7288.838  | 5836.805  | AJ227865  | 316.704   | 565.997   | AB011118  | 10500.569 | 6803.601  |
| NM_001901 | 1324.146  | 665.602   | NM_00518E | 476.314   | 705.986   | S66666    | 433.744   | 883.655   |
| AL117423  | 12023.211 | 10791.888 | X64981    | 1976.644  | 3753.411  | AK021476  | 571.852   | 284.623   |
| NM_002084 | 1958.545  | 1488.188  | X75692    | 6178.199  | 6634.394  | NM_01537E | 2855.03   | 3760.77   |
| D16892    | 4137.595  | 3120.892  | X64988    | 982.569   | 946.713   | NM_013341 | 246.488   | 208.418   |
| NM_004750 | 2594.059  | 2216.268  | Y10511    | 16186.706 | 28404.904 | NM_00406E | 191.528   | 399.77    |
| NM_00729E | 4694.546  | 4588.22   | NM_019617 | 420.738   | 1961.646  | NM_004941 | 2723.992  | 3658.055  |
| NM_003651 | 32655.164 | 30807.02  | AK021832  | 1253.997  | 911.866   | AF151831  | 1456.305  | 1883.046  |
| NM_014012 | 974.121   | 1154.696  | AK021505  | 4604.028  | 3755.283  | AB011121  | 306.317   | 389.355   |
| NM_00041E | 2897.504  | 2033.041  | AK021598  | 3817.043  | 2653.513  | AF083255  | 2238.722  | 3179.875  |
| NM_01324E | 2114.885  | 1785.548  | AK025238  | 382.075   | 512.409   | AK022605  | 447.731   | 421.438   |
| NM_018431 | 983.668   | 1223.006  | AK026416  | 38036.48  | 48151.531 | AL049955  | 8065.785  | 5826.79   |
| NM_000591 | 4811.785  | 7774.648  | AK025797  | 1796.593  | 2367.01   | AF155654  | 3460.868  | 2548.786  |
| NM_00056E | 4760.535  | 9934.753  | NM_01775E | 440.631   | 450.938   | AF088044  | 470.069   | 319.892   |
| NM_00201E | 1008.367  | 990.721   | AK000853  | 592.155   | 915.09    | AK000028  | 1144.332  | 829.75    |
| AF253318  | 3843.222  | 3738.253  | AK000085  | 818.678   | 876.846   | NM_013320 | 21174.834 | 10141.013 |
| NM_017767 | 18058.891 | 14070.82  | AK000019  | 839.483   | 994.551   | AJ245902  | 343.581   | 151.778   |
| AJ290954  | 3103.776  | 2842.909  | AK000645  | 742.577   | 1050.34   | AL050039  | 347.039   | 383.169   |
| AK022832  | 2756.181  | 2590.156  | AK000893  | 400.475   | 594.063   | AF009316  | 325.146   | 259.917   |
| NM_014641 | 908.404   | 922.349   | AK024156  | 1037.545  | 894.201   | AF087987  | 542.432   | 714.673   |
| NM_004462 | 1473.116  | 1216.697  | AF086288  | 2145.074  | 1607.826  | AK021723  | 211.314   | 243.478   |
| NM_000343 | 493.303   | 609.492   | AF119866  | 459.761   | 328.759   | H09474    | 1152.769  | 724.227   |
| NM_02024E | 2416.79   | 2397.244  | NM_016944 | 589.343   | 554.816   | AB002368  | 4017.301  | 4342.496  |
| NM_016354 | 3217.328  | 3494.922  | AK023109  | 1967.106  | 1237.408  | AL360263  | 31405.061 | 13599.776 |
| NM_001044 | 980.428   | 826.052   | NM_005293 | 22930.814 | 15488.413 | BC012757  | 449.242   | 334.792   |
| NM_004644 | 1902.543  | 2733.115  | S50185    | 842.205   | 715.733   | M96686    | 317.314   | 137.104   |
| AV681967  | 1965.733  | 1994.687  | AF133332  | 6393.511  | 3751.132  | NM_004062 | 2088.236  | 2172.2    |
| NM_018250 | 2230.274  | 3189.968  | AK022805  | 2967.597  | 2660.034  | NM_005883 | 490.096   | 555.058   |
| NM_016553 | 9609.931  | 14867.545 | NM_017503 | 584.697   | 725.311   | NM_00444E | 696.082   | 656.766   |
| AB023136  | 941.651   | 2008.789  | AK024606  | 3571.219  | 6529.976  | NM_014591 | 1418.376  | 1757.147  |
| NM_00379E | 44144.293 | 55236.59  | NM_016417 | 30913.621 | 43466.898 | NM_014592 | 530.662   | 892.661   |
| NM_014232 | 5426.345  | 7218.452  | NM_01910E | 1212.249  | 1933.196  | NM_00194E | 583.256   | 612.996   |
| NM_005701 | 2315.636  | 2646.376  | L10147    | 19920.912 | 24946.102 | NM_02003E | 1183.047  | 1267.899  |
| NM_001231 | 854.449   | 785.313   | AL080118  | 6691.311  | 8741.344  | NM_006653 | 395.395   | 387.938   |
| NM_00681E | 55584.895 | 54446.93  | AL049378  | 5049.508  | 5686.2    | NM_014442 | 4187.643  | 3233.147  |
| NM_014744 | 2696.985  | 1998.955  | AF087959  | 4594.888  | 5196.194  | AB002313  | 743.397   | 591.323   |
| D80004    | 932.194   | 773.06    | L09086    | 1808.563  | 1953.1    | AB011167  | 1075.926  | 498.416   |
| X63966    | 339.019   | 538.523   | L37702    | 20403.455 | 14262.806 | NM_00540E | 725.059   | 275.098   |
| NM_00094E | 4748.444  | 4822.765  | AK022812  | 879.509   | 648.639   | NM_00020E | 2263.101  | 1073.802  |
| NM_016070 | 5387.751  | 5901.926  | AK022433  | 620.511   | 499.704   | NM_00218E | 26666.199 | 13354.098 |
| NM_016101 | 5034.555  | 5275.786  | U79301    | 9264.537  | 7428.11   | AK027119  | 10156.322 | 8017.278  |
| NM_00585E | 51098.93  | 55289.484 | AK022260  | 8610.651  | 6234.535  | AB037727  | 30535.709 | 17634.371 |



|           |           |           |           |           |           |           |           |           |
|-----------|-----------|-----------|-----------|-----------|-----------|-----------|-----------|-----------|
| NM_020313 | 768.842   | 777.827   | M32219    | 10527.805 | 8158.295  | NM_005426 | 709.464   | 780.119   |
| NM_014628 | 3572.652  | 3708.024  | BC018868  | 1908.3    | 1645.139  | NM_004763 | 231.094   | 249.458   |
| AK025630  | 2352.361  | 2650.214  | AF086174  | 762.716   | 481.193   | NM_014063 | 3111.218  | 2451.869  |
| AL365404  | 46395.023 | 41943.828 | AF007128  | 9259.762  | 10945.485 | D86964    | 1865.823  | 1461.252  |
| AK022907  | 18662.652 | 18236.178 | AJ012498  | 1447.87   | 1512.658  | AL049801  | 445.907   | 169.658   |
| NM_014793 | 2852.408  | 2886.856  | NM_005973 | 23657.275 | 21754.809 | NM_016395 | 4789.998  | 3092.639  |
| NM_004245 | 6853.658  | 6148.666  | X04547    | 2124.41   | 2134.97   | NM_003152 | 634.137   | 262.721   |
| NM_003241 | 2445.096  | 2380.237  | AK025823  | 2664.374  | 6713.693  | NM_006342 | 2012.624  | 2002.284  |
| NM_002685 | 5586.091  | 5771.48   | AK026691  | 1110.866  | 1569.024  | NM_016396 | 1133.238  | 1679.873  |
| AK024504  | 3282.263  | 4408.879  | AL359941  | 6890.57   | 8484.885  | NM_005685 | 1322.829  | 1825.263  |
| AF039023  | 3467.07   | 3059.396  | U52076    | 1202.862  | 1357.887  | NM_005552 | 24732.787 | 21313.965 |
| NM_005511 | 4238.553  | 4693.294  | AF035278  | 2850.332  | 3706.792  | NM_006717 | 1499.528  | 1744.438  |
| NM_014698 | 45136.91  | 36112.68  | AF086493  | 2712.479  | 2551.948  | AL109786  | 866.776   | 898.443   |
| NM_018475 | 7025.675  | 7109.028  | AL050202  | 2358.473  | 2075.551  | AK026479  | 2493.123  | 1884.435  |
| NM_003262 | 4949.583  | 3688.644  | U32999    | 18686.338 | 17546.816 | AK022860  | 2015.729  | 1932.366  |
| NM_020125 | 867.054   | 542.278   | U66052    | 7580.837  | 9772.625  | X60188    | 10994.252 | 7752.815  |
| X52005    | 31949.773 | 23432.373 | NM_000857 | 1516.01   | 981.197   | NM_005977 | 957.395   | 708.643   |
| NM_001047 | 1800.915  | 1435.341  | L20688    | 46353.68  | 33230.293 | NM_006265 | 6617.443  | 2670.86   |
| AK024396  | 14914.267 | 20116.473 | X69111    | 21661.313 | 18460.465 | NM_003126 | 441.083   | 158.768   |
| U58514    | 4484.654  | 5585.118  | AB037799  | 5190.678  | 4212.892  | NM_006055 | 1273.015  | 659.458   |
| M57627    | 1321.601  | 1723.538  | AB007950  | 25402.799 | 17507.051 | NM_000347 | 8563.473  | 6419.722  |
| M58603    | 5615.348  | 8941.76   | AL133111  | 686.055   | 896.544   | M13452    | 624.637   | 545.808   |
| AA443286  | 1847.078  | 1583.862  | AK025593  | 2921.769  | 2380.445  | AF082075  | 965.274   | 1895.087  |
| AB003334  | 6229.263  | 6653.049  | AB018304  | 3761.562  | 2937.623  | NM_016114 | 891.901   | 843.795   |
| AW276315  | 1841.571  | 2167.997  | NM_007061 | 17532.977 | 15053.431 | AY007114  | 584.021   | 593.444   |
| AA490737  | 5455.141  | 4721.471  | NM_001088 | 30781.09  | 25807.881 | AF086604  | 922.893   | 578.207   |
| AI878886  | 31286.525 | 28288.314 | BC015991  | 9235.831  | 9634.133  | AB000895  | 502.538   | 232.813   |
| BG697179  | 22938.191 | 21491.822 | U94902    | 791.9     | 891.666   | X80031    | 319.897   | 235.78    |
| NM_002136 | 46684.863 | 52920.316 | U46214    | 8223.586  | 8808.77   | AF019382  | 714.88    | 515.542   |
| BM012504  | 15404.308 | 17064.047 | NM_000310 | 17604.711 | 20178.164 | NM_015601 | 359.078   | 533.347   |
| AA664145  | 4203.357  | 4399.767  | AF161343  | 6839.706  | 7674.276  | NM_001780 | 10440.437 | 12541.017 |
| X72308    | 45050.742 | 50911.348 | NM_004765 | 1933.119  | 2651.444  | AJ277442  | 794.439   | 595.7     |
| T50790    | 7087.106  | 7142.966  | AF009307  | 704.132   | 1097.818  | NM_004565 | 1344.936  | 1415.602  |
| R48168    | 13903     | 12366.811 | AK022246  | 3717.191  | 5475.613  | AF089088  | 1039.818  | 1369.853  |
| AB040954  | 7317.525  | 5720.806  | X75684    | 2035.483  | 2516.317  | L07557    | 2850.957  | 3051.13   |
| NM_002081 | 1056.594  | 454.609   | D17200    | 1238.814  | 1570.711  | NM_002796 | 20026.844 | 15139.399 |
| AB023139  | 8942.173  | 6877.903  | AF113701  | 23195.58  | 24586.557 | D78514    | 4046.865  | 3904.052  |
| NM_017885 | 5958.409  | 3322.627  | Y11158    | 3428.348  | 3055.279  | AK021665  | 597.577   | 559.745   |
| D16892    | 11964.968 | 8961.751  | NM_006771 | 24613.416 | 41784.695 | NM_013366 | 322.499   | 414.194   |
| NM_004750 | 4390.839  | 3866.184  | NM_014718 | 3774.351  | 2969.513  | NM_002787 | 13462.211 | 8997.174  |
| NM_007295 | 6927.034  | 8061.05   | NM_000632 | 1946.591  | 1529.792  | U95006    | 5533.562  | 3284.512  |
| AK023317  | 533.125   | 558.111   | AB002298  | 1317.119  | 1123.657  | NM_003347 | 3400.101  | 2363.953  |
| NM_003651 | 36041.098 | 37831.102 | AK024488  | 1771.504  | 1149.005  | AF273051  | 463.077   | 317.636   |
| NM_000418 | 1212.3    | 1241.479  | AK023249  | 52601.25  | 40953.398 | NM_014516 | 4703.575  | 2998.146  |
| NM_013246 | 1236.71   | 1088.385  | NM_007360 | 415.297   | 530.729   | AK021868  | 921.972   | 641.222   |
| NM_018431 | 649.583   | 601.42    | NM_017442 | 13753.822 | 10064.966 | AK000643  | 47688.902 | 75821.938 |
| NM_000565 | 2415.705  | 2233.307  | NM_000743 | 2582.41   | 2452.609  | NM_018421 | 1794.536  | 1576.971  |
| NM_002019 | 843.48    | 1384.909  | NM_007218 | 3475.675  | 3278.051  | AB014574  | 37634.734 | 36041.723 |
| AF253318  | 3224.341  | 2869.848  | Z25436    | 2826.881  | 3550.926  | NM_020127 | 1019.139  | 1057.715  |
| NM_017767 | 26402.541 | 20747.912 | NM_005275 | 4867.703  | 5338.865  | NM_015623 | 2863.449  | 2995.605  |
| AK024848  | 20176.342 | 20544.309 | NM_003844 | 52941.879 | 52857.23  | AB045116  | 334.699   | 127.125   |
| NM_004852 | 764.794   | 625.367   | NM_002005 | 32928.563 | 29527.084 | L49054    | 354.9     | 153.055   |
| NM_000543 | 1414.037  | 990.759   | NM_012324 | 5126.8    | 5761.712  | NM_014727 | 1108.618  | 947.419   |

|           |           |           |           |           |           |           |           |           |
|-----------|-----------|-----------|-----------|-----------|-----------|-----------|-----------|-----------|
| U06699    | 28458.855 | 21488.377 | AK000039  | 1841.36   | 1909.645  | BE885010  | 345.805   | 358.38    |
| AJ290954  | 2828.687  | 1649.691  | AL137352  | 5382.509  | 4817.748  | NM_000192 | 193.679   | 311.827   |
| AK025451  | 5362.909  | 3378.424  | NM_014749 | 3522.096  | 4904.437  | NM_002943 | 1829.947  | 3124.605  |
| NM_002783 | 6323.905  | 4828.197  | D49958    | 664.466   | 908.958   | AL133649  | 666.06    | 582.825   |
| NM_003038 | 1800.759  | 1786.971  | NM_004489 | 8469.196  | 10888.614 | AB018303  | 676.427   | 861.051   |
| NM_018155 | 10602.497 | 9720.166  | BF240063  | 1966.598  | 2808.069  | NM_006454 | 3589.784  | 4249.376  |
| AL050358  | 4043.775  | 4879.887  | BI461699  | 2324.025  | 2257.136  | NM_015846 | 2522.287  | 3232.34   |
| NM_004731 | 1074.748  | 1233.957  | AK090409  | 588.947   | 385.685   | NM_015972 | 10580.47  | 10819.229 |
| NM_000544 | 3807.799  | 4952.48   | AF172264  | 1115.154  | 1759.244  | NM_016132 | 640.631   | 359.954   |
| NM_004644 | 752.877   | 802.501   | U80756    | 52913.418 | 28883.225 | NM_018006 | 1101.194  | 774.091   |
| AV681967  | 867.951   | 1005.163  | NM_018161 | 4606.851  | 2957.131  | NM_016090 | 679.27    | 214.431   |
| NM_018250 | 1480.163  | 1688.967  | NM_005248 | 33140.727 | 20261.402 | NM_001013 | 27309.139 | 13278.981 |
| NM_016553 | 8881.104  | 9194.036  | NM_004810 | 4360.423  | 3587.117  | AK024040  | 3120.259  | 1948.479  |
| AB023136  | 820.61    | 885.786   | AL117629  | 6210.744  | 3806.416  | NM_005061 | 2813.555  | 2455.078  |
| NM_003795 | 38235.945 | 34558.789 | NM_002595 | 2331.356  | 1762.465  | NM_000997 | 41800.207 | 52665.66  |
| NM_014232 | 4484.363  | 4115.81   | NM_015726 | 1969.466  | 1183.753  | AF182417  | 27456.855 | 16416.068 |
| NM_005701 | 1924.775  | 2331.677  | AF174604  | 4465.313  | 3437.474  | AL137354  | 13593.102 | 10608.552 |
| NM_001231 | 799.303   | 877.324   | AB002379  | 14197.417 | 12651.822 | NM_001023 | 38960.84  | 42494.258 |
| NM_006819 | 44970.297 | 49762.402 | AF113223  | 3712.677  | 2829.173  | AK021571  | 4834.929  | 2693.474  |
| NM_014744 | 3051.087  | 2529.417  | AB046851  | 1601.698  | 1936.346  | AK022178  | 602.796   | 356.979   |
| AF146759  | 3414.163  | 4098.031  | NM_005745 | 20558.793 | 15909.131 | NM_006011 | 355.613   | 394.941   |
| AB032993  | 8644.493  | 6076.115  | NM_019858 | 55479.492 | 57587.309 | L00635    | 1085.083  | 1876.775  |
| NM_000854 | 6270.315  | 5148.539  | NM_018174 | 1445.181  | 1517.815  | NM_002541 | 1662.271  | 2089.047  |
| NM_001901 | 1085.759  | 698.438   | NM_014548 | 6042.413  | 7948.413  | NM_000056 | 2960.825  | 3345.977  |
| AL117423  | 10399.897 | 7158.556  | NM_004437 | 2850.568  | 3511.301  | NM_016311 | 6591.629  | 7051.605  |
| NM_002084 | 3085.083  | 1820.766  | AK025875  | 1812.48   | 1746.413  | NM_001867 | 35589.988 | 29073.332 |
| NM_005511 | 4628.753  | 5622.788  | BC014152  | 55512.969 | 56571.488 | NM_002300 | 42040.617 | 76760.883 |
| NM_014698 | 48512.426 | 50390.301 | NM_012418 | 790.489   | 1103.899  | NM_000290 | 4127.758  | 5063.88   |
| NM_018475 | 7762.533  | 12958.348 | NM_000226 | 2143.818  | 2736.33   | NM_016538 | 2193.132  | 1646.672  |
| NM_003262 | 5457.515  | 6663.536  | AB037779  | 61486.234 | 68719.477 | AK023275  | 4745.232  | 4335.09   |
| NM_020125 | 895.246   | 1105.499  | NM_000655 | 1736.987  | 1877.929  | AJ223352  | 2504.472  | 2151.511  |
| AK022832  | 648.032   | 998.329   | NM_000393 | 1268.734  | 1246.98   | NM_012238 | 869.223   | 1032.299  |
| NM_017784 | 991.686   | 840.798   | NM_000889 | 6023.075  | 7745.6    | NM_016539 | 4454.783  | 2639.366  |
| NM_014641 | 2364.753  | 2704.812  | NM_005761 | 1120.039  | 1620.719  | NM_006807 | 6999.412  | 4524.575  |
| NM_004462 | 4509.795  | 4717.005  | NM_012339 | 2280.668  | 1806.273  | L16464    | 381.115   | 310.792   |
| AB037739  | 316.058   | 343.224   | NM_005787 | 25704.826 | 18261.939 | NM_006532 | 4589.792  | 4498.325  |
| AB020664  | 1600.914  | 1727.647  | NM_002143 | 4504.445  | 3467.954  | U07132    | 4860.079  | 4114.212  |
| NM_006640 | 26564.227 | 20662.342 | AF284421  | 52357.555 | 48007.934 | NM_003436 | 300.934   | 327.713   |
| NM_000869 | 528.318   | 292.685   | NM_006048 | 14542.883 | 11622.088 | AB034691  | 421.167   | 685.541   |
| NM_000343 | 647.411   | 775.254   | NM_006360 | 45659.871 | 33412.109 | NM_001675 | 394.009   | 298.316   |
| NM_019112 | 8184.145  | 7087.821  | NM_003968 | 7598.731  | 5552.407  | NM_003422 | 812.197   | 432.833   |
| NM_012336 | 9021.433  | 7437.771  | NM_002786 | 424.88    | 445.736   | NM_001451 | 619.849   | 693.988   |
| NM_020161 | 452.871   | 318.07    | NM_002810 | 56692.465 | 56153.641 | NM_014779 | 1215.709  | 3037.453  |
| NM_020246 | 2524.302  | 1805.387  | NM_003343 | 27015.23  | 26695.973 | NM_014446 | 1050.103  | 1930.881  |
| NM_000084 | 4433.636  | 3078.81   | NM_002789 | 40187.445 | 40541.965 | U58096    | 8780.941  | 9454.893  |
| NM_016354 | 3321.664  | 2629.289  | NM_003470 | 17662.77  | 21684.002 | NM_016929 | 6445.988  | 9036.68   |
| AB040954  | 10127.661 | 7754.932  | AL080137  | 1815.562  | 3532.347  | NM_012323 | 724.885   | 1396.725  |
| NM_002081 | 1402.431  | 1190.7    | NM_017679 | 6637.599  | 8236.469  | NM_006942 | 387.645   | 43.666    |
| AB023139  | 11009.83  | 11205.903 | AF155103  | 5982.614  | 6893.823  | NM_018199 | 385.087   | 552.859   |
| NM_017885 | 5816.568  | 5771.36   | NM_017704 | 3688.113  | 4530.672  | NM_013943 | 825.34    | 1202.488  |
| NM_000946 | 3900.068  | 3509.508  | BC006359  | 4670.043  | 6695.949  | NM_001639 | 4458.05   | 5538.914  |
| NM_016070 | 2618.198  | 2207.233  | AK026127  | 2040.155  | 2327.131  | BG534366  | 6686.175  | 4824.914  |
| NM_016101 | 9896.218  | 12833.838 | BC016062  | 20866.799 | 24152.76  | BG698522  | 8129.119  | 5533.688  |

|           |           |           |           |           |           |           |           |           |
|-----------|-----------|-----------|-----------|-----------|-----------|-----------|-----------|-----------|
| NM_00585  | 50267.547 | 51411.328 | NM_002814 | 5390.186  | 6810.676  | AA152346  | 490.028   | 398.494   |
| NM_020313 | 1394.459  | 1274.692  | NM_012250 | 17093.717 | 17034.379 | L15189    | 1126.605  | 605.654   |
| NM_014628 | 5035.746  | 4883.302  | NM_006283 | 17185.119 | 17109.975 | AB023420  | 8264.522  | 3820.421  |
| AK025630  | 3162.793  | 2902.823  | Y08267    | 3693.526  | 3980.299  | BI822179  | 5019.719  | 3150.685  |
| AL365404  | 42624     | 39197.508 | AB016898  | 1157.887  | 1296.859  | AF022912  | 2564.336  | 1490.895  |
| AK022907  | 17380.049 | 12876.144 | NM_017530 | 6426.896  | 2538.701  | AA477428  | 8492.598  | 5920.394  |
| NM_014793 | 2921.704  | 2028.599  | AL360183  | 3485.575  | 2831.441  | AA156342  | 1099.445  | 1167.83   |
| BF213077  | 501.865   | 370.147   | AK027046  | 1397.178  | 1080.353  | R45594    | 8289.642  | 7208.578  |
| NM_004245 | 5849.453  | 3164.312  | NM_003113 | 5001.395  | 3802.833  | AI143386  | 250.182   | 191.808   |
| NM_003241 | 2892.816  | 1997.124  | NM_016578 | 7997.355  | 5866.408  | H46425    | 2380.031  | 1875.6    |
| NM_002685 | 4613.434  | 2485.913  | NM_003822 | 888.085   | 759.932   | AI355949  | 553.962   | 180.673   |
| AK024504  | 3192.139  | 2171.281  | NM_015832 | 17650.027 | 11812.78  | AA278152  | 5629.008  | 2977.462  |
| AF039023  | 3388.45   | 2275.807  | NM_001326 | 15681.507 | 13766.86  | H75530    | 1634.322  | 2189.35   |
| CY3Cy5    | 3860.968  | 136.252   | NM_014319 | 3266.527  | 2975.313  | NM_005036 | 404.918   | 978.504   |
| NM_145904 | 37597.27  | 20342.875 | NM_004865 | 9479.88   | 11168.242 | NM_018201 | 1378.641  | 2057.587  |
| AF086303  | 351.303   | 341.226   | NM_017923 | 1392.765  | 1710.791  | NM_014438 | 417.271   | 397.09    |
| AF086434  | 634.775   | 762.478   | AB019566  | 60036.785 | 57829.156 | NM_014880 | 1790.532  | 2172.625  |
| AK022063  | 5409.53   | 3729.73   | NM_000981 | 53192.926 | 51647.27  | NM_003764 | 2189.289  | 2650.834  |
| AF086345  | 3176.773  | 2525.204  | NM_002047 | 34965.859 | 36020.848 | NM_004825 | 1649.271  | 2083.338  |
| AF086464  | 589.703   | 442.934   | NM_001031 | 52690.023 | 57438.418 | NM_006793 | 19764.68  | 14207.772 |
| AL049278  | 3228.512  | 2215.146  | NM_007208 | 22858.096 | 24108.236 | NM_001538 | 5825.065  | 5089.55   |
| AL117519  | 2078.325  | 1242.015  | NM_000999 | 55954.477 | 56659.422 | X97261    | 3361.734  | 865.275   |
| AK001595  | 2237.51   | 2060.269  | NM_000985 | 26330.797 | 29968.65  | NM_001468 | 299.741   | 164.557   |
| NM_018015 | 2071.178  | 1990.986  | BF130622  | 33548.141 | 30056.328 | NM_005410 | 336.709   | 114.201   |
| NM_003715 | 4628.884  | 3889.471  | NM_003859 | 13912.11  | 11107.418 | D87666    | 29603.678 | 10913.494 |
| NM_145904 | 39584.781 | 26468.773 | NM_000236 | 1714.476  | 1601.007  | NM_001315 | 1232.392  | 735.393   |
| SR2       | 46793.766 | 35531.02  | NM_002903 | 55401.207 | 57854.207 | AF286095  | 1984.761  | 1455.629  |
| SR4       | 12109.513 | 13743.763 | NM_001861 | 2625.054  | 1319.726  | NM_000878 | 781.805   | 887.97    |
| SR6       | 1510.848  | 1410.757  | AK025558  | 17963.832 | 13757.176 | S66407    | 1250.449  | 1291.153  |
| SR8       | 6019.313  | 16791.66  | AK024355  | 3643.055  | 2483.763  | NM_004258 | 30629.973 | 12497.206 |
| SR10      | 21048.443 | 10378.421 | NM_001864 | 52559.23  | 36902.145 | NM_001981 | 2754.233  | 1165.328  |
| CY3Cy5    | 5630.37   | 472.457   | NM_003477 | 24449.107 | 17471.654 | NM_001585 | 37406.316 | 66312.047 |
| AF086395  | 6973.327  | 4038.087  | NM_002654 | 56997.027 | 43617.844 | AK026108  | 21704.881 | 39916.25  |
| AF086049  | 1515.695  | 1417.365  | NM_015478 | 2572.179  | 1503.048  | AF149304  | 416.508   | 580.563   |
| AF114263  | 501.586   | 419.844   | NM_020382 | 7814.979  | 5022.814  | NM_012095 | 2604.356  | 4236.701  |
| AK026142  | 4681.18   | 4160.403  | NM_007192 | 18835.334 | 20244.117 | X73079    | 15017.868 | 19755.758 |
| AK021494  | 3896.897  | 2299.847  | AB002337  | 16343.463 | 20770.125 | NM_019091 | 566.462   | 400.003   |
| AK022117  | 322.323   | 307.217   | NM_014933 | 10344.03  | 10115.086 | L07518    | 332.837   | 200.426   |
| AF075023  | 1054.795  | 1129.864  | NM_003076 | 40482.578 | 44765.48  | AF264781  | 1116.47   | 982.398   |
| AL360160  | 38792.383 | 26974.273 | NM_006385 | 1201.66   | 1664.305  | NM_016124 | 1450.157  | 863.361   |
| AK001092  | 70358.305 | 63502.863 | AK024250  | 1518.05   | 1725.924  | NM_015948 | 3102.948  | 1675.842  |
| NM_014144 | 1316.06   | 1212.586  | NM_003456 | 15449.095 | 16001.537 | NM_000804 | 226.378   | 386.649   |
| AF147345  | 1842.81   | 1688.771  | NM_002585 | 9649.577  | 12235.294 | NM_006555 | 1835.013  | 1370.325  |
| AF147373  | 2374.201  | 2228.59   | AB029016  | 3128.718  | 4022.255  | NM_014521 | 1002.222  | 739.81    |
| AF086253  | 613.704   | 1115.544  | AK000445  | 916.487   | 971.737   | NM_002445 | 950.653   | 1313.541  |
| AF086337  | 1569.5    | 2869.506  | NM_002701 | 3997.959  | 4001.583  | NM_017805 | 335.789   | 411.317   |
| AK026861  | 259.092   | 275.717   | NM_005693 | 1102.51   | 1340.827  | AK023202  | 1876.032  | 1321.518  |
| AK021642  | 3616.444  | 2032.087  | X97303    | 14024.438 | 9892.372  | D63877    | 1162.386  | 640.883   |
| AK022455  | 495.77    | 345.711   | L32162    | 960.434   | 1218.635  | AF131760  | 767.103   | 519.712   |
| AK021987  | 1116.423  | 795.172   | NM_006148 | 382.463   | 252.078   | NM_018698 | 690.332   | 1332.475  |
| AK026905  | 899.137   | 580.711   | AJ290954  | 3884.163  | 3434.937  | NM_006461 | 1533.801  | 4805.903  |
| NM_000134 | 627.185   | 601.335   | AK025451  | 5408.592  | 4325.978  | NM_002826 | 1480.678  | 2319.13   |
| AF075108  | 1205.98   | 841.267   | NM_002783 | 10511.701 | 10100.285 | AF159141  | 3288.993  | 4236.523  |

|           |           |           |           |           |           |           |           |           |
|-----------|-----------|-----------|-----------|-----------|-----------|-----------|-----------|-----------|
| NM_00506C | 831.679   | 476.838   | X52005    | 31995.541 | 26737.543 | NM_01645E | 25233.471 | 21681.811 |
| AF085935  | 355.212   | 331.488   | NM_001047 | 1881.854  | 1703.871  | AK022233  | 1582.281  | 2561.982  |
| AL035369  | 1549.55   | 1173.112  | AK024396  | 17222.096 | 16766.766 | AK026410  | 8071.86   | 7526.71   |
| AF075097  | 4118.724  | 3819.723  | U58514    | 5215.833  | 4354.3    | NM_014637 | 3943.373  | 2731.099  |
| AK022801  | 776.07    | 756.232   | M57627    | 1089.86   | 939.876   | NM_01337E | 12151.26  | 8870.779  |
| AL133075  | 3944.714  | 3393.831  | W74254    | 1900.602  | 1605.783  | AF113208  | 7857.81   | 5958.252  |
| AL137630  | 2327.819  | 2194.648  | M58603    | 9840.889  | 9089.351  | NM_00615E | 2833.853  | 1240.174  |
| AL137277  | 7640.699  | 7578.479  | AA443286  | 4200.188  | 4038.647  | NM_012164 | 1499.759  | 796.2     |
| AL137447  | 518.143   | 567.532   | AB003334  | 12188.664 | 11833.949 | AK026010  | 7745.269  | 4734.77   |
| AL157467  | 391.401   | 249.082   | AW276315  | 3256.691  | 4464.537  | NM_004721 | 288.617   | 472.833   |
| BC023609  | 2196.368  | 2321.43   | AA490737  | 7134.445  | 9762.992  | AB011156  | 461.851   | 319.095   |
| AK023264  | 429.835   | 364.841   | AI878886  | 40217.887 | 46559.777 | NM_01807E | 282.642   | 130.046   |
| AK024457  | 4532.59   | 3096.757  | BG697179  | 32165.275 | 39881.23  | NM_00476C | 5827.785  | 5003.931  |
| AL389977  | 1058.124  | 923.147   | NM_00213E | 56792.602 | 56668.48  | NM_00675E | 2306.858  | 835.921   |
| AK026894  | 1274.623  | 1265.678  | BM012504  | 20271.098 | 27081.047 | NM_00680E | 3876.242  | 15293.828 |
| AK026372  | 1144.387  | 1040.146  | AA664145  | 4849.172  | 6507.088  | NM_01692E | 6815.907  | 7992.513  |
| AF161369  | 2764.363  | 2258.001  | X72308    | 59029.918 | 57494.922 | NM_01232E | 795.931   | 1249.951  |
| AK027176  | 3676.949  | 2931.325  | T70999    | 2092.406  | 1971.872  | NM_00694E | 235.94    | 337.76    |
| AF073328  | 664.275   | 565.549   | T50790    | 12106.323 | 10128.466 | NM_01819E | 438.963   | 616.396   |
| AF129266  | 508.458   | 267.158   | R48168    | 16403.951 | 15881.423 | NM_01394E | 648.683   | 1252.82   |
| Y12019    | 1783.557  | 1221.279  | BC008837  | 2723.129  | 2779.747  | NM_00163E | 4877.59   | 7890.655  |
| AF147418  | 329.637   | 226       | NM_00681E | 53779.34  | 38554.555 | H39560    | 259.867   | 307.855   |
| AK021898  | 2148.06   | 2253.537  | NM_014744 | 3203.225  | 2119.878  | BG534366  | 6492.469  | 6978.012  |
| AK022024  | 2320.668  | 2490.793  | AF146759  | 4714.978  | 3789.175  | BG698522  | 9333.843  | 8719.689  |
| AK022301  | 1131.743  | 1345.76   | AB032993  | 10855.335 | 7641.658  | AA152346  | 551.014   | 388.895   |
| AK021948  | 3282.266  | 3082.224  | NM_000854 | 8145.866  | 5192.845  | L15189    | 1381.87   | 1007.566  |
| AK022054  | 415.131   | 508.2     | NM_001901 | 1034.892  | 603.851   | AB023420  | 8310.287  | 4589.952  |
| AK022341  | 598.636   | 714.618   | AL117423  | 15960.876 | 12001.895 | BI822179  | 5457.97   | 2736.978  |
| U48697    | 654.747   | 322.855   | NM_00614C | 476.625   | 401.15    | AF022912  | 2618.719  | 1202.087  |
| AF230317  | 401.226   | 316.431   | NM_00700E | 549.966   | 684.771   | AA477428  | 9799.214  | 6992.105  |
| AK023806  | 3608.921  | 2279.428  | NM_002084 | 3591.277  | 3609.01   | AA156342  | 1137.131  | 696.759   |
| AF088068  | 305.519   | 361.071   | D16892    | 13857.833 | 14992.005 | R45594    | 8181.888  | 5531.877  |
| Y16696    | 14736.234 | 12720.991 | NM_00475C | 4222.006  | 5369.876  | AI143386  | 310.657   | 442.327   |
| AK026094  | 4030.255  | 3425.091  | NM_00729E | 8220.353  | 11032.879 | H46425    | 2666.096  | 2615.637  |
| AF161344  | 7791.335  | 6219.858  | AK023317  | 485.823   | 665.346   | AI355949  | 674.934   | 604.472   |
| AF022793  | 267.692   | 327.165   | NM_003651 | 33119.395 | 43956.598 | AA278152  | 6204.127  | 5165.541  |
| AF086027  | 1946.649  | 1467.87   | NM_01401E | 1301.228  | 1909.968  | H75530    | 1738.154  | 943.262   |
| NM_001207 | 55222.906 | 56283.742 | NM_00041E | 3212.953  | 5840.983  | AK000554  | 609.096   | 116.639   |
| NM_00663E | 4670.292  | 3795.93   | NM_01324E | 2156.153  | 1969.787  | NM_00647E | 1344.926  | 2770.572  |
| X14675    | 1468.487  | 1431.9    | NM_018431 | 1425.598  | 1916.141  | NM_01488C | 2115.623  | 2266.383  |
| AF071170  | 705.2     | 806.177   | NM_000591 | 6238.493  | 8104.005  | NM_003764 | 2042.258  | 2410.949  |
| AF161364  | 291.154   | 318.057   | NM_00056E | 3750.032  | 4477.604  | NM_00482E | 1692.282  | 2785.626  |
| AF075075  | 1404.462  | 1405.254  | NM_00201E | 1001.669  | 1115.399  | NM_00679E | 22344.041 | 20703.535 |
| NM_018304 | 8726.093  | 7157.933  | AF253318  | 8229.834  | 7787.14   | NM_00153E | 6961.826  | 9160.134  |
| NM_01647E | 2140.601  | 1996.874  | NM_017767 | 26735.328 | 23666.695 | X97261    | 3501.886  | 1600.817  |
| AF086064  | 1220.608  | 897.808   | NM_00326E | 4967.194  | 2953.539  | NM_00146E | 341.338   | 137.038   |
| AK023042  | 1385.569  | 1200.71   | NM_02012E | 1198.838  | 802.534   | D87666    | 31701.129 | 13219.819 |
| AF086501  | 288.473   | 294.138   | AK022832  | 3128.949  | 2201.823  | NM_00131E | 1367.307  | 849.596   |
| AK026429  | 515.622   | 462.76    | NM_017784 | 1578.98   | 1024.206  | AF286095  | 2068.685  | 1207.323  |
| NM_01655C | 5487.008  | 4256.588  | NM_014641 | 3872.37   | 2948.242  | NM_00087E | 1233.422  | 1354.709  |
| AK024813  | 6699.835  | 5062.843  | NM_00446E | 6788.601  | 4800.41   | S66407    | 1225.619  | 1248.199  |
| AJ227909  | 15865.368 | 17286.533 | AB037739  | 387.283   | 352.223   | NM_01652E | 431.546   | 606.977   |
| AK021880  | 915.204   | 848.844   | NM_00034E | 872.748   | 1501.49   | NM_00425E | 32508.385 | 24729.996 |

|           |           |           |           |           |           |           |           |           |
|-----------|-----------|-----------|-----------|-----------|-----------|-----------|-----------|-----------|
| AK024107  | 1115.962  | 1119.903  | NM_020246 | 3819.649  | 7020.439  | NM_001981 | 3138.172  | 2136.514  |
| AL109684  | 467.071   | 489.571   | NM_016354 | 4400.161  | 9457.348  | NM_001585 | 35705.352 | 25634.066 |
| NM_014186 | 8295.918  | 7253.332  | NM_001044 | 1038.229  | 1976.898  | AK026108  | 14482.224 | 3421.411  |
| AF056442  | 1281.964  | 1322.513  | NM_004644 | 2649.722  | 3706.379  | NM_014446 | 1361.393  | 2543.856  |
| AK024752  | 40168.094 | 35374.949 | AV681967  | 1990.057  | 2235.55   | U58096    | 12109.793 | 21367.896 |
| BG117194  | 1078.133  | 1404.199  | NM_018250 | 3270.521  | 7943.527  | X73079    | 15346.713 | 18228.637 |
| AF131859  | 4427.749  | 3966.05   | NM_016553 | 12557.698 | 16013.031 | NM_019091 | 332.222   | 373.592   |
| AK023632  | 577.103   | 495.916   | AB023136  | 1053.494  | 1158.246  | L07518    | 244.337   | 322.171   |
| AF086118  | 8015.677  | 7979.053  | NM_003795 | 46858.539 | 42506.859 | AF264781  | 1215.918  | 1404.309  |
| NM_014136 | 1290.67   | 1403.319  | NM_014232 | 7308.962  | 10869.104 | NM_016124 | 1507.285  | 1077.79   |
| AK025044  | 2402.677  | 1926.625  | NM_005701 | 2007.043  | 3612.388  | NM_015946 | 2849.451  | 1868.212  |
| AK023690  | 708.711   | 768.317   | NM_001231 | 1429.028  | 1912.815  | NM_000804 | 375.942   | 414.337   |
| NM_014723 | 1288.387  | 1987.082  | AB023139  | 10655.042 | 4656.915  | NM_006555 | 1844.235  | 930.47    |
| AB011106  | 2444.512  | 2283.834  | NM_017885 | 5990.386  | 4222.433  | NM_014521 | 1236.636  | 968.886   |
| D26362    | 2301.09   | 1805.682  | X63966    | 435.589   | 499.567   | NM_002445 | 1331.056  | 1339.74   |
| NM_013452 | 2580.734  | 2059.324  | NM_000946 | 5895.238  | 4375.23   | NM_017805 | 296.725   | 496.419   |
| AY009402  | 3147.659  | 2662.583  | NM_016070 | 6797.805  | 5739.156  | AK023202  | 1723.789  | 1318.565  |
| NM_018451 | 1200.892  | 542.021   | NM_016390 | 5016.369  | 4229.199  | D63877    | 1481.958  | 1479.336  |
| NM_012443 | 808.287   | 829.557   | NM_016101 | 11504.842 | 9215.761  | AF131760  | 764.564   | 571.787   |
| NM_007005 | 467.902   | 577.577   | NM_005855 | 56904.66  | 54074.289 | NM_018696 | 752.353   | 430.027   |
| NM_002584 | 10058.651 | 9111.554  | NM_020313 | 1668.775  | 1286.157  | NM_006461 | 1146.173  | 313.978   |
| AK022154  | 561.665   | 315.052   | NM_014628 | 5933.44   | 6671.675  | NM_018201 | 1993.427  | 3152.67   |
| AK022199  | 1038.49   | 951.521   | AK025630  | 3242.606  | 5293.891  | NM_014436 | 610.857   | 1137.339  |
| NM_006211 | 775.051   | 530.834   | AK022907  | 35610.992 | 58516.711 | AF159141  | 3586.904  | 3662.68   |
| NM_003524 | 6996.984  | 5703.22   | NM_014793 | 3255.712  | 6271.472  | NM_016456 | 18040.184 | 31138.361 |
| AK021438  | 749.21    | 798.985   | NM_004245 | 8993.554  | 9507.782  | AK022233  | 1383.131  | 2665.815  |
| AK022315  | 595.796   | 672.708   | NM_003241 | 5002.913  | 6548.72   | AL137713  | 98.832    | 337.769   |
| S39891    | 2219.623  | 2010.32   | NM_002685 | 5799.57   | 5978.225  | AK026410  | 8571.944  | 14392.414 |
| R17536    | 787.723   | 843.377   | AK024504  | 3357.208  | 3456.528  | NM_014637 | 3893.585  | 4948.025  |
| AK021624  | 630.012   | 463.389   | AF039023  | 3751.889  | 3845.113  | NM_013375 | 14377.39  | 15954.253 |
| AF278605  | 8212.109  | 7855.599  | NM_005511 | 6544.409  | 11638.146 | AF113208  | 6693.191  | 5532.827  |
| NM_006497 | 45844.777 | 38147.539 | NM_014696 | 56238.945 | 57511.109 | NM_006153 | 3322.193  | 1456.455  |
| AK022329  | 886.348   | 720.372   | NM_018475 | 7697.463  | 9997.777  | NM_012164 | 1610.702  | 1051.767  |
| AL133599  | 1188.495  | 990.046   | AK025451  | 5491.943  | 2496.289  | AK026010  | 331.194   | 450.982   |
| AK022380  | 890.628   | 714.843   | NM_002783 | 11786.577 | 8026.483  | NM_004721 | 148.37    | 168.361   |
| AB037776  | 1267.295  | 1346.579  | X52005    | 34574.805 | 25242.773 | AB011156  | 433.88    | 603.434   |
| AF196976  | 8723.343  | 7642.072  | NM_001047 | 2167.505  | 1515.489  | NM_018075 | 1108.48   | 1139.815  |
| AL050379  | 2525.017  | 2086.359  | AK024396  | 17546.596 | 15312.769 | NM_004760 | 5759.833  | 5671.089  |
| NM_003161 | 2736.019  | 2242.796  | U58514    | 5009.761  | 3534.062  | NM_006752 | 2518.565  | 1640.328  |
| NM_014496 | 1288.57   | 1211.281  | M57627    | 1273.176  | 907.007   | NM_006805 | 3635.148  | 1005.384  |
| NM_016215 | 33583.672 | 25431.799 | W74254    | 2463.723  | 1863.993  | AF149304  | 568.57    | 2377.047  |
| AK026919  | 377.243   | 391.4     | M58603    | 10271.971 | 8964.703  | NM_012095 | 2699.261  | 9740.358  |
| NM_001501 | 11509.48  | 10972.216 | AA443286  | 4044.197  | 2801.802  | NM_006942 | 286.905   | 111.881   |
| NM_006176 | 33692.41  | 27486.354 | AB003334  | 13114.975 | 11647.868 | NM_018195 | 441.887   | 722.63    |
| AL137459  | 1962.317  | 1881.407  | AW276315  | 4116.986  | 5157.183  | NM_013943 | 774.268   | 1500.901  |
| AB037812  | 559.587   | 606.417   | AA490737  | 7797.509  | 10591.931 | NM_001635 | 4404.539  | 9126.487  |
| AB007932  | 5189.939  | 4411.227  | BG697179  | 29460.354 | 43852.355 | H39560    | 150.252   | 216.075   |
| AF219257  | 33910.918 | 26388.248 | NM_002136 | 55151.598 | 55494.328 | BG534366  | 7771.072  | 17417.076 |
| NM_003978 | 669.85    | 764.569   | BM012504  | 19676.164 | 24979.148 | BG698522  | 12378.177 | 21779.477 |
| NM_002561 | 28029.627 | 22549.004 | AA664145  | 5074.223  | 5731.989  | AA152346  | 649.605   | 1082.471  |
| NM_006103 | 51625.078 | 40716.566 | X72308    | 57445.91  | 58365.43  | L15189    | 1275.156  | 2058.726  |
| NM_006206 | 400.115   | 573.25    | T70999    | 659.897   | 712.969   | AB023420  | 8395.546  | 6929.443  |
| NM_000805 | 404.767   | 433.438   | T50790    | 9987.481  | 10281.151 | BI822179  | 5144.398  | 3566.494  |

|           |           |           |           |           |           |           |           |           |
|-----------|-----------|-----------|-----------|-----------|-----------|-----------|-----------|-----------|
| AL359933  | 23766.098 | 17585.066 | R48168    | 16115.896 | 17827.027 | AF022912  | 2988.215  | 1554.364  |
| NM_001302 | 1547.719  | 1295.185  | AB040954  | 9815.507  | 12393.971 | AA477428  | 9694.979  | 6142.324  |
| M17783    | 8520.296  | 6570.466  | NM_002081 | 2411.134  | 3588.715  | AA156342  | 1310.827  | 796.682   |
| NM_018590 | 5212.507  | 4009.958  | AF146759  | 4242.025  | 3267.366  | R45594    | 8762.396  | 6551.478  |
| NM_003178 | 2900.347  | 2131.161  | AB032993  | 10803.07  | 5502.19   | AI143386  | 334.912   | 184.968   |
| NM_012437 | 7791.136  | 6256.835  | NM_000854 | 8038.717  | 4801.098  | H46425    | 3814.533  | 3589.853  |
| NM_002607 | 988.952   | 1164.084  | NM_001901 | 996.12    | 846.897   | AI355949  | 1498.341  | 2084.367  |
| AF116712  | 1003.953  | 795.019   | AL117423  | 17134.627 | 12521.913 | AA278152  | 6684.663  | 6787.42   |
| AF116626  | 7130.634  | 6557.74   | NM_006140 | 714.921   | 456.233   | H75530    | 1694.303  | 1494.931  |
| NM_001760 | 23999.021 | 22850.291 | NM_007003 | 375.678   | 521.283   | AK000554  | 774.519   | 395.337   |
| NM_002527 | 1699.846  | 1292.778  | NM_002084 | 3730.059  | 3136.217  | NM_006472 | 1232.891  | 417.154   |
| NM_005890 | 2249.487  | 1701.713  | D16892    | 13613.723 | 9729.338  | NM_002826 | 1343.72   | 11762.233 |
| NM_007065 | 48302.797 | 30953.887 | NM_004750 | 4253.36   | 4295.804  | X97261    | 3592.986  | 2282.503  |
| AF149785  | 10126.864 | 9767.197  | NM_007295 | 11226.747 | 15723.506 | NM_001468 | 232.21    | 393.95    |
| NM_012068 | 15109.78  | 14778.109 | AK023317  | 574.345   | 1157.987  | D87666    | 35387.113 | 37145.734 |
| NM_004064 | 8112.405  | 5336.435  | NM_003651 | 35914.516 | 38961.895 | NM_001315 | 1341.927  | 3517.49   |
| NM_001256 | 5303.47   | 4138.208  | NM_014012 | 1186.982  | 1503.036  | AF286095  | 2002.818  | 8666.876  |
| NM_014704 | 6125.676  | 5538.873  | NM_000418 | 2933.319  | 3723.188  | NM_000878 | 1179.501  | 3175.196  |
| NM_020205 | 1024.068  | 1050.312  | NM_013246 | 2437.334  | 2532.761  | S66407    | 1477.699  | 3782.764  |
| NM_001227 | 1243.062  | 1393.493  | NM_018431 | 1480.508  | 1616.102  | NM_004258 | 29554.154 | 20491.818 |
| NM_001191 | 16830.768 | 15146.75  | NM_000591 | 5820.914  | 7303.846  | NM_001981 | 4093.125  | 2736.276  |
| U15174    | 741.218   | 1117.759  | NM_000565 | 4052.416  | 5092.278  | NM_014654 | 487.114   | 329.711   |
| NM_013342 | 2353.557  | 2556.065  | NM_002019 | 722.396   | 720.961   | NM_001585 | 35983.254 | 35222.387 |
| NM_014344 | 1319.181  | 856.979   | AF253318  | 7833.872  | 6039.735  | AK026108  | 16349.53  | 10377.081 |
| AB040917  | 436.629   | 438.773   | NM_017767 | 39986.836 | 33701.84  | NM_006379 | 1783.888  | 1756.501  |
| AL110261  | 15546.319 | 10557.374 | NM_006148 | 424.768   | 624.977   | BF571428  | 6416.036  | 5834.343  |
| AA203539  | 638.957   | 670.966   | AJ290954  | 4406.246  | 4375.429  | AB037723  | 16093.238 | 13970.163 |
| AK021786  | 1662.001  | 1243.116  | AK022832  | 2566.908  | 1746.186  | NM_006246 | 2453.378  | 1589.179  |
| AF245505  | 3697.439  | 2496.155  | NM_017784 | 1490.433  | 693.067   | NM_004316 | 568.253   | 306.656   |
| NM_004279 | 17673.98  | 13567.819 | NM_014641 | 4131.222  | 2986.128  | NM_014446 | 1207.356  | 550.143   |
| NM_004851 | 20411.699 | 19138.736 | NM_004462 | 6541.471  | 4672.839  | U58096    | 9379.623  | 1716.525  |
| NM_001908 | 6239.28   | 5536.195  | AB037739  | 318.041   | 315.306   | NM_016929 | 9189.278  | 43755.359 |
| NM_000285 | 22025.084 | 17380.588 | NM_000343 | 1365.437  | 3351.048  | NM_012323 | 1080.414  | 8648.604  |
| NM_005911 | 46646.047 | 35401.793 | NM_020246 | 4398.974  | 5923.467  | NM_003054 | 707.848   | 1045.936  |
| AV702690  | 3658.885  | 3362.169  | NM_016354 | 4990.318  | 5793.05   | NM_002219 | 2502.343  | 6570.527  |
| AL117452  | 14872.924 | 14075.608 | NM_001044 | 1202.698  | 1429.268  | AF182404  | 2600.357  | 8959.783  |
| NM_012230 | 1328.77   | 1546.129  | NM_004644 | 2275.01   | 3001.839  | NM_000804 | 364.202   | 3879.235  |
| NM_014038 | 9068.458  | 6895.916  | AV681967  | 1948.208  | 2259.226  | NM_002445 | 1006.026  | 5508.862  |
| NM_002061 | 5567.448  | 5638.583  | NM_018250 | 2837.856  | 2986.255  | NM_017809 | 257.827   | 440.902   |
| AF169974  | 4279.183  | 4156.591  | NM_016553 | 12245.484 | 15889.931 | AK023202  | 1813.918  | 1499.276  |
| NM_004522 | 2029.229  | 2260.488  | AB023136  | 1199.399  | 1327.491  | D63877    | 1695.879  | 715.815   |
| NM_005733 | 3094.819  | 3795.803  | NM_003795 | 46318.77  | 44614.719 | AF131760  | 952.434   | 571.01    |
| NM_018138 | 4970.369  | 6509.224  | NM_014232 | 5740.127  | 6989.7    | NM_018698 | 871.858   | 408.197   |
| NM_019619 | 5242.791  | 5998.269  | NM_005701 | 2142.683  | 1909.521  | NM_006461 | 1300.499  | 990.474   |
| AF183411  | 2761.749  | 2737.631  | NM_001231 | 861.144   | 964.723   | NM_018201 | 1889.556  | 1650.802  |
| BF244591  | 1662.329  | 1538.496  | NM_006819 | 56317.117 | 57092.375 | NM_014438 | 662.074   | 581.665   |
| NM_005886 | 9069.532  | 6709.756  | NM_014744 | 3939.427  | 3293.245  | NM_014880 | 2209.51   | 2099.513  |
| U63785    | 1782.353  | 1561.734  | D80004    | 909.838   | 534.383   | NM_003764 | 2573.847  | 2287.255  |
| NM_005966 | 2518.429  | 1720.614  | NM_000946 | 5604.905  | 3806.34   | NM_004829 | 1571.492  | 479.048   |
| NM_003156 | 4809.781  | 3169.855  | NM_016070 | 6352.866  | 4919.285  | NM_006793 | 26770.084 | 35867.508 |
| AF090944  | 1697.129  | 1256.552  | NM_016390 | 5036.36   | 3457.452  | NM_001538 | 7562.608  | 18454.318 |
| NM_006473 | 1594.926  | 2196.66   | NM_016101 | 10545.226 | 7064.564  | NM_004428 | 367.808   | 472.245   |
| NM_005653 | 2655.299  | 1966.841  | NM_005859 | 58073.559 | 51670.422 | NM_006809 | 3405.971  | 7036.481  |

|           |           |           |           |           |           |           |           |           |
|-----------|-----------|-----------|-----------|-----------|-----------|-----------|-----------|-----------|
| NM_014553 | 5547.73   | 4309.375  | NM_020313 | 1679.095  | 1615.561  | AF149304  | 358.567   | 1072.677  |
| NM_003440 | 1242.803  | 1297.187  | NM_014628 | 6211.883  | 5550.367  | NM_012095 | 2013.117  | 7907.151  |
| NM_004698 | 8824.893  | 6516.813  | AK025630  | 4042.767  | 4455.605  | L07518    | 267.728   | 642.378   |
| U41387    | 48170.609 | 35678.633 | AK022907  | 34852.176 | 36506.363 | AF264781  | 949.259   | 1331.718  |
| NM_004516 | 15396.022 | 11036.73  | NM_014793 | 3437.521  | 4565.777  | AK022823  | 279.837   | 89.324    |
| NM_006513 | 5275.311  | 8192.757  | NM_004245 | 10687.047 | 11976.073 | AK024215  | 3373.308  | 3550.377  |
| NM_012111 | 20471.582 | 26499.195 | NM_003241 | 4306.083  | 5898.353  | AB044661  | 1962.944  | 1583.341  |
| NM_004470 | 26945.652 | 25532.879 | NM_002685 | 5042.341  | 8336.408  | NM_000606 | 9954.355  | 8403.578  |
| NM_001418 | 15293.897 | 13618.202 | AK024504  | 2740.45   | 3612.146  | NM_016124 | 1916.167  | 1611.009  |
| NM_003756 | 50462.605 | 33574.512 | AF039023  | 3285.989  | 4000.233  | NM_019079 | 409.672   | 132.783   |
| AL049680  | 5035.425  | 3847.964  | NM_005511 | 5578      | 6584.831  | U53530    | 1235.37   | 825.245   |
| AL133660  | 2872.408  | 4470.49   | NM_014698 | 59735.809 | 55505.262 | NM_006598 | 616.193   | 218.39    |
| NM_005932 | 1458.148  | 897.293   | NM_018475 | 7824.357  | 6859.276  | NM_015948 | 3963.663  | 8496.215  |
| BF036874  | 3709.774  | 4012.223  | NM_003262 | 7178.996  | 5999.625  | AK000554  | 737.653   | 1391.583  |
| BE888487  | 959.794   | 929.598   | NM_020125 | 1468.913  | 1256.909  | NM_006472 | 1190.067  | 2275.924  |
| AF182419  | 3233.04   | 3210.847  | X52005    | 36658.473 | 21133.607 | NM_002826 | 1020.902  | 2729.05   |
| NM_004293 | 1073.503  | 1152.003  | NM_001047 | 2248.523  | 1534.17   | AF159141  | 2662.183  | 16800.152 |
| NM_004450 | 388.415   | 383.515   | AK024396  | 11761.245 | 9516.819  | NM_016458 | 31273.227 | 74609.828 |
| NM_007016 | 3149.428  | 3532.697  | U58514    | 5412.068  | 4869.003  | AK022233  | 1734.316  | 4454.392  |
| NM_002703 | 12634.518 | 11762.17  | M57627    | 1295.486  | 731.654   | AK026410  | 8148.37   | 8746.364  |
| NM_005375 | 3447.845  | 2878.598  | W74254    | 2905.191  | 2206.559  | NM_014637 | 3857.13   | 2593.738  |
| NM_005985 | 16625.861 | 18019.709 | M58603    | 9296.128  | 6596.994  | NM_013379 | 12895.811 | 9254.115  |
| NM_015906 | 5411.868  | 4673.753  | AA443286  | 5422.1    | 3113.336  | AF113208  | 8056.752  | 7496.24   |
| AF229246  | 27631.738 | 35173.957 | AB003334  | 12820.255 | 10352.978 | NM_006153 | 2990.383  | 2716.621  |
| S64709    | 3543.15   | 3537.598  | AW276315  | 3702.906  | 3584.377  | NM_012164 | 1707.277  | 1359.305  |
| NM_018488 | 2698.075  | 2382.806  | AA490737  | 10087.397 | 8380.03   | AK026010  | 248.081   | 429.31    |
| X56465    | 1474.862  | 1157.385  | BG697179  | 34639.594 | 37805.516 | NM_004721 | 255.738   | 303.761   |
| NM_003071 | 14473.043 | 11441.613 | NM_002136 | 54180.754 | 53888.926 | AB011156  | 576.964   | 364.723   |
| NM_003108 | 521.711   | 562.343   | BM012504  | 21702.352 | 36302.648 | NM_018079 | 374.11    | 42.899    |
| NM_013310 | 6932.354  | 4455.354  | AA664145  | 5882.806  | 7129.417  | NM_004760 | 7034.519  | 16378.402 |
| BC004958  | 5280.405  | 3842.723  | X72308    | 57416.676 | 58583.676 | NM_006752 | 2970.662  | 18852.137 |
| NM_005762 | 13452.824 | 9925.998  | T70999    | 582.722   | 865.467   | CY3Cy5    | 790.448   | 102.735   |
| X84370    | 10549.348 | 9807.692  | T50790    | 13762.292 | 17137.145 | SB        | 545.885   | 261.233   |
| NM_004039 | 1307.967  | 1390.363  | R48168    | 18168.32  | 25182.17  | AL389941  | 307.943   | 540.723   |
| NM_000508 | 1083.044  | 881.833   | AB040954  | 10771.434 | 15191.038 | AB037756  | 572.165   | 516.896   |
| AB014558  | 1942.393  | 2047.928  | NM_002081 | 1921.84   | 2014.252  | AK001853  | 1299.747  | 1390.077  |
| NM_006287 | 1202.229  | 1037.802  | AB023139  | 11760.274 | 10461.691 | AK021888  | 230.851   | 175.242   |
| NM_000118 | 6656.18   | 5752.896  | NM_017885 | 6451.705  | 5744.471  | AK022848  | 1272.685  | 1244.583  |
| NM_000913 | 1553.913  | 1589.604  | D16892    | 13478.813 | 6794.656  | AL049957  | 488.247   | 551.736   |
| NM_001298 | 51746.895 | 55569.305 | NM_004750 | 4185.276  | 4331.412  | NM_021005 | 271.991   | 314.68    |
| BG325046  | 5378.443  | 5999.513  | NM_007295 | 9086.52   | 6104.22   | SB        | 482.922   | 534.878   |
| AI351740  | 30995.434 | 29248.902 | AK023317  | 369.994   | 352.404   | SR2       | 16739.096 | 16077.382 |
| AA444051  | 25452.119 | 22122.365 | NM_003651 | 38671.09  | 30939.898 | SR4       | 3636.272  | 3837.36   |
| NM_007164 | 21404.859 | 18885.045 | NM_014012 | 1336.291  | 1146.793  | SR6       | 528.942   | 511.764   |
| BE783826  | 48666.512 | 55325.918 | NM_000418 | 3327.392  | 2273.696  | SR8       | 2093.862  | 8410.21   |
| X04827    | 1922.532  | 3442.96   | NM_013246 | 2611.784  | 1882.911  | SR10      | 7337.93   | 5456.25   |
| BC020596  | 2185.842  | 2598.277  | NM_018431 | 1633.285  | 1382.107  | CY3Cy5    | 3195.349  | 471.587   |
| AF116606  | 51619.887 | 60110.07  | NM_000591 | 6624.033  | 5822.206  | AF086063  | 303.273   | 354.388   |
| X98922    | 4768.58   | 5570.189  | NM_000565 | 3376.305  | 2931.937  | AF086098  | 358.93    | 429.571   |
| AK098435  | 8364.894  | 9477.742  | NM_002019 | 887.728   | 1232.902  | AF086076  | 186.54    | 147.888   |
| AK092872  | 5535.363  | 4152.339  | NM_000799 | 425.522   | 640.701   | AL833393  | 519.679   | 786.042   |
| AF230496  | 1542.327  | 1320.477  | AF253318  | 6463.124  | 7270.392  | AF088005  | 440.418   | 282.989   |
| M16801    | 2708.605  | 2317.684  | NM_017767 | 39146.824 | 42747.906 | AF086096  | 1089.86   | 1109.249  |

|           |           |           |           |           |           |           |           |           |
|-----------|-----------|-----------|-----------|-----------|-----------|-----------|-----------|-----------|
| M94065    | 2881.031  | 2277.013  | AK024848  | 25413.549 | 32316.221 | NM_017933 | 2559.849  | 1500.002  |
| NM_00606E | 2926.632  | 2501.231  | NM_004852 | 857.034   | 1031.079  | NM_017819 | 2948.563  | 1741.39   |
| NM_002704 | 549.01    | 614.372   | NM_000543 | 1745.761  | 2202.881  | NM_014803 | 309.22    | 289.042   |
| U16752    | 994.583   | 859.971   | U06699    | 50266.777 | 52168.906 | AF147386  | 502.928   | 204.252   |
| M30134    | 594.178   | 640.493   | NM_00614E | 459.831   | 549.551   | AF273052  | 3487.594  | 2669.776  |
| NM_00088C | 269.58    | 230.263   | AJ290954  | 5328.13   | 5117.33   | NM_017943 | 2220.332  | 2008.989  |
| NM_00203E | 15575.092 | 12693.498 | AK025451  | 6871.807  | 6952.378  | AF147383  | 511.406   | 460.851   |
| NM_00572E | 27903.789 | 24210.268 | NM_002783 | 16386.209 | 18285.795 | AK025682  | 414.906   | 398.143   |
| NM_015493 | 2165.643  | 2175.952  | NM_00303E | 1763.332  | 650.789   | NM_01647E | 3910.323  | 5146.381  |
| NM_003747 | 1102.849  | 1537.889  | NM_018155 | 10538.76  | 5746.432  | AL389986  | 2562.768  | 2578.672  |
| AB037744  | 2868.136  | 2636.118  | AL050358  | 3279.491  | 2718.958  | AF088052  | 428.553   | 2205.958  |
| AF141901  | 454.734   | 619.098   | NM_004731 | 1207.835  | 1137.823  | AK027155  | 1630.829  | 1477.315  |
| NM_00700E | 1348.041  | 1347.569  | NM_000544 | 5378.628  | 5599.843  | AF264626  | 237.582   | 235.688   |
| L29143    | 2377.931  | 2841.826  | NM_001044 | 1350.6    | 906.849   | AK024528  | 3727.325  | 1948.18   |
| AF234532  | 2676.079  | 3457.24   | NM_004644 | 2653.101  | 2741.096  | NM_01537C | 1411.983  | 1443.576  |
| NM_00241E | 1733.955  | 2865.911  | AV681967  | 2230.082  | 1759.387  | AF085917  | 514.201   | 639.11    |
| NM_00209C | 1160.536  | 1757.426  | NM_01825C | 3236.922  | 2805.955  | AF085989  | 351.367   | 291.274   |
| NM_00448E | 733.619   | 1015.263  | NM_016553 | 11807.282 | 9838.089  | AL360139  | 36509.449 | 29442.266 |
| NM_01241E | 663.255   | 575.248   | AB023136  | 1056.46   | 1026.309  | AF075110  | 1365.211  | 1493.405  |
| NM_01329E | 14821.079 | 13973.542 | NM_00379E | 44371.762 | 46008.355 | AL137323  | 272.653   | 230.941   |
| AL117478  | 2676.118  | 2212.644  | NM_014232 | 6169.772  | 9285.414  | AL137494  | 1557.367  | 2125.055  |
| NM_005307 | 5545.22   | 3687.281  | NM_005701 | 2030.38   | 2866.311  | AL162037  | 1411.909  | 1456.605  |
| NM_00595E | 6075.743  | 4182.369  | NM_001231 | 1007.67   | 1389.5    | AL390150  | 645.897   | 692.098   |
| AF225426  | 2041.245  | 2533.58   | NM_00681E | 55472.723 | 57032.961 | AK021962  | 208.577   | 85.428    |
| NM_00520E | 12301.98  | 11746.215 | NM_014744 | 3626.993  | 4967.237  | AK056674  | 326.912   | 528.658   |
| AF099740  | 1023.584  | 1085.928  | AF146759  | 7214.435  | 8957.933  | AK022856  | 201.207   | 511.146   |
| NM_006117 | 10867.88  | 9993.119  | AB032993  | 11475.637 | 14782.075 | AK022042  | 374.043   | 638.248   |
| NM_00222E | 2304.631  | 1846.174  | NM_000854 | 9947.271  | 13397.426 | AL117588  | 300.248   | 109.095   |
| NM_00622E | 909.431   | 795.731   | NM_001901 | 1357.913  | 1145.619  | AK024653  | 6515.972  | 4865.269  |
| NM_01541E | 34832.09  | 25968.498 | AL117423  | 20731.992 | 23146.445 | AF103907  | 262.774   | 130.332   |
| NM_004897 | 4130.314  | 4135.053  | NM_00614C | 815.282   | 985.298   | AF094508  | 368.035   | 335.064   |
| NM_00255E | 1622.554  | 1536.02   | NM_007003 | 381.575   | 302.849   | AF161351  | 369.057   | 513.263   |
| AF225418  | 2052.019  | 2382.533  | NM_002084 | 4057.301  | 4133.509  | AF111782  | 1145.164  | 1134.953  |
| NM_00030E | 2444.34   | 3583.311  | NM_005511 | 4659.167  | 3381.195  | AF151530  | 563.437   | 681.319   |
| NM_00452E | 15544.092 | 20817.662 | NM_01469E | 51127.363 | 38816.145 | AK021991  | 298.024   | 245.237   |
| AK026381  | 17384.848 | 16785.369 | NM_01847E | 7516.7    | 4990.423  | AK022093  | 669.083   | 860.85    |
| AK023107  | 7447.402  | 8177.822  | NM_003262 | 6625.624  | 4314.438  | AK022232  | 222.531   | 71.652    |
| NM_00457E | 436.692   | 659.09    | NM_02012E | 1014.028  | 586.181   | AK022376  | 368.627   | 403.674   |
| NM_000647 | 1820.92   | 1560.021  | AK022832  | 2748.344  | 2888.646  | AK022005  | 185.541   | 218.94    |
| AB046793  | 385.161   | 396.077   | NM_017784 | 1829.411  | 1475.937  | AK022272  | 381.759   | 891.949   |
| NM_017604 | 4863.544  | 4536.188  | NM_014641 | 3494.386  | 4514.472  | AF279780  | 13430.605 | 12243.348 |
| NM_01773E | 14090.294 | 13798.121 | NM_004462 | 5651.789  | 6228.462  | AK022510  | 758.831   | 1583.725  |
| NM_016557 | 2406.134  | 2519.717  | AB037739  | 356.395   | 257.146   | AK023878  | 403.26    | 1782.806  |
| NM_000623 | 3437.482  | 2348.613  | AB020664  | 2609.698  | 4408.097  | AK021851  | 473.04    | 1661.514  |
| AF161348  | 1877.931  | 2184.306  | NM_00664C | 32317.732 | 47314.129 | L37717    | 369.858   | 1173.866  |
| NM_018467 | 21999.727 | 21469.762 | NM_00086E | 583.136   | 943.095   | AJ131609  | 1224.19   | 1904.488  |
| AF150735  | 12342.014 | 9864.571  | NM_000343 | 1092.192  | 2324.903  | BC019280  | 1344.386  | 1499.868  |
| NM_018183 | 2188.68   | 1824.305  | NM_019112 | 11135.278 | 13578.257 | AF086498  | 294.993   | 230.832   |
| NM_012382 | 4810.073  | 5808.307  | NM_01233E | 12498.402 | 16035.189 | AK000687  | 296.835   | 275.014   |
| BF038366  | 2332.998  | 3681.858  | NM_020161 | 800.837   | 1194.053  | AF079567  | 598.302   | 403.425   |
| NM_002452 | 10928.069 | 16830.654 | NM_02024E | 4698.61   | 5345.911  | AL049311  | 226.739   | 425.626   |
| NM_012304 | 1233.834  | 2224.925  | NM_000084 | 5934.448  | 6251.309  | AK000016  | 1296.29   | 1344.743  |
| NM_01644C | 38298.391 | 35354.336 | NM_016354 | 6022.491  | 7208.706  | AK023367  | 534.508   | 351.12    |



|           |           |           |           |           |           |           |           |           |
|-----------|-----------|-----------|-----------|-----------|-----------|-----------|-----------|-----------|
| NM_007194 | 3037.816  | 3308.935  | AB040954  | 8240.351  | 4244.726  | AL080209  | 477.366   | 434.747   |
| NM_000314 | 10305.853 | 9526.716  | NM_002081 | 1194.283  | 595.795   | AL137431  | 183.63    | 196.422   |
| AB002369  | 1306.134  | 1760.691  | AB023139  | 10196.363 | 6823.087  | NM_016255 | 427.882   | 440.907   |
| S74620    | 768.112   | 892.917   | NM_017885 | 6127.432  | 4478.37   | NM_014318 | 793.732   | 961.787   |
| AF305239  | 2124.428  | 1800.779  | D80004    | 1002.782  | 911.289   | AL133089  | 1962.151  | 2066.309  |
| NM_002827 | 13966.2   | 10822.762 | X63966    | 456.616   | 394.058   | AK023526  | 496.829   | 1049.882  |
| NM_001946 | 782.173   | 691.255   | NM_000946 | 5713.797  | 4430.584  | BE266129  | 456.01    | 2988.842  |
| BF035425  | 52198.25  | 49109.012 | NM_016070 | 5355.042  | 4549.126  | AK025602  | 3675.472  | 8950.487  |
| NM_001608 | 690.776   | 677.574   | NM_016390 | 3815.697  | 3752.157  | AK026309  | 1362.518  | 2644.946  |
| NM_000155 | 59396.043 | 71112.172 | NM_016101 | 11636.767 | 16305.764 | AL137486  | 1837.137  | 2997.156  |
| NM_014638 | 1877.253  | 2183.635  | NM_005859 | 57723.129 | 57124.688 | AL110162  | 441.581   | 386.596   |
| NM_000508 | 348.842   | 430.813   | NM_020313 | 1429.134  | 2128.028  | AK022681  | 1912.22   | 2409.865  |
| AB014558  | 2082.263  | 1700.3    | NM_014628 | 6071.014  | 7788.273  | NM_017708 | 257.087   | 249.79    |
| NM_006287 | 1336.661  | 1189.801  | AK025630  | 2930.376  | 5348.271  | BE895529  | 2550.727  | 3018.836  |
| NM_000118 | 6994.262  | 5844.022  | AL365404  | 58133.523 | 55892.762 | AK000964  | 210.002   | 135.526   |
| NM_000913 | 1462.768  | 1068.251  | AK022907  | 37896.152 | 50604.688 | AL117536  | 1594.644  | 1155.238  |
| NM_001295 | 50304.258 | 48068.953 | NM_014793 | 3504.07   | 4865.717  | NM_017751 | 2832.955  | 2819.162  |
| BG325046  | 5103.426  | 4458.301  | NM_004245 | 15675.441 | 16892.832 | NM_003771 | 661.222   | 698.809   |
| AI351740  | 31044.836 | 33108.32  | NM_003241 | 6075.468  | 8543.434  | NM_017860 | 550.576   | 433.821   |
| AA444051  | 23649.254 | 36216.848 | NM_002685 | 5896.302  | 5271.813  | X91195    | 27672.926 | 21555.371 |
| X04827    | 3302.659  | 7196.785  | AK024504  | 3359.035  | 3421.567  | AF086190  | 271.108   | 234.773   |
| H07088    | 6078.799  | 8318.943  | AF039023  | 3744.382  | 4044.732  | NM_006143 | 319.797   | 375.277   |
| AI004656  | 3721.152  | 4159.264  | CY3Cy5    | 5445.312  | 228.794   | AL050035  | 1361.233  | 2248.238  |
| BC020596  | 1808.736  | 2285.205  | NM_145904 | 31504.104 | 46300.121 | AK024449  | 144.06    | 264.559   |
| AF116606  | 49885.359 | 58687.867 | AF086303  | 554.276   | 992.237   | AF040723  | 16120.651 | 24003.322 |
| X98922    | 4890.194  | 6032.889  | AF086434  | 1879.499  | 5502.457  | NM_015527 | 1677.196  | 4138.869  |
| AK098435  | 7822.537  | 6001.92   | AK022063  | 11287.181 | 18876.826 | X89675    | 596.269   | 2775.188  |
| AK092872  | 5741.195  | 5615.384  | AF086345  | 9065.008  | 10462.979 | NM_012185 | 286.467   | 919.522   |
| AF230496  | 1452.834  | 1374.722  | AF086464  | 1244.671  | 1628.681  | NM_005798 | 5029.814  | 17473.707 |
| M16801    | 1226.391  | 1116.602  | AL049278  | 3597.811  | 5972.233  | NM_004216 | 852.697   | 1957.081  |
| NM_013334 | 15619.679 | 12547.021 | AL117519  | 3202.173  | 5157.457  | NM_016285 | 16097.841 | 17487.742 |
| U16752    | 779.564   | 706.643   | AK001595  | 3284.692  | 3185.641  | NM_001464 | 306.79    | 453.196   |
| M30134    | 521.739   | 471.641   | NM_018015 | 3256.498  | 2725.325  | NM_002051 | 1575.237  | 1194.473  |
| NM_002038 | 19625.705 | 15577.375 | NM_003715 | 7861.163  | 7085.169  | AK022177  | 339.5     | 558.01    |
| NM_005725 | 27029.895 | 19493.604 | NM_145904 | 36323.723 | 37466.531 | AK023852  | 225.662   | 181.874   |
| NM_015493 | 2391.138  | 2227.57   | SR2       | 49096.766 | 28947.416 | AF086466  | 1038.209  | 1133.029  |
| NM_003747 | 925.779   | 1161.754  | SR4       | 13764.832 | 7714.642  | AB007962  | 1897.265  | 2071.069  |
| AB037744  | 2270.935  | 2967.553  | SR6       | 2170.804  | 1137.284  | AF005081  | 593.474   | 675.323   |
| L29143    | 2566.665  | 6074.244  | SR8       | 7179.501  | 4823.384  | AK021546  | 270.603   | 190.774   |
| AF234532  | 2577.904  | 4295.097  | SR10      | 24690.471 | 3888.391  | AL050186  | 5039.909  | 4811.477  |
| NM_002418 | 2367.535  | 3204.034  | CY3Cy5    | 5306.469  | 239.827   | AK021918  | 1518.538  | 1910.896  |
| NM_002090 | 1254.941  | 1831.769  | AF086395  | 8647.787  | 6939.237  | AK021669  | 1294.327  | 1974.094  |
| NM_004485 | 575.585   | 708.588   | AF086049  | 3276.66   | 4335.255  | AL080113  | 17791.412 | 15921.539 |
| NM_012419 | 1665.076  | 4797.063  | AF114263  | 878.673   | 1532.146  | AL050083  | 678.363   | 982.875   |
| NM_013295 | 14952.216 | 17957.598 | AK026142  | 5361.571  | 5498.651  | AK022766  | 490.983   | 799.413   |
| AL117478  | 2234.792  | 2496.2    | AK021494  | 6458.678  | 7613.814  | AL049422  | 2479.506  | 6246.3    |
| NM_005307 | 4459.101  | 4953.159  | AK022117  | 540.408   | 1297.908  | NM_000093 | 757.583   | 3013.351  |
| NM_005958 | 6069.159  | 6371.383  | AF075023  | 3249.465  | 5666.024  | NM_001775 | 3317.827  | 7266.138  |
| AF225426  | 1711.595  | 1749.858  | AL360160  | 65967.914 | 54395.277 | AB033059  | 584.111   | 1751.154  |
| NM_005208 | 12285.594 | 9672.465  | AK001092  | 70921.555 | 63131.598 | NM_016484 | 949.52    | 2957.373  |
| X84370    | 10571.324 | 8749.562  | NM_014144 | 4209.134  | 6185.726  | AK026114  | 323.174   | 453.986   |
| NM_004035 | 1761.929  | 1458.8    | AF147345  | 4990.015  | 4307.465  | NM_014452 | 262.509   | 1500.729  |
| NM_002225 | 1846.843  | 1359.342  | AF147373  | 8290.051  | 4712.601  | NM_014683 | 200.223   | 414.61    |

|           |           |           |           |           |           |           |           |           |
|-----------|-----------|-----------|-----------|-----------|-----------|-----------|-----------|-----------|
| NM_006229 | 856.65    | 661.342   | AF086253  | 876.634   | 241.75    | AF023130  | 154.99    | 373.427   |
| NM_015415 | 38698.988 | 23697.789 | AF086337  | 2328.991  | 1396.473  | AK021536  | 3144.013  | 2415.86   |
| NM_004897 | 3589.962  | 3082.93   | AK026861  | 603.467   | 846.982   | NM_002600 | 326.681   | 442.188   |
| NM_002555 | 1402.777  | 1007.561  | AK021642  | 6297.406  | 7425.632  | NM_003646 | 7513.625  | 8112.314  |
| AF225418  | 1984.139  | 1428.882  | AK022455  | 651.968   | 664.377   | NM_006663 | 407.555   | 423.367   |
| NM_000309 | 2193.002  | 2398.529  | AK021987  | 2873.767  | 2843.194  | NM_006092 | 338.167   | 278.653   |
| NM_004528 | 15832.34  | 16814.721 | AK026905  | 2478.104  | 3039.785  | NM_003939 | 231.304   | 142.387   |
| AK026381  | 16766.971 | 25895.898 | AK023449  | 641.586   | 732.2     | NM_012424 | 261.717   | 263.955   |
| AF004711  | 2047.849  | 4516.188  | NM_000134 | 975.917   | 1466.955  | NM_002446 | 839.629   | 852.29    |
| NM_000647 | 1925.306  | 3070.055  | AF075108  | 1556.023  | 1562.14   | NM_004440 | 234.309   | 137.501   |
| AB046793  | 446.436   | 551.135   | NM_005060 | 1243.145  | 1923.337  | NM_000863 | 537.859   | 539.961   |
| NM_017604 | 6158.478  | 9180.415  | AF085935  | 614.008   | 1269.661  | NM_006651 | 1528.788  | 2330.615  |
| NM_017738 | 13563.945 | 20540.662 | AL035369  | 2614.387  | 2245.807  | NM_005336 | 3648.612  | 3867.733  |
| NM_016557 | 3399.712  | 6877.711  | AF075097  | 9773.223  | 10810.567 | NM_001419 | 4630.304  | 6035.41   |
| NM_000623 | 4480.269  | 7924.588  | AK022801  | 711.887   | 687.17    | AF119817  | 10309.522 | 13758.235 |
| NM_018301 | 377.885   | 729.085   | AL133075  | 8931.348  | 13145.441 | AL035306  | 1424.604  | 3048.817  |
| AF161348  | 1804.597  | 1996.267  | AL137692  | 1842.407  | 2625.819  | NM_004230 | 4339.554  | 12487.77  |
| NM_018467 | 21367.633 | 18734.621 | AL137630  | 3375.643  | 4294.395  | NM_014503 | 414.108   | 554.529   |
| NM_006068 | 2943.507  | 2049.227  | AK055236  | 378.584   | 277.637   | NM_014659 | 953.093   | 1342.939  |
| NM_002704 | 395.942   | 378.827   | AL137277  | 18039.641 | 9307.433  | NM_004399 | 2805.845  | 2298.03   |
| AF150735  | 10878.496 | 7456.49   | AL137447  | 582.997   | 197.365   | NM_006337 | 2712.972  | 6291.968  |
| NM_018183 | 2115.197  | 1533.282  | BC023609  | 2314.9    | 890.609   | NM_004507 | 1313.784  | 1772.068  |
| NM_012382 | 4856.167  | 4322.682  | AK023264  | 618.148   | 668.235   | NM_002710 | 9556.688  | 10198.886 |
| BF038366  | 2352.74   | 4124.526  | AK024457  | 14904.898 | 17062.611 | NM_014060 | 2110.287  | 1703.141  |
| NM_002452 | 9255.563  | 11987.725 | AK026894  | 1988.428  | 2563.37   | NM_004749 | 4481.345  | 3296.494  |
| NM_012304 | 867.481   | 2093.768  | AK026372  | 1167.706  | 1624.721  | BQ446064  | 687.207   | 719.744   |
| NM_016440 | 38091.676 | 52466.117 | AF161369  | 8397.206  | 9091.254  | AF302502  | 1097.944  | 1322.92   |
| S74620    | 743.691   | 1080.897  | AK027176  | 10671.347 | 8415.85   | AF274571  | 704.885   | 809.478   |
| AF305239  | 2661.026  | 3539.163  | AF073328  | 1345.398  | 1379.003  | NM_005449 | 354.578   | 357.893   |
| NM_002827 | 16113.037 | 27208.455 | AF129266  | 1535.269  | 645.26    | NM_003879 | 1054.862  | 1149.334  |
| NM_001946 | 915.052   | 2202.969  | Y12019    | 4955.458  | 3513.414  | NM_016052 | 4367.801  | 3017.213  |
| NM_001608 | 1569.105  | 3240.43   | AF147418  | 1094.163  | 1904.814  | NM_005427 | 605.471   | 747.389   |
| NM_000159 | 51216.563 | 62725.953 | AF232217  | 3112.358  | 5275.448  | NM_016312 | 412.003   | 406.449   |
| NM_014638 | 1787.904  | 1949.448  | AL137326  | 1682.169  | 3537.211  | AF234887  | 432.19    | 535.853   |
| AF099740  | 1085.341  | 1073.214  | AK021898  | 6144.764  | 10560.731 | NM_001776 | 723.084   | 1399.258  |
| NM_006117 | 10929.439 | 8721.092  | AK022024  | 2597.231  | 2682.253  | NM_001792 | 402.856   | 496.474   |
| NM_006287 | 1348.689  | 885.542   | AK022301  | 1288.47   | 1155.457  | NM_001903 | 466.656   | 619.299   |
| NM_000118 | 6641.032  | 5085.808  | AK021948  | 3399.136  | 1842.704  | U87223    | 2479.793  | 3039.315  |
| NM_000913 | 1386.604  | 911.408   | AK022054  | 340.947   | 217.792   | NM_005857 | 2169.507  | 5863.011  |
| NM_001298 | 50929.809 | 40762.203 | AK022191  | 554.849   | 233.426   | NM_002429 | 176.285   | 120.988   |
| BG325046  | 5380.98   | 3372.318  | AK022341  | 482.88    | 340.738   | NM_000429 | 1197.131  | 7868.208  |
| AI351740  | 29459.988 | 21588.104 | U48697    | 407.011   | 706.231   | AK027037  | 335.539   | 232.212   |
| AA444051  | 22278.986 | 22703.852 | AF230317  | 920.573   | 933.284   | NM_003875 | 5195.506  | 4861.275  |
| NM_007164 | 24144.203 | 30497.998 | AK023806  | 5801.854  | 5937.165  | AF191687  | 1315.916  | 889.973   |
| BE783826  | 44666.246 | 52118.137 | AF088068  | 789.463   | 1296.013  | NM_003046 | 228.995   | 62.973    |
| X04827    | 2723.672  | 3979.378  | AK026094  | 5421.537  | 8724.253  | NM_000274 | 6651.708  | 5087.676  |
| H07088    | 6061.236  | 7199.604  | AF161344  | 18445.309 | 22788.83  | NM_000170 | 1811.677  | 2195.138  |
| AI004656  | 3400.917  | 5644.827  | AF086027  | 2854.428  | 1934.268  | NM_000281 | 203.35    | 318.802   |
| AF116606  | 46607.422 | 59365.258 | NM_001207 | 68667.516 | 63391.238 | AK001295  | 1131.427  | 880.262   |
| X98922    | 4900.349  | 7658.507  | AK023655  | 1049.418  | 912.942   | NM_006031 | 1391.172  | 1377.06   |
| AK098435  | 7693.094  | 9544.521  | NM_006638 | 6613.441  | 5397.471  | NM_002715 | 2050.845  | 1664.431  |
| AK092872  | 7085.125  | 11334.85  | X14675    | 3900.468  | 4716.325  | NM_001020 | 40509.621 | 54614.91  |
| AF230496  | 2119.213  | 4403.446  | AF071170  | 1266.866  | 2352.053  | AB020660  | 751.838   | 771.677   |

|           |           |           |           |           |           |           |           |           |
|-----------|-----------|-----------|-----------|-----------|-----------|-----------|-----------|-----------|
| NM_013334 | 14055.859 | 13248.248 | AF161364  | 6867.964  | 10098.902 | NM_018051 | 934.324   | 1043.616  |
| AF113125  | 343.114   | 574.75    | AF075075  | 3352.776  | 6833.048  | NM_015371 | 1607.971  | 2307.002  |
| AF141901  | 1095.303  | 840.677   | NM_018304 | 14224.288 | 5521.98   | AB040915  | 1638.13   | 1736.306  |
| NM_00700E | 1015.721  | 1263.5    | NM_016472 | 2693.152  | 3736.848  | AF147791  | 357.541   | 510.461   |
| AL109708  | 1324.333  | 1480.629  | AF086064  | 854.737   | 1291.017  | NM_00132E | 23503.096 | 19911.85  |
| L29143    | 2956.443  | 2129.294  | AK023042  | 3528.361  | 3786.262  | NM_00574E | 3017.923  | 3747.04   |
| AF234532  | 2712.866  | 1989.375  | AK024813  | 11208.183 | 16354.984 | NM_00669E | 1219.011  | 502.659   |
| NM_00241E | 1773.573  | 1592.206  | AJ227909  | 39360.953 | 42119.805 | NM_00459E | 3484.773  | 1708.937  |
| NM_00209C | 1037.765  | 1346.255  | AK021880  | 1358.758  | 1107.809  | NM_006037 | 644.021   | 547.107   |
| NM_00448E | 837.266   | 1106.812  | AK024107  | 1053.755  | 778.456   | NM_015871 | 4699.258  | 35782.047 |
| NM_01329E | 14465.133 | 18592.602 | AL109684  | 1380.569  | 1310.289  | NM_019037 | 8219.295  | 10464.167 |
| AL117478  | 1938.108  | 2416.725  | NM_01418E | 12430.279 | 13072.309 | NM_015891 | 1983.047  | 471.067   |
| NM_005307 | 5346.639  | 6476.16   | AF056442  | 3073.68   | 4146.696  | NM_006802 | 508.765   | 309.33    |
| NM_00595E | 5739.661  | 7415.861  | AK024752  | 50791.145 | 57326.637 | AB037778  | 944.237   | 837.73    |
| NM_01343E | 1088.699  | 2138.211  | BG117194  | 2257.061  | 4811.204  | NM_00506E | 10769.536 | 10541.227 |
| AF225426  | 848.983   | 1151.609  | AK024181  | 1403.091  | 1960.813  | NM_00308E | 4159.624  | 3148.813  |
| NM_00520E | 9205.124  | 10413.291 | AF131859  | 4554.468  | 8196.634  | NM_00375E | 7551.22   | 6587.22   |
| NM_000421 | 1307.857  | 1803.698  | AF086118  | 10397.558 | 5936.105  | NM_00622E | 281.109   | 217.494   |
| AK025687  | 29059.066 | 42114.215 | NM_01413E | 1639.93   | 1358.977  | NM_01759C | 1247.131  | 770.516   |
| AF218941  | 4156.583  | 9564.454  | AK025044  | 8290.633  | 3518.482  | AB011145  | 2881.214  | 2421.104  |
| AL137264  | 37768.391 | 56632.422 | AK023644  | 559.381   | 248.224   | NM_015251 | 277.777   | 212.94    |
| NM_00222E | 596.589   | 1120.046  | AK023690  | 1647.822  | 718.967   | M92422    | 2328.883  | 2268.481  |
| X84370    | 11593.572 | 12104.514 | NM_01472E | 2137.614  | 5424.212  | NM_01786E | 1849.559  | 1937.891  |
| NM_00403E | 1811.586  | 1540.721  | AB011106  | 2748.976  | 5170.3    | NM_001874 | 249.469   | 285.083   |
| NM_00050E | 422.864   | 429.62    | D26362    | 2621.348  | 4119.896  | NM_00186E | 299.709   | 308.712   |
| AB014558  | 2341.4    | 2103.459  | NM_01345E | 6491.646  | 8853.048  | X69637    | 449.215   | 338.655   |
| NM_006854 | 13819.047 | 8492.565  | NM_018451 | 1674.957  | 1801.515  | NM_00421E | 199.546   | 336.319   |
| NM_00458C | 3803.651  | 2010.49   | NM_01244E | 931.798   | 1004.359  | NM_01815E | 29456.637 | 30594.609 |
| NM_020387 | 50173.742 | 41294.754 | NM_00700E | 824.291   | 674.366   | NM_00081E | 7110.252  | 3462.665  |
| NM_00724E | 1602.338  | 1618.23   | NM_002584 | 10113.598 | 8012.107  | NM_00251E | 3508.935  | 2084.963  |
| AK026248  | 2353.139  | 1792.513  | AK022154  | 678.058   | 678.999   | NM_017424 | 705.841   | 230.777   |
| NM_00457E | 520.197   | 300.111   | AK022199  | 1846.519  | 1504.903  | NM_00152E | 7632.838  | 23880.561 |
| NM_000647 | 1283.959  | 1358.919  | NM_006211 | 1495.925  | 1106.291  | NM_00088E | 4570.812  | 3273.856  |
| NM_017604 | 4918.668  | 5941.301  | NM_003524 | 9969.851  | 10904.973 | AF254086  | 1384.856  | 787.02    |
| NM_01773E | 10623.16  | 12977.965 | AK021438  | 1191.587  | 3176.803  | AL390142  | 1391.328  | 789.177   |
| NM_016557 | 2400.253  | 3394.279  | NM_00591E | 2631.934  | 5127.765  | NM_00656E | 969.902   | 663.992   |
| NM_00062E | 2944.758  | 5322.937  | S39891    | 2964.847  | 3758.05   | AB007930  | 2102.352  | 1919.909  |
| AF161348  | 2049.428  | 3280.218  | R17536    | 839.375   | 863.676   | X76978    | 272.597   | 352.353   |
| NM_018467 | 21311.4   | 25164.928 | AK021624  | 749.156   | 593.193   | AJ005273  | 1048.189  | 1569.438  |
| NM_00606E | 3028.617  | 3190.185  | AF278605  | 9359.745  | 7035.873  | AK021892  | 998.185   | 870.657   |
| NM_002704 | 655.92    | 795.952   | NM_006497 | 58101.035 | 46419.332 | NM_003121 | 10369.822 | 6641.816  |
| U16752    | 2271.73   | 3465.173  | AK022329  | 1479.406  | 905.173   | NM_003437 | 1406.283  | 1010.396  |
| M30134    | 2672.71   | 4850.224  | AL133599  | 3855.125  | 2459.657  | NM_018337 | 5542.525  | 3876.444  |
| NM_00088C | 382.804   | 591.089   | AK022380  | 472.761   | 407.788   | NM_01804E | 1279.524  | 1466.185  |
| NM_00203E | 17235.523 | 20137.668 | AB037776  | 1567.5    | 3826.251  | NM_006481 | 3436.936  | 4257.831  |
| NM_00572E | 28614.506 | 22550.195 | AF196976  | 14462.64  | 35352.715 | AB011115  | 536.655   | 600.73    |
| NM_01549E | 2810.553  | 2194.072  | AL050379  | 3752.951  | 5798.868  | NM_00391C | 12530.09  | 13234.595 |
| NM_003747 | 1372.085  | 1521.254  | NM_003161 | 4219.026  | 5622.621  | AB007913  | 809.347   | 1026.719  |
| AB037744  | 2821.121  | 1947.703  | NM_01449E | 2214.584  | 3032.59   | L09080    | 8258.925  | 14547.305 |
| NM_00160E | 463.22    | 355.228   | NM_01621E | 49323.672 | 53994.328 | NM_00732E | 5739.58   | 5942.164  |
| NM_00015E | 51101.004 | 59635.996 | AK026919  | 1017.457  | 1407.418  | NM_00188E | 1994.861  | 1183.696  |
| NM_01463E | 1667.517  | 1460.824  | NM_001501 | 23432.781 | 21184.914 | NM_004467 | 244.438   | 173.033   |
| AF099740  | 1143.061  | 1068.089  | NM_00617E | 54333.859 | 51812.844 | NM_01805E | 7930.192  | 4944.722  |

|           |           |           |           |           |           |           |           |           |
|-----------|-----------|-----------|-----------|-----------|-----------|-----------|-----------|-----------|
| NM_006117 | 10432.721 | 9345.7    | AL137459  | 3815.75   | 2925.81   | NM_00454E | 7906.617  | 5246.748  |
| NM_00222E | 1672.073  | 1604.357  | AB037812  | 1003.495  | 857.759   | X69079    | 23144.938 | 9810.356  |
| NM_00622E | 1383.157  | 3407.175  | AB007932  | 11600.586 | 8521.227  | BI759406  | 10369.327 | 5951.486  |
| NM_01541E | 35325.664 | 35155.309 | AF219257  | 50897.309 | 51236.789 | R76099    | 3695.32   | 3394.275  |
| NM_004897 | 3683.431  | 4597.598  | NM_00397E | 2583.79   | 2880.769  | S74445    | 781.187   | 656.1     |
| NM_00255E | 1215.389  | 2042.757  | NM_002561 | 38586.895 | 47203.34  | BI763360  | 2203.081  | 2580.61   |
| AF225418  | 2287.476  | 3338.208  | NM_00610E | 56859.215 | 53354.336 | D25538    | 945.769   | 873.986   |
| NM_00452E | 14915.76  | 24302.711 | NM_00620E | 470.354   | 695.411   | NM_00036C | 12359.416 | 10881.833 |
| AK026381  | 16476.406 | 15375.804 | NM_00080E | 683.765   | 642.413   | D49950    | 209.167   | 114.217   |
| NM_00245C | 12197.811 | 5994.843  | AL359933  | 31079.449 | 23590.883 | NM_00184E | 475.306   | 465.046   |
| NM_00168E | 2037.902  | 2804.562  | NM_00130E | 1664.693  | 1315.073  | X03635    | 2065.08   | 1753.948  |
| AF004711  | 547.027   | 1074.534  | M17783    | 12968.252 | 8131.905  | AF353674  | 2069.406  | 2954.216  |
| NM_00070E | 1070.838  | 1964.099  | NM_01859C | 5364.09   | 2557.14   | BC002645  | 2825.701  | 2941.93   |
| NM_004231 | 54616.879 | 62392.945 | NM_00317E | 3539.288  | 1303.963  | NM_02113E | 1187.002  | 1902.936  |
| NM_016577 | 1116.182  | 859.683   | NM_012437 | 9290.85   | 4899.721  | BC002792  | 3019.512  | 7081.764  |
| AK023107  | 7737.124  | 5876.058  | NM_002607 | 1323.94   | 2663.145  | NM_005847 | 256.765   | 163.364   |
| NM_013334 | 10500.552 | 5627.677  | AF116712  | 1260.957  | 3021.698  | NM_00228E | 35050.582 | 34228.527 |
| AF150735  | 11364.666 | 13205.164 | AF116626  | 8325.918  | 12328.068 | NM_002164 | 605.638   | 437.235   |
| NM_01818E | 2115.67   | 2878.461  | NM_00176C | 32612.42  | 48270.672 | NM_003811 | 5798.317  | 4077.729  |
| BF038366  | 1441.984  | 1949.789  | NM_002527 | 2371.099  | 2978.61   | NM_002981 | 3632.51   | 2020.229  |
| NM_00245E | 9473.165  | 11207.719 | NM_00589C | 3025.111  | 2421.451  | NM_001244 | 957.775   | 618.755   |
| NM_012304 | 628.239   | 836.886   | NM_00706E | 55935.695 | 49068.387 | NM_01227E | 209.416   | 208.023   |
| NM_01644C | 37634.82  | 33239.609 | AF149785  | 14579.137 | 13451.882 | NM_006137 | 777.729   | 249.202   |
| NM_007194 | 3092.177  | 4219.025  | NM_01206E | 25226.387 | 22198.324 | NM_01613E | 17799.984 | 8548.515  |
| NM_000314 | 11284.438 | 19230.08  | NM_004064 | 14184.833 | 11831.157 | AL117468  | 2358.274  | 1149.279  |
| AB002369  | 1414.506  | 2511.213  | NM_00125E | 8859.854  | 6859.462  | NM_01961E | 2983.783  | 2074.081  |
| S74620    | 666.65    | 1095.927  | NM_014704 | 11842.482 | 9622.133  | NM_00538E | 399.601   | 328.513   |
| AF305239  | 2087.037  | 1752.65   | NM_02020E | 1974.325  | 1881.364  | AK027086  | 1095.697  | 1854.134  |
| NM_002827 | 11842.267 | 8565.688  | AK024815  | 665.248   | 596.461   | AB032997  | 432.189   | 393.069   |
| BF035425  | 51974.523 | 51210.809 | NM_001227 | 1976.99   | 2066.693  | AL096857  | 1284.418  | 1489.144  |
| CY3Cy5    | 5696.897  | 351.516   | NM_001191 | 29129.098 | 23826.84  | X07203    | 13045.144 | 10687.747 |
| NM_00417E | 6822.918  | 11433.033 | U15174    | 965.404   | 1096.051  | AB040104  | 241.052   | 319.904   |
| NM_00454E | 35099.539 | 51339.949 | NM_01334E | 2527.111  | 2294.51   | NM_003834 | 2765.755  | 2370.219  |
| AK027120  | 932.719   | 1270.53   | NM_014344 | 1860.02   | 1229.867  | NM_00575E | 1117.721  | 1561.426  |
| AB029001  | 1845.36   | 2049.441  | AB040917  | 704.87    | 717.415   | NM_00370E | 10943.911 | 11484.267 |
| AB006624  | 3764.745  | 4171.074  | AL110261  | 44255     | 30892.727 | NM_00036E | 605.028   | 1091.701  |
| AL109717  | 1730.304  | 1926.45   | AA203539  | 969.166   | 561.075   | NM_00440E | 660.359   | 847.739   |
| AK025473  | 881.903   | 713.151   | AK021786  | 1964.168  | 811.838   | NM_00198E | 1904.293  | 2969.104  |
| AF146693  | 806.617   | 903.822   | AF245505  | 3250.343  | 1449.55   | AF073770  | 1127.898  | 606.486   |
| AF271070  | 15085.432 | 19632.545 | M26663    | 436.79    | 784.844   | AL359401  | 3270.627  | 1679.526  |
| NM_01490E | 798.54    | 1078.182  | NM_00427E | 18427.156 | 22793.631 | NM_01221E | 548.653   | 416.664   |
| AK055959  | 1073.619  | 1044.555  | NM_004851 | 22609.949 | 30183.643 | NM_01657E | 2449.629  | 1119.288  |
| AF052141  | 1400.451  | 1260.562  | NM_00190E | 10358.018 | 12213.759 | NM_00130E | 5772.485  | 3575.412  |
| AF052149  | 3869.925  | 3994.407  | NM_00028E | 21733.453 | 23456.859 | M21304    | 217.432   | 81.869    |
| AK025586  | 1860.8    | 1693.446  | NM_005911 | 61179.102 | 59153.84  | NM_00197E | 249.637   | 122.405   |
| AL137512  | 658.584   | 438.954   | AV702690  | 4225.451  | 3055.346  | AB040896  | 379.441   | 226.213   |
| NM_00417E | 6230.016  | 5795.054  | AL117452  | 18527.426 | 17347.605 | NM_001107 | 1689.578  | 558.936   |
| NM_00454E | 33784.883 | 22918.914 | NM_01223C | 2004.19   | 1678.796  | AF084645  | 216.515   | 124.072   |
| SR3       | 34606.949 | 26629.971 | NM_01403E | 13346.032 | 12779.146 | AF151851  | 3033.574  | 3257.674  |
| SR5       | 3359.384  | 3953.053  | NM_002061 | 5783.503  | 5072.99   | NM_003471 | 157.336   | 181.075   |
| SR7       | 4592.229  | 39024     | AF169974  | 8968.526  | 7708.045  | AF220417  | 942.554   | 1089.579  |
| SR9       | 16340.565 | 3782.344  | NM_00452E | 5595.93   | 5350.007  | NM_00112E | 15788.31  | 13476.374 |
| CY3Cy5    | 4183.003  | 287.488   | NM_00573E | 3709.272  | 2654.764  | NM_004591 | 1992.504  | 1402.135  |

|           |           |           |           |           |           |           |           |           |
|-----------|-----------|-----------|-----------|-----------|-----------|-----------|-----------|-----------|
| L32606    | 882.17    | 1324.396  | NM_018138 | 9256.475  | 9205.194  | AB037732  | 1038.184  | 1485.898  |
| L05148    | 667.125   | 1254.221  | NM_019619 | 5635.77   | 4924.695  | NM_005767 | 505.394   | 486.187   |
| AK091125  | 854.239   | 1160.233  | AF183411  | 4190.335  | 3608.203  | NM_001837 | 373.841   | 536.171   |
| D16904    | 1095.271  | 1932.587  | BF244591  | 1446.672  | 924.658   | NM_001838 | 35739.496 | 46866.77  |
| D16474    | 3682.642  | 3562.768  | NM_005886 | 17471.57  | 13239.692 | BC016029  | 454.863   | 620.162   |
| AL080072  | 851.925   | 932.127   | U63785    | 1835.377  | 1752.085  | M27487    | 20882.674 | 19207.682 |
| AL035301  | 632.286   | 600.308   | NM_005966 | 3002.241  | 1607.341  | NM_002611 | 1111.977  | 552.565   |
| NM_017687 | 2243.596  | 3458.216  | NM_003156 | 6950.828  | 3695.658  | NM_017417 | 255.769   | 128.217   |
| NM_017975 | 3477.512  | 4052.305  | AF090944  | 1955.06   | 734.859   | AL133602  | 525.122   | 472.337   |
| AK025036  | 1343.42   | 1189.396  | NM_006473 | 2288.514  | 3181.909  | AF037219  | 1516.431  | 784.985   |
| AK024843  | 16818.461 | 16348.676 | NM_014643 | 2413.268  | 2893.809  | AK026075  | 205.869   | 139.409   |
| AF074994  | 1103.836  | 1254.395  | NM_005653 | 4478.69   | 4800.479  | NM_000251 | 1914.462  | 713.606   |
| NM_017670 | 7444.084  | 7173.745  | NM_014553 | 6505.559  | 7254.671  | AF118071  | 157.806   | 142.842   |
| AK021468  | 529.092   | 470.095   | NM_003440 | 1721.63   | 2447.114  | NM_006038 | 1308.653  | 1379.639  |
| BC033020  | 862.18    | 920.891   | NM_004698 | 10469.305 | 10576.967 | AB011133  | 1676.544  | 1689.934  |
| AK026168  | 2307.651  | 2141.307  | U41387    | 49540.152 | 42942.578 | NM_017572 | 19030.125 | 14002.929 |
| AJ296152  | 8757.119  | 8516.621  | NM_004516 | 29019.227 | 28571.377 | NM_018444 | 998.405   | 637.68    |
| AK001067  | 3236.755  | 3805.859  | NM_006513 | 4911.941  | 4162.569  | NM_000252 | 701.221   | 730.352   |
| AK027088  | 13342.994 | 12410.84  | NM_003685 | 28824.801 | 20588.895 | NM_006947 | 4900.083  | 3818.249  |
| AB037721  | 6628.22   | 6052.91   | NM_002486 | 1324.612  | 1536.536  | NM_004090 | 3009.999  | 3023      |
| AK024525  | 5904.325  | 8984.336  | NM_006295 | 14413.108 | 14140.796 | NM_014634 | 2147.475  | 2195.276  |
| AK024909  | 755.981   | 899.573   | NM_001540 | 7229.201  | 5560.172  | NM_001918 | 6906.572  | 8514.814  |
| AK024544  | 1728.107  | 1959.255  | NM_012111 | 34069.738 | 28458.824 | BC031485  | 829.671   | 1067.536  |
| AK021705  | 2567.225  | 3430.134  | NM_004470 | 39381.438 | 39909.828 | NM_004092 | 2935.73   | 5798.798  |
| NM_016141 | 29023.328 | 31291.234 | NM_001418 | 13076.736 | 8685.208  | X15624    | 693.062   | 1217.695  |
| AL109702  | 1212.621  | 1208.905  | NM_003756 | 55680.281 | 32713.018 | NM_001886 | 1940.953  | 598.767   |
| AK025624  | 9560.745  | 10535.597 | AL049680  | 6491.952  | 3857.076  | NM_004467 | 284.472   | 416.208   |
| AK026684  | 958.08    | 877.305   | AL133660  | 2642.186  | 2729.099  | NM_018058 | 6697.493  | 3331.097  |
| AL110125  | 7356.26   | 5605.961  | NM_005932 | 875.658   | 481.228   | NM_004548 | 7311.225  | 2778.28   |
| AK022764  | 890.953   | 954.154   | BF036874  | 6880.711  | 8728.199  | X69079    | 19278.639 | 5997.399  |
| X89744    | 429.559   | 415.73    | BE888487  | 1766.713  | 2233.571  | BI759406  | 9753.12   | 2403.69   |
| AJ011600  | 2093.756  | 1817.687  | AF182419  | 9968.313  | 10571.748 | R76099    | 3678.347  | 1371.497  |
| AJ002785  | 1505.709  | 1474.908  | NM_004293 | 1056.774  | 1408.689  | S74445    | 614.123   | 360.446   |
| Z70716    | 666.202   | 906.946   | NM_004450 | 540.182   | 659.086   | BI763360  | 1943.305  | 1584.908  |
| AL049251  | 544.523   | 915.504   | NM_007016 | 4274.286  | 5438.206  | D25538    | 803.616   | 933.752   |
| Z83945    | 1655.471  | 1591.309  | NM_002703 | 16670.006 | 16304.229 | NM_000360 | 12292.378 | 14135.13  |
| AF086216  | 498.976   | 1094.691  | NM_005375 | 4447.064  | 3552.523  | D49950    | 264.305   | 199.202   |
| AK022422  | 674.666   | 1162.471  | NM_005985 | 43631.41  | 49428.191 | NM_001848 | 475.552   | 348.549   |
| AK023485  | 950.169   | 1221.392  | NM_015906 | 9296.148  | 10645.537 | X03635    | 1680.086  | 1128.547  |
| AK022474  | 15255.974 | 22756.043 | AK023759  | 6722.679  | 5419.407  | BC011847  | 35001.914 | 63997.102 |
| AK022392  | 1621.069  | 2279.99   | L25270    | 55153.777 | 51171.969 | X03348    | 745.085   | 643.128   |
| AL117451  | 620.691   | 464.64    | AB033111  | 3209.781  | 2522.708  | BC002645  | 2809.643  | 2440.231  |
| AL049280  | 1761.64   | 1277.453  | AJ276316  | 4862.874  | 3569.222  | NM_021138 | 1043.284  | 1189.253  |
| AK025212  | 4610.252  | 4624.533  | AF229246  | 41958.211 | 34125.988 | BC002792  | 2774.163  | 4880.362  |
| AB021925  | 683.132   | 576.471   | S64709    | 7772.872  | 6556.254  | NM_001523 | 228.52    | 397.999   |
| AL157503  | 7851.542  | 7177.592  | NM_018488 | 4707.527  | 3258.65   | NM_017423 | 623.409   | 770.894   |
| AK000053  | 1027.727  | 955.118   | X56465    | 1635.141  | 1034.722  | Z70705    | 285.502   | 321.707   |
| AK000786  | 1446.406  | 911.11    | NM_003071 | 25119.57  | 17655.986 | NM_003811 | 5646.545  | 5011.682  |
| AK000935  | 2043.621  | 1692.553  | NM_003108 | 605.962   | 397.909   | NM_002981 | 3867.148  | 1848.667  |
| AK021458  | 4698.296  | 4080.258  | NM_005762 | 11284.812 | 6394.662  | NM_001244 | 561.878   | 184.907   |
| NM_017674 | 10606.196 | 10161.637 | X84370    | 21377.883 | 30964.803 | NM_012275 | 215.22    | 110.98    |
| AK000811  | 1130.263  | 854.365   | NM_004039 | 1948.09   | 2297.048  | NM_006137 | 672.906   | 259.753   |
| AK000966  | 2070.006  | 1800.975  | NM_000508 | 1039.131  | 1528.77   | NM_016138 | 14507.354 | 4162.374  |

|           |           |           |           |           |           |           |           |           |
|-----------|-----------|-----------|-----------|-----------|-----------|-----------|-----------|-----------|
| NM_01863C | 6230.23   | 26568.764 | AB014558  | 2337.596  | 3211.378  | AL117468  | 2171.016  | 632.01    |
| AF086175  | 989.03    | 2272.722  | NM_006287 | 3295.685  | 4139.152  | NM_019613 | 2932.19   | 983.548   |
| AK002196  | 925.356   | 1390.504  | NM_000118 | 8809.95   | 11943.771 | NM_005382 | 341.801   | 110.008   |
| NM_00457E | 1775.112  | 2516.914  | NM_000913 | 3446.9    | 3341.086  | AK027086  | 1087.149  | 629.614   |
| AF040097  | 1309.21   | 1690.764  | NM_00129E | 60983.949 | 62297.781 | AB032997  | 399.632   | 458.953   |
| NM_02043E | 983.664   | 1190.714  | BG325046  | 8920.895  | 11972.949 | AL096857  | 1127.05   | 1238.218  |
| AK024182  | 1867.224  | 2158.552  | AI351740  | 41564.531 | 53217.453 | X07203    | 13182.719 | 12462.249 |
| NM_006913 | 9749.916  | 13710.792 | AA444051  | 25719.23  | 29541.393 | AB040104  | 246.706   | 238.151   |
| NM_00049E | 9353.451  | 8503.141  | NM_007164 | 43344.75  | 39350.738 | NM_003834 | 2789.972  | 2742.273  |
| AK001880  | 4748.168  | 4630.125  | BE783826  | 57801.453 | 54914.398 | NM_00595E | 2504.088  | 2325.816  |
| AF156166  | 5633.722  | 5740.352  | X04827    | 5364.824  | 5535.205  | NM_003381 | 750.959   | 541.007   |
| NM_014373 | 4176.328  | 3488.55   | H07088    | 6366.39   | 8322.305  | NM_00036E | 558.416   | 811.716   |
| NM_01420E | 24290.846 | 16265.344 | AI004656  | 5903.137  | 10217.838 | NM_00440E | 387.722   | 483.392   |
| NM_001651 | 6168.672  | 5866.943  | BC020596  | 3331.265  | 2713.637  | NM_00198E | 1466.412  | 2359.118  |
| L32786    | 1769.065  | 1559.117  | AF116606  | 59301.273 | 53517.441 | L09080    | 2297.055  | 3191.516  |
| U03239    | 489.616   | 698.159   | X98922    | 8364.577  | 11054.074 | NM_00732E | 1991.97   | 2561.416  |
| AL355720  | 4840.871  | 5066.224  | NM_00606E | 5444.732  | 5838.229  | NM_012213 | 588.875   | 275.435   |
| AK002023  | 2985.228  | 2782.77   | NM_002704 | 1228.014  | 1676.42   | NM_016573 | 1944.365  | 837.352   |
| AF150156  | 633.624   | 794.455   | U16752    | 2812.189  | 3094.732  | NM_001303 | 4885.859  | 2061.094  |
| NM_016464 | 715.519   | 902.274   | M30134    | 1422.551  | 3009.959  | M21304    | 214.663   | 156.941   |
| L40402    | 2407.362  | 1941.505  | NM_00088C | 388.725   | 1075.284  | NM_00197E | 218.118   | 174.144   |
| Z36780    | 2934.906  | 8114.269  | NM_00203E | 33265.332 | 46197.242 | AB040896  | 377.563   | 332.737   |
| AK022403  | 1742.456  | 4287.947  | NM_005729 | 36768.336 | 45394.184 | NM_001107 | 1703.395  | 388.138   |
| AK022955  | 7087.034  | 12152.271 | NM_015493 | 3011.866  | 5172.963  | AF084645  | 243.706   | 63.301    |
| AF131741  | 482.365   | 1117.398  | NM_003747 | 1587.7    | 3109.246  | AF151851  | 2763.667  | 1412.941  |
| AK021760  | 1039.791  | 1217.141  | AB037744  | 3777.846  | 5377.891  | NM_003471 | 246.802   | 310.609   |
| BC035855  | 1605.672  | 1567.461  | AF141901  | 1318.358  | 1645.886  | AF220417  | 895.241   | 1357.912  |
| AL137408  | 13714.447 | 13237.184 | NM_00700E | 2619.563  | 2712.785  | NM_001122 | 18115.689 | 15473.498 |
| AF054995  | 2956.635  | 3009.129  | AL109708  | 2135.623  | 1650.425  | NM_004591 | 1743.841  | 1791.499  |
| AL080176  | 4637.234  | 4183.646  | L29143    | 6637.312  | 7044.308  | AL133027  | 729.777   | 700.484   |
| AK023627  | 3465.012  | 3768.712  | AF234532  | 4900.204  | 5979.073  | AB037732  | 760.067   | 751.533   |
| AK025949  | 1831.021  | 2065.654  | NM_00241E | 3280.581  | 5705.112  | NM_005767 | 322.698   | 454.528   |
| Y10259    | 4320.742  | 4273.627  | NM_00209C | 1112.177  | 1371.486  | NM_00183E | 34160.309 | 36259.387 |
| AK021725  | 3997.356  | 4850.352  | NM_00448E | 1137.523  | 1071.78   | BC016029  | 276.494   | 337.775   |
| AF119893  | 643.121   | 652.413   | NM_01329E | 16618.736 | 17786.596 | M27487    | 19010.35  | 17596.846 |
| NM_00240E | 6000.155  | 5842.879  | NM_00595E | 4560.806  | 2806.255  | NM_00228E | 23174.791 | 21249.248 |
| AK024282  | 1501.277  | 1526.833  | AF099740  | 1740.381  | 2130.62   | NM_002164 | 527.994   | 1072.746  |
| AF085838  | 6567.526  | 6322.024  | NM_006117 | 12986.123 | 15888.696 | NM_017417 | 246.676   | 185.422   |
| NM_018277 | 1111.303  | 1161.025  | NM_00222E | 3610.667  | 3632.034  | AL133602  | 658.607   | 579.407   |
| AF014455  | 755.459   | 921.457   | NM_00622E | 1221.394  | 1596.381  | AF037219  | 1567.705  | 752.315   |
| AF086335  | 2257.424  | 1837.667  | NM_01541E | 49763.695 | 52772.527 | AK026075  | 248.096   | 82.526    |
| AL355741  | 416.351   | 354.817   | NM_004897 | 5335.029  | 9210.472  | NM_000251 | 1778.461  | 426.687   |
| AB011118  | 15818.744 | 15923.373 | NM_00255E | 3054.695  | 3864.151  | AF118071  | 132.421   | 183.999   |
| S66666    | 1018.545  | 1182.507  | AF225418  | 2687.967  | 5046.279  | NM_00603E | 1479.718  | 349.398   |
| AK021476  | 2013.694  | 2055.193  | NM_00030E | 2808.316  | 6577.656  | AB011133  | 1844.242  | 2329.956  |
| NM_01537E | 9186.532  | 18038.795 | NM_00452E | 40692.547 | 54863.09  | NM_017572 | 20317.045 | 17287.201 |
| NM_00117E | 1134.31   | 1757.245  | AK026381  | 40549.008 | 39334.473 | NM_018444 | 1036.66   | 801.221   |
| NM_013341 | 839.664   | 1006.368  | AK023107  | 9900.148  | 10708.021 | NM_000252 | 715.348   | 737.732   |
| NM_01653E | 497.053   | 992.203   | NM_00457E | 904.308   | 1258.544  | NM_006947 | 4465.35   | 3899.437  |
| NM_00406E | 845.698   | 1218.837  | NM_000647 | 3181.525  | 2257.792  | NM_017917 | 1377.723  | 1062.157  |
| NM_004941 | 5429.52   | 4742.871  | AB046793  | 1178.65   | 757.405   | NM_00409C | 2864.106  | 2731.226  |
| AF151831  | 3163.727  | 3568.251  | NM_017604 | 5774.06   | 3917.97   | NM_014634 | 2522.692  | 2075.053  |
| AB011121  | 681.046   | 588.761   | AF150735  | 11322.089 | 15141.866 | BC031485  | 900.061   | 778.893   |

|           |           |           |           |           |           |           |           |           |
|-----------|-----------|-----------|-----------|-----------|-----------|-----------|-----------|-----------|
| AF083255  | 6479.472  | 7535.582  | NM_018183 | 3352.922  | 3573.824  | NM_004092 | 2947.342  | 4266.458  |
| AK022605  | 1215.768  | 1433.929  | NM_002452 | 13599.623 | 16045.653 | X15624    | 605.737   | 1125.112  |
| AL049955  | 22089.832 | 18657.877 | NM_012304 | 1359.498  | 1417.058  | AF073770  | 847.172   | 1097.081  |
| AF155654  | 7109.01   | 8595.001  | NM_016440 | 46194.68  | 47134.27  | AL359401  | 3171.822  | 4641.097  |
| AF088044  | 906.287   | 924.042   | NM_007194 | 3863.642  | 3449.661  | NM_004467 | 368.29    | 373.432   |
| AK000028  | 3324.991  | 3575.184  | NM_000314 | 11978.938 | 8516.307  | NM_018058 | 7005.771  | 4830.579  |
| NM_013320 | 50964.984 | 41952.125 | AB002369  | 1507.385  | 1218.966  | NM_004548 | 7927.572  | 6429.908  |
| AJ245902  | 982.726   | 963.763   | S74620    | 1413.174  | 1118.914  | X69079    | 19870.582 | 13634.826 |
| AL050039  | 1213.403  | 874.363   | AF305239  | 3171.351  | 1380.398  | BI759406  | 10086.898 | 3652.383  |
| AF009316  | 845.951   | 733.156   | NM_001608 | 410.173   | 464.276   | R76099    | 3499.623  | 1381.046  |
| BE816678  | 546.628   | 454.657   | NM_000159 | 61941.621 | 54153.684 | S74445    | 626.883   | 429.363   |
| AF087987  | 1599.104  | 1543.828  | NM_014638 | 2659.399  | 2050.6    | BI763360  | 2254.905  | 565.06    |
| Z36840    | 436.002   | 259.434   | NM_000508 | 2334.985  | 3599.381  | D25538    | 834.265   | 526.743   |
| AK021723  | 377.815   | 406.481   | AB014558  | 2284.459  | 4045.306  | NM_000360 | 13289.343 | 7704.441  |
| H09474    | 2984.599  | 2981.059  | NM_006287 | 2831.469  | 3105.527  | NM_001848 | 503.481   | 388.236   |
| AB002368  | 12190.681 | 14561.862 | NM_000118 | 8288.318  | 11304.692 | X03635    | 1882.825  | 1802.668  |
| AL360263  | 49235.152 | 53462.758 | NM_000913 | 3382.668  | 4439.497  | BC011847  | 37452.773 | 83834.297 |
| BC012757  | 1171.119  | 1835.856  | NM_001298 | 55319.711 | 57600.465 | X03348    | 640.774   | 665.691   |
| M96686    | 683.877   | 1143.745  | BG325046  | 8994.352  | 11429.124 | AF353674  | 2103.889  | 1759.41   |
| NM_004062 | 5628.006  | 7786.289  | NM_007164 | 45255.684 | 58030.711 | BC002645  | 2900.279  | 2179.012  |
| NM_005883 | 852.568   | 1194.517  | BE783826  | 57858.148 | 56495.734 | NM_021138 | 1605.582  | 1359.151  |
| NM_004448 | 1801.93   | 2419.35   | X04827    | 4376.381  | 4424.881  | NM_001523 | 276.221   | 228.302   |
| NM_014591 | 4053.853  | 5537.851  | H07088    | 6302.308  | 4391.379  | NM_017423 | 538.069   | 516.682   |
| NM_014592 | 1058.058  | 946.748   | AI004656  | 5417.936  | 4432.84   | Z70705    | 271.965   | 270.493   |
| NM_001945 | 512.478   | 501.541   | BC020596  | 3039.924  | 2231.886  | NM_002611 | 830.976   | 1064.307  |
| NM_020038 | 2572.687  | 2659.372  | AF116606  | 56944.672 | 51811.609 | NM_005382 | 450.48    | 608.904   |
| NM_006653 | 1099.234  | 1146.088  | X98922    | 7229.567  | 6964.641  | AK027086  | 1301.148  | 2189.885  |
| NM_014442 | 5522.941  | 5965.787  | AK098435  | 9919.758  | 7104.402  | AB032997  | 540.399   | 625.612   |
| AB002313  | 1308.629  | 1445.578  | AK092872  | 6973.053  | 5897.823  | AL096857  | 1271.743  | 1854.935  |
| AB011167  | 3994.21   | 4013.099  | M16801    | 2888.804  | 2768.147  | X07203    | 13159.354 | 8034.028  |
| NM_005408 | 1183.063  | 1189.406  | NM_003034 | 496.536   | 328.357   | AB040104  | 298.002   | 162.236   |
| NM_000208 | 6364.225  | 6523.043  | NM_013334 | 28393.404 | 15081.365 | NM_003834 | 2778.202  | 1026.734  |
| NM_002188 | 48659.84  | 46834.605 | AB049629  | 648.575   | 403.005   | NM_005958 | 2590.633  | 846.008   |
| AK027119  | 21511.09  | 16629.596 | U16752    | 3006.098  | 3199.375  | NM_003381 | 766.531   | 232.843   |
| AB037727  | 47491.105 | 41020.004 | M30134    | 1432.214  | 1605.605  | NM_005758 | 867.996   | 671.876   |
| NM_005428 | 916.405   | 798.718   | NM_000880 | 350.309   | 767.181   | NM_003702 | 10351.95  | 7852.159  |
| NM_004763 | 844.194   | 702.525   | NM_002038 | 31155.107 | 40097.016 | NM_000368 | 492.885   | 664.285   |
| NM_014063 | 10206.916 | 9040.19   | NM_005729 | 38841.648 | 59243.453 | NM_016351 | 1262.915  | 1286.552  |
| D86964    | 6192.584  | 6908.715  | NM_015493 | 3515.94   | 5702.782  | NM_004405 | 734.224   | 721.762   |
| AL049801  | 1527.054  | 1889.868  | NM_003747 | 1575.983  | 2797.147  | NM_001988 | 2663.069  | 1751.415  |
| NM_016395 | 12357.37  | 12182.817 | AB037744  | 3989.266  | 9510.615  | NM_006060 | 895.272   | 516.768   |
| NM_003152 | 2531.3    | 2457.648  | AL109708  | 1640.082  | 1729.123  | NM_005667 | 1402.612  | 1379.695  |
| NM_006342 | 4760.782  | 5284.157  | L29143    | 7033.169  | 6238.492  | NM_006308 | 467.173   | 311.44    |
| NM_016396 | 2926.369  | 4561.495  | AF234532  | 5024.97   | 3078.653  | NM_000060 | 599.824   | 462.742   |
| NM_005688 | 2859.868  | 3908.523  | NM_002418 | 3890.851  | 3212.256  | NM_009588 | 218.157   | 224.133   |
| AF086546  | 460.051   | 324.517   | NM_002090 | 1501.865  | 1125.969  | L09080    | 2001.8    | 2295.045  |
| NM_005552 | 39682.379 | 40901.266 | NM_004485 | 1414.761  | 1171.386  | NM_007328 | 1872.16   | 1837.264  |
| NM_006717 | 3972.973  | 5669.799  | NM_013296 | 14036.82  | 11886.114 | NM_001888 | 1876.344  | 3347.194  |
| AL109786  | 2581.438  | 2496.707  | AL117478  | 3287.592  | 1904.566  | D83782    | 2391.913  | 6238.364  |
| AK026479  | 6234.891  | 6165.078  | NM_005307 | 12851.875 | 8759.058  | NM_002078 | 1269.357  | 2488.702  |
| AK022860  | 5152.433  | 6348.012  | NM_005958 | 5997.787  | 4771.488  | NM_000287 | 923.455   | 2780.084  |
| X60188    | 36206.461 | 30434.242 | X84370    | 19295.031 | 15218.927 | NM_001658 | 830.447   | 2365.914  |
| NM_005977 | 2679.925  | 2644.456  | NM_004039 | 2691.293  | 1631.358  | AF091033  | 664.663   | 1273.858  |

|           |           |           |           |           |           |           |           |           |
|-----------|-----------|-----------|-----------|-----------|-----------|-----------|-----------|-----------|
| NM_002747 | 437.114   | 485.819   | NM_002225 | 3672.578  | 3659.04   | NM_001122 | 19408.521 | 12120.649 |
| NM_006265 | 17304.152 | 15402.537 | NM_006229 | 5122.799  | 6257.629  | NM_004591 | 2294.374  | 1088.646  |
| NM_003126 | 1394.197  | 1061.188  | NM_015415 | 47915.48  | 52577.402 | AL133027  | 1048.238  | 335.184   |
| NM_006059 | 4047.054  | 4116.488  | NM_004897 | 5320.663  | 9043.581  | AB037732  | 808.156   | 338.066   |
| NM_000347 | 12870.718 | 10102.374 | NM_002555 | 3095.081  | 4189.414  | NM_005767 | 227.883   | 173.011   |
| M13452    | 2323.509  | 1768.806  | AF225418  | 3122.401  | 5005.571  | NM_001837 | 284.5     | 608.323   |
| AF082075  | 1822.544  | 1566.587  | NM_000309 | 3676.439  | 7377.202  | NM_001839 | 36445.199 | 65848.125 |
| NM_016114 | 2643.553  | 2346.876  | NM_004528 | 41994.313 | 53589.512 | BC016029  | 371.387   | 322.268   |
| AY007114  | 1289.384  | 1237.085  | AK026381  | 51240.477 | 56518.918 | M27487    | 19845.465 | 15887.028 |
| AF086604  | 419.018   | 456.748   | AK023107  | 9744.867  | 7270.666  | NM_002286 | 28685.721 | 23254.15  |
| AB000895  | 1427.506  | 1257.081  | NM_004578 | 1267.415  | 2314.42   | NM_002164 | 404.008   | 397.693   |
| X80031    | 988.928   | 674.708   | NM_000647 | 3355.319  | 2040.862  | NM_003811 | 5446.524  | 7738.267  |
| AF019382  | 1011.978  | 916.468   | AB046793  | 484.753   | 334.728   | NM_002981 | 4444.54   | 3736.045  |
| NM_015601 | 1306.806  | 1317.605  | NM_017604 | 5129.215  | 4104.343  | NM_001244 | 920.348   | 875.125   |
| NM_001780 | 21026.756 | 27008.828 | NM_017738 | 38254.336 | 34825.355 | NM_006137 | 214.015   | 184.663   |
| AJ277442  | 1356.792  | 1317.168  | NM_016557 | 3480.491  | 2854.34   | NM_016139 | 19773.557 | 15711.691 |
| NM_004569 | 2769.758  | 3688.801  | NM_000623 | 3533.153  | 2457.53   | AL117468  | 1589.338  | 2713.612  |
| AF089088  | 1991.149  | 2455.172  | AF161348  | 2608.378  | 3046.439  | NM_019613 | 3416.089  | 5167.724  |
| L07557    | 6295.324  | 6803.139  | NM_018467 | 47752.621 | 36665.945 | BC031485  | 1755.972  | 8217.591  |
| NM_002796 | 37363.902 | 30954.76  | NM_006068 | 5529.031  | 2858.913  | NM_004092 | 2767.602  | 11205.787 |
| D78514    | 9901.207  | 9678.097  | NM_002704 | 1169.232  | 748.634   | X15624    | 739.076   | 5235.364  |
| AK021665  | 1806.767  | 2520.167  | AK026288  | 892.743   | 706.857   | AF073770  | 473.577   | 1241.785  |
| NM_013366 | 1048.403  | 967.452   | AF150735  | 12165.672 | 14297.452 | AL359401  | 3405.678  | 8580.646  |
| NM_002787 | 30181.316 | 26981.379 | NM_018183 | 2985.431  | 3900.985  | NM_012213 | 694.979   | 460.628   |
| U95006    | 12773.866 | 13940.78  | NM_012382 | 9365.264  | 21266.727 | NM_016573 | 2321.976  | 1478.271  |
| NM_003347 | 9739.503  | 8908.399  | BF038366  | 2358.766  | 3987.109  | NM_001303 | 5875.092  | 4145.862  |
| AF273051  | 1464.515  | 1327.822  | NM_002452 | 13065.233 | 21155.813 | M21304    | 250.756   | 113.121   |
| NM_014516 | 8768.959  | 8789.135  | NM_012304 | 1395.919  | 2064.297  | NM_001979 | 197.723   | 229.423   |
| AK021868  | 2034.458  | 1872.863  | NM_016440 | 45285.094 | 37762.266 | AB040896  | 490.854   | 270.873   |
| AK000643  | 48870.957 | 70085.461 | NM_007194 | 4447.421  | 3191.17   | NM_001107 | 2091.13   | 1759.152  |
| NM_018421 | 4420.069  | 4144.959  | NM_000314 | 12746.521 | 10748.903 | AF084645  | 281.199   | 287.522   |
| AB014574  | 50720.074 | 60492.906 | AB002369  | 1454.148  | 1207.391  | AF151851  | 3092.673  | 3198.662  |
| NM_020127 | 2267.104  | 2177.917  | S74620    | 1418.955  | 1101.09   | NM_005176 | 493.465   | 331.678   |
| NM_015623 | 8598.919  | 8659.678  | AF305239  | 2935.499  | 1423.982  | NM_003636 | 1667.641  | 1071.96   |
| AB045116  | 611.371   | 511.524   | NM_002827 | 29879.643 | 24249.709 | NM_002234 | 1139.878  | 1123.298  |
| L49054    | 1069.166  | 1137.095  | NM_001946 | 1140.734  | 570.996   | NM_000701 | 1575.826  | 1437.563  |
| NM_014727 | 2700.407  | 2624.948  | BF035425  | 56817.566 | 50804.836 | AB022696  | 1982.263  | 1952.912  |
| BE885010  | 877.429   | 916.922   | NM_000159 | 61407.711 | 57041.508 | AF137372  | 2070.825  | 2596.953  |
| NM_002943 | 3132.992  | 4583.48   | NM_014638 | 2115.832  | 1625.851  | AF220417  | 942.786   | 1748.375  |
| AL133649  | 1567.882  | 2006.657  | AF099740  | 1809.048  | 1274.645  | NM_001523 | 494.576   | 2741.025  |
| AB018303  | 1083.679  | 1273.513  | NM_006117 | 13079.318 | 7750.948  | NM_017423 | 1478.294  | 6970.542  |
| NM_006454 | 8096.326  | 9241.252  | NM_006287 | 3225.041  | 3294.112  | Z70705    | 395.983   | 1822.452  |
| NM_015846 | 5435.695  | 5813.063  | NM_000118 | 8501.868  | 10368.501 | NM_002611 | 1131.143  | 6630.484  |
| NM_015972 | 24150.336 | 26019.734 | NM_000913 | 3037.921  | 2997.482  | NM_017417 | 292.542   | 329.241   |
| NM_001644 | 400.28    | 448.743   | NM_001298 | 59607.715 | 62052.918 | AL133602  | 687.612   | 578.224   |
| NM_016132 | 2203.463  | 2585.552  | BG325046  | 9155.017  | 12946.201 | AF037219  | 1815.561  | 1258.586  |
| NM_018006 | 3129.585  | 3556.791  | AI351740  | 45582.309 | 54104.172 | NM_000251 | 1952.358  | 1147.474  |
| NM_016090 | 2127.742  | 2124.044  | AA444051  | 27647.559 | 43326.949 | NM_006038 | 1512.404  | 1467.893  |
| NM_001013 | 50447.508 | 46050.512 | NM_007164 | 49000.355 | 56814.801 | AB011133  | 1711.001  | 1588.406  |
| AK024040  | 8097.498  | 7896.326  | BE783826  | 55685.648 | 57603.156 | NM_017572 | 19229.537 | 11253.262 |
| NM_005061 | 9050.816  | 7419.266  | X04827    | 5875.488  | 6578.285  | NM_018444 | 750.166   | 367.15    |
| AF182417  | 46768.039 | 36640.465 | H07088    | 6228.852  | 5505.771  | NM_000252 | 887.823   | 550.454   |
| AL137354  | 35374.324 | 23355.154 | AI004656  | 5572.912  | 3780.837  | NM_006947 | 4960.043  | 4430.033  |



|           |           |           |           |           |           |           |           |           |
|-----------|-----------|-----------|-----------|-----------|-----------|-----------|-----------|-----------|
| NM_001023 | 53080.125 | 72032.305 | BC020596  | 3667.887  | 2780.627  | NM_017917 | 1452.761  | 1032.487  |
| AK021571  | 15505.178 | 13176.95  | AF116606  | 59418.535 | 54613.633 | NM_00409C | 3247.684  | 3426.538  |
| AK022178  | 1898.981  | 1705.709  | X98922    | 8095.89   | 6713.43   | NM_014634 | 2323.035  | 2942.154  |
| NM_006011 | 1137.481  | 1158.395  | AK098435  | 10819.28  | 7383.543  | NM_00191C | 7308.814  | 10615.817 |
| L00635    | 2605.487  | 2377.684  | AK092872  | 7217.49   | 5742.417  | CY3Cy5    | 1910.653  | 194.217   |
| NM_002541 | 3636.549  | 5935.122  | AF230496  | 2433.242  | 1684.254  | NM_003822 | 461.544   | 282.744   |
| NM_00005E | 7698.275  | 8828.648  | M16801    | 2712.323  | 2435.894  | NM_004412 | 3823.695  | 2139.779  |
| NM_016311 | 16497.611 | 20728.979 | NM_013334 | 38154.438 | 27713.273 | NM_016647 | 511.744   | 483.135   |
| NM_001867 | 44722.035 | 53575.047 | AF141901  | 1049.732  | 1512.589  | AK024695  | 367.822   | 336.5     |
| NM_00230C | 45086.605 | 70649.617 | NM_00700E | 2358.936  | 3225.475  | NM_01865C | 297.396   | 120.521   |
| NM_00029C | 7632.138  | 7553.673  | AL109708  | 4081.549  | 4326.673  | AF038174  | 1021.137  | 664.775   |
| NM_01653E | 4329.535  | 4109.43   | L29143    | 6631.168  | 7961.422  | NM_013243 | 386.254   | 177.038   |
| AK023275  | 9155.061  | 9015.774  | AF234532  | 5782.325  | 8816.449  | AF070632  | 454.626   | 710.587   |
| AJ223352  | 6811.352  | 6459.847  | NM_00241E | 3679.521  | 4363.991  | AF161359  | 865.995   | 722.894   |
| NM_01223E | 3417.887  | 4947.553  | NM_00209C | 1249.108  | 1892.265  | AL365520  | 753.349   | 475.186   |
| NM_01653C | 12389.89  | 12206.56  | NM_00448E | 1300.055  | 1824.339  | AK023623  | 2619.734  | 2147.992  |
| NM_006807 | 15845.722 | 14992.094 | NM_01241C | 571.909   | 627.932   | AF086534  | 355.593   | 250.158   |
| NM_00032E | 493.122   | 249.43    | NM_01329E | 16285.901 | 16666.521 | AF070617  | 307.329   | 517.016   |
| L16464    | 987.911   | 770.903   | AL117478  | 4541.432  | 3033.294  | NM_01491E | 832.723   | 737.281   |
| NM_006532 | 10056.613 | 8090.43   | NM_005307 | 13895.432 | 10066.949 | NM_003822 | 356.563   | 516.124   |
| NM_00343E | 767.909   | 701.759   | NM_00595E | 7480.486  | 5130.995  | NM_004412 | 3567.016  | 2752.893  |
| AB034691  | 363.167   | 398.331   | NM_01343E | 825.639   | 1050.657  | SR1       | 50162.238 | 24420.75  |
| NM_00167E | 1221.186  | 833.974   | AF225426  | 1240.224  | 1065.534  | SR3       | 17313.154 | 7757.659  |
| NM_003422 | 2226.324  | 2526.028  | NM_00520E | 26208.221 | 20270.736 | SR5       | 1720.795  | 1388.335  |
| NM_001451 | 1945.077  | 1486.381  | NM_000421 | 2094.611  | 1492.273  | SR7       | 2089.362  | 7455.231  |
| NM_01477C | 2812.553  | 2845.159  | AK025687  | 34665.563 | 27639.846 | SR9       | 4829.089  | 604.401   |
| NM_01444E | 1438.791  | 1885.303  | AF218941  | 9475.215  | 7416.367  | CY3Cy5    | 1630.265  | 171.674   |
| U58096    | 19987.703 | 23216.141 | AL137264  | 57685.891 | 53332.816 | U84515    | 414.87    | 255.568   |
| NM_01692E | 12184.297 | 15213.564 | NM_00222E | 1009.835  | 1144.016  | AF086106  | 436.658   | 189.265   |
| NM_012323 | 1713.288  | 2516.552  | X84370    | 24452.861 | 26857.611 | AF086143  | 3094.176  | 1908.054  |
| NM_006942 | 450.763   | 340.131   | NM_00403C | 1558.103  | 1464.562  | AF086112  | 429.055   | 785.027   |
| NM_01819C | 1143.977  | 1381.763  | NM_00050E | 1451.71   | 1069.501  | AL137254  | 552.524   | 421.337   |
| NM_013943 | 1607.255  | 1744.957  | AB014558  | 2444.058  | 1681.83   | AK026359  | 388.127   | 310.228   |
| NM_00163C | 13499.256 | 14743.335 | NM_006854 | 20392.135 | 28026.553 | AF085884  | 711.145   | 1190.818  |
| H39560    | 420.706   | 753.769   | NM_00458C | 8143.053  | 15289.002 | S81522    | 2481.218  | 2458.491  |
| BG534366  | 14567.955 | 18945.863 | NM_020387 | 55417.375 | 56665.129 | S94541    | 637.999   | 383.847   |
| BG698522  | 18817.033 | 19162.381 | NM_00724E | 2948.508  | 3682.978  | L36587    | 12822.205 | 8198.635  |
| AA152346  | 1191.404  | 869.587   | AK026248  | 3094.545  | 3948.808  | AK024228  | 492.788   | 418.313   |
| L15189    | 3022.656  | 3584.873  | NM_00457E | 942.925   | 1237.186  | AK022420  | 1910.709  | 1142.769  |
| AB023420  | 18206.969 | 16995.49  | NM_000647 | 3441.352  | 2989.775  | AK023254  | 432.59    | 253.608   |
| BI822179  | 11177.736 | 11334.692 | AB046793  | 613.457   | 727.571   | AK023945  | 14167.181 | 6265.661  |
| AF022912  | 5838.421  | 5180.797  | NM_017604 | 6083.396  | 7894.199  | AK022446  | 386.617   | 210.075   |
| AA477428  | 16435.221 | 14215.188 | NM_01773E | 36918.109 | 34542.316 | AK023352  | 243.829   | 115.505   |
| AA156342  | 2960.835  | 2378.692  | NM_016557 | 3484.81   | 3831.021  | AK023773  | 371.246   | 260.261   |
| R45594    | 17024.824 | 13921.21  | NM_000623 | 3918.636  | 3242.865  | AK021539  | 2318.028  | 1763.593  |
| AI143386  | 744.297   | 704.639   | NM_018301 | 594.897   | 856.281   | AK026738  | 645.753   | 450.029   |
| H46425    | 4834.41   | 4486.995  | AF161348  | 2284.111  | 2167.362  | AK025011  | 857.825   | 727.632   |
| AI355949  | 1230.304  | 1160.794  | NM_018467 | 46983.402 | 41389.855 | AL157491  | 1125.863  | 1473.22   |
| AA278152  | 14496.532 | 14912.553 | NM_00606E | 5032.399  | 3440.239  | NM_00526E | 1349.226  | 1180.545  |
| H75530    | 5117.266  | 5207.655  | NM_002704 | 1125.085  | 861.482   | AF087965  | 400.266   | 379.436   |
| NM_00503E | 1346.259  | 923.029   | U16752    | 3238.897  | 2123.765  | AF085998  | 579.281   | 940.653   |
| NM_018201 | 4467.003  | 8140.57   | M30134    | 1004.978  | 945.031   | AK024681  | 333.246   | 369.091   |
| NM_01443E | 1634.107  | 2230.354  | NM_00203E | 32784.473 | 27585.469 | X68742    | 348.52    | 268.328   |

|           |           |           |           |           |           |           |           |           |
|-----------|-----------|-----------|-----------|-----------|-----------|-----------|-----------|-----------|
| NM_01488C | 1522.045  | 2445.933  | NM_005729 | 37998.258 | 34584.977 | NM_014907 | 14813.189 | 8703.282  |
| NM_003764 | 5321.612  | 6857.585  | NM_015493 | 3066.448  | 2453.063  | AB007977  | 9761.055  | 9359.742  |
| NM_01961E | 391.721   | 204.988   | NM_003747 | 1389.436  | 1195.227  | NM_014221 | 4595.608  | 4038.782  |
| NM_00482E | 1901.938  | 1704.446  | AB037744  | 5101.682  | 3092.491  | AK000477  | 122.692   | 1608.573  |
| NM_006793 | 37100.91  | 35353.652 | NM_00160E | 897.227   | 866.353   | AK021773  | 923.371   | 440.433   |
| NM_00153E | 6114.084  | 6479.892  | NM_000159 | 59384.93  | 61806.836 | AK024674  | 270.631   | 194.737   |
| X97261    | 9444.385  | 5063.938  | NM_01463E | 1731.862  | 2336.859  | AK024244  | 2273.612  | 1568.455  |
| NM_00146E | 716.66    | 784.022   | AF099740  | 2413.439  | 2860.04   | AL390084  | 451.149   | 257.158   |
| NM_00541C | 396.45    | 363.956   | NM_006117 | 13006.65  | 15400.321 | AK021479  | 260.976   | 248.199   |
| D87666    | 46398.094 | 35389.215 | NM_00222E | 3641.236  | 4005.439  | NM_00383E | 2299.442  | 2635.32   |
| NM_002921 | 460.375   | 316.268   | NM_006229 | 1346.275  | 1651.205  | AK000245  | 990.561   | 1026.851  |
| NM_00131E | 2913.098  | 2718.812  | NM_01541E | 47684.563 | 46315.082 | AF118072  | 315.868   | 312.807   |
| AF286095  | 6545.804  | 6059.611  | NM_004897 | 5182.479  | 5839.333  | AK024112  | 273.959   | 517.741   |
| NM_00087E | 1760.366  | 1526.328  | NM_00255E | 2976.353  | 2547.711  | AF085900  | 11052.854 | 7637.559  |
| S66407    | 2466.3    | 2236.469  | AF225418  | 2966.211  | 2434.58   | AK026195  | 384.546   | 274.344   |
| NM_016523 | 325.424   | 297.608   | NM_000309 | 3264.437  | 3012.407  | AL389956  | 399.364   | 968.999   |
| NM_018727 | 386.76    | 259.342   | NM_00452E | 35058.723 | 26527.686 | AL079274  | 13074.748 | 7007.336  |
| NM_00425E | 52691.965 | 54067.52  | AK026381  | 47592.281 | 45489.703 | AL137398  | 532.985   | 416.695   |
| NM_001981 | 8807.252  | 9130.731  | NM_00245C | 15481.939 | 5594.328  | Y12021    | 964.384   | 511.688   |
| NM_00158E | 51583.801 | 63674.906 | NM_00168E | 1313.464  | 983.617   | NM_01330C | 17065.967 | 13003.393 |
| AK026108  | 17706.576 | 16460.721 | NM_00497E | 852.21    | 739.302   | AK026039  | 1952.29   | 1603.189  |
| AF149304  | 936.721   | 1764.688  | NM_00070E | 1214.444  | 1365.331  | AF108756  | 3616.182  | 2422.523  |
| NM_01209E | 7355.817  | 13579.388 | NM_004231 | 57936.008 | 59521.457 | AF116709  | 609.221   | 394.492   |
| NM_01643E | 539.385   | 829.78    | NM_002243 | 1042.518  | 1537.088  | AK026499  | 353.309   | 309.107   |
| X73079    | 31993.961 | 42591.809 | NM_016577 | 2298.722  | 1466.192  | AK021911  | 5251.213  | 5042.972  |
| NM_019091 | 1117.758  | 1138.145  | AK023107  | 10072.598 | 6588.923  | D17225    | 364.668   | 499.983   |
| L07518    | 434.425   | 234.023   | NM_013334 | 26780.918 | 24259.115 | AF147430  | 263.234   | 488.427   |
| AF264781  | 2733.377  | 2578.41   | AF150735  | 9732.511  | 9814.755  | AK025766  | 4446.61   | 3554.37   |
| NM_00245E | 584.076   | 474.942   | NM_018183 | 3190.336  | 2535.624  | U35875    | 18505.287 | 15236.28  |
| NM_016124 | 4103.686  | 5337.721  | NM_012382 | 9919.636  | 10356.861 | AK021857  | 17061.055 | 10980.897 |
| NM_01594E | 4414.629  | 4005.522  | BF038366  | 2106.838  | 1364.19   | AK022257  | 518.572   | 649.174   |
| NM_000804 | 616.133   | 587.706   | NM_002452 | 12576.851 | 8775.856  | BE887356  | 31254.115 | 21469.859 |
| NM_00655E | 4410.961  | 3582.292  | NM_012304 | 1166.309  | 902.498   | AK024756  | 1109.021  | 740.108   |
| NM_014521 | 1915.173  | 1381.84   | NM_01644C | 40975.063 | 20786.951 | NM_017911 | 1104.396  | 567.945   |
| NM_00244E | 3003.091  | 2837.979  | NM_007194 | 3659.688  | 2299.593  | AJ224168  | 4117.368  | 2404.09   |
| NM_01780E | 877.329   | 990.698   | NM_000314 | 12438.476 | 7325.049  | S69873    | 336.126   | 345.152   |
| AK023202  | 4419.439  | 4363.774  | AB002369  | 1745.145  | 1499.082  | AF147325  | 44733.406 | 28674.84  |
| D63877    | 3800.423  | 3841.634  | S74620    | 1736.686  | 1304.141  | NM_01442E | 735.233   | 405.435   |
| AF131760  | 2039.968  | 2306.93   | AF305239  | 3606.37   | 2130.428  | AK023584  | 262.452   | 285.209   |
| NM_01869E | 2101.192  | 2100.642  | NM_002827 | 31359.609 | 24218.188 | D87466    | 2139.107  | 1661.231  |
| NM_006461 | 3408.4    | 3234.709  | NM_00194E | 888.525   | 632.035   | AK025048  | 363.092   | 229.748   |
| NM_00282E | 3274.25   | 7024.092  | BF035425  | 58547.676 | 56278.016 | U84522    | 874.818   | 605.234   |
| AF159141  | 7621.726  | 13308.527 | CY3Cy5    | 15709.718 | 6508.854  | AK021694  | 601.181   | 437.725   |
| NM_00242C | 350.786   | 513.112   | NM_00417E | 5595.164  | 20042.541 | AF086013  | 289.65    | 199.708   |
| NM_01645E | 38382.164 | 37475.742 | AK027120  | 1320.641  | 3387.016  | U84505    | 1463.326  | 1933.358  |
| AK022233  | 3817.452  | 4382.573  | AB029001  | 2288.557  | 1909.543  | X81005    | 875.227   | 687.88    |
| AL137713  | 273.822   | 121.929   | AB006624  | 5000.46   | 6430.955  | AL049265  | 754.586   | 791.304   |
| AK026410  | 15792.994 | 17008.322 | AL109717  | 4804.38   | 9236.63   | AL137635  | 492.457   | 439.354   |
| NM_014637 | 9370.698  | 10764.859 | AK025473  | 1100.749  | 2200.557  | AL049430  | 975.245   | 878.584   |
| NM_01337E | 33495.438 | 35266.82  | AF146693  | 885.517   | 1621.749  | AK021461  | 453.419   | 670.66    |
| AF113208  | 10811.139 | 12634.076 | AF271070  | 13878.619 | 28692.994 | AB015349  | 242.75    | 379.053   |
| NM_006153 | 4500.421  | 4422.829  | NM_014903 | 832.748   | 1682.69   | NM_014913 | 15598.679 | 9572.866  |
| NM_012164 | 3984.715  | 3347.889  | AK055959  | 1452.66   | 3310.201  | NM_012341 | 3822.446  | 2169.65   |

|           |           |           |           |           |           |           |           |           |
|-----------|-----------|-----------|-----------|-----------|-----------|-----------|-----------|-----------|
| AK026010  | 460.817   | 650.783   | AF052141  | 1646.932  | 3776.223  | NM_003256 | 16410.451 | 7806.746  |
| NM_004721 | 447.523   | 296.245   | AF052149  | 4100.31   | 9427.295  | D87450    | 1652.214  | 849.201   |
| AB011156  | 1122.223  | 977.048   | AK025586  | 1569.968  | 3570.061  | NM_017797 | 2050.702  | 1657.581  |
| NM_018079 | 742.826   | 744.901   | SR5       | 4058.957  | 10090.378 | AF000562  | 3249.626  | 2037.278  |
| NM_004760 | 13213.865 | 12661.318 | SR7       | 5887.242  | 57848.758 | AK025713  | 2185.737  | 1820.199  |
| NM_006752 | 7394.389  | 6479.39   | SR9       | 15799.987 | 8495.365  | NM_018100 | 405.976   | 364.299   |
| NM_004428 | 373.616   | 259.642   | CY3Cy5    | 9671.083  | 662.354   | NM_004075 | 1819.604  | 1905.7    |
| NM_006809 | 8243.614  | 8367.705  | L32606    | 1357.111  | 7543.597  | NM_001887 | 2097.953  | 2601.401  |
| NM_016929 | 12640.815 | 26951.365 | AK091125  | 7056.621  | 7970.37   | NM_006533 | 1543.438  | 1290.499  |
| NM_012323 | 2727.201  | 9882.215  | D16474    | 11304.4   | 6177.185  | AK026747  | 2340.332  | 2857.342  |
| NM_006942 | 649.61    | 1070.352  | AL080072  | 1236.529  | 791.878   | AL110150  | 1647.061  | 1637.64   |
| NM_018199 | 1188.33   | 1705.432  | AK024898  | 1169.056  | 1427.646  | NM_001998 | 2097.776  | 2129.344  |
| NM_013943 | 1352.074  | 1861.917  | AL035301  | 698.203   | 668.647   | X87825    | 2238.012  | 3668.59   |
| NM_001639 | 12716.743 | 16224.938 | NM_017687 | 2203.584  | 2018.623  | AK001285  | 14095.502 | 10338.908 |
| H39560    | 462.388   | 621.965   | NM_017975 | 3646.742  | 4952.406  | D17215    | 4090.929  | 4053.272  |
| BG534366  | 15522.42  | 18653.975 | AK025036  | 1255.556  | 1569.538  | BE781513  | 736.205   | 691.57    |
| BG698522  | 18306.691 | 17282.965 | AK024843  | 19232.631 | 21988.574 | NM_015714 | 22780.842 | 14276.112 |
| AA152346  | 1065.661  | 933.304   | AF074994  | 1305.609  | 2245.119  | AK075564  | 300.787   | 364.029   |
| L15189    | 2995.871  | 4297.983  | NM_017670 | 8487.423  | 14150.466 | AK026219  | 1288.627  | 1404.712  |
| AB023420  | 16069.96  | 15747.633 | AJ296152  | 11816.604 | 32401.592 | D28446    | 1016.567  | 1014.551  |
| BI822179  | 10592.203 | 9289.603  | AK001067  | 4491.806  | 10341.064 | NM_016279 | 297.375   | 73.037    |
| AF022912  | 5414.39   | 3671.875  | AK027088  | 15743.021 | 41825.762 | NM_000211 | 5685.933  | 3453.205  |
| AA477428  | 15687.498 | 14148.007 | AB037721  | 21229.092 | 36533.598 | AB037830  | 736.535   | 313.42    |
| AA156342  | 2894.254  | 2212.95   | AK024525  | 14950.33  | 10849.213 | NM_015685 | 5038.838  | 2766.736  |
| R45594    | 16315.838 | 13276.446 | AK024909  | 932.012   | 786.374   | NM_004357 | 23079.432 | 13345.279 |
| AI143386  | 611.059   | 375.285   | AK024544  | 3315.969  | 1873.624  | X03324    | 2247.163  | 1687.865  |
| H46425    | 5291.982  | 3875.727  | AK021705  | 2601.371  | 1640.545  | AF130988  | 383.827   | 239.555   |
| AI355949  | 1216.105  | 835.688   | NM_016141 | 53087.977 | 32563.176 | NM_015385 | 592.219   | 295.299   |
| AA278152  | 13769.663 | 11406.208 | AL109702  | 1137.448  | 772.637   | NM_003690 | 3218.681  | 2553.063  |
| H75530    | 5506.723  | 4722.944  | AK025624  | 9700.911  | 7080.31   | NM_000876 | 1705.026  | 1282.956  |
| AK000554  | 2011.654  | 1772.862  | AK026684  | 1095.622  | 878.26    | NM_014214 | 2746.524  | 1923.058  |
| NM_006472 | 2839.093  | 2508.234  | AL110125  | 22274.367 | 14352.798 | NM_000856 | 404.828   | 324.416   |
| NM_014880 | 1790.77   | 2593.276  | AK022764  | 1149.053  | 985.052   | NM_002752 | 1259.316  | 870.603   |
| NM_003764 | 5224.389  | 9047.027  | X89744    | 673.572   | 1098.776  | NM_013281 | 286.71    | 492.592   |
| NM_004829 | 1812.667  | 1882.486  | AJ011600  | 3798.673  | 7955.595  | NM_016112 | 250.101   | 482.392   |
| NM_006793 | 34356.293 | 30024.908 | AJ002785  | 3398.492  | 9234.047  | X85106    | 314.394   | 417.731   |
| NM_001538 | 5265.982  | 4638.704  | Z70716    | 1415.962  | 3907.118  | NM_003931 | 1386.332  | 1089.714  |
| X97261    | 9258.528  | 4370.475  | AL049251  | 613.778   | 2693.309  | NM_006681 | 399.009   | 91.535    |
| NM_001468 | 788.96    | 612.601   | Z83945    | 3047.263  | 8709.677  | NM_012479 | 33253.508 | 13906.909 |
| NM_005410 | 351.969   | 440.287   | AF086216  | 798.196   | 620.197   | AF250226  | 6120.701  | 3873.516  |
| D87666    | 42700.77  | 34346.109 | AK022422  | 1048.534  | 865.179   | NM_003217 | 12692.12  | 9949.308  |
| NM_002921 | 442.701   | 224.619   | AK023485  | 955.104   | 612.866   | NM_006534 | 6105.96   | 3686.427  |
| NM_001315 | 2939.121  | 2064.277  | AK022474  | 13176.474 | 4985.141  | NM_017601 | 1589.537  | 987.697   |
| AF286095  | 5902.694  | 5595.046  | AK022392  | 4729.178  | 2292.522  | AF110265  | 9741.874  | 4692.679  |
| NM_000878 | 1911.693  | 1333.039  | AL117451  | 641.848   | 474.978   | AF272371  | 43619.289 | 59885.094 |
| S66407    | 2029.429  | 1684.322  | AL049280  | 4946.634  | 2249.205  | AK021848  | 1767.045  | 1152.619  |
| NM_016523 | 423.151   | 494.479   | AK025212  | 7813.206  | 5213.414  | NM_003704 | 1745.738  | 1149.183  |
| NM_018727 | 396.429   | 198.032   | AB021925  | 744.957   | 491.889   | AF084362  | 307.929   | 384.796   |
| NM_004258 | 41823.367 | 39709.84  | AL157503  | 6067.369  | 4764.423  | NM_001553 | 1595.19   | 1130.571  |
| NM_001981 | 8665.956  | 6978.486  | AK000053  | 1006.023  | 1106.868  | NM_014173 | 6731.99   | 3647.071  |
| NM_001585 | 45169.57  | 54130.199 | AK000786  | 1833.318  | 1793.714  | NM_001731 | 13798.442 | 8511.082  |
| AK026108  | 17980.438 | 15202.463 | AK000935  | 1519.114  | 1708.553  | AL137506  | 326.683   | 295.218   |
| NM_014446 | 1170.915  | 1120.818  | AK021458  | 6145.446  | 8340.226  | AK022961  | 1509.739  | 1254.999  |

|           |           |           |           |           |           |           |           |           |
|-----------|-----------|-----------|-----------|-----------|-----------|-----------|-----------|-----------|
| U58096    | 19558.027 | 14292.856 | NM_017674 | 23085.09  | 32728.281 | NM_007375 | 2653.821  | 1746.457  |
| NM_01643E | 439.63    | 420.025   | AK000811  | 1021.285  | 2096.376  | NM_014371 | 1875.271  | 1379.903  |
| X73079    | 34113.703 | 46626.852 | AK000966  | 1522.092  | 2492.656  | AF290512  | 1863.586  | 1701.086  |
| NM_019091 | 1000.108  | 1136.83   | NM_018630 | 5899.671  | 3416.8    | NM_00671E | 2552.163  | 1237.812  |
| L07518    | 437.678   | 454.513   | AF086175  | 1149.958  | 565.524   | AB002323  | 1899.556  | 865.716   |
| AF264781  | 2829.303  | 2992.24   | AK002196  | 677.153   | 466.299   | AK022241  | 6683.848  | 3265.546  |
| AK022823  | 308.285   | 245.659   | NM_00457E | 3080.34   | 1711.235  | AK022587  | 1684.333  | 1385.644  |
| NM_00245E | 460.539   | 475.709   | AF040097  | 1855.745  | 805.985   | NM_005512 | 186.529   | 176.163   |
| NM_016124 | 4302.243  | 5393.352  | NM_02043E | 574.309   | 330.413   | NM_00550E | 710.361   | 617.398   |
| NM_01594E | 4224.429  | 4105.122  | AK024182  | 2031.867  | 1655.504  | NM_005723 | 363.292   | 199.436   |
| NM_000804 | 495.841   | 528.966   | NM_006913 | 14077.416 | 11068.407 | AL137404  | 44083.203 | 47840.809 |
| NM_00655E | 4555.769  | 3705.734  | NM_00049E | 14506.241 | 7586.659  | NM_005814 | 2440.258  | 2198.209  |
| NM_014521 | 1754.51   | 1185.972  | AK001880  | 5978.567  | 3423.106  | NM_002851 | 850.353   | 594.911   |
| NM_00244E | 2785.216  | 2347.957  | AF156166  | 12896.604 | 7526.548  | NM_002071 | 877.241   | 438.826   |
| NM_01780E | 767.918   | 673.959   | NM_014373 | 5665.238  | 2799.122  | NM_00533E | 21924.725 | 10261.903 |
| AK023202  | 4537.612  | 3833.775  | NM_01420E | 24874.824 | 11357.581 | NM_00190E | 6430.88   | 3234.089  |
| D63877    | 3550.56   | 3019.088  | NM_001651 | 14229.886 | 10552.488 | NM_004142 | 542.912   | 345.329   |
| AF131760  | 1920.617  | 1528.722  | L32786    | 3017.737  | 2189.886  | AF108138  | 2464.398  | 2078.388  |
| NM_01869E | 2045.253  | 2150.822  | U03239    | 757.441   | 808.242   | BF340302  | 2332.121  | 1582.504  |
| NM_006461 | 3487.669  | 3632.984  | AL355720  | 5234.861  | 4509.759  | AK024210  | 1254.607  | 1117.62   |
| NM_018201 | 4583.921  | 4569.654  | AK002023  | 5111.61   | 4224.036  | NM_00227E | 1871.459  | 1349.135  |
| NM_01443E | 1313.29   | 1048.022  | AF150156  | 853.816   | 1081.729  | AL133087  | 1427.301  | 842.437   |
| AF159141  | 6586.99   | 6852.426  | NM_016464 | 1315.253  | 1444.69   | NM_01801C | 936.263   | 806.668   |
| NM_00242C | 385.772   | 480.483   | L40402    | 7380.71   | 7817.438  | NM_002274 | 9735.056  | 5872.799  |
| NM_01645E | 36173.668 | 31241.293 | Z36780    | 4744.978  | 4013.103  | AL080200  | 437.446   | 367.072   |
| AK022233  | 3682.809  | 4519.2    | AK022403  | 2101.424  | 1686.697  | BF337874  | 3445.356  | 2899.656  |
| AL137713  | 223.442   | 316.493   | AK022955  | 6359.979  | 4377.109  | NM_00347E | 15447.729 | 10230.129 |
| AK026410  | 13418.503 | 13991.659 | AK021760  | 633.864   | 418.573   | NM_000243 | 3382.484  | 1993.136  |
| NM_014637 | 8994.024  | 8969.769  | BC035855  | 6403.746  | 2961.459  | NM_004383 | 12094.317 | 6048.735  |
| NM_01337E | 32258.975 | 28541.699 | AL137408  | 30220.164 | 13340.244 | AL157475  | 3122.619  | 2498.37   |
| AF113208  | 10610.617 | 14021.275 | AF054995  | 3539.022  | 2306.541  | NM_00606E | 35452.223 | 20723.375 |
| NM_006153 | 4708.263  | 4015.257  | AL080176  | 5217.669  | 3144.676  | NM_01765E | 1655.82   | 992.578   |
| NM_012164 | 3465.927  | 3021.234  | AK023627  | 3659.412  | 2677.886  | X16282    | 8453.179  | 3127.143  |
| AK026010  | 563.489   | 557.477   | AK025949  | 2276.388  | 1752.122  | NM_01441E | 1397.261  | 822.589   |
| NM_004721 | 415.741   | 328.142   | Y10259    | 4396.156  | 2664.057  | S75264    | 5344.628  | 3093.187  |
| AB011156  | 1068.764  | 761.629   | AK021725  | 6420.8    | 4404.442  | AF027513  | 931.974   | 636.814   |
| NM_01807E | 691.332   | 514.514   | AF119893  | 1102.282  | 667.031   | NM_00137E | 4134.889  | 2621.443  |
| NM_00476C | 12972.405 | 10953.573 | NM_00240E | 6755.721  | 4731.786  | NM_018664 | 716.251   | 478.952   |
| NM_00680E | 7825.82   | 6955.582  | AK024282  | 1612.05   | 1369.861  | BC006428  | 2551.021  | 1707.505  |
| AF149304  | 1123.894  | 1087.689  | AF085838  | 6166.082  | 4373.377  | NM_005034 | 710.215   | 629.356   |
| NM_01209E | 8262.596  | 8586.813  | NM_018277 | 1835.106  | 1388.472  | NM_00392E | 8160.797  | 4250.598  |
| NM_006942 | 464.254   | 604.535   | AF014455  | 622.976   | 841.134   | AF085356  | 758.253   | 431.423   |
| NM_01819E | 1148.801  | 1363.092  | AF086335  | 2984.973  | 2154.528  | NM_016047 | 17526.543 | 9170.795  |
| NM_013943 | 1649.095  | 2046.382  | AL355741  | 388.685   | 378.964   | NM_00149E | 3711.421  | 2565.084  |
| NM_00163E | 12758.403 | 16034.426 | AB011118  | 39243.781 | 36589.145 | BF030165  | 7927.626  | 5289.47   |
| H39560    | 483.16    | 672.763   | S66666    | 742.784   | 657.038   | NM_016732 | 2236.022  | 1014.894  |
| BG534366  | 15344.04  | 22723.521 | AK021476  | 3129.121  | 3206.584  | NM_014763 | 11925.911 | 6474.861  |
| BG698522  | 17344.111 | 17625.715 | NM_01537E | 8042.475  | 5592.78   | NM_02018E | 4486.793  | 3362.046  |
| AA152346  | 1005.891  | 869.28    | NM_00117E | 997.13    | 714.068   | NM_002832 | 3749.294  | 3359.772  |
| L15189    | 2955.519  | 3286.868  | NM_013341 | 483.986   | 416.488   | NM_017732 | 2925.542  | 2552.212  |
| AB023420  | 17049.609 | 14646.19  | NM_01653E | 501.244   | 289.583   | NM_000152 | 34771.359 | 22274.385 |
| BI822179  | 10785.662 | 11078.918 | NM_00406E | 562.448   | 446.343   | D17222    | 14534.815 | 7593.778  |
| AF022912  | 5540.918  | 3990.876  | NM_004941 | 8125.545  | 3603.554  | NM_000154 | 2850.025  | 2032.666  |

|           |           |           |           |           |           |           |           |           |
|-----------|-----------|-----------|-----------|-----------|-----------|-----------|-----------|-----------|
| AA477428  | 14860.032 | 14483.124 | AF151831  | 4354.652  | 3177.625  | NM_00354E | 458.318   | 297.016   |
| AA156342  | 2781.968  | 2232.901  | AB011121  | 799.996   | 418.137   | NM_000671 | 1403.539  | 1121.419  |
| R45594    | 16551.211 | 13417.498 | AF083255  | 6665.512  | 4340.782  | NM_006297 | 10926.404 | 8051.254  |
| AI143386  | 778.128   | 462.553   | AK022605  | 4005.658  | 3348.862  | X85325    | 31756.646 | 16122.292 |
| H46425    | 4434.873  | 3639.973  | AL049955  | 27245.971 | 11885.75  | AF318366  | 5817.008  | 3533.98   |
| AI355949  | 1265.677  | 1071.491  | AF155654  | 12040.304 | 7204.178  | AF182423  | 1397.942  | 1294.159  |
| AA278152  | 14218.732 | 10373.174 | AF088044  | 1394.875  | 1238.508  | D26018    | 2357.199  | 1335.853  |
| H75530    | 5047.437  | 3944.115  | AK000028  | 3949.53   | 2636.156  | AB037863  | 871.887   | 890.084   |
| AK000554  | 2100.004  | 1352.003  | NM_01332C | 52016.879 | 29843.371 | BC000363  | 1264.116  | 1095.577  |
| NM_006472 | 2869.019  | 1751.354  | AJ245902  | 936.002   | 1019.919  | NM_007237 | 906.13    | 647.444   |
| NM_00282E | 3567.237  | 3038.248  | AL050039  | 1719.063  | 1355.925  | NM_00460E | 509.038   | 491.75    |
| X97261    | 9744      | 4894.871  | AF009316  | 935.172   | 561.714   | NM_018257 | 6878.011  | 5132.753  |
| NM_00146E | 773.878   | 775.097   | BE816678  | 412.404   | 343.028   | NM_00591E | 1556.843  | 1700.43   |
| NM_00541C | 366.353   | 608.889   | AF087987  | 1500.415  | 1376.471  | NM_01225E | 40891.09  | 28580.678 |
| D87666    | 46378.77  | 45625     | Z36840    | 506.304   | 389.984   | NM_00600E | 1020.855  | 670.276   |
| NM_002921 | 507.249   | 396.626   | AK021723  | 682.818   | 793.097   | NM_01632E | 961.948   | 1088.149  |
| NM_00131E | 2881.584  | 2949      | H09474    | 5948.695  | 5846.005  | NM_001604 | 713.422   | 830.755   |
| AF286095  | 6689.167  | 7914.615  | AB002368  | 12551.106 | 15323.643 | NM_00090E | 1033.93   | 883.013   |
| NM_00087E | 1827.658  | 1592.23   | AL360263  | 57591.941 | 57252.043 | AB011102  | 2540.733  | 1850.097  |
| S66407    | 2035.963  | 1872.209  | BC012757  | 1219.654  | 706.396   | D63480    | 1947.212  | 1677.906  |
| NM_01652E | 352.235   | 353.195   | M96686    | 571.362   | 516.45    | NM_00296E | 4321.792  | 3376.054  |
| NM_018727 | 276.633   | 243.816   | NM_004062 | 4216.888  | 3301.219  | NM_00647E | 369.666   | 310.976   |
| NM_00425E | 45925.648 | 49389.785 | NM_00588E | 1728.549  | 1598.318  | NM_00462C | 1341.245  | 1220.809  |
| NM_001981 | 7830.805  | 7883.994  | NM_00444E | 1748.369  | 1148.976  | AF087940  | 3999.937  | 2994.373  |
| NM_014654 | 1151.525  | 956.072   | NM_014591 | 4193.607  | 3285.596  | AJ277587  | 1411.877  | 1267.496  |
| NM_00158E | 46142.219 | 43232.586 | NM_014592 | 2494.967  | 2192.626  | D87432    | 2451.584  | 2594.564  |
| AK026108  | 17721.908 | 15761.438 | NM_00194E | 1019.373  | 1099.057  | Y18483    | 286.436   | 349.524   |
| NM_00637E | 3095.41   | 3512.828  | NM_02003E | 10373.727 | 9301.357  | AI565117  | 42296.113 | 49420.996 |
| BF571428  | 8902.688  | 6146.909  | NM_00665E | 1641.534  | 1189.262  | AI299075  | 2235.807  | 1905.425  |
| AB037723  | 22077.197 | 16174.581 | NM_01444E | 23687.602 | 14174.884 | M59979    | 1255.327  | 1305.722  |
| NM_00624E | 4528.48   | 3665.425  | AB002313  | 2199.165  | 1263.87   | AB011098  | 1119.401  | 1231.72   |
| NM_00431E | 818.798   | 549.265   | AB011167  | 3663.323  | 2797.518  | AA609759  | 1981.573  | 2408.449  |
| NM_01444E | 1339.518  | 1168.826  | NM_00540E | 2629.409  | 1761.875  | AA029418  | 5148.755  | 4605.896  |
| U58096    | 19295.648 | 12634.239 | NM_00020E | 9609.922  | 5529.344  | L20815    | 4615.65   | 4930.091  |
| NM_01692E | 13649.608 | 9225.678  | NM_00218E | 55651.367 | 52064.258 | AI364483  | 41233.383 | 40333.063 |
| NM_01232E | 1971.311  | 2101.481  | AK027119  | 45277.531 | 26814.51  | AA456001  | 9417.813  | 11370.182 |
| NM_003054 | 1337.436  | 1301.536  | AB037727  | 54409.133 | 52507.84  | AA176581  | 576.787   | 1211.487  |
| NM_00304E | 451.852   | 551.667   | NM_00542E | 1749.152  | 1676.871  | BI818232  | 391.949   | 637.541   |
| NM_00479C | 391.323   | 641.577   | NM_01406E | 13972.292 | 11350.88  | AA451686  | 6120.391  | 7501.503  |
| NM_00221E | 7691.333  | 8588.701  | D86964    | 5952.824  | 7934.321  | NM_00428E | 175.863   | 207.441   |
| AF182404  | 6375.305  | 8706.417  | AL049801  | 1940.292  | 2379.362  | NM_01789E | 14235.089 | 8100.907  |
| NM_000804 | 578.856   | 640.445   | NM_01639E | 14887.888 | 15086.895 | AB002374  | 4375.98   | 2477.473  |
| NM_00655E | 4327.686  | 4005.351  | NM_00315E | 2796.94   | 2721.564  | U17327    | 1730.656  | 1425.35   |
| NM_014521 | 1802.603  | 1519.74   | NM_00634E | 5160.778  | 2957.689  | AB046781  | 308       | 142.896   |
| NM_00244E | 2830.587  | 3020.969  | NM_01639E | 3311.794  | 1982.552  | M87790    | 31877.332 | 24751.373 |
| NM_01780E | 748.279   | 1025.37   | NM_00568E | 3406.254  | 1836.419  | NM_00176E | 959.776   | 1019.243  |
| AK023202  | 4361.448  | 4677.427  | NM_00555E | 53823.258 | 39201.629 | NM_00002E | 5169.042  | 4959.66   |
| D63877    | 3238.464  | 3099.698  | NM_006717 | 3857.409  | 2869.371  | NM_00071E | 718.965   | 730.816   |
| AF131760  | 1986.595  | 2182.534  | AL109786  | 2684.652  | 2449.42   | AF035802  | 3056.875  | 4199.522  |
| NM_01869E | 1881.321  | 1862.741  | AK026479  | 7683.462  | 8880.523  | Y08145    | 1973.905  | 2645.952  |
| NM_006461 | 3347.35   | 2959.29   | AK022860  | 7171.792  | 9878.715  | M26123    | 263.736   | 418.24    |
| NM_018201 | 4452.978  | 3759.216  | X60188    | 51856.402 | 37066.828 | NM_00183E | 6649.689  | 7226.721  |
| NM_01443E | 1221.804  | 1016.881  | NM_005977 | 3082.265  | 2586.069  | NM_01955E | 575.382   | 1849.65   |

|           |           |           |           |           |           |           |           |           |
|-----------|-----------|-----------|-----------|-----------|-----------|-----------|-----------|-----------|
| NM_01488C | 1400.696  | 1138.707  | NM_002747 | 727.586   | 678.611   | NM_01209E | 7475.615  | 11909.135 |
| NM_003764 | 5788.403  | 4333.111  | NM_00626E | 20262.611 | 11705.463 | NM_00390E | 13777.448 | 25532.035 |
| NM_01961E | 311.56    | 139.269   | NM_00312E | 1648.283  | 1485.218  | L12052    | 2520.095  | 10341.935 |
| NM_00482E | 1890.009  | 1454.768  | NM_00605E | 4270.793  | 3338.962  | AB028976  | 6239.132  | 22561.275 |
| NM_00679E | 36421.98  | 25594.947 | NM_000347 | 44347.781 | 27681.18  | AK026337  | 7062.833  | 23317.844 |
| NM_00153E | 5458.879  | 4294.522  | M13452    | 2982.967  | 2027.014  | NM_01586E | 685.485   | 2404.181  |
| NM_00442E | 420.685   | 436.619   | AF082075  | 2263.511  | 2229.46   | NM_00462E | 685.073   | 3118.778  |
| NM_00680E | 7686.263  | 10361.396 | NM_016114 | 2411.027  | 2987.986  | NM_00189E | 811.924   | 4131.58   |
| AF149304  | 1468.286  | 1546.332  | AY007114  | 1758.281  | 2116.61   | NM_01332E | 12583.973 | 12365.593 |
| NM_01209E | 6840.838  | 8405.77   | AF086604  | 1414.498  | 1682.775  | NM_00079C | 294.975   | 362.418   |
| NM_01643E | 442.111   | 482.322   | AB000895  | 1970.444  | 2292.897  | NM_00266C | 2286.719  | 3973.916  |
| X73079    | 33858.402 | 32963.344 | X80031    | 1186.16   | 1408.928  | NM_01590C | 674.656   | 811.373   |
| NM_019091 | 981.799   | 875.419   | AF019382  | 2823.324  | 3202.317  | NM_00370E | 592.987   | 2291.541  |
| L07518    | 371.518   | 234.446   | NM_015601 | 1190.212  | 743.673   | AF182218  | 340.025   | 958.208   |
| AF264781  | 2838.351  | 2571.212  | NM_00178C | 28082.342 | 15665.562 | NM_01612E | 838.699   | 4285.464  |
| AK022823  | 413.712   | 298.063   | AJ277442  | 1537.888  | 1052.21   | AK023749  | 425.266   | 1822.162  |
| NM_00245E | 473.519   | 383.765   | NM_00456E | 3248.448  | 2048.246  | NM_002337 | 3057.549  | 10091.814 |
| AK024215  | 7746.608  | 6490.936  | AF089088  | 3021.316  | 2517.906  | NM_01324E | 1533.938  | 5280.656  |
| AB044661  | 4385.812  | 3433.783  | L07557    | 8261.345  | 7574.371  | NM_00642E | 41428.582 | 67323.352 |
| NM_00060E | 18241.736 | 13885.703 | NM_00279E | 45298.988 | 53949.387 | NM_00476E | 908.672   | 3735.739  |
| NM_016124 | 4269.537  | 4421.368  | D78514    | 11399.15  | 30935.316 | NM_00581E | 23996.297 | 50956.594 |
| NM_01907E | 570.758   | 508.025   | AK021665  | 2583.208  | 5247.047  | AK024722  | 140.885   | 720.961   |
| U53530    | 3921.93   | 2418.698  | NM_01336E | 1050.203  | 902.107   | AK025520  | 3254.644  | 6931.021  |
| NM_00659E | 1583.032  | 1649.859  | NM_002787 | 35153.355 | 22311.398 | NM_00489E | 2868.052  | 10635.723 |
| NM_01594E | 4318.286  | 3523.322  | U95006    | 15998.569 | 10975.329 | NM_014597 | 18834.146 | 47893.285 |
| AK000554  | 1564.549  | 1627.884  | NM_003347 | 15216.429 | 12824.952 | BF540935  | 8676.009  | 16235.104 |
| NM_00647E | 2814.918  | 2407.632  | AF273051  | 1626.156  | 1648.65   | NM_00446E | 510.217   | 1739.391  |
| NM_00282E | 3150.042  | 3501.242  | NM_01451E | 19840.891 | 16255.729 | NM_007081 | 1334.771  | 6998.735  |
| AF159141  | 5693.182  | 5251.546  | AK021868  | 2744.051  | 3097.675  | AB032964  | 1936.306  | 9203.421  |
| NM_01645E | 33705.23  | 22657.021 | AK000643  | 58506.688 | 66597.414 | BE733605  | 5932.133  | 21182.471 |
| AK022233  | 3707.224  | 3552.1    | NM_018421 | 5000.146  | 5304.293  | NM_003334 | 21301.229 | 51614.246 |
| AL137713  | 333.856   | 544.689   | AB014574  | 54741.48  | 59672.125 | NM_00269E | 1384.303  | 6770.602  |
| AK026410  | 13228.022 | 11729.975 | NM_020127 | 2318.76   | 3625.164  | NM_003671 | 777.899   | 3701.502  |
| NM_014637 | 8254.739  | 7200.324  | NM_01562E | 8727.946  | 18898.52  | M20695    | 83.093    | 1021.814  |
| NM_01337E | 30840.869 | 23144.518 | AB045116  | 1072.78   | 2641.606  | AK026000  | 3727.563  | 12817.816 |
| AF113208  | 10348.509 | 9933.949  | L49054    | 1264.671  | 1887.143  | NM_01783E | 1385.201  | 6261.466  |
| NM_00615E | 4610.173  | 4314.743  | NM_014727 | 4854.343  | 7808.9    | NM_00667E | 5495.737  | 15248.665 |
| NM_012164 | 3776.246  | 2519.862  | BE885010  | 1780.989  | 1457.01   | NM_00302E | 4443.337  | 14918.664 |
| AK026010  | 573.92    | 630.398   | NM_00019E | 329.595   | 289.611   | NM_00487E | 4045.856  | 12831.128 |
| NM_004721 | 413.2     | 295.305   | NM_00294E | 4585.5    | 2977.132  | NM_01984E | 1104.386  | 5600.777  |
| AB011156  | 1153.493  | 945.216   | AL133649  | 2640.586  | 1636.387  | NM_002951 | 12095.985 | 37377.965 |
| NM_01807E | 776.795   | 762.56    | AB018303  | 1449.343  | 1104.916  | NM_002317 | 1690.7    | 8202.508  |
| NM_00476C | 12374.406 | 10667.424 | NM_006454 | 10685.095 | 11315.214 | NM_00032C | 932.579   | 4129.604  |
| NM_00675E | 7044.285  | 5477.33   | NM_01584E | 9178.24   | 20070.84  | D63480    | 2963.468  | 9970.616  |
| CY3Cy5    | 3612.949  | 104.723   | NM_01597E | 38273.938 | 60540.672 | NM_00296E | 5571.65   | 17327.068 |
| NM_02100E | 808.51    | 1158.859  | NM_001644 | 1478.435  | 4084.055  | NM_00647E | 560.828   | 2821.415  |
| SB        | 2265.856  | 1671.275  | NM_01613E | 2244.676  | 2045.331  | NM_00462C | 1633.146  | 7811.994  |
| AF086342  | 408.296   | 455.911   | NM_01800E | 3308.607  | 4318.015  | AF087940  | 5452.521  | 19025.375 |
| AF086451  | 388.802   | 472.121   | NM_01609C | 2086.504  | 1295.933  | AJ277587  | 1740.841  | 7583.243  |
| AF086387  | 1012.633  | 914.188   | NM_00101E | 57293.594 | 48799.281 | D87432    | 3310.358  | 12076.961 |
| AF086443  | 362.389   | 296.568   | AK024040  | 9974.85   | 14587.779 | Y18483    | 381.429   | 1886.896  |
| AL389941  | 1112.306  | 1375.54   | NM_005061 | 9766.988  | 12981.623 | AI565117  | 37907.203 | 72921.461 |
| AB037756  | 1720.298  | 1724.598  | NM_000997 | 57280.363 | 60595.699 | U28015    | 95.558    | 1010.465  |

|           |           |           |           |           |           |           |           |           |
|-----------|-----------|-----------|-----------|-----------|-----------|-----------|-----------|-----------|
| AK001853  | 2574.512  | 2656.302  | AF182417  | 56018.629 | 57382.344 | AI299075  | 3056.546  | 9798.322  |
| AK025071  | 864.77    | 988.546   | AL137354  | 40066.438 | 56596.82  | M59979    | 1562.394  | 7191.193  |
| AK021888  | 646.127   | 927.051   | NM_001023 | 59327.684 | 68281.242 | AB011098  | 1302.372  | 5403.69   |
| AK022848  | 3934.198  | 3085.83   | AK021571  | 19321.922 | 55913.086 | AA609759  | 2557.599  | 10569.472 |
| AL049957  | 1449.124  | 1454.702  | AK022178  | 2736.498  | 8354.058  | AA029418  | 6609.205  | 17407.393 |
| NM_021005 | 892.32    | 644.256   | NM_006011 | 2004.525  | 3510.532  | L20815    | 5429.633  | 19337.184 |
| SB        | 1446.705  | 1019.872  | L00635    | 5396.557  | 5549.014  | AI364483  | 43039.625 | 67956.063 |
| SR2       | 39845.195 | 28026.699 | NM_002541 | 3331.607  | 1383.049  | AA456001  | 12048.099 | 31981.018 |
| SR4       | 12033.699 | 9896.575  | NM_000056 | 4717.148  | 2873.783  | AA176581  | 858.733   | 4537.27   |
| SR6       | 1655.963  | 1252.63   | NM_016311 | 15867.421 | 8679.018  | BI818232  | 224.932   | 1192.336  |
| SR8       | 6396.616  | 14949.987 | NM_001867 | 55685.793 | 43602.844 | AA451686  | 6917.338  | 28049.006 |
| SR10      | 20769.086 | 5836.909  | NM_002300 | 54849.355 | 59300.727 | AA934644  | 172.157   | 965.92    |
| CY3Cy5    | 3157.337  | 153.216   | NM_000290 | 12354.841 | 17304.162 | NM_002050 | 3841.287  | 11464.704 |
| AF086063  | 1149.097  | 1469.561  | NM_016538 | 6798.449  | 11217.492 | U17327    | 2053.643  | 7153.198  |
| AF086098  | 1692.452  | 1890.774  | AK023275  | 16481.455 | 22114.996 | AB046781  | 253.39    | 1305.322  |
| AF086076  | 497.268   | 772.492   | AJ223352  | 7687.467  | 7404.538  | M87790    | 39553.332 | 68257.742 |
| AL833393  | 2328.848  | 2484.027  | NM_012238 | 4088.698  | 3918.545  | NM_001768 | 1203.213  | 5543.167  |
| AF088005  | 2252.821  | 1643.14   | NM_016539 | 13407.097 | 10570.579 | NM_000029 | 6610.41   | 20615.801 |
| AF086096  | 2318.326  | 2972.084  | NM_006807 | 17948.191 | 3607.021  | NM_000715 | 736.812   | 2694.531  |
| AL390132  | 603.323   | 647.294   | L16464    | 1671.034  | 1739.056  | AF035802  | 4445.53   | 13629.185 |
| NM_017933 | 11675.858 | 11675.567 | NM_006532 | 26525.941 | 23593.348 | Y08145    | 2622.683  | 9066.016  |
| NM_017819 | 8082.127  | 6754.121  | U07132    | 18705.883 | 15547.121 | M26123    | 370.027   | 1555.278  |
| NM_014803 | 1277.029  | 1315.662  | NM_003436 | 1161.763  | 1706.571  | NM_001838 | 7880.258  | 18765.518 |
| AK024956  | 737.576   | 1043.179  | AB034691  | 669.965   | 1577.891  | NM_019555 | 618.865   | 2801.294  |
| AF147386  | 1206.941  | 1334.149  | NM_001675 | 2913.328  | 10515.596 | NM_012096 | 7274.661  | 11999.875 |
| AF273052  | 9681.66   | 8254.114  | NM_003422 | 3830.616  | 10644.704 | NM_003905 | 11442.038 | 15731.836 |
| NM_017943 | 7019.855  | 6487.349  | NM_001451 | 2863.806  | 4577.965  | L12052    | 2599.791  | 5931.398  |
| AF147383  | 787.372   | 683.049   | NM_014779 | 3634.417  | 4176.662  | AB028976  | 5209.617  | 9476.22   |
| AK025682  | 1089.263  | 818.922   | NM_014446 | 2674.042  | 1619.397  | AK026337  | 6608.875  | 10857.149 |
| NM_016478 | 11754.083 | 10029.055 | U58096    | 21896.25  | 10673.89  | NM_015868 | 669.493   | 1518.629  |
| AL389986  | 5651.755  | 4140.553  | NM_016929 | 21510.746 | 13035.706 | NM_004626 | 473.013   | 1020.925  |
| AF086279  | 721.328   | 670.881   | NM_012323 | 2865.188  | 2809.441  | NM_001898 | 546.026   | 647.217   |
| AF088052  | 1309.247  | 1128.416  | NM_006942 | 444.488   | 475.126   | AB011102  | 2576.861  | 4108.877  |
| AK027155  | 4948.837  | 4892.238  | NM_018199 | 895.792   | 978.275   | NM_002660 | 3314.556  | 12146.825 |
| AF221846  | 574.43    | 489.649   | NM_013943 | 3595.429  | 5046.087  | NM_015900 | 923.899   | 3947.698  |
| AF264626  | 646.226   | 739.976   | NM_001639 | 13424.159 | 15908.829 | NM_003706 | 833.231   | 3011.787  |
| AK027219  | 354.51    | 353.79    | H39560    | 594.802   | 776.031   | AF182218  | 320.461   | 456.794   |
| AK024528  | 15201.03  | 14600.583 | BG534366  | 19816.131 | 22658.297 | NM_016122 | 1034.838  | 1280.841  |
| NM_015370 | 4746.723  | 4696.242  | BG698522  | 44262.473 | 37501.652 | NM_002337 | 2258.205  | 2339.902  |
| AF085917  | 1568.141  | 1544.043  | AA152346  | 1677.919  | 1350.698  | NM_013245 | 936.063   | 682.202   |
| AF085989  | 1108.01   | 1435.455  | L15189    | 3692.141  | 2936.578  | NM_006423 | 31856.881 | 21314.654 |
| AL360139  | 51754.801 | 68658.406 | AB023420  | 24544.85  | 15996.993 | NM_004766 | 772.202   | 813.512   |
| AF075110  | 3489.613  | 3350.634  | BI822179  | 14331.793 | 11932.772 | NM_005819 | 19357.582 | 18621.283 |
| AL137323  | 751.794   | 740.077   | AF022912  | 7513.631  | 5509.925  | AK025520  | 2417.698  | 1855.981  |
| AL137494  | 4695.947  | 4038.422  | AA477428  | 23144.064 | 22035.725 | NM_004892 | 2343.134  | 2592.687  |
| AL162037  | 4031.115  | 4057.078  | AA156342  | 3738.541  | 3472.613  | NM_014597 | 15039.147 | 9694.685  |
| AL390150  | 1795.049  | 1591.666  | R45594    | 22167.436 | 22807.49  | AB002374  | 2998.828  | 2692.841  |
| AL137359  | 336.325   | 269.529   | AI143386  | 937.339   | 1203.533  | NM_004466 | 487.439   | 711.243   |
| AL137575  | 350.649   | 345.579   | H46425    | 12896.054 | 22403.85  | NM_007081 | 1474.381  | 3053.427  |
| NM_002761 | 711.712   | 525.012   | AI355949  | 4134.155  | 9303.447  | AB032964  | 1819.346  | 2876.566  |
| AK021962  | 554.915   | 690.85    | AA278152  | 18146.678 | 29592.857 | BE733605  | 6111.267  | 5485.157  |
| AK056674  | 915.226   | 857.009   | H75530    | 6754.256  | 10311.913 | NM_003334 | 21482.113 | 15441.906 |
| AK022856  | 396.254   | 416.37    | NM_005036 | 1163.546  | 1188.02   | NM_002693 | 1365.26   | 1655.323  |

|           |           |           |           |           |           |           |           |           |
|-----------|-----------|-----------|-----------|-----------|-----------|-----------|-----------|-----------|
| AK022042  | 859.116   | 784.527   | NM_018201 | 6629.125  | 4769.369  | NM_003671 | 847.021   | 856.272   |
| AL117588  | 423.24    | 652.438   | NM_014438 | 1975.285  | 1260.155  | AK026000  | 3205.694  | 2864.315  |
| AK021569  | 261.967   | 233.968   | NM_014880 | 6598.31   | 4334.803  | NM_017833 | 1253.991  | 1470.334  |
| AK024653  | 22566.129 | 20035.258 | NM_003764 | 5583.131  | 3665.435  | NM_006675 | 4995.45   | 3527.519  |
| AF103907  | 740.612   | 550.124   | NM_004829 | 5698.48   | 4765.563  | NM_003022 | 3459.718  | 2586.55   |
| AF094508  | 653.946   | 528.894   | NM_006793 | 47815.859 | 36109.41  | NM_004873 | 2630.923  | 2345.434  |
| AF161351  | 1333.504  | 1524.987  | NM_001538 | 25748.449 | 23196.869 | NM_019842 | 1045.675  | 1009.048  |
| AF111782  | 2575.609  | 1923.385  | X97261    | 9847.315  | 3884.827  | NM_002951 | 8933.491  | 7826.055  |
| AF151530  | 1313.475  | 1334.422  | NM_001468 | 1011.57   | 926.903   | NM_002317 | 1244.087  | 1378.62   |
| AK021991  | 841.824   | 487.209   | NM_005410 | 923.66    | 651.774   | NM_000320 | 664.33    | 650.329   |
| AK022093  | 1795.734  | 1220.367  | D87666    | 55296.75  | 50210.535 | NM_003136 | 4121.994  | 3011.673  |
| AK022232  | 330.519   | 198.016   | NM_001315 | 3589.848  | 3394.012  | NM_006475 | 472.77    | 549.799   |
| AK022376  | 1080.292  | 691.792   | AF286095  | 6459.388  | 6292.747  | NM_004620 | 1527.128  | 1688.723  |
| AK022005  | 756.982   | 505.455   | NM_000878 | 3351.753  | 3239.308  | AF087940  | 5156.748  | 4981.412  |
| AK022137  | 529.475   | 420.51    | S66407    | 4258.153  | 4769.317  | AJ277587  | 1549.245  | 2075.286  |
| AK022272  | 1067.59   | 726.455   | NM_018727 | 395.969   | 589.928   | D87432    | 2834.807  | 3184.372  |
| AL357201  | 322.981   | 397.87    | NM_004258 | 56355.148 | 61344.664 | AI565117  | 42210.996 | 45527.758 |
| AF279780  | 36705.309 | 35917.699 | NM_001981 | 6552.442  | 10706.377 | U28015    | 143.431   | 266.044   |
| AK022510  | 2192.874  | 2202.336  | NM_001585 | 55472.059 | 62932.984 | AI299075  | 2509.587  | 1955.586  |
| AK023878  | 583.189   | 777.592   | AK026108  | 41594.797 | 37460.961 | M59979    | 1356.239  | 1352.031  |
| AK021851  | 511.446   | 446.853   | AF149304  | 1342.205  | 788.485   | AB011098  | 986.611   | 1177.1    |
| L37717    | 761.215   | 899.136   | NM_012095 | 10118.797 | 8073.786  | AA609759  | 2219.95   | 2209.307  |
| AJ131609  | 5706.387  | 6719.896  | X73079    | 33286.641 | 23228.07  | AA029418  | 5188.12   | 3028.783  |
| BC019280  | 4624.128  | 4356.354  | NM_019091 | 879.711   | 615.244   | L20815    | 3871.081  | 3012.678  |
| AF086498  | 894.299   | 815.256   | L07518    | 679.323   | 507.839   | AI364483  | 37121.066 | 25021.305 |
| AK000687  | 1181.185  | 1195.241  | AF264781  | 2955.644  | 1928.806  | AA456001  | 9535.977  | 6267.283  |
| L77565    | 246.379   | 235.608   | NM_002456 | 569.319   | 570.035   | AA176581  | 549.493   | 472.09    |
| AF079567  | 2021.546  | 1602.176  | NM_016124 | 4841.075  | 3682.602  | BI818232  | 304.429   | 160.189   |
| AL049311  | 834.919   | 981.199   | NM_015948 | 10023.44  | 8738.338  | AA451686  | 5401.022  | 4654.757  |
| AK000016  | 2320.295  | 1966.515  | NM_000804 | 1079.732  | 1625.715  | NM_002050 | 2622.356  | 2199.288  |
| AK023367  | 1612.927  | 1467.574  | NM_006555 | 5895.697  | 5689.938  | NM_007097 | 5232.595  | 3752.298  |
| AL080209  | 1618.372  | 1486.739  | NM_014521 | 5088.177  | 4859.673  | D87446    | 3282.483  | 2367.284  |
| AL137431  | 411.35    | 388.749   | NM_002445 | 3804.767  | 4188.313  | BF540935  | 8671.081  | 5887.673  |
| NM_016255 | 1211.588  | 1174.532  | NM_017809 | 1275.639  | 1712.869  | NM_000715 | 786.472   | 453.57    |
| NM_014318 | 1798.088  | 1555.21   | AK023202  | 4715      | 4854.143  | AF035802  | 4365.775  | 3266.605  |
| AL133089  | 2780.686  | 2868.529  | D63877    | 3783.225  | 6046.352  | Y08145    | 2891.338  | 1832.551  |
| AK023526  | 1551.48   | 1819.523  | AF131760  | 2203.051  | 3283.813  | M26123    | 222.742   | 225.842   |
| BE266129  | 1315.758  | 1258.409  | NM_018698 | 2348.147  | 2648.947  | NM_001838 | 6912.537  | 4289.271  |
| X66227    | 328.308   | 244.996   | NM_006461 | 3608.79   | 4239.457  | NM_019555 | 531.975   | 392.033   |
| AK025602  | 11509.361 | 12958.907 | NM_002826 | 4032.517  | 2998.31   | NM_012096 | 7536.836  | 3627.791  |
| AK026309  | 3666.655  | 4843.034  | AF159141  | 14400.49  | 9803.188  | NM_003905 | 11871.249 | 6802.517  |
| AL137486  | 6126.206  | 7180.162  | NM_002420 | 526.415   | 649.209   | L12052    | 1731.584  | 1380.456  |
| AL110162  | 1357.66   | 1203.153  | NM_016458 | 53056.434 | 47382.434 | AB028976  | 4443.935  | 3116.132  |
| AF119880  | 483.026   | 555.561   | AK022233  | 4532.188  | 4615.629  | AK026337  | 3957.123  | 2820.145  |
| AK022681  | 7575.953  | 9789.684  | AK026410  | 28244.824 | 25211.75  | NM_015866 | 421.42    | 181.331   |
| NM_017708 | 821.921   | 989.428   | NM_014637 | 10871.72  | 9913.497  | AB031038  | 265.913   | 209.446   |
| BE895529  | 3722.753  | 4084.365  | NM_013379 | 46268.465 | 48438.941 | NM_004626 | 356.433   | 241.202   |
| AK000964  | 696.255   | 736.208   | AF113208  | 36105.699 | 32222.172 | NM_001896 | 495.614   | 415.209   |
| AL117536  | 12237.374 | 11775.76  | NM_006153 | 8669.223  | 6966.654  | NM_004305 | 40459.039 | 34659.074 |
| NM_017751 | 6395.006  | 6141.403  | NM_012164 | 4286.704  | 3384.177  | AF072506  | 181.726   | 237.539   |
| NM_003771 | 1189.418  | 873.169   | AK026010  | 912.477   | 1453.365  | NM_005992 | 167.054   | 355.745   |
| NM_017860 | 1216.994  | 792.665   | NM_004721 | 472.715   | 930.727   | NM_003144 | 5780.401  | 4401.07   |
| X91195    | 48836.156 | 43518.621 | AB011156  | 2286.397  | 1897.877  | NM_000908 | 872.53    | 945.634   |



|           |           |           |           |           |           |           |           |           |
|-----------|-----------|-----------|-----------|-----------|-----------|-----------|-----------|-----------|
| AF086190  | 634.911   | 503.2     | NM_018079 | 2182.566  | 3162.789  | AB011102  | 2321.821  | 2572.926  |
| NM_006143 | 555.313   | 480.546   | NM_004760 | 15554.372 | 19143.402 | D63480    | 1790.251  | 1954.819  |
| AL050035  | 5197.305  | 4131.201  | NM_006752 | 7342.601  | 9735.32   | NM_002965 | 4166.762  | 4282.402  |
| AK024449  | 198.765   | 286.635   | NM_006809 | 11217.702 | 12632.368 | M81768    | 345.587   | 208.444   |
| AF090101  | 406.795   | 319.643   | NM_016929 | 30779.521 | 17382.488 | AK023749  | 250.162   | 259.063   |
| AF040723  | 32028.016 | 33941.531 | NM_012323 | 3419.887  | 3781.934  | NM_002337 | 2623.349  | 1939.516  |
| NM_015527 | 5172.137  | 5657.258  | NM_006942 | 644.916   | 797.263   | NM_013245 | 1280.662  | 586.162   |
| X89675    | 1306.567  | 1619.68   | NM_018199 | 1401.149  | 1009.33   | NM_006423 | 29958.066 | 14699.371 |
| NM_012189 | 1048.154  | 1033.751  | NM_013943 | 3361.579  | 3636.202  | NM_004766 | 1264.794  | 852.691   |
| NM_005799 | 12963.424 | 16418.543 | NM_001639 | 12557.307 | 10017.049 | NM_005819 | 15022.262 | 11804.013 |
| NM_004216 | 2826.774  | 3195.718  | H39560    | 626.73    | 737.11    | AK025520  | 2295.327  | 1023.948  |
| NM_016289 | 36104.176 | 30516.262 | BG534366  | 18180.387 | 22345.154 | NM_004892 | 2142.857  | 2066.781  |
| NM_001464 | 979.518   | 1079.804  | BG698522  | 45596.367 | 41726.531 | NM_014597 | 14487.887 | 9480.348  |
| NM_002051 | 5107.928  | 6085.233  | AA152346  | 1991.36   | 1345.706  | NM_017896 | 11787.991 | 6620.929  |
| AK022177  | 1470.985  | 1470.688  | L15189    | 3445.467  | 3605.934  | AB002374  | 3234.345  | 2555.551  |
| AK023852  | 872.518   | 983.461   | AB023420  | 24045.627 | 17764.221 | U17327    | 1316.146  | 914.335   |
| AF086466  | 2982.932  | 3327.025  | BI822179  | 12895.277 | 11325.498 | AB046781  | 558.984   | 499.586   |
| AB007962  | 5355.867  | 6368.424  | AF022912  | 6852.004  | 4770.136  | M87790    | 30348.424 | 19171.811 |
| AF005081  | 1572.817  | 1570.473  | AA477428  | 22164.076 | 19376.445 | NM_001768 | 1271.204  | 1317.283  |
| AK026438  | 581.687   | 946.918   | AA156342  | 3154.381  | 3908.547  | NM_000029 | 7096.819  | 4828.481  |
| AK021546  | 782.214   | 694.117   | R45594    | 22068.379 | 32151.607 | NM_017921 | 304.888   | 128.416   |
| AL050186  | 13562.566 | 12227.344 | AI143386  | 1000.845  | 1821.053  | NM_003136 | 4534.606  | 3097.653  |
| AK021918  | 4146.158  | 3328.277  | H46425    | 9035.648  | 8646.448  | NM_013328 | 12341.014 | 7060.003  |
| AK021669  | 4328.938  | 3725.906  | AI355949  | 1868.033  | 1778.62   | NM_000790 | 308.572   | 116.003   |
| AL080113  | 34237.262 | 27614.369 | AA278152  | 16504.514 | 16898.871 | NM_002660 | 1886.38   | 1884.776  |
| AL050083  | 1330.871  | 1252.132  | H75530    | 4348.439  | 6045.702  | NM_015900 | 706.698   | 247.056   |
| AK022766  | 778.724   | 806.265   | AK000554  | 1762.08   | 2305.468  | NM_003706 | 397.033   | 401.522   |
| AL049422  | 7218.274  | 5771.968  | NM_006472 | 3209.881  | 3214.839  | AF182218  | 351.464   | 241.798   |
| NM_000093 | 1771.778  | 1880.585  | NM_014880 | 8160.018  | 4957.216  | AB033054  | 4707.056  | 4235.715  |
| NM_001779 | 8136.57   | 10234.967 | NM_003764 | 8105.514  | 5516.55   | NM_016122 | 884.532   | 778.081   |
| AB033059  | 1811.42   | 2062.341  | NM_004829 | 7204.156  | 5879.304  | AF153330  | 511       | 583.869   |
| NM_016484 | 3427.367  | 3967.641  | NM_006793 | 52768.785 | 44813.57  | NM_001652 | 221.876   | 338.855   |
| AK026114  | 1016.644  | 1069.993  | NM_001538 | 22879.777 | 23806.98  | NM_002050 | 3824.93   | 2643.815  |
| NM_014452 | 998.341   | 848.416   | X97261    | 9540.559  | 3793.427  | NM_007097 | 6636.083  | 3220.26   |
| NM_014683 | 532.746   | 867.276   | NM_001468 | 1098.607  | 921.642   | D87446    | 3112.135  | 2155.198  |
| AF023130  | 431.71    | 353.006   | NM_005410 | 1716.569  | 1121.028  | BF540935  | 5141.318  | 2857.863  |
| AK021536  | 9691.611  | 7817.858  | D87666    | 53674.867 | 47544.629 | NM_004466 | 243.282   | 217.726   |
| U31285    | 392.647   | 235.72    | NM_002921 | 454.977   | 583.871   | NM_007081 | 945.928   | 997.314   |
| AF079529  | 335.843   | 391.668   | NM_001315 | 3809.782  | 3152.767  | AB032964  | 1620.589  | 1415.16   |
| NM_002600 | 1189.027  | 1653.594  | AF286095  | 5933.676  | 6129.669  | BE733605  | 2436.89   | 2056.112  |
| NM_003646 | 20381.725 | 19436.697 | NM_000878 | 3462.711  | 5233.539  | NM_003334 | 15301.958 | 12986.526 |
| NM_006663 | 1259.615  | 1584.344  | S66407    | 4255.359  | 9720.216  | NM_002693 | 1276.559  | 1221.269  |
| NM_006092 | 1053.134  | 1013.323  | NM_016523 | 1004.846  | 2896.925  | NM_003671 | 619.213   | 588.004   |
| NM_003939 | 603.874   | 659.687   | NM_004258 | 57138.57  | 55869.695 | AK026000  | 2632.219  | 2197.382  |
| NM_012424 | 719.927   | 669.597   | NM_001981 | 6850.312  | 7053.521  | NM_017833 | 1118.099  | 1721.157  |
| NM_002446 | 1267.353  | 1098.185  | NM_001585 | 57561.566 | 61370.152 | NM_006675 | 4229.915  | 3875.564  |
| NM_000863 | 1533.925  | 1085.855  | AK026108  | 41873.543 | 42640.609 | NM_003022 | 4088.567  | 3468.405  |
| NM_006651 | 3124.497  | 2717.088  | NM_014446 | 2825.565  | 3074.5    | NM_004873 | 3454.972  | 3339.757  |
| NM_005336 | 11004.876 | 8408.647  | U58096    | 24507.178 | 19678.105 | NM_019842 | 970.604   | 1067.826  |
| NM_001419 | 11090.446 | 9568.543  | NM_016438 | 445.65    | 298       | NM_002951 | 9793.78   | 8841.129  |
| AF119817  | 35350.91  | 24203.064 | X73079    | 37115.504 | 25702.369 | NM_002317 | 1420.123  | 1404.832  |
| AL035306  | 4015.547  | 3304.52   | NM_019091 | 1167.485  | 915.481   | NM_000320 | 636.255   | 754.791   |
| NM_004230 | 8762.446  | 7755.491  | L07518    | 1071.511  | 850.735   | CY3Cy5    | 222.596   | 58.949    |

|           |           |           |           |           |           |           |           |          |
|-----------|-----------|-----------|-----------|-----------|-----------|-----------|-----------|----------|
| AK024372  | 377.837   | 304.233   | AF264781  | 3189.576  | 2159.405  | NM_145655 | 1134.907  | 497.361  |
| NM_014503 | 1512.884  | 1493.563  | NM_002456 | 466.982   | 511.54    | AK022138  | 962.028   | 579.804  |
| NM_014659 | 2831.768  | 2777.883  | NM_016124 | 5400.477  | 5841.517  | AF086191  | 4698.302  | 2339.656 |
| NM_004399 | 8168.252  | 7721.467  | NM_015948 | 9089.764  | 7409.408  | AB037824  | 316.812   | 212.681  |
| NM_006337 | 7563.984  | 8229.093  | NM_000804 | 1062.097  | 1214.469  | AK025437  | 680.353   | 415.412  |
| NM_004507 | 4309.914  | 4540.698  | NM_006555 | 5579.906  | 5871.832  | NM_145655 | 1011.166  | 818.789  |
| NM_002710 | 26654.096 | 20297.479 | NM_014521 | 6191.485  | 7231.757  | SR10      | 15250.195 | 3259.199 |
| NM_014060 | 7717.89   | 8213.184  | NM_002445 | 4021.098  | 8183.066  | CY3Cy5    | 407.788   | 127.971  |
| NM_004749 | 13065.778 | 13469.774 | NM_017809 | 1070.067  | 2743.317  | NM_018465 | 915.178   | 574.634  |
| BQ446064  | 2506.605  | 2882.816  | AK023202  | 4394.824  | 4543.979  | AL359932  | 712.657   | 318.427  |
| AF302502  | 2714.561  | 2841.925  | D63877    | 2944.862  | 3081.482  | AB037850  | 3800.813  | 1821.774 |
| AF274571  | 2568.975  | 2751.33   | AF131760  | 1965.322  | 2499.423  | AK002197  | 1280.848  | 655.865  |
| NM_005449 | 1137.858  | 1210.061  | NM_018698 | 2391.458  | 2837.57   | AF087996  | 2812.225  | 1011.958 |
| NM_003879 | 3679.812  | 3649.282  | NM_006461 | 3780.239  | 5120.638  | AL833249  | 1549.563  | 696.467  |
| U69263    | 331.259   | 196.117   | NM_018201 | 4867.771  | 6629.163  | NM_020424 | 371.395   | 285.235  |
| NM_016052 | 10767.761 | 8683.859  | NM_014438 | 2335.043  | 2571.034  | AK022339  | 1563.781  | 976.3    |
| NM_005427 | 1112.209  | 994.025   | AF159141  | 15201.072 | 10110.764 | AK025126  | 726.987   | 195.806  |
| NM_016312 | 1037.147  | 863.79    | NM_002420 | 529.186   | 489.756   | AK025317  | 7015.836  | 2488.438 |
| AF234887  | 597.427   | 658.64    | NM_016458 | 56639.121 | 47108.621 | AK025177  | 899.987   | 576.331  |
| NM_001776 | 1911.518  | 1933.041  | AK022233  | 4742.99   | 5204.675  | AK025552  | 4784.029  | 1672.485 |
| NM_001792 | 370.831   | 517.602   | AK026410  | 29989.777 | 25809.281 | AK026725  | 540.705   | 358      |
| NM_001903 | 487.173   | 427.937   | NM_014637 | 10706.392 | 9551.522  | AK023122  | 592.836   | 333.573  |
| U87223    | 7713.162  | 5629.688  | NM_013379 | 47737.781 | 51328.188 | AF147408  | 1210.407  | 502.058  |
| NM_005857 | 4975.227  | 6000.646  | AF113208  | 34604.988 | 32889.344 | AK027222  | 2096.811  | 742.81   |
| NM_002429 | 852.839   | 740.65    | NM_006153 | 8712.974  | 7308.779  | AL080086  | 536.928   | 600.903  |
| NM_000429 | 2843.98   | 3616.982  | NM_012164 | 4517.495  | 3919.371  | AL157458  | 605.04    | 707.041  |
| AK027037  | 1185.798  | 1258.573  | AK026010  | 1812.985  | 1902.523  | NM_015377 | 556.02    | 322.395  |
| NM_003875 | 13409.266 | 13833.502 | NM_004721 | 640.203   | 1055.643  | AL137531  | 826.514   | 467.546  |
| AF191687  | 5216.875  | 5176.24   | AB011156  | 1409.539  | 2376.726  | AK022210  | 253.231   | 223.857  |
| NM_003046 | 510       | 394.644   | NM_018079 | 954.371   | 1303.315  | AL080085  | 3060.577  | 1047.208 |
| NM_000274 | 16943.529 | 14443.213 | NM_004760 | 15702.054 | 14589.621 | NM_007017 | 386.909   | 265.499  |
| NM_000170 | 4251.524  | 4825.891  | NM_006752 | 6797.432  | 5628.232  | AL137446  | 985.721   | 428.544  |
| NM_000281 | 556.302   | 593.112   | NM_006809 | 9056.674  | 10200.371 | AB025286  | 1083.589  | 490.093  |
| AK001295  | 3131.531  | 2719.149  | AF149304  | 2186.217  | 3024.174  | AF056437  | 218.058   | 129.936  |
| NM_006031 | 4150.762  | 4352.692  | NM_012095 | 8473.097  | 10374.021 | NM_005029 | 1206.149  | 633.227  |
| NM_002715 | 6956.735  | 5569.073  | NM_006942 | 1095.806  | 1117.871  | AF056447  | 1195.645  | 976.507  |
| NM_001020 | 48279.648 | 72199.727 | NM_018199 | 1309.426  | 959.194   | AK001010  | 1254.596  | 1001.121 |
| AB020660  | 2492.884  | 2180.46   | NM_013943 | 4165.055  | 3983.083  | NM_018076 | 823.442   | 777.148  |
| NM_006659 | 25288.721 | 21711.424 | NM_001639 | 11723.722 | 10891.833 | AK001820  | 730.051   | 856.825  |
| NM_018051 | 1541.387  | 1449.582  | BG534366  | 20411.686 | 21615.08  | AK021482  | 7523.88   | 4648.044 |
| NM_015371 | 3186.255  | 3455.111  | BG698522  | 51377.484 | 47845.121 | NM_006158 | 22936.869 | 7768.418 |
| AB040915  | 3520.421  | 2677.642  | AA152346  | 1940.365  | 1867.709  | NM_006346 | 1740.152  | 866.413  |
| NM_001328 | 44304.574 | 35656.684 | L15189    | 3629.999  | 4134.64   | AK025240  | 3183.896  | 1225.23  |
| NM_005749 | 7850.085  | 6147.866  | AB023420  | 27050.889 | 21495.691 | NM_017633 | 9171.949  | 3104.86  |
| NM_006696 | 3564.153  | 3370.758  | BI822179  | 14879.801 | 13598.697 | AF086186  | 30146.42  | 7102.448 |
| NM_004599 | 13993.432 | 15823.647 | AF022912  | 8047.364  | 5838.291  | NM_017802 | 4895.779  | 1649.956 |
| NM_006037 | 2287.28   | 2027.329  | AA477428  | 22973.832 | 19962.936 | AJ008137  | 8887.605  | 2898.021 |
| NM_015871 | 11377.772 | 11553.265 | AA156342  | 3480.789  | 3607.904  | AK000939  | 478.552   | 375.41   |
| NM_019037 | 13163.14  | 11258.43  | R45594    | 21355.234 | 23146.625 | AL109674  | 2040.666  | 1075.274 |
| NM_015891 | 6146.722  | 4218.68   | AI143386  | 2099.603  | 3742.066  | AK024512  | 5958.555  | 2601.918 |
| NM_006802 | 1720.688  | 1620.388  | H46425    | 17326.029 | 23231.111 | AK023454  | 2064.728  | 1414.063 |
| AB037778  | 2009.571  | 1915.468  | AI355949  | 2012.109  | 2782.409  | L23207    | 626.818   | 633.582  |
| NM_005066 | 29112.92  | 25744.232 | AA278152  | 18867.508 | 15740.541 | NM_018627 | 722.752   | 768.113  |

|           |           |           |           |           |           |          |           |           |
|-----------|-----------|-----------|-----------|-----------|-----------|----------|-----------|-----------|
| NM_00308  | 10430.301 | 8154.535  | H75530    | 3749.546  | 3917.708  | S82164   | 1265.102  | 651.06    |
| NM_00375  | 23656.252 | 20468.506 | AK000554  | 1663.069  | 2022.26   | AK024394 | 1888.904  | 1267.202  |
| NM_00622  | 860.063   | 730.554   | NM_006472 | 3018.6    | 3644.532  | AF147374 | 553.629   | 532.809   |
| NM_01759  | 4091.153  | 3594.962  | NM_00282  | 3829.887  | 5294.46   | AF130091 | 584.256   | 367.269   |
| AB011145  | 7922.916  | 7399.378  | X97261    | 10126.187 | 3657.82   | L43338   | 11431.645 | 3312.204  |
| NM_00375  | 27320.953 | 19198.502 | NM_00146  | 1068.426  | 1166.776  | AJ227866 | 33815.465 | 7841.969  |
| NM_015251 | 395.254   | 283.451   | NM_00541  | 992.617   | 1100.809  | AF458223 | 3553.931  | 1266.299  |
| M92422    | 6757.06   | 5315.696  | D87666    | 52205.684 | 51585.785 | AK022838 | 8393.09   | 2929.944  |
| NM_01786  | 4989.726  | 4623.19   | NM_001315 | 3900.271  | 3722.599  | NM_00350 | 775.123   | 595.917   |
| NM_00186  | 371.11    | 202.81    | AF286095  | 10666.762 | 15173.451 | AF086519 | 2954.75   | 1452.018  |
| NM_00421  | 441.097   | 616.365   | NM_00087  | 3678.916  | 4541.661  | AF055012 | 8714.089  | 4940.717  |
| NM_01815  | 39061.352 | 41656.352 | S66407    | 4496.99   | 5039.616  | AK022307 | 2432.237  | 1157.408  |
| NM_00081  | 18446.291 | 19420.465 | NM_00425  | 55413.379 | 55795.77  | NM_01240 | 3739.958  | 1567.824  |
| NM_00251  | 11810.958 | 11926.812 | NM_001981 | 10354.513 | 12334.437 | AK022611 | 3767.082  | 1635.916  |
| NM_01742  | 4197.436  | 4288.728  | NM_014654 | 2071.213  | 3183.744  | NM_00495 | 3337.987  | 1859.497  |
| NM_00152  | 18243.273 | 19123.088 | NM_00158  | 57807.914 | 60158.453 | NM_02041 | 4307.063  | 1563.435  |
| NM_00088  | 14080.864 | 14889.757 | AK026108  | 51773.637 | 56254.531 | AB037730 | 2509.948  | 1115.89   |
| AF254086  | 3728.912  | 3609.619  | NM_00637  | 5774      | 9666.876  | NM_00135 | 7900.713  | 2724.284  |
| AL390142  | 1925.99   | 1530.696  | BF571428  | 29308.254 | 28743.225 | NM_00389 | 2329.937  | 1033.411  |
| NM_00656  | 3921.816  | 3768.82   | AB037723  | 49528.711 | 51387.027 | AB037816 | 703.968   | 428.898   |
| AB007930  | 6726.567  | 7693.88   | NM_00624  | 5573.892  | 5250.423  | NM_01426 | 226.905   | 310.168   |
| X76978    | 719.078   | 583.02    | NM_00431  | 1846.272  | 2248.295  | AF086234 | 22722.129 | 7942.804  |
| AJ005273  | 2741.139  | 3350.319  | NM_01444  | 3693.543  | 4855.058  | AK023680 | 8730.374  | 5064.544  |
| AK021892  | 2649.911  | 3381.888  | U58096    | 26094.162 | 27283.395 | AF009324 | 3150.677  | 1772.501  |
| NM_01763  | 380.112   | 365.272   | NM_01692  | 27136.879 | 38071.508 | AL137480 | 29749.674 | 17430.533 |
| NM_00312  | 30081.613 | 21809.701 | NM_01232  | 2932.799  | 5496.129  | AB028968 | 2274.169  | 1541.302  |
| NM_00343  | 2044.203  | 1480.547  | NM_00305  | 2363.931  | 1782.069  | AK001202 | 758.872   | 566.84    |
| NM_01833  | 9537.841  | 6929.614  | NM_00304  | 668.688   | 607.191   | AF195764 | 58331.285 | 32844.645 |
| AA193295  | 380.661   | 388.803   | NM_00479  | 806.738   | 1047.627  | AF055029 | 1447.637  | 940.596   |
| NM_01804  | 2893.285  | 3177.742  | AF182404  | 9485.926  | 11042.232 | AB011542 | 770.136   | 454.743   |
| NM_00648  | 8384.717  | 7430.307  | NM_00080  | 843.75    | 852.83    | NM_00185 | 4961.651  | 2212.464  |
| AB011115  | 943.333   | 973.047   | NM_00655  | 5691.425  | 5386.346  | NM_00579 | 743.496   | 517.561   |
| NM_00391  | 29033.613 | 23151.016 | NM_01452  | 4899.803  | 4687      | X99661   | 785.955   | 471.455   |
| AB007913  | 1346.462  | 990.312   | NM_00244  | 4461.155  | 5694.744  | NM_00592 | 1996.653  | 1374.364  |
| L09080    | 10744.877 | 11110.833 | NM_01780  | 1125.191  | 1390.823  | AB028983 | 5395.541  | 1910.355  |
| NM_00732  | 9955.938  | 8708.132  | AK023202  | 5005.037  | 5016.416  | AB037800 | 1048.725  | 495.654   |
| AK023080  | 508.231   | 635.655   | D63877    | 3513.091  | 4365.092  | AK026377 | 401.427   | 195.919   |
| NM_00188  | 5611.593  | 7544.801  | AF131760  | 3331.995  | 5042.103  | NM_01866 | 2632.939  | 1212.467  |
| NM_00446  | 535.711   | 877.103   | NM_01869  | 3290.13   | 5045.953  | NM_00339 | 4872.581  | 3869.741  |
| NM_01805  | 21827.908 | 24713.178 | NM_00646  | 3874.231  | 4818.709  | NM_01463 | 1324.132  | 2560.435  |
| NM_00454  | 30007.564 | 30802.965 | NM_01820  | 8386.948  | 12315.717 | NM_00674 | 2849.347  | 2036.039  |
| X69079    | 43387.32  | 40150.148 | NM_01443  | 2355.361  | 3317.132  | NM_00708 | 998.266   | 1086.793  |
| BI759406  | 33949.926 | 27832.775 | NM_01488  | 9406.745  | 9531.592  | NM_00387 | 10351.596 | 4242.521  |
| R76099    | 12985.957 | 11956.818 | NM_00376  | 7478.368  | 6849.694  | AK024507 | 1073.776  | 858.472   |
| S74445    | 1689.113  | 2078.189  | NM_00482  | 4537.983  | 8309.983  | NM_00124 | 3025.089  | 2062.724  |
| BI763360  | 5666.056  | 6177.1    | NM_00679  | 54232.703 | 64592.504 | AK025997 | 751.108   | 1314.01   |
| D25538    | 2958.552  | 2708.665  | NM_00153  | 22389.971 | 46976.426 | NM_01488 | 1650.59   | 1421.063  |
| NM_00036  | 31251.609 | 27919.564 | NM_00442  | 558.857   | 471.475   | NM_01855 | 7180.831  | 3468.429  |
| D49950    | 826.985   | 788.624   | NM_00680  | 9305.939  | 10834.942 | NM_00560 | 1735.861  | 744.002   |
| NM_00184  | 1381.879  | 1285.259  | NM_01209  | 9728.067  | 11509.597 | NM_00596 | 9054.084  | 2785.752  |
| X03635    | 2916.618  | 2455.575  | NM_01643  | 480.217   | 783.427   | AB014566 | 2343.128  | 966.634   |
| BC011847  | 47418.984 | 74601.938 | X73079    | 36924     | 34942.68  | NM_01567 | 1051.323  | 413.5     |
| X03348    | 2125.148  | 2367.581  | NM_01909  | 808.418   | 954.717   | AK025950 | 615.065   | 591.978   |

|           |           |           |           |           |           |           |           |           |
|-----------|-----------|-----------|-----------|-----------|-----------|-----------|-----------|-----------|
| AF353674  | 5290.611  | 5837.527  | L07518    | 936.634   | 871.979   | NM_014223 | 1852.359  | 762.147   |
| BC002645  | 6491.748  | 7158.051  | AF264781  | 2641.823  | 2664.144  | NM_016194 | 424.986   | 247.79    |
| NM_021138 | 3525.868  | 3163.852  | AK024215  | 9242.402  | 12558.62  | AL050385  | 1151.665  | 898.714   |
| BC002792  | 6168.262  | 8330.368  | AB044661  | 5202.398  | 5894.963  | NM_007027 | 4084.734  | 2653.189  |
| NM_005847 | 346.909   | 403.339   | NM_000606 | 44183.715 | 38931.738 | NM_000633 | 54234.629 | 36280.801 |
| NM_002286 | 48878.805 | 73144.266 | NM_016124 | 4794.903  | 4361.355  | AB037855  | 2922.563  | 2985.502  |
| NM_002164 | 1112.895  | 1076.362  | NM_019079 | 831.959   | 828.147   | AK024524  | 4546.66   | 3866.979  |
| NM_003811 | 15079.474 | 22904.121 | U53530    | 4561.319  | 5031.445  | NM_000562 | 4161.829  | 2241.194  |
| NM_002981 | 12298.396 | 15365.868 | NM_006598 | 2185.277  | 2572.257  | NM_020353 | 445.595   | 329.678   |
| NM_001244 | 3139.424  | 3418.642  | NM_015948 | 11659.624 | 19535.65  | NM_019011 | 12858.701 | 8876.427  |
| NM_012275 | 631.134   | 539.764   | AK000554  | 2328.556  | 1598.743  | NM_004879 | 5379.881  | 6620.341  |
| NM_006137 | 1704.173  | 1642.802  | NM_002826 | 3008      | 2028.014  | AB020694  | 1886.619  | 3755.273  |
| NM_016139 | 43345.66  | 40426.02  | AF159141  | 11473.211 | 12032.057 | AL050131  | 1004.986  | 2701.125  |
| AL117468  | 4837.208  | 4492.511  | NM_002420 | 526.954   | 661.87    | NM_004475 | 12515.835 | 12837.917 |
| NM_019613 | 8403.779  | 8083.712  | NM_016458 | 52530.82  | 48201.715 | NM_001627 | 3030.254  | 2845.614  |
| NM_005382 | 1174.6    | 1162.066  | AK022233  | 3799.173  | 5298.012  | NM_002544 | 1017.621  | 752.401   |
| AK027086  | 4397.671  | 5252.114  | AK026410  | 22501.422 | 29445.74  | X77690    | 2257.06   | 1194.712  |
| AB032997  | 1598.693  | 1697.461  | NM_014637 | 10435.069 | 22601.066 | NM_006536 | 1482.496  | 1005.304  |
| AL096857  | 4305.481  | 4999.334  | NM_013379 | 50442.184 | 49742.172 | NM_005658 | 7921.476  | 2968.602  |
| AB002351  | 232.325   | 272.487   | AF113208  | 37432.027 | 44811.391 | NM_002422 | 730.911   | 404.683   |
| X07203    | 28049.133 | 25875.168 | NM_006153 | 9774.71   | 10703.131 | NM_006690 | 3101.534  | 1177.591  |
| AB040104  | 632.259   | 703.22    | NM_012164 | 4456.201  | 4711.012  | NM_006156 | 250.339   | 174.676   |
| NM_003834 | 5686.04   | 6472.743  | AK026010  | 549.143   | 772.203   | AF218022  | 3146.341  | 1147.978  |
| NM_005959 | 6543.691  | 7605.174  | NM_004721 | 1146.545  | 909.975   | NM_003348 | 2518.666  | 1159.498  |
| NM_003381 | 2279.169  | 2208.22   | AB011156  | 2390.079  | 2187.886  | AB006198  | 12981.153 | 6851.353  |
| NM_005756 | 2839.999  | 3127.627  | NM_018079 | 2667.113  | 3043.896  | U72518    | 3013.33   | 3319.183  |
| NM_003702 | 32785.668 | 26857.969 | NM_004760 | 14525.785 | 20601.605 | AF264765  | 681.853   | 1217.906  |
| NM_000369 | 1468.275  | 1736.704  | NM_006752 | 7572.741  | 8671.05   | NM_015322 | 2135.647  | 3305.628  |
| NM_004405 | 1401.254  | 1498.879  | CY3Cy5    | 11443.731 | 278.007   | NM_000268 | 57443.098 | 56520.313 |
| NM_001988 | 4719.257  | 4435.185  | NM_021005 | 1244.928  | 2738.616  | M30493    | 39089.129 | 40865.668 |
| AF073770  | 2696.441  | 2843.514  | SB        | 1745.868  | 2548.729  | AJ008160  | 584.837   | 718.118   |
| AL359401  | 7794.523  | 8015.932  | AF086342  | 562.461   | 1388.642  | NM_005824 | 1353.932  | 1289.888  |
| NM_012213 | 1525.973  | 1668.159  | AF086451  | 769.651   | 1490.942  | AF052211  | 6723.937  | 5224.381  |
| NM_016573 | 6573.41   | 7107.164  | AF086310  | 516.81    | 1255.885  | U66561    | 1678.941  | 889.43    |
| NM_001303 | 15643.104 | 17056.9   | AF086387  | 1384.292  | 2584.124  | NM_000306 | 2779.571  | 1554.918  |
| M21304    | 650.316   | 730.608   | AF086443  | 458.714   | 793.635   | NM_002200 | 444.922   | 423.183   |
| NM_001979 | 707.836   | 963.204   | AL389941  | 1723.596  | 2001.705  | AF017433  | 692.115   | 511.989   |
| AB040896  | 1573.104  | 2138.917  | AB037756  | 2664.729  | 5433.399  | AF130111  | 1487.238  | 970.845   |
| NM_001107 | 4386.308  | 3946.812  | AK001853  | 5601.789  | 11370.943 | NM_016307 | 9313.413  | 5260.166  |
| AF084645  | 748.224   | 644.883   | AK025071  | 1236.579  | 2498.384  | AB028449  | 4003.82   | 2228.732  |
| AF151851  | 9182.001  | 8271.511  | AK021888  | 839.052   | 2006.695  | NM_004697 | 4854.631  | 2170.296  |
| NM_014379 | 223.658   | 388.161   | AK022848  | 10355.678 | 21227.184 | AF131776  | 8801.463  | 5401.356  |
| AF220417  | 2860.567  | 3530.762  | AK055302  | 640.283   | 1402.55   | NM_020528 | 7536.873  | 4706.522  |
| NM_001122 | 17724.881 | 18643.045 | AL049957  | 2574.446  | 5938.876  | NM_007040 | 51321.859 | 24914.854 |
| NM_004591 | 2372.982  | 2385.739  | NM_021005 | 3583.574  | 6252.141  | NM_014483 | 12680.1   | 8749.168  |
| NM_006274 | 550.249   | 575.491   | SB        | 1877.41   | 2699.925  | AK024249  | 2484.265  | 3588.082  |
| AL133027  | 1230.356  | 1431.234  | SR2       | 57198.297 | 57852.324 | AF239156  | 8962.531  | 5012.543  |
| AB037732  | 2048.573  | 2536.325  | SR4       | 17047.232 | 28081.742 | NM_020390 | 3511.59   | 4193.275  |
| NM_005767 | 966.082   | 697.07    | SR6       | 2315.447  | 3119.708  | NM_003321 | 27228.775 | 27277.707 |
| NM_001837 | 693.205   | 675.35    | SR8       | 7854.441  | 31700.857 | U18937    | 20335.686 | 24083.4   |
| NM_001839 | 45791.258 | 73411.234 | SR10      | 26694.002 | 11713.938 | AF268872  | 2324.89   | 5302.043  |
| BC016029  | 900.605   | 1197.483  | AF086063  | 2188.912  | 4618.588  | AK022180  | 60190.527 | 58294.855 |
| M27487    | 42907.594 | 41423.398 | AF086098  | 4208.737  | 8725.875  | NM_001226 | 1181.97   | 2090.006  |

|           |           |           |           |           |           |            |           |           |
|-----------|-----------|-----------|-----------|-----------|-----------|------------|-----------|-----------|
| NM_002611 | 2510.914  | 2898.611  | AF086076  | 894.531   | 1945.79   | NM_001336  | 2296.422  | 3856.883  |
| NM_017417 | 702.302   | 618.022   | AL833393  | 2774.985  | 6294.119  | AB050716   | 1134.744  | 2810.914  |
| AL133602  | 1682.619  | 1803.986  | AF088005  | 3335.074  | 5535.47   | AF161353   | 28140.371 | 12109.058 |
| AF037219  | 5944.545  | 5743.322  | AF086096  | 5433.797  | 13407.938 | NM_000764  | 4093.137  | 2803.169  |
| AK026075  | 798.706   | 1095.871  | AL390132  | 901.905   | 1919.8    | NM_004146  | 27607.301 | 13253.359 |
| NM_000251 | 5496.792  | 4751.125  | NM_017933 | 28140.105 | 49326.695 | NM_003002  | 19735.166 | 8520.246  |
| AF118071  | 576.26    | 597.02    | NM_017819 | 10505.606 | 12980.138 | D42047     | 3530.697  | 2123.537  |
| NM_006038 | 4381.556  | 4022.93   | NM_014803 | 1211.512  | 1090.681  | AB009282   | 19608.531 | 8366.775  |
| NM_002485 | 348.614   | 369.607   | AK024956  | 1538.015  | 1914.791  | NM_005004  | 52854.066 | 27360.029 |
| AB011133  | 5819.959  | 6636.206  | AF147386  | 2246.051  | 3955.058  | NM_014639  | 10566.036 | 5497.374  |
| NM_017572 | 38406.984 | 29707.068 | AF273052  | 13234.215 | 24922.748 | NM_006392  | 4962.249  | 2928.606  |
| NM_018444 | 2580.979  | 2723.401  | NM_017943 | 9249.747  | 19892.246 | NM_014717  | 2500.52   | 1972.562  |
| NM_000252 | 1932.76   | 2354.085  | AF147383  | 5145.238  | 11178.405 | NM_017922  | 3102.531  | 2497.431  |
| NM_006947 | 12444.902 | 13204.646 | AK025682  | 2633.565  | 5210.342  | NM_002823  | 59430.984 | 55056.02  |
| NM_017917 | 3796.406  | 3606.806  | NM_016478 | 39101.109 | 55054.938 | NM_017916  | 21126.182 | 20199.035 |
| NM_004090 | 9532.913  | 9013.546  | AL389986  | 8160.794  | 15593.858 | NM_001805  | 28276.109 | 40316.152 |
| NM_014634 | 5787.812  | 5636.729  | AF086279  | 907.873   | 2366.106  | NM_004343  | 24587.988 | 32079.4   |
| NM_001919 | 22671.557 | 21259.887 | AK027155  | 18595.361 | 37445.125 | X52355     | 11948.873 | 16523     |
| BC031485  | 2890.627  | 2383.596  | AF221846  | 1474.891  | 2692.553  | NM_006963  | 12312.978 | 13910.295 |
| NM_004092 | 8845.664  | 12178.299 | AF264626  | 1173.259  | 1882.207  | NM_000307  | 1190.148  | 2894.772  |
| X15624    | 1955.55   | 2397.693  | AK026826  | 352.239   | 800.418   | NM_006510  | 23786.717 | 28750.459 |
| AK023080  | 418.337   | 471.603   | AK024528  | 39924.684 | 58150.836 | NM_003141  | 5526.463  | 8840.704  |
| NM_001886 | 5037.842  | 6303.552  | NM_015370 | 10486.813 | 12767.552 | NM_020245  | 4786.551  | 7828.718  |
| NM_004467 | 549.92    | 968.078   | AF085917  | 2591.176  | 3975.085  | NM_007175  | 730.327   | 1589.252  |
| NM_018058 | 21628.441 | 22429.141 | AF085989  | 1538.455  | 3324.045  | AJ011497   | 3076.286  | 5142.742  |
| NM_004548 | 28694.1   | 30153.912 | AL360139  | 61145.906 | 62308.434 | NM_003018  | 1006.266  | 1684.842  |
| X69079    | 42245.406 | 56637.305 | AF075110  | 4720.127  | 10808.173 | NM_000336  | 2057.793  | 3401.392  |
| BI759406  | 33023.91  | 27664.533 | AK022157  | 543.982   | 1612.292  | W61100     | 58530.859 | 60807.422 |
| R76099    | 12292.195 | 10572.589 | AL137323  | 1334.684  | 2360.975  | AA608568   | 10062.825 | 12375.091 |
| S74445    | 1675.75   | 1868.989  | AL137494  | 7196.186  | 15619.146 | BG831301   | 48690.867 | 54172.371 |
| BI763360  | 5156.958  | 4284.782  | AL162037  | 7018.408  | 15424.306 | M14764     | 2109.848  | 3595.417  |
| D25538    | 2911.9    | 2860.002  | AL390150  | 2550.786  | 4695.875  | AA478647   | 6291.049  | 9693.736  |
| NM_000360 | 33580.121 | 32637.932 | AL137359  | 512.164   | 1609.763  | AW058501   | 1121.866  | 2443.472  |
| D49950    | 729.825   | 712.568   | AL137575  | 596.898   | 869.541   | ID 2623896 | 3599.059  | 7482.763  |
| NM_001849 | 1199.09   | 1421.277  | NM_002761 | 1502.628  | 2580.543  | AA482489   | 597.727   | 1280.859  |
| X03635    | 2238.797  | 2131.125  | AK021962  | 933.596   | 1687.743  | AA458922   | 2676.643  | 4726.556  |
| BC011847  | 42153.664 | 75255.344 | AK056674  | 2117.752  | 4563.784  | NM_004168  | 15837.664 | 17217.746 |
| X03348    | 2444.434  | 2655.187  | AK022856  | 1665.056  | 2071.013  | NM_005038  | 3723.415  | 8524.306  |
| AF353674  | 5068.914  | 5077.083  | AK022042  | 1782.117  | 3320.255  | M95923     | 5587.752  | 10278.122 |
| BC002645  | 6452.889  | 6546.429  | AL117588  | 1472.906  | 2868.484  | NM_002415  | 59922.371 | 60943.082 |
| NM_021138 | 3241.449  | 3656.672  | AK021569  | 373.092   | 1002.609  | NM_006332  | 64320.883 | 59236.766 |
| BC002792  | 7021.204  | 9623.875  | AK024653  | 62257.395 | 70294.023 | NM_002000  | 399.26    | 921.828   |
| NM_001523 | 935.911   | 1021.38   | AF103907  | 1677.517  | 2996.222  | NM_000916  | 3763.822  | 6566.987  |
| NM_017423 | 1640.282  | 1484.256  | AF094508  | 2246.674  | 4038.632  | NM_018663  | 6112.114  | 7930.368  |
| Z70705    | 776.236   | 643.517   | AF161351  | 2335.298  | 4260.775  | NM_145904  | 19004.076 | 21020.133 |
| NM_003811 | 14272.002 | 20615.566 | AF257098  | 789.022   | 1557.247  | NM_006796  | 13199.551 | 18146.184 |
| NM_002981 | 11815.51  | 12168.613 | NM_014130 | 710.64    | 1229.897  | NM_000706  | 696.554   | 1673.036  |
| NM_001244 | 3329.717  | 3070.336  | AF111782  | 9923.768  | 17852.902 | NM_015941  | 2910.112  | 6070.86   |
| NM_012275 | 569.346   | 689.474   | AF151530  | 4017.239  | 8805.989  | NM_003655  | 3890.603  | 7712.042  |
| NM_006137 | 1451.706  | 1600.568  | AK021991  | 1199.706  | 2183.021  | NM_014837  | 3513.748  | 7180.619  |
| NM_016139 | 41695.711 | 41740.914 | AK022093  | 7515.466  | 15257.011 | NM_017729  | 1635.241  | 3804.625  |
| AL117468  | 5624.177  | 6983.222  | AK022232  | 859.009   | 1390.57   | NM_005255  | 26432.449 | 30127.162 |
| NM_019613 | 8245.714  | 8464.172  | AK022376  | 2703.819  | 4255.769  | NM_002838  | 6890.124  | 10623.046 |

|           |           |           |           |           |           |           |           |           |
|-----------|-----------|-----------|-----------|-----------|-----------|-----------|-----------|-----------|
| NM_005382 | 1002.285  | 978.446   | AK022005  | 1559.398  | 2149.638  | AK027377  | 374.075   | 1182.345  |
| AK027086  | 4007.329  | 5326.583  | AK022137  | 1636.667  | 2677.384  | BF528358  | 1048.927  | 2445.336  |
| AB032997  | 1389.392  | 1208.886  | AK022272  | 5924.027  | 11021.425 | NM_016335 | 875.589   | 2019.515  |
| AL096857  | 4871.764  | 4956.178  | AL357201  | 515.592   | 423.565   | AK025111  | 712.677   | 1998.746  |
| AB002351  | 422.938   | 365.142   | AF279780  | 45734.051 | 48006.875 | NM_001732 | 4078.79   | 8238.92   |
| X07203    | 28362.377 | 28338.689 | AK022510  | 3261.833  | 3093.545  | NM_018690 | 6158.497  | 10930.498 |
| AB040104  | 681.42    | 635.547   | AK023878  | 2030.579  | 2660.683  | NM_000860 | 1272.407  | 3752.218  |
| NM_003834 | 5408.43   | 6241.269  | AK021851  | 2068.678  | 2418.633  | AB037798  | 1900.347  | 4631.853  |
| NM_005959 | 6120.998  | 6780.129  | L37717    | 1747.193  | 2517.468  | NM_000780 | 469.149   | 1582.91   |
| NM_003381 | 2232.681  | 1570.557  | AJ131609  | 6312.152  | 9394.451  | AF272663  | 19416.65  | 30415.543 |
| NM_005756 | 2487.79   | 2610.998  | BC019280  | 6653.745  | 10909.281 | NM_012190 | 2762.164  | 4612.525  |
| NM_003702 | 32157.451 | 24404.137 | AF086498  | 1027.581  | 1993.932  | AF277719  | 359.206   | 995.231   |
| NM_000369 | 1453.975  | 1722.07   | AK000687  | 1481.408  | 2203.066  | NM_000791 | 1908.584  | 3661.29   |
| NM_004405 | 1405.603  | 1325.521  | AF079567  | 3093.711  | 4357.847  | NM_003681 | 2814.907  | 5198.157  |
| NM_001988 | 4082.581  | 3589.039  | AL049311  | 2073.269  | 3931.61   | NM_014905 | 8632.856  | 12410.198 |
| L09080    | 3986.91   | 3594.207  | AK000016  | 8831.825  | 17645.088 | NM_015700 | 5733.257  | 11112.518 |
| NM_007326 | 4565.555  | 3876.515  | AK023367  | 3489.691  | 6607.374  | U66621    | 13220.313 | 18824.34  |
| NM_012213 | 1461.97   | 1743.694  | AL080209  | 3433.492  | 7016.564  | NM_005720 | 58212.223 | 60762.352 |
| NM_016573 | 6307.564  | 5488.25   | AL137431  | 1353.725  | 2448.634  | AB040936  | 1153.857  | 2931.466  |
| NM_001303 | 15675.722 | 16296.443 | NM_016255 | 1895.339  | 2889.637  | U61736    | 1038.418  | 2666.084  |
| M21304    | 671.651   | 499.329   | NM_014318 | 3861.104  | 7451.571  | AJ132086  | 1712.974  | 3165.561  |
| NM_001979 | 697.143   | 883.661   | AL133089  | 14558.907 | 11341.03  | U92816    | 20281.059 | 23468.754 |
| AB040896  | 1534.696  | 2227.789  | AK023526  | 1686.163  | 1489.795  | NM_004106 | 1014.358  | 2419.026  |
| NM_001107 | 4497.079  | 4422.403  | BE266129  | 2088.263  | 2082.808  | S76984    | 8082.802  | 13692.387 |
| AF084645  | 737.039   | 965.595   | X66227    | 433.79    | 550.634   | NM_005651 | 1187.522  | 2385.574  |
| AF151851  | 8129.972  | 7665.83   | AK025602  | 13748.41  | 15178.439 | NM_007195 | 460.224   | 1467.424  |
| NM_003471 | 408.583   | 394.54    | AK026309  | 7709.64   | 8616.728  | AK023337  | 5004.587  | 8570.405  |
| AF220417  | 2869.685  | 3626      | AL137486  | 18261.576 | 21301.75  | NM_013275 | 19136.859 | 25706.309 |
| NM_001122 | 25708.418 | 22473.607 | AL110162  | 1795.558  | 1086.161  | AB037842  | 414.133   | 1246.625  |
| NM_004591 | 2186.976  | 2008.115  | AF119880  | 595.627   | 478.445   | NM_019011 | 1799.22   | 3460.916  |
| NM_006274 | 353.292   | 757.3     | AK022681  | 8826.356  | 11240.434 | AF459094  | 5712.469  | 8598.7    |
| AL133027  | 1397.175  | 1437.498  | NM_017708 | 1242.596  | 1488.072  | NM_003157 | 3330.148  | 6076.454  |
| AB037732  | 2105.117  | 2449.009  | BE895529  | 9363.093  | 13761.575 | NM_004938 | 892.233   | 2758.164  |
| NM_005767 | 974.866   | 926.929   | AK000964  | 1036.369  | 1230.795  | NM_014326 | 1380.958  | 3236.527  |
| NM_001837 | 823.922   | 793.104   | AL117536  | 12870.675 | 17051.557 | NM_004448 | 1043.474  | 2682.528  |
| NM_001839 | 44616.621 | 71028.344 | NM_017751 | 15212.517 | 16591.756 | NM_015981 | 2269.612  | 3083.265  |
| BC016029  | 843.373   | 846.649   | NM_003771 | 5029.8    | 6008.61   | NM_000455 | 6986.493  | 8246.927  |
| M27487    | 41198.699 | 36089     | NM_017860 | 1742.369  | 1949.53   | NM_014791 | 9956.373  | 11994.594 |
| NM_002286 | 48348.066 | 52415.488 | X91195    | 60995.301 | 59250.957 | NM_003318 | 5346.228  | 4980.945  |
| NM_002164 | 860.715   | 705.786   | AF086190  | 2041.773  | 2158.506  | NM_004362 | 8522.107  | 8452.585  |
| NM_017417 | 666.866   | 319.883   | NM_006143 | 1339.779  | 1403.681  | NM_000182 | 12620.894 | 8386.295  |
| AL133602  | 1764.722  | 1465.323  | AL050035  | 10026.446 | 9801.33   | AK023384  | 2635.298  | 2154.415  |
| AF037219  | 6020.65   | 6570.514  | AF090101  | 1308.471  | 1743.534  | NM_016026 | 11287.968 | 5641.788  |
| AK026075  | 704.069   | 788.525   | AF040723  | 57016.391 | 50186.094 | NM_020245 | 3141.386  | 3551.416  |
| NM_000251 | 5049.583  | 5499.602  | NM_015527 | 6714.167  | 5229.765  | AJ011497  | 6815.829  | 6530.854  |
| AF118071  | 656.4     | 563.886   | X89675    | 3208.771  | 2190.209  | NM_003018 | 487.245   | 1032.446  |
| NM_006038 | 3789.42   | 3130.687  | NM_012189 | 2558.721  | 2015.34   | NM_000336 | 2677.366  | 3645.739  |
| NM_002485 | 266.078   | 265.324   | NM_005798 | 16037.656 | 17026.699 | W61100    | 57247.211 | 59911.527 |
| AB011133  | 6252.956  | 4936.665  | NM_004216 | 3378.513  | 3395.566  | AA608568  | 9211.253  | 9045.57   |
| NM_017572 | 37470.141 | 30002.01  | NM_016289 | 54487.215 | 53426.66  | BG831301  | 56910.289 | 56313.402 |
| NM_018444 | 2672.876  | 3237.027  | NM_001464 | 1381.869  | 1174.996  | M14764    | 1874.594  | 2250.633  |
| NM_000252 | 1853.464  | 2701.974  | NM_002051 | 5362.037  | 4451.847  | AA478647  | 5446.784  | 5520.402  |
| NM_006947 | 12360.412 | 14454.632 | AK022177  | 1239.147  | 960.32    | M35999    | 975.464   | 1282.634  |

|           |           |           |           |           |           |            |           |           |
|-----------|-----------|-----------|-----------|-----------|-----------|------------|-----------|-----------|
| NM_017917 | 3805.725  | 3599.435  | AK023852  | 1161.904  | 847.443   | AW058501   | 3237.347  | 2532.313  |
| NM_00409C | 9470.55   | 8524.54   | AF086466  | 7451.203  | 6764.987  | M81379     | 577.371   | 752.974   |
| NM_014634 | 5272.642  | 5219.193  | AB007962  | 10077.398 | 9620.74   | ID 2623896 | 3139.459  | 2798.725  |
| NM_001919 | 21848.559 | 19941.291 | AF005081  | 3423.637  | 2723.484  | ID 2602214 | 11091.793 | 11854.663 |
| BC031485  | 3149.666  | 2528.644  | AK026438  | 803.188   | 695.286   | ID 2071279 | 8981.016  | 9392.823  |
| NM_004092 | 9114.36   | 11120.293 | AK021546  | 1132.882  | 760.342   | L10709     | 8103.08   | 6117.413  |
| X15624    | 1846.609  | 2055.668  | AL050186  | 18308.807 | 16240.348 | N35489     | 2154.604  | 2160.335  |
| AF073770  | 2856.909  | 2817.397  | AK021918  | 7093.249  | 5939.638  | AA458922   | 2140.688  | 1677.88   |
| AL359401  | 8113.028  | 8378.212  | AF069137  | 546.167   | 525.366   | NM_001719  | 17910.402 | 7201.812  |
| NM_004467 | 513.496   | 832.589   | AK021669  | 7109.262  | 5086.438  | AL080062   | 2145.752  | 976.456   |
| NM_005622 | 290.626   | 273.773   | AL080113  | 49384.184 | 36157.344 | AF308802   | 1696.203  | 846.692   |
| NM_01805E | 21249.438 | 22769.721 | AL050083  | 1533.219  | 999.643   | NM_00241E  | 55892.359 | 55407.691 |
| NM_00454E | 30508.078 | 30173.777 | AK022766  | 1142.191  | 739.822   | NM_006332  | 55528.32  | 54343.098 |
| X69079    | 41830.91  | 55052.066 | AL049422  | 8431.109  | 7061.824  | NM_00200C  | 163.652   | 123.528   |
| BI759406  | 32670.471 | 27839.809 | NM_000093 | 2620.555  | 1969.864  | NM_00091E  | 3064.713  | 4044.075  |
| R76099    | 12248.659 | 13787.184 | NM_001779 | 12858.349 | 11817.891 | NM_018663  | 4429.345  | 4322.342  |
| S74445    | 1838.175  | 1754.576  | AB033059  | 2545.157  | 1733.692  | NM_145904  | 16774.691 | 11348.374 |
| BI763360  | 4746.409  | 3982.102  | NM_016484 | 4804.055  | 4386.328  | NM_00679E  | 13197.275 | 10063.949 |
| D25538    | 3170.035  | 3186.732  | AK026114  | 2420.35   | 1801.974  | NM_00070E  | 605.325   | 728.393   |
| NM_00036C | 32809.156 | 30025.625 | NM_014452 | 1600.709  | 1660.141  | NM_015941  | 3536.847  | 3474.386  |
| D49950    | 953.499   | 760.057   | NM_014683 | 1382.253  | 1219.997  | NM_00365E  | 3149.815  | 2230.042  |
| NM_00184E | 1356.284  | 1436.73   | AK021536  | 13229.017 | 12602.516 | NM_014837  | 3758.795  | 3266.007  |
| X03635    | 4065.671  | 3839.707  | U31285    | 337.31    | 558.932   | NM_01772E  | 279.644   | 447.223   |
| BC011847  | 42490.227 | 72989.656 | AF079529  | 603.094   | 499.02    | NM_00525E  | 23565.307 | 19042.098 |
| X03348    | 2435.703  | 2986.764  | NM_00260C | 2056.248  | 1908.657  | NM_00284C  | 418.747   | 1000.156  |
| AF353674  | 5117.673  | 5203.568  | NM_00364E | 27172.754 | 19231.57  | NM_006174  | 1802.774  | 2337.44   |
| BC002645  | 7200.017  | 6796.333  | NM_006663 | 1938.639  | 1489.367  | NM_01585C  | 10784.768 | 9360.055  |
| NM_021138 | 3830.802  | 3524.045  | NM_006092 | 2416.318  | 1777.053  | NM_004864  | 1135.133  | 2223.987  |
| BC002792  | 6599.568  | 8134.182  | NM_003939 | 5541.125  | 5503.937  | NM_00283E  | 5626.416  | 4872.39   |
| NM_001523 | 850.979   | 878.293   | NM_012424 | 1147.281  | 972.312   | AK027377   | 516.718   | 577.366   |
| NM_017423 | 1524.102  | 1527.318  | NM_00244E | 6577.501  | 5167.699  | BF528358   | 667.574   | 700.648   |
| Z70705    | 668.288   | 378.807   | NM_000863 | 3542.075  | 1889.568  | NM_01633E  | 679.466   | 636.073   |
| NM_002611 | 2442.598  | 1599.057  | NM_006651 | 15299.141 | 8882.179  | NM_00651C  | 22003.744 | 8455.925  |
| NM_005382 | 1188.139  | 1207.451  | NM_00533E | 15286.776 | 8906.557  | NM_003141  | 6077.396  | 3708.738  |
| AK027086  | 4059.584  | 3611.898  | NM_001419 | 10309.347 | 3772.343  | NM_01869C  | 2382.658  | 1397.996  |
| AB032997  | 1666.494  | 1392.346  | AF119817  | 57450.113 | 45819.582 | AB037798   | 2659      | 1984.836  |
| AL096857  | 5249.63   | 5688.495  | AL035306  | 5006.289  | 2295.155  | AF272663   | 14296.896 | 10159.396 |
| AB002351  | 321.335   | 419.836   | NM_00423C | 22562.459 | 16318.444 | NM_01219C  | 3507.997  | 3886.785  |
| X07203    | 28936.189 | 26326.295 | NM_014503 | 2657.474  | 1817.775  | AB033015   | 2181.462  | 1176.944  |
| AB040104  | 809.885   | 964.465   | NM_014659 | 6486.827  | 5245.046  | AF277719   | 447.827   | 793.788   |
| NM_003834 | 6529.393  | 6784.548  | NM_004399 | 11519.522 | 10795.06  | NM_000791  | 1927.259  | 2067.22   |
| NM_00595E | 9259.388  | 9966.422  | NM_006337 | 15115.259 | 14577.381 | NM_003681  | 2692.251  | 1481.873  |
| NM_003381 | 2548.563  | 2460.118  | NM_004507 | 5781.967  | 5587.855  | NM_01490E  | 6810.301  | 4857.902  |
| NM_00575E | 2833.688  | 2890.646  | NM_00271C | 36148.262 | 30827.23  | NM_01570C  | 3651.537  | 3185.526  |
| NM_003702 | 33965.426 | 28402.471 | NM_01406C | 11060.796 | 13597.863 | U66621     | 10623.199 | 9105.501  |
| NM_00036E | 1546.315  | 2346.598  | NM_004749 | 21179.57  | 18882.801 | AB040936   | 446.058   | 1073.049  |
| NM_016351 | 3255.199  | 4081.476  | BQ446064  | 2418.938  | 666.206   | U61736     | 1325.044  | 1643.643  |
| NM_00440E | 1283.626  | 1176.556  | AF302502  | 7438.2    | 6577.938  | AJ132086   | 1439.459  | 1585.757  |
| NM_00198E | 4026.011  | 3486.508  | AF274571  | 3514.358  | 2723.586  | U92816     | 16028.059 | 6815.491  |
| NM_00606C | 2625.344  | 2309.899  | NM_005449 | 1807.739  | 1570.169  | NM_00410E  | 646.4     | 569.651   |
| NM_005667 | 4938.284  | 5092.827  | NM_003879 | 4616.574  | 4134.864  | NM_00348E  | 6459.085  | 3134.95   |
| NM_00630E | 1470.907  | 1510.284  | NM_016052 | 19142.725 | 13076.127 | NM_00503E  | 4546.282  | 2397.526  |
| NM_00006C | 924.372   | 1103.683  | NM_005427 | 2821.709  | 1816.984  | NM_014081  | 531.649   | 496.981   |

|           |           |           |           |           |           |            |           |           |
|-----------|-----------|-----------|-----------|-----------|-----------|------------|-----------|-----------|
| NM_009589 | 569.823   | 967.539   | NM_016312 | 1361.538  | 640.967   | NM_005651  | 803.894   | 710.6     |
| L09080    | 5472.903  | 5395.977  | AF234887  | 791.444   | 476.648   | NM_007195  | 1067.608  | 1628.863  |
| NM_007326 | 6189.443  | 5661.144  | NM_001776 | 2530.581  | 1433.127  | AK023337   | 3527.638  | 3500.948  |
| AK023080  | 582.192   | 379.9     | NM_001792 | 939.946   | 399.002   | NM_013275  | 10185.481 | 9799.254  |
| NM_001886 | 4703.964  | 4969.77   | NM_001903 | 539.581   | 267.126   | AB037842   | 627.588   | 1520.041  |
| D83782    | 5306.277  | 4616.09   | U87223    | 28642.771 | 11129.766 | NM_019011  | 1378.479  | 927.676   |
| NM_002078 | 3242.313  | 2531.176  | NM_005857 | 7287.766  | 7076.44   | AF459094   | 3717.281  | 2103.756  |
| NM_000287 | 2705.632  | 2827.377  | NM_002429 | 588.879   | 359.994   | NM_003157  | 3175.758  | 2342.183  |
| NM_001656 | 2471.861  | 2599.841  | NM_000429 | 4862.417  | 6974.606  | NM_004938  | 868.155   | 1025.769  |
| AF091033  | 1095.316  | 1215.801  | AK027037  | 1575.873  | 1453.313  | NM_014326  | 930.497   | 1276.409  |
| NM_001122 | 30052.926 | 28393.697 | NM_003875 | 17910.336 | 23849.674 | NM_015981  | 1607.79   | 3399.92   |
| NM_004591 | 5981.906  | 6177.001  | AF191687  | 7913.481  | 12028.37  | NM_000455  | 4757.054  | 7043.281  |
| NM_006274 | 490.994   | 584.422   | NM_003046 | 716.2     | 2237.915  | NM_014791  | 6533.597  | 7188.994  |
| AL133027  | 1671.961  | 1717.547  | NM_000274 | 19952.971 | 12390.303 | NM_003318  | 4795.622  | 3330.269  |
| AB037732  | 2219.593  | 2714.288  | NM_000170 | 15663.353 | 13170.853 | NM_004362  | 7631.075  | 6007.7    |
| NM_005767 | 1046.46   | 866.984   | NM_000281 | 878.38    | 934.631   | NM_000182  | 12752.316 | 5911.444  |
| NM_001837 | 717.591   | 774.261   | AK001295  | 4930.397  | 2793.692  | AK023384   | 2517.117  | 1793.814  |
| NM_001839 | 41136.641 | 70172.508 | NM_006031 | 5801.014  | 5769.105  | NM_016026  | 9499.528  | 4559.162  |
| BC016029  | 1001.73   | 1233.019  | NM_002715 | 8474.535  | 7066.357  | AK025111   | 273.895   | 369.413   |
| M27487    | 39577.074 | 38825.195 | NM_001020 | 59328.109 | 63250.469 | NM_001732  | 2342.438  | 1244.202  |
| NM_002286 | 42704.09  | 51655.211 | AB020660  | 3372.761  | 3355.546  | NM_003018  | 2453.825  | 1857.401  |
| NM_002164 | 1056.596  | 989.578   | NM_006659 | 55836.023 | 56520.23  | NM_000336  | 1307.61   | 1788.693  |
| NM_003811 | 15329.199 | 18803.736 | NM_018051 | 2457.03   | 1401.402  | W61100     | 58249.453 | 65937.219 |
| NM_002981 | 12404.579 | 13844.67  | NM_015371 | 21548.439 | 12530.614 | AA608568   | 4087.138  | 5642.026  |
| NM_001244 | 1917.076  | 1628.424  | AB040915  | 7117.474  | 3934.86   | BG831301   | 56509.02  | 59972.254 |
| NM_012275 | 603.992   | 807.778   | AF147791  | 676.064   | 388.601   | M35999     | 1221.876  | 1085.731  |
| NM_006137 | 1077.677  | 1196.109  | NM_001328 | 62011.629 | 49998.582 | AW058501   | 1168.692  | 1046.497  |
| NM_016139 | 43118.313 | 42716.668 | NM_005749 | 10371.104 | 4580.928  | M81379     | 261.073   | 373.657   |
| AL117468  | 3883.47   | 4714.146  | NM_006696 | 4551.038  | 3688.353  | ID 2623896 | 2972.917  | 2091.844  |
| NM_019613 | 8452.789  | 7703.991  | NM_004599 | 16238.986 | 14161.211 | ID 2602214 | 9747.562  | 6106.565  |
| BC031485  | 3169.859  | 2993.433  | NM_006037 | 3307.185  | 2680.084  | L10709     | 9803.055  | 16637.221 |
| NM_004092 | 8098.186  | 7877.18   | NM_015871 | 14182.613 | 17270.742 | N35489     | 2012.542  | 4053.778  |
| X15624    | 2125.169  | 2558.849  | NM_019037 | 40390.301 | 52333.965 | AA458922   | 2243.62   | 2451.857  |
| AF073770  | 2670.057  | 2800.841  | NM_015891 | 8325.282  | 18635.492 | NM_001719  | 18479.506 | 9604.412  |
| AL359401  | 7342.101  | 7439.798  | NM_006802 | 2942.17   | 3474.298  | AL080062   | 2295.144  | 1391.986  |
| NM_012213 | 1446.556  | 1441.018  | AB037778  | 5887.158  | 5994.806  | AF308802   | 1877.32   | 853.748   |
| NM_016573 | 6215.673  | 6168.938  | NM_005066 | 36626.172 | 24451.209 | S76984     | 6681.369  | 3329.613  |
| NM_001303 | 14049.144 | 13578.658 | NM_003089 | 20052.26  | 12178.859 | NM_014495  | 62066.496 | 58281.48  |
| M21304    | 492.303   | 378.03    | NM_003753 | 28991.434 | 22010.244 | NM_006796  | 14079.745 | 6583.542  |
| NM_001979 | 926.016   | 982.03    | NM_006223 | 1441.385  | 851.298   | NM_015941  | 2767.393  | 3337.993  |
| AB040896  | 1608.746  | 1909.224  | NM_017590 | 5472.134  | 4177.089  | NM_003655  | 3623.067  | 5508.727  |
| NM_001107 | 4657.277  | 3943.171  | AB011145  | 12038.037 | 8767.637  | NM_005259  | 21129.535 | 25080.563 |
| AF084645  | 797.964   | 989.405   | NM_003750 | 52584.051 | 36858.848 | NM_015850  | 10407.438 | 5010.182  |
| AF151851  | 6720.973  | 6578.454  | M92422    | 8619.749  | 4248.904  | NM_004864  | 759.571   | 893.754   |
| NM_005176 | 929.674   | 917.517   | NM_017868 | 7146.306  | 4644.14   | NM_002838  | 4719.089  | 2690.658  |
| NM_003636 | 5139.075  | 5718.748  | X69637    | 270.282   | 155.858   | AK027377   | 177.34    | 272.128   |
| NM_002234 | 1469.141  | 1229.982  | NM_004212 | 718.818   | 734.13    | NM_014686  | 53880.641 | 53012.684 |
| NM_003471 | 385.696   | 577.071   | NM_018159 | 53424.152 | 54391.418 | NM_002487  | 3452.829  | 9955.416  |
| NM_000701 | 4548.656  | 4889.439  | NM_000819 | 35095.66  | 26059.77  | NM_013340  | 1287.745  | 3211.895  |
| AB022696  | 8906.063  | 8563.257  | NM_002513 | 11622.032 | 9105.021  | NM_005462  | 1210.861  | 2191.531  |
| NM_002233 | 322.939   | 302.224   | NM_017424 | 5464.584  | 4738.916  | NM_012319  | 2444.037  | 3898.251  |
| NM_014379 | 183.221   | 216.165   | NM_001522 | 34887.926 | 37868.84  | NM_006510  | 20984.967 | 13718.352 |
| AF137372  | 4830.17   | 4880.646  | NM_000883 | 18438.354 | 20858     | NM_003141  | 5543.564  | 3978.962  |



|           |           |           |           |           |           |           |           |           |
|-----------|-----------|-----------|-----------|-----------|-----------|-----------|-----------|-----------|
| AF220417  | 3000.327  | 3310.9    | AF254086  | 6626.465  | 8441.239  | NM_020245 | 5355.528  | 2585.416  |
| NM_001523 | 897.718   | 625.964   | AL390142  | 7757.023  | 10229.365 | NM_007175 | 378.299   | 609.004   |
| NM_017423 | 1598.677  | 1309.815  | NM_006565 | 4493.731  | 5903.98   | NM_019087 | 1806.359  | 1383.573  |
| Z70705    | 862.027   | 477.556   | AB007930  | 8343.385  | 10516.456 | NM_016322 | 648.007   | 772.236   |
| NM_002611 | 2411.293  | 2080.223  | X76978    | 1415.053  | 881.974   | NM_004277 | 779.817   | 1957.68   |
| NM_017417 | 498.965   | 394.139   | AJ005273  | 3950.729  | 3325.459  | NM_005072 | 693.703   | 1337.449  |
| AL133602  | 1411.563  | 1053.318  | AK021892  | 3955.569  | 2975.358  | U61736    | 864.082   | 1047.193  |
| AF037219  | 5611.135  | 4549.135  | NM_017637 | 517.426   | 456.409   | AJ132086  | 1005.933  | 1029.766  |
| AK026075  | 761.241   | 645.014   | NM_003121 | 39002.133 | 24115.602 | U92816    | 16409.477 | 7481.267  |
| NM_000251 | 5212.346  | 5517.942  | NM_003437 | 14421.651 | 8477.338  | NM_004106 | 735.01    | 709.033   |
| AF118071  | 545.065   | 402.891   | NM_018337 | 32040.984 | 20724.744 | NM_005035 | 4129.63   | 12538.179 |
| NM_006035 | 4068.545  | 3756.236  | AA193295  | 380.441   | 253.204   | M95923    | 5671.846  | 9527.635  |
| NM_002485 | 263.321   | 175.217   | NM_018045 | 7130.545  | 4898.812  | NM_002415 | 61519.805 | 61919.809 |
| AB011133  | 5370.76   | 4934.15   | NM_006481 | 10065.146 | 6612.782  | NM_006332 | 57899.039 | 55711.223 |
| NM_017572 | 36506.945 | 27357.734 | AB011115  | 1974.651  | 1057.204  | NM_000916 | 4668.19   | 3326.768  |
| NM_018444 | 2597.428  | 2372.424  | NM_003910 | 30679.85  | 11029.013 | NM_018663 | 4999.375  | 2457.994  |
| NM_000252 | 2023.669  | 2486.364  | AB007913  | 7619.943  | 3096.051  | NM_145904 | 17105.906 | 5565.618  |
| NM_006947 | 13065.035 | 15343.332 | L09080    | 49700.586 | 48272.598 | NM_000182 | 14005.349 | 15129.109 |
| NM_017917 | 3830.96   | 4103.017  | NM_007326 | 31097.082 | 23309.844 | AK023384  | 2422.365  | 2139.31   |
| NM_004090 | 8868.742  | 8718.384  | AK023080  | 699.77    | 795.518   | NM_016026 | 10307.126 | 6877.78   |
| NM_014634 | 5948.277  | 6916.135  | NM_001886 | 10976.212 | 11388.405 | NM_000860 | 720.012   | 1673.39   |
| NM_001919 | 20231.432 | 17564.467 | NM_004467 | 2444.724  | 2325.124  | AB037798  | 1566.69   | 4274.563  |
| CY3Cy5    | 5700.589  | 266.595   | NM_005622 | 623.515   | 924.42    | NM_000780 | 894.766   | 2581.777  |
| NM_003822 | 1136.557  | 1594.754  | NM_018055 | 32778.914 | 38410.508 | AF272663  | 20590.271 | 16702.541 |
| NM_004412 | 9940.81   | 9761.105  | NM_004545 | 33368.43  | 43249.395 | NM_012190 | 2602.833  | 2121.476  |
| NM_016647 | 1334.52   | 1351.016  | X69079    | 60187.434 | 63333.02  | AF277719  | 267.443   | 357.337   |
| AK024695  | 1052.289  | 1203.852  | BI759406  | 52871.703 | 53885.887 | NM_000791 | 1135.111  | 887.166   |
| NM_018655 | 459.732   | 743.432   | R76099    | 16235.896 | 19115.447 | NM_003681 | 2968.83   | 1656.133  |
| AF038174  | 1085.784  | 1102.766  | BI763360  | 15496.471 | 12159.134 | NM_000807 | 2558.146  | 7759.38   |
| AF070632  | 573.732   | 626.16    | D25538    | 4346.851  | 3151.205  | NM_014905 | 10404.803 | 5466.119  |
| AF161359  | 1300.471  | 1372.261  | NM_000360 | 48236.137 | 41606.57  | X91148    | 1164.129  | 948.949   |
| AL365520  | 1043.395  | 990.75    | D49950    | 1170.496  | 924.099   | NM_015700 | 3579.216  | 2304.765  |
| AL359338  | 440.797   | 548.745   | NM_001849 | 1539.13   | 1057.675  | NM_001715 | 17492.99  | 7695.382  |
| AK023623  | 7185.901  | 6303.36   | X03635    | 14939.424 | 12383.058 | AL080062  | 1825.09   | 1302.764  |
| AF086534  | 860.522   | 693.771   | BC011847  | 61557.395 | 66893.172 | AF308802  | 1822.646  | 1382.443  |
| AF070617  | 747.868   | 954.301   | X03348    | 3212.035  | 2593.434  | S76984    | 4926.471  | 4684.844  |
| NM_014915 | 2458.504  | 1666.026  | AF353674  | 7926.427  | 5518.253  | NM_014495 | 58666.945 | 57761.617 |
| NM_003822 | 805.505   | 752.318   | BC002645  | 11321.815 | 7792.461  | NM_014081 | 1508.992  | 2460.7    |
| NM_004412 | 8637.387  | 5683.919  | NM_021138 | 10897.346 | 6506.506  | NM_007195 | 1795.874  | 3990.85   |
| SR1       | 77836.633 | 64838.352 | BC002792  | 8395.005  | 5938.929  | AK023337  | 6477.474  | 7611.039  |
| SR3       | 35243.48  | 18775.658 | NM_002286 | 54750.301 | 64312.766 | NM_013275 | 17409.705 | 9625.81   |
| SR5       | 3663.199  | 2474.866  | NM_002164 | 2510.472  | 2102.257  | AB037842  | 341.556   | 295.338   |
| SR7       | 4260.945  | 22883.109 | NM_003811 | 21800.266 | 27204.496 | NM_019011 | 1513.811  | 859.126   |
| SR9       | 12657.214 | 1491.462  | NM_002981 | 13259.054 | 13298.627 | AF459094  | 5935.17   | 16304.396 |
| CY3Cy5    | 4840.721  | 277.815   | NM_001244 | 6353.99   | 5709.718  | NM_004935 | 1160.412  | 5257.244  |
| U84515    | 1187.628  | 1296.424  | NM_012275 | 1236.02   | 1397.052  | NM_014326 | 1590.193  | 4722.861  |
| AF086106  | 311.866   | 350.765   | NM_006137 | 4480.305  | 4609.428  | NM_015981 | 2025.013  | 4742.774  |
| AF086143  | 6337.681  | 5474.048  | NM_016139 | 57257.105 | 64346.215 | NM_000455 | 3758.244  | 5214.241  |
| AF086112  | 640.932   | 922.949   | AL117468  | 14023.831 | 21720.59  | NM_014791 | 6309.133  | 4156.112  |
| AK026359  | 1076.426  | 1110.101  | NM_019613 | 12424.6   | 15055.993 | NM_003315 | 4150.918  | 2210.458  |
| AF085884  | 1752.877  | 1812.834  | NM_005382 | 2281.466  | 1980      | NM_004362 | 7376.269  | 4721.486  |
| S81522    | 8096.179  | 6010.709  | AK027086  | 4760.49   | 6265.511  | CY3Cy5    | 4489.458  | 378.633   |
| S94541    | 915.856   | 553.808   | AB032997  | 2093.928  | 1853.51   | NM_004102 | 3588.722  | 3534.461  |

|           |           |           |           |           |           |           |           |           |
|-----------|-----------|-----------|-----------|-----------|-----------|-----------|-----------|-----------|
| L36587    | 21884.654 | 14856.881 | AL096857  | 6489.658  | 6188.586  | NM_004544 | 4271.881  | 6531.843  |
| AK024228  | 1431.327  | 922.358   | AB002351  | 819.754   | 712.519   | AF052140  | 272.524   | 1005.86   |
| AK023945  | 26966.67  | 28130.988 | X07203    | 38238.48  | 34816.395 | NM_018836 | 1472.944  | 3754.309  |
| AK022446  | 809.161   | 921.275   | AB040104  | 1852.169  | 1365.188  | AF007147  | 347.797   | 1420.643  |
| AK023352  | 551.656   | 659.853   | NM_003834 | 14965.611 | 13165.174 | AF052127  | 3065.893  | 5800.471  |
| AK026202  | 942.025   | 1721.555  | NM_005959 | 13150.063 | 12539.398 | AK024261  | 457.674   | 805.768   |
| AK021539  | 8707.246  | 7969.419  | NM_003381 | 4264.088  | 2378.765  | AF052150  | 419.072   | 435.469   |
| AK021819  | 622.48    | 499.379   | NM_005756 | 3395.311  | 2178.803  | AK024885  | 1022.245  | 350.629   |
| AK026738  | 1306.792  | 1050.328  | NM_003702 | 39452.488 | 27536.725 | AL080223  | 1122.309  | 350.915   |
| AK025011  | 1703.42   | 1614.542  | NM_000369 | 2895.612  | 2015.587  | AK001630  | 2273.158  | 1103.616  |
| AL157491  | 2388.139  | 2260.282  | NM_004405 | 5100.48   | 2955.076  | NM_014612 | 14457.547 | 4893.97   |
| NM_005266 | 3332.122  | 2323.517  | NM_001988 | 15543.386 | 6979.257  | NM_004102 | 2729.012  | 964.766   |
| AF087965  | 696.792   | 661.204   | AF073770  | 4185.694  | 4195.348  | NM_004544 | 3811.293  | 1458.225  |
| AF085998  | 1096.746  | 678.999   | AL359401  | 10765.273 | 9837.219  | SR1       | 71546.109 | 26436.133 |
| AB030240  | 1975.165  | 1676.489  | NM_012213 | 3117.621  | 2595.197  | SR3       | 25818.67  | 5162.843  |
| AK024681  | 628.252   | 600.314   | NM_016573 | 12698.704 | 10638.953 | SR5       | 2020.134  | 1002.447  |
| AF085990  | 354.95    | 237.254   | NM_001303 | 31374.184 | 32327.334 | SR7       | 3683.43   | 29819.674 |
| NM_014907 | 30735.408 | 20437.436 | M21304    | 1138.932  | 1152.219  | SR9       | 8951.432  | 3263.8    |
| AB007977  | 13081.018 | 9481.445  | NM_001979 | 2109.066  | 2244.736  | CY3Cy5    | 6027.518  | 774.439   |
| NM_014221 | 8771.64   | 6624.213  | AB040896  | 1998.367  | 6184.192  | Z36807    | 36992.973 | 50695.965 |
| AK021773  | 2226.854  | 2686.422  | NM_001107 | 6582.186  | 9566.562  | AK021837  | 1662.656  | 1278.543  |
| AK027074  | 1413.989  | 1280.201  | AF084645  | 940.113   | 1249.812  | AF075112  | 462.931   | 224.027   |
| AL365456  | 656.182   | 748.619   | AF151851  | 18421.123 | 20080.449 | AK001796  | 502.44    | 309.646   |
| AK022364  | 264.93    | 367.884   | NM_003471 | 434.406   | 541.286   | AF086152  | 21201.693 | 4461.507  |
| AK024674  | 486.884   | 468.211   | NM_014379 | 343.093   | 382.232   | U78519    | 1064.504  | 282.588   |
| AK024244  | 4208.632  | 3685.469  | AF220417  | 3198.499  | 2946.578  | AK026872  | 1309.699  | 554.338   |
| AK023812  | 439.508   | 502.341   | NM_001122 | 52893.316 | 60727.668 | AL157505  | 978.768   | 515.556   |
| AL390084  | 1027.359  | 947.591   | NM_004591 | 23012.088 | 18690.838 | NM_00719C | 3194.101  | 1643.218  |
| AK023565  | 421.004   | 391.124   | NM_006274 | 507.517   | 468.731   | AF043897  | 861.219   | 2277.224  |
| AK021479  | 689.526   | 699.335   | AL133027  | 7080.163  | 6773.626  | U79246    | 5637.458  | 9558.801  |
| NM_003835 | 4694.711  | 4518.072  | AB037732  | 3590.418  | 2799.996  | AK022619  | 445.887   | 412.603   |
| AK000245  | 3165.738  | 2821.727  | NM_005767 | 1503.984  | 840.125   | AK023464  | 498.429   | 896.709   |
| AF118072  | 917.304   | 671.633   | NM_001837 | 1286.024  | 1029.737  | AK023905  | 1670.974  | 2764.14   |
| AF085900  | 20667.73  | 14129.956 | NM_001839 | 57184.047 | 61534.148 | AK026208  | 1393.697  | 431.549   |
| AK026195  | 368.728   | 251.052   | BC016029  | 1483.434  | 865.036   | NM_016947 | 40411.91  | 9517.048  |
| AL079274  | 30889.994 | 30369.191 | M27487    | 50518.43  | 26908.48  | AY007136  | 756.685   | 190.069   |
| S46403    | 1178.027  | 2267.396  | NM_002611 | 4492.783  | 3775.888  | AL359940  | 1364.407  | 507.704   |
| AL137398  | 2508.757  | 4149.018  | NM_017417 | 2182.737  | 1136.657  | NM_018286 | 509.862   | 182.661   |
| Y12021    | 2565.055  | 2826.953  | AL133602  | 5284.6    | 5624.292  | AK024925  | 10242.491 | 3853.311  |
| NM_01330C | 26910.182 | 27532.139 | AF037219  | 8544.235  | 9449.702  | AL049460  | 6628.223  | 2485.995  |
| AK026039  | 2806.692  | 3292.199  | AK026075  | 854.911   | 1570.211  | AK022396  | 927.281   | 465.462   |
| AF108756  | 6539.945  | 7415.003  | NM_000251 | 7840.355  | 12166.201 | AF075113  | 847.149   | 761.701   |
| AF116709  | 1139.197  | 899.165   | AF118071  | 943.783   | 795.346   | AK022892  | 4890.867  | 6014.133  |
| AK025533  | 1538.65   | 1261.337  | NM_006038 | 9651.896  | 22172.449 | U10508    | 6728.219  | 11593.364 |
| AK026499  | 638.46    | 546.166   | AB011133  | 6825.258  | 5538.975  | AK002162  | 272.577   | 519.287   |
| AK021911  | 12530.542 | 10657.845 | NM_017572 | 48078.094 | 37982.43  | AK022980  | 364.034   | 1964.458  |
| D17225    | 830.454   | 611.432   | NM_018444 | 4111.463  | 3808.98   | AK026237  | 1777.277  | 4744.815  |
| AF147430  | 472.969   | 360.116   | NM_000252 | 2938.554  | 2509.073  | AK023687  | 693.902   | 984.053   |
| AK025766  | 10637.899 | 10310.334 | NM_006947 | 16529.807 | 15998.316 | AK002088  | 5436.153  | 3284.258  |
| U35875    | 37014.746 | 25047.266 | NM_017917 | 5080.638  | 3810.867  | AK022193  | 353.293   | 227.809   |
| AK021857  | 39331.648 | 23142.195 | NM_00409C | 10698.504 | 7049.082  | AK000106  | 2426.584  | 633.099   |
| AK022257  | 1290.12   | 964.605   | NM_014634 | 13298.758 | 9232.293  | AK022370  | 606.565   | 139.485   |
| BE887356  | 35128.527 | 19845.416 | NM_001919 | 45292.449 | 31252.875 | AK026765  | 688.649   | 200.404   |

|           |           |           |           |           |           |           |           |           |
|-----------|-----------|-----------|-----------|-----------|-----------|-----------|-----------|-----------|
| AK024756  | 2624.955  | 3033.641  | BC031485  | 4696.714  | 2674.902  | AL117530  | 458.504   | 154.855   |
| NM_017911 | 2282.778  | 2732.409  | NM_004092 | 11835.46  | 8958.08   | AL080191  | 3398.145  | 1158.387  |
| AJ224168  | 9672.615  | 11308.156 | X15624    | 2271.782  | 1170.613  | AK021639  | 710.291   | 283.504   |
| S69873    | 1034.88   | 1268.022  | AK023080  | 615.997   | 716.686   | AK023189  | 1796.372  | 876.979   |
| AF147325  | 61083.961 | 68898.883 | NM_001886 | 10237.079 | 10542.44  | AF306347  | 1386.733  | 4258.795  |
| NM_014428 | 1383.718  | 1847.825  | NM_004467 | 1906.611  | 1745.036  | AL359651  | 1263.215  | 3043.959  |
| AK023584  | 573.809   | 628.526   | NM_005622 | 491.254   | 582.886   | AF070599  | 1021.488  | 1314.884  |
| NM_003774 | 666.644   | 449.172   | NM_018058 | 31525.127 | 33340.219 | NM_005450 | 2202.587  | 2707.388  |
| D87466    | 4363.636  | 4757.559  | NM_004548 | 31495.412 | 31905.637 | AK023600  | 486.462   | 967.721   |
| AK025048  | 557.562   | 531.872   | X69079    | 57930.66  | 60781.586 | Z83952    | 305.049   | 667.552   |
| U84522    | 1911.541  | 1731.832  | BI759406  | 53942.258 | 60497.492 | NM_005210 | 128.984   | 553.858   |
| AK021694  | 1895.74   | 2128.944  | R76099    | 15334.653 | 26077.625 | NM_005285 | 5769.393  | 3352.242  |
| AF086013  | 821.337   | 783.444   | S74445    | 4355.017  | 6215.211  | AK001918  | 560.891   | 275.324   |
| U84505    | 4110.036  | 3356.088  | BI763360  | 14209.437 | 16697.895 | NM_018635 | 31928.107 | 8587.222  |
| X81005    | 2217.085  | 1813.342  | D25538    | 3938.323  | 3510.502  | AF086048  | 1331.673  | 581.025   |
| AL049265  | 1672.121  | 2008.792  | NM_000360 | 41368.309 | 33816.66  | L15616    | 6768.876  | 2110.93   |
| AK022225  | 448.215   | 521.172   | D49950    | 965.577   | 1002.252  | AB019565  | 5540.915  | 1564.712  |
| AL137635  | 611.11    | 633.691   | NM_001849 | 1332.539  | 1239.484  | NM_016940 | 1963.995  | 494.341   |
| AL049430  | 2018.003  | 1676.358  | X03635    | 13588.077 | 12133.493 | AK025757  | 1917.194  | 788.96    |
| AK021461  | 490.505   | 449.052   | BC011847  | 55529.207 | 62101.176 | Y16713    | 327.991   | 151.318   |
| AB015349  | 535.888   | 251.692   | X03348    | 3184.045  | 3156.051  | L07394    | 7903.252  | 3498      |
| NM_014913 | 29238.846 | 41939.082 | AF353674  | 8119.956  | 6771.559  | AK056133  | 761.229   | 383.04    |
| NM_005864 | 624.894   | 785.447   | BC002645  | 11254.257 | 7919.499  | NM_017845 | 6921.797  | 3172.078  |
| NM_012341 | 7812      | 8079.501  | NM_021138 | 10287.903 | 7166.026  | AF130080  | 322.576   | 116.389   |
| NM_003256 | 36409.887 | 33595.945 | BC002792  | 8891.678  | 8617.367  | AK026006  | 1190.446  | 775.272   |
| D87450    | 3927.739  | 4245.643  | NM_001523 | 1551.843  | 875.662   | NM_019085 | 6449.303  | 3720.241  |
| NM_017797 | 4587.831  | 5712.134  | NM_017423 | 2217.041  | 1306.77   | AF147440  | 794.717   | 1144.167  |
| AF000562  | 6183.427  | 5707.479  | Z70705    | 1364.321  | 580.175   | AL122072  | 3218.962  | 7071.309  |
| AK025713  | 4909.99   | 4878.711  | NM_003811 | 22518.141 | 33532.805 | AK026221  | 343.754   | 1042.633  |
| NM_018100 | 714.5     | 754.09    | NM_002981 | 13853.328 | 11868.552 | AK026403  | 1500.111  | 2867.251  |
| NM_004075 | 4048.459  | 4843.832  | NM_001244 | 5787.756  | 5295.313  | U90904    | 5138.91   | 4108.106  |
| NM_001887 | 5308.09   | 4306.719  | NM_012275 | 1284.739  | 993.809   | AF088053  | 2120.228  | 1935.722  |
| NM_006533 | 4118.694  | 3803.043  | NM_006137 | 5041.62   | 4462.564  | AL133662  | 480.484   | 746.045   |
| AK026747  | 6055.196  | 5448.761  | NM_016139 | 52760.852 | 54179.344 | NM_002565 | 389.452   | 558.825   |
| AL110150  | 6327.552  | 5807.448  | AL117468  | 13485.201 | 17455.234 | U90903    | 736.693   | 1269.674  |
| NM_001998 | 6766.138  | 4909.942  | NM_019613 | 12034.73  | 21228.469 | AF278760  | 981.565   | 916.989   |
| X87825    | 3244.917  | 3162.974  | NM_005382 | 2113.749  | 2708.968  | AB032954  | 3881.777  | 1608.097  |
| NM_000914 | 280.917   | 325.546   | AK027086  | 4441.396  | 8641.138  | NM_006003 | 17079.744 | 4705.853  |
| AK001285  | 24384.039 | 20931.313 | AB032997  | 2269.502  | 2466.702  | AL110197  | 437.775   | 141.274   |
| D17215    | 9343.635  | 8636.449  | AL096857  | 5950.639  | 7025.366  | AF085995  | 580.144   | 145.888   |
| BE781513  | 1232.292  | 1289.988  | AB002351  | 915.112   | 1681.655  | NM_017632 | 1597.488  | 401.054   |
| NM_015714 | 33085.438 | 27611.08  | X07203    | 36446.031 | 27415.83  | AK026655  | 1180.728  | 511.54    |
| AK075564  | 759.901   | 910.106   | AB040104  | 1745.174  | 1385.854  | NM_005279 | 293.549   | 151.127   |
| AK026219  | 1293.788  | 1864.623  | NM_003834 | 14060.842 | 13628.492 | AF129926  | 1161.119  | 617.946   |
| D28446    | 2722.852  | 5430.729  | NM_005959 | 12477.748 | 12624.797 | AK025822  | 1650.927  | 1210.073  |
| NM_016279 | 653.532   | 836.702   | NM_003381 | 4286.865  | 3217.767  | AL360140  | 421.078   | 346.892   |
| NM_000211 | 11117.742 | 15442.744 | NM_005756 | 3390.674  | 2767.216  | AF201937  | 26450.025 | 11958.83  |
| AB037830  | 1709.776  | 1830.332  | NM_003702 | 37025.148 | 24070.844 | AL390128  | 2098.212  | 2261.253  |
| NM_015685 | 8908.801  | 7520.701  | NM_000369 | 2482.294  | 2019.32   | AL157429  | 10669.793 | 19360.377 |
| NM_004357 | 53140.516 | 46607.254 | NM_004405 | 4962.933  | 3908.425  | NM_012071 | 11071.385 | 21284.045 |
| X03324    | 4937.568  | 5101.687  | NM_001988 | 15401.863 | 8670.563  | AF055018  | 6828.912  | 11632.875 |
| AF130988  | 1211.619  | 1349.13   | L09080    | 41930.547 | 27265.795 | NM_001777 | 20642.727 | 10541.749 |
| NM_014934 | 285.862   | 317.078   | NM_007326 | 25026.824 | 12724.598 | U79457    | 6471.233  | 4768.996  |

|           |           |           |           |           |           |           |           |           |
|-----------|-----------|-----------|-----------|-----------|-----------|-----------|-----------|-----------|
| NM_01538E | 1233.977  | 1223.282  | NM_012213 | 2849.458  | 2310.934  | AB037832  | 2426.483  | 1934.667  |
| NM_00369C | 7032.047  | 9741.007  | NM_016573 | 13266.525 | 11963.984 | NM_014347 | 11692.492 | 7831.961  |
| NM_00087E | 6654.588  | 6876.33   | NM_001303 | 32488.996 | 30415.35  | NM_00129E | 10432.563 | 5285.869  |
| NM_014214 | 6241.357  | 6982.126  | M21304    | 1210.058  | 899.143   | NM_004344 | 10093.865 | 5555.497  |
| NM_00085E | 1006.134  | 902.889   | NM_001979 | 2644.485  | 2061.188  | AF085972  | 374.643   | 167.914   |
| NM_002752 | 3333.737  | 3075.691  | AB040896  | 2297.106  | 2939.508  | NM_000757 | 803.021   | 433.824   |
| NM_013281 | 963.59    | 861.593   | NM_001107 | 6684.176  | 7499.673  | AB046786  | 906.128   | 410.05    |
| Y11306    | 1513.568  | 1590.172  | AF084645  | 988.975   | 1218.944  | NM_01662C | 29388.588 | 9206.773  |
| NM_016112 | 675.092   | 1079.255  | AF151851  | 19606.799 | 29098.947 | D16914    | 52226.598 | 36322.84  |
| X85106    | 1083.954  | 1146.781  | NM_003471 | 531.256   | 1564.941  | AA084879  | 711.143   | 571.855   |
| NM_003931 | 3624.701  | 3998.995  | AF220417  | 3090.67   | 3416.221  | NM_000833 | 1501.144  | 1082.907  |
| AF250226  | 16661.049 | 13002.366 | NM_001122 | 54113.297 | 47287.5   | NM_000283 | 2655.77   | 1356.805  |
| NM_003217 | 25096.688 | 20730.541 | NM_004591 | 21045.551 | 17806.07  | NM_01246C | 2239.036  | 1441.391  |
| NM_006534 | 14913.08  | 17137.092 | AL133027  | 6626.228  | 6697.696  | NM_012118 | 1804.439  | 1405.382  |
| NM_017601 | 3173.745  | 4032.349  | AB037732  | 3286.731  | 4180.694  | AK024092  | 1472.209  | 1600.166  |
| AF110265  | 18268.357 | 15003.288 | NM_005767 | 1274.23   | 1231.593  | AK026285  | 398.051   | 820.257   |
| AF272371  | 55498.984 | 66673.836 | NM_001837 | 1295.158  | 1185.657  | AK022226  | 296.708   | 836.231   |
| AK021848  | 3528.255  | 4101.003  | NM_001839 | 58606.023 | 65890.461 | AK002044  | 4121.239  | 8844.268  |
| NM_003704 | 3806.943  | 3989.729  | BC016029  | 1576.996  | 1138.534  | AK022206  | 998.138   | 2297.419  |
| AK023140  | 674.177   | 666.891   | M27487    | 51361.629 | 37476.102 | BC032460  | 4608.648  | 3930.865  |
| AF084362  | 1042.187  | 1587.815  | NM_00228E | 58753.242 | 58289.691 | NM_014071 | 1630.541  | 1625.958  |
| NM_001553 | 3505.314  | 5112.272  | NM_002164 | 2274.702  | 1161.476  | NM_00516E | 609.17    | 473.708   |
| NM_014173 | 14294.113 | 23388.338 | NM_017417 | 1988.827  | 1243.606  | NM_000213 | 25627.256 | 14996.895 |
| NM_001731 | 30499.02  | 44986.82  | AL133602  | 4951.688  | 4743.146  | BE906107  | 11784.896 | 6053.914  |
| AL137506  | 695.559   | 979.039   | AF037219  | 7696.316  | 7200.538  | NM_01551E | 2834.739  | 1627.257  |
| AK022961  | 4094.383  | 3637.974  | AK026075  | 843.281   | 1354.255  | NM_005211 | 691.452   | 621.866   |
| NM_00737E | 6809.772  | 6437.951  | NM_000251 | 6969.011  | 8021.139  | NM_004857 | 15239.992 | 9720.447  |
| NM_014371 | 4524.705  | 5426.836  | NM_00603E | 9853.452  | 13156.128 | NM_01210E | 5703.552  | 4152.749  |
| AF290512  | 3481.36   | 3557.046  | AB011133  | 6448.663  | 6361.946  | NM_003253 | 935.516   | 1093.817  |
| NM_00671E | 9768.194  | 11771.425 | NM_017572 | 49969.254 | 41488.77  | NM_01328E | 5013.976  | 3731.797  |
| AB002323  | 7388.124  | 11271.222 | NM_018444 | 4095.499  | 3402.469  | NM_002872 | 8528.377  | 7563.04   |
| AL137404  | 56606.91  | 60985.594 | NM_000252 | 2780.733  | 2175.79   | NM_00049C | 1079.909  | 1942.775  |
| NM_005814 | 3595.047  | 2711.25   | NM_006947 | 16082.953 | 15390.2   | AJ225028  | 326.858   | 868.751   |
| NM_002851 | 2160.362  | 3062.862  | NM_017917 | 5291.489  | 3715.202  | NM_00483E | 1452.775  | 2614.601  |
| NM_002071 | 1555.106  | 1481.607  | NM_00409C | 10149.535 | 9265.108  | NM_012193 | 3012.041  | 7856.979  |
| NM_00533E | 45063.746 | 30197.209 | NM_014634 | 12838.743 | 11101.957 | NM_00340E | 8699.379  | 12703.838 |
| NM_00190E | 12984.944 | 11879.576 | NM_001919 | 43345.125 | 31408.412 | NM_00472C | 3776.633  | 5023.651  |
| NM_004142 | 1225.916  | 1853.947  | BC031485  | 4047.376  | 3106.539  | NM_001057 | 1955.978  | 3096.467  |
| AF108138  | 6032.726  | 13012.263 | NM_004092 | 12262.556 | 11538.313 | NM_004524 | 2505.97   | 2622.489  |
| NM_004347 | 441.891   | 566.106   | X15624    | 2533.637  | 2214.594  | NM_00631E | 4869.174  | 4943.744  |
| BF340302  | 4749.249  | 4069.167  | AF073770  | 3929.384  | 2683.793  | NM_018401 | 1077.502  | 1504.283  |
| AB037728  | 290.119   | 215.128   | AL359401  | 9958.261  | 6010.055  | NM_005163 | 3689.283  | 4575.359  |
| AK024210  | 2647.565  | 2458.295  | NM_004467 | 2526.828  | 2903.76   | NM_007273 | 51544.781 | 47321.762 |
| NM_00227E | 3398.391  | 3231.334  | NM_005622 | 443.764   | 560.925   | BE894943  | 1207.052  | 1571.613  |
| AL133087  | 3461.669  | 3187.728  | NM_01805E | 31756.314 | 31292.346 | NM_016422 | 2888.977  | 4302.728  |
| NM_01801C | 3281.683  | 6124.123  | NM_00454E | 28742.752 | 30166.715 | NM_01787E | 5858.989  | 6292.7    |
| BF337874  | 7075.646  | 7945.966  | X69079    | 53493.281 | 58654.727 | NM_004494 | 56898.402 | 64306.965 |
| NM_00347E | 31713.945 | 26997.922 | BI759406  | 48213.234 | 52185.262 | AL049687  | 369.659   | 1359.486  |
| AL157475  | 6817.926  | 5583.869  | R76099    | 15456.271 | 17289.309 | NM_005643 | 9393.016  | 14848.962 |
| NM_00606E | 33561.445 | 22325.828 | S74445    | 4135.201  | 5849.197  | NM_003592 | 11333.292 | 18455.801 |
| NM_01765E | 3389.876  | 3455.431  | BI763360  | 15722.53  | 20307.035 | NM_014953 | 6715.464  | 9431.225  |
| X16282    | 16756.563 | 15976.493 | D25538    | 3833.497  | 5083.001  | AF179995  | 888.9     | 2456.754  |
| AK022519  | 456.365   | 625.363   | NM_00036C | 46282.277 | 52306.824 | NM_00209E | 353.723   | 1384.769  |

|           |           |           |           |           |           |           |           |           |
|-----------|-----------|-----------|-----------|-----------|-----------|-----------|-----------|-----------|
| NM_014415 | 3282.125  | 2864.039  | D49950    | 1166.427  | 1046.539  | NM_016195 | 3521.655  | 4689.971  |
| S75264    | 12734.06  | 10743.995 | NM_001849 | 1489.775  | 1447.956  | NM_004523 | 2140.311  | 3832.292  |
| AF027513  | 1889.535  | 1801.458  | X03635    | 13450.956 | 13287.355 | NM_004404 | 11365.531 | 17600.598 |
| NM_001379 | 7776.303  | 10605.122 | BC011847  | 51695.348 | 66659.664 | NM_002960 | 6785.389  | 9590.973  |
| NM_018664 | 1256.864  | 1513.542  | X03348    | 3326.316  | 3533.696  | AB046788  | 420.262   | 1632.667  |
| BC006428  | 5227.847  | 5803.564  | AF353674  | 7791.019  | 6687.72   | NM_006790 | 1730.718  | 3875.246  |
| NM_005034 | 1679.313  | 1550.385  | BC002645  | 12748.45  | 11260.583 | AL117522  | 18531.037 | 24375.045 |
| NM_003926 | 14138.14  | 11750.898 | NM_021138 | 11649.459 | 10059.76  | AB011541  | 1740.864  | 4044.47   |
| AF085356  | 1605.251  | 1490.478  | BC002792  | 8919.921  | 8666.613  | NM_019061 | 7347.792  | 11546.045 |
| NM_016047 | 35222.813 | 31154.656 | NM_001523 | 1719.439  | 1180.703  | AB033007  | 2869.487  | 5695.599  |
| NM_001499 | 13596.592 | 18384.145 | NM_017423 | 2372.104  | 1873.241  | NM_003781 | 324.634   | 1623.788  |
| BF030165  | 20935.332 | 36955.992 | Z70705    | 1733.518  | 753.398   | NM_001304 | 652.213   | 2100.837  |
| NM_016732 | 12282.717 | 13344.947 | NM_002611 | 4548.554  | 2749.512  | NM_003130 | 3603.644  | 6770.017  |
| NM_014763 | 22039.016 | 19582.596 | NM_005382 | 2636.419  | 2954.906  | NM_004716 | 44345.152 | 50989.645 |
| NM_020185 | 9045.173  | 8036.129  | AK027086  | 5243.018  | 8619.717  | D29810    | 2675.156  | 4062.417  |
| NM_002832 | 7531.305  | 5455.635  | AB032997  | 2142.101  | 1710.378  | NM_000128 | 4140.845  | 8739.515  |
| NM_017732 | 6009.601  | 4662.577  | AL096857  | 7075.637  | 7425.696  | AB002384  | 6741.649  | 10810.21  |
| NM_003654 | 589.59    | 491.747   | AB002351  | 1009.802  | 895.112   | NM_018437 | 535.809   | 1759.585  |
| NM_000152 | 47393.406 | 55928.621 | X07203    | 43372.902 | 47741.148 | NM_000422 | 1756.622  | 2828.765  |
| D17222    | 26781.76  | 27977.867 | AB040104  | 2147.561  | 1888.627  | AK023164  | 1391.182  | 3220.871  |
| NM_000154 | 4594.635  | 4167.937  | NM_003834 | 15955.674 | 25767.131 | NM_005379 | 2153.047  | 4354.097  |
| NM_006213 | 381.143   | 553.706   | NM_005959 | 14013.253 | 21092.891 | AK027121  | 15013.445 | 22431.783 |
| NM_003549 | 699.895   | 642.561   | NM_003381 | 4372.545  | 4845.92   | NM_017433 | 4441.151  | 8368.075  |
| NM_000671 | 2377.792  | 2936.733  | NM_005756 | 3420.181  | 3642.192  | AL117661  | 2888.68   | 5098.25   |
| NM_006297 | 20079.064 | 22224.59  | NM_003702 | 38667.898 | 36787.879 | X64643    | 1594.434  | 3527.31   |
| X85325    | 51663.867 | 56721.133 | NM_000369 | 2620.503  | 3137.527  | NM_005380 | 12423.459 | 25856.26  |
| AF318366  | 12283.206 | 11185.849 | NM_016351 | 3884.025  | 4972.146  | NM_005561 | 7094.297  | 14839.711 |
| AF182423  | 3009.65   | 3934.025  | NM_004405 | 4394.664  | 4606.25   | AF272381  | 8334.864  | 17010.66  |
| D26018    | 5829.918  | 5353.904  | NM_001988 | 17977.469 | 15081.939 | NM_001518 | 14374.739 | 28198.797 |
| AK023029  | 321.126   | 316.743   | NM_006060 | 3975.699  | 3028.263  | NM_003412 | 45433.578 | 68921.172 |
| AB037863  | 1840.859  | 1780.163  | NM_005667 | 6330.745  | 6673.504  | NM_018336 | 655.104   | 2590.061  |
| BC000363  | 2751.721  | 2712.993  | NM_006308 | 3085.744  | 2315.803  | AK022668  | 3218.951  | 8913.597  |
| NM_007237 | 2646.015  | 2718.132  | NM_000060 | 820.026   | 869.703   | AW975132  | 3123.591  | 7519.889  |
| NM_004608 | 978.869   | 957.008   | NM_009589 | 1061.386  | 964.616   | NM_006051 | 5873.236  | 12261.29  |
| NM_018257 | 13712.245 | 12521.962 | L09080    | 41675.035 | 39175.531 | NM_018427 | 5739.062  | 9108.898  |
| NM_005919 | 3403.698  | 2748.613  | NM_007326 | 26392.379 | 16713.906 | AB037814  | 384.123   | 1028.766  |
| NM_012256 | 47729.543 | 39629.707 | AK023080  | 597.093   | 520.178   | NM_014663 | 1338.94   | 2641.17   |
| NM_006006 | 1812.983  | 966.342   | NM_001886 | 10581.876 | 7651.922  | AF007217  | 1277.324  | 1787.614  |
| NM_016325 | 3797.523  | 3265.067  | D83782    | 16523.744 | 19244.256 | AB037753  | 4757.195  | 7607.5    |
| NM_000908 | 1636.763  | 2010.424  | NM_002078 | 5930.06   | 6562.431  | NM_004674 | 2326.233  | 3710.697  |
| AB011102  | 5265.623  | 7455.693  | NM_000287 | 4242.906  | 4121.845  | AB037801  | 3243.712  | 5112.513  |
| D63480    | 4274.052  | 4270.998  | NM_001656 | 3822.409  | 4326.201  | AL080159  | 22708.727 | 28647.943 |
| NM_002969 | 8390.82   | 7836.799  | AF091033  | 3442.511  | 3237.988  | NM_017823 | 45741.387 | 52428.863 |
| NM_006475 | 812.332   | 746.323   | NM_001122 | 53495.234 | 60327.223 | U55185    | 1231.346  | 2851.095  |
| NM_004620 | 2784.489  | 2982.488  | NM_004591 | 22028.469 | 22501.938 | U30828    | 14108.128 | 22256.521 |
| AF087940  | 8452.929  | 8495.182  | NM_006274 | 610.99    | 1167.55   | AF085886  | 51745.828 | 63440.598 |
| AJ277587  | 2693.913  | 3008.549  | AL133027  | 8215.918  | 13823.775 | AK023828  | 12974.428 | 26012.092 |
| D87432    | 5868.284  | 7112.678  | AB037732  | 3364.544  | 5768.313  | NM_006572 | 15643.635 | 24264.455 |
| Y18483    | 741.756   | 1130.225  | NM_005767 | 1497.231  | 1448.238  | NM_004784 | 702.714   | 1236.083  |
| AI565117  | 52500.461 | 63677.23  | NM_001837 | 1122.769  | 1387.008  | AK021815  | 1142.25   | 3674.967  |
| AI299075  | 4924.047  | 4164.118  | NM_001839 | 54478.09  | 67475.016 | NM_001543 | 1888.76   | 5127.433  |
| M59979    | 3021.035  | 2968.065  | BC016029  | 1586.877  | 1722.259  | NM_016641 | 6974.133  | 13853.519 |
| AB011098  | 1977.442  | 2365.071  | M27487    | 54244.613 | 57132.867 | AB018010  | 1483.603  | 3590.069  |

|           |           |           |           |           |           |           |           |           |
|-----------|-----------|-----------|-----------|-----------|-----------|-----------|-----------|-----------|
| AA609759  | 4383.325  | 3910.175  | NM_002286 | 55084.07  | 61532.902 | NM_01461C | 12479.573 | 21352.16  |
| AA029418  | 10037.676 | 8630.993  | NM_002164 | 2116.733  | 2225.616  | NM_004737 | 328.211   | 923.374   |
| L20815    | 11286.295 | 8964.868  | NM_003811 | 23905.732 | 34134.223 | NM_000688 | 1535.974  | 2240.042  |
| AI364483  | 49800.199 | 42560.082 | NM_002981 | 15398.828 | 13824.969 | NM_006621 | 2876.891  | 5245.844  |
| AA456001  | 20526.383 | 18282.75  | NM_001244 | 5864.909  | 4171.366  | BF347398  | 14498.764 | 18274.91  |
| AA176581  | 4740.658  | 4377.779  | NM_012275 | 1069.63   | 898.778   | AK026762  | 3349.016  | 5665.429  |
| BI818232  | 380.515   | 349.651   | NM_006137 | 4346.903  | 3076.171  | AF078844  | 313.16    | 748.815   |
| AA451686  | 11687.854 | 9421.169  | NM_016139 | 51027.738 | 38243.313 | NM_004412 | 925.437   | 2693.263  |
| AA934644  | 778.263   | 812.616   | AL117468  | 13399.212 | 10367.832 | L48516    | 3221.522  | 6608.631  |
| NM_017896 | 23949.809 | 25170.893 | NM_019613 | 11436.833 | 7361.103  | NM_016648 | 8557.874  | 17008.73  |
| AB002374  | 7856.643  | 8449.681  | BC031485  | 4381.275  | 5545      | AF083930  | 1777.454  | 4411.128  |
| U17327    | 3401.781  | 2926.529  | NM_004092 | 12377.407 | 14927.542 | AB040907  | 361.684   | 1265.83   |
| AB046781  | 460.786   | 353.946   | X15624    | 2834.617  | 3003.361  | NM_005986 | 183.326   | 872.208   |
| M87790    | 50262.656 | 50745.125 | AF073770  | 4228.802  | 4122.701  | NM_003426 | 527.164   | 1530.843  |
| NM_001768 | 2735.408  | 2829.722  | AL359401  | 10422.012 | 9595.009  | NM_014862 | 1225.573  | 2989.844  |
| NM_000029 | 16905.99  | 15734.373 | NM_012213 | 2930.931  | 3250.586  | AK027159  | 819.149   | 2292.378  |
| NM_000715 | 1003.514  | 1060.766  | NM_016573 | 12835.484 | 14794.563 | NM_005266 | 402.739   | 2303.606  |
| Y08145    | 3118.552  | 3517.273  | NM_001303 | 35417.711 | 45232.055 | D70835    | 50670.91  | 52723.293 |
| M26123    | 489.507   | 539.049   | M21304    | 933.775   | 914.402   | NM_002697 | 8494.643  | 10005.154 |
| NM_001838 | 11582.976 | 12290.769 | NM_001979 | 2114.695  | 2175.186  | NM_002448 | 611.985   | 2282.06   |
| NM_019555 | 1390.006  | 1359.749  | AB040896  | 1989.833  | 2568.411  | AF053952  | 41989.746 | 58973.813 |
| NM_012096 | 12379.787 | 11064.123 | NM_001107 | 6093.677  | 6252.597  | NM_003213 | 9301.687  | 16976.17  |
| NM_003905 | 20714.346 | 18906.9   | AF084645  | 1055.356  | 1080.331  | BF184738  | 1720.589  | 3772.966  |
| L12052    | 4535.844  | 3687.357  | AF151851  | 20077.02  | 24235.66  | NM_014044 | 2670.334  | 4942.256  |
| AB028976  | 8685.647  | 7267.099  | NM_005176 | 2245.475  | 3642.081  | NM_00090C | 3473.791  | 6569.587  |
| AK026337  | 4468.291  | 3160.359  | NM_003636 | 6065.163  | 5770.003  | AK023684  | 6860.397  | 11686.368 |
| NM_015869 | 1054.365  | 663.298   | NM_002234 | 12034.844 | 12346.538 | NM_000232 | 3054.375  | 5782.299  |
| NM_004626 | 919.798   | 789.189   | NM_003471 | 587.854   | 585.436   | J05070    | 788.824   | 1389.397  |
| NM_001899 | 1451.972  | 1074.455  | NM_000701 | 6821.793  | 5594.412  | AA700390  | 3773.688  | 7323.012  |
| NM_013328 | 21614.373 | 22582.609 | AB022696  | 43469.98  | 36983.707 | Y18474    | 1196.48   | 2238.281  |
| NM_00079C | 574.295   | 594.708   | AF137372  | 6962.939  | 4783.557  | AA436163  | 1950.692  | 4464.79   |
| NM_00266C | 4954.44   | 5250.667  | AF220417  | 3132.508  | 2471.953  | BI907981  | 7896.598  | 18950.674 |
| NM_01590C | 1258.515  | 1029.953  | NM_001523 | 1653.135  | 1657.894  | BI603841  | 8832.242  | 22061.008 |
| NM_003706 | 1481.374  | 1832.454  | NM_017423 | 2146.306  | 2462.893  | M19888    | 1700.295  | 5113.109  |
| AF182218  | 659.29    | 793.027   | Z70705    | 1643.17   | 1062.261  | Y08136    | 1344.911  | 3915.83   |
| AK023749  | 677.214   | 789.443   | NM_002611 | 4845.847  | 4057.833  | AA156863  | 11627.199 | 21199.525 |
| NM_002337 | 4775.428  | 4153.885  | NM_017417 | 2112.107  | 1693.288  | BI915199  | 972.764   | 2141.095  |
| NM_013245 | 2291.424  | 1720.491  | AL133602  | 4653.192  | 5793.065  | R82957    | 52973.844 | 63143.348 |
| NM_006423 | 48913.488 | 33019.309 | AF037219  | 6898.262  | 7832.633  | BI830442  | 4017.035  | 8567.385  |
| NM_004766 | 2190.014  | 1595.21   | AK026075  | 854.384   | 650.225   | AI218732  | 1274.614  | 3058.289  |
| NM_005819 | 37373.371 | 24460.631 | NM_000251 | 7408.427  | 7444.689  | AF079098  | 1631.253  | 1978.46   |
| AK025520  | 5182.159  | 2337.257  | AF118071  | 510.01    | 475.576   | AK023448  | 2019.737  | 4590.261  |
| NM_004892 | 4344.398  | 3212.007  | NM_006038 | 9769.375  | 12182.739 | Y18213    | 8166.873  | 13932.837 |
| NM_014597 | 30594.982 | 16372.258 | AB011133  | 5208.071  | 3724.049  | NM_003283 | 6487.749  | 11473.931 |
| BF540935  | 19418.387 | 16830.609 | NM_017572 | 50233.129 | 41536.652 | AF249898  | 7217.312  | 12201.434 |
| NM_004466 | 881.428   | 762.963   | NM_018444 | 4491.472  | 3909.207  | M69181    | 11447.598 | 19003.33  |
| NM_007081 | 2776.93   | 3131.394  | NM_000252 | 2833.904  | 2579.646  | AK027224  | 270.999   | 1230.387  |
| AB032964  | 3213.559  | 3528.679  | NM_006947 | 16109.976 | 13726.556 | L09078    | 487.395   | 1701.066  |
| BE733605  | 9128.359  | 9232.796  | NM_017917 | 5117.032  | 4164.313  | NM_002652 | 489.076   | 1640.451  |
| NM_003334 | 48786.07  | 51058.992 | NM_00409C | 10256.396 | 7975.292  | NM_001311 | 17253.959 | 20801.768 |
| NM_002693 | 2884.432  | 3903.832  | NM_014634 | 13287.891 | 8816.546  | NM_017798 | 10762.82  | 21739.26  |
| NM_003671 | 1919.158  | 2136.18   | NM_001919 | 41361.781 | 26445.098 | NM_000354 | 287.128   | 883.511   |
| NM_017833 | 1998.388  | 2873.813  | CY3Cy5    | 5441.003  | 250.581   | NM_01241C | 3234.009  | 9064.246  |

|           |           |           |           |           |           |           |           |           |
|-----------|-----------|-----------|-----------|-----------|-----------|-----------|-----------|-----------|
| NM_006675 | 9909.743  | 10934.084 | NM_003822 | 959.396   | 681.213   | NM_001111 | 12964.962 | 27133.34  |
| NM_003022 | 8982.93   | 7973.156  | NM_004412 | 8445.53   | 5757.302  | NM_018045 | 9781.454  | 14649.985 |
| NM_004873 | 8632.746  | 7333.007  | NM_016647 | 1383.674  | 962.722   | AJ133439  | 1262.739  | 2600.44   |
| NM_019842 | 2498.616  | 1821.963  | AK024695  | 1214.26   | 789.671   | NM_014395 | 3423.249  | 6601.426  |
| NM_002951 | 17877.85  | 17797.354 | NM_018659 | 521.883   | 711.15    | NM_001561 | 1107.332  | 1606.711  |
| NM_002317 | 2888.858  | 2241.914  | AF038174  | 4515.787  | 3940.667  | NM_005160 | 2849.598  | 2790.549  |
| NM_000320 | 1684.039  | 2524.739  | NM_013243 | 703.926   | 640.185   | NM_000595 | 663.49    | 1372.08   |
| NM_017921 | 481.125   | 283.23    | AF070632  | 667.849   | 645.808   | X78817    | 41228.16  | 48038.254 |
| NM_003135 | 7896.757  | 5495.637  | AF161359  | 1770.782  | 1433.659  | AB023135  | 2865.329  | 5554.941  |
| D63480    | 4923.952  | 4826.923  | AL365520  | 1739.735  | 1915.268  | AY009401  | 636.333   | 1816.056  |
| NM_002965 | 9037.757  | 9573.436  | AL359338  | 755.147   | 886.264   | AF294628  | 2998.946  | 5398.107  |
| NM_006475 | 774.983   | 913.742   | AK023623  | 13372.682 | 15274.299 | NM_004152 | 265.054   | 494.555   |
| NM_004620 | 3298.585  | 3826.627  | AF086534  | 1523.674  | 5178.509  | BU565263  | 52112.383 | 68761.453 |
| AF087940  | 8381.828  | 7531.716  | AF070617  | 842.738   | 2974.079  | NM_005025 | 3929.876  | 6125.393  |
| AJ277587  | 2765.37   | 2413.194  | NM_014915 | 3040.616  | 5305.483  | NM_001611 | 714.402   | 1589.221  |
| D87432    | 6220.006  | 6486.578  | NM_003822 | 1439.333  | 1601.128  | M59979    | 893.708   | 841.844   |
| AI565117  | 56350.594 | 67707.953 | NM_004412 | 11528.217 | 10799.938 | AB018310  | 1905.225  | 2513.09   |
| AI299075  | 4936.079  | 4894.398  | SR1       | 72575.563 | 63769     | NM_020133 | 820.733   | 961.092   |
| M59979    | 3118.112  | 4023.736  | SR3       | 43034.27  | 34504.391 | NM_015375 | 22731.693 | 25881.275 |
| AB011098  | 2400.138  | 2835.264  | SR5       | 4202.122  | 5224.801  | NM_004875 | 404.909   | 1258.815  |
| AA609759  | 3997.19   | 4655.65   | SR7       | 5115.79   | 27219.355 | NM_015057 | 472.463   | 1381.954  |
| AA029418  | 10505.396 | 8999.167  | SR9       | 15141.701 | 2588.054  | AF303398  | 16488.162 | 10284.035 |
| L20815    | 8994.069  | 7996.268  | CY3Cy5    | 6464.893  | 379.289   | NM_014810 | 1587.463  | 1811.599  |
| AI364483  | 46250.359 | 49674.934 | U84515    | 1460.701  | 1134.424  | NM_004735 | 3953.651  | 3620.354  |
| AA456001  | 21072.52  | 18614.52  | AF086106  | 866.412   | 853.82    | NM_007357 | 4621.363  | 4721.548  |
| AA176581  | 1371.602  | 1349.641  | AF086143  | 8697.941  | 5703.327  | NM_003763 | 6646.209  | 9984.533  |
| AA451686  | 11218.121 | 13812.467 | AF086112  | 736.446   | 890.55    | AB046836  | 1112.232  | 1137.899  |
| NM_007097 | 11853.565 | 8081.857  | AL137254  | 2399.41   | 3118.137  | NM_017815 | 7193.309  | 3694.029  |
| D87446    | 5677.782  | 4305.179  | AK026359  | 1094.231  | 1741.042  | AJ224166  | 3749.008  | 1767.876  |
| U17327    | 2884.893  | 2190.036  | AF085884  | 2685.378  | 5894.458  | AK026098  | 3546.252  | 2358.036  |
| AB046781  | 428.109   | 374.789   | S81522    | 8053.211  | 8590.309  | NM_012381 | 2083.299  | 1545.164  |
| M87790    | 45055.223 | 44273.313 | S94541    | 1523.65   | 2225.916  | M20702    | 703.571   | 669.946   |
| NM_001765 | 2698.925  | 2866.362  | L36587    | 27480.482 | 25712.703 | NM_006397 | 32599.09  | 43099.613 |
| NM_000025 | 15456.313 | 14642.937 | AK024228  | 1627.146  | 1893.672  | D83776    | 2382.402  | 6872.56   |
| NM_000715 | 888.865   | 908.008   | AK022420  | 4183.261  | 2814.708  | NM_004085 | 7138.396  | 13669.019 |
| AF035802  | 7289.135  | 8359.063  | AK023254  | 679.01    | 570.433   | NM_002180 | 1342.703  | 3405.555  |
| Y08145    | 3272.408  | 3702.744  | AK023945  | 26295.23  | 17146.764 | NM_000135 | 2932.755  | 5435.491  |
| M26123    | 702.173   | 1039.677  | AK022446  | 1026.964  | 1085.429  | NM_018163 | 2235.87   | 5140.081  |
| NM_001835 | 12184.724 | 16888.334 | AK023352  | 511.506   | 397.859   | AK026362  | 5846.73   | 17077.615 |
| NM_019555 | 1184.764  | 1238.988  | AK023773  | 1174.256  | 832.52    | NM_004965 | 2553.583  | 8189.539  |
| NM_012095 | 12543.938 | 11881.838 | AK026202  | 339.804   | 347.461   | NM_005905 | 2897.092  | 3654.151  |
| NM_003905 | 20733.303 | 21373.201 | AK021539  | 9745.744  | 7566.244  | NM_004785 | 3577.745  | 6727.249  |
| L12052    | 4407.893  | 5319.016  | AK021819  | 863.698   | 1036.183  | AK024079  | 342.071   | 429.902   |
| AB028976  | 8293.19   | 9455.663  | AK026738  | 2487.638  | 3102.508  | NM_002425 | 1510.999  | 1096.758  |
| AB011102  | 2145.976  | 1179.598  | AK025011  | 1583.221  | 2132.21   | NM_014674 | 2709.237  | 2662.288  |
| NM_002660 | 4709.184  | 7740.594  | AL157491  | 2483.38   | 3664.277  | NM_018271 | 1611.905  | 1889.483  |
| NM_015900 | 1233.015  | 1213.547  | NM_005265 | 5102.195  | 8058.017  | NM_014652 | 1077.663  | 422.89    |
| NM_003705 | 1339.01   | 2370.705  | AF087965  | 1099.674  | 1372.643  | AL133020  | 4127.1    | 1413.627  |
| AF182218  | 680.931   | 723.935   | AF085998  | 1768.813  | 1778.647  | NM_003213 | 6361.792  | 4422.396  |
| NM_016122 | 2209.165  | 4672.497  | AB030240  | 438.466   | 503.848   | BF184738  | 1094.601  | 732.232   |
| AK023749  | 858.234   | 1191.954  | AK024681  | 1126.035  | 1601.424  | NM_014044 | 2536.895  | 1185.568  |
| NM_002337 | 5273.943  | 5848.89   | X68742    | 1009.196  | 1526.49   | NM_000900 | 3237.57   | 1490.047  |
| NM_004765 | 2302.529  | 3535.754  | AF085990  | 646.355   | 876.176   | AK023684  | 5141.989  | 2456.239  |

|           |           |           |           |           |           |           |           |           |
|-----------|-----------|-----------|-----------|-----------|-----------|-----------|-----------|-----------|
| AK025520  | 3227.989  | 2653.163  | NM_014907 | 28799.016 | 28983.023 | NM_000232 | 2712.685  | 1716.476  |
| AB002374  | 1517.268  | 707.056   | AB007977  | 19549.996 | 24956.473 | J05070    | 680.417   | 473.315   |
| NM_004466 | 743.705   | 789.718   | NM_014221 | 9828.639  | 17311.887 | AA700390  | 3364.288  | 6230.138  |
| NM_007081 | 2509.835  | 2912.957  | AK025181  | 809.471   | 579.036   | Y18474    | 1311.452  | 3311.391  |
| AB032964  | 3569.724  | 3441.515  | AK021773  | 3027.599  | 2462.189  | AA436163  | 1429.558  | 3064.932  |
| BE733605  | 7716.613  | 6578.395  | AK027074  | 1397.45   | 763.466   | BI907981  | 7112.262  | 14367.572 |
| NM_003334 | 45252.941 | 40073.629 | AL365456  | 886.05    | 725.602   | BI603841  | 7606.34   | 15085.028 |
| NM_002693 | 3757.87   | 3532.659  | NM_018038 | 744.298   | 687.675   | M19888    | 1742.927  | 2297.297  |
| NM_003671 | 1925.772  | 2344.712  | AK022364  | 925.451   | 1530.311  | Y08136    | 1252.177  | 2118.367  |
| AK026000  | 6742.434  | 8167.369  | AK024674  | 1622.714  | 1576.94   | AA156863  | 10721.483 | 7032.62   |
| NM_017833 | 1894.499  | 3622.204  | AK024244  | 8618.155  | 7517.227  | BI915199  | 619.039   | 1692.64   |
| NM_006675 | 10031.729 | 22265.426 | AK023812  | 1040.172  | 908.592   | R82957    | 51233.551 | 41847.434 |
| NM_003022 | 8357.198  | 10323.912 | AL390084  | 2105.04   | 2731.158  | BI830442  | 4529.029  | 1737.452  |
| NM_004873 | 7626.79   | 7484.354  | AK023565  | 779.739   | 1090.635  | AA398951  | 465.6     | 143.98    |
| NM_019842 | 2342.998  | 2659.327  | AK021479  | 1090.056  | 1522.319  | AI218732  | 1474.589  | 594.536   |
| NM_002951 | 15237.443 | 21576.211 | NM_003835 | 9170.042  | 11957.9   | NM_018890 | 29061.32  | 6535.015  |
| NM_002317 | 2947.112  | 4979.266  | AK000245  | 4315.557  | 5723.981  | NM_016204 | 6511.743  | 3885.909  |
| NM_000320 | 1634.923  | 1854.812  | AF118072  | 1289.41   | 1488.933  | NM_003283 | 3906.975  | 2164.445  |
| NM_003136 | 1869.287  | 1950.126  | AK023724  | 616.209   | 779.417   | AF249898  | 3983.684  | 1524.186  |
| NM_013328 | 6290.57   | 4379.642  | AK024112  | 496.603   | 748.292   | M69181    | 7999.541  | 2012.435  |
| NM_006475 | 851.635   | 1184.228  | AF085900  | 34634.852 | 30713.961 | L09078    | 382.707   | 404.459   |
| NM_004620 | 3171.868  | 4046.163  | AK026195  | 385.607   | 940.163   | NM_002652 | 345.184   | 599.633   |
| AF087940  | 11124.285 | 9683.359  | AL049443  | 573.502   | 1475.231  | NM_001311 | 14046.42  | 8552.34   |
| AJ277587  | 2983.753  | 2959.851  | AL079274  | 31498.941 | 17459.348 | NM_017798 | 9470.566  | 7594.037  |
| D87432    | 4903.827  | 5221.263  | S46403    | 384.205   | 452.59    | NM_012410 | 2982.763  | 6477.651  |
| Y18483    | 908.216   | 900.272   | AL137398  | 1606.185  | 1597.574  | NM_001111 | 13082.7   | 13690.429 |
| AI565117  | 52166.637 | 64204.965 | Y12021    | 3410.097  | 2584.398  | NM_018048 | 8682.421  | 9487.663  |
| U28015    | 644.26    | 964.192   | AF127771  | 743.745   | 627.359   | AJ133439  | 1087.607  | 651.871   |
| AI299075  | 7631.39   | 7130.674  | NM_013300 | 39623.605 | 31001.289 | NM_014395 | 2891.225  | 1533.497  |
| M59979    | 2391.557  | 2925.942  | AK026039  | 5650.05   | 5788.779  | NM_001561 | 1151.456  | 870.187   |
| AB011098  | 2702.759  | 3365.28   | AF108756  | 14809.452 | 12619.347 | NM_005160 | 2493.493  | 899.271   |
| AA609759  | 4651.59   | 6632.048  | AF116709  | 1958.52   | 2842.906  | NM_000596 | 474.573   | 175.265   |
| AA029418  | 11035.412 | 12574.813 | AK025533  | 2774.95   | 4647.078  | X78817    | 35180.773 | 9766.135  |
| L20815    | 10517.513 | 10321.672 | AK026499  | 893.905   | 1247.652  | AB023135  | 1454.094  | 920.958   |
| AI364483  | 52392.516 | 48422.953 | AK021911  | 15402.418 | 19101.078 | AY009401  | 3433.076  | 2571.332  |
| AA456001  | 17346.768 | 15253.16  | D17225    | 1181.375  | 1471.377  | AF294628  | 5421.707  | 4426.979  |
| AA176581  | 962.522   | 1061.401  | AF147430  | 579.599   | 1224.864  | NM_002448 | 471.17    | 289.177   |
| BI818232  | 960.047   | 1421.011  | AK025766  | 15911.717 | 23829.121 | AF053952  | 32408.785 | 11332.09  |
| AA451686  | 5203.3    | 7855.898  | U35875    | 47160.055 | 48882.664 | BU565263  | 51843.184 | 65243.504 |
| NM_002050 | 3803.465  | 2539.368  | AK021857  | 49381.734 | 44497.082 | NM_005028 | 3489.924  | 1632.809  |
| NM_007097 | 5597.841  | 4165.8    | AK022257  | 1616.879  | 1854.552  | NM_001611 | 606.412   | 281.786   |
| D87446    | 2230.282  | 2024.763  | BE887356  | 61150.031 | 57453.66  | M59979    | 798.582   | 348.034   |
| BF540935  | 8906.479  | 4881.974  | AK001074  | 515.483   | 421.429   | AB018310  | 1942.182  | 4003.645  |
| NM_000715 | 1176.411  | 1200.265  | AK024756  | 2686.285  | 3009.211  | NM_020133 | 681.867   | 1579.168  |
| AF035802  | 8077.966  | 8909.309  | NM_017911 | 2500.906  | 1565.069  | NM_015379 | 20348.803 | 26777.904 |
| Y08145    | 5602.571  | 4299.616  | AJ224168  | 9645.819  | 6314.046  | NM_004878 | 567.857   | 726.116   |
| M26123    | 606.733   | 778.071   | S69873    | 1242.7    | 1151.437  | NM_015057 | 391.667   | 190.465   |
| NM_001838 | 11560.824 | 12070.962 | AF147325  | 61977.375 | 56043.762 | AF303398  | 12696.676 | 4629.781  |
| NM_019555 | 1492.324  | 1663.996  | NM_014428 | 1851.468  | 1319.634  | NM_014810 | 1549.694  | 1061.752  |
| NM_012096 | 13129.425 | 11294.052 | NM_018497 | 769.095   | 691.521   | NM_004738 | 5103.919  | 1655.759  |
| NM_003905 | 21697.557 | 21014.75  | AK023584  | 597.315   | 720.424   | NM_007357 | 5247.861  | 2157.461  |
| L12052    | 5086.905  | 5468.329  | NM_003774 | 543.916   | 578.845   | NM_003763 | 7202.258  | 3009.707  |
| AB028976  | 6394.413  | 6574.444  | D87466    | 8308.189  | 9772.911  | AK023448  | 1585.927  | 714.701   |



|           |           |           |           |           |           |           |           |           |
|-----------|-----------|-----------|-----------|-----------|-----------|-----------|-----------|-----------|
| AK026337  | 5498.74   | 5808.432  | AK025048  | 885.962   | 1710.839  | Y18213    | 6200.935  | 1859.326  |
| NM_015869 | 1228.494  | 1227.723  | U84522    | 3919.801  | 5359.077  | NM_017816 | 6194.024  | 3075.771  |
| AB031038  | 406.53    | 649.905   | AK021694  | 2555.51   | 3795.694  | AJ224166  | 3308.106  | 1404.507  |
| NM_004626 | 586.814   | 632.76    | AF086013  | 986.597   | 1378.008  | AK026098  | 3197.027  | 1933.531  |
| NM_001899 | 1235.352  | 1102.239  | U84505    | 7108.2    | 8820.685  | NM_012381 | 1345.959  | 982.667   |
| NM_004305 | 49495.695 | 60767.688 | X81005    | 3213.311  | 4023.451  | M20702    | 616.296   | 543.856   |
| AF072506  | 5421.566  | 2870.35   | AL049265  | 2694.677  | 8198.577  | NM_006397 | 32568.279 | 22842.014 |
| NM_005992 | 2914.507  | 1847.029  | AK022225  | 770.377   | 2226.794  | D83776    | 2190.509  | 2102.172  |
| NM_003144 | 3952.552  | 2854.494  | NM_012352 | 806.949   | 1547.278  | NM_004088 | 6161.979  | 3681.193  |
| NM_000908 | 723.288   | 762.492   | AL137635  | 687.519   | 1041.046  | NM_002180 | 1835.1    | 2682.828  |
| AB011102  | 2245.137  | 2416.16   | AL049430  | 2896.823  | 3284.805  | NM_000138 | 2749.699  | 1197.685  |
| D63480    | 2180.483  | 1233.904  | AK021461  | 783.317   | 998.103   | NM_018163 | 2107.308  | 801.49    |
| NM_002969 | 2763.564  | 1927.21   | AB015349  | 611.036   | 954.615   | AK026362  | 4152.892  | 1410.467  |
| M81768    | 703.438   | 681.292   | NM_014913 | 30807.723 | 17192.879 | NM_004968 | 2158.513  | 746.206   |
| AK023749  | 640.68    | 827.249   | NM_005864 | 874.777   | 571.844   | NM_005908 | 2764.063  | 866.048   |
| NM_002337 | 6010.151  | 5911.645  | NM_012341 | 8106.991  | 5107.418  | NM_004785 | 3573.069  | 1311.317  |
| NM_013245 | 2888.592  | 1922.529  | NM_003256 | 41564.957 | 23199.496 | AK024079  | 439.365   | 151.571   |
| NM_006423 | 47335.305 | 43418.375 | D87450    | 4183.398  | 3277.372  | NM_002428 | 2260.62   | 4501.481  |
| NM_004766 | 2130.48   | 1919.775  | NM_017797 | 4905.743  | 4149.093  | NM_014674 | 2441.333  | 1246.959  |
| NM_005819 | 27659.246 | 38591.156 | AK021919  | 446.159   | 374.187   | NM_018271 | 4969.037  | 2150.274  |
| AK025520  | 4360.192  | 3433.733  | AF000562  | 6926.833  | 4780.693  | NM_000547 | 5788.593  | 2760.051  |
| NM_004892 | 3805.91   | 4435.728  | AK025713  | 6194.369  | 5643.468  | NM_014652 | 1420.82   | 464.254   |
| NM_014597 | 29516.229 | 25038.834 | NM_018100 | 833.58    | 1164.502  | AL133020  | 4835.439  | 1697.211  |
| NM_017896 | 22190.617 | 17266.512 | NM_004075 | 5304.292  | 9404.315  | NM_014044 | 2379.31   | 1411.706  |
| AB002374  | 5675.098  | 5252.143  | NM_001887 | 6272.604  | 10952.396 | NM_000900 | 2464.548  | 1408.809  |
| U17327    | 1004.632  | 814.531   | NM_006533 | 8373.349  | 10888.733 | AK023684  | 4786.647  | 2604.421  |
| M87790    | 46402.227 | 45870.684 | AK026747  | 8009.394  | 15271.02  | NM_000232 | 2187.561  | 2101.596  |
| NM_001768 | 1487.722  | 840.38    | AL110150  | 20467.105 | 22525.789 | J05070    | 582.272   | 1233.487  |
| NM_000029 | 10309.742 | 4308.255  | NM_001998 | 14193.741 | 14666.07  | AA700390  | 3393.883  | 4072.516  |
| NM_017921 | 385.889   | 800.875   | X87825    | 6989.366  | 10600.462 | Y18474    | 951.83    | 1211.681  |
| NM_003136 | 8621.448  | 9715.306  | NM_000914 | 372.859   | 595.949   | AA436163  | 1392.191  | 834.63    |
| NM_013328 | 21490.727 | 23923.396 | AK001285  | 30998.135 | 39088.184 | BI907981  | 6539.656  | 2439.275  |
| NM_000790 | 734.002   | 637.741   | D17215    | 15978.494 | 21356.365 | BI603841  | 8272.021  | 3273.771  |
| NM_002660 | 5025.034  | 4884.56   | BE781513  | 1672.87   | 2455.469  | M19888    | 1211.486  | 430.057   |
| NM_015900 | 1256.843  | 1022.623  | NM_015714 | 52165.371 | 46459.938 | Y08136    | 1004.071  | 212.71    |
| NM_003706 | 1724.264  | 2844.211  | AK075564  | 604.181   | 1122.061  | AA156863  | 12483.857 | 3724.736  |
| AF182218  | 475.862   | 470.178   | AK026219  | 1531.19   | 2234.921  | BI915199  | 751.413   | 201.297   |
| AB033054  | 6934.152  | 6280.355  | D28446    | 3403.7    | 4048.996  | R82957    | 38367.223 | 10550.521 |
| NM_016122 | 399.347   | 376.676   | NM_000211 | 11316.966 | 6784.563  | BI830442  | 4094.026  | 1387.009  |
| NM_016583 | 2207.523  | 2453.364  | AB037830  | 1821.387  | 1532.37   | AI218732  | 1330.504  | 710.61    |
| AF153330  | 2534.138  | 1525.079  | NM_015685 | 14481.881 | 7924.785  | NM_018890 | 29850.822 | 6022.382  |
| NM_002050 | 6565.823  | 8010.566  | NM_004357 | 57363.211 | 46283.711 | NM_016204 | 9052.828  | 3256.427  |
| NM_007097 | 11646.344 | 20961.686 | X03324    | 6570.64   | 5273.325  | AB046836  | 1564.685  | 1115.217  |
| D87446    | 7944.619  | 6670.29   | AF130988  | 1513.12   | 1493.312  | NM_001311 | 13561.923 | 4431.718  |
| BF540935  | 17023.645 | 16473.598 | NM_014934 | 496.948   | 557.63    | NM_017798 | 6728.205  | 2783.728  |
| NM_004466 | 1133.892  | 2754.923  | NM_015385 | 1550.479  | 1174.619  | NM_012410 | 2659.051  | 2668.205  |
| NM_007081 | 2929.062  | 3551.742  | NM_003690 | 8525.165  | 9266.697  | NM_001111 | 10027.252 | 16684.9   |
| AB032964  | 2857.938  | 2866.483  | NM_000876 | 9469.827  | 9762.729  | NM_018048 | 7798.667  | 16618.789 |
| BE733605  | 6060.082  | 4985.174  | NM_014214 | 7128.753  | 8490.287  | AJ133439  | 935.989   | 1130.709  |
| NM_003334 | 34137.781 | 31976.012 | NM_000856 | 1139.066  | 1667.88   | NM_014395 | 2875.206  | 2886.425  |
| NM_002693 | 3067.514  | 2693.859  | NM_002752 | 4144.728  | 4787.665  | NM_001561 | 924.905   | 375.011   |
| NM_003671 | 1424.165  | 1671.016  | NM_013281 | 1430.776  | 1577.22   | NM_005160 | 2146.914  | 502.489   |
| AK026000  | 6239.922  | 12690.093 | Y11306    | 1903.867  | 2454.208  | NM_000596 | 655.204   | 206.932   |

|           |           |           |           |           |           |           |           |           |
|-----------|-----------|-----------|-----------|-----------|-----------|-----------|-----------|-----------|
| NM_017833 | 1302.893  | 1697.108  | NM_016112 | 1122.515  | 1182.075  | X78817    | 33835.426 | 8996.585  |
| NM_006675 | 3501.859  | 3605.209  | X85106    | 1080.129  | 965.42    | AB023135  | 1672.733  | 515.97    |
| NM_003022 | 3453.047  | 2437.185  | NM_003931 | 3861.601  | 5141.872  | AY009401  | 719.155   | 243.603   |
| NM_004873 | 5890.816  | 3952.276  | NM_006681 | 972.021   | 988.089   | AF294628  | 1092.07   | 254.316   |
| NM_019842 | 2030.417  | 1541.644  | NM_012479 | 54984.445 | 54455.441 | NM_000193 | 7740.163  | 3448.952  |
| NM_002951 | 13777.964 | 10422.994 | AF250226  | 24480.672 | 29196.557 | BC014586  | 769.409   | 481.232   |
| NM_002317 | 2191.21   | 1095.074  | NM_006534 | 14831.266 | 8819.244  | NM_002448 | 464.802   | 148.695   |
| NM_000320 | 1777.339  | 1132.992  | NM_017601 | 3794.186  | 2296.488  | AF053952  | 31912.926 | 10531.436 |
| CY3Cy5    | 1028.01   | 210.604   | AF110265  | 22683.709 | 11466.271 | NM_003213 | 7454.177  | 3998.57   |
| NM_145658 | 1536.674  | 1125.569  | AF272371  | 58517.352 | 56970.43  | BF184738  | 1482.222  | 1200.802  |
| NM_021957 | 679.086   | 754.419   | AK021848  | 4132.632  | 3397.559  | NM_015057 | 538.321   | 583.277   |
| AK022138  | 1426.486  | 2063.854  | NM_003704 | 4344.738  | 3708.435  | AF303398  | 15333.956 | 3908.318  |
| AL050013  | 326.17    | 1051.713  | AK023140  | 994.667   | 853.187   | NM_014810 | 1446.264  | 303.531   |
| AL133052  | 1993.968  | 2270.5    | AF084362  | 1788.81   | 1748.393  | NM_004738 | 2675.585  | 454.173   |
| AB037824  | 1065.104  | 1218.96   | NM_001553 | 4161.023  | 3586.539  | NM_007357 | 4223.937  | 1314.429  |
| AF361494  | 426.669   | 517.805   | NM_014173 | 16683.422 | 15360.173 | NM_003763 | 6323.562  | 2156.188  |
| AK022810  | 658.578   | 677.692   | NM_001731 | 31960.791 | 34469.188 | AK023448  | 1729.584  | 214.152   |
| AK001384  | 793.64    | 971.973   | AL137506  | 1140.516  | 2039.774  | NM_003283 | 4983.001  | 698.686   |
| AK025437  | 2318.271  | 1996.324  | AK022961  | 5058.828  | 6871.811  | AF249898  | 5286.469  | 895.181   |
| NM_021957 | 569.629   | 540.231   | NM_007375 | 8410.8    | 8770.781  | M69181    | 9981.728  | 1951.225  |
| SR2       | 46862.152 | 41724.633 | NM_014371 | 5576.477  | 7572.293  | L09078    | 680.96    | 309.013   |
| SR4       | 11319.961 | 15981.594 | AF290512  | 10772.75  | 10766.44  | NM_002652 | 369.372   | 310.496   |
| SR6       | 1672.116  | 2853.336  | NM_006716 | 12596.083 | 11222.64  | NM_014652 | 718.785   | 315.405   |
| SR8       | 6780.888  | 24273.854 | AB002323  | 9498.094  | 9032.564  | AL133020  | 3495.601  | 3005.939  |
| SR10      | 19815.357 | 5799.635  | AK022241  | 16988.158 | 13342.91  | NM_004152 | 223.444   | 532.207   |
| CY3Cy5    | 672.863   | 106.145   | AK022587  | 4580.884  | 5254.152  | BU565263  | 59108.734 | 71955.203 |
| AK026818  | 250.3     | 319.366   | NM_005512 | 586.085   | 810.545   | NM_005028 | 4374.575  | 3145.944  |
| NM_018468 | 1358.756  | 1210.219  | NM_005506 | 2580.17   | 2309.816  | NM_001611 | 940.126   | 2244.755  |
| AL359932  | 577.136   | 547.444   | NM_005723 | 955.11    | 1508.57   | M59979    | 811.111   | 291.137   |
| AK024551  | 1049.56   | 1256.803  | NM_002851 | 2113.468  | 1439.038  | AB018310  | 1614.794  | 418.264   |
| AL833249  | 1813.728  | 1654.521  | NM_002071 | 1027.551  | 989.533   | NM_020133 | 903.124   | 211.8     |
| AF131852  | 1124.429  | 1180.499  | NM_005339 | 55712.164 | 39231.273 | NM_015379 | 19260.861 | 3878.981  |
| AK021894  | 1610.198  | 1749.122  | NM_001906 | 14916.064 | 9272.374  | NM_004878 | 380.172   | 231.081   |
| NM_020424 | 5253.162  | 6055.797  | NM_004142 | 2028.64   | 1538.736  | AF144638  | 48437.074 | 27352.865 |
| AF438313  | 1607.362  | 2197.485  | AF108138  | 6399.959  | 9265.16   | NM_000742 | 1178.395  | 643.998   |
| AF147341  | 591.871   | 609.063   | NM_004347 | 633.127   | 937.471   | NM_002355 | 11282.698 | 2872.829  |
| AB033009  | 23977.424 | 23822.688 | BF340302  | 12708.315 | 11796.671 | AK026608  | 1846.762  | 602.676   |
| AK022086  | 771.797   | 5619.36   | AK024210  | 4211.666  | 5466.38   | NM_018890 | 26885.578 | 9211.594  |
| AF147320  | 1300.208  | 1984.975  | NM_002276 | 7936.818  | 7825.032  | NM_016204 | 8127.517  | 3913.193  |
| AK027024  | 961.732   | 1070.497  | AL133087  | 5276.089  | 4610.097  | AB046836  | 1476.182  | 4587.681  |
| AK022339  | 2246.693  | 1948.461  | NM_018010 | 3540.009  | 4824.601  | NM_017816 | 7299.681  | 7127.788  |
| AK025317  | 9851.597  | 7737.889  | NM_002274 | 34372.375 | 36248.383 | AJ224166  | 3538.279  | 3669.48   |
| AK026119  | 467.505   | 627.48    | AL080200  | 1112.177  | 1549.643  | AK026098  | 3434.422  | 1275.135  |
| NM_005110 | 371.183   | 2127.369  | BF337874  | 9636.417  | 13418.315 | NM_012381 | 1548.025  | 537.309   |
| X92110    | 909.953   | 2699.721  | NM_003475 | 49674.605 | 51044.305 | M20702    | 519.369   | 119.707   |
| AF147408  | 2061.283  | 2399.114  | NM_000243 | 8836.571  | 8804.133  | NM_006397 | 28572.646 | 8389.265  |
| AK027222  | 3260.196  | 4335.779  | NM_004383 | 26323.305 | 36165.77  | D83776    | 1617.554  | 714.077   |
| AF054994  | 1056.585  | 1546.174  | NM_017656 | 3386.627  | 1673.17   | NM_004088 | 6101.192  | 2899.255  |
| AF085868  | 728.344   | 778.622   | X16282    | 20698.518 | 8383.546  | NM_002180 | 1182.087  | 509.207   |
| AL049275  | 1591.634  | 1648.895  | AK022519  | 732.488   | 876.289   | NM_000138 | 2256.64   | 698.655   |
| AK054767  | 404.469   | 665.805   | NM_014415 | 3858.231  | 2634.529  | NM_018163 | 2369.332  | 544.622   |
| AL049301  | 916.8     | 1653.395  | S75264    | 15795.888 | 10190.876 | AK026362  | 4102.847  | 557.635   |
| AL050042  | 1847.893  | 2943.613  | AF027513  | 2404.084  | 1486.779  | NM_004968 | 1895.909  | 512.083   |

|           |           |           |           |           |           |           |           |           |
|-----------|-----------|-----------|-----------|-----------|-----------|-----------|-----------|-----------|
| AL117570  | 381.304   | 324.904   | NM_001379 | 9786.525  | 8055.344  | NM_005908 | 2484.322  | 854.714   |
| AL157458  | 770.545   | 853.1     | NM_018664 | 1598.867  | 1838.846  | NM_004785 | 3380.219  | 1659.483  |
| NM_015377 | 881.535   | 857.718   | BC006428  | 5842.882  | 4857.724  | AK024079  | 569.737   | 160.721   |
| AL137531  | 1303.052  | 1329.918  | NM_005034 | 2433.434  | 2778.39   | NM_002428 | 1784.318  | 825.331   |
| AL080085  | 3767.421  | 6522.097  | NM_003926 | 25925.879 | 29917.326 | NM_014674 | 1503.007  | 1088.694  |
| AL137446  | 2290.352  | 2198.94   | AF085356  | 3388.42   | 4041.5    | NM_018271 | 1067.128  | 878.413   |
| AB025286  | 2722.387  | 3066.159  | NM_016047 | 40536.547 | 36388.438 | CY3Cy5    | 1639.891  | 188.809   |
| AF009286  | 891.48    | 1205.66   | NM_001499 | 15482.787 | 18845.939 | NM_020967 | 993.067   | 2163.355  |
| NM_015880 | 752.375   | 604.824   | BF030165  | 23198.799 | 40120.266 | NM_001071 | 7563.771  | 16839.252 |
| AF056437  | 961.814   | 972.257   | NM_016732 | 17356.875 | 28938.477 | AK021540  | 403.098   | 1405.918  |
| AB032364  | 454.67    | 629.339   | NM_014763 | 28642.068 | 31444.381 | AK022258  | 1022.983  | 1978.775  |
| AF009295  | 420.118   | 457.482   | NM_020185 | 10717.682 | 14131.052 | AF088043  | 278.267   | 229.863   |
| NM_005029 | 1357.169  | 2305.208  | NM_002832 | 10441.725 | 21382.758 | AF131799  | 402.987   | 205.786   |
| AF056447  | 7018.131  | 7051.953  | NM_003654 | 444.365   | 417.769   | AK000455  | 560.696   | 175.444   |
| AK001010  | 1056.485  | 1223.814  | NM_000152 | 51241.043 | 38904.605 | AK023719  | 2237.064  | 847.666   |
| NM_018076 | 732.508   | 1089.303  | D17222    | 27800.934 | 16984.168 | AK025590  | 1568.782  | 547.846   |
| AK021442  | 2055.148  | 2453.285  | NM_000154 | 5788.207  | 3575.937  | AY007149  | 1414.654  | 730.168   |
| AK001076  | 863.743   | 1560.536  | NM_006213 | 652.268   | 440.87    | NM_020967 | 1311.339  | 318.84    |
| AK021482  | 4405.04   | 3722.626  | NM_000671 | 3734.979  | 3668.742  | NM_001071 | 6252.838  | 1992.714  |
| NM_006158 | 20193.35  | 13162.721 | NM_006297 | 31227.926 | 37004.164 | SR2       | 20960.84  | 5053.782  |
| NM_006346 | 1691.947  | 1923.838  | X85325    | 58078.598 | 46692.73  | SR4       | 5127.91   | 1690.732  |
| AK025240  | 3696.929  | 4735.623  | AF318366  | 15314.918 | 12453.067 | SR6       | 690.044   | 324.523   |
| NM_005377 | 803.133   | 412.246   | AF182423  | 3545.445  | 4830.963  | SR8       | 2972.399  | 4534.71   |
| NM_017633 | 11300.321 | 16479.678 | D26018    | 6506.333  | 6625.251  | SR10      | 9351.947  | 1749.65   |
| AF086186  | 22839.59  | 27609.336 | AB037863  | 2592.186  | 2832.138  | CY3Cy5    | 1205.777  | 131.069   |
| NM_017802 | 6151.202  | 4430.177  | BC000363  | 2573.909  | 3077.019  | AL157484  | 5147.631  | 9686.417  |
| AK023667  | 1719.894  | 1708.136  | NM_005919 | 6206.982  | 16502.221 | AK024850  | 599.51    | 1539.121  |
| AJ008137  | 9222.733  | 7695.945  | NM_012256 | 59190.191 | 56240.988 | Y09836    | 897.597   | 1896.565  |
| AF085841  | 983.616   | 709.675   | NM_006006 | 2536.049  | 2879.116  | AL137597  | 1600.749  | 4013.356  |
| AJ008118  | 60260.898 | 68947.039 | NM_016325 | 4262.663  | 7312.912  | AK022144  | 275.371   | 1234.759  |
| AK000939  | 380.164   | 418.196   | NM_001604 | 1516.027  | 1614.746  | AF086044  | 348.486   | 1102.911  |
| AL109674  | 1000.241  | 1432.982  | NM_000908 | 1423.182  | 1037.757  | NM_014926 | 219.178   | 1070.691  |
| AK024512  | 7196.888  | 8369.505  | AB011102  | 5920.58   | 3107.156  | AF131790  | 253.098   | 248.2     |
| AK023454  | 1885.864  | 2354.609  | D63480    | 5072.959  | 3201.626  | NM_012075 | 1565.426  | 640.815   |
| L23207    | 858.683   | 1073.26   | NM_002969 | 9122.692  | 7859.623  | AK023911  | 2289.069  | 917.821   |
| NM_018062 | 1290.931  | 1869.316  | NM_006475 | 1254.828  | 1268.069  | NM_001283 | 3051.208  | 1315.693  |
| NM_007128 | 20327.623 | 21866.99  | NM_004620 | 4175.096  | 3797.214  | AL110237  | 339.882   | 220.669   |
| NM_007160 | 589.107   | 676.669   | AF087940  | 16087.449 | 11310.863 | D87470    | 453.582   | 143.237   |
| NM_018627 | 1087.323  | 806.829   | AJ277587  | 3533.002  | 3596.802  | AF147307  | 2779.922  | 976.675   |
| S82164    | 1366.993  | 1084.94   | D87432    | 7215.399  | 6956.096  | AK001829  | 501.383   | 251.664   |
| AK024394  | 2602.857  | 3158.395  | Y18483    | 1196.998  | 1009.15   | NM_016525 | 1803.137  | 526.414   |
| AF147374  | 1397.62   | 1568.036  | AI565117  | 58520.219 | 60486.359 | AK024931  | 4222.968  | 1697.291  |
| AF130091  | 779.943   | 795.308   | AI299075  | 14117.652 | 13560.73  | AK025659  | 1687.594  | 2416.515  |
| L43338    | 3387.955  | 5953.437  | M59979    | 3821.495  | 4472.826  | AK026407  | 404.711   | 1457.268  |
| AJ227866  | 12186.737 | 14081.025 | AB011098  | 3344.903  | 3623.247  | AK026788  | 1133.936  | 2762.736  |
| AF458223  | 5515.33   | 5435.161  | AA609759  | 5346.986  | 7696.209  | AK025272  | 2617.098  | 5671.374  |
| AK026822  | 375.017   | 288.716   | AA029418  | 15667.192 | 13668.335 | AK026824  | 353.617   | 1025.84   |
| AK022838  | 13275.63  | 11031.096 | AA456001  | 41910.172 | 55006.324 | AL365407  | 948.891   | 911.021   |
| NM_003509 | 714.645   | 731.263   | AA451686  | 15707.997 | 12154.226 | AK000840  | 12425.883 | 1828.298  |
| AF086519  | 1207.357  | 1549.148  | NM_017896 | 25389.609 | 9356.89   | AL162073  | 360.531   | 203.41    |
| L08435    | 1590.795  | 2817.47   | AB002374  | 7792.666  | 3680.657  | AJ006835  | 6210.412  | 2952.276  |
| AF055012  | 9516.296  | 8488.439  | U17327    | 2654.608  | 1712.594  | AL110138  | 397.851   | 169.618   |
| AK022307  | 4735.6    | 4416.308  | M87790    | 53289.59  | 51978.602 | AL050153  | 524.064   | 310.912   |

|           |           |           |           |           |           |           |           |           |
|-----------|-----------|-----------|-----------|-----------|-----------|-----------|-----------|-----------|
| NM_005172 | 1880.449  | 3307.171  | NM_001768 | 3544.497  | 3432.594  | AL122039  | 276.545   | 260.552   |
| AK025192  | 12941.231 | 11251.133 | NM_000029 | 24485.914 | 16160.467 | AF070577  | 1702.671  | 1292.592  |
| NM_012403 | 3289.636  | 3112.771  | NM_000715 | 1739.269  | 1871.181  | AL137445  | 641.777   | 1029.627  |
| AK022611  | 5601.786  | 4004.428  | AF035802  | 13454.172 | 18792.662 | U92992    | 333.825   | 767.098   |
| NM_004952 | 2885.411  | 2207.547  | Y08145    | 8561.258  | 10333.997 | BC028422  | 651.187   | 1522.06   |
| AY007239  | 512.92    | 711.366   | M26123    | 811.038   | 1085.62   | AK022219  | 367.523   | 1175.965  |
| NM_020414 | 4660.08   | 5620.299  | NM_001838 | 14733.245 | 17737.813 | AK024192  | 247.695   | 913.433   |
| AB037730  | 3277.298  | 3792.169  | NM_019555 | 2328.959  | 5009.371  | AJ011378  | 775.733   | 2326.215  |
| NM_001357 | 6356.801  | 7234.56   | NM_012096 | 15663.841 | 13852.848 | AF009266  | 444.318   | 389.981   |
| NM_003893 | 2924.803  | 2976.126  | NM_003905 | 26635.152 | 45184.797 | AF009310  | 548.513   | 244.704   |
| AB037816  | 1958.898  | 1786.912  | AB028976  | 16161.644 | 35414.184 | AF054991  | 386.352   | 67.704    |
| NM_014265 | 732.398   | 913.173   | AK026337  | 25432.646 | 35310.801 | AF060168  | 1076.921  | 372.836   |
| U92026    | 1029.134  | 1188.422  | NM_015869 | 1717.129  | 456.752   | AF009275  | 512.496   | 341.471   |
| AF086234  | 28034.592 | 24128.715 | NM_004626 | 1398.207  | 720.647   | AF015251  | 231.938   | 76.841    |
| AK023680  | 5870.734  | 6290.38   | NM_001899 | 1763.928  | 941.076   | AF056426  | 624.365   | 279.623   |
| AF009324  | 4738.564  | 5714.515  | NM_013328 | 24049.268 | 11644.893 | AK001096  | 416.996   | 332.637   |
| AK022112  | 341.867   | 661.893   | NM_000790 | 596.656   | 544.249   | NM_018325 | 277.08    | 217.502   |
| AL137480  | 36961.902 | 62291.395 | NM_002660 | 5929.546  | 5245.668  | AK001150  | 2134.285  | 702.582   |
| AK022182  | 1743.306  | 2799.854  | NM_015900 | 1919.062  | 1838.37   | AK002123  | 235.933   | 319.783   |
| D16473    | 3358.408  | 4639.02   | NM_003706 | 1848.411  | 2321.137  | AK021633  | 392.792   | 318.682   |
| AB028968  | 3047.413  | 4322.614  | AF182218  | 812.283   | 1000.735  | AF189251  | 529.941   | 2034.47   |
| AK001202  | 1606.086  | 1711.142  | NM_016122 | 1874.825  | 6324.744  | NM_005322 | 1460.397  | 3366.778  |
| AF195764  | 58163.43  | 50632.398 | AK023749  | 1141.087  | 1427.879  | AK024465  | 6624.712  | 14023.87  |
| AF055029  | 1999.073  | 1515.978  | NM_002337 | 7309.007  | 7148.971  | AF075119  | 465.301   | 1288.633  |
| AB011542  | 1921.352  | 1426.897  | NM_013245 | 3571.157  | 3412.837  | AK021478  | 2028.016  | 5138.582  |
| NM_001853 | 2385.64   | 2889.766  | NM_004766 | 3360.174  | 8519.141  | AF131782  | 923.112   | 1951.436  |
| U41737    | 414.505   | 437.569   | NM_005819 | 53156.637 | 53717.625 | NM_014210 | 3670.347  | 5359.759  |
| NM_005799 | 951.349   | 857.808   | AK024722  | 267.43    | 454.179   | AK021603  | 2574.62   | 1517.449  |
| X99661    | 1385.279  | 1745.105  | AK025520  | 5712.553  | 1038.327  | AL110136  | 2887.06   | 401.624   |
| NM_005927 | 1504.237  | 1494.781  | NM_004892 | 4932.998  | 1757.504  | AJ008130  | 20285.91  | 7226.873  |
| AB028983  | 4466.186  | 4066.912  | NM_014597 | 29229.594 | 6072.963  | NM_003665 | 242.992   | 152.649   |
| AB037800  | 1974.631  | 2014.672  | BF540935  | 18691.672 | 7382.022  | AF086502  | 722.055   | 420.16    |
| AK026377  | 2482.267  | 3128.677  | NM_004466 | 807.675   | 596.274   | L39924    | 1029.612  | 455.912   |
| NM_018660 | 3674.365  | 3834.693  | NM_007081 | 2634.635  | 3099.753  | U52054    | 2761.883  | 1296.99   |
| NM_003394 | 3710.393  | 3106.367  | AB032964  | 3923.182  | 4578.918  | D17226    | 601.153   | 758.96    |
| NM_014636 | 1059.243  | 812.522   | BE733605  | 9954.262  | 7051.129  | AK023325  | 950.228   | 505.088   |
| NM_006747 | 3563.227  | 4973.393  | NM_003334 | 49546.109 | 45257.09  | NM_017985 | 1700.255  | 928.051   |
| NM_007086 | 1344.083  | 1429.148  | NM_002693 | 4588.629  | 5901.913  | AK025866  | 1826.667  | 940.309   |
| NM_003870 | 11684.093 | 13198.41  | NM_003671 | 1968.237  | 2429.29   | AF088058  | 1971.327  | 856.519   |
| AK024507  | 1073.717  | 1480.164  | AK026000  | 8612.498  | 16589.768 | NM_000513 | 877.608   | 697.859   |
| NM_001243 | 5368.677  | 6932.821  | NM_017833 | 2804.669  | 9926.94   | Y11165    | 729.539   | 719.171   |
| AK025997  | 1291.514  | 2469.797  | NM_003022 | 10615.395 | 19235.068 | NM_003530 | 984.916   | 2901.685  |
| NM_005546 | 429.033   | 708.81    | NM_004873 | 8871.491  | 9627.178  | AJ227871  | 630.767   | 1040.954  |
| NM_000299 | 487.679   | 601.823   | NM_019842 | 3252.358  | 3880.516  | AK025344  | 1313.042  | 2626.177  |
| NM_005478 | 700.917   | 1498.013  | NM_002951 | 23988.432 | 24924.436 | D28589    | 20495.035 | 24867.373 |
| NM_014887 | 2047.073  | 2882.699  | NM_002317 | 5324.974  | 3205.407  | AF301223  | 582.533   | 1481.784  |
| NM_018556 | 4324.843  | 4169.988  | NM_000320 | 2213.895  | 1257.636  | NM_017867 | 3036.757  | 6716.698  |
| NM_005235 | 418.693   | 266.661   | NM_003136 | 8485.642  | 5086.718  | U92820    | 1675.217  | 3796.917  |
| NM_005600 | 2497.85   | 1799.567  | D63480    | 4616.489  | 2264.059  | NM_017937 | 1123.949  | 2690.875  |
| NM_005967 | 5642.204  | 5066.524  | NM_002969 | 8340.433  | 4032.179  | AL360266  | 1809.078  | 3093.677  |
| NM_013315 | 739.391   | 391.669   | NM_006475 | 975.842   | 949.7     | AL160132  | 24817.795 | 16943.307 |
| AB014566  | 3037.371  | 1959.452  | NM_004620 | 4198.655  | 4649.085  | NM_019557 | 1217.833  | 312.136   |
| NM_015678 | 649.695   | 469.518   | AF087940  | 16009.931 | 14479.989 | NM_003545 | 367.649   | 356.257   |

|           |           |           |           |           |           |           |           |           |
|-----------|-----------|-----------|-----------|-----------|-----------|-----------|-----------|-----------|
| NM_014223 | 2630.491  | 2835.771  | AJ277587  | 3467.729  | 3143.881  | AK024413  | 1127.172  | 939.461   |
| NM_016194 | 929.672   | 889.944   | D87432    | 7860.235  | 8003.231  | AK022247  | 452.664   | 422.101   |
| AL050385  | 1327.152  | 1049.03   | Y18483    | 1056.548  | 847.964   | AK001453  | 1809.135  | 1142.467  |
| NM_007027 | 4160.703  | 3890.492  | AI565117  | 59580.695 | 57291.176 | AB007972  | 2007.437  | 1725.136  |
| NM_000633 | 42468.988 | 30158.793 | U28015    | 315.682   | 342.62    | AL390144  | 3692.756  | 3075.215  |
| AB037855  | 2389.15   | 2872.66   | AI299075  | 12050.981 | 11242.221 | AK024017  | 1541.188  | 1225.473  |
| AK024524  | 6848.798  | 6565.224  | M59979    | 3966.86   | 5045.335  | X56196    | 546.168   | 628.671   |
| NM_000562 | 3773.981  | 3731.028  | AB011098  | 3434.65   | 7292.633  | D17220    | 3766.17   | 3474.305  |
| NM_020353 | 879.559   | 691.856   | AA029418  | 14531.218 | 31334.699 | D28363    | 47012.637 | 25591.023 |
| NM_019011 | 11296.169 | 12576.623 | AI364483  | 56726.801 | 55196.895 | AB011171  | 641.466   | 825.137   |
| NM_004879 | 7016.893  | 9422.786  | AA456001  | 34244.824 | 22953.48  | NM_003586 | 1571.378  | 3448.777  |
| AB020694  | 2232.896  | 3199.941  | AA176581  | 3037.917  | 1983.454  | NM_000922 | 1631.412  | 3699.676  |
| NM_016071 | 38978.164 | 37454.758 | BI818232  | 964.172   | 524.755   | NM_013232 | 7862.018  | 17557.908 |
| AL050131  | 967.918   | 1815.505  | AA451686  | 12883.622 | 4497.984  | NM_017993 | 595.909   | 1629.046  |
| NM_004475 | 8553.683  | 12720.656 | NM_002050 | 8578.685  | 2788.633  | NM_000362 | 562.038   | 1088.861  |
| NM_001627 | 3179.239  | 4734.475  | NM_007097 | 12981.743 | 4502.247  | NM_014429 | 1641.97   | 2427.618  |
| NM_002544 | 756.968   | 833.899   | D87446    | 6989.257  | 2629.204  | AK000770  | 1436.283  | 2479.213  |
| X77690    | 2813.964  | 2122.039  | U17327    | 2581.53   | 1423.179  | NM_002370 | 7174.232  | 18595.912 |
| NM_006536 | 1284.381  | 794.538   | AB046781  | 599.981   | 426.977   | NM_015670 | 1655.343  | 3123.308  |
| NM_005658 | 9842.613  | 6526.314  | M87790    | 57224.16  | 49545.844 | NM_014709 | 738.871   | 1063.274  |
| NM_002422 | 1255.714  | 954.942   | NM_001768 | 3911.883  | 3562.645  | AK002203  | 272.262   | 273.669   |
| NM_006690 | 2865.031  | 1999.248  | NM_000029 | 28779.377 | 18447.701 | AK026469  | 3272.317  | 3567.039  |
| NM_006156 | 338.239   | 350.488   | NM_000715 | 1806.485  | 2048.739  | D16935    | 2457.349  | 3695.718  |
| AF218022  | 2765.604  | 2597.331  | AF035802  | 15354.701 | 14054.917 | U92019    | 566.84    | 1022.996  |
| NM_003348 | 3563.671  | 2733.501  | Y08145    | 7358.083  | 7213.684  | U52835    | 748.966   | 1695.965  |
| AB033029  | 429.689   | 416.199   | M26123    | 651.319   | 766.745   | NM_000756 | 1657.766  | 3581.214  |
| AL137663  | 1625.986  | 1471.195  | NM_001838 | 15070.979 | 28657.705 | AK022148  | 608.302   | 1430.694  |
| AB006198  | 14045.686 | 11374.169 | NM_012096 | 15787.625 | 43928.258 | Z36811    | 53852.879 | 66534.148 |
| U72518    | 4653.271  | 4961.104  | NM_003905 | 28245.961 | 55696.602 | NM_018950 | 12325.173 | 21524.145 |
| AF264765  | 792.755   | 1068.589  | L12052    | 6197.784  | 14150.14  | K03200    | 3641.046  | 8130.614  |
| NM_015322 | 2602.995  | 3825.88   | AB028976  | 13832.596 | 9380.157  | U17629    | 2707.85   | 6567.825  |
| NM_016607 | 4690.537  | 5258.494  | AK026337  | 19685.736 | 4613.197  | NM_020428 | 4256.695  | 11619.702 |
| NM_000268 | 21756.494 | 25234.996 | NM_015869 | 1712.861  | 386.759   | U79265    | 1174.16   | 4442.396  |
| AJ008160  | 695.696   | 912.712   | NM_004626 | 1524.356  | 538.671   | AK022868  | 3963.018  | 12762.465 |
| NM_005824 | 1940.531  | 2345.489  | NM_001899 | 1529.641  | 928.984   | NM_002687 | 10754.997 | 19729.857 |
| AF052211  | 4039.021  | 5953.72   | NM_000908 | 2108.215  | 1303.602  | NM_000627 | 2589.56   | 6704.613  |
| U66561    | 2098.595  | 1511.903  | AB011102  | 5620.428  | 2014.446  | NM_000038 | 973.079   | 927.861   |
| NM_000306 | 3234.681  | 2800.966  | NM_002660 | 5262.524  | 5540.093  | NM_000825 | 1468.652  | 3235.46   |
| NM_002200 | 1169.051  | 1029.751  | NM_015900 | 2232.647  | 1882.356  | NM_001963 | 551.73    | 1425.749  |
| AF017433  | 1575.533  | 1246.748  | NM_003706 | 2247.394  | 3576.677  | NM_004334 | 2343.637  | 7068.951  |
| AF130111  | 2715.924  | 1983.115  | AF182218  | 960.967   | 1593.568  | S62027    | 139.85    | 1602.799  |
| NM_016307 | 5196.172  | 4141.034  | NM_016122 | 2172.882  | 3190.555  | NM_003886 | 9585.667  | 25331.232 |
| AB028449  | 4516.318  | 3976.587  | NM_002337 | 7464.548  | 22839.543 | NM_005843 | 1878.304  | 4146.306  |
| NM_004697 | 4598.111  | 3879.774  | NM_013245 | 3562.674  | 11294.988 | NM_003854 | 367.97    | 1736.155  |
| U94384    | 703.38    | 1089.564  | NM_006423 | 53792.508 | 59074.773 | NM_017980 | 568.653   | 1598.064  |
| AF131776  | 8890.722  | 7904.716  | NM_004766 | 2928.755  | 1758.293  | NM_001252 | 42783.906 | 51898.844 |
| NM_020528 | 7034.024  | 6740.598  | NM_005819 | 45288.969 | 17818.588 | AF053712  | 2903.439  | 9217.658  |
| NM_007040 | 46330.121 | 38153.953 | AK025520  | 5810.597  | 840.341   | NM_003947 | 874.442   | 2421.91   |
| AK024249  | 3015.663  | 2935.897  | NM_004892 | 5644.035  | 2801.915  | NM_002821 | 14977.792 | 26764.531 |
| AF239156  | 9878.612  | 7405.104  | NM_014597 | 32103.418 | 13691.175 | M96652    | 34370.047 | 41105.039 |
| NM_020390 | 5464.073  | 4498.126  | NM_017896 | 25371.865 | 6189.33   | L41690    | 1473.079  | 3949.713  |
| NM_003321 | 25231.221 | 26407.162 | AB002374  | 8088.993  | 2134.999  | NM_018059 | 660.321   | 2465.024  |
| U18937    | 27325.025 | 26370.889 | NM_004466 | 635.099   | 362.619   | NM_000939 | 50166.117 | 63588.609 |

|            |           |           |           |           |           |           |           |           |
|------------|-----------|-----------|-----------|-----------|-----------|-----------|-----------|-----------|
| U01925     | 1034.374  | 1365.009  | NM_007081 | 2545.919  | 2628.902  | NM_005183 | 317.149   | 708.411   |
| AJ420488   | 56847.539 | 64396.297 | AB032964  | 4327.172  | 3952.979  | AF065164  | 3154.581  | 9219.857  |
| AF268872   | 2898.461  | 4845.323  | BE733605  | 10615.488 | 8057.032  | AJ008143  | 27309.604 | 46968.926 |
| NM_001226  | 1712.213  | 2609.283  | NM_003334 | 53817.688 | 50616.672 | NM_007144 | 766.055   | 2832.817  |
| NM_001336  | 1726.834  | 2337.967  | NM_002693 | 5509.641  | 5661.691  | NM_005093 | 280.891   | 1716.652  |
| AB050716   | 1513.476  | 1742.276  | NM_003671 | 2556.689  | 5966.259  | NM_004424 | 12499.895 | 29295.586 |
| AF161353   | 28946.602 | 16218.175 | M20695    | 2253.415  | 1146.572  | AL133117  | 1478.706  | 6520.6    |
| NM_000764  | 3991.913  | 3423.578  | AK026000  | 9624.295  | 15923.081 | AB033040  | 405.515   | 1838.264  |
| NM_004146  | 30628.492 | 17653.123 | NM_017833 | 2852.145  | 5586.683  | AF070586  | 9887.416  | 30425.531 |
| NM_003002  | 21262.311 | 13943.452 | NM_006675 | 11434.089 | 13138.125 | NM_014412 | 1548.274  | 5719.838  |
| D42047     | 3596.009  | 2936.386  | NM_003022 | 10103.157 | 12191.95  | NM_013303 | 1229.891  | 5080.094  |
| AB009282   | 15770.476 | 11058.999 | NM_004873 | 9738.629  | 16568.73  | NM_012227 | 3727.256  | 6638.807  |
| NM_005004  | 47526.996 | 29902.453 | NM_019842 | 2906.156  | 3335.083  | NM_006101 | 1822.458  | 4558.733  |
| NM_014639  | 10187.188 | 9953.41   | NM_002951 | 21646.779 | 14904.745 | NM_001237 | 6967.766  | 16928.152 |
| NM_006392  | 7014.357  | 6480.398  | NM_002317 | 4756.743  | 1457.515  | NM_002507 | 1720.26   | 4301.704  |
| NM_014717  | 3422.366  | 3856.723  | NM_000320 | 2079.061  | 721.506   | NM_015962 | 3127.808  | 9008.7    |
| NM_017922  | 4060.671  | 4405.345  | NM_003136 | 9262.566  | 3252.4    | NM_016145 | 539.936   | 2462.679  |
| NM_017916  | 20667.629 | 16808.816 | NM_013328 | 22549.842 | 12191.911 | NM_016078 | 9778.457  | 19131.945 |
| NM_001805  | 13485.187 | 11708.659 | NM_000790 | 924.22    | 399.648   | NM_003798 | 776.402   | 1494.394  |
| AK022360   | 5452.834  | 6741.129  | NM_006475 | 855.232   | 551.331   | NM_004401 | 4362.961  | 8068.651  |
| AK095694   | 666.211   | 930.611   | NM_004620 | 3009.991  | 2193.047  | NM_001845 | 10408.055 | 20743.801 |
| X52341     | 52400.594 | 48330.594 | AF087940  | 11279.396 | 8580.82   | AF255910  | 1048.068  | 2128.204  |
| NM_003082  | 7541.516  | 7645.429  | AJ277587  | 3610.167  | 4574.984  | NM_016146 | 3309.962  | 8937.002  |
| AL133632   | 8125.169  | 8659.773  | D87432    | 9114.109  | 9896.474  | AB046776  | 634.332   | 2873.152  |
| NM_004343  | 25812.938 | 21718.674 | Y18483    | 970.266   | 1149.035  | D42084    | 3425.633  | 8485.646  |
| X52355     | 9828.421  | 11562.075 | AI565117  | 49580.297 | 54152.238 | NM_001734 | 410.556   | 1522.233  |
| NM_006963  | 9532.336  | 7975.618  | U28015    | 700.898   | 554.282   | NM_014693 | 3398.837  | 8401.393  |
| NM_000307  | 1200.808  | 951.403   | AI299075  | 15864.735 | 35446.664 | AB007896  | 1308.542  | 4176.446  |
| NM_006510  | 19978.822 | 14636.186 | M59979    | 4509.868  | 15443.781 | AB007916  | 3199.097  | 10271.499 |
| NM_003141  | 3693.686  | 3004.447  | AB011098  | 3629.186  | 6000.581  | NM_002874 | 982.329   | 3486.1    |
| NM_020245  | 5044.795  | 3496.34   | AA609759  | 6030.139  | 8547.602  | AB028980  | 231.803   | 928.688   |
| NM_007175  | 761.307   | 553.019   | AA029418  | 12966.267 | 12317.463 | NM_001825 | 441.463   | 846.567   |
| AB046381   | 1094.708  | 700.276   | L20815    | 20968.902 | 18370.822 | AF049140  | 2798.87   | 6010.909  |
| AJ011497   | 3511.633  | 2912.022  | AI364483  | 53220.813 | 51448.281 | AB037793  | 322.254   | 1278.061  |
| NM_003018  | 639.393   | 555.251   | AA456001  | 37678.664 | 33449.965 | AL136794  | 1389.582  | 3074.572  |
| NM_000336  | 1864.387  | 2384.947  | AA176581  | 2279.057  | 2078.717  | BC035601  | 52024     | 67741.602 |
| W61100     | 58149.551 | 72024.25  | AA451686  | 12652.293 | 4721.637  | NM_001458 | 1586.318  | 4778.686  |
| AA608568   | 11299.258 | 16146.025 | NM_002050 | 8054.452  | 3717.132  | NM_020388 | 8314.72   | 18606.838 |
| BG831301   | 50506.867 | 61879.973 | NM_007097 | 13325.367 | 3427.62   | NM_004202 | 54708.617 | 66867.383 |
| M14764     | 1979.232  | 2387.747  | D87446    | 7191.022  | 2472.057  | AB046829  | 762.388   | 2244.398  |
| AA478647   | 4598.748  | 5436.314  | BF540935  | 32416.713 | 16382.98  | NM_016445 | 1483.701  | 3898.533  |
| M35999     | 2083.41   | 1580.396  | NM_000715 | 1358.457  | 917.042   | NM_003379 | 44189.988 | 45578.863 |
| AW058501   | 1606.74   | 1505.265  | AF035802  | 12050.49  | 5634.09   | NM_004521 | 10062.262 | 18215.35  |
| M81379     | 534.531   | 632.689   | Y08145    | 8495.725  | 5405.531  | AF229162  | 1755.251  | 3693.158  |
| ID 2623896 | 3760.85   | 4818.744  | M26123    | 771.013   | 766.014   | U02309    | 61383.574 | 71075.156 |
| ID 2602214 | 8120.082  | 7956.301  | NM_001838 | 15401.641 | 10495.805 | AF263547  | 8791.846  | 24849.025 |
| ID 2071279 | 8696.104  | 10311.618 | NM_019555 | 2389.401  | 2158.128  | NM_004831 | 1527.604  | 5121.609  |
| L10709     | 8932.134  | 8017.368  | NM_012096 | 15003.071 | 12448.934 | NM_014213 | 6205.673  | 21983.4   |
| N35489     | 2725.458  | 3050.163  | NM_003905 | 24298.088 | 20992.113 | NM_000168 | 4117.232  | 15981.528 |
| AA482489   | 539.703   | 427.289   | L12052    | 5681.545  | 10746.605 | AF294629  | 13030.404 | 32074.871 |
| AA458922   | 2855.959  | 2858.443  | AB028976  | 14866.63  | 30328.719 | NM_000545 | 11288.123 | 30139.766 |
| NM_004168  | 14629.991 | 11002.291 | AK026337  | 19026.043 | 18558.182 | NM_002136 | 48944.223 | 67910.195 |
| NM_003485  | 7411.157  | 4858.171  | NM_015869 | 1695.53   | 1581.18   | AK025571  | 3139.154  | 10531.611 |

|           |           |           |           |           |           |            |           |           |
|-----------|-----------|-----------|-----------|-----------|-----------|------------|-----------|-----------|
| NM_00503E | 4269.83   | 2954.592  | AB031038  | 702.59    | 1085.163  | NM_00494C  | 539.72    | 1106.52   |
| M95923    | 3338.88   | 2412.394  | NM_00462E | 1214.239  | 1484.447  | NM_01446E  | 26177.369 | 30707.994 |
| NM_00241E | 57179.703 | 56800.008 | NM_00189E | 1516.588  | 1729.872  | NM_00552C  | 11917.799 | 21406.242 |
| NM_00633E | 61354.207 | 63914.41  | NM_00430E | 51654.98  | 51806.734 | AK023265   | 1774.212  | 4091.464  |
| NM_00200C | 568.197   | 149.064   | NM_00599E | 310.818   | 223.011   | NM_01872E  | 911.013   | 2317.332  |
| NM_00091E | 2866.05   | 3392.264  | NM_003144 | 14456.568 | 3037.656  | AB029009   | 3038.617  | 7655.005  |
| NM_01866E | 6846.431  | 6962.071  | NM_00090E | 2395.284  | 797.609   | AF112207   | 2215.436  | 6209.327  |
| NM_145904 | 25518.248 | 32149.918 | AB011102  | 5385.863  | 2666.298  | AJ420488   | 53733.324 | 65206.348 |
| NM_00679E | 11536.002 | 14045.396 | D63480    | 5091.022  | 3370.851  | NM_005594  | 50139.836 | 59525.32  |
| NM_00070E | 1167.238  | 1885.668  | NM_00296E | 12110.286 | 18172.547 | NM_004461  | 54818.852 | 67622.117 |
| NM_015941 | 4477.685  | 6364.949  | M81768    | 834.328   | 583.854   | NM_01847E  | 3294.097  | 5183.303  |
| NM_00365E | 3844.331  | 3706.674  | AK023749  | 863.386   | 889.788   | BF106121   | 1202.149  | 2056.111  |
| NM_014837 | 3533.774  | 3905.621  | NM_002337 | 6559.457  | 10990.792 | AK022590   | 1305.239  | 1652.976  |
| NM_01772E | 704.143   | 751.88    | NM_01324E | 3464.33   | 2460.806  | AK024343   | 1329.256  | 1454.613  |
| NM_00525E | 11540.755 | 11468.923 | NM_00642E | 50919.914 | 49128.754 | NM_00256E  | 576.765   | 1565.314  |
| NM_00284C | 630.709   | 1923.011  | NM_00476E | 2997.012  | 3379.254  | M12078     | 5828.157  | 13090.911 |
| NM_006174 | 2321.965  | 3010.806  | NM_00581E | 43874.555 | 42743.32  | NM_00455C  | 7604.101  | 17669.686 |
| NM_01585C | 5237.751  | 6580.762  | AK025520  | 5519.617  | 5150.465  | NM_00078E  | 1700.744  | 4722.958  |
| NM_004864 | 1543.225  | 2411.416  | NM_00489E | 5879.224  | 10790.007 | NM_00411C  | 31796.338 | 44660.48  |
| NM_00283E | 6243.432  | 6407.192  | NM_014597 | 33199.313 | 29099.096 | NM_013387  | 48058.48  | 63450.984 |
| AK027377  | 439.899   | 1007.386  | NM_01789E | 28472.326 | 20018.711 | NM_00526E  | 24336.576 | 32578.402 |
| BF528358  | 1193.911  | 1145.377  | AB002374  | 8037.604  | 5979.772  | NM_005757  | 1031.512  | 908.569   |
| NM_01633E | 566.529   | 552.382   | U17327    | 3135.005  | 1566.729  | NM_01648E  | 283.408   | 349.686   |
| AK025111  | 652.248   | 583.697   | AB046781  | 353.58    | 88.142    | NM_02012E  | 1074.791  | 735.923   |
| NM_00173E | 1435.859  | 874.798   | M87790    | 53872.133 | 30106.846 | NM_00506E  | 8484.342  | 8749.438  |
| NM_01869C | 5387.888  | 4352.515  | NM_00176E | 4127.937  | 3186.128  | NM_01822E  | 3905.576  | 4105.642  |
| NM_00086C | 1794.791  | 1390.247  | NM_00002E | 31757.08  | 40043.148 | NM_00669E  | 18964.193 | 13512.692 |
| AB037798  | 2430.025  | 2429.616  | NM_00313E | 10030.355 | 6233.059  | NM_00172E  | 1516.673  | 1792.507  |
| NM_00078C | 473.061   | 559.653   | NM_01332E | 24512.154 | 16442.457 | AB046802   | 4707.487  | 5101.498  |
| AF272663  | 11421.373 | 9889.935  | NM_00079C | 863.263   | 563.74    | NM_003297  | 819.597   | 797.344   |
| NM_01219C | 3816.165  | 4508.508  | NM_00266C | 5874.233  | 7389.826  | NM_00694C  | 640.817   | 465.574   |
| AB033015  | 485.538   | 1012.609  | NM_01590C | 2069.64   | 1615.477  | NM_01826E  | 6061.145  | 3820.117  |
| AF277719  | 591.948   | 743.618   | NM_00370E | 2165.268  | 5395.158  | AK024633   | 3018.663  | 2184.661  |
| NM_000791 | 3085.739  | 4420.354  | AF182218  | 2046.006  | 5425.988  | NM_00145E  | 3349.394  | 1847.348  |
| NM_003681 | 3097.366  | 4557.879  | AB033054  | 15766.048 | 11396.443 | NM_005257  | 9718.406  | 5027.816  |
| NM_01490E | 4115.169  | 4231.105  | NM_01612E | 1693.124  | 862.522   | AF011573   | 6663.708  | 4539.88   |
| NM_01570C | 5488.325  | 7335.975  | AF153330  | 1732.252  | 469.857   | NM_00214E  | 2673.945  | 1939.901  |
| U66621    | 9777.036  | 10241.504 | NM_00165E | 478.691   | 272.824   | NM_00724E  | 6305.569  | 15758.979 |
| NM_00572C | 49684.203 | 46924.578 | NM_00205C | 7984.313  | 4291.075  | NM_00189C  | 1104.642  | 3088.107  |
| AB040936  | 680.043   | 778.845   | NM_007097 | 10512.228 | 5408.455  | NM_00128E  | 3428.542  | 6019.33   |
| AB023161  | 332.45    | 1215.838  | D87446    | 7556.276  | 4284.25   | NM_01464E  | 878.067   | 4207.091  |
| U61736    | 895.871   | 1184.058  | BF540935  | 31769.389 | 17552.367 | NM_019604  | 673.081   | 1108.324  |
| AJ132086  | 2177.749  | 3175.791  | NM_00446E | 920.859   | 847.422   | NM_00507E  | 967.636   | 904.346   |
| U92816    | 17572.119 | 16759.883 | NM_007081 | 2863.912  | 3067.326  | NM_000951  | 3525.153  | 2511.516  |
| NM_00410E | 1222.329  | 1242.373  | AB032964  | 3969.679  | 3818.788  | X52599     | 3828.863  | 2790.281  |
| S76984    | 10529.874 | 6104.046  | BE733605  | 9298.435  | 6918.296  | AA029300   | 2624.763  | 2861.533  |
| NM_01449E | 52123.027 | 61701.039 | NM_003334 | 45233.934 | 39671.43  | BG708842   | 47384.25  | 44700.973 |
| NM_014081 | 910.141   | 858.061   | NM_00269E | 4988.22   | 6464.552  | M19723     | 48098.457 | 61674.133 |
| NM_005651 | 1196.342  | 1007.835  | NM_003671 | 3273.232  | 7651.042  | X06256     | 3190.057  | 4360.414  |
| NM_00719E | 1345.983  | 2077.241  | AK026000  | 7807.68   | 8292.596  | AA709271   | 1901.999  | 1883.243  |
| AK023337  | 5433.653  | 6427.371  | NM_01783E | 3156.392  | 3722.612  | M34057     | 3648.615  | 2093.068  |
| NM_01327E | 18905.363 | 21536.717 | NM_00667E | 10083.324 | 7968.236  | ID 1984668 | 1646.147  | 665.738   |
| AB037842  | 787.392   | 1336.331  | NM_00302E | 8590.764  | 3800.417  | ID 1832579 | 2829.004  | 1058.41   |

|            |           |           |           |           |           |            |           |           |
|------------|-----------|-----------|-----------|-----------|-----------|------------|-----------|-----------|
| U92074     | 521.969   | 980.898   | NM_004873 | 7755.674  | 1904.778  | H-430185 N | 1016.781  | 332.097   |
| NM_019011  | 1971.332  | 2857.444  | NM_019842 | 2942.244  | 714.946   | D16583     | 4043.314  | 1240.438  |
| AF459094   | 4878.067  | 4335.706  | NM_002951 | 19238.129 | 8991.188  | H44051     | 2078.62   | 587.685   |
| NM_003157  | 3295.567  | 3590.183  | NM_002317 | 4813.292  | 2253.897  | AA481547   | 20051.912 | 7029.886  |
| NM_00493E  | 2298.033  | 2380.936  | NM_000320 | 2150.563  | 2309.711  | AA831880   | 1103.649  | 484.449   |
| NM_01432E  | 1366.445  | 1030.693  | CY3Cy5    | 1170.354  | 90.419    | T64880     | 5298.606  | 2944.143  |
| NM_00444E  | 881.931   | 849.315   | NM_14565E | 3161.878  | 2622.266  | NM_00285E  | 4793.952  | 15439.679 |
| NM_015981  | 1554.722  | 1930.125  | NM_021957 | 1102.705  | 1141.327  | NM_001817  | 5676.526  | 13768.205 |
| NM_00045E  | 5480.159  | 7802.063  | AK022138  | 2200.775  | 2782.256  | AF063611   | 1162.437  | 3204.998  |
| NM_014791  | 5891.519  | 8403.832  | AF086191  | 14214.242 | 27153.752 | NM_00603E  | 1979.457  | 3946.173  |
| NM_00331E  | 5210.288  | 5829.443  | NM_01763E | 7959.118  | 14539.801 | NM_00208E  | 1321.011  | 2212.829  |
| NM_00436E  | 4809.76   | 5602.294  | AL133052  | 2532.154  | 2484.177  | M28983     | 477.419   | 398.711   |
| NM_00018E  | 14877.879 | 13693.575 | AB037824  | 3457.447  | 5955.458  | NM_01465E  | 7866.372  | 4050.163  |
| AK023384   | 2236.21   | 2351.317  | AF361494  | 806.097   | 1119.582  | NM_00207E  | 2964.786  | 1680.958  |
| NM_01602E  | 10983.752 | 10013.39  | AK022810  | 1658.589  | 1106.417  | X05299     | 2783.952  | 1527.484  |
| NM_02024E  | 4495.394  | 2903.252  | AK001384  | 1537.717  | 1305.793  | BM468475   | 581.277   | 501.408   |
| NM_00717E  | 879.784   | 869.363   | AK025437  | 4067.527  | 3378.117  | NM_00031E  | 3340.748  | 2577.632  |
| AB046381   | 629.917   | 592.147   | AK074164  | 927.687   | 537.49    | NM_00206E  | 29073.688 | 16135.676 |
| AJ011497   | 3999.594  | 2922.861  | NM_14565E | 1928.915  | 945.974   | AK001230   | 3955.071  | 3420.22   |
| NM_00301E  | 1448.305  | 5976.133  | NM_021957 | 1078.006  | 588.253   | NM_01468E  | 8401.483  | 4968.732  |
| NM_00033E  | 1254.453  | 1440.512  | SR2       | 51883.18  | 23574.932 | NM_005027  | 2696.134  | 1486.249  |
| W61100     | 58217.316 | 66266.352 | SR4       | 15168.422 | 7073.518  | NM_00461E  | 1499.877  | 588.182   |
| AA608568   | 12270.56  | 17765.547 | SR6       | 1887.655  | 1067.527  | NM_00560E  | 21115.377 | 8891.854  |
| M14764     | 2706.386  | 5374.938  | SR8       | 9070.376  | 12733.884 | NM_012294  | 175.525   | 55.567    |
| AA478647   | 4273.119  | 5577.57   | SR10      | 25717.842 | 3702.634  | NM_00110E  | 304.367   | 122.272   |
| M35999     | 1371.562  | 1419.808  | CY3Cy5    | 988.61    | 108.384   | NM_01849E  | 1625.994  | 476.403   |
| AW058501   | 887.274   | 1106.177  | AL359932  | 1302.35   | 1322.331  | NM_00477E  | 449.131   | 367.445   |
| ID 2623896 | 3738.81   | 3359.369  | AB037850  | 6641.552  | 11055.349 | NM_00435E  | 207.566   | 313.862   |
| ID 2602214 | 7253.183  | 4394.308  | AK002197  | 6483.545  | 8980.75   | NM_01225E  | 1037.73   | 617.411   |
| ID 2071279 | 8432.866  | 7533.61   | AF087996  | 12033.179 | 12158.375 | NM_006224  | 48352.512 | 42683.84  |
| L10709     | 9232.637  | 7111.503  | AK021710  | 4224.995  | 4321.917  | AL137300   | 5916.229  | 4617.465  |
| N35489     | 2831.547  | 3278.875  | AK024551  | 1521.574  | 1950.761  | NM_00022E  | 3667.796  | 3679.156  |
| AA458922   | 2698.33   | 4104.081  | AL833249  | 11850.767 | 20134.49  | NM_00699E  | 22916.131 | 16973.375 |
| NM_00171E  | 16001.132 | 13159.476 | NM_018374 | 427.942   | 601.509   | NM_00312E  | 9245.96   | 6566.194  |
| AL080062   | 3009.91   | 2753.208  | AF131852  | 454.898   | 456.866   | NM_00195E  | 3671.702  | 1299.544  |
| AF308802   | 1910.97   | 1691.354  | AK021894  | 1976.752  | 1750.661  | AB033064   | 3613.457  | 2636.291  |
| M95923     | 1711.02   | 1075.168  | NM_020424 | 7446.755  | 6939.07   | AK022317   | 7580.189  | 6307.352  |
| NM_00241E  | 51426.898 | 44655.441 | AF438313  | 515.362   | 395.828   | NM_01839E  | 6898.561  | 4373.259  |
| NM_00633E  | 50416.434 | 54827.164 | NM_01781E | 670.644   | 413.681   | NM_003124  | 14980.727 | 8078.01   |
| NM_00091E  | 1215.125  | 1240.172  | AF147341  | 1564.274  | 823.752   | NM_00688E  | 43998.82  | 25998.002 |
| NM_01866E  | 3660.443  | 3394.935  | AB033009  | 47282.633 | 22129.299 | NM_004531  | 3559.293  | 3560.433  |
| NM_015941  | 5159      | 7210.751  | AK022086  | 1266.809  | 1076.306  | AB040920   | 762.666   | 925.963   |
| NM_00365E  | 3606.835  | 4063.434  | AF147320  | 2496.762  | 1309.837  | NM_01572E  | 9437.999  | 7190.496  |
| NM_014837  | 3574.224  | 3813.531  | AK027024  | 881.847   | 571.802   | AB033070   | 473.878   | 1417.087  |
| NM_01772E  | 745.768   | 500.844   | AK022339  | 2957.874  | 1944.356  | AK000158   | 5310.178  | 4183.426  |
| NM_00525E  | 10794.318 | 6189.827  | AK025177  | 482.795   | 665.203   | NM_00576E  | 1394.831  | 605.482   |
| NM_00284E  | 644.233   | 658.646   | AK025552  | 500.982   | 1531.027  | AK024500   | 16938.531 | 5952.704  |
| NM_006174  | 2228.755  | 1748.374  | AK026725  | 6386.688  | 5645.554  | NM_002564  | 17395.586 | 6668.038  |
| NM_01585E  | 8144.965  | 7165.046  | NM_005110 | 861.998   | 727.83    | Z83806     | 182.914   | 55.034    |
| NM_004864  | 1580.868  | 2167.911  | X92110    | 574.346   | 615.614   | NM_00096E  | 401.565   | 285.886   |
| NM_00283E  | 5661.669  | 5390      | AK023122  | 566.149   | 1662.075  | NM_01330E  | 4431.056  | 2050.88   |
| AK027377   | 461.069   | 511.057   | AF147408  | 5406.599  | 5743.936  | AF027302   | 4397.371  | 2924.009  |
| BF528358   | 1364.628  | 1298.765  | AK027222  | 13210.337 | 11863.91  | NM_00670E  | 29100.879 | 17819.518 |



|            |           |           |           |           |           |            |           |           |
|------------|-----------|-----------|-----------|-----------|-----------|------------|-----------|-----------|
| NM_01633E  | 780.737   | 1098.293  | AF085868  | 633.686   | 863.943   | AB037835   | 1810.594  | 1249.7    |
| NM_00651C  | 19018.918 | 16278.998 | AK054767  | 674.19    | 483.168   | NM_01622E  | 671.77    | 813.051   |
| NM_003141  | 3582.278  | 3970.133  | AL080086  | 1152.006  | 574.586   | NM_000157  | 2589.793  | 1281.052  |
| NM_01869C  | 2534.286  | 1580.47   | AL049301  | 2413.909  | 1908.913  | NM_000712  | 330.463   | 186.408   |
| NM_00086C  | 485.519   | 308.783   | AL050042  | 4154.808  | 3650.117  | NM_01808E  | 1470.631  | 1059.747  |
| AF272663   | 5464.344  | 3549.25   | AL117570  | 605.722   | 412.627   | BC013695   | 6298.958  | 2594.17   |
| NM_01219C  | 798.458   | 527.677   | AL157458  | 1835.49   | 4774.686  | NM_00720E  | 807.54    | 398.75    |
| NM_01490E  | 4426.373  | 7307.507  | AL080085  | 7529.575  | 8830.812  | AK023035   | 3221.421  | 2045.985  |
| NM_01570C  | 4822.902  | 6715.575  | NM_007017 | 4717.706  | 5356.173  | NM_01484E  | 1849.278  | 1348.283  |
| U66621     | 10009.213 | 8135.154  | AL137446  | 13957.943 | 19287.541 | AB011164   | 4162.519  | 3970.655  |
| NM_00572C  | 44598.301 | 26748.609 | AB025286  | 8513.647  | 11969.391 | M24750     | 1021.946  | 779.226   |
| AB040936   | 802.826   | 625.631   | AF009286  | 843.783   | 1442.385  | NM_00596E  | 2838.491  | 2610.779  |
| U61736     | 861.364   | 875.833   | AF056437  | 1457.176  | 2673.147  | NM_00274C  | 3627.041  | 2816.78   |
| AJ132086   | 1905.457  | 2062.162  | AB032364  | 686.625   | 1502.678  | AL117482   | 3113.249  | 2249.172  |
| U92816     | 19102.348 | 17411.316 | AF009295  | 3757.651  | 7155.613  | NM_00654E  | 41595.781 | 19632.547 |
| NM_00410E  | 2170.48   | 2464.412  | NM_00502E | 3123.145  | 3530.225  | AB018324   | 12057.364 | 5447.772  |
| NM_00348E  | 8105.377  | 7941.148  | AF056447  | 3154.449  | 3263.241  | NM_00274E  | 45070.363 | 30472.199 |
| NM_00503E  | 4949.392  | 4707.97   | AK001010  | 3087.88   | 2312.318  | Z25431     | 2368.924  | 672.275   |
| NM_014081  | 391.016   | 392.509   | NM_01807E | 1715.268  | 1251.751  | NM_005627  | 9091.392  | 4101.648  |
| AK023337   | 2683.204  | 1847.817  | AK021442  | 4936.725  | 2879.589  | M64497     | 410.781   | 266.484   |
| NM_01327E  | 11292.148 | 7961.783  | AK001076  | 1853.489  | 1468.194  | NM_007274  | 12947.745 | 5140.829  |
| U92074     | 244.098   | 325.291   | AK001820  | 2107.207  | 1265.639  | NM_00335E  | 6820.687  | 2993.875  |
| NM_019011  | 1995.717  | 3052.389  | AK021482  | 19066.023 | 10356.574 | NM_00189C  | 967.954   | 776.077   |
| AF459094   | 4209.432  | 6556.944  | NM_00615E | 51797.266 | 53872.051 | NM_00128E  | 2761.108  | 1530.682  |
| NM_003157  | 4676.233  | 12100.123 | NM_00634E | 6405.869  | 10091.239 | NM_01464E  | 569.598   | 388.574   |
| NM_00493E  | 1754.055  | 3666.454  | AK025240  | 7040.401  | 10656.742 | NM_019604  | 433.884   | 438.321   |
| NM_01432E  | 930.926   | 786.716   | NM_01763E | 20538.551 | 16137.599 | NM_00507E  | 686.809   | 622.437   |
| NM_00444E  | 962.266   | 878.678   | AF086186  | 53625.285 | 55362.668 | NM_000951  | 3694.93   | 3112.273  |
| NM_015981  | 2105.34   | 1192.658  | NM_01780E | 12777.425 | 14240.158 | X52599     | 4321.222  | 2077.344  |
| NM_00045E  | 4190.98   | 3405.92   | AK023667  | 3677.716  | 7119.38   | AA029300   | 2729.996  | 1760.463  |
| NM_014791  | 5878.386  | 4571.813  | AJ008137  | 31415.697 | 51117.719 | BG708842   | 46768.75  | 40923.98  |
| NM_00331E  | 4210.195  | 3067.515  | AF085841  | 1177.069  | 1182.886  | M19723     | 50003.594 | 62669.645 |
| NM_00436E  | 4666.66   | 4606.086  | AJ008118  | 65610.07  | 71124.156 | X06256     | 3334.103  | 3121.637  |
| NM_00018E  | 14741.503 | 12992.775 | AK000939  | 1315.66   | 2890.313  | AA709271   | 2380.359  | 1905.194  |
| AK023384   | 2238.004  | 2481.175  | AL109674  | 4104.239  | 5754.094  | M34057     | 3773.588  | 2634.385  |
| NM_01602E  | 11475.044 | 10702.929 | AK024512  | 11636.733 | 9236.774  | ID 1984668 | 1552.8    | 914.874   |
| AK025111   | 685.592   | 1715.989  | AK023454  | 5485.788  | 4426.809  | ID 1832579 | 2538.46   | 1571.114  |
| NM_00173E  | 1896.207  | 1914.651  | L23207    | 2819.654  | 1861.697  | H-430185 N | 1133.714  | 612.656   |
| AJ011497   | 2135.142  | 1623.42   | NM_01806E | 2382.315  | 1629.155  | D16583     | 4108.858  | 1344.317  |
| NM_00301E  | 1336.789  | 1608.088  | NM_00712E | 39545.191 | 20552.768 | H44051     | 1855.577  | 585.87    |
| NM_00033E  | 488.757   | 441.985   | NM_00716C | 888.466   | 576.931   | AA481547   | 20383.678 | 6456.814  |
| W61100     | 53213.434 | 63114.484 | NM_018627 | 2146.773  | 1346.685  | AA831880   | 1109.56   | 478.228   |
| AA608568   | 2161.695  | 1438.409  | S82164    | 3402.172  | 2672.756  | T64880     | 5387.164  | 2599.45   |
| BG831301   | 51773.309 | 48330.824 | AK024394  | 3858.612  | 4228.854  | AB028990   | 748.677   | 235.039   |
| M14764     | 914.394   | 713.404   | AF147374  | 1822.1    | 2214.965  | AK002089   | 205.718   | 92.501    |
| AA478647   | 3264.739  | 2525.495  | AF130091  | 1042.9    | 1636.609  | AF063611   | 646.738   | 536.007   |
| M35999     | 1803.426  | 1639.226  | L43338    | 28999.059 | 20822.52  | NM_00603E  | 1990.529  | 1174.914  |
| AW058501   | 2459.651  | 3394.027  | AJ227866  | 50862.27  | 54948.266 | NM_00208E  | 942.794   | 647.363   |
| M81379     | 1088.713  | 1826.846  | AF458223  | 7309.24   | 7154.84   | M28983     | 243.05    | 408.705   |
| ID 2623896 | 3282.128  | 5161.698  | AK026822  | 724.078   | 1318.061  | NM_01465E  | 8332.478  | 4304.834  |
| ID 2602214 | 8694.025  | 5636.838  | AK022838  | 23738.467 | 37676.152 | NM_00207E  | 2856.107  | 1644.338  |
| ID 2071279 | 8573.171  | 5441.952  | NM_00350E | 1094.841  | 1352.347  | X05299     | 2468.231  | 1389.747  |
| L10709     | 8904.746  | 3929.952  | AF086519  | 2168.134  | 3505.842  | BM468475   | 529.931   | 477.484   |

|           |           |           |           |           |           |           |           |           |
|-----------|-----------|-----------|-----------|-----------|-----------|-----------|-----------|-----------|
| N35489    | 2452.114  | 1315.652  | AF055012  | 12974.188 | 22953.309 | NM_00031E | 3448.072  | 2288.042  |
| AA458922  | 2854.517  | 2162.365  | U00950    | 3152.62   | 2805.034  | NM_00206C | 32837.992 | 15925.55  |
| NM_00171E | 16177.3   | 12832.552 | AF085997  | 982.51    | 687.675   | AK001230  | 4406.58   | 3615.437  |
| AL080062  | 3165.529  | 2229.425  | NM_005172 | 14128.511 | 8678.032  | NM_01468C | 8531.173  | 4598.369  |
| AF308802  | 2557.737  | 2026.749  | AK025192  | 52237.523 | 29798.195 | NM_005027 | 2789.266  | 2256.422  |
| S76984    | 12926.042 | 14861.215 | NM_012403 | 6986.362  | 3914.466  | NM_004612 | 1308.012  | 1050.592  |
| NM_01449E | 49582.832 | 61769.699 | AK022611  | 7953.701  | 4083.045  | NM_00560E | 21073.117 | 12025.548 |
| NM_00679E | 2488.843  | 1615.34   | NM_004952 | 4857.554  | 2854.919  | NM_012294 | 169.523   | 355.525   |
| NM_015941 | 1161.471  | 826.91    | NM_020414 | 8976.256  | 4987.178  | NM_00110E | 340.017   | 340.431   |
| NM_00365E | 1245.898  | 660.353   | AB037730  | 5098.679  | 3960.72   | NM_01558E | 515.226   | 198.343   |
| NM_014837 | 906.771   | 490.68    | NM_001357 | 17083.936 | 18261.521 | NM_01849C | 2019.807  | 569.919   |
| NM_00525E | 5123.917  | 2466.402  | NM_003893 | 4816.871  | 4470.448  | NM_00477E | 444.225   | 184.391   |
| NM_006174 | 1730.622  | 1083.07   | AB037816  | 3407.347  | 4534.696  | NM_004352 | 192.28    | 107.334   |
| NM_01585C | 7988.624  | 6467.545  | NM_01426E | 1362.025  | 2799.175  | NM_01225E | 369.224   | 195.249   |
| NM_004864 | 1814.686  | 1713.412  | U92026    | 2652.211  | 4115.578  | NM_00724E | 5064.23   | 2577.05   |
| NM_00283E | 5746.469  | 6371.583  | AF086234  | 34720.563 | 52231.918 | NM_00022E | 2782.745  | 2749.616  |
| NM_002487 | 1427.695  | 1157.556  | AF009324  | 6822.18   | 13375.062 | NM_00699E | 20754.02  | 16472.26  |
| NM_01334C | 1519.46   | 911.287   | AF019226  | 569.195   | 734.531   | NM_00312E | 9295.65   | 7351.395  |
| NM_005462 | 1256.328  | 830.253   | AK022112  | 1110.27   | 873.203   | NM_00195E | 3371.791  | 2836.848  |
| NM_01231E | 3475.264  | 3045.638  | AL137480  | 53259.602 | 35321.719 | AB033064  | 3869.378  | 2829.775  |
| AK026235  | 500.945   | 501.901   | AK022182  | 2448.355  | 1159.064  | AK022317  | 7268.228  | 6411.493  |
| NM_00651C | 15218.018 | 13443.499 | D16473    | 3593.99   | 2158.964  | NM_01839E | 7255.243  | 5823.114  |
| NM_003141 | 3578.968  | 4366.101  | AB028968  | 3760.2    | 2484.286  | NM_003124 | 14129.11  | 8714.953  |
| NM_02024E | 6730.773  | 6601.944  | AK001202  | 2252.039  | 1557.961  | NM_00688E | 38778.746 | 24789.215 |
| NM_00717E | 1139.276  | 1351.32   | AF195764  | 61723.645 | 50180.113 | NM_004531 | 3452.782  | 3520.608  |
| NM_019087 | 505.62    | 639.196   | AF055029  | 3219.204  | 2370.245  | AB040920  | 721.606   | 813.06    |
| NM_005072 | 435.402   | 388.336   | AB011542  | 2999.198  | 1690.618  | NM_01572C | 11163.715 | 7977.65   |
| AF215923  | 1028.986  | 541.099   | NM_001853 | 7161.773  | 3320.949  | AB033070  | 364.485   | 492.47    |
| U66621    | 2949.864  | 2234.949  | U41737    | 740.16    | 436.209   | AK000158  | 6216.98   | 5433.286  |
| NM_00572C | 43550.684 | 19727.119 | NM_00579E | 2164.617  | 1373.137  | NM_00576E | 1392.279  | 1355.514  |
| AB040936  | 458.66    | 312.891   | X99661    | 2056.713  | 1522.212  | AK024500  | 17688.771 | 8965.899  |
| U92816    | 13368.631 | 13937.977 | NM_005927 | 3794.963  | 4459.674  | NM_002564 | 18475.316 | 8124.58   |
| NM_00348E | 5985.453  | 3731.438  | AB028983  | 13005.699 | 10678.161 | NM_00096E | 408.31    | 211.705   |
| NM_00503E | 4322.939  | 2545.307  | AB037800  | 4630.572  | 5102.362  | NM_01330E | 4354.97   | 1602.363  |
| M95923    | 4027.626  | 2023.297  | AK026377  | 2597.841  | 3843.973  | AF027302  | 3978.265  | 2008.305  |
| NM_00241E | 54841.199 | 42947.754 | NM_01866C | 5549.066  | 6411.215  | NM_002852 | 3394.884  | 1606.525  |
| NM_006332 | 55295.652 | 51058.461 | NM_003394 | 8396.421  | 14105.448 | NM_001817 | 3976.688  | 1441.628  |
| NM_00200C | 860.079   | 428.809   | NM_006747 | 4669.229  | 7515.009  | NM_01622E | 426.048   | 459.435   |
| NM_00091E | 2780.286  | 2747.266  | NM_00708E | 2343.074  | 4888.765  | NM_000157 | 2612.532  | 1613.79   |
| NM_01866E | 6489.741  | 4873.376  | NM_00387C | 21986.295 | 35174.785 | NM_000712 | 1999.242  | 3156.453  |
| NM_145904 | 26767.635 | 21470.014 | AK024507  | 2887.482  | 4217.459  | NM_01808E | 1662.831  | 1365.643  |
| NM_000182 | 3289.479  | 2022.08   | NM_001243 | 6837.048  | 5196.139  | BC013695  | 6830.674  | 4219.189  |
| AK023384  | 715.975   | 499.418   | AK025997  | 2224.806  | 2149.301  | NM_00720E | 711.516   | 291.902   |
| NM_01602E | 2354.558  | 1596.352  | NM_00554E | 745.588   | 590.921   | AK023035  | 2922.389  | 1688.865  |
| NM_001732 | 402.613   | 425.082   | NM_00029E | 644.279   | 385.387   | NM_01484E | 1820.17   | 1345.07   |
| NM_01869C | 1737.056  | 1193.368  | NM_00547E | 8977.588  | 5185.53   | AB011164  | 3815.002  | 2734.84   |
| NM_00086C | 385.079   | 313.059   | S51112    | 1423.956  | 1064.703  | M24750    | 938.846   | 753.279   |
| AB037798  | 488.14    | 455.363   | NM_014887 | 3259.24   | 2300.164  | NM_00596E | 3038.888  | 2930.267  |
| AF277719  | 1524.005  | 1731.429  | NM_01855E | 20507.328 | 11971.541 | NM_00274C | 3773.389  | 2426.893  |
| NM_000791 | 2681.153  | 2214.301  | NM_00523E | 579.383   | 498.766   | AL117482  | 2982.18   | 2414.672  |
| NM_003681 | 2966.316  | 1758.669  | NM_00560C | 3763.68   | 1612.321  | NM_00654E | 45145.844 | 29035.438 |
| NM_00480C | 6006.398  | 3316.844  | NM_005967 | 20531.967 | 6529.183  | AB018324  | 12117.55  | 7270.343  |
| AB037738  | 642.607   | 480.071   | AB014566  | 6191.673  | 3320.219  | NM_002742 | 49223.133 | 47410.039 |

|           |           |           |           |           |           |            |           |           |
|-----------|-----------|-----------|-----------|-----------|-----------|------------|-----------|-----------|
| S82769    | 584.622   | 567.757   | NM_015678 | 800.142   | 859.6     | Z25431     | 1939.422  | 867.269   |
| NM_014954 | 48272.879 | 30069.166 | AK025950  | 485.775   | 343.701   | NM_005627  | 8326.833  | 4379.816  |
| NM_000807 | 979.013   | 636.029   | NM_014223 | 3825.098  | 3432.163  | M64497     | 335.682   | 363.257   |
| NM_014909 | 3857.021  | 2643.647  | NM_016194 | 1391.151  | 1560.035  | NM_007274  | 14438.514 | 5203.673  |
| X91148    | 1797.075  | 2065.685  | AL050385  | 1449.668  | 2010.036  | NM_003356  | 7751.517  | 2704.107  |
| NM_015700 | 5721.716  | 6139.884  | NM_007027 | 6863.459  | 12727.638 | AF238315   | 424.62    | 481.016   |
| NM_001719 | 5747.782  | 2940.455  | AB037855  | 4440.972  | 7107.929  | NM_006224  | 43084.621 | 23543.736 |
| AL080062  | 728.543   | 502.095   | AK024524  | 9216.798  | 15444.891 | AL137300   | 5023.627  | 2709.656  |
| AF308802  | 633.345   | 323.166   | NM_000562 | 12322.531 | 15172.633 | NM_014648  | 507.753   | 528.775   |
| S76984    | 2272.443  | 1164.891  | NM_020353 | 1202.963  | 1562.26   | NM_019604  | 605.489   | 398.435   |
| NM_014495 | 47967.93  | 56323.234 | NM_019011 | 42403.07  | 28454.156 | NM_005073  | 1047.967  | 727.307   |
| NM_007195 | 1154.839  | 527.508   | NM_004879 | 11782.995 | 9003.457  | NM_000951  | 4154.049  | 4159.131  |
| AK023337  | 4413.516  | 1801.59   | AB020694  | 3766.924  | 2383.841  | X52599     | 4302.584  | 2614.996  |
| NM_013275 | 14566.67  | 8262.36   | NM_016071 | 47200.438 | 26363.018 | AA029300   | 2737.535  | 2337.839  |
| AB037842  | 915.289   | 1089.446  | AL050131  | 2160.659  | 1775.902  | BG708842   | 46109.574 | 51219.387 |
| U92074    | 560.792   | 279.895   | NM_004475 | 25435.869 | 11858.872 | M19723     | 49661.141 | 64999.48  |
| NM_019011 | 2088.313  | 1375.568  | NM_001627 | 5850.005  | 3685.398  | X06256     | 4004.049  | 3258.177  |
| AF459094  | 4336.408  | 2323.043  | NM_002544 | 2031.349  | 1554.928  | AA709271   | 2353.052  | 2432.238  |
| NM_003157 | 3404.592  | 1867.503  | X77690    | 6459.601  | 3035.467  | M34057     | 4010.545  | 3729.222  |
| NM_004938 | 1456.891  | 749.047   | NM_006536 | 2522.969  | 1006.951  | ID 1984668 | 1390.873  | 951.495   |
| NM_014326 | 1487.407  | 816.092   | NM_005658 | 15299.125 | 4229.905  | ID 1832579 | 2675.61   | 2216.372  |
| NM_004448 | 870.036   | 560.594   | NM_002422 | 2408.537  | 1344.404  | H-430185 N | 974.652   | 851.154   |
| NM_015981 | 1580.466  | 780.156   | NM_006690 | 10596.273 | 8380.564  | D16583     | 4293.275  | 2400.461  |
| NM_000455 | 4714.248  | 2887.764  | AF218022  | 5011.284  | 4099.154  | H44051     | 2219.006  | 1596.513  |
| NM_014791 | 5024.735  | 3048.339  | NM_003348 | 4519.773  | 3950.817  | AA481547   | 18359.029 | 6733.653  |
| NM_003318 | 4749.147  | 3258.518  | AL137663  | 325.255   | 1147.319  | AA831880   | 1104.342  | 499.442   |
| NM_004362 | 4943.031  | 4856.362  | AB006198  | 24049.93  | 28150.51  | T64880     | 6701.901  | 2865.166  |
| CY3Cy5    | 6353.359  | 507.516   | U72518    | 7023.426  | 6605.981  | AB028990   | 553.526   | 172.287   |
| NM_004102 | 3028.04   | 3807.171  | AF264765  | 1959.378  | 1436.445  | NM_006708  | 24230.084 | 8481.548  |
| NM_004544 | 5898.819  | 6943.478  | NM_015322 | 4140.337  | 3182.222  | AB037835   | 1515.334  | 799.078   |
| AF052140  | 522.982   | 841.458   | NM_016607 | 14988.978 | 10425.184 | BM468475   | 454.312   | 490.671   |
| NM_018836 | 1045.363  | 1391.55   | NM_003275 | 1176.873  | 739.764   | NM_000318  | 3125.392  | 1834.875  |
| AF007147  | 799.49    | 1313.474  | NM_000268 | 59422.551 | 50665.293 | NM_002060  | 34242.875 | 17241.746 |
| AF052127  | 1681.435  | 2211.6    | M30493    | 57014.723 | 40218.559 | AK001230   | 4426.05   | 4118.713  |
| AK024261  | 581.521   | 761.356   | AJ008160  | 1799.4    | 1057.771  | NM_014680  | 9300.082  | 6002.476  |
| AF052150  | 463.824   | 668.235   | NM_005824 | 2594.729  | 1646.541  | NM_005027  | 3132.087  | 2300.506  |
| AF086481  | 524.78    | 790.506   | AF052211  | 10194.285 | 7495.562  | NM_004612  | 1419.173  | 1136.61   |
| AK021982  | 261.151   | 317.176   | U66561    | 2839.383  | 989.822   | NM_005608  | 24458.922 | 15387.61  |
| AL355689  | 487.566   | 303.536   | NM_000306 | 6514.029  | 2032.19   | NM_012294  | 404.363   | 517.923   |
| AK024885  | 2008.819  | 2043.211  | NM_002200 | 1940.304  | 636.617   | NM_001106  | 468.993   | 403.604   |
| AL080223  | 2789.873  | 2387.007  | AF017433  | 2443.224  | 1292.386  | NM_015583  | 684.14    | 703.885   |
| AK001630  | 5439.255  | 4909.853  | AF130111  | 6845.615  | 3832.445  | NM_018490  | 2597.751  | 2660.833  |
| NM_014612 | 13362.049 | 12262.841 | NM_016307 | 12652.492 | 7779.042  | NM_004778  | 868.496   | 586.073   |
| NM_004102 | 2708.874  | 3056.047  | AB028449  | 6742.602  | 4526.267  | NM_006245  | 2107.044  | 1367.418  |
| NM_004544 | 6064.561  | 5014.9    | NM_004697 | 8156.521  | 9400.931  | NM_004352  | 339.807   | 514.835   |
| SR1       | 62757.105 | 60971.043 | U94384    | 442.926   | 704.666   | NM_012258  | 374.255   | 285.557   |
| SR3       | 27917.646 | 17972.049 | AF131776  | 12590.127 | 11916.375 | NM_005103  | 723.671   | 536.146   |
| SR5       | 3134.395  | 2808.086  | NM_020528 | 14789.916 | 24717.803 | NM_004822  | 2802.172  | 1873.778  |
| SR7       | 3625.341  | 23756.836 | AF239156  | 15573.883 | 18357.852 | AK022349   | 1349.58   | 551.032   |
| SR9       | 13293.459 | 2432.456  | NM_020390 | 8740.338  | 7343.706  | NM_005750  | 506.343   | 467.066   |
| CY3Cy5    | 4527.866  | 376.529   | NM_003321 | 38939.672 | 25285.684 | NM_004973  | 331.206   | 203.019   |
| Z36807    | 31006.951 | 24434.746 | U18937    | 31474.668 | 21275.592 | NM_007245  | 4987.127  | 2124.479  |
| U20896    | 574.287   | 754.921   | U01925    | 1376.339  | 1129.191  | NM_001890  | 694.946   | 299.598   |

|           |           |           |            |           |           |           |           |           |
|-----------|-----------|-----------|------------|-----------|-----------|-----------|-----------|-----------|
| U52836    | 947.458   | 991.399   | AJ420488   | 61529.43  | 58329.668 | NM_00128E | 2796.827  | 1359.753  |
| NM_01793E | 1681.109  | 1916.402  | AF268872   | 4338.42   | 2883.541  | NM_01822E | 1990.879  | 2115.617  |
| AK021837  | 1348.989  | 1597.717  | AK022180   | 61242.875 | 57765.621 | NM_00632E | 7284.177  | 6282.708  |
| AF075112  | 887.96    | 1097.724  | NM_00122E  | 2440.51   | 2103.934  | AY009127  | 14080.604 | 14658.261 |
| AK001796  | 894.344   | 872.403   | NM_00133E  | 3939.21   | 2668.218  | NM_01486E | 4611.46   | 4223.497  |
| AF086152  | 13691.494 | 13088.631 | AB050716   | 1767.505  | 1516.456  | NM_00392E | 256.457   | 138.689   |
| U78519    | 1506.913  | 2079.947  | AF161353   | 35852.727 | 12491.572 | AK000158  | 6789.427  | 6721.871  |
| AK026872  | 1479.251  | 1613.916  | NM_000764  | 13613.739 | 3600.678  | NM_00576E | 1476.386  | 1403.168  |
| AL157505  | 502.416   | 286.328   | NM_00414E  | 48946.105 | 12268.596 | AK024500  | 18843.445 | 13162.867 |
| NM_00719C | 5661.748  | 4684.249  | NM_00300E  | 29927.973 | 9970.464  | NM_002564 | 23328.891 | 17486.268 |
| AF043897  | 1239.161  | 1244.552  | D42047     | 6913.65   | 2999.325  | NM_00096E | 454.228   | 535.522   |
| U79246    | 2439.284  | 2009.748  | AB009282   | 27468.414 | 13094.976 | NM_01330E | 5229.787  | 4433.523  |
| AK022619  | 674.641   | 724.124   | NM_005004  | 52446.023 | 35491.559 | AF027302  | 4072.418  | 4147.366  |
| AK023464  | 630.278   | 797.046   | NM_01463E  | 12484.007 | 8913.143  | NM_00285E | 3488.107  | 3336.982  |
| AK024157  | 467.734   | 440.557   | NM_00639E  | 6003.144  | 5076.521  | NM_001817 | 3918.997  | 2267.223  |
| AK022963  | 369.518   | 509.854   | NM_00282E  | 60654.215 | 57011.527 | AF063611  | 655.756   | 445.66    |
| AK023905  | 2091.607  | 2080.576  | NM_01791E  | 33785.195 | 51908.516 | NM_00603E | 1659.326  | 1009.979  |
| AK024231  | 1907.616  | 2608.74   | NM_00180E  | 45723.98  | 43303.32  | NM_00208E | 610.577   | 357.116   |
| AK022441  | 648.594   | 758.322   | AK022360   | 10782.979 | 9989.272  | NM_01465E | 6312.286  | 2561.014  |
| AK026208  | 2473.139  | 2612.301  | AK095694   | 1631.729  | 1493.135  | NM_00207E | 2428.138  | 1030.329  |
| NM_016947 | 41842.23  | 35835.121 | X52341     | 59589.012 | 52684.645 | X05299    | 2326.902  | 911.873   |
| AY007136  | 1323.232  | 1194.248  | NM_00308E  | 11115.601 | 5908.586  | NM_007274 | 17816.285 | 13908.273 |
| AL359940  | 1652.725  | 1887.564  | AL133632   | 12623.822 | 6026.51   | NM_00335E | 10702.698 | 8336.631  |
| NM_01828E | 754.75    | 981.83    | NM_00434E  | 34317.012 | 15489.342 | AF238315  | 561.379   | 750.654   |
| AF085961  | 388.403   | 488.869   | X52355     | 19089.338 | 10571.043 | NM_006224 | 54664.738 | 49777.367 |
| AK024925  | 13447.227 | 10519.269 | NM_00696E  | 20941.914 | 10057.492 | AL137300  | 5617.493  | 4330.653  |
| AK022039  | 271.922   | 274.6     | NM_000307  | 2111.03   | 1655.324  | NM_00022E | 3442.407  | 3371.264  |
| AL049460  | 4054.632  | 2894.297  | NM_00651C  | 41061.234 | 15323.831 | NM_00699E | 22110.275 | 17216.674 |
| AK022396  | 760.487   | 679.303   | NM_003141  | 15902.604 | 5954.155  | NM_00312E | 9579.165  | 7321.45   |
| AF075113  | 1473.639  | 1438.734  | NM_02024E  | 17525.619 | 5479.064  | NM_00195E | 3775.594  | 2743.125  |
| AF086037  | 340.416   | 422.182   | NM_00717E  | 1080.595  | 549.86    | AB033064  | 4000.987  | 5100.072  |
| AK022892  | 3876.043  | 1981.697  | AB046381   | 800.649   | 454.338   | AK022317  | 8317.649  | 9718.12   |
| AK002162  | 272.936   | 313.307   | AJ011497   | 16017.474 | 7357.317  | NM_01839E | 7482.497  | 8933.826  |
| AK022980  | 524.866   | 628.446   | NM_00301E  | 1242.776  | 761.03    | NM_003124 | 14915.36  | 11993.527 |
| AL359058  | 2224.382  | 3471.865  | NM_00033E  | 4106.338  | 3658.001  | NM_00688E | 45217.48  | 29190.281 |
| AK026237  | 1059.897  | 1531.751  | W61100     | 60596.734 | 65763.531 | NM_004531 | 3600.567  | 3880.868  |
| AK023687  | 1107.855  | 1132.039  | AA608568   | 17501.301 | 14873.899 | AL133581  | 2451.935  | 1966.319  |
| AK002088  | 13353.381 | 12642.008 | BG831301   | 57506.777 | 58714.961 | NM_00255E | 505.525   | 507.659   |
| X98206    | 463.833   | 470.516   | M14764     | 5431      | 8481.471  | NM_005031 | 5361.4    | 4193.116  |
| AK022193  | 572.53    | 686.521   | AA478647   | 14731.005 | 21741.109 | AB040920  | 676.089   | 389.856   |
| AK000106  | 3870.005  | 3780.689  | M35999     | 2996.626  | 4511.717  | NM_00072C | 478.581   | 264.229   |
| AK022370  | 1123.275  | 1503.425  | AW058501   | 4107.661  | 4390.685  | NM_00484E | 450.776   | 319.339   |
| AK026765  | 1082.291  | 764.15    | M81379     | 1560.711  | 1836.231  | AK024639  | 2069.563  | 453.694   |
| AL117530  | 436.48    | 514.928   | ID 262389E | 6437.521  | 5127.418  | NM_01572C | 9415.384  | 4037.287  |
| AL080191  | 2800.458  | 2885.838  | ID 2602214 | 26000.287 | 14481.712 | AB007915  | 369.773   | 232.771   |
| AK021639  | 1028.066  | 1133.735  | ID 2071279 | 14332.626 | 9278.373  | AB033070  | 306.828   | 381.961   |
| AK023189  | 2637.273  | 2573.266  | L10709     | 15307.593 | 7400.431  | AB028990  | 758.102   | 406.16    |
| AF306347  | 699.979   | 504.076   | N35489     | 3516.408  | 2123.164  | NM_00670E | 28865.699 | 16965.09  |
| AF070599  | 556.862   | 591.098   | AA482489   | 882.928   | 733.266   | AB037835  | 1474.334  | 1300.114  |
| NM_00545C | 1437.859  | 1620.665  | AA458922   | 5203.429  | 3081.907  | NM_01622E | 379.348   | 420.888   |
| AK023600  | 576.126   | 555.038   | NM_00416E  | 22025.389 | 13383.232 | NM_000157 | 2838.124  | 2425.689  |
| NM_00552E | 412.366   | 500.939   | NM_00348E  | 13988.45  | 4553.757  | NM_00071E | 289.406   | 509.841   |
| NM_00528E | 3667.732  | 4558.191  | NM_00503E  | 7027.058  | 2297.802  | NM_01808E | 1498.202  | 1310.168  |

|           |           |           |           |           |           |           |           |           |
|-----------|-----------|-----------|-----------|-----------|-----------|-----------|-----------|-----------|
| AK001918  | 601.394   | 744.265   | M95923    | 10816.658 | 3542.973  | BC013695  | 6527.514  | 5205.572  |
| NM_01863E | 25582.119 | 24768.693 | NM_00241E | 63361.203 | 33595.047 | NM_00720E | 670.855   | 535.871   |
| AF086048  | 2281.869  | 3198.725  | NM_00633E | 62760.398 | 49615.5   | AK023035  | 2757.765  | 3452.381  |
| L15616    | 7979.641  | 9205.731  | NM_00200C | 729.404   | 367.661   | NM_01484E | 1627.699  | 1768.58   |
| AB019565  | 7881.016  | 9153.586  | NM_00091E | 8173.049  | 4674.925  | AB011164  | 3597.344  | 3780.96   |
| NM_01694C | 2907.249  | 2477.845  | NM_01866E | 9355.8    | 3611.015  | M24750    | 843.791   | 710.52    |
| AK025757  | 2175.507  | 2166.936  | NM_145904 | 26157.891 | 13496.941 | NM_00596E | 2864.46   | 2202.535  |
| Y16713    | 539.121   | 611.979   | NM_00679E | 23153.865 | 18315.207 | NM_00274C | 3666.749  | 1869.738  |
| L07394    | 6616.193  | 7130.464  | NM_00070E | 2346.917  | 2851.004  | AL117482  | 3255.828  | 1178.438  |
| AK056133  | 1590.871  | 1268.183  | NM_015941 | 6477.375  | 9302.57   | NM_00654E | 37306.605 | 17569.268 |
| NM_01784E | 8584.847  | 7922.794  | NM_00365E | 7953.641  | 9745.349  | AB018324  | 10998.912 | 4402.038  |
| AF130080  | 697.627   | 631.937   | NM_014837 | 10279.996 | 9688.744  | NM_00274E | 47575.262 | 30325.791 |
| AK026006  | 1705.469  | 1606.77   | NM_01772E | 989.775   | 1179.03   | Z25431    | 2200.388  | 833.833   |
| NM_01908E | 5725.212  | 3749.722  | NM_00525E | 46045.84  | 33456.168 | NM_005627 | 8910.098  | 6087.653  |
| AF147440  | 436.131   | 493.174   | NM_00284C | 926.302   | 947.986   | M64497    | 445.539   | 418.576   |
| AL122072  | 2375.414  | 2076.252  | NM_006174 | 3497.193  | 2976.988  | CY3Cy5    | 1832.288  | 143.62    |
| AK026221  | 568.795   | 534.781   | NM_01585C | 29350.963 | 23274.879 | NM_002711 | 1610.758  | 725.873   |
| AK026403  | 2135.234  | 1761.625  | NM_004864 | 2020.797  | 1979.699  | AF143873  | 383.396   | 39.471    |
| U90904    | 6845.893  | 8771.894  | NM_00283E | 10668.79  | 6628.696  | AL355732  | 615.818   | 274.981   |
| AF088053  | 2218.924  | 2712.379  | AK027377  | 1009.735  | 903.797   | NM_01796E | 2045.003  | 1256.274  |
| AL133662  | 694.098   | 671.98    | BF528358  | 1198.401  | 887.683   | AF143327  | 717.675   | 465.286   |
| NM_00256E | 556.54    | 643.516   | NM_01633E | 1434.54   | 1368.813  | AL049991  | 309.736   | 136.079   |
| U90903    | 1216.408  | 1618.066  | AK025111  | 1375.629  | 1283.558  | AL049990  | 768.6     | 601.114   |
| AF278760  | 1517.304  | 1620.473  | NM_00173E | 5213.355  | 3726.367  | AF131843  | 578.024   | 321.715   |
| X58061    | 408.851   | 717.72    | NM_01869C | 13356.358 | 9902.313  | AK026653  | 419.955   | 281.957   |
| AB032954  | 3204.574  | 3905.559  | NM_00086C | 2306.149  | 1925.04   | NM_020231 | 681.65    | 787.98    |
| NM_00600E | 15694.075 | 16929.055 | AB037798  | 3224.679  | 928.51    | AF075008  | 1332.253  | 934.826   |
| AL110197  | 529.048   | 484.685   | NM_00078C | 808.973   | 274.395   | NM_006504 | 947.166   | 831.072   |
| AF085995  | 991.701   | 925.365   | AF272663  | 32411.875 | 9434.835  | NM_002711 | 1106.576  | 673.104   |
| NM_01763E | 2136.967  | 1809.366  | NM_01219C | 4452.535  | 1303.038  | SR1       | 58580.215 | 34597.621 |
| AK026655  | 1649.674  | 1712.658  | AB033015  | 930.915   | 598.488   | SR3       | 18031.805 | 11044.115 |
| S41522    | 396.329   | 505.133   | AF277719  | 637.166   | 544.026   | SR5       | 2033.116  | 1724.644  |
| NM_00527E | 523.122   | 285.873   | NM_000791 | 5246.289  | 3353.485  | SR7       | 1917.473  | 12666.596 |
| AF129926  | 2321.963  | 1707.756  | NM_003681 | 5697.959  | 3997.07   | SR9       | 4175.924  | 548.989   |
| AK025822  | 2420.43   | 2609.582  | NM_01490E | 22937.496 | 23825.836 | CY3Cy5    | 1894.249  | 177.361   |
| AL360140  | 726.026   | 468.664   | NM_01570C | 7104.72   | 6861.293  | L38282    | 1427.313  | 709.684   |
| AF201937  | 23622.508 | 15512.148 | U66621    | 25740.699 | 23789.043 | NM_01805E | 1115.205  | 491.439   |
| AL390128  | 2727.809  | 1960.964  | NM_00572C | 59922.992 | 55275.766 | NM_01900E | 1462.551  | 751.291   |
| AL157429  | 6604.512  | 6104.487  | AB040936  | 1525.719  | 1668.598  | M20838    | 485.488   | 228.979   |
| NM_012071 | 9559.132  | 8011.034  | AB023161  | 738.645   | 501.002   | AK022738  | 487.347   | 323.822   |
| AF055018  | 3904.497  | 2782.963  | U61736    | 2433.373  | 2055.563  | AK023505  | 1228.653  | 833.095   |
| NM_001777 | 17984.998 | 19076.736 | AJ132086  | 4167.632  | 3250.189  | AB037851  | 4094.085  | 3281.702  |
| U79457    | 7413.766  | 8717.886  | U92816    | 39579.953 | 27113.838 | AL050389  | 3657.813  | 2693.336  |
| AB037832  | 2475.1    | 2801.516  | NM_00410E | 2240.841  | 2719.63   | AK024684  | 736.214   | 569.47    |
| NM_014347 | 8242.033  | 9431.814  | S76984    | 14085.957 | 7764.392  | NM_01494E | 10516.496 | 6409.798  |
| NM_00129E | 10309.012 | 11065.491 | NM_01449E | 56122.453 | 52594.078 | AK001546  | 692.777   | 611.585   |
| NM_004344 | 9198.713  | 12980.009 | NM_014081 | 3092.357  | 1428.403  | NM_006537 | 3252.434  | 3182.312  |
| AF085972  | 559.985   | 802.46    | NM_005651 | 3748.497  | 1607.627  | AF007155  | 10498.826 | 9048.218  |
| NM_000757 | 786.344   | 805.587   | AK023699  | 1665.073  | 409.06    | AK023055  | 306.981   | 406.137   |
| AB046786  | 867.135   | 963.731   | NM_00719E | 1908.161  | 1336.424  | AL049282  | 1771.5    | 1535.35   |
| NM_01662C | 33073.977 | 28669.303 | AK023337  | 14015.925 | 5760.938  | AK021443  | 1655.485  | 1164.945  |
| D16914    | 49958.16  | 62454.563 | NM_01327E | 36104.352 | 11607.249 | AF070569  | 413.166   | 618.713   |
| AA084879  | 1180.651  | 1077.804  | AB037842  | 1310.313  | 481.445   | NM_02023E | 1158.198  | 1091.711  |

|           |           |           |            |           |           |           |           |           |
|-----------|-----------|-----------|------------|-----------|-----------|-----------|-----------|-----------|
| NM_000833 | 1582.742  | 1197.3    | NM_019011  | 3236.546  | 2286.889  | AK024315  | 9188.252  | 4906.167  |
| NM_000283 | 3206.475  | 2679.967  | AF459094   | 6861.104  | 5578.583  | AK024945  | 1390.636  | 746.719   |
| NM_012460 | 2849.915  | 2426.668  | NM_003157  | 8786.573  | 7154.296  | AK024579  | 1391.992  | 802.257   |
| X64980    | 324.729   | 245.508   | NM_004938  | 1926.056  | 2801.255  | AL133118  | 3087.42   | 2217.427  |
| NM_012118 | 2272.792  | 1907.362  | NM_014326  | 3534.414  | 2954.125  | AK023571  | 3314.721  | 2939.466  |
| AK001133  | 283.817   | 303.937   | NM_004448  | 1851.006  | 1741.613  | NM_001702 | 1697.253  | 1481.355  |
| AK024092  | 1504.849  | 1146.323  | NM_015981  | 5095.792  | 4335.406  | AK026657  | 1023.937  | 960.923   |
| AK022226  | 313.324   | 314.062   | NM_000455  | 8840.957  | 6109.773  | AL833558  | 356.584   | 194.26    |
| AK002044  | 4803.293  | 3982.568  | NM_014791  | 11585.863 | 8959.961  | AF087991  | 13580.367 | 10994.023 |
| AK021967  | 350.27    | 257.226   | NM_003318  | 9021.815  | 5497.805  | Y12839    | 395.813   | 421.614   |
| AK022206  | 551.608   | 488.623   | NM_004362  | 11999.795 | 9171.3    | X64979    | 495.317   | 318.688   |
| BC032460  | 5050.956  | 5530.168  | NM_000182  | 20124.215 | 11756.813 | AJ001876  | 329.712   | 380.053   |
| NM_014071 | 1553.762  | 1493.87   | AK023384   | 5505.811  | 4040.602  | AJ227884  | 1259.916  | 1402.507  |
| AK024404  | 348.303   | 442.381   | NM_016026  | 17910.352 | 19582.076 | X64986    | 5249.619  | 4812.36   |
| NM_006329 | 570.73    | 773.482   | NM_020245  | 11625.518 | 5735.108  | Y10510    | 679.547   | 534.618   |
| AB032369  | 316.93    | 466.703   | NM_007175  | 1274.659  | 1389.428  | AK000842  | 4775.96   | 3040.171  |
| NM_005166 | 679.442   | 871.067   | AB046381   | 1196.025  | 2072.974  | AK023386  | 9540.36   | 4668.219  |
| NM_000213 | 13571.276 | 13323.171 | AJ011497   | 14562.404 | 22401.785 | NM_007053 | 10461.892 | 6319.173  |
| BE906107  | 6817.782  | 9122.425  | NM_003018  | 1382.419  | 2145.68   | AK022153  | 1368.987  | 950.999   |
| NM_015516 | 1728.169  | 1814.285  | NM_000336  | 4448.481  | 8217.113  | AK022789  | 793.555   | 551.628   |
| AB033065  | 1006.816  | 1000.54   | W61100     | 58478.492 | 61225.063 | AK023756  | 335.722   | 122.896   |
| NM_005211 | 517.407   | 503.952   | AA608568   | 17193.152 | 22152.078 | AK002095  | 649.006   | 598.954   |
| NM_004857 | 9068.6    | 8034.5    | M14764     | 4795.213  | 2530.132  | AK000821  | 5479.668  | 4715.657  |
| NM_012108 | 6004.606  | 5650.564  | AA478647   | 13790.023 | 3399.35   | AK024526  | 5511.651  | 4960.4    |
| NM_003253 | 1082.047  | 837.215   | M35999     | 4238.839  | 2368.15   | AK000848  | 513.734   | 638.301   |
| NM_013285 | 5101.133  | 3499.794  | AW058501   | 4253.139  | 3014.258  | AK023307  | 285.374   | 291.442   |
| NM_002872 | 13499.08  | 10299.354 | M81379     | 1376.36   | 1415.714  | NM_017618 | 1177.58   | 848.053   |
| NM_000490 | 837.931   | 859.157   | ID 2623896 | 6682.823  | 5873.536  | NM_017848 | 353.068   | 226.505   |
| AJ225028  | 358.4     | 291.351   | ID 2602214 | 19427.266 | 12736.951 | NM_019056 | 4164.565  | 2053.822  |
| NM_004839 | 1020.667  | 612.258   | ID 2071279 | 13623.074 | 9832.938  | AF279783  | 2717.966  | 1129.221  |
| NM_012193 | 2467.642  | 1938.484  | L10709     | 14896.657 | 8998.172  | AF182422  | 7641.866  | 3433.618  |
| NM_003405 | 9561.323  | 6188.071  | N35489     | 3845.031  | 2418.162  | NM_016943 | 412.081   | 112.661   |
| NM_004720 | 5299.736  | 4211.915  | AA482489   | 562.942   | 450.758   | AF070602  | 798.794   | 367.724   |
| NM_001057 | 1759.825  | 1310.961  | AA458922   | 5047.719  | 2744.115  | BE393290  | 933.521   | 599.221   |
| NM_004524 | 3180.536  | 4143.843  | NM_001719  | 26854.943 | 15613.099 | NM_017622 | 810.32    | 442.678   |
| NM_006315 | 4715.143  | 4801.951  | AL080062   | 3652.106  | 2524.944  | AF133331  | 3277.678  | 2123.35   |
| NM_018401 | 1479.749  | 1544.108  | AF308802   | 5174.238  | 6880.516  | AK022289  | 2122.623  | 1552.942  |
| NM_005163 | 3998.916  | 5650.259  | M95923     | 9099.96   | 12802.763 | AF161403  | 12797.215 | 11213.637 |
| NM_007273 | 43018.73  | 59548.398 | NM_002415  | 58245.586 | 64181.953 | S75708    | 5551.14   | 4789.114  |
| BE894943  | 950.038   | 1476.227  | NM_006332  | 60710.133 | 63787.563 | U79291    | 3712.237  | 3964.354  |
| AF085994  | 287.252   | 385.469   | NM_002000  | 735.833   | 997.075   | D17172    | 15548.523 | 22406.834 |
| NM_016422 | 2842.725  | 4750.478  | NM_000916  | 7458.839  | 13873.483 | AJ227859  | 1169.228  | 1266.564  |
| NM_017878 | 5421.04   | 6132.584  | NM_018663  | 11719.383 | 15841.209 | NM_018544 | 716.583   | 714.897   |
| NM_004494 | 40571.957 | 51320.414 | NM_145904  | 28443.736 | 48704.563 | L10141    | 6855.396  | 5658.2    |
| AL049687  | 435.855   | 506.319   | NM_000706  | 4618.977  | 3022.659  | AB020699  | 2245.961  | 2579.088  |
| NM_005643 | 6063.231  | 7208.916  | NM_015941  | 13709.049 | 4801.698  | AF086269  | 1060.372  | 1382.823  |
| NM_003592 | 7117.474  | 6003.305  | NM_003655  | 6874.534  | 1739.464  | U90437    | 2034.436  | 1214.759  |
| NM_014953 | 4816.112  | 2757.059  | NM_014837  | 7782.145  | 4219.229  | D17169    | 27464.938 | 12972.841 |
| AF179995  | 983.106   | 860.038   | NM_017729  | 1716.433  | 1208.691  | NM_017924 | 2387.562  | 1073.099  |
| NM_002099 | 453.393   | 155.542   | NM_005259  | 45393.332 | 38675.109 | S81578    | 485.721   | 230.097   |
| NM_016195 | 3072.544  | 1443.911  | NM_002840  | 910.126   | 904.029   | NM_017546 | 3660.499  | 2112.352  |
| NM_004523 | 2663.431  | 1915.449  | NM_006174  | 2655.369  | 2630.567  | AL137400  | 390.327   | 162.662   |
| NM_004404 | 10039.807 | 9545.882  | NM_015850  | 23229.43  | 21295.904 | NM_006511 | 690.251   | 742.763   |

|           |           |           |           |           |           |           |           |           |
|-----------|-----------|-----------|-----------|-----------|-----------|-----------|-----------|-----------|
| NM_00296C | 5586.233  | 4244.637  | NM_004864 | 1921.608  | 2025.935  | AF007142  | 784.519   | 497.448   |
| AB046788  | 834.809   | 914.648   | NM_00283E | 10404.336 | 7896.036  | AF119853  | 1826.213  | 1431.478  |
| NM_00679C | 1354.327  | 1215.295  | AK027377  | 893.093   | 667.358   | AF279782  | 207.383   | 175.622   |
| AL117522  | 15719.378 | 12168.175 | BF528358  | 1175.941  | 884.967   | NM_00112E | 2869.015  | 2571.816  |
| AB011541  | 1070.071  | 736.798   | NM_01633E | 1478.479  | 1296.562  | AK023673  | 1437.258  | 2833.526  |
| NM_01910E | 467.87    | 674.267   | NM_00651C | 45311.098 | 38921.805 | NM_01825E | 1025.899  | 3908.735  |
| NM_019061 | 6220.891  | 7087.288  | NM_003141 | 18707.75  | 21503.938 | NM_01800C | 46116.777 | 55695.121 |
| AB033007  | 2133.808  | 2441.615  | NM_01869C | 12959.86  | 23170.975 | AF164963  | 441.24    | 689.751   |
| NM_003781 | 543.798   | 746.012   | NM_00086C | 3138.491  | 5498.438  | AF124366  | 21741.496 | 18372.172 |
| NM_001304 | 833.954   | 791.968   | AB037798  | 3995.574  | 7275.535  | AF130112  | 984.339   | 1011.635  |
| NM_00313C | 2868.931  | 4162.297  | NM_00078C | 859.751   | 1868.464  | NM_000551 | 3008.668  | 2507.72   |
| NM_00471E | 31665.438 | 31896.859 | AF272663  | 28062.482 | 50264.762 | AL365518  | 494.205   | 424.27    |
| D29810    | 2393.441  | 3025.248  | NM_01219C | 5562.181  | 10847.612 | AF086257  | 2584.584  | 2658.307  |
| NM_00012E | 1759.28   | 1980.11   | AB033015  | 340.993   | 1251.168  | AC119751  | 340.807   | 296.874   |
| AB002384  | 4971.334  | 3905.469  | AF277719  | 971.654   | 2373.687  | U00928    | 848.316   | 818.153   |
| NM_018437 | 761.469   | 699.861   | NM_000791 | 4867.273  | 8891.125  | AK002114  | 1723.114  | 939.996   |
| NM_00042E | 1113.52   | 671.777   | NM_003681 | 6353.938  | 11936.398 | AL390184  | 641.342   | 478.834   |
| AK023164  | 1676.697  | 1637.444  | NM_01490E | 18721.828 | 5815.048  | NM_01869E | 1365.237  | 1081.196  |
| NM_00537E | 1473.443  | 1082.634  | NM_01570C | 6447.103  | 2894.755  | NM_01804E | 323.304   | 92.086    |
| AK027121  | 11060.563 | 8045.052  | U66621    | 24540.158 | 20887.592 | AK026318  | 866.333   | 505.199   |
| NM_01743E | 2380.715  | 1941.175  | NM_00572C | 57236.934 | 57079.332 | AF291673  | 806.865   | 648.841   |
| AL117661  | 3124.735  | 2364.409  | AB040936  | 1540.985  | 1839.447  | NM_00436E | 9637.295  | 7117.509  |
| X64643    | 1982.66   | 1114.327  | U61736    | 2011.931  | 2445.287  | NM_01635E | 3608.273  | 2911.374  |
| NM_00538C | 16214.602 | 13119.686 | AJ132086  | 2924.415  | 2739.496  | AJ296290  | 1989.183  | 1578.801  |
| NM_005561 | 7603.273  | 5630.755  | U92816    | 41535.859 | 28177.08  | NM_02018E | 3354.109  | 3293.468  |
| AF272381  | 12726.766 | 8218.007  | NM_00410E | 1692.477  | 1328.422  | NM_01802E | 495.115   | 539.774   |
| NM_00151E | 11362.485 | 11052.686 | NM_00348E | 17817.928 | 13418.216 | AL389954  | 539.094   | 646.869   |
| NM_00341E | 16048.222 | 16596.811 | NM_00503E | 7210.857  | 7203.108  | NM_01985E | 2448.011  | 4879.142  |
| NM_01833E | 923.141   | 1056.013  | NM_014081 | 3537.108  | 5607.858  | NM_00611E | 4495.797  | 15102.212 |
| AK022668  | 2892.198  | 3039.54   | NM_005651 | 1955.763  | 3676.254  | AK02622E  | 12968.104 | 20786.367 |
| AW975132  | 2165.789  | 2083.45   | NM_00719E | 2225.677  | 4648.827  | AL050032  | 5934.58   | 8671.961  |
| NM_006051 | 3207.603  | 3854.503  | AK023337  | 10316.999 | 15151.39  | AF009304  | 444.819   | 547.048   |
| NM_018427 | 4834.184  | 6080.299  | NM_01327E | 29562.324 | 43145.918 | AF086177  | 5765.637  | 6106.705  |
| AB037814  | 431.524   | 451.054   | AB037842  | 1382.271  | 2254.535  | NM_01894E | 1901.129  | 2439.689  |
| NM_01466E | 1479.226  | 2017.605  | U92074    | 550.48    | 1423.984  | Z36847    | 303.364   | 316.505   |
| AF007217  | 1362.022  | 990.155   | NM_019011 | 3709.863  | 7736.588  | D17187    | 1100.155  | 1455.357  |
| AB037753  | 5338.73   | 5067.027  | AF459094  | 7691.915  | 17427.432 | AJ243672  | 682.418   | 937.367   |
| NM_004674 | 2607.909  | 2675.02   | NM_003157 | 7799.256  | 5681.403  | AL122087  | 384.174   | 339.129   |
| AB037801  | 3679.101  | 3003.6    | NM_00493E | 1955.391  | 1260.157  | NM_014767 | 430.208   | 157.056   |
| AL080159  | 17459.111 | 15114.016 | NM_01432E | 2345.145  | 2802.744  | Y17867    | 1701.435  | 887.837   |
| NM_01782E | 36685.375 | 30617.906 | NM_00444E | 1584.067  | 1359.75   | M92642    | 757.335   | 403.826   |
| U55185    | 1809.343  | 1419.457  | NM_015981 | 4107.708  | 4288.419  | NM_018071 | 2729.949  | 1531.075  |
| U30828    | 14377.479 | 11304.438 | NM_00045E | 7788.85   | 7020.862  | NM_00433E | 2141.998  | 1313.192  |
| AF085886  | 41684.242 | 34270.227 | NM_014791 | 11059.56  | 9813.113  | M31520    | 51069.141 | 56737.129 |
| AK023828  | 8735.731  | 5953.721  | NM_00331E | 7945.605  | 5935.704  | NM_00202C | 10001.098 | 7130.717  |
| NM_00657E | 15539.322 | 11646.66  | NM_00436E | 13669.493 | 10834.439 | AL050137  | 1845.712  | 1375.4    |
| NM_004784 | 486.024   | 341.315   | NM_00018E | 19115.215 | 12964.463 | AK024423  | 2934.88   | 2716.287  |
| AK021815  | 1071.892  | 1186.552  | AK023384  | 4537.645  | 3405.765  | NM_00504E | 29300.668 | 20170.215 |
| NM_00154E | 1931.805  | 2170.483  | NM_01602E | 14847.452 | 10260.742 | NM_00597E | 8284.201  | 7700.423  |
| NM_016641 | 6270.267  | 6860.898  | AK025111  | 1163.97   | 1202.087  | NM_00628E | 4512.389  | 5084.338  |
| AB018010  | 1294.708  | 1341.754  | NM_00173E | 5842.332  | 6164.001  | NM_020321 | 490.728   | 880.937   |
| NM_01461C | 9315.182  | 11375.258 | AB046381  | 1202.272  | 2570.864  | NM_00082E | 167.919   | 364.693   |
| NM_004737 | 477.004   | 500.318   | AJ011497  | 14348.912 | 23132.848 | NM_01592C | 26808.238 | 31341.67  |

|           |           |           |            |           |           |           |           |           |
|-----------|-----------|-----------|------------|-----------|-----------|-----------|-----------|-----------|
| NM_000689 | 1050.365  | 1349.819  | NM_003018  | 1376.713  | 2827.448  | AB011113  | 2016.893  | 2968.954  |
| NM_006621 | 2845.641  | 4153.525  | NM_000336  | 3832.994  | 6356.896  | NM_004115 | 518.101   | 887.549   |
| BF347398  | 5909.016  | 8126.443  | W61100     | 58118.953 | 61142.707 | NM_018287 | 632.561   | 864.346   |
| AK026762  | 2794.686  | 3092.438  | AA608568   | 17500.213 | 24599.906 | NM_001955 | 1872.994  | 2109.777  |
| AF078844  | 270.018   | 280.579   | BG831301   | 53155.117 | 57637.984 | AF016004  | 2061.046  | 3605.606  |
| NM_004412 | 950.889   | 905.172   | M14764     | 4523.364  | 6735.487  | NM_003567 | 4139.862  | 4272.692  |
| L48516    | 3425.556  | 2705.592  | AA478647   | 13866.33  | 21130.072 | NM_007315 | 511.61    | 306.326   |
| NM_016648 | 6615.81   | 6085.138  | M35999     | 2647.323  | 5276.29   | L20686    | 2236.203  | 2088.486  |
| AF083930  | 2173.827  | 2059.184  | AW058501   | 3548.232  | 5792.4    | NM_000304 | 334.791   | 365.641   |
| AB040907  | 356.876   | 230.003   | M81379     | 2004.678  | 2970.05   | AK023362  | 586.942   | 550.416   |
| NM_005986 | 381.07    | 270.303   | ID 2623896 | 6535.567  | 6563.796  | NM_002460 | 578.138   | 400.373   |
| NM_003426 | 383.666   | 382.042   | ID 2602214 | 17822.033 | 17348.625 | NM_002675 | 2582.522  | 1377.343  |
| NM_014862 | 1412.285  | 1170.868  | ID 2071279 | 14758.836 | 15577.552 | NM_012432 | 31944.625 | 15234.403 |
| AK027159  | 1139.985  | 609.198   | L10709     | 14322.554 | 12874.051 | NM_005007 | 5126.295  | 3211.421  |
| AF060169  | 458.328   | 364.27    | N35489     | 3484.723  | 3735.691  | AK024996  | 2174.586  | 1223.921  |
| NM_005269 | 591.673   | 553.522   | AI928195   | 397.555   | 564.447   | NM_001258 | 243.54    | 238.042   |
| D70835    | 37836.316 | 21909.633 | AA482489   | 780.187   | 858.855   | NM_004417 | 341.892   | 256.99    |
| NM_002697 | 5821.941  | 4575.557  | AA458922   | 4416.34   | 4730.317  | NM_012290 | 4155.233  | 3353.833  |
| NM_002448 | 774.012   | 732.528   | NM_001719  | 24665.65  | 18629.195 | NM_002431 | 2114.356  | 1295.59   |
| AF053952  | 21952.922 | 23221.189 | AL080062   | 2783.494  | 2370.912  | NM_001827 | 31956.852 | 20236.869 |
| NM_003213 | 6965.486  | 8885.573  | AF308802   | 3743.605  | 2443.744  | NM_020466 | 5368.725  | 4640.589  |
| BF184738  | 659.142   | 1225.525  | S76984     | 12401.075 | 9263.478  | AL079280  | 347.818   | 360.444   |
| NM_014044 | 2470.482  | 3438.516  | NM_014495  | 52124.598 | 56503.957 | NM_002853 | 2911.135  | 4484.539  |
| NM_000900 | 2759.257  | 4839.975  | NM_006796  | 21275.641 | 40202.047 | NM_003174 | 1295.489  | 2304.495  |
| AK023684  | 5537.71   | 9298.833  | NM_014837  | 5878.542  | 10324.012 | NM_012307 | 11944.904 | 15030.743 |
| NM_000232 | 1667.78   | 2512.455  | NM_017729  | 1224.808  | 2345.998  | NM_002540 | 939.965   | 1360.725  |
| J05070    | 1166.809  | 1026.664  | NM_005259  | 22621.123 | 35627.031 | NM_006371 | 1741.492  | 2002.831  |
| AA700390  | 3447.588  | 4804.819  | NM_002840  | 781.237   | 1814.302  | NM_018834 | 673.766   | 1004.807  |
| Y18474    | 983.059   | 1372.598  | NM_006174  | 2866.741  | 5341.839  | AK026882  | 1338.898  | 1989.672  |
| AA436163  | 1867.936  | 2264.336  | NM_015850  | 24014.193 | 42825.371 | NM_004574 | 1223.11   | 1458.259  |
| BI907981  | 2705.952  | 3126.748  | NM_004864  | 2012.294  | 5071.463  | NM_004848 | 3748.135  | 4683.749  |
| BI603841  | 7268.879  | 6039.939  | NM_002838  | 9083.158  | 16770.998 | NM_001944 | 267.757   | 254.183   |
| M19888    | 1718.988  | 1489.244  | NM_014686  | 53777.418 | 57938.168 | NM_014813 | 303.8     | 308.007   |
| Y08136    | 1475.466  | 1122.524  | BF528358   | 1193.303  | 1955.464  | AF014459  | 1778.051  | 2430.96   |
| AA156863  | 8400.84   | 7257.09   | NM_016339  | 1374.853  | 2615.032  | M64108    | 744.001   | 846.656   |
| BI915199  | 1094.038  | 845.884   | NM_002487  | 5696.073  | 10686.104 | NM_001503 | 2805.26   | 1900.809  |
| R82957    | 40149.277 | 38598.152 | NM_013340  | 3639.333  | 5179.65   | NM_006302 | 2104.588  | 1471.864  |
| BI830442  | 2355.44   | 1686.406  | NM_005462  | 3339.669  | 4506.358  | AJ224875  | 2398.368  | 1354.225  |
| AI218732  | 1806.435  | 1776.883  | NM_012319  | 5924.302  | 10591.826 | NM_002149 | 1611.679  | 831.755   |
| AF079098  | 1363.864  | 1299.918  | NM_006510  | 42475.059 | 51391.691 | AF043324  | 3663.773  | 2274.899  |
| AK023448  | 2009.219  | 1908.851  | NM_003141  | 13699.858 | 13608.985 | AK024172  | 1387.128  | 843.33    |
| Y18213    | 6523.178  | 5792.812  | NM_020245  | 16216.346 | 13508.034 | NM_014814 | 3467.16   | 2676.182  |
| NM_003283 | 5387.194  | 5659.604  | NM_007175  | 1319.604  | 1943.456  | NM_002797 | 19258.881 | 14576.726 |
| AF249898  | 6343.357  | 6756.195  | U66621     | 22701.051 | 35434.598 | AK024318  | 845.991   | 935.719   |
| M69181    | 8426.992  | 10294.318 | NM_005720  | 54718.645 | 62756.137 | NM_016129 | 3415.476  | 3630.676  |
| AK027224  | 397.133   | 276.326   | AB040936   | 1162.732  | 2504.374  | NM_002809 | 6323.979  | 6345.617  |
| L09078    | 549.064   | 812.169   | AB023161   | 460.008   | 1073.369  | NM_017912 | 10396.543 | 14143.747 |
| NM_002652 | 615.928   | 655.14    | U61736     | 1808.11   | 4004.769  | NM_000423 | 6641.8    | 18698.471 |
| NM_001311 | 10730.746 | 10935.029 | AJ132086   | 3298.763  | 5455.373  | AB046838  | 3606.668  | 6185.076  |
| NM_017798 | 8251.998  | 8488.864  | U92816     | 35731.449 | 30345.969 | AK026339  | 247.467   | 452.702   |
| NM_000354 | 243.668   | 210.964   | NM_004106  | 2203.505  | 3761.399  | X98411    | 1158.37   | 1502.002  |
| NM_012410 | 2740.666  | 2442.185  | NM_003485  | 16807.158 | 24859.625 | AF116658  | 14803.926 | 16830.771 |
| NM_001111 | 9781.24   | 9794.235  | NM_005038  | 8473.956  | 13434.45  | NM_014865 | 8715.428  | 10619.029 |



|           |           |           |           |           |           |           |           |           |
|-----------|-----------|-----------|-----------|-----------|-----------|-----------|-----------|-----------|
| NM_018049 | 9365.77   | 8240.593  | M95923    | 13292.315 | 14699.725 | AB032977  | 6742.277  | 8076.588  |
| AJ133439  | 842.038   | 612.947   | NM_002415 | 57542.004 | 60759.254 | AK001725  | 529.373   | 1039.417  |
| NM_014395 | 3156.906  | 2364.905  | NM_006332 | 57349.145 | 59456.621 | NM_003036 | 1315.077  | 1276.891  |
| NM_001561 | 935.254   | 646.055   | NM_002000 | 1026      | 1483.562  | NM_020529 | 7512.378  | 7406.514  |
| NM_005160 | 3511      | 2244.047  | NM_000916 | 8805.493  | 12387.315 | S72604    | 20184.613 | 17275.996 |
| NM_000596 | 742.588   | 456.857   | NM_018663 | 11902.293 | 12223.387 | NM_017984 | 378.978   | 340.431   |
| X78817    | 32061.773 | 24579.045 | NM_145904 | 29593.891 | 40259.758 | AF038951  | 8426.655  | 3599.848  |
| AB023135  | 1562.955  | 1128.469  | NM_016026 | 12500.098 | 25821.75  | NM_006492 | 1053.616  | 571.956   |
| AY009401  | 960.702   | 584.797   | NM_000860 | 3050.073  | 5561.827  | AK021811  | 899.732   | 474.516   |
| AF294628  | 874.121   | 719.954   | AB037798  | 3774.684  | 6954.662  | NM_003428 | 2022.295  | 1056.781  |
| NM_004152 | 266.633   | 256.653   | NM_000780 | 488.696   | 1963.24   | AF055030  | 1908.771  | 1015.288  |
| BU565263  | 35997.75  | 76690.875 | AF272663  | 32322.566 | 55653.484 | AK000589  | 2074.109  | 897.471   |
| NM_005028 | 3965.988  | 8246.336  | NM_012190 | 4575.159  | 9115.828  | X53281    | 15986.878 | 11131.821 |
| NM_001611 | 634.322   | 1193.838  | AB033015  | 359.507   | 1170.734  | BC012782  | 2213.2    | 1422.461  |
| M59979    | 1278.607  | 1289.179  | AF277719  | 895.016   | 1261.726  | AF132026  | 45729.453 | 38340.941 |
| AB018310  | 942.466   | 1882.073  | NM_000791 | 4367.042  | 6489.395  | AL050353  | 1007.429  | 1349.779  |
| NM_020133 | 903.91    | 1374.531  | NM_003681 | 5977.318  | 7644.621  | AB037788  | 6763.069  | 8995.411  |
| NM_015379 | 18417.195 | 21646.857 | NM_004800 | 12823.171 | 19596.596 | NM_004587 | 7325.937  | 7071.612  |
| NM_004878 | 419.466   | 574.929   | S82769    | 5408.884  | 7697.842  | NM_000975 | 51785.438 | 67856.984 |
| NM_015057 | 660.357   | 492.037   | NM_004677 | 1152.806  | 2164.959  | AF147412  | 31496.822 | 25651.115 |
| AF303398  | 9109.694  | 7674.364  | NM_014954 | 57547.063 | 63914.59  | AK024570  | 9614.419  | 10120.565 |
| NM_014810 | 2078.662  | 1052.984  | NM_000807 | 1352.099  | 2104.113  | AF161401  | 9634.879  | 11344.403 |
| NM_004738 | 3623.895  | 2077.091  | NM_014909 | 22147.473 | 26445.566 | NM_000990 | 12968.186 | 12313.494 |
| NM_007357 | 4624.451  | 3542.43   | X91148    | 4259.982  | 5779.611  | NM_014740 | 3802.08   | 4823.519  |
| NM_003763 | 6045.431  | 4697.637  | NM_015700 | 8173.598  | 11075.289 | NM_015956 | 10368.743 | 10156.833 |
| AB046836  | 1111.247  | 1698.577  | NM_005651 | 1692.996  | 4420.001  | AK024601  | 6463.94   | 6536.887  |
| NM_017816 | 7588.658  | 10109.454 | NM_005418 | 315.852   | 1268.802  | S68069    | 2081.06   | 1949.028  |
| AJ224166  | 4373.779  | 4193.237  | NM_007195 | 2041.24   | 5129.194  | AB011095  | 2095.487  | 2493.763  |
| AK026098  | 5251.493  | 8937.172  | AK023337  | 12218.938 | 23406.793 | NM_002488 | 13516.573 | 6852.223  |
| NM_012381 | 2056.111  | 2781.896  | NM_013275 | 32835.602 | 32239.957 | NM_004003 | 12042.485 | 6989.948  |
| M20702    | 784.214   | 959.094   | AB037842  | 1006.243  | 1077.653  | NM_000188 | 1711.452  | 941.465   |
| NM_006397 | 25285.408 | 30689.57  | U92074    | 768.416   | 797.404   | BF244401  | 5170.629  | 2877.262  |
| D83776    | 2413.683  | 3454.997  | NM_019011 | 4141.587  | 6493.422  | NM_004718 | 32036.594 | 14497.156 |
| NM_004088 | 6125.271  | 9906.192  | AF459094  | 8373.176  | 13283.091 | AL359585  | 4329.544  | 2503.266  |
| NM_002180 | 1550.396  | 2524.423  | NM_003157 | 7680.019  | 11305.315 | AB046850  | 4451.012  | 3360.12   |
| NM_000138 | 4296.075  | 5954.594  | NM_004938 | 2134.116  | 4244.27   | NM_014801 | 3075.797  | 2409.555  |
| NM_018163 | 2133.231  | 2066.217  | NM_014326 | 2694.263  | 4366.022  | NM_003642 | 4261.916  | 3920.816  |
| AK026362  | 4626.105  | 4199.767  | NM_004448 | 1515.225  | 3221.972  | AB027013  | 6700.717  | 7376.892  |
| NM_004968 | 3438.251  | 4247.342  | NM_015981 | 4974.89   | 7158.301  | BC032686  | 359.137   | 702.366   |
| NM_005908 | 3397.983  | 2798.817  | NM_000455 | 10168.095 | 12661.363 | BF185480  | 2219.108  | 2999.696  |
| NM_004785 | 4947.445  | 3873.115  | NM_014791 | 12630.66  | 16408.898 | NM_002128 | 21178.5   | 19619.803 |
| AK024079  | 667.028   | 708.103   | NM_003318 | 9330.492  | 11460.22  | NM_007105 | 294.863   | 736.964   |
| NM_002428 | 3134.683  | 2223.062  | NM_004362 | 14581.275 | 18361.758 | NM_003074 | 5273.591  | 4597.659  |
| NM_014674 | 3843.655  | 3488.93   | CY3Cy5    | 12112.79  | 512.523   | AL360195  | 7973.399  | 11503.258 |
| NM_018271 | 1090.292  | 1214.194  | NM_004102 | 10570.512 | 11131.244 | U14383    | 676.745   | 1396.103  |
| NM_000547 | 499.821   | 281.891   | AF007147  | 1229.496  | 1607.631  | NM_017810 | 1099.611  | 1235.694  |
| NM_014652 | 1175.758  | 706.631   | AF052127  | 6993.665  | 7520.476  | NM_003181 | 54217.059 | 70072.414 |
| AL133020  | 4784.723  | 3429.168  | AK024261  | 1261.203  | 1338.221  | NM_004451 | 3410.506  | 6019.946  |
| NM_003213 | 6916.178  | 12963.878 | AF052150  | 943.59    | 1530.24   | NM_004364 | 913.533   | 767.227   |
| BF184738  | 795.639   | 1356.761  | AF086481  | 804.135   | 1267.978  | NM_020395 | 1721.843  | 1890.729  |
| NM_014044 | 2703.337  | 3011.393  | AK024885  | 2811.854  | 2264.07   | NM_003425 | 1228.056  | 1181.727  |
| NM_000900 | 3012.473  | 4261.65   | AL080223  | 4832.373  | 4050.281  | NM_013388 | 3882.837  | 4802.848  |
| AK023684  | 5476.364  | 9534.359  | AK001630  | 8856.181  | 6372.201  | AK026232  | 4561.928  | 3250.132  |

|           |           |           |           |           |           |           |           |           |
|-----------|-----------|-----------|-----------|-----------|-----------|-----------|-----------|-----------|
| NM_000232 | 1443.825  | 2964.173  | NM_014612 | 59076.023 | 39957.883 | NM_014892 | 4599.066  | 2657.4    |
| J05070    | 1255.593  | 1279.481  | NM_004102 | 10212.706 | 5473.299  | AK023827  | 3966.469  | 2941.676  |
| AA700390  | 3455.9    | 6403.617  | NM_004544 | 9033.201  | 4881.185  | NM_001117 | 483.332   | 95.689    |
| Y18474    | 1145.223  | 1701.934  | SR7       | 6318.382  | 24479.992 | L07517    | 1512.294  | 1308.494  |
| AA436163  | 1836.244  | 2724.285  | SR9       | 20469.789 | 2510.283  | AK022451  | 11841.535 | 9350.691  |
| BI907981  | 2892.914  | 3609.55   | CY3Cy5    | 11116.907 | 418.202   | NM_014352 | 44883.109 | 66438.805 |
| BI603841  | 6777.28   | 6318.648  | Z36836    | 639.605   | 1501.087  | BM918441  | 5144.71   | 5793.766  |
| M19888    | 1585.735  | 1712.853  | NM_017932 | 3734.683  | 4686.85   | AA425102  | 196.152   | 215.016   |
| Y08136    | 1353.49   | 1209.112  | AK021837  | 6075.627  | 6416.137  | AA878880  | 256.393   | 265.276   |
| AA156863  | 8561.28   | 6320.108  | AF075112  | 1320.337  | 1692.863  | AA150828  | 3026.943  | 4236.036  |
| BI915199  | 1181.985  | 958.45    | AK001796  | 1437.492  | 1426.764  | H90764    | 1006.062  | 2091.431  |
| R82957    | 43939.246 | 41948.426 | AF086152  | 60588.203 | 48195.754 | AI859208  | 777.403   | 1846.349  |
| BI830442  | 2238.044  | 1826.276  | U78519    | 3054.948  | 2537.487  | H64379    | 10928.377 | 14228.099 |
| AI218732  | 1857.665  | 1515.183  | AK026872  | 5975.567  | 3737.103  | BE208258  | 40381.84  | 35960.246 |
| NM_018892 | 29548.949 | 18872.465 | AF043897  | 1867.898  | 1435.069  | T72202    | 1034.885  | 1676.303  |
| NM_016204 | 7514.18   | 6262.27   | U79246    | 2751.042  | 2211.227  | BI831922  | 1530.67   | 1935.755  |
| NM_003283 | 5168.934  | 6037.006  | AK022619  | 948.982   | 1082.289  | M69238    | 2173.747  | 2932.816  |
| AF249898  | 6348.48   | 6170.103  | AK023464  | 1721.41   | 1718.208  | AA664180  | 1017.573  | 1713.057  |
| M69181    | 8774.533  | 7324.15   | AK023563  | 137.815   | 2407.485  | M80244    | 212.431   | 239.218   |
| AK027224  | 289.613   | 272.467   | AK023905  | 19881.172 | 47087.691 | AA599158  | 10173.305 | 12143.794 |
| L09078    | 670.908   | 1095.554  | AK024231  | 9230.631  | 15193.989 | NM_000692 | 4304.399  | 5262.786  |
| NM_002652 | 556.426   | 744.219   | AK022441  | 2635.131  | 3041.607  | L08240    | 1284.382  | 766.832   |
| NM_001311 | 11472.2   | 11974.2   | AK026208  | 3275.654  | 5316.725  | NM_017952 | 1504.721  | 1015.124  |
| NM_017792 | 8285.774  | 10373.271 | NM_016947 | 62385.543 | 59423.281 | NM_002942 | 1833.521  | 1088.362  |
| NM_000354 | 196.35    | 253.997   | AY007136  | 1692.479  | 1033.301  | NM_016081 | 10484.902 | 7859.455  |
| NM_012412 | 2767.374  | 3244.651  | AL359940  | 3834.217  | 3042.468  | NM_006382 | 2836.549  | 1739.943  |
| NM_001111 | 10006.02  | 10444.787 | NM_018282 | 1673.455  | 1385.253  | M30818    | 1090.618  | 999.706   |
| NM_018042 | 9604.861  | 9325.215  | AK022892  | 13488.435 | 4630.821  | NM_000162 | 536.434   | 426.079   |
| AJ133439  | 823.437   | 573.676   | AK022980  | 1079.195  | 755.437   | NM_005752 | 3097.434  | 2342.87   |
| NM_014392 | 3158.25   | 2649.78   | AL359058  | 2907.065  | 3148.589  | NM_003322 | 43168.965 | 36767.391 |
| NM_001561 | 943.419   | 631.191   | AK026237  | 4918.335  | 8774.863  | NM_003292 | 44419.074 | 59684.574 |
| NM_005162 | 3515.71   | 2523.868  | AK023687  | 3889.855  | 7690.096  | NM_014332 | 43655.695 | 65110.641 |
| NM_000592 | 713.193   | 402.486   | AK002088  | 40824.199 | 50318.598 | NM_007034 | 693.814   | 865.904   |
| X78817    | 31485.879 | 23105.215 | X98206    | 1516.794  | 1798.334  | NM_001562 | 631.326   | 889.385   |
| AB023135  | 1464.203  | 1341.062  | AK022193  | 693.34    | 1591.968  | NM_001782 | 44198.074 | 43474.895 |
| AY009401  | 868.771   | 808.097   | AK000106  | 5075.749  | 8738.374  | J03171    | 3115.847  | 4268.319  |
| AF294628  | 834.635   | 751.265   | AK022370  | 1736.833  | 3015.4    | NM_005852 | 837.396   | 1338.818  |
| NM_002442 | 704.455   | 603.738   | AK026765  | 2244.281  | 1681.74   | NM_004322 | 36659.879 | 32502.512 |
| AF053952  | 21469.129 | 15773.947 | AK025016  | 543.5     | 297.85    | NM_002312 | 282.626   | 354.228   |
| BU565263  | 41984.438 | 78674.852 | AL080191  | 14339.6   | 10597.282 | NM_007214 | 6229.21   | 4324.572  |
| NM_005022 | 3959.172  | 5161.916  | AF306347  | 2688.995  | 2672.941  | NM_000311 | 7949.845  | 4008.585  |
| NM_001611 | 861.844   | 795.857   | AF070599  | 2767.052  | 2639.341  | NM_017902 | 1784.45   | 1034.159  |
| M59979    | 1221.844  | 840.56    | NM_005452 | 5382.868  | 3800.656  | NM_006332 | 9024.67   | 5964.985  |
| AB018310  | 1063.111  | 1410.409  | AK023600  | 2953.436  | 1645.552  | NM_000782 | 2837.587  | 1536.738  |
| NM_020132 | 873.122   | 784.512   | NM_005522 | 1033.219  | 2259.944  | NM_017731 | 393.121   | 462.387   |
| NM_015372 | 18140.193 | 22511.199 | NM_005282 | 14004.858 | 28473.445 | AB040891  | 1977.703  | 2028.775  |
| NM_004872 | 313.789   | 537.052   | AK001918  | 1542.237  | 2951.075  | AB037780  | 367.594   | 339.311   |
| NM_015057 | 624.364   | 648.479   | NM_018632 | 58372.434 | 61088.078 | AK025616  | 387.368   | 731.494   |
| AF303398  | 10043.093 | 7556.418  | NM_016942 | 4344.328  | 3133.35   | NM_007252 | 1653.649  | 2435.555  |
| NM_014812 | 2042.286  | 1649.972  | AK025757  | 4485.443  | 3794.426  | NM_001042 | 14498.751 | 18486.916 |
| NM_004732 | 3894.439  | 3043.67   | Y16713    | 987.636   | 874.026   | NM_005697 | 15364.608 | 16506.039 |
| NM_007357 | 4285.979  | 4125.021  | AL122072  | 7544.36   | 5587.947  | NM_003092 | 3124.387  | 3837.579  |
| NM_003762 | 6294.675  | 5791.487  | AK026221  | 951.18    | 972.094   | NM_004781 | 1387.416  | 1588.216  |

|           |           |           |           |           |           |           |           |           |
|-----------|-----------|-----------|-----------|-----------|-----------|-----------|-----------|-----------|
| AK023448  | 2720.455  | 1625.117  | AK026403  | 3517.773  | 2668.74   | NM_018303 | 1277.453  | 1519.962  |
| Y18213    | 7173.648  | 3628.163  | U90904    | 11942.263 | 9131.327  | NM_003897 | 2801.077  | 1701.903  |
| NM_01781E | 8148.091  | 9267.127  | AF088053  | 3788.142  | 2663.549  | NM_01416E | 16362.679 | 10921.396 |
| AJ224166  | 4114.793  | 3685.935  | AL133662  | 3337.562  | 3140.803  | AL442085  | 4339.923  | 3487.984  |
| AK026098  | 4858.642  | 5286.808  | NM_00256E | 963.594   | 731.465   | NM_013313 | 2575.472  | 2358.691  |
| NM_012381 | 2045.864  | 1975.883  | U90903    | 1886.925  | 3733.614  | NM_01473E | 5157.869  | 4281.555  |
| M20702    | 737.138   | 796.893   | AB032954  | 9160.021  | 10942.072 | AK023886  | 1703.742  | 1925.225  |
| NM_006397 | 21005.428 | 16440.223 | AK026655  | 3115.745  | 3013.463  | NM_00255E | 2640.292  | 3384.737  |
| D83776    | 2247.233  | 3125.84   | NM_00527E | 1878.324  | 1867.881  | AJ404615  | 2170.008  | 1927.495  |
| NM_00408E | 6118.396  | 10901.271 | AL157429  | 29685.563 | 22515.326 | NM_01605E | 20358.775 | 19900.598 |
| NM_00218C | 1544.426  | 3285.626  | NM_012071 | 18171.691 | 12285.179 | AB007869  | 2889.054  | 4636.146  |
| NM_00013E | 3815.47   | 7253.577  | AF055018  | 16581.596 | 11494.084 | AB046844  | 891.572   | 1378.42   |
| NM_018163 | 2070.238  | 2567.735  | NM_001777 | 31949.961 | 22035.852 | NM_000302 | 1717.818  | 2378.15   |
| AK026362  | 4378.954  | 4300.097  | U79457    | 11039.3   | 6288.774  | NM_01323E | 37108.18  | 31757.527 |
| NM_00496E | 2763.396  | 3549.129  | AB037832  | 5334.988  | 2924.979  | NM_01601E | 4825.217  | 5129.254  |
| NM_00590E | 3412.322  | 3831.992  | NM_014347 | 23644.107 | 15763.78  | NM_02012C | 595.716   | 850.107   |
| NM_00478E | 5097.23   | 5079.673  | NM_00129E | 20112.336 | 27123.516 | AK022900  | 688.231   | 823.76    |
| AK024079  | 687.531   | 316.719   | NM_004344 | 19316.465 | 31803.551 | AB023216  | 409.768   | 594.315   |
| NM_00242E | 3090.643  | 2100.242  | D16914    | 65994.453 | 69612.531 | AK023827  | 4151.549  | 3132.266  |
| NM_014674 | 3783.279  | 3198.399  | NM_000833 | 3684.174  | 3590.833  | NM_001117 | 426.837   | 200.48    |
| NM_018271 | 992.233   | 1002.494  | X64980    | 458.884   | 872.859   | NM_000231 | 312.984   | 101.375   |
| NM_000547 | 427.698   | 359.254   | NM_012118 | 5120.287  | 5739.321  | L07517    | 1553.798  | 1148.656  |
| NM_014652 | 1050.615  | 658.02    | AK024092  | 3103.01   | 3272.004  | AK022451  | 13019.109 | 8806.389  |
| AL133020  | 4495.532  | 3565.883  | AK026285  | 574.839   | 477.494   | NM_01435E | 50901.871 | 67597.805 |
| NM_004152 | 395.527   | 148.389   | AK002044  | 8140.941  | 4756.493  | BM918441  | 5219.843  | 5069.572  |
| NM_014044 | 2233.975  | 2872.177  | AK022206  | 1235.211  | 816.676   | AA425102  | 203.976   | 238.904   |
| NM_00090C | 2625.839  | 3575.49   | BC032460  | 8480.192  | 5949.272  | AA150828  | 3054.779  | 3797.392  |
| AK023684  | 5404.916  | 8960.135  | NM_014071 | 4365.905  | 2609.265  | H90764    | 968.283   | 1593.614  |
| NM_000232 | 1405.22   | 1364.479  | AB032369  | 558.418   | 969.409   | AI859208  | 565.294   | 751.476   |
| J05070    | 1122.162  | 727.398   | BE906107  | 23171.65  | 23737.193 | H64379    | 11251.884 | 12590.969 |
| AA700390  | 3212.078  | 3149.558  | NM_01551E | 7512.822  | 6898.204  | BE208258  | 42320.723 | 37483.215 |
| Y18474    | 1061.656  | 1218.997  | AB033065  | 1726.077  | 1550.02   | T72202    | 1235.761  | 1732.129  |
| AA436163  | 1721.37   | 2542.755  | NM_005211 | 2295.295  | 2949.282  | BI831922  | 1585.026  | 1407.797  |
| BI907981  | 3265.052  | 4190.512  | NM_004857 | 40862.977 | 39976.738 | M69238    | 1344.886  | 1616.7    |
| BI603841  | 7447.836  | 8504.486  | NM_003253 | 3522.858  | 6677.878  | AA664180  | 640.24    | 586.523   |
| M19888    | 1732.074  | 1924.415  | NM_01328E | 9697.846  | 10305.941 | M80244    | 342.824   | 377.873   |
| Y08136    | 1129.621  | 1466.735  | NM_002872 | 19595.908 | 19681.381 | AA599158  | 9853.078  | 11051.589 |
| AA156863  | 8388.353  | 7922.49   | NM_00049C | 3195.635  | 3069.536  | BE294756  | 1359.341  | 1994.847  |
| BI915199  | 1081.255  | 745.11    | AJ225028  | 945.153   | 985.437   | AK026092  | 4436.26   | 5512.482  |
| R82957    | 40588.453 | 32643.824 | NM_00483E | 4128.906  | 3559.182  | NM_00294C | 2048.228  | 1363.071  |
| BI830442  | 2268.199  | 1751.271  | NM_012193 | 9586.829  | 5598.387  | NM_016081 | 12564.565 | 8248.014  |
| AI218732  | 1777.409  | 1424.899  | NM_00340E | 23243.156 | 10958.105 | NM_00638E | 3073.19   | 2645.46   |
| NM_01889C | 28007.461 | 17832.445 | NM_00472C | 9716.851  | 6225.487  | M30818    | 1175.971  | 784.867   |
| NM_016204 | 7513.159  | 5735.757  | NM_001057 | 2432.217  | 1798.737  | NM_00016E | 546.083   | 472.212   |
| AB046836  | 1535.335  | 828.153   | NM_004524 | 5033.93   | 4015.295  | NM_00575E | 3088.566  | 2436.699  |
| NM_001311 | 10834.345 | 9614.843  | NM_00631E | 9172.254  | 5871.588  | NM_00332E | 41808.051 | 31708.404 |
| NM_01779E | 8133.983  | 8638.926  | NM_018401 | 2292.459  | 1669.015  | NM_00329E | 40646.016 | 58106.992 |
| NM_000354 | 239.327   | 229.973   | NM_005163 | 7402.53   | 4578.843  | NM_01433C | 39328.191 | 45429.668 |
| NM_01241C | 2614.322  | 2069.897  | NM_007273 | 58772.75  | 60074.484 | NM_007034 | 768.28    | 820.74    |
| NM_001111 | 9633.514  | 8044.088  | BE894943  | 3273.408  | 4103.117  | NM_005261 | 208.78    | 246.045   |
| NM_01804E | 9010.485  | 8358.941  | NM_016422 | 5323.503  | 6431.399  | NM_00156C | 640.115   | 982.127   |
| AJ133439  | 883.145   | 579.799   | NM_01787E | 19867.957 | 16421.816 | NM_00178E | 42875.176 | 45508.117 |
| NM_01439E | 3057.814  | 4676.365  | NM_004494 | 62205.559 | 59179     | J03171    | 2811.958  | 3009.982  |

|           |           |           |           |           |           |           |           |           |
|-----------|-----------|-----------|-----------|-----------|-----------|-----------|-----------|-----------|
| NM_001561 | 876.219   | 1147.921  | AL049687  | 701.656   | 680.583   | NM_00585E | 638.579   | 667.819   |
| NM_00516C | 3515.977  | 4241.125  | NM_005643 | 15889.326 | 12305.639 | NM_004323 | 33370.293 | 28005.861 |
| NM_00059E | 620.399   | 801.316   | NM_003592 | 19020.965 | 13318.56  | NM_00231C | 629.281   | 988.482   |
| X78817    | 36721.531 | 38912.16  | NM_014953 | 13866.837 | 10814.793 | NM_005312 | 1789.993  | 2237.687  |
| AB023135  | 1398.78   | 1454.26   | AF179995  | 1608.034  | 1815.655  | NM_00421C | 5876.774  | 6687.492  |
| AY009401  | 670.528   | 607.42    | NM_016195 | 5982.405  | 3811.419  | NM_02014C | 867.086   | 1347.505  |
| AF294628  | 770.922   | 762.884   | NM_004523 | 4629.95   | 4428.169  | AK026232  | 4050.705  | 5250.771  |
| AK026960  | 528.377   | 283.761   | NM_004404 | 18769.6   | 16033.247 | NM_014892 | 2672.336  | 2993.639  |
| NM_001991 | 2332.583  | 2302.679  | NM_00296C | 15604.021 | 11891.34  | NM_01790E | 1918.44   | 1065.743  |
| NM_017852 | 418.352   | 272.432   | AB046788  | 948.415   | 852.726   | NM_00633E | 9367.026  | 6039.015  |
| NM_000193 | 7131.371  | 6429.331  | NM_00679C | 4791.822  | 3463.754  | NM_00078E | 2869.413  | 1568.901  |
| BC014586  | 1162.009  | 1184.925  | AL117522  | 48695.637 | 45047.613 | NM_017731 | 533.879   | 391.482   |
| NM_00244E | 686.959   | 489.371   | AB011541  | 1842.337  | 1638.176  | AB040891  | 1984.33   | 1806.799  |
| AF053952  | 21442.135 | 17218.416 | NM_019061 | 13073.849 | 9615.703  | AK025616  | 451.296   | 424.037   |
| NM_003213 | 7697.692  | 6046.362  | AB033007  | 6269.732  | 4122.447  | NM_00725E | 1628.841  | 2210.414  |
| BF184738  | 871.056   | 860.603   | NM_003781 | 787.281   | 942.898   | NM_00104E | 18645.27  | 20782.871 |
| NM_015057 | 597.079   | 1354.069  | NM_001304 | 1055.859  | 1696.081  | NM_005697 | 15803.351 | 17893.443 |
| AF303398  | 8762.077  | 11592.494 | NM_000504 | 714.392   | 744.225   | NM_00309E | 3085.396  | 4053.208  |
| NM_01481C | 1903.294  | 2010.391  | NM_00313C | 4903.279  | 4108.733  | NM_004781 | 1359.322  | 1576.506  |
| NM_00473E | 3331.991  | 4327.205  | NM_00471E | 60083.109 | 52999.051 | NM_018303 | 1143.599  | 1549.666  |
| NM_007357 | 3859.231  | 5226.62   | D29810    | 5428.409  | 4611.633  | NM_01475E | 6587.88   | 8825.393  |
| NM_003763 | 5494.877  | 5854.402  | NM_00012E | 10323.811 | 12977.637 | NM_005124 | 1344.707  | 1867.266  |
| AK023448  | 2335.405  | 1279.623  | AB002384  | 9403.84   | 9823.966  | AK000947  | 2062.884  | 2532.405  |
| Y18213    | 6512.894  | 4229.127  | NM_018437 | 3124.446  | 3298.115  | L08240    | 954.267   | 1078.845  |
| NM_003283 | 5494.376  | 4636.017  | NM_000422 | 2905.97   | 2374.047  | NM_017952 | 980.153   | 1576.312  |
| AF249898  | 7067.683  | 4252.912  | AK023164  | 3095.82   | 3132.848  | NM_01416E | 15683.758 | 9965.05   |
| M69181    | 9419.06   | 5371.951  | NM_005379 | 7370.375  | 6097.929  | AL442085  | 4340.532  | 3084.978  |
| AK027224  | 301.278   | 212.389   | AK027121  | 21938.16  | 18993.707 | NM_013313 | 2713.908  | 2488.245  |
| L09078    | 533.599   | 316.899   | NM_017433 | 9812.192  | 9399.1    | NM_01473E | 4522.219  | 3262.476  |
| NM_002652 | 586.613   | 359.614   | AL117661  | 5754.656  | 7063.88   | AK023886  | 1442.709  | 1427.33   |
| NM_000547 | 437.692   | 568.329   | X64643    | 2912.26   | 2044.203  | NM_002553 | 2542.782  | 2299.073  |
| NM_014652 | 946.828   | 1015.439  | NM_00538C | 27295.125 | 18661.094 | AJ404615  | 1811.718  | 1896.625  |
| AL133020  | 4347.244  | 5004.412  | NM_005561 | 17064.625 | 12676.523 | NM_016053 | 18769.33  | 18329.768 |
| BC001123  | 243.418   | 165.709   | AF272381  | 23233.092 | 16146.191 | AB007869  | 2841.895  | 3742.79   |
| NM_004152 | 521.861   | 351.802   | NM_00151E | 18082.121 | 11787.423 | AB046844  | 1014.961  | 1979.455  |
| BU565263  | 42335.473 | 77658.219 | NM_003412 | 56402.871 | 43802.434 | NM_000302 | 1717.568  | 2063.706  |
| NM_00502E | 5267.704  | 24289.895 | NM_01833E | 1513.668  | 748.405   | NM_01323E | 37006.547 | 31227.824 |
| NM_001611 | 944.954   | 2481.961  | AK022668  | 5893.178  | 3526.321  | NM_01601E | 5374.96   | 6669.198  |
| M59979    | 1099.671  | 1633.703  | AW975132  | 5948.759  | 6843.641  | NM_02012C | 827.752   | 997.064   |
| AB018310  | 1118.929  | 1435.035  | NM_006051 | 12262.852 | 25098.121 | AK022900  | 798.811   | 823.75    |
| NM_020133 | 743.846   | 933.945   | NM_014663 | 1338.044  | 1137.733  | NM_001125 | 234.593   | 124.789   |
| NM_01537E | 16921.998 | 16321.949 | AF007217  | 2768.924  | 1460.959  | AB023216  | 418.224   | 320.042   |
| NM_00487E | 391.055   | 469.256   | AB037753  | 5800.556  | 4613.396  | NM_00226E | 42778.02  | 35454.168 |
| AF144638  | 40846.508 | 54876.785 | NM_004674 | 4299.044  | 5616.992  | NM_01440C | 4675.215  | 6337.497  |
| BF028822  | 386.654   | 510.659   | AB037801  | 7002.45   | 8114.873  | AL157492  | 851.682   | 1286.104  |
| NM_005502 | 522.645   | 422.017   | AL080159  | 46469.164 | 44549.664 | AL353957  | 2179.307  | 2203.781  |
| NM_000742 | 1500.053  | 882.901   | NM_017823 | 54102.516 | 49711.77  | NM_007214 | 4429.084  | 5058.68   |
| NM_00235E | 9579.236  | 6602.475  | U55185    | 2697.141  | 2627.597  | NM_000311 | 6795.451  | 8701.379  |
| AK026608  | 2609.408  | 1685.201  | U30828    | 21390.061 | 20422.514 | L07517    | 1620.485  | 1132.613  |
| NM_01889C | 33049.488 | 55449.797 | AF085886  | 60765.492 | 59910.043 | AK022451  | 14087.417 | 8799.953  |
| NM_016204 | 5175.677  | 6711.796  | AK023828  | 32467.48  | 25699.508 | NM_01435E | 48678.031 | 58626.703 |
| AB046836  | 1026.673  | 1039.579  | NM_006572 | 24378.723 | 21548.813 | BM918441  | 5668.015  | 4544.215  |
| NM_01781E | 7487.544  | 7228.644  | AK021815  | 1863.315  | 1905.785  | AA425102  | 336.685   | 144.205   |

|           |           |           |           |           |           |           |           |           |
|-----------|-----------|-----------|-----------|-----------|-----------|-----------|-----------|-----------|
| AJ224166  | 4135.346  | 2913.597  | NM_001543 | 3701.661  | 3785.211  | AA878880  | 332.977   | 270.209   |
| AK026098  | 4618.735  | 10201.599 | NM_016641 | 10582.878 | 6918.58   | AA150828  | 2732.241  | 2774.812  |
| NM_012381 | 2017.558  | 3544.241  | AB018010  | 3980.262  | 2376.007  | H90764    | 968.922   | 1544.807  |
| M20702    | 576.837   | 1152.581  | NM_014610 | 21468.814 | 23383.699 | AI859208  | 535.521   | 660.486   |
| NM_006397 | 19081.643 | 21621.918 | NM_004737 | 1165.057  | 2115.719  | H64379    | 12160.076 | 14744.386 |
| D83776    | 2148.342  | 2349.396  | NM_006621 | 6554.068  | 12736.958 | BE208258  | 41794.785 | 44096.051 |
| NM_00408E | 6025.049  | 7397.209  | BF347398  | 26961.434 | 19073.555 | T72202    | 1364.901  | 1802.614  |
| NM_002180 | 1676.333  | 2300.057  | AK026762  | 5929.859  | 4597.079  | BI831922  | 1553.946  | 1907.192  |
| NM_00013E | 3948.756  | 4491.124  | AF078844  | 1530.003  | 1080.637  | M69238    | 2586.474  | 2970.532  |
| NM_018163 | 2978.849  | 2458.724  | NM_004412 | 2443.532  | 2193.219  | AA664180  | 716.062   | 848.405   |
| AK026362  | 4364.05   | 3526.819  | L48516    | 5409.224  | 6210.804  | AA599158  | 10545.996 | 12920.761 |
| NM_00496E | 2976.402  | 3363.069  | NM_01664E | 12474.501 | 13593.105 | BE294756  | 872.408   | 1410.281  |
| NM_00590E | 3298.057  | 3256.302  | AF083930  | 3795.54   | 3400.647  | AK026092  | 5929      | 8347.213  |
| NM_00478E | 5008.682  | 3592.752  | AB040907  | 1287.547  | 990.614   | AK001175  | 1178.364  | 1204.553  |
| AK024079  | 998.049   | 871.903   | NM_00342E | 1196.818  | 1491.377  | NM_003897 | 2247.116  | 2890.771  |
| NM_00242E | 2960.97   | 2107.885  | NM_014862 | 2640.577  | 2404.481  | NM_00329E | 39271.77  | 39118.176 |
| NM_014674 | 3718.661  | 2717.565  | AK027159  | 1617.965  | 1301.434  | NM_014330 | 40260.172 | 33491.762 |
| NM_018271 | 1150.113  | 719.894   | NM_00526E | 1240.912  | 1316.929  | NM_007034 | 746.516   | 442.901   |
| CY3Cy5    | 1554.99   | 155.213   | D70835    | 63326.73  | 48545.195 | NM_001560 | 764.899   | 782.614   |
| NM_020967 | 1676.055  | 1228.242  | NM_002697 | 7878.759  | 6096.513  | NM_001783 | 40072.422 | 37464.484 |
| NM_001071 | 10581.678 | 14187.017 | NM_00244E | 1222.739  | 1542.752  | J03171    | 2902.231  | 3909.707  |
| AF086181  | 382.926   | 324.633   | AF053952  | 50634.633 | 41957.957 | NM_00585E | 1014.843  | 1732.345  |
| AK021540  | 541.079   | 670.317   | NM_003213 | 19993.473 | 15347.297 | NM_004323 | 34736.289 | 42664.82  |
| D86985    | 265.338   | 318.952   | BF184738  | 3181.094  | 2865.547  | NM_002310 | 399.642   | 796.963   |
| AK022258  | 1729.21   | 1996.642  | NM_014044 | 7675.593  | 7372.507  | NM_005312 | 2151.702  | 2712.572  |
| AF088043  | 366.129   | 273.583   | NM_000900 | 8254.826  | 10666.786 | NM_001711 | 1675.681  | 2928.06   |
| AF131799  | 1015.342  | 1041.357  | AK023684  | 11619.323 | 20107.004 | NM_004210 | 8471.31   | 10811.452 |
| AK000455  | 1483.211  | 1522.945  | NM_000232 | 5273.907  | 6783.939  | NM_020140 | 1377.127  | 2717.556  |
| NM_005230 | 459.937   | 571.233   | J05070    | 1901.464  | 1107.36   | NM_00149E | 7599.106  | 9891.833  |
| AK023719  | 3920.72   | 4194.589  | AA700390  | 4318.132  | 3760.922  | NM_001962 | 724.677   | 1311.413  |
| AK025590  | 3013.568  | 3685.341  | Y18474    | 2315.169  | 2104.684  | NM_002500 | 4316.934  | 5609.62   |
| AY007149  | 1470.196  | 1958.833  | AA436163  | 3952.161  | 4552.139  | AK026232  | 4341.82   | 5966.114  |
| NM_020967 | 1457.827  | 1443.186  | BI907981  | 16101.814 | 16946.672 | AK023827  | 3912.489  | 6678.748  |
| NM_001071 | 10755.987 | 13643.5   | BI603841  | 23546.627 | 24214.814 | NM_001117 | 358.486   | 521.511   |
| SR2       | 42188.012 | 38290.918 | BG696638  | 2733.731  | 4674.755  | NM_00033E | 293.68    | 158.434   |
| SR4       | 10802.566 | 14151.291 | M19888    | 4090.949  | 3271.879  | AF283645  | 5103.741  | 2825.315  |
| SR6       | 1533.939  | 2048.577  | Y08136    | 3234.344  | 2853.396  | NM_01657E | 3557.844  | 2713.137  |
| SR8       | 5954.813  | 21796.965 | AA156863  | 29150.49  | 28605.338 | NM_018557 | 299.563   | 314.028   |
| SR10      | 18954.707 | 9832.354  | BI915199  | 1771.442  | 1622.204  | NM_00104E | 15579.856 | 11742.196 |
| CY3Cy5    | 1673.847  | 212.313   | R82957    | 60140.324 | 59199.746 | NM_005697 | 16896.824 | 15262.773 |
| AL157484  | 5549.46   | 4973.592  | BI830442  | 13925.431 | 12730.44  | NM_00309E | 3625.685  | 3505.849  |
| AK024850  | 647.563   | 416.489   | AI218732  | 2709.792  | 3469.067  | NM_004781 | 1732.692  | 2561.824  |
| Y09836    | 1327.343  | 1233.86   | Y18213    | 13896.688 | 10206.19  | NM_018303 | 1318.458  | 2964.458  |
| AL137597  | 2734.052  | 3222.158  | NM_003283 | 5068.156  | 3337.985  | NM_01475E | 7387.086  | 20914.148 |
| AK022144  | 292.47    | 338.267   | AF249898  | 10889.577 | 6325.438  | NM_005124 | 1604.833  | 2338.937  |
| AF086044  | 609.258   | 721.702   | M69181    | 25568.732 | 16022.448 | AK000947  | 3144.269  | 5280.185  |
| NM_01492E | 471.336   | 773.56    | L09078    | 1072.112  | 1461.924  | L08240    | 1383.87   | 1666.001  |
| AF131790  | 583.216   | 376.88    | NM_001311 | 25292.76  | 14657.681 | NM_017952 | 1370.004  | 1786.24   |
| NM_01207E | 1906.955  | 2320.22   | NM_01779E | 16210.545 | 12483.524 | NM_002940 | 1360.432  | 1614.228  |
| AB004851  | 627.991   | 699.818   | NM_012410 | 8052.773  | 9963.298  | NM_016081 | 11043.948 | 16013.557 |
| NM_013381 | 367.553   | 385.847   | NM_001111 | 27763.121 | 34614.707 | NM_00638E | 1661.574  | 2567.076  |
| AK023911  | 2404.859  | 2519.261  | NM_01804E | 17818.057 | 14366.204 | M30818    | 1073.364  | 1455.235  |
| NM_001283 | 7076.073  | 6427.783  | AJ133439  | 5330.795  | 4736.124  | NM_00575E | 1737.121  | 2060.416  |

|           |           |           |           |           |           |           |           |           |
|-----------|-----------|-----------|-----------|-----------|-----------|-----------|-----------|-----------|
| AL110237  | 600.39    | 766.657   | NM_014395 | 6583.182  | 5911.639  | NM_003325 | 41266.566 | 46871.777 |
| D87470    | 1663.886  | 1541.651  | NM_001561 | 3256.006  | 3772.496  | NM_014400 | 5252.634  | 3221.111  |
| AF147307  | 4536.358  | 5370.228  | NM_005160 | 6531.404  | 6707.63   | AL157492  | 1153.28   | 730.641   |
| AK001829  | 829       | 1017.272  | NM_000596 | 2068.424  | 2532.049  | AL353957  | 2389.7    | 1435.726  |
| NM_016525 | 3703.764  | 4505.556  | X78817    | 59401.98  | 65967.031 | NM_007214 | 6446.481  | 3863.297  |
| AK024931  | 7801.942  | 11285.622 | AB023135  | 4920.072  | 8863.497  | NM_000311 | 8230.42   | 5390.017  |
| AL109715  | 627.903   | 1037.185  | AY009401  | 1395.107  | 2407.805  | NM_017905 | 2291.659  | 1573.121  |
| AK025659  | 1727.406  | 1183.205  | AF294628  | 1702.061  | 2232.881  | NM_006335 | 10529.521 | 9769.006  |
| AK026407  | 247.998   | 314.781   | BU565263  | 58380.012 | 63109.047 | NM_000786 | 3262.839  | 3052.201  |
| AK026788  | 2162.292  | 2558.47   | NM_005028 | 3593.317  | 3219.947  | AL133561  | 329.304   | 2458.015  |
| AK025272  | 3714.159  | 3856.481  | NM_001611 | 1483.3    | 1412.25   | NM_017731 | 546.25    | 4205.634  |
| AK026824  | 550.247   | 540.342   | M59979    | 1538.313  | 1189.216  | AB040891  | 1679.388  | 2746.102  |
| AL365407  | 1270.144  | 1263.058  | AB018310  | 2102.189  | 1672.954  | AB037780  | 280.049   | 426.752   |
| AK022407  | 223.556   | 310.546   | NM_020133 | 1847.595  | 1121.888  | NM_005845 | 18794.963 | 20928.717 |
| AK000840  | 10859.046 | 10641.313 | NM_015379 | 32533.143 | 21334.107 | NM_016205 | 6238.907  | 7956.371  |
| AL162073  | 1060.236  | 1243.943  | NM_004878 | 1064.817  | 1163.227  | AK075415  | 578.909   | 881.872   |
| AL390160  | 461.278   | 462.949   | NM_004738 | 6213.531  | 8979.915  | NM_018964 | 3998.588  | 5339.177  |
| AJ006835  | 15589.96  | 16146.905 | NM_007357 | 9030.446  | 18730.32  | NM_000080 | 1507.367  | 1932.448  |
| AL110138  | 362.09    | 393.83    | NM_003763 | 11312.949 | 15643.889 | NM_001825 | 992.245   | 1986.692  |
| AL049445  | 573.246   | 2122.535  | AB046836  | 3556.663  | 4507.844  | NM_007256 | 1500.363  | 2532.028  |
| AL050153  | 325.573   | 477.72    | NM_017816 | 14776.37  | 11541.28  | AK026092  | 5965.492  | 3628.97   |
| AL122039  | 803.395   | 965.638   | AJ224166  | 7370.738  | 4146.072  | AK001175  | 1303.847  | 558.89    |
| AF070577  | 2100.757  | 2323.77   | AK026098  | 6181.818  | 5153.764  | NM_003897 | 3017.393  | 2051.844  |
| AL137445  | 519.287   | 412.287   | NM_012381 | 3492.405  | 2705.397  | NM_014165 | 17301.223 | 15638.26  |
| U92992    | 473.436   | 477.429   | M20702    | 1265.587  | 952.592   | AL442085  | 3868.915  | 3851.151  |
| BC028422  | 886.06    | 1015.819  | NM_006397 | 54085.246 | 42322.063 | J03250    | 283.627   | 711.682   |
| AK022219  | 422.104   | 528.253   | D83776    | 4225.065  | 3755.221  | NM_013313 | 2904.98   | 13723.438 |
| AJ011378  | 933.332   | 1201.374  | NM_004088 | 12543.743 | 11882.715 | NM_014736 | 6201.509  | 33172.852 |
| AF009266  | 677.556   | 936.043   | NM_002180 | 2460.053  | 3674.433  | AK023886  | 1578.872  | 8571.026  |
| AF009310  | 610.51    | 533.475   | NM_002428 | 3912.092  | 4802.618  | NM_002553 | 2605.042  | 10365.628 |
| AF054991  | 487.09    | 319.823   | NM_000547 | 761.532   | 1841.391  | AJ404615  | 1539.223  | 4048.067  |
| AF060168  | 1633.283  | 2011.732  | NM_014652 | 2266.694  | 2521.701  | NM_016053 | 18404.965 | 23638.502 |
| AF009275  | 893.702   | 943.951   | AL133020  | 4398.172  | 4809.976  | AB007869  | 2657.906  | 3831.091  |
| AF015251  | 496.333   | 729.777   | NM_003213 | 21942.033 | 30176.701 | AB046844  | 816.977   | 1312.096  |
| AF056426  | 1038.966  | 1134.797  | BF184738  | 3439.24   | 5064.475  | NM_000302 | 1562.397  | 1693.999  |
| AF064850  | 230.228   | 405.967   | NM_014044 | 8533.438  | 7013.815  | NM_013235 | 33628.605 | 29625.707 |
| AK001096  | 396.937   | 456.219   | NM_000900 | 9991.965  | 7709.078  | NM_016015 | 5040.495  | 5557.34   |
| NM_018325 | 618.06    | 806.386   | AK023684  | 9719.489  | 7544.131  | NM_020120 | 716.669   | 816.704   |
| AK021565  | 258.904   | 293.243   | NM_000232 | 4643.077  | 3540.857  | AK022900  | 709.962   | 630.859   |
| AK021778  | 750.681   | 1257.871  | J05070    | 1718.887  | 923.596   | NM_001125 | 207.828   | 279.012   |
| AK001150  | 1991.406  | 2812.632  | AA700390  | 4807.311  | 4318.086  | NM_002266 | 25098.369 | 21177.861 |
| AK002123  | 498.337   | 395.89    | Y18474    | 1950.86   | 1914.933  | CY3Cy5    | 1124.885  | 103.813   |
| AK021633  | 836.035   | 1019.998  | AA436163  | 3639.565  | 4154.073  | NM_033195 | 809.692   | 569.694   |
| AF189251  | 454.258   | 558.732   | BI907981  | 15627.006 | 13798.02  | NM_015001 | 564.549   | 392.082   |
| NM_005322 | 1568.26   | 1343.881  | BI603841  | 19883.133 | 32427.973 | AF086261  | 330.807   | 363.069   |
| AK024465  | 9905.092  | 9551.565  | M19888    | 4648.505  | 8847.995  | U79295    | 359.67    | 655.771   |
| AF075119  | 713.249   | 648.274   | AI218732  | 3153.075  | 4392.126  | AK002107  | 716.206   | 970.165   |
| AK021478  | 3703.263  | 3985.481  | NM_018890 | 46601.668 | 53940.777 | NM_003596 | 1442.211  | 1572.941  |
| AF131782  | 943.217   | 926.677   | NM_016204 | 17021.125 | 15093.234 | AF052181  | 1330.628  | 848.936   |
| NM_014210 | 5317.016  | 6766.98   | NM_003283 | 10592.393 | 13256.524 | AL050074  | 2073.838  | 1137.823  |
| AK021603  | 1663.019  | 1380.437  | AF249898  | 10952.915 | 14133.189 | AK026436  | 400.447   | 912.91    |
| AL110136  | 3556.766  | 2971.448  | M69181    | 25168.434 | 23652.119 | NM_018061 | 845.42    | 2975.273  |
| AJ008130  | 39091.641 | 29854.02  | L09078    | 1104.203  | 1076.917  | NM_033195 | 660.534   | 1443.571  |

|           |           |           |           |           |           |           |           |           |
|-----------|-----------|-----------|-----------|-----------|-----------|-----------|-----------|-----------|
| NM_00366E | 393.947   | 394.594   | NM_002652 | 739.279   | 684.075   | SR2       | 28731.264 | 35627.133 |
| AF086502  | 1201.678  | 1053.008  | NM_001311 | 26310.555 | 13489.744 | SR4       | 5274.68   | 8357.965  |
| L39924    | 1995.438  | 2219.982  | NM_01779E | 14840.807 | 11666.353 | SR6       | 694.465   | 766.343   |
| U52054    | 6050.914  | 8080.426  | NM_01241C | 8670.877  | 9705.061  | SR8       | 3070.991  | 7476.6    |
| D17226    | 364.672   | 239.295   | NM_001111 | 32264.137 | 38922.688 | SR10      | 9240.666  | 2028.344  |
| AK023325  | 1233.944  | 1305.463  | NM_01804E | 15486.076 | 20085.217 | CY3Cy5    | 1175.831  | 128.133   |
| NM_01798E | 1271.07   | 1790.668  | AJ133439  | 4600.469  | 7065.633  | AF088014  | 163.017   | 148.462   |
| AK025866  | 4169.244  | 5315.017  | NM_00516C | 6240.848  | 10457.282 | AL109719  | 471.533   | 320.425   |
| AF088058  | 1231.418  | 1680.66   | AY009401  | 1659.234  | 1839.621  | U92022    | 571.821   | 580.705   |
| NM_00051E | 1415.601  | 2079.62   | AF294628  | 2139.121  | 1914.365  | NM_00365C | 700.741   | 635.055   |
| Y11165    | 1144.333  | 1462.408  | NM_00244E | 1780.4    | 1534.599  | AK022119  | 4811.371  | 5076.332  |
| NM_00353C | 1169.989  | 1151.393  | AF053952  | 53645.477 | 42529.242 | AK027158  | 316.406   | 1062.636  |
| AJ227871  | 996.03    | 703.646   | BU565263  | 58018.742 | 81290.07  | AK002187  | 554.491   | 985.283   |
| AK025344  | 2129.288  | 2207.711  | NM_00502E | 7810.213  | 10495.461 | AF085836  | 2939.374  | 3254.436  |
| D28589    | 21042.938 | 18316.631 | NM_001611 | 2185.002  | 2699.791  | AL049449  | 1491.146  | 1002.288  |
| AF301223  | 889.05    | 1079.372  | M59979    | 1609.04   | 1216.214  | AL359654  | 1228.713  | 1666.986  |
| NM_017867 | 3613.543  | 4386.423  | AB018310  | 2603.742  | 1969.435  | AK024224  | 3447.84   | 4146.597  |
| U92820    | 2779.684  | 2680.98   | NM_02013E | 1151.515  | 994.578   | NM_01898E | 1129.565  | 886.986   |
| NM_017937 | 1492.331  | 1766.257  | NM_01537E | 31531.881 | 17311.236 | AF086254  | 2024.039  | 1937.538  |
| AL360266  | 2810.216  | 2457.642  | NM_00487E | 764.503   | 908.556   | AK026856  | 298.495   | 360.558   |
| AL160132  | 21554.709 | 18624.072 | NM_01481C | 4082.189  | 4113.47   | AL162033  | 2516.359  | 1521.589  |
| NM_019557 | 2263.107  | 2105.089  | NM_007357 | 8533.388  | 8233.659  | AK026893  | 424.582   | 445.981   |
| NM_00354E | 305.067   | 227.408   | NM_00376E | 11335.395 | 9393.396  | AL133038  | 1441.716  | 1786.945  |
| AK024413  | 778.702   | 863.356   | AK023448  | 2761.824  | 1676.369  | AL137414  | 4097.269  | 3947.751  |
| AK022247  | 768.78    | 667.887   | Y18213    | 11320.734 | 6224.023  | AL137624  | 9791.023  | 9661.572  |
| AK001453  | 2901.361  | 2936.828  | NM_01781E | 14184.267 | 17461.576 | AL359574  | 1482.704  | 1426.4    |
| AB007972  | 2793.077  | 3042.47   | AJ224166  | 7492.032  | 9404.041  | AL133569  | 2841.333  | 2390.182  |
| AL390144  | 5339.681  | 5265.495  | AK026098  | 7328.542  | 7465.375  | AK027189  | 456.321   | 497.905   |
| AK024017  | 1112.802  | 1327.335  | NM_012381 | 3301.082  | 2899.183  | AK001910  | 1334.769  | 973.101   |
| X56196    | 1112.414  | 1561.747  | M20702    | 700.391   | 563.306   | AF124368  | 314.459   | 361.486   |
| D17220    | 6786.807  | 9220.487  | NM_006397 | 49088.516 | 42170.711 | AF265210  | 1464.947  | 1274.272  |
| D28363    | 55496.527 | 66139.203 | D83776    | 3463.554  | 3261.776  | AK024241  | 467.987   | 844.662   |
| AB011171  | 535.82    | 522.646   | NM_00408E | 11636.786 | 10632.817 | AK025061  | 934.563   | 4182.585  |
| AF090099  | 423.77    | 486.113   | NM_00218C | 2993.693  | 3372.51   | AK022296  | 330.944   | 236.25    |
| AK023606  | 416.793   | 470.585   | NM_00013E | 5195.363  | 5478.071  | AK021940  | 531.211   | 664.815   |
| NM_00358E | 833.092   | 663.157   | NM_01816E | 4177.885  | 3798.897  | AK022189  | 371.463   | 201.609   |
| NM_00092E | 3578.933  | 3058.632  | AK026362  | 11801.413 | 9844.153  | AK022338  | 317.483   | 463.251   |
| NM_01323E | 6622.113  | 6477.5    | NM_00496E | 5002.966  | 5185.237  | U48696    | 989.243   | 730.185   |
| NM_01799E | 1232.301  | 1664.712  | NM_00590E | 7090.95   | 7783.716  | AF230316  | 2339.704  | 1670.498  |
| NM_00036E | 1023.274  | 928.126   | NM_00478E | 8949.668  | 10334.4   | AK024515  | 5544.891  | 4894.757  |
| NM_01442E | 2747.708  | 2683.568  | AK024079  | 1496.844  | 2321.626  | AF085862  | 1913.115  | 4902.114  |
| AK000770  | 1320.306  | 1365.878  | NM_014674 | 7409.31   | 7415.497  | NM_00051C | 3665.078  | 3833.992  |
| NM_00237C | 9809.937  | 12978.522 | NM_01465E | 2146.556  | 1555.358  | NM_017787 | 1165.807  | 909.672   |
| NM_01567C | 3282.234  | 3390.811  | AL133020  | 7791.152  | 5711.486  | NM_02031E | 6106.815  | 5397.689  |
| NM_01470E | 1494.581  | 1194.083  | NM_014044 | 7957.244  | 9298.083  | NM_00568E | 538.524   | 372.679   |
| AK002203  | 554.034   | 517.008   | NM_00090C | 10017.036 | 14213.994 | NM_020427 | 13259.501 | 7529.998  |
| AK026469  | 4424.938  | 4071.818  | AA700390  | 8055.873  | 6318.357  | AF085920  | 545.531   | 345.681   |
| D16935    | 5429.106  | 6622.947  | Y18474    | 1851.488  | 1659.02   | AK023173  | 9181.438  | 5791.625  |
| U92019    | 868.753   | 885.071   | AA436163  | 3588.339  | 3424.459  | AK025225  | 444.12    | 409.821   |
| U52835    | 1400.829  | 1002.887  | BI907981  | 15834.491 | 12389.238 | U79275    | 7300.516  | 8352.594  |
| NM_00075E | 2977.329  | 3277.02   | BI603841  | 25388.844 | 20573.279 | AF088067  | 4373.353  | 3436.68   |
| AK022148  | 596.543   | 599.844   | BG696638  | 3136.144  | 2697.925  | AK022213  | 1418.393  | 666.592   |
| Z36811    | 61655.281 | 65210.008 | M19888    | 5108.81   | 4815.909  | AF056441  | 2645.932  | 1444.301  |

|           |           |           |           |           |           |           |           |           |
|-----------|-----------|-----------|-----------|-----------|-----------|-----------|-----------|-----------|
| NM_01895C | 13495.429 | 16668.758 | Y08136    | 2995.724  | 3036.679  | AJ276253  | 8369.716  | 5960.314  |
| K03200    | 5524.915  | 8795.86   | AA156863  | 34411.191 | 33957.461 | AF147314  | 583.829   | 480.204   |
| U17629    | 3899.351  | 7603.199  | BI915199  | 2038.701  | 1771.985  | NM_01898C | 3533.142  | 2699.714  |
| NM_02042E | 5544.813  | 13292.716 | R82957    | 58878.113 | 59831.191 | AF086201  | 583.825   | 593.515   |
| U79265    | 1251.373  | 1782.672  | BI830442  | 15567.053 | 22681.955 | AK024712  | 642.485   | 949.943   |
| AK022868  | 6064.064  | 6624.236  | AI218732  | 5879.839  | 6629.586  | NM_00290Z | 3690.165  | 2740.244  |
| NM_002687 | 9681.285  | 7823.105  | NM_01889C | 51810.742 | 39184.121 | NM_02024E | 16668.436 | 12131.681 |
| NM_000627 | 3902.01   | 3685.605  | NM_016204 | 21374.518 | 16917.619 | X89670    | 734.777   | 566.268   |
| NM_00003E | 1282.054  | 624.77    | AB046836  | 3636.466  | 3324.713  | NM_00172E | 324.047   | 274.564   |
| NM_00082E | 1006.588  | 1066.063  | NM_001311 | 28923.283 | 28414.148 | NM_00405E | 2755.868  | 1934.947  |
| NM_00196E | 594.06    | 517.813   | NM_001561 | 2807.678  | 2530.924  | NM_00148E | 487.2     | 539.866   |
| NM_004334 | 1670.532  | 1805.499  | NM_00516C | 5819.993  | 5048.41   | AL117603  | 1837.078  | 1225.809  |
| NM_00388E | 7173.687  | 7435.137  | NM_00059E | 1884.829  | 1830.718  | AK024048  | 2188.957  | 1570.186  |
| NM_00584E | 3392.448  | 4761.066  | X78817    | 59603.398 | 58576.918 | AK055991  | 507.491   | 399.216   |
| NM_003854 | 339.101   | 502.744   | AB023135  | 6211.805  | 7508.355  | AF113697  | 512.253   | 539.317   |
| NM_01798C | 723.636   | 539.292   | NM_00339E | 938.198   | 1357.596  | AK022326  | 994.231   | 797.211   |
| NM_00125Z | 45126.02  | 33427.086 | AY009401  | 1724.857  | 1536.167  | AF085991  | 1070.224  | 1114.89   |
| AF053712  | 1762.429  | 1770.257  | AF294628  | 2873.766  | 2810.947  | NM_00194E | 602.788   | 474.054   |
| NM_003947 | 994.185   | 1010.806  | AK026960  | 2301.186  | 2757.774  | NM_004927 | 5571.397  | 4042.348  |
| NM_002821 | 21856.197 | 20617.078 | NM_001991 | 4997.041  | 9473.527  | AB040928  | 403.611   | 295.152   |
| M96652    | 40956.898 | 29752.434 | NM_01785Z | 802.289   | 749.423   | NM_00145E | 1047.047  | 883.547   |
| L41690    | 2374.183  | 2488.353  | NM_00019E | 25049.428 | 23975.186 | NM_01551E | 22307.164 | 12322.95  |
| NM_01805E | 1395.414  | 1469.483  | BC014586  | 3526.134  | 3058.937  | NM_00621E | 3107.091  | 1724.655  |
| NM_00093E | 50135.031 | 57432.926 | NM_00244E | 875.036   | 690.64    | NM_00444E | 7014.592  | 4822.583  |
| NM_00518E | 479.301   | 679.781   | AF053952  | 51947.488 | 38349.773 | NM_00489E | 4263.891  | 4434.511  |
| NM_006514 | 939.548   | 3093.64   | NM_00321E | 19022.932 | 11292.05  | AF272036  | 803.354   | 464.748   |
| AF065164  | 1447.105  | 2109.737  | BF184738  | 3618.947  | 3693.372  | AF231023  | 1557.222  | 967.241   |
| K01900    | 369.59    | 387.588   | NM_02038E | 461.17    | 962.849   | NM_00514E | 3838.222  | 2765.648  |
| AJ008143  | 18771.889 | 15734.208 | AF303398  | 37096.023 | 37886.551 | NM_00474E | 1408.41   | 1160.281  |
| NM_007144 | 1064.106  | 821.04    | NM_01481C | 3202.304  | 2468.362  | AF146019  | 2457.921  | 1877.571  |
| NM_00509E | 1734.662  | 954.683   | NM_00473E | 6186.753  | 5579.674  | Z36782    | 4644.44   | 3103.899  |
| NM_004424 | 11322.369 | 9568.774  | NM_007357 | 8895.516  | 8916.27   | NM_00349C | 19802.188 | 16292.499 |
| AL133117  | 2506.51   | 2496.696  | NM_00376E | 16149.736 | 17130.943 | AF508940  | 3419.386  | 2708.846  |
| AB033040  | 310.923   | 329.72    | AK023448  | 3409.779  | 2342.487  | NM_020237 | 431.678   | 333.511   |
| AF070586  | 9010.163  | 8718.159  | Y18213    | 16134.781 | 12423.66  | AF130051  | 311.833   | 226.197   |
| NM_01441Z | 2623.261  | 2685.722  | NM_00328E | 11610.781 | 12578.251 | M25753    | 9409.236  | 5219.638  |
| NM_01330E | 594.805   | 528.806   | AF249898  | 9175.641  | 6024.082  | NM_00388E | 1635.141  | 886.387   |
| NM_012227 | 7055.811  | 6536.834  | M69181    | 28786.385 | 20434.727 | NM_01492E | 1566.482  | 1255.928  |
| NM_006101 | 2291.689  | 2006.522  | NM_00265Z | 671.356   | 786.757   | NM_00420E | 5466.594  | 3295.807  |
| NM_001237 | 9115.192  | 7371.66   | NM_000547 | 805.232   | 1869.901  | NM_001951 | 844.77    | 669.97    |
| NM_002507 | 2579.463  | 2674.673  | NM_00502E | 10500.782 | 16861.096 | NM_003674 | 49353.137 | 36364.039 |
| NM_01596Z | 3250.896  | 4080.939  | NM_001611 | 2474.934  | 3844.863  | NM_001197 | 3747.893  | 3322.926  |
| NM_01614E | 790.824   | 1099.754  | M59979    | 1770.784  | 2421.558  | NM_00668Z | 1011.005  | 1211.373  |
| NM_01607E | 9178.894  | 8504.547  | AB018310  | 3946.695  | 4699.494  | NM_00641C | 651.996   | 537.967   |
| NM_00379E | 1439.178  | 1131.939  | NM_02013E | 1539.802  | 1577.925  | NM_014977 | 56339.914 | 62301.879 |
| NM_004401 | 7657.372  | 6879.474  | NM_01537E | 34354.09  | 39521.074 | AK026325  | 2128.446  | 1697.108  |
| NM_00184E | 1558.15   | 1610.974  | NM_00487E | 1165.494  | 1331.325  | U83857    | 946.049   | 732.749   |
| AF255910  | 626.226   | 579.507   | AF144638  | 57848.492 | 66352.164 | NM_00123C | 797.323   | 581.61    |
| NM_00042E | 388.772   | 229.635   | BF028822  | 1133.455  | 1173.125  | AK025662  | 904.099   | 508.064   |
| NM_01614E | 4500.834  | 5578.442  | NM_00550Z | 1075.203  | 1289.781  | NM_000201 | 6755.288  | 5750.19   |
| AB046776  | 664.864   | 610.762   | NM_00074Z | 4429.198  | 3636.152  | AB011539  | 1252.181  | 1156.594  |
| D42084    | 5655.518  | 5075.564  | NM_00235E | 22033.678 | 16971.682 | U37028    | 2622.536  | 2172.701  |
| NM_001734 | 789.845   | 727.884   | AK026608  | 6341.476  | 4411.275  | AB014597  | 1345.836  | 1513.22   |



|           |           |           |           |           |           |           |           |           |
|-----------|-----------|-----------|-----------|-----------|-----------|-----------|-----------|-----------|
| NM_014693 | 4960.562  | 4644.779  | NM_018890 | 42184.398 | 60249.453 | NM_001793 | 27616.76  | 16397.043 |
| AB007896  | 1920.811  | 1981.298  | NM_016204 | 29451.791 | 45952.352 | AK024313  | 6745.985  | 4167.238  |
| AB007916  | 3841.853  | 4263.201  | AK026098  | 8780.786  | 15646.498 | NM_003891 | 1953.986  | 1222.863  |
| NM_002874 | 845.307   | 877.581   | NM_012381 | 3784.348  | 7310.224  | AL359575  | 505.843   | 264.652   |
| AB028980  | 460.01    | 205.584   | M20702    | 1218.716  | 1796.73   | NM_002022 | 331.69    | 234.935   |
| AF049140  | 4102.973  | 4369.65   | NM_006397 | 52986.535 | 51517.617 | NM_015524 | 652.427   | 832.319   |
| AB037793  | 595.737   | 534.384   | D83776    | 4130.357  | 6561.1    | NM_001673 | 11542.689 | 8315.386  |
| AL136794  | 2146.221  | 1672.899  | NM_004088 | 13347.121 | 18154.76  | NM_016510 | 2959.368  | 3077.621  |
| BC035601  | 41751.895 | 38315.461 | NM_002180 | 2753.339  | 3932.659  | NM_000071 | 6916.814  | 8597.484  |
| NM_001458 | 1908.163  | 1706.278  | NM_000138 | 4689.748  | 5963.082  | NM_006843 | 3405.47   | 5358.983  |
| NM_020388 | 9503.808  | 9788.229  | NM_004968 | 4924.437  | 4385.348  | NM_004321 | 2442.212  | 3099.234  |
| NM_004202 | 48653.41  | 47595.277 | NM_005908 | 6573.698  | 5690.481  | AF311212  | 4049.095  | 4563.696  |
| AB046829  | 1397.339  | 1569.635  | NM_004785 | 9333.488  | 6858.784  | NM_006915 | 1095.945  | 631.893   |
| NM_016445 | 1547.713  | 1473.744  | AK024079  | 1378.043  | 1072.149  | NM_006035 | 1086.309  | 1100.015  |
| NM_003379 | 18673.021 | 18271.434 | NM_002428 | 3639.965  | 2480.669  | NM_006088 | 8536.383  | 5450.897  |
| NM_004521 | 13232.18  | 14128.894 | NM_014674 | 5913.101  | 4458.136  | NM_004520 | 6072.045  | 3494.823  |
| AF229162  | 2535.96   | 2022.837  | NM_018271 | 2286.911  | 1505.518  | AK027118  | 1988.359  | 1732.097  |
| U02309    | 44853.871 | 40754.582 | CY3Cy5    | 4133.046  | 108.415   | AK022882  | 13083.419 | 12776.114 |
| AB028991  | 4270.52   | 6027.829  | NM_020967 | 2041.687  | 1542.694  | NM_006105 | 3831.88   | 2801.954  |
| AF263547  | 12807.259 | 10969.042 | NM_001071 | 17378.896 | 11414.124 | NM_005981 | 1527.321  | 1415.904  |
| NM_003923 | 592.329   | 535.241   | AF086181  | 1295.453  | 839.551   | AF210651  | 976.686   | 899.57    |
| NM_004831 | 2488.368  | 1805.876  | AK021540  | 1209.485  | 1136.94   | AF090942  | 768.67    | 776.235   |
| NM_014213 | 8440.275  | 9864.003  | AK022258  | 2228.808  | 1962.567  | NM_014595 | 7668.085  | 5598.485  |
| NM_000168 | 4985.402  | 4040.456  | AF088043  | 715.777   | 628.056   | NM_014788 | 639.474   | 790.913   |
| AF294629  | 10755.642 | 10849.337 | AF131799  | 1757.608  | 2398.527  | AB046784  | 2063.761  | 1417.733  |
| NM_000545 | 10410.536 | 9599.708  | AK000455  | 3185.331  | 3271.798  | X52402    | 2851.936  | 1863.925  |
| NM_002136 | 51490.148 | 50439.516 | NM_005230 | 648.241   | 1051.538  | AL133663  | 637.811   | 360.927   |
| AK025571  | 2318.98   | 2156.602  | AK023719  | 10011.062 | 9066.693  | NM_004992 | 704.061   | 383.38    |
| NM_004940 | 491.803   | 489.482   | AK025590  | 5990.496  | 6348.866  | NM_014462 | 2780.349  | 1814.779  |
| NM_014463 | 23848.504 | 19425.744 | AY007149  | 2573.615  | 2126.665  | NM_014156 | 61811.355 | 53888.168 |
| NM_005520 | 16250.234 | 14734.587 | NM_020967 | 1532.131  | 1039.709  | NM_003137 | 3009.841  | 2478.135  |
| AK023265  | 1707.109  | 2012.828  | NM_001071 | 16624.818 | 12534.604 | NM_006938 | 30655.33  | 20259.963 |
| NM_018723 | 1131.36   | 1163.044  | SR2       | 53164.16  | 27679.236 | AF265228  | 1730.597  | 3320.299  |
| AB029009  | 5822.438  | 6394.14   | SR4       | 15922.137 | 9597.233  | NM_003757 | 17728.449 | 11186.083 |
| AF112207  | 3628.365  | 3497.988  | SR6       | 2093.583  | 1317.875  | AK025561  | 2959.565  | 2077.707  |
| AJ420488  | 55204.57  | 77254.375 | SR8       | 8626.889  | 13204.627 | NM_018602 | 38556.957 | 20197.801 |
| NM_005594 | 49488.109 | 41073.77  | SR10      | 26812.715 | 4369.409  | NM_004096 | 1769.493  | 834.958   |
| NM_004461 | 55853.852 | 69341.977 | CY3Cy5    | 2919.744  | 97.96     | NM_017629 | 9597.075  | 6262.591  |
| NM_018473 | 5119.056  | 4857.585  | AL157484  | 43064.57  | 26257.207 | AL049681  | 2466.695  | 2060.887  |
| BF106121  | 2375.083  | 3344.915  | AK024850  | 1450.337  | 1206.497  | NM_006584 | 822.532   | 825.955   |
| AK022590  | 2646.399  | 3138.945  | Y09836    | 2631.247  | 1840.45   | NM_003551 | 3663.039  | 3232.478  |
| AK024343  | 2255.437  | 2566.458  | AL137597  | 4438.937  | 3450.572  | AF305210  | 501.202   | 636.706   |
| NM_001936 | 447.577   | 332.73    | AK022144  | 893.031   | 883.718   | AK021900  | 2850.145  | 2251.897  |
| NM_002569 | 661.267   | 504.4     | AF086044  | 960.441   | 882.454   | NM_002764 | 13127.386 | 7376.006  |
| M12078    | 4489.92   | 4559.813  | NM_014926 | 846.372   | 900.004   | NM_019857 | 920.66    | 626.918   |
| NM_004550 | 9702.274  | 8790.173  | AF131790  | 1105.438  | 1055.685  | NM_015455 | 41682.77  | 23279.518 |
| NM_000785 | 3132.278  | 2957.041  | NM_012075 | 4474.64   | 5103.854  | AF024702  | 9407.001  | 7814.304  |
| NM_004110 | 19238.574 | 16521.107 | AB004851  | 2570.169  | 2057.082  | NM_001964 | 2190.938  | 2655.415  |
| NM_013387 | 49124.313 | 45256.793 | NM_013381 | 499.784   | 614.883   | NM_002114 | 625.603   | 1488.091  |
| NM_005262 | 18989.639 | 20544.91  | AK023911  | 16373.782 | 15833.081 | NM_006166 | 2683.587  | 2293.727  |
| NM_005757 | 1691.676  | 1294.386  | NM_001283 | 10222.199 | 10042.354 | S72620    | 45178.371 | 28393.477 |
| NM_016483 | 555.34    | 619.558   | AL110237  | 1435.602  | 1280.94   | NM_016831 | 377.814   | 415.065   |
| NM_020128 | 1934.858  | 1786.903  | D87470    | 2372.095  | 2046.668  | S73501    | 361.289   | 229.82    |

|            |           |           |           |           |           |           |           |           |
|------------|-----------|-----------|-----------|-----------|-----------|-----------|-----------|-----------|
| NM_00506E  | 9317.938  | 11275.11  | AF147307  | 7819.867  | 8495.127  | NM_00526E | 5816.873  | 5617.904  |
| NM_01822E  | 8225.236  | 7735.883  | AK001829  | 2626.898  | 2183.364  | AB033022  | 6565.017  | 4785.5    |
| NM_00669E  | 30719.963 | 21437.076 | NM_01652E | 5612.43   | 3187.61   | NM_000474 | 417.354   | 240.497   |
| NM_00172E  | 2176.295  | 2481.261  | AK024931  | 25649.896 | 16643.705 | NM_016264 | 1003.92   | 908.553   |
| AB046802   | 3343.247  | 3288.125  | AL109715  | 1009.087  | 717.182   | NM_00607E | 28742.701 | 19680.043 |
| NM_003297  | 1466.793  | 1779.363  | AK025659  | 4664.161  | 3008.708  | AB037837  | 2767.687  | 2670.67   |
| X74861     | 345.028   | 738.191   | AK026407  | 797.49    | 536.686   | NM_001155 | 10218.023 | 8759.608  |
| NM_00694C  | 1225.888  | 935.131   | AK026788  | 7078.807  | 5815.21   | M62896    | 36250.578 | 22580.779 |
| NM_01826E  | 8928.58   | 7715.765  | AK025272  | 6337.278  | 3599.421  | NM_01773E | 1304.352  | 1486.39   |
| AK024633   | 4827.041  | 5242.482  | AK026824  | 1428.479  | 1148.987  | NM_00149E | 51102.547 | 44561.441 |
| NM_00145E  | 5985.672  | 5510.662  | AL365407  | 3704.953  | 3837.869  | AF263523  | 1487.807  | 1505.689  |
| NM_005257  | 12660.265 | 12029.919 | AK022407  | 869.75    | 854.408   | L08441    | 9822.454  | 11848.076 |
| AF011573   | 8381.247  | 10228.051 | AK000840  | 59892.379 | 52227.781 | AA641953  | 1159.53   | 904.83    |
| NM_00214E  | 3129.514  | 2914.488  | AL162073  | 3168.323  | 3978.983  | AI248827  | 2585.543  | 3463.83   |
| NM_00724E  | 7670.492  | 6032.823  | AL390160  | 2232.733  | 2031.401  | AA496452  | 20267.816 | 39478.691 |
| NM_00189C  | 1496.06   | 1541.849  | AJ006835  | 18722.131 | 16235.838 | X67594    | 7683.003  | 11253.692 |
| NM_00128E  | 5518.281  | 5326.576  | AL110138  | 2408.33   | 1949.428  | NM_01586E | 428.863   | 668.961   |
| NM_01464E  | 1028.93   | 1116.318  | AL122039  | 1181.716  | 757.325   | NM_001631 | 2005.874  | 2128.212  |
| NM_019604  | 714.685   | 868.815   | AF070577  | 21267.014 | 11477.139 | AB000734  | 11646.968 | 10680.871 |
| NM_00507E  | 1420.354  | 1334.183  | AL137445  | 1677.547  | 1334.641  | NM_005987 | 64073.836 | 68906.813 |
| NM_000951  | 3632.244  | 3943.077  | U92992    | 809.442   | 684.036   | X87838    | 3922.349  | 5050.433  |
| X52599     | 2409.938  | 2266.134  | BC028422  | 1510.85   | 1326.563  | AK023059  | 779.535   | 1253.649  |
| AA029300   | 4053.094  | 4948.097  | AK022219  | 896.007   | 773.617   | AF224266  | 3295.513  | 3128.617  |
| BG708842   | 43792.102 | 62799.813 | AK024192  | 614.485   | 553.674   | U72882    | 43147.398 | 39704.523 |
| M19723     | 48128.277 | 71146.023 | NM_013244 | 698.876   | 816.176   | NM_014337 | 15110.474 | 11998.419 |
| X06256     | 2706.076  | 3063.922  | AJ011378  | 3997.576  | 3707.336  | NM_007161 | 16350.95  | 12485.36  |
| AA709271   | 1392.122  | 1853.862  | AF009266  | 1121.322  | 1270.079  | NM_014387 | 1380.778  | 1080.956  |
| M34057     | 4745.131  | 4717.483  | AF009310  | 2325.79   | 1969.235  | NM_003641 | 4165.186  | 2751.764  |
| ID 1984668 | 2961.501  | 3042.452  | AF054991  | 1231.706  | 1488.348  | NM_01246E | 1935.866  | 1527.349  |
| ID 1832579 | 3620.266  | 3527.796  | AF060168  | 2766.806  | 3213.522  | L29140    | 53203.664 | 49455.18  |
| H-430185 N | 1970.282  | 1484.048  | AF009275  | 2020.095  | 2516.165  | AK026448  | 4650.44   | 4024.953  |
| D16583     | 4700.285  | 3970.887  | AF015251  | 775.117   | 1077.908  | AK057418  | 2723.44   | 3427.955  |
| H44051     | 802.636   | 736.13    | AF056426  | 2705.308  | 3264.005  | AF148646  | 6741.369  | 26761.664 |
| AA481547   | 27228.957 | 26710.506 | AK001096  | 920.817   | 1258.331  | AL110218  | 1726.249  | 6371.806  |
| AA831880   | 1583.999  | 1703.416  | NM_01832E | 1691.247  | 1635.902  | AB023201  | 2096.905  | 4873.091  |
| T64880     | 5714.708  | 6902.528  | AK021565  | 853.156   | 629.425   | X00094    | 2293.722  | 6030.112  |
| NM_00285E  | 4526.347  | 4697.667  | AK021778  | 1170.935  | 1051.393  | NM_00377E | 9879.109  | 18752.365 |
| NM_001817  | 4525.395  | 3571.265  | AK001150  | 8790.637  | 5552.662  | NM_00208E | 21386.709 | 33545.074 |
| AF063611   | 1612.431  | 1992.593  | AK002123  | 1081.751  | 944.819   | NM_00292E | 15095.653 | 20171.639 |
| NM_00603E  | 1728.033  | 1774.576  | AK021633  | 3582.971  | 2208.148  | AF155657  | 8385.246  | 10328.57  |
| NM_00208E  | 836.598   | 985.01    | AF189251  | 2120.087  | 1551.082  | NM_00605E | 9433.649  | 10283.554 |
| NM_00459C  | 361.449   | 467.923   | NM_00532E | 3329.687  | 3079.464  | AF045229  | 11604.943 | 10458.226 |
| M28983     | 512.427   | 486.345   | AK024465  | 18013.307 | 12582.523 | NM_00184C | 10347.318 | 10750.545 |
| NM_01465E  | 7732.791  | 9041.909  | AF075119  | 1100.508  | 895.288   | NM_01609E | 47645.629 | 50371.035 |
| NM_00207E  | 3539.968  | 3517.79   | AK021478  | 8418.239  | 6584.073  | NM_000394 | 429.595   | 658.057   |
| X05299     | 4101.478  | 4043.853  | AF131782  | 2595.222  | 1960.945  | NM_00007E | 294.006   | 262.152   |
| BM468475   | 1057.283  | 1374.45   | NM_01421C | 9099.002  | 10389.434 | NM_000697 | 1114.102  | 1031.043  |
| NM_00031E  | 4642.511  | 4726.728  | AK021603  | 20959.672 | 19840.135 | NM_000017 | 8603.14   | 6377.483  |
| NM_00206C  | 29352.383 | 24621.475 | AL110136  | 8252.355  | 6415.33   | NM_000237 | 680.418   | 586.012   |
| AK001230   | 4898.284  | 6353.877  | AF075095  | 556.563   | 743.646   | NM_01834E | 5561.297  | 3598.303  |
| NM_01468C  | 10443.459 | 10287.046 | AJ008130  | 64961.254 | 61658.316 | AL122054  | 982.099   | 617.942   |
| NM_005027  | 4517.926  | 4574.679  | NM_00366E | 1109.06   | 1603.931  | AB023151  | 707.588   | 677.936   |
| NM_00461E  | 2605.827  | 2097.436  | AF086502  | 3303.198  | 4579.005  | NM_00014C | 16299.807 | 14424.997 |

|           |           |           |           |           |           |           |           |           |
|-----------|-----------|-----------|-----------|-----------|-----------|-----------|-----------|-----------|
| NM_00560E | 30817.631 | 24752.717 | L39924    | 3260.852  | 3207.19   | NM_00512E | 3660.815  | 5076.461  |
| NM_012294 | 313.046   | 248.851   | U52054    | 10340.117 | 10237.454 | NM_02003E | 1060.558  | 1551.47   |
| NM_001106 | 610.043   | 514.207   | D17226    | 614.382   | 577.193   | NM_01624E | 2854.36   | 6268.362  |
| NM_01849C | 1060.247  | 899.86    | AK023325  | 3849.996  | 5407.636  | NM_00513E | 1322.816  | 3919.216  |
| NM_00477E | 439.067   | 560.276   | NM_01798E | 7808.254  | 6075.852  | NM_00497E | 23085.652 | 31102.611 |
| NM_01225E | 897.88    | 625.252   | AK025866  | 6779.988  | 4884.135  | NM_005737 | 38950.027 | 39659.801 |
| NM_006224 | 50974.199 | 62545.16  | AF088058  | 12572.511 | 8685.631  | NM_00075E | 1750.827  | 5117.573  |
| AL137300  | 7371.405  | 6772.297  | NM_000513 | 2647.132  | 1830.433  | AB040945  | 1387.611  | 2491.271  |
| NM_00022E | 3710.318  | 3977.009  | Y11165    | 3362.495  | 2402.722  | NM_00201E | 10718.655 | 13674.846 |
| NM_00699E | 31709.832 | 27890.914 | NM_00353C | 1559.009  | 1271.095  | NM_002377 | 469.554   | 1007.377  |
| NM_00312E | 12840.228 | 13069.757 | AJ227871  | 1420.312  | 1193.154  | NM_00601E | 884.526   | 1623.755  |
| NM_00195E | 5248.075  | 4526.803  | AK025344  | 3372.199  | 2598.269  | AF161383  | 5409.776  | 6233.873  |
| AB033064  | 3095.058  | 3693.317  | D28589    | 50740.488 | 34078.113 | NM_00041C | 14372.559 | 33443.309 |
| AK022317  | 9581.478  | 12353.741 | AF301223  | 1522.662  | 1257.823  | AF182814  | 1380.843  | 1123.41   |
| NM_01839E | 10305.108 | 10891.245 | NM_017867 | 6528.873  | 5573.884  | NM_00532E | 648.157   | 763.283   |
| NM_003124 | 10254.178 | 10409.304 | U92820    | 4691.236  | 3950.6    | NM_000107 | 10186.658 | 7234.325  |
| NM_00688E | 45388.285 | 47601.168 | NM_017937 | 3556.949  | 3292.47   | AL157445  | 2938.991  | 2850.202  |
| NM_004531 | 5260.673  | 6725.164  | AL360266  | 5705.017  | 5198.531  | NM_001517 | 16974.857 | 15350.832 |
| AB040920  | 1161.97   | 1900.094  | AL160132  | 64284.098 | 63012.949 | NM_00505E | 7057.697  | 7554.817  |
| NM_01572C | 13023.727 | 12390.685 | NM_019557 | 3632.953  | 4103.355  | D86974    | 4710.716  | 7332.998  |
| AB033070  | 823.984   | 983.991   | NM_00354E | 1124.701  | 1626.723  | NM_01828E | 5845.404  | 6465.006  |
| AK000158  | 6418.857  | 7509.318  | AK024413  | 2518.369  | 3763.525  | NM_00198E | 1554.728  | 1561.353  |
| NM_00576E | 2315.175  | 2188.388  | AL137752  | 599.712   | 878.047   | NM_003384 | 5854.544  | 7419.911  |
| AK024500  | 25687.988 | 21628.686 | AK022247  | 1799.738  | 2100.062  | NM_00292E | 1127.462  | 2664.033  |
| NM_002564 | 20675.699 | 19026.063 | AK001453  | 4118.99   | 4449.148  | BC028375  | 1039.08   | 1770.592  |
| NM_001884 | 663.309   | 709.221   | AB007972  | 10001.249 | 8832.675  | AB026436  | 2723.725  | 3373.975  |
| Z83806    | 494.899   | 443.529   | AL390144  | 9946.154  | 9385.46   | NM_01602E | 9011.222  | 11644.218 |
| NM_00096E | 1245.33   | 1326.851  | AK024017  | 4595.017  | 11854.168 | AK024562  | 2238.026  | 3183.239  |
| NM_01330E | 1295.895  | 1234.55   | X56196    | 1560.786  | 1443.657  | NM_01406E | 1661.544  | 2758.149  |
| AF027302  | 6783.059  | 7024.463  | D17220    | 13347.633 | 10840.651 | NM_00457E | 1172.572  | 2768.042  |
| NM_00670E | 33295.23  | 20255.514 | D28363    | 63196.672 | 58597.504 | NM_01773E | 1695.804  | 1984.169  |
| AB037835  | 2716.358  | 2075.32   | AB011171  | 2593.758  | 1871.132  | NM_00031E | 248.457   | 273.661   |
| NM_01622E | 671.777   | 559.739   | AF090099  | 872.536   | 742.677   | NM_00149E | 51517.52  | 48498.945 |
| NM_000157 | 3217.415  | 2818.943  | NM_00358E | 2801.044  | 2480.501  | AF263523  | 1367.573  | 1676.387  |
| NM_00071E | 373.99    | 358.717   | NM_00092E | 3844.816  | 2911.771  | L08441    | 10483.854 | 10496.212 |
| NM_01808E | 1407.188  | 1278.765  | NM_01323E | 24418.873 | 17544.678 | AA641953  | 1018.923  | 935.429   |
| BC013695  | 10257.623 | 10239.411 | NM_01799E | 1702.907  | 1701.367  | AI248827  | 3787.183  | 2943.027  |
| NM_00720E | 853.691   | 712.308   | NM_00036E | 1473.835  | 1304.365  | R45026    | 45195.223 | 35157.426 |
| AK023035  | 5800.52   | 5213.385  | NM_01442E | 5073.338  | 4087.788  | BI768063  | 1522.846  | 1469.189  |
| NM_01484E | 3712.55   | 4057.214  | AK000770  | 4353.711  | 3924.808  | AI970239  | 4443.057  | 5378.096  |
| AB011164  | 6170.236  | 5451.365  | NM_00237C | 15856.67  | 16465.588 | AA496452  | 16839.133 | 15354.9   |
| M24750    | 2139.161  | 2471.02   | NM_01567C | 4284.591  | 4654.91   | X67594    | 6084.428  | 8490.457  |
| NM_00596E | 4422.125  | 5548.426  | NM_01470E | 2193.046  | 1891.348  | NM_01586E | 757.157   | 3673.079  |
| NM_00274C | 6488.09   | 7239.539  | AK002203  | 1034.947  | 1066.417  | NM_001631 | 1651.947  | 4098.028  |
| AL117482  | 5047.404  | 4875.097  | AK026469  | 28727.432 | 32598.926 | AB000734  | 10039.705 | 14290.565 |
| NM_00654E | 55231.324 | 48143.902 | D16935    | 7058.59   | 11269.564 | NM_005987 | 56365.734 | 67430.953 |
| AB018324  | 19347.604 | 17153.324 | U92019    | 1739.444  | 2022.74   | X87838    | 3558.056  | 4741.135  |
| NM_00274E | 60232.344 | 67705.836 | U52835    | 2756.152  | 2222.49   | NM_00016E | 5059.647  | 7169.186  |
| Z25431    | 3559.499  | 3233.081  | NM_00075E | 6202.091  | 5526.832  | NM_014337 | 15460.615 | 13259.076 |
| NM_005627 | 15450.657 | 21859.598 | AK022148  | 2315.604  | 2521.259  | NM_007161 | 14808.519 | 12861.854 |
| M64497    | 1502.232  | 1413.795  | Z36811    | 60532.398 | 61115.07  | NM_014387 | 1525.89   | 1597.623  |
| NM_007274 | 8850.757  | 7729.588  | NM_01895C | 20483.611 | 12278.039 | NM_003641 | 4153.31   | 3261.521  |
| NM_00335E | 2847.323  | 2626.914  | K03200    | 8745.748  | 7289.128  | NM_01246E | 1897.747  | 1602.69   |

|            |           |           |           |           |           |           |           |           |
|------------|-----------|-----------|-----------|-----------|-----------|-----------|-----------|-----------|
| AF238315   | 528.41    | 638.569   | U17629    | 6665.75   | 6005.708  | L29140    | 51806.969 | 37195.531 |
| NM_00189C  | 1551.391  | 1178.354  | NM_02042E | 12220.729 | 8902.505  | AK026448  | 4655.087  | 3772.695  |
| NM_00128E  | 5328.509  | 4482.371  | U79265    | 4270.075  | 2981.562  | AK057418  | 2924.478  | 2737.849  |
| NM_01464E  | 1080.414  | 883.429   | AK022868  | 8302.096  | 4466.953  | AF148646  | 9495.095  | 9640.434  |
| NM_019604  | 756.338   | 687.28    | NM_002687 | 23465.721 | 17185.74  | AL110218  | 1876.584  | 1990.033  |
| NM_005073  | 1304.427  | 1448.291  | NM_000627 | 8249.369  | 5262.666  | AB023201  | 1617.031  | 2229.719  |
| NM_000951  | 3610.019  | 3438.114  | NM_00003E | 2280.824  | 914.898   | X00094    | 1675.268  | 2127.63   |
| X52599     | 2708.554  | 3001.829  | NM_00082E | 7200.481  | 5792.018  | NM_00377E | 9554.892  | 12694.237 |
| AA029300   | 3879.128  | 4232.457  | NM_001963 | 1228.137  | 990.426   | NM_00208E | 23179.182 | 45309.895 |
| BG708842   | 47159.578 | 49804.07  | NM_004334 | 10092.18  | 8343.036  | NM_00292E | 14764.176 | 29318.178 |
| M19723     | 46536.277 | 63965.879 | S62027    | 899.393   | 743.295   | AF155657  | 7994.911  | 14475.065 |
| X06256     | 2512.675  | 2501.049  | NM_00388E | 35910.383 | 32041.373 | NM_00605E | 8251.164  | 9319.876  |
| AA709271   | 1451.521  | 1590.742  | NM_005843 | 4669.387  | 5937.862  | AF045229  | 10776.035 | 8346.371  |
| M34057     | 4395.685  | 5524.942  | NM_003854 | 1338.438  | 1211.144  | NM_00184C | 9634.731  | 9229.558  |
| ID 1984668 | 3262.924  | 3145.625  | NM_01798C | 1432.752  | 1484.121  | NM_01609E | 39712.445 | 39783.473 |
| ID 1832579 | 3864.77   | 3985.745  | NM_00125E | 62528.102 | 61209.125 | NM_000394 | 353.273   | 1163.01   |
| H-430185 N | 1800.228  | 1433.848  | AF053712  | 10651.508 | 12623.321 | NM_00115E | 13494.379 | 26345.623 |
| D16583     | 5781.651  | 4438.419  | NM_003947 | 3047.684  | 3617.843  | M62896    | 46029.059 | 59639.781 |
| H44051     | 2004.129  | 1442.618  | NM_002821 | 37885.957 | 34435.398 | NM_000017 | 4511.543  | 2633.489  |
| AA481547   | 32552.201 | 25044.172 | M96652    | 62372.031 | 63322     | NM_000237 | 570.137   | 594.192   |
| AA831880   | 2373.015  | 2510.659  | L41690    | 3832.398  | 4618.82   | NM_01834E | 5652.598  | 4610.673  |
| T64880     | 7376.174  | 8273.44   | NM_01805E | 2588.37   | 3088.59   | AL122054  | 698.832   | 551.006   |
| AB028990   | 1638.969  | 1190.003  | NM_00093E | 65826.734 | 61730.074 | AB023151  | 565.065   | 432.845   |
| AK002089   | 930.134   | 772.944   | NM_00518E | 944.363   | 839.388   | NM_00014C | 15844.448 | 13491.846 |
| AF063611   | 1463.666  | 1363.404  | NM_006514 | 5363.899  | 4078.178  | NM_00512E | 4118.652  | 3985.997  |
| NM_00603E  | 1587.582  | 1589.064  | AF065164  | 25181.662 | 18250.016 | NM_00497E | 23072.139 | 23145.055 |
| NM_00208E  | 757.566   | 798.627   | K01900    | 692.705   | 436.902   | NM_005737 | 37280.992 | 34183.84  |
| NM_00459C  | 444.756   | 409.902   | AJ008143  | 58679.504 | 52562.559 | NM_00166C | 11862.464 | 13348.785 |
| M28983     | 366.743   | 412.888   | NM_007144 | 2045.798  | 1694.781  | NM_00075E | 1837.444  | 2888.351  |
| NM_01465E  | 7461.314  | 8063.155  | NM_00509E | 717.05    | 842.283   | AB040945  | 1455.703  | 1800.934  |
| NM_00207E  | 3541.468  | 3246.485  | NM_004424 | 40559.617 | 28194.215 | NM_00201E | 10660.604 | 11651.849 |
| X05299     | 4336.428  | 4444.518  | AL133117  | 4195.254  | 3283.817  | NM_00601E | 641.189   | 988.534   |
| BM468475   | 1043.25   | 1169.864  | AB033040  | 759.456   | 740.292   | AF161383  | 4631.946  | 4351.878  |
| NM_00031E  | 4570.481  | 3619.019  | AF070586  | 41327.719 | 29256.006 | NM_00041C | 12815.768 | 17019.352 |
| NM_00206C  | 25332.668 | 21618.898 | NM_01441E | 4274.49   | 3713.123  | AF224266  | 3210.425  | 4874.75   |
| AK001230   | 5994.4    | 6567.255  | NM_01330E | 2174.478  | 2669.618  | U72882    | 44469.77  | 56393.672 |
| NM_01468C  | 9973.684  | 9187.696  | NM_012227 | 9597.994  | 8833.4    | NM_00532E | 672.228   | 796.396   |
| NM_005027  | 3882.01   | 4454.544  | NM_006101 | 4061.606  | 3907.719  | NM_000107 | 10350.359 | 8096.245  |
| NM_00461E  | 2356.318  | 2404.679  | NM_001237 | 14911.546 | 17196.523 | AL157445  | 3263.582  | 2723.688  |
| NM_00560E  | 31536.088 | 26835.586 | NM_002507 | 6969.683  | 10180.52  | NM_001517 | 17755.086 | 11278.163 |
| NM_012294  | 344.487   | 284.051   | NM_01596E | 10221.357 | 14327.975 | NM_00505E | 7979.093  | 8285.229  |
| NM_001106  | 617.671   | 455.515   | NM_01614E | 1745.121  | 2718.634  | D86974    | 5616.195  | 7077.091  |
| NM_01558E  | 1007.821  | 997.844   | NM_01607E | 35596.375 | 34224.121 | NM_003384 | 6137.803  | 7249.452  |
| NM_01849C  | 2309.043  | 1814.78   | NM_00379E | 1664.327  | 1453.816  | Y12337    | 2421.744  | 3045.421  |
| NM_00477E  | 665.772   | 690.823   | NM_004401 | 14946.439 | 15847.103 | M29551    | 15636.169 | 17505.654 |
| NM_00435E  | 369.503   | 300.694   | NM_00184E | 29856.924 | 21376.768 | AB023148  | 537.571   | 724.868   |
| NM_01225E  | 1124.253  | 995.955   | AF255910  | 3922.137  | 3373.623  | NM_00292E | 1072.804  | 1633.454  |
| AF101051   | 397.827   | 402.632   | NM_01614E | 7884.969  | 5383.853  | BC028375  | 762.572   | 776.648   |
| NM_00724E  | 8074.97   | 4924.612  | AB046776  | 4817.4    | 3173.253  | AB026436  | 2110.524  | 2169.453  |
| NM_00022E  | 3426.745  | 3063.151  | D42084    | 8284.73   | 7812.327  | NM_01602E | 8015.923  | 6268.053  |
| NM_00699E  | 31765.787 | 22167.703 | NM_001734 | 1031.991  | 1178.429  | AK024562  | 1999.099  | 1865.641  |
| NM_00312E  | 12322.88  | 10884.231 | NM_01469E | 13571.008 | 10404.598 | NM_01406E | 1513.296  | 1806.887  |
| NM_00195E  | 5226.388  | 4566.555  | AB007896  | 3908.648  | 3378.046  | NM_00457E | 875.425   | 1066.121  |

|           |           |           |           |           |           |           |           |           |
|-----------|-----------|-----------|-----------|-----------|-----------|-----------|-----------|-----------|
| AB033064  | 3074.188  | 3570.934  | AB007916  | 7855.986  | 7110.246  | NM_000072 | 698.009   | 963.544   |
| AK022317  | 8537.158  | 8432.288  | NM_002874 | 1607.921  | 2594.466  | NM_000697 | 1291.715  | 1497.812  |
| NM_018396 | 10534.243 | 10484.972 | AF049140  | 6701.865  | 7202.58   | NM_001496 | 54672.527 | 61807.91  |
| NM_003124 | 10690.37  | 11011.781 | AB037793  | 834.565   | 1034.817  | AF263523  | 1809.517  | 2658.06   |
| NM_006886 | 46391.359 | 42097.797 | AL136794  | 3234.771  | 3428.637  | L08441    | 10466.681 | 11827.831 |
| NM_004531 | 5081.871  | 6609.937  | BC035601  | 60441.984 | 57843.156 | AA641953  | 1186.06   | 1149.341  |
| AB040920  | 1231.871  | 1785.467  | NM_001458 | 10699.697 | 10120.402 | AI248827  | 3886.88   | 3004.771  |
| NM_015720 | 14475.639 | 14581.181 | NM_020388 | 49406.609 | 50158.816 | R45026    | 47114.973 | 35843.504 |
| AB033070  | 626.814   | 972.463   | NM_004202 | 62813.82  | 59915.992 | BI768063  | 1397.653  | 1773.294  |
| AK000158  | 5254.274  | 6913.981  | AB046829  | 1904.899  | 2491.328  | AI970239  | 5061.221  | 6479.256  |
| NM_005769 | 1918.349  | 2294.38   | NM_016445 | 6249.194  | 6895.979  | AA496452  | 20419.961 | 18043.385 |
| AK024500  | 25510.453 | 22740.527 | NM_003379 | 59230.727 | 58432.734 | X67594    | 7655.79   | 10471.643 |
| NM_002564 | 18261.115 | 17250.656 | NM_004521 | 15877.11  | 8901.143  | NM_015866 | 563.643   | 758.098   |
| Z83806    | 379.579   | 322.264   | AF229162  | 4515.584  | 3622.975  | NM_001631 | 1673.26   | 1888.232  |
| NM_000963 | 714.693   | 751.459   | U02309    | 60671.625 | 61494.438 | AB000734  | 10585.063 | 9029.292  |
| NM_013308 | 7397.737  | 7390.152  | AB028991  | 13965.574 | 10048.981 | NM_005987 | 61491.234 | 67847.883 |
| AF027302  | 7508.163  | 7220.822  | AF263547  | 20265.746 | 12597.51  | X87838    | 3591.819  | 2461.414  |
| NM_002852 | 3402.682  | 4066.554  | NM_003923 | 1287.175  | 1399.273  | NM_000166 | 3945.501  | 3206.127  |
| NM_001817 | 4335.38   | 2440.19   | NM_004831 | 3395.103  | 2837.109  | AF182814  | 1425.041  | 1630.158  |
| NM_016228 | 708.158   | 727.765   | NM_014213 | 20072.777 | 17211.596 | L37199    | 611.612   | 1285.43   |
| NM_000157 | 3172.198  | 2028.486  | NM_000168 | 15874.154 | 12682.063 | NM_007260 | 785.188   | 944.008   |
| NM_018088 | 1121.939  | 908.25    | AF294629  | 47727.84  | 39591.789 | AF148646  | 10152.347 | 9722.834  |
| BC013695  | 10188.124 | 8473.097  | NM_000545 | 40872.004 | 36990.492 | AL110218  | 1502.547  | 1389.567  |
| NM_007205 | 956.205   | 578.029   | NM_002136 | 55559.422 | 56875.121 | AB023201  | 1935.406  | 1798.174  |
| AK023035  | 5084.281  | 4475.331  | AK025571  | 12838.17  | 13873.359 | X00094    | 1750.215  | 1612.752  |
| NM_014846 | 3562.759  | 3165.087  | NM_004940 | 703.708   | 805.905   | NM_003775 | 10591.416 | 9976.729  |
| AB011164  | 6179.033  | 5536.701  | NM_014463 | 41809.977 | 40637.25  | NM_002082 | 23536.713 | 23904.916 |
| M24750    | 1911.098  | 1903.019  | NM_005520 | 31571.945 | 30857.57  | NM_002922 | 15018.766 | 16175.401 |
| NM_005965 | 4357.533  | 4303.289  | AK023265  | 7485.112  | 10834.027 | AF155657  | 9243.767  | 11286.753 |
| NM_002740 | 6324.513  | 6348.391  | NM_018723 | 6368.92   | 7993.395  | NM_006056 | 10464.149 | 12492.166 |
| AL117482  | 4667.008  | 6158.057  | AB029009  | 11225.037 | 12986.646 | AF045229  | 11057.875 | 11689.476 |
| NM_006549 | 45621.855 | 42923.738 | AF112207  | 6530.933  | 7582.292  | NM_001840 | 9456.103  | 12121.802 |
| AB018324  | 18701.957 | 18637.586 | AJ420488  | 64256.992 | 61907.449 | AK025099  | 1903.836  | 2304.239  |
| NM_002742 | 51278.016 | 61733.996 | NM_005594 | 61456.914 | 63108.563 | NM_016096 | 45537.77  | 40562.75  |
| Z25431    | 3393.957  | 3214.587  | NM_004461 | 63089.867 | 63017.09  | NM_000228 | 448.565   | 654.143   |
| NM_005627 | 14970.97  | 21609.414 | NM_018473 | 8777.675  | 8190.505  | NM_000830 | 942.808   | 1048.306  |
| M64497    | 1410.345  | 1534.714  | BF106121  | 5007.652  | 6939.836  | NM_005206 | 385.742   | 538.747   |
| NM_007274 | 15800.42  | 14759.272 | AK022590  | 4846.269  | 4119.363  | AF148950  | 734.107   | 820.186   |
| NM_003356 | 8914.49   | 7910.419  | AK024343  | 3482.918  | 2824.27   | NM_001155 | 12338.328 | 12572.621 |
| AF238315  | 798.276   | 1017.797  | NM_001936 | 989.932   | 815.179   | M62896    | 43169.555 | 31697.32  |
| NM_006224 | 52108.434 | 61177.684 | NM_002569 | 2359.19   | 1878.881  | NM_017736 | 1189.599  | 2022.752  |
| AL137300  | 6657.083  | 5884.526  | M12078    | 18527.525 | 17592.277 | NM_006803 | 594.756   | 432.212   |
| NM_014648 | 1102.81   | 812.141   | NM_004550 | 15661.799 | 11931.624 | NM_002533 | 964.579   | 1056.166  |
| NM_019604 | 615.364   | 439.625   | NM_000785 | 4613.576  | 4775.66   | AF235022  | 658.655   | 548.305   |
| NM_005073 | 1336.158  | 1107.394  | NM_004110 | 57874.113 | 50099.602 | AL137764  | 23609.877 | 14845.201 |
| NM_000951 | 3837.618  | 3334.913  | NM_013387 | 59746.445 | 57128.238 | NM_001660 | 13515.758 | 8389.026  |
| X52599    | 3051.578  | 3027.765  | NM_005262 | 56177.344 | 51850.855 | NM_000710 | 458.754   | 651.64    |
| AA029300  | 3758.356  | 3984.521  | NM_005757 | 2189.739  | 2119.43   | NM_000752 | 1969.564  | 2416.82   |
| BG708842  | 50863.391 | 62980.07  | NM_016483 | 1074.05   | 1057.306  | AB040945  | 1741.153  | 1564.273  |
| M19723    | 48213.613 | 68532.883 | NM_020128 | 2774.763  | 2603.883  | NM_002018 | 10485.371 | 10999.902 |
| X06256    | 2314.553  | 1957.609  | NM_005068 | 47207.27  | 41182.035 | NM_002377 | 437.15    | 685.145   |
| AA709271  | 1251.324  | 1416.012  | NM_018223 | 11554.089 | 9783.075  | NM_006018 | 734.137   | 1704.448  |
| M34057    | 4284.25   | 3816.512  | NM_006693 | 40041.367 | 34223.699 | AF161383  | 5012.607  | 6266.299  |

|            |           |           |            |           |           |           |           |           |
|------------|-----------|-----------|------------|-----------|-----------|-----------|-----------|-----------|
| ID 1984668 | 3036.401  | 3179.556  | NM_001722  | 4775.744  | 6337.561  | NM_00041C | 12170.695 | 16464.066 |
| ID 1832579 | 3619.279  | 4745.077  | AB046802   | 13749.21  | 19121.65  | AF224266  | 4498.643  | 4828.177  |
| H-430185 N | 1726.25   | 1714.723  | NM_003297  | 2430.997  | 2590.143  | U72882    | 47645.742 | 49945.855 |
| D16583     | 5370.165  | 4000.61   | X74861     | 1500.618  | 2981.02   | NM_014337 | 20916.262 | 14900.206 |
| H44051     | 1926.849  | 1529.57   | NM_00694C  | 1888.387  | 2278.438  | NM_007161 | 23385.6   | 15629.857 |
| AA481547   | 30310.688 | 25985.732 | NM_018269  | 15816.793 | 14902.664 | NM_014387 | 1450.34   | 1227.318  |
| AA831880   | 2451.475  | 2571.591  | AK024633   | 11802.04  | 10351.785 | NM_003641 | 4023.803  | 3752.959  |
| T64880     | 7008.445  | 7337      | NM_001453  | 13288.396 | 16210.292 | NM_012463 | 1977.589  | 2631.851  |
| AB028990   | 1618.061  | 1124.828  | AF011573   | 28534.068 | 23032.408 | L29140    | 58740.281 | 61550.547 |
| AK002089   | 476.995   | 497.371   | NM_002145  | 10760.354 | 9269.526  | AK026448  | 4656.67   | 4917.83   |
| NM_00670E  | 33501.445 | 24188.246 | AF101051   | 685.086   | 1386.884  | AK057418  | 3068.003  | 3234.171  |
| AB037835   | 2918.178  | 2253.729  | NM_007245  | 14254.243 | 12363.073 | AK024562  | 911.809   | 742.126   |
| BM468475   | 878.883   | 932.147   | NM_00189C  | 2430.503  | 2175.464  | NM_01406E | 520.797   | 449.039   |
| NM_00031E  | 3986.302  | 2374.376  | NM_00128E  | 8952.982  | 9181.58   | NM_004573 | 924.447   | 1246.317  |
| NM_00206C  | 26690.271 | 18728.941 | NM_01464E  | 1646.588  | 1564.722  | NM_000072 | 487.086   | 422.373   |
| AK001230   | 5572.241  | 5419.729  | NM_019604  | 2752.293  | 2731.91   | NM_000697 | 1317.047  | 973.483   |
| NM_01468C  | 9860.394  | 7184.715  | NM_005073  | 2631.213  | 2515.584  | NM_000017 | 9860.112  | 7657.029  |
| NM_005027  | 4151.018  | 3491.201  | NM_000951  | 14709.651 | 16268.582 | NM_000237 | 705.079   | 572.267   |
| NM_004612  | 2276.996  | 2134.863  | X52599     | 23201.523 | 21892.131 | NM_01834E | 6302.378  | 5884.938  |
| NM_00560E  | 28606.965 | 21571.607 | AA029300   | 7492.777  | 7563.877  | AL122054  | 939.191   | 1130.052  |
| NM_00110E  | 466.952   | 546.53    | BG708842   | 58495.305 | 60924.41  | AB023151  | 620.657   | 907.453   |
| NM_015583  | 906.178   | 694.791   | M19723     | 59205.961 | 59334.648 | NM_00014C | 16599.695 | 20685.691 |
| NM_01849C  | 2571.028  | 2239.461  | X06256     | 23666.979 | 27880.252 | NM_00512E | 4058.177  | 5900.287  |
| NM_00477E  | 476.305   | 670.816   | AA149811   | 593.122   | 1092.645  | NM_02003E | 1068.511  | 1188.124  |
| NM_00624E  | 3093.023  | 4020.955  | AA709271   | 10495.323 | 10536.085 | NM_01624E | 2794.764  | 2734.977  |
| NM_004352  | 326.777   | 174.537   | M34057     | 21384.848 | 23339.898 | NM_01592E | 11543.558 | 9740.823  |
| NM_01225E  | 771.459   | 689.839   | ID 1984668 | 4559.928  | 4591.444  | X03757    | 4915.827  | 3957.509  |
| NM_005103  | 575.408   | 793.675   | ID 1832579 | 6543.995  | 7813.947  | NM_01865E | 26742.59  | 16554.775 |
| NM_004822  | 1892.516  | 1961.202  | H-430185 N | 5170.611  | 5559.507  | NM_00513E | 906.897   | 525.608   |
| AK022349   | 2155.19   | 1961.229  | D16583     | 14274.973 | 12202.496 | AK094513  | 642.635   | 619.204   |
| NM_00575C  | 641.165   | 597.757   | H44051     | 11770.122 | 9592.388  | NM_001183 | 7018.959  | 7607.363  |
| NM_004973  | 777.678   | 513.935   | AA481547   | 48587.891 | 42240.207 | NM_00089C | 2512.616  | 2831.377  |
| NM_00724E  | 8362.833  | 7186.939  | AA831880   | 4620.338  | 4555.979  | NM_00497E | 23206.855 | 18063.49  |
| NM_00189C  | 1722.561  | 1355.534  | T64880     | 20935.635 | 19690.674 | AK021597  | 1412.218  | 1787.033  |
| NM_00128E  | 5756.542  | 4998.816  | NM_002852  | 11963.99  | 12212.962 | NM_005737 | 39903.23  | 31309.404 |
| NM_01822E  | 1926.993  | 1264.103  | NM_001817  | 13875.855 | 11746.652 | NM_00016E | 2535.928  | 2287.077  |
| NM_00632E  | 8666.089  | 5650.824  | AF063611   | 1856.641  | 1996.489  | BE799167  | 2446.083  | 1858.548  |
| AY009127   | 16326.383 | 16363.407 | NM_00603E  | 9689.604  | 10169.955 | AF182814  | 1239.252  | 1143.771  |
| NM_01486E  | 5307.407  | 4355.791  | NM_00208E  | 3996.204  | 3935.4    | NM_00532E | 659.882   | 707.351   |
| NM_00392E  | 609.999   | 576.879   | NM_00459C  | 621.932   | 485.055   | NM_000107 | 11210.361 | 10337.018 |
| AK000158   | 5661.554  | 5597.444  | M28983     | 1145.299  | 944.459   | AL157445  | 3009.977  | 3523.966  |
| NM_00576E  | 1724.109  | 1880.123  | NM_01465E  | 30905.572 | 31865.85  | NM_001517 | 19780.998 | 17631.279 |
| AK024500   | 18937.48  | 15778.706 | NM_00207E  | 21103.814 | 21226.863 | NM_005053 | 7044.481  | 8495.288  |
| NM_002564  | 16844.141 | 16861.314 | X05299     | 7523.648  | 7018.693  | D86974    | 5087.618  | 5491.012  |
| Z83806     | 390.996   | 451.094   | BM468475   | 2932.415  | 2937.189  | NM_018283 | 5972.452  | 6035.341  |
| NM_000963  | 692.459   | 934.479   | NM_00031E  | 10746.054 | 10269.493 | NM_001983 | 2232.779  | 2317.746  |
| NM_01330E  | 4620.217  | 4937.501  | NM_00206C  | 60004.07  | 60164.539 | NM_003384 | 6500.346  | 5294.23   |
| AF027302   | 7234.164  | 6664.464  | AK001230   | 30101.18  | 36372.777 | Y12337    | 2737.198  | 2039.481  |
| NM_002852  | 4095.062  | 4935.7    | NM_01468C  | 41058.164 | 40968.605 | M29551    | 15066.161 | 8942.412  |
| NM_001817  | 5068.77   | 3933.479  | NM_005027  | 14688.043 | 16644.701 | AB023148  | 346.767   | 270.302   |
| AF063611   | 1630.462  | 1553.394  | NM_004612  | 5085.242  | 5158.669  | NM_00292E | 1213.718  | 1152.323  |
| NM_00603E  | 1671.593  | 1486.595  | NM_00560E  | 57594.52  | 56359.406 | BC028375  | 952.135   | 1153.718  |
| NM_00208E  | 1025.681  | 911.352   | NM_012294  | 1091.933  | 1373.63   | AB026436  | 2280.876  | 2085.796  |

|           |           |           |           |           |           |           |           |           |
|-----------|-----------|-----------|-----------|-----------|-----------|-----------|-----------|-----------|
| NM_00459C | 498.848   | 383.464   | NM_01849C | 6991.862  | 7668.308  | NM_01602C | 9114.197  | 11002.146 |
| M28983    | 421.322   | 410.328   | NM_00477E | 3658.715  | 3305.816  | CY3Cy5    | 4399.031  | 115.195   |
| NM_01465E | 8079.019  | 7972.643  | NM_00435E | 1377.76   | 1402.364  | NM_00210C | 29295.629 | 9649.146  |
| NM_00207E | 3664.863  | 2799.07   | NM_01225E | 1351.886  | 1022.106  | NM_00337C | 20810.988 | 8549.879  |
| X05299    | 4164.215  | 3479.897  | NM_00622A | 59667.109 | 58902.676 | AK000819  | 1143.206  | 934.021   |
| NM_00727A | 14450.152 | 10600.82  | AL137300  | 14992.136 | 14641.393 | AF201941  | 1240.126  | 820.591   |
| NM_00335E | 7677.856  | 4468.333  | NM_00022E | 13168.035 | 12889.944 | NM_00707C | 1589.763  | 360.819   |
| AF238315  | 627.389   | 733.581   | NM_00699E | 45261.211 | 48912.855 | AL133019  | 1859.711  | 712.908   |
| NM_00622A | 40526.859 | 50650.906 | NM_00312E | 21923     | 21603.322 | AK026192  | 460.207   | 121.733   |
| AL137300  | 7105.937  | 6428.529  | NM_00195E | 17169.869 | 18291.891 | NM_01489E | 491.837   | 323.683   |
| NM_00022E | 3616.831  | 3005.165  | AB033064  | 11758.462 | 11557.665 | NM_01774E | 4163.548  | 946.607   |
| NM_00699E | 32690.26  | 27296.711 | AK022317  | 38217.621 | 45642.504 | AK025374  | 646.427   | 391.696   |
| NM_00312E | 12923.534 | 12471.109 | NM_01839E | 21606.396 | 24797.928 | NM_014901 | 5975.1    | 1323.021  |
| NM_00195E | 4651.338  | 3544.85   | NM_00312A | 49282.805 | 52191.984 | AK000005  | 4898.832  | 984.457   |
| AB033064  | 2555.409  | 3255.668  | NM_00688E | 54209.887 | 56317.879 | NM_00210C | 28266.99  | 2048.401  |
| AK022317  | 7780.846  | 8408.699  | NM_004531 | 11574.232 | 16538.061 | NM_00337C | 20363.301 | 1500.574  |
| NM_01839E | 10420.626 | 11096.846 | AB040920  | 2858.77   | 4307.52   | SR1       | 66700.578 | 6540.841  |
| NM_00312A | 9101.463  | 9806.485  | NM_01572C | 53960.945 | 57584.57  | SR3       | 26804.777 | 2368.202  |
| NM_00688E | 42094.926 | 44921.207 | AB033070  | 5203.003  | 8515.464  | SR5       | 2392.677  | 267.475   |
| NM_004531 | 5207.533  | 6422.688  | AK000158  | 42746.477 | 50973.98  | SR7       | 2775.331  | 2608.893  |
| AL133581  | 2529.432  | 2523.615  | NM_00576E | 17783.139 | 18948.092 | SR9       | 8052.472  | 263.432   |
| NM_00255E | 847.248   | 1043.531  | AK024500  | 60312.82  | 57085.094 | CY3Cy5    | 2397.239  | 87.39     |
| NM_005031 | 7759.033  | 9038.06   | NM_00256A | 57346.219 | 57352.609 | NM_01328E | 623.674   | 537.714   |
| AB040920  | 1115.583  | 1544.467  | NM_00188A | 1276.344  | 6935.49   | AF071508  | 1695.446  | 3108.893  |
| NM_00072C | 996.247   | 854.146   | Z83806    | 732.257   | 923.086   | L07265    | 36839.551 | 22527.969 |
| NM_00484A | 623.006   | 803.669   | NM_01330E | 16401.824 | 16257.369 | D16472    | 7563.399  | 4971.729  |
| AK024639  | 4368.669  | 3062.347  | AF027302  | 11163.642 | 9703.81   | NM_00281E | 34170.949 | 7765.671  |
| NM_01572C | 14020.273 | 10773.897 | NM_00670E | 49610.234 | 48930.719 | AK022745  | 10789.819 | 1889.734  |
| AB007915  | 1164.045  | 883.538   | AB037835  | 5153.938  | 5857.21   | AL049450  | 3763.021  | 835.416   |
| AB033070  | 759.63    | 994.44    | NM_01622E | 1201.019  | 1216.067  | NM_00508E | 49560.434 | 7026.586  |
| AB028990  | 1208.268  | 718.064   | NM_000157 | 7709.37   | 7924.855  | NM_01760E | 1339.938  | 182.447   |
| AK002089  | 332.342   | 235.928   | NM_00071E | 850.603   | 965.861   | AK024644  | 7123.107  | 1249.397  |
| NM_00670E | 28120.975 | 17960.74  | NM_01808E | 6248.802  | 6481.234  | U68494    | 775.234   | 275.331   |
| AB037835  | 2450.151  | 2011.866  | BC013695  | 16963.482 | 14751.699 | AL137360  | 3186.939  | 777.151   |
| NM_01622E | 613.014   | 444.913   | NM_00720E | 3690.374  | 3205.215  | AK024523  | 973.865   | 814.933   |
| NM_000157 | 3143.585  | 2936.812  | AK023035  | 10263.115 | 12451.554 | AK024543  | 1473.544  | 1608.549  |
| NM_00071E | 302.748   | 284.986   | NM_01484E | 6526.713  | 6787.964  | AK024624  | 28315.689 | 36927.363 |
| NM_01808E | 1027.689  | 812.505   | AB011164  | 18156.084 | 16705.281 | AK025090  | 1057.593  | 454.381   |
| BC013695  | 9598.128  | 7485.704  | M24750    | 2646.799  | 3538.65   | AK024883  | 4558.591  | 990.737   |
| NM_00720E | 753.325   | 461.701   | NM_00596E | 12415.284 | 15921.026 | AF217989  | 5125.187  | 1331.228  |
| AK023035  | 5155.344  | 4296.35   | NM_00274C | 10637.81  | 12452.534 | AL109696  | 783.135   | 236.666   |
| NM_01484E | 3865.644  | 5143.008  | AL117482  | 8266.232  | 8872.619  | AK022190  | 669.882   | 245.327   |
| AB011164  | 5943.097  | 5184.759  | NM_00654E | 60812.367 | 59719.246 | AJ011593  | 2880.814  | 625.448   |
| M24750    | 2043.185  | 2313.462  | AB018324  | 33460.012 | 41524.047 | AJ227907  | 514.743   | 33.126    |
| NM_00596E | 4256.67   | 4194.049  | NM_00274E | 61711.961 | 62985.082 | U17621    | 318.867   | 231.996   |
| NM_00274C | 6331.088  | 5512.795  | Z25431    | 7145.521  | 6692.96   | AL049239  | 3849.465  | 691.704   |
| AL117482  | 4875.606  | 4279.996  | NM_005627 | 25198.73  | 39355.273 | AK023187  | 592.666   | 1306.102  |
| NM_00654E | 42256.559 | 34972.688 | M64497    | 9646.423  | 11307.491 | AK022231  | 242.964   | 508.588   |
| AB018324  | 18284.926 | 16686.172 | NM_00727A | 40046.813 | 25957.566 | NM_01903E | 636.814   | 1059.055  |
| NM_00274E | 51661.16  | 64163.047 | NM_00335E | 43962.516 | 42593.395 | AL133101  | 1475.073  | 842.717   |
| Z25431    | 3438.893  | 3438.596  | AF238315  | 1574.139  | 2125.565  | AL157459  | 2004.341  | 709.787   |
| NM_005627 | 15151.424 | 20748.758 | NM_00189C | 2011.32   | 2063.659  | AL353954  | 1365.912  | 240.286   |
| M64497    | 1361.113  | 1497.692  | NM_00128E | 9173.672  | 10414.487 | NM_01763C | 991.629   | 196.836   |

|           |           |           |            |           |           |           |           |           |
|-----------|-----------|-----------|------------|-----------|-----------|-----------|-----------|-----------|
| CY3Cy5    | 7427.332  | 404.072   | NM_014648  | 1385.529  | 1373.724  | AK000778  | 2556.064  | 365.617   |
| NM_002711 | 3382.931  | 2098.504  | NM_019604  | 2439.561  | 2498.099  | AL133573  | 7685.869  | 8810.935  |
| AL355732  | 1371.194  | 1539.983  | NM_005073  | 2199.873  | 2095.603  | AK000115  | 3868.154  | 4298.006  |
| AL049990  | 1731.223  | 1646.107  | NM_000951  | 16669.289 | 15261.851 | AK000958  | 940.649   | 173.893   |
| AF131843  | 1143.747  | 742.97    | X52599     | 18243.238 | 13704.951 | BC024924  | 7523.323  | 7914.916  |
| AK026653  | 572.898   | 488.804   | AA029300   | 6742.052  | 6872.268  | AF086374  | 401.559   | 1300.406  |
| NM_020231 | 374.072   | 317.271   | BG708842   | 55079.574 | 59548.301 | AL162066  | 28241.275 | 28960.182 |
| AF075008  | 1455.857  | 871.653   | M19723     | 56081.699 | 59993.145 | NM_016096 | 31181.359 | 10523.362 |
| NM_006504 | 1370.976  | 1686.073  | X06256     | 26079.977 | 25801.461 | U79290    | 1254.682  | 345.145   |
| AF070538  | 427.584   | 286.636   | AA709271   | 10338.419 | 10434.95  | X98114    | 439.408   | 283.029   |
| AL137430  | 415.773   | 299.951   | M34057     | 20644.746 | 24781.367 | D87682    | 626.762   | 416.88    |
| NM_002711 | 2301.411  | 1146.993  | ID 1984668 | 4725.991  | 4535.944  | AF321617  | 6491.728  | 1569.514  |
| SR1       | 86641.32  | 61848.512 | ID 1832579 | 6740.981  | 6916.752  | M85205    | 504.365   | 248.771   |
| SR3       | 18005.285 | 8460.55   | H-430185 M | 5437.646  | 5379.592  | AF223389  | 584.159   | 83.496    |
| SR7       | 955.753   | 5547.324  | D16583     | 14855.909 | 15511.903 | NM_000682 | 291.314   | 878.61    |
| SR9       | 1776.675  | 178.993   | H44051     | 27447.785 | 30787.857 | NM_016296 | 1118.553  | 2623.496  |
| CY3Cy5    | 4220.88   | 167.956   | AA481547   | 52133.875 | 56957.25  | AK002146  | 656.33    | 1167.323  |
| L38282    | 3205.245  | 2863.853  | AA831880   | 4772.138  | 5366.186  | NM_003156 | 1393.225  | 1488.608  |
| NM_018056 | 2615.926  | 2348.277  | T64880     | 21889.354 | 27755.332 | AK023494  | 834.914   | 789.292   |
| NM_019006 | 3395.38   | 3320.803  | AB028990   | 2266.087  | 2132.369  | NM_015492 | 7966.431  | 1405.715  |
| AK023505  | 2040.537  | 1272.321  | AK002089   | 480.421   | 1146.787  | AF132204  | 5180.354  | 1791.892  |
| AB037851  | 3601.936  | 2475.348  | AF063611   | 1597.82   | 2100.289  | AK022874  | 7327.392  | 1808.047  |
| AL050389  | 2450.311  | 1613.126  | NM_006039  | 7143.21   | 5748.673  | AF143875  | 823.902   | 1232.966  |
| AK024684  | 1184.901  | 693.885   | NM_002089  | 3158.552  | 2876.083  | AK024602  | 50271.758 | 45378.141 |
| NM_014945 | 19724.869 | 10159.606 | NM_004590  | 714.011   | 827.615   | NM_000485 | 4474.322  | 1103.531  |
| AK001546  | 2048.03   | 1615.141  | M28983     | 1012.318  | 909.174   | NM_018542 | 1115.702  | 372.203   |
| NM_006537 | 7731.39   | 5486.803  | NM_014656  | 31752.178 | 28026.717 | AK025503  | 2575.395  | 979.313   |
| AF007155  | 17255.262 | 9266.324  | NM_002076  | 13939.809 | 10813.768 | AF130073  | 2288.872  | 793.861   |
| AL049282  | 4400.953  | 1456.639  | X05299     | 6918.66   | 5906.532  | AK024225  | 11336.661 | 2032.012  |
| AK021443  | 1012.855  | 441.04    | BM468475   | 1923.341  | 2038.733  | AF086334  | 538.826   | 139.685   |
| AF070569  | 621.886   | 728.085   | NM_000318  | 12017.972 | 10910.879 | AF075035  | 32548.264 | 23429.275 |
| AK024315  | 15951.333 | 10409.212 | NM_002060  | 57578.035 | 54923.773 | AL110180  | 3431.15   | 1665.344  |
| AK024862  | 106.044   | 1451.224  | AK001230   | 34694.168 | 36817.996 | NM_007262 | 28420.029 | 20766.602 |
| AK024945  | 3255.625  | 2050.5    | NM_014680  | 42809.238 | 39232.609 | NM_014783 | 3438.412  | 2923.03   |
| AK024579  | 3182.826  | 2459.95   | NM_005027  | 13997.432 | 13412.193 | NM_014053 | 5314.396  | 2897.701  |
| AL133118  | 3847.23   | 491.882   | NM_004612  | 5052.628  | 5248.954  | NM_002571 | 962.242   | 1288.871  |
| AK023571  | 3882.803  | 2797.604  | NM_005608  | 53927.969 | 54121.531 | NM_004936 | 4371.146  | 3615.209  |
| NM_001702 | 1968.747  | 1477.651  | NM_012294  | 1027.449  | 1313.85   | NM_001425 | 8179.759  | 3873.55   |
| AK026657  | 2472.332  | 1944.432  | NM_001106  | 3073.713  | 3585.256  | NM_015710 | 831.781   | 357.534   |
| AL833558  | 585.765   | 660.768   | NM_015583  | 3841.425  | 5271.785  | NM_014156 | 4082.801  | 743.085   |
| AF087991  | 33400.035 | 23160.771 | NM_018490  | 7221.069  | 7559.494  | AK021591  | 2051.423  | 727.911   |
| AJ227862  | 341.468   | 325.364   | NM_004778  | 4240.446  | 4191.412  | NM_014675 | 1700.177  | 1624.242  |
| Y12839    | 886.811   | 699.246   | NM_004352  | 1617.187  | 1760.508  | NM_014040 | 6689.538  | 4387.092  |
| X64979    | 863.695   | 642.052   | NM_012258  | 1665.896  | 1801.583  | AK000799  | 4954.704  | 3366.052  |
| AJ001876  | 952.756   | 796.988   | NM_007245  | 13777.624 | 14113.277 | NM_015582 | 574.085   | 442.817   |
| AJ227884  | 3913.766  | 2226.865  | NM_000229  | 10821.303 | 10527.585 | AK027091  | 902.383   | 613.121   |
| X64986    | 3767.39   | 1509.31   | NM_006995  | 43686.129 | 44722.602 | NM_001526 | 1986.653  | 838.229   |
| AK000842  | 12158.19  | 9687.241  | NM_003129  | 22170.318 | 19585.951 | U31738    | 1255.584  | 823.643   |
| AK023386  | 20683.057 | 11745.032 | NM_001956  | 20614.164 | 20445.441 | AF179890  | 7217.565  | 1683.335  |
| NM_007053 | 20123.982 | 17624.734 | AB033064   | 13796.063 | 17225.225 | AK023536  | 14071.77  | 3165.421  |
| AK022153  | 3182.252  | 1913.02   | AK022317   | 38730.344 | 39892.367 | AK026561  | 1790.524  | 486.954   |
| AK022789  | 1320.706  | 768.576   | NM_006886  | 58761.102 | 57899.125 | AK021568  | 8636.551  | 1294.838  |
| AK023756  | 429.618   | 472.739   | NM_004531  | 11341.755 | 15435.33  | AF088054  | 362.565   | 632.124   |



|           |           |           |            |           |           |           |           |           |
|-----------|-----------|-----------|------------|-----------|-----------|-----------|-----------|-----------|
| AK002095  | 1026.172  | 658.482   | AB040920   | 2797.533  | 4017.922  | AK023881  | 3410.688  | 2427.209  |
| AK000821  | 13935.795 | 12574.759 | NM_015720  | 57205.102 | 56967.191 | AK027114  | 67454.992 | 25036.475 |
| AK024526  | 15448.428 | 20806.652 | AB033070   | 5298.585  | 6492.563  | NM_001078 | 2482.374  | 1375.127  |
| AK000848  | 1254.71   | 961.464   | AK000158   | 42825.473 | 48636.285 | NM_000552 | 6511.79   | 3363.014  |
| AK023307  | 1108.538  | 1291.35   | NM_005769  | 19065.537 | 19465.203 | NM_003809 | 453.726   | 1424.687  |
| NM_017618 | 2869.507  | 2373.756  | AK024500   | 56624.625 | 56656.047 | AK000860  | 5136.762  | 10445.467 |
| NM_017848 | 801.407   | 393.455   | NM_002564  | 58894.188 | 58875.527 | NM_014961 | 944.094   | 639.37    |
| NM_019056 | 8721.66   | 6123.889  | NM_001884  | 725.288   | 1756.865  | NM_020145 | 2839.45   | 786.976   |
| AF279783  | 6227.006  | 4438.182  | Z83806     | 721.225   | 1197.593  | AK021529  | 3963.431  | 874.306   |
| AF182422  | 15769.671 | 12838.811 | NM_000963  | 2000.76   | 2371.664  | AB037845  | 6151.203  | 7326.95   |
| NM_016943 | 585.743   | 473.514   | NM_013308  | 17236.389 | 19975.355 | NM_005980 | 976.595   | 925.738   |
| AF070602  | 1615.541  | 1315.872  | AF027302   | 11678.762 | 12877.897 | NM_016190 | 61829.445 | 59902.633 |
| BE393290  | 2462.805  | 2052.463  | NM_002852  | 7975.595  | 6839.479  | AL137579  | 8405.579  | 8166.024  |
| NM_017622 | 1519.303  | 1317.329  | NM_001817  | 14755.425 | 12528.558 | NM_012383 | 5902.038  | 5898.674  |
| AF133331  | 6697.647  | 4868.124  | NM_016228  | 2467.878  | 2993.768  | AJ271684  | 1582.167  | 1381.615  |
| AK022289  | 4928.012  | 3860.021  | NM_000157  | 7681.848  | 6260.575  | AF255342  | 11288.951 | 5907.227  |
| L34408    | 380.622   | 357.628   | NM_000712  | 873.84    | 758.186   | NM_003300 | 12644.24  | 5107.99   |
| AF161403  | 24646.941 | 20800.363 | NM_018088  | 5574.121  | 6230.398  | AK026682  | 4792.859  | 2256.677  |
| S75708    | 11516.587 | 9413.537  | BC013695   | 15935.602 | 13203.018 | NM_017720 | 63548.219 | 27583.779 |
| U79291    | 9016.162  | 8046.905  | NM_007205  | 3474.707  | 2232.93   | NM_004655 | 393.651   | 577.447   |
| D17172    | 29600.441 | 33285.188 | NM_014846  | 6044.154  | 5774.449  | NM_003942 | 1439.282  | 291.448   |
| AF161370  | 421.465   | 907.251   | AB011164   | 16406.371 | 16792.088 | NM_006471 | 14934.76  | 4104.71   |
| AJ227859  | 2669.269  | 3318.611  | M24750     | 2500.988  | 2579.422  | NM_000368 | 2461.791  | 5772.35   |
| NM_018544 | 1821.106  | 1508.854  | NM_005965  | 13869.491 | 14152.388 | NM_016586 | 1649.597  | 2897.619  |
| AK022670  | 327.004   | 258.574   | NM_002740  | 10664.404 | 11211.794 | AK023847  | 446.235   | 256.226   |
| L10141    | 16881.973 | 17072.693 | AL117482   | 8260.985  | 8946.1    | NM_003860 | 4802.042  | 2244.448  |
| AB020699  | 6242.988  | 6400.146  | NM_006549  | 57383.566 | 56650.234 | NM_005414 | 1521.229  | 635.65    |
| AF086269  | 3839.609  | 5220.371  | AB018324   | 34735.402 | 37723.625 | NM_004468 | 24349.568 | 17392.846 |
| U90437    | 6863.918  | 8400.604  | NM_002742  | 58941.477 | 59542.055 | NM_016031 | 10565.446 | 9271.478  |
| D17169    | 49073.973 | 40990.418 | Z25431     | 6601.192  | 9307.268  | NM_004804 | 1982.755  | 899.697   |
| NM_017924 | 4733.47   | 4843.328  | NM_005627  | 24251.842 | 47648.453 | M92439    | 16840.809 | 3224.26   |
| S81578    | 1592.287  | 1824.728  | M64497     | 1719.629  | 2324.422  | AL117665  | 4846.751  | 2169.147  |
| NM_017546 | 7183.422  | 8558.753  | NM_007274  | 46479.168 | 46817.168 | AF263541  | 2048.624  | 4702.918  |
| AF086210  | 681.46    | 647.748   | NM_003356  | 46067.27  | 46040.594 | AK027169  | 245.288   | 1214.591  |
| AL137400  | 565.99    | 432.123   | AF238315   | 1862.984  | 2435.511  | NM_001262 | 4909.361  | 8977.441  |
| NM_006511 | 1361.184  | 1179.021  | NM_006224  | 61654.621 | 62119.766 | BE873030  | 3751.859  | 6497.985  |
| AF007142  | 1510.774  | 1530.561  | AL137300   | 18277.09  | 17424.566 | NM_002440 | 682.29    | 1771.682  |
| AF119853  | 4637.222  | 5224.134  | NM_014648  | 1140.164  | 1162.301  | NM_003625 | 1362.019  | 2771.14   |
| AF279782  | 743.936   | 1042.233  | NM_019604  | 3266.383  | 2503.821  | BC006990  | 9712.081  | 8565.292  |
| AJ012497  | 796.91    | 791.07    | NM_005073  | 2659.065  | 2167.499  | NM_002277 | 4865.909  | 2156.933  |
| NM_001126 | 7220.345  | 8446.221  | NM_000951  | 16730.498 | 17955.174 | NM_019114 | 3724.155  | 2416.693  |
| AK023673  | 3227.32   | 4453.888  | X52599     | 19727.533 | 17621.219 | M33552    | 21136.217 | 5865.819  |
| NM_018252 | 2886.647  | 4901.58   | AA029300   | 6368.151  | 6685.564  | AJ252060  | 1768.117  | 260.092   |
| NM_018000 | 56766.145 | 60402.859 | BG708842   | 54979.297 | 57787.328 | NM_006403 | 5533.83   | 2401.545  |
| AF164963  | 1988.518  | 2928.49   | AA709271   | 9580.22   | 7777.025  | AJ001402  | 2249.295  | 3944.881  |
| AF124366  | 52749.844 | 53781.344 | M34057     | 16416.363 | 14375.771 | NM_004540 | 544.697   | 1671.591  |
| AF130112  | 2628.906  | 3273.259  | ID 1984668 | 4174.917  | 3740.93   | L25628    | 656.486   | 398.647   |
| NM_000551 | 9346.952  | 11103.456 | ID 1832579 | 6588.331  | 6982.276  | M37033    | 20669.395 | 6068.536  |
| AL365518  | 1466.522  | 1644.169  | H-430185 N | 3832.13   | 4428.499  | NM_007171 | 2366.032  | 630.173   |
| AF086257  | 7677.463  | 10489.465 | D16583     | 15083.457 | 16416.09  | NM_004278 | 1902.689  | 839.723   |
| AF075056  | 1118.824  | 1317.26   | H44051     | 14741.877 | 15627.023 | NM_005632 | 2340.919  | 825.153   |
| AC119751  | 1084.33   | 1352.457  | AA481547   | 51866.082 | 54880.148 | AK021499  | 623.25    | 362.598   |
| U00928    | 2407.676  | 2945.196  | AA831880   | 5041.733  | 6261.469  | AK000336  | 5037.611  | 1610.204  |

|           |           |           |           |           |           |           |           |           |
|-----------|-----------|-----------|-----------|-----------|-----------|-----------|-----------|-----------|
| NM_002029 | 597.201   | 513.545   | T64880    | 20920.719 | 27270.686 | NM_006292 | 11551.228 | 23137.289 |
| AK002114  | 4186.785  | 5157.817  | AB028990  | 2158.909  | 2228.318  | AB007948  | 1767.888  | 3358.736  |
| AL390184  | 1014.191  | 1425.277  | AK002089  | 743.69    | 849.607   | AB033066  | 3486.748  | 4819.554  |
| NM_018699 | 3130.647  | 4867.463  | NM_006708 | 46331.453 | 45297.691 | AF126028  | 1580.616  | 2922.107  |
| NM_018048 | 483.466   | 695.821   | AB037835  | 3631.705  | 3559.999  | NM_007019 | 33446.523 | 47504.613 |
| AK026318  | 1667.604  | 2488.311  | BM468475  | 1618.335  | 1598.699  | NM_007075 | 450.346   | 1199.504  |
| AF291673  | 1199.533  | 1357.104  | NM_000318 | 8768.234  | 7344.825  | NM_016042 | 893.141   | 2060.297  |
| NM_004365 | 17241.043 | 25495.945 | NM_002060 | 52761.172 | 55420.813 | NM_017640 | 968.006   | 2011.151  |
| NM_016355 | 8985.01   | 11989.254 | AK001230  | 20066.961 | 24341.33  | NM_017721 | 3091.312  | 5439.708  |
| AJ296290  | 5511.632  | 6508.89   | NM_014680 | 36267.395 | 31973.352 | NM_019088 | 11186.672 | 5072.271  |
| NM_020183 | 8070.897  | 11457.881 | NM_005027 | 11239.779 | 12170.876 | AB002373  | 1490.36   | 1088.651  |
| NM_018029 | 1030.21   | 1907.497  | NM_004612 | 4532.895  | 4508.399  | NM_016350 | 44245.734 | 6723.992  |
| AL389954  | 1553.506  | 2264.616  | NM_005608 | 52753.543 | 53087.902 | AK024167  | 5938.365  | 3572.687  |
| NM_019852 | 6644.554  | 9443.196  | NM_001106 | 1692.695  | 1597.11   | NM_005026 | 4609.063  | 3689.191  |
| NM_006118 | 10204.045 | 17408.215 | NM_015583 | 2543.908  | 2296.191  | NM_004140 | 415.241   | 555.893   |
| AK026225  | 35890.348 | 47035.355 | NM_018490 | 8674.402  | 8181.167  | NM_002866 | 19174.199 | 10897.3   |
| AL050032  | 8773.303  | 12207.859 | NM_004778 | 5216.73   | 5055.589  | AF230809  | 5057.66   | 1926.557  |
| AF009304  | 1776.523  | 2677.395  | NM_006245 | 6048.623  | 5849.546  | NM_017894 | 61796.691 | 28538.74  |
| AF086177  | 18478.648 | 26697.432 | NM_004352 | 1079.431  | 1508.293  | NM_006509 | 11913.194 | 2664.369  |
| NM_018949 | 3041.247  | 4073.717  | NM_012258 | 1388.853  | 1374.458  | AK025447  | 2113.466  | 791.178   |
| AK021593  | 389.379   | 741.396   | NM_005103 | 1656.465  | 2137.268  | NM_002624 | 62405.668 | 59793.086 |
| Z36847    | 341.224   | 490.916   | NM_004822 | 11372.08  | 15526.266 | AF006199  | 1471.43   | 1678.321  |
| D17187    | 2654.378  | 3246.909  | AK022349  | 6520.598  | 8381.481  | NM_004554 | 29694.133 | 14671.709 |
| AJ243672  | 2473.481  | 3484.969  | NM_005750 | 2029.451  | 3090.147  | NM_014576 | 929.505   | 2622.376  |
| AL122087  | 1351.048  | 2135.31   | NM_004973 | 1527.076  | 1755.753  | AL162035  | 2221.129  | 4853.301  |
| NM_014767 | 766.051   | 1368.133  | NM_007245 | 14975.713 | 17097.248 | NM_006692 | 1891.296  | 3429.353  |
| Y17867    | 4153.807  | 5347.682  | NM_001890 | 3703.461  | 6881.097  | NM_003084 | 2555.84   | 4040.206  |
| M92642    | 688.686   | 862.094   | NM_001286 | 8566.676  | 8040.541  | NM_002582 | 15349.84  | 22780.719 |
| NM_018071 | 3328.79   | 4278.081  | NM_018229 | 3858.094  | 5215.565  | NM_001009 | 60381.078 | 63774.762 |
| NM_004333 | 2638.347  | 3170.51   | NM_006325 | 22618.717 | 23784.637 | NM_001026 | 61742.098 | 62119.73  |
| M31520    | 58750.242 | 65966.789 | AY009127  | 37269.551 | 44341.297 | NM_001011 | 62207.863 | 61411.703 |
| NM_002020 | 30295.756 | 34695.492 | NM_014869 | 12056.095 | 14497.157 | AB061315  | 1946.976  | 1213.552  |
| AL050137  | 4069.073  | 5540.019  | AK000158  | 31444.865 | 44536.184 | D17289    | 12601.034 | 4179.807  |
| AK024423  | 6483.89   | 9580.097  | NM_005769 | 7950.374  | 9229.188  | NM_002949 | 33929.711 | 3390.118  |
| NM_005043 | 52160.273 | 54083.316 | NM_002564 | 54510.293 | 56428.004 | NM_014230 | 6774.675  | 1165.034  |
| NM_005979 | 16444.516 | 21613.531 | Z83806    | 1433.907  | 1298.073  | NM_000235 | 1020.581  | 511.991   |
| NM_006282 | 10870.797 | 17109.125 | NM_000963 | 2106.598  | 2844.38   | U28480    | 647.91    | 382.157   |
| NM_020321 | 1238.203  | 1898.015  | NM_013308 | 17328.506 | 22250.68  | NM_000108 | 21686.24  | 6616.856  |
| NM_000826 | 417.943   | 948.37    | AF027302  | 11611.334 | 15418.465 | NM_018128 | 4532.886  | 1332.72   |
| NM_015920 | 52638.953 | 55041.137 | NM_002852 | 13682.382 | 19694.783 | NM_016931 | 14039.196 | 6392.646  |
| AB011113  | 4482.635  | 6663.729  | NM_001817 | 15451.244 | 15643.261 | NM_004373 | 57541.727 | 60935.313 |
| NM_004115 | 1714.259  | 2776.295  | AF063611  | 2268.573  | 2792.404  | NM_005566 | 59252.992 | 59994.93  |
| NM_018287 | 1927.905  | 2700.678  | NM_006039 | 9899.1    | 13109.969 | NM_000162 | 7394.885  | 5734.535  |
| NM_001955 | 3766.431  | 5380.808  | NM_002089 | 3790.351  | 5552.067  | AK027067  | 523.304   | 1396.829  |
| AF016004  | 5383.572  | 11290.701 | M28983    | 956.289   | 1564.051  | NM_016287 | 15392.222 | 25693.635 |
| NM_003567 | 11395.871 | 13323.979 | NM_014656 | 27757.971 | 29006.361 | AK021661  | 587.124   | 1544.691  |
| NM_007315 | 1409.288  | 990.202   | NM_002076 | 13853.48  | 16408.141 | NM_003864 | 18755.68  | 25207.6   |
| L20686    | 4502.13   | 6076.751  | X05299    | 7083.882  | 6401.105  | NM_006824 | 23178.807 | 32906.207 |
| NM_000304 | 1320.924  | 1811.702  | NM_007274 | 43264.496 | 44677.727 | NM_002107 | 2999.79   | 5802.102  |
| AK023362  | 1991.893  | 2847.278  | NM_003356 | 40760.945 | 38417.875 | NM_002694 | 21916.844 | 27228.021 |
| NM_002460 | 107.084   | 664.867   | AF238315  | 1642.48   | 2330.038  | NM_004454 | 1383.63   | 2233.529  |
| NM_002675 | 1076.408  | 1295.545  | NM_006224 | 56317.637 | 56499.086 | NM_000966 | 909.675   | 2166.74   |
| NM_012432 | 51682.129 | 53903.781 | AL137300  | 17605.596 | 17212.828 | NM_012482 | 4076.639  | 7197.949  |

|           |           |           |           |           |           |           |           |           |
|-----------|-----------|-----------|-----------|-----------|-----------|-----------|-----------|-----------|
| NM_005007 | 10828.723 | 14155.672 | NM_000229 | 16273.927 | 16463.146 | AF217227  | 697.304   | 720.118   |
| AK024996  | 6528.443  | 8971.539  | NM_006995 | 45396.879 | 47218.008 | AK024141  | 5048.529  | 3924.844  |
| NM_001258 | 993.344   | 1309.26   | NM_003129 | 23895.455 | 35759.738 | U13706    | 608.262   | 179.41    |
| NM_004417 | 1034.176  | 1135.996  | NM_001956 | 21625.691 | 22651.83  | AF213356  | 816.177   | 123.733   |
| NM_012290 | 11635.196 | 17631.727 | AB033064  | 13115.82  | 16260.176 | BC035716  | 4556.876  | 1383.213  |
| NM_002431 | 5274.575  | 5830.268  | AK022317  | 39058.895 | 37954.504 | NM_018014 | 4657.827  | 7605.677  |
| NM_001827 | 57399.719 | 57183.816 | NM_018396 | 19439.031 | 22406.59  | NM_001312 | 885.569   | 850.542   |
| NM_020466 | 9025.557  | 12344.308 | NM_003124 | 51351.004 | 52577.457 | AF007192  | 780.38    | 556.978   |
| AL079280  | 1113.911  | 1306.509  | NM_006886 | 56391.496 | 57228.199 | NM_001276 | 6053.714  | 1965.477  |
| NM_002853 | 8118.378  | 10595.194 | NM_004531 | 11062.111 | 14782.51  | NM_016157 | 1870.587  | 609.916   |
| NM_003174 | 3490.386  | 4632.16   | AL133581  | 6163.174  | 7836.196  | NM_014915 | 35648.984 | 25235.002 |
| NM_012307 | 20685.072 | 25052.807 | NM_002558 | 2265.106  | 2825.889  | NM_012286 | 6324.239  | 6368.717  |
| NM_002540 | 2808.249  | 3631.063  | NM_005031 | 17815.809 | 26173.949 | D84294    | 4437.428  | 12946.464 |
| NM_006371 | 6098.832  | 7671.471  | AB040920  | 2215.318  | 3587.491  | X59770    | 2265.892  | 5227.686  |
| NM_018834 | 2695.017  | 3751.237  | NM_000720 | 1499.891  | 2049.898  | K02765    | 13074.046 | 20501.076 |
| AK026882  | 4210.272  | 4897.508  | NM_004842 | 1502.516  | 2325.438  | M65134    | 1913.672  | 3632.545  |
| NM_004574 | 3111.963  | 3783.543  | AK024639  | 7162.84   | 7637.38   | BG539651  | 18448.574 | 23335.109 |
| NM_004848 | 10528.595 | 12172.564 | NM_015720 | 54179.234 | 57853.246 | N52646    | 57893.922 | 59587.027 |
| NM_001944 | 803.941   | 865.484   | AB007915  | 1899.423  | 2490.681  | AW160671  | 61014.262 | 57799.016 |
| NM_014813 | 662.231   | 451.138   | AB033070  | 1365.912  | 2219.578  | BI870529  | 17061.51  | 23214.1   |
| AF014459  | 4737.362  | 7410.929  | AB028990  | 1996.72   | 1533.897  | AA702698  | 2323.392  | 4841.694  |
| M64108    | 1902.263  | 3053.113  | NM_006708 | 46409.691 | 48553.895 | AI681514  | 2615.79   | 4952.119  |
| NM_001503 | 5624.012  | 5628.427  | AB037835  | 4695.692  | 5283.647  | NM_001300 | 3487.271  | 7404.883  |
| NM_006302 | 2311.054  | 2433.255  | NM_016228 | 1749.41   | 1808.931  | BG748827  | 8005.304  | 9668.004  |
| AJ224875  | 5411.889  | 5798.383  | NM_000157 | 7509.867  | 7033.97   | AA952897  | 9883.193  | 8772.546  |
| NM_002149 | 3972.007  | 3886.972  | NM_000712 | 1059.736  | 982.186   | BG760342  | 3097.498  | 531.391   |
| AF043324  | 9774.579  | 11745.884 | NM_018088 | 5386.468  | 6618.366  | AA703141  | 1062.185  | 220.732   |
| AK024172  | 3925.107  | 4424.616  | BC013695  | 16326.209 | 16099.987 | AI122630  | 6774.057  | 10818.709 |
| NM_014814 | 8843.684  | 8723.474  | NM_007205 | 2890.557  | 2373.57   | AF086790  | 2899.825  | 5773.622  |
| NM_002797 | 35330.902 | 34318.676 | AK023035  | 8922.231  | 9458.074  | AK025966  | 8520.672  | 8576.467  |
| AK024318  | 2318.513  | 2872.452  | NM_014846 | 6158.878  | 8739.904  | NM_014440 | 287.126   | 500.447   |
| NM_016129 | 7039.15   | 6927.785  | AB011164  | 14485.79  | 16268.275 | NM_018725 | 882.025   | 674.907   |
| NM_002809 | 14039.987 | 11765.447 | M24750    | 2511.295  | 3218.487  | NM_003081 | 48214.633 | 11712.529 |
| NM_017912 | 17843.432 | 15759.467 | NM_005965 | 10459.905 | 11395.656 | NM_016495 | 1165.979  | 546.474   |
| NM_000423 | 12732.954 | 14922.403 | NM_002740 | 10436.4   | 14574.156 | D50402    | 53313.402 | 31958.832 |
| AB046838  | 7876.258  | 8283.428  | AL117482  | 7776.597  | 11006.029 | AF181722  | 750.653   | 1930.753  |
| AK026339  | 918.513   | 886.632   | NM_006549 | 56503.059 | 61335.148 | NM_003687 | 6457.791  | 12231.012 |
| X98411    | 3020.585  | 3290.225  | AB018324  | 29774.842 | 37214.211 | NM_004134 | 9581.746  | 18034.537 |
| AF116658  | 31024.293 | 33165.727 | NM_002742 | 56148.941 | 64935.117 | NM_005955 | 15616.504 | 24276.709 |
| NM_014865 | 17814.723 | 18450.641 | Z25431    | 6210.767  | 7981.793  | NM_004048 | 1573.861  | 5394.969  |
| AB032977  | 14676.781 | 12728.273 | NM_005627 | 23642.213 | 45583.813 | BE548044  | 587.859   | 1572.804  |
| AK001725  | 1970.964  | 1782.288  | M64497    | 1901.16   | 2246.112  | NM_006017 | 189.821   | 1034.819  |
| NM_003036 | 3522.837  | 1884.516  | CY3Cy5    | 5170.317  | 249.086   | NM_012428 | 5568.058  | 9811.202  |
| NM_020529 | 14728.101 | 10574.179 | NM_002711 | 3039.807  | 2283.365  | NM_013269 | 15878.862 | 28740.971 |
| S72604    | 46343.582 | 56673.598 | AF143873  | 1986.515  | 4862.975  | NM_001728 | 5630.512  | 10388.852 |
| NM_017984 | 1411.82   | 1928.879  | AL355732  | 2650.15   | 4530.707  | NM_003824 | 10728.593 | 7346.4    |
| AF038951  | 16989.688 | 13058.649 | NM_017966 | 4617.303  | 5496.9    | NM_000686 | 1542.194  | 536.261   |
| NM_006492 | 2645.123  | 2631.821  | AF143327  | 2175.897  | 2144.597  | NM_012452 | 2941.338  | 358.029   |
| AK021811  | 2138.977  | 2407.302  | AL137535  | 654.776   | 719.941   | AF229166  | 451.802   | 105.072   |
| NM_003428 | 4994.232  | 5873.45   | AL049991  | 512.492   | 338.826   | NM_006764 | 2638.778  | 6447.456  |
| AF055030  | 4184.906  | 3816.378  | AL049990  | 1744.505  | 1450.848  | NM_001386 | 3431.112  | 10136.256 |
| AK000589  | 5645.425  | 3248.704  | AF131843  | 1611.711  | 1264.147  | NM_005313 | 39289.98  | 42261.051 |
| X53281    | 27944.266 | 23731.842 | AK026653  | 1178.392  | 1235.654  | NM_017765 | 32963.613 | 19160.408 |

|           |           |           |           |           |           |           |           |           |
|-----------|-----------|-----------|-----------|-----------|-----------|-----------|-----------|-----------|
| BC012782  | 5103.626  | 3357.595  | NM_020231 | 1708.561  | 3722.597  | NM_00042E | 935.197   | 423.071   |
| AF132026  | 57349.789 | 56293.109 | AL137430  | 361.288   | 499.156   | NM_00357E | 488.381   | 356.497   |
| AL050353  | 2282.667  | 1813.469  | NM_002711 | 2449.748  | 1803.994  | AK026352  | 1751.552  | 9310.256  |
| AB037788  | 17355.787 | 16466.711 | SR1       | 75034.18  | 63606.313 | AF169257  | 215.496   | 718.623   |
| NM_004587 | 16134.948 | 9835.431  | SR3       | 32164.314 | 9143.017  | NM_01618C | 1405.399  | 2718.802  |
| NM_00097E | 52696.305 | 56808.297 | SR5       | 3553.032  | 882.987   | NM_005827 | 12036.212 | 16614.561 |
| AF147412  | 50250.277 | 47884.934 | SR7       | 4459.121  | 6876.524  | NM_00305E | 8757.171  | 17128.225 |
| AK024570  | 25335.574 | 44019.699 | SR9       | 9656.942  | 477.334   | NM_01622E | 7401.25   | 15585.442 |
| AF161401  | 17157.697 | 17323.938 | CY3Cy5    | 3054.222  | 91.965    | AK024311  | 677.442   | 1504.946  |
| NM_00099C | 35016.336 | 25001.734 | L38282    | 3027.682  | 1812.395  | AF052155  | 3731.553  | 4635.118  |
| NM_01474C | 12045.018 | 8016.229  | NM_01805E | 2224.912  | 1250.995  | NM_00508E | 5844.803  | 3494.899  |
| NM_01595E | 28913.971 | 16258.113 | NM_01900E | 3330.856  | 3615.724  | AF060902  | 4797.956  | 2530.589  |
| AK024601  | 12461.388 | 7332.097  | M20838    | 1506.872  | 1357.663  | AF121858  | 16732.449 | 2165.494  |
| S68069    | 3942.131  | 5622.551  | AK022738  | 987.306   | 848.029   | NM_017681 | 803.939   | 2030.67   |
| AB011095  | 3898.169  | 3272.101  | AK023505  | 3468.579  | 3372.396  | X57655    | 27148.99  | 32817.27  |
| NM_00248E | 29277.334 | 35755.559 | AB037851  | 11546.062 | 14979.814 | NM_018261 | 3255.234  | 6648.832  |
| NM_00400E | 41551.934 | 38803.941 | AL050389  | 7748.426  | 9780.498  | NM_01479E | 1157.553  | 852.033   |
| NM_00018E | 4881.023  | 6414.176  | AK001546  | 1462.248  | 1476.023  | AL050288  | 35520.336 | 15769.102 |
| BF244401  | 17055.09  | 26590.078 | NM_006537 | 7104.956  | 6189.495  | NM_00504C | 7424.267  | 13449.132 |
| NM_00471E | 53602.336 | 53154.016 | AF007155  | 24537.346 | 22015.32  | NM_016391 | 23989.451 | 34835.66  |
| AL359585  | 10099.066 | 8080.617  | AK023055  | 654.01    | 456.666   | M80783    | 225.961   | 820.393   |
| AB046850  | 12182.2   | 8197.088  | AL049282  | 5443.939  | 2222.469  | AF075033  | 7142.86   | 12795.378 |
| NM_014801 | 6788.851  | 4266.035  | AK021443  | 3614.608  | 1374.796  | D50911    | 17063.23  | 24338.572 |
| NM_00364E | 9596.152  | 7198.7    | AF070569  | 943.612   | 317.889   | AB011104  | 1668.243  | 4209.618  |
| AB027013  | 12007.95  | 9540.474  | NM_02023E | 2810.437  | 700.019   | AK024069  | 12432.747 | 18569.027 |
| BC032686  | 1012.475  | 919.026   | AK024315  | 12213.302 | 7564.878  | NM_00458E | 22206.217 | 29475.385 |
| BF185480  | 5159.025  | 5396.931  | AK024945  | 5042.746  | 4246.76   | NM_01564C | 22555.449 | 29152.084 |
| NM_00212E | 40229.992 | 24916.193 | AK024579  | 3858.207  | 3584.908  | AF233450  | 836.835   | 1879      |
| NM_00710E | 410.612   | 569.195   | AL133118  | 6079.678  | 5905.821  | NM_01623E | 2568.553  | 4673.82   |
| NM_003074 | 11561.604 | 7108.712  | AK023571  | 6322.507  | 6908.722  | NM_000821 | 48223.539 | 47871.766 |
| AL360195  | 12717.35  | 13208.067 | AF052148  | 303.919   | 1223.545  | NM_00314E | 29826.623 | 3396.654  |
| U14383    | 1638.869  | 1514.109  | AF131783  | 509.687   | 706.345   | NM_00163E | 768.569   | 226.779   |
| NM_01781C | 2765.029  | 2956.132  | NM_00170E | 3309.515  | 4746.167  | NM_012264 | 471.918   | 539.334   |
| NM_003181 | 51346.844 | 53966.293 | AK026657  | 2297.03   | 4020.875  | AF311312  | 658.337   | 707.739   |
| NM_004451 | 9430.32   | 10595.267 | AF087991  | 24914.094 | 20055.004 | NM_00127E | 7980.828  | 17291.715 |
| NM_004364 | 1146.866  | 377.774   | Y12839    | 919.992   | 772.459   | NM_016157 | 2066.018  | 5616.428  |
| NM_02039E | 5330.075  | 3728.531  | X64979    | 1373.719  | 1452.783  | NM_01491E | 34118.473 | 51048.793 |
| NM_00342E | 3048.25   | 1732.58   | AJ001876  | 1201.119  | 1106.895  | NM_01228E | 6004.498  | 3727.036  |
| NM_01338E | 9398.311  | 6594.529  | AJ227884  | 4133.228  | 3317.418  | NM_00219E | 15718.057 | 4416.283  |
| AK026232  | 11247.247 | 24083.1   | X64986    | 12611.725 | 7538.704  | D84294    | 3976.832  | 3961.666  |
| NM_01489E | 14379.396 | 21449.172 | Y10510    | 630.664   | 254.34    | X59770    | 2249.177  | 5465.206  |
| AK023827  | 7561.76   | 9041.562  | AK000842  | 11376.362 | 6972.833  | K02765    | 10843.27  | 18143.525 |
| NM_001117 | 792.274   | 1148.78   | AK023386  | 23332.57  | 18201.773 | M65134    | 1615.972  | 3777.4    |
| NM_000231 | 342.291   | 353.236   | NM_00705E | 26839.119 | 23037.572 | BG539651  | 18512.781 | 26542.322 |
| L07517    | 3065.128  | 2531.524  | AK022153  | 4575.312  | 4122.825  | N52646    | 54829.539 | 58325.277 |
| AK022451  | 22809.715 | 18114.279 | AK022789  | 2030.773  | 2054.092  | AW160671  | 59182.363 | 61739.938 |
| NM_01435E | 55936.91  | 55996.121 | AK023756  | 590.992   | 971.712   | BI870529  | 16610.369 | 21350.08  |
| BM918441  | 11613.292 | 10110.073 | AK024252  | 428.704   | 449.565   | AA702698  | 2060.167  | 3455.85   |
| AA425102  | 454.011   | 297.703   | AK002095  | 1967.03   | 1880.608  | AI681514  | 2042.137  | 4214.946  |
| AA878880  | 886.109   | 593.849   | AK023946  | 1039.642  | 2690.006  | NM_00130C | 3406.146  | 5549.089  |
| AA150828  | 6701.555  | 8203.183  | AK000821  | 10571.395 | 9419.227  | BG748827  | 9443.74   | 14524.487 |
| H90764    | 2021.186  | 2117.42   | AK024526  | 14614.027 | 10228.468 | AA952897  | 11017.566 | 17219.773 |
| AI859208  | 1204.623  | 1737.318  | AK000848  | 1465.279  | 1427.909  | BG760342  | 3755.794  | 6377.276  |

|           |           |           |           |           |           |           |           |           |
|-----------|-----------|-----------|-----------|-----------|-----------|-----------|-----------|-----------|
| H64379    | 24752.609 | 23489.188 | AK023307  | 812.402   | 687.347   | AA703141  | 1441.885  | 1660.874  |
| BE208258  | 50794.273 | 51886.125 | NM_017618 | 3400.359  | 2283.059  | AI122630  | 7307.199  | 1179.837  |
| T72202    | 3360.256  | 3379.128  | NM_017848 | 799.608   | 586.423   | NM_006588 | 7320.747  | 1286.64   |
| BI831922  | 3943.026  | 4737.755  | NM_019056 | 7654.604  | 3537.689  | AB007875  | 3172.884  | 1950.016  |
| M69238    | 4988.111  | 6961.628  | AF279783  | 5732.086  | 2925.321  | NM_018725 | 1002.551  | 2625.753  |
| AA664180  | 1808.888  | 1575.855  | AF182422  | 17135.113 | 13991.775 | NM_003081 | 48469.895 | 58124.172 |
| M80244    | 435.392   | 429.105   | NM_016943 | 787.644   | 714.879   | NM_016495 | 1409.784  | 2313.293  |
| AA599158  | 20853.533 | 14130.799 | AF070602  | 1824.168  | 2023.939  | D50402    | 50185.336 | 25522.088 |
| BE294756  | 1974.42   | 1574.501  | BE393290  | 2799.137  | 3712.861  | M73547    | 17878.225 | 6500.352  |
| NM_000696 | 8278.091  | 5397.436  | NM_017622 | 1932.331  | 3960.989  | AF181722  | 1001.393  | 1306.798  |
| L08240    | 3656.55   | 4516.587  | AF133331  | 7302.629  | 10131.627 | NM_003687 | 6309.174  | 13708.716 |
| NM_017952 | 3861.595  | 3970.884  | AK022289  | 4370.482  | 3294.163  | NM_004134 | 9149.089  | 19428.154 |
| NM_002940 | 4424.183  | 4431.474  | L34408    | 521.073   | 565.919   | NM_005955 | 15223.447 | 26221.949 |
| NM_016081 | 27210.141 | 24427.893 | AF161403  | 34231.148 | 33250.309 | NM_004048 | 1392.982  | 4607.017  |
| NM_006388 | 6806.325  | 5659.631  | S75708    | 13649.688 | 13651.586 | BE548044  | 917.327   | 2158.867  |
| M30818    | 2532.009  | 2102.334  | U79291    | 8944.944  | 8337.758  | NM_006017 | 208.846   | 834.519   |
| NM_000163 | 1089.927  | 809.254   | D17172    | 27650.061 | 29046.539 | NM_012428 | 5710.142  | 10008.289 |
| NM_005755 | 8018.34   | 4603.032  | AF161370  | 435.977   | 396.451   | NM_013268 | 16396.998 | 25222.902 |
| NM_003328 | 52509.891 | 49573.242 | AJ227859  | 2128.983  | 2028.934  | NM_001728 | 5765.472  | 9777.441  |
| NM_003298 | 51566     | 51049.285 | NM_018544 | 1691.601  | 1463.722  | NM_005565 | 730.746   | 2272.242  |
| NM_014330 | 51321.359 | 50243.688 | L10141    | 18682.52  | 16756.344 | NM_003824 | 10425.766 | 17610.125 |
| NM_007034 | 2150.745  | 3372.667  | AB020699  | 6375.226  | 7065.532  | NM_000688 | 1545.095  | 3713.916  |
| NM_001560 | 1249.877  | 1215.991  | AF086269  | 3084.84   | 3093.316  | NM_012452 | 4425.281  | 6708.793  |
| NM_001783 | 52310.648 | 57957.191 | U90437    | 5226.018  | 4487.428  | AF229166  | 1508.658  | 2248.734  |
| J03171    | 7874.342  | 14267.399 | D17169    | 47932.648 | 28817.143 | NM_006764 | 3934.659  | 883.479   |
| NM_005856 | 2414.825  | 3984.301  | NM_017924 | 4555.219  | 2936.795  | NM_001388 | 3456.279  | 899.101   |
| NM_004323 | 49309.391 | 51488.715 | S81578    | 1673.909  | 1484.114  | NM_001312 | 2466.944  | 531.211   |
| NM_002310 | 841.73    | 659.65    | NM_017546 | 8165.152  | 8236.767  | AF007192  | 770.431   | 330.258   |
| NM_005312 | 4947.447  | 2937.651  | AJ001889  | 746.538   | 834.607   | NM_017765 | 24954.152 | 28356.699 |
| NM_004210 | 15783.471 | 15906.79  | AF086210  | 709.108   | 1095.298  | NM_000428 | 884.887   | 1512.851  |
| NM_020140 | 3380.918  | 2770.702  | AL137400  | 706.396   | 1588.127  | NM_003578 | 428.833   | 317.238   |
| NM_007214 | 11584.373 | 8350.689  | NM_006511 | 2243.437  | 4682.093  | NM_014721 | 565.852   | 367.34    |
| NM_000311 | 17523.668 | 12774.239 | AF007142  | 1922.572  | 1213.681  | AK026352  | 2058.076  | 13049.688 |
| NM_017908 | 4765.222  | 2861.389  | AF119853  | 5463.284  | 3940.916  | AF169257  | 119.123   | 739.998   |
| NM_006335 | 19014.766 | 13755.697 | AF279782  | 532.519   | 307.27    | NM_016180 | 1147.557  | 1819.607  |
| NM_000788 | 6433.979  | 2732.962  | NM_001126 | 6651.124  | 5025.822  | NM_005827 | 10472.065 | 16839.697 |
| NM_002518 | 409.873   | 280.565   | AK023673  | 2679.096  | 2961.052  | NM_003058 | 9332.277  | 14125.529 |
| NM_017731 | 829.129   | 621.348   | NM_018252 | 2023.217  | 2985.144  | NM_016228 | 7311.333  | 13620.735 |
| AB040891  | 3662.713  | 2201.342  | NM_018000 | 61067.797 | 59768.875 | AK024311  | 745.516   | 2126.045  |
| AB037780  | 627.45    | 403.849   | AF164963  | 1371.331  | 1330.687  | AF052155  | 2551.431  | 5534.396  |
| AK025616  | 2086.291  | 1493.466  | AF124366  | 46770.441 | 45627.555 | NM_005085 | 5354.751  | 7943.547  |
| NM_007256 | 2741.504  | 3020.745  | AF130112  | 2315.538  | 2396.75   | AF060902  | 4870.159  | 7646.39   |
| NM_001045 | 27319.193 | 24323.309 | NM_000551 | 8059.838  | 6371.911  | AF121858  | 21393.352 | 31586.266 |
| NM_005697 | 39218.926 | 30840.471 | AL365518  | 953.062   | 891.664   | NM_013437 | 726.862   | 936.762   |
| NM_003098 | 7022.02   | 6520.837  | AF086257  | 6545.139  | 7311.507  | NM_017681 | 1090.683  | 256.821   |
| NM_004781 | 3815.833  | 4515.516  | AF075056  | 764.55    | 633.907   | X57655    | 24896.594 | 3864.087  |
| NM_016315 | 444.822   | 1173.729  | AC119751  | 789.6     | 809.674   | AK025966  | 8582.563  | 1521.436  |
| NM_018303 | 2359.16   | 2175.279  | U00928    | 2274.791  | 2541.201  | NM_014440 | 437.556   | 372.013   |
| NM_014758 | 11382.285 | 8914.117  | AK002114  | 3803.89   | 2043.122  | NM_014796 | 1062.409  | 1532.356  |
| AL133047  | 668.746   | 487.075   | AL390184  | 1071.381  | 1222.169  | AL050288  | 31957.006 | 12481.689 |
| NM_005124 | 4185.01   | 4008.313  | NM_018699 | 4412.217  | 4600.022  | NM_005040 | 6164.419  | 3471.864  |
| AK000947  | 7521.113  | 7361.676  | NM_018048 | 313.018   | 608.091   | NM_016391 | 26865.25  | 38719.344 |
| NM_003897 | 6501.102  | 3996.432  | AK026318  | 1931.544  | 2950.698  | M80783    | 168.751   | 1216.188  |

|           |           |           |           |           |           |           |           |           |
|-----------|-----------|-----------|-----------|-----------|-----------|-----------|-----------|-----------|
| NM_014165 | 30138.27  | 17964.412 | AF291673  | 2880.808  | 8181.784  | AF075033  | 6917.301  | 11023.274 |
| AL442085  | 10453.647 | 5166.847  | NM_004365 | 19452.355 | 44258.621 | D50911    | 16357.13  | 17770.602 |
| NM_013313 | 6053.477  | 5750.51   | NM_016355 | 8062.702  | 4231.172  | AB011104  | 1645.385  | 4802.349  |
| NM_014736 | 11100.454 | 7541.796  | AJ296290  | 4270.367  | 2652.173  | AK024069  | 11371.323 | 19225.76  |
| AK023886  | 3293.696  | 2529.186  | NM_020183 | 5821.652  | 3332.092  | NM_004582 | 22919.396 | 31029.512 |
| NM_002553 | 5412.333  | 3690.247  | NM_018029 | 997.816   | 567.581   | NM_015640 | 21822.631 | 27490.332 |
| AJ404615  | 4784.241  | 3281.158  | AL389954  | 1081.64   | 733.058   | AF233450  | 807.416   | 1761.193  |
| NM_016053 | 36286.734 | 27821.729 | NM_019852 | 4588.311  | 4940.575  | NM_016233 | 2985.323  | 5695.218  |
| AB007869  | 5449.808  | 3968.515  | NM_006118 | 8991.385  | 19773.955 | NM_000821 | 44042.031 | 47860.551 |
| AB046844  | 2064.222  | 2573.695  | AK026225  | 31384.475 | 58098.789 | NM_003145 | 43870.348 | 54260.668 |
| NM_000302 | 3579.94   | 4286.863  | AL050032  | 9791.883  | 10200.163 | NM_001632 | 1693.193  | 1737.163  |
| NM_013235 | 54770.57  | 53302.031 | AF009304  | 1092.392  | 1103.529  | NM_012264 | 563.204   | 194.213   |
| NM_016015 | 11314.885 | 12583.617 | AF086177  | 13216.868 | 12324.226 | AF311312  | 809.559   | 249.954   |
| NM_020120 | 2008.301  | 2283.785  | NM_018949 | 2659.726  | 3238.577  | NM_005313 | 31861.32  | 5599.746  |
| AK022900  | 1590.691  | 1340.679  | AK021593  | 500.534   | 453.432   | NM_014915 | 32863.711 | 29209.338 |
| NM_001125 | 378.126   | 583.43    | Z36847    | 1547.459  | 1600.312  | NM_012286 | 5104.282  | 5037.553  |
| AB023216  | 1226.719  | 1071.047  | D17187    | 2160.749  | 2799.283  | NM_002195 | 14844.676 | 8309.416  |
| NM_002266 | 54681.957 | 45541.359 | AJ243672  | 2688.867  | 3458.515  | D84294    | 3267.293  | 3170.171  |
| NM_014400 | 10148.372 | 7792.873  | AL122087  | 1126.857  | 1244.482  | X59770    | 2111.152  | 1917.401  |
| AL157492  | 2298.109  | 2411.978  | NM_014767 | 691.132   | 520.168   | K02765    | 13601.91  | 26122.031 |
| AL353957  | 4873.695  | 3796.288  | Y17867    | 5823.49   | 3219.137  | M65134    | 1727.015  | 4171.207  |
| AK023827  | 6766.877  | 5020.22   | M92642    | 1370.605  | 1356.559  | BG539651  | 19317.186 | 22904.592 |
| NM_001117 | 1106.897  | 801.824   | NM_018071 | 6783.079  | 6975.95   | N52646    | 59621.305 | 59307.223 |
| NM_000231 | 442.004   | 385.315   | NM_004333 | 5157.753  | 6024.846  | AW160671  | 53488.879 | 56391.359 |
| L07517    | 3323.714  | 2556.192  | AL050137  | 4472.298  | 7241.446  | BI870529  | 18039.033 | 31808.094 |
| AK022451  | 23766.516 | 17388.174 | AK024423  | 7533.964  | 4310.64   | AA702698  | 2348.526  | 5476.31   |
| NM_014359 | 53135.02  | 52563.469 | NM_005043 | 53929.789 | 31871.271 | AI681514  | 2503.12   | 5407.163  |
| BM918441  | 12137.898 | 10807.525 | NM_005979 | 17552.846 | 7584.927  | NM_001300 | 3445.756  | 8348.601  |
| AA425102  | 488.487   | 500.303   | NM_006282 | 7953.53   | 3810.506  | BG748827  | 9442.141  | 16053.764 |
| AA878880  | 620.537   | 520.236   | NM_020321 | 829.726   | 659.091   | AA952897  | 10054.642 | 17656.801 |
| AA150828  | 6046.145  | 5417.81   | NM_000826 | 436.345   | 526.187   | BG760342  | 3755.168  | 6492.025  |
| H90764    | 1686.045  | 1678.415  | NM_015920 | 41063.863 | 36956.258 | AA703141  | 1715.913  | 3065.052  |
| AI859208  | 1231.452  | 1150.862  | AB011113  | 4259.98   | 6274.671  | AA195244  | 827.449   | 6893.811  |
| H64379    | 24621.033 | 22494.809 | NM_004115 | 1654.454  | 1537.333  | AI122630  | 10773.726 | 16659.412 |
| BE208258  | 53331.773 | 56257.316 | NM_018287 | 1483.341  | 1379.268  | NM_006589 | 8055.633  | 7806.004  |
| BI833114  | 453.797   | 455.935   | NM_001955 | 5965.032  | 4951.918  | AB007875  | 2411.465  | 426.246   |
| T72202    | 3969.927  | 4664.155  | AF016004  | 4749.787  | 8219.586  | NM_018261 | 1240.897  | 325.99    |
| BI831922  | 4084.687  | 4779.638  | NM_003567 | 10734.16  | 10862.451 | NM_005955 | 10790.736 | 9125.286  |
| M69238    | 5231.678  | 7209.152  | NM_007315 | 1512.79   | 901.929   | NM_004048 | 1408.853  | 2396.791  |
| AA664180  | 2131.087  | 2697.043  | L20686    | 7271.835  | 8473.826  | BE548044  | 538.293   | 600.007   |
| M80244    | 684.907   | 915.422   | NM_000304 | 1144.853  | 1313.517  | NM_012428 | 5527.526  | 11594.861 |
| AA599158  | 22577.348 | 27879.598 | AK023362  | 1956.398  | 2192.588  | NM_013269 | 17488.369 | 29941.559 |
| BE294756  | 1753.539  | 1554.496  | NM_002460 | 1018.405  | 851.15    | NM_001728 | 5626.485  | 8254.045  |
| AK026092  | 11288.607 | 10578.171 | NM_002675 | 4470.863  | 2738.72   | NM_005565 | 408.536   | 847.398   |
| AK001175  | 2976.002  | 3032.568  | NM_012432 | 57729.27  | 51175.531 | NM_003824 | 14556.577 | 19222.971 |
| NM_002940 | 4587.122  | 4018.217  | NM_005007 | 15792.669 | 12719.07  | NM_000686 | 2138.76   | 4557.155  |
| NM_016081 | 28791.611 | 24275.736 | AK024996  | 6312.319  | 5040.55   | NM_012452 | 6501.028  | 10050.161 |
| NM_006389 | 7535.96   | 6864.68   | NM_001258 | 583.126   | 623.229   | AF229166  | 957.165   | 2300.581  |
| M30818    | 2880.593  | 2844.205  | NM_004417 | 825.375   | 1004.393  | NM_005137 | 11058.233 | 15739.366 |
| NM_000163 | 1179.309  | 1488.24   | NM_012290 | 10585.924 | 12274.452 | NM_006764 | 3824.922  | 6421.569  |
| NM_005755 | 8753.309  | 9032.652  | NM_002431 | 4291.892  | 1873.721  | NM_001386 | 3359.325  | 7938.073  |
| NM_003329 | 52481.344 | 57408.547 | NM_001827 | 48489.684 | 20162.188 | NM_001163 | 3346.099  | 6213.435  |
| NM_003299 | 49683.242 | 58894.957 | NM_020466 | 11017.332 | 3761.62   | NM_005878 | 6983.258  | 14023.218 |

|           |           |           |           |           |           |           |           |           |
|-----------|-----------|-----------|-----------|-----------|-----------|-----------|-----------|-----------|
| U70981    | 575.459   | 637.718   | AL079280  | 676.872   | 417.893   | AB006713  | 585.684   | 2985.575  |
| NM_014330 | 49229.227 | 55530.164 | NM_002853 | 5711.106  | 3133.706  | AF308602  | 3099.921  | 6089.83   |
| NM_007034 | 1683.894  | 2339.946  | NM_003174 | 3213.462  | 1866.078  | AB011089  | 2898.298  | 4139.864  |
| NM_005261 | 590.264   | 1150.856  | NM_012307 | 20398.451 | 15705.079 | AF007192  | 682.694   | 241.925   |
| NM_001560 | 1161.793  | 1729.297  | NM_002540 | 1847.638  | 2081.46   | NM_001270 | 5696.495  | 1417.274  |
| NM_001783 | 52653.223 | 62949.031 | NM_006371 | 3648.292  | 2960.959  | NM_016157 | 1970.531  | 628.355   |
| J03171    | 7256.09   | 9531.367  | NM_018834 | 1749.055  | 1727.48   | NM_003053 | 9085.819  | 9298.767  |
| NM_005850 | 2361.78   | 2429.883  | AK026882  | 4295.28   | 3257.963  | NM_003044 | 6075.213  | 5959.405  |
| NM_004323 | 49989.332 | 54419.699 | NM_004574 | 3185.865  | 2422.492  | NM_006672 | 24055.088 | 18925.293 |
| NM_002310 | 1524.279  | 1927.442  | NM_004848 | 8914.878  | 8811.075  | NM_000330 | 247.933   | 900.013   |
| NM_005312 | 5503.852  | 7654.123  | NM_001944 | 718.239   | 787.364   | M31659    | 783.056   | 2145.567  |
| NM_004210 | 20950.027 | 30185.986 | NM_014813 | 674.236   | 911.314   | NM_003050 | 11473.428 | 22789.197 |
| NM_020140 | 4182.477  | 6924.741  | AF014459  | 5909.512  | 10704.612 | NM_016220 | 7869.691  | 16895.428 |
| AK026232  | 11977.849 | 15628.144 | M64108    | 2394.398  | 2748.21   | AK024311  | 634.423   | 1476.621  |
| NM_014892 | 11931.474 | 14190.311 | NM_001503 | 6652.134  | 3853.024  | AF052155  | 4932.783  | 5051.352  |
| NM_017900 | 5469.789  | 7200.968  | NM_006302 | 4428.514  | 2822.211  | NM_005080 | 6423.554  | 6977.271  |
| NM_006330 | 21497.381 | 29003.293 | AJ224875  | 5523.208  | 3294.861  | AF060902  | 7156.385  | 7836.686  |
| NM_000780 | 8070.27   | 7978.476  | NM_002140 | 3611.217  | 2736.571  | AF121858  | 24161.287 | 26658.939 |
| NM_002510 | 576.245   | 560.256   | AF043324  | 8738.433  | 8149.235  | NM_013437 | 603.552   | 1480.15   |
| NM_017731 | 1011.635  | 1687.211  | AK024172  | 3348.547  | 3060.999  | NM_017681 | 1652.395  | 4002.329  |
| AB040891  | 4254.383  | 6171.785  | NM_014814 | 8274.548  | 7859.626  | X57655    | 32987.789 | 39490.867 |
| AB037780  | 709.195   | 1114.599  | NM_002797 | 30351.488 | 30004.32  | AK025966  | 10705.851 | 19120.48  |
| AK025616  | 738.422   | 1164.687  | AK024318  | 2012.154  | 1453.885  | NM_014440 | 402.45    | 1413.755  |
| NM_007250 | 3149.563  | 4303.878  | NM_016120 | 5613.954  | 3625.137  | NM_018720 | 1262.454  | 3643.795  |
| NM_001040 | 29530.238 | 36335.301 | NM_002800 | 12348.328 | 7084.356  | NM_003081 | 48278.852 | 58140.934 |
| NM_005697 | 38186.816 | 44782.176 | NM_017912 | 25110.324 | 16142.895 | NM_016490 | 1231.048  | 2993.394  |
| NM_003090 | 7545.528  | 9862.751  | NM_000423 | 10625.87  | 7647.83   | D50402    | 53735.492 | 51836.313 |
| NM_004781 | 4137.745  | 5460.563  | AB046838  | 7332.025  | 5255.665  | M73547    | 15283.203 | 4278.48   |
| NM_016310 | 283.797   | 756.407   | AK026339  | 993.918   | 658.821   | AF181722  | 560.688   | 214.349   |
| NM_018303 | 2987.153  | 3918.019  | X98411    | 3056.695  | 2362.341  | NM_003687 | 5699.776  | 1575.977  |
| NM_014750 | 13439.472 | 17278.869 | AF116658  | 28430.578 | 24536.523 | NM_004134 | 6899.539  | 1199.18   |
| AL133047  | 897.752   | 1101.018  | NM_014860 | 21914.748 | 16387.895 | NM_001630 | 1276.215  | 1667.306  |
| NM_005124 | 3510.124  | 4558.348  | AB032977  | 20495.697 | 16147.298 | NM_012264 | 674.952   | 911.451   |
| AK000947  | 7994.049  | 10292.251 | AK001725  | 1285.368  | 1672.126  | AF311312  | 1580.845  | 2643.954  |
| L08240    | 3133.387  | 4278.286  | NM_003030 | 3100.538  | 2840.036  | NM_001170 | 391.034   | 1001.43   |
| NM_017952 | 3790.359  | 4778.465  | NM_020520 | 15377.82  | 17169.961 | NM_005313 | 44606.23  | 49423.109 |
| NM_014160 | 32181.807 | 38869.723 | S72604    | 52916.355 | 52382.637 | NM_017760 | 31611.543 | 49278.242 |
| AL442085  | 11189.943 | 12330.061 | NM_017984 | 912.589   | 1117.813  | NM_000420 | 809.103   | 2000.752  |
| J03250    | 514.034   | 831.712   | AF038951  | 16915.498 | 8227.278  | AB040967  | 192.397   | 731.433   |
| NM_013313 | 7045.205  | 9429.668  | NM_006492 | 2214.906  | 1237.014  | NM_003570 | 603.063   | 1090.814  |
| NM_014730 | 11734.655 | 16542.26  | AK021811  | 1941.787  | 1419.936  | NM_014721 | 579.365   | 1346.624  |
| AK023886  | 4124.745  | 5382.25   | NM_003420 | 5879      | 3888.344  | AK026352  | 1680.641  | 6846.202  |
| NM_002553 | 5575.236  | 8625.802  | AF055030  | 3765.738  | 3173.713  | AL137705  | 3062.426  | 5757.761  |
| AJ404615  | 5150.554  | 6947.056  | AK000589  | 4968.66   | 3275.783  | U41898    | 1470.208  | 3447.389  |
| NM_016053 | 40392.809 | 44547.441 | X53281    | 32277.33  | 33383.629 | NM_020340 | 357.775   | 1379.814  |
| AB007869  | 6058.981  | 6429.25   | BC012782  | 4695.304  | 5234.945  | AF169257  | 884.694   | 2102.223  |
| AB046844  | 2219.019  | 3064.696  | AF132026  | 60941.926 | 47609.789 | NM_014840 | 1237.112  | 1220.827  |
| NM_000302 | 4240.312  | 5183.382  | AL050353  | 2643.872  | 1893.936  | BF217766  | 648.917   | 769.15    |
| NM_013230 | 55310.805 | 53499.332 | AB037788  | 15132.855 | 6827.515  | NM_000184 | 1465.744  | 576.687   |
| NM_016010 | 11991.85  | 15378.973 | NM_004587 | 16069.199 | 5839.065  | NM_016180 | 817.549   | 260.813   |
| NM_020120 | 2130.516  | 2476.641  | NM_000970 | 57782.02  | 54461.41  | NM_000112 | 345.966   | 161.134   |
| AK022900  | 1660.509  | 1390.014  | AF147412  | 48885.113 | 27420.088 | NM_005827 | 9283.837  | 1695.668  |
| NM_001125 | 507.362   | 635.301   | AK024570  | 20101.199 | 17037.73  | NM_006580 | 8739.105  | 8721.896  |

|           |           |           |           |           |           |           |           |           |
|-----------|-----------|-----------|-----------|-----------|-----------|-----------|-----------|-----------|
| AB023216  | 1329.6    | 1437.073  | AF161401  | 17867.715 | 12176.372 | NM_002191 | 425.649   | 1048.18   |
| NM_002266 | 55732.082 | 52972.273 | NM_000990 | 27561.121 | 18902.814 | AB007875  | 2654.185  | 5223.966  |
| NM_014400 | 9532.658  | 10406.602 | NM_014740 | 9050.379  | 7694.993  | NM_018261 | 1748.165  | 3072.811  |
| AL157492  | 2198.257  | 2641.793  | NM_015956 | 26732.543 | 24261.816 | NM_014796 | 1511.295  | 3276.015  |
| AL353957  | 5354.509  | 4258.428  | AK024601  | 16783.689 | 17605.826 | AL050288  | 38099     | 49252.535 |
| NM_007214 | 12090.999 | 11640.38  | S68069    | 3945.774  | 5077.631  | NM_005040 | 5900.914  | 11144.564 |
| NM_000311 | 15426.594 | 16012.029 | AB011095  | 9440.181  | 11011.303 | NM_016391 | 23886.9   | 35189.215 |
| NM_000231 | 525.266   | 595.143   | NM_002488 | 27845.328 | 14778.61  | AF075033  | 7456.253  | 14128.275 |
| L07517    | 3419.011  | 4261.067  | NM_004003 | 36410.59  | 19082.16  | D50911    | 17684.822 | 29540.996 |
| AK022451  | 26055.24  | 27192.305 | NM_000188 | 4788.716  | 2895.773  | AB011104  | 1414.194  | 3708.716  |
| NM_014356 | 47851.828 | 56316.566 | BF244401  | 15202.265 | 9523.067  | AK024069  | 6590.871  | 13272.083 |
| BM918441  | 13148.759 | 14019.025 | NM_004718 | 51745.969 | 38030.23  | NM_004582 | 7374.459  | 12565.805 |
| AA425102  | 480.306   | 399.802   | AL359585  | 9655.318  | 7879.146  | NM_015640 | 17923.424 | 22936.564 |
| AA878880  | 763.602   | 782.942   | AB046850  | 10496.393 | 18636.031 | AF233450  | 941.864   | 1324.326  |
| AA150828  | 6624.568  | 5988.606  | NM_014801 | 11960.304 | 28735.459 | NM_016233 | 1961.127  | 713.189   |
| H90764    | 1813.637  | 1700.461  | NM_003642 | 8127.777  | 3659.118  | NM_000821 | 43633.309 | 8305.551  |
| AI859208  | 1270.911  | 1301.077  | AB027013  | 15154.765 | 7322.046  | NM_003145 | 33778.906 | 5412.759  |
| H64379    | 25725.754 | 19070.406 | BC032686  | 1077.796  | 678.413   | CY3Cy5    | 1687.903  | 61.188    |
| BE208258  | 44583.918 | 46960.684 | AL360195  | 15474.01  | 16026.946 | NM_012466 | 4282.126  | 3383.289  |
| BI833114  | 516.281   | 676.749   | U14383    | 2127.561  | 1342.393  | NM_134260 | 2192.453  | 1267.498  |
| T72202    | 3246.746  | 2823.907  | NM_017810 | 2887.394  | 2292.369  | AF086448  | 1574.961  | 1298.492  |
| BI831922  | 3952.907  | 3254.74   | NM_003181 | 59062.449 | 55180.207 | AF086386  | 876.374   | 643.256   |
| M69238    | 4703.986  | 3714.191  | NM_004451 | 8615.032  | 8288.042  | AF086457  | 774.727   | 565.95    |
| AA664180  | 2527.198  | 2941.645  | NM_004364 | 1745.902  | 921.3     | AK025469  | 792.544   | 464.838   |
| AA599158  | 20430.447 | 17811.91  | NM_020395 | 7189.501  | 8094.13   | NM_020236 | 2168.712  | 2332.345  |
| BE294756  | 2035.739  | 1682.793  | NM_003425 | 3096.321  | 3441.12   | AF070581  | 925.685   | 1745.159  |
| AK026092  | 9091.021  | 7559.673  | NM_013388 | 9925.984  | 13212.538 | AK024187  | 597.662   | 518.942   |
| AK001175  | 2853.022  | 2577.521  | AK026232  | 11114.229 | 7952.484  | NM_003307 | 402.555   | 194.585   |
| NM_003897 | 5721.648  | 3617.65   | NM_014892 | 13734.867 | 7638.818  | AF070565  | 523.417   | 658.25    |
| NM_003296 | 47118.715 | 52771.898 | AK023827  | 8750.253  | 7983.423  | AK021644  | 905.084   | 607.572   |
| U70981    | 441.424   | 670.03    | NM_001117 | 791.003   | 739.59    | NM_012466 | 3365.927  | 1253.063  |
| NM_014330 | 52728.984 | 51490.238 | NM_000231 | 418.354   | 432.257   | NM_134260 | 3354.795  | 1004.69   |
| NM_007034 | 1454.314  | 1186.937  | L07517    | 3129.751  | 3934.571  | SR2       | 21541.271 | 5652.542  |
| NM_005261 | 568.87    | 542.239   | BM918441  | 11530.729 | 8398.731  | SR4       | 5142.669  | 1708.264  |
| NM_001560 | 1366.498  | 941.528   | AA425102  | 533.564   | 192.351   | SR6       | 734.034   | 158.669   |
| NM_001783 | 54806.531 | 44343.758 | T72202    | 2733.749  | 3028.476  | SR8       | 2622.262  | 3155.765  |
| J03171    | 7171.376  | 5864.287  | BI831922  | 3232.368  | 2663.751  | SR10      | 8778.167  | 1186.437  |
| NM_005856 | 2006.743  | 1437.438  | M69238    | 6750.542  | 6037.321  | CY3Cy5    | 1254.322  | 85.973    |
| NM_002310 | 964.997   | 678.438   | AA664180  | 1946.99   | 2111.749  | AK023038  | 507.777   | 551.11    |
| NM_005312 | 5047.484  | 3630.439  | M80244    | 982.83    | 1345.467  | AF086074  | 1709.69   | 1351.374  |
| NM_001711 | 3423.419  | 2971.891  | AA599158  | 25713.342 | 28292.559 | AK023964  | 2577.197  | 2909.925  |
| NM_004210 | 15287.61  | 14934.762 | BE294756  | 2465.676  | 3159.754  | AF086084  | 456.431   | 369.76    |
| NM_020140 | 3655.223  | 3948.455  | NM_000696 | 8417.008  | 10043.224 | AL050184  | 684.997   | 608.551   |
| NM_001496 | 17469.293 | 15578.209 | L08240    | 2874.174  | 2138.121  | AF085853  | 358.612   | 306.746   |
| NM_001962 | 2691.737  | 3091.696  | NM_017952 | 2724.717  | 2072.785  | AK027185  | 887.387   | 562.594   |
| NM_002500 | 5674.859  | 5319.459  | NM_002940 | 4386.153  | 3901.913  | AK025576  | 1367.086  | 952.788   |
| AK026232  | 9431.188  | 8016.85   | NM_016081 | 31583.426 | 26448.281 | AL442086  | 3505.83   | 2685.575  |
| NM_014892 | 11188.731 | 6566.307  | NM_006389 | 7165.514  | 7963.559  | BC034819  | 1911.764  | 1374.614  |
| AK023827  | 7129.076  | 4449.412  | M30818    | 2960.159  | 5890.813  | AF147313  | 12168.258 | 6818.511  |
| NM_001117 | 818.032   | 623.822   | NM_003329 | 54894.371 | 31851.662 | AF147382  | 43349.91  | 22075.846 |
| AF283645  | 11015.341 | 9708.749  | NM_014330 | 57400.77  | 62591.879 | AK001957  | 1444.656  | 679.627   |
| NM_016575 | 7253.078  | 4028.383  | NM_007034 | 1315.831  | 3365.237  | AK021833  | 1231.793  | 1857.199  |
| NM_018557 | 476.802   | 475.575   | NM_001783 | 55230.848 | 61180.594 | AF143867  | 982.329   | 299.148   |



|           |           |           |           |           |           |           |           |           |
|-----------|-----------|-----------|-----------|-----------|-----------|-----------|-----------|-----------|
| NM_001045 | 28853.947 | 18426.09  | J03171    | 6236.197  | 9888.532  | AK025889  | 1965.754  | 670.392   |
| NM_005697 | 23281.428 | 17318.332 | NM_005856 | 2417.301  | 4140.105  | NM_014715 | 1360.96   | 571.251   |
| NM_003095 | 6428.895  | 4024.658  | NM_004323 | 55537.961 | 56714.426 | AK027134  | 614.837   | 463.366   |
| NM_004781 | 3721.56   | 1866.488  | NM_002310 | 1645.071  | 2342.45   | AK024168  | 572.261   | 445.093   |
| NM_018303 | 2685.208  | 1552.93   | NM_005312 | 5350.649  | 8268.507  | AF264622  | 542.396   | 483.532   |
| NM_014758 | 12861.405 | 9443.055  | NM_004210 | 18194.609 | 31075.154 | AK021793  | 1633.033  | 1199.82   |
| AL133047  | 706.418   | 678.341   | NM_020140 | 3045.549  | 6835.396  | AK022255  | 5764.54   | 3949.877  |
| NM_005124 | 3817.477  | 3366.656  | NM_007214 | 12318.988 | 9734.398  | AF075079  | 379.735   | 370.729   |
| AK000947  | 7807.532  | 7110.158  | NM_000311 | 14902.76  | 9390.37   | AK022479  | 301.2     | 383.263   |
| L08240    | 2955.673  | 2229.21   | NM_017909 | 4109.922  | 3488.796  | AF086004  | 14293.235 | 9962.966  |
| NM_017952 | 4208.614  | 5686.172  | NM_006335 | 20383.086 | 19128.246 | AL137318  | 988.32    | 495.462   |
| U97698    | 331.821   | 727.087   | NM_000786 | 7340.45   | 12397.433 | AL137482  | 616.123   | 351.727   |
| M30818    | 3141.702  | 4703.098  | NM_017731 | 1803.331  | 1730.743  | AL162011  | 4323.151  | 1467.158  |
| NM_000163 | 1560.799  | 1822.375  | AB037780  | 1146.629  | 2198.397  | AK056111  | 567.574   | 258.489   |
| NM_014400 | 6663.419  | 5345.842  | AK025616  | 886.809   | 1970.869  | Y13807    | 703.671   | 322.325   |
| AL353957  | 4879.666  | 1969.095  | NM_007256 | 2857.191  | 7540.217  | AB037792  | 1012.751  | 1395.997  |
| NM_007214 | 10155.657 | 4801.377  | NM_003099 | 6953.829  | 12919.882 | AK022480  | 235.92    | 399.382   |
| NM_000311 | 15193.905 | 7840.802  | NM_004781 | 3553.146  | 7608.334  | AK024158  | 877.65    | 1254.976  |
| NM_017909 | 5197.517  | 3247.956  | NM_016315 | 363.341   | 944.172   | AL080082  | 373.26    | 395.31    |
| NM_006335 | 18216.193 | 12039.986 | NM_018303 | 3173.187  | 8193.859  | AK021623  | 414.306   | 579.523   |
| NM_000786 | 6943.504  | 2350.539  | NM_014758 | 26019.119 | 49338.813 | AK023733  | 1173.526  | 2194.793  |
| NM_017731 | 793.78    | 575.198   | AL133047  | 829.948   | 1667.676  | AK027112  | 3332.655  | 2600.441  |
| AB040891  | 3488.677  | 2482.432  | NM_005124 | 4393.212  | 8556.978  | AL049314  | 3809.253  | 4351.647  |
| AB037780  | 481.477   | 383.384   | AK000947  | 7454.88   | 17116.785 | AF093016  | 14253.467 | 9797.682  |
| NM_005845 | 34864.652 | 26448.846 | NM_003897 | 5415.532  | 3735.534  | AF161345  | 486.524   | 555.248   |
| NM_016209 | 15066.772 | 23756.688 | NM_014165 | 28263.268 | 20874.195 | -         | 346.265   | 267.404   |
| AK026092  | 7755.497  | 4676.092  | AL442085  | 11073.143 | 12043.835 | NM_014163 | 12255.813 | 6093.04   |
| AK001175  | 2460.009  | 1413.527  | NM_013313 | 7783.204  | 8014.325  | NM_014137 | 383.276   | 281.938   |
| NM_003897 | 5949.406  | 2900.119  | NM_014736 | 10612.864 | 9387.896  | AK021974  | 741.346   | 436.328   |
| NM_014165 | 28366.004 | 18902.178 | AK023886  | 3339.594  | 2100.155  | AK022068  | 359.928   | 132.047   |
| AL442085  | 6818.09   | 3147.996  | AB007869  | 6163.357  | 14192.459 | AK022229  | 1141.815  | 382.571   |
| NM_013313 | 5520.04   | 3699.958  | AB046844  | 1462.757  | 3960.702  | AK022362  | 5046.555  | 1617.804  |
| NM_014736 | 9913.188  | 4912.661  | NM_000302 | 3307.482  | 9496.38   | AK022004  | 4311.783  | 1178.631  |
| AK023886  | 2681.569  | 1806.308  | NM_020120 | 2126.42   | 4338.854  | AK022390  | 672.971   | 336.881   |
| NM_002553 | 4802.552  | 3174.278  | AK022900  | 1841.721  | 3364.021  | AF085865  | 1331.581  | 3984.73   |
| AJ404615  | 3916.802  | 2390.047  | NM_001125 | 441.617   | 1240.659  | AK025521  | 478.336   | 936.308   |
| NM_016053 | 33415.121 | 22981.604 | AB023216  | 1428.592  | 2441.758  | NM_001053 | 48797.641 | 56547.234 |
| AB007869  | 5055.242  | 3208.919  | NM_002266 | 58749.352 | 61665.703 | Z70694    | 2412.47   | 2838.45   |
| AB046844  | 2073.188  | 2558.417  | NM_014400 | 12768.499 | 30654.959 | L77602    | 1281.12   | 1037.581  |
| NM_001125 | 1710.284  | 3674.264  | AL157492  | 3443.776  | 8609.59   | NM_015421 | 7533.102  | 5228.917  |
| AB023216  | 1504.152  | 1318.163  | AL353957  | 6307.696  | 16001.68  | AF086081  | 2550.869  | 2097.76   |
| NM_002266 | 62690.117 | 48455.301 | AK023827  | 9101.2    | 8124.836  | NM_018634 | 324.756   | 180.624   |
| CY3Cy5    | 1681.26   | 134.856   | NM_001117 | 825.769   | 672.221   | NM_018111 | 423.924   | 554.506   |
| NM_015001 | 1503.044  | 621.2     | L07517    | 2894.818  | 2918.701  | AK023730  | 161.511   | 223.289   |
| AF086437  | 386.201   | 230.089   | AK022451  | 34077.43  | 28115.039 | AF161360  | 1056.328  | 1010.714  |
| AK025088  | 2689.488  | 1597.947  | NM_014359 | 55353.742 | 55566.324 | AK021720  | 580.924   | 495.281   |
| U79295    | 427.168   | 679.466   | BM918441  | 11605.2   | 10327.655 | NM_016497 | 30648.502 | 13543.108 |
| AK002107  | 864.774   | 1576.992  | AA425102  | 741.78    | 600.601   | AF009261  | 662.526   | 158.532   |
| NM_018061 | 1315.477  | 1613.557  | AA150828  | 8701.96   | 3667.511  | AL133086  | 643.905   | 966.177   |
| NM_033195 | 2753.479  | 2179.81   | BE208258  | 54482.547 | 59885.145 | NM_012151 | 7279.553  | 7641.744  |
| SR10      | 17784.447 | 1476.453  | M69238    | 6684.44   | 9272.088  | AJ227912  | 484.199   | 1868.912  |
| CY3Cy5    | 1151.149  | 99.224    | AA664180  | 1873.414  | 2527.853  | NM_018195 | 1093.841  | 1768.222  |
| AK022119  | 1671.77   | 684.97    | M80244    | 609.285   | 1111.195  | AK025532  | 21030.51  | 16578.1   |

|            |           |           |           |           |           |           |           |           |
|------------|-----------|-----------|-----------|-----------|-----------|-----------|-----------|-----------|
| NM_016644  | 1002.884  | 735.86    | AA599158  | 24941.779 | 43971.938 | NM_003522 | 592.354   | 569.796   |
| AF085836   | 4441.625  | 10329.646 | BE294756  | 2403.921  | 5646.141  | BF217847  | 663.885   | 596.913   |
| AL049449   | 1523.448  | 2618.657  | AK026092  | 19675.408 | 43247.523 | NM_00532C | 4060.994  | 3326.613  |
| AF147347   | 599.016   | 959.462   | AK001175  | 3306.369  | 7801.624  | Y10519    | 572.044   | 697.392   |
| AL359654   | 897.883   | 1557.056  | NM_00294C | 4623.976  | 3442.556  | AF056452  | 315.281   | 376.537   |
| AK024224   | 1522.094  | 3674.923  | NM_016081 | 26256.852 | 18022.789 | AF119901  | 2293.219  | 1823.506  |
| NM_015362  | 8491.439  | 18178.877 | NM_006389 | 7376.695  | 5774.213  | AK001936  | 612.805   | 443.727   |
| AF147371   | 1220.122  | 2335.479  | M30818    | 2872.582  | 3048.974  | NM_00377C | 46704.348 | 33140.527 |
| AK023745   | 1107.531  | 1756.065  | NM_000163 | 1110.657  | 1283.144  | AK001395  | 2277.927  | 891.563   |
| AK026761   | 472.764   | 793.98    | NM_005755 | 8647.158  | 6629.554  | S57803    | 5894.125  | 2415.327  |
| NM_01883E  | 5703.275  | 8665.37   | NM_003329 | 53676.672 | 52803.172 | AK023131  | 1594.661  | 646.329   |
| AF075092   | 373.12    | 1005.354  | NM_003299 | 53837.156 | 54756.867 | X78926    | 1010.056  | 933.647   |
| AF085944   | 456.064   | 909.604   | NM_01433C | 57381.328 | 54569.305 | AJ278110  | 778.394   | 1676.563  |
| AL133038   | 1880.119  | 3867.16   | NM_001783 | 48816.199 | 53086.758 | NM_014237 | 1138.708  | 3415.603  |
| AL137414   | 1850.046  | 4111.982  | J03171    | 6567.123  | 4585.043  | NM_02039E | 304.621   | 648.643   |
| AL359574   | 1289.652  | 3323.2    | NM_005856 | 2208.18   | 2012.963  | AF029900  | 2728.402  | 4244.581  |
| AL133569   | 3873.36   | 8240.477  | NM_004323 | 53291.773 | 45952.984 | NM_00332E | 4600.259  | 4555.034  |
| AL137435   | 421.85    | 1075.113  | NM_00231C | 779.957   | 952.96    | NM_01617E | 1564.564  | 1838.706  |
| AK027189   | 1535.204  | 1653.548  | NM_005312 | 4286.467  | 6238.951  | AK022639  | 4445.984  | 3938.57   |
| AK024241   | 437.287   | 646.555   | NM_00421C | 18851.982 | 32769.02  | D31766    | 866.819   | 824.013   |
| AK025061   | 888.656   | 1054.314  | NM_02014C | 3725.629  | 10453.171 | NM_006547 | 3177.024  | 2238.377  |
| AK023882   | 335.078   | 940.904   | AK026232  | 10505.208 | 27653.301 | L23867    | 560.125   | 471.255   |
| AK026750   | 1431.39   | 2040.287  | NM_014892 | 17555.387 | 31819.893 | AB020968  | 405.734   | 650.214   |
| AF072164   | 1967.644  | 2120.25   | NM_017909 | 4868.848  | 3318.636  | AL138690  | 2244.534  | 2009.016  |
| AF083122   | 914.026   | 1369.861  | NM_006335 | 15446.279 | 8107.127  | AK000394  | 503.251   | 498.914   |
| AF147317   | 519.428   | 816.438   | NM_000786 | 7482.165  | 3804.646  | NM_013941 | 921.81    | 813.914   |
| AF232216   | 566.25    | 1391.306  | NM_002519 | 344.622   | 357.308   | AF074989  | 949.367   | 622.341   |
| NM_017773  | 3276.414  | 5816.652  | NM_017731 | 1119.032  | 1254.043  | AK001107  | 639.61    | 418.643   |
| AK021885   | 699.007   | 1691.756  | AB040891  | 3366.943  | 2957.827  | AF147393  | 306.787   | 272.994   |
| AK022018   | 577.315   | 1370.504  | AB037780  | 555.717   | 526.334   | AL080112  | 1255.078  | 521.816   |
| AK022161   | 480.796   | 1545.854  | AK025616  | 593.254   | 454.476   | AL137325  | 558.787   | 364.864   |
| AK022296   | 657.241   | 1399.135  | NM_001045 | 39564.594 | 38988.066 | AF147361  | 828.32    | 392.951   |
| AK021940   | 997.621   | 2287.022  | NM_005697 | 32359.461 | 21217.223 | NM_001851 | 3997.49   | 2728.426  |
| AK022052   | 464.626   | 425.445   | NM_003099 | 5979.387  | 4268.446  | S67789    | 1169.173  | 962.458   |
| AK022189   | 814.738   | 472.066   | NM_004781 | 3585.501  | 2342.713  | AK022689  | 8458.936  | 11046.156 |
| AK022338   | 946.333   | 1053.216  | NM_018303 | 2666.162  | 2273.599  | NM_016227 | 348.304   | 424.215   |
| AK024515   | 2925.473  | 2911.387  | NM_01475E | 23526.402 | 21204.672 | NM_00419E | 21947.162 | 19948.277 |
| AF085862   | 1897.088  | 2139.546  | AL133047  | 717.17    | 1091.214  | NM_00470E | 3155.902  | 2705.034  |
| NM_01799E  | 622.728   | 910.455   | NM_005124 | 3765.475  | 6457.948  | NM_02019C | 20682.162 | 17736.063 |
| AL049271   | 48991.996 | 48917.441 | AK000947  | 7890.794  | 23479.891 | AK024003  | 569.175   | 629.808   |
| AK026198   | 1946.477  | 3720.958  | L08240    | 4455.503  | 11031.103 | NM_014357 | 3765.05   | 3523.808  |
| NM_005001  | 22231.258 | 39402.469 | NM_017952 | 2969.374  | 5976.808  | NM_004067 | 444.762   | 668.46    |
| AK024175   | 1759.185  | 3364.404  | NM_014165 | 26804.479 | 16251.996 | NM_000121 | 8714.884  | 6825.766  |
| NM_00051C  | 1991.786  | 4792.16   | AL442085  | 11258.405 | 7242.136  | NM_002091 | 11675.51  | 8687.149  |
| NM_017787  | 1849.541  | 4195.651  | NM_013313 | 7646.078  | 7395.072  | AB033092  | 4245.729  | 3337.684  |
| M20839     | 505.052   | 563.856   | NM_014736 | 12060.638 | 16621.334 | M89957    | 14857.506 | 8354.798  |
| NM_02031E  | 9551.723  | 6643.644  | AK023886  | 3857.211  | 4509.847  | NM_003023 | 380.146   | 394.743   |
| unknown (4 | 396.803   | 296.536   | NM_002553 | 5681.372  | 8076.988  | BC035030  | 3993.113  | 2628.064  |
| NM_005683  | 1411.741  | 1412.803  | AJ404615  | 4568.143  | 7526.242  | NM_00534C | 33352.234 | 13298.53  |
| AK023173   | 7164.25   | 8314.8    | NM_016053 | 43552.445 | 45922.551 | NM_016201 | 3016.095  | 1451.492  |
| AK025225   | 434.248   | 814.329   | AB007869  | 6466.566  | 5190.561  | NM_000864 | 1521.276  | 644.631   |
| U79275     | 6726.422  | 7872.041  | AB046844  | 2268.108  | 1798.224  | NM_017977 | 2023.218  | 735.497   |
| AF088067   | 6265.38   | 12504.578 | NM_013235 | 54508.828 | 35235.094 | AF147727  | 1199.017  | 449.039   |

|           |           |           |           |           |           |           |           |           |
|-----------|-----------|-----------|-----------|-----------|-----------|-----------|-----------|-----------|
| AF056441  | 2968.496  | 6549.662  | NM_016015 | 10324.827 | 5722.262  | NM_006751 | 399.826   | 181.179   |
| AK024142  | 318.695   | 960.551   | NM_020120 | 2287.703  | 1569.938  | AB037834  | 981.886   | 386.298   |
| Y10509    | 234.499   | 872.474   | AK022900  | 1658.334  | 805.482   | NM_003565 | 1795.775  | 1011.875  |
| AK024389  | 7603.954  | 15936.767 | AB023216  | 710.237   | 679.067   | NM_002777 | 409.409   | 293.18    |
| AK026793  | 1352.751  | 3022.22   | NM_002266 | 61395.465 | 52240.27  | AF202635  | 550.583   | 606.62    |
| NM_001672 | 498.663   | 1059.293  | NM_014400 | 10639.426 | 13529.416 | NM_014125 | 825.747   | 1291.948  |
| AJ276253  | 8891.147  | 16640.723 | AL157492  | 2689.693  | 4277.536  | NM_017904 | 931.698   | 1192.663  |
| AF147314  | 1022.881  | 2419.452  | AL353957  | 6501.337  | 18217.26  | NM_013367 | 1450.21   | 1400.081  |
| NM_018980 | 2540.038  | 4437.754  | NM_007214 | 11996.25  | 28001.934 | NM_000321 | 1965.807  | 1940.377  |
| AF086201  | 1581.211  | 1143.517  | NM_000311 | 14893.656 | 24121.443 | NM_006341 | 10047.648 | 7141.254  |
| AK024712  | 663.134   | 629.944   | L07517    | 3130.938  | 2457.819  | NM_001705 | 1518.556  | 1578.141  |
| NM_002902 | 3684.28   | 5693.621  | AK022451  | 34148.344 | 23776.869 | NM_006191 | 3391.198  | 2859.521  |
| NM_020245 | 15209.293 | 17039.307 | NM_014359 | 53109.84  | 56552.516 | NM_001800 | 1953.068  | 1462.199  |
| X89670    | 1790.952  | 2811.596  | BM918441  | 12261.981 | 12891.282 | NM_004335 | 5950.621  | 4486.671  |
| NM_001725 | 1218.264  | 1591.579  | AA425102  | 722.245   | 732.885   | NM_015945 | 1642.901  | 1459.069  |
| NM_004053 | 2367.199  | 2887.098  | AA878880  | 659.874   | 752.923   | NM_013975 | 1982.225  | 2076.402  |
| NM_001485 | 749.739   | 886.562   | AA150828  | 9408.375  | 9657.875  | NM_003790 | 3466.316  | 2824.248  |
| M20259    | 735.491   | 1572.807  | H90764    | 2956.47   | 8117.931  | NM_000494 | 4978.061  | 3849.097  |
| NM_020374 | 2630.709  | 3438.363  | AI859208  | 967.087   | 2004.023  | NM_016023 | 1344.553  | 753.583   |
| AB033093  | 2641.218  | 5716.101  | H64379    | 41018.711 | 32788.012 | NM_003722 | 14497.551 | 6969.539  |
| NM_005912 | 896.232   | 1916.079  | BE208258  | 48198.602 | 37817.301 | NM_014430 | 360.579   | 104.354   |
| AK021879  | 762.862   | 1748.836  | T72202    | 2879.081  | 2004.515  | NM_000495 | 576.922   | 354.465   |
| AL355717  | 477.139   | 1093.847  | BI831922  | 3029.393  | 2168.932  | AF085883  | 1548.151  | 660.82    |
| AK055991  | 1036.289  | 2328.496  | M69238    | 6792.778  | 4173.054  | NM_016571 | 963.148   | 367.36    |
| AF113697  | 709.541   | 1576.845  | AA664180  | 2469.536  | 2087.069  | NM_003685 | 1077.849  | 518.269   |
| AK022326  | 1809.807  | 2199.862  | AA599158  | 24293.891 | 19050.344 | NM_016445 | 4027.037  | 2129.222  |
| AF085991  | 2726.493  | 1739.311  | BE294756  | 2167.146  | 1986.662  | BC036368  | 471.944   | 282.027   |
| NM_001943 | 1083.032  | 1416.365  | AK026092  | 16442.754 | 18759.168 | AK023237  | 412.756   | 310.028   |
| NM_004927 | 6853.492  | 4665.861  | AK001175  | 2895.463  | 3923.714  | NM_001870 | 821.961   | 975.756   |
| AB040928  | 370.079   | 437.783   | NM_003897 | 5790.177  | 6802.753  | AJ271216  | 1166.023  | 1360.82   |
| NM_001455 | 940.52    | 812.917   | NM_003295 | 53578.047 | 56952.75  | U23028    | 2074.839  | 1993.875  |
| NM_015513 | 16841.105 | 10744.384 | NM_014330 | 53307.043 | 54670.703 | NM_000817 | 2690.265  | 3063.794  |
| NM_006215 | 1148.963  | 718.975   | NM_007034 | 1747.206  | 1298.408  | AF113132  | 26125.105 | 21368.025 |
| NM_004443 | 5851.147  | 4100.121  | NM_005261 | 768.013   | 682.637   | NM_006571 | 2188.229  | 3097.61   |
| NM_017412 | 764.518   | 672.483   | NM_001560 | 1866.153  | 1341.943  | AK022680  | 1780.569  | 1899.219  |
| NM_005544 | 326.003   | 130.737   | NM_001783 | 52763.941 | 53020.629 | NM_018945 | 10934.809 | 7591.974  |
| NM_002964 | 40625.637 | 20829.51  | J03171    | 6566.79   | 13760.266 | NM_016355 | 5949.453  | 3879.028  |
| NM_003215 | 2431.469  | 2734.623  | NM_005855 | 2458.058  | 4299.409  | NM_001065 | 51210.695 | 71448.492 |
| NM_016447 | 1947.63   | 3293.289  | NM_004323 | 50370.902 | 50255.469 | NM_004155 | 1300.03   | 977.008   |
| NM_015625 | 8599.431  | 13584.557 | NM_002310 | 1084.652  | 696.181   | AK000561  | 807.203   | 753.724   |
| AB006628  | 4105.506  | 8126.562  | NM_005312 | 5422.669  | 3770.753  | AB051449  | 15443.683 | 9465.495  |
| AF272036  | 843.773   | 2038.799  | NM_001711 | 3557.397  | 3711.281  | BC009187  | 2973.414  | 1835.625  |
| AF231023  | 2145.866  | 5425.49   | NM_004210 | 18128.477 | 22722.332 | AL133617  | 608.303   | 384.482   |
| NM_005145 | 8327.863  | 19234.947 | NM_020140 | 4386.3    | 6088.104  | NM_016485 | 4108.96   | 1682.328  |
| AF508940  | 5458.235  | 3853.057  | NM_001495 | 19365.502 | 15674.271 | AF090894  | 476.26    | 251.529   |
| NM_005425 | 241.723   | 235.634   | NM_001962 | 2565.349  | 2494.541  | NM_014052 | 9986.172  | 4264.073  |
| AF130051  | 543.081   | 344.875   | NM_002500 | 11059.151 | 12294.139 | NM_020145 | 1228.254  | 1142.205  |
| M25753    | 6210.385  | 2394.246  | AK026232  | 10916.129 | 15190.434 | NM_006237 | 625.169   | 812.158   |
| NM_003883 | 473.152   | 349.212   | NM_014892 | 17518.582 | 26730.156 | NM_001271 | 2723.121  | 2108.86   |
| NM_004203 | 5633.429  | 2326.579  | AK023827  | 11729.489 | 17846.627 | NM_003683 | 4071.283  | 3413.47   |
| NM_001951 | 490.908   | 250.311   | NM_001117 | 794.536   | 1144.399  | AF039019  | 1978.542  | 2093.706  |
| NM_002391 | 1041.772  | 406.728   | NM_000335 | 767.865   | 604.679   | NM_012255 | 2895.064  | 3359.307  |
| NM_007065 | 4107.368  | 1749.898  | AF283645  | 13003.393 | 9395.704  | NM_018195 | 885.192   | 819.056   |

|           |           |           |           |           |           |           |           |           |
|-----------|-----------|-----------|-----------|-----------|-----------|-----------|-----------|-----------|
| NM_003674 | 36117.148 | 15162.29  | NM_016575 | 10951.866 | 8208.511  | NM_00481E | 3379.649  | 3697.62   |
| NM_001197 | 5737.917  | 2720.342  | NM_018557 | 594.498   | 800.737   | J04205    | 9037.815  | 9333.678  |
| NM_006682 | 393.64    | 448.542   | NM_001045 | 45379     | 36227.52  | D38491    | 3440.087  | 2993.939  |
| NM_014977 | 27588.27  | 19568.379 | NM_005697 | 42057.188 | 32595.184 | AK026835  | 2190.833  | 2943.56   |
| AK026325  | 2328.5    | 2014.802  | NM_003099 | 7079.169  | 4395.626  | NM_00281E | 11640.169 | 7744.734  |
| U83857    | 1565.762  | 1599.271  | NM_004781 | 3655.952  | 5233.528  | NM_00309C | 31751.266 | 20602.045 |
| NM_00123C | 860.682   | 817.874   | NM_018303 | 3267.336  | 2559.487  | NM_013264 | 2567.237  | 2809.601  |
| AK025662  | 1695.637  | 1367.979  | NM_01475E | 27067.668 | 25413.246 | NM_00331E | 9447.744  | 6821.938  |
| NM_000201 | 11914.998 | 11577.085 | AL133047  | 522.668   | 616.471   | NM_00557C | 6384.816  | 4241.867  |
| U37028    | 2817.438  | 1516.958  | NM_005124 | 3857.263  | 4387.088  | NM_00008E | 6856.307  | 4166.577  |
| AB014597  | 2242.576  | 939.281   | AK000947  | 7762.326  | 16564.834 | NM_003752 | 2414.365  | 1189.925  |
| NM_001793 | 28042.652 | 11010.968 | L08240    | 2746.472  | 3435.804  | NM_003932 | 7119.49   | 2885.871  |
| S81361    | 385.865   | 322.971   | NM_017952 | 2839.564  | 2406.025  | NM_016491 | 11695.091 | 3364.593  |
| AK024313  | 8269.39   | 3607.477  | NM_00294C | 3851.122  | 3378.606  | NM_00642E | 20575.693 | 7092.686  |
| NM_003891 | 2214.021  | 916.771   | NM_016081 | 31217.023 | 25776.219 | NM_00251E | 1152.245  | 581.32    |
| AL359575  | 864.387   | 371.282   | NM_006389 | 6167.722  | 5335.37   | NM_002064 | 844.896   | 620.899   |
| NM_002022 | 1537.579  | 1650.916  | M30818    | 2808.711  | 3904.326  | NM_015522 | 5051.377  | 4001.336  |
| NM_001673 | 12056.109 | 8032.341  | NM_000163 | 1140.643  | 2517.956  | NM_01596C | 14313.256 | 15180.814 |
| NM_01651C | 1038.893  | 504.294   | NM_005755 | 7782.537  | 8534.823  | NM_00608E | 4440.817  | 4134.467  |
| NM_01427C | 2398.079  | 925.1     | NM_003329 | 54239.367 | 56565.906 | NM_000907 | 6378.132  | 5589.204  |
| NM_000071 | 6793.793  | 2654.761  | NM_01440C | 11809.099 | 9770.13   | AF254085  | 5040.514  | 4820.325  |
| NM_006843 | 3241.806  | 2072.015  | AL157492  | 3217.195  | 2232.666  | AK023541  | 214.475   | 273.814   |
| NM_004321 | 2067.761  | 1210.115  | AL353957  | 5108.8    | 3298.859  | NM_001987 | 1996.948  | 3122.97   |
| AF311212  | 4476.554  | 2428.136  | NM_007214 | 12407.091 | 12710.89  | AF244088  | 2836.626  | 4600.052  |
| NM_00691E | 1162.091  | 619.958   | NM_000311 | 16258.426 | 23055.057 | NM_00713E | 1081.953  | 1187.541  |
| NM_00603E | 1796.636  | 995.871   | NM_017909 | 5017.626  | 4803.145  | AJ251845  | 502.715   | 338.321   |
| NM_00608E | 3433.372  | 2139.426  | NM_00633E | 19375.125 | 12756.989 | AK000435  | 2437.345  | 2253.01   |
| NM_00452C | 6943.167  | 3990.282  | NM_00078E | 6713.684  | 3240.005  | AK000569  | 3238.972  | 2530.423  |
| AK027118  | 3200.582  | 2045.99   | NM_017731 | 1138.479  | 1261.53   | NM_00604E | 1838.999  | 1089.874  |
| AK022882  | 20073.197 | 9350.427  | AB040891  | 3749.619  | 4890.647  | BC016698  | 4449.3    | 2382.639  |
| NM_00610E | 5183.145  | 2857.753  | AB037780  | 1140.532  | 2333.704  | NM_007374 | 614.682   | 242.837   |
| NM_005981 | 2744.382  | 3055.807  | NM_00584E | 33059.625 | 38287.664 | NM_006167 | 470.163   | 300.423   |
| AF210651  | 1281.178  | 502.156   | NM_016209 | 15586.737 | 11208.284 | NM_016357 | 935.159   | 465.457   |
| AF090942  | 1570.209  | 892.844   | AK075415  | 1697.293  | 1964.284  | NM_01450C | 10206.615 | 5050.269  |
| NM_01459E | 10413.196 | 4963.33   | AK025616  | 668.336   | 423.648   | L09071    | 695.787   | 857.776   |
| NM_01478E | 1554.352  | 860.129   | NM_018964 | 11589.513 | 9671.426  | NM_005924 | 499.811   | 401.611   |
| AB046784  | 3353.086  | 1327.34   | NM_00008C | 2816.385  | 3036.629  | NM_019841 | 329.544   | 536.373   |
| X52402    | 4387.701  | 2323.935  | NM_001829 | 2258.042  | 3007.972  | NM_003322 | 632.335   | 1101.801  |
| AL133663  | 846.357   | 450.943   | NM_00725E | 5031.801  | 5809.905  | NM_00356E | 386.121   | 480.528   |
| NM_004992 | 1758.027  | 924.606   | AK026092  | 14452.992 | 10574.536 | BC036375  | 13988.354 | 15695.765 |
| NM_014462 | 2238.557  | 2225.697  | AK001175  | 2787.56   | 1916.112  | NM_00049E | 268.826   | 439.964   |
| NM_01415E | 50743.406 | 56465.891 | NM_003897 | 6261.421  | 5043.053  | BF347926  | 6284.101  | 7196.905  |
| NM_003137 | 6823.604  | 3434.726  | NM_01416E | 27259.436 | 19711.396 | N54821    | 10862.115 | 14700.931 |
| NM_00693E | 28211.848 | 8927.646  | AL442085  | 11943.759 | 6995.924  | BF063899  | 1057.659  | 2145.443  |
| NM_00451E | 686.793   | 236.781   | NM_013313 | 7323.384  | 5579.217  | U18087    | 47934.609 | 67973.555 |
| NM_02015E | 4080.388  | 2191.776  | NM_01473E | 11100.615 | 7523.25   | U66349    | 1207.946  | 1798.298  |
| AF176085  | 3089.186  | 1493.055  | AK023886  | 3292.722  | 2977.666  | AA057156  | 6346.563  | 7656.191  |
| NM_00698E | 15428.239 | 9038.151  | NM_002553 | 4694.262  | 5283.839  | U19487    | 971.469   | 1060.141  |
| AF265228  | 833.226   | 417.996   | AJ404615  | 4577.347  | 6896.338  | AF166327  | 35472.277 | 22749.895 |
| NM_003757 | 23976.99  | 10656.043 | NM_016053 | 41833.063 | 60650.27  | AF260739  | 2308.034  | 1638.651  |
| AK025561  | 3086.147  | 1890.135  | AB007869  | 6018.476  | 10642.127 | AF531423  | 19829.771 | 11465.591 |
| NM_018602 | 10492.313 | 5283.089  | AB046844  | 2196.825  | 2225.677  | X76555    | 734.519   | 386.22    |
| NM_00409E | 2879.356  | 1329.172  | NM_000302 | 4143.066  | 3083.716  | NM_005432 | 5189.962  | 2667.733  |

|           |           |           |           |           |           |           |           |           |
|-----------|-----------|-----------|-----------|-----------|-----------|-----------|-----------|-----------|
| NM_017629 | 7139.671  | 3195.267  | NM_013235 | 51944.824 | 40181.914 | L10386    | 10408.951 | 4275.369  |
| AL049681  | 3306.997  | 1783.101  | NM_016015 | 10591.839 | 8419.898  | AF061812  | 24304.586 | 10693.866 |
| NM_006584 | 682.844   | 525.616   | NM_020120 | 1834.815  | 1881.781  | AL136756  | 3204.696  | 1978.678  |
| AF118224  | 890.946   | 468.91    | AK022900  | 1718.257  | 1701.324  | NM_015944 | 901.432   | 588.114   |
| NM_003551 | 8429.083  | 5023.195  | NM_001125 | 1735.614  | 5672.334  | NM_001548 | 344.01    | 155.499   |
| AF305210  | 508.593   | 434.301   | AB023216  | 1205.216  | 1389.539  | NM_000758 | 3573.232  | 3521.124  |
| AK021900  | 4583.321  | 2350.474  | NM_002266 | 58353.563 | 57508.613 | M17017    | 426.872   | 821.734   |
| NM_002764 | 14560.425 | 6723.151  | AF086437  | 4119.267  | 6475.496  | NM_002990 | 1401.79   | 1813.357  |
| NM_019857 | 4615.506  | 3203.632  | AK025088  | 6714.554  | 6935.541  | NM_002432 | 3941.292  | 4463.723  |
| NM_000884 | 701.316   | 1024.583  | AK026436  | 810.246   | 987.916   | NM_002343 | 3896.755  | 6377.41   |
| NM_015455 | 41566.707 | 50374.598 | NM_018061 | 1734.508  | 2151.089  | AB033037  | 1127.321  | 1985.818  |
| AF024702  | 9082.727  | 6151.405  | NM_033199 | 2012.156  | 2034.812  | L40400    | 4493.244  | 6847.429  |
| NM_001964 | 1345.647  | 564.8     | NM_015001 | 2611.391  | 1804.749  | AK025688  | 1511.61   | 3315.695  |
| NM_005962 | 9857.833  | 6657.125  | SR2       | 51503.801 | 31268.449 | NM_005930 | 339.879   | 1002.253  |
| AK026804  | 1301.585  | 1607.686  | SR4       | 17172.438 | 11151.986 | Z36819    | 5809.122  | 9136.897  |
| NM_016170 | 3249.686  | 2042.205  | SR6       | 1984.191  | 1053.3    | NM_014847 | 34351.855 | 23998.096 |
| NM_002114 | 253.105   | 119.136   | SR8       | 8564.282  | 15551.364 | NM_014448 | 5197.792  | 5786.995  |
| NM_006166 | 1828.94   | 889.553   | SR10      | 29412.27  | 6971.143  | AL080157  | 3341.059  | 3843.544  |
| S72620    | 26876.936 | 12244.049 | CY3Cy5    | 3959.168  | 174.757   | NM_005100 | 424.079   | 439.835   |
| S73501    | 317.703   | 307.246   | NM_016644 | 3315.337  | 4433.049  | NM_005308 | 1982.428  | 1756.024  |
| NM_005263 | 1534.72   | 1091.478  | AF085842  | 1152.515  | 642.863   | NM_000911 | 768.82    | 649.367   |
| AB033022  | 2258.572  | 1438.573  | AF147397  | 932.209   | 660.339   | NM_007227 | 689.468   | 488.188   |
| NM_000474 | 733.694   | 429.897   | AK027158  | 800.121   | 617.096   | NM_007023 | 765.871   | 389.781   |
| NM_016264 | 835.48    | 648.376   | AK002187  | 1454.816  | 1622.292  | NM_005873 | 7813.344  | 3236.395  |
| NM_006079 | 43623.441 | 19319.719 | AF085836  | 8427.7    | 6247.378  | NM_004624 | 2586.359  | 1833.329  |
| AB037837  | 4193.689  | 2498.378  | AL049449  | 4943.68   | 5772.688  | NM_003865 | 746.954   | 639.238   |
| NM_001155 | 16419.402 | 11695.765 | AF147347  | 868.654   | 1325.816  | AB015330  | 12439.891 | 6116.017  |
| M62896    | 36403.691 | 19318.146 | AL359654  | 2781.133  | 2912.624  | NM_004315 | 6499.956  | 4156.765  |
| NM_017736 | 2849.939  | 2421.219  | AK024224  | 2064.715  | 2718.34   | NM_020166 | 4021.117  | 3200.2    |
| NM_000390 | 325.064   | 377.461   | NM_015362 | 15184.962 | 14050.467 | AK023860  | 3429.984  | 4391.687  |
| NM_000313 | 792.801   | 528.872   | AF147371  | 796.779   | 658.714   | NM_000031 | 2508.268  | 3248.665  |
| NM_001498 | 48931.695 | 38195.469 | AK023745  | 1606.787  | 912.618   | NM_002085 | 16119.508 | 17301.363 |
| AF263523  | 2926.348  | 4048.837  | NM_018982 | 2919.604  | 1371.514  | AK026061  | 349.473   | 1085.312  |
| L08441    | 16075.47  | 19050.973 | AF086254  | 5728.663  | 2996.69   | NM_016286 | 7149.106  | 12922.299 |
| AA641953  | 741.813   | 613.735   | AK026761  | 1021.365  | 662.932   | NM_001567 | 2351.272  | 4584.464  |
| AI248827  | 3546.548  | 1984.1    | NM_018838 | 11877.934 | 6652.976  | NM_004905 | 9093.382  | 10028.23  |
| R45026    | 42722.969 | 23983.777 | AF075083  | 1111.532  | 811.945   | AF217971  | 7631.086  | 10431.145 |
| AI970239  | 1389.977  | 918.528   | AK021454  | 1427.749  | 904.874   | NM_001925 | 518.395   | 943.856   |
| AA496452  | 19046.008 | 9548.26   | AK022069  | 3092.654  | 2339.859  | NM_004982 | 2697.642  | 3033.348  |
| X67594    | 1707.817  | 1119.606  | AL137457  | 2808.463  | 1853.656  | NM_004732 | 3087.26   | 3225.112  |
| AF363393  | 407.713   | 520.303   | AF075092  | 705.061   | 752.775   | NM_018346 | 3114.43   | 4513.001  |
| BC008837  | 624.783   | 756.662   | AF085944  | 3771.74   | 3859.219  | NM_006363 | 4634.612  | 5088.324  |
| NM_015869 | 503.748   | 551.347   | AL133038  | 2344.089  | 2336.179  | NM_020415 | 1708.372  | 1653.313  |
| NM_001631 | 370.474   | 409.344   | AL137414  | 1824.467  | 1788.444  | NM_014879 | 183.807   | 263.862   |
| AB000734  | 4160.385  | 3537.063  | AL359574  | 2786.519  | 2562.625  | AL049667  | 2414.761  | 1598.927  |
| NM_000862 | 559.293   | 553.01    | AL133569  | 9583.894  | 6451.411  | NM_000334 | 4648.464  | 3636.745  |
| X87838    | 6119.795  | 5342.151  | AL137435  | 545.367   | 312.069   | NM_020400 | 1247.849  | 657.099   |
| AK023059  | 1531.838  | 1286.576  | AL157463  | 704.508   | 513.053   | NM_001504 | 4221.09   | 1718.609  |
| AF224266  | 4664.218  | 3117.123  | AL359604  | 946.02    | 488.449   | D50926    | 4633.585  | 2903.266  |
| U72882    | 38497.637 | 23070.781 | AK027189  | 1387.035  | 686.117   | BF205683  | 3033.719  | 2210.411  |
| NM_014337 | 19316.242 | 12089.246 | AK024241  | 3362.688  | 1993.122  | NM_001565 | 537.758   | 414.902   |
| NM_007161 | 24231.172 | 11683.338 | AK025061  | 4739.831  | 3241.833  | AF135422  | 1457.668  | 1384.258  |
| NM_014387 | 1458.391  | 633.02    | AK023882  | 631.811   | 608.27    | NM_004479 | 28317.691 | 29656.957 |

|           |           |           |           |           |           |           |           |           |
|-----------|-----------|-----------|-----------|-----------|-----------|-----------|-----------|-----------|
| NM_003641 | 5105.666  | 2629.667  | AK026750  | 2663.169  | 2059.156  | NM_00261C | 1060.976  | 882.703   |
| NM_012463 | 2740.467  | 2724.791  | AF072164  | 3880.987  | 2804.866  | AF070587  | 2614.037  | 2728.416  |
| L29140    | 48842.906 | 48763.059 | NM_01861C | 441.488   | 633.606   | BE250526  | 1533.181  | 2757.861  |
| AK026448  | 5811.624  | 8232.519  | AF147317  | 1305.777  | 1228.812  | NM_01681C | 3378.378  | 11004.334 |
| AK057418  | 1365.739  | 1574.208  | AF232216  | 2463.807  | 2179.814  | NM_01222C | 7623.338  | 12942.142 |
| NM_00726C | 1147.585  | 1142.675  | NM_017773 | 18375.061 | 13767.251 | NM_00500C | 1769.516  | 3367.711  |
| AF148646  | 8803.653  | 9233.527  | AK021885  | 775.829   | 912.9     | NM_00659C | 2499.83   | 3749.835  |
| AL110218  | 915.212   | 977.028   | AK022296  | 1101.341  | 912.606   | AK023214  | 12409.087 | 14513.965 |
| AB023201  | 882.345   | 1447.149  | AK021940  | 1811.539  | 1271.726  | NM_00146C | 6033.231  | 6215.637  |
| X00094    | 1229.032  | 1262.466  | AK022189  | 1320.184  | 723.862   | NM_00360C | 18571.445 | 16217.911 |
| NM_00377C | 10531.846 | 14556.409 | AK022338  | 1253.721  | 576.099   | NM_01749C | 4137.352  | 4507.528  |
| NM_00208C | 4169.971  | 4498.023  | U48696    | 3174.407  | 2969.051  | NM_00271C | 1672.882  | 1911.1    |
| NM_00292C | 17219.764 | 21534.383 | AF230316  | 8737.911  | 4811.622  | AK026727  | 1912.593  | 1739.025  |
| AF155657  | 11517.817 | 16244.935 | AK024515  | 15457.925 | 11208.797 | NM_00283C | 316.451   | 193.439   |
| NM_00605C | 3290.947  | 4660      | AF085862  | 6126.414  | 3314.404  | NM_006247 | 4005.292  | 2279.545  |
| AF045229  | 17248.986 | 22999.342 | NM_01799C | 4014.785  | 2649.393  | AB032983  | 2391.057  | 1459.835  |
| NM_01609C | 42374.605 | 47558.879 | AL049271  | 61651.289 | 54436.688 | NM_018281 | 9399.319  | 4381.249  |
| NM_000394 | 790.245   | 1122.697  | AK023079  | 50147.793 | 39513.887 | NM_004457 | 2968.107  | 1415.682  |
| NM_00007C | 1001.094  | 738.128   | NM_01960C | 4329.347  | 3772.223  | NM_01404C | 1835.906  | 1030.791  |
| NM_000697 | 2231.913  | 1413.153  | AK026198  | 5063      | 3771.602  | NM_00539C | 1279.087  | 874.343   |
| NM_000017 | 11663.805 | 6581.108  | NM_005001 | 28918.928 | 19338.994 | NM_019841 | 430.702   | 556.057   |
| NM_000237 | 1128.406  | 706.101   | AK024175  | 2519.571  | 2314.429  | NM_00332C | 909.636   | 1185.152  |
| NM_01834C | 6935.76   | 3269.276  | NM_00051C | 3244.36   | 2804.509  | NM_00356C | 514.825   | 1205.251  |
| AL122054  | 1520.576  | 1978.384  | NM_017787 | 3317.016  | 2702.099  | BC036375  | 14127.063 | 18888.131 |
| AB011182  | 931.108   | 852.18    | NM_02031C | 16129.644 | 8304.222  | NM_00049C | 255.082   | 465.502   |
| AB023151  | 1488.142  | 2439.31   | NM_00568C | 2682.974  | 1651.624  | BF347926  | 5318.39   | 5847.937  |
| NM_00014C | 16263.245 | 23947.881 | NM_020427 | 42882.523 | 23519.805 | N54821    | 10104.747 | 15219.885 |
| NM_00512C | 3038.597  | 3223.943  | AJ011601  | 2681.469  | 2851.119  | BI912037  | 4367.262  | 9206.874  |
| NM_01624C | 1353.082  | 1915.904  | AF085920  | 2817.997  | 2504.512  | AA454646  | 13187.305 | 19276.264 |
| NM_005737 | 25881.682 | 28240.627 | AK023173  | 32367.371 | 20730.01  | BF063899  | 1023.305  | 2025.439  |
| NM_00166C | 11015.522 | 15616.99  | AK025225  | 958.859   | 1047.357  | U18087    | 48630.625 | 74684.328 |
| NM_00071C | 1236.612  | 1730.624  | U79275    | 23956.902 | 17622.281 | U66349    | 1156.865  | 2029.15   |
| NM_00075C | 750.807   | 1257.011  | AJ227908  | 2229.499  | 2411.859  | AA057156  | 6718.872  | 7436.147  |
| AB040945  | 1151.85   | 1589.822  | AF007193  | 2271.526  | 2110.789  | U19487    | 935.441   | 1366.493  |
| NM_00201C | 4337.89   | 6488.961  | AK022367  | 2198.216  | 1955.069  | AF166327  | 37456.688 | 31161.896 |
| NM_002377 | 390.973   | 1274.059  | BC028589  | 3249.392  | 3429.302  | AF260739  | 2303.239  | 2558.813  |
| NM_00041C | 21057.654 | 33660.707 | AF088067  | 18430.709 | 17764.738 | AF531423  | 20537.422 | 19860.729 |
| AF182814  | 3266.07   | 5323.288  | AK022213  | 2030.383  | 1754.093  | X76555    | 700.696   | 789.83    |
| NM_00532C | 2106.3    | 1567.254  | AF056441  | 5221.411  | 4829.362  | NM_00543C | 5909.855  | 3774.15   |
| NM_000107 | 16272.401 | 18195.123 | Y10509    | 802.802   | 895.661   | L10386    | 10541.734 | 5720.559  |
| AL157445  | 4186.538  | 6249.469  | AK024389  | 18033.205 | 14991.091 | AF061812  | 26135.443 | 11163.053 |
| NM_001517 | 26004.713 | 39497.797 | AK026793  | 3512.523  | 2795.989  | AL136756  | 3568.001  | 2151.622  |
| NM_00505C | 6609.048  | 12109.538 | NM_00167C | 1506.264  | 2332.825  | NM_00147C | 36706.98  | 22186.699 |
| D86974    | 5466.081  | 8212.335  | AJ276253  | 24201.359 | 28180.479 | M17017    | 408.846   | 660.87    |
| NM_01828C | 6621.627  | 9475.358  | AF147314  | 2398.783  | 1659.721  | NM_00299C | 1605.483  | 2201.113  |
| NM_00198C | 1333.997  | 2124.811  | NM_01898C | 13939.796 | 6348.213  | NM_00243C | 4156.223  | 5620.363  |
| Y12337    | 1181.85   | 1424.592  | AF086201  | 2207.344  | 941.021   | NM_01242C | 325.789   | 504.618   |
| M29551    | 2776.987  | 3338.354  | AK024712  | 2219.279  | 1259.454  | NM_00234C | 3386.753  | 5877.403  |
| AB023148  | 531.382   | 632.191   | NM_00290C | 10650.612 | 11143.798 | AB033037  | 998.187   | 1621.244  |
| NM_00292C | 1841.825  | 2484.179  | NM_02024C | 45820.34  | 35241.652 | L40400    | 5362.834  | 7879.143  |
| BC028375  | 1074.21   | 1802.048  | X89670    | 2819.589  | 2252.791  | AK025688  | 1516.172  | 2734.238  |
| AB026436  | 3084.432  | 6031.233  | NM_00172C | 726.025   | 669.561   | Z36819    | 5464.292  | 8747.239  |
| AK024562  | 2079.983  | 2674.21   | NM_00405C | 8097.248  | 6013.36   | NM_014847 | 39953.879 | 44575.801 |

|           |           |           |           |           |           |           |           |           |
|-----------|-----------|-----------|-----------|-----------|-----------|-----------|-----------|-----------|
| NM_014066 | 3383.836  | 5135.752  | NM_001489 | 1601.537  | 1564.282  | NM_014448 | 5594.167  | 6079.982  |
| NM_004573 | 1129.442  | 1871.064  | M20259    | 895.519   | 1135.468  | AL080157  | 3123.683  | 4555.034  |
| NM_017736 | 2329.285  | 2622.748  | NM_020374 | 4746.857  | 5326.609  | NM_005308 | 2095.533  | 2756.86   |
| NM_000390 | 455.688   | 473.54    | NM_014922 | 3657.49   | 4377.945  | NM_000911 | 817.751   | 1023.846  |
| NM_000313 | 984.138   | 1377.738  | AF183570  | 777.372   | 1051.15   | NM_007227 | 635.778   | 737.133   |
| NM_001498 | 49500.758 | 57574.309 | NM_005497 | 61189.199 | 56145.469 | NM_007023 | 690.809   | 555.085   |
| AF263523  | 4095.462  | 5422.906  | AK024048  | 5350.017  | 5324.859  | NM_005873 | 8469.931  | 5102.423  |
| L08441    | 26231.252 | 23527.211 | AB033093  | 4771.679  | 4407.075  | NM_004624 | 2707.483  | 1668.971  |
| AA641953  | 2271.873  | 3431.254  | NM_005912 | 2744.664  | 2789.2    | NM_003865 | 915.2     | 647.723   |
| AI248827  | 8659.812  | 13027.484 | NM_005909 | 59853.328 | 51224.09  | AB015330  | 13174.438 | 5923.471  |
| R45026    | 51395.875 | 63003.125 | AK021879  | 699.392   | 706.968   | L09071    | 450.796   | 405.046   |
| BI768063  | 3113.931  | 6133.626  | AL355717  | 634.706   | 494.451   | NM_005924 | 576.935   | 641.913   |
| BG386057  | 466.283   | 1049.134  | AK055991  | 1456.103  | 1223.56   | AK023860  | 3872.87   | 6257.806  |
| AI970239  | 2746.007  | 3957.901  | AF113697  | 1345.349  | 843.191   | NM_000031 | 2715.244  | 4047.246  |
| AA496452  | 22045.842 | 33230.383 | AK022326  | 4658.466  | 1953.178  | NM_002085 | 15567.863 | 16909.75  |
| AF363393  | 364.659   | 506.555   | AF085991  | 3027.534  | 1364.13   | AK026061  | 408.662   | 670.929   |
| BC008837  | 1112.675  | 1717.551  | AF075007  | 657.25    | 2510.609  | NM_016286 | 7057.551  | 10682.831 |
| NM_001631 | 665.486   | 1247.009  | NM_001943 | 1825.893  | 2195.547  | NM_001567 | 2083.045  | 3888.202  |
| AB000734  | 4721.967  | 7981.955  | NM_004927 | 15265.44  | 12244.297 | NM_004905 | 8724.55   | 9851.443  |
| X87838    | 6871.09   | 9586.082  | AB040928  | 1300.439  | 1130.843  | AF217971  | 7401.032  | 10683.662 |
| NM_000169 | 8015.07   | 11606.976 | NM_001459 | 5213.209  | 4150.251  | NM_001925 | 446.212   | 1152.01   |
| NM_000699 | 295.904   | 400.255   | NM_015513 | 55467.5   | 50482.227 | NM_004982 | 2769.507  | 5471.251  |
| NM_014337 | 16894.443 | 23600.295 | NM_006219 | 9570.234  | 8753.813  | NM_004732 | 2717.704  | 5679.776  |
| NM_014387 | 2153.901  | 2338.304  | NM_004443 | 26865.852 | 22240.629 | NM_018349 | 3715.188  | 5132.47   |
| NM_003641 | 7415.114  | 7875.271  | NM_001932 | 463.737   | 1213.64   | NM_006363 | 4697.445  | 6303.759  |
| NM_012463 | 3838.966  | 4211.835  | NM_017412 | 2416.241  | 2924.804  | NM_020415 | 1681.906  | 2323.902  |
| L29140    | 51500.586 | 56118.527 | NM_005544 | 1183.982  | 1610.447  | AL049667  | 2381.698  | 2273.01   |
| AK026448  | 8675.406  | 11940.896 | NM_002964 | 61252.266 | 60195.23  | NM_000334 | 5050.589  | 5267.221  |
| AK057418  | 6304.114  | 11020.985 | AF311862  | 62726.316 | 60742.309 | NM_020400 | 1351.963  | 1193.165  |
| L37199    | 949.246   | 1642.612  | NM_003215 | 3361.756  | 5460.766  | NM_001504 | 4702.882  | 2276.422  |
| NM_007260 | 2618.489  | 3749.498  | NM_016447 | 2872.538  | 3832.604  | D50926    | 4187.451  | 2419.034  |
| AF148646  | 13191.29  | 17815.248 | NM_015626 | 11920.104 | 13907.126 | BF205683  | 2921.751  | 1878.15   |
| AL110218  | 1386.553  | 1490.731  | NM_004899 | 11824.431 | 12127.604 | NM_001565 | 564.738   | 296.631   |
| AB023201  | 1695.583  | 1626.558  | AB006628  | 35395.758 | 33363.195 | NM_000758 | 4469.539  | 3402.885  |
| NM_003775 | 9931.629  | 7126.778  | AF272036  | 3198.893  | 2769.367  | NM_004479 | 23853.959 | 25719.35  |
| NM_002082 | 14103.229 | 12957.257 | AF231023  | 4450.096  | 3218.05   | NM_002610 | 966.322   | 1109.75   |
| NM_002922 | 18591.299 | 32163.162 | NM_005148 | 11237.931 | 8141.338  | AF070587  | 2345.594  | 2239.808  |
| AF045229  | 17849.15  | 16324.364 | NM_004746 | 3638.312  | 2330.353  | BE250526  | 1367.311  | 1797.952  |
| NM_001840 | 19167.93  | 18744.865 | AF146019  | 7408.025  | 3692.175  | NM_016819 | 2886.689  | 3745.125  |
| NM_016099 | 42441.914 | 32548.564 | Z36782    | 12337.201 | 4613.593  | NM_012222 | 7549.682  | 10513.576 |
| NM_000394 | 708.133   | 659.438   | NM_003490 | 47166.777 | 23456.027 | NM_005002 | 1883.302  | 2758.43   |
| NM_001155 | 20140.76  | 29748.244 | AF508940  | 8978.836  | 8046.964  | NM_006596 | 2282.434  | 4095.094  |
| M62896    | 39931.441 | 32461.127 | NM_020237 | 1851.552  | 1321.982  | AK023214  | 11382.711 | 16019.71  |
| NM_000017 | 10995.093 | 14276.108 | AF130051  | 1321.804  | 1166.631  | NM_001469 | 5586.345  | 9754.155  |
| AL122054  | 2046.865  | 2699.081  | M25753    | 20589.064 | 16230.186 | NM_003600 | 19629.789 | 32740.58  |
| AB011182  | 1678.72   | 1794.48   | NM_003883 | 4296.283  | 3658.083  | NM_017490 | 3822.889  | 4286.608  |
| AB023151  | 1547.967  | 1635.513  | NM_014929 | 4391.898  | 4539.998  | NM_002718 | 1777.605  | 3562.271  |
| NM_000140 | 19251.967 | 31138.678 | NM_004203 | 23602.854 | 25334.541 | AK026727  | 1613.446  | 2511.028  |
| NM_005125 | 5224.804  | 8718.041  | NM_001951 | 1834.978  | 2335.257  | NM_002830 | 266.111   | 342.974   |
| NM_020038 | 920.92    | 1743.434  | NM_002391 | 3053.976  | 3281.062  | NM_006247 | 4469.311  | 4450.101  |
| NM_016246 | 2891.269  | 5339.371  | NM_007066 | 8733.957  | 8456.031  | AB032983  | 2223.478  | 1813.683  |
| NM_005136 | 1320.945  | 1378.33   | NM_003674 | 64365.59  | 60413.492 | NM_018281 | 9558.683  | 6074.08   |
| NM_004976 | 21075.65  | 19896.807 | NM_001197 | 9480.864  | 11361.521 | NM_004457 | 2956.659  | 1134.03   |

|           |           |           |           |           |           |           |           |           |
|-----------|-----------|-----------|-----------|-----------|-----------|-----------|-----------|-----------|
| NM_005737 | 32435.088 | 25150.764 | NM_006682 | 2707.589  | 3986.258  | NM_014045 | 1769.928  | 882.938   |
| NM_001660 | 10273.357 | 5886.978  | NM_006410 | 1460.231  | 2156.209  | NM_005396 | 1111.469  | 645.064   |
| NM_000710 | 623.326   | 342.764   | NM_014977 | 61484.543 | 59810.676 | NM_004315 | 7509.479  | 5245.518  |
| NM_000752 | 2069.382  | 1082.529  | AK026325  | 5392.438  | 5480.552  | NM_020166 | 4482.198  | 2643.367  |
| AB040945  | 1858.622  | 1814.261  | U83857    | 10030.989 | 9443.648  | NM_003565 | 381.643   | 653.923   |
| NM_002015 | 8693.872  | 11015.621 | NM_001230 | 3347.522  | 3151.991  | BC036375  | 14791.384 | 17626.604 |
| NM_002377 | 559.522   | 661.652   | AK025662  | 2796.757  | 1532.136  | NM_000496 | 487.8     | 860.473   |
| NM_006015 | 1579.582  | 1866.865  | NM_000201 | 19299.035 | 11839.917 | BF347926  | 5798.11   | 5417.474  |
| AF161383  | 10060.985 | 6285.994  | AB011539  | 4654.329  | 2863.158  | N54821    | 9685.736  | 10737.838 |
| NM_000410 | 18438.105 | 21344.451 | U37028    | 9537.174  | 5152.161  | BI912037  | 4054.728  | 5220.65   |
| AF224266  | 3563.416  | 3130.875  | AB014597  | 3348.075  | 1521.857  | AA454646  | 13401.816 | 17896.453 |
| U72882    | 39205.121 | 29672.947 | NM_001793 | 58330.844 | 27144.721 | BF063899  | 1063.067  | 1905.008  |
| NM_000107 | 14986.32  | 13214.214 | S81361    | 754.226   | 693.42    | U18087    | 46081.406 | 74127.586 |
| AL157445  | 3538.51   | 3357.338  | AK024313  | 23891.961 | 20360.818 | U66349    | 1146.25   | 2941.396  |
| NM_001517 | 22628.398 | 23611.822 | NM_003891 | 6657.629  | 5981.615  | AA057156  | 6541.359  | 14108.928 |
| NM_005053 | 7090.377  | 11350.261 | AL359575  | 1965.927  | 1475.642  | U19487    | 1157.318  | 3865.816  |
| D86974    | 7105.678  | 13099.121 | NM_002022 | 1084.804  | 1376.198  | AF166327  | 38183.461 | 38173.164 |
| NM_018283 | 11007.362 | 18406.107 | NM_015524 | 2284.174  | 2266.882  | AF260739  | 2295.509  | 3430.473  |
| NM_001983 | 5063.824  | 8547.481  | NM_001673 | 32626.244 | 42648.664 | AF531423  | 22677.559 | 27243.033 |
| NM_004993 | 1029.098  | 1316.629  | AK023167  | 1946.024  | 4350.344  | X76555    | 766.457   | 1029.151  |
| NM_003384 | 10242.301 | 8258.113  | NM_016510 | 8329.058  | 9270.245  | NM_005432 | 6481.322  | 7089.205  |
| Y12337    | 2980.842  | 1563.942  | NM_014270 | 7586.488  | 8367.88   | L10386    | 10521.626 | 8684.388  |
| M29551    | 16466.141 | 3621.949  | NM_000071 | 17399.299 | 18865.115 | AF061812  | 34400.961 | 21529.488 |
| AB023148  | 763.394   | 223.08    | NM_006843 | 10619.733 | 12541.714 | AL136756  | 3667.001  | 2695.319  |
| NM_002925 | 1345.41   | 504.701   | NM_004321 | 4965.702  | 7512.917  | NM_001475 | 35499.672 | 21777.844 |
| BC028375  | 1024.601  | 816.182   | AF311212  | 9428.364  | 13647.045 | AF135422  | 1341.371  | 964.425   |
| AB026436  | 3193.671  | 2180.472  | NM_006915 | 2052.665  | 2424.827  | NM_005930 | 256.788   | 555.01    |
| NM_016025 | 13242.325 | 10390.653 | NM_006035 | 3154.072  | 3067.292  | Z36819    | 5373.798  | 6866.109  |
| AK024562  | 1345.47   | 999.245   | NM_006086 | 25583.93  | 20120.82  | NM_014847 | 41279.289 | 49216.516 |
| NM_014066 | 2748.551  | 1697.41   | NM_004520 | 14698.296 | 8383.765  | NM_014445 | 5235.116  | 5833.348  |
| NM_004573 | 1343.334  | 766.966   | AK027118  | 5589.607  | 3854.472  | AL080157  | 2945.279  | 4658.159  |
| NM_000072 | 1139.037  | 891.77    | AK022882  | 30340.553 | 23067.805 | NM_005100 | 257.278   | 698.955   |
| NM_000697 | 2035.272  | 1738.516  | NM_006105 | 9198.469  | 4854.681  | NM_005305 | 2089.559  | 3416.394  |
| NM_000313 | 587.436   | 481.133   | NM_005981 | 3434.298  | 1996.368  | NM_000911 | 939.056   | 1726.396  |
| NM_001495 | 52291.434 | 44141.422 | AF210651  | 2347.841  | 752.483   | NM_007227 | 642.155   | 1212.933  |
| AF263523  | 3168.56   | 2459.828  | AF090942  | 1788.371  | 972.489   | NM_007023 | 955.173   | 2294.446  |
| L08441    | 23142.348 | 13638.063 | NM_014595 | 26239.891 | 20334.238 | NM_005873 | 8789.818  | 20242.396 |
| AA641953  | 2062.693  | 1388.499  | NM_014785 | 2450.635  | 2070.576  | NM_004624 | 2611.294  | 5012.513  |
| AI248827  | 9065.71   | 6960.24   | AB046784  | 6889.97   | 6282.403  | NM_014461 | 587.958   | 1137.898  |
| R45026    | 49824.301 | 53298.094 | X52402    | 12009.442 | 10195.935 | NM_003865 | 951.721   | 1587.754  |
| BI768063  | 3764.174  | 7904.334  | AL133663  | 1796.086  | 2007.708  | AB015330  | 16082.996 | 17433.309 |
| BG386057  | 919.684   | 2114.525  | NM_004992 | 2232.407  | 2086.326  | NM_001455 | 2371.729  | 3258.833  |
| AI970239  | 4908.558  | 10011.547 | NM_014462 | 7570.124  | 6355.962  | NM_002385 | 3942.621  | 3988.553  |
| AA496452  | 26921.531 | 25497.355 | NM_014156 | 58588.426 | 57028.563 | NM_001885 | 359.453   | 329.475   |
| X67594    | 11072.805 | 6132.412  | NM_003137 | 18708.729 | 22986.385 | AF039196  | 456.013   | 334.527   |
| AF363393  | 352.414   | 436.541   | NM_006935 | 51325.109 | 51769.988 | L09071    | 513.097   | 423.974   |
| BC008837  | 387.33    | 331.253   | NM_004515 | 2165.194  | 2042.412  | NM_005924 | 532.165   | 474.793   |
| NM_015865 | 702.728   | 319.524   | NM_020155 | 13092.302 | 15769.372 | NM_019841 | 581.835   | 382.676   |
| NM_001631 | 1419.474  | 421.871   | AF176085  | 7691.68   | 7924.603  | NM_003322 | 879.034   | 988.699   |
| AB000734  | 10857.709 | 4321.462  | NM_006985 | 46526.816 | 49647.629 | NM_013365 | 2394.167  | 4328.828  |
| NM_000862 | 628.242   | 443.876   | AF265228  | 3276.701  | 4527.667  | NM_005817 | 4728.989  | 6806.779  |
| NM_005987 | 49398.145 | 55390.453 | NM_003757 | 43092.402 | 44141.777 | NM_003916 | 8894.345  | 12292.159 |
| X87838    | 4929.719  | 3159.835  | AK025561  | 7441.432  | 6767.075  | NM_002870 | 41542.988 | 63441.438 |



|           |           |           |           |           |           |           |           |           |
|-----------|-----------|-----------|-----------|-----------|-----------|-----------|-----------|-----------|
| NM_000169 | 4094.48   | 2061.315  | NM_018602 | 61145.391 | 54838.492 | NM_002802 | 623.028   | 1098.69   |
| AF182814  | 2882.528  | 2182.087  | NM_004096 | 5344.529  | 3203.129  | NM_006363 | 4388.639  | 5741.87   |
| L37199    | 697.447   | 636.036   | NM_017629 | 23202.824 | 13329.736 | NM_020415 | 1611.715  | 2865.93   |
| NM_007260 | 2830.598  | 1330.457  | AL049681  | 4972.449  | 3013.167  | NM_014879 | 234.966   | 448.602   |
| AF148646  | 16181.178 | 9036.289  | NM_006584 | 982.97    | 887.912   | AL049667  | 2659.439  | 3792.176  |
| AL110218  | 2640.701  | 1547.895  | NM_003551 | 11117.297 | 10520.451 | NM_000334 | 4933.177  | 8593.388  |
| AB023201  | 3667.349  | 2649.786  | AF305210  | 2636.819  | 2362.307  | NM_020400 | 570.308   | 817.641   |
| X00094    | 2519.498  | 1563.28   | AK021900  | 7606.836  | 5755.324  | NM_001504 | 5854.545  | 8708.041  |
| NM_003775 | 15062.896 | 10735.245 | NM_002764 | 35105.09  | 29720.65  | D50926    | 5150.898  | 8904.178  |
| NM_006056 | 7980.329  | 3686.639  | NM_019857 | 3225.612  | 3486.111  | BF205683  | 3384.847  | 5326.648  |
| AF045229  | 17936.6   | 6731.998  | NM_015455 | 60406.676 | 54330.559 | NM_001565 | 526.066   | 1060.618  |
| NM_001840 | 17600.479 | 8157.664  | AF024702  | 23200.924 | 23981.438 | NM_001548 | 345.556   | 502.201   |
| AK025099  | 2468.989  | 930.292   | NM_001964 | 5735.344  | 6354.038  | NM_000758 | 4663.901  | 5247.609  |
| NM_016099 | 31881.006 | 10191.909 | NM_005962 | 21238.24  | 31915.355 | M17017    | 729.308   | 1032.781  |
| NM_000394 | 704.571   | 293.099   | X74864    | 14545.858 | 14110.279 | NM_002990 | 1987.649  | 1703.616  |
| NM_000228 | 1342.48   | 794.42    | AK026804  | 5466.283  | 4819.57   | NM_002432 | 4173.695  | 2757.934  |
| NM_000830 | 1608.962  | 745.908   | NM_016170 | 37856.602 | 39108.602 | NM_012420 | 212.088   | 273.183   |
| NM_014587 | 203.203   | 143.268   | NM_002114 | 1115.051  | 1098.261  | NM_002343 | 3719.663  | 3247.786  |
| NM_005209 | 548.143   | 543.207   | NM_006166 | 6363.222  | 4962.432  | AB033037  | 952.244   | 872.111   |
| AF148950  | 822.278   | 664.562   | S72620    | 62041.191 | 52079.113 | L40400    | 5224.089  | 4227.635  |
| NM_001155 | 15242.617 | 10857.082 | NM_016831 | 1238.513  | 1337.443  | AK025688  | 1172.037  | 1104.229  |
| M62896    | 32750.906 | 23804.441 | S73501    | 1074.816  | 671.41    | NM_004457 | 3176.484  | 3001.114  |
| NM_017736 | 1464.908  | 1835.986  | NM_005263 | 14704.681 | 10094.845 | NM_014049 | 1691.588  | 1958.655  |
| NM_000014 | 816.474   | 517.274   | AB033022  | 20281.871 | 11407.206 | NM_005396 | 1215.726  | 1543.42   |
| NM_006803 | 1667.345  | 748.178   | NM_000474 | 996.646   | 717.992   | NM_004315 | 9072.921  | 14492.993 |
| NM_002533 | 1879.101  | 793.789   | NM_016264 | 2779.945  | 1058.014  | NM_020166 | 4895.049  | 4804.925  |
| AF235022  | 1968.617  | 941.371   | NM_006079 | 43406.434 | 15696.207 | S56138    | 346.195   | 502.9     |
| AL137764  | 30281.092 | 14011.585 | AB037837  | 4478.686  | 2130.254  | AK023860  | 4541.466  | 6859.972  |
| NM_001660 | 17800.244 | 9654.477  | NM_001155 | 30985.869 | 28162.174 | NM_000031 | 2942.094  | 4272.279  |
| NM_000710 | 736.323   | 579.36    | M62896    | 58516.938 | 52925.246 | NM_002085 | 16577.607 | 17905.926 |
| NM_000752 | 2211.196  | 937.6     | NM_017736 | 3194.134  | 3623.125  | AK026061  | 353.11    | 745.999   |
| AB040945  | 1893.03   | 621.117   | NM_000313 | 992.3     | 1069.43   | NM_016286 | 7520.833  | 13425.148 |
| NM_002018 | 9539.399  | 4061.134  | NM_001498 | 58597.395 | 56626.992 | NM_001567 | 2225.182  | 5240.341  |
| NM_002377 | 1046.784  | 910.525   | AF263523  | 5015.671  | 5178.521  | NM_004905 | 9663.223  | 18659.713 |
| NM_006018 | 1684.594  | 1124.924  | L08441    | 31546.619 | 43259.145 | AF217971  | 8167.985  | 13355.119 |
| AF161383  | 7592.436  | 3691.241  | AA641953  | 3081.087  | 4159.731  | NM_001925 | 732.19    | 1725.568  |
| NM_000410 | 18408.652 | 17091.596 | AI248827  | 11255.024 | 8908.865  | AF245517  | 1448.09   | 1948.573  |
| AF224266  | 5000.698  | 4344.905  | R45026    | 61249.336 | 62044.492 | NM_004137 | 418.875   | 698.381   |
| U72882    | 35116.137 | 24074.445 | BI768063  | 4170.439  | 4759.147  | NM_014407 | 639.865   | 906.168   |
| NM_014337 | 13980.511 | 10075.508 | BG386057  | 1897.101  | 1995.571  | NM_004982 | 2836.921  | 2568.666  |
| NM_007161 | 18867.084 | 10741.521 | AI970239  | 12463.965 | 12853.408 | NM_001694 | 46156.836 | 56601.551 |
| NM_014387 | 1416.255  | 1015.571  | AA496452  | 42924.816 | 43699.848 | AF286370  | 1101.509  | 624.043   |
| NM_003641 | 3595.244  | 2280.614  | X67594    | 22306.418 | 26824.949 | NM_000217 | 527.017   | 309.303   |
| NM_012463 | 2055.686  | 1724.273  | BC008837  | 1470.285  | 1474.438  | NM_004732 | 2661.349  | 1914.514  |
| L29140    | 51871.813 | 53324.105 | NM_015869 | 3079.606  | 2987.809  | AK026180  | 726.836   | 787.637   |
| AK026448  | 5645.894  | 4356.027  | NM_001631 | 3544.685  | 2582.967  | NM_018349 | 5944.63   | 4356.219  |
| AK057418  | 5069.202  | 4316.876  | AB000734  | 26241.266 | 16799.885 | NM_001478 | 43306.203 | 46472.371 |
| AK024562  | 2141.047  | 885.43    | NM_000862 | 663.91    | 452.965   | AF135422  | 1350.964  | 1238.309  |
| NM_014066 | 2732.856  | 969.16    | NM_005987 | 63165.105 | 59222.93  | NM_004479 | 25787.506 | 29040.977 |
| NM_004573 | 1442.525  | 947.702   | X87838    | 9498.374  | 3776.539  | NM_002610 | 951.433   | 1087.186  |
| NM_000072 | 1461.295  | 603.892   | AK023059  | 1404.604  | 675.186   | AF070587  | 2541.29   | 2639.276  |
| NM_000697 | 2346.063  | 1011.531  | AF224266  | 15987.26  | 15942.646 | BE250526  | 1507.907  | 1915.881  |
| NM_000017 | 12344.534 | 6286.998  | U72882    | 59221.258 | 56503.695 | NM_016819 | 3336.229  | 5730.044  |

|           |           |           |           |           |           |           |           |           |
|-----------|-----------|-----------|-----------|-----------|-----------|-----------|-----------|-----------|
| NM_000237 | 1400.402  | 1379.465  | NM_014337 | 48995.367 | 43808.289 | NM_012222 | 8250.166  | 15255.971 |
| NM_018346 | 7267.45   | 3388.91   | NM_007161 | 44776.344 | 42587.648 | NM_005002 | 2241.772  | 12043.352 |
| AL122054  | 1609.302  | 853.376   | NM_014387 | 6518.062  | 7109.156  | NM_006596 | 2338.265  | 5289.764  |
| AB023151  | 1387.557  | 755.574   | NM_003641 | 14720.967 | 15954.185 | AK023214  | 12038.323 | 17808.637 |
| NM_000140 | 14984.706 | 11675.441 | NM_012463 | 5744.569  | 7036.395  | NM_001466 | 6413.961  | 7922.12   |
| NM_005125 | 4494.311  | 3364.784  | L29140    | 57785.492 | 58958.285 | NM_003600 | 18396.348 | 17640.387 |
| NM_020038 | 913.74    | 704.235   | AK026448  | 13268.383 | 14428.901 | NM_017490 | 3992.13   | 4014.75   |
| NM_016246 | 3453.789  | 3589.649  | AK057418  | 9267.15   | 13249.7   | NM_002718 | 1916.927  | 2540.201  |
| NM_015926 | 9686.281  | 12345.011 | L37199    | 871.48    | 1339.801  | AK026727  | 1977.523  | 1172.996  |
| X03757    | 5220.299  | 5274.81   | NM_007260 | 3450.064  | 4730.651  | NM_002830 | 294.712   | 157.893   |
| NM_018658 | 25956.988 | 23362.084 | AF148646  | 30910.158 | 31801.59  | NM_006247 | 4025.32   | 2749.464  |
| NM_005136 | 1266.438  | 992.318   | AL110218  | 6124.832  | 5921.928  | AB032983  | 2322.654  | 1910.719  |
| AK094513  | 1321.176  | 1091.829  | AB023201  | 6658.196  | 6073.497  | NM_018281 | 12768.623 | 9950.32   |
| NM_001183 | 12191.358 | 13911.389 | X00094    | 4666.43   | 4328.281  | CY3Cy5    | 2926.999  | 133.46    |
| NM_000890 | 1895.886  | 1945.677  | NM_003775 | 24871.213 | 20815.326 | NM_000945 | 1723.898  | 511.35    |
| NM_004976 | 39398.035 | 42327.023 | NM_002082 | 46467.949 | 42592.406 | NM_002574 | 82925.531 | 21239.848 |
| AK021597  | 2374.463  | 3011.243  | NM_002922 | 31867.035 | 26633.283 | NM_001310 | 5467.567  | 1298.698  |
| NM_005737 | 40684.02  | 45873.617 | AF155657  | 20591.256 | 17343.297 | AK026924  | 3907.316  | 1460.419  |
| NM_000166 | 6225.767  | 2417.03   | NM_006056 | 32746.598 | 21718.871 | AL122047  | 2103.9    | 945.339   |
| AF182814  | 3226.154  | 1566.486  | AF045229  | 25929.641 | 13651.689 | AF052091  | 1558.329  | 657.999   |
| NM_005329 | 1257.266  | 1183.212  | NM_001840 | 23347.271 | 10865.279 | AK024447  | 78496.945 | 36238.621 |
| NM_000107 | 14252.45  | 13007.876 | NM_016099 | 60524.109 | 50695.125 | AF052145  | 870.365   | 1122.265  |
| AL157445  | 2461.876  | 3094.221  | NM_000394 | 691.573   | 508.095   | AF086458  | 2237.438  | 4167.145  |
| NM_001517 | 17434.168 | 20322.139 | NM_000072 | 1687.292  | 2837.116  | AF086548  | 1533.859  | 3445.428  |
| NM_005053 | 6106.438  | 7530.592  | NM_000697 | 4119.881  | 4473.211  | AK023717  | 1353.589  | 2120.509  |
| D86974    | 6216.575  | 7071.147  | NM_000017 | 29573.369 | 27483.289 | AK022294  | 1150.226  | 1087.372  |
| NM_018283 | 10352.619 | 13341.354 | NM_000237 | 2068.947  | 3093.098  | AF086507  | 653.119   | 415.77    |
| NM_001983 | 4948.748  | 5519.236  | NM_018346 | 18738.578 | 23007.992 | U79289    | 646.69    | 437.252   |
| NM_004993 | 546.066   | 845.69    | AL122054  | 2558.955  | 3576.126  | NM_014028 | 1717.386  | 903.91    |
| NM_003384 | 10038.423 | 13057.035 | AB011182  | 611.292   | 979.031   | NM_000945 | 1040.862  | 397.072   |
| Y12337    | 2421.528  | 3025.828  | AB023151  | 2004.658  | 3109.288  | NM_002574 | 73184.43  | 33914.898 |
| M29551    | 18634.146 | 23068.74  | NM_000140 | 48252.371 | 55116.211 | SR1       | 80191.648 | 55579.188 |
| AB023148  | 865.94    | 1104.952  | NM_005125 | 9481.137  | 12166.417 | SR3       | 26757.705 | 14995.912 |
| NM_002929 | 1731.232  | 2282.755  | NM_020038 | 2575.017  | 3872.457  | SR5       | 2643.256  | 2374.368  |
| BC028375  | 1316.61   | 1716.222  | NM_016246 | 8549.556  | 13210.59  | SR7       | 2392.942  | 11357.22  |
| AB026436  | 3808.862  | 7242.78   | NM_005136 | 2425.471  | 3108.084  | SR9       | 7696.385  | 838.387   |
| NM_016029 | 16229.354 | 28333.662 | NM_004976 | 48169.383 | 50690.441 | CY3Cy5    | 3443.626  | 166.82    |
| CY3Cy5    | 4782.393  | 188.511   | NM_005737 | 58806.863 | 55663.719 | AK026923  | 1356.543  | 444.197   |
| NM_002103 | 30644.469 | 21884.604 | NM_001660 | 28636.041 | 25718.445 | AK021691  | 27829.848 | 14465.977 |
| NM_003379 | 27082.293 | 21148.523 | NM_000710 | 920.974   | 1328.499  | AK023595  | 657.108   | 523.586   |
| AK000819  | 541.399   | 578.486   | NM_000752 | 4731.905  | 5058.422  | AK001357  | 409.994   | 531.556   |
| AF201941  | 1869.874  | 2203.375  | AB040945  | 5985.158  | 3854.189  | NM_015721 | 3654.007  | 4478.493  |
| AF143878  | 1414.613  | 3327.725  | NM_002018 | 27782.414 | 22415.986 | AF086298  | 590.902   | 814.669   |
| NM_007070 | 2134.3    | 4243.01   | NM_002377 | 697.031   | 793.434   | AK027238  | 594.959   | 343.393   |
| AL133019  | 2297.253  | 3639.224  | NM_006018 | 2374.028  | 2442.107  | AK000032  | 653.777   | 528.206   |
| AK026192  | 574.907   | 746.617   | AF161383  | 13327.425 | 7417.918  | S94540    | 37937.449 | 46976.176 |
| NM_014895 | 695.88    | 795.625   | NM_000410 | 29126.99  | 21122.934 | U79297    | 747.557   | 625.011   |
| NM_017748 | 4023.412  | 4335.681  | AF182814  | 4037.222  | 6796.036  | AF052122  | 9253.12   | 11335.417 |
| AK025374  | 1322.252  | 1006.645  | NM_005329 | 2652.098  | 4231.661  | AK022416  | 1002.843  | 301.494   |
| NM_014901 | 5742.088  | 6244.676  | NM_000107 | 26584.137 | 38696.391 | AK023224  | 1678.22   | 623.182   |
| AK000005  | 3423.912  | 2049.37   | AL157445  | 11566.839 | 19578.096 | AK023731  | 1237.634  | 360.282   |
| NM_002103 | 26700.955 | 13706.174 | NM_001517 | 45343.91  | 51622.91  | AK022442  | 417.011   | 275.068   |
| NM_003379 | 25474.943 | 14492.327 | NM_005053 | 5151.282  | 4082.271  | AK023336  | 499.339   | 287.666   |

|           |           |           |           |           |           |           |           |           |
|-----------|-----------|-----------|-----------|-----------|-----------|-----------|-----------|-----------|
| SR1       | 110798.45 | 39652.75  | D86974    | 12951.747 | 21195.691 | AK023727  | 1677.666  | 1935.941  |
| SR3       | 30047.002 | 13327.214 | NM_018283 | 14959.736 | 22553.607 | AK025271  | 622.315   | 1086.588  |
| SR5       | 2697.568  | 1639.07   | NM_001983 | 5851.841  | 8253.285  | AF086204  | 5057.623  | 6559.669  |
| SR7       | 3721.238  | 15936.022 | NM_004993 | 1276.046  | 2416.879  | NM_007021 | 1346.707  | 2150.197  |
| SR9       | 12182.525 | 1420.649  | NM_003384 | 15442.154 | 20037.039 | AK026283  | 421.83    | 591.836   |
| CY3Cy5    | 2843.052  | 120.041   | Y12337    | 8196.94   | 11441.669 | AK022076  | 433.455   | 515.543   |
| NM_01328E | 923.184   | 697.881   | M29551    | 42008.133 | 49919.738 | AK023065  | 389.6     | 594.421   |
| M60721    | 1283.42   | 1112.664  | AB023148  | 1597.102  | 2135.675  | NM_01767E | 289.063   | 372.591   |
| L39061    | 1849.518  | 2073.841  | NM_002929 | 3049.916  | 3816.944  | AK021570  | 665.875   | 1118.412  |
| AF071508  | 1028.916  | 1068.536  | BC028375  | 2215.927  | 2719.817  | AL360204  | 1019.909  | 721.885   |
| L07265    | 24009.516 | 16782.689 | AB026436  | 5545.772  | 6622.916  | AK000103  | 696.691   | 781.06    |
| D16472    | 1987.038  | 1333.432  | NM_016029 | 20794.436 | 21891.039 | AK026294  | 478.103   | 836.39    |
| AK022467  | 334.899   | 1143.965  | AK024562  | 6455.61   | 5888.793  | AF085959  | 557.68    | 1483.307  |
| NM_002813 | 18726.996 | 25144.443 | NM_014066 | 3820.239  | 3451.089  | AK023104  | 572.169   | 1289.089  |
| AK022745  | 17357.457 | 21056.035 | NM_004573 | 2957.871  | 2524.877  | AK022181  | 707.184   | 1746.581  |
| AL049450  | 4294.51   | 4526.17   | NM_017736 | 3436.443  | 6542.29   | NM_018474 | 5571.557  | 3461.073  |
| NM_00508E | 32859.016 | 19792.816 | NM_000390 | 638.02    | 841.745   | AK024937  | 3205.429  | 2038.31   |
| NM_00723E | 938.843   | 734.756   | NM_000313 | 1129.914  | 1743.637  | D17178    | 1460.845  | 991.821   |
| AL049340  | 686.507   | 565.161   | NM_00149E | 59371.383 | 60847.941 | AK022094  | 1926.623  | 1673.781  |
| NM_01760E | 2102.395  | 1544.175  | AF263523  | 5912.298  | 8235.699  | AK026695  | 997.293   | 1134.104  |
| AK024644  | 6040.132  | 3240.189  | L08441    | 33842.039 | 49234.074 | AK022220  | 626.845   | 1042.344  |
| AB019573  | 447.473   | 258.332   | AA641953  | 3267.722  | 4644.752  | AK000141  | 7867.692  | 14033.978 |
| U68494    | 1599.251  | 604.925   | AI248827  | 12969.073 | 17688.186 | AL137758  | 3637.849  | 7454.066  |
| AF064254  | 1727.387  | 844.615   | R45026    | 60339.262 | 58875.078 | AK023865  | 400.488   | 1267.438  |
| AL137360  | 3818.871  | 2190.02   | BI768063  | 4771.008  | 7616.829  | AK025786  | 629.671   | 1498.448  |
| AK024523  | 1139.217  | 696.917   | BG386057  | 1076.088  | 2112.244  | AK024188  | 711.814   | 1859.107  |
| AK024600  | 1586.328  | 1510.067  | AI970239  | 14571.58  | 22529.582 | AK024379  | 283.218   | 797.631   |
| AK024543  | 1525.384  | 1274.374  | AA496452  | 48035.512 | 54388.906 | AK026820  | 527.548   | 1015.767  |
| AK024624  | 19762.129 | 14713.834 | X67594    | 26565.168 | 36464.262 | AK001716  | 3235.36   | 6396.13   |
| AK025090  | 775.586   | 1446.074  | AF363393  | 706.487   | 1728.936  | AF113683  | 431.332   | 702.244   |
| AK024883  | 4479.976  | 7923.18   | BC008837  | 1114.697  | 1396.821  | AK026821  | 1899.091  | 3434.205  |
| AF217989  | 6472.327  | 20877.633 | NM_015869 | 1846.022  | 2865.301  | AK026280  | 2546.037  | 5283.473  |
| NM_017654 | 407.298   | 926.701   | NM_001631 | 5145.928  | 7971.162  | AF113017  | 9295.861  | 16504.926 |
| L77561    | 302.203   | 309.129   | AB000734  | 29082.877 | 41108.438 | AL080232  | 11944.004 | 21133.379 |
| AL109696  | 1545.975  | 1290.021  | NM_000862 | 863.74    | 1506.218  | AK001120  | 6908.017  | 13615.638 |
| AK022190  | 513.773   | 523.921   | NM_005987 | 60913.859 | 66381.203 | AK021980  | 4004.721  | 6532.698  |
| AJ011593  | 4337.008  | 2542.681  | X87838    | 11273.581 | 14182.033 | S46402    | 845.202   | 1495.474  |
| AJ227907  | 422.085   | 526.403   | NM_000169 | 14049.933 | 19725.451 | AF075048  | 486.771   | 955.429   |
| X89743    | 615.636   | 621.295   | NM_014337 | 47576.176 | 51260.141 | Z83940    | 699.941   | 1600.979  |
| AJ002784  | 289.978   | 327.578   | NM_007161 | 44728.375 | 48630.578 | NM_00580C | 1578.663  | 2706.209  |
| U17621    | 617.5     | 416.9     | NM_014387 | 5905.73   | 6834.298  | AF019617  | 19096.885 | 29999.018 |
| AL049239  | 2179.997  | 1170.041  | NM_003641 | 13336.303 | 19397.654 | AL137305  | 6723.011  | 12026.966 |
| AF086208  | 4102.455  | 3949.889  | NM_012463 | 5895.877  | 9028.341  | NM_00529C | 661.021   | 1303.854  |
| AK023335  | 2722.939  | 2642.802  | L29140    | 59195.102 | 57801.055 | AK025802  | 1176.836  | 2311.183  |
| AK023187  | 578.996   | 655.506   | AK026448  | 13164.437 | 17927.199 | AF085973  | 574.479   | 1204.188  |
| AK022231  | 316.024   | 448.987   | AK057418  | 8862.538  | 14055.283 | NM_00543C | 137.651   | 616.585   |
| AL133101  | 1820.486  | 1092.988  | L37199    | 1064.761  | 1856.661  | NM_018013 | 2397.693  | 4905.094  |
| AL157459  | 1911.911  | 1866.902  | NM_00726C | 5318.6    | 7847.659  | AK026873  | 1844.427  | 5247.998  |
| AB020654  | 219.204   | 144.676   | AF148646  | 33989.383 | 45025.859 | AK026394  | 2807.313  | 6786.325  |
| AL353954  | 1683.885  | 1316.873  | AL110218  | 6263.953  | 8257.035  | NM_00544E | 882.568   | 1842.062  |
| NM_01763C | 1092.955  | 790.865   | AB023201  | 7005.121  | 8988.808  | AK025943  | 34372.273 | 53307.082 |
| AK000778  | 2742.622  | 1499.963  | X00094    | 6080.983  | 8200.994  | BG106479  | 628.445   | 1417.259  |
| AL133573  | 4664.318  | 2505.17   | NM_00377E | 25176.061 | 37464.789 | AF130069  | 14956.896 | 19580.75  |

|           |           |           |           |           |           |           |           |           |
|-----------|-----------|-----------|-----------|-----------|-----------|-----------|-----------|-----------|
| AK000115  | 2819.075  | 1181.873  | NM_002082 | 52941.809 | 55301.52  | AL109669  | 1964.416  | 5085.277  |
| NM_017959 | 433.599   | 281.728   | NM_002922 | 34153.582 | 52234.586 | AB037766  | 2428.278  | 4103.927  |
| AK000958  | 970.879   | 521.475   | AF155657  | 23042.504 | 44531.773 | AK026995  | 306.945   | 786.195   |
| NM_017906 | 3949.962  | 5311.95   | NM_006056 | 29457.043 | 43864.07  | AL133091  | 545.293   | 1001.437  |
| AL110286  | 4901.804  | 4578.76   | AF045229  | 31027.633 | 36294.773 | BF842915  | 318.049   | 858.24    |
| AF086374  | 349.429   | 427.523   | NM_001840 | 28177.648 | 37099.285 | X82545    | 5730.445  | 11333.25  |
| AL162066  | 15833.447 | 12191.751 | NM_016099 | 59317.957 | 57873.078 | AF302079  | 15797.462 | 21827.785 |
| NM_016096 | 24584.313 | 12585.803 | NM_000394 | 1351.706  | 1587.738  | AJ224167  | 593.328   | 976.958   |
| U79290    | 1400.397  | 587.619   | NM_001155 | 35260.422 | 38684.723 | NM_002550 | 675.725   | 1017.321  |
| X98114    | 308.482   | 471.085   | M62896    | 59829.113 | 58811.867 | NM_000692 | 1596.341  | 2879.302  |
| NM_014152 | 398.119   | 279.102   | NM_000017 | 30867.832 | 25467.395 | AF086062  | 1418.548  | 2413.658  |
| AF086473  | 332.436   | 449.714   | NM_000237 | 2245.746  | 1910.986  | L47668    | 57697.277 | 73580.258 |
| D87682    | 1307.043  | 777.253   | NM_018346 | 16920.303 | 13512.047 | NM_017920 | 4695.276  | 8865.897  |
| AF321617  | 5511.588  | 4384.151  | AL122054  | 2306.875  | 2611.327  | AK025345  | 1240.256  | 2128.198  |
| AF223389  | 551.759   | 606.201   | AB023151  | 1766.467  | 2388.333  | D25274    | 14377.438 | 29192.49  |
| AK002146  | 854.391   | 1837.23   | NM_000140 | 46068.133 | 46844.461 | U84520    | 4523.266  | 9849.925  |
| NM_003159 | 1092.377  | 960.662   | NM_005125 | 10855.077 | 15619     | Z11853    | 462.59    | 970.382   |
| AK023494  | 573.404   | 420.803   | NM_020038 | 2528.593  | 3095.276  | AL133616  | 3455.304  | 10253.501 |
| NM_015492 | 5686.905  | 3301.751  | NM_016246 | 7626.84   | 8492.12   | AK023391  | 321.995   | 865.362   |
| AF132204  | 2017.977  | 1474.045  | NM_005136 | 2239.734  | 3072.699  | AK026382  | 3729.281  | 7524.256  |
| AK022874  | 7519.93   | 4672.03   | NM_004976 | 46276.859 | 48152.957 | AK091169  | 3074.573  | 7167.265  |
| AK024602  | 11920.621 | 10751.171 | NM_005737 | 59087.281 | 55843.477 | NM_014745 | 52347.078 | 65396.996 |
| NM_018507 | 321.074   | 358.317   | NM_001660 | 27832.254 | 37325.773 | AF086026  | 8863.469  | 16473.479 |
| NM_000485 | 7159.866  | 6124.751  | NM_000710 | 1133.218  | 1946.149  | AL133011  | 1087.841  | 2589.991  |
| NM_018542 | 882.429   | 777.114   | NM_000752 | 6819.248  | 9660.469  | NM_016300 | 507.981   | 1058.983  |
| AK025503  | 1585.89   | 1243.404  | AB040945  | 6775.06   | 9581.601  | NM_015607 | 14404.472 | 23383.836 |
| AF130073  | 2070.217  | 1727.278  | NM_002018 | 27010.189 | 45690.609 | AK026955  | 751.71    | 1581.625  |
| AK024225  | 14012.156 | 11009.112 | NM_002377 | 1635.722  | 2780.47   | AL110202  | 18529.615 | 32932.082 |
| AF086334  | 719.847   | 439.596   | NM_006018 | 2539.521  | 4694.649  | NM_006228 | 2150.507  | 3528.079  |
| AL137602  | 342.251   | 273.028   | AF161383  | 14847.206 | 18167.023 | NM_003768 | 14658.977 | 19392.717 |
| AF075035  | 8096.362  | 4233.126  | NM_000410 | 28838.191 | 37524.066 | NM_018393 | 2097.626  | 3228.377  |
| AL110180  | 3731.142  | 1573.675  | AF224266  | 15338.088 | 15198.653 | BF032535  | 2128.297  | 3320.876  |
| NM_007262 | 30674.258 | 21125.51  | U72882    | 62045.082 | 62639.648 | NM_018332 | 2604.528  | 4168.321  |
| NM_014783 | 3349.167  | 2942.457  | NM_005329 | 2531.559  | 2341.809  | NM_005096 | 6766.91   | 10988.854 |
| NM_014053 | 5812.638  | 5731.59   | NM_000107 | 23501.119 | 17740.41  | NM_006760 | 1421.785  | 2765.083  |
| NM_002571 | 356.283   | 241.071   | AL157445  | 12713.593 | 11299.391 | NM_012288 | 6408.332  | 11487.196 |
| NM_004939 | 4553.325  | 2740.545  | NM_001517 | 49774.68  | 45086.547 | AB037775  | 712.805   | 1779.043  |
| NM_001425 | 9333.498  | 5118.206  | NM_005053 | 22839.836 | 21617.59  | L27560    | 1473.974  | 2843.624  |
| NM_015710 | 902.56    | 362.645   | D86974    | 13165.078 | 14218.291 | AK022517  | 3213.133  | 6105.916  |
| NM_014158 | 4190.472  | 2403.798  | NM_018283 | 14765.71  | 14237.938 | NM_000329 | 17204.865 | 34002.559 |
| AK021591  | 2209.052  | 1579.231  | NM_001983 | 6114.32   | 5745.87   | NM_001182 | 25136.686 | 42717.797 |
| NM_014675 | 1289.937  | 680.644   | NM_004993 | 611.32    | 892.922   | AF143328  | 207.51    | 822.177   |
| NM_014040 | 6907.135  | 4303.018  | NM_003384 | 15816.52  | 15675.996 | NM_000333 | 2774.498  | 5528.377  |
| AK000799  | 5054.153  | 3234.213  | Y12337    | 8409.908  | 9138.415  | NM_000172 | 9045.28   | 16963.789 |
| NM_015582 | 421.935   | 315.56    | M29551    | 43177.23  | 46390.32  | NM_002297 | 6943.542  | 13284.99  |
| AK027091  | 735.066   | 658.058   | AB023148  | 2049.18   | 2619.787  | AB040968  | 16885.816 | 31041.863 |
| NM_001526 | 1296.914  | 859.675   | NM_002929 | 3577.59   | 4064.163  | X85323    | 937.505   | 1375.949  |
| U31738    | 2142.154  | 1608.483  | BC028375  | 2546.353  | 3265.173  | U17615    | 2856.888  | 2751.634  |
| AF179890  | 10424.77  | 8976.496  | AB026436  | 6177.258  | 9461.997  | NM_005303 | 4676.06   | 6163.501  |
| AK023536  | 17046.289 | 14098.653 | NM_016029 | 19723.844 | 21691.467 | NM_016126 | 9579.972  | 13047.697 |
| AK026561  | 746.452   | 479.293   | AK024562  | 7281.11   | 7005.359  | U84119    | 777.139   | 983.291   |
| AK021568  | 6384.116  | 4426.983  | NM_014066 | 4588.346  | 3830.031  | NM_003608 | 2076.042  | 3452.022  |
| Z36838    | 1246.88   | 734.991   | NM_004573 | 2580.793  | 1818.223  | NM_001845 | 547.706   | 548.373   |

|           |           |           |           |           |           |           |           |           |
|-----------|-----------|-----------|-----------|-----------|-----------|-----------|-----------|-----------|
| AF088054  | 548.401   | 515.353   | NM_000072 | 1371.428  | 802.538   | NM_00459€ | 439.963   | 606.877   |
| AK023881  | 3421.348  | 1843.219  | NM_000697 | 4100.756  | 2598.716  | AK024697  | 387.626   | 772.578   |
| AK027114  | 70588.43  | 53814.43  | NM_000313 | 1093.022  | 1057.217  | NM_00646€ | 3174.77   | 5519.525  |
| NM_00107€ | 2573.397  | 2375.499  | NM_00149€ | 60308.711 | 61505.387 | L34156    | 1246.674  | 2413.387  |
| NM_000552 | 5810.303  | 6933.886  | AF263523  | 4480.595  | 4956.807  | NM_00374€ | 757.699   | 1386.586  |
| NM_00380€ | 759.797   | 732.065   | L08441    | 31787.908 | 36825.316 | NM_003557 | 8676.663  | 11433.987 |
| AK000860  | 2699.625  | 1340.168  | AA641953  | 3182.11   | 3050.482  | NM_001257 | 20232.982 | 22330.873 |
| NM_014961 | 775.943   | 525.87    | AI248827  | 12534.713 | 10492.946 | NM_00179€ | 415.996   | 627.437   |
| NM_02014€ | 2608.809  | 1087.761  | R45026    | 57028.309 | 55000.016 | D85245    | 5129.16   | 9974.023  |
| AK021529  | 3052.325  | 1646.611  | BI768063  | 4177.788  | 5038.861  | NM_000943 | 911.292   | 1733.74   |
| AB037845  | 6042.706  | 3782.437  | BG386057  | 901.807   | 2246.669  | NM_00465€ | 5654.894  | 8902.698  |
| NM_00598€ | 425.106   | 309.791   | AI970239  | 15215.332 | 18566.551 | NM_00125€ | 19840.605 | 19495.631 |
| NM_01619€ | 51501.578 | 23603.555 | AA496452  | 45467.961 | 54613.414 | AF298812  | 951.111   | 1030.021  |
| AL137579  | 4198.455  | 2074.07   | X67594    | 28500.094 | 34852.199 | NM_00496€ | 1725.012  | 2114.885  |
| NM_012383 | 4713.077  | 2451.837  | AF363393  | 959.665   | 1230.623  | AJ249900  | 432.538   | 615.064   |
| AJ271684  | 1014.254  | 604.01    | BC008837  | 690.935   | 1397.25   | AK022581  | 5776.213  | 5096.837  |
| AF255342  | 6165.646  | 4478.482  | NM_01586€ | 2167.639  | 2497.984  | NM_018054 | 1991.168  | 2031.408  |
| NM_00330€ | 9763.484  | 7303.917  | NM_001631 | 5777.209  | 5776.56   | NM_00618€ | 1100.281  | 673.764   |
| AK026682  | 4342.74   | 3100.309  | AB000734  | 33971.105 | 34481.043 | NM_00095€ | 5605.47   | 3585.189  |
| NM_01772€ | 62828.043 | 67708.633 | NM_000862 | 1384.368  | 1588.992  | NM_001401 | 481.653   | 291.172   |
| NM_00465€ | 323.51    | 265.598   | NM_005987 | 56000.895 | 64748.496 | NM_013271 | 26609.096 | 15627.398 |
| NM_003942 | 1811.163  | 1929.164  | X87838    | 9811.538  | 9156.616  | NM_004157 | 2634.393  | 1822.755  |
| NM_006471 | 9272.54   | 5439.542  | NM_000169 | 16145.704 | 11852.718 | NM_000684 | 456.5     | 377.616   |
| NM_00416€ | 1242.86   | 415.489   | AF182814  | 4179.177  | 2457.829  | NM_007354 | 812.694   | 460.745   |
| NM_00036€ | 2134.455  | 1505.74   | L37199    | 960.165   | 873.042   | U67037    | 942.742   | 743.906   |
| NM_01658€ | 2009.042  | 1330.726  | NM_00726€ | 4623.138  | 4610.021  | NM_00496€ | 25872.602 | 13490.077 |
| NM_00386€ | 2350.394  | 2081.701  | AF148646  | 30776.717 | 39046.402 | AF272370  | 15594.309 | 12087.819 |
| NM_005414 | 1167.158  | 774.143   | AL110218  | 4448.807  | 4941.653  | AF130050  | 13652.009 | 8433.682  |
| NM_00446€ | 10030.522 | 6862.589  | AB023201  | 6052.558  | 6394.695  | AF119898  | 514.871   | 280.269   |
| NM_016031 | 7124.917  | 4872.084  | X00094    | 5466.55   | 5629.329  | AK023045  | 844.409   | 415.608   |
| NM_004804 | 2554.449  | 1677.034  | NM_00377€ | 24667.092 | 23970.563 | NM_012197 | 7413.624  | 5580.796  |
| M92439    | 11901.503 | 5740.54   | NM_002082 | 49391.492 | 53919.977 | AK024016  | 4470.788  | 3695.165  |
| AL117665  | 5747.757  | 5614.826  | NM_002922 | 29140.836 | 41306.004 | NM_003581 | 2559.878  | 2597.096  |
| AF263541  | 2245.383  | 4010.862  | AF155657  | 20504.35  | 33951.016 | NM_00288€ | 324.409   | 369.62    |
| NM_001262 | 3742.43   | 2144.3    | NM_00605€ | 37793.559 | 50740.086 | NM_012407 | 993.812   | 1157.785  |
| BE873030  | 1826.824  | 800.392   | AF045229  | 28471.35  | 33801.336 | AF302505  | 1598.424  | 1140.827  |
| NM_00244€ | 408.883   | 315.833   | NM_00184€ | 27034.529 | 31447.611 | NM_00718€ | 3476.761  | 2718.648  |
| NM_00362€ | 1149.061  | 975.455   | AK025099  | 7372.617  | 9716.354  | NM_007044 | 1916.444  | 2148.188  |
| BC006990  | 7312.187  | 6663.898  | NM_01609€ | 58721.309 | 58344.551 | AF294326  | 4509.618  | 3485.203  |
| NM_002277 | 2452.073  | 1748.422  | NM_000394 | 1605.214  | 3070.845  | NM_01467€ | 1815.819  | 1573.526  |
| NM_019114 | 4144.07   | 5745.155  | NM_00022€ | 1855.948  | 1908.139  | NM_012317 | 53863.566 | 67313.023 |
| M33552    | 25721.889 | 14890.586 | NM_00083€ | 3487.174  | 4031.239  | NM_017853 | 4613.189  | 2736.015  |
| AJ252060  | 2928.536  | 2124.819  | NM_005209 | 1765.511  | 2184.838  | NM_016097 | 7256.507  | 5424.438  |
| NM_006403 | 5252.291  | 4561.428  | AF148950  | 3462.323  | 3112.523  | AB035301  | 578.308   | 357.4     |
| NM_018977 | 730.455   | 501.546   | NM_001155 | 34715.398 | 25681.025 | AB046800  | 7686.716  | 6321.294  |
| AJ001402  | 1147.076  | 534.044   | M62896    | 56769.785 | 51538.969 | NM_002162 | 2433.75   | 2021.146  |
| NM_00454€ | 475.84    | 348.678   | NM_01773€ | 3103      | 2108.919  | NM_00643€ | 1104.354  | 1145.523  |
| L25628    | 539.513   | 430.764   | NM_00039€ | 465.325   | 771.284   | AF209198  | 5865.979  | 2099.108  |
| M37033    | 20696.004 | 16936.686 | NM_000014 | 1548.554  | 1471.305  | M69012    | 53480.367 | 42452.887 |
| NM_007171 | 2527.237  | 1984.684  | NM_006803 | 2833.975  | 2416.789  | NM_00693€ | 16712.184 | 6448.799  |
| NM_00427€ | 1470.204  | 855.219   | NM_002533 | 2933.106  | 2793.22   | NM_001327 | 27552.77  | 11953.634 |
| NM_005632 | 2064.593  | 1756.08   | AF235022  | 3576.136  | 4063.601  | AB037722  | 1023.383  | 506.683   |
| AK021499  | 806.474   | 1701.312  | AL137764  | 56602.898 | 53898.758 | NM_000063 | 1721.056  | 1262.911  |

|           |           |           |           |           |           |           |           |           |
|-----------|-----------|-----------|-----------|-----------|-----------|-----------|-----------|-----------|
| AK000336  | 2596.711  | 2640.359  | NM_001660 | 25853.244 | 22978.828 | NM_01838E | 1700.043  | 1100.812  |
| NM_00279E | 28855.592 | 27857.463 | NM_000710 | 1236.038  | 1366.931  | AB033026  | 592.747   | 411.728   |
| NM_00629Z | 8899.38   | 11171.787 | NM_00075Z | 6205.525  | 6531.163  | AF104914  | 15840.494 | 12800.125 |
| AB007948  | 2081.956  | 1401.764  | AB040945  | 5587.64   | 6289.611  | NM_01471E | 8567.575  | 7258.399  |
| AB033066  | 1626.989  | 478.567   | NM_00201E | 28434.021 | 39411.777 | AK023845  | 1988.147  | 1632.038  |
| AF126028  | 1350.528  | 776.613   | NM_002377 | 2725.271  | 4091.724  | NM_00263E | 9597.56   | 7278.233  |
| NM_00701E | 23324.533 | 12977.918 | NM_00601E | 3300.789  | 6821.19   | NM_016487 | 2158.968  | 1952.465  |
| NM_00707E | 585.716   | 633.752   | AF161383  | 15782.65  | 18433.959 | NM_00580E | 14432.534 | 8968.091  |
| NM_01604Z | 789.886   | 1081.89   | NM_000410 | 29935.279 | 47276.793 | NM_006401 | 29804.092 | 22636.299 |
| NM_017640 | 781.985   | 917.5     | AF224266  | 18505.533 | 20754.822 | NM_01591Z | 5410.824  | 4260.075  |
| NM_017721 | 2501.753  | 2442.151  | U72882    | 58043.527 | 57848.621 | NM_005157 | 4140.186  | 3141.817  |
| NM_01908E | 10808.138 | 8316.504  | NM_014337 | 47626.031 | 48977.898 | NM_01816E | 2410.15   | 752.89    |
| AB002373  | 1878.93   | 2105.652  | NM_007161 | 47035.563 | 45454.316 | AK021452  | 693.901   | 148.813   |
| NM_016350 | 38874.469 | 18909.631 | NM_014387 | 5009.489  | 5012.23   | NM_00450E | 3666.773  | 1445.441  |
| AK024167  | 4969.202  | 3388.354  | NM_003641 | 14009.737 | 12495.995 | S74529    | 51626.277 | 24948.049 |
| NM_00502E | 5359.541  | 2366.759  | NM_01246Z | 5043.812  | 4246.738  | NM_020227 | 915.06    | 362.175   |
| NM_004140 | 1021.197  | 677.094   | L29140    | 59645.746 | 56682.57  | NM_00559E | 609.44    | 320.645   |
| NM_00286E | 16607.215 | 9269.953  | AK026448  | 13598.752 | 5736.873  | NM_001421 | 720.553   | 294.515   |
| AF230809  | 4576.676  | 2984.768  | AK057418  | 7993.308  | 4117.321  | U97060    | 706.752   | 353.771   |
| NM_017894 | 44486.98  | 26704.861 | AK024562  | 5590.261  | 3955.234  | M73837    | 3031.095  | 1616.269  |
| AK025447  | 2089.396  | 1457.577  | NM_01406E | 3824.788  | 2699.297  | U69127    | 39386.328 | 28633.33  |
| NM_002624 | 49347.895 | 58210.922 | NM_00457Z | 3046.047  | 2967.008  | NM_00583E | 12632.482 | 5867.914  |
| AF006199  | 1585.13   | 2322.03   | NM_00007Z | 2000.5    | 3979.704  | AK023379  | 4334.919  | 2740.24   |
| NM_004554 | 14691.155 | 21265.172 | NM_000697 | 4029.497  | 3614.741  | NM_00607E | 737.963   | 797.998   |
| NM_018119 | 6311.251  | 6886.911  | NM_000017 | 30163.678 | 24757.381 | AK021904  | 7481.155  | 6313.954  |
| NM_01457E | 1549.8    | 1590.683  | NM_000237 | 2257.914  | 2022.964  | -         | 1658.667  | 1409.056  |
| AL162035  | 1787.701  | 1951.489  | NM_01834E | 18458.164 | 18096.414 | NM_01829Z | 908.328   | 669.608   |
| NM_00669Z | 824.498   | 479.108   | AL122054  | 2405.794  | 3032.664  | AL049705  | 8021.594  | 5759.872  |
| NM_003084 | 2380.998  | 1273.441  | AB011182  | 830.826   | 1031.47   | NM_01545E | 3352.453  | 2958.385  |
| NM_00258Z | 8064.916  | 5467.529  | AB023151  | 2191.53   | 2787.346  | D13540    | 6372.058  | 3628.157  |
| NM_00100E | 62319.074 | 58414.586 | NM_000140 | 50599.789 | 52758.723 | NM_016570 | 2899.08   | 1936.418  |
| NM_00102E | 62906.309 | 45082.605 | NM_00512E | 13224.533 | 15875.344 | NM_000690 | 2106.966  | 612.519   |
| NM_001011 | 59393.504 | 46806.641 | NM_02003E | 4234.761  | 7106.411  | NM_00015E | 12262.54  | 4181.228  |
| AB061315  | 2764.154  | 2043.681  | NM_01624E | 9940.395  | 13474.617 | AK024489  | 1498.058  | 522.993   |
| D17289    | 16434.551 | 9714.456  | NM_01592E | 29927.908 | 37021.465 | NM_000181 | 5267.878  | 2306.179  |
| NM_00294E | 37715.227 | 12448.717 | X03757    | 15057.935 | 15702.749 | NM_000667 | 334.701   | 110.276   |
| NM_014230 | 10253.244 | 5411.268  | NM_01865E | 56716.422 | 53259.137 | NM_014121 | 1379.716  | 517.673   |
| NM_00023E | 2540.132  | 1560.728  | NM_00513E | 2649.633  | 2569.264  | NM_006730 | 1651.757  | 821.935   |
| NM_01587E | 760.159   | 295.173   | AK094513  | 2173.519  | 2328.751  | NM_005644 | 2191.708  | 934.753   |
| AF068236  | 46307.621 | 19799.082 | NM_00118Z | 21517.326 | 20242.459 | NM_01844Z | 7080.506  | 2975.16   |
| U28480    | 691.587   | 609.666   | NM_000890 | 7560.99   | 5097.229  | AF182416  | 9083.979  | 5605.156  |
| NM_00010E | 18090.377 | 13145.707 | NM_00497E | 47111.297 | 28890.848 | NM_00599E | 23030.25  | 14474.175 |
| NM_016931 | 10858.928 | 14784.348 | AK021597  | 5027.729  | 3024.873  | NM_00601E | 1133.275  | 684.667   |
| NM_00016Z | 3672.269  | 14618.692 | NM_005737 | 55501.25  | 44114.938 | NM_004634 | 2826.716  | 2442.62   |
| AK027067  | 628.73    | 477.608   | NM_00016E | 11997.919 | 8863.778  | NM_002017 | 3773.686  | 2494.71   |
| NM_016287 | 10279.224 | 9501.236  | AF182814  | 4222.419  | 4129.434  | NM_01752Z | 9188.109  | 7852.959  |
| AK021661  | 827.437   | 781.984   | NM_00532E | 2544.387  | 2172.048  | NM_00238Z | 44805.355 | 37926.867 |
| NM_003864 | 11028.378 | 8519.049  | NM_000107 | 25951.578 | 33543.77  | NM_00215E | 688.068   | 777.394   |
| NM_006824 | 15318.558 | 11817.503 | AL157445  | 14815.487 | 15271.77  | U13223    | 21063.752 | 14564.587 |
| NM_002107 | 2681.246  | 2731.405  | NM_001517 | 45331.199 | 40933.504 | NM_016270 | 6148.335  | 5281.159  |
| NM_002694 | 9360.063  | 12051.575 | NM_00505Z | 27929.16  | 28918.115 | AF269249  | 646.23    | 567.213   |
| NM_004454 | 1298.443  | 1055.382  | D86974    | 13639.029 | 15005.169 | X51417    | 384.792   | 368.424   |
| NM_00096E | 389.728   | 449.49    | NM_01828Z | 17269.627 | 19649.371 | D31763    | 4849.047  | 2304.542  |

|           |           |           |           |           |           |           |           |           |
|-----------|-----------|-----------|-----------|-----------|-----------|-----------|-----------|-----------|
| NM_012482 | 2915.452  | 2472.448  | NM_001983 | 6411.314  | 6560.266  | NM_014815 | 2127.511  | 823.332   |
| AF217227  | 1453.677  | 1762.656  | NM_004993 | 686.031   | 1290.484  | NM_005443 | 3550.476  | 1105.582  |
| AK024141  | 1914.613  | 1874.891  | NM_003384 | 15774.593 | 15055.992 | NM_007221 | 9956.259  | 3274.444  |
| U13706    | 719.047   | 332.905   | Y12337    | 6923.336  | 6492.541  | X54163    | 47033.176 | 16109.827 |
| AF213356  | 727.965   | 484.143   | M29551    | 45289.551 | 39615.449 | AK025395  | 1243.548  | 332.767   |
| BC035716  | 4105.333  | 1864.919  | AB023148  | 1714.102  | 1369.681  | NM_000388 | 2061.463  | 775.672   |
| NM_018014 | 4779.632  | 2057.741  | NM_002929 | 3131.195  | 2915.718  | X58377    | 578.302   | 278.684   |
| NM_002359 | 24398.15  | 6942.652  | BC028375  | 2136.238  | 1796.24   | BI830936  | 825.439   | 413.36    |
| NM_001312 | 891.31    | 1041.667  | AB026436  | 4919.479  | 3381.11   | U79292    | 30644.184 | 16483.607 |
| NM_016157 | 791.159   | 1270.688  | NM_016029 | 20184.295 | 13338.951 | AA947915  | 680.191   | 455.136   |
| NM_002195 | 16143.405 | 36639.633 | CY3Cy5    | 11294.958 | 268.019   | BI830753  | 1133.584  | 892.372   |
| D84294    | 4891.972  | 10409.13  | NM_002103 | 73388.531 | 64430.164 | X68314    | 2618.857  | 1946.922  |
| X59770    | 1386.493  | 1614.865  | NM_003379 | 40080.578 | 46609.051 | X71973    | 27733.127 | 20183.648 |
| K02765    | 6481.938  | 4652.064  | AF143331  | 4404.863  | 5200.569  | T49651    | 25489.867 | 20500.867 |
| M65134    | 1391.274  | 1763.155  | AK000819  | 4355.646  | 5522.925  | N51014    | 954.173   | 819.026   |
| BG539651  | 11343.936 | 13933.65  | AF201941  | 2816.556  | 3783.897  | BE392471  | 17042.461 | 16616.787 |
| N52646    | 39388.816 | 30054.824 | AF143325  | 578.029   | 1256.543  | AI802950  | 3406.269  | 3775.102  |
| AW160671  | 53953.094 | 64109.43  | AF143878  | 898.126   | 1866.572  | AI741278  | 373.611   | 356.967   |
| BI870529  | 17467.734 | 21172.184 | AF026941  | 766.858   | 1329.949  | AA682423  | 1303.6    | 1276.26   |
| AA702698  | 1576.848  | 1725.294  | NM_007070 | 3773.941  | 5636.885  | AL043686  | 5343.81   | 4256.282  |
| AI681514  | 1250.552  | 1219.393  | AL133019  | 5488.973  | 7885.382  | AA490172  | 1126.347  | 955.883   |
| NM_001300 | 2421.61   | 2082.498  | NM_017748 | 13583.491 | 15990.853 | AA775212  | 2793.441  | 1780.512  |
| BG748827  | 11369.877 | 7571.863  | AK025374  | 3488.661  | 3877.965  | NM_000402 | 1429.759  | 972.024   |
| AA952897  | 9704.053  | 6425.322  | NM_014901 | 12953.013 | 17691.066 | AK026266  | 34300.938 | 9125.214  |
| BG760342  | 3434.626  | 1835.373  | SR9       | 23189.1   | 4756.511  | NM_007124 | 15089.699 | 3358.678  |
| AA703141  | 2177.375  | 1233.795  | CY3Cy5    | 16893.908 | 413.527   | NM_003176 | 9209.31   | 2410.618  |
| AA195244  | 333.482   | 221.563   | NM_013288 | 1310.821  | 1084.14   | NM_000723 | 1954.138  | 406.886   |
| AI122630  | 7829.579  | 4094.409  | L39061    | 4089.703  | 4000.864  | AL096751  | 11764.04  | 4733.862  |
| AF086790  | 1754.757  | 583.175   | AF071508  | 4749.126  | 5405.478  | NM_000364 | 1197.525  | 405.694   |
| AK025966  | 2895.191  | 6895.275  | L07265    | 57563.555 | 57155.152 | AF026920  | 16949.236 | 8870.328  |
| NM_003081 | 41093.445 | 40917.516 | D16472    | 12887.744 | 15144.604 | NM_004931 | 4935.82   | 2170.673  |
| NM_016495 | 1211.844  | 3503.493  | AF085823  | 537.085   | 1079.234  | NM_000607 | 29573.547 | 15283.479 |
| D50402    | 43396.441 | 58495.176 | NM_002813 | 51238.633 | 54428.477 | NM_002575 | 4211.268  | 2952.22   |
| M73547    | 14784.016 | 36072.359 | NM_001198 | 3779.748  | 4678.4    | NM_004244 | 3679.819  | 2880.413  |
| AF181722  | 449.112   | 710.155   | AK023481  | 1552.46   | 1653.153  | NM_003371 | 49358.961 | 58996.25  |
| NM_003687 | 2919.628  | 3360.061  | NM_005086 | 68267.891 | 63525.488 | AK023114  | 5193.541  | 5452.035  |
| NM_004134 | 7976.276  | 7517.687  | NM_007238 | 1817.932  | 2063.234  | NM_003678 | 3076.957  | 4752.447  |
| NM_005955 | 6808.134  | 6466.553  | AL137360  | 6890.189  | 6914.832  | NM_012301 | 2624.66   | 2565.862  |
| NM_004048 | 1336.208  | 1787.734  | AK024523  | 1229.81   | 1063.457  | NM_014938 | 2785.987  | 3179.146  |
| BE548044  | 755.685   | 886.024   | AK024600  | 6095.443  | 7655.74   | AK001500  | 2175.288  | 603.786   |
| NM_012428 | 4199.354  | 3950.406  | AK024543  | 4199.331  | 3595.393  | NM_006774 | 800.941   | 270.436   |
| NM_013269 | 12061.076 | 9210.4    | AK024624  | 56980.66  | 48763.695 | NM_020129 | 1976.839  | 823.092   |
| NM_001728 | 7447.386  | 6843.449  | AK025090  | 3495.248  | 4395.758  | Y16521    | 7770.408  | 2668.645  |
| NM_005565 | 240.463   | 224.051   | AK024883  | 8928.761  | 11390.732 | AL050371  | 5941.453  | 3861.892  |
| NM_003824 | 7066.923  | 3652.89   | AF086215  | 1130.925  | 2910.365  | NM_002651 | 2659.576  | 1258.497  |
| NM_000686 | 412.353   | 273.05    | AL109696  | 2462.782  | 3209.224  | NM_002413 | 13440.164 | 7308.769  |
| NM_012452 | 4831.253  | 2240.926  | AK022190  | 1935.024  | 2935.292  | NM_017577 | 690.127   | 372.373   |
| AF229166  | 653.957   | 403.202   | AJ011593  | 4009.155  | 4430.622  | NM_016301 | 9640.524  | 6413.512  |
| NM_006764 | 2883.766  | 1538.209  | Z83942    | 1960.132  | 2029.443  | NM_014668 | 6990.438  | 5957.342  |
| NM_001386 | 1085.218  | 465.07    | AF086208  | 6080.147  | 5679.97   | NM_004722 | 5350.177  | 5493.781  |
| NM_001179 | 1276.343  | 2519.168  | AK023335  | 9504.528  | 11303.19  | NM_014425 | 1810.212  | 1779.928  |
| NM_005313 | 40962.391 | 49847.098 | AK023187  | 695.558   | 1134.796  | NM_012133 | 5946.711  | 13139.454 |
| NM_000428 | 1031.567  | 1654.747  | AK022231  | 2953.08   | 2468.215  | NM_017954 | 634.337   | 645.286   |

|           |           |           |           |           |           |           |           |           |
|-----------|-----------|-----------|-----------|-----------|-----------|-----------|-----------|-----------|
| AB040967  | 350.461   | 926.879   | NM_019033 | 4766.252  | 3197.624  | NM_006612 | 6983.159  | 6579.356  |
| NM_014721 | 937.372   | 2886.478  | AL133101  | 2839.583  | 2668.773  | NM_016451 | 1705.371  | 1584.433  |
| AK026352  | 1080.429  | 1411.659  | AK000958  | 3413.619  | 3865.313  | NM_007351 | 48739.355 | 35554.977 |
| NM_016180 | 651.274   | 893.835   | BC024924  | 16074.86  | 11079.65  | AL049935  | 16819.982 | 4110.347  |
| NM_005827 | 5715.166  | 6196.242  | NM_017906 | 7533.471  | 7273.348  | AB033043  | 18152.893 | 6747.981  |
| NM_003056 | 7960.104  | 10357.913 | AL110286  | 13157.261 | 17252.686 | NM_014996 | 7677.445  | 2468.266  |
| NM_016226 | 7177.103  | 6755.294  | NM_014152 | 1638.087  | 2002.015  | AK025220  | 3376.647  | 1169.766  |
| AK024311  | 695.876   | 564.289   | D87682    | 1608.727  | 1766.932  | NM_016308 | 20422.445 | 7571.101  |
| AF052155  | 3364.585  | 1326.542  | AF321617  | 16704.012 | 18563.896 | D42046    | 4222.698  | 2385.191  |
| NM_005085 | 2898.208  | 1143      | NM_016298 | 3001.935  | 2449.329  | NM_001033 | 8832.776  | 4272.875  |
| AF060902  | 2809.945  | 1108.921  | AK002146  | 2822.097  | 3081.031  | NM_004526 | 13220.967 | 6848.016  |
| AF121858  | 15690.347 | 6656.093  | NM_003159 | 2249.3    | 1608.348  | NM_002526 | 18970.229 | 10623.488 |
| NM_013437 | 397.998   | 253.507   | AK023494  | 1671.677  | 1080.232  | NM_020135 | 3331.397  | 2111.882  |
| NM_017681 | 1361.515  | 992.296   | AK024602  | 64376.629 | 64482.133 | NM_018518 | 4926.97   | 3469.582  |
| X57655    | 26041.766 | 11975.396 | NM_000485 | 9032.084  | 6866.952  | AK023149  | 2169.261  | 1228.472  |
| NM_018261 | 2592.754  | 5667.464  | NM_018542 | 3536.594  | 2916.419  | AK023168  | 3976.927  | 4414.346  |
| AL050288  | 39363.828 | 50845.156 | AK025503  | 5341.921  | 4836.5    | NM_006646 | 565.783   | 682.486   |
| NM_005040 | 5781.184  | 15612.82  | NM_007262 | 45971.184 | 31959.494 | NM_004742 | 3258.615  | 2851.449  |
| NM_016391 | 20048.016 | 26309.332 | NM_014783 | 6569.552  | 5274.731  | NM_014753 | 1840.388  | 1656.426  |
| AF075033  | 7967.503  | 6729.91   | NM_014053 | 8589.168  | 7610.299  | NM_006585 | 33739.898 | 33826.918 |
| D50911    | 18491.318 | 13142.284 | NM_002571 | 1014.449  | 923.437   | NM_014331 | 3972.741  | 4378.326  |
| AB011104  | 1719.273  | 1086.053  | NM_004939 | 3085.468  | 2020.239  | NM_006795 | 33800.793 | 31180.143 |
| AK024069  | 7430.781  | 6094.519  | NM_001425 | 11326.972 | 6593.657  | AF070568  | 1887.72   | 1947.735  |
| NM_004582 | 17085.758 | 13835.553 | AK000799  | 10159.016 | 6833.178  | NM_000277 | 491.808   | 458.394   |
| NM_015640 | 19416.053 | 13172.426 | NM_015582 | 1880.438  | 2281.943  | NM_000240 | 6951.565  | 6586.604  |
| AF233450  | 941.54    | 579.439   | AK027091  | 3873.296  | 4517.411  | AK055733  | 12581.549 | 13085.282 |
| NM_016233 | 1405.04   | 591.646   | NM_001526 | 7136.579  | 6587.034  | AF298880  | 5405.758  | 5335.168  |
| NM_000821 | 25996.744 | 10460.191 | U31738    | 2807.658  | 2412.241  | NM_007221 | 9428.744  | 3570.48   |
| NM_020121 | 324.547   | 144.233   | AF179890  | 14795.154 | 12257.825 | X54163    | 47138.855 | 15331.56  |
| NM_003145 | 27902.443 | 20722.814 | NM_001078 | 6529.71   | 5805.274  | AK025395  | 1295.802  | 430.707   |
| NM_001632 | 2078.969  | 3348.709  | NM_000552 | 11100.381 | 9995.733  | NM_000388 | 1857.32   | 859.682   |
| NM_012264 | 1488.116  | 2363.708  | AK000860  | 8440.451  | 4579.822  | X58377    | 579.062   | 185.646   |
| AF311312  | 2058.741  | 3611.733  | NM_014961 | 942.654   | 535.981   | NM_002466 | 372.386   | 154.276   |
| NM_001276 | 10335.388 | 24419.568 | NM_016190 | 63183.836 | 60416.121 | AI673575  | 510.53    | 301.576   |
| D84294    | 4839.499  | 11810.764 | AL137579  | 20844.572 | 14807.448 | BI830936  | 818.923   | 409.865   |
| X59770    | 1694.928  | 5018.659  | NM_012383 | 9385.113  | 8107.592  | U79292    | 32148.443 | 18381.043 |
| K02765    | 5869.148  | 14036.898 | AJ271684  | 5820.79   | 3462.014  | AA947915  | 746.504   | 483.385   |
| M65134    | 1141.976  | 1608.439  | AF255342  | 32076.043 | 18723.615 | BI830753  | 1146.312  | 1007.766  |
| BG539651  | 10384.441 | 8769.931  | NM_003300 | 27270.875 | 14604.086 | X68314    | 3011.634  | 2004.199  |
| N52646    | 40834.465 | 32717.852 | AK023847  | 1598.517  | 1128.888  | X71973    | 29943.693 | 18434.279 |
| AW160671  | 40858.383 | 14657.532 | NM_003860 | 10871.957 | 8090.92   | T49651    | 28246.043 | 22735.414 |
| BI870529  | 16794.842 | 10723.371 | NM_005414 | 1306.384  | 832.685   | N51014    | 1229.74   | 863.228   |
| AA702698  | 1479.21   | 1257.773  | NM_004468 | 44948.473 | 33610.699 | BE392471  | 18453.967 | 14352.104 |
| AI681514  | 1314.902  | 877.156   | NM_016031 | 11613.482 | 6983.237  | AI802950  | 4236.208  | 4605.79   |
| NM_001300 | 2606.799  | 1812.838  | NM_004804 | 3350.739  | 2066.858  | AI741278  | 495.284   | 512.915   |
| BG748827  | 10957.243 | 5171.751  | M92439    | 39213.5   | 15098.396 | AA682423  | 1551.771  | 1377.135  |
| AA952897  | 9332.637  | 3901.053  | AL117665  | 12027.749 | 5959.77   | AL043686  | 5906.721  | 5606.325  |
| BG760342  | 3106.834  | 1079.611  | AF263541  | 4663.574  | 2391.757  | AA490172  | 1283.153  | 1348.355  |
| AA703141  | 1879.596  | 1344.849  | AK027169  | 3850.095  | 1943.684  | AA775212  | 2521.148  | 2296.539  |
| AI122630  | 9535.879  | 15416.787 | NM_001262 | 10222.111 | 7859.309  | AB011174  | 3489.805  | 3538.579  |
| NM_006588 | 8679.063  | 14503.016 | BE873030  | 10786.679 | 6402.134  | AB040879  | 1325.804  | 1449.885  |
| NM_002191 | 310.277   | 530.622   | NM_002440 | 1551.038  | 1610.249  | NM_003176 | 10649.526 | 3015.341  |
| AB007875  | 2380.562  | 1859.294  | NM_003625 | 3241.196  | 2713.959  | NM_000723 | 1842.239  | 490.841   |



|           |           |           |           |           |           |           |           |           |
|-----------|-----------|-----------|-----------|-----------|-----------|-----------|-----------|-----------|
| NM_018725 | 853.982   | 1561.329  | BC006990  | 14535.403 | 8315.399  | AL096751  | 9490.485  | 3759.326  |
| NM_003081 | 36126.801 | 31811.428 | NM_002277 | 12700.103 | 6695.379  | NM_000364 | 1350.658  | 445.467   |
| NM_016495 | 1366.957  | 2099.849  | NM_019114 | 8644.799  | 5149.622  | AF026920  | 17470.486 | 7874.853  |
| NM_003687 | 3086.465  | 9446.242  | M33552    | 46819.879 | 20156.66  | NM_004931 | 4878.813  | 1995.305  |
| NM_004045 | 2188.515  | 3363.688  | L25628    | 1068.112  | 721.619   | NM_000607 | 33062.438 | 15149.839 |
| BE548044  | 763.4     | 346.01    | M37033    | 34209.945 | 20652.68  | NM_002575 | 4855.207  | 3417.6    |
| NM_012425 | 4410.372  | 2874.706  | NM_007171 | 3415.775  | 3091.583  | NM_004244 | 4262.814  | 2413.105  |
| NM_013265 | 11967.201 | 7529.273  | NM_004275 | 1586.576  | 1251.366  | NM_003371 | 55937.316 | 65623.664 |
| NM_001725 | 7026.614  | 3422.28   | NM_005632 | 2589.369  | 1950.957  | AK023114  | 5946.739  | 6198.498  |
| NM_005565 | 353.152   | 233.902   | AK021499  | 1301.091  | 661.453   | NM_003675 | 3401.068  | 4174.529  |
| NM_003824 | 7890.77   | 2348.434  | AK000336  | 4363.32   | 1858.503  | NM_012301 | 3130.194  | 3097.419  |
| NM_000685 | 497.421   | 379.659   | NM_002795 | 54907.914 | 22838.141 | NM_014935 | 3418.992  | 3670.048  |
| NM_012452 | 4523.517  | 2997.292  | NM_006292 | 21128.859 | 10608.679 | AF049460  | 526.154   | 563.33    |
| AF229166  | 590.972   | 959.716   | AB007948  | 7487.213  | 3411.961  | NM_014815 | 1604.533  | 1834.065  |
| NM_006764 | 2776.563  | 5183.862  | AB033066  | 8002.391  | 4385.81   | NM_005443 | 3386.678  | 3418.197  |
| NM_001385 | 1475.527  | 1522.092  | AF126028  | 2961.742  | 2317.997  | NM_020125 | 1780.97   | 891.599   |
| AF007192  | 1021.876  | 917.86    | NM_007019 | 43516.477 | 48015.59  | Y16521    | 6998.928  | 2369.47   |
| NM_017765 | 12998.248 | 11216.593 | NM_007075 | 990.614   | 892.118   | AL050371  | 5907.571  | 3561.015  |
| NM_000425 | 662.642   | 730.835   | NM_016042 | 1447.31   | 979.42    | NM_002651 | 2822.71   | 1313.128  |
| NM_014721 | 1285.034  | 1029.925  | NM_017640 | 1935.637  | 1246.242  | NM_002413 | 15015.554 | 6619.081  |
| AK026352  | 1370.243  | 3133.008  | NM_017721 | 5760.158  | 3719.855  | NM_017577 | 720.071   | 518.853   |
| NM_006665 | 763.997   | 419.567   | NM_019085 | 21834.611 | 10330.015 | NM_016301 | 11387.717 | 7621.568  |
| AF169257  | 374.481   | 267.25    | AB002373  | 3950.379  | 2553.266  | NM_014665 | 8689.005  | 6109.576  |
| NM_016180 | 977.648   | 1304.176  | AF230809  | 7103.782  | 4405.212  | NM_004722 | 5860.929  | 5046.579  |
| NM_005827 | 6557.288  | 8739.723  | NM_017894 | 66528.672 | 68050.508 | NM_014425 | 2158.506  | 2122.355  |
| NM_003055 | 7799.763  | 5842.546  | NM_006509 | 11167.54  | 9320.827  | NM_012133 | 6708.54   | 7104.176  |
| NM_016225 | 6652.874  | 5816.458  | AK025447  | 3351.623  | 2520.761  | NM_017954 | 579.897   | 817.835   |
| AK024311  | 663.442   | 508.329   | NM_002624 | 65674.055 | 61321.668 | NM_006612 | 7369.801  | 7417.248  |
| AF052155  | 3322.561  | 871.423   | AF006199  | 2464.529  | 1094.536  | NM_016451 | 2167.117  | 2105.526  |
| NM_005085 | 3163.412  | 1077.498  | NM_004554 | 58464.414 | 25070.156 | NM_007351 | 49391.754 | 41136.992 |
| AF060902  | 3136.987  | 2071.038  | NM_018119 | 13931.326 | 4660.423  | AK026266  | 25338.338 | 18807.199 |
| AF121858  | 16075.262 | 16267.319 | NM_014575 | 6061.756  | 2157.328  | NM_007124 | 9585.446  | 7326.292  |
| NM_013437 | 383.768   | 477.273   | AL162035  | 8052.38   | 2876.01   | AB033043  | 23185.201 | 9634.008  |
| NM_017681 | 1226.143  | 1490.306  | NM_006692 | 4577.854  | 2161.355  | NM_014995 | 6842.349  | 1927.779  |
| X57655    | 28257.418 | 21443.627 | NM_003084 | 5286.186  | 2311.705  | AK025220  | 3116.602  | 1089.112  |
| AK025966  | 2718.713  | 3583.634  | NM_002582 | 27721.492 | 37328.004 | NM_016305 | 20879.652 | 7394.918  |
| NM_014440 | 706.284   | 1526.788  | NM_001009 | 68913.016 | 63687.813 | D42046    | 4351.227  | 2214.13   |
| NM_014795 | 1071.524  | 1304.292  | NM_001025 | 69570.922 | 57219.242 | NM_001033 | 9010.665  | 4163.458  |
| AL050288  | 28420.766 | 20106.029 | NM_001011 | 69395.273 | 63913.238 | NM_004525 | 13092.931 | 6032.119  |
| NM_005040 | 5098.296  | 4972.695  | AB061315  | 3215.488  | 1725.556  | NM_002525 | 18118.604 | 9730.16   |
| NM_016391 | 19971.125 | 15543.783 | D17289    | 26644.553 | 8796.07   | NM_020135 | 3407.944  | 2177.618  |
| AF075033  | 6871.47   | 4159.292  | U28480    | 1247.524  | 1218.611  | NM_018515 | 4981.643  | 2972.857  |
| D50911    | 14843.905 | 6673.462  | NM_000105 | 24640.715 | 21466.6   | AK023149  | 1973.85   | 1345.853  |
| AB011104  | 1413.65   | 1328.417  | NM_018125 | 9534.429  | 8329.599  | AK023168  | 3929.485  | 4046.252  |
| AK024069  | 7869.287  | 11288.276 | NM_016931 | 30108.043 | 19544.094 | NM_006645 | 446.481   | 355.804   |
| NM_004582 | 15895.607 | 15957.918 | NM_004373 | 66023.336 | 46167.234 | NM_004742 | 3620.396  | 3128.937  |
| NM_015640 | 18022.652 | 10983.085 | NM_005565 | 69253.539 | 41606.551 | NM_014753 | 1909.114  | 1608.649  |
| AF233450  | 882.91    | 505.519   | NM_000162 | 13534.188 | 4691.161  | NM_006585 | 34826.641 | 34285.051 |
| NM_016233 | 1354.956  | 402.032   | NM_016287 | 30391.514 | 15296.839 | NM_014331 | 4384.195  | 5172.581  |
| NM_000821 | 27007.105 | 5265.961  | AK021661  | 2885.167  | 1356.505  | NM_006795 | 34129.672 | 32918.188 |
| NM_020121 | 366.27    | 240.216   | NM_003864 | 31549.637 | 13238.394 | AF070568  | 1860.9    | 2239.879  |
| NM_003145 | 27936.436 | 30915.395 | NM_004454 | 2043.774  | 1321.232  | NM_000277 | 488.46    | 678.867   |
| NM_001632 | 1807.819  | 2451.846  | NM_000965 | 1523.249  | 789.813   | NM_000240 | 6870.55   | 9226.82   |

|           |           |           |           |           |           |           |           |           |
|-----------|-----------|-----------|-----------|-----------|-----------|-----------|-----------|-----------|
| NM_012264 | 1358.255  | 1509.583  | NM_012482 | 7491.938  | 3870.954  | AK055733  | 12421.86  | 12659.895 |
| AF311312  | 2463.558  | 6005.513  | AF217227  | 1818.292  | 1131.184  | AF298880  | 5122.367  | 5609.23   |
| NM_001179 | 445.369   | 2122.204  | AK024141  | 15305.212 | 11890.724 | AK001500  | 1560.737  | 1874.096  |
| NM_005313 | 41264.203 | 67060.461 | U13706    | 3858.807  | 3214.272  | AK025395  | 1207.553  | 377.831   |
| NM_014915 | 40369.691 | 21694.105 | AF213356  | 2742.604  | 2451.476  | NM_000385 | 1691.826  | 704.022   |
| NM_012286 | 3664.292  | 3914.372  | BC035716  | 18793.787 | 15395.381 | X58377    | 496.984   | 229.586   |
| NM_002195 | 13197.479 | 11143.031 | NM_018014 | 12979.201 | 10044.551 | BI830936  | 825.401   | 465.653   |
| D84294    | 4545.515  | 4136.462  | NM_001276 | 14069.444 | 11909.12  | U79292    | 35732.484 | 18790.592 |
| X59770    | 1631.142  | 3349.454  | NM_016157 | 3594.695  | 2473.25   | AA947915  | 866.72    | 534.379   |
| K02765    | 8554.215  | 7558.792  | NM_014915 | 55991.926 | 22954.803 | BI830753  | 1194.08   | 912.299   |
| M65134    | 1158.875  | 922.862   | D84294    | 9668.916  | 17569.938 | X68314    | 2570.027  | 1868.329  |
| BG539651  | 9790.052  | 4769.993  | AA702698  | 3279.682  | 2540.341  | X71973    | 30474.211 | 23113.609 |
| N52646    | 33514.688 | 15884.245 | AI681514  | 3954.375  | 2849.855  | T49651    | 27146.451 | 25586.391 |
| AW160671  | 44878.277 | 22795.832 | NM_001300 | 5153.125  | 3541.163  | N51014    | 1136.35   | 939.052   |
| BI870529  | 15690.542 | 15155.877 | BG748827  | 19089.496 | 8945.577  | BE392471  | 18969.146 | 14588.875 |
| AA702698  | 1612.067  | 2093.348  | AA952897  | 21985.865 | 13542.029 | AI802950  | 4254.397  | 4255.394  |
| AI681514  | 1389.171  | 1959.776  | BG760342  | 9583.373  | 7877.767  | AI741278  | 585.387   | 553.578   |
| NM_001300 | 2425.785  | 2067.691  | AA703141  | 4709.938  | 3928.615  | AA682423  | 1563.606  | 1883.559  |
| AA952897  | 7706.946  | 2758.82   | AI122630  | 19330.381 | 18588.633 | AL043686  | 6201.915  | 9122.906  |
| BG760342  | 2920.606  | 1060.689  | AF086790  | 9008.385  | 6723.161  | AA490172  | 1495.36   | 1815.149  |
| AA703141  | 1785.861  | 1274.301  | AK025966  | 2350.269  | 2336.868  | AA775212  | 2918.38   | 3626.223  |
| AI122630  | 8863.985  | 17815.879 | NM_014440 | 721.727   | 851.616   | AB011174  | 3678.513  | 5856.042  |
| NM_006585 | 8407.755  | 11401.034 | NM_018725 | 2557.262  | 3535.587  | AB040879  | 1109.937  | 1914.823  |
| AB007875  | 2564.019  | 9058.715  | NM_003081 | 59184.148 | 48756.742 | AL049935  | 11251.519 | 9990.921  |
| NM_018261 | 2325.973  | 7871.957  | NM_016495 | 2403.011  | 1392.349  | NM_002575 | 4699.726  | 2758.211  |
| NM_005955 | 3595.188  | 3237.09   | M73547    | 34742.883 | 50067.922 | NM_004244 | 4228.912  | 2712.921  |
| NM_004045 | 1087.539  | 1161.983  | AF181722  | 3194.578  | 3126.009  | NM_003371 | 52341.371 | 55165.84  |
| BE548044  | 435.114   | 594.863   | NM_012425 | 8252.192  | 10659.421 | AK023114  | 6288.807  | 6724.304  |
| NM_012425 | 4065.544  | 4634.279  | NM_013269 | 22258.092 | 19943.264 | NM_003675 | 3418.548  | 4880.725  |
| NM_013269 | 12403.732 | 13391.677 | NM_001725 | 10839.346 | 9413.16   | NM_012301 | 4407.114  | 5151.792  |
| NM_001725 | 6288.931  | 5677.869  | NM_003824 | 26805.609 | 16963.645 | NM_000680 | 570.134   | 827.63    |
| NM_003824 | 7461.175  | 9830.073  | NM_000686 | 2263.82   | 2503.354  | NM_005631 | 246.165   | 448.983   |
| NM_000686 | 493.242   | 1113.854  | NM_012452 | 14768.452 | 13313.819 | NM_014415 | 19516.379 | 23088.141 |
| NM_012452 | 5879.218  | 13218.715 | AF229166  | 4561.768  | 4931.896  | NM_014935 | 3919.81   | 5250.649  |
| AF229166  | 723.932   | 1344.19   | NM_005313 | 51858.121 | 47556.918 | AF049460  | 461.94    | 913.372   |
| NM_005137 | 6267.841  | 6973.407  | NM_017765 | 57414.996 | 55881.566 | AK026066  | 2045.701  | 3833.697  |
| NM_001386 | 1236.973  | 1063.211  | NM_000425 | 2164.332  | 2366.661  | NM_005244 | 10148.284 | 18681.268 |
| NM_001163 | 3514.224  | 1777.635  | NM_014721 | 1376.068  | 2361.219  | AF054589  | 3523.423  | 7845.97   |
| NM_005875 | 2513.821  | 2726.523  | AK026352  | 7283.701  | 24766.523 | NM_005270 | 791.395   | 1673.057  |
| AB006713  | 263.633   | 902.076   | NM_016226 | 12299.564 | 11967.967 | NM_014815 | 2175.867  | 4745.923  |
| AF308602  | 2992.413  | 6992.849  | AK024311  | 1120.816  | 1268.987  | NM_005443 | 3202.029  | 7116.253  |
| AB011089  | 2296.129  | 2528      | AF052155  | 7166.027  | 5630.667  | NM_007221 | 9674.662  | 19239.307 |
| AF007192  | 1029.412  | 3114.842  | NM_005085 | 17304.113 | 12069.486 | X54163    | 40772.492 | 54910.652 |
| NM_001276 | 10149.468 | 29240.268 | AF060902  | 11134.223 | 9770.215  | NM_018607 | 529.985   | 372.271   |
| NM_016157 | 1039.121  | 2796.979  | AF121858  | 52633.113 | 52485.363 | NM_002975 | 7243.967  | 7235.731  |
| NM_003053 | 4181.218  | 4998.27   | NM_013437 | 4766.015  | 6697.063  | NM_014665 | 7181.929  | 10916.554 |
| NM_003044 | 2367.048  | 3129.987  | X57655    | 49183.934 | 45701.918 | NM_004722 | 6950.025  | 11641.895 |
| NM_006672 | 15612.183 | 17316.371 | NM_018261 | 3190.319  | 3384.942  | NM_014425 | 2657.943  | 5371.699  |
| NM_000335 | 267.215   | 525.63    | NM_014796 | 2678.522  | 2398.478  | NM_012133 | 8176.081  | 16378.361 |
| M31659    | 768.864   | 1214.73   | AL050288  | 48183.996 | 52842.254 | NM_017954 | 847.042   | 2402.768  |
| NM_003056 | 8336.381  | 10290.57  | NM_005040 | 10602.564 | 14227.466 | NM_006612 | 9308.334  | 18790.383 |
| NM_016226 | 6578.461  | 7810.335  | NM_016391 | 40899.383 | 48664.625 | NM_016451 | 2194.95   | 5007.852  |
| AK024311  | 765.038   | 1125.269  | AF075033  | 13998.902 | 26559.494 | NM_007351 | 48298.078 | 63885.891 |

|           |           |           |           |           |           |           |           |           |
|-----------|-----------|-----------|-----------|-----------|-----------|-----------|-----------|-----------|
| AF052155  | 3485.71   | 5321.533  | D50911    | 28521.613 | 45799.016 | AK026266  | 34730.602 | 56671.398 |
| AF060902  | 3015.446  | 5755.306  | AB011104  | 5905.639  | 6628.138  | NM_007124 | 16294.014 | 31132.432 |
| AF121858  | 20247.609 | 28724.361 | AK024069  | 16494.926 | 21449.715 | NM_003176 | 11898.11  | 23416.049 |
| NM_013437 | 581.352   | 1255.17   | NM_015640 | 35129.039 | 35049.883 | NM_000723 | 1991.422  | 4941.156  |
| NM_017681 | 1239.961  | 2614.487  | AF233450  | 2094.107  | 2901.449  | AL096751  | 15093.566 | 31000.877 |
| AK025966  | 2577.554  | 4839.67   | NM_016233 | 5664.496  | 6172.861  | NM_000364 | 1139.498  | 3020.698  |
| NM_014440 | 448.898   | 982.433   | NM_000821 | 62702.988 | 56936.816 | AF026920  | 16183.706 | 38885.641 |
| NM_018725 | 1186.678  | 2682.043  | NM_020121 | 1347.79   | 1716.455  | NM_004931 | 4590.938  | 11402.153 |
| NM_003081 | 48312.203 | 56825.051 | NM_003145 | 51573.098 | 49097.535 | NM_000607 | 32007.912 | 51135.949 |
| NM_016495 | 1376.664  | 4192.687  | NM_001632 | 3305.17   | 3893.277  | NM_000240 | 9053.651  | 15419.635 |
| D50402    | 47831.527 | 50287.152 | NM_012264 | 3832.73   | 5304.752  | AK055733  | 16238.047 | 27653.41  |
| M73547    | 16165.023 | 37666.066 | AF311312  | 3471.165  | 4739.401  | AF298880  | 8869.199  | 14391.429 |
| AF181722  | 503.337   | 1322.398  | NM_001276 | 14605.104 | 20807.779 | AK001500  | 2560.698  | 5039.972  |
| NM_003687 | 2908.203  | 9555.396  | NM_016157 | 3406.326  | 4355.962  | NM_006774 | 840.549   | 1925.984  |
| NM_004134 | 9274.438  | 25813.816 | NM_014915 | 56903.23  | 62544.059 | NM_020125 | 2193.304  | 4894.495  |
| NM_001632 | 1767.054  | 4154.782  | NM_012286 | 12848.65  | 12174.26  | Y16521    | 9434.224  | 18936.053 |
| NM_012264 | 1424.47   | 3420.989  | D84294    | 8255.202  | 14629.12  | AL050371  | 7178.49   | 16404.58  |
| AF311312  | 1526.522  | 4669.918  | X59770    | 4777.003  | 7365.907  | NM_002651 | 2847.334  | 6388.817  |
| NM_001179 | 629.403   | 1788.82   | K02765    | 24823.24  | 32264.889 | NM_002413 | 14723.313 | 27847.852 |
| NM_005313 | 41691.324 | 62040.629 | BG539651  | 33048.484 | 47938.605 | NM_017577 | 800.018   | 1554.605  |
| NM_017765 | 16010.974 | 28279.295 | N52646    | 61143.02  | 63753.73  | NM_001757 | 614.705   | 1456.601  |
| NM_000425 | 865.079   | 2168.558  | AW160671  | 62707.77  | 65484.367 | NM_001647 | 14505.291 | 26880.803 |
| AB040967  | 358.703   | 654.568   | BI870529  | 31316.303 | 26681.27  | NM_018155 | 1799.729  | 3873.415  |
| AK026352  | 977.967   | 4604.127  | AA702698  | 4839.542  | 7262.468  | NM_016301 | 11752.243 | 24620.725 |
| AL137705  | 2488.874  | 5730.727  | NM_001300 | 6559.832  | 7340.926  | AK021975  | 1302.544  | 3056.407  |
| U41898    | 775.012   | 1232.547  | BG748827  | 18739.639 | 21801.09  | AB032952  | 45598.551 | 61150.758 |
| NM_014845 | 996.922   | 2042.785  | AA952897  | 21390.271 | 26021.73  | NM_002522 | 55798.922 | 72408.336 |
| BF217766  | 820.762   | 1770.987  | BG760342  | 8367.937  | 8586.857  | AB011174  | 5001.333  | 8284.191  |
| NM_000184 | 1920.046  | 5351.288  | AA703141  | 3123.048  | 3428.876  | AB040879  | 1495.679  | 3032.499  |
| NM_016180 | 17444.252 | 97316.672 | AA195244  | 590.421   | 955.016   | AL049935  | 20095.068 | 25967.262 |
| NM_000112 | 640.15    | 1540.56   | AI122630  | 19034.836 | 22262.365 | AB033043  | 21650.9   | 45052.902 |
| NM_005827 | 6807.437  | 18939.816 | NM_006589 | 17155.445 | 17710.111 | NM_014995 | 8374.732  | 14154.284 |
| NM_006585 | 9416.483  | 22296.188 | NM_002191 | 2546.968  | 3301.033  | AK025220  | 3873.795  | 6474.703  |
| NM_002191 | 391.585   | 1108.018  | NM_018725 | 2630.159  | 3780.866  | NM_016305 | 23552.154 | 43313.938 |
| AB007875  | 2743.028  | 7587.544  | NM_003081 | 63108.422 | 59995.871 | D42046    | 4994.851  | 10643.687 |
| NM_018261 | 2159.878  | 4531.49   | NM_016495 | 2907.979  | 4715.75   | NM_001033 | 10325.796 | 19061.213 |
| NM_014795 | 1628.491  | 3648.182  | D50402    | 63201.684 | 60576.578 | NM_004525 | 13331.199 | 20575.428 |
| AL050288  | 37227.672 | 48319.273 | AF181722  | 2562.026  | 3213.081  | NM_002525 | 18025.27  | 23550.898 |
| NM_005040 | 6629.844  | 16104.989 | NM_003687 | 16456.922 | 26099.775 | NM_020135 | 3209.45   | 4051.049  |
| NM_016391 | 23978.012 | 35353     | NM_004134 | 15462.481 | 25514.979 | NM_018515 | 4305.222  | 5737.239  |
| M80783    | 354.696   | 881.032   | NM_004045 | 3088.896  | 6532.939  | AK023149  | 1652.767  | 2209.666  |
| AF075033  | 7967.548  | 14329.284 | BE548044  | 1643.615  | 3635.865  | AK023168  | 3669.876  | 5353.704  |
| D50911    | 18431.154 | 26812.967 | NM_006017 | 2842.752  | 3225.872  | NM_006645 | 408.027   | 771.54    |
| AB011104  | 1727.733  | 3241.974  | NM_012425 | 10070.284 | 13521.211 | NM_004742 | 2932.588  | 3643.008  |
| AK024069  | 8204      | 16290.226 | NM_001725 | 11698.59  | 13792.808 | NM_014753 | 1848.369  | 2555.037  |
| NM_004582 | 14769.061 | 25024.877 | NM_005565 | 518.295   | 1624.57   | NM_006585 | 32790.93  | 45819.371 |
| NM_015640 | 20583.119 | 33604.574 | NM_003824 | 31362.125 | 43902.891 | NM_014331 | 4163.117  | 5539.898  |
| AF233450  | 1099.899  | 2448.431  | NM_000685 | 3442.524  | 4821.001  | NM_006795 | 34135.293 | 36069.336 |
| NM_016233 | 1872.604  | 2600.973  | NM_012452 | 18125.15  | 22805.078 | AF070568  | 1695.818  | 1901.039  |
| NM_000821 | 43248.426 | 56771.793 | AF229166  | 2072.128  | 3159.903  | NM_000277 | 490.77    | 783.721   |
| NM_003145 | 31889.785 | 52285.566 | NM_006764 | 12831.653 | 17006.109 | CY3Cy5    | 468.618   | 110.363   |
| CY3Cy5    | 1888.195  | 190.44    | NM_001385 | 11863.974 | 20239.857 | NM_022552 | 1286.384  | 638.246   |
| NM_012465 | 4536.699  | 3380.435  | NM_001312 | 1484.998  | 1464.051  | NM_014385 | 7607.521  | 3517.925  |

|           |           |           |           |           |           |           |           |           |
|-----------|-----------|-----------|-----------|-----------|-----------|-----------|-----------|-----------|
| NM_13426C | 5801.203  | 4944.241  | AF007192  | 4363.115  | 5920.499  | AF086187  | 2106.248  | 1187.657  |
| AF086448  | 2074.823  | 1857.142  | NM_017765 | 60822.785 | 58059.215 | AF305836  | 91237.461 | 62163.059 |
| AB019391  | 222.342   | 86.885    | NM_000428 | 2537.804  | 3780.308  | AL109784  | 711.048   | 747.387   |
| AF086386  | 1584.806  | 1570.444  | AB040967  | 732.026   | 1596.449  | AL035295  | 3819.518  | 4288.006  |
| AF086457  | 771.673   | 533.679   | NM_003578 | 1023.69   | 1886.459  | NM_018302 | 6433.726  | 3801.406  |
| AK025469  | 1417.168  | 1892.39   | AK026352  | 8702.908  | 23360.301 | AK027252  | 4802.069  | 3471.996  |
| NM_020239 | 2837.653  | 2948.737  | AF169257  | 511.529   | 2689.75   | AF165527  | 1843.738  | 1279.462  |
| AF070581  | 1241.011  | 1263.719  | NM_005827 | 23522.115 | 30041.313 | NM_014092 | 234.914   | 231.941   |
| AK024187  | 811.664   | 1220.564  | NM_003056 | 20837.643 | 26975.734 | AL359596  | 1227.877  | 940.708   |
| NM_003307 | 650.411   | 925.146   | AK024311  | 1974.562  | 2177.406  | U79249    | 760.505   | 879.109   |
| AF070565  | 513.157   | 761.157   | AF052155  | 8990.969  | 10755.392 | AK022114  | 835.515   | 957.848   |
| AK021644  | 1161.374  | 1201.697  | NM_005085 | 19125.516 | 24844.936 | AL133585  | 2313.789  | 2815.238  |
| NM_016599 | 322.403   | 344.501   | AF060902  | 9628.063  | 12675.426 | NM_022552 | 1669.947  | 1970.251  |
| NM_012469 | 3859.591  | 3992.485  | AF121858  | 53938.02  | 57009.758 | NM_014389 | 10020.961 | 11964.259 |
| NM_13426C | 6136.891  | 13670.217 | NM_013437 | 1362.098  | 2119.849  | SR2       | 44079.637 | 53678.004 |
| SR4       | 7930.521  | 9578.688  | NM_017681 | 3346.362  | 4795.907  | SR4       | 11620.414 | 15910.023 |
| SR6       | 1272.312  | 1391.629  | X57655    | 53324.434 | 60766.313 | SR6       | 1291.485  | 1892.926  |
| SR8       | 4444.875  | 17068.715 | AK025966  | 13793.635 | 19840.801 | SR8       | 5933.069  | 24955.58  |
| SR10      | 14083.279 | 6231.639  | NM_014440 | 2868.951  | 4539.856  | SR10      | 21032.607 | 10037.467 |
| CY3Cy5    | 1781.337  | 174.112   | NM_014796 | 2853.957  | 4147.189  | CY3Cy5    | 1616.014  | 126.447   |
| AK023038  | 699.415   | 404.927   | AL050288  | 51474.559 | 60141.508 | NM_003887 | 1521.973  | 1614.254  |
| AK026206  | 868.649   | 514.99    | NM_016391 | 41854.406 | 53940.438 | NM_004267 | 10503.464 | 10571.037 |
| AF086074  | 1813.252  | 1050.572  | M80783    | 1465.649  | 3217.968  | AL357212  | 705.349   | 475.718   |
| AK023964  | 3008.607  | 2590.952  | D50911    | 28855.406 | 45902.41  | AK026687  | 1555.491  | 2698.835  |
| AF086084  | 615.164   | 633.687   | AB011104  | 2560.102  | 5105.996  | NM_017994 | 6555.792  | 10558.047 |
| AL050184  | 1015.482  | 911.769   | NM_004582 | 32093.732 | 40587.695 | AK021693  | 2709.714  | 4384.355  |
| AK027185  | 1166.025  | 1309.21   | NM_015640 | 38467.961 | 53361.582 | AB023177  | 535.697   | 1289.639  |
| AK025576  | 911.717   | 557.783   | NM_016233 | 5983.266  | 8869.751  | AL050015  | 1078.637  | 1805.817  |
| AF147385  | 444.324   | 482.287   | NM_000821 | 61873.836 | 60789.762 | AY007117  | 3111.753  | 4603.872  |
| AL442086  | 2426.032  | 2861.559  | NM_020121 | 1403.095  | 1887.286  | AF039698  | 2510.549  | 3413.9    |
| BC034819  | 2147.594  | 2475.377  | NM_003145 | 55188.168 | 53237.617 | AL109679  | 561.739   | 650.723   |
| AF147313  | 5476.252  | 7688.205  | NM_001632 | 3424.27   | 4836.157  | AB046828  | 2807.777  | 4609.788  |
| AF147382  | 31339.715 | 27953.273 | NM_012264 | 2360      | 2735.307  | AF144487  | 545.804   | 1011.797  |
| AK001957  | 2030.91   | 1948.87   | AF311312  | 3090.258  | 4231.574  | AL137532  | 1742.488  | 3213.508  |
| AF143867  | 652.149   | 500.376   | NM_001179 | 763.27    | 1641.045  | AK025419  | 4408.764  | 6049.565  |
| AK025889  | 2782.484  | 3627.658  | NM_005313 | 58642.949 | 62119.152 | NM_013259 | 17214.801 | 18667.428 |
| NM_014715 | 1518.099  | 2042.009  | NM_014915 | 56471.941 | 57121.789 | NM_018375 | 6957.698  | 9655.943  |
| AK027134  | 418.021   | 418.78    | NM_012286 | 14579.563 | 15650.38  | AK026838  | 2111.115  | 3049.715  |
| AK024168  | 677.252   | 399.314   | NM_002195 | 33868.617 | 35067.336 | AK022443  | 1398.848  | 2497.215  |
| AF222857  | 222.229   | 90.508    | D84294    | 8142.296  | 15884.919 | AK023371  | 3463.057  | 6079.841  |
| AF264622  | 525.881   | 381.918   | M65134    | 4106.636  | 6484.29   | AK025112  | 2436.169  | 3584.086  |
| AK027203  | 174.226   | 277.7     | N52646    | 60723.297 | 68271.234 | AK026079  | 2680.568  | 3738.45   |
| AK021793  | 1465.359  | 1095.548  | AW160671  | 63382.672 | 67089.289 | AK026675  | 253.483   | 1050.851  |
| AK022255  | 2958.792  | 2419.904  | BI870529  | 28666.557 | 44897.012 | AK025173  | 8063.458  | 11431.318 |
| AF075079  | 685.288   | 521.593   | AI681514  | 4998.134  | 5914.805  | AK025430  | 986.428   | 1544.01   |
| AK022479  | 509.17    | 490.233   | NM_001300 | 10108.595 | 15232.357 | AK026722  | 917.373   | 2011.387  |
| AK023572  | 363.052   | 374.598   | AA952897  | 21669.223 | 27729.09  | AL110133  | 6080.944  | 8811.536  |
| AF086004  | 9488.674  | 9154.705  | BG760342  | 6322.834  | 6649.252  | AK000529  | 4565.498  | 6753.838  |
| AF147433  | 426.457   | 918.448   | AA703141  | 3645.867  | 3207.48   | AK027243  | 1321.061  | 2355.162  |
| AF085978  | 212.153   | 572.267   | AI122630  | 17883.605 | 16501.08  | AF147415  | 665.633   | 1053.248  |
| AF086006  | 395.873   | 490.072   | NM_006589 | 17812.98  | 13167.779 | AK098474  | 665.693   | 826.867   |
| AL137318  | 1766.253  | 1998.368  | NM_002191 | 1423.506  | 1148.325  | AL117475  | 1904.89   | 2748.786  |
| AL137482  | 817.204   | 1141.353  | AB007875  | 7604.594  | 6665.407  | AL049300  | 5373.549  | 6485.109  |

|           |           |           |           |           |           |           |           |           |
|-----------|-----------|-----------|-----------|-----------|-----------|-----------|-----------|-----------|
| AL162011  | 6772.323  | 8379.986  | NM_018261 | 4081.065  | 4080.991  | NM_01753E | 4736.606  | 6528.253  |
| AL390177  | 457.268   | 346.025   | NM_00595E | 39914.629 | 30571.33  | AK025365  | 1950.142  | 3234.24   |
| AL137678  | 289.403   | 265.006   | NM_00404E | 3347.89   | 4034.997  | AK023489  | 451.646   | 1011.097  |
| AK056111  | 769.186   | 817.759   | BE548044  | 1601.059  | 1681.597  | AK021561  | 3455.573  | 5176.074  |
| AL162055  | 289.052   | 315.685   | NM_003824 | 31414.33  | 47024.781 | AL050145  | 2147.167  | 3607.676  |
| Y13807    | 1180.126  | 1516.193  | NM_00068E | 2506.47   | 3598.261  | AK025222  | 480.569   | 738.781   |
| AK022053  | 275.083   | 185.492   | AF229166  | 6081.011  | 5640.9    | Y11609    | 4370.089  | 6762.288  |
| AB037792  | 1101.715  | 1150.21   | NM_005137 | 26493.338 | 30223.912 | AJ278482  | 571.13    | 1141.402  |
| AK022480  | 340.184   | 114.039   | NM_00138E | 9662.222  | 15309.492 | NM_01212E | 18495.902 | 24833.506 |
| AK024158  | 472.171   | 360.596   | NM_001163 | 5636.024  | 5498.542  | AF009285  | 11031.892 | 15290.542 |
| AL080082  | 570.751   | 614.157   | NM_00587E | 12345.785 | 10575.795 | NM_01212E | 3476.446  | 5494.667  |
| AK021623  | 700.412   | 622.772   | AF308602  | 6736.665  | 5763.615  | AB032363  | 791.692   | 2683.105  |
| AK023733  | 295.612   | 96.717    | AB011089  | 6322.776  | 3311.198  | AF009294  | 4029.669  | 5261.454  |
| AK027112  | 3633.628  | 3237.21   | AF007192  | 2583.817  | 2070.025  | AK001225  | 514.951   | 969.704   |
| AL049314  | 5231.371  | 4021.536  | NM_00127E | 15991.738 | 21764.498 | AK021435  | 809.066   | 891.868   |
| AF093016  | 16729.383 | 15468.289 | NM_016157 | 4792.914  | 4122.81   | AK021684  | 3247.892  | 4593.918  |
| AF161345  | 498.804   | 308.451   | NM_00305E | 19154.135 | 15137.133 | AK001060  | 4581.224  | 7886.729  |
| -         | 527.045   | 563.819   | NM_003044 | 17422.543 | 18230.684 | AK021480  | 954.942   | 1754.199  |
| AF090925  | 507.961   | 521.946   | NM_00667E | 52157.359 | 54984.754 | NM_00530E | 54940.445 | 60913.32  |
| AF100637  | 160.276   | 368.335   | NM_00033E | 1123.974  | 1593.974  | NM_00164E | 14186.024 | 17167.545 |
| NM_01416E | 8273.366  | 9440.218  | NM_00305E | 18848.133 | 23568.572 | AL137327  | 4049.95   | 5861.318  |
| NM_014137 | 326.014   | 450.977   | NM_017681 | 7010.186  | 7636.827  | AK026090  | 1542.849  | 2478.131  |
| AK021974  | 1121.884  | 1691.772  | AK025966  | 11930.44  | 10863.522 | AF070637  | 1216.853  | 2030.825  |
| AK022068  | 728.023   | 1101.608  | NM_01444E | 771.279   | 937.899   | AL137634  | 924.521   | 1807.29   |
| AK022229  | 1166.317  | 1439.293  | NM_003081 | 55436.152 | 47396.758 | AK024863  | 8162.002  | 12660.565 |
| AK022362  | 6107.489  | 7250.512  | NM_01649E | 2495.567  | 1988.708  | AK026908  | 18595.979 | 26504.428 |
| AK022004  | 6466.478  | 6663.269  | D50402    | 64442.527 | 54513.148 | D17110    | 289.657   | 3574.315  |
| AK022136  | 307.581   | 257.553   | M73547    | 38941.383 | 19449.43  | AF117338  | 15060.89  | 23008.475 |
| AK022390  | 673.025   | 870.693   | AF181722  | 1722.23   | 1101.414  | AK025567  | 3026.453  | 5705.725  |
| AL360138  | 267.825   | 187.616   | NM_003687 | 17473.57  | 12051.491 | NM_01910E | 443.795   | 764.585   |
| U61096    | 415.77    | 191.31    | NM_004134 | 14881.886 | 10823.55  | AF086421  | 1284.91   | 2149.207  |
| AF085865  | 3976.243  | 3409.08   | NM_00163E | 2970.875  | 3730.321  | AF161522  | 3054.809  | 5186.897  |
| AK025521  | 272.034   | 325.523   | NM_012264 | 1791.218  | 2082.117  | AF086028  | 13035.979 | 26297.916 |
| Z70694    | 1726.283  | 1708.614  | AF311312  | 2628.225  | 3078.609  | U46119    | 643.702   | 622.223   |
| L77602    | 359.406   | 435.957   | NM_001179 | 688.492   | 965.882   | NM_019897 | 1543.331  | 2334.012  |
| NM_015421 | 9520.239  | 8269.191  | NM_00531E | 49657.227 | 43395.543 | AF038188  | 11735.734 | 14749.409 |
| AF086081  | 4700.39   | 4571.533  | NM_01776E | 56847.957 | 57531.398 | D17046    | 2162.702  | 3158.713  |
| NM_018634 | 389.63    | 444.608   | NM_00357E | 1684.025  | 1949.28   | NM_01764E | 12302.521 | 14037.758 |
| NM_018111 | 567.784   | 526.224   | AL137705  | 5036.702  | 4131.582  | AJ227864  | 490.712   | 552.271   |
| AK023730  | 421.265   | 601.419   | U41898    | 1997.362  | 2045.189  | AF157562  | 3395.631  | 3147.1    |
| AF161360  | 545.972   | 852.474   | NM_01484E | 2796.366  | 1415.901  | AK021958  | 7705.594  | 10187.486 |
| AK021720  | 608.573   | 700.842   | BF217766  | 4623.343  | 1578.292  | M31164    | 1370.421  | 2582.857  |
| NM_016497 | 34850.23  | 30448.189 | NM_000184 | 3431.752  | 1483.132  | NM_003511 | 979.306   | 3903.747  |
| AK000617  | 463.564   | 366.162   | NM_01618E | 2290.688  | 1846.748  | NM_003531 | 2176.479  | 2831.171  |
| AF009261  | 1066.51   | 1174.871  | NM_000112 | 2343.679  | 1699.742  | L08434    | 865.018   | 1065.195  |
| AL133086  | 1197.764  | 995.246   | NM_005827 | 17218.182 | 13610.032 | NM_01779E | 1758.078  | 2095.236  |
| NM_012151 | 6064.648  | 5158.421  | NM_00658E | 16029.988 | 15146.091 | NM_00351E | 1293.476  | 1507.506  |
| AF087994  | 1440.611  | 1255.844  | NM_002191 | 539.763   | 768.702   | NM_018534 | 1244.66   | 2172.276  |
| AJ227912  | 710.468   | 587.048   | AB007875  | 6190.422  | 5775.968  | AB037847  | 1772.278  | 1740.463  |
| NM_01819E | 1388.328  | 1390.158  | NM_018261 | 3358.696  | 3374.159  | NM_00517E | 3260.544  | 2442.659  |
| NM_00352E | 651.215   | 437.045   | NM_01479E | 3295.157  | 5000.331  | S96437    | 2664.285  | 2637.612  |
| BF217847  | 750.756   | 758.614   | AL050288  | 48721.953 | 54174.465 | NM_01517E | 956.556   | 1155.613  |
| NM_00532E | 1787.502  | 1773.258  | NM_00504E | 12472.403 | 17635.732 | AL353939  | 867.26    | 926.154   |

|           |           |           |           |           |           |           |           |           |
|-----------|-----------|-----------|-----------|-----------|-----------|-----------|-----------|-----------|
| U79242    | 454.156   | 691.124   | NM_016391 | 38911.156 | 45994.777 | AL117573  | 4997.399  | 2492.787  |
| Y10519    | 368.705   | 520.78    | AB011104  | 2485.138  | 1487.034  | NM_016116 | 2007.518  | 1873.815  |
| AF119901  | 3191.278  | 3351.744  | AK024069  | 14781.864 | 6902.19   | NM_005663 | 2138.74   | 1688.182  |
| AL049782  | 276.519   | 283.605   | NM_004582 | 28382.84  | 10987.232 | NM_006550 | 562.098   | 339.712   |
| AK001936  | 972.166   | 1158.076  | NM_015640 | 34310.133 | 13211.286 | NM_017644 | 6654.867  | 3664.316  |
| NM_003770 | 43075.313 | 44007.973 | AF233450  | 4636.478  | 2289.943  | NM_002482 | 1418.066  | 1239.716  |
| AF222023  | 322.025   | 237.441   | NM_016233 | 3848.668  | 2668.015  | AL050068  | 836.448   | 570.197   |
| AK001395  | 5160.597  | 5805.078  | NM_000821 | 37423.723 | 22629.715 | U92025    | 1058.692  | 853.195   |
| S57803    | 5100.025  | 7280.582  | NM_003145 | 43784.816 | 29430.951 | AB046766  | 599.155   | 775.154   |
| AF131822  | 389.426   | 425.684   | CY3Cy5    | 6829.479  | 94.222    | AF009323  | 1202.859  | 1964.576  |
| AK023131  | 1425.823  | 1954.036  | NM_012469 | 20392.879 | 26599.514 | AK001526  | 3379.412  | 2429.509  |
| AJ276248  | 268.168   | 453.916   | NM_134260 | 14097.261 | 7329.133  | AF086183  | 1029.488  | 515.456   |
| X78926    | 1428.364  | 1161.806  | AF086448  | 5214.509  | 3002.212  | AK000525  | 1978.68   | 928.605   |
| AJ278110  | 1064.019  | 834.766   | AF086386  | 4343.793  | 2570.367  | AL137434  | 1425.155  | 1111.593  |
| NM_014237 | 1632.116  | 1167.549  | AF086413  | 657.072   | 537.847   | Z36795    | 1854.132  | 1396.309  |
| NM_020390 | 419.079   | 340.684   | AF086457  | 2607.107  | 2201.313  | AL080216  | 1528.405  | 487.663   |
| AF029900  | 2114.518  | 1533.217  | AK025469  | 3467.796  | 3174.243  | NM_006670 | 2194.76   | 1172.03   |
| NM_003325 | 4371.837  | 4095.844  | NM_020239 | 7602.748  | 8730.632  | NM_002750 | 3487.812  | 1881.671  |
| NM_016178 | 1958.993  | 2102.313  | AF070581  | 5500.079  | 3646.305  | AK024134  | 8645.426  | 4461.053  |
| AK022639  | 2546.285  | 2160.325  | AK024187  | 2931.46   | 2834.366  | NM_003014 | 757.057   | 336.7     |
| D31766    | 1022.07   | 859.638   | NM_003307 | 1505.195  | 1279.797  | NM_018558 | 800.852   | 671.088   |
| NM_006547 | 3259.851  | 2878.11   | AF070565  | 2754.923  | 2433.854  | NM_001974 | 3700.47   | 2516.091  |
| L23867    | 470.292   | 545.729   | AK021644  | 4245.77   | 3081.295  | NM_013957 | 763.096   | 554.54    |
| AB020968  | 359.612   | 323.293   | NM_016599 | 805.026   | 679.962   | NM_002468 | 4947.541  | 3594.968  |
| AL138690  | 3215.961  | 4072.161  | NM_012469 | 17453.961 | 14041.453 | NM_003028 | 1480.976  | 1286.758  |
| AK000394  | 752.097   | 656.134   | NM_134260 | 14078.897 | 11073.695 | NM_001560 | 2321.753  | 2067.068  |
| NM_013941 | 1472.704  | 2100.267  | SR2       | 61789.332 | 46862.813 | NM_016541 | 2760.829  | 2157.467  |
| AF074989  | 1113.359  | 1288.757  | SR4       | 21112.564 | 15390.989 | NM_018548 | 3036.454  | 2347.428  |
| AK001107  | 681.082   | 757.822   | SR6       | 3243.275  | 2183.872  | NM_018238 | 3862.575  | 2280.328  |
| AF147393  | 468.411   | 423.888   | SR8       | 10099.701 | 31524.043 | NM_006858 | 19237.578 | 7768.436  |
| AK022368  | 321.84    | 473.375   | SR10      | 32054.213 | 8454.034  | NM_001405 | 8275.815  | 3382.665  |
| AL080112  | 2031.356  | 2666.682  | CY3Cy5    | 8695.582  | 131.844   | NM_003880 | 1315.563  | 666.931   |
| AL137325  | 1035.144  | 1242.423  | AK023038  | 4686.61   | 2981.076  | AF131778  | 1863.489  | 1064.532  |
| AF147361  | 1263.905  | 1415.385  | AK026206  | 3781.115  | 2361.784  | NM_001562 | 1398.641  | 1020.696  |
| NM_001851 | 4151.116  | 3352.506  | AF086074  | 13564.44  | 4343.365  | NM_013278 | 1287.374  | 699.196   |
| S67789    | 1666.481  | 1112.889  | AK023964  | 9049.059  | 5540.775  | NM_006477 | 1848.201  | 929.183   |
| AK022689  | 7285.716  | 5394.811  | AF086084  | 1887.152  | 1373.254  | NM_002880 | 2286.913  | 1145.265  |
| NM_016227 | 1245.708  | 605.796   | AL050184  | 2181.289  | 1605.081  | NM_000678 | 19879.156 | 10473.435 |
| NM_004195 | 15584.462 | 11474.27  | AF085853  | 1288.852  | 1007.287  | NM_001060 | 1379.921  | 687.739   |
| NM_004705 | 3185.273  | 2347.304  | AK027185  | 3123.083  | 2384.97   | NM_004657 | 3497.779  | 1731.856  |
| NM_020190 | 14082.822 | 11098.453 | AK025576  | 5856.667  | 3953.188  | NM_018170 | 3216.766  | 1159.968  |
| AK024003  | 410.195   | 305.45    | AF147385  | 1103.604  | 968.339   | NM_003867 | 2561.661  | 1258.014  |
| NM_014357 | 1696.339  | 1143.045  | AL442086  | 17572.836 | 12632.712 | AL162062  | 321.763   | 255.2     |
| NM_004067 | 310.074   | 329.512   | BC034819  | 10028.211 | 8729.489  | NM_003173 | 11562.741 | 6890.275  |
| NM_000121 | 7883.353  | 7771.009  | AF147313  | 56203.488 | 52635.41  | NM_005030 | 13547.187 | 8073.277  |
| NM_002091 | 5422.695  | 4827.059  | AF147382  | 68020.656 | 67557.727 | NM_017584 | 3963.882  | 3060.91   |
| AB033092  | 5504.232  | 6941.362  | AK001957  | 7427.441  | 6073.28   | NM_020359 | 4733.858  | 3294.879  |
| M89957    | 23793.467 | 20921.865 | AK000850  | 899.548   | 711.322   | AB014541  | 29745.322 | 21062.723 |
| NM_003023 | 653.252   | 643.29    | AK021833  | 3070.933  | 2627.905  | NM_002583 | 10567.267 | 5078.726  |
| BC035030  | 2683.301  | 3042.817  | AF143867  | 4877.65   | 3634.922  | NM_006570 | 22407.391 | 14153.24  |
| NM_005340 | 39045.285 | 30557.689 | AK025889  | 8598.67   | 7461.141  | NM_020348 | 1076.672  | 749.089   |
| NM_016201 | 2892.382  | 3370.626  | NM_014715 | 7452.203  | 5414.941  | NM_006034 | 21358.578 | 8998.02   |
| NM_000864 | 2674.026  | 3543.185  | AK027134  | 4190.628  | 5083.657  | AB040943  | 674.87    | 277.471   |

|           |           |           |           |           |           |           |           |           |
|-----------|-----------|-----------|-----------|-----------|-----------|-----------|-----------|-----------|
| NM_017977 | 1467.45   | 1527.573  | AK024168  | 2938.112  | 4166.623  | NM_005201 | 56588.551 | 18887.584 |
| AF147727  | 1461.344  | 1634.396  | AF264622  | 3199.909  | 1896.676  | NM_000092 | 1447.661  | 858.012   |
| NM_006751 | 739.037   | 1146.267  | AK027203  | 875.975   | 813.291   | NM_019086 | 7534.35   | 5018.017  |
| AB037834  | 1471.664  | 1542.941  | AK021793  | 8908.363  | 6811.974  | NM_018384 | 16310.574 | 8675.01   |
| NM_003569 | 2499.879  | 2637.748  | AK022255  | 44502.234 | 31079.387 | NM_001872 | 1168.262  | 605.772   |
| NM_002777 | 703.398   | 418.425   | AF075079  | 1679.291  | 1342.87   | AF157323  | 2853.43   | 1526.58   |
| AF202635  | 1074.791  | 983.793   | AK022479  | 2014.296  | 1530.951  | NM_005877 | 10810.254 | 3623.649  |
| NM_014125 | 1141.748  | 1172.858  | AK023572  | 1534.61   | 1011.671  | NM_003338 | 3875.108  | 2347.458  |
| NM_017904 | 1560.862  | 1166.756  | AF086004  | 62563.762 | 56390.371 | NM_013396 | 1873.345  | 1510.034  |
| NM_013367 | 2795.643  | 2314.78   | AF147433  | 951.556   | 715.849   | NM_017752 | 2997.826  | 2209.16   |
| AL137550  | 348.405   | 363.774   | AF085978  | 727.681   | 389.658   | D26069    | 13465.426 | 7924.306  |
| NM_000321 | 2505.777  | 2271.615  | AF085930  | 473.899   | 1069.72   | BF107577  | 42953.117 | 29650.313 |
| NM_006341 | 8122.127  | 5650.871  | AF086006  | 1471.261  | 1686.943  | NM_005837 | 14648.853 | 8010.727  |
| NM_001709 | 606.941   | 556.724   | AL137318  | 3503.352  | 2790.52   | NM_016625 | 8703.544  | 3482.575  |
| NM_006191 | 5004.269  | 4082.91   | AL137482  | 2359.215  | 1877.221  | NM_017493 | 3075.767  | 1648.853  |
| NM_001800 | 1863.396  | 1541.113  | AL162011  | 17294.791 | 13576.556 | NM_006136 | 11861.034 | 3817.061  |
| NM_004336 | 6730.079  | 5992.427  | AL390177  | 1032.005  | 1339.86   | AF237772  | 1114.021  | 441.961   |
| NM_015949 | 2447.775  | 2686.276  | AL137678  | 814.794   | 771.547   | AK025934  | 3105.477  | 853.337   |
| NM_013979 | 2471.285  | 3988.587  | AK056111  | 2901.962  | 2299.576  | AJ008154  | 2479.359  | 1136.808  |
| NM_003790 | 1936.722  | 2164.436  | Y13807    | 2686.219  | 1865.809  | NM_003487 | 10116.136 | 4225.751  |
| NM_000494 | 4840.074  | 5845.527  | AK022053  | 640.137   | 799.578   | NM_006887 | 6020.877  | 3555.493  |
| NM_016023 | 1655.812  | 1841.64   | AB037792  | 2390.343  | 2881.797  | U90919    | 2409.089  | 1161.165  |
| NM_003722 | 12383.303 | 13641.7   | AK022480  | 2009.515  | 1784.465  | NM_006177 | 4152.629  | 2854.961  |
| NM_014430 | 596.719   | 772.764   | AK024158  | 2262.105  | 1615.925  | AL137286  | 6857.093  | 4237.738  |
| NM_000495 | 749.251   | 884.339   | AL080082  | 1107.05   | 850.012   | NM_016358 | 35954.949 | 15669.479 |
| AF085883  | 1914.152  | 2708.852  | AK021623  | 1658.951  | 1407.443  | NM_016275 | 11737.307 | 5415.095  |
| NM_016571 | 944.427   | 1214.251  | AK023733  | 586.288   | 726.852   | NM_020418 | 9976.982  | 5071.83   |
| NM_003688 | 1487.373  | 1882.302  | AK027112  | 9067.495  | 6242.391  | NM_013293 | 3411.051  | 2206.244  |
| NM_016446 | 3805.92   | 4145.377  | AL049314  | 9654.051  | 7411.527  | AF315592  | 4945.482  | 2793.805  |
| BC036368  | 526.58    | 665.18    | AF093016  | 48987.48  | 40417.988 | AF095844  | 3279.247  | 3331.12   |
| AK023237  | 771.991   | 323.104   | AF161345  | 2073.382  | 1557.715  | NM_015833 | 3632.248  | 2721.609  |
| NM_001870 | 997.668   | 609.319   | -         | 1863.281  | 1835.926  | NM_000986 | 58733.289 | 56426.531 |
| AJ271216  | 1557.144  | 957.203   | AF090925  | 1262.106  | 775.266   | AK026760  | 41317.07  | 27563.916 |
| U23028    | 2662.501  | 2042.462  | NM_014163 | 60431.84  | 54980.273 | NM_014772 | 3905.013  | 2804.866  |
| NM_000817 | 2808.184  | 2116.741  | NM_014137 | 1478.068  | 1459.814  | AK025248  | 3855.125  | 2858.158  |
| AF113132  | 14194.808 | 12089.372 | AK021974  | 2913.342  | 2266.58   | NM_004539 | 18786.377 | 9613.274  |
| NM_006571 | 2493.21   | 2588.713  | AK022068  | 1706.492  | 1175.917  | NM_006428 | 20810.068 | 7246.045  |
| NM_001875 | 373.921   | 213.29    | AK022229  | 7481.959  | 5073.659  | NM_004280 | 11980.422 | 3655.744  |
| AK022680  | 2231.498  | 2015.684  | AK022362  | 17771.043 | 12857.61  | AF110399  | 2989.863  | 955.523   |
| NM_018946 | 11570.741 | 13298.433 | AK022004  | 15420.763 | 11671.115 | AK027094  | 3996.884  | 1503.94   |
| NM_016359 | 7731.097  | 8815.566  | AK022136  | 754.82    | 554.847   | AF174600  | 4165.963  | 1799.819  |
| NM_001069 | 45163.465 | 79004.555 | AK022390  | 3427.875  | 2823.659  | AK001003  | 1750.951  | 890.108   |
| NM_004156 | 1669.638  | 1576.38   | AL360138  | 415.627   | 901.815   | NM_002800 | 17307.742 | 9388.967  |
| AK000561  | 1369.89   | 1767.37   | U61096    | 1074.848  | 1747.137  | NM_000775 | 2611.711  | 1660.286  |
| AB051449  | 15003.344 | 16554.469 | AF085865  | 10868.379 | 10782.268 | AB032981  | 3261.491  | 2662.165  |
| BC009187  | 4422.817  | 4992.885  | X78261    | 1515.138  | 1731.33   | NM_005917 | 19816.326 | 8964.875  |
| AL133617  | 1038.917  | 928.815   | AK025521  | 1265.292  | 1600.814  | NM_007052 | 843.134   | 683.313   |
| NM_016485 | 5569.264  | 6282.677  | NM_001053 | 68189.195 | 69915.539 | BC017044  | 422.016   | 247.39    |
| NM_002615 | 267.298   | 239.647   | Z70694    | 11147.91  | 10409.656 | AV758498  | 1622.964  | 880.877   |
| AF090894  | 796.232   | 620.158   | L77602    | 4719.672  | 4305.941  | NM_020196 | 2107.825  | 939.308   |
| NM_013344 | 427.708   | 453.555   | NM_015421 | 21984.563 | 19815.938 | AK024113  | 796.492   | 485.627   |
| NM_014052 | 11399.497 | 11257.715 | AF086081  | 10265.786 | 9373.616  | NM_018657 | 1407.717  | 885.397   |
| AK023792  | 270.771   | 235.353   | NM_018634 | 966.811   | 1004.988  | L40410    | 13828.837 | 8712.12   |

|           |           |           |           |           |           |             |           |           |
|-----------|-----------|-----------|-----------|-----------|-----------|-------------|-----------|-----------|
| NM_020149 | 1597.942  | 1396.729  | NM_018111 | 1533.235  | 1566.314  | NM_007055   | 2368.204  | 1660.711  |
| NM_006237 | 782.777   | 473.505   | AK023730  | 950.493   | 972.65    | NM_016652   | 1597.235  | 1174.727  |
| NM_001271 | 3192.845  | 1826.434  | AF161360  | 5230.672  | 4489.807  | NM_016310   | 25605.463 | 13569.971 |
| NM_003683 | 4465.659  | 2594.348  | AK021720  | 2406.101  | 2381.787  | AK021562    | 822.736   | 761.065   |
| AF039019  | 2810.825  | 2025.361  | NM_016497 | 60796.234 | 59189.832 | BC006560    | 2681.244  | 2314.454  |
| NM_012255 | 4249.542  | 2667.654  | AK000617  | 872.348   | 626.941   | NM_006295   | 889.495   | 476.286   |
| NM_018196 | 1127.134  | 567.644   | AF009261  | 2394.604  | 1618.227  | AF060938    | 26215.77  | 12801.551 |
| NM_004815 | 3098.289  | 1960.765  | AF086264  | 506.711   | 354.788   | NM_001973   | 6208.301  | 2554.61   |
| J04205    | 10975.729 | 9554.911  | AL133086  | 4572.976  | 5177.975  | NM_014465   | 8026.535  | 2471.358  |
| D38491    | 4980.188  | 2834.488  | NM_012151 | 19255.617 | 25325.217 | NM_006855   | 9108.423  | 2123.889  |
| AK026835  | 2961.896  | 2763.275  | NM_018195 | 5253.834  | 7090.082  | X52350      | 63887.957 | 31938.346 |
| NM_002819 | 14014.059 | 13263.303 | AK025532  | 56836.988 | 61011.156 | AF071554    | 1837.043  | 844.825   |
| NM_003090 | 23847.076 | 23545.711 | AK021789  | 895.361   | 1339.313  | NM_002147   | 680.844   | 392.058   |
| NM_013264 | 5117.549  | 5424.919  | AF086383  | 850.869   | 1172.962  | NM_017685   | 3112.222  | 1972.834  |
| NM_003315 | 11208.722 | 10757.746 | NM_003522 | 2422.56   | 3257.038  | AK025612    | 37670.797 | 27057.807 |
| NM_005570 | 6066.358  | 6463.92   | BF217847  | 3278.47   | 4257.249  | NM_012203   | 2031.252  | 1483.221  |
| NM_000086 | 5398.809  | 6693.713  | NM_005320 | 21991.686 | 29223.42  | NM_004736   | 10374.369 | 6291.514  |
| NM_003752 | 3747.645  | 3479.667  | U79242    | 1518.276  | 2099.126  | NM_006895   | 1730.992  | 1315.84   |
| NM_003932 | 11415.22  | 12139.875 | Y10519    | 2354.051  | 2990.295  | NM_006455   | 11136.914 | 6748.353  |
| NM_016491 | 15092.726 | 13595.583 | AF056452  | 2380.295  | 2878.882  | D50373      | 979.571   | 655.807   |
| NM_006425 | 24541.475 | 22058.027 | AF119901  | 12330.073 | 16503.652 | AA488757    | 39942.313 | 29648.74  |
| NM_002516 | 760.155   | 679.266   | AL049782  | 925.569   | 1322.302  | AA205399    | 1206.442  | 1112.534  |
| NM_002064 | 1208.79   | 1151.594  | AK001936  | 2519.192  | 2520.351  | AI394286    | 1079.549  | 950.457   |
| NM_015523 | 6674.231  | 4821.276  | NM_003770 | 67986.117 | 66168.117 | H07071      | 4646.504  | 3975.777  |
| NM_015960 | 11473.507 | 8120.714  | AK001395  | 10752.294 | 10606.84  | M25322      | 13522.526 | 11526.718 |
| NM_006085 | 7066.794  | 4285.574  | S57803    | 22486.48  | 21861.104 | AA436187    | 535.402   | 659.547   |
| NM_000907 | 8184.703  | 4559.35   | AF131822  | 1192.478  | 1033.534  | H-L 27586 I | 3470.466  | 3541.268  |
| AF254085  | 5798.762  | 3537.755  | AK023131  | 9054.621  | 7610.5    | ID 214180   | 1070.55   | 617.444   |
| AK023541  | 310.887   | 197.854   | AJ276248  | 841.69    | 726.011   | ID 1867426  | 28660.246 | 14294.325 |
| NM_001987 | 2145.527  | 1557.801  | X78926    | 4007.226  | 4285.128  | ID 396450   | 2455.758  | 1431.941  |
| AF244088  | 1483.614  | 1110.562  | AJ278110  | 3058.745  | 3882.229  | W99328      | 2355.026  | 904.428   |
| NM_007136 | 1187.766  | 1173.157  | AF029900  | 15889.302 | 20124.59  | AI434176    | 1632.175  | 627.944   |
| AK025434  | 442.61    | 703.633   | NM_003325 | 14107.567 | 17634.469 | H08563      | 3370.403  | 834.215   |
| AJ251845  | 945.137   | 682.155   | NM_016175 | 5524.882  | 6109.33   | BE735403    | 2321.664  | 1105.96   |
| AK000435  | 1852.362  | 1646.286  | AK022639  | 20120.164 | 25501.768 | NM_002631   | 16438.338 | 7540.199  |
| AK000569  | 1917.311  | 1994.438  | D31766    | 2799.722  | 3213.176  | AB033109    | 1168.523  | 753.811   |
| NM_006049 | 2635.474  | 2613.243  | NM_006547 | 11198.534 | 12796.353 | NM_002053   | 45501.195 | 27960.789 |
| BC016698  | 5254.486  | 7315.081  | L23867    | 3085.334  | 3609.372  | NM_006885   | 3684.648  | 2965.503  |
| NM_007374 | 743.096   | 660.266   | AB020968  | 1044.181  | 1244.765  | NM_002435   | 4953.882  | 3532.982  |
| AK000049  | 199.261   | 316.855   | AL138690  | 9064.034  | 10238.264 | NM_014585   | 9632.923  | 5798.028  |
| NM_006167 | 711.771   | 851.234   | AK000394  | 1832.436  | 2243.964  | NM_000755   | 2014.666  | 1529.97   |
| NM_016357 | 1273.41   | 1980.858  | NM_013941 | 4085.061  | 5888.024  | AK023334    | 6300.349  | 2613.091  |
| NM_014500 | 7482.543  | 7469.574  | AF074989  | 4079.866  | 5067.522  | NM_002563   | 29822.012 | 15512.13  |
| L09071    | 567.246   | 584.533   | AK001107  | 3539.607  | 4206.966  | NM_002437   | 3937.465  | 2249.803  |
| NM_005924 | 1229.476  | 1399.373  | AF147393  | 2101.502  | 2594.054  | D79991      | 2387.814  | 1552.382  |
| NM_019841 | 556.398   | 461.085   | AK022368  | 702.483   | 1095.79   | AK022425    | 1704.178  | 1396.938  |
| NM_003322 | 529.385   | 421.833   | AL080112  | 5490.979  | 5502.151  | NM_000054   | 30323.252 | 21587.324 |
| NM_003565 | 620.209   | 351.488   | AK022299  | 273.892   | 987.933   | NM_014713   | 14792.971 | 10767.44  |
| BC036375  | 8465.154  | 6184.548  | AL137325  | 2037.823  | 2421.558  | NM_001812   | 2517.113  | 3048.506  |
| NM_000496 | 444.751   | 188.332   | AF147361  | 4272.772  | 4529.879  | NM_014785   | 1870.653  | 1999.882  |
| BF347926  | 5586.229  | 2793.215  | NM_001851 | 14294.672 | 20340.4   | AK025175    | 721.393   | 662.154   |
| N54821    | 10160.932 | 8618.006  | S67789    | 3810.048  | 4734.217  | NM_005811   | 11019.233 | 8318.713  |
| BI912037  | 3921.158  | 3000.205  | NM_004195 | 67857.438 | 69450.133 | NM_005764   | 2010.929  | 1493.784  |



|           |           |           |           |           |           |           |           |           |
|-----------|-----------|-----------|-----------|-----------|-----------|-----------|-----------|-----------|
| AA454646  | 15277.559 | 12349.104 | NM_004705 | 10063.506 | 11116.844 | NM_016362 | 4894.291  | 3028.242  |
| BF063899  | 1474.811  | 1647.261  | NM_020190 | 68334.031 | 67434.891 | NM_004214 | 10349.409 | 3813.889  |
| U18087    | 39417.004 | 39960.727 | AK024003  | 2191.979  | 3580.779  | NM_004325 | 12860.539 | 4358.201  |
| U66349    | 1556.069  | 2564.81   | NM_014357 | 17192.004 | 21146.885 | NM_002836 | 13940.974 | 3602.484  |
| AA057156  | 8391.911  | 10609.898 | NM_004067 | 1656.186  | 1936.882  | NM_020167 | 4126.43   | 838.44    |
| U19487    | 523.1     | 583.104   | NM_000121 | 38872.363 | 46852.184 | NM_016058 | 12522.969 | 4268.461  |
| AF166327  | 37093.926 | 37153.75  | AB033092  | 17959.031 | 22483.998 | NM_014005 | 7419.445  | 3240.556  |
| AF260739  | 1550.536  | 1728.172  | M89957    | 43659.461 | 47408.977 | NM_006033 | 14118.431 | 9642.513  |
| AF531423  | 23899.262 | 25245.789 | NM_003023 | 1687.854  | 1942.579  | NM_004837 | 4752.06   | 3315.052  |
| X76555    | 610.365   | 696.705   | BC035030  | 26525.035 | 33510.742 | NM_000370 | 1878.593  | 1317.212  |
| NM_005432 | 2888.361  | 3232.264  | NM_016201 | 23688.479 | 26331.922 | BE865893  | 5755.255  | 3412.273  |
| L10386    | 14901.573 | 18903.41  | NM_000864 | 6278.287  | 7706.337  | NM_003123 | 58226.727 | 56507.035 |
| AF061812  | 15657.697 | 15788.098 | NM_017977 | 8138.2    | 10507.573 | AY005822  | 5804.754  | 4464.271  |
| AL136756  | 3114.967  | 3465.877  | AF147727  | 7440.203  | 9051.505  | NM_018125 | 52547.98  | 35138.379 |
| NM_015944 | 989.46    | 877.338   | NM_006751 | 1825.424  | 2997.165  | AF289022  | 3160.823  | 2197.718  |
| NM_001548 | 554.714   | 527.783   | AB037834  | 4216.166  | 4614.066  | M17252    | 546.972   | 476.6     |
| NM_000758 | 5677.584  | 3798.355  | NM_003569 | 6171.953  | 7488.92   | NM_016025 | 10071.315 | 6885.094  |
| M17017    | 443.456   | 290.667   | NM_002777 | 1631.054  | 2936.497  | NM_013315 | 3277.685  | 3197.849  |
| NM_002990 | 2845.844  | 1813.929  | AF202635  | 2816.594  | 3331.429  | NM_020410 | 5563.327  | 6861.573  |
| NM_002432 | 2017.801  | 1328.727  | NM_014125 | 4884.835  | 5123.208  | NM_000453 | 3002.837  | 3092.748  |
| NM_012420 | 337.852   | 306.653   | NM_013367 | 6968.126  | 8668.166  | J03048    | 9243.226  | 7359.924  |
| NM_002343 | 2795.822  | 2102.223  | AL137550  | 989.142   | 1561.094  | NM_004583 | 716.327   | 822.851   |
| AB033037  | 1387.294  | 1237.51   | NM_000321 | 7151.737  | 11173.608 | NM_001103 | 936.052   | 972.258   |
| L40400    | 2771.028  | 2034.858  | NM_006341 | 37319.32  | 46500.27  | AF228710  | 44732.469 | 35760.688 |
| AK025688  | 1915.147  | 1626.701  | NM_001709 | 3907.58   | 5574.234  | NM_018395 | 781.83    | 470.41    |
| NM_005930 | 350.894   | 357.489   | NM_006191 | 11505.319 | 14916.178 | AY007131  | 57287.594 | 53117.27  |
| Z36819    | 5413.037  | 7368.911  | NM_001800 | 5249.979  | 6452.515  | U61735    | 3767.884  | 1322.405  |
| NM_014847 | 22953.805 | 18418.182 | NM_015949 | 6827.152  | 7257.309  | NM_001144 | 22225.094 | 6314.389  |
| NM_014448 | 2255.121  | 3018.732  | NM_013979 | 7182.262  | 9523.098  | AK023766  | 7805.077  | 1944.184  |
| AL080157  | 2448.282  | 3084.137  | NM_003790 | 20126.605 | 22550.523 | NM_001897 | 2007.77   | 786.849   |
| NM_005100 | 649.405   | 636.403   | NM_000494 | 22454.025 | 27583.578 | NM_003853 | 1607.975  | 589.94    |
| NM_005308 | 2094.401  | 2814.896  | NM_016023 | 4845.01   | 6700.453  | NM_018376 | 3483.071  | 2590.545  |
| NM_000911 | 528.742   | 642.599   | NM_014430 | 1163.75   | 1523.941  | NM_017615 | 948.764   | 749.12    |
| NM_007227 | 1074.084  | 1477.252  | NM_000495 | 3007.422  | 3141.266  | NM_017438 | 3988.553  | 2861.82   |
| NM_007023 | 944.808   | 1100.561  | AF085883  | 5891.577  | 6988.639  | U59209    | 5404.378  | 3640.073  |
| NM_005873 | 9559.021  | 13234.542 | NM_016571 | 5641.245  | 6889.869  | NM_020195 | 7091.922  | 7063.672  |
| NM_004624 | 2948.219  | 3591.587  | NM_003688 | 4330.368  | 4743.057  | AK023824  | 7146.087  | 5316.355  |
| NM_003865 | 845.637   | 1422.544  | NM_016446 | 28214.59  | 34488.23  | AL133069  | 5888.232  | 4812.856  |
| AB015330  | 10982.658 | 11367.885 | BC036368  | 2003.768  | 2321.101  | AL117574  | 656.678   | 483.213   |
| NM_004315 | 6742.787  | 5594.212  | NM_018221 | 3217.583  | 1777.493  | AK026055  | 8515.657  | 8483.059  |
| NM_020166 | 4618.958  | 2363.731  | AK023237  | 1753.579  | 2144.786  | AK024126  | 790.549   | 945.066   |
| S56138    | 353.953   | 244.629   | NM_001870 | 3967.11   | 4806.155  | NM_001516 | 6377.849  | 7730.102  |
| AK023860  | 2456.301  | 1663.864  | AJ271216  | 4515.237  | 5011.712  | NM_002744 | 11901.328 | 12008.376 |
| NM_000031 | 3281.315  | 2034.94   | U23028    | 8077.592  | 10081.585 | NM_015917 | 15388.882 | 15735.84  |
| NM_002085 | 19537.572 | 10365.741 | NM_000817 | 11910.078 | 14871.696 | NM_020397 | 1641.48   | 1466.162  |
| AK026061  | 279.658   | 194.547   | AF113132  | 67019.836 | 68818.5   | NM_000061 | 5777.761  | 5642.634  |
| NM_016286 | 8143.191  | 6492.214  | NM_006571 | 8107.792  | 9952.063  | AB046859  | 36781.398 | 20943.307 |
| NM_001567 | 2797.225  | 2002.028  | NM_001875 | 990.285   | 1338.305  | NM_005105 | 8584.535  | 5236.611  |
| NM_004905 | 7770.563  | 5137.63   | AK022680  | 6524.173  | 7894.004  | AK023573  | 7772.931  | 3393.939  |
| AF217971  | 4115.964  | 2844.084  | NM_018946 | 32774.898 | 41021.637 | NM_002730 | 3064.605  | 987.338   |
| NM_001925 | 433.669   | 379.487   | NM_016359 | 23276.852 | 23788.014 | NM_012268 | 37984.543 | 22659.006 |
| NM_004982 | 1974.06   | 1919.948  | NM_001069 | 62683.828 | 66399.484 | NM_012203 | 2468.296  | 2130.725  |
| NM_004732 | 1242.721  | 1782.864  | NM_004156 | 4794.487  | 5861.536  | NM_004736 | 12282.003 | 11802.64  |

|           |           |           |           |           |           |             |           |           |
|-----------|-----------|-----------|-----------|-----------|-----------|-------------|-----------|-----------|
| NM_018349 | 2240.594  | 3447.383  | AK000561  | 3203.7    | 4223.711  | NM_006895   | 1563.481  | 2756.201  |
| NM_006363 | 4693.059  | 6005.005  | AB051449  | 55780.32  | 57805.777 | NM_006455   | 11843.682 | 23970.869 |
| NM_020415 | 1499.756  | 2137.666  | BC009187  | 12207.847 | 15592.046 | AA427949    | 304.61    | 757.517   |
| NM_014879 | 344.748   | 502.28    | AL133617  | 2310.885  | 3379.192  | D50373      | 1753.934  | 1453.619  |
| AL049667  | 1825.128  | 2076.842  | NM_016485 | 15183.645 | 18595.67  | AA488757    | 36054.242 | 23119.207 |
| NM_000334 | 2925.008  | 3657.935  | NM_002615 | 1445.858  | 1729.209  | AA205399    | 863.975   | 835.217   |
| NM_020400 | 1566.92   | 2287.294  | AF090894  | 3395.957  | 3710.248  | AA436187    | 1303.292  | 3038.613  |
| NM_001504 | 1885.948  | 1379.807  | NM_013344 | 943.205   | 1113.178  | H-L 27586 I | 4074.333  | 6394.7    |
| D50926    | 2879.131  | 4686.218  | NM_014052 | 29283.195 | 37878.816 | ID 214180   | 740.358   | 1000.205  |
| BF205683  | 2174.235  | 4152.853  | AK023792  | 4599.292  | 4330.859  | ID 1867426  | 31765.477 | 28305.607 |
| NM_001565 | 940.647   | 985.414   | NM_020149 | 6663.266  | 9851.715  | W99328      | 2245.633  | 1311.764  |
| NM_002612 | 395.56    | 385.5     | NM_006237 | 4456.401  | 5703.967  | AI434176    | 1660.607  | 594.332   |
| AF135422  | 1294.972  | 834.178   | NM_001271 | 8980.371  | 8523.053  | H08563      | 4110.688  | 4242.755  |
| NM_004479 | 11086.63  | 6605.13   | NM_003683 | 15292.785 | 11042.8   | NM_006885   | 2344.165  | 1878.808  |
| NM_002610 | 1968.651  | 774.325   | AF039019  | 7896.05   | 6473.616  | NM_002435   | 2802.86   | 1984.597  |
| AF070587  | 2930.424  | 1091.457  | NM_012255 | 10677.945 | 6906.263  | NM_014585   | 9043.575  | 7243.64   |
| BE250526  | 776.147   | 384.573   | NM_018196 | 3217.046  | 2432.951  | NM_000755   | 1745.216  | 1942.067  |
| NM_016819 | 2953.093  | 1686.474  | NM_004818 | 11916.552 | 9680.192  | AK023334    | 5300.139  | 5242.06   |
| NM_012222 | 3101.579  | 2076.303  | J04205    | 27673.188 | 23057.893 | NM_002563   | 28264.816 | 29250.984 |
| NM_005002 | 2260.799  | 1800.173  | D38491    | 11654.916 | 7140.423  | NM_002437   | 4246.164  | 3960.931  |
| NM_006596 | 3638.564  | 3011.282  | AK026835  | 7515.798  | 7189.182  | D79991      | 2107.736  | 1908.084  |
| AK023214  | 7545.707  | 6192.93   | NM_002819 | 39724.559 | 41988.348 | AK022425    | 1484.746  | 1261.344  |
| NM_001469 | 9392.007  | 9445.051  | NM_003090 | 68420.516 | 68487.477 | NM_000054   | 27395.711 | 21234.553 |
| NM_003600 | 6345.235  | 7503.498  | NM_013264 | 10223.603 | 10753.646 | NM_014713   | 14434.344 | 18168.463 |
| NM_017490 | 4056.77   | 3950.806  | NM_003315 | 28838.924 | 32381.465 | AK025175    | 758.865   | 1574.988  |
| NM_002718 | 1912.255  | 2076.924  | NM_005570 | 22005.086 | 23745.861 | NM_005811   | 10984.732 | 15368.528 |
| AK026727  | 1678.609  | 1824.141  | NM_000086 | 34974.926 | 39456.238 | NM_005764   | 1976.557  | 2131.102  |
| NM_002830 | 502.435   | 542.656   | NM_003752 | 10265.045 | 11027.993 | NM_016362   | 5734.853  | 6221.292  |
| NM_006247 | 5712.649  | 6988.97   | NM_003932 | 28594.387 | 32436.135 | NM_004214   | 10388.132 | 8847.089  |
| AB032983  | 1275.356  | 1657.697  | NM_016491 | 41360.211 | 45708.242 | NM_004325   | 14535.73  | 9741.17   |
| NM_018281 | 7555.855  | 9801.611  | NM_006429 | 56204.641 | 59879.078 | NM_002836   | 10986.544 | 9508.616  |
| NM_004457 | 3596.963  | 4068.317  | NM_002516 | 4571.71   | 4882.136  | NM_016055   | 14976.193 | 32512.678 |
| NM_014049 | 2040.677  | 2570.869  | NM_002064 | 4081.424  | 6122.277  | NM_014005   | 9472.019  | 17211.555 |
| NM_005396 | 423.242   | 397.449   | NM_015523 | 20221.244 | 21227.26  | NM_017685   | 5276.101  | 9612.948  |
| NM_019841 | 642.716   | 883.404   | NM_015960 | 56863.074 | 45648.398 | AK025612    | 50035.813 | 51031.215 |
| NM_003322 | 598.291   | 600.869   | NM_006085 | 16179.925 | 11587.067 | NM_000370   | 1251.274  | 1195.648  |
| NM_003565 | 709.897   | 437.083   | NM_000907 | 19133.049 | 13020.895 | BE865893    | 7702.951  | 6901.517  |
| BC036375  | 8287.848  | 4459.759  | AF254085  | 12175.82  | 7497.013  | NM_003123   | 56990.594 | 59850.941 |
| NM_000496 | 427.064   | 221.912   | NM_001987 | 6162.4    | 3796.387  | AY005822    | 4688.749  | 5619.136  |
| BF347926  | 5699.818  | 2408.35   | AF244088  | 12414.278 | 8890.402  | NM_018125   | 50845.035 | 50188.785 |
| N54821    | 10493.682 | 6336.588  | NM_007136 | 4702.022  | 3885.982  | AF289022    | 3383.049  | 3582.352  |
| BI912037  | 3852.136  | 2079.179  | AK025434  | 983.536   | 1094.97   | M17252      | 507.684   | 461.338   |
| AA454646  | 15108.061 | 8425.531  | AJ251845  | 1731.932  | 1388.078  | NM_016025   | 9719.796  | 6655.297  |
| BF063899  | 1605.112  | 1066.524  | AK000435  | 8983.452  | 10850.393 | NM_013315   | 3159.261  | 2981.452  |
| U18087    | 37405.059 | 26249.42  | AK000569  | 13779.153 | 12443.016 | NM_020410   | 5262.031  | 7561.437  |
| U66349    | 1370.384  | 1085.758  | NM_006049 | 5867.746  | 5193.786  | NM_000453   | 3616.148  | 5608.947  |
| AA057156  | 8433.675  | 7582.765  | NM_017661 | 537.877   | 500.868   | NM_004583   | 4718.484  | 7423.324  |
| U19487    | 477.693   | 391.217   | BC016698  | 12952.155 | 17363.703 | NM_001103   | 925.436   | 1883.854  |
| AF166327  | 35875.781 | 28700.891 | NM_007374 | 2300.997  | 1947.02   | AF228710    | 42439.211 | 47578.387 |
| AF260739  | 1563.009  | 1782.953  | AK000049  | 620.056   | 530.696   | NM_018395   | 507.537   | 861.002   |
| AF531423  | 22962.252 | 25234.684 | NM_006167 | 1532.911  | 1352.547  | AY007131    | 58625.219 | 59605.289 |
| X76555    | 656.052   | 821.639   | NM_016357 | 3219.161  | 3392.261  | U61735      | 4125.239  | 4082.296  |
| NM_005432 | 2862.392  | 2838.899  | NM_014500 | 36311.273 | 39750.156 | NM_001897   | 2501.993  | 4860.547  |

|           |           |           |           |           |           |             |           |           |
|-----------|-----------|-----------|-----------|-----------|-----------|-------------|-----------|-----------|
| L10386    | 15227.696 | 16844.797 | L09071    | 2220.318  | 2562.051  | NM_003853   | 1971.823  | 4626.763  |
| AF061812  | 17601.133 | 18498.781 | NM_005924 | 2181.584  | 1949.89   | AB033109    | 2737.347  | 5847.92   |
| AL136756  | 3060.214  | 3745.633  | NM_019841 | 2204.169  | 1821.21   | NM_002053   | 50179.629 | 40205.641 |
| NM_016383 | 236.243   | 146.389   | NM_003322 | 3584.854  | 3246.03   | NM_017438   | 3112.841  | 2400.532  |
| NM_001478 | 27362.012 | 22414.834 | NM_003568 | 1764.215  | 1606.564  | U59209      | 3916.093  | 2416.332  |
| NM_012420 | 586.905   | 468.405   | BC036375  | 33906.805 | 27781.83  | NM_020195   | 4918.37   | 4048.337  |
| NM_002343 | 2998.343  | 2099.009  | BF347926  | 16089.672 | 9510.436  | AK023824    | 6966.347  | 6673.038  |
| AB033037  | 1457.226  | 849.91    | N54821    | 30717.766 | 20376.971 | AL133069    | 6267.563  | 7960.542  |
| L40400    | 2937.199  | 1343.099  | BI912037  | 17510.701 | 14047.923 | AK026055    | 7717.25   | 8258.195  |
| AK025688  | 1685.494  | 1137.238  | AA454646  | 38250.922 | 28088.234 | AK024126    | 487.177   | 602.43    |
| NM_005930 | 379.038   | 407.895   | BF063899  | 3814.9    | 3220.574  | NM_001516   | 6075.788  | 7756.286  |
| Z36819    | 5438.146  | 4137.917  | U18087    | 62155.254 | 58634.426 | NM_002744   | 12299.163 | 16844.777 |
| NM_014847 | 17431.822 | 8931.529  | U66349    | 4164.88   | 3164.597  | NM_015917   | 15931.735 | 25588.709 |
| NM_014448 | 2085.719  | 2265.408  | AA057156  | 26124.584 | 24627.666 | NM_020397   | 1673.943  | 2604.949  |
| AL080157  | 2249.803  | 2648.069  | U19487    | 3356.242  | 2617.694  | NM_000061   | 7421.944  | 11458.25  |
| NM_005100 | 707.349   | 741.081   | AF166327  | 58077.422 | 55710.105 | AB046859    | 34140.07  | 42680.938 |
| NM_005308 | 2138.827  | 2409.564  | AF260739  | 9432.917  | 10292.189 | NM_005109   | 7907.145  | 12344.009 |
| NM_000911 | 616.036   | 670.476   | AF531423  | 46408.918 | 50292.496 | AK023573    | 11454.661 | 17769.277 |
| NM_007227 | 1016.034  | 1526.476  | X76555    | 2794.056  | 2710.027  | NM_002730   | 4453.47   | 5396.288  |
| NM_007023 | 943.174   | 1059.863  | NM_005432 | 20231.684 | 23546.543 | AB011540    | 55621.094 | 63179.098 |
| NM_005873 | 8800.279  | 11608.141 | L10386    | 31014.391 | 30021.221 | NM_000040   | 16935.936 | 28065.152 |
| NM_004624 | 2949.62   | 3908.043  | AF061812  | 64303.184 | 59148.113 | NM_004631   | 7206.745  | 13645.796 |
| NM_003865 | 908.653   | 1236.593  | AL136756  | 13630.123 | 12458.082 | NM_006033   | 22601.893 | 34609.863 |
| AB015330  | 12587.414 | 13925.477 | NM_015944 | 3608.758  | 3260.487  | NM_004837   | 5949.729  | 5235.711  |
| L09071    | 646.87    | 732.343   | NM_001548 | 1832.076  | 1857.193  | NM_004736   | 10446.517 | 12034.556 |
| NM_005924 | 1323.545  | 1760.544  | NM_000758 | 15543.54  | 13474.376 | NM_006895   | 430.239   | 849.781   |
| S56138    | 414.945   | 1776.425  | M17017    | 2429.485  | 1902.414  | NM_006455   | 12377.094 | 13775.52  |
| AK023860  | 2869.541  | 8668.597  | NM_002990 | 8041.482  | 6397.177  | AA427949    | 638.986   | 862.332   |
| NM_000031 | 3485.785  | 4367.564  | NM_002432 | 17656.473 | 14534.143 | D50373      | 1096.226  | 1569.565  |
| NM_002085 | 21094.43  | 25285.709 | NM_012420 | 1213.787  | 1520.053  | AA488757    | 36001.191 | 42483.332 |
| AK026061  | 543.846   | 667.267   | NM_002343 | 13454.823 | 13755.957 | AA205399    | 1274.914  | 1558.181  |
| NM_016286 | 8303.143  | 10090.261 | AB033037  | 3857.525  | 3035.217  | H07071      | 5211.793  | 7468.756  |
| NM_001567 | 2630.286  | 1070.124  | L40400    | 26389.961 | 18484.693 | M25322      | 15714.575 | 23820.873 |
| NM_004905 | 7873.526  | 3479.78   | AK025688  | 5689.734  | 3991.114  | AA436187    | 743.682   | 1673.997  |
| AF217971  | 3879.174  | 1941.866  | NM_005930 | 1373.119  | 1260.117  | H-L 27586 I | 3783.31   | 6982.79   |
| NM_001925 | 371.557   | 213.839   | Z36819    | 14927.555 | 13918.357 | ID 214180   | 868.141   | 1685.181  |
| NM_004982 | 1885.077  | 1248.625  | NM_014847 | 61040.477 | 58925.59  | ID 1867426  | 36051.328 | 55243.824 |
| NM_004732 | 1234.873  | 633.107   | NM_014448 | 19689.104 | 17107.393 | ID 396450   | 681.218   | 1303.807  |
| NM_018349 | 2143.625  | 2407.826  | AL080157  | 19460.365 | 18582.537 | W99328      | 2397.164  | 4152.038  |
| NM_006363 | 4969.583  | 5485.543  | NM_005100 | 1372.879  | 1352.455  | AI434176    | 2074.481  | 3570.738  |
| NM_020415 | 1450.242  | 1262.443  | NM_005308 | 7321.157  | 7286.657  | NM_001718   | 605.665   | 1176.937  |
| NM_014879 | 478.997   | 288.706   | NM_000911 | 3252.699  | 3216.759  | AF116659    | 3630.162  | 8030.578  |
| AL049667  | 1853.643  | 1722.999  | NM_007227 | 2594.292  | 3059.773  | NM_000317   | 32288.133 | 49547.035 |
| NM_000334 | 3175.773  | 4418.515  | NM_007023 | 2399.583  | 2730.802  | NM_018376   | 4185.128  | 8585.51   |
| NM_020400 | 1524.473  | 2341.441  | NM_005873 | 24856.092 | 22875.748 | NM_017615   | 946.244   | 827.895   |
| NM_001504 | 1806.955  | 1641.817  | NM_004624 | 10063.772 | 8927.178  | AK022425    | 1576.886  | 2890.077  |
| D50926    | 2777.38   | 4612.845  | NM_003865 | 3742.194  | 3741.636  | NM_000054   | 31060.41  | 43638.379 |
| BF205683  | 2124.828  | 3634.316  | AB015330  | 51229.465 | 42697.277 | NM_014713   | 16809.807 | 22945.426 |
| NM_001565 | 957.89    | 1263.747  | NM_004315 | 21985.025 | 21247.537 | NM_001812   | 2691.701  | 4353.766  |
| NM_000758 | 5956.371  | 7921.678  | NM_020166 | 18436.807 | 13864.043 | NM_014785   | 1398.519  | 2582.612  |
| NM_004479 | 13276.779 | 41718.871 | S56138    | 788.436   | 669.15    | NM_005811   | 12296.754 | 19364.482 |
| NM_002610 | 1709.55   | 3273.489  | AK023860  | 27286.084 | 23068.191 | NM_005764   | 2161.521  | 3652.068  |
| AF070587  | 2744.96   | 3637.502  | NM_000031 | 8105.176  | 10413.725 | NM_016362   | 4860.361  | 7931.712  |

|           |           |           |           |           |           |           |           |           |
|-----------|-----------|-----------|-----------|-----------|-----------|-----------|-----------|-----------|
| BE250526  | 654.284   | 773.806   | NM_002085 | 43025.891 | 50680.594 | NM_004214 | 11001.433 | 16269.896 |
| NM_016819 | 3229.324  | 4299.599  | AK026061  | 1627.21   | 1743.679  | NM_004329 | 16454.957 | 25953.727 |
| NM_012222 | 3774.72   | 4259.846  | NM_016286 | 25627.607 | 23046.83  | NM_002836 | 16370.227 | 22584.322 |
| NM_005002 | 2185.317  | 919.57    | NM_001567 | 10222.121 | 8412.093  | NM_020167 | 4306.743  | 7762.61   |
| NM_006596 | 3383.23   | 2138.68   | NM_004905 | 23068.254 | 17680.947 | AL049963  | 22982.988 | 36645.5   |
| AK023214  | 7937.625  | 4236.672  | AF217971  | 29319.357 | 21424.85  | NM_016058 | 14353.403 | 22594.781 |
| NM_001469 | 8351.952  | 5446.901  | NM_001925 | 2086.373  | 2010.863  | NM_014005 | 8221.197  | 10662.893 |
| NM_003600 | 7862.079  | 4745.572  | NM_004982 | 11897.658 | 9010.191  | NM_004636 | 19234.117 | 24875.535 |
| NM_017490 | 3812.543  | 2767.652  | NM_004732 | 16384.598 | 13064.247 | AK022603  | 875.403   | 1500.09   |
| NM_002718 | 1726.69   | 2698.988  | NM_018349 | 14346.932 | 14699.871 | NM_017688 | 6204.039  | 12613.413 |
| AK026727  | 1710.807  | 1912.37   | NM_006363 | 13613.855 | 15399.291 | AK025612  | 56671.582 | 69218.805 |
| NM_002830 | 474.221   | 347.456   | NM_020415 | 6348.236  | 5781.08   | NM_012268 | 54554.996 | 66138.141 |
| NM_006247 | 5604.588  | 6766.12   | NM_014879 | 826.468   | 928.089   | NM_012203 | 2166.075  | 2359.306  |
| AB032983  | 1409.954  | 1578.984  | AL049667  | 11207.972 | 14331.63  | NM_002868 | 4195.451  | 6925.969  |
| NM_018281 | 7862.957  | 9450.702  | NM_000334 | 27980.193 | 36390.164 | AK024100  | 7315.607  | 10384.352 |
| NM_004457 | 3646.016  | 3738.102  | NM_020400 | 4339.207  | 4588.376  | NM_005135 | 1033.733  | 1538.691  |
| NM_014049 | 2144.763  | 2584.096  | NM_001504 | 18117.082 | 15268.853 | NM_003827 | 8058.9    | 13597.672 |
| NM_005396 | 481.65    | 654.497   | D50926    | 11987.795 | 13774.629 | NM_004583 | 891.839   | 1763.51   |
| NM_004315 | 8492.154  | 15506.195 | BF205683  | 13921.38  | 13812.007 | NM_001103 | 1216.116  | 1940.269  |
| NM_020166 | 4651.636  | 4828.103  | NM_001565 | 2073.916  | 2116.677  | AF228710  | 41684.258 | 48503.246 |
| NM_003568 | 573.109   | 2957.576  | NM_002612 | 1584.928  | 1523.269  | NM_018396 | 810.722   | 1153.449  |
| BC036375  | 9704.403  | 37730.602 | AF135422  | 5572.586  | 3647.315  | AY007131  | 56616.91  | 63309.418 |
| NM_000496 | 496.663   | 1662.888  | NM_004479 | 60098.699 | 53746.348 | U61735    | 3841.469  | 4051.227  |
| BF347926  | 5974.764  | 16148.8   | BE250526  | 3881.467  | 5022.343  | NM_001144 | 21263.492 | 20477.162 |
| N54821    | 11043.733 | 18512.74  | NM_016819 | 11165.851 | 9651.513  | AK023766  | 7227.624  | 8135.674  |
| BI912037  | 4172.337  | 5908.762  | NM_012222 | 35386.836 | 33825.91  | NM_001897 | 1460.356  | 1974.391  |
| AA454646  | 15375.651 | 13389.824 | NM_005002 | 6783.231  | 6706.65   | NM_003853 | 1994.126  | 2100.01   |
| BF063899  | 1494.983  | 865.807   | NM_006596 | 7938.542  | 6471.123  | AB033109  | 2032.938  | 2467.186  |
| U18087    | 32903.094 | 17914.469 | AK023214  | 37493.109 | 31371.66  | NM_002053 | 52981.328 | 54860.574 |
| U66349    | 1416.952  | 701.907   | NM_001469 | 16792.531 | 16412.732 | NM_006888 | 3800.017  | 4504.334  |
| AA057156  | 7477.411  | 4623.216  | NM_003600 | 50618.359 | 43230.223 | AK023334  | 10454.392 | 19168.281 |
| U19487    | 450.259   | 381.841   | NM_017490 | 17876.01  | 15471.698 | NM_002563 | 34049.211 | 52025.492 |
| AF166327  | 34753.285 | 21300.365 | NM_002718 | 7015.324  | 6819.2    | NM_002437 | 4428.684  | 8812.404  |
| AF260739  | 1430.11   | 1335.544  | AK026727  | 9173.96   | 9398.339  | D79991    | 2405.49   | 3579.552  |
| AF531423  | 22756.506 | 22920.652 | NM_002830 | 905.915   | 936.911   | AB011540  | 47835.344 | 42496.742 |
| X76555    | 619.876   | 693.558   | NM_006247 | 13087.553 | 12355.185 | NM_000040 | 12548.13  | 10635.272 |
| NM_005432 | 3347.909  | 3393.371  | AB032983  | 10874.581 | 10818.079 | NM_004631 | 4247.438  | 4370.802  |
| L10386    | 14791.906 | 15887.76  | NM_018281 | 34921.234 | 33696.441 | NM_006033 | 17918.994 | 21476.895 |
| AF061812  | 19530.709 | 18316.623 | NM_004457 | 9717.227  | 7093.651  | NM_004837 | 4967.665  | 11980.563 |
| AL136756  | 2971.028  | 2944.28   | NM_014049 | 6750.513  | 5770.301  | NM_000370 | 1730.017  | 4452.756  |
| NM_001478 | 28595.381 | 24096.982 | NM_005396 | 4594.957  | 3732.321  | BE865893  | 9376.132  | 12981.943 |
| NM_002612 | 412.699   | 504.778   | NM_019841 | 2690.306  | 2503.311  | NM_003123 | 57428.633 | 61249.406 |
| AF135422  | 1408.605  | 1434.854  | NM_003322 | 3299.669  | 2796.178  | AY005822  | 4928.101  | 4947.238  |
| NM_005930 | 325.366   | 1364.441  | NM_003568 | 1445.473  | 1351.927  | NM_018129 | 48079.199 | 39857.738 |
| Z36819    | 4697.676  | 22319.816 | BC036375  | 30961.799 | 40433.758 | AF289022  | 3030.787  | 3016.524  |
| NM_014847 | 34042.777 | 80786.977 | BI912037  | 16535.725 | 15975.864 | M17252    | 542.13    | 496.974   |
| NM_001195 | 209.436   | 633.001   | AA454646  | 36673.875 | 34507.738 | NM_016025 | 9530.199  | 6740.62   |
| NM_014448 | 2877.813  | 7914.233  | BF063899  | 3735.967  | 3384.402  | NM_013319 | 3388.374  | 3250.441  |
| AL080157  | 3192.648  | 5378.186  | U18087    | 60018.398 | 65070.027 | NM_000746 | 1740.587  | 1620.053  |
| NM_005100 | 657.398   | 1493.049  | U66349    | 5117.685  | 5869.981  | NM_000722 | 1101.456  | 1078.164  |
| NM_005308 | 2166.07   | 2512.122  | AA057156  | 24542.037 | 19956.225 | NM_006030 | 1384.53   | 1321.956  |
| NM_000911 | 543.295   | 440.922   | U19487    | 3190.353  | 2197.967  | NM_001718 | 320.24    | 346.743   |
| NM_007227 | 900.406   | 627.705   | AF166327  | 58572.082 | 55293.82  | AF116659  | 1518.185  | 1083.343  |

|           |           |           |           |           |           |           |           |           |
|-----------|-----------|-----------|-----------|-----------|-----------|-----------|-----------|-----------|
| NM_007023 | 868.955   | 619.572   | AF260739  | 9736.602  | 8638.252  | NM_000317 | 21449.824 | 17382.99  |
| NM_005873 | 8646.066  | 6466.206  | AF531423  | 47755.836 | 56188.855 | NM_018376 | 2615.528  | 3695.46   |
| NM_004624 | 2587.563  | 2220.99   | X76555    | 2999.26   | 2815.344  | NM_017615 | 997.12    | 1740.485  |
| NM_014461 | 431.21    | 559.519   | NM_005432 | 20757.283 | 18628.432 | NM_017438 | 3493.814  | 5577.704  |
| NM_003865 | 858.68    | 674.342   | L10386    | 31355.5   | 25501.482 | U59209    | 3219.195  | 3913.31   |
| AB015330  | 14099.98  | 13052.077 | AF061812  | 61366.648 | 57886.586 | NM_020195 | 4808.098  | 4758.927  |
| NM_001455 | 3432.907  | 5147.993  | AL136756  | 14832.238 | 13452.801 | AK023824  | 6343.729  | 5173.798  |
| NM_002385 | 1537.132  | 1374.093  | NM_001478 | 60098.516 | 54176.18  | AL133069  | 5229.939  | 5034.308  |
| NM_001885 | 663.502   | 878.287   | M17017    | 3163.405  | 3225.748  | AK026055  | 7570.559  | 5799.629  |
| AF039196  | 353.816   | 418.915   | NM_002990 | 7830.56   | 7190.273  | AK024126  | 935.407   | 934.909   |
| L09071    | 622.939   | 844.498   | NM_002432 | 16805.207 | 14407.564 | NM_001516 | 6173.994  | 5314.905  |
| NM_005924 | 1009.51   | 1164.3    | NM_012420 | 2025.348  | 2038.404  | NM_002744 | 12341.76  | 10644.708 |
| NM_019841 | 654.942   | 626.638   | L40400    | 22611.934 | 31420.053 | NM_015917 | 14737.465 | 10965.496 |
| NM_003322 | 526.519   | 587.319   | AK025688  | 5232.31   | 5263.827  | NM_020397 | 1411.358  | 1124.09   |
| NM_013365 | 3475.469  | 16031.532 | NM_005930 | 1393.559  | 1546.142  | AF035314  | 853.576   | 1325.315  |
| NM_005817 | 6212.393  | 26932.018 | Z36819    | 15158.458 | 16848.604 | NM_018036 | 1332.563  | 1431.43   |
| NM_003916 | 7282.379  | 31623.795 | NM_014847 | 63830.523 | 66071.016 | AF052087  | 708.462   | 1464.787  |
| NM_002870 | 33198.93  | 85522.531 | NM_001195 | 418.564   | 652.508   | AF007143  | 1095.303  | 1662.939  |
| NM_002802 | 563.263   | 1813.838  | NM_014448 | 18838.688 | 16707.195 | AK023656  | 1295.968  | 1287.807  |
| NM_006363 | 4238.38   | 8917.614  | AL080157  | 19978.781 | 15007.184 | AF086511  | 2724.498  | 3631.237  |
| NM_020415 | 1620.522  | 3027.722  | NM_005100 | 1327.773  | 1244.121  | AK022989  | 6960.65   | 8862.024  |
| NM_014879 | 315.162   | 428.264   | NM_005308 | 7274.18   | 6490.389  | AK001604  | 3720.751  | 4149.795  |
| AL049667  | 1784.168  | 1622.594  | NM_000911 | 3268.216  | 2575.729  | NM_020141 | 6490.977  | 9570.351  |
| NM_000334 | 3290.858  | 2667.201  | NM_007227 | 2564.035  | 2750.856  | AL359627  | 715.513   | 3902.627  |
| NM_020400 | 1346.941  | 1368.995  | NM_007023 | 2605.858  | 2580.768  | NM_006482 | 2205.861  | 2996.538  |
| NM_001504 | 1993.332  | 903.687   | NM_005873 | 24080.688 | 21873.572 | NM_001824 | 79187.133 | 65174.156 |
| D50926    | 2828.294  | 2241.177  | NM_004624 | 9978.14   | 10358.31  | SR1       | 64689.617 | 25167.375 |
| BF205683  | 1799.766  | 1814.608  | NM_003865 | 3857.935  | 3802.427  | SR3       | 28897.457 | 3835.393  |
| NM_001565 | 879.5     | 865.202   | AB015330  | 55741.703 | 52705.727 | SR5       | 2617.645  | 477.742   |
| NM_001548 | 480.564   | 413.824   | L09071    | 1878.855  | 1912.806  | SR7       | 3043.924  | 3874.402  |
| NM_000758 | 5471.931  | 7106.048  | NM_005924 | 2428.937  | 2368.299  | SR9       | 8664.258  | 253.514   |
| M17017    | 432.253   | 517.321   | S56138    | 1739.863  | 2448.803  | CY3Cy5    | 2395.801  | 106.218   |
| NM_002990 | 3082.053  | 4122.455  | AK023860  | 27446.094 | 30025.248 | U15553    | 9014.415  | 11232.637 |
| NM_002432 | 1970.623  | 2158.105  | NM_000031 | 8521.872  | 10311.389 | Z36829    | 963.314   | 1052.477  |
| NM_012420 | 300.46    | 352.113   | NM_002085 | 46467.406 | 56250.965 | AK024734  | 10307.367 | 12110.109 |
| NM_002343 | 3091.191  | 4283.352  | AK026061  | 2035.71   | 3058.37   | NM_017741 | 1982.994  | 1973.669  |
| AB033037  | 1626.94   | 2637.094  | NM_016286 | 25129.855 | 33170.035 | AK022223  | 396.505   | 771.763   |
| L40400    | 3357.78   | 4574.849  | NM_001567 | 9344.51   | 10991.086 | NM_005887 | 5050.109  | 7558.086  |
| AK025688  | 1889.872  | 3042.672  | NM_004905 | 24108.414 | 18451.363 | AK024921  | 659.833   | 1023.549  |
| NM_004457 | 3243.283  | 13412.534 | AF217971  | 30082.848 | 24398.881 | AL110232  | 634.948   | 1471.956  |
| NM_014049 | 2037.784  | 9491.304  | NM_001925 | 2239.633  | 2063.395  | AK026103  | 3028.727  | 3950.183  |
| NM_005396 | 534.669   | 2104.748  | NM_004982 | 12207.691 | 14027.92  | NM_016353 | 24220.16  | 23242.689 |
| NM_004315 | 6069.483  | 29453.061 | NM_004732 | 15189.345 | 15728.373 | AL080280  | 9039.926  | 1615.831  |
| NM_020166 | 4343.49   | 19368.633 | NM_018349 | 13418.976 | 13090.986 | AB028947  | 1919.251  | 365.062   |
| S56138    | 251.01    | 533.004   | NM_006363 | 13243.499 | 12353.797 | AK022556  | 320.076   | 1029.354  |
| AK023860  | 3091.444  | 5175.794  | NM_020415 | 6314.185  | 5680.673  | AK023437  | 5202.405  | 8430.152  |
| NM_000031 | 3604.064  | 3109.306  | NM_014879 | 596.486   | 876.635   | AK024147  | 635.815   | 1245.375  |
| NM_002085 | 19266.838 | 14628.949 | AL049667  | 12062.499 | 11582.273 | AK022897  | 907.823   | 1086.41   |
| AK026061  | 376.185   | 491.324   | NM_000334 | 29166.162 | 32371.381 | AK023556  | 422.175   | 925.499   |
| NM_016286 | 7952.276  | 6785.073  | NM_020400 | 4332.447  | 4540.103  | AK023898  | 6354.975  | 7182.28   |
| NM_001567 | 2545.759  | 1863.353  | NM_001504 | 20593.648 | 18116.926 | AK021619  | 1010.347  | 1838.214  |
| NM_004905 | 8268.069  | 5201.088  | D50926    | 12725.193 | 14421.894 | AK025872  | 1081.536  | 2308.559  |
| AF217971  | 4097.056  | 4317.219  | BF205683  | 15760.053 | 15669.859 | AF131762  | 4912.911  | 7055.629  |

|           |           |           |           |           |           |           |           |           |
|-----------|-----------|-----------|-----------|-----------|-----------|-----------|-----------|-----------|
| NM_001925 | 444.678   | 457.289   | NM_001565 | 2099.476  | 1966.126  | AY007089  | 2581.023  | 4705.025  |
| AF245517  | 1797.016  | 1789.318  | NM_000758 | 14851.038 | 15423.501 | AK021816  | 5662.62   | 8347.586  |
| NM_004137 | 435.72    | 501.021   | NM_004479 | 58244.559 | 53479.254 | D43770    | 20013.037 | 31233.529 |
| NM_014407 | 377.43    | 441.994   | NM_002610 | 3731.309  | 3339.406  | AF085960  | 1529.573  | 1927.546  |
| NM_004982 | 1907.917  | 2113.152  | AF070587  | 8991.177  | 7401.272  | AK021519  | 638.294   | 136.807   |
| NM_001694 | 39557.816 | 71717.938 | BE250526  | 4257.063  | 5259.009  | NM_014254 | 5160.74   | 809.602   |
| AF286370  | 719.074   | 859.077   | NM_016819 | 11978.885 | 18664.945 | AF086036  | 2167.15   | 465.541   |
| NM_000217 | 359.152   | 495.349   | NM_012222 | 35477.398 | 41042.43  | U09197    | 791.654   | 218.062   |
| NM_004732 | 1231.938  | 1474.727  | NM_005002 | 7071.101  | 9472.2    | AK025218  | 943.949   | 1551.802  |
| AK026180  | 937.181   | 1339.579  | NM_006596 | 9526.128  | 11143.307 | AJ227899  | 2943.812  | 4243.979  |
| NM_018349 | 2312.282  | 2977.927  | AK023214  | 40695.047 | 45343.605 | AL359607  | 2654.6    | 5256.196  |
| NM_016383 | 167.678   | 542.191   | NM_001469 | 19668.152 | 26433.867 | AF161371  | 6730.947  | 8083.292  |
| NM_001478 | 35230.566 | 79317.18  | NM_003600 | 53772.23  | 52587.445 | AK022464  | 2196.243  | 2589.576  |
| NM_002612 | 361.162   | 707.228   | NM_017490 | 18948.756 | 22199.83  | AF086230  | 1808.03   | 3426.199  |
| AF135422  | 1646.609  | 5028.302  | NM_002718 | 7758.743  | 9922.222  | AK023408  | 3589.788  | 6816.274  |
| NM_004479 | 11483.927 | 15615.47  | AK026727  | 9454.895  | 11552.938 | AK000144  | 2348.664  | 3458.274  |
| NM_002610 | 1650.364  | 929.689   | NM_002830 | 1089.141  | 1108.729  | AK022275  | 568.251   | 909.341   |
| AF070587  | 2890.857  | 1531.564  | NM_006247 | 15424.555 | 20671.947 | AK000942  | 550.576   | 1031.301  |
| BE250526  | 833.826   | 1358.036  | AB032983  | 15701.578 | 17955.563 | AL117533  | 1156.802  | 2585.715  |
| NM_016819 | 2984.752  | 1951.799  | NM_018281 | 37674.961 | 39719.238 | AK026036  | 1211.37   | 2790.954  |
| NM_012222 | 3396.676  | 2459.331  | NM_004457 | 10117.586 | 10118.352 | AK023422  | 3607.573  | 6163.728  |
| NM_005002 | 2209.475  | 1131.215  | NM_014049 | 7071.419  | 6512.993  | AK022796  | 1862.052  | 2345.873  |
| NM_006596 | 3841.251  | 4495.011  | NM_005396 | 4906.277  | 4728.061  | AK095193  | 332.957   | 242.587   |
| AK023214  | 7841.251  | 8130.835  | NM_004315 | 21300.873 | 33972.688 | AK025081  | 1378.55   | 298.682   |
| NM_001469 | 9013.411  | 9453.767  | NM_020166 | 17483.455 | 17427.967 | AL122088  | 1458.141  | 399.811   |
| NM_003600 | 8568.037  | 7190.569  | NM_003568 | 2429.204  | 2311.253  | AF119912  | 577.113   | 246.392   |
| NM_017490 | 3938.651  | 3735.052  | BC036375  | 33686.113 | 30860.92  | AL137518  | 2075.71   | 778.8     |
| NM_002718 | 1549.313  | 2358.598  | NM_000496 | 1193.146  | 1157.51   | T99941    | 7919.534  | 7407.881  |
| AK026727  | 1729.599  | 2261.467  | BF347926  | 17499.484 | 16787.49  | AF113678  | 1856.885  | 1590.871  |
| NM_002830 | 592.149   | 597.706   | N54821    | 32219.441 | 35264.57  | AL137313  | 64862.246 | 73551.836 |
| NM_006247 | 5746.125  | 8242.283  | BI912037  | 20554.121 | 23946.064 | AB002363  | 6817.892  | 14360.369 |
| AB032983  | 1336.254  | 1699.072  | AA454646  | 42641.035 | 55622.926 | NM_005284 | 3963.11   | 7066.475  |
| NM_018281 | 7755.003  | 8528.197  | BF063899  | 4420.714  | 6017.711  | AF086351  | 659.398   | 1157.669  |
| CY3Cy5    | 5278.495  | 271.936   | U18087    | 59638.336 | 66988.891 | D83199    | 12568.051 | 19912.303 |
| NM_000945 | 2043.846  | 1096.85   | U66349    | 4443.178  | 5237.734  | AK025957  | 884.534   | 1928.368  |
| NM_002574 | 79727.953 | 48753.613 | AA057156  | 27685.885 | 34724.93  | Y16708    | 1554.785  | 3052.336  |
| NM_001310 | 3908.775  | 2421.973  | U19487    | 3799.657  | 4356.084  | AL157453  | 2196.61   | 3404.823  |
| AK026924  | 3954.46   | 1866.993  | AF166327  | 62315.34  | 65964.234 | NM_019040 | 6688.247  | 11898.389 |
| AL122047  | 2428.805  | 2164      | AF260739  | 11217.442 | 14319.226 | NM_005978 | 2030.6    | 4271.418  |
| AF052091  | 1376.43   | 950.76    | AF531423  | 54064.727 | 60213.68  | Y16711    | 1320.183  | 2684.677  |
| AF052145  | 978.689   | 870.469   | X76555    | 3823.968  | 4069.902  | AJ272179  | 5392.93   | 8041.345  |
| AF086548  | 1440.073  | 1439.131  | NM_005432 | 26115.521 | 31824.752 | AJ007015  | 5060.822  | 2668.73   |
| AK023717  | 2243.661  | 2625.208  | L10386    | 34446.66  | 44899.902 | AL049317  | 1525.339  | 626.277   |
| AK022294  | 1157.345  | 1185.464  | AF061812  | 59832.207 | 61965.211 | AK026279  | 2261.812  | 605.024   |
| AF086507  | 914.296   | 908.605   | AL136756  | 17613.553 | 20527.801 | AF130094  | 13712.045 | 3315.679  |
| U79289    | 1020.732  | 1179.842  | NM_001478 | 60805.383 | 63532.648 | AK026673  | 2736.841  | 1046.941  |
| NM_014028 | 2657.646  | 2551.51   | NM_002612 | 1939.726  | 1900.256  | AF170935  | 14554.515 | 6354.129  |
| NM_000945 | 2716.295  | 3684.687  | AF135422  | 5736.805  | 6796.496  | AB007978  | 910.663   | 467.022   |
| SR7       | 5536.319  | 62786.82  | NM_005930 | 2511.408  | 3101.837  | AF217970  | 1386.854  | 704.709   |
| SR9       | 17246.332 | 5345.116  | NM_014847 | 62941.027 | 60106.301 | AF086297  | 1304.929  | 950.836   |
| CY3Cy5    | 9897.076  | 506.632   | NM_001195 | 267.156   | 846.169   | AK025455  | 2089.642  | 1458.714  |
| AK026923  | 1383.725  | 1138.264  | NM_014448 | 18925.746 | 18811.223 | AK026799  | 6541.365  | 3349.896  |
| U61091    | 729.153   | 763.395   | AL080157  | 18536.938 | 19607.09  | NM_014860 | 1465.978  | 3872.822  |

|           |           |           |           |           |           |           |           |           |
|-----------|-----------|-----------|-----------|-----------|-----------|-----------|-----------|-----------|
| AK023595  | 905.819   | 1273.483  | NM_005100 | 1524.353  | 1691.366  | AK022549  | 1346.712  | 2450.31   |
| AK001357  | 399.845   | 848.539   | NM_005308 | 8007.888  | 10586.053 | NM_018157 | 469.353   | 746.901   |
| NM_015721 | 5036.298  | 7154.88   | NM_000911 | 3797.218  | 3267.272  | Z70714    | 3823.01   | 3735.039  |
| AF086298  | 1004.194  | 1904.437  | NM_007227 | 3080.715  | 3923.138  | AK021640  | 11115.447 | 14188.505 |
| AK027238  | 956.4     | 1452.468  | NM_007023 | 3000.434  | 4046.105  | NM_016565 | 64858.492 | 69755.813 |
| AK000032  | 794.622   | 1406.222  | NM_005873 | 27254.551 | 35224.34  | U84509    | 2525.983  | 4720.73   |
| AL360201  | 422.03    | 1001.518  | NM_004624 | 12487.361 | 15916.819 | AK002036  | 3552.262  | 4078.179  |
| S94540    | 44182.594 | 43501.133 | NM_014461 | 3342.824  | 3134.674  | AK025775  | 3033.239  | 992.852   |
| U79297    | 1215.471  | 1238.547  | NM_003865 | 4689.294  | 4512.063  | AB046791  | 1532.304  | 478.703   |
| AK002164  | 940.285   | 1408.328  | AB015330  | 54672.574 | 55830.855 | AF043469  | 1671.099  | 336.244   |
| AF052122  | 22387.52  | 28009.229 | NM_001455 | 9083.702  | 11430.436 | AK022008  | 1525.856  | 500.427   |
| AK022416  | 1213.211  | 1753.738  | NM_002385 | 19018.75  | 24627.215 | NM_018186 | 1617.191  | 894.15    |
| AK023224  | 3098.235  | 4198.895  | NM_001885 | 1469.931  | 1798.945  | AL080188  | 2336.667  | 1333.059  |
| AK023731  | 1947.6    | 1755.223  | AF039196  | 2730.764  | 3597.563  | NM_002390 | 2997.396  | 2150.568  |
| AK022442  | 481.342   | 1043.545  | L09071    | 2202.507  | 3168.547  | NM_006142 | 1427.044  | 1090.285  |
| AK023336  | 613.484   | 1071.377  | NM_005924 | 2589.776  | 3595.641  | NM_014910 | 9934.892  | 6563.345  |
| AK023771  | 496.513   | 649.668   | NM_019841 | 2230.573  | 2887.663  | AK001064  | 3806.621  | 2012.509  |
| AK023727  | 2330.177  | 3119.302  | NM_003322 | 3295.833  | 4030.886  | AB029031  | 3891.506  | 5995.661  |
| AK025271  | 1129.109  | 1602.066  | NM_003916 | 25512.582 | 19959.293 | NM_001294 | 9699.456  | 17634.818 |
| AF086204  | 4987.172  | 6717.284  | NM_002870 | 56345.375 | 57123.246 | AF302786  | 3078.249  | 3630.487  |
| NM_007021 | 1499.996  | 2153.557  | NM_002802 | 1482.531  | 1460.444  | AL122083  | 8465.425  | 11180.203 |
| AK026283  | 593.742   | 847.96    | NM_006363 | 12175.318 | 12007.561 | NM_019095 | 7703.354  | 24892.357 |
| AK023065  | 322.373   | 655.501   | NM_020415 | 5712.913  | 4703.757  | AK022212  | 57843.188 | 62628.207 |
| NM_017675 | 624.857   | 840.673   | NM_014879 | 735.977   | 764.674   | X64974    | 3836.88   | 9557.286  |
| AK021570  | 813.73    | 1586.777  | AL049667  | 11304.202 | 10489.019 | NM_000834 | 6401.652  | 18068.979 |
| AL360204  | 1356.017  | 2414.032  | NM_000334 | 27750.805 | 26471.902 | NM_006485 | 41910.859 | 51389.027 |
| AK000103  | 1150.512  | 1730.754  | NM_020400 | 4537.349  | 5014.595  | AL137268  | 2056.736  | 596.371   |
| AK026294  | 620.343   | 1010.055  | NM_001504 | 19705.4   | 18230.076 | AK022398  | 1060.65   | 452.95    |
| AF085959  | 987.005   | 2098.962  | D50926    | 12613.395 | 13999.89  | AK024109  | 1752.099  | 402.158   |
| AF075107  | 823.081   | 1167.137  | BF205683  | 16264.033 | 15558.882 | AF088048  | 1571.867  | 406.054   |
| AK023104  | 2389.438  | 3801.898  | NM_001565 | 1927.963  | 2415.044  | AK001143  | 2926.342  | 1564.941  |
| AK022181  | 2220.537  | 2452.69   | NM_001548 | 1608.746  | 1942.192  | AK001701  | 2864.345  | 1511.183  |
| NM_018474 | 9094.623  | 11736.872 | NM_000758 | 14707.509 | 16554.955 | AK022205  | 1021.899  | 594.764   |
| AK024937  | 4090.103  | 5744.855  | M17017    | 2203.027  | 2179.91   | AK024955  | 62435.816 | 60899.078 |
| D17178    | 1734.893  | 2216.021  | NM_002990 | 8109.93   | 8341.86   | NM_016580 | 1344.807  | 974.2     |
| AK022094  | 2774.478  | 2619.133  | NM_002432 | 19155.762 | 19292.992 | AF169693  | 1555.442  | 1254.234  |
| AK026695  | 1248.18   | 1500.658  | NM_012420 | 2365.008  | 2960.868  | L23206    | 12885.114 | 6573.025  |
| AK022220  | 524.73    | 546.315   | NM_002343 | 15346.855 | 20511.084 | NM_012192 | 4442.426  | 1577.415  |
| AK000141  | 7550.581  | 5139.667  | AB033037  | 4596.678  | 6440.404  | NM_006293 | 3079.404  | 2215.769  |
| AL137758  | 3869.768  | 2914.712  | L40400    | 26934.854 | 31380.281 | NM_007225 | 7240.094  | 14957.975 |
| AK023865  | 375.769   | 519.3     | AK025688  | 6021.396  | 7547.693  | AB011105  | 3509.437  | 7579.585  |
| AK025786  | 1244.601  | 1137.976  | NM_004457 | 9778.009  | 9143.252  | NM_002213 | 983.84    | 2378.68   |
| AK024188  | 681.258   | 889.542   | NM_014049 | 5946.043  | 4434.919  | NM_018970 | 608.124   | 1378.001  |
| AK026820  | 717.618   | 659.97    | NM_005396 | 4017.315  | 3142.917  | NM_004814 | 4952.348  | 8178.775  |
| AK001716  | 4104.533  | 4040.964  | NM_004315 | 20232.914 | 21167.436 | D86976    | 14907.76  | 29573.73  |
| AF113683  | 749.514   | 797.775   | NM_020166 | 17233.713 | 12638.794 | AF307080  | 706.916   | 1076.278  |
| NM_014095 | 587.95    | 478.996   | S56138    | 783.729   | 910.692   | NM_004057 | 3436.389  | 3766.131  |
| AK026821  | 1708.584  | 1522.766  | AK023860  | 24705.688 | 18444.748 | NM_018971 | 812.501   | 428.043   |
| AK026280  | 1591.758  | 1400      | NM_000031 | 8492.249  | 5717.294  | K03175    | 704.857   | 313.931   |
| AF113017  | 4904.625  | 4959.872  | NM_002085 | 43820.961 | 37883.277 | NM_003015 | 1580.942  | 584.484   |
| AL080232  | 10233.5   | 7265.566  | AK026061  | 1571.976  | 1356.624  | NM_003711 | 1158.955  | 451.626   |
| AK001120  | 9759.337  | 6007.768  | NM_016286 | 24245.854 | 23612.977 | NM_006496 | 5328.18   | 1699.26   |
| AK021980  | 4519.737  | 3054.003  | NM_001567 | 9661.146  | 8740.812  | NM_004826 | 1841.559  | 820.637   |

|           |           |           |           |           |           |           |           |           |
|-----------|-----------|-----------|-----------|-----------|-----------|-----------|-----------|-----------|
| S46402    | 1096.063  | 746.386   | NM_004905 | 22832.75  | 17641.4   | NM_013314 | 3530.391  | 1717.523  |
| Z83940    | 817.381   | 575.941   | AF217971  | 30642.211 | 24225.359 | NM_003182 | 925.383   | 560.12    |
| NM_00580C | 1577.821  | 973.533   | NM_001925 | 2149.726  | 2582.243  | NM_004431 | 20571.697 | 17781.92  |
| AF019617  | 20428.742 | 11735.173 | AF245517  | 4735.793  | 7664.819  | NM_002012 | 2675.959  | 1966.633  |
| AL137305  | 7206.766  | 4355.328  | NM_004137 | 2017.773  | 1962.224  | NM_00207C | 30330.689 | 17209.092 |
| NM_00529C | 660.36    | 366.572   | NM_014407 | 2687.721  | 2803.782  | AF227969  | 5212.693  | 3636.298  |
| AK025802  | 1072.407  | 661.882   | NM_004982 | 12939.168 | 13012.913 | NM_003944 | 54496.398 | 58061.199 |
| AF085973  | 518.264   | 465.295   | NM_001694 | 61203.406 | 64870.383 | AB014600  | 5991.011  | 7007.923  |
| NM_018013 | 2433.646  | 1799.215  | AF286370  | 5960.918  | 6901.955  | NM_018312 | 3280.709  | 1710.906  |
| AK026873  | 3279.885  | 2809.228  | NM_000217 | 1879.072  | 2338.762  | X98259    | 1409.73   | 846.833   |
| AK026394  | 4062.503  | 3558.049  | NM_004732 | 15156.053 | 16202.931 | NM_014792 | 584.601   | 360.233   |
| NM_00544E | 1786.331  | 1751.655  | AK026180  | 2872.277  | 2803.797  | U05255    | 245.698   | 187.208   |
| AK025943  | 44239.586 | 33111.305 | NM_018349 | 13207.007 | 13046.245 | X98260    | 9372.809  | 2406.717  |
| BG106479  | 1162.181  | 1598.861  | NM_00147E | 59796.789 | 50604.449 | NM_007217 | 6200.094  | 2268.392  |
| AF130069  | 22090.504 | 26093.928 | NM_002612 | 934.414   | 822.688   | NM_014777 | 28007.27  | 11307.803 |
| AL109669  | 3859.635  | 4296.796  | AF135422  | 5694.885  | 3656.146  | NM_001102 | 5438.72   | 2723.242  |
| AB037766  | 2526.356  | 1686.043  | NM_004479 | 54535.59  | 43891.598 | NM_003803 | 4539.387  | 2824.93   |
| AK026995  | 488.692   | 381.097   | NM_00261C | 2928.742  | 2141.33   | NM_00281E | 43920.113 | 21664.258 |
| AL133091  | 702.732   | 999.33    | AF070587  | 7623.44   | 3522.041  | NM_001937 | 8795.225  | 5115.315  |
| BF842915  | 487.845   | 561.952   | BE250526  | 4078.066  | 3197.688  | AK024778  | 709.378   | 463.105   |
| X82545    | 8618.747  | 5594.534  | NM_016819 | 10404.625 | 7930.264  | AK025498  | 2481.903  | 2100.408  |
| AF302079  | 15865.302 | 8945.097  | NM_012222 | 35649.84  | 27786.449 | NM_00139E | 22933.592 | 15727.464 |
| AJ224167  | 551.367   | 342.921   | NM_005002 | 6140.707  | 3667.693  | NM_00206E | 1246.414  | 913.117   |
| NM_00255C | 496.606   | 413.757   | NM_00659E | 7736.203  | 6258.777  | NM_019854 | 516.626   | 356.706   |
| NM_000692 | 1804.887  | 1008.761  | AK023214  | 39196.449 | 34599.699 | NM_01333E | 2797.185  | 1168.585  |
| AF086062  | 1447.171  | 817.179   | NM_001469 | 18206.711 | 20528.072 | NM_014671 | 12154.496 | 5905.696  |
| L47668    | 55945.566 | 41873.688 | NM_00360C | 51990.266 | 47274.98  | NM_001814 | 9806.544  | 5256.635  |
| NM_01792C | 5384.208  | 3586.332  | NM_01749C | 18942.266 | 17506.375 | NM_00565E | 2302.305  | 1394.965  |
| AK025345  | 1388.56   | 888.866   | NM_00271E | 8073.202  | 7264.65   | NM_006012 | 7344.426  | 4359.419  |
| D25274    | 14731.547 | 9538.068  | AK026727  | 8658.654  | 7896.695  | NM_002151 | 2213.594  | 1272.783  |
| U84520    | 5140.235  | 4218.082  | NM_00283C | 898.362   | 905.655   | NM_01488E | 2177.107  | 1030.905  |
| Z11853    | 569.371   | 393.633   | NM_006247 | 13785.96  | 11539.599 | AF173935  | 884.953   | 446.609   |
| AL133616  | 4239.658  | 4536.507  | AB032983  | 13270.3   | 10707.802 | AK025322  | 22006.5   | 10446.092 |
| AK026382  | 4412.782  | 4251.26   | NM_018281 | 36764.871 | 29547.928 | NM_017887 | 4145.066  | 1796.028  |
| AK091169  | 4459.857  | 5236.691  | CY3Cy5    | 5192.434  | 286.828   | NM_00052E | 3408.314  | 1634.947  |
| NM_01474E | 59056.109 | 58819.918 | NM_00094E | 2453.496  | 2405.179  | AF007152  | 2492.545  | 1811.804  |
| AF086026  | 8730.875  | 8090.151  | NM_002574 | 73148.742 | 49955.918 | NM_01757E | 506.692   | 487.358   |
| AL133011  | 768.256   | 742.382   | NM_00131C | 3854.57   | 3247.773  | AL122100  | 2196.761  | 2149.686  |
| NM_01630C | 674.913   | 874.312   | AK026924  | 4633.101  | 4208.617  | NM_00531C | 5602.724  | 2776.954  |
| NM_015607 | 18612.67  | 16999.463 | AL122047  | 2453.53   | 2268.834  | NM_014423 | 9389.494  | 6643.103  |
| AK026955  | 2933.312  | 2924.697  | AF052091  | 1880.592  | 1485.395  | BE904126  | 52845.176 | 38681.973 |
| AL110202  | 24296.453 | 14279.964 | AK024447  | 76163.445 | 51997.801 | AF272380  | 55031.578 | 44043.133 |
| NM_00622E | 2408.816  | 2010.977  | AF052145  | 1191.457  | 1137.418  | NM_03328E | 538.335   | 377.093   |
| NM_00376E | 14722.926 | 8913.155  | AF086458  | 2437.845  | 2618.709  | AK000102  | 3315.379  | 2489.867  |
| NM_018393 | 1912.414  | 1212.986  | AF086548  | 1630.815  | 1357.306  | AB040916  | 6120.778  | 4230.973  |
| BF032535  | 1438.555  | 916.695   | AK023717  | 2651.82   | 2519.636  | NM_005587 | 3764.476  | 2315.794  |
| NM_018332 | 2653.72   | 1345.661  | AK022294  | 1458.243  | 1442.979  | AF038362  | 2909.91   | 1586.509  |
| NM_00509E | 6322.131  | 3528.166  | AF086507  | 1299.008  | 1485.131  | NM_00519E | 48436.695 | 22232.365 |
| NM_00676C | 1279.778  | 793.09    | U79289    | 1129.042  | 1356.253  | NM_005481 | 2270.306  | 1061.594  |
| NM_01228E | 6468.709  | 3910.183  | NM_01402E | 2186.473  | 1695.441  | NM_00471E | 10215.825 | 4909.693  |
| AB037775  | 710.17    | 486.034   | NM_00094E | 2039.344  | 1802.27   | L40392    | 2706.834  | 1603.472  |
| L27560    | 1329.396  | 964.957   | NM_002574 | 73004.742 | 59468.77  | NM_001007 | 58789.82  | 60797.75  |
| AK022517  | 2911.529  | 2109.447  | SR1       | 76111.742 | 67151.227 | NM_003017 | 9538.971  | 6785.182  |



|           |           |           |           |           |           |           |           |           |
|-----------|-----------|-----------|-----------|-----------|-----------|-----------|-----------|-----------|
| NM_000329 | 18344.766 | 15960.87  | SR3       | 33730.609 | 35726.691 | NM_020366 | 5444.462  | 4389.821  |
| NM_001182 | 13086.63  | 7899.231  | SR5       | 3669.344  | 6542.093  | AK021608  | 2125.608  | 2157.404  |
| NM_000333 | 2582.496  | 1757.821  | SR7       | 3827.379  | 37237.039 | NM_004297 | 1943.437  | 1765.562  |
| NM_000172 | 8622.281  | 6474.47   | SR9       | 12897.346 | 3656.653  | NM_006044 | 10649.21  | 11351.24  |
| NM_002297 | 7464.073  | 7037.093  | CY3Cy5    | 6054.46   | 630.693   | NM_003635 | 4561.583  | 4521.411  |
| AB040968  | 18571.949 | 15386.893 | AK026923  | 1500.099  | 1458.515  | NM_000662 | 2652.878  | 2024.669  |
| X85323    | 1601.312  | 1151.021  | U61091    | 303.836   | 271.684   | NM_000292 | 2888.915  | 2516.612  |
| U17615    | 3532.204  | 2450.408  | AK021691  | 27229.709 | 19380.6   | NM_003688 | 55346.359 | 60809.445 |
| NM_005303 | 3287.97   | 2877.414  | AK023595  | 1029.647  | 1631.213  | NM_016173 | 1421.149  | 1005.695  |
| NM_016126 | 10782.523 | 7438.355  | AK001357  | 525.051   | 799.588   | NM_002875 | 5985.148  | 4040.213  |
| U84119    | 1398.572  | 1486.719  | NM_015721 | 4404.638  | 4262.566  | NM_004427 | 10737.688 | 7548.189  |
| NM_003608 | 4003.158  | 2884.167  | AF086298  | 1006.327  | 813.989   | U90549    | 4753.9    | 4243.04   |
| NM_006460 | 2544.73   | 1702.935  | AK027238  | 1015.942  | 688.147   | NM_013240 | 14383.581 | 10003.03  |
| L34156    | 821.427   | 601.711   | AK000032  | 944.691   | 766.773   | NM_015874 | 23037.389 | 17364.084 |
| NM_003749 | 495.328   | 332.619   | AL360201  | 566.099   | 472.641   | NM_004965 | 56183.246 | 59215.266 |
| NM_003557 | 8208.756  | 5328.263  | S94540    | 58459.063 | 68680.055 | AF312393  | 53153.449 | 49475.602 |
| NM_001257 | 21737.879 | 11079.858 | U79297    | 1353.527  | 2018.881  | AF272898  | 20057.408 | 17914.293 |
| D85245    | 6302.379  | 3992.646  | AK002164  | 543.249   | 748.403   | AB037817  | 1264.541  | 1284.664  |
| NM_000943 | 773.614   | 478.133   | AF052122  | 13336.466 | 24267.906 | AB032951  | 10391.534 | 9212.709  |
| NM_004658 | 5646.374  | 4447.076  | AK022416  | 1224.888  | 859.145   | NM_005149 | 12214.707 | 13161.305 |
| NM_001250 | 25649.68  | 15150.633 | AK023224  | 2716.89   | 2538.207  | AK024073  | 3080.427  | 2910.64   |
| AF298812  | 1463.725  | 1300.662  | AK023731  | 1635.712  | 726.937   | NM_018083 | 2537.054  | 2803.838  |
| NM_004969 | 2418.688  | 2047.586  | AK022442  | 705.975   | 870.805   | AL110188  | 5868.031  | 3784.774  |
| AJ249900  | 539.864   | 474.72    | AK023336  | 684.898   | 406.477   | D70834    | 42681.859 | 22764.393 |
| AK022581  | 7967.771  | 6694.651  | AK023771  | 720.261   | 799.505   | NM_000970 | 66278.727 | 64745.043 |
| NM_018054 | 4178.66   | 3761.328  | AK023727  | 2160.035  | 7941.022  | NM_012465 | 998.191   | 1103.359  |
| NM_006186 | 1065.931  | 934.154   | AK025271  | 792.699   | 1685.654  | M60499    | 2347.541  | 3015.759  |
| NM_000958 | 10116.812 | 8912.907  | AF086204  | 6796.486  | 7386.136  | NM_001614 | 56529.625 | 67283.805 |
| NM_001401 | 1252.657  | 849.776   | NM_007021 | 1744.244  | 1577.956  | NM_000366 | 794.724   | 816.367   |
| NM_013271 | 31467.131 | 18856.979 | AK026283  | 544.123   | 336.218   | NM_003833 | 38295.801 | 44756     |
| NM_004157 | 4481.625  | 3980.66   | AK021570  | 909.069   | 898.402   | AK000868  | 13054.893 | 12733.823 |
| NM_000684 | 627.092   | 1023.046  | AL360204  | 1180.554  | 1366.735  | NM_001233 | 3338.489  | 4800.569  |
| NM_007354 | 824.485   | 602.726   | AK000103  | 1570.23   | 3278.886  | NM_001234 | 1958.738  | 2108.413  |
| U67037    | 1150.314  | 939.608   | AK026294  | 1442.899  | 2319.529  | BF679789  | 14372.387 | 16293.979 |
| NM_004960 | 27458.719 | 12930.115 | AF075107  | 1786.505  | 3891.361  | H97792    | 14541.763 | 14771.234 |
| AF272370  | 15648.541 | 9139.358  | AK023104  | 1492.201  | 2548.627  | L33404    | 813.376   | 1109.697  |
| AF130050  | 14165.411 | 9520.524  | AK022181  | 1170.326  | 1949.971  | M13509    | 4079.354  | 4223.719  |
| AF119898  | 522.254   | 541.349   | NM_018474 | 7555.731  | 6180.379  | X04076    | 7822.872  | 5494.848  |
| AK023045  | 442.96    | 560.304   | AK024937  | 3295.36   | 2656.679  | W95082    | 579.645   | 780.761   |
| NM_012197 | 7274.938  | 5164.224  | D17178    | 1593.793  | 1177.201  | AA485362  | 1970.114  | 2013.298  |
| AK024016  | 4544.611  | 3740.991  | AK022094  | 2486.374  | 1887.13   | AJ222801  | 12850.872 | 11871.726 |
| NM_003581 | 3314.108  | 2503.324  | AK026695  | 1214.381  | 1121.888  | W72207    | 23981.148 | 25541.283 |
| NM_012407 | 1399.271  | 1257.356  | AK022220  | 494.68    | 338.877   | BI772354  | 816.484   | 819.616   |
| AF302505  | 2033.741  | 1502.505  | AL137539  | 400.562   | 288.85    | AA733033  | 2561.025  | 2440.159  |
| NM_007186 | 4399.797  | 2639.28   | U52832    | 1051.827  | 422.029   | AA583574  | 1682.345  | 1676.592  |
| NM_007044 | 3263.197  | 3872.915  | AK022037  | 451.798   | 1810.132  | U67733    | 792.728   | 1070.829  |
| AF294326  | 8163.812  | 6397.859  | AK000141  | 7926.466  | 17364.465 | AI690184  | 62382.387 | 62654.758 |
| NM_014678 | 3211.535  | 2899.45   | AL137758  | 3776.304  | 4244.921  | AA927490  | 2645.229  | 2412.274  |
| NM_012317 | 58366.441 | 61573.094 | AK023865  | 551.078   | 605.785   | NM_003779 | 1034.024  | 821.908   |
| NM_017853 | 8151.641  | 5503.48   | AK025786  | 1032.457  | 777.71    | NM_020164 | 15986.415 | 10721.86  |
| NM_016097 | 9515.487  | 9239.075  | AK024188  | 1120.417  | 569.45    | AK023521  | 15559.389 | 12941.519 |
| AB035301  | 640.008   | 681.532   | AK024379  | 319.529   | 290.085   | NM_014267 | 33201.004 | 37592.004 |
| AB046800  | 10911.188 | 8441.369  | AK026820  | 538.543   | 543.049   | NM_001481 | 327.413   | 727.66    |

|           |           |           |           |           |           |           |           |           |
|-----------|-----------|-----------|-----------|-----------|-----------|-----------|-----------|-----------|
| NM_002162 | 4040.111  | 3836.488  | AK001716  | 6260.619  | 4323.346  | U30872    | 2113.021  | 2536.851  |
| NM_00643E | 1277.137  | 1029.441  | AF113683  | 451.268   | 416.832   | AF111783  | 327.521   | 494.911   |
| AF209198  | 7505.393  | 5417.348  | NM_01409E | 442.863   | 724.976   | NM_02046E | 8272.06   | 8491.324  |
| L09247    | 579.125   | 397.807   | AF113017  | 8842.769  | 39909.461 | NM_00263E | 2036.786  | 2195.079  |
| M69012    | 54832.59  | 44827.355 | AL080232  | 22446.826 | 37076.465 | NM_014734 | 3981.827  | 4107.501  |
| NM_00693E | 16570.564 | 9002.369  | AK001120  | 14813.036 | 32701.166 | NM_00228E | 1801.376  | 1509.451  |
| NM_001327 | 30854.389 | 17272.307 | AF264629  | 270.351   | 1145.095  | AK026408  | 2366.584  | 1931.465  |
| AF321182  | 493.744   | 383.826   | AK021980  | 4580.572  | 4150.305  | NM_00502E | 669.798   | 760.248   |
| AB037722  | 1244.835  | 947.555   | S46402    | 1277.85   | 1014.025  | NM_006307 | 1198.714  | 1012.912  |
| NM_00006E | 2189.265  | 1586.673  | AF075048  | 554.233   | 388.958   | M74782    | 3718.144  | 3258.382  |
| NM_01838E | 2268.734  | 2009.654  | Z83940    | 991.596   | 772.26    | NM_01781E | 3549.03   | 3450.363  |
| AB033026  | 658.529   | 469.623   | NM_00580C | 1699.05   | 1253.368  | NM_02043E | 1120.003  | 1250.144  |
| AF104914  | 20765.539 | 14921.602 | AF019617  | 26226.266 | 19626.414 | NM_001767 | 890.668   | 1145.081  |
| NM_01471E | 14266.082 | 13308.857 | AL137305  | 7491.37   | 5698.646  | AF028823  | 4247.43   | 3229.021  |
| NM_00227E | 1892.601  | 1836.138  | NM_00529C | 644.042   | 544.96    | NM_00497C | 1671.279  | 1159.462  |
| AK023845  | 3293.799  | 2788.051  | AK025802  | 1455.624  | 2910.299  | NM_00429E | 61073.016 | 59927.605 |
| NM_00263E | 14851.749 | 13583.104 | AF085973  | 569.105   | 1074.689  | NM_002087 | 28773.057 | 17561.537 |
| NM_016487 | 2959.452  | 3197.788  | NM_01801E | 3327.446  | 2668.735  | AB023154  | 1291.351  | 664.598   |
| NM_00580E | 22738.229 | 20222.363 | AK026873  | 2861.563  | 2750.214  | NM_01458E | 942.919   | 931.114   |
| NM_006401 | 43740.293 | 38796.176 | AK026394  | 4104.828  | 3114.203  | AF200815  | 1051.995  | 1336.983  |
| NM_01591E | 13731.938 | 17054.713 | NM_00544E | 1185.785  | 854.231   | NM_00105E | 814.721   | 756.692   |
| NM_005157 | 7681.914  | 9765.287  | AK025943  | 33109.484 | 19967.205 | AY026461  | 4163.785  | 6617.646  |
| NM_01816E | 2566.751  | 2169.038  | BG106479  | 971.091   | 1018.484  | AK025708  | 6758.384  | 8753.312  |
| AK021452  | 1151.416  | 550.501   | AF130069  | 32048.455 | 37115.582 | NM_00040E | 1691.155  | 2440.157  |
| NM_00450E | 4535.644  | 3056.606  | AL109669  | 3904.145  | 8696.148  | NM_005564 | 54319.109 | 59032.156 |
| S74529    | 54231.117 | 46273.27  | AB037766  | 3877.047  | 9920.003  | NM_00450E | 5008.36   | 4022.526  |
| NM_020227 | 1420.401  | 1033.154  | AK026995  | 538.067   | 1763.341  | AL137619  | 8629.317  | 8761.947  |
| NM_00593E | 570.175   | 355.984   | AL133091  | 1005.632  | 1475.325  | AB007859  | 1203.535  | 1769.1    |
| NM_00559E | 845.078   | 693.86    | BF842915  | 689.988   | 890.807   | NM_006754 | 780.984   | 800.159   |
| NM_001421 | 960.06    | 808.53    | X82545    | 9151.596  | 14410.096 | NM_001127 | 2536.668  | 2409.584  |
| U97060    | 791.556   | 602.672   | AF302079  | 18495.668 | 14086.477 | NM_01243C | 3441.952  | 3021.663  |
| M73837    | 3754.405  | 3367.553  | AJ224167  | 848.353   | 615.528   | NM_003917 | 51509.711 | 47753.125 |
| U69127    | 52825.191 | 48507.867 | NM_00255C | 783.385   | 644.12    | NM_007077 | 3303.688  | 2723.699  |
| NM_00583E | 16794.145 | 12117.638 | NM_00069E | 1889.09   | 1656.274  | NM_00295E | 2721.933  | 2600.154  |
| AK023379  | 5981.146  | 6634.782  | AF086062  | 1776.028  | 1436.425  | AB018739  | 2066.574  | 2539.152  |
| NM_00607E | 1333.44   | 1287.217  | L47668    | 60696.496 | 54021.789 | NM_00675C | 54581.711 | 53620.664 |
| AK021904  | 17501.412 | 21646.516 | NM_01792C | 7551.073  | 9150.862  | AK001913  | 4353.549  | 3551.006  |
| -         | 3981.867  | 6121.703  | AK025345  | 1252.356  | 1464.531  | NM_00429E | 6077.019  | 6161.339  |
| NM_01829E | 1903.149  | 2993.614  | D25274    | 13020.458 | 11977.802 | NM_015484 | 6521.852  | 7132.551  |
| AL049705  | 14192.985 | 21690.574 | U84520    | 9441.889  | 8504.914  | NM_01804E | 1228.967  | 1500.347  |
| NM_01545E | 5768.396  | 8308.427  | Z11853    | 771.287   | 592.798   | NM_01331E | 5057.853  | 8028.565  |
| D13540    | 9617.927  | 11861.105 | AL133616  | 3978.555  | 3611.272  | M20701    | 35853.043 | 29336.236 |
| NM_01657C | 8704.73   | 12002.272 | AK026382  | 5298.706  | 3118.178  | NM_00291E | 2318.499  | 2571.603  |
| NM_00427E | 650.979   | 645.533   | AK091169  | 4307.365  | 4239.727  | NM_013284 | 4332.585  | 4392.21   |
| NM_00069C | 2378.738  | 2323.772  | NM_01474E | 63016.898 | 64623.527 | NM_00673E | 2734.915  | 2141.57   |
| NM_00015E | 16117.777 | 14928.01  | AF086026  | 12035.415 | 16988.807 | NM_013274 | 5567.374  | 5058.694  |
| AK024489  | 1463.05   | 1599.338  | AL133011  | 1558.058  | 3141.102  | AL050187  | 1124.416  | 1447.337  |
| NM_000181 | 6192.499  | 6142.15   | NM_01630C | 528.708   | 1271.546  | NM_007127 | 723.094   | 897.851   |
| NM_000667 | 347.839   | 582.769   | NM_015607 | 14394.964 | 18572.738 | NM_012387 | 29777.068 | 34630.813 |
| NM_014121 | 1494.039  | 2022.922  | AK026955  | 1573.004  | 2127.38   | NM_01473E | 1554.964  | 1750.459  |
| NM_00673C | 2308.847  | 3142.594  | AL110202  | 22440.785 | 28495.773 | NM_00425E | 26228.955 | 29127.578 |
| NM_005644 | 3078.736  | 4017.451  | NM_00622E | 2365.412  | 2110.203  | AF172929  | 6332.909  | 6156.944  |
| NM_01844E | 9787.315  | 11325.408 | NM_00376E | 16248.703 | 11908.816 | NM_00639E | 29395.389 | 29823.039 |

|           |           |           |           |           |           |           |           |           |
|-----------|-----------|-----------|-----------|-----------|-----------|-----------|-----------|-----------|
| AF182416  | 14385.377 | 18970.85  | NM_018393 | 2048.975  | 1262.327  | AK025655  | 2436.143  | 2643.925  |
| NM_005999 | 32215.164 | 32164.535 | BF032535  | 2062.846  | 1784.542  | NM_001362 | 1836.427  | 1531.387  |
| NM_006015 | 2297.577  | 3706.473  | NM_018332 | 2834.359  | 2343.816  | NM_004056 | 1008.277  | 607.391   |
| NM_004634 | 6320.13   | 9850.38   | NM_005096 | 7228.894  | 5751.026  | NM_001614 | 62262.109 | 61318.605 |
| NM_017523 | 17625.301 | 25718.135 | NM_006760 | 1453.138  | 1549.365  | NM_003833 | 34878.363 | 29029.447 |
| NM_002382 | 53876.039 | 60248.121 | NM_012289 | 6358.167  | 4629.156  | AK000868  | 12026.149 | 12179.236 |
| NM_016270 | 10310.01  | 13872.697 | AB037775  | 709.801   | 775.436   | NM_001233 | 4166      | 3866.56   |
| AF269249  | 1950.084  | 2665.486  | L27560    | 2081.703  | 2162.558  | NM_001234 | 1997.23   | 2397.331  |
| X51417    | 1061.013  | 1428.509  | AK022517  | 3676.953  | 4064.05   | BF679789  | 14367.289 | 21162.049 |
| D31763    | 9241.084  | 8718.792  | NM_000329 | 19762.125 | 25732.537 | H97792    | 13316.545 | 15081.672 |
| NM_014815 | 3022.198  | 4678.902  | NM_001182 | 23930.363 | 24541.725 | L33404    | 1239.465  | 3168.077  |
| NM_005443 | 4420.752  | 6793.652  | NM_000333 | 2909.447  | 2704.054  | M13509    | 4368.27   | 5224.496  |
| NM_007221 | 11569.296 | 16668.445 | NM_000172 | 9268.064  | 10078.743 | X04076    | 7398.317  | 8720.91   |
| X54163    | 54600.195 | 58729.23  | NM_002297 | 9398.1    | 9419.588  | W95082    | 470.662   | 882.757   |
| AK025395  | 1344.668  | 1761.129  | AB040968  | 24734.164 | 22947.252 | AA485362  | 2044.131  | 2778.51   |
| NM_000388 | 2628.694  | 3744.426  | X85323    | 1070.748  | 1318.2    | AJ222801  | 12696.531 | 12848.721 |
| X58377    | 704.398   | 1120.723  | U17615    | 4505.755  | 5881.842  | W72207    | 23358.58  | 31060.828 |
| NM_002469 | 589.471   | 1241.329  | NM_005303 | 6012.467  | 12947.63  | BI772354  | 1421.773  | 1436.281  |
| AI673575  | 566.262   | 808.171   | NM_016126 | 9241.666  | 11012.675 | AA733033  | 2924.768  | 3890.998  |
| BI830936  | 1279.139  | 2324.051  | U84119    | 1377.074  | 2027.599  | AA583574  | 1903.152  | 2398.523  |
| U79292    | 43072.641 | 48638.754 | NM_003608 | 3609.634  | 4789.545  | U67733    | 1193.729  | 1658.677  |
| AA947915  | 840.321   | 1437.098  | NM_006460 | 3177.031  | 2625.93   | AI690184  | 58544.547 | 62124.531 |
| BI830753  | 1436.48   | 1753.341  | L34156    | 1148.606  | 1299.973  | T48692    | 556.969   | 842.137   |
| X68314    | 3609.847  | 5483.19   | NM_003749 | 549.559   | 491.841   | AA927490  | 2553.14   | 2709.736  |
| N51014    | 2991.202  | 4710.734  | NM_003557 | 8309.679  | 7674.634  | NM_005052 | 13229.813 | 11163.312 |
| BE392471  | 31006.107 | 42597.395 | NM_001257 | 27691.414 | 21688.051 | BF038439  | 1203.046  | 1119.605  |
| AA682423  | 1675.834  | 2674.944  | D85245    | 6945.914  | 6816.119  | AF319476  | 1192.519  | 1666.854  |
| AL043686  | 8171.654  | 11486.312 | NM_000943 | 1370.7    | 2240.732  | NM_014267 | 26744.916 | 22483.334 |
| AA490172  | 2049.619  | 3214.91   | NM_004658 | 6081.981  | 7964.352  | U30872    | 1922.492  | 988.582   |
| AA775212  | 4030.302  | 4756.433  | NM_001250 | 26733.299 | 24019.561 | AF111783  | 354.608   | 335.098   |
| NM_000402 | 2272.378  | 2803.793  | AF298812  | 2152.616  | 1860.309  | NM_020469 | 7801.817  | 6385.528  |
| AK026266  | 47232.703 | 51128.828 | NM_004969 | 2523.215  | 1809.019  | NM_002639 | 1627.381  | 2016.562  |
| NM_007124 | 20560.1   | 25796.686 | AJ249900  | 670.501   | 560.526   | NM_014734 | 4057.243  | 5956.961  |
| NM_003176 | 11432.132 | 15587.385 | AK022581  | 6748.375  | 7035.364  | NM_002289 | 2920.334  | 3389.737  |
| NM_000723 | 2061.996  | 3413.07   | NM_018054 | 2721.246  | 2882.174  | AK026408  | 2335.978  | 3285.385  |
| AL096751  | 16590.998 | 20476.963 | NM_006186 | 1553.998  | 1454.04   | NM_005025 | 599.85    | 973.332   |
| NM_000364 | 1530.53   | 2410.389  | NM_000958 | 8719.94   | 9327.407  | NM_006307 | 1149.276  | 1829.956  |
| AF026920  | 28478.818 | 34932.211 | NM_001401 | 950.707   | 995.693   | M74782    | 3786.972  | 4107.398  |
| NM_004931 | 6707.807  | 12317.9   | NM_013271 | 41881.969 | 49706.473 | NM_017818 | 4186.829  | 4184.484  |
| NM_000607 | 44978.406 | 52318.691 | NM_004157 | 3904.968  | 4652.537  | NM_020433 | 980.085   | 1508.174  |
| AB011099  | 375.637   | 1038.378  | NM_000684 | 621.913   | 779.293   | NM_001767 | 608.949   | 884.8     |
| NM_002575 | 5435.703  | 8654.577  | NM_007354 | 1065.471  | 914.721   | AF028823  | 7878.771  | 10261.31  |
| AK023114  | 8712.157  | 13137.279 | U67037    | 1320.574  | 1094.397  | NM_004970 | 686.207   | 844.731   |
| NM_003678 | 5171.238  | 8043.938  | NM_004960 | 27659.514 | 19927.83  | NM_004295 | 57821.273 | 61972.23  |
| NM_012301 | 3564.992  | 4093.898  | AF272370  | 19349.133 | 16606.52  | NM_002087 | 29181.844 | 33018.434 |
| NM_000680 | 416.161   | 383.056   | AF130050  | 14640.808 | 13482.651 | AB023154  | 1567.71   | 1222.284  |
| NM_014938 | 4658.651  | 5292.947  | AF119898  | 653.209   | 695.972   | NM_014585 | 1049.659  | 1206.109  |
| AF049460  | 675.169   | 693.143   | AK023045  | 774.276   | 618.536   | AF200815  | 1351.362  | 1949.814  |
| AK001500  | 2777.485  | 3138.138  | NM_012197 | 7619.806  | 6411.111  | NM_012465 | 1154.381  | 1216.279  |
| NM_006774 | 1329.756  | 2084.328  | AK024016  | 4621.236  | 4206.017  | M60499    | 2355.57   | 3018.268  |
| NM_020129 | 2690.283  | 4137.509  | NM_003581 | 3199.949  | 3317.167  | AY026461  | 4577.845  | 3803.465  |
| Y16521    | 8790.304  | 8545.134  | NM_002888 | 621.218   | 678.844   | AK025708  | 6708.581  | 1303.913  |
| AL050371  | 7295.547  | 9529.024  | NM_012407 | 1644.961  | 1898.732  | NM_000405 | 1709.18   | 1279.161  |

|           |           |           |           |           |           |           |           |           |
|-----------|-----------|-----------|-----------|-----------|-----------|-----------|-----------|-----------|
| NM_002651 | 3602.62   | 4529.335  | AF302505  | 1999.102  | 1874.647  | NM_005564 | 49618.328 | 57054.098 |
| NM_002413 | 15765.396 | 14902.696 | NM_007186 | 5793.488  | 5000.489  | NM_004508 | 5332.575  | 4962.176  |
| NM_017577 | 988.7     | 1364.749  | NM_007044 | 2894.81   | 2890.627  | AL137619  | 8900.267  | 9111.139  |
| NM_016301 | 14102.248 | 18130.434 | AF294326  | 6523.543  | 5315.044  | AB007859  | 969.116   | 1502.416  |
| NM_004722 | 8189.634  | 11422.786 | NM_014678 | 3761.192  | 4449.326  | NM_006754 | 704.716   | 902.132   |
| NM_014425 | 3473.134  | 4614.933  | NM_012317 | 58363.773 | 66018.422 | NM_001127 | 3837.515  | 4561.913  |
| NM_012133 | 10597.653 | 10956.868 | NM_017853 | 7325.387  | 5979.013  | NM_012430 | 3969.535  | 3979.052  |
| NM_017954 | 1452.148  | 1816.984  | NM_016097 | 8215.549  | 8351.611  | NM_003917 | 43377.57  | 46546.633 |
| NM_006612 | 7736.197  | 6242.439  | AB035301  | 780.775   | 884.761   | NM_007077 | 2863.957  | 3342.511  |
| NM_016451 | 2539.03   | 2340.05   | AB046800  | 9890.815  | 11414.476 | NM_002956 | 2882.5    | 3006.944  |
| NM_007351 | 55295.184 | 54332.977 | NM_002162 | 4123.834  | 4729.749  | AB018739  | 2376.302  | 2438.047  |
| AL049935  | 21228.186 | 13777.075 | NM_006438 | 1962.556  | 3240.961  | NM_006750 | 51907.805 | 53560.078 |
| AB033043  | 28460.82  | 20941.969 | AF209198  | 7412.173  | 5165.5    | NM_020164 | 17221.932 | 12109.377 |
| NM_014996 | 9079.01   | 6387.482  | L09247    | 491.359   | 381.582   | AK023521  | 17800.848 | 14785.613 |
| AK025220  | 4903.067  | 3208.485  | M69012    | 50690.055 | 48303.191 | NM_004292 | 2553.689  | 2081.37   |
| NM_016308 | 24411.318 | 18350.367 | NM_016347 | 401.81    | 403.652   | NM_018046 | 985.797   | 534.401   |
| D42046    | 5082.678  | 4280.729  | NM_006936 | 16181.047 | 11480.407 | NM_013316 | 5420.472  | 3410.705  |
| NM_001033 | 12813.675 | 9394.063  | NM_001327 | 29345.994 | 23090.697 | M20701    | 37057.207 | 30544.094 |
| NM_004526 | 17051.953 | 13566.652 | AF321182  | 419.679   | 274.355   | NM_002912 | 2290.432  | 2512.339  |
| NM_002526 | 19359.779 | 14503.997 | AB037722  | 1149.11   | 1678.601  | NM_013284 | 4043.97   | 4421.435  |
| NM_020135 | 4293.681  | 3169.059  | NM_003652 | 318.945   | 448.763   | NM_006739 | 2674.196  | 2003.186  |
| NM_018518 | 4824.846  | 4111.169  | NM_000063 | 2469.206  | 2544.167  | NM_013274 | 5183.516  | 4487.233  |
| AK023149  | 2674.157  | 2472.493  | NM_018389 | 2083.113  | 1968.331  | AL050187  | 889.179   | 1126.603  |
| AK023168  | 5131.369  | 6167.404  | AB033026  | 861.729   | 855.008   | NM_007127 | 945.14    | 942.29    |
| NM_006646 | 838.4     | 780.556   | AF104914  | 16657.393 | 14118.623 | NM_012387 | 29611.176 | 29780.178 |
| NM_004742 | 3694.214  | 3919.892  | NM_014716 | 12798.392 | 12621.687 | NM_014735 | 1381.116  | 1601.348  |
| NM_014753 | 3066.866  | 2639.281  | AB002354  | 604.22    | 752.032   | NM_004252 | 26263.678 | 28284.891 |
| NM_006585 | 45468.289 | 41208.184 | NM_002278 | 681.994   | 576.014   | AF172929  | 6627.129  | 6209.45   |
| NM_014331 | 5432.632  | 3759.825  | AK023845  | 2558.438  | 3091.221  | NM_006396 | 32791.398 | 29898.98  |
| NM_006795 | 36199.668 | 27064.098 | NM_002638 | 15799.435 | 17755.648 | AK025655  | 2798.885  | 2932.556  |
| AF070568  | 3135.205  | 2494.949  | NM_016487 | 3028.724  | 4696.982  | NM_001362 | 1216.089  | 1130.501  |
| NM_000277 | 670.335   | 506.494   | NM_005808 | 18309.162 | 42166.293 | NM_004056 | 1306.639  | 772.567   |
| NM_000240 | 10173.295 | 8690.904  | NM_006401 | 35554.598 | 39679.539 | NM_001056 | 1072.91   | 1065.247  |
| AK055733  | 19667.648 | 32615.383 | NM_015913 | 10832.044 | 15541.567 | NM_003833 | 36579.605 | 47611.676 |
| AF298880  | 8572.828  | 6969.14   | NM_005157 | 7480.448  | 9754.114  | AK000868  | 11714.315 | 9154.559  |
| NM_007221 | 10551.12  | 8306.555  | NM_018169 | 3101.671  | 2962.515  | NM_001233 | 2657.937  | 2016.176  |
| X54163    | 52401.059 | 37157.719 | AK021452  | 1036.934  | 877.223   | BF679789  | 15660.988 | 14623.608 |
| AK025395  | 1181.669  | 776.087   | NM_004506 | 4743.862  | 3682.802  | H97792    | 15716.729 | 19178.502 |
| NM_000388 | 2440.988  | 2023.988  | S74529    | 54612.41  | 55092.363 | L33404    | 694.633   | 1243.678  |
| X58377    | 641.079   | 404.093   | NM_020227 | 1863.17   | 1674.646  | M13509    | 5065.588  | 5525.131  |
| NM_002466 | 601.463   | 555.081   | NM_005933 | 567.042   | 333.661   | X04076    | 7763.484  | 7062.363  |
| AI673575  | 535.916   | 319.553   | NM_005596 | 1150.88   | 1643.559  | W95082    | 756.465   | 922.86    |
| BI830936  | 1100.741  | 787.603   | NM_001421 | 883.168   | 1095.243  | AA485362  | 2025.577  | 2399.297  |
| U79292    | 38807.402 | 28718.67  | U97060    | 904.387   | 817.275   | AJ222801  | 14173.112 | 14152.308 |
| AA947915  | 945.093   | 783.424   | M73837    | 3442.064  | 3709.233  | W72207    | 25210.277 | 28814.764 |
| BI830753  | 1446.283  | 1000.236  | U69127    | 48012.582 | 38183.828 | BI772354  | 1597.641  | 1939.696  |
| X68314    | 2678.099  | 2000.888  | NM_005839 | 12919.084 | 7171.216  | AA733033  | 3267.143  | 3834.325  |
| X71973    | 40999.711 | 29268.668 | AK023379  | 4770.592  | 3840.935  | AA583574  | 1739.862  | 2130.407  |
| T49651    | 33020.582 | 31226.883 | NM_006076 | 1270.588  | 1500.934  | AI690184  | 59488.352 | 66977.547 |
| N51014    | 1616.377  | 1490.786  | AK021904  | 11940.476 | 11225.163 | T48692    | 484.259   | 736.858   |
| BE392471  | 26222.416 | 23775.977 | -         | 2663.851  | 3672.034  | AA927490  | 1923.608  | 2726.732  |
| AI802950  | 5971.669  | 5959.894  | NM_018292 | 1053.782  | 2126.779  | NM_005052 | 10949.358 | 9029.079  |
| AI741278  | 677.891   | 886.504   | AL049705  | 10632.049 | 25356.279 | BF038439  | 1016.841  | 1069.703  |

|           |           |           |           |           |           |           |           |           |
|-----------|-----------|-----------|-----------|-----------|-----------|-----------|-----------|-----------|
| AA682423  | 1557.633  | 1264.379  | NM_015458 | 4477.773  | 5218.733  | AF319476  | 1241.81   | 1380.485  |
| AL043686  | 7798.19   | 6044.973  | D13540    | 7373.297  | 8611.395  | AK001913  | 4495.397  | 4475.34   |
| AA490172  | 2002.58   | 1514.57   | NM_016570 | 7562.581  | 10347.874 | NM_002288 | 1727.935  | 810.064   |
| AA775212  | 3562.055  | 2700.551  | NM_004273 | 805.424   | 718.163   | AK026408  | 1965.315  | 2051.984  |
| AB011174  | 4011.166  | 3822.209  | NM_000690 | 2655.075  | 2551.578  | M74782    | 4695.463  | 3353.048  |
| AB040879  | 1861.427  | 1555.528  | NM_000155 | 15677.147 | 14302.308 | NM_017818 | 4504.943  | 4705.825  |
| NM_003176 | 11215.846 | 7844.602  | AK024489  | 1586.558  | 1640.711  | NM_020433 | 1317.659  | 1592.41   |
| NM_000723 | 2133.212  | 1305.828  | NM_000181 | 7591.243  | 5878.89   | NM_001767 | 543.85    | 814.633   |
| AL096751  | 15879.938 | 10633.102 | NM_000667 | 422.323   | 553.884   | AF028823  | 8613.345  | 7891.483  |
| NM_000364 | 1502.475  | 932.057   | NM_014121 | 2007.54   | 1539.933  | NM_004970 | 753.898   | 430.759   |
| AF026920  | 27086.432 | 18025.539 | NM_006730 | 2041.176  | 5755.051  | NM_004295 | 59613.371 | 63320.652 |
| NM_004931 | 6710.675  | 4536.004  | NM_005644 | 2466.828  | 4936.129  | NM_002087 | 34768.785 | 31264.762 |
| NM_000607 | 44574.531 | 25495.938 | NM_018442 | 8002.643  | 7988.915  | AB023154  | 1273.991  | 1263.616  |
| AB011099  | 473.307   | 430.07    | AF182416  | 13166.919 | 13663.42  | NM_001714 | 618.736   | 779.234   |
| NM_002575 | 4900.927  | 3536.153  | NM_005999 | 27163.455 | 23200.021 | NM_014585 | 1119.198  | 1260.552  |
| NM_004244 | 5429.75   | 4669.412  | NM_006015 | 1821.837  | 1646.486  | AF200815  | 1114.351  | 1369.667  |
| NM_003371 | 58596.25  | 61976.734 | NM_004634 | 4227.336  | 3569.741  | NM_014564 | 612.901   | 673.375   |
| AK023114  | 7751.893  | 7819.223  | NM_002017 | 4492.831  | 4381.566  | NM_013441 | 4488.146  | 3638.363  |
| NM_003678 | 4400.683  | 5470.852  | NM_017523 | 13065.927 | 16487.455 | NM_014421 | 3235.28   | 3330.586  |
| NM_012301 | 4058.492  | 3426.776  | NM_002382 | 49621.801 | 43103.254 | AB033028  | 448.595   | 552.938   |
| NM_005631 | 334.215   | 317.129   | NM_002158 | 1146.025  | 1160.533  | NM_017680 | 1023.874  | 813.02    |
| NM_014938 | 4244.302  | 4018.508  | U13223    | 24153.5   | 24534.957 | NM_012465 | 1313.197  | 1071.942  |
| AF049460  | 1398.737  | 1185.483  | NM_016270 | 7234.61   | 13648.034 | M60499    | 2466.046  | 2277.106  |
| NM_014815 | 3133.938  | 3475.473  | AF269249  | 1247.266  | 3374.239  | NM_001614 | 64771.719 | 70656.328 |
| NM_005443 | 4334.199  | 4821.546  | X51417    | 509.243   | 851.894   | NM_000366 | 1039.669  | 1133.287  |
| NM_020128 | 2168.258  | 1777.428  | D31763    | 7305.213  | 6230.534  | AB007859  | 1408.924  | 1582.88   |
| Y16521    | 9153.292  | 6442.411  | NM_014815 | 3046.787  | 3058.334  | NM_006754 | 698.551   | 840.413   |
| AL050371  | 7167.524  | 6043.467  | NM_005443 | 4075.534  | 3648.426  | NM_001127 | 4555.423  | 4395.842  |
| NM_002651 | 3692.947  | 2230.169  | NM_007221 | 9956.21   | 10298.6   | NM_012430 | 3842.752  | 3583.555  |
| NM_002413 | 18424.303 | 10850.473 | X54163    | 46985.766 | 39072.285 | NM_003917 | 53894.156 | 59690.352 |
| NM_017577 | 930.834   | 851.984   | AK025395  | 1559.225  | 1494.871  | NM_007077 | 3551.652  | 3861.993  |
| NM_016301 | 14038.624 | 10321.957 | NM_000388 | 2267.53   | 2161.928  | NM_002956 | 3000.945  | 3775.551  |
| NM_014668 | 9747.781  | 7572.198  | X58377    | 799.921   | 687.338   | AB018739  | 3417.1    | 3983.233  |
| NM_004722 | 7717.794  | 7828.708  | NM_002469 | 646.694   | 491.507   | NM_006750 | 55517.367 | 56556.082 |
| NM_014425 | 3303.043  | 3758.965  | AI673575  | 1560.861  | 4226.846  | NM_020164 | 18412.883 | 13479.238 |
| NM_012133 | 9898.995  | 10990.694 | BI830936  | 1109.217  | 2815.979  | AK023521  | 17160.352 | 14331.17  |
| NM_017954 | 782.393   | 998.416   | U79292    | 44552.703 | 52920.805 | NM_014267 | 31920.723 | 31890.115 |
| NM_006612 | 9540.012  | 8080.897  | AA947915  | 1324.421  | 2026.739  | NM_001481 | 481.127   | 420.163   |
| NM_016451 | 3653.465  | 3047.555  | BI830753  | 1870.567  | 1918.421  | U30872    | 2290.718  | 2438.176  |
| NM_007351 | 54401.379 | 41338.914 | X68314    | 3593.639  | 3713.069  | AF111783  | 513.535   | 532.573   |
| AK026266  | 38913.078 | 28637.615 | X71973    | 33746.172 | 30772.43  | NM_020468 | 7492.512  | 7227.922  |
| NM_007124 | 17845.006 | 22218.709 | T49651    | 25050.404 | 28572.457 | NM_002638 | 1928.816  | 1945.339  |
| AB033043  | 28129.443 | 30157.074 | N51014    | 1623.795  | 1616.994  | NM_014734 | 3533.011  | 3830.571  |
| NM_014998 | 8332.078  | 5978.346  | BE392471  | 20224.934 | 16615.539 | NM_018085 | 515.115   | 745.834   |
| AK025220  | 4711.675  | 2647.36   | AI802950  | 4988.282  | 4443.136  | NM_001056 | 994.4     | 967.387   |
| NM_016308 | 23748.178 | 17089.283 | AI741278  | 445.662   | 377.941   | AY026461  | 4379.236  | 4600.991  |
| D42046    | 5199.836  | 3877.607  | AA682423  | 1220.128  | 1749.565  | AK025708  | 6676.757  | 6264.847  |
| NM_001033 | 12870.934 | 9051.354  | AL043686  | 6895.471  | 16889.117 | NM_000405 | 1872.9    | 2256.821  |
| NM_004526 | 16979.434 | 12656.502 | AA490172  | 1700.657  | 2158.095  | NM_005564 | 55983.789 | 65700.93  |
| NM_002526 | 18718.078 | 11773.479 | AA775212  | 3232.866  | 3357.264  | NM_004508 | 4393.848  | 4272.782  |
| NM_020135 | 4720.246  | 3536.662  | NM_000402 | 1843.246  | 1935.191  | NM_006405 | 51229.965 | 51050.641 |
| NM_018518 | 5902.62   | 4086.367  | AK026266  | 36336.504 | 24929.086 | NM_006748 | 534.358   | 591.351   |
| AK023149  | 2574.948  | 1626.688  | NM_007124 | 16793.828 | 11713.583 | NM_004694 | 2669.902  | 2851.546  |

|           |           |           |           |           |           |           |           |           |
|-----------|-----------|-----------|-----------|-----------|-----------|-----------|-----------|-----------|
| AK023168  | 4121.861  | 4025.081  | NM_003176 | 10438.356 | 8059.449  | AL137619  | 7923.483  | 7559.806  |
| NM_006646 | 481.932   | 453.27    | NM_000723 | 2405.754  | 1624.72   | NM_003615 | 484.211   | 521.894   |
| NM_004742 | 3473.048  | 2424.209  | AL096751  | 15099.886 | 12752.402 | BF038439  | 1005.153  | 1581.347  |
| NM_014753 | 2680.197  | 1938.236  | NM_000364 | 1754.148  | 1356.151  | AF319476  | 1013.611  | 1551.852  |
| NM_006585 | 45323.992 | 41064.895 | AF026920  | 30165.135 | 26779.035 | AK001913  | 3828.707  | 3424.762  |
| NM_014331 | 6814.667  | 7903.619  | NM_004931 | 6664.463  | 18273.094 | NM_004292 | 2523.111  | 3492.95   |
| NM_006795 | 44670.672 | 35579.816 | NM_000607 | 41630.84  | 57303.418 | NM_015484 | 5931.184  | 5816.941  |
| AF070568  | 3256.169  | 2849.654  | AB011099  | 343.112   | 481.203   | NM_018046 | 929.551   | 1065.246  |
| NM_000277 | 924.617   | 639.639   | NM_002575 | 7168.831  | 7098.145  | NM_013316 | 5779.553  | 5866.13   |
| NM_000240 | 11592.759 | 9588.331  | NM_004244 | 5698.952  | 5846.87   | M20701    | 39299.625 | 37891.973 |
| AK055733  | 19982.646 | 17825.598 | NM_003371 | 55180.906 | 58688.316 | NM_002912 | 3249.457  | 3474.875  |
| AF298880  | 7940.728  | 7195.628  | AK023114  | 6059.008  | 5222.746  | NM_013284 | 4110.765  | 4805.903  |
| AK001500  | 2717.407  | 2558.289  | NM_003678 | 3659.146  | 3455.643  | NM_006739 | 2414.335  | 2276.628  |
| NM_006774 | 1248.106  | 2059.362  | NM_012301 | 3507.548  | 4304.483  | NM_013274 | 4050.275  | 3766.955  |
| AK025395  | 1241.005  | 1116.368  | NM_000680 | 573.812   | 987.193   | AL050187  | 1081.67   | 1195.275  |
| NM_000385 | 2716.4    | 2230.195  | NM_005631 | 352.614   | 383.168   | NM_007127 | 758.787   | 770.655   |
| X58377    | 781.015   | 490.28    | NM_014938 | 4227.283  | 6281.788  | NM_012387 | 26120.678 | 24584.119 |
| NM_002465 | 584.538   | 409.226   | AF049460  | 571.727   | 924.689   | NM_014735 | 1429.743  | 1596.448  |
| AI673575  | 365.079   | 409.933   | AK001500  | 2613.179  | 2143.79   | NM_004252 | 21526.262 | 23745.553 |
| BI830936  | 1292.964  | 1234.246  | NM_006774 | 1560.841  | 1270.451  | AF172929  | 5521.775  | 5256.558  |
| U79292    | 40401.797 | 32367.967 | NM_020129 | 2787.382  | 3117.288  | NM_006395 | 31561.244 | 29662.373 |
| AA947915  | 1155.275  | 892.982   | Y16521    | 9216.183  | 6852.151  | AK025655  | 2599.192  | 2822.118  |
| BI830753  | 1597.184  | 1369.624  | AL050371  | 5832.986  | 12788.02  | CY3Cy5    | 1864.2    | 73.108    |
| X68314    | 2810.224  | 1899.501  | NM_002651 | 3157.282  | 4644.832  | NM_012245 | 38314.289 | 19458.064 |
| X71973    | 40682.121 | 24733.27  | NM_002413 | 15611.358 | 16527.219 | NM_133263 | 1291.795  | 1038.515  |
| T49651    | 30839.939 | 25461.158 | NM_017577 | 910.897   | 1132.727  | AF086176  | 1207.641  | 1032.745  |
| N51014    | 1300.199  | 1072.432  | NM_016301 | 10539.459 | 14380.977 | NM_017742 | 1057.05   | 701.381   |
| BE392471  | 25537.395 | 18691.428 | NM_014668 | 11247.835 | 13531.082 | NM_005108 | 1426.495  | 1152.67   |
| AI802950  | 5559.019  | 6128.807  | NM_004722 | 7947.457  | 9984.588  | AK022292  | 4522.048  | 3530.91   |
| AI741278  | 580.973   | 479.527   | NM_014425 | 2694.521  | 3179.098  | AB051436  | 2090.4    | 1779.754  |
| AA682423  | 1837.443  | 1911.408  | NM_012133 | 7992.836  | 8595.854  | AK026482  | 22419.041 | 15437.446 |
| AL043686  | 8224.146  | 8051.708  | NM_017954 | 605.618   | 916.332   | AL137473  | 1983.873  | 1939.811  |
| AA490172  | 2197.795  | 1667.006  | NM_006612 | 7639.179  | 8592.817  | AJ001873  | 9439.393  | 7888.253  |
| AA775212  | 3776.839  | 2699.94   | NM_016451 | 2473.084  | 2273.973  | AL137476  | 8142.584  | 5890.37   |
| AB011174  | 4548.291  | 3840.862  | NM_007351 | 55165.75  | 55918.059 | AF052174  | 2829.42   | 2405.361  |
| AB040879  | 1629.052  | 1158.976  | AL049935  | 19654.418 | 15098.082 | AF070590  | 670.729   | 639.751   |
| AL049935  | 23314.379 | 21960.672 | AB033043  | 31458.068 | 25265.279 | NM_012245 | 30436.48  | 12279.943 |
| NM_002575 | 5964.05   | 4749.691  | NM_014999 | 8293.516  | 6709.244  | NM_133263 | 1104.024  | 429.874   |
| NM_004244 | 5643.479  | 4752.772  | AK025220  | 4722.163  | 3105.774  | SR2       | 26670.246 | 10927.3   |
| NM_003371 | 52473.703 | 56870.879 | NM_016308 | 21637.082 | 18502.199 | SR4       | 7380.847  | 2397.55   |
| AK023114  | 7976.691  | 7070.839  | D42046    | 4405.765  | 4149.875  | SR6       | 765.091   | 259.622   |
| NM_003678 | 4607.759  | 5402.472  | NM_001033 | 11074.693 | 10088.122 | SR8       | 3819.07   | 4093.436  |
| NM_012301 | 5056.845  | 3943.173  | NM_004526 | 14110.941 | 17802.684 | SR10      | 11874.647 | 1703.145  |
| NM_000680 | 512.847   | 585.253   | NM_002526 | 17180.738 | 24931.934 | CY3Cy5    | 1611.413  | 74.154    |
| NM_005631 | 408.543   | 412.141   | NM_020135 | 4182.875  | 5392.398  | AK024432  | 1154.421  | 792.182   |
| NM_014419 | 25060.002 | 28247.777 | NM_018518 | 5356.55   | 7569.385  | AF088001  | 493.351   | 292.906   |
| NM_014938 | 5111.603  | 6203.484  | AK023149  | 2346.49   | 2638.963  | NM_018067 | 5998.969  | 4633.992  |
| AF049460  | 978.634   | 1139.401  | AK023168  | 5255.417  | 8656.837  | NM_018956 | 15372.647 | 9056.574  |
| AK026066  | 2821.494  | 3919.627  | NM_006646 | 684.81    | 817.295   | NM_014787 | 1004.284  | 700.859   |
| NM_005244 | 12488.188 | 15490.761 | NM_004742 | 4088.855  | 3965.273  | AL122109  | 635.065   | 696.4     |
| AF054589  | 5475.438  | 8086.209  | NM_014753 | 2184.74   | 2257.205  | AF074988  | 1727.973  | 953.416   |
| NM_005270 | 1327.122  | 1338.129  | NM_006585 | 34850.98  | 42156.934 | AK024946  | 636.692   | 661.333   |
| NM_014815 | 3000.855  | 3515.181  | NM_014331 | 5984.159  | 5533.386  | AK026375  | 2601.313  | 1830.821  |

|           |           |           |           |           |           |           |           |           |
|-----------|-----------|-----------|-----------|-----------|-----------|-----------|-----------|-----------|
| NM_005443 | 4413.16   | 5815.871  | NM_006795 | 38664.918 | 27352.393 | U85992    | 435.576   | 404.645   |
| NM_007221 | 12808.822 | 16677.082 | AF070568  | 2481.489  | 2174.61   | AL110152  | 555.737   | 448.329   |
| X54163    | 51180.395 | 57395.078 | NM_000277 | 451.196   | 472.986   | AF131745  | 1817.534  | 1347.103  |
| NM_018607 | 481.733   | 519.53    | NM_000240 | 11424.025 | 8880.019  | AL117565  | 3220.216  | 2178.18   |
| NM_002978 | 11591.555 | 8875.771  | AK055733  | 15727.078 | 19291.613 | AK022109  | 2543.253  | 1267.487  |
| NM_014668 | 12267.476 | 14647.3   | AF298880  | 8247.378  | 8180.41   | AF143882  | 608.594   | 265.72    |
| NM_004722 | 9572.807  | 12466.646 | NM_007221 | 10751.223 | 11910.72  | U00953    | 461.551   | 272.249   |
| NM_014425 | 3796.702  | 4964.342  | X54163    | 47334.277 | 40448.484 | AK025650  | 2322.881  | 1783.905  |
| NM_012133 | 10282.93  | 17436.961 | AK025395  | 1432.26   | 1226.986  | AK026401  | 1755.433  | 1646.362  |
| NM_017954 | 1014.896  | 1660.887  | NM_000388 | 2342.395  | 2337.622  | AK026773  | 2382.426  | 2063.108  |
| NM_006612 | 11261.204 | 18146.543 | X58377    | 824.548   | 688.039   | AB026054  | 257.421   | 311.546   |
| NM_016451 | 4023.021  | 5499.137  | NM_002469 | 538.359   | 531.615   | AK022604  | 728.072   | 602.31    |
| NM_007351 | 50509.047 | 61728.289 | AI673575  | 536.221   | 649.424   | U66048    | 1280.585  | 1026.069  |
| AK026266  | 48843.445 | 55027.336 | BI830936  | 1455.864  | 1481.642  | AK023401  | 7547.467  | 4984.282  |
| NM_007124 | 22556.625 | 29511.084 | U79292    | 44516.824 | 53669.773 | AK001865  | 1121.436  | 1264.489  |
| NM_003176 | 13640.933 | 21164.355 | AA947915  | 1107.98   | 1837.056  | AK024035  | 18546.965 | 13520.021 |
| NM_000723 | 2921.853  | 4164.906  | BI830753  | 1715.508  | 2822.313  | AL050079  | 1227.353  | 663.915   |
| AL096751  | 18540.475 | 25109.318 | X68314    | 3360.646  | 8601.651  | AL080233  | 1739.636  | 679.811   |
| NM_000364 | 1376.971  | 2156.779  | X71973    | 33900.168 | 49852.449 | AL117663  | 2067.161  | 1307.187  |
| AF026920  | 28668.709 | 31358.139 | T49651    | 25507.582 | 34228.199 | NM_014293 | 4336.637  | 2274.352  |
| NM_004931 | 6786.824  | 11455.146 | N51014    | 1534.057  | 1503.89   | AK023429  | 536.049   | 289.191   |
| NM_000607 | 46951.254 | 55643.594 | BE392471  | 21964.154 | 21309.516 | AK022276  | 682.229   | 509.174   |
| NM_000240 | 11123.09  | 17250.541 | AI802950  | 5602.021  | 6363.559  | AL133653  | 420.711   | 641.706   |
| AK055733  | 20661.785 | 30040.703 | AI741278  | 524.283   | 898.555   | AK023774  | 544.213   | 508.873   |
| AF298880  | 12991.001 | 18204.127 | AA682423  | 1399.155  | 1408.203  | AL049377  | 823.245   | 613.608   |
| AK001500  | 3598.357  | 4944.375  | AL043686  | 7102.217  | 5860.555  | AK001432  | 1673.937  | 1226.314  |
| NM_006774 | 1481.911  | 2265.987  | AA490172  | 1658.216  | 1296.562  | AL133568  | 3109.496  | 2887.794  |
| NM_020129 | 2909.321  | 5445.28   | AA775212  | 3186.203  | 1964.163  | AF009265  | 2651.876  | 2463.552  |
| Y16521    | 11461.909 | 18798.49  | AB011174  | 4482.259  | 4093.419  | AF009309  | 5001.134  | 3202.869  |
| AL050371  | 8708.971  | 16234.257 | AB040879  | 1680.054  | 1313.899  | NM_002360 | 1386.259  | 1264.408  |
| NM_002651 | 4172.221  | 7629.293  | NM_003176 | 11188.468 | 8546.376  | AF009322  | 363.991   | 308.491   |
| NM_002413 | 20909.52  | 31167.346 | NM_000723 | 2265.327  | 1999.574  | AF056425  | 2864.624  | 2167.941  |
| NM_017577 | 1092.985  | 1943.555  | AL096751  | 15371.826 | 12376.643 | AF090893  | 344.973   | 459.502   |
| NM_001757 | 580.095   | 892.478   | NM_000364 | 1466.941  | 1223.497  | NM_018033 | 5695.204  | 3489.483  |
| NM_001647 | 21915.488 | 33161.957 | AF026920  | 29328.195 | 25282.941 | AK001945  | 1297.404  | 791.178   |
| NM_018158 | 2770.705  | 4678.538  | NM_004931 | 7089.546  | 5072.693  | AK021630  | 738.48    | 475.192   |
| NM_016301 | 15959.463 | 26954.348 | NM_000607 | 40383.887 | 31587.252 | AK021831  | 733.937   | 573.158   |
| AK021975  | 1651.499  | 2894.462  | AB011099  | 417.057   | 750.613   | NM_020153 | 1122.425  | 622.284   |
| AB032952  | 47947.352 | 56632.348 | AF090409  | 262.802   | 882.8     | NM_005321 | 1200.294  | 810.515   |
| NM_002522 | 51335.852 | 63272.18  | NM_002575 | 6178.546  | 13921.104 | AF073520  | 4734.724  | 3580.234  |
| AB011174  | 5955.184  | 9482.896  | NM_004244 | 5535.913  | 9393.298  | AF143885  | 329.751   | 143.996   |
| AB043635  | 359.879   | 508.039   | NM_003371 | 54964.313 | 60488.695 | NM_014015 | 12310.801 | 9466.846  |
| AB040879  | 1967.925  | 3389.737  | AK023114  | 5861.427  | 5922.851  | AK026839  | 948.942   | 863.236   |
| AL049935  | 27694.311 | 30068.527 | NM_003678 | 4142.635  | 4735.702  | AJ008123  | 6120.781  | 5069.798  |
| AB033043  | 39106.285 | 52070.219 | NM_012301 | 2774.245  | 2727.705  | AJ008156  | 874.319   | 659.916   |
| NM_014998 | 11635.104 | 16002.773 | NM_000680 | 837.291   | 522.955   | AF161437  | 3251.335  | 2691.765  |
| AK025220  | 6093.674  | 8131.108  | NM_005631 | 734.533   | 728.08    | U73530    | 443.375   | 421.072   |
| NM_016308 | 28784.055 | 42693.594 | NM_014938 | 3579.203  | 3451.658  | AF086158  | 4938.077  | 3807.552  |
| D42046    | 5951.261  | 9764.365  | AF049460  | 552.293   | 542.403   | AF086050  | 1440.995  | 981.036   |
| NM_001033 | 13734.19  | 18216.779 | NM_014815 | 2370.807  | 2071.976  | AF147375  | 1020.184  | 820.32    |
| NM_004526 | 19663.307 | 29636.773 | NM_005443 | 3781.972  | 2980.154  | X51524    | 7634.817  | 5493.023  |
| NM_002526 | 25306.65  | 33205.496 | NM_020129 | 2635.536  | 2967.483  | AK025759  | 2111.071  | 1561.202  |
| NM_020135 | 5147.176  | 8235.414  | Y16521    | 8814.206  | 6408.76   | AK024105  | 689.001   | 366.424   |

|           |           |           |           |           |           |           |           |           |
|-----------|-----------|-----------|-----------|-----------|-----------|-----------|-----------|-----------|
| NM_01851E | 6673.139  | 9431.829  | AL050371  | 5854.737  | 6351.559  | AJ238556  | 494.932   | 236.035   |
| AK023149  | 2790.336  | 3231.47   | NM_002651 | 3401.426  | 2449.375  | AK021516  | 2355.523  | 995.87    |
| AK023168  | 5611.895  | 8487.926  | NM_002413 | 15622.928 | 21099.969 | Z70699    | 571.756   | 375.058   |
| NM_00664E | 729.052   | 1067.328  | NM_017577 | 921.308   | 2263.48   | NM_00689E | 3334.904  | 1924.39   |
| NM_00474Z | 3423.582  | 3804.647  | NM_016301 | 10674.481 | 32307.789 | AL080066  | 13345.848 | 7803.469  |
| NM_01475Z | 2955.904  | 2764.468  | NM_01466E | 10223.283 | 14310.804 | AL137620  | 1453.166  | 1760.762  |
| NM_00658E | 48457.219 | 50084.41  | NM_00472Z | 8321.105  | 9440.475  | NM_005294 | 3527.958  | 3044.317  |
| NM_014331 | 6797.752  | 6551.369  | NM_01442E | 3045.619  | 3411.613  | AF085826  | 933.921   | 722.09    |
| NM_00679E | 41436.746 | 37228.797 | NM_01213Z | 7984.714  | 8750.019  | AK024362  | 610.595   | 644.561   |
| AF070568  | 3530.739  | 4182.354  | NM_017954 | 885.519   | 941.657   | AF118068  | 2179.823  | 2534.959  |
| NM_000277 | 2096.36   | 2440.892  | NM_00661Z | 8159.271  | 7663.646  | NM_004164 | 284.162   | 251.467   |
| NM_01438E | 10275.729 | 15397.798 | NM_016451 | 3104.447  | 2128.714  | NM_01901E | 880.991   | 862.344   |
| AF086187  | 3014.309  | 5387.836  | NM_007351 | 47780.141 | 34504.586 | M87931    | 503.866   | 622.264   |
| AF305836  | 67104.602 | 67982.883 | AK026266  | 28484.303 | 19417.645 | NM_003544 | 47601.641 | 31001.838 |
| AL109784  | 891.559   | 1257.054  | NM_007124 | 12719.599 | 9128.575  | U17640    | 495.874   | 309.046   |
| AL035295  | 1353.412  | 2333.213  | AB033043  | 33520.348 | 28483.359 | AK001187  | 1310.83   | 1358.138  |
| NM_01830Z | 7329.759  | 11232.397 | NM_01499E | 8719.261  | 6368.764  | NM_00352E | 22451.4   | 17178.826 |
| AK027252  | 4380.716  | 8979.665  | AK025220  | 4334.787  | 2723.13   | AF056436  | 2108.369  | 2479.008  |
| AF165527  | 1501.414  | 2433.91   | NM_01630E | 21596.365 | 17841.268 | AB023191  | 871.337   | 469.934   |
| NM_01409Z | 691.616   | 1006.644  | D42046    | 5005.294  | 4626.757  | AK027212  | 3249.526  | 2156.896  |
| AL359596  | 1247.013  | 1670.806  | NM_00103Z | 11345.366 | 7971.302  | X56197    | 733.991   | 308.647   |
| U79249    | 566.101   | 442.225   | NM_00452E | 14421.118 | 11001.737 | NM_00519E | 9933.164  | 4071.581  |
| AK022114  | 414.02    | 496.203   | NM_00252E | 14691.095 | 12422.983 | U90905    | 764.718   | 437.48    |
| AL133585  | 2486.838  | 2991.314  | NM_02013E | 4371.43   | 5882.175  | AF161422  | 903.865   | 440.666   |
| NM_02255Z | 1579.166  | 1476.852  | NM_01851E | 5553.27   | 11288.708 | AL137384  | 884.221   | 171.843   |
| NM_01438E | 6135.549  | 4329.72   | AK023149  | 3036.676  | 11876.352 | AF070619  | 1186.504  | 945.048   |
| SR2       | 36001.406 | 25443.377 | AK023168  | 5431.692  | 20378.865 | NM_000787 | 603.091   | 340.243   |
| SR4       | 9342.576  | 9114.998  | NM_00664E | 759.171   | 1923.942  | U57962    | 2841.203  | 2776.77   |
| SR6       | 1274.785  | 1416.291  | NM_00474Z | 4148.94   | 5755.788  | NM_01617E | 5360.463  | 4967.51   |
| SR8       | 5136.751  | 11388.469 | NM_01475Z | 2438.825  | 2268.156  | NM_005574 | 9379.965  | 8931.427  |
| SR10      | 17030.623 | 5304.779  | NM_00658E | 35856.852 | 33337.676 | NM_00461C | 4503.861  | 3514.329  |
| CY3Cy5    | 664.977   | 126.488   | NM_014331 | 6174.426  | 5754.788  | NM_00161Z | 1689.489  | 1336.38   |
| NM_004267 | 10202.809 | 13750.021 | NM_00679E | 41832.285 | 30969.123 | AK027002  | 3449.035  | 3194.129  |
| AL357212  | 416.911   | 671.159   | AF070568  | 2796.552  | 2728.664  | AB025254  | 2783.443  | 3068.655  |
| AK026687  | 1334.619  | 2002.951  | NM_000277 | 830.562   | 699.598   | NM_004081 | 2261.937  | 2512.445  |
| AL117444  | 1404.153  | 2343.63   | NM_00024C | 11110.461 | 10492.365 | AK001039  | 4612.255  | 3718.529  |
| NM_017994 | 5724.792  | 4477.097  | AK055733  | 14659.503 | 15644.458 | AK026465  | 1354.277  | 1027.293  |
| AK021693  | 2236.514  | 1672.385  | AF298880  | 8634.708  | 6815.091  | AK024321  | 693.764   | 576.207   |
| AB023177  | 1136.034  | 691.261   | AK001500  | 2689.105  | 1898.634  | U52834    | 957.881   | 999.27    |
| AL050015  | 686.09    | 575.743   | NM_006774 | 1152.449  | 929.224   | AJ227898  | 247.189   | 357.737   |
| AY007117  | 3164.897  | 3172.095  | AK025395  | 1401.378  | 1440.802  | NM_00353Z | 944.724   | 363.673   |
| AF039698  | 2069.339  | 1991.419  | NM_00038E | 2540.369  | 2342.821  | NM_01786E | 7340.038  | 2914.811  |
| AB046828  | 2465.754  | 1611.822  | X58377    | 938.399   | 758.128   | AF203447  | 10331.334 | 5738.683  |
| AF144487  | 279.011   | 193.065   | NM_00246E | 601.395   | 514.797   | NM_01850Z | 2379.735  | 1619.338  |
| AL137532  | 1372.291  | 1307.923  | BI830936  | 1198.272  | 986.292   | AB040976  | 9119.215  | 5226.716  |
| AK025419  | 3198.49   | 2889.537  | U79292    | 42080.172 | 39769.375 | NM_018641 | 2368.548  | 2225.029  |
| NM_01325E | 7891.334  | 5288.514  | AA947915  | 1085.219  | 1065.764  | NM_002371 | 560.885   | 354.804   |
| NM_01837E | 3587.146  | 2962.479  | BI830753  | 1779.256  | 2292.287  | NM_00256Z | 473.747   | 511.77    |
| AK026838  | 1097.153  | 1133.425  | X68314    | 3137.252  | 5674.304  | AK024502  | 6772.984  | 5708.393  |
| AK022443  | 1309.284  | 1543.566  | X71973    | 34860.535 | 62129.789 | NM_001124 | 392.114   | 386.916   |
| AK023371  | 2363.387  | 3558.705  | T49651    | 27447.055 | 64136.621 | NM_00458E | 1802.041  | 1562.509  |
| AK025112  | 1912.63   | 1419.555  | N51014    | 1516.419  | 2286.513  | NM_004844 | 3940.792  | 3677.193  |
| AK026675  | 234.684   | 167.353   | BE392471  | 20830.959 | 21600.346 | NM_000051 | 2444.543  | 2494.469  |



|           |           |           |           |           |           |           |           |           |
|-----------|-----------|-----------|-----------|-----------|-----------|-----------|-----------|-----------|
| AK025173  | 4931.585  | 2671.274  | AI802950  | 5509.411  | 6328.516  | NM_005709 | 406.435   | 456.179   |
| AK025430  | 443.136   | 341.544   | AI741278  | 443.983   | 539.911   | NM_004180 | 4824.755  | 4009.542  |
| AK026722  | 848.907   | 399.329   | AA682423  | 1612.612  | 1356.992  | NM_004786 | 20179.453 | 17859.734 |
| AL110133  | 3792.833  | 1804.207  | AL043686  | 7035.852  | 6404.227  | AF302109  | 800.081   | 643.641   |
| AK000529  | 4172.126  | 3276.441  | AA490172  | 1666.138  | 1229.609  | AL117485  | 13024.871 | 6375.109  |
| AK027243  | 1268.785  | 891.92    | AA775212  | 3133.172  | 2266.192  | NM_003505 | 407.104   | 197.942   |
| AF147415  | 635.208   | 550.985   | AB011174  | 4480.955  | 4383.89   | NM_007191 | 1943.544  | 905.826   |
| AK098474  | 377.468   | 347.463   | AB040879  | 1701.81   | 1149.124  | AL109667  | 1145.157  | 1025.304  |
| AL117475  | 1700.203  | 1111.279  | AL049935  | 16132.029 | 11173.653 | NM_000840 | 702.815   | 419.74    |
| AL049300  | 2007.173  | 1585.602  | AB011099  | 586.211   | 367.22    | NM_001094 | 1251.242  | 985.136   |
| NM_017535 | 2159.251  | 1951.773  | AF090409  | 368.68    | 271.795   | AJ008142  | 38318.813 | 30722.559 |
| L23852    | 684.987   | 1534.686  | NM_002575 | 5377.448  | 4635.014  | AL035289  | 1051.503  | 612.987   |
| AK025365  | 2901.97   | 1761.238  | NM_004244 | 5858.497  | 4869.82   | NM_001343 | 1698.057  | 1582.802  |
| AK023489  | 464.48    | 211.126   | NM_003371 | 51780.648 | 57430.027 | NM_007275 | 17158.018 | 13543.952 |
| AK021561  | 2527.26   | 1115.472  | AK023114  | 7132.634  | 5695.244  | NM_019025 | 42429.762 | 32891.73  |
| AK025222  | 331.054   | 175.988   | NM_003678 | 4453.469  | 5728.942  | NM_018461 | 4027.363  | 3108.094  |
| Y11609    | 1992.508  | 695.739   | NM_012301 | 3953.384  | 5617.786  | AF235023  | 3026.884  | 2287.534  |
| AJ278482  | 368.506   | 178.846   | NM_000680 | 693.934   | 781.717   | NM_006910 | 3914.024  | 3821.102  |
| NM_012122 | 14382.84  | 7062.218  | NM_005631 | 408.275   | 645.376   | AF162667  | 2357.827  | 2020.021  |
| AF009285  | 5302.847  | 2882.141  | NM_014419 | 23531.795 | 26201.838 | AB046847  | 2266.622  | 1932.47   |
| NM_012125 | 2813.42   | 1865.881  | NM_014938 | 3465.286  | 2967.95   | NM_000447 | 2062.467  | 1937.36   |
| AB032363  | 426.741   | 412.326   | AF049460  | 604.675   | 639.242   | NM_006354 | 3622.611  | 3263.107  |
| AF009294  | 2433.835  | 2217.28   | AK026066  | 1798.451  | 2151.468  | AF303378  | 5819.737  | 5296.796  |
| NM_001524 | 725.556   | 462.129   | NM_005244 | 9878.738  | 9613.771  | NM_016037 | 10729.774 | 8650.62   |
| AK000998  | 575.698   | 1360.827  | AF054589  | 4137.767  | 5267.786  | NM_000043 | 4572.885  | 5464.453  |
| AK001225  | 435.276   | 583.917   | NM_005270 | 1281.839  | 1431.57   | NM_015965 | 579.447   | 276.594   |
| AK021435  | 1037.581  | 783.277   | NM_014815 | 2562      | 2236.498  | NM_000417 | 3556.539  | 3263.619  |
| AK021684  | 2157.137  | 1614.315  | NM_005443 | 6180.032  | 5002.517  | NM_020356 | 8949.848  | 5323.327  |
| AK001060  | 304.155   | 478.185   | NM_007221 | 9137.709  | 10124.593 | NM_004063 | 705.08    | 472.648   |
| AK021480  | 609.836   | 889.994   | X54163    | 46472.453 | 54959.129 | NM_006144 | 4803.469  | 4146.915  |
| AL080186  | 1531.065  | 698.401   | NM_018607 | 498.71    | 379.744   | AL136549  | 15439.414 | 10068.663 |
| NM_005306 | 31752.221 | 12938.765 | NM_002978 | 8867.704  | 5702.687  | NM_012168 | 2124.405  | 1899.167  |
| NM_001646 | 9311.056  | 3672.37   | NM_014668 | 10738.37  | 9000.695  | NM_007038 | 3559.003  | 3089.486  |
| AL137327  | 2886.377  | 1296.493  | NM_004722 | 8579.64   | 8266.31   | AF311324  | 5451.188  | 4486.02   |
| AK026090  | 1056.39   | 446.497   | NM_014425 | 3149.85   | 2991.414  | AF124433  | 1148.841  | 774.494   |
| AF070637  | 626.366   | 424.342   | NM_012133 | 7636.165  | 9453.979  | AK001647  | 435.707   | 301.558   |
| AL137634  | 677.598   | 827.592   | NM_017954 | 826.957   | 1508.127  | NM_001461 | 528.369   | 473.984   |
| AK024863  | 6465.556  | 4297.556  | NM_006612 | 5933.701  | 5680.232  | AF061556  | 1068.821  | 925.054   |
| AK026908  | 7252.589  | 3724.942  | NM_016451 | 2701.917  | 2023.333  | AL162049  | 1541.795  | 1404.823  |
| AF117338  | 5715.96   | 4037.211  | NM_007351 | 49081.762 | 40165.777 | AF036144  | 435.19    | 398.83    |
| AK025567  | 1385.524  | 1049.448  | AK026266  | 28622.264 | 22088.988 | NM_005032 | 888.704   | 1009.161  |
| NM_019102 | 343.909   | 398.191   | NM_007124 | 13185.417 | 7996.419  | NM_004160 | 5665.117  | 5792.068  |
| U56857    | 8639.787  | 6059.311  | NM_003176 | 8359.563  | 8020.72   | AL109677  | 1571.014  | 1400.907  |
| L43349    | 480.213   | 539.255   | NM_000723 | 1666.104  | 1662.137  | NM_003941 | 51559.598 | 42693.098 |
| BE905682  | 734.302   | 1832.317  | AL096751  | 15052.454 | 13604.026 | AF177909  | 2243.707  | 1977.307  |
| AF086421  | 956.71    | 803.742   | NM_000364 | 1712.61   | 999.523   | NM_002664 | 15432.251 | 15837.942 |
| AK001612  | 520.678   | 479.553   | AF026920  | 30054.158 | 20488.303 | AB018271  | 1009.768  | 833.4     |
| AF161522  | 2377.301  | 2262.149  | NM_004931 | 5842.907  | 6311.479  | AL137665  | 7084.432  | 5254.662  |
| AF086028  | 4403.708  | 3680.862  | NM_000607 | 49390.594 | 64935.055 | NM_016434 | 4177.975  | 2163.801  |
| U46119    | 776.225   | 995.606   | NM_000240 | 13403.589 | 11374.381 | U36561    | 53252.277 | 67739.563 |
| AF038188  | 7817.398  | 3079.024  | AK055733  | 18313.424 | 17306.424 | AF205437  | 1224.476  | 1082.789  |
| D17046    | 1561.227  | 838.863   | AF298880  | 10121.702 | 7843.704  | AF034102  | 29419.342 | 18087.234 |
| NM_017645 | 5797.06   | 2756.897  | AK001500  | 2908.351  | 1995.311  | AB037748  | 1345.763  | 1789.375  |

|           |           |           |           |           |           |           |           |           |
|-----------|-----------|-----------|-----------|-----------|-----------|-----------|-----------|-----------|
| AJ227864  | 1091.285  | 1305.591  | NM_006774 | 1231.056  | 1139.402  | AB002306  | 2571.975  | 2064.94   |
| AF157562  | 4042.026  | 5928.505  | NM_020129 | 2524.801  | 3100.405  | NM_00130C | 2710.978  | 3143.619  |
| AK021958  | 10229.62  | 9741.629  | Y16521    | 8852.595  | 6933.192  | NM_012472 | 501.039   | 713.531   |
| M31164    | 1639.703  | 2006.956  | AL050371  | 5062.628  | 5615.523  | NM_018187 | 6961.085  | 6293.703  |
| NM_003531 | 1515.035  | 1088.283  | NM_002651 | 2803.552  | 2016.022  | NM_00301E | 26540.367 | 22228.133 |
| NM_01779E | 902.577   | 749.505   | NM_002413 | 9337.113  | 7923.284  | NM_005463 | 51045.082 | 55552.191 |
| NM_00351C | 466.028   | 380.309   | NM_017577 | 589.732   | 948.121   | NM_00132E | 2315.491  | 2199.083  |
| NM_00353E | 1164.966  | 622.501   | NM_001757 | 432.447   | 599.803   | NM_018282 | 23408.41  | 14627.258 |
| AL137403  | 2513.335  | 2464.151  | NM_001647 | 6896.332  | 5681.144  | BC019932  | 1856.847  | 1750.628  |
| AL049348  | 1000.535  | 969.746   | NM_01815E | 1593.356  | 1653.025  | AF114818  | 5863.486  | 5265.018  |
| NM_018534 | 1309.734  | 1176.241  | NM_016301 | 9042.397  | 10321.613 | AK025106  | 1905.982  | 2315.589  |
| AB037847  | 1706.432  | 1600.654  | AK021975  | 1294.894  | 1215.831  | NM_020144 | 4586.064  | 4938.654  |
| NM_00517C | 2778.641  | 2308.701  | AB032952  | 50068.762 | 61621.98  | NM_00390E | 50615.047 | 53248.789 |
| S96437    | 1224.26   | 939.563   | NM_002522 | 51028.898 | 61815.172 | BE893142  | 3242.386  | 3342.797  |
| NM_01517E | 1164.712  | 1058.417  | AB011174  | 4916.306  | 4232.964  | NM_003103 | 4948.492  | 4368.104  |
| AL353939  | 631.269   | 986.042   | AB040879  | 1894.858  | 1140.891  | NM_01534C | 10151.789 | 7836.848  |
| AL117573  | 3816.587  | 3530.396  | AL049935  | 19056.064 | 14803.37  | NM_006451 | 4772.956  | 3387.822  |
| NM_01865E | 2709.475  | 1239.739  | AB033043  | 31890.928 | 28487.293 | NM_002094 | 1616.752  | 1117.377  |
| NM_005663 | 2724.054  | 1544.196  | NM_01499E | 7894.706  | 6223.29   | NM_002937 | 1024.589  | 852.895   |
| X89960    | 629.349   | 912.966   | AK025220  | 4417.352  | 2749.391  | NM_003191 | 10973.273 | 9859.355  |
| NM_00655C | 1048.636  | 2439.582  | NM_01630E | 19296.604 | 16963.74  | NM_01823E | 50915.453 | 47985.184 |
| NM_017644 | 7633.857  | 9287.647  | D42046    | 4440.152  | 4761.926  | NM_012104 | 45906.508 | 29093.633 |
| NM_002482 | 1163.242  | 977.103   | NM_001033 | 9280.06   | 9820.594  | NM_000761 | 50880.961 | 58567.535 |
| AL050068  | 284.677   | 185.871   | NM_00452E | 11925.6   | 9993.143  | NM_020142 | 5264.627  | 5051.85   |
| AF009323  | 521.9     | 438.76    | NM_00252E | 8699.995  | 7298.824  | NM_000774 | 6114.176  | 5677.525  |
| AK001526  | 3294.356  | 2538.623  | NM_02013E | 3174.941  | 3132.367  | NM_017781 | 51952.262 | 58842.32  |
| NM_00051E | 352.162   | 561.407   | NM_01851E | 3889.632  | 3782.89   | NM_006004 | 55499.184 | 39227.375 |
| AF086183  | 1028.302  | 645.23    | AK023149  | 1657.644  | 1294.022  | NM_004894 | 24438.781 | 20026.063 |
| AK000525  | 1952.594  | 1668.478  | AK023168  | 3344.854  | 3293.384  | AB028960  | 535.736   | 566.145   |
| AL137434  | 1675.312  | 1250.733  | NM_00664E | 343.329   | 505.227   | NM_00564E | 33796.352 | 22355.088 |
| Z36795    | 1727.285  | 1532.743  | NM_004742 | 2157.834  | 1405.113  | NM_006943 | 11711.044 | 9567.243  |
| AL080216  | 1341.654  | 1360.944  | NM_014753 | 2023.618  | 1760.976  | NM_006741 | 19514.217 | 16364.781 |
| NM_00667C | 2848.855  | 1845.34   | NM_00658E | 35011.762 | 50741.098 | NM_01416E | 6637.965  | 5562.973  |
| AK024134  | 7391.069  | 15409.505 | NM_014331 | 5717.014  | 16329.79  | AL117606  | 13002.013 | 13796.188 |
| NM_003014 | 1078.938  | 3396.202  | NM_00679E | 44769.379 | 38208.52  | NM_01233C | 2591.538  | 2445.105  |
| NM_01855E | 1263.12   | 2128.681  | AF070568  | 2708.162  | 4638.566  | AF294278  | 6710.693  | 7470.632  |
| NM_001974 | 3897.272  | 4629.891  | NM_000277 | 1099.586  | 1261.996  | NM_018211 | 3222.841  | 3496.28   |
| NM_013957 | 701.255   | 602.711   | CY3Cy5    | 1851.121  | 93.643    | NM_01452C | 4814.345  | 3543.025  |
| NM_00246E | 3879.707  | 2307.4    | NM_022552 | 4409.362  | 2934.016  | NM_00261E | 2863.818  | 2197.024  |
| NM_00302E | 1100.387  | 799.577   | NM_01438E | 18471.297 | 13421.911 | AK025712  | 24047.52  | 14740.808 |
| NM_00156E | 595.664   | 464.433   | AK025015  | 593.973   | 1153.973  | NM_005634 | 3027.192  | 2521.895  |
| NM_016541 | 1273.155  | 1147.951  | AF086187  | 3566.142  | 3620.907  | NM_017757 | 7698.282  | 6454.828  |
| NM_01854E | 2537.441  | 2667.505  | AF305836  | 66634.867 | 65328.328 | NM_00214E | 43440.453 | 28954.953 |
| NM_013401 | 451.525   | 393.536   | AL109784  | 1415.009  | 1329.375  | AB007892  | 1768.973  | 1538.905  |
| NM_01823E | 4030.421  | 3396.819  | AL035295  | 8725.199  | 7956.982  | NM_018207 | 4713.298  | 5604.743  |
| NM_00685E | 11208.021 | 8835.698  | NM_018302 | 11611.571 | 9405.456  | NM_00034E | 50592.457 | 63681.668 |
| NM_00140E | 5060.975  | 4118.39   | AK027252  | 8158.685  | 8744.65   | NM_001862 | 50894.965 | 63795.855 |
| NM_00388C | 1096.481  | 925.219   | AF165527  | 5927.345  | 6789.32   | NM_006531 | 6472.287  | 7045.606  |
| AF131778  | 1480.725  | 955.205   | NM_014092 | 1294.473  | 1413.817  | AB029021  | 36564.184 | 28072.227 |
| NM_001562 | 1738.697  | 1915.841  | AL359596  | 2711.04   | 2407.877  | NM_002101 | 1696.841  | 1209.141  |
| NM_01327E | 1545.035  | 1854.835  | U79249    | 1175      | 1246.257  | NM_005423 | 773.285   | 1403.39   |
| NM_006477 | 2332.019  | 1903.512  | AK022114  | 806.444   | 975.672   | J02874    | 11337.014 | 12450.737 |
| NM_006291 | 206.992   | 1033.435  | AL133585  | 2133.77   | 1403.922  | BF310427  | 11187.613 | 10783.152 |

|           |           |           |           |           |           |            |           |           |
|-----------|-----------|-----------|-----------|-----------|-----------|------------|-----------|-----------|
| NM_01817C | 4180.125  | 9747.143  | NM_022552 | 3948.033  | 3419.992  | N94424     | 571.569   | 690.565   |
| NM_003867 | 2553.549  | 5188.725  | NM_014389 | 20324.186 | 27767.783 | AA045192   | 3457.381  | 3653.533  |
| AL162062  | 556.498   | 493.312   | SR2       | 55593.141 | 47690.289 | H45617     | 802.614   | 1093.38   |
| NM_003173 | 9186.437  | 4116.199  | SR4       | 18751.146 | 14101.824 | M92642     | 8536.164  | 9664.704  |
| NM_00503C | 9866.697  | 4894.77   | SR6       | 2452.312  | 1489.364  | H-U 44385  | 27984.859 | 20281.258 |
| NM_017584 | 3566.315  | 2852.846  | SR8       | 8920.566  | 14738.846 | ID 1654970 | 9907.43   | 5608.478  |
| NM_020359 | 3885.869  | 3536.565  | SR10      | 28829.506 | 5015.518  | ID 2531132 | 12019.435 | 8294.55   |
| AB014541  | 21992.926 | 13953.689 | CY3Cy5    | 1272.561  | 86.201    | ID 4365538 | 1478.743  | 1046.453  |
| NM_002583 | 9519.931  | 5788.02   | NM_003887 | 3352.854  | 5420.007  | BF125928   | 12017.821 | 8146.362  |
| NM_00657C | 16039.433 | 10451.011 | NM_004267 | 20525.867 | 19429.494 | BG571026   | 4289.878  | 3569.323  |
| NM_02034E | 1120.235  | 766.878   | AL357212  | 1399.303  | 2651.939  | AA489017   | 11363.79  | 10559.424 |
| NM_006034 | 10429.417 | 8153.145  | AK026687  | 2137.105  | 2866.463  | NM_00114C  | 1011.499  | 1381.401  |
| AB040943  | 1076.216  | 1175.023  | AL117444  | 2846.163  | 2853.188  | NM_004843  | 1045.748  | 2296.855  |
| NM_005201 | 49036.031 | 24201.096 | NM_017994 | 10270.639 | 10204.646 | AK022845   | 1197.064  | 1384.271  |
| NM_000092 | 1169.618  | 822.907   | AK021693  | 4637.183  | 3336.126  | NM_003004  | 492.816   | 570.427   |
| NM_01908E | 3543.949  | 4316.659  | AB023177  | 1864.625  | 1546.749  | S77835     | 3629.636  | 4589.969  |
| NM_005877 | 13013.541 | 26996.557 | AL050015  | 1928.013  | 1715.915  | NM_00298E  | 1594.442  | 2103.389  |
| AK024458  | 311.235   | 565.783   | AY007117  | 6941.738  | 6982.222  | AB018347   | 30824.844 | 31721.162 |
| NM_00333E | 3468.472  | 3364.232  | AF039698  | 5022.129  | 5725.462  | AB033073   | 14946.002 | 13638.016 |
| NM_01339E | 2069.59   | 976.362   | AL109679  | 930.948   | 758.092   | NM_003284  | 8102.266  | 6675.779  |
| NM_017752 | 2669.259  | 2513.065  | AB046828  | 5415.195  | 4340.573  | NM_018152  | 780.966   | 560.827   |
| D26069    | 11146.719 | 8542.727  | AF144487  | 697.871   | 780.286   | NM_00031E  | 3316.381  | 3405.316  |
| BF107577  | 35890.695 | 22777.285 | AL137532  | 3215.657  | 3308.744  | NM_003257  | 359.509   | 360.443   |
| NM_005837 | 13867.972 | 7492.891  | AK025419  | 6637.932  | 5108.893  | NM_012461  | 4625.448  | 6107.807  |
| NM_01662E | 6751.868  | 3645.383  | NM_013259 | 25063.15  | 22961.883 | AK001379   | 1996.759  | 2212.712  |
| NM_017493 | 2050.714  | 897.541   | NM_01837E | 12223.494 | 10119.31  | NM_01745C  | 3316.331  | 3460.865  |
| NM_00613E | 9804.009  | 5319.799  | AK026838  | 3310      | 2071.208  | NM_002023  | 1293.202  | 1353.793  |
| AF237772  | 800.371   | 751.724   | AK022443  | 2143.492  | 1233.957  | NM_00283E  | 1792.039  | 1900.451  |
| AK025934  | 2602.99   | 1523.321  | AK023371  | 7150.815  | 3452.776  | AF190500   | 1046.804  | 983.019   |
| AJ008154  | 1686.339  | 1316.081  | AK025112  | 3861.749  | 4772.829  | NM_005273  | 26751.451 | 20087.029 |
| NM_003487 | 6944.359  | 3813.188  | AK026079  | 495.512   | 839.801   | NM_007072  | 4052.987  | 8426.409  |
| NM_006887 | 5402.182  | 4148.077  | AK025173  | 18566.295 | 24122.17  | NM_01232C  | 3190.917  | 3928.49   |
| AL137286  | 5773.888  | 6993.799  | AK025430  | 1141.701  | 1131.652  | NM_01820E  | 1988.82   | 2487.534  |
| NM_01627E | 14686.951 | 23622.783 | AK026722  | 1037.941  | 947.008   | NM_01592E  | 3387.279  | 4011.696  |
| NM_02041E | 6531.879  | 12219.698 | AL110133  | 10156.285 | 9348.597  | U90653     | 8539.372  | 7670.875  |
| NM_013293 | 4067.3    | 3778.377  | AL050053  | 598.739   | 632.824   | NM_00019E  | 1089.92   | 1136.441  |
| AF315592  | 4838.268  | 3248.218  | AK000529  | 7732.762  | 6738.032  | NM_01833E  | 3329.932  | 3838.406  |
| AF095844  | 3032.912  | 2368.219  | AK027243  | 1753.742  | 1925.421  | NM_00674E  | 15931.728 | 16572.832 |
| NM_015833 | 2449.838  | 2247.634  | AF147415  | 1387.967  | 1362.259  | NM_00027E  | 1015.391  | 763.907   |
| NM_00098E | 50141.348 | 56427.941 | AK098474  | 928.49    | 1185.672  | AK000037   | 2100.465  | 1098.534  |
| AK026760  | 29700.719 | 18390.631 | AL117475  | 4556.602  | 4609.149  | NM_01476C  | 1578.794  | 1122.484  |
| NM_005617 | 217.982   | 207.037   | AL049300  | 10357.339 | 8596.531  | NM_018713  | 925.245   | 1199.787  |
| NM_014772 | 3128.768  | 2864.807  | NM_01753E | 6789.038  | 5281.771  | AJ006268   | 697.094   | 1306.54   |
| AK025248  | 2587.301  | 2105.198  | AK025365  | 3087.091  | 2667.505  | AF190864   | 5068.408  | 6548.018  |
| NM_00453E | 15250.103 | 8444.654  | AK023445  | 686.083   | 1124.061  | NM_001177  | 3071.602  | 4434.024  |
| NM_00642E | 17440.066 | 8703.58   | AK023489  | 1422.552  | 2073.111  | NM_014447  | 1550.057  | 1958.186  |
| NM_00428C | 10334.736 | 4913.874  | AK021561  | 9293.636  | 12636.924 | NM_00235E  | 1431.523  | 1421.494  |
| AF110399  | 2300.462  | 1401.377  | AJ278482  | 784.986   | 1167.308  | NM_006691  | 1364.664  | 1534.084  |
| AK027094  | 4001.116  | 2273.846  | NM_012122 | 28514.369 | 26384.928 | NM_00150E  | 674.352   | 836.326   |
| AF174600  | 4736.121  | 3344.573  | AF009285  | 20003.955 | 20189.518 | NM_00371C  | 9437.111  | 11303.932 |
| AK001003  | 1089.38   | 784.647   | NM_01212E | 5768.634  | 6354.881  | Z83805     | 618.827   | 991.735   |
| NM_00280C | 13659.119 | 10166.799 | AF056435  | 479.78    | 603.655   | NM_00466E  | 1022.192  | 1108.217  |
| BF217864  | 12256.193 | 16419.07  | AB032363  | 760.745   | 786.885   | NM_003614  | 9162.908  | 10185.989 |

|             |           |           |           |           |           |             |           |           |
|-------------|-----------|-----------|-----------|-----------|-----------|-------------|-----------|-----------|
| NM_005917   | 26486.727 | 25893.672 | AF009294  | 6313.202  | 6204.43   | NM_014257   | 5608.583  | 6925.694  |
| NM_007052   | 894.244   | 2147.509  | NM_001524 | 1855.946  | 1652.487  | NM_000025   | 19791.127 | 28831.873 |
| BC017044    | 781.742   | 2035.527  | AK000998  | 1006.037  | 1211.118  | D38521      | 3875.654  | 3517.198  |
| AV758498    | 1897.655  | 4780.719  | AK001225  | 935.527   | 1067.662  | NM_000403   | 21724.117 | 18728.635 |
| NM_020196   | 2604.506  | 5919.244  | AK021435  | 762.339   | 941.402   | NM_018127   | 12709.961 | 13114.881 |
| AK024113    | 708.357   | 378.169   | AK021684  | 5698.611  | 6066.074  | AB020677    | 10909.359 | 9431.897  |
| NM_018657   | 1232.026  | 898.227   | AK001060  | 1273.258  | 1470.151  | AB033097    | 5217.108  | 5859.892  |
| L40410      | 11922.105 | 9299.898  | AK021480  | 1275.29   | 873.534   | NM_000135   | 2926.856  | 2821.913  |
| NM_007055   | 2206.043  | 2163.774  | AL080186  | 2199.358  | 1643.597  | AJ223948    | 6281.373  | 6745.796  |
| NM_016652   | 1898.949  | 1914.793  | NM_005306 | 66584     | 65238.875 | NM_016218   | 416.687   | 218.636   |
| NM_016310   | 21415.957 | 13939.547 | NM_001646 | 36687.711 | 36520.129 | AK022947    | 1149.867  | 906.055   |
| AK021562    | 1023.993  | 1189.123  | AL137327  | 5859.565  | 6368.332  | AL050029    | 903.953   | 844.083   |
| BC006560    | 1654.5    | 1399.137  | AK026908  | 35147.789 | 43365.293 | AL049966    | 399.675   | 366.386   |
| NM_006298   | 4713.783  | 3586.839  | AF117338  | 25061.746 | 29367.326 | NM_005204   | 7193.586  | 6956.475  |
| AF060938    | 25688.119 | 14321.396 | AK025567  | 5981.001  | 7365.635  | NM_016203   | 960.923   | 1167.927  |
| NM_001973   | 4679.721  | 3447.849  | NM_019102 | 714.113   | 845.628   | NM_002755   | 2675.514  | 3513.481  |
| NM_014468   | 7846.63   | 4662.129  | U56857    | 54895.523 | 51929.5   | NM_007271   | 2052.341  | 2400.721  |
| NM_006856   | 8237.146  | 3635.828  | L43349    | 955.66    | 951.211   | NM_006255   | 2417.056  | 2876.228  |
| X52350      | 51715.898 | 25538.018 | BE905682  | 998.922   | 1043.35   | BE392143    | 3063.677  | 2596.737  |
| AF071554    | 1270.509  | 1005.866  | AF086421  | 2338.41   | 2771.476  | NM_005813   | 2452.037  | 4746.187  |
| NM_002147   | 658.574   | 436.58    | AK001612  | 659.175   | 846.864   | AB037718    | 3275.581  | 4402.421  |
| NM_017688   | 3230.401  | 3556.885  | AF161522  | 4424.476  | 5207.199  | AL389994    | 1224.405  | 2680.612  |
| AK025612    | 17836.102 | 16298.155 | AF086028  | 19740.582 | 19376.754 | NM_003905   | 4010.094  | 3530.723  |
| NM_012268   | 31647.285 | 24463.367 | U46119    | 638.545   | 558.705   | NM_001277   | 14260.438 | 16562.275 |
| NM_012203   | 1565.399  | 2087.136  | NM_019897 | 1637.88   | 1140.709  | NM_003655   | 7112.736  | 9472.359  |
| NM_003296   | 860.554   | 1505.317  | AF038188  | 24136.297 | 16738.982 | NM_001862   | 50096.977 | 64890.262 |
| NM_004736   | 13808.485 | 26612.742 | D17046    | 4639.918  | 3652.799  | NM_006531   | 6512.33   | 8036.322  |
| NM_006895   | 484.701   | 1560.271  | NM_017645 | 18141.639 | 18058.242 | AB029021    | 35711.449 | 32040.143 |
| NM_006455   | 10673.174 | 18566.213 | NM_017795 | 2204.337  | 3216.596  | NM_002101   | 1531.398  | 1343.446  |
| AA427949    | 561.713   | 397.329   | NM_003510 | 2459.816  | 2667.94   | NM_005423   | 794.38    | 1009.674  |
| D50373      | 1171.586  | 1017.973  | NM_003538 | 699.172   | 850.412   | Z36789      | 264.079   | 592.361   |
| AA488757    | 22518.928 | 16229.171 | AL137403  | 10080.453 | 8936.16   | J02874      | 11318.576 | 14005.485 |
| AA205399    | 2121.034  | 3678.109  | AL049348  | 2989.149  | 2930.046  | BF310427    | 11769.423 | 14204.132 |
| H07071      | 5641.073  | 7833.708  | NM_018534 | 2373.418  | 2430.461  | N94424      | 610.962   | 959.855   |
| M25322      | 9276.598  | 9057.819  | AB037847  | 4514.083  | 5943.399  | AA045192    | 2822.938  | 3729.073  |
| AA436187    | 325.696   | 364.696   | NM_005170 | 5798.038  | 5578.713  | H45617      | 683.847   | 1060.885  |
| H-L 27586 I | 3090.656  | 2983.023  | S96437    | 4244.957  | 4665.308  | M92642      | 8191.86   | 9454.523  |
| ID 214180   | 1124.837  | 772.588   | NM_015176 | 1643.038  | 1890.546  | H-U 44385 I | 29034.002 | 25893.23  |
| ID 1867426  | 19492.785 | 9956.175  | AL353939  | 1493.666  | 1333.245  | ID 1654970  | 11069.604 | 11799.194 |
| ID 396450   | 462.527   | 487.67    | AL117573  | 8389.166  | 6405.063  | ID 2531132  | 12282.51  | 11613.585 |
| W99328      | 1779.936  | 1495.563  | NM_016116 | 892.947   | 702.881   | ID 4365538  | 1596.717  | 1591.746  |
| AI434176    | 2224.137  | 1239.973  | NM_000929 | 416.839   | 398.307   | AA485665    | 560.105   | 510.471   |
| H08563      | 2165.262  | 1134.872  | NM_018655 | 4419.974  | 3063.976  | BF125928    | 12063.08  | 15321.266 |
| BE735403    | 1716.949  | 1428.705  | NM_005663 | 4931.548  | 3846.167  | BG571026    | 1750.318  | 2890.484  |
| NM_002631   | 16797.898 | 10554.52  | X89960    | 1139.522  | 1067.289  | AA489017    | 11737.452 | 16150.529 |
| AB033109    | 2439.163  | 3016.836  | NM_006550 | 1458.07   | 969.085   | NM_004843   | 1239.989  | 2509.561  |
| NM_002053   | 45390.164 | 27534.301 | AL050068  | 1366.736  | 2072.05   | AK022845    | 885.966   | 1395.823  |
| NM_006888   | 4013.41   | 3762.394  | U92025    | 1195.052  | 1700.235  | NM_003004   | 369.849   | 496.82    |
| NM_002438   | 3823.903  | 3582.709  | AF009323  | 970.685   | 1191.442  | S77835      | 890.596   | 1186.63   |
| NM_014588   | 8457.531  | 6659.98   | U52829    | 851.627   | 844.349   | NM_002985   | 1481.564  | 1956.525  |
| NM_000755   | 1623.079  | 2426.789  | Z25437    | 586.738   | 480.516   | AB018347    | 29667.984 | 30755.523 |
| AK023334    | 6251.824  | 11237.748 | AK001526  | 6912.225  | 7172.421  | AB033073    | 14306.211 | 16201.058 |
| NM_002563   | 37386.043 | 40012.922 | NM_000519 | 1261.804  | 1308.516  | NM_003284   | 9664.083  | 10986.784 |

|           |           |           |           |           |           |           |           |           |
|-----------|-----------|-----------|-----------|-----------|-----------|-----------|-----------|-----------|
| NM_002437 | 4251.085  | 3498.36   | AF086183  | 2724.499  | 2613.481  | NM_018152 | 933.617   | 1283.004  |
| D79991    | 2547.846  | 1723.331  | AK000525  | 3327.041  | 3460.951  | NM_000319 | 4406.731  | 6970.891  |
| AK022425  | 1715.917  | 1837.64   | AL137434  | 2633.51   | 3368.089  | NM_003257 | 944.458   | 1854.71   |
| NM_000054 | 24404.236 | 28883.393 | Z36795    | 3150      | 3534.625  | NM_012461 | 5263.353  | 19836.518 |
| NM_014713 | 14529.561 | 27185.637 | AL080216  | 2619.031  | 2609.799  | AK001379  | 2146.152  | 2738.979  |
| NM_001812 | 2285.884  | 3741.767  | NM_006670 | 4060.641  | 3028.408  | NM_017450 | 3552.544  | 4397.383  |
| NM_014785 | 1123.092  | 2437.902  | NM_012425 | 5986.846  | 4388.052  | NM_002023 | 1505.419  | 1953.139  |
| AK025175  | 752.695   | 1211.167  | NM_005816 | 524.622   | 412.725   | NM_002839 | 2254.284  | 2906.531  |
| NM_005811 | 8009.398  | 6590.049  | NM_002750 | 10877.215 | 8507.114  | AF190500  | 1051.926  | 1235.544  |
| NM_005764 | 1590.584  | 1418.841  | NM_000081 | 446.237   | 313.315   | NM_001616 | 340.26    | 416.547   |
| NM_016362 | 4171.86   | 3853.472  | AK024134  | 15786.733 | 12439.266 | NM_005904 | 587.715   | 654.997   |
| NM_004214 | 8530.96   | 5126.559  | NM_002468 | 8776.235  | 11833.071 | NM_005273 | 28997.344 | 24298.992 |
| NM_004329 | 9956.091  | 5630.324  | NM_003028 | 2558.399  | 3014.793  | NM_000524 | 346.765   | 433.159   |
| NM_002836 | 12281.299 | 6945.554  | NM_001566 | 1966.728  | 1824.083  | NM_018207 | 3682.809  | 3358.815  |
| NM_020167 | 2660.13   | 1390.481  | NM_016541 | 6634.983  | 7044.032  | NM_000345 | 52515.566 | 60451.766 |
| NM_016058 | 11159.881 | 7649.322  | NM_018548 | 5509.469  | 5495.143  | NM_018208 | 2393.899  | 4823.457  |
| NM_014005 | 3640.427  | 2529.546  | NM_013401 | 1215.2    | 1395.788  | NM_015929 | 3164.371  | 6921.242  |
| NM_006033 | 11239.109 | 8766.009  | NM_018238 | 9564.484  | 10936.455 | U90653    | 8043.184  | 9757.205  |
| NM_004837 | 5076.745  | 4540.316  | NM_006858 | 37677.176 | 40625.176 | NM_000196 | 542.016   | 819.901   |
| NM_000370 | 1434.947  | 1405.359  | NM_001405 | 13899.565 | 14375.121 | NM_018339 | 3644.874  | 4560.922  |
| BE865893  | 6848.964  | 3625.369  | NM_003880 | 2383.813  | 2520.368  | NM_006745 | 14664.902 | 20285.094 |
| NM_003123 | 56338.434 | 50920.121 | NM_005468 | 2444.955  | 3475.851  | NM_000275 | 1106.377  | 1738.06   |
| AY005822  | 4633.396  | 2990.43   | AF131778  | 3245.238  | 3874.279  | AK000037  | 1954.558  | 1877.175  |
| NM_018129 | 41685.93  | 23942.842 | NM_001562 | 3503.053  | 3844.158  | NM_014760 | 2027.495  | 2324.474  |
| AF289022  | 3632.529  | 3175.594  | NM_013278 | 2660.56   | 3046.286  | NM_018713 | 1109.14   | 3529.333  |
| AB002326  | 330.741   | 187.395   | NM_006477 | 5130.511  | 3755.181  | AJ006268  | 874.902   | 2480.859  |
| M17252    | 367.156   | 401.846   | NM_002880 | 6755.768  | 4617.939  | AF190864  | 4893.545  | 7025.063  |
| NM_016025 | 11478.689 | 8305.142  | NM_000678 | 45293.582 | 34567.59  | NM_001177 | 2904.076  | 4056.909  |
| NM_013319 | 3521.258  | 5061.494  | NM_001066 | 2676.369  | 2786.486  | NM_014447 | 1352.515  | 1855.895  |
| NM_020410 | 5761.397  | 9404.365  | NM_004657 | 11170.128 | 9463.921  | NM_002356 | 1470.411  | 1305.842  |
| NM_000453 | 2384.378  | 4497.201  | NM_006291 | 372.906   | 651.841   | NM_006691 | 1189.785  | 1484.603  |
| J03048    | 11446.902 | 10383.257 | NM_018170 | 6482.806  | 4378.819  | NM_001505 | 889.773   | 958.598   |
| NM_004583 | 1480.015  | 1956.462  | NM_005030 | 25377.934 | 19016.518 | NM_003710 | 10203.679 | 9181.521  |
| NM_001103 | 723.178   | 827.877   | NM_017584 | 7350.967  | 7389.915  | Z83805    | 838.019   | 754.231   |
| AF228710  | 35998.715 | 33436.934 | NM_020359 | 7799.661  | 9772.731  | NM_004666 | 932.106   | 934.222   |
| NM_018399 | 502.845   | 395.674   | AB014541  | 51454.684 | 56803.02  | NM_003614 | 8988.725  | 7459.2    |
| AY007131  | 51237.484 | 35631.637 | NM_002583 | 21081.625 | 19470.217 | NM_014257 | 8132.492  | 8687.826  |
| U61735    | 4625.47   | 3514.15   | NM_006570 | 38860.672 | 41955.875 | NM_001140 | 1034.664  | 1470.009  |
| NM_001144 | 22066.674 | 10601.672 | NM_020348 | 2268.572  | 2770.806  | NM_000403 | 21798.594 | 42484.434 |
| AK023766  | 8357.223  | 4557.379  | NM_006034 | 36364.008 | 40314.176 | NM_018127 | 12114.347 | 18571.305 |
| NM_001897 | 920.187   | 966.069   | AB040943  | 1895.369  | 2007.688  | AB020677  | 10386.414 | 12067.181 |
| NM_003853 | 1422.405  | 1012.614  | NM_005201 | 60854.973 | 61192.18  | AB033097  | 5433.697  | 7237.849  |
| NM_018376 | 3453.599  | 3673.919  | NM_000092 | 2764.947  | 2055.933  | NM_000135 | 2534.059  | 2545.044  |
| NM_017615 | 1037.14   | 691.94    | NM_019086 | 11235.403 | 12383.98  | AJ223948  | 6237.136  | 8466.25   |
| NM_017438 | 3759.072  | 2307.783  | NM_018384 | 36774.93  | 37837.488 | NM_016218 | 426.055   | 692.316   |
| U59209    | 4368.808  | 2093.1    | NM_001872 | 3769.636  | 3044.287  | AK022947  | 1200.973  | 1416.5    |
| NM_020195 | 5543.798  | 2966.37   | AF157323  | 5365.559  | 4279.172  | AL050029  | 1253.434  | 1589.321  |
| AK023824  | 4572.137  | 2892.419  | NM_006025 | 1110.463  | 986.867   | NM_005204 | 6863.402  | 10327.505 |
| AL133069  | 5167.034  | 6524.582  | NM_005877 | 19265.662 | 14683.397 | NM_016203 | 1099.073  | 1938.205  |
| AK026055  | 9868.557  | 7473.434  | NM_017752 | 5494.284  | 9470.659  | NM_002759 | 2988.436  | 4141.653  |
| AK024126  | 644.649   | 621.764   | D26069    | 22436.078 | 26234.715 | NM_007271 | 1760.542  | 2473.958  |
| NM_001516 | 5826.809  | 5251.391  | BF107577  | 60606.172 | 55342.988 | NM_006255 | 2328.329  | 3173.189  |
| NM_002744 | 10683.349 | 10944.266 | NM_005837 | 24766.531 | 25112.301 | BE392143  | 3998.505  | 4653.573  |

|             |           |           |           |           |           |            |           |           |
|-------------|-----------|-----------|-----------|-----------|-----------|------------|-----------|-----------|
| NM_015917   | 16503.158 | 15279.932 | NM_017493 | 3667.066  | 4230.446  | NM_005813  | 2501.517  | 1956.852  |
| NM_020397   | 1468.62   | 1603.687  | NM_006136 | 20417.455 | 20114.645 | AB037718   | 6827.251  | 5456.889  |
| NM_000061   | 7923.098  | 10049.416 | AF237772  | 2308.582  | 4229.199  | AL389994   | 1172.93   | 834.578   |
| AB046859    | 33466.492 | 17230.527 | AK025934  | 4973.868  | 4616.884  | NM_003905  | 4141.006  | 3211.593  |
| NM_005105   | 5956.895  | 3370.011  | AJ008154  | 3851.551  | 3369.411  | NM_001277  | 13972.771 | 14011.146 |
| AK023573    | 8277.147  | 4351.408  | NM_003487 | 13505.123 | 13027.978 | NM_003655  | 7294.48   | 8278.949  |
| NM_002730   | 2928.194  | 1417.226  | NM_006887 | 10680.075 | 11771.203 | NM_007072  | 4290.967  | 5286.438  |
| NM_004825   | 1949.554  | 1332.629  | U90919    | 7621.806  | 5139.429  | NM_012320  | 3310.85   | 3525.722  |
| AB011540    | 48247.625 | 21999.191 | NM_006177 | 9866.683  | 6774.604  | NM_005423  | 1288.181  | 3589.124  |
| NM_000040   | 12289.296 | 7842.262  | AL137286  | 17569.295 | 12317.301 | Z36789     | 321.048   | 547.291   |
| NM_004631   | 4208.783  | 3391.33   | NM_016355 | 56469.844 | 47213.5   | J02874     | 11501.5   | 17021.213 |
| NM_012265   | 36508.895 | 24101.381 | NM_016275 | 20995.934 | 15650.105 | BF310427   | 11057.43  | 14653.537 |
| NM_012203   | 1581.123  | 1447.374  | NM_020415 | 19315.945 | 16749.078 | N94424     | 640.488   | 1025.658  |
| NM_003295   | 296.995   | 274.734   | NM_015833 | 7926.731  | 7294.116  | AA045192   | 3599.212  | 4517.741  |
| NM_004735   | 10305.442 | 6285.675  | NM_000985 | 59654.383 | 55490.25  | H45617     | 671.89    | 1006.171  |
| NM_006895   | 818.437   | 644.329   | AK026760  | 57837.129 | 54549.492 | M92642     | 7804.521  | 10422.815 |
| NM_006455   | 8143.501  | 5582.608  | NM_014772 | 8759.856  | 10472.174 | H-U 44385  | 32076.936 | 26891.078 |
| AA427949    | 353.109   | 263.819   | AK025248  | 6586.771  | 8474.791  | ID 1654970 | 11240.005 | 11280.507 |
| D50373      | 926.607   | 574.485   | NM_006425 | 34438.871 | 44740.191 | ID 2531132 | 10184.466 | 11683.499 |
| H07071      | 5620.27   | 4940.979  | NM_004280 | 21200.133 | 22762.059 | ID 4365538 | 1542.897  | 2021.935  |
| M25322      | 9721.263  | 7955.907  | AF110399  | 5873.253  | 5728.868  | AA485665   | 642.584   | 803.861   |
| AA436187    | 5721.179  | 6233.797  | AK027094  | 8468.615  | 8908.639  | BF125928   | 11819.572 | 8904.941  |
| H-L 27586 I | 6017.456  | 6583.135  | AF174600  | 9063.146  | 8988.462  | BG571026   | 3779.662  | 2186.508  |
| ID 214180   | 1770.613  | 2034.13   | AK001003  | 1964.108  | 1904.396  | AA489017   | 11180.861 | 7099.833  |
| ID 1867426  | 22819.355 | 20519.955 | NM_002800 | 25530.688 | 25296.098 | NM_000025  | 16775.141 | 18457.865 |
| W99328      | 2150.733  | 1104.499  | NM_000775 | 5129.583  | 3051.929  | D38521     | 3503.075  | 3568.281  |
| AI434176    | 1353.636  | 722.886   | AB032981  | 1753.892  | 1178.019  | NM_012461  | 5843.84   | 11537.127 |
| H08563      | 1504.419  | 1127.885  | BF217864  | 37524.563 | 38733.164 | AK001379   | 2421.078  | 3799.179  |
| BE735403    | 1988.138  | 1061.017  | NM_005917 | 39426.109 | 31574.879 | NM_017450  | 3376.703  | 3786.424  |
| NM_001715   | 997.732   | 671.691   | NM_007052 | 1358.731  | 1476.835  | NM_002023  | 1146.951  | 1318.116  |
| AF116659    | 2625.219  | 2558.935  | BC017044  | 1091.265  | 1125.229  | NM_002835  | 2135.75   | 3151.859  |
| NM_000317   | 33374.629 | 46894.199 | AV758498  | 2991.781  | 2297.219  | AF190500   | 1029.5    | 1533.414  |
| NM_006885   | 3761.415  | 4826.271  | NM_020195 | 4607.672  | 4648.226  | NM_001615  | 340.414   | 544.287   |
| NM_002435   | 3976.799  | 4080.78   | AB002299  | 796.254   | 708.63    | NM_005904  | 378.359   | 705.431   |
| NM_014585   | 5877.554  | 5345.113  | AK024113  | 2048.377  | 1847.304  | NM_005273  | 29653.061 | 32453.83  |
| NM_000755   | 1854.529  | 1716.308  | NM_018657 | 2504.819  | 2818.299  | NM_000524  | 348.149   | 772.482   |
| AK023334    | 5661.863  | 2987.193  | L40410    | 22627.893 | 21363.432 | NM_006575  | 12998.951 | 14939.407 |
| NM_002563   | 29593.389 | 14821.588 | NM_007055 | 5093.87   | 4330.225  | NM_018645  | 276.104   | 344.973   |
| NM_002437   | 4191.347  | 2373.565  | NM_016652 | 2754.173  | 2968.968  | AB035266   | 18121.996 | 19698.227 |
| D79991      | 2424.486  | 1511.367  | NM_016310 | 38293.953 | 35674.691 | NM_003744  | 5650.705  | 4001.142  |
| NM_001812   | 3039.408  | 2339.908  | AK021562  | 1938.486  | 2235.857  | NM_006375  | 2934.998  | 1557.58   |
| NM_014785   | 1230.618  | 981.644   | BC006560  | 5837.551  | 6522.114  | NM_018132  | 988.958   | 516.675   |
| AK025175    | 1404.597  | 1618.899  | NM_006295 | 1541.012  | 2075.258  | NM_018207  | 3606.575  | 2564.624  |
| NM_005811   | 11191.542 | 9316.556  | AF060938  | 43960.773 | 49870.602 | NM_000345  | 53512.098 | 65429.234 |
| NM_005764   | 1770.539  | 2346.698  | NM_001973 | 14444.154 | 17464.855 | NM_001862  | 53179.648 | 64772.578 |
| NM_016362   | 5346.637  | 6604.313  | NM_014465 | 12118.14  | 13648.906 | NM_006531  | 6495.88   | 8157.528  |
| NM_004214   | 9539.048  | 6831.17   | NM_006855 | 14945.195 | 15912.16  | NM_020195  | 38495.016 | 49720.441 |
| NM_004325   | 11497.85  | 5685.402  | X52350    | 58844.938 | 55996.961 | AA098879   | 496.401   | 949.146   |
| NM_002835   | 11708.905 | 7039.192  | AF071554  | 3569.765  | 3794.438  | AF070525   | 8842.303  | 9432.316  |
| NM_020167   | 2156.025  | 1516.889  | NM_002147 | 1237.607  | 1217.37   | NM_001177  | 2977.126  | 4014.115  |
| NM_016055   | 13283.352 | 12015.151 | NM_017685 | 8657.504  | 5299.39   | NM_014447  | 3261.311  | 4687.727  |
| NM_014005   | 5610.329  | 6749.082  | AK025612  | 52786.434 | 48437.57  | NM_002355  | 1511.587  | 1576.863  |
| NM_017685   | 3769.543  | 5268.231  | NM_012265 | 58834.719 | 58283.918 | NM_006691  | 1367.714  | 1671.248  |

|             |           |           |             |           |           |           |           |           |
|-------------|-----------|-----------|-------------|-----------|-----------|-----------|-----------|-----------|
| AK025612    | 27035.943 | 37039.848 | NM_012203   | 3739.666  | 3929.45   | NM_001505 | 835.608   | 1050.25   |
| NM_000370   | 1515.746  | 2124.135  | NM_003296   | 778.328   | 945.687   | NM_003710 | 10901.976 | 14963.122 |
| BE865893    | 6668.107  | 5791.648  | NM_004736   | 16601.502 | 17334.104 | Z83805    | 741.013   | 1391.161  |
| NM_003123   | 48294.922 | 49735.465 | NM_006895   | 657.65    | 790.321   | NM_004666 | 886.967   | 1267.998  |
| AY005822    | 9218.494  | 5136.54   | NM_006459   | 24564.262 | 27421.111 | NM_003614 | 8270.14   | 10397.938 |
| NM_018129   | 43946.094 | 23484.039 | AA427949    | 776.238   | 671.987   | NM_014257 | 6384.198  | 8287.791  |
| AF289022    | 4019.788  | 2690.829  | D50373      | 1789.943  | 2161.872  | NM_001140 | 940.134   | 1437.187  |
| M17252      | 465.884   | 397.279   | AA488757    | 60555.469 | 60326.109 | NM_004843 | 1450.834  | 1336.428  |
| NM_016025   | 11155.625 | 11015.098 | AA205399    | 1950.257  | 2383.615  | AK022845  | 1126.022  | 754.035   |
| J03048      | 10381.261 | 5812.767  | H07071      | 12258.254 | 11418.864 | S77835    | 725.32    | 417.637   |
| NM_004583   | 838.08    | 1077.068  | M25322      | 28887.764 | 28557.246 | NM_002985 | 1588.345  | 1466.105  |
| NM_001103   | 796.232   | 995.567   | AA436187    | 1020.146  | 1337.295  | AB018347  | 28569.49  | 29271.168 |
| AF228710    | 38358.316 | 41038.996 | H-L 27586 I | 6408.295  | 7119.435  | AB033073  | 14333.926 | 14106.605 |
| NM_018399   | 870.179   | 943.215   | ID 214180   | 1653.934  | 2185.173  | NM_003284 | 9473.848  | 9542.045  |
| AY007131    | 48400.727 | 44711.281 | ID 1867426  | 50508.262 | 53560.691 | NM_001277 | 12740.897 | 21407.42  |
| U61735      | 4464.71   | 2880.238  | ID 396450   | 803.954   | 1166.104  | NM_003659 | 6356.335  | 11121.953 |
| NM_001144   | 21712.795 | 11326.098 | W99328      | 5165.595  | 5959.945  | NM_007072 | 4094.695  | 5432.511  |
| AK023766    | 10001.214 | 9941.729  | AI434176    | 3130.138  | 2834.123  | NM_012320 | 3053.305  | 3445.107  |
| NM_001897   | 2248.83   | 4057.295  | H08563      | 7871.566  | 8509.903  | NM_018208 | 2023.339  | 2277.994  |
| NM_003853   | 1902.21   | 3808.725  | BE735403    | 4974.461  | 5083.188  | NM_015929 | 3370.852  | 4654.423  |
| AB033109    | 3446.297  | 6220.671  | NM_002631   | 28952.174 | 28488.104 | U90653    | 7773.662  | 9456.997  |
| NM_017438   | 3981.082  | 4236.752  | AB033109    | 4642.333  | 3726.478  | NM_000196 | 569.581   | 1031.547  |
| U59209      | 4435.188  | 4327.782  | NM_002053   | 59778.426 | 59250.816 | NM_018339 | 3479.54   | 5377.49   |
| NM_020195   | 6175.478  | 6950.592  | NM_006889   | 7011.788  | 9836.155  | NM_006745 | 14120.168 | 23666.531 |
| AK023824    | 5027.901  | 3831.937  | NM_002438   | 11242.694 | 14073.763 | NM_000275 | 1141.116  | 1704.294  |
| AL133069    | 5075.202  | 5884.03   | NM_014589   | 21962.912 | 28580.148 | AK000037  | 1851.695  | 1951.158  |
| AL117574    | 474.504   | 821.707   | NM_000759   | 4597.861  | 6627.722  | NM_014760 | 1720.446  | 2384.352  |
| AK026055    | 9943.059  | 16080.397 | AK023334    | 15507.85  | 15867.611 | NM_018398 | 938.982   | 854.125   |
| AK024126    | 1305.604  | 1728.909  | NM_002563   | 39893.832 | 40900.094 | NM_002560 | 46616.055 | 49528.766 |
| NM_001516   | 5580.947  | 5777.7    | NM_002437   | 8721.542  | 6992.664  | NM_014404 | 4373.231  | 3477.949  |
| NM_020397   | 2050.747  | 1838.351  | D79991      | 8691.718  | 10889.757 | NM_018713 | 1188.247  | 1054.491  |
| NM_000061   | 6600.42   | 7637.834  | AK022425    | 4215.174  | 5586.895  | NM_015947 | 7915.305  | 6139.288  |
| AB046859    | 33220.746 | 22827.715 | NM_000054   | 51415.965 | 55381.824 | NM_002042 | 48724.918 | 56383.207 |
| NM_005109   | 6234.308  | 4922.107  | NM_014713   | 23136.217 | 21478.498 | AB028944  | 459.062   | 892.97    |
| AK023573    | 10448.481 | 8210.368  | NM_001812   | 4822.801  | 4282.277  | AJ006268  | 702.852   | 1035.684  |
| NM_002730   | 5071.784  | 3056.588  | NM_014785   | 2819.636  | 2862.362  | M74089    | 4572.177  | 5538.888  |
| NM_004828   | 3198.087  | 2367.201  | AK025175    | 632.603   | 562.583   | AF190864  | 5369.331  | 6668.425  |
| AB011540    | 47759.992 | 52784.641 | NM_005811   | 22141.01  | 22390.689 | NM_000025 | 16716.016 | 20931.967 |
| NM_000040   | 14171.9   | 14847.493 | NM_005764   | 5640.024  | 7241.051  | D38521    | 3392.702  | 3557.305  |
| NM_004631   | 4789.36   | 6730.761  | NM_016362   | 9396.669  | 14160.165 | NM_000403 | 18678.135 | 20104.912 |
| NM_006033   | 15743.929 | 30549.443 | NM_004214   | 17079.652 | 21622.887 | NM_018127 | 11714.73  | 14178.424 |
| NM_003296   | 427.642   | 1045.713  | NM_004329   | 28790.506 | 34059.98  | AB020677  | 10363.277 | 10153.816 |
| NM_004736   | 13074.552 | 17709.725 | NM_002836   | 28005.188 | 37763.301 | AB033097  | 5010.711  | 4808      |
| NM_006895   | 594.19    | 969.043   | NM_020167   | 6747.357  | 7795.547  | NM_000135 | 2585.164  | 3256.479  |
| NM_006459   | 9617.546  | 9848.446  | NM_016058   | 20693.264 | 24228.771 | AJ223948  | 6104.956  | 9516.225  |
| AA427949    | 1875.614  | 1533.385  | NM_014005   | 8317.953  | 8357.884  | NM_016218 | 478.325   | 735.506   |
| D50373      | 1353.755  | 2356.071  | NM_006033   | 38320.211 | 33704.012 | AK022947  | 1354.786  | 1698.099  |
| AA488757    | 38216.293 | 38528.328 | NM_004837   | 12005.935 | 19165.109 | AL050029  | 1421.698  | 1620.279  |
| AA205399    | 724.81    | 1962.026  | NM_003123   | 58342.426 | 58721.5   | AL049966  | 475.202   | 600.951   |
| H07071      | 7016.793  | 14348.959 | AY005822    | 11210.886 | 12655.237 | NM_005204 | 7186.674  | 5696.854  |
| M25322      | 11205.623 | 14925.501 | NM_018129   | 59264.746 | 58477.508 | NM_016203 | 1064.33   | 924.826   |
| AA436187    | 1490.698  | 2399.875  | AF289022    | 6636.803  | 5786.267  | NM_002759 | 2677.335  | 1694.062  |
| H-L 27586 I | 3688.884  | 4513.646  | AB002326    | 808.357   | 541.709   | NM_007271 | 1999.08   | 1473.175  |

|            |           |           |             |           |           |           |           |           |
|------------|-----------|-----------|-------------|-----------|-----------|-----------|-----------|-----------|
| ID 214180  | 1393.502  | 1471.948  | M17252      | 1114.184  | 1442.298  | NM_00625E | 2461.937  | 2549.048  |
| ID 1867426 | 26486.072 | 20022.734 | NM_016025   | 18614.152 | 25383.975 | BE392143  | 4107.515  | 3803.604  |
| ID 396450  | 763.587   | 1315.586  | NM_013319   | 6734.562  | 7556.025  | NM_005813 | 2634.252  | 2446.491  |
| W99328     | 2205.243  | 2953.141  | NM_020410   | 10230.475 | 10937.207 | AB037718  | 6965.641  | 8182.914  |
| AI434176   | 1530.576  | 1168.342  | NM_000453   | 5733.782  | 6264.369  | AL389994  | 1190.311  | 1587.453  |
| H08563     | 6476.159  | 4111.465  | J03048      | 22823.158 | 24596.141 | CY3Cy5    | 2884.9    | 202.426   |
| BE735403   | 1929.731  | 1212.925  | NM_004583   | 1430.893  | 1755.736  | NM_00058E | 15214.233 | 6837.394  |
| NM_00171E  | 768.33    | 844.546   | NM_001103   | 1724.499  | 2107.932  | AF143872  | 25440.768 | 10329.608 |
| AF116659   | 2766.107  | 5938.397  | AF228710    | 58136.668 | 62321.363 | AF143326  | 1555.616  | 1059.82   |
| NM_000317  | 28324.561 | 46043.711 | NM_018399   | 8611.436  | 8565.358  | AL049229  | 2169.652  | 1164.908  |
| NM_01837E  | 4102.422  | 13401.454 | U61735      | 8196.709  | 11779.286 | NM_01830E | 69194.375 | 40747.313 |
| NM_01761E  | 1105.125  | 2122.657  | NM_001144   | 36517.582 | 49723.918 | AK026146  | 3251.274  | 2313.39   |
| AK022425   | 2053.678  | 4305.094  | AK023766    | 16984.6   | 22187.283 | AK023152  | 3212.129  | 1901.379  |
| NM_000054  | 32615.627 | 39152.926 | NM_001897   | 3544.447  | 4297.263  | AK000155  | 482.672   | 439.327   |
| NM_014713  | 15876.383 | 23436.473 | NM_003853   | 3206.375  | 3346.269  | AL389937  | 2501.598  | 1557.988  |
| NM_001812  | 5439.762  | 8476.612  | NM_01837E   | 5919.546  | 5151.915  | AK025201  | 3121.777  | 2680.776  |
| NM_01478E  | 2208.622  | 3462.736  | NM_01761E   | 2016.431  | 2726.85   | AK022995  | 1373.51   | 1237.496  |
| AK025175   | 335.887   | 747.769   | NM_01743E   | 7044.667  | 11717.179 | SR1       | 102355.69 | 66000.773 |
| NM_005811  | 10694.274 | 19811.961 | U59209      | 8214.804  | 8689.731  | SR3       | 27456.977 | 24142.174 |
| NM_005764  | 1845.485  | 4290.311  | NM_02019E   | 11043.745 | 11467.148 | SR5       | 2567.23   | 2832.932  |
| NM_016362  | 5045.783  | 10986.66  | AK023824    | 14805.017 | 9816.961  | SR7       | 3026.092  | 21922.914 |
| NM_004214  | 10639.807 | 20960.742 | AL133069    | 10109.189 | 10517.635 | SR9       | 6536.163  | 1021.205  |
| NM_00432E  | 14801.991 | 27223.189 | AL117574    | 1712.929  | 1987.518  | CY3Cy5    | 2815.968  | 136.997   |
| NM_00283E  | 17640.51  | 23843.664 | AK026055    | 15616.64  | 15718.026 | L13433    | 2713.468  | 1102.199  |
| NM_020167  | 3229.84   | 4156.114  | AK024126    | 919.661   | 1077.732  | NM_00722C | 871.418   | 400.368   |
| AL049963   | 17016.264 | 13597.804 | NM_00151E   | 10963.32  | 10767.102 | NM_017777 | 2144.215  | 925.098   |
| NM_01605E  | 12490.961 | 10697.009 | NM_002744   | 22913.785 | 22851.109 | AK001499  | 3567.669  | 1682.362  |
| NM_01400E  | 5241.463  | 5268.695  | NM_015917   | 24621.051 | 37115.18  | AK026852  | 1054.561  | 840.448   |
| NM_00463E  | 15696.361 | 13666.146 | NM_020397   | 3092.713  | 4496.292  | AK021629  | 662.064   | 736.763   |
| AK022603   | 440.109   | 402.544   | NM_000061   | 11683.236 | 16479.514 | AL110257  | 82295.867 | 49856.926 |
| NM_00489E  | 7203.586  | 4894.45   | NM_002730   | 7638.532  | 9525.707  | AB013384  | 2212.573  | 2912.626  |
| NM_013372  | 480.621   | 650.833   | NM_00482E   | 4009.282  | 6150.923  | AK024270  | 2154.168  | 2514.524  |
| NM_01768E  | 4423.458  | 9033.957  | AB011540    | 57088.785 | 56439.262 | AK025569  | 4872.407  | 4483.92   |
| AK025612   | 24191.309 | 34563.152 | NM_000040   | 36740.883 | 37926.063 | AK023060  | 3725.807  | 6211.422  |
| NM_01226E  | 40134.227 | 51304.84  | NM_004631   | 8939.325  | 8931.339  | AF052146  | 45902.203 | 35955.426 |
| NM_012203  | 1549.505  | 3658.154  | NM_01226E   | 54964.703 | 52356.188 | NM_00487C | 4603.795  | 4699.571  |
| AL157469   | 565.388   | 1231.581  | NM_012203   | 3880.38   | 3121.926  | AK024242  | 21453.539 | 6785.964  |
| NM_00286E  | 4428.037  | 9404.032  | NM_00329E   | 870.075   | 865.026   | AK024559  | 1772.715  | 597.95    |
| AK024100   | 9150.47   | 13517.438 | NM_00473E   | 15987.927 | 12542.233 | AK024851  | 1681.714  | 540.542   |
| NM_00513E  | 1045.934  | 2229.077  | NM_00689E   | 704.196   | 699.442   | AK024943  | 805.254   | 378.535   |
| NM_003827  | 10533.217 | 15979.613 | NM_00645E   | 23452.086 | 15893.431 | AK022628  | 76003.773 | 35612.621 |
| NM_004583  | 915.895   | 2065.112  | AA427949    | 651.926   | 477.872   | AK021737  | 11886.058 | 6680.474  |
| NM_001103  | 819.96    | 2000.893  | D50373      | 1765.509  | 2867.223  | AL357454  | 473.624   | 218.396   |
| NM_01839E  | 541.268   | 1230.819  | AA488757    | 54541.227 | 57446.566 | AK026295  | 1057.701  | 847.382   |
| AY007131   | 48528.156 | 62944.578 | AA205399    | 1928.993  | 2243.761  | AK022346  | 447.009   | 290.268   |
| U61735     | 5069.839  | 12296.837 | H07071      | 10213.398 | 8476.998  | AK025007  | 1921.65   | 1636.472  |
| NM_001144  | 28133.096 | 40816.566 | M25322      | 26380.973 | 24852.555 | NM_01648E | 8221.425  | 6592.816  |
| AK023766   | 10771.433 | 15163.347 | AA436187    | 820.258   | 924.274   | AK026490  | 58905.195 | 48532.84  |
| NM_001897  | 1545.826  | 1515.524  | H-L 27586 I | 6039.102  | 7635.667  | AJ227861  | 2214.27   | 2325.984  |
| NM_003853  | 1733.187  | 1856.124  | ID 214180   | 4285.756  | 4599.668  | AJ001875  | 2135.108  | 2422.21   |
| AB033109   | 3526.5    | 5505.189  | ID 1867426  | 53034.813 | 59776.652 | AK002028  | 41970.027 | 16161.741 |
| NM_002053  | 48746.172 | 41371.16  | W99328      | 5652.057  | 6716.376  | AL050127  | 4841.489  | 1780.033  |
| NM_00688E  | 4061.825  | 5986.183  | AI434176    | 4204.152  | 4182.549  | AK024805  | 7456.647  | 3030.275  |



|           |           |           |           |           |           |           |           |           |
|-----------|-----------|-----------|-----------|-----------|-----------|-----------|-----------|-----------|
| NM_00243E | 4342.184  | 4947.22   | H08563    | 9122.615  | 11960.242 | AK001423  | 1366.514  | 773.822   |
| NM_00075E | 1662.68   | 4358.836  | BE735403  | 5217.62   | 7356.87   | AK021989  | 415.859   | 261.579   |
| AK023334  | 8437.551  | 13448.9   | NM_00171E | 1049.106  | 1196.155  | NM_01862E | 1995.593  | 1697.574  |
| NM_00256E | 41374.488 | 50495.879 | AF116659  | 7567.34   | 9000.549  | AK022298  | 5357.533  | 5046.952  |
| NM_002437 | 4684.463  | 8762.561  | NM_000317 | 39200.852 | 41372.992 | AJ277441  | 45625.727 | 39102.594 |
| D79991    | 2972.317  | 6877.076  | NM_00688E | 6426.74   | 4338.973  | NM_006057 | 4664.211  | 5222.628  |
| AB011540  | 52277.859 | 61698.273 | NM_00243E | 10730.316 | 6914.305  | AK025784  | 42467.051 | 13668.1   |
| NM_00004C | 18916.391 | 26078.408 | NM_01458E | 21032.094 | 12622.934 | U07199    | 6144.891  | 1868.396  |
| NM_004631 | 5256.159  | 9507.763  | NM_00075E | 3982.848  | 1959.522  | AK023713  | 1539.207  | 619.509   |
| NM_00603E | 16617.158 | 24294.295 | AK023334  | 16958.365 | 6726.539  | X81445    | 1037.098  | 506.941   |
| NM_004837 | 5647.812  | 11069.719 | NM_00256E | 41886.52  | 19098.211 | U95091    | 2103.788  | 852.99    |
| NM_00037C | 1519.044  | 4570.585  | NM_002437 | 8668.119  | 3898.725  | NM_01790C | 40979.871 | 16805.975 |
| BE865893  | 8980.486  | 14487.754 | D79991    | 4727.406  | 5426.38   | S50182    | 1176.547  | 618.766   |
| AY005822  | 4671.999  | 7993.802  | AK022425  | 3230.051  | 5677.901  | AL360145  | 1050.322  | 851.201   |
| NM_01812E | 44033.063 | 55197.93  | NM_000054 | 39281.168 | 33117.422 | Y12016    | 3207.224  | 1700.451  |
| AF289022  | 4175.434  | 8499.526  | NM_01471E | 15034.044 | 9485.883  | S75763    | 66764.531 | 65418.398 |
| AB002326  | 298.744   | 423.409   | NM_00181E | 3556.987  | 2828.906  | AL359943  | 67253.195 | 64227.578 |
| M17252    | 783.872   | 849.668   | NM_01478E | 2675.096  | 3552.604  | NM_000534 | 2388.144  | 3317.009  |
| NM_01602E | 11636.32  | 6123.456  | AK025175  | 962.91    | 1013.568  | L10140    | 448.561   | 680.909   |
| NM_01331E | 3674.894  | 4428.227  | NM_005811 | 18114.209 | 20034.229 | AL133447  | 1209.315  | 1499.189  |
| NM_00074E | 1643.533  | 2081.107  | NM_005764 | 5484.617  | 5993.191  | AB037853  | 61031.27  | 57780.754 |
| NM_00072E | 1072.314  | 1201.783  | NM_01636E | 10704.906 | 12501.616 | D28450    | 66823.5   | 65777.344 |
| NM_00603C | 1808.901  | 2633.661  | NM_004214 | 17080.727 | 22104.254 | AK056222  | 2317.014  | 2736.487  |
| NM_02041C | 5460.956  | 6613.811  | NM_00432E | 27274.248 | 30910.768 | L37700    | 821.048   | 450.621   |
| NM_014211 | 564.9     | 1690.233  | NM_00283E | 29473.18  | 34572.66  | NM_01766E | 4963.217  | 1761.793  |
| NM_000814 | 2370.002  | 5541.216  | NM_020167 | 6378.078  | 6954.637  | AK024819  | 483.812   | 191.706   |
| NM_00045E | 2534.124  | 6300.494  | NM_01605E | 20764.516 | 27539.232 | AF052106  | 4335.015  | 2036.938  |
| J03077    | 40861.918 | 52339.691 | NM_01400E | 12187.316 | 13135.83  | AK000441  | 523.485   | 216.41    |
| J03048    | 13053.189 | 22026.422 | NM_01768E | 10043.104 | 10414.044 | AK022391  | 1350.05   | 817.379   |
| NM_00171E | 670.923   | 516.724   | AK025612  | 55072.926 | 51030.113 | NM_016167 | 6070.568  | 3767.742  |
| AF116659  | 2206.941  | 2158.122  | NM_00037C | 2679.856  | 1289.38   | NM_01612E | 542.944   | 521.443   |
| NM_000317 | 22643.582 | 19549.361 | BE865893  | 20965.262 | 8965.544  | AK024090  | 20605.27  | 14929.583 |
| NM_01837E | 3730.588  | 6651.75   | NM_00312E | 59953.566 | 51212.816 | AL133574  | 5020.559  | 4768.637  |
| NM_01761E | 1117.808  | 2454.748  | AY005822  | 11707.788 | 4606.808  | AK021936  | 1373.754  | 1461.577  |
| NM_01743E | 5786.191  | 13404.493 | NM_01812E | 58876.609 | 46205.953 | AF147339  | 57011.488 | 51366.02  |
| U59209    | 4409.438  | 8389.151  | AF289022  | 6543.094  | 3736.242  | AL390181  | 56703.926 | 44087.965 |
| NM_02019E | 6193.313  | 11169.196 | M17252    | 1024.07   | 854.891   | NM_017914 | 54065.355 | 46342.395 |
| BC002753  | 267.114   | 286.01    | NM_01602E | 16640.57  | 16917.756 | AK024953  | 10237.217 | 12743.608 |
| AK023824  | 5218.716  | 7520.066  | NM_01331E | 6405.747  | 5020.964  | AK024276  | 3779.852  | 4329.766  |
| AL133069  | 5578.81   | 12951.046 | NM_02041C | 9311.657  | 8610.187  | S83374    | 4012.723  | 5308.019  |
| AL117574  | 439.439   | 1061.662  | NM_00045E | 6987.471  | 10470.616 | NM_00315C | 1483.622  | 617.798   |
| AK026055  | 10141.711 | 7384.06   | J03048    | 21090.146 | 26281.352 | NM_014784 | 2159.975  | 888.615   |
| AK024126  | 810.929   | 1074.848  | NM_00458E | 2660.859  | 2261.886  | AK026383  | 4609.445  | 2100.209  |
| NM_00151E | 6046.097  | 5031.466  | NM_00110E | 2288.83   | 2768.743  | AB014594  | 2741.734  | 1091.998  |
| NM_002744 | 9766.496  | 8870.946  | AF228710  | 57809.805 | 57598.879 | M94547    | 1114.549  | 527.578   |
| NM_015917 | 15540.013 | 17223.586 | NM_01839E | 1176.034  | 1188.677  | NM_005087 | 15206.929 | 7458.77   |
| NM_020397 | 1318.764  | 1990.306  | AY007131  | 58153.934 | 57407.754 | NM_01209E | 4218.45   | 1797.278  |
| NM_000061 | 7989.513  | 11911.802 | U61735    | 8181.738  | 7668.259  | NM_01809E | 1859.282  | 1060.793  |
| AB046859  | 36726.008 | 49325.344 | NM_001144 | 35850.395 | 39811.344 | AB023164  | 4174.089  | 2686.766  |
| NM_00510E | 7080.648  | 13405.206 | AK023766  | 14560.156 | 16967.973 | NM_00117E | 532.594   | 579.891   |
| AK023573  | 10508.845 | 20541.006 | NM_001897 | 3411.153  | 4397.69   | AK023696  | 12586.315 | 8070.423  |
| NM_00273C | 3433.65   | 8741.916  | NM_00385E | 4170.386  | 4566.785  | NM_000704 | 1835.689  | 2002.04   |
| NM_00482E | 2431.652  | 5893.493  | AB033109  | 7192.557  | 8022.236  | NM_015987 | 592.819   | 764.93    |

|           |           |           |             |           |           |           |           |           |
|-----------|-----------|-----------|-------------|-----------|-----------|-----------|-----------|-----------|
| CY3Cy5    | 8706.162  | 731.688   | NM_002053   | 58563.012 | 54171.938 | NM_019605 | 1754.606  | 2408.075  |
| AF035314  | 849.121   | 1516.548  | NM_017438   | 6728.137  | 1688.763  | Z49090    | 16925.443 | 17896.826 |
| NM_018036 | 1387.26   | 1954.232  | U59209      | 7376.247  | 2207.003  | AK021592  | 7668.839  | 10486.333 |
| AF052087  | 1027.846  | 1934.365  | NM_020195   | 10791.924 | 12517.659 | AK025467  | 5523.125  | 6078.85   |
| AF007143  | 1342.193  | 1286.693  | AK023824    | 13284.096 | 13403.563 | AK026593  | 5622.702  | 6289.006  |
| AK023656  | 1212.36   | 1165.234  | AL133069    | 10803.875 | 6993.861  | AL117666  | 1310.688  | 672.949   |
| AF086511  | 852.782   | 913.033   | AL117574    | 766.992   | 665.821   | Y17865    | 2667.983  | 1095.813  |
| AK022989  | 2230.996  | 1552.006  | AK026055    | 14667.212 | 9902.919  | NM_005825 | 28931.807 | 10974.463 |
| AK001604  | 3573.528  | 2547.121  | AK024126    | 1354.866  | 822.742   | NM_002756 | 7344.757  | 2937.22   |
| AF086497  | 453.292   | 498.598   | NM_001516   | 10355.913 | 6752.426  | AJ000414  | 1032.912  | 662.89    |
| NM_020141 | 5386.44   | 3892.618  | NM_002744   | 19663.305 | 18624.777 | AK025674  | 19699.996 | 11129.14  |
| NM_006482 | 1136.254  | 888.189   | NM_015917   | 24110.418 | 25641.684 | AF007194  | 11064.52  | 6310.09   |
| NM_001824 | 76365.469 | 55930.332 | NM_020397   | 2202.408  | 1698.249  | NM_019065 | 1533.423  | 1227.775  |
| SR5       | 4449.761  | 9407.451  | NM_000061   | 10699.483 | 10342.453 | NM_004761 | 4377.851  | 3275.542  |
| SR7       | 4933.507  | 57806.867 | AB046859    | 51694.672 | 42319.246 | Z25424    | 4490.817  | 2924.305  |
| SR9       | 17107.268 | 9656.484  | NM_005109   | 14460.283 | 10844.609 | U79458    | 4500.638  | 4267.298  |
| CY3Cy5    | 10839.015 | 1126.616  | AK023573    | 15975.049 | 14345.183 | NM_014920 | 601.747   | 745.131   |
| U15553    | 4823.81   | 3173.708  | NM_002730   | 6208.447  | 6173.726  | NM_002961 | 4517.595  | 2903.436  |
| Z36829    | 497.562   | 612.785   | NM_004828   | 3895.885  | 4710.856  | NM_018296 | 1041.322  | 1314.357  |
| AK024734  | 11682.68  | 6908.314  | AB011540    | 60743.668 | 56107.121 | NM_000676 | 4622.319  | 5008.036  |
| NM_017741 | 2049.159  | 2025.165  | NM_000040   | 36378.258 | 39148.254 | NM_005766 | 1506.661  | 1618.414  |
| AK022223  | 437.937   | 542.24    | NM_004631   | 9697.896  | 10977.914 | NM_004127 | 65179.145 | 68210.172 |
| NM_005887 | 3964.021  | 2305.002  | NM_006033   | 38727.879 | 43236.73  | NM_013324 | 3914.692  | 3856.613  |
| AL110232  | 755.549   | 778.106   | NM_004837   | 12475.96  | 16697.705 | AL133022  | 644.369   | 1139.756  |
| AK026103  | 2744.175  | 1542.875  | NM_003296   | 639.829   | 279.959   | NM_003953 | 3387.97   | 4679.093  |
| NM_016353 | 11961.896 | 6051.991  | NM_004736   | 18245.213 | 14154.336 | NM_006301 | 625.802   | 1173.152  |
| AL080280  | 6745.209  | 14106.402 | NM_006895   | 834.786   | 883.432   | NM_012219 | 622.921   | 331.088   |
| AB028947  | 1325.692  | 3087.475  | NM_006459   | 24941.621 | 30076.084 | X72887    | 896.273   | 476.953   |
| AK022556  | 529.661   | 628.367   | AA427949    | 912.797   | 1027.178  | NM_004525 | 1621.288  | 814.165   |
| AK023437  | 4452.732  | 4566.834  | D50373      | 2084.602  | 1613.646  | NM_000127 | 1119.131  | 571.058   |
| AK024147  | 457.809   | 531.545   | AA488757    | 57319.398 | 47144.008 | Y10483    | 25402.809 | 10082.726 |
| AK022897  | 902.225   | 865.634   | AA205399    | 2445.757  | 1691.713  | NM_006784 | 1982.646  | 1016.531  |
| AK023898  | 3630.177  | 2247.946  | AI394286    | 2038.52   | 1490.836  | NM_017876 | 2067.513  | 928.651   |
| AK021619  | 732.116   | 508.458   | H07071      | 10582.609 | 7007.583  | NM_001087 | 64896.762 | 54238.758 |
| AK025872  | 573.122   | 378.513   | M25322      | 26811.293 | 20316.711 | NM_001826 | 1443.835  | 846.45    |
| AF131762  | 4515.765  | 1963.953  | AA436187    | 2514.289  | 1568.988  | NM_003721 | 6523.328  | 4404.517  |
| AY007089  | 3101.847  | 1573.088  | H-L 27586 I | 6251.974  | 7474.417  | NM_004724 | 1099.551  | 1262.499  |
| AK021816  | 3760.523  | 1715.254  | ID 214180   | 1614.146  | 1911.128  | NM_001431 | 6128.129  | 4852.24   |
| D43770    | 20196.055 | 7220.13   | ID 1867426  | 51091.078 | 54600.234 | NM_000381 | 840.301   | 1172.731  |
| AF085960  | 657.064   | 369.775   | ID 396450   | 821.247   | 710.657   | NM_000427 | 2238.74   | 2556.359  |
| AK021519  | 633.622   | 354.362   | W99328      | 4735.013  | 4051.707  | NM_014924 | 628.618   | 926.252   |
| NM_014254 | 5453.699  | 2530.545  | AI434176    | 3054.266  | 2164.09   | NM_006946 | 1403.519  | 2001.069  |
| U09197    | 1816.574  | 4652.468  | H08563      | 9927.591  | 10938.805 | NM_000174 | 66888.875 | 67891.742 |
| AK025218  | 725.38    | 1144.571  | BE735403    | 4433.167  | 5801.005  | NM_002506 | 753.865   | 1312.109  |
| AJ227899  | 2295.554  | 2671.123  | NM_001718   | 935.408   | 1189.986  | NM_014343 | 3152.063  | 4587.21   |
| AL359607  | 2033.994  | 3843.416  | AF116659    | 5918.428  | 6474.563  | D25303    | 722.21    | 1293.424  |
| AF161371  | 7174.306  | 5016.233  | NM_000317   | 39670.914 | 47623.621 | NM_002336 | 6565.197  | 8083.564  |
| AK022464  | 1088.858  | 863.753   | NM_018376   | 7044.249  | 9878.004  | AF022913  | 2064.553  | 964.894   |
| AF086230  | 778.632   | 805.672   | NM_017615   | 1816.249  | 2326.791  | NM_000026 | 1508.214  | 647.289   |
| AK023408  | 2794.746  | 1510.861  | AK022425    | 3163.972  | 2746.458  | NM_001382 | 7031.332  | 3004.63   |
| AK000144  | 1670.789  | 547.771   | NM_000054   | 48814.648 | 33940.055 | M93718    | 8640.064  | 2731.852  |
| AK022275  | 1001.435  | 502.764   | NM_014713   | 22611.369 | 24595.096 | NM_005386 | 2205.2    | 901.897   |
| AK000942  | 352.595   | 288.858   | NM_001812   | 4979.55   | 5125.743  | AK023807  | 18211.16  | 7600.426  |

|           |           |           |           |           |           |           |           |           |
|-----------|-----------|-----------|-----------|-----------|-----------|-----------|-----------|-----------|
| AL117533  | 746.37    | 493.329   | NM_014785 | 2565.766  | 3043.69   | NM_01818E | 19106.766 | 11741.479 |
| AK026036  | 1224.564  | 725.394   | AK025175  | 483.533   | 1018.835  | AK024273  | 2219.338  | 1052.024  |
| AK023422  | 1647.156  | 886.019   | NM_005811 | 17917.619 | 10732.714 | X59417    | 17652.324 | 10944.512 |
| AK022796  | 1075.928  | 548.477   | NM_005764 | 4311.1    | 2935.366  | NM_00565E | 61204.961 | 65711.266 |
| AK095193  | 812.426   | 541.891   | NM_016362 | 9215.927  | 6901.507  | D28476    | 5534.742  | 4166.781  |
| AK025081  | 1398.482  | 601.586   | NM_004214 | 14778.943 | 10722.675 | NM_01626E | 5093.422  | 3737.867  |
| AL122088  | 1504.915  | 582.391   | NM_00432E | 25827.35  | 18418.691 | NM_00333E | 40286.797 | 33305.043 |
| AF119912  | 864.678   | 443.556   | NM_00283E | 29921.975 | 29011.975 | AB002376  | 7590.913  | 7929.267  |
| T99941    | 5389.489  | 4820.763  | NM_020167 | 7548.754  | 7797.102  | NM_01824E | 1055.26   | 1569.902  |
| AF113678  | 1377.824  | 1166.799  | AL049963  | 29163.768 | 35388.379 | NM_00555E | 2237.944  | 2773.296  |
| AL137313  | 57715.641 | 63532.871 | NM_01605E | 20100.604 | 22859.525 | NM_016631 | 1276.793  | 1711.662  |
| AB002363  | 6598.96   | 3967.859  | NM_01400E | 10348.744 | 10881.596 | AB015617  | 21042.139 | 26472.598 |
| NM_005284 | 2214.638  | 1194.976  | NM_00463E | 32478.719 | 22196.338 | AK022730  | 2342.479  | 1994.687  |
| AF086351  | 462.18    | 338.496   | AK022603  | 1211.54   | 952.148   | NM_00225E | 7765.244  | 12164.384 |
| D83199    | 13090.423 | 5337.232  | NM_00489E | 11428.08  | 15829.277 | AF064839  | 40607.219 | 49004.859 |
| AK025957  | 571.271   | 384.973   | NM_01337E | 1494.693  | 2123.342  | NM_00543E | 15392.456 | 17566.689 |
| Y16708    | 1060.133  | 469.427   | NM_00397E | 3335.064  | 4532.957  | AB037810  | 1404.082  | 1990.339  |
| AL157453  | 1840.376  | 611.499   | NM_01768E | 9020.08   | 11310.604 | AF222694  | 532.45    | 1293.534  |
| NM_01904C | 5563.661  | 2442.361  | AK025612  | 54506.754 | 54548.168 | AL049925  | 2979.535  | 4547.637  |
| NM_00597E | 941.443   | 561.839   | NM_01226E | 57785.953 | 59532.574 | NM_01615E | 734.449   | 368.564   |
| Y16711    | 933.721   | 600.109   | NM_01220E | 3998.422  | 4707.836  | AK027089  | 3879.129  | 1538.647  |
| AJ272179  | 6067.581  | 3252.808  | AL157469  | 1138.263  | 1130.19   | X59845    | 881.775   | 504.593   |
| AJ007015  | 4995.951  | 1183.401  | NM_00286E | 6720.916  | 5162.165  | NM_006284 | 14851.266 | 6420.777  |
| AL049317  | 1866.373  | 1034.805  | AK024100  | 15091.459 | 10102.614 | U18909    | 3029.977  | 1373.204  |
| AL050090  | 1014.394  | 639.877   | NM_00513E | 1767.173  | 1656.682  | NM_00348E | 3953.782  | 1930.88   |
| AF086309  | 581.052   | 563.155   | NM_003827 | 16661.5   | 18205.961 | NM_01658E | 14247.657 | 7280.625  |
| AF238870  | 642.23    | 501.947   | NM_00458E | 1205.396  | 937.471   | NM_003597 | 827.902   | 504.383   |
| AK026279  | 2469.164  | 1392.427  | NM_00110E | 1492.535  | 809.446   | NM_00256E | 62955.516 | 43253.809 |
| AF130094  | 9148.616  | 3473.493  | AF228710  | 55714.094 | 45712.473 | NM_006561 | 700.677   | 527.945   |
| AK026673  | 2772.778  | 1046.937  | NM_01839E | 1993.364  | 1490.778  | NM_017521 | 1533.445  | 1252.275  |
| AF170935  | 12813.277 | 4588.62   | AY007131  | 57078.355 | 58161.789 | AK025200  | 29126.229 | 26522.918 |
| AB007978  | 920.698   | 1109.124  | U61735    | 7090.521  | 7161.465  | NM_00138E | 9298.014  | 10680.131 |
| AF217970  | 1823.378  | 2102.327  | NM_001144 | 33807.668 | 38368.371 | NM_00102E | 67748.078 | 67702.734 |
| AF086297  | 1393.375  | 1315.641  | AK023766  | 12397.275 | 14982.371 | NM_00500E | 22933.717 | 25966.359 |
| AK025455  | 2158.222  | 1876.143  | NM_001897 | 3322.208  | 3532.111  | NM_016304 | 43127.504 | 47116.629 |
| AK026799  | 8169.929  | 4330.887  | NM_00385E | 3937.102  | 4088.354  | NM_00601E | 17558.873 | 22352.893 |
| NM_01486C | 413.873   | 453.002   | AB033109  | 3988.127  | 5070.333  | NM_01404E | 20321.197 | 23890.459 |
| AK022549  | 1225.474  | 881.609   | NM_00205E | 56261.633 | 57633.332 | L34071    | 10087.249 | 11207.776 |
| NM_018157 | 605.205   | 676.718   | NM_00688E | 6765.541  | 7699.08   | AB043007  | 31344.471 | 32397.109 |
| Z70714    | 3597.97   | 1973.694  | NM_00243E | 10111.367 | 14763.504 | NM_004861 | 5411.705  | 6487.64   |
| AK021640  | 4944.574  | 1290      | NM_01458E | 26002.156 | 36482.383 | NM_016161 | 411.712   | 1097.109  |
| AK002036  | 2975.208  | 1905.003  | NM_00075E | 4198.288  | 6419.26   | AV718258  | 1007.615  | 550.852   |
| U84512    | 408.66    | 350.218   | AK023334  | 19617.09  | 22020.314 | NM_00516E | 6206.222  | 2227.626  |
| AK025775  | 3582.25   | 1477.087  | NM_00256E | 40635.664 | 52043.906 | NM_00513E | 44757.313 | 23184.318 |
| AB046791  | 448.086   | 357.318   | NM_002437 | 10728.62  | 10998.641 | NM_00211E | 62488.773 | 45853.426 |
| AF043469  | 2071.408  | 1090.599  | D79991    | 4935.145  | 5605.371  | AK023162  | 2554.047  | 1777.155  |
| AL109671  | 669.622   | 539.128   | AB011540  | 58655.582 | 55138.184 | NM_00639E | 6380.969  | 4232.57   |
| NM_01237E | 524.205   | 357.366   | NM_00004C | 30664.158 | 17772.826 | NM_01864E | 6450.709  | 4359.887  |
| AK022008  | 2076.479  | 967.918   | NM_004631 | 8758.342  | 5967.771  | NM_01826E | 604.392   | 563.061   |
| NM_01818E | 1377.988  | 579.423   | NM_00603E | 38378.824 | 40046.922 | NM_01344E | 2258.029  | 2233.758  |
| AL080188  | 1728.076  | 902.199   | NM_004837 | 9394.238  | 11797.975 | NM_004537 | 2551.979  | 2515.528  |
| NM_00239C | 5728.501  | 10885.065 | NM_00037C | 2685.283  | 2167.477  | AL390134  | 1348.068  | 1431.625  |
| NM_00614E | 1733.855  | 2259.477  | BE865893  | 20785.047 | 14407.936 | NM_02022E | 6957.573  | 6967.15   |

|           |           |           |           |           |           |           |           |           |
|-----------|-----------|-----------|-----------|-----------|-----------|-----------|-----------|-----------|
| NM_01491C | 6500.481  | 4760.884  | NM_003123 | 52326.625 | 54175.512 | NM_01786E | 4773.82   | 6585.11   |
| AK001064  | 5009.664  | 2964.286  | AY005822  | 11399.095 | 11474.975 | NM_003427 | 2489.99   | 3582.519  |
| AB029031  | 4050.497  | 2576.363  | NM_018129 | 57296.121 | 52987.367 | NM_00592C | 3026.534  | 4507.664  |
| NM_001294 | 9716.41   | 5433.734  | AF289022  | 7019.966  | 5372.23   | Y09321    | 2490.419  | 2936.494  |
| NM_014241 | 678.708   | 426.843   | AB002326  | 1149.438  | 1315.806  | NM_00659E | 1074.389  | 1649.36   |
| AF302786  | 2689.866  | 963.651   | M17252    | 1541.904  | 1009.901  | NM_00037E | 38640.309 | 41425.871 |
| NM_01245E | 3859.882  | 2620.027  | NM_01602E | 17945.852 | 14658.798 | NM_00047E | 11485.802 | 16359.355 |
| AL137268  | 2307.857  | 2603.375  | NM_01331E | 5997.285  | 7197.913  | M61872    | 18958.627 | 20256.973 |
| AK022398  | 506.976   | 543.935   | NM_00074E | 3208.885  | 3796.461  | NM_005721 | 3599.866  | 1297.415  |
| AK024109  | 4211.192  | 1924.262  | NM_00072E | 4073.383  | 3226.486  | AF284223  | 2662.564  | 1387.043  |
| AF088048  | 2909.536  | 1401.085  | NM_00603C | 3002.175  | 3404.16   | AF176012  | 629.305   | 592.589   |
| AK001143  | 2659.62   | 1115.722  | NM_02041C | 10916.794 | 12936.792 | BE743838  | 8627.984  | 3937.59   |
| AK001701  | 3962.466  | 1553.804  | AF000143  | 55860.43  | 56996.746 | AF273046  | 8574.444  | 4749.74   |
| AK024955  | 55510.77  | 59786.02  | NM_014211 | 1241.172  | 1602.464  | NM_001081 | 3817.837  | 2025.757  |
| NM_01658C | 1211.144  | 1459.955  | NM_000814 | 6258.382  | 7341.247  | NM_00248E | 9703.795  | 6108.042  |
| AF169693  | 1206.481  | 1276.249  | NM_00045E | 6466.806  | 7508.422  | BF002026  | 2331.335  | 2058.059  |
| L23206    | 8910.67   | 6152.168  | J03077    | 49845.906 | 55416.809 | L35594    | 1126.01   | 853.508   |
| NM_01219E | 5846.539  | 2941.6    | J03048    | 22393.861 | 23263.133 | BE790116  | 4521.242  | 3826.546  |
| NM_00629E | 4413.993  | 3084.819  | NM_00171E | 1068.536  | 651.963   | AI922341  | 8416.948  | 7540.825  |
| NM_00722E | 4762.295  | 2534.115  | AF116659  | 6105.071  | 3666.602  | S57283    | 843.622   | 1055.103  |
| AB011105  | 3158.697  | 1591.594  | NM_000317 | 37197.117 | 49379.336 | AA410517  | 1165.76   | 1468.647  |
| NM_00221E | 650.597   | 351.775   | NM_01837E | 6962.378  | 7048.967  | M12824    | 3537.987  | 4366.147  |
| NM_00301E | 1170.603  | 1772.887  | NM_01761E | 3679.555  | 3723.06   | W60100    | 2015.657  | 2252.751  |
| NM_003711 | 1601.245  | 1342.139  | NM_01743E | 6174.445  | 5315.53   | M24898    | 2140.47   | 3377.715  |
| NM_00649E | 5262.592  | 3178.588  | U59209    | 7232.328  | 4010.114  | U72508    | 1666.375  | 2180.886  |
| NM_00482E | 1564.36   | 728.352   | NM_02019E | 11361.902 | 15747.464 | AA457153  | 7336.619  | 8323.766  |
| NM_013314 | 2561.92   | 1484.729  | AK023824  | 15634.677 | 14955.556 | AA283122  | 49667.172 | 55872.863 |
| NM_00318E | 652.364   | 373.572   | AL133069  | 11347.123 | 13101.531 | AA868504  | 2156.935  | 3830.546  |
| NM_004431 | 19027.732 | 14980.027 | AL117574  | 798.451   | 1465.89   | AA877845  | 5481.872  | 7777.6    |
| NM_00201E | 3615.659  | 3016.319  | AK026055  | 14631.257 | 12314.737 | AA664241  | 61931.887 | 67897.258 |
| NM_00207C | 33855.023 | 20708.627 | AK024126  | 806.489   | 969.17    | AI016456  | 6596.554  | 10066.401 |
| AF227969  | 6490.939  | 4622.983  | NM_00151E | 10858.521 | 9443.663  | NM_00606E | 28380.178 | 35928.918 |
| AF116657  | 831.735   | 901.267   | NM_002744 | 22979.844 | 20695.633 | AK022230  | 17238.215 | 7775.375  |
| NM_00410E | 449.916   | 544.113   | NM_015917 | 25000.908 | 28756.855 | AK022147  | 17156.984 | 8221.265  |
| NM_003944 | 47439.242 | 27716.307 | NM_020397 | 2888.965  | 2858.668  | L25664    | 11378.749 | 6137.354  |
| NM_01612C | 47703.441 | 20744.713 | NM_000061 | 9642.685  | 11787.626 | NM_01494C | 3763.574  | 1511.504  |
| NM_00289E | 1228.856  | 1046.732  | AB046859  | 53038.324 | 52361.148 | NM_00578E | 744.416   | 494.992   |
| X98260    | 8663.839  | 4292.36   | NM_00510E | 14086.259 | 18209.875 | AK000851  | 942.979   | 424.54    |
| NM_007217 | 7864.525  | 8555.437  | AK023573  | 14823.676 | 18904.121 | NM_00690C | 7266.192  | 4684.801  |
| NM_014777 | 20592.154 | 12913.947 | NM_00273C | 6525.223  | 6688.149  | AJ289111  | 23978.443 | 14895.45  |
| NM_001102 | 5260.126  | 3272.298  | NM_00482E | 5152.939  | 6146.642  | NM_01635E | 38471.27  | 24926.668 |
| NM_00380E | 788.705   | 739.05    | CY3Cy5    | 14922.917 | 662.226   | NM_00640E | 10735.729 | 7313.297  |
| NM_00281E | 56752.043 | 41795.742 | NM_001824 | 71100.445 | 63007.426 | AF216292  | 41216.289 | 26337.824 |
| NM_001937 | 4468.409  | 2758.622  | AF035314  | 2729.203  | 2520.555  | NM_00095E | 8943.502  | 8655.485  |
| AK024778  | 874.889   | 537.829   | NM_01803E | 2375.596  | 1757.227  | NM_005894 | 538.312   | 695.585   |
| AK025498  | 2974.703  | 2829.798  | AF052087  | 1159.481  | 1352.197  | NM_014584 | 4823.13   | 5457.747  |
| NM_00139E | 15869.46  | 10165.903 | AF007143  | 2421.568  | 1906.798  | M30627    | 611.653   | 880.1     |
| NM_00206E | 1304.898  | 1150.627  | AF147417  | 1573.329  | 1122.81   | NM_00581C | 27783.232 | 32867.402 |
| NM_019854 | 451.894   | 379.276   | AK023656  | 4238.988  | 4497.055  | M28170    | 23269.578 | 29301.949 |
| NM_01333E | 3673.233  | 2309.133  | AF086485  | 808.314   | 1600.345  | NM_00155E | 1297.289  | 2015.844  |
| NM_014671 | 8941.703  | 7253.902  | AF086511  | 5357.944  | 6442.103  | AK026223  | 8597.951  | 14180.761 |
| NM_001814 | 8928.886  | 5507.809  | AK022989  | 12980.487 | 11889.865 | NM_000874 | 6355.83   | 7502.319  |
| NM_00052E | 1973.792  | 2058.588  | NM_00648E | 2715.198  | 1817.329  | NM_005854 | 1167.149  | 2039.688  |

|           |           |           |           |           |           |           |           |           |
|-----------|-----------|-----------|-----------|-----------|-----------|-----------|-----------|-----------|
| AF007152  | 3428.072  | 2755.426  | NM_001824 | 67727.188 | 62865.016 | AB007863  | 61004.863 | 64359.781 |
| AL122100  | 593.567   | 607.418   | SR3       | 43615.527 | 46710.625 | NM_017785 | 1657.507  | 2543.308  |
| NM_005310 | 4422.582  | 2407.721  | SR5       | 4836.409  | 2225.478  | NM_016645 | 4351.774  | 1768.535  |
| NM_014423 | 12516.861 | 22074.193 | SR7       | 7130.691  | 20612.758 | AK090536  | 16159.874 | 6716.007  |
| BE904126  | 19239.889 | 11530.394 | SR9       | 18483.266 | 930.992   | D63477    | 445.748   | 266.152   |
| AF272380  | 40893.555 | 19855.713 | CY3Cy5    | 12309.449 | 422.123   | NM_020243 | 26760.58  | 12401.2   |
| NM_033285 | 1097.773  | 1308.433  | U15553    | 15032.961 | 11323.021 | NM_014051 | 6981.063  | 4028.352  |
| NM_003265 | 724.237   | 565.446   | Z36829    | 1952.669  | 1381.838  | AK025398  | 2943.447  | 2251.217  |
| AK000102  | 3126.276  | 1956.369  | AK024734  | 18513.1   | 13730.806 | AK023056  | 1512.529  | 1052.308  |
| AB040916  | 5677.533  | 4067.86   | NM_017741 | 3897.268  | 4792.268  | AK022207  | 1326.246  | 1607.2    |
| NM_005587 | 3367.707  | 2234.328  | AK022223  | 2540.77   | 3277.073  | NM_004995 | 3463.056  | 4000.51   |
| AF038362  | 3068.572  | 1569.585  | NM_005887 | 8875.199  | 12987.561 | NM_017435 | 1252.686  | 931.599   |
| NM_005195 | 26613.828 | 12629.01  | AK024921  | 1422.855  | 1588.884  | NM_014037 | 12498.872 | 16046.872 |
| NM_005481 | 2117.613  | 1160.11   | AK026103  | 6622.861  | 11253.523 | NM_004865 | 30003.727 | 37166.672 |
| BF541482  | 604.94    | 410.402   | AK022556  | 1333.934  | 811.96    | NM_018685 | 1544.673  | 2444.081  |
| NM_001007 | 59589.363 | 57226.383 | AK023437  | 9433.243  | 8011.648  | AK056652  | 7328.471  | 10757.853 |
| NM_003017 | 13836.383 | 8057.28   | AK024147  | 955.515   | 1113.718  | NM_015835 | 496.918   | 991.154   |
| NM_020365 | 8230.065  | 5132.24   | AK022897  | 1738.851  | 1429.708  | AL137438  | 1470.961  | 2727.605  |
| AK021608  | 3040.925  | 2667.927  | AK023556  | 621.166   | 718.089   | NM_017957 | 11112.107 | 17356.092 |
| NM_004297 | 978.077   | 932.989   | AK023898  | 13846.479 | 12458.745 | NM_003024 | 3136.737  | 5106.088  |
| NM_006044 | 6364.63   | 4933.938  | AK021619  | 1890.337  | 2073.618  | NM_013245 | 5380.268  | 10170.496 |
| NM_003635 | 3290.29   | 2419.067  | AK022347  | 1795.657  | 2375.695  | NM_000034 | 60533.652 | 66394.297 |
| NM_000662 | 3201.213  | 2327.389  | AK025872  | 2268.154  | 2820.288  | NM_012435 | 70374.672 | 67030.867 |
| NM_000292 | 3121.348  | 2121.15   | AF131762  | 10055.072 | 8811.167  | AK001299  | 46850.969 | 25492.803 |
| NM_003685 | 57100.133 | 52093.945 | AY007089  | 5002.173  | 7959.637  | AB014559  | 24359.572 | 11342.505 |
| NM_016173 | 1068.813  | 680.031   | AK021816  | 14417.523 | 17620.6   | NM_016485 | 10838.328 | 6018.731  |
| NM_002875 | 5586.852  | 3411.974  | D43770    | 26953.676 | 9336.127  | NM_005033 | 6188.24   | 4250.371  |
| AB037817  | 1029.447  | 652.652   | AF085960  | 1360.178  | 1428.054  | NM_015932 | 46587.652 | 29395.143 |
| AB032951  | 8897.563  | 5518.479  | AF087976  | 442.179   | 1102.089  | NM_017945 | 641.118   | 454.359   |
| NM_005145 | 8015.372  | 5516.346  | NM_014254 | 8329.073  | 7693.211  | AK022169  | 1307.381  | 1263.762  |
| AK024073  | 1303.941  | 1224.058  | AF086036  | 1058.905  | 536.807   | AF015592  | 2650.176  | 2073.907  |
| NM_018083 | 3412.379  | 3683.722  | AK025218  | 1442.416  | 1061.385  | AK026795  | 515.531   | 684.42    |
| AL110188  | 5963.862  | 4914.754  | AJ227899  | 4251.536  | 2824.805  | NM_016395 | 5226.178  | 4519.153  |
| D70834    | 33999.941 | 21059.414 | AL359607  | 4108.272  | 4206.871  | NM_016617 | 10440.766 | 8685.885  |
| NM_000970 | 58246.594 | 57143.219 | AF161371  | 11643.739 | 8314.007  | NM_002027 | 9477.486  | 10168.585 |
| NM_012465 | 1070.719  | 746.449   | AK022464  | 4019.376  | 3312.679  | AL162078  | 8040.89   | 9366.091  |
| M60499    | 2879.444  | 2472.699  | AF086230  | 3573.903  | 3429.147  | NM_000915 | 418.861   | 604.118   |
| NM_001614 | 60616.465 | 60208.383 | AK023408  | 5910.012  | 5588.35   | NM_013382 | 11887.546 | 16076.222 |
| NM_000365 | 719.933   | 774.559   | AK000144  | 4089.003  | 4010.502  | AB002314  | 1217.816  | 1980.185  |
| NM_003833 | 43328.414 | 26269.248 | AK022275  | 1246.244  | 1245.52   | NM_014043 | 4920.548  | 8128.521  |
| AK000868  | 9511.302  | 6937.454  | AK000942  | 1291.789  | 1026.078  | NM_014622 | 799.975   | 1315.271  |
| NM_001233 | 3126.195  | 2727.435  | AL117533  | 2586.111  | 1840.343  | AB011114  | 58699.488 | 61942.293 |
| NM_001234 | 1836.76   | 1523.635  | AK026036  | 2304.735  | 1008.763  | D11466    | 27668.316 | 38133.215 |
| BF679789  | 6461.191  | 4504.572  | AK022796  | 3932.134  | 2897.512  | NM_014055 | 34504.684 | 45082.098 |
| H97792    | 11824.495 | 14807.518 | AF090910  | 302.529   | 862.339   | D31885    | 48231.371 | 55996.492 |
| W95082    | 611.539   | 984.574   | AK095193  | 2968.476  | 4824.477  | AF176012  | 581.722   | 538.858   |
| W72207    | 20064.969 | 14648.983 | T99941    | 11564.704 | 7876.574  | BE743838  | 8906.11   | 4495.665  |
| BI772354  | 909.439   | 929.446   | AF113678  | 3229.032  | 1754.821  | AF273046  | 7290.278  | 4649.084  |
| AA733033  | 1881.892  | 1953.193  | AL137313  | 63806.457 | 59341.984 | NM_001081 | 3771.655  | 1854.626  |
| AA583574  | 1725.531  | 1959.352  | Z83951    | 1703.793  | 1694.572  | NM_002483 | 9262.781  | 6925.108  |
| AA927490  | 2456.75   | 3340.877  | AL833529  | 787.836   | 881.719   | BF002026  | 2193.035  | 1758.25   |
| NM_003775 | 534.795   | 686.514   | AB002363  | 11037.258 | 12394.991 | L35594    | 946.772   | 671.127   |
| NM_020164 | 16451.875 | 6875.052  | NM_005284 | 9763.097  | 8889.429  | BE790116  | 3910.518  | 2273.568  |

|           |           |           |           |           |           |           |           |           |
|-----------|-----------|-----------|-----------|-----------|-----------|-----------|-----------|-----------|
| AK023521  | 12172.674 | 6608.339  | AF086351  | 1287.928  | 1241.844  | AI922341  | 7272.402  | 5605.685  |
| NM_014267 | 28049.41  | 16753.961 | AK025957  | 1447.888  | 1763.969  | S57283    | 636.993   | 646.925   |
| U30872    | 2224.788  | 2193.897  | AL157453  | 4112.186  | 1848.25   | AA410517  | 1256.928  | 1376.144  |
| AF111783  | 478.077   | 464.563   | NM_019040 | 16033.555 | 13397.425 | M12824    | 2939.14   | 3310.219  |
| NM_020469 | 7221.385  | 5000.292  | NM_005978 | 3870.949  | 1592.701  | W60100    | 1854.118  | 2153.208  |
| NM_002639 | 1830.671  | 1624.306  | Y16711    | 1505.935  | 499.193   | M24898    | 3921.845  | 4642.414  |
| NM_014734 | 3388.46   | 3272.818  | AJ272179  | 7987.974  | 5563.947  | U72508    | 2294.54   | 3182.031  |
| NM_002289 | 2061.959  | 2685.699  | AJ007015  | 8279.271  | 3739.385  | AA457153  | 6641.321  | 7770.157  |
| M74782    | 2671.917  | 5148.437  | AL049317  | 3095.679  | 5203.124  | AA283122  | 44334.688 | 49658.27  |
| NM_017818 | 3965.276  | 3801.029  | AB007978  | 1913.659  | 957.364   | AA868504  | 2209.614  | 3585.23   |
| NM_020433 | 2236.39   | 2046.157  | AF217970  | 2312.09   | 1373.226  | AA877845  | 5649.927  | 9157.467  |
| NM_001767 | 659.831   | 593.158   | AF086297  | 3479.292  | 2042.067  | AA664241  | 56840.965 | 69050.031 |
| AF028823  | 4124.809  | 3391.368  | AK025455  | 3789.194  | 2931.748  | AI016456  | 6250.544  | 9937.837  |
| NM_004970 | 260.699   | 498.528   | AK026799  | 15782.701 | 10777.265 | AK026281  | 1275.132  | 2220.446  |
| NM_004295 | 53054.344 | 49817.645 | NM_014860 | 783.907   | 961.043   | U23862    | 373.493   | 1093.933  |
| AB023154  | 1885.707  | 3602.56   | AK022549  | 2767.12   | 2317.482  | AK026680  | 11998.957 | 16387.705 |
| NM_014585 | 428.965   | 1093.486  | NM_018157 | 1318.626  | 1106.388  | L25664    | 11528.481 | 5880.545  |
| AF200815  | 644.628   | 999.68    | AK021640  | 18016.367 | 24776.799 | NM_014940 | 3590.366  | 1518.012  |
| NM_001056 | 987.004   | 685.211   | U84509    | 6030.93   | 3683.222  | NM_005783 | 760.966   | 688.561   |
| AY026461  | 3050.427  | 1693.666  | AK002036  | 4639.748  | 1132.307  | AK000851  | 942.792   | 452.18    |
| AK025708  | 5852.001  | 4142.916  | U84512    | 2140.629  | 665.603   | NM_006900 | 7843.173  | 4151.937  |
| NM_000405 | 961.542   | 1199.327  | AK025775  | 6694.505  | 5864.128  | AJ289111  | 25091.186 | 16766.625 |
| NM_004508 | 4176.783  | 6311.133  | AB046791  | 2468.868  | 3487.868  | NM_016356 | 37992.305 | 21693.215 |
| AL137619  | 4831.539  | 3889.997  | AK022008  | 4333.398  | 6421.692  | NM_006406 | 10027.717 | 5264.591  |
| AB007859  | 890.069   | 1278.39   | NM_018186 | 2901.888  | 1698.747  | AF216292  | 38775.266 | 20162.752 |
| NM_006754 | 2497.479  | 4136.653  | NM_002390 | 9144.653  | 6231.497  | NM_000952 | 8174.428  | 6663.786  |
| NM_001127 | 4797.584  | 5425.043  | NM_006142 | 3172.587  | 1744.248  | NM_005894 | 401.392   | 408.531   |
| NM_012430 | 3103.537  | 3404.498  | NM_014910 | 16147.971 | 13921.869 | NM_014584 | 5551.717  | 4378.157  |
| NM_003917 | 37967.297 | 33891.004 | AK001064  | 9273.652  | 7398.74   | M30627    | 593.807   | 701.786   |
| NM_007077 | 2036.45   | 2491.698  | AB029031  | 6312.639  | 5569.441  | NM_005810 | 36598.539 | 37692.523 |
| NM_002956 | 3107.602  | 4849.656  | NM_001294 | 15214.973 | 14413.52  | M28170    | 28986.947 | 27129.65  |
| AB018739  | 3444.18   | 5148.913  | AF302786  | 6258.25   | 8467.099  | NM_001555 | 2129.304  | 2507.941  |
| NM_006750 | 51901.051 | 50827.441 | AL122083  | 16840.793 | 29693.979 | AK026223  | 8722.421  | 14078.86  |
| NM_005538 | 431.743   | 235.608   | AK022212  | 61510.883 | 58100.063 | NM_000874 | 6901.432  | 7479.525  |
| AK001913  | 4455.625  | 1988.672  | X64974    | 8059.124  | 7292.189  | NM_005854 | 1561.24   | 2218.065  |
| NM_004292 | 2040.266  | 1411.893  | NM_000834 | 12471.112 | 11249.77  | AB007863  | 58926.906 | 65750.133 |
| NM_015484 | 5597.158  | 5077.441  | NM_006485 | 63561.633 | 19388.258 | NM_017789 | 1620.354  | 2164.886  |
| NM_018046 | 1623.529  | 3291.865  | NM_012459 | 7050.782  | 4889.6    | D31887    | 3745.297  | 6148.731  |
| NM_013316 | 2868.346  | 3197.357  | NM_012360 | 944.144   | 1239.036  | NM_005721 | 2965.011  | 5261.783  |
| M20701    | 27965.914 | 16663.648 | AL137268  | 4370.791  | 6542.921  | AF284223  | 2194.303  | 4440.045  |
| NM_002912 | 2352.383  | 2178.559  | AK001130  | 916.059   | 1806.099  | D63477    | 620.99    | 259.624   |
| NM_013284 | 5089.14   | 7189.6    | AK024109  | 11492.663 | 16796.227 | NM_020243 | 26225.205 | 12739.057 |
| NM_013274 | 6006.429  | 6611.499  | AF088048  | 4343.306  | 5149.494  | AK025398  | 2630.337  | 1928.202  |
| AL050187  | 2237.747  | 4482.018  | AK001143  | 5103.297  | 3214.564  | AK027082  | 345.256   | 207.43    |
| NM_007127 | 662.204   | 1220.713  | AK001701  | 6700.499  | 2913.393  | AK023056  | 1339.378  | 1130.812  |
| NM_014735 | 1515.804  | 2145.66   | AK022205  | 2318.399  | 1512.559  | AK022207  | 1032.477  | 1357.146  |
| NM_004252 | 22135.898 | 24703.982 | AK024955  | 60824.063 | 60370.148 | NM_004996 | 3424.901  | 3649.722  |
| AF172929  | 5974.265  | 7052.588  | NM_016580 | 3323.167  | 2662.4    | NM_017435 | 922.811   | 600.638   |
| NM_006398 | 26317.234 | 24689.842 | AF169693  | 3394.379  | 2512.263  | NM_014037 | 16747.07  | 18674.004 |
| AK025655  | 2866.934  | 3331.613  | L23206    | 23347.693 | 18542.906 | NM_004866 | 30484.014 | 33138.031 |
| NM_001362 | 620.986   | 681.187   | NM_012192 | 9494.355  | 9246.13   | NM_018688 | 2445.338  | 2996.299  |
| NM_004056 | 1568.292  | 1484.7    | NM_006293 | 6221.351  | 5397.069  | AK056652  | 9708.534  | 12254.316 |
| NM_001614 | 62255.566 | 64589.504 | NM_007229 | 11601.116 | 9462.363  | NM_015835 | 603.399   | 1327.469  |

|           |           |           |           |           |           |           |           |           |
|-----------|-----------|-----------|-----------|-----------|-----------|-----------|-----------|-----------|
| NM_000366 | 1584.123  | 1010.484  | NM_004814 | 8071.324  | 7758.023  | AL137438  | 1446.571  | 2329.818  |
| NM_003833 | 36314.887 | 14695.606 | D86976    | 21034.686 | 16798.496 | NM_017957 | 13357.113 | 18612.682 |
| AK000868  | 8037.143  | 4326.988  | AF307080  | 1292.478  | 1406.532  | NM_003024 | 3266.416  | 4521.659  |
| NM_001233 | 2663.594  | 2327.502  | NM_004057 | 9815.501  | 6805.377  | NM_013248 | 5504.301  | 8490.505  |
| NM_001234 | 2114.12   | 2556.536  | NM_018971 | 2588.522  | 857.606   | NM_000034 | 59276.98  | 68545.438 |
| BF679789  | 8863.825  | 7614.343  | NM_003015 | 2921.474  | 4438.741  | AK022230  | 17120.453 | 28522.824 |
| H97792    | 9467.182  | 6704.896  | NM_003711 | 2442.789  | 2805.614  | AK022147  | 15140.492 | 26081.723 |
| L33404    | 509.925   | 630.586   | NM_006496 | 10277.521 | 16596.854 | AK001299  | 49270.996 | 25711.182 |
| M13509    | 2882.283  | 2650.946  | NM_000828 | 1460.63   | 2207.33   | AB014559  | 22804.787 | 10241.541 |
| X04076    | 7131.2    | 6767.95   | NM_004826 | 9489.262  | 10592.104 | NM_016488 | 10773.383 | 6214.58   |
| W72207    | 20566.123 | 28358.793 | NM_013314 | 6768.221  | 4231.011  | NM_005033 | 6329.638  | 3980.391  |
| AA583574  | 1796.538  | 2633.054  | NM_003182 | 906.949   | 719.502   | NM_015932 | 47356.473 | 28240.742 |
| U67733    | 777.932   | 2242.224  | NM_004431 | 45685.422 | 45064.262 | NM_017948 | 666.615   | 621.024   |
| AI690184  | 53782.875 | 65217.328 | NM_002012 | 6082.201  | 4644.954  | AK022169  | 1530.364  | 1046.94   |
| AA927490  | 3053.875  | 3001.82   | NM_002070 | 43024.777 | 34267.945 | AF015592  | 2663.585  | 1632.934  |
| NM_005052 | 8401.72   | 6235.99   | AF227969  | 10096.646 | 9347.021  | AK026795  | 705.556   | 626.702   |
| AF319476  | 899.295   | 1288.358  | AF116657  | 3261.571  | 3073.725  | NM_016398 | 4557.992  | 3911.092  |
| NM_014267 | 29386.582 | 16760.475 | NM_004102 | 1293.38   | 1322.389  | NM_016617 | 9779.554  | 7025.128  |
| NM_001481 | 661.42    | 611.959   | NM_003944 | 62898.91  | 64540.961 | NM_002027 | 9328.584  | 8304.769  |
| U30872    | 1901.12   | 1649.857  | NM_002893 | 4941.625  | 5305.926  | AL162078  | 7892.802  | 8994.154  |
| AF111783  | 855.152   | 586.977   | NM_002393 | 51413.754 | 57463.746 | NM_000918 | 268.867   | 543.912   |
| NM_020468 | 8232.524  | 7075.949  | NM_002668 | 8667.165  | 8658.757  | NM_013382 | 13855.764 | 16858.58  |
| NM_002638 | 2029.908  | 2016.291  | AB014600  | 13303.79  | 9671.87   | AB002314  | 1855.333  | 2597.808  |
| NM_014734 | 3929.317  | 3290.368  | NM_018312 | 7107.885  | 4793.565  | NM_014043 | 4715.231  | 7026.886  |
| NM_002288 | 1539.33   | 1045.226  | X98259    | 4175.634  | 3112.162  | NM_014622 | 563.483   | 1283.597  |
| AK026408  | 2159.008  | 2223.773  | NM_014792 | 859.367   | 392.57    | AB011114  | 60050.707 | 66639.438 |
| NM_020433 | 1384.301  | 2037.588  | X98260    | 16287.373 | 21154.746 | D11466    | 29399.475 | 37903.215 |
| AF028823  | 7481.898  | 9430.794  | NM_007217 | 13053.651 | 20311.951 | NM_014058 | 34181.324 | 38861.438 |
| NM_004298 | 44358.875 | 43577.324 | NM_014777 | 40392.313 | 41447.16  | D31885    | 44761.066 | 53361.379 |
| NM_002087 | 30802.467 | 25966.861 | NM_001102 | 10048.543 | 13607.28  | AK090536  | 15636.297 | 23206.398 |
| AB023154  | 1526.03   | 1238.536  | NM_003803 | 10095.426 | 12807.894 | BE743838  | 8727.165  | 3704.11   |
| NM_014588 | 496.284   | 689.082   | NM_002818 | 63176.953 | 61231.441 | AF273046  | 8325.284  | 4746.166  |
| AF200815  | 850.426   | 1093.037  | NM_001937 | 23087.174 | 16342.839 | NM_001081 | 3740.282  | 2451.151  |
| NM_012468 | 818.912   | 909.859   | AK024778  | 1162.41   | 687.726   | NM_002483 | 9942.054  | 6737.709  |
| M60499    | 2397.483  | 3049.996  | AL157500  | 1851.221  | 1221.652  | BF002026  | 2230.024  | 1841.74   |
| AY026461  | 5167.242  | 5936.597  | AK025498  | 4526.112  | 5195.125  | L35594    | 1055.18   | 1194.694  |
| AK025708  | 5656.46   | 9520.813  | NM_001398 | 48175.895 | 42459.418 | BE790116  | 3982.162  | 2618.226  |
| NM_000408 | 893.937   | 799.383   | NM_002068 | 2375.871  | 1894.771  | AI922341  | 8058.814  | 5515.77   |
| NM_005564 | 52244.621 | 61344.195 | NM_019854 | 1245.22   | 1223.758  | S57283    | 712.05    | 687.155   |
| NM_004508 | 4120.603  | 3290.675  | NM_013338 | 5807.703  | 5426.937  | AA410517  | 1358.075  | 1407.375  |
| AL137619  | 7855.531  | 14978.866 | NM_014671 | 23365.102 | 20938.789 | M12824    | 3292.682  | 3678.672  |
| AB007859  | 1121.089  | 1573.836  | NM_001814 | 16292.666 | 13259.405 | W60100    | 2041.515  | 1880.826  |
| NM_006754 | 730.513   | 1222.539  | NM_005656 | 5968.405  | 5652.232  | M24898    | 2502.102  | 3330.82   |
| NM_001127 | 4621.842  | 6520.918  | NM_006012 | 14723.335 | 12163.271 | U72508    | 1757.831  | 2097.32   |
| NM_003917 | 34242.188 | 34358.957 | NM_002151 | 5035.343  | 2799.58   | AA457153  | 6742.694  | 7416.988  |
| NM_007077 | 2549.263  | 3511.454  | NM_014888 | 5127.639  | 3203.29   | AA283122  | 43583.563 | 52351.656 |
| NM_002958 | 2389.097  | 2581.586  | AF173935  | 2734.176  | 2550.248  | AA868504  | 1954.519  | 2883.318  |
| AB018739  | 3364.177  | 3713.534  | AK025322  | 51541.926 | 25336.463 | AA877845  | 4873.324  | 7171.004  |
| NM_006750 | 53051.152 | 57378.008 | NM_017650 | 872.183   | 1616.241  | AA664241  | 54039.23  | 59904.578 |
| NM_020164 | 17316.779 | 16230.226 | NM_017578 | 2155.655  | 2999.216  | AI016456  | 5958.382  | 9689.37   |
| AK023521  | 13477.293 | 20743.469 | AL122100  | 9471.697  | 13442.603 | AK026281  | 1428.533  | 2325.065  |
| NM_004292 | 2629.433  | 2148.115  | NM_005310 | 17297.482 | 11524.413 | U23862    | 530.959   | 1062.182  |
| NM_015484 | 5423.777  | 3889.329  | NM_014423 | 18095.738 | 13929.292 | AK026680  | 10463.628 | 14841.329 |

|           |           |           |           |           |           |           |           |           |
|-----------|-----------|-----------|-----------|-----------|-----------|-----------|-----------|-----------|
| NM_018046 | 1278.595  | 1114.274  | BE904126  | 63277.797 | 57194.816 | AF216292  | 42634.773 | 19362.957 |
| NM_013316 | 2150.161  | 1762.862  | NM_033288 | 983.716   | 1257.128  | NM_000952 | 8604.213  | 5996.682  |
| M20701    | 23380.688 | 31686.592 | NM_003269 | 933.346   | 1383.101  | NM_005894 | 539.296   | 391.816   |
| NM_002912 | 2141.267  | 4438.43   | AK000102  | 4398.823  | 2559.277  | NM_014584 | 5410.434  | 4084.291  |
| NM_013284 | 4911.985  | 4500.254  | AB040916  | 9991.354  | 8257.519  | M30627    | 513.878   | 434.629   |
| NM_006739 | 2999.673  | 2837.667  | NM_005587 | 7967.158  | 6327.208  | NM_005810 | 23513.795 | 23888.5   |
| NM_013274 | 5994.427  | 5843.847  | AF038362  | 7134.99   | 5014.128  | M28170    | 21225.039 | 18665.242 |
| AL050187  | 1169.7    | 1521.323  | NM_005481 | 4857.95   | 5216.178  | NM_001555 | 1216.542  | 982.929   |
| NM_007127 | 456.41    | 639.668   | NM_004715 | 19591.137 | 22891.076 | AK026223  | 8845.172  | 10231.077 |
| NM_012387 | 28595.816 | 26084.07  | BF541482  | 783.344   | 1669.715  | NM_000874 | 6865.465  | 6577.916  |
| NM_014735 | 1226.262  | 1169.83   | NM_003017 | 19729.664 | 29003.779 | NM_005854 | 1302.683  | 1836.909  |
| NM_004252 | 30069.811 | 25913.824 | NM_020366 | 14218.143 | 20540.172 | AB007863  | 55729.418 | 63036.574 |
| AF172929  | 6927.006  | 8073.713  | AK021608  | 5272.744  | 4729.442  | AK024456  | 12285.949 | 17450.893 |
| AK025655  | 3264.733  | 4704.792  | NM_003635 | 9218.678  | 8887.684  | NM_017789 | 1614.506  | 2535.588  |
| NM_001362 | 730.883   | 1065.333  | NM_000662 | 4840.761  | 2894.248  | D31887    | 3770.022  | 6400.52   |
| NM_004056 | 1436.887  | 1904.688  | NM_000292 | 6724.554  | 7040.023  | NM_002313 | 3373.885  | 5167.128  |
| NM_001056 | 1434.507  | 2727.645  | NM_003689 | 57539.859 | 57184.813 | NM_004459 | 2840.928  | 4070.259  |
| NM_003833 | 40145.281 | 50660.113 | NM_016173 | 3412.929  | 2349.65   | NM_005503 | 389.575   | 1049.543  |
| AK000868  | 9325.441  | 7596.669  | NM_002875 | 11624.147 | 12405.181 | NM_001502 | 3948.724  | 7245.166  |
| NM_001233 | 3107.602  | 1799.86   | NM_004427 | 21123.76  | 25523.594 | NM_005721 | 2890.535  | 4413.704  |
| NM_001234 | 2328.031  | 2916.858  | U90549    | 12394.032 | 14671.151 | AF284223  | 2120.33   | 4379.492  |
| BF679789  | 8691.201  | 5968.147  | NM_013240 | 27511.793 | 18384.834 | AF176012  | 763.81    | 1998.856  |
| H97792    | 10942.322 | 11250.019 | NM_015874 | 37110.988 | 24120.326 | NM_013386 | 388.852   | 605.612   |
| L33404    | 863.636   | 1694.103  | NM_004965 | 61958.637 | 49336.25  | NM_004171 | 4888.529  | 4729.234  |
| M13509    | 3061.813  | 2999.811  | AF312393  | 60093.352 | 46021.426 | NM_014037 | 13737.997 | 17697.479 |
| X04076    | 7024.271  | 5707.136  | AF272898  | 23942.9   | 31045.865 | NM_004866 | 29895.832 | 31486.336 |
| AA485362  | 1462.225  | 1473.607  | AB037817  | 2956.917  | 4553.666  | NM_018688 | 1537.649  | 2192.081  |
| AJ222801  | 9122.544  | 7150.506  | NM_005149 | 27343.889 | 43948.543 | AK056652  | 6872.356  | 9900.666  |
| W72207    | 21529.58  | 20437.986 | AK024073  | 2913.447  | 3899.905  | NM_015839 | 575.617   | 1284.974  |
| BI772354  | 1702.47   | 1788.434  | NM_018083 | 6758.88   | 6282.587  | AL137438  | 1441.128  | 2938.114  |
| AA733033  | 2739.147  | 2275.582  | AL110188  | 17759.242 | 16083.227 | NM_017957 | 13818.739 | 26774.143 |
| AA583574  | 2011.454  | 1909.399  | NM_000970 | 60836.688 | 64284.848 | NM_003024 | 4109.713  | 7935.438  |
| AI690184  | 49388.367 | 60938.773 | NM_012465 | 4628.937  | 4716.891  | NM_013248 | 6112.391  | 13147.848 |
| T48692    | 1374.904  | 2739.293  | M60499    | 4206.056  | 3546.055  | NM_000034 | 55777.863 | 70602.367 |
| AA927490  | 3277.6    | 3853.721  | NM_001614 | 62353.98  | 62452.395 | AK022230  | 24583.869 | 49457.824 |
| NM_005052 | 10083.746 | 12918.738 | NM_000366 | 1190.931  | 1204.415  | AK022147  | 22143.449 | 43932.754 |
| BF038439  | 603.302   | 1072.832  | NM_003833 | 54595.648 | 54112.617 | L25664    | 12163.6   | 26616.309 |
| AF319476  | 1533.034  | 4512.989  | AK000868  | 24000.545 | 24252.662 | NM_014940 | 3774.332  | 6444.392  |
| NM_005538 | 732.419   | 1663.004  | NM_001233 | 6489.763  | 6248.302  | NM_005783 | 864.891   | 1749.955  |
| AK001913  | 4992.415  | 5048.681  | NM_001234 | 3814.423  | 3391.779  | AK000851  | 918.159   | 1606.664  |
| NM_002289 | 1647.576  | 1061.885  | BF679789  | 21635.016 | 25023.85  | NM_006900 | 7923.279  | 20229.488 |
| AK026408  | 2171.859  | 2010.027  | H97792    | 33683.988 | 44249.434 | AJ289111  | 25093.82  | 46635.91  |
| NM_005025 | 699.657   | 848.201   | L33404    | 1772.288  | 2326.311  | NM_016356 | 33582.781 | 51397.922 |
| NM_006307 | 656.09    | 424.147   | M13509    | 8473.02   | 7028.26   | NM_006406 | 9315.308  | 20612.457 |
| M74782    | 2374.448  | 2044.563  | X04076    | 12846.185 | 6908.01   | D11466    | 34104.848 | 49976.926 |
| NM_017818 | 3677.632  | 3251.613  | W95082    | 564.142   | 555.298   | NM_014056 | 41251.145 | 57162.363 |
| NM_020433 | 631.319   | 1084.229  | AA485362  | 2637.93   | 2043.372  | D31885    | 47993.309 | 60219.066 |
| NM_001767 | 502.297   | 868.294   | AJ222801  | 23150.004 | 27188.49  | NM_016649 | 4613.205  | 9555.065  |
| AF028823  | 6636.518  | 5344.33   | W72207    | 35985.531 | 52995.629 | AK090536  | 18009.871 | 35439.91  |
| NM_004295 | 52531.746 | 53957.215 | BI772354  | 3008.311  | 4544.234  | D63477    | 597.525   | 1677.802  |
| NM_002087 | 33347.707 | 24055.957 | AA733033  | 5806.191  | 8465.477  | NM_020243 | 30388.309 | 50482.832 |
| AB023154  | 1644.385  | 1466.07   | AA583574  | 3576.663  | 5150.36   | NM_014051 | 7454.48   | 15938.78  |
| NM_001714 | 507.521   | 827.327   | U67733    | 722.87    | 1604.491  | AK025398  | 3040.899  | 7913.801  |



|           |           |           |           |           |           |           |           |           |
|-----------|-----------|-----------|-----------|-----------|-----------|-----------|-----------|-----------|
| NM_014585 | 435.959   | 822.026   | AI690184  | 59589.129 | 61384.047 | AK027082  | 378.48    | 1249.352  |
| AF200815  | 820.907   | 947.034   | T48692    | 1314.898  | 1640.162  | AB037750  | 297.641   | 1369.29   |
| NM_014564 | 338.983   | 469.585   | AA927490  | 5218.635  | 7480.847  | AK023056  | 1746.429  | 3913.867  |
| NM_013441 | 3592.306  | 2639.135  | NM_003779 | 1984.588  | 2665.139  | NM_001120 | 54493.91  | 70140.133 |
| NM_014421 | 2713.836  | 2822.916  | NM_020164 | 25198.838 | 25243.859 | NM_017885 | 3660.306  | 8415.289  |
| NM_017680 | 500.841   | 757.338   | AK023521  | 27289.186 | 26354.195 | NM_004915 | 7335.228  | 19847.262 |
| NM_012465 | 1532.892  | 4445.574  | NM_014267 | 40552.395 | 45464.668 | AK022207  | 1501.174  | 3529.226  |
| M60499    | 2633.116  | 5757.031  | NM_001481 | 817.372   | 907.856   | AV708752  | 3303.696  | 8156.03   |
| NM_001614 | 55548.195 | 68457.938 | U30872    | 3948.041  | 3463.817  | AF119885  | 2862.737  | 7391.508  |
| NM_000366 | 958.905   | 1531.35   | AF111783  | 882.492   | 897.913   | NM_000750 | 958.028   | 2241.465  |
| NM_004300 | 3176.862  | 2936.168  | NM_020469 | 15388.932 | 14564.752 | NM_004996 | 3036.64   | 7062.997  |
| AB007859  | 1164.695  | 2064.881  | NM_002639 | 3649.969  | 3603.152  | NM_005971 | 4707.79   | 11589.435 |
| NM_006754 | 726.582   | 993.037   | NM_014734 | 7290.527  | 9035.676  | NM_017435 | 1533.833  | 2870.811  |
| NM_001127 | 4273.867  | 4727.803  | NM_002289 | 3901.192  | 2996.607  | AK026281  | 1862.998  | 3241.089  |
| NM_012430 | 3389.234  | 3607.546  | AK026408  | 4254.051  | 3328.411  | U23862    | 647.385   | 1639.18   |
| NM_002956 | 3004.828  | 3104.421  | NM_005025 | 1211.844  | 772.023   | AK026680  | 12509.215 | 23257.031 |
| AB018739  | 3189.327  | 2946.267  | NM_006307 | 2553.664  | 1534.451  | NM_012436 | 53636.332 | 68451.313 |
| NM_006750 | 49773.195 | 38817.602 | M74782    | 7096.189  | 3585.795  | AK001299  | 46720.414 | 53512.531 |
| NM_020164 | 19050.418 | 12864.599 | NM_017818 | 8125.735  | 8365.282  | AB014559  | 20762.951 | 32111.25  |
| AK023521  | 15367.92  | 13231.041 | NM_020433 | 3685.065  | 5619.68   | NM_016485 | 10462.541 | 15218.013 |
| NM_014267 | 30312.662 | 30241.967 | NM_001767 | 1695.98   | 3014.851  | NM_005033 | 5394.111  | 8362.631  |
| NM_001481 | 743.354   | 711.427   | AF028823  | 16850.229 | 25024.852 | NM_015932 | 49823.105 | 58252.098 |
| U30872    | 2614.231  | 3523.876  | NM_004970 | 943.262   | 1682.624  | NM_017945 | 619.479   | 1109.077  |
| AF111783  | 510.164   | 860.399   | NM_004295 | 56410.82  | 59910.418 | AK022169  | 1427.069  | 2287.616  |
| NM_000256 | 2685.663  | 6883.273  | NM_002087 | 58513.109 | 56904.863 | AF015592  | 2346.578  | 3354.958  |
| NM_020469 | 3227.119  | 5584.986  | AB023154  | 3232.475  | 2637.986  | AK026795  | 906.454   | 1561.924  |
| NM_002639 | 2321.111  | 4147.845  | NM_014585 | 2583.35   | 3352.939  | NM_016395 | 4859.612  | 8165.779  |
| NM_014734 | 3573.239  | 6322.423  | AF200815  | 1726.02   | 2237.632  | NM_016617 | 10284.262 | 14029.475 |
| NM_001362 | 583.566   | 894.458   | NM_001056 | 1618.081  | 2066.305  | NM_002027 | 8739.497  | 15473.019 |
| NM_004056 | 1127.821  | 1014.952  | AY026461  | 7703.579  | 7834.672  | AL162078  | 7307.108  | 13264.984 |
| NM_001056 | 2141.64   | 1432.74   | AK025708  | 10715.331 | 11029.015 | NM_000915 | 428.668   | 744.525   |
| AY026461  | 4432.251  | 4259.827  | NM_000405 | 3032.579  | 3281.722  | NM_013382 | 12217.391 | 20091.715 |
| AK025708  | 5712.313  | 5640.426  | NM_005337 | 1655.255  | 1715.431  | AB002314  | 1126.457  | 2244.107  |
| NM_005564 | 48615.109 | 59157.23  | NM_005564 | 58819.023 | 59606.762 | NM_014043 | 4182.606  | 7763.349  |
| NM_004508 | 4544.682  | 3634.267  | NM_004508 | 8925.51   | 6036.697  | NM_014622 | 613.917   | 1587.283  |
| NM_006405 | 46104.082 | 44676.563 | AL137619  | 22591.629 | 15346.144 | AB011114  | 61010.055 | 70865.648 |
| NM_006749 | 407.698   | 736.667   | NM_000085 | 790.953   | 576.232   | CY3Cy5    | 3446.22   | 41.69     |
| NM_004694 | 2226.26   | 3154.229  | AB007859  | 2535.44   | 4151.994  | NM_019884 | 3670.932  | 2098.962  |
| NM_000324 | 350.201   | 1059.857  | NM_006754 | 1927.798  | 2732.32   | AF088051  | 2862.294  | 1960.518  |
| AL137619  | 1343.714  | 2422.191  | NM_001127 | 8618.818  | 13535.106 | AF086366  | 754.963   | 623.292   |
| NM_005052 | 9481.553  | 13084.871 | NM_012430 | 7728.419  | 11851.535 | AF086360  | 3240.484  | 2625.429  |
| BF038439  | 465.745   | 311.501   | NM_003917 | 53106.008 | 58095.746 | AF086436  | 413.935   | 600.757   |
| AF319476  | 1153.44   | 1625.076  | NM_007077 | 8244.179  | 13599.211 | AF035282  | 651.003   | 1548.715  |
| NM_005538 | 1584.315  | 1382.307  | NM_002956 | 6851.045  | 7532.417  | AK021966  | 2901.909  | 3140.978  |
| AK001913  | 6186.864  | 10756.364 | AB018739  | 5676.355  | 6605.048  | AB018292  | 12274.461 | 16325.595 |
| NM_004292 | 2314.91   | 1693.548  | NM_006750 | 60211.605 | 59374.188 | AK022842  | 2767.274  | 3211.827  |
| NM_015484 | 5498.64   | 5445.282  | NM_005538 | 310.186   | 785.199   | NM_007006 | 13243.896 | 11534.673 |
| NM_018046 | 1264.163  | 1499.213  | AK001913  | 8456.37   | 9275.211  | AL137346  | 4513.563  | 5331.596  |
| NM_013316 | 2913.358  | 3203.747  | NM_004292 | 4533.55   | 3446.282  | NM_017756 | 55680.504 | 45982.121 |
| M20701    | 30885.264 | 25607.297 | NM_015484 | 9234.066  | 9364.821  | NM_019884 | 4743.393  | 2811.872  |
| NM_002912 | 2521.063  | 2872.039  | NM_018046 | 1922.713  | 2297.478  | SR2       | 43266.594 | 31436.863 |
| NM_013284 | 5015.368  | 4541.388  | NM_013316 | 10343.451 | 10174.124 | SR4       | 12015.652 | 6386.877  |
| NM_006739 | 3433.495  | 2929.851  | M20701    | 53538.82  | 49186.926 | SR6       | 1282.893  | 608.36    |

|           |           |           |           |           |           |           |           |           |
|-----------|-----------|-----------|-----------|-----------|-----------|-----------|-----------|-----------|
| NM_013274 | 5358.851  | 5562.14   | NM_002912 | 4431.354  | 5575.87   | SR8       | 5297.32   | 8266.967  |
| AL050187  | 1636.647  | 3088.459  | NM_006739 | 5275.119  | 3954.417  | SR10      | 19517.891 | 4061.673  |
| NM_007127 | 416.145   | 631.725   | NM_013274 | 9921.34   | 7039.901  | CY3Cy5    | 4162.32   | 565.106   |
| NM_012387 | 31548.301 | 30685.795 | AL050187  | 1955.769  | 1695.336  | AF086054  | 3557.991  | 1612.178  |
| NM_014735 | 1168.048  | 1499.715  | NM_012387 | 44863.602 | 32587.414 | AK022259  | 80285.047 | 61456.293 |
| NM_004252 | 17635.193 | 20165.914 | NM_014735 | 4230.525  | 5714.165  | AK022461  | 645.202   | 447.25    |
| AF172929  | 5673.021  | 6767.793  | NM_004252 | 58030.336 | 66477.195 | NM_01601C | 6359.943  | 3851.551  |
| NM_006398 | 25039.191 | 32821.719 | AF172929  | 13906.411 | 22272.287 | AJ001904  | 513       | 1112.213  |
| AK025655  | 3121.551  | 7360.787  | NM_006398 | 49754.707 | 59945.293 | AF075022  | 2272.463  | 3093.555  |
| CY3Cy5    | 4824.588  | 273.919   | AK025655  | 4158.82   | 6626.84   | AF075060  | 2534.158  | 2560.832  |
| NM_133263 | 1538.287  | 4956.858  | NM_001362 | 4142.062  | 4063.664  | AB002438  | 1478.418  | 1722.999  |
| AF086176  | 671.254   | 2067.774  | NM_004056 | 2583.445  | 2405.895  | AK021441  | 2569.587  | 2760.212  |
| AF086232  | 351.936   | 642.385   | NM_001614 | 60366.422 | 66207.844 | AF085846  | 2150.338  | 1875.253  |
| NM_017742 | 1285.214  | 1125.758  | NM_000366 | 1334.186  | 1689.778  | AK023901  | 11208.751 | 7451.172  |
| NM_005108 | 1499.209  | 2164.404  | NM_003833 | 54809.621 | 56150.734 | AL109705  | 1065.878  | 857.628   |
| AK022292  | 4313.324  | 3909.476  | AK000868  | 21614.668 | 18783.963 | AF088057  | 6960.332  | 4154.918  |
| AB051436  | 3153.064  | 2729.955  | NM_001233 | 5213.526  | 4442.303  | AF086255  | 39767.02  | 23393.898 |
| AK026482  | 10369.371 | 3951.476  | NM_001234 | 3215.996  | 3151.261  | AK026847  | 1036.448  | 452.23    |
| AL137473  | 2647.219  | 1342.279  | BF679789  | 20573.465 | 21806.795 | AK026891  | 1635.185  | 960.832   |
| AJ001873  | 5808.325  | 2330.358  | H97792    | 30548.818 | 32705.92  | AK024595  | 790.484   | 410.614   |
| AL137476  | 3376.077  | 1655.935  | L33404    | 2299.856  | 2500.644  | AK001126  | 4460.491  | 4303.452  |
| AF052174  | 3194.406  | 1643.401  | X04076    | 12123.185 | 12691.585 | AF085976  | 2869.604  | 2417.671  |
| AF070590  | 1110.338  | 717.236   | W95082    | 559.777   | 827.562   | AF075104  | 5156.631  | 3812.749  |
| NM_004708 | 296.478   | 277.162   | AA485362  | 3418.366  | 2955.175  | AL133025  | 1074.446  | 1206.151  |
| NM_012245 | 19801.84  | 10907.469 | AJ222801  | 27303.391 | 19707.088 | AL137402  | 8156.59   | 7067.173  |
| NM_133263 | 1480.661  | 1383.873  | W72207    | 34438.453 | 26136.594 | AL137617  | 2184.15   | 1583.982  |
| SR2       | 37217.004 | 19960.727 | BI772354  | 2716.887  | 1222.782  | AL359568  | 18441.322 | 13134.169 |
| SR4       | 9603.489  | 7093.729  | AA733033  | 6244.224  | 7783.08   | AL133564  | 8922.625  | 5530.786  |
| SR6       | 1392.912  | 1184.206  | AA583574  | 4046.353  | 5964.78   | AL137428  | 736.034   | 664.831   |
| SR8       | 5516.896  | 12979.007 | U67733    | 557.536   | 1434.589  | AL157462  | 1487.338  | 880.714   |
| SR10      | 16943.045 | 4843.538  | AI690184  | 58453.379 | 61703.078 | AL359602  | 7390.104  | 4452.881  |
| CY3Cy5    | 1636.755  | 142.157   | T48692    | 1596.634  | 2178.229  | NM_01819C | 63801.887 | 42787.434 |
| AK024432  | 814.789   | 3001.855  | AA927490  | 3742.759  | 5907.843  | AK021744  | 1454.8    | 824.966   |
| AF088001  | 483.58    | 1583.522  | NM_005052 | 21912.826 | 29300.602 | NM_01843C | 6220.129  | 4090.132  |
| NM_014787 | 1367.623  | 1133.276  | BF038439  | 2552.603  | 2311.855  | AL110200  | 2979.009  | 2342.256  |
| AL122109  | 632.242   | 333.763   | AF319476  | 2486.215  | 3650.857  | AL133640  | 3027.635  | 1978.577  |
| AF074988  | 1839.805  | 1518.82   | NM_014267 | 40609.156 | 57281.52  | AF070647  | 42278.512 | 28188.303 |
| AK024946  | 909.484   | 1568.062  | NM_001481 | 623.646   | 1182.196  | AF116649  | 1088.256  | 1015.758  |
| AF052497  | 354.038   | 1657.931  | U30872    | 4062.4    | 3747.564  | AF174394  | 1731.914  | 1315.523  |
| AK026375  | 3130.933  | 2021.816  | AF111783  | 652.061   | 988.175   | AK025924  | 1001.533  | 1651.256  |
| U85992    | 805.831   | 434.467   | NM_020469 | 13470.284 | 12680.915 | AK021876  | 25385.582 | 22706.525 |
| AL110152  | 532.121   | 282.85    | NM_002639 | 4005.598  | 3253.887  | AK022017  | 1537.289  | 1018.3    |
| AF131745  | 2853.639  | 1401.988  | NM_014734 | 6516.773  | 6377.132  | AK022160  | 2139.207  | 1532.07   |
| AL117565  | 3733.404  | 2082.185  | NM_002289 | 2922.381  | 2828.437  | AK022295  | 1450.973  | 948.746   |
| AF147305  | 254.392   | 150.514   | NM_005025 | 1564.252  | 1873.49   | AK021935  | 4319.71   | 3043.815  |
| AK022109  | 1328.331  | 989.69    | NM_006307 | 1993.063  | 1706.294  | AK022187  | 12662.892 | 8718.483  |
| NM_00703C | 317.906   | 284.629   | M74782    | 8062.229  | 7134.914  | AK022337  | 2645.892  | 1935.536  |
| AK022111  | 240.643   | 261.741   | NM_017818 | 7130.203  | 6831.227  | AL133618  | 6989.708  | 4211.512  |
| AK021527  | 279.46    | 239.484   | NM_020433 | 2192.296  | 2121.47   | AF230314  | 1707.506  | 1306.355  |
| AF143882  | 1101.023  | 808.646   | NM_001767 | 883.416   | 900.25    | AK001086  | 713.139   | 552.334   |
| U00953    | 366.302   | 300.798   | AF028823  | 13930.39  | 8171.112  | AJ131610  | 4750.068  | 3050.431  |
| AK025650  | 1649.415  | 5585.746  | NM_00497C | 804.109   | 1484.337  | AF119872  | 12771.046 | 8375.533  |
| AK026401  | 1851.768  | 5222.407  | NM_004295 | 56148.918 | 61625     | AK023255  | 63988.656 | 42160.816 |

|           |           |          |           |           |           |           |           |           |
|-----------|-----------|----------|-----------|-----------|-----------|-----------|-----------|-----------|
| AK026773  | 989.607   | 1306.728 | NM_002087 | 55135.617 | 59577.773 | NM_002622 | 14457.075 | 7688.966  |
| AK025893  | 796.137   | 515.059  | AB023154  | 3098.595  | 4000.111  | AK024185  | 2092.17   | 1561.602  |
| AK026452  | 298.46    | 176.584  | NM_014585 | 2679.201  | 4249.146  | AL137562  | 5358.652  | 3300.347  |
| AK022604  | 1000.91   | 1185.892 | AF200815  | 1873.062  | 2846.091  | M90355    | 66187.969 | 56164.051 |
| U66048    | 783.455   | 282.306  | NM_012465 | 4041.824  | 3637.035  | AK022495  | 2128.896  | 1516.917  |
| AK023401  | 3835.879  | 1312.095 | M60499    | 5286.272  | 6847.996  | AK023143  | 944.935   | 981.507   |
| AK001865  | 1538.919  | 971.087  | AY026461  | 7993.005  | 10206.484 | AK026373  | 9111.777  | 9376.245  |
| AK024035  | 13371.273 | 5918.877 | AK025708  | 10566.658 | 11901.111 | AK021581  | 3881.906  | 2647.625  |
| AL049331  | 249.402   | 234.325  | NM_000405 | 2665.2    | 3024.217  | NM_006687 | 3819.58   | 2603.924  |
| AL050079  | 834.712   | 576.932  | NM_005564 | 58400.383 | 55608.492 | NM_013301 | 3496.238  | 2511.915  |
| AL080233  | 978.844   | 722.866  | NM_005639 | 1299.831  | 1252.796  | NM_017673 | 1583.075  | 1261.59   |
| AL050132  | 230.569   | 292.15   | AL137619  | 20768.008 | 16764.459 | AB046857  | 1340.91   | 1185.458  |
| AL117663  | 572.865   | 406.923  | NM_000085 | 411.657   | 513.743   | AK024408  | 21919.709 | 15010.582 |
| NM_014293 | 2930.5    | 1845.281 | AB007859  | 2699.039  | 3673.142  | AJ227905  | 435.068   | 657.627   |
| AK023429  | 610.892   | 1395.647 | NM_006754 | 1231.984  | 1563.676  | AF086307  | 22405.779 | 13187.633 |
| AK022276  | 639.162   | 733.491  | NM_001127 | 6967.793  | 4625.479  | L19364    | 4821.235  | 3127.339  |
| AK026881  | 405.743   | 610.908  | NM_012430 | 6456.632  | 7060.37   | NM_005390 | 3557.53   | 2759.42   |
| AL133653  | 724.557   | 573.966  | NM_003917 | 53801.852 | 58478.629 | AJ012502  | 16256.614 | 12872.538 |
| AK023774  | 866.494   | 435.523  | NM_007077 | 6757.136  | 9843.392  | AK021722  | 1050.154  | 565.861   |
| AL049377  | 500.912   | 264.127  | NM_002956 | 6230.605  | 10587.582 | NM_000681 | 970.729   | 693.571   |
| AK001432  | 1073.67   | 515.37   | AB018739  | 4285.503  | 5448.72   | AF147445  | 3339.296  | 2341.051  |
| AL133568  | 3032      | 910.314  | NM_006750 | 59671.832 | 56125.012 | Y10508    | 24316.844 | 16083.858 |
| AF009265  | 2778.787  | 1232.661 | NM_020164 | 33202.137 | 24331.287 | NM_005182 | 68774.492 | 61472.852 |
| AF009309  | 2078.118  | 663.315  | AK023521  | 37230.363 | 26532.84  | D17074    | 1588.484  | 1831.337  |
| NM_002360 | 2000.303  | 875.896  | NM_017737 | 2480.729  | 3609.92   | AF039944  | 4885.7    | 6058.895  |
| AF009322  | 460.014   | 324.205  | NM_004292 | 5677.284  | 6535.759  | AK025035  | 8474.639  | 7545.999  |
| AF056425  | 1768.538  | 986.522  | NM_015484 | 10302.887 | 12774.671 | AK002085  | 4357.968  | 3530.438  |
| AF090893  | 352.813   | 324.087  | NM_018046 | 1983.125  | 2205.008  | AB018338  | 22441.908 | 14949.532 |
| NM_018033 | 5364.524  | 3171.185 | NM_013316 | 6730.743  | 6319.267  | D80010    | 2577.005  | 1841.282  |
| AK001945  | 395.328   | 348.501  | M20701    | 51410.371 | 47812.027 | NM_004923 | 1762.473  | 1129.228  |
| AK021766  | 310.772   | 286.223  | NM_002912 | 3827.246  | 3954.75   | NM_003971 | 5876.618  | 3566.292  |
| AK001147  | 275.899   | 347.984  | NM_013284 | 7974.594  | 8042.016  | AK026973  | 1444.347  | 1056.911  |
| AK021630  | 541.299   | 470.984  | NM_006739 | 4280.245  | 3476.902  | NM_005822 | 2443.904  | 2327.715  |
| AK021831  | 722.124   | 743.821  | AL050187  | 1543.594  | 1358.909  | U81002    | 6313.68   | 4397.994  |
| NM_014015 | 4891.557  | 2904.948 | NM_007127 | 1260.098  | 1082.597  | NM_016295 | 14778.366 | 10015.41  |
| AK026839  | 953.289   | 330.736  | NM_012387 | 47862.465 | 53767.563 | NM_014185 | 18722.84  | 13896.867 |
| AK024973  | 371.073   | 191.766  | NM_014735 | 3719.334  | 4964.866  | L38517    | 6463.471  | 4805.481  |
| AJ008123  | 3952.24   | 491.079  | NM_004252 | 50735.031 | 54170.043 | AK026101  | 18119.76  | 11068.813 |
| AJ008156  | 914.6     | 243.731  | AF172929  | 11727.989 | 10631.659 | AK022194  | 34103.063 | 23620.926 |
| AF161437  | 2878.568  | 1205.137 | NM_006398 | 47177.441 | 23034.186 | AF085963  | 2007.544  | 1480.564  |
| U73530    | 269.454   | 228.895  | AK025655  | 4379.821  | 5958.845  | AK021436  | 3075.394  | 2528.034  |
| AF086158  | 7055.126  | 3863.476 | NM_001362 | 2790.583  | 3215.092  | AL137569  | 5476.127  | 4511.753  |
| AF086050  | 1830.151  | 1048.525 | NM_004056 | 1824.643  | 1924.544  | AK021920  | 4157.705  | 3723.275  |
| AF147375  | 1368.328  | 651.417  | NM_001056 | 1953.82   | 1902.026  | AL049415  | 5616.502  | 7312.813  |
| X51524    | 3390.084  | 2097.235 | NM_003833 | 55928.574 | 64864.793 | AL110194  | 13064.482 | 10131.549 |
| AK025759  | 3458.175  | 2618.213 | AK000868  | 21761.854 | 29866.393 | AF138860  | 1332.323  | 1003.647  |
| AK024105  | 716.418   | 536.332  | NM_001233 | 6034.491  | 7100.971  | AF200348  | 2515.416  | 1818.428  |
| AJ238556  | 707.256   | 702.51   | NM_001234 | 3232.755  | 3792.316  | Y11710    | 923.621   | 824.567   |
| AK021516  | 1500.078  | 1225.172 | BF679789  | 20959.283 | 22067.586 | NM_002650 | 4210.967  | 3262.91   |
| Z70699    | 527.223   | 520.23   | H97792    | 28775.641 | 35632.395 | AK024071  | 2044.14   | 1562.863  |
| NM_006895 | 1701.829  | 1601.757 | L33404    | 1841.458  | 1872.088  | AB002319  | 3255.852  | 2546.916  |
| AL080066  | 11539.552 | 5666.448 | M13509    | 7799.521  | 7825.876  | AF039942  | 3936.813  | 2952.995  |
| AJ227870  | 328.323   | 419.797  | X04076    | 11870.67  | 12407.991 | NM_004421 | 2913.972  | 2061.199  |

|           |           |           |           |           |           |           |           |           |
|-----------|-----------|-----------|-----------|-----------|-----------|-----------|-----------|-----------|
| AL137620  | 713.727   | 371.521   | W95082    | 981.363   | 1296.151  | NM_018654 | 837.877   | 997.324   |
| NM_005294 | 2018.463  | 568.808   | AJ222801  | 24188.014 | 19584.822 | AB046863  | 18857.244 | 13314.739 |
| AK026879  | 463.596   | 193.212   | W72207    | 34805.121 | 43634.766 | M62403    | 9408.711  | 6160.745  |
| AF085826  | 1150.837  | 275.499   | BI772354  | 2441.927  | 3957.052  | NM_017883 | 5463.67   | 3852.248  |
| AK024362  | 706.576   | 221.055   | AA733033  | 5953.882  | 9768.378  | AK025131  | 4032.195  | 2774.359  |
| AF118068  | 3276.77   | 577.099   | AA583574  | 3999.44   | 5004.004  | NM_000754 | 27654.271 | 21562.334 |
| NM_004164 | 470.059   | 159.694   | U67733    | 614.895   | 960.066   | NM_000718 | 3911.705  | 2888.289  |
| NM_019018 | 1162.217  | 531.216   | AI690184  | 59558.898 | 57511.168 | NM_000161 | 4475.328  | 4246.767  |
| M87931    | 774.063   | 303.465   | T48692    | 1325.691  | 1185.479  | NM_001445 | 2250.376  | 1346.182  |
| NM_003544 | 40198.566 | 15045.508 | AA927490  | 5599.359  | 7194.58   | NM_002006 | 52163.5   | 36921.82  |
| U17640    | 308.489   | 256.932   | NM_005052 | 16609.207 | 22196.006 | NM_007111 | 18236.828 | 11252.539 |
| AK001187  | 845.304   | 617.646   | BF038439  | 1675.546  | 1961.558  | NM_002655 | 1823.776  | 1513.537  |
| NM_003529 | 10447.34  | 5973.156  | AF319476  | 2447.036  | 3053.028  | AB028955  | 31568.715 | 20426.178 |
| AF056436  | 1832.833  | 1158.184  | AK001913  | 8639.385  | 4316.713  | U66879    | 24502.131 | 14781.976 |
| AB023191  | 943.788   | 553.923   | NM_002289 | 3905.295  | 4199.396  | NM_016022 | 4765.364  | 3790.708  |
| AK027212  | 5171.922  | 4379      | AK026408  | 3929.479  | 4647.43   | NM_004874 | 2042.866  | 1224.987  |
| X56197    | 948.023   | 881.047   | NM_005025 | 1100.223  | 1215.524  | NM_014204 | 2270.684  | 1900.397  |
| NM_005199 | 3629.212  | 3154.843  | NM_006307 | 1508.872  | 2135.553  | S70385    | 28495.113 | 20342.637 |
| U90905    | 867.79    | 850.742   | M74782    | 5658.72   | 6099.979  | NM_004086 | 1021.423  | 626.845   |
| AF161422  | 1275.439  | 988.274   | NM_017818 | 7122.266  | 7687.955  | NM_014944 | 13511.895 | 10878.727 |
| AL137384  | 912.84    | 380.696   | NM_020433 | 2417.11   | 2625.133  | NM_007352 | 471.775   | 514.749   |
| AF070619  | 1241.449  | 1005.766  | AF028823  | 14660.187 | 15161.644 | AF176706  | 4389.769  | 3212.817  |
| NM_000787 | 1069.208  | 1290.541  | NM_004970 | 746.885   | 1028.4    | NM_014484 | 993.98    | 752.598   |
| U57962    | 1901.203  | 1503.836  | AB023154  | 2895.294  | 2101.297  | AF279698  | 2016.231  | 2056.599  |
| NM_016176 | 5686.088  | 2949.024  | NM_001714 | 1777.941  | 2158.166  | AY007121  | 3378.407  | 3338.811  |
| NM_005574 | 8280.024  | 3624.544  | NM_014585 | 2758.939  | 4003.84   | NM_003372 | 11649.681 | 9799.988  |
| NM_017895 | 8624.628  | 3133.817  | AF200815  | 1611.396  | 2548.66   | NM_007317 | 8355.095  | 7129.012  |
| NM_004610 | 3518.683  | 1346.787  | NM_014564 | 2178.944  | 1811.366  | AB037826  | 508.507   | 608.831   |
| NM_001612 | 1702.327  | 523.253   | NM_013441 | 9927.819  | 6803.374  | AK021466  | 2044.182  | 2334.113  |
| AK027002  | 2321.194  | 690.34    | NM_014421 | 11290.765 | 8396.199  | Z36796    | 62638.074 | 63340.84  |
| AB025254  | 1890.675  | 500.039   | AB033028  | 3781.45   | 2883.884  | NM_001559 | 1258.1    | 1316.928  |
| NM_004081 | 1208.613  | 512.345   | NM_017680 | 1934.024  | 2029.152  | NM_002634 | 24617.916 | 18898.389 |
| AK001039  | 3486.518  | 1729.358  | NM_012465 | 2566.571  | 2778.789  | NM_017749 | 5619.744  | 4196.327  |
| AK026465  | 1091.542  | 457.352   | M60499    | 5467.111  | 4788.146  | NM_002938 | 13944.569 | 9588.761  |
| AK024321  | 438.017   | 280.971   | NM_001614 | 64768.434 | 59944.754 | AK023652  | 22508.197 | 15182.724 |
| U52834    | 534.664   | 232.197   | NM_000366 | 2015.64   | 1187.562  | AF099032  | 1619.411  | 1064.455  |
| M34428    | 358.253   | 312.176   | NM_004300 | 5571.985  | 7457.197  | NM_003070 | 5458.36   | 4375.271  |
| NM_003532 | 974.508   | 634.999   | AB007859  | 1812.531  | 2068.731  | AL122101  | 22217.602 | 17001.748 |
| NM_017869 | 6967.812  | 4189.693  | NM_006754 | 1340.85   | 1727.54   | NM_016638 | 14601.994 | 11803.986 |
| AF075100  | 443.917   | 492.031   | NM_001127 | 6835.819  | 8050.828  | AB018274  | 11787.056 | 11364.628 |
| AF203447  | 8532.774  | 5672.465  | NM_012430 | 5495.015  | 5969.5    | AF121255  | 5392.731  | 5325.608  |
| NM_018502 | 1440.494  | 1218.107  | NM_002956 | 6434.237  | 5828.755  | NM_005494 | 9776.18   | 8537.349  |
| AB040976  | 4478.162  | 6104.545  | AB018739  | 4377.178  | 4061.823  | NM_017946 | 873.323   | 816.349   |
| NM_018641 | 2635.26   | 1901.806  | NM_006750 | 57784.453 | 56464.664 | NM_004953 | 8568.081  | 7394.715  |
| U49089    | 211.224   | 145.599   | NM_020164 | 28810.195 | 23012.416 | NM_012199 | 3119.595  | 2862.287  |
| NM_002221 | 4176.369  | 1622.167  | AK023521  | 34108     | 26287.768 | AL049682  | 1618.96   | 1739.71   |
| NM_002371 | 582.357   | 436.098   | NM_014267 | 43286.129 | 51935.148 | NM_005528 | 12422.517 | 11692.514 |
| NM_002562 | 297.958   | 211.934   | NM_001481 | 1208.893  | 876.478   | AL050199  | 3961.58   | 4180.503  |
| AK024502  | 7326.499  | 3630.837  | U30872    | 5203.977  | 2953.694  | NM_004901 | 1571.534  | 1049.47   |
| NM_001124 | 454.391   | 173.749   | AF111783  | 728.419   | 427.363   | NM_006721 | 19115.85  | 14487.673 |
| NM_004586 | 2602.373  | 1387.159  | NM_020469 | 15068.715 | 10026.204 | NM_016282 | 23434.438 | 17439.939 |
| NM_004844 | 3519.371  | 2281.187  | NM_002639 | 3022.883  | 1676.768  | NM_002765 | 9255.129  | 5773.116  |
| NM_000051 | 2287.296  | 1078.065  | NM_014734 | 7613.381  | 7063.408  | NM_001905 | 4509.506  | 3297.98   |

|           |           |           |           |           |           |           |           |           |
|-----------|-----------|-----------|-----------|-----------|-----------|-----------|-----------|-----------|
| NM_005709 | 371.301   | 240.283   | NM_001362 | 1925.835  | 3416.331  | AF091081  | 25197.014 | 25566.355 |
| NM_004180 | 5404.508  | 2795.908  | NM_004056 | 1548.528  | 1701.811  | U90842    | 1041.344  | 1560.605  |
| NM_004786 | 19801.936 | 13693.633 | NM_001056 | 1902.691  | 3328.629  | AF086325  | 10315.375 | 11524.297 |
| AF302109  | 901.558   | 609.072   | AY026461  | 8960.412  | 8323.393  | NM_004928 | 1124.217  | 1338.779  |
| AL117485  | 10449.778 | 6865.916  | AK025708  | 10685.974 | 10196.954 | NM_005081 | 306.743   | 383.193   |
| NM_003505 | 467.961   | 442.284   | NM_000405 | 3123.098  | 3126.216  | NM_004956 | 1210.322  | 1308.32   |
| NM_007191 | 1425.537  | 828.784   | NM_004694 | 5351.922  | 4894.232  | AK026022  | 59843.422 | 60854.59  |
| AL109667  | 626.918   | 657.285   | NM_000324 | 1613.995  | 969.445   | NM_003196 | 11566.002 | 11170.825 |
| NM_000840 | 464.058   | 443.463   | NM_012206 | 732.995   | 1012.97   | NM_004306 | 68274.703 | 70795.594 |
| AJ008142  | 12885.051 | 8686.086  | AL137619  | 23582.5   | 20419.518 | NM_006786 | 13856.062 | 12232.696 |
| NM_001343 | 1760.917  | 1460.375  | NM_003615 | 1204.283  | 817.474   | NM_006205 | 1941.825  | 2302.395  |
| NM_007275 | 14268.729 | 8098.4    | NM_005052 | 13462.903 | 17553.26  | NM_004034 | 16585.563 | 13136.288 |
| NM_019025 | 37483.152 | 19057.008 | BF038439  | 2473.795  | 2709.914  | NM_000130 | 19664.096 | 15391.279 |
| NM_018461 | 4105.568  | 2444.017  | AF319476  | 2049.318  | 2412.248  | R36143    | 4995.395  | 7435.863  |
| AF235023  | 3658.293  | 2848.118  | AK001913  | 6553.404  | 5572.844  | AK056843  | 14236.839 | 15026.429 |
| NM_006910 | 3473.219  | 2751.712  | NM_017737 | 1374.327  | 1290.857  | U49928    | 63420.211 | 60005.148 |
| AF162667  | 2467.149  | 1472.286  | NM_004292 | 3687.577  | 3230.366  | AK096645  | 61265.152 | 58088.426 |
| AB046847  | 1999.448  | 775.256   | NM_015484 | 9681.921  | 8664.286  | AK092859  | 1555.741  | 1884.761  |
| NM_000447 | 1704.236  | 728.708   | NM_018046 | 1700.538  | 2015.057  | NM_005793 | 13192.218 | 14994.214 |
| NM_006354 | 3525.534  | 2142.594  | NM_013316 | 8261.63   | 8611.044  | M55646    | 29652.17  | 22126.385 |
| AF303378  | 4111.708  | 2210.494  | M20701    | 48136.055 | 46484.836 | NM_006112 | 31266.779 | 30419.021 |
| NM_016037 | 9403.245  | 5989.249  | NM_002912 | 5192.588  | 4864.687  | M12807    | 2941.338  | 2559.598  |
| NM_000043 | 4245.122  | 3151.34   | NM_004252 | 49760.648 | 46281.227 | NM_001765 | 3320.887  | 3387.564  |
| NM_016140 | 292.554   | 188.959   | AF172929  | 15115.271 | 10377.313 | NM_003361 | 3362.751  | 2719.186  |
| NM_015965 | 956.651   | 691.224   | NM_006398 | 42060.898 | 39559.422 | NM_012096 | 22021.055 | 18000.379 |
| NM_000417 | 3870.803  | 2780.202  | L11285    | 833.837   | 820.76    | NM_007184 | 5703.558  | 11199.553 |
| NM_020356 | 2452.143  | 1799.427  | AK025655  | 5449.336  | 6841.655  | NM_005855 | 1479.648  | 2081.234  |
| NM_004063 | 256.6     | 378.112   | NM_017742 | 3267.956  | 2345.6    | NM_018653 | 824.931   | 1315.868  |
| NM_006144 | 511.448   | 554.495   | NM_005108 | 4941.819  | 3525.9    | NM_005388 | 16999.408 | 18103.365 |
| AL136549  | 13423.372 | 8322.293  | AK022292  | 18448.119 | 12882.555 | NM_007232 | 63005.402 | 58481.547 |
| NM_012168 | 1208.935  | 417.154   | AB051436  | 4671.983  | 3012.139  | NM_016257 | 1542.733  | 1562.299  |
| NM_002216 | 267.41    | 261.022   | AK026482  | 47272.547 | 30087.15  | NM_002717 | 5989.901  | 8525.813  |
| NM_007038 | 2333.541  | 2190.365  | AL137473  | 5261.702  | 4275.053  | AF231916  | 11372.146 | 9799.773  |
| NM_001461 | 577.535   | 624.125   | AJ001873  | 40859.949 | 25069.061 | NM_003501 | 10891.668 | 9441.135  |
| AF061556  | 1143.189  | 558.842   | AL137476  | 37863.363 | 22447.955 | AK022654  | 54184.48  | 50681.914 |
| AL162049  | 1978.706  | 900.972   | AF052174  | 8218.982  | 5723.851  | BC002905  | 7891.729  | 7023.133  |
| AF036144  | 495.77    | 415.016   | AF070590  | 3535.738  | 2357.278  | NM_018091 | 14853.945 | 12508.36  |
| NM_001823 | 315.671   | 222.891   | NM_004709 | 1341.682  | 1243.82   | NM_001108 | 9460.646  | 9462.181  |
| NM_005032 | 1109.481  | 1186.251  | NM_012245 | 61708.742 | 53830.234 | NM_001637 | 938.947   | 961.947   |
| NM_004160 | 5764.689  | 3704.818  | NM_133263 | 3469.072  | 2580.793  | NM_016630 | 25830.094 | 25258.438 |
| AL109677  | 1782.449  | 1094.094  | SR2       | 58383.422 | 42940.336 | NM_018485 | 1078.281  | 1939.787  |
| NM_003941 | 43130.496 | 23205.154 | SR4       | 21592.43  | 14109.429 | NM_016568 | 1783.051  | 3492.7    |
| AF177909  | 1442.124  | 1011.897  | SR6       | 2557.12   | 2121.438  | NM_002987 | 425.549   | 683.201   |
| NM_002664 | 17919.859 | 12534.299 | SR8       | 11057.369 | 22984.625 | AB033102  | 51449.75  | 54848.172 |
| AB018271  | 1382.561  | 1293.411  | SR10      | 34059.879 | 8475.228  | NM_014774 | 3299.22   | 4849.618  |
| AL137665  | 3608.922  | 2776.532  | CY3Cy5    | 7695.86   | 127.953   | NM_014143 | 24983.637 | 32362.973 |
| NM_016434 | 2145.926  | 1457.614  | NM_018956 | 53313.289 | 40702.965 | NM_012200 | 3578.613  | 2531.555  |
| U36561    | 51175.664 | 64564.566 | NM_014787 | 2596.193  | 2126.975  | NM_001724 | 2815.974  | 2632.774  |
| AF205437  | 1321.114  | 1232.059  | AL122109  | 1596.479  | 1123.602  | NM_000150 | 6497.449  | 4610.567  |
| AF034102  | 37187.887 | 21731.742 | AF074988  | 4538.297  | 2626.833  | AB023152  | 462.605   | 812.419   |
| AB037748  | 1260.355  | 1450.578  | AK024946  | 1660.707  | 1400.285  | NM_006212 | 2523.989  | 1855.764  |
| AB002306  | 2737.511  | 2183.214  | AK026375  | 6486.001  | 4822.471  | AK022872  | 4556.697  | 3659.093  |
| NM_001300 | 1980.345  | 1851.959  | U85992    | 1555.483  | 1281.6    | AK024272  | 4826.252  | 4188.39   |

|            |           |           |            |           |           |           |           |           |
|------------|-----------|-----------|------------|-----------|-----------|-----------|-----------|-----------|
| NM_012472  | 637.287   | 909.389   | AL110152   | 2176.698  | 1491.297  | NM_016381 | 1694.288  | 1883.929  |
| NM_018187  | 5626.355  | 10330.427 | AF131745   | 5442.954  | 3800.025  | AL591715  | 1642.721  | 1972.889  |
| NM_001325  | 1586.103  | 2307.373  | AL117565   | 11277.183 | 7488.943  | NM_005605 | 7466.001  | 13110.441 |
| NM_018282  | 18117.551 | 11095.323 | AF147305   | 1033.578  | 1027.3    | NM_003582 | 1847.358  | 3668.908  |
| BC019932   | 2543.629  | 1690.592  | AK022109   | 11193.219 | 8119.483  | AF057354  | 826.435   | 1231.018  |
| AF114818   | 4640.914  | 3023.472  | AK022103   | 1433.969  | 1145.479  | AF169351  | 14198.537 | 17496.162 |
| AK025106   | 2279.183  | 2263.512  | NM_007030  | 1017.352  | 718.228   | M14200    | 62344.301 | 61711.426 |
| NM_020144  | 4895.835  | 3402.399  | AK022111   | 1117.921  | 791.299   | NM_016341 | 1140.905  | 1730.966  |
| NM_003905  | 41950.926 | 25633.406 | AK021527   | 1434.388  | 1161.278  | NM_006785 | 13300.939 | 12122.22  |
| BE893142   | 3344.663  | 2217.666  | AF143882   | 1956.132  | 1911.839  | NM_006205 | 2145.13   | 2041.252  |
| NM_003103  | 5728.676  | 3671.546  | U00953     | 1851.352  | 1534.235  | NM_004034 | 17668.137 | 15707.913 |
| NM_015340  | 10326.773 | 6603.417  | AK026401   | 7029.988  | 5697.299  | NM_000130 | 19379.385 | 15066.579 |
| NM_006451  | 6386      | 4351.612  | AK026773   | 3970.032  | 2864.06   | AF193756  | 1087.526  | 827.377   |
| NM_002094  | 2463.535  | 1734.138  | AB026054   | 706.792   | 646.728   | AI492087  | 1168.828  | 1230.666  |
| NM_002937  | 1423.489  | 980.477   | AK022604   | 1890.756  | 1426.524  | R72122    | 9248.824  | 9319.339  |
| NM_003191  | 7372.009  | 6335.594  | U66048     | 3454.707  | 3237.942  | AK056843  | 11483.076 | 13632.02  |
| NM_018235  | 43945.348 | 36161.242 | AL080095   | 690.411   | 845.885   | U49928    | 62543.621 | 57944.793 |
| NM_002424  | 323.921   | 337.699   | AK023401   | 16874.135 | 9305.338  | AK096645  | 63132.457 | 61405.496 |
| NM_012104  | 32756.408 | 17793.254 | AK001865   | 2929.023  | 3254.254  | AK092859  | 1585.143  | 2136.994  |
| NM_000761  | 36673.664 | 27072.521 | AK024035   | 61542.484 | 53011.148 | NM_006895 | 5585.113  | 6822.785  |
| NM_020142  | 2782.723  | 2928.032  | AL050079   | 5634.581  | 4061.536  | M12807    | 2824.023  | 2276.459  |
| NM_000774  | 4257.122  | 5989.437  | AL080233   | 4722.884  | 3957.031  | NM_001765 | 3306.611  | 3663.93   |
| NM_017781  | 45485.586 | 63360.668 | AL050132   | 782.634   | 678.141   | NM_003361 | 3285.459  | 2942.233  |
| NM_005645  | 33641.832 | 28817.09  | AL117663   | 4461.238  | 4309.978  | NM_012095 | 20960.375 | 17073.596 |
| NM_006943  | 9138.979  | 4816.064  | NM_014293  | 29441.662 | 27565.053 | NM_018684 | 54747.82  | 48879.484 |
| NM_006741  | 18707.141 | 13551.843 | unknown (4 | 872.938   | 1098.886  | NM_017983 | 1396.641  | 1582.065  |
| NM_014165  | 7962.896  | 5586.824  | AK022276   | 1530.768  | 1610.415  | AF116909  | 1125.832  | 1192.081  |
| AL117606   | 10922.88  | 6911.366  | AK026881   | 1110.428  | 1041.653  | NM_002923 | 3709.725  | 5359.058  |
| NM_012330  | 3244.045  | 1898.026  | AL133653   | 1018.521  | 869.799   | NM_006794 | 2512.504  | 3030.195  |
| AF294278   | 4919.956  | 3594.088  | AK023774   | 1524.665  | 1482.428  | NM_018653 | 819.798   | 1072.17   |
| NM_018211  | 2418.204  | 1983.281  | AL049377   | 3135.829  | 2055.518  | NM_005385 | 16025.402 | 16851.51  |
| NM_014520  | 5839.194  | 4196.404  | AK001432   | 4194.587  | 3318.266  | NM_007232 | 59662.824 | 54520.379 |
| AL117508   | 279.641   | 445.758   | AL133568   | 8787.921  | 6529.55   | NM_016257 | 1150.182  | 1765.668  |
| NM_002615  | 3366.662  | 2677.611  | AF009265   | 5322.859  | 3961.183  | NM_002717 | 4821.21   | 6582.299  |
| AK025712   | 24331.693 | 15875.182 | AF009309   | 20298.924 | 22276.953 | NM_004305 | 66759.078 | 71845.703 |
| NM_005634  | 3336.745  | 2788.855  | NM_002360  | 7308.349  | 6115.84   | NM_001153 | 586.643   | 727.76    |
| NM_017757  | 7234.538  | 5570.424  | AF009322   | 1253.736  | 1441.486  | AK022654  | 53651.57  | 46107.543 |
| NM_002145  | 28738.285 | 18047.127 | AF056425   | 13800.958 | 10847.173 | BC002905  | 7442.275  | 6035.021  |
| AB007892   | 2204.644  | 1654.556  | AF090893   | 1070.883  | 838.151   | NM_018091 | 15497.126 | 13688.949 |
| NM_018207  | 2222.88   | 2504.808  | NM_018033  | 33813.797 | 23856.234 | NM_001105 | 8328.362  | 8649.683  |
| NM_000345  | 38912.242 | 30046.266 | AK001945   | 5022.635  | 3965.59   | NM_001637 | 1209.923  | 1093.043  |
| NM_001862  | 50339.848 | 58111.508 | AK021541   | 629.202   | 769.727   | NM_016630 | 25283.875 | 20454.09  |
| NM_006531  | 1486.82   | 2606.82   | AK021766   | 613.554   | 706.052   | NM_014291 | 13718.299 | 12918.393 |
| AB029021   | 37191.648 | 48548.652 | AK001147   | 1409.537  | 1329.855  | NM_014631 | 1128.139  | 1017.551  |
| NM_002101  | 964.138   | 2343.417  | AK021630   | 2450.069  | 2316.413  | NM_001085 | 10166.087 | 10424.202 |
| J02874     | 5585.271  | 6521.531  | AK021831   | 2090.823  | 2344.037  | U09384    | 2768.717  | 3881.728  |
| BF310427   | 8581.251  | 8505.507  | NM_020153  | 1905.419  | 1240.282  | NM_004794 | 13753.875 | 28105.205 |
| N94424     | 429.281   | 427.054   | AF073520   | 12158.186 | 11085.527 | NM_002803 | 14957.555 | 31077.219 |
| AA045192   | 2200.029  | 2889.58   | AF143885   | 1137.973  | 934.965   | NM_005505 | 4835.671  | 8535.425  |
| H45617     | 358.752   | 416.39    | NM_014015  | 38970.102 | 25843.357 | NM_018485 | 607.234   | 1052.238  |
| M92642     | 4708.039  | 3784.919  | AK026839   | 2934.918  | 2068.619  | NM_006785 | 2027.531  | 2971.645  |
| H-U 44385  | 25128.084 | 14198.046 | AK024973   | 473.633   | 523.864   | AK025039  | 1301.592  | 1468.217  |
| ID 1654970 | 10440.902 | 7455.168  | AJ008123   | 24037.227 | 17035.473 | NM_016565 | 2000.098  | 2618.285  |

|            |           |           |           |           |           |           |           |           |
|------------|-----------|-----------|-----------|-----------|-----------|-----------|-----------|-----------|
| ID 2531132 | 14558.834 | 11260.433 | AJ008156  | 2539.917  | 2637.994  | AB033102  | 48944.227 | 51507.914 |
| ID 4365538 | 832.243   | 1005.177  | AF147321  | 1291.706  | 1507.793  | NM_014774 | 3711.543  | 4634.866  |
| AA485665   | 422.374   | 474.63    | AF161437  | 8347.363  | 11600.716 | NM_014143 | 23719.545 | 30236.371 |
| BF125928   | 13187.775 | 11289.702 | U73530    | 899.133   | 892.583   | M55646    | 27457.625 | 38987.566 |
| BG571026   | 2791.612  | 2335.998  | AF086158  | 13936.947 | 10827.104 | NM_006112 | 26974.893 | 40020.609 |
| AA489017   | 14697.916 | 14999.222 | AF086050  | 4552.652  | 5962.93   | NM_000150 | 6014.253  | 3785.47   |
| NM_001140  | 1165.924  | 2290.696  | AF147375  | 3680.558  | 3450.108  | AB023152  | 476.634   | 563.767   |
| NM_016059  | 230.326   | 270.842   | X51524    | 25963.578 | 18558.607 | NM_006212 | 2885.596  | 2074.289  |
| NM_004843  | 927.714   | 1635.599  | AK025759  | 7078.306  | 5698.798  | AK022872  | 4339.672  | 3439.666  |
| AK022845   | 609.338   | 1328.933  | AK024105  | 1826.505  | 1620.227  | AK024272  | 5193.836  | 4241.642  |
| S77835     | 900.946   | 1690.242  | AJ238556  | 1667.774  | 2210.735  | NM_016381 | 1752.615  | 1605.041  |
| NM_002985  | 2008.255  | 3302.157  | AK021516  | 14229.853 | 11796.567 | AL591715  | 1739.621  | 1953.583  |
| AB018347   | 16609.061 | 21282.018 | Z70699    | 2233.545  | 2291.838  | NM_018042 | 16838.387 | 14596.975 |
| AB033073   | 4689.317  | 4771.31   | AL049919  | 587.071   | 621.183   | BE741525  | 1631.23   | 1998.64   |
| NM_003284  | 5157.105  | 5242.556  | NM_006898 | 10508.092 | 8879.907  | BF030555  | 56910.148 | 56309.219 |
| NM_018152  | 857.316   | 1190.554  | AL137620  | 2108.917  | 1811.798  | NM_012433 | 11070.148 | 11753.206 |
| NM_000319  | 6003.579  | 17141.43  | NM_005294 | 13037.49  | 9251.095  | NM_005605 | 7655.325  | 8785.184  |
| NM_003257  | 431.431   | 938.975   | AF085826  | 2261.202  | 1947.091  | NM_002576 | 2950.279  | 4259.043  |
| NM_012461  | 5349.738  | 5527.204  | AK024362  | 1851.724  | 1485.761  | NM_003582 | 2148.668  | 3999.678  |
| AK001379   | 2225.012  | 2113.791  | AF118068  | 6557.073  | 6217.167  | AF057354  | 567.466   | 905.276   |
| NM_017450  | 3541.848  | 2838.07   | NM_004164 | 764.78    | 928.253   | AF169351  | 12738.087 | 16138.438 |
| NM_002023  | 983.25    | 931.688   | NM_019018 | 2478.132  | 2715.776  | M14200    | 67420.359 | 66785.523 |
| NM_002839  | 1024.595  | 845.626   | M87931    | 1916.992  | 2800.952  | NM_000282 | 2552.549  | 3358.796  |
| AF190500   | 474.252   | 404.175   | NM_003544 | 66901.789 | 67247.5   | NM_000532 | 16347.452 | 19732.047 |
| NM_001616  | 377.988   | 368.892   | U17640    | 1103.031  | 1086.924  | NM_016341 | 953.483   | 1391.142  |
| NM_005904  | 604.75    | 642.396   | AK001187  | 4490.037  | 3887.305  | AF231916  | 9274.282  | 12175.575 |
| NM_005273  | 24241.125 | 17390.855 | NM_003529 | 45356.156 | 44935.43  | NM_003501 | 10509.573 | 17028.188 |
| NM_000524  | 510.741   | 737.021   | AF086284  | 780.766   | 967.75    | NM_004034 | 15023.678 | 12974.933 |
| NM_007072  | 1977.598  | 4073.888  | AF056436  | 5991.723  | 4805.098  | NM_000130 | 15508.706 | 12848.779 |
| NM_012320  | 1637.417  | 2967.952  | AB023191  | 2612.069  | 2589.439  | AF193756  | 724.537   | 776.483   |
| NM_018208  | 1835.479  | 3362.944  | AK027212  | 12225.241 | 10554.758 | AI492087  | 1570.747  | 1616.434  |
| NM_015929  | 3046.963  | 11591.601 | X56197    | 2173.692  | 2331.713  | R72122    | 8408.286  | 8956.522  |
| U90653     | 9259.102  | 24977.783 | NM_005199 | 27397.424 | 26727.135 | Z35309    | 11223.394 | 10414.078 |
| NM_000196  | 550.908   | 1106.169  | U90905    | 2108.866  | 2362.229  | X04571    | 1436.996  | 1672.768  |
| NM_018339  | 4304.328  | 5955.728  | AF161422  | 2834.488  | 2179.699  | AA700005  | 1069.807  | 1727.419  |
| NM_006745  | 13804.652 | 14390.413 | AL137384  | 2183.093  | 1056.356  | AA292025  | 4115.168  | 5277.799  |
| NM_000275  | 979.313   | 1139.673  | AF070619  | 5480.688  | 6412.87   | AA437226  | 7908.691  | 8508.68   |
| AK000037   | 1507.156  | 2348.255  | NM_000787 | 1169.014  | 924.366   | R36143    | 3392.069  | 4726.9    |
| NM_014760  | 2658.73   | 3276.686  | U57962    | 8272.191  | 6191.285  | XM_056359 | 2578.465  | 2583.723  |
| NM_018713  | 928.784   | 1267.044  | NM_016176 | 14399.438 | 12078.308 | D10353/NM | 32461.865 | 37759.125 |
| AJ006268   | 935.943   | 895.713   | NM_005574 | 21269.748 | 23219.059 | M15042    | 11246.393 | 14271.312 |
| AF190864   | 5253.216  | 4389.748  | NM_017895 | 32616.023 | 22907.424 | AK056843  | 13742.102 | 16087.171 |
| NM_001177  | 2945.471  | 3065.15   | NM_004610 | 20764.152 | 15668.382 | U49928    | 60158.883 | 64782.34  |
| NM_014447  | 1916.897  | 1790.771  | NM_001612 | 4135.492  | 2877.573  | AK096645  | 60310.82  | 70992.133 |
| NM_002356  | 958.513   | 823.766   | AK027002  | 11840.305 | 7983.599  | NM_018291 | 21097.758 | 24302.635 |
| NM_006691  | 1475.532  | 1315.945  | AB025254  | 10550.295 | 8135.379  | NM_005530 | 10901.095 | 15539.095 |
| NM_001505  | 1135.919  | 1008.674  | NM_004081 | 7295.21   | 6788.402  | NM_006899 | 6554.666  | 9939.177  |
| NM_003710  | 6066.769  | 5644.614  | AK001039  | 19150.572 | 26098.031 | NM_012200 | 3024.295  | 4343.09   |
| Z83805     | 663.843   | 894.185   | AK026465  | 3754.216  | 6429.13   | NM_001724 | 3039.752  | 5395.629  |
| NM_004666  | 1144.351  | 1072.931  | AK024321  | 1722.668  | 1485.793  | BE906724  | 1475.613  | 1648.475  |
| NM_003614  | 5643.464  | 4755.716  | U52834    | 2065.355  | 2043.844  | NM_002283 | 20759.584 | 18862.797 |
| NM_014257  | 6850.194  | 4756.505  | M34428    | 656.436   | 1107.662  | AJ276095  | 12423.614 | 12018.432 |
| NM_000025  | 10384.816 | 17564.764 | NM_003532 | 3664.637  | 3445.789  | NM_004819 | 4811.237  | 4237.879  |

|            |           |           |           |           |           |           |           |           |
|------------|-----------|-----------|-----------|-----------|-----------|-----------|-----------|-----------|
| D38521     | 3310.207  | 4641.125  | NM_017869 | 21459.24  | 20802.766 | NM_007184 | 3994.419  | 4154.882  |
| NM_000403  | 9228.661  | 13142.008 | AF075100  | 942.151   | 878.265   | NM_005291 | 58139.012 | 53967.199 |
| NM_018127  | 10160.332 | 18338.418 | AF203447  | 25660.531 | 21241.164 | AF253316  | 678.975   | 1179.698  |
| AB020677   | 4369.612  | 6284.907  | NM_018502 | 6299.661  | 5656.203  | NM_005855 | 915.705   | 926.706   |
| AB033097   | 3466.707  | 5355.622  | AB040976  | 26513.334 | 18007.555 | NM_002923 | 6112.598  | 7414.374  |
| NM_000135  | 2219.354  | 2235.613  | NM_018641 | 6231.306  | 8777.462  | NM_006794 | 3489.256  | 4270.891  |
| AJ223948   | 5516.277  | 5518.753  | NM_002221 | 8634.71   | 5911.173  | NM_018653 | 1143.922  | 1882.053  |
| NM_016218  | 563.643   | 581.811   | NM_002371 | 1629.786  | 1477.296  | NM_005388 | 18149.824 | 21593.809 |
| AK022947   | 1162.417  | 457.726   | NM_002562 | 949.642   | 832.834   | NM_007232 | 64437.34  | 70919.07  |
| AL050029   | 1596.109  | 1512.47   | AK024502  | 15546.6   | 12869.483 | NM_003027 | 1404.93   | 2126.23   |
| AL049966   | 627.627   | 699.169   | NM_001124 | 1122.92   | 1066.31   | NM_016257 | 2216.299  | 3583.158  |
| NM_005204  | 7656.206  | 6959.502  | NM_004586 | 5421.121  | 5727.216  | NM_002717 | 6661.599  | 8807.023  |
| NM_016203  | 1292.341  | 1392.143  | NM_004844 | 10046.354 | 14590.94  | NM_012114 | 1912.559  | 2269.47   |
| NM_002759  | 2846.288  | 2731.476  | NM_013447 | 921.348   | 1015.347  | NM_014486 | 918.849   | 1169.96   |
| NM_007271  | 2499.467  | 2356.346  | NM_000051 | 6242.894  | 7054.869  | NM_003025 | 47784.578 | 45771.699 |
| NM_006255  | 3099.697  | 3055.639  | NM_005709 | 1117.169  | 1135.109  | NM_020179 | 9078.129  | 11537.764 |
| BE392143   | 3838.122  | 3689.939  | NM_004180 | 11182.839 | 8806.513  | NM_004306 | 58796.082 | 67848.266 |
| NM_005813  | 3298.33   | 2761.195  | NM_004786 | 41352.504 | 60235.523 | NM_001153 | 926.427   | 957.724   |
| AB037718   | 6050.28   | 5247.588  | AF302109  | 2985.67   | 3276.113  | NM_006786 | 13665.476 | 15180.509 |
| AL389994   | 1984.568  | 3676.492  | AL117485  | 47155.246 | 52294.652 | NM_006205 | 2112.228  | 3069.109  |
| NM_003909  | 5403.457  | 5658.881  | NM_003505 | 2198.752  | 3073.949  | NM_004283 | 1640.476  | 2143.264  |
| NM_001277  | 7552.144  | 6926.626  | NM_007191 | 7086.327  | 9671.471  | NM_004163 | 43641.969 | 52645.609 |
| NM_003659  | 4331.302  | 3811.864  | AL109667  | 2159.537  | 2941.558  | AK026308  | 2822.322  | 3553.725  |
| NM_001862  | 46330.785 | 65487.91  | NM_000840 | 1981.191  | 2172.17   | NM_013337 | 4144.282  | 5516.531  |
| NM_006531  | 976.42    | 1826.412  | NM_001094 | 578.444   | 761.771   | NM_004193 | 2688.694  | 3496.647  |
| AB029021   | 27002.098 | 26351.535 | NM_001343 | 4200.29   | 3561.37   | NM_002803 | 17998.285 | 20754.08  |
| NM_002101  | 956.803   | 1320.768  | NM_007275 | 48889.543 | 50215.715 | NM_005508 | 6259.37   | 6778.468  |
| NM_005423  | 803.886   | 1462.695  | NM_019025 | 60566.117 | 55819.129 | NM_018485 | 1019.862  | 1455.189  |
| Z36789     | 348.645   | 728.715   | NM_018461 | 12815.896 | 8417.292  | NM_006788 | 2258.534  | 3069.265  |
| J02874     | 4785.767  | 7418.326  | AF235023  | 8262.771  | 5117.608  | NM_002987 | 883.115   | 1265.197  |
| BF310427   | 6556.479  | 7553.487  | NM_006910 | 8258.99   | 7354.063  | AB033102  | 46121.996 | 48794.902 |
| N94424     | 481.206   | 563.876   | AF162667  | 6699.778  | 5733.119  | NM_014774 | 3276.743  | 4771.741  |
| AA045192   | 1723.938  | 1625.141  | AB046847  | 5183.174  | 5234.87   | NM_014143 | 23511.76  | 22587.809 |
| H45617     | 449.912   | 626.836   | NM_000447 | 6346.088  | 7695.616  | M55646    | 30125.725 | 33321.738 |
| M92642     | 3190.495  | 3468.15   | NM_006354 | 9676.025  | 14545.031 | NM_006112 | 26724.941 | 43715.492 |
| H-U 44385  | 25978.947 | 15703.996 | AF303378  | 14726.886 | 13779.397 | NM_001765 | 4014.207  | 6423.731  |
| ID 1654970 | 10366.263 | 8386.76   | NM_016037 | 21754.027 | 17107.775 | NM_003361 | 3026.738  | 4347.384  |
| ID 2531132 | 14666.919 | 12492.566 | NM_000043 | 9260.748  | 9851.926  | NM_012099 | 22387.572 | 36732.551 |
| ID 4365538 | 859.561   | 710.334   | NM_016140 | 1033.002  | 1615.524  | NM_000282 | 2664.105  | 2756.701  |
| AA485665   | 512.254   | 421.329   | NM_015965 | 1150.426  | 2284.547  | NM_000532 | 15688.918 | 16051.656 |
| BF125928   | 12897.992 | 11809.561 | NM_000417 | 9713.815  | 9432.942  | NM_016341 | 1043.476  | 1226.244  |
| BG571026   | 2599.213  | 2476.664  | NM_020356 | 22725.428 | 23188.418 | AF231916  | 9124.461  | 8258.338  |
| AA489017   | 14124.325 | 13384.869 | AF152527  | 321.187   | 712.898   | NM_003501 | 9711.129  | 10609.594 |
| NM_004843  | 1639.393  | 7699.192  | NM_004063 | 1391.331  | 1303.825  | AK022654  | 51763.965 | 53323.77  |
| AK022845   | 462.059   | 771.422   | NM_006144 | 3065.991  | 2745.386  | BC002905  | 6892.496  | 8296.968  |
| S77835     | 782.086   | 1084.983  | AL136549  | 34871.059 | 30316.926 | NM_018091 | 14813.267 | 16310.183 |
| NM_002985  | 1360.081  | 1962.615  | NM_012168 | 4960.738  | 4017.401  | NM_001108 | 8861.352  | 11925.863 |
| AB018347   | 12721.804 | 19146.047 | NM_002216 | 1132.105  | 1082.366  | NM_014291 | 14815.878 | 19520.42  |
| AB033073   | 5911.513  | 10227.778 | NM_007038 | 12705.532 | 9136.692  | NM_001089 | 8846.387  | 12510.075 |
| NM_003284  | 4217.011  | 6100.314  | AF311324  | 13548.927 | 9448.533  | NM_000120 | 2464.38   | 3369.95   |
| NM_018152  | 672.208   | 955.098   | AF124433  | 2854.425  | 1565.337  | AF172327  | 60256.359 | 66714.641 |
| NM_000319  | 4624.581  | 4437.013  | AK001647  | 761.408   | 666.441   | NM_001676 | 11156.343 | 16798.52  |
| NM_003257  | 319.296   | 457.571   | NM_001461 | 1487.23   | 1322.768  | NM_000220 | 3182.01   | 7150.873  |



|           |           |           |           |           |           |           |           |           |
|-----------|-----------|-----------|-----------|-----------|-----------|-----------|-----------|-----------|
| NM_012461 | 4513.471  | 5623.042  | AF061556  | 3024.183  | 3324.305  | NM_001679 | 36524.75  | 41211.047 |
| AK001379  | 2250.382  | 2870.75   | AL162049  | 4737.719  | 7159.18   | NM_004046 | 67655.063 | 75592.266 |
| NM_017450 | 2556.61   | 2534.207  | AF036144  | 1202.83   | 2187.473  | NM_004983 | 5260.137  | 7394.648  |
| NM_002023 | 1103.249  | 1301.157  | NM_005032 | 2331.673  | 2050.341  | NM_006860 | 11157.343 | 18992.412 |
| NM_002839 | 1299.123  | 1399.987  | NM_004160 | 15158.771 | 14064.063 | NM_018291 | 11935.155 | 11119.887 |
| AF190500  | 485.138   | 631.639   | AL109677  | 4050.282  | 4944.869  | NM_005530 | 10094.83  | 8028.769  |
| NM_001616 | 465.559   | 379.466   | NM_002664 | 37998.34  | 47736.047 | NM_006899 | 4958.459  | 3907.042  |
| NM_005904 | 674.129   | 647.454   | AB018271  | 3173.656  | 3491.325  | NM_012200 | 2712.922  | 2151.834  |
| NM_005273 | 23723.48  | 17082.545 | AL137665  | 16807.271 | 18575.188 | NM_001724 | 2384.518  | 2128.369  |
| NM_000524 | 405.332   | 509.312   | NM_016434 | 11210.395 | 12475.988 | NM_000150 | 4341.068  | 3707.768  |
| NM_018207 | 2680.89   | 2590.123  | U36561    | 61195.469 | 69254.641 | AB023152  | 367.117   | 970.085   |
| NM_000345 | 50054.953 | 49945.266 | AF205437  | 3140.663  | 4276.423  | NM_006212 | 3026.204  | 2309.759  |
| NM_018208 | 1339.141  | 4118.077  | AF034102  | 57185.965 | 52540.191 | AK022872  | 4921.672  | 4332.959  |
| NM_015929 | 2419.452  | 5332.355  | AB037748  | 2476.985  | 3441.268  | AK024272  | 5214.021  | 6740.396  |
| U90653    | 6791.063  | 10802.767 | AB002306  | 5783.965  | 7427.082  | NM_016381 | 2298.066  | 4722.443  |
| NM_000196 | 579.219   | 685.117   | NM_001300 | 5702.396  | 7027.766  | AL591715  | 1837.578  | 3281.844  |
| NM_000178 | 282.401   | 375.454   | NM_012472 | 1866.298  | 2683.788  | NM_018042 | 16272.83  | 23821.486 |
| NM_018339 | 3005.159  | 4138.418  | NM_018187 | 17276.326 | 16591.164 | BE741525  | 1401.882  | 1822.021  |
| NM_006745 | 14338.941 | 23410.75  | NM_003016 | 48769.75  | 38322.785 | BF030555  | 55856.945 | 57955.074 |
| NM_000275 | 1113.777  | 1343.261  | NM_005463 | 58866.445 | 55058.98  | NM_012433 | 11123.433 | 9926.386  |
| AK000037  | 1509.558  | 1376.167  | NM_001325 | 5563.208  | 5775.012  | NM_005605 | 7734.521  | 8667.011  |
| NM_014760 | 2009.748  | 2292.15   | NM_018282 | 51390.551 | 52739.91  | NM_002576 | 3753.489  | 4651.166  |
| NM_018713 | 678.045   | 1006.931  | BC019932  | 5740.885  | 7840.783  | NM_003582 | 2200.058  | 2985.749  |
| AF190864  | 4556.923  | 5119.29   | AF114818  | 12656.304 | 17451.762 | AF169351  | 16810.156 | 24773.047 |
| NM_001177 | 2803.487  | 3877.595  | AK025106  | 5095.105  | 4990.208  | M14200    | 67964.758 | 77606.203 |
| NM_014447 | 1827.246  | 1876.255  | NM_020144 | 13969.635 | 10307.934 | CY3Cy5    | 7262.205  | 116.323   |
| NM_002356 | 1075.021  | 1084.874  | NM_003908 | 61995.555 | 59909.922 | NM_000623 | 1677.357  | 2049.518  |
| NM_006691 | 1486.249  | 1315.396  | BE893142  | 7559.653  | 9208.764  | NM_000941 | 2324.853  | 1864.807  |
| NM_001505 | 1071.942  | 1316.083  | NM_003103 | 13344.94  | 17697.283 | AK026844  | 3268.729  | 2091.407  |
| NM_003710 | 6892.517  | 6539.957  | NM_015340 | 28525.826 | 40005.926 | AK026735  | 4719.114  | 4837.413  |
| Z83805    | 1190.38   | 1251.737  | NM_006451 | 13574.252 | 12354.168 | AL110104  | 47867.191 | 41852.371 |
| NM_004666 | 1204.031  | 1252.389  | NM_002094 | 4855.054  | 4632.883  | AF240633  | 1290      | 1070.601  |
| NM_003614 | 6037.489  | 6169.231  | NM_002937 | 2712.272  | 3115.744  | AK027056  | 4921.474  | 2956.727  |
| NM_014257 | 7517.28   | 7282.826  | NM_003191 | 26892.195 | 41544.848 | AK024294  | 1670.626  | 1309.783  |
| NM_001140 | 1035.096  | 1143.017  | NM_012104 | 63784.832 | 58686.422 | AL110126  | 2679.393  | 2191.275  |
| NM_016059 | 225.866   | 217.955   | NM_000761 | 61730.781 | 66676.047 | AF052172  | 44993.543 | 41447.75  |
| NM_000403 | 3305.964  | 5245.187  | NM_020142 | 15669.188 | 15216.994 | AB014573  | 7316.684  | 7649.552  |
| NM_018127 | 9109.651  | 17506.354 | NM_000774 | 20099.16  | 21067.656 | AK025418  | 611.316   | 621.699   |
| AB020677  | 1597.074  | 2097.441  | NM_017781 | 59689.984 | 56269.957 | AK025496  | 7347.525  | 7078.308  |
| AB033097  | 1284.923  | 2016.709  | NM_006004 | 58964.953 | 53680.777 | NM_000941 | 1736.681  | 1235.317  |
| NM_000135 | 1301.773  | 1769.837  | NM_004894 | 45630.297 | 40156.129 | SR1       | 83021.875 | 62729.914 |
| AJ223948  | 4770.286  | 7227.594  | AB028960  | 2365.277  | 1897.789  | SR3       | 35799.418 | 24192.869 |
| NM_016218 | 534.438   | 739.282   | NM_005648 | 55639.605 | 51047.414 | SR5       | 3805.601  | 2881.784  |
| AK022947  | 1420.83   | 1587.984  | AK000689  | 724.417   | 743.683   | SR7       | 4185.984  | 19836.354 |
| AL050029  | 737.329   | 766.114   | NM_006943 | 27628.053 | 37130.168 | SR9       | 13288.952 | 1485.505  |
| AL049966  | 548.897   | 657.438   | NM_006741 | 55441.961 | 54732.281 | CY3Cy5    | 7500.333  | 199.191   |
| NM_005204 | 6574.314  | 5214.055  | NM_014166 | 17406.92  | 11471.462 | AF283776  | 2735.765  | 1739.701  |
| NM_016203 | 1599.399  | 1630.343  | AL117606  | 31513.816 | 23342.766 | L10123    | 34543.023 | 24649.738 |
| NM_002759 | 2829.104  | 3004.087  | NM_012330 | 7301.204  | 7006.238  | D16877    | 6660.512  | 7000.798  |
| NM_007271 | 2127.757  | 3129.891  | AF294278  | 29129.695 | 38337.859 | AL109781  | 3405.069  | 2813.465  |
| NM_006255 | 2826.631  | 3428.487  | NM_018211 | 10698.298 | 17059.395 | AL079289  | 710.09    | 601.968   |
| BE392143  | 4248.558  | 3996.318  | NM_014520 | 17262.922 | 18312.92  | AK027237  | 737.142   | 543.977   |
| NM_005813 | 3468.163  | 3044.319  | AL117508  | 404.257   | 486.148   | AF075017  | 713.708   | 607.812   |

|            |           |           |            |           |           |           |           |           |
|------------|-----------|-----------|------------|-----------|-----------|-----------|-----------|-----------|
| AB037718   | 6432.85   | 6486.716  | NM_002616  | 7750.149  | 7625.774  | AK027104  | 2799.417  | 2187.825  |
| AL389994   | 1478.454  | 1744.584  | AK025712   | 54401.629 | 58721.07  | AL133090  | 47649.242 | 32692.438 |
| NM_003909  | 5409.21   | 5825.349  | NM_005634  | 8397.694  | 11548.488 | AF085867  | 2645.967  | 2299.226  |
| NM_001277  | 8456.707  | 9142.893  | NM_002146  | 62022.531 | 61061.906 | AF086510  | 3127.572  | 2499.632  |
| NM_003659  | 4942.446  | 5393.955  | AB007892   | 4492.226  | 3942.82   | NM_002816 | 2053.317  | 1356.209  |
| NM_007072  | 2671.928  | 2986.726  | NM_018207  | 10363.293 | 11103.893 | AK024520  | 7699.926  | 4144.541  |
| NM_012320  | 2471.926  | 2779.275  | NM_000345  | 58846.797 | 62823.355 | AK024592  | 3601.18   | 2642.724  |
| AB029021   | 4937.683  | 7213.396  | NM_001862  | 60807.188 | 59545.785 | AK024904  | 1608.847  | 1411.673  |
| NM_002101  | 864.211   | 941.421   | NM_006531  | 13648.225 | 12191.933 | AK025030  | 2071.184  | 1575.194  |
| NM_005423  | 778.322   | 1450.252  | AB029021   | 62597.035 | 58394.883 | AK024542  | 1691.579  | 1478.003  |
| Z36789     | 1116.504  | 1648.064  | NM_002101  | 4769.154  | 4251.493  | AK024915  | 1888.77   | 1801.154  |
| J02874     | 1021.281  | 1802.766  | NM_005423  | 3401.158  | 3012.24   | AK091109  | 59411.699 | 55987.574 |
| BF310427   | 1634.652  | 2347.65   | Z36789     | 2079.214  | 1711.018  | AF032897  | 802.429   | 698.879   |
| N94424     | 324.787   | 607.382   | J02874     | 23459.355 | 23525.693 | NM_014967 | 2784.633  | 2579.684  |
| AA045192   | 869.265   | 1333.81   | BF310427   | 35733.961 | 37928.453 | AK022915  | 4961.532  | 4324.553  |
| H45617     | 414.589   | 589.892   | N94424     | 1327.916  | 1804.101  | AF131834  | 1886.205  | 1747.182  |
| M92642     | 1364.936  | 1831.29   | AA045192   | 9361.346  | 8703.16   | AL355711  | 804.737   | 844.249   |
| H-U 44385  | 24188.543 | 16434.031 | H45617     | 2274.097  | 1954.742  | AK025851  | 1413.574  | 1108.031  |
| ID 1654970 | 7406.54   | 5738.291  | M92642     | 20023.404 | 21183.396 | AJ011409  | 32281.949 | 23853.143 |
| ID 2531132 | 12413.387 | 13808.497 | AA464532   | 574.784   | 832.052   | AJ227906  | 2543.293  | 2215.13   |
| ID 4365538 | 811.412   | 1092.157  | H-U 44385  | 57681.441 | 60899.043 | U17633    | 1087.449  | 737.724   |
| AA485665   | 485.48    | 354.384   | ID 1654970 | 29845.324 | 29575.814 | Z83939    | 5659.68   | 4978.114  |
| BF125928   | 13267.878 | 12105.738 | ID 2531132 | 29935.223 | 24781.133 | AF086202  | 24782.076 | 18557.209 |
| BG571026   | 2845.539  | 2959.622  | ID 4365538 | 4817.997  | 4611.322  | AK023270  | 3369.852  | 3181.049  |
| AA489017   | 13653.016 | 12300.162 | AA485665   | 1999.55   | 1891.639  | AF085979  | 18857.098 | 18369.012 |
| NM_000025  | 14975.513 | 13337.847 | BF125928   | 28825.527 | 37597.883 | AK023112  | 1682.465  | 1178.713  |
| D38521     | 4754.017  | 4271.213  | BG571026   | 8581.775  | 9900.286  | NM_017806 | 47035.73  | 43426.797 |
| NM_018152  | 403.152   | 929.95    | AA489017   | 26898.955 | 29108.639 | AK021895  | 4038.046  | 4230.669  |
| NM_000319  | 4418.469  | 6224.129  | NM_001140  | 2692.459  | 3153.754  | AF204172  | 4176.944  | 3582.746  |
| NM_003257  | 480.673   | 775.377   | NM_004843  | 4245.915  | 4914.805  | AK000036  | 10885.845 | 8165.343  |
| NM_012461  | 4224.89   | 7960.235  | AK022845   | 2631.913  | 3166.457  | AK000769  | 501.868   | 442.911   |
| AK001379   | 1999.32   | 3276.06   | NM_003004  | 1514.688  | 2498.104  | AK000924  | 1148.464  | 1015.731  |
| NM_017450  | 1448.531  | 2628.15   | S77835     | 2737.417  | 2364.875  | AK000114  | 3462.338  | 2630.056  |
| NM_002023  | 476.568   | 752.318   | NM_002985  | 4170.042  | 4224.015  | AK000952  | 17641.99  | 11931.732 |
| NM_002839  | 436.313   | 823.685   | AB018347   | 60854.48  | 58652.395 | AF119862  | 21429.99  | 14504.479 |
| AF190500   | 290.914   | 328.9     | AB033073   | 43843.922 | 38442.211 | U17628    | 1750.29   | 1112.253  |
| NM_001616  | 283.027   | 473.271   | NM_003284  | 30301.609 | 27987.314 | AF119867  | 15273.907 | 10696.809 |
| NM_005904  | 582.13    | 752.652   | NM_018152  | 2589.249  | 2027.62   | AL357205  | 6952.829  | 9822.11   |
| NM_005273  | 14170.585 | 19895.039 | NM_000319  | 12024.731 | 9657.673  | AF124819  | 1248.014  | 793.025   |
| NM_000524  | 477.155   | 1035.023  | NM_003257  | 1077.634  | 1042.809  | D17091    | 2224.057  | 1478.103  |
| NM_006576  | 3998.259  | 3675.646  | NM_012461  | 11935.197 | 11220.281 | AL133074  | 1116.594  | 683.618   |
| AB035266   | 9949.34   | 9881.119  | AK001379   | 6532.24   | 7204.778  | AF086318  | 18406.371 | 14011.313 |
| NM_003744  | 5154.586  | 3964.651  | NM_017450  | 11688.105 | 11234.046 | AF088012  | 765.912   | 582.325   |
| NM_006378  | 2867.162  | 2629.281  | NM_002023  | 3548.601  | 3419.413  | NM_018121 | 1112.533  | 971.331   |
| NM_018132  | 1043.774  | 1043.411  | NM_002839  | 9136.288  | 7846.86   | AB050477  | 6851.394  | 5446.248  |
| NM_018207  | 2888.535  | 3830.468  | AF190500   | 3449.324  | 3329.08   | AK000152  | 2838.475  | 2649.866  |
| NM_000345  | 48568.617 | 51383.691 | NM_001616  | 912.179   | 1079.578  | AK024300  | 2400.845  | 1916.277  |
| NM_001862  | 50641.059 | 56147.156 | NM_005904  | 1555.276  | 1836.332  | L09092    | 1472.769  | 1372.177  |
| NM_006531  | 2496.902  | 2393.066  | NM_005273  | 56597.34  | 53116.254 | NM_012132 | 1251.563  | 1183.102  |
| NM_002779  | 2981.359  | 4693.064  | NM_000524  | 1325.438  | 1297.363  | NM_012129 | 2356.782  | 1939.354  |
| L40397     | 10972.732 | 18762.834 | NM_007072  | 15154.623 | 18037.318 | AK025716  | 2199.088  | 2030.997  |
| NM_020198  | 6940.612  | 9882.139  | NM_012320  | 9973.86   | 13155.491 | AF090947  | 5387.372  | 3889.591  |
| AA098879   | 407.374   | 871.848   | NM_018208  | 6706.81   | 8637.099  | NM_005047 | 1805.37   | 1530.061  |

|           |           |           |           |           |           |           |           |           |
|-----------|-----------|-----------|-----------|-----------|-----------|-----------|-----------|-----------|
| AF070525  | 9032.382  | 24009.875 | NM_015929 | 8984.73   | 11421.48  | AJ272196  | 22721.496 | 17219.123 |
| NM_001177 | 2874.002  | 5521.402  | U90653    | 19121.803 | 22338.967 | AF116662  | 855.773   | 738.381   |
| NM_014447 | 1868.388  | 2712.527  | NM_000196 | 1399.318  | 1864.673  | X58162    | 25764.789 | 31594.953 |
| NM_002356 | 459.682   | 533.586   | NM_018339 | 8838.142  | 12322.821 | AK022825  | 3369.751  | 2664.098  |
| NM_006691 | 785.98    | 903.366   | NM_006745 | 33328.188 | 42393.344 | AK021988  | 14134.487 | 10573.605 |
| NM_001505 | 867.554   | 916.383   | NM_000275 | 2715.681  | 3489.356  | AF086494  | 42268.531 | 31826.377 |
| NM_003710 | 2064.215  | 2562.33   | AK000037  | 5364.891  | 4201.703  | BI769977  | 1051.754  | 1109.236  |
| Z83805    | 501.521   | 654.042   | NM_014760 | 5418.903  | 4873.823  | AL137567  | 4375.514  | 3901.031  |
| NM_004666 | 799.09    | 1354.366  | NM_018713 | 3898.233  | 4013.459  | AK024913  | 2706.235  | 2555.803  |
| NM_003614 | 4556.206  | 4902.688  | AJ006268  | 2075.653  | 2348.285  | AB007961  | 6501.35   | 5002.521  |
| NM_014257 | 7697.49   | 9371.912  | AF190864  | 13338.701 | 12954.755 | NM_005547 | 2460.638  | 1906.957  |
| NM_001140 | 1036.034  | 1292.507  | NM_001177 | 7258.385  | 9763.442  | NM_001173 | 1540.41   | 876.671   |
| NM_004843 | 1412.184  | 1912.775  | NM_014447 | 4543.348  | 5492.139  | AB020656  | 1940.589  | 1455.615  |
| AK022845  | 703.759   | 683.091   | NM_002356 | 3508.301  | 3121.696  | AK023648  | 4636.602  | 4106.358  |
| NM_003004 | 290.973   | 610.36    | NM_006691 | 4703.951  | 4909.199  | NM_000412 | 1311.49   | 956.779   |
| S77835    | 1127.977  | 1182.917  | NM_001505 | 2629.402  | 2440.716  | AF077033  | 3296.25   | 2604.551  |
| NM_002985 | 2084.838  | 2429.094  | NM_003710 | 40948.738 | 39633.629 | D50406    | 748.471   | 605.398   |
| AB018347  | 18410.729 | 19565.156 | Z83805    | 2467.175  | 1941.625  | NM_004991 | 1216.327  | 1083.643  |
| AB033073  | 7854.388  | 7224.084  | NM_004666 | 2698.512  | 2472.993  | AK026708  | 9756.058  | 7029.853  |
| NM_003284 | 5454.225  | 4835.385  | NM_003614 | 28819.219 | 24960.734 | NM_017903 | 4679.391  | 4231.193  |
| NM_003909 | 3020.305  | 5883.294  | NM_014257 | 22976.242 | 20281.672 | NM_018074 | 2957.365  | 2642.803  |
| NM_001277 | 5439.845  | 8436.499  | NM_000025 | 48508.848 | 55624.102 | NM_000909 | 5387.269  | 4738.928  |
| NM_003659 | 2977.961  | 5770.85   | D38521    | 11336.554 | 14306.984 | AK024828  | 1742.158  | 1925.053  |
| NM_007072 | 1298.5    | 3885.318  | NM_000403 | 51469.906 | 52253.816 | AF009315  | 3362.603  | 3336.927  |
| NM_018208 | 1992.95   | 3925.9    | NM_018127 | 29840.412 | 41419.949 | NM_006783 | 696.654   | 708.564   |
| NM_015929 | 3911.65   | 6903.265  | AB020677  | 36304.055 | 41385.742 | L37711    | 780.223   | 693.919   |
| U90653    | 8869.681  | 10576.057 | AB033097  | 16595.164 | 18188.313 | S70313    | 21604.773 | 16625.113 |
| NM_000196 | 674.242   | 682.354   | NM_000135 | 11806.361 | 14954.945 | AK021607  | 1520.475  | 1597.859  |
| NM_018339 | 2896.378  | 3911.33   | AJ223948  | 20849.031 | 28133.23  | AK025860  | 631.611   | 493.696   |
| NM_006745 | 15533.047 | 21556.656 | NM_016218 | 1360.246  | 2144.534  | AF135960  | 2584.973  | 1474.201  |
| NM_000275 | 1094.309  | 1506.921  | AK022947  | 3779.376  | 5055.473  | NM_014216 | 28661.158 | 27292.695 |
| AK000037  | 1153.589  | 891.987   | AL050029  | 5570.818  | 5313.745  | NM_003010 | 3026.138  | 2339.944  |
| NM_014760 | 2279.725  | 2799.23   | AL049966  | 1507.708  | 1765.652  | NM_006871 | 1817.315  | 1494.684  |
| NM_018398 | 806.296   | 1068.378  | NM_005204 | 17761.137 | 19813.416 | NM_019074 | 6321.038  | 6075.016  |
| NM_002560 | 39776.09  | 40098.898 | NM_016203 | 3095.866  | 4476.315  | NM_018494 | 69263.367 | 62335.676 |
| NM_014404 | 2343.256  | 2984.468  | NM_002759 | 8760.102  | 9899.669  | AK000006  | 999.13    | 965.657   |
| NM_018713 | 1046.548  | 1504.491  | NM_007271 | 6554.16   | 7978.494  | NM_001115 | 2839.915  | 2341.431  |
| NM_015947 | 8634.273  | 10362.129 | NM_006255 | 9200.657  | 9616.464  | NM_014921 | 1557.359  | 1063.118  |
| NM_002042 | 45807.234 | 54009.535 | BE392143  | 13660.138 | 16877.742 | NM_016581 | 64061.781 | 61340.16  |
| AB028944  | 609.026   | 676.534   | NM_005813 | 9319.427  | 10632.771 | NM_013255 | 2028.424  | 2061.052  |
| AJ006268  | 908.499   | 1176.439  | AB037718  | 23914.098 | 26534.848 | NM_007183 | 996.108   | 544.394   |
| M74089    | 4825.68   | 5996.679  | AL389994  | 4244.17   | 4117.717  | AJ238243  | 15808.204 | 13151.111 |
| AF190864  | 5583.253  | 5861.453  | NM_003909 | 11229.325 | 11548.689 | J05046    | 35491.898 | 27211.449 |
| NM_000025 | 5841.555  | 9660.004  | NM_001277 | 31527.924 | 36285.883 | NM_012318 | 3396.046  | 3055.03   |
| NM_000403 | 3180.843  | 4331.363  | NM_003659 | 22952.07  | 26430.621 | NM_002751 | 15076.246 | 12591.01  |
| NM_018127 | 10352.959 | 13427.084 | NM_001862 | 57134.008 | 62742.5   | NM_004291 | 4680.946  | 3830.093  |
| AB020677  | 1792.519  | 2097.285  | NM_006531 | 15031.538 | 17573.514 | NM_004912 | 3560.883  | 2655.338  |
| AB033097  | 1469.7    | 1874.801  | AB029021  | 59576.402 | 65346.117 | U79304    | 16671.266 | 13436.211 |
| NM_000135 | 1129.412  | 1341.031  | NM_002101 | 5381.886  | 5896.972  | NM_016267 | 5234.145  | 4189.775  |
| AJ223948  | 5352.584  | 9157.24   | NM_005423 | 2479.825  | 3090.546  | NM_004671 | 7112.039  | 5751.947  |
| NM_016218 | 660.585   | 919.988   | Z36789    | 1223.696  | 1354.104  | NM_006526 | 4615.356  | 4655.61   |
| AK022947  | 1662.84   | 2584.991  | J02874    | 25692.43  | 28497.654 | U35622    | 707.306   | 776.501   |
| AL050029  | 1649.865  | 2100.025  | BF310427  | 38078.383 | 42157.305 | NM_007045 | 2415.985  | 2319.508  |

|           |           |           |            |           |           |           |           |           |
|-----------|-----------|-----------|------------|-----------|-----------|-----------|-----------|-----------|
| AL049966  | 509.079   | 746.847   | N94424     | 2481.904  | 3103.574  | NM_003627 | 6952.864  | 5933.562  |
| NM_005204 | 7085.827  | 7799.442  | AA045192   | 11474.003 | 12569.964 | NM_012145 | 26229.496 | 20859.793 |
| NM_016203 | 1253.127  | 1480.244  | AI521645   | 1271.152  | 1747.37   | AF305779  | 2286.201  | 2315.575  |
| NM_002759 | 3017.251  | 3468.441  | H45617     | 2571.392  | 3465.409  | AF225416  | 8748.763  | 8012.794  |
| NM_007271 | 2552.411  | 3089.527  | M92642     | 25207.33  | 28775.234 | NM_016231 | 3503.572  | 3612.784  |
| NM_006255 | 3236.785  | 4705.716  | H-U 44385  | 57726.012 | 57774.086 | NM_002093 | 4551.784  | 3721.928  |
| BE392143  | 4407.916  | 5262.933  | ID 1654970 | 28519.883 | 37182.629 | AB042555  | 21413.533 | 15776.458 |
| NM_005813 | 3301.142  | 3863.584  | ID 2531132 | 31468.502 | 40828.117 | NM_001729 | 2407.654  | 2346.316  |
| AB037718  | 6581.121  | 8306.766  | ID 4365538 | 4858.614  | 5787.072  | NM_017763 | 2370.719  | 2163.375  |
| AL389994  | 1270.996  | 1845.092  | AA485665   | 1619.329  | 2124.32   | NM_013975 | 3475.709  | 3348.711  |
| CY3Cy5    | 5096.125  | 263.14    | BF125928   | 30452.316 | 40665.395 | NM_003843 | 12505.496 | 12423.713 |
| NM_000585 | 16972.031 | 13311.849 | BG571026   | 10025.785 | 10912.769 | NM_012216 | 2930.414  | 2866.733  |
| AF143872  | 26845.348 | 17571.48  | AA489017   | 30447.809 | 38176.938 | NM_016376 | 34967.383 | 30418.088 |
| AK025686  | 444.672   | 287.07    | NM_004843  | 3912.295  | 5033.243  | AB046848  | 13308.687 | 11924.607 |
| AF143326  | 2207.934  | 1641.786  | AK022845   | 2827.438  | 3431.508  | AL133057  | 7149.152  | 6554.188  |
| AL049229  | 2453.474  | 1946.708  | NM_003004  | 1982.141  | 2206.606  | U04845    | 10534.286 | 10961.932 |
| NM_018306 | 79425.906 | 58200.363 | S77835     | 2733.623  | 3087.472  | NM_018103 | 7371.047  | 7834.92   |
| AK026146  | 3639.712  | 2561.826  | NM_002985  | 4467.642  | 4858.608  | NM_000312 | 4995.443  | 4590.373  |
| AK023152  | 4573.292  | 3160.448  | AB018347   | 59645.258 | 55386.559 | NM_003963 | 2698.487  | 2446.953  |
| AL389937  | 2659.697  | 1541.752  | AB033073   | 42943.738 | 47586.684 | AC009729  | 777.453   | 632.357   |
| AK025201  | 3932.25   | 3472.042  | NM_003284  | 31990.68  | 34512.336 | NM_016595 | 3748.616  | 2858.139  |
| AK021927  | 527.841   | 441.718   | NM_018152  | 3316.417  | 4483.28   | BE874867  | 68277.25  | 63430.781 |
| AK022995  | 2004.725  | 1674.571  | NM_000319  | 12890.824 | 16400.359 | AL136719  | 5356.847  | 4872.949  |
| NM_000585 | 13919.578 | 13872.643 | NM_003257  | 1616.551  | 2126.458  | NM_014105 | 8790.127  | 8799.572  |
| SR1       | 73878.891 | 64989.883 | NM_012461  | 11897.083 | 15881.854 | NM_012160 | 3921.711  | 3330.055  |
| SR3       | 38712.383 | 32048.25  | AK001379   | 6151.631  | 7151.975  | NM_006357 | 66453.32  | 65369.348 |
| SR5       | 4387.366  | 5242.298  | NM_017450  | 11858.745 | 12315.908 | NM_014245 | 57501.016 | 52574.781 |
| SR7       | 4498.282  | 30952.52  | NM_002023  | 3603.125  | 3987.058  | AK027070  | 3536.76   | 3462.469  |
| SR9       | 13235.253 | 2390.965  | NM_002839  | 6575.701  | 7984.123  | AF129533  | 1494.831  | 1402.703  |
| CY3Cy5    | 4769.519  | 242.566   | AF190500   | 4560.771  | 5747.289  | NM_003341 | 15360.972 | 15649.339 |
| L13433    | 1705.032  | 1209.547  | NM_001616  | 1093.509  | 1753.688  | NM_017785 | 1946.665  | 2575.552  |
| NM_007220 | 1396.645  | 1022.638  | NM_005904  | 1471.447  | 2549.856  | NM_006245 | 9845.375  | 8331.383  |
| NM_017777 | 2015.63   | 1709.023  | NM_005273  | 58757.289 | 57270.906 | NM_018315 | 877.132   | 837.816   |
| AK001499  | 4588.072  | 2397.66   | NM_000524  | 1113.191  | 1670.575  | NM_006835 | 1357.512  | 1152.71   |
| AK026852  | 1221.787  | 1036.634  | NM_018645  | 631.692   | 854.809   | NM_000223 | 1024.627  | 1785.821  |
| AK021629  | 1048.536  | 1052.795  | NM_018207  | 9182.248  | 10937.203 | AF119256  | 2980.234  | 2985.572  |
| AL110257  | 63353.012 | 48225.457 | NM_000345  | 62926.938 | 63598.754 | NM_007015 | 1043.844  | 1100.476  |
| AB013384  | 2932.596  | 2931.251  | NM_018205  | 6087.358  | 5607.639  | NM_005180 | 8550.606  | 11017.1   |
| AK024824  | 1103.967  | 887.385   | NM_015929  | 7537.349  | 8266.838  | NM_003410 | 11625.435 | 10798.87  |
| AK024270  | 4198.569  | 4322.534  | U90653     | 17137.896 | 15989.553 | NM_007145 | 2396.721  | 1968.991  |
| AK025569  | 6296.933  | 5713.739  | NM_000196  | 1559.009  | 2376.98   | NM_002225 | 3277.436  | 2889.17   |
| AK023060  | 1667.426  | 1459.133  | NM_018339  | 8372.814  | 8611.043  | S69027    | 7079.57   | 6068.378  |
| NM_014870 | 1173.199  | 1058.641  | NM_006745  | 33229.031 | 35572.449 | NM_012119 | 10052.144 | 8054.189  |
| AK021917  | 1018.157  | 1270.167  | NM_000275  | 3521.072  | 3491.012  | X99631    | 27098.117 | 26650.828 |
| AF052146  | 54758.531 | 40667.758 | AK000037   | 5054.949  | 4025.389  | NM_001730 | 4279.521  | 4504.994  |
| NM_004870 | 7233.648  | 7233.163  | NM_014760  | 5830.929  | 6048.617  | AK026290  | 7351.397  | 6169.422  |
| AK024242  | 26200.127 | 20683.193 | NM_018713  | 4583.832  | 5771.882  | AB014589  | 2628.358  | 2776.07   |
| AK024559  | 1804.572  | 1665.665  | AJ006268   | 3003.507  | 3882.159  | AF248649  | 1544.63   | 1413.232  |
| AK024851  | 1265.426  | 1146.853  | AF190864   | 14602.872 | 15988.202 | U37146    | 49907.102 | 49438.215 |
| AK024943  | 601.38    | 622.793   | NM_001177  | 7145.633  | 8820.837  | NM_012085 | 2723.257  | 3650.93   |
| AK024995  | 328.452   | 246.819   | NM_014447  | 4409.515  | 4984.033  | AB040431  | 17039.434 | 17011.527 |
| AK022628  | 63871.5   | 52207.668 | NM_002356  | 3644.803  | 3417.128  | NM_000991 | 63096.16  | 63009.609 |
| AK021737  | 12238.789 | 8503.646  | NM_006691  | 5241.371  | 6786.183  | NM_016034 | 42236.059 | 42132.363 |

|           |           |           |            |           |           |           |           |           |
|-----------|-----------|-----------|------------|-----------|-----------|-----------|-----------|-----------|
| AL357454  | 521.139   | 515.222   | NM_001505  | 2403.326  | 2269.481  | NM_018285 | 26856.861 | 26096.803 |
| AK026295  | 1682.274  | 1457.062  | NM_003710  | 42077.676 | 45330.414 | AK022393  | 19331.73  | 15415.699 |
| AK022346  | 590.368   | 526.673   | Z83805     | 2528.173  | 2925.227  | AK026302  | 19437.832 | 13455.276 |
| AK025007  | 3118.405  | 2566.842  | NM_004666  | 3236.868  | 3468.789  | NM_012214 | 4651.746  | 4688.009  |
| NM_016486 | 9201.193  | 6960.244  | NM_003614  | 32951.516 | 36671.98  | AF049656  | 47211.926 | 48159.223 |
| AL117601  | 560.067   | 484.504   | NM_014257  | 23817.184 | 25674.637 | NM_001966 | 3574.308  | 3113.975  |
| AK026490  | 61707.781 | 53517.457 | NM_001140  | 3286.681  | 3800.239  | NM_016135 | 6009.13   | 5127.944  |
| AJ227861  | 2606.342  | 2235.005  | NM_000403  | 47656.129 | 38250.563 | Z36833    | 68008.305 | 65116.32  |
| AJ001020  | 523.696   | 484.817   | NM_018127  | 28180.033 | 30999.855 | NM_014355 | 11824.114 | 11377.657 |
| NM_005553 | 1039.104  | 928.529   | AB020677   | 34750.227 | 34991.363 | M21191    | 45426.879 | 50621.137 |
| AJ001875  | 2231.174  | 2084.308  | AB033097   | 15033.884 | 12001.334 | AF072810  | 1974.895  | 2016.295  |
| X64985    | 519.899   | 958.602   | NM_000135  | 10704.79  | 7893.388  | L19778    | 1598.448  | 1049.875  |
| Y10507    | 732.636   | 977.198   | AJ223948   | 18435.398 | 15728.523 | AF174482  | 39720.648 | 43011.504 |
| AK002028  | 64841.121 | 42939.305 | NM_016218  | 1369.617  | 1379.534  | Y08836    | 443.744   | 607.89    |
| AL050127  | 4141.082  | 3184.028  | AK022947   | 3572.099  | 3825.86   | NM_003528 | 14959.925 | 12028.268 |
| AK024805  | 9943.293  | 7917.227  | AL050029   | 4920.149  | 4355.745  | NM_017765 | 1633.942  | 1548.458  |
| AK001423  | 1889.303  | 1210.882  | AL049966   | 1266.918  | 1192.382  | D85131    | 14396.835 | 12528.636 |
| AK021989  | 489.64    | 229.992   | NM_005204  | 15647.237 | 14522.953 | NM_004956 | 1655.127  | 1485.092  |
| NM_018625 | 1201.594  | 1199.264  | NM_016203  | 2787.151  | 2523.904  | D30612    | 9023.074  | 7595.542  |
| AK022298  | 6579.458  | 6781.836  | NM_002759  | 8188.031  | 7121.314  | NM_002163 | 10882.357 | 9990.377  |
| AJ277441  | 53285.969 | 40551.332 | NM_007271  | 5547.036  | 4714.922  | U52097    | 20184.736 | 17994.559 |
| NM_006057 | 2136.071  | 1788.454  | NM_006255  | 8018.353  | 7954.995  | NM_003416 | 2968.465  | 3568.682  |
| AK025784  | 50834.32  | 37004.063 | BE392143   | 12541.026 | 11736.501 | X74497    | 2623.636  | 2774.8    |
| U07199    | 7458.477  | 4954.155  | NM_005813  | 8171.79   | 7319.369  | NM_012210 | 1875.855  | 1566.635  |
| AK023713  | 2041.943  | 1634.15   | AB037718   | 17418.166 | 18096.158 | U10072    | 3370.174  | 2629.069  |
| X81445    | 1615.216  | 1244.689  | AL389994   | 3174.068  | 3462.623  | AF222749  | 23983.475 | 21597.299 |
| U95091    | 2800.418  | 1776.927  | NM_003909  | 10871.438 | 10413.454 | NM_001321 | 12528.058 | 8305.645  |
| NM_017900 | 47821.5   | 34344.172 | NM_001277  | 35093.789 | 40217.027 | AB018264  | 11986.42  | 8628.331  |
| S50182    | 1913.717  | 1540.995  | NM_003659  | 18364.609 | 19444.279 | NM_006911 | 1214.852  | 1422.454  |
| AL360145  | 1392.627  | 1102.113  | NM_007072  | 12337.24  | 15739.356 | U92544    | 6477.653  | 7898.429  |
| Y12016    | 3453.655  | 2757.77   | NM_012320  | 8319.785  | 11020.818 | NM_019644 | 1365.376  | 1452.433  |
| S75763    | 66096.969 | 63973.902 | AB029021   | 59065.113 | 60480.945 | NM_006791 | 3681.427  | 3928.554  |
| NM_000534 | 3935.172  | 3826.683  | NM_002101  | 3948.555  | 3672.853  | AJ278348  | 39127.418 | 39903.883 |
| L10140    | 771.195   | 864.324   | NM_005423  | 2285.898  | 3368.508  | NM_015872 | 878.135   | 948.472   |
| AL133447  | 1984.828  | 1962.713  | Z36789     | 903.413   | 871.322   | AI285199  | 16649.488 | 14339.74  |
| AB037853  | 54208.793 | 51703.957 | J02874     | 25924.199 | 26451.178 | L07738    | 2576.931  | 2580.568  |
| D28450    | 58655.617 | 57848.301 | BF310427   | 39619.043 | 40970.508 | Z48054    | 6462.808  | 7015.993  |
| AK056222  | 3825.849  | 4328.94   | N94424     | 2448.537  | 2517.132  | H90415    | 12248.188 | 12056.228 |
| L37700    | 1484.175  | 1239.086  | AA045192   | 10061.021 | 10866.602 | AA676470  | 56916.07  | 51983.324 |
| NM_017665 | 6017.213  | 4203.069  | AI521645   | 1618.597  | 2790.926  | AA430512  | 11533.463 | 9605.522  |
| AB007966  | 462.674   | 437.778   | H45617     | 3072.294  | 3087.351  | M38258    | 1624.416  | 1588.774  |
| AB007976  | 939.494   | 747.458   | M92642     | 24170.936 | 20977.754 | AA457155  | 60029.383 | 58799.961 |
| AK024819  | 617.974   | 492.544   | H-U 44385  | 54875.086 | 47433.23  | BM014365  | 1743.566  | 1350.979  |
| AF052106  | 5244.224  | 3779.378  | ID 1654970 | 29274.826 | 19721.705 | H91842    | 974.268   | 904.572   |
| AK000441  | 1016.411  | 703.303   | ID 2531132 | 30716.57  | 24245.096 | U78045    | 4667.16   | 4612.009  |
| AK022391  | 1924.133  | 1860.147  | ID 4365538 | 4533.841  | 4704.86   | AA878561  | 61352.066 | 57913.23  |
| NM_016167 | 5157.175  | 4155.37   | AA485665   | 1496.878  | 1523.152  | BF688309  | 3601.16   | 2804.908  |
| NM_016125 | 937.095   | 965.676   | BF125928   | 29228.107 | 24750.852 | AI538525  | 2151.311  | 1720.734  |
| AK024090  | 27941.502 | 20845.465 | BG571026   | 8538.499  | 6809.107  | NM_005205 | 64474.055 | 58962.305 |
| AL133574  | 5202.251  | 4513.146  | AA489017   | 26707.09  | 25466.02  | BE878426  | 60270.305 | 59599.805 |
| AK021936  | 1256.363  | 1334.619  | NM_000025  | 41024.637 | 49919.805 | NM_001745 | 41013.582 | 43442.309 |
| AL390181  | 57612.336 | 54188.938 | D38521     | 9988.463  | 12220.422 | NM_003825 | 14414.07  | 15073.979 |
| NM_017914 | 49410.293 | 49050.539 | NM_018152  | 2916.148  | 2931.183  | AK025006  | 13795.34  | 15357.558 |

|           |           |           |           |           |           |           |           |           |
|-----------|-----------|-----------|-----------|-----------|-----------|-----------|-----------|-----------|
| NM_00635C | 629.072   | 1150.078  | NM_000319 | 11790.501 | 17779.795 | AF218014  | 43870.184 | 48878.664 |
| AK024953  | 11876.731 | 14138.521 | NM_003257 | 1166.099  | 1785.537  | NM_00667E | 12091.078 | 10679.414 |
| AK024276  | 4376.351  | 4536.235  | NM_012461 | 12304.452 | 15694.128 | AY007729  | 58468.379 | 54964.266 |
| S83374    | 3892.56   | 4153.966  | AK001379  | 6335.019  | 6329.416  | NM_014424 | 963.998   | 731.746   |
| AL161979  | 405.431   | 1125.882  | NM_01745C | 11665.988 | 13577.76  | AF159092  | 2588.593  | 2872.482  |
| NM_00315C | 2115.643  | 1919.365  | NM_002023 | 3902.267  | 5349.783  | BC007318  | 5298.177  | 6087.274  |
| NM_014784 | 2873.274  | 2010.298  | NM_002839 | 9014.358  | 12393.938 | M36693    | 12398.596 | 11277.343 |
| AK026383  | 3813.937  | 3375.952  | AF190500  | 4014.107  | 4884.765  | NM_016292 | 26519.287 | 26196.305 |
| AK023821  | 481.438   | 395.977   | NM_00161E | 3242.663  | 3243.801  | NM_002601 | 8163.313  | 6410.336  |
| AB014594  | 3707.931  | 2975.119  | NM_005904 | 2051.472  | 2226.441  | NM_001781 | 1868.788  | 2137.253  |
| M94547    | 1478.863  | 1454.534  | NM_005273 | 53969.43  | 54537.883 | NM_014432 | 6344.096  | 6208.107  |
| NM_005087 | 16292.194 | 12053.207 | NM_000524 | 1709.319  | 1601.281  | NM_00155E | 6189.056  | 5262.238  |
| NM_01209E | 3048.882  | 2763.645  | NM_00657E | 48649.934 | 38697.008 | NM_00253C | 1217.465  | 1112.577  |
| NM_01809E | 2195.86   | 2001.746  | NM_01864E | 2660.99   | 1730.132  | NM_018941 | 3378.895  | 2906.777  |
| AB023164  | 4949.27   | 4282.946  | NM_014682 | 813.051   | 1041.452  | NM_00589E | 24243.793 | 21167.143 |
| NM_001178 | 711.646   | 822.524   | AB035266  | 47396.641 | 47669.133 | NM_00288E | 60460.93  | 60450.121 |
| AK023696  | 14936.824 | 13218.536 | NM_003744 | 18142.9   | 14517.098 | AF078866  | 1717.024  | 1356.201  |
| NM_000704 | 2359.423  | 2362.233  | NM_00637E | 7478.568  | 5433.195  | BF311880  | 40703.703 | 51832.141 |
| NM_015987 | 908.146   | 758.543   | NM_018132 | 2486.889  | 2053.601  | NM_00007E | 656.236   | 895.134   |
| NM_01960E | 2841.748  | 3473.01   | NM_003061 | 627.8     | 923.178   | NM_01607E | 743.318   | 646.194   |
| NM_01536E | 1317.518  | 1559.596  | NM_018207 | 10488.059 | 12050.468 | NM_00136C | 16320.9   | 13329.471 |
| Z49090    | 10969.473 | 12305.485 | NM_00034E | 58926.449 | 66098.867 | AK026656  | 15327.574 | 14322.692 |
| AK021592  | 9626.812  | 9112.409  | NM_001862 | 61580.633 | 62731.648 | NM_000751 | 55083.129 | 51983.313 |
| AK025467  | 8298.934  | 9161.037  | NM_006531 | 12590.229 | 11730.721 | NM_005071 | 1848.421  | 1992.942  |
| AK026593  | 10405.297 | 11989.907 | NM_002779 | 15074.758 | 11909.459 | NM_01673C | 58466.41  | 58528.352 |
| AL117666  | 1768.332  | 2092.151  | L40397    | 35162.688 | 48855.133 | AL035297  | 1992.367  | 1739.483  |
| Y17865    | 3692.223  | 2564.948  | NM_02019E | 61880.027 | 60066.449 | NM_00440E | 9516.34   | 8894.038  |
| NM_00582E | 33488.063 | 22523.596 | AA098879  | 1714.47   | 1949.526  | AJ131244  | 2822.017  | 2609.306  |
| NM_00275E | 9979.24   | 8034.55   | AF070525  | 21187.131 | 24717.391 | NM_002532 | 9177.201  | 9238.835  |
| U79299    | 486.437   | 536.471   | NM_001177 | 7720.077  | 11035.727 | NM_01238E | 9415.059  | 11195.187 |
| AJ000414  | 1289.762  | 1271.518  | NM_014447 | 4158.509  | 6412.229  | NM_016651 | 2423.506  | 3902.306  |
| AK025674  | 22857.273 | 18667.93  | NM_00235E | 3823.687  | 5664.646  | NM_001671 | 1817.188  | 2028.364  |
| AF007194  | 14412.732 | 11484.396 | NM_006691 | 4398.69   | 5531.479  | NM_019843 | 5099.935  | 4962.273  |
| NM_01906E | 2227.651  | 1882.909  | NM_00150E | 2656.959  | 2360.094  | NM_016192 | 10515.961 | 13453.099 |
| NM_004761 | 5680.542  | 5719.421  | NM_00371C | 36865.418 | 36202.754 | AB046774  | 1109.527  | 1010.366  |
| Z25424    | 6177.708  | 5106.299  | Z83805    | 1964.123  | 2075.277  | AK022385  | 51222.488 | 43731.871 |
| U79458    | 6962.854  | 6196.156  | NM_00466E | 2591.291  | 2029.085  | NM_00277E | 973.863   | 1470.653  |
| NM_01492C | 845.761   | 841.586   | NM_003614 | 33957.539 | 27495.965 | AK024584  | 11995.028 | 10715.906 |
| NM_002961 | 6662.927  | 3617.905  | NM_014257 | 24352.525 | 20039.885 | NM_003504 | 7555.693  | 8909.452  |
| NM_01829E | 1638.448  | 1787.211  | NM_00114C | 3112.632  | 3165.914  | NM_01329E | 7843.609  | 9244.754  |
| NM_00067E | 4317.645  | 3919.269  | NM_004843 | 4097.954  | 4467.334  | NM_007267 | 3325.151  | 4455.571  |
| NM_00576E | 1625.354  | 2558.626  | AK022845  | 3005.506  | 2740.12   | AK022830  | 288.005   | 515.776   |
| AL117612  | 1269.3    | 1218.561  | NM_003004 | 1100.039  | 1160.475  | Z36816    | 8547.586  | 9089.119  |
| NM_013324 | 5507.115  | 6367.085  | S77835    | 2136.539  | 1834.699  | NM_00586E | 11997.295 | 11662.845 |
| AL133022  | 1199.793  | 1484.876  | NM_00298E | 4436.948  | 5070.432  | NM_006413 | 12628.68  | 12313.531 |
| NM_006301 | 883.344   | 1276.42   | AB018347  | 56729.387 | 58125.91  | NM_017684 | 680.25    | 727.461   |
| NM_01221E | 990.95    | 1132.174  | AB033073  | 37822.93  | 42273.855 | AK025542  | 6332.28   | 5965.485  |
| X72887    | 1655.106  | 1252.372  | NM_003284 | 26780.258 | 30376.799 | AF207547  | 1049.428  | 1162.98   |
| NM_00452E | 2140.419  | 1794.709  | NM_00390E | 9300.464  | 9664.428  | NM_00276E | 17117.506 | 15045.911 |
| NM_000127 | 1571.201  | 1221.871  | NM_001277 | 37638.844 | 33250.273 | NM_003691 | 2088.676  | 2366.044  |
| Y10483    | 32042.527 | 22468.262 | NM_00365E | 19439.377 | 18301.467 | NM_00295C | 19864.426 | 19301.244 |
| NM_006784 | 2843.111  | 2324.964  | NM_007072 | 14279.259 | 13476.757 | NM_00231E | 7421.394  | 7630.542  |
| NM_01787E | 2832.757  | 2200.877  | NM_01232C | 9490.758  | 8724.392  | NM_001433 | 6905.177  | 6852.353  |

|           |           |           |           |           |           |           |           |           |
|-----------|-----------|-----------|-----------|-----------|-----------|-----------|-----------|-----------|
| NM_001087 | 53255.438 | 59328.363 | NM_018208 | 6500.612  | 7835.452  | NM_003134 | 56561.941 | 53095.453 |
| NM_001826 | 487.068   | 572.231   | NM_015929 | 9698.735  | 14219.892 | NM_004314 | 4871.52   | 4710.033  |
| AK025352  | 603.097   | 715.047   | U90653    | 17478.379 | 22160.402 | NM_018247 | 15391.367 | 13098.562 |
| NM_003721 | 8933.998  | 8139.064  | NM_000196 | 1270.164  | 2013.359  | NM_017979 | 9389.188  | 8224.211  |
| NM_004724 | 1465.313  | 1616.71   | AK000037  | 5377.316  | 4234.603  | NM_006911 | 897.812   | 979.159   |
| NM_001431 | 7737.455  | 7549.34   | NM_014760 | 5564.922  | 4598.859  | U92544    | 6892.421  | 8169.492  |
| NM_000381 | 912.584   | 1003.165  | NM_018398 | 3030.497  | 3146.069  | NM_019644 | 1403.202  | 1668.418  |
| NM_000427 | 3286.834  | 4171.893  | NM_002560 | 63062.227 | 58947.758 | NM_006791 | 3731.115  | 4889.918  |
| NM_014924 | 1248.812  | 1529.001  | NM_014404 | 19728.801 | 16114.019 | AJ278348  | 38274.449 | 49668.355 |
| NM_006946 | 1660.996  | 1999.861  | NM_018713 | 5155.146  | 4719.526  | NM_015872 | 1842.795  | 2406.512  |
| NM_002508 | 1435.117  | 1856.153  | NM_015947 | 21617.184 | 23492.92  | AI285199  | 17441.311 | 23122.314 |
| NM_014343 | 5905.454  | 7734.063  | NM_002042 | 60336.457 | 59278.539 | AA757170  | 662.809   | 731.868   |
| NM_002338 | 7807.831  | 8580.025  | AB028944  | 1919.722  | 2414.559  | L07738    | 2546.906  | 2580.297  |
| AF022913  | 2180.976  | 2674.917  | AJ006268  | 2303.035  | 3318.399  | Z48054    | 5508.599  | 6576.055  |
| NM_000028 | 1785.666  | 1536.188  | M74089    | 8774.286  | 12185.169 | H90415    | 12484.63  | 10869.226 |
| NM_001382 | 11922.592 | 8221.834  | AF190864  | 14484.193 | 18823.238 | AA676470  | 52748.098 | 51906.934 |
| M93718    | 11152.295 | 6883.497  | NM_000025 | 45875.043 | 42162.961 | AA430512  | 10164.243 | 9106.206  |
| NM_005386 | 2652.212  | 2293.17   | D38521    | 9676.609  | 8127.005  | M38258    | 1386.122  | 1630.053  |
| AK023807  | 21514.848 | 17364.285 | NM_000403 | 45571.148 | 42777.094 | AA457155  | 56859.152 | 53772.41  |
| NM_018188 | 22377.887 | 18649.762 | NM_018127 | 27422.805 | 42285.215 | BM014365  | 1320.293  | 1212.252  |
| AK024273  | 2316.811  | 1553.432  | AB020677  | 33465.578 | 36632.383 | H91842    | 1407.765  | 1580.783  |
| X59417    | 23389.84  | 21822.271 | AL049966  | 1904.028  | 2174.835  | U78045    | 5244.842  | 4970.443  |
| NM_005658 | 55941.738 | 60310.664 | NM_005204 | 16008.354 | 13601.799 | AA878561  | 62482.938 | 58459.477 |
| D28476    | 6168.146  | 5780.292  | NM_016203 | 3407.88   | 3162.14   | BF688309  | 2720.572  | 3658.72   |
| NM_016263 | 6376.358  | 5509.127  | NM_002759 | 8449.28   | 7310.442  | AI538525  | 1566.797  | 1509.425  |
| NM_003335 | 50052.941 | 44380.227 | NM_007271 | 6481.39   | 6076.095  | AF222980  | 1166.091  | 1685.844  |
| AB002376  | 10392.405 | 12677.112 | NM_006255 | 7357.27   | 7956.837  | AK026758  | 6130.484  | 5546.987  |
| NM_018249 | 1024.798  | 1110.76   | BE392143  | 11941.448 | 11827.407 | NM_012201 | 7088.332  | 6491.19   |
| NM_005558 | 3415.345  | 3685.349  | NM_005813 | 7855.657  | 8402.479  | NM_001745 | 38013.449 | 51051.348 |
| NM_016631 | 1713.825  | 1987.473  | AB037718  | 20199.951 | 24319.75  | NM_003825 | 13513.546 | 14516.041 |
| AB015617  | 27296.088 | 32553.514 | AL389994  | 3639.851  | 4217.363  | AK025006  | 14103.162 | 12792.128 |
| AK022730  | 3436.913  | 3021.221  | CY3Cy5    | 3728.914  | 208.379   | AF218014  | 40487.27  | 48328.602 |
| NM_002256 | 9189.019  | 14818.063 | NM_000588 | 23232.801 | 12922.776 | NM_006678 | 13372.226 | 15614.906 |
| NM_005439 | 19715.182 | 23194.002 | AF143872  | 27925.994 | 16793.83  | AY007729  | 59443.84  | 58987.664 |
| AL049925  | 5166.795  | 5796.669  | AK025686  | 376.384   | 394.619   | NM_014424 | 756.293   | 746.395   |
| NM_016153 | 1331.999  | 1303.341  | AF143326  | 2686.703  | 2112.44   | AF159092  | 2913.726  | 3927.235  |
| AK027089  | 4758.245  | 3397.944  | AL049229  | 2798.419  | 1609.794  | BC007318  | 5941.405  | 6718.07   |
| X59845    | 1038.756  | 1181.536  | NM_018306 | 59509.059 | 39338.82  | M36693    | 12130.565 | 11931.353 |
| NM_006284 | 18845.016 | 17626.473 | AK026146  | 2222      | 1339.115  | NM_016292 | 26896.477 | 27709.58  |
| U18909    | 4199.13   | 3332.952  | AK023152  | 3761.127  | 2880.797  | NM_002601 | 7386.395  | 6799.11   |
| NM_003489 | 5142.482  | 4185.21   | AK000155  | 522.653   | 470.101   | U62858    | 382.97    | 970.442   |
| NM_016589 | 19518.004 | 15798.383 | AL389937  | 2084.361  | 1078.084  | NM_001781 | 1643.181  | 2337.189  |
| NM_003597 | 1287.205  | 1334.715  | AK025201  | 3727.659  | 2301.704  | NM_014432 | 7132.146  | 7588.218  |
| NM_002568 | 56630.469 | 59242.797 | AK022995  | 1576.009  | 814.227   | NM_001558 | 6595.81   | 7362.21   |
| NM_006561 | 1301.531  | 1312.756  | NM_000588 | 16941.736 | 21967.482 | NM_006953 | 391.285   | 676.776   |
| NM_017521 | 1850.525  | 2142.155  | SR5       | 3317.543  | 6293.825  | NM_002530 | 1307.714  | 1747.026  |
| NM_006743 | 344.314   | 599.714   | SR7       | 4595.062  | 21886.193 | NM_018941 | 5446.163  | 5922.791  |
| AK025200  | 30360.209 | 34162.461 | SR9       | 11688.591 | 1966.635  | NM_020241 | 416.449   | 841.545   |
| NM_001383 | 11999.543 | 14959.704 | CY3Cy5    | 3673.975  | 208.843   | NM_001321 | 11369.629 | 10366.524 |
| NM_001029 | 52900.27  | 59977.293 | L13433    | 1526.739  | 1175.864  | AB018264  | 11220.993 | 11809.771 |
| NM_005008 | 33480.301 | 38281.789 | NM_007220 | 1340.515  | 1128.376  | AF078866  | 1480.406  | 2029.377  |
| NM_016304 | 50466.727 | 59712.383 | NM_017777 | 2101.861  | 1503.054  | BF311880  | 39988.496 | 52510.359 |
| NM_006013 | 25545.109 | 31572.98  | AK001499  | 4466.938  | 2304.073  | NM_000078 | 2282.786  | 3415.171  |

|           |           |           |           |           |           |           |           |           |
|-----------|-----------|-----------|-----------|-----------|-----------|-----------|-----------|-----------|
| AB043007  | 43131.375 | 40765.805 | AK026852  | 1322.235  | 966.868   | NM_016075 | 713.474   | 859.665   |
| NM_004861 | 7808.068  | 8621.423  | AK021629  | 1246.636  | 937.913   | NM_001360 | 15149.261 | 16633.57  |
| NM_016161 | 1598.124  | 2023.517  | AL110257  | 53425.906 | 21195.709 | AK026656  | 16297.475 | 20127.639 |
| AV718258  | 1282.994  | 1203.768  | AB013384  | 2761.955  | 2616.699  | NM_000751 | 57763.305 | 59805.273 |
| NM_005165 | 8042.002  | 5408.847  | AK024824  | 1114.86   | 1989.507  | NM_005071 | 1987.323  | 2632.935  |
| NM_005135 | 52876.539 | 47141     | AK024270  | 3423.009  | 7310.675  | NM_016730 | 57953.953 | 62478.234 |
| NM_002115 | 52162.301 | 50535.172 | NM_014870 | 718.383   | 1067.327  | AL035297  | 2567.56   | 3154.494  |
| AK023162  | 3809.806  | 3304.363  | AK021917  | 926.497   | 2478.577  | NM_004405 | 10942.005 | 13253.204 |
| NM_006395 | 8315.653  | 7163.013  | AF052146  | 59946.5   | 61476.152 | AJ131244  | 3188.994  | 4097.425  |
| NM_018645 | 7742.642  | 6954.072  | NM_004870 | 5363.642  | 5352.828  | NM_002532 | 9662.16   | 14867.401 |
| NM_018263 | 925.609   | 850.158   | AK024242  | 28047.014 | 14286.735 | NM_012385 | 9742.248  | 14386.213 |
| NM_013445 | 2971.889  | 2717.547  | AK024559  | 1746.921  | 1334.904  | NM_016651 | 2560.545  | 4493.654  |
| NM_004537 | 3368.216  | 4010.124  | AK024851  | 1629.85   | 1001.918  | NM_001671 | 851.284   | 1767.757  |
| AL390134  | 1422.546  | 1977.414  | AK024943  | 604.163   | 549.705   | NM_019843 | 4917.386  | 7494.527  |
| NM_020225 | 7830.619  | 9027.411  | AK024995  | 401.977   | 372.855   | NM_016192 | 14852.401 | 20350.58  |
| NM_017865 | 6055.104  | 7649.314  | AK022628  | 60661.852 | 38375.484 | BE878426  | 59879.766 | 63471.23  |
| NM_003427 | 3234.69   | 4236.274  | AK021737  | 13023.913 | 5997.357  | AK022385  | 54576.367 | 56883.715 |
| NM_005920 | 3984.667  | 4721.681  | AL357454  | 452.757   | 283.492   | NM_002775 | 856.124   | 1854.457  |
| Y09321    | 3765.645  | 4513.756  | AK026295  | 1621.243  | 1046.314  | AK024584  | 11954.909 | 8460.995  |
| NM_006593 | 1424.881  | 1687.548  | AK022346  | 568.708   | 580.258   | NM_003504 | 8267.662  | 11069.793 |
| NM_000375 | 38555.73  | 37031.648 | AK025007  | 3092.174  | 2957.041  | NM_013295 | 7589.976  | 9495.285  |
| NM_000475 | 14502.152 | 19981.199 | NM_016485 | 9794.63   | 19388.078 | NM_007267 | 3857.254  | 6227.523  |
| M61872    | 20509.75  | 18898.695 | AL117601  | 427.011   | 183.737   | AK022830  | 363.114   | 799.245   |
| NM_005721 | 4467.935  | 4461.751  | AK026490  | 68460.609 | 55328.844 | Z36816    | 9076.148  | 12962.63  |
| AF284223  | 2978.303  | 2887.774  | AJ227861  | 3021.558  | 9488.349  | NM_005865 | 14830.107 | 21204.646 |
| AF176012  | 1096.874  | 972.503   | AJ001020  | 814.116   | 2810.935  | NM_006413 | 13306.81  | 19628.529 |
| BE743838  | 10554.826 | 8905.155  | NM_005553 | 501.487   | 766.073   | NM_017684 | 756.654   | 1069.168  |
| AF273046  | 9752.316  | 8023.098  | AJ001875  | 1731.631  | 1462.45   | AK025542  | 8545.455  | 9735.173  |
| NM_001081 | 5691.333  | 4667.724  | Y10204    | 312.715   | 355.209   | AF207547  | 1612.994  | 2306.582  |
| NM_002483 | 11088.349 | 10604.622 | X64985    | 592.764   | 1387.537  | NM_002765 | 17391.189 | 23989.723 |
| BF002026  | 3061.967  | 3203.233  | Y10507    | 5088.465  | 7371.273  | NM_003691 | 2114.502  | 3397.726  |
| L35594    | 1494.036  | 1426.972  | AK002028  | 59472.309 | 35841.359 | NM_002950 | 21632.227 | 26834.658 |
| BE790116  | 4777.219  | 4284.306  | AL050127  | 3958.942  | 2465.776  | NM_002315 | 7630.154  | 10899.159 |
| AI922341  | 11691.246 | 12111.187 | AK024805  | 12710.625 | 7158.566  | NM_001433 | 2290.58   | 2542.844  |
| S57283    | 1085.8    | 956.017   | AK000189  | 382.507   | 638.26    | NM_003134 | 58756.285 | 58731.25  |
| AA410517  | 1373.238  | 1914.671  | AK001423  | 1742.458  | 1322.922  | NM_004314 | 7922.818  | 10443.809 |
| M12824    | 4301.1    | 7414.152  | NM_018629 | 1126.614  | 344.884   | NM_018247 | 16435.824 | 21330.693 |
| W60100    | 2762.351  | 4106.961  | AK023407  | 460.406   | 2152.74   | NM_017975 | 10260.44  | 12677.974 |
| M24898    | 2679.211  | 3140.646  | AK022298  | 8002.12   | 18396.322 | NM_005895 | 30889.555 | 36360.074 |
| U72508    | 2189.821  | 3408.984  | AJ277441  | 48118.262 | 42257.367 | NM_002885 | 58218.457 | 59964.82  |
| AA457153  | 9333.082  | 12005.104 | NM_006057 | 2420.441  | 2635.754  | NM_019644 | 1856.637  | 3134.248  |
| AA283122  | 42773.895 | 42273.969 | AK025784  | 49608.594 | 25685.475 | NM_006791 | 4562.572  | 7367.253  |
| AA868504  | 3513.321  | 4803.765  | U07199    | 8536.265  | 4374.676  | AJ278348  | 41073.355 | 55882.313 |
| AA877845  | 8887.665  | 11692.588 | AK023713  | 2103.864  | 1501.906  | NM_015872 | 1770.689  | 2553.838  |
| AA664241  | 52373.75  | 64373.016 | X81445    | 1767.072  | 1157.396  | AI285199  | 14989.212 | 20600.615 |
| AI016456  | 4891.11   | 5967.735  | U95091    | 2778.857  | 1606.02   | BI906283  | 494.425   | 1254.064  |
| NM_006065 | 32432.006 | 36173.063 | NM_017900 | 49324.367 | 30353.131 | AA757170  | 604.222   | 1097.923  |
| AK022230  | 22537.219 | 22749.676 | S50182    | 1984.924  | 1295.548  | L07738    | 2498.427  | 3902.92   |
| AK022147  | 23729.254 | 19869.133 | AL360145  | 1303.298  | 1250.878  | Z48054    | 7097.457  | 9745.646  |
| L25664    | 17260.844 | 16616.322 | Y12016    | 3434.899  | 2290.447  | H90415    | 14983.687 | 20213.01  |
| NM_014940 | 4541.897  | 3375.368  | S75763    | 57045.957 | 50632.891 | AA676470  | 61135.523 | 61998.195 |
| NM_005783 | 990.997   | 1024.767  | NM_000534 | 3297.533  | 6566.398  | AA430512  | 10875.802 | 14343.841 |
| AK000851  | 1388.947  | 1114.894  | L10140    | 606.603   | 945.774   | M38258    | 2108.804  | 3160.478  |



|           |           |           |           |           |           |           |           |           |
|-----------|-----------|-----------|-----------|-----------|-----------|-----------|-----------|-----------|
| NM_00690C | 9305.437  | 7514.279  | AL133447  | 1806.59   | 1694.964  | AA457155  | 60525.91  | 59018.641 |
| AJ289111  | 31350.396 | 28997.883 | AB037853  | 36664.492 | 40381.742 | BM014365  | 1338.733  | 1795.476  |
| NM_01635E | 48559.141 | 40167.352 | D28450    | 58591.566 | 58071.449 | H91842    | 856.171   | 944.483   |
| NM_00640E | 15557.718 | 12342.052 | L37700    | 1604.901  | 1032.27   | U78045    | 5612.499  | 7356.569  |
| AF216292  | 47116.281 | 37154.953 | NM_017665 | 6384.786  | 3564.573  | AA878561  | 61801.898 | 67912.453 |
| NM_00095Z | 11287.45  | 11032.99  | AB007976  | 825.095   | 684.885   | BF688309  | 1098.335  | 1508.958  |
| NM_014584 | 8648.204  | 10583.767 | AK024819  | 517.907   | 484.629   | AI538525  | 1681.167  | 1979.115  |
| M30627    | 841.998   | 1112.143  | AF052106  | 5605.132  | 3934.363  | AF222980  | 1006.945  | 1502.488  |
| NM_00581C | 27569.111 | 32183.146 | AK000441  | 650.078   | 741.481   | AK026758  | 5994.523  | 6036.054  |
| M28170    | 27831.275 | 34412.891 | AK022391  | 2694.08   | 1924.564  | NM_012201 | 4693.967  | 4762.007  |
| NM_00155E | 1715.92   | 2678.382  | NM_016167 | 5134.331  | 3644.357  | AB046774  | 939.016   | 1175.983  |
| AK026223  | 13019.622 | 17789.354 | NM_016125 | 850.311   | 552.957   | AF159092  | 2859.458  | 4310.298  |
| NM_000874 | 9190.044  | 9548.51   | AK024090  | 24496.084 | 9954.95   | BC007318  | 5260.555  | 6071.703  |
| NM_005854 | 1523.377  | 2025      | AL133574  | 5670.578  | 2659.698  | M36693    | 12426.164 | 16220.128 |
| AB007863  | 54333.953 | 57801.414 | AK021936  | 1091.219  | 660.235   | NM_01629Z | 23618.553 | 35562.57  |
| NM_01778E | 7492.775  | 8016.906  | AL390181  | 58656.242 | 52038.375 | NM_002601 | 7182.644  | 7134.868  |
| D31887    | 6543.781  | 8682.283  | NM_017914 | 53633.738 | 32921.176 | U62858    | 261.001   | 1518.505  |
| NM_01664E | 5428.286  | 5175.678  | AK024953  | 13850.194 | 15559.162 | NM_001781 | 1800.017  | 2601.55   |
| AK090536  | 20542.047 | 16627.543 | AK024276  | 3760.925  | 5658.417  | NM_01443Z | 8070.507  | 8802.712  |
| D63477    | 929.479   | 670.006   | AL161979  | 1323.946  | 2119.059  | NM_00155E | 8503.894  | 9055.464  |
| NM_02024Z | 30858.59  | 25401.727 | NM_00315C | 2432.989  | 1470.855  | NM_00695Z | 644.486   | 658.806   |
| NM_014051 | 8102.053  | 6713.648  | NM_014784 | 3353.56   | 2110.381  | NM_00253C | 2016.769  | 3295.128  |
| AK025398  | 3745.011  | 3479.151  | AK026383  | 4029.178  | 3368.932  | U96173    | 2725.747  | 3148.716  |
| AK027082  | 502.752   | 314.943   | AK023821  | 515.32    | 432.361   | NM_018941 | 4647.434  | 4431.803  |
| AK023056  | 1821.981  | 1809.591  | AB014594  | 3800.951  | 3244.736  | NM_020241 | 517.609   | 718.355   |
| AK022207  | 1447.772  | 1813.743  | M94547    | 1683.791  | 1243.492  | BE730585  | 2717.081  | 3510.174  |
| NM_00499E | 4534.138  | 5592.017  | NM_005087 | 16898.27  | 9817.372  | NM_00198C | 1840.141  | 1814.565  |
| NM_01743E | 1435.214  | 1080.589  | NM_01209E | 2461.179  | 1405.032  | NM_005954 | 1239.425  | 1674.963  |
| NM_014037 | 7726.983  | 8171.389  | NM_01809E | 2314.137  | 1545.231  | NM_012471 | 1034.467  | 1036.144  |
| NM_00486E | 27202.994 | 33341.887 | AB023164  | 4622.16   | 2782.096  | NM_001321 | 11146.59  | 9306.437  |
| NM_01868E | 2281.228  | 2738.668  | NM_001178 | 686.915   | 542.794   | AB018264  | 12340.658 | 10474.358 |
| AK056652  | 9567.168  | 17408.434 | AK023696  | 15814.698 | 6916.257  | NM_006911 | 894.459   | 965.66    |
| NM_01583E | 972.427   | 1334.495  | NM_000704 | 2082.543  | 1063.296  | U92544    | 7539.768  | 8701.96   |
| AL137438  | 2094.074  | 2998.62   | NM_015987 | 739.228   | 438.495   | AB023147  | 3979.084  | 5882.069  |
| NM_017957 | 16756.064 | 19814.998 | NM_01960E | 2684.919  | 2103.428  | NM_01661E | 26586.615 | 30367.707 |
| NM_003024 | 4753.704  | 5789.606  | NM_01536E | 1225.828  | 1158.955  | NM_00563C | 2009.016  | 3247.123  |
| NM_01243E | 52206.676 | 60974.383 | Z49090    | 16163.222 | 7825.542  | AK023106  | 3374.799  | 5633.728  |
| AK001299  | 52324.488 | 43253.898 | AK021592  | 14192.252 | 14777.761 | NM_01673C | 66718.883 | 74853.875 |
| AB014559  | 25907.146 | 19112.154 | AF085952  | 548.7     | 878.754   | AL035297  | 1876.908  | 2246.282  |
| NM_01648E | 13520.052 | 11087.749 | AK025467  | 8344.646  | 10695.167 | NM_00440E | 11544.261 | 14030.432 |
| NM_00503Z | 7272.973  | 6701.393  | AK026593  | 10678.028 | 12156.99  | AJ131244  | 4012.814  | 5405.903  |
| NM_01593Z | 50410.828 | 44995.395 | AL117666  | 2000.795  | 1509.465  | NM_00253Z | 9410.856  | 12623.678 |
| NM_01794E | 1247.852  | 1001.995  | Y17865    | 4728.697  | 2609.134  | NM_01238E | 10843.215 | 12653.446 |
| AK022169  | 1618.649  | 1318.794  | NM_00582E | 37287.414 | 22217.785 | NM_016651 | 2904.141  | 4667.761  |
| AF015592  | 3697.958  | 2775.154  | NM_00275E | 11875.91  | 6714.158  | NM_001671 | 1125.712  | 1402.674  |
| AK026795  | 979.492   | 951.526   | U79299    | 567.056   | 556.1     | NM_01984Z | 6344.827  | 6938.807  |
| NM_01639E | 7085.399  | 6774.866  | AJ000414  | 1335.934  | 1194.714  | NM_01619Z | 15573.325 | 15711.958 |
| NM_016617 | 12055.572 | 10983.33  | AK025674  | 20326.635 | 11848.135 | BE878426  | 60125.699 | 62760.434 |
| NM_002027 | 10960.859 | 12083.474 | AF007194  | 10822.879 | 5503.716  | NM_00174E | 38214.035 | 45811.227 |
| AL162078  | 6925.216  | 7021.669  | NM_01906E | 1938.755  | 1036.433  | NM_00382E | 14420.279 | 15106.869 |
| NM_00091E | 1456.334  | 1682.405  | NM_004761 | 4957.985  | 3595.84   | AK025006  | 13605.809 | 15011.671 |
| NM_01338Z | 12180.714 | 13597.661 | Z25424    | 5032.499  | 2234.085  | AF218014  | 42726.453 | 43947.156 |
| AB002314  | 1222.8    | 1474.58   | U79458    | 5589.117  | 3087.814  | NM_00667E | 12265.071 | 10503.69  |

|           |           |           |           |           |           |           |           |           |
|-----------|-----------|-----------|-----------|-----------|-----------|-----------|-----------|-----------|
| NM_014043 | 6282.338  | 8139.052  | NM_014920 | 928.961   | 682.332   | AY007729  | 63678.746 | 61731.586 |
| NM_014622 | 931.903   | 1116.703  | NM_002961 | 5890.543  | 4635.636  | NM_014424 | 1953.317  | 1344.788  |
| AB011114  | 49018.977 | 56480.949 | NM_018298 | 1559.293  | 2342.556  | NM_004314 | 3921.601  | 5981.596  |
| D11466    | 31463.648 | 35744.367 | NM_000676 | 3059.384  | 1673.518  | NM_018247 | 16663.83  | 25828.201 |
| NM_014056 | 43370.254 | 43946.137 | NM_005766 | 1441.325  | 1264.616  | AF078866  | 1296.194  | 2622.26   |
| D31885    | 48916.266 | 53291.242 | NM_004127 | 61190.711 | 59856.766 | NM_001360 | 15644.006 | 15504.03  |
| AF176012  | 1189.491  | 1435.703  | NM_013324 | 6031.926  | 7436.004  | AK026656  | 18702.461 | 19484.781 |
| BE743838  | 11054.629 | 9429.32   | AL133022  | 847.738   | 2168.551  | AJ276207  | 22591.025 | 23020.006 |
| AF273046  | 9196.481  | 7737.619  | NM_003953 | 5512.358  | 8384.091  | AB011131  | 7747.981  | 7979.379  |
| NM_001081 | 5570.721  | 4453.007  | NM_006301 | 1210.339  | 2171.356  | NM_000746 | 556.628   | 892.373   |
| NM_002483 | 10791.87  | 10837.085 | NM_012219 | 936.588   | 816.465   | NM_000751 | 57321.938 | 54129.645 |
| BF002026  | 3167.235  | 2605.704  | X72887    | 1427.374  | 889.904   | NM_014846 | 7582.646  | 7034.534  |
| L35594    | 1564.565  | 1393.591  | NM_004529 | 2626.876  | 1632.224  | NM_001042 | 7087.687  | 7058.753  |
| BE790116  | 4104.338  | 2989.942  | NM_000127 | 1696.999  | 1138.968  | NM_012226 | 3318.316  | 3203.813  |
| AI922341  | 10480.021 | 7744.848  | Y10483    | 31933.182 | 19342.83  | NM_005071 | 1851.411  | 1725.925  |
| S57283    | 793.599   | 767.132   | NM_006784 | 2857.531  | 1678.134  | AF222980  | 808.117   | 2047.357  |
| AA410517  | 1121.415  | 1051.661  | NM_017876 | 3067.723  | 1973.447  | AK026758  | 5802.182  | 6640.761  |
| M12824    | 4500.367  | 4503.332  | NM_001087 | 58013.793 | 54895.23  | AK022385  | 54114.762 | 60125.938 |
| W60100    | 2597.494  | 2685.593  | NM_001826 | 892.455   | 670.509   | NM_002775 | 2350.044  | 5308.541  |
| M24898    | 2204.757  | 2399.214  | AK025352  | 568.436   | 414.581   | AK024584  | 10506.283 | 13222.32  |
| U72508    | 4221.315  | 4592.661  | NM_003721 | 6371.153  | 3056.334  | AK022830  | 754.013   | 1857.259  |
| AA457153  | 10706.515 | 10655.482 | NM_004724 | 2057.464  | 1206.354  | Z36816    | 8673.775  | 12277.864 |
| AA868504  | 3348.501  | 5176.082  | NM_001431 | 7582.218  | 9259.994  | NM_005865 | 13384.298 | 14523.422 |
| AA877845  | 6235.25   | 10760.695 | AK022666  | 802.522   | 2172.243  | NM_006413 | 11770.983 | 12599.797 |
| AA664241  | 51112.711 | 63004.875 | NM_000381 | 795.733   | 1680.421  | NM_017684 | 835.531   | 970.995   |
| AI016456  | 5683.908  | 6568.911  | NM_000427 | 2836.776  | 1614.43   | AK025542  | 6444.08   | 6059.216  |
| AK026281  | 2037.458  | 2473.644  | NM_014924 | 897.879   | 820.297   | AF207547  | 899.293   | 1197.366  |
| U23862    | 734.779   | 632.557   | NM_006946 | 1754.354  | 1991.849  | NM_002766 | 17398.977 | 17822.73  |
| AK026680  | 13452.314 | 16436.543 | NM_000174 | 62072.348 | 62670.199 | NM_003691 | 8207.281  | 7324.835  |
| L25664    | 18256.32  | 18932.303 | NM_002508 | 1024.155  | 2083.427  | NM_002950 | 19585.703 | 19506.061 |
| NM_014940 | 4956.121  | 3674.233  | NM_014343 | 4688.496  | 10309.274 | NM_002318 | 7035.143  | 7267.013  |
| NM_005783 | 907.846   | 1185.235  | D25303    | 1141.323  | 2431.74   | NM_001433 | 786.021   | 787.234   |
| AK000851  | 1505.59   | 1105.969  | NM_002338 | 11339.881 | 16096.697 | NM_003134 | 63027.883 | 60014.582 |
| NM_006900 | 10087.508 | 8533.95   | AF022913  | 3060.42   | 1864.022  | CY3Cy5    | 3833.687  | 87.137    |
| AJ289111  | 30526.813 | 27706.732 | NM_000028 | 2180.773  | 1347.084  | NM_022095 | 714.296   | 954.023   |
| NM_016356 | 49077.332 | 34315.184 | NM_001382 | 12588.174 | 5749.608  | AF088061  | 2533.764  | 1918.101  |
| NM_006406 | 14997.787 | 12978.397 | M93718    | 12519.121 | 5499.404  | AF086286  | 2523.862  | 1988.597  |
| AF216292  | 45082.645 | 31639.867 | NM_005386 | 3237.428  | 2325.079  | AF086376  | 2241.364  | 1818.334  |
| NM_000952 | 10569.579 | 9285.858  | AK023807  | 23976.902 | 12298.517 | AK022997  | 12730.788 | 8200.272  |
| NM_005894 | 1358.264  | 1477.413  | NM_018188 | 21715.16  | 14106.283 | NM_017617 | 2482.979  | 2010.841  |
| NM_014584 | 8470.757  | 7274.906  | AK024273  | 2039.003  | 1275.021  | AF131830  | 811.519   | 798.439   |
| M30627    | 902.446   | 651.335   | X59417    | 22514.162 | 12722.476 | AK027232  | 5605.735  | 4325.577  |
| NM_005810 | 28411.279 | 28635.947 | NM_005659 | 58118.848 | 54204.426 | NM_022095 | 854.878   | 444.601   |
| M28170    | 28135.342 | 26967.398 | D28476    | 5160.362  | 2756.068  | SR2       | 35408.934 | 13543.078 |
| NM_001555 | 1554.364  | 1429.927  | NM_016263 | 4213.654  | 1648.204  | SR4       | 10259.896 | 4195.037  |
| NM_000874 | 5616.795  | 7233.493  | NM_003335 | 39454.387 | 23430.447 | SR6       | 1166.782  | 860.457   |
| NM_005854 | 2760.216  | 4254.416  | AB002376  | 10220.998 | 16508.936 | SR8       | 5335.172  | 23925.23  |
| AB007863  | 55472.422 | 61003.586 | NM_018249 | 695.031   | 2797.395  | SR10      | 16503.875 | 4116.746  |
| NM_017786 | 2115.397  | 3387.208  | NM_005558 | 2745.329  | 7682.964  | CY3Cy5    | 3244.625  | 86.198    |
| D31887    | 6280.743  | 7272.287  | NM_016631 | 1095.208  | 1005.011  | AF088064  | 3741.649  | 3912.038  |
| NM_005721 | 4562.459  | 4598.601  | AB015617  | 22370.492 | 16912.121 | AF086103  | 616.419   | 778.283   |
| AF284223  | 3995.979  | 4946.853  | AK022730  | 3029.512  | 1722.901  | AL080135  | 644.41    | 872.918   |
| D63477    | 720.434   | 939.589   | NM_002256 | 10540.905 | 9940.67   | AK023158  | 1311.427  | 1205.103  |

|           |           |           |           |           |           |           |           |           |
|-----------|-----------|-----------|-----------|-----------|-----------|-----------|-----------|-----------|
| NM_020243 | 31128.137 | 22728.639 | AF064839  | 43492.918 | 54409.246 | AF085852  | 3313.726  | 2551.91   |
| AK025398  | 3567.457  | 4336.397  | NM_005439 | 19046.549 | 29029.32  | AF042838  | 1546.822  | 1270.937  |
| AK027082  | 688.872   | 561.391   | AB037810  | 1569.491  | 2885.611  | AL137511  | 790.359   | 1299.504  |
| AK023056  | 1756.654  | 1458.925  | AF222694  | 1179.53   | 2526.483  | AF075062  | 7173.678  | 4730.617  |
| AK022207  | 1543.837  | 1936.479  | AL049925  | 5326.521  | 9104.867  | NM_004188 | 1406.226  | 904.229   |
| NM_004996 | 4704.101  | 4756.086  | NM_016153 | 975.982   | 937.995   | AF147381  | 9884.266  | 4313.785  |
| NM_017435 | 1779.23   | 1114.631  | AK027089  | 5811.115  | 3606.022  | AK027101  | 28758.127 | 11152.32  |
| NM_014037 | 15100.625 | 13762.729 | X59845    | 1477.838  | 915.766   | AK024358  | 1580.397  | 884.716   |
| NM_004866 | 30515.096 | 32889.727 | NM_006284 | 21124.512 | 13154.311 | AF088075  | 1753.767  | 1156.46   |
| NM_018688 | 2421.656  | 2570.036  | U18909    | 4267.389  | 3568.996  | AK026376  | 1759.152  | 1292.206  |
| AK056652  | 8882.476  | 8569.477  | NM_003489 | 5033.626  | 3113.888  | AK027097  | 665.224   | 535.255   |
| NM_015839 | 648.823   | 848.061   | NM_016589 | 20895.256 | 12313.2   | AL117437  | 754.542   | 1113.541  |
| AL137438  | 1857.195  | 3062.114  | NM_003597 | 752.844   | 737.493   | AK027198  | 2250.184  | 1910.224  |
| NM_017957 | 13546.935 | 25074.832 | NM_002568 | 61638.82  | 48814.523 | AF147426  | 2524.248  | 1955.558  |
| NM_003024 | 5976.148  | 10104.66  | NM_006561 | 1125.529  | 825.476   | BC019667  | 24532.91  | 15012.549 |
| NM_013248 | 8525.98   | 13062.988 | NM_017521 | 1772.243  | 965.956   | AK026026  | 16999.441 | 11189.325 |
| NM_000034 | 59056.207 | 67544.414 | AK025200  | 27910.389 | 46554.902 | AF085941  | 18213.729 | 12279.629 |
| AK022230  | 21144.971 | 22746.016 | NM_001383 | 12711.254 | 8340.915  | Z69892    | 10778.037 | 10677.051 |
| AK022147  | 20535.188 | 24132.494 | NM_001029 | 60529.926 | 55163.891 | AK023590  | 1150.442  | 1262.437  |
| AK001299  | 52850.102 | 53451.387 | NM_005008 | 28197.006 | 23089.811 | AF087961  | 752.282   | 656.946   |
| AB014559  | 26860.402 | 22417.797 | NM_016304 | 47551.863 | 42142.699 | AL137309  | 2469.153  | 1255.977  |
| NM_016489 | 14289.865 | 14845.114 | NM_006013 | 22426.326 | 22995.361 | AL137475  | 792.922   | 426.459   |
| NM_005033 | 8537.397  | 8361.885  | NM_014046 | 25402.277 | 35349.488 | AL161956  | 2730.713  | 877.667   |
| NM_015932 | 52198.723 | 50950.773 | L34071    | 14032.982 | 19517.881 | AL390176  | 1363.162  | 643.19    |
| NM_017949 | 1273.343  | 1109.66   | AB043007  | 38261.715 | 51488.629 | AL137356  | 527.515   | 281.259   |
| AK022169  | 1932.875  | 1605.35   | NM_004861 | 9755.079  | 14962.155 | AL137547  | 1026.955  | 828.403   |
| AF015592  | 3539.81   | 3436.677  | NM_016161 | 541.836   | 1691.056  | AK021994  | 803.499   | 741.788   |
| AK026795  | 1028.721  | 1216.17   | AV718258  | 1319.343  | 991.061   | Z70763    | 658.292   | 576.322   |
| NM_016399 | 7844.435  | 6334.678  | NM_005165 | 8557.814  | 3416.458  | AK023802  | 22256.313 | 14516.49  |
| NM_016617 | 12582.436 | 11368.536 | NM_005138 | 60809.887 | 39444.258 | AL359567  | 1401.218  | 1477.38   |
| NM_002027 | 10539.184 | 11083.225 | NM_002115 | 58067.738 | 51203.219 | NM_017726 | 6965.774  | 6158.582  |
| AL162078  | 9121.192  | 8204.688  | AK023162  | 3498.46   | 2436.4    | AK026716  | 1109.562  | 1154.684  |
| NM_000919 | 561.107   | 579.042   | NM_006396 | 7732.572  | 5063.233  | AL049325  | 12347.975 | 8503.44   |
| NM_013382 | 12414.47  | 11823.254 | NM_018649 | 6776.619  | 3248.616  | AK023952  | 724.154   | 770.882   |
| AB002314  | 2600.452  | 3256.593  | NM_018263 | 789.656   | 380.94    | AK000787  | 716.25    | 786.352   |
| NM_014043 | 6520.949  | 9589.426  | NM_013449 | 2781.01   | 1786.77   | AF090885  | 22912.311 | 14833.282 |
| NM_014622 | 637.552   | 1036.008  | NM_004537 | 3014.09   | 2320.529  | NM_016646 | 1109.534  | 1081.674  |
| AB011114  | 54382.793 | 64700.863 | AL390134  | 1379.388  | 1400.882  | NM_014082 | 3657.894  | 4291.676  |
| D11466    | 37185.789 | 49095.719 | NM_020226 | 6588.209  | 2826.08   | AF100636  | 655.568   | 1257.517  |
| NM_014056 | 45290.898 | 54477.059 | NM_017865 | 4802.711  | 4509.623  | AF161366  | 427.367   | 494.481   |
| D31885    | 48617.996 | 51191.535 | NM_003427 | 2296.368  | 3197.45   | AK022197  | 2470.636  | 1680.539  |
| NM_016649 | 8049.506  | 9365.868  | AK021842  | 304.456   | 643.794   | AK021970  | 527.468   | 266.56    |
| AK090536  | 21410.008 | 26156.84  | NM_005920 | 3045.951  | 4532.367  | AK022066  | 64423.848 | 31817.186 |
| BE743838  | 10969.702 | 11464.727 | Y09321    | 2914.13   | 5051.997  | AK022224  | 1622.569  | 767.406   |
| AF273046  | 9688.617  | 7935.764  | NM_006593 | 1286.909  | 2620.121  | AK022359  | 738.379   | 461.236   |
| NM_001081 | 6095.846  | 5952.721  | NM_000376 | 34994.906 | 51138.309 | AK022000  | 1757.123  | 1264.239  |
| NM_002483 | 12230.664 | 12724.162 | NM_000475 | 14994.856 | 26328.686 | AK022129  | 3555.422  | 2626.585  |
| BF002026  | 3193.931  | 3305.169  | M61872    | 27249.201 | 37591.984 | AK022263  | 3524.362  | 2463.266  |
| L35594    | 1769.141  | 2191.424  | NM_005721 | 4431.279  | 3234.938  | AK022384  | 809.104   | 798.542   |
| BE790116  | 5425.392  | 4593.679  | AF284223  | 3244.079  | 2648.298  | AF086304  | 17673.221 | 17767.664 |
| AI922341  | 10086.707 | 8422.953  | AF176012  | 1169.879  | 1068.538  | AB032976  | 1756.139  | 1774.026  |
| S57283    | 1530.04   | 1274.308  | BE743838  | 12946.26  | 7147.233  | AF301222  | 19951.279 | 17546.201 |
| AA410517  | 1462.317  | 1216.475  | AF273046  | 11148.702 | 6578.905  | AK025114  | 4559.471  | 3956.416  |

|           |           |           |           |           |           |           |           |           |
|-----------|-----------|-----------|-----------|-----------|-----------|-----------|-----------|-----------|
| M12824    | 3533.468  | 3860.139  | NM_001081 | 5895.532  | 4514.448  | AF215981  | 15769.784 | 15392.124 |
| W60100    | 2761.984  | 2775.77   | NM_002483 | 10901.389 | 7093.266  | NM_006160 | 13617.979 | 27135.082 |
| M24898    | 4530.007  | 4837.99   | BF002026  | 2309.042  | 2400.59   | NM_000525 | 2454.885  | 3563.901  |
| U72508    | 1849.722  | 1868.3    | L35594    | 1078.21   | 991.376   | AF009259  | 674.046   | 561.559   |
| AA457153  | 8832.948  | 9639.502  | BE790116  | 5169.177  | 2338.633  | AF009260  | 1040.011  | 565.242   |
| AA283122  | 36442.625 | 34359.242 | AI922341  | 7763.44   | 4125.952  | NM_003075 | 1423.853  | 1147.332  |
| AA868504  | 3516.427  | 4195.188  | S57283    | 1140.06   | 1577.839  | NM_017902 | 2752.198  | 2238.656  |
| AA877845  | 7510.6    | 10773.615 | AA410517  | 1360.313  | 1358.091  | NM_017835 | 20768.443 | 19192.32  |
| AA664241  | 44023.879 | 57264.98  | M12824    | 3360.968  | 2976.407  | NM_018347 | 5619.537  | 5378.415  |
| AI016456  | 5953.493  | 6994.361  | W60100    | 1970.305  | 876.647   | AK024986  | 323.449   | 966.649   |
| AK026281  | 1975.192  | 2520.835  | M24898    | 2240.768  | 2689.498  | AK026730  | 3096.794  | 2703.428  |
| U23862    | 656.653   | 874.949   | U72508    | 1486.718  | 1988.901  | AK024739  | 2869.739  | 3463.722  |
| AK026680  | 13433.891 | 13796.944 | AA457153  | 8275.875  | 8158.068  | AK098681  | 1990.486  | 2582.871  |
| NM_012436 | 47573.223 | 58569.598 | AA283122  | 42459.781 | 51115.809 | AK024164  | 48376.137 | 42121.215 |
| AF216292  | 44535.055 | 36733.273 | AA868504  | 2981.173  | 7845.655  | AF052130  | 6418.505  | 3169.074  |
| NM_000952 | 10516.257 | 8644.304  | AA877845  | 8912.51   | 18905.479 | AF130090  | 28732.793 | 10750.387 |
| NM_005894 | 688.542   | 970.041   | AA664241  | 58202.711 | 66581.531 | AL096727  | 1828.823  | 951.051   |
| NM_014584 | 9069.789  | 8672.108  | AI016456  | 10488.999 | 20208.607 | AL080110  | 4463.256  | 2179.446  |
| M30627    | 910.124   | 877.698   | NM_006066 | 46125.406 | 59981.871 | NM_020425 | 1055.118  | 621.143   |
| NM_005810 | 34082.918 | 33955.148 | AK022230  | 28381.131 | 17796.088 | AK024076  | 3124.718  | 2406.843  |
| M28170    | 28649.914 | 26017.074 | AK022147  | 26340.688 | 15584.681 | M87940    | 1428.657  | 1322.836  |
| NM_001555 | 1894.435  | 1667.404  | L25664    | 18138.211 | 11401.564 | L77588    | 3203.656  | 2945.593  |
| AK026223  | 12093.624 | 11150.208 | NM_014940 | 4709.593  | 3080.186  | NM_014273 | 17701.998 | 14926.743 |
| NM_000874 | 9217.781  | 6864.122  | NM_005783 | 1159.036  | 860.036   | AF039442  | 948.732   | 1397.902  |
| NM_005854 | 1456.712  | 1757.539  | AK000851  | 1633.413  | 868.108   | NM_004680 | 1065.033  | 1449.966  |
| AB007863  | 48102.309 | 53759.535 | NM_006900 | 9524.765  | 6391.801  | AF104260  | 459.652   | 1546.339  |
| AK024456  | 15350.882 | 17188.514 | AJ289111  | 28353.389 | 23378.395 | NM_005671 | 1021.158  | 1378.154  |
| NM_017789 | 1717.333  | 1851.602  | NM_016356 | 40212.07  | 26560.834 | NM_017405 | 3037.849  | 3135.459  |
| D31887    | 5507.519  | 5749.806  | NM_006406 | 16149.773 | 7033.954  | AL117643  | 1784.898  | 758.44    |
| NM_002313 | 4808.397  | 5184.563  | AF216292  | 40614.617 | 18166.492 | AF069135  | 7175.823  | 2935.222  |
| NM_004459 | 4241.643  | 4246.778  | NM_000952 | 8464.003  | 5232.668  | AK026524  | 1380.224  | 845.96    |
| NM_005503 | 594.826   | 718.585   | NM_005894 | 744.166   | 2053.771  | AB011157  | 5071.576  | 3239.036  |
| NM_001502 | 4131.784  | 5484.118  | NM_014584 | 6657.795  | 8083.209  | U17632    | 945.589   | 1082.632  |
| NM_005721 | 3915.608  | 4783.356  | M30627    | 557.011   | 807.922   | AK026764  | 1707.336  | 2493.796  |
| AF284223  | 4682.901  | 6042.767  | NM_005810 | 23444.525 | 13222.083 | AF113700  | 2527.385  | 2907.346  |
| AF176012  | 2093.719  | 2373.282  | M28170    | 19229.857 | 18098.832 | X91348    | 38576.18  | 36048.152 |
| NM_013386 | 727.358   | 927.807   | NM_001555 | 1465.153  | 1885.738  | Z36505    | 3272.44   | 3357.219  |
| NM_006517 | 666.952   | 1007.738  | AK026223  | 11781.635 | 21473.566 | NM_001854 | 2385.952  | 2461.837  |
| NM_004171 | 5734.522  | 5519.787  | NM_000874 | 8131.376  | 13355.161 | NM_017913 | 2278.226  | 2726.512  |
| NM_014037 | 18396.059 | 19343.256 | NM_005854 | 1437.8    | 4372.737  | NM_002755 | 18035.086 | 14500.93  |
| NM_004866 | 38370.141 | 33822.793 | AB007863  | 60296.949 | 60806.121 | AK024799  | 62047.383 | 63210.52  |
| NM_018688 | 2224.984  | 2332.831  | NM_017789 | 4098.139  | 7978.419  | NM_016388 | 2456.865  | 1136.243  |
| AK056652  | 9602.626  | 8374.467  | D31887    | 5558.835  | 10688.337 | AB046783  | 915.349   | 488.746   |
| NM_015839 | 555.203   | 586.834   | NM_016649 | 6061.662  | 4363.083  | NM_000845 | 770.051   | 499.851   |
| AL137438  | 1658.33   | 1952.133  | AK090536  | 23145.855 | 11833.756 | NM_004604 | 68652.281 | 65017.188 |
| NM_017957 | 12744.507 | 12624.101 | D63477    | 975.892   | 744.974   | NM_014965 | 8995.758  | 5906.459  |
| NM_003024 | 4706.971  | 4817.75   | NM_020243 | 31492.107 | 20334.906 | NM_004882 | 39228.242 | 38787.238 |
| NM_013248 | 8066.783  | 8442.063  | NM_014051 | 8985.955  | 5772.224  | AL390148  | 16535.355 | 35908.379 |
| NM_000034 | 52596.633 | 62827.121 | AK025398  | 3483.61   | 3273.48   | AK024055  | 1236.855  | 1737.929  |
| AK022147  | 25963.508 | 26809.533 | AK027082  | 380.022   | 338.148   | NM_013376 | 807.013   | 978.634   |
| L25664    | 14009.759 | 15082.918 | AK023056  | 1688.671  | 1806.731  | NM_017964 | 1370.472  | 1535.454  |
| NM_014940 | 4550.425  | 4517.756  | NM_017435 | 1296.226  | 897.683   | NM_016428 | 6302.982  | 4728.354  |
| NM_005783 | 974.079   | 1867.93   | NM_014037 | 9137.543  | 5804.727  | NM_004083 | 11257.194 | 8680.559  |

|           |           |           |           |           |           |           |           |           |
|-----------|-----------|-----------|-----------|-----------|-----------|-----------|-----------|-----------|
| AK000851  | 1412.977  | 1430.861  | NM_004866 | 27071.896 | 36157.66  | NM_016036 | 42431.027 | 31366.484 |
| NM_006900 | 9263.368  | 10688.791 | NM_018688 | 2084.429  | 2360.831  | M96577    | 26274.447 | 9528.471  |
| AJ289111  | 28514.816 | 31777.25  | AK056652  | 9987.473  | 11874.665 | NM_013258 | 58599.938 | 26017.533 |
| NM_016356 | 45861.422 | 39657.594 | NM_015839 | 586.653   | 1606.61   | NM_003842 | 4222.972  | 1779.924  |
| NM_006406 | 15198.785 | 17469.332 | AL137438  | 1774.687  | 5258.301  | NM_016184 | 1949.157  | 1337.387  |
| D11466    | 41427.461 | 36311.379 | NM_017957 | 16965.992 | 40559.457 | L11238    | 21924.07  | 12625.938 |
| NM_014056 | 38688.355 | 30698.748 | NM_003024 | 5653.18   | 12601.718 | AK025684  | 1006.067  | 1136.403  |
| D31885    | 50218.098 | 45990.965 | NM_013248 | 8304.531  | 15808.768 | NM_012205 | 15075.117 | 14834.295 |
| NM_016649 | 5437.406  | 5351.719  | NM_000034 | 61744.223 | 62414.199 | K02046    | 4190.654  | 4827.896  |
| AK090536  | 18944.195 | 19480.098 | NM_012436 | 54651.336 | 58622.973 | U87223    | 2194.587  | 2493.076  |
| D63477    | 1139.544  | 1263.134  | AK001299  | 49017.023 | 33108.074 | NM_002217 | 722.308   | 822.046   |
| NM_020243 | 32827.07  | 27217.697 | AB014559  | 28697.26  | 17843.799 | NM_004995 | 3684.869  | 4559.511  |
| NM_014051 | 8290.383  | 8682.817  | NM_016489 | 16040.406 | 9356.199  | NM_000386 | 9771.756  | 8086.241  |
| AK025398  | 3431.584  | 3634.507  | NM_005033 | 8702.855  | 5148.395  | NM_007231 | 738.982   | 751.962   |
| AK027082  | 484.614   | 429.308   | NM_015932 | 56686.555 | 40334.313 | AK026940  | 8281.927  | 3000.38   |
| AB037750  | 575.398   | 509.65    | NM_017949 | 1030.975  | 864.61    | AF155117  | 6575.759  | 2786.992  |
| AK023056  | 1908.254  | 1579.041  | AK022169  | 1324.825  | 1157.574  | AB014527  | 637.362   | 395.862   |
| NM_017888 | 5055.931  | 4707.832  | AF015592  | 3311.958  | 2485.168  | NM_004411 | 1793.832  | 1250.153  |
| NM_004915 | 7780.17   | 6880.636  | AK026795  | 765.326   | 1194.537  | NM_015938 | 9380.561  | 7405.457  |
| AK022207  | 1580.422  | 1731.624  | AL162078  | 5980.694  | 6319.613  | NM_000740 | 1093.27   | 909.192   |
| AV708752  | 5428.87   | 7547.732  | NM_000919 | 514.01    | 424.514   | NM_017843 | 9754.93   | 6229.689  |
| AF119885  | 4316.958  | 5137.75   | NM_013382 | 9072.54   | 9476.152  | U10485    | 1191.602  | 1067.498  |
| NM_000750 | 1439.094  | 1776.338  | AB002314  | 1352.982  | 2438.54   | AK025326  | 30887.117 | 25076.27  |
| NM_004996 | 5409.686  | 6015.749  | NM_014043 | 7042.651  | 11950.158 | NM_016328 | 10030.702 | 9661.702  |
| NM_005971 | 6667.892  | 7956.727  | NM_014622 | 1138.932  | 2538.736  | NM_017544 | 44821.227 | 42041.723 |
| NM_017435 | 1712.499  | 975.944   | AB011114  | 59170.629 | 61569.945 | NM_003153 | 1773.516  | 1831.337  |
| AK026281  | 2200.406  | 2169.848  | D11466    | 42999.008 | 60577.242 | NM_016285 | 1327.307  | 1631.377  |
| U23862    | 573.251   | 648.704   | NM_014056 | 43160.18  | 58572.645 | NM_014707 | 953.918   | 1091.509  |
| AK026680  | 13376.476 | 13092.817 | D31885    | 55086.578 | 61509.309 | AF025771  | 1960.684  | 1483.685  |
| NM_012436 | 48960.074 | 61012.102 | AF176012  | 1236.004  | 1226.872  | NM_007187 | 13775.323 | 11440.693 |
| AK001299  | 51482.586 | 52070.891 | BE743838  | 12542.555 | 6321.392  | NM_007279 | 8702.945  | 6045.328  |
| AB014559  | 24953.875 | 22340.404 | AF273046  | 11934.921 | 7770.446  | NM_000801 | 7247.334  | 3268.167  |
| NM_016489 | 13582.753 | 12520.585 | NM_001081 | 6303.426  | 3820.046  | NM_006115 | 54121.227 | 28102.275 |
| NM_005033 | 7752.885  | 6745.79   | NM_002483 | 13317.636 | 8173.128  | NM_005801 | 6121.655  | 2636.054  |
| NM_015932 | 50297.738 | 46013.859 | BF002026  | 2747.182  | 2943.834  | NM_018198 | 3245.835  | 1441.233  |
| NM_017949 | 1131.804  | 1015.154  | L35594    | 1188.562  | 1040.228  | NM_001536 | 30334.418 | 17328.588 |
| AK022169  | 1596.622  | 1638.243  | BE790116  | 4862.429  | 3260.135  | NM_012267 | 471.318   | 416.104   |
| AF015592  | 3738.097  | 3359.655  | AI922341  | 9743.725  | 6273.563  | NM_000022 | 14987.261 | 15212.948 |
| AK026795  | 978.888   | 770.793   | S57283    | 1138.456  | 1913.136  | NM_016576 | 6426.261  | 5331.021  |
| NM_016399 | 7047.87   | 7116.762  | M12824    | 4141.441  | 11736.917 | NM_004213 | 3693.081  | 3628.438  |
| NM_016617 | 13035.252 | 11314.803 | M24898    | 1469.463  | 2171.081  | NM_001929 | 57929.711 | 59898.297 |
| NM_002027 | 11610.48  | 11006.717 | U72508    | 1118.644  | 1141.074  | NM_000906 | 2744.093  | 1947.972  |
| AL162078  | 8729.985  | 8164.96   | AA457153  | 7209.208  | 5783.137  | NM_000480 | 5996.451  | 5279.343  |
| NM_000919 | 744.617   | 635.124   | AA283122  | 40974.094 | 51975.023 | AK022976  | 2077.388  | 1931.28   |
| NM_013382 | 13274.104 | 13064.753 | AA868504  | 2942.769  | 5844.176  | AB048791  | 8271.112  | 7516.671  |
| AB002314  | 1542.765  | 2038.33   | AA877845  | 8813.946  | 17030.785 | NM_003107 | 2585.014  | 2411.663  |
| NM_014043 | 6811.543  | 7644.738  | AA664241  | 59523.289 | 67943.102 | NM_006874 | 7886.842  | 5154.525  |
| NM_014622 | 1702.006  | 1738.111  | AI016456  | 8539.308  | 15237.864 | AB046777  | 2791.442  | 2318.4    |
| AB011114  | 55807.797 | 61285.703 | AK026281  | 1751.809  | 3968.375  | NM_001880 | 2217.31   | 700.287   |
| CY3Cy5    | 3163.868  | 108.48    | U23862    | 720.378   | 2023.715  | AB028943  | 6932.687  | 2095.998  |
| NM_019884 | 5784.135  | 3851.784  | AK026680  | 18890.355 | 47543.371 | NM_006194 | 1945.901  | 714.93    |
| AF088051  | 1928.632  | 1258.04   | L25664    | 19280.861 | 13562.656 | AK001603  | 25707.957 | 11872.598 |
| AF086366  | 1210.339  | 1293.977  | NM_014940 | 5080.354  | 3012.503  | U71601    | 3328.13   | 2079.754  |

|           |           |           |           |           |           |           |           |           |
|-----------|-----------|-----------|-----------|-----------|-----------|-----------|-----------|-----------|
| AF086360  | 2379.843  | 3314.875  | NM_005783 | 1057.886  | 664.371   | AK025985  | 44559.301 | 52751.898 |
| AF086436  | 680.327   | 630.559   | AK000851  | 1346.573  | 867.881   | NM_013256 | 4303.044  | 2776.731  |
| AF087993  | 5695.976  | 6037.215  | NM_006900 | 12365.882 | 6841.913  | NM_004143 | 2123.392  | 1632.075  |
| AF035282  | 1321.976  | 1621.425  | AJ289111  | 27408.318 | 19770.916 | X66087    | 3059.017  | 2313.64   |
| AK021966  | 3352.345  | 3984.229  | NM_016356 | 42716.711 | 29064.842 | L09070    | 661.414   | 802.52    |
| AB018292  | 16042.035 | 16079.549 | NM_006406 | 16303.606 | 8490.312  | NM_000062 | 7421.762  | 8120.738  |
| AK022842  | 744.996   | 1167.051  | AF216292  | 44268.699 | 24081.512 | NM_017877 | 4527.667  | 4954.74   |
| NM_007006 | 17363.32  | 21750.873 | NM_000952 | 9808.541  | 5405.878  | NM_009590 | 15736.599 | 17688.338 |
| AL137346  | 3917.154  | 5960.871  | NM_005894 | 1434.694  | 1838.264  | AL133037  | 1164.052  | 1860.256  |
| NM_017756 | 36256.051 | 35838.133 | M30627    | 1137.494  | 3358.772  | NM_020350 | 5096.086  | 3472.612  |
| NM_019884 | 6408.643  | 6847.371  | M28170    | 17985.027 | 26436.799 | NM_000350 | 8532.377  | 7341.877  |
| SR2       | 50199.172 | 47493.078 | NM_001555 | 906.325   | 1076.637  | AA419164  | 2288.87   | 2109.369  |
| SR4       | 12896.909 | 19666.914 | AK026223  | 9299.716  | 14681.013 | L35251    | 5734.701  | 4825.369  |
| SR6       | 1654.629  | 2714.773  | NM_000874 | 8305.211  | 9988.091  | BE910395  | 7475.441  | 6363.431  |
| SR8       | 7003.149  | 26225.844 | NM_005854 | 1418.112  | 3810.758  | N46828    | 15050.476 | 12670.858 |
| SR10      | 21617.217 | 9664.989  | AB007863  | 58695.07  | 64532.02  | BI908302  | 54198.988 | 54573.844 |
| CY3Cy5    | 3608.559  | 142.04    | NM_017789 | 1653.65   | 4496.66   | AA460969  | 5750.861  | 3977.851  |
| AF086054  | 5002.744  | 2869.65   | D31887    | 5113.379  | 13503.7   | BG695859  | 5374.18   | 2905.648  |
| AK022259  | 69343.305 | 61073.195 | NM_005721 | 4732.046  | 11079.409 | M85079    | 27975.568 | 8838.589  |
| AK022461  | 651.53    | 1403.24   | AF284223  | 3132.524  | 8890.924  | AA457671  | 20112.984 | 7181.488  |
| NM_016010 | 8167.271  | 10521.932 | D63477    | 940.683   | 506.398   | X07437    | 13693.497 | 5696.836  |
| AJ001904  | 1609.179  | 1874.24   | NM_020243 | 31664.33  | 18396.746 | NM_000641 | 3278.287  | 1339.835  |
| AF075022  | 1931.24   | 2284.266  | AK025398  | 4154.75   | 3592.471  | AE006466  | 23620.539 | 16182.206 |
| AF075060  | 3464.26   | 4448.31   | AK027082  | 579.021   | 333.313   | BC008737  | 60127.656 | 59411.289 |
| AB002438  | 1266.354  | 1476.621  | AK023056  | 1680.842  | 985.176   | BC011655  | 4495.303  | 3644.652  |
| AF147436  | 1514.368  | 1957.068  | AK022207  | 1742.115  | 1677.25   | BC002396  | 9919.846  | 7868.193  |
| AK021441  | 4026.722  | 6819.651  | NM_004866 | 27503.254 | 20137.539 | NM_003613 | 2857.105  | 2356.67   |
| AK026018  | 841.866   | 1016.084  | NM_018688 | 2200.005  | 2019.087  | NM_005385 | 6873.23   | 6772.339  |
| AF085846  | 2795.127  | 3825.115  | AK056652  | 6707.272  | 7872.227  | NM_018985 | 5088.439  | 4163.647  |
| AK023901  | 8695.431  | 8218.186  | NM_015839 | 1489.551  | 2496.293  | NM_006074 | 57287.348 | 57838.758 |
| AL109705  | 1332.131  | 1721.83   | AL137438  | 2045.344  | 4112.52   | AF208232  | 7967.209  | 7402.896  |
| AF147392  | 928.758   | 1132.66   | NM_017957 | 20913.375 | 46627.645 | NM_002988 | 9177.626  | 7645.067  |
| AF088057  | 5608.859  | 6904.693  | NM_003024 | 5256.192  | 13688.967 | NM_004186 | 1855.719  | 2014.013  |
| AK026847  | 1442.691  | 966.654   | NM_013248 | 8135.639  | 19341.035 | NM_016258 | 7823.656  | 8184.805  |
| AL359560  | 418.006   | 363.099   | AK022147  | 36753.762 | 55470.246 | AF203032  | 13929.675 | 13481.146 |
| AK026891  | 1843.124  | 1123.074  | AK001299  | 54353.141 | 34892.703 | AB014542  | 25483.695 | 18001.639 |
| AK024595  | 842.004   | 1377.319  | AB014559  | 28337.248 | 14544.399 | NM_014640 | 1962.926  | 1846.362  |
| AK025313  | 1009.369  | 1068.811  | NM_016489 | 14685.266 | 7100.952  | Y10518    | 59573.305 | 60308.574 |
| AK001126  | 4680.059  | 5180.005  | NM_005033 | 8701.312  | 5723.253  | AF155135  | 9874.818  | 8309.216  |
| AF085976  | 5199.224  | 6548.502  | NM_015932 | 53719.727 | 35246.555 | NM_014790 | 4004.14   | 3563.894  |
| AF075104  | 6845.993  | 8454.227  | NM_017949 | 1451.377  | 1204.552  | NM_003571 | 28749.154 | 14424.393 |
| AK021724  | 431.216   | 842.755   | AK022169  | 1752.882  | 1385.607  | AB032965  | 64405.367 | 53363.695 |
| AL133025  | 1815.187  | 2274.563  | AF015592  | 3436.735  | 2042.837  | NM_020370 | 873.447   | 477.131   |
| AL137402  | 10905.738 | 15093.398 | AK026795  | 1006.973  | 984.026   | NM_004767 | 2329.118  | 1027.761  |
| AL137617  | 2061.889  | 2215.899  | NM_016399 | 6258.442  | 2884.981  | BF310159  | 22101.666 | 8871.348  |
| AL359568  | 23870.123 | 27231.316 | NM_016617 | 13582.597 | 9973.28   | NM_018986 | 3434.22   | 2956.951  |
| AL133564  | 7228.296  | 9490.413  | AL162078  | 5216.787  | 9496.311  | AB044934  | 793.157   | 781.081   |
| AL137428  | 1279.026  | 1988.885  | NM_000919 | 1230.643  | 971.301   | U27655    | 13355.292 | 10544.555 |
| AL157462  | 2088.569  | 2878.698  | NM_013382 | 8736.759  | 6717.842  | Z21965    | 60467.895 | 58669.371 |
| NM_018190 | 59738.758 | 61329.457 | AB002314  | 2754.374  | 2208.587  | NM_012427 | 2570.784  | 2974.026  |
| AK021744  | 2800.426  | 2014.335  | NM_014043 | 7127.483  | 16007.895 | AF133424  | 6322.371  | 6965.263  |
| NM_018430 | 8089.024  | 5800.751  | NM_014622 | 1131.134  | 2494.636  | NM_005003 | 28667.896 | 26304.779 |
| AL110200  | 4532.234  | 3757.78   | AB011114  | 60269.281 | 62152.781 | AF084560  | 16095.354 | 16230.914 |

|           |           |           |           |           |           |           |           |           |
|-----------|-----------|-----------|-----------|-----------|-----------|-----------|-----------|-----------|
| AK022308  | 1231.848  | 734.347   | D11466    | 43077.355 | 63242.5   | NM_01571E | 1329.763  | 1356.47   |
| AL133640  | 3895.967  | 3519.679  | NM_01405E | 42713.746 | 62263.148 | NM_00003Z | 13586.351 | 15217.491 |
| AK023783  | 538.802   | 764.393   | D31885    | 56519.797 | 63472.668 | NM_00208Z | 4701.559  | 5927.837  |
| AF070647  | 57350.398 | 55246.316 | NM_01664E | 6463.19   | 13838.262 | NM_00203E | 6326.71   | 12126.011 |
| AF174394  | 2072.446  | 2433.862  | AK090536  | 20472.861 | 48813.68  | NM_01490C | 2790.48   | 3523.585  |
| AK025384  | 649.512   | 789.255   | BE743838  | 14443.11  | 6934.029  | BF342908  | 2274.506  | 2362.9    |
| AF144054  | 694.686   | 1157.749  | AF273046  | 11205.298 | 6371.146  | AK023510  | 7630.994  | 5609.437  |
| AF230315  | 372.475   | 483.744   | NM_001081 | 6116.565  | 3593.292  | NM_00434E | 3925.167  | 3182.677  |
| AK025924  | 1013.364  | 1211.902  | NM_00248Z | 14124.987 | 8931.542  | NM_01457C | 4153.534  | 1868.802  |
| AK021876  | 26750.318 | 26697.641 | BF002026  | 3054.101  | 2676.569  | NM_01482Z | 3474.997  | 1870.931  |
| AK022017  | 1580.81   | 1711.605  | L35594    | 1548.999  | 1100.54   | NM_00529E | 2523.104  | 1509.913  |
| AK022160  | 3707.777  | 4008.77   | BE790116  | 5924.695  | 3643.585  | NM_003611 | 6103.536  | 6492.484  |
| AK022295  | 1121.829  | 2056.466  | AI922341  | 10391.306 | 5024.098  | AB014538  | 6805.607  | 6510.778  |
| AK021935  | 5036.764  | 6491.224  | S57283    | 940.37    | 591.885   | NM_00620E | 1283.882  | 1291.917  |
| AK022187  | 10494.404 | 16420.09  | AA410517  | 967.06    | 577.037   | AK025118  | 7063.204  | 8371.7    |
| AK022337  | 2840.651  | 4440.813  | M12824    | 4228.357  | 5134.141  | NM_000727 | 4648.302  | 4813.335  |
| AL133618  | 7936.125  | 6172.129  | W60100    | 3038.538  | 5878.761  | NM_002621 | 703.996   | 964.419   |
| AF230314  | 2140.168  | 1523.521  | M24898    | 3141.1    | 5685.165  | NM_00413E | 3027.248  | 3290.393  |
| AK001086  | 862.441   | 785.271   | U72508    | 2280.413  | 1597.695  | NM_00020Z | 514.666   | 492.464   |
| AJ131610  | 5009.801  | 5581.019  | AA457153  | 7732.84   | 6249.405  | NM_01344Z | 1566.275  | 1528.795  |
| S50207    | 3866.69   | 3378.996  | AA283122  | 25227.775 | 23322.98  | NM_00092E | 13509.946 | 12480.887 |
| AF119872  | 19274.137 | 17109.295 | AA868504  | 2708.157  | 5056.874  | NM_00046E | 2566.995  | 3483.832  |
| AI275123  | 711.049   | 334.647   | AA877845  | 8490.979  | 11677.607 | AF116685  | 742.676   | 981.866   |
| NM_00262Z | 19054.604 | 19726.248 | AA664241  | 54268.805 | 62532.176 | NM_00012Z | 3146.145  | 4893.124  |
| AK024185  | 1819.633  | 2145.364  | AI016456  | 8749.953  | 18160.506 | AL137501  | 1363.68   | 1821.779  |
| NM_015417 | 731.996   | 715.553   | AK026281  | 1992.369  | 7353.394  | BE858979  | 2378.805  | 3464.192  |
| AL137562  | 7881.313  | 6095.199  | U23862    | 809.311   | 2934.736  | NM_00012Z | 2842.653  | 2620.147  |
| M90355    | 66192.688 | 56420.664 | AK026680  | 17886.035 | 40929.629 | NM_00624C | 6191.104  | 9017.197  |
| AK022495  | 3153.744  | 2229.264  | NM_01243E | 55967.93  | 67964.273 | NM_00702E | 6398.561  | 9369.39   |
| AK021632  | 1280.593  | 974.722   | AF216292  | 48874.941 | 24602.805 | M37712    | 11678.852 | 11106.549 |
| AK023143  | 1284.613  | 968.902   | NM_00095Z | 12934.72  | 6434.958  | AF070670  | 20682.938 | 25254.506 |
| AK026373  | 9586.725  | 8340.749  | NM_014584 | 9342.643  | 5610.364  | NM_01615E | 4392.385  | 3303.207  |
| AF090918  | 1221.098  | 1009.005  | M30627    | 829.255   | 670.076   | NM_01652E | 2143.629  | 2139.537  |
| AK021581  | 5847.406  | 9498.926  | NM_00581C | 38184.336 | 26132.754 | NM_015974 | 1983.108  | 2447.369  |
| NM_006687 | 4448.235  | 3456.992  | M28170    | 28493.596 | 17293.24  | NM_014384 | 1573.073  | 2624.798  |
| NM_013301 | 4390.487  | 3362.003  | NM_00155E | 1617.611  | 1151.367  | NM_00257Z | 3838.433  | 3921.806  |
| NM_01767Z | 1490.222  | 1402.516  | AK026223  | 9545.141  | 5182.282  | NM_00959C | 15388.229 | 21041.309 |
| AB046857  | 1673.607  | 1420.803  | NM_000874 | 6630.164  | 4660.636  | AL133037  | 939.062   | 2035.172  |
| AK024408  | 21572.471 | 17982.109 | NM_005854 | 2190.199  | 3583.986  | NM_02035C | 4330.32   | 4123.63   |
| L19364    | 5558.97   | 6205.417  | AB007863  | 45440.73  | 44446.188 | NM_00035C | 8615.315  | 10127.354 |
| NM_00539C | 2948.8    | 2619.553  | AK024456  | 14684.305 | 17432.979 | L35251    | 8705.157  | 10900.855 |
| AJ012502  | 17936.291 | 18138.096 | NM_01778E | 3836.078  | 4479.736  | BE910395  | 6244.468  | 5900.792  |
| AK024170  | 506.006   | 377.519   | D31887    | 4957.922  | 4760.288  | N46828    | 12640.906 | 16292.89  |
| AK021722  | 783.53    | 770.054   | NM_00618C | 1087.347  | 2278.572  | BI908302  | 52630.691 | 57824.789 |
| NM_000681 | 515.364   | 586.794   | NM_00231Z | 4332.101  | 8106.094  | AA460969  | 5195.591  | 7705.438  |
| AF147445  | 2554.859  | 2078.867  | NM_00445E | 3920.854  | 7106.915  | BG695859  | 3931.816  | 5012.529  |
| Y10508    | 19747.387 | 13395.521 | NM_00550Z | 876.069   | 2709.043  | M85079    | 25798.049 | 21387.041 |
| NM_00518Z | 61087.211 | 53897.883 | NM_00150Z | 7897.163  | 19788.41  | X07437    | 16775.387 | 27777.24  |
| D17074    | 2248.866  | 1753.554  | NM_005721 | 9100.099  | 16523.576 | NM_000641 | 3986.286  | 6490.362  |
| AF039944  | 4187.175  | 2938.423  | AF284223  | 3024.202  | 9236.1    | BC011655  | 3647.341  | 2173.645  |
| AJ276252  | 1863.735  | 1970.506  | AF176012  | 987.366   | 3333.296  | BC002396  | 9036.545  | 5860.173  |
| AK021716  | 6228.021  | 10042.211 | NM_01338E | 561.503   | 589.773   | AF112219  | 10500.804 | 8057.244  |
| AK025035  | 13064.669 | 21520.154 | NM_006517 | 450.379   | 497.151   | NM_006074 | 57595.699 | 64848.211 |

|           |           |           |           |           |           |           |           |           |
|-----------|-----------|-----------|-----------|-----------|-----------|-----------|-----------|-----------|
| AK002085  | 4372.442  | 7070.303  | NM_004171 | 4877.836  | 3716.32   | AF208232  | 7885.498  | 12860.071 |
| AF086200  | 310.798   | 917.511   | NM_014037 | 18784.895 | 9802.282  | NM_002988 | 9189.949  | 17070.693 |
| AB018338  | 16442.971 | 12544.225 | NM_004866 | 34424.926 | 22388.48  | NM_004186 | 1847.695  | 3283.637  |
| D80010    | 2354.883  | 2020.237  | NM_018688 | 2402.063  | 1203.529  | NM_016258 | 8734.776  | 11288.91  |
| NM_004923 | 1764.688  | 1573.239  | AK056652  | 8605.838  | 4455.449  | NM_014640 | 2483.191  | 4027.237  |
| NM_003971 | 4930.891  | 2733.698  | NM_015839 | 561.354   | 524.443   | Y10518    | 57253.43  | 64842.211 |
| AK026973  | 648.839   | 819.947   | AL137438  | 2215.729  | 3160.304  | AF155135  | 9976.632  | 13671.082 |
| NM_005822 | 952.748   | 1164.361  | NM_017957 | 13074.121 | 14439.481 | NM_014790 | 3117.356  | 5549.403  |
| U81002    | 6275.982  | 5486.734  | NM_003024 | 4502.463  | 3964.673  | NM_003571 | 26704.338 | 41264.332 |
| NM_016296 | 11430.769 | 8738.709  | NM_013248 | 6936.379  | 6201.175  | AB032965  | 58392.777 | 64112.047 |
| NM_014185 | 17552.174 | 16586.646 | NM_000034 | 58918.832 | 62191.852 | NM_004767 | 2389.675  | 4326.856  |
| L38517    | 5159.403  | 4338.56   | AK022230  | 12305.647 | 11611.667 | BF310159  | 24884.148 | 36014.621 |
| AK026101  | 17128.063 | 13572.635 | AK022147  | 18832.123 | 34855.039 | NM_000316 | 368.111   | 1171.256  |
| AK022194  | 33684.578 | 24015.387 | L25664    | 15403.772 | 28764.309 | NM_018986 | 3650.948  | 6622.795  |
| AF085963  | 2213.213  | 1847.285  | NM_014940 | 4545.934  | 8906.109  | AB044934  | 910.001   | 2146.885  |
| AK021436  | 5047.092  | 4725.536  | NM_005783 | 1455.1    | 4003.969  | U27655    | 14779.253 | 23768.037 |
| U58664    | 1992.824  | 1597.307  | AK000851  | 1506.388  | 4189.437  | Z21965    | 56162.938 | 36334.074 |
| AF085937  | 458.991   | 366.237   | NM_006900 | 13577.109 | 33718.105 | NM_012427 | 2919.375  | 2471.76   |
| AL137569  | 6827.45   | 5171.537  | AJ289111  | 32851.09  | 68062.773 | L09070    | 423.698   | 828.822   |
| AK021920  | 4808.745  | 3194.193  | NM_016356 | 57362.363 | 67348.852 | NM_000062 | 8453.518  | 8447.877  |
| AL049415  | 6108.914  | 3544.223  | NM_006406 | 14757.69  | 34073.137 | AF084560  | 16495.535 | 27958.709 |
| AK022375  | 2145.751  | 2301.297  | D11466    | 40716.965 | 23900.076 | NM_015715 | 1379.029  | 3321.381  |
| NM_003378 | 59457.906 | 63865.855 | NM_014056 | 41667.418 | 20815.148 | NM_000032 | 14576.417 | 24735.482 |
| AL110194  | 14047.646 | 22969.416 | D31885    | 42887.508 | 26471.451 | NM_002083 | 4667.299  | 8565.13   |
| AF138860  | 1995.382  | 3093.772  | NM_016649 | 5465.614  | 3620.929  | NM_002035 | 6324.806  | 9921.449  |
| NM_001942 | 549.783   | 377.324   | AK090536  | 22524.869 | 9728.395  | NM_014900 | 3126.332  | 5203.627  |
| AF200348  | 2443.09   | 1840.769  | D63477    | 1020.774  | 609.297   | BF342908  | 2763.484  | 4960.661  |
| Y11710    | 1077.935  | 909.206   | NM_020243 | 31333.018 | 12811.314 | AF118073  | 481.788   | 1571.491  |
| J03756    | 499.125   | 537.099   | NM_014051 | 7667.115  | 4114.023  | AK023510  | 7330.458  | 10679.994 |
| NM_002650 | 3766.895  | 3379.173  | AK025398  | 3200.429  | 4420.752  | NM_004345 | 3754.571  | 6497.632  |
| NM_003260 | 21099.246 | 17535.471 | AK027082  | 1627.897  | 3126.615  | NM_006528 | 796.545   | 1805.707  |
| AK024071  | 2177.528  | 1790.608  | AB037750  | 2857.505  | 2150.729  | NM_002232 | 827.859   | 2523.527  |
| AF056490  | 3165.241  | 2867.449  | AK023056  | 2302.655  | 2278.196  | NM_014570 | 5102.027  | 8001.857  |
| NM_005539 | 4517.218  | 4300.25   | NM_001120 | 47204.957 | 53262.438 | NM_005296 | 2448.296  | 4794.646  |
| NM_005541 | 6951.108  | 7788.409  | NM_017888 | 4297.325  | 7738.629  | NM_001337 | 1608.06   | 3209.874  |
| AB002319  | 2649.882  | 2710.748  | NM_004915 | 7898.703  | 10977.197 | NM_003611 | 6107.086  | 10592.387 |
| AF039942  | 3550.078  | 3221.753  | AK022207  | 1670.339  | 4418.268  | AB014538  | 7530.062  | 13068.018 |
| NM_004421 | 3160.415  | 3173.861  | AV708752  | 5470.637  | 15041.148 | NM_006209 | 1710.135  | 3265.993  |
| AB046863  | 19155.771 | 14407.908 | AF119885  | 4364.974  | 13307.041 | AK025118  | 7901.484  | 10737.676 |
| M62403    | 9183.709  | 5775.297  | NM_000750 | 1649.835  | 4104.099  | NM_000727 | 4448.569  | 3569.692  |
| NM_017883 | 6641.357  | 6490.885  | NM_004996 | 4852.919  | 11404.302 | NM_005385 | 7295.452  | 6530.106  |
| AK025131  | 3380.043  | 1820.14   | NM_005971 | 6586.62   | 14748.339 | NM_018985 | 4553.423  | 3975.479  |
| NM_000754 | 30392.463 | 21591.758 | NM_017435 | 1819.123  | 2242.386  | NM_013443 | 1147.969  | 2347.354  |
| NM_014619 | 1841.25   | 1174.043  | AK026281  | 1984.654  | 1368.169  | NM_000925 | 12924.031 | 18305.947 |
| NM_005629 | 23844.352 | 18065.762 | U23862    | 487.801   | 438.501   | NM_000465 | 3299.359  | 4711.153  |
| J04621    | 1333.829  | 2131.059  | AK026680  | 14937.216 | 5748.359  | AF116685  | 1999.802  | 3055.182  |
| NM_000718 | 4965.333  | 6801.359  | NM_012436 | 54963.664 | 57755.848 | NM_000123 | 3135.931  | 5505.839  |
| NM_000161 | 4656.476  | 7142.182  | AK001299  | 52219.133 | 31594.684 | AL137501  | 1418.966  | 2700.633  |
| BQ893560  | 322.547   | 475.448   | AB014559  | 29413.383 | 8770.001  | BE858979  | 1074.09   | 1939.63   |
| NM_001972 | 1315.865  | 1305.234  | NM_016489 | 13761.416 | 6502.374  | NM_000122 | 2824.745  | 2625.547  |
| NM_001445 | 1985.895  | 1617.044  | NM_005033 | 7616.205  | 5046.287  | NM_006712 | 56630.555 | 64057.176 |
| AK024455  | 335.385   | 419.989   | NM_015932 | 56065.371 | 46062.906 | NM_006240 | 3977.454  | 5133.552  |
| NM_002006 | 52085.531 | 38069.086 | NM_017949 | 3918.712  | 4843.516  | M37712    | 12036.814 | 15375.137 |



|           |           |           |           |           |           |           |           |           |
|-----------|-----------|-----------|-----------|-----------|-----------|-----------|-----------|-----------|
| NM_007111 | 16754.957 | 12786.473 | AK022169  | 1404.806  | 1189.741  | NM_00264E | 10559.877 | 21928.377 |
| NM_00204E | 699.143   | 460.567   | AF015592  | 3285.28   | 1893.357  | AF070670  | 19797.559 | 36677.723 |
| NM_00470Z | 1374.614  | 946.152   | AK026795  | 1920.86   | 1584.075  | NM_01615E | 5268.422  | 10029.598 |
| NM_00710E | 3306.099  | 2922.687  | NM_01639E | 6098.409  | 7986.102  | NM_01652E | 3259.569  | 6776.167  |
| AK023404  | 6630.986  | 5470.011  | NM_016617 | 12154.352 | 14289.686 | NM_015974 | 2767.826  | 2563.924  |
| NM_01323E | 2383.212  | 3082.332  | NM_002027 | 10823.926 | 20089.926 | NM_014384 | 1878.673  | 2333.385  |
| NM_00178E | 4869.734  | 5756.934  | AL162078  | 12011.008 | 18604.805 | NM_00257E | 3794.401  | 3303.583  |
| NM_016004 | 5547.783  | 7102.277  | NM_00091E | 1132.104  | 1934.216  | AF133424  | 7560.778  | 6216.411  |
| NM_00265E | 1769.259  | 1440.052  | NM_01338E | 15687.337 | 49402.414 | NM_00500E | 29137.426 | 29173.162 |
| AB028955  | 24928.021 | 18203.803 | AB002314  | 1747.162  | 5915.821  | AL133037  | 3425.083  | 5969.044  |
| U66879    | 24368.533 | 16854.621 | NM_01404E | 7436.793  | 14589.438 | NM_02035C | 4228.225  | 5237.073  |
| NM_01602Z | 6298.585  | 4851.181  | NM_01462Z | 2778.195  | 7162.575  | NM_00035C | 7569.002  | 9780.098  |
| NM_004874 | 2420.51   | 1580.003  | AB011114  | 58891.871 | 65358.168 | X91103    | 20327.324 | 29136.387 |
| NM_014204 | 2564.809  | 1661.042  | CY3Cy5    | 4631.084  | 80        | AA419164  | 4134.108  | 4741.558  |
| S70385    | 27722.049 | 16902.492 | NM_019884 | 9653.999  | 5719.412  | L35251    | 5007.672  | 5170.301  |
| M34671    | 9183.162  | 9694.188  | AF088051  | 5302.785  | 2470.724  | BE910395  | 6386.648  | 7502.838  |
| NM_01850E | 9838.735  | 7976.873  | AK023883  | 4665.968  | 2521.186  | N46828    | 12789.942 | 14730.814 |
| NM_00408E | 1716.281  | 1214.026  | AF086260  | 2637      | 1671.977  | BI908302  | 56540.922 | 60223.395 |
| NM_014944 | 13574.533 | 7800.922  | AF086366  | 2292.875  | 1463.066  | AA460969  | 5532.835  | 5736.809  |
| NM_00110E | 493.394   | 492.781   | AF086360  | 7772.444  | 7197.812  | BG695859  | 4250.326  | 4598.454  |
| NM_00735Z | 1209.972  | 1100.331  | AF086436  | 1175.576  | 1089.192  | M85079    | 26104.41  | 20995.875 |
| AF176706  | 4186.65   | 4194.92   | AF087993  | 9160.079  | 7326.558  | AA457671  | 17211.734 | 17766.785 |
| NM_014484 | 691.359   | 958.25    | AF035282  | 1926.745  | 1978.976  | X07437    | 11993.828 | 12772.574 |
| NM_00108E | 4767.575  | 4622.449  | AK021966  | 6886.007  | 6449.602  | NM_000641 | 3149.054  | 3500.929  |
| NM_01467C | 4895.208  | 4921.21   | AB018292  | 40162.977 | 33802.258 | BC008737  | 56408.07  | 71886.711 |
| NM_01904E | 8649.525  | 7617.916  | AK022842  | 1953.462  | 1996.751  | BC011655  | 4816.337  | 9974.083  |
| NM_00104C | 2570.832  | 2421.972  | NM_00700E | 25777.68  | 25043.887 | BC002396  | 10221.778 | 16815.133 |
| AF279698  | 6366.925  | 6959.914  | NM_01775E | 65363.586 | 57435.719 | AF112219  | 10482.902 | 7060.235  |
| AB040881  | 11315.903 | 9848.783  | NM_019884 | 9278.616  | 6569.118  | NM_00413E | 3365.011  | 3964.216  |
| AY007121  | 3942.946  | 3164.926  | SR2       | 61184.957 | 56909.633 | Y10518    | 59030.199 | 63443.426 |
| NM_00337Z | 13212.255 | 10305.653 | SR4       | 20458.029 | 20653.734 | AF155135  | 9256.785  | 15097.356 |
| NM_007317 | 9333.383  | 9661.748  | SR6       | 2835.194  | 3227.727  | NM_01479C | 2940.318  | 4155.163  |
| AB037826  | 1211.654  | 677.666   | SR8       | 10176.594 | 29462.383 | NM_003571 | 27267.078 | 33008.082 |
| Z36796    | 62559.293 | 62242.074 | SR10      | 33611.152 | 12462.314 | AB032965  | 58699.777 | 64080.027 |
| NM_00644E | 51103.828 | 41147.688 | CY3Cy5    | 6575.966  | 129.867   | NM_02037C | 799.446   | 1278.619  |
| NM_00155E | 505.184   | 608.95    | AF086054  | 8149.611  | 6818.559  | NM_004767 | 3818.568  | 5445.013  |
| NM_002634 | 26512.25  | 22671.73  | AK022259  | 73899.711 | 63163.473 | BF310159  | 20178.363 | 18875.756 |
| NM_01774E | 4138.925  | 2900.002  | AK022461  | 949.476   | 1217.015  | NM_01898E | 4658.728  | 5397.403  |
| NM_00293E | 10959.734 | 9614.095  | NM_01601C | 11063.535 | 8810.244  | AB044934  | 996.31    | 1467.751  |
| AK023652  | 14770.897 | 13628.772 | AF147401  | 2480.733  | 2107.411  | U27655    | 12886.283 | 10044.255 |
| AF099032  | 1913.596  | 1936.732  | AJ001904  | 974.723   | 1154.288  | NM_00579E | 3586.436  | 4907.188  |
| NM_00307C | 5318.5    | 6003.859  | AF075022  | 4953.057  | 6209.637  | NM_00336C | 3887.69   | 3794.299  |
| AL122101  | 11449.626 | 11073.374 | AF075060  | 5895.396  | 4984.106  | Z21965    | 51530.191 | 52228.137 |
| NM_01621E | 7811.033  | 6498.79   | AB002438  | 2953.074  | 2745.567  | NM_012427 | 2380.187  | 2876.434  |
| AK001649  | 491.375   | 436.724   | AF085846  | 4232.878  | 4325.579  | NM_00085Z | 2029.57   | 2145.779  |
| NM_01663E | 25872.539 | 20621.246 | AK023901  | 32498.945 | 28414.723 | NM_00039E | 3087.237  | 2725.21   |
| AB018274  | 15373.384 | 15167.79  | AF088057  | 16040.432 | 17427.633 | AW797282  | 816.82    | 785.573   |
| NM_005871 | 10848.208 | 12387.083 | AF086255  | 60728.91  | 51500.254 | NM_00240Z | 742.062   | 844.107   |
| NM_00704Z | 6305.547  | 8592.484  | AK022660  | 4281.857  | 4318.643  | NM_00006Z | 8909.753  | 9521.419  |
| NM_01633E | 15288.878 | 14025.431 | AK026847  | 1904.05   | 1200.875  | NM_00959C | 14841.052 | 28783.396 |
| BE875028  | 6723.146  | 5261.387  | AK023048  | 753.955   | 474.535   | NM_014747 | 11499.288 | 20150.174 |
| AK000511  | 7605.814  | 5558.366  | AL359560  | 1070.493  | 865.898   | Y19240    | 8981.137  | 11720.606 |
| AF121255  | 5192.562  | 5138.948  | AK026891  | 4136.996  | 2985.584  | AF091029  | 17639.094 | 21346.674 |

|           |           |           |           |           |           |           |           |           |
|-----------|-----------|-----------|-----------|-----------|-----------|-----------|-----------|-----------|
| NM_005494 | 11276.145 | 8535.748  | AK024595  | 2019.51   | 2017.747  | X97074    | 54831.945 | 59411.945 |
| NM_017946 | 1079.128  | 896.496   | AF075032  | 2060.012  | 2788.024  | AL117235  | 752.31    | 1104.898  |
| NM_004953 | 10585.398 | 6769.526  | AF085971  | 2984.001  | 2952.916  | NM_014822 | 2449.479  | 2945.339  |
| AL049682  | 7280.882  | 5969.54   | AF147302  | 8356.979  | 9337.404  | NM_005296 | 2416.876  | 3714.342  |
| NM_005526 | 12453.682 | 7999.319  | AF085929  | 12162.255 | 14601.895 | NM_003611 | 5392.71   | 6083.933  |
| AL050199  | 4574.847  | 2676.807  | AK001126  | 12288.678 | 10553.725 | AB014538  | 5819.186  | 7048.089  |
| NM_004901 | 1651.814  | 1248.5    | AF085976  | 15056.473 | 12399.315 | NM_006209 | 1167.491  | 1251.582  |
| U77088    | 868.478   | 894.112   | AL133025  | 1720.598  | 1578.18   | AK025118  | 7030.305  | 7632.374  |
| NM_006721 | 17722.107 | 18688.941 | AL137402  | 15132.369 | 14393.256 | NM_000727 | 3747.468  | 3957.088  |
| NM_016282 | 20475.314 | 19052.568 | AL137617  | 7851.306  | 5933.537  | NM_002621 | 619.152   | 876.115   |
| NM_002765 | 10597.306 | 9731.394  | AL133564  | 22702.816 | 20821.891 | NM_005385 | 6541.162  | 6950.595  |
| NM_001905 | 4094.41   | 4010.515  | AL137428  | 2335.478  | 2382.705  | NM_018985 | 4188.675  | 3106.151  |
| AF292100  | 9106.209  | 7857.339  | AL157462  | 4882.82   | 7813.553  | NM_006074 | 56324.336 | 48354.637 |
| NM_003434 | 58290.574 | 62498.547 | AL359602  | 20572.244 | 21458.26  | AF208232  | 8146.306  | 6433.605  |
| NM_018181 | 760.349   | 629.415   | NM_018190 | 66476.859 | 57757.078 | NM_002988 | 9942.507  | 8046.053  |
| X68880    | 550.312   | 410.996   | AK021744  | 2661.688  | 1792.559  | NM_004186 | 2100.78   | 2443.492  |
| NM_005654 | 787.526   | 879.527   | NM_018430 | 19209.939 | 13174.516 | NM_016258 | 8385.751  | 7579.514  |
| AF024698  | 54535.238 | 58484.492 | AL110200  | 7961.31   | 5638.119  | AF203032  | 16799.168 | 17922.303 |
| BE904617  | 46793.496 | 41955.934 | AL133640  | 6017.045  | 6801.686  | AB014542  | 21820.207 | 18465.348 |
| AK024495  | 2001.285  | 1552.813  | AK023783  | 2253.483  | 2992.611  | NM_014640 | 1346.39   | 1776.616  |
| AF024694  | 3273.73   | 2612.144  | AL358312  | 1385.966  | 2514.276  | NM_015974 | 1461.391  | 1929.056  |
| AF091081  | 22404.205 | 16359.853 | AF070647  | 58075.828 | 59971.508 | AF133424  | 5482.209  | 6962.193  |
| AK001758  | 3106.957  | 2540.96   | AF116649  | 2879.439  | 2269.633  | NM_005003 | 27755.836 | 27346.447 |
| U90842    | 1805.034  | 1474.967  | AF174394  | 3856.389  | 3587.43   | AF084560  | 15309.731 | 16287.063 |
| AF086325  | 5883.964  | 4554.42   | AK025384  | 1758.125  | 1661.202  | NM_015715 | 1508.463  | 2701.821  |
| NM_004958 | 1811.516  | 1262.337  | AF144054  | 3547.992  | 3018.722  | NM_000032 | 12064.147 | 13841.331 |
| AK026022  | 58340.586 | 42089.148 | AK025924  | 1596.191  | 1276.524  | NM_002083 | 3594.329  | 3500.184  |
| NM_003198 | 10418.504 | 7532.51   | AK021876  | 57901.391 | 54695.711 | NM_002035 | 5622.584  | 5344.089  |
| NM_004306 | 59547.199 | 61889.266 | AK022017  | 2156.624  | 1862.903  | NM_014900 | 2808.091  | 3024.994  |
| NM_006786 | 14114.053 | 15139.064 | AK022160  | 6597.627  | 5296.447  | BF342908  | 3961.206  | 3829.195  |
| NM_006205 | 2957.637  | 3143.833  | AK022295  | 1419.503  | 1399.068  | AF118073  | 476.918   | 489.242   |
| NM_004034 | 13290.672 | 13245.688 | AK021935  | 8134.795  | 8663.847  | AK023510  | 6657.265  | 5928.219  |
| NM_000130 | 15624.842 | 14242.23  | AK022187  | 15214.985 | 18262.771 | NM_004345 | 3368.068  | 3816.096  |
| AF193756  | 783.822   | 666.952   | AK022337  | 9302.338  | 8644.501  | NM_000702 | 51227.98  | 44530.02  |
| AI492087  | 982.913   | 925.133   | AL133618  | 13561.205 | 10189.74  | X71490    | 26651.783 | 24184.68  |
| R72122    | 8464.971  | 8593.595  | AF230314  | 5032.599  | 3859.633  | AF257081  | 6926.958  | 6146.169  |
| Z35309    | 10005.854 | 9195.599  | AK001086  | 2971.897  | 2181.412  | NM_006528 | 1148.301  | 880.072   |
| X04571    | 1446.843  | 1352.792  | AJ131610  | 6767.052  | 5675.847  | NM_001688 | 27603.619 | 15365.062 |
| AA700005  | 1110.333  | 1455.606  | AF119872  | 22539.895 | 19974.576 | NM_016106 | 6829.128  | 8989.193  |
| AA292025  | 4619.982  | 3451.596  | X99687    | 1599.316  | 1949.084  | NM_014570 | 3650.819  | 4188.259  |
| AA437226  | 7905.466  | 7324.758  | AI275123  | 1016.412  | 1670.876  | NM_004135 | 2461.054  | 2819.037  |
| R36143    | 3137.071  | 2256.039  | AK023255  | 67062.594 | 61670.48  | NM_013443 | 1048.26   | 1646.08   |
| XM_056359 | 2183.291  | 1428.122  | NM_002622 | 31668.73  | 25962.842 | NM_000925 | 11961.806 | 12207.845 |
| D10353/NM | 21873.227 | 21965.186 | AK024185  | 3788.81   | 3253.09   | NM_000465 | 2303.055  | 3389.002  |
| M15042    | 12512.07  | 11048.895 | NM_015417 | 824.954   | 1259.111  | NM_000123 | 3160.66   | 4668.373  |
| AK056843  | 9626.878  | 10654.652 | AL137562  | 11138.805 | 12681.901 | AL137501  | 1422.089  | 1733.391  |
| U49928    | 57755     | 59406.934 | M90355    | 66996.063 | 70211.922 | BE858979  | 623.212   | 514.199   |
| AK092859  | 1921.736  | 1466.866  | AK022495  | 4522.723  | 4545.238  | NM_000122 | 2589.406  | 1912.195  |
| NM_005793 | 14599.702 | 11571.052 | AK021632  | 1759.003  | 1719.483  | NM_006712 | 60008.691 | 62369.949 |
| M55646    | 29432.691 | 25974.025 | AK023143  | 1518.82   | 1061.444  | NM_006240 | 4268.924  | 3944.098  |
| NM_006112 | 34300.113 | 38010.133 | AK026373  | 13045.21  | 16359.457 | NM_007026 | 5094.538  | 4427.696  |
| NM_000879 | 1368.037  | 1357.693  | AK021581  | 7791.391  | 6652.503  | M37712    | 11137.073 | 6884.092  |
| M12807    | 3066.53   | 3329.391  | NM_014106 | 7819.292  | 5278.194  | NM_002648 | 10120.888 | 7425.582  |

|           |           |           |           |           |           |           |           |           |
|-----------|-----------|-----------|-----------|-----------|-----------|-----------|-----------|-----------|
| NM_001765 | 2554.874  | 2583.975  | NM_006687 | 13565.117 | 9780.307  | AF070670  | 19722.988 | 15967.888 |
| NM_003361 | 2629.348  | 2712.845  | NM_013301 | 6456.936  | 4825.212  | NM_016156 | 3945.989  | 4464.878  |
| NM_012096 | 18069.43  | 17249.521 | NM_017673 | 2089.345  | 2509.777  | NM_016528 | 1982.549  | 2197.186  |
| NM_018684 | 51190.988 | 42807.277 | AB046857  | 2420.346  | 2189.23   | CY3Cy5    | 4680.919  | 179.5     |
| NM_017983 | 1959.504  | 2236.178  | AK024408  | 48167.547 | 45250.91  | NM_000664 | 1666.208  | 789.466   |
| AF116909  | 1130.73   | 1431.883  | AF086307  | 42021.34  | 49704.859 | AK026155  | 1261.979  | 674.161   |
| BE906724  | 1942.088  | 2513.406  | L19364    | 7855.2    | 7865.693  | NM_018052 | 37361.273 | 19171.689 |
| NM_002283 | 18902.988 | 28086.537 | NM_005390 | 7390.417  | 7526.367  | AK022386  | 11659.202 | 7740.849  |
| AJ276095  | 9516.729  | 12622.105 | AJ012502  | 27449.166 | 39213.359 | NM_002767 | 17768.566 | 10754.357 |
| NM_004819 | 5084.527  | 5048.842  | AK024170  | 1254.869  | 1736.127  | AF131846  | 20377.418 | 12047.351 |
| NM_007184 | 3848.307  | 3290.663  | AK021722  | 1609.692  | 1737.173  | AF088069  | 7205.639  | 3706.559  |
| NM_005291 | 52224.359 | 42719.965 | NM_000681 | 1771.235  | 1729.795  | AF086551  | 805.795   | 739.185   |
| AF253316  | 743.99    | 646.371   | AF147445  | 5323.277  | 4487.522  | NM_013393 | 4312.584  | 3310.356  |
| NM_005855 | 898.648   | 1568.892  | Y10508    | 35925.109 | 28878.152 | AK025082  | 1452.773  | 1050.461  |
| NM_002923 | 4793.044  | 4176.771  | NM_005182 | 66833.258 | 69626.172 | AF086535  | 755.308   | 584.033   |
| NM_006794 | 2695.258  | 3215.272  | D17074    | 3396.563  | 3759.916  | AB040901  | 1567.761  | 1315.14   |
| NM_018653 | 925.773   | 1673.063  | AF039944  | 7374.596  | 8109.241  | AL137406  | 3484.827  | 2775.767  |
| NM_005388 | 16336.361 | 23456.08  | AJ276252  | 3061.341  | 3271.45   | NM_000498 | 581.485   | 632.026   |
| NM_016257 | 1019.822  | 839.355   | AK025035  | 16668.801 | 16097.936 | NM_000664 | 1271.582  | 1082.359  |
| NM_002717 | 5624.173  | 4992.645  | AK002085  | 7642.183  | 6475.18   | SR1       | 84822.398 | 64776.078 |
| AF231916  | 6265.166  | 7100.794  | AB018338  | 35177.199 | 23335.764 | SR3       | 30466.613 | 27989.027 |
| NM_003501 | 10263.389 | 10266.06  | D80010    | 4017.128  | 3149.257  | SR5       | 3414.794  | 3785.397  |
| AK022654  | 45007.145 | 43919.195 | NM_004923 | 2945.156  | 2446.407  | SR7       | 3186.013  | 26442.174 |
| BC002905  | 8243.896  | 7824.396  | NM_003971 | 8303.127  | 7222.349  | SR9       | 9211.228  | 1816.443  |
| NM_018091 | 16579.686 | 16954.756 | AK026973  | 993.262   | 1253.027  | CY3Cy5    | 6620.939  | 318.577   |
| NM_001108 | 9258.224  | 11835.007 | NM_005822 | 1612.346  | 1696.842  | AK027147  | 24860.824 | 14251.646 |
| NM_001637 | 1199.995  | 1135.768  | U81002    | 10243.362 | 9317.62   | AK023887  | 816.69    | 642.347   |
| NM_016630 | 26604.514 | 25916.133 | NM_016299 | 24847.6   | 25918.854 | AF088022  | 10479.326 | 7245.052  |
| NM_014291 | 11568.266 | 10466.8   | NM_014185 | 36509.691 | 39776.813 | AK026537  | 2054.253  | 1489.513  |
| NM_014631 | 1629.999  | 1349.984  | L38517    | 14563.372 | 12427.556 | NM_015485 | 2964.203  | 2172.37   |
| NM_001089 | 8866.543  | 10994.998 | AK026101  | 37999.758 | 37901.043 | AF147411  | 765.989   | 899.357   |
| NM_000120 | 2112.217  | 3126.663  | AK022194  | 63369.152 | 69383.977 | NM_002666 | 12129.099 | 14339.835 |
| NM_004519 | 330.046   | 805.228   | AF085963  | 4585.289  | 4945.601  | AF202145  | 3068.631  | 5108.787  |
| U09384    | 2608.668  | 2214.596  | AF131851  | 1592.803  | 1635.279  | AK022412  | 9547.148  | 2716.888  |
| NM_004794 | 12850.086 | 15184.589 | AK021436  | 2483.097  | 2760.73   | AK023073  | 13980.411 | 4223.751  |
| NM_002803 | 14856.578 | 16449.855 | U58664    | 2404.674  | 2492.553  | AK023922  | 543.273   | 227.137   |
| NM_005508 | 5406.135  | 6141.722  | AF085937  | 1000.346  | 898.328   | AK022438  | 1135.97   | 559.858   |
| NM_018485 | 1050.674  | 1255.278  | AL137569  | 15826.269 | 18103.986 | AK023316  | 426.683   | 545.388   |
| NM_006788 | 1994.189  | 1623.964  | AK021920  | 7743.258  | 7743.631  | AK023764  | 753.69    | 466.048   |
| AK025039  | 471.534   | 754.957   | AI065056  | 848.768   | 858.874   | AK024082  | 634.127   | 508.225   |
| NM_016568 | 1917.522  | 3193.678  | NM_003378 | 67712.93  | 68005.828 | AK025072  | 4067.544  | 2673.914  |
| NM_002987 | 766.101   | 538.049   | AL110194  | 22447.205 | 15905.703 | AK022410  | 1038.597  | 714.439   |
| NM_014774 | 3471.348  | 3402.285  | AF138860  | 2765.478  | 2469.779  | AF086541  | 494.196   | 443.995   |
| NM_014143 | 25488.283 | 21480.604 | AF200348  | 4879.203  | 3470.245  | L10378    | 11699.778 | 8716.376  |
| NM_012200 | 3808.826  | 3593.007  | Y11710    | 2114.297  | 1300.676  | AK022179  | 1113.925  | 749.92    |
| NM_001724 | 2858.216  | 3763.135  | J03756    | 1931.862  | 1786.1    | AK022173  | 523.152   | 548.743   |
| NM_000150 | 1942.215  | 2186.548  | NM_002650 | 5728.797  | 5126.175  | AJ227860  | 1396.331  | 1173.184  |
| AB023152  | 616.208   | 490.45    | NM_003260 | 43665.789 | 47829.09  | AL157448  | 568.198   | 578.36    |
| NM_006212 | 2805.186  | 2735.73   | AK024071  | 3423.68   | 2550.693  | AF026942  | 3483.776  | 2486.243  |
| AK022872  | 4219.941  | 4026.559  | AF056490  | 7646.614  | 8968.396  | AJ276429  | 3012.577  | 2750.356  |
| AK024272  | 5083.708  | 4615.876  | NM_005539 | 6749.91   | 7541.462  | AK023589  | 1267.396  | 1488.713  |
| NM_016381 | 1741.241  | 1590.236  | BF341504  | 710.571   | 838.5     | AK021590  | 2428.053  | 2547.804  |
| AL591715  | 1478.356  | 1559.338  | NM_005541 | 12058.771 | 11543.443 | AB002441  | 580.979   | 594.285   |

|           |           |           |           |           |           |           |           |           |
|-----------|-----------|-----------|-----------|-----------|-----------|-----------|-----------|-----------|
| NM_018042 | 14757.116 | 14669.435 | AB002319  | 3916.142  | 3768.582  | AK023998  | 1585.167  | 1478.951  |
| BE741525  | 1698.462  | 2104.066  | AF039942  | 6547.668  | 5615.488  | AK021643  | 502.394   | 662.41    |
| BF030555  | 47768.328 | 47267.852 | NM_004421 | 5303.562  | 5574.379  | NM_014054 | 2079.494  | 588.31    |
| NM_012433 | 12144.075 | 10951.165 | AB046863  | 39629.578 | 40862.121 | AK021840  | 79402.383 | 26869.217 |
| NM_005605 | 5010.959  | 5652.561  | M62403    | 24404.094 | 27022.549 | AF086480  | 3462.217  | 2317.645  |
| NM_002576 | 3990.517  | 4604.466  | NM_017883 | 11092.191 | 12025.731 | AK022122  | 987.267   | 716.698   |
| NM_003582 | 2419.127  | 2045.155  | AK025131  | 6340.063  | 6409.546  | AK022415  | 61903.766 | 42045.48  |
| AF057354  | 941.76    | 1467.426  | NM_000754 | 39417.082 | 39739.133 | AL137368  | 2310.233  | 1612.158  |
| AF169351  | 11189.988 | 17298.848 | NM_014619 | 3506.828  | 3271.531  | AK021932  | 5208.062  | 5273.639  |
| NM_000282 | 3556.557  | 2974.591  | NM_005629 | 45274.137 | 48489.5   | AK026787  | 5024.353  | 3671.314  |
| NM_000532 | 15898.179 | 17715.012 | J04621    | 1609.345  | 1564.106  | AK023542  | 1121.559  | 944.909   |
| NM_016341 | 1713.953  | 1581.64   | NM_000718 | 7119.438  | 5835.156  | AK000203  | 1255.472  | 1211.677  |
| NM_006786 | 13483.688 | 13186.634 | NM_001972 | 1620.715  | 1363.952  | AK021845  | 16472.748 | 12428.935 |
| NM_006205 | 2558.283  | 2733.217  | NM_001445 | 3016.814  | 1961.629  | NM_018592 | 4871.665  | 4258.129  |
| NM_004034 | 11366.407 | 12290.571 | AK024455  | 603.842   | 533.728   | NM_018503 | 57345.902 | 49902.414 |
| NM_000130 | 13604.658 | 12495.811 | NM_002006 | 56043.285 | 57518.234 | NM_016445 | 27452.311 | 26082.211 |
| AF193756  | 823.212   | 722.643   | NM_007111 | 27028.297 | 16833.342 | AL049670  | 5748.734  | 5524.646  |
| AI492087  | 971.942   | 1056.721  | NM_002048 | 850.72    | 663.773   | AK021465  | 653.988   | 648.42    |
| R72122    | 8411.284  | 9468.007  | NM_004702 | 1751.707  | 1448.004  | NM_018512 | 28802.031 | 31770.738 |
| Z35309    | 11460.816 | 11064.893 | NM_007109 | 5024.39   | 4369.922  | NM_018568 | 392.737   | 479.582   |
| X04571    | 1417.99   | 1496.552  | AK023404  | 20412.561 | 16966.803 | AL161991  | 14229.203 | 3442.081  |
| AA700005  | 1351.294  | 1629.185  | NM_013239 | 2845.948  | 2767.06   | D17032    | 19720.246 | 4622.402  |
| AA292025  | 4634.746  | 4613.019  | NM_001789 | 5882.503  | 3952.879  | NM_017941 | 2372.249  | 1025.493  |
| AA437226  | 7811.962  | 8147.681  | NM_016004 | 8719.16   | 8162.489  | D28384    | 73429.469 | 62866.793 |
| R36143    | 2965.781  | 2570.642  | NM_002655 | 3489.334  | 3699.483  | AF118079  | 62228.844 | 48908.07  |
| XM_056359 | 2500.631  | 2324.452  | AB028955  | 54404.195 | 58774.711 | AF277572  | 363.262   | 482.451   |
| D10353/NM | 26037.559 | 31118.793 | U66879    | 44744.945 | 49595.516 | AL365413  | 1967.252  | 1476.981  |
| M15042    | 13214.171 | 15439.701 | NM_016022 | 11386.248 | 11590.99  | NM_005258 | 8631.031  | 5536.481  |
| AK056843  | 10237.006 | 8833.651  | NM_004874 | 3449.352  | 2846.505  | NM_003948 | 391.259   | 391.7     |
| U49928    | 51715.332 | 58628.348 | NM_014204 | 2826.792  | 3858.851  | AK025062  | 1461.641  | 1212.12   |
| AK096645  | 56403.684 | 62893.445 | S70385    | 40187.254 | 39618.059 | Z27405    | 57528.492 | 41370.895 |
| NM_018291 | 15160.884 | 11818.31  | M34671    | 13195.846 | 12330.477 | AK023412  | 1589.189  | 1346.006  |
| NM_006899 | 6807.965  | 7307.962  | NM_001941 | 2381.312  | 2106.632  | NM_014617 | 55824.305 | 40472.316 |
| NM_000879 | 2844.921  | 2264.853  | NM_018509 | 13674.026 | 12747.31  | AK074682  | 3907.57   | 3724.482  |
| M12807    | 3080.06   | 2578.705  | NM_004086 | 7779.905  | 7998.488  | X74605    | 1345.426  | 1200.361  |
| NM_001765 | 2381.793  | 2363.41   | NM_007352 | 810.667   | 903.024   | AK024513  | 716.681   | 791.392   |
| NM_003361 | 2779.55   | 2600.794  | AF176706  | 11522.481 | 8108.625  | BC036692  | 2620.764  | 2728.439  |
| NM_012099 | 19290.721 | 17426.465 | NM_001086 | 8536.507  | 6896.227  | AJ009640  | 2667.015  | 2278.757  |
| NM_018684 | 54392.211 | 46326.508 | NM_014670 | 10523.739 | 8932.438  | Y11163    | 880.77    | 1149.726  |
| NM_017983 | 1646.624  | 2006.752  | NM_019048 | 12976.412 | 11649.014 | AF086391  | 451.237   | 865.931   |
| AF116909  | 1230.549  | 1254.405  | NM_001040 | 3797.417  | 4025.201  | AF147340  | 550.501   | 654.373   |
| BE906724  | 2160.768  | 2310.174  | AF279698  | 14142.324 | 13620.333 | AK025119  | 635.14    | 269.545   |
| NM_002283 | 16400.313 | 16129.604 | NM_019849 | 6784.736  | 5985.873  | AJ224170  | 2587.615  | 2245.572  |
| AJ276095  | 9630.631  | 9904.577  | NM_000049 | 1143.755  | 706.055   | AF085866  | 10145.369 | 8642.511  |
| NM_004819 | 5572.672  | 6615.691  | AB032996  | 64069.953 | 58273.793 | AK000806  | 65221.398 | 60297.676 |
| NM_007184 | 3922.162  | 4625.284  | AB040881  | 15493.103 | 13423.987 | NM_016471 | 4767.526  | 4333.14   |
| NM_005291 | 55090.984 | 50706.949 | AY007121  | 5867.082  | 6985.512  | NM_001145 | 968.137   | 637.644   |
| AF253316  | 502.369   | 823.577   | NM_003372 | 18744.023 | 21427.035 | NM_005364 | 15392.176 | 13294.975 |
| NM_005855 | 1024.689  | 1052.261  | NM_003980 | 559.194   | 1033.061  | AK023482  | 6599.59   | 6367.86   |
| NM_002923 | 8941.599  | 8910.427  | NM_006443 | 62996.871 | 58511.609 | AK022798  | 656.855   | 937.329   |
| NM_006794 | 3186.75   | 2888.644  | NM_001559 | 871.714   | 893.105   | AL157423  | 638.54    | 902.224   |
| NM_018653 | 1029.603  | 867.521   | NM_002634 | 40504.727 | 39152.766 | AK023115  | 504.699   | 649.43    |
| NM_005388 | 16370.642 | 14052.313 | NM_017749 | 7035.983  | 6268.617  | AK023176  | 2002.965  | 2849.78   |

|           |           |           |           |           |           |           |           |           |
|-----------|-----------|-----------|-----------|-----------|-----------|-----------|-----------|-----------|
| NM_007232 | 55665.77  | 51854.73  | NM_002938 | 22491.324 | 15759.698 | NM_006826 | 15382.202 | 4258.921  |
| NM_016257 | 957.621   | 682.991   | AK023652  | 48687.34  | 43082.75  | AB007973  | 15917.209 | 6998.666  |
| NM_002717 | 5358.059  | 5207.398  | AF099032  | 4688.227  | 3296.163  | M96843    | 7950.998  | 5012.166  |
| NM_001153 | 498.025   | 807.001   | NM_004780 | 3298.358  | 2141.729  | NM_017791 | 5245.074  | 4943.692  |
| AK022654  | 47276.512 | 43390.699 | NM_016216 | 27922.65  | 21337.734 | NM_005882 | 9897.527  | 8932.644  |
| BC002905  | 7770.274  | 6309.356  | AK001649  | 820.375   | 1090.332  | BC012304  | 5165.832  | 9458.821  |
| NM_018091 | 15266.234 | 13670.018 | NM_016638 | 43299.164 | 43843.461 | AB046815  | 3118.097  | 3724.974  |
| NM_001108 | 9242.838  | 11735.543 | AB018274  | 26708.1   | 23273.258 | NM_000440 | 5564.236  | 4231.799  |
| NM_001637 | 995.798   | 1032.743  | NM_005871 | 16379.183 | 13225.605 | NM_001297 | 5284.176  | 5053.888  |
| NM_016630 | 27261.578 | 26882.34  | NM_007042 | 9638.549  | 9337.865  | NM_004403 | 8439.936  | 10372.002 |
| NM_014291 | 13319.877 | 11649.515 | NM_016333 | 24991.732 | 20293.486 | X64993    | 1484.918  | 2032.427  |
| NM_014631 | 1343.271  | 1229.066  | BE875028  | 15091.615 | 13418.574 | NM_004434 | 16401.975 | 21058.826 |
| NM_001089 | 7314.475  | 6455.965  | AK000511  | 16076.462 | 16727.58  | NM_006269 | 970.143   | 912.265   |
| NM_000120 | 1854.919  | 1733.389  | AF121255  | 7792.404  | 9688.786  | NM_016230 | 4678.822  | 4790.714  |
| NM_004519 | 916.625   | 1098.328  | NM_005494 | 17978.895 | 20634.783 | NM_001083 | 2560.502  | 2380.277  |
| U09384    | 2966.817  | 2691.304  | NM_005528 | 26606.818 | 26394.936 | AK023966  | 13418.117 | 12443.693 |
| NM_004794 | 8781.697  | 13867.026 | AL050199  | 6664.478  | 5833.043  | AK025702  | 3563.859  | 4706.411  |
| NM_002803 | 16427.482 | 17484.414 | NM_004901 | 3331.032  | 2332.999  | NM_018958 | 2277.418  | 2359.794  |
| NM_005508 | 5274.769  | 5468.36   | U77088    | 1554.416  | 1323.878  | AL050200  | 616.985   | 757.063   |
| NM_018485 | 1065.021  | 980.838   | NM_006721 | 33577.934 | 28483.049 | NM_002367 | 735.845   | 1090.672  |
| NM_006788 | 2876.136  | 2443.095  | NM_016282 | 43034.883 | 45255.852 | AK022038  | 2383.48   | 3372.107  |
| AK025039  | 3519.43   | 3154.583  | NM_002765 | 20561.805 | 26606.676 | AF253321  | 3890.464  | 1613.709  |
| NM_016568 | 2679.886  | 2399.15   | NM_001905 | 7328.865  | 8234.403  | U80735    | 7019.417  | 3378.558  |
| NM_002987 | 394.964   | 476.765   | AF292100  | 16528.762 | 14119.063 | NM_017850 | 3828.973  | 3184.952  |
| AB033102  | 51401.797 | 48874.395 | NM_003434 | 67231.836 | 71067.727 | NM_016522 | 1776.531  | 1768.218  |
| NM_014774 | 3251.251  | 4066.618  | NM_018181 | 1251.028  | 1765.052  | NM_002224 | 11670.418 | 11444.432 |
| NM_014143 | 25140.471 | 28715.867 | X68880    | 1197.867  | 951.453   | X07979    | 47113.133 | 48155.422 |
| M55646    | 25970.324 | 26856.963 | NM_005654 | 1355.621  | 1682.459  | NM_003874 | 1606.272  | 1707.911  |
| NM_006112 | 32721.074 | 47653.926 | AF024698  | 66555.398 | 75382.164 | NM_000082 | 1010.57   | 1069.79   |
| NM_000150 | 2743.703  | 2402.345  | BE904617  | 62518.078 | 62361.164 | L13857    | 1927.213  | 1386.624  |
| AB023152  | 503.093   | 752.028   | AK024495  | 3053.123  | 2876.855  | NM_018098 | 7446.519  | 5527.752  |
| NM_006212 | 2897.582  | 2305.287  | AF024694  | 7498.151  | 8146.863  | AF286164  | 1268.418  | 862.487   |
| AK022872  | 4796.3    | 4218.874  | AF091081  | 35601.445 | 30717.947 | AF146277  | 8709.166  | 5511.943  |
| AK024272  | 5024.081  | 5003.188  | AK001758  | 5778.257  | 5577.828  | NM_002559 | 895.919   | 578.488   |
| NM_016381 | 1564.839  | 1926.867  | NM_004959 | 2524.883  | 2326.688  | AF055033  | 35591.289 | 25001.893 |
| AL591715  | 1113.25   | 1275.284  | AK026022  | 66734.063 | 59021.418 | NM_017700 | 560.379   | 855.121   |
| NM_018042 | 16669.557 | 14592.735 | NM_003199 | 16949.752 | 15001.332 | M37191    | 18108.787 | 17617.936 |
| BE741525  | 1541.97   | 1730.428  | NM_004306 | 66919.195 | 73665.328 | NM_005242 | 491.249   | 607.806   |
| BF030555  | 47438.734 | 42279.242 | NM_001153 | 1380.969  | 1291.189  | NM_003020 | 1044.633  | 908.965   |
| NM_012433 | 10840.261 | 8105.109  | NM_006786 | 22166.102 | 21868.578 | NM_003404 | 43728.801 | 43642.383 |
| NM_005605 | 5085.074  | 4948.302  | NM_006205 | 4474.462  | 4565.046  | NM_001114 | 1329.349  | 1715.219  |
| NM_002576 | 3979.908  | 4522.802  | NM_004034 | 38916.043 | 45811.102 | NM_004455 | 719.536   | 289.753   |
| NM_003582 | 2471.425  | 2737.542  | NM_000130 | 37459.246 | 40320.969 | NM_006010 | 18614.258 | 5578.839  |
| AF057354  | 697.079   | 741.764   | AF193756  | 1588.683  | 1928.559  | K03191    | 4165.514  | 2229.78   |
| AF169351  | 11386.301 | 10064.201 | AI492087  | 1948.37   | 2718.571  | NM_005079 | 25952.564 | 15711.656 |
| M14200    | 58198.449 | 56830.16  | R72122    | 16172.462 | 18523.037 | NM_005192 | 35325.305 | 23469.637 |
| NM_000282 | 3365.835  | 4634.456  | Z35309    | 22172.119 | 27463.881 | NM_004585 | 2220.454  | 2747.907  |
| NM_000532 | 14924.685 | 25596.768 | X04571    | 2643.37   | 2959.438  | NM_015032 | 5151.274  | 3383.011  |
| NM_016341 | 1508.488  | 2315.552  | AA700005  | 2299.193  | 2300.998  | AK022956  | 5844.136  | 4802.473  |
| AF231916  | 6510.671  | 7461.375  | AA292025  | 7380.771  | 7043.868  | AK023121  | 1289.808  | 1234.154  |
| NM_003501 | 9480.232  | 11646.971 | AA437226  | 15432.317 | 16396.355 | NM_014104 | 61859.895 | 55660.422 |
| NM_004034 | 13975.332 | 16278.12  | R36143    | 7785.875  | 7323.634  | NM_002392 | 1475.46   | 929.552   |
| NM_000130 | 14670.79  | 11143.853 | XM_056359 | 4757.487  | 4116.86   | NM_002749 | 57747.691 | 59292.727 |

|           |           |           |           |           |           |           |           |           |
|-----------|-----------|-----------|-----------|-----------|-----------|-----------|-----------|-----------|
| AF193756  | 1071.335  | 1033.218  | U49928    | 61802.426 | 63719.266 | NM_01821E | 12250.213 | 10670.716 |
| AI492087  | 1005.815  | 1153.967  | AK096645  | 64597.809 | 61467.52  | NM_00339C | 6409.419  | 4775.77   |
| R72122    | 8691.436  | 9492.07   | AK092859  | 3153.368  | 3493.33   | AL137747  | 4526.96   | 3419.509  |
| Z35309    | 11479.494 | 11553.242 | NM_005793 | 23725.848 | 24855.051 | NM_01475E | 5758.402  | 4477.268  |
| X04571    | 1167.588  | 1450.966  | M55646    | 61383.211 | 58444.75  | AF077188  | 16754.592 | 14532.277 |
| AA700005  | 1236.933  | 1317.282  | NM_006112 | 48155.387 | 53461.484 | NM_01244E | 4598.85   | 4322.732  |
| AA292025  | 4423.586  | 3905.563  | M12807    | 5357.305  | 5271.439  | NM_01833E | 1395.126  | 1466.725  |
| AA437226  | 8264.025  | 6526.02   | NM_00176E | 6399.913  | 6853.196  | NM_01868E | 58151.508 | 51973.504 |
| R36143    | 2633.86   | 2639.377  | NM_003361 | 6715.81   | 8373.119  | NM_006984 | 6069.901  | 5761.336  |
| XM_056359 | 2054.311  | 1564.338  | NM_01209E | 34604.664 | 36388.078 | AF231919  | 2016.717  | 2195.517  |
| D10353/NM | 24462.088 | 20587.689 | NM_018684 | 65088.027 | 65213.91  | NM_018214 | 2364.456  | 3221.813  |
| M15042    | 12286.323 | 11812.932 | NM_017983 | 3096.553  | 3895.923  | NM_00507E | 21757.471 | 30222.314 |
| AK056843  | 8318.676  | 9641.524  | AF116909  | 2396.932  | 2722.042  | NM_019023 | 76171.32  | 56428.426 |
| U49928    | 50119.219 | 56816.91  | BE906724  | 3816.895  | 4699.747  | NM_00297C | 1134.797  | 587.31    |
| AK096645  | 49105.625 | 54099.289 | NM_002283 | 40881.16  | 45848.109 | NM_00549E | 30307.123 | 16157.944 |
| AK092859  | 1669.453  | 1871.787  | AJ276095  | 29677.041 | 29976.438 | NM_01327C | 1902.365  | 1918.008  |
| NM_018291 | 11739.985 | 16190.991 | NM_00481E | 9272.863  | 9300.226  | NM_015387 | 5688.271  | 4985.878  |
| NM_00553C | 11042.807 | 14716.756 | NM_007184 | 6563.246  | 6468.635  | NM_001733 | 5992.379  | 2992.443  |
| NM_00689E | 6682.765  | 7891.937  | NM_005291 | 65731.133 | 54261.441 | NM_00506E | 964.161   | 939.102   |
| NM_01220C | 3494.963  | 4161.303  | AF253316  | 1439.187  | 1527.713  | NM_01782E | 31544.914 | 25227.889 |
| NM_001724 | 3037.072  | 5181.117  | NM_018653 | 1506.25   | 1742.641  | NM_01403E | 3286.815  | 2659.324  |
| BE906724  | 1921.88   | 2548.538  | NM_00538E | 23943.729 | 28695.883 | NM_020122 | 22714.473 | 17063.371 |
| NM_002283 | 17378.459 | 17700.439 | NM_007232 | 64497.953 | 56675.758 | NM_013432 | 13387.982 | 12309.835 |
| AJ276095  | 9494.258  | 9351.957  | NM_016257 | 4560.763  | 5373.568  | AB020716  | 821.185   | 967.733   |
| NM_00481E | 5313.417  | 5370.304  | NM_002717 | 8615.561  | 10275.101 | U57341    | 649.266   | 708.563   |
| NM_007184 | 3898.416  | 3744.706  | AF231916  | 28136.188 | 26285.207 | NM_00229E | 60812.438 | 54423.824 |
| NM_005291 | 49067.777 | 48555.828 | NM_003501 | 21243.115 | 21851.785 | AK027130  | 1047.545  | 1582.482  |
| AF253316  | 562.403   | 652.424   | AK022654  | 63209.785 | 64827.363 | NM_00547E | 39734.211 | 39843.211 |
| NM_00585E | 904.611   | 859.419   | BC002905  | 19482.02  | 18579.934 | NM_00573C | 60764.773 | 63251.664 |
| NM_002923 | 4469.85   | 3846.104  | NM_018091 | 26434.322 | 29358.723 | X82240    | 15525.489 | 20291.588 |
| NM_006794 | 2373.764  | 2161.589  | NM_001108 | 13641.098 | 21956.977 | NM_01399E | 8030.369  | 10849.984 |
| NM_018653 | 1085.382  | 746.558   | NM_001637 | 2438.784  | 3196.021  | U52096    | 11464.763 | 3052.811  |
| NM_00538E | 15888.779 | 16341.496 | NM_01663C | 37616.5   | 40435.617 | AB013897  | 2660.132  | 1151.427  |
| NM_007232 | 52792.637 | 52359.895 | NM_014291 | 25313.277 | 23128.527 | NM_00552E | 35205.141 | 12792.781 |
| NM_003027 | 1415.353  | 1428.174  | NM_014631 | 2093.159  | 1847.303  | AK001669  | 3001.317  | 1052.395  |
| NM_016257 | 1179.999  | 1211.022  | NM_00108E | 20242.033 | 24151.406 | NM_00619E | 1470.642  | 1011.042  |
| NM_002717 | 6331.624  | 8710.514  | NM_00012C | 4470.658  | 6238.964  | NM_00619C | 27505.314 | 21932.32  |
| NM_012114 | 997.945   | 1299.467  | NM_00451E | 841.005   | 1054.457  | NM_00636E | 4241.594  | 3544.773  |
| NM_01448E | 611.962   | 789.498   | U09384    | 4375.715  | 4346.441  | NM_004133 | 1420.588  | 900.052   |
| NM_00302E | 48285.984 | 43178.438 | NM_004794 | 27525.285 | 35691.5   | NM_00161E | 12160.904 | 9688.927  |
| U52051    | 556.186   | 728.204   | NM_002803 | 28028.502 | 30051.072 | BC000401  | 16579.766 | 14463.279 |
| NM_02017E | 8864.267  | 10943.862 | NM_00550E | 8576.682  | 8531.041  | NM_00642E | 5247.567  | 4140.705  |
| NM_00430E | 48995.164 | 55832.945 | NM_01848E | 1521.536  | 1678.043  | BF344046  | 4608.875  | 4193.185  |
| NM_00678E | 14447.624 | 22361.352 | NM_00678E | 5551.188  | 6449.65   | AF432218  | 25438.791 | 28093.373 |
| NM_00620E | 2303.75   | 3422.988  | AK025039  | 710.732   | 746.969   | NM_00428E | 6677.301  | 7196.79   |
| NM_004283 | 2290.54   | 1921.558  | NM_01656E | 4193.423  | 5565.968  | AL133644  | 17394.049 | 26007.912 |
| NM_004163 | 48063.75  | 42999.852 | NM_002987 | 1201.825  | 1187.346  | NM_00270E | 5324.081  | 6400.247  |
| AK026308  | 2444.205  | 2537.404  | AB033102  | 63568.215 | 58841.406 | NM_00419E | 1184.755  | 1610.194  |
| NM_013337 | 3727.941  | 4423.725  | NM_014774 | 7788.628  | 9092.765  | NM_00687E | 2063.707  | 407.241   |
| NM_004193 | 3201.195  | 3117.869  | NM_014143 | 35766.438 | 34358.266 | NM_000293 | 1487.425  | 236.38    |
| NM_002803 | 16171.958 | 17209.574 | NM_01220C | 6514.502  | 5589.977  | NM_00374E | 1021.938  | 345.479   |
| NM_00550E | 5590.769  | 6032.574  | NM_001724 | 5267.934  | 5904.698  | NM_01226E | 394.312   | 153.012   |
| NM_01848E | 1010.361  | 1272.51   | NM_00015C | 8746.56   | 8470.5    | AF153821  | 3539.538  | 1565.234  |

|           |           |           |           |           |           |           |           |           |
|-----------|-----------|-----------|-----------|-----------|-----------|-----------|-----------|-----------|
| NM_00678E | 2063.301  | 2242.235  | AB023152  | 1083.073  | 1168.915  | NM_01337C | 3760.979  | 4594.6    |
| NM_01656E | 1800.865  | 1811.519  | NM_006212 | 5779.748  | 4671.157  | NM_001374 | 1952.278  | 1767.401  |
| NM_002987 | 354.043   | 273.579   | AK022872  | 7881.119  | 7724.661  | NM_00331C | 4840.096  | 3761.02   |
| AB033102  | 48513.277 | 49775.953 | AK024272  | 10831.419 | 10098.38  | AK024461  | 6755.705  | 6142.662  |
| NM_014774 | 3941.364  | 4118.864  | NM_016381 | 2831.124  | 2893.64   | AK025485  | 1475.841  | 864.927   |
| NM_014143 | 25932.129 | 31845.508 | AL591715  | 3714.373  | 3872.469  | NM_01763E | 4737.681  | 3694.297  |
| M55646    | 36105.457 | 40000.309 | NM_018042 | 36621.074 | 39524.082 | X62534    | 2430.779  | 2260.707  |
| NM_006112 | 33959.586 | 37755.98  | BE741525  | 3113.461  | 3417.101  | AF027147  | 36397.184 | 27619.959 |
| M12807    | 3099.317  | 3130.229  | BF030555  | 61895.914 | 64704.277 | M62399    | 6763.869  | 6388.316  |
| NM_00176E | 1605.911  | 1993.537  | NM_012433 | 20503.629 | 18971.707 | NM_002357 | 1737.832  | 1718.901  |
| NM_003361 | 1923.79   | 2740.598  | NM_00560E | 16433.752 | 15486.883 | U71600    | 4954.173  | 5230.267  |
| NM_01209E | 16063.514 | 18600.922 | NM_00257E | 6927.811  | 9169.236  | NM_004472 | 1195.524  | 1694.908  |
| NM_018684 | 52282.375 | 56587.066 | NM_003582 | 5558.65   | 6183.326  | AB037862  | 2457.868  | 3569.808  |
| NM_017983 | 2371.504  | 3800.968  | AF057354  | 1779.729  | 2321.766  | NM_005392 | 1932.965  | 1869.944  |
| AF116909  | 2450.431  | 4344.963  | AF169351  | 32762.484 | 35803.891 | AL133572  | 8928.281  | 11601.726 |
| NM_000282 | 2372.629  | 2723.334  | M14200    | 65955.086 | 63830.914 | AK022500  | 9528.544  | 11556.184 |
| NM_000532 | 16464.953 | 16946.891 | NM_000282 | 6204.16   | 6394.483  | NM_003447 | 1121.298  | 1813.762  |
| NM_016341 | 1417.487  | 1508.963  | NM_000532 | 27136.859 | 33580.844 | NM_005014 | 2942.77   | 949.696   |
| AF231916  | 7340.666  | 6322.98   | NM_016341 | 2679.26   | 2457.602  | NM_006944 | 1398.105  | 1524.701  |
| NM_003501 | 9693.808  | 9074.638  | NM_00678E | 20812.893 | 19343.844 | NM_004407 | 1362.852  | 1384.349  |
| AK022654  | 49606.313 | 53314.98  | NM_00620E | 4749.404  | 4287.982  | NM_00007C | 7528.384  | 5060.19   |
| BC002905  | 9491.24   | 8961.356  | NM_004034 | 40073.203 | 39988.953 | NM_001202 | 2272.728  | 1340.24   |
| NM_018091 | 16261.184 | 16043.822 | NM_00013C | 38014.031 | 33605.887 | AB037804  | 605.734   | 238.317   |
| NM_001108 | 8988.929  | 11811.714 | AF193756  | 1595.321  | 1738.504  | U34249    | 2349.227  | 723.549   |
| NM_001637 | 948.031   | 967.074   | AI492087  | 1542.15   | 1600.311  | NM_00328E | 55320.445 | 53348.367 |
| NM_01663C | 25503.355 | 23113.861 | R72122    | 15426.741 | 17526.801 | AI200114  | 3809.746  | 2420.357  |
| NM_014291 | 12909.838 | 12115.592 | Z35309    | 23387.895 | 24473.936 | M23254    | 1512.141  | 1199.046  |
| NM_014631 | 1481.925  | 1105.683  | X04571    | 2784.98   | 3279.105  | BE618539  | 9425.483  | 7506.845  |
| NM_00108E | 10610.001 | 12100.551 | AA700005  | 2161.854  | 2824.52   | R28062    | 5864.856  | 4696.088  |
| NM_00012C | 2018.415  | 2868.876  | AA292025  | 8602.313  | 10333.321 | U38545    | 251.111   | 640.674   |
| AF172327  | 55588.582 | 57536.348 | AA437226  | 17314.93  | 21330.418 | AI627464  | 1212.842  | 1328.991  |
| NM_00167E | 14461.989 | 13589.566 | R36143    | 8684.821  | 9989.253  | BI756258  | 3977.855  | 4083.111  |
| NM_00022C | 2362.889  | 2567.786  | XM_056359 | 5523.809  | 4967.165  | AI342225  | 53914.133 | 58075.938 |
| NM_00167E | 39149.91  | 38975.207 | D10353/NM | 56080.793 | 55848.473 | AA634103  | 54932.109 | 54805.086 |
| NM_00404E | 50734.773 | 65677     | M15042    | 25576.955 | 27778.686 | J04599    | 1349.715  | 2013.961  |
| NM_004983 | 2438.559  | 3349.876  | AK056843  | 26659.451 | 29285.701 | AF110020  | 2546.361  | 4432.16   |
| U09384    | 3755.07   | 4648.447  | U49928    | 61507.234 | 63111.07  | AA707922  | 975.409   | 1272.774  |
| NM_00686C | 10712.425 | 17312.738 | AK096645  | 62407.637 | 66529.195 | AA608557  | 8839.945  | 11079.754 |
| NM_004794 | 12128.918 | 22931.582 | AK092859  | 3527.36   | 3746.243  | AL050095  | 17529.473 | 21346.215 |
| NM_018291 | 12004.669 | 14292.974 | NM_018291 | 42484.359 | 42083.133 | U03272    | 1369.045  | 2335.844  |
| NM_00553C | 10850.319 | 10707.453 | NM_00553C | 20027.914 | 24988.061 | NM_012253 | 16748.773 | 22591.549 |
| NM_00689E | 6283.867  | 7153.71   | NM_00689E | 12788.831 | 12198.241 | NM_00025E | 56487.301 | 61638.293 |
| NM_01220C | 3252.872  | 3152.239  | NM_00087E | 619.486   | 788.549   | AB033055  | 39498.309 | 55819.105 |
| NM_001724 | 2659.66   | 2763.271  | M12807    | 5113.693  | 5074.167  | AF311287  | 31751.545 | 50812.477 |
| NM_00015C | 3108.498  | 2853.413  | NM_00176E | 6691.939  | 7068.913  | NM_00309E | 3291.634  | 4300.981  |
| AB023152  | 487.055   | 588.241   | NM_003361 | 6533.475  | 6387.476  | NM_014781 | 5376.989  | 4397.673  |
| NM_006212 | 3339.852  | 2756.953  | NM_01209E | 44313.883 | 43863     | BU629989  | 1800.923  | 475.3     |
| AK022872  | 4340.767  | 4033.236  | NM_018684 | 61113.75  | 59211.813 | X87896    | 2403.528  | 1190.313  |
| AK024272  | 4625.281  | 4718.206  | NM_017983 | 2778.986  | 2965.249  | M88310    | 4220.173  | 3114.534  |
| NM_016381 | 1445.245  | 1693.204  | AF116909  | 2388.179  | 2971.743  | D16856    | 459.873   | 355.004   |
| AL591715  | 1554.25   | 1464.686  | BE906724  | 3863.846  | 4812.005  | NM_000042 | 2710.355  | 1894.523  |
| NM_018042 | 16644.695 | 15480.859 | NM_002283 | 41363.84  | 48999.434 | AF035787  | 12915.642 | 9353.698  |
| BE741525  | 1763.237  | 1817.836  | AJ276095  | 29107.959 | 35310.41  | NM_005024 | 420.684   | 507.158   |

|           |           |           |           |           |           |           |           |           |
|-----------|-----------|-----------|-----------|-----------|-----------|-----------|-----------|-----------|
| BF030555  | 46301.465 | 49020.672 | NM_004819 | 8956.396  | 11576.806 | NM_003403 | 1468.267  | 1388.124  |
| NM_012433 | 10436.181 | 9247.034  | NM_007184 | 6655.469  | 8201.812  | NM_014808 | 5714.275  | 6633.301  |
| NM_005605 | 3574.759  | 4335.982  | NM_005291 | 63193.781 | 63243.594 | AB006627  | 4931.97   | 5321.384  |
| NM_002576 | 3985.373  | 5793.621  | AF253316  | 1449.796  | 2189.822  | NM_000416 | 9637.864  | 10959.637 |
| NM_003582 | 2583.384  | 3247.492  | NM_005855 | 1728.997  | 2164.705  | NM_002965 | 570.663   | 964.716   |
| AF057354  | 1179.828  | 1756.868  | NM_002923 | 8461.942  | 9447.465  | AB007883  | 11658.333 | 13505.398 |
| AF169351  | 8802.401  | 11513.509 | NM_006794 | 5996.802  | 6954.564  | NM_006391 | 863.332   | 821.484   |
| M14200    | 58124.754 | 64683.977 | NM_018653 | 1900.469  | 1839.392  | AY009397  | 57725.188 | 67068.383 |
| CY3Cy5    | 9100.686  | 385.467   | NM_005388 | 27944.324 | 29965.602 | NM_007037 | 57238.363 | 59664.797 |
| NM_000623 | 567.837   | 1246.493  | NM_007232 | 62207.598 | 66487.117 | NM_016335 | 6052.389  | 7524.27   |
| NM_000941 | 4556.964  | 3923.233  | NM_016257 | 3508.036  | 4722.269  | NM_003165 | 8542.439  | 16532.924 |
| AK026844  | 2071.781  | 967.42    | NM_002717 | 10876.508 | 14679.523 | NM_003906 | 53954.996 | 65104.48  |
| AK026735  | 2717.875  | 1132.99   | NM_004306 | 62105.375 | 66766.141 | AL359590  | 54520.746 | 59888.84  |
| AL110104  | 24804.414 | 13336.736 | NM_001153 | 1634.981  | 1590.949  | NM_002861 | 14755.771 | 11772.784 |
| AF240633  | 625.35    | 541.316   | AK022654  | 66062.805 | 57817.434 | NM_003080 | 11283.368 | 3220.447  |
| AK027056  | 5155.045  | 3136.255  | BC002905  | 18923.477 | 17118.084 | NM_013268 | 620.1     | 436.438   |
| AK024294  | 1765.767  | 1217.465  | NM_018091 | 26515.531 | 23864.254 | NM_002645 | 4858.888  | 3205.434  |
| AL110126  | 4179.151  | 2939.574  | NM_001108 | 13733.311 | 18778.941 | AB033027  | 2636.176  | 1956.723  |
| AF052172  | 38763.316 | 28836.75  | NM_001637 | 2084.672  | 2541.946  | AF320293  | 691.783   | 637.778   |
| AB014573  | 6426.75   | 5108.553  | NM_016630 | 36423.426 | 35169.258 | NM_001171 | 1879.78   | 1990.024  |
| AK025418  | 1033.341  | 824.419   | NM_014291 | 23980.33  | 20102.219 | S81591    | 904.933   | 1041.734  |
| AB020643  | 3490.172  | 4031.889  | NM_014631 | 1727.613  | 2014.308  | NM_006323 | 18161.074 | 18676.488 |
| NM_000941 | 2215.716  | 2856.953  | NM_001089 | 20260.404 | 23673.563 | NM_016466 | 3084.999  | 3466.828  |
| SR3       | 32468.057 | 25618.305 | NM_000120 | 4526.2    | 4759.447  | NM_001493 | 7264.161  | 8114.079  |
| SR5       | 3325.739  | 3016.694  | NM_004519 | 1104.633  | 964.455   | NM_003716 | 644.091   | 953.919   |
| SR7       | 4821.351  | 33638.387 | U09384    | 4404.607  | 5308.789  | NM_014841 | 1701.048  | 2282.632  |
| SR9       | 13871.178 | 2721.813  | NM_004794 | 26457.488 | 30210.314 | NM_016370 | 1036.243  | 1191.003  |
| CY3Cy5    | 8659.903  | 585.336   | NM_002987 | 883.809   | 966.571   | NM_014426 | 15101.974 | 24055.238 |
| L10404    | 1103.707  | 1709.141  | AB033102  | 62280.324 | 55997.605 | NM_006816 | 59506.605 | 62522.91  |
| AF283776  | 3317.813  | 5572.302  | NM_014774 | 23703.293 | 22345.154 | AK026518  | 64995.582 | 69319.352 |
| L10123    | 25750.363 | 21510.139 | NM_014143 | 37421.195 | 42988.633 | AF132734  | 32382.129 | 41830.648 |
| AF071507  | 1253.275  | 647.234   | M55646    | 61250.953 | 57852.477 | NM_018379 | 5176.831  | 10141.528 |
| D16877    | 3503.237  | 1319.562  | NM_006112 | 42489.277 | 50186.398 | NM_016403 | 53872.781 | 54043.359 |
| D16468    | 2679.494  | 1937.648  | NM_000150 | 8347.268  | 8726.781  | AK021788  | 1730.425  | 2173.986  |
| AL049992  | 774.859   | 425.63    | AB023152  | 1178.345  | 1421.93   | NM_001921 | 9995.388  | 11937.195 |
| AL109781  | 2602.979  | 1797.702  | NM_006212 | 5111.877  | 4900.232  | NM_006230 | 12783.777 | 4054.21   |
| NM_017594 | 1659.875  | 1671.589  | AK022872  | 8862.611  | 8393      | NM_014695 | 18095.354 | 7171.485  |
| AK027237  | 1072.948  | 1090.273  | AK024272  | 10081.115 | 11284.679 | NM_013400 | 18031.311 | 11703.392 |
| AF075017  | 2132.739  | 1819.174  | NM_016381 | 2382.275  | 2600.604  | AK026257  | 3029.184  | 1841.279  |
| AK027104  | 4513.908  | 4354.073  | AL591715  | 3438.81   | 3140.939  | AK023836  | 14722.691 | 13168.524 |
| AK026158  | 836.387   | 1223.18   | NM_012433 | 17027.33  | 18733.523 | NM_018105 | 4029.455  | 3242.676  |
| NM_002816 | 1943.289  | 1816.874  | NM_005605 | 8350.164  | 11014.68  | AJ299442  | 7739.479  | 10196.394 |
| NM_017822 | 5783.324  | 6234.575  | NM_002576 | 6583.118  | 8147.409  | BE734914  | 819.698   | 634.653   |
| AK024520  | 9356.857  | 11931.022 | NM_003582 | 3494.026  | 3832.999  | AB040897  | 735.247   | 750.143   |
| AK024592  | 2423.453  | 3122.251  | AF057354  | 2034.265  | 1887.505  | NM_000125 | 4101.856  | 4606.394  |
| AK024904  | 1934.286  | 1461.185  | NM_016341 | 3860.197  | 3621.843  | NM_003762 | 6954.31   | 8953.425  |
| AK024542  | 1220.152  | 490.469   | AF231916  | 33013.086 | 34061.539 | NM_018446 | 4164.454  | 5928.718  |
| AK024915  | 2028.598  | 1276.99   | NM_003501 | 20515.273 | 22398.979 | NM_000187 | 1363.519  | 2455.594  |
| AK091109  | 53271.758 | 36495.098 | NM_004034 | 34519.355 | 40993.742 | NM_014465 | 1886.524  | 2678.502  |
| AF032897  | 860.901   | 716.888   | NM_000130 | 36916.793 | 42646.078 | D87292    | 2521.941  | 3338.85   |
| NM_014967 | 3613.326  | 3089.403  | AF193756  | 1689.647  | 2013.75   | NM_005498 | 3395.326  | 5162.623  |
| AK022915  | 5234.666  | 4736.97   | NM_004183 | 934.624   | 869.296   | NM_004407 | 1262.643  | 2520.679  |
| AK021736  | 690.394   | 720.308   | AI492087  | 2259.985  | 2583.008  | NM_000070 | 7834.832  | 13175.86  |



|           |           |           |           |           |           |           |           |           |
|-----------|-----------|-----------|-----------|-----------|-----------|-----------|-----------|-----------|
| AF131834  | 1984.222  | 1716.369  | R72122    | 16242.618 | 17336.945 | NM_001202 | 2860.225  | 4855.468  |
| AL355711  | 2151.795  | 1920.62   | Z35309    | 23907.898 | 22266.455 | AB037804  | 816.81    | 1235.696  |
| AJ001906  | 440.538   | 743.652   | R36143    | 3326.946  | 3595.421  | U34249    | 2781.286  | 4943.031  |
| U17633    | 665.525   | 495.814   | XM_056359 | 2628.22   | 1700.55   | NM_003285 | 55357.988 | 58463.754 |
| AF086202  | 26823.256 | 28746.256 | D10353/NM | 38040.156 | 39983.117 | AI200114  | 4211.318  | 1594.747  |
| AF085979  | 26828.553 | 16585.623 | M15042    | 18641.035 | 21999.35  | M23254    | 1285.706  | 1125.041  |
| AK023112  | 1658.45   | 970.567   | AK056843  | 9163.029  | 9849.507  | BE618539  | 9840.595  | 8300.924  |
| NM_017806 | 36052.859 | 21134.049 | U49928    | 62923.098 | 63151.699 | R28062    | 5159.075  | 5724.683  |
| AK021712  | 2026.8    | 1419.847  | AK096645  | 64941.238 | 60896.059 | U38545    | 288.218   | 252.088   |
| AK021895  | 2495.785  | 2101.617  | NM_001724 | 5227.772  | 5924.838  | AI627464  | 1041.611  | 1032.376  |
| AK024293  | 406.669   | 330.987   | BE906724  | 3301.314  | 3532.7    | BI756258  | 3510.517  | 4245.047  |
| AK000036  | 5312.838  | 5556.734  | NM_002283 | 45003.57  | 55382.059 | AI342225  | 58677.102 | 59487     |
| AK000769  | 711.795   | 773.413   | AJ276095  | 30439.803 | 31658.016 | AA634103  | 53787.387 | 55390.379 |
| AK000924  | 665.093   | 729.078   | NM_004819 | 8334.801  | 9375.268  | J04599    | 1882.713  | 2404.636  |
| AK022252  | 979.043   | 1318.832  | NM_007184 | 6279.615  | 7346.369  | AF110020  | 2865.068  | 4024.184  |
| AK000114  | 2944.316  | 3146.133  | NM_005291 | 62808.27  | 65385.645 | AA707922  | 929.478   | 1350.001  |
| AK000952  | 1224.394  | 2149.243  | NM_006794 | 2983.3    | 3199.757  | AA608557  | 8326.946  | 11039.647 |
| AF119862  | 23265.977 | 20768.912 | NM_018653 | 1526.382  | 1903.586  | AL050095  | 12484.909 | 17416.289 |
| U17628    | 2209.863  | 1897.733  | NM_005388 | 15559.149 | 17362.123 | U03272    | 867.661   | 1461.423  |
| AF119867  | 8147.655  | 6102.926  | NM_007232 | 59979.785 | 59543.625 | AF075085  | 55574.387 | 63384.359 |
| AF124819  | 1182.672  | 633.011   | NM_003027 | 1996.945  | 1991.779  | NM_005892 | 7112.076  | 9214.312  |
| D17091    | 2671.603  | 1698.149  | NM_014486 | 1547.473  | 1712.236  | NM_006478 | 1714.865  | 2877.299  |
| AL133074  | 1019.96   | 756.733   | NM_003025 | 52345.883 | 55207.844 | AF311287  | 30087.469 | 48418.027 |
| AF086318  | 9088.131  | 6481.547  | NM_020179 | 13069.405 | 15946.031 | NM_003098 | 3483.965  | 5789.257  |
| AF088012  | 818.192   | 528.162   | NM_001153 | 3816.433  | 2160.515  | NM_014781 | 6308.944  | 10495.375 |
| NM_018121 | 1420.091  | 1243.3    | NM_006205 | 4265.513  | 4055.127  | BU629989  | 1834.461  | 1679.139  |
| AB050477  | 4484.649  | 4577.12   | NM_004283 | 3315.363  | 4206.301  | X87896    | 2548.482  | 1055.736  |
| AK000152  | 1042.819  | 1816.974  | NM_004163 | 62096.48  | 70331.273 | M88310    | 3828.514  | 1783.255  |
| L09092    | 931.445   | 1086.568  | AK026308  | 4703.721  | 5340.91   | D16856    | 443.928   | 334.365   |
| NM_012132 | 1395.8    | 1260.527  | NM_013337 | 7138.292  | 7383.925  | NM_000042 | 2910.146  | 2405.363  |
| NM_012129 | 1045.029  | 1010.545  | NM_004193 | 5655.963  | 5847.258  | AF035787  | 12812.45  | 10295.817 |
| AK025716  | 1635.385  | 2017.504  | NM_002803 | 23721.869 | 26502.645 | AF090405  | 309.819   | 323.686   |
| NM_020186 | 9631.091  | 7232.972  | NM_016568 | 2528.062  | 2662.167  | NM_003403 | 1901.243  | 1408.146  |
| AK022424  | 838.623   | 554.165   | NM_002987 | 1255.237  | 960.558   | AB006627  | 5486.62   | 6321.603  |
| NM_005047 | 2201.46   | 1465.912  | AB033102  | 46633.902 | 51363.617 | NM_000416 | 9569.791  | 10535.364 |
| AJ272196  | 21803.855 | 13072.112 | NM_014774 | 5270.404  | 6506.029  | NM_003382 | 445.994   | 477.067   |
| X58162    | 10521.844 | 7484.012  | M12807    | 4760.584  | 5034.906  | NM_002965 | 481.582   | 781.309   |
| AK022825  | 1006.919  | 943.001   | NM_017983 | 3717.397  | 3990.932  | AB007883  | 11952.228 | 12822.16  |
| AK001937  | 68472.516 | 64945.438 | AF116909  | 2083.091  | 2557.104  | NM_003835 | 1187.098  | 922.525   |
| AL365517  | 1331.579  | 1123.808  | NM_000282 | 7167.611  | 7259.192  | NM_006391 | 479.589   | 853.01    |
| AK021988  | 7457.245  | 8458.636  | NM_000532 | 30398.488 | 35789.602 | AY009397  | 57931.73  | 69556.352 |
| AF086494  | 19494.992 | 15744.526 | NM_016341 | 2431.228  | 2403.293  | NM_007037 | 51482.34  | 59824.813 |
| BI769977  | 1114.452  | 1009.567  | AF231916  | 26613.699 | 23378.145 | NM_005014 | 3148.407  | 4160.763  |
| AL137567  | 895.355   | 697.408   | NM_003501 | 17797.125 | 18443.648 | NM_006944 | 1601.913  | 2413.821  |
| AK024913  | 3554.178  | 3379.857  | AK022654  | 61143.016 | 61500.012 | NM_003165 | 8527.579  | 14821.204 |
| AB007961  | 3913.739  | 3977.51   | NM_001637 | 3936.092  | 3775.589  | NM_003906 | 54421.215 | 60915.664 |
| NM_005547 | 732.883   | 854.547   | NM_016630 | 32132.973 | 38854.512 | AL359590  | 55422.422 | 63764.039 |
| NM_001173 | 2016.526  | 2334.857  | NM_014291 | 10304.739 | 10971.01  | NM_003080 | 9220.198  | 3643.476  |
| AK023648  | 4370.142  | 2278.906  | NM_014631 | 4001.439  | 3287.339  | NM_013268 | 630.99    | 667.138   |
| NM_000412 | 1509.089  | 1047.73   | NM_001089 | 14026.552 | 13635.093 | NM_002645 | 5239.048  | 3944.989  |
| AF077033  | 2931.246  | 2438.179  | NM_000120 | 2212.645  | 2469.621  | AB033027  | 3025.561  | 2507.314  |
| D50406    | 1462.461  | 960.426   | AF172327  | 43800.57  | 39611.477 | AF320293  | 835.133   | 796.701   |
| NM_004991 | 826.44    | 740.569   | NM_004794 | 29040.695 | 33453.785 | NM_001171 | 1778.04   | 1782.178  |

|           |           |           |           |           |           |           |           |           |
|-----------|-----------|-----------|-----------|-----------|-----------|-----------|-----------|-----------|
| AK026708  | 12240.553 | 9015.741  | NM_018291 | 40492.035 | 36403.316 | NM_006323 | 18327.236 | 20743.604 |
| NM_017903 | 5564.687  | 4132.596  | NM_005530 | 18396.412 | 17016.525 | NM_016466 | 2454.587  | 2756.356  |
| NM_018074 | 3949.575  | 3673.462  | NM_006899 | 11874.556 | 11377.031 | NM_001493 | 6660.467  | 8389.438  |
| NM_000909 | 5842.944  | 4748.577  | NM_012200 | 6001.769  | 5264.74   | NM_003716 | 747.365   | 1383.32   |
| U31737    | 782.463   | 654.338   | NM_001724 | 5186.972  | 5045.288  | NM_014841 | 924.847   | 1543.491  |
| AK024828  | 2223.643  | 2468.454  | NM_000150 | 7761.74   | 5698.1    | NM_014426 | 10602.641 | 13515.497 |
| AF009315  | 1625.211  | 1202.811  | AB023152  | 885.254   | 875.753   | NM_006816 | 57377.301 | 58764.09  |
| NM_019013 | 946.815   | 845.672   | NM_006212 | 4889.039  | 4203.835  | AK026518  | 59263.82  | 62983.082 |
| NM_006783 | 415.366   | 289.642   | NM_007254 | 769.348   | 1065.715  | NM_016403 | 55283.488 | 69045.672 |
| L37711    | 649.543   | 623.288   | NM_018042 | 11094.265 | 13466.001 | NM_015603 | 1794.896  | 2413.813  |
| S70313    | 4579.349  | 3810.191  | CY3Cy5    | 16184.381 | 595.213   | NM_001921 | 9451.399  | 4504.252  |
| AK021607  | 1114.019  | 1080.981  | NM_000941 | 3356.377  | 2465.311  | NM_006230 | 11495.831 | 5833.381  |
| AF135960  | 1384.584  | 640.186   | AK026844  | 3773.072  | 2418.044  | NM_014695 | 13743.405 | 9895.481  |
| NM_014216 | 15717.591 | 13319.338 | AK026735  | 5752.369  | 3014.183  | NM_013400 | 15461.991 | 13162.733 |
| NM_003010 | 2671.042  | 2259.679  | AL110104  | 49625.469 | 34476.84  | AK026257  | 2602.757  | 1728.293  |
| NM_006871 | 969.954   | 1127.454  | AF240633  | 1941.14   | 1197.438  | AK023836  | 14994.507 | 13470.026 |
| NM_019074 | 5418.39   | 4790.551  | AK027056  | 8645.962  | 5543.178  | NM_018105 | 3807.873  | 3514.424  |
| NM_018494 | 61319.277 | 55462.523 | AK024294  | 1953.798  | 1932.66   | AJ299442  | 8038.49   | 9353.594  |
| AK000006  | 1136.596  | 1028.653  | AL110126  | 4389.345  | 6201.983  | AB040897  | 586.502   | 663.312   |
| NM_001115 | 1969.839  | 1736.093  | AF052172  | 60511.066 | 51340.715 | NM_000125 | 2915.477  | 3656.514  |
| NM_014921 | 853.487   | 605.549   | SR7       | 7452.259  | 34202.453 | NM_003762 | 6323.025  | 7711.388  |
| NM_013255 | 2527.315  | 2995.623  | SR9       | 22594.371 | 2637.324  | NM_018446 | 4249.783  | 5606.08   |
| NM_007183 | 591.059   | 694.993   | CY3Cy5    | 10380.684 | 220.809   | NM_000187 | 829.41    | 1654.677  |
| AJ238243  | 17417.066 | 15871.329 | L10404    | 1852.259  | 2788.227  | NM_014465 | 1673.161  | 2313.717  |
| J05046    | 45954.32  | 39220.078 | AF283776  | 4272.306  | 3964.803  | D87292    | 2037.979  | 2878.822  |
| NM_012318 | 3947.772  | 3887.047  | L10123    | 44621.34  | 27248.721 | NM_005498 | 2587.136  | 4370.363  |
| NM_002751 | 11528.21  | 8908.38   | D16877    | 7429.756  | 5191.28   | NM_016335 | 6107.112  | 8828.343  |
| NM_004291 | 1482.747  | 1208.958  | AL049992  | 1011.922  | 569.885   | NM_000372 | 570.744   | 1410.628  |
| NM_003816 | 5220.61   | 4831.362  | AL109781  | 4872.227  | 4574.138  | NM_001202 | 2954.389  | 5595.985  |
| AK022635  | 629.349   | 497.677   | AL079289  | 1051.047  | 1487.793  | AB037804  | 589.708   | 1038.9    |
| NM_004912 | 3459.582  | 2252.579  | NM_018484 | 999.164   | 2224.199  | NM_003285 | 52620.109 | 51852.824 |
| U79304    | 10488.689 | 6996.591  | NM_017822 | 9805.896  | 8726.425  | AI200114  | 3414.29   | 2138.948  |
| NM_016267 | 2589.174  | 1975.822  | AK024520  | 10326.963 | 9609.033  | M23254    | 1432.779  | 1080.996  |
| NM_004671 | 5174.104  | 3443.685  | AK024592  | 6034.086  | 4368.897  | BE618539  | 8768.129  | 6449.713  |
| NM_006526 | 6772.194  | 5531.143  | AK024904  | 3177.621  | 2600.472  | R28062    | 5006.833  | 4620.28   |
| U35622    | 579.079   | 430.533   | AK025030  | 3229.903  | 3224.241  | U38545    | 376.487   | 559.346   |
| NM_007045 | 3404.612  | 3098.393  | AK024542  | 3492.95   | 3982.641  | AI627464  | 852.086   | 1037.697  |
| NM_003627 | 7013.294  | 10184.257 | AK024915  | 2873.623  | 1621.8    | BI756258  | 4109.122  | 4821.177  |
| NM_012145 | 27240.334 | 24574.455 | AK091109  | 67579.461 | 63646.492 | AI342225  | 49315.055 | 56548.633 |
| AF305779  | 2316.347  | 3160.477  | AF032897  | 812.317   | 986.64    | J04599    | 2589.148  | 3090.798  |
| AF225416  | 9217.069  | 10230.856 | NM_014967 | 5280.322  | 5978.644  | AA608557  | 7160.773  | 8990.717  |
| NM_016231 | 3891.385  | 4221.372  | AK021736  | 661.683   | 525.791   | AL050095  | 14063.401 | 15634.88  |
| NM_002093 | 4246.185  | 3524.93   | AJ011598  | 1271.484  | 1090.993  | U03272    | 787.601   | 1292.281  |
| AB042555  | 13493.764 | 10854.5   | AF085979  | 29013.229 | 40484.609 | AF075085  | 54781.801 | 59024.656 |
| NM_001729 | 1562.712  | 1304.002  | AK023112  | 1859.64   | 1066.968  | NM_005892 | 4780.787  | 6471.613  |
| NM_013975 | 3754.007  | 3058.067  | NM_017806 | 62265.902 | 51383.594 | NM_006478 | 772.369   | 1606.411  |
| NM_012216 | 3401.212  | 3570.794  | AK021895  | 6512.355  | 6353.986  | AF132734  | 21856.049 | 32462.279 |
| NM_005338 | 1409.397  | 1709.949  | AK000036  | 12668.779 | 9251.28   | NM_018379 | 3824.198  | 6783.838  |
| X73502    | 3800.48   | 3427.541  | AK000769  | 784.936   | 737.443   | NM_000042 | 3543.884  | 7522.335  |
| NM_020445 | 59981.516 | 62241.609 | AK000924  | 2186.583  | 1733.319  | NM_003403 | 1122.446  | 871.061   |
| NM_016376 | 36006.207 | 28705.824 | AK000114  | 4191.15   | 3044.792  | NM_014808 | 5194.167  | 4549.731  |
| AB046848  | 10273.712 | 9089.336  | AK000952  | 44797.777 | 38708.02  | AB006627  | 5105.466  | 4477.544  |
| AL133057  | 6001.445  | 6621.004  | AF119867  | 29131.027 | 42440.117 | NM_000416 | 8709.53   | 7303.006  |

|           |           |           |           |           |           |           |           |           |
|-----------|-----------|-----------|-----------|-----------|-----------|-----------|-----------|-----------|
| U04845    | 7148.872  | 6506.307  | D17091    | 3088.329  | 1810.7    | NM_00296E | 762.683   | 757.025   |
| NM_01810E | 5781.171  | 5498.915  | AL133074  | 1616.04   | 977.761   | AB007883  | 11199.437 | 9263.354  |
| AL049689  | 636.787   | 391.709   | AF086318  | 27555.621 | 17745.098 | NM_00164E | 802.602   | 1407.626  |
| NM_00031E | 2896.792  | 2610.502  | AF088012  | 828.281   | 723.514   | NM_00549E | 1981.07   | 2043.76   |
| NM_00396E | 1957.529  | 2031.429  | NM_018121 | 1537.934  | 1548.078  | AF038196  | 3451.614  | 5876.709  |
| AC009729  | 1244.219  | 1236.162  | L09092    | 1550.792  | 1345.965  | NM_00485E | 34903.457 | 45566.016 |
| NM_01659E | 4274.18   | 4255.149  | AK025716  | 3632.612  | 3206.111  | NM_01635E | 4485.938  | 5982.683  |
| BE874867  | 52294.238 | 43147.77  | L09268    | 2751.326  | 2633.965  | NM_005014 | 2305.83   | 3522.659  |
| AL136719  | 5155.76   | 5195.093  | NM_02018E | 14815.61  | 17670.227 | NM_006944 | 430.964   | 912.786   |
| NM_01410E | 10834.118 | 10919.979 | AK022424  | 1077.951  | 1672.569  | NM_004407 | 884.817   | 1450.447  |
| NM_01216C | 4395.483  | 3661.328  | AF090947  | 16690.02  | 14801.429 | NM_00007C | 5341.673  | 8370.954  |
| NM_006357 | 57385.805 | 57533.969 | BC016962  | 1027.306  | 1315.265  | NM_00632E | 17948.174 | 14987.462 |
| NM_01424E | 53534.305 | 40888.656 | NM_005047 | 2563.765  | 1793.272  | NM_01646E | 3306.762  | 2403.454  |
| AK027070  | 1648.734  | 1825.622  | AJ272196  | 32476.344 | 23889.504 | NM_00149E | 7399.053  | 6209.05   |
| AF129533  | 882.637   | 762.723   | X58162    | 24730.422 | 28906.027 | NM_00371E | 624.127   | 868.868   |
| NM_003341 | 14372.879 | 11592.908 | AK022825  | 2961.214  | 2668.626  | NM_014841 | 981.326   | 893.535   |
| NM_01831E | 1002.631  | 1076.135  | AK001937  | 68098.203 | 60365.703 | NM_01442E | 10518.298 | 10224.641 |
| AB020640  | 13024.168 | 15109.06  | AB007961  | 13605.3   | 11857.365 | NM_00681E | 52013.617 | 51895.723 |
| D29954    | 18820.859 | 15373.043 | NM_005547 | 2568.02   | 2679.622  | AK026518  | 57339.418 | 56095.699 |
| AF007131  | 5660.296  | 5370.08   | AF164794  | 15679.876 | 17526.031 | NM_00025E | 50951.34  | 50490.547 |
| NM_00683E | 2294.753  | 1916.201  | NM_001173 | 1899.154  | 2602.359  | AB033055  | 22968.563 | 27387.709 |
| NM_00022E | 1059.104  | 853.058   | AB020656  | 4409.565  | 4851.128  | AF311287  | 12334.287 | 15941.839 |
| NM_005851 | 1638.947  | 1083.523  | AK023648  | 7147.042  | 6795.938  | NM_00309E | 3326.558  | 5302.771  |
| AF119256  | 2329.46   | 2237.3    | NM_00041E | 1905.414  | 2668.993  | NM_014781 | 5214.018  | 7352.512  |
| NM_00518C | 8391.837  | 7216.392  | AF077033  | 5320.158  | 5191.205  | BU629989  | 2137.437  | 2906.347  |
| NM_00341C | 8228.752  | 6889.75   | D50406    | 1141.28   | 1041.919  | X87896    | 2015.279  | 3862.461  |
| NM_00714E | 2637.194  | 2574.79   | NM_004991 | 1596.091  | 1565.98   | M88310    | 3669.981  | 5538.969  |
| NM_00222E | 3173.463  | 4823.906  | AK026708  | 19761.57  | 18653.873 | D16856    | 880.234   | 1095.718  |
| S69027    | 5657.29   | 7028.178  | NM_01790E | 8238.722  | 9312.871  | NM_01446E | 3232.784  | 1107.194  |
| NM_012119 | 6395.1    | 7079.101  | NM_018074 | 6203.973  | 7810.696  | D87292    | 2352.849  | 905.512   |
| X99631    | 25691.301 | 24103.635 | NM_00090E | 12260.254 | 14229.347 | NM_00549E | 2793.699  | 2153.089  |
| NM_00173C | 4557.163  | 4847.423  | AK024828  | 3341.197  | 3850.485  | NM_01633E | 4166.142  | 3227.384  |
| AK026290  | 7929.028  | 8758.902  | AF009315  | 5711.54   | 5508.915  | NM_00316E | 7234.226  | 5928.123  |
| AB014589  | 2417.206  | 2544.86   | S70313    | 31809.641 | 41220.215 | NM_00390E | 51335.906 | 42837.52  |
| AF248649  | 1673.326  | 1455.627  | AK021607  | 2002.71   | 2312.161  | AL359590  | 53401.977 | 50659.488 |
| U37146    | 34183.145 | 26471.83  | AK025860  | 1382.433  | 1318.838  | NM_002861 | 12674.211 | 13048.109 |
| NM_01208E | 2570.453  | 2228.494  | NM_00021E | 2601.134  | 1515.459  | NM_00308C | 7926.545  | 8039.572  |
| AB040431  | 14262.503 | 11263.327 | NM_00220E | 745.712   | 535.448   | NM_00404E | 254.327   | 440.77    |
| NM_016067 | 54087.438 | 55822.633 | AF135960  | 5159.346  | 4998.691  | NM_01326E | 659.777   | 810.722   |
| NM_01828E | 27920.291 | 23301.09  | NM_01421E | 37199.523 | 46512.922 | NM_00264E | 5132.788  | 5317.13   |
| AK022393  | 21167.314 | 17348.951 | NM_00301C | 4458.449  | 7380.42   | AB033027  | 2632.897  | 3440.325  |
| AK026302  | 19697.318 | 14233.903 | NM_006871 | 2644.179  | 2394.907  | AK021805  | 11200.529 | 15309.003 |
| NM_012214 | 5401.005  | 3553.266  | NM_019074 | 11281.146 | 13589.371 | AB014550  | 2428.776  | 3240.029  |
| NM_00196E | 2273.294  | 1910.205  | NM_018494 | 67167.469 | 70767.648 | AF320294  | 3125.663  | 4343.535  |
| NM_01613E | 7145.719  | 6737.029  | AK000006  | 1530.228  | 1738.007  | NM_00429E | 2292.847  | 3286.996  |
| Z36833    | 58196.262 | 60457.426 | NM_001115 | 4650.778  | 5926.726  | NM_001171 | 987.59    | 2165.614  |
| AW963246  | 785.976   | 874.06    | NM_014921 | 1560.903  | 2046.347  | NM_00225C | 12071.29  | 14537.616 |
| NM_01435E | 9137.58   | 9388.562  | NM_016581 | 63350.715 | 69959.391 | S81591    | 496.014   | 1188.795  |
| M21191    | 54305.855 | 53092.633 | NM_01325E | 4299.69   | 4951.298  | AF075085  | 58641.43  | 43453.641 |
| AF072810  | 2763.302  | 2602.76   | NM_00718E | 1158.293  | 1565.349  | NM_00589E | 4732.111  | 2225.365  |
| L19778    | 1299.263  | 1269.252  | AJ238243  | 37028.344 | 49420.23  | NM_00647E | 1105.17   | 802.335   |
| AF174482  | 15349.986 | 13685.692 | J05046    | 63553.094 | 64475.707 | AF132734  | 23093.996 | 15968.298 |
| NM_00352E | 2797.608  | 2514.423  | NM_01231E | 7723.139  | 9853.802  | NM_01837E | 4121.184  | 3503.164  |

|           |           |           |           |           |           |           |           |           |
|-----------|-----------|-----------|-----------|-----------|-----------|-----------|-----------|-----------|
| D85131    | 17937.658 | 30477.559 | NM_002751 | 32338.104 | 38142.215 | NM_016403 | 43237.398 | 39776.621 |
| NM_004956 | 1031.767  | 1145.166  | NM_016267 | 15128.408 | 16542.332 | NM_015603 | 1346.657  | 1508.992  |
| NM_002163 | 9040.283  | 9070.534  | NM_004671 | 22200.717 | 26765.535 | AK021788  | 972.731   | 1104.956  |
| U52097    | 18786.035 | 12350.794 | NM_006526 | 8249.287  | 7146.42   | NM_001921 | 9069.367  | 8511.2    |
| NM_003416 | 3022.518  | 3022.312  | U35622    | 736.294   | 457.589   | NM_006230 | 9952.362  | 11029.391 |
| X74497    | 2727.771  | 2454.206  | NM_007045 | 4712.661  | 7674.72   | NM_014695 | 15011.269 | 18931.244 |
| NM_012210 | 2246.659  | 1635.39   | NM_003627 | 12509.471 | 21423.174 | NM_013400 | 15961.717 | 17269.736 |
| U10072    | 4481.494  | 2996.294  | NM_012145 | 38864.613 | 47209.984 | AK026257  | 2383.701  | 2244.124  |
| AB018264  | 8164.893  | 7542.319  | AF305779  | 2690.014  | 2300.857  | AK023836  | 14075.739 | 16279.127 |
| NM_006911 | 1191.306  | 1382.124  | AF225416  | 11524.101 | 11132.479 | NM_018105 | 3188.176  | 4022.33   |
| U92544    | 3796.906  | 3739.329  | NM_016231 | 4950.768  | 5066.872  | AJ299442  | 5341.27   | 9017.813  |
| NM_019644 | 851.634   | 832.469   | NM_002093 | 6211.904  | 5642.327  | NM_000125 | 3473.04   | 5512.167  |
| NM_006791 | 5001.113  | 5004.736  | AB042555  | 29622.061 | 28150.729 | NM_003762 | 6260.135  | 9713.362  |
| AJ278348  | 40232.77  | 38872.676 | NM_001729 | 3754.191  | 3715.334  | NM_018446 | 3931.735  | 8289.936  |
| NM_015872 | 780.307   | 1148.287  | NM_017763 | 3786.641  | 3760.293  | NM_000187 | 1977.187  | 3217.743  |
| AI285199  | 6937.541  | 6537.781  | NM_013975 | 6064.306  | 7512.127  | CY3Cy5    | 2894.947  | 35.223    |
| L07738    | 1822.035  | 1509.376  | NM_003843 | 24612.961 | 29928.861 | NM_017532 | 3469.337  | 2248.632  |
| Z48054    | 5679.552  | 4703.549  | NM_012216 | 4477.934  | 5880.476  | AF086184  | 17369.234 | 11220.372 |
| H90415    | 5571.597  | 5121.808  | NM_005338 | 2242.122  | 2006.227  | NM_018275 | 12004.209 | 8527.778  |
| AA676470  | 31412.207 | 32900.363 | X73502    | 7760.985  | 9163.527  | AL049266  | 6452.502  | 3927.485  |
| AA430512  | 9895.743  | 10677.571 | NM_018103 | 15228.506 | 19087.568 | AF007149  | 1693.34   | 1281.377  |
| M38258    | 1114.743  | 992.183   | AL049689  | 512.04    | 1000.501  | AK001469  | 3638.433  | 3024.132  |
| AA457155  | 50507.211 | 52833.879 | NM_000312 | 9062.325  | 7975.209  | AF035318  | 906.459   | 902.518   |
| BM014365  | 1496.699  | 1657.67   | NM_003963 | 4738.491  | 3084.261  | NM_015456 | 5413.373  | 6241.356  |
| H91842    | 821.182   | 720.107   | AC009729  | 1751.432  | 1558.777  | AK025056  | 2001.729  | 1985.842  |
| U78045    | 2634.872  | 2072.543  | NM_016598 | 7601.995  | 7808.18   | AF140710  | 5792.044  | 9342.115  |
| AA878561  | 57695.625 | 60086.176 | BE874867  | 64853.766 | 61547.051 | NM_017532 | 5960.412  | 8061.254  |
| BF688309  | 643.961   | 538.04    | AL136719  | 6251.168  | 7884.529  | SR2       | 43233.895 | 47661.488 |
| AI538525  | 1935.817  | 1272.402  | NM_014109 | 11984.215 | 12607.247 | SR4       | 12346.938 | 13438.155 |
| NM_005205 | 60771.543 | 58559.176 | NM_012160 | 5440.944  | 4141.017  | SR6       | 1636.94   | 1608.53   |
| BE878426  | 56247.281 | 57549.605 | NM_006357 | 64039.711 | 70403.984 | SR8       | 6227.705  | 19768.527 |
| NM_001745 | 39706.043 | 42401.105 | NM_014248 | 61722.098 | 59563.695 | SR10      | 23309.744 | 11474.985 |
| NM_003825 | 13445.953 | 17310.881 | AK027070  | 3689.986  | 3655.591  | CY3Cy5    | 4166.596  | 239.981   |
| AK025006  | 14149.071 | 18606     | AF129533  | 1761.517  | 1740.17   | AL157477  | 3366.516  | 2110.246  |
| AF218014  | 30233.613 | 30625.367 | NM_003341 | 26309.602 | 29464.713 | AB002318  | 2015.004  | 1139.212  |
| NM_006678 | 8021.332  | 11411.859 | NM_017785 | 2686.936  | 4166.44   | AL357535  | 2111.999  | 1706.163  |
| AY007729  | 44241.383 | 40914.305 | NM_006249 | 13465.467 | 17191.691 | AL049951  | 958.177   | 1088.129  |
| NM_014424 | 625.501   | 716.527   | NM_018318 | 757.102   | 1055.333  | AK024963  | 1039.159  | 633.841   |
| AF159092  | 932.918   | 864.923   | AB020640  | 33634.25  | 35938.645 | AK023725  | 1412.068  | 1397.965  |
| BC007318  | 4603.308  | 4421.231  | D29954    | 30620.395 | 25797.084 | AL137727  | 2466.945  | 2028.868  |
| M36693    | 8968.053  | 6895.002  | AF119256  | 3986.582  | 5132.573  | AF074986  | 729.503   | 809.987   |
| NM_016292 | 12795.056 | 10060.155 | NM_007015 | 649.614   | 770.741   | AL049240  | 4720.27   | 4810.656  |
| NM_002601 | 6137.12   | 5061.019  | NM_005180 | 13821.887 | 16427.451 | U80773    | 1648.04   | 1766.981  |
| NM_001781 | 1737.336  | 2242.696  | NM_003410 | 18244.221 | 14273.769 | AK021745  | 3290.981  | 2650.663  |
| NM_014432 | 6435.987  | 6110.083  | NM_007146 | 3877.289  | 2173.481  | AK000801  | 9273.97   | 8077.859  |
| NM_001558 | 4017.079  | 3489.814  | NM_002229 | 4612.076  | 3587.38   | D85433    | 5000.317  | 4684.211  |
| NM_002530 | 1008.817  | 689.032   | S69027    | 9813.347  | 7116.698  | AK025109  | 5085.129  | 3025.804  |
| NM_018941 | 2788.753  | 1957.959  | NM_012119 | 17621.746 | 16862.914 | AK026057  | 1969.823  | 1565.005  |
| NM_005895 | 25842.924 | 23712.496 | X99631    | 37080.566 | 46914.012 | NM_019596 | 1100.477  | 1209.125  |
| NM_002885 | 52916.82  | 54096.383 | NM_001730 | 4694.87   | 5428.127  | AF085859  | 1453.284  | 1418.961  |
| AF078866  | 2658.478  | 2522.715  | AK026290  | 10497.708 | 8607.452  | AK026307  | 1100.68   | 1126.557  |
| BF311880  | 21430.24  | 18348.469 | AB014589  | 4175.74   | 3641.1    | AL117464  | 3093.775  | 3275.86   |
| NM_000078 | 592.947   | 404.554   | AF248649  | 2360.459  | 2175.792  | L23849    | 1106.573  | 878.366   |

|           |           |           |           |           |           |           |           |           |
|-----------|-----------|-----------|-----------|-----------|-----------|-----------|-----------|-----------|
| NM_016075 | 852.611   | 1286.591  | U37146    | 57848.441 | 56438.102 | AL049997  | 22492.697 | 13810.909 |
| NM_001360 | 15907.961 | 14347.039 | NM_012086 | 4583.726  | 4911.395  | AK024118  | 2813.557  | 1584.764  |
| AK026656  | 10009.585 | 8755.143  | AB040431  | 24730.605 | 29442.328 | AK024509  | 1440.671  | 1441.393  |
| NM_000751 | 45266.488 | 36130.211 | NM_000991 | 62307.902 | 74276.75  | AF009282  | 11084.147 | 11648.687 |
| NM_005071 | 1115.069  | 1055.767  | NM_016034 | 54830.637 | 56648.777 | AF024704  | 6533.686  | 6332.05   |
| NM_016730 | 44978.598 | 44586.637 | X69150    | 64379.645 | 60265.945 | AF056431  | 1037.791  | 1218.578  |
| AL035297  | 1455.329  | 1512.816  | NM_001025 | 65484.344 | 60513.066 | NM_016412 | 2982.353  | 4156.261  |
| NM_004408 | 5673.052  | 4247.011  | NM_016067 | 63083.648 | 57269.48  | AF009293  | 1600.373  | 1642.864  |
| AJ131244  | 2768.363  | 2753.476  | NM_018285 | 40533.238 | 31889.945 | NM_004158 | 62841.711 | 63323.32  |
| NM_002532 | 8341.381  | 8059.593  | AK022393  | 32629.439 | 24736.238 | AF056444  | 13349.903 | 12661.658 |
| NM_012388 | 7251.783  | 6155.837  | AK026302  | 28420.797 | 25431.82  | AK002210  | 7173.847  | 7826.024  |
| NM_016651 | 1845.101  | 1803      | NM_012214 | 8600.111  | 8523.242  | AK021677  | 2493.796  | 2833.608  |
| NM_001671 | 382.302   | 457.768   | AF049656  | 65602.945 | 58089.738 | AK001057  | 2783.005  | 2963.892  |
| NM_019843 | 3902.948  | 3652.567  | NM_001966 | 5310.586  | 4993.988  | AK001808  | 1726.627  | 1186.73   |
| NM_016192 | 11225.908 | 8001.81   | NM_016138 | 9656.188  | 12461.217 | AK021471  | 1207.155  | 992.733   |
| AB046774  | 1066.631  | 833.734   | Z36833    | 67491.797 | 68556.094 | AK021709  | 1545.255  | 1244.64   |
| AK022385  | 39412.73  | 31246.754 | NM_014355 | 14991.725 | 19012.787 | AL359563  | 4381.181  | 2483.874  |
| NM_002775 | 977.79    | 1119.188  | M21191    | 51848.387 | 57211.66  | NM_005304 | 770.761   | 239.284   |
| AK024584  | 11048.1   | 6792.213  | AF072810  | 3492.482  | 3673.164  | NM_014477 | 2658.523  | 2155.662  |
| NM_003504 | 7365.325  | 7587.83   | L19778    | 1761.244  | 1469.012  | AL109791  | 536.167   | 574.046   |
| NM_013298 | 6740.516  | 6936.89   | AF174482  | 38167.289 | 41831.145 | S71486    | 5128.83   | 5814.48   |
| NM_007267 | 4045.512  | 4966.098  | Y08836    | 602.459   | 734.461   | L33808    | 14703.294 | 16195.006 |
| AK022830  | 291.283   | 562.55    | NM_003528 | 12760.397 | 13056.132 | AJ008117  | 12401.873 | 12191.266 |
| Z36816    | 8117.291  | 9116.228  | NM_017769 | 1635.452  | 2503.055  | AJ008147  | 59647.898 | 58227.594 |
| NM_005865 | 7586.773  | 7292.551  | D85131    | 20883.943 | 26223.566 | AK024369  | 1965.542  | 2407.03   |
| NM_006413 | 10103.444 | 10897.939 | NM_004956 | 2194.144  | 1582.856  | L43345    | 3276.061  | 4276.139  |
| NM_017684 | 846.509   | 824.393   | D30612    | 13316.673 | 9245.465  | AF147303  | 960.098   | 1510.015  |
| AK025542  | 4322.674  | 4370.671  | NM_002163 | 15847.578 | 12386.333 | AF086224  | 1124.099  | 1183.128  |
| AF207547  | 854.003   | 810.081   | U52097    | 38723.199 | 26989.326 | S56365    | 67502.328 | 62504.094 |
| NM_002768 | 11595.674 | 10855.447 | NM_003416 | 5520.683  | 5950.319  | AK023607  | 1456.459  | 1280.099  |
| NM_003691 | 2016.239  | 2136.897  | X74497    | 5805.17   | 5999.592  | AK026874  | 4582.093  | 3393.444  |
| NM_002950 | 17254.115 | 14645.034 | NM_012210 | 3804.327  | 3867.901  | AK024178  | 2614.583  | 1987.927  |
| NM_002318 | 5435.064  | 4743.874  | U10072    | 6153.211  | 6878.25   | AF088033  | 4757.866  | 4311.512  |
| NM_001433 | 544.275   | 658.247   | AF222749  | 46125.348 | 54752.758 | NM_020422 | 5932.813  | 4498.674  |
| NM_003134 | 46539.867 | 60240.898 | NM_001321 | 19270.895 | 18664.75  | NM_017847 | 2293.098  | 2299.484  |
| NM_004314 | 4501.044  | 4558.616  | AB018264  | 23471.01  | 33200.512 | AL049675  | 3013.5    | 2917.295  |
| NM_018247 | 14792.974 | 13060.193 | NM_006911 | 2504.077  | 2720.776  | AL050151  | 675.234   | 816.807   |
| NM_017979 | 10363.294 | 7921.056  | U92544    | 11214.081 | 11622.332 | NM_003537 | 31082.719 | 39890.441 |
| NM_006911 | 1196.879  | 950.241   | NM_019644 | 2238.241  | 2392.68   | AK024177  | 1976.82   | 3476.133  |
| U92544    | 3091.922  | 2817.724  | NM_006791 | 5840.355  | 6445.928  | AK024827  | 5669.729  | 6069.021  |
| NM_019644 | 774.583   | 740.948   | AJ278348  | 42070.078 | 44308.063 | K01564    | 2709.023  | 2565.936  |
| NM_006791 | 4605.545  | 4210.625  | NM_015872 | 1458.442  | 1239.862  | AB023175  | 1362.874  | 1340.553  |
| AJ278348  | 42072.129 | 34141.711 | AI285199  | 22763.1   | 22439.275 | NM_000737 | 5985.976  | 4485.51   |
| NM_015872 | 826.132   | 1324.58   | AA757170  | 639.6     | 1027.968  | NM_000838 | 11472.465 | 9512.558  |
| AI285199  | 7393.417  | 7419.787  | L07738    | 2896.905  | 2701.488  | AK024102  | 30042.307 | 31356.473 |
| L07738    | 1411.56   | 1533.694  | Z48054    | 9551.001  | 11731.455 | NM_001290 | 1687.587  | 1368.017  |
| Z48054    | 6606.132  | 6555.574  | H90415    | 17357.109 | 20309.934 | AL079273  | 6444.599  | 5213.261  |
| H90415    | 4433.901  | 4475.217  | AA676470  | 57060.434 | 60500.227 | NM_005045 | 389.795   | 513.072   |
| AA676470  | 35673.613 | 38719.07  | AA430512  | 16013.63  | 16034.221 | NM_003713 | 9510.472  | 14031.896 |
| AA430512  | 10935.335 | 14260.394 | M38258    | 3595.106  | 2655.796  | D31886    | 5285.262  | 5751.361  |
| M38258    | 1303.214  | 896.413   | AA457155  | 60708.184 | 58276.605 | U92024    | 901.776   | 874.137   |
| AA457155  | 47505.121 | 51708.543 | BM014365  | 2458.547  | 2023.597  | AK023330  | 6268.834  | 5084.321  |
| BM014365  | 1270.418  | 1142.55   | H91842    | 1171.751  | 1077.395  | AF075071  | 2601.213  | 2506.266  |

|           |           |           |           |           |           |           |           |           |
|-----------|-----------|-----------|-----------|-----------|-----------|-----------|-----------|-----------|
| H91842    | 855.164   | 949.94    | U78045    | 8188.518  | 6865.366  | AF001892  | 1466.86   | 1637.628  |
| U78045    | 3130.957  | 3073.747  | AA878561  | 62089.258 | 57276.379 | AK026597  | 850.378   | 2569.518  |
| AA878561  | 51499.445 | 56245.973 | BF688309  | 1466.551  | 1700.698  | U79271    | 5348.099  | 5821.934  |
| BF688309  | 626.176   | 652.606   | AI538525  | 3167.496  | 3996.739  | NM_019888 | 1724.467  | 1872.867  |
| AI538525  | 1523.786  | 1633.826  | NM_005205 | 63530.941 | 66504.383 | AK024609  | 7987.361  | 6837.846  |
| AF222980  | 700.149   | 622.027   | BE878426  | 59514.949 | 59484.727 | NM_018120 | 24089.828 | 19731.99  |
| AK026758  | 3279.741  | 2987.123  | NM_001745 | 46576.563 | 51606.848 | NM_015991 | 1577.872  | 1615.092  |
| NM_012201 | 5969.679  | 4441.579  | NM_003825 | 17875.98  | 18444.705 | NM_005562 | 4818.13   | 4495.558  |
| NM_001745 | 37302.281 | 36141.617 | AK025006  | 17788.795 | 21697.752 | NM_004932 | 2625.146  | 2517.039  |
| NM_003825 | 12603.185 | 15604.029 | AF218014  | 49300.953 | 46494.371 | NM_005233 | 879.164   | 681.236   |
| AK025006  | 13375.079 | 14637.959 | NM_006678 | 17741.746 | 14013.01  | NM_006654 | 1007.946  | 1199.068  |
| AF218014  | 34734.078 | 32909.668 | AY007729  | 58987.332 | 54612.27  | NM_002350 | 7365.555  | 7643.092  |
| NM_006678 | 8352.415  | 7605.851  | NM_014424 | 784.108   | 1192.168  | NM_012417 | 2046.59   | 2649.65   |
| AY007729  | 45634.035 | 42099.301 | AF159092  | 1190.923  | 1658.176  | NM_002546 | 2020.88   | 1952.884  |
| NM_014424 | 869.077   | 768.868   | BC007318  | 6494.18   | 7717.833  | NM_014288 | 936.04    | 779.124   |
| AF159092  | 1004.786  | 1083.883  | M36693    | 16755.432 | 16107.29  | NM_002342 | 1140.874  | 1120.446  |
| BC007318  | 4748.394  | 5243.023  | NM_016292 | 36256.602 | 36664.793 | D13631    | 2861.794  | 3335.941  |
| M36693    | 9794.213  | 9872.728  | NM_002601 | 10597.826 | 11163.756 | NM_003712 | 5059.837  | 5444.908  |
| NM_016292 | 16757.057 | 14587.705 | NM_001781 | 2793.999  | 2725.784  | NM_002184 | 2774.844  | 2815.269  |
| NM_002601 | 7158.407  | 5627.514  | NM_014432 | 10553.984 | 9094.925  | NM_014883 | 10507.877 | 10014.238 |
| NM_001781 | 1213.608  | 1615.266  | NM_001558 | 10467.221 | 8380.572  | NM_017805 | 7994.479  | 8536.79   |
| AF035121  | 1108.518  | 1124.052  | NM_006953 | 2288.461  | 2388.956  | M86841    | 1222.621  | 1076.68   |
| NM_014432 | 6454.701  | 5188.662  | NM_002530 | 2304.896  | 2289.405  | U56387    | 1513.443  | 1652.9    |
| NM_001558 | 4980.816  | 3966.665  | NM_018941 | 6773.825  | 6627.866  | AL049296  | 5111.402  | 4045.893  |
| NM_002530 | 766.749   | 794.049   | NM_020241 | 852.185   | 1142.248  | NM_014471 | 65611.219 | 59169.141 |
| NM_018941 | 2320.847  | 2587.789  | NM_005898 | 39220.73  | 46448.305 | NM_004397 | 2615.46   | 2862.437  |
| NM_001321 | 8294.527  | 6298.102  | NM_002889 | 58798.715 | 59697.645 | NM_003188 | 608.552   | 740.903   |
| AB018264  | 11734.714 | 7700.107  | AF078866  | 2847.479  | 5499.52   | NM_020238 | 7400.882  | 4839.312  |
| AF078866  | 2302.822  | 2709.732  | BF311880  | 37289.809 | 46669.652 | NM_006201 | 3073.775  | 2931.815  |
| BF311880  | 12328.047 | 11375.239 | NM_000078 | 1116.262  | 1005.639  | NM_007110 | 1604.817  | 1912.718  |
| NM_000078 | 479.147   | 638.743   | NM_016075 | 1778.384  | 1543.189  | NM_001255 | 12265.953 | 12171.357 |
| NM_016075 | 952.76    | 1097.387  | NM_001360 | 21339.77  | 20410.938 | U50383    | 24903.48  | 22898.535 |
| NM_001360 | 17879.008 | 18159.768 | AK026656  | 22175.648 | 19530.248 | AK025085  | 8556.877  | 6894.114  |
| AK026656  | 10538.971 | 10906.807 | NM_000751 | 59097.594 | 51759.047 | NM_016317 | 1747.62   | 1302.548  |
| NM_000751 | 45733.859 | 45176.5   | NM_005071 | 3178.548  | 3070.182  | NM_006290 | 10298.772 | 7980.539  |
| NM_005071 | 1339.213  | 1389.125  | NM_016730 | 58548.785 | 55008.152 | AK022290  | 1213.881  | 1139.022  |
| NM_016730 | 36727.711 | 35211.164 | AL035297  | 3279.846  | 2551.204  | NM_003680 | 32221.967 | 42156.02  |
| AL035297  | 2048.305  | 2148.056  | NM_004408 | 18383.939 | 12687.962 | AF118124  | 18940.826 | 19551.156 |
| NM_004408 | 5217.13   | 4428.92   | AJ131244  | 4294.943  | 4325.739  | NM_004848 | 21455.006 | 23534.213 |
| AJ131244  | 1649.053  | 1747.087  | NM_002532 | 12351.503 | 11693.206 | AL137527  | 19074.912 | 17048.643 |
| NM_002532 | 7500.734  | 8369.74   | NM_012388 | 11417.705 | 10691.289 | AK026068  | 700.42    | 945.11    |
| NM_012388 | 7733.04   | 7912.461  | NM_016651 | 4695.024  | 4899.676  | J04974    | 29608.842 | 24620.787 |
| NM_016651 | 1968.062  | 3102.052  | NM_001671 | 1135.757  | 1333.853  | NM_017675 | 3508.843  | 2926.351  |
| NM_001671 | 382.934   | 783.646   | NM_019843 | 7571.887  | 9412.151  | NM_007014 | 3733.243  | 3088.264  |
| NM_019843 | 3321.075  | 3859.75   | NM_016192 | 21343.959 | 25045.801 | AL096740  | 1444.182  | 1635.437  |
| NM_016192 | 7384.628  | 7931.333  | AB046774  | 1888.245  | 2199.172  | AF191545  | 3063.604  | 4152.44   |
| BE878426  | 49229.262 | 56413.48  | AK022385  | 54975.797 | 48528.719 | NM_014554 | 5794.48   | 5998.802  |
| AK022385  | 39775.641 | 45019.898 | NM_002775 | 1264.836  | 1500.567  | AL137484  | 2293.61   | 2306.697  |
| NM_002775 | 850.051   | 1069.996  | AK024584  | 15499.852 | 13279.829 | AK023968  | 3101.67   | 2470.217  |
| AK024584  | 9720.142  | 7689.527  | NM_003504 | 9975.003  | 11438.844 | NM_004652 | 1192.635  | 1226.387  |
| NM_003504 | 7663.652  | 11881.267 | NM_013298 | 8771.481  | 8325.305  | NM_000353 | 415.985   | 402.648   |
| NM_013298 | 6685.032  | 8788.637  | NM_007267 | 4936.74   | 5063.537  | AK025425  | 55317.938 | 53338.34  |
| NM_007267 | 4286.501  | 5549.866  | AK022830  | 338.128   | 1088.752  | AK025974  | 44678.91  | 49543.047 |

|           |           |           |           |           |           |           |           |           |
|-----------|-----------|-----------|-----------|-----------|-----------|-----------|-----------|-----------|
| AK022830  | 287.122   | 609.785   | Z36816    | 12582.786 | 15505.062 | NM_016532 | 6338.329  | 6470.814  |
| Z36816    | 10937.357 | 15335.831 | NM_005865 | 13475.074 | 14299.051 | X98115    | 2889.737  | 2969.547  |
| NM_005865 | 8058.326  | 9601.252  | NM_006413 | 16329.323 | 18302.535 | NM_005781 | 7070.19   | 6328.909  |
| NM_006413 | 11839.989 | 14635.538 | NM_017684 | 977.95    | 1160.284  | BC036740  | 28733.299 | 32800.074 |
| AK025542  | 4839.356  | 5178.704  | AK025542  | 11859.904 | 11993.842 | NM_001747 | 6247.204  | 6360.065  |
| AF207547  | 1061.786  | 1109.302  | AF207547  | 1666.623  | 2075.399  | NM_001148 | 20531.197 | 25158.689 |
| NM_002768 | 11568.686 | 14072.076 | NM_002768 | 30513.945 | 29861.041 | AF242522  | 17835.414 | 17031.676 |
| NM_003691 | 2214.118  | 3950.32   | NM_003691 | 3779.414  | 4002.85   | AJ008152  | 8966.604  | 9548.697  |
| NM_002950 | 19493.791 | 20060.818 | NM_002950 | 29892.697 | 23762.59  | NM_003657 | 2679.234  | 2174.336  |
| NM_002318 | 4357.353  | 4753.635  | NM_002318 | 11728.593 | 9640.525  | NM_000588 | 776.744   | 543.937   |
| NM_001433 | 807.332   | 673.579   | NM_001433 | 1011.633  | 1273.905  | S67970    | 1858.641  | 1540.889  |
| NM_003134 | 52019.32  | 61577.352 | NM_003134 | 58409.957 | 54998.609 | AF221520  | 5433.306  | 5156.646  |
| NM_004314 | 4241.508  | 6600.997  | NM_004314 | 7189.22   | 6587.696  | NM_006941 | 61352.496 | 66809.563 |
| NM_018247 | 13425.257 | 21340.986 | NM_018247 | 26299.918 | 28793.809 | AB037852  | 1687.213  | 1478.171  |
| NM_017979 | 8771.089  | 10098.306 | NM_017979 | 29582.35  | 38563.641 | NM_005360 | 3232.142  | 2700.802  |
| NM_005898 | 26034.164 | 29251.516 | NM_006911 | 2091.81   | 2562.769  | NM_004348 | 5421.499  | 5217.591  |
| NM_002888 | 48673.453 | 59226.402 | U92544    | 13735.852 | 15006.693 | NM_002092 | 21147.611 | 26546.74  |
| NM_019644 | 1149.603  | 1269.486  | NM_019644 | 3532.127  | 4941.324  | NM_018077 | 5932.343  | 7752.476  |
| NM_006791 | 4339.33   | 5335.733  | NM_006791 | 6473.61   | 6284.552  | NM_016838 | 31369.334 | 35124.945 |
| AJ278348  | 44403.723 | 47324.371 | AJ278348  | 41555.832 | 48334.297 | NM_005968 | 63920.609 | 61769.516 |
| NM_015872 | 1052.289  | 1461.636  | NM_015872 | 1227.912  | 1470.898  | AK021416  | 1426.662  | 1994.832  |
| AI285199  | 9576.162  | 13885.842 | AI285199  | 32859.777 | 25399.426 | NM_018471 | 16735.061 | 18821.918 |
| AA757170  | 451.73    | 585.717   | L07738    | 2757.283  | 2703.416  | NM_003818 | 12063.666 | 12582.299 |
| L07738    | 1720.069  | 2097.64   | Z48054    | 8613.231  | 11925.257 | NM_006560 | 6456.188  | 6416.208  |
| Z48054    | 7199.565  | 8561.345  | H90415    | 10664.608 | 11680.976 | NM_016183 | 11687.362 | 12173.947 |
| H90415    | 5746.818  | 6239.73   | AA676470  | 59377.262 | 56806.301 | NM_004872 | 8161.691  | 7321.726  |
| AA676470  | 36131.859 | 33674.516 | AA430512  | 15662.199 | 16356.507 | NM_001958 | 59860.359 | 60249.773 |
| AA430512  | 10780.641 | 11167.641 | M38258    | 3339.262  | 3549.769  | NM_004757 | 5351.05   | 5690.084  |
| M38258    | 1229.552  | 1415.332  | AA457155  | 56982.57  | 57264.691 | NM_015904 | 10553.047 | 10500.458 |
| AA457155  | 53428.637 | 64840.148 | BM014365  | 2259.333  | 1994.293  | NM_001960 | 63344.004 | 60341.227 |
| BM014365  | 1769.096  | 1868.432  | H91842    | 1265.37   | 1225.547  | NM_018122 | 8239.571  | 10035.397 |
| H91842    | 1452.48   | 2074.822  | U78045    | 7991.443  | 6682.93   | NM_007058 | 13106.407 | 18235.109 |
| U78045    | 5023.622  | 5475.283  | AA878561  | 61649.301 | 57984.77  | NM_001528 | 5549.823  | 5287.552  |
| AA878561  | 60369.262 | 66190.742 | BF688309  | 1431.145  | 1639.212  | NM_017947 | 3007.233  | 2833.876  |
| BF688309  | 945.158   | 1208.107  | AI538525  | 2535.36   | 2565.213  | NM_002494 | 28079.908 | 34263.938 |
| AI538525  | 2388.503  | 3801.802  | AF222980  | 1749.855  | 1922.545  | M58510    | 18719.439 | 15882.07  |
| AF222980  | 1229.942  | 1833.833  | AK026758  | 9799.292  | 10092.183 | NM_000782 | 2802.444  | 2680.814  |
| AK026758  | 4788.593  | 5904.858  | NM_012201 | 10465.852 | 11656.33  | BE396003  | 2940.335  | 2716.552  |
| NM_012201 | 6463.069  | 7213.978  | NM_001745 | 52113.5   | 59318.594 | AK023300  | 5460.467  | 5359.082  |
| AB046774  | 952.602   | 1371.585  | NM_003825 | 20846.174 | 22041.047 | NM_018082 | 3332.555  | 2792.764  |
| AF159092  | 1076.916  | 1161.4    | AK025006  | 18442.898 | 16251.935 | NM_003904 | 8283.852  | 8236.997  |
| BC007318  | 4814.205  | 5558.13   | AF218014  | 54668.641 | 54575.348 | NM_006234 | 35862.652 | 40206.27  |
| M36693    | 11164.559 | 12285.88  | NM_006678 | 16208.992 | 17286.844 | AK026387  | 2071.463  | 1648.398  |
| NM_016292 | 19336.277 | 22916.635 | AY007729  | 59789.23  | 53057.168 | AK022284  | 3310.033  | 3466.345  |
| NM_002601 | 7915.202  | 8835.346  | NM_014424 | 1187.124  | 1016.849  | AF060937  | 910.891   | 568.979   |
| NM_000877 | 219.191   | 363.37    | AF159092  | 2059.595  | 2235.379  | AB040893  | 6928.219  | 7442.954  |
| NM_001781 | 1761.046  | 2289.706  | BC007318  | 6795.448  | 7518.994  | AK025844  | 3889.861  | 3600.349  |
| NM_014432 | 7731.856  | 7917.518  | M36693    | 16196.209 | 16857.27  | NM_004024 | 11097.01  | 13147.402 |
| NM_001558 | 5660.124  | 6391.273  | NM_016292 | 25903.594 | 25226.369 | X52345    | 30988.027 | 31928.283 |
| NM_006953 | 672.041   | 989.67    | NM_002601 | 12164.424 | 10325.606 | NM_006965 | 8999.808  | 9006.848  |
| NM_002530 | 1144.652  | 1735.749  | U62858    | 433.004   | 770.629   | AF027142  | 61403.805 | 55913.152 |
| U96173    | 2741.418  | 4718.127  | NM_001781 | 2371.636  | 3697.475  | NM_016372 | 63780.133 | 57085.145 |
| NM_018941 | 3310.158  | 3741.56   | NM_014432 | 9834.756  | 8337.357  | AB020705  | 6726.192  | 7666.955  |

|           |           |           |           |           |           |           |           |           |
|-----------|-----------|-----------|-----------|-----------|-----------|-----------|-----------|-----------|
| NM_020241 | 711.736   | 894.445   | NM_001558 | 9957.504  | 7694.905  | NM_002980 | 2928.502  | 3085.407  |
| BE730585  | 1997.822  | 2217.045  | NM_006953 | 494.824   | 729.663   | NM_015886 | 1089.821  | 1165.471  |
| NM_006159 | 1182.315  | 1542.327  | NM_002530 | 1781.005  | 1647.459  | NM_004262 | 1704.306  | 2177.87   |
| NM_005954 | 1389.655  | 1935.098  | NM_018941 | 6683.585  | 5433.304  | NM_007102 | 63195.859 | 58477.691 |
| NM_012471 | 959.419   | 1315.031  | NM_020241 | 573.802   | 1124.917  | BG491613  | 11840.404 | 10075.511 |
| NM_001321 | 10839.722 | 10397.321 | NM_001321 | 19568.162 | 17678.342 | AA397813  | 59894.254 | 56115.973 |
| AB018264  | 12909.785 | 13546.98  | AB018264  | 25879.947 | 28605.809 | W47350    | 7479.499  | 5796.712  |
| NM_006911 | 1381.987  | 1475.959  | AF078866  | 2775.727  | 2928.643  | AF097935  | 1424.824  | 1181.779  |
| U92544    | 5595.509  | 5893.992  | BF311880  | 37750.078 | 35534.457 | W68291    | 19624.346 | 21463.43  |
| AB023147  | 4160.4    | 4714.001  | NM_000078 | 1145.847  | 1253.236  | N64384    | 7803.284  | 8664.69   |
| NM_016615 | 16403.709 | 16818.742 | NM_016075 | 911.905   | 783.064   | H-U 05770 | 10990.591 | 12119.813 |
| NM_005630 | 2495.279  | 2615.696  | NM_001360 | 20941.057 | 13242.92  | H-M 65199 | 24252.246 | 25697.877 |
| NM_001046 | 508.913   | 704.35    | AK026656  | 24431.816 | 21578.482 | H-M 32315 | 2695.647  | 2716.926  |
| AK023106  | 3134.756  | 3874.398  | NM_000751 | 57621.629 | 50887.445 | H-D85429M | 21416.287 | 20173.852 |
| NM_016730 | 34223.563 | 41197.664 | NM_005071 | 2816.862  | 2915.548  | BF439832  | 3058.51   | 3351.533  |
| AL035297  | 2071.57   | 2731.285  | NM_016730 | 59978.695 | 58998.805 | BG819162  | 3337.713  | 4306.185  |
| NM_004408 | 6095.362  | 6869.783  | AL035297  | 2753.642  | 2813.617  | NM_012088 | 48028.227 | 52242.098 |
| AJ131244  | 3260.571  | 4941.812  | NM_004408 | 17688.047 | 18186.91  | NM_000139 | 1473.478  | 1768.139  |
| NM_002532 | 9321.462  | 10930.497 | AJ131244  | 3849.494  | 4093.127  | NM_006664 | 6577.788  | 10690.392 |
| NM_012388 | 8421.098  | 9604.474  | NM_002532 | 12639.004 | 11996.996 | NM_002416 | 821.107   | 1302.052  |
| NM_016651 | 2375.219  | 2904.373  | NM_012388 | 11282.918 | 10758.471 | NM_000448 | 2855.947  | 3544.102  |
| NM_001671 | 545.844   | 738.727   | NM_016651 | 3938.071  | 4106.828  | NM_004513 | 11662.499 | 15417.168 |
| NM_019843 | 4605.104  | 7234.593  | NM_001671 | 865.961   | 1384.943  | NM_001708 | 58327.797 | 58735.301 |
| NM_016192 | 12769.407 | 15792.654 | NM_019843 | 7257.51   | 7394.102  | NM_017735 | 7279.783  | 6262.343  |
| BE878426  | 53830.105 | 61151.477 | NM_016192 | 19207.238 | 17975.623 | AB033044  | 26089.07  | 19807.883 |
| NM_001745 | 39468.703 | 41800.703 | BE878426  | 59077.715 | 54140.18  | AB014564  | 2752.827  | 2184.187  |
| NM_003825 | 11013.061 | 17620.967 | AK022385  | 60692.32  | 56469.75  | NM_020230 | 7692.562  | 5751.889  |
| AK025006  | 12808.921 | 20869.363 | NM_002775 | 1794.42   | 2521.323  | NM_006762 | 62793.746 | 60753.531 |
| AF218014  | 44334.156 | 46100.973 | AK024584  | 15746.007 | 8478.819  | BF131321  | 4767.658  | 5356.322  |
| NM_006678 | 10991.378 | 12645.337 | NM_003504 | 12348.537 | 10581.754 | NM_016540 | 1593.241  | 1632.618  |
| NM_014424 | 948.116   | 1065.038  | NM_013298 | 9365.649  | 11737.402 | NM_012116 | 4568.82   | 5093.349  |
| NM_004314 | 5920.625  | 6974.01   | NM_007267 | 5985.928  | 5525.34   | NM_000020 | 14681.091 | 28997.539 |
| NM_018247 | 14463.389 | 17987.287 | Z36816    | 11629.176 | 9809.751  | NM_000956 | 1020.096  | 848.482   |
| NM_017979 | 10838.718 | 11050.836 | NM_005865 | 21142.371 | 16162.515 | AB033091  | 11028.919 | 14856.235 |
| NM_005898 | 28654.324 | 29012.027 | NM_006413 | 17849.219 | 16244.636 | NM_004557 | 17849.756 | 21048.996 |
| NM_002889 | 45685.297 | 48123.527 | NM_017684 | 1107.072  | 1163.886  | NM_003742 | 6065.428  | 8412.095  |
| AF078866  | 2884.698  | 4076.296  | AK025542  | 10498.061 | 10493.317 | NM_005094 | 5232.1    | 8383.895  |
| BF311880  | 15659.665 | 17189.049 | AF207547  | 1309.369  | 1371.15   | NM_002152 | 20751.227 | 22399.371 |
| NM_000078 | 378.826   | 431.802   | NM_002768 | 23841.658 | 23302.557 | NM_001701 | 1062.601  | 793.019   |
| NM_016075 | 875.45    | 1040.982  | NM_003691 | 3331.969  | 4353.109  | AK022558  | 3907.883  | 4318.75   |
| NM_001360 | 16969.543 | 18823.129 | NM_002950 | 32022.203 | 30689.623 | NM_006476 | 59765.914 | 59879.426 |
| AK026656  | 12904.697 | 17508.535 | NM_002318 | 12172.348 | 11746.52  | AK023787  | 3539.433  | 3132.494  |
| AJ276207  | 23883.525 | 25014.09  | NM_001433 | 811.056   | 1195.953  | NM_002133 | 4237.263  | 4357.642  |
| AB011131  | 8182.367  | 7049.979  | NM_003134 | 62452.973 | 52272.344 | NM_015697 | 9482.999  | 9847.453  |
| NM_000749 | 650.455   | 727.644   | NM_004314 | 6772.054  | 6746.83   | AF086489  | 537.34    | 710.923   |
| NM_000751 | 50906.422 | 45080.168 | NM_018247 | 23229.494 | 32339.271 | AB018258  | 727.179   | 655.018   |
| NM_014849 | 6729.059  | 7061.447  | NM_017979 | 27089.545 | 26221.578 | NM_005953 | 26030.016 | 12276.257 |
| NM_001042 | 7330.417  | 8403.737  | NM_005898 | 40421.898 | 43624.289 | BF337921  | 7820.74   | 7638.335  |
| NM_005071 | 2008.486  | 2578.179  | NM_002889 | 59597.629 | 60741.309 | U53532    | 4397.025  | 4550.993  |
| AF222980  | 1137.208  | 1077.457  | NM_019644 | 4128.579  | 5128.735  | NM_001740 | 4822.161  | 5847.168  |
| AK026758  | 3383.237  | 3854.384  | NM_006791 | 6246.068  | 7060.181  | NM_012484 | 9122.326  | 10075.491 |
| NM_012201 | 6678.591  | 6919.068  | AJ278348  | 49478.363 | 51582.051 | AL096732  | 5353.361  | 5976.102  |
| AB046774  | 1041.996  | 1351.576  | AI285199  | 36830.543 | 49197.309 | AB006423  | 1567.111  | 4826.787  |



|           |           |           |           |           |           |           |           |           |
|-----------|-----------|-----------|-----------|-----------|-----------|-----------|-----------|-----------|
| AK022385  | 46573.414 | 48766.43  | BI906283  | 761.52    | 1247.112  | NM_005719 | 62609.527 | 60820.73  |
| NM_002775 | 906.286   | 1232.437  | L07738    | 3395.279  | 2386.114  | NM_003462 | 53550.625 | 55766.145 |
| AK024584  | 10423.597 | 7744.211  | Z48054    | 9897.611  | 10923.684 | NM_006093 | 12181.84  | 14314.496 |
| NM_003504 | 7874.16   | 10862.968 | H90415    | 23142.615 | 22192.676 | AK023915  | 14310.98  | 17831.799 |
| NM_013298 | 7382.772  | 11723.54  | AA676470  | 63414.086 | 60949.594 | AB051453  | 2328.857  | 2616.56   |
| NM_007267 | 4015.142  | 6039.784  | AA430512  | 15416.781 | 14103.672 | AK026842  | 806.514   | 672.928   |
| AK022830  | 426.62    | 507.565   | M38258    | 3528.815  | 3630.05   | NM_002395 | 1433.301  | 1297.454  |
| Z36816    | 9333.429  | 10965.067 | AA457155  | 61384.563 | 61761.48  | AB023203  | 3318.792  | 3634.308  |
| NM_005865 | 5243.421  | 6041.01   | BM014365  | 2128.516  | 2878.159  | NM_014963 | 2858.805  | 2809.623  |
| NM_006413 | 11518.862 | 16070.856 | H91842    | 1337.395  | 1553.875  | NM_004255 | 2776.766  | 3215.53   |
| NM_017684 | 674.833   | 1015.259  | U78045    | 9264.98   | 10015.506 | NM_016271 | 9192.588  | 7488.697  |
| AK025542  | 6230.285  | 6651.024  | AA878561  | 65180.195 | 63050.648 | NM_016619 | 1450.579  | 1559.815  |
| AF207547  | 1303.353  | 1537.749  | BF688309  | 1752.887  | 1639.538  | NM_014481 | 2558.92   | 2619.776  |
| NM_002768 | 15569.601 | 15601.881 | AI538525  | 2717.763  | 2513.546  | U22172    | 5588.634  | 5579.25   |
| NM_003691 | 2346.462  | 2660.738  | AF222980  | 1918.93   | 1649.393  | AF020089  | 3019.285  | 2964.221  |
| NM_002950 | 20662.387 | 23706.16  | AK026758  | 9985.516  | 10036.926 | NM_006257 | 1699.263  | 1760.84   |
| NM_002318 | 7844.28   | 8766.022  | NM_012201 | 9457.585  | 10557.577 | NM_016281 | 13448.164 | 11955.423 |
| NM_001433 | 654.182   | 839.592   | AB046774  | 2469.612  | 3282.552  | NM_004734 | 25251.996 | 26155.357 |
| NM_003134 | 59231.492 | 63155.066 | AF159092  | 3544.329  | 5458.823  | AK024793  | 3775.218  | 4972.461  |
| CY3Cy5    | 5150.593  | 126.134   | BC007318  | 8505.698  | 10656.456 | AF208291  | 1708.054  | 2718.813  |
| NM_022095 | 923.661   | 1379.222  | M36693    | 20291.236 | 20231.166 | NM_004877 | 30843.744 | 40899.754 |
| AF088061  | 1170.653  | 937.856   | NM_016292 | 39267.445 | 35840.715 | L10284    | 62887.621 | 58308.328 |
| AF086286  | 1853.38   | 1345.926  | NM_002601 | 14115.702 | 16248.497 | NM_000276 | 2071.65   | 2357.142  |
| AF086376  | 1280.25   | 1194.074  | U62858    | 612.871   | 1411.591  | NM_000019 | 65040.758 | 64175.492 |
| AF086410  | 1212.816  | 1051.543  | NM_001781 | 2589.315  | 2799.83   | AK023701  | 2697.632  | 3920.096  |
| AK022997  | 11845.255 | 7341.874  | NM_014432 | 13379.318 | 13401.8   | NM_002980 | 2976.645  | 2856.411  |
| NM_017617 | 625.527   | 367.504   | NM_001558 | 14278.403 | 13786.466 | NM_015886 | 995.092   | 1214.272  |
| AF131830  | 1001.456  | 841.781   | NM_006953 | 633.131   | 845.201   | NM_004262 | 487.981   | 551.644   |
| NM_014811 | 630.635   | 611.51    | NM_002530 | 3208.765  | 3965.478  | NM_007102 | 65743.938 | 58785.156 |
| AK027232  | 1629.112  | 1915.859  | U96173    | 2848.975  | 3902.056  | BG491613  | 12559.396 | 14569.201 |
| NM_012204 | 654.968   | 429.992   | NM_018941 | 3519.991  | 5338.324  | AA397813  | 53923.73  | 53795.355 |
| NM_022095 | 1476.25   | 780.276   | NM_020241 | 1391.818  | 1805.608  | W47350    | 7769.739  | 6858.113  |
| SR2       | 44064.348 | 23999.193 | BE730585  | 5218.799  | 6745.744  | AI160964  | 1096.061  | 1256.234  |
| SR4       | 12112.057 | 8420.556  | NM_001980 | 3161.553  | 3090.949  | H-X 53655 | 2983.848  | 2445.11   |
| SR6       | 1658.771  | 1093.674  | NM_005954 | 2484.48   | 2652.263  | H-U 05770 | 10109.997 | 9438.002  |
| SR8       | 6160.131  | 14082.225 | NM_012471 | 2028.66   | 1836.782  | H-M 65199 | 21886.365 | 21682.111 |
| SR10      | 19920.41  | 5052.443  | NM_001321 | 23111.354 | 19453.219 | H-M 32315 | 2718.818  | 2273.042  |
| CY3Cy5    | 3320.609  | 154.533   | AB018264  | 27293.598 | 25290.428 | H-V00536M | 5358.599  | 4228.484  |
| AL080135  | 735.702   | 351.946   | NM_006911 | 2161.259  | 2897.9    | H-D85429M | 15638.261 | 13806.795 |
| AK023158  | 1353.809  | 1246.019  | U92544    | 18450.508 | 30575.391 | BF439832  | 3065.8    | 2716.816  |
| AF085852  | 1569.644  | 1449.704  | AB023147  | 7463.01   | 11499.938 | BG819162  | 2624.187  | 2748.229  |
| AF042838  | 1598.498  | 1078.621  | NM_016615 | 45751.879 | 56426.871 | M38449    | 11976.135 | 10403.486 |
| AL137511  | 559.054   | 341.076   | NM_005630 | 3038.848  | 3282.22   | NM_001091 | 3172.047  | 3831.147  |
| AF075031  | 365.945   | 529.077   | NM_001046 | 699.726   | 953.939   | NM_002416 | 866.932   | 1127.264  |
| AF075062  | 7394.422  | 5189.63   | AK023106  | 7074.919  | 7764.618  | NM_002728 | 2716.046  | 3125.313  |
| NM_004188 | 1366.64   | 934.976   | AL035297  | 3265.828  | 4713.416  | NM_000450 | 1006.32   | 915.657   |
| AF147381  | 10096.809 | 8895.784  | NM_004408 | 18790.268 | 14958.233 | NM_000448 | 2356.81   | 2095.612  |
| AK027101  | 20799.549 | 11702.97  | AJ131244  | 4521.031  | 4504.032  | NM_004513 | 10084.808 | 9220.832  |
| AK024358  | 3242.298  | 2193.694  | NM_002532 | 13124.723 | 14534.016 | NM_001708 | 57672.148 | 55507.996 |
| AF088075  | 2491.143  | 1599.6    | NM_012388 | 15870.5   | 16753.426 | NM_017735 | 7000.863  | 5681.542  |
| AK026376  | 2308.336  | 1177.297  | NM_016651 | 4967.83   | 6362.877  | AB033044  | 23974.66  | 25512.119 |
| AK027198  | 720.319   | 648.714   | NM_001671 | 1383.887  | 1730.47   | AB014564  | 2513.704  | 2569.373  |
| AF147426  | 2301.796  | 2320.063  | NM_019843 | 6674.045  | 9279.32   | NM_020230 | 6601.477  | 5837      |

|           |           |           |           |           |           |           |           |           |
|-----------|-----------|-----------|-----------|-----------|-----------|-----------|-----------|-----------|
| BC019667  | 2937.513  | 2707.174  | NM_016192 | 10830.635 | 14452.163 | NM_006762 | 61742.313 | 61812.574 |
| AK026026  | 4656.147  | 3238.94   | BE878426  | 59743.887 | 67725.172 | NM_006352 | 1825.226  | 2453.358  |
| AF085941  | 17069.885 | 10843.522 | NM_001745 | 51852.918 | 56393.789 | NM_016430 | 2544.51   | 4008.282  |
| Z69892    | 11813.063 | 8552.867  | NM_003825 | 20185.822 | 23173.016 | NM_004447 | 11218.746 | 11167.028 |
| AK023590  | 431.704   | 422.14    | AK025006  | 18975.713 | 20277.715 | NM_001204 | 5342.002  | 5280.251  |
| AF087961  | 528.573   | 466.308   | AF218014  | 60901.473 | 65714.023 | BF131321  | 2884.729  | 2517.673  |
| AL137309  | 2817.321  | 2681.675  | NM_006678 | 24126.781 | 24478.264 | NM_016540 | 614.238   | 639.608   |
| AL137475  | 805.073   | 669.719   | AY007729  | 63320.152 | 71974.305 | NM_012116 | 4037.311  | 4168.293  |
| AL161956  | 3358.328  | 2658.527  | NM_014424 | 2220.019  | 2828.251  | NM_000020 | 12211.042 | 11688.03  |
| AL390176  | 2316.103  | 2015.662  | NM_004314 | 7675.72   | 10519.816 | AB033091  | 9863.802  | 11766.62  |
| AL137356  | 647.684   | 486.242   | NM_018247 | 25336.773 | 31927.684 | NM_004557 | 16742.936 | 16346.079 |
| AL137547  | 1307.755  | 782.351   | NM_017979 | 29984.328 | 34065.145 | NM_016372 | 63797.523 | 59896.125 |
| AK021994  | 1097.572  | 792.956   | NM_005898 | 39939.465 | 45928.078 | AB020705  | 5504.805  | 6450.484  |
| Z70763    | 706.753   | 544.604   | NM_002889 | 61089.941 | 58954.016 | BE382905  | 1063.783  | 1065.686  |
| AK023802  | 17527.805 | 9832.627  | BF311880  | 41668.559 | 52785.801 | NM_002152 | 22688.006 | 21289.307 |
| AK021981  | 507.97    | 617.416   | NM_000078 | 1032.44   | 943.586   | NM_001701 | 872.821   | 911.911   |
| AL359567  | 596.996   | 668.774   | NM_016075 | 1144.831  | 1174.226  | AK022558  | 3754.118  | 3612.042  |
| NM_017726 | 451.264   | 507.385   | NM_001360 | 22626.871 | 19101.994 | NM_006476 | 60776.723 | 55463.035 |
| AK026716  | 541.501   | 1326.966  | AK026656  | 10977.986 | 13983.564 | AK023787  | 3227.161  | 2417.626  |
| AL049325  | 1611.815  | 3356.343  | AJ276207  | 22982.246 | 32990.418 | NM_002133 | 3725.421  | 3673.179  |
| AK023952  | 1213.343  | 2400.751  | AB011131  | 7407.045  | 11040.784 | NM_015697 | 8914.999  | 8647.211  |
| AF161342  | 918.428   | 832.346   | NM_000749 | 3261.922  | 3696.129  | AB018258  | 2176.356  | 2306.195  |
| NM_016646 | 758.719   | 529.497   | NM_000751 | 61369.203 | 55856.094 | NM_005953 | 29824.658 | 19101.27  |
| NM_014082 | 1784.133  | 1549.025  | NM_014849 | 14469.162 | 12157.771 | BF337921  | 8970.747  | 10309.39  |
| AF100636  | 379.947   | 309.281   | NM_001042 | 10792.27  | 10854.547 | U53532    | 4569.338  | 3910.454  |
| AK022197  | 1114.082  | 895.612   | NM_012229 | 5913.222  | 6871.552  | NM_001740 | 5194.28   | 4449.54   |
| AK021970  | 559.474   | 710.251   | NM_005071 | 3689.513  | 4597.181  | NM_012484 | 7019.322  | 7411.416  |
| AK022066  | 64275.25  | 46550.629 | AF222980  | 2022.396  | 2611.755  | AL096732  | 5103.39   | 4696.258  |
| AK022224  | 1456.702  | 1263.084  | AK026758  | 10991.788 | 12226.518 | AB006423  | 963.035   | 1193.226  |
| AK022359  | 1002.241  | 686.186   | NM_012201 | 11801.876 | 14906.474 | AJ132084  | 1907.493  | 1708.638  |
| AK022000  | 1116.979  | 887.659   | AB046774  | 2228.946  | 2881.078  | NM_005719 | 61392.801 | 57808.703 |
| AK022129  | 2410.131  | 2150.551  | AK022385  | 61328.754 | 55367.723 | NM_003462 | 47326.602 | 48136.57  |
| AK022263  | 2500.739  | 1791.014  | NM_002775 | 1831.152  | 2992.014  | NM_006093 | 11353.842 | 9583.249  |
| AK022384  | 644.434   | 557.211   | AK024584  | 17568.197 | 15852.814 | NM_000139 | 1700.03   | 1471.892  |
| AF086304  | 11027.03  | 15421.313 | NM_003504 | 9809.642  | 8615.321  | NM_006664 | 5817.895  | 7972.957  |
| D55641    | 632.375   | 989.155   | NM_013298 | 9468.586  | 9952.521  | AB051453  | 2521.759  | 2913.251  |
| AB032976  | 1519.122  | 1467.634  | NM_007267 | 5555.425  | 6582.369  | AK026842  | 459.185   | 630.483   |
| AF301222  | 14126.698 | 18145.707 | Z36816    | 10771.657 | 12803.2   | NM_002395 | 1836.408  | 1700.273  |
| AF215981  | 894.703   | 1260.596  | NM_005865 | 23281.461 | 21833.32  | AB023203  | 12462.299 | 13829.3   |
| AF087980  | 859.605   | 1072.542  | NM_006413 | 16066.31  | 18817.35  | NM_014963 | 2736.389  | 2673.694  |
| AK000257  | 873.409   | 873.427   | NM_017684 | 1013.98   | 1976.632  | NM_004259 | 2649.345  | 2435.83   |
| NM_006160 | 3520.843  | 2565.716  | AK025542  | 2961.801  | 4593.689  | NM_016271 | 8358.563  | 6919.242  |
| NM_000529 | 1471.374  | 2977.876  | AF207547  | 1032.75   | 1228.987  | NM_016619 | 1528.676  | 1662.252  |
| AF009259  | 2462.243  | 2540.905  | NM_002768 | 22800.395 | 24936.23  | NM_014481 | 2493.357  | 3030.487  |
| AF009260  | 957.827   | 754.166   | NM_003691 | 3963.269  | 4225.831  | U22172    | 5259.108  | 5720.726  |
| NM_003079 | 2353.638  | 2069.215  | NM_002950 | 31066.219 | 26951.773 | AB032960  | 2003.794  | 2091.532  |
| NM_017902 | 3044.818  | 2592.095  | NM_002318 | 13830.596 | 13620.279 | NM_014264 | 18771.93  | 18155.17  |
| NM_017835 | 13565.263 | 17970.848 | NM_001433 | 1229.216  | 1330.27   | AF020089  | 3179.52   | 3636.734  |
| NM_018347 | 1263.996  | 1710.784  | NM_003134 | 61151.254 | 62304.965 | NM_006257 | 2081.428  | 2340.348  |
| AF086223  | 632.037   | 1331.257  | CY3Cy5    | 8864.42   | 122.92    | NM_016281 | 14305.621 | 12079.343 |
| AK024986  | 708.901   | 829.631   | NM_022095 | 2354.082  | 3032.033  | NM_004734 | 29670.225 | 32345.217 |
| AK026730  | 1424.228  | 1955.836  | AF088061  | 5086.963  | 3917.275  | AK024793  | 2738.849  | 4287.835  |
| AK024739  | 1449.106  | 2679.743  | AF086425  | 925.425   | 1057.11   | AF208291  | 1784.446  | 1849.075  |

|           |           |           |           |           |           |           |           |           |
|-----------|-----------|-----------|-----------|-----------|-----------|-----------|-----------|-----------|
| AK098681  | 448.388   | 834.725   | AF086286  | 4829.589  | 4056.713  | NM_004877 | 30318.131 | 39572.301 |
| AK026772  | 3991.447  | 7516.588  | AF086376  | 5983.474  | 5465.094  | L10284    | 61846.109 | 56412.309 |
| AK024154  | 4119.419  | 4263.755  | AF086410  | 1195.779  | 1503.023  | NM_000276 | 2481.034  | 2474.369  |
| AF086341  | 917.739   | 1064.338  | AK027232  | 14557.459 | 12435.858 | NM_000019 | 61232     | 55106.434 |
| AK026672  | 523.62    | 621.972   | NM_022095 | 2131.766  | 2243.02   | AK023701  | 2392.666  | 2308.76   |
| S83282    | 64662.848 | 67385.047 | SR2       | 57985.516 | 44809.531 | NM_003742 | 4537.643  | 4084.806  |
| AK024164  | 14990.353 | 22393.871 | SR4       | 22461.857 | 16380.342 | NM_005094 | 4320.597  | 5307.566  |
| AL096727  | 1867.206  | 1981.021  | SR6       | 2626.382  | 2154.302  | NM_015886 | 1266.37   | 1254.027  |
| AL080110  | 5379.804  | 4565.17   | SR8       | 10216.703 | 18832.256 | NM_004262 | 1453.317  | 1591.068  |
| NM_020425 | 1373.836  | 1056.556  | SR10      | 32566.631 | 6987.728  | NM_007102 | 64123.238 | 67865.711 |
| AK024076  | 3862.225  | 3004.04   | CY3Cy5    | 8018.728  | 118.692   | BG491613  | 13637.636 | 12456.832 |
| M87940    | 1468.559  | 1183.589  | AF088064  | 1799.531  | 2421.013  | AA397813  | 56850.691 | 55527.914 |
| AK022971  | 615.705   | 735.646   | AF086103  | 2009.848  | 2097.093  | W47350    | 6493.096  | 8311.293  |
| L77588    | 2223.092  | 1546.806  | AL080135  | 1943.116  | 2563.838  | AI160964  | 998.861   | 1285.463  |
| NM_014273 | 8694.94   | 11735.769 | AK023158  | 3155.642  | 2836.947  | W68291    | 19421.031 | 19222.117 |
| AF039442  | 1213.866  | 2333.063  | AK000580  | 846.512   | 1110.655  | N64384    | 7765.176  | 8249.026  |
| AF104260  | 1230.031  | 1688.529  | AF075062  | 20798.777 | 14465.896 | H-X 53655 | 3348.688  | 2989.068  |
| NM_005671 | 1112.039  | 2103.996  | AK027101  | 57406.254 | 49555.922 | H-U 05770 | 11156.713 | 10511.384 |
| NM_017409 | 370.243   | 747.449   | AF010236  | 700.499   | 765.264   | H-M 65199 | 25115.008 | 21910.201 |
| NM_019625 | 3715.28   | 6025.724  | AK024358  | 5176.11   | 4373.969  | H-M 32315 | 2868.738  | 2551.442  |
| NM_006729 | 3758.628  | 5321.677  | AF088075  | 3010.586  | 2351.224  | H-V00536M | 5947.8    | 5999.591  |
| NM_006071 | 2138.031  | 2973.855  | AK026376  | 3736.217  | 2344.188  | H-D85429M | 15929.686 | 12264.496 |
| NM_012236 | 4505.394  | 6440.212  | AK027097  | 1382.909  | 1287.432  | BG819162  | 3970.291  | 4113.731  |
| NM_013939 | 804.921   | 1243.775  | AK024613  | 2321.939  | 2496.896  | M38449    | 10800.367 | 10483.041 |
| AB038651  | 3348.595  | 3473.113  | AF264623  | 2292.121  | 1549.151  | NM_001091 | 2613.703  | 2836.632  |
| AL359603  | 1478.628  | 1725.468  | AK027198  | 3499.493  | 3251.513  | AK023915  | 10991.032 | 13666.752 |
| X84838    | 981.569   | 1821.716  | AL162077  | 747.168   | 1024.028  | AB014564  | 2817.331  | 2510.174  |
| AF075063  | 1167.732  | 1255.944  | AK022404  | 1181.398  | 1361.119  | NM_020230 | 6749.423  | 5687.569  |
| AF069135  | 6980.688  | 5303.196  | AL137475  | 2682.869  | 2090.939  | NM_006762 | 65100.277 | 59213.41  |
| AK026524  | 1738.72   | 1234.844  | AL161956  | 6944.794  | 6200.986  | NM_006352 | 2320.899  | 2272.954  |
| AB011157  | 5320.098  | 4400.714  | AL390176  | 3641.573  | 2823.722  | NM_016430 | 1205.277  | 1752.874  |
| U17632    | 661.35    | 695.246   | AL137356  | 2422.227  | 1556.265  | NM_004447 | 10377.679 | 8736.34   |
| AK026764  | 2255.78   | 2141.149  | AL137547  | 2582.913  | 2283.185  | NM_001204 | 4745.839  | 4488.11   |
| AF113700  | 2919.985  | 2730.354  | AK021994  | 1690.043  | 1540.716  | BF131321  | 2506.396  | 2952.38   |
| X91348    | 15509.579 | 19169.949 | Z70763    | 1431.546  | 1596.689  | NM_016540 | 1183.184  | 1328.415  |
| Z36505    | 4810.953  | 8125.498  | AK023802  | 45929.504 | 28362.441 | NM_012116 | 4515.489  | 4995.802  |
| NM_001854 | 1663.671  | 3728.313  | AK021981  | 1258.143  | 2016.203  | NM_000020 | 14395.358 | 14498.872 |
| NM_017913 | 2606.722  | 6098.814  | AL359567  | 4249.441  | 5285.621  | NM_002845 | 583.744   | 912.302   |
| NM_002755 | 14061.66  | 17822.557 | NM_017726 | 14393.243 | 14457.771 | NM_000956 | 768.467   | 877.492   |
| AK024799  | 26579.066 | 24980.428 | AK026716  | 1113.044  | 1097.407  | NM_002442 | 10098.007 | 9114.45   |
| NM_000924 | 6576.041  | 7293.866  | AL049325  | 33063.805 | 26841.734 | AB033091  | 9834.069  | 9914.601  |
| NM_003330 | 6850.53   | 6803.488  | AK023952  | 2279.098  | 1965.162  | NM_004557 | 16974.859 | 14958.787 |
| NM_003647 | 617.433   | 567.415   | AK000787  | 1721.239  | 1538.336  | NM_014757 | 7235.534  | 8024.795  |
| NM_001699 | 10307.354 | 10242.209 | AF090885  | 36836.777 | 29281.986 | NM_017893 | 727.629   | 586.914   |
| NM_018351 | 1391.286  | 1467.677  | AK021970  | 1913.256  | 1500.237  | NM_001584 | 7643.514  | 7329.051  |
| AK023019  | 901.057   | 759.851   | AK022066  | 68257.984 | 69607.516 | NM_012259 | 60305.492 | 54574.055 |
| NM_147171 | 3450.218  | 3368.14   | AK022224  | 3384.318  | 3057.625  | AF272357  | 5142.688  | 5220.48   |
| AF238083  | 11284.641 | 12550.274 | AK022359  | 1547.297  | 1290.386  | NM_016372 | 62439.875 | 62042     |
| NM_002962 | 879.987   | 892.876   | AK022000  | 4618.25   | 3600.775  | AB020705  | 5629.458  | 5088.66   |
| NM_016388 | 3267.685  | 4289.819  | AK022129  | 11444.749 | 7600.129  | NM_014333 | 215.201   | 273.757   |
| AB046783  | 1442.825  | 1325.896  | AK022263  | 8926.853  | 6154.401  | NM_002980 | 2439.791  | 3085.977  |
| NM_000845 | 1095.022  | 894.807   | AK022384  | 1637.608  | 1057.307  | NM_016274 | 5790.443  | 4829.09   |
| NM_004604 | 63856.105 | 64338.223 | AF086304  | 36573.031 | 37084.84  | NM_014946 | 6570.465  | 5529.779  |

|           |           |           |           |           |           |           |           |           |
|-----------|-----------|-----------|-----------|-----------|-----------|-----------|-----------|-----------|
| NM_014965 | 8137.608  | 6065.529  | AB032976  | 4280.375  | 5242.464  | NM_014251 | 3784.615  | 2774.263  |
| NM_004882 | 26342.938 | 21593.426 | AF301222  | 30279.826 | 45766.215 | AK022750  | 4903.305  | 4374.655  |
| AL390148  | 12074.506 | 11819.054 | AF215981  | 31781.809 | 26134.473 | NM_004251 | 10987.441 | 10749.265 |
| AK024055  | 1158.413  | 1033.715  | NM_000732 | 55421.121 | 43973.59  | BF337921  | 7638.833  | 7809.476  |
| NM_013376 | 1086.199  | 1007.794  | AF130044  | 2762.516  | 1925.297  | U53532    | 3150.474  | 2826.207  |
| NM_017964 | 2154.635  | 2870.737  | AF009260  | 1855.61   | 1841.086  | NM_001740 | 4852.949  | 5059.808  |
| NM_016272 | 316.804   | 720.123   | NM_003079 | 3193.717  | 2667.89   | AL096732  | 5164.233  | 4787.116  |
| NM_016428 | 5473.308  | 7477.557  | NM_017902 | 5640.803  | 4030.03   | AB006423  | 1173.442  | 1041.093  |
| NM_004083 | 11768.757 | 15167.121 | NM_017835 | 38806.23  | 39041.039 | NM_005719 | 61445.355 | 59423.301 |
| NM_016039 | 28691.42  | 25633.596 | NM_018347 | 13182.128 | 17221.141 | NM_003462 | 52366.777 | 52928.582 |
| NM_001184 | 3197.577  | 3656.469  | AF086223  | 434.356   | 894.489   | NM_006093 | 10725.884 | 8755.192  |
| NM_015530 | 9691.027  | 8780.724  | AK024986  | 927.508   | 1524.444  | NM_000139 | 2199.695  | 2291.41   |
| NM_016238 | 5460.102  | 4954.851  | AK026730  | 3026.314  | 4404.913  | NM_006664 | 5495.357  | 6321.98   |
| NM_001758 | 564.251   | 589.741   | AK024739  | 3019.937  | 4068.951  | NM_002416 | 942.949   | 901.758   |
| BE546276  | 514.222   | 416.183   | AK098681  | 3521.243  | 2715.821  | NM_002728 | 2538.053  | 3215.84   |
| NM_004725 | 9949.455  | 10721.473 | AK026772  | 7888.227  | 8442.619  | NM_000450 | 467.771   | 852.475   |
| NM_015997 | 7071.646  | 6480.692  | NM_014260 | 24653.805 | 20320.258 | NM_000448 | 3001.832  | 2872.124  |
| NM_001167 | 6266.074  | 4568.714  | AK026458  | 1485.552  | 1374.23   | NM_004513 | 10581.353 | 11193.174 |
| NM_012115 | 5048.228  | 4272.33   | AK022266  | 2071.416  | 1299.537  | NM_001708 | 60704.938 | 66860.844 |
| NM_004933 | 35108.961 | 29931.922 | AF052130  | 11510.29  | 12093.744 | NM_017735 | 7738.559  | 7004.618  |
| M96577    | 20287.645 | 19635.996 | AL096727  | 4991.459  | 4352.926  | AB033044  | 28047.301 | 31142.971 |
| NM_013258 | 43523.867 | 33780.352 | AL080110  | 9378.417  | 9919.547  | NM_000276 | 2778.7    | 2211.824  |
| NM_003842 | 5012.772  | 4437.375  | NM_020425 | 2296.962  | 2404.284  | NM_003742 | 3874.795  | 3570.752  |
| NM_016184 | 2709.281  | 2790.402  | AK024076  | 8298.633  | 8341.402  | NM_005094 | 4890.29   | 4538.712  |
| L11238    | 21309.406 | 15576.98  | M87940    | 2616.805  | 2365.426  | BE382905  | 1358.954  | 1402.799  |
| AK025684  | 1216.151  | 1163.388  | L77588    | 6101.359  | 4158.729  | NM_002152 | 17295.543 | 18869.463 |
| NM_012205 | 11064.337 | 9316.892  | NM_014273 | 38010.207 | 35612.652 | AK022558  | 3596.614  | 4032.402  |
| K02046    | 4790.283  | 4000.78   | AF039442  | 2233.81   | 2603.253  | NM_006476 | 58649.293 | 55593.734 |
| U87223    | 2029.126  | 1553.994  | NM_004680 | 2658.324  | 3759.696  | AK023787  | 3922.381  | 3563.582  |
| NM_002217 | 687.946   | 745.457   | AF104260  | 834.445   | 1628.969  | NM_002133 | 3887.752  | 4377.677  |
| NM_004995 | 3692.352  | 5594.553  | NM_005671 | 2121.883  | 3790.272  | NM_015697 | 9796.7    | 9931.718  |
| NM_000386 | 10519.556 | 12518.047 | NM_017409 | 653.764   | 1146.168  | AF086489  | 682.643   | 530.852   |
| NM_007231 | 1017.271  | 1086.632  | NM_019625 | 45129.254 | 37767.707 | NM_032943 | 6184.835  | 6145.796  |
| NM_001190 | 4338.806  | 4004.219  | NM_006729 | 7995.24   | 6294.883  | NM_007177 | 26417.52  | 29198.762 |
| NM_005271 | 16395.582 | 16611.531 | NM_006071 | 4244.903  | 3504.788  | NM_000482 | 871.593   | 675.683   |
| NM_015654 | 6404.086  | 5581.568  | NM_012236 | 25882.424 | 16708.666 | NM_005953 | 25614.189 | 12260.337 |
| NM_012244 | 2852.501  | 2480.744  | AB038651  | 9604.425  | 6377.532  | NM_002395 | 1163.276  | 1147.167  |
| NM_004341 | 2093.636  | 1938.78   | AL359603  | 2471.485  | 2535      | NM_014963 | 4702.689  | 4415.504  |
| AB082521  | 8055.309  | 6435.852  | NM_013940 | 1062.617  | 1303.451  | NM_004259 | 2963.818  | 3418.304  |
| AK026806  | 454.208   | 382.484   | AL117643  | 3888.945  | 4123.582  | NM_016271 | 8044.934  | 8309.668  |
| AL050182  | 2362.599  | 1502.692  | AK001102  | 2106.695  | 1568.093  | NM_016619 | 1306.734  | 1150.879  |
| NM_020040 | 1094.07   | 1145.276  | AF069135  | 25649.387 | 20008.336 | NM_014481 | 1162.503  | 1408.114  |
| NM_002374 | 3246.543  | 3123.198  | AK026524  | 2470.275  | 3302.989  | U22172    | 5589.805  | 5211.922  |
| AK026940  | 7771.704  | 7010.93   | AB011157  | 9882.175  | 9065.604  | AB032960  | 1345.793  | 1547.978  |
| AF155117  | 7255.572  | 6355.728  | U17632    | 1804.906  | 1619.983  | AF208291  | 1828.336  | 2156.816  |
| AB014527  | 1173.245  | 990.906   | AK026764  | 3495.885  | 2635.562  | CY3Cy5    | 22285.92  | 1017.883  |
| NM_004411 | 2343.696  | 2202.656  | AF113700  | 5382.256  | 3102.272  | NM_000620 | 756.029   | 856.543   |
| NM_015938 | 10457.423 | 8239.055  | X91348    | 63511.777 | 60687.637 | NM_000905 | 7539.702  | 5819.708  |
| NM_000740 | 1211.071  | 1038.133  | Z36505    | 7312.285  | 6463.84   | AK023269  | 3189.312  | 2808.574  |
| NM_017843 | 10994.304 | 8383.467  | NM_001854 | 5488.609  | 5379.517  | AF070564  | 9759.047  | 10143.714 |
| U10485    | 1433.366  | 1113.339  | NM_017913 | 4345.814  | 5379.386  | NM_014778 | 4456.371  | 3127.729  |
| AK025326  | 28426.541 | 31234.777 | NM_002755 | 36771.23  | 40699.613 | AK001171  | 31308.713 | 26561.668 |
| NM_016328 | 8635.807  | 8146.99   | AK024799  | 62803.785 | 67620.352 | AF086491  | 6442.373  | 5037.783  |

|           |           |           |           |           |           |           |           |           |
|-----------|-----------|-----------|-----------|-----------|-----------|-----------|-----------|-----------|
| NM_017544 | 33200.227 | 26872.932 | NM_000924 | 17866.438 | 15792.032 | NM_014856 | 1828.381  | 1402.141  |
| NM_003153 | 2266.883  | 2395.995  | NM_003330 | 16310.703 | 13796.74  | AK021611  | 1595.289  | 1732.115  |
| NM_016285 | 1241.85   | 1242.257  | NM_003647 | 1214.275  | 867.921   | NM_003492 | 880.474   | 1118.457  |
| NM_014707 | 1097.275  | 1335.12   | NM_001699 | 65158.227 | 58930.242 | NM_000905 | 8279.814  | 5722.153  |
| AF025771  | 1980.381  | 1951.198  | AB006589  | 804.984   | 549.013   | SR1       | 75877.984 | 60161.035 |
| NM_018215 | 2945.794  | 2421.44   | NM_018351 | 3690.059  | 3002.301  | SR3       | 40452.281 | 32634.604 |
| AB033110  | 2619.865  | 2197.718  | AK023019  | 1592.057  | 1245.122  | SR5       | 4722.205  | 3332.135  |
| NM_005083 | 42296.555 | 30936.738 | NM_147171 | 17227.586 | 18693.646 | SR7       | 4699.584  | 23155.875 |
| NM_007187 | 10790.491 | 9467.645  | AF238083  | 60158.605 | 66196.68  | SR9       | 16138.057 | 1528.792  |
| NM_001825 | 870.202   | 720.024   | NM_016385 | 8612.994  | 7171.672  | CY3Cy5    | 17009.496 | 545.084   |
| NM_018983 | 13609.42  | 12960.525 | NM_000845 | 2689.808  | 2229.967  | U63828    | 3820.79   | 2564.365  |
| NM_003096 | 9434.283  | 8025.058  | NM_004604 | 64723.23  | 66317.766 | Z36794    | 1041.183  | 820.809   |
| NM_007279 | 9456.842  | 7099.225  | NM_014965 | 18515.557 | 18159.338 | Z36828    | 7469.693  | 7835.319  |
| BE390833  | 24919.861 | 22254.809 | NM_004882 | 64329.617 | 61478.918 | AF086121  | 36114.652 | 40192.949 |
| NM_004730 | 14047.875 | 13674.501 | AL390148  | 38438.121 | 26844.535 | AF086140  | 2455.981  | 2320.169  |
| NM_000801 | 7014.343  | 5354.511  | AK024055  | 1974.385  | 1047.003  | AK022551  | 3739.441  | 3414.51   |
| NM_006115 | 54356.781 | 45692.031 | NM_013376 | 2267.325  | 2479.454  | AF085968  | 1475.256  | 1152.718  |
| NM_005801 | 5707.515  | 4683.05   | NM_017964 | 3966.971  | 4704.015  | AB011136  | 5486.796  | 4113.657  |
| NM_018195 | 4267.081  | 4000.432  | NM_016272 | 1635.834  | 2757.409  | AF085898  | 7609.008  | 5742.932  |
| NM_001539 | 25344.043 | 23272.869 | NM_016425 | 12382.382 | 11820.821 | AL161960  | 2331.908  | 1863.295  |
| NM_012267 | 772.885   | 727.606   | NM_004083 | 18914.83  | 19265.281 | AL049964  | 3869.087  | 2838.337  |
| NM_003293 | 282.837   | 243.227   | NM_016039 | 53750.75  | 50049.121 | AK022485  | 871.196   | 1003.544  |
| NM_016616 | 909.503   | 636.013   | NM_001184 | 7116.548  | 6577.667  | AK023395  | 11360.929 | 8760.682  |
| NM_000022 | 13736.511 | 14279.784 | NM_015530 | 17252.781 | 15246.053 | AK023818  | 8469.052  | 5534.02   |
| NM_016576 | 7568.701  | 7041.128  | NM_016235 | 12258.856 | 10724.614 | AK024139  | 532.244   | 956.204   |
| NM_004213 | 1956.754  | 1907.334  | NM_001755 | 1222.103  | 1408.368  | AK023895  | 653.189   | 645.406   |
| NM_001925 | 54846.273 | 54327.602 | BE546276  | 1533.468  | 1102.582  | AK024206  | 13455.048 | 10943.135 |
| NM_000906 | 3048.58   | 2850.884  | NM_004725 | 19117.313 | 13521.518 | AK026273  | 27536.924 | 27667.801 |
| NM_000480 | 5799.828  | 5728.678  | NM_015997 | 29916.191 | 26025.709 | NM_020250 | 36666.66  | 35789.07  |
| AF254084  | 55539.59  | 38772.398 | NM_001167 | 27167.227 | 24785.77  | AF055007  | 1954.79   | 1193.016  |
| AK022648  | 750.366   | 778.145   | NM_012115 | 15245.626 | 15511.354 | NM_012337 | 2534.834  | 2425.346  |
| AK022976  | 1436.935  | 1247.64   | NM_004933 | 63310.551 | 66540.086 | AL389879  | 25046.838 | 21993.865 |
| AB048791  | 7011.851  | 6488.681  | M96577    | 41400.656 | 48290.809 | AK022869  | 2070.468  | 1880.817  |
| NM_003107 | 1452.297  | 1325.878  | NM_013255 | 62522.582 | 63131.926 | NM_016111 | 24780.271 | 21991.027 |
| NM_006874 | 6365.067  | 4440.591  | L11238    | 34328.977 | 33076.813 | AF085958  | 76465.898 | 60237.539 |
| AB046777  | 2487.179  | 2022.06   | AK025684  | 2361.335  | 3192.299  | AF086021  | 8767.105  | 6168.852  |
| AJ251844  | 10081.566 | 8218.632  | NM_012205 | 25314.537 | 22604.797 | AK024472  | 3740.794  | 2947.456  |
| D16815    | 2571.316  | 2211.372  | K02046    | 7105.107  | 4825.976  | NM_017976 | 4949.137  | 3820.313  |
| NM_001880 | 2690.469  | 1980.059  | U87223    | 7015.638  | 3605.078  | U06700    | 1313.086  | 1105.666  |
| AB028943  | 4871.912  | 3494.386  | NM_002217 | 1777.333  | 1438.857  | NM_017915 | 18631.967 | 13242.063 |
| NM_006194 | 1609.433  | 1410.045  | NM_004995 | 8247.115  | 11409.183 | NM_017855 | 66000.773 | 54741.109 |
| AK001603  | 15320.958 | 13434.548 | AK023320  | 1441.953  | 1218.271  | AB007954  | 3802.146  | 3158.584  |
| U71601    | 3057.371  | 2659.028  | NM_000386 | 24997.563 | 28729.922 | AK023508  | 1247.315  | 1176.286  |
| AK025985  | 50350.801 | 59032.93  | NM_007231 | 2094.61   | 2628.241  | AK025840  | 3817.93   | 4414.335  |
| NM_013256 | 4326.098  | 3726.067  | NM_001190 | 11213.36  | 10841.756 | AK026915  | 3629.392  | 4369.441  |
| NM_004143 | 2279.932  | 1987.631  | NM_005271 | 34249.27  | 46321.676 | AB033100  | 42870.43  | 46310.57  |
| X66087    | 3505.421  | 2894.266  | NM_015654 | 14765.251 | 15864.282 | AL390138  | 4121.511  | 5301.366  |
| L09070    | 589.861   | 500.865   | NM_012244 | 6101.984  | 7538.675  | AL137290  | 6349.792  | 5687.762  |
| NM_000062 | 8918.771  | 8840.514  | NM_004341 | 4676.718  | 5817.128  | NM_014124 | 54400.805 | 44690.238 |
| NM_009590 | 9611.122  | 10385.063 | AB082521  | 35489.27  | 37588.445 | AF119888  | 1423.073  | 1238.875  |
| AL133037  | 1301.121  | 1513.412  | AK026806  | 654.153   | 1001.511  | AK001551  | 4128.812  | 2912.846  |
| NM_020350 | 4731.252  | 3434.991  | AL050182  | 9787.34   | 10410.874 | AK001825  | 2106.836  | 1566.985  |
| NM_000350 | 5450.605  | 4304.089  | NM_020040 | 3434.234  | 3964.423  | AK024714  | 1905.659  | 1796.639  |

|           |           |           |           |           |           |           |           |           |
|-----------|-----------|-----------|-----------|-----------|-----------|-----------|-----------|-----------|
| X91103    | 14438.786 | 12572.846 | NM_002374 | 13091.612 | 16125.866 | AK022363  | 2257.465  | 2032.59   |
| AA419164  | 2176.011  | 1897.629  | AK026940  | 17297.322 | 18589.951 | NM_005181 | 2488.21   | 1719.233  |
| L35251    | 4728.524  | 4972.508  | AF155117  | 21099.893 | 23886.102 | AF026945  | 651.728   | 578.128   |
| BE910395  | 7571.275  | 8329.761  | NM_015938 | 17856.705 | 22872.871 | NM_005247 | 64307.566 | 55897.273 |
| N46828    | 11290.254 | 10490.969 | NM_000740 | 2508.178  | 2549.606  | NM_005283 | 3165.89   | 3777.55   |
| BI908302  | 55325.887 | 49061.691 | NM_017843 | 16957.223 | 13224.409 | AL122089  | 2159.953  | 2697.451  |
| AA460969  | 4985.759  | 3632.386  | U10485    | 5388.089  | 3242.982  | AA203665  | 9920.879  | 8548.565  |
| BG695859  | 3449.796  | 3364.525  | AK025326  | 52825.973 | 37825.93  | U95646    | 2725.363  | 2566.506  |
| M85079    | 7581.676  | 6771.718  | NM_016328 | 28584.645 | 28277.994 | Y16705    | 3266.149  | 4586.839  |
| AA457671  | 18025.08  | 13753.763 | NM_017544 | 63161.203 | 56361.922 | AF279775  | 10454.064 | 13860.353 |
| X07437    | 16741.1   | 13957.645 | NM_003153 | 4083.594  | 4587.52   | NM_006262 | 3080.778  | 3598.383  |
| NM_000641 | 3177.88   | 3210.708  | NM_016285 | 3412.142  | 3833.283  | AK026598  | 2867.512  | 2603.525  |
| AE006466  | 19759.102 | 16099.774 | NM_014707 | 2216.83   | 2917.317  | AK023602  | 3228.189  | 3547.572  |
| BC008737  | 55295.324 | 61473.309 | AF025771  | 3340.156  | 3453.125  | NM_018097 | 55246.137 | 52099.293 |
| BC011655  | 5451.336  | 5350.848  | NM_018215 | 5009.316  | 5372.47   | Y11167    | 1894.746  | 1875.641  |
| BC002396  | 10399.929 | 17459.494 | AB033110  | 4869.521  | 4658.1    | AK026813  | 1797.107  | 1364.243  |
| NM_003613 | 2732.469  | 2915.638  | NM_005083 | 60945.012 | 56972.293 | AK027225  | 1744.487  | 1684.537  |
| NM_005385 | 5661.816  | 5619.482  | NM_007187 | 27409.764 | 25552.121 | AK023083  | 2648.27   | 2233.043  |
| NM_018985 | 4401.813  | 3450.451  | NM_001828 | 1083.699  | 1094.616  | AF130093  | 1964.167  | 2460.368  |
| NM_006074 | 58454.609 | 53305.676 | NM_018983 | 26811.523 | 31678.896 | AF116622  | 1469.463  | 1145.106  |
| AF208232  | 6494.619  | 6768.859  | NM_003096 | 15905.743 | 13728.294 | AF217967  | 901.054   | 824.583   |
| NM_002988 | 8125.986  | 8334.559  | NM_007279 | 22117.365 | 23102.543 | NM_017447 | 2480.471  | 1978.387  |
| NM_004186 | 1482.134  | 1220.42   | BE390833  | 47309.793 | 48712.523 | AL049452  | 843.19    | 605.01    |
| NM_016258 | 8895.572  | 7505.736  | NM_004730 | 24196.383 | 26704.645 | NM_016622 | 3481.837  | 3003.845  |
| AF203032  | 7784.925  | 7398.246  | NM_000801 | 13833.044 | 14859.845 | AK026976  | 3481.183  | 3507.538  |
| AB014542  | 12602.542 | 11610.128 | NM_012267 | 1226.175  | 1532.855  | AF070559  | 890.125   | 800.469   |
| NM_014640 | 1746.539  | 2120.828  | NM_016616 | 854.683   | 1015.149  | D42043    | 45535.102 | 56575.008 |
| Y10518    | 55781.078 | 59000.898 | NM_000022 | 23136.881 | 23076.611 | BC024009  | 4966.732  | 6234.511  |
| AF155135  | 9491.991  | 9017.505  | NM_016576 | 12974.121 | 11071.448 | AF128543  | 18100.156 | 16554.984 |
| NM_014790 | 2667.996  | 2893.489  | NM_004213 | 4881.822  | 4713.124  | AK022071  | 2213.884  | 2177.001  |
| NM_003571 | 22357.941 | 18426.377 | NM_001929 | 62126.004 | 57630.262 | NM_004188 | 1367.188  | 1521.051  |
| AB032965  | 54064.859 | 58087.797 | NM_000906 | 5878.54   | 5775.328  | X94290    | 3015.264  | 3156.775  |
| NM_020370 | 997.68    | 1091.112  | NM_000480 | 11031.247 | 11820.672 | AK026685  | 35016.266 | 37675.074 |
| NM_004767 | 1927.815  | 1973.093  | AF254084  | 61120.473 | 54259.109 | AF090927  | 50321.383 | 54111.789 |
| BF310159  | 20732.287 | 16402.576 | AK022648  | 1120.888  | 1271.449  | AL137642  | 2256.17   | 3165.247  |
| NM_000316 | 472.826   | 504.571   | AK022976  | 2687.748  | 2233.623  | AL133619  | 15767.505 | 13759.933 |
| NM_018986 | 4485.928  | 4165.867  | AB048791  | 19256.582 | 16428.404 | AK025902  | 5201.203  | 4189.891  |
| AB044934  | 1044.07   | 1252.866  | NM_003107 | 2372.474  | 2183.979  | NM_004517 | 4160.132  | 2861.591  |
| U27655    | 12795.666 | 13001.024 | NM_006874 | 15016.467 | 10415.651 | NM_000679 | 3472.429  | 2686.491  |
| Z21965    | 55398.488 | 59267.563 | AB046777  | 4665.776  | 4238.554  | AF218006  | 62022.18  | 56780.422 |
| NM_012427 | 1939.484  | 1969.743  | AJ251844  | 38950.672 | 32431.969 | AK026935  | 41128.965 | 35430.906 |
| AF133424  | 3746.852  | 4163.662  | D16815    | 4856.262  | 5584.792  | NM_020162 | 7056.039  | 5026.439  |
| NM_005003 | 23844.885 | 22565.92  | NM_001880 | 4009.814  | 4997.689  | AK027124  | 66152.875 | 58365.129 |
| AF084560  | 14010.707 | 14449.959 | NM_006194 | 5414.381  | 5197.169  | M31212    | 25585.725 | 22656.053 |
| NM_015715 | 1627.099  | 2008.513  | AK001603  | 53526.82  | 49191.777 | NM_001821 | 8123.808  | 10572.092 |
| NM_000032 | 12206.308 | 12956.084 | NM_013256 | 8405.813  | 5722.132  | NM_005647 | 2288.069  | 2295.093  |
| NM_002083 | 2950.578  | 2541.25   | NM_004143 | 3502.567  | 2193.949  | X64978    | 18024.746 | 18806     |
| NM_002035 | 6125.934  | 5243.686  | X66087    | 6958.226  | 4886.727  | NM_000912 | 43798.887 | 42521.898 |
| NM_014900 | 3209.155  | 2217.075  | L09070    | 863.172   | 1084.582  | NM_002345 | 1775.947  | 2261.204  |
| BF342908  | 1549.972  | 1435.461  | NM_000062 | 14827.63  | 15076.136 | U57971    | 3427.818  | 3338.266  |
| AF118073  | 518.829   | 389.903   | NM_017877 | 1519.597  | 1115.004  | X89673    | 2035.074  | 2045.457  |
| AK023510  | 5275.042  | 4366.954  | NM_009590 | 35322.832 | 40289.285 | AK024593  | 3101.854  | 2588.145  |
| NM_004345 | 3431.172  | 3299.508  | AL133037  | 1744.362  | 2463.438  | Z83934    | 1924.775  | 2116.974  |

|           |           |           |           |           |           |           |           |           |
|-----------|-----------|-----------|-----------|-----------|-----------|-----------|-----------|-----------|
| NM_00652E | 525.981   | 486.657   | NM_02035C | 7786.535  | 5726.245  | NM_01835E | 4100.42   | 3668.98   |
| NM_00223Z | 1212.807  | 1217.815  | NM_00035C | 20658.893 | 20948.164 | AK022020  | 3222.502  | 3286.917  |
| NM_01457C | 4702.183  | 5107.899  | X91103    | 41181.008 | 46618.207 | AK000263  | 16110.285 | 14002.276 |
| NM_01482Z | 2419.06   | 3258.795  | AA419164  | 3925.458  | 3765.889  | Y13895    | 1925.042  | 1820.453  |
| NM_00529E | 2713.501  | 2726.65   | L35251    | 10266.768 | 7652.381  | L14723    | 18888.809 | 14891.09  |
| NM_001337 | 657.581   | 557.253   | BE910395  | 18955.369 | 13760.615 | AK024462  | 38226.547 | 31384.564 |
| NM_003611 | 5108.716  | 4404.738  | N46828    | 38365.262 | 30140.598 | NM_019601 | 1347.108  | 1259.672  |
| AB014538  | 6516.268  | 7086.604  | BI908302  | 65765.422 | 62295.367 | NM_00220E | 1688.613  | 1295.951  |
| NM_00620E | 1545.176  | 1512.021  | AA460969  | 9833.824  | 8208.015  | NM_007074 | 1372.224  | 1007.584  |
| AK025118  | 7944.195  | 8457.892  | BG695859  | 7472.188  | 6832.535  | NM_006614 | 1195.683  | 777.797   |
| NM_000727 | 3172.704  | 2948.123  | M85079    | 37001.617 | 33717.922 | NM_00223C | 5108.595  | 5027.571  |
| NM_002621 | 541.714   | 492.106   | AA457671  | 50165.859 | 55889.602 | NM_00381E | 12744.691 | 9397.184  |
| NM_00413E | 3679.175  | 3186.904  | X07437    | 42402.18  | 47406.574 | NM_00143C | 1423.464  | 1387.3    |
| NM_00020Z | 22541.596 | 11221.432 | AE006466  | 50532.82  | 51938.746 | AB010098  | 1238.979  | 1047.486  |
| NM_01344Z | 1529.279  | 1630.139  | BC008737  | 66954.219 | 64687.301 | U17989    | 3659.762  | 2764.027  |
| NM_00092E | 12776.476 | 12917.942 | BC011655  | 7781.651  | 4682.272  | U62325    | 2658.657  | 2405.369  |
| NM_00046E | 2849.432  | 3244.672  | BC002396  | 15593.535 | 7568.478  | AL137595  | 1071.457  | 1283.85   |
| NM_00012Z | 2774.094  | 3296.344  | NM_00361Z | 5657.975  | 6262.508  | NM_01802E | 2594.59   | 2676.644  |
| AL137501  | 2248.765  | 1906.897  | NM_00538E | 12754.181 | 14640.097 | AF249267  | 64403.355 | 54590.27  |
| BE858979  | 767.727   | 573.352   | NM_01898E | 7622.769  | 6734.628  | NM_00411Z | 1153.465  | 1283.924  |
| NM_00012Z | 3489.522  | 2357.053  | NM_006074 | 63369.328 | 63040.266 | X84939    | 5840.137  | 5982.821  |
| NM_00671Z | 50624.637 | 55377.758 | AF208232  | 18763.166 | 20627.572 | NM_01832C | 30589.133 | 32908.98  |
| NM_00624C | 2867.617  | 2530.28   | NM_00298E | 24027.684 | 26815.984 | NM_00206E | 6070.437  | 5404.426  |
| NM_00702E | 6083.396  | 5352.097  | NM_00418E | 4859.335  | 7648.361  | NM_01605E | 8774.809  | 7011.087  |
| M37712    | 10670.355 | 7465.996  | NM_01625E | 14911.53  | 18060.102 | NM_013251 | 964.689   | 803.33    |
| NM_00264E | 11083.554 | 10952.362 | AF203032  | 40203.922 | 48485.133 | NM_01232E | 1202.781  | 1098.532  |
| AF070670  | 15764.964 | 12694.44  | AB014542  | 41179.313 | 40014.375 | NM_00308E | 58983.574 | 55113.438 |
| NM_01615E | 4612.254  | 5203.942  | NM_01464C | 3302.323  | 2893.397  | NM_016084 | 26452.09  | 21982.938 |
| NM_01652E | 2680.017  | 2757.319  | Y10518    | 63995.898 | 59379.27  | AF095289  | 34427.449 | 38003.746 |
| NM_015974 | 2481.199  | 2449.21   | AF155135  | 19944.271 | 17463.953 | NM_005537 | 5748.037  | 4131.666  |
| NM_014384 | 2097.748  | 2076.855  | NM_01479C | 5415.449  | 5110.676  | NM_01900Z | 4813.606  | 3684.625  |
| NM_00257Z | 4277.671  | 3328.241  | NM_003571 | 55610.449 | 50214.633 | NM_01593E | 18103.064 | 19095.68  |
| NM_017877 | 1584.691  | 1520.243  | AB032965  | 63640.859 | 64038.227 | AF182412  | 1303.236  | 1660.658  |
| NM_00959C | 7082.766  | 7762.171  | NM_02037C | 1892.14   | 2373.666  | AK027200  | 2341.11   | 2166.221  |
| AL133037  | 910.911   | 1224.134  | NM_01898E | 7275.749  | 8222.604  | S78372    | 1127.729  | 1507.774  |
| NM_02035C | 4302.725  | 3484.679  | AB044934  | 1832.936  | 2599.701  | U03106    | 14157.307 | 16906.33  |
| NM_00035C | 5357.787  | 4398.351  | U27655    | 30967.85  | 27980.41  | NM_00007E | 23741.24  | 21809.271 |
| X91103    | 15547.124 | 15074.343 | Z21965    | 63760     | 52245.242 | NM_00684E | 56813.762 | 57935.039 |
| AA419164  | 2114.379  | 1710.357  | NM_012427 | 4365.786  | 4608.634  | NM_01488E | 1387.496  | 2354.226  |
| L35251    | 4924.302  | 3805.7    | AF133424  | 15583.404 | 16849.244 | M73239    | 1586.102  | 1647.951  |
| BE910395  | 7819.702  | 6458.151  | AF084560  | 35268.156 | 38616.672 | NM_00494E | 9878.889  | 9712.751  |
| N46828    | 11677.536 | 10607.331 | NM_01571E | 3753.654  | 5048.489  | NM_02024Z | 1997.304  | 2374.798  |
| BI908302  | 50226.758 | 48401.621 | NM_00003Z | 36498.184 | 37094.152 | NM_00178E | 35226.469 | 47006.09  |
| AA460969  | 4652.856  | 3629.329  | NM_00208Z | 8342.818  | 11027.271 | NM_00717E | 70215.258 | 65917.641 |
| BG695859  | 3712.933  | 3144.293  | NM_00203E | 12578.686 | 19187.195 | NM_01664E | 11841.743 | 10057.589 |
| M85079    | 12268.932 | 8847.671  | NM_01490C | 5944.995  | 8283.414  | NM_01425E | 4631.229  | 4082.367  |
| AA457671  | 17503.977 | 17433.75  | BF342908  | 3748.523  | 4143.03   | NM_015967 | 5184.018  | 4137.118  |
| X07437    | 13502.293 | 13598.441 | AF118073  | 2541.604  | 1945.497  | NM_00359E | 2204.251  | 2273.904  |
| NM_000641 | 3159.073  | 3456.278  | AK023510  | 13347.27  | 10405.854 | NM_00240E | 3225.96   | 2532.477  |
| AE006466  | 19704.285 | 16774.98  | NM_00434E | 7799.609  | 7612.497  | NM_004994 | 54264.66  | 49622.141 |
| BC008737  | 52101.094 | 58895.297 | NM_00223Z | 947.763   | 1326.89   | NM_00661C | 37218.121 | 46751.609 |
| BC011655  | 5179.915  | 4616.412  | NM_01457C | 8113.025  | 7156.144  | NM_01762E | 511.876   | 833.866   |
| BC002396  | 9185.847  | 9778.497  | NM_01482Z | 5211.44   | 5625.964  | NM_003791 | 6362.185  | 5866.185  |

|           |           |           |           |           |           |           |           |           |
|-----------|-----------|-----------|-----------|-----------|-----------|-----------|-----------|-----------|
| AF112219  | 10907.8   | 9815.795  | AB014538  | 19255.555 | 19965.416 | NM_018017 | 11253.222 | 11042.802 |
| NM_006074 | 52464.926 | 50258.492 | NM_006209 | 3151.287  | 3038.186  | AK001296  | 38157.285 | 46508.199 |
| AF208232  | 6523.592  | 6238.302  | AK025118  | 12096.168 | 8009.564  | AK000173  | 838.682   | 1355.932  |
| NM_002988 | 7374.167  | 6986.157  | NM_000727 | 8712.934  | 6512.771  | NM_018365 | 4659.231  | 5734.056  |
| NM_004186 | 1426.486  | 1579.999  | NM_002621 | 1530.338  | 1360.219  | NM_006586 | 64912.266 | 60801.648 |
| NM_016258 | 7929.241  | 8187.498  | NM_013443 | 3249.979  | 3825.085  | AJ272180  | 2630.139  | 3304.624  |
| AF203032  | 11210.319 | 9819.172  | NM_000925 | 23875.48  | 29223.209 | AK022643  | 1297.136  | 1407.244  |
| AB014542  | 20822.092 | 15748.351 | NM_000465 | 4849.047  | 7163.217  | AB046808  | 3340.475  | 2347.78   |
| NM_014640 | 1947.47   | 1678.036  | AF116685  | 598.931   | 1160.947  | AK027179  | 6852.945  | 5361.135  |
| Y10518    | 56653.984 | 59461.973 | NM_000123 | 5491.371  | 7916.321  | AF015313  | 950.227   | 1049.208  |
| AF155135  | 10036.937 | 9216.954  | AL137501  | 3519.354  | 2997.963  | NM_006466 | 3773.083  | 2748.188  |
| NM_014790 | 2828.98   | 2679.732  | BE858979  | 1741.674  | 1167.145  | NM_005681 | 2973.647  | 3791.699  |
| NM_003571 | 29633.59  | 23105.164 | NM_000122 | 5767.573  | 3999.039  | NM_015156 | 4348.261  | 4577.143  |
| AB032965  | 56900.766 | 62221.379 | NM_006712 | 64848.883 | 59667.285 | NM_012384 | 6032.138  | 5728.317  |
| NM_020370 | 889.042   | 810.245   | NM_006240 | 12227.957 | 10797.201 | NM_004653 | 8257.638  | 7339.518  |
| NM_004767 | 2005.931  | 2375.405  | NM_007026 | 10363.644 | 13271.179 | AF233453  | 5131.422  | 4789.002  |
| BF310159  | 21997.096 | 18297.313 | AF070670  | 37661.645 | 27399.781 | D87454    | 22811.826 | 20492.283 |
| NM_018986 | 4175.835  | 4982.284  | NM_016156 | 8762.248  | 7497.638  | NM_007020 | 7159.009  | 7470.335  |
| AB044934  | 1043.325  | 1480.942  | NM_016528 | 4454.421  | 3064.705  | NM_000713 | 42646.855 | 56813.098 |
| U27655    | 11754.31  | 10450.228 | NM_015974 | 4143.94   | 1752.023  | NM_016055 | 24544.635 | 28283.533 |
| Z21965    | 49892.094 | 50574.383 | NM_014384 | 4400.908  | 4942.208  | NM_014161 | 5383.97   | 4803.181  |
| NM_012427 | 2194.37   | 2306.04   | NM_002573 | 7483.262  | 8985.554  | BF312817  | 6811.046  | 6371.346  |
| L09070    | 500.065   | 447.064   | NM_017877 | 2408.307  | 2257.396  | AF284580  | 2411.704  | 2892.402  |
| NM_000062 | 10951.055 | 14834.499 | AL133037  | 1903.4    | 2520.268  | AK024961  | 5474.373  | 5274.272  |
| AF084560  | 12878.565 | 13483.186 | NM_020350 | 7948.043  | 5980.044  | NM_002711 | 2180.671  | 1835.705  |
| NM_015715 | 1380.253  | 1433.985  | NM_000350 | 23253.178 | 26583.51  | NM_003778 | 61343.559 | 59585.031 |
| NM_000032 | 11552.91  | 11431.803 | X91103    | 41354.367 | 54784.766 | NM_001041 | 4011.054  | 3033.032  |
| NM_002083 | 2210.29   | 2116.245  | AA419164  | 3748.251  | 4582.859  | AK023263  | 2636.552  | 2930.314  |
| NM_002035 | 4249.242  | 4948.508  | L35251    | 10358.782 | 11288.349 | NM_004622 | 3219.605  | 3568.924  |
| NM_014900 | 2896.003  | 2748.083  | BE910395  | 18312.305 | 17504.709 | AK021445  | 3885.62   | 4863.958  |
| BF342908  | 1720.255  | 1856.761  | N46828    | 36246.984 | 31263.461 | NM_017934 | 22517.453 | 24927.307 |
| AF118073  | 618.587   | 527.175   | BI908302  | 64024.199 | 58346.051 | NM_014168 | 67021.711 | 57879.262 |
| AK023510  | 5000.071  | 4182.68   | AA460969  | 9659.569  | 7837.503  | AF211971  | 10070.518 | 8019.267  |
| NM_004345 | 3535.333  | 3564.647  | BG695859  | 6533.252  | 5604.688  | NM_002931 | 5543.403  | 4777.234  |
| NM_006528 | 349.913   | 289.038   | M85079    | 36612.305 | 27553.996 | NM_013448 | 68242.008 | 63483.246 |
| NM_002232 | 418.799   | 566.316   | AA457671  | 51186.129 | 46466.73  | X65232    | 57654.438 | 58807.625 |
| NM_014570 | 4362.607  | 4950.68   | X07437    | 43474.48  | 42335.68  | NM_002196 | 1460.738  | 1690.812  |
| NM_014822 | 2885.927  | 3039.24   | NM_000641 | 6789.212  | 7281.532  | NM_017755 | 14136.558 | 14120.804 |
| NM_005296 | 2914.277  | 3381.564  | AE006466  | 42111.211 | 39609.984 | NM_018416 | 1850.688  | 1884.672  |
| NM_001337 | 597.162   | 831.32    | BC008737  | 66141.508 | 63281.496 | NM_016621 | 3326.121  | 3189.454  |
| NM_003611 | 5706.22   | 5125.51   | BC011655  | 8271.971  | 6063.691  | NM_002975 | 4975.013  | 4353.544  |
| AB014538  | 6322.605  | 7718.443  | BC002396  | 16421.422 | 11321.268 | NM_014556 | 7682.772  | 7496.897  |
| NM_006209 | 1260.923  | 1359.29   | AF112219  | 17866.197 | 6299.256  | NM_001615 | 66328.68  | 62189.391 |
| AK025118  | 7638.857  | 9988.462  | NM_006074 | 62395.66  | 65738.844 | NM_002725 | 4112.966  | 2928.885  |
| NM_000727 | 2623.485  | 3182.141  | AF208232  | 17732.982 | 17625.824 | NM_014375 | 35880.281 | 40379.039 |
| NM_002621 | 615.266   | 619.602   | NM_002988 | 24041.863 | 27330.439 | NM_017812 | 28641.193 | 32310.746 |
| NM_005385 | 6739.294  | 8734.065  | AB014542  | 39512.957 | 44669.203 | AF204173  | 2571.619  | 2431.962  |
| NM_018985 | 5496.958  | 7467.845  | NM_014640 | 3232.295  | 3868.838  | J03260    | 7123.843  | 7784.831  |
| NM_000203 | 346.489   | 407.869   | Y10518    | 62649.648 | 65234.762 | U13738    | 3729.392  | 4600.441  |
| NM_013443 | 1413.93   | 1447.866  | AF155135  | 18281.49  | 17907.707 | AF068236  | 64263.195 | 63234.465 |
| NM_000925 | 13604.711 | 13897.776 | NM_014790 | 5302.6    | 5026.779  | H94487    | 6409.694  | 7193.646  |
| NM_000465 | 2992.636  | 3879.34   | NM_003571 | 58424.41  | 54143.398 | BG681747  | 39969.02  | 40130.48  |
| NM_000123 | 3214.778  | 4518.441  | AB032965  | 65812.25  | 66540.648 | H63077    | 3075.957  | 4149.499  |



|           |           |           |           |           |           |           |           |           |
|-----------|-----------|-----------|-----------|-----------|-----------|-----------|-----------|-----------|
| AL137501  | 2550.366  | 3107.056  | NM_020370 | 1702.629  | 2077.457  | AA679352  | 11603.695 | 12683.863 |
| BE858979  | 790.644   | 1138      | NM_004767 | 5458.374  | 5773.119  | AA437291  | 1756.212  | 2797.99   |
| NM_000122 | 3252.675  | 2555.72   | BF310159  | 40788.488 | 39975.902 | X52001    | 6034.44   | 5942.725  |
| NM_006240 | 2915.9    | 2700.597  | NM_000316 | 704.198   | 1200.359  | BI823872  | 2898.719  | 3466.747  |
| NM_007026 | 5772.119  | 6434.77   | NM_018986 | 5956.522  | 6379.372  | AA430552  | 3089.531  | 2944.274  |
| M37712    | 10794.592 | 8623.954  | AB044934  | 3933.302  | 3482.978  | X66142    | 4140.7    | 3460.075  |
| NM_002648 | 12126.619 | 13104.79  | U27655    | 31100.641 | 25424.986 | NM_003731 | 48412.395 | 49750.66  |
| AF070670  | 19350.59  | 19156.348 | NM_005795 | 1421.912  | 1120.401  | NM_005446 | 39927.305 | 36744.422 |
| NM_016156 | 5028.2    | 5545.439  | Z21965    | 63083.02  | 58493.426 | NM_013292 | 27589.521 | 22115.969 |
| NM_016528 | 3623.725  | 2784.225  | NM_012427 | 4247.113  | 1984.093  | NM_002387 | 6383.44   | 4744.284  |
| NM_015974 | 2074.803  | 2119.23   | NM_000062 | 15998.165 | 19601.113 | NM_000066 | 8284.183  | 6209.523  |
| NM_014384 | 2409.853  | 2892.62   | AF084560  | 34268.25  | 36575.344 | AB023217  | 1349.479  | 1013.712  |
| NM_002573 | 4152.036  | 5266.534  | NM_015715 | 2470.536  | 3383.921  | L08902    | 2694.415  | 2919.322  |
| AF133424  | 5257.108  | 10028.518 | NM_000032 | 33700.059 | 36900     | J02639    | 8010.317  | 10026.03  |
| NM_005003 | 35194.313 | 48719.84  | BF342908  | 3151.628  | 4182.513  | M58050    | 9133.256  | 10797.085 |
| AL133037  | 971.061   | 1605.446  | AF118073  | 707.794   | 1346.941  | NM_007263 | 19657.16  | 21671.094 |
| NM_020350 | 4828.926  | 3519.837  | AK023510  | 11891.933 | 12527.295 | AF206020  | 10903.783 | 10809.548 |
| NM_000350 | 5231.109  | 4945.898  | NM_004345 | 7290.27   | 7616.91   | NM_014410 | 10603.069 | 10159.19  |
| X91103    | 19136.012 | 18971.277 | NM_002232 | 866.988   | 720.479   | AF312769  | 1948.095  | 2607.8    |
| AA419164  | 2033.32   | 2247.617  | NM_014570 | 7652.767  | 8526.459  | NM_013261 | 2577.126  | 2361.552  |
| L35251    | 4622.856  | 5914.297  | NM_014822 | 4950.406  | 5528.101  | AF309553  | 7066.932  | 7041.424  |
| BE910395  | 6501.481  | 9686.524  | NM_005296 | 6939.022  | 7787.109  | NM_003605 | 1712.856  | 2037.636  |
| N46828    | 12573.452 | 14319.157 | NM_001337 | 1038.455  | 1361.277  | NM_001900 | 69560.68  | 68293.664 |
| BI908302  | 50945.164 | 58488.074 | NM_003611 | 15340.361 | 17156.93  | NM_003993 | 6028.796  | 5706.985  |
| AA460969  | 4529.602  | 5251.447  | AB014538  | 19092.336 | 20681.623 | NM_002150 | 12891.1   | 9992.597  |
| BG695859  | 4076.137  | 6806.362  | NM_006209 | 3856.575  | 3735.355  | NM_004595 | 17813.492 | 13591.068 |
| M85079    | 14143.847 | 16467.156 | AK025118  | 13725.126 | 13537.197 | NM_002264 | 1979.217  | 1443.537  |
| X07437    | 15870.933 | 16166.821 | NM_000727 | 7270.156  | 4203.601  | NM_014754 | 35507.156 | 35045.441 |
| NM_000641 | 3972.653  | 5168.838  | NM_002621 | 1979.642  | 934.273   | D49387    | 1610.822  | 1744.218  |
| AE006466  | 21764.92  | 23322.398 | NM_005385 | 9842.136  | 12821.337 | AF050146  | 14031.63  | 14976.88  |
| BC008737  | 51818.305 | 62072.121 | NM_018985 | 7832.132  | 6648.926  | NM_000116 | 4285.69   | 5173.876  |
| BC011655  | 5615.31   | 5748.527  | NM_000203 | 842.495   | 928.713   | NM_006698 | 14193.273 | 14200.401 |
| BC002396  | 9599.695  | 11300.746 | NM_013443 | 2425.401  | 2806.266  | NM_006804 | 28996.879 | 38786.801 |
| AF112219  | 10687.544 | 11677.059 | NM_000925 | 24773.33  | 25769.217 | AK025641  | 63319.004 | 64041.18  |
| NM_000521 | 308.201   | 370.116   | NM_000123 | 6017.296  | 8216.88   | AB014514  | 5120.851  | 5287.356  |
| NM_002625 | 395.212   | 719.078   | AL137501  | 3397.222  | 4727.689  | NM_002865 | 13713.448 | 15369.209 |
| NM_004135 | 4555.907  | 5056.435  | BE858979  | 1453.881  | 1772.532  | NM_003566 | 3637.951  | 2328.621  |
| Y10518    | 55694.551 | 61810.16  | NM_000122 | 5637.634  | 4510.707  | NM_007155 | 69551.938 | 69920.578 |
| AF155135  | 10305.49  | 11029.56  | NM_006712 | 62525.688 | 61173.289 | NM_018390 | 3198.489  | 3028.75   |
| NM_014790 | 3075.082  | 3705.224  | NM_006240 | 13147.096 | 13068.1   | AB037724  | 14781.349 | 12180.817 |
| NM_003571 | 32107.752 | 26926.676 | NM_007026 | 11620.497 | 14604.439 | AK025086  | 4295.215  | 3083.157  |
| AB032965  | 53279.582 | 62537.828 | M37712    | 21810.629 | 22172.809 | AK026151  | 13875.172 | 11660.522 |
| NM_020370 | 1166.561  | 1269.844  | NM_002648 | 20020.725 | 25633.605 | NM_014140 | 2054.046  | 2108.901  |
| NM_004767 | 2229.575  | 2556.5    | AF070670  | 40283.746 | 37338.195 | NM_002916 | 5496.762  | 5664.067  |
| BF310159  | 20866.91  | 17264.867 | NM_016156 | 8493.708  | 8084.998  | M20700    | 8587.622  | 7802.028  |
| NM_000316 | 613.404   | 768.491   | NM_016528 | 6074.82   | 4768.793  | NM_001034 | 10104.505 | 8224.107  |
| NM_018986 | 3398.678  | 4405.459  | NM_015974 | 4883.081  | 3514.693  | NM_002688 | 3391.543  | 3024.936  |
| AB044934  | 2298.083  | 3900.075  | AF133424  | 15236.467 | 16233.832 | NM_017686 | 1150.9    | 1264.644  |
| U27655    | 11154.015 | 16875.498 | NM_005003 | 41546.758 | 52227.5   | AK000800  | 3828.668  | 4710.476  |
| NM_003360 | 4224.518  | 4242.009  | AL133037  | 1580.028  | 2343.833  | NM_018154 | 7198.704  | 7930.159  |
| Z21965    | 46941.801 | 47946.949 | NM_020350 | 8866.732  | 5994.603  | AB023198  | 6413.499  | 6514.496  |
| NM_012427 | 2058.952  | 2380.113  | NM_000350 | 25128.834 | 23912.504 | AF304163  | 10354.111 | 9543.677  |
| AF131857  | 24851.053 | 25111.277 | X91103    | 43290.082 | 52621.742 | NM_005231 | 9141.057  | 8930.887  |

|           |           |           |           |           |           |           |           |           |
|-----------|-----------|-----------|-----------|-----------|-----------|-----------|-----------|-----------|
| NM_000852 | 574.344   | 571.652   | AA419164  | 4082.363  | 5095.529  | AF064729  | 1727.117  | 1830.943  |
| NM_000399 | 1825.458  | 1839.815  | L35251    | 10592.674 | 11140.766 | NM_005412 | 21998.988 | 30121.186 |
| AW797282  | 506.808   | 460.216   | BE910395  | 19536.371 | 24906.148 | NM_012113 | 3988.761  | 4223.085  |
| NM_002402 | 785.2     | 959.453   | N46828    | 36163.172 | 47821.891 | NM_014556 | 8691.81   | 9555.579  |
| L09070    | 581.525   | 795.736   | BI908302  | 60447.867 | 62007.023 | NM_001615 | 66544.297 | 65408.855 |
| NM_000062 | 10984.282 | 15452.995 | AA460969  | 8955.887  | 9117.897  | NM_002725 | 4804.122  | 3697.809  |
| NM_009590 | 13300.563 | 15335.578 | BG695859  | 7996.032  | 9164.936  | NM_014375 | 43646.227 | 50416.688 |
| NM_014747 | 13022.032 | 16689.527 | M85079    | 31820.408 | 28911.924 | NM_017812 | 29895.914 | 30508.07  |
| Y19240    | 10361.883 | 10994.668 | AA457671  | 52621.625 | 54476.363 | AF204173  | 2624.985  | 2849.016  |
| AF091029  | 17050.609 | 17384.279 | X07437    | 38207.918 | 49156.168 | J03260    | 7584.186  | 9278.904  |
| X97074    | 52377.73  | 46439.34  | NM_000641 | 7749.51   | 10354.224 | U13738    | 4777.463  | 5306.13   |
| AL117235  | 919.526   | 1135.687  | AE006466  | 51239.664 | 54376.973 | H94487    | 6967.61   | 7025.961  |
| NM_014822 | 2774.652  | 2891.498  | BC008737  | 64926.668 | 59703.168 | BG681747  | 36327.238 | 35667.625 |
| NM_005296 | 3377.508  | 3505.454  | BC011655  | 8469.03   | 8215.7    | AA437291  | 2077.024  | 2563.052  |
| NM_001337 | 578.032   | 523.862   | BC002396  | 17346.381 | 14695.387 | X04503    | 4827.615  | 5063.284  |
| NM_003611 | 5235.012  | 5074.646  | AF112219  | 17172.689 | 12003.678 | X52001    | 7301.501  | 7458.357  |
| AB014538  | 5269.102  | 8182.739  | NM_004135 | 6704.173  | 8725.528  | X66142    | 3859.932  | 4395.072  |
| NM_006209 | 1672.614  | 2157.224  | Y10518    | 60149.738 | 65119.063 | NM_005913 | 1044.007  | 1092.534  |
| AK025118  | 7222.891  | 9295.313  | AF155135  | 20089.248 | 21535.76  | R45054    | 1868.141  | 2253.76   |
| NM_000727 | 2686.287  | 2827.474  | NM_014790 | 5532.888  | 5756.09   | AL117398  | 4624.896  | 7418.306  |
| NM_002621 | 595.299   | 723.885   | NM_003571 | 57483.738 | 58171.68  | NM_013292 | 32733.518 | 32268.279 |
| NM_005385 | 5469.791  | 7410.356  | AB032965  | 60958.297 | 65020.117 | NM_002387 | 5079.971  | 3637.28   |
| NM_018985 | 5861.985  | 5919.185  | NM_020370 | 1812.641  | 2323.286  | L08902    | 2615.164  | 2671.754  |
| NM_006074 | 56051.313 | 60137.078 | NM_004767 | 5477.648  | 7992.925  | J02639    | 8070.811  | 9129.896  |
| AF208232  | 7183.486  | 9104.395  | BF310159  | 37104.074 | 49680.621 | M58050    | 9089.047  | 9624.683  |
| NM_002988 | 10035.645 | 11247.869 | NM_000316 | 698.084   | 1382.487  | AF206020  | 10780.039 | 9538.771  |
| NM_004186 | 1950.783  | 2371.311  | NM_018986 | 5633.002  | 6165.804  | NM_013261 | 2790.568  | 2507.294  |
| NM_016258 | 9728.891  | 10957.519 | AB044934  | 1770.624  | 3444.219  | NM_006139 | 1365.601  | 1434.541  |
| AF203032  | 13528.188 | 15354.443 | U27655    | 24462.98  | 31299.318 | NM_001900 | 66322.797 | 61410.43  |
| AB014542  | 24171.984 | 22749.938 | NM_003360 | 7188.434  | 9362.407  | NM_002264 | 2372.704  | 1954.233  |
| NM_014640 | 1961.428  | 2256.547  | Z21965    | 59407.402 | 70064.039 | AF050146  | 14713.896 | 14295.369 |
| NM_015974 | 1873.424  | 2621.41   | NM_012427 | 5051.464  | 6502.172  | NM_000116 | 4533.283  | 4963.758  |
| NM_014384 | 2069.181  | 2395.803  | AF131857  | 34464.336 | 40640.641 | NM_006698 | 14244.624 | 13080.211 |
| NM_002573 | 3982.712  | 4202.217  | NM_000852 | 1037.618  | 1107.237  | NM_006804 | 27218.816 | 27787.828 |
| AF133424  | 5243.603  | 5699.49   | NM_000399 | 4440.864  | 4421.593  | AB037724  | 14735.923 | 12441.983 |
| NM_005003 | 33094.918 | 27791.436 | AW797282  | 1171.276  | 1124.901  | AK025086  | 3355.834  | 2734.302  |
| AF084560  | 14212.704 | 15187.896 | NM_002402 | 6481.109  | 5787.407  | M20700    | 8582.295  | 7896.001  |
| NM_015715 | 1738.649  | 2605.542  | L09070    | 1958.584  | 2237.922  | NM_001034 | 10289.565 | 9673.395  |
| NM_000032 | 13924.276 | 11954.742 | NM_017877 | 2666.905  | 2788.107  | NM_002689 | 3069.775  | 2849.188  |
| NM_002083 | 2776.271  | 2546.435  | NM_009590 | 31769.928 | 44415.012 | NM_018154 | 5781.561  | 5416.708  |
| NM_002035 | 6237.054  | 6219.668  | NM_014747 | 25242.895 | 30670.223 | AB023198  | 7437.35   | 9111.947  |
| NM_014900 | 3390.167  | 4269.902  | Y19240    | 21703.709 | 24378.746 | NM_012113 | 3459.699  | 3844.387  |
| BF342908  | 1754.055  | 2308.128  | AF091029  | 35986.973 | 39869.871 | NM_002725 | 4238.227  | 3156.612  |
| AF118073  | 616.385   | 856.601   | X97074    | 62122.008 | 60976.902 | NM_014375 | 46672.848 | 51634.414 |
| AK023510  | 5051.426  | 5625.471  | AL117235  | 1677.184  | 2498.272  | U13738    | 3294.96   | 3251.179  |
| NM_004345 | 3333.994  | 4609.153  | NM_014822 | 4583.514  | 7732.719  | AF068236  | 64406.48  | 64034.102 |
| NM_000702 | 51483.07  | 49271.242 | NM_005296 | 5569.607  | 8728.648  | H94487    | 12539.555 | 12445.087 |
| X71490    | 33318.363 | 31506.439 | NM_001337 | 692.289   | 1360.221  | H63077    | 2267.577  | 2347.134  |
| AF257081  | 9947.639  | 11991.133 | NM_003611 | 11829.626 | 14848.019 | AA430552  | 3931.894  | 3898.947  |
| NM_001688 | 36479.73  | 31749.877 | AB014538  | 18199.756 | 20098.686 | X66142    | 3949.524  | 4167.652  |
| NM_000219 | 366.363   | 551.527   | NM_006209 | 3487.884  | 4932.255  | R45054    | 1750.618  | 1731.392  |
| NM_002232 | 743.785   | 811.908   | AK025118  | 12174.511 | 16809.164 | AL117398  | 4974.101  | 6580.443  |
| NM_016106 | 6936.997  | 8912.578  | NM_000727 | 7208.233  | 9277.337  | AY007158  | 66691.797 | 74803.25  |

|           |           |           |           |           |           |           |           |           |
|-----------|-----------|-----------|-----------|-----------|-----------|-----------|-----------|-----------|
| NM_01457C | 4585.02   | 5779.579  | NM_002621 | 1881.877  | 2395.642  | NM_007263 | 17145.811 | 15317.495 |
| AF112219  | 10965.629 | 15236.09  | NM_005385 | 14809.002 | 18075.471 | AF206020  | 10359.782 | 8164.244  |
| NM_002625 | 268.166   | 635.235   | NM_018985 | 9161.272  | 8345.451  | NM_01441C | 7568.607  | 6376.383  |
| NM_004135 | 4209.05   | 4060.356  | NM_006074 | 67210.164 | 68456.633 | AF305835  | 909.139   | 1339.897  |
| NM_000203 | 801.169   | 926.156   | AF208232  | 19743.525 | 18368.625 | AF312769  | 3258.736  | 3520.434  |
| NM_013443 | 1707.82   | 1526.182  | NM_002988 | 25754.156 | 26613.633 | AB020668  | 7368.723  | 7542.4    |
| NM_000925 | 13824.924 | 11352.052 | NM_004186 | 5171.81   | 7124.994  | NM_006203 | 56803.422 | 53445.984 |
| NM_000465 | 2695.142  | 2978.576  | NM_016258 | 15933.436 | 17192.277 | AF309553  | 7168.455  | 7176.223  |
| NM_000123 | 3419.979  | 4561.379  | AF203032  | 25745.023 | 27093.084 | NM_003605 | 4107.742  | 4977.403  |
| AL137501  | 1960.706  | 2163.568  | NM_01464C | 3438.514  | 4338.464  | NM_01455E | 9117.711  | 14305.883 |
| BE858979  | 658.352   | 899.694   | NM_015974 | 3603.389  | 3940.169  | NM_001615 | 69844.93  | 74049.461 |
| NM_000122 | 3664.767  | 3422.43   | NM_014384 | 2947.497  | 2913.963  | AK025886  | 1927.838  | 1562.941  |
| NM_006712 | 49613.863 | 59968.555 | NM_002573 | 6334.146  | 6324.344  | NM_00305E | 1788.147  | 1441.167  |
| NM_00624C | 3352.836  | 3632.714  | AF133424  | 17567.332 | 16883.758 | NM_002865 | 12781.875 | 13839.617 |
| NM_00702E | 6271.046  | 7190.099  | NM_005003 | 44257.051 | 49059.492 | NM_00356E | 5860.062  | 5621.144  |
| M37712    | 11339.352 | 10783.625 | AF084560  | 29661.229 | 40257.625 | NM_00424C | 1250.433  | 1509.582  |
| NM_00264E | 12732.203 | 13292.395 | NM_015715 | 2800.531  | 5190.799  | L08902    | 4190.616  | 4698.474  |
| AF070670  | 16506.178 | 16985.77  | NM_000032 | 33875.676 | 40485.184 | J02639    | 9547.036  | 10520.659 |
| NM_01615E | 5687.943  | 6684.87   | NM_002083 | 7887.554  | 8660.446  | M58050    | 9545.107  | 8945.94   |
| NM_01652E | 3081.719  | 3494.628  | NM_002035 | 14139.628 | 12741.152 | NM_012113 | 2614.387  | 2812.947  |
| CY3Cy5    | 6786.1    | 237.451   | NM_01490C | 7096.963  | 7122.106  | NM_00215C | 11251.942 | 10292.497 |
| NM_00049E | 648.534   | 611.872   | BF342908  | 4173.552  | 4716.54   | NM_002264 | 1933.922  | 2201.058  |
| NM_000664 | 2099.037  | 2034.661  | AF118073  | 1709.033  | 2220.592  | NM_006415 | 765.752   | 933.128   |
| AK026155  | 1608.545  | 1637.107  | AK023510  | 13044.36  | 18223.055 | AF050146  | 11867.771 | 14611.266 |
| NM_018052 | 44671.344 | 28200.127 | NM_004345 | 8487.041  | 10083.904 | NM_00011E | 4633.566  | 6398.291  |
| AF143322  | 554.41    | 389.448   | NM_000702 | 60934.488 | 59082.863 | NM_00669E | 12606.684 | 15379.865 |
| AK022386  | 11184.385 | 10156.393 | X71490    | 52075.602 | 48278.391 | AJ278917  | 66712.047 | 68233.984 |
| NM_002767 | 20757.799 | 21116.584 | AF257081  | 28353.754 | 27748.033 | AK025641  | 69377.484 | 67779.133 |
| AF131846  | 15343.936 | 13411.721 | NM_00168E | 46967.133 | 48872.441 | AB040457  | 1991.644  | 1762.136  |
| AF088069  | 7698.011  | 5951.023  | NM_003631 | 701.434   | 943.171   | AL117398  | 5068.661  | 6041.245  |
| AF086551  | 980.823   | 836.887   | NM_000219 | 3827.821  | 4193.792  | AY007158  | 66497.43  | 86929.961 |
| NM_013393 | 6598.046  | 6523.668  | NM_002232 | 992.297   | 1107.973  | NM_00172C | 5413.32   | 5695.7    |
| AK025082  | 1660.15   | 1576.536  | NM_01610E | 10782.617 | 11224.006 | NM_01839C | 2772.607  | 2997.868  |
| AF086535  | 771.146   | 1161.85   | AF112219  | 17530.223 | 18405.51  | NM_01414C | 2191.072  | 2382.605  |
| AB040901  | 1770.123  | 1722.332  | NM_002625 | 585.636   | 545.818   | BC006287  | 7805.14   | 9111.068  |
| AL137406  | 5001.197  | 4079.72   | NM_004135 | 6398.076  | 6501.224  | AB023198  | 8215.919  | 10274.133 |
| NM_00049E | 706.615   | 633.201   | NM_000203 | 799.31    | 1500.252  | AF304163  | 9474.563  | 9085.63   |
| NM_000664 | 2006.806  | 2013.082  | NM_013443 | 2895.834  | 4955.603  | NM_005231 | 10443.594 | 12928.569 |
| SR1       | 65587.422 | 65504.555 | NM_000925 | 24727.619 | 30880.74  | AF064729  | 3960.256  | 5235.027  |
| SR3       | 41228.93  | 36061.27  | NM_000465 | 5305.46   | 5479.898  | NM_005412 | 26314.166 | 31736.447 |
| SR5       | 4481.751  | 5327.421  | BE858979  | 3591.747  | 4465.134  | NM_02197E | 4171.696  | 3913.374  |
| SR7       | 4802.841  | 38392.945 | NM_000122 | 6343.111  | 6208.602  | AF216077  | 5198.609  | 4125.139  |
| SR9       | 14754.695 | 3036.698  | NM_006712 | 62177.027 | 58463.832 | AF086238  | 777.085   | 474.508   |
| CY3Cy5    | 7274.444  | 371.848   | NM_00624C | 12117.51  | 13257.937 | AK021612  | 15174.106 | 14983.653 |
| U54734    | 522.982   | 412.55    | NM_00702E | 10650.835 | 10609.878 | AF088031  | 1107.455  | 1490.115  |
| U84507    | 597.614   | 670.653   | M37712    | 18325.246 | 14005.605 | AK002025  | 66369.086 | 50167.012 |
| AK000872  | 2396.487  | 2580.018  | NM_00264E | 20362.34  | 18228.563 | AK026299  | 2654.153  | 1929.951  |
| AK027147  | 23503.807 | 19282.309 | AF070670  | 33170.273 | 24000.678 | NM_017794 | 1645.218  | 1567.255  |
| AF086285  | 762.218   | 586.623   | NM_01615E | 7672.631  | 7834.834  | AK025170  | 2421.199  | 1763.711  |
| AF085924  | 1442.749  | 1342.735  | NM_01652E | 4018.403  | 3610.704  | AK025697  | 6041.451  | 3919.938  |
| AK023887  | 1096.501  | 903.679   | CY3Cy5    | 6684.219  | 128.812   | AK021734  | 4000.592  | 3237.581  |
| AF088022  | 12877.13  | 11249.509 | NM_00049E | 836.5     | 345.842   | NM_02197E | 2822.396  | 1821.842  |
| AK026537  | 3168.916  | 2722.501  | NM_000664 | 3132.183  | 733.295   | SR2       | 39795.945 | 30938.674 |

|           |           |           |           |           |           |           |           |           |
|-----------|-----------|-----------|-----------|-----------|-----------|-----------|-----------|-----------|
| NM_015485 | 3551.155  | 3702.144  | AK026155  | 2171.875  | 470.138   | SR4       | 12966.438 | 9084.493  |
| AF085992  | 517.684   | 611.28    | NM_018052 | 57891.453 | 9498.859  | SR6       | 1604.386  | 984.494   |
| AF147411  | 871.842   | 1119.29   | AF143322  | 754.91    | 694.495   | SR8       | 5284.365  | 11532.128 |
| S83307    | 467.031   | 857.071   | AK022386  | 14265.188 | 3925.802  | SR10      | 18743.701 | 4406.391  |
| NM_002666 | 13772.237 | 13847.953 | NM_002767 | 30667.926 | 5948.708  | CY3Cy5    | 2280.685  | 46.424    |
| AF202145  | 4312.749  | 4645.076  | AF131846  | 25096.15  | 6661.586  | AK026802  | 551.075   | 785.104   |
| AK022412  | 10626.164 | 10170.068 | AF088069  | 11210.62  | 2385.938  | NM_004544 | 10189.658 | 8460.698  |
| AK023073  | 8493.736  | 6217.273  | AF086551  | 2714.033  | 1127.417  | AF086041  | 1648.752  | 1581.948  |
| AK023697  | 325.821   | 365.363   | AF263545  | 4168.677  | 1378.788  | Y15167    | 700.787   | 776.07    |
| AK023922  | 663.977   | 661.999   | NM_013393 | 6867.299  | 2101.994  | AL133080  | 2107.82   | 1683.62   |
| AK022438  | 1318.74   | 1343.996  | AK025082  | 2834.924  | 1134.968  | NM_017792 | 5058.629  | 4430.593  |
| AK023316  | 514.767   | 618.405   | AF086535  | 3678.805  | 2243.9    | AK025213  | 2405.875  | 2240.357  |
| AK023764  | 1080.219  | 1101.863  | AB040901  | 2271.44   | 1766.096  | NM_014945 | 1732.899  | 1327.637  |
| AK024082  | 776.375   | 870.941   | AL137406  | 5955.662  | 5367.265  | AL080221  | 1424.913  | 1177.436  |
| AK025072  | 4440.814  | 4199.882  | NM_000498 | 1734.782  | 1059.873  | AK026591  | 979.762   | 746.665   |
| AK022410  | 1098.959  | 740.115   | NM_000664 | 4483.129  | 5352.479  | AK001889  | 2296.274  | 2038.272  |
| AF086541  | 1096.228  | 978.004   | SR1       | 66545.148 | 64228.129 | AK025726  | 4132.619  | 3699.208  |
| L10378    | 12572.021 | 12352.539 | SR3       | 44699.852 | 49053.145 | AJ227869  | 2879.708  | 2326.052  |
| AK022179  | 1467.97   | 1309.276  | SR5       | 5923.176  | 6009.702  | AL117613  | 7761.516  | 5371.933  |
| AK022173  | 559.101   | 625.247   | SR7       | 5688.262  | 38410.352 | AL137753  | 6960.365  | 5051.169  |
| AJ227860  | 1191.617  | 1184.459  | SR9       | 16742.977 | 3078.015  | AL110262  | 16865.865 | 11471.74  |
| AL157448  | 987.026   | 1035.459  | CY3Cy5    | 12387.054 | 723.304   | AK025627  | 11664.781 | 8288.835  |
| AF026942  | 4885.584  | 4920.35   | U84507    | 355.546   | 113.052   | AK025191  | 1779.801  | 1887.739  |
| AJ276429  | 3997.234  | 4289.175  | U61086    | 584.722   | 771.418   | AK025246  | 6161.938  | 5632.462  |
| AL117657  | 410.481   | 558.329   | AK000872  | 3643.101  | 685.509   | AK025847  | 3465.606  | 3000.448  |
| AK023589  | 1364.519  | 1470.201  | AK027147  | 33357.766 | 10175.682 | AB033031  | 1793.437  | 1443.832  |
| AK021590  | 2491.93   | 2711.337  | AF086285  | 1263.769  | 567.757   | AF085872  | 10655.407 | 7102.192  |
| AB002441  | 806.014   | 917.164   | AF085924  | 1342.542  | 595.535   | AK022538  | 41354.012 | 38387.867 |
| AK023998  | 1965.564  | 1588.6    | AF088022  | 11046.027 | 3861.447  | AK022342  | 1209.697  | 1135.885  |
| AK021643  | 1001.476  | 954.505   | AK026537  | 4521.753  | 2015.326  | AF147420  | 2760.493  | 2448.13   |
| Z11802    | 1076.445  | 970.93    | NM_015485 | 5805.639  | 3428.975  | AL049312  | 2471.976  | 1970.244  |
| NM_014054 | 2766.88   | 2635.25   | AF147411  | 1295.477  | 1652.429  | AL050072  | 5071.459  | 3743.449  |
| AK021840  | 63980.059 | 52889.277 | AK025221  | 2086.301  | 3664.521  | AL117590  | 1186.584  | 784.455   |
| AK022228  | 5020.44   | 4647.779  | S83307    | 2470.773  | 3527.668  | AL049357  | 13566.044 | 9379.909  |
| AK022031  | 1416.904  | 1665.344  | NM_002666 | 17155.293 | 17315.754 | AK027180  | 3498.974  | 2812.013  |
| AF003738  | 334.669   | 299.859   | AF202145  | 7314.297  | 12176.748 | AK022236  | 9006.411  | 8013.271  |
| AF086480  | 2109.041  | 1929.611  | AK022412  | 14983.048 | 3217.655  | AL390180  | 856.756   | 1051.487  |
| AK022122  | 1285.218  | 1193.734  | AK023073  | 13972.653 | 2494.603  | AF009262  | 20416.896 | 16007.644 |
| AK026084  | 696.541   | 683.909   | AK023922  | 660.702   | 265.717   | AF009306  | 1697.377  | 1429.806  |
| AK022415  | 51690.953 | 29091.396 | AK022438  | 2257.39   | 628.266   | AF050198  | 2505.794  | 1602.717  |
| AL137368  | 2567.394  | 2473.061  | AK023316  | 524.385   | 308.886   | AK024346  | 6302.384  | 5438.717  |
| AK021932  | 1005.007  | 1146.232  | AK023764  | 826.546   | 325.1     | AF056422  | 2079.903  | 1481.502  |
| AK026787  | 5214.36   | 4090.918  | AK024082  | 955.763   | 353.935   | AF090892  | 3461.715  | 2839.157  |
| AK023542  | 1252.427  | 1241.294  | AK025072  | 6183.075  | 2104.256  | AK001089  | 1230.706  | 1002.186  |
| AK000203  | 1562.068  | 1459.923  | AK022410  | 1294.68   | 620.636   | AK001919  | 606.845   | 519.793   |
| NM_018503 | 50982.5   | 44718.223 | AF086541  | 997.73    | 363.598   | AK021535  | 724.9     | 793.744   |
| NM_016449 | 31045.398 | 28673.385 | L10378    | 12934.986 | 4031.434  | AK021753  | 5273.365  | 3374.69   |
| AL049670  | 6604.724  | 6291.579  | AK022179  | 1728.557  | 849.242   | AK001139  | 3650.723  | 2276.579  |
| AK021465  | 843.721   | 943.022   | AK022173  | 776.307   | 962.017   | AK002090  | 836.735   | 701.436   |
| NM_018512 | 21269.723 | 19227.48  | AJ227860  | 2349.832  | 2928      | AK021618  | 817.365   | 747.323   |
| NM_018568 | 543.029   | 439.065   | AL157448  | 1202.257  | 1265.411  | AK021822  | 1395.317  | 1569      |
| AL161991  | 15369.613 | 13505.14  | AF026942  | 5972.362  | 7327.362  | AF116620  | 5404.888  | 5288.543  |
| D17032    | 23721.592 | 15526.12  | AJ276429  | 5393.286  | 6226.427  | AF293335  | 69334.945 | 61714.555 |

|           |           |           |           |           |           |           |           |           |
|-----------|-----------|-----------|-----------|-----------|-----------|-----------|-----------|-----------|
| AL137292  | 1020.878  | 979.118   | AL117657  | 660.906   | 644.931   | X96644    | 4541.511  | 3603.333  |
| NM_017941 | 1786.328  | 1698.152  | AK023589  | 2129.289  | 2200.544  | Z34281    | 30951.922 | 26725.445 |
| AF301016  | 501.102   | 542.693   | AK021590  | 4886.579  | 5005.013  | NM_018678 | 68091.578 | 65255.703 |
| BE900527  | 2192.234  | 2592.813  | AB002441  | 717.286   | 1182.329  | AJ008122  | 64286.793 | 56517     |
| D28384    | 60007.609 | 60177.93  | AK023998  | 3938.743  | 5204.855  | NM_006220 | 5979.647  | 4550.272  |
| AF118079  | 58976.543 | 50903.176 | AK021643  | 1687.309  | 1986.413  | AK022667  | 9129.022  | 8363.656  |
| AF277572  | 491.306   | 481.513   | Z11802    | 1402.506  | 1917.35   | AK026667  | 678.488   | 725.223   |
| AL365413  | 2428.368  | 2204.645  | NM_014054 | 4230.664  | 762.714   | NM_014174 | 6117.187  | 4886.306  |
| NM_005258 | 8603.561  | 7436.561  | AK021840  | 71881.445 | 31921.242 | AF147337  | 2485.316  | 2591.55   |
| NM_003948 | 790.847   | 768.521   | AK022228  | 7021.884  | 1624.731  | AK025203  | 69075.43  | 64708.332 |
| AK025062  | 1923.618  | 1819.79   | AK022031  | 1291.625  | 550.159   | AK026981  | 3175.377  | 2501.025  |
| AK023412  | 3854.209  | 3965.915  | AF003738  | 668.185   | 879.273   | AK023819  | 1130.556  | 881.548   |
| X74605    | 1394.694  | 1704.779  | AF086480  | 4084.398  | 882.7     | AL133656  | 3212.327  | 2592.221  |
| AK024513  | 971.796   | 1167.871  | AK022122  | 1675.335  | 361.335   | AL050037  | 10032.114 | 7100.186  |
| BC036692  | 2841.286  | 2738.481  | AL109713  | 499.638   | 463.378   | NM_001417 | 56169.473 | 49686.621 |
| AJ009640  | 2950.431  | 3198.128  | AK026084  | 633.862   | 550.882   | AK023557  | 942.687   | 1125.003  |
| Y11163    | 1342.186  | 1520.314  | AK022415  | 55816.824 | 32143.83  | AK027107  | 2869.155  | 2136.129  |
| AF086391  | 692.061   | 451.857   | AL137368  | 3468.342  | 916.674   | AK025196  | 14754.081 | 13382.255 |
| AF147340  | 1145.202  | 1213.491  | AK021932  | 1289.16   | 574.01    | AJ227879  | 673.059   | 577.681   |
| L31901    | 545.502   | 344.779   | AK026787  | 2460.977  | 1697.801  | AK024800  | 1242.302  | 1286.192  |
| AK025119  | 865.063   | 520.848   | AK023542  | 1168.469  | 1149.502  | AK000401  | 3443.915  | 3103.14   |
| AJ224170  | 2776.465  | 2574.535  | AK000203  | 2005.709  | 2375.943  | AF305068  | 1585.433  | 1435.471  |
| AF085866  | 8582.606  | 7466.883  | AK021845  | 19197.398 | 19504.199 | D17231    | 60443.406 | 55724.484 |
| NM_006108 | 722.09    | 526.195   | AK022434  | 712.759   | 1058.166  | AF531295  | 1858.554  | 1622.561  |
| AK000806  | 58816.43  | 54235.309 | NM_018592 | 7952.836  | 8149.116  | X60484    | 1110.888  | 1210.582  |
| NM_016471 | 5728.356  | 5332.603  | NM_018503 | 61371.906 | 58930.543 | AF055019  | 2314.427  | 1993.613  |
| Z11852    | 355.225   | 306.619   | NM_016449 | 43375.945 | 44200.887 | NM_003525 | 7065.978  | 6237.927  |
| AK023482  | 6984.421  | 6622.456  | AL049670  | 9316.913  | 7577.988  | AK000229  | 1475.815  | 1491.707  |
| AK022798  | 1175.129  | 1202.067  | AK021465  | 1069.125  | 1046.827  | AF056432  | 3256.874  | 2888.644  |
| AL157423  | 875.6     | 904.005   | NM_018512 | 36191.875 | 47743.703 | AK001987  | 30258.555 | 23225.32  |
| AK023115  | 587.475   | 510.993   | NM_018568 | 756.19    | 1114.542  | NM_013332 | 4392.226  | 2967.071  |
| AK023176  | 1555.427  | 1630.398  | AL161991  | 25883.488 | 4759.192  | X56199    | 4592.385  | 4183.507  |
| NM_006828 | 18404.273 | 13646.54  | D17032    | 39273.926 | 7176.781  | NM_005193 | 6003.354  | 4377.933  |
| AB007973  | 17637.154 | 15703.98  | AL137292  | 1070.086  | 395.542   | AL162006  | 1037.985  | 775.618   |
| NM_002998 | 615.075   | 442.062   | NM_017941 | 3601.707  | 3031.775  | NM_017971 | 34900.93  | 30192.391 |
| M96843    | 8364.053  | 5984.129  | AF301016  | 561.071   | 322.107   | AF090097  | 1903.732  | 1681.662  |
| NM_017791 | 4399.917  | 4643.127  | BE900527  | 3098.736  | 666.712   | NM_014750 | 3365.875  | 2802.579  |
| NM_005882 | 10970.875 | 10358.945 | D28384    | 66036.492 | 53908.219 | NM_015912 | 1952.872  | 1813.029  |
| BC012304  | 5074.25   | 5216.241  | AF118079  | 68743.914 | 64305.988 | NM_005104 | 14179.229 | 12748.468 |
| AB046815  | 3231.755  | 3090.437  | AF277572  | 653.156   | 497.08    | NM_006888 | 30271.289 | 27370.672 |
| NM_000440 | 6405.452  | 6494.068  | AL365413  | 2618.869  | 708.082   | AL137423  | 4813.465  | 4527.788  |
| NM_001297 | 5410.648  | 4850.346  | NM_005258 | 10074.836 | 3166.219  | AB018322  | 10494.347 | 10703.19  |
| NM_004403 | 9465.512  | 7809.112  | NM_003948 | 1032.383  | 702.953   | NM_007068 | 38157.938 | 37309.82  |
| X64993    | 1408.274  | 1260.372  | AK025062  | 2087.157  | 2212.315  | AF113211  | 1766.375  | 1481.969  |
| NM_016230 | 4232.556  | 4873.159  | Z27405    | 59277.223 | 58976.984 | AL117568  | 3755.482  | 3437.776  |
| NM_001083 | 1674.734  | 1701.905  | AK023412  | 2396.771  | 2885.291  | NM_000843 | 2225.241  | 2115.582  |
| AK023966  | 13738.659 | 14907.561 | NM_014617 | 62275.094 | 56493.516 | S71805    | 1491.303  | 1300.486  |
| AK025702  | 5864.563  | 8671.686  | AK074682  | 7209.266  | 6783.708  | NM_018391 | 2250.196  | 2472.048  |
| NM_018958 | 1964.236  | 2352.902  | X74605    | 2558.814  | 2896.65   | U90917    | 1205.388  | 1974.406  |
| AL050200  | 882.536   | 905.542   | AK024513  | 1372.886  | 1380.918  | AK022140  | 6598.438  | 5405.208  |
| NM_002367 | 790.3     | 797.034   | BC036692  | 3328.272  | 3844.815  | AK023372  | 41106.695 | 37657.098 |
| AK022038  | 1680.023  | 1504.28   | AJ009640  | 4012.849  | 3835.759  | U21072    | 1662.226  | 1434.465  |
| AF253321  | 2900.456  | 2193.33   | Y11163    | 1457.201  | 1399.766  | AK024377  | 730.136   | 743.276   |

|           |           |           |           |           |           |           |           |           |
|-----------|-----------|-----------|-----------|-----------|-----------|-----------|-----------|-----------|
| U80735    | 8240.416  | 6331.958  | AF086391  | 943.848   | 1344.739  | AL137461  | 1170.744  | 994.51    |
| NM_01785C | 3996.557  | 4309.76   | AF147340  | 846.627   | 1126.713  | AF114264  | 9328.919  | 7833.528  |
| NM_016522 | 2241.097  | 2219.273  | L31901    | 317.579   | 199.97    | NM_018972 | 3848.015  | 4207.451  |
| NM_002224 | 13492.329 | 12657.149 | AK025119  | 1130.829  | 302.243   | AB037828  | 1140.805  | 1162.615  |
| X07979    | 48883.023 | 39892.824 | AJ224170  | 5068.996  | 1952.49   | AB023210  | 648.132   | 459.695   |
| NM_003874 | 1846.575  | 1387.833  | AF085866  | 12611.733 | 5264.523  | AB037786  | 3170.626  | 2622.233  |
| NM_000082 | 1140.445  | 1313.645  | AK000806  | 52597.762 | 36789.309 | NM_00364E | 12972.713 | 12758.285 |
| L13857    | 2066.588  | 1645.506  | NM_016471 | 7082.603  | 5915.562  | AB037735  | 833.715   | 638.04    |
| NM_01809E | 7403.822  | 7209.079  | Z11852    | 506.723   | 776.274   | AK002177  | 8901.949  | 7010.099  |
| AF286164  | 1213.232  | 929.796   | D21861    | 238.38    | 900.902   | AK024429  | 2801.833  | 2139.594  |
| AF146277  | 8359.623  | 6401.724  | NM_001145 | 1047.282  | 1171.493  | NM_00349E | 64734.152 | 64610.223 |
| NM_00255E | 944.384   | 802.819   | NM_005364 | 19873.086 | 19355.223 | AB000509  | 2204.23   | 1857.772  |
| AF055033  | 25561.359 | 21773.232 | AK023482  | 9743.346  | 9284.468  | AB018314  | 2151.508  | 2008.06   |
| NM_01770C | 1173.08   | 1025.792  | AK022798  | 1038.226  | 1109.403  | NM_00437E | 1038.567  | 1029.659  |
| M37191    | 17644.4   | 19811.527 | AF086014  | 470.683   | 682.625   | AJ238899  | 2082.362  | 1589.27   |
| NM_005242 | 677.95    | 646.696   | AL157423  | 1490.649  | 1815.656  | NM_018037 | 5503.899  | 3706.188  |
| NM_00302C | 1057.849  | 787.995   | AK023115  | 493.691   | 812.991   | NM_001110 | 2735.993  | 2298.63   |
| NM_003404 | 45706.391 | 35689.52  | AK023176  | 2771.764  | 3625.423  | NM_000841 | 8264.802  | 6468.778  |
| NM_001114 | 2048.573  | 1808.877  | NM_00682E | 32205.545 | 7784.295  | NM_00124E | 2059.676  | 1754.726  |
| NM_00445E | 941.309   | 686.955   | AB007973  | 25987.502 | 19226.125 | AJ008139  | 9744.185  | 9810.987  |
| NM_00601C | 18553.844 | 12660.638 | NM_00299E | 790.966   | 302.167   | NM_00432E | 10987.182 | 10109.693 |
| K03191    | 4452.308  | 3642.97   | M96843    | 11915.847 | 1932.953  | NM_000882 | 847.857   | 786.331   |
| NM_00507E | 29449.191 | 25431.064 | NM_017791 | 5815.348  | 1249.243  | NM_004577 | 6168.57   | 5387.393  |
| NM_005192 | 38788.68  | 29926.527 | NM_005882 | 16761.191 | 7581.769  | AF007157  | 44714.148 | 44924.703 |
| NM_00458E | 2395.319  | 1867.958  | BC012304  | 8935.786  | 8656.747  | D38553    | 3985.656  | 3692.73   |
| NM_015032 | 4657.324  | 3234.999  | AB046815  | 5628.46   | 2600.344  | NM_00617C | 12540.768 | 8750.629  |
| AK022956  | 6559.891  | 5981.211  | NM_00044C | 7850.393  | 2726.725  | NM_01429E | 8280.942  | 5466.52   |
| AK023121  | 1099.86   | 1010.477  | NM_001297 | 5366.673  | 4195.254  | AK001581  | 2462.045  | 1682.54   |
| NM_014104 | 52066.785 | 51331.047 | NM_004403 | 16328.104 | 16789.809 | NM_005862 | 3597.052  | 2931.118  |
| NM_002392 | 1512.434  | 1424.569  | X64993    | 2931.827  | 4307.053  | NM_00054E | 10679.515 | 8559.79   |
| NM_00274E | 54828.777 | 57748.445 | NM_004434 | 27747.213 | 50718.727 | AK022541  | 8193.768  | 6295.405  |
| NM_01821E | 11839.257 | 11497.014 | NM_00626E | 1202.965  | 1432.851  | AB002297  | 4169.6    | 3473.018  |
| NM_00339C | 6021.352  | 5024.644  | NM_01623C | 6452.5    | 6917.376  | NM_00502C | 48948.977 | 46558     |
| AL137747  | 5015.621  | 4669.706  | NM_001083 | 2810.178  | 3125.958  | NM_014077 | 3271.925  | 3066.365  |
| NM_01475E | 5627.573  | 5494.324  | AK023966  | 20678.904 | 15556.079 | NM_018412 | 2435.207  | 2034.568  |
| AF077188  | 18574.154 | 17755.961 | AK025702  | 6806.233  | 8051.938  | NM_01232E | 7769.938  | 6704.5    |
| NM_01244E | 5325.566  | 5378.702  | D17064    | 1427.707  | 1550.284  | M14087    | 9665.074  | 8032.102  |
| NM_01833E | 1500.856  | 1189.092  | NM_01895E | 3227.145  | 4544.353  | NM_00088E | 21221.355 | 15211.211 |
| NM_01868E | 55421.293 | 52961.598 | AL050200  | 748.627   | 846.487   | M59040    | 3829.985  | 3092.957  |
| NM_006984 | 5451.365  | 4651.767  | NM_002367 | 1072.81   | 1467.733  | X15880    | 69275.266 | 61394.535 |
| AF231919  | 2661.364  | 2192      | AK022038  | 3008.597  | 3528.066  | NM_00679E | 1132.379  | 1244.151  |
| NM_018214 | 2375.442  | 2051.842  | AF253321  | 3833.128  | 1960.564  | X04366    | 2673.757  | 2489.641  |
| Y11718    | 470.84    | 418.804   | U80735    | 11723.372 | 3238.521  | NM_00050E | 69050.641 | 64150.945 |
| NM_00507E | 17288.799 | 14659.148 | NM_01785C | 6105.506  | 1513.683  | NM_003481 | 8862.354  | 6952.773  |
| NM_019023 | 54050.016 | 57598.859 | NM_016522 | 3604.316  | 1556.28   | AB046814  | 725.893   | 680.027   |
| NM_00442C | 1255.448  | 940.395   | NM_002224 | 21221.594 | 11807.245 | NM_017664 | 7465.879  | 7635.172  |
| NM_00297C | 1133.395  | 1131.416  | X07979    | 59187.875 | 61962.391 | AK025523  | 1285.738  | 1476.73   |
| NM_00549E | 32855.059 | 25557.209 | NM_003874 | 4167.188  | 2313.094  | NM_00705E | 7193.006  | 6635.828  |
| NM_01327C | 2166.925  | 1999.796  | NM_000082 | 2258.351  | 500.935   | NM_00687C | 10246.07  | 8934.908  |
| NM_015387 | 6051.118  | 6239.622  | L13857    | 3228.482  | 803.2     | NM_00735E | 7715.043  | 7066.941  |
| NM_001733 | 5590.09   | 3445.813  | NM_01809E | 7981.099  | 5959.681  | L13283    | 2633.926  | 2287.941  |
| NM_00506E | 1297.308  | 1172.124  | AF286164  | 1630.195  | 2020.843  | NM_013327 | 2781.088  | 2436.318  |
| NM_01782E | 32316.336 | 28806.77  | AF146277  | 12386.02  | 16575.863 | AF303888  | 14475.618 | 12827.035 |

|           |           |           |           |           |           |           |           |           |
|-----------|-----------|-----------|-----------|-----------|-----------|-----------|-----------|-----------|
| NM_014035 | 3386.429  | 3361.164  | NM_002559 | 1294.653  | 1313.973  | NM_000077 | 2102.846  | 1849.115  |
| NM_020122 | 22235.227 | 22316.934 | AF055033  | 39481.301 | 34618.199 | AF176646  | 1449.833  | 1153.855  |
| NM_013432 | 18336.439 | 16660.844 | NM_017700 | 2006.698  | 1822.199  | NM_003672 | 34931.984 | 26319.701 |
| AB020716  | 1130.885  | 1278.203  | M37191    | 21661.451 | 20347.893 | NM_002574 | 68809.75  | 67801.18  |
| U57341    | 425.227   | 412.306   | J04422    | 1385.37   | 1241.942  | NM_012391 | 5997.27   | 5822.285  |
| NM_002295 | 55107.344 | 53198.055 | NM_005242 | 811.098   | 1104.049  | NM_005254 | 4326.722  | 4665.686  |
| AK027130  | 2012.517  | 1974.67   | NM_003020 | 1195.104  | 1475.054  | NM_005611 | 1030.589  | 1078.263  |
| NM_005479 | 43157.172 | 33093.141 | NM_003404 | 50995.18  | 53897.855 | NM_004830 | 1077.106  | 1118.049  |
| NM_005730 | 52789.699 | 52598.035 | NM_001114 | 2642.465  | 3151.305  | AF132362  | 63362.34  | 71661.883 |
| X82240    | 17765.172 | 16232.3   | NM_004455 | 1213.134  | 288.909   | NM_007007 | 14943.403 | 15047.854 |
| NM_013995 | 6667.982  | 6301.761  | NM_006010 | 31192.121 | 16698.035 | NM_006386 | 5627.119  | 5627.311  |
| BC021298  | 782.179   | 665.572   | K03191    | 7026.125  | 4360.153  | NM_006555 | 24423.406 | 20359.916 |
| U52096    | 10503.065 | 6537.734  | NM_005079 | 46029.398 | 13679.989 | NM_004501 | 46038.309 | 41378.055 |
| AB013897  | 3070.07   | 2500.987  | NM_005192 | 55868.441 | 11854.688 | NM_004966 | 17089.299 | 16004.683 |
| NM_005526 | 36055.375 | 27120.809 | NM_004585 | 3265.069  | 1713.556  | NM_006700 | 3289.606  | 2860.633  |
| AK001669  | 3848.388  | 2725.186  | NM_015032 | 7594.582  | 4305.592  | NM_006445 | 16578.883 | 14967.99  |
| NM_006195 | 2066.079  | 2107.567  | AK022956  | 11454.422 | 11340.889 | NM_012105 | 30327.863 | 26293.281 |
| NM_006190 | 29144.396 | 25744.793 | AK023121  | 2710.697  | 1945.973  | AF019633  | 4861.034  | 3701.264  |
| NM_006365 | 4655.564  | 4348.639  | NM_014104 | 66478.281 | 36747.137 | AB002361  | 16229.775 | 14598.831 |
| NM_004133 | 744.142   | 612.091   | NM_002392 | 2895.845  | 996.603   | NM_018060 | 11943.597 | 9444.949  |
| NM_001615 | 12296.575 | 13757.267 | NM_002749 | 60570.949 | 61104.559 | NM_014235 | 4898.004  | 3938.865  |
| BC000401  | 17635.162 | 19106.512 | NM_018216 | 18637.324 | 14921.908 | NM_017662 | 10520.579 | 8562.522  |
| NM_006425 | 5164.586  | 5114.658  | NM_003390 | 9698.432  | 11703.47  | U88837    | 3065.517  | 2264.451  |
| BF344046  | 6681.562  | 6175.759  | AL137747  | 7961.209  | 8852.442  | NM_017446 | 28840.578 | 23187.018 |
| AF432218  | 30524.139 | 22912.799 | NM_014755 | 7862.396  | 7211.626  | NM_017582 | 16207.645 | 13705.74  |
| NM_004286 | 8440.237  | 6674.501  | AF077188  | 27367.666 | 24327.469 | NM_015235 | 6295.858  | 4940.01   |
| AL133644  | 13870.689 | 8033.644  | NM_012446 | 6799.021  | 6805.387  | AK026962  | 5232.892  | 4231.662  |
| NM_002706 | 5455.999  | 4016.054  | NM_018335 | 1817.239  | 1799.78   | D00265    | 50215.309 | 54100.422 |
| NM_004195 | 683.572   | 502.914   | NM_018685 | 59384.824 | 60615.398 | NM_000775 | 1276.418  | 1633.508  |
| NM_006876 | 2357.688  | 2088.803  | NM_006984 | 8007.855  | 8594.445  | NM_004552 | 59906.152 | 58648.359 |
| NM_000293 | 1751.759  | 1130.98   | AF231919  | 3674.556  | 4116.478  | NM_000143 | 3979.448  | 4233.753  |
| NM_003745 | 1897.951  | 1497.724  | NM_018214 | 2864.456  | 3304.344  | AF317889  | 548.073   | 991.231   |
| NM_005395 | 499.795   | 461.074   | Y11718    | 1337.086  | 1692.083  | NM_006294 | 65895.789 | 63480.004 |
| NM_012265 | 1081.309  | 1234.225  | NM_005076 | 36344.141 | 41118.453 | AL137294  | 944.183   | 1674.342  |
| AF153821  | 3337.535  | 3027.531  | NM_019023 | 62101.113 | 49064.672 | NM_003743 | 3235.904  | 2551.044  |
| NM_013370 | 3728.052  | 3862.99   | NM_004420 | 1719.254  | 2298.708  | AB037797  | 1496.018  | 1568.543  |
| NM_001374 | 1710.94   | 1768.596  | NM_002970 | 1690.776  | 542.651   | NM_001520 | 1552.369  | 1670.59   |
| NM_003310 | 5308.781  | 5613.146  | NM_005499 | 47043.66  | 9497.627  | NM_017870 | 4021.052  | 3695.342  |
| AK024461  | 6513.963  | 8136.377  | NM_013270 | 2676.869  | 1062.677  | AL133633  | 4011.476  | 3626.216  |
| AK025485  | 1931.825  | 1538.193  | NM_015387 | 9065.309  | 2492.183  | NM_012252 | 2349.616  | 2418.26   |
| NM_017635 | 5361.185  | 5304.846  | NM_001733 | 8507.908  | 3877.575  | AK026817  | 4428.042  | 3671.724  |
| X62534    | 2589.897  | 2599.212  | NM_005065 | 2146.627  | 2127.26   | AL157442  | 44250.859 | 42130.379 |
| AF027147  | 42089.563 | 32478.832 | NM_017825 | 38242.016 | 41449.766 | AB011148  | 4336.949  | 4637.072  |
| M62399    | 7730.42   | 8460.096  | NM_014035 | 4004.392  | 3822.584  | AL389938  | 64463.699 | 60038.484 |
| NM_002357 | 1654.104  | 2125.878  | NM_020122 | 31862.152 | 27940.893 | NM_001945 | 58363.914 | 55047.723 |
| U71600    | 4623.349  | 4927.875  | NM_013432 | 29238.902 | 25459.553 | NM_007084 | 5526.78   | 4225.939  |
| NM_004472 | 1298.577  | 1499.793  | AB020716  | 1544.672  | 1806.835  | M97191    | 63306.738 | 57501.563 |
| AB037862  | 2753.216  | 2773.786  | NM_002295 | 60127.559 | 58928.984 | AK023015  | 11773.823 | 9090.433  |
| NM_005392 | 2350.496  | 1679.685  | AK027130  | 1781.378  | 2244.915  | NM_003457 | 40309.703 | 32507.963 |
| AL133572  | 8534.566  | 5921.842  | NM_005479 | 51677.652 | 58257.031 | NM_016102 | 28834.588 | 36938.492 |
| AK022500  | 7262.949  | 5397.91   | NM_013995 | 10270.772 | 10385.217 | NM_004376 | 2640.146  | 3366.092  |
| NM_003447 | 590.719   | 890.258   | BC021298  | 812.901   | 222.818   | NM_000272 | 1176.729  | 1327.352  |
| NM_005014 | 2574.54   | 2128.1    | U52096    | 19145.803 | 18628.162 | NM_006845 | 60247.688 | 63284.918 |

|           |           |           |           |           |           |             |           |           |
|-----------|-----------|-----------|-----------|-----------|-----------|-------------|-----------|-----------|
| NM_006944 | 681.376   | 615.318   | AB013897  | 4127.85   | 1122.589  | NM_005603   | 63772.809 | 62009.602 |
| NM_004407 | 1238.07   | 822.968   | NM_005526 | 53306.992 | 10393.167 | NM_001061   | 2454.337  | 3225.157  |
| NM_000070 | 7668.76   | 6341.225  | AK001669  | 5063.697  | 1958.715  | AI075338    | 3538.014  | 3710.445  |
| NM_001202 | 2941.961  | 2296.385  | NM_006195 | 3346.173  | 4255.339  | BG744154    | 25348.623 | 29137.016 |
| AB037804  | 735.016   | 806.821   | NM_006190 | 40919.961 | 47899.684 | Z11694      | 17412.26  | 18844.795 |
| U34249    | 2260.037  | 2230.867  | NM_006368 | 8000.576  | 8298.023  | BF983177    | 6188.399  | 6359.38   |
| NM_003289 | 51265.004 | 57076.902 | NM_004133 | 1410.495  | 424.099   | Z26317      | 4825.182  | 4099.154  |
| AI200114  | 2540.006  | 2656.997  | NM_004433 | 415.402   | 346.162   | X16983      | 59547.797 | 54093.98  |
| M74220    | 448.644   | 505.859   | NM_001618 | 15025.848 | 20733.83  | X56160      | 6786.809  | 6199.539  |
| M23254    | 1366.169  | 1970.326  | BC000401  | 22451.215 | 18944.654 | BG679991    | 2626.861  | 2477.517  |
| BE618539  | 7119.906  | 7655.535  | NM_006425 | 6969.439  | 6486.106  | H-Y 00097 I | 9544.71   | 8886.232  |
| R28062    | 5668.62   | 6167.37   | BF344046  | 8577.358  | 8354.58   | H-M 59964   | 943.64    | 974.969   |
| U38545    | 432.051   | 604.922   | AF432218  | 37261.082 | 42026.184 | H-Y 00711 I | 64242.027 | 59390.633 |
| AI627464  | 1175.469  | 1260.964  | NM_004286 | 12712.789 | 11915.62  | H-X 16707 I | 7743.91   | 6423.285  |
| BI756258  | 4195.511  | 4806.914  | AL133644  | 28902.061 | 39253.02  | AL038354    | 16278.126 | 12198.923 |
| AF110020  | 2434.948  | 2549.243  | NM_002706 | 7277.526  | 7860.38   | R14607      | 9221.661  | 5476.94   |
| AA608557  | 9865.344  | 9018.227  | NM_004199 | 981.489   | 997.067   | W84867      | 1450.939  | 1336.098  |
| AL050095  | 12507.692 | 9571.605  | NM_006876 | 3880.169  | 1374.542  | BF245026    | 952.918   | 598.157   |
| NM_012253 | 12335.557 | 16322.939 | NM_000293 | 3116.757  | 914.319   | NM_016584   | 36887.098 | 43870.488 |
| NM_000258 | 54461.934 | 50889.484 | NM_003748 | 2700.556  | 518.398   | NM_001815   | 5010.124  | 5388.823  |
| AB033055  | 31253.541 | 19159.498 | NM_005398 | 1500.113  | 608.721   | NM_000064   | 23224.525 | 26214.035 |
| AF311287  | 23925.154 | 17068.912 | NM_012269 | 1946.574  | 2768.387  | NM_003264   | 1101.062  | 1044.07   |
| NM_003098 | 3817.313  | 3562.067  | AF153821  | 6787.504  | 7793.714  | NM_006725   | 12198.152 | 13625.843 |
| NM_014781 | 5859.755  | 5723.644  | NM_013370 | 6178.093  | 9014.92   | NM_003326   | 5843.332  | 6606.852  |
| BU629989  | 1916.985  | 1745.592  | NM_003310 | 8928.243  | 2492.272  | NM_004568   | 63797.816 | 61376.02  |
| X87896    | 3115.505  | 3351.845  | AK024461  | 12313.461 | 8819.774  | NM_000202   | 9333.884  | 10552.274 |
| M88310    | 3725.559  | 3815.507  | AK025485  | 2874.825  | 2589.08   | NM_005496   | 14906.923 | 14197.161 |
| D16856    | 467.463   | 473.681   | NM_017635 | 6735.467  | 7227.549  | NM_016608   | 1888.619  | 2682.092  |
| NM_000042 | 2860.739  | 3428.606  | X62534    | 3266.971  | 3135.346  | NM_002858   | 7198.987  | 7666.929  |
| AF035787  | 7470.887  | 8608.846  | AF027147  | 47798.805 | 45052.508 | NM_004817   | 5300.344  | 5684.257  |
| NM_005024 | 624.212   | 695.245   | M62399    | 10395.633 | 10588.754 | NM_018975   | 25853.787 | 25793.961 |
| NM_003403 | 1592.516  | 1640.899  | NM_002357 | 2160.658  | 1926.509  | AB023215    | 26027.906 | 25451.645 |
| NM_014808 | 5894.197  | 6670.343  | U71600    | 9760.017  | 9193      | NM_001284   | 36513.059 | 37002.156 |
| AB006627  | 6045.951  | 6310.078  | NM_004472 | 2304.1    | 3124.658  | NM_003242   | 42766.586 | 35047.004 |
| NM_000416 | 10216.337 | 12800.923 | AB037862  | 4192.39   | 5556.062  | NM_002846   | 1306.374  | 1667.212  |
| NM_003382 | 377.862   | 371.203   | NM_005392 | 2881.656  | 2768.096  | U31099      | 1818.496  | 2046.435  |
| NM_002965 | 678.692   | 885.681   | AL133572  | 12887.421 | 14040.614 | NM_001105   | 26762.479 | 20203.797 |
| AB007883  | 11244.119 | 10259.965 | AK022500  | 13767.981 | 14177.796 | NM_005585   | 601.386   | 907.184   |
| NM_006391 | 479.405   | 443.574   | NM_003447 | 798.042   | 1462.922  | NM_002075   | 17159.52  | 13069.697 |
| AY009397  | 47164.75  | 57464.832 | NM_005014 | 4293.098  | 3851.405  | Y08756      | 62422.047 | 56201.023 |
| NM_007037 | 50122.824 | 43638.293 | NM_006944 | 764.955   | 276.59    | AY007090    | 1044.758  | 1275.698  |
| NM_016335 | 3860.057  | 3529.739  | NM_004407 | 1699.223  | 266.194   | NM_006436   | 2283.165  | 1910.842  |
| NM_003165 | 8763.613  | 7071.954  | NM_000070 | 11334.633 | 2381.165  | NM_018073   | 1691.85   | 2409.474  |
| NM_003906 | 46217.508 | 34810.453 | NM_001202 | 4931.5    | 6202.562  | AL137529    | 1761.047  | 2161.303  |
| AL359590  | 49592.172 | 43685.949 | AB037804  | 1457.485  | 2430.913  | NM_012332   | 6806.691  | 8362.426  |
| NM_002861 | 14628.097 | 14167.166 | U34249    | 4420.34   | 6137.867  | AK026648    | 2416.67   | 3170.402  |
| NM_003080 | 8612.032  | 8448.63   | M74220    | 479.526   | 397.369   | NM_000497   | 2261.676  | 2622.949  |
| NM_004042 | 421.759   | 353.818   | M23254    | 2342.556  | 1763.023  | NM_017421   | 2230.398  | 2374.553  |
| NM_013268 | 881.626   | 969.814   | BE618539  | 11465.502 | 15826.486 | AK025977    | 62528.125 | 68643.688 |
| NM_002645 | 5155.089  | 4831.77   | R28062    | 7077.517  | 8415.432  | NM_000273   | 3759.439  | 4289.659  |
| AB033027  | 2669.577  | 3619.873  | U38545    | 358.6     | 864.553   | NM_002896   | 23978.242 | 27877.012 |
| AF320293  | 525.545   | 777.047   | AI627464  | 1947.73   | 2351.575  | NM_005397   | 8967.399  | 9238.283  |
| NM_001171 | 1954.87   | 2076.169  | BI756258  | 6143.703  | 6909.532  | AB014511    | 8739.42   | 8980.257  |



|           |           |           |           |           |           |             |           |           |
|-----------|-----------|-----------|-----------|-----------|-----------|-------------|-----------|-----------|
| S81591    | 623.711   | 640.127   | AI342225  | 58832.488 | 60247.359 | NM_001662   | 21545.758 | 21795.252 |
| NM_006323 | 19465.449 | 22526.674 | AA634103  | 56876.688 | 56212.16  | AB011100    | 4439.059  | 5520.837  |
| NM_016466 | 3417.412  | 4204.616  | J04599    | 2528.532  | 3221.412  | U61741      | 2792.699  | 2453.08   |
| NM_001493 | 7555.182  | 8003.333  | AF110020  | 5506.862  | 6454.11   | NM_012402   | 10534.381 | 10599.271 |
| NM_003716 | 804.351   | 1162.836  | AA707922  | 418.715   | 850.862   | M76676      | 9703.717  | 9172.302  |
| NM_014841 | 918.144   | 1490.568  | AA608557  | 15821.444 | 19310.717 | NM_003857   | 1392.822  | 1434.211  |
| NM_014426 | 11521.217 | 12091.974 | AL050095  | 25716.68  | 28112.24  | AL137690    | 748.685   | 920.874   |
| NM_006816 | 55624.871 | 57903.41  | U03272    | 1213.628  | 1566.989  | Z83804      | 3464.661  | 3073.739  |
| AK026518  | 55438.078 | 59415.57  | NM_012253 | 24806.924 | 27926.268 | NM_004386   | 4806.272  | 3945.003  |
| AF132734  | 29511.369 | 24281.904 | NM_000258 | 59124.605 | 53100.547 | U67784      | 3734.02   | 3492.707  |
| NM_018379 | 5234.264  | 3488.988  | AB033055  | 46835.379 | 5527.571  | NM_007366   | 4667.697  | 4110.895  |
| NM_016403 | 46998.461 | 36071.668 | AF311287  | 36150.535 | 4548.643  | NM_000153   | 1328.716  | 1464.996  |
| NM_015603 | 1697.287  | 1538.718  | NM_003098 | 5841      | 5790.743  | NM_002033   | 2600.428  | 2988.119  |
| AK021788  | 1029.808  | 749.803   | NM_014781 | 11676.009 | 18800.104 | AK091794    | 3845.56   | 3536.35   |
| NM_001921 | 10451.583 | 9761.271  | BU629989  | 4062.912  | 6068.534  | NM_004111   | 3804.551  | 4848.042  |
| NM_006230 | 14611.166 | 15335.73  | X87896    | 6373.212  | 9527.156  | NM_005316   | 7032.307  | 8515.988  |
| NM_014698 | 14102.241 | 13018.479 | D16856    | 583.962   | 271.434   | NM_016316   | 5688.267  | 7876.357  |
| NM_013400 | 17459.277 | 20114.881 | NM_000042 | 4664.164  | 3533.841  | NM_003366   | 18841.227 | 23557.502 |
| AK026257  | 2430.787  | 2289.211  | AF035787  | 8283.996  | 10079.777 | NM_000057   | 3130.774  | 3030.842  |
| AK023836  | 11891.763 | 13803.879 | AF090405  | 1425.798  | 1294.03   | NM_018343   | 8536.226  | 8420.44   |
| NM_018108 | 3998.833  | 4362.229  | NM_003403 | 2292.526  | 3025.452  | NM_017719   | 1677.571  | 1863.601  |
| AJ299442  | 9043.509  | 11733.662 | NM_014808 | 8445.648  | 10182.666 | AF064078    | 3114.588  | 2908.714  |
| AB040897  | 791.346   | 1051.706  | AB006627  | 10694.057 | 11548.677 | AL049688    | 4493.319  | 4359.342  |
| NM_000129 | 4576.676  | 5778.316  | NM_000416 | 14343.435 | 14552.538 | NM_002737   | 5536.425  | 5012.98   |
| NM_003762 | 7645.653  | 9438.005  | NM_002965 | 1153.572  | 1384.229  | Z25427      | 4658.482  | 3980.688  |
| NM_000187 | 1525.53   | 2026.563  | AB007883  | 20771.678 | 24099.424 | NM_004672   | 16531.559 | 16146.253 |
| NM_014465 | 1159.436  | 1464.32   | NM_003839 | 406.72    | 933.104   | NM_001353   | 6600.231  | 6185.608  |
| D87292    | 1898.281  | 2383.837  | NM_006391 | 845.455   | 1636.779  | NM_006214   | 2596.744  | 2759.714  |
| NM_005498 | 2296.714  | 2092.833  | AY009397  | 57620.664 | 69017.75  | AJ010228    | 15543.237 | 15199.742 |
| NM_004407 | 1164.071  | 997.962   | NM_007037 | 58353.496 | 63725.672 | NM_005198   | 6663.558  | 6411.363  |
| NM_000070 | 7532.001  | 5894.168  | NM_016335 | 6414.908  | 6595.545  | NM_000272   | 1364.867  | 1882.563  |
| NM_001202 | 2692.744  | 2427.53   | NM_003165 | 11510.682 | 1916.11   | NM_006848   | 61040.895 | 67945.094 |
| AB037804  | 784.151   | 595.547   | NM_003906 | 57364.629 | 50543.813 | NM_005603   | 62844.293 | 61620.82  |
| U34249    | 2394.912  | 1892.521  | AL359590  | 60875.91  | 58048.223 | NM_001061   | 2308.558  | 3622.374  |
| NM_003288 | 51239.324 | 55012.043 | NM_002861 | 26428.846 | 36858.719 | AI075338    | 3983.131  | 4507.488  |
| AI200114  | 2881.163  | 3190.583  | NM_003080 | 17858.742 | 20980.961 | BF983177    | 7050.412  | 8210.037  |
| M74220    | 364.965   | 465.563   | NM_004042 | 959.024   | 1322.491  | Z26317      | 4388.611  | 4737.364  |
| M23254    | 1687.87   | 2272.959  | NM_002645 | 9316.473  | 3508.976  | X16983      | 60955.48  | 57834.172 |
| BE618539  | 7367.92   | 8433.028  | AB033027  | 3898.26   | 5431.241  | X56160      | 8446.581  | 8327.218  |
| R28062    | 4862.832  | 5500.532  | AF320293  | 1026.104  | 991.424   | H-M 59964   | 1374.605  | 1993.094  |
| U38545    | 497.668   | 541.619   | S81591    | 991.583   | 998.592   | H-Y 00711 I | 68154.125 | 69171.93  |
| AI627464  | 1138.914  | 1481.486  | NM_006323 | 27688.557 | 26799.885 | H-X 16707 I | 7474.253  | 8083.581  |
| BI756258  | 4592.245  | 6228.61   | NM_016466 | 5052.005  | 5128.027  | AL038354    | 16398.861 | 13427.313 |
| J04599    | 1828.838  | 2307.721  | NM_001493 | 10560.109 | 11480.814 | R14607      | 7302.626  | 5819.07   |
| AF110020  | 3264.524  | 4442.2    | NM_003716 | 1197.347  | 1754.993  | W84867      | 1490.689  | 1320.301  |
| AA707922  | 891.347   | 917.239   | NM_014841 | 2029.389  | 2430.745  | NM_005718   | 7846.946  | 6262.209  |
| AA608557  | 8851.33   | 13883.658 | NM_014426 | 17767.988 | 20812.084 | NM_018264   | 1870.641  | 1682.664  |
| U03272    | 1743.786  | 1887.832  | NM_006816 | 60699.238 | 55069.75  | NM_000064   | 21540.709 | 19051.35  |
| AF075085  | 46939.148 | 57212.309 | AK026518  | 61145.039 | 59725.984 | NM_003264   | 876.576   | 1035.92   |
| NM_005892 | 4674.144  | 5023.687  | AF132734  | 46057.879 | 17530.129 | NM_006725   | 11277.327 | 13932.565 |
| NM_006478 | 750.052   | 996.804   | NM_018379 | 7270.619  | 1200.787  | NM_003326   | 2779.374  | 4295.474  |
| AF311287  | 25219.877 | 21806.893 | NM_016403 | 59145.293 | 37123.043 | NM_004568   | 61937.418 | 62598.547 |
| NM_003098 | 3314.054  | 3625.831  | NM_015603 | 2814.157  | 2128.666  | NM_000202   | 8465.832  | 10390.532 |

|           |           |           |           |           |           |           |           |           |
|-----------|-----------|-----------|-----------|-----------|-----------|-----------|-----------|-----------|
| NM_014781 | 5536.766  | 4984.828  | AK021788  | 1628.494  | 1681.562  | NM_005496 | 13464.882 | 12414.632 |
| BU629989  | 2076.227  | 1528.41   | NM_001921 | 19562.033 | 29660.328 | NM_016608 | 1725.945  | 2188.545  |
| X87896    | 3416.128  | 3524.148  | NM_006230 | 26633.568 | 34127.32  | NM_002858 | 7509.532  | 7220.159  |
| M88310    | 5014.745  | 5581.691  | NM_014699 | 27269.129 | 35921.906 | NM_004817 | 3701.763  | 3977.187  |
| D16856    | 554.074   | 807.097   | AK026257  | 4681.402  | 1565.624  | NM_018975 | 27004.059 | 33757.074 |
| NM_000042 | 3349.763  | 4483.403  | AK023836  | 23166.461 | 14769.511 | AB023215  | 34514.543 | 41867.496 |
| AF035787  | 6677.871  | 8075.96   | NM_018109 | 6536.979  | 6608.177  | NM_001284 | 35589.379 | 36813.969 |
| NM_005024 | 538.668   | 593.48    | BE734914  | 1545.027  | 1259.348  | NM_002846 | 1375.026  | 2229.976  |
| NM_003403 | 1735.522  | 2638.185  | AB040897  | 1141.691  | 1304.455  | U31099    | 2164.368  | 2488.938  |
| NM_014808 | 5924.348  | 9371.542  | NM_000129 | 6710.387  | 6265.376  | NM_001105 | 27039.125 | 20978.391 |
| AB006627  | 7618.632  | 10947.058 | NM_003762 | 11560.826 | 12776.021 | NM_005585 | 633.319   | 787.219   |
| NM_000416 | 9871.093  | 13478.298 | NM_018446 | 7204.441  | 7500.864  | NM_002075 | 15817.097 | 14200.066 |
| NM_003382 | 332.484   | 518.033   | NM_000187 | 1990.221  | 2538.495  | Y08756    | 57057.672 | 54031.875 |
| NM_002965 | 749.019   | 938.373   | NM_014465 | 2465.261  | 3063.217  | AY007090  | 1258.544  | 1218.908  |
| AB007883  | 12037.805 | 13010.321 | D87292    | 3296.092  | 3223.22   | NM_006436 | 2020.725  | 1679.654  |
| AY009397  | 49098.867 | 60787.141 | NM_005498 | 5010.788  | 5774.184  | AV752086  | 2050.624  | 1706.53   |
| NM_007037 | 53808.355 | 53507.871 | NM_004407 | 1927.518  | 482.856   | NM_016102 | 35418.34  | 40075.617 |
| NM_005014 | 2201.643  | 2464.393  | NM_000070 | 11426.632 | 2136.458  | NM_012332 | 6019.853  | 6748.066  |
| NM_006944 | 658.649   | 759.224   | NM_001202 | 4497.389  | 4795.315  | AK026648  | 2886.736  | 2734.728  |
| NM_003165 | 9113.237  | 8842.355  | AB037804  | 1417.627  | 1599.656  | NM_000497 | 2185.265  | 2473.384  |
| NM_003906 | 48160.098 | 37568.375 | U34249    | 3749.932  | 3583.982  | NM_017421 | 2613.605  | 3112.374  |
| AL359590  | 53469.551 | 51701.688 | NM_003289 | 55799.324 | 58729.285 | AK025977  | 56312.602 | 60473.691 |
| NM_002861 | 14729.73  | 13357.244 | AI200114  | 6270.118  | 6364.008  | AK023130  | 5930.496  | 6858.46   |
| NM_003080 | 9276.418  | 5913.405  | M74220    | 879.331   | 799.003   | NM_000273 | 3187.932  | 3016.145  |
| NM_004042 | 405.985   | 381.098   | BE618539  | 16257.859 | 6849.94   | NM_002896 | 23590.814 | 31148.775 |
| NM_013268 | 937.644   | 860.528   | R28062    | 9352.173  | 8030.511  | NM_005397 | 6301.808  | 6593.261  |
| NM_002645 | 5640.197  | 5192.581  | U38545    | 1178.676  | 1057.093  | AB014511  | 9581.153  | 11190.952 |
| AB033027  | 2857.659  | 3245.59   | AI627464  | 1865.365  | 2534.308  | NM_001662 | 21876.299 | 22906.92  |
| AF320293  | 728.506   | 1073.91   | AI342225  | 56449.348 | 65409.652 | AB011100  | 4873.527  | 5551.322  |
| NM_001171 | 2050.793  | 2248.888  | AA634103  | 59122.191 | 59613.293 | U61741    | 3434.061  | 3445.216  |
| S81591    | 690.79    | 892.075   | J04599    | 2685.728  | 3138.141  | NM_012402 | 9443.754  | 10644.637 |
| NM_006323 | 19850.725 | 26928.564 | AF110020  | 3394.572  | 4193.707  | M76676    | 9863.013  | 9560.383  |
| NM_016466 | 3987.142  | 4774.025  | AA707922  | 616.257   | 921.626   | NM_003857 | 1259.506  | 1908.573  |
| NM_001493 | 7921.815  | 10266.763 | AA608557  | 14886.275 | 15751.341 | AL137690  | 613.762   | 845.33    |
| NM_003716 | 839.344   | 1374.573  | AL050095  | 23133.303 | 25919.279 | Z83804    | 3326.701  | 3386.394  |
| NM_014841 | 1264.187  | 1551.802  | U03272    | 3164.094  | 3629.004  | NM_004386 | 4131.931  | 3938.092  |
| NM_014426 | 11709.556 | 12446.899 | AF075085  | 54677.699 | 56432.66  | U67784    | 3635.779  | 3353.688  |
| NM_006816 | 49336.035 | 55463.148 | NM_005892 | 7573.095  | 7572.568  | NM_007366 | 4627.536  | 4044.658  |
| AK026518  | 47215.715 | 54446.477 | NM_006478 | 1655.963  | 1834.349  | NM_000592 | 920.607   | 1008.824  |
| NM_000258 | 54144.637 | 56007.113 | AF311287  | 36567.43  | 4621.98   | NM_016584 | 43897.195 | 41305.375 |
| AB033055  | 27320.477 | 25480.846 | NM_003098 | 5864.208  | 6516.084  | NM_000153 | 1217.517  | 800.497   |
| NM_016403 | 48879.102 | 42569.563 | NM_014781 | 10156.652 | 14304.137 | NM_004111 | 3835.072  | 5474.65   |
| NM_015603 | 1691.905  | 1498.992  | BU629989  | 3237.537  | 2991.097  | NM_003366 | 19575.674 | 22704.215 |
| AK021788  | 1109.62   | 929.51    | X87896    | 6255.156  | 6553.656  | NM_000057 | 2379.561  | 2837.045  |
| NM_001921 | 11280.005 | 9998.941  | M88310    | 7538.723  | 7970.113  | NM_018343 | 11644.327 | 13838.726 |
| NM_006230 | 15743.501 | 11823.671 | D16856    | 991.939   | 949.905   | AK095793  | 3006.513  | 4047.509  |
| NM_014699 | 15873.175 | 12977.469 | AF035787  | 15026.763 | 6703.585  | NM_003177 | 6073.966  | 6805.413  |
| NM_013400 | 18452.758 | 20853.258 | AF090405  | 576.929   | 602.968   | NM_017719 | 1495.308  | 1805.754  |
| AK026257  | 2963.059  | 2735.195  | NM_005024 | 1504.586  | 1559.995  | AF064078  | 3311.901  | 3910.813  |
| AK023836  | 17180.684 | 20256.703 | NM_003403 | 2793.429  | 2898.467  | AL049688  | 3793.102  | 6663.783  |
| NM_018109 | 5020.811  | 6446.886  | NM_014808 | 7438.596  | 8279.25   | NM_002737 | 4805.602  | 6190.087  |
| AJ299442  | 8623.781  | 12458.011 | AB006627  | 8341.505  | 8732.352  | Z25427    | 4070.227  | 4504.251  |
| AB040897  | 957.707   | 1059.321  | NM_000416 | 13246.108 | 15675.66  | NM_004672 | 16069.712 | 16960.586 |

|           |           |           |           |           |           |             |           |           |
|-----------|-----------|-----------|-----------|-----------|-----------|-------------|-----------|-----------|
| NM_000129 | 4761.48   | 7483.956  | NM_003382 | 525.847   | 900.467   | NM_001353   | 6003.069  | 6482.726  |
| NM_003762 | 8218.848  | 11452.242 | NM_002965 | 1001.223  | 1305.421  | NM_006214   | 2822.896  | 2966.496  |
| NM_018446 | 4950.293  | 6024.703  | AB007883  | 19655.291 | 21246.93  | AJ010228    | 14596.674 | 14661.128 |
| NM_000187 | 1125.34   | 1496.844  | NM_007037 | 52446.223 | 55120.945 | NM_005198   | 5752.39   | 7239.471  |
| NM_014465 | 1425.019  | 1633.565  | NM_005014 | 3924.798  | 3798.837  | AK021426    | 844.966   | 764.837   |
| D87292    | 1876.902  | 2063.197  | NM_006944 | 1055.349  | 1377.536  | NM_018073   | 2400.66   | 2304.1    |
| NM_005498 | 2092.608  | 2183.545  | NM_003165 | 11951.021 | 2427.615  | NM_006848   | 60707.289 | 69293.297 |
| NM_016335 | 3581.301  | 3132.101  | NM_003906 | 55518.094 | 46092.211 | NM_005603   | 63202.059 | 67445.164 |
| NM_001202 | 3129.214  | 3102.402  | AL359590  | 55838.809 | 58500.289 | NM_001061   | 2155.716  | 3390.7    |
| AB037804  | 772.671   | 801.568   | NM_002861 | 27288.59  | 33521.367 | AI075338    | 3552.883  | 4441.255  |
| U34249    | 2719.032  | 2769.48   | NM_003080 | 19053.002 | 24586.52  | Z26317      | 3747.635  | 4699.645  |
| NM_003288 | 44732.438 | 53217.402 | NM_004042 | 810.227   | 1162.283  | X16983      | 61485.5   | 60626.535 |
| AI200114  | 3746.18   | 2736.911  | NM_013268 | 1716.555  | 2251.393  | X56160      | 7963.266  | 11271.668 |
| M74220    | 599.603   | 596.202   | NM_002645 | 10936.357 | 13734.232 | BG679991    | 3460.581  | 5494.776  |
| M23254    | 2141.155  | 2589.159  | AB033027  | 4885.661  | 2292.968  | H-Y 00097 I | 9914.063  | 12451.319 |
| BE618539  | 7114.36   | 8738.625  | AF320293  | 1106.559  | 851.362   | H-M 59964   | 994.045   | 1708.565  |
| R28062    | 6321.212  | 6423.187  | NM_001171 | 2468.866  | 2464.866  | H-U76456M   | 641.733   | 1260.811  |
| U38545    | 553.009   | 593.899   | S81591    | 1192.329  | 877.231   | AL038354    | 15585.589 | 19621.549 |
| AI627464  | 1164.836  | 1780.719  | NM_006323 | 25610.311 | 27358.236 | R14607      | 7697.83   | 7473.556  |
| BI756258  | 4947.526  | 6452.519  | NM_016466 | 4454.168  | 5345.725  | W84867      | 1442.479  | 1665.158  |
| AI342225  | 45417.176 | 63168.219 | NM_001493 | 11108.063 | 10930.459 | NM_005718   | 7663.082  | 7014.556  |
| AA634103  | 45708.129 | 60744.391 | NM_003716 | 974.39    | 1386.788  | NM_018264   | 2228.342  | 2465.716  |
| J04599    | 2472.265  | 5253.086  | NM_014841 | 3844.104  | 6150.303  | NM_014580   | 2337.914  | 2526.621  |
| AF110020  | 3145.752  | 3553.318  | NM_014426 | 18117.775 | 20341.73  | AB028998    | 647.975   | 648.58    |
| AA707922  | 411.923   | 427.695   | NM_006816 | 59128.016 | 59119.402 | NM_016608   | 2306.702  | 2835.392  |
| AA608557  | 10798.949 | 20458.461 | AK026518  | 59757.254 | 65372.863 | NM_002858   | 7332.711  | 8535.901  |
| AL050095  | 14829.874 | 25809.689 | NM_000258 | 61064.531 | 62385.906 | NM_004817   | 3756.799  | 4287.73   |
| U03272    | 1608.257  | 2339.386  | AB033055  | 39586.383 | 44362.719 | NM_018975   | 24923.408 | 36283.824 |
| AF075085  | 51044.414 | 57178.809 | NM_016403 | 63284.043 | 17710.529 | AB023215    | 25977.07  | 34575.34  |
| NM_005892 | 3628.114  | 3954.648  | NM_015603 | 2931.904  | 1930.901  | U31099      | 1837.581  | 2462.41   |
| NM_006478 | 759.498   | 739.987   | AK021788  | 1672.403  | 1059.594  | NM_001105   | 33796.527 | 38065.188 |
| AF132734  | 20724.102 | 20897.852 | NM_001921 | 18527.207 | 22298.455 | NM_005585   | 838.231   | 1557.672  |
| NM_018379 | 3368.773  | 2786.582  | NM_006230 | 26016.342 | 36372.25  | NM_002075   | 13649.471 | 16425.393 |
| NM_000042 | 3991.6    | 3895.738  | NM_014699 | 28994.949 | 30903.57  | Y08756      | 66951.297 | 69943.016 |
| AF035787  | 9836.574  | 7518.873  | NM_013400 | 29108.91  | 41596.07  | NM_005563   | 13441.444 | 16499.793 |
| AF090405  | 328.374   | 207.911   | AK026257  | 5318.096  | 6017.153  | NM_005102   | 4065.022  | 8377.948  |
| NM_005024 | 511.944   | 449.501   | NM_018109 | 7410.439  | 3999.119  | NM_004518   | 3556.511  | 5361.204  |
| NM_003403 | 1975.146  | 1616.595  | AJ299442  | 10425.676 | 9995.163  | NM_006501   | 1361.564  | 1887.666  |
| NM_014808 | 7485.445  | 8060.421  | AB040897  | 1006.817  | 1083.19   | NM_002719   | 18846.35  | 18454.172 |
| AB006627  | 7429.023  | 7678.956  | NM_000129 | 4666.923  | 5920.116  | NM_000272   | 1153.089  | 1256.316  |
| NM_000416 | 9780.895  | 11871.67  | NM_003762 | 12142.636 | 12794.702 | NM_016131   | 16639.574 | 18068.125 |
| NM_003382 | 394.884   | 650.922   | NM_018446 | 6876.353  | 8772.51   | NM_006822   | 3864.467  | 3888.645  |
| NM_002965 | 838.569   | 985.774   | NM_000187 | 1885.964  | 2530.705  | NM_012142   | 11770.282 | 15215.315 |
| AB007883  | 13467.203 | 16049.537 | NM_014465 | 2385.667  | 3490.334  | NM_016429   | 2208.49   | 2516.644  |
| NM_006391 | 654.411   | 820.725   | D87292    | 2954.267  | 3949.088  | NM_012402   | 9963.413  | 12826.667 |
| AK093780  | 20127.668 | 30203.271 | NM_005498 | 4268.791  | 5744.93   | M76676      | 8710.211  | 11449.687 |
| NM_007037 | 44538.281 | 51684.66  | NM_016335 | 6372.894  | 6535.159  | NM_003857   | 1006.742  | 1642.916  |
| NM_001649 | 1105.39   | 3876.546  | NM_000372 | 516.621   | 882.497   | AL137690    | 671.804   | 1138.352  |
| NM_005492 | 6348.745  | 8529.973  | NM_001202 | 4606.77   | 1595.057  | Z83804      | 3159.855  | 4249.444  |
| AF038196  | 4312.227  | 6710.415  | AB037804  | 1747.021  | 1103.263  | NM_004386   | 4848.588  | 5013.779  |
| NM_004859 | 36554.309 | 43650.129 | U34249    | 4018.399  | 2958.199  | U67784      | 4007.004  | 6539.006  |
| NM_016352 | 3913.409  | 3328.231  | NM_003289 | 53558.094 | 52120.43  | NM_007366   | 8356.16   | 16043.958 |
| NM_005014 | 2475.111  | 3490.648  | AI200114  | 6367.082  | 7192.622  | NM_016584   | 37296.215 | 49638.215 |

|           |           |           |           |           |           |           |           |           |
|-----------|-----------|-----------|-----------|-----------|-----------|-----------|-----------|-----------|
| NM_006944 | 666.409   | 711.987   | M74220    | 1027.789  | 1441.178  | NM_001815 | 5607.643  | 8630.136  |
| NM_004407 | 1110.199  | 1525.188  | M23254    | 3183.975  | 5124.198  | NM_000064 | 27441.859 | 32344.621 |
| NM_000070 | 6706.793  | 6377.578  | BE618539  | 19757.148 | 20714.654 | NM_003264 | 1129.278  | 1143.812  |
| NM_003304 | 330.902   | 451.423   | U38545    | 623.586   | 776.609   | NM_006725 | 14141.316 | 14358.472 |
| NM_006323 | 19064.926 | 21471.807 | AI627464  | 1857.401  | 2149.324  | NM_005496 | 14776.987 | 11853.443 |
| NM_016466 | 4345.875  | 4836.966  | BI756258  | 4541.883  | 4282.056  | NM_006214 | 2204.393  | 2772.279  |
| NM_001493 | 8344.547  | 8487.028  | AI342225  | 57574.828 | 57763.363 | AJ010228  | 12680.949 | 13969.968 |
| NM_003716 | 884.209   | 1264.114  | AA634103  | 57944.465 | 56911.617 | NM_005196 | 6113.165  | 7298.954  |
| NM_014841 | 1304.356  | 1942.666  | J04599    | 2325.514  | 2502.387  | NM_018073 | 2304.22   | 3411.323  |
| NM_014426 | 11515.589 | 15197.363 | AF110020  | 2512.998  | 3465.607  | NM_012332 | 6528.06   | 11270.774 |
| NM_006816 | 40038.164 | 51006.648 | AA707922  | 202.451   | 984.069   | NM_000497 | 1847.675  | 3038.892  |
| NM_000258 | 48407.191 | 55546.348 | AA608557  | 14393.84  | 17829.346 | NM_017421 | 2393.772  | 3502.401  |
| AB033055  | 34163.359 | 32677.834 | AL050095  | 23100.523 | 27252.301 | AK025977  | 57553.945 | 84208.547 |
| AF311287  | 23102.131 | 22830.174 | U03272    | 1302.221  | 1108.907  | NM_000273 | 2596.364  | 3013.298  |
| NM_003098 | 2560.822  | 4068.415  | AF075085  | 58031.406 | 58575.828 | NM_002896 | 24626.539 | 41457.918 |
| NM_014781 | 5088.653  | 7233.762  | NM_005892 | 7986.779  | 8460.439  | NM_000486 | 2584.772  | 4303.423  |
| BU629989  | 1661.371  | 1308.916  | NM_006478 | 1600.958  | 1917.054  | BE876237  | 2623.61   | 4683.43   |
| X87896    | 2988.099  | 3059.495  | AF132734  | 33641.352 | 37646.547 | NM_005397 | 5688.164  | 6745.892  |
| M88310    | 3074.199  | 2799.32   | NM_018379 | 6332.485  | 6940.481  | NM_000806 | 12207.785 | 13435.72  |
| NM_014465 | 2391.486  | 2578.838  | NM_000042 | 6118.478  | 2225.987  | NM_014252 | 8365.722  | 9454.763  |
| D87292    | 2285.189  | 2092.366  | AF035787  | 16437.012 | 8895.697  | NM_001662 | 22234.078 | 20987.385 |
| NM_005498 | 3230.931  | 2824.941  | NM_005024 | 1096.121  | 1232.051  | NM_005718 | 6319.243  | 7034.8    |
| NM_016335 | 4752.085  | 3939.055  | NM_003403 | 3658.29   | 3674.968  | NM_018264 | 1437.105  | 1979.119  |
| NM_003165 | 8251.857  | 7830.242  | NM_014808 | 11683.157 | 15454.755 | NM_014580 | 2321.567  | 2653.291  |
| AL359590  | 49944.219 | 49738.066 | AB006627  | 14343.52  | 18313.146 | NM_000153 | 697.792   | 1222.632  |
| NM_002861 | 14987.45  | 15209.786 | NM_000416 | 18202.881 | 21803.717 | NM_002033 | 1477.747  | 2293.635  |
| NM_003080 | 8019.224  | 7291.875  | NM_002965 | 1123.321  | 1604.585  | NM_004111 | 4337.585  | 6210.239  |
| NM_004042 | 399.345   | 158.891   | AB007883  | 15064.896 | 11283.797 | AF085966  | 5160.196  | 7818.948  |
| NM_013268 | 905.473   | 995.946   | NM_006391 | 1143.769  | 1247.935  | NM_005316 | 6112.312  | 7952.795  |
| NM_002645 | 5140.297  | 6089.546  | AK093780  | 30922.58  | 27538.57  | NM_016316 | 4306.334  | 5194.008  |
| AB014550  | 3524.674  | 4461.525  | AY009397  | 56807.156 | 56487.551 | NM_003366 | 19856.699 | 21929.229 |
| AF320294  | 9551.999  | 9298.296  | NM_007037 | 54528.84  | 55723.637 | NM_000057 | 2313.811  | 3032.604  |
| AF320293  | 577.637   | 992.512   | NM_001649 | 1159.269  | 1345.227  | NM_018343 | 7650.33   | 7675.899  |
| AF161436  | 6619.586  | 6221.264  | NM_005492 | 9933.873  | 11387.146 | AK095793  | 1842.09   | 2043.139  |
| NM_020402 | 7672.604  | 6518.976  | AF038196  | 6029.148  | 8544.37   | NM_003177 | 5579.035  | 7070.981  |
| NM_004296 | 2601.913  | 2010.725  | NM_004859 | 53882.387 | 55011.883 | NM_017719 | 1120.476  | 1493.771  |
| NM_001171 | 1346.352  | 724.309   | NM_016352 | 7094.388  | 7345.956  | AF064078  | 3138.209  | 3719.847  |
| NM_002250 | 4982.412  | 4465.203  | NM_005014 | 3287.375  | 3971.575  | AL049688  | 4731.021  | 4199.234  |
| S81591    | 412.305   | 566.471   | NM_006944 | 1353.974  | 1761.47   | Z25427    | 4973.601  | 4859.399  |
| AF075085  | 51522.051 | 53428.52  | NM_004407 | 1600.479  | 1890.623  | NM_004672 | 17318.115 | 17901.604 |
| NM_005892 | 4606.4    | 3341.603  | NM_000070 | 12425.196 | 13833.104 | NM_001353 | 6756.877  | 6411.231  |
| NM_006478 | 933.324   | 723.053   | NM_003304 | 854.004   | 572.466   | CY3Cy5    | 5584.898  | 102.22    |
| AF132734  | 25558.926 | 20083.471 | NM_006323 | 36087.113 | 51871.574 | AF252284  | 3667.688  | 1761.659  |
| NM_018379 | 4240.901  | 3200.573  | NM_016466 | 7171.904  | 6792.305  | BU727558  | 1823.429  | 871.739   |
| NM_016403 | 45244.117 | 40181.469 | NM_003716 | 1500.155  | 2150.957  | AK025794  | 7632      | 4724.955  |
| NM_015603 | 1410.982  | 1522.448  | NM_014841 | 1868.744  | 2071.337  | NM_003541 | 1967.577  | 1016.601  |
| AK021788  | 931.723   | 758.357   | NM_014426 | 17858.59  | 15727.499 | AK024522  | 2087.244  | 1228.722  |
| NM_001921 | 10263.417 | 9988.646  | NM_006816 | 59429.023 | 57126.297 | NM_007196 | 2946.645  | 1810.314  |
| NM_006230 | 13259.992 | 14773.996 | AK026518  | 57775.617 | 56293.316 | M33197    | 83782.43  | 65108.426 |
| NM_014696 | 14878.011 | 14811.797 | NM_000258 | 57147.605 | 61575.613 | AK023220  | 471.834   | 453.7     |
| NM_013400 | 15233.059 | 17652.637 | AB033055  | 45390.773 | 49018.996 | AK024566  | 690.925   | 588.06    |
| AK026257  | 2698.256  | 3050.689  | AF311287  | 37214.137 | 43610.637 | AF038182  | 1947.072  | 1774.879  |
| AK023836  | 13510.696 | 14804.705 | NM_003098 | 4470.16   | 5447.842  | NM_016475 | 3776.163  | 2951.232  |

|           |           |           |           |           |           |           |           |           |
|-----------|-----------|-----------|-----------|-----------|-----------|-----------|-----------|-----------|
| NM_018109 | 3824.111  | 3857.778  | NM_014781 | 8081.625  | 9627.049  | AF086472  | 1183.157  | 784.44    |
| AJ299442  | 9517.655  | 9148.964  | BU629989  | 3566.864  | 3837.901  | AF252284  | 2492.031  | 2173.361  |
| AB040897  | 882.114   | 697.105   | X87896    | 5163.909  | 5685.701  | BU727558  | 1179.343  | 1111.022  |
| NM_000129 | 4242.098  | 3627.573  | M88310    | 5904.635  | 6000.828  | SR1       | 78496.844 | 64568.809 |
| NM_003762 | 7790.827  | 7913.512  | D16856    | 664.457   | 963.742   | SR3       | 35109.813 | 35307.801 |
| NM_018446 | 3522.355  | 3789.668  | NM_014465 | 3264.293  | 319.714   | SR5       | 3966.728  | 4002.178  |
| NM_000187 | 1238.254  | 1162.742  | D87292    | 4370.765  | 2037.987  | SR7       | 3706.277  | 38123.406 |
| CY3Cy5    | 1711.138  | 114.09    | NM_005498 | 5754.126  | 6728.114  | NM_005598 | 3075.093  | 1365.12   |
| NM_017532 | 3611.748  | 3704.705  | NM_016335 | 10154.06  | 6399.268  | AK023636  | 8803.358  | 5197.333  |
| AF086184  | 14575.126 | 11622.005 | NM_003165 | 16019.164 | 15848.011 | D25272    | 1747.133  | 962.798   |
| NM_018275 | 7152.072  | 6749.604  | NM_003906 | 53235.066 | 55425.883 | M33197    | 83661.227 | 65066.344 |
| AK021560  | 1395.33   | 1191.132  | AL359590  | 56523.055 | 53779.727 | NM_020168 | 1557.035  | 1171.059  |
| AF088045  | 474.382   | 707.384   | NM_002861 | 29653.541 | 30127.525 | AL832699  | 6984.098  | 5134.978  |
| AF007149  | 1362.581  | 1388.262  | NM_003080 | 14459.286 | 16128.425 | NM_012191 | 1421.876  | 1103.198  |
| NM_014705 | 537.253   | 590.854   | NM_004042 | 914.754   | 1098.556  | M33197    | 73907.938 | 64260.594 |
| AK001469  | 5311.784  | 7306.916  | NM_013268 | 917.848   | 1320.614  | AK000757  | 660.097   | 547.613   |
| AF035318  | 1093.311  | 2000.652  | NM_002645 | 6170.356  | 5494.769  | AL359577  | 1380.46   | 1019.764  |
| NM_015456 | 5704.068  | 9224.388  | AB033027  | 3225.662  | 3921.787  | NM_018139 | 4992.172  | 4626.993  |
| AK025056  | 1952.134  | 2315.153  | AK021805  | 25418.357 | 33737.805 | NM_014805 | 5042.37   | 7084.572  |
| AF140710  | 3486.048  | 3049.152  | AB014550  | 3880.707  | 5629.158  | NM_014871 | 1510.403  | 1782.475  |
| NM_017532 | 2611.831  | 3251.708  | AF320294  | 15567.656 | 18541.178 | M33197    | 66693.531 | 63997.898 |
| SR2       | 43042.957 | 43144.602 | AF320293  | 1189.34   | 1303.672  | AL137552  | 5672.934  | 7397.838  |
| SR4       | 12040.715 | 14455.966 | AF161436  | 10999.727 | 10896.475 | M33197    | 76555.289 | 64677.59  |
| SR6       | 1485.629  | 1770.798  | NM_020402 | 13046.936 | 13147.56  | AK024779  | 1765.919  | 1216.796  |
| SR8       | 6156.979  | 17544.035 | NM_004299 | 4703.493  | 5455.114  | AK024406  | 1782.344  | 1219.132  |
| SR10      | 20138.59  | 7041.109  | NM_001171 | 3509.388  | 4062.555  | AK024568  | 23390.834 | 15864.791 |
| CY3Cy5    | 1610.323  | 136.385   | NM_002250 | 15590.649 | 14963.023 | AK024873  | 1391.881  | 857.443   |
| AL157477  | 3783.509  | 3368.535  | S81591    | 596.935   | 1022.868  | M33197    | 79075.93  | 64709.621 |
| AB002318  | 1557.471  | 1380.211  | AF075085  | 56138.125 | 46943.117 | AK024981  | 32534.994 | 23396.59  |
| AL357535  | 1547.226  | 1453.365  | NM_005892 | 9015.529  | 5812.507  | AK027246  | 1170.3    | 720.784   |
| AL049951  | 1043.578  | 1273.634  | NM_006478 | 1816.681  | 2421.652  | U80766    | 4635.114  | 3724.611  |
| AK022936  | 9346.479  | 9164.404  | AF132734  | 45588.527 | 49071.316 | AK001638  | 1813.135  | 1432.656  |
| AK024385  | 3329.51   | 3286.269  | NM_018379 | 9137.444  | 9614.809  | AF161386  | 17174.805 | 14395.195 |
| AL137727  | 2641.105  | 2439.606  | NM_016403 | 57900.371 | 52356.93  | AL365369  | 4142.886  | 3206.939  |
| L17327    | 583.126   | 791.099   | NM_015603 | 3392.233  | 4535.356  | AK025454  | 8388.934  | 6272.095  |
| AF074986  | 892.612   | 690.591   | AK021788  | 1902.752  | 2209.103  | M33197    | 70333.633 | 64076.004 |
| U80773    | 1670.151  | 2633.476  | NM_001921 | 18297.723 | 15376.229 | X05826    | 13639.107 | 12860.861 |
| AK021745  | 2352.124  | 2013.826  | NM_006230 | 22489.088 | 20224.113 | Y11608    | 543.905   | 876.384   |
| L38937    | 4813.694  | 4167.521  | NM_014699 | 20271.52  | 17376.424 | AJ001872  | 11372.118 | 13969.951 |
| AK024327  | 1233.802  | 1407.291  | NM_013400 | 21475.727 | 15402.437 | AJ227882  | 616.75    | 983.398   |
| AK000801  | 7693.43   | 6661.388  | AK026257  | 3045.774  | 2411.778  | M33197    | 66524.602 | 67142.555 |
| D85433    | 4104.726  | 3947.601  | AK023836  | 11850.654 | 11275.708 | M33197    | 77797.578 | 64607.426 |
| AK025109  | 5778.889  | 4501.611  | NM_018109 | 5248.636  | 5140.066  | NM_014696 | 13826.007 | 9236.914  |
| AK026057  | 1848.087  | 1849.149  | AJ299442  | 14033.328 | 14323.388 | AL359055  | 3102.085  | 1842.958  |
| AK021627  | 3003.179  | 2743.512  | AB040897  | 1222.474  | 1450.202  | NM_014908 | 2625.5    | 1865.715  |
| AF085859  | 1372.834  | 1015.771  | NM_000129 | 6552.959  | 8063.158  | AK025931  | 70158.914 | 63176.102 |
| AF075047  | 623.086   | 489.531   | NM_003762 | 12025.283 | 13867.351 | M33197    | 3405.736  | 2421.173  |
| AL049260  | 360.69    | 285.858   | NM_018446 | 6365.643  | 7121.833  | AK021972  | 1435.166  | 934       |
| AL049975  | 676.604   | 900.01    | NM_000187 | 2130.634  | 3018.519  | M33197    | 69755.211 | 64041.527 |
| AL080067  | 971.657   | 1030.262  | CY3Cy5    | 3630.825  | 89.4      | AK001083  | 2930.513  | 3658.843  |
| AL117464  | 1905.109  | 2108.073  | NM_017532 | 5915.512  | 5374.808  | AK000185  | 2588.886  | 3655.665  |
| AL080160  | 744.709   | 628.32    | AF086184  | 32175.902 | 36072.48  | NM_017962 | 1004.606  | 1712.816  |
| L23849    | 928.899   | 876.011   | NM_018275 | 24717.939 | 29464.48  | NM_017834 | 633.792   | 552.266   |

|           |           |           |           |           |           |           |           |           |
|-----------|-----------|-----------|-----------|-----------|-----------|-----------|-----------|-----------|
| AL049997  | 18809.891 | 25567.713 | AL049266  | 9606.728  | 9694.104  | AK000865  | 1266.565  | 1537.567  |
| AK024118  | 1674.273  | 1949.522  | AK021560  | 2578.58   | 2540.061  | M33197    | 66486.836 | 68792.93  |
| X89657    | 513.862   | 752.598   | AF088045  | 1511.948  | 1377.283  | AF147349  | 15008.627 | 7264.934  |
| AK024509  | 1757.435  | 1701.255  | AF007149  | 2608.523  | 2526.122  | AL050346  | 43547.766 | 25595.438 |
| AL050185  | 362.15    | 484.204   | NM_014705 | 725.292   | 748.815   | AK001520  | 10153.822 | 5617.921  |
| NM_017709 | 871.953   | 707.315   | AK001469  | 7559.013  | 7534.293  | D90070    | 21543.932 | 16442.35  |
| AF049615  | 1053.383  | 1217.629  | AF035318  | 1381.692  | 1413.348  | Y12235    | 1180.515  | 832.184   |
| NM_014358 | 37446.23  | 30317.287 | CY3Cy5    | 3252.06   | 325.759   | AF132601  | 644.414   | 235.226   |
| AF009282  | 9081.015  | 7833.994  | AL157477  | 5717.438  | 5587.497  | M33197    | 71436     | 60952.188 |
| AF024704  | 6277.613  | 5629.97   | AB002318  | 3634.619  | 2636.466  | AF086179  | 4170.766  | 2676.594  |
| AF056431  | 1058.359  | 1237.487  | AL357535  | 5875.756  | 5531.241  | AK025807  | 5292.317  | 3900.829  |
| NM_016412 | 1593.454  | 1497.683  | AL049951  | 2342.022  | 2024.629  | NM_018381 | 1283.248  | 803.126   |
| AF009293  | 1524.809  | 1377.748  | AK024963  | 1813.511  | 2129.102  | M33197    | 68226.406 | 64012.719 |
| NM_004158 | 52325.699 | 59056.527 | AK023725  | 2314.305  | 2088.562  | AK026277  | 9408.285  | 8755.761  |
| AF056444  | 13737.334 | 12890.599 | AK022936  | 14432.479 | 12563.403 | U10509    | 2562.366  | 3524.531  |
| AK000989  | 3172.461  | 3641.553  | AK024385  | 6976.44   | 6420.512  | NM_007165 | 57809.324 | 60628.621 |
| NM_018065 | 275.954   | 223.792   | AL137727  | 5170.11   | 4607.543  | NM_014018 | 12492.382 | 25168.842 |
| AK002210  | 5844.165  | 6093.963  | L17327    | 1197.339  | 1313.684  | AF085956  | 3835.26   | 5874.657  |
| AK021677  | 2343.653  | 2578.432  | AF074986  | 1757.238  | 1829.655  | NM_019116 | 2673.43   | 2960.889  |
| AK001057  | 1048.595  | 1290.674  | AF075004  | 733.076   | 445.661   | AF147318  | 1255.332  | 1501.11   |
| AK001808  | 277.858   | 710.836   | AL049240  | 10439.443 | 11176.558 | L37699    | 2033.566  | 1081.896  |
| AK021471  | 746.613   | 887.374   | U80773    | 2627.866  | 2766.84   | M33197    | 69227.594 | 64127.824 |
| AK021709  | 515.264   | 761.62    | AK021745  | 4960.903  | 4427.176  | AL050173  | 2615.613  | 1923.709  |
| AL359563  | 2582.564  | 2406.729  | AK025109  | 9403.607  | 11030.16  | D80002    | 2915.916  | 1937.429  |
| NM_014477 | 2266.814  | 1914.946  | AK025295  | 2226.842  | 1924.87   | U17637    | 15273.352 | 12564.985 |
| L40521    | 305.094   | 427.971   | AK026057  | 4926.724  | 4164.537  | AF207831  | 1381.521  | 782.868   |
| AF086478  | 4184.631  | 3868.13   | AK026713  | 882.099   | 645.905   | M33197    | 69847.422 | 64172.508 |
| AF086022  | 835.365   | 896.778   | AK021627  | 4640.687  | 3719.044  | NM_018272 | 3791.949  | 3013.293  |
| AK021514  | 67793.586 | 65941.414 | AF085859  | 2889.489  | 2835.488  | AF086125  | 1847.442  | 1496.806  |
| AJ008134  | 6617.401  | 6273.527  | AF085888  | 535.889   | 598.034   | AK023547  | 846.122   | 559.979   |
| S71486    | 4030.53   | 3568.418  | AK026307  | 2550.458  | 2534.097  | U67847    | 3306.773  | 2476.64   |
| L33808    | 13085.118 | 11010.271 | AF075047  | 1569.357  | 1244.281  | AL137321  | 10406.234 | 9448.321  |
| AJ008117  | 11720.101 | 10296.881 | AL049260  | 931.862   | 604.568   | M33197    | 70812.891 | 63886.094 |
| AJ008147  | 50201.527 | 41184.688 | AL080160  | 1445.169  | 1242.31   | AK024207  | 7737.167  | 9066.778  |
| AK024369  | 833.222   | 679.747   | AL110258  | 1550.375  | 1618.027  | AK021843  | 2187.992  | 3919.572  |
| L43345    | 2243.894  | 2495.199  | X89657    | 739.478   | 987.289   | AF075025  | 1430.841  | 2494.244  |
| AF180297  | 6157.412  | 5726.207  | AK024509  | 2892.156  | 2595.859  | AF116623  | 1195.542  | 1711.942  |
| AK023245  | 1331.61   | 1442.065  | AL050185  | 2499.261  | 2175.251  | AF088008  | 2249.72   | 2806.74   |
| AF147303  | 402.827   | 520.709   | NM_017709 | 1844.953  | 1670.122  | AK023528  | 690.795   | 775.751   |
| AF086224  | 501.168   | 661.937   | AF049615  | 2271.292  | 2060.615  | AK023043  | 744.284   | 851.099   |
| S56365    | 54138.117 | 60834.266 | NM_014358 | 51476.363 | 55751.57  | NM_004688 | 5561.941  | 3511.087  |
| AF186017  | 399.5     | 445.38    | AF009282  | 18767.535 | 19292.645 | AB037725  | 826.076   | 316.315   |
| AK023607  | 1255.37   | 1494.298  | AF024704  | 13507.289 | 13789.313 | M33197    | 69949.594 | 63862.805 |
| AK027209  | 236.855   | 170.238   | AF056431  | 1509.07   | 1253.349  | NM_00486C | 5121.842  | 3939.302  |
| AK026874  | 1388.656  | 1445.643  | NM_016412 | 5920.828  | 5102.386  | AF217190  | 10439.157 | 5783.214  |
| AF088033  | 3345.117  | 2914.529  | AF009293  | 2556.609  | 2412.394  | AB028981  | 64779.41  | 57779.906 |
| NM_020422 | 5314.906  | 4545.916  | NM_004158 | 62757.145 | 66771.672 | NM_00680C | 6944.836  | 4030.34   |
| AJ227897  | 407.787   | 323.786   | AF056444  | 34072.18  | 32620.221 | NM_002476 | 960.779   | 677.03    |
| AK023628  | 313.016   | 259.45    | AK000989  | 6807.432  | 6498.172  | NM_002725 | 7320.876  | 6183.225  |
| AY007156  | 1402.992  | 1439.156  | AK021471  | 1375.357  | 1319.18   | M33197    | 66181.633 | 71646.219 |
| AF086408  | 55014.813 | 51699.168 | AK021709  | 1686.872  | 1733.091  | AK025266  | 3261.463  | 3063.934  |
| AK023979  | 4016.95   | 3646.009  | AL359563  | 5034.715  | 4528.728  | AK001843  | 2372.481  | 2153.616  |
| NM_017847 | 2268.545  | 3212.07   | NM_005304 | 2116.761  | 2225.769  | AK000548  | 45115.91  | 42956.957 |

|           |           |           |           |           |           |           |           |           |
|-----------|-----------|-----------|-----------|-----------|-----------|-----------|-----------|-----------|
| AL049675  | 2521.636  | 2560.418  | AF085984  | 1524.829  | 1240.969  | NM_003920 | 32576.834 | 31541.422 |
| AL050151  | 889.039   | 988.245   | NM_014477 | 8561.521  | 7302.018  | NM_004787 | 53167.398 | 51986.738 |
| NM_003537 | 22554.879 | 19925.16  | AF086478  | 10042.429 | 9607.321  | AF087984  | 4571.555  | 4710.791  |
| AF056419  | 22876.318 | 22039.959 | AF086022  | 2379.275  | 2254.793  | AF009302  | 1526.011  | 1604.368  |
| AF074983  | 1421.603  | 1909.806  | AK021514  | 67744.672 | 75435.086 | M33197    | 66570.313 | 66490.672 |
| AK021862  | 1004.413  | 1325.852  | AJ008134  | 21275.145 | 21291.24  | AK022273  | 6937.677  | 10754.822 |
| AK024177  | 998.074   | 1430.78   | S71486    | 6672.514  | 6134.499  | NM_015882 | 3272.524  | 4576.971  |
| AK024827  | 5552.299  | 6740.104  | L33808    | 28194.305 | 26097.721 | AK027161  | 630.726   | 710.588   |
| AF090102  | 480.487   | 508.265   | AJ008117  | 23623.725 | 19826.588 | AK024271  | 1981.632  | 2502.621  |
| K01564    | 1518.648  | 1711.609  | AJ008147  | 63120.07  | 56555.414 | AK021650  | 20686.518 | 23300.916 |
| AB023175  | 956.039   | 976.505   | AK024369  | 1789.424  | 2073.561  | AL050210  | 5841.948  | 7218.799  |
| NM_000737 | 4132.134  | 3579.118  | AL049244  | 960.105   | 632.349   | NM_004132 | 7296.436  | 3979.375  |
| NM_000839 | 8601.57   | 8885.666  | L43345    | 3288.892  | 3398.521  | NM_014844 | 3633.583  | 2362.981  |
| AK024102  | 25948.713 | 27183.141 | AF180297  | 12354.424 | 12692.658 | M33197    | 78537.828 | 64631.789 |
| NM_001290 | 1453.244  | 1195.242  | AK023245  | 2686.069  | 2570.822  | NM_018492 | 4460.079  | 3125.02   |
| AL079273  | 5659.121  | 5227.416  | AF147303  | 903.556   | 1213.038  | NM_001346 | 4207.234  | 2834.119  |
| NM_005045 | 485.796   | 388.52    | AF086224  | 1348.488  | 707.878   | NM_003146 | 4809.989  | 3857.883  |
| AK026129  | 1793.113  | 1205.102  | AK027209  | 562.332   | 638.179   | NM_003377 | 10003.111 | 6724.106  |
| NM_001743 | 44074.227 | 29985.447 | AK026874  | 4916.194  | 4385.181  | NM_002220 | 8699.378  | 7143.669  |
| NM_003713 | 8991.144  | 7325.554  | AK024178  | 1497.304  | 1195.923  | AB033034  | 5335.858  | 4843.533  |
| D31886    | 4811.118  | 6834.616  | AF088033  | 6942.437  | 6760.129  | D38169    | 7517.742  | 6646.877  |
| U92024    | 1080.795  | 1355.496  | NM_020422 | 8016.698  | 6994.842  | M33197    | 66640.977 | 63122.633 |
| AK023330  | 7257.196  | 6550.08   | AJ227897  | 1023.966  | 784.253   | AJ293294  | 6600.465  | 5999.834  |
| AF075071  | 2172.226  | 2041.461  | AK023628  | 548.231   | 879.827   | NM_018171 | 1793.345  | 1363.153  |
| AL080213  | 211.623   | 319.268   | AY007156  | 2386.213  | 2623.929  | NM_002447 | 26346.018 | 24035.166 |
| AF001892  | 487.884   | 662.911   | AF086408  | 64096.316 | 61084.559 | NM_014145 | 15307.688 | 15842.453 |
| X93500    | 2492.065  | 3324.101  | AK023979  | 8431.347  | 8232.236  | X63454    | 632.735   | 1144.739  |
| U79271    | 1662.136  | 2228.755  | NM_017847 | 3065.251  | 3344.329  | NM_014141 | 11150.561 | 13211.36  |
| NM_019888 | 767.516   | 1382.76   | AL049675  | 4895.437  | 4067.362  | NM_002223 | 3226.204  | 3801.774  |
| AK024609  | 4648.051  | 5980.822  | AL050151  | 1907.12   | 1968.836  | M33197    | 66419.227 | 66596.055 |
| AK023660  | 687.919   | 596.508   | NM_003537 | 41809.395 | 45745.063 | NM_005490 | 31715.414 | 32974.402 |
| NM_018120 | 4902.915  | 4386.89   | AF056419  | 49927.281 | 49221.199 | NM_003151 | 2968.45   | 3478.169  |
| NM_015991 | 969.685   | 998.786   | AF074983  | 2068.181  | 2319.659  | NM_006811 | 6786.026  | 6291.209  |
| NM_005562 | 977.9     | 1245.024  | AK021862  | 1182.62   | 1294.031  | NM_005601 | 2080.386  | 2679.895  |
| NM_004932 | 1829.992  | 1662.156  | AK024177  | 1844.187  | 1833.194  | NM_016151 | 22050.861 | 24295.795 |
| NM_005233 | 474.149   | 383.766   | AK024827  | 12955.171 | 11358.772 | AK026270  | 1654.131  | 1555.838  |
| X99658    | 237.514   | 304.795   | AK021952  | 524.753   | 328.574   | NM_004556 | 13277.875 | 9723.005  |
| NM_006654 | 941.849   | 869.775   | K01564    | 3451.695  | 3090.679  | D90075    | 2741.199  | 2058.969  |
| NM_003162 | 1102.188  | 818.815   | AB023175  | 2586.107  | 2285.625  | M33197    | 64512.801 | 67956.648 |
| NM_000395 | 3199.814  | 2468.65   | NM_000737 | 11576.457 | 11956.54  | NM_014857 | 1256.003  | 695.622   |
| NM_003266 | 1091.657  | 790.909   | NM_000839 | 20459.939 | 18138.754 | AK023827  | 8052.227  | 5348.723  |
| NM_002350 | 7400.319  | 6726.931  | AK024102  | 35436.391 | 35519.867 | AK021702  | 4121.474  | 3189.764  |
| NM_012417 | 2430.161  | 1835.977  | NM_001290 | 2030.358  | 1783.35   | NM_003885 | 2665.069  | 2238.908  |
| NM_002546 | 1662.62   | 1618.993  | AL079273  | 8984.575  | 8447.923  | AL161977  | 595.281   | 659.48    |
| NM_002966 | 623.597   | 684.91    | NM_005045 | 978.358   | 675.205   | NM_016448 | 12397.843 | 12655.752 |
| BF246606  | 430.7     | 386.842   | AK026129  | 3167.591  | 3325.88   | NM_003936 | 2172.171  | 1848.009  |
| NM_014289 | 1040.436  | 996.927   | NM_001743 | 62428.813 | 56995.906 | M33197    | 62697.582 | 65838.273 |
| NM_002342 | 1013.568  | 1361.299  | NM_003713 | 19519.832 | 24395.408 | NM_002688 | 1758.432  | 1679.707  |
| D13631    | 2465.038  | 3548.971  | D31886    | 7608.517  | 9167.324  | NM_004415 | 6951.694  | 8830.252  |
| NM_003712 | 3463.338  | 3688.116  | U92024    | 959.534   | 1093.183  | NM_007278 | 21777.961 | 24841.768 |
| NM_002184 | 1706.134  | 1720.835  | AK023330  | 12965.061 | 11931.647 | NM_005219 | 12432.456 | 13406.309 |
| NM_014883 | 4419.332  | 4872.99   | AF075071  | 3725.264  | 3232.025  | NM_004723 | 4529.848  | 4523.741  |
| NM_017805 | 3761.646  | 4528.279  | AL080213  | 522.24    | 562.784   | M33197    | 65941.117 | 65162.32  |

|           |           |           |           |           |           |           |           |           |
|-----------|-----------|-----------|-----------|-----------|-----------|-----------|-----------|-----------|
| NM_00023C | 466.524   | 607.382   | AF147428  | 499.684   | 836.605   | NM_018413 | 2648.898  | 2178.392  |
| M86841    | 692.299   | 668.672   | AF001892  | 1123.784  | 1309.508  | AB018299  | 27234.023 | 30062.951 |
| U56387    | 981.069   | 1216.988  | X93500    | 3665.052  | 3904.594  | NM_005245 | 4776.067  | 5645.394  |
| AJ012370  | 643.834   | 672.232   | U79271    | 3634.929  | 3896.175  | NM_002941 | 1059.873  | 1184.912  |
| AL049296  | 4073.856  | 4065.237  | NM_019888 | 2396.153  | 2333.582  | AK025605  | 3492.212  | 2471.575  |
| NM_014471 | 56771.383 | 57834.266 | AK024609  | 11354.923 | 10936.751 | NM_003783 | 2055.882  | 1228.735  |
| NM_004397 | 1747.85   | 1563.592  | AK023660  | 765.125   | 912.531   | NM_00700C | 5765.125  | 4273.868  |
| NM_003189 | 289.653   | 260.742   | NM_01812C | 32644.395 | 32949.313 | M23161    | 10520.2   | 7072.418  |
| NM_02023E | 6151.477  | 3431.545  | NM_015991 | 2460.814  | 2829.707  | NM_00610C | 1175.714  | 772.431   |
| D49356    | 604.571   | 572.135   | NM_005562 | 1912.408  | 1885.494  | NM_003197 | 9004.051  | 6021.46   |
| AJ250475  | 1683.169  | 1421.113  | NM_004932 | 3495.063  | 3229.995  | AF176705  | 7925.465  | 6179.063  |
| NM_00080C | 2514.62   | 2382.979  | NM_006654 | 1360.144  | 1441.817  | D29012    | 14352.794 | 14896.626 |
| NM_018579 | 2230.219  | 2019.778  | NM_003162 | 2052.537  | 2355.023  | NM_012179 | 18730.42  | 18095.023 |
| NM_006201 | 2926.441  | 2824.135  | NM_000395 | 7562.29   | 9088.532  | NM_002793 | 4944.896  | 4611.225  |
| NM_007110 | 2055.373  | 2331.904  | NM_003266 | 1858.689  | 1892.672  | NM_00478E | 2069.791  | 1943.123  |
| NM_001255 | 12145.987 | 11124.254 | NM_00235C | 12681.325 | 11199.787 | M33197    | 64316.121 | 64954.074 |
| U50383    | 20549.744 | 18152.143 | NM_012417 | 3520.843  | 2978.91   | AL442083  | 6866.449  | 8518.84   |
| AK025085  | 7992.818  | 7576.526  | NM_002546 | 5168.494  | 4399.881  | D63487    | 8480.646  | 8895.975  |
| NM_016317 | 823.103   | 985.103   | NM_002966 | 1028.845  | 678.262   | AK097791  | 10484.837 | 15926.766 |
| NM_00629C | 8555.41   | 6792.118  | BF246606  | 672.069   | 741.931   | NM_020367 | 1090.979  | 1839.06   |
| AK022290  | 1248.2    | 1094.647  | NM_014289 | 2033.732  | 1837.71   | AK022705  | 2367.313  | 2711.063  |
| NM_00368C | 26514.498 | 32607.703 | NM_002342 | 2146.705  | 1929.831  | NM_016404 | 12387.886 | 15922.401 |
| AF118124  | 13180.894 | 15149.187 | D13631    | 4756.48   | 6513.798  | L03426    | 2986.744  | 2808.439  |
| NM_004849 | 13116.139 | 13829.737 | NM_003712 | 7355.625  | 8045.366  | M33197    | 66103.578 | 63123.891 |
| AL137527  | 11352.298 | 11016.649 | NM_002184 | 3961.15   | 4112.168  | NM_020163 | 3195.244  | 3437.292  |
| AK026068  | 1334.772  | 1681.372  | NM_014883 | 7647.067  | 7063.682  | NM_004324 | 3256.362  | 4518.863  |
| AK024186  | 423.198   | 315.584   | NM_017805 | 9721.004  | 8221.314  | NM_005614 | 25115.371 | 33987.395 |
| J04974    | 2739.968  | 2283.098  | M86841    | 1589.438  | 1465.794  | AJ133115  | 9344.317  | 5289.5    |
| NM_017675 | 481.974   | 516.81    | U56387    | 1615.789  | 1463.643  | AF042831  | 965.792   | 298.603   |
| NM_007014 | 2345.975  | 2203.803  | AL049296  | 7330.815  | 7442.564  | X51630    | 13973.713 | 11047.751 |
| AL096740  | 1216.813  | 1022.856  | NM_014471 | 66581.563 | 79991.125 | NM_005056 | 3857.746  | 2558.029  |
| AF191545  | 1077.39   | 1016.799  | NM_004397 | 4512.055  | 4341.25   | NM_001965 | 2095.337  | 1530.146  |
| NM_014554 | 4566.645  | 4206.565  | NM_003189 | 564.046   | 769.308   | AF208502  | 20351.539 | 13915.384 |
| AL137484  | 1799.977  | 1482.874  | NM_02023E | 10744.865 | 6715.819  | M33197    | 66540.648 | 67008.25  |
| AK023968  | 2139.743  | 1422.269  | D49356    | 1159.618  | 1188.169  | AF264750  | 47424.074 | 34826.871 |
| NM_004652 | 1167.897  | 888.228   | AJ250475  | 4548.66   | 4477.305  | NM_00698C | 2378.889  | 1830.088  |
| AB040948  | 287.598   | 345.701   | NM_00080C | 5083.5    | 4815.714  | AK023904  | 9822.802  | 8608.696  |
| NM_000353 | 548.502   | 456.815   | NM_018579 | 3781.986  | 3396.21   | NM_017956 | 22490.117 | 22344.826 |
| AK025425  | 48835.934 | 43591.891 | NM_006201 | 4939.268  | 4266.58   | NM_017826 | 519.841   | 533.928   |
| AK025974  | 26873.74  | 27642.408 | NM_007110 | 2794.638  | 2985.377  | NM_016496 | 2036.617  | 2044.121  |
| NM_016532 | 4740.807  | 6551.289  | NM_001255 | 18851.633 | 15838.414 | NM_014309 | 10709.62  | 10930.068 |
| X98115    | 2412.444  | 2122.222  | U50383    | 32916.867 | 31070.969 | M33197    | 61882.988 | 58797.391 |
| NM_005781 | 5170.484  | 4551.574  | AK025085  | 12293.27  | 9946.778  | NM_004094 | 5245.508  | 5838.931  |
| BC036740  | 15620.31  | 15435.303 | NM_016317 | 871.882   | 912.459   | NM_020236 | 3849.744  | 4807.985  |
| NM_001747 | 5175.988  | 6370.033  | NM_00629C | 15808.275 | 12921.984 | AK027059  | 15062.959 | 27144.238 |
| NM_001148 | 18051.074 | 15178.104 | AK022290  | 1626.197  | 1683.005  | AF151109  | 32755.748 | 35880.184 |
| AF242522  | 13031.037 | 12002.656 | NM_00368C | 37645.828 | 50737.781 | NM_015414 | 62516.773 | 60315.73  |
| AJ008152  | 1418.517  | 1276.966  | AF118124  | 24999.752 | 30225.014 | L34070    | 14179.016 | 13016.023 |
| NM_003657 | 1929.78   | 1762.443  | NM_004849 | 31319.609 | 33993.527 | M33197    | 64287.922 | 61487.508 |
| S67970    | 947.88    | 921.729   | AL137527  | 20041.213 | 18224.111 | NM_016219 | 20281.045 | 25829.617 |
| AF221520  | 4416.823  | 3948.104  | AK026068  | 942.772   | 952.562   | NM_001865 | 66795.023 | 64621.66  |
| NM_006941 | 51343.066 | 46477.598 | J04974    | 53346.895 | 54412.41  | NM_006441 | 11633.005 | 10031.066 |
| AB037852  | 1052.424  | 1330.406  | NM_017675 | 6736.223  | 6709.793  | NM_00191E | 3345.006  | 2995.203  |



|           |           |           |           |           |           |           |           |           |
|-----------|-----------|-----------|-----------|-----------|-----------|-----------|-----------|-----------|
| NM_00536C | 1685.645  | 1665.468  | NM_007014 | 4984.894  | 5551.2    | NM_01824E | 16947.875 | 15768.913 |
| NM_00434C | 3335.21   | 2627.552  | AL096740  | 2831.515  | 2951.377  | M33197    | 64281.414 | 63611.883 |
| NM_00209Z | 16586.4   | 15060.917 | AF191545  | 2568.723  | 2954.548  | AF252390  | 2948.777  | 2294.629  |
| NM_018077 | 4232.238  | 3698.963  | NM_014554 | 8135.675  | 8801.966  | NM_012117 | 10836.77  | 7233.988  |
| NM_01683C | 23611.256 | 19074.338 | AL137484  | 5622.999  | 5173.258  | D17130    | 66315.414 | 65115.059 |
| NM_00596E | 45271.047 | 54324.754 | AK023968  | 4106.659  | 3630.883  | X76302    | 6140.291  | 5455.963  |
| AK021416  | 1362.612  | 1788.569  | NM_00465Z | 1770.032  | 1689.03   | AK02627E  | 1549.066  | 1722.163  |
| NM_018471 | 14928.476 | 26767.961 | NM_00035Z | 850.816   | 858.444   | M33197    | 64203.621 | 66193.75  |
| NM_00381C | 13344.361 | 15511.438 | AK025425  | 60278.875 | 55363.004 | X52354    | 2624.567  | 3178.467  |
| NM_00195E | 48836.523 | 52453.695 | AK025974  | 42843.93  | 47087.043 | NM_00541Z | 1584.418  | 1987.205  |
| NM_004757 | 4519.343  | 4437.515  | NM_01653Z | 9824.057  | 11597.088 | NM_00231E | 4931.849  | 5587.766  |
| NM_015904 | 7925.307  | 10004.976 | X98115    | 4992.313  | 4878.294  | AK024191  | 1783.507  | 2072.195  |
| NM_00196C | 49639.805 | 52939.77  | NM_005781 | 14135.062 | 15404.996 | NM_00660E | 6193.296  | 6043.589  |
| NM_01812Z | 5786.267  | 6087.422  | BC036740  | 52554.508 | 54181.355 | NM_000457 | 4988.721  | 4935.524  |
| NM_00705E | 8343.192  | 9081.933  | NM_001747 | 9710.879  | 11308.105 | M33197    | 65922.164 | 75810.336 |
| NM_00152E | 438.192   | 418.54    | NM_001148 | 23713.629 | 31254.238 | NM_01462Z | 12771.921 | 9860.991  |
| NM_002494 | 20321.266 | 18159.885 | AF242522  | 19257.672 | 17893.457 | NM_007244 | 35190.703 | 27969.178 |
| M58510    | 12979.326 | 12497.823 | AJ008152  | 14864.822 | 13904.876 | M30629    | 14530.422 | 12994.723 |
| NM_00078Z | 2084.242  | 1486.883  | NM_003657 | 3883.095  | 3738.979  | AF193873  | 15858.927 | 17109.498 |
| BE396003  | 2749.27   | 2258.27   | NM_00058E | 899.906   | 994.668   | NM_00262E | 4542.766  | 4163.204  |
| AK023300  | 4525.385  | 3305.452  | S67970    | 1403.458  | 1596.777  | M23575    | 2181.745  | 1887.122  |
| NM_01808Z | 2873.561  | 2706.113  | AF221520  | 8751.536  | 9311.217  | AA190729  | 3466.027  | 3075.313  |
| NM_003904 | 8943.104  | 9015.928  | NM_006941 | 63250.977 | 57321.359 | BF974315  | 11157.131 | 8504.514  |
| NM_006234 | 33946.148 | 33880.059 | AB037852  | 1719.478  | 1792.385  | AI652705  | 8548.671  | 9938.758  |
| AK026387  | 1050.835  | 947.725   | NM_00536C | 3204.512  | 3283.856  | AA973397  | 3741.018  | 4330.234  |
| NM_003594 | 2031.255  | 2800.437  | NM_00434C | 7058.926  | 6411.146  | AA569974  | 1286.304  | 1750.798  |
| NM_005521 | 10108.274 | 12794.427 | NM_00209Z | 24859.25  | 26575.725 | AA923615  | 2274.648  | 2866.817  |
| AF164438  | 12844.712 | 16253.288 | NM_018077 | 7373.055  | 6898.836  | AA446028  | 1145.884  | 1312.508  |
| AK022284  | 1721.027  | 2027.368  | NM_01683C | 48867.781 | 47913.723 | M80583    | 1222.94   | 1529.019  |
| AF060937  | 655.201   | 597.095   | NM_00596E | 60132.832 | 57115.074 | AW009565  | 6562.648  | 8368.487  |
| AB040893  | 4809.153  | 4396.461  | AK021416  | 2140.744  | 2346.77   | AW451878  | 607.553   | 794.235   |
| AK025844  | 3395.89   | 2863.848  | NM_018471 | 21914.504 | 21260.164 | X07767    | 4838.745  | 4386.764  |
| NM_004024 | 4583.717  | 5687.636  | NM_00381C | 19698.178 | 17165.586 | X65293    | 492.449   | 559.934   |
| X52345    | 18787.293 | 19596.719 | NM_00656C | 11120.599 | 10496.458 | NM_00085Z | 16542.088 | 13978.041 |
| NM_00696E | 8084.501  | 9427.295  | NM_01618Z | 16310.097 | 13930.795 | NM_00084E | 830.925   | 445.057   |
| AF02714Z  | 34491.383 | 30924.992 | NM_00487Z | 13422.747 | 10841.669 | AF016903  | 64034.211 | 62322.188 |
| NM_01433Z | 300.724   | 288.117   | NM_00195E | 61341.059 | 54919.309 | NM_01567E | 21934.791 | 17244.533 |
| NM_00298C | 1794.494  | 1942.087  | NM_004757 | 8088.786  | 10612.94  | AK022267  | 1461.533  | 1065.11   |
| NM_01588E | 1158.569  | 1369.704  | NM_015904 | 15054.835 | 14932.388 | NM_01604C | 4804.999  | 3710.167  |
| NM_02035E | 265.847   | 342.096   | NM_00196C | 63056.176 | 57357.77  | M33197    | 60202.316 | 60954.59  |
| BG491613  | 9923.634  | 9883.038  | NM_01812Z | 9733.889  | 9579.271  | AF031136  | 62188.5   | 62366.102 |
| AA397813  | 48673.348 | 44891.004 | NM_00705E | 20124.953 | 24938.559 | NM_006597 | 56266.398 | 54538.563 |
| W47350    | 4697.198  | 3819.095  | NM_017947 | 3501.19   | 3127.831  | NM_01248Z | 34521.438 | 36582.074 |
| AI160964  | 1159.809  | 1350.156  | NM_002494 | 38518.988 | 35548.23  | NM_00349E | 9385.087  | 10091.624 |
| N64384    | 4452.645  | 6349.992  | M58510    | 26558.951 | 20866.992 | AB023420  | 26767.326 | 29050.053 |
| H-X 53655 | 1528.186  | 1652.819  | NM_00078Z | 5140.399  | 4558.752  | M33197    | 62083.602 | 64731.355 |
| H-U 05770 | 8832.001  | 9643.929  | BE396003  | 4421.009  | 4214.951  | NM_007264 | 37755.836 | 47331.219 |
| H-M 65199 | 17093.801 | 15718.105 | AK023300  | 9319.921  | 7655.425  | NM_00226Z | 1337.781  | 1409.544  |
| H-M 32315 | 1625.026  | 2068.791  | NM_01808Z | 4893.315  | 4273.61   | NM_016511 | 33422.77  | 41139.984 |
| H-V00536M | 4649.705  | 4605.479  | NM_003904 | 14695.7   | 13729.507 | NM_00355E | 4669.905  | 6088.41   |
| H-D85429M | 15132.329 | 13732.909 | NM_006234 | 45008.746 | 48288.098 | NM_00254Z | 392.053   | 809.83    |
| BF439832  | 2608.53   | 4179.566  | AK026387  | 3237.933  | 2751.596  | NM_00218E | 561.414   | 849.064   |
| BG819162  | 986.273   | 1574.543  | AB028987  | 32939.922 | 32820.109 | M55337    | 4420.749  | 4741.908  |

|           |           |           |             |           |           |           |           |           |
|-----------|-----------|-----------|-------------|-----------|-----------|-----------|-----------|-----------|
| NM_01208E | 26719.457 | 33786.625 | NM_003594   | 4302.663  | 4169.176  | NM_01322E | 1475.469  | 1362.227  |
| NM_00241E | 530.652   | 625.198   | NM_005521   | 21207.57  | 19527.371 | NM_01653E | 63726.395 | 62817.379 |
| NM_00272E | 2347.736  | 2770.124  | AF164438    | 39994.996 | 45068.117 | NM_00734E | 8032.391  | 6044.007  |
| NM_00045C | 865.854   | 1248.219  | AK022284    | 4390.237  | 5558.52   | NM_00567E | 3243.098  | 2044.512  |
| NM_00044E | 1789.805  | 1608.224  | AF060937    | 1425.072  | 1476.984  | D25217    | 3656.938  | 2742.068  |
| NM_00451E | 6199.438  | 5895.691  | AB040893    | 11883.817 | 11565.841 | NM_006351 | 19124.334 | 14862.468 |
| NM_01773E | 5127.809  | 4944.942  | AK025844    | 7378.731  | 7216.98   | M33197    | 66416.664 | 63937.398 |
| AB033044  | 23721.152 | 20478.395 | NM_004024   | 15133.053 | 14170.016 | NM_00010E | 1743.062  | 1251.878  |
| AB014564  | 3368.425  | 3784.65   | X52345      | 44511.598 | 45002.992 | NM_00468E | 18909.191 | 15045.675 |
| NM_02023C | 6557.13   | 5538.342  | NM_01637E   | 61954.961 | 59699.984 | AK023226  | 2908.457  | 2434.792  |
| NM_00676E | 51377.797 | 55696.258 | AB020705    | 8616.161  | 7787.201  | AK025263  | 1029.962  | 893.705   |
| NM_00635E | 2033.078  | 1878.742  | NM_01433E   | 2010.681  | 2680.31   | NM_006931 | 13703.742 | 14916.992 |
| NM_01643C | 1034.133  | 1646.097  | NM_00298C   | 3615.796  | 3540.184  | NM_018057 | 7219.154  | 8517.295  |
| NM_004447 | 9045.027  | 8894.564  | NM_01588E   | 1608.562  | 1622.916  | M33197    | 63161.391 | 63661.027 |
| NM_001204 | 3045.416  | 3058.146  | NM_00426E   | 3614.864  | 3095.962  | NM_015717 | 5738.499  | 6732.774  |
| NM_00095E | 752.762   | 854.858   | BG491613    | 18397.594 | 16241.624 | NM_01592E | 5998.003  | 6390.957  |
| AB033091  | 5309.14   | 7037.493  | AA397813    | 59265.188 | 57167.359 | NM_00366E | 1614.394  | 2257.539  |
| NM_004557 | 2971.856  | 3126.845  | W47350      | 13640.942 | 10397.313 | AF220217  | 1974.047  | 2446.452  |
| NM_005094 | 4943.591  | 4590.531  | AI160964    | 1923.412  | 2308.518  | NM_01332E | 53194.367 | 53138.891 |
| BE382905  | 925.236   | 1488.429  | W68291      | 28077.123 | 29267.23  | NM_014937 | 3220.276  | 3405.19   |
| NM_00215E | 17606.393 | 24569.285 | N64384      | 15873.752 | 15478.586 | NM_01742E | 2690.556  | 3063.138  |
| NM_001701 | 441.558   | 785.651   | H-X 53655 I | 5484.982  | 6457.79   | M33197    | 11608.004 | 11579.064 |
| AK022558  | 3975.191  | 3956      | H-U 05770 I | 17344.908 | 19215.426 | NM_00455E | 23396.695 | 16566.746 |
| NM_00647E | 51562.039 | 49137.457 | H-M 65199   | 45476.777 | 45532.121 | AL079296  | 1131.392  | 757.441   |
| AK023787  | 2353.884  | 1810.603  | H-M 32315   | 4183.428  | 4190.769  | NM_01477C | 12389.909 | 12112.313 |
| NM_00213E | 3421.249  | 2830.056  | H-V00536M   | 8641.37   | 8126.627  | AB037737  | 1694.771  | 1259.946  |
| NM_015697 | 7643.525  | 7111.086  | H-D85429M   | 25511.5   | 15859.493 | M33197    | 66222.922 | 71538.414 |
| AF086489  | 692.414   | 624.545   | BF439832    | 5094.156  | 4766.512  | AK023103  | 2772.415  | 2796.722  |
| AB018258  | 378.444   | 559.131   | BG819162    | 4686.691  | 4737.654  | NM_01785E | 3961.207  | 3344.923  |
| NM_00595E | 18484.318 | 9365.505  | NM_00013E   | 2034.653  | 1979.613  | NM_01905E | 56494.469 | 55810.809 |
| BF337921  | 5444.323  | 5477.369  | NM_006664   | 9885.195  | 11795.918 | NM_013347 | 790.511   | 638.445   |
| U53532    | 3751.436  | 3364.485  | NM_00241E   | 2015.547  | 1688.818  | D80008    | 1728.401  | 1700.41   |
| AJ132084  | 684.835   | 745.897   | NM_00272E   | 4284.027  | 4399.156  | X56789    | 3962.01   | 3610.126  |
| NM_00571E | 52617.434 | 59695.23  | NM_00045C   | 6820.358  | 5754.215  | AK001069  | 64141.246 | 63015.449 |
| NM_00346E | 31592.977 | 33183.824 | NM_01773E   | 11504.453 | 11940.215 | NM_00093E | 2789.291  | 3016.168  |
| NM_00609E | 6300.398  | 7402.837  | AB033044    | 46420.035 | 47512.918 | NM_00035E | 42387.762 | 46376.078 |
| AK023915  | 10150.705 | 8365.586  | AB014564    | 4345.412  | 4802.614  | NM_00639E | 5442.989  | 7449.496  |
| AB051453  | 1679.411  | 1351.616  | NM_02023C   | 10422.688 | 9008.367  | NM_01430E | 9176.228  | 10707.795 |
| AK026842  | 491.743   | 505.961   | NM_00676E   | 58424.336 | 64127.598 | NM_001084 | 6796.149  | 7507.407  |
| NM_00239E | 1122.683  | 1122.813  | NM_00635E   | 3442.048  | 3865.576  | NM_01598E | 11076.896 | 11567.051 |
| AB023203  | 2677.709  | 3365.46   | NM_01643C   | 2197.691  | 3715.618  | NM_01862E | 6369.548  | 6927.481  |
| NM_01496E | 2558.099  | 2494.179  | NM_004447   | 16254.784 | 18192.639 | M33197    | 64173.004 | 68995.016 |
| NM_00425E | 3037.417  | 2587.757  | NM_001204   | 10830.901 | 14387.26  | NM_005867 | 12879.924 | 12195.524 |
| NM_016271 | 9167.022  | 6843.323  | BF131321    | 5386.299  | 6557.781  | AK026031  | 41710.488 | 42566.527 |
| NM_01661E | 1458.191  | 1404.822  | NM_01654C   | 954.177   | 999.449   | NM_01646E | 11663.396 | 11454.301 |
| NM_014481 | 1478.755  | 1581.229  | NM_01211E   | 7185.664  | 7831.525  | NM_007244 | 31385.586 | 22264.785 |
| U22172    | 4415.08   | 3647.64   | NM_00002C   | 22956.039 | 22926.814 | M30629    | 13432.966 | 10404.381 |
| AB032960  | 1646.305  | 1649.486  | NM_00095E   | 1337.911  | 1106.598  | AF193873  | 14962.609 | 13851.955 |
| NM_014264 | 15555.466 | 14214.683 | NM_004557   | 19818.77  | 22709.797 | NM_00262E | 5161.75   | 4006.748  |
| AF020089  | 1880.975  | 2749.912  | NM_00374E   | 7031.69   | 6459.413  | M23575    | 2428.313  | 2193.922  |
| NM_006257 | 2302.867  | 3001.73   | NM_005094   | 6712.383  | 7932.821  | AA190729  | 4174.3    | 3651.044  |
| NM_016281 | 11439.109 | 10276.1   | BE382905    | 2082.762  | 1963.652  | BF974315  | 13122.283 | 9311.456  |
| NM_004734 | 21661.383 | 22045.225 | NM_00647E   | 59423.418 | 54211.805 | AI652705  | 7645.759  | 8194.589  |

|             |           |           |             |           |           |           |           |           |
|-------------|-----------|-----------|-------------|-----------|-----------|-----------|-----------|-----------|
| AK024793    | 2013.183  | 2233.796  | AK023787    | 3997.603  | 4712.707  | AA973397  | 3340.728  | 3951.061  |
| L10284      | 55581.672 | 59183.734 | NM_002133   | 5202.835  | 6305.089  | AA569974  | 1065.318  | 1403.089  |
| NM_000276   | 1548.853  | 1856.86   | NM_015697   | 12291.494 | 12993.815 | AA446028  | 1019.587  | 901.34    |
| NM_000019   | 54200.738 | 61147.43  | AF086489    | 987.205   | 1714.888  | M80583    | 1049.722  | 1715.672  |
| AK023701    | 1875.642  | 3106.455  | AB018258    | 1513.874  | 1788.997  | AW009565  | 6784.104  | 8414.225  |
| NM_014333   | 312.934   | 406.931   | NM_005953   | 35057.055 | 19159.73  | X07767    | 4081.329  | 4285.56   |
| NM_002980   | 1758.575  | 1589.405  | U53532      | 7455.945  | 7835.615  | X65293    | 637.254   | 710.363   |
| NM_015886   | 901       | 964.138   | NM_012484   | 10170.558 | 12990.22  | M33197    | 26370.805 | 23294.92  |
| BG491613    | 10266.226 | 10049.186 | AL096732    | 9238.618  | 8824.178  | AL050139  | 10380.366 | 11423.261 |
| AA397813    | 45924.863 | 37616.133 | AB006423    | 1573.877  | 1434.547  | NM_002593 | 1319.62   | 1338.925  |
| W47350      | 5241.43   | 4293.056  | AJ132084    | 601.574   | 718.258   | AF016903  | 61452.16  | 60182.004 |
| AI160964    | 1076.019  | 1070.476  | NM_005719   | 59999.57  | 57470.18  | NM_015675 | 19116.453 | 14446.749 |
| W68291      | 14988.889 | 12199.057 | NM_006093   | 9167.084  | 10313.322 | AK022267  | 1270.147  | 821.067   |
| N64384      | 5374.588  | 4648.199  | AK023915    | 23162.039 | 20840.572 | NM_016040 | 4858.617  | 3532.168  |
| H-X 53655 I | 1864.006  | 2077.236  | AB051453    | 3646.365  | 3524.872  | M33197    | 62804.91  | 62807.168 |
| H-M 32315   | 1935.23   | 2743.021  | AK026842    | 2150.898  | 1742.832  | AF031136  | 62116.27  | 66326.68  |
| H-V00536M   | 4320.764  | 5532.532  | AB023203    | 9728.343  | 8323.491  | NM_006597 | 54438.309 | 57980.59  |
| H-D85429M   | 14899.329 | 16648.975 | NM_014963   | 4452.321  | 4240.937  | NM_012483 | 28959.082 | 32989.004 |
| BF439832    | 2454.596  | 3208.178  | NM_004259   | 6805.873  | 5399.157  | NM_003498 | 8573.729  | 9413.089  |
| M38449      | 9872.872  | 13245.47  | NM_016271   | 16693.131 | 13430.098 | AB023420  | 24473.672 | 27740.305 |
| NM_001091   | 1434.558  | 2155.196  | NM_016619   | 2421.284  | 2437.589  | M33197    | 61106.23  | 62966.43  |
| NM_002416   | 728.636   | 704.489   | NM_014481   | 3126.955  | 3577.836  | NM_007264 | 34585.977 | 40591.055 |
| NM_002728   | 2663.965  | 2473.007  | U22172      | 14188.627 | 16387.441 | NM_002262 | 1317.684  | 1527.417  |
| NM_000450   | 863.281   | 529.763   | AB032960    | 3560.67   | 4718.032  | NM_016511 | 30335.328 | 41279.281 |
| NM_000448   | 1519.032  | 1670.543  | NM_014264   | 26254.959 | 28003.928 | NM_003558 | 3835.082  | 5022.968  |
| NM_004513   | 5528.41   | 6332.682  | AF020089    | 4610.93   | 5099.303  | NM_002185 | 918.463   | 1106.756  |
| NM_017735   | 6050.386  | 5717.309  | NM_016281   | 21519.688 | 23979.057 | M55337    | 2883.943  | 3820.542  |
| AB033044    | 25947.748 | 19977.951 | AK024793    | 5371.451  | 5453.378  | NM_013229 | 972.658   | 1000.558  |
| AB014564    | 2602.508  | 2071.053  | AF208291    | 2834.18   | 3159.311  | NM_016533 | 63846.492 | 62474.34  |
| NM_020230   | 6751.067  | 4944.466  | NM_004877   | 45752.488 | 52163.441 | M33197    | 65436.309 | 66885.227 |
| NM_006762   | 48211.895 | 54450.902 | L10284      | 63765.102 | 56643.375 | NM_014623 | 9010.794  | 11217.78  |
| NM_006352   | 1754.411  | 2000.971  | AK023701    | 3261.601  | 3920.752  | D25217    | 3827.899  | 2529.827  |
| NM_016430   | 914.514   | 1670.315  | NM_014333   | 477.753   | 670.889   | NM_006351 | 19322.391 | 12066.448 |
| NM_004447   | 9740.909  | 8612.875  | NM_002980   | 3668.646  | 3066.854  | M33197    | 62751.246 | 62118.121 |
| NM_000020   | 6368.784  | 7705.182  | NM_015886   | 1792.84   | 1821.682  | NM_000103 | 1603.303  | 926.929   |
| NM_000956   | 447.429   | 557.735   | NM_020358   | 566.309   | 669.584   | NM_004683 | 18226.219 | 13705.639 |
| AB020705    | 4298.491  | 6807.372  | NM_004262   | 870.076   | 875.066   | AK023226  | 3309.24   | 2489.681  |
| BE382905    | 937.709   | 1015.356  | NM_007102   | 63571.813 | 59888.246 | AK025263  | 1096.517  | 1009.442  |
| NM_002152   | 17649.557 | 16028.795 | BG491613    | 17624.83  | 16350.614 | NM_006931 | 11352.558 | 13707.747 |
| NM_001701   | 433.414   | 470.748   | AA397813    | 58306.117 | 53248.711 | NM_018057 | 6378.511  | 7591.856  |
| AK022558    | 3498.134  | 4159.805  | W47350      | 12764.934 | 12452.181 | M33197    | 60039.762 | 64120.09  |
| NM_006476   | 51546.344 | 51581.066 | AI160964    | 2418.885  | 2429.479  | NM_015717 | 4278.49   | 6374.137  |
| AK023787    | 1886.648  | 1635.941  | W68291      | 27870.379 | 41563.801 | NM_015925 | 4356.832  | 6696.815  |
| NM_002133   | 3125.475  | 2654.431  | N64384      | 16466.699 | 16464.99  | NM_003665 | 1604.849  | 2706.754  |
| NM_015697   | 7744.561  | 6541.964  | H-X 53655 I | 5416.92   | 5556.387  | AF220217  | 2784.188  | 4003.031  |
| AF086489    | 544.511   | 491.391   | H-V00536M   | 9335.349  | 9895.598  | NM_013323 | 50062.934 | 52733.832 |
| AB018258    | 738.321   | 943.1     | H-D85429M   | 25238.262 | 20079.094 | NM_014937 | 2910.547  | 4860.872  |
| NM_005953   | 18277.945 | 7060.088  | BF439832    | 5261.521  | 5999.855  | NM_017426 | 2901.483  | 5071.2    |
| BF337921    | 5075.952  | 4709.998  | BG819162    | 4935.705  | 5121.557  | M33197    | 12223.995 | 11612.883 |
| NM_001740   | 2631.793  | 2868.312  | M38449      | 17127.463 | 16508.057 | NM_000853 | 10011.509 | 11917.011 |
| NM_012484   | 6223.201  | 7403.829  | AK025495    | 1947.958  | 1308.221  | NM_000846 | 527.618   | 800.988   |
| AL096732    | 3463.949  | 3380.549  | NM_001091   | 4967.207  | 5402.161  | NM_014770 | 12126.727 | 10321.646 |
| AB006423    | 2403.31   | 3222.129  | NM_002416   | 1333.512  | 1228.741  | AB037737  | 1730.426  | 1357.513  |

|           |           |           |           |           |           |           |           |           |
|-----------|-----------|-----------|-----------|-----------|-----------|-----------|-----------|-----------|
| AJ132084  | 601.888   | 734.89    | NM_002728 | 4142.783  | 4321.316  | M33197    | 64942.469 | 64510.574 |
| NM_005719 | 44636.895 | 55324.625 | NM_000450 | 984.168   | 995.753   | AK023103  | 2895.755  | 2782.585  |
| NM_006093 | 7325.44   | 14389.5   | NM_000448 | 4495.583  | 3959.175  | NM_017858 | 3834.41   | 3336.65   |
| NM_006664 | 3306.318  | 5412.242  | NM_004513 | 13522.69  | 12673.491 | NM_019058 | 59055.855 | 59204.598 |
| AB051453  | 1860.103  | 1190.162  | NM_001708 | 60016.352 | 62723.715 | NM_013347 | 670.314   | 619.067   |
| AK026842  | 733.681   | 508.434   | NM_017735 | 11375.394 | 11742.643 | D80008    | 2116.036  | 2170.19   |
| NM_014963 | 2446.807  | 2373.424  | AB033044  | 46264.992 | 49058.883 | X56789    | 3528.824  | 3792.442  |
| NM_004259 | 2868.809  | 2413.381  | AB014564  | 5069.502  | 5010.63   | AK001069  | 62873.273 | 60078.094 |
| NM_016271 | 8589.87   | 8110.894  | NM_020230 | 10217.151 | 9209.14   | NM_000935 | 2166.657  | 3314.288  |
| NM_016619 | 1554.717  | 1602.502  | NM_006762 | 59467.934 | 59005.656 | NM_000358 | 29372.371 | 40299.895 |
| NM_014481 | 1550.021  | 1317.835  | NM_006352 | 3410.846  | 3914.715  | NM_006395 | 3151.937  | 4262.424  |
| U22172    | 3408.008  | 3446.693  | NM_016430 | 2804.046  | 5803.122  | NM_014306 | 8258.439  | 12130.968 |
| AB032960  | 1619.201  | 1873.935  | NM_004447 | 15298.435 | 17644.059 | NM_001084 | 5359.405  | 8172.773  |
| NM_014264 | 14664.508 | 12383.807 | NM_001204 | 11118.712 | 12577.438 | NM_015983 | 6949.871  | 13858.487 |
| AF020089  | 1442.752  | 1490.587  | BF131321  | 5402.948  | 5648.841  | NM_018622 | 6652.294  | 11941.612 |
| NM_006257 | 1889.722  | 2178.478  | NM_000020 | 22258.326 | 24674.199 | M33197    | 61745.445 | 57596.902 |
| NM_004734 | 18632.154 | 23192.953 | NM_000956 | 1367.918  | 1810.736  | NM_005867 | 14363.953 | 20717.457 |
| AK024793  | 1829.644  | 1881.503  | AB033091  | 12824.116 | 16276.298 | AK026031  | 42732.813 | 53382.773 |
| AF208291  | 1478.356  | 1251.535  | NM_004557 | 30599.184 | 34129.625 | NM_016468 | 9200.646  | 13446.45  |
| AK023701  | 2110.795  | 3099.65   | AB020705  | 6724.235  | 7689.573  | NM_007342 | 5153.027  | 6081.902  |
| NM_003742 | 8048.288  | 11075.491 | BE382905  | 1347.36   | 1227.104  | NM_005672 | 1997.265  | 1815.313  |
| NM_005094 | 4578.458  | 6176.721  | NM_002152 | 29503.629 | 30856.68  | AF193873  | 13603.732 | 12497.248 |
| NM_015886 | 1031.975  | 491.307   | NM_001701 | 872.47    | 1198.084  | NM_002628 | 5136.935  | 3620.515  |
| BG491613  | 9648.516  | 10397.7   | AK022558  | 5447.987  | 6673.916  | M23575    | 2292.923  | 1870.067  |
| AA397813  | 45130.316 | 35590.535 | NM_006476 | 57524.574 | 52647.969 | AA190729  | 3951.113  | 3082.455  |
| W47350    | 5220.777  | 4516.34   | AK023787  | 4667.97   | 4337.091  | BF974315  | 14224.281 | 10713.758 |
| AI160964  | 967.968   | 1028.322  | NM_002133 | 7463.565  | 7631.785  | AI652705  | 6574.091  | 6973.314  |
| W68291    | 14010.609 | 11000.724 | NM_015697 | 14705.911 | 16144.499 | AA973397  | 3308.292  | 3875.285  |
| N64384    | 5444.236  | 4481.344  | AF086489  | 1213.779  | 1422.403  | AA569974  | 1155.441  | 1541.041  |
| H-X 53655 | 1962.084  | 1528.968  | AB018258  | 690.264   | 990.706   | AA446028  | 854.879   | 1457.167  |
| H-U 05770 | 8417.284  | 8732.146  | NM_005953 | 34743.055 | 19680.371 | M80583    | 971.273   | 2074.357  |
| H-M 65199 | 20081.354 | 19696.629 | AJ132084  | 710.784   | 1048.061  | AW009565  | 5535.327  | 7029.307  |
| H-M 32315 | 1918.78   | 1922.689  | NM_005719 | 60415.148 | 60854.371 | H18633    | 812.133   | 1849.746  |
| H-V00536M | 4071.649  | 4711.988  | NM_003462 | 53226.172 | 58539.539 | X07767    | 4044.937  | 6778.925  |
| M38449    | 10319.401 | 11946.843 | NM_006093 | 15403.093 | 16297.598 | X65293    | 1051.28   | 1810.769  |
| NM_001091 | 1916.586  | 1943.165  | NM_006664 | 7069.61   | 9261.687  | M33197    | 24180.402 | 33970.348 |
| NM_007312 | 1670.646  | 2177.846  | AB051453  | 2580.172  | 2665.427  | AL050139  | 7445.06   | 11823.861 |
| AK023915  | 8809.465  | 10944.885 | AK026842  | 1205.74   | 941.605   | NM_002593 | 1617.588  | 2065.982  |
| NM_006762 | 46734.414 | 50241.465 | NM_002395 | 2371.482  | 2183.794  | NM_004558 | 15027.75  | 20950.607 |
| NM_006352 | 1875.156  | 1690.336  | AB023203  | 4189.069  | 5117.577  | AL079296  | 947.584   | 1202.405  |
| NM_016430 | 990.975   | 1024.302  | NM_014963 | 4422.373  | 4147.709  | NM_006597 | 56715.285 | 46550.488 |
| NM_004447 | 8219.651  | 7626.485  | NM_004259 | 4425.78   | 4405.926  | NM_012483 | 34356.758 | 28943.215 |
| NM_001204 | 2738.883  | 2075.978  | NM_016271 | 17064.115 | 14948.978 | NM_003498 | 9631.887  | 7490.445  |
| BF131321  | 1922.382  | 1435.435  | NM_016619 | 2560.575  | 2622.572  | AB023420  | 25277.348 | 20718.738 |
| NM_012116 | 3088.949  | 2643.794  | NM_014481 | 2327.749  | 3012.143  | M33197    | 65911.078 | 71765.234 |
| NM_000020 | 9094.42   | 6462.791  | AB032960  | 4401.505  | 4315.822  | NM_007264 | 37970.543 | 39641.586 |
| NM_000956 | 469.948   | 404.924   | NM_014264 | 24496.619 | 24440.906 | NM_002262 | 1293.774  | 1190.779  |
| NM_002442 | 6606.682  | 6120.334  | AF020089  | 4241.257  | 4795.558  | NM_016511 | 36818.348 | 40075.109 |
| AB033091  | 5354.286  | 8489.791  | NM_006257 | 4027.858  | 4054.245  | NM_003558 | 3681.981  | 4283.696  |
| NM_004557 | 8351.395  | 7610.764  | NM_000276 | 3136.785  | 4408.03   | NM_002185 | 711.05    | 1120.839  |
| NM_001584 | 6118.286  | 7540.086  | NM_000019 | 60008.887 | 62826.23  | M55337    | 845.119   | 1950.186  |
| NM_016372 | 31957.645 | 27985.512 | AK023701  | 4556.587  | 6140.591  | M33197    | 64782.992 | 85985.391 |
| AB020705  | 5720.25   | 5546.404  | NM_003742 | 6535.139  | 7180.713  | NM_013228 | 928.078   | 1106.331  |

|           |           |           |             |           |           |           |           |           |
|-----------|-----------|-----------|-------------|-----------|-----------|-----------|-----------|-----------|
| NM_014333 | 769.546   | 1002.652  | NM_005094   | 6027.377  | 7068.236  | NM_016533 | 50776.996 | 52223.988 |
| NM_002980 | 1569.251  | 1825.232  | NM_015886   | 1529.845  | 1603.693  | NM_014751 | 10878.411 | 17331.533 |
| NM_014251 | 2408.752  | 1937.069  | NM_020358   | 808.569   | 1096.328  | NM_002347 | 31770.439 | 47472.293 |
| AK022750  | 4787.668  | 4007.037  | NM_004262   | 1092.593  | 1095.378  | AB046807  | 1334.249  | 1906.337  |
| NM_004251 | 8439.319  | 9462.378  | NM_007102   | 58294.371 | 61794.984 | M33197    | 65665.266 | 74231.523 |
| BF337921  | 3932.179  | 4547.363  | BG491613    | 19225.889 | 18203.604 | NM_014623 | 8803.283  | 15418.622 |
| U53532    | 3305.89   | 3465.738  | AA397813    | 56103.66  | 50584.965 | NM_007244 | 23856.898 | 37246.531 |
| NM_001740 | 2478.695  | 2121.291  | W47350      | 12737.153 | 11258.354 | M30629    | 7236.352  | 9474.979  |
| NM_012484 | 6971.339  | 5017.514  | N64384      | 15292.396 | 17058.639 | NM_018976 | 12522.777 | 10123.142 |
| AL096732  | 4664.872  | 2757.98   | H-X 53655 I | 6135.848  | 7496.485  | NM_003355 | 15368.877 | 10362.77  |
| AB006423  | 642.699   | 437.905   | H-D85429M   | 20524.688 | 17144.904 | NM_005074 | 2598.08   | 2640.845  |
| AJ132084  | 552.163   | 410.29    | M38449      | 12730.208 | 15533.564 | NM_013272 | 1923.472  | 1880.924  |
| NM_005719 | 44194.328 | 33765.188 | AK025495    | 766.092   | 961.146   | NM_004170 | 5601.306  | 4531.323  |
| NM_003462 | 34404.238 | 21266.619 | NM_001091   | 6973.824  | 7573.743  | NM_018057 | 5520.03   | 5613.72   |
| NM_006093 | 8582.687  | 6506.38   | NM_007312   | 1472.73   | 1373.075  | M33197    | 65748.648 | 79279.727 |
| NM_000139 | 1009.732  | 658.063   | AK023915    | 21220.496 | 26396.842 | NM_015717 | 5530.799  | 5723.843  |
| NM_006664 | 7462.502  | 5609.738  | AB014564    | 4822.168  | 4214.3    | NM_015925 | 4553.569  | 5063.968  |
| NM_002416 | 1475.672  | 979.698   | NM_020230   | 10526.852 | 10247.436 | NM_003665 | 1721.942  | 2328.683  |
| NM_002728 | 2849.979  | 1849.733  | NM_006762   | 54601.73  | 55992.781 | AF220217  | 1690.008  | 2817.535  |
| NM_000450 | 2613.702  | 1942.03   | NM_006352   | 4152.304  | 4285.832  | NM_013323 | 28133.578 | 38535.141 |
| NM_000448 | 3302.412  | 2651.107  | NM_016430   | 2038.387  | 3637.789  | NM_014937 | 841.629   | 2062.26   |
| NM_004513 | 6394.106  | 6368.187  | NM_004447   | 14784.148 | 15075.633 | NM_017426 | 2593.849  | 4557.296  |
| NM_001708 | 49543.633 | 48580.68  | NM_001204   | 7648.568  | 6916.991  | M33197    | 12653.3   | 16677.17  |
| NM_017735 | 6800.814  | 6944.901  | BF131321    | 4318.531  | 5229.8    | NM_000853 | 3968.049  | 6811.581  |
| AB033044  | 22565.592 | 20529.563 | NM_016540   | 807.039   | 941.432   | NM_000846 | 625.647   | 1176.025  |
| NM_000276 | 526.667   | 396.875   | NM_012116   | 6588.482  | 6762.773  | NM_006820 | 411.514   | 992.514   |
| AK023701  | 1304.465  | 708.331   | NM_000020   | 23572.814 | 22525.908 | AF016903  | 33089.898 | 44217.934 |
| NM_003742 | 3609.726  | 2681.027  | AB033091    | 11387.651 | 11124.494 | NM_015675 | 9452.784  | 17030.59  |
| NM_005094 | 3007.815  | 2373.93   | NM_004557   | 25409.992 | 28548.055 | AK022267  | 1099.339  | 1670.552  |
| BE382905  | 790.073   | 841.614   | NM_014757   | 11335.151 | 15940.174 | NM_016040 | 4406.721  | 4982.198  |
| NM_002152 | 14721.786 | 14447.188 | NM_017893   | 1251.529  | 1415.125  | M33197    | 64604.113 | 87948.547 |
| NM_001701 | 715.06    | 586.275   | AF272357    | 7262.707  | 9298.728  | AF031136  | 62807.273 | 71591.914 |
| AK022558  | 3926.674  | 3866.95   | NM_016372   | 56938.063 | 57430.566 | NM_005867 | 18240.158 | 13368.676 |
| NM_006476 | 50024.621 | 43275.43  | AB020705    | 6969.306  | 8161.502  | AK026031  | 43176.953 | 35098.582 |
| AK023787  | 2118.212  | 1791.903  | NM_014333   | 1497.044  | 1963.335  | NM_016468 | 12902.213 | 10394.223 |
| NM_002133 | 3294.702  | 3186.557  | NM_002980   | 4038.504  | 4603.651  | NM_007342 | 6994.195  | 6638.894  |
| NM_015697 | 7672.174  | 6862.523  | NM_016274   | 6869.074  | 7205.236  | NM_005672 | 2389.473  | 1863.393  |
| AF086489  | 653.804   | 639       | NM_014946   | 2028.355  | 2171.29   | D25217    | 3222.333  | 2922.016  |
| NM_032943 | 5162.496  | 4811.712  | NM_014251   | 7425.729  | 8746.958  | NM_006351 | 17863.756 | 15773.307 |
| NM_007177 | 34310.703 | 26260.688 | AK022750    | 13575.563 | 14260.131 | M33197    | 65826.461 | 68689.375 |
| NM_000809 | 365.966   | 271.638   | NM_004251   | 17240.885 | 21574.299 | NM_004683 | 8729.033  | 12557.898 |
| AB018258  | 474.314   | 419.168   | BF337921    | 17445.322 | 17653.75  | AK023226  | 2512.684  | 3228.082  |
| AL359592  | 850.626   | 853.465   | U53532      | 6288.948  | 5694.931  | AK025263  | 1176.291  | 1625.07   |
| NM_006078 | 9922.42   | 10158.664 | NM_001740   | 8139.527  | 7444.578  | M33197    | 61030.172 | 69899.477 |
| NM_000824 | 545.466   | 719.422   | NM_012484   | 9752.557  | 10585.018 | NM_001467 | 2253.277  | 3743.099  |
| NM_000482 | 704.144   | 707.391   | AL096732    | 9103.352  | 9586.423  | NM_018066 | 17672.131 | 26652.381 |
| NM_005953 | 20620.762 | 9119.382  | AB006423    | 1347.219  | 1368.759  | NM_006931 | 3689.197  | 4936.04   |
| M38449    | 7880.319  | 6077.712  | AJ132084    | 2656.628  | 2576.5    | NM_020344 | 5835.327  | 8371.25   |
| AK025495  | 417.617   | 408.94    | NM_005719   | 59230.184 | 59000.656 | AF119868  | 480.146   | 818.638   |
| NM_001091 | 532.334   | 486.166   | NM_003462   | 52161.398 | 49859.398 | NM_005050 | 3902.034  | 6026.886  |
| AK023915  | 4424.131  | 5267.508  | NM_006093   | 12673.573 | 10833.91  | M33197    | 65499.359 | 74946.867 |
| AB051453  | 1300.327  | 1073.189  | NM_000139   | 1542.266  | 1579.147  | NM_019844 | 1131.045  | 1204.477  |
| AK026842  | 1043.298  | 785.084   | NM_006664   | 7992.029  | 9433.826  | M33197    | 36467.902 | 23826.457 |

|           |           |           |           |           |           |           |           |           |
|-----------|-----------|-----------|-----------|-----------|-----------|-----------|-----------|-----------|
| NM_00239E | 1023.838  | 486.951   | NM_00241E | 1250.392  | 1193.95   | AL050139  | 12409.356 | 10044.178 |
| AB023203  | 2316.548  | 2391.914  | NM_00044E | 4753.996  | 6091.802  | NM_00259E | 1490.373  | 1231.787  |
| NM_01496E | 1905.37   | 1932.374  | NM_00451E | 13937.032 | 16640.389 | NM_00455E | 17184.049 | 15870.929 |
| NM_00425E | 2581.47   | 1857.587  | NM_00170E | 58335.438 | 60905.184 | AL079296  | 1283.306  | 1036.832  |
| NM_016271 | 8781.021  | 5269.256  | NM_01773E | 12917.328 | 15103.382 | NM_01477C | 9687.745  | 13362.17  |
| NM_01661E | 1580.231  | 1304.994  | AB033044  | 52343.516 | 53062.066 | AB037737  | 1495.328  | 1413.822  |
| NM_014481 | 1289.122  | 1127.318  | NM_00027E | 3139.448  | 2968.079  | M33197    | 61685.363 | 62814.508 |
| U22172    | 3537.067  | 2385.092  | NM_00001E | 55769.492 | 50017.336 | AK023103  | 1711.133  | 2415.347  |
| AB032960  | 1446.849  | 1175.8    | AK023701  | 3914.75   | 4165.82   | NM_01785E | 3001.284  | 3737.133  |
| NM_014264 | 14265.385 | 8978.072  | NM_00374E | 6474.643  | 5950.177  | NM_01905E | 47855.195 | 57251.234 |
| AF020089  | 1652.699  | 1128.517  | NM_005094 | 6018.363  | 6070.071  | NM_013347 | 1196.323  | 1602.873  |
| NM_006257 | 2147.216  | 1658.974  | BE382905  | 1288.393  | 1242.359  | D80008    | 1842.48   | 2427.481  |
| NM_016281 | 13129.281 | 9386.248  | NM_00215E | 30786.143 | 33062.438 | X56789    | 1414.021  | 1986.801  |
| NM_004734 | 26760.936 | 20856.895 | NM_001701 | 740.641   | 995.329   | AK001069  | 46897.539 | 55006.309 |
| AK024793  | 2618.605  | 1935.877  | AK022558  | 5209.583  | 6193.603  | M33197    | 61455.672 | 64093.141 |
| AF208291  | 1009.914  | 958.153   | NM_00647E | 54025.434 | 51160.621 | NM_00093E | 1189.914  | 1491.424  |
| NM_004877 | 25661.984 | 22839.646 | AK023787  | 3512.159  | 3065.412  | NM_00035E | 9901.071  | 12707.277 |
| L10284    | 50148.246 | 51460.656 | NM_00213E | 4359.077  | 4614.697  | NM_00639E | 1768.077  | 2298.196  |
| CY3Cy5    | 14658.534 | 545.419   | NM_015697 | 11063.173 | 10527.927 | NM_01430E | 7336.847  | 9557.328  |
| NM_00062C | 702.698   | 1000.129  | AF086489  | 591.317   | 773.851   | NM_001084 | 2381.225  | 3215.027  |
| NM_00090E | 5408.841  | 5392.486  | NM_03294E | 5773.795  | 6294.852  | NM_01598E | 4196.213  | 4703.712  |
| AK023269  | 3206.925  | 3486.664  | NM_007177 | 47757.633 | 48604.047 | NM_01862E | 5735.017  | 7807.033  |
| AF070564  | 5928.98   | 5116.705  | NM_00080E | 581.441   | 851.887   | M33197    | 65579.992 | 68850.813 |
| AK021439  | 16709.391 | 14985.96  | AB018258  | 611.427   | 715.165   | CY3Cy5    | 5890.065  | 92.036    |
| AF052099  | 2988.045  | 2634.053  | AL359592  | 1533.93   | 1641.515  | NM_006981 | 1036.905  | 988.745   |
| AL110111  | 2728.927  | 2446.569  | NM_00607E | 15860.341 | 20471.863 | M33197    | 74351.367 | 62280.117 |
| AF070543  | 1129.015  | 1134.86   | NM_000824 | 741.261   | 799.271   | NM_01848E | 1802.587  | 1704.723  |
| AF086525  | 831.323   | 688.021   | NM_00048E | 1354.873  | 1366.136  | NM_01788C | 1373.805  | 2455.373  |
| AF086509  | 460.46    | 448.44    | NM_00595E | 29089.91  | 14634.821 | AF090945  | 3118.839  | 3003.084  |
| NM_01477E | 3861.008  | 3276.69   | M38449    | 13977.983 | 12420.457 | AF085848  | 1650.046  | 1393.041  |
| AK001171  | 16421.482 | 15721.601 | AK025495  | 645.874   | 727.943   | AF147437  | 2254.693  | 1864.687  |
| AF086491  | 1937.054  | 1876.788  | NM_001091 | 4230.373  | 4073.743  | M33197    | 70758.617 | 62396.207 |
| NM_01485E | 1503.623  | 1472.802  | AK023915  | 18888.754 | 18778.473 | M33197    | 71350.477 | 62653.402 |
| NM_00349E | 892.111   | 862.269   | AB051453  | 3092.763  | 3093.318  | AF085975  | 5615.435  | 4975.185  |
| NM_00062C | 860.576   | 808.56    | AK026842  | 1001.846  | 1080.217  | M33197    | 73457.945 | 62585.219 |
| NM_00090E | 5687.215  | 6503.845  | NM_00239E | 2144.499  | 1646.941  | AL137390  | 2621.381  | 2739.931  |
| SR5       | 4765.535  | 7002.633  | AB023203  | 3004.947  | 3962.259  | M33197    | 68122.891 | 65384.996 |
| SR9       | 14653.77  | 3329.729  | NM_01496E | 3715.241  | 3223.03   | M33197    | 69642.234 | 62153.633 |
| CY3Cy5    | 14405.401 | 660.126   | NM_00425E | 3430.133  | 3414.459  | AL049846  | 1359.775  | 1264.296  |
| U63828    | 2191.37   | 2298.152  | NM_016271 | 12349.815 | 10543.839 | AK024161  | 944.337   | 1341.798  |
| Z36794    | 842.717   | 2554.191  | NM_01661E | 1761.086  | 1673.599  | AK021682  | 39899.941 | 41219.57  |
| Z36828    | 4068.752  | 3825.781  | NM_014481 | 1738.676  | 1879.459  | NM_020351 | 485.304   | 830.127   |
| AF086121  | 32756.896 | 28840.732 | U22172    | 9100.39   | 8244.862  | AK022174  | 1260.681  | 1195.227  |
| AF086140  | 1837.331  | 1802.944  | AB032960  | 2928.607  | 3087.739  | M33197    | 73936.68  | 62912.168 |
| NM_01569E | 400.111   | 629.381   | NM_014264 | 16561.879 | 15662.757 | NM_00608E | 67666.477 | 62094.824 |
| AK022551  | 3630.104  | 3396.788  | AF020089  | 2488.114  | 3113.021  | NM_01826E | 692.885   | 1029.559  |
| AF085968  | 1135.776  | 1066.158  | NM_006257 | 2188.759  | 2570.494  | AF130086  | 4864.854  | 5325.979  |
| AK023665  | 573.033   | 710.258   | NM_016281 | 19161.57  | 20539.322 | AK023858  | 4512.916  | 3895.676  |
| AB011136  | 3205.126  | 2893.707  | NM_004734 | 37668.406 | 45912.586 | AF250920  | 2349.174  | 2016.121  |
| AF085898  | 4748.453  | 4754.123  | AK024793  | 4172.813  | 4173.667  | NM_01773E | 2294.188  | 2550.694  |
| AL161960  | 2325.879  | 2795.587  | AF208291  | 1987.289  | 1704.136  | M33197    | 2480.817  | 1786.498  |
| AL049964  | 3099.334  | 3874.179  | NM_004877 | 41122.129 | 44772.621 | M33197    | 68051.719 | 65813.102 |
| AK022485  | 661.789   | 781.632   | L10284    | 59585.953 | 50063.73  | AL137658  | 27632.754 | 32046.477 |

|           |           |           |           |           |           |           |           |           |
|-----------|-----------|-----------|-----------|-----------|-----------|-----------|-----------|-----------|
| AK023395  | 1280.927  | 1324.89   | CY3Cy5    | 21589.047 | 932.874   | D16888    | 1558.874  | 1358.215  |
| AK023818  | 4352.923  | 6251.46   | NM_000905 | 9922.407  | 10030.212 | U79277    | 1872.517  | 1714.759  |
| AK023895  | 576.203   | 842.288   | AK021439  | 45584.887 | 54537.68  | AF068298  | 6003.399  | 5879.617  |
| AK024206  | 3434.773  | 4165.374  | AF052099  | 3137.946  | 2562.048  | Z70770    | 2204.614  | 2108.48   |
| AK026273  | 8345.276  | 9236.255  | AL110111  | 2566.763  | 2415.526  | AJ227900  | 3803.975  | 3172.001  |
| AF055007  | 1245.766  | 1657.524  | AF070543  | 1432.681  | 1611.444  | M33197    | 66540.047 | 61240.496 |
| NM_012337 | 1606.315  | 1975.021  | NM_014778 | 6569.25   | 5095.314  | AJ012500  | 3444.609  | 3865.592  |
| AL389879  | 15159.456 | 15597.72  | AK001171  | 28825.066 | 23107.813 | BC035058  | 2651.866  | 2342.798  |
| AK022869  | 1881.321  | 1950.042  | AF086491  | 9229.055  | 8703.146  | X57566    | 9035.488  | 10108.736 |
| NM_016111 | 22338.871 | 21805.793 | NM_014856 | 2268.697  | 2348.584  | M33197    | 68041.883 | 64746.539 |
| AF085958  | 67053.328 | 66100.586 | NM_003492 | 2893.527  | 3466.273  | NM_018616 | 10899.261 | 9651.782  |
| AF086021  | 7160.668  | 7645.408  | NM_000620 | 766.13    | 1103.517  | AL360137  | 640.976   | 927.136   |
| AL117655  | 676.789   | 845.152   | NM_000905 | 6451.96   | 5995.74   | U28131    | 67347.875 | 71315.438 |
| AK024472  | 2484.036  | 3172.73   | SR1       | 76151.711 | 61951.137 | AY007106  | 2926.934  | 3195.148  |
| NM_017976 | 4394.013  | 5029.189  | SR3       | 49847.98  | 48373.23  | AF015910  | 66516.531 | 66937.359 |
| U06700    | 1266.752  | 1205.281  | SR5       | 5470.934  | 4806.642  | BC009993  | 1157.895  | 1144.909  |
| NM_017918 | 14710.826 | 18058.789 | SR7       | 7153.576  | 40724.5   | M33197    | 67807.805 | 68232.07  |
| NM_017855 | 45550.68  | 51626.504 | SR9       | 22741.74  | 3735.119  | NM_016824 | 5058.733  | 4453.954  |
| AB007954  | 2010.802  | 2362.237  | CY3Cy5    | 28204.725 | 1887.411  | NM_003031 | 8112.63   | 9655.749  |
| AK026494  | 1422.247  | 1846.166  | U63828    | 4723.292  | 5714.329  | NM_007170 | 962.999   | 1022.856  |
| AK022067  | 704.518   | 787.798   | Z36794    | 2195.688  | 2753.897  | NM_003008 | 1186.214  | 1043.355  |
| AK023508  | 725.045   | 926.156   | Z36828    | 10708.217 | 10180.655 | M33197    | 65024.582 | 63706.965 |
| AK025840  | 2444.545  | 3042.7    | AF086121  | 44150.395 | 41748.719 | U58662    | 1559.477  | 1566.577  |
| AK026915  | 1668.082  | 2261.621  | AF086140  | 2134.968  | 2027.898  | M33197    | 67696.063 | 65329.699 |
| AL110259  | 830.195   | 2031.159  | AF085968  | 3241.188  | 2347.994  | NM_015916 | 2651.509  | 2836.688  |
| AL390138  | 2490.434  | 2613.886  | AB011136  | 4266.005  | 4702.384  | NM_015888 | 67180.898 | 70151.977 |
| AL137290  | 4440.832  | 5205.259  | AL049964  | 4875.512  | 6263.21   | M33197    | 64863.914 | 61088.863 |
| AK024180  | 1115.916  | 1015.374  | AK022485  | 1586.266  | 1614.865  | NM_004276 | 2193.383  | 2244.304  |
| NM_014124 | 37907.172 | 33427.051 | AK023395  | 11036.592 | 11571.845 | NM_002332 | 22308.287 | 18829.596 |
| AF119888  | 884.289   | 949.881   | AK023818  | 16231.245 | 16804.051 | NM_002858 | 3574.842  | 3195.084  |
| AK001551  | 3389.792  | 3077.866  | AK024139  | 3833.459  | 3925.668  | NM_005246 | 6167.515  | 5272.744  |
| AK001825  | 2130.609  | 1875.548  | AK023895  | 878.986   | 1099.736  | NM_017651 | 1195.691  | 727.985   |
| AK024714  | 685.897   | 1121.576  | AK024206  | 12136.354 | 11804.768 | AF161339  | 1747.58   | 2058.629  |
| AK022363  | 2146.666  | 2761.913  | AK026273  | 33204.328 | 41634.184 | AK000354  | 3252.541  | 3246.433  |
| AL353949  | 1009.445  | 1009.075  | NM_012337 | 3901.223  | 2642.422  | NM_014882 | 1771.903  | 1630.233  |
| NM_005181 | 1202.175  | 1861.791  | AL389879  | 33865.414 | 24866.422 | M33197    | 66682.789 | 60363.273 |
| AF026945  | 1202.482  | 1458.264  | AF085958  | 77433.93  | 62176.684 | NM_001510 | 1515.03   | 1532.084  |
| AF143676  | 2437.752  | 2507.825  | AF086021  | 11552.79  | 13080.247 | NM_004272 | 1793.396  | 2101.716  |
| U66044    | 3450.299  | 3257.768  | AF085982  | 5196.159  | 5101.75   | NM_000358 | 2608.002  | 2214.031  |
| NM_005247 | 10014.191 | 9703.217  | AL117655  | 1208.617  | 966.732   | NM_001930 | 9067.666  | 9240.822  |
| NM_005283 | 1161.593  | 1322.887  | AK024472  | 2347.087  | 2489.309  | AK025270  | 1828.665  | 2237.614  |
| AL122089  | 969.949   | 1088.623  | AF087981  | 1399.646  | 1163.856  | NM_001564 | 4846.5    | 5538.45   |
| AA203665  | 3417.741  | 4596.166  | NM_017976 | 7308.33   | 7582.236  | M33197    | 64523.766 | 58697.637 |
| Y16705    | 1661.023  | 1675.114  | U06700    | 2229.379  | 2559.643  | AF263537  | 8154.902  | 6586.913  |
| AF279775  | 4512.776  | 4661.307  | NM_017918 | 25975.578 | 32491.41  | NM_015895 | 7793.368  | 5931.438  |
| NM_006262 | 2664.136  | 2792.409  | NM_017855 | 68059.227 | 71950.445 | NM_000188 | 987.07    | 758.777   |
| AK026598  | 2703.116  | 2894.823  | AB007954  | 6247.857  | 6402.447  | AL050050  | 919.408   | 315.132   |
| AK023602  | 733.079   | 913.958   | AK026494  | 9453.495  | 10529.645 | NM_003252 | 7953.354  | 8377.144  |
| NM_018097 | 58361.848 | 53186.316 | AK023508  | 1621.25   | 1799.13   | NM_001228 | 3183.183  | 3440.982  |
| AF130043  | 801.65    | 1037.517  | AK025840  | 6016.955  | 5471.756  | NM_015885 | 2810.737  | 3216.207  |
| Y11167    | 2122.419  | 2290.657  | AK026915  | 2966.294  | 3140.351  | NM_000308 | 2584.82   | 2569.815  |
| AK026813  | 1173.446  | 1034.976  | AL110259  | 2179.759  | 1623.902  | X69636    | 5185.086  | 4864.076  |
| AK027225  | 1814.433  | 1679.075  | AL390138  | 7289.632  | 9162.314  | NM_013974 | 1888.835  | 1284.932  |

|           |           |           |           |           |           |           |           |           |
|-----------|-----------|-----------|-----------|-----------|-----------|-----------|-----------|-----------|
| AK023083  | 3519.049  | 3840.569  | AL137290  | 11021.205 | 8260.087  | NM_017547 | 1455.496  | 1285.441  |
| AF130093  | 751.852   | 1002.196  | NM_014124 | 70372.383 | 61323.129 | NM_003983 | 4568.864  | 3954.22   |
| AF116622  | 720.772   | 1221.774  | AF119888  | 2024.24   | 1787.554  | NM_003193 | 4549.287  | 5500.313  |
| AF217967  | 1033.674  | 1275.282  | AK001551  | 6688.974  | 5690.054  | AF113216  | 1590.503  | 1735.691  |
| NM_017447 | 2468.258  | 3170.694  | AK001825  | 2635.454  | 2172.758  | NM_017583 | 1842.896  | 1902.174  |
| AL049452  | 674.154   | 633.567   | AK024714  | 861.397   | 1310.984  | AK023582  | 1644.679  | 1377.186  |
| NM_016622 | 1775.734  | 2123.924  | AK022363  | 3163.462  | 3721.489  | NM_000124 | 1779.113  | 1593.344  |
| AK026976  | 3276.975  | 4326.532  | NM_005181 | 4650.669  | 5106.223  | NM_017993 | 7547.485  | 7814.261  |
| AF070559  | 1077.904  | 1133.246  | AF026945  | 1859.28   | 2698.881  | NM_014517 | 3361.838  | 2833.298  |
| D42043    | 23544.244 | 30685.102 | AF143676  | 7637.093  | 7894.39   | NM_005463 | 1923.242  | 1421.269  |
| BC024009  | 3681.468  | 4082.855  | U66044    | 26220.719 | 25544.213 | NM_004263 | 2847.599  | 2058.19   |
| AF128543  | 9188.179  | 8418.528  | NM_005247 | 42291.668 | 48512.055 | D31765    | 3644.279  | 3055.705  |
| AK022071  | 467.238   | 433.618   | NM_005283 | 4042.11   | 3904.682  | NM_006107 | 10196.832 | 6669.133  |
| NM_004183 | 1092.824  | 1023.958  | AL122089  | 2420.971  | 1825.141  | NM_004175 | 1269.56   | 1136.917  |
| X94290    | 3325.215  | 4203.191  | AA203665  | 15841.409 | 17866.389 | AF288288  | 43162.051 | 46905.707 |
| AK026685  | 23134.213 | 21271.693 | U95646    | 1930.171  | 2587.276  | NM_003763 | 7452.768  | 7768.864  |
| AF090927  | 45467.578 | 35932.664 | Y16705    | 3260.202  | 4216.71   | AL080080  | 6533.408  | 5393.565  |
| AL137642  | 1742.169  | 1869.905  | AF279775  | 12940.589 | 14691.063 | M33197    | 6531.953  | 6556.981  |
| AL133619  | 13882.654 | 15681.531 | NM_006262 | 5107.337  | 5015.177  | NM_001161 | 16952.428 | 16870.555 |
| AK025902  | 4459.224  | 5339.544  | AK026598  | 3045.256  | 2383.612  | NM_004044 | 16880.775 | 16599.283 |
| NM_004517 | 4505.436  | 4148.462  | AK023602  | 1811.969  | 1998.992  | NM_000221 | 58064.262 | 56610.738 |
| AI017418  | 660.595   | 500.895   | NM_018097 | 62366.008 | 56385.41  | H75678    | 4192.104  | 2940.519  |
| NM_000673 | 857.316   | 818.077   | AF130043  | 1035.8    | 791.963   | NM_002533 | 1358.271  | 929.86    |
| AF218006  | 13089.376 | 10079.044 | Y11167    | 2589.107  | 2462.208  | NM_006452 | 22193.035 | 18997.545 |
| AK026935  | 3630.614  | 2978.735  | AK026813  | 1779.489  | 1599.607  | AB002359  | 4189.283  | 3611.625  |
| NM_020162 | 7003.983  | 6694.498  | AK027225  | 2511.767  | 2215.619  | M33197    | 17834.309 | 15000.948 |
| AK027124  | 15439.689 | 16391.07  | AK023083  | 3489.766  | 4150.505  | AB007864  | 3058.302  | 2888.645  |
| AB037813  | 576.178   | 728.169   | AF130093  | 1741.112  | 2495.575  | NM_002193 | 3941.142  | 3468.639  |
| M31212    | 18614.236 | 24233.816 | AF116622  | 1257.806  | 1695.125  | NM_005933 | 759.425   | 1120.88   |
| NM_001821 | 3366.706  | 4130.383  | AF217967  | 2094.06   | 2475.628  | NM_014163 | 7373.99   | 7952.264  |
| NM_005647 | 1968.09   | 2406.504  | NM_017447 | 3881.589  | 4222.326  | NM_004964 | 14108.99  | 15160.687 |
| X64978    | 13591.145 | 11994.517 | AL049452  | 956.9     | 1177.919  | NM_005197 | 9781.414  | 9900.117  |
| NM_000912 | 46809.781 | 40930.582 | BF345435  | 3175.921  | 2045.32   | AL137421  | 67318.188 | 69884.984 |
| NM_002345 | 2067.097  | 1932.613  | NM_016622 | 5989.868  | 5805.608  | M33197    | 67220.43  | 73764.445 |
| U57971    | 2122.585  | 2632.079  | AK026976  | 5607.402  | 6338.801  | NM_007241 | 929.988   | 1129.174  |
| X89673    | 1800.448  | 1987.287  | AF070559  | 1543.472  | 2075.85   | M33197    | 64973.398 | 60631.316 |
| AK024593  | 2171.516  | 2217.28   | D42043    | 54229.453 | 57524.32  | NM_001154 | 9352.567  | 9831.77   |
| Z83934    | 1305.169  | 1503.363  | BC024009  | 8563.103  | 9822.795  | NM_001813 | 4131.827  | 5691.204  |
| NM_018353 | 3392.313  | 4433.645  | AF128543  | 25089.447 | 24418.342 | NM_001993 | 1632.578  | 2127.777  |
| AK022020  | 2902.724  | 3310.923  | NM_004183 | 1542.371  | 1487.971  | NM_000175 | 1843.541  | 1729.117  |
| U17634    | 672.678   | 663.875   | X94290    | 3136.143  | 2969.768  | NM_015725 | 11847.565 | 11863.847 |
| AK000263  | 13686.356 | 16143.184 | AK026685  | 53381.148 | 50196.57  | R19938    | 17348.41  | 15371.126 |
| Y13895    | 1221.603  | 1337.586  | AF090927  | 64524.684 | 54325.301 | N94487    | 14108.598 | 14229.144 |
| L14723    | 2980.546  | 2212.823  | AL137642  | 1852.781  | 1883.629  | AI886795  | 4797.242  | 5214.209  |
| AK024462  | 3856.798  | 3047.133  | AL133619  | 20981.707 | 22081.359 | BG743223  | 736.248   | 1231.444  |
| NM_005711 | 368.837   | 600.673   | AK025902  | 10013.732 | 10803.631 | M36634    | 1389.179  | 1370.91   |
| NM_019601 | 1238.501  | 1110.628  | NM_004517 | 5891.373  | 6445.572  | M14156    | 28524.947 | 34902.203 |
| NM_002203 | 1243.187  | 957.209   | AI017418  | 876.142   | 1030.777  | U87939    | 1689.155  | 2062.15   |
| NM_007074 | 526.551   | 528.158   | NM_000673 | 3064.052  | 3424.94   | U86961    | 2368.027  | 2709.142  |
| NM_006614 | 644.528   | 469.097   | AF218006  | 59194.027 | 60713.461 | U47924    | 1026.21   | 1308.264  |
| NM_002233 | 4834.412  | 5299.288  | AK026935  | 27574.445 | 33393.863 | NM_005191 | 3332.932  | 3643.252  |
| NM_003815 | 2800.821  | 3019.551  | NM_020162 | 10505.996 | 10755.556 | AK094237  | 4623.713  | 4671.001  |
| NM_001433 | 1115.868  | 999.26    | AK027124  | 68394.641 | 69518.977 | L07592    | 1110.695  | 1226.9    |



|           |           |           |           |           |           |           |           |           |
|-----------|-----------|-----------|-----------|-----------|-----------|-----------|-----------|-----------|
| AB010098  | 1446.159  | 1613.324  | M31212    | 28469.018 | 31719.98  | M33197    | 67217.531 | 70775.219 |
| U17989    | 2411.085  | 3133.374  | NM_001821 | 12060.697 | 16658.412 | NM_002983 | 18112.555 | 17749.457 |
| U62325    | 2425.224  | 2275.292  | NM_005647 | 2988.079  | 2722.917  | NM_000074 | 23538.033 | 23256.543 |
| AL137595  | 1459.438  | 1708.881  | X64978    | 25206.576 | 29366.988 | BF434335  | 55431.441 | 60360.172 |
| NM_01802E | 1830.043  | 1554.851  | NM_000912 | 61417.195 | 54945.57  | M57627    | 1335.688  | 1241.609  |
| AF249267  | 59221.164 | 60475.219 | NM_002345 | 2340.576  | 2297.85   | NM_002993 | 2453.384  | 2342.179  |
| NM_004113 | 966.191   | 1062.3    | U57971    | 4342.769  | 3471.686  | AK026946  | 3002.548  | 2487.558  |
| X84939    | 4701.946  | 4607.317  | X89673    | 3304.814  | 3188.963  | M33197    | 62613.383 | 67141.602 |
| NM_01832C | 19855.498 | 19911.176 | AK024593  | 3525.796  | 2961.793  | NM_003192 | 2539.441  | 2247.883  |
| NM_00206E | 5258.528  | 6782.258  | Z83934    | 2018.031  | 1917.693  | NM_01844E | 6217.076  | 5315.63   |
| NM_01605E | 8685.477  | 9392.802  | NM_01835E | 5097.753  | 4985.898  | AF086129  | 1559.128  | 1576.222  |
| AF188492  | 548.839   | 790.076   | AK022020  | 3749.681  | 3970.91   | D79994    | 2784.663  | 3647.053  |
| M65066    | 18206.104 | 18823.762 | AK000263  | 25094.16  | 25276.033 | NM_01445E | 27743.1   | 29262.1   |
| NM_016951 | 3007.646  | 3522.02   | Y13895    | 1650.11   | 1652.18   | AF235049  | 7914.31   | 7983.353  |
| NM_013251 | 1102.912  | 921.295   | L14723    | 34105.742 | 41880.332 | NM_007223 | 65655.07  | 59646.645 |
| NM_01232E | 1473.504  | 1187.313  | AK024462  | 51361.07  | 54073.133 | NM_00014E | 1159.515  | 1306.29   |
| NM_00308E | 5087.339  | 3894.494  | NM_019601 | 992.308   | 920.577   | AF030107  | 37119.254 | 45821.039 |
| NM_016084 | 24299.881 | 21495.361 | NM_00220E | 2854.697  | 3227.359  | NM_000871 | 2126.638  | 2426.793  |
| AF095289  | 28100.596 | 24631.059 | NM_007074 | 1356.095  | 1280.079  | NM_01896E | 4403.018  | 4198.339  |
| NM_005537 | 4878.847  | 4018.979  | NM_006614 | 1054.51   | 1108.037  | AF086924  | 67577.82  | 64924.309 |
| NM_019003 | 2181.287  | 2033.504  | NM_00223C | 8271.394  | 7919.904  | NM_005164 | 2109.578  | 1934.855  |
| NM_01593E | 4646.463  | 4229.331  | NM_00381E | 14972.95  | 12029.571 | NM_00199E | 6640.341  | 5663.623  |
| AF182412  | 1029.789  | 1489.863  | NM_00143C | 3072.651  | 3316.392  | NM_000183 | 12172.939 | 14252.996 |
| AK027200  | 2276.748  | 2525.268  | AB010098  | 1636.601  | 1854.191  | AY004175  | 4250.748  | 4222.072  |
| S78372    | 999.976   | 956.753   | U17989    | 4828.959  | 5029.675  | M33197    | 63183.551 | 63578.551 |
| U03106    | 9709.12   | 15208.836 | U62325    | 3378.227  | 3564.923  | NM_012327 | 7682.24   | 7023.159  |
| NM_00684E | 41542.695 | 39863.902 | AL137595  | 1842.652  | 1941.781  | NM_000904 | 6809.707  | 6746.281  |
| NM_01488E | 1927.016  | 2376.173  | NM_01802E | 1793.922  | 1489.409  | NM_01604E | 3783.618  | 3612.144  |
| M73239    | 1937.588  | 1910.773  | AF249267  | 66093.133 | 61465.934 | NM_00037E | 8633.966  | 7219.872  |
| NM_00494E | 5438.797  | 5546.819  | NM_004113 | 1011.796  | 815.641   | NM_00026E | 45747.863 | 49283.645 |
| NM_020242 | 2151.515  | 1987.598  | X84939    | 5838.323  | 4673.989  | NM_01884E | 9952.262  | 11523.303 |
| NM_00178E | 29861.785 | 26341.621 | NM_01832C | 48560.766 | 46613.367 | NM_00223E | 7695.976  | 7052.867  |
| NM_00717E | 60110.477 | 63341.641 | NM_00206E | 6555.25   | 6237.87   | NM_01790E | 21123.867 | 19858.992 |
| NM_017682 | 942.362   | 905.473   | NM_01605E | 11360.275 | 10834.764 | NM_00681E | 28270.803 | 25454.496 |
| NM_00220E | 6040.623  | 5571.223  | AF188492  | 656.963   | 662.348   | M33197    | 66491.977 | 65730     |
| NM_002291 | 1436.221  | 1360.952  | M65066    | 27122.271 | 20744.684 | NM_00171E | 5335.97   | 5588.382  |
| AL137477  | 11602.967 | 11493.708 | NM_016951 | 4032.679  | 3530.308  | NM_006564 | 3873.062  | 4112.734  |
| NM_01664E | 11067.208 | 9513.291  | NM_013251 | 1495.085  | 1495.573  | NM_004802 | 1963.517  | 1983.774  |
| NM_01425E | 1081.651  | 956.97    | NM_01232E | 2076.907  | 1976.357  | M33197    | 67276.914 | 74370.57  |
| NM_015967 | 4038.401  | 3995.004  | NM_00308E | 57527.813 | 60496.797 | NM_00668C | 1410.134  | 1216.576  |
| NM_012237 | 317.641   | 326.479   | NM_016084 | 24436.223 | 23246.814 | NM_002633 | 29005.654 | 29353.268 |
| NM_00240E | 1912.348  | 1228.287  | AF095289  | 34761.555 | 40229.258 | NM_00287E | 7111.658  | 6189.92   |
| NM_004994 | 47782.859 | 37633.316 | NM_005537 | 7430.225  | 7463.103  | NM_017723 | 2852.284  | 3982.246  |
| NM_00661C | 2581.083  | 2024.714  | AC003962  | 742.881   | 784.29    | AK022922  | 2061.205  | 2139.553  |
| NM_01762E | 432.171   | 507.187   | NM_019003 | 4294.165  | 3752.008  | NM_006462 | 5965.405  | 6995.248  |
| NM_018017 | 8071.542  | 9057.074  | NM_01593E | 31764.285 | 27075.41  | NM_002613 | 888.278   | 1013.182  |
| AK001296  | 22525.746 | 26927.057 | AF182412  | 1846.58   | 1817.909  | NM_00441E | 3820.622  | 3810.422  |
| NM_01836E | 4439.887  | 5255.503  | AK027200  | 3461.635  | 3125.188  | U47635    | 2123.278  | 1960.725  |
| NM_00658E | 54871.742 | 44218.031 | U03106    | 22658.668 | 34309.551 | NM_01865C | 1422.591  | 1783.355  |
| AJ272180  | 2542.838  | 2269.578  | NM_00007E | 29653.635 | 32652.674 | AK026945  | 3652.254  | 5385.265  |
| AK025709  | 1763.054  | 1679.593  | NM_00684E | 66529.922 | 62620.453 | NM_00282E | 1876.359  | 2062.274  |
| NM_01901E | 24394.043 | 23272.426 | NM_01488E | 701.867   | 707.7     | NM_01436E | 1280.487  | 1665.461  |
| NM_012261 | 19001.771 | 19653.91  | M73239    | 1363.952  | 1288.263  | M33197    | 67162.352 | 68909.031 |

|           |           |           |           |           |           |           |           |           |
|-----------|-----------|-----------|-----------|-----------|-----------|-----------|-----------|-----------|
| NM_015556 | 13251.188 | 12407.191 | NM_004945 | 6874.813  | 6088.896  | NM_00139E | 18130.746 | 15125.615 |
| NM_00609E | 4568.836  | 4711.195  | NM_020242 | 2503.692  | 2451.109  | AB050049  | 10092.538 | 9653.056  |
| AF272379  | 8081.44   | 6246.757  | NM_00178E | 40338.91  | 42526.445 | NM_00181E | 3912.299  | 3680.955  |
| AK022643  | 459.846   | 413.787   | NM_00717E | 65793.828 | 68436.094 | NM_01693E | 804.464   | 765.289   |
| AB046808  | 2784.72   | 2133.833  | NM_017682 | 1454.489  | 1290.977  | NM_00199E | 1141.031  | 1659.024  |
| AK026265  | 2417.626  | 2484.166  | NM_00220E | 8914.383  | 6894.451  | R19938    | 19180     | 23127.344 |
| AF015313  | 874.374   | 790.156   | NM_002291 | 810.515   | 748.445   | N94487    | 14615.381 | 16738.607 |
| NM_00646E | 3176.037  | 2543.671  | AL137477  | 23161.693 | 22794.309 | AI886795  | 5742.989  | 5809.719  |
| NM_005681 | 1593.874  | 1506.262  | NM_01664E | 16626.51  | 15386.749 | D10495    | 3004.069  | 2876.858  |
| NM_01515E | 3431.2    | 3753.093  | NM_01425E | 7436.311  | 8382.779  | BF344679  | 2830.43   | 3089.608  |
| NM_012384 | 3297.73   | 3507.468  | NM_015967 | 5711.69   | 5795.314  | M14156    | 10970.413 | 11719.368 |
| NM_00465E | 6944.96   | 6902.302  | NM_00240E | 4470.842  | 4324.353  | U86961    | 1832.306  | 2251.012  |
| AF233453  | 4369.616  | 4787.333  | NM_004994 | 54340.246 | 53448.66  | NM_005191 | 894.396   | 1123.119  |
| D87454    | 17240.262 | 18369.24  | NM_00661C | 46586.215 | 50205.586 | AK094237  | 3033.519  | 3172.37   |
| NM_00702C | 7388.759  | 9083.67   | NM_01762E | 1052.342  | 1058.902  | M33197    | 67061.633 | 68939.953 |
| NM_00071E | 35663.125 | 32012.158 | NM_003791 | 8420.958  | 9135.894  | L40520    | 1850.41   | 2709.591  |
| NM_01605E | 20049.211 | 20426.416 | NM_018017 | 13816.177 | 15319.188 | BF434335  | 47289.746 | 48965.637 |
| NM_013291 | 14645.139 | 14080.17  | AK001296  | 41558.293 | 42727.758 | M57627    | 1010.374  | 895.968   |
| NM_00293E | 16367.729 | 15349.546 | AK000173  | 932.632   | 1048.083  | NM_00299E | 1603.924  | 1736.458  |
| NM_014161 | 7201.319  | 7475.063  | NM_01836E | 5403.724  | 4661.914  | AK026946  | 3222.117  | 3527.791  |
| BF312817  | 8777.535  | 12223.838 | NM_00658E | 63619.84  | 55694.207 | M33197    | 63407.313 | 63092.676 |
| AF284580  | 2252.918  | 2257.371  | AJ272180  | 3094.51   | 2926.872  | NM_00319E | 4360.639  | 4180.14   |
| AK024961  | 6037.13   | 5278.668  | AK025709  | 2254.334  | 2294.664  | NM_01844E | 7853.666  | 9032.234  |
| NM_01606E | 15528.716 | 12275.475 | NM_01901E | 54122.797 | 52905.953 | AF086129  | 1815.014  | 2159.84   |
| NM_002711 | 975.695   | 972.949   | NM_012261 | 24386.359 | 21135.891 | D79994    | 1928.05   | 2367.586  |
| NM_00019E | 24818.523 | 21652.244 | NM_01555E | 14382.11  | 12376.608 | NM_01445E | 24908.012 | 23576.254 |
| NM_00377E | 46607.789 | 47181.922 | NM_00609E | 6521.73   | 6704.479  | AF235049  | 2759.714  | 3402.708  |
| NM_001041 | 446.991   | 522.84    | AF272379  | 11409.359 | 11960.894 | M33197    | 63555.887 | 60996.902 |
| AK023263  | 2420.432  | 2635.847  | AK022643  | 1570.866  | 1483.661  | NM_00648C | 62663.145 | 61307.77  |
| NM_00462E | 2542.561  | 3594.712  | AB046808  | 2648.962  | 2651.665  | NM_00722E | 63151.805 | 60871.715 |
| AK021445  | 937.84    | 817.319   | AK026265  | 2960.516  | 3193.596  | NM_00014E | 901.838   | 1266.672  |
| NM_017934 | 5783.494  | 7096.95   | AK027179  | 4230.483  | 5152.659  | AF030107  | 22953.141 | 22260.842 |
| NM_01416E | 25370.855 | 28356.51  | AF015313  | 1460.251  | 1363.297  | NM_000871 | 1700.252  | 2087.182  |
| AF211971  | 8158.725  | 7527.91   | NM_00646E | 3626.273  | 2837.851  | NM_01896E | 3609.757  | 3798.769  |
| NM_002931 | 3362.138  | 3375.8    | NM_005681 | 3541.704  | 3467.092  | AF086924  | 65541.063 | 68448.328 |
| U12767    | 896.512   | 1114.199  | NM_01515E | 6143.001  | 6111.693  | M33197    | 66289.859 | 86212.516 |
| U17630    | 2713.455  | 2635.1    | NM_012384 | 5800.163  | 5604.53   | NM_001154 | 8137.223  | 9069.645  |
| M33782    | 4094.106  | 3904.157  | NM_00465E | 8412.896  | 8463.733  | NM_00018E | 13043.847 | 9778.838  |
| NM_00219E | 843.941   | 991.767   | AF233453  | 6644.406  | 6774.118  | AY004175  | 3971.617  | 3026.194  |
| NM_01775E | 17488.703 | 14762.966 | D87454    | 24620.463 | 24209.314 | M33197    | 63894.246 | 63143.762 |
| NM_01841E | 2435.521  | 2757.044  | NM_00702C | 6768.469  | 7425.21   | NM_012327 | 4630.239  | 5214.145  |
| NM_00460E | 12606.551 | 11388.101 | NM_00071E | 40926.121 | 41602.258 | NM_000904 | 6068.284  | 6362.146  |
| D70833    | 65741.008 | 65060.098 | NM_01605E | 34087.133 | 29868.09  | NM_01604E | 4736.715  | 4084.697  |
| NM_016621 | 3831.224  | 2600.386  | NM_013291 | 15827.442 | 12848.225 | NM_00037E | 7986.59   | 5939.919  |
| NM_00297E | 1545.844  | 1683.536  | NM_00293E | 19706.652 | 17256.223 | NM_00026E | 39572.164 | 39471.297 |
| AK023511  | 12200.662 | 12776.219 | NM_014161 | 7483.45   | 6656.33   | NM_01884E | 5461.905  | 5129.436  |
| NM_01455E | 4154.245  | 5210.35   | BF312817  | 9595.131  | 8985.095  | NM_00223E | 6713.642  | 5168.964  |
| NM_00272E | 1280.796  | 1243.219  | AF284580  | 2464.88   | 2114.736  | NM_01790E | 25785.166 | 28251.057 |
| NM_01437E | 2523.938  | 2908.29   | AK024961  | 6182.338  | 5411.966  | NM_00681E | 28976.436 | 33211.445 |
| NM_01781E | 18515.426 | 22549.525 | NM_01606E | 17697.604 | 16563.303 | NM_00280E | 1383.057  | 2086.043  |
| AF204173  | 1039.921  | 1405.279  | NM_002711 | 849.788   | 1242.001  | NM_006564 | 5541.583  | 5770.708  |
| J03260    | 1664.414  | 1998.671  | NM_00019E | 53045.227 | 53716.344 | NM_00480E | 1876.431  | 1824.176  |
| U13738    | 3521.262  | 3515.198  | NM_001041 | 3178.053  | 3287.96   | M33197    | 66893.906 | 69541.844 |

|           |           |           |           |           |           |           |           |           |
|-----------|-----------|-----------|-----------|-----------|-----------|-----------|-----------|-----------|
| AF068236  | 14808.652 | 14092.854 | NM_000693 | 865.724   | 900.267   | NM_002983 | 14313.906 | 16168.333 |
| H94487    | 763.157   | 862.222   | AK023263  | 3690.369  | 4576.549  | NM_000074 | 25166.102 | 27496.469 |
| BG681747  | 29956.512 | 27876.037 | NM_004622 | 4733.768  | 6191.677  | M33197    | 64669.688 | 57316.664 |
| H63077    | 1533.651  | 1533.277  | AK021445  | 4558.842  | 5486.251  | NM_002878 | 7043.453  | 7080.21   |
| AA679352  | 9664.194  | 11194.177 | NM_017934 | 29785.096 | 30653.152 | NM_017723 | 2814.609  | 2334.585  |
| AA437291  | 2009.327  | 1844.223  | NM_014168 | 64533.918 | 53062.777 | AK022922  | 2941.561  | 2949.315  |
| X04503    | 3396.619  | 4189.926  | AF211971  | 12110.523 | 9909.177  | NM_006462 | 4399.844  | 4104.847  |
| D45917    | 7291.487  | 8371.233  | NM_002931 | 6275.64   | 5800.022  | AK024750  | 8031.373  | 6358.513  |
| X52001    | 9286.694  | 8924.52   | U12767    | 864.89    | 959.121   | NM_000400 | 27928.43  | 30627.801 |
| BI823872  | 693.089   | 704.229   | U17630    | 3759.683  | 3560.416  | M33197    | 64659.234 | 65690.992 |
| AA430552  | 9404.075  | 7522.231  | M33782    | 5559.335  | 4183.566  | NM_002613 | 797.196   | 842.366   |
| X66142    | 5244.972  | 4474.241  | NM_002196 | 1511.432  | 1313.229  | M33197    | 67502.531 | 67328.188 |
| NM_005913 | 1242.87   | 1045.764  | NM_017755 | 22433.246 | 18547.139 | NM_001398 | 15556.396 | 14155.012 |
| R45054    | 7232.405  | 6150.992  | NM_018416 | 2830.891  | 2335.566  | AB050049  | 7576.428  | 7964.298  |
| NM_003780 | 54312.688 | 56454.266 | NM_016621 | 4997.647  | 4880.369  | NM_001995 | 5029.274  | 4516.263  |
| NM_003731 | 24938.848 | 26559.178 | NM_002975 | 4238.764  | 5044.264  | NM_001993 | 1250.691  | 1542.386  |
| NM_005446 | 11157.061 | 10676.871 | AK023511  | 17360.311 | 18448.936 | NM_015725 | 9444.462  | 8933.249  |
| NM_013292 | 6425.693  | 7150.626  | NM_014556 | 17085.881 | 22458.625 | R61452    | 1152.299  | 1025.683  |
| NM_000069 | 2256.245  | 2714.757  | NM_002725 | 4755.479  | 4191.025  | R19938    | 21034.572 | 23259.375 |
| AB023217  | 1022.327  | 1153.431  | NM_014375 | 62755.582 | 58313.973 | N94487    | 17502.611 | 16113.057 |
| L08902    | 1087.666  | 1735.405  | NM_017812 | 34466.938 | 41290.34  | AI886795  | 4289.978  | 4140.27   |
| J02639    | 8403.836  | 11509.214 | AF204173  | 3073.902  | 3621.768  | D10495    | 3903.807  | 4303.491  |
| M58050    | 6349.649  | 6768.575  | J03260    | 8079.252  | 9911.023  | M33197    | 67037.688 | 75753.953 |
| NM_007263 | 19205.189 | 19947.332 | U13738    | 4398.323  | 4699.291  | NM_002633 | 24227.654 | 24326.299 |
| AF206020  | 1211.467  | 1308.153  | AF068236  | 63502.301 | 64459.043 | AF086129  | 2409.681  | 2046.711  |
| NM_001756 | 995.79    | 848.247   | H94487    | 12888.13  | 13159.084 | D79994    | 2395.106  | 3134.885  |
| NM_014410 | 4110.195  | 3466.364  | BG681747  | 43761.539 | 40572.973 | NM_014458 | 30255.969 | 28215.586 |
| AF312769  | 1582.673  | 1360.158  | H63077    | 5333.708  | 5536.602  | AF235049  | 8234.145  | 8278.052  |
| AB020668  | 4537.816  | 4226.724  | AA437291  | 3744.869  | 4597.92   | M33197    | 64253.906 | 66657.891 |
| NM_006203 | 52163.664 | 51249.367 | X04503    | 5271.227  | 5978.923  | NM_007369 | 2127.905  | 1734.442  |
| NM_013261 | 2320.138  | 1970.128  | D45917    | 11601.552 | 9369.753  | NM_014776 | 2964.335  | 2957.16   |
| NM_003558 | 431.803   | 536.08    | X52001    | 18072.885 | 12963.179 | NM_006480 | 64227.414 | 61480.586 |
| AF309553  | 7840.308  | 6561.535  | BI823872  | 1021.647  | 860.474   | NM_007223 | 64640.246 | 70769.68  |
| NM_003605 | 2370.914  | 2145.063  | AA430552  | 15446.246 | 14078.104 | NM_000145 | 1085.765  | 1363.482  |
| NM_006139 | 1517.972  | 1043.16   | X66142    | 7742.856  | 5966.823  | AF030107  | 16776.141 | 18627.27  |
| NM_001900 | 59735.898 | 63640.086 | NM_005913 | 2223.524  | 1809.656  | NM_000871 | 1579.205  | 1670.23   |
| NM_003993 | 6048.48   | 6471.945  | NM_003780 | 63506.262 | 63243.238 | M33197    | 63840.828 | 68939.5   |
| NM_002150 | 2423.003  | 2615.325  | NM_003731 | 50193.891 | 56726.461 | NM_018968 | 2545.475  | 1884.39   |
| NM_004595 | 13663.944 | 13783.142 | NM_013292 | 49759.289 | 57401     | AF086924  | 62418.066 | 67587.641 |
| NM_020178 | 473.999   | 875.343   | NM_002387 | 8547.49   | 9544.942  | M33197    | 66333.313 | 81939.75  |
| NM_002264 | 2068.509  | 2354.109  | NM_000069 | 17465.213 | 19727.18  | NM_001154 | 4124.372  | 3676.364  |
| NM_014754 | 28452.492 | 33141.066 | AB023217  | 1583.314  | 1866.355  | NM_016938 | 579.13    | 788.868   |
| D49387    | 429.086   | 577.21    | L08902    | 3396.311  | 3281.716  | NM_001663 | 5093.721  | 4363.679  |
| AF050146  | 1802.536  | 2039.546  | J02639    | 8991.715  | 9600.586  | NM_004218 | 11607.809 | 11993.271 |
| NM_000116 | 2311.281  | 2414.378  | M58050    | 10265.098 | 11682.372 | NM_016530 | 4205.351  | 3883.868  |
| NM_006698 | 7136.127  | 8306.887  | NM_007263 | 26148.119 | 27698.592 | M33197    | 62779.32  | 64708.367 |
| NM_006804 | 5188.347  | 6849.502  | AF206020  | 19028.211 | 17628.227 | NM_001716 | 15775.196 | 15240.78  |
| NM_001133 | 1739.967  | 1693.657  | NM_014410 | 13666.496 | 10653.751 | NM_006564 | 3458.481  | 3281.131  |
| AK025641  | 51880.695 | 53989.234 | AF312769  | 3134.953  | 2961.597  | NM_004802 | 1435.679  | 1113.271  |
| AB014514  | 5195.948  | 5238.724  | AB020668  | 12578.549 | 10287.144 | M33197    | 64178.602 | 65553.367 |
| NM_002865 | 12815.152 | 14668.072 | NM_006203 | 63786.41  | 57210.668 | NM_002983 | 8835.414  | 7709.98   |
| NM_003566 | 3782.822  | 2571.399  | NM_013261 | 3919.82   | 2716.538  | NM_000074 | 16858.396 | 16344.339 |
| NM_007159 | 59822.637 | 55919.844 | NM_003558 | 3002.533  | 2357.688  | BF434335  | 49838.828 | 53849.742 |

|           |           |           |           |           |           |           |           |           |
|-----------|-----------|-----------|-----------|-----------|-----------|-----------|-----------|-----------|
| NM_01839C | 3058.462  | 3014.318  | AF309553  | 10852.533 | 8631.019  | M57627    | 752.381   | 951.708   |
| AB037724  | 4173.643  | 4373.567  | NM_003605 | 4082.415  | 3616.578  | NM_002993 | 1306.469  | 1270.454  |
| AK025086  | 1695.821  | 1385.03   | NM_006139 | 1669.699  | 1517.29   | AK026946  | 1656.212  | 1943.413  |
| AK026151  | 2870.809  | 3446.09   | NM_003993 | 8990.318  | 9346.808  | M33197    | 65675.914 | 88544.719 |
| NM_01414C | 1972.645  | 3460.819  | NM_00215C | 17931.674 | 23799.217 | NM_003192 | 1842.471  | 1616.484  |
| NM_00291E | 4972.712  | 7719.456  | NM_02017E | 1042.525  | 1162.83   | NM_01844E | 8260.933  | 7540.903  |
| M20700    | 5200.729  | 5977.999  | NM_002264 | 3063.15   | 3710.106  | NM_00139E | 18601.061 | 17052.576 |
| NM_001034 | 8204.527  | 7458.572  | NM_014754 | 45028.5   | 55573.277 | AB050049  | 11460.077 | 11178.226 |
| NM_00268E | 3011.749  | 2952.597  | D49387    | 2324.977  | 2418.273  | J05125    | 879.955   | 494.055   |
| NM_01768E | 675.908   | 929.708   | AF050146  | 21898.334 | 24859.297 | AY004175  | 2933.619  | 2116.108  |
| AL096734  | 600.143   | 1107.294  | NM_000116 | 5965.279  | 6263.499  | M33197    | 63331.969 | 63380.578 |
| NM_00721E | 940.456   | 859.972   | NM_00669E | 17223.664 | 19090.389 | NM_012327 | 3070.653  | 2645.992  |
| AK000800  | 3313.692  | 3563.357  | NM_006804 | 41845.539 | 36699.754 | NM_000904 | 1890.405  | 1934.492  |
| NM_018154 | 5362.515  | 5096.592  | NM_001133 | 1725.652  | 1512.292  | NM_00037E | 4052.051  | 2653.48   |
| BC006287  | 4918.45   | 5653.366  | AK025641  | 64640.512 | 62081.793 | NM_00026E | 32763.166 | 27288.109 |
| AB023198  | 7054.947  | 9777.345  | AB040457  | 1422.523  | 1444.514  | NM_01884E | 4373.623  | 4062.208  |
| AF304163  | 10095.939 | 9896.792  | AB014514  | 10013.208 | 8477.402  | M33197    | 67129.984 | 68718.859 |
| NM_005231 | 9724.922  | 10208.684 | NM_00286E | 18693.027 | 15053.917 | AF279890  | 7457.903  | 7299.939  |
| AF064729  | 2857.07   | 2144.41   | NM_00356E | 5450.907  | 3517.273  | NM_00223E | 4978.739  | 4161.628  |
| NM_00541E | 26258.025 | 27367.205 | AK026315  | 800.239   | 811.587   | NM_01206E | 4876.709  | 4428.975  |
| NM_012113 | 4122.885  | 4234.521  | NM_00715E | 64625.16  | 63798.535 | NM_00168E | 61788.965 | 61043.875 |
| NM_01455E | 4317.826  | 6067.43   | NM_01839C | 4151.845  | 5078.304  | NM_016601 | 2149.141  | 2099.599  |
| NM_00161E | 57595.805 | 59759.66  | AB037724  | 24941.051 | 23952.242 | NM_01790E | 20026.5   | 19103.715 |
| NM_00272E | 1386.131  | 1187.213  | AK026151  | 21141.439 | 22545.838 | M33197    | 66779.805 | 77942.789 |
| NM_01437E | 3546.637  | 3583.66   | M20700    | 10380.084 | 10725.287 | NM_00681E | 32239.113 | 30395.248 |
| NM_01781E | 17772.559 | 30470.223 | NM_001034 | 13919.358 | 14739.65  | M33197    | 64619.547 | 95437.992 |
| AF204173  | 999.181   | 1783.892  | NM_00268E | 5266.897  | 5632.903  | L40520    | 2460.402  | 2317.304  |
| J03260    | 1827.131  | 3280.889  | NM_01768E | 1331.193  | 1393.017  | M33197    | 65626.375 | 63431.371 |
| U13738    | 3755.256  | 4959.821  | AL096734  | 2274.582  | 1527.712  | NM_00287E | 1763.464  | 1164.875  |
| AF068236  | 29826.168 | 31283.141 | AK000800  | 5677.184  | 6078.871  | NM_01772E | 1564.599  | 1428.341  |
| H94487    | 993.122   | 1344.414  | NM_018154 | 7836.061  | 6780.112  | NM_00646E | 3130.967  | 2399.085  |
| BG681747  | 28766.27  | 23974.715 | NM_00535E | 875.641   | 968.862   | AK024750  | 5036.748  | 3983.436  |
| AA679352  | 8721.942  | 11332.915 | BC006287  | 7103.7    | 5993.763  | NM_00040C | 27264.408 | 30293.322 |
| AA437291  | 1950.773  | 2071.764  | AB023198  | 9925.897  | 10573.673 | M33197    | 66725.422 | 66202.32  |
| X04503    | 2785.496  | 3250.858  | AF304163  | 13625.423 | 10240.744 | NM_00261E | 3870.877  | 3266.709  |
| D45917    | 4254.913  | 3734.787  | NM_005231 | 13854.56  | 11451.783 | NM_00441E | 6478.546  | 7224.105  |
| X52001    | 9163.663  | 8100.145  | AF064729  | 3941.658  | 3405.615  | U47635    | 3226.855  | 3097.938  |
| BI823872  | 1112.651  | 1546.836  | NM_00541E | 32229.305 | 38479.777 | NM_01865C | 2450.813  | 2417.234  |
| AA430552  | 8809.939  | 7895.454  | NM_012113 | 4053.295  | 4179.33   | AK026945  | 4563.381  | 6198.1    |
| X66142    | 5430.442  | 4301.252  | NM_01455E | 10550.755 | 13069.551 | NM_00282E | 1704.243  | 1971.721  |
| NM_00591E | 1231.558  | 729.107   | NM_00272E | 4577.003  | 3481.7    | NM_01436E | 1301.769  | 2396.167  |
| R45054    | 7586.474  | 6051.646  | NM_01781E | 38362.172 | 44096.352 | M33197    | 67649.75  | 69786.258 |
| AL117398  | 4986.015  | 4518.828  | U13738    | 4779.964  | 4395.008  | AL834159  | 5532.273  | 4533.805  |
| AY007158  | 53940.617 | 60473.879 | AF068236  | 64205.543 | 64340.895 | NM_000164 | 31949.299 | 39352.316 |
| NM_00172C | 5902.243  | 4379.767  | H94487    | 12627.842 | 15375.188 | AK025253  | 1579.346  | 1921.306  |
| NM_01329E | 7441.084  | 10578.782 | BG681747  | 42371.059 | 38317.754 | AK025004  | 1678.231  | 1568.238  |
| NM_002387 | 4484.917  | 4312.834  | H63077    | 4777.03   | 4130.043  | AL136818  | 1330.279  | 1248.314  |
| NM_00006E | 1959.469  | 2069.544  | AA679352  | 13942.271 | 11630.012 | AK022049  | 1253.951  | 1043.205  |
| AB023217  | 1278.399  | 1114.344  | AA437291  | 4685.516  | 3541.231  | AF086517  | 16143.419 | 14214.911 |
| L08902    | 1419.199  | 2212.384  | X04503    | 5216.393  | 6059.925  | AK025740  | 23223.98  | 19250.904 |
| J02639    | 9283.266  | 16705.822 | D45917    | 11955.601 | 13869.751 | AK000311  | 2639.167  | 2532.844  |
| M58050    | 6832.024  | 9388.965  | X52001    | 18247.826 | 16952.568 | SR5       | 5533.967  | 5883.693  |
| NM_00726E | 19922.943 | 26558.949 | AA430552  | 17384.109 | 16113.66  | SR7       | 6209.282  | 39654.059 |

|           |           |           |           |           |           |           |           |           |
|-----------|-----------|-----------|-----------|-----------|-----------|-----------|-----------|-----------|
| AF206020  | 1110.855  | 1225.027  | X66142    | 9538.871  | 9779.124  | SR9       | 16479.545 | 2313.625  |
| NM_01441C | 2526.653  | 2752.597  | NM_005913 | 2995.296  | 3072.516  | CY3Cy5    | 12949.844 | 457.34    |
| AF305835  | 1353.308  | 1422.663  | R45054    | 9427.229  | 8026.539  | D16951    | 719.138   | 1148.901  |
| AF312769  | 2134.34   | 2415.355  | AL117398  | 7496.213  | 8559.34   | L19362    | 1089.118  | 980.365   |
| AB020668  | 5572.494  | 6509.9    | NM_00172C | 13554.867 | 13015.742 | L33807    | 2660.595  | 2759.634  |
| NM_006203 | 50961.324 | 56172.711 | NM_002387 | 6289.133  | 6569.677  | NM_01645C | 71743.789 | 60359.516 |
| NM_013261 | 2231.286  | 2096.993  | NM_000069 | 15148.46  | 14727.09  | AK022677  | 4322.793  | 4949.918  |
| NM_00355E | 661.914   | 795.425   | AB023217  | 1639.971  | 1655.036  | AF217993  | 5689.279  | 5499.166  |
| AF309553  | 7869.406  | 8069.408  | M58050    | 11870.554 | 12321.418 | AF131823  | 1638.94   | 1263.763  |
| NM_00360E | 2532.371  | 2570.096  | NM_007263 | 24678.742 | 26201.971 | AK026324  | 12197.251 | 10250.628 |
| NM_006139 | 1252.779  | 1000.408  | AF206020  | 19198.809 | 17189.643 | AK024518  | 26879.875 | 24116.268 |
| NM_00190C | 56447.391 | 65291.973 | NM_01441C | 13131.731 | 6340.551  | AK024586  | 1383.455  | 1308.914  |
| NM_003993 | 5739.208  | 5326.24   | AF305835  | 2185.794  | 1000.325  | AK025017  | 6345.033  | 7177.56   |
| NM_00297E | 3961.187  | 3150.376  | AF312769  | 4656.086  | 4987.849  | AK024534  | 729.765   | 944.802   |
| AK023511  | 15311.793 | 11855.068 | AB020668  | 14336.852 | 16180.404 | AK024616  | 3634.785  | 3881.641  |
| NM_02017E | 698.077   | 803.643   | NM_006203 | 63113.316 | 64064.465 | AK024914  | 5197.717  | 5499.812  |
| NM_002264 | 1757.991  | 2237.707  | NM_013261 | 3562.368  | 3661.651  | AK025346  | 77717.406 | 61247.883 |
| NM_014754 | 25349.449 | 29408.107 | AF309553  | 11081.945 | 7638.194  | AK026869  | 3018.684  | 3293.962  |
| AF050146  | 1380.724  | 1289.326  | NM_00360E | 4666.673  | 5454.475  | NM_01909C | 75864.25  | 60934.348 |
| NM_000116 | 2726.808  | 3147.277  | NM_006139 | 2278.933  | 2200.175  | Y12020    | 63119.422 | 57619.789 |
| NM_00669E | 7859.593  | 8579.734  | NM_00190C | 64531.461 | 69712.383 | AJ011597  | 569.754   | 806.036   |
| NM_006804 | 8033.395  | 8535.775  | AK023511  | 21883.574 | 21559.285 | AJ001905  | 5167.771  | 5580.273  |
| AK025641  | 40695.141 | 42609.043 | NM_002264 | 2444.527  | 2644.109  | U17635    | 2092.82   | 2051.503  |
| AB040457  | 886.613   | 879.639   | NM_014754 | 44509.25  | 49610.152 | AL049930  | 1159.042  | 654.092   |
| AB014514  | 6910.165  | 8738.587  | D49387    | 2579.833  | 2649.113  | AF086198  | 32951.859 | 31280.521 |
| NM_00286E | 13503.887 | 15196.573 | NM_000116 | 6126.8    | 6354.241  | AL137382  | 78269.43  | 61374.465 |
| NM_00356E | 4144.822  | 3325.146  | NM_006804 | 41352.461 | 27296.117 | AK024599  | 5198.576  | 5047.544  |
| AK026315  | 614.927   | 573.686   | AK025641  | 63302.531 | 61693.969 | NM_01445C | 7992.101  | 7317.917  |
| NM_00715E | 55532.129 | 58754.902 | AB040457  | 1127.481  | 958.325   | AK021821  | 1161.586  | 1319.519  |
| NM_003731 | 44095.488 | 38673.992 | AB014514  | 10493.601 | 12646.663 | AL049328  | 1848.692  | 2003.539  |
| NM_00544E | 38264.68  | 29982.881 | NM_00286E | 18407     | 19981.492 | AK000910  | 4807.187  | 6209.931  |
| AB037724  | 4270.454  | 4726.567  | NM_00356E | 6393.381  | 2924.461  | AF252280  | 27699.676 | 27687.988 |
| AK025086  | 1482.599  | 1530.191  | AK026315  | 855.954   | 1014.853  | AK000107  | 1186.878  | 868.202   |
| AK026151  | 2349.652  | 2613.597  | NM_00544E | 59568.996 | 58289.5   | AK000795  | 1926.547  | 1620.543  |
| NM_01414C | 1636.956  | 2264.381  | AK025086  | 6024.722  | 5835.316  | AK000951  | 1761.169  | 1078.606  |
| NM_00291E | 5286.083  | 5952.184  | AK026151  | 21985.912 | 22282.834 | AF130064  | 62870.477 | 59416.055 |
| M20700    | 4794.3    | 4617.579  | NM_01414C | 3087.949  | 3673.816  | U17624    | 1749.747  | 1363.259  |
| NM_001034 | 8290.231  | 8105.401  | M20700    | 10814.942 | 9715.914  | AK025184  | 630.232   | 1195.151  |
| NM_00268E | 3003.466  | 2633.852  | NM_00268E | 5297.248  | 3397.52   | D16988    | 52365.219 | 45191.277 |
| NM_01768E | 807.342   | 844.508   | AL096734  | 1174.704  | 1311.789  | AK001959  | 15981.328 | 17939.6   |
| AL096734  | 835.258   | 1085.878  | AK000800  | 4667.232  | 4854.81   | U36217    | 5611.056  | 6397.313  |
| AK000800  | 3615.157  | 4255.232  | NM_018154 | 7581.996  | 6292.399  | AL389880  | 426.614   | 478.125   |
| NM_018154 | 5335.872  | 5316.381  | NM_00535E | 617.532   | 746.131   | AK024155  | 20981.404 | 23266.17  |
| NM_00535E | 650.176   | 741.88    | BC006287  | 7598.261  | 9863.051  | AL359334  | 11804.553 | 14535.552 |
| BC006287  | 6570.01   | 7869.483  | AB023198  | 9833.961  | 14334.213 | AK027095  | 1943.106  | 1875.047  |
| AB023198  | 8370.546  | 11629.915 | AF304163  | 11481.669 | 12416.948 | AF116615  | 3636.397  | 4687.433  |
| AF304163  | 9336.238  | 9799.569  | NM_005231 | 14997.213 | 16409.785 | U17636    | 74294.875 | 60927.953 |
| NM_005231 | 11042.355 | 11648.614 | AF064729  | 4148.718  | 3767.477  | NM_01854E | 9580.147  | 10716.035 |
| AF064729  | 2995.626  | 2738.081  | NM_005412 | 35195.191 | 39115.402 | AJ011910  | 15659.774 | 18945.732 |
| NM_005412 | 26310.271 | 29603.586 | NM_012113 | 4030.028  | 3898.109  | AK024378  | 1992.409  | 2229.961  |
| NM_012113 | 4242.449  | 6078.546  | NM_00215C | 22049.756 | 14952.625 | NM_01402E | 7422.089  | 7304.824  |
| NM_00215C | 12444.013 | 9847.84   | NM_00459E | 23126.871 | 18425.129 | D61703    | 19817.141 | 16103.587 |
| NM_00459E | 16178.253 | 13015.03  | NM_01437E | 64248.289 | 62473.371 | AL359652  | 2184.81   | 2152.871  |

|           |           |           |           |           |           |           |           |           |
|-----------|-----------|-----------|-----------|-----------|-----------|-----------|-----------|-----------|
| NM_002725 | 3901.443  | 5401.825  | NM_017812 | 38214.684 | 49178.512 | AK022423  | 2804.269  | 2757.399  |
| NM_014375 | 5494.272  | 6312.606  | AF204173  | 2338.464  | 3147.589  | AF088021  | 10065.412 | 10257.206 |
| NM_017812 | 18119.619 | 22411.832 | H63077    | 4500.957  | 4740.535  | BF509267  | 3266.274  | 3341.974  |
| AF204173  | 1292.14   | 1797.471  | AA679352  | 13312.666 | 12311.264 | NM_002455 | 6510.18   | 7318.937  |
| J03260    | 1728.984  | 2208.887  | AA437291  | 4838.507  | 4479.91   | NM_002955 | 6374.164  | 5962.025  |
| U13738    | 2863.113  | 2721.463  | X04503    | 4791.956  | 5408.554  | AK000899  | 14832.766 | 16432.066 |
| AF068236  | 49990.434 | 53800.621 | D45917    | 11477.188 | 12760.296 | NM_017991 | 1405.251  | 1378.184  |
| H94487    | 2680.855  | 2150.988  | X52001    | 18880.996 | 21164.875 | U67822    | 871.858   | 1174.852  |
| BG681747  | 28696.971 | 26567.732 | BI823872  | 1131.207  | 1349.786  | AK025431  | 552.599   | 865.375   |
| H63077    | 1826.779  | 1219.818  | AA430552  | 23278.299 | 24941.277 | AK023662  | 1989.72   | 2506.458  |
| AA679352  | 8634.114  | 12102.572 | X66142    | 8668.742  | 9240.703  | AF086274  | 69633.297 | 61602.734 |
| AA437291  | 1238.206  | 1433.453  | NM_005913 | 2849.531  | 2560.659  | AK023682  | 1492.837  | 1898.181  |
| X04503    | 2783.366  | 2985.346  | R45054    | 11153.177 | 10175.759 | AK024024  | 3322.199  | 3259.308  |
| D45917    | 6898.784  | 6008.479  | AL117398  | 7235.981  | 8660.584  | AK000685  | 15282.497 | 18760.629 |
| X52001    | 10161.429 | 8579.359  | AY007158  | 59625.523 | 60423.961 | D28381    | 28237.348 | 29203.383 |
| BI823872  | 518.8     | 423.912   | NM_001720 | 11868.748 | 9315.753  | AK023543  | 1291.678  | 1069.019  |
| AA430552  | 8867.461  | 8044.841  | NM_018390 | 4830.042  | 3919.541  | BE706519  | 2392.032  | 2094.172  |
| X66142    | 5364.232  | 4430.001  | AF206020  | 20450.818 | 20533.939 | NM_019096 | 6614.79   | 6249.464  |
| NM_005913 | 1303.172  | 1083.239  | NM_014410 | 16324.627 | 16673.275 | NM_014725 | 1469.906  | 1365.725  |
| R45054    | 7822.807  | 7896.312  | NM_006203 | 62489.02  | 57707.066 | NM_006892 | 4315.86   | 4029.607  |
| AL117398  | 4819.678  | 4373.331  | AF309553  | 9141.45   | 8257.356  | NM_019117 | 1432.978  | 1763.383  |
| AY007158  | 49641.125 | 60417.754 | NM_003605 | 3691.553  | 3982.448  | NM_018305 | 2784.96   | 2775.846  |
| NM_001720 | 5911.788  | 3877.344  | NM_006139 | 2086.489  | 2252.192  | NM_017655 | 7689.093  | 8154.702  |
| NM_018390 | 3335.718  | 1809.13   | NM_000100 | 56639.547 | 60975.91  | NM_018675 | 17407.24  | 16672.646 |
| NM_007263 | 18084.186 | 16259.063 | NM_001900 | 64595.297 | 68291.859 | NM_006775 | 6887.293  | 6461.686  |
| AF206020  | 2833.943  | 1932.165  | NM_003993 | 9020.186  | 11348.322 | NM_019847 | 1293.259  | 1150.116  |
| NM_014410 | 2534.573  | 1341.515  | NM_018961 | 8272.502  | 9662.898  | D17093    | 11323.385 | 9268.465  |
| AF305835  | 511.64    | 305.187   | NM_005586 | 9329.024  | 12955.022 | AL117521  | 4198.127  | 4100.124  |
| AF312769  | 494.396   | 223.958   | NM_012242 | 3006.988  | 3477.238  | AK021913  | 21614.908 | 25252.313 |
| AB020668  | 2551.71   | 1557.271  | NM_006896 | 3411.637  | 2249.478  | AL137489  | 34695.188 | 43991.938 |
| NM_006203 | 33597.176 | 19599.91  | NM_001130 | 62043.066 | 58225.242 | AF009311  | 11195.441 | 12241.54  |
| NM_013261 | 1741.105  | 879.788   | NM_002975 | 6157.247  | 4778.34   | S73397    | 4980.412  | 5200.135  |
| AF309553  | 6640.548  | 5626.142  | AK023511  | 20846.336 | 16446.775 | AK023939  | 884.133   | 922.762   |
| NM_003605 | 2067.005  | 1865.928  | NM_014556 | 13709.563 | 12815.66  | AB014557  | 2645.225  | 2417.429  |
| NM_006139 | 1953.766  | 1311.508  | NM_001615 | 63977.559 | 62651.113 | NM_005575 | 7104.016  | 4328.132  |
| NM_000100 | 43914.301 | 29525.16  | NM_003055 | 1718.351  | 1476.121  | NM_003653 | 10215.956 | 10800.232 |
| NM_001900 | 58245.82  | 63387.094 | NM_004594 | 1013.012  | 324.402   | NM_018457 | 48681.855 | 50221.449 |
| NM_003993 | 5911.603  | 4245.914  | AB014514  | 10641.785 | 9183.464  | NM_002953 | 8213.501  | 8693.509  |
| NM_018961 | 3411.365  | 2757.333  | NM_002865 | 19048.973 | 26146.738 | NM_002187 | 969.898   | 1056.573  |
| NM_005586 | 4283.667  | 2727.941  | AK026315  | 907.973   | 1332.445  | NM_014246 | 13975.369 | 12314.565 |
| NM_012242 | 2188.858  | 1481.033  | NM_007159 | 63076.793 | 61458.578 | BC035395  | 8518.178  | 6094.084  |
| NM_006896 | 2416.115  | 1589.115  | NM_003731 | 60300.453 | 58791.859 | NM_001703 | 23914.623 | 20986.514 |
| NM_001130 | 53186.207 | 57151.738 | NM_005446 | 59952.195 | 61193.91  | NM_020126 | 4068.219  | 4000.678  |
| NM_002975 | 4077.906  | 3314.73   | NM_013292 | 49739.75  | 54953.926 | NM_013982 | 6709.517  | 6651.719  |
| AK023511  | 15834.754 | 13817.827 | NM_002387 | 6954.755  | 7395.975  | NM_005045 | 2282.387  | 2358.332  |
| NM_014556 | 9627.245  | 8064.349  | NM_000069 | 12396.204 | 6930.074  | NM_004630 | 16340.566 | 18146.045 |
| NM_001615 | 53781.707 | 58948.086 | AB023217  | 3496.597  | 1991.663  | AK023001  | 12231.607 | 13729.876 |
| AK025886  | 467.073   | 348.671   | L08902    | 3057.291  | 2031.196  | NM_014826 | 24334.412 | 24438.904 |
| NM_003055 | 683.157   | 438.178   | J02639    | 11456.021 | 8976.856  | NM_006116 | 5015.698  | 5178.467  |
| AB014514  | 3786.909  | 3306.269  | M58050    | 12975.412 | 10722.347 | BF219403  | 44219.852 | 49298.93  |
| NM_002865 | 12148.222 | 10304.118 | NM_012113 | 4384.521  | 5809.042  | NM_016119 | 3800.582  | 4186.928  |
| NM_003566 | 3705.995  | 1635.155  | NM_002150 | 20628.867 | 19713.504 | AK075450  | 3236.161  | 4092.174  |
| AK026315  | 593.897   | 528.309   | NM_004595 | 19765.764 | 19089.846 | AF178983  | 9643.659  | 10648.594 |

|           |           |           |           |           |           |           |           |           |
|-----------|-----------|-----------|-----------|-----------|-----------|-----------|-----------|-----------|
| NM_00715E | 49482.254 | 47798.316 | NM_02017E | 1143.673  | 964.318   | NM_001324 | 10356.145 | 10341.11  |
| NM_003731 | 37408.652 | 26829.006 | NM_002264 | 3025.839  | 3990.674  | AB037795  | 2240.45   | 2847.628  |
| NM_00544E | 38760.797 | 25053.916 | NM_014754 | 43174.152 | 48592.441 | D43949    | 2884.896  | 3461.351  |
| NM_01329E | 26798.656 | 19496.502 | D49387    | 2653.152  | 3155.61   | AF111849  | 27604.846 | 28110.678 |
| NM_002387 | 4858.331  | 3783.439  | NM_00669E | 17819.037 | 22475.801 | AK022975  | 817.315   | 999.851   |
| NM_00006E | 7499.218  | 6019.877  | NM_006804 | 42591.016 | 46091.305 | NM_015344 | 1200.353  | 1183.98   |
| AB023217  | 1282.218  | 1209.049  | NM_01596E | 20133.168 | 24284.381 | NM_00428E | 3274.068  | 2793.827  |
| L08902    | 2456.597  | 1836.67   | NM_003051 | 12691.274 | 16698.072 | AL122055  | 4463.147  | 3168.12   |
| J02639    | 8785.771  | 7589.083  | NM_001133 | 4520.23   | 1485.397  | NM_00513E | 17510.998 | 15898.772 |
| M58050    | 8397.876  | 7657.666  | NM_14534E | 16490.473 | 14380.605 | X07695    | 700.844   | 529.203   |
| NM_012113 | 2253.778  | 1804.26   | AJ278917  | 62495.551 | 55024.371 | D87458    | 3534.948  | 3497.208  |
| NM_00215C | 4751.272  | 3262.253  | AK025641  | 66590.469 | 61863.906 | AK021750  | 15438.878 | 16491.412 |
| NM_00459E | 13444.925 | 10184.982 | AY007158  | 60838.852 | 66859.578 | NM_00362E | 4814.752  | 4591.454  |
| NM_02017E | 570.544   | 564.667   | NM_00172C | 10437.041 | 10386.521 | NM_00693E | 1539.238  | 1848.995  |
| NM_002264 | 1943.228  | 1382.933  | NM_01839C | 3617.698  | 3796.867  | AK023594  | 5023.759  | 4578.728  |
| NM_014754 | 24162.225 | 21075.721 | AB037724  | 23129.918 | 24417.4   | AF208005  | 1537.934  | 1509.861  |
| D49387    | 1208.1    | 804.578   | AK025086  | 5240.522  | 6126.908  | NM_002231 | 25311.906 | 25022.428 |
| AF050146  | 9887.452  | 8015.154  | AK026151  | 20672.406 | 22617.867 | NM_020474 | 11911.905 | 12040.876 |
| NM_000116 | 3006.965  | 2741.147  | NM_01414C | 2994.198  | 4790.292  | NM_00264E | 4179.177  | 5666.687  |
| NM_00669E | 11184.884 | 9637.105  | NM_00291E | 6207.028  | 8022.383  | NM_017807 | 5293.937  | 5654.742  |
| NM_006804 | 25391.568 | 20279.842 | M20700    | 10088.796 | 10250.95  | NM_01474E | 1017.47   | 974.895   |
| NM_01596E | 12151.368 | 9869.089  | NM_001034 | 13511.057 | 11457.816 | NM_00278E | 47908.223 | 52577.801 |
| NM_003051 | 7573.823  | 6046.747  | NM_00268E | 3896.149  | 3987.565  | NM_00046E | 20434.336 | 20408.914 |
| NM_14534E | 13635.104 | 8393.624  | NM_01768E | 1139.348  | 1287.375  | NM_00333E | 7260.283  | 6819.19   |
| AJ278917  | 55352.574 | 42295.191 | AK000800  | 6961.542  | 4853.605  | NM_00580E | 29891.348 | 32831.375 |
| AK025641  | 56490.785 | 52459.699 | NM_018154 | 8170.833  | 6722.015  | NM_004181 | 35884.777 | 44818.973 |
| AL117398  | 4848.142  | 5271.072  | BC006287  | 7355.686  | 9028.709  | NM_00390C | 13498.003 | 10685.433 |
| AY007158  | 58689.109 | 60117.344 | AB023198  | 9174.717  | 10371.836 | NM_003337 | 1495.655  | 1247.154  |
| NM_00172C | 2001.478  | 1101.633  | AF304163  | 11382.703 | 12127.723 | AF298152  | 2859.673  | 1686.457  |
| NM_01839C | 2189.892  | 1439.602  | NM_005231 | 14507.606 | 14216.837 | AF117233  | 8348.988  | 7476.154  |
| AB037724  | 5260.849  | 3698.912  | AF064729  | 3876.765  | 4029.255  | NM_01584E | 1178.916  | 1087.418  |
| AK025086  | 1705.278  | 1253.983  | NM_00541E | 32438.641 | 45186.426 | NM_00172E | 1989.357  | 1806.767  |
| AK026151  | 8134.684  | 4671.69   | SB        | 2399.436  | 54.435    | NM_01601E | 2224.943  | 2688.372  |
| NM_01414C | 1661.784  | 1258.345  | NM_02197E | 5330.977  | 5987.528  | M94362    | 25598.947 | 30626.566 |
| NM_00291E | 4547.987  | 3409.861  | AF216077  | 7912.447  | 7420.545  | AK024707  | 2179.886  | 2494.351  |
| M20700    | 5848.173  | 3662.874  | AK021612  | 17725.621 | 20642.963 | NM_01425E | 1458.883  | 1516.215  |
| NM_001034 | 8595.25   | 5043.957  | AF088031  | 1275.501  | 1243.126  | X90978    | 1927.107  | 1794.079  |
| NM_00268E | 3044.459  | 2060.868  | AK002025  | 73390.008 | 62183.766 | AF217226  | 18321.434 | 16419.709 |
| NM_01768E | 913.339   | 636.781   | AK026299  | 3276.993  | 3013.609  | NM_00552E | 542.042   | 915.592   |
| AL096734  | 769.441   | 491.985   | NM_017794 | 2871.626  | 3217.013  | NM_00576C | 24839.434 | 25562.996 |
| AK000800  | 3213.728  | 2313.031  | AK025170  | 4663.522  | 5216.952  | NM_01421E | 3075.336  | 3113.208  |
| NM_018154 | 5968.764  | 3596.856  | AK001478  | 3777.024  | 4343.45   | NM_00726E | 3862.179  | 3883.969  |
| NM_00535E | 611.943   | 352.417   | AK025697  | 11869.324 | 9412.137  | AK023639  | 20201.863 | 18978.479 |
| BC006287  | 5609.83   | 5108.72   | AK021734  | 4571.246  | 4698.61   | AL137700  | 812.209   | 1088.249  |
| AB023198  | 7483.257  | 7256.76   | NM_02197E | 4793.221  | 4592.676  | NM_004904 | 1678.089  | 1762.205  |
| AF304163  | 9811.19   | 9295.932  | SR8       | 11110.127 | 25181.881 | NM_00308E | 10056.59  | 7490.621  |
| NM_005231 | 10038.118 | 10496.714 | SR10      | 33827.063 | 12053.213 | NM_00678E | 3505.358  | 2675.536  |
| AF064729  | 2772.953  | 2444.368  | NM_004544 | 17006.809 | 16457.824 | NM_00098E | 4410.994  | 4612.251  |
| NM_00541E | 26145.738 | 28745.84  | AF086041  | 1027.328  | 1860.219  | NM_001024 | 70024.844 | 64057.699 |
| CY3Cy5    | 1749.379  | 103.618   | Y15167    | 1358.316  | 1899.22   | NM_01609E | 69138.875 | 63829.523 |
| SB        | 1475.452  | 112.568   | AL133080  | 3369.717  | 3427.387  | NM_01242E | 66067.961 | 65110     |
| NM_02197E | 3144.849  | 3152.963  | NM_01779E | 8617.409  | 12825.831 | AK026367  | 43765.879 | 52141.859 |
| AF216077  | 3262.818  | 2831.774  | AK025213  | 5004.217  | 6360.531  | AK026491  | 29631.428 | 37652.168 |

|            |           |           |           |           |           |           |           |           |
|------------|-----------|-----------|-----------|-----------|-----------|-----------|-----------|-----------|
| AK021612   | 10054.469 | 8473.257  | NM_014949 | 2837.372  | 2871.917  | NM_001015 | 65776.43  | 63936.426 |
| AF147342   | 4524.628  | 3404.017  | AL080221  | 2090.774  | 2672.365  | AL110170  | 68460.945 | 70944.336 |
| AF088031   | 752.605   | 721.972   | AK026591  | 1592.341  | 1808.463  | AB044137  | 890.324   | 1214.578  |
| AK002025   | 72792     | 51202.457 | AK001889  | 3645.328  | 4245.427  | NM_000920 | 1995.282  | 2104.012  |
| AK026299   | 2766.586  | 2447.807  | AK025726  | 11752.872 | 10795.987 | NM_020375 | 17477.123 | 19560.861 |
| NM_017794  | 2732.61   | 3045.71   | AJ227869  | 5220.64   | 4535.917  | NM_016045 | 21786.807 | 23051.709 |
| AK025170   | 1421.774  | 1240.029  | AL110262  | 30102.641 | 29257.244 | NM_013311 | 12621.293 | 11041.979 |
| AK025697   | 6763.39   | 5968.985  | AK025627  | 23186.488 | 29723.193 | NM_000291 | 63655.652 | 58354.605 |
| AK021734   | 1183.312  | 1122.532  | AK025246  | 11445.072 | 14257.459 | NM_018081 | 3286      | 3613.052  |
| NM_021976  | 3213.376  | 3258.362  | AK025847  | 2487.885  | 3925.08   | NM_014645 | 3646.043  | 4750.34   |
| SR2        | 49404.5   | 43545.605 | AB033031  | 3335.705  | 3686.413  | AL117488  | 2836.789  | 2914.868  |
| SR4        | 14063.256 | 15280.532 | AF085872  | 28176.303 | 27367.451 | NM_012240 | 3830.24   | 3300.071  |
| SR6        | 2080.595  | 1943.138  | AK022538  | 64148.473 | 58703.703 | NM_019005 | 4994.722  | 3863.423  |
| SR8        | 7554.767  | 20352.867 | AK022342  | 2242.273  | 2077.518  | NM_004735 | 12497.511 | 9969.578  |
| SR10       | 23203.672 | 7602.956  | AF147420  | 4740.465  | 4659.884  | AV752216  | 1131.774  | 1011.988  |
| CY3Cy5     | 1637.311  | 105.932   | AL049312  | 4966.85   | 4268.865  | NM_005341 | 5126.083  | 5492.189  |
| NM_004544  | 11731.399 | 11499.512 | AL050072  | 10950.404 | 10729.45  | AF181999  | 2823.469  | 3184.414  |
| AF086041   | 986.546   | 998.445   | AL117590  | 2584.677  | 2865.42   | NM_001934 | 5738.871  | 5882.157  |
| Y15167     | 826.713   | 946.996   | AL049357  | 26357.148 | 21652.119 | AB011090  | 3453.953  | 3307.25   |
| AL133080   | 2358.624  | 2367.694  | AL050129  | 959.082   | 943.034   | NM_018682 | 10276.883 | 10097.152 |
| NM_017792  | 5783.255  | 5312.915  | AL110223  | 2521.174  | 2862.468  | AB033024  | 3341.194  | 3728.05   |
| AK025213   | 3112.374  | 2536.045  | AL117659  | 1606.335  | 1366.84   | NM_002475 | 1764.213  | 1973.487  |
| NM_014945  | 2346.404  | 1516.694  | AK027180  | 6561.419  | 5567.814  | NM_000345 | 20414.113 | 20489.15  |
| AL080221   | 1751.447  | 1502.6    | AK022236  | 10605.577 | 12517.446 | NM_005055 | 9930.095  | 8811.249  |
| AK026591   | 1052.277  | 866.69    | AK000073  | 4778.316  | 5119.462  | NM_004950 | 4651.525  | 4854.894  |
| AK001889   | 3318.344  | 3564.912  | AK000618  | 1681.645  | 1557.098  | NM_000724 | 6414.871  | 6036.951  |
| AK025726   | 5989.704  | 6126.901  | AK024773  | 1548.602  | 1853.026  | NM_002557 | 22381.719 | 26208.646 |
| AJ227869   | 3025.605  | 2905.047  | AF009262  | 27653.436 | 33228.68  | BI762229  | 6922.184  | 5804.597  |
| AL117613   | 5884.117  | 8058.72   | AF050198  | 4043.51   | 3375.105  | BG618320  | 44938.738 | 40239.938 |
| AL137753   | 7776.698  | 7803.685  | AK024346  | 6804.173  | 6480.049  | Y00787    | 5602.68   | 6625.175  |
| AK021785   | 552.687   | 716.18    | AF056422  | 4324.021  | 3386.586  | NM_007276 | 6441.21   | 6628.759  |
| AL110262   | 15107.429 | 13558.797 | AF090892  | 1320.979  | 1057.459  | N34462    | 12260.902 | 11418.049 |
| AK025627   | 11020.744 | 9370.404  | AK001089  | 3201.013  | 2714.417  | AI658778  | 8097.221  | 8648.342  |
| AK025191   | 661.456   | 788.915   | AK001919  | 1417.982  | 1570.032  | Z48482    | 3117.76   | 3083.249  |
| AK025246   | 6759.689  | 7095.893  | AK021535  | 1137.759  | 1533.863  | W60413    | 5496.866  | 5738.137  |
| AK025847   | 3115.984  | 2495.762  | AK021753  | 9800.135  | 9187.687  | BI823365  | 7604.455  | 6900.18   |
| AK026442   | 387.933   | 507.505   | AK001139  | 8518.867  | 7783.062  | NM_013247 | 5478.517  | 6284.435  |
| AB033031   | 2362.645  | 1899.667  | AK002090  | 1420.279  | 1344.182  | NM_006770 | 4747.89   | 4131.858  |
| AF085872   | 8828.225  | 7361.384  | AK021618  | 1222.104  | 1267.052  | NM_004703 | 8273.556  | 9541.287  |
| AK022538   | 42557.988 | 37529.746 | AK021822  | 2376.098  | 2061.117  | NM_001512 | 1839.338  | 1780.338  |
| AK022342   | 955.553   | 1304.761  | AF116620  | 11138.86  | 14324.091 | NM_014706 | 7226.457  | 8060.778  |
| AF147420   | 2191.579  | 2421.818  | AK024431  | 17080.746 | 23617.52  | AJ001348  | 2331.586  | 2617.501  |
| AL049312   | 2196.477  | 2670.277  | NM_018675 | 67977.625 | 67898.398 | NM_014007 | 1560.398  | 1626.012  |
| AL050072   | 3701.863  | 4902.935  | NM_006220 | 6641.555  | 6925.65   | AB033006  | 3239.873  | 3041.495  |
| AL117590   | 1380.273  | 1395.179  | AK022667  | 14522.872 | 13413.668 | NM_016332 | 16995.52  | 16824.658 |
| AL049357   | 11076.678 | 9078.307  | AK026667  | 896.989   | 961.662   | NM_006457 | 2846.749  | 3219.321  |
| AK027180   | 4129.737  | 2738.93   | NM_014174 | 10417.069 | 12523.906 | NM_003682 | 1901.408  | 2258.353  |
| unknown (4 | 491.547   | 430.419   | AF147337  | 3902.944  | 4389.695  | NM_000207 | 1475.722  | 1835.25   |
| AK022236   | 7736.523  | 7978.75   | AK025203  | 70203.367 | 61791.324 | NM_002531 | 2793.367  | 2213.129  |
| AK000073   | 3062.027  | 2712.151  | AK026981  | 6047.882  | 5398.204  | NM_006314 | 38184.801 | 46758.094 |
| AK000618   | 925.813   | 1750.501  | AK023819  | 1566.263  | 1883.607  | NM_002754 | 2478.593  | 2278.734  |
| AK024773   | 657.526   | 786.573   | AL133656  | 6276.96   | 7332.795  | NM_000797 | 27731.375 | 31238.459 |
| AL390180   | 745.639   | 810.618   | AL050037  | 15765.512 | 15285.637 | AL080148  | 56925.414 | 55985.238 |



|           |           |           |           |           |           |           |           |           |
|-----------|-----------|-----------|-----------|-----------|-----------|-----------|-----------|-----------|
| AF009262  | 19705.063 | 17292.971 | NM_001417 | 66150.336 | 59688.496 | AF000381  | 9532.337  | 9873.524  |
| AF009306  | 1690.782  | 1888.444  | AK023557  | 1718.186  | 2144.923  | NM_012105 | 5328.978  | 5326.194  |
| AF050198  | 2243.502  | 2266.311  | AB040887  | 5076.873  | 6300.716  | S82470    | 6190.828  | 6433.524  |
| AK024346  | 4560.375  | 5512.55   | AK025196  | 19371.125 | 21440.416 | AB028982  | 2108.969  | 2462.502  |
| AF009320  | 1349.861  | 1844.697  | AJ227879  | 1277.657  | 1375.518  | NM_002004 | 3922.873  | 4148.912  |
| AF056422  | 2048.82   | 2122.274  | AK024800  | 1142.513  | 1683.36   | NM_000747 | 5481.192  | 4984.28   |
| AF090892  | 824.533   | 980.149   | AK000401  | 4504.904  | 6455.536  | AK021489  | 49704.133 | 54422.293 |
| AK001089  | 1661.191  | 2066.836  | D17231    | 67150.555 | 69580.188 | NM_004525 | 777.532   | 1195.78   |
| AK001919  | 803.191   | 1056.897  | AF531295  | 2942.547  | 2233.226  | NM_003895 | 721.516   | 847.83    |
| AK021535  | 940.558   | 1245.146  | X60484    | 1618.522  | 1345.349  | NM_004317 | 6373.033  | 5387.291  |
| AK021753  | 4330.838  | 3937.092  | AF055019  | 2542.317  | 3224.056  | NM_014645 | 6035.281  | 6199.235  |
| AK001139  | 2928.494  | 2211.078  | NM_003525 | 11920.34  | 12865.659 | NM_003693 | 4672.066  | 5145.667  |
| AK002090  | 934.518   | 1008.266  | AK000229  | 2814.771  | 3387.72   | NM_000356 | 65997.32  | 61959.414 |
| AK021618  | 766.325   | 555.471   | AF056432  | 5503.949  | 5679.241  | NM_018134 | 66677.914 | 64128.027 |
| AK021822  | 1318.078  | 1009.063  | AK001987  | 43887.887 | 47070.676 | L27479    | 1572.428  | 1270.67   |
| AF116620  | 6862.92   | 7307.057  | NM_013332 | 6987.222  | 5417.67   | NM_002193 | 1773.307  | 1705.723  |
| AF293335  | 59713.926 | 54991.375 | X56199    | 10301.635 | 10649.538 | NM_001385 | 9814.801  | 9350.432  |
| AK024431  | 10983.574 | 15875.518 | NM_005193 | 14412.981 | 16966.539 | X76770    | 3824.486  | 3542.651  |
| AF116635  | 628.189   | 771.913   | AL162006  | 2260.252  | 2819.711  | AB037808  | 2924.968  | 2600.568  |
| X96644    | 4044.395  | 4655.044  | NM_017971 | 54282.066 | 51904.98  | NM_016035 | 5560.495  | 5545.265  |
| Z34281    | 27393.129 | 22031.605 | AF090097  | 2835.757  | 2738.733  | Z36821    | 22689.488 | 23842.863 |
| NM_018675 | 65877.172 | 66637.547 | AF054998  | 2772.923  | 3023.876  | AF289485  | 4386.056  | 5191.607  |
| AJ008122  | 37094.961 | 29386.459 | NM_014750 | 5430.88   | 6038.764  | AF130092  | 4347.363  | 3768.748  |
| NM_006220 | 3937.291  | 3092.227  | NM_015912 | 4925.994  | 7079.477  | NM_019853 | 10428.607 | 8000.528  |
| AK022667  | 8616.804  | 9785.588  | NM_000460 | 4449.857  | 5349.544  | NM_017992 | 1557.58   | 1877.119  |
| AK026667  | 4144.701  | 6353.131  | AB002339  | 7842.459  | 8427.557  | NM_005400 | 1109.078  | 1093.157  |
| AK000944  | 730.425   | 1027.663  | NM_005104 | 23397.162 | 26937.984 | AK023061  | 1174.379  | 1192.094  |
| NM_014174 | 5068.615  | 6003.772  | NM_006885 | 38325.855 | 47454.656 | NM_007255 | 3068.159  | 3651.207  |
| AF147337  | 2751.162  | 3160.981  | AL137423  | 7301.205  | 11291.5   | NM_001187 | 2473.449  | 1933.76   |
| AK026981  | 3410.745  | 4308.552  | NM_007065 | 60777.203 | 53172.672 | NM_018241 | 3771.351  | 4358.408  |
| NM_006394 | 865.513   | 1673.332  | AF113211  | 2466.971  | 1662.132  | NM_005055 | 13252.685 | 12835.524 |
| AK023819  | 1977.272  | 2497.851  | AL117568  | 6530.355  | 4649.178  | NM_004950 | 3813.677  | 3610.255  |
| AL359558  | 864.915   | 1060.436  | NM_000843 | 3986.154  | 4462.429  | NM_000724 | 5215.895  | 5023.036  |
| AL133656  | 2323.815  | 1960.17   | S71805    | 2375.827  | 2866.512  | NM_002557 | 22097.977 | 24785.582 |
| AL050037  | 9637.754  | 8226.216  | NM_018391 | 4074.505  | 5067.388  | NM_004477 | 707.903   | 789.609   |
| NM_001417 | 58396.426 | 37155.656 | U52833    | 1787.399  | 989.762   | BI762229  | 6909.109  | 7868.417  |
| AK023557  | 954.085   | 1041.629  | U90917    | 2679.102  | 2332.42   | BG618320  | 47270.898 | 50656.375 |
| AK027107  | 1503.191  | 1327.728  | AK022140  | 12980.711 | 11630.163 | Y00787    | 3720.32   | 3725.382  |
| AB040887  | 3201.646  | 3538.217  | AK023372  | 64684.16  | 59874.707 | NM_007275 | 6057.342  | 6062.274  |
| AK025196  | 7325.165  | 9898.124  | U21072    | 2983.127  | 3606.416  | N34462    | 12404.557 | 12368.989 |
| AJ227879  | 1870.56   | 3414.875  | AK024377  | 1396.917  | 1900.873  | AI658778  | 7010.67   | 8076.104  |
| AK024800  | 970.786   | 943.484   | AL137461  | 2044.465  | 2023.98   | L19067    | 8665.549  | 8388.173  |
| AK000401  | 3331.144  | 2905.68   | AF114264  | 10809.492 | 12146.959 | Z48482    | 1089.174  | 842.68    |
| AF305068  | 1416.031  | 1334.791  | NM_005545 | 6028.573  | 6788.28   | W60413    | 4853.307  | 4687.288  |
| D17231    | 58487.156 | 49095.906 | AB018261  | 1196.624  | 938.768   | BI823365  | 8078.689  | 7438.296  |
| AF531295  | 2289.287  | 2721.027  | NM_018972 | 5309.517  | 6468.666  | X06318    | 1567.808  | 1480.96   |
| X60484    | 1164.626  | 1573.509  | AB037828  | 1468.017  | 1502.115  | NM_016217 | 45883.453 | 51615.902 |
| AF055019  | 4204.403  | 5836.233  | AB023210  | 1041.322  | 1434.802  | AK025971  | 7522.188  | 7283.09   |
| NM_003525 | 8308.082  | 9428.606  | NM_003645 | 25530.953 | 16290.873 | BE394704  | 554.152   | 451.997   |
| AF056432  | 3783.834  | 5283.556  | AB037735  | 2108.405  | 1362.892  | NM_004703 | 2022.594  | 1788.184  |
| AK001987  | 25764.797 | 28818.529 | AK002177  | 15377.585 | 9077.222  | NM_001512 | 1378.349  | 1221.222  |
| NM_013332 | 5576.869  | 5094.728  | AK024429  | 4938.864  | 4588.391  | NM_014706 | 7085.129  | 7772.187  |
| X56199    | 3175.157  | 3115.437  | NM_003496 | 67992.609 | 71265.406 | AK023172  | 640.974   | 692.188   |

|           |           |           |           |           |           |           |           |           |
|-----------|-----------|-----------|-----------|-----------|-----------|-----------|-----------|-----------|
| NM_005193 | 6779.152  | 5524.256  | AB000509  | 3543.993  | 3904.317  | AJ001348  | 2402.055  | 2452.937  |
| AL162006  | 1067.458  | 995.572   | AB018314  | 4307.809  | 4265.269  | NM_014007 | 1574.326  | 1703.698  |
| NM_017971 | 31817.141 | 22135.795 | NM_004378 | 2402.869  | 2651.352  | AB033006  | 4410.788  | 4980.274  |
| AF090097  | 1631.25   | 1387.812  | AJ238899  | 1774.169  | 1714.841  | AF020314  | 4674.997  | 4400.126  |
| NM_014750 | 3044.352  | 2896.956  | NM_018037 | 8277.916  | 7989.278  | NM_016332 | 15608.38  | 16113.556 |
| NM_015912 | 1340.612  | 1623.25   | NM_001110 | 5893.153  | 6437.6    | AK023936  | 787.987   | 801.691   |
| NM_000460 | 2445.736  | 3387.785  | NM_000841 | 17481.137 | 18598.066 | NM_006457 | 2389.203  | 2680.464  |
| AB002339  | 5327.042  | 7454.313  | NM_001245 | 2787.253  | 2435.556  | NM_003682 | 1824.884  | 1620.676  |
| NM_005104 | 15774.431 | 26255.613 | AJ008139  | 19069.348 | 21170.033 | NM_000207 | 1374.268  | 1148.929  |
| NM_006888 | 28678.412 | 29776.248 | NM_004326 | 25791.547 | 32888.871 | NM_002531 | 2813.37   | 2686.129  |
| AL137423  | 5220.164  | 5326.375  | NM_004577 | 11204.215 | 10184.543 | NM_006314 | 25615.727 | 26178.303 |
| AB018322  | 11973.571 | 10203.459 | NM_015507 | 1561.92   | 1883.308  | NM_001782 | 8108.047  | 7677.455  |
| NM_007068 | 29558.934 | 27552.014 | AF007157  | 55692.918 | 58644.398 | NM_000797 | 27585.836 | 26515.553 |
| AF113211  | 1186.644  | 1172.497  | D38553    | 6067.83   | 7209.833  | AL080148  | 53092.703 | 55872.223 |
| AL117568  | 3940.419  | 3904.236  | NM_006170 | 19598.67  | 19169.924 | NM_002479 | 2460.491  | 2501.558  |
| NM_000843 | 1465.772  | 1299.653  | NM_014298 | 13540.943 | 6947.264  | NM_000348 | 30051.25  | 35674.578 |
| S71805    | 5686.75   | 6564.907  | AK001581  | 4446.487  | 2465.85   | NM_012105 | 3370.408  | 2328.439  |
| NM_018391 | 2891.856  | 3360.626  | NM_005862 | 7840.413  | 3996.892  | S82470    | 4571.796  | 4820.843  |
| U52833    | 619.676   | 1188.955  | NM_000548 | 17799.188 | 8821.528  | AB028982  | 2612.416  | 2751.302  |
| U90917    | 1046.834  | 1558.959  | AK022541  | 15353.411 | 11072.087 | NM_002004 | 3263.362  | 3473.145  |
| AK022140  | 7277.115  | 6666.635  | AB002297  | 7743.766  | 6987.84   | NM_005121 | 798.702   | 488.393   |
| AK023372  | 43005.797 | 36151.574 | NM_005020 | 63094.691 | 62902.715 | NM_000747 | 4264.41   | 4329.352  |
| U21072    | 1898.291  | 2052.002  | NM_014077 | 6530.666  | 6903.06   | AJ275973  | 13095.313 | 12325.597 |
| AK024377  | 967.195   | 796.032   | NM_018412 | 3822.346  | 4247.29   | U76362    | 14747.902 | 13990.833 |
| AL137461  | 715.167   | 780.026   | NM_012329 | 17902.666 | 19180.627 | AK021489  | 45937.664 | 54092.414 |
| AF114264  | 4370.386  | 4863.39   | M14087    | 22695.07  | 23960.051 | NM_004525 | 1005.223  | 874.051   |
| NM_017514 | 588.877   | 689.792   | NM_000885 | 33701.867 | 32599.877 | NM_003895 | 453.675   | 508.501   |
| AB018261  | 545.576   | 486.814   | NM_012338 | 1745.064  | 779.813   | NM_004317 | 5653.44   | 5174.144  |
| NM_018972 | 3794.642  | 4280.255  | X15880    | 68045.727 | 69643.063 | NM_014645 | 5654.707  | 5058.512  |
| AB037828  | 1357.023  | 1401.776  | NM_000666 | 6361.861  | 6598.68   | NM_014708 | 4843.11   | 4421.232  |
| AB023210  | 907.371   | 863.497   | NM_003481 | 11229.893 | 11866.18  | NM_003693 | 3080.621  | 3593.145  |
| AB037786  | 2457.332  | 1817.927  | AB046814  | 1591.445  | 1464.478  | NM_000356 | 62435.785 | 55855.266 |
| NM_003648 | 13363.718 | 13433.762 | NM_017778 | 1636.073  | 1107.689  | NM_018134 | 64954.754 | 63362.535 |
| AB037735  | 1484.382  | 1584.777  | NM_017664 | 7881.813  | 6823.429  | NM_013247 | 6629.606  | 6777.472  |
| AK002177  | 7352.263  | 6137.682  | AK025523  | 1016.006  | 1172.42   | NM_006770 | 5826.501  | 5716.162  |
| AK024429  | 2241.749  | 1917.242  | NM_007059 | 11978.742 | 15991.104 | NM_001388 | 7291.493  | 7786.316  |
| NM_003496 | 63390.883 | 67400.516 | NM_006870 | 14942.285 | 14758.93  | X76770    | 4953.135  | 3797.306  |
| AB000509  | 2694.688  | 2799.996  | NM_007359 | 13767.707 | 16311.67  | NM_016038 | 4955.309  | 4854.67   |
| AB018314  | 2400.284  | 3052.473  | L13283    | 1834.041  | 2222.391  | Z36821    | 26310.602 | 25319.242 |
| NM_004378 | 1498.738  | 1960.011  | NM_013327 | 4585.4    | 4838.599  | AF289485  | 5579.776  | 5591.507  |
| AJ238899  | 1532.376  | 1621.98   | AF303888  | 21547.344 | 27182.398 | AF130092  | 8915.31   | 8518.804  |
| NM_018037 | 6182.922  | 4876.352  | NM_000077 | 3856.976  | 3302.408  | NM_016095 | 5758.663  | 5074.742  |
| NM_001110 | 3748.563  | 3582.379  | AF176646  | 2370.201  | 1359.162  | AK024794  | 2135.477  | 1837.634  |
| NM_000841 | 10458.429 | 8952.95   | NM_003672 | 35708.219 | 43626.418 | NM_019853 | 9020.187  | 6257.687  |
| NM_001245 | 2056.859  | 1503.436  | NM_002574 | 68286.789 | 66416.672 | NM_017992 | 1158.667  | 1208.498  |
| AJ008139  | 11124.146 | 9317.471  | AF141655  | 12965.104 | 11084.92  | AK023061  | 627.717   | 979.392   |
| NM_004326 | 9426.68   | 7415.387  | NM_007345 | 5253.985  | 4050.55   | NM_007255 | 3442.571  | 3989.447  |
| NM_000882 | 574.817   | 574.131   | NM_004830 | 1996.603  | 1844.824  | NM_003668 | 8660.838  | 8711.301  |
| NM_004577 | 6426.822  | 6426.526  | AF132362  | 66069.883 | 70212.953 | NM_013384 | 69216.523 | 64662.934 |
| NM_015507 | 488.047   | 631.532   | NM_007007 | 18983.68  | 20520.854 | NM_001187 | 2442.138  | 1934.625  |
| AF007157  | 38794.449 | 27505.727 | NM_006386 | 8831.084  | 11399.076 | NM_018241 | 3294.073  | 3524.357  |
| D38553    | 4066.084  | 2771.376  | NM_006559 | 35528.766 | 39382.273 | NM_005834 | 6321.037  | 6555.599  |
| NM_006170 | 10056.738 | 8210.224  | NM_004501 | 60538.727 | 54770.648 | AF000381  | 10607.192 | 9742.799  |

|           |           |           |             |           |           |           |           |           |
|-----------|-----------|-----------|-------------|-----------|-----------|-----------|-----------|-----------|
| NM_01429E | 8939.407  | 6052.15   | NM_00496E   | 29944.781 | 35561.344 | NM_000724 | 4908.757  | 4089.537  |
| AK001581  | 2556.152  | 2125.381  | NM_00670C   | 6014.194  | 3100.874  | NM_002557 | 3330.975  | 3150.36   |
| NM_00586E | 3297.713  | 3338.489  | NM_00644E   | 26887.543 | 24719.412 | BI762229  | 9373.056  | 9240.474  |
| NM_00054E | 5941.764  | 4996.537  | NM_01210E   | 47954.113 | 44417.828 | BG618320  | 45827.676 | 49869.344 |
| AK022541  | 9121.468  | 7832.917  | AF019633    | 7800.861  | 7550.533  | Y00787    | 3614.836  | 3269.452  |
| AB002297  | 4571.203  | 4154.972  | AB002361    | 30803.064 | 32999.254 | NM_00727E | 5517.142  | 4712.003  |
| NM_00502C | 52996.93  | 46689.574 | NM_01806C   | 17387.385 | 21577.324 | N34462    | 11735.332 | 10513.037 |
| NM_01841E | 3278.717  | 3673.657  | NM_01423E   | 8185.687  | 9463.686  | AI658778  | 6254.387  | 6387.146  |
| NM_01232E | 12405.416 | 11508.669 | NM_01766E   | 17137.969 | 20926.861 | L19067    | 8314.414  | 7755.642  |
| M14087    | 12750.634 | 14041.432 | U88837      | 5640.875  | 5899.224  | Z48482    | 875.881   | 1086.408  |
| AJ272324  | 995.184   | 1613.337  | NM_01744E   | 39637.387 | 44026.152 | W60413    | 4247.605  | 3970.722  |
| NM_00088E | 15918.143 | 15650.149 | NM_01758E   | 25433.586 | 23703.568 | BI823365  | 5748.636  | 4917.36   |
| M59040    | 3960.836  | 2641.338  | NM_01523E   | 9482.772  | 9854.933  | X06318    | 1338.733  | 1538.873  |
| X15880    | 71663.477 | 66198.203 | AK026962    | 6721.968  | 7113.696  | NM_016217 | 51805.758 | 55440.793 |
| X04366    | 2435.48   | 1907.508  | NM_00014E   | 6554.028  | 6439.246  | AK025971  | 6207.537  | 6575.488  |
| NM_00050E | 65457.09  | 62669.953 | AF317889    | 1665.223  | 1339.729  | NM_00261E | 11330.896 | 11430.132 |
| NM_01865E | 2408.124  | 3625.465  | NM_006294   | 68919.93  | 61458.977 | L27479    | 1520.813  | 1286.763  |
| NM_00066E | 3462.823  | 3692.047  | NM_00374E   | 5032.016  | 4358.198  | AB033006  | 3834.985  | 4632.042  |
| NM_003481 | 7809.335  | 5164.146  | NM_00152C   | 3346.705  | 3087.292  | AF020314  | 3882.564  | 3650.063  |
| AB046814  | 837.39    | 1131.745  | AL050367    | 1673.493  | 1207.166  | NM_01633E | 5306.913  | 5549.918  |
| NM_017664 | 5731.075  | 4257.332  | NM_01787C   | 4701.107  | 5064.618  | AK023936  | 594.227   | 620.178   |
| AK025523  | 622.027   | 714.246   | AL133633    | 7303.384  | 6121.107  | NM_006457 | 2251.26   | 2984.85   |
| NM_00735E | 9430.227  | 8937.822  | NM_01225E   | 4127.315  | 3725.929  | NM_00368E | 1486.156  | 1636.771  |
| L13283    | 3657.782  | 3108.479  | AK026817    | 9979.496  | 7370.939  | NM_000207 | 853.804   | 1031.303  |
| NM_013327 | 4132.777  | 3799.178  | AL157442    | 62452.246 | 54875.406 | NM_002531 | 3857.108  | 3514.084  |
| AF303888  | 15738.12  | 18959.994 | AB011148    | 9352.14   | 9610.839  | NM_006314 | 30458.08  | 37180.285 |
| NM_000077 | 1898.744  | 1756.677  | AL389938    | 66276.617 | 64414.672 | NM_00178E | 4655.316  | 4794.934  |
| AF176646  | 820.278   | 644.484   | NM_00194E   | 67045.852 | 62144.816 | NM_000797 | 19976.135 | 19333.4   |
| NM_00367E | 30704.746 | 21171.998 | NM_007084   | 8316.394  | 7649.748  | NM_01629E | 9815.729  | 10930.444 |
| NM_002574 | 69479.148 | 66752.898 | M97191      | 65793.719 | 55142.281 | AL080148  | 42870.82  | 52511.23  |
| NM_012391 | 4452.528  | 3872.913  | AK023015    | 18135.795 | 14981.94  | NM_006731 | 783.872   | 805.856   |
| NM_005254 | 3273.694  | 3363.387  | NM_003457   | 50674.078 | 44289.348 | NM_018487 | 1110.859  | 1952.554  |
| NM_005611 | 1031.818  | 966.904   | AV752086    | 2821.449  | 2809.165  | NM_020134 | 2225.604  | 2653.95   |
| AF141655  | 3462.008  | 3716.39   | NM_01610E   | 57463.766 | 60266.902 | NM_014061 | 2120.859  | 2077.575  |
| NM_00734E | 2026.201  | 1765.013  | NM_00027E   | 1399.58   | 1698.214  | BC034395  | 7299.522  | 8061.774  |
| NM_00483C | 1057.997  | 890.231   | NM_001061   | 3790.759  | 5070.834  | NM_00247E | 2080.134  | 1884.245  |
| AF132362  | 56462.203 | 64504.781 | AI075338    | 9928.749  | 13394.188 | NM_00034E | 28120.266 | 34828.426 |
| NM_007007 | 12637.229 | 11441.369 | Z11694      | 31869.252 | 41657.383 | AF040248  | 1358.897  | 1180.35   |
| NM_00638E | 3956.9    | 4253.268  | BF983177    | 10213.951 | 12451.827 | NM_01422E | 1189.169  | 1337.038  |
| NM_00655E | 20529.594 | 21157.768 | X16983      | 66364.242 | 59668.375 | AL832292  | 3547.619  | 2545.983  |
| NM_004501 | 44733.441 | 33317.992 | X56160      | 10937.612 | 8938.698  | NM_00304E | 8880.798  | 9928.513  |
| NM_00496E | 19445.082 | 17370.916 | BG679991    | 4590.975  | 3749.663  | NM_00566E | 12481.639 | 13661.458 |
| NM_00670C | 2888.61   | 2170.202  | H-Y 00097 I | 18448.602 | 16792.305 | AK021489  | 34276.457 | 44824.934 |
| NM_00644E | 18011.582 | 12734.917 | H-M 59964   | 1347.572  | 1261.857  | NM_00452E | 691.784   | 966.061   |
| NM_01210E | 27797.43  | 21531.742 | H-Y 00711 I | 66761.469 | 70300.828 | NM_00389E | 675.955   | 571.615   |
| AF019633  | 4767.068  | 3903.821  | H-X 16707 I | 15177.11  | 15087.177 | NM_004317 | 4326.861  | 4294.033  |
| AB002361  | 14771.653 | 14959.517 | AL038354    | 23362.756 | 22606.352 | NM_01464E | 4837.811  | 5130.677  |
| NM_01806C | 12304.744 | 13058.069 | R14607      | 13756.993 | 12531.139 | NM_01470E | 2717.156  | 2765.595  |
| NM_01423E | 5810.024  | 6287.55   | W84867      | 2130.805  | 2501.356  | NM_00369E | 3657.917  | 3992.21   |
| NM_01766E | 11727.681 | 12812.041 | BF245026    | 1510.851  | 1218.243  | NM_00035E | 50680.629 | 52020.652 |
| U88837    | 3704.704  | 3678.018  | NM_00059E   | 1515.148  | 2175.753  | NM_018134 | 46996.375 | 50003.785 |
| NM_01744E | 30059.891 | 31401.627 | NM_016584   | 59235.836 | 58223.281 | NM_013247 | 6073.915  | 6995.152  |
| NM_01758E | 17212.967 | 15268.341 | NM_00181E   | 9676.597  | 10724.276 | NM_00677C | 3368.319  | 3358.786  |

|             |           |           |           |           |           |           |           |           |
|-------------|-----------|-----------|-----------|-----------|-----------|-----------|-----------|-----------|
| NM_015239   | 6511.018  | 5100.393  | NM_000064 | 50823.227 | 50833.906 | BE394704  | 1127.097  | 1192.306  |
| AK026962    | 4571.521  | 3382.862  | NM_003264 | 2476.55   | 2112.555  | NM_004703 | 5569.135  | 4935.054  |
| D00265      | 46882.73  | 35595.453 | NM_006725 | 26193.289 | 32061.813 | NM_001512 | 1753.382  | 1724.009  |
| NM_000779   | 815.438   | 749.961   | NM_003326 | 4872.171  | 6416.674  | NM_014706 | 9805.68   | 10587.621 |
| NM_004552   | 56661.367 | 43125.395 | NM_000202 | 13274.736 | 16875.99  | AK023172  | 857.799   | 1221.708  |
| NM_000143   | 3908.751  | 4067.962  | NM_016608 | 4137.281  | 4595.602  | NM_001187 | 1052.624  | 949.352   |
| AF317889    | 459.297   | 556.043   | NM_004817 | 5395.911  | 4439.987  | NM_018241 | 2410.052  | 2214.636  |
| NM_003743   | 2115.8    | 2151.973  | NM_018975 | 32338.662 | 36040.449 | NM_005834 | 4076.377  | 4082.719  |
| AB037797    | 1871.565  | 3526.417  | AB023215  | 39953.895 | 46815.355 | AF000381  | 3100.136  | 3653.019  |
| NM_001520   | 2032.294  | 2916.503  | NM_001284 | 47818.086 | 47874.734 | NM_012105 | 4188.571  | 3589.896  |
| AL050367    | 855.714   | 921.776   | NM_003242 | 44368.578 | 33306.516 | S82470    | 4542.352  | 4861.692  |
| NM_017870   | 2138.608  | 1370.776  | NM_002849 | 2284.58   | 2282.52   | AB028982  | 2121.795  | 2538.524  |
| AL133633    | 5399.99   | 4276.55   | U31099    | 5357.424  | 5283.362  | NM_002004 | 4637.876  | 4699.342  |
| NM_012252   | 2698.186  | 2691.889  | NM_001105 | 53292.605 | 48445.719 | NM_005121 | 1347.677  | 895.967   |
| AK026817    | 5254.695  | 4562.42   | NM_005585 | 1326.783  | 1654.286  | NM_001643 | 47393.734 | 55450.977 |
| AL157442    | 44971.168 | 39909.414 | NM_002075 | 25847.434 | 25988.645 | NM_020221 | 867.359   | 1083.544  |
| AB011148    | 5554.14   | 5633.498  | Y08756    | 66907.516 | 63129.109 | NM_000747 | 4007.703  | 3941.635  |
| AL389938    | 59514.254 | 62070.258 | AY007090  | 2553.418  | 2466.917  | NM_005415 | 4495.522  | 3648.255  |
| NM_001949   | 57858.152 | 62157.141 | NM_006439 | 2451.962  | 2104.226  | AK026841  | 1758.052  | 1847.55   |
| NM_007084   | 3792.389  | 4286.354  | NM_018073 | 3439.596  | 2982.094  | AL137708  | 491.95    | 1509.825  |
| M97191      | 55063.086 | 53453.922 | NM_012332 | 12241.276 | 11718.529 | AJ275973  | 17883.389 | 18109.713 |
| AK023015    | 12078.949 | 9444.668  | NM_000497 | 2678.354  | 2919.036  | NM_006493 | 1374.849  | 1751.648  |
| NM_003457   | 32298.23  | 20247.551 | NM_017421 | 3616.535  | 3771.432  | U76362    | 22411.434 | 23479.814 |
| AV752086    | 1587.158  | 1229.119  | NM_005397 | 8396.166  | 7659.028  | NM_016217 | 45175.551 | 50329.359 |
| NM_016102   | 30033.492 | 31133.289 | AB014511  | 12475.258 | 12383.204 | AK025971  | 4017.754  | 3987.073  |
| NM_004376   | 3327.599  | 3195.711  | NM_001662 | 30113.428 | 32078.654 | NM_002618 | 6006.854  | 5484.082  |
| NM_000272   | 892.622   | 1096.768  | AB011100  | 7839.579  | 8376.061  | L27479    | 993.697   | 983.284   |
| NM_005603   | 58943.402 | 65524.117 | U61741    | 4231.294  | 3328.534  | NM_002193 | 1033.957  | 1266.584  |
| NM_001061   | 6249.299  | 7553.847  | NM_012402 | 18051.887 | 16505.002 | NM_001388 | 8666.638  | 9252.001  |
| BF983177    | 3511.42   | 3104.094  | M76676    | 16847.01  | 16898.848 | X76770    | 5918.926  | 5833.667  |
| Z26317      | 3296.173  | 2115.157  | NM_003857 | 1612.152  | 2121.029  | AB037808  | 2227.758  | 2431.086  |
| X16983      | 47131.313 | 36382.633 | AL137690  | 1215.514  | 1742.692  | NM_016038 | 3281.265  | 3242.279  |
| X56160      | 4863.538  | 3874.78   | Z83804    | 6254.853  | 7035.039  | Z36821    | 20167.105 | 19553.549 |
| BG679991    | 1585.435  | 1263.77   | NM_004386 | 7930.644  | 8335.97   | AF289485  | 4286.301  | 4778.789  |
| H-Y 00097 I | 10943.808 | 10703.245 | U67784    | 5240.825  | 6175.766  | AF130092  | 5819.55   | 5370.6    |
| H-M 59964   | 1074.852  | 996.326   | NM_007366 | 9121.32   | 9830.106  | NM_016095 | 6211.63   | 5488.029  |
| H-Y 00711 I | 63860.574 | 73197.281 | NM_000153 | 859.282   | 687.941   | AK024794  | 2565.891  | 2626.014  |
| H-X 16707 I | 5867.652  | 6199.215  | AK091794  | 2608.619  | 2746.663  | NM_019853 | 9515.854  | 6805.119  |
| H-U76456M   | 670.316   | 1049.738  | NM_004111 | 7751.064  | 8982.482  | NM_017992 | 1486.249  | 1365.245  |
| AL038354    | 15807.697 | 24104.52  | AF085966  | 8466.15   | 11700.119 | NM_005400 | 1115.415  | 891.006   |
| R14607      | 5311.524  | 5001.006  | NM_003369 | 38405.91  | 28075.658 | AK023061  | 772.699   | 811.209   |
| W84867      | 1059.364  | 911.236   | NM_000057 | 6006.037  | 4611.843  | NM_007255 | 4364.154  | 4668.552  |
| BF245026    | 741.332   | 578.521   | NM_018343 | 13415.913 | 11015.864 | NM_003668 | 9100.75   | 9519.096  |
| NM_000592   | 522.475   | 639.299   | AK095793  | 3291.964  | 2677.497  | NM_013384 | 69683.797 | 66755.453 |
| NM_016584   | 38161.625 | 36333.793 | NM_003177 | 9280.138  | 9984.067  | CY3Cy5    | 8512.327  | 146.763   |
| NM_001815   | 4061.271  | 3610.752  | NM_017719 | 2712.163  | 2355.208  | AF086281  | 3635.092  | 3428.602  |
| NM_000064   | 25657.598 | 21216.422 | AF064078  | 7006.222  | 5441.929  | AF070621  | 12854.759 | 13229.262 |
| NM_003264   | 951.96    | 689.268   | AL049688  | 9057.68   | 8093.975  | AK023678  | 45104.867 | 37592.188 |
| NM_006725   | 7493.216  | 5757.365  | NM_002737 | 11213.694 | 9659.9    | AF052090  | 10175.987 | 7663.662  |
| NM_003326   | 2447.532  | 2553.341  | Z25427    | 8493.261  | 8023.464  | AL355730  | 1393.713  | 2222.262  |
| NM_002858   | 7972.582  | 10348.111 | NM_004672 | 25007.848 | 27415.811 | U79273    | 2341.833  | 2583.092  |
| NM_004817   | 3910.44   | 2666.02   | NM_001353 | 12810.217 | 13297.608 | NM_016346 | 3766.512  | 2740.847  |
| NM_018975   | 21542.266 | 16402.457 | NM_006214 | 4910.93   | 4936.406  | SR2       | 40996.727 | 41109.32  |

|           |           |           |             |           |           |           |           |           |
|-----------|-----------|-----------|-------------|-----------|-----------|-----------|-----------|-----------|
| AB023215  | 23944.141 | 19846.58  | AJ010228    | 27467.023 | 25183.822 | SR4       | 16025.477 | 12423.544 |
| NM_001284 | 35304.984 | 28050.822 | NM_005198   | 10160.026 | 9620.867  | SR6       | 1277.378  | 1096.38   |
| NM_003242 | 27013.404 | 21909.893 | NM_004376   | 6260.09   | 8133.779  | SR8       | 5585.272  | 12981.319 |
| NM_002849 | 1731.731  | 1745.151  | NM_006848   | 63806.91  | 65247.008 | SR10      | 20865.811 | 4716.516  |
| NM_001105 | 25273.242 | 21640.35  | NM_001061   | 14133.416 | 14089.357 | CY3Cy5    | 6024.53   | 108.541   |
| NM_005585 | 991.419   | 1190.714  | AI075338    | 8016.332  | 8236.298  | AB042410  | 2630.507  | 2379.854  |
| NM_002075 | 13307.343 | 13739.438 | BG744154    | 31219.742 | 38659.859 | AF086092  | 4885.822  | 6263.037  |
| Y08756    | 54352.313 | 54922.711 | Z11694      | 22885.748 | 21767.117 | AF116682  | 45115.215 | 43553.863 |
| AY007090  | 1088.778  | 990.764   | BF983177    | 9044.581  | 8789.451  | AL137259  | 4772.385  | 3875.647  |
| NM_006439 | 1064.117  | 835.175   | Z26317      | 8207.959  | 7828.712  | AL122107  | 14134.897 | 14639.465 |
| AK021426  | 466.943   | 1013.433  | X16983      | 66574.281 | 62714.512 | AF075021  | 1893.7    | 1572.049  |
| NM_018073 | 1947.132  | 1921.093  | X56160      | 11698.876 | 10501.732 | AK025140  | 8296.048  | 6888.856  |
| AL137529  | 1499.116  | 1366.493  | BG679991    | 4985.505  | 4525.851  | AK001503  | 14796.171 | 12782.301 |
| NM_012332 | 6284.055  | 4231.409  | H-Y 00097 I | 16895.189 | 20584.445 | AK022880  | 3974.323  | 4707.681  |
| AK026648  | 2592.541  | 1808.698  | H-M 59964   | 2102.722  | 2067.888  | NM_003601 | 19239.598 | 23119.779 |
| NM_000497 | 1983.851  | 1358.123  | H-X 16707 I | 14036.626 | 12163.023 | AF086375  | 1248.644  | 1275.357  |
| NM_017421 | 2807.93   | 3037.107  | AL038354    | 22555.965 | 17701.799 | AK001228  | 2459.78   | 2540.169  |
| NM_002899 | 23750.529 | 25257.416 | R14607      | 11741.321 | 11917.453 | AK026778  | 10251.686 | 14117.172 |
| NM_005397 | 6178.419  | 5544.398  | W84867      | 3148.245  | 3780.964  | AF074987  | 5775.954  | 5116.073  |
| AB014511  | 8317.863  | 6982.274  | NM_005718   | 13173.737 | 11851.818 | AK001058  | 42397.867 | 37046.746 |
| NM_001662 | 21900.396 | 19198.16  | NM_018264   | 3584.527  | 3597.585  | AK027041  | 3520.081  | 3280.931  |
| AB011100  | 3808.964  | 3955.827  | NM_001815   | 8879.211  | 11735.211 | AK000937  | 1607.383  | 1434.141  |
| U61741    | 2837.959  | 2574.027  | NM_003264   | 1576.485  | 1662.767  | AK023718  | 14767.662 | 10745.118 |
| NM_012402 | 10941.466 | 10135.416 | NM_006725   | 30558.334 | 31845.049 | AF075089  | 6594.429  | 5562.566  |
| M76676    | 8525.193  | 7694.593  | NM_004568   | 63461.566 | 63436.125 | AF086007  | 80472.367 | 64851.375 |
| NM_003857 | 960.274   | 1117.974  | NM_000202   | 12019.021 | 17558.102 | AK000803  | 5564.794  | 4108.494  |
| AL137690  | 935.298   | 1231.569  | NM_016608   | 3713.517  | 4159.791  | AK022374  | 1955.18   | 1820.316  |
| Z83804    | 4106.799  | 4355.021  | NM_002858   | 12668.634 | 14904.741 | AF085926  | 58142.414 | 57881.766 |
| NM_004386 | 4156.775  | 3753.405  | NM_004817   | 7258.042  | 7306.008  | AL137307  | 9021.592  | 13068.706 |
| U67784    | 3006.955  | 2939.228  | NM_018975   | 34782.359 | 43844.711 | AL137468  | 8143.943  | 11231.568 |
| NM_007366 | 4590.284  | 3430.447  | AB023215    | 45571.426 | 49485.633 | AL162007  | 26689.611 | 37250.078 |
| NM_014580 | 1798.696  | 2884.749  | NM_001284   | 47722.152 | 52267.371 | AL390137  | 34817.391 | 32379.686 |
| AB028998  | 853.453   | 1117.55   | NM_003242   | 50527.359 | 51877.867 | AK024213  | 49133.484 | 47708.852 |
| NM_002033 | 1724.709  | 1375.55   | NM_002849   | 11387.172 | 3647.226  | AB007959  | 1792.888  | 1557.146  |
| AK091794  | 1375.568  | 1310.363  | NM_005585   | 1442.282  | 1364.661  | AF090093  | 35081.785 | 36107.176 |
| NM_004111 | 4529.023  | 3753.506  | NM_002075   | 27716.461 | 24769.129 | AF161340  | 20869.303 | 18438.369 |
| AF085966  | 6056.621  | 7708.403  | Y08756      | 67768.945 | 68761.695 | NM_018562 | 29752.191 | 20806.584 |
| NM_005316 | 6685.37   | 8585.397  | AY007090    | 2222.28   | 2943.731  | AF098666  | 3734.186  | 2765.727  |
| NM_003369 | 18265.432 | 18814.049 | NM_006439   | 2064.786  | 2372.104  | AF161365  | 4074.627  | 3578.537  |
| NM_000057 | 2040.552  | 1766.074  | AV752086    | 3840.042  | 3494.071  | AK021969  | 2849.8    | 4873.958  |
| NM_018343 | 8797.572  | 5815.771  | NM_016102   | 55937.223 | 61547.461 | AK022065  | 2680.854  | 3170.085  |
| AK095793  | 1724.483  | 1199.022  | AL137529    | 2547.575  | 3663.59   | AK022221  | 24306.846 | 23515.584 |
| NM_003177 | 6262.751  | 5578.504  | NM_000497   | 3345.371  | 3428.101  | AK022356  | 3022.431  | 2347.856  |
| NM_017719 | 1340.088  | 1248.541  | AK025977    | 65067.328 | 92977.344 | AK021998  | 3936.885  | 2476.958  |
| AF064078  | 3904.515  | 3862.25   | AK023130    | 9528.101  | 13595.109 | AK022126  | 3754.968  | 2554.591  |
| AL049688  | 5256.073  | 5096.259  | NM_002899   | 42497.574 | 51840.625 | AF086262  | 3447.765  | 3378.11   |
| NM_002737 | 3973.12   | 3589.458  | NM_005397   | 10015.023 | 11136.005 | AF086292  | 27325.359 | 24908.965 |
| Z25427    | 5547.814  | 5366.175  | AB014511    | 14691.356 | 17177.57  | AK024342  | 43615.422 | 53207.016 |
| NM_004672 | 16156.792 | 15286.789 | NM_001662   | 29704.461 | 32567.342 | L77599    | 64834.797 | 59562.332 |
| NM_001353 | 8339.914  | 8067.148  | AB011100    | 7709.716  | 8753.378  | AK021673  | 47404.25  | 47429.934 |
| NM_006214 | 3590.444  | 3966.912  | U61741      | 5065.816  | 5048.411  | AB014543  | 14788.217 | 13231.363 |
| AJ010228  | 17426.686 | 14458.261 | NM_012402   | 19904.934 | 21959.102 | NM_018445 | 5402.779  | 5418.283  |
| NM_005198 | 5788.903  | 5301.792  | M76676      | 17918.977 | 17194.576 | AK022743  | 18571.172 | 15828.368 |

|             |           |           |             |           |           |           |           |           |
|-------------|-----------|-----------|-------------|-----------|-----------|-----------|-----------|-----------|
| NM_004376   | 3154.873  | 3130.446  | AL137690    | 1211.542  | 1402.725  | AF035306  | 5924.856  | 5032.106  |
| NM_000272   | 876.859   | 709.293   | Z83804      | 6399.252  | 5594.187  | AK091662  | 1112.734  | 1280.854  |
| NM_006061   | 767.345   | 496.946   | NM_004386   | 8401.122  | 9284.143  | AB038318  | 1234.525  | 1740.346  |
| NM_001061   | 1535.352  | 2401.44   | U67784      | 4885.561  | 5468.915  | NM_003954 | 2804.271  | 3882.242  |
| AI075338    | 1983.779  | 3675.109  | NM_007366   | 11318.769 | 11461.568 | NM_016346 | 3268.173  | 4342.326  |
| BG744154    | 21937.541 | 45190.063 | NM_000592   | 4101.208  | 4302.088  | AK023640  | 822.039   | 744.859   |
| Z11694      | 18349.727 | 21477.551 | NM_016584   | 57794.813 | 64731.555 | AK024046  | 4853.638  | 5234.94   |
| BF983177    | 3659.297  | 2164.475  | AK091794    | 1722.405  | 1190.507  | NM_017931 | 6686.835  | 6415.274  |
| Z26317      | 3201.662  | 1839.719  | AF085966    | 8914.549  | 9810.652  | AK022793  | 2461.521  | 2031.109  |
| X16983      | 46941.238 | 40221.676 | NM_005316   | 10289.249 | 9296.844  | AK027171  | 2598.478  | 3141.837  |
| X56160      | 5287.787  | 3512.074  | NM_000057   | 5614      | 5741.093  | AK021945  | 9694.081  | 14704.547 |
| BG679991    | 1702.577  | 985.565   | NM_018343   | 14735.123 | 14994.052 | L23545    | 3522.119  | 5886.453  |
| H-Y 00097 I | 9977.532  | 9035.619  | AK095793    | 2958.858  | 3960.23   | AK024153  | 4075.407  | 5261.145  |
| H-M 59964   | 617.358   | 669.013   | NM_003177   | 9764.83   | 9310.719  | Y10516    | 10990.106 | 11431.882 |
| H-Y 00711 I | 59047.836 | 68856.992 | NM_017719   | 2276.708  | 2509.22   | AF056451  | 19884.482 | 14499.969 |
| H-X 16707 I | 6954.017  | 6638.684  | AF064078    | 5534.152  | 5486.88   | AF015039  | 14656.358 | 12779.689 |
| AL038354    | 15041.211 | 14055.827 | AL049688    | 9582.013  | 9022.935  | NM_005222 | 13790.176 | 12394.484 |
| R14607      | 6043.327  | 4776.982  | NM_002737   | 12497.121 | 11341.832 | BC024308  | 6092.929  | 4250.166  |
| W84867      | 1358.976  | 1707.773  | Z25427      | 8386.181  | 7610.017  | NM_000536 | 4286.06   | 3165.862  |
| NM_005716   | 8916.266  | 8443.205  | NM_004672   | 24530.924 | 22148.752 | AK001838  | 73998.914 | 64026.996 |
| NM_018264   | 2286.434  | 1611.364  | NM_001353   | 14530.275 | 12940.634 | NM_018295 | 3317.016  | 2526.641  |
| NM_001815   | 4681.599  | 4132.259  | NM_006214   | 5045.521  | 5871.345  | AF070574  | 1711.653  | 1175.497  |
| NM_000064   | 23811.98  | 19962.086 | AJ010228    | 24285.248 | 26599.404 | NM_017425 | 3089.352  | 3327.726  |
| NM_003264   | 1550.984  | 1555.737  | AK021426    | 3298.743  | 3080.41   | AB007922  | 1991.785  | 2348.134  |
| NM_004566   | 57999.461 | 64660.777 | NM_018073   | 5863.624  | 4713.718  | NM_003746 | 44413.766 | 53959.441 |
| NM_000202   | 9346.355  | 16588.953 | NM_006846   | 59459.699 | 62870.957 | NM_002910 | 67732.477 | 62995.555 |
| NM_005496   | 13354.071 | 23481.012 | NM_005603   | 62617.891 | 64434.484 | NM_013986 | 67817.203 | 63114.012 |
| NM_016606   | 1426.546  | 2249.064  | NM_001061   | 4283.885  | 4006.714  | U55055    | 1380.928  | 1268.875  |
| NM_002856   | 7769.905  | 10822.602 | AI075338    | 11056.17  | 9401.316  | AK021485  | 3048.971  | 2137.501  |
| NM_004817   | 3942.76   | 2351.7    | Z26317      | 7283.536  | 5639.46   | AB018319  | 10023.87  | 13851.874 |
| NM_018975   | 20377.332 | 13671.563 | X16983      | 62385.898 | 58496.973 | BM973473  | 2117.844  | 2401.546  |
| AB023215    | 21883.113 | 14822.489 | X56160      | 13452.646 | 8377.176  | AK021637  | 2480.786  | 2910.461  |
| NM_001284   | 35244.887 | 24301.008 | BG679991    | 4849.329  | 3697.338  | AK021658  | 1426.047  | 977.868   |
| NM_003242   | 22818.84  | 17797.064 | H-Y 00097 I | 16412.904 | 12288.529 | U17631    | 2569.525  | 2348.006  |
| NM_002846   | 1768.405  | 1744.885  | H-M 59964   | 2321.392  | 1815.919  | AL137723  | 2975.286  | 2482.374  |
| U31099      | 2134.37   | 2146.891  | H-Y 00711 I | 64275.332 | 60331.363 | NM_014286 | 15201.196 | 14345.773 |
| NM_001105   | 28662.301 | 23980.084 | H-X 16707 I | 15716.266 | 12490.767 | AF035300  | 1814.478  | 1846.205  |
| NM_005585   | 1014.914  | 1036.287  | AL038354    | 22728.006 | 16611.584 | NM_014726 | 34742.508 | 31564.652 |
| NM_002075   | 13280.58  | 13026.989 | R14607      | 16131.588 | 13101.595 | NM_005826 | 6459.958  | 6654.17   |
| Y08756      | 54507.543 | 56129.328 | W84867      | 1921.751  | 2457.849  | NM_001616 | 8428.543  | 9277.896  |
| AY007090    | 1242.43   | 1306.547  | NM_005716   | 13262.996 | 14245.705 | NM_006596 | 8600.904  | 6995.802  |
| NM_006436   | 1166.13   | 1088.959  | NM_014580   | 4268.932  | 3438.955  | NM_004463 | 1932.215  | 2656.209  |
| AV752086    | 1945.485  | 1585.815  | AB028998    | 1251.017  | 1043.782  | NM_005936 | 4418.985  | 4446.745  |
| NM_016102   | 36782.777 | 33024.82  | NM_016606   | 3263.746  | 3202.134  | U43586    | 3262.076  | 3571.809  |
| AL137529    | 2398.816  | 2462.013  | NM_002856   | 11555.937 | 11980.296 | NM_006271 | 14785.779 | 17223.316 |
| NM_012332   | 6279.639  | 7651.238  | NM_004817   | 6888.043  | 6170.287  | NM_003026 | 1529.492  | 1542.913  |
| AK026648    | 2992.17   | 4369.202  | NM_018975   | 35256.512 | 42394.438 | NM_000721 | 69505.898 | 62999.086 |
| NM_000497   | 1998.112  | 2984.635  | AB023215    | 47155.309 | 53326.492 | NM_003933 | 3459.778  | 2636.173  |
| NM_017421   | 3348.204  | 3153.9    | NM_001284   | 42074.773 | 46529.242 | NM_005095 | 4478.367  | 3490.776  |
| AK025977    | 54688.668 | 61675.621 | NM_003242   | 46695.586 | 43635.07  | NM_003163 | 29974.275 | 19266.174 |
| AK023130    | 6242.937  | 12704.456 | NM_002846   | 2371.875  | 3322.409  | NM_016205 | 1877.537  | 1874.534  |
| NM_000273   | 1940.529  | 2981.296  | U31099      | 5522.444  | 5541.701  | NM_005756 | 2881.209  | 2502.516  |
| NM_005397   | 5329.626  | 6716.204  | NM_001105   | 59230.527 | 53275.785 | AF149724  | 1120.171  | 1341.583  |

|             |           |           |           |           |           |           |           |           |
|-------------|-----------|-----------|-----------|-----------|-----------|-----------|-----------|-----------|
| AB014511    | 8195.458  | 6411.054  | NM_005585 | 1578.454  | 1381.013  | BC020745  | 1047.471  | 1159.138  |
| NM_001662   | 19289.373 | 15315.39  | NM_002075 | 32027.703 | 26791.063 | NM_004661 | 3789.124  | 3022.834  |
| AB011100    | 3330.048  | 2854.438  | Y08756    | 61426.895 | 61584.66  | NM_002005 | 2343.173  | 1620.293  |
| U61741      | 2617.838  | 2670.544  | NM_005563 | 21210.873 | 17446.1   | NM_001610 | 4524.314  | 3504.546  |
| NM_012402   | 11857.034 | 11271.456 | AY007090  | 2770.52   | 2697.327  | NM_001241 | 1283.391  | 1539.136  |
| M76676      | 9064.822  | 9657.414  | NM_006439 | 2475.084  | 2302.301  | AF217504  | 3943.054  | 3438.034  |
| NM_003857   | 1230.602  | 1387.76   | NM_005102 | 7216.544  | 7084.742  | AK027102  | 15757.356 | 13340.229 |
| AL137690    | 1110.152  | 1199.1    | NM_004518 | 6086.056  | 5925.456  | AL109714  | 918.443   | 745.179   |
| Z83804      | 4573.662  | 5297.944  | NM_006501 | 3035.03   | 2169.432  | NM_004632 | 7951.742  | 5671.11   |
| NM_004386   | 5121.927  | 4906.459  | NM_002719 | 31329.553 | 25489.674 | NM_017919 | 13027.545 | 13709.593 |
| U67784      | 3125.33   | 3739.709  | AB035356  | 1071.569  | 732.449   | NM_014456 | 8367.066  | 12960.414 |
| NM_007366   | 4401.931  | 4796.168  | AV752086  | 3081.949  | 2078.026  | NM_004740 | 19440.244 | 30077.104 |
| NM_000592   | 780.567   | 809.888   | NM_004376 | 7127.508  | 4263.448  | NM_003805 | 5906.904  | 6073.148  |
| NM_016584   | 44659.375 | 34573.715 | NM_000272 | 1683.867  | 1153.106  | NM_019886 | 8001.446  | 7993.963  |
| NM_000153   | 961.439   | 607.427   | NM_016131 | 21278.746 | 20542.213 | NM_003278 | 70579.297 | 62988.348 |
| NM_002033   | 1244.562  | 1723.892  | NM_006822 | 6870.444  | 5679.474  | NM_000426 | 1368.275  | 838.638   |
| AK091794    | 527.302   | 795.329   | NM_012142 | 19727.908 | 20101.506 | U95031    | 2757.707  | 1773.365  |
| NM_004111   | 4303.095  | 5482.919  | NM_016429 | 3862.319  | 3787.446  | NM_004771 | 3200.528  | 3366.792  |
| AF085966    | 6251.218  | 8927.917  | AB011100  | 7580.863  | 8945.666  | AL365514  | 1138.856  | 1170.127  |
| NM_005316   | 6548.776  | 10878.84  | U61741    | 3973.506  | 3998.724  | NM_018295 | 2945.536  | 2410.407  |
| NM_016316   | 4613.1    | 9024.27   | NM_012402 | 17764.82  | 21142.6   | NM_002104 | 1566.37   | 1591.643  |
| NM_003369   | 18306.033 | 34190.613 | M76676    | 16484.639 | 16850.328 | NM_016002 | 50564.582 | 49148.91  |
| NM_018343   | 7544.361  | 9268.076  | NM_003857 | 2164.861  | 1912.182  | NM_014546 | 2066.343  | 1865.278  |
| AK095793    | 1444.329  | 1183.071  | AL137690  | 1281.758  | 1483.197  | NM_000531 | 761.386   | 1290.427  |
| NM_003177   | 6045.21   | 4792.121  | Z83804    | 6478.257  | 6717.552  | NM_017832 | 5459.023  | 3986.001  |
| NM_017719   | 1773.24   | 1594.183  | NM_004386 | 9514.229  | 9149.75   | NM_001713 | 17925.752 | 16605.195 |
| AF064078    | 3659.794  | 3353.883  | U67784    | 6295.565  | 6590.408  | NM_015367 | 20667.6   | 14566.524 |
| AL049688    | 5406.759  | 5096.089  | NM_007366 | 12629.774 | 12628.479 | NM_014496 | 23950.178 | 17666.898 |
| NM_002737   | 4808.567  | 5172.809  | NM_000592 | 1734.437  | 1975.017  | NM_002375 | 60661.199 | 52533.227 |
| Z25427      | 5627.458  | 6222.221  | NM_016584 | 62041.992 | 60101.988 | NM_000986 | 67030.805 | 67216.641 |
| NM_004672   | 15857.152 | 20921.258 | NM_001815 | 11338.325 | 12055.978 | NM_001813 | 3873.123  | 4913.877  |
| NM_001353   | 8235.311  | 9427.627  | NM_000064 | 55671.797 | 58217.324 | AF055016  | 6789.169  | 7777.561  |
| NM_006214   | 3364.387  | 4869.96   | NM_003264 | 2124.379  | 2268.591  | NM_007234 | 17269.199 | 13896.352 |
| AJ010228    | 12828.354 | 22072.174 | NM_006725 | 26899.996 | 29556.111 | Y16704    | 67249.055 | 64407.785 |
| NM_005196   | 5902.603  | 6474.249  | NM_003326 | 6754.605  | 8466.974  | NM_014567 | 7936.12   | 5016.583  |
| NM_018073   | 2407.816  | 2081.109  | NM_000202 | 17188.557 | 16929.719 | NM_017842 | 2361.224  | 1582.639  |
| NM_006061   | 1105.51   | 861.543   | NM_005496 | 21640.941 | 19404.902 | NM_019057 | 12734.93  | 8277.26   |
| NM_001061   | 1850.212  | 2616.478  | NM_006214 | 3741.129  | 4281.555  | NM_002677 | 2737.266  | 2062.526  |
| AI075338    | 2858.491  | 3092.43   | AJ010228  | 25829.889 | 19842.912 | NM_001537 | 6193.544  | 6186.767  |
| BG744154    | 23328.48  | 33691.691 | NM_005196 | 9574.151  | 9874.774  | U80743    | 1570.583  | 1287.089  |
| Z11694      | 18356.707 | 25741.9   | NM_018073 | 3272.823  | 3116.869  | NM_001352 | 6170.771  | 5907.41   |
| BF983177    | 3610.478  | 5841.004  | AL137529  | 2000.903  | 1789.439  | D15050    | 1348.025  | 1228.067  |
| Z26317      | 3203.961  | 5388.43   | NM_012332 | 11418.765 | 10889.551 | NM_006627 | 4059.24   | 3659.164  |
| X56160      | 5778.676  | 7322.699  | AK026648  | 3954.153  | 3579.341  | NM_003093 | 49186.543 | 55210.477 |
| BG679991    | 1667.74   | 1266.621  | NM_000497 | 3539.123  | 2822.868  | U05589    | 2031.327  | 2072.026  |
| H-Y 00097 I | 9935.599  | 6826.154  | NM_017421 | 4845.773  | 2803.122  | NM_014473 | 21572.506 | 16436.824 |
| H-M 59964   | 619.961   | 361.862   | AK025977  | 65623.766 | 61311.586 | NM_003095 | 67087.695 | 63152.742 |
| H-Y 00711 I | 59815.781 | 66656.211 | AK023130  | 10824.389 | 10665.284 | NM_016386 | 11044.806 | 8980.938  |
| H-X 16707 I | 6573.933  | 6914.702  | NM_000273 | 5246.584  | 4121.509  | NM_002295 | 63906.066 | 59547.887 |
| AL038354    | 15661.032 | 17898.209 | NM_002899 | 46314.957 | 50145.273 | NM_003133 | 17089.906 | 17678.195 |
| R14607      | 8003.108  | 10985.334 | NM_000486 | 3827.645  | 4077.842  | NM_001762 | 17867.305 | 19588.246 |
| W84867      | 1149.178  | 1716.264  | BE876237  | 4969.011  | 5290.815  | NM_016306 | 26300.666 | 30926.289 |
| NM_005718   | 8671.044  | 8860.45   | NM_005397 | 9760.145  | 9697.637  | NM_003755 | 1045.146  | 1122.29   |

|           |           |           |           |           |           |           |           |           |
|-----------|-----------|-----------|-----------|-----------|-----------|-----------|-----------|-----------|
| NM_018264 | 2235.135  | 2279.143  | NM_000806 | 28624.414 | 30642.836 | NM_01323E | 5300.164  | 4258.626  |
| NM_01458C | 1940.438  | 1747.727  | NM_00632C | 4337.743  | 3094.958  | BE258640  | 30234.156 | 28374.762 |
| AB028998  | 1006.957  | 917.337   | AB014511  | 15648.407 | 16203.68  | NM_003314 | 8952.384  | 7144.587  |
| NM_01660E | 1896.736  | 1640.758  | NM_014252 | 14562.643 | 15842.376 | NM_016623 | 22596.096 | 17638.891 |
| NM_00285E | 8863.836  | 9335.229  | NM_001662 | 33806.875 | 36214.766 | NM_001334 | 8831.281  | 6194.644  |
| NM_004817 | 4182.049  | 4657.034  | NM_00571E | 10661.326 | 10521.379 | NM_00124E | 1011.094  | 966.669   |
| NM_01897E | 25854.17  | 38145.527 | NM_018264 | 3142.524  | 3521.725  | AL365411  | 3556.003  | 3801.325  |
| AB023215  | 23997.809 | 27644.027 | NM_01458C | 3611.479  | 3650.18   | AF254082  | 62376.707 | 63011.727 |
| NM_001284 | 34594.023 | 39200.766 | NM_002033 | 1361.719  | 1409.996  | AF205718  | 36873.977 | 44007.992 |
| NM_003242 | 21686.539 | 25184.059 | NM_004111 | 7619.469  | 8210.331  | AY004252  | 2097.886  | 1594.051  |
| NM_00284C | 1233.124  | 2538.146  | AF085966  | 8802.308  | 7201.742  | NM_006261 | 21002.91  | 18735.092 |
| U31099    | 1481.524  | 2670.274  | NM_00531E | 9317.483  | 7621.493  | AK027045  | 1486.978  | 1215.405  |
| NM_00558E | 999.128   | 959.526   | NM_01631E | 10062.225 | 8435.758  | AF169796  | 9686.035  | 7086.751  |
| NM_00207E | 12884.703 | 8801.851  | NM_00336E | 40138     | 27966.588 | AK026157  | 739.649   | 868.97    |
| Y08756    | 52146.094 | 51784.484 | NM_000057 | 4120.094  | 3362.323  | AK001814  | 12384.044 | 10629.233 |
| NM_005563 | 11067.067 | 8273.679  | NM_018343 | 13744.797 | 8445.024  | NM_007222 | 3116.858  | 3944.783  |
| AY007090  | 1009.258  | 1160.214  | AK095793  | 3593.345  | 2397.203  | NM_00343E | 16010.889 | 18375.875 |
| NM_00643E | 1068.879  | 1139.507  | NM_003177 | 9360.322  | 6556.877  | NM_016291 | 19179.264 | 16045.458 |
| NM_005102 | 4288.512  | 5148.944  | NM_01771E | 2493.857  | 1624.669  | NM_005937 | 63540.566 | 58693.379 |
| NM_00451E | 3013.306  | 3377.261  | AF064078  | 6130.323  | 4329.925  | AB037809  | 2970.366  | 2261.845  |
| NM_006501 | 2566.724  | 2777.58   | AL049688  | 8674.039  | 7762.462  | AB011129  | 2022.778  | 1523.765  |
| NM_00271E | 20526.504 | 22933.887 | NM_002737 | 11539.411 | 8579.43   | NM_014391 | 32732.543 | 23953.863 |
| AB035356  | 440.158   | 582.168   | Z25427    | 8258.346  | 7553.691  | NM_00427C | 2901.781  | 2204.914  |
| AV752086  | 2003.264  | 1812.801  | NM_004672 | 23931.902 | 18014.508 | NM_00671C | 1115      | 1363.227  |
| NM_016102 | 34858.891 | 35172.871 | NM_001353 | 13344.683 | 9201.048  | NM_003323 | 20555.549 | 24551.645 |
| NM_00437E | 5164.618  | 4833.731  | CY3Cy5    | 9688.398  | 249.86    | BG685310  | 3964.956  | 4237.049  |
| NM_000272 | 898.888   | 835.304   | AF252284  | 7680.913  | 8963.931  | H85962    | 60914.047 | 58599.789 |
| NM_016131 | 14830.59  | 9487.068  | BU727558  | 3438.163  | 2944.513  | BG742446  | 4879.644  | 4002.767  |
| NM_006822 | 2114.444  | 1588.059  | AK025794  | 19344.141 | 27090.959 | AA864554  | 1231.876  | 1376.063  |
| NM_012142 | 11567.794 | 17952.732 | NM_003541 | 4848.557  | 5388.968  | X66945    | 14730.162 | 11474.7   |
| NM_01642E | 3011.491  | 3815.081  | AF131835  | 610.254   | 970.239   | AI160703  | 1478.07   | 1266.688  |
| AB011100  | 3755.708  | 5255.249  | AK024522  | 3576.25   | 3508.379  | X12830    | 15248.369 | 16332.205 |
| U61741    | 2589.429  | 3679.842  | NM_00719E | 6325.422  | 5792.193  | U00482    | 6267.358  | 8903.275  |
| NM_012402 | 10852.465 | 18548.436 | M33197    | 69614.914 | 63523.523 | K01904    | 30565.826 | 28917.35  |
| M76676    | 8836.987  | 15543.128 | AK023220  | 1100.437  | 1241.421  | BE538886  | 3288.477  | 2999.772  |
| AL137690  | 1111.28   | 936.059   | AK024566  | 1188.089  | 1143.348  | NM_00222E | 806.417   | 577.445   |
| Z83804    | 3555.136  | 2565.409  | AF038182  | 2553.392  | 2317.017  | M57650    | 60217.605 | 54088.703 |
| NM_00438E | 4254.125  | 3608.028  | NM_01647E | 5276.79   | 3203.715  | BC023978  | 3420.241  | 3060.553  |
| U67784    | 3132.8    | 3322.322  | AF086472  | 2987.225  | 1918.051  | M21302    | 12456.76  | 8887.749  |
| NM_00736E | 4244.284  | 4014.598  | AF252284  | 4658.093  | 2418.536  | NM_002512 | 63479.246 | 63459.453 |
| NM_000592 | 936.555   | 1206.031  | BU727558  | 2988.816  | 1789.084  | NM_00641E | 3348.957  | 3257.636  |
| NM_016584 | 46795.676 | 47204.359 | SR1       | 80501.898 | 65403.371 | AF035035  | 1587.894  | 1624.301  |
| NM_00181E | 6170.127  | 6077.975  | SR3       | 47983.805 | 28604.705 | AK024715  | 1644.741  | 1547.542  |
| NM_000064 | 33388.465 | 33245.516 | SR5       | 5645.71   | 3724.719  | NM_014942 | 1921.087  | 1978.721  |
| NM_003264 | 1484.481  | 1359.158  | SR7       | 6955.334  | 26992.258 | NM_01836C | 10204.563 | 10135.259 |
| NM_00672E | 12036.242 | 11280.586 | SR9       | 19875.578 | 2425.587  | AL365415  | 1917.071  | 1402.984  |
| NM_00332E | 3754.014  | 4105.719  | CY3Cy5    | 10054.283 | 300.569   | L29147    | 64212.516 | 59856.105 |
| NM_00456E | 60575.758 | 62891.742 | L77559    | 1672.137  | 1377.356  | NM_00152E | 62791.012 | 57375.477 |
| NM_000202 | 10605.463 | 10173.063 | NM_00559E | 3551.191  | 4035.647  | NM_00605E | 13850.07  | 20070.998 |
| NM_00549E | 13879.229 | 10303.281 | Y10515    | 2152.305  | 2219.929  | NM_00429E | 2861.32   | 3797.854  |
| NM_006214 | 2427.219  | 2798.731  | M87942    | 621.47    | 1052.804  | NM_00504E | 2306.644  | 2174.03   |
| AJ010228  | 14184.563 | 12749.568 | AK023636  | 16250.621 | 9831.757  | NM_005972 | 4394.285  | 4299.654  |
| NM_00519E | 6516.969  | 5664.446  | D25272    | 3113.964  | 2979.47   | NM_00106C | 731.668   | 586.756   |



|           |           |           |           |           |           |           |           |           |
|-----------|-----------|-----------|-----------|-----------|-----------|-----------|-----------|-----------|
| AK021426  | 1073.253  | 942.341   | M33197    | 70261.359 | 63531.91  | NM_018841 | 10946.085 | 7801.09   |
| NM_018073 | 2357.902  | 2583.317  | NM_020168 | 1168.149  | 1188.334  | NM_005226 | 1963.975  | 1199.14   |
| AL137529  | 1702.24   | 3033.965  | AL832699  | 9383.337  | 10656.45  | AK022859  | 3828.69   | 2795.49   |
| NM_012332 | 7696.344  | 11704.378 | NM_012191 | 1601.844  | 1543.497  | NM_000374 | 15161.562 | 17250.271 |
| AK026648  | 2697.051  | 5610.121  | AK000757  | 1434.345  | 851.601   | NM_001355 | 46872.504 | 54794.98  |
| NM_000497 | 2250.261  | 3033.879  | AL359577  | 2770.818  | 1838.922  | NM_002245 | 2241.534  | 2234.139  |
| NM_017421 | 3291.769  | 1984.411  | NM_018139 | 8024.639  | 5549.652  | NM_004980 | 58976.52  | 50822.977 |
| AK025977  | 56739.855 | 53622.07  | NM_014805 | 6107.439  | 4569.946  | NM_003224 | 3626.891  | 3463.859  |
| AK023130  | 6602.707  | 7743.635  | AF052120  | 2485.578  | 1831.847  | NM_004227 | 2840.787  | 2831.078  |
| NM_000273 | 2565.731  | 2485.716  | NM_014871 | 2261.237  | 1962.506  | NM_005282 | 13585.379 | 18586.721 |
| NM_002895 | 23226.736 | 25163.135 | AK026754  | 1138.549  | 892.864   | NM_001736 | 4729.031  | 5671.181  |
| NM_000486 | 2025.502  | 2466.766  | M33197    | 73114.078 | 64086.84  | AB028949  | 937.049   | 1123.295  |
| BE876237  | 2100.469  | 2371.582  | AL137552  | 4832.103  | 3427.607  | AL137580  | 2264.187  | 2618.217  |
| NM_005397 | 6982.534  | 7347.969  | M33197    | 77985.391 | 43219.711 | NM_004101 | 1630.862  | 1544.085  |
| NM_000806 | 17675.84  | 16763.689 | AK024779  | 2890.454  | 1954.536  | NM_002995 | 64311.5   | 59073.258 |
| NM_006320 | 3454.964  | 2745.303  | AK024940  | 878.158   | 973.893   | AB033114  | 667.238   | 770.558   |
| AB014511  | 9744.491  | 9867.587  | AK024406  | 2851.726  | 3182.437  | NM_015978 | 11879.273 | 10254.132 |
| NM_014252 | 8919.069  | 8465.288  | AK024568  | 53983.105 | 46008.645 | NM_003810 | 2702.133  | 2339.348  |
| NM_001662 | 22951.307 | 20323.381 | AK024873  | 2899.047  | 2520.799  | AB046816  | 1512.741  | 1632.145  |
| NM_005718 | 6603.65   | 6362.022  | M33197    | 66586.219 | 68332.102 | AL137266  | 7690.429  | 7965.159  |
| NM_018264 | 1806.376  | 1475.868  | AK024981  | 43985.887 | 32950.445 | NM_016457 | 1486.536  | 1654.854  |
| NM_014580 | 1454.358  | 1619.457  | AK027246  | 1932.689  | 1650.639  | NM_005057 | 2099.718  | 1587.501  |
| AB028998  | 1029.333  | 748.322   | U80766    | 3953.693  | 3772.289  | AF143321  | 2549.418  | 2828.908  |
| NM_000153 | 1036.421  | 826.743   | AK001638  | 2279.704  | 2566.381  | AB046842  | 6387.364  | 7451.271  |
| NM_002033 | 901.502   | 854.905   | AF161386  | 20434.682 | 20072.537 | NM_004850 | 3489.46   | 3807.873  |
| NM_004111 | 4005.81   | 3855.571  | AL365369  | 4252.515  | 4080.737  | NM_002822 | 21306.824 | 23352.893 |
| AF085966  | 5350.115  | 4171.859  | M33197    | 67539.633 | 61393.488 | BF306955  | 6109.17   | 5874.401  |
| NM_005316 | 6549.951  | 5167.627  | X05826    | 23289.896 | 21931.861 | NM_001394 | 12710.535 | 10457.764 |
| NM_016316 | 5428.948  | 5779.614  | Y11608    | 1509.148  | 1909.003  | NM_018441 | 21317.047 | 18045.994 |
| NM_003369 | 20413.32  | 18754.479 | AJ001872  | 16809.932 | 16737.031 | NM_000778 | 23672.662 | 22251.264 |
| NM_000057 | 2594.426  | 2438.468  | AJ227882  | 1001.152  | 1353.768  | NM_001605 | 3374.406  | 2698.096  |
| NM_018343 | 9347.688  | 9526.564  | M33197    | 67065.352 | 65053.102 | BE733234  | 1019.105  | 1151.588  |
| AK095793  | 2000.859  | 1980.117  | M33197    | 65484.867 | 78050.727 | NM_016247 | 19502.117 | 21355.594 |
| NM_003177 | 6969.822  | 6814.747  | AL137556  | 4401.569  | 4391.346  | H85962    | 62030.941 | 62544.297 |
| NM_017719 | 1775.307  | 1878.253  | NM_014696 | 19208.688 | 21928.949 | AA864554  | 1565.232  | 2210.687  |
| AF064078  | 4100.329  | 3760.509  | AL359055  | 7334.124  | 8154.883  | X66945    | 14880.427 | 19857.662 |
| AL049688  | 4957.342  | 4947.22   | NM_014908 | 5744.883  | 6388.007  | AI160703  | 1058.918  | 1443.396  |
| NM_002737 | 5442.421  | 4763.421  | AB037771  | 848.619   | 1042.452  | X12830    | 13872.261 | 12252.203 |
| Z25427    | 5519.515  | 5166.042  | AK025931  | 60300.906 | 48970.719 | U00482    | 4957.435  | 4410.375  |
| NM_004672 | 15856.771 | 15066.375 | M33197    | 5207.891  | 3959.379  | K01904    | 30917.877 | 39448.109 |
| NM_001353 | 8138.767  | 6117.69   | M33197    | 67077.828 | 65392.547 | BE538886  | 4630.391  | 5007.74   |
| CY3Cy5    | 7098.416  | 360.099   | AK001083  | 4181.078  | 3009.692  | NM_002228 | 878.575   | 640.204   |
| AF252284  | 3428.068  | 3923.815  | AK000185  | 2849.407  | 2266.119  | M57650    | 62708.68  | 62152.918 |
| BU727558  | 1496.024  | 1813.935  | NM_017962 | 1926.653  | 1207.009  | BC023978  | 3108.577  | 3061.877  |
| AK025794  | 8764.803  | 15199.598 | AK027227  | 629.619   | 855.761   | M21302    | 10770.492 | 9757.848  |
| NM_003541 | 2149.073  | 3099.916  | NM_017834 | 1309.199  | 814.387   | AK024865  | 2883.798  | 2860.362  |
| AK024522  | 1536.444  | 1850.173  | AK000865  | 1724.488  | 1164.131  | NM_007210 | 1269.413  | 1410.241  |
| NM_007198 | 3247.026  | 3925.76   | M33197    | 81140.711 | 31136.42  | NM_001483 | 5504.223  | 5075.771  |
| M33197    | 75471.844 | 63262.129 | AF147349  | 26918.563 | 16922.939 | NM_014443 | 9496.816  | 6567.77   |
| AK023220  | 786.221   | 1190.672  | AL050346  | 59421.813 | 56048.781 | NM_005212 | 6162.366  | 6351.528  |
| AK024566  | 633.353   | 1147.971  | AK001520  | 23082.295 | 22433.105 | M14584    | 1097.048  | 834.643   |
| AK025683  | 455.34    | 970.109   | AK021731  | 1759.185  | 2055.496  | NM_006415 | 3198.688  | 3203.646  |
| AF038182  | 2285.297  | 2074.034  | D90070    | 41230.023 | 51678.051 | AF035035  | 2306.462  | 1788.52   |

|           |           |           |           |           |           |           |           |           |
|-----------|-----------|-----------|-----------|-----------|-----------|-----------|-----------|-----------|
| NM_016475 | 2818.497  | 2096.018  | Y12235    | 2317.284  | 2263.672  | AB020676  | 3570.391  | 3008.738  |
| AF086472  | 1559.97   | 1098.421  | AF132601  | 774.143   | 913.05    | AK024715  | 1982.295  | 1597.103  |
| AF252284  | 2193.23   | 1552.464  | M33197    | 71092.055 | 63615.5   | U90942    | 65311.004 | 64244.57  |
| SR3       | 24029.256 | 23972.223 | AF086179  | 6945.731  | 6208.107  | NM_014942 | 1979.045  | 2116.606  |
| SR5       | 2983.706  | 2899.729  | AK025807  | 7522.472  | 6330.627  | NM_018360 | 9172.963  | 9973.146  |
| SR7       | 3769.454  | 23266.742 | AK022478  | 1070.872  | 828.96    | AL365415  | 1795.939  | 2137.474  |
| SR9       | 9059.714  | 1677.036  | NM_018381 | 1708.121  | 1285.454  | L29147    | 64560.434 | 60557.453 |
| CY3Cy5    | 5511.82   | 299.205   | AK026277  | 14418.04  | 7435.79   | NM_001525 | 53091.973 | 47944.727 |
| L77559    | 956.39    | 1117.331  | U10509    | 4381.582  | 2653.296  | NM_006055 | 11547.226 | 9354.678  |
| NM_005595 | 1773.062  | 2216.608  | NM_007165 | 65719.422 | 46512.871 | NM_004295 | 2893.288  | 2623.658  |
| Y10515    | 1019.395  | 1190.188  | NM_014015 | 17145.393 | 10405.224 | NM_005045 | 2035.456  | 2713.774  |
| AK023636  | 7553.718  | 7960.489  | AF085956  | 4192.629  | 2700.362  | NM_001060 | 1293.09   | 1440.076  |
| D25272    | 1782.687  | 1938.696  | NM_019116 | 3920.699  | 2980.749  | NM_018841 | 12932.918 | 11139.395 |
| M33197    | 77666.977 | 63087.633 | AF147318  | 2469.893  | 1974.54   | NM_005225 | 1847.259  | 1407.315  |
| AL832699  | 5410.322  | 3851.991  | L37699    | 2769.328  | 327.987   | AK022859  | 3216.953  | 3552.556  |
| NM_012191 | 963.904   | 514.268   | M33197    | 65777.023 | 73443.555 | L09102    | 56226.074 | 55983.781 |
| M33197    | 79693.219 | 58416.336 | AL050173  | 4494.128  | 4218.854  | NM_003675 | 10847.209 | 11720.245 |
| AK000757  | 863.619   | 598.214   | D80002    | 5672.568  | 5797.996  | AF113007  | 23819.604 | 24304.707 |
| AL359577  | 1070.81   | 1050.931  | U17637    | 25586.133 | 27233.184 | NM_000685 | 4623.233  | 3095.016  |
| NM_018135 | 4127.364  | 3964.558  | AF207831  | 2957.565  | 2382.58   | U39573    | 2137.727  | 2197.076  |
| AF052120  | 554.301   | 1272.079  | AK023174  | 1121.648  | 1287.275  | D82061    | 7164.8    | 7617.946  |
| NM_014871 | 1188.765  | 1150.384  | NM_003545 | 1643.6    | 1173.746  | AJ293009  | 5431.377  | 5067.432  |
| M33197    | 78500.18  | 62969.434 | M33197    | 66835.273 | 62377.043 | NM_000374 | 4432.925  | 4659.292  |
| M33197    | 64936.207 | 62803.32  | NM_018272 | 1583.317  | 1582.797  | NM_000502 | 25242.998 | 30739.789 |
| AK024779  | 1187.456  | 1346.533  | AF086125  | 1636.408  | 1506.823  | NM_001355 | 43286.41  | 49448.551 |
| AK024406  | 1405.117  | 1262.424  | AL079279  | 1942.46   | 1591.181  | NM_002245 | 2218.012  | 3242.396  |
| AK024568  | 24082.41  | 21916.426 | AK023547  | 1648.068  | 1510.338  | NM_004980 | 61162.434 | 57455.832 |
| AK024873  | 1237.511  | 1047.972  | AK021933  | 805.802   | 1092.374  | NM_003224 | 2787.921  | 3318.798  |
| AK027246  | 1275.67   | 1471.565  | M33197    | 66969.328 | 62424.152 | NM_004227 | 2483.653  | 2347.657  |
| U80766    | 3259.236  | 3390.643  | AK024207  | 10824.286 | 12294.617 | NM_005282 | 12221.101 | 9145.085  |
| AK001638  | 1391.623  | 1465.944  | AK021843  | 2320.7    | 2595.032  | NM_001735 | 6653.816  | 7304.113  |
| AF161386  | 13922.055 | 11686.103 | AF075025  | 1587.932  | 1462.372  | AB028949  | 1041.301  | 1465.241  |
| AL365369  | 2639.655  | 1796.2    | AF116623  | 909.878   | 836.751   | NM_002995 | 61876.07  | 64187.762 |
| AK025454  | 3345.761  | 2791.4    | AF088008  | 3919.597  | 3054.767  | AB033114  | 1258.09   | 1026.008  |
| M33197    | 67225.023 | 59935.355 | AK023528  | 3019.742  | 4275.106  | NM_015975 | 10228.705 | 13155.169 |
| X05826    | 9709.548  | 8902.521  | AK023043  | 2293.347  | 1080.348  | NM_003810 | 2315.141  | 3013.731  |
| AJ227882  | 482.885   | 562.828   | NM_004685 | 10162.054 | 1512.657  | NM_004905 | 1315.226  | 1314.994  |
| M33197    | 66179.703 | 66135.453 | AB037725  | 1831.411  | 1140.968  | NM_016171 | 64744.023 | 61939.453 |
| M33197    | 62855.555 | 61492.863 | M33197    | 66474.57  | 66933.875 | NM_018973 | 10927.11  | 9147.615  |
| AL137556  | 1978.827  | 1651.458  | NM_017715 | 1068.857  | 1727.873  | NM_002591 | 50776.289 | 51514.813 |
| NM_014695 | 8274.785  | 6986.495  | NM_004860 | 10259.642 | 10467.364 | AL049334  | 1773.621  | 2305.309  |
| AL359055  | 3070.69   | 2169.541  | AF217190  | 20430.117 | 18196.805 | NM_020215 | 2735.133  | 2949.445  |
| NM_014905 | 2586.829  | 2439.11   | AB028981  | 58283.469 | 58981.035 | AK021860  | 4275.085  | 3491.759  |
| AK021972  | 897.237   | 662.779   | NM_006800 | 4032.649  | 4151.377  | AB046816  | 1482.351  | 1409.492  |
| AF075074  | 1473.649  | 1395.343  | NM_002475 | 1112.794  | 849.292   | AL137266  | 8850.399  | 10328.442 |
| AK001083  | 1991.073  | 2592.52   | NM_002729 | 12035.102 | 7596.344  | NM_016457 | 1421.853  | 1808.363  |
| AK000185  | 1165.499  | 1674.852  | M33197    | 66701.07  | 66678.055 | NM_005057 | 1874.042  | 1575.053  |
| NM_017962 | 555.445   | 1040.353  | AK025266  | 4622.863  | 5429.25   | AF143321  | 2587.211  | 2802.999  |
| NM_017834 | 392.082   | 413.154   | AK001843  | 4709.678  | 6177.034  | AB046842  | 5998.462  | 7034.457  |
| AK000865  | 856.764   | 849.86    | AK000548  | 51999.008 | 55435.457 | NM_004850 | 5358.205  | 6601.139  |
| M33197    | 62118.977 | 63254.184 | NM_004787 | 64724.109 | 64182.555 | NM_002822 | 20062.084 | 20513.66  |
| AF147349  | 12015.086 | 9023.057  | AF087984  | 10151.314 | 9775.214  | NM_001394 | 11142.479 | 10622.827 |
| AL050346  | 30753.965 | 19078.355 | AF009302  | 4080.671  | 4472.072  | NM_018441 | 25920.566 | 24218.332 |

|           |           |           |           |           |           |           |           |           |
|-----------|-----------|-----------|-----------|-----------|-----------|-----------|-----------|-----------|
| AK001520  | 9857.651  | 6198.566  | M33197    | 64111.027 | 65829.656 | NM_00077E | 21684.285 | 23868.949 |
| AK021731  | 439.111   | 348.743   | AK022273  | 14135.187 | 16544.719 | NM_00160E | 3495.415  | 4541.568  |
| D90070    | 17662.787 | 18183.711 | NM_01588E | 2738.477  | 3223.945  | BE733234  | 1544.359  | 2452.257  |
| Y12235    | 923.266   | 1034.118  | AK027161  | 864.542   | 832.091   | NM_02022E | 8709.427  | 9908.44   |
| M33197    | 63585.09  | 55563.422 | AK024271  | 2300.286  | 2786.281  | AK024685  | 1687.727  | 1968.36   |
| AF086179  | 3597.39   | 3009.421  | AK021650  | 28492.619 | 30611.697 | NM_01228E | 1357.748  | 1285.918  |
| AK025807  | 4226.296  | 3615.041  | AL050210  | 10722.883 | 12015.49  | NM_00332E | 20303.105 | 23741.029 |
| AK022478  | 398.663   | 382.302   | NM_00413E | 9994.311  | 1234.395  | BG685310  | 4364.121  | 4808.142  |
| NM_018381 | 912.139   | 730.728   | NM_014844 | 6752.938  | 5498.218  | AW300857  | 63371.137 | 70282.813 |
| U10509    | 1845.504  | 2393.512  | M33197    | 64973.094 | 65969.078 | H85962    | 60793.043 | 65773.266 |
| NM_00716E | 31592.461 | 40789.449 | NM_01849E | 8868.21   | 9038.217  | BG742446  | 2490.263  | 2375.145  |
| NM_01401E | 8287.75   | 15423.239 | NM_00134E | 6433.998  | 5648.305  | AA864554  | 1664.992  | 1664.053  |
| AF085956  | 2346.025  | 3313.698  | NM_00314E | 2134.966  | 2373.703  | X66945    | 14473.63  | 16270.084 |
| NM_01911E | 1814.132  | 1834.204  | NM_003377 | 17436.164 | 12326.445 | AI160703  | 1307.315  | 1560.84   |
| L37699    | 1616.11   | 1702.565  | NM_00222E | 5456.368  | 2988.215  | X12830    | 15150.801 | 16572.318 |
| M33197    | 62492.305 | 61469.688 | AB033034  | 8138.422  | 5806.775  | U00482    | 5809.352  | 5521.732  |
| AL050173  | 1983.355  | 1450.944  | D38169    | 5302.377  | 4949.757  | K01904    | 28902.783 | 32705.508 |
| D80002    | 2032.267  | 1460.916  | M33197    | 64842.344 | 67748.547 | BE538886  | 6000.295  | 5514.339  |
| U17637    | 9903.625  | 8842.9    | AJ293294  | 9267.422  | 9922.887  | NM_00222E | 783.894   | 798.033   |
| AF207831  | 1273.016  | 1286.955  | NM_018171 | 2227.307  | 2287.862  | M57650    | 66257.984 | 70534.68  |
| AK023174  | 559.747   | 638.677   | NM_01414E | 22791.379 | 25060.564 | BC023978  | 3255.626  | 3508.268  |
| NM_00354E | 669.489   | 654.008   | X63454    | 792.848   | 900.547   | M21302    | 11969.185 | 12341.247 |
| M33197    | 68826.922 | 58753.789 | NM_014141 | 28512.279 | 28251.896 | NM_00148E | 5387.502  | 6746.096  |
| NM_01827E | 4215.733  | 3226.078  | NM_00222E | 8325.423  | 8357.191  | NM_01494E | 831.78    | 1381.174  |
| AF086125  | 1318.536  | 960.964   | M33197    | 64255.344 | 63445.063 | NM_01836E | 5250.615  | 4819.883  |
| AL079279  | 474.335   | 368.702   | NM_00549E | 42262.426 | 50526.656 | AL365415  | 1475.097  | 1710.107  |
| AK023547  | 592.091   | 375.916   | NM_003151 | 5583.957  | 6016.455  | L29147    | 65785     | 66579.539 |
| U67847    | 2814.037  | 1687.007  | NM_006811 | 10218.843 | 11587.649 | NM_00152E | 60079.629 | 61013.168 |
| M33197    | 66758.461 | 69682.469 | NM_005601 | 4356.195  | 5542.492  | NM_00605E | 10342.164 | 9749.787  |
| AK024207  | 6359.183  | 8436.239  | NM_016151 | 44195.508 | 53528.035 | NM_00429E | 1508.798  | 2089.162  |
| AK021843  | 939.952   | 1294.428  | AK026270  | 2519.046  | 1693.416  | NM_00504E | 1434.972  | 1622.629  |
| AF075025  | 489.702   | 702.276   | NM_00455E | 26048.67  | 21309.264 | NM_00597E | 5517.132  | 6405.447  |
| AF088008  | 1633.575  | 2246.475  | D90075    | 6514.554  | 7554.263  | NM_00106E | 3213.633  | 4218.568  |
| NM_00468E | 4496.3    | 5436.881  | M33197    | 66289.203 | 68009.484 | NM_018841 | 9566.223  | 9250.431  |
| AB037725  | 638.988   | 471.496   | NM_014857 | 2344.827  | 1973.897  | NM_00522E | 4433.335  | 4271.882  |
| M33197    | 66891.266 | 56817.551 | AK023827  | 6962.71   | 7576.766  | AL133105  | 12526.66  | 11827.154 |
| NM_00486E | 4248.661  | 4631.781  | AK021702  | 6844.915  | 5505.013  | AK022859  | 5351.355  | 5591.376  |
| AF217190  | 8712.508  | 7710.557  | NM_00388E | 4401.274  | 2820.858  | NM_00372E | 63324.453 | 67011.016 |
| AB028981  | 61434.395 | 54596.129 | AL161977  | 1404.698  | 1109.13   | L09102    | 43664.086 | 54009.449 |
| NM_00680E | 3694.672  | 3148.713  | NM_01644E | 9979.806  | 7714.478  | U68488    | 1423.843  | 1337.456  |
| NM_00247E | 907.844   | 954.631   | NM_00393E | 3850.346  | 4522.667  | NM_016247 | 5163.708  | 5560.789  |
| NM_00272E | 7376.445  | 4999.728  | M33197    | 61794.633 | 61080.055 | NM_00165E | 65618.508 | 77875.922 |
| M33197    | 64784.43  | 61866.988 | NM_00268E | 2573.807  | 2558.301  | NM_006827 | 28880.043 | 32324.43  |
| AK025266  | 2891.639  | 2454.422  | NM_00441E | 10281.484 | 12022.847 | AK021761  | 15459.747 | 15833.327 |
| AK001843  | 1996.343  | 1664.923  | NM_01426E | 871.096   | 1257.31   | AK024536  | 4796.515  | 4671.858  |
| AK000548  | 36994.496 | 24683.119 | NM_00727E | 34719.484 | 34976.621 | NM_01866E | 6122.382  | 5685.028  |
| NM_00392E | 24711.355 | 27401.42  | NM_00521E | 26999.359 | 28042.088 | NM_004227 | 2421.976  | 2572.046  |
| NM_004787 | 41990.547 | 34736.988 | NM_00472E | 8450.758  | 8323.952  | NM_00528E | 6328.438  | 5857.032  |
| AF087984  | 4559.078  | 6697.383  | M33197    | 64965.395 | 67581.305 | NM_00173E | 3381.159  | 4157.311  |
| AF009302  | 1322.083  | 2265.414  | NM_01841E | 3878.096  | 4540.433  | AL137580  | 1509.76   | 2109.525  |
| M33197    | 61716.805 | 63227.512 | AB018299  | 45643.238 | 58682.434 | AB033114  | 874.242   | 877.73    |
| AK022273  | 7198.648  | 7986.344  | NM_00524E | 8704.021  | 10578.43  | NM_01597E | 21761.223 | 19831.803 |
| NM_01588E | 1390.59   | 1513.193  | NM_002941 | 2167.01   | 3162.758  | NM_00381E | 4490.667  | 4710.947  |

|           |           |           |           |           |           |           |           |           |
|-----------|-----------|-----------|-----------|-----------|-----------|-----------|-----------|-----------|
| AK024271  | 824.993   | 1156.201  | AK025605  | 6706.733  | 4341.183  | NM_00490E | 1093.661  | 1146.775  |
| AK021650  | 2270.242  | 2350.817  | NM_003783 | 2445.131  | 1427.903  | NM_005212 | 9685.663  | 11870.646 |
| AL050210  | 4022.041  | 4042.149  | NM_007000 | 12485.107 | 9024.115  | NM_00641E | 3087.203  | 3760.022  |
| NM_004132 | 5968.802  | 5209.928  | M23161    | 22448.877 | 26056.178 | AF035035  | 1623.204  | 1744.104  |
| NM_014844 | 2817.211  | 2303.697  | NM_006100 | 1827.64   | 2026.28   | AB020676  | 1337.231  | 1939.831  |
| M33197    | 63032.945 | 63125.836 | NM_003197 | 18620.498 | 21679.834 | AK024715  | 1060.691  | 1352.602  |
| NM_018492 | 3939.276  | 3264.894  | AF176705  | 13592.038 | 9781.252  | U90942    | 37868.094 | 44956.586 |
| NM_00134E | 3591.245  | 3222.839  | D29012    | 27275.184 | 21710.684 | NM_00077E | 18513.924 | 20385.301 |
| NM_00314E | 2546.092  | 2368.466  | NM_017414 | 1660.325  | 1369.599  | NM_00160E | 2482.796  | 2675.911  |
| NM_003377 | 9303.682  | 8988.565  | NM_012179 | 27371.346 | 28723.279 | BE733234  | 973.619   | 1112.338  |
| NM_002220 | 7035.655  | 5255.592  | NM_002793 | 10442.713 | 13988.029 | NM_02022E | 23896.113 | 22170.07  |
| AB033034  | 4931.185  | 3440.466  | NM_00478E | 3527.528  | 3786.298  | AK024685  | 4284.68   | 3932.021  |
| D38169    | 6784.598  | 5150.268  | AL442083  | 11933.381 | 12308.976 | NM_00367E | 12012.537 | 10176.454 |
| M33197    | 63162.727 | 62430.016 | D63487    | 12931.214 | 13680.547 | AF113007  | 20670.145 | 23880.826 |
| AJ293294  | 6119.822  | 3839.543  | AK097791  | 18954.947 | 20133.984 | NM_00068E | 4362.956  | 3370.325  |
| NM_018171 | 1577.028  | 1082.911  | NM_020367 | 1798.561  | 2046.234  | U39573    | 1960.08   | 2124.649  |
| NM_002447 | 29715.588 | 39185.406 | AK022705  | 4195.996  | 4631.567  | D82061    | 7258.585  | 7151.558  |
| NM_01414E | 14343.16  | 25684.344 | NM_016404 | 22778.172 | 27079.346 | AJ293009  | 7688.955  | 8313.154  |
| NM_014141 | 10310.75  | 10556.959 | L03426    | 5190.914  | 6747.813  | NM_000374 | 9428.704  | 12395.737 |
| NM_002223 | 3037.863  | 4094.994  | M33197    | 65718.516 | 72175.914 | NM_000502 | 48715.695 | 55710.574 |
| M33197    | 66235.641 | 65878.555 | NM_020163 | 5655.805  | 7233.385  | NM_00135E | 47364.859 | 59748.906 |
| NM_005490 | 25222.17  | 21869.961 | NM_004324 | 6745.096  | 10046.838 | NM_00517E | 63430.215 | 61959.938 |
| NM_003151 | 2772.173  | 2952.521  | NM_005614 | 39875.477 | 47469.402 | NM_00169E | 19029.656 | 22555.557 |
| NM_006811 | 5508.936  | 5412.09   | AJ133115  | 15807.55  | 9118.065  | NM_00497E | 51668.156 | 48259.219 |
| NM_005601 | 969.956   | 1352.554  | AF042831  | 1046.544  | 593.164   | D87445    | 7325.123  | 7668.522  |
| NM_016151 | 3310.075  | 3409.221  | X51630    | 26088.727 | 27551.178 | NM_00023E | 6705.543  | 8021.962  |
| AK026270  | 1200.036  | 761.587   | NM_00505E | 6074.458  | 3982.67   | NM_002247 | 1876.714  | 2265.798  |
| NM_00455E | 11136.065 | 9483.399  | NM_00196E | 3220.437  | 2587.676  | NM_004980 | 9083.26   | 9372.309  |
| D90075    | 2314.648  | 2307.07   | AF208502  | 29392.023 | 20222.461 | AB011094  | 30162.297 | 33073.621 |
| M33197    | 60589.105 | 60543.41  | M33197    | 61792.93  | 64207.477 | NM_003224 | 1996.661  | 3081.602  |
| NM_014857 | 1251.079  | 1086.279  | AF264750  | 61418.594 | 48398.895 | AK024865  | 2012.575  | 2491.364  |
| AK023827  | 7571.524  | 5233.6    | NM_006980 | 4345.541  | 3718.801  | NM_007210 | 1052.998  | 1853.46   |
| AK021702  | 3966.461  | 4158.254  | AK023904  | 16101.854 | 13885.101 | NM_00148E | 4712.08   | 5698.496  |
| NM_00388E | 2972.386  | 2494.076  | NM_01795E | 25856.17  | 27262.613 | NM_01897E | 9652.933  | 10254.038 |
| AL161977  | 638.558   | 429.404   | NM_01782E | 1250.31   | 1745.113  | NM_002591 | 37055.438 | 39021.422 |
| NM_01644E | 11106.496 | 9426.705  | NM_01649E | 2382.137  | 2472.055  | NM_02021E | 2621.839  | 3013.959  |
| NM_00393E | 1989.758  | 1354.526  | M33197    | 61639.816 | 58620.953 | AK021860  | 6810.115  | 7251.646  |
| M33197    | 62384.594 | 62140.258 | NM_004094 | 8058.979  | 9979.282  | AB046816  | 1405.465  | 1400.844  |
| NM_00268E | 1781.877  | 2443.758  | NM_02023E | 5731.158  | 6119.394  | AL137266  | 8721.495  | 10158.236 |
| NM_02036E | 700.855   | 639.116   | AK027059  | 25292.354 | 24228.158 | NM_016457 | 1257.169  | 1789.289  |
| NM_00441E | 3846.807  | 6210.906  | AF151109  | 47612.434 | 51855.418 | NM_005057 | 2223.134  | 2667.954  |
| NM_00727E | 19491.047 | 19024.816 | NM_015414 | 60954.676 | 64369.98  | AB046842  | 2759.016  | 3337.242  |
| NM_00521E | 11775.1   | 13437.781 | L34070    | 18069.123 | 18097.332 | NM_004850 | 1732.414  | 2205.544  |
| NM_00472E | 3922.665  | 3330.84   | M33197    | 64360.051 | 70494.539 | NM_002822 | 17640.338 | 24428.326 |
| M33197    | 63699.469 | 61705.164 | NM_01621E | 41858.852 | 55570.961 | BF306955  | 1543.063  | 1804.021  |
| NM_01841E | 2007.179  | 1779.833  | NM_004751 | 2699.759  | 3451.902  | NM_001394 | 11021.468 | 11926.267 |
| AB018299  | 29594.736 | 24489.059 | NM_006441 | 20108.732 | 11039.413 | NM_018441 | 15875.757 | 15500.562 |
| NM_00524E | 3286.16   | 3128.723  | NM_00191E | 6853.769  | 6376.99   | CY3Cy5    | 10338.44  | 308.207   |
| NM_002941 | 1198.657  | 1221.104  | NM_01824E | 19378.705 | 13804.428 | BM664556  | 1977.565  | 1418.544  |
| AK025605  | 2881.331  | 3133.971  | M33197    | 63128.137 | 60878.059 | AL359586  | 1369.848  | 780.473   |
| NM_00378E | 1053.213  | 1153.562  | AF252390  | 4373.308  | 3760.183  | AF035290  | 1866.265  | 1378.739  |
| NM_007000 | 6168.308  | 4813.428  | NM_012117 | 19733.486 | 17117.672 | M33197    | 92766.953 | 67592.25  |
| M23161    | 8997.541  | 7853.014  | D17130    | 64109.793 | 60947.227 | AK023288  | 1410.134  | 1391.504  |

|           |           |           |           |           |           |           |           |           |
|-----------|-----------|-----------|-----------|-----------|-----------|-----------|-----------|-----------|
| NM_00610C | 1020.661  | 1091.408  | X76302    | 8545.312  | 9486.983  | NM_01798E | 2848.334  | 3777.697  |
| NM_003197 | 8040.464  | 7222.588  | M33197    | 63697.191 | 63373.707 | AK024846  | 7274.789  | 7101.613  |
| AF176705  | 8263.73   | 8085.35   | X52354    | 4042.821  | 5088.527  | SR3       | 31515.605 | 32166.693 |
| D29012    | 15703.134 | 13681.661 | NM_005413 | 1698.959  | 2453.309  | SR7       | 3234.762  | 21143.094 |
| NM_017414 | 574.333   | 444.176   | NM_002315 | 10311.761 | 10860.304 | CY3Cy5    | 11095.903 | 678.566   |
| NM_012179 | 15952.327 | 12675.524 | AK024191  | 2548.567  | 3136.379  | U52839    | 1918.506  | 1249.563  |
| NM_002793 | 4136.578  | 3672.303  | NM_00660E | 8864.962  | 8334.819  | AK026984  | 36361.035 | 45457.184 |
| NM_00478E | 1988.336  | 1642.063  | NM_000457 | 9655.604  | 9082.001  | AK021796  | 20043.869 | 25665.441 |
| M33197    | 61913.27  | 63875.418 | M34356    | 4883.31   | 4669.13   | AL117427  | 7092.822  | 5571.227  |
| AL442083  | 6349.122  | 10403.408 | NM_014623 | 22349.277 | 20081.332 | AF052118  | 14082.124 | 13907.922 |
| D63487    | 5586.394  | 9642.037  | NM_007244 | 49818.375 | 26443.428 | AK023305  | 61035.141 | 63122.047 |
| AK097791  | 6985.909  | 13185.845 | M30629    | 21460.348 | 11603.838 | AK022428  | 731.791   | 987.03    |
| NM_020367 | 740.252   | 854.959   | BE539299  | 941.648   | 1124.036  | AK025089  | 9655.711  | 11751.395 |
| AK022705  | 1530.092  | 1356.617  | AF193873  | 10068.223 | 10665.731 | M33197    | 70376.094 | 65518.035 |
| NM_016404 | 10797.762 | 11084.495 | NM_00262E | 5104.93   | 3774.354  | AK001279  | 1465.854  | 1719.632  |
| L03426    | 2296.981  | 2418.816  | M23575    | 2560.936  | 1638.322  | AK001567  | 1170.45   | 1058.803  |
| M33197    | 71191.969 | 63519.754 | AA190729  | 7584.33   | 5861.092  | M33197    | 61982.582 | 67366.234 |
| NM_020163 | 2516.553  | 1993.122  | BF974315  | 20280.693 | 21462.426 | AF075006  | 780.298   | 474.133   |
| NM_004324 | 2973.342  | 3219.364  | T74985    | 805.328   | 1197.813  | M33197    | 74763.656 | 65822.508 |
| NM_005614 | 22417.918 | 18531.363 | AI652705  | 6748.875  | 7412.468  | AK000903  | 57175.984 | 47877.164 |
| AJ133115  | 7054.961  | 7019.045  | AA973397  | 5918.125  | 7793.92   | AK023938  | 2604.994  | 1769.432  |
| AF042831  | 578.493   | 612.523   | AA569974  | 2631.125  | 3192.809  | AL110169  | 997.627   | 1225.061  |
| X51630    | 12546.688 | 10495.232 | AA923615  | 3750.093  | 4668.856  | AK022088  | 1832.678  | 1687.719  |
| NM_00505E | 2995.03   | 2151.354  | AA446028  | 1830.883  | 2216.509  | M33197    | 76490.672 | 66119.938 |
| NM_00196E | 2086.316  | 1505.136  | M80583    | 1877.577  | 3307.079  | AL157466  | 4248.773  | 4194.688  |
| AF208502  | 16724.266 | 12038.069 | AW009565  | 11855.09  | 13433.693 | AK024336  | 1294.59   | 1570.134  |
| M33197    | 57495.219 | 60428.281 | AW451878  | 607.292   | 1084.464  | NM_018621 | 689.943   | 726.726   |
| AF264750  | 48355.957 | 31402.283 | X07767    | 7267.359  | 7605.208  | AK022118  | 2185.601  | 1882.475  |
| NM_00698C | 2571.637  | 1576.456  | X65293    | 1446.318  | 1539.487  | AK026453  | 6796.21   | 6178.233  |
| AK023904  | 12066.421 | 10318.964 | M33197    | 1749.684  | 2279.941  | M33197    | 80055.281 | 66470.984 |
| NM_01795E | 15894.066 | 11292.508 | NM_000853 | 23203.977 | 22158.215 | D17203    | 58027.707 | 46146.961 |
| NM_01782E | 659.067   | 535.532   | NM_00084E | 1112.874  | 1226.807  | NM_00649E | 8731.842  | 7051.096  |
| NM_01649E | 1667.728  | 1319.445  | AF016903  | 62574.266 | 60616.227 | NM_00528E | 3913.84   | 2662.529  |
| NM_01430E | 9479.343  | 17723.424 | NM_01567E | 16871.352 | 11159.177 | AK022101  | 3040.798  | 2581.525  |
| M33197    | 52077     | 59633.438 | AK022267  | 2091.852  | 2503.716  | NM_003251 | 3350.104  | 3080.033  |
| NM_004094 | 3308.186  | 5066.831  | NM_01604C | 7573.948  | 5179.503  | AB046772  | 1565.757  | 1936.777  |
| NM_02023E | 2870.615  | 4300.912  | M33197    | 63565.48  | 62706.973 | M33197    | 74959.836 | 65833.43  |
| AK027059  | 11291.604 | 8510.597  | AF031136  | 62533.473 | 61328.992 | AL442080  | 2167.779  | 2638.008  |
| AF151109  | 24052.607 | 15593.903 | NM_006597 | 60940.008 | 59566.129 | AY007143  | 3369.329  | 3507.697  |
| NM_015414 | 58044.203 | 56621.93  | NM_012483 | 36593.25  | 43453.52  | L15557    | 994.375   | 834.863   |
| L34070    | 8588.135  | 7247.513  | NM_00349E | 16818.334 | 16919.363 | AK022729  | 941.721   | 1026.62   |
| M33197    | 60562.016 | 60554.383 | AB023420  | 37790.469 | 44283.484 | NM_00616E | 1013.791  | 1461.336  |
| NM_01621E | 17740.729 | 14194.063 | M33197    | 64567.906 | 67381.93  | AL050374  | 744.944   | 738.151   |
| NM_004751 | 1160.547  | 904.553   | NM_007264 | 58998.07  | 61566.711 | M33197    | 81082.203 | 66413.844 |
| NM_00186E | 55898.414 | 59916.008 | NM_002262 | 1980.869  | 2538.993  | AF116655  | 4026.523  | 4888.549  |
| NM_006441 | 9662.015  | 8066.639  | NM_016511 | 60242.688 | 64989.344 | AJ243222  | 1182.185  | 1234.181  |
| NM_00191E | 3417.665  | 2903.921  | NM_00355E | 6971.939  | 8965.481  | AK026132  | 1721.559  | 2100.635  |
| NM_01824E | 16914.344 | 14602.467 | NM_002543 | 460.803   | 857.351   | Y11162    | 545.93    | 649.633   |
| M33197    | 60396.34  | 58559.133 | NM_00218E | 1074.14   | 1562.945  | AF070584  | 1819.008  | 1858.143  |
| AF252390  | 3000.406  | 2026.668  | M55337    | 4259.723  | 6028.15   | AF052109  | 3565.035  | 1848.41   |
| NM_012117 | 10618.319 | 5557.646  | NM_01322E | 2303.946  | 2233.694  | M33197    | 63508.781 | 61033.051 |
| D17130    | 55049.867 | 50857.297 | NM_016533 | 64123.676 | 66361.008 | NM_00335E | 65580.039 | 65099.691 |
| X76302    | 4803.147  | 4417.359  | NM_007342 | 14928.249 | 13210.203 | X82127    | 45147.465 | 45663.586 |

|           |           |           |           |           |           |           |           |           |
|-----------|-----------|-----------|-----------|-----------|-----------|-----------|-----------|-----------|
| AK026276  | 1252.297  | 1375.619  | NM_005672 | 4406.457  | 5233.635  | AL122044  | 5334.072  | 4339.937  |
| X52354    | 1747.469  | 1711.763  | D25217    | 6680.942  | 7037.236  | NM_018296 | 1989.878  | 2248.34   |
| NM_005413 | 635.85    | 520.199   | NM_006351 | 31581.432 | 36082.648 | M33197    | 65719.125 | 64931.586 |
| NM_002315 | 4434.478  | 3923.7    | M33197    | 63175.605 | 63956.52  | AF070578  | 872.001   | 999.699   |
| AK024191  | 1229.718  | 1027.268  | NM_004683 | 9962.292  | 7065.054  | Z11849    | 5993.709  | 6131.939  |
| NM_006608 | 4144.616  | 3242.004  | AK023226  | 4590.843  | 4315.232  | M33197    | 70597.359 | 65281.313 |
| NM_000457 | 3410.558  | 2617.614  | AK025263  | 1783.921  | 1905.07   | AF075050  | 2113.76   | 2927.159  |
| M34356    | 2112.372  | 1800.383  | NM_006931 | 23243.51  | 25107.742 | AK024842  | 1065.688  | 1480.969  |
| M33197    | 57865.945 | 60259.969 | AJ133127  | 1475.377  | 1381.737  | AB018327  | 4000.995  | 2307.202  |
| NM_014623 | 10310.714 | 9025.442  | NM_019844 | 1032.299  | 1097.667  | AF303889  | 806.707   | 356.827   |
| NM_007244 | 23407.934 | 16963.895 | NM_018057 | 13413.257 | 16976.939 | M33197    | 75709.625 | 65924.844 |
| M30629    | 12324.942 | 10691.593 | M33197    | 62847.738 | 66728.258 | AK022649  | 9754.32   | 8599.171  |
| BE539299  | 532.493   | 536.62    | NM_015717 | 10474.391 | 11382.608 | NM_016507 | 6379.455  | 6008.935  |
| AF193873  | 11652.616 | 8716.89   | NM_015925 | 9735.638  | 11094.981 | NM_002024 | 8685.951  | 7927.29   |
| NM_002628 | 4038.919  | 3310.145  | NM_003665 | 3380.909  | 3947.672  | NM_002743 | 8549.329  | 10997.905 |
| M23575    | 1861.198  | 1525.831  | AF220217  | 3268.51   | 4493.708  | AF173358  | 3416.346  | 4075.71   |
| AA190729  | 4298.4    | 2895.723  | NM_013323 | 55283.547 | 59229.137 | NM_001563 | 5118.728  | 6236.128  |
| BF974315  | 11838.745 | 6843.352  | NM_014937 | 1919.545  | 2731.716  | NM_000266 | 692.469   | 1088.193  |
| AI652705  | 5635.226  | 5243.38   | NM_017426 | 5198.749  | 6212.935  | X89666    | 1862.094  | 2381.056  |
| AA973397  | 2865.73   | 3388.93   | M33197    | 15462.512 | 15116.921 | NM_003104 | 9274.983  | 10773.028 |
| AA569974  | 1085.672  | 1070.346  | NM_004558 | 39024.066 | 30669.318 | NM_014581 | 663.57    | 726.352   |
| AA446028  | 928.66    | 810.171   | AL079296  | 2293.498  | 2548.538  | NM_014406 | 3128.546  | 3161.544  |
| M80583    | 730.147   | 689.328   | NM_014770 | 22955.99  | 23200.098 | Z11801    | 814.491   | 907.549   |
| AW009565  | 5877.594  | 5277.899  | AB037737  | 3686.215  | 2748.742  | S68954    | 3081.561  | 1432.18   |
| X07767    | 2862.935  | 2856.412  | M33197    | 65633.359 | 62839.926 | S81335    | 917.284   | 916.731   |
| X65293    | 473.633   | 634.754   | AK023103  | 4132.921  | 3566.478  | NM_006197 | 5551.586  | 1919.089  |
| M33197    | 1025.066  | 933.377   | NM_017858 | 6359.235  | 4333.51   | NM_014181 | 3217.704  | 2371.918  |
| NM_000853 | 11543.052 | 13768.933 | NM_019059 | 63365.125 | 62668.52  | M29273    | 1217.959  | 1332.476  |
| NM_000846 | 653.563   | 347.315   | NM_013347 | 990.333   | 1602.955  | NM_004854 | 8425.659  | 7961.93   |
| AF016903  | 56065.344 | 57248.945 | D80008    | 3515.742  | 3626.682  | AJ245418  | 16520.572 | 17690.123 |
| NM_015675 | 15491.008 | 10564.022 | X56789    | 3989.784  | 5287.512  | NM_006377 | 5753.388  | 5555.384  |
| AK022267  | 1319.384  | 1004.727  | AK001069  | 63940.883 | 61595.484 | NM_018362 | 5871.778  | 6761.519  |
| NM_016040 | 4198.6    | 3368.863  | NM_000935 | 4899.76   | 5574.045  | M33197    | 65238.41  | 64690.043 |
| M33197    | 54843.508 | 59815.578 | NM_000359 | 57887.836 | 50776.145 | NM_004755 | 958.845   | 1011.187  |
| AF031136  | 54023.059 | 60464.461 | NM_006395 | 7096.641  | 7974.085  | NM_006182 | 406.676   | 806.019   |
| NM_006597 | 46845.813 | 34584.563 | NM_014306 | 13495.348 | 15679.253 | AL137543  | 985.818   | 1366.663  |
| NM_012483 | 26464.449 | 25571.264 | NM_001084 | 9952.331  | 13028.256 | NM_001957 | 2605.05   | 2899.948  |
| NM_003498 | 9737.863  | 14530.314 | NM_015983 | 12512.793 | 14303.967 | AK024533  | 9187.035  | 10397.199 |
| AB023420  | 21303.082 | 18283.279 | NM_018622 | 8821.63   | 10734.69  | NM_002736 | 13712.151 | 14240.371 |
| NM_002262 | 1134.048  | 835.679   | M33197    | 64206.984 | 64148.23  | NM_004246 | 1153.889  | 1422.053  |
| NM_016511 | 46550.09  | 39114.762 | NM_005867 | 20228.959 | 25898.707 | NM_005207 | 2601.4    | 1792.236  |
| NM_003559 | 2874.537  | 3709.099  | AK026031  | 60147.566 | 57537.23  | NM_003087 | 7434.704  | 6522.383  |
| NM_002185 | 854.138   | 1184.885  | NM_016468 | 17490.273 | 18978.043 | NM_001630 | 3495.236  | 3077.293  |
| M55337    | 1860.258  | 1678.914  | NM_007244 | 52525.965 | 41697.016 | AF305081  | 4170.122  | 4619.593  |
| NM_013229 | 622.888   | 517.433   | M30629    | 26632.615 | 21973.916 | AF118078  | 1095.54   | 1405.785  |
| NM_016533 | 60573.75  | 62362.465 | BE539299  | 1136.111  | 712.531   | NM_020169 | 637.593   | 713.419   |
| NM_007342 | 7053.283  | 9209.744  | AF193873  | 16863.689 | 10445.049 | NM_005858 | 1842.991  | 2601.787  |
| NM_005672 | 2174.357  | 1620.687  | NM_002628 | 3540.131  | 2852.332  | NM_014931 | 3844.701  | 4128.3    |
| D25217    | 3273.356  | 2761.639  | M23575    | 2869.417  | 3547.954  | NM_014487 | 7611.224  | 7456.426  |
| NM_006351 | 15234.03  | 12172.818 | AA190729  | 7653.411  | 4670.486  | NM_018070 | 1519.815  | 1650.967  |
| M33197    | 62326.441 | 59165.543 | BF974315  | 21887.25  | 9853.543  | NM_002484 | 8306.557  | 8115.625  |
| NM_000103 | 784.35    | 571.081   | T74985    | 1514.81   | 1450.558  | M33197    | 64360.773 | 63458.559 |
| NM_004683 | 14832.221 | 10940.298 | AI652705  | 7438.125  | 8288.083  | AL162052  | 2964.594  | 4268.904  |

|           |           |           |           |           |           |           |           |           |
|-----------|-----------|-----------|-----------|-----------|-----------|-----------|-----------|-----------|
| AK023226  | 2666.561  | 1977.277  | AA973397  | 7091.172  | 7521.877  | AK025941  | 779.773   | 901.104   |
| AK025263  | 838.427   | 693.667   | AA569974  | 2372.467  | 2548.586  | AF059531  | 20465.033 | 14171.394 |
| NM_006931 | 11655.932 | 11793.89  | AA446028  | 1614.337  | 1925.952  | NM_002707 | 15384.19  | 11439.193 |
| M33197    | 59709.859 | 62410.246 | M80583    | 1889.275  | 2902.786  | NM_006264 | 877.593   | 559.431   |
| NM_015717 | 4262.49   | 4375.151  | AW009565  | 11606.779 | 11185.091 | AF029777  | 4820.404  | 3620.664  |
| NM_015925 | 5517.763  | 5822.202  | AW451878  | 741.7     | 1205.574  | NM_003352 | 1605.132  | 1299.003  |
| NM_003665 | 1499.155  | 2481.511  | AI570478  | 317.841   | 902.618   | AK026884  | 38241.703 | 41824.258 |
| AF220217  | 1976.194  | 3868.348  | X07767    | 5844.476  | 6681.969  | S82198    | 2781.871  | 3030.489  |
| NM_013323 | 55742.227 | 61024.813 | X65293    | 1783.24   | 1823.549  | NM_002594 | 2461.985  | 3710.69   |
| NM_014937 | 867.978   | 1042.051  | M33197    | 33428.121 | 38288.879 | NM_001159 | 1112.371  | 1217.628  |
| NM_017426 | 2748.38   | 2534.785  | AL050139  | 19714.082 | 23189.059 | NM_031407 | 3185.609  | 4612.233  |
| M33197    | 9679.31   | 8946.04   | NM_002593 | 1733.955  | 2219.162  | NM_002218 | 585.196   | 667.338   |
| NM_004558 | 19414.041 | 22199.891 | NM_006820 | 371.441   | 1130.592  | M33197    | 66748.328 | 65000.559 |
| AL079296  | 1163.672  | 1425.251  | AF016903  | 61664.938 | 61992.594 | AK000410  | 29304.283 | 32106.732 |
| NM_014770 | 11063.53  | 8602.809  | NM_015675 | 35334.063 | 40483.777 | NM_020193 | 2361.24   | 2540.039  |
| AB037737  | 1674.952  | 1354.955  | AK022267  | 2021.041  | 1767.456  | D86982    | 844.8     | 871.754   |
| M33197    | 62196.238 | 60660.785 | NM_016040 | 8371.006  | 5252.933  | NM_005619 | 756.06    | 891.051   |
| AK023103  | 2413.41   | 2471.072  | M33197    | 63571.879 | 65047.707 | D87440    | 5118.484  | 4926.059  |
| NM_017858 | 3348.614  | 3048.578  | AF031136  | 61570.668 | 57697.328 | AK000332  | 26165.938 | 25495.748 |
| NM_019058 | 58637.289 | 50218.484 | NM_006597 | 57047.762 | 58018.281 | AL080156  | 1969.241  | 1787.282  |
| NM_013347 | 674.245   | 539.963   | NM_012483 | 35820.684 | 42562.988 | NM_006738 | 1910.442  | 2087.375  |
| D80008    | 1853.997  | 2052.174  | NM_003498 | 17997.439 | 21508.666 | NM_002285 | 850.431   | 1141.437  |
| X56789    | 2712.417  | 3844.597  | AB023420  | 40576.223 | 49526.707 | NM_006694 | 11241.074 | 13204.884 |
| AK001069  | 61629.844 | 62515.199 | M33197    | 63799.113 | 63735.074 | NM_013351 | 51885.016 | 44016.996 |
| NM_000935 | 2427.329  | 2964.363  | NM_007264 | 57600.477 | 58753.109 | NM_012340 | 14821.433 | 10255.44  |
| NM_000358 | 37907.766 | 31451.195 | NM_002262 | 1998.566  | 2387.738  | NM_006022 | 4042.949  | 3084.315  |
| NM_006395 | 3180.507  | 3456.121  | NM_016511 | 62433.523 | 63534.434 | AK025110  | 1345.635  | 886.861   |
| NM_014306 | 7159.267  | 6640.299  | NM_003559 | 6978.978  | 8593.862  | X52339    | 60153.578 | 58855.973 |
| NM_001084 | 4268.424  | 4570.276  | NM_002543 | 624.25    | 1197.747  | M33197    | 64553.648 | 64676.359 |
| NM_015983 | 7222.854  | 8172.944  | NM_002185 | 1302.54   | 1498.699  | AB046830  | 3419.127  | 4066.072  |
| NM_018622 | 5582.84   | 8167.385  | M55337    | 3805.312  | 5427.419  | NM_007122 | 1869.137  | 3037.99   |
| M33197    | 61836.602 | 64161.793 | NM_013229 | 1540.575  | 2106.315  | NM_001488 | 1604.346  | 1920.841  |
| NM_005867 | 12061.269 | 14806.839 | NM_016533 | 61775.152 | 66996.484 | NM_016202 | 7011.297  | 8622.666  |
| AK026031  | 40835.895 | 37836.297 | M33197    | 62049.484 | 67680.289 | NM_012476 | 1195.854  | 1703.06   |
| NM_016468 | 9456.921  | 9540.677  | NM_014623 | 15325.179 | 19059.715 | NM_016604 | 1295.264  | 1216.62   |
| NM_007244 | 32662.871 | 32256.537 | D25217    | 7784.6    | 8407.924  | M33197    | 65174.891 | 69489.922 |
| M30629    | 14573.579 | 16173.146 | NM_006351 | 35141.648 | 38981.258 | NM_006276 | 3857.895  | 4048.687  |
| BE539299  | 443.595   | 447.088   | M33197    | 63035.781 | 65554.047 | NM_003407 | 2880.799  | 3749.881  |
| AF193873  | 11602.364 | 8077.806  | NM_000103 | 1041.883  | 853.864   | NM_007209 | 64228.117 | 62389.078 |
| NM_002628 | 4435.699  | 3499.821  | NM_004683 | 6247.044  | 4435.753  | NM_003729 | 3104.385  | 3739.229  |
| M23575    | 2041.126  | 2000.922  | AK023226  | 4695.237  | 3728.499  | L05096    | 18809.889 | 20132.08  |
| AA190729  | 3901.076  | 2980.375  | AK025263  | 2263.55   | 1683.647  | NM_002848 | 1442.582  | 1813.641  |
| BF974315  | 12817.068 | 9294.616  | NM_006931 | 21804.082 | 22145.578 | NM_015914 | 2868.097  | 3558.367  |
| AI652705  | 6568.501  | 11937.769 | AJ133127  | 1303.181  | 1252.146  | NM_007180 | 7359.36   | 5606.016  |
| AA973397  | 3451.51   | 7171.589  | NM_018057 | 12136.704 | 12590.972 | NM_005609 | 1752.448  | 1255.93   |
| AA569974  | 1370.867  | 3423.655  | M33197    | 63625.855 | 65199.395 | NM_005476 | 13351.883 | 10538.024 |
| AA446028  | 960.789   | 1762.364  | NM_015717 | 11051.261 | 10239.69  | NM_005660 | 12207.467 | 9045.038  |
| M80583    | 1087.936  | 1951.99   | NM_015925 | 11111.855 | 10950.672 | AK023902  | 5433.749  | 5034.129  |
| AW009565  | 6024.542  | 5969.459  | NM_003665 | 3496.84   | 4495.854  | NM_000401 | 1146.974  | 1157.935  |
| AW451878  | 775.348   | 1352.328  | AF220217  | 3500.698  | 3937.402  | NM_005223 | 1322.008  | 1363.762  |
| X07767    | 3544.441  | 4519.824  | NM_013323 | 57803.453 | 58373.707 | AB011173  | 4120.715  | 4982.325  |
| X65293    | 1006.174  | 1158.682  | NM_014937 | 1816.392  | 2397.484  | AB023195  | 2076.571  | 2433.927  |
| M33197    | 24914.104 | 28349.633 | NM_017426 | 4880.115  | 6249.989  | U43431    | 1416.808  | 1889.662  |

|           |           |           |           |           |           |           |           |           |
|-----------|-----------|-----------|-----------|-----------|-----------|-----------|-----------|-----------|
| AL050139  | 11041.083 | 13823.54  | M33197    | 16384.34  | 18144.113 | X57147    | 1039.162  | 1267.545  |
| NM_002593 | 852.846   | 912.99    | NM_000853 | 18007.877 | 24966.059 | AB006622  | 1226.056  | 1293.787  |
| AF016903  | 54592.258 | 59922.086 | NM_000846 | 1030.137  | 1388.781  | M33197    | 62937.559 | 67600.32  |
| NM_015675 | 17939.723 | 14086.495 | NM_014770 | 25613.932 | 36483.398 | AK097041  | 2812.295  | 2739.417  |
| AK022267  | 1288.792  | 1073.959  | AB037737  | 3475.165  | 3381.859  | AF068744  | 55658.945 | 61806.082 |
| NM_016040 | 4969.008  | 3146.939  | M33197    | 66591.766 | 68664.969 | AK000762  | 1743.956  | 2134.318  |
| M33197    | 55971.91  | 60900.77  | AK023103  | 4207.445  | 3708.326  | NM_004571 | 802.419   | 655.262   |
| AF031136  | 56277.969 | 59377.762 | NM_017858 | 8178.039  | 8083.116  | AF276513  | 1324.498  | 956.489   |
| NM_006597 | 57073.855 | 63312.172 | NM_019059 | 61773.844 | 55476.121 | M33197    | 64945.809 | 73692.266 |
| NM_007329 | 405.99    | 843.224   | NM_013347 | 1382.168  | 1428.061  | M95610    | 63427.352 | 63174.563 |
| NM_012483 | 31030.645 | 38070.527 | D80008    | 3222.484  | 2705.813  | NM_003118 | 12234.45  | 8025.348  |
| NM_003498 | 8963.646  | 14577.483 | X56789    | 2981.627  | 2381.253  | L02922    | 40905.809 | 36131.152 |
| AB023420  | 26296.939 | 46361.172 | AK001069  | 64309.621 | 54795.074 | NM_001797 | 11282.239 | 11703.797 |
| M33197    | 57914.887 | 66574.797 | NM_000935 | 4624.646  | 5866.334  | NM_003154 | 6073.129  | 5965.916  |
| NM_007264 | 47320.051 | 61174.977 | NM_000359 | 53002.641 | 51845.727 | NM_004235 | 7720.847  | 6763.744  |
| NM_002262 | 1581.112  | 2323.721  | NM_006395 | 6212.484  | 7513.903  | AK023459  | 15761.336 | 16246.098 |
| NM_016511 | 48790.137 | 40327.102 | NM_014306 | 12462.357 | 11928.77  | BI762154  | 3323.186  | 4503.704  |
| NM_003559 | 3865.041  | 4015.029  | NM_001084 | 12244.425 | 12493.423 | U13022    | 3910.439  | 4390.038  |
| M55337    | 2089.693  | 2397.969  | NM_015983 | 13809.416 | 15461.622 | R23251    | 21446.908 | 25559.123 |
| NM_013229 | 910.269   | 1186.363  | NM_018622 | 10438.144 | 10547.917 | AA702640  | 2738.183  | 3354.912  |
| NM_016533 | 60748.297 | 64638.137 | M33197    | 65700.063 | 72147.484 | T68583    | 2995.159  | 3896.983  |
| M33197    | 62978.727 | 63468.582 | NM_005867 | 22300.721 | 26475.711 | AA481944  | 41241.477 | 46019.535 |
| NM_014623 | 9983.796  | 12669.391 | AK026031  | 56655.098 | 54380.203 | AF038440  | 1271.947  | 1476.075  |
| D25217    | 3864.018  | 3543.54   | NM_016468 | 16494.137 | 17235.275 | M31158    | 7454.569  | 8488.043  |
| NM_006351 | 18031.084 | 14209.729 | NM_007342 | 8960.729  | 10939.269 | H00742    | 1942.166  | 2697.387  |
| M33197    | 55777.438 | 59832.488 | NM_005672 | 3816.559  | 5077.145  | D42108    | 5012.587  | 6564.222  |
| NM_000103 | 1021.635  | 665.211   | BE539299  | 1414.619  | 1125.868  | BG700922  | 1801.597  | 2509.098  |
| NM_004683 | 16247.09  | 12157.337 | AF193873  | 22829.018 | 21181.209 | AI366068  | 2460.444  | 3236.98   |
| AK023226  | 2583.403  | 2045.518  | NM_002628 | 9662.975  | 8873.224  | N57553    | 14314.524 | 14730.968 |
| AK025263  | 1197.476  | 1062.353  | M23575    | 4137.037  | 3671.383  | M33197    | 62213.141 | 63095.828 |
| NM_006931 | 11821.652 | 15922.728 | AA190729  | 8201.36   | 5679.557  | NM_018202 | 62778.934 | 54071.633 |
| NM_018057 | 4924.001  | 5763.921  | BF974315  | 22378.736 | 16844.756 | AB023197  | 22740.914 | 14585.45  |
| M33197    | 59370.129 | 68266.008 | T74985    | 1344.672  | 821.739   | NM_022173 | 39239.105 | 31093.564 |
| NM_015717 | 6154.458  | 9677.637  | AI652705  | 6627.896  | 5872.805  | AB040970  | 9675.8    | 6969.132  |
| NM_015925 | 6090.139  | 5195.931  | AA973397  | 5537.261  | 5218.525  | NM_018330 | 6146.062  | 4452.866  |
| NM_003665 | 2111.592  | 2531.707  | AA569974  | 3247.637  | 2650.487  | AB023222  | 3540.443  | 3543.733  |
| AF220217  | 1779.773  | 2077.893  | AA446028  | 1778.982  | 2594.292  | AB033088  | 6210.666  | 6518.219  |
| NM_013323 | 44990.914 | 48421.598 | M80583    | 2225.162  | 3540.058  | M33197    | 63185.98  | 62406.063 |
| NM_014937 | 1018.807  | 1700.409  | AW009565  | 10297.655 | 11412.899 | U50342    | 55780.184 | 54958.473 |
| NM_017426 | 2937.7    | 4086.523  | AW451878  | 806.563   | 970.321   | NM_000295 | 1660.306  | 1560.847  |
| M33197    | 12103.881 | 15443.017 | X07767    | 7544.158  | 7781.049  | NM_000716 | 2053.543  | 2199.317  |
| NM_000853 | 9425.3    | 12530.569 | X65293    | 1731.156  | 1653.532  | AF026932  | 868.584   | 776.636   |
| NM_014770 | 12883.748 | 10399.843 | M33197    | 35097.16  | 40958.504 | AF103795  | 2142.936  | 1618.841  |
| AB037737  | 1900.974  | 1597.501  | AL050139  | 19195.965 | 24602.996 | NM_006215 | 744.436   | 564.784   |
| M33197    | 60569.457 | 60877.508 | NM_002593 | 1461.442  | 1959.415  | M33197    | 63886.965 | 61397.488 |
| AK023103  | 2927.576  | 2427.396  | NM_004558 | 35137.23  | 40259.32  | NM_007024 | 6426.009  | 7413.323  |
| NM_017858 | 4068.382  | 2630.267  | AL079296  | 2583.628  | 3056.089  | NM_013231 | 2241.037  | 2652.77   |
| NM_019059 | 52486.844 | 42877.051 | NM_006597 | 59693.371 | 60251.426 | NM_012106 | 6726.069  | 9688.102  |
| NM_013347 | 929.14    | 1592.277  | NM_007329 | 1221.099  | 1344.722  | NM_006254 | 3610.541  | 5081.158  |
| D80008    | 2288.578  | 2541.523  | NM_012483 | 54178.938 | 57846.633 | X95425    | 5657.386  | 6440.614  |
| X56789    | 3047.516  | 3583.707  | NM_003498 | 15553.354 | 11358.814 | NM_004422 | 3172.496  | 3879.456  |
| AK001069  | 58974.168 | 63213.895 | AB023420  | 34508.672 | 27077.293 | NM_016562 | 2199.967  | 2829.77   |
| NM_000935 | 2943.925  | 3881.911  | M33197    | 62019.922 | 60714.129 | AY009399  | 17461.867 | 17088.6   |



|           |           |           |           |           |           |           |           |           |
|-----------|-----------|-----------|-----------|-----------|-----------|-----------|-----------|-----------|
| NM_000359 | 37206.105 | 44597.082 | NM_002262 | 1107.326  | 1086.21   | NM_004895 | 18376.313 | 19018.977 |
| NM_006395 | 3038.664  | 5619.374  | NM_016511 | 46162.441 | 46507.301 | U80018    | 2392.69   | 1835.055  |
| NM_014306 | 9063.09   | 14117.726 | NM_003559 | 6454.481  | 6062.071  | NM_000717 | 2956.87   | 1886.677  |
| NM_001084 | 7178.275  | 4984.866  | NM_002543 | 2559.776  | 2389.903  | M33197    | 65347.469 | 66712.734 |
| NM_015983 | 9011.917  | 8482.593  | NM_002185 | 2291.569  | 2332.309  | NM_004845 | 20088.42  | 17921.424 |
| NM_018622 | 6595.264  | 8782.234  | M55337    | 4443.326  | 5351.813  | NM_007107 | 12751.486 | 15700.79  |
| M33197    | 58515.617 | 60405.391 | M33197    | 62260.953 | 65644.281 | NM_000047 | 63149.539 | 58747.313 |
| NM_005867 | 13721.812 | 17573.604 | NM_013229 | 1534.491  | 1593.368  | M68874    | 703.391   | 799.1     |
| AK026031  | 43240.07  | 44667.496 | NM_016533 | 60910.426 | 67461.844 | NM_006319 | 10885.218 | 9574.265  |
| NM_016465 | 11874.962 | 12170.506 | NM_014751 | 53998.688 | 56270.836 | NM_018226 | 2574.252  | 3170.13   |
| NM_007342 | 6202.915  | 7283.863  | NM_002347 | 61115.762 | 62580.945 | NM_006660 | 10639.028 | 11333.669 |
| NM_005672 | 1992.029  | 1888.657  | AB046807  | 3477.915  | 4321.552  | NM_006685 | 29212.486 | 36219.758 |
| BE539299  | 559.616   | 495.43    | NM_018176 | 1147.737  | 1443.669  | NM_012135 | 14403.889 | 14278.515 |
| AF193873  | 12580.897 | 8449.284  | NM_003508 | 1416.983  | 1790.698  | AF121856  | 9682.313  | 9966.534  |
| NM_002628 | 5393.722  | 3618.529  | M33197    | 60075.941 | 67237.633 | NM_006421 | 3845.63   | 4972.619  |
| M23575    | 2446.29   | 1939.573  | NM_014623 | 15945.655 | 20895.982 | NM_017457 | 18063.932 | 17975.994 |
| AA190729  | 4399.099  | 2516.813  | NM_007244 | 51256.551 | 54625.879 | NM_003765 | 14021.285 | 13488.336 |
| BF974315  | 13319.538 | 7909.162  | M30629    | 24086.287 | 27782.201 | NM_005868 | 1263.969  | 1243.188  |
| T74985    | 1006.854  | 989.832   | NM_018976 | 23880.084 | 21027.686 | M33197    | 64456.211 | 65684.961 |
| AI652705  | 6490.669  | 9386.414  | NM_003355 | 33864.809 | 33263.586 | NM_001201 | 4809.076  | 3454.181  |
| AA973397  | 3082.137  | 5693.912  | NM_005074 | 6255.619  | 6531.062  | NM_016618 | 5536.196  | 3372.606  |
| AA569974  | 1321.363  | 2333.712  | NM_013272 | 3776.003  | 3896.095  | AB014568  | 56128.859 | 50565.453 |
| AA446028  | 1677.323  | 2740.517  | NM_004170 | 8039.259  | 7732.929  | AK022238  | 2548.681  | 1259.729  |
| M80583    | 1290.588  | 2294.507  | NM_018057 | 7049.292  | 4441.895  | NM_012245 | 15672.385 | 11203.564 |
| AW009565  | 7352.484  | 9804.379  | NM_015717 | 4218.529  | 3575.203  | AK022546  | 34256.715 | 35699.762 |
| AI570478  | 1443.754  | 1162.972  | NM_015925 | 6230.826  | 5881.874  | NM_014067 | 39763.473 | 36367.547 |
| X07767    | 4293.147  | 5157.219  | NM_003665 | 3389.521  | 2677.251  | NM_002914 | 15385.399 | 12737.212 |
| X65293    | 851.78    | 757.152   | AF220217  | 4283.947  | 4533.434  | NM_020385 | 4586.982  | 5402.038  |
| M33197    | 26755.695 | 28088.277 | NM_013323 | 61641.934 | 59823.113 | NM_006541 | 1757.326  | 1865.203  |
| AL050139  | 13557.136 | 16740.287 | NM_014937 | 2053.904  | 2731.54   | M33197    | 64031.785 | 61489.27  |
| NM_002593 | 1256.418  | 1293.653  | NM_017426 | 5641.653  | 5636.29   | NM_005705 | 6224.693  | 11404.002 |
| NM_004558 | 23883.492 | 24896.334 | M33197    | 19270.521 | 17480.879 | NM_004328 | 4574.064  | 8151.233  |
| AL079296  | 1292.542  | 1229.481  | NM_000853 | 19856.699 | 25667.309 | NM_004581 | 9794.065  | 12881.594 |
| NM_006597 | 51088.805 | 43171.184 | NM_000846 | 1452.196  | 1342.872  | NM_006817 | 19588.75  | 23284.549 |
| NM_007329 | 444.842   | 488.497   | AF016903  | 62413.836 | 64427.344 | NM_007108 | 22787.17  | 23519.174 |
| NM_012483 | 40185.199 | 26895.078 | NM_015675 | 31128.977 | 35255.875 | NM_015921 | 33013.453 | 37243.074 |
| NM_003498 | 10544.618 | 7617.57   | AK022267  | 1931.203  | 2908.74   | AB040900  | 15632.641 | 15671.611 |
| AB023420  | 25323.207 | 15488.34  | NM_016040 | 7348.279  | 9118.438  | NM_001080 | 4183.751  | 2978.164  |
| NM_002262 | 1139.877  | 2218.606  | M33197    | 62186.344 | 66259.047 | NM_001482 | 1303.199  | 1429.078  |
| NM_016511 | 54333.711 | 59100.629 | AF031136  | 60558.844 | 66363.664 | NM_001215 | 339.862   | 561.187   |
| NM_003559 | 4484.195  | 6544.192  | NM_005867 | 38958.707 | 22741.307 | NM_003118 | 4194.677  | 2839.728  |
| NM_002185 | 639.602   | 1264.198  | AK026031  | 57590.539 | 55087.422 | L02922    | 37433.879 | 30185.273 |
| M55337    | 2309.573  | 3588.087  | NM_016468 | 28049.93  | 26863.951 | NM_001797 | 8283.085  | 7612.52   |
| M33197    | 59253.828 | 67353.273 | NM_007342 | 13297.854 | 11329.263 | NM_003154 | 7141.588  | 5522.053  |
| NM_013229 | 924.059   | 1436.125  | NM_005672 | 3197.669  | 3432.393  | NM_004235 | 8270.127  | 6668.75   |
| NM_016533 | 57858.207 | 63291.965 | D25217    | 5625.782  | 4310.861  | AK023459  | 16433.641 | 17797.994 |
| NM_014751 | 48588.242 | 46438.711 | NM_006351 | 30064.547 | 28270.533 | BI762154  | 3809.67   | 4682.719  |
| NM_002347 | 55355.559 | 52811.215 | M33197    | 62818.43  | 60055.414 | U13022    | 2899.736  | 2572.411  |
| AB046807  | 2380.312  | 2533.446  | NM_000103 | 1140.74   | 943.899   | R23251    | 26607.605 | 28349.133 |
| NM_018176 | 558.497   | 742.998   | NM_004683 | 23303.246 | 16762.848 | AA702640  | 4218.674  | 5322.114  |
| NM_003508 | 894.827   | 1509.148  | AK023226  | 4911.134  | 5492.951  | T68583    | 9076.983  | 13762.023 |
| M33197    | 59937.898 | 68738.984 | AK025263  | 1941.72   | 1693.946  | AA481944  | 49845.105 | 56483.453 |
| NM_014623 | 11147.21  | 15413.322 | M33197    | 60882.125 | 66329.938 | AF038440  | 2455.175  | 3920.51   |

|           |           |           |           |           |           |           |           |           |
|-----------|-----------|-----------|-----------|-----------|-----------|-----------|-----------|-----------|
| NM_007244 | 37915.871 | 38952.215 | NM_001467 | 8889.872  | 9823.942  | M31158    | 7915.235  | 15841.172 |
| M30629    | 7523.055  | 8371.968  | NM_018066 | 61091.727 | 63733.188 | H00742    | 3273.78   | 4294.527  |
| NM_018976 | 11652.443 | 12504.03  | NM_006931 | 23426.695 | 22594.387 | D42108    | 5926.232  | 6492.538  |
| NM_003355 | 16409.832 | 12275.324 | NM_020344 | 24093.66  | 25564.742 | BG700922  | 2107.313  | 2190.354  |
| NM_005074 | 2974.792  | 2347.18   | AF119868  | 978.834   | 1498.805  | AI366068  | 2760.747  | 2805.494  |
| NM_013272 | 2253.134  | 1815.087  | NM_005050 | 12408.66  | 17885.615 | N57553    | 18466.25  | 21999.197 |
| NM_004170 | 6237.608  | 3973.323  | AJ133127  | 391.796   | 1001.934  | M33197    | 62322.441 | 70985.5   |
| NM_018057 | 5674.32   | 5145.98   | M33197    | 65218.168 | 73753.992 | NM_016545 | 5167.713  | 6168.716  |
| NM_015717 | 6468.63   | 10244.732 | NM_019844 | 617.013   | 1019.013  | NM_001440 | 43458.543 | 52695.602 |
| NM_015925 | 6328.204  | 10816.044 | M33197    | 54229.535 | 27595.971 | NM_022173 | 29102.268 | 18633.588 |
| NM_003665 | 2142.542  | 3879.884  | AL050139  | 27007.773 | 28477.506 | AB040970  | 7845.175  | 5604.248  |
| AF220217  | 1966.464  | 2897.839  | NM_002593 | 2043.177  | 2332.846  | AB023222  | 2768.978  | 2071.1    |
| NM_013323 | 50697.309 | 52309.285 | NM_004558 | 25187.75  | 27049.336 | AB033088  | 6464.046  | 5962.688  |
| NM_014937 | 1000.113  | 1975.774  | AL079296  | 2421.308  | 2491.777  | M33197    | 62706.141 | 65220.441 |
| NM_017426 | 2980.357  | 5183.447  | NM_014770 | 10704.614 | 11573.799 | U50342    | 57399.66  | 57387.051 |
| M33197    | 11996.412 | 12806.009 | AB037737  | 2977.127  | 2518.825  | NM_000295 | 2009.523  | 1401.33   |
| NM_000853 | 10764.535 | 16427.514 | M33197    | 64314.16  | 62247.582 | NM_000716 | 1354.045  | 942.308   |
| NM_000846 | 715.735   | 668.222   | AK023103  | 4184.896  | 4369.463  | AF026932  | 1184.345  | 1572.004  |
| AF016903  | 53133.023 | 56959.133 | NM_017858 | 6122.747  | 7119.202  | AF103795  | 4190.987  | 4290.583  |
| NM_015675 | 17581.623 | 17592.078 | NM_019059 | 63282.313 | 56920.477 | NM_006215 | 956.888   | 846.243   |
| AK022267  | 1317.238  | 1367.144  | NM_013347 | 1470.499  | 1619.446  | M33197    | 62439.98  | 65488.043 |
| NM_016040 | 5107.807  | 5281.039  | D80008    | 3144.567  | 2862.482  | NM_007024 | 11028.36  | 13389.297 |
| M33197    | 60931.262 | 70298.672 | X56789    | 5409.943  | 5456.861  | NM_013231 | 5087.638  | 5993.746  |
| NM_005867 | 18235.027 | 17482.938 | AK001069  | 64529.289 | 58879.25  | NM_012106 | 8332.065  | 8830.581  |
| AK026031  | 48419.129 | 37474.484 | M33197    | 66815.984 | 66324.367 | NM_006254 | 4763.809  | 4711.34   |
| NM_016468 | 13835.732 | 10390.522 | NM_000935 | 3779.124  | 4457.271  | X95425    | 7780.914  | 7316.083  |
| NM_007342 | 7100.313  | 6937.482  | NM_000359 | 43708.09  | 42502.941 | NM_004422 | 4704.559  | 4555.91   |
| NM_005672 | 1971.191  | 1243.24   | NM_006395 | 6426.086  | 6383.21   | NM_016562 | 2569.452  | 2978.073  |
| D25217    | 3714.549  | 5362.981  | NM_014306 | 12863.014 | 14193.223 | AY009399  | 20005.594 | 26699.969 |
| NM_006351 | 18108.139 | 31419.398 | NM_001084 | 10522.291 | 12484.833 | NM_004895 | 20546.469 | 27026.373 |
| M33197    | 57046.25  | 64905.598 | NM_015983 | 14272.884 | 15176.093 | M33197    | 62372.203 | 65603.031 |
| NM_000103 | 1007.806  | 1415.41   | NM_018622 | 10215.589 | 10613.128 | M95610    | 41582.824 | 55666.414 |
| NM_004683 | 14656.37  | 17203.158 | M33197    | 64352.375 | 68164.375 | NM_000717 | 2167.935  | 1163.706  |
| AK023226  | 2525.118  | 2700.545  | CY3Cy5    | 8198.484  | 499.238   | M33197    | 63209.652 | 69415.82  |
| AK025263  | 850.717   | 998.113   | NM_006981 | 2557.564  | 1393.746  | NM_004845 | 10607.237 | 8355.146  |
| M33197    | 58885.637 | 60469.652 | AF086429  | 3776.21   | 2624.598  | NM_007107 | 12093.355 | 10038.618 |
| NM_001467 | 5575.843  | 5434.361  | NM_019060 | 728.298   | 749.002   | NM_000047 | 57256.992 | 57314.539 |
| NM_018066 | 49625.875 | 51477.816 | AF086302  | 999.857   | 551.054   | NM_006319 | 13898.766 | 11555.836 |
| NM_006931 | 10776.029 | 11516.438 | AF086439  | 3169.973  | 1955.586  | NM_018226 | 3251.277  | 3499.926  |
| NM_020344 | 13115.391 | 16212.655 | M33197    | 75570.555 | 65106.422 | NM_004605 | 1194.972  | 1192.421  |
| AF119868  | 565.93    | 937.76    | AF038171  | 1202.641  | 861.803   | NM_006660 | 13523.463 | 13644.333 |
| NM_005050 | 7242.639  | 8065.28   | AF052160  | 936.763   | 902.45    | NM_006685 | 59395.902 | 62668.809 |
| M33197    | 31399.922 | 28748.756 | AK026512  | 1435.676  | 1015.035  | AF154121  | 2753.52   | 2664.238  |
| AL050139  | 12687.414 | 12370.153 | NM_006981 | 1707.152  | 1071.787  | NM_012139 | 19602.018 | 16564.672 |
| NM_002593 | 1171.644  | 828.597   | SR6       | 2095.771  | 1899.254  | AF121856  | 10491.065 | 8657.566  |
| NM_004558 | 20082.059 | 16752.699 | SR8       | 8609.922  | 19488.197 | NM_006421 | 6971.372  | 7591.922  |
| AL079296  | 1112.28   | 1018.451  | AK026718  | 6062.465  | 2470.802  | NM_017457 | 20429.008 | 18023.482 |
| NM_014770 | 13958.826 | 19223.012 | AJ245600  | 1432.344  | 834.813   | NM_003765 | 15522.25  | 15747.707 |
| AB037737  | 1683.035  | 3360      | AK022035  | 10308.856 | 6630.818  | NM_005868 | 844.201   | 1197.242  |
| M33197    | 59418.781 | 63574.492 | M33197    | 82109.164 | 66889.641 | M33197    | 59404.453 | 61373.773 |
| AK023103  | 2646.431  | 4180.833  | NM_004337 | 5011.293  | 2903.117  | NM_018202 | 38665.07  | 49008.047 |
| NM_017858 | 3086.539  | 4495.532  | AF075016  | 869.718   | 672.606   | AB023197  | 12307.833 | 12178.271 |
| NM_019059 | 58407.281 | 59491.348 | AL137269  | 3322.438  | 1755.16   | AB014568  | 50652.504 | 39130.191 |

|           |           |           |           |           |           |           |           |           |
|-----------|-----------|-----------|-----------|-----------|-----------|-----------|-----------|-----------|
| NM_013347 | 550.084   | 915.795   | AK021983  | 2990.652  | 1403.757  | NM_012245 | 12689.203 | 8343.59   |
| D80008    | 1647.76   | 1618.112  | Y11681    | 14621.177 | 7464.973  | AK022546  | 31127.217 | 24964.426 |
| X56789    | 2408.261  | 3141.319  | AL110135  | 19707.717 | 11232.233 | NM_014067 | 34233.793 | 33296.348 |
| AK001069  | 58327.258 | 58536.148 | NM_006993 | 21748.205 | 19512.662 | NM_002914 | 15548.264 | 23385.695 |
| M33197    | 65248.23  | 64357.266 | M33197    | 66993.047 | 65412.348 | NM_020385 | 5410.528  | 4727.311  |
| NM_000935 | 2360.495  | 2580.854  | AL359626  | 2068.744  | 1782.524  | NM_006541 | 1524.677  | 1513.275  |
| NM_000355 | 40501.441 | 37420.25  | AK026878  | 2713.386  | 1470.959  | M33197    | 62961.633 | 60793.617 |
| NM_006395 | 3810.358  | 4437.228  | AK000777  | 1179.145  | 760.76    | NM_005705 | 7957.35   | 9182.634  |
| NM_014306 | 8135.343  | 9212.979  | M33197    | 65697.359 | 58569.051 | NM_004325 | 5034.742  | 5276.06   |
| NM_001084 | 5544.881  | 5424.179  | AF144233  | 3671.405  | 1849.317  | NM_004581 | 7954.309  | 7018.146  |
| NM_015983 | 9023.925  | 9894.296  | AK022986  | 1250.921  | 969.415   | NM_006817 | 20354.07  | 19351.209 |
| NM_018622 | 7419.098  | 7720.993  | AF085975  | 11618.117 | 6825.523  | NM_007105 | 21164.691 | 19476.52  |
| M33197    | 61490.789 | 64367.066 | M33197    | 71144.141 | 63322.859 | NM_015921 | 33711.906 | 34340.008 |
| CY3Cy5    | 3985.628  | 212.452   | AL137390  | 3023.556  | 1611.42   | AB040900  | 18088.352 | 15519.035 |
| NM_006981 | 624.144   | 478.688   | AL137611  | 3415.682  | 1786.229  | NM_001080 | 4414.035  | 4019.321  |
| AF038171  | 777.194   | 905.599   | AL359566  | 20958.627 | 10073.621 | NM_001482 | 1427.677  | 1755.548  |
| AF052160  | 343.246   | 561.347   | AL137427  | 4782.945  | 2102.189  | U80018    | 1284.212  | 1868.942  |
| AK026512  | 962.906   | 744.306   | AL157460  | 2065.961  | 1032.637  | NM_001797 | 7973.117  | 6587.42   |
| AL117636  | 687.362   | 583.373   | M33197    | 63552.719 | 66744.844 | NM_003154 | 3584.383  | 2397.957  |
| NM_018482 | 1797.071  | 1820.378  | AL080134  | 465.961   | 1080.446  | NM_004235 | 2462.059  | 1854.123  |
| NM_017880 | 1125.026  | 977.464   | AL049846  | 2675.485  | 2055.057  | AK023459  | 12445.13  | 9727.227  |
| AF090945  | 2506.041  | 2359.156  | AK024161  | 2536.323  | 1844.117  | BI762154  | 2446.096  | 2129.641  |
| NM_006981 | 1365.614  | 1077.204  | AK021682  | 65255.129 | 71036.594 | U13022    | 2710.517  | 2089.372  |
| SR2       | 43934.945 | 51703.105 | AK022141  | 1222.155  | 1016.307  | R23251    | 29417.807 | 38578.594 |
| SR4       | 12784.915 | 13692.643 | AK023942  | 66735.391 | 63320.758 | AA702640  | 4353.654  | 4515.369  |
| SR6       | 1598.448  | 1723.027  | M33197    | 67070.898 | 63215.703 | T68583    | 10220.559 | 11349.205 |
| SR8       | 6048.214  | 17770.262 | AK022046  | 1090.973  | 624.206   | AA481944  | 59627.023 | 63939.047 |
| SR10      | 21050.213 | 7286.853  | AK027207  | 2427.051  | 1857.989  | AF038440  | 2404.225  | 2636.975  |
| CY3Cy5    | 4112.703  | 118.947   | AF083120  | 1286.453  | 1010.5    | M31158    | 8979.875  | 8835.497  |
| AK026718  | 2456.826  | 1967.49   | AJ227892  | 5988.166  | 5167.938  | H00742    | 2636.926  | 2731.553  |
| AK022035  | 1059.003  | 708.968   | M33197    | 66595.336 | 56538.051 | D42108    | 4170.593  | 3595.897  |
| M33197    | 80748.602 | 62893.191 | AK022013  | 2653.846  | 1999.884  | BG700922  | 1789.951  | 1447.151  |
| NM_004337 | 2685.703  | 1600.515  | AK022155  | 4453.415  | 3602.471  | AI366068  | 3014.758  | 2597.994  |
| AL137269  | 3359.225  | 3475.842  | AK022288  | 1212.186  | 940.405   | N57553    | 19553.215 | 18885.197 |
| AK021983  | 2837.677  | 3116.154  | AK024201  | 945.439   | 494.888   | M33197    | 61683.117 | 67210     |
| Y11681    | 13955.084 | 13857.368 | AK022174  | 1156.123  | 626.379   | NM_016545 | 4341.751  | 4723.316  |
| AL110135  | 11000.579 | 11515.641 | AK022331  | 803.336   | 618.995   | NM_001440 | 46035.117 | 53727.621 |
| NM_006993 | 16086.241 | 18673.783 | M33197    | 66461.063 | 68784.078 | NM_001201 | 2777.189  | 3125.353  |
| M33197    | 71406.039 | 63907.273 | AL049299  | 11184.325 | 5895.357  | NM_016615 | 686.452   | 434.564   |
| M33197    | 75519.086 | 64001.461 | NM_006085 | 66824.672 | 66743.5   | NM_000710 | 1414.531  | 742.376   |
| M33197    | 68132.688 | 63045.293 | NM_018265 | 2292.45   | 2210.907  | AF026932  | 1586.927  | 1381.14   |
| AF144233  | 1844.394  | 1226.342  | AF130086  | 14212.333 | 14648.43  | AF103795  | 4447.435  | 3309.362  |
| AF085975  | 4816.761  | 3486.368  | AK023858  | 9777.313  | 8503.498  | NM_006215 | 1115.041  | 812.251   |
| AL137390  | 2549.606  | 3205.759  | M33197    | 66699.531 | 66722.547 | M33197    | 61699.934 | 68580.82  |
| AL137611  | 4487.773  | 5857.101  | AF250920  | 6357.883  | 5378.059  | NM_007024 | 12853.856 | 12736.803 |
| AL359566  | 20718.736 | 24549.816 | NM_017733 | 3340.671  | 3252.48   | NM_013231 | 7332.571  | 6354.952  |
| AL137427  | 6026.193  | 4247.467  | NM_014042 | 13707.637 | 12379.404 | NM_012100 | 8593.919  | 10025.731 |
| AL157460  | 1403.337  | 1270.723  | D17152    | 37073.461 | 38445.82  | NM_006254 | 5327.143  | 6625.326  |
| M33197    | 61441.07  | 60395.164 | AK024464  | 27740.016 | 26506.539 | X95425    | 13571.969 | 16320.593 |
| M33197    | 59283.457 | 59190.16  | AK026748  | 906.921   | 815.734   | NM_004422 | 6547.955  | 8851.198  |
| AK024161  | 1063.884  | 785.838   | AK025423  | 1123.19   | 1050.295  | NM_016562 | 3446.116  | 4037.082  |
| AK021682  | 5665.172  | 3614.719  | AF009284  | 4009.387  | 3864.631  | M33197    | 60717.453 | 68172.859 |
| AK022141  | 1441.758  | 1096.384  | AK026226  | 1612.898  | 2325.876  | AY009399  | 24565.803 | 23559.803 |

|           |           |           |           |           |           |           |           |           |
|-----------|-----------|-----------|-----------|-----------|-----------|-----------|-----------|-----------|
| AK023942  | 32031.93  | 20181.207 | AL137380  | 1586.817  | 1380.227  | NM_00489E | 17032.813 | 14882.706 |
| M33197    | 57353.703 | 49880.453 | M33197    | 66694.531 | 66673.813 | U59748    | 3754.939  | 3710.104  |
| AK022046  | 471.478   | 393.038   | AL137658  | 45029.91  | 42236.117 | NM_01430E | 28301.395 | 28611.627 |
| AK027207  | 834.821   | 682.087   | D16888    | 2657.347  | 1968.086  | M33197    | 61669.82  | 65634.492 |
| AF143323  | 1155.89   | 1023.173  | U79277    | 1067.555  | 1109.442  | M95610    | 34733.172 | 35134.621 |
| M33197    | 60182.883 | 59075.984 | AF068298  | 9738.908  | 6726.966  | NM_00311E | 1572.925  | 1496.5    |
| AK022013  | 1999.148  | 3028.958  | Z70770    | 4949.469  | 2995.928  | L02922    | 23911.787 | 20393.441 |
| AK022155  | 4276.023  | 5137.157  | AJ227900  | 6473.343  | 4304.566  | NM_00404E | 26299.174 | 13564.175 |
| AK022288  | 1046.615  | 1499.151  | AK023242  | 2493.126  | 1913.478  | NM_001891 | 4853.414  | 2856.124  |
| AK021916  | 776.485   | 690.362   | M33197    | 66639.258 | 67462.148 | NM_01213E | 26117.088 | 23409.527 |
| AK024201  | 779.87    | 847.561   | AJ012500  | 9566.774  | 5716.425  | AF121856  | 11347.599 | 11247.985 |
| AK022174  | 1039.886  | 889.026   | AF085833  | 1842.376  | 1131.12   | NM_006421 | 6506.048  | 10519.959 |
| AK022331  | 669.65    | 854.79    | L19368    | 954.388   | 762.743   | NM_017457 | 21437.514 | 28898.082 |
| M33197    | 63569.047 | 61131.918 | X57566    | 7736.902  | 4897.11   | NM_00376E | 16215.373 | 28143.762 |
| NM_00608E | 28859.752 | 17828.953 | M33197    | 68484.336 | 59505.188 | NM_00586E | 1597.075  | 1083.458  |
| NM_01826E | 1100.527  | 631.89    | NM_01861E | 15510.98  | 8403.983  | M33197    | 63668.781 | 66487.523 |
| AF130086  | 1660.637  | 1185.948  | AK023809  | 3310.41   | 2880.155  | NM_01820E | 49837.605 | 46142.516 |
| AK023858  | 2525.917  | 1968.131  | U28131    | 65336.418 | 58539.281 | AB023197  | 13510.803 | 10726.059 |
| M33197    | 60544.785 | 53302.059 | AY007106  | 4389.453  | 3155.023  | NM_02217E | 21318.654 | 17807.889 |
| AF250920  | 3165.644  | 2628.977  | AF015910  | 53652.145 | 55057.852 | AB040970  | 5286.713  | 3755.452  |
| NM_01773E | 1650.08   | 1787.005  | BC009993  | 2202.326  | 3152.56   | NM_01833E | 3912.067  | 2695.264  |
| NM_01404E | 7031.667  | 6344.446  | M33197    | 64687.168 | 58438.938 | AB023222  | 1839.016  | 1510.445  |
| D17152    | 21919.484 | 17283.254 | AB049150  | 1203.262  | 907.747   | AB033088  | 4143.762  | 2944.549  |
| AK024464  | 13427.095 | 9918.654  | NM_016824 | 10657.229 | 10486.013 | M33197    | 57318.633 | 60285.844 |
| AK025423  | 1721.357  | 2110.14   | NM_003031 | 12233.951 | 14692.928 | U50342    | 31725.795 | 24182.73  |
| M33197    | 64812.625 | 63022.605 | X89674    | 2153.014  | 1908.523  | NM_00108E | 7264.577  | 3213.776  |
| AL137658  | 14043.687 | 11848.073 | NM_00717E | 2252.778  | 2449.942  | NM_00148E | 1605.545  | 1121.852  |
| U79277    | 1035.402  | 875.89    | NM_00300E | 3139.645  | 3384.482  | U80018    | 2201.496  | 1986.186  |
| AF068298  | 4681.826  | 3942.5    | NM_00410E | 1154.766  | 1209.514  | NM_000717 | 2281.597  | 1781.172  |
| AJ227900  | 2757.095  | 2379.885  | M33197    | 64407.395 | 62513.578 | M33197    | 60792.98  | 65461.551 |
| AK023242  | 1470.113  | 1607.447  | AF317550  | 449.937   | 1079.353  | NM_00484E | 11186.681 | 15234.917 |
| M33197    | 60579.074 | 63009.211 | AK025416  | 898.78    | 1314.305  | NM_007107 | 12529.378 | 17247.824 |
| AJ012500  | 4073.336  | 3924.977  | AK022165  | 1081.372  | 896.973   | NM_000047 | 48942.953 | 56970.48  |
| AF085833  | 864.33    | 974.796   | M33197    | 64870.688 | 57335.148 | M68874    | 1403.658  | 1312.719  |
| U00944    | 1132.952  | 975.463   | NM_01591E | 3941.759  | 4020.401  | NM_00631E | 11385.478 | 14186.127 |
| X57566    | 10146.604 | 12011.075 | NM_00352E | 1853.711  | 1941.124  | NM_01822E | 3373.132  | 3180.746  |
| M33197    | 63983.656 | 63083.848 | NM_01588E | 65571.531 | 65269.176 | NM_00460E | 1558.513  | 959.101   |
| NM_01861E | 16364.694 | 15222.975 | NM_00021E | 1281.61   | 1786.848  | Z36813    | 6269.764  | 5319.049  |
| AK023809  | 1820.753  | 1955.095  | M33197    | 64583.871 | 60348.5   | NM_00666E | 10292.532 | 7895.703  |
| M87943    | 56728.859 | 57472.25  | NM_00427E | 5208.292  | 6147.663  | NM_00148E | 637.57    | 541.045   |
| AL360137  | 1495.056  | 1301.199  | NM_00233E | 33001.852 | 34953.527 | NM_004727 | 693.686   | 502.664   |
| U28131    | 54209.016 | 59594.793 | NM_00285E | 8528.068  | 8630.896  | NM_00055E | 1968.835  | 1969.328  |
| AY007106  | 3209.943  | 2451.178  | NM_00524E | 14262.953 | 13336.585 | NM_00668E | 52106.367 | 52984.711 |
| AF015910  | 43708.457 | 31105.648 | NM_017651 | 2967.412  | 3010.682  | M33197    | 35423.965 | 20798.672 |
| BC009993  | 874.049   | 749.103   | AF161339  | 4047.154  | 6854.776  | AF154121  | 1370.594  | 849.907   |
| M33197    | 58240.582 | 58386.09  | M33197    | 63264.418 | 61193.383 | M33197    | 64136.582 | 80910.008 |
| NM_016824 | 5920.841  | 4169.96   | AK000354  | 11858.694 | 11666.543 | NM_01654E | 8181.63   | 5293.143  |
| NM_003031 | 7764.251  | 6306.511  | AL161984  | 937.063   | 964.83    | NM_00144E | 62441.461 | 60132.672 |
| NM_00717E | 1000.333  | 975.025   | NM_01488E | 998.904   | 1473.615  | NM_001201 | 4062.496  | 3524.376  |
| NM_00300E | 1843.453  | 1412.066  | AK024474  | 8668.684  | 8909.564  | NM_01661E | 1405.829  | 963.823   |
| M33197    | 63273.266 | 61052.164 | NM_00686E | 969.41    | 879.801   | AB014568  | 51180.586 | 48956.879 |
| AF317550  | 490.013   | 335.133   | NM_017901 | 3159.695  | 4385.507  | AK022238  | 831.5     | 352.186   |
| AK025416  | 564.932   | 516.927   | NM_00427E | 3631.588  | 3760.987  | NM_01224E | 12963.74  | 9978.907  |

|           |           |           |           |           |           |           |           |           |
|-----------|-----------|-----------|-----------|-----------|-----------|-----------|-----------|-----------|
| AK022165  | 521.792   | 596.529   | NM_000358 | 4273.554  | 4619.842  | AK022546  | 29880.408 | 40063.227 |
| AF090883  | 928.574   | 937.747   | NM_001930 | 15785.317 | 23730.184 | NM_014067 | 24242.5   | 27859.086 |
| U23860    | 920.488   | 1407.951  | AK025270  | 2836.759  | 3225.635  | NM_002914 | 15358.487 | 17431.75  |
| M33197    | 59738.027 | 58613.566 | NM_001564 | 8294.912  | 11244.709 | NM_020385 | 5539.75   | 4038.976  |
| AL049263  | 1265.158  | 1296.369  | M33197    | 64349.504 | 64097.074 | NM_006541 | 1480.989  | 2177.312  |
| AK022372  | 3645.554  | 4234.418  | AF263537  | 16495.082 | 17504.004 | M33197    | 60527.273 | 63443.785 |
| AJ227863  | 724.835   | 952.492   | NM_015895 | 14664.002 | 11077.074 | NM_005705 | 6551.982  | 8084.199  |
| NM_015916 | 3277.87   | 2956.103  | NM_004675 | 631.475   | 832.879   | NM_004328 | 5209.424  | 5167.961  |
| NM_003520 | 686.5     | 842.383   | NM_000189 | 3404.3    | 3007.033  | NM_004581 | 8848.646  | 8330.972  |
| NM_015889 | 43838.758 | 33799.703 | AL050050  | 4502.897  | 3249.148  | NM_006817 | 18346.949 | 23601.949 |
| M33197    | 62137.918 | 59810.496 | NM_005256 | 636.422   | 1033.699  | NM_007108 | 19303.666 | 26950.795 |
| NM_004276 | 2102.833  | 1525.015  | NM_004690 | 2947.692  | 2586.409  | NM_015921 | 30943.365 | 41443.555 |
| NM_002332 | 18039.254 | 13611.724 | M33197    | 60930.41  | 64158.227 | AB040900  | 10931.451 | 12756.683 |
| NM_002859 | 2642.423  | 2180.049  | NM_013374 | 64239.766 | 58189.699 | CY3Cy5    | 5406.082  | 130.699   |
| NM_005246 | 4872.248  | 3885.536  | NM_003252 | 17480.246 | 15232.931 | NM_005844 | 7277.555  | 6581.898  |
| NM_017651 | 1112.345  | 1280.299  | NM_001228 | 5838.155  | 6838.124  | AK024941  | 3750.38   | 4163.31   |
| AF161339  | 2646.171  | 2581.623  | AK026607  | 1410.329  | 1683.363  | AF056434  | 5162.53   | 4296.967  |
| M33197    | 57240.066 | 57822.297 | NM_016561 | 22573.01  | 23381.736 | M33197    | 45151.449 | 41754.039 |
| AK000354  | 7751.869  | 5985.296  | NM_014245 | 41253.668 | 42963.07  | AL390152  | 4973.196  | 4367.194  |
| AL161984  | 939.928   | 999.648   | AL110226  | 59012.473 | 63266.922 | AK026721  | 1200.947  | 1175.855  |
| NM_014882 | 2713.78   | 2917.853  | AB046822  | 1938.078  | 1528.696  | AK023027  | 3794.671  | 3722.238  |
| NM_000836 | 1136.728  | 1772.462  | NM_015885 | 3822.723  | 4291.003  | AB002348  | 43251.285 | 46969.348 |
| M33197    | 58259.82  | 61336.039 | AK024809  | 925.224   | 1228.527  | NM_006917 | 1180.002  | 1376.558  |
| NM_001510 | 3303.886  | 3035.348  | NM_000308 | 5017.667  | 6889.315  | SR2       | 26346.428 | 29552.764 |
| NM_017901 | 3236.454  | 4318.88   | X69636    | 12475.671 | 14055.38  | SR4       | 7826.26   | 9060.95   |
| NM_004272 | 2963.765  | 5673.047  | M33197    | 64573.734 | 68080.742 | SR6       | 770.494   | 744.26    |
| NM_000358 | 2038.761  | 1960.396  | NM_004173 | 65038.066 | 63298.156 | SR8       | 3835.672  | 12968.269 |
| NM_001930 | 6909.12   | 6257.888  | NM_013974 | 6237.869  | 6694.5    | SR10      | 14399.896 | 5162.954  |
| NM_001564 | 2768.389  | 2459.222  | NM_017547 | 6691.809  | 7909.891  | CY3Cy5    | 4563.41   | 80.209    |
| M33197    | 60715.676 | 57248.504 | NM_003983 | 11213.564 | 11605.406 | AK025948  | 827.815   | 783.83    |
| AF263537  | 6898.894  | 5078.419  | AK023708  | 2019.53   | 2073.417  | AJ238555  | 1049.276  | 1547.205  |
| NM_015895 | 7232.145  | 5174.026  | NM_002108 | 2910.424  | 2916.617  | AL353948  | 44942.02  | 52823.313 |
| NM_000189 | 1201.493  | 875.285   | M33197    | 65910.984 | 71733.813 | M33197    | 77503.953 | 63294.984 |
| AL050050  | 2180.082  | 1488.687  | NM_018464 | 40410.895 | 48311.953 | AK025869  | 10949.957 | 10493.98  |
| NM_005256 | 957.765   | 957.154   | D43948    | 9570.797  | 8493.126  | AL050088  | 4829.599  | 6467.871  |
| NM_004690 | 1300.983  | 799.342   | NM_012310 | 33241.051 | 36889.516 | AK024939  | 2353.086  | 2553.779  |
| M33197    | 58602.602 | 57438.703 | AF113216  | 2685.735  | 2960.417  | AK001561  | 4222.741  | 5176.63   |
| NM_013374 | 50513.086 | 30973.078 | NM_017589 | 2913.312  | 3126.884  | AB007880  | 3375.898  | 3168.159  |
| NM_003252 | 10921.164 | 7743.66   | AK023582  | 2224.57   | 1956.563  | AK024950  | 2366.869  | 2832.323  |
| NM_001228 | 4132.119  | 3365.32   | NM_000124 | 2254.245  | 2850.566  | M33197    | 75445.82  | 62699.77  |
| AK026607  | 563.504   | 601.182   | NM_017996 | 11713.38  | 14965.238 | NM_014146 | 6081.506  | 6169.966  |
| NM_016561 | 27271.072 | 29669.785 | NM_014517 | 6871.504  | 6590.087  | NM_018843 | 1281.262  | 1373.289  |
| NM_014245 | 37395.254 | 36075.926 | NM_005466 | 4330.708  | 4501.108  | AK024275  | 890.013   | 1101.234  |
| AB046822  | 658.956   | 1090.63   | NM_004269 | 5171.739  | 7225.766  | M33197    | 72268.195 | 62818.754 |
| NM_015885 | 3958.874  | 5249.047  | NM_003409 | 1470.068  | 2108.462  | AK026052  | 2389.783  | 1969.418  |
| AK024809  | 798.417   | 836.717   | M33197    | 63943.539 | 84411.898 | AK025387  | 1609.659  | 1899.103  |
| NM_000308 | 1591.003  | 1761.34   | D31765    | 14287.34  | 15544.912 | AK026259  | 66984.492 | 65887.695 |
| X69636    | 2829.537  | 2447.802  | NM_006107 | 24219.215 | 24039.482 | M33197    | 68016.43  | 66836.867 |
| M33197    | 60650.484 | 58350.793 | NM_004175 | 3022.645  | 3145.561  | AK024506  | 7537.609  | 8609.937  |
| NM_004173 | 52742.727 | 34410.461 | AF288288  | 61779.813 | 62098.078 | NM_014179 | 2105.045  | 2446.266  |
| NM_013974 | 1891.282  | 1476.856  | NM_017646 | 29692.092 | 31571.199 | AF086326  | 5581.368  | 7215.572  |
| NM_017547 | 3069.143  | 3075.209  | AL050368  | 4676.003  | 4264.811  | M33197    | 68150.336 | 64830.379 |
| NM_003983 | 5898.612  | 5550.909  | NM_003092 | 31490.027 | 36900.02  | AL117528  | 1580.813  | 2349.862  |

|           |           |           |           |           |           |           |           |           |
|-----------|-----------|-----------|-----------|-----------|-----------|-----------|-----------|-----------|
| AK023708  | 1024.393  | 785.971   | M33197    | 63501.371 | 66692.578 | M33197    | 68012.438 | 66000.125 |
| NM_00210E | 1035.179  | 922.901   | BE243152  | 450.731   | 869.453   | NM_01793E | 714.64    | 854.75    |
| M33197    | 60834.508 | 57915.211 | NM_005861 | 12042.667 | 13937.609 | NM_00422E | 4500.228  | 4659.605  |
| NM_018464 | 26110.877 | 20689.422 | NM_01884E | 6428.321  | 6812.214  | M33197    | 68911.594 | 62408.734 |
| D43948    | 5984.737  | 5355.911  | NM_00376C | 16647.885 | 16927.75  | AF056430  | 971.018   | 947.46    |
| NM_01231C | 21831.48  | 20382.939 | AB037759  | 1254.564  | 1231.965  | AF009291  | 1264.499  | 1508.64   |
| BE410824  | 779.684   | 867.709   | AK025998  | 7560.447  | 6166.221  | M33197    | 68435.195 | 62143.961 |
| BF382116  | 8745.448  | 10217.237 | M33197    | 6456.246  | 5119.852  | NM_01805E | 2644.856  | 2587.439  |
| NM_01758E | 2466.842  | 2734.558  | NM_001161 | 28318.576 | 26716.695 | AK002199  | 1060.252  | 1102.661  |
| AK023582  | 2049.986  | 1935.389  | NM_004044 | 26215.795 | 30212.064 | AK021662  | 793.33    | 840.523   |
| NM_000124 | 838.692   | 748.521   | NM_000221 | 63933.926 | 62259.047 | AK001038  | 1296.115  | 1532.445  |
| NM_01799E | 5659.289  | 4573.421  | H75678    | 7628.594  | 7961.768  | M33197    | 73772.719 | 62793.938 |
| NM_014517 | 1737.338  | 1336.707  | NM_00253E | 2273.144  | 2724.589  | NM_00617E | 1330.152  | 1642.299  |
| NM_00546E | 1146.722  | 888.482   | NM_00645E | 37219.379 | 40272.715 | AL360165  | 2468.625  | 2461.125  |
| NM_00426E | 1707.753  | 1208.785  | AB002359  | 11366.56  | 12007.769 | M33197    | 71913.578 | 62608.813 |
| NM_00340E | 380.767   | 268.381   | M33197    | 28356.193 | 26803.672 | NM_005281 | 6419.875  | 5828.607  |
| M33197    | 60170.52  | 59470.547 | AB007864  | 6984.781  | 7143.004  | NM_00554E | 4548.354  | 4144.348  |
| D31765    | 4907.421  | 3979.251  | NM_00219E | 10811.899 | 12727.743 | AJ008115  | 31165.465 | 35533.27  |
| NM_006107 | 13081.575 | 7385.209  | AF024693  | 1130.454  | 1650.102  | AF083125  | 1717.408  | 1557.1    |
| NM_00417E | 1604.499  | 1545.003  | AK025905  | 4297.64   | 4135.616  | U72851    | 697.65    | 802.809   |
| AF288288  | 46759.805 | 41589.234 | AL121733  | 4865.842  | 4722.495  | AK026212  | 768.853   | 878.497   |
| NM_01764E | 14331.313 | 11729.488 | BE958072  | 5325.932  | 6314.369  | AF086222  | 734.388   | 860.823   |
| AL050368  | 2398.961  | 2100.794  | M33197    | 61828.137 | 57491.969 | AL049434  | 947.931   | 1495.047  |
| NM_00309E | 16874.303 | 17072.039 | NM_01753E | 2421.489  | 2429.904  | AF086415  | 4636.643  | 5609.563  |
| M33197    | 54544.98  | 57824.691 | NM_01448C | 7152.031  | 7277.452  | D28391    | 45653.922 | 48589.758 |
| NM_005861 | 4956.247  | 5023.403  | NM_00593E | 850.223   | 1091.24   | M33197    | 63450.082 | 56480.836 |
| NM_01884E | 4647.715  | 5560.101  | NM_01416E | 10872.227 | 12097.872 | AK026859  | 889.387   | 1158.342  |
| NM_00376C | 18085.836 | 23482.232 | NM_004964 | 24045.021 | 23547.766 | D86961    | 2728.024  | 2654.896  |
| AB037759  | 2111.064  | 2552.344  | NM_005197 | 14448.269 | 14147.927 | AJ227896  | 32052.664 | 36411.086 |
| M33197    | 6565.96   | 7520.238  | NM_007241 | 3809.155  | 2655.658  | L32841    | 5693.536  | 5525.798  |
| NM_001161 | 13299.709 | 9502.283  | M33197    | 66312.023 | 69216.219 | AF131770  | 4214.616  | 4338.866  |
| NM_004044 | 12074.481 | 9717.036  | NM_001154 | 16415.811 | 17915.779 | NM_00643E | 10988.311 | 11164.34  |
| NM_000221 | 49126.387 | 40558.082 | NM_00181E | 6192.281  | 6294.349  | U62823    | 2656.058  | 2396.109  |
| H75678    | 1926.891  | 1129.276  | NM_01693E | 2336.647  | 2788.21   | NM_00353E | 24536.314 | 28242.363 |
| NM_00253E | 775.282   | 751.611   | NM_00199E | 2578.69   | 3498.934  | M33197    | 65841.023 | 68136.859 |
| NM_00645E | 17088.816 | 11983.085 | BF575833  | 1053.796  | 1313.606  | AK000852  | 25902.334 | 28128.455 |
| AB002359  | 4654.174  | 3637.641  | NM_01572E | 27396.924 | 36549.863 | AF251188  | 5613.982  | 5023.719  |
| M33197    | 14001.262 | 9598.961  | R61452    | 4132.692  | 4023.973  | AK026418  | 4868.116  | 4855.109  |
| AB007864  | 3666.153  | 3411.489  | R19938    | 38801.348 | 35415.949 | AF086194  | 24385.793 | 27756.178 |
| NM_00219E | 6998.627  | 7988.102  | N94487    | 35916.32  | 37272.695 | AK026811  | 6587.296  | 7870.249  |
| AK025905  | 1870.604  | 1855.49   | AI886795  | 13081.979 | 14095.619 | NM_00030C | 1309.867  | 1432.408  |
| AL121733  | 1947.5    | 2156.45   | D10495    | 7382.576  | 7199.987  | M33197    | 67563.648 | 70977.641 |
| BE958072  | 2356.278  | 2048.73   | BF344679  | 7486.29   | 7766.9    | AV756917  | 3481.799  | 3199.6    |
| M33197    | 51491.273 | 51622.184 | BG743223  | 1821.062  | 1728.144  | NM_01838C | 9858.672  | 12540.541 |
| NM_01753E | 1683.537  | 1703.434  | M36634    | 4091.894  | 3551.811  | AK001442  | 2497.397  | 2553.245  |
| NM_01448C | 4298.317  | 5188.175  | M14156    | 57452.879 | 51671.797 | NM_01207C | 1668.031  | 1533.721  |
| NM_00593E | 962.782   | 1359.214  | U87939    | 2753.583  | 2995.093  | NM_01903E | 353.702   | 501.57    |
| NM_005197 | 16288.397 | 19863.248 | U86961    | 4136.352  | 4337.969  | AF183423  | 1581.077  | 1929.107  |
| AL137421  | 55442.988 | 60181.68  | U47924    | 633.023   | 935.725   | M33197    | 67721.531 | 68428.133 |
| M33197    | 57966.199 | 59023.523 | NM_005191 | 5490.607  | 4652.856  | U12129    | 4828.542  | 4146.905  |
| NM_007241 | 1262.598  | 1663.994  | AK094237  | 5996.975  | 5562.821  | S81242    | 66273.422 | 62315.379 |
| M33197    | 61588.707 | 57386.027 | L07592    | 1316.714  | 2042.717  | AF230801  | 2281.718  | 2302.824  |
| NM_001154 | 7659.917  | 7338.808  | M33197    | 64510.094 | 59354.844 | AF075072  | 1996.743  | 1435.858  |

|           |           |           |           |           |           |           |           |           |
|-----------|-----------|-----------|-----------|-----------|-----------|-----------|-----------|-----------|
| NM_001819 | 2372.157  | 1960.796  | NM_002983 | 25613.76  | 38981.648 | NM_002509 | 4305.833  | 3984.42   |
| NM_016938 | 914.277   | 811.961   | NM_000074 | 44814.293 | 46363.637 | U38442    | 678.17    | 813.283   |
| NM_001993 | 850.425   | 781.326   | NM_020393 | 514.943   | 915.242   | AF110136  | 1399.236  | 1763.57   |
| BF575833  | 451.222   | 398.909   | BF434335  | 62115.836 | 65003.395 | AK026706  | 1372.135  | 1806.432  |
| NM_015725 | 10281.131 | 8301.41   | M57627    | 2157.763  | 2583.731  | AB007936  | 64431.07  | 64844.008 |
| R61452    | 1846.903  | 1575.998  | NM_002993 | 4672.412  | 4675.022  | NM_000887 | 1249.66   | 1149.973  |
| R19938    | 19396.549 | 17728.641 | AK026946  | 8117.827  | 8308.669  | M33197    | 67769.078 | 68531.086 |
| N94487    | 16670.594 | 16033.36  | M33197    | 61909.809 | 65979.719 | NM_015416 | 4716.655  | 4483.684  |
| AI886795  | 6450.144  | 5959.787  | NM_003192 | 10522.677 | 9080.051  | NM_002731 | 668.119   | 721.52    |
| D10495    | 3962.381  | 3160.961  | NM_018449 | 14963.631 | 13833.293 | NM_003899 | 3294.36   | 2863.935  |
| BF344679  | 3443.292  | 3015.724  | AF086129  | 3950.22   | 4051.974  | X99662    | 4865.592  | 5907.521  |
| M36634    | 1914.851  | 1458.462  | D79994    | 4976.057  | 7256.953  | NM_003473 | 52215.977 | 56714.895 |
| M14156    | 37687.383 | 33291.359 | NM_014458 | 52964.09  | 57339.594 | NM_014325 | 951.806   | 712.885   |
| U87939    | 2127.225  | 2596.231  | AF235049  | 17526.848 | 18753.395 | M33197    | 67300.078 | 65347.883 |
| U86961    | 2904.528  | 3297.253  | M33197    | 64127.566 | 67236.242 | NM_012453 | 487.537   | 644.3     |
| NM_005191 | 4351.782  | 4586.833  | NM_007369 | 3704.551  | 3918.391  | NM_006016 | 27388.582 | 30981.85  |
| AK094237  | 6169.065  | 7497.414  | NM_014776 | 8215.778  | 8112.828  | NM_001242 | 48119.789 | 58978.215 |
| L07592    | 1598.556  | 1665.287  | NM_006480 | 62337.934 | 59661.57  | NM_014891 | 6340.306  | 8775.402  |
| NM_002983 | 13414.447 | 14468.337 | NM_007223 | 62616.465 | 65159.574 | M33197    | 67345.313 | 69298.383 |
| NM_000074 | 19539.18  | 15834.285 | NM_000145 | 2038.516  | 2246.778  | NM_003236 | 2127.737  | 2933.391  |
| BF434335  | 47555.469 | 43147.504 | AF030107  | 44151.926 | 48105.207 | AF052692  | 851.442   | 961.393   |
| M57627    | 1714.729  | 1516.071  | NM_000871 | 3800.717  | 4328.827  | AF062739  | 3672.569  | 2649.173  |
| NM_002993 | 2351.467  | 2035.99   | NM_018968 | 11456.155 | 8974.046  | NM_006602 | 2933.203  | 2170.299  |
| AK026946  | 3763.842  | 4443.405  | AF086924  | 60054.824 | 63422.223 | AL079314  | 1291.074  | 934.835   |
| M33197    | 58940.031 | 59136.375 | NM_001995 | 12862.493 | 14798.682 | NM_001260 | 2504.253  | 1798.289  |
| NM_003192 | 3228.103  | 2888.368  | NM_000183 | 21059.213 | 21285.957 | NM_001950 | 2935.604  | 3142.107  |
| NM_018449 | 6881.801  | 6777.225  | AY004175  | 5386.966  | 6239.77   | AK026364  | 926.97    | 1185.998  |
| AF086129  | 1930.074  | 1690.436  | M33197    | 62583.176 | 65833.914 | NM_006999 | 1056.907  | 1651.107  |
| D79994    | 3118.131  | 3219.188  | NM_012327 | 10633.581 | 11099.507 | NM_006286 | 2000.144  | 2494.959  |
| NM_014458 | 24508.424 | 19334.992 | NM_000904 | 12135.635 | 15188.353 | NM_015996 | 889.301   | 1069.44   |
| L10333    | 596.225   | 802.907   | NM_016048 | 8417.855  | 7961.727  | NM_015703 | 16022.086 | 17247.387 |
| AF235049  | 7869.434  | 8491.402  | NM_000375 | 15602.872 | 12436.863 | AB018337  | 1771.619  | 1995.018  |
| NM_007369 | 2148.344  | 2765.628  | NM_000265 | 58750.961 | 54439.762 | NM_014489 | 1571.127  | 1311.83   |
| NM_014776 | 4963.71   | 5808.27   | NM_018849 | 16276.103 | 17854.02  | AK025273  | 2793.561  | 3014.098  |
| NM_000145 | 2351.105  | 3386.24   | NM_002236 | 21568.859 | 19827.189 | M33197    | 66514.055 | 67689.328 |
| AF030107  | 42952.723 | 46469.145 | NM_017905 | 50170.094 | 52186.434 | NM_002205 | 1960.162  | 1999.724  |
| NM_000871 | 3076.23   | 3446.776  | NM_006815 | 54949.25  | 54010.477 | NM_002214 | 2681.274  | 3325.166  |
| NM_018968 | 5994.235  | 4675.821  | NM_002806 | 24745.053 | 30008.787 | NM_001911 | 1439.524  | 1116.475  |
| NM_005164 | 659.056   | 830.123   | M33197    | 63869.453 | 71219.594 | NM_000537 | 1822.013  | 2862.802  |
| NM_001995 | 6726.573  | 6614.051  | NM_001716 | 24749.52  | 27441.178 | NM_006503 | 1032.884  | 968.615   |
| NM_000183 | 11619.09  | 10649.841 | NM_002030 | 1923.23   | 2054.151  | M33197    | 3169.528  | 1962.455  |
| AY004175  | 3513.107  | 3230.938  | NM_006073 | 760.38    | 1589.416  | AB020698  | 829.112   | 644.348   |
| M33197    | 55299.051 | 58621.984 | NM_004951 | 1863.844  | 2082.833  | U68382    | 3642.19   | 4915.147  |
| NM_012327 | 6166.583  | 6422.708  | NM_006564 | 12218.661 | 12971.751 | NM_003969 | 2886.141  | 3652.877  |
| NM_000904 | 7178.705  | 7916.583  | NM_004802 | 4731.011  | 4588.723  | NM_004651 | 2493.463  | 3659.032  |
| NM_016048 | 4865.065  | 4700.515  | M33197    | 64352.422 | 65689.25  | NM_003363 | 191.512   | 826.185   |
| NM_000375 | 6488.542  | 6207.536  | NM_002633 | 40543.176 | 41278.047 | M33197    | 63828.184 | 61785.977 |
| NM_000265 | 46186.402 | 33919.742 | M33197    | 66829.867 | 58353.965 | NM_017569 | 8385.104  | 7906.96   |
| NM_018849 | 5647.643  | 5582.343  | NM_002878 | 16730.822 | 17238.342 | NM_001456 | 708.974   | 967.284   |
| AJ000096  | 682.896   | 532.757   | NM_017723 | 5264.548  | 5758.865  | AK024480  | 1631.626  | 1943.659  |
| NM_002236 | 9312.875  | 6142.486  | AK022922  | 3797.262  | 3573.73   | Y13871    | 28256.428 | 35366.684 |
| NM_017905 | 30473.586 | 24831.918 | NM_006462 | 10454.726 | 10833.885 | NM_012134 | 1458.5    | 800.569   |
| NM_006815 | 44600.711 | 36061.664 | AK024750  | 22090.814 | 21380.865 | AL137725  | 13902.287 | 16729.658 |

|           |           |           |           |           |           |             |           |           |
|-----------|-----------|-----------|-----------|-----------|-----------|-------------|-----------|-----------|
| M33197    | 60332.461 | 63665.668 | NM_000400 | 54108.219 | 52420.199 | M33197      | 67047.125 | 63458.918 |
| NM_001716 | 17653.338 | 24638.145 | M33197    | 66401.227 | 53822.34  | AJ008151    | 31333.416 | 40663.445 |
| NM_002030 | 1373.494  | 1743.719  | NM_002613 | 11016.799 | 11387.58  | NM_005228   | 1232.295  | 1212.023  |
| NM_004951 | 1814.191  | 1973.605  | NM_004419 | 21947.68  | 24428.127 | NM_004091   | 2592.632  | 2070.753  |
| NM_006564 | 11941.631 | 11914.021 | U47635    | 6613.806  | 6612.518  | AF027219    | 2436.7    | 3953.745  |
| NM_004802 | 3561.471  | 3458.437  | NM_018650 | 5625.97   | 5449.318  | NM_006333   | 5337.649  | 3334.973  |
| M33197    | 65337.391 | 65321.16  | AK026945  | 12158.469 | 22119.688 | M33197      | 63961.434 | 64807.773 |
| NM_002633 | 26085.723 | 24830.416 | NM_002828 | 4794.986  | 5707.585  | NM_002898   | 9098.875  | 10688.256 |
| NM_006279 | 817.009   | 699.719   | NM_014369 | 2457.845  | 2948.122  | AK022749    | 15744.447 | 17784.729 |
| M33197    | 59459.242 | 63142.078 | M33197    | 63051.426 | 62130.188 | BF031409    | 9243.5    | 10709.855 |
| NM_002878 | 6238.757  | 6031.716  | NM_001398 | 30582.791 | 29207.623 | NM_007043   | 882.822   | 1082.227  |
| NM_017723 | 2602.27   | 2834.632  | AB050049  | 10484.452 | 10150.688 | U94388      | 846.661   | 680.952   |
| AK022922  | 1829.331  | 2211.362  | NM_001819 | 5555.748  | 6451.703  | NM_012322   | 5064.822  | 4701.462  |
| NM_006462 | 4617.161  | 4662.708  | NM_016938 | 1678.207  | 1675.349  | M33197      | 64130.445 | 60757.707 |
| AK024750  | 7962.372  | 7438.736  | NM_001993 | 2078.51   | 2285.516  | NM_004888   | 60073.285 | 56926.695 |
| NM_000400 | 33373.359 | 35343.113 | BF575833  | 792.644   | 1164.879  | AK025314    | 3032.847  | 2223.982  |
| M33197    | 59393.055 | 59301.961 | NM_015725 | 25486.303 | 24192.154 | NM_002453   | 21376.857 | 27896.174 |
| NM_002613 | 7271.526  | 6844.782  | R61452    | 3555.607  | 3253.522  | AK000780    | 60591.379 | 58601.938 |
| NM_004419 | 14535.593 | 18994.91  | R19938    | 41669.055 | 45844.68  | M33197      | 64824.699 | 64353.914 |
| U47635    | 8786.019  | 10106.361 | N94487    | 36047.164 | 35167.34  | NM_000131   | 642.415   | 657.463   |
| NM_018650 | 3873.385  | 5465.994  | AI886795  | 14093.555 | 13675.977 | M64714      | 513.618   | 450.608   |
| AK026945  | 10014.762 | 22044.316 | D10495    | 6341.708  | 6046.948  | AK027033    | 777.999   | 717.849   |
| NM_002828 | 4241.217  | 5300.259  | BF344679  | 6721.04   | 6456.249  | NM_000106   | 8853.29   | 5536.97   |
| NM_014369 | 2307.441  | 2799.77   | BG743223  | 1299.832  | 1183.498  | NM_003000   | 26969.783 | 16285.167 |
| M33197    | 57414.297 | 62076.008 | M36634    | 2895.567  | 2854.465  | NM_002495   | 20062.756 | 23953.264 |
| NM_001398 | 24380.227 | 24150.324 | M14156    | 52850.504 | 51269.945 | M33197      | 64876.641 | 64898.234 |
| AB050049  | 11133.935 | 10848.229 | U87939    | 2669.767  | 2729.049  | NM_014593   | 3746.567  | 4895.023  |
| NM_001819 | 2557.59   | 2474.66   | U86961    | 4042.909  | 3971.413  | NM_006833   | 18436.42  | 23358.01  |
| NM_016938 | 963.121   | 883.523   | NM_005191 | 5623.417  | 6617.184  | NM_012257   | 1724.433  | 1745.589  |
| NM_001993 | 830.921   | 1359.508  | AK094237  | 5967.251  | 6081.775  | U37690      | 45463.813 | 46633.641 |
| BF575833  | 454.327   | 790.036   | L07592    | 1702.34   | 1850.671  | NM_005120   | 1049.327  | 1056.451  |
| NM_000175 | 358.539   | 727.843   | M33197    | 60920.957 | 60661.074 | AB029012    | 24869.574 | 23666.936 |
| NM_015725 | 17511.541 | 24982.793 | L40520    | 3269.251  | 3899.145  | M33197      | 62160.73  | 59928.426 |
| R61452    | 1817.052  | 2190.428  | NM_020393 | 836.782   | 1312.942  | AF060936    | 22838.574 | 27233.775 |
| R19938    | 18114.01  | 18982.969 | BF434335  | 63307.227 | 61810.215 | NM_005568   | 4113.865  | 3306.306  |
| N94487    | 15095.007 | 15599.693 | M57627    | 2048.572  | 2216.891  | NM_018167   | 934.463   | 831.57    |
| AI886795  | 5375.935  | 5533.462  | NM_002993 | 4484.253  | 4368.329  | AK024149    | 957.277   | 1085.325  |
| D10495    | 3709.237  | 3775.574  | AK026946  | 5915.379  | 6246.444  | AK023094    | 510.712   | 692.524   |
| BF344679  | 1945.993  | 2289.692  | M33197    | 61862.133 | 68934.984 | M33197      | 63165.008 | 60278.414 |
| M36634    | 2121.698  | 2200.061  | NM_003192 | 9545.44   | 8356.168  | M33197      | 67620.992 | 69333.367 |
| M14156    | 41903.227 | 39288.527 | NM_018449 | 16055.307 | 16025.947 | AJ011129    | 11567.263 | 11193.243 |
| U87939    | 2045.145  | 2202.309  | AF086129  | 4181.54   | 4186.129  | NM_006387   | 6527.848  | 4729.072  |
| U86961    | 11526.236 | 9909.229  | D79994    | 4907.286  | 5919.234  | NM_005646   | 2132.57   | 1931.913  |
| NM_005191 | 3585.744  | 5159.992  | NM_014458 | 45188.816 | 50504.605 | NM_006639   | 1727.893  | 1525.15   |
| AK094237  | 4209.421  | 4942.298  | L10333    | 2134.129  | 1858.88   | BI767871    | 5522.848  | 8045.609  |
| L07592    | 1375.512  | 1765.515  | AF235049  | 13808.79  | 15479.05  | AA418907    | 1623.75   | 995.006   |
| M33197    | 55092.863 | 64056.195 | M33197    | 63340.184 | 65486.355 | M65291      | 1085.138  | 1161.297  |
| AK027244  | 502.083   | 506.476   | NM_007369 | 3196.081  | 3500.301  | AA115473    | 6767.35   | 7329.751  |
| L40520    | 2949.625  | 2874.13   | NM_014776 | 7120.149  | 7633.855  | AA872397    | 10624.195 | 11711.592 |
| AK026946  | 4972.981  | 7818.257  | NM_006480 | 60995.668 | 60979.859 | M24283      | 6112.543  | 6355.365  |
| M33197    | 56395.379 | 64672.602 | NM_007223 | 62321.102 | 63494.789 | AA709414    | 2355.866  | 2150.403  |
| NM_003192 | 6854.531  | 7536.149  | NM_000145 | 3389.892  | 3205.873  | D12676      | 4939.682  | 5577.931  |
| NM_018449 | 7585.957  | 9396.877  | AF030107  | 51106.207 | 54941.203 | H-X 02812 I | 2437.72   | 2458.111  |



|           |           |           |           |           |           |           |           |           |
|-----------|-----------|-----------|-----------|-----------|-----------|-----------|-----------|-----------|
| AF086129  | 1809.729  | 2063.416  | NM_000871 | 3017.906  | 4368.144  | U75898    | 4867.012  | 7067.917  |
| D79994    | 2056.518  | 3809.763  | NM_018968 | 9362.245  | 8319.489  | M29039    | 2031.83   | 2608.785  |
| NM_01445E | 5689.059  | 7784.88   | AF086924  | 60107.387 | 63030.844 | M33197    | 54342.137 | 54510.063 |
| AF235049  | 4090.578  | 5336.638  | M33197    | 60911.473 | 63915.449 | NM_018402 | 979.474   | 928.289   |
| M33197    | 55181.414 | 68325.719 | NM_001154 | 14844.423 | 15139.942 | NM_01800E | 2389.67   | 1769.64   |
| NM_00736E | 2126.461  | 2771.211  | NM_000183 | 23222.684 | 21621.162 | AK075081  | 2408.088  | 1937.927  |
| NM_01477E | 4667.288  | 4691.381  | AY004175  | 6383.373  | 5970.589  | NM_00089E | 6004.451  | 5526.368  |
| NM_00648C | 54087.633 | 58602.82  | M33197    | 60506.879 | 63876.137 | NM_00382C | 58321.602 | 58053.758 |
| NM_007223 | 54953.508 | 59407.707 | NM_012327 | 10748.695 | 11359.386 | NM_01591E | 1804.448  | 2311.841  |
| NM_00014E | 1494.943  | 2653.123  | NM_000904 | 11826.673 | 13097.292 | M33197    | 63255.805 | 61976.098 |
| AF030107  | 42432.035 | 46863.734 | NM_01604E | 7831.408  | 7814.214  | NM_01651E | 13392.46  | 9603.611  |
| NM_000871 | 2010.792  | 2574.214  | NM_00037E | 15186.489 | 13209.419 | NM_00618E | 31054.969 | 24648.594 |
| NM_01896E | 6077.085  | 5596.985  | NM_00026E | 60003.207 | 57822.477 | NM_01480C | 2879.629  | 2483.139  |
| AF086924  | 55636.605 | 63043.246 | NM_01884E | 17719.211 | 16175.282 | NM_001557 | 849.247   | 1227.167  |
| M33197    | 59790.016 | 64378.313 | NM_00223E | 18039.115 | 15867.804 | AF147311  | 5494.985  | 5469.893  |
| NM_001154 | 10712.266 | 12657.49  | NM_01790E | 46583.695 | 45238.25  | NM_002131 | 45374.035 | 48119.02  |
| NM_000183 | 10781.608 | 8938.751  | NM_00681E | 51129.641 | 53024.301 | NM_017927 | 8862.079  | 9125.058  |
| NM_000904 | 8892.984  | 11469.144 | NM_00280E | 23716.6   | 26785.6   | M33197    | 60282.844 | 62670.152 |
| NM_01604E | 5601.167  | 5946.509  | M33197    | 63243.734 | 68128.031 | NM_001203 | 7344.896  | 7355.646  |
| NM_00037E | 5585.199  | 5583.064  | NM_00171E | 24917.574 | 25513.861 | NM_00479E | 44730.262 | 50856.063 |
| NM_00026E | 44266.055 | 30407.051 | NM_00203C | 2098.922  | 1968.541  | NM_014047 | 12734.457 | 17685.463 |
| NM_01884E | 1042.842  | 1477.253  | NM_006073 | 928.576   | 1542.068  | AK022901  | 2411.815  | 2482.657  |
| NM_00223E | 367.816   | 679.177   | NM_004951 | 1813.745  | 2208.115  | AF037332  | 4504.273  | 6975.7    |
| NM_01790E | 4834.034  | 5827.126  | NM_006564 | 12180.913 | 12252.279 | NM_020151 | 15345.212 | 14750.254 |
| NM_00681E | 30285.875 | 32661.668 | NM_004802 | 5173.203  | 4391.177  | NM_005891 | 24946.482 | 21269.514 |
| NM_00280E | 13403.251 | 17213.805 | M33197    | 63014.844 | 67183.773 | NM_00164E | 1137.321  | 1111.773  |
| M33197    | 56520.207 | 65457.75  | NM_002983 | 26784.504 | 34330.336 | NM_00395E | 1275.56   | 1215.994  |
| NM_00171E | 19179.047 | 19675.049 | NM_000074 | 24069.467 | 21842.658 | M33197    | 62742.617 | 64500.555 |
| NM_00203C | 1148.137  | 1347.599  | NM_00287E | 15867.385 | 15352.477 | NM_00350C | 6141.988  | 6307.77   |
| NM_006073 | 521.28    | 631.406   | NM_017723 | 5291.847  | 5451.103  | NM_014317 | 2378.7    | 2437.302  |
| NM_004951 | 1553.642  | 1777.788  | AK022922  | 3507.607  | 3040.953  | L09234    | 7361.836  | 6668.702  |
| NM_006564 | 7913.269  | 9990.222  | NM_006462 | 11051.341 | 10748.555 | AK026740  | 1163.112  | 1057.885  |
| NM_004802 | 2845.824  | 2923.236  | AK024750  | 19480.371 | 18350.582 | NM_017881 | 5931.806  | 6060.144  |
| NM_000074 | 24167.189 | 21930.297 | NM_00040C | 52915.813 | 51848.535 | NM_01889E | 2660.017  | 2554.807  |
| NM_00287E | 10638.396 | 9433.979  | M33197    | 65022.141 | 59713.516 | AF069307  | 2381.534  | 2679.947  |
| NM_017723 | 2022.994  | 1803.603  | NM_002613 | 15196.156 | 19346.74  | U92978    | 3514.775  | 3743.767  |
| AK022922  | 2319.029  | 2073.878  | NM_00441E | 18796.818 | 23885.717 | NM_018034 | 7267.434  | 7992.053  |
| NM_006462 | 3138.655  | 2847.305  | U47635    | 5412.459  | 6045.573  | M33197    | 61378.938 | 57395.742 |
| AK024750  | 1099.984  | 1323.732  | NM_01865C | 5069.638  | 4615.203  | AB037831  | 5461.249  | 6098.458  |
| NM_00040C | 7428.517  | 7914.306  | AK026945  | 12671.253 | 19412.914 | NM_012103 | 15262.714 | 19461.615 |
| M33197    | 58539.43  | 59695.445 | NM_00282E | 5075.729  | 4657.097  | AL122077  | 31678.559 | 35737.035 |
| NM_002613 | 4213.267  | 4279.79   | NM_01436E | 2151.5    | 2221.443  | NM_014632 | 1205.862  | 1406.294  |
| NM_00441E | 4713.206  | 5536.731  | M33197    | 65415.598 | 59210.793 | NM_006422 | 1300.282  | 1387.523  |
| U47635    | 2299.109  | 2328.01   | NM_00139E | 29544.652 | 29016.713 | NM_01694E | 1022.194  | 588.477   |
| NM_01865C | 2368.742  | 2810.06   | AB050049  | 18028.131 | 16255.027 | M33197    | 62597     | 57572.523 |
| AK026945  | 9168.577  | 13625.453 | J05125    | 1060.299  | 1301.453  | NM_00532E | 33571.27  | 33843.906 |
| NM_00282E | 3312.429  | 3887.999  | NM_005164 | 1071.403  | 1266.646  | NM_00728E | 756.082   | 682.813   |
| NM_01436E | 2104.552  | 2515.269  | NM_00199E | 9757.277  | 8448.013  | AB035130  | 2670.057  | 2994.587  |
| M33197    | 58132.203 | 60270.18  | NM_001993 | 3125.864  | 3593.776  | NM_00335E | 3314.146  | 3278.59   |
| NM_00139E | 17274.701 | 19800.742 | BF575833  | 1319.48   | 1723.74   | M33197    | 63667.563 | 64697.371 |
| AB050049  | 11961.604 | 12235.235 | R61452    | 3431.365  | 4060.136  | AF119917  | 833.749   | 622.824   |
| NM_005164 | 941.652   | 1202.156  | R19938    | 40090.477 | 43938.723 | NM_01791E | 1432.942  | 1075.324  |
| NM_00199E | 7369.509  | 6951.846  | N94487    | 36888.133 | 36490.914 | NM_00357E | 1780.117  | 1713.594  |

|           |           |           |           |           |           |             |           |           |
|-----------|-----------|-----------|-----------|-----------|-----------|-------------|-----------|-----------|
| NM_001993 | 1071.601  | 1189.616  | AI886795  | 11981.899 | 11121.509 | AL049283    | 1011.634  | 1183.926  |
| BF575833  | 576.224   | 1043.365  | D10495    | 6770.108  | 6835.181  | M33197      | 64832.543 | 60352.883 |
| R61452    | 2324.131  | 2434.674  | BF344679  | 5953.205  | 6577.162  | NM_002401   | 60550.883 | 56243.16  |
| R19938    | 15795.379 | 18671.594 | BG743223  | 787.811   | 1054.538  | NM_001274   | 1485.749  | 1364.103  |
| N94487    | 6161.22   | 5319.288  | M36634    | 3098.866  | 2811.117  | NM_002227   | 3707.682  | 3020.632  |
| AI886795  | 4172.823  | 3889.164  | M14156    | 50535.102 | 52579.133 | NM_007195   | 1690.595  | 2205.742  |
| D10495    | 4363.919  | 3731.362  | U87939    | 2595.568  | 2662.786  | AB002301    | 668.797   | 897.217   |
| BF344679  | 1769.158  | 2335.693  | U86961    | 3995.708  | 3599.423  | AB014530    | 6333.646  | 7056.257  |
| M36634    | 907.649   | 1108.66   | U47924    | 592.823   | 610.291   | M33197      | 63362.523 | 58877.586 |
| M14156    | 3974.933  | 3111.528  | NM_005191 | 5623.525  | 5292.842  | NM_005985   | 1767.32   | 1921.768  |
| U87939    | 1081.833  | 973.207   | AK094237  | 6884.001  | 6688.907  | AB014607    | 7409.594  | 5143.309  |
| U86961    | 1601.956  | 1994.421  | L07592    | 1661.334  | 1640.205  | AF134401    | 1215.545  | 1077.399  |
| NM_005191 | 3990.068  | 3932.011  | M33197    | 61686.887 | 64461.012 | NM_001035   | 469.94    | 460.692   |
| AK094237  | 3413.958  | 3539.656  | AK027244  | 732.237   | 1061.755  | NM_005645   | 3260.695  | 4126.003  |
| L07592    | 1108.143  | 1440.626  | L40520    | 4500.218  | 4126.167  | NM_006635   | 4792.094  | 5337.369  |
| M33197    | 56471.031 | 61589.477 | NM_002633 | 41162.629 | 35408.531 | NM_001692   | 2165.121  | 1851.457  |
| L40520    | 1810.34   | 1995.269  | AF086129  | 5631.687  | 5502.045  | BI767871    | 9010.045  | 7065.676  |
| NM_002633 | 27198.855 | 24576.611 | D79994    | 5563.048  | 6839.996  | M65291      | 1063.855  | 765.256   |
| AF086129  | 2109.083  | 2031.132  | NM_014455 | 52209.16  | 53096.375 | AA115473    | 6964.798  | 7320.667  |
| D79994    | 2975.585  | 4180.542  | AF235049  | 18878.391 | 21206.172 | AA872397    | 10665.209 | 10209.903 |
| NM_014455 | 21390.018 | 22282.719 | M33197    | 59369.48  | 66081.102 | M24283      | 6042.558  | 5788.559  |
| AF235049  | 8213.977  | 8714.842  | NM_007365 | 4596.041  | 4936.126  | AA709414    | 2374.931  | 2720.084  |
| M33197    | 55514.133 | 62646.23  | NM_014775 | 9562.977  | 8963.317  | D12676      | 2284.723  | 1999.922  |
| NM_007365 | 1138.256  | 1138.69   | NM_006480 | 59615.617 | 62588.418 | NM_000935   | 44991     | 45368.672 |
| NM_014775 | 2290.111  | 2339.429  | NM_007223 | 59668.836 | 64386.676 | NM_004295   | 53742.613 | 54671.203 |
| NM_006480 | 42956.621 | 43020.723 | NM_000145 | 3055.651  | 3386.968  | H-X 02812 I | 4097.432  | 4925.499  |
| NM_007223 | 38865.23  | 37950.742 | AF030107  | 51616.797 | 56822.953 | U75898      | 8888.047  | 9109.506  |
| NM_000145 | 1431.727  | 2209.6    | NM_000871 | 4624.204  | 5523.41   | M29039      | 1995.018  | 2458.747  |
| AF030107  | 35938.512 | 39098.492 | M33197    | 60121.129 | 66817.867 | M33197      | 1949.868  | 1226.993  |
| NM_000871 | 859.513   | 1203.873  | NM_018965 | 13193.439 | 10496.247 | AB011146    | 9174.291  | 6293.875  |
| M33197    | 53728.996 | 60054.926 | AF086924  | 58833.203 | 61822.129 | NM_018005   | 1515.152  | 1914.418  |
| NM_018965 | 3872.474  | 3008.975  | NM_000264 | 1196.717  | 1495.638  | AK075081    | 1670.68   | 1667.694  |
| AF086924  | 28522.051 | 29925.678 | AB058740  | 45708.063 | 48076.801 | NM_000895   | 12610.613 | 10236.323 |
| NM_000264 | 499.784   | 713.011   | NM_003385 | 1515.665  | 1716.537  | NM_003820   | 61624.32  | 64961.988 |
| AB058740  | 24615.52  | 25714.133 | NM_001885 | 1703.884  | 2064.074  | NM_015915   | 4512.312  | 4383.169  |
| NM_003385 | 474.362   | 1154.372  | NM_004392 | 1363.526  | 1403.174  | M33197      | 63072.176 | 57020.102 |
| NM_001885 | 1126.159  | 1668.409  | M33197    | 60915.504 | 66573.578 | NM_016515   | 12685.864 | 10449.729 |
| NM_004392 | 465.229   | 484.1     | NM_001154 | 15879.85  | 14811.788 | NM_006185   | 21936.873 | 21221.215 |
| M33197    | 57397.965 | 64756.605 | NM_001819 | 6200.09   | 5607.073  | NM_014800   | 3616.695  | 3142.092  |
| NM_001154 | 6911.604  | 8044.522  | NM_016935 | 1578.187  | 1835.636  | NM_001557   | 879.607   | 1060.957  |
| NM_001819 | 3102.658  | 3089.658  | NM_001663 | 8482.299  | 9822.655  | AF147311    | 5091.415  | 5559.907  |
| NM_016935 | 821.718   | 858.4     | NM_004215 | 21799.951 | 24619.844 | NM_002131   | 46495.926 | 46212.176 |
| NM_001663 | 4211.679  | 4174.992  | NM_016530 | 9929.048  | 11048.12  | NM_017927   | 7248.77   | 6632.696  |
| NM_004215 | 12059.39  | 10806.432 | NM_014804 | 3539.884  | 3976.343  | M33197      | 60597.977 | 59388.66  |
| NM_016530 | 4327.118  | 3888.05   | NM_012455 | 25778.48  | 27668.639 | NM_001203   | 6967.464  | 6740.809  |
| NM_014804 | 1649.569  | 1747.954  | NM_002805 | 27799.469 | 33289.918 | NM_004795   | 41301.309 | 44480.379 |
| NM_012455 | 9300.763  | 11480.395 | M33197    | 61216.516 | 68039.219 | NM_014047   | 17143.953 | 21699.32  |
| NM_002805 | 15059.86  | 16634.229 | NM_001715 | 29281.951 | 32979.48  | AK022901    | 1810.507  | 2192.806  |
| M33197    | 59481.047 | 64759.363 | NM_002030 | 2503.921  | 2119.769  | AF037332    | 6544.426  | 7105.814  |
| NM_001715 | 14567.417 | 16733.689 | NM_006073 | 1262.814  | 1646.707  | NM_014571   | 667.849   | 787.58    |
| NM_002030 | 1323.978  | 1175.992  | NM_004951 | 1913.306  | 2150.051  | M33197      | 66750.969 | 71711.648 |
| NM_006073 | 429.818   | 641.861   | NM_006564 | 17033.295 | 15946.349 | AJ011129    | 33723.836 | 32615.398 |
| NM_004951 | 1761.137  | 2139.589  | NM_004802 | 6186.99   | 5254.349  | NM_001645   | 893.347   | 819.23    |

|           |           |           |           |           |           |             |           |           |
|-----------|-----------|-----------|-----------|-----------|-----------|-------------|-----------|-----------|
| NM_006564 | 2164.433  | 2509.769  | M33197    | 59456.734 | 65470.586 | NM_00395E   | 1845.705  | 1366.387  |
| NM_004802 | 1246.533  | 1241.594  | NM_002983 | 24277.945 | 30378.303 | M33197      | 63694.059 | 69768.234 |
| M33197    | 55543.418 | 61325.703 | NM_000074 | 37076.969 | 39912.043 | NM_00350C   | 7407.989  | 8682.557  |
| NM_002983 | 12000.913 | 15480.611 | NM_020393 | 1190.335  | 1292.027  | NM_014317   | 2392.08   | 1687.235  |
| NM_000074 | 17814.479 | 17590.641 | BF434335  | 59544.691 | 57241.359 | L09234      | 5579.223  | 4765.196  |
| BF434335  | 38063.223 | 40659.719 | M57627    | 3208.327  | 2858.534  | NM_017881   | 6532.305  | 5851.445  |
| M57627    | 839.076   | 1009.596  | NM_002993 | 3642.422  | 3857.366  | NM_01889E   | 2586.737  | 2621.132  |
| NM_002993 | 1051.326  | 992.246   | AK026946  | 6153.911  | 5890.92   | AF069307    | 1635.711  | 1699.161  |
| AK026946  | 2351.406  | 1879.348  | NM_018449 | 13175.294 | 11497.773 | U92978      | 2204.662  | 1362.255  |
| M33197    | 50300.371 | 55210.262 | NM_00139E | 43691.371 | 43310.277 | NM_018034   | 7148.245  | 6134.015  |
| NM_003192 | 6173.402  | 5216.189  | AB050049  | 21877.457 | 23273.135 | M33197      | 62137.18  | 60519.164 |
| NM_01844E | 8265.624  | 8149.024  | J05125    | 1593.05   | 2118.432  | AB037831    | 5804.794  | 4320.656  |
| NM_00139E | 24528.164 | 21503.859 | NM_005164 | 1270.214  | 1785.701  | NM_012103   | 18922.113 | 16629.621 |
| AB050049  | 11635.953 | 10034.173 | NM_00199E | 14565.9   | 14866.266 | AL122077    | 15519.583 | 14433.282 |
| J05125    | 833.461   | 913.108   | NM_000183 | 27020.521 | 27552.295 | NM_014632   | 1296.194  | 1401.348  |
| NM_005164 | 621.574   | 823.517   | AY004175  | 7115.893  | 7547.188  | NM_006422   | 2091.571  | 2240.955  |
| NM_00199E | 6524.971  | 5280.54   | M33197    | 59238.164 | 61993.711 | BE789195    | 1023.126  | 1378.462  |
| NM_000183 | 9942.331  | 8501.178  | NM_012327 | 11524.532 | 12130.978 | NM_01694E   | 1230.689  | 981.218   |
| AY004175  | 1719.658  | 1472.642  | NM_000904 | 13036.77  | 15682.916 | M33197      | 64314.906 | 62506.961 |
| M33197    | 55045.996 | 60699.531 | NM_01604E | 7493.886  | 8124.883  | NM_00725E   | 1394.462  | 1201.327  |
| NM_012327 | 3485.195  | 3695.009  | NM_00037E | 13769.315 | 12939.802 | NM_018402   | 1108.111  | 1022.061  |
| NM_000904 | 8321.996  | 11008.814 | NM_00026E | 58242.031 | 56678.094 | AB035130    | 1318.97   | 1283.308  |
| NM_01604E | 4423.958  | 5323.959  | NM_01884E | 17684.654 | 17741.463 | NM_00335E   | 1771.955  | 1555.727  |
| NM_00037E | 6532.95   | 5817.707  | M33197    | 60877.391 | 65327.563 | M33197      | 60828.332 | 58719.309 |
| NM_00026E | 47072.336 | 30411.939 | M16796    | 964.982   | 1073.151  | NM_01791E   | 852.31    | 663.477   |
| NM_01884E | 1770.072  | 1407.845  | AF279890  | 24739.912 | 24914.426 | NM_00357E   | 2519.526  | 2358.316  |
| M33197    | 55424.18  | 54813.078 | NM_00223E | 14410.73  | 13084.044 | AL049283    | 1100.575  | 1085.861  |
| M16796    | 767.418   | 400.428   | NM_01206E | 9375.763  | 9574.397  | M33197      | 62121.727 | 55265.453 |
| AF279890  | 7732.394  | 6471.307  | NM_00168E | 61393.051 | 65704.523 | NM_002401   | 55720.609 | 55502.84  |
| NM_00223E | 2918.693  | 2640.976  | NM_016601 | 4834.991  | 4582.125  | NM_001274   | 2987.709  | 2566.084  |
| NM_01206E | 2012.813  | 1604.463  | NM_01790E | 45082.309 | 44471.414 | NM_002227   | 3275.18   | 1713.164  |
| NM_00168E | 44972.613 | 39771.035 | NM_00681E | 51959.746 | 54542.305 | NM_00719E   | 1658.268  | 1652.377  |
| NM_016601 | 846.819   | 511.517   | M33197    | 60323.676 | 68520.555 | AB014530    | 10148.418 | 9823.043  |
| NM_01790E | 31098.451 | 23288.076 | AK027244  | 1284.761  | 1712.294  | M33197      | 63526.781 | 63179.465 |
| M33197    | 58195.113 | 62287.438 | L40520    | 5306.887  | 6681.279  | NM_00598E   | 9983.429  | 9687.582  |
| NM_00681E | 42836.172 | 30113.91  | NM_002633 | 42762.559 | 48683.379 | AB014607    | 17770.344 | 16703.021 |
| M33197    | 56422.652 | 58198.387 | U11036    | 579.555   | 1194.59   | AF134401    | 2084.449  | 2151.627  |
| AK027244  | 806.563   | 848.19    | M33197    | 60381.988 | 58760.152 | NM_020151   | 17178.465 | 13281.765 |
| L40520    | 2774.264  | 2907.366  | NM_00287E | 13801.306 | 14903.234 | NM_005891   | 16754.859 | 11855.185 |
| NM_002633 | 25398.51  | 19093.635 | NM_017723 | 4858.857  | 5912.911  | NM_006387   | 4330.41   | 2932.183  |
| M33197    | 60442.813 | 61036.711 | AK022922  | 2586.958  | 2867.286  | NM_00564E   | 1256.68   | 919.47    |
| NM_00287E | 3324.991  | 2878.614  | NM_006462 | 10798.79  | 11702.595 | NM_00663E   | 2148.827  | 2326.935  |
| NM_017723 | 1301.189  | 1109.15   | AK024750  | 19321.951 | 16335.172 | BI767871    | 9699.963  | 11564.454 |
| AK022922  | 1832.246  | 1637.829  | NM_00040C | 43478.121 | 39454.363 | AA418907    | 1379.877  | 1349.218  |
| NM_006462 | 3291.752  | 2438.799  | M33197    | 64734.992 | 58317.16  | M65291      | 931.54    | 870.311   |
| AK024750  | 1667.802  | 1408.024  | NM_002613 | 9735.808  | 9843.264  | AA115473    | 9616.881  | 9812.358  |
| NM_00040C | 27909.697 | 26247.121 | NM_00441E | 19324.842 | 22529.252 | AA872397    | 9900.167  | 9846.51   |
| M33197    | 59321.695 | 59973.176 | U47635    | 5471.65   | 5947.064  | M24283      | 6695.281  | 7107.259  |
| NM_002613 | 3827.44   | 2711.831  | NM_01865C | 7033.353  | 7132.791  | D12676      | 4458.227  | 4693.251  |
| NM_00441E | 6408.209  | 6793.797  | AK026945  | 11002.832 | 19687.568 | NM_00093E   | 47563.094 | 54221.531 |
| U47635    | 2332.123  | 2272.411  | NM_00282E | 5445.551  | 5141.11   | NM_00429E   | 54109.777 | 55071.082 |
| NM_01865C | 2233.125  | 2434.606  | NM_01436E | 2473.118  | 2516.12   | H-X 02812 I | 2709.938  | 2404.169  |
| AK026945  | 5535.062  | 8849.526  | M33197    | 63787.691 | 61669.746 | U75898      | 8498.36   | 6464.206  |

|           |           |           |           |           |           |           |           |           |
|-----------|-----------|-----------|-----------|-----------|-----------|-----------|-----------|-----------|
| NM_00282E | 4002.582  | 4446.066  | CY3Cy5    | 15511.738 | 677.835   | M29039    | 2658.959  | 2601.744  |
| NM_01436E | 2447.156  | 2974.793  | AL834159  | 8784.809  | 9935.422  | M59815    | 1016.533  | 1067.437  |
| M33197    | 59859.637 | 62275.805 | NM_000164 | 46119.605 | 51251.676 | M33197    | 2642.644  | 2399.377  |
| CY3Cy5    | 10217.106 | 586.638   | AK025253  | 4546.902  | 4228.052  | AB011146  | 7061.688  | 6496.761  |
| AL834159  | 3563.982  | 3819.275  | AK025004  | 2102.787  | 2012.778  | NM_00367E | 1434.301  | 1213.372  |
| NM_000164 | 16242.563 | 11716.715 | AK025740  | 34171.281 | 24774.955 | NM_00532E | 32865.836 | 30511.672 |
| AK021971  | 520.387   | 570.636   | AK000311  | 5197.243  | 4205.584  | NM_01480C | 3219.158  | 2083.76   |
| AK025253  | 1302.238  | 1171.113  | AK021747  | 3028.254  | 2293.427  | AF147311  | 5023.11   | 5824.582  |
| AK025004  | 888.983   | 883.847   | AK025640  | 14733.479 | 11591.969 | NM_002131 | 38554.586 | 42147.254 |
| AL136818  | 1170.495  | 1379.99   | AL137685  | 1062.342  | 1092.776  | NM_017927 | 3733.858  | 3618.535  |
| AF146798  | 1655.514  | 1293.957  | AL834159  | 6194.076  | 5971.063  | M33197    | 61196.16  | 69260.102 |
| AK022049  | 1161.664  | 1426.298  | NM_000164 | 34717.129 | 35163.578 | NM_00120E | 7504.512  | 6148.59   |
| AF086517  | 11558.338 | 11712.13  | SR3       | 48235.563 | 48543.098 | NM_00479E | 58931.625 | 59843.852 |
| AK025740  | 24283.447 | 18800.703 | SR5       | 6129.115  | 5248.633  | NM_00673E | 516.11    | 761.745   |
| AK000311  | 4246.24   | 5045.191  | SR7       | 6682.118  | 40595.855 | NM_00203E | 1313.17   | 721.047   |
| AK021747  | 1777.489  | 1672.633  | SR9       | 21546.672 | 3367.09   | NM_014047 | 10555.302 | 10745.707 |
| AK025640  | 7300.789  | 8149.23   | CY3Cy5    | 13559.932 | 545.152   | AK022901  | 2889.605  | 4198.388  |
| AL834159  | 3792.351  | 3314.459  | D55638    | 1309.214  | 934.62    | NM_00150E | 637.55    | 1056.708  |
| NM_000164 | 18407.219 | 9934.914  | L23870    | 791.827   | 1073.015  | M33197    | 61849.113 | 76335.477 |
| SR3       | 37540.844 | 30891.043 | D55644    | 1178.681  | 2113.129  | AF037332  | 4403.007  | 3726.807  |
| SR5       | 4356.47   | 3685.867  | D16951    | 1295.602  | 1591.071  | NM_00605E | 740.923   | 655.612   |
| SR7       | 4340.89   | 29817.756 | L19362    | 1131.143  | 1258.368  | AB040912  | 9989.321  | 8606.971  |
| SR9       | 14970.62  | 2402.838  | L33807    | 3946.743  | 3352.31   | NM_003871 | 4473.759  | 4852.657  |
| CY3Cy5    | 7974.442  | 424.494   | NM_016534 | 3312.183  | 2373.065  | NM_00624E | 4556.232  | 5139.771  |
| L23870    | 585.137   | 674.914   | AB021923  | 3189.844  | 2649.525  | M33197    | 61699.438 | 69617.164 |
| L33807    | 2213.351  | 1741.99   | AK024240  | 1335.107  | 1353.278  | AJ011129  | 36257.539 | 39615.223 |
| AL355722  | 1026.858  | 755.512   | NM_01645E | 71121.25  | 63298.484 | NM_01448E | 1485.449  | 1335.718  |
| NM_016534 | 2396.686  | 2325.562  | AK022677  | 4684.992  | 4505.908  | NM_01338E | 6014.332  | 8528.244  |
| AB021923  | 2202.486  | 1951.885  | AL137645  | 44023.563 | 43237.293 | AK022817  | 1068.847  | 934.805   |
| AK024240  | 1429.652  | 1411.064  | AK022894  | 4011.283  | 3704.034  | NM_018034 | 2717.335  | 2731.469  |
| NM_01645E | 69175.898 | 66475.883 | AF217993  | 6716.478  | 6134.389  | M33197    | 59996.059 | 64882.305 |
| AK022677  | 3175.72   | 3017.795  | AF131823  | 1405.529  | 1526.944  | AB037831  | 3524.513  | 2624.064  |
| AL137645  | 13144.194 | 10839.785 | AK026324  | 15027.563 | 14252.952 | NM_01210E | 20642.604 | 24292.572 |
| AK022894  | 2393.01   | 1874.814  | AK024518  | 32529.828 | 20950.705 | AL122077  | 16306.498 | 16545.25  |
| AF217993  | 3675.827  | 3561.167  | AK024586  | 2230.495  | 1437.048  | NM_01463E | 1479.027  | 1671.277  |
| AF131823  | 1048.85   | 1006.186  | AK024914  | 7611.278  | 6504.852  | NM_00642E | 1940.729  | 2661.873  |
| AK026324  | 10110.559 | 8513.199  | AK025346  | 67543.141 | 64282.68  | BE789195  | 670.577   | 926.024   |
| AK024518  | 18283.744 | 17457.748 | AK022583  | 9332.523  | 8082.106  | NM_01694E | 1068.502  | 1109.46   |
| AK025017  | 3509.77   | 4166.812  | AL359062  | 9206.743  | 7985.668  | M33197    | 59059.133 | 53432.309 |
| AK024534  | 911.907   | 1215.656  | AK026869  | 3772.102  | 3401.971  | NM_00725E | 952.659   | 1007.877  |
| AK024914  | 3217.447  | 2214.423  | AK023150  | 389.894   | 815.998   | NM_01840E | 908.309   | 748.812   |
| AK025346  | 64943.902 | 66534.969 | NM_01909E | 69037.141 | 63029.25  | NM_01800E | 2631.813  | 3252.513  |
| AK022583  | 4610.61   | 4654.209  | Y12020    | 64106.383 | 57112.207 | AK075081  | 3191.546  | 3909.961  |
| AL359062  | 4633.815  | 4614.08   | AJ011597  | 549.071   | 771.645   | NM_00089E | 14111.455 | 15505.799 |
| AK026869  | 2565.471  | 2543.726  | AJ001905  | 4201.261  | 4087.32   | NM_00382C | 60252.289 | 58694.91  |
| NM_01909E | 66248.453 | 66536.328 | U17635    | 1708.427  | 1612.333  | NM_01591E | 5452.262  | 5098.528  |
| Y12020    | 49893.527 | 37629.359 | AL049930  | 656.422   | 703.414   | M33197    | 65721.32  | 71630.086 |
| AJ011597  | 489.832   | 588.287   | AF086198  | 33609.699 | 30604.715 | NM_01651E | 20409.154 | 20245.369 |
| AJ001905  | 2071.727  | 2210.125  | NM_01801E | 1592.333  | 998.686   | NM_00618E | 38887.008 | 40093.797 |
| U17635    | 1564.537  | 1530.487  | AK024928  | 1005.843  | 885.261   | NM_00598E | 6180.883  | 6371.14   |
| AL049930  | 700.731   | 847.097   | NM_01445C | 12898.568 | 8876.976  | AB014607  | 14022.052 | 9769.925  |
| NM_01801E | 495.207   | 688.203   | AK024152  | 3237.338  | 2478.53   | NM_020151 | 17840.279 | 18289.176 |
| NM_01445C | 6714.479  | 5616.481  | AK021821  | 1379.295  | 1001.122  | NM_005891 | 7544.156  | 5433.441  |

|           |           |           |           |           |           |           |           |           |
|-----------|-----------|-----------|-----------|-----------|-----------|-----------|-----------|-----------|
| AB007975  | 673.859   | 659.211   | AL049328  | 1720.078  | 1756.847  | NM_001645 | 616.385   | 912.428   |
| AK024152  | 1833.118  | 2219.252  | AK000030  | 2109.144  | 2151.325  | NM_003956 | 1174.417  | 1161.692  |
| AL137603  | 474.643   | 718.109   | NM_017932 | 1769.328  | 2302.768  | M33197    | 60369.539 | 59565.707 |
| AK021821  | 1423.071  | 1748.133  | AK000910  | 6849.617  | 6693.849  | NM_00350C | 8912.737  | 7585.51   |
| AL049328  | 1568.092  | 1690.814  | AF252280  | 44107.301 | 45293.578 | L09234    | 14910.442 | 14075.998 |
| AK000030  | 1155.473  | 951.224   | AK000107  | 944.009   | 1060.784  | NM_000055 | 941.377   | 1118.572  |
| NM_017932 | 1113.367  | 1052.825  | AK000795  | 891.1     | 904.712   | AK026740  | 1092.947  | 1089.191  |
| AK000910  | 3975.039  | 5425.875  | AK000951  | 1612.737  | 1541.018  | NM_017881 | 5933.643  | 5512.454  |
| AF252280  | 27890.404 | 30880.422 | AF130064  | 59696.648 | 53013.773 | M33197    | 63535.09  | 66139.297 |
| AK000107  | 1000.415  | 1096.157  | U17624    | 2530.444  | 2261.173  | NM_017634 | 2154.042  | 2372.407  |
| AK000795  | 1183.427  | 1300.844  | U36217    | 10456.929 | 8607.285  | NM_000813 | 828.089   | 893.815   |
| AK000951  | 2172.289  | 1868.607  | AL157452  | 1058.888  | 997.873   | NM_018896 | 3526.481  | 2427.904  |
| AF130064  | 56559.074 | 55975.242 | AK024155  | 42386.555 | 38417.094 | AJ300465  | 3497.378  | 4062.095  |
| U17624    | 1750.939  | 2187.78   | AK027095  | 2552.665  | 2391.409  | X86400    | 1582.189  | 1693.895  |
| U36217    | 4356.255  | 5836.278  | AF062097  | 3645.701  | 2441.542  | NM_00081C | 3150.476  | 3979.491  |
| AL157452  | 637.815   | 702.714   | BC030949  | 5412.773  | 3260.992  | AF069307  | 2392.673  | 2760.314  |
| AK024155  | 29400.068 | 25645.646 | AF116615  | 4262.451  | 2543.374  | M33197    | 64533.105 | 70229.695 |
| AK027095  | 1804.521  | 3364.056  | U17636    | 74246.453 | 63902.871 | U92978    | 2771.789  | 2687.776  |
| AF062097  | 2425.217  | 2749.848  | NM_018546 | 11621.423 | 9294.883  | M33197    | 1988.408  | 1303.393  |
| BC030949  | 3305.862  | 3412.008  | U52699    | 67095.578 | 67845.164 | AB011146  | 5334.149  | 3574.025  |
| AF116615  | 2216.266  | 1754.129  | S71613    | 3310.502  | 2675.656  | NM_005326 | 27223.377 | 32005.061 |
| NM_018546 | 5526.431  | 5395.133  | AJ011910  | 26600.406 | 19983.348 | NM_014065 | 1363.219  | 1627.149  |
| U52699    | 51664.273 | 52333.449 | AK024378  | 2328.016  | 1946.86   | AB035130  | 2122.225  | 2258.79   |
| S71613    | 1889.339  | 1391.864  | NM_014026 | 8889.031  | 6823.07   | NM_003355 | 1815.12   | 1526.693  |
| AJ011910  | 11192.354 | 9843.086  | D61703    | 20258.367 | 15918.07  | M33197    | 59907.824 | 53445.73  |
| AK024378  | 1219.705  | 1093.129  | AL359652  | 2817.19   | 1740.744  | NM_017915 | 1444.847  | 996.563   |
| NM_014026 | 6913.997  | 6599.967  | AK022423  | 3110.433  | 2318.362  | NM_003575 | 2278.91   | 1923.513  |
| D61703    | 10773.67  | 11181.569 | AF088021  | 17088.02  | 10777.257 | AL049283  | 1871      | 1628.558  |
| AL050376  | 648.313   | 896.685   | NM_002455 | 8846.78   | 5972.912  | M33197    | 60225.922 | 56536.723 |
| AL359652  | 1575.604  | 2463.374  | NM_002959 | 13860.176 | 8732.938  | NM_002401 | 61941.141 | 67783.602 |
| BF509267  | 2581.202  | 3128.605  | AB046773  | 1826.373  | 1295.42   | NM_001274 | 2305.138  | 2228.621  |
| NM_002455 | 5655.838  | 5534.947  | NM_017991 | 2569.486  | 2028.721  | NM_003913 | 537.962   | 523.748   |
| NM_002959 | 8411.328  | 8096.441  | L37198    | 3919.743  | 3470.487  | NM_002227 | 5096.474  | 4176.467  |
| AB046773  | 566.305   | 814.851   | U67822    | 1533.079  | 1830.815  | NM_007195 | 6716.243  | 8124.318  |
| NM_017991 | 1212.173  | 999.535   | AK021921  | 1505.058  | 1143.796  | AB014530  | 4885.17   | 4955.297  |
| L37198    | 1574.725  | 2183.471  | AK025431  | 865.431   | 732.771   | M33197    | 66189.391 | 62778.25  |
| U67822    | 752.654   | 1055.841  | AK023662  | 2374.291  | 1845.594  | CY3Cy5    | 10400.81  | 295.061   |
| AK021921  | 1339.598  | 1189.144  | AF086274  | 68940.648 | 62874.039 | AK054960  | 14987.495 | 11803.861 |
| AK025431  | 395.982   | 384.921   | AK023682  | 2856.118  | 2561.247  | L15344    | 665.122   | 634.597   |
| AK023682  | 1343.082  | 1711.953  | AK024024  | 6112.042  | 5632.357  | AK024150  | 573.321   | 468.183   |
| AK024024  | 2322.767  | 3005.775  | AK000685  | 20182.73  | 13459.475 | AF070536  | 1704.234  | 1640.113  |
| AK000685  | 12207.026 | 9778.12   | D28381    | 26484.709 | 17119.711 | U79300    | 1435.135  | 1542.941  |
| D28381    | 20225.563 | 18502.287 | BE706519  | 2020.625  | 1697.239  | AK025151  | 26029.941 | 28040.484 |
| BE706519  | 1536.958  | 1591.285  | NM_014725 | 2273.877  | 1664.247  | AK025550  | 3575.268  | 3756.525  |
| NM_019096 | 4336.27   | 5478.664  | NM_006892 | 5780.975  | 4501.147  | AF088076  | 34576.852 | 44651.551 |
| NM_014725 | 788.441   | 978.823   | NM_019117 | 2651.399  | 2482.674  | AF086543  | 4387.535  | 4610.219  |
| NM_006892 | 3210.781  | 3446.051  | NM_018309 | 4107.333  | 3289.088  | AK002098  | 1425.304  | 1215.79   |
| NM_019117 | 1596.552  | 1334.661  | NM_017658 | 8474.248  | 5960.97   | AB011128  | 28741.596 | 29219.91  |
| NM_018309 | 2555.621  | 2456.657  | NM_018679 | 31348.119 | 23417.795 | AK025074  | 4074.051  | 4210.473  |
| NM_017658 | 3210.112  | 2639.772  | NM_016643 | 1326.503  | 827.676   | AK054960  | 22450.744 | 22067.439 |
| NM_018679 | 12596.499 | 10552.493 | NM_006779 | 10399.884 | 6983.58   | L15344    | 1423.059  | 1427.764  |
| NM_016643 | 1286.674  | 1250.984  | NM_019847 | 3138.775  | 2015.577  | SR1       | 88713.68  | 59922.922 |
| NM_00258C | 782.369   | 728.829   | D17093    | 27214.43  | 16943.707 | SR3       | 38451.977 | 44975.391 |

|           |           |           |           |           |           |           |           |           |
|-----------|-----------|-----------|-----------|-----------|-----------|-----------|-----------|-----------|
| NM_006779 | 5729.719  | 4194.322  | AL117521  | 8876.757  | 6030.3    | SR5       | 3822.207  | 3836.401  |
| NM_019847 | 2399.806  | 1776.706  | NM_000731 | 1509.843  | 989.456   | SR7       | 4079.387  | 31195.24  |
| D17093    | 21598.816 | 18037.645 | AK021913  | 32330.545 | 30930.602 | SR9       | 12482.108 | 2039.046  |
| AL117521  | 4274.175  | 5538.543  | AL137489  | 43506.453 | 47578.32  | CY3Cy5    | 12240.425 | 349.918   |
| AK021913  | 13172.321 | 11862.296 | AF009311  | 20371.918 | 19063.58  | U73799    | 2769.086  | 2452.813  |
| AL137489  | 28844.807 | 28870.432 | S73397    | 6118.69   | 6183.695  | AK021668  | 47129.867 | 47416.617 |
| S73397    | 4677.616  | 4630.656  | AK023939  | 1084.145  | 1100.549  | AF086148  | 34788.676 | 36703.215 |
| AL050219  | 719.758   | 760.897   | AL050219  | 1554.983  | 1608.226  | NM_01649C | 4551.822  | 4655.868  |
| AK024433  | 4108.251  | 3735.856  | AK024433  | 6872.791  | 5753.012  | AL137498  | 9692.275  | 5307.615  |
| U82321    | 1472.148  | 1409.502  | U82321    | 1484.455  | 1537.867  | S66168    | 25071.781 | 21685.01  |
| AK023856  | 1884.285  | 2398.452  | AK023856  | 2110.121  | 2122.648  | NM_003851 | 30606.348 | 42281.801 |
| AB014557  | 2591.159  | 2008.98   | AB014557  | 4382.341  | 4096.705  | U79244    | 549.301   | 648.684   |
| NM_005578 | 4402.451  | 2882.761  | NM_005578 | 9571.884  | 5132.101  | AK022482  | 2338.453  | 2672.16   |
| NM_003653 | 14706.033 | 13367.116 | NM_003653 | 19838.438 | 20870.662 | AK024135  | 893.61    | 642.215   |
| NM_018457 | 34802.715 | 25128.189 | NM_018457 | 54290.695 | 51242.848 | AK022803  | 6090.696  | 5333.324  |
| NM_002953 | 8140      | 8838.652  | NM_002953 | 12118.231 | 11809.066 | AK023517  | 2032.601  | 1507.639  |
| NM_002187 | 1303.068  | 1477.864  | NM_002187 | 1509.121  | 1351.228  | AK023869  | 8991.027  | 7473.598  |
| NM_014246 | 9659.786  | 7589.856  | NM_014246 | 18499.49  | 17516.506 | AK025156  | 28079.449 | 28759.42  |
| NM_014859 | 925.266   | 648.337   | NM_014859 | 898.506   | 1041.728  | AK022116  | 6463.588  | 6446.359  |
| NM_001116 | 482.373   | 259.737   | NM_001116 | 647.301   | 805.603   | AF026526  | 1101.885  | 1387.936  |
| BC035395  | 16105.421 | 15182.468 | BC035395  | 20626.412 | 14784.49  | AK026207  | 1458.732  | 1898.623  |
| NM_001703 | 26782.92  | 28269.541 | NM_001703 | 38605.027 | 33295.594 | AK024984  | 8805.271  | 8388.532  |
| NM_020126 | 4240.563  | 4166.259  | NM_020126 | 7314.994  | 5911.058  | AL110236  | 527.3     | 640.13    |
| NM_013982 | 6103.849  | 4993.079  | NM_013982 | 9345.44   | 6312.538  | AF086008  | 2863.281  | 3094.895  |
| NM_005049 | 5207.376  | 4790.194  | NM_005049 | 7753.394  | 5947.623  | AF087970  | 926.845   | 797.177   |
| NM_00463C | 13108.344 | 12238.85  | NM_003882 | 1078.335  | 650.599   | U05597    | 1435.968  | 1317.999  |
| AK023001  | 10819.703 | 8641.914  | NM_00463C | 22420.535 | 22546.258 | AK026366  | 58244.004 | 58716.246 |
| NM_014826 | 20405.633 | 17002.242 | AK023001  | 19972.508 | 18582.383 | AK024229  | 15618.806 | 16088.433 |
| AF201947  | 627.532   | 626.33    | NM_014826 | 29758.383 | 30902.432 | AK021467  | 17162.311 | 16508.475 |
| U01147    | 2850.681  | 2353.842  | AF201947  | 1739.579  | 1766.418  | AK022498  | 2092.509  | 1611.083  |
| NM_00404C | 22760.955 | 16347.244 | U01147    | 4380.053  | 3765.297  | AJ245433  | 56690.773 | 52813.883 |
| NM_006116 | 5539.656  | 4624.544  | NM_00404C | 42269.91  | 41642.918 | AK021942  | 31162.18  | 29193.465 |
| NM_005456 | 1022.642  | 893.049   | NM_006116 | 9589.478  | 6708.965  | AK021817  | 2737.978  | 2734.146  |
| BF219403  | 46128.832 | 40578.539 | NM_005456 | 1262.274  | 927.671   | AK023217  | 968.104   | 1187.565  |
| NM_016119 | 5149.889  | 5735.702  | BF219403  | 60420.777 | 55357.555 | AK021883  | 783.525   | 636.443   |
| AK075450  | 2441.003  | 2739.253  | NM_016119 | 7295.099  | 8223.149  | AK024193  | 3560.813  | 3570.066  |
| AF178983  | 10847.271 | 7643.57   | AK075450  | 5218.597  | 5748.487  | NM_018543 | 704.348   | 757.325   |
| NM_001324 | 10052.029 | 6851.364  | AF178983  | 22326.787 | 25960.033 | AK024438  | 25090.887 | 25159.578 |
| AB037795  | 2370.215  | 2194.51   | NM_001324 | 13040.356 | 10652.431 | AL390170  | 998.627   | 950.9     |
| D43949    | 3177.478  | 2614.851  | AB037795  | 2856.974  | 2909.903  | AK022887  | 696.257   | 841.756   |
| AF111849  | 25936.668 | 27318.477 | D43949    | 3498.695  | 3889.845  | AK000745  | 19471.205 | 24489.484 |
| AK022975  | 1191.969  | 966.907   | AF111849  | 32830.676 | 37368.199 | NM_015901 | 767.429   | 601.1     |
| NM_015344 | 1203.633  | 1113.731  | AK022975  | 1540.539  | 1744.397  | Z83935    | 1381.739  | 1419.07   |
| NM_004288 | 4169.872  | 3716.576  | NM_015344 | 1820.726  | 1935.179  | AF093744  | 16131.041 | 13339.493 |
| AL122055  | 6368.052  | 6285.969  | NM_004288 | 8310.549  | 7656.013  | NM_018687 | 18846.578 | 15927.048 |
| NM_005132 | 31926.99  | 32431.813 | AL122055  | 10337.345 | 9846.148  | M57417    | 47069.914 | 50482.34  |
| X07695    | 693.588   | 736.182   | NM_005132 | 35704.805 | 42888.117 | NM_006189 | 1384.787  | 1462.54   |
| D87458    | 3017.332  | 2306.578  | X07695    | 1669.042  | 1619.937  | AJ272177  | 1431.805  | 1521.445  |
| AK021750  | 13497.221 | 12516.364 | D87458    | 5286.127  | 6175.909  | AK024618  | 2174.414  | 2738.215  |
| NM_003626 | 2502.902  | 2416.436  | AK021750  | 16469.66  | 15910.413 | AL049969  | 919.635   | 1142.412  |
| NM_006932 | 667.014   | 720.277   | NM_003626 | 3062.955  | 4271.988  | NM_00522C | 2640.11   | 2693.845  |
| AK023594  | 3645.393  | 3192.082  | NM_006932 | 1135.532  | 1250.178  | X79308    | 1574.834  | 1703.61   |
| AB010099  | 42860.492 | 30401.17  | AK023594  | 8395.49   | 6224.39   | AF086476  | 540.866   | 701.759   |

|           |           |           |           |           |           |           |           |           |
|-----------|-----------|-----------|-----------|-----------|-----------|-----------|-----------|-----------|
| AB039920  | 14574.552 | 10862.66  | AB010099  | 65980.313 | 61898.941 | NM_01766C | 3244.945  | 2816.466  |
| AB046782  | 3041.492  | 3046.187  | AB039920  | 33577.309 | 26940.885 | AB011151  | 18677.568 | 16508.078 |
| AF300612  | 61457.527 | 66926.508 | AB046782  | 3627.602  | 2768.584  | U92995    | 3715.47   | 3166.048  |
| AF208005  | 1893.093  | 1589.472  | AF300612  | 66954.18  | 67846.797 | NM_00710C | 1610.408  | 1765.935  |
| NM_002231 | 18433.76  | 22968.568 | AF208005  | 2249.501  | 2014.698  | AL137555  | 3599.036  | 3826.039  |
| NM_017807 | 5041.867  | 4404.336  | NM_002231 | 39676.172 | 41742.133 | AL133017  | 1667.293  | 1469.955  |
| NM_01474C | 1075.291  | 1065.901  | NM_020474 | 17692.801 | 16536.896 | U84506    | 2854.898  | 2391.221  |
| NM_00278C | 43295.246 | 48131.305 | NM_002643 | 5394.47   | 5399.52   | U21556    | 72037.305 | 60564.645 |
| NM_000462 | 18484.479 | 22830.082 | NM_017807 | 7562.044  | 7598.851  | AB002444  | 773.551   | 723.977   |
| NM_00333C | 10217.334 | 9743.888  | NM_01474C | 1226.52   | 1423.354  | AB002344  | 7310.455  | 8313.134  |
| NM_00580C | 30552.613 | 26616.482 | NM_00278C | 57467.832 | 54642.508 | BF210352  | 1357.138  | 1314.901  |
| NM_004181 | 29795.043 | 33029.254 | NM_000462 | 31946.217 | 36310.359 | NM_00682C | 3530.445  | 3634.737  |
| NM_00390C | 20610.766 | 18168.582 | NM_00333C | 14979.13  | 15590.826 | NM_01766C | 11237.784 | 12112.828 |
| NM_003337 | 4582.899  | 3957.498  | NM_00580C | 47639.254 | 53289.512 | AK023760  | 4670.451  | 5052.321  |
| AF298152  | 5615.87   | 3586.895  | NM_004181 | 40176.488 | 48767.164 | X98415    | 71543.18  | 63742.211 |
| AF117233  | 10860.247 | 10006.434 | NM_00390C | 24472.455 | 28154.559 | AK024205  | 1971.902  | 2276.242  |
| NM_01584C | 1349.242  | 1227.474  | NM_003337 | 5187.858  | 5442.793  | AF086034  | 20278.951 | 22034.109 |
| NM_001723 | 2214.849  | 1902.757  | AF298152  | 7482.497  | 5914.301  | AF130071  | 1621.936  | 1662.71   |
| NM_01601C | 2034.626  | 2241.675  | AF117233  | 14488.391 | 16490.955 | AJ272057  | 2935.235  | 3219.282  |
| M94362    | 22125.426 | 25748.098 | NM_01584C | 1723.237  | 1816.599  | NM_004402 | 579.104   | 757.454   |
| AK024707  | 2015.381  | 1824.732  | NM_001723 | 3265.47   | 2817.84   | AK024216  | 26683.508 | 32575.193 |
| NM_01425C | 1628.546  | 1784.341  | NM_01601C | 2485.96   | 3243.518  | Y16752    | 4028.133  | 3493.386  |
| AK022909  | 3016.462  | 2308.482  | M94362    | 30334.98  | 35167.703 | NM_02015C | 421.615   | 629.236   |
| NM_00653C | 10652.594 | 10922.77  | AK024707  | 2945.715  | 2924.534  | NM_01483C | 1353.924  | 1126.178  |
| NM_003587 | 51992.539 | 58065.969 | NM_01425C | 1993.473  | 2202.561  | AF355402  | 6479.185  | 7322.381  |
| X90978    | 2323.061  | 2173.408  | AK022909  | 5456.688  | 4936.007  | AK000407  | 3124.598  | 3035.879  |
| NM_004387 | 451.57    | 240.933   | NM_00653C | 17254.082 | 14679.134 | NM_020524 | 11501.438 | 13432.501 |
| AF217226  | 13620.735 | 13772.805 | NM_003587 | 65967.75  | 72319.813 | NM_00199C | 3525.961  | 5856.734  |
| NM_005522 | 759.79    | 513.171   | X90978    | 3146.963  | 3482.549  | X64977    | 2042.092  | 3558.004  |
| NM_00576C | 19243.449 | 16792.803 | AF217226  | 30759.857 | 29340.814 | AF064851  | 853.993   | 888.916   |
| NM_014212 | 2877.641  | 2786.867  | AL359578  | 581.774   | 672.115   | NM_002602 | 14883.372 | 22975.168 |
| NM_00726C | 4243.863  | 4690.304  | NM_005522 | 1705.371  | 1038.453  | NM_01623C | 716.239   | 654.001   |
| AK023639  | 22600.514 | 23698.861 | NM_00576C | 35739.809 | 39858.461 | D17271    | 4149.307  | 3257.981  |
| AL122118  | 468.639   | 363.808   | NM_014212 | 4343.451  | 3690.255  | X91648    | 907.092   | 683.356   |
| AL137700  | 1174.988  | 1330.674  | NM_00726C | 5865.71   | 5867.391  | AK026658  | 567.644   | 631.312   |
| NM_004904 | 2617.302  | 2675.921  | AK023639  | 25789.211 | 25839.664 | AF086322  | 953.037   | 1259.842  |
| NM_003083 | 16242.676 | 15960.731 | AL137700  | 1646.493  | 1602.029  | Z70717    | 1332.179  | 1410.13   |
| NM_00678C | 7427.479  | 6861.073  | NM_004904 | 2847.97   | 2992.401  | AK024736  | 2215.905  | 2277.537  |
| NM_000982 | 6322.007  | 5740.733  | NM_003083 | 28265.424 | 32273.467 | NM_01823C | 663.083   | 943.99    |
| AK026367  | 42710.563 | 46635.742 | NM_00678C | 8670.147  | 9423.574  | U88892    | 2472.564  | 2495.46   |
| AK026491  | 31937.477 | 28119.498 | NM_000982 | 8640.253  | 8672.35   | AK023755  | 825.172   | 805.124   |
| NM_00419C | 46755.875 | 47086.52  | NM_001024 | 64552.805 | 62248.98  | NM_00572C | 1086.794  | 1031.094  |
| NM_01427C | 15134.929 | 14350.956 | NM_016093 | 64787.305 | 63139.004 | NM_012211 | 1050.048  | 1098.227  |
| NM_00040C | 9900.554  | 6608.153  | NM_012423 | 63166.535 | 62803.242 | AB040877  | 4313.535  | 6712.437  |
| AB044137  | 607.162   | 851.989   | AK026367  | 46032.711 | 51319.766 | NM_00628C | 5410.085  | 7830.158  |
| NM_00092C | 2090.192  | 2166      | AK026491  | 34123.742 | 35540.414 | NM_019067 | 4078.923  | 5498.324  |
| NM_02037C | 16057.392 | 17628.311 | NM_001015 | 62725.293 | 67221.383 | AF251025  | 529.541   | 403.056   |
| NM_01604C | 20618.625 | 16829.383 | AL110170  | 65208.023 | 61348.871 | NM_015677 | 6532.946  | 6406.554  |
| NM_013311 | 15427.682 | 13138.951 | NM_00419C | 54370.84  | 59674.535 | NM_001772 | 7093.962  | 5980.15   |
| NM_000291 | 56085.219 | 54395.18  | NM_01427C | 24943.209 | 22282.129 | AF161341  | 642.426   | 710.711   |
| NM_018081 | 4889.551  | 5706.761  | NM_00040C | 17085.342 | 14755.612 | AJ249902  | 583.724   | 479.431   |
| NM_01464C | 4227.994  | 4815.028  | AB044137  | 839.267   | 1308.633  | NM_004384 | 860.18    | 784.309   |
| AL117488  | 2463.384  | 2643.813  | NM_00092C | 3205.209  | 3793.314  | L05500    | 14334.03  | 12331.341 |

|           |           |           |           |           |           |           |           |           |
|-----------|-----------|-----------|-----------|-----------|-----------|-----------|-----------|-----------|
| NM_01224C | 5119.28   | 5118.59   | NM_016049 | 23560.559 | 21501.82  | NM_01230E | 14962.706 | 16103.254 |
| NM_01900E | 6255.654  | 6968.975  | NM_013311 | 18089.158 | 13909.979 | NM_00622E | 4767.526  | 4461.42   |
| NM_00473E | 16082.561 | 14308.331 | NM_000291 | 62443.371 | 58724.547 | L10374    | 17280.691 | 13793.654 |
| AV752216  | 2270.691  | 2311.621  | NM_018081 | 5386.735  | 5866.635  | NM_00024E | 3060.978  | 3604.669  |
| NM_001934 | 4409.036  | 4368.865  | NM_014649 | 6365.761  | 7275.694  | NM_00586C | 5003.866  | 6136.864  |
| AB011090  | 2713.621  | 2185.347  | AL117488  | 4398      | 4056.196  | AF095288  | 29034.758 | 30892.158 |
| NM_00020E | 561.795   | 428.067   | NM_01224C | 6384.766  | 5892.738  | AK025116  | 426.697   | 622.104   |
| NM_01868E | 8630.346  | 6926.163  | NM_01900E | 11261.646 | 11006.22  | NM_00561C | 2799.669  | 2501.54   |
| AB033024  | 2454.262  | 2688.338  | NM_00473E | 19343.674 | 22861.326 | AL133651  | 1752.209  | 2530.379  |
| NM_01894E | 10630.935 | 10518.431 | AV752216  | 2779.914  | 2786.102  | NM_00347E | 2917.846  | 3622.996  |
| NM_005531 | 12753.116 | 13182.736 | NM_005341 | 6802.236  | 6586.105  | NM_016237 | 6073.377  | 5743.141  |
| NM_006977 | 1321.676  | 1127.285  | AF181999  | 3382.065  | 3699.938  | NM_004924 | 3660.496  | 3953.55   |
| NM_00247E | 1134.159  | 1057.672  | NM_001934 | 5861.012  | 5825.986  | NM_00179E | 1970.88   | 1616.16   |
| NM_00034E | 21061.211 | 21541.857 | AB011090  | 3713.094  | 3564.739  | NM_001211 | 2345.916  | 1844.063  |
| NM_00505E | 18665.973 | 21009.199 | NM_01868E | 13375.116 | 12038.303 | NM_00650E | 966.067   | 1079.095  |
| NM_00495C | 3951.579  | 3861.216  | AB033024  | 4399.036  | 4205.649  | AB033050  | 1402.834  | 1510.004  |
| NM_000724 | 5569.561  | 4986.082  | NM_01894E | 16313.688 | 15942.482 | NM_00435E | 13083.204 | 13934.407 |
| NM_002557 | 16097.648 | 16413.414 | NM_005531 | 20874.777 | 23246.48  | BC015022  | 3515.366  | 3420.975  |
| NM_004477 | 734.524   | 1010.648  | NM_006977 | 2357.664  | 2125.062  | AB033086  | 2294.535  | 2247.388  |
| AI417775  | 564.022   | 468.548   | NM_00247E | 3311.281  | 3578.792  | NM_00240E | 71875.203 | 60948.789 |
| BI762229  | 13452.137 | 14205.432 | NM_00505E | 24585.369 | 29603.553 | U87169    | 2622.549  | 2697.668  |
| AA131406  | 597.536   | 343.344   | NM_00495C | 8191.053  | 8492.023  | NM_00207E | 1142.264  | 1235.91   |
| BG618320  | 48067.426 | 46884.992 | NM_000724 | 7915.699  | 6650.626  | AF117222  | 839.589   | 922.097   |
| Y00787    | 3634.537  | 3389.397  | NM_002557 | 24817.273 | 24660.967 | NM_003291 | 4175.245  | 7701.085  |
| NM_00727E | 5691.778  | 5025.343  | NM_004477 | 1072.359  | 1282.345  | AK022950  | 2406.984  | 2753.807  |
| N34462    | 12245.924 | 13508.22  | BE728156  | 1190.931  | 1021.503  | AB014576  | 9428.639  | 16123.529 |
| AI658778  | 8261.903  | 8977.266  | BI762229  | 17434.576 | 20540.412 | NM_019044 | 16190.168 | 21758.25  |
| L19067    | 8810.251  | 8009.618  | AA131406  | 602.657   | 537.252   | AF174601  | 2226.227  | 2113.852  |
| Z48482    | 796.06    | 791.812   | BG618320  | 64488.605 | 53546.352 | NM_01470C | 712.959   | 906.669   |
| W60413    | 4276.801  | 3984.054  | M28983    | 662.914   | 598.532   | NM_015644 | 926.267   | 1507.294  |
| BI823365  | 5486.493  | 5532.343  | Y00787    | 6241.202  | 6467.292  | NM_005687 | 2625.909  | 2874.85   |
| X06318    | 937.725   | 1053.513  | NM_00727E | 8965.126  | 7899.244  | NM_00598E | 2928.579  | 2675.553  |
| NM_019101 | 1628.224  | 1207.741  | N34462    | 16198.212 | 16476.012 | AB016902  | 1566.24   | 1901.271  |
| NM_013247 | 4234.901  | 5022.715  | AI658778  | 9740.229  | 11687.102 | AF272378  | 66616.875 | 59252.934 |
| NM_00677C | 3223.751  | 3173.849  | L19067    | 10643.087 | 11755.115 | M61870    | 1191.819  | 1313.316  |
| BE394704  | 773.176   | 916.155   | Z48482    | 1475.969  | 1137.377  | AK026980  | 1560.896  | 1174.114  |
| NM_00470E | 6721.384  | 6643.99   | W60413    | 12232.366 | 9868.198  | NM_02036E | 3904.249  | 3571.656  |
| NM_00151E | 919.935   | 887.596   | BI823365  | 13130.842 | 10858.281 | AF024708  | 22507.045 | 30246.26  |
| NM_01470E | 6240.968  | 6710.529  | X06318    | 1788.422  | 1781.824  | NM_006467 | 6798.596  | 11367.662 |
| AK023172  | 650.763   | 871.672   | NM_019101 | 2829.298  | 2845.773  | NM_00145E | 844.267   | 976.979   |
| AF139768  | 448.305   | 527.559   | NM_013247 | 7728.439  | 10039.396 | NM_00616E | 1125.239  | 1266.292  |
| AJ001348  | 1538.788  | 1810.57   | NM_00677C | 7326.749  | 8873.442  | NM_014764 | 5834.88   | 9549.895  |
| NM_014007 | 2022.466  | 1990.08   | BE394704  | 1150.074  | 1585.202  | NM_01807E | 2613.335  | 3005.03   |
| AB033006  | 4306.041  | 4196.629  | NM_00470E | 11461.03  | 12296.93  | NM_01605C | 392.016   | 423.527   |
| AF020314  | 6755.92   | 5487.896  | NM_00151E | 1960.344  | 1618.303  | NM_00708C | 8821.909  | 7773.387  |
| NM_01633E | 22982.412 | 19710.576 | NM_01470E | 11235.53  | 12294.159 | AK023531  | 10204.03  | 10861.683 |
| AK023936  | 1303.803  | 1175.491  | AK023172  | 768.489   | 1107.677  | NM_006697 | 2859.46   | 2941.273  |
| NM_006457 | 2765.63   | 3559.162  | AF139768  | 481.449   | 574.556   | M19182    | 1455.943  | 1731.13   |
| NM_00368E | 2467.939  | 2243.575  | AJ001348  | 3527.927  | 3734.53   | AK025707  | 1770.818  | 1713.051  |
| NM_000207 | 1376.901  | 1360.024  | NM_014007 | 2898.716  | 3476.614  | NM_00624E | 1137.764  | 963.387   |
| NM_002531 | 2677.498  | 2728.951  | AB033006  | 7123.676  | 7587.519  | X78712    | 1708.909  | 1789.061  |
| NM_006314 | 34078.055 | 32401.531 | AF020314  | 12944.739 | 12595.146 | NM_001497 | 812.584   | 735.593   |
| NM_00178E | 8652.646  | 9291.402  | NM_01633E | 33895.09  | 39050.688 | NM_00413C | 2440.367  | 3079.627  |



|           |           |           |           |           |           |           |           |           |
|-----------|-----------|-----------|-----------|-----------|-----------|-----------|-----------|-----------|
| NM_002754 | 426.744   | 686.777   | AK023936  | 1165.964  | 1328.117  | NM_00634E | 1065.095  | 736.292   |
| NM_000797 | 15489.968 | 16545.232 | NM_006457 | 4389.082  | 5610.938  | AF067972  | 19017.283 | 17403.686 |
| AL080148  | 38727.52  | 31631.186 | NM_003682 | 2293.072  | 2832.897  | NM_00495E | 974.782   | 1363.025  |
| AF000381  | 5772.195  | 6303.166  | NM_000207 | 1827.009  | 2181.182  | AB020635  | 4924.315  | 8397.151  |
| NM_01210E | 4719.494  | 4218.369  | NM_002531 | 5441.608  | 5976.728  | NM_00651E | 1332.544  | 1614.13   |
| S82470    | 5106.161  | 4398.011  | NM_006314 | 58079.656 | 55733.219 | NM_005224 | 978.362   | 929.563   |
| AB028982  | 1556.325  | 2286.581  | NM_001782 | 12911.026 | 13043.93  | NM_012144 | 5194.317  | 7293.826  |
| NM_002004 | 3834.822  | 4356.319  | NM_002754 | 1035.751  | 1316.104  | NM_00290E | 2097.35   | 2915.313  |
| NM_005121 | 1470.485  | 895.704   | NM_000797 | 21673.176 | 23537.777 | NM_00537E | 25472.053 | 28643.365 |
| NM_000747 | 4477.745  | 3848.184  | NM_014927 | 4134.806  | 3591.681  | NM_01765E | 9213.993  | 9236.493  |
| AJ275973  | 14356.038 | 16197.254 | AF217525  | 2041.118  | 2450.995  | D70832    | 29686.957 | 29478.752 |
| U76362    | 18555.803 | 20029.836 | AL080148  | 62933.621 | 58492.664 | NM_00142E | 9164.6    | 9003.225  |
| AK021489  | 43159.035 | 49314.77  | AF000381  | 11029.025 | 13110.632 | NM_00237E | 27608.301 | 32607.463 |
| NM_00452E | 945.696   | 1072.018  | NM_01210E | 6944.376  | 6774.306  | AB007929  | 5860.711  | 6930.93   |
| NM_00389E | 850.805   | 653.859   | S82470    | 7746.572  | 6824.515  | NM_00457E | 6403.733  | 8955.35   |
| NM_004317 | 6606.421  | 7297.798  | AB020695  | 2609.323  | 2856.181  | AA203126  | 1441.683  | 1902.301  |
| NM_01464E | 4458.576  | 4624.917  | AB028982  | 3429.722  | 4130.992  | L12347    | 13424.955 | 18199.111 |
| NM_01470E | 3435.865  | 3994.817  | NM_002004 | 5693.449  | 5728.872  | NM_00162E | 5722.045  | 6123.974  |
| NM_00369E | 3316.072  | 4231.149  | NM_005121 | 2310.328  | 1825.749  | Z36788    | 3216.326  | 3014.722  |
| NM_00035E | 51719.188 | 49126.922 | NM_000747 | 7059.958  | 7564.125  | NM_018477 | 8058.963  | 9879.688  |
| NM_018134 | 53640.18  | 43835.004 | AJ275973  | 17396.387 | 19852.238 | U20536    | 747.038   | 980.594   |
| L27479    | 985.288   | 1591.03   | U76362    | 29342.717 | 32869.984 | AW167715  | 5159.598  | 3384.747  |
| NM_00219E | 1597.14   | 1584.816  | AK021489  | 53221.512 | 57068.188 | AA424735  | 4750.826  | 6250.009  |
| NM_00138E | 8756.269  | 9518.938  | NM_00452E | 1314.187  | 1645.289  | U78294    | 1156.602  | 1654.561  |
| X76770    | 6519.414  | 6369.101  | NM_00389E | 1052.582  | 1383.927  | AA171613  | 590.715   | 958.83    |
| AB037808  | 2339.175  | 1977.374  | NM_004317 | 8634.786  | 9337.739  | AI189375  | 1323.211  | 1302.131  |
| NM_01603E | 6819.892  | 8446.912  | NM_01464E | 8717.828  | 8812.684  | AI978885  | 1398.721  | 1155.375  |
| Z36821    | 14528.865 | 16616.912 | NM_01470E | 6198.092  | 5731.293  | NM_00030E | 2159.301  | 2471.856  |
| AF289485  | 5616.409  | 6978.366  | NM_00369E | 4648.122  | 4892.793  | NM_00193E | 16393.842 | 14397.115 |
| AF130092  | 5951.192  | 6174.055  | NM_00035E | 62401.395 | 60103.234 | NM_00327E | 26449.242 | 28961.666 |
| NM_01609E | 7003.334  | 7040.523  | NM_018134 | 60755.121 | 59291.797 | AB014599  | 3235.448  | 3188.371  |
| AK024794  | 2779.5    | 3092.357  | L27479    | 1611.709  | 2214.569  | NM_00439E | 529.458   | 602.518   |
| NM_01985E | 10028.964 | 9841.446  | NM_00219E | 3608.853  | 4363.478  | NM_00583E | 658.323   | 715.459   |
| NM_01799E | 1580.955  | 1913.467  | NM_00138E | 16516.867 | 20106.479 | AW407841  | 5065.052  | 5203.88   |
| NM_00540E | 831.521   | 1131.69   | X76770    | 11647.067 | 11314.99  | U15197    | 488.23    | 685.063   |
| AK023061  | 1069.624  | 1573.18   | AB037808  | 3550.294  | 3460.753  | NM_00187E | 1874.622  | 1659.992  |
| NM_00725E | 4460.494  | 4162.79   | NM_01603E | 8176.596  | 10038.175 | AF264014  | 13494.941 | 14992.793 |
| NM_00366E | 8608.504  | 10621.132 | AF090911  | 5125.097  | 5425.175  | NM_00415E | 3226.957  | 4859.274  |
| NM_013384 | 58712.512 | 61701.563 | Z36821    | 38033.031 | 40175.117 | NM_001831 | 1031.333  | 891.621   |
| NM_001187 | 1945.769  | 2310.666  | AF289485  | 7705.682  | 8469.667  | NM_01458E | 7191.841  | 10666.987 |
| NM_018241 | 2721.052  | 2880.548  | AF130092  | 14583.392 | 15256.483 | NM_01436E | 9905.95   | 14967.802 |
| NM_005834 | 7753.661  | 7902.038  | NM_01609E | 9118.554  | 9971.738  | NM_00645E | 1590.632  | 1919.397  |
| NM_00505E | 14708.309 | 19238.646 | AK024794  | 3278.776  | 3366.572  | NM_01809E | 1584.756  | 1344.722  |
| NM_00495E | 3675.196  | 4088.261  | NM_01985E | 14522.854 | 12189.873 | AL390078  | 1487.831  | 1639.229  |
| NM_000724 | 5467.644  | 6186.848  | NM_01799E | 1991.233  | 2123.902  | NM_00403E | 2830.827  | 2941.063  |
| NM_002557 | 16323.829 | 16641.936 | NM_00540E | 1527.998  | 1401.439  | NM_01598E | 1317.501  | 1250.073  |
| NM_004477 | 480.004   | 614.84    | AK023061  | 1702.765  | 1788.539  | NM_01495E | 5367.404  | 5540.896  |
| BE728156  | 468.608   | 501.222   | NM_00725E | 6565.065  | 7387.092  | NM_00399E | 3328.789  | 2863.99   |
| BI762229  | 11836.066 | 14608.559 | NM_00366E | 10905.115 | 10775.026 | NM_000137 | 1328.326  | 967.272   |
| BG618320  | 37861.207 | 39344.227 | NM_013384 | 70374.063 | 63062.301 | NM_01210E | 4053.581  | 3609.317  |
| Y00787    | 2934.342  | 2878.101  | NM_001187 | 2893.32   | 2547.253  | NM_005017 | 15416.805 | 11658.942 |
| NM_00727E | 6044.607  | 5124.297  | NM_018241 | 4636.875  | 5287.698  | AF163572  | 11740.035 | 9323.164  |
| N34462    | 13487.712 | 13394.921 | NM_005834 | 8347.556  | 9533.614  | NM_000897 | 5108.791  | 4686.569  |

|           |           |           |           |           |           |           |           |           |
|-----------|-----------|-----------|-----------|-----------|-----------|-----------|-----------|-----------|
| AI658778  | 7716.797  | 9993.272  | NM_005059 | 25373.35  | 31620.615 | NM_000487 | 833.874   | 735.243   |
| L19067    | 8320.876  | 10165.656 | NM_004950 | 7782.157  | 9187.683  | NM_006411 | 15126.603 | 12634.527 |
| Z48482    | 823.59    | 970.239   | NM_000724 | 7369.678  | 7294.236  | NM_014182 | 1653.493  | 1240.828  |
| W60413    | 4469.948  | 4866.365  | NM_002557 | 27702.928 | 34533.504 | NM_001170 | 4931.487  | 5682.57   |
| BI823365  | 6602.244  | 7045.937  | NM_004477 | 980.977   | 1274.949  | NM_014342 | 2314.894  | 3103.84   |
| X06318    | 1199.877  | 1100.853  | BE728156  | 1214.207  | 1251.203  | NM_004853 | 7384.542  | 10004.316 |
| NM_016217 | 42177.707 | 48724.031 | BI762229  | 17339.775 | 24273.703 | NM_001494 | 12667.635 | 18476.125 |
| AK025971  | 6376.37   | 7194.7    | AA131406  | 2160.324  | 2023.889  | NM_017707 | 636.281   | 881.143   |
| NM_002618 | 9284.425  | 8840.643  | BG618320  | 62564.773 | 58351.609 | NM_004206 | 2636.687  | 3177.055  |
| BE394704  | 899.677   | 964.651   | Y00787    | 7050.518  | 7084.464  | NM_004603 | 24875.947 | 25411.975 |
| NM_004703 | 5439.998  | 6786.467  | NM_007276 | 7726.477  | 7096.31   | AK022849  | 2912.246  | 2383.297  |
| NM_001512 | 1294.236  | 1386.362  | N34462    | 16565.34  | 16217.143 | AF040964  | 3160.627  | 1987.505  |
| NM_014706 | 7176.231  | 8948.555  | AI658778  | 10195.595 | 10019.507 | NM_001773 | 1086.889  | 834.913   |
| AK023172  | 899.361   | 905.94    | L19067    | 12033.052 | 13145.651 | Z70704    | 4006.415  | 3150.453  |
| AF139768  | 475.611   | 630.347   | Z48482    | 1593.746  | 1732.801  | NM_014363 | 3656.599  | 2527.646  |
| AJ001348  | 1664.859  | 1870.37   | W60413    | 10333.214 | 9568.438  | NM_000557 | 13056.281 | 10152.873 |
| NM_014007 | 1540.187  | 1950.156  | BI823365  | 11790.198 | 10776.365 | NM_003239 | 836.067   | 676.603   |
| AB033006  | 3525.448  | 4340.465  | X06318    | 1503.11   | 1976.718  | NM_001375 | 11873.479 | 10793.499 |
| AF020314  | 5241.467  | 5670.73   | NM_016217 | 56309.785 | 59274.348 | NM_002312 | 1749.196  | 1365.7    |
| NM_016332 | 18242.947 | 18768.805 | AK025971  | 10125.351 | 11060.676 | NM_004774 | 3876.162  | 2389.218  |
| AK023936  | 735.311   | 768.092   | NM_002618 | 20416.176 | 20027.607 | NM_016937 | 2219.429  | 1715.189  |
| NM_006457 | 2884.726  | 4480.49   | BE394704  | 1323.46   | 1468.896  | NM_002690 | 1870.199  | 1817.887  |
| NM_003682 | 1934.825  | 1936.541  | NM_004703 | 9941.097  | 12106.706 | NM_012328 | 3637.128  | 3533.88   |
| NM_000207 | 1377.241  | 1587.261  | NM_001512 | 1922.655  | 2032.85   | NM_007341 | 1159.119  | 1090.069  |
| NM_002531 | 3201.913  | 3106.002  | NM_014706 | 10665.944 | 11815.074 | NM_016508 | 1412.051  | 2065.513  |
| NM_006314 | 33208.254 | 36988.273 | AK023172  | 1081.143  | 1218.936  | NM_006456 | 12436.5   | 17244.186 |
| NM_001782 | 8767.942  | 10000.492 | AF139768  | 810.322   | 664.426   | AK026062  | 3989.617  | 5954.403  |
| NM_002754 | 612.158   | 591.61    | AJ001348  | 3233.209  | 3948.431  | AF047002  | 18878.08  | 29153.809 |
| NM_000797 | 13743.949 | 16359.016 | NM_014007 | 2667.587  | 3611.016  | AL050082  | 2363.16   | 2775.011  |
| NM_014927 | 411.843   | 798.67    | AB033006  | 7326.595  | 7812.574  | NM_006623 | 41515.332 | 44444.578 |
| AF217525  | 572.404   | 643.774   | AF020314  | 11593.411 | 12291.628 | NM_016588 | 2049.534  | 2115.591  |
| AL080148  | 46404.145 | 51694.582 | NM_016332 | 31007.18  | 38869.336 | NM_003135 | 5447.829  | 4446.22   |
| NM_002479 | 1689.045  | 1737.664  | AK023936  | 1757.997  | 1601.483  | AA203126  | 2359.078  | 1974.897  |
| NM_000348 | 31738.346 | 31196.141 | NM_006457 | 4006.479  | 5006.914  | L12347    | 51015.367 | 47115.094 |
| NM_012105 | 4778.701  | 5194.186  | NM_003682 | 2156.967  | 2638.432  | NM_001622 | 17138.236 | 13144.278 |
| S82470    | 6279.837  | 7024.623  | NM_000207 | 1755.34   | 1839.846  | Z36788    | 9383.187  | 7671.177  |
| AB028982  | 1737.499  | 1914.648  | NM_002531 | 6370.7    | 5410.192  | NM_018477 | 13741.949 | 12314.916 |
| NM_002004 | 3391.119  | 4190.386  | NM_006314 | 47761.547 | 53843.43  | U20536    | 1041.103  | 773.649   |
| NM_005121 | 911.11    | 999.718   | NM_001782 | 11097.665 | 11273.294 | AI298534  | 5944.739  | 5042.477  |
| NM_000747 | 4082.31   | 4269.727  | NM_002754 | 755.419   | 812.284   | R71691    | 6747.486  | 5149.195  |
| AJ275973  | 14505.502 | 17258.557 | NM_000797 | 25723.939 | 29612.07  | AW167715  | 1695.838  | 1404.19   |
| U76362    | 17660.068 | 18854.566 | NM_014927 | 2491.367  | 2676.68   | AA424735  | 4779.879  | 3666.107  |
| NM_003060 | 955.282   | 489.803   | AF217525  | 856.299   | 846.081   | U78294    | 1156.667  | 977       |
| AK021489  | 43977.195 | 49840.277 | AL080148  | 59903.441 | 61687.836 | AA171613  | 410.237   | 563.814   |
| NM_004525 | 956.826   | 1262.215  | NM_002479 | 4506.794  | 5111.962  | BI760394  | 2485.916  | 2103.807  |
| NM_003895 | 717.62    | 1012.966  | NM_000348 | 43363.488 | 49612.074 | AA555216  | 681.941   | 698.433   |
| NM_004317 | 6681.178  | 7384.795  | NM_012105 | 7404.612  | 7172.665  | U09117    | 25052.367 | 33971.148 |
| NM_014645 | 3722.549  | 4804.535  | S82470    | 6489.153  | 6961.4    | M21054    | 1045.807  | 1762.074  |
| NM_014708 | 3803.146  | 3955.58   | AB028982  | 3172.792  | 4180.176  | M18468    | 786.678   | 1568.875  |
| NM_003693 | 4045.074  | 4977.32   | NM_002004 | 4800.581  | 5470.327  | H66070    | 15866.542 | 24358.582 |
| NM_000356 | 55073.465 | 58821.633 | NM_005121 | 1761.098  | 1681.903  | AA164741  | 573.159   | 763.591   |
| NM_018134 | 51661.773 | 58058.109 | NM_000747 | 6895.917  | 7829.08   | NM_001665 | 19885.291 | 19555.219 |
| NM_013247 | 6647.134  | 10246.646 | AJ275973  | 16773.902 | 19337.186 | AB014599  | 6068.075  | 4291.666  |

|           |           |           |           |           |           |           |           |           |
|-----------|-----------|-----------|-----------|-----------|-----------|-----------|-----------|-----------|
| NM_00677C | 5641.197  | 5219.811  | U76362    | 31862.514 | 36815.109 | NM_00583Z | 1693.61   | 1420.189  |
| NM_00138E | 9632.187  | 11109.27  | NM_00306C | 1554.519  | 1028.707  | AW407841  | 6369.372  | 4291.201  |
| X76770    | 6432.329  | 7420.498  | AK021489  | 52147.66  | 58901.133 | U15197    | 1323.15   | 1046.767  |
| AB037808  | 2547.633  | 2379.623  | NM_00452E | 978.379   | 1062.964  | NM_00187E | 5854.302  | 4168.512  |
| NM_01603E | 7524.591  | 8974.042  | NM_00389E | 847.235   | 1080.807  | AF264014  | 15169.534 | 14400.731 |
| Z36821    | 14950.473 | 15160.588 | NM_004317 | 7878.58   | 9553.885  | NM_00415E | 2497.345  | 2004.727  |
| AF289485  | 5595.362  | 7296.856  | NM_01464E | 7121.319  | 7905.944  | NM_001831 | 834.112   | 643.748   |
| AF130092  | 7376.405  | 7848.278  | NM_01470E | 6296.024  | 6487.749  | NM_01458E | 8449.298  | 6174.858  |
| NM_01609E | 6195.356  | 5953.136  | NM_00369Z | 6423.836  | 7550.905  | NM_01436E | 17807.008 | 15293.123 |
| AK024794  | 2323.144  | 2694.844  | NM_00035E | 64755.449 | 63756.293 | NM_00092Z | 1184.209  | 1170.311  |
| NM_01985Z | 10715.805 | 8607.815  | NM_018134 | 63208.598 | 65247.258 | NM_00645Z | 1918.33   | 2078.582  |
| NM_01799Z | 2065.851  | 2346.589  | NM_013247 | 8981.509  | 10975.055 | NM_01809E | 1486.892  | 2049.244  |
| NM_00540C | 950.508   | 807.85    | NM_00677C | 9866.173  | 10225.755 | AL390078  | 1762.834  | 2501.139  |
| AK023061  | 710.581   | 680.798   | NM_00138E | 13839.116 | 16221.167 | NM_01495E | 4612.797  | 4525.031  |
| NM_00725E | 3738.04   | 3682.88   | X76770    | 10911.392 | 11038.013 | NM_00399Z | 3098.794  | 3076.514  |
| NM_00366E | 7826.189  | 9111.65   | AB037808  | 3029.567  | 3385.74   | NM_00237E | 7575.127  | 6999.772  |
| NM_013384 | 57570.66  | 61859.125 | NM_01603E | 9438.832  | 11429.599 | NM_01210Z | 12014.662 | 13324.65  |
| NM_001187 | 2010.069  | 2015.519  | Z36821    | 35906.02  | 38669.727 | NM_005017 | 44602.699 | 43995.785 |
| NM_018241 | 2471.484  | 2904.87   | AF289485  | 7385.094  | 9743.555  | AF163572  | 22916.184 | 20354.451 |
| NM_005834 | 7447.897  | 9621.079  | AF130092  | 19477.523 | 22510.652 | NM_000897 | 9672.746  | 8268.632  |
| AF000381  | 7872.778  | 9444.212  | NM_01985Z | 13320.225 | 11541.071 | NM_000487 | 956.397   | 994.987   |
| NM_000724 | 4988.096  | 5983.257  | NM_01799Z | 1878.772  | 1832.956  | NM_006411 | 20980.348 | 17194.609 |
| NM_002557 | 16264.119 | 19064.439 | NM_00540C | 2163.192  | 2273.79   | NM_01418Z | 2523.649  | 1719.429  |
| NM_004477 | 743.069   | 1318.261  | AK023061  | 767.573   | 874.767   | AB040884  | 629.041   | 625.357   |
| BE728156  | 539.448   | 730.326   | NM_00725E | 7663.65   | 8884.068  | NM_00117C | 7894.25   | 8272.436  |
| BI762229  | 13193.27  | 16140.461 | NM_00366E | 10865.058 | 12996.428 | NM_01434Z | 4282.404  | 4401      |
| BG618320  | 49943.711 | 51392.219 | NM_013384 | 65835.188 | 71899.891 | NM_00485Z | 8065.589  | 5816.911  |
| Y00787    | 3255.465  | 3084.319  | NM_001187 | 3549.698  | 3086.865  | NM_001494 | 16017.361 | 13489.561 |
| NM_00727E | 7274.95   | 6394.011  | NM_018241 | 5300.408  | 5141.416  | NM_017707 | 598.812   | 583.501   |
| N34462    | 16031.14  | 15913.546 | NM_005834 | 8768.014  | 9598.951  | NM_00420E | 2642.883  | 2902.18   |
| AI658778  | 9351.195  | 10392.48  | AF000381  | 15646.318 | 19326.125 | AK022849  | 2284.859  | 2313.898  |
| L19067    | 8992.094  | 9942.949  | NM_000724 | 6588.042  | 6747.651  | AF040964  | 2404.621  | 2008.374  |
| Z48482    | 884.109   | 835.269   | NM_002557 | 23528.891 | 27695.391 | NM_00193E | 7713.145  | 6920.391  |
| W60413    | 4719.18   | 4651.658  | NM_004477 | 956.25    | 1078.317  | NM_01436Z | 2628.218  | 1945.136  |
| BI823365  | 5562.018  | 6143.829  | BE728156  | 700.93    | 576.357   | NM_000557 | 12433.992 | 9630.012  |
| X06318    | 1095.695  | 968.551   | BI762229  | 17947.996 | 24810.865 | NM_00323E | 874.507   | 779.833   |
| NM_016217 | 36060.336 | 34147.113 | AA131406  | 532.914   | 821.334   | NM_00137E | 7545.405  | 6976.21   |
| AK025971  | 5790.03   | 5054.882  | Y00787    | 8194.378  | 9059.98   | NM_00231Z | 1171.715  | 812.941   |
| NM_00261E | 8319.805  | 8745.892  | NM_00727E | 8656.88   | 7762.36   | M20699    | 1303.547  | 1301.056  |
| L27479    | 1668.538  | 2030.662  | N34462    | 17147.205 | 17145.246 | NM_004774 | 7510.17   | 5873.067  |
| NM_00219Z | 2018.604  | 2530.28   | AI658778  | 7978.215  | 9365.602  | NM_016937 | 3958.657  | 3561.105  |
| AB033006  | 3681.135  | 4173.635  | L19067    | 9937.064  | 10854.805 | NM_00269C | 2855.328  | 2431.207  |
| AF020314  | 5015.16   | 5380.763  | Z48482    | 1264.583  | 1574.559  | NM_01232E | 4928.869  | 4737.966  |
| NM_01633Z | 15726.549 | 16776.664 | W60413    | 11322.847 | 13835.951 | NM_007341 | 1761.612  | 1319.877  |
| AK023936  | 941.404   | 982.772   | BI823365  | 13149.143 | 14290.67  | NM_01650E | 1645.819  | 2137.068  |
| NM_006457 | 2294.563  | 2848.059  | X06318    | 1646.144  | 1796.723  | NM_00645E | 25015.266 | 21161.232 |
| NM_00368Z | 1468.07   | 1587.764  | AK025971  | 10653.859 | 8717.083  | AK026062  | 4772.606  | 3919.432  |
| NM_000207 | 1088.21   | 1572.2    | NM_00261E | 21298.646 | 19929.691 | AF047002  | 23498.34  | 17206.816 |
| NM_002531 | 3051.786  | 3235.006  | L27479    | 2108.337  | 2381.336  | AL050082  | 2118.434  | 2564.823  |
| NM_006314 | 34416.621 | 34821.715 | NM_00219Z | 3444.903  | 3638.096  | NM_01658E | 1841.238  | 2220.54   |
| NM_00178Z | 8899.052  | 8358.749  | AB033006  | 5110.742  | 5373.196  | NM_00313E | 6615.258  | 6453.998  |
| NM_002754 | 545.523   | 687.924   | AF020314  | 10638.749 | 10665.225 | L12347    | 37545.324 | 33578.23  |
| NM_000797 | 20417.229 | 22432.396 | NM_01633Z | 29476.83  | 35546.781 | NM_00162Z | 9113.571  | 7357.979  |

|           |           |           |           |           |           |           |           |           |
|-----------|-----------|-----------|-----------|-----------|-----------|-----------|-----------|-----------|
| NM_016293 | 10883.108 | 12065.752 | AK023936  | 1187.94   | 1708.124  | Z36788    | 4950.18   | 4360.045  |
| AL080148  | 47308.762 | 49311.973 | NM_006457 | 3472.217  | 5051.77   | NM_018477 | 7953.568  | 9149.012  |
| NM_006731 | 483.925   | 577.76    | NM_003682 | 2174.824  | 2577.075  | R71691    | 7712.81   | 6153.53   |
| NM_018487 | 1164.804  | 1098.39   | NM_000207 | 1495.239  | 1990.857  | AW167715  | 2910.004  | 2800.317  |
| NM_020134 | 2624.853  | 2733.953  | NM_002531 | 6132.856  | 6610.783  | AA424735  | 10181.106 | 8870.652  |
| NM_014061 | 1867.543  | 2132.886  | NM_006314 | 53883.016 | 55422.41  | U78294    | 5495.958  | 4803.759  |
| BC034395  | 3987.532  | 3556.163  | NM_001782 | 12459.491 | 12645.319 | AA171613  | 711.481   | 780.837   |
| NM_002479 | 1353.965  | 1071.647  | NM_002754 | 1587.198  | 1543.233  | BI760394  | 2879.032  | 3092.781  |
| NM_000348 | 32913.816 | 27326.217 | NM_000797 | 26633.15  | 35837.27  | U09117    | 32267.748 | 34563.191 |
| NM_005059 | 22687.184 | 21742.035 | NM_016293 | 15097.715 | 16971.225 | M21054    | 1466.544  | 1303.751  |
| NM_004950 | 4983.621  | 4777.718  | AL080148  | 62155.238 | 61515.242 | M18468    | 1362.125  | 1023.206  |
| AF040248  | 1469.632  | 1533.264  | NM_006731 | 853.366   | 1016.948  | H66070    | 14800.945 | 11996.351 |
| NM_014228 | 1427.056  | 1224.319  | NM_018487 | 2288.321  | 3346.876  | AI189375  | 1608.143  | 1759.847  |
| AL832292  | 5293.271  | 3800.699  | NM_020134 | 5516.755  | 7098.606  | NM_001665 | 20181.834 | 23515.682 |
| NM_003045 | 13336.411 | 11622.721 | NM_014061 | 2298.966  | 3048.346  | Z70704    | 976.88    | 1116.797  |
| NM_005662 | 12359.107 | 9679.225  | NM_002479 | 3876.109  | 3725.541  | AF264014  | 12793.113 | 12480.544 |
| AK021489  | 42036.16  | 34099.359 | NM_000348 | 43672.742 | 50760.965 | NM_014586 | 7561.328  | 7134.059  |
| NM_004525 | 712.304   | 511.833   | NM_005059 | 27692.572 | 34170.457 | NM_014366 | 13660.511 | 13261.966 |
| NM_003895 | 594.864   | 471.79    | NM_004950 | 10255.473 | 10580.707 | NM_006453 | 2299.832  | 1793.691  |
| NM_004317 | 5823.047  | 4647.355  | AF040248  | 2413.535  | 2592.657  | NM_018096 | 1361.946  | 1146.471  |
| NM_014645 | 5063.566  | 4738.174  | NM_014228 | 2502.231  | 2718.608  | AL390078  | 1055.25   | 946.88    |
| NM_014708 | 4235.057  | 3818.224  | AL832292  | 7870.66   | 7419.111  | NM_004036 | 4228.249  | 3762.078  |
| NM_003693 | 2839.12   | 2258.046  | NM_003045 | 34921.668 | 43896.063 | NM_015986 | 2886.235  | 2438.077  |
| NM_000356 | 40391.762 | 33013.176 | NM_005662 | 19066.357 | 20902.092 | NM_006546 | 1056.26   | 983.946   |
| NM_018134 | 51878.629 | 48768.52  | AK021489  | 48545.246 | 55694.797 | NM_014959 | 7668.119  | 6463.007  |
| NM_013247 | 6426.251  | 5638.764  | NM_004525 | 1279.207  | 1518.508  | NM_003992 | 5118.51   | 4366.899  |
| NM_006770 | 3413.017  | 2554.004  | NM_003895 | 1051.498  | 1313.102  | AF279265  | 3314.172  | 3245.366  |
| BE394704  | 982.893   | 771.139   | NM_004317 | 8857.622  | 9550.339  | NM_005213 | 21386.113 | 24766.605 |
| NM_004703 | 7686.559  | 7101.155  | NM_014645 | 10856.291 | 10912.684 | AB040914  | 611.37    | 740.514   |
| NM_001512 | 1402.058  | 1041.569  | NM_014708 | 6016.977  | 6847.591  | NM_002997 | 6165.781  | 7653.856  |
| NM_014706 | 6567.65   | 5855.736  | NM_003693 | 4624.729  | 5209.037  | NM_002379 | 27613.789 | 28413.813 |
| AK023172  | 1065.131  | 571.852   | NM_000356 | 60595.078 | 57548.863 | AB007929  | 3474.908  | 3744.594  |
| AF139768  | 611.051   | 406.5     | NM_018134 | 52713.914 | 57814     | NM_004579 | 1390.144  | 1520.55   |
| AJ001348  | 2144.431  | 1578.04   | NM_013247 | 8322.691  | 10781.354 | AA203126  | 1425.197  | 1286.573  |
| NM_014007 | 1439.717  | 1157.446  | NM_006770 | 10099.633 | 10564.589 | AB043997  | 762.428   | 488.721   |
| NM_001187 | 2230.409  | 1428.227  | NM_001512 | 2016.62   | 2127.945  | NM_004853 | 9981.662  | 8685.25   |
| NM_018241 | 3454.953  | 2398.474  | NM_014706 | 12893.707 | 12930.438 | NM_004206 | 2622.883  | 2482.827  |
| NM_005834 | 6385.466  | 6126.52   | AK023172  | 1093.878  | 1126.332  | NM_004603 | 25644.875 | 27165.41  |
| AF000381  | 5661.73   | 4638.792  | AF139768  | 922.663   | 951.754   | AK022849  | 3180.17   | 2450.159  |
| NM_012105 | 4731.704  | 3684.179  | AJ001348  | 6813.185  | 6929.758  | AF040964  | 11688.162 | 9964.569  |
| S82470    | 4291.09   | 3217.684  | NM_001187 | 2187.707  | 1854.563  | AK023527  | 649.05    | 505.332   |
| AB028982  | 2123.07   | 1988.986  | NM_018241 | 3685.49   | 3764.557  | NM_001939 | 16446.543 | 12838.319 |
| NM_002004 | 4688.269  | 4152.437  | NM_005834 | 8471.825  | 9038.106  | NM_003279 | 44780.16  | 43752.949 |
| NM_005121 | 1259.134  | 792.143   | AF000381  | 12247.248 | 12909.801 | AB014599  | 5950.058  | 4930.434  |
| NM_001643 | 46126.836 | 41283.48  | NM_012105 | 7958.181  | 7663.961  | NM_004393 | 705.595   | 556.91    |
| NM_020221 | 985.557   | 1004.879  | S82470    | 8493.054  | 8383.626  | AB018345  | 437.255   | 748.083   |
| NM_000747 | 3538.416  | 3514.051  | AB028982  | 3310.888  | 4987.681  | AW407841  | 4951.362  | 4213.65   |
| NM_005415 | 5719.156  | 5304.521  | NM_002004 | 7699.719  | 10033.294 | NM_003135 | 6865.773  | 5729.608  |
| AK026841  | 1694.65   | 1622.02   | NM_005121 | 1232.653  | 737.009   | NM_000137 | 1552.394  | 1052.742  |
| AJ275973  | 15659.287 | 16510.148 | NM_001643 | 51663.016 | 58704.484 | AF163572  | 12212.429 | 14300.005 |
| NM_006493 | 1390.854  | 1493.013  | NM_020221 | 2075.494  | 2755.922  | NM_000897 | 5448.432  | 5718.381  |
| U76362    | 14160.503 | 12400.737 | NM_005415 | 8448.764  | 8328.054  | NM_000487 | 1019.348  | 789.722   |
| NM_016217 | 33386.352 | 21465.277 | AK026841  | 2356.104  | 3167.567  | NM_006411 | 20347.279 | 18443.025 |

|           |           |           |           |           |           |           |           |           |
|-----------|-----------|-----------|-----------|-----------|-----------|-----------|-----------|-----------|
| AK025971  | 5421.379  | 3836.651  | AJ275973  | 18547.016 | 21027.617 | NM_014182 | 2772.272  | 2136.597  |
| NM_00261E | 4524.733  | 3408.668  | NM_006493 | 2044.201  | 2425.53   | AB040884  | 813.026   | 818.058   |
| L27479    | 986.669   | 1262.625  | U76362    | 39631.566 | 46979.117 | NM_000492 | 17564.455 | 16103.662 |
| NM_00138E | 3085.945  | 3611.945  | NM_016217 | 52274.273 | 59952.098 | NM_01208E | 855.555   | 651.616   |
| X76770    | 5282.255  | 5072.731  | AK025971  | 7207.483  | 7198.878  | NM_001170 | 7556.917  | 6700.726  |
| AB037808  | 1540.613  | 1202.968  | NM_00261E | 15560.497 | 15851.249 | AL137716  | 879.914   | 991.79    |
| NM_01603E | 5631.407  | 5189.875  | L27479    | 1678.36   | 2015.874  | NM_00469E | 2309.4    | 2986.152  |
| Z36821    | 7550.678  | 6756.531  | NM_002193 | 3002.198  | 3321.892  | NM_014342 | 3208.749  | 2770.716  |
| AF289485  | 6278.792  | 7794.478  | NM_00138E | 12715.834 | 13074.844 | NM_01447C | 1703.98   | 1705.819  |
| AF130092  | 8016.246  | 8101.346  | X76770    | 9395.381  | 8777.782  | NM_00166E | 24741.793 | 24344.547 |
| NM_01609E | 6584.367  | 5846.673  | AB037808  | 2980.697  | 2542.112  | Z70704    | 2028.164  | 1729.899  |
| AK024794  | 2696.224  | 3012.708  | NM_01603E | 9376.828  | 13500.426 | NM_01436E | 1791.606  | 1730.39   |
| NM_01985E | 9301.287  | 7113.947  | AF090911  | 1213.11   | 1069.076  | NM_000557 | 3498.538  | 3031.447  |
| NM_017992 | 1736.568  | 1906.331  | Z36821    | 33552.77  | 41568.348 | NM_002312 | 2487.43   | 1805.999  |
| NM_00540C | 683.57    | 710.856   | AF289485  | 7210.816  | 9592.938  | M20699    | 1426.96   | 1481.231  |
| AK023061  | 753.614   | 768.875   | AF130092  | 10989.241 | 10372.777 | NM_004774 | 7769.032  | 5540.434  |
| NM_00725E | 3610.299  | 3265.073  | NM_01609E | 7772.365  | 6000.995  | NM_016937 | 3596.12   | 2892.494  |
| NM_00366E | 7715.377  | 8897.373  | AK024794  | 3009.433  | 3461.998  | NM_00269C | 3141.428  | 2543.06   |
| NM_013384 | 56550.172 | 59962.648 | NM_01985E | 12242.902 | 12098.813 | NM_01232E | 5127.482  | 4390.678  |
| CY3Cy5    | 6780.736  | 172.221   | NM_017992 | 2548.714  | 2774.982  | NM_007341 | 2200.58   | 1670.015  |
| NM_01634E | 4833.11   | 3797.519  | NM_00540C | 1283.743  | 1266.085  | NM_01650E | 2013.343  | 1881.088  |
| AF088047  | 448.087   | 464.697   | AK023061  | 1273.812  | 1328.329  | NM_00645E | 24615.961 | 20868.412 |
| AF086281  | 1349.314  | 1110.572  | NM_00725E | 6461.543  | 8783.645  | AK026062  | 5134.43   | 5561.713  |
| AF086453  | 446.62    | 602.679   | NM_00366E | 10991.516 | 13069.802 | AF047002  | 21263.734 | 23429.973 |
| AF070621  | 10521.258 | 13313.861 | NM_013384 | 64455.453 | 58135     | AL050082  | 1987.033  | 1962.293  |
| NM_02024C | 2823.565  | 3357.202  | CY3Cy5    | 12481.765 | 199.265   | NM_00662E | 38429.477 | 39449.242 |
| AK023678  | 42110.879 | 25774.775 | NM_01634E | 8903.232  | 8754.226  | CY3Cy5    | 5470.586  | 110.865   |
| AF052090  | 6026.058  | 4726.771  | AF086281  | 3731.618  | 4443.571  | NM_016134 | 1362.308  | 1547.147  |
| AL355730  | 581.188   | 615.158   | AF086453  | 1055.948  | 1038.979  | AL390185  | 7332.041  | 8361.205  |
| U79273    | 1869.131  | 1476.851  | AF070621  | 16922.908 | 13764.955 | AF086235  | 16131.82  | 17297.322 |
| AK022050  | 3428.307  | 2751.299  | NM_02024C | 4948.38   | 4189.178  | AF143886  | 1988.762  | 1950.06   |
| NM_01634E | 3304.664  | 3685.658  | AK023678  | 60924.129 | 53887.566 | AK025975  | 5253.606  | 7140.99   |
| SR6       | 1689.604  | 1767.362  | AF052090  | 10987.813 | 10106.614 | AK025583  | 51255.605 | 52933.703 |
| SR8       | 6791.36   | 17444.316 | AL355730  | 1243.053  | 1382.377  | AL109788  | 8218.855  | 9051.691  |
| SR10      | 21718.83  | 6452.122  | U79273    | 3437.236  | 4098.624  | NM_014952 | 113318.45 | 66865.203 |
| CY3Cy5    | 5135.017  | 212.856   | AK022050  | 7448.246  | 6826.527  | AL133053  | 1479.451  | 1198.108  |
| AB042410  | 1890.63   | 1629.957  | NM_01634E | 7582.817  | 6735.11   | AL109695  | 21056.697 | 26093.174 |
| AF086102  | 3238.849  | 2621.738  | SR2       | 55227.074 | 52672.273 | SR2       | 39128.848 | 51329.094 |
| AF116682  | 41002.922 | 33772.078 | SR4       | 22287.301 | 19973.426 | SR4       | 15244.353 | 20310.527 |
| AL137259  | 3147.208  | 5328.786  | SR6       | 2669.255  | 2162.387  | SR6       | 1649.205  | 1923.02   |
| AL122107  | 12115.771 | 13978.896 | SR8       | 9923.973  | 22955.391 | SR8       | 5883.454  | 21872.338 |
| AF075021  | 4078.324  | 3360.231  | SR10      | 31265.926 | 8829.271  | SR10      | 19090.777 | 7729.175  |
| AK023259  | 1035.45   | 1841.011  | CY3Cy5    | 8891.532  | 132.569   | CY3Cy5    | 6762.593  | 120.467   |
| AK001503  | 9568.649  | 14049.401 | AB042410  | 2243.347  | 1883.736  | NM_01481E | 6450.399  | 7748.658  |
| AK022880  | 1731.722  | 1732.611  | AF086102  | 7816.091  | 7087.553  | NM_01760E | 2539.458  | 2620.108  |
| NM_003601 | 18780.846 | 18295.092 | AF086079  | 1677.923  | 1034.181  | AF086040  | 1032.382  | 1316.516  |
| AK001058  | 40303.082 | 31075.338 | AL122107  | 37483.52  | 33058.52  | AK023559  | 21876.072 | 22300.955 |
| AK026239  | 2784.937  | 2300.852  | AF075021  | 2367.09   | 2036.487  | AB037859  | 75246.555 | 63702.008 |
| AF086283  | 1580.478  | 1611.982  | AK025140  | 12239.345 | 11689.496 | NM_01769E | 10551.408 | 11056.826 |
| AK027041  | 2181.26   | 1880.033  | AK001503  | 27413.658 | 22547.471 | AL050166  | 6329.447  | 7525.406  |
| AK024332  | 539.335   | 483.52    | AK022880  | 3933.623  | 3573.675  | NM_01845E | 3856.54   | 3865.599  |
| NM_00535E | 39921.961 | 31383.537 | NM_003601 | 28676.869 | 29970.656 | NM_01435C | 11807.2   | 12273.501 |
| AF086007  | 67834.047 | 64727.484 | AF086375  | 845.04    | 790.561   | U00925    | 19727.111 | 18364.486 |

|           |           |           |           |           |           |           |           |           |
|-----------|-----------|-----------|-----------|-----------|-----------|-----------|-----------|-----------|
| AK000803  | 5312.574  | 5716.749  | AK001228  | 3986.777  | 4439.607  | AK026805  | 10319.238 | 12222.458 |
| AK022374  | 1006.069  | 1145.626  | AK026778  | 4223.514  | 4353.893  | AB037765  | 2464.928  | 3248.686  |
| AF085926  | 29234.332 | 24810.449 | AF074987  | 6780.919  | 6807.456  | AK025068  | 2549.686  | 2652.813  |
| AL137307  | 7667.139  | 7837.926  | AK001058  | 61973.313 | 54424.582 | AL137566  | 3508.486  | 3115.466  |
| AL137468  | 8510.145  | 9758.223  | AK026239  | 4310.627  | 3557.35   | AF087962  | 9681.866  | 9448.692  |
| AL390137  | 27572.475 | 24272.457 | AF086283  | 2887.027  | 3546.51   | AL050197  | 3378.033  | 3510.546  |
| AL137340  | 660.224   | 764.352   | AK027041  | 2746.676  | 2428.986  | AL117580  | 6036.232  | 5748.805  |
| AL137542  | 737.744   | 870.516   | AK024332  | 797.146   | 672.118   | AL110190  | 4773.299  | 3502.716  |
| AL162045  | 977.397   | 1195.639  | AK000937  | 2819.711  | 2859.499  | AJ001893  | 6789.224  | 6575.407  |
| AK022437  | 32658.186 | 21746.125 | AK023718  | 20556.447 | 18738.949 | NM_018225 | 36905     | 45025.836 |
| AK024213  | 50520.629 | 31935.336 | AF075089  | 11614.832 | 10246.478 | AF091526  | 4627.125  | 4267.736  |
| AK022184  | 1208.047  | 1292.248  | AF086007  | 68882.75  | 60791.613 | AK026705  | 4441.642  | 4362.071  |
| AB007959  | 1740.083  | 1323.839  | AK000803  | 8448.321  | 7820.981  | NM_003602 | 4769.224  | 4237.389  |
| AF161340  | 11777.191 | 9350.628  | AK022374  | 1865.281  | 1648.37   | AF009258  | 56466.586 | 57439.855 |
| AF242771  | 1319.391  | 2371.118  | AF085926  | 47380.777 | 45674.566 | AF009305  | 4441.49   | 4102.324  |
| NM_018562 | 21939.602 | 27484.58  | AF085948  | 906.464   | 1097.114  | AF009270  | 1653.853  | 1682.392  |
| AF098666  | 1719.25   | 2818.545  | AL137307  | 12183.796 | 12555.327 | AF009318  | 3552.329  | 3977.973  |
| AF161365  | 1281.813  | 1661.149  | AL137468  | 10373.291 | 10070.807 | AK001906  | 2224.96   | 2305.255  |
| AK021969  | 1753.337  | 1899.216  | AL162007  | 35136.324 | 33900.801 | AK021528  | 1193.017  | 1289.671  |
| AK022065  | 1325.063  | 1489.995  | AL390137  | 40533.387 | 48082.531 | AK001136  | 1658.491  | 1253.555  |
| AK022221  | 19681.086 | 14986.872 | AL137340  | 948.363   | 1237.83   | AK021810  | 1384.279  | 1116.458  |
| AK022356  | 1306.265  | 1101.809  | AL137542  | 980.146   | 1941.994  | AF086317  | 5273.177  | 6023.043  |
| AK021998  | 3330.827  | 2546.326  | AL162045  | 1943.084  | 1660.772  | U16850    | 7081.01   | 9174.259  |
| AK022126  | 3121.685  | 2638.656  | X92185    | 878.011   | 735.636   | AL390178  | 2825.666  | 3825.007  |
| AK022256  | 828.755   | 677.014   | AK022437  | 45456.785 | 42347.172 | NM_005383 | 1080.026  | 1079.291  |
| AK022383  | 3336.708  | 2482.845  | AK024213  | 61695.141 | 61175.871 | NM_005368 | 1222.59   | 1204.002  |
| AF086262  | 3155.677  | 3208.635  | AK025093  | 1235.587  | 1271.604  | NM_018618 | 1611.786  | 1526.471  |
| AF086292  | 14428.391 | 10010.998 | AB007959  | 2796.243  | 2728.777  | AJ008121  | 47678.91  | 47099.16  |
| AK024342  | 35061.973 | 22891.234 | AK024360  | 657.783   | 683.965   | AJ008153  | 6230.77   | 5264.494  |
| AL137712  | 8937.063  | 6752.948  | AK023394  | 600.51    | 746.956   | AK023739  | 1190.548  | 1488.781  |
| AL137606  | 2097.094  | 2359.247  | AF090093  | 41006.051 | 43728.391 | AL389983  | 3102.67   | 2766.778  |
| NM_018445 | 4464.418  | 3931.227  | AF161340  | 21377.207 | 18853.34  | AJ008159  | 1604.694  | 2060.652  |
| AK022743  | 9985.512  | 12555.878 | AF242771  | 3034.746  | 3515.427  | X74606    | 984.13    | 1103.709  |
| AF035306  | 3138.094  | 4644.257  | NM_018562 | 36140.953 | 32672.809 | NM_012183 | 1389.518  | 1894.869  |
| AK091662  | 788.128   | 1386.813  | AF098666  | 3676.259  | 3087.474  | AK026785  | 1828.691  | 1814.915  |
| AB038318  | 1096.815  | 1431.209  | AF161365  | 2118.508  | 1903.435  | AL049466  | 3685.146  | 4370.802  |
| NM_003954 | 2419.354  | 3594.118  | NM_014134 | 382.916   | 661.111   | AB037802  | 1032.077  | 1316.72   |
| NM_016348 | 1848.531  | 1980.751  | AK021969  | 2524.889  | 2751.214  | AL137450  | 4246.138  | 4258.553  |
| AK022003  | 693.993   | 1019.442  | AK022065  | 2187.986  | 2630.783  | AK023058  | 6395.283  | 6005.393  |
| AK023877  | 478.524   | 386.195   | AK022221  | 38273.547 | 39740.922 | NM_012064 | 12856.447 | 11411.152 |
| AK024046  | 4096.463  | 3480.591  | AK022356  | 2782.68   | 2917.678  | AK001460  | 957.382   | 889.001   |
| NM_017931 | 6115.888  | 4521.053  | AK021998  | 9320.115  | 9740.589  | AK092508  | 6168.845  | 6211.15   |
| AK022793  | 2361      | 1849.986  | AK022126  | 6476.067  | 5771.181  | AK027111  | 74230.125 | 63406.211 |
| AJ227910  | 2849.826  | 2318.071  | AK022256  | 2100.921  | 2007.097  | M60749    | 1741.896  | 1362.258  |
| AF001893  | 3061.746  | 1788.69   | AK022383  | 6497.739  | 5723.687  | X79986    | 2160.086  | 1983.29   |
| X04236    | 8899.646  | 8456.41   | AF086262  | 4592.49   | 4251.302  | NM_017698 | 3193.714  | 3919.804  |
| AK093746  | 14183.871 | 17153.777 | AF086292  | 30746.75  | 27185.611 | AF086490  | 2099.086  | 2155.203  |
| AK021945  | 8314.973  | 9066.767  | AK024342  | 60109.328 | 55985.645 | AF131738  | 27854.979 | 37667.48  |
| L23545    | 1336.111  | 1422.423  | AL137712  | 18109.639 | 18056.559 | AK021666  | 4500.478  | 4286.287  |
| AK024153  | 2754.646  | 4169.894  | AL137606  | 708.532   | 896.643   | AK024081  | 1038.537  | 671.136   |
| U50528    | 3233.563  | 5188.807  | L77599    | 66672.461 | 67807.984 | NM_000795 | 398.286   | 459.979   |
| AB020632  | 4328.74   | 5068.748  | AK021673  | 51938.531 | 51843.676 | AB037761  | 28038.717 | 28800.799 |
| NM_018614 | 63184.367 | 59648.309 | AB014543  | 15558.306 | 14259.493 | NM_014008 | 62467.609 | 61383.438 |

|           |           |           |           |           |           |           |           |           |
|-----------|-----------|-----------|-----------|-----------|-----------|-----------|-----------|-----------|
| AL117549  | 3497.215  | 3728.791  | NM_018445 | 7698.289  | 7743.306  | NM_014731 | 11675.246 | 12148.641 |
| NM_005222 | 14495.218 | 13249.474 | AK022743  | 19602.279 | 18474.041 | AF035191  | 17253.676 | 13410.694 |
| BC024308  | 5294.513  | 4563.322  | AF035306  | 6194.724  | 5312.873  | NM_00405E | 1146.975  | 1176.356  |
| NM_00053E | 3913.525  | 3789.115  | AK091662  | 1487.95   | 1311.38   | NM_004527 | 2148.702  | 2098.698  |
| AK001838  | 66414.477 | 62902.035 | AB038318  | 982.713   | 1321.573  | NM_012062 | 12033.354 | 14928.071 |
| NM_01829E | 2618.952  | 2436.77   | NM_003954 | 3568      | 3717.628  | AK026717  | 1214.338  | 1295.864  |
| AF070574  | 955.949   | 861.046   | NM_01634E | 3671.24   | 2976.904  | NM_001507 | 1366.045  | 1300.081  |
| AF190900  | 3533.497  | 3026.034  | AK022003  | 854.58    | 833.848   | BF037206  | 2691.435  | 2713.214  |
| BE972401  | 11942.481 | 12305.228 | AK023877  | 889.741   | 1027.553  | AK021474  | 27898.645 | 34946.215 |
| U56725    | 445.59    | 626.037   | AK023640  | 795.964   | 833.518   | AK023642  | 819.332   | 1360.712  |
| NM_01742E | 1324.357  | 1399.47   | AK024046  | 6067.831  | 3848.084  | AB031547  | 3311.035  | 3562.564  |
| AB007922  | 647.962   | 447.518   | NM_017931 | 10452.358 | 6664.452  | NM_00397C | 2805      | 3043.152  |
| NM_015982 | 4308.677  | 3297.45   | AK022793  | 2827.745  | 1622.065  | AK022496  | 2716.674  | 2995.558  |
| NM_00374E | 45957.234 | 38145.887 | AJ227910  | 4466.514  | 3308.357  | AB042636  | 985.076   | 958.802   |
| NM_00291C | 59266.043 | 55252.93  | AF001893  | 8313.522  | 7927.936  | AB033035  | 2518.055  | 2439.292  |
| AC096970  | 35865.031 | 26135.885 | X04236    | 14657.306 | 16456.529 | NM_002883 | 5389.481  | 6080.085  |
| NM_014627 | 5695.308  | 5502.812  | AK093746  | 28510.102 | 28044.168 | NM_019012 | 1273.429  | 1027.253  |
| NM_01393E | 26791.637 | 30294.5   | D16875    | 1055.174  | 832.576   | NM_01615C | 9575.832  | 10013.744 |
| AK021485  | 485.903   | 688.592   | AK027171  | 3862.879  | 3534.055  | U57058    | 726.355   | 961.888   |
| AB018319  | 6239.042  | 5505.635  | AK021945  | 11461.213 | 10709.771 | AL137452  | 993.073   | 1114.472  |
| AK001101  | 4316.821  | 3559.26   | L23545    | 2127.861  | 1998.485  | AK024549  | 47131.027 | 57534.684 |
| BM973473  | 1450.742  | 2341.128  | AK024153  | 4533.688  | 4639.935  | NM_00633E | 29336.908 | 33842.371 |
| AK021637  | 4004.026  | 4807.101  | Y10516    | 14558.543 | 14439.074 | NM_007164 | 25035.727 | 26651.324 |
| AK021658  | 1232.562  | 1066.673  | AF056451  | 22859.641 | 21813.119 | NM_000261 | 1998.712  | 2824.286  |
| D61705    | 466.648   | 559.589   | AF015039  | 15879.197 | 14640.81  | NM_019851 | 3917.683  | 4259.049  |
| U17631    | 1870.994  | 2108.646  | U50528    | 5614.192  | 6459.328  | NM_01409E | 18594.336 | 25479.078 |
| AL137723  | 2410.452  | 2034.034  | AB020632  | 6516.945  | 6584.704  | NM_00570E | 10026.973 | 13135.589 |
| AL137311  | 1678.163  | 1397.618  | NM_018614 | 71731.492 | 64160.09  | NM_001261 | 6491.665  | 7893.369  |
| AF035300  | 1880.986  | 2188.142  | AL117549  | 5466.912  | 5359.672  | NM_001977 | 2914.718  | 3250.125  |
| NM_017703 | 8918.086  | 8138.716  | NM_005222 | 33645.453 | 36251.781 | NM_00721E | 1528.012  | 2097.204  |
| NM_01532C | 4948.293  | 4007.875  | BC024308  | 12650.649 | 11814.889 | AK026854  | 3431.74   | 3319.232  |
| NM_00405E | 2238.221  | 1732.054  | NM_00053E | 5518.836  | 6276.021  | NM_00126E | 11362.6   | 11242.051 |
| NM_01472E | 28747.338 | 22617.721 | AK001838  | 68059.016 | 63559.988 | NM_00250E | 3454.523  | 3493.254  |
| AJ297349  | 1129.278  | 1195.258  | NM_01829E | 5025.603  | 4403.403  | NM_00490E | 5172.632  | 3187.67   |
| NM_00582E | 3715.721  | 2824.524  | AF070574  | 2043.466  | 2020.757  | NM_012447 | 8154.423  | 7410.702  |
| NM_00161E | 4143.11   | 3402.982  | AF190900  | 4356.763  | 3483.454  | NM_00636E | 1653.061  | 1415.879  |
| NM_004463 | 963.547   | 1041.525  | NM_020404 | 61278.32  | 57141.859 | AK027013  | 21120.986 | 25424.135 |
| NM_00593E | 1923.426  | 2110.604  | BE972401  | 17470.416 | 13337.725 | AL389934  | 9466.625  | 10984.435 |
| U43586    | 2622.139  | 3324.823  | NM_015982 | 8622.313  | 8050.551  | NM_00433C | 6035.981  | 5644.764  |
| NM_006271 | 9462.275  | 8786.757  | NM_00374E | 56832.883 | 56042.563 | AF151802  | 11078.701 | 11781.046 |
| NM_018647 | 1601.937  | 1686.461  | NM_00291C | 66303.258 | 70548.047 | AL133071  | 1332.866  | 1565.672  |
| NM_00302E | 657.783   | 721.496   | AC096970  | 60492.805 | 55481.746 | AB040898  | 2163.21   | 1697.246  |
| NM_000721 | 63256.379 | 66070.766 | NM_014627 | 10474.409 | 10188.361 | NM_01615E | 8000.157  | 11026.161 |
| NM_003933 | 2815.193  | 2889.64   | NM_01393E | 45808.992 | 43418.59  | NM_001224 | 16714.416 | 20922.572 |
| NM_01864C | 676.385   | 514.962   | NM_01398E | 66406.641 | 69201.555 | NM_017811 | 13611.47  | 16171.244 |
| NM_00509E | 4017.091  | 3466.858  | U55055    | 2515.779  | 2098.812  | NM_00156E | 3667.691  | 4303.174  |
| NM_003163 | 23318.432 | 15468.302 | AK021485  | 1228.525  | 1053.218  | NM_004131 | 985.801   | 898.176   |
| NM_01620E | 5054.035  | 3511.149  | AB018319  | 10384.444 | 8424.773  | AK023284  | 1340.896  | 1463.274  |
| NM_00575E | 6031.406  | 4364.24   | AK001101  | 6490.383  | 5892.268  | NM_005101 | 7785.57   | 10179.126 |
| AF149724  | 2610.787  | 2206.357  | AK021658  | 2885.217  | 2482.829  | NM_000177 | 4276.654  | 4890.812  |
| BC020745  | 1038.773  | 1023.61   | D61705    | 887.452   | 938.328   | NM_003387 | 26132.252 | 27280.15  |
| NM_006367 | 21431.174 | 20410.367 | U17631    | 3947.849  | 3390.567  | U60665    | 4014.908  | 4182.081  |
| NM_006732 | 64472.359 | 55521.641 | AL137723  | 3823.949  | 4036.561  | NM_018367 | 2246.223  | 2270.579  |

|           |           |           |           |           |           |           |           |           |
|-----------|-----------|-----------|-----------|-----------|-----------|-----------|-----------|-----------|
| NM_004354 | 7033.522  | 5837.096  | AK000774  | 1567.246  | 1410.127  | NM_001363 | 16381.549 | 15154.871 |
| NM_004661 | 3680.852  | 2893.889  | NM_014288 | 19778.387 | 17778.838 | NM_014323 | 9327.423  | 9733.911  |
| NM_002009 | 903.149   | 806.126   | AF035300  | 2553.415  | 2052.074  | NM_003205 | 1970.787  | 2399.65   |
| NM_001610 | 2559.739  | 2330.173  | NM_014726 | 40320     | 47409.039 | AB002324  | 1978.367  | 2250.796  |
| NM_001241 | 1459.385  | 1246.606  | AJ297349  | 2097.738  | 2163.365  | NM_002165 | 433.612   | 531.605   |
| AF217504  | 3122.396  | 2621.293  | NM_005828 | 6795.388  | 6270.083  | AK026231  | 2900.37   | 3119.811  |
| AL109714  | 947.67    | 1059.303  | NM_001619 | 8791.793  | 8537.453  | NM_002140 | 33908.605 | 44284.711 |
| NM_004632 | 6118.64   | 5966.235  | NM_006599 | 8807.574  | 7721.362  | NM_020143 | 7318.833  | 7485.172  |
| NM_017919 | 7795.196  | 10237.933 | NM_004463 | 1360.977  | 1488.637  | NM_012469 | 5210.151  | 6419.953  |
| NM_014456 | 8019.717  | 8649.154  | NM_005936 | 3891.174  | 4787.288  | NM_005131 | 2363.75   | 2492.091  |
| NM_004740 | 15344.971 | 14207.823 | U43586    | 4725.402  | 5081.43   | NM_007056 | 3906.021  | 3759.926  |
| NM_003805 | 3480.137  | 3612.882  | NM_006271 | 17067.668 | 15816.013 | AF083383  | 1865.522  | 2115.331  |
| NM_019886 | 7237.76   | 9299.124  | NM_003933 | 5273.047  | 4671.562  | NM_004890 | 67535.016 | 65948.609 |
| NM_000426 | 990.69    | 950.098   | NM_018640 | 793.586   | 703.674   | AK023181  | 6253.595  | 5642.361  |
| M29540    | 509.95    | 327.917   | NM_005095 | 6452.052  | 5616.784  | NM_004294 | 6646.226  | 6791.474  |
| U95031    | 1662.954  | 1333.377  | NM_000055 | 1136.59   | 807.28    | NM_005051 | 31467.781 | 39456.891 |
| NM_004771 | 3628.325  | 3005.609  | NM_003163 | 45181.414 | 37289.715 | AB002366  | 1399.043  | 1333.875  |
| AL365514  | 1948.754  | 1519.156  | NM_016205 | 8175.822  | 5842.102  | AB006630  | 2578.521  | 1670.881  |
| NM_018299 | 2774.685  | 2024.908  | NM_005759 | 8118.831  | 4991.751  | NM_004453 | 2547.574  | 3092.317  |
| NM_002104 | 1650.097  | 1763.033  | AF149724  | 3196.834  | 1983.22   | NM_016229 | 14134.843 | 12037.004 |
| NM_005504 | 18195.26  | 18425.727 | BC020745  | 1648.61   | 1087.486  | NM_018244 | 7084.299  | 6551.031  |
| AF234654  | 1975.392  | 1859.644  | NM_006367 | 25732.764 | 21462.869 | NM_002492 | 66543.805 | 69518.352 |
| NM_000110 | 3124.457  | 3768.976  | NM_006732 | 66355.508 | 60184.195 | AB046855  | 1230.571  | 1168.542  |
| NM_016002 | 44022.035 | 38563.77  | NM_004354 | 10415.047 | 7765.396  | NM_005642 | 8173.627  | 7946.972  |
| NM_014549 | 1952.093  | 1640.076  | NM_004661 | 5228.189  | 2982.382  | NM_018105 | 2568.125  | 2090.723  |
| NM_000531 | 668.934   | 908.685   | NM_002009 | 1884.857  | 1017.401  | AK023452  | 8906.332  | 9437.348  |
| NM_017832 | 2968.777  | 2882.83   | NM_001610 | 4205.535  | 2852.319  | NM_000332 | 642.754   | 902.733   |
| NM_001713 | 7300.46   | 5592.837  | NM_001241 | 2273.126  | 1430.64   | AK022215  | 6302.557  | 6961.106  |
| NM_015367 | 18238.244 | 14421.095 | AF217504  | 5305.304  | 3460.711  | U90305    | 1858.534  | 1718.905  |
| NM_014498 | 11658.563 | 10989.056 | AK027102  | 19597.455 | 12369.683 | NM_001527 | 23699.266 | 24711.559 |
| NM_002375 | 42497.191 | 43817.477 | AL109714  | 1498.83   | 1389.365  | AK025269  | 31283.791 | 35120.43  |
| NM_000988 | 63031.609 | 62851.949 | NM_004632 | 9234.853  | 8935.304  | NM_001438 | 662.048   | 991.073   |
| NM_001813 | 3500.734  | 3095.776  | NM_017919 | 13362.586 | 14071.592 | AB040971  | 2143.15   | 2551.411  |
| AF055016  | 6463.534  | 6907.91   | NM_014456 | 11610.605 | 10186.523 | NM_006562 | 11210.388 | 11512.087 |
| NM_007234 | 16216.683 | 22846.414 | NM_000426 | 2025.193  | 1787.909  | X65665    | 1509.173  | 1650.57   |
| NM_014567 | 6487.488  | 5758.093  | AK021957  | 66348.539 | 68088.281 | NM_003112 | 2941.813  | 2784.109  |
| NM_017842 | 2488.765  | 2185.193  | U95031    | 3614.727  | 2829.92   | AL080170  | 2744.293  | 3598.787  |
| NM_002677 | 1909.368  | 1510.376  | NM_004771 | 5381.759  | 4787.802  | AB039903  | 8090.473  | 8155.569  |
| NM_012082 | 1006.463  | 1038.371  | AL365514  | 2656.764  | 2036.87   | NM_000542 | 42445.934 | 49248.703 |
| NM_001537 | 6856.296  | 6332.835  | NM_018299 | 3565.136  | 2626.56   | NM_014625 | 887.868   | 931.815   |
| U80743    | 1367.307  | 1291.223  | NM_002104 | 2567.626  | 2681.588  | NM_006851 | 2278.237  | 3119.99   |
| NM_001352 | 8074.372  | 6939.853  | NM_005504 | 30743.719 | 40050.047 | AK001560  | 2122.984  | 2648.876  |
| D15050    | 1899.247  | 996.221   | AF234654  | 4007.267  | 3818.645  | AB001328  | 2468.353  | 2672.883  |
| NM_006527 | 14180.771 | 9555.397  | NM_000110 | 6354.319  | 5786.367  | H99588    | 1827.758  | 2041.263  |
| NM_006627 | 3999.858  | 3539.918  | NM_016002 | 52704.582 | 54390.711 | X00588    | 7725.524  | 8066.968  |
| NM_007363 | 21057.016 | 20259.727 | NM_014549 | 1649.09   | 1805.495  | AI359037  | 47696.617 | 53912.117 |
| NM_003093 | 46175.258 | 37899.094 | NM_000531 | 1004.523  | 1074.332  | J04513    | 832.801   | 850.415   |
| U05589    | 1860.632  | 2079.909  | NM_017832 | 4585.126  | 3196.707  | BI754285  | 2742.224  | 2398.949  |
| NM_014473 | 19685.043 | 24328.525 | NM_001713 | 13917.291 | 9653.919  | X15998    | 12011.339 | 12472.955 |
| NM_003095 | 59381.512 | 62026.992 | NM_015367 | 27171.084 | 21637.215 | M76482    | 788.026   | 604.98    |
| NM_016389 | 4651.708  | 3906.033  | NM_014498 | 22922.328 | 18056.633 | NM_001883 | 4047.156  | 4978.602  |
| NM_002295 | 58142.207 | 59589.41  | NM_002375 | 53795.473 | 48582.594 | NM_004628 | 5055.117  | 6065.819  |
| NM_003133 | 18661.527 | 19174.365 | NM_000988 | 65428.234 | 67813.047 | L31785    | 2334.699  | 2921.204  |



|           |           |           |           |           |           |           |           |           |
|-----------|-----------|-----------|-----------|-----------|-----------|-----------|-----------|-----------|
| NM_001762 | 19106.611 | 18184.941 | NM_001813 | 5130.5    | 4004.064  | H-M 69043 | 15894.05  | 21733.82  |
| NM_016306 | 19853.391 | 17275.77  | AF055016  | 10643.829 | 9916.889  | AF077374  | 2274.235  | 2373.765  |
| NM_003755 | 1215.721  | 1368.886  | NM_007234 | 25396.295 | 20406.203 | U43901    | 880.874   | 1397.401  |
| NM_013238 | 5162.504  | 5556.948  | NM_014567 | 14325.733 | 12553.427 | X59065    | 3638.932  | 3464.158  |
| BE258640  | 31275.852 | 30738.908 | NM_017842 | 4189.169  | 3582.878  | M59828    | 30248.607 | 24471.299 |
| NM_003314 | 9819.148  | 8961.723  | NM_019057 | 22932.754 | 20216.609 | NM_002168 | 6326.814  | 5432.174  |
| NM_016623 | 20477.502 | 16319.034 | NM_002677 | 3938.515  | 3455.544  | NM_000588 | 2954.686  | 2260.982  |
| NM_001334 | 19049.396 | 12619.994 | NM_012082 | 1110.014  | 1456.463  | NM_016548 | 13210.126 | 15662.771 |
| NM_001246 | 1487.406  | 2150.113  | NM_001537 | 10332.882 | 9762.14   | AF309653  | 5038.049  | 5315.532  |
| AL365411  | 6691.715  | 6984.437  | U80743    | 2069.427  | 2051.902  | NM_002620 | 38924.715 | 46771.07  |
| M24470    | 1012.878  | 1016.345  | NM_001352 | 9975.283  | 9096.694  | NM_003784 | 64065.613 | 59579.32  |
| NM_016068 | 17539.363 | 12966.724 | D15050    | 2367.958  | 1939.14   | NM_005448 | 18982.639 | 15323.547 |
| AK024677  | 1211.882  | 1020.791  | NM_014724 | 954.505   | 867.059   | NM_014898 | 1914.099  | 1770.443  |
| NM_000038 | 1956.172  | 1648.935  | NM_006527 | 22268.58  | 20665.395 | NM_003630 | 9274.01   | 10051.294 |
| AF254082  | 56139.512 | 55195.301 | NM_006627 | 5773.856  | 5682.628  | NM_000048 | 4585.701  | 4720.837  |
| AF205718  | 14219.582 | 16500.064 | NM_007363 | 30563.33  | 34712.758 | NM_003218 | 2323.409  | 3055.423  |
| NM_003420 | 1812.207  | 1680.506  | NM_003093 | 53890.539 | 57544.598 | NM_006708 | 6449.575  | 7161.326  |
| AY004252  | 1532.603  | 1651.866  | U05589    | 2870.376  | 2835.917  | NM_000612 | 27246.344 | 29339.623 |
| NM_006261 | 6930.345  | 6988.711  | NM_014473 | 26643.004 | 31002.705 | NM_004257 | 25770.959 | 27490.449 |
| AK027045  | 1626.99   | 1561.737  | NM_003098 | 62511.867 | 65620.57  | NM_000683 | 2970.1    | 3349.495  |
| AF169796  | 5925.529  | 5207.497  | NM_016388 | 14162.24  | 15846.506 | NM_003628 | 5584.788  | 5983.309  |
| AK026157  | 646.511   | 869.993   | NM_002298 | 63232.938 | 60851.555 | NM_005901 | 7624.422  | 7141.315  |
| AK001814  | 11737.547 | 12975.367 | NM_003133 | 24384.639 | 26476.59  | NM_004248 | 14105.313 | 13302.166 |
| NM_007222 | 2858.499  | 2769.281  | NM_001762 | 26303.559 | 26178.707 | AB013452  | 758.903   | 857.422   |
| NM_003438 | 7997.006  | 6071.978  | NM_016306 | 30135.92  | 29651.336 | M93107    | 5457.603  | 5978.906  |
| NM_016291 | 12920.858 | 10580.112 | NM_003755 | 1936.978  | 1766.935  | BC001479  | 17470.154 | 17662.828 |
| NM_005937 | 55085.984 | 59330.188 | NM_013238 | 7185.746  | 5906.634  | NM_002461 | 62464.801 | 56320.594 |
| AB037809  | 2980.403  | 2815.511  | BE258640  | 38339.629 | 34459.504 | NM_005771 | 818.8     | 1320.665  |
| AB011129  | 1752.69   | 1416.282  | NM_003314 | 14189.754 | 10859.36  | AB032986  | 59769.418 | 54884.539 |
| NM_014391 | 28944.439 | 19695.924 | NM_016623 | 30750.771 | 20095.451 | NM_017528 | 64641.887 | 58340.125 |
| NM_004270 | 2700.939  | 1751.858  | NM_001334 | 31682.492 | 20188.025 | NM_014324 | 63595.129 | 59310.172 |
| L09102    | 60672.266 | 56774.793 | NM_001246 | 4143.661  | 3903.865  | NM_001687 | 36654.094 | 42493.59  |
| U68488    | 847.749   | 630.426   | AL365411  | 8836.919  | 8997.735  | AK026374  | 3371.167  | 3557.225  |
| NM_016247 | 9385.554  | 7679.099  | M24470    | 1925.625  | 2108.294  | NM_003458 | 11271.176 | 13337.396 |
| NM_001157 | 371.995   | 424.947   | NM_016068 | 20435.404 | 19650.08  | NM_013348 | 62866.938 | 57314.734 |
| NM_012282 | 836.444   | 809.256   | AK024677  | 2448.015  | 2538.791  | NM_006861 | 4167.14   | 4555.162  |
| NM_006710 | 508.198   | 658.956   | NM_000038 | 3746.515  | 2795.759  | AK023142  | 2001.625  | 2100.041  |
| NM_003323 | 18264.576 | 20239.275 | AF254082  | 62941.676 | 61776.449 | U61740    | 56247.129 | 52840.531 |
| BG685310  | 3385.397  | 4164.192  | AF205718  | 25624.521 | 23407.379 | NM_006408 | 61283.07  | 57398.648 |
| AW300857  | 53899.488 | 55310.625 | NM_003420 | 2215.864  | 1845.892  | AB049054  | 8617.924  | 8467.448  |
| H85962    | 54561.57  | 59154.594 | AY004252  | 2275.366  | 2331.992  | NM_015071 | 3404.03   | 2955.345  |
| BG742446  | 2127.231  | 1895.063  | NM_006261 | 18149.9   | 19311.154 | NM_013227 | 7874.759  | 6188.276  |
| AA864554  | 1756.633  | 1419.401  | AK027045  | 2940.579  | 2518.797  | Z83803    | 1468.54   | 1177.131  |
| X66945    | 8826.974  | 8031.396  | AF169796  | 11564.935 | 13587.919 | AF027205  | 32173.104 | 31247.264 |
| AI160703  | 1049.115  | 1204.389  | AK026157  | 1095.182  | 1306.76   | AF075012  | 2815.14   | 3657.88   |
| X12830    | 5362.605  | 6712.291  | AK001814  | 16953.371 | 18303.121 | NM_001570 | 1860.913  | 2001.42   |
| U00482    | 3665.607  | 3722.856  | NM_007222 | 4919.375  | 5033.578  | AB040672  | 1548.808  | 1457.311  |
| K01904    | 27674.125 | 19462.988 | NM_003438 | 14353.831 | 14812.538 | NM_002192 | 2277.314  | 3004.601  |
| BE538886  | 1833.714  | 1757.589  | NM_016291 | 24076.879 | 26235.834 | NM_005491 | 11530.357 | 17964.797 |
| NM_002228 | 1075.159  | 654.661   | NM_005937 | 61063.773 | 63287.18  | NM_003868 | 9834.519  | 9642.042  |
| M57650    | 52510.883 | 50913.813 | AB037809  | 4857.734  | 4461.832  | AK025599  | 1135.978  | 1571.203  |
| BC023978  | 2291.717  | 2308.768  | AB011129  | 3078.709  | 2851.729  | X63417    | 2773.011  | 3476.304  |
| M21302    | 9996.771  | 6724.199  | NM_014391 | 52183.387 | 47289.371 | S94539    | 46142.438 | 51694.223 |

|           |           |           |           |           |           |           |           |           |
|-----------|-----------|-----------|-----------|-----------|-----------|-----------|-----------|-----------|
| NM_002512 | 54961.652 | 57244.902 | NM_004270 | 4791.464  | 2931.547  | NM_006402 | 3860.5    | 4489.962  |
| NM_016171 | 59036.996 | 58232.816 | L09102    | 66173.648 | 71252.758 | NM_005785 | 3984.238  | 3834.418  |
| NM_014443 | 6332.541  | 4379.395  | U68488    | 1903.128  | 1443.421  | NM_018248 | 4462.52   | 4147.846  |
| NM_005212 | 4657.859  | 4916.363  | NM_000675 | 660.625   | 737.164   | AK001695  | 10661.467 | 8539.766  |
| M14584    | 769.545   | 759.891   | NM_016247 | 31693.65  | 30785.193 | NM_017886 | 11905.973 | 10994.566 |
| NM_006419 | 2988.223  | 2165.398  | NM_001157 | 586.528   | 1022.316  | NM_006252 | 3557.802  | 3488.501  |
| AF035035  | 795.417   | 689.004   | NM_012282 | 2075.754  | 2528.705  | NM_001721 | 1284.899  | 1411.244  |
| AB020676  | 1760.86   | 2107.502  | NM_006710 | 1567.936  | 1976.861  | NM_014397 | 22304.373 | 19445.992 |
| AK024715  | 1228.137  | 1257.743  | NM_003323 | 29082.082 | 34496.34  | AB023182  | 3891.279  | 4175.413  |
| U90942    | 56605.527 | 60166.43  | BG685310  | 5851.975  | 5967.776  | NM_003607 | 2016.941  | 1976.225  |
| NM_014942 | 1193.493  | 1210.767  | AW300857  | 63247.027 | 60962.063 | NM_006575 | 3712.414  | 3426.757  |
| NM_018360 | 5990.455  | 6048.125  | H85962    | 62018.082 | 58667.855 | NM_013254 | 5035.205  | 4820.888  |
| AL365415  | 1305.207  | 1235.445  | BG742446  | 4103.903  | 4625.339  | NM_000437 | 31005.777 | 31005.473 |
| L29147    | 59117.504 | 59983.047 | AA864554  | 2768.156  | 2741.22   | AB046819  | 36154.551 | 47294.281 |
| NM_001525 | 59814.758 | 58693.406 | X66945    | 16797.512 | 18468.594 | NM_006090 | 12972.447 | 14798.619 |
| NM_006055 | 9113.334  | 11033.894 | AI160703  | 1844.896  | 2245.266  | NM_002900 | 25018.48  | 25981.793 |
| NM_004296 | 1678.777  | 1617.897  | X12830    | 10941.155 | 12946.996 | NM_000542 | 6697.219  | 6920.362  |
| NM_005048 | 1045.366  | 937.131   | U00482    | 6726.072  | 8397.832  | NM_006851 | 2063.997  | 2413.314  |
| NM_005972 | 2306.588  | 2461.321  | Z80998    | 748.607   | 729.747   | AK001560  | 1503.88   | 1792.911  |
| NM_001060 | 884.018   | 910.538   | K01904    | 41647.934 | 42715.578 | AB001328  | 2695.715  | 3100.209  |
| NM_018841 | 8738.734  | 7345.589  | NM_002228 | 1616.441  | 1276.088  | H99588    | 1793.288  | 1662.736  |
| NM_005226 | 1580.135  | 1216.883  | M57650    | 63046.324 | 62817.582 | X00588    | 5864.231  | 6359.845  |
| AK022859  | 2467.309  | 1922.445  | BC023978  | 3590.778  | 4407.046  | AI359037  | 49597.066 | 55603.145 |
| NM_020228 | 9903.628  | 7839.537  | M21302    | 18481.152 | 16910.463 | J04513    | 922.685   | 1086.406  |
| AK024685  | 3777.047  | 3216.776  | NM_002512 | 64116.383 | 62710.191 | BI754285  | 2584.859  | 2448.818  |
| NM_003676 | 9963.863  | 13494.984 | NM_004908 | 853.581   | 870.245   | X15998    | 14186.28  | 12799.48  |
| AF113007  | 17217.986 | 41280.508 | NM_005212 | 9061.931  | 9557.891  | NM_001883 | 4108.834  | 4506.779  |
| NM_000688 | 4769.563  | 8579.017  | M14584    | 1814.67   | 1920.829  | NM_004628 | 5022.353  | 4818.967  |
| U39573    | 1923.889  | 2969.795  | NM_006419 | 4651.113  | 4779.311  | L31785    | 2138.848  | 1961.086  |
| D82061    | 6879.247  | 5671.802  | AF035035  | 2524.7    | 3016.52   | H-M 69043 | 15435.289 | 16982.492 |
| AJ293009  | 4604.43   | 4791.786  | AB020676  | 5945.909  | 6909.272  | AF077374  | 2637.284  | 2531.088  |
| NM_000374 | 3830.432  | 4534.201  | AK024715  | 1719.148  | 1925.925  | U43901    | 1133.044  | 1011.405  |
| NM_000502 | 16747.59  | 20825.934 | U90942    | 62256.926 | 61911.879 | X59065    | 2725.598  | 2300.866  |
| NM_001359 | 23976.24  | 23728.246 | NM_014942 | 2224.275  | 2424.802  | M59828    | 26884.455 | 19194.393 |
| NM_002245 | 1320.071  | 1128.528  | NM_018360 | 11999.976 | 13571.022 | AJ010482  | 3890.724  | 3140.722  |
| NM_004980 | 50322.605 | 50442.266 | AK022489  | 1009.091  | 1124.949  | NM_016546 | 3515.502  | 3565.021  |
| NM_003224 | 3339.959  | 4108.965  | AL365415  | 2596.883  | 2644.868  | AF309653  | 3113.386  | 2619.564  |
| NM_004227 | 2624.972  | 3347.215  | L29147    | 63211.375 | 63072.922 | NM_002620 | 33045.012 | 36564.387 |
| NM_005282 | 8311.446  | 11791.493 | NM_001525 | 62066.102 | 63866.82  | S79267    | 1472.516  | 1706.706  |
| NM_001736 | 4651.763  | 5239.042  | NM_006055 | 17105.592 | 19648.539 | NM_001816 | 1129.021  | 1092.912  |
| AB028949  | 779.507   | 701.472   | NM_004296 | 5889.572  | 5666.555  | NM_003784 | 62822.176 | 59775.027 |
| AL137580  | 1411.088  | 1380.186  | NM_005048 | 2319.556  | 2483.323  | NM_000195 | 61457.695 | 59575.914 |
| NM_004101 | 1282.475  | 1381.803  | NM_001060 | 1713.791  | 1994.573  | NM_005445 | 16530.551 | 10287.972 |
| NM_002995 | 58355.668 | 61479.508 | NM_018841 | 12090.25  | 12476.992 | NM_014895 | 1584.582  | 1592.898  |
| AB033114  | 643.613   | 794.051   | AK022859  | 4153.021  | 4775.618  | NM_003630 | 9614.511  | 9204.118  |
| NM_015978 | 7751.557  | 6853.54   | NM_020228 | 27637.16  | 29801.293 | NM_000046 | 4783.025  | 5504.176  |
| NM_003810 | 2777.969  | 2377.618  | AK024685  | 8387.771  | 8201.219  | NM_003219 | 2760.313  | 3442.418  |
| NM_006581 | 843.051   | 176.842   | NM_003676 | 13900.709 | 14494.778 | NM_006709 | 8334.814  | 7491.164  |
| NM_018973 | 9270.498  | 14865.579 | NM_000688 | 6304.247  | 6807.288  | NM_000612 | 24901.305 | 29990.582 |
| NM_002591 | 39969.875 | 53561.563 | U39573    | 3906.865  | 4303.292  | NM_004257 | 28992.725 | 31128.982 |
| NM_020216 | 2861.784  | 2659.111  | D82061    | 12802.053 | 13280.944 | NM_000683 | 1926.902  | 1858.883  |
| AK021860  | 3131.873  | 3153.266  | AJ293009  | 8938.932  | 10797.189 | NM_003625 | 3077.889  | 3558.263  |
| AB046816  | 1378.968  | 1508.526  | NM_000374 | 7220.641  | 10389.415 | NM_005901 | 8088.743  | 9036.862  |

|           |           |           |           |           |           |           |           |           |
|-----------|-----------|-----------|-----------|-----------|-----------|-----------|-----------|-----------|
| AL137266  | 7451.671  | 8407.724  | NM_000502 | 35377.949 | 45022.922 | NM_004248 | 14303.988 | 15303.297 |
| NM_016457 | 1902.557  | 2519.143  | NM_001359 | 30894.666 | 36094.129 | AL080170  | 4796.695  | 4318.716  |
| NM_005057 | 2620.82   | 3168.504  | NM_002245 | 3237.02   | 3539.586  | AB039903  | 8320.237  | 6413.498  |
| AF143321  | 1085.755  | 1966.985  | NM_004980 | 59885.949 | 61634.477 | M93107    | 3725.869  | 3331.273  |
| AB046842  | 3372.931  | 5966.912  | NM_003224 | 4657.076  | 5888.095  | BC001479  | 5598.105  | 5245.754  |
| NM_004850 | 2399.404  | 2785.075  | NM_004227 | 3783.674  | 4285.147  | NM_002461 | 55937.004 | 55216.961 |
| NM_002822 | 17944.76  | 19565.824 | NM_001736 | 6274.561  | 8060.113  | NM_005771 | 1378.879  | 1292.166  |
| BF306955  | 4017.667  | 3926.137  | AB028949  | 1345.286  | 1781.469  | AB032986  | 50752.016 | 52250.945 |
| NM_001394 | 11912.152 | 9310.902  | NM_004101 | 3107.74   | 2920.193  | NM_017528 | 61584.852 | 58450.039 |
| NM_018441 | 19348.75  | 17651.648 | NM_002995 | 60744.922 | 65614.367 | NM_016032 | 4609.292  | 5175.562  |
| NM_000778 | 21340.691 | 18277.166 | NM_015978 | 19404.799 | 20576.057 | NM_014324 | 66228.508 | 61899.063 |
| NM_001609 | 3022.495  | 2744.172  | NM_003810 | 3126.988  | 3399.246  | NM_001687 | 33179.57  | 40923.566 |
| BE733234  | 1410.429  | 1278.594  | NM_002591 | 55268.164 | 50751.996 | AK026374  | 3068.773  | 2665.324  |
| NM_000675 | 734.839   | 1022.645  | AL049334  | 937.056   | 1055.151  | NM_003455 | 7417.122  | 8159.988  |
| NM_016247 | 13076.873 | 17525.371 | NM_020216 | 4800.39   | 4518.82   | NM_013345 | 62692.238 | 59275.035 |
| NM_001157 | 1628.099  | 980.133   | AK021860  | 5440.478  | 5555.594  | NM_006861 | 2964.964  | 2953.47   |
| NM_012282 | 1396.741  | 3026.306  | AB046816  | 1943.643  | 1823.215  | AK023142  | 2035.359  | 2054.465  |
| NM_006710 | 873.147   | 2376.828  | AL137266  | 11253.817 | 11510.235 | U61740    | 56940.004 | 54798.852 |
| NM_003323 | 19387.844 | 40710.027 | NM_016457 | 2251.284  | 2476.913  | NM_006405 | 62266.754 | 56570.637 |
| BG685310  | 3842.983  | 5850.326  | NM_005057 | 3274.605  | 3842.768  | AB049054  | 4708.343  | 5178.877  |
| AW300857  | 56313.188 | 56010.566 | AF143321  | 2322.637  | 2970.534  | NM_015071 | 2621.701  | 2409.814  |
| H85962    | 56349.75  | 57948.258 | NM_004850 | 4092.324  | 4478.637  | NM_013227 | 4715.257  | 4142.492  |
| BG742446  | 2019.426  | 2230.689  | NM_002822 | 24795.205 | 29549.949 | Z83803    | 1510.536  | 1191.929  |
| AA864554  | 1886.468  | 2573.924  | NM_001394 | 16868.904 | 20129.811 | AF027205  | 31725.109 | 25556.012 |
| X66945    | 8512.49   | 11287.357 | NM_018441 | 31434.547 | 35622.77  | AF075012  | 2244.85   | 1980.723  |
| AI160703  | 973.076   | 1296.179  | NM_000778 | 31047.313 | 35560.004 | NM_001570 | 2403.802  | 2018.52   |
| X12830    | 4366.108  | 4433.415  | NM_001609 | 4773.523  | 4500.424  | NM_015658 | 890.557   | 1023.44   |
| U00482    | 3150.981  | 4503.548  | BE733234  | 2160.72   | 1845.334  | NM_000585 | 6212.464  | 4203.544  |
| Z80998    | 577.851   | 1173.575  | NM_000675 | 1104.665  | 1312.154  | NM_005491 | 7707.423  | 9430.863  |
| K01904    | 32762.332 | 32180.654 | NM_016247 | 31217.225 | 32712.766 | AK025599  | 1987.339  | 1879.423  |
| BE538886  | 2788.51   | 2525.07   | NM_001157 | 662.393   | 1106.878  | X63417    | 4869.596  | 5388.75   |
| NM_002228 | 1394.039  | 937.763   | NM_012282 | 1785.074  | 2063.513  | S94539    | 28982.996 | 38882.582 |
| M57650    | 58621.617 | 56862.984 | NM_003323 | 26174.291 | 33169.074 | NM_006402 | 3788.003  | 4249.078  |
| BC023978  | 2701.602  | 2635.898  | BG685310  | 6109.485  | 5634.156  | NM_005785 | 1870.501  | 1704.378  |
| M21302    | 10053.248 | 7161.654  | AW300857  | 61495.762 | 57361.445 | NM_018248 | 2763.147  | 2231.085  |
| AK024865  | 2763.62   | 2690.346  | H85962    | 61326.371 | 57640.918 | AK001695  | 13478.707 | 10849.749 |
| NM_007210 | 1225.942  | 1277.955  | BG742446  | 5850.586  | 5779.186  | NM_017886 | 12250.577 | 10065.933 |
| NM_001483 | 5419.261  | 4766.754  | AA864554  | 2368.917  | 2733.075  | NM_006252 | 3025.282  | 2512.989  |
| NM_014443 | 9074.993  | 7568.516  | X66945    | 14163.221 | 13962.049 | NM_001721 | 1544.09   | 1179.741  |
| NM_005212 | 6195.19   | 8514.256  | AI160703  | 2020.652  | 1730.065  | NM_014397 | 18039.135 | 15506.625 |
| M14584    | 1179.603  | 1505.965  | X12830    | 10252.468 | 9482.409  | AB023182  | 5032.081  | 4581.378  |
| NM_006419 | 3540.952  | 5359.282  | U00482    | 5865.589  | 6322.213  | NM_003607 | 1248.576  | 1221.825  |
| AF035035  | 1131.484  | 2513.754  | Z80998    | 981.517   | 1193.202  | NM_006575 | 3574.349  | 2546.612  |
| AB020676  | 2200.575  | 3722.238  | M57650    | 57716.301 | 56629.402 | NM_013254 | 4734.696  | 3816.123  |
| AK024715  | 2311.07   | 2328.921  | BC023978  | 3928.383  | 4736.396  | NM_000437 | 32085.932 | 25494.99  |
| U90942    | 53590.328 | 60752.988 | M21302    | 24519.34  | 29028.609 | AB046819  | 35757.461 | 34906.188 |
| NM_014942 | 1174.857  | 1187.792  | AK024865  | 4188.123  | 4468.125  | NM_006090 | 14474.794 | 11249.228 |
| NM_018360 | 5373.626  | 6010.805  | NM_007210 | 2592.084  | 2538.496  | NM_002900 | 23971.625 | 20317.805 |
| AK022489  | 1474.084  | 1687.214  | NM_001483 | 8598.226  | 7977.387  | NM_004910 | 3635.876  | 2687.07   |
| AL365415  | 1499.223  | 1707.77   | NM_014443 | 18535.18  | 16438.777 | AB013452  | 3529.166  | 2505.405  |
| L29147    | 53785.848 | 57580.633 | NM_005212 | 11162.197 | 10624.754 | NM_006851 | 1214.695  | 1134.77   |
| NM_001525 | 55460.207 | 57923.844 | M14584    | 2201.841  | 2086.355  | AB001328  | 1627.168  | 1870.111  |
| NM_006055 | 10390.189 | 14468.3   | AB020676  | 4566.657  | 5566.618  | X00588    | 2164.524  | 2455.244  |

|           |           |           |           |           |           |           |           |           |
|-----------|-----------|-----------|-----------|-----------|-----------|-----------|-----------|-----------|
| NM_004296 | 1621.441  | 2726.694  | AK024715  | 1497.702  | 1994.612  | AI359037  | 42422.895 | 48789     |
| NM_005048 | 1138.755  | 1733.072  | U90942    | 60173.637 | 64795.563 | J04513    | 776.301   | 710.917   |
| NM_005972 | 2937.707  | 2722.179  | NM_014942 | 1915.211  | 2113.532  | BI754285  | 1518.328  | 1400.352  |
| NM_001060 | 1051.617  | 1016.962  | NM_018360 | 10341.368 | 12434.137 | X15998    | 9569.762  | 7357.52   |
| NM_018841 | 10630.133 | 9432.515  | AL365415  | 2295.633  | 2181.757  | M76482    | 681.659   | 629.063   |
| NM_005226 | 6694.792  | 6437.828  | L29147    | 61699.957 | 62170.184 | NM_001883 | 4090.393  | 3153.266  |
| AK022859  | 2864.381  | 2391.51   | NM_001525 | 58717.934 | 56554.621 | NM_004628 | 5127.089  | 4740.959  |
| L09102    | 57189.957 | 59668.934 | NM_006055 | 14310.409 | 16081.456 | L31785    | 2482.25   | 1926.007  |
| U68488    | 1014.978  | 1023.04   | NM_004296 | 2479.119  | 3205.851  | H-M 69043 | 17444.744 | 18218.717 |
| NM_003676 | 9598.815  | 8992.1    | NM_005048 | 2237.465  | 2297.057  | AF077374  | 2784.13   | 2776.705  |
| AF113007  | 18286.266 | 25732.1   | NM_001060 | 1256.057  | 1318.199  | U43901    | 1337.19   | 1166.913  |
| NM_000688 | 5485.525  | 6037.137  | NM_018841 | 13272.064 | 13935.385 | X59065    | 2148.919  | 1822.089  |
| U39573    | 1615.411  | 2475.809  | NM_005226 | 2706.618  | 2959.185  | M59828    | 25798.883 | 15876.545 |
| D82061    | 6762.289  | 12116.894 | AK022859  | 5626.457  | 6990.581  | AJ010482  | 4501.597  | 3141.773  |
| AJ293009  | 5905.873  | 8229.501  | NM_014464 | 830.427   | 809.891   | NM_000896 | 1109.745  | 1265.578  |
| NM_000374 | 3772.575  | 3073.287  | L09102    | 62393.66  | 64887.672 | AB040672  | 9366.082  | 8521.994  |
| NM_000502 | 17307.176 | 12911.578 | U68488    | 1313.459  | 1189.44   | NM_002192 | 8029.192  | 4937.198  |
| NM_001359 | 22115.338 | 22237.85  | NM_003676 | 14629.163 | 13510.35  | NM_014896 | 833.336   | 998.514   |
| NM_002245 | 997.139   | 1246.25   | AF113007  | 26483.078 | 31737.102 | NM_003630 | 2134.493  | 2179.937  |
| NM_004980 | 38060.719 | 39810.344 | D82061    | 11592.736 | 14883.027 | NM_006709 | 4242.684  | 3994.044  |
| NM_003224 | 3688.791  | 3470.576  | AJ293009  | 8073.282  | 9647.771  | NM_000612 | 5100.154  | 5382.246  |
| NM_004227 | 2402.747  | 2957.438  | NM_000374 | 7585.292  | 8920.285  | NM_004257 | 18953.598 | 17460.859 |
| NM_005282 | 8676.112  | 11186.59  | NM_000502 | 34810.105 | 46293.563 | NM_000683 | 2113.229  | 2100.198  |
| NM_001736 | 5054.218  | 6257.216  | BF088089  | 1817.99   | 1920.822  | NM_003629 | 1113.592  | 1050.26   |
| AB028949  | 761.98    | 935.102   | NM_001359 | 31511.65  | 40306.805 | NM_005901 | 5921.436  | 4997.964  |
| AL137580  | 1752.149  | 1608.828  | NM_002245 | 2598.188  | 2457.643  | NM_004248 | 13686.909 | 10478.543 |
| NM_004101 | 1580.684  | 1657.926  | NM_004980 | 59082.457 | 58367.75  | NM_001313 | 1079.805  | 938.717   |
| NM_002995 | 57747.816 | 60390.438 | NM_003224 | 4260.127  | 4932.544  | NM_004796 | 605.4     | 817.256   |
| AB033114  | 1441.736  | 1669.711  | NM_004227 | 3903.64   | 4485.333  | NM_000435 | 15899.915 | 11812.819 |
| NM_015978 | 9852.912  | 10292.238 | NM_005282 | 13000.204 | 16520.84  | NM_001842 | 53394.191 | 51090.781 |
| NM_003810 | 2020.589  | 1337.017  | NM_001736 | 5729.729  | 7672.21   | AB017169  | 1106.894  | 771.613   |
| NM_004908 | 1087.69   | 813.773   | AB028949  | 1025.184  | 1366.188  | AL080170  | 5740.832  | 4173.699  |
| NM_016171 | 59560.367 | 62458.473 | AL137580  | 2677.842  | 2471.469  | AB039903  | 9615.926  | 8726.954  |
| NM_018973 | 9298.488  | 8441.25   | NM_004101 | 3335.232  | 2981.906  | NM_000542 | 41194.57  | 38532.07  |
| NM_002591 | 38733.105 | 39768.762 | NM_002995 | 62747.359 | 62645.676 | NM_014625 | 1305.055  | 838.389   |
| NM_020216 | 3341.038  | 3512.441  | AB033114  | 1710.572  | 2268.273  | NM_005829 | 767.576   | 993.679   |
| AK021860  | 2975.584  | 2222.659  | NM_015978 | 23081.082 | 25907.832 | NM_000466 | 444.328   | 793.723   |
| AB046816  | 1036.455  | 1257.043  | NM_003810 | 3939.039  | 4113.255  | NM_015908 | 8046.177  | 7379.683  |
| AL137266  | 6645.649  | 6839.44   | NM_004908 | 1219.089  | 1386.057  | AK022600  | 12301.406 | 12093.394 |
| NM_016457 | 1739.307  | 1670.525  | NM_016171 | 62621.195 | 64388.949 | U61740    | 33633.672 | 32251.363 |
| NM_005057 | 2091.503  | 1784.131  | NM_018973 | 13368.936 | 11876.101 | NM_006409 | 61802.52  | 58366.137 |
| AF143321  | 1206.881  | 1228.491  | NM_002591 | 51591.93  | 44973.449 | AB049054  | 4897.558  | 5117.893  |
| AB046842  | 3009.376  | 3570.22   | AL049334  | 587.391   | 920.926   | NM_015071 | 580.698   | 642.507   |
| NM_004850 | 2438.9    | 2680.385  | NM_020216 | 4611.839  | 5355.777  | NM_013227 | 3926.034  | 3608.315  |
| NM_002822 | 19691.373 | 19365.787 | AK021860  | 6445.24   | 8386.679  | Z83803    | 1124.102  | 859.267   |
| BF306955  | 4167.073  | 3114.859  | AB046816  | 1721.195  | 2005.951  | AF027205  | 33521.223 | 27491.354 |
| NM_001394 | 14936.854 | 12127.619 | AL137266  | 11023.529 | 14298.58  | AF075012  | 2690.971  | 1990.564  |
| NM_018441 | 22536.51  | 23467.428 | NM_016457 | 2067.966  | 2340.287  | NM_001570 | 2051.147  | 1293.046  |
| NM_000778 | 24409.053 | 28769.447 | NM_005057 | 2878.994  | 3017.669  | NM_015658 | 1340.656  | 924.686   |
| NM_001609 | 4403.496  | 5254.212  | AF143321  | 2320.085  | 2878.231  | NM_000589 | 6912.881  | 3384.443  |
| BE733234  | 1425.804  | 1906.278  | AB046842  | 5024.93   | 5444.594  | NM_016546 | 27901.063 | 24449.58  |
| NM_020228 | 11840.842 | 12883.793 | NM_004850 | 3214.821  | 4408.342  | AF309653  | 4970.07   | 6007.177  |
| AK024685  | 5379.343  | 7010.722  | NM_002822 | 22313.91  | 29184.699 | NM_002620 | 48908.492 | 53001.613 |

|           |           |           |           |           |           |           |           |           |
|-----------|-----------|-----------|-----------|-----------|-----------|-----------|-----------|-----------|
| NM_001157 | 689.642   | 642.166   | BF306955  | 6757.617  | 7358.354  | S79267    | 3110.05   | 2026.705  |
| NM_012282 | 1246.607  | 1085.614  | NM_001394 | 17096.402 | 18317.914 | NM_001816 | 1592.124  | 1087.577  |
| NM_006710 | 567.882   | 633.725   | NM_018441 | 29602.383 | 33843.363 | NM_003784 | 61200.168 | 60622.922 |
| NM_003323 | 19616.963 | 21413.994 | NM_000778 | 28536.945 | 35327.297 | NM_000195 | 58743.457 | 55325.121 |
| BG685310  | 2934.904  | 2894.819  | NM_001609 | 4897.921  | 5065.835  | NM_005445 | 26723.641 | 14095.081 |
| AW300857  | 53868.434 | 48824.914 | BE733234  | 2683.754  | 3044.227  | AB046819  | 25629.789 | 30328.18  |
| H85962    | 55181.828 | 53163.527 | NM_020228 | 25064.439 | 27452.646 | NM_006090 | 6606.776  | 7615.538  |
| BG742446  | 2235.961  | 1969.29   | AK024685  | 8249.36   | 9711.615  | NM_002900 | 1386.093  | 1562.278  |
| AA864554  | 1802.934  | 1544.121  | NM_001157 | 676.068   | 774.962   | NM_004910 | 760.918   | 514.714   |
| X66945    | 8710.438  | 8014.064  | NM_012282 | 1651.684  | 1771.027  | AB013452  | 912.735   | 1488.836  |
| AI160703  | 820.952   | 976.207   | NM_006710 | 945.139   | 1194.618  | M93107    | 2120.94   | 2082.659  |
| X12830    | 4945.652  | 4080.994  | NM_003323 | 25514.596 | 31399.34  | BC001479  | 3405.34   | 3190.167  |
| U00482    | 2611.151  | 2434.831  | BG685310  | 4287.394  | 4516.107  | NM_002461 | 56676.031 | 53417.027 |
| Z80998    | 696.496   | 665.547   | AW300857  | 59781.34  | 62207.633 | NM_005771 | 586.99    | 817.803   |
| K01904    | 35184.215 | 26287.084 | H85962    | 60737.418 | 63747.824 | AB032986  | 40020.379 | 45546.984 |
| BE538886  | 2227.765  | 2234.719  | BG742446  | 4601.212  | 5650.297  | NM_017528 | 57170.793 | 58773.539 |
| NM_002228 | 1347.455  | 957.169   | AA864554  | 2092.241  | 2735.448  | NM_016032 | 9295.365  | 8817.007  |
| M57650    | 57170.203 | 60228.523 | X66945    | 14814.816 | 18727.779 | NM_014324 | 57938.898 | 55385.32  |
| BC023978  | 3067.23   | 3860.693  | AI160703  | 1701.917  | 2156.145  | NM_001687 | 41578.188 | 37431.703 |
| M21302    | 12322.991 | 12317.949 | X12830    | 10738.489 | 10451.947 | AK026374  | 4537.745  | 3124.661  |
| AK024865  | 3488.982  | 3914.113  | U00482    | 5546.994  | 5581.935  | NM_001169 | 5106.225  | 3693.917  |
| NM_007210 | 2770.698  | 3367.479  | K01904    | 40475.016 | 49034.383 | AK024648  | 34528.922 | 25460.021 |
| NM_001483 | 5992.087  | 8515.394  | BE538886  | 4201.597  | 4610.063  | NM_000719 | 1241.718  | 503.872   |
| NM_014942 | 1097.5    | 960.265   | NM_002228 | 1661.397  | 1334.119  | NM_003455 | 13201.132 | 15122.528 |
| NM_018360 | 5559.698  | 4716.125  | M57650    | 62819.766 | 63536.832 | NM_000171 | 4362.823  | 3207.319  |
| AL365415  | 1243.796  | 822.493   | BC023978  | 2349.568  | 3105.21   | AL354615  | 1185.518  | 774.867   |
| L29147    | 53791.035 | 58467.027 | M21302    | 9781.051  | 12060.298 | NM_013345 | 60311.18  | 59100.301 |
| NM_001525 | 53870.617 | 53757.148 | AK024865  | 4113.561  | 4612.043  | NM_003705 | 9128.109  | 7702.055  |
| NM_006055 | 8996.107  | 8715.025  | NM_007210 | 1553.538  | 1956.866  | NM_006861 | 6092.408  | 4429.185  |
| NM_004296 | 1535.503  | 1742.863  | NM_001483 | 7686.293  | 9156.098  | AJ010482  | 2026.136  | 1914.493  |
| NM_005048 | 1147.549  | 1014.638  | NM_014942 | 1354.532  | 1455.361  | AB040672  | 2911.269  | 2954.258  |
| NM_005972 | 2161.963  | 1693.237  | NM_018360 | 9178.284  | 8635.263  | NM_002192 | 913.115   | 1299.83   |
| NM_001060 | 907.078   | 752.333   | AL365415  | 1392.671  | 1663.718  | NM_005491 | 7452.057  | 7817.954  |
| NM_018841 | 9366.207  | 7916.002  | L29147    | 58764.27  | 58311.543 | NM_003865 | 2730.416  | 2051.735  |
| NM_005226 | 1692.402  | 1514.964  | NM_001525 | 59622.508 | 63302.32  | AK025599  | 724.76    | 462.86    |
| AL133105  | 9452.133  | 10369.399 | NM_006055 | 16728.512 | 18365.24  | X63417    | 3164.273  | 2986.891  |
| AK022859  | 2863.333  | 3044.254  | NM_004296 | 3758.19   | 4063.64   | S94539    | 50376.395 | 52338.496 |
| NM_000214 | 627.581   | 550.979   | NM_005048 | 2634.191  | 3241.667  | NM_006402 | 4355.357  | 2783.906  |
| NM_014864 | 6903.673  | 6356.858  | NM_005972 | 5295.059  | 6387.688  | NM_005785 | 4940.022  | 2352.988  |
| NM_003728 | 49067.152 | 45238.934 | NM_001060 | 1333.208  | 1454.128  | NM_018248 | 5166.55   | 3934.416  |
| NM_014352 | 25842.041 | 26923.471 | NM_018841 | 14989.042 | 13693.055 | AK001695  | 16897.477 | 9078.813  |
| NM_012481 | 6605.715  | 6607.378  | NM_005226 | 3529.095  | 2861.785  | NM_017886 | 14971.791 | 9901.587  |
| L09102    | 55556.121 | 69803.125 | AL133105  | 17301.9   | 17220.701 | NM_006252 | 4871.709  | 2906.23   |
| NM_016247 | 12040.843 | 17348.771 | NM_000214 | 1529.143  | 1543.943  | NM_001721 | 2059.624  | 1127.76   |
| NM_001658 | 57355.387 | 59136.051 | NM_014864 | 8834.216  | 9153.285  | NM_014397 | 22787.076 | 16248.01  |
| NM_006827 | 24222.82  | 21052.479 | NM_003728 | 56908.238 | 58559.566 | AB023182  | 5042.9    | 2747.5    |
| AK021761  | 10813.724 | 10330.291 | NM_014352 | 19561.555 | 21920.895 | NM_003607 | 1926.172  | 1112.748  |
| AK024536  | 3104.903  | 3345.505  | NM_012481 | 7286.737  | 6961.735  | NM_006575 | 4450.734  | 2932.418  |
| NM_018668 | 7338.741  | 7253.411  | L09102    | 61510.898 | 60677.645 | NM_013254 | 5489.678  | 4143.434  |
| NM_004227 | 2269.866  | 2195.646  | U68488    | 1599.414  | 1747.401  | NM_000437 | 33529.637 | 23177.328 |
| NM_005282 | 7127.115  | 7066.235  | NM_000675 | 908.59    | 989.656   |           |           |           |
| NM_001736 | 4356.958  | 4177.885  | NM_016247 | 37768.184 | 40388.445 |           |           |           |
| AB028949  | 767.381   | 966.878   | NM_001658 | 62679.426 | 62945.977 |           |           |           |

|           |           |           |           |           |           |
|-----------|-----------|-----------|-----------|-----------|-----------|
| AL137580  | 1363.753  | 1717.036  | NM_006827 | 33812.336 | 35846.516 |
| NM_004101 | 1416.214  | 1722.834  | AK021761  | 20923.744 | 21660.156 |
| NM_002995 | 56680.008 | 57194.566 | AK024536  | 11458.453 | 11019.292 |
| AB033114  | 647.547   | 689.031   | NM_018668 | 12510.408 | 12896.137 |
| NM_015978 | 9301.067  | 8815.994  | NM_004227 | 3528.529  | 3542.854  |
| NM_003810 | 1984.975  | 2803.593  | NM_005282 | 13254.178 | 14819.132 |
| NM_004908 | 681.467   | 951.991   | NM_001736 | 6489.964  | 7293.252  |
| NM_016171 | 58096.277 | 61354.051 | AB028949  | 1379.286  | 1392.213  |
| NM_014443 | 10964.753 | 6538.556  | AL137580  | 2138.501  | 2490.594  |
| NM_005212 | 6806.423  | 5466.667  | NM_004101 | 2511.233  | 2574.317  |
| M14584    | 1126.468  | 885.651   | NM_002995 | 59834.492 | 62132.594 |
| NM_006419 | 3804.759  | 3629.68   | AB033114  | 1555.916  | 1371.98   |
| AF035035  | 1159.619  | 1512.669  | NM_015978 | 23479.193 | 23655.459 |
| U90942    | 58401.762 | 63963.902 | NM_003810 | 3871.963  | 4062.146  |
| NM_000778 | 15389.702 | 15531.849 | NM_016171 | 62061.273 | 62845.953 |
| NM_001609 | 2648.496  | 2341.45   | NM_014443 | 10492.03  | 8885.144  |
| BE733234  | 784.672   | 1047.93   | NM_005212 | 7538.296  | 8008.99   |
| NM_020228 | 11717.917 | 15108.416 | M14584    | 1199.475  | 938.591   |
| AK024685  | 2959.516  | 3461.17   | NM_006419 | 6490.673  | 5029.716  |
| NM_003676 | 10134.405 | 8891.818  | AF035035  | 1609.88   | 1342.446  |
| AF113007  | 18261.092 | 25337.283 | AB020676  | 3279.353  | 3382.601  |
| NM_000688 | 4980.649  | 4225.342  | AK024715  | 1303.641  | 1277.221  |
| U39573    | 1649.38   | 1674.586  | U90942    | 61984.039 | 60496.879 |
| D82061    | 7080.753  | 7813.337  | NM_000778 | 24587.65  | 22320.18  |
| AJ293009  | 4530.774  | 5578.788  | NM_001609 | 3705.334  | 3183.299  |
| NM_000374 | 4047.688  | 3905.771  | BE733234  | 1597.059  | 1577.139  |
| NM_000502 | 19269.912 | 14854.749 | AK024685  | 5883.633  | 6539.494  |
| NM_001359 | 24261.504 | 31646.359 | NM_003676 | 12636.724 | 14837.079 |
| NM_005175 | 58275.398 | 59698.934 | AF113007  | 26435.844 | 34506.656 |
| NM_001696 | 16986.391 | 16224.437 | NM_000688 | 6673.722  | 6682.961  |
| NM_004975 | 32530.854 | 18978.463 | U39573    | 3743.036  | 3823.918  |
| NM_002245 | 1173.699  | 1209.75   | D82061    | 10984.573 | 11163.58  |
| D87445    | 9780.978  | 8959.976  | AJ293009  | 7307.227  | 7436.828  |
| NM_000238 | 8868.086  | 8412.398  | NM_000374 | 7422.358  | 7052.234  |
| NM_002247 | 3269.03   | 3894.251  | NM_000502 | 36251.906 | 38456.887 |
| NM_004980 | 46905.863 | 55016.695 | NM_001359 | 33621.57  | 43632.402 |
| AB011094  | 32958.941 | 47407.664 | NM_005175 | 60750.926 | 62494.867 |
| NM_003224 | 3642.816  | 5775.244  | NM_001696 | 23444.631 | 27091.094 |
| AK024865  | 1500.067  | 2053.527  | NM_004975 | 25468.836 | 19545.148 |
| NM_007210 | 1058.696  | 1069.526  | NM_002245 | 2358.692  | 2627.371  |
| NM_001483 | 4733.313  | 4792.347  | D87445    | 12973.505 | 13448.646 |
| NM_018973 | 7940.035  | 7444.752  | NM_000238 | 6394.872  | 6289.186  |
| NM_002591 | 41404.785 | 33738.098 | NM_002247 | 3496.874  | 3346.843  |
| NM_020216 | 3305.535  | 2881.471  | NM_004980 | 53771.621 | 55565.887 |
| AK021860  | 3636.866  | 2936.59   | AB011094  | 37689.984 | 39292.281 |
| AB046816  | 1297.432  | 1691.771  | NM_003224 | 3968.392  | 3994.065  |
| AL137266  | 7383.59   | 8359.753  | AK024865  | 2293.161  | 1749.351  |
| NM_016457 | 1582.541  | 1688.823  | NM_007210 | 1581.899  | 1658.306  |
| NM_005057 | 2460.675  | 1949.396  | NM_018973 | 12248.803 | 12842.029 |
| AF143321  | 1625.731  | 1447.273  | NM_002591 | 53746.246 | 43018.031 |
| AB046842  | 3170.353  | 3258.956  | AL049334  | 2305.556  | 2348.736  |
| NM_004850 | 2384.386  | 2335.612  | NM_020216 | 5066.575  | 5834.122  |
| NM_002822 | 18050.842 | 18531.648 | AK021860  | 7498.021  | 6365.343  |

|           |           |           |           |           |           |
|-----------|-----------|-----------|-----------|-----------|-----------|
| BF306955  | 3528.279  | 3814.396  | AB046816  | 1699.823  | 1907.13   |
| NM_001394 | 12965.586 | 15685.358 | AL137266  | 8624.021  | 9443.644  |
| NM_018441 | 17053.678 | 15852.951 | NM_016457 | 1748.109  | 1844.348  |
| CY3Cy5    | 8911.099  | 453.175   | NM_005057 | 2440.027  | 2591.35   |
| BM664556  | 1916.3    | 1716.847  | AF143321  | 1237.461  | 1375.55   |
| AL359586  | 1538.439  | 1616.848  | AB046842  | 3333.5    | 3674.316  |
| AF035290  | 1638.37   | 1950.111  | NM_004850 | 1984.638  | 2256.253  |
| AK023216  | 489.484   | 510.976   | NM_002822 | 23604.48  | 26016.566 |
| M33197    | 87347.156 | 65789.633 | BF306955  | 3807.974  | 4029.494  |
| AK023288  | 1305.508  | 1334.607  | NM_001394 | 14421.747 | 13558.457 |
| NM_017986 | 7171.208  | 5627.63   | NM_018441 | 21905.07  | 20489.346 |
| AK024846  | 6122.309  | 4242.514  | CY3Cy5    | 16083.366 | 621.419   |
| BM664556  | 1325.044  | 1137.124  | BM664556  | 3473.959  | 2936.004  |
| SR3       | 31160.236 | 27594.697 | AL359586  | 2948.805  | 1890.087  |
| SR7       | 4091.524  | 31400.791 | AF035290  | 2944.945  | 2216.494  |
| CY3Cy5    | 7174.574  | 423.382   | AK023216  | 1078.165  | 776.05    |
| U52839    | 1523.595  | 846.303   | M33197    | 73262.477 | 65854.57  |
| M33197    | 77812.969 | 66431.023 | AK023288  | 2872.48   | 2937.901  |
| AK026984  | 50771.289 | 36599.762 | NM_017986 | 18964.412 | 18168.156 |
| AF007146  | 735.985   | 439.965   | AK024846  | 13210.919 | 14301.77  |
| AL117427  | 14522.316 | 16889.193 | BM664556  | 2691.252  | 2860.817  |
| AK023305  | 55767.441 | 58747.273 | SR3       | 50156.965 | 56082.039 |
| AK022428  | 646.573   | 524.381   | SR7       | 6044.47   | 42159.648 |
| AK000788  | 442.556   | 489.399   | CY3Cy5    | 16398.334 | 891.883   |
| AK025089  | 9946.186  | 10583.259 | U52839    | 4178.952  | 4560.885  |
| M33197    | 78365.898 | 65264.586 | X78262    | 1206.75   | 987.267   |
| AK001279  | 1608.507  | 1943.188  | U58667    | 1094.459  | 701.068   |
| AF086407  | 576.772   | 754.336   | M33197    | 66234.836 | 64241.336 |
| AK001567  | 1287.161  | 1423.227  | AK026984  | 72133.789 | 65642.867 |
| M33197    | 81310.516 | 60874.043 | AK021796  | 835.904   | 825.289   |
| AK023938  | 2227.635  | 3500.835  | AF007146  | 1043.918  | 903.096   |
| AL110169  | 877.609   | 1107.245  | AL117427  | 21964.98  | 27231.355 |
| AK022088  | 672.49    | 554.782   | AF052118  | 34169.941 | 38192.375 |
| NM_013391 | 807.18    | 637.974   | AK023305  | 61800.48  | 62461.996 |
| M33197    | 63057.16  | 67138.906 | AK022428  | 2255.393  | 2493.55   |
| AL157466  | 5263.476  | 3995.198  | AK000788  | 1415.696  | 1696.607  |
| AL389981  | 533.135   | 640.688   | AK025089  | 20540.643 | 20144.021 |
| AK024336  | 1557.453  | 1681.245  | M33197    | 72162.398 | 65623.109 |
| AK023862  | 542.237   | 598.715   | AK001279  | 3073.245  | 3991.191  |
| NM_018621 | 712.853   | 764.87    | AF086407  | 977.112   | 1371.512  |
| AK022118  | 2787.664  | 3023.519  | AF085949  | 618.937   | 1173.977  |
| AK026453  | 9785.174  | 10115.518 | AK001567  | 1512.845  | 1684.454  |
| M33197    | 71239.414 | 66836.672 | M33197    | 66142.328 | 64818.289 |
| D17203    | 46738.285 | 32311.877 | AF075006  | 1510.275  | 628.455   |
| NM_005286 | 1134.281  | 1617.112  | M33197    | 76531.273 | 66430.859 |
| AK022101  | 433.38    | 551.11    | AK000903  | 74930.492 | 65942.836 |
| NM_003251 | 2448.336  | 2920.158  | AK023938  | 3907.141  | 4840.15   |
| AB046772  | 1141.716  | 1154.577  | AF086565  | 1129.05   | 1099.626  |
| AL442080  | 2879.246  | 2465.345  | AL110169  | 2094.742  | 1757.622  |
| AY007143  | 12666.714 | 10119.484 | AK022088  | 2204.521  | 1773.042  |
| L15557    | 1503.03   | 1004.159  | NM_013391 | 1969.777  | 1692.17   |
| AK022729  | 1153.94   | 1113.657  | M33197    | 75198.578 | 66141.781 |
| NM_006166 | 7250.772  | 4919.602  | AL157466  | 11151.638 | 11304.122 |

|           |           |           |           |           |           |
|-----------|-----------|-----------|-----------|-----------|-----------|
| AL050374  | 1622.516  | 1134.884  | AL389981  | 2316.369  | 3114.921  |
| M33197    | 85752.445 | 65749.742 | AK024336  | 3977.583  | 4469.946  |
| AL122073  | 18086.529 | 15552.751 | AK023862  | 1132.114  | 1225.087  |
| AF116655  | 4622.913  | 3945.507  | NM_018621 | 1978.524  | 2604.92   |
| AJ243222  | 1229.939  | 1113.846  | AK022016  | 905.733   | 1170.163  |
| AK026132  | 2711.049  | 3425.363  | AK022118  | 4965.524  | 5134.553  |
| Y11162    | 881.513   | 908.224   | AK026453  | 18228.719 | 18841.82  |
| AF070584  | 2887.233  | 2534.44   | AF116678  | 2502.007  | 2955.021  |
| AF052109  | 2119.905  | 1141.268  | M33197    | 65614.25  | 68854.922 |
| M33197    | 49554.246 | 30779.01  | D17203    | 68632.109 | 64438.938 |
| NM_003353 | 62539.844 | 66252.789 | NM_006495 | 12476.556 | 15167.914 |
| X82127    | 44068.133 | 45025.75  | NM_005288 | 3195.616  | 2777.056  |
| AL122044  | 4532.342  | 3846.713  | AK022101  | 688.259   | 728.898   |
| NM_018296 | 1931.684  | 1439.598  | NM_003251 | 3656.069  | 3434.599  |
| M33197    | 66810.148 | 67199.563 | AF086203  | 830.839   | 821.591   |
| AF070578  | 1073.081  | 1200.067  | AB046772  | 3080.27   | 2689.626  |
| L13743    | 1441.489  | 1207.913  | M33197    | 74714.617 | 65864.469 |
| U84519    | 5153.403  | 6546.334  | AL442080  | 7056.055  | 6957.252  |
| Z11849    | 7592.494  | 4223.671  | AY007143  | 41373.984 | 40769.449 |
| M33197    | 73801.828 | 66605.977 | L15557    | 4201.335  | 4550.99   |
| AF052103  | 4653.913  | 4290.797  | AK022729  | 3282.738  | 3939.524  |
| AF075050  | 2473.56   | 2470.849  | NM_006168 | 13781.258 | 15232.054 |
| AK024842  | 1178.355  | 1086.464  | AL050374  | 5310.483  | 5458.03   |
| NM_018382 | 776.671   | 507.625   | M33197    | 80251.242 | 67158.43  |
| AB018327  | 3281.729  | 2125.289  | AL122073  | 29768.988 | 33035.102 |
| AF303889  | 1104.833  | 1043.092  | AF116655  | 7556.204  | 8823.818  |
| M33197    | 64042.891 | 67376.242 | AJ243222  | 2744.879  | 3722.085  |
| AK022649  | 6901.881  | 6008.612  | AK026132  | 4265.912  | 6582.796  |
| NM_016507 | 5998.237  | 7187.847  | Y11162    | 1576.548  | 2025.534  |
| NM_002024 | 7477.923  | 6089.978  | AF070584  | 4786.021  | 5822.877  |
| NM_002743 | 9386.01   | 9826.206  | AF052109  | 3931.32   | 3504.787  |
| AF173358  | 16179.735 | 14613.401 | M33197    | 65479.293 | 68960.352 |
| NM_016366 | 6569.018  | 5866.483  | NM_003353 | 65272.055 | 63507.898 |
| NM_001563 | 5904.452  | 6623.137  | X82127    | 46153.926 | 38359.281 |
| NM_000266 | 1756.193  | 1982.753  | AL122044  | 12365.552 | 8744.817  |
| X89666    | 2273.858  | 2030.22   | NM_018296 | 4354.586  | 3998.972  |
| NM_003104 | 10613.694 | 15699.856 | NM_005752 | 8628.922  | 9285.084  |
| NM_014581 | 2467.199  | 3665.945  | M33197    | 67518.828 | 64351.199 |
| NM_014406 | 3306.984  | 2636.269  | AF070578  | 1522.415  | 1564.854  |
| Z11801    | 1469.316  | 1250.291  | L13743    | 3820.537  | 4344.189  |
| AK027253  | 479.453   | 549.793   | U84519    | 13272.844 | 16246.601 |
| S68954    | 3828.085  | 1465.779  | Z11849    | 17141.447 | 16845.926 |
| S81335    | 958.753   | 865.49    | U84527    | 1621.085  | 6525.813  |
| NM_006197 | 3758.59   | 1434.073  | M33197    | 68358.633 | 64522.719 |
| NM_014181 | 1902.543  | 2560.539  | AF052103  | 11033.552 | 13046.487 |
| M29273    | 765.171   | 1176.575  | AF075050  | 4842.089  | 6505.244  |
| NM_004854 | 5246.071  | 4276.833  | AK024842  | 1683.969  | 2596.958  |
| AJ245418  | 16242.17  | 19847.77  | NM_018382 | 1246.663  | 1660.723  |
| NM_006377 | 4524.384  | 3944.424  | AB018327  | 8471.834  | 7988.525  |
| NM_002436 | 1464.293  | 1332.907  | AF303889  | 1373.422  | 1783.702  |
| NM_018362 | 7815.583  | 7398.03   | M33197    | 64860.656 | 73140.398 |
| M33197    | 63195.184 | 68778.672 | AK022649  | 12689.713 | 8276.779  |
| NM_004755 | 1590.117  | 1033.663  | NM_016507 | 9217.733  | 7463.125  |



|           |           |           |           |           |           |
|-----------|-----------|-----------|-----------|-----------|-----------|
| NM_002186 | 1468.489  | 1974.72   | NM_002024 | 17054.146 | 11137.999 |
| NM_006182 | 984.737   | 1142.254  | NM_002743 | 20321.846 | 17008.633 |
| AL137543  | 2314.164  | 2050.477  | AF173358  | 35674.574 | 37472.09  |
| NM_001957 | 3001.382  | 2669.216  | NM_016366 | 19349.148 | 19829.816 |
| AK024533  | 22398.395 | 17878.533 | NM_001563 | 14495.043 | 16252.361 |
| NM_002736 | 16512.945 | 14297.709 | NM_000266 | 3066.519  | 4214.25   |
| NM_004246 | 1512.744  | 1321.027  | X89666    | 6293.93   | 6936.444  |
| NM_005207 | 1826.291  | 1177.04   | NM_017429 | 959.525   | 1250.506  |
| NM_003087 | 6514.723  | 5604.753  | NM_003104 | 18421.42  | 21381.678 |
| NM_001630 | 2569.618  | 1776.689  | NM_014581 | 6918.476  | 7177.685  |
| AF305081  | 2994.849  | 2478.531  | NM_000898 | 1600.64   | 2461.589  |
| AF118078  | 2301.22   | 2146.69   | M33197    | 65303.219 | 68436.664 |
| NM_020169 | 637.642   | 1031.663  | NM_014406 | 6418.741  | 7242.773  |
| AL157428  | 1280.458  | 2369.577  | Z11801    | 2949.249  | 3623.638  |
| NM_005858 | 2544.875  | 2286.744  | AK027253  | 1174.419  | 1613.257  |
| NM_014931 | 5132.028  | 4390.976  | S68954    | 8224.565  | 3864.19   |
| NM_014487 | 8059.315  | 6165.307  | S81335    | 7522.329  | 8828.4    |
| NM_018070 | 2123.305  | 1890.383  | NM_006197 | 8649.749  | 3449.623  |
| NM_002484 | 11051.315 | 9365.902  | NM_014181 | 2950.415  | 3450.982  |
| M33197    | 59382.184 | 62910.121 | NM_004854 | 10311.021 | 6222.599  |
| NM_018240 | 22980.873 | 22911.447 | AJ245418  | 27556.756 | 22154.904 |
| AL162052  | 3356.704  | 2532.588  | NM_006377 | 11976.583 | 8542.191  |
| AK025941  | 3064.535  | 2188.516  | AF244129  | 1454.955  | 1458.057  |
| NM_018179 | 1347.142  | 894.312   | NM_002436 | 4592.821  | 4931.489  |
| AF059531  | 15627.829 | 11547.972 | NM_018362 | 15947.789 | 15659.068 |
| NM_002707 | 13771.709 | 17213.449 | M33197    | 65594.336 | 68237.672 |
| AF029777  | 3610.34   | 2656.009  | NM_004755 | 2957.5    | 3375.192  |
| NM_003352 | 1261.805  | 877.841   | NM_002186 | 3618.908  | 3796.413  |
| AK026884  | 39768.754 | 36601.914 | NM_006182 | 1793.706  | 2014.635  |
| S82198    | 1543.171  | 1273.858  | AL137543  | 4581.91   | 5705.81   |
| NM_002594 | 3632.307  | 3521.666  | NM_004444 | 43697.391 | 55147.125 |
| NM_001159 | 4122.507  | 4158.356  | NM_001957 | 5652.257  | 7288.859  |
| NM_031407 | 5940.95   | 6525.293  | AK024533  | 56304.594 | 65602.734 |
| M33197    | 60895.68  | 62905.887 | NM_002736 | 34169.289 | 47940.25  |
| NM_020193 | 1722.467  | 1349.579  | NM_004246 | 18572.586 | 22518.045 |
| NM_005619 | 1230.914  | 1231.635  | NM_004961 | 693.25    | 1120.518  |
| D87440    | 12038.131 | 9616.208  | NM_005207 | 5247.459  | 5354.612  |
| AK000332  | 52291.746 | 41780.82  | NM_003087 | 6322.209  | 4008.456  |
| AL080156  | 1260.802  | 799.717   | NM_001630 | 24045.578 | 14352.122 |
| NM_006738 | 3215.25   | 2853.305  | AF132200  | 997.345   | 876.349   |
| NM_002285 | 1164.409  | 1198.501  | AF305081  | 7714.684  | 6899.13   |
| NM_006694 | 17163.84  | 15550.702 | AF118078  | 5565.576  | 4946.856  |
| NM_013351 | 55718.926 | 46139.785 | NM_020169 | 1628.539  | 1786.534  |
| NM_012340 | 14472.758 | 15544.449 | AL157428  | 1913.42   | 2299.521  |
| NM_006022 | 2603.406  | 3185.034  | BE904175  | 700.275   | 980.904   |
| AK025110  | 1242.261  | 1507.292  | NM_005858 | 6026.325  | 7229.684  |
| X52339    | 55346.359 | 53051.59  | NM_014931 | 13401.924 | 18056.986 |
| M33197    | 57584.07  | 66825.367 | NM_014487 | 16344.373 | 17605.924 |
| AB046830  | 2725.947  | 3629.483  | NM_018070 | 4933.166  | 4869.901  |
| NM_007122 | 2537.779  | 2789.827  | NM_002484 | 24459.105 | 26391.012 |
| NM_001488 | 1398.79   | 1239.046  | M33197    | 60662.91  | 62806.289 |
| NM_016202 | 13797.369 | 19287.768 | AL162052  | 10593.712 | 11638.981 |
| NM_012476 | 1917.242  | 1983.756  | AK025941  | 7448.599  | 8233.854  |

|           |           |           |           |           |           |
|-----------|-----------|-----------|-----------|-----------|-----------|
| NM_016604 | 1531.799  | 1806.877  | NM_018179 | 3760.466  | 3846.81   |
| NM_006276 | 3197.068  | 3530.986  | AF059531  | 27395.732 | 10609.571 |
| NM_003407 | 4506.41   | 4107.24   | NM_002707 | 23944.867 | 8569.874  |
| NM_007209 | 55559.348 | 61676.23  | AF029777  | 5253.178  | 3380.979  |
| NM_003729 | 4247.798  | 4883.468  | NM_003352 | 3358.287  | 1833.168  |
| L05096    | 18269.826 | 19702.027 | AK026884  | 60825.039 | 53180.82  |
| BC015899  | 12481.268 | 13191.363 | S82198    | 4915.856  | 4042.563  |
| M33197    | 63072.363 | 67337.352 | NM_002594 | 8458.593  | 7558.098  |
| NM_002848 | 628.462   | 389.339   | NM_001159 | 8691.347  | 8491.137  |
| NM_015914 | 2143.361  | 1492.649  | NM_031407 | 12493.748 | 14764.599 |
| NM_007180 | 6754.101  | 5852.556  | NM_002218 | 716.07    | 821.694   |
| NM_005609 | 1952.493  | 2797.863  | M33197    | 66229.82  | 65260.254 |
| NM_005476 | 8654.98   | 11537.771 | AK000410  | 65962.727 | 66158.859 |
| NM_005660 | 9425.072  | 12010.528 | NM_020193 | 5619.381  | 5604.609  |
| AK023902  | 5109.776  | 7880.098  | D86982    | 1484.45   | 1692.838  |
| NM_000401 | 1333.407  | 2096.127  | NM_005619 | 2263.779  | 3802.541  |
| NM_005223 | 953.614   | 1238.21   | D87440    | 26006.395 | 28474.922 |
| AB011173  | 6384.164  | 7866.111  | AK000332  | 64136.574 | 66361.953 |
| AB023195  | 2748.395  | 2862.303  | AL080156  | 2751.113  | 2450.909  |
| U43431    | 1799.21   | 1516.473  | NM_006738 | 8511.452  | 9971.392  |
| X57147    | 799.083   | 892.19    | NM_002285 | 2665.505  | 3251.22   |
| M33197    | 62967.867 | 65290.555 | NM_006694 | 34937.555 | 43857.652 |
| AK097041  | 5338.003  | 5211.131  | NM_013351 | 64484.387 | 26897.984 |
| AF068744  | 54706.039 | 62502.402 | NM_012340 | 15879.402 | 6098.705  |
| NM_004497 | 1272.939  | 1308.307  | NM_006022 | 4650.983  | 2977.159  |
| AK000762  | 2366.495  | 2970.389  | AK025110  | 2351.301  | 1578.367  |
| NM_004571 | 949.547   | 1325.009  | X52339    | 64868.629 | 61538.43  |
| NM_002895 | 1208.182  | 1456.679  | M33197    | 65288.727 | 70975.711 |
| AF276513  | 2067.679  | 1819.245  | AB046830  | 6168.522  | 4974.25   |
| M33197    | 63157.25  | 69570.484 | NM_007122 | 7074.195  | 6465.315  |
| M95610    | 59798.863 | 65550.508 | NM_001488 | 3275.896  | 2706.387  |
| NM_003118 | 5894.942  | 7655.128  | NM_016202 | 34076.551 | 29897.219 |
| L02922    | 36678.848 | 43399.535 | NM_012476 | 4888.842  | 4781.642  |
| NM_001797 | 8750.773  | 12373.689 | NM_016604 | 3850.292  | 4566.726  |
| NM_003154 | 2818.546  | 3568.371  | M33197    | 65693.805 | 68439.344 |
| NM_004235 | 2287.102  | 3683.212  | NM_006276 | 7957.487  | 9173.789  |
| AK023459  | 10436.207 | 16256.466 | NM_003407 | 12463.449 | 13846.384 |
| BI762154  | 2322.549  | 3881.105  | NM_007209 | 65233.719 | 63753.836 |
| U13022    | 2687.667  | 2594.805  | NM_003729 | 9711.423  | 12839.484 |
| R23251    | 21445.779 | 21738.527 | L05096    | 34942.621 | 38617.867 |
| AA702640  | 3615.08   | 4248.584  | BC015899  | 24154.443 | 26939.859 |
| T68583    | 6107.868  | 5945.747  | M33197    | 63928.133 | 66175.906 |
| AA481944  | 55058.426 | 61544.098 | NM_002848 | 2348.007  | 3398.258  |
| AF038440  | 2109.581  | 2195.608  | NM_015914 | 4408.898  | 5187.697  |
| M31158    | 8432.353  | 9573.404  | NM_007180 | 11069.35  | 4450.281  |
| H00742    | 2747.766  | 3367.385  | NM_005609 | 2493.519  | 1195.689  |
| D42108    | 5999.231  | 8201.075  | NM_005476 | 16395.084 | 9663.975  |
| BG700922  | 2363.11   | 3127.986  | NM_005660 | 12833.565 | 7836.301  |
| AI366068  | 2858.745  | 4854.853  | AK023902  | 9015.753  | 6969.064  |
| N57553    | 15088.313 | 13591.554 | NM_000401 | 1997.549  | 1654.747  |
| M33197    | 58280.324 | 58486.191 | NM_005223 | 2045.308  | 2274.896  |
| NM_018202 | 56712.258 | 54375.164 | AB011173  | 12403.889 | 9986.272  |
| AB023197  | 19463.793 | 20052.631 | AB023195  | 4405.732  | 5545.556  |

|           |           |           |           |           |           |
|-----------|-----------|-----------|-----------|-----------|-----------|
| NM_022173 | 31045.387 | 33018.707 | U43431    | 3604.045  | 3471.499  |
| AB040970  | 8072.37   | 8352.77   | X57147    | 1589.025  | 1675.583  |
| NM_018330 | 5028.286  | 4581.793  | AK021563  | 1392.996  | 1806.919  |
| AB023222  | 2643.626  | 3026.07   | AB006622  | 4167.639  | 4466.298  |
| AB033088  | 5772.402  | 6667.506  | M33197    | 65048.258 | 72458.43  |
| M33197    | 54869.234 | 68383.5   | AK097041  | 13178.343 | 14408.486 |
| U50342    | 55673.996 | 60396.195 | AF068744  | 63865.77  | 64406.305 |
| NM_000295 | 2212.796  | 2120.409  | NM_004497 | 1216.847  | 1445.409  |
| NM_000716 | 619.614   | 427.856   | AK000762  | 4800.284  | 5987.109  |
| AF026932  | 1194.746  | 1163.577  | NM_004571 | 2851.739  | 3091.526  |
| AF103795  | 2215.228  | 2067.196  | NM_016260 | 1401.896  | 1724.877  |
| NM_006215 | 714.145   | 626.415   | NM_002895 | 3219.003  | 3887.323  |
| M33197    | 60568.387 | 63659.934 | AF276513  | 6084.435  | 6562.732  |
| NM_007024 | 9111.478  | 8348.719  | M33197    | 66283.891 | 64478.941 |
| NM_013231 | 4920.883  | 5479.179  | M95610    | 64325.352 | 52265.883 |
| NM_012106 | 7527.814  | 9728.308  | NM_003118 | 3125.141  | 1704.433  |
| NM_006254 | 5028.978  | 5993.787  | L02922    | 46732.75  | 32865.98  |
| X95425    | 9876.256  | 9610.002  | NM_001797 | 10098.667 | 8464.939  |
| NM_004422 | 4655.698  | 4418.301  | NM_003154 | 4349.459  | 3315.871  |
| NM_016562 | 1006.989  | 975.825   | NM_004235 | 4324.532  | 4006.47   |
| AY009399  | 21381.998 | 21042.211 | AK023459  | 17854.451 | 17616.254 |
| NM_004895 | 3397.398  | 4817.337  | BI762154  | 4966.978  | 5179.235  |
| U80018    | 2494.556  | 2123.407  | U13022    | 3980.31   | 3342.012  |
| NM_000717 | 2276.809  | 1546.711  | R23251    | 41243.297 | 40708.395 |
| M33197    | 60827.68  | 65681.063 | AA702640  | 8172.203  | 9369.136  |
| NM_004845 | 12150.402 | 12812.558 | T68583    | 21437.33  | 21754.879 |
| NM_007107 | 12194.736 | 13822.2   | AA481944  | 64204.145 | 57057.195 |
| NM_000047 | 59274.566 | 60225.875 | AF038440  | 5962.612  | 7046.966  |
| M68874    | 705.051   | 1323.314  | M31158    | 15522.651 | 19255.764 |
| NM_006319 | 10468.933 | 8023.332  | H00742    | 6374.905  | 7676.851  |
| NM_018226 | 2432.151  | 2115.461  | D42108    | 14670.812 | 15878.79  |
| NM_004605 | 1013.602  | 988.9     | BG700922  | 6245.563  | 7438.747  |
| NM_006660 | 11060.228 | 14493.572 | BG565837  | 685.967   | 966.521   |
| NM_006685 | 55997.906 | 58772.543 | N57553    | 28379.27  | 34032.656 |
| AF154121  | 1259.354  | 984.268   | M33197    | 62974.973 | 61416.996 |
| NM_012139 | 19558.525 | 20752.492 | NM_018202 | 62965.727 | 55908.063 |
| AF121856  | 9800.398  | 12346.957 | AB023197  | 26512.156 | 10564.447 |
| NM_006421 | 5340.75   | 6317.999  | NM_022173 | 29962.77  | 15706.727 |
| NM_017457 | 16799.906 | 14655.099 | AB040970  | 13910.215 | 8867.276  |
| NM_003765 | 15139.462 | 18347.43  | NM_018330 | 8670.417  | 7557.518  |
| NM_005868 | 1230.754  | 1753.055  | AB023222  | 4583.141  | 3808.528  |
| M33197    | 58775.559 | 61343.469 | AB033088  | 10973.788 | 8928.688  |
| NM_001201 | 4468.136  | 4684.119  | M33197    | 63044.41  | 66919.906 |
| NM_016618 | 1190.936  | 722.474   | U50342    | 63433.977 | 61018.992 |
| AB014568  | 53325.238 | 54625.688 | NM_000295 | 3036.287  | 2536.579  |
| AK022238  | 527.144   | 823.758   | NM_000716 | 1265.852  | 822.24    |
| NM_012249 | 12878.258 | 10622.341 | AF026932  | 2108.618  | 2444.849  |
| AK022546  | 33733.457 | 41943.449 | AF103795  | 5884.728  | 5453.908  |
| NM_014067 | 37328.566 | 45596.129 | NM_006215 | 2244.43   | 1951.338  |
| NM_002914 | 15667.468 | 12892.152 | M33197    | 62684.789 | 65943.477 |
| NM_020385 | 3669.928  | 2595.815  | NM_007024 | 22170.129 | 27883.754 |
| NM_006541 | 885.273   | 1017.495  | NM_013231 | 14138.887 | 17660.781 |
| M33197    | 60536.988 | 64282.262 | NM_012106 | 13751.849 | 18736.18  |

|           |           |           |           |           |           |
|-----------|-----------|-----------|-----------|-----------|-----------|
| NM_00570E | 6068.333  | 5831.511  | NM_006254 | 9545.854  | 10632.265 |
| NM_00432E | 4268.699  | 4188.103  | NM_004422 | 11500.807 | 11643.049 |
| NM_004581 | 9051.233  | 9136.102  | NM_016562 | 5559.613  | 6334.341  |
| NM_006817 | 20647.783 | 29993.592 | AY009399  | 37572.129 | 46001.078 |
| NM_00710E | 19949.617 | 28577.479 | NM_00489E | 40665.586 | 46506.738 |
| NM_015921 | 33540.223 | 34518.418 | U80018    | 3078.586  | 1689.473  |
| AB040900  | 15842.146 | 17926.102 | NM_000717 | 3272.754  | 1686.26   |
| NM_00108C | 4248.715  | 4398.693  | M33197    | 63279.82  | 66535.539 |
| NM_001482 | 1476.882  | 1975.159  | NM_00484E | 34036.43  | 27969.016 |
| NM_003118 | 6857.339  | 6031.931  | NM_007107 | 23693.662 | 21619.859 |
| L02922    | 43827.855 | 28669.025 | NM_000047 | 65605.25  | 69313.961 |
| NM_001797 | 9038.542  | 10215.406 | M68874    | 806.243   | 714.995   |
| NM_003154 | 3200.655  | 3447.848  | NM_006319 | 17303.686 | 14147.615 |
| NM_00423E | 3540.258  | 4076.442  | NM_01822E | 4803.185  | 4866.158  |
| AK023459  | 11393.532 | 16248.438 | NM_00460E | 1856.443  | 1942.671  |
| BI762154  | 2889.842  | 4022.575  | NM_00666C | 22471.139 | 23471.441 |
| U13022    | 3128.971  | 3820.419  | NM_00668E | 63578.527 | 64049.719 |
| R23251    | 25405.744 | 22166.656 | AF154121  | 5493.78   | 5208.437  |
| AA702640  | 4247.21   | 4204.322  | NM_012139 | 49943.785 | 55814.039 |
| T68583    | 7958.517  | 6484.908  | AF121856  | 18473.113 | 21503.936 |
| AA481944  | 57433.844 | 55477.117 | NM_006421 | 10598.242 | 13296.087 |
| AF038440  | 2013.282  | 2098.941  | NM_017457 | 32379.609 | 36966.023 |
| M31158    | 7749.285  | 8067.347  | NM_00376E | 31134.221 | 36322.676 |
| H00742    | 2898.182  | 2752.72   | NM_00586E | 2426.891  | 2833.55   |
| D42108    | 5850.682  | 6697.889  | M33197    | 64580.5   | 64196.777 |
| BG700922  | 2391.98   | 3491.384  | NM_001201 | 3567.647  | 1989.523  |
| AI366068  | 2817.849  | 3404.23   | NM_01661E | 3087.821  | 1482.924  |
| N57553    | 14599.274 | 15077.256 | AB014568  | 54952.355 | 29234.473 |
| NM_01654E | 5081.686  | 6136.362  | AK022238  | 1354.595  | 831.26    |
| NM_00144C | 52345.609 | 46290.203 | NM_012249 | 17445.443 | 15373.279 |
| NM_02217E | 36408.871 | 31000.688 | AK022546  | 50523.18  | 52033.715 |
| AB040970  | 8736.751  | 6936.727  | NM_014067 | 49870.789 | 50799.895 |
| NM_01833C | 6058.201  | 6224.315  | NM_002914 | 25563.141 | 22834.373 |
| AB023222  | 2901.81   | 3435.992  | NM_02038E | 6163.592  | 4819.189  |
| AB033088  | 6886.601  | 7920.028  | NM_006541 | 2738.177  | 3491.484  |
| M33197    | 56371.258 | 70178.453 | M33197    | 64789.57  | 65429.82  |
| U50342    | 57276.477 | 64407.379 | NM_00570E | 17133.295 | 19692.371 |
| NM_00029E | 2735.428  | 3237.456  | NM_00432E | 9835.343  | 11897.031 |
| NM_00071E | 945.479   | 950.531   | NM_004581 | 24238.654 | 28519.998 |
| AF026932  | 1597.173  | 1802.61   | NM_006817 | 37618.699 | 44381.457 |
| AF103795  | 2876.98   | 3044.647  | NM_00710E | 39359.953 | 44750.453 |
| NM_00621E | 1046.609  | 1184.268  | NM_015921 | 56055.18  | 59978.555 |
| M33197    | 57876.398 | 66616.266 | AB040900  | 32754.65  | 39109.285 |
| NM_007024 | 10059.249 | 10750.023 | NM_00108C | 6309.538  | 6436.38   |
| NM_013231 | 5704.817  | 6148.901  | NM_001482 | 2069.492  | 2530.249  |
| NM_01210E | 7728.544  | 9749.798  | NM_003118 | 3915.168  | 1876.012  |
| NM_006254 | 4850.159  | 6687.745  | L02922    | 43224.547 | 23009.256 |
| X95425    | 9802.596  | 11055.386 | NM_001797 | 5597.561  | 4231.053  |
| NM_004422 | 5071.492  | 5897.938  | NM_003154 | 4737.364  | 3606.208  |
| NM_016562 | 3552.524  | 4563.422  | NM_00423E | 4992.407  | 4410.702  |
| AY009399  | 20219.443 | 21514.66  | AK023459  | 20469.377 | 20699.643 |
| M95610    | 53638.328 | 44528.531 | BI762154  | 6277.181  | 6149.199  |
| NM_000717 | 1447.039  | 1714.357  | U13022    | 5308.475  | 5077.247  |

|           |           |           |           |           |           |
|-----------|-----------|-----------|-----------|-----------|-----------|
| M33197    | 58438.527 | 68577.414 | R23251    | 41987.508 | 44641.711 |
| NM_004845 | 8188.525  | 10188.433 | AA702640  | 7436.688  | 7397.076  |
| NM_007107 | 11338.372 | 15982.596 | T68583    | 16420.291 | 15525.11  |
| NM_000047 | 55178.164 | 61579.758 | AA481944  | 64478.246 | 65306.176 |
| M68874    | 587.637   | 902.386   | AF038440  | 5789.091  | 6703.471  |
| NM_006319 | 12412.988 | 9574.959  | M31158    | 15565.771 | 18616.207 |
| NM_018226 | 3159.115  | 2535.082  | H00742    | 6843.305  | 7544.797  |
| NM_004605 | 1369.544  | 1629.555  | D42108    | 19352.855 | 20073.32  |
| NM_006660 | 11811.722 | 16372.558 | BG700922  | 4480.039  | 5414.77   |
| NM_006685 | 54897.289 | 61488.813 | AI366068  | 5804.364  | 7246.119  |
| AF154121  | 2769.495  | 2081.335  | N57553    | 28280.854 | 30206.512 |
| NM_012139 | 30327.799 | 26071.027 | M33197    | 60441.426 | 62977.199 |
| AF121856  | 10179.96  | 8322.201  | NM_016545 | 9586.926  | 11274.472 |
| NM_006421 | 5134.322  | 4853.362  | NM_001440 | 60058.781 | 55064.598 |
| NM_017457 | 16994.824 | 13171.001 | NM_022173 | 29115.797 | 11929.061 |
| NM_003765 | 13773.576 | 11605.207 | AB040970  | 14621.545 | 5855.404  |
| NM_005865 | 1356.981  | 1216.184  | NM_018330 | 9042.194  | 4243.961  |
| M33197    | 56124.098 | 61627.313 | AB023222  | 6154.736  | 4135.176  |
| NM_018202 | 46632.434 | 27974.43  | AB033088  | 11881.745 | 10852.017 |
| AB023197  | 13186.78  | 6327.537  | M33197    | 62832.785 | 63144.715 |
| AB014568  | 26264.525 | 28631.412 | U50342    | 62625.629 | 61418.555 |
| AK022238  | 962.549   | 885.17    | NM_000295 | 3902.423  | 3271.469  |
| NM_012249 | 4881.731  | 4842.015  | NM_000716 | 1682.813  | 1403.492  |
| AK022546  | 17376.641 | 22957.141 | AF026932  | 2639.224  | 2876.148  |
| NM_014067 | 21206.004 | 31089.711 | AF103795  | 4541.749  | 4541.703  |
| NM_002914 | 11872.812 | 15332.355 | NM_006215 | 1795.714  | 1602.425  |
| NM_020385 | 4663.989  | 2790.007  | M33197    | 63978.191 | 63654.484 |
| NM_006541 | 1528.828  | 1099.693  | NM_007024 | 20870.154 | 22001.422 |
| M33197    | 58847.516 | 61368.313 | NM_013231 | 13908.632 | 14561.178 |
| NM_005705 | 7877.904  | 6241.512  | NM_012106 | 15934.772 | 19345.939 |
| NM_004325 | 5591.731  | 4955.157  | NM_006254 | 8785.394  | 9412.746  |
| NM_004581 | 12389.396 | 9317.211  | X95425    | 35970.539 | 37914.512 |
| NM_006817 | 22740.248 | 19250.305 | NM_004422 | 12622.246 | 13570.197 |
| NM_007105 | 22599.438 | 17412.992 | NM_016562 | 6049.415  | 6674.846  |
| NM_015921 | 36033.98  | 24588.49  | AY009399  | 36937.902 | 39203.195 |
| AB040900  | 17361.139 | 12547.507 | NM_004895 | 35176.359 | 34828.277 |
| NM_001080 | 3885.902  | 2135.378  | M33197    | 62174.441 | 66837.031 |
| NM_001482 | 1203.579  | 1087.561  | M95610    | 61764     | 57800.121 |
| U80018    | 1653.214  | 1565.519  | NM_000717 | 3402.398  | 1309.658  |
| NM_001797 | 2028.444  | 2546.206  | M33197    | 64601.238 | 72590.867 |
| NM_003154 | 1937.399  | 2261.04   | NM_004845 | 27350.764 | 20735.988 |
| NM_004235 | 1442.765  | 2059.693  | NM_007107 | 25108.193 | 21170.621 |
| AK023459  | 10165.678 | 16236.584 | NM_000047 | 63867.035 | 60150.824 |
| BI762154  | 1154.29   | 1781.466  | M68874    | 922.855   | 1314.728  |
| U13022    | 1767.643  | 2374.97   | NM_006319 | 21538.682 | 19117.912 |
| R23251    | 23858.855 | 36990.289 | NM_018226 | 6721.629  | 6925.344  |
| AA702640  | 4474.294  | 4686.905  | NM_004605 | 2815.238  | 3247.872  |
| T68583    | 13040.471 | 13565.189 | NM_006660 | 22118.301 | 21290.783 |
| AA481944  | 52419.352 | 58647.414 | NM_006685 | 64218.438 | 66850.609 |
| AF038440  | 2768.534  | 2725.041  | AF154121  | 2537.172  | 2249.594  |
| M31158    | 9674.46   | 8579.809  | NM_012139 | 48987.609 | 50955.41  |
| H00742    | 4196.508  | 3724.235  | AF121856  | 18701.332 | 18867.33  |
| D42108    | 8800.285  | 8333.319  | NM_006421 | 10803.28  | 12713.069 |

|           |           |           |           |           |           |
|-----------|-----------|-----------|-----------|-----------|-----------|
| BG700922  | 2769.431  | 3307.282  | NM_017457 | 32260.236 | 32661.471 |
| AI366068  | 3260.244  | 4172.667  | NM_003765 | 28442.232 | 30999.385 |
| NM_016545 | 5672.411  | 5559.781  | NM_005868 | 1779.068  | 2230.843  |
| NM_001440 | 50472.5   | 37496.051 | M33197    | 61020.047 | 57613.066 |
| NM_001201 | 2746.977  | 1684.863  | NM_018202 | 61268.227 | 57409.527 |
| NM_016618 | 717.822   | 689.942   | AB023197  | 19016.434 | 20846.912 |
| NM_000716 | 1103.411  | 1703.327  | AB014568  | 46956.363 | 20908.662 |
| AF026932  | 1162.337  | 1301.414  | AK022238  | 772.053   | 483.987   |
| AF103795  | 2392.908  | 3011.562  | NM_012249 | 10287.255 | 5631.295  |
| NM_006215 | 998.78    | 1471.391  | AK022546  | 51420.016 | 51455.699 |
| M33197    | 59666.242 | 66779.055 | NM_014067 | 54991.801 | 50884.121 |
| NM_007024 | 6321.507  | 6713.099  | NM_002914 | 31360.002 | 30876.418 |
| NM_013231 | 5443.903  | 5960.037  | NM_020385 | 7946.559  | 6599.917  |
| NM_012106 | 9483.58   | 12016.157 | NM_014877 | 920.113   | 862.912   |
| NM_006254 | 5064.66   | 5733.307  | NM_006541 | 2564.24   | 2630.771  |
| X95425    | 18399.314 | 18122.721 | M33197    | 66619.133 | 64293.945 |
| NM_004422 | 7695.402  | 7642.347  | NM_005705 | 14005.364 | 12573.762 |
| NM_016562 | 4482.605  | 4391.326  | NM_004328 | 8005.082  | 8791.708  |
| M33197    | 55724.664 | 63977.543 | NM_004581 | 20003.811 | 17959.383 |
| AY009399  | 27663.756 | 27303.383 | NM_006817 | 34051.609 | 40874.082 |
| NM_004895 | 45038.551 | 40020.293 | NM_007108 | 34828.508 | 41228.871 |
| U59748    | 8108.601  | 8730.62   | NM_015921 | 50921.332 | 51375.586 |
| L32537    | 706.696   | 666.13    | AB040900  | 29146.834 | 31796.305 |
| NM_014303 | 29358.553 | 23685.367 | NM_001080 | 6703.856  | 5963.984  |
| M33197    | 55102.449 | 61921.18  | NM_001482 | 1970.276  | 2599.08   |
| M95610    | 52011.258 | 39208.316 | U80018    | 2136.054  | 3755.885  |
| NM_003118 | 3768.945  | 1696.542  | NM_001797 | 5331.315  | 3521.015  |
| L02922    | 28450.953 | 24435.15  | NM_003154 | 3235.323  | 1672.002  |
| NM_004045 | 24316.643 | 30583.166 | NM_004235 | 4068.58   | 3075.774  |
| NM_001891 | 2317.784  | 2363.459  | AK023459  | 21926.195 | 18586.297 |
| NM_012139 | 24080.412 | 24064.766 | BI762154  | 5945.182  | 5899.424  |
| AF121856  | 10947.257 | 11876.502 | U13022    | 6242.392  | 4498.134  |
| NM_006421 | 5841.35   | 6816.724  | R23251    | 47460.469 | 54123.863 |
| NM_017457 | 18786.555 | 20785.463 | BG763477  | 398.591   | 775.774   |
| NM_003765 | 19961.719 | 17412.822 | AA702640  | 9539.941  | 9828.3    |
| NM_005868 | 1428.38   | 1293.051  | T68583    | 23319.518 | 22967.969 |
| M33197    | 56279.93  | 62900.27  | AA481944  | 60381.672 | 59441.465 |
| NM_018202 | 51733.188 | 36345.59  | AF038440  | 4308.364  | 4254.019  |
| AB023197  | 17554.918 | 10666.506 | M31158    | 14715.146 | 15777.861 |
| NM_022173 | 32678.123 | 21578.154 | H00742    | 5692.922  | 6069.899  |
| AB040970  | 7215.651  | 6788.447  | D42108    | 11758.431 | 10797.015 |
| NM_018330 | 4704.473  | 3528.97   | BG700922  | 4350.565  | 4566.602  |
| AB023222  | 2223.557  | 1375.892  | AI366068  | 5018.1    | 5788.284  |
| AB033088  | 4546.469  | 2098.631  | BG565837  | 806.755   | 886.109   |
| M33197    | 60511.492 | 58168.563 | N57553    | 29076.418 | 32404.551 |
| U50342    | 59814.973 | 49748.934 | M33197    | 59546.891 | 63050.887 |
| NM_000295 | 1561.977  | 1372.342  | NM_016545 | 9875.157  | 9834.195  |
| NM_001080 | 6500.304  | 10924.014 | NM_001440 | 57064.246 | 56327.781 |
| NM_001482 | 1443.023  | 2485.645  | NM_001201 | 4457.87   | 7034.948  |
| NM_001215 | 506.238   | 699.357   | NM_016618 | 1434.903  | 1481.64   |
| U80018    | 1603.953  | 2223.101  | NM_000716 | 1856.93   | 933.338   |
| NM_000717 | 2518.946  | 2297.886  | AF026932  | 1827.015  | 1047.292  |
| M33197    | 53865.754 | 63735.887 | AF103795  | 6416.797  | 3946.555  |

|           |           |           |           |           |           |
|-----------|-----------|-----------|-----------|-----------|-----------|
| NM_00484E | 10388.043 | 8646.832  | NM_00621E | 2654.189  | 1685.065  |
| NM_007107 | 11119.57  | 10563.714 | M33197    | 62816.332 | 62576.578 |
| NM_000047 | 44026.922 | 43132.266 | NM_007024 | 23057.113 | 22336.186 |
| M68874    | 336.667   | 370.288   | NM_013231 | 18300.344 | 18980.107 |
| NM_00631E | 12201.903 | 9121.791  | NM_01210E | 17897.047 | 21178.195 |
| NM_01822E | 2840.657  | 2744.6    | NM_006254 | 11256.469 | 9102.251  |
| NM_00460E | 1388.651  | 1818.512  | X95425    | 40286.27  | 35535.832 |
| Z36813    | 7395.111  | 5488.884  | NM_00442E | 11203.182 | 10200.043 |
| NM_00666C | 12447.14  | 9899.224  | NM_01656E | 6667.013  | 6850.732  |
| NM_00148E | 747.737   | 667.943   | M33197    | 61981.688 | 66301.086 |
| NM_004727 | 1040.318  | 769.782   | AY009399  | 39303.723 | 36847.512 |
| NM_00055E | 2694.278  | 2358.638  | NM_00489E | 57675.453 | 60110.117 |
| NM_00668E | 53738.945 | 48635.91  | U59748    | 11861.38  | 12883.522 |
| M33197    | 37448.559 | 26253.424 | L32537    | 1260.357  | 1597.618  |
| AF154121  | 2205.887  | 1757.612  | NM_01430E | 43025.996 | 51806.617 |
| M33197    | 58869.105 | 67136.461 | AF130062  | 5766.807  | 6214.871  |
| NM_01654E | 7627.286  | 12507.429 | NM_01486E | 1243.902  | 1079.83   |
| NM_00144C | 55481.934 | 63160.711 | M33197    | 61809.047 | 65450.75  |
| NM_001201 | 2066.436  | 2619.187  | M95610    | 55385.895 | 54502     |
| NM_01661E | 1673.333  | 1948.66   | NM_003118 | 4508.347  | 4737.584  |
| AB014568  | 14045.715 | 8454.7    | L02922    | 37369.363 | 44907.813 |
| NM_01224E | 2777.229  | 2618.571  | NM_00404E | 46121.762 | 18906.742 |
| AK022546  | 16857.111 | 12548.824 | NM_001891 | 3187.468  | 1801.476  |
| NM_014067 | 19263.207 | 16206.281 | NM_01213E | 56068.801 | 55954.793 |
| NM_002914 | 12519.559 | 13105.906 | AF121856  | 22608.496 | 19597.732 |
| NM_02038E | 3301.462  | 2945.192  | NM_006421 | 12998.545 | 11706.274 |
| NM_006541 | 1091.494  | 1011.637  | NM_017457 | 35264.859 | 29141.998 |
| M33197    | 55657.387 | 61048.617 | NM_00376E | 30756.441 | 27700.125 |
| NM_00570E | 7695.058  | 6736.384  | NM_00586E | 1973.334  | 2080.953  |
| NM_00432E | 6294.619  | 6515.417  | M33197    | 63549.172 | 62633.445 |
| NM_004581 | 12998.763 | 12119.413 | NM_01820E | 61643.09  | 57437.246 |
| NM_006817 | 22717.053 | 24869.707 | AB023197  | 29508.189 | 29965.434 |
| NM_00710E | 21743.777 | 18791.146 | NM_02217E | 53446.426 | 58914.699 |
| NM_015921 | 36363.473 | 28398.594 | AB040970  | 13353.627 | 14039.896 |
| AB040900  | 19716.232 | 24292.295 | NM_01833C | 8179.945  | 8518.121  |
| CY3Cy5    | 2635.347  | 112.743   | AB023222  | 3581.598  | 3920.663  |
| NM_006917 | 1137.35   | 819.09    | AB033088  | 8799.093  | 8438.646  |
| AF086225  | 2052.297  | 2297.878  | M33197    | 60654.75  | 64069.906 |
| NM_005844 | 1710.767  | 2145.229  | U50342    | 61539.492 | 61508.969 |
| AK024941  | 2551.387  | 3295.788  | NM_00029E | 2569.141  | 3162.988  |
| M33197    | 61289.945 | 56419.363 | NM_00108C | 15288.456 | 5506.878  |
| AK025489  | 1667.927  | 1836.609  | NM_00148E | 3017.144  | 1874.886  |
| AL390152  | 1242.388  | 996.841   | NM_00121E | 3163.535  | 1924.262  |
| AK026721  | 2204.149  | 2860.8    | U80018    | 3114.064  | 2832.86   |
| AK023027  | 3841.236  | 3999.125  | NM_000717 | 4474.22   | 3022.65   |
| AK025598  | 1092.18   | 1165.746  | M33197    | 61678.918 | 67345.07  |
| NM_006917 | 749.594   | 853.262   | NM_00484E | 29012.844 | 24243.742 |
| SR2       | 38830.926 | 37989.352 | NM_007107 | 21843.416 | 16301.136 |
| SR4       | 10718.069 | 15768.631 | NM_000047 | 62095.82  | 61344.613 |
| SR6       | 1413.778  | 2138.327  | M68874    | 901.096   | 1026.03   |
| SR8       | 4878.316  | 25387.396 | NM_00631E | 17759.822 | 15160.774 |
| SR10      | 18057.629 | 9657.358  | NM_01822E | 5616.89   | 6347.024  |
| CY3Cy5    | 3139.393  | 170.56    | NM_00460E | 2089.395  | 2889.322  |

|           |           |           |           |           |           |
|-----------|-----------|-----------|-----------|-----------|-----------|
| AK025948  | 689.014   | 786.474   | Z36813    | 15792.361 | 16076.129 |
| AJ238555  | 1139.612  | 1806.202  | NM_005835 | 784.238   | 739.442   |
| AL353948  | 13078.662 | 16564.451 | NM_006660 | 23561.256 | 27745.34  |
| M33197    | 75981.68  | 64996.953 | NM_001486 | 1645.874  | 2055.472  |
| AK025869  | 2769.261  | 2574.516  | NM_004727 | 1831.57   | 2579.783  |
| AL050088  | 1281.892  | 2034.609  | NM_000559 | 4955.492  | 5495.254  |
| AK024939  | 2419.768  | 3533.854  | NM_006685 | 63193.645 | 61987.328 |
| AF074998  | 770.979   | 792.54    | M33197    | 55687.695 | 60304.605 |
| AB007880  | 2997.15   | 3582.134  | AF154121  | 3618.898  | 4183.97   |
| AK024950  | 1592.017  | 1910.043  | M33197    | 64928.188 | 71098.398 |
| NM_018843 | 1244.443  | 1247.701  | NM_016545 | 14104.364 | 7835.491  |
| AK024275  | 655.52    | 1126.56   | NM_001440 | 62874.063 | 57661.105 |
| AL049461  | 843.35    | 986.309   | NM_001201 | 6346.973  | 4447.508  |
| M33197    | 66243.961 | 65950.117 | NM_016618 | 3390.001  | 1823.533  |
| M33197    | 64241.641 | 66245.664 | AB014568  | 63132.75  | 62538.777 |
| AK026259  | 16711.271 | 17002.586 | AK022238  | 1029.638  | 967.874   |
| M33197    | 65400.105 | 66124.625 | NM_012249 | 20222.16  | 20979.566 |
| NM_018126 | 756.627   | 742.773   | AK022546  | 39796.074 | 33608.996 |
| AK024506  | 6226.155  | 8111.305  | NM_014067 | 44757.883 | 40587.148 |
| NM_014179 | 1938.883  | 2106.54   | NM_002914 | 24935.621 | 21509.912 |
| AF086326  | 5577.968  | 8415.983  | NM_020385 | 7827.312  | 8411.634  |
| M33197    | 70112.008 | 65588.484 | NM_006541 | 2492.03   | 2523.643  |
| AL080057  | 862.897   | 884.01    | M33197    | 64240.809 | 66750.281 |
| M33197    | 64477.012 | 68013.75  | NM_005705 | 15088.2   | 16147.472 |
| AK024470  | 1688.092  | 1889.542  | NM_004328 | 9818.806  | 11011.739 |
| NM_017935 | 495.867   | 678.857   | NM_004581 | 24208.176 | 23625.135 |
| NM_004226 | 4258.719  | 4257.925  | NM_006817 | 35498.262 | 44131.145 |
| M33197    | 64505.91  | 65127.145 | NM_007108 | 34609.762 | 41418.941 |
| AF056430  | 847.974   | 1372.725  | NM_015921 | 53940.07  | 57642.855 |
| NM_014906 | 585.991   | 763.738   | AB040900  | 29354.896 | 33895.488 |
| AF009291  | 1404.581  | 1936.418  | CY3Cy5    | 8664.06   | 126.857   |
| M33197    | 63472.305 | 58183.301 | NM_006917 | 3960.543  | 4458.215  |
| NM_018055 | 3319.207  | 2703.385  | AF086225  | 5115.044  | 5255.129  |
| AK002199  | 796.276   | 851.912   | NM_005844 | 29589.412 | 31044.635 |
| AK021662  | 983.173   | 993.188   | AK024941  | 6642.654  | 6305.203  |
| AK001038  | 1372.985  | 1502.668  | AF056434  | 10154.732 | 9746.443  |
| AK001802  | 882.406   | 1098.109  | AF086199  | 1158.516  | 1506.235  |
| AK021469  | 2010.034  | 2836.584  | M33197    | 67583.375 | 63820.555 |
| M33197    | 64314.723 | 67110.328 | AK025489  | 4719.232  | 4762.59   |
| AK023633  | 1477.104  | 1305.359  | AB075853  | 933.659   | 968.069   |
| AL360165  | 2283.773  | 2479.85   | AL390152  | 14976.377 | 15090.644 |
| M33197    | 72875.359 | 65374.637 | AK026721  | 4751.413  | 5064.598  |
| NM_005281 | 5585.887  | 6225.223  | AK023027  | 13618.259 | 12292.322 |
| NM_005549 | 3702.134  | 4411.963  | AK025598  | 2192.185  | 1999.354  |
| AJ008115  | 28115.865 | 34289.691 | AB002348  | 64249.09  | 57759.816 |
| AF083125  | 3539.207  | 4848.731  | NM_006917 | 1951.518  | 1871.428  |
| U72851    | 1012.872  | 904.81    | SR2       | 50556.984 | 50129.43  |
| AK022970  | 714.773   | 640.697   | SR4       | 17260.547 | 16671.506 |
| AK026212  | 1554.35   | 1663.961  | SR6       | 2377.561  | 1838.539  |
| AF086222  | 1108.269  | 1178.3    | SR8       | 8865.466  | 22701.686 |
| AF086415  | 5542.253  | 8074.898  | SR10      | 30594.932 | 8279.123  |
| D28391    | 38160.922 | 42273.598 | CY3Cy5    | 6119.014  | 117.562   |
| M33197    | 59440.238 | 55536.813 | AK025948  | 1623.866  | 2066.122  |



|           |           |           |           |           |           |
|-----------|-----------|-----------|-----------|-----------|-----------|
| D86961    | 1587.406  | 1593.468  | AK000674  | 796.152   | 1086.971  |
| AJ227896  | 3838.737  | 3321.561  | AJ238555  | 3526.889  | 4842.459  |
| L32841    | 5055.221  | 6471.045  | L23850    | 621.01    | 990.553   |
| AF131770  | 5022.735  | 4977.578  | AL353948  | 66263.453 | 70438.25  |
| NM_006432 | 15464.057 | 18843.346 | M33197    | 67099.477 | 66775.008 |
| AF025441  | 1741.791  | 2349.483  | AK025869  | 24662.922 | 24323.531 |
| U62823    | 2565.313  | 3303.726  | AL050088  | 10714.055 | 12192.66  |
| NM_003535 | 17507.898 | 21029.146 | AK024939  | 6206.058  | 5841.491  |
| M33197    | 67626.148 | 64325.781 | AK001561  | 23531.885 | 23323.9   |
| AK000852  | 34920.07  | 26109.16  | AB007880  | 7993.386  | 8492.436  |
| AF251188  | 6860.396  | 5588.148  | AK024950  | 5075.099  | 5410.251  |
| AK026418  | 5837.605  | 5569.615  | M33197    | 67033.859 | 67237.609 |
| AF086194  | 24604.666 | 23903.684 | NM_014146 | 16322.924 | 17039.25  |
| AK026811  | 6091.021  | 7625.236  | AF147356  | 740.388   | 800.285   |
| NM_017743 | 1441.234  | 1406.45   | NM_018843 | 2981.372  | 2441.2    |
| NM_000300 | 1560.545  | 1746.827  | AK024275  | 1495.395  | 1642.138  |
| M33197    | 63799.203 | 65400.434 | AL049461  | 1396.192  | 995.055   |
| AV756917  | 3149.198  | 4898.748  | AL109782  | 17693.689 | 15540.407 |
| NM_018380 | 3317.118  | 4679.336  | M33197    | 67308.727 | 65748.852 |
| AK001442  | 415.671   | 678.742   | AK026052  | 1033.307  | 1386.109  |
| NM_012070 | 1618.245  | 1711.269  | AK026601  | 1013.852  | 1126.905  |
| NM_019035 | 472.882   | 507.835   | AK025387  | 978.346   | 1027.694  |
| AF183423  | 1221.686  | 1397.954  | AK026259  | 65592.492 | 76139.828 |
| U92023    | 971.661   | 634.707   | M33197    | 65918.891 | 74185.102 |
| U12129    | 3729.031  | 4013.264  | NM_018126 | 2282.745  | 2621.575  |
| S81242    | 61019.43  | 64110.879 | AK024506  | 17626.402 | 18133.004 |
| AF075072  | 4685.76   | 4475.037  | NM_014179 | 5367.189  | 5793.149  |
| M33197    | 63382.5   | 61815.738 | AF086326  | 10838.88  | 11918.369 |
| NM_002505 | 6030.642  | 4870.326  | M33197    | 67354.406 | 64268.785 |
| U38442    | 976.109   | 771.79    | AL049937  | 1696.953  | 1243.368  |
| AF110136  | 1332.485  | 1166.454  | AL080057  | 1347.578  | 1204.081  |
| AK026706  | 2485.679  | 2440.77   | M33197    | 66672.672 | 69250.859 |
| AB007936  | 62452.063 | 65567.133 | M33197    | 66307.578 | 71731.773 |
| M33197    | 64197.848 | 65775.297 | AK024470  | 4365.588  | 3867.257  |
| X99659    | 40029.789 | 36953.785 | NM_017935 | 1689.175  | 2039.408  |
| NM_015415 | 4930.886  | 6092.025  | NM_004226 | 8925.887  | 9156.505  |
| NM_002731 | 657.956   | 563.378   | AL137436  | 787.051   | 663.904   |
| NM_003895 | 2718.397  | 3301.392  | AK023400  | 1070.447  | 1067.456  |
| X99662    | 5078.468  | 5540.21   | AK023961  | 1033.856  | 1046.428  |
| NM_003473 | 51257.906 | 45390.883 | M33197    | 68130.469 | 62580.293 |
| M33197    | 60313.461 | 61782.363 | AF023203  | 834.702   | 1156.238  |
| NM_006015 | 34787.871 | 31321.572 | AF056430  | 2426.245  | 2442.743  |
| NM_014891 | 7257.173  | 7426.322  | NM_014906 | 734.018   | 655.444   |
| NM_013392 | 10490.554 | 8701.941  | AF009291  | 2282.87   | 2411.069  |
| M33197    | 62537.301 | 64112.594 | AF056440  | 2647.494  | 2858.088  |
| NM_002175 | 836.865   | 1011.123  | M33197    | 66825.75  | 68106.836 |
| NM_003235 | 2843.704  | 2856.917  | NM_018055 | 7144.668  | 7366.752  |
| NM_003455 | 1028.947  | 1163.053  | AK002199  | 1656.122  | 1677.104  |
| AF052692  | 1581.583  | 1858.539  | AK021662  | 1972.863  | 1906.709  |
| NM_000175 | 3401.285  | 2459.834  | AK001038  | 2017.714  | 1463.535  |
| AF062739  | 473.606   | 405.805   | AK001802  | 2178.156  | 1383.907  |
| NM_006602 | 1327.215  | 1952.607  | AK021469  | 3600.227  | 4013.372  |
| M33197    | 64366.805 | 65342.82  | AK021706  | 4128.995  | 5364.235  |

|           |           |           |           |           |           |
|-----------|-----------|-----------|-----------|-----------|-----------|
| AL079314  | 1946.725  | 2118.056  | M33197    | 68071.727 | 63048.848 |
| NM_001260 | 1734.254  | 1626.838  | AK023633  | 4480.19   | 4565.238  |
| NM_001950 | 3618.731  | 4184.333  | M84507    | 736.888   | 927.679   |
| AK026364  | 1812.468  | 1331.449  | NM_005372 | 837.564   | 920.388   |
| NM_018117 | 1689.399  | 1630.973  | NM_006179 | 4559.101  | 4600.62   |
| NM_006999 | 1529.471  | 1439.372  | AL360165  | 6259.167  | 5990.343  |
| NM_006289 | 1286.875  | 1423.878  | M33197    | 70891.625 | 62356.625 |
| M33197    | 60218.781 | 62424.254 | AJ008132  | 24594.783 | 21419.955 |
| NM_004331 | 9439.123  | 9306.045  | NM_005281 | 16067.435 | 15310.196 |
| NM_015999 | 1674.406  | 1676.772  | NM_005549 | 12668.943 | 12498.396 |
| NM_015703 | 16725.115 | 17255.42  | AJ008115  | 58682.973 | 57775.363 |
| AB018337  | 2196.151  | 1885.636  | AF083125  | 6796.542  | 7739.549  |
| NM_014489 | 2725.199  | 1851.846  | U72851    | 1784.124  | 1604.151  |
| AK025273  | 3869.74   | 3255.365  | M33197    | 69428.859 | 62995.277 |
| M33197    | 66294.859 | 65003.047 | AK022970  | 1175.044  | 1294.325  |
| NM_002205 | 2174.219  | 2406.874  | AK026212  | 2701.513  | 2857.777  |
| NM_002214 | 2276.791  | 3181.389  | AF086222  | 1633.864  | 1742.658  |
| NM_001911 | 1673.569  | 1281.824  | AF086415  | 10690.973 | 12504.961 |
| NM_006503 | 712.839   | 1027.692  | D28391    | 61339.082 | 58674.676 |
| M33197    | 1722.918  | 2309.148  | M33197    | 66664     | 67421.938 |
| AB020698  | 942.938   | 885.485   | AJ227885  | 1104.714  | 1102.183  |
| U68382    | 4490.303  | 4946.298  | D86961    | 5841.133  | 4029.057  |
| NM_003969 | 3853.584  | 3124.73   | AJ227896  | 49821.961 | 52707.559 |
| NM_004651 | 3461.738  | 3080.474  | L32841    | 11429.923 | 12067.059 |
| NM_003363 | 1201.921  | 1340.17   | M33197    | 66529.484 | 68806.055 |
| M33197    | 58593.121 | 61452.273 | AF131770  | 9523.829  | 10964.6   |
| NM_017569 | 13495.755 | 11385.345 | NM_006432 | 28925.613 | 36437.887 |
| NM_001459 | 1666.966  | 1356.986  | AK023897  | 2815.975  | 2919.291  |
| AK024480  | 1799.459  | 1753.95   | AF025441  | 3004.201  | 3164.04   |
| Y13871    | 28193.768 | 20876.199 | AK026768  | 5102.133  | 7531.694  |
| NM_012134 | 582.688   | 702.65    | M33197    | 66710.797 | 68462.641 |
| AL137725  | 14555.869 | 11716.294 | AK000852  | 46527.918 | 54157.293 |
| M33197    | 60967.152 | 63747.98  | AF251188  | 8397.299  | 9023.639  |
| AJ008151  | 23844.391 | 33459.656 | AK026418  | 7305.197  | 7270.484  |
| NM_005229 | 2256.843  | 3705.68   | AF086194  | 28349.828 | 34189.344 |
| NM_002354 | 907.32    | 1269.61   | AK026811  | 8970.796  | 9246.716  |
| NM_004091 | 955.155   | 934.615   | AF086019  | 2273.625  | 1584.086  |
| X74070    | 54347.945 | 59622.699 | NM_017743 | 3708.578  | 4199.611  |
| AF027219  | 632.996   | 696.028   | NM_000300 | 7620.767  | 8342.13   |
| NM_006333 | 4887.519  | 6355.168  | M33197    | 65929.188 | 73954.125 |
| M33197    | 54448.277 | 59124.559 | NM_012070 | 3398.101  | 3335.592  |
| NM_002899 | 10240.326 | 12101.505 | NM_019039 | 1588.707  | 1505.719  |
| AK022749  | 17261.596 | 17276.758 | AF183423  | 2194.615  | 1968.318  |
| BF031409  | 15050.485 | 13301.169 | M33197    | 65376.309 | 74413.313 |
| NM_007043 | 2192.215  | 2350.78   | U92023    | 2630.716  | 2375.959  |
| BE378791  | 820.666   | 998.837   | U12129    | 11033.604 | 8893.851  |
| U94388    | 2148.825  | 2087.094  | S81242    | 62917.613 | 72288.852 |
| NM_012322 | 5811.011  | 5478.424  | AF230801  | 4709.313  | 4993.919  |
| M33197    | 55365.773 | 59191.57  | AF075072  | 4822.52   | 4471.46   |
| NM_004889 | 53278.445 | 47649.559 | M33197    | 63647.414 | 68565.602 |
| AK025314  | 3582.178  | 3287.965  | NM_002509 | 8278.756  | 9107.122  |
| NM_002109 | 4785.624  | 3776.745  | U38442    | 1213.61   | 1484.526  |
| NM_000984 | 54851.055 | 58501.836 | AF110136  | 3113.362  | 3087.842  |

|             |           |           |           |           |           |
|-------------|-----------|-----------|-----------|-----------|-----------|
| NM_002453   | 13833.479 | 12016.589 | AK001558  | 1109.339  | 1360.047  |
| AK000780    | 52676.82  | 52253.117 | AF005258  | 3976.903  | 4770.67   |
| M33197      | 58721.887 | 61427.371 | NM_000887 | 4480.48   | 4623.013  |
| NM_000131   | 1104.024  | 1368.173  | AF277292  | 2047.697  | 2169.743  |
| NM_001836   | 420.701   | 725.11    | NM_002731 | 1709.283  | 1542.023  |
| M64714      | 673.702   | 879.972   | NM_003899 | 7081.043  | 6286.449  |
| AK026043    | 652.777   | 833.088   | X99662    | 8426.573  | 8461.256  |
| NM_005006   | 7783.773  | 7925.742  | NM_003473 | 61999.816 | 61662.551 |
| AK027033    | 1867.385  | 1741.387  | NM_014325 | 3565.237  | 3526.282  |
| NM_000106   | 4700.283  | 5386.48   | M33197    | 64189.652 | 71970.398 |
| NM_003000   | 26042.029 | 28149.355 | NM_017753 | 1717.641  | 1920.04   |
| NM_002495   | 18818.842 | 20544.031 | NM_012453 | 787.328   | 805.818   |
| M33197      | 55923.82  | 59446.547 | NM_001882 | 984.719   | 912.981   |
| NM_016284   | 3134.038  | 2720.042  | NM_014891 | 12465.606 | 13838.652 |
| NM_014593   | 3805.77   | 3726.452  | NM_013392 | 24627.754 | 30406.371 |
| NM_006833   | 21373.674 | 22000.133 | NM_002175 | 1131.68   | 1310.016  |
| NM_012257   | 2227.504  | 2324.89   | NM_003236 | 7375.949  | 8330.875  |
| U37690      | 52235.063 | 42315.832 | AF052692  | 2093.483  | 2630.817  |
| NM_005120   | 1241.249  | 1421.727  | NM_002820 | 1211.738  | 1523.971  |
| AB029012    | 21290.971 | 17580.635 | NM_000179 | 12222.364 | 11280.305 |
| M33197      | 56210.551 | 59637.98  | NM_005215 | 1154.761  | 863.174   |
| NM_006296   | 2019.624  | 1449.963  | AF062739  | 8745.133  | 8039.995  |
| AF060936    | 22110.162 | 15334.302 | AL079314  | 4032.201  | 3813.529  |
| NM_005566   | 1152.251  | 810.05    | NM_001260 | 5043.382  | 4732.114  |
| NM_018167   | 1130.983  | 1171.927  | NM_001950 | 7307.246  | 7780.817  |
| AK024149    | 1966.322  | 2299.233  | AK026364  | 2815.452  | 2680.537  |
| AK023094    | 999.637   | 1468.406  | NM_018117 | 2189.37   | 2328.292  |
| M33197      | 61241.105 | 64313.625 | NM_006999 | 2409.617  | 2755.477  |
| M33197      | 58112.012 | 63087.984 | NM_006286 | 2366.227  | 2680.622  |
| AJ011129    | 1167.032  | 1548.898  | M33197    | 62962.84  | 67727.867 |
| NM_006387   | 6379.105  | 7842.079  | NM_004331 | 15870.105 | 17535.621 |
| NM_005646   | 2595.368  | 2581.489  | BE886648  | 1072.614  | 586.5     |
| NM_006639   | 1709.248  | 1776.301  | NM_015703 | 32310.387 | 36591.113 |
| NM_001692   | 736.011   | 705.163   | AB018337  | 4222.724  | 5442.384  |
| BI767871    | 11607.985 | 10049.34  | AK025273  | 7604.252  | 9030.968  |
| AA418907    | 1659.777  | 1490.742  | M33197    | 65596.008 | 69726.82  |
| M65291      | 1040.454  | 1262.533  | NM_001794 | 1493.31   | 1308.607  |
| AA115473    | 9709.865  | 11293.009 | AL117664  | 3310.296  | 2437.291  |
| AA872397    | 13127.8   | 17093.721 | NM_002205 | 6028.863  | 8135.646  |
| M24283      | 7662.985  | 9212.104  | NM_002214 | 7860.968  | 11169.213 |
| AA709414    | 2541.001  | 2334.75   | NM_001911 | 9354.165  | 8018.927  |
| D12676      | 6489.072  | 5784.222  | NM_000537 | 4575.066  | 4864.085  |
| NM_000939   | 50351.379 | 38014.727 | NM_006503 | 4563.078  | 3886.271  |
| NM_004295   | 56582.328 | 55705.633 | AB002321  | 1739.654  | 1627.546  |
| H-X 02812 I | 4192.429  | 5550.216  | NM_002515 | 981.856   | 1076.398  |
| U75898      | 9749.834  | 11646.192 | M33197    | 5892.467  | 4837.421  |
| M29039      | 2334.965  | 3184.78   | AB020698  | 1917.709  | 1772.581  |
| M59815      | 787.195   | 1272.031  | U68382    | 9495.311  | 9024.969  |
| M33210      | 552.074   | 625.553   | NM_003969 | 6532.437  | 6022.809  |
| M33197      | 53792.898 | 60444.66  | NM_004651 | 5428.771  | 5407.586  |
| NM_007259   | 1867.889  | 2387.844  | NM_003363 | 806.486   | 678.573   |
| NM_018402   | 796.216   | 744.431   | M33197    | 64367.883 | 63457.18  |
| NM_018009   | 1419.438  | 1235.505  | NM_002906 | 1591.361  | 1185.376  |

|           |           |           |           |           |           |
|-----------|-----------|-----------|-----------|-----------|-----------|
| AK075081  | 3351.127  | 2618.353  | AK024480  | 3776.302  | 4380.134  |
| NM_00089E | 13899.19  | 17034.777 | Y13871    | 61233.477 | 58476.199 |
| NM_00382C | 53868.641 | 55300.18  | NM_012134 | 2378.911  | 2142.933  |
| NM_01591E | 6118.064  | 6037.063  | AL137725  | 19277.129 | 25352.09  |
| M33197    | 56641.863 | 65550.734 | NM_00522E | 6146.239  | 6708.486  |
| NM_01651E | 21528.795 | 20992.418 | NM_002354 | 5284.584  | 4723.569  |
| NM_00618E | 40389.195 | 34487.008 | NM_004091 | 12689.634 | 12473.23  |
| NM_01480C | 4442.661  | 5532      | X74070    | 65116.898 | 75126.461 |
| NM_001557 | 1243.077  | 1487.225  | AF027219  | 4435.744  | 4831.201  |
| AF147311  | 6288.013  | 8343.956  | BC022846  | 472.308   | 628.677   |
| NM_002131 | 53386.648 | 51157.348 | NM_006333 | 12671.201 | 11693.002 |
| NM_017927 | 7495.96   | 5755.162  | M33197    | 63980.016 | 64660.398 |
| NM_001203 | 7771.078  | 6780.959  | NM_00289E | 33967.316 | 36443.48  |
| NM_00479E | 42001.746 | 35086.332 | AK022749  | 42454.57  | 46358.238 |
| NM_00203E | 585.6     | 574.909   | BF031409  | 28149.475 | 28132.672 |
| NM_014047 | 19883.605 | 28966.514 | NM_007043 | 4021.991  | 4020.938  |
| AK022901  | 3060.461  | 4353.465  | BE378791  | 1489.576  | 1726.617  |
| NM_00150E | 680.441   | 833.982   | U94388    | 2410.486  | 2443.071  |
| AF037332  | 7692.301  | 12928.87  | NM_012322 | 10582.617 | 12142.364 |
| NM_014571 | 870.347   | 1320.458  | M33197    | 62658.488 | 59058.738 |
| NM_020151 | 16161.679 | 19367.729 | NM_00488E | 61828.199 | 58935.578 |
| NM_005891 | 28349.189 | 21336.92  | AK025314  | 8778.38   | 8513.119  |
| NM_00164E | 1677.171  | 1987.009  | NM_00210E | 10259.857 | 12575.109 |
| NM_00395E | 2654.528  | 2822.351  | NM_000984 | 61585.91  | 66588.57  |
| M33197    | 58926.777 | 61898.934 | NM_002453 | 25680.969 | 40657.406 |
| NM_00350C | 12122.695 | 12968.872 | AK000780  | 60625.48  | 64648.563 |
| NM_014317 | 4775.651  | 7135.992  | M33197    | 62868.207 | 61919.531 |
| L09234    | 20384.15  | 27132.699 | NM_000131 | 4235.784  | 3593.858  |
| NM_00005E | 1231.774  | 1233.075  | NM_00183E | 1314.079  | 1141.066  |
| AK026740  | 1471.094  | 1203.277  | M64714    | 1826.807  | 1736.89   |
| NM_017881 | 5701.112  | 5803.256  | AK026043  | 3873.283  | 4627.182  |
| NM_01889E | 2102.713  | 2560.696  | NM_00500E | 20782.875 | 25315.459 |
| AF069307  | 2369.677  | 2933.871  | AK027033  | 5826.13   | 5431.902  |
| U92978    | 2325.761  | 2325.279  | NM_00010E | 18784.49  | 18788.297 |
| M33197    | 60695.047 | 61854.758 | NM_00300C | 42179.391 | 46384.082 |
| AB037831  | 6346.199  | 7126.793  | NM_00249E | 38873.422 | 40940.695 |
| NM_012103 | 20641.23  | 22925.707 | M33197    | 62239.676 | 58766.668 |
| AL122077  | 10661.926 | 12696.041 | NM_016284 | 4913.365  | 4709.23   |
| NM_014632 | 1213.485  | 1456.198  | NM_014593 | 6619.111  | 7418.383  |
| NM_006422 | 2521.842  | 4256.785  | NM_006833 | 32693.129 | 39046.34  |
| BE789195  | 636.255   | 1173.948  | NM_012257 | 4008.054  | 3556.237  |
| NM_01694E | 1744.719  | 2104.443  | U37690    | 56514.27  | 54360.188 |
| M33197    | 61302.891 | 65510.824 | NM_00512C | 3169.279  | 3057.857  |
| NM_00532E | 40804.297 | 38147.359 | AB029012  | 42839.531 | 44907.879 |
| NM_00728E | 725.027   | 534.711   | M33197    | 61862.84  | 61639.445 |
| NM_01406E | 1974.377  | 1384.968  | AJ010278  | 927.665   | 821.51    |
| AB035130  | 2428.403  | 2324.754  | NM_00629E | 3594.099  | 4093.692  |
| NM_00335E | 2584.834  | 2103.077  | AF060936  | 49633.473 | 50898.609 |
| M33197    | 70292.633 | 64157.883 | NM_00556E | 3441.315  | 3160.504  |
| AK021834  | 2084.842  | 3039.064  | NM_018167 | 1646.412  | 1489.405  |
| NM_01791E | 1799.212  | 2281.267  | AK024149  | 3058.78   | 2838.134  |
| NM_00357E | 1747.905  | 1648.489  | AK023094  | 1487.577  | 1629.815  |
| AL049283  | 989.796   | 1238.32   | M33197    | 63308.59  | 60772.008 |

|             |           |           |             |           |           |
|-------------|-----------|-----------|-------------|-----------|-----------|
| M33197      | 68972.266 | 64114.977 | M33197      | 64181.109 | 63798.219 |
| NM_002401   | 48869.246 | 48164.172 | AJ011129    | 37533.719 | 37091.965 |
| NM_001274   | 3134.312  | 3695.995  | AF282874    | 949.214   | 1048.3    |
| NM_003913   | 1273.365  | 798.735   | NM_001039   | 2346.583  | 2357.38   |
| NM_002227   | 4240.917  | 4004.242  | NM_006387   | 13914.598 | 14267.33  |
| AB002301    | 523.057   | 629.619   | NM_005646   | 5437.382  | 5404.9    |
| AB014530    | 8993.903  | 13380.515 | NM_006639   | 4095.667  | 3694.306  |
| M33197      | 59610.926 | 64152.176 | NM_001692   | 1837.998  | 1648.936  |
| NM_005989   | 6286.278  | 7009.374  | BI767871    | 18556.029 | 19623.443 |
| AB014607    | 14048.313 | 12911.566 | AA418907    | 1808.482  | 2400.824  |
| AF134401    | 1415.3    | 2226.343  | M65291      | 1810.99   | 1205.642  |
| NM_001039   | 1256.71   | 855.633   | AA115473    | 17374.395 | 20224.084 |
| NM_006387   | 8288.312  | 6748.84   | AA872397    | 20342.693 | 22222.621 |
| NM_005646   | 3690.124  | 3616.961  | M24283      | 16450.037 | 18129.832 |
| NM_006639   | 2236.034  | 1703.163  | AA709414    | 7195.064  | 6585.664  |
| BI767871    | 12596.595 | 14299.308 | D12676      | 11932.267 | 12994.35  |
| AA418907    | 1998.167  | 1973.215  | NM_000939   | 61974.543 | 60017.328 |
| M65291      | 430.377   | 515.401   | NM_004295   | 64120.664 | 64364.258 |
| AA115473    | 7365.23   | 4901.788  | H-X 02812 I | 5624.595  | 5469.192  |
| AA872397    | 6226.643  | 4773.543  | U75898      | 22700.174 | 21240.453 |
| M24283      | 4655.099  | 4266.332  | M29039      | 2928.938  | 3839.129  |
| AA709414    | 1013.468  | 873.93    | M59815      | 1257.18   | 1014.937  |
| D12676      | 3967.147  | 4810.556  | M33210      | 740.134   | 923.29    |
| NM_000939   | 45249.371 | 33416.707 | M33197      | 59567.551 | 57867.523 |
| NM_004295   | 53055.551 | 53368.492 | NM_007259   | 2903.372  | 3805.569  |
| H-X 02812 I | 4020.76   | 4421.619  | NM_018402   | 2414.664  | 2526.848  |
| U75898      | 6622.621  | 7091.714  | NM_018009   | 4832.093  | 6244.558  |
| M29039      | 1610.96   | 2152.059  | AK075081    | 6807.945  | 6127.169  |
| M33197      | 2872.877  | 3174.138  | NM_000895   | 21351.426 | 24080.99  |
| AB011146    | 5895.843  | 7012.337  | NM_003820   | 58737.355 | 54904.414 |
| NM_003679   | 708.845   | 811.191   | NM_015915   | 10835.74  | 9372.11   |
| NM_018009   | 2732.739  | 2477.829  | M33197      | 62614.195 | 62924.445 |
| AK075081    | 3829.989  | 2808.833  | NM_016518   | 31844.885 | 34091.715 |
| NM_000895   | 13309.335 | 10248.759 | NM_006185   | 38593.547 | 39625.5   |
| NM_003820   | 49833.852 | 48510.496 | NM_014800   | 6183.718  | 6004.25   |
| NM_015915   | 5754.527  | 4163.264  | NM_001557   | 2771.867  | 2915.33   |
| M33197      | 54736.98  | 61434.711 | AF147311    | 11909.399 | 12429.01  |
| NM_016518   | 21141.566 | 19303.07  | NM_002131   | 61050.461 | 61008.035 |
| NM_006185   | 46061.391 | 35334.797 | NM_017927   | 14902.642 | 14340.7   |
| NM_014800   | 4182.459  | 3337.978  | M33197      | 60057.02  | 60355.195 |
| NM_001557   | 897.44    | 616.15    | NM_001203   | 12629.415 | 14226.288 |
| AF147311    | 6132.49   | 5363.735  | NM_004799   | 61492.004 | 64099.246 |
| NM_002131   | 40650.32  | 32647.561 | NM_006733   | 2168.047  | 1890.201  |
| NM_017927   | 5446.433  | 4809.917  | NM_002039   | 1056.101  | 659.512   |
| M33197      | 57747.84  | 63469.215 | NM_014047   | 33855.305 | 38962.168 |
| NM_001203   | 4984.535  | 5762.134  | AK022901    | 4712.621  | 5431.049  |
| NM_004799   | 27095.396 | 31856.852 | NM_001508   | 652.481   | 973.791   |
| NM_002039   | 514.447   | 363.696   | AF037332    | 9642.973  | 10756.697 |
| NM_014047   | 16745.785 | 15241.959 | NM_014571   | 1231.836  | 1225.957  |
| AK022901    | 3058.411  | 3199.12   | NM_020151   | 34060.781 | 34671.289 |
| NM_001508   | 556.134   | 658.307   | NM_005891   | 41035.266 | 45833.008 |
| AF037332    | 6884.348  | 8722.913  | NM_001645   | 3105.591  | 3119.893  |
| NM_014571   | 433.081   | 720.312   | NM_003956   | 3567.278  | 3195.652  |

|           |           |           |           |           |           |
|-----------|-----------|-----------|-----------|-----------|-----------|
| M33197    | 60941.16  | 67761.766 | M33197    | 62543.965 | 62374.629 |
| AJ011129  | 15127.208 | 18203.396 | NM_003500 | 17860.221 | 17410.838 |
| NM_001645 | 2057.535  | 2426.446  | NM_014317 | 7275.028  | 6892.18   |
| NM_003956 | 2809.171  | 2006.759  | L09234    | 27528.707 | 27787.736 |
| M33197    | 52785.461 | 60498     | NM_000059 | 2185.029  | 2353.731  |
| NM_003500 | 11748.324 | 7147.015  | AK026740  | 2376.93   | 1883.57   |
| NM_014317 | 4083.968  | 3535.506  | NM_017881 | 9780.058  | 9053.299  |
| L09234    | 18431.592 | 17267.688 | NM_018896 | 5024.608  | 4864.941  |
| NM_000059 | 1273.233  | 1110.899  | AF069307  | 5023.442  | 5352.983  |
| AK026740  | 1198.859  | 840.596   | U92978    | 5771.42   | 7715.661  |
| NM_017881 | 3351.767  | 2658.45   | NM_018034 | 14099.74  | 15816.376 |
| NM_018896 | 2204.849  | 1474.1    | M33197    | 62482.215 | 64497.848 |
| AF069307  | 1688.86   | 1838.793  | AB037831  | 12347.778 | 12111.882 |
| U92978    | 1993.599  | 2142.389  | NM_012103 | 34607.633 | 36762.449 |
| NM_018034 | 4727.465  | 5260.607  | AL122077  | 42588.387 | 45535.613 |
| M33197    | 54294.512 | 63137.77  | NM_014632 | 3440.011  | 3281.391  |
| AB037831  | 4265.697  | 5054.81   | NM_006422 | 4326.395  | 4386.711  |
| NM_012103 | 23270.393 | 26765.012 | BE789195  | 1102.934  | 1273.25   |
| AL122077  | 18521.166 | 19436.15  | NM_016946 | 1853.93   | 1781.924  |
| NM_014632 | 1104.046  | 1003.281  | M33197    | 62969.441 | 62301.965 |
| NM_006422 | 2442.825  | 2951.44   | NM_005326 | 49523.023 | 47689.813 |
| BE789195  | 591.064   | 710.751   | NM_007286 | 992.487   | 988.293   |
| NM_016946 | 1304.591  | 1624.894  | NM_014069 | 3408.048  | 3693.805  |
| M33197    | 56469.891 | 65655.422 | AB035130  | 4206.487  | 4244.513  |
| NM_007259 | 1337.317  | 2126.388  | NM_003359 | 4134.208  | 4569.344  |
| NM_018402 | 995.812   | 1127.101  | M33197    | 64379.988 | 58225.863 |
| NM_014069 | 1828.125  | 1821.187  | AF119917  | 1759.966  | 1877.99   |
| AB035130  | 2218.366  | 1692.565  | NM_017915 | 2786.565  | 3292.401  |
| NM_003359 | 3319.259  | 2223.623  | AL050097  | 3467.121  | 3863.55   |
| M33197    | 54249.125 | 33977.621 | AK021513  | 1537.509  | 1442.385  |
| AF119917  | 825.226   | 638.918   | NM_003579 | 3856.802  | 3417.306  |
| NM_017915 | 1808.34   | 1764.353  | AL049283  | 2400.153  | 2063.658  |
| NM_003579 | 1616.321  | 1580.079  | M33197    | 63141.656 | 57046.234 |
| AL049283  | 1223.227  | 1005.168  | NM_002401 | 62149.188 | 58314.316 |
| M33197    | 57446.211 | 56757.484 | NM_001274 | 6620.528  | 6261.406  |
| NM_002401 | 43489.859 | 34445.641 | NM_003913 | 1029.254  | 918.799   |
| NM_001274 | 2392.137  | 2637.401  | NM_002227 | 6925.375  | 5067.04   |
| NM_002227 | 2927.006  | 2418.655  | NM_007199 | 5465.023  | 5126.805  |
| NM_007199 | 1590.076  | 1921.985  | AB002301  | 620.316   | 728.139   |
| AB002301  | 1066.073  | 641.958   | AB014530  | 20154.754 | 20041.168 |
| AB014530  | 5653.173  | 6564.686  | M33197    | 63602.387 | 57719.648 |
| M33197    | 58613.102 | 61839.809 | NM_005989 | 10616.982 | 12059.083 |
| NM_005989 | 7378.106  | 8125.458  | AB014607  | 17171.174 | 14039.694 |
| AB014607  | 7342.808  | 6863.479  | AF134401  | 3970.626  | 3675.669  |
| AF134401  | 1995.037  | 2924.07   | NM_001039 | 1624.633  | 2021.172  |
| NM_020151 | 15408.547 | 18302.076 | NM_006387 | 12791.827 | 12371.209 |
| NM_005891 | 23060.332 | 22535.465 | NM_005646 | 6272.387  | 6300.731  |
| NM_006387 | 8287.761  | 7718.968  | NM_006639 | 3464.277  | 3121.686  |
| NM_005646 | 3459.587  | 3832.75   | NM_001692 | 1540.602  | 1620.067  |
| NM_006639 | 2187.01   | 2045.864  | BI767871  | 18904.439 | 18479.391 |
| NM_001692 | 751.057   | 613.062   | AA418907  | 2895.731  | 3172.256  |
| BI767871  | 11843.604 | 6979.472  | M65291    | 1960.704  | 2446.29   |
| AA418907  | 2149.244  | 1708.329  | AA115473  | 20174.137 | 22784.752 |

|             |           |           |             |           |           |
|-------------|-----------|-----------|-------------|-----------|-----------|
| AA115473    | 6581.773  | 5848.819  | AA872397    | 18109.943 | 16470.117 |
| AA872397    | 4816.046  | 4310.654  | M24283      | 11782.871 | 10230.11  |
| M24283      | 6857.31   | 6864.621  | AA709414    | 3485.173  | 3164.686  |
| AA709414    | 1089.682  | 1000.149  | D12676      | 5996.059  | 5648.288  |
| D12676      | 2603.349  | 2446.805  | NM_000939   | 52957.766 | 51454.953 |
| NM_000939   | 43024.609 | 36420.043 | NM_004295   | 60499.379 | 61686.363 |
| NM_004295   | 52133.488 | 46895.43  | H-X 02812 I | 5676.9    | 4691.172  |
| H-X 02812 I | 4033.677  | 4172.815  | U75898      | 24929.023 | 21566.068 |
| U75898      | 7667.023  | 7566.945  | M29039      | 2954.901  | 2791.011  |
| M29039      | 1299.706  | 1276.775  | M59815      | 653.98    | 776.605   |
| M59815      | 253.264   | 503.13    | M33197      | 3269.052  | 2727.175  |
| AB011146    | 2921.285  | 1863.043  | AB011146    | 8517.381  | 8495.752  |
| NM_003679   | 542.552   | 334.548   | NM_003679   | 932.22    | 909.454   |
| NM_005326   | 16857.098 | 12398.609 | NM_018009   | 3883.455  | 4259.191  |
| NM_014800   | 4663.809  | 3583.368  | AK075081    | 6591.729  | 6130.171  |
| NM_001557   | 1157.52   | 872.265   | NM_000895   | 21438.305 | 22670.027 |
| AF147311    | 6876.956  | 6260.616  | NM_003820   | 60306.152 | 57298.617 |
| NM_002131   | 48415.848 | 30926.471 | NM_015915   | 7910.893  | 7529.239  |
| NM_017927   | 9406.648  | 7220.985  | M33197      | 61692.715 | 61760.051 |
| M33197      | 56809.512 | 61932.91  | NM_016518   | 34553.539 | 33522.926 |
| NM_001203   | 8300.821  | 6537.089  | NM_006185   | 54783.555 | 52034.203 |
| NM_004799   | 38340.129 | 25967.566 | NM_014800   | 6480.792  | 7761.993  |
| NM_006733   | 585.359   | 563.746   | NM_001557   | 1916.747  | 2085.682  |
| NM_014047   | 13698.618 | 10420.416 | AF147311    | 11630.765 | 9921.994  |
| AK022901    | 2369.138  | 2118.097  | NM_002131   | 58800.113 | 53445.965 |
| NM_001508   | 620.102   | 385.882   | NM_017927   | 11200.257 | 9003.215  |
| M33197      | 56439.969 | 60645.5   | M33197      | 62890.246 | 59925.023 |
| AF037332    | 5757.035  | 6046.9    | NM_001203   | 13029.593 | 13821.757 |
| NM_006052   | 1508.835  | 1364.045  | NM_004799   | 57990.074 | 59076.48  |
| AB040912    | 4368.665  | 3125.315  | NM_006733   | 1309.805  | 1249.62   |
| NM_003871   | 3280.474  | 1753.629  | NM_014047   | 27898.621 | 25366.145 |
| NM_006243   | 3999.647  | 3138.482  | AK022901    | 5794.464  | 4931.443  |
| NM_007252   | 597.271   | 379.078   | AF037332    | 9295.673  | 9359.044  |
| M33197      | 56787.098 | 57357.168 | NM_014571   | 996.033   | 1155.205  |
| AJ011129    | 4770.373  | 3024.542  | M33197      | 63504.285 | 60679.918 |
| NM_001039   | 908.272   | 597.98    | AJ011129    | 39805.977 | 42157.898 |
| NM_005738   | 487.453   | 517.156   | NM_001645   | 1990.627  | 2330.271  |
| NM_014488   | 2767.737  | 2731.141  | NM_003956   | 3815.426  | 3340.859  |
| NM_013389   | 9092.922  | 6320.838  | M33197      | 61308.594 | 60207.848 |
| AB014567    | 434.527   | 593.093   | NM_003500   | 14994.26  | 14085.573 |
| AK022817    | 3342.872  | 2241.022  | NM_014317   | 7065.599  | 7595.583  |
| NM_018034   | 7575.889  | 5151.907  | L09234      | 27451.316 | 28268.607 |
| M33197      | 54512.707 | 59748.48  | NM_000059   | 1865.585  | 2167.59   |
| AB037831    | 7777.818  | 5343.089  | AK026740    | 2356.547  | 2468.321  |
| NM_012103   | 20174.916 | 14304.308 | NM_017881   | 7903.792  | 8373.745  |
| AL122077    | 15934.952 | 10665.144 | NM_018896   | 4120.796  | 3234      |
| NM_014632   | 596.247   | 497.972   | AF069307    | 4285.946  | 3996.691  |
| NM_006422   | 2063.646  | 1904.164  | U92978      | 3430.681  | 3712.573  |
| NM_016946   | 1445.825  | 1248.979  | NM_018034   | 7526.122  | 10684.927 |
| M33197      | 52245.57  | 58780.055 | M33197      | 60910.332 | 61744.828 |
| NM_007259   | 1365.509  | 1072.777  | AB037831    | 11639.683 | 14874.941 |
| NM_018402   | 871.333   | 507.95    | NM_012103   | 34888.098 | 40325.965 |
| NM_018009   | 1524.949  | 988.655   | AL122077    | 40704.809 | 36589.73  |

|           |           |           |             |           |           |
|-----------|-----------|-----------|-------------|-----------|-----------|
| AK075081  | 2739.843  | 1961.334  | NM_014632   | 3357.826  | 2593.456  |
| NM_000895 | 12414.884 | 10175.029 | NM_006422   | 3327.337  | 3470.177  |
| NM_003820 | 47087.512 | 42749.742 | BE789195    | 935.847   | 1229.006  |
| NM_015915 | 4790.391  | 2728.715  | NM_016946   | 1488.42   | 1779.269  |
| M33197    | 53043.891 | 49434.199 | M33197      | 62824.438 | 62342.152 |
| NM_016518 | 12079.577 | 7822.45   | NM_007259   | 1987.252  | 2271.012  |
| NM_006185 | 30394.705 | 18832.633 | NM_018402   | 2084.811  | 1739.802  |
| NM_005989 | 10972.433 | 11514.176 | NM_014069   | 3368.923  | 3787.439  |
| AB014607  | 15228.136 | 15025.055 | AB035130    | 3393.28   | 3305.595  |
| AF134401  | 2488.475  | 2762.174  | NM_003359   | 3558.564  | 3146.7    |
| NM_020151 | 13799.188 | 11028.241 | M33197      | 63284.777 | 60196.449 |
| NM_005891 | 19905.674 | 16340.395 | AF119917    | 1491.469  | 1561.672  |
| NM_001645 | 1597.972  | 1843.831  | NM_017915   | 2533.672  | 2759.615  |
| NM_003956 | 963.34    | 628.364   | AL050097    | 841.599   | 945.385   |
| M33197    | 49727.285 | 56756.25  | AK021513    | 814.045   | 728.277   |
| NM_003500 | 8887.66   | 5822.145  | NM_003579   | 3787.21   | 2970.52   |
| NM_014317 | 3979.049  | 3454.612  | AL049283    | 2577.579  | 2059.962  |
| L09234    | 16354.092 | 15924.542 | M33197      | 64307.035 | 64765.418 |
| NM_000059 | 600.426   | 750.974   | NM_002401   | 64800.332 | 61829.547 |
| AK026740  | 1379.776  | 1416.802  | NM_001274   | 5935.12   | 6914.369  |
| NM_017881 | 5001.05   | 3949.988  | NM_003913   | 2780.027  | 1425.816  |
| M33197    | 50516.887 | 55214     | NM_002227   | 7921.527  | 6564.431  |
| NM_017634 | 2396.157  | 2341.934  | NM_007199   | 3711.653  | 3276.214  |
| NM_000813 | 850.008   | 441.254   | AB002301    | 965.044   | 1024.457  |
| NM_018896 | 1915.665  | 1089.046  | AB014530    | 19820.455 | 19531.631 |
| AJ300465  | 1878.112  | 1106.135  | M33197      | 64621.32  | 66309.203 |
| X86400    | 2244.629  | 1393.103  | NM_005989   | 9224.356  | 9680.446  |
| NM_000810 | 1367.432  | 1270.189  | AB014607    | 22936.439 | 20658.691 |
| AF069307  | 2124.634  | 1326.135  | AF134401    | 2956.051  | 2807.44   |
| M33197    | 55625.582 | 60167.336 | NM_020151   | 21916.617 | 24378.939 |
| U92978    | 2036.774  | 1515.131  | NM_005891   | 35360.414 | 32598.82  |
| M33197    | 2483.868  | 1765.848  | NM_006387   | 13305.188 | 14664.771 |
| AB011146  | 5843.452  | 6657.554  | NM_005646   | 4508.934  | 4508.961  |
| NM_003679 | 655.472   | 482.189   | NM_006639   | 3303.202  | 3173.309  |
| NM_005326 | 12704.898 | 14141.58  | NM_001692   | 1537.061  | 1757.683  |
| NM_014069 | 1405      | 1400.995  | BI767871    | 14189.562 | 14558.187 |
| AB035130  | 1644.531  | 1550.412  | AA418907    | 1767.09   | 1720.268  |
| NM_003359 | 1681.626  | 1526.821  | M65291      | 1455.323  | 1633.099  |
| M33197    | 50606.551 | 54035.418 | AA115473    | 15062.852 | 16041.015 |
| AF119917  | 899.32    | 1001.813  | AA872397    | 17404.955 | 16513.711 |
| NM_017915 | 1430.879  | 1516.493  | M24283      | 11007.025 | 11192.929 |
| AL050097  | 757.445   | 597.519   | AA709414    | 4290.593  | 4364.539  |
| NM_003579 | 2315.755  | 1571.913  | D12676      | 10039.414 | 11104.968 |
| AL049283  | 1326.378  | 1367.767  | NM_000939   | 57988.93  | 57906.727 |
| M33197    | 57797.613 | 59753.359 | NM_004295   | 59234.855 | 60832.254 |
| NM_002401 | 44009.926 | 35518.168 | H-X 02812 I | 5919.191  | 5419.138  |
| NM_001274 | 3685.503  | 2428.574  | U75898      | 21653.254 | 17882.602 |
| NM_003913 | 705.082   | 523.894   | M29039      | 2563.783  | 2037.025  |
| NM_002227 | 3012.213  | 1205.566  | M59815      | 739.747   | 663.762   |
| NM_007199 | 1148.536  | 779.792   | M33197      | 2729.436  | 2339.684  |
| AB002301  | 413.57    | 292.057   | AB011146    | 7800.556  | 9043.068  |
| AB014530  | 4471.017  | 2959.751  | NM_003679   | 1360.068  | 1331.453  |
| M33197    | 58080.297 | 61481.734 | NM_005326   | 39480.973 | 33064.523 |



|           |           |           |           |           |           |
|-----------|-----------|-----------|-----------|-----------|-----------|
| CY3Cy5    | 7578.438  | 241.963   | NM_014800 | 6320.617  | 7049.524  |
| AK054960  | 17249.779 | 17124.725 | NM_001557 | 2160.959  | 2198.329  |
| L15344    | 705.108   | 880.232   | AF147311  | 14200.179 | 13234.781 |
| AK024150  | 1155.077  | 1196.678  | NM_002131 | 57094.895 | 57139.031 |
| AF070536  | 578.09    | 732.94    | NM_017927 | 11911.042 | 10049.295 |
| U79300    | 436.757   | 481.246   | M33197    | 60600.977 | 56480.461 |
| AK025151  | 4266.766  | 3535.062  | NM_001203 | 16671.453 | 15010.678 |
| AK025550  | 2436.727  | 2587.423  | NM_004799 | 53992.746 | 50030.047 |
| AF088076  | 26882.893 | 25948.947 | NM_006733 | 927.906   | 901.65    |
| AF086543  | 2371.569  | 2449.102  | NM_002039 | 594.239   | 774.129   |
| AK002098  | 1651.061  | 2189.018  | NM_014047 | 29305.102 | 36152.523 |
| AB011128  | 25701.369 | 27336.135 | AK022901  | 4958.831  | 6098.599  |
| AK026742  | 592.843   | 652.816   | NM_001508 | 1386.192  | 856.657   |
| AK025074  | 3882.743  | 3763.076  | M33197    | 62601.305 | 56873.465 |
| AK054960  | 20001.389 | 17414.008 | AF037332  | 8954.269  | 9160.431  |
| L15344    | 1432.842  | 1709.701  | NM_014571 | 839.616   | 1123.846  |
| SR1       | 73475.477 | 68408.875 | NM_006052 | 2364.864  | 2897.149  |
| SR3       | 35010.805 | 30510.775 | AB040912  | 12708.083 | 11677.884 |
| SR5       | 3693.369  | 2959.345  | NM_003871 | 5260.817  | 4916.138  |
| SR7       | 3451.266  | 25135.219 | NM_006243 | 7017.189  | 6590.469  |
| SR9       | 12654.304 | 2308.772  | NM_007252 | 1394.953  | 703.817   |
| CY3Cy5    | 8603.393  | 335.984   | M33197    | 60919.406 | 56406.887 |
| U73799    | 500.216   | 476.691   | AJ011129  | 37552.352 | 36252.52  |
| AK021668  | 43770.941 | 36951.219 | NM_001039 | 1902.87   | 2366.042  |
| AK002195  | 460.767   | 930.364   | NM_005738 | 996.659   | 934.402   |
| AF086128  | 341.124   | 676.561   | NM_014488 | 8484.867  | 6331.006  |
| AK026099  | 269.792   | 595.369   | NM_013389 | 10275.272 | 9563.103  |
| AK022850  | 1587.651  | 1872.022  | AB014567  | 1107.535  | 758.274   |
| NM_016490 | 3636.888  | 4262.62   | AK022817  | 5368.563  | 5513.013  |
| AL137498  | 7179.37   | 5716.809  | NM_018034 | 11983.518 | 11285.006 |
| S66168    | 9948.65   | 6695.23   | M33197    | 60239.426 | 57210.719 |
| NM_003851 | 26974.65  | 38255.809 | AB037831  | 13187.426 | 13150.111 |
| U79244    | 449.667   | 666.692   | NM_012103 | 31008.381 | 36663.371 |
| AK022482  | 1751.938  | 1875.664  | AL122077  | 36392.41  | 39943.227 |
| AK022803  | 758.719   | 960.398   | NM_014632 | 2867.49   | 3016.074  |
| AK023517  | 3093.448  | 3267.158  | NM_006422 | 3655.014  | 4851.14   |
| AK023869  | 7855.263  | 9337.379  | NM_016946 | 2135.452  | 1628.209  |
| AK022116  | 1085.809  | 1238.188  | M33197    | 60111.246 | 52992.609 |
| AF026526  | 1888.094  | 2492.273  | NM_007259 | 2181.273  | 2376.894  |
| AK026207  | 3040.42   | 3984.92   | NM_018402 | 1953.635  | 1423.321  |
| AK024984  | 2389.851  | 2475.294  | NM_018009 | 3337.058  | 3284.624  |
| AL110236  | 588.037   | 681.124   | AK075081  | 6285.793  | 5715.903  |
| AF085955  | 673.833   | 562.639   | NM_000895 | 21971.709 | 22942.758 |
| AF075106  | 11668.202 | 9949.013  | NM_003820 | 60465.879 | 59277.762 |
| AK023339  | 9211.806  | 8034.121  | NM_015915 | 12126.196 | 10306.871 |
| AF086008  | 1462.37   | 1146.456  | M33197    | 62479.438 | 57987.988 |
| AF087970  | 582.678   | 811.984   | NM_016518 | 38143.809 | 38574.289 |
| U05597    | 1137.962  | 946.94    | NM_006185 | 54314.887 | 50492.457 |
| AK026366  | 43920.078 | 43385.711 | NM_005989 | 10642.552 | 10660.409 |
| AK024229  | 17291.703 | 18647.662 | AB014607  | 12385.918 | 10589.903 |
| AK021824  | 355.739   | 592.768   | AF134401  | 3670.603  | 4092.977  |
| AK021467  | 1763.331  | 1739.108  | NM_020151 | 27133.586 | 27834.9   |
| NM_020371 | 1837.537  | 2765.247  | NM_005891 | 40701.063 | 36752.996 |

|           |           |           |           |           |           |
|-----------|-----------|-----------|-----------|-----------|-----------|
| AK022498  | 2441.123  | 2479.497  | NM_001645 | 3418.772  | 3038.798  |
| AJ245433  | 8489.34   | 9350.133  | NM_003956 | 3477.459  | 3085.336  |
| AK021942  | 47302.105 | 45646.371 | M33197    | 61501.566 | 58446.555 |
| NM_014127 | 1711.139  | 1917.465  | NM_003500 | 16553.387 | 15331.186 |
| AL360187  | 405.268   | 695.409   | NM_014317 | 7283.049  | 7032.961  |
| AK021878  | 1663.94   | 2020.492  | L09234    | 27773.615 | 33221.664 |
| AK021817  | 997.849   | 1061.455  | NM_000059 | 2463.51   | 2338.418  |
| AL080103  | 291.849   | 410.721   | AK026740  | 2469.636  | 2016.924  |
| AK023217  | 1033.996  | 1067.126  | NM_017881 | 9618.157  | 8040.376  |
| AK021883  | 764.926   | 873.687   | M33197    | 61418.949 | 60194.219 |
| AF090902  | 9165.247  | 8303.039  | NM_017634 | 3046.636  | 3576.327  |
| AF119887  | 33990.582 | 26626.84  | NM_000813 | 1411.805  | 1110.118  |
| AK091038  | 1076.416  | 1135.221  | NM_018896 | 4176.33   | 3032.879  |
| AK024193  | 3192.024  | 5706.943  | AJ300465  | 9596.929  | 9274.304  |
| NM_018578 | 1159.859  | 1736.007  | X86400    | 2390.323  | 1982.104  |
| NM_018543 | 1344.167  | 1985.02   | NM_000810 | 3407.693  | 3656.532  |
| AK024438  | 17976.135 | 17905.484 | AF069307  | 5112.189  | 5507.15   |
| AF161337  | 1185.152  | 930.191   | M33197    | 62188.219 | 60584.727 |
| AL390170  | 970.468   | 1205.508  | U92978    | 3922.438  | 4227.832  |
| NM_015901 | 663.247   | 784.878   | M33197    | 4539.702  | 3948.961  |
| NM_006365 | 362.014   | 494.766   | AB011146  | 9508.25   | 8910.168  |
| AF093744  | 24431.805 | 23186.564 | NM_003679 | 918.592   | 931.973   |
| NM_018687 | 9128.716  | 9997.044  | NM_005326 | 26571.572 | 27610.314 |
| M57417    | 14032.62  | 15090.597 | NM_014069 | 4808.13   | 4427.206  |
| NM_017728 | 903.364   | 1183.834  | AB035130  | 4090.899  | 4469.84   |
| U80772    | 1212.574  | 1525.597  | NM_003359 | 4027.297  | 3954.164  |
| NM_006189 | 1453.849  | 1574.696  | M33197    | 59163.676 | 57245.254 |
| AJ272177  | 876.794   | 1179.92   | AF119917  | 1467.325  | 1915.419  |
| AK026402  | 39450.223 | 38986.238 | NM_017915 | 2693.608  | 3324.624  |
| AF111846  | 3417.728  | 3677.799  | AL050097  | 690.202   | 838.763   |
| AK024618  | 2333.768  | 2996.682  | NM_003579 | 4239.64   | 3829.264  |
| AL049969  | 1308.12   | 1807.818  | AL049283  | 1855.573  | 1354.391  |
| NM_005220 | 3030.343  | 4349.969  | M33197    | 64222.727 | 59398.402 |
| NM_018619 | 690.179   | 1350.058  | NM_002401 | 60516.184 | 59912.012 |
| X79308    | 1653.124  | 1358.713  | NM_001274 | 6149.57   | 6146.375  |
| AB011151  | 12873.645 | 15031.913 | NM_003913 | 1296.349  | 1633.824  |
| NM_007106 | 1883.556  | 2072.564  | NM_002227 | 6426.317  | 5601.71   |
| AL137555  | 1376.688  | 1393.347  | NM_007199 | 9995.898  | 9594.316  |
| AL133017  | 1170.503  | 1456.612  | AB002301  | 2125.064  | 2224.557  |
| U84506    | 1419.945  | 1969.641  | AB014530  | 13987.323 | 14233.452 |
| U21556    | 55084.758 | 65778.086 | M33197    | 63027.465 | 60903.57  |
| AB002344  | 3452.886  | 3955.457  | CY3Cy5    | 14423.273 | 364.205   |
| BF210352  | 1256.867  | 1090.401  | AK054960  | 37211.18  | 33286.375 |
| NM_006829 | 3807.432  | 4361.096  | L15344    | 1889.749  | 1593.618  |
| NM_017669 | 16562.572 | 15776.586 | AK024150  | 2356.527  | 2706.407  |
| AK023760  | 8474.508  | 11368.244 | AF070536  | 4087.303  | 4587.733  |
| X98415    | 57714.246 | 66202.813 | AK022297  | 1693.182  | 1906.959  |
| AK024205  | 2735.298  | 5419.987  | U79300    | 3226.571  | 2775.695  |
| AF086034  | 17227.158 | 35869.063 | AK025151  | 40279.578 | 38051.074 |
| AK000174  | 567.484   | 1126.298  | AK025550  | 9263.39   | 8636.238  |
| AF130071  | 2207.794  | 2990.244  | AF088076  | 57510.594 | 59102.805 |
| AJ272057  | 2115.287  | 2639.206  | AF086543  | 10697.362 | 10598.17  |
| NM_004402 | 757.496   | 659.84    | AB046797  | 1667.684  | 1522.907  |

|           |           |           |           |           |           |
|-----------|-----------|-----------|-----------|-----------|-----------|
| AK024216  | 20512.141 | 19946.428 | AK002098  | 3558.537  | 3199.637  |
| Y16752    | 5949.421  | 4729.771  | AB011128  | 59745.109 | 57686.574 |
| NM_01483C | 1604.915  | 1635.697  | AK026742  | 853.268   | 828.254   |
| AF355402  | 6405.495  | 7818.317  | AK025074  | 6539.708  | 5729.487  |
| AK000407  | 3749.058  | 3978.418  | AK054960  | 44795.637 | 44437.23  |
| AK026164  | 541.89    | 551.995   | L15344    | 1598.418  | 1678.302  |
| NM_020524 | 5005.631  | 6735.396  | SR1       | 73871.063 | 63728.172 |
| NM_00199E | 3759.762  | 3322.493  | SR3       | 46281.621 | 42000.441 |
| X64977    | 2310.041  | 2383.423  | SR5       | 5717.865  | 4095.511  |
| AF064851  | 776.946   | 718.81    | SR7       | 5401.347  | 32496.666 |
| NM_00260Z | 14018.951 | 11298.426 | SR9       | 32650.859 | 4675.114  |
| NM_01623E | 1154.85   | 1078.104  | CY3Cy5    | 13340.177 | 246.076   |
| D17271    | 15204.529 | 14874.497 | U52050    | 2242.04   | 2035.26   |
| X91648    | 2111.772  | 2167.492  | U73799    | 4989.958  | 4973.272  |
| AK026658  | 741.619   | 1660.904  | Z36826    | 963.556   | 655.026   |
| AF282264  | 8949.671  | 18950.865 | AK021668  | 62721.16  | 54647.148 |
| AF086322  | 1213.307  | 2180.141  | AF086148  | 55423.258 | 57386.418 |
| AK024736  | 2480.944  | 3477.108  | AJ227854  | 1308.291  | 1392.306  |
| NM_01823E | 493.916   | 774.212   | AK002195  | 1072.602  | 1522.848  |
| U88892    | 1244.864  | 1734.948  | AF086128  | 824.995   | 1024.63   |
| AK023755  | 530.615   | 692.656   | AK022850  | 3367.871  | 3041.264  |
| NM_00572E | 791.615   | 1073.749  | NM_01649C | 11897.38  | 11150.072 |
| NM_012211 | 1460.557  | 1164.911  | AF038193  | 744       | 738.902   |
| AB040877  | 2371.543  | 2446.976  | AL137498  | 11763.255 | 9394.627  |
| AB040927  | 662.187   | 736.829   | AK024289  | 4851.957  | 4097.607  |
| AK026737  | 2606.302  | 2098.356  | S66168    | 32754.879 | 28085.439 |
| NM_00021C | 901.667   | 856.046   | NM_003851 | 38974.051 | 43765.211 |
| NM_00628E | 5833.408  | 6573.276  | AK022482  | 4233.699  | 5033.293  |
| NM_019067 | 4429.601  | 3851.986  | AK023811  | 1196.597  | 600.774   |
| AF251025  | 828.911   | 597.994   | AK024135  | 2400.706  | 2680.622  |
| NM_015677 | 5138.73   | 4147.638  | AK022803  | 12856.117 | 12264.927 |
| NM_00177Z | 6569.653  | 5716.697  | AK023517  | 4361.882  | 4332.835  |
| NM_004384 | 4686.805  | 5944.068  | AK023869  | 11360.315 | 11014.739 |
| NM_00024E | 3742.099  | 4967.022  | AK025156  | 57769.242 | 51306.621 |
| NM_00586C | 7168.365  | 7926.212  | AK022116  | 17734.299 | 17463.531 |
| AF095288  | 24325.287 | 25452.377 | AF026526  | 5408.33   | 5212.606  |
| AK026271  | 9290.878  | 13653.83  | AK026207  | 7790.701  | 8186.474  |
| NM_00179E | 13288.277 | 18360.148 | AK024984  | 55815.266 | 52526.922 |
| AF090895  | 1990.277  | 2216.146  | AL110236  | 855.747   | 1192.171  |
| NM_00561C | 3308.487  | 2982.318  | AF085955  | 808.142   | 742.657   |
| AL133651  | 1629.693  | 2120.427  | AF075106  | 20611.076 | 20279.994 |
| AB014532  | 8885.627  | 9899.836  | AK023339  | 14483.677 | 14304.755 |
| NM_00347E | 3525.581  | 4885.215  | AF085981  | 2546.516  | 2008.452  |
| NM_016237 | 8152.938  | 10692.517 | AF086008  | 5233.784  | 3763.568  |
| NM_004924 | 4733.877  | 6293.22   | AF087970  | 711.615   | 797.398   |
| NM_00179E | 2216.621  | 3144.305  | AF086029  | 947.558   | 932.307   |
| NM_001211 | 4243.263  | 4343.931  | U05597    | 3159.573  | 1629.273  |
| NM_00650E | 705.919   | 430.89    | NM_01456E | 1566.96   | 1421.955  |
| AB033050  | 3275.963  | 3027.073  | AK026366  | 67097.055 | 67064.109 |
| NM_00435E | 32660.92  | 50887.551 | AK024229  | 37877.152 | 40880.344 |
| NM_00185E | 512.564   | 749.968   | AK021824  | 911.099   | 856.582   |
| BC015022  | 4616.467  | 9400.434  | AK021467  | 30051.488 | 31789.342 |
| AB033086  | 828.997   | 1179.968  | NM_020371 | 3398.324  | 3676.652  |

|           |           |           |           |           |           |
|-----------|-----------|-----------|-----------|-----------|-----------|
| NM_002073 | 2136.143  | 1984.483  | AK022498  | 4700.803  | 3511.107  |
| AF117222  | 494.993   | 545.38    | AJ245433  | 63177.438 | 53621.496 |
| NM_001935 | 58124.383 | 63715.848 | AK021942  | 64792.254 | 58708.859 |
| NM_001749 | 1010.882  | 859.498   | NM_014127 | 3165.036  | 3103.137  |
| AF090327  | 989.015   | 965.716   | AL360187  | 6819.997  | 6531.618  |
| NM_003291 | 5417.299  | 6463.811  | AK021878  | 3382.083  | 2957.461  |
| AK022950  | 2926.757  | 2671.63   | AK021817  | 15743.507 | 14361.515 |
| S75755    | 4624.791  | 5594.512  | AL080103  | 1501.669  | 1245.073  |
| AF176518  | 710.827   | 778.05    | AK023217  | 2240.96   | 2200.66   |
| AB014576  | 26664.779 | 28239.424 | AF090902  | 25490.547 | 24443.219 |
| NM_019044 | 19052.357 | 20525.041 | AK091038  | 2520.635  | 2506.578  |
| AK000145  | 573.723   | 574.653   | AK024193  | 5015.014  | 4455.414  |
| AF174601  | 4221.882  | 5422.28   | NM_018578 | 1628.165  | 1836.786  |
| AF279865  | 1024.005  | 1261.276  | NM_018543 | 610.094   | 878.594   |
| NM_014700 | 1633.254  | 1543.983  | AK024438  | 33857.035 | 33368.82  |
| NM_014714 | 636.375   | 1055.791  | AL390170  | 1921.198  | 1644.15   |
| NM_015644 | 2640.643  | 3110.424  | AK022887  | 1566.121  | 1713.854  |
| NM_005687 | 9756.821  | 9507.884  | AK000745  | 41034.176 | 45357.004 |
| NM_005983 | 6121.619  | 6556.239  | NM_005299 | 2385.547  | 2488.6    |
| AB016902  | 4918.601  | 6682.297  | NM_015901 | 3116.437  | 3014.344  |
| AF272378  | 56080.07  | 60872.629 | AF130065  | 1036.874  | 1028.981  |
| M61870    | 1926.207  | 1138.215  | Z83935    | 5055.154  | 5104.02   |
| AK026980  | 2225.079  | 1590.367  | NM_006365 | 857.53    | 656.499   |
| NM_020368 | 5122.79   | 4033.609  | AF093744  | 38035.699 | 40381.555 |
| AF024708  | 35460.645 | 27032.346 | M57417    | 67342.961 | 63270.371 |
| NM_006467 | 7356.182  | 8312.383  | NM_017728 | 3729.249  | 3379.707  |
| NM_017566 | 7025.8    | 6830.374  | U80772    | 1251.45   | 1278.475  |
| NM_006582 | 1725.375  | 1934.509  | NM_006189 | 5556.359  | 6066.775  |
| AB033019  | 6706.589  | 6692.861  | AJ272177  | 1775.031  | 1786.275  |
| NM_001452 | 871.652   | 1065.512  | AK026402  | 58298.645 | 56600.293 |
| NM_006162 | 1921.76   | 1609.626  | AF111846  | 2792.151  | 2645.567  |
| NM_014764 | 9741.543  | 11042.552 | NM_005220 | 6669.316  | 6157.654  |
| NM_018078 | 3578.609  | 3472.981  | NM_018619 | 1947.158  | 1109.602  |
| NM_016050 | 1008.004  | 1208.001  | X79308    | 7965.491  | 6720.154  |
| NM_007080 | 14260.396 | 15871.438 | AF086476  | 1540.214  | 1686.127  |
| AK026912  | 8822.271  | 9605.854  | NM_017660 | 12708.475 | 13903.886 |
| AK023531  | 19674.166 | 19076.906 | AB011151  | 45990.594 | 48282.902 |
| NM_006697 | 18417.434 | 15748.741 | U92995    | 10012.606 | 9144.28   |
| M19182    | 1609.649  | 1791.66   | Z70769    | 776.223   | 893.082   |
| AK025707  | 2205.195  | 3650.052  | NM_007106 | 4071.974  | 4668.416  |
| NM_006242 | 1122.703  | 818.994   | AL133017  | 3082.118  | 3346.008  |
| X78712    | 2167.123  | 2017.059  | U84506    | 14250.392 | 12400.202 |
| NM_001497 | 923.696   | 961.243   | U21556    | 66571.055 | 71907.477 |
| NM_004130 | 3996.63   | 3446.598  | AB002444  | 2371.468  | 1970.188  |
| NM_006348 | 1179.741  | 1473.329  | AB002344  | 9978.339  | 9739.236  |
| AF067972  | 26788.582 | 25495.941 | BF210352  | 2084.588  | 1910.343  |
| NM_004958 | 1441.208  | 1799.594  | NM_006829 | 7291.802  | 8014.429  |
| D87076    | 4781.927  | 4665.462  | NM_017669 | 31825.906 | 34052.086 |
| NM_014149 | 2068.672  | 2273.514  | AF147379  | 65799.719 | 63375.707 |
| AB020635  | 8917.393  | 10488.479 | AK023760  | 9161.625  | 10235.805 |
| NM_006515 | 1443.542  | 1496.744  | AF086034  | 29355.982 | 34453.57  |
| NM_005224 | 541.562   | 616.776   | AK000174  | 2974.98   | 2520.841  |
| NM_012144 | 11297.094 | 10085.601 | AF130071  | 4472.169  | 4431.268  |

|           |           |           |           |           |           |
|-----------|-----------|-----------|-----------|-----------|-----------|
| X65231    | 47902.914 | 39292.266 | AJ272057  | 6271.403  | 9968.019  |
| NM_00290E | 5330.09   | 3631.906  | NM_004402 | 2220.964  | 2535.508  |
| AF205632  | 4490.338  | 3270.457  | AK024216  | 37954.574 | 46367.602 |
| NM_00537E | 47245.563 | 45635.988 | Y16752    | 21046.35  | 20482.379 |
| NM_002397 | 1998.431  | 1805.569  | NM_014694 | 909.81    | 1087.723  |
| AF000672  | 2594.147  | 2548.866  | NM_020156 | 2386.19   | 2246.988  |
| NM_01765Z | 13696.37  | 12367.46  | NM_014830 | 4016.922  | 4174.829  |
| X59268    | 5109.167  | 4493.779  | AF355402  | 12402.657 | 13907.055 |
| D70832    | 53220.258 | 41757.188 | AK000407  | 10440.284 | 10068.676 |
| NM_00142E | 13861.351 | 22050.182 | NM_020524 | 29181.27  | 33402.523 |
| NM_00237E | 28056.404 | 26806.514 | NM_00199E | 9286.537  | 12086.326 |
| NM_00457E | 8067.343  | 7095.681  | X64977    | 4853.57   | 6243.86   |
| AA203126  | 2880.746  | 3033.047  | AF064851  | 2298.845  | 1934.441  |
| L12347    | 16029.77  | 16455.734 | NM_002602 | 33454.109 | 43049.391 |
| NM_00162Z | 10885.043 | 12422.367 | NM_01623E | 4398.439  | 4198.344  |
| Z36788    | 3399.667  | 3916.172  | NM_00338E | 3214.236  | 3316.799  |
| NM_018477 | 10004.267 | 13019.956 | D17271    | 21927.605 | 20000.697 |
| U20536    | 584.087   | 660.792   | X91648    | 3293.138  | 3078.907  |
| AW167715  | 3005.422  | 4113.238  | Z70717    | 1925.755  | 2361.046  |
| AA424735  | 6665.258  | 7995.105  | AK024736  | 4670.154  | 3825.188  |
| U78294    | 1896.657  | 1660.434  | NM_01823E | 1545.332  | 2669.397  |
| AA171613  | 576.402   | 793.852   | U88892    | 6992.923  | 9875.654  |
| BI760394  | 3553.724  | 3062.844  | AK023755  | 2791.628  | 3626.567  |
| AA555216  | 857.786   | 988.142   | NM_00572E | 1683.032  | 2136.761  |
| U09117    | 33434.68  | 26737.105 | NM_012211 | 4560.521  | 4773.451  |
| M21054    | 1327.033  | 1400.373  | AB040877  | 15442.477 | 16017.52  |
| M18468    | 1140.816  | 1115.81   | AB040927  | 3597.655  | 3803.16   |
| H66070    | 25480.834 | 27474.174 | AK026737  | 24371.359 | 26439.814 |
| AA164741  | 666.808   | 733.729   | NM_000210 | 1984.905  | 2099.104  |
| AI189375  | 1800.105  | 1644.663  | NM_00628E | 18188.369 | 20547.32  |
| AI978885  | 3983.438  | 4447.231  | NM_019067 | 8858.334  | 9659.814  |
| NM_00030E | 9346.711  | 11775.338 | AF251025  | 1990.889  | 1943.305  |
| AB014599  | 4051.487  | 6823.914  | NM_015677 | 20186.902 | 17524.826 |
| NM_00439E | 759.257   | 903.403   | NM_00177Z | 21407.105 | 18368.977 |
| AB018345  | 608.786   | 672.517   | AB011087  | 2151.905  | 2410.288  |
| NM_00583Z | 703.585   | 800.793   | AF161341  | 19306.246 | 18574.979 |
| AW407841  | 5038.442  | 5062.854  | AJ249902  | 8185.057  | 8154.802  |
| U15197    | 1046.63   | 1238.766  | NM_004384 | 7562.172  | 8210.045  |
| AF264014  | 15010.493 | 27477.092 | L05500    | 32072.43  | 29743.5   |
| L09098    | 644.245   | 961.493   | NM_01230E | 42121.555 | 48470.535 |
| NM_00415E | 3475.936  | 3791.929  | AF222903  | 6019.547  | 5748.828  |
| NM_001831 | 667.422   | 722.137   | NM_00622E | 9787.729  | 9593.47   |
| NM_01458E | 10645.195 | 10207.87  | L10374    | 31469.615 | 32757.602 |
| NM_01436E | 18864.248 | 18220.496 | NM_00024E | 9174.776  | 10434.163 |
| NM_00092E | 1433.714  | 1267.228  | NM_014310 | 2811.396  | 2666.406  |
| NM_00645E | 2802.887  | 2496.131  | NM_005860 | 20475.217 | 25737.564 |
| NM_01809E | 1663.276  | 1438.407  | AF095288  | 45518.348 | 50840.91  |
| AL390078  | 892.164   | 973.15    | AK025116  | 970.809   | 1595.588  |
| NM_00403E | 2262.657  | 2081.842  | AK026271  | 17239.574 | 21456.703 |
| NM_01598E | 2592.022  | 3098.019  | NM_00179E | 24877.939 | 34887.715 |
| NM_01495E | 10382.068 | 11926.309 | AF090895  | 4842.217  | 5709.664  |
| NM_00399Z | 6040.809  | 6315.54   | NM_005610 | 5573.976  | 4685.569  |
| NM_000137 | 810.097   | 815.158   | AL133651  | 5567.114  | 5943.787  |

|           |           |           |           |           |           |
|-----------|-----------|-----------|-----------|-----------|-----------|
| NM_012102 | 8332.602  | 14003.443 | AB014532  | 35247.715 | 35969.012 |
| NM_005017 | 26306.844 | 39970.578 | NM_003478 | 7854.009  | 8887.689  |
| AF163572  | 18530.16  | 19178.736 | NM_016237 | 16947.814 | 15896.977 |
| NM_000897 | 8093.453  | 7884.774  | NM_004924 | 12803.208 | 13274.355 |
| NM_000487 | 1205.788  | 1412.79   | NM_001798 | 10708.222 | 10824.014 |
| NM_006411 | 17457.357 | 23141.195 | NM_001211 | 23750.717 | 20995.516 |
| NM_014182 | 2573.531  | 2913.9    | NM_006505 | 953.258   | 1027.202  |
| AB040884  | 633.344   | 557.318   | AB033050  | 5007.201  | 4603.419  |
| NM_001170 | 9104.524  | 8413.025  | NM_004356 | 44096.387 | 52951.309 |
| NM_014342 | 3012.055  | 3362.293  | BC015022  | 6237.401  | 7314.45   |
| NM_004853 | 8807.884  | 10438.196 | AB033086  | 1568.74   | 1900.561  |
| NM_001494 | 20385.893 | 21122.473 | NM_002406 | 66278.156 | 61019.684 |
| NM_017707 | 1062.823  | 995.805   | U87169    | 6569.623  | 6253.705  |
| NM_004206 | 3302.455  | 4333.31   | NM_002073 | 5087.312  | 5341.656  |
| NM_004603 | 28084.291 | 25580.783 | AF117222  | 1110.219  | 1256.339  |
| AK022849  | 2954.928  | 3179.489  | NM_001935 | 64913.676 | 64230.063 |
| AF040964  | 13192.331 | 14601.634 | NM_001749 | 1301.874  | 1429.537  |
| Z70704    | 2267.091  | 2817.711  | AF090327  | 2307.424  | 2525.632  |
| NM_014363 | 1787.116  | 2658.096  | NM_003291 | 10609.124 | 13425.771 |
| NM_000557 | 5314.37   | 7679.529  | AK022950  | 6438.764  | 6739.361  |
| NM_001375 | 12308.81  | 11647.896 | S75755    | 21742.176 | 20306.604 |
| NM_002312 | 2413.27   | 2164.006  | AF176518  | 2405.568  | 2734.42   |
| M20699    | 2017.554  | 2672.12   | AB014576  | 52035.969 | 52363.539 |
| NM_004774 | 5532.897  | 6768.628  | NM_019044 | 30827.215 | 29609.971 |
| NM_016937 | 2122.002  | 2596.752  | AK000145  | 1616.844  | 1635.796  |
| NM_002690 | 2582.292  | 2338.453  | AF174601  | 11404.435 | 11071.627 |
| NM_012328 | 5401.542  | 5021.449  | AF279865  | 2207.509  | 2249.198  |
| NM_007341 | 1515.325  | 1730.042  | NM_014700 | 2554.05   | 2466.951  |
| NM_016508 | 1299.257  | 2074.81   | NM_014714 | 1103.477  | 1474.227  |
| NM_006456 | 21594.969 | 26648.111 | NM_015644 | 4062.436  | 5126.237  |
| AK026062  | 5312.597  | 6450.593  | NM_005687 | 14686.994 | 15644.749 |
| AF047002  | 28293.008 | 26761.346 | NM_005983 | 8766.299  | 9045.774  |
| AL050082  | 2178.698  | 2883.929  | AB016902  | 16447.699 | 15934.986 |
| NM_006623 | 28678     | 27202.553 | AF272378  | 64453.445 | 60093.734 |
| NM_016588 | 2411.235  | 1987.5    | M61870    | 5830.435  | 4749.786  |
| NM_003135 | 8796.164  | 9484.615  | AK026980  | 5446.409  | 5861.338  |
| NM_004579 | 7409.958  | 6640.241  | AJ277915  | 2225.004  | 2262.726  |
| AA203126  | 2222.695  | 2249.014  | NM_020368 | 8443.207  | 8219.271  |
| L12347    | 21594.748 | 21535.529 | AF024708  | 50040.672 | 48097.977 |
| NM_001622 | 8469.098  | 9646.438  | NM_006467 | 13541.836 | 15444.171 |
| Z36788    | 2242.101  | 2475.087  | NM_017566 | 27436.611 | 30825.232 |
| NM_018477 | 9111.324  | 9661.214  | NM_006582 | 3116.67   | 3582.663  |
| U20536    | 894.152   | 971.311   | AB033019  | 15658.763 | 16050.11  |
| AI298534  | 2946.204  | 3346.891  | NM_001452 | 1625.671  | 1837.884  |
| R71691    | 8344.043  | 8862.253  | NM_006162 | 2679.893  | 2745.596  |
| AW167715  | 2073.164  | 2257.517  | NM_014764 | 16902.861 | 16926.113 |
| AA424735  | 3520.944  | 3720.192  | NM_018078 | 7408.555  | 7369.128  |
| U78294    | 1261.833  | 1073.003  | NM_016050 | 1516.551  | 1521.889  |
| AA171613  | 594.268   | 696.895   | NM_007080 | 23545.389 | 21295.535 |
| BI760394  | 3402.037  | 3409.038  | AK026912  | 12254.924 | 11814.777 |
| AA555216  | 580.586   | 830.253   | AK023531  | 34124.07  | 34925.684 |
| U09117    | 49604.969 | 50777.91  | NM_006697 | 32177.389 | 33302.27  |
| M21054    | 1576.914  | 2056.976  | M19182    | 3037.817  | 2934.05   |

|           |           |           |           |           |           |
|-----------|-----------|-----------|-----------|-----------|-----------|
| M18468    | 1108.064  | 1069.598  | AK025707  | 4052.827  | 4213.454  |
| H66070    | 28294.072 | 27977.793 | NM_006242 | 3260.333  | 3018.829  |
| AA164741  | 788.432   | 1001.403  | AF282887  | 1207.271  | 1004.028  |
| AI189375  | 1977.873  | 1753.249  | X78712    | 4469.205  | 4202.417  |
| NM_001665 | 28624.031 | 33635.609 | NM_001497 | 2291.833  | 2367.194  |
| AF097645  | 445.459   | 675.937   | NM_004130 | 8428.666  | 7870.094  |
| NM_003279 | 32471.654 | 26980.779 | NM_006348 | 3331.668  | 3304.966  |
| AB014599  | 4886.667  | 4486.141  | AF067972  | 58942.836 | 55567.234 |
| NM_004393 | 659.79    | 530.544   | NM_004958 | 4657.365  | 4736.331  |
| AB018345  | 721.903   | 778.703   | D87076    | 8915.062  | 9368.202  |
| NM_005832 | 577.382   | 381.266   | NM_014149 | 5421.469  | 4717.84   |
| AW407841  | 6424.952  | 6256.897  | AB020635  | 21967.684 | 20649.885 |
| U15197    | 1573.885  | 2063.271  | NM_006515 | 3160.675  | 3045.605  |
| NM_001879 | 3665.921  | 3176.44   | NM_005224 | 1520.276  | 1537.516  |
| AF264014  | 14244.578 | 17900.447 | NM_012144 | 38533.465 | 42223.605 |
| L09098    | 341.346   | 521.694   | X65231    | 64528.363 | 63180.672 |
| NM_004155 | 3624.962  | 3379.224  | NM_002908 | 9465.913  | 8600.147  |
| NM_001831 | 540.595   | 632.129   | NM_005378 | 63806.539 | 53003.59  |
| NM_014586 | 11266.132 | 10227.752 | NM_002397 | 5218.952  | 5022.807  |
| NM_014366 | 20683.668 | 21898.389 | AF000672  | 3545.867  | 3433.267  |
| NM_000923 | 1695.311  | 2002.266  | NM_017652 | 45623.281 | 46882.207 |
| NM_006453 | 3256.638  | 4201.302  | X59268    | 9009.097  | 7858.325  |
| NM_018096 | 1794.5    | 1895.215  | D70832    | 66604.719 | 70008.43  |
| AL390078  | 2093.207  | 2091.824  | NM_001429 | 32666.381 | 32644.326 |
| NM_004036 | 4219.337  | 4475.232  | NM_002379 | 47541.395 | 47952.871 |
| NM_015986 | 2597.435  | 3417.887  | AB007929  | 12600.172 | 13274.084 |
| NM_014959 | 11478.077 | 9857.666  | NM_004579 | 18248.02  | 18788.057 |
| NM_003992 | 4304.769  | 3749.362  | AA203126  | 4631.011  | 4148.977  |
| NM_002379 | 22596.191 | 21224.391 | L12347    | 62200.199 | 55749.836 |
| AB007929  | 4177.042  | 5162.305  | NM_001622 | 33851.086 | 33089.66  |
| NM_012102 | 9202.342  | 8166.892  | Z36788    | 17531.715 | 16996.074 |
| NM_005017 | 27383.916 | 24107.119 | NM_018477 | 20321.994 | 22568.623 |
| AF163572  | 14465.938 | 15043.583 | U20536    | 1604.939  | 1495.981  |
| NM_000897 | 4708.978  | 3920.96   | AI298534  | 14978.079 | 13150.79  |
| NM_000487 | 898.435   | 1070.437  | R71691    | 20152.16  | 15837.087 |
| NM_006411 | 13768.186 | 16254.286 | AW167715  | 8823.279  | 8869.246  |
| NM_014182 | 2641.235  | 2727.8    | AA424735  | 44963.941 | 41539.598 |
| AB040884  | 514.091   | 541.815   | U78294    | 15699.421 | 14813.537 |
| NM_001170 | 5013.114  | 6926.365  | AA171613  | 1683.955  | 1904.682  |
| NM_014342 | 2693.99   | 3614.959  | BI760394  | 11670.622 | 11783.237 |
| NM_004853 | 9958.509  | 10778.079 | M21054    | 4728.248  | 4187.143  |
| NM_001494 | 20397.834 | 24718.451 | M18468    | 2677.873  | 2813.985  |
| NM_017707 | 1144.732  | 1075.94   | H66070    | 36686.824 | 39850.973 |
| NM_004206 | 3442.38   | 4616.214  | AA164741  | 1409.693  | 1432.507  |
| NM_004603 | 23888.732 | 23309.135 | AI189375  | 4706.714  | 4636.943  |
| AK022849  | 2716.212  | 2506.744  | AI978885  | 12526.838 | 11719.918 |
| AF040964  | 12482.396 | 9804.71   | NM_000303 | 22846.869 | 21072.189 |
| NM_001939 | 7767.599  | 7374.958  | NM_001939 | 32785.18  | 31101.57  |
| NM_014363 | 697.867   | 668.703   | NM_003279 | 64024.961 | 61352.758 |
| NM_000557 | 5395.317  | 4460.738  | AB014599  | 11633.93  | 10398.208 |
| NM_001375 | 5926.275  | 5862.165  | NM_004393 | 1180.878  | 1202.828  |
| NM_002312 | 639.656   | 667.39    | AB018345  | 1025.61   | 1030.125  |
| M20699    | 955.409   | 953.07    | NM_005832 | 3362.296  | 2460.047  |

|           |           |           |           |           |           |
|-----------|-----------|-----------|-----------|-----------|-----------|
| NM_004774 | 3631.502  | 3603.803  | AW407841  | 10063.178 | 8468.711  |
| NM_016937 | 1268.934  | 1545.983  | U15197    | 2030.126  | 2088.316  |
| NM_002690 | 1905.65   | 2279.927  | NM_001879 | 7832.392  | 6801.709  |
| NM_012328 | 2672.214  | 3228.123  | AF264014  | 32384.293 | 37136.926 |
| NM_007341 | 582.544   | 760.75    | L09098    | 501.318   | 837.012   |
| NM_016508 | 1614.555  | 1906.906  | NM_004155 | 7583.715  | 7697.343  |
| NM_006456 | 9146.51   | 9478.938  | NM_001831 | 4135.472  | 3827.211  |
| AK026062  | 4498.662  | 4942.211  | NM_014586 | 20618.871 | 19031.615 |
| AF047002  | 28238.527 | 22912.203 | NM_014366 | 38783.738 | 44965.984 |
| AL050082  | 2878.211  | 2337.923  | NM_000923 | 3517.986  | 3353.967  |
| NM_006623 | 47419.223 | 33926.824 | NM_006453 | 8185.791  | 6830.291  |
| NM_016588 | 3037.018  | 1881.145  | NM_018096 | 2834.572  | 3175.308  |
| NM_003135 | 9414.756  | 5289.188  | AL390078  | 7388.504  | 8627.595  |
| NM_000137 | 1561.06   | 829.583   | NM_004036 | 9587.308  | 8740.019  |
| L12347    | 22933.566 | 13709.159 | NM_015986 | 5345.769  | 5357.04   |
| NM_001622 | 2750.312  | 1403.512  | NM_014959 | 29246.037 | 33459.113 |
| Z36788    | 705.786   | 448.686   | NM_003992 | 11520.573 | 11508.219 |
| NM_018477 | 7328.884  | 5736.397  | NM_000137 | 4083.418  | 4429.935  |
| U20536    | 266.166   | 286.658   | NM_012102 | 21044.596 | 24858.865 |
| AI298534  | 678.547   | 439.104   | NM_005017 | 61954.969 | 57994.293 |
| R71691    | 4654.333  | 2848.939  | AF163572  | 48554.988 | 49989.754 |
| AW167715  | 1707.368  | 779.801   | NM_000897 | 25060.047 | 26387.029 |
| AA424735  | 986.25    | 745.876   | NM_000487 | 3112.088  | 2900.192  |
| U78294    | 688.459   | 412.015   | NM_006411 | 38259.777 | 44746.715 |
| BI760394  | 2678.894  | 1772.99   | NM_014182 | 4196.421  | 4317.664  |
| AA555216  | 467.952   | 449.889   | AB040884  | 809.598   | 1250.609  |
| U09117    | 16097.152 | 9997.762  | NM_001170 | 25109.611 | 27850.953 |
| M21054    | 708.444   | 523.245   | NM_014342 | 6843.973  | 7181.75   |
| M18468    | 991.877   | 663.414   | NM_000452 | 845.699   | 1102.773  |
| H66070    | 30233.311 | 17562.711 | NM_004853 | 15893.714 | 14783.834 |
| AA164741  | 891.273   | 576.702   | NM_001494 | 35268.828 | 41267.051 |
| AI189375  | 2520.231  | 1326.992  | NM_017707 | 1919.741  | 1867.563  |
| AF097645  | 285.796   | 268.472   | NM_004206 | 5569.94   | 5731.443  |
| NM_001773 | 310.936   | 275.939   | NM_004603 | 53251.625 | 58276.883 |
| Z70704    | 2821.749  | 1573.804  | AK022849  | 7787.907  | 7964.56   |
| AF264014  | 12108.916 | 7079.25   | AF040964  | 22897.148 | 21926.506 |
| NM_004155 | 785.312   | 483.658   | NM_001773 | 1783.263  | 2034.601  |
| NM_001831 | 345.828   | 268.39    | Z70704    | 5678.588  | 5507.811  |
| NM_014586 | 7447.323  | 3859.261  | NM_014363 | 3681.672  | 3505.141  |
| NM_014366 | 6256.644  | 4326.073  | NM_000557 | 21743.418 | 19139.971 |
| NM_000923 | 808.879   | 600.962   | NM_003239 | 2028.586  | 1428.118  |
| NM_006453 | 1087.977  | 509.071   | NM_001375 | 25624.979 | 25206.807 |
| NM_018096 | 502.503   | 397.362   | NM_002312 | 5529.871  | 4994.339  |
| AL390078  | 582.883   | 479.644   | M20699    | 4099.171  | 3681.491  |
| NM_004036 | 2584.326  | 1644.836  | NM_004774 | 13465.702 | 14126.789 |
| NM_015986 | 1528.672  | 1066.525  | NM_016937 | 7517.263  | 7311.48   |
| NM_006546 | 997.819   | 671.337   | NM_002690 | 3340.684  | 4139.998  |
| NM_014959 | 5077.208  | 3097.256  | NM_012328 | 7750.978  | 8765.713  |
| NM_003992 | 3820.617  | 2333.728  | NM_007341 | 2997.38   | 3655.609  |
| AF279265  | 2825.462  | 1522.676  | NM_016508 | 3410.408  | 4004.544  |
| NM_005213 | 20053.826 | 14224.073 | NM_006456 | 42810.992 | 46703.953 |
| AB040914  | 1965.002  | 1283.513  | AK026062  | 9032.962  | 8582.287  |
| NM_002997 | 13158.034 | 10117.213 | AF047002  | 39539.262 | 41836.703 |



|           |           |           |           |           |           |
|-----------|-----------|-----------|-----------|-----------|-----------|
| AB007929  | 5051.881  | 3329.321  | AL050082  | 5848.728  | 6113.504  |
| NM_004579 | 11741.066 | 6946.126  | NM_006623 | 66385.352 | 72575.07  |
| AA203126  | 2147.635  | 1643.56   | NM_016588 | 4919.838  | 4625.475  |
| AB043997  | 594.238   | 461.595   | NM_003135 | 15218.049 | 14335.283 |
| NM_004853 | 2881.848  | 1497.38   | NM_004579 | 16472.58  | 17380.678 |
| NM_001494 | 4808.583  | 3204.378  | AA203126  | 4348.096  | 4556.346  |
| NM_017707 | 481.463   | 433.206   | L12347    | 59176.473 | 56752.57  |
| NM_004206 | 1302.583  | 665.659   | NM_001622 | 27338.174 | 25541.32  |
| NM_004603 | 14960.837 | 8789.101  | Z36788    | 13944.745 | 13313.235 |
| AK022849  | 1975.3    | 1670.13   | NM_018477 | 17441.727 | 18886.549 |
| AF040964  | 7787.727  | 5305.292  | U20536    | 1032.95   | 1238.543  |
| NM_001939 | 11181.635 | 9068.431  | AI298534  | 11219.276 | 10667.477 |
| NM_003279 | 27972.924 | 18842.588 | R71691    | 16091.7   | 14183.693 |
| AB014599  | 7632.317  | 5499.577  | AW167715  | 7192.016  | 6840.28   |
| NM_004393 | 1054.447  | 642.988   | AA424735  | 31121.432 | 26903.211 |
| AB018345  | 830.886   | 888.866   | U78294    | 7227.872  | 7244.615  |
| NM_005832 | 928.315   | 682.833   | AA171613  | 1288.056  | 1445.208  |
| AW407841  | 7615.897  | 5898.5    | BI760394  | 5794.018  | 6889.184  |
| U15197    | 1511.028  | 1301.144  | AA555216  | 1132.256  | 1080.932  |
| NM_001879 | 6087.083  | 5038.484  | U09117    | 49150.082 | 53191.703 |
| NM_016588 | 1306.903  | 577.612   | M21054    | 3170.802  | 3029.035  |
| NM_003135 | 5754.343  | 3013.673  | M18468    | 2481.332  | 2198.184  |
| NM_000137 | 536.572   | 389.989   | H66070    | 33053.457 | 31249.775 |
| NM_012102 | 2171.141  | 1071.274  | AA164741  | 1285.789  | 1340.792  |
| NM_005017 | 8392.879  | 4379.024  | AI189375  | 3716.373  | 4221.72   |
| AF163572  | 4733.059  | 3114.603  | NM_001665 | 39603.078 | 44968     |
| NM_000897 | 2898.617  | 1688.619  | AF097645  | 976.826   | 1282.468  |
| NM_006411 | 17773.174 | 10909.445 | NM_003279 | 62082.176 | 59998.719 |
| NM_014182 | 1993.52   | 1558.625  | AB014599  | 9923.681  | 8874.426  |
| AB040884  | 595.232   | 505.67    | NM_004393 | 898.437   | 963.245   |
| NM_000492 | 14338.179 | 9951.378  | AB018345  | 1401.788  | 714.974   |
| NM_012089 | 664.655   | 394.751   | NM_005832 | 2544.914  | 2243.799  |
| NM_001170 | 10109.015 | 6939.517  | AW407841  | 8671.032  | 7434.128  |
| AL137716  | 913.434   | 707.297   | AF264014  | 29410.652 | 35424.039 |
| NM_004696 | 2910.39   | 1860.049  | NM_004155 | 4747.282  | 4818.2    |
| NM_014342 | 3843.178  | 2916.349  | NM_001831 | 1302.562  | 1586.302  |
| Z50169    | 610.815   | 483.596   | NM_014586 | 12928.82  | 13188.878 |
| NM_001665 | 19582.609 | 11705.989 | NM_014366 | 27676.104 | 30673.369 |
| Z70704    | 1844.952  | 1080.441  | NM_000923 | 2077.6    | 2015.04   |
| NM_014363 | 525.896   | 377.645   | NM_006453 | 4763.074  | 4305.49   |
| NM_000557 | 806.975   | 421.305   | NM_018096 | 2547.168  | 2315.641  |
| NM_001375 | 3533.695  | 1526.85   | AL390078  | 3342.489  | 3133.707  |
| M20699    | 347.948   | 351.886   | NM_004036 | 6865.478  | 7101.417  |
| NM_004774 | 2469.061  | 1112.69   | NM_015986 | 6094.034  | 6656.166  |
| NM_016937 | 1831.14   | 878.392   | NM_014959 | 21986.852 | 22924.979 |
| NM_002690 | 1670.863  | 1264.462  | NM_003992 | 6284.048  | 6673.893  |
| NM_012328 | 3016.347  | 2278.096  | NM_002379 | 47156.855 | 50559.609 |
| NM_007341 | 4078.589  | 2400.236  | AB007929  | 8966.385  | 9442.116  |
| NM_016508 | 1670.142  | 1113.433  | NM_012102 | 12480.337 | 14990.059 |
| NM_006456 | 18731.693 | 9647.781  | NM_005017 | 59150.168 | 54093.469 |
| AK026062  | 5196.923  | 3335.94   | AF163572  | 35279.656 | 40456.395 |
| AF047002  | 26419.984 | 14545.479 | NM_000897 | 20767.178 | 19835.951 |
| AL050082  | 2733.563  | 1773.203  | NM_000487 | 2247.987  | 2422.135  |

|           |           |           |           |           |           |
|-----------|-----------|-----------|-----------|-----------|-----------|
| NM_006623 | 49486.898 | 35884.602 | NM_014182 | 4880.329  | 4776.457  |
| CY3Cy5    | 4193.272  | 134.727   | AB040884  | 956.472   | 1220.252  |
| NM_016134 | 715.256   | 671.145   | NM_001170 | 23675.076 | 25854.551 |
| AL390185  | 4033.471  | 4345.13   | NM_014342 | 5616.083  | 6748.223  |
| AF086235  | 12305.906 | 12449.824 | NM_004853 | 12599.789 | 14240.655 |
| AF143886  | 1485.235  | 1825.892  | NM_001494 | 26428.842 | 29346.779 |
| AK025975  | 3802.359  | 3615.234  | NM_017707 | 1010.829  | 1146.489  |
| AK025583  | 61211.586 | 47414.688 | NM_004206 | 4905.406  | 5070.476  |
| NM_014664 | 2209.01   | 1871.79   | NM_004603 | 40040.531 | 41920.344 |
| AL109788  | 9623.959  | 9074.756  | AK022849  | 5137.066  | 5432.833  |
| NM_014952 | 77764.023 | 65482.934 | AF040964  | 17787.961 | 16543.215 |
| AL133053  | 1751.774  | 2603.41   | NM_001939 | 33165.441 | 31189.238 |
| NM_018142 | 10554.988 | 14361.346 | NM_000557 | 16901.752 | 17276.053 |
| NM_017653 | 6239.011  | 7014.096  | NM_003239 | 1692.04   | 1438.049  |
| AL109695  | 20397.457 | 18785.607 | NM_001375 | 22174.84  | 27543.602 |
| NM_016134 | 913.483   | 1490.195  | NM_002312 | 5580.19   | 5826.019  |
| SR2       | 43015.066 | 49823.715 | M20699    | 3328.682  | 3356.672  |
| SR4       | 12521.685 | 11972.333 | NM_004774 | 12849.085 | 11936.131 |
| SR6       | 1423.608  | 1394.591  | NM_016937 | 6146.502  | 6188.358  |
| SR8       | 5773.498  | 17582.707 | NM_002690 | 3748.357  | 3947.498  |
| SR10      | 19149.637 | 5781.798  | NM_012328 | 6054.959  | 6469.95   |
| CY3Cy5    | 2826.735  | 109.596   | NM_007341 | 3094.575  | 3712.796  |
| NM_014819 | 4727.892  | 5485.727  | NM_016508 | 2780.533  | 4036.867  |
| NM_017609 | 1198.233  | 1048.819  | NM_006456 | 40744.434 | 40709.488 |
| AF086040  | 1319.266  | 1490.432  | AK026062  | 4561.309  | 4949.372  |
| AB032988  | 2398.506  | 3026.789  | AF047002  | 35447.938 | 34304.82  |
| AK023559  | 12709.351 | 14210.697 | AL050082  | 5282.737  | 5328.433  |
| AB037859  | 65188.367 | 66336.117 | NM_006623 | 65850.008 | 66814.578 |
| AL049233  | 3422.399  | 3418.573  | NM_016588 | 3962.303  | 4010.316  |
| NM_017696 | 7957.059  | 6542.185  | NM_003135 | 13948.188 | 13967.505 |
| AL050166  | 5795.027  | 7802.377  | NM_000137 | 3765.814  | 2799.504  |
| AK024254  | 2107.512  | 2722.295  | Z36788    | 10458.714 | 10712.288 |
| NM_018456 | 5166.869  | 5343.062  | NM_018477 | 17134.463 | 20682.426 |
| AK026697  | 690.382   | 672.056   | U20536    | 1132.775  | 1274.628  |
| NM_019021 | 2520.154  | 2345.708  | AI298534  | 6088.407  | 5571.501  |
| NM_004717 | 571.324   | 1024.685  | R71691    | 13566.061 | 11397.13  |
| AK002183  | 1030.649  | 1593.327  | AW167715  | 6360.904  | 7068.836  |
| NM_018996 | 850.848   | 888.658   | AA424735  | 29666.518 | 28084.668 |
| AL137304  | 2614.045  | 2669.599  | U78294    | 5345.889  | 4784.147  |
| AL049274  | 664.58    | 841.989   | AA171613  | 903.249   | 1073.027  |
| AK026883  | 2209.199  | 1821.113  | BI760394  | 5069.373  | 5312.746  |
| NM_014350 | 11975.775 | 9522.848  | AA555216  | 958.936   | 853.248   |
| U00925    | 18171.102 | 14344.582 | U09117    | 57979.711 | 54974.133 |
| AK025190  | 415.742   | 541.058   | M21054    | 3521.117  | 3764.549  |
| AK025846  | 1350.357  | 1694.425  | M18468    | 1574.312  | 1584.465  |
| AK026805  | 10463.277 | 9333.667  | H66070    | 18233.84  | 16233.002 |
| AB037765  | 2110.018  | 3231.247  | AA164741  | 1308.912  | 1137.962  |
| AK025068  | 3321.529  | 6024.599  | AI189375  | 3129.902  | 2799.452  |
| AK026720  | 1737.292  | 2032.488  | NM_001665 | 35892.895 | 43667.766 |
| AL137566  | 2989.985  | 2592.288  | AF097645  | 1019.873  | 729.577   |
| AF087962  | 8924.921  | 8171.58   | NM_001773 | 1427.166  | 1433.833  |
| AL050197  | 4039.958  | 7423.479  | Z70704    | 4981.257  | 4996.928  |
| AF085870  | 14295.566 | 15853.291 | AF264014  | 15974.774 | 17644.672 |

|           |           |           |           |           |           |
|-----------|-----------|-----------|-----------|-----------|-----------|
| AL050063  | 871.695   | 778.706   | NM_004155 | 4308.172  | 3732.131  |
| AL110190  | 5166.609  | 3164.124  | NM_001831 | 1611.722  | 1706.105  |
| AL117656  | 652.54    | 563.291   | NM_014586 | 13427.832 | 14415.712 |
| AJ001893  | 5193.156  | 4948.565  | NM_014366 | 26155.588 | 27811.559 |
| NM_018225 | 38653.805 | 41744.098 | NM_006453 | 2726.455  | 2339.459  |
| AK025534  | 1245.257  | 1248.71   | NM_018096 | 2222.188  | 1748.269  |
| AK022577  | 521.272   | 688.22    | AL390078  | 2998.869  | 2815.486  |
| AF091526  | 5096.892  | 6661.958  | NM_004036 | 5083.505  | 5301.824  |
| AK026705  | 6099.876  | 5044.633  | NM_015986 | 4704.821  | 5473.114  |
| NM_003602 | 3408.553  | 3411.841  | NM_006546 | 1044.453  | 1122.114  |
| AF009258  | 58459.074 | 56500.273 | NM_014959 | 20655.748 | 21950.148 |
| AF009305  | 4709.671  | 4466.026  | NM_003992 | 6642.873  | 6300.136  |
| NM_006193 | 1186.221  | 1273.282  | AF279265  | 7503.174  | 6365.042  |
| AF056454  | 458.323   | 569.346   | NM_005213 | 32160.551 | 39735.391 |
| AF009270  | 1615.405  | 1891.202  | AB040914  | 2347.166  | 2865.25   |
| AF009318  | 3140.543  | 4948.887  | NM_002997 | 12908.813 | 14563.71  |
| AF056421  | 2221.46   | 3353.626  | NM_002379 | 51948.531 | 55790.949 |
| AF090889  | 669.778   | 871.92    | AB007929  | 9695.88   | 12162.612 |
| AK001085  | 2676.313  | 2790.646  | NM_004579 | 17250.01  | 18206.916 |
| AK001906  | 5483.418  | 5422.313  | AA203126  | 4174.551  | 3416.136  |
| AK021528  | 959.987   | 1010.06   | AB043997  | 1887.642  | 1305.573  |
| AK021746  | 1424.931  | 1124.551  | NM_004853 | 13261.949 | 13614.382 |
| AK001136  | 1182.884  | 1447.233  | NM_004206 | 3413.468  | 3249.789  |
| AK021617  | 385.624   | 521.997   | NM_004603 | 39968.129 | 42804.254 |
| AK021810  | 1561.442  | 1507.678  | AK022849  | 4417.61   | 4723.331  |
| AF086317  | 6216.547  | 6717.905  | AF040964  | 17395.186 | 16450.977 |
| U16850    | 4977.108  | 6209.289  | NM_001939 | 32381.895 | 33132.789 |
| AL390178  | 1600.891  | 2076.822  | NM_003279 | 55505.449 | 56268.539 |
| NM_005383 | 719.709   | 806.305   | AB014599  | 9623.059  | 8945.905  |
| NM_005368 | 1226.349  | 1266.467  | NM_004393 | 1322.673  | 1240.941  |
| NM_018618 | 1209.5    | 1396.726  | AB018345  | 838.608   | 994.029   |
| AJ008121  | 52880.68  | 42650.863 | NM_005832 | 1777.529  | 1687.845  |
| AJ008153  | 6805.705  | 7478.618  | AW407841  | 9881.042  | 8790.756  |
| AK023739  | 1738.575  | 1700.638  | U15197    | 2000.074  | 2077.657  |
| NM_005830 | 11260.133 | 12881.97  | NM_001879 | 8669.081  | 8459.878  |
| AL389983  | 5744.448  | 5716.617  | NM_016588 | 3962.11   | 3373.235  |
| AJ008159  | 2402.295  | 2368.551  | NM_003135 | 4961.654  | 3945.51   |
| AK000995  | 3396.472  | 3446.308  | NM_000137 | 2800.251  | 3066.685  |
| U00959    | 4405.17   | 7610.139  | NM_012102 | 11445.931 | 15618.899 |
| AF147306  | 7537.958  | 9093.462  | NM_005017 | 52890.508 | 56114.934 |
| AF086267  | 7508.87   | 6544.571  | NM_000897 | 12072.344 | 12345.375 |
| X74606    | 896.267   | 893.413   | NM_000487 | 1159.853  | 1333.224  |
| NM_012183 | 5191.237  | 4052.678  | NM_006411 | 28294.639 | 31061.543 |
| AK026785  | 2132.645  | 2227.299  | NM_014182 | 3331.458  | 3848.141  |
| AK022994  | 560.177   | 472.362   | AB040884  | 1408.459  | 1214.796  |
| AL049466  | 4380.942  | 4387.242  | NM_000492 | 31200.996 | 33067.617 |
| AB037802  | 1083.213  | 1223.91   | NM_012089 | 1901.171  | 1647.217  |
| AL137450  | 4028.015  | 4195.525  | NM_001170 | 21655.445 | 23075.025 |
| AK023058  | 4650.349  | 3646.408  | AL137716  | 2577.683  | 3185.012  |
| AJ227878  | 593.543   | 926.114   | NM_004696 | 5747.015  | 5617.386  |
| NM_012064 | 12889.586 | 11346.243 | NM_014342 | 5440.815  | 5849.355  |
| AK001460  | 1021.051  | 906.255   | Z50169    | 1803.805  | 1738.953  |
| AK092508  | 6370.254  | 6368.582  | NM_014470 | 2920.551  | 3082.07   |

|           |           |           |           |           |           |
|-----------|-----------|-----------|-----------|-----------|-----------|
| AK027111  | 61411.055 | 63113.758 | NM_001665 | 28530.395 | 26663.248 |
| NM_00351E | 1113.596  | 1787.667  | AF097645  | 1597.054  | 1020.266  |
| M60749    | 4321.895  | 4826.036  | NM_001773 | 1036.848  | 1243.606  |
| X79986    | 2856.208  | 3202.036  | Z70704    | 3766.062  | 4135.944  |
| NM_00352E | 13480.654 | 14004.475 | NM_014363 | 2947.938  | 3339.382  |
| X01448    | 2019.173  | 2847.29   | NM_000557 | 7320.833  | 8280.95   |
| NM_01469C | 18677.846 | 19331.367 | NM_001375 | 19706.746 | 22185.959 |
| NM_01769E | 3931.854  | 3829.887  | NM_002312 | 10140.929 | 5997.463  |
| AF086490  | 2128.636  | 1946.762  | M20699    | 2743.588  | 2717.84   |
| AF131738  | 31278.006 | 27501.43  | NM_004774 | 3756.143  | 3877.14   |
| AK021666  | 10616.083 | 10314.763 | NM_016937 | 1946.816  | 2191.828  |
| AK024081  | 1641.414  | 1436.015  | NM_00269C | 4393.979  | 3981.08   |
| AK024825  | 5563.017  | 4942.797  | NM_01232E | 7048.501  | 7275.945  |
| NM_00079E | 673.881   | 448.77    | NM_007341 | 5468.443  | 5411.858  |
| NM_014731 | 12252.591 | 13375.443 | NM_01650E | 2854.163  | 3328.757  |
| AF035191  | 17647.822 | 17224.258 | NM_00645E | 44567.301 | 52390.766 |
| NM_00405E | 1066.963  | 1018.795  | AK026062  | 6349.43   | 7271.251  |
| NM_004527 | 1365.133  | 1264.737  | AF047002  | 31727.623 | 33768.984 |
| NM_01206E | 14465.018 | 13936.841 | AL050082  | 6046.116  | 6163.983  |
| AK026717  | 762.045   | 917.761   | NM_00662E | 66158.906 | 66589.93  |
| NM_001507 | 2370.294  | 4594.202  | CY3Cy5    | 6320.636  | 78.014    |
| X92108    | 1417.719  | 1762.895  | NM_016134 | 1200.753  | 1129.263  |
| AK022120  | 4115.182  | 3931.944  | AL390185  | 10551.596 | 11178.103 |
| Z70762    | 1367.799  | 1524.203  | AF086235  | 19354.418 | 20293.9   |
| D17099    | 1398.971  | 1392.414  | AF143886  | 2600.636  | 2963.574  |
| BF037206  | 4579.099  | 4339.459  | AK025975  | 7692.084  | 9923.741  |
| AK021474  | 46843.02  | 36791.98  | AK025583  | 68678.195 | 64420.039 |
| AK023642  | 763.971   | 906.072   | NM_014664 | 4468.753  | 4241.533  |
| U52827    | 2397.281  | 2001.479  | AL109788  | 17350.385 | 19048.393 |
| AB031547  | 3300.022  | 2585.719  | NM_01495E | 71766.445 | 64627.535 |
| NM_00397C | 3566.278  | 2397.467  | AL133053  | 5092.556  | 4491.702  |
| AK022496  | 2181.449  | 2742.893  | NM_01814E | 18335.072 | 17150.43  |
| AB033035  | 3229.37   | 3178.394  | NM_01765E | 9282.34   | 10917.301 |
| NM_00288E | 5644.82   | 6090.158  | AL109695  | 28117.227 | 30147.24  |
| NM_01901E | 1008.478  | 977.473   | NM_016134 | 1335.428  | 1395.763  |
| NM_000141 | 714.192   | 453.019   | SR4       | 17819.67  | 18770.506 |
| NM_01615C | 8823.712  | 7215.482  | SR6       | 1879.517  | 1760.029  |
| U57058    | 1501.498  | 2496.222  | SR8       | 7621.856  | 19126.609 |
| AL137452  | 3305.838  | 4977.891  | SR10      | 27520.373 | 8466.487  |
| NM_001347 | 11940.767 | 12885.979 | CY3Cy5    | 7687.971  | 560.814   |
| AK024549  | 53323.523 | 42956.004 | NM_01481E | 7356.032  | 7904.981  |
| NM_00633E | 33904.855 | 28372.93  | NM_01760E | 1838.276  | 1316.341  |
| NM_007164 | 24906.734 | 26736.521 | AF086040  | 1962.449  | 1783.81   |
| NM_000261 | 1558.901  | 2087.919  | AB032988  | 3224.304  | 3027.646  |
| NM_00260E | 1503.267  | 2538.414  | AK023559  | 25203.449 | 26088.596 |
| NM_00257C | 4073.396  | 5601.509  | AB037859  | 65050.547 | 76592.422 |
| NM_00318E | 3411.147  | 4651.14   | AL049233  | 8359.531  | 6963.589  |
| NM_001657 | 610.585   | 1086.361  | NM_01769E | 16678.291 | 14445.276 |
| NM_00358E | 1397.111  | 1665.9    | AL050166  | 9087.451  | 9335.913  |
| NM_019851 | 5197.293  | 4397.643  | AK024254  | 4059.964  | 4145.616  |
| NM_00323E | 497.308   | 652.086   | NM_01845E | 8514.375  | 8387.084  |
| NM_01409E | 20709.703 | 23659.023 | AK026697  | 1417.736  | 1766.495  |
| NM_00570E | 9589.5    | 7632.007  | NM_019021 | 3473.671  | 3412.533  |

|           |           |           |           |           |           |
|-----------|-----------|-----------|-----------|-----------|-----------|
| NM_001261 | 6565.187  | 5870.305  | NM_004717 | 1060.964  | 1395.02   |
| NM_001977 | 3143.135  | 3175.358  | AK002183  | 3951.78   | 4100.142  |
| NM_007219 | 1978.151  | 2110.141  | NM_018996 | 1444.883  | 1496.914  |
| AK026854  | 3739.137  | 3629.047  | AL137304  | 4136.374  | 4218.356  |
| NM_001269 | 14132.676 | 13854.133 | AL049274  | 1254.147  | 1406.658  |
| NM_002506 | 3576.272  | 3392.543  | AF147343  | 1757.125  | 1906.778  |
| NM_004906 | 7864.348  | 5789.803  | AK025214  | 852.423   | 676.966   |
| X98261    | 428.986   | 510.341   | AK025846  | 1975.547  | 2221.828  |
| NM_012447 | 19967.68  | 27722.709 | AK026805  | 16092.622 | 16632.209 |
| NM_006366 | 2017.532  | 3229.469  | AB037765  | 2500.837  | 2886.471  |
| AK027013  | 39228.93  | 38093.789 | AK025068  | 5008.225  | 4976.788  |
| NM_001344 | 38563.66  | 37152.105 | AK026720  | 2356.419  | 2313.02   |
| NM_018294 | 3155.926  | 2893.019  | AL137566  | 5514.659  | 5542.574  |
| AL389934  | 10706.78  | 10760.688 | AF087962  | 18550.221 | 16005.884 |
| NM_004330 | 6662.903  | 7904.023  | AL050197  | 5565.061  | 5998.64   |
| AF151802  | 11151.022 | 12086.292 | AF085870  | 25882.912 | 26893.088 |
| AB006746  | 2160.965  | 2380.698  | AL050063  | 1281.169  | 1061.555  |
| NM_006498 | 8434.637  | 9913.044  | AL080217  | 799.754   | 565.068   |
| AB023233  | 4306.658  | 6102.591  | AL117580  | 33655.875 | 35289.363 |
| AL133071  | 541.903   | 786.561   | AL050124  | 358.515   | 509.176   |
| NM_004369 | 5742.335  | 5956.05   | AL117656  | 2014.448  | 1581.328  |
| NM_004370 | 1017.781  | 1064.415  | AJ001893  | 9108.939  | 6479.05   |
| AB040898  | 2057.183  | 1524.891  | NM_018225 | 42842.035 | 48636.422 |
| NM_016155 | 6062.626  | 8101.548  | AK025534  | 1617.545  | 1454.081  |
| NM_001224 | 14846.337 | 12697.548 | AK022577  | 669.809   | 550.485   |
| NM_017811 | 11599.5   | 11106.038 | AF091526  | 8730.176  | 9214.751  |
| NM_001569 | 4029.9    | 3580.487  | AK026705  | 9437.381  | 9976.614  |
| NM_004131 | 1045.919  | 771.389   | NM_003602 | 4690.689  | 4504.751  |
| AK023284  | 1424.406  | 1402.068  | AF009258  | 62420.117 | 55987.762 |
| AF106069  | 474.776   | 623.641   | AF009305  | 10037.382 | 9323.705  |
| NM_005101 | 8103.8    | 7733.862  | NM_006193 | 2688.608  | 2938.006  |
| AF130060  | 50548.797 | 54061.777 | AF056454  | 612.131   | 524.496   |
| NM_007057 | 29151.416 | 27385.641 | AF009270  | 2632.92   | 2938.207  |
| NM_000177 | 3780.371  | 4980.098  | AF009318  | 4539.997  | 4050.786  |
| NM_003387 | 26388.934 | 34289.883 | AF056421  | 4035.2    | 3547.872  |
| U60665    | 4204.895  | 5293.403  | AF090889  | 578.672   | 870.685   |
| NM_005507 | 52390.629 | 62289.941 | AK001085  | 2320.334  | 2013.317  |
| AL080133  | 20821.316 | 27948.041 | AK001906  | 7014.989  | 6134.822  |
| AY014403  | 2028.864  | 2417.516  | AK021528  | 1293.2    | 1444.855  |
| NM_006912 | 26163.895 | 29999.135 | AK021746  | 2728.123  | 2363.258  |
| X12534    | 6328.671  | 5771.461  | AK001136  | 1771.28   | 1907.122  |
| NM_018367 | 1370.435  | 1405.14   | AK021810  | 2921.267  | 2150.242  |
| NM_001363 | 15601.677 | 14058.873 | U16850    | 9105.984  | 13806.129 |
| NM_014323 | 8504.715  | 8030.248  | AL390178  | 3004.359  | 1892.014  |
| NM_003205 | 2441.729  | 2224.125  | NM_005383 | 1176.702  | 1217.312  |
| AB002324  | 2772.352  | 2560.839  | NM_005368 | 2407.939  | 2443.714  |
| AL359938  | 719.61    | 744.011   | NM_018618 | 1986.222  | 1934.864  |
| AK026231  | 2921.428  | 2704.888  | AJ008121  | 62216.844 | 61340.641 |
| NM_002140 | 32206.266 | 20822.803 | AJ008153  | 13382.774 | 10956.315 |
| NM_020143 | 9242.961  | 7131.582  | AK023739  | 2495.972  | 2671.867  |
| NM_012469 | 6392.585  | 5393.5    | NM_005830 | 18079.535 | 17584.414 |
| NM_005131 | 2989.079  | 3692.357  | AL389983  | 8961.227  | 8346.556  |
| NM_007056 | 4517.775  | 4490.565  | AJ008159  | 2773.346  | 2781.148  |

|           |           |           |           |           |           |
|-----------|-----------|-----------|-----------|-----------|-----------|
| AF083383  | 4343.808  | 4306.804  | AK000995  | 5557.136  | 5034.784  |
| NM_006925 | 5261.032  | 5890.294  | U00959    | 6536.49   | 6333.824  |
| NM_004890 | 54122.621 | 59295.836 | NM_014578 | 54807.348 | 50668.555 |
| AK023181  | 7760.095  | 11651.676 | AF147306  | 8696.97   | 7996.23   |
| NM_004294 | 8942.318  | 12000.735 | AF086267  | 15481.366 | 15357.994 |
| NM_005051 | 33387.652 | 38271.641 | X74606    | 1249.831  | 1192.178  |
| NM_001968 | 40607.895 | 40649.492 | NM_012183 | 10023.459 | 9109.093  |
| D17259    | 57909.68  | 64052.32  | AK026785  | 3747.557  | 3472.309  |
| AB002366  | 1056.024  | 1232.576  | AK001938  | 831.377   | 968.96    |
| AF264627  | 55458.777 | 60299.242 | AK022994  | 1345.39   | 1125.984  |
| NM_018130 | 18088.125 | 16841.195 | U17623    | 2925.783  | 923.236   |
| AF085878  | 2418.347  | 2173.364  | AL137450  | 5906.615  | 5023.272  |
| AB006630  | 2176.234  | 1346.94   | AK023058  | 8789.807  | 9117.31   |
| NM_004453 | 4364.373  | 4513.815  | AJ227878  | 850.269   | 1128.397  |
| NM_016229 | 15841.83  | 14105.558 | NM_012064 | 30048.877 | 30388.074 |
| NM_018244 | 7853.899  | 7350.369  | AK001460  | 1177.666  | 1274.912  |
| NM_002492 | 56113.789 | 53952.297 | AK092508  | 11557.417 | 11259.955 |
| AB046855  | 1571.719  | 1184.141  | AK027111  | 65999.969 | 68364.508 |
| NM_005642 | 9545.299  | 6870.547  | NM_003518 | 1427.343  | 1646.556  |
| NM_018105 | 2758.241  | 2016.333  | M60749    | 6580.121  | 6408.748  |
| AK023452  | 9709.634  | 8195.052  | AF056424  | 1657.952  | 1464.449  |
| AF155065  | 616.259   | 883.361   | X79986    | 4337.81   | 4047.849  |
| NM_000332 | 863.518   | 1151.745  | NM_003523 | 21649.928 | 23872.377 |
| AK022215  | 8993.199  | 12453.124 | X01448    | 2537.859  | 3063.66   |
| U90305    | 2023.766  | 2579.627  | NM_016503 | 13577.836 | 12919.94  |
| NM_001527 | 28375.961 | 34063.945 | AK056351  | 53707.102 | 50843.93  |
| AK025269  | 29216.588 | 35557.977 | NM_014690 | 25091.988 | 21674.234 |
| NM_001438 | 862.666   | 1558.716  | NM_017698 | 4926.71   | 4567.418  |
| AB040971  | 1309.683  | 1572.407  | AF086490  | 3248      | 3116.856  |
| NM_006562 | 9773.011  | 10979.61  | AF131738  | 39981.328 | 49893.813 |
| X65665    | 786.536   | 934.518   | AK021666  | 34411.957 | 34597.281 |
| NM_003112 | 1687.062  | 1784.103  | AK024081  | 3195.97   | 2727.106  |
| AL080170  | 3524.45   | 5054.028  | AK024825  | 8475.643  | 7320.126  |
| AB039903  | 8578.227  | 10162.85  | NM_014731 | 15818.891 | 17357.822 |
| NM_000542 | 31843.59  | 32883.422 | AF035191  | 23577.725 | 21477.697 |
| NM_014625 | 1340.078  | 1510.573  | NM_004058 | 2347.179  | 2284.486  |
| NM_006851 | 2423.293  | 3683.394  | NM_004527 | 2767.297  | 2671.163  |
| AK001560  | 3060.027  | 2526.754  | NM_012062 | 19343.422 | 18820.465 |
| AB001328  | 2852.131  | 2784.101  | AK026717  | 1420.364  | 1498.094  |
| NM_000948 | 867.35    | 895.926   | NM_001507 | 3701.268  | 4942.011  |
| H99588    | 2135.873  | 2086.786  | X92108    | 1386.918  | 1448.639  |
| X00588    | 7964.188  | 8228.494  | AL389876  | 6638.499  | 5187.629  |
| AI359037  | 52226.332 | 52799.328 | AK022120  | 6694.405  | 7857.984  |
| J04513    | 1255.784  | 1551.558  | U52830    | 1264.771  | 1282.738  |
| BI754285  | 2491.518  | 3594.577  | Z70762    | 1352.706  | 1306.669  |
| X15998    | 13411.766 | 16623.025 | D17099    | 1168.777  | 1022.328  |
| M76482    | 789.029   | 1246.982  | BF037206  | 7341.439  | 6901.17   |
| X17519    | 558.104   | 877.683   | AK021474  | 62306.078 | 62103.824 |
| NM_001883 | 4344.955  | 5471.559  | AK023642  | 1179.22   | 1517.008  |
| NM_004628 | 5764.585  | 7473.781  | U52827    | 6839.308  | 4713.444  |
| L31785    | 2869.409  | 4465.79   | AB031547  | 4907.927  | 3032.201  |
| H-M 69043 | 14401.203 | 21974.588 | AB042636  | 2282.803  | 1696.576  |
| AF077374  | 2232.146  | 2536.615  | AB033035  | 3091.694  | 2631.954  |

|           |           |           |           |           |           |
|-----------|-----------|-----------|-----------|-----------|-----------|
| U43901    | 1107.475  | 1207.335  | NM_002883 | 7325.848  | 7397.378  |
| X59065    | 2261.536  | 2317.355  | NM_019012 | 1544.9    | 1253.76   |
| M59828    | 25119.779 | 18578.092 | NM_000141 | 931.745   | 1095.857  |
| NM_00216E | 6528.833  | 5812.654  | NM_016150 | 18178.24  | 18885.258 |
| NM_01565E | 619.568   | 880.202   | U57058    | 2001.781  | 2014.696  |
| NM_00058E | 5974.299  | 5870.717  | AL137452  | 4804.642  | 4458.723  |
| NM_01654E | 20830.566 | 24104.848 | NM_004312 | 63147.117 | 61074.938 |
| AF309653  | 3652.426  | 3540.425  | NM_001347 | 13100.182 | 13631.336 |
| NM_00262C | 42266.781 | 45782.98  | AK024549  | 58089.699 | 61470.676 |
| S79267    | 2110.928  | 2322.557  | NM_00633E | 40800.344 | 44583.859 |
| NM_00181E | 2456.901  | 2569.782  | NM_007164 | 28914.49  | 28732.879 |
| NM_003784 | 52370.738 | 58666.234 | NM_000261 | 1992.814  | 1941.813  |
| NM_00019E | 54699.996 | 60592.27  | NM_00260E | 1782.627  | 1760.177  |
| NM_00544E | 22168.174 | 22024.648 | NM_00257C | 5097.237  | 4534.471  |
| NM_01489E | 2820.708  | 3366.477  | NM_003183 | 4992.214  | 5746.836  |
| NM_00363C | 11584.869 | 16672.051 | NM_001657 | 722.088   | 835.176   |
| NM_00004E | 5979.811  | 7898.896  | NM_00358E | 3181.928  | 2907.627  |
| NM_00321E | 3906.998  | 5574.22   | NM_019851 | 9224.64   | 8092.197  |
| NM_00670E | 9743.425  | 12587.831 | NM_00323E | 904.718   | 712.351   |
| NM_000612 | 31132.773 | 34071.094 | NM_01409E | 30223.197 | 27433.713 |
| NM_004257 | 32165.799 | 37648.023 | NM_001261 | 8057.625  | 10288.143 |
| NM_000683 | 3239.971  | 4023.216  | NM_001977 | 4508.083  | 4903.337  |
| NM_00362E | 4762.25   | 5978.008  | NM_00721E | 2890.088  | 2201.715  |
| NM_005901 | 8261.888  | 9325.479  | AK026854  | 5415.783  | 4124.125  |
| NM_00424E | 11191.339 | 11237.865 | NM_00126E | 24970.225 | 19899.758 |
| NM_00491C | 2069.619  | 2984.125  | NM_00250E | 6811.078  | 5281.195  |
| AB013452  | 3041.291  | 4045.481  | NM_00490E | 12837.285 | 7548.463  |
| M93107    | 5775.342  | 6031.076  | X98261    | 1837.98   | 1049.357  |
| BC001479  | 17091.953 | 18202.432 | NM_012447 | 26320     | 24453.49  |
| NM_002461 | 54999.82  | 56132.727 | NM_00636E | 3632.627  | 2790.682  |
| NM_005771 | 1102.661  | 1243.306  | AK027013  | 48697.641 | 45523.906 |
| NM_016032 | 9033.807  | 11674.314 | NM_001344 | 48348.539 | 46265.156 |
| NM_014324 | 55992.277 | 59559.805 | NM_018294 | 4357.318  | 4265.028  |
| NM_001687 | 47191.063 | 49246.516 | AL389934  | 17296.789 | 16330.241 |
| AK026374  | 4101.803  | 5373.355  | NM_00433C | 10433.066 | 10939.286 |
| NM_00345E | 11128.763 | 14670.382 | AF151802  | 16931.111 | 14205.983 |
| NM_01334E | 54388.391 | 60925.32  | AB006746  | 3189.333  | 2920.103  |
| NM_006861 | 5019.765  | 6617.916  | NM_00649E | 9186.645  | 9443.659  |
| AK023142  | 2331.616  | 2757.448  | AB023233  | 6051.719  | 5973.999  |
| U61740    | 52656.434 | 52691.918 | AL133071  | 1939.438  | 1812.441  |
| NM_00640E | 57790.844 | 63283.164 | NM_00436E | 14746.963 | 13222.098 |
| AB049054  | 6878.378  | 9627.811  | NM_00437C | 1876.302  | 1740.191  |
| NM_015071 | 2515.866  | 3173.77   | AB040898  | 3858.825  | 2819.001  |
| NM_013227 | 4650.867  | 5879.338  | NM_01615E | 10438.97  | 11192.125 |
| Z83803    | 1345.295  | 1982.896  | NM_004131 | 2718.586  | 1797.293  |
| AF027205  | 38504.031 | 33672.906 | AK023284  | 2253.125  | 1797.125  |
| AF075012  | 2768.11   | 2326.273  | AF106069  | 1068.965  | 592.906   |
| NM_00157C | 2095.54   | 1896.085  | NM_005101 | 12673.656 | 14903.553 |
| AB040672  | 6653.296  | 9234.903  | AF130060  | 62081.328 | 61030.574 |
| NM_002192 | 4943.597  | 5559.935  | NM_007057 | 40612.762 | 45148.145 |
| NM_005491 | 9926.722  | 11146.226 | NM_000177 | 4856.031  | 4057.619  |
| NM_00386E | 6842.423  | 5361.563  | NM_003387 | 33965.961 | 34371.438 |
| AK025599  | 1765.853  | 2173.11   | U60665    | 6684.471  | 5211.276  |

|           |           |           |           |           |           |
|-----------|-----------|-----------|-----------|-----------|-----------|
| X63417    | 5026.563  | 6086.974  | NM_005507 | 63760.332 | 63685.5   |
| S94539    | 51061.109 | 54792.684 | AL080133  | 27786.5   | 24160.609 |
| NM_006402 | 4934.28   | 5880.075  | AY014403  | 3485.306  | 3546.37   |
| NM_005785 | 2890.361  | 3390.393  | NM_006912 | 50094.852 | 41816.777 |
| NM_018245 | 4214.955  | 5645.441  | X12534    | 11714.554 | 9617.115  |
| AK001695  | 15172.247 | 17752.014 | NM_018367 | 2454.319  | 2148.718  |
| NM_017885 | 14562.764 | 17555.895 | NM_001363 | 23054.287 | 19559.428 |
| NM_006252 | 5111.062  | 5707.271  | NM_014323 | 13270.02  | 15352.406 |
| NM_001721 | 1631.442  | 2151.119  | NM_003205 | 2832.156  | 3400.462  |
| NM_014397 | 20892.961 | 25877.439 | AB002324  | 5944.592  | 6215.324  |
| AB023182  | 5207.987  | 7217.614  | AF205600  | 1452.088  | 1447.862  |
| NM_003607 | 1588.142  | 2075.272  | AL359938  | 2367.409  | 1655.735  |
| NM_006575 | 3476.359  | 3218.623  | AK026231  | 3594.004  | 3812.325  |
| NM_013254 | 5330.833  | 6384.908  | NM_002140 | 47941.77  | 53412.406 |
| NM_000437 | 31695.123 | 34530.898 | NM_020143 | 15224.354 | 15855.993 |
| AB046819  | 43200.738 | 39408.973 | NM_012469 | 9476.819  | 10385.938 |
| NM_006090 | 15120.205 | 14240.027 | NM_005131 | 4492.436  | 4734.394  |
| NM_002900 | 26448.443 | 20385.971 | NM_007056 | 6286.108  | 5629.578  |
| NM_000542 | 30017.477 | 34593.363 | AF083383  | 5829.93   | 4614.695  |
| NM_014625 | 429.798   | 506.995   | NM_006925 | 7412.245  | 6175.777  |
| NM_006851 | 2097.494  | 2792.563  | NM_004890 | 62251.547 | 65903.336 |
| AK001560  | 1898.265  | 1867.145  | AK023181  | 11010.466 | 10150.709 |
| AB001328  | 1823.07   | 2075.253  | NM_004294 | 14890.175 | 13233.894 |
| H99588    | 852.429   | 766.078   | NM_005051 | 37920.809 | 46810.855 |
| X00588    | 4872.086  | 5027.016  | NM_001968 | 45523.754 | 53947.406 |
| AI359037  | 42582.367 | 46863.305 | D17259    | 60996.508 | 63363.824 |
| J04513    | 797.92    | 892.14    | AB002366  | 1702.033  | 2387.281  |
| BI754285  | 1446.337  | 1820.664  | AF264627  | 61119.441 | 72704.148 |
| X15998    | 9091.665  | 9278.737  | NM_018130 | 26749.582 | 42290.898 |
| M76482    | 574.635   | 586.546   | AF085878  | 5119.597  | 6518.756  |
| X17519    | 512.398   | 673.658   | AB006630  | 3298.377  | 3477.781  |
| NM_001883 | 3956.683  | 4818.865  | NM_004453 | 5548.133  | 6155.946  |
| NM_004625 | 5577.061  | 6438.779  | BE870547  | 3911.862  | 797.522   |
| L31785    | 2312.541  | 3026.744  | AK024440  | 2238.695  | 305.159   |
| H-M 69043 | 15461.065 | 20465.014 | NM_016229 | 21802.359 | 31289.994 |
| AF077374  | 2354.183  | 2906.156  | NM_018244 | 11078.245 | 12529.098 |
| U43901    | 1142.656  | 1383.516  | NM_002492 | 62529.656 | 56914.504 |
| X59065    | 2281.732  | 2378.869  | AB046855  | 2604.831  | 2414.875  |
| M59828    | 26554.229 | 20703.842 | NM_005642 | 15836.926 | 14418.103 |
| AJ010482  | 4527.112  | 3654.124  | NM_018105 | 4550.662  | 3291.541  |
| NM_000895 | 1401.143  | 549.673   | AK023452  | 14690.57  | 12599.479 |
| NM_016545 | 19781.52  | 26749.797 | AF155065  | 1162.79   | 1117.448  |
| AF309653  | 3394.711  | 3364.637  | NM_000332 | 1552.189  | 1537.647  |
| NM_002620 | 35260.605 | 35808.418 | AK022215  | 12629.673 | 13920.896 |
| S79267    | 1242.761  | 1463.032  | U90305    | 2694.493  | 3137.173  |
| NM_001815 | 791.169   | 869.314   | NM_001527 | 36077.895 | 41472.781 |
| NM_003784 | 48465.078 | 52905.863 | AK025269  | 49075.633 | 46835.648 |
| NM_000195 | 39896.051 | 41626.977 | NM_001438 | 1509.456  | 1148.953  |
| NM_005445 | 18435.422 | 17240.371 | AB040971  | 3035.797  | 2543.323  |
| NM_014895 | 2166.141  | 2715.519  | NM_006562 | 17156.365 | 14495.627 |
| NM_003630 | 9572.218  | 12947.693 | X65665    | 1527.781  | 1034.689  |
| NM_000045 | 5332.896  | 6341.625  | NM_003112 | 4305.962  | 3319.961  |
| NM_003215 | 1841.455  | 2353.028  | NM_018951 | 1325.231  | 1633.397  |



|           |           |           |           |           |           |
|-----------|-----------|-----------|-----------|-----------|-----------|
| NM_00670  | 3034.163  | 3755.87   | AL080170  | 6544.229  | 9414.133  |
| NM_00061  | 20148.098 | 24611.305 | AB039903  | 12602.874 | 15116.078 |
| NM_004257 | 31447.5   | 32603.906 | NM_014625 | 5611.768  | 2034.54   |
| NM_000683 | 2664.159  | 2531.916  | AK001560  | 4844.095  | 5260.768  |
| NM_003629 | 6042.314  | 4135.608  | AB001328  | 5826.571  | 6179.196  |
| NM_005901 | 7401.437  | 5519.018  | NM_000948 | 1217.526  | 1383.351  |
| NM_004248 | 10640.072 | 7858.83   | H99588    | 3437.733  | 2686.239  |
| AL080170  | 5331.453  | 3101.77   | X00588    | 17644.354 | 16192.945 |
| AB039903  | 9419.2    | 5007.829  | AI359037  | 58983.777 | 53904.551 |
| M93107    | 4923.784  | 6738.708  | J04513    | 1432.698  | 1568.387  |
| BC001479  | 14641.954 | 14436.45  | BI754285  | 3878.988  | 4115.468  |
| NM_002461 | 48410.41  | 46110.648 | X15998    | 18110.129 | 18937.625 |
| NM_005771 | 554.359   | 584.013   | M76482    | 1305.958  | 1490.197  |
| AB032986  | 51257.879 | 48679.551 | X17519    | 653.522   | 1084.221  |
| NM_017528 | 49582.168 | 54008.426 | NM_001883 | 6432.098  | 6169.792  |
| NM_016032 | 4866.158  | 6409.364  | NM_004628 | 8774.712  | 8697.946  |
| NM_014324 | 54566.91  | 55168.41  | L31785    | 3119.76   | 2909.161  |
| NM_001687 | 43815.609 | 41429.383 | H-M 69043 | 25176.027 | 27996.543 |
| AK026374  | 2635.234  | 2149.856  | AF077374  | 3898.813  | 3273.958  |
| NM_003459 | 9519.519  | 10203.032 | U43901    | 1469.232  | 1479.22   |
| NM_013349 | 41580.238 | 36383.734 | X59065    | 3682.608  | 3709.539  |
| NM_006861 | 4385.935  | 4642.845  | M59828    | 37236.504 | 32086.854 |
| AK023142  | 1452.348  | 1518.004  | NM_002168 | 9771.852  | 9774.554  |
| U61740    | 37225.859 | 32102.531 | NM_015658 | 1415.156  | 1754.743  |
| NM_006409 | 53321.348 | 58667.965 | NM_000589 | 8341.941  | 8297.938  |
| AB049054  | 9548.228  | 6740.292  | NM_016546 | 34150.023 | 44195.289 |
| NM_015071 | 2427.631  | 2548.233  | S79267    | 3941.488  | 4170.842  |
| NM_013227 | 4815.9    | 2773.714  | NM_001816 | 1812.784  | 1979.982  |
| Z83803    | 1587.901  | 953.445   | NM_003784 | 61402.785 | 61437.887 |
| AF027205  | 35686.293 | 20888.168 | NM_000195 | 62469.324 | 58470.648 |
| AF075012  | 2602.961  | 2378.904  | NM_005445 | 32548.621 | 25490.566 |
| NM_001570 | 2137.012  | 1465.715  | NM_014899 | 3909.461  | 4381.952  |
| NM_015658 | 1126.147  | 467.456   | NM_003630 | 17395.992 | 20257.479 |
| NM_000589 | 6788.563  | 3630.357  | NM_000046 | 9123.296  | 8915.268  |
| NM_005491 | 9774.346  | 6444.498  | NM_003219 | 5782.713  | 5904.507  |
| NM_003869 | 3543.745  | 2097.372  | NM_006709 | 14919.862 | 15138.935 |
| AK025599  | 1137.879  | 759.926   | NM_000612 | 34819.441 | 43790.867 |
| X63417    | 3206.668  | 2385.878  | NM_004257 | 40048.445 | 47390.77  |
| S94539    | 20185.688 | 12817.005 | NM_000683 | 4319.679  | 4283.713  |
| NM_006402 | 4788.929  | 3099.643  | NM_003629 | 12188.571 | 11067.811 |
| NM_005785 | 1736.078  | 1214.482  | NM_005901 | 11968.781 | 12119.48  |
| NM_018248 | 2563.92   | 1635.86   | NM_004248 | 18166.297 | 18004.174 |
| AK001695  | 11317.578 | 6677.706  | NM_000959 | 612.884   | 754.494   |
| NM_017886 | 9588.272  | 6625.674  | NM_004910 | 5087.899  | 5419.673  |
| NM_006252 | 1838.916  | 1680.634  | AB013452  | 4291.523  | 5713.453  |
| NM_001721 | 1535.308  | 1492.033  | M93107    | 9813.198  | 11687.084 |
| NM_014397 | 20252.424 | 20320.379 | BC001479  | 27375.361 | 30865.107 |
| AB023182  | 3801.528  | 3834.708  | NM_002461 | 58465.566 | 55330.184 |
| NM_003607 | 1313.03   | 1263.972  | NM_005771 | 1979.089  | 2605.793  |
| NM_006575 | 3885.577  | 2296.388  | AB032986  | 61221.672 | 57879.551 |
| NM_013254 | 5518.945  | 4464.67   | NM_017528 | 59131.738 | 58757.461 |
| NM_000437 | 30639.434 | 27802.736 | NM_016032 | 13413.917 | 15114.052 |
| AB046819  | 43846.906 | 33530.809 | NM_014324 | 59772.598 | 60020.977 |

|           |           |           |           |           |           |
|-----------|-----------|-----------|-----------|-----------|-----------|
| NM_00609C | 16135.049 | 15369.522 | NM_001687 | 56590.031 | 51856.066 |
| NM_00290C | 22184.734 | 18432.633 | AK026374  | 7289.351  | 7078.305  |
| NM_00491C | 3705.272  | 2623.544  | NM_003459 | 19644.463 | 22217.242 |
| AB013452  | 3794.304  | 3130.855  | NM_013349 | 57469.949 | 59705.859 |
| NM_006851 | 2021.531  | 1588.541  | NM_006861 | 6831.946  | 7765.289  |
| AK001560  | 1079.143  | 789.586   | AK023142  | 4937.723  | 5316.887  |
| AB001328  | 625.547   | 422.585   | U61740    | 60760.52  | 58634.363 |
| NM_00094E | 443.631   | 429.52    | NM_006409 | 58765.438 | 60609.891 |
| H99588    | 1652.818  | 989.302   | AB049054  | 13160.034 | 13501.279 |
| X00588    | 2123.083  | 1009.073  | NM_015071 | 4623.984  | 4374.47   |
| AI359037  | 46716.605 | 27517.58  | NM_013227 | 9349.204  | 10025.295 |
| BI754285  | 468.336   | 390.544   | Z83803    | 2440.465  | 2309.815  |
| X15998    | 1472.997  | 1071.64   | AF027205  | 52167.34  | 52487.184 |
| M76482    | 481.166   | 434.626   | AF075012  | 4786.317  | 4613.493  |
| X17519    | 442.499   | 493.075   | NM_001570 | 3637.794  | 3333.148  |
| NM_001883 | 1808.673  | 1898.518  | AB040672  | 12973.367 | 18907.992 |
| NM_00462E | 3883.583  | 4168.344  | NM_002192 | 14524.578 | 21339.842 |
| L31785    | 2707.905  | 2845.552  | NM_005491 | 19212.566 | 33697.602 |
| H-M 69043 | 16828.426 | 18087.109 | NM_003869 | 17575.889 | 23596.063 |
| AF077374  | 1659.629  | 1918.577  | AK025599  | 2909.852  | 3937.969  |
| U43901    | 1218.116  | 1113.239  | X63417    | 5843.072  | 8513.874  |
| X59065    | 2687.508  | 2458.354  | S94539    | 59378.316 | 54647.773 |
| M59828    | 31726.621 | 26870.727 | NM_006402 | 7673.285  | 7950.932  |
| AJ010482  | 4611.256  | 4335.045  | NM_005785 | 5205.129  | 5562.417  |
| NM_00089E | 1319.471  | 1126.37   | NM_01824E | 6258.166  | 7420.3    |
| AB040672  | 7448.589  | 6120.296  | AK001695  | 19675.848 | 19941.355 |
| NM_002192 | 5736.589  | 3723.894  | NM_01788E | 20990.756 | 22308.822 |
| NM_01489E | 1501.033  | 1149.162  | NM_006252 | 6792.725  | 6357.887  |
| NM_00363C | 12260.227 | 10147.012 | NM_001721 | 3159.059  | 2449.167  |
| NM_00004E | 4857.822  | 3217.191  | NM_014397 | 28174.74  | 25739.748 |
| NM_00321E | 1425.104  | 1098.529  | AB023182  | 5565.428  | 5929.131  |
| NM_00670E | 3801.225  | 1962.395  | NM_003607 | 2938.683  | 3013.185  |
| NM_000612 | 19779.842 | 12245.825 | NM_00657E | 6533.531  | 4903.566  |
| NM_004257 | 21929.252 | 15731.625 | NM_013254 | 8094.218  | 7778.475  |
| NM_000683 | 888.637   | 891.713   | NM_000437 | 40169.09  | 46642.902 |
| NM_00362E | 1336.412  | 1473.167  | AB046819  | 54602.363 | 53451.086 |
| NM_005901 | 8129.415  | 7158.442  | NM_00609C | 23417.24  | 26146.004 |
| NM_00424E | 1441.738  | 1549.361  | NM_00290C | 46134.047 | 46490.488 |
| NM_001313 | 870.789   | 869.337   | NM_000542 | 49203.16  | 52640.938 |
| NM_00479E | 697.869   | 556.491   | NM_01462E | 2206.219  | 2611.07   |
| NM_00043E | 4501.943  | 4089.012  | NM_006851 | 4135.361  | 5256.283  |
| NM_001842 | 44239.25  | 49599.418 | AK001560  | 5051.115  | 7618.444  |
| NM_007281 | 281.857   | 347.754   | AB001328  | 7069.207  | 7749.652  |
| AB017169  | 1393.451  | 1194.784  | NM_00094E | 867.402   | 1528.751  |
| AL080170  | 5927.921  | 3658.818  | H99588    | 2384.754  | 2171.756  |
| AB039903  | 10079.742 | 6935.067  | X00588    | 14334.383 | 13929.613 |
| NM_000542 | 20661.158 | 14936.334 | AI359037  | 58582.961 | 56635.16  |
| NM_01462E | 604.537   | 521.401   | J04513    | 4981.143  | 4696.904  |
| NM_00582E | 2473.225  | 1818.995  | BI754285  | 3541.971  | 3505.695  |
| NM_00046E | 2755.422  | 2208.525  | X15998    | 16453.664 | 17505.094 |
| NM_01590E | 14100.323 | 11472.887 | M76482    | 958.848   | 1194.036  |
| AK022600  | 6807.227  | 4978.49   | X17519    | 807.186   | 856.61    |
| AK023142  | 1480.439  | 1149.113  | NM_001883 | 7038.684  | 6766.493  |

|           |           |           |           |           |           |
|-----------|-----------|-----------|-----------|-----------|-----------|
| U61740    | 31818.277 | 26600.471 | NM_004628 | 6354.663  | 6779.799  |
| NM_006409 | 52872.563 | 56999.766 | L31785    | 3713.301  | 3759.006  |
| AB049054  | 4429.108  | 4081.522  | H-M 69043 | 22189.883 | 24446.863 |
| NM_015071 | 1753.44   | 1506.299  | AF077374  | 3540.596  | 3426.2    |
| NM_013227 | 2546.573  | 2291.74   | U43901    | 2060.852  | 1773.555  |
| Z83803    | 1495.242  | 1512.982  | X59065    | 4122.567  | 4003.791  |
| AF027205  | 21048.443 | 20617.227 | M59828    | 37477.555 | 39172.512 |
| AF075012  | 2149.996  | 2375.091  | AJ010482  | 7167.51   | 7940.105  |
| NM_001570 | 1824.39   | 1754.653  | NM_000896 | 2616.682  | 2463.062  |
| NM_015658 | 623.867   | 428.034   | NM_016546 | 29211.209 | 39824.484 |
| NM_000589 | 6418.402  | 3258.851  | AF309653  | 5511.598  | 8035.748  |
| NM_016546 | 25168.799 | 17987.332 | NM_002620 | 53942.34  | 52724.648 |
| AF309653  | 2354.562  | 1770.258  | S79267    | 5065.333  | 7539.732  |
| NM_002620 | 41022.371 | 23361.992 | NM_001816 | 2174.458  | 2433.36   |
| S79267    | 2035.776  | 1064.724  | NM_003784 | 62983.973 | 61811.055 |
| NM_001816 | 1684.181  | 1091.933  | NM_000195 | 59065.754 | 58652.109 |
| NM_003784 | 51125.172 | 48621.313 | NM_005445 | 28825.184 | 25595.643 |
| NM_000195 | 49497.965 | 47535.855 | NM_014899 | 4375.639  | 4005.57   |
| NM_005445 | 21787.457 | 10319.986 | NM_003630 | 15327.554 | 14488.233 |
| AB046819  | 30633.658 | 22798.48  | NM_000046 | 8898.795  | 8717.75   |
| NM_006090 | 10163.628 | 10909.24  | NM_003219 | 4773.223  | 5215.665  |
| NM_002900 | 9794.656  | 8102.119  | NM_006709 | 13525.079 | 14675.355 |
| NM_004910 | 2080.133  | 1435.808  | NM_000612 | 36901.055 | 42972.383 |
| AB013452  | 2931.928  | 1681.068  | NM_004257 | 40147.793 | 47861.176 |
| M93107    | 5282.781  | 3813.008  | NM_002844 | 1323.71   | 1945.446  |
| BC001479  | 7717.659  | 6783.296  | NM_000683 | 5840.916  | 5661.504  |
| NM_002461 | 45323.355 | 36802.656 | NM_003629 | 7187.798  | 6845.528  |
| NM_005771 | 680.263   | 553.085   | NM_005901 | 11748.329 | 10868.701 |
| AB032986  | 49212.688 | 42395.148 | NM_004248 | 19487.814 | 17516.141 |
| NM_017528 | 47064.008 | 40540.598 | NM_019066 | 1041.583  | 946.766   |
| NM_016032 | 4827.521  | 3864.884  | AL080170  | 9873.538  | 9630.842  |
| NM_014324 | 46895.023 | 53351.109 | AB039903  | 16601.029 | 14177.153 |
| NM_001687 | 43714.27  | 34750.113 | M93107    | 6778.544  | 8516.177  |
| AK026374  | 2945.5    | 2241.5    | BC001479  | 17216.709 | 27152.162 |
| NM_001169 | 3884.581  | 3233.965  | NM_002461 | 57654.441 | 57825.574 |
| AK024648  | 29217.563 | 26235.736 | NM_005771 | 2243.73   | 2558.874  |
| NM_000719 | 1028.187  | 688.162   | NM_017528 | 59954.324 | 58845.668 |
| NM_003459 | 9434.582  | 8994.528  | NM_016032 | 15861.608 | 16902.551 |
| NM_000171 | 3285.863  | 1482.178  | NM_014324 | 61110.613 | 57661.668 |
| AL354615  | 1536.765  | 1025.298  | NM_001687 | 53023.738 | 52305.609 |
| NM_013349 | 48852.797 | 49295.801 | AK026374  | 5704.405  | 5403.686  |
| NM_003705 | 8526.762  | 4050.792  | NM_003459 | 22055.486 | 23567.064 |
| NM_006861 | 5740.366  | 3072.531  | NM_013349 | 58550.379 | 55649.676 |
| AJ010482  | 2639.055  | 1859.828  | NM_006861 | 6674.268  | 8117.633  |
| NM_000896 | 596.25    | 861.88    | AK023142  | 3723.077  | 5090.247  |
| AB040672  | 1260.988  | 947.081   | U61740    | 59941.668 | 57759.77  |
| NM_002192 | 1442.758  | 777.514   | NM_006409 | 59892.199 | 61191.34  |
| NM_005491 | 10075.604 | 6328.337  | AB049054  | 12667.098 | 13080.347 |
| NM_003869 | 1812.935  | 1060.168  | NM_015071 | 4373.984  | 4607.322  |
| AK025599  | 2012.492  | 1111.974  | NM_013227 | 7450.601  | 7632.156  |
| X63417    | 4739.239  | 4849.059  | Z83803    | 2220.703  | 2187.266  |
| S94539    | 20775.627 | 19339.971 | AF027205  | 53471.188 | 49565.148 |
| NM_006402 | 4248.543  | 3064.697  | AF075012  | 4580.148  | 4626.18   |

|           |           |           |           |           |           |
|-----------|-----------|-----------|-----------|-----------|-----------|
| NM_00578E | 1743.058  | 1300.819  | NM_001570 | 3283.351  | 3411.449  |
| NM_01824E | 2445.493  | 1980.861  | NM_01565E | 1721.827  | 1725.342  |
| AK001695  | 12164.67  | 8453.287  | NM_000589 | 10931.249 | 9753.308  |
| NM_01788E | 8412.115  | 8914.896  | AK025599  | 2973.947  | 3958.522  |
| NM_00625Z | 2635.865  | 2632.368  | X63417    | 6523.431  | 8696.378  |
| NM_001721 | 1388.239  | 1557.299  | NM_00640Z | 7980.304  | 8513.851  |
| NM_014397 | 18764.143 | 19188.773 | NM_00578E | 5063.993  | 5158.406  |
| AB023182  | 4084.141  | 3904.246  | NM_01824E | 5291.319  | 6699.626  |
| NM_003607 | 1878.639  | 1355.637  | AK001695  | 20531.229 | 18988.828 |
| NM_00657E | 3442.679  | 2258.344  | NM_01788E | 21520.754 | 21830.357 |
| NM_013254 | 5284.053  | 3784.748  | NM_00625Z | 5536.77   | 5959.975  |
| NM_000437 | 31378.48  | 21915.039 | NM_001721 | 2092.638  | 2199.721  |
|           |           |           | NM_014397 | 27898.787 | 27600.541 |
|           |           |           | AB023182  | 6167.021  | 6789.421  |
|           |           |           | NM_003607 | 2775.121  | 2668.944  |
|           |           |           | NM_00657E | 5694.558  | 4869.34   |
|           |           |           | NM_013254 | 7768.163  | 7728.935  |
|           |           |           | NM_000437 | 41274.422 | 45086.539 |
|           |           |           | AB046819  | 52634.684 | 53886.613 |
|           |           |           | NM_006090 | 24432.482 | 24330.105 |
|           |           |           | NM_002900 | 40583.77  | 43524.02  |
|           |           |           | NM_004910 | 4806.768  | 4312.783  |
|           |           |           | AB013452  | 6129.875  | 6004.631  |
|           |           |           | AB001328  | 3697.339  | 4869.69   |
|           |           |           | NM_00094E | 1342.258  | 1583.842  |
|           |           |           | H99588    | 2552.896  | 2654.294  |
|           |           |           | X00588    | 13925.816 | 14950.621 |
|           |           |           | AI359037  | 57298.871 | 54200.301 |
|           |           |           | J04513    | 3479.706  | 3609.956  |
|           |           |           | BI754285  | 3095.164  | 3284.888  |
|           |           |           | X15998    | 19683.287 | 17307.203 |
|           |           |           | M76482    | 1142.839  | 919.162   |
|           |           |           | X17519    | 858.337   | 939.877   |
|           |           |           | NM_00188Z | 6338.626  | 6562.387  |
|           |           |           | NM_00462E | 6540.419  | 7320.287  |
|           |           |           | L31785    | 3203.673  | 4048.75   |
|           |           |           | H-M 69043 | 21951.162 | 25763.172 |
|           |           |           | AF077374  | 3149.116  | 3457.617  |
|           |           |           | U43901    | 1868.37   | 2180.812  |
|           |           |           | X59065    | 3696.448  | 3864.502  |
|           |           |           | M59828    | 39473.41  | 35686.363 |
|           |           |           | AJ010482  | 6432.086  | 6442.735  |
|           |           |           | NM_00089E | 2016.742  | 1925.757  |
|           |           |           | AB040672  | 12490.65  | 10418.905 |
|           |           |           | NM_00219Z | 14665.357 | 10084.01  |
|           |           |           | NM_01489E | 3032.535  | 4344.282  |
|           |           |           | NM_003630 | 13780.582 | 20881.271 |
|           |           |           | NM_00004E | 7652.86   | 10540.798 |
|           |           |           | NM_00321E | 5480.596  | 7267.194  |
|           |           |           | NM_00670E | 14352.264 | 15519.845 |
|           |           |           | NM_00061Z | 37789.336 | 44685.961 |
|           |           |           | NM_004257 | 39716.563 | 46019.145 |
|           |           |           | NM_00068Z | 6414.412  | 6131.145  |

|                  |           |           |
|------------------|-----------|-----------|
| <b>NM_003629</b> | 8729.059  | 8669.56   |
| <b>NM_005901</b> | 11736.665 | 12680.3   |
| <b>NM_004248</b> | 18812.297 | 19201.725 |
| <b>NM_000959</b> | 303.173   | 703.005   |
| <b>NM_001313</b> | 2185.807  | 2140.953  |
| <b>NM_019066</b> | 491.77    | 691.199   |
| <b>NM_004796</b> | 1191.685  | 1599.539  |
| <b>NM_000435</b> | 26930.902 | 27445.242 |
| <b>NM_001842</b> | 56767.148 | 53496.199 |
| <b>NM_007281</b> | 721.081   | 519.989   |
| <b>AB017169</b>  | 2125.905  | 2407.569  |
| <b>AL080170</b>  | 9220.548  | 9327.313  |
| <b>AB039903</b>  | 17284.871 | 15049.321 |
| <b>NM_000542</b> | 55578.41  | 52495.164 |
| <b>NM_014625</b> | 1300.428  | 1140.116  |
| <b>NM_005829</b> | 4126.769  | 4894.06   |
| <b>NM_000466</b> | 9516.007  | 11980.542 |
| <b>NM_015544</b> | 2551.169  | 1392.129  |
| <b>NM_015908</b> | 22270.609 | 33284.883 |
| <b>AK022600</b>  | 44783.813 | 48250.941 |
| <b>AK023142</b>  | 4786.198  | 5228.438  |
| <b>U61740</b>    | 58735.828 | 58181.797 |
| <b>NM_006409</b> | 59218.289 | 55507.008 |
| <b>AB049054</b>  | 14809.731 | 15489.121 |
| <b>NM_015071</b> | 5451.519  | 5191.009  |
| <b>NM_013227</b> | 9346.648  | 10069.98  |
| <b>Z83803</b>    | 1841.368  | 2154.623  |
| <b>AF027205</b>  | 53950.086 | 52113.16  |
| <b>AF075012</b>  | 4180.699  | 4248.15   |
| <b>NM_001570</b> | 2857.714  | 3099.344  |
| <b>NM_015658</b> | 1301.507  | 1557.061  |
| <b>NM_000589</b> | 10649.309 | 8599.856  |
| <b>NM_016546</b> | 38690.754 | 46481.414 |
| <b>AF309653</b>  | 8525.457  | 7903.089  |
| <b>NM_002620</b> | 57713.211 | 56512.852 |
| <b>S79267</b>    | 4965.849  | 3914.426  |
| <b>NM_001816</b> | 2882.042  | 3043.072  |
| <b>NM_003784</b> | 57168.27  | 52852.316 |
| <b>NM_000195</b> | 58874.98  | 60562.91  |
| <b>NM_005445</b> | 38733.637 | 29415.885 |
| <b>AB046819</b>  | 48409.551 | 47613.355 |
| <b>NM_006090</b> | 18603.682 | 22635.861 |
| <b>NM_002900</b> | 34101.766 | 39817.559 |
| <b>NM_004910</b> | 5197.263  | 4419.893  |
| <b>AB013452</b>  | 5671.696  | 5291.396  |
| <b>M93107</b>    | 12420.319 | 11897.62  |
| <b>BC001479</b>  | 31638.965 | 35277.121 |
| <b>NM_002461</b> | 58968.203 | 55584.066 |
| <b>NM_005771</b> | 1606.265  | 1993.437  |
| <b>AB032986</b>  | 59532.727 | 59113.977 |
| <b>NM_017528</b> | 58477.031 | 57491.605 |
| <b>NM_016032</b> | 15313.615 | 17962.021 |
| <b>NM_014324</b> | 55886.926 | 53968.992 |

|                  |           |           |
|------------------|-----------|-----------|
| <b>NM_001687</b> | 56167.91  | 56805.027 |
| <b>AK026374</b>  | 8008.687  | 7117.341  |
| <b>NM_001169</b> | 6767.834  | 7023.477  |
| <b>AK024648</b>  | 44117.383 | 53192.789 |
| <b>NM_000719</b> | 1690.703  | 1686.703  |
| <b>NM_003459</b> | 24381.143 | 25718.742 |
| <b>NM_000171</b> | 9103.034  | 8267.616  |
| <b>AL354615</b>  | 2417.543  | 3006.849  |
| <b>NM_013349</b> | 59834.859 | 57758.844 |
| <b>NM_003705</b> | 13753.715 | 12538.469 |
| <b>NM_006861</b> | 8233.218  | 7897.202  |
| <b>AJ010482</b>  | 4132.247  | 4816.001  |
| <b>NM_000896</b> | 1686.077  | 1622.71   |
| <b>AB040672</b>  | 10182.228 | 9515.002  |
| <b>NM_002192</b> | 9124.112  | 9022.635  |
| <b>NM_005491</b> | 19264.24  | 21712.129 |
| <b>NM_003869</b> | 11455.772 | 11731.571 |
| <b>AK025599</b>  | 2508.231  | 2799.794  |
| <b>X63417</b>    | 7758.783  | 8430.173  |
| <b>S94539</b>    | 56363.027 | 53807.141 |
| <b>NM_006402</b> | 7896.511  | 9830.173  |
| <b>NM_005785</b> | 6264.604  | 5547.576  |
| <b>NM_018248</b> | 7397.997  | 6726.847  |
| <b>AK001695</b>  | 20930.406 | 19389.309 |
| <b>NM_017886</b> | 19821.082 | 18610.852 |
| <b>NM_006252</b> | 7369.644  | 6651.413  |
| <b>NM_001721</b> | 3004.165  | 2560.369  |
| <b>NM_014397</b> | 32517.596 | 28545.93  |
| <b>AB023182</b>  | 7770.027  | 7272.793  |
| <b>NM_003607</b> | 3958.63   | 4328.935  |
| <b>NM_006575</b> | 8857.142  | 7027.707  |
| <b>NM_013254</b> | 8933.915  | 8737.015  |
| <b>NM_000437</b> | 45148.523 | 49802.32  |











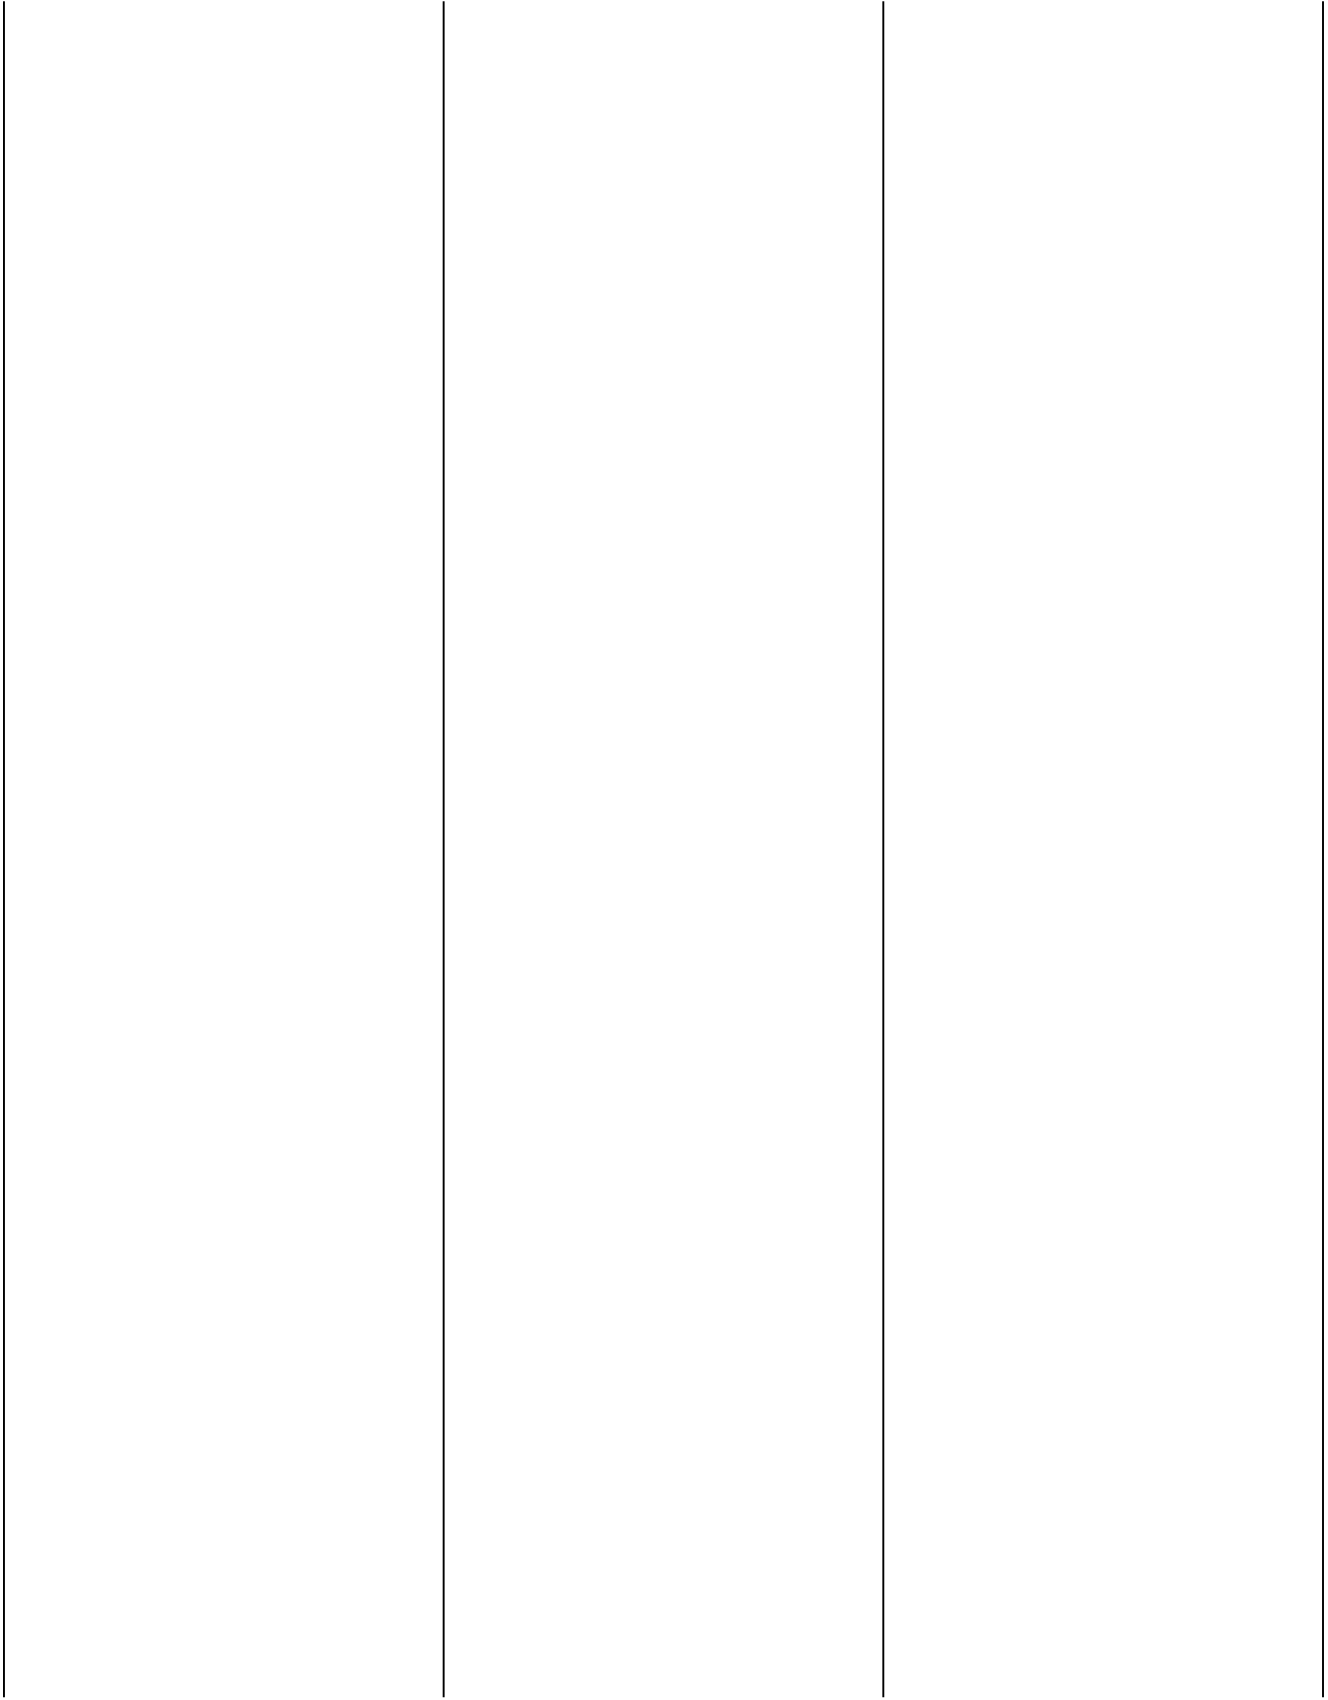

























































| <i>Replicate 1<br/>2uM TPEN control</i> |           |           | <i>Replicate 2<br/>2uM TPEN control</i> |           |           | <i>Replicate 3<br/>2uM TPEN control</i> |           |           |
|-----------------------------------------|-----------|-----------|-----------------------------------------|-----------|-----------|-----------------------------------------|-----------|-----------|
| ID                                      | AMPCH1    | AMPCH2    | ID                                      | AMPCH1    | AMPCH2    | ID                                      | AMPCH1    | AMPCH2    |
| CY3Cy5                                  | 11944.929 | 667.499   | CY3Cy5                                  | 9626.198  | 206.033   | CY3Cy5                                  | 11395.983 | 287.027   |
| NM_006003                               | 26224.682 | 31377.818 | NM_006003                               | 13159.928 | 9111.05   | NM_006003                               | 30586.848 | 36483.953 |
| NM_006555                               | 9702.762  | 11220.929 | NM_006555                               | 4718.345  | 3804.345  | NM_006555                               | 8293.593  | 9172.677  |
| NM_004271                               | 10094.969 | 12049.628 | NM_004271                               | 48242.027 | 44200.535 | NM_004271                               | 57889.402 | 51590.063 |
| AK022282                                | 1124.506  | 1543.91   | AF129928                                | 1587.108  | 1627.836  | AF129928                                | 3252.684  | 3196.401  |
| NM_018266                               | 4039.844  | 4911.216  | AK022282                                | 1140.978  | 416.312   | AK022282                                | 1662.322  | 1661.242  |
| NM_004867                               | 915.468   | 960.155   | NM_018266                               | 2504.122  | 2457.906  | NM_018266                               | 3854.629  | 3317.679  |
| AL050021                                | 25649.018 | 29623.031 | NM_004867                               | 876.215   | 1055.833  | NM_004867                               | 1742.594  | 972.965   |
| AB002448                                | 2288.638  | 2375.372  | AL050021                                | 25253.074 | 26312.719 | AL050021                                | 26265.262 | 13015.968 |
| AF070580                                | 770.29    | 1228.875  | AB002448                                | 1734.202  | 1663.614  | AB002448                                | 2079.057  | 743.919   |
| NM_003838                               | 1187.349  | 1228.65   | NM_003838                               | 3554.472  | 3420.233  | AB032991                                | 6215.399  | 7120.465  |
| AB032991                                | 4191.667  | 4294.994  | AB032991                                | 3981.54   | 3290.33   | AK026985                                | 12385.59  | 13283.405 |
| AK026985                                | 5821.231  | 4851.539  | AK026985                                | 9076.428  | 7834.212  | AF007153                                | 601.284   | 1403.939  |
| AF007153                                | 820.667   | 914.939   | AK000855                                | 2129.695  | 2055.503  | AK000855                                | 3400.038  | 2807.251  |
| AK000855                                | 3159.85   | 3191.093  | NM_006003                               | 32608.113 | 30031.859 | NM_006555                               | 9772.219  | 9207.042  |
| NM_006003                               | 34859.691 | 40005.93  | NM_006555                               | 7146.016  | 7330.13   | SR1                                     | 68169.75  | 66292.211 |
| NM_006555                               | 10775.14  | 12211.365 | SR3                                     | 52125.82  | 51979.492 | SR3                                     | 46147.211 | 52595.395 |
| SR1                                     | 72830.18  | 61159.211 | SR5                                     | 7667.07   | 8997.904  | SR5                                     | 8114.051  | 10343.575 |
| SR3                                     | 32133.148 | 40237.395 | SR7                                     | 7830.036  | 49482.559 | SR7                                     | 8202.385  | 45706.332 |
| SR5                                     | 6517.238  | 8455.829  | SR9                                     | 23808.236 | 4212.465  | SR9                                     | 25530.328 | 7699.954  |
| SR7                                     | 5819.634  | 46073.313 | CY3Cy5                                  | 15317.24  | 235.781   | CY3Cy5                                  | 12115.94  | 383.384   |
| SR9                                     | 24313.992 | 10160.263 | NM_014029                               | 58668.91  | 53737.895 | M21536                                  | 1365.656  | 1557.005  |
| CY3Cy5                                  | 15898.637 | 1048.998  | L08443                                  | 8074.942  | 6343.224  | NM_014029                               | 63408.781 | 67744.688 |
| M87941                                  | 589.229   | 445.817   | L38936                                  | 1311.042  | 1804.808  | Z83937                                  | 2728.649  | 2758.268  |
| M21536                                  | 1881.82   | 3411.285  | D55643                                  | 5012.692  | 5325.659  | L08443                                  | 11308.125 | 10374.973 |
| NM_014029                               | 63613.555 | 71813.406 | AK025818                                | 4561.491  | 4174.02   | L38936                                  | 2370.665  | 2599.61   |
| Z83937                                  | 3702.776  | 4728.026  | AK023185                                | 7618.451  | 6666.148  | D55643                                  | 5711.468  | 5654.478  |
| L08443                                  | 3090.581  | 3414.793  | AL050204                                | 7173.198  | 5753.029  | AK025818                                | 5353.289  | 4156.039  |
| L38936                                  | 2090.799  | 2685.76   | AF085999                                | 1938.644  | 1831.438  | AK023185                                | 5389.7    | 2742.642  |
| D55643                                  | 8345.548  | 10450.746 | AK025316                                | 3912.568  | 4702.271  | AL359622                                | 2493.606  | 815.309   |
| AK025818                                | 6214.692  | 6638.127  | AK026357                                | 4916.885  | 4828.459  | AL050204                                | 11292.073 | 6222.352  |
| AK023185                                | 9243.99   | 9245.286  | NM_014235                               | 15709.504 | 14677.267 | AK025316                                | 4911.097  | 6001.527  |
| AL359622                                | 1555.402  | 2078.119  | AK022426                                | 1745.349  | 1573.87   | NM_014353                               | 1139.376  | 999.715   |
| AL050204                                | 3308.54   | 3926.711  | AF070552                                | 21458.404 | 20774.184 | AF070541                                | 896.582   | 1388.222  |
| AF085999                                | 2648.094  | 3181.363  | AK024517                                | 4553.497  | 4385.794  | AF070552                                | 18196.074 | 20422.365 |
| AK025316                                | 3170.906  | 3040.663  | AK024585                                | 3117.133  | 3274.991  | AK024517                                | 6026.748  | 6179.826  |
| AK026357                                | 5715.041  | 5522.253  | AK024887                                | 7523.924  | 7300.546  | AK024585                                | 3151.237  | 2572.169  |
| NM_018323                               | 9688.576  | 9350.091  | AK025005                                | 1279.137  | 1374.466  | AK024887                                | 10391.455 | 8817.274  |
| NM_014235                               | 20130.668 | 20522.918 | AK023089                                | 3531.619  | 3856.389  | AK025005                                | 1566.182  | 1584.928  |
| AK026922                                | 4590.825  | 5993.627  | AK026059                                | 63626.711 | 73248.781 | AK023089                                | 5600.082  | 2625.328  |
| AK022426                                | 1488.794  | 1458.356  | AK026942                                | 2571.557  | 2745.132  | AK025814                                | 9425.173  | 11278.116 |
| AK022645                                | 2735.42   | 7498.25   | AK025814                                | 5850.799  | 6429.977  | AK000655                                | 31651.748 | 38319.617 |
| AF070541                                | 673.728   | 1271.975  | AK000655                                | 18881.785 | 19334.258 | Y10209                                  | 1031.768  | 939.735   |
| AF070552                                | 26874.355 | 31807.953 | AL117611                                | 1648.818  | 1763.796  | X64983                                  | 2402.859  | 1919.284  |
| AK024517                                | 3199.02   | 3304.411  | NM_017936                               | 8295.068  | 7930.231  | D63134                                  | 2327.216  | 2396.788  |
| AK024585                                | 985.896   | 1009.623  | Y10209                                  | 1175.523  | 1523.436  | AJ227893                                | 907.363   | 1251.44   |
| AK025005                                | 3078.573  | 3658.136  | X64983                                  | 1598.922  | 1571.354  | Y10513                                  | 9441.1    | 10890.166 |
| AK023089                                | 4625.423  | 4741.727  | D63134                                  | 2669.329  | 3306.144  | AK055950                                | 2332.41   | 2538.535  |

|           |           |           |           |           |           |           |           |           |
|-----------|-----------|-----------|-----------|-----------|-----------|-----------|-----------|-----------|
| AK026059  | 9642.401  | 10834.581 | AJ227893  | 1127.892  | 920.018   | AL050122  | 2249.339  | 1971.968  |
| AK026942  | 1506.451  | 1408.633  | Y10513    | 6904.477  | 6557.827  | AK000839  | 28679.383 | 23493     |
| AK025814  | 4541.947  | 4211.59   | AK055950  | 1947.683  | 1434.088  | AF086195  | 1263.228  | 1164.537  |
| AK000655  | 8357.953  | 8352.064  | AL050122  | 1513.308  | 984.053   | AK021963  | 1081.045  | 823.786   |
| AL117611  | 2358.165  | 2145.368  | AK000839  | 22859.582 | 19217.654 | AK026345  | 15170.276 | 15171.695 |
| AF131841  | 819.722   | 1264.75   | AF086195  | 3888.632  | 3153.292  | NM_018278 | 11311.019 | 5605.62   |
| NM_017936 | 4987.452  | 6056.666  | AK021963  | 1207.816  | 1097.746  | AK026328  | 1436.833  | 1016.466  |
| AJ227881  | 871.126   | 1027.779  | AK026345  | 8879.643  | 6915.514  | AK000417  | 2576.025  | 2460.722  |
| D63134    | 1855.708  | 2017.027  | AB007971  | 2100.152  | 1585.398  | AK000864  | 20051.488 | 20626.238 |
| AJ227893  | 604.008   | 765.337   | NM_018278 | 10702.678 | 12209.747 | AK022414  | 4095.332  | 5067.376  |
| Y10513    | 3343.682  | 3754.151  | AK026328  | 1425.829  | 2114.701  | NM_017624 | 17802.746 | 18695.207 |
| AK055950  | 2674.726  | 3102.535  | AK000417  | 2105.48   | 2058.142  | NM_017928 | 1822.065  | 2619.943  |
| AL050122  | 1202.108  | 1205.922  | AK000864  | 14978.242 | 14675.286 | AK000907  | 18282.328 | 19582.691 |
| AK000839  | 14105.425 | 27089.408 | AK022414  | 3909.193  | 3918.257  | NM_016094 | 10513.917 | 10796.762 |
| AF086195  | 942.915   | 1065.557  | NM_017624 | 12717.506 | 13451.056 | AK025003  | 7180.618  | 6363.863  |
| AK021963  | 783.446   | 781.974   | NM_017928 | 1867.403  | 1884.435  | AK023601  | 740.62    | 889.781   |
| AK022183  | 782.732   | 316.008   | AK000907  | 16054.575 | 16389.283 | NM_001427 | 5161.444  | 4622.043  |
| AK026345  | 2001.044  | 1351.717  | NM_016094 | 8023.707  | 6317.773  | NM_016175 | 3429.631  | 3276.151  |
| AK021803  | 734.461   | 508.114   | AK025003  | 5549.146  | 4272.517  | M15639    | 12152.194 | 10506.152 |
| NM_004803 | 427.441   | 674.069   | NM_001427 | 4287.354  | 4210.415  | AF130084  | 5196.737  | 4257.518  |
| AB007971  | 772.19    | 1015.623  | NM_016175 | 2277.752  | 1937.968  | AF133334  | 25985.738 | 13509.694 |
| NM_018278 | 2264.577  | 2081.479  | M15639    | 11797.39  | 11046.519 | AK026292  | 2338.605  | 1834.217  |
| AK026328  | 1180.117  | 1470.645  | AF130084  | 4442.458  | 4203.03   | AK023617  | 483.473   | 655.051   |
| AK000417  | 1921.272  | 2003.422  | AF133334  | 15331.183 | 14531.519 | NM_016290 | 14384.664 | 17857.877 |
| AK000864  | 2518.602  | 2676.502  | NM_016290 | 11735.73  | 10259.042 | AK026498  | 6336.331  | 8289.52   |
| AK022414  | 4760.465  | 5518.983  | AK026498  | 5849.078  | 4912.255  | AK095587  | 15683.145 | 18717.314 |
| NM_017624 | 8934.135  | 9016.839  | AK095587  | 10589.423 | 8726.084  | AF086043  | 3841.456  | 3565.362  |
| NM_017928 | 2059.624  | 2584.548  | AF086043  | 2243.54   | 2293.515  | AK024174  | 2375.194  | 1167.123  |
| AK000907  | 14776.341 | 14464.094 | AK024174  | 2466.233  | 1819.948  | AK000038  | 3768.005  | 2259.54   |
| NM_016094 | 13415.123 | 16185.039 | AK000038  | 4237.849  | 3951.82   | BC010084  | 3071.415  | 2239.185  |
| AK025003  | 4596.482  | 4599.399  | BC010084  | 3069.449  | 3299.552  | U10513    | 3518.977  | 2992.983  |
| AK023601  | 1403.445  | 1131.574  | U10513    | 4965.161  | 6098.412  | L10151    | 65699.906 | 67164.891 |
| NM_001427 | 7076.429  | 7727.48   | L10151    | 65072.105 | 55160.777 | AK022203  | 2230.264  | 2418.733  |
| NM_016175 | 3731.997  | 4289.094  | AK022203  | 2188.971  | 2573.352  | BC032236  | 672.852   | 788.768   |
| M15639    | 21178.709 | 25456.906 | AK023037  | 2755.543  | 2876.49   | AK023037  | 2880.319  | 3946.659  |
| AF130084  | 6346.919  | 7361.37   | S71611    | 704.911   | 1216.386  | S71611    | 865.173   | 1269.214  |
| AF133334  | 15131.152 | 19115.537 | L37704    | 1952.679  | 959.823   | unknown ( | 463.858   | 968.387   |
| AK023617  | 1051.858  | 677.549   | AB007968  | 2670.182  | 1795.235  | L37704    | 1961.455  | 1613.071  |
| NM_016290 | 10344.102 | 8372.441  | AL117544  | 1724.987  | 1480.442  | AB007968  | 4162.014  | 3302.385  |
| AK026498  | 4767.088  | 4238.917  | NM_005664 | 45003.254 | 41780.344 | AL117544  | 1490.909  | 1543.24   |
| AK095587  | 23761.076 | 26390.354 | NM_006270 | 61868.758 | 53593.637 | NM_005664 | 58367.777 | 56471.527 |
| AF086043  | 3866.096  | 4108.199  | U50277    | 2480.87   | 2339.393  | NM_006270 | 63645.504 | 53829.016 |
| AK024174  | 2215.819  | 1923.95   | Z48633    | 7635.57   | 7364.068  | U50277    | 2381.965  | 1012.404  |
| AK000038  | 5504.162  | 5652.623  | M62627    | 32303.639 | 33169.266 | Z48633    | 13823.291 | 15010.078 |
| BC010084  | 1161.044  | 785.163   | NM_006686 | 12555.185 | 10990.495 | M62627    | 42692.027 | 56553.09  |
| U10513    | 5704.671  | 6837.436  | AK002209  | 2392.658  | 2268.456  | NM_006686 | 19157.77  | 23763.783 |
| L10151    | 66170.828 | 59848.246 | NM_017854 | 63603.832 | 64386.957 | AK002209  | 3319.432  | 4114.012  |
| AK022203  | 1879.71   | 2043.76   | NM_014354 | 4266.223  | 3618.458  | NM_014354 | 7435.191  | 6984.002  |
| BC032236  | 638.378   | 1338.894  | AL137548  | 14294.575 | 15111.505 | AL137548  | 14986.832 | 7170.064  |
| AK023037  | 1798.129  | 1831.671  | AK095051  | 3143.033  | 2151.645  | AK095051  | 2453.952  | 1179.013  |
| S71611    | 647.087   | 1114.568  | AF088062  | 2448.426  | 2824.582  | AK026468  | 586.227   | 322.261   |
| L37704    | 2732.672  | 1746.992  | AK024929  | 3516.849  | 4087.232  | AF088062  | 1312.155  | 1016.374  |
| AB007968  | 3107.895  | 2941.76   | NM_017779 | 1238.76   | 805.693   | AK024929  | 2875.263  | 3037.019  |

|           |           |           |           |           |           |           |           |           |
|-----------|-----------|-----------|-----------|-----------|-----------|-----------|-----------|-----------|
| AL117544  | 2951.068  | 3610.219  | D17232    | 51426.262 | 49186.688 | NM_017779 | 1026.929  | 1087.302  |
| NM_005664 | 7738.872  | 7270.241  | NM_005260 | 13791.802 | 14482.56  | D17232    | 43875.441 | 52581.039 |
| NM_006270 | 27384.52  | 35642.695 | AF085880  | 13119.35  | 15456.976 | NM_005260 | 16003.274 | 20553.625 |
| U50277    | 2569.369  | 2851.352  | NM_016158 | 2602.355  | 2562.963  | AF085880  | 14360.738 | 17731.453 |
| Z48633    | 7390.722  | 6832.952  | AF000990  | 2924.475  | 3045.309  | AK026663  | 1935.245  | 1969.441  |
| M62627    | 36955.945 | 42621.16  | AK026663  | 1326.65   | 996.143   | NM_001174 | 2492.657  | 2653.136  |
| NM_006686 | 8935.387  | 8900.635  | NM_001174 | 1481.463  | 1271.12   | U69645    | 2582.96   | 2550.071  |
| AK002209  | 2367.45   | 2105.297  | U69645    | 1480.5    | 921.51    | NM_019082 | 12609.423 | 11836.78  |
| NM_017854 | 60553.316 | 62198.223 | NM_019082 | 9471.45   | 8200.115  | NM_001424 | 3767.384  | 3497.095  |
| NM_014354 | 5748.249  | 5917.019  | NM_001424 | 2906.641  | 2157.733  | AB040950  | 3556.467  | 3337.628  |
| AL137548  | 13474.537 | 15408.396 | AB040950  | 3091.091  | 3268.404  | NM_014003 | 10086.044 | 7966.659  |
| AK095051  | 3963.251  | 3267.414  | NM_014003 | 8267.729  | 6927.332  | NM_001356 | 6014.838  | 6108.223  |
| AK026468  | 1843.523  | 1386.36   | NM_001356 | 2698.604  | 2369.63   | AB002282  | 66038.547 | 81608.766 |
| AF088062  | 1875.829  | 2108.822  | AB002282  | 63912.82  | 76642.867 | AB037805  | 31560.568 | 39250.594 |
| AK024929  | 2573.986  | 2872.844  | AB037805  | 14439.736 | 13707.292 | NM_006373 | 19121.879 | 25123.682 |
| NM_017779 | 1018.49   | 1306.357  | NM_006373 | 15127.211 | 14139.395 | AF085922  | 2123.641  | 1979.448  |
| D17232    | 33414.684 | 44870.715 | AF085922  | 991.322   | 858.585   | AK001007  | 3084.022  | 1267.389  |
| NM_005260 | 3766.007  | 4022.527  | AK001007  | 3504.106  | 3005.25   | NM_014485 | 1416.011  | 591.618   |
| AF085880  | 14723.832 | 16588.768 | NM_014485 | 1500.354  | 1366.939  | AF116655  | 22670.463 | 16214.266 |
| NM_016158 | 2638.659  | 3102.407  | AF116655  | 28636.41  | 29005.084 | AF086134  | 605.866   | 510.729   |
| AF000990  | 4334.454  | 5698.703  | AF086134  | 918.657   | 1054.255  | AF009308  | 30544.813 | 28920.299 |
| AK026663  | 907.585   | 1019.55   | AF009308  | 51221.629 | 52458.637 | AB032969  | 65950.656 | 81438.719 |
| NM_001174 | 2762.677  | 3093.323  | AB032969  | 63816.227 | 59486.008 | Y11610    | 5917.522  | 6498.119  |
| U69645    | 1428.935  | 1517.029  | Y11610    | 5951.228  | 5700.763  | AF085940  | 1009.166  | 1202.115  |
| NM_019082 | 14372.231 | 15618.197 | AF085940  | 914.686   | 939.162   | L37695    | 2172.327  | 2583.925  |
| NM_001424 | 1159.248  | 1501.25   | L37695    | 2158.797  | 2178.725  | NM_004627 | 15834.482 | 21859.762 |
| AB040950  | 5825.328  | 6963.282  | NM_004627 | 16659.658 | 18606.826 | AK026523  | 20414.506 | 24395.313 |
| NM_014003 | 9458.533  | 9855.202  | AK026523  | 23062.465 | 23307.771 | NM_005928 | 5000.319  | 5524.397  |
| NM_001356 | 1570.951  | 1727.054  | AL050217  | 57312.223 | 51753.48  | NM_005424 | 6199.579  | 5375.067  |
| AB002282  | 60707.043 | 54993.461 | NM_005928 | 4258.403  | 3897.563  | NM_005975 | 6270.267  | 5034.74   |
| AB037805  | 1063.694  | 977.367   | NM_005424 | 3324.27   | 2892.837  | AY007220  | 33477.609 | 24101.203 |
| NM_006373 | 6544.986  | 6779.326  | NM_005975 | 5434.153  | 4462.835  | NM_004438 | 9552.464  | 9487.329  |
| AF085922  | 1271.442  | 1611.617  | AY007220  | 29623.143 | 25805.775 | X89399    | 1484.857  | 1322.839  |
| AK001007  | 3240.024  | 3275.018  | NM_004438 | 5783.488  | 4040.131  | NM_003808 | 5377.563  | 6557.182  |
| NM_014485 | 1598.282  | 1564.345  | X89399    | 1371.531  | 935.256   | AK023666  | 3209.172  | 4533.059  |
| AF116655  | 21165.35  | 20982.918 | NM_003808 | 3499.312  | 3429.55   | NM_005399 | 4448.101  | 5357.665  |
| AF086134  | 857.899   | 719.828   | AK023666  | 2020.394  | 1927.774  | NM_005118 | 1068.366  | 706.634   |
| AF009308  | 49882.402 | 53489.406 | NM_005399 | 3014.061  | 2866.795  | NM_015185 | 7453.556  | 4716.771  |
| AB032969  | 66490.008 | 59446.262 | NM_006573 | 1244.252  | 1221.499  | NM_005374 | 1220.071  | 711.152   |
| Y11610    | 8670.562  | 9028.633  | NM_005118 | 1402.862  | 1733.217  | AF011757  | 1526.784  | 1572.094  |
| AF085940  | 1062.153  | 1461.605  | NM_015185 | 8609.178  | 8011.283  | NM_003632 | 3603.378  | 4474.335  |
| L37695    | 2215.965  | 2212.823  | NM_005374 | 1385.587  | 1325.422  | NM_002194 | 7240.281  | 7530.833  |
| NM_004627 | 17236.83  | 20486.174 | AF011757  | 1767.54   | 1971.962  | AB028989  | 1563.035  | 2240.464  |
| AK026523  | 4634.265  | 5516.303  | NM_003632 | 3219.204  | 3673.649  | NM_016166 | 26314.51  | 30823.148 |
| AL050217  | 10023.392 | 11792.136 | NM_002194 | 6508.861  | 6481.481  | NM_002086 | 24709.553 | 31694.059 |
| NM_005928 | 5020.888  | 5641.709  | AB028989  | 2044.271  | 2026.019  | NM_016248 | 6691.118  | 9252.278  |
| NM_005424 | 1320.819  | 1290.164  | NM_016166 | 30927.764 | 32966.125 | NM_005488 | 66230.344 | 71503.859 |
| NM_005975 | 10900.094 | 12392.5   | NM_002086 | 30140.146 | 31951.35  | NM_004464 | 675.665   | 772.959   |
| AY007220  | 1704.072  | 1207.34   | NM_002398 | 1140.982  | 880.605   | NM_002398 | 1543.174  | 1797.259  |
| NM_004438 | 2845.862  | 1553.181  | NM_005417 | 1488.106  | 1792.025  | NM_005417 | 2866.785  | 3241.076  |
| X89399    | 867.397   | 394.026   | NM_002649 | 5167.442  | 4623.174  | NM_002649 | 8175.773  | 8057.132  |
| NM_003808 | 3554.021  | 3425.291  | AK025329  | 26068.238 | 23800.006 | AK025329  | 25978.039 | 25238.361 |
| AK023666  | 2036.328  | 2106.136  | NM_001259 | 1591.553  | 1616.015  | NM_001259 | 1266.776  | 1091.452  |

|           |           |           |           |           |           |           |           |           |
|-----------|-----------|-----------|-----------|-----------|-----------|-----------|-----------|-----------|
| NM_00539E | 5542.402  | 6085.951  | AL137679  | 5387.769  | 4497.641  | AL137679  | 5914.753  | 4363.852  |
| NM_00657E | 1712.902  | 1982.565  | NM_00178E | 25587.234 | 22917.73  | NM_00178E | 29650.092 | 43502.965 |
| NM_005118 | 2183.93   | 1976.757  | AB040965  | 1813.008  | 1559.322  | AB040965  | 2392.193  | 2439.924  |
| NM_01518E | 8592.902  | 7416.124  | AK025026  | 7591.595  | 6278.013  | AK025026  | 12736.673 | 14103.284 |
| NM_005374 | 1039.108  | 1044.413  | AK023052  | 6182.387  | 6125.804  | AK023052  | 8818.623  | 9355.384  |
| AF011757  | 913.111   | 995.856   | AB018350  | 3154.561  | 2975.067  | AB018350  | 2519.449  | 1671.393  |
| NM_00363E | 1025.948  | 1061.137  | NM_00645E | 62649.027 | 61283.07  | NM_00645E | 66760.984 | 76397.773 |
| NM_002194 | 4688.468  | 4715.45   | NM_017541 | 1445.178  | 1262.021  | NM_01846C | 6511.592  | 5689.675  |
| AB028989  | 2716.066  | 2841.959  | NM_01846C | 8911.632  | 8889.483  | NM_00270E | 24993.793 | 20695.307 |
| NM_01616E | 11494.136 | 12449.404 | NM_005591 | 29083.887 | 30281.828 | NM_005591 | 29132.963 | 29322.381 |
| NM_00208E | 24495.959 | 26671.738 | NM_00237E | 2522.255  | 2152.256  | NM_00237E | 2740.749  | 2865.721  |
| NM_01624E | 3442.669  | 4866.427  | NM_00312E | 1049.889  | 1263.59   | NM_00312E | 973.335   | 1033.448  |
| NM_00548E | 25039.59  | 26939.512 | AK024251  | 1398.975  | 1334.168  | AK024251  | 1388.274  | 1661.159  |
| NM_004464 | 852.154   | 860.702   | NM_00254E | 6698.937  | 6039.61   | NM_00254E | 5284.064  | 7005.867  |
| NM_00239E | 2592.013  | 2536.216  | NM_00668E | 64350.043 | 60907.047 | NM_00668E | 66979.188 | 74320.125 |
| NM_005417 | 2884.466  | 2702.405  | NM_00438E | 901.241   | 1574.727  | NM_005411 | 12410.339 | 13913.534 |
| NM_00264E | 5752.466  | 6640.667  | NM_00480E | 1830.208  | 1704.379  | NM_00438E | 1888.365  | 1862.808  |
| AK025329  | 30890.225 | 39417.789 | NM_004617 | 3109.667  | 3143.94   | NM_00480E | 1761.724  | 1898.177  |
| NM_00125E | 2006.254  | 2181.002  | NM_00566E | 4740.335  | 4601.575  | NM_004617 | 6481.134  | 6803.038  |
| AL137679  | 5484.34   | 4656.06   | NM_00674E | 1046.087  | 872.841   | NM_00566E | 6581.484  | 6423.563  |
| NM_00178E | 26856.365 | 26133.563 | NM_012177 | 10973.503 | 12482.942 | NM_00674E | 1404.029  | 911.729   |
| AB040965  | 1077.041  | 335.026   | NM_00666E | 63373.605 | 59508.047 | NM_012177 | 11025.381 | 11740.283 |
| AK025026  | 1204.1    | 1333.777  | NM_002807 | 17419.508 | 15846.065 | NM_00666E | 64407.75  | 59725.262 |
| AK023052  | 1841.58   | 1513.917  | NM_00279E | 59371.816 | 57157.02  | NM_002807 | 18011.813 | 11759.24  |
| AB018350  | 4549.191  | 4587.161  | NM_00279C | 46845.863 | 48572.383 | NM_00279E | 63599.703 | 60406.148 |
| NM_00645E | 20682.311 | 21213.895 | NM_01838E | 13093.061 | 12450.096 | NM_00279C | 53577.828 | 53527.898 |
| NM_017541 | 1440.085  | 1152.656  | NM_01494E | 2859.183  | 2225.509  | NM_01838E | 16121.949 | 19445.455 |
| NM_01846C | 8126.829  | 7452.658  | BF217579  | 34618.215 | 35771.816 | NM_01494E | 3286.903  | 2966.335  |
| NM_00270E | 5434.628  | 4953.362  | NM_00433E | 19492.393 | 18097.975 | BF217579  | 40342.652 | 27431.336 |
| NM_005591 | 32296.785 | 39909.375 | AF040965  | 35808.316 | 39722.043 | NM_00433E | 19733.143 | 12860.521 |
| NM_00237E | 2777.348  | 2608.677  | NM_007011 | 3887.505  | 3802.074  | AF040965  | 39110.73  | 41037.941 |
| NM_00312E | 1158.635  | 1299.845  | Y10210    | 16885.209 | 16742.727 | AB037840  | 13022.983 | 11049.134 |
| NM_017734 | 586.491   | 850.266   | AB020689  | 7675.877  | 9473.721  | NM_007011 | 3547.593  | 3418.902  |
| NM_00254E | 3410.311  | 3038.494  | AK023916  | 1697.125  | 1531.643  | Y10210    | 20634.938 | 21262.021 |
| NM_00668E | 40099.246 | 45312.91  | NM_00320E | 9131.441  | 10740.807 | AB020689  | 9903.832  | 12581.266 |
| NM_005411 | 1606.899  | 1733.838  | NM_002514 | 2624.572  | 2616.048  | AF177238  | 2033.454  | 2069.325  |
| NM_00480E | 1810.898  | 1719.907  | AF177238  | 2043.857  | 2747.05   | NM_02048E | 12204.584 | 14989.558 |
| NM_004617 | 4764.139  | 4969.58   | AF191770  | 1235.642  | 2638.539  | NM_01494E | 61040.52  | 59836.043 |
| NM_00566E | 6519.471  | 6511.864  | NM_02048E | 14554.484 | 17586.158 | AB033112  | 4211.606  | 4990.971  |
| NM_00674E | 1211.185  | 1487.482  | NM_01494E | 60256.285 | 71791.07  | NM_005674 | 453.682   | 596.016   |
| NM_012177 | 9763.542  | 11943.911 | AB033112  | 3565.413  | 3592.509  | AK023243  | 6677.575  | 5622.928  |
| NM_00666E | 26175.875 | 24848.178 | AK023243  | 5934.342  | 5286.319  | NM_01440E | 4866.283  | 3537.18   |
| NM_002807 | 16398.512 | 13322.599 | NM_01440E | 5636.717  | 5418.667  | BE791857  | 1888.077  | 1887.249  |
| NM_00279E | 61843.051 | 58619.777 | BE791857  | 1639.089  | 1357.3    | NM_006867 | 1609.005  | 2394.751  |
| NM_00279C | 37367.012 | 37322.078 | NM_006867 | 1285.276  | 1217.887  | NM_00142E | 11291.698 | 6909.032  |
| NM_01838E | 17199.283 | 16347.949 | NM_00142E | 11232.212 | 11799.036 | NM_00551E | 837.966   | 466.576   |
| NM_01494E | 1728.456  | 1417.678  | NM_00551E | 1362.517  | 977.8     | AK022358  | 16388.852 | 12423.009 |
| BF217579  | 4475.038  | 3770.858  | AK022358  | 18248.592 | 20897.072 | NM_01420E | 63745.754 | 56692.094 |
| BC036820  | 306.844   | 532.119   | NM_01420E | 62114.59  | 57448.758 | NM_018141 | 26582.293 | 25957.602 |
| NM_00433E | 18529.018 | 17636.771 | NM_018141 | 30678.574 | 35248.77  | NM_00485E | 14683.683 | 19593.801 |
| AF040965  | 13163.596 | 11726.668 | BE790474  | 970.06    | 845.116   | NM_00695E | 972.962   | 1486.182  |
| AB037840  | 2996.144  | 3040.781  | NM_00096E | 998.802   | 533.635   | NM_00505E | 1080.455  | 1526.622  |
| NM_007011 | 2987.443  | 2898.37   | NM_016504 | 63485.402 | 59803.492 | NM_00319E | 26678.574 | 30051.162 |



|           |           |           |           |           |           |           |           |           |
|-----------|-----------|-----------|-----------|-----------|-----------|-----------|-----------|-----------|
| Y10210    | 24052.545 | 23061.176 | U25752    | 61253.59  | 66884.758 | AF220415  | 2326.21   | 2496.635  |
| AB020689  | 9085.047  | 9851.753  | X96646    | 63770.887 | 60395.563 | NM_005174 | 64531.102 | 58105.207 |
| AK023916  | 1726.929  | 2196.313  | NM_006952 | 2082.049  | 3399.224  | NM_000365 | 12675.507 | 10936.854 |
| NM_003203 | 11806.755 | 11723.753 | NM_005055 | 2025.418  | 1244.314  | NM_013450 | 10504.498 | 7065.167  |
| NM_002514 | 1554.066  | 1539.372  | NM_003198 | 27150.939 | 26919.307 | NM_004538 | 5139.968  | 3118.89   |
| AF177238  | 1661.608  | 1876.79   | AF220415  | 3122.66   | 2212.814  | NM_003077 | 9353.989  | 5801.845  |
| AF191770  | 900.519   | 1146.325  | NM_005174 | 61972.133 | 63626.09  | NM_002105 | 8055.921  | 7715.801  |
| NM_020482 | 4297.155  | 4427.889  | NM_000365 | 16480.496 | 14621.862 | NM_018488 | 3980.642  | 4319.67   |
| NM_014947 | 15468.641 | 14887.547 | NM_013450 | 13894.56  | 13205.191 | L13203    | 16998.693 | 16698.381 |
| AB033112  | 4279.328  | 3879.94   | NM_004538 | 6985.215  | 6666.573  | NM_018040 | 2923.824  | 3284.687  |
| NM_005674 | 473.002   | 562.803   | NM_003077 | 13978.016 | 12900.51  | AB042646  | 50680.719 | 50962.988 |
| AK023243  | 3690.962  | 1814.514  | NM_002105 | 11448.622 | 12202.599 | NM_003431 | 5713.451  | 7441.865  |
| NM_014409 | 2404.9    | 2988.104  | NM_018488 | 5011.943  | 6204.901  | AB021641  | 1560.916  | 2599.827  |
| BE791857  | 902.531   | 860.635   | L13203    | 22097.273 | 21357.957 | NM_012406 | 19736.916 | 22597.861 |
| NM_006867 | 2199.442  | 2446.782  | NM_018040 | 3695.693  | 4037.483  | NM_012278 | 2234.567  | 2720.157  |
| NM_001422 | 6246.767  | 7450.921  | AB042646  | 61090.711 | 56051.008 | AF023142  | 952.356   | 1102.347  |
| NM_005513 | 1135.505  | 706.469   | NM_003431 | 5652.924  | 5993.727  | NM_016100 | 1119.801  | 1319.639  |
| AK022358  | 18786.359 | 17070.65  | M29581    | 11718.424 | 11521.325 | NM_014057 | 4288.018  | 4982.701  |
| NM_014205 | 64059.535 | 58588.391 | NM_012406 | 30415.615 | 33864.773 | NM_001550 | 34754.188 | 36024.414 |
| NM_018141 | 24527.928 | 26779.738 | NM_012278 | 1561.224  | 1587.51   | AK026849  | 41300.988 | 47359.145 |
| BE790474  | 1244.399  | 1269.768  | AF023142  | 656.753   | 767.187   | NM_018677 | 4385.654  | 3753.286  |
| NM_000969 | 1066.309  | 946.572   | NM_016100 | 971.847   | 1148.587  | NM_002785 | 8686.173  | 7965.271  |
| NM_016504 | 65484.762 | 60356.324 | NM_014057 | 4521.729  | 4776.045  | X78947    | 2639.044  | 1215.539  |
| U25752    | 64084.93  | 63976.367 | NM_001550 | 34980.48  | 33908.375 | NM_000041 | 61253.129 | 50818.766 |
| X96646    | 64412.484 | 62390.379 | AK026849  | 44041.949 | 49263.707 | W69211    | 2975.97   | 2344.474  |
| NM_004855 | 22477.637 | 26752.779 | NM_018677 | 4773.982  | 4503.795  | AA449931  | 36023.508 | 35408.605 |
| NM_006952 | 1343.815  | 1458.536  | NM_002785 | 5770.061  | 5734.462  | AA877347  | 57426.633 | 54674.621 |
| NM_005055 | 653.142   | 823.331   | X78947    | 2145.392  | 1904.206  | R54049    | 2295.324  | 2058.058  |
| NM_003198 | 34180.344 | 28064.934 | NM_000041 | 59386.063 | 57705.27  | S57235    | 45033.414 | 48124.645 |
| AF220415  | 5138.418  | 4056.729  | W69211    | 3085.992  | 3203.838  | AI376272  | 14442.777 | 13957.07  |
| NM_005174 | 65129.637 | 58247.164 | AA449931  | 39065.863 | 43596.664 | BF242229  | 5245.92   | 5511.576  |
| NM_000365 | 6161.772  | 5093.159  | AA877347  | 60697.301 | 60695.258 | X75756    | 59816.977 | 62252.094 |
| NM_013450 | 1355.067  | 602.127   | R54049    | 2064.369  | 3125.169  | AI754623  | 11418.086 | 14293.767 |
| NM_004538 | 2893.938  | 2643.993  | BI755551  | 1876.954  | 2014.9    | AA401326  | 60733.941 | 60525.766 |
| NM_003077 | 16620.865 | 15465.457 | S57235    | 35188.859 | 36466.363 | AA504482  | 22390.369 | 27013.9   |
| NM_002105 | 15351.392 | 13159.831 | AI376272  | 12008.199 | 11935.662 | BI602175  | 4096.924  | 4223.516  |
| NM_018488 | 5307.641  | 5581.911  | BF242229  | 4439.747  | 4850.588  | NM_004109 | 12257.845 | 14490.213 |
| L13203    | 3074.926  | 2936.56   | X75756    | 63073.641 | 60400.516 | BF307652  | 9299.974  | 8942.582  |
| NM_018040 | 3039.101  | 3125.833  | AI754623  | 9051.521  | 9615.115  | NM_017772 | 4274.224  | 5049.418  |
| AB042646  | 24115.639 | 24617.182 | AA401326  | 62036.824 | 58023.625 | AF116574  | 5646.56   | 5180.372  |
| NM_003431 | 2260.166  | 2268.902  | N55461    | 3929.375  | 4116.917  | NM_005529 | 2878.248  | 3219.559  |
| M29581    | 3591.67   | 3885.989  | BI602175  | 3649.464  | 3511.014  | NM_005869 | 12852.098 | 13157.651 |
| AL096747  | 2068.941  | 1959.423  | NM_004109 | 20969.043 | 21602.109 | AF105067  | 8694.268  | 8041.295  |
| AB021641  | 1974.534  | 2184.355  | BF307652  | 4555.456  | 4811.276  | NM_018676 | 3396.536  | 3202.963  |
| NM_012406 | 14141.229 | 13315.233 | NM_017772 | 4241.64   | 4997.545  | NM_012072 | 1917.343  | 2003.75   |
| NM_012278 | 2106.39   | 1398.003  | AF116574  | 4383.983  | 4371.636  | NM_006014 | 4352.445  | 3829.908  |
| AF023142  | 1705.827  | 1087.28   | NM_005529 | 2784.385  | 3105.348  | NM_006280 | 62844.363 | 56648.16  |
| NM_016100 | 1574.503  | 861.019   | NM_005869 | 12290.59  | 9953.007  | NM_002155 | 3259.564  | 2681.976  |
| NM_014057 | 5392.303  | 3043.072  | AF105067  | 9012.067  | 7541.099  | NM_001771 | 43212.027 | 44674.512 |
| NM_001550 | 8905.229  | 5491.257  | NM_018676 | 3259.56   | 3238.695  | NM_002066 | 4130.744  | 3627.065  |
| AK026849  | 742.488   | 735.978   | NM_012072 | 2573.521  | 2054.792  | NM_007355 | 61308.137 | 58358.492 |
| NM_018677 | 4776.823  | 3280.591  | NM_006014 | 5597.665  | 5544.056  | NM_006096 | 2605.606  | 2320.291  |
| NM_002785 | 1309.802  | 840.244   | NM_006280 | 62657.094 | 62811.375 | NM_006869 | 62938.18  | 58826.57  |

|           |           |           |           |           |           |           |           |           |
|-----------|-----------|-----------|-----------|-----------|-----------|-----------|-----------|-----------|
| NM_000041 | 22153.16  | 19753.742 | NM_002155 | 4835.903  | 3346.112  | NM_015364 | 25092.574 | 25081.424 |
| W69211    | 522.878   | 768.211   | NM_001771 | 44867.449 | 50038.707 | NM_006611 | 1231.742  | 1133.278  |
| AA449931  | 3488.011  | 2502.51   | NM_002066 | 3208.906  | 3107.764  | NM_004963 | 8182.225  | 10016.994 |
| AA877347  | 36030.719 | 32338.311 | NM_007355 | 61777.184 | 56406.172 | NM_001181 | 1661.127  | 1955.364  |
| R54049    | 581.982   | 634.348   | NM_006096 | 4276.148  | 5347.297  | AB037857  | 9649.942  | 12217.763 |
| BI755551  | 1011.979  | 1045.686  | NM_006869 | 59954.152 | 54778.539 | NM_005012 | 916.368   | 852.356   |
| S57235    | 16003.713 | 15187.49  | NM_015364 | 24016.936 | 23503.887 | NM_013262 | 16464.703 | 15920.841 |
| AI376272  | 2263.679  | 2268.254  | NM_006611 | 1585.171  | 1481.404  | NM_007185 | 30326.215 | 35425.078 |
| BF242229  | 5496.144  | 5649.714  | NM_004963 | 8649.704  | 8398.455  | NM_012288 | 7849.458  | 8203.852  |
| X75756    | 15064.929 | 17192.834 | NM_001181 | 1242.73   | 1369.836  | NM_005264 | 7614.521  | 8752.946  |
| AI754623  | 9233.066  | 10183.877 | NM_005535 | 62045.207 | 60233.926 | NM_020373 | 3640.155  | 4556.608  |
| AA401326  | 23770.234 | 27214.947 | AB037857  | 10155.349 | 11666.515 | NM_000714 | 20595.432 | 23254.973 |
| N55461    | 1770.159  | 2018.539  | NM_013262 | 16959.566 | 15047.059 | NM_002556 | 6603.069  | 6308.879  |
| AA504482  | 10187.063 | 10657.152 | NM_007185 | 37759.641 | 44797.195 | NM_018089 | 19217.691 | 15100.293 |
| BI602175  | 704.762   | 669.667   | NM_012288 | 5821.829  | 6050.878  | L21934    | 2717.801  | 2512.55   |
| NM_004109 | 25794.883 | 29067.428 | NM_005264 | 7211.445  | 8458.792  | AL117442  | 30402.143 | 29255.783 |
| NM_017772 | 5656.432  | 3437.431  | NM_020373 | 4058.519  | 3620.756  | NM_007185 | 6777.395  | 5509.893  |
| AF116574  | 4432.987  | 2242.516  | NM_000714 | 20126.676 | 23132.014 | NM_014341 | 12429.909 | 10727.977 |
| NM_005529 | 3353.229  | 3148.12   | NM_002556 | 7512.056  | 7364.348  | NM_014229 | 4477.308  | 4539.861  |
| NM_005869 | 12638.359 | 9350.675  | NM_018089 | 23581.432 | 22171.938 | NM_013265 | 54350.551 | 53009.445 |
| AF105067  | 7060.34   | 5100.521  | L21934    | 4430.161  | 4095.047  | NM_014964 | 13591.589 | 14211.109 |
| NM_018676 | 1629.416  | 1267.057  | AL117442  | 34672.066 | 35901.148 | NM_014016 | 23925.375 | 24154.914 |
| NM_012072 | 1714.98   | 1092.532  | NM_007185 | 9493.12   | 11713.696 | NM_003794 | 19473.691 | 19622.121 |
| NM_006014 | 5546.229  | 4616.013  | NM_014341 | 16654.818 | 15946.031 | NM_019892 | 20922.396 | 20134.713 |
| NM_006280 | 48012.324 | 46903.223 | NM_014229 | 5845.924  | 6351.987  | NM_016169 | 21354.205 | 21373.914 |
| NM_002155 | 3081.782  | 1694.922  | NM_013265 | 58659.582 | 55347.273 | NM_004533 | 1607.862  | 1481.449  |
| NM_001771 | 36747.555 | 36362.52  | NM_014964 | 16037.506 | 15905.678 | NM_012135 | 2352.492  | 2330.439  |
| NM_002066 | 932.764   | 643.595   | NM_014016 | 21211.438 | 21981.055 | M37190    | 1814.479  | 1748.727  |
| NM_007355 | 67304.797 | 55365.023 | NM_013433 | 4596.168  | 4848.484  | NM_006812 | 19800.152 | 19359.861 |
| NM_006096 | 2271.126  | 2362.993  | AJ224867  | 1263.952  | 1637.752  | AK024434  | 34022.813 | 41247.141 |
| NM_006869 | 28935.795 | 31076.346 | NM_003794 | 22690.182 | 23659.264 | NM_002388 | 20112.063 | 21449.549 |
| NM_015364 | 22832.453 | 25149.422 | NM_019892 | 25583.072 | 24967.383 | NM_016069 | 61085.879 | 53118.129 |
| NM_006611 | 1405.297  | 1349.449  | NM_016169 | 25725.201 | 26777.188 | NM_017612 | 5176.677  | 4765.707  |
| NM_004963 | 2486.744  | 2393.305  | NM_004533 | 2762.989  | 3365.735  | NM_013236 | 20827.328 | 19758.287 |
| NM_001181 | 1944.811  | 1905.55   | NM_012135 | 2388.757  | 2264.506  | NM_017841 | 13575.547 | 12813.334 |
| NM_005535 | 29818.162 | 33664.148 | M37190    | 1728.692  | 1415.971  | NM_001254 | 10752.188 | 8636.265  |
| AB037857  | 3059.935  | 3689.277  | NM_006812 | 19244.08  | 16761.596 | NM_020412 | 49129.316 | 46580.605 |
| NM_005012 | 1053.223  | 1237.155  | AK024434  | 40015.676 | 46150.688 | NM_003032 | 32920.84  | 32360.867 |
| NM_013262 | 18887.352 | 17931.412 | NM_002388 | 23791.506 | 22875     | NM_017453 | 23620.324 | 21049.365 |
| NM_007185 | 14131.175 | 16882.936 | NM_016069 | 62557.281 | 61811.598 | AF038564  | 12903.473 | 13368.843 |
| NM_012288 | 13416.876 | 16447.533 | NM_017612 | 7004.499  | 6727.012  | AB033768  | 1885.784  | 2311      |
| NM_005264 | 4799.427  | 5674.851  | NM_013236 | 23931.867 | 25783.643 | NM_017659 | 8447.272  | 9494.023  |
| NM_020373 | 5087.112  | 6193.142  | NM_017841 | 14254.272 | 16013.804 | NM_006904 | 29146.729 | 33983.246 |
| NM_000714 | 20695.441 | 23299.268 | NM_001254 | 14581.544 | 14491.997 | NM_006347 | 23279.344 | 25305.9   |
| NM_002556 | 8876.851  | 7968.598  | NM_020412 | 60520.324 | 56390.074 | NM_020406 | 4861.544  | 4652.864  |
| NM_018089 | 10039.399 | 6968.199  | NM_003032 | 57403.781 | 53197.984 | NM_014685 | 47750.984 | 43945.414 |
| L21934    | 3784.328  | 2831.926  | NM_017453 | 33330.063 | 33542.77  | NM_016100 | 1477.5    | 1567.532  |
| AL117442  | 6683.497  | 4687.515  | AF038564  | 14414.409 | 15690.379 | NM_014057 | 4546.14   | 5354.954  |
| NM_007185 | 6164.261  | 5667.46   | AB033768  | 2175.093  | 2077.198  | NM_001550 | 34371.934 | 41537.805 |
| NM_014341 | 18120.596 | 17102.674 | NM_017659 | 9115.362  | 9777.132  | AK026849  | 43247.297 | 49966.379 |
| NM_006446 | 768.693   | 1013.576  | NM_006904 | 37494.922 | 40616.535 | NM_018677 | 5754.189  | 8889.446  |
| NM_014229 | 4311.919  | 4781.658  | NM_004217 | 41844.195 | 41908.664 | NM_002785 | 8328.922  | 8967.04   |
| NM_013265 | 32951.883 | 37612.027 | NM_006347 | 32327.379 | 33353.82  | X78947    | 2381.493  | 2444.853  |

|           |           |           |           |           |           |           |           |           |
|-----------|-----------|-----------|-----------|-----------|-----------|-----------|-----------|-----------|
| NM_014964 | 4665.968  | 4098.19   | NM_020406 | 8944.542  | 8223.748  | NM_000041 | 60949.211 | 54410.391 |
| NM_014016 | 5735.625  | 6220.703  | NM_014685 | 51614.094 | 52770.539 | W69211    | 2227.556  | 1897.074  |
| NM_013433 | 6302.021  | 5412.505  | AB046843  | 354.826   | 2593.23   | AA449931  | 35319.363 | 37973.02  |
| AJ224867  | 1226.787  | 1205.454  | NM_016100 | 1554.529  | 1437.953  | AA877347  | 60154.508 | 52996.488 |
| NM_003794 | 17209.043 | 16279.563 | NM_014057 | 4969.635  | 4861.808  | R54049    | 2330.46   | 2497.024  |
| NM_019892 | 14215.784 | 11385.681 | NM_001550 | 35029.047 | 35474.93  | BI755551  | 923.014   | 440.956   |
| NM_016169 | 15298.24  | 12276.234 | AK026849  | 43627.172 | 52088.563 | S57235    | 47797.387 | 49899.363 |
| NM_004533 | 1641.87   | 1558.523  | NM_018677 | 5221.594  | 5430.682  | AI376272  | 11453.433 | 11648.566 |
| NM_012135 | 1412.446  | 1502.611  | NM_002785 | 5758.238  | 5864.628  | BF242229  | 4930.765  | 4469.092  |
| NM_006812 | 26624.797 | 28675.949 | X78947    | 1825.887  | 1598.685  | X75756    | 61396.488 | 59618.129 |
| AK024434  | 9086.984  | 10658.644 | NM_000041 | 60803.68  | 63099.43  | AI754623  | 10962.804 | 11210.402 |
| NM_016397 | 752.398   | 832.651   | W69211    | 2635.884  | 3125.374  | AA401326  | 61505.797 | 57006.926 |
| NM_002388 | 24254.174 | 31399.09  | AA449931  | 36769.086 | 40794.535 | N55461    | 3102.246  | 2722.338  |
| NM_016069 | 55440.836 | 30155.391 | AA877347  | 60066.094 | 63769.438 | AA504482  | 19028.195 | 22297.033 |
| NM_017612 | 6112.97   | 4512.632  | R54049    | 1625.248  | 2087.985  | BI602175  | 4175.123  | 3587.706  |
| NM_013236 | 20041.736 | 16355.197 | BI755551  | 615.229   | 825.307   | NM_016516 | 2686.116  | 2465.352  |
| NM_017841 | 12514.801 | 8789.629  | S57235    | 47546.598 | 50509.629 | AF263538  | 3949.483  | 3273.442  |
| NM_001254 | 14716.783 | 10654.46  | AI376272  | 11779.244 | 12705.794 | AF116574  | 6640.112  | 6558.698  |
| NM_020412 | 10433.857 | 9456.635  | BF242229  | 5431.439  | 5251.92   | NM_005529 | 2723.209  | 3152.656  |
| NM_003032 | 43845.324 | 42938.098 | X75756    | 59830.727 | 66759.852 | NM_005869 | 13144.948 | 12345.396 |
| NM_017453 | 27809.551 | 25313.998 | AI754623  | 13035.961 | 14253.481 | AF105067  | 7826.699  | 8018.451  |
| AF038564  | 18982.439 | 18168.854 | AA401326  | 61944.977 | 58991.957 | NM_018676 | 3477.683  | 4033.476  |
| AB033768  | 2063.137  | 2470.865  | N55461    | 1962.793  | 2000.142  | NM_012072 | 2381.878  | 2780.686  |
| NM_017659 | 6693.812  | 6554.123  | AA504482  | 22726.277 | 22924     | NM_006014 | 5077.067  | 5698.257  |
| NM_006904 | 32715.32  | 26084.752 | BI602175  | 4001.734  | 3656.792  | NM_006280 | 62640.301 | 55330.789 |
| NM_004217 | 23129.756 | 24155.266 | NM_016516 | 4354.334  | 4309.462  | NM_002155 | 2851.38   | 2571.821  |
| NM_006347 | 29162.586 | 27295.27  | AF263538  | 8029.935  | 6989.578  | NM_001771 | 41944.082 | 49205.297 |
| NM_020406 | 6934.035  | 5549.545  | AF116574  | 5588.016  | 5843.435  | NM_002066 | 4074.53   | 4402.496  |
| NM_014685 | 59266.332 | 50836.613 | NM_005529 | 2682.72   | 3291.331  | NM_007355 | 63413.973 | 57515.609 |
| NM_016100 | 2074.622  | 1903.217  | NM_005869 | 11791.047 | 12679.111 | NM_006096 | 3259.188  | 3468.973  |
| NM_014057 | 6147.737  | 7031.899  | AF105067  | 7888.285  | 8349.889  | NM_006869 | 63799.152 | 56165.367 |
| NM_001550 | 13885.577 | 14743.533 | NM_018676 | 3313.351  | 3391.431  | NM_015364 | 23012.916 | 23813.879 |
| AK026849  | 2758.223  | 2726.825  | NM_012072 | 2476.314  | 2372.26   | NM_006611 | 1391.135  | 1276.554  |
| NM_018677 | 6677.621  | 7874.624  | NM_006014 | 5590.636  | 5543.49   | NM_004963 | 8031.47   | 6521.936  |
| NM_002785 | 2225.974  | 2306.943  | NM_006280 | 59266.949 | 59320.215 | NM_001181 | 1869.947  | 2164.561  |
| X78947    | 718.525   | 778.27    | NM_002155 | 4816.12   | 3427.38   | NM_005535 | 62061.371 | 57844.016 |
| NM_000041 | 34836.125 | 16746.141 | NM_001771 | 42376.238 | 48212.66  | AB037857  | 10118.604 | 9983.469  |
| W69211    | 1055.323  | 677.77    | NM_002066 | 3256.841  | 3351.988  | NM_005012 | 757.266   | 912.407   |
| AA449931  | 5597.834  | 2660.528  | NM_007355 | 60349.945 | 58826.91  | NM_013262 | 16763.67  | 14808.477 |
| AA877347  | 44421.977 | 35491.656 | NM_006096 | 3540.363  | 3221.232  | NM_007185 | 29285.688 | 32470.666 |
| BI755551  | 867.244   | 486.878   | NM_006869 | 61246.563 | 59537.914 | NM_012278 | 2269.25   | 3026.69   |
| S57235    | 22200.553 | 18343.326 | NM_015364 | 27574.215 | 30708.371 | AF023142  | 915.38    | 602.088   |
| AI376272  | 2232.558  | 1570.342  | NM_006611 | 1408.539  | 1593.945  | NM_020373 | 3399.378  | 4089.219  |
| BF242229  | 6506.905  | 5066.498  | NM_004963 | 8799.982  | 9262.71   | NM_000714 | 20735.467 | 22794.625 |
| X75756    | 19062.883 | 15975.482 | NM_001181 | 1501.915  | 1521.857  | NM_002556 | 6399.416  | 6743.896  |
| AI754623  | 11984.589 | 10284.262 | NM_005535 | 60090.594 | 60635.418 | NM_018089 | 19079.416 | 19626.189 |
| AA401326  | 21451.711 | 19659.064 | AB037857  | 10493.23  | 11065.13  | L21934    | 1724.662  | 1926.636  |
| N55461    | 2084.939  | 1690.678  | NM_005012 | 1575.142  | 1909.841  | AL117442  | 28817.395 | 29148.979 |
| AA504482  | 13319.776 | 12650.698 | NM_013262 | 20985.152 | 20273.426 | NM_007185 | 7985.949  | 8694.439  |
| BI602175  | 773.708   | 1128.053  | NM_007185 | 37236.164 | 41637.832 | NM_014341 | 14446.287 | 14066.54  |
| NM_016516 | 5289.768  | 5233.534  | NM_012278 | 2330.811  | 2692.016  | NM_014229 | 5368.958  | 5780.565  |
| AF263538  | 6186.473  | 7149.314  | AF023142  | 1761.167  | 1981.908  | NM_013265 | 52059.934 | 50904.051 |
| AF116574  | 3174.487  | 3130.417  | NM_020373 | 3907.253  | 4061.353  | NM_014964 | 11541.096 | 11439.169 |

|           |           |           |           |           |           |           |           |           |
|-----------|-----------|-----------|-----------|-----------|-----------|-----------|-----------|-----------|
| NM_005529 | 2905.509  | 3158.466  | NM_000714 | 20734.719 | 23912.541 | NM_014016 | 23190.742 | 20106.615 |
| NM_005869 | 13088.997 | 16603.172 | NM_002556 | 7065.475  | 7947.346  | NM_013433 | 5663.896  | 4905.869  |
| AF105067  | 11014.374 | 12763.782 | NM_018089 | 20151.707 | 17586.938 | AJ224867  | 857.074   | 1009.521  |
| NM_018676 | 4246.979  | 3856.12   | L21934    | 4222.438  | 3788.016  | NM_003794 | 19859.92  | 17696.852 |
| NM_012072 | 2966.415  | 3416.834  | AL117442  | 32193.076 | 32187.955 | NM_019892 | 20475.234 | 19236.482 |
| NM_006014 | 7251.06   | 9005.29   | NM_007188 | 9207.575  | 9918.59   | NM_016169 | 19364.188 | 17387.818 |
| NM_006280 | 56601.992 | 57224.602 | NM_014341 | 16521.207 | 13860.605 | NM_004533 | 1331.503  | 1371.824  |
| NM_002155 | 4585.665  | 1799.369  | NM_014229 | 6504.343  | 6786.26   | BF307652  | 7595.376  | 6348.639  |
| NM_001771 | 50129.945 | 44747.828 | NM_013265 | 58065.945 | 51945.5   | NM_017772 | 4480.301  | 4482.927  |
| NM_002066 | 1508.996  | 865.308   | NM_014964 | 15046.736 | 14296.731 | NM_006812 | 17947.385 | 17463.139 |
| NM_007355 | 63427.992 | 58420.848 | NM_014016 | 22713.223 | 21153.93  | AK024434  | 34667.527 | 38876.184 |
| NM_006096 | 2637.67   | 2057.783  | NM_013433 | 5792.841  | 6831.699  | NM_002388 | 19085.354 | 19806.1   |
| NM_006869 | 41976.863 | 42851.871 | AJ224867  | 2466.015  | 2836.945  | NM_016069 | 57737.68  | 53102.52  |
| NM_015364 | 24240.295 | 23630.904 | NM_003794 | 20896.508 | 21140.959 | NM_017612 | 8715.854  | 11220.173 |
| NM_006611 | 1682.284  | 1793.13   | NM_019892 | 23001.688 | 23900.461 | NM_013236 | 17702.854 | 17820.121 |
| NM_004963 | 3451.988  | 3003.864  | NM_016169 | 19504.518 | 20286.246 | NM_017841 | 12114.538 | 12133.636 |
| NM_001181 | 2576.798  | 2790.529  | NM_004533 | 1497.386  | 1773.854  | NM_001254 | 12394.691 | 11345.713 |
| NM_005535 | 31111.826 | 33636.484 | BF307652  | 7224.773  | 6788.465  | NM_020412 | 56551.629 | 51952.215 |
| AB037857  | 3686.748  | 3352.385  | NM_017772 | 4265.029  | 5960.358  | NM_003032 | 43584.125 | 48214.523 |
| NM_005012 | 1316.735  | 1459.948  | NM_006812 | 21515.139 | 21711.939 | NM_017453 | 26371.781 | 25493.98  |
| NM_013262 | 23833.707 | 20456.617 | AK024434  | 38691.57  | 43444.375 | AF038564  | 9361.799  | 10001.482 |
| NM_007188 | 19354.375 | 21031.609 | NM_002388 | 22671.158 | 21395.768 | AB033768  | 1865.314  | 1946.8    |
| NM_012278 | 3204.065  | 3174.125  | NM_016069 | 59366.145 | 57035.965 | NM_017659 | 8142.057  | 7808.527  |
| AF023142  | 2474.385  | 2294.003  | NM_017612 | 6569.904  | 6687.216  | NM_006904 | 28659.473 | 25526.258 |
| NM_020373 | 3836.145  | 3648.427  | NM_013236 | 23418.014 | 24329.846 | NM_004217 | 32572.146 | 33610.082 |
| NM_000714 | 19693.545 | 26963.434 | NM_017841 | 13657.217 | 15540.868 | NM_006347 | 25503.436 | 22494.105 |
| NM_002556 | 9673.984  | 10782.104 | NM_001254 | 15765.116 | 15017.859 | NM_020406 | 4161.228  | 4163.16   |
| NM_018089 | 16833.578 | 20442.781 | NM_020412 | 59566.281 | 52134.844 | NM_014685 | 49652.277 | 45383.953 |
| L21934    | 5149.813  | 6015.609  | NM_003032 | 54808.371 | 50484.098 | NM_012288 | 7143.134  | 7662.848  |
| AL117442  | 10049.503 | 5916.242  | NM_017453 | 33349.961 | 32732.961 | NM_005264 | 7674.737  | 8004.306  |
| NM_007188 | 9556.612  | 6452.982  | AF038564  | 13474.465 | 14323.049 | NM_001550 | 34176.891 | 34988.34  |
| NM_014341 | 21767.652 | 15135.914 | AB033768  | 2050.433  | 2185.771  | AK026849  | 41692.875 | 46620.82  |
| NM_014229 | 5419.783  | 4632      | NM_017659 | 9089.129  | 8768.398  | NM_018677 | 4343.329  | 4327.748  |
| NM_013265 | 35359.613 | 33405.496 | NM_006904 | 34926.609 | 36281.969 | NM_002785 | 6534.594  | 6250.533  |
| NM_014964 | 5060.467  | 4286.019  | NM_004217 | 36745     | 41246.305 | X78947    | 3130.955  | 3202.377  |
| NM_014016 | 8612.799  | 8452.104  | NM_006347 | 30009.836 | 31593.793 | NM_000041 | 58986.574 | 50593.344 |
| NM_013433 | 7430.136  | 6448.099  | NM_020406 | 6857.297  | 8202.044  | W69211    | 2769.585  | 3297.968  |
| AJ224867  | 1338.043  | 1270.839  | NM_014685 | 50526.102 | 51950.422 | AA449931  | 32598.66  | 37515.832 |
| NM_003794 | 19088.176 | 16172.495 | NM_012288 | 7415.918  | 7971.422  | AA877347  | 53265.547 | 54008.035 |
| NM_019892 | 14418.56  | 11977.256 | NM_005264 | 3395.268  | 3342.475  | R54049    | 2263.066  | 2419.597  |
| NM_016169 | 16331.301 | 12264.416 | NM_001550 | 35768.547 | 40027.367 | BI755551  | 830.614   | 1016.09   |
| NM_004533 | 1800.559  | 1500.128  | AK026849  | 43565.078 | 49828.523 | S57235    | 46591.148 | 46077.09  |
| BF307652  | 1307.283  | 1341.856  | NM_018677 | 4873.566  | 4534.171  | AI376272  | 14378.354 | 14116.462 |
| NM_017772 | 5267.582  | 5149.952  | NM_002785 | 5505.499  | 5352.119  | BF242229  | 4138.344  | 3821.902  |
| NM_006812 | 26710.412 | 30262.826 | X78947    | 1812.375  | 1502.221  | X75756    | 60045.637 | 55786.176 |
| AK024434  | 11996.989 | 14415.959 | NM_000041 | 58627.473 | 56777.375 | AI754623  | 10091.77  | 10146.656 |
| NM_016397 | 719.575   | 927.677   | W69211    | 2512.775  | 2677.389  | AA401326  | 54151.258 | 51786.91  |
| NM_002388 | 25576.354 | 28604.223 | AA449931  | 37107.191 | 41117.949 | N55461    | 1673.229  | 1272.163  |
| NM_016069 | 59864.914 | 52877.465 | AA877347  | 50136.754 | 52586.09  | AA504482  | 18200.439 | 18830.426 |
| NM_017612 | 7991.019  | 7812.179  | R54049    | 1526.455  | 1847.419  | BI602175  | 4107.593  | 3068.272  |
| NM_019042 | 479.525   | 799.557   | S57235    | 45511.762 | 49325.316 | NM_016516 | 3452.878  | 3032.418  |
| NM_013357 | 673.648   | 714.52    | AI376272  | 10984.044 | 10121.234 | AF263538  | 4392.959  | 4115.832  |
| NM_017841 | 13871.774 | 7236.476  | BF242229  | 5004.554  | 4621.94   | NM_012135 | 2128.137  | 2163.15   |

|           |           |           |           |           |           |           |           |           |
|-----------|-----------|-----------|-----------|-----------|-----------|-----------|-----------|-----------|
| NM_001254 | 16065.966 | 8409.263  | X75756    | 60320.113 | 61883.828 | NM_002155 | 3441.609  | 3219.444  |
| NM_020412 | 8621.529  | 6397.739  | AI754623  | 12126.342 | 12228.011 | NM_001771 | 40448.117 | 45666.023 |
| NM_003032 | 45143.406 | 44529.793 | AA401326  | 49945.293 | 54014.492 | NM_002066 | 3428.137  | 3109.894  |
| NM_017453 | 26105.332 | 23089.707 | N55461    | 1694.975  | 1475.779  | NM_007355 | 63078.375 | 52720.109 |
| AF038564  | 16654.959 | 15914.327 | AA504482  | 21230.924 | 22152.682 | NM_006096 | 4549.819  | 4724.3    |
| AB033768  | 2141.047  | 2121.818  | BI602175  | 2834.071  | 2550.166  | NM_006866 | 62637.613 | 56516.031 |
| NM_017659 | 7731.652  | 7565.359  | NM_016516 | 4400.884  | 4793.482  | NM_015364 | 20569.523 | 20591.436 |
| NM_006904 | 33225.484 | 27354.766 | AF263538  | 7182.065  | 7477.83   | NM_006611 | 1074.935  | 1014.749  |
| NM_004217 | 18814.572 | 17229.074 | NM_012135 | 2009.267  | 2244.599  | NM_004963 | 5697.519  | 5345.073  |
| NM_006347 | 26103.574 | 21246.566 | M37190    | 1353.598  | 2069.024  | NM_001181 | 1264.973  | 1425.244  |
| NM_020406 | 5045.742  | 3531.994  | NM_002155 | 4469.075  | 3009.118  | NM_005535 | 61579.582 | 57140.797 |
| NM_014685 | 50314.371 | 47383.434 | NM_001771 | 43008.719 | 51261.566 | AB037857  | 7979.743  | 6508.802  |
| NM_012288 | 11179.009 | 11437.7   | NM_002066 | 2776.131  | 2624.638  | NM_005012 | 799.462   | 611.439   |
| NM_005264 | 6174.879  | 5370.938  | NM_007355 | 59673.297 | 63331.91  | AF218021  | 1899.751  | 1712.655  |
| NM_001550 | 18976.584 | 20481.066 | NM_006096 | 3470.129  | 3219.766  | NM_013262 | 15676.695 | 13706.867 |
| AK026849  | 2765.124  | 3238.28   | NM_006866 | 58036.258 | 59151.727 | NM_007185 | 30008.361 | 32448.965 |
| NM_018677 | 8077.564  | 9274.907  | NM_015364 | 26162.662 | 26842.473 | NM_003221 | 1350.389  | 1151.644  |
| NM_002785 | 3032.997  | 3234.356  | NM_006611 | 1440.494  | 1105.156  | NM_003357 | 45113.277 | 49446     |
| X78947    | 770.462   | 797.511   | NM_004963 | 8063.234  | 7852.787  | AF195420  | 956.252   | 1093.615  |
| NM_000041 | 37852.91  | 47497.559 | NM_001181 | 1615.42   | 1670.876  | AK023261  | 6196.385  | 6850.031  |
| W69211    | 1243.205  | 1389.912  | NM_005535 | 59060.746 | 60717.035 | NM_005097 | 2896.735  | 3074.036  |
| AA449931  | 5715.705  | 5790.133  | AB037857  | 11157.536 | 12621.031 | NM_012278 | 1769.189  | 2091.378  |
| BI755551  | 737.08    | 429.265   | NM_005012 | 882.06    | 995.982   | AF023142  | 789.272   | 728.133   |
| S57235    | 17244.945 | 11452.419 | AF218021  | 2400.497  | 2206.851  | NM_016100 | 1211.663  | 1223.558  |
| AI376272  | 2833.828  | 1491.58   | NM_013262 | 18258.932 | 16839.869 | NM_000341 | 2705.522  | 3141.418  |
| BF242229  | 6172.139  | 5162.343  | NM_007185 | 29837.906 | 32629.826 | AK023533  | 1894.454  | 1522.161  |
| X75756    | 18504.633 | 16775.264 | NM_003221 | 1791.161  | 1783.05   | NM_012450 | 5731.313  | 5358.427  |
| AI754623  | 10789.032 | 9861.797  | NM_003357 | 50546.633 | 54394.621 | NM_007071 | 22116.855 | 22106.182 |
| AA401326  | 20163.305 | 18726.766 | AF195420  | 1496.911  | 1426.135  | NM_016582 | 33943.621 | 39930.758 |
| N55461    | 1460.413  | 1359.258  | AK023261  | 6132.366  | 7943.432  | NM_014229 | 4825.362  | 5454.933  |
| AA504482  | 7870.166  | 6953.502  | NM_005097 | 3904.178  | 4612.631  | NM_013265 | 48002.992 | 47368.02  |
| BI602175  | 801.969   | 645.122   | NM_012278 | 1421.116  | 3048.979  | NM_014964 | 9744.42   | 9535.983  |
| NM_016516 | 3503.957  | 3039.034  | NM_016100 | 1156.319  | 1334.028  | NM_014016 | 19272.152 | 16211.925 |
| AF263538  | 3787.05   | 5031.737  | NM_014057 | 5528.225  | 6145.735  | NM_013433 | 5317.517  | 5092.654  |
| NM_012135 | 1820.695  | 1912.227  | NM_000341 | 2930.955  | 3091.501  | AJ224867  | 1213.425  | 779.319   |
| M37190    | 654.567   | 971.899   | AK023533  | 1693.681  | 2037.03   | NM_003794 | 20221.408 | 15276.978 |
| NM_002155 | 4506.864  | 4183.374  | NM_012450 | 3887.627  | 4545.24   | NM_019892 | 19992.01  | 17682.027 |
| NM_001771 | 49928.477 | 52628.145 | NM_007071 | 21254.088 | 24747.895 | NM_016166 | 18088.49  | 16012.207 |
| NM_002066 | 1946.287  | 1706.012  | NM_016582 | 37863.016 | 45218.398 | NM_004533 | 1350.157  | 1459.31   |
| NM_007355 | 61822.938 | 63387.84  | NM_014229 | 5404.823  | 6998.963  | BF307652  | 7866.382  | 6704.942  |
| NM_006096 | 2951.078  | 2975.748  | NM_013265 | 54608.355 | 52241.48  | NM_017772 | 3523.591  | 3475.09   |
| NM_006866 | 36046.25  | 49485.668 | NM_014964 | 13839.902 | 13752.04  | AF116574  | 3909.943  | 3627.428  |
| NM_015364 | 29311.217 | 37288.563 | NM_014016 | 26077.781 | 25567.777 | NM_005529 | 2449.05   | 2835.663  |
| NM_006611 | 1738.645  | 1358.106  | NM_013433 | 5815.633  | 6629.14   | NM_005866 | 12384.179 | 11763.692 |
| NM_004963 | 2580.78   | 540.543   | AJ224867  | 1253.443  | 1290.173  | AF105067  | 7078.016  | 6878.344  |
| NM_001181 | 1554.334  | 956.319   | NM_003794 | 18836.643 | 16232.069 | NM_018676 | 3189.563  | 2821.036  |
| NM_005535 | 22030.154 | 17488.428 | NM_019892 | 21084.188 | 21526.768 | NM_012072 | 2642.087  | 2451.609  |
| AB037857  | 2752.799  | 2144.903  | NM_016166 | 19373.424 | 19296.064 | NM_006014 | 3942.425  | 4391.938  |
| NM_005012 | 1029.815  | 820.511   | NM_004533 | 1800.467  | 1641.651  | NM_006280 | 63816.707 | 57928.906 |
| AF218021  | 1644.388  | 1658.491  | BF307652  | 6348.738  | 5663.53   | NM_020406 | 5204.974  | 4798.104  |
| NM_013262 | 15663.867 | 15946.596 | NM_017772 | 5313.88   | 5258.799  | NM_014685 | 48003.027 | 44935.68  |
| NM_007185 | 14055.472 | 15873.229 | AF116574  | 7057.66   | 6770.557  | NM_012288 | 6882.995  | 7416.316  |
| NM_003357 | 27353.492 | 24696.816 | NM_005529 | 3507.574  | 3811.473  | NM_005264 | 6170.164  | 6594.941  |

|           |           |           |           |           |           |           |           |           |
|-----------|-----------|-----------|-----------|-----------|-----------|-----------|-----------|-----------|
| AF195420  | 1419.515  | 1334.029  | NM_005869 | 15000.411 | 15757.112 | NM_020373 | 3097.729  | 3856.396  |
| AK023261  | 6335.102  | 6952.676  | AF105067  | 7984.263  | 9243.299  | NM_000714 | 16925.463 | 18290.434 |
| NM_005097 | 2220.846  | 2298.518  | NM_018676 | 3130.247  | 3182.757  | NM_002556 | 4919.023  | 4710.003  |
| NM_012278 | 2793.395  | 3281.198  | NM_012072 | 2932.634  | 2762.407  | NM_018089 | 17553.754 | 13049.665 |
| AF023142  | 2164.293  | 2344.828  | NM_006014 | 5504.98   | 6362.982  | L21934    | 2201.823  | 2091.896  |
| NM_016100 | 2008.723  | 2531.936  | NM_006280 | 63011.438 | 60434.254 | AL117442  | 22504.424 | 21545.621 |
| NM_014057 | 7536.15   | 9562.981  | NM_020406 | 6413.55   | 6378.743  | NM_004695 | 1847.548  | 1778.33   |
| NM_000341 | 3615.944  | 3939.827  | NM_014685 | 44384.801 | 53126.699 | AF299075  | 4843.106  | 3939.529  |
| AK023533  | 2747.853  | 2564.256  | NM_012288 | 7712.388  | 8032.59   | NM_000340 | 649.686   | 599.846   |
| NM_012450 | 3126.806  | 2901.252  | NM_005264 | 7194.206  | 8547.903  | NM_007188 | 6917.064  | 7216.487  |
| NM_007071 | 27089.428 | 35382.594 | NM_020373 | 3820.279  | 4346.633  | NM_001214 | 26635.824 | 26812.949 |
| NM_016582 | 11985.605 | 13849.807 | NM_000714 | 22066.348 | 24851.711 | AK022409  | 2682.378  | 2644.291  |
| NM_014229 | 5271.769  | 6110.291  | NM_002556 | 7765.61   | 8379.389  | U16851    | 26237.215 | 21629.828 |
| NM_013265 | 36489.352 | 47598.77  | NM_018089 | 19882.486 | 18837.6   | NM_014341 | 12166.57  | 10935.888 |
| NM_014964 | 6461.228  | 2834.914  | L21934    | 3061.814  | 3113.952  | NM_016516 | 3372.629  | 3115.344  |
| NM_014016 | 5762.461  | 2542.157  | AL117442  | 31091.332 | 29631.889 | AF263538  | 5368.211  | 4904.637  |
| NM_013433 | 5771.789  | 4279.301  | NM_004695 | 1595.958  | 1679.542  | NM_012135 | 1599.873  | 1549.232  |
| AJ224867  | 808.611   | 597.992   | AF299075  | 8043.903  | 6837.87   | M37190    | 1475.864  | 1341.091  |
| NM_003794 | 14588.426 | 12388.405 | NM_000340 | 1359.99   | 1424.802  | NM_006812 | 15302.692 | 15297.613 |
| NM_019892 | 12121.436 | 10346.904 | NM_007188 | 9042.157  | 11155.599 | AK024434  | 25618.074 | 24969.854 |
| NM_016169 | 14387.928 | 13704.114 | NM_001214 | 25603.385 | 30466.016 | NM_002388 | 16379.197 | 14199.107 |
| NM_004533 | 1344.223  | 1302.823  | U16851    | 35165.051 | 37850.355 | NM_016069 | 59452.469 | 49329.422 |
| BF307652  | 1357.073  | 1106.83   | NM_014341 | 16525.033 | 14834.331 | NM_017612 | 5663.107  | 6024.685  |
| NM_017772 | 4663.749  | 5525.001  | NM_020309 | 1867.884  | 1877.174  | NM_013236 | 15214.142 | 13736.259 |
| AF116574  | 3004.601  | 3025      | NM_016516 | 3335.086  | 3800.85   | NM_017841 | 12227.086 | 11139.41  |
| NM_005529 | 2547.352  | 2824.921  | AF263538  | 4830.127  | 4526.837  | NM_001254 | 9975.229  | 8699.811  |
| NM_005869 | 14516.231 | 14846.124 | NM_012135 | 2560.002  | 2236.653  | NM_020412 | 47547.594 | 40398.098 |
| AF105067  | 8907.753  | 9795.772  | M37190    | 1280.581  | 1660.298  | NM_003032 | 36915.246 | 35590.008 |
| NM_018676 | 2959.598  | 3049.207  | NM_006812 | 22035.85  | 22288.467 | NM_017453 | 26977.469 | 27169.973 |
| NM_012072 | 2622.263  | 2773.054  | AK024434  | 36495.57  | 40860.484 | AF038564  | 9892.407  | 9062.112  |
| NM_006014 | 7299.26   | 8078.609  | NM_002388 | 23125.383 | 23383.393 | AB033768  | 1644.038  | 1140.381  |
| NM_006280 | 59040.016 | 52276.477 | NM_016069 | 61140.941 | 59266.195 | NM_017659 | 7218.378  | 6098.591  |
| NM_020406 | 4509.873  | 3389.86   | NM_017612 | 6422.608  | 6364.418  | NM_006904 | 27113.293 | 24325.32  |
| NM_014685 | 47600.957 | 50373.543 | NM_013236 | 21858.857 | 21617.324 | NM_004217 | 34121.871 | 35228.391 |
| NM_012288 | 9905.018  | 12038.871 | NM_017841 | 13072.034 | 13578.375 | NM_006347 | 25654.078 | 25789.68  |
| NM_005264 | 5383.098  | 5015.771  | NM_001254 | 15619.76  | 13110.535 | CY3Cy5    | 11113.144 | 463.814   |
| NM_020373 | 3941.55   | 4341.746  | NM_020412 | 55640.656 | 54627.547 | SB        | 900.42    | 723.259   |
| NM_000714 | 19651.533 | 22899.932 | NM_003032 | 54506.586 | 55179.605 | NM_002054 | 2451.1    | 2968.846  |
| NM_002556 | 6429.484  | 3326.925  | NM_017453 | 34258.82  | 37770.734 | AF086332  | 65627.703 | 74645.375 |
| NM_018089 | 13565.965 | 12907.324 | AF038564  | 6117.123  | 6485.964  | AF086432  | 759.584   | 749.696   |
| L21934    | 4598.936  | 4610.607  | NM_017659 | 6742.186  | 7560.792  | AJ404614  | 765.135   | 671.115   |
| AL117442  | 7450.138  | 7237.574  | NM_006904 | 26393.766 | 25061.24  | AF086347  | 31052.729 | 38964.566 |
| NM_004695 | 1250.481  | 1150.393  | NM_004217 | 32688.668 | 31444.127 | AF086388  | 3354.093  | 3461.685  |
| AF299075  | 1617.291  | 1901.302  | NM_006347 | 26922.893 | 26954.111 | AK001043  | 34860.289 | 38586.637 |
| NM_000340 | 970.153   | 1018.354  | CY3Cy5    | 12052.583 | 326.177   | AK024535  | 42059.809 | 44614.43  |
| NM_007188 | 8754.758  | 9840.671  | NM_002054 | 2043.359  | 1628.287  | AL359608  | 3255.816  | 3686.075  |
| NM_001214 | 6061.421  | 7060.203  | AF086332  | 55510.762 | 52694.133 | NM_016498 | 67551.328 | 77960.508 |
| AK022409  | 1887.531  | 2122.708  | AF086432  | 1382.321  | 2060.556  | NM_016551 | 4482.741  | 4231.371  |
| U16851    | 43183.949 | 44197.117 | AF086347  | 28985.092 | 27669.098 | AK024631  | 3265.332  | 3652.765  |
| NM_014341 | 26229.598 | 29921.652 | AK001043  | 24233.732 | 21268.047 | AF087977  | 2290.31   | 2503.476  |
| NM_020309 | 1222.927  | 1290.974  | AK024535  | 39206.59  | 42602.109 | AK026949  | 1469.826  | 1906.497  |
| NM_006446 | 555.781   | 874.341   | AL359608  | 3701.113  | 3721.4    | NM_002054 | 1494.812  | 1230.352  |
| NM_016516 | 4260.222  | 4534.225  | NM_016498 | 75822.258 | 63950.504 | SR2       | 62965.527 | 62983.965 |

|           |           |           |           |           |           |           |           |           |
|-----------|-----------|-----------|-----------|-----------|-----------|-----------|-----------|-----------|
| AF263538  | 6382.184  | 7000.245  | NM_016551 | 4073.107  | 4742.937  | SR4       | 22468.084 | 29491.008 |
| NM_012135 | 2077.566  | 2292.616  | AK024631  | 4401.644  | 4311.312  | SR6       | 2784.383  | 4166.04   |
| M37190    | 660.406   | 1028.924  | AK026949  | 1723.583  | 1676.165  | SR8       | 10496.894 | 35402.227 |
| NM_006812 | 31179.816 | 35712.219 | NM_002054 | 1573.886  | 1730.569  | SR10      | 35112.703 | 18566.393 |
| AK024434  | 10629.857 | 3827.685  | SR2       | 80220.023 | 64616.02  | CY3Cy5    | 13196.55  | 455.013   |
| NM_002385 | 17731.477 | 11519.073 | SR4       | 31434.563 | 34942.758 | NM_014332 | 1142.587  | 1264.457  |
| NM_016065 | 50792.457 | 50675.805 | SR6       | 4267.251  | 4606.666  | AF086068  | 3917.297  | 4738.19   |
| NM_017612 | 6645.653  | 5686.036  | SR8       | 14573.797 | 33719.672 | AF086059  | 2086.482  | 2847.716  |
| NM_019042 | 504.567   | 415.374   | SR10      | 46124.121 | 17323.451 | AF086091  | 1632.827  | 1802.428  |
| NM_013235 | 18998.301 | 21159.557 | CY3Cy5    | 12405.585 | 187.914   | AF075018  | 1336.324  | 1459.123  |
| NM_017841 | 12168.018 | 13877.822 | NM_014332 | 665.384   | 641.629   | AK024239  | 4392.441  | 4897.476  |
| NM_001254 | 14960.36  | 15846.716 | AF086068  | 4937.394  | 5097.48   | AF147390  | 1010.891  | 1115.642  |
| NM_020412 | 9870.559  | 10606.088 | AF086059  | 1244.231  | 1306.862  | AF075019  | 3132.985  | 4030.476  |
| NM_003032 | 42858.793 | 45901.875 | AF086091  | 1671.182  | 1776.985  | AK021498  | 12121.787 | 12432.727 |
| NM_017453 | 32739.414 | 39528.594 | AK024239  | 3294.569  | 2541.231  | AF085874  | 14065.512 | 14657.169 |
| AF038564  | 16468.082 | 19432.877 | AF075019  | 4265.301  | 4549.947  | AF147346  | 952.851   | 1261.196  |
| AB033768  | 2312.131  | 2756.776  | AK021498  | 8770.535  | 7732.926  | AK026959  | 1611.541  | 1947.485  |
| NM_017655 | 7871.694  | 8604.021  | AF085874  | 16564.281 | 14794.223 | NM_019555 | 1037.484  | 946.123   |
| NM_006904 | 32540.254 | 37294.371 | AF147346  | 1832.22   | 1394.861  | NM_004753 | 47160.133 | 49669.656 |
| NM_004217 | 23121.102 | 25951.957 | AK026959  | 2603.988  | 2586.856  | NM_015462 | 11007.522 | 10943.466 |
| NM_006347 | 28104.164 | 30702.053 | NM_019555 | 1902.316  | 1865.389  | AK026700  | 2263.127  | 2983.219  |
| CY3Cy5    | 15492.655 | 967.968   | NM_004753 | 45390.371 | 45584.707 | AF086242  | 1674.049  | 1378.872  |
| SB        | 1429.431  | 1058.609  | NM_015462 | 16793.842 | 17731.338 | AK026868  | 2938.759  | 3774.752  |
| NM_002054 | 1833.757  | 1967.735  | AK026700  | 2865.736  | 2734.016  | AK022245  | 1003.099  | 1008.149  |
| AF086332  | 5537.258  | 6187.09   | AF086370  | 1008.684  | 1103.448  | AK022200  | 18848.117 | 20870.844 |
| AF086347  | 3860.438  | 4080.064  | AK026868  | 2427.782  | 2748.528  | AK023396  | 1780.612  | 2306.427  |
| AF086388  | 1260.139  | 1485.984  | AK022200  | 15934.8   | 16088.471 | AF264625  | 1376.138  | 2166.833  |
| AK001043  | 12271.551 | 12655.299 | AK023396  | 1573.34   | 2296.089  | AF088025  | 2237.052  | 2865.733  |
| AK024535  | 9918.551  | 9759.769  | AF264625  | 1793.736  | 2180.773  | AK024286  | 891.943   | 1290.878  |
| AL359608  | 2193.182  | 1771.85   | AF088025  | 1829.758  | 2142.28   | AF085934  | 3674.719  | 4628.101  |
| NM_016495 | 44797.531 | 47457.25  | AF085934  | 2801.343  | 2718.907  | AF147423  | 2451.336  | 2214.808  |
| NM_016551 | 4130.493  | 4197.736  | AF147423  | 1632.929  | 1719.871  | AF075088  | 2362.297  | 1818.903  |
| AK026949  | 2528.339  | 2333.011  | AF075088  | 2064.34   | 2780.757  | AK023971  | 68224.438 | 74111.25  |
| SR2       | 34383.926 | 41339.461 | AK023971  | 66016.867 | 62790.59  | AK024738  | 2341.216  | 2557.801  |
| SR4       | 8538.332  | 12277.574 | AK024738  | 3700.585  | 3730.314  | AL133103  | 2393.11   | 2534.531  |
| SR8       | 4720.966  | 27797.027 | AL133103  | 4053.808  | 4506.985  | BC015321  | 1408.694  | 1665.175  |
| SR10      | 28336.438 | 15983.85  | BC015321  | 3232.054  | 3325.135  | AL137293  | 7359.689  | 7343.568  |
| CY3Cy5    | 15307.367 | 818.444   | AL157450  | 4123.396  | 4039.304  | AL137458  | 2510.709  | 2841.358  |
| AF086068  | 5612.095  | 6707.955  | AL359594  | 3147.802  | 3587.932  | AL157490  | 29662.537 | 33688.277 |
| AK026322  | 2696.145  | 3436.345  | AL137293  | 7967.069  | 7858.037  | AL390167  | 6719.038  | 7109.242  |
| AF075018  | 984.726   | 899.85    | AL137458  | 3400.744  | 3800.375  | AK023657  | 1859.533  | 1832.314  |
| AK024239  | 1772.424  | 1532.658  | AL157490  | 38475.902 | 44943.555 | AK001022  | 1249.316  | 1524.549  |
| AF147390  | 1301.585  | 985.197   | AL390167  | 6715.72   | 6729.807  | AL049351  | 59033.285 | 60239.117 |
| AF085879  | 612.835   | 1145.359  | AK023657  | 2164.204  | 2447.075  | AL137508  | 2218.626  | 2237.821  |
| AF075019  | 2799.448  | 3153.672  | AK001022  | 1786.353  | 1593.529  | AK021826  | 13218.738 | 15572.343 |
| AF147388  | 995.453   | 1421.917  | AL049351  | 51064.379 | 49102.512 | AK024541  | 2417.691  | 3015.614  |
| AK021498  | 4506.1    | 4666.105  | AL137508  | 5440.791  | 4441.212  | AK025341  | 2403.795  | 2028.31   |
| AK026959  | 1105.885  | 1312.496  | AK021826  | 11224.684 | 11715.369 | AK021838  | 53100.598 | 57952.258 |
| NM_019555 | 1899.687  | 2342.905  | AK024541  | 1341.784  | 1757.633  | AK021990  | 1192.939  | 1756.792  |
| NM_004753 | 5112.8    | 6611.91   | AK025341  | 1244.889  | 1299.432  | AF083118  | 2893.987  | 3678.965  |
| AK026700  | 2794.928  | 3514.588  | AK021838  | 52719.266 | 57115.266 | AF211977  | 1356.322  | 1072.931  |
| AF086242  | 1979.24   | 1725.699  | AK021990  | 2538.355  | 2651.939  | AK000957  | 860.562   | 888.742   |
| AF086370  | 1893.041  | 1387.875  | AF083118  | 2921.379  | 3543.743  | AF089811  | 3433.429  | 4207.673  |

|           |           |           |           |           |           |           |           |           |
|-----------|-----------|-----------|-----------|-----------|-----------|-----------|-----------|-----------|
| AK026868  | 1593.361  | 1982.324  | AF211977  | 1381.719  | 1840.459  | AF147444  | 1704.331  | 2034.614  |
| AK022200  | 4109.051  | 4066.975  | AF089811  | 4373.135  | 4242.775  | NM_016566 | 1716.36   | 1262.785  |
| AK026967  | 1393.251  | 1589.505  | AF147444  | 3303.83   | 3739.503  | AK021909  | 1544.213  | 1784.256  |
| AK023396  | 850.961   | 943.266   | NM_016566 | 1211.963  | 1452.982  | AK022327  | 763.286   | 1089.436  |
| AF264625  | 908.301   | 1207.923  | AK021909  | 2532.206  | 3596.138  | AK022201  | 3362.341  | 3434.927  |
| AF088025  | 1311.642  | 1245.829  | AK022043  | 2831.371  | 3015.653  | AK022353  | 17775.279 | 19115.412 |
| AK024286  | 725.062   | 1251.046  | AK022168  | 2304.839  | 2231.322  | AF064848  | 55785.16  | 62577.363 |
| AF085934  | 890.909   | 1087.563  | AK022327  | 2380.068  | 2007.01   | U61089    | 15092.488 | 14320.272 |
| BC015321  | 2935.152  | 3559.356  | AK022201  | 2153.098  | 2178.927  | AK001036  | 7210.276  | 8099.041  |
| AL390167  | 11193.2   | 11786.255 | AK022353  | 14427.399 | 12892.586 | AK024858  | 33867.703 | 34519.426 |
| AK023657  | 3011.21   | 2870.925  | AF064848  | 49939.93  | 50172.902 | Y16697    | 1936.209  | 2136.153  |
| AK001022  | 1636.045  | 1553.446  | U61089    | 19701.813 | 19944.445 | NM_001046 | 24559.098 | 27236.234 |
| AL049351  | 2427.137  | 2864.406  | AK001036  | 8137.834  | 11598.123 | AK024554  | 4466.903  | 4701.203  |
| AL137508  | 1088.845  | 731.661   | AK024858  | 40238.762 | 41148.332 | AF068294  | 13891.366 | 14442.479 |
| AK021826  | 5221.235  | 4711.433  | Y16697    | 2665.549  | 2422.775  | AK025909  | 13377.593 | 15457.002 |
| AK024541  | 1204.155  | 1652.341  | NM_001046 | 22233.033 | 27454.939 | AK026138  | 8167.045  | 10115.479 |
| AK021838  | 9960.011  | 10351.281 | AK024554  | 4614.474  | 4920.208  | Z70706    | 1185.912  | 1435.307  |
| AK021990  | 1190.203  | 1204.584  | AF068294  | 12322.206 | 14204.284 | NM_018101 | 21429.602 | 24115.803 |
| AF083118  | 3431.769  | 3602.042  | AK025909  | 14094.569 | 16219.583 | AJ491695  | 19152.674 | 19154.182 |
| AF132602  | 926.201   | 802.224   | AK026138  | 7291.207  | 8486.791  | AF052107  | 49660.414 | 54775.117 |
| AK021909  | 4134.961  | 4861.497  | Z70706    | 1579.113  | 2104.378  | NM_000703 | 594.266   | 2667.559  |
| AK022201  | 2777.556  | 1888.169  | NM_000549 | 1548.707  | 1449.565  | AK022430  | 5538.703  | 5846.999  |
| AK022353  | 4699.52   | 4088.046  | NM_018101 | 23556.93  | 28127.91  | AL137279  | 4541.07   | 5525.284  |
| AF064848  | 22522.914 | 20494.5   | AF293366  | 2857      | 3120.52   | AK023981  | 4993.295  | 4787.027  |
| U61089    | 9730.888  | 7355.227  | BF526704  | 4450.627  | 4777.626  | AK025037  | 2798.004  | 2676.339  |
| AK001036  | 6074.564  | 6678.363  | AJ491695  | 19311.26  | 18256.121 | AK021874  | 43998.164 | 49151.688 |
| AK024858  | 15170.043 | 14865.586 | AF052107  | 44480.215 | 48247.055 | AF086384  | 66458.281 | 93418.883 |
| Y16697    | 3216.589  | 3825.189  | AK025113  | 748.774   | 854.02    | M77818    | 45502.227 | 55976.613 |
| NM_001046 | 13919.209 | 16414.529 | AK022430  | 5045.178  | 5940.935  | AF009267  | 10303.599 | 11684.857 |
| AK024554  | 3577.644  | 3886.61   | AL137279  | 6709.883  | 6507.044  | AK027129  | 20704.379 | 24446.902 |
| AF068294  | 7549.972  | 9126.129  | AK023981  | 4978.474  | 6815.466  | L19367    | 2110.096  | 2859.808  |
| AK025909  | 20325.771 | 25374.383 | AK025037  | 3697.324  | 4576.478  | NM_015696 | 6986.205  | 8170.193  |
| AK026138  | 6766.284  | 7964.182  | AK021874  | 52498.438 | 52660.02  | AK024138  | 10219.538 | 10712.579 |
| Z70706    | 2018.065  | 2601.931  | AF086384  | 65918.891 | 73800.461 | Y10505    | 6151.011  | 6813.722  |
| AF052107  | 11849.015 | 12932.431 | M77818    | 60302.914 | 54942.941 | NM_005615 | 14706.818 | 15969.586 |
| AL137279  | 6856.416  | 7047.924  | AF009267  | 7988.15   | 9024.227  | Z34290    | 2843.173  | 2505.237  |
| AK023981  | 4819.732  | 5674.047  | AK027129  | 22778.15  | 26219.586 | AF070642  | 12955.612 | 13027.826 |
| AK025037  | 3519.129  | 4273.88   | NM_015696 | 9671.49   | 10213.66  | AK027125  | 7746.273  | 8796.622  |
| AK021874  | 24116.959 | 29777.395 | AK024138  | 10227.396 | 12723.884 | AK025311  | 2668.951  | 5454.296  |
| AF086384  | 72575.281 | 75164.336 | Y10505    | 7410.804  | 8274.452  | D16918    | 1981.183  | 3469.995  |
| M77818    | 52604.805 | 59544.34  | U00946    | 21059.424 | 21212.48  | D16467    | 5352.651  | 6020.703  |
| AF009267  | 2779.718  | 3098.188  | NM_005615 | 15888.337 | 16250.67  | AF090932  | 8420.661  | 9095.509  |
| AK027129  | 22687.232 | 25848.49  | Z34290    | 3622.833  | 3737.003  | AF166125  | 2700.425  | 3198.07   |
| L19367    | 1095.01   | 1074.238  | AF070642  | 15625.455 | 15173.969 | AF225425  | 19001.184 | 20857.527 |
| NM_015696 | 7841.721  | 9879.333  | AK027125  | 7134.001  | 8290.585  | NM_014737 | 26792.203 | 30311.303 |
| AK024138  | 12265.396 | 14962.285 | AK025311  | 813.828   | 1057.627  | NM_003486 | 21459.434 | 23040.932 |
| NM_005615 | 2566.37   | 2208.212  | D16918    | 7322.719  | 7978.887  | NM_001454 | 65438.73  | 100755.77 |
| Z34290    | 5333.486  | 4757.152  | D16467    | 7313.18   | 7949.424  | NM_006556 | 11268.619 | 13753.92  |
| AF070642  | 13007.386 | 12344.935 | AF090932  | 7339.044  | 7283.746  | Z22780    | 919.052   | 883.996   |
| AK027125  | 5865.8    | 6821.853  | AF166125  | 2120.861  | 2324.899  | NM_005797 | 3326.993  | 3150.568  |
| AK025311  | 1475.955  | 1457.479  | AF225425  | 19416.191 | 20316.943 | NM_004824 | 5969.093  | 6932.259  |
| AF225425  | 3617.694  | 3563.755  | NM_014737 | 23741.914 | 27157.211 | M17733    | 65843.719 | 95580.391 |
| NM_014737 | 22314.615 | 27432.99  | NM_003486 | 23516.654 | 25994.568 | U83191    | 2417.427  | 2767.402  |



|           |           |           |           |           |           |           |           |           |
|-----------|-----------|-----------|-----------|-----------|-----------|-----------|-----------|-----------|
| NM_00348E | 27653.154 | 34787.875 | NM_001454 | 63687.461 | 92529.305 | NM_01395Z | 23390.6   | 31550.357 |
| NM_001454 | 69953.781 | 100004.97 | NM_00655E | 14940.381 | 16082.812 | AK021434  | 22250.527 | 23861.172 |
| NM_00655E | 11884.113 | 15184.927 | Z22780    | 1539.63   | 1031.323  | NM_01647E | 39829.539 | 42674.969 |
| Z22780    | 1420.544  | 1349.781  | NM_005797 | 2847.686  | 3650.102  | AK000933  | 31446.537 | 39697.121 |
| NM_005797 | 1175.049  | 1105.136  | NM_004824 | 9466.094  | 10841.814 | Y10205    | 2404.384  | 2366.392  |
| NM_004824 | 17719.5   | 18882.561 | M17733    | 62958.016 | 99842.273 | NM_01462E | 3517.35   | 3547.996  |
| M17733    | 70363.688 | 95104.109 | U83191    | 2497.406  | 2690.66   | AK025277  | 4739.525  | 4799.385  |
| U83191    | 3110.234  | 3775.549  | NM_01647E | 38902.844 | 47984.656 | AF086095  | 2560.417  | 2412.206  |
| NM_01395Z | 32031.293 | 42068.875 | AK000933  | 37996.309 | 48707.211 | NM_01835Z | 2903.695  | 3135.455  |
| AK021434  | 17413.395 | 16526.844 | Y10205    | 2343.135  | 2311.998  | AL080092  | 23648.281 | 26811.047 |
| NM_01647E | 9367.865  | 10317.572 | NM_01462E | 4336.256  | 4734.791  | AF075069  | 2140.238  | 2117.459  |
| AK000933  | 48292.391 | 55526.281 | AK025277  | 4131.656  | 4367.552  | NM_00542Z | 1567.832  | 1479.366  |
| NM_01462E | 5615.55   | 5372.357  | AF086095  | 3160.777  | 3300.229  | AK024427  | 12171.511 | 13547.263 |
| NM_013937 | 886.651   | 846.905   | NM_01835Z | 3160.223  | 4652.331  | NM_00300E | 5146.353  | 5402.809  |
| AK025277  | 2805.183  | 2889.892  | AK026880  | 5064.804  | 5218.784  | NM_00049Z | 3739.53   | 6687.464  |
| AF086095  | 4650.287  | 5735.311  | AF086061  | 3147.836  | 3425.123  | AF272035  | 14643.669 | 18328.07  |
| NM_01835Z | 5166.666  | 6561.748  | AL080092  | 29036.002 | 34029.684 | AY009133  | 3334.31   | 3811.528  |
| AK026880  | 4174.152  | 4200.47   | AF075069  | 2273.761  | 2173.093  | NM_00096E | 1597.026  | 1917.914  |
| AF086061  | 2711.431  | 2648.152  | NM_00542Z | 2122.772  | 2558.816  | NM_01340Z | 17072.613 | 17664.334 |
| X79985    | 1115.244  | 844.257   | AK024427  | 12395.759 | 14551.103 | NM_00412Z | 2236.567  | 2748.439  |
| AL080092  | 33402.531 | 36955.691 | NM_00300E | 5713.905  | 6178.012  | AF178930  | 4554.959  | 4129.864  |
| AF075069  | 2545.313  | 2161.717  | NM_00049Z | 2409.166  | 2499.426  | M74161    | 12847.016 | 12893.421 |
| NM_00542Z | 1517.119  | 1937.542  | AF272035  | 18918.771 | 22588.604 | NM_01654Z | 11978.844 | 12940.398 |
| AK024427  | 23377.797 | 27376.162 | AY009133  | 3361.718  | 4233.459  | NM_000484 | 4782.145  | 4499.716  |
| NM_00300E | 6987.703  | 8235.941  | NM_00096E | 1446.206  | 1527.579  | NM_00385E | 5561.97   | 5629.963  |
| NM_00049Z | 2907.396  | 2867.528  | NM_01340Z | 25482.012 | 28164.689 | Z36820    | 5418      | 5615.887  |
| AF272035  | 16190.774 | 17921.609 | NM_00412Z | 3375.531  | 3813.313  | NM_003967 | 19271.131 | 22879.746 |
| AY009133  | 1296.885  | 1206.534  | NM_000674 | 2070.962  | 2036.274  | NM_012451 | 11070.338 | 12551.202 |
| NM_01340Z | 14100.227 | 13309.364 | AB020671  | 839.287   | 1778.771  | NM_006624 | 30424.617 | 36083.066 |
| AB020671  | 965.824   | 1204.593  | NM_01623Z | 5401.112  | 5948.089  | NM_00706E | 1342.308  | 989.562   |
| AK024257  | 655.464   | 1773.32   | AF178930  | 5600.839  | 4595.702  | AF130079  | 4463.438  | 4327.825  |
| NM_01623Z | 4107.008  | 4284.836  | M74161    | 12972.898 | 11773.999 | NM_017667 | 5537.319  | 4773.386  |
| AF178930  | 4533.499  | 3760.98   | NM_01654Z | 14701.803 | 18782.537 | AK002211  | 25156.254 | 27431.643 |
| M74161    | 21540.193 | 22732.641 | NM_000484 | 5291.915  | 5589.114  | NM_012127 | 14221.927 | 15556.131 |
| NM_01654Z | 15025.327 | 17987.59  | NM_00385E | 1164.555  | 1036.272  | NM_014454 | 6692.267  | 7662.617  |
| NM_000484 | 5156.704  | 5309.756  | S40369    | 32813.297 | 38345.012 | NM_01748E | 7845.649  | 8303.177  |
| S40369    | 30816.707 | 33097.148 | NM_015831 | 16952.08  | 19298.514 | AL137669  | 7598.555  | 9069.087  |
| NM_015831 | 20117     | 19941.115 | AK023154  | 17378.873 | 19731.219 | AJ275213  | 3207.846  | 4030.238  |
| AK023154  | 23289.965 | 24253.045 | Z36820    | 6163.756  | 6387.859  | AB032958  | 11473.881 | 13211.502 |
| Z36820    | 6524.836  | 5913.859  | NM_003967 | 22520.363 | 25796.182 | NM_01426Z | 10115.827 | 11211.822 |
| NM_003967 | 22644.549 | 20303.262 | NM_012451 | 12269.996 | 14681.392 | NM_020361 | 2637.848  | 2430.969  |
| NM_012451 | 17933.563 | 18263.535 | NM_006624 | 32789.402 | 41699.848 | NM_015907 | 5603.674  | 6626.137  |
| NM_006624 | 36300.727 | 42166.738 | AF130079  | 1715.266  | 1715.584  | NM_00191Z | 6413.315  | 7674.569  |
| AF130079  | 2623.697  | 2340.265  | NM_017667 | 7213.351  | 7440.755  | NM_013267 | 11961.336 | 13364.301 |
| NM_017667 | 8799.084  | 8891.367  | AK002211  | 47001.211 | 49558.434 | NM_002454 | 8803.561  | 8631.859  |
| AK002211  | 11444.446 | 12379.257 | NM_012127 | 19884.197 | 24396.818 | NM_001917 | 11204.867 | 11912.99  |
| NM_012127 | 16213.783 | 16146.264 | NM_014454 | 11733.108 | 12205.93  | L07033    | 4272.024  | 4253.222  |
| NM_014454 | 8719.391  | 10030.507 | NM_01748E | 13724.396 | 12642.733 | AK026341  | 9406.524  | 6439.23   |
| NM_01748E | 13905.945 | 15553.165 | NM_002824 | 46263.344 | 57337.734 | NM_01894Z | 18755.928 | 16513.934 |
| NM_002824 | 19693.988 | 21284.631 | NM_01467Z | 18520.189 | 21378.334 | AJ292757  | 2925.714  | 2889.103  |
| NM_00683E | 63266.406 | 57721.711 | AB002330  | 11724.786 | 12797.139 | NM_00399E | 3100.308  | 4036.17   |
| NM_00602Z | 41510.211 | 51039.926 | AL137509  | 52129.645 | 56974.375 | NM_00446E | 1705.395  | 1758.186  |
| NM_01467Z | 17042.166 | 19141.037 | NM_00653E | 25838.396 | 24828.875 | NM_00251C | 3123.817  | 2939.377  |

|           |           |           |           |           |           |           |           |           |
|-----------|-----------|-----------|-----------|-----------|-----------|-----------|-----------|-----------|
| AB002330  | 19444.17  | 19972.082 | NM_019887 | 23765.471 | 26238.01  | NM_020386 | 1983.044  | 1838.595  |
| AL137509  | 67419.172 | 57849.051 | NM_004050 | 40704.59  | 46679.695 | NM_001270 | 5861.113  | 6462.635  |
| NM_006538 | 32595.809 | 37619.738 | NM_006024 | 30068     | 36160.742 | NM_001952 | 43043.379 | 44176.082 |
| NM_019887 | 26248.91  | 29772.547 | NM_020191 | 6668.834  | 9122.525  | NM_003223 | 24536.35  | 26793.197 |
| NM_004050 | 8178.766  | 9590.402  | NM_017434 | 45340.668 | 45421.531 | U81557    | 2772.755  | 2830.628  |
| NM_006024 | 31831.164 | 37581.898 | NM_020405 | 1253.74   | 1988.011  | NM_014878 | 8378.754  | 9172.106  |
| NM_020191 | 13255.58  | 14028.855 | NM_020182 | 3340.433  | 3500.609  | AK023530  | 1447.223  | 2041.502  |
| NM_017434 | 3273.075  | 3183.563  | AL137669  | 9765.401  | 11975.734 | NM_003977 | 65009.391 | 58457.02  |
| NM_020405 | 1751.527  | 2106.801  | NM_014263 | 14239.324 | 15813.685 | NM_005998 | 56829.074 | 52703.223 |
| NM_020182 | 4989.681  | 5097.115  | NM_020361 | 3818.143  | 4094.247  | U28424    | 12568.205 | 10268.242 |
| AL137669  | 8222.32   | 7459.021  | NM_015907 | 10789.696 | 10877.472 | BF541372  | 28884.332 | 26077.518 |
| AJ275213  | 6511.278  | 6250.445  | NM_001912 | 7195.324  | 8316.464  | NM_004623 | 10383.836 | 10871.979 |
| AB032958  | 6121.892  | 6102.845  | NM_013267 | 17345.301 | 19599.553 | NM_004793 | 29640.01  | 37557.785 |
| NM_014263 | 12945.053 | 15125.326 | NM_002454 | 11894.056 | 15027.022 | NM_004390 | 33771.145 | 40863.344 |
| NM_020361 | 3069.431  | 3255.675  | NM_001917 | 18917.848 | 19857.055 | AL050028  | 16230.846 | 20017.07  |
| NM_015907 | 8724.384  | 8228.933  | NM_005956 | 61439.461 | 78868.664 | NM_000371 | 1629.644  | 1749.862  |
| NM_001912 | 2541.84   | 2569.788  | NM_003043 | 61292.613 | 58964.297 | BE732255  | 14159.754 | 17053.451 |
| NM_013267 | 3915.4    | 4164.457  | D87077    | 5014.536  | 6163.399  | NM_004955 | 11002.786 | 12229.97  |
| NM_002454 | 11502.698 | 11619.103 | NM_014308 | 2247.049  | 2414.771  | NM_003364 | 6530.755  | 7210.406  |
| NM_001917 | 12603.945 | 15488.958 | L07033    | 6478.771  | 6624.084  | NM_017803 | 5565.963  | 5907.714  |
| NM_005956 | 31280.73  | 37233.945 | AK023934  | 1497.901  | 1226.198  | NM_015863 | 1281.378  | 953.203   |
| NM_003043 | 7699.586  | 7998.592  | AK000142  | 2887.362  | 2898.167  | NM_005994 | 32094.232 | 34018.359 |
| D87077    | 3773.3    | 3540.004  | NM_005993 | 23283.439 | 27327.592 | NM_001571 | 6074.626  | 6063.802  |
| NM_014308 | 2011.385  | 2399.27   | AK026341  | 10034.927 | 9921.342  | AF126749  | 1549.918  | 986.659   |
| L07033    | 7171.636  | 8279.668  | NM_018943 | 14828.365 | 17924.102 | NM_018108 | 4819.319  | 4109.067  |
| AK023934  | 2309.408  | 2338.046  | AJ292757  | 2152.687  | 2730.884  | NM_003408 | 7304.194  | 5064.19   |
| AK000142  | 4539.29   | 5060.303  | AK025239  | 1134.064  | 894.454   | NM_003450 | 5528.476  | 4564.352  |
| NM_005993 | 30477.139 | 38759.891 | U01922    | 10657.813 | 11384.449 | AK021577  | 3538.069  | 3549.655  |
| AK025239  | 2619.051  | 1862.568  | NM_003999 | 4153.557  | 4370.576  | NM_003433 | 27056.566 | 28014.977 |
| U01922    | 5018.35   | 4667.128  | NM_001270 | 9037.104  | 8971.591  | NM_005221 | 9606.477  | 9783.544  |
| NM_003999 | 4710.126  | 4849.807  | NM_001952 | 62518.625 | 79517.141 | NM_005870 | 1548.51   | 1666.643  |
| NM_004469 | 1734.629  | 1766.195  | NM_003223 | 34304.816 | 40406.652 | NM_018561 | 4380.606  | 4943.663  |
| NM_002510 | 4404.06   | 3831.812  | NM_006713 | 64763.215 | 75819.5   | NM_007193 | 1889.453  | 2434.236  |
| NM_020386 | 1258.225  | 597.736   | NM_020201 | 30475.523 | 36314.469 | NM_001994 | 27446.584 | 30880.73  |
| NM_001270 | 7475.276  | 7985.635  | U81557    | 7607.569  | 7647.685  | J00129    | 44501.313 | 47571.527 |
| NM_001952 | 12899.692 | 13527.431 | NM_014878 | 11369.891 | 11114.223 | L10146    | 13893.471 | 14828.543 |
| NM_003223 | 19164.777 | 20235.867 | AK023530  | 3671.137  | 3687.79   | NM_000685 | 27289.734 | 26798.637 |
| NM_006713 | 67323.242 | 71838.813 | NM_016019 | 37277.332 | 38309.617 | AK025657  | 38155.523 | 42591.527 |
| NM_020201 | 12335.105 | 13387.106 | NM_012245 | 44847.445 | 47299.914 | AF142063  | 2092.092  | 2295.843  |
| U81557    | 1023.731  | 937.706   | NM_003986 | 1581.612  | 1562.51   | W42849    | 6606.729  | 6783.928  |
| NM_014878 | 9549.633  | 10696.383 | NM_001533 | 58411.176 | 59092.41  | AI889961  | 10974.818 | 12272.813 |
| AK023530  | 4242.938  | 4988.81   | NM_006929 | 65266.141 | 59579.414 | R20392    | 42651.211 | 45445.969 |
| NM_016019 | 34000.055 | 42328.898 | AK022827  | 1533.419  | 912.739   | N56684    | 2993.309  | 2958.424  |
| NM_012245 | 31636.166 | 36431.918 | NM_003977 | 63451.625 | 62274.051 | M55153    | 6541.783  | 6052.229  |
| AK022591  | 778.635   | 1127.984  | AF092137  | 42856.289 | 39851.5   | AF414120  | 4304.916  | 3695.055  |
| NM_003986 | 2559.927  | 2324.668  | NM_004623 | 14904.967 | 16349.806 | AK097322  | 2452.482  | 2343.177  |
| NM_001533 | 70461.305 | 60656.313 | AL050028  | 21575.367 | 27357.266 | AL136131  | 16709.35  | 13206.573 |
| NM_006929 | 33497.387 | 39248.57  | NM_000371 | 2595.506  | 2774.261  | U59911    | 18390.947 | 22394.693 |
| AK022827  | 2292.995  | 2537.56   | BE732255  | 24606.195 | 27203.18  | NM_004957 | 17533.934 | 19386.658 |
| NM_005998 | 68226.844 | 61050.445 | NM_004955 | 20774.627 | 17291.932 | AV697672  | 2009.044  | 2022.198  |
| BF541372  | 17668.684 | 18175.172 | NM_003364 | 11870.739 | 12339.01  | NM_002190 | 2052.664  | 1667.963  |
| AF092137  | 46237.258 | 44497.137 | NM_017803 | 7969.276  | 7513.087  | AK056773  | 14453.307 | 15370.602 |
| NM_004623 | 14389.016 | 14909.162 | NM_015863 | 1547.538  | 1716.057  | NM_002182 | 66498.031 | 60423.328 |

|           |           |           |           |           |           |           |           |           |
|-----------|-----------|-----------|-----------|-----------|-----------|-----------|-----------|-----------|
| NM_006853 | 562.228   | 529.291   | NM_005994 | 57054.195 | 51982.816 | NM_01647C | 11964.039 | 12052.055 |
| NM_004793 | 37572.57  | 37004.715 | AB027508  | 27965.477 | 26579.115 | AL365408  | 66449.961 | 62566.199 |
| NM_00439C | 38800.836 | 38296.273 | NM_016331 | 13920.754 | 13470.508 | AK026204  | 16355.176 | 15465.131 |
| AL050028  | 18097.217 | 19876.852 | NM_01436C | 64628.992 | 64693.199 | NM_01463E | 6660.697  | 5360.626  |
| NM_000371 | 1645.662  | 1712.22   | NM_018952 | 2023.519  | 1680.428  | AK023196  | 22573.762 | 23028.67  |
| BE732255  | 22858.979 | 26401.121 | NM_00735E | 19260.391 | 17506.803 | NM_01872E | 10096.253 | 8930.091  |
| NM_00495E | 28205.033 | 28128.838 | NM_001571 | 10251.881 | 10969.027 | NM_00086E | 12706.952 | 10819.363 |
| NM_003364 | 13582.774 | 16334.735 | AF126749  | 2734.459  | 2505.058  | NM_000867 | 3022.317  | 2012.743  |
| NM_017803 | 4602.823  | 5412.393  | NM_003433 | 30621.346 | 36835.645 | AF076642  | 4313.285  | 2580.68   |
| NM_015863 | 1279.857  | 1359.941  | NM_005221 | 13539.18  | 15078.269 | NM_00238E | 19233.938 | 12762.504 |
| NM_005994 | 23187.484 | 20394.018 | NM_00587C | 2077.097  | 2604.642  | NM_005314 | 13048.587 | 13084.996 |
| AB027508  | 14426.255 | 20559.764 | NM_018561 | 5187.467  | 5654.978  | NM_00194C | 10259.893 | 9649.721  |
| NM_016331 | 13947.693 | 15299.726 | NM_007193 | 1353.236  | 1822.295  | U83115    | 28483.693 | 32176.664 |
| NM_01436C | 39152.328 | 26900.975 | NM_001994 | 36568.664 | 41622.355 | NM_016234 | 32644.777 | 37520.273 |
| NM_018952 | 1080.932  | 803.06    | J00129    | 61224.246 | 63436.805 | NM_00187E | 20106.85  | 22639.465 |
| AB033053  | 977.7     | 960.58    | NM_00332C | 12001.516 | 13128.721 | NM_016082 | 7669.672  | 8499.743  |
| NM_00735E | 13413.667 | 14544.105 | L10146    | 15903.001 | 16251.986 | NM_000433 | 4295.388  | 4508.31   |
| NM_001571 | 11965.361 | 12699.905 | NM_00068E | 26160.961 | 24180.252 | NM_00019C | 29863.014 | 33109.641 |
| NM_00345C | 4495.028  | 3891.339  | AK025657  | 36379.734 | 37833.609 | X15667    | 24272.055 | 24325.43  |
| AK021577  | 6575.157  | 6294.925  | AF142063  | 2687.574  | 2130.802  | NM_017512 | 18137.949 | 17405.559 |
| NM_003433 | 4967.623  | 4790.302  | W42849    | 7522.288  | 6674.16   | NM_018661 | 3855.769  | 3402.803  |
| NM_005221 | 6958.646  | 6274.139  | AI889961  | 13617.287 | 12032.26  | NM_00224E | 64279.215 | 63633.969 |
| NM_00587C | 3366.899  | 2606.589  | AI360116  | 35472.148 | 34920.484 | AK096507  | 1348.521  | 1293.377  |
| NM_018561 | 5308.431  | 4435.072  | NM_013983 | 3402.891  | 3199.889  | NM_004311 | 39081.203 | 37107.836 |
| NM_007193 | 1216.272  | 797.629   | AI572835  | 41552.574 | 40651.941 | NM_005624 | 18941.207 | 17992.867 |
| NM_001994 | 15491.318 | 14347.678 | R20392    | 41141.531 | 41122.578 | AB020672  | 3898.969  | 3611.782  |
| J00129    | 49836.625 | 52263.965 | AA486367  | 12471.648 | 8186.982  | AK026958  | 2614.27   | 1911.958  |
| NM_00332C | 15698.455 | 17165.959 | N56684    | 3118.263  | 2531.375  | AB040962  | 2894.915  | 2850.028  |
| L10146    | 15545.972 | 17092.363 | M55153    | 9439.164  | 8030.205  | NM_00063E | 812.756   | 755.959   |
| NM_00068E | 16347.278 | 16813.541 | AF414120  | 4089.79   | 4435.759  | NM_01559E | 4039.084  | 3133.554  |
| W42849    | 5782.42   | 6010.132  | AL136131  | 20132.029 | 17725.023 | AB037902  | 2013.105  | 1589.029  |
| AI889961  | 22140.238 | 22338.318 | NM_033357 | 21238.164 | 21456.055 | NM_01869E | 42735.613 | 42091.605 |
| AI360116  | 46029.656 | 46206.797 | AF335109  | 9673.107  | 10573.688 | NM_00013E | 53458.285 | 48457.043 |
| NM_013983 | 2594.671  | 2061.254  | NM_003263 | 7125.51   | 7562.162  | AL157456  | 5802.377  | 5452.864  |
| AI572835  | 5513.135  | 5103.578  | U59911    | 16693.412 | 17830.176 | AL162056  | 5022.255  | 5353.598  |
| R20392    | 18403.949 | 17702.361 | NM_004957 | 24864.77  | 24992.404 | NM_00038C | 58610.754 | 50491.375 |
| AA486367  | 10709.697 | 7935.676  | AV697672  | 2392.781  | 2666.471  | NM_00462E | 11001.391 | 10532.546 |
| N56684    | 2295.776  | 2523.469  | NM_000942 | 62900.367 | 66510.773 | NM_01487E | 12617.082 | 12482.29  |
| AK097322  | 2115.328  | 1844.717  | NM_002982 | 2408.771  | 2416.356  | NM_00540E | 8414.762  | 8751.231  |
| AL136131  | 18946.859 | 14167.753 | NM_00219C | 1206.659  | 1442.297  | NM_00332E | 7680.961  | 5582.176  |
| NM_033357 | 23420.27  | 19793.971 | AK056773  | 12258.331 | 11969.801 | AF073482  | 13068.406 | 10783.686 |
| AF335109  | 10501.26  | 9449.768  | NM_002182 | 63450.328 | 65553.078 | NM_01627E | 67688.148 | 58093.449 |
| NM_003263 | 7734.502  | 6827.014  | NM_01647C | 11447.224 | 10027.569 | NM_017762 | 13150.646 | 11818.23  |
| U59911    | 22788.395 | 23431.543 | AL365408  | 61230.801 | 63183.48  | NM_001863 | 64918.281 | 59202.859 |
| NM_004957 | 22441.486 | 16736.732 | AK026204  | 15634.921 | 13494.249 | NM_000921 | 20899.051 | 20722.773 |
| AV697672  | 1877.975  | 2179.498  | NM_01463E | 6227.461  | 4339.436  | NM_00009E | 6909.748  | 6709.237  |
| NM_000942 | 58984.641 | 55235.727 | NM_00414E | 34232.258 | 32258.273 | NM_00001E | 35084.629 | 38940.145 |
| NM_002982 | 1825.054  | 1697.012  | AK023196  | 16801.813 | 17794.098 | AK026913  | 7118.758  | 7232.282  |
| NM_00219C | 1570.246  | 1058.642  | NM_01872E | 11758.222 | 11687.813 | J00129    | 44267.449 | 43610.32  |
| AK056773  | 7861.974  | 6124.262  | AK024014  | 44092.137 | 45762.594 | NM_00332C | 9834.751  | 10991.351 |
| NM_01647C | 14226.262 | 12023.055 | NM_00086E | 13588.483 | 11601.222 | L10146    | 17201.15  | 20020.137 |
| AL365408  | 37757.465 | 36871.781 | NM_000867 | 4492.345  | 5103.219  | NM_00068E | 23922.561 | 25833.883 |
| AK026204  | 10760.694 | 8448.126  | AF076642  | 3365.274  | 3345.939  | AK025657  | 35718.566 | 38442.23  |

|           |           |           |           |           |           |           |           |           |
|-----------|-----------|-----------|-----------|-----------|-----------|-----------|-----------|-----------|
| NM_014635 | 6759.704  | 4373.826  | NM_002386 | 30281.678 | 30294.387 | AF142063  | 2530.259  | 2238.432  |
| NM_004145 | 14570.479 | 12804.608 | NM_005314 | 13906.893 | 13030.987 | W42849    | 7502.747  | 8347.079  |
| AK023196  | 12669.365 | 12907.552 | NM_004885 | 14070.716 | 14349.289 | AI889961  | 11844.436 | 13531.982 |
| NM_018725 | 14034.849 | 12749.279 | NM_005145 | 37389.906 | 39464.48  | AI360116  | 29796.975 | 30353.502 |
| AK024014  | 14474.208 | 13857.077 | NM_012152 | 62875.188 | 52087.863 | NM_013983 | 3589.234  | 3319.69   |
| NM_000865 | 9197.666  | 8052.365  | NM_001940 | 10079.563 | 11807.366 | AI572835  | 39472.516 | 42046.742 |
| NM_000867 | 7676.62   | 8171.64   | U83115    | 33028.305 | 36660.258 | R20392    | 42261.914 | 41604.316 |
| AF076642  | 6982.245  | 6037.646  | NM_016234 | 35179.395 | 44934.633 | AA486367  | 14488.545 | 8951.065  |
| NM_002386 | 8840.317  | 7320.619  | NM_001876 | 19397.971 | 19884.049 | N56684    | 3765.918  | 3432.728  |
| NM_005314 | 11322.595 | 12095.645 | NM_016144 | 11707.46  | 12596.227 | M55153    | 8199.109  | 7996.107  |
| NM_004885 | 22387.268 | 22418.725 | AL133099  | 12979.693 | 12916.318 | AF414120  | 3547.03   | 2838.659  |
| NM_005145 | 42300.965 | 41197.16  | NM_016082 | 7604.832  | 7156.497  | AL136131  | 8628.433  | 5191.411  |
| NM_012152 | 20392.426 | 17574.32  | NM_000433 | 3767.923  | 3276.075  | NM_033357 | 14014.557 | 11980.96  |
| NM_001940 | 16849.33  | 15882.872 | NM_000190 | 24247.877 | 21083.729 | AF335109  | 6906.55   | 7427.479  |
| U83115    | 41167.914 | 38944.07  | X15667    | 25027.09  | 22374.422 | NM_003263 | 5420.159  | 4608.843  |
| NM_016234 | 36856.516 | 36205.18  | NM_017512 | 1875.962  | 1783.135  | U59911    | 13916.1   | 16363.15  |
| NM_001876 | 18966.693 | 17111.994 | NM_018661 | 2481.61   | 2052.036  | NM_004482 | 1908.464  | 2263.686  |
| NM_016144 | 11125.317 | 9819.647  | NM_002249 | 61540.285 | 58469.086 | NM_000352 | 1016.258  | 833.281   |
| AL133099  | 9635.206  | 9005.742  | NM_007126 | 63509.355 | 56859.27  | NM_000942 | 54395.895 | 50695.738 |
| NM_016082 | 7551.072  | 7044.392  | NM_004311 | 38237.469 | 40599.23  | NM_002982 | 2902.249  | 2496.663  |
| NM_000433 | 5521.445  | 5405.784  | NM_005624 | 12712.229 | 12815.768 | NM_002190 | 1790.048  | 1745.059  |
| NM_000190 | 21621.619 | 18931.594 | NM_002302 | 3534.469  | 3719.499  | AK056773  | 12129.744 | 13500.654 |
| X15667    | 5772.036  | 5192.499  | AB020672  | 1437.459  | 1678.608  | NM_002182 | 63159.262 | 56763.629 |
| NM_017512 | 3222.018  | 2740.008  | AK026958  | 4976.744  | 4550.13   | NM_016470 | 10020.901 | 10522.378 |
| NM_018661 | 2235.571  | 1997.321  | NM_000579 | 2720.694  | 2560.823  | AL365408  | 63432.965 | 57093.906 |
| NM_002249 | 52191.707 | 49811.945 | NM_001480 | 1980.11   | 1680.981  | AK026204  | 16317.824 | 16197.121 |
| AK096507  | 2162.965  | 1355.927  | AF263462  | 11172.443 | 12280.59  | NM_014635 | 7091.955  | 6489.832  |
| NM_007126 | 58070.84  | 49816.262 | AB040962  | 2945.907  | 3000.534  | NM_004145 | 35759.539 | 39354.266 |
| NM_004311 | 41650.922 | 44790.539 | NM_000639 | 475.463   | 751.746   | AK023196  | 18932.088 | 18922.93  |
| NM_005624 | 5415.852  | 5525.848  | NM_015599 | 3406.089  | 3268.266  | NM_018725 | 8745.021  | 7966.396  |
| NM_002302 | 3408.613  | 3085.203  | AB037902  | 954.791   | 1645.676  | AK024014  | 43685.902 | 44155.559 |
| AB020672  | 1668.623  | 1587.252  | NM_018696 | 51696.621 | 41790.871 | NM_000865 | 11561.228 | 9721.25   |
| AK026958  | 2519.61   | 2367.001  | NM_000136 | 58117.547 | 46216.676 | NM_000867 | 3933.682  | 2495.118  |
| NM_000579 | 3495.277  | 3368.777  | AL157456  | 4251.087  | 2977.806  | AF076642  | 3247.897  | 1905.763  |
| NM_001480 | 2714.775  | 2423.982  | AL162056  | 2798.724  | 2184.565  | NM_002386 | 27659.297 | 26022.037 |
| AF263462  | 8070.198  | 7286.686  | NM_000380 | 57352.488 | 44606.063 | NM_005314 | 7906.002  | 7526.447  |
| AB040962  | 1514.051  | 1116.336  | NM_004628 | 8874.218  | 6442.068  | NM_004885 | 9324.021  | 8881.06   |
| NM_000639 | 1083.859  | 1023.234  | AF085734  | 511.439   | 427.124   | NM_005145 | 29343.15  | 31407.391 |
| NM_015599 | 3660.921  | 3283.585  | NM_014876 | 15705.015 | 13974.714 | NM_012152 | 42044.504 | 39364.914 |
| AB037902  | 2274.82   | 1944.994  | NM_005406 | 10693.436 | 10378.842 | NM_001940 | 8764.943  | 7986.325  |
| NM_018696 | 13738.051 | 14507.947 | NM_003328 | 11833.199 | 10619.504 | U83115    | 26988.105 | 23424.279 |
| NM_000136 | 43287.219 | 40434.145 | X93921    | 7515.746  | 6931.708  | NM_007193 | 1464.861  | 2346.637  |
| AL157456  | 2601.614  | 2338.726  | AF073482  | 10815.523 | 9526.589  | NM_001994 | 21927.027 | 19301.109 |
| AL162056  | 8448.867  | 9944.043  | NM_005990 | 18560.465 | 13675.047 | NM_016144 | 10377.351 | 10934.188 |
| NM_000380 | 6837.178  | 6910.722  | NM_016276 | 66081.188 | 63056.77  | AL133099  | 11471.336 | 10990.828 |
| NM_004628 | 8853.479  | 8891.987  | NM_017762 | 19455.879 | 16797.07  | NM_016082 | 6050.717  | 6096.375  |
| AF085734  | 1694.961  | 1531.13   | NM_001863 | 66493.797 | 63531.094 | NM_000433 | 3823.302  | 3342.326  |
| NM_006502 | 1425.848  | 1966.155  | NM_000921 | 32287.303 | 35652.277 | NM_000190 | 27832.545 | 26727.77  |
| NM_014876 | 20463.086 | 17755.744 | NM_000098 | 7186.268  | 8787.114  | X15667    | 24084.211 | 24832.455 |
| NM_005406 | 14150.969 | 12975.71  | NM_000016 | 42651.219 | 41087.09  | NM_017512 | 13934.12  | 12313.144 |
| NM_003328 | 17576.215 | 16235.874 | AK026913  | 11238.42  | 10153.85  | NM_018661 | 3249.716  | 4905.562  |
| X93921    | 10801.6   | 10202.877 | J00129    | 53984.023 | 55561.477 | NM_002249 | 64602.59  | 54913.418 |
| AF073482  | 20259.975 | 20237.01  | NM_003320 | 11645.764 | 11342.572 | AK096507  | 2159.512  | 1951.137  |

|           |           |           |           |           |           |           |           |           |
|-----------|-----------|-----------|-----------|-----------|-----------|-----------|-----------|-----------|
| NM_00599C | 16824.229 | 14824.255 | L10146    | 15634.853 | 16322.053 | NM_00712E | 63654.754 | 56787.168 |
| NM_01627E | 30790.623 | 23893.484 | NM_00068E | 20631.67  | 18803.76  | NM_00431I | 33453.984 | 33689.359 |
| NM_01776Z | 37538.305 | 37285.305 | AK025657  | 31002.215 | 24147.375 | NM_00562A | 12397.262 | 10251.436 |
| NM_00186Z | 67732.375 | 57401.52  | AF142063  | 2327.828  | 2168.197  | NM_00230Z | 3522.982  | 2502.722  |
| NM_00092I | 37427.125 | 39391.102 | W42849    | 7407.158  | 5757.16   | AB020672  | 7479.749  | 6392.33   |
| NM_00009E | 6699.596  | 5689.245  | AI889961  | 13711.956 | 12127.736 | AK026958  | 2569.373  | 1826.992  |
| NM_00001E | 41870.797 | 37757.766 | AI360116  | 36739.473 | 34185.586 | NM_00057E | 4069.798  | 3502.209  |
| AK026913  | 8594.56   | 6360.801  | NM_01398Z | 3962.982  | 3232.78   | AB040962  | 2148.356  | 1515.563  |
| J00129    | 61893.527 | 62163.879 | AA486367  | 13096.067 | 9139.538  | NM_01869E | 42458.934 | 37670.559 |
| NM_00332C | 21426.59  | 22158.238 | N56684    | 2757.829  | 2630.31   | NM_00013E | 47573.781 | 45688.148 |
| L10146    | 20394.871 | 20430.254 | M55153    | 9312.167  | 8023.167  | AL157456  | 4332.769  | 3845.249  |
| NM_00068E | 26963.016 | 26236.707 | AF414120  | 3057.996  | 2641.91   | AL162056  | 2793.219  | 2254.663  |
| AK025657  | 8552.648  | 7379.012  | AK097322  | 1997.09   | 1299.12   | NM_00038C | 55248.52  | 49638.836 |
| AF142063  | 4770.919  | 4926.972  | AL136131  | 15905.959 | 9546.771  | NM_00462E | 9120.482  | 8560.996  |
| W42849    | 7522.485  | 7310.606  | NM_033357 | 16901.291 | 12401.582 | NM_01487E | 10255.342 | 9820.819  |
| AI889961  | 24800.67  | 25379.516 | AF335109  | 9658.042  | 8368.094  | NM_00540E | 6201.75   | 6172.892  |
| AI360116  | 53564.602 | 51333.027 | NM_00326Z | 6953.494  | 5726.62   | NM_00332E | 6640.432  | 6101.047  |
| NM_01398Z | 2179.039  | 2263.526  | U59911    | 21552.322 | 22098.963 | X93921    | 5201.226  | 4544.088  |
| AI572835  | 6254.229  | 4458.769  | NM_00448Z | 3468.522  | 3397.366  | AF073482  | 7389.561  | 5937.755  |
| R20392    | 18462.744 | 14651.714 | NM_00035Z | 2532.501  | 1857.049  | NM_00599C | 15964.758 | 13047.481 |
| AA486367  | 8989.072  | 5940.538  | NM_00094Z | 56848.707 | 51296.523 | NM_01627E | 63339.34  | 59416.805 |
| N56684    | 2431.455  | 1949.012  | NM_00298Z | 2461.066  | 2533.594  | NM_01776Z | 11760.84  | 10261.991 |
| M55153    | 3168.804  | 2201.564  | NM_00219C | 1360.743  | 1132.194  | NM_00009E | 7943.397  | 6504.205  |
| AF414120  | 5455.687  | 4348.629  | AK056773  | 14279.938 | 12437.132 | NM_00001E | 34226.043 | 36636.195 |
| AK097322  | 2005.391  | 1526.688  | NM_00218Z | 63568.164 | 67669.906 | NM_00068E | 21808.193 | 17798.934 |
| AL136131  | 17453.588 | 12489.404 | NM_01647C | 11862.452 | 7583.071  | AK025657  | 32919.895 | 33394.148 |
| NM_033357 | 21900.021 | 17538.986 | AL365408  | 62650.707 | 74544.195 | AF142063  | 2113.102  | 2134.294  |
| AF335109  | 10924.979 | 9952.532  | AK026204  | 18043.725 | 17200.045 | W42849    | 6723.448  | 5815.643  |
| NM_00326Z | 7104.659  | 6290.599  | AK023196  | 16751.879 | 15370.854 | AI889961  | 10404.645 | 10905.397 |
| U59911    | 21435.723 | 20642.82  | NM_01872E | 12039.355 | 11970.6   | AI360116  | 25135.973 | 23742.906 |
| NM_00448Z | 2517.197  | 2255.892  | AK024014  | 43958.102 | 44748.922 | NM_01398Z | 2734.353  | 2318.615  |
| NM_00094Z | 70161.242 | 63133.375 | AF076642  | 5164.42   | 4456.267  | AI572835  | 32261.889 | 31679.014 |
| NM_00298Z | 2268.812  | 2202.435  | NM_00238E | 28896.127 | 25719.723 | R20392    | 32331.738 | 31367.457 |
| NM_00219C | 2205.074  | 1614.196  | NM_005314 | 11400.33  | 10070.825 | AA486367  | 10487.782 | 6129.624  |
| AK056773  | 9929.619  | 8941.794  | NM_00488E | 9566.571  | 7243.51   | N56684    | 2934.497  | 2766.493  |
| NM_00218Z | 4708.023  | 4367.724  | NM_00514E | 38366.648 | 30688.707 | M55153    | 7709.476  | 8652      |
| NM_01647C | 14746.611 | 12683.024 | NM_01215Z | 59848.137 | 52376.52  | AF414120  | 2369.868  | 1858.388  |
| AL365408  | 42256.375 | 39957.938 | NM_00194C | 12347.526 | 12309.207 | AK097322  | 1834.756  | 1053.189  |
| AK026204  | 10112.113 | 7877.626  | U83115    | 39614.996 | 43330.523 | AL136131  | 12755.096 | 10532.703 |
| NM_01463E | 6732.718  | 4639.312  | NM_00719Z | 1801.48   | 1625.304  | NM_033357 | 12677.744 | 9924.035  |
| NM_00414E | 14674.969 | 10895.672 | NM_00199A | 32233.244 | 30684.064 | U59911    | 16654.355 | 15415.206 |
| AK023196  | 12261.23  | 10876.869 | NM_016144 | 7200.925  | 7732.105  | NM_00448Z | 2529.875  | 6379.765  |
| NM_01872E | 12495.603 | 10899.986 | AL133099  | 9736.862  | 10168.411 | NM_00414E | 32450.021 | 31986.123 |
| AK024014  | 12387.945 | 9466.263  | NM_01608Z | 7424.045  | 6215.149  | AK023196  | 15927.201 | 16956.945 |
| NM_00086E | 7298.149  | 6035.242  | NM_00043Z | 4527.509  | 3340.648  | NM_01872E | 7284.514  | 7628.813  |
| NM_000867 | 5779.776  | 4918.88   | NM_00019C | 34017.25  | 36036.773 | AK024014  | 33224.453 | 35948.91  |
| AF076642  | 5763.185  | 4516.6    | X15667    | 27389.303 | 23508.311 | NM_00086E | 7043.024  | 6995.822  |
| NM_00238E | 6713.012  | 6230.011  | NM_01751Z | 2450.824  | 2155.676  | NM_000867 | 2900.706  | 2011.261  |
| NM_005314 | 8747.901  | 8841.128  | NM_01866I | 2406.471  | 2159.779  | AF076642  | 2809.16   | 2027.553  |
| NM_00488E | 16134.635 | 16631.379 | NM_00224Z | 61141.809 | 63812.344 | NM_00238E | 15074.825 | 13847.864 |
| NM_00514E | 40666.035 | 42245.668 | AK096507  | 732.716   | 767.313   | NM_005314 | 8762.316  | 8599.52   |
| NM_01215Z | 14366.223 | 14104.872 | NM_00712E | 60607.164 | 58968.008 | NM_00488E | 8275.49   | 8016.031  |
| NM_00194C | 13317.383 | 12801.957 | NM_00431I | 42873.445 | 44774.348 | NM_00514E | 24444.889 | 24846.875 |

|           |           |           |           |           |           |           |           |           |
|-----------|-----------|-----------|-----------|-----------|-----------|-----------|-----------|-----------|
| U83115    | 34687.367 | 38658.531 | NM_005624 | 17244.986 | 17818.418 | NM_012152 | 49667.191 | 52409.551 |
| NM_007193 | 1593.087  | 1272.198  | AK026958  | 5195.827  | 4356.089  | AK024093  | 7369.705  | 6765.336  |
| NM_001994 | 19750.076 | 15253.963 | NM_000579 | 1915.834  | 1466.073  | NM_001940 | 8615.268  | 6573.662  |
| NM_016144 | 11773.07  | 10233.677 | NM_001480 | 1938.14   | 1436.913  | U83115    | 21022.561 | 17795.813 |
| AL133099  | 10004.595 | 8272.906  | AF263462  | 10952.827 | 9823.919  | NM_001264 | 13460.668 | 6545.146  |
| NM_016082 | 8761.741  | 6789.007  | AB040962  | 3235.798  | 2746.255  | NM_013364 | 14573.484 | 4632.498  |
| NM_000433 | 4896.31   | 4186.302  | NM_000639 | 1175.512  | 1121.543  | NM_001994 | 12641.641 | 6767.916  |
| NM_000190 | 20930.459 | 17292.807 | AV697672  | 3055.526  | 2684.658  | NM_016057 | 22105.955 | 20807.744 |
| X15667    | 4719.072  | 3337.644  | NM_018696 | 52641.559 | 43916.191 | NM_014677 | 4502.542  | 4543.784  |
| NM_017512 | 2873.739  | 2433.302  | NM_000136 | 55197.559 | 43921.977 | NM_006855 | 2067.434  | 2201.052  |
| NM_018661 | 1663.117  | 1125.298  | AL157456  | 4386.845  | 2048.892  | AK022790  | 31906.744 | 30780.127 |
| NM_002249 | 44244.004 | 43519.965 | AL162056  | 5546.629  | 5646.73   | NM_004311 | 29955.094 | 33158.414 |
| AK096507  | 1278.636  | 1239.102  | NM_000380 | 57968.016 | 48966.039 | NM_005624 | 7998.564  | 7873.761  |
| NM_007126 | 43028.992 | 43942.363 | NM_004628 | 13317.575 | 11454.052 | NM_002302 | 2006.101  | 1460.879  |
| NM_004311 | 33694.508 | 38432.074 | AF085734  | 1049.917  | 775.048   | AK026958  | 1568.893  | 1220.907  |
| NM_005624 | 3684.052  | 4049.148  | NM_014876 | 18499.531 | 17952.441 | NM_000579 | 1709.852  | 1312.333  |
| NM_002302 | 1996.412  | 2117.712  | NM_005406 | 10915.142 | 13738.071 | NM_001480 | 1244.585  | 939.708   |
| AB020672  | 1655.795  | 984.253   | NM_003328 | 13383.33  | 15380.883 | AF263462  | 7430.466  | 5768.733  |
| AK026958  | 2143.75   | 1810.611  | X93921    | 10573.274 | 10962.99  | AB040962  | 1901.816  | 1315.525  |
| NM_000579 | 2704.517  | 2568.334  | AF073482  | 16275.189 | 18558.078 | NM_000639 | 4966.845  | 4609.184  |
| NM_001480 | 2678.695  | 2880.165  | NM_005990 | 24266.246 | 24190.648 | AV697672  | 1909.967  | 2298.213  |
| AF263462  | 6282.495  | 6405.473  | NM_017762 | 23233.268 | 21008.258 | NM_000098 | 7484.003  | 8915.494  |
| AB040962  | 1205.588  | 1283.956  | NM_001863 | 66926.727 | 63381.855 | NM_000016 | 36783.504 | 41689.309 |
| NM_000639 | 891.623   | 1200.639  | NM_000921 | 32209.793 | 26754.559 | AK026913  | 6819.476  | 6399.544  |
| AV697672  | 2698.261  | 2387.265  | NM_000098 | 8062.285  | 6631.425  | NM_016144 | 9694.364  | 9933.437  |
| AB037902  | 2142.002  | 1704.753  | NM_000016 | 42509.93  | 46937.91  | AL133099  | 7809.668  | 7882.289  |
| NM_018696 | 11661.983 | 11100.556 | AK026913  | 11717.802 | 11007.405 | NM_016082 | 5101.378  | 4720      |
| NM_000136 | 37172.641 | 31473.227 | NM_016234 | 41310.383 | 44135.012 | NM_000433 | 3200.843  | 2718.79   |
| AL157456  | 1524.228  | 1249.249  | NM_001876 | 21157.799 | 20240.498 | NM_000190 | 22974.641 | 20715.834 |
| AL162056  | 6403.22   | 6139.613  | L10146    | 7362.445  | 7646.663  | X15667    | 19908.471 | 17240.438 |
| NM_000380 | 5490.745  | 5426.16   | NM_000685 | 21256.609 | 16325.194 | NM_017512 | 1536.13   | 1108.76   |
| NM_004628 | 6930.321  | 7067.316  | AK025657  | 28691.875 | 21028.887 | NM_018661 | 3666.354  | 2766.561  |
| AF085734  | 1660.258  | 1713.097  | AF142063  | 1670.202  | 1225.747  | AK023078  | 10947.552 | 6552.714  |
| NM_006502 | 1037.511  | 879.36    | W42849    | 6723.034  | 3303.051  | NM_004482 | 3673.019  | 2915.717  |
| NM_014876 | 16758.002 | 15152.756 | AI889961  | 18051.561 | 16615.883 | NM_000352 | 1251.196  | 1728.819  |
| NM_005406 | 11172.753 | 10898.207 | AI360116  | 45460.563 | 41554.008 | NM_018696 | 34289.254 | 35919.746 |
| NM_003328 | 13006.612 | 12248.71  | NM_013983 | 5030.06   | 4687.64   | NM_000136 | 42717.137 | 41908.738 |
| X93921    | 7720.213  | 7375.775  | AI572835  | 52497.586 | 50286.402 | AL157456  | 3896.6    | 3027.097  |
| AF073482  | 15317.964 | 17570.273 | R20392    | 50513.82  | 48262.988 | AL162056  | 2431.125  | 1832.435  |
| NM_005990 | 13518.385 | 14012.506 | AA486367  | 14321.449 | 11143.255 | NM_000380 | 42270.891 | 39449.957 |
| NM_016276 | 25916.217 | 20916.189 | N56684    | 2508.505  | 3022.361  | NM_004628 | 7501.057  | 6088.511  |
| NM_017762 | 32042.414 | 31373.744 | M55153    | 9628.056  | 13056.469 | NM_014876 | 7979.238  | 6489.687  |
| NM_001863 | 68312.234 | 57860.332 | AF414120  | 5081.293  | 5827.318  | NM_005406 | 4759.522  | 3229.783  |
| NM_000921 | 32967.508 | 37250.523 | AK097322  | 2912.884  | 3332.347  | NM_017762 | 11900.967 | 12080.853 |
| NM_000098 | 7436.725  | 7387.298  | AL136131  | 20448.346 | 21312.736 | NM_001863 | 64724.559 | 61254     |
| NM_000016 | 37073.801 | 42112.332 | NM_033357 | 20246.838 | 21327.152 | CY3Cy5    | 24579.66  | 733.184   |
| AK026913  | 8539.109  | 8425.854  | NM_003263 | 6861.146  | 3543.64   | NM_006497 | 61339.734 | 59457.758 |
| NM_016234 | 41511.875 | 42913.48  | U59911    | 21829.129 | 18033.305 | NM_006892 | 4223.65   | 5589.526  |
| NM_001876 | 19292.328 | 17780.43  | NM_004482 | 3873.18   | 2993.829  | AK023616  | 6513.693  | 6825.289  |
| L10146    | 16629.266 | 17809.199 | NM_000352 | 2199.984  | 1356.411  | AK022249  | 1749.391  | 2312.538  |
| NM_000685 | 26057.564 | 24207.227 | NM_015599 | 5439.947  | 4406.428  | AK025665  | 16980.893 | 17448.707 |
| AK025657  | 7041.591  | 6927.258  | NM_014635 | 4290.404  | 3096.352  | AL355694  | 3554.469  | 4082.938  |
| AF142063  | 3120.039  | 3281.063  | NM_004145 | 27004.625 | 24565.807 | AF191492  | 2661.251  | 2264.259  |

|           |           |           |           |           |           |           |           |           |
|-----------|-----------|-----------|-----------|-----------|-----------|-----------|-----------|-----------|
| W42849    | 4942.308  | 4323.368  | AK023196  | 12278.476 | 10446.673 | BC037530  | 75028.711 | 65276.602 |
| AI889961  | 21550.514 | 23388.439 | NM_018728 | 6992.067  | 4096.622  | NM_014851 | 25521.758 | 24852.34  |
| AI360116  | 43930.844 | 46936.828 | AK024014  | 36492.105 | 20808.713 | AL355743  | 3549.975  | 4447.262  |
| NM_013983 | 2076.339  | 2064.614  | NM_000865 | 12426.917 | 12175.682 | L77571    | 1970.203  | 1767.213  |
| AI572835  | 4694.338  | 4641.29   | NM_000867 | 4543.615  | 4404.833  | X81896    | 2587.621  | 2839.607  |
| R20392    | 17188.281 | 18867.795 | AF076642  | 4699.439  | 3949.74   | AF070595  | 1506.417  | 1424.227  |
| AA486367  | 9997.356  | 8036.51   | NM_002386 | 36811.258 | 39697.242 | NM_006497 | 59985.145 | 56666.488 |
| N56684    | 2077.497  | 2265.844  | NM_005314 | 14540.996 | 17570.438 | NM_006892 | 7081.379  | 7774.457  |
| M55153    | 2492.932  | 2506.395  | NM_004885 | 14371.241 | 18413.842 | SR5       | 12298.871 | 14820.597 |
| AF414120  | 5403.19   | 5181.951  | NM_005145 | 40002.391 | 42828.785 | SR7       | 10208.6   | 44994.469 |
| AK097322  | 2018.283  | 1943.225  | NM_012152 | 60780.512 | 65997.797 | SR9       | 33316.695 | 9198.304  |
| AL136131  | 16903.947 | 14723.056 | AK024093  | 16981.369 | 20156.922 | CY3Cy5    | 22819.385 | 1128.341  |
| NM_033357 | 23249.314 | 21957.764 | NM_001940 | 14910.872 | 18043.797 | M74093    | 5845.456  | 5781.458  |
| AF335109  | 9371.215  | 11405.343 | U83115    | 45696.5   | 44947.762 | M28219    | 9629.306  | 9577.048  |
| NM_003263 | 6625.858  | 7048.721  | NM_001264 | 49888.859 | 48658.809 | L17326    | 2257.942  | 2606.818  |
| U59911    | 19472.496 | 21845.338 | NM_014368 | 3768.199  | 2877.688  | D17207    | 16244.869 | 19641.391 |
| NM_004482 | 4326.051  | 4330.803  | NM_000850 | 6265.763  | 4397.89   | D55640    | 12973.519 | 14750.383 |
| NM_000352 | 974.571   | 920.932   | NM_004676 | 6522.263  | 5610.936  | AF085897  | 5653.696  | 6218.006  |
| NM_015599 | 3888.261  | 3388.062  | NM_007193 | 2349.026  | 2007.413  | AF085822  | 4170.327  | 4119.822  |
| NM_014635 | 6431.39   | 5486.879  | NM_001994 | 45451.332 | 39743.379 | AK021510  | 2304.558  | 2630.075  |
| NM_004145 | 14946.479 | 15684.31  | J00129    | 61377.73  | 61907.059 | AK022711  | 3803.927  | 3879.754  |
| AK023196  | 10894.576 | 12311.661 | NM_003320 | 15245.186 | 14226.882 | AK024310  | 2813.468  | 8805.538  |
| NM_018728 | 11862.177 | 11958.679 | AL137631  | 19604.416 | 19966.795 | AK023039  | 2031.741  | 2086.249  |
| AK024014  | 9688.393  | 9233.494  | NM_016057 | 19489.844 | 17024.828 | AL109688  | 15940.304 | 15007.433 |
| NM_000865 | 6914.907  | 6924.728  | NM_014677 | 4582.652  | 3740.562  | AF074981  | 5131.327  | 4655.284  |
| NM_000867 | 6337.331  | 6061.453  | NM_006855 | 2238.306  | 770.498   | AK025863  | 6268.64   | 6226.369  |
| AF076642  | 6036.273  | 4333.172  | NM_004311 | 33947.91  | 35760.406 | D42044    | 6239.57   | 6105.442  |
| NM_002386 | 6489.4    | 6412.912  | NM_005624 | 15436.263 | 13725.659 | AK026149  | 9908.131  | 10499.364 |
| NM_005314 | 9068.746  | 10265.961 | NM_002302 | 3137.721  | 3256.381  | AK025305  | 2506.497  | 3515.045  |
| NM_004885 | 16503.152 | 17683.791 | AB020672  | 1211.883  | 1664.544  | AL117415  | 40525.891 | 49371.656 |
| NM_005145 | 35558.832 | 40643.273 | AK026958  | 4557.989  | 5739.376  | AK024615  | 3506.481  | 3673.285  |
| NM_012152 | 13319.857 | 11766.727 | NM_000579 | 2995.011  | 3261.828  | AK025054  | 6492.589  | 6172.167  |
| AK024093  | 15194.806 | 16200.791 | NM_001480 | 1587.587  | 1937.805  | AK024556  | 4157.161  | 4581.643  |
| NM_001940 | 12310.155 | 11528.164 | AF263462  | 12119.92  | 14906.038 | AK024728  | 496.932   | 720.595   |
| U83115    | 35622.742 | 38779.855 | AB040962  | 3220.349  | 3038.848  | AK024935  | 4909.042  | 5316.65   |
| NM_001264 | 26070.346 | 25526.189 | NM_000639 | 1064.851  | 1236.886  | NM_007168 | 690.441   | 970.702   |
| NM_013364 | 10888.3   | 11627.104 | AV697672  | 2619.663  | 3309.305  | AK022811  | 3441.061  | 3771.262  |
| NM_014368 | 3507.016  | 4207.439  | NM_002982 | 3972.416  | 2783.212  | AL117635  | 4494.352  | 4508.108  |
| NM_000850 | 3814.044  | 3915.925  | NM_002190 | 2235.537  | 2181.701  | AK025332  | 11316.422 | 10859.165 |
| NM_004676 | 2101.904  | 2422.406  | AK056773  | 20358.424 | 21201.91  | AB040929  | 1427.845  | 1404.06   |
| NM_007193 | 2675.352  | 2604.699  | NM_002182 | 59907.246 | 70886.938 | AB020735  | 3507.983  | 3220.309  |
| NM_001994 | 19261.994 | 18643.68  | NM_016470 | 18313.309 | 17612.859 | AL109700  | 1145.621  | 1070.469  |
| J00129    | 56083.426 | 49214.84  | AL365408  | 62486.543 | 80386.469 | D17010    | 1489.979  | 1976.143  |
| NM_003320 | 20083.479 | 19722.523 | AK026204  | 25057.004 | 20305.898 | AJ011596  | 27966.438 | 31435.254 |
| AL137631  | 13633.207 | 13507.337 | NM_000098 | 6006.259  | 5809.463  | U17639    | 1459.459  | 1970.866  |
| NM_016057 | 26890.885 | 27181.303 | NM_000016 | 32770.297 | 29393.668 | X51779    | 10064.041 | 10529.332 |
| NM_014677 | 5013.171  | 5678.955  | AK026913  | 7470.242  | 5026.126  | X81001    | 2535.95   | 2916.124  |
| NM_006855 | 3273.41   | 3648.838  | NM_016234 | 29229.748 | 17861.352 | AL049254  | 5655.022  | 5574.001  |
| AK022790  | 23898.291 | 23520.59  | NM_016144 | 11389.517 | 11283.625 | Z83954    | 20190.098 | 14514.996 |
| NM_004311 | 30839.91  | 39318.262 | AL133099  | 12420.096 | 11847.006 | AK024331  | 3117.894  | 3008.361  |
| NM_005624 | 4108.17   | 4575.836  | NM_016082 | 9461.391  | 9310.047  | AK024452  | 3376.179  | 3227.466  |
| NM_002302 | 2046.114  | 2062.073  | NM_000433 | 5395.922  | 7065.392  | AK021556  | 1437.468  | 1246.407  |
| AB020672  | 1258.512  | 1135.648  | NM_000190 | 32049.383 | 44631.914 | AJ249975  | 1108.569  | 1337.812  |

|           |           |           |           |           |           |           |           |           |
|-----------|-----------|-----------|-----------|-----------|-----------|-----------|-----------|-----------|
| AK026958  | 2389.51   | 2393.244  | X15667    | 27790.635 | 34729.949 | AK021733  | 3218.164  | 3426.846  |
| NM_000579 | 2995.478  | 2398.721  | NM_017512 | 3137.157  | 3134.341  | NM_012449 | 1816.963  | 1567.79   |
| NM_001480 | 2894.59   | 3414.828  | NM_018661 | 3600.833  | 3432.1    | AK021551  | 7298.44   | 7666.373  |
| AF263462  | 5226.276  | 4809.73   | NM_001678 | 1525.896  | 1475.783  | AK025117  | 4907.181  | 5659.04   |
| AB040962  | 1348.939  | 1067.818  | AK023078  | 18456.238 | 24396.336 | AK000024  | 44159.566 | 48601.656 |
| NM_000639 | 823.344   | 696.674   | NM_002239 | 63913.023 | 58267.527 | AK026693  | 4232.47   | 4663.885  |
| AV697672  | 2234.136  | 1989.531  | NM_002249 | 62212.707 | 63367.219 | NM_012285 | 2913.435  | 2712.192  |
| NM_000942 | 62057.082 | 50126.711 | NM_015684 | 31673.715 | 31855.986 | AK001128  | 1976.087  | 1816.639  |
| NM_002982 | 2741.809  | 2592.093  | NM_003945 | 56626.5   | 54492.418 | AK000090  | 2839.255  | 3075.835  |
| NM_002190 | 1985.547  | 1391.85   | NM_004981 | 64052.086 | 62286.637 | AK000950  | 20758.92  | 22316.885 |
| AK056773  | 9888.804  | 8921.17   | AK096507  | 1206.327  | 1193.31   | AK026812  | 16968.939 | 18090.783 |
| NM_002182 | 5597.134  | 5393.378  | NM_016524 | 6837.18   | 7016.073  | AK000176  | 11869.326 | 12270.481 |
| NM_016470 | 17135.086 | 17364.373 | NM_007126 | 65682.031 | 57147.848 | AK000831  | 26927.717 | 29678.623 |
| AL365408  | 51159.359 | 44861.207 | NM_004482 | 2869.609  | 2557.203  | AK000981  | 7551.197  | 8085.021  |
| AK026204  | 14155.827 | 12283.088 | NM_000352 | 1932.19   | 965.818   | X95095    | 17790.943 | 18024.223 |
| NM_000098 | 6480.778  | 6816.992  | AB037902  | 1526.422  | 1154.813  | AB007902  | 4591.392  | 4724.903  |
| NM_000016 | 36403.047 | 42094.828 | NM_018696 | 58958.598 | 50785.105 | AF078528  | 26694.461 | 27285.518 |
| AK026913  | 7440.71   | 7841.551  | NM_000136 | 59524.816 | 50720.172 | AF161411  | 5952.465  | 6660.48   |
| NM_016234 | 40893.441 | 42372.559 | AL157456  | 4446.477  | 5829.092  | AK000450  | 46593.277 | 54025.043 |
| NM_001876 | 19033.607 | 18938.762 | AL162056  | 5904.687  | 6123.201  | NM_018224 | 38445.738 | 50551.52  |
| NM_016144 | 13205.334 | 14136.684 | NM_000380 | 56862.492 | 52043.848 | NM_019896 | 12909.976 | 14038.434 |
| AL133099  | 8508.899  | 9820.085  | NM_004628 | 12187.45  | 15378.052 | NM_018566 | 22401.795 | 25393.574 |
| NM_016082 | 8745.243  | 8880.207  | AF085734  | 907.763   | 654.171   | NM_000539 | 750.868   | 781.187   |
| NM_000433 | 6170.082  | 6572.543  | NM_014876 | 21093.846 | 22751.193 | JO4118    | 3839.742  | 3800.341  |
| AF268419  | 655.253   | 742.975   | NM_005406 | 11517.626 | 13641.29  | AK025325  | 36555.754 | 48468.598 |
| NM_000190 | 22126.936 | 23168.182 | NM_003328 | 11573.254 | 3638.238  | S75762    | 1480.83   | 1457.493  |
| X15667    | 4966.372  | 4046.863  | X93921    | 9804.135  | 5151.303  | U50531    | 15883.307 | 16254.6   |
| NM_017512 | 2913.431  | 3438.508  | AF073482  | 14866.201 | 8851.239  | NM_005318 | 8397.533  | 8982.836  |
| NM_018661 | 1696.409  | 1495.67   | NM_005990 | 21531.092 | 15379.326 | U85653    | 1212.151  | 867.561   |
| NM_001678 | 1223.936  | 1211.101  | NM_016276 | 65552.914 | 63555.383 | L09099    | 66630.188 | 65349.945 |
| AK023078  | 17772.176 | 19534.172 | NM_017762 | 19960.93  | 20088.891 | AL117474  | 4325.489  | 5176.849  |
| NM_002239 | 60705.133 | 55161.527 | NM_001863 | 66979.656 | 65639.688 | NM_005421 | 7895.922  | 7224.462  |
| NM_002249 | 43872.445 | 42280.168 | NM_000921 | 33184.652 | 33864.598 | AK024580  | 72094.672 | 64480.227 |
| NM_015684 | 26643.455 | 24722.764 | CY3Cy5    | 26137.201 | 439.3     | AL442093  | 23768.088 | 25022.445 |
| NM_003945 | 45108.34  | 46079.332 | NM_006497 | 69023.273 | 58230.168 | Z36874    | 65198.926 | 75974.977 |
| NM_004981 | 6086.412  | 6142.211  | NM_006892 | 6102.289  | 6979.529  | AK095477  | 4283.531  | 4721.311  |
| AK096507  | 1474.955  | 1733.451  | AK025665  | 15003.676 | 13707.155 | AK023326  | 2536.938  | 3131.741  |
| NM_016524 | 5180.608  | 4978.458  | AL355694  | 4077.166  | 3247.022  | AK022462  | 8756.99   | 9151.51   |
| NM_007126 | 52214.977 | 46871.023 | AF191492  | 2789.71   | 2903.713  | NM_020530 | 6505.918  | 6992.901  |
| NM_004482 | 3691.572  | 5123.093  | BC037530  | 87264.031 | 66888.766 | AK022418  | 14955.863 | 15507.795 |
| NM_000352 | 1288.873  | 1058.005  | NM_014851 | 13688.905 | 12006.179 | AF279777  | 3171.044  | 3168.288  |
| NM_015599 | 3080.709  | 2766.003  | AL355743  | 2966.324  | 3089.622  | AK021748  | 66411.125 | 67332.953 |
| AB037902  | 2268.889  | 1998.994  | AF070595  | 2675.965  | 1555.404  | AL137257  | 19390.332 | 20754.063 |
| NM_018696 | 10268.196 | 10668.781 | NM_006892 | 5736.026  | 6703.259  | AF086503  | 1440.939  | 1640.125  |
| NM_000136 | 37689.387 | 35269.844 | SR1       | 84183.57  | 66072.344 | AK000543  | 33115.328 | 40103.441 |
| AL157456  | 1978.468  | 2020.203  | SR3       | 59964.281 | 59083.91  | AK026683  | 15093.328 | 16370.506 |
| AL162056  | 6823.458  | 7166.385  | SR7       | 10328.803 | 48876.219 | D16906    | 1388.756  | 763.175   |
| NM_000380 | 5730.927  | 6111.647  | SR9       | 30713.238 | 6565.938  | AL079309  | 11903.766 | 12764.345 |
| NM_004628 | 6720.411  | 6458.938  | CY3Cy5    | 16949.283 | 160.621   | AK022335  | 3583.085  | 3371.979  |
| AF085734  | 1712.514  | 1850.159  | M74093    | 6295.561  | 5074.387  | AL110280  | 19956.021 | 20185.648 |
| NM_006502 | 1481.8    | 1131.099  | M28219    | 22724.178 | 27376.957 | AK024235  | 1484.954  | 1880.494  |
| NM_014876 | 18226.641 | 17688.299 | L17326    | 2648.701  | 2996.304  | NM_017458 | 5479.041  | 5136.814  |
| NM_005406 | 11808.399 | 12874.224 | D17207    | 17895.154 | 18897.316 | AF086196  | 2644.006  | 3561.691  |



|           |           |           |           |           |           |           |           |           |
|-----------|-----------|-----------|-----------|-----------|-----------|-----------|-----------|-----------|
| NM_00332E | 14573.392 | 13581.822 | D55640    | 11489.137 | 11322.826 | NM_00554E | 66284.883 | 68386.648 |
| X93921    | 8829.155  | 7644.908  | AF085897  | 3165.711  | 5645.561  | NM_000267 | 9506.219  | 9958.362  |
| AF073482  | 17782.26  | 18225.584 | AF085822  | 4375.803  | 3797.039  | NM_01660E | 6618.21   | 8377.891  |
| NM_00599C | 14544.97  | 15409.216 | AK021510  | 2310.096  | 1898.164  | NM_00439E | 63510.949 | 88998.547 |
| NM_01627E | 28971.779 | 25518.678 | AK022711  | 4722.379  | 4112.878  | NM_016181 | 2411.846  | 2671.028  |
| NM_01776E | 31936.318 | 35919.723 | AL109688  | 8303.581  | 6416.408  | NM_01496E | 16967.756 | 18849.465 |
| NM_00186E | 72645.047 | 66699.609 | AF074981  | 2936.309  | 2714.727  | NM_01496E | 1680.224  | 1635.339  |
| NM_000921 | 33366.945 | 34444.863 | AK025863  | 6490.455  | 5655.791  | D87684    | 18829.785 | 17762.91  |
| CY3Cy5    | 30062.676 | 1637.525  | D42044    | 6655.454  | 5507.427  | NM_00158E | 1474.031  | 1931.819  |
| NM_006497 | 16576.658 | 19126.877 | AK026149  | 3746.645  | 3485.003  | NM_006317 | 65053.363 | 75839.836 |
| NM_00689E | 9090.004  | 10173.058 | AB027011  | 32608.174 | 35962.75  | NM_00121E | 16950.592 | 17481.711 |
| AK023616  | 2512.058  | 2570.88   | AF131788  | 5932.649  | 41037.793 | NM_00073C | 31656.346 | 25910.273 |
| AK025665  | 17099.719 | 16051.136 | AL117415  | 18054.25  | 15890.044 | U31734    | 65357.879 | 74147.969 |
| AL355694  | 1221.169  | 1793.731  | AK024615  | 1665.141  | 1735.558  | AF085885  | 5364.468  | 7707.749  |
| AK027152  | 617.945   | 1066.28   | AK025054  | 6222.713  | 5490.077  | M24751    | 4063.167  | 4130.749  |
| AF191492  | 2218.131  | 2220.274  | AK024556  | 3154.374  | 2924.03   | AK026569  | 63904.219 | 86147.93  |
| BC037530  | 11974.409 | 12206.226 | AK024935  | 4984.197  | 5092.292  | AL049974  | 3807.81   | 3989.644  |
| NM_014851 | 7583.89   | 7399.642  | AK022811  | 4066.587  | 4322.06   | AK022953  | 1488.338  | 1742.444  |
| AL355743  | 3495.048  | 4506.577  | AK025332  | 5777.066  | 6278.267  | AF009319  | 16246.673 | 17468.994 |
| L77571    | 1160.313  | 1690.572  | AB040929  | 1208.266  | 1469.618  | AL365519  | 2429.593  | 2861.491  |
| X81896    | 1775.903  | 1969.221  | AJ011596  | 23932.402 | 24698.057 | NM_01846E | 18311.791 | 18396.463 |
| AF070595  | 2713.157  | 2311.615  | AL049215  | 68350.523 | 63903.762 | Z36845    | 3675.017  | 3251.929  |
| NM_006497 | 14175.68  | 14215.15  | X51779    | 2962.131  | 2400.723  | M73792    | 3286.663  | 3637.097  |
| NM_00689E | 8405.929  | 8267.284  | AL049254  | 1428.211  | 1722.773  | NM_016127 | 34866.906 | 42541.293 |
| SR5       | 7223.718  | 10857.572 | AK024331  | 3113.947  | 3642.393  | AF085939  | 3436.05   | 3868.575  |
| SR7       | 7959.522  | 48853.168 | AK024452  | 3703.248  | 3866.255  | NM_00679E | 56308.133 | 55646.441 |
| SR9       | 31356.791 | 9991.405  | AK021556  | 1495.956  | 1427.082  | NM_00587E | 65389.082 | 74514.273 |
| CY3Cy5    | 17331.139 | 712.869   | AJ249975  | 1490.095  | 1547.451  | AF039697  | 1787.419  | 1831.249  |
| M74093    | 3274.703  | 3337.477  | AK021733  | 4124.945  | 4375.827  | NM_004934 | 1986.813  | 2235.451  |
| L17326    | 1422.718  | 1179.549  | AK021551  | 7394.875  | 8035.177  | AF284436  | 4086.285  | 3944.257  |
| D17207    | 7364.137  | 7564.67   | AK000024  | 44538.5   | 48298.492 | NM_00444E | 2616.565  | 2715.302  |
| D55640    | 10295.783 | 13056.333 | AK026693  | 4139.993  | 3923.723  | U39657    | 25723.395 | 27657.807 |
| AF085897  | 1789.271  | 2238.111  | NM_01228E | 2431.376  | 1660.94   | NM_01634C | 8771.423  | 9983.973  |
| AK021510  | 3531.966  | 4428.935  | AK001128  | 2181.824  | 1713.206  | NM_01837E | 2666.064  | 2638.469  |
| AK022711  | 2021.902  | 2280.696  | AK000090  | 1938.879  | 2207.522  | NM_00644E | 7915.546  | 8907.855  |
| AK024310  | 1664.355  | 2026.097  | AK000794  | 15459.455 | 14425.02  | BF216030  | 22229.559 | 23603.096 |
| AK023039  | 1282.41   | 1583.279  | AK000950  | 19005.439 | 19849.346 | NM_002757 | 3687.318  | 3679.251  |
| AL109688  | 3524.324  | 4305.536  | AK026812  | 14664.36  | 14921.033 | NM_003684 | 4663.379  | 6281.937  |
| AF074981  | 1205.704  | 1853.719  | AK000176  | 8053.097  | 8979.546  | NM_005657 | 6885.91   | 7809.857  |
| AK025863  | 6374.637  | 6577.259  | AK000831  | 24027.879 | 23331.109 | NM_017671 | 3763.431  | 3887.915  |
| D42044    | 4923.749  | 5375.276  | AK000981  | 6265.53   | 5545.782  | AB040883  | 4910.296  | 5123.957  |
| AK023009  | 3211.006  | 5230.665  | X95095    | 16363.98  | 17598.027 | NM_01863E | 4755.278  | 5095.917  |
| AK026149  | 2660.832  | 3518.86   | AB007902  | 6338.058  | 6604.641  | AF264628  | 2274.906  | 2813.694  |
| AB027011  | 8862.573  | 8561.93   | AF078528  | 35333.152 | 37982.207 | NM_00114E | 758.436   | 1390.787  |
| AK025305  | 2291.431  | 2075.852  | AF161411  | 8742.444  | 9149.564  | NM_00171E | 32768.805 | 39989.457 |
| AK024556  | 952.769   | 959.045   | AK000450  | 53116.457 | 56442.316 | NM_00439E | 26668.457 | 27099.119 |
| AK024728  | 828.429   | 724.319   | NM_018224 | 41270.367 | 52013.902 | NM_00266E | 3470.026  | 3663.252  |
| AK024935  | 1571.63   | 1655.857  | NM_01989E | 18294.752 | 19910.057 | NM_006094 | 16333.563 | 14616.198 |
| AK022811  | 2884.157  | 2857.692  | NM_01856E | 22866.922 | 28460.297 | AF080158  | 3889.432  | 4025.636  |
| AL117635  | 2012.939  | 1908.528  | J04118    | 6476.607  | 5819.357  | AB037794  | 9245.54   | 10449.211 |
| AK025332  | 2593.617  | 2758.736  | AK025325  | 34565.48  | 41494.609 | NM_01417E | 41214.609 | 52023.348 |
| AB040929  | 1402.377  | 1713.68   | S75762    | 2143.765  | 1812.855  | NM_001251 | 59819.848 | 60412.695 |
| AB020735  | 1952.142  | 2952.976  | U50531    | 11912.276 | 10402.254 | NM_00478E | 1493.917  | 1669.427  |

|           |           |           |           |           |           |           |           |           |
|-----------|-----------|-----------|-----------|-----------|-----------|-----------|-----------|-----------|
| AJ011596  | 3120.323  | 2763.982  | NM_005318 | 4660.896  | 4161.936  | AB011112  | 23933.316 | 23574.566 |
| AL049215  | 9471.493  | 10176.976 | L09099    | 70507.258 | 64426.18  | NM_018668 | 14317.662 | 15613.338 |
| X51779    | 1000.185  | 1076.372  | AL117474  | 4097.136  | 5246.171  | NM_002623 | 8978.015  | 8415.009  |
| X81001    | 1015      | 787.117   | AL442093  | 15261.893 | 15275.499 | NM_018844 | 12605.008 | 12622.246 |
| AL049254  | 1138.823  | 1166.425  | Z36874    | 64483.395 | 80843.094 | AF279778  | 6252.176  | 6733.114  |
| AK024331  | 2959.053  | 3656.432  | AK095477  | 6719.342  | 8487.87   | NM_015477 | 10243.083 | 10236.479 |
| AK024452  | 1714.632  | 2092.098  | AK023326  | 3035.991  | 4069.822  | AK023212  | 7123.059  | 8245.897  |
| AK021733  | 3371.87   | 3399.737  | AK022462  | 11088.579 | 11874.474 | AL353943  | 4066.28   | 4921.016  |
| AK021551  | 5262.524  | 5673.313  | NM_020530 | 9419.34   | 9947.226  | BE568801  | 12935.258 | 12876.938 |
| AK025117  | 3188.119  | 2834.652  | AK022418  | 17941.381 | 18371.566 | NM_003127 | 4052.46   | 2888.334  |
| AK022357  | 933.475   | 870.281   | AF279777  | 3224.546  | 3993.138  | NM_013286 | 18971.654 | 20336.389 |
| AK000024  | 4236.669  | 4374.2    | AK021748  | 65975.758 | 65232.586 | NM_006082 | 65063.059 | 77107.414 |
| AK026693  | 1929.196  | 1829.752  | AL137257  | 18499.057 | 21047.189 | NM_006633 | 718.628   | 1256.672  |
| NM_012285 | 825.572   | 909.847   | AF086503  | 1394.26   | 2751.837  | NM_016262 | 3353.15   | 3722.959  |
| AK001128  | 2805.82   | 2872.326  | AK000543  | 36780.324 | 46856.855 | AB011116  | 24383.316 | 24474.385 |
| AK000090  | 1357.533  | 1446.769  | AK026683  | 16457.98  | 17207.594 | AB037858  | 4873.32   | 4330.275  |
| AK000794  | 8620.066  | 9132.989  | AL079309  | 12073.595 | 13269.457 | NM_000173 | 677.332   | 740.398   |
| AK000950  | 23186.268 | 22729.721 | AK022335  | 2801.727  | 2821.76   | NM_005775 | 2909.554  | 2533.174  |
| AK026812  | 13757.724 | 13925.519 | AL110280  | 7960.764  | 8500.202  | NM_017639 | 5683.093  | 4111.019  |
| AK000176  | 9747.795  | 9976.202  | AK024235  | 845.102   | 1018.413  | NM_004385 | 9176.143  | 8481.734  |
| AK000831  | 24434.117 | 24411.5   | NM_017458 | 3689.85   | 3828.237  | L25629    | 1695.281  | 1753.096  |
| AK000981  | 7417.26   | 7046.463  | AF086196  | 2320.983  | 2612.166  | AJ245539  | 1297.93   | 1868.903  |
| X95095    | 9765.336  | 10915.587 | NM_005542 | 69362.656 | 64139.594 | AB033052  | 14631.6   | 15815.305 |
| AB007902  | 5861.706  | 6886.07   | NM_000267 | 10737.472 | 13633.575 | NM_018227 | 6580.717  | 7475.832  |
| AF078528  | 30763.305 | 30882.299 | NM_016603 | 10103.311 | 13168.287 | AF050199  | 3128.584  | 3422.327  |
| AF161411  | 8233.227  | 9587.253  | NM_004398 | 61862.137 | 106474.63 | NM_003340 | 46808.535 | 52107.766 |
| AK000450  | 51893.027 | 57320.453 | NM_016181 | 921.394   | 868.289   | U46752    | 9714.396  | 10532.6   |
| NM_018224 | 19804.607 | 23048.588 | NM_014966 | 24914.811 | 25859.457 | NM_002794 | 65085.191 | 61919.035 |
| NM_019896 | 16805.33  | 19481.328 | NM_014962 | 1603.519  | 2029.387  | BF244646  | 62072.734 | 70809.883 |
| NM_018569 | 17787.912 | 21946.346 | D87684    | 20228.631 | 22843.152 | AK024030  | 17024.861 | 19248.865 |
| J04118    | 6039.23   | 6456.705  | NM_001586 | 1695.895  | 1912.695  | AF275808  | 4375.945  | 4311.092  |
| AK025325  | 10544.503 | 11426.308 | NM_006317 | 65164.727 | 75294.477 | AK024038  | 10797.351 | 12295.488 |
| S75762    | 1436.095  | 1655.427  | NM_001219 | 18192.85  | 20027.201 | NM_002055 | 3867.633  | 4495.683  |
| AK023838  | 732.341   | 802.394   | NM_000730 | 38277.426 | 32576.178 | NM_005803 | 24424.904 | 28525.557 |
| U50531    | 8520.235  | 8381.232  | U31734    | 65720.898 | 64720.07  | NM_015515 | 16239.271 | 14346.601 |
| NM_005318 | 1798.404  | 1824.16   | AF085885  | 4797.182  | 11512.417 | AK001579  | 61287.543 | 53099.719 |
| U85653    | 925.803   | 1107.901  | M24751    | 5561.151  | 5396.295  | NM_002670 | 25107.012 | 31582.385 |
| L09099    | 70586.648 | 66448.813 | AK026569  | 66320.711 | 66495.398 | AF163302  | 14326.167 | 13486.097 |
| AL117474  | 3829.942  | 3740.121  | AL049974  | 4242.173  | 4978.588  | NM_006408 | 16822.672 | 17253.076 |
| NM_005421 | 2832.724  | 2501.764  | AK022953  | 1120.816  | 1353.682  | NM_002419 | 14553.565 | 14277.334 |
| AK024580  | 21729.5   | 21429.525 | AF009319  | 13655.899 | 12307.133 | NM_005935 | 1029.83   | 1020.131  |
| AL442093  | 10349.303 | 9706.68   | AL365519  | 3234.412  | 3257.531  | NM_012415 | 6752.562  | 6671.093  |
| Z36874    | 68793.711 | 85095.266 | NM_018465 | 22058.057 | 23809.285 | NM_003454 | 6037.886  | 7684.341  |
| AK095477  | 8543.056  | 10261.693 | Z36845    | 4265.156  | 4225.435  | NM_006885 | 5035.703  | 4126.115  |
| AK023326  | 6764.035  | 7279.155  | M73792    | 3305.113  | 3689.56   | M25077    | 16616.318 | 15824.195 |
| AK022462  | 13809.943 | 15560.107 | NM_016127 | 32059.443 | 36858.16  | NM_018702 | 13161.753 | 14656.453 |
| NM_020530 | 2549.793  | 2719.109  | AF085939  | 3255.232  | 3940.06   | M62843    | 2321.966  | 2308.409  |
| AK022418  | 7006.162  | 7731.762  | NM_006792 | 54114.211 | 53944.047 | U96131    | 3531.107  | 3426.014  |
| AF279777  | 3095.822  | 2668.127  | NM_005876 | 66050.453 | 69419.141 | NM_001519 | 870.83    | 750.58    |
| AK021748  | 8294.422  | 6721.925  | AF039697  | 2551.935  | 1613.813  | NM_004593 | 9331.656  | 9661.92   |
| AK021771  | 1153.001  | 966.539   | NM_004934 | 2711.328  | 3152.491  | NM_005778 | 45732.711 | 50119.855 |
| AL137257  | 12944.836 | 14244.99  | AF284436  | 4874.232  | 4891.747  | NM_001032 | 63442.875 | 68138.289 |
| AF086503  | 2257.046  | 3312.369  | NM_004445 | 2781.657  | 3000.514  | NM_018084 | 57337.52  | 55185.477 |

|           |           |           |           |           |           |           |           |           |
|-----------|-----------|-----------|-----------|-----------|-----------|-----------|-----------|-----------|
| D16906    | 979.489   | 1133.28   | U39657    | 31142.963 | 36647.961 | AF164797  | 65690.898 | 61580.715 |
| AL079309  | 14146.175 | 15746.832 | NM_016340 | 9871.636  | 13173.647 | NM_017840 | 62978.223 | 56881.488 |
| AK022335  | 2464.888  | 2113.846  | NM_018373 | 2280.361  | 2838.307  | AK001052  | 64576.172 | 66153.008 |
| AL110280  | 3699.376  | 4052.517  | NM_006449 | 9300.738  | 10643.639 | NM_001415 | 66317.883 | 58526.508 |
| AK024235  | 961.721   | 847.989   | BF216030  | 17919.615 | 18583.266 | NM_004564 | 28882.906 | 28352.797 |
| AF014457  | 610.858   | 958.039   | AF131839  | 700.213   | 816.447   | NM_000965 | 65521.285 | 63668.168 |
| NM_017455 | 3075.446  | 2793.29   | NM_002757 | 2102.298  | 2643.973  | NM_003270 | 3783.679  | 3879.936  |
| AK024203  | 553.188   | 918.642   | NM_003684 | 6906.094  | 8292.669  | NM_016591 | 2501.089  | 2064.087  |
| AF086196  | 2558.974  | 2556.767  | AB040883  | 4689.669  | 4895.841  | AL157437  | 54468.504 | 53355.637 |
| NM_005542 | 70240.625 | 65536.547 | NM_018639 | 4816.876  | 5141.833  | NM_006005 | 10587.952 | 12072.04  |
| NM_000267 | 11687.581 | 14588.375 | AF264628  | 1387.195  | 1742.286  | NM_002625 | 62457.77  | 58788.047 |
| NM_016603 | 14326.706 | 13974.818 | NM_001715 | 25084.23  | 30083.912 | NM_014364 | 14690.19  | 16567.645 |
| NM_004395 | 19005.766 | 20533.752 | NM_004395 | 11219.481 | 12000.671 | NM_001685 | 63906.891 | 62631.59  |
| NM_016181 | 1301.605  | 1590.596  | NM_002663 | 2811.28   | 3236.22   | NM_006067 | 61676.227 | 54298.527 |
| NM_014965 | 28249.553 | 33316.102 | NM_006094 | 6804.832  | 6333.689  | NM_000284 | 18587.639 | 17878.918 |
| NM_014962 | 1378.181  | 1331.871  | AF080158  | 3330.868  | 4057.909  | NM_004813 | 18103.982 | 20292.029 |
| D87684    | 16220.442 | 15928.601 | AB037794  | 6781.748  | 7682.153  | AK023008  | 6128.703  | 5824.66   |
| NM_001585 | 946.507   | 878.811   | NM_014175 | 53491.992 | 66141.102 | NM_004685 | 24634.291 | 26885.215 |
| NM_006317 | 69485.945 | 78340.242 | NM_001251 | 62886.586 | 70240.867 | NM_006025 | 23919.463 | 27606.373 |
| NM_001215 | 17147.115 | 21197.082 | NM_004789 | 2250.82   | 2466.699  | BG339855  | 3267.152  | 2844.98   |
| NM_000730 | 45628.535 | 40039.211 | AB011112  | 31470.916 | 32927.438 | AB040956  | 11472.85  | 12792.363 |
| M24751    | 1445.003  | 1360.247  | NM_018669 | 17922.609 | 19622.379 | NM_016587 | 7204.371  | 7478.711  |
| AK026569  | 68854.164 | 74846.32  | NM_002623 | 10462.118 | 13168.726 | NM_003515 | 9070.23   | 10666.541 |
| AL049974  | 5599.1    | 6127.791  | NM_018844 | 15129.869 | 16519.145 | NM_017953 | 9064.292  | 7713.569  |
| AK022953  | 1360.198  | 1411.656  | AF279778  | 8268.661  | 8587.419  | NM_006914 | 2639.677  | 2482.015  |
| AF009319  | 5758.731  | 5837.83   | NM_015477 | 11456.294 | 12271.077 | NM_003445 | 61926.063 | 56270.191 |
| AL365519  | 2884.761  | 2681.838  | AK023212  | 7905.173  | 8701.442  | NM_001485 | 32700.762 | 36854.789 |
| NM_018465 | 19189.74  | 19057.486 | AL353943  | 4161.006  | 5853.802  | NM_002702 | 4274.058  | 3830.536  |
| Z36845    | 4249.292  | 4014.389  | BE568801  | 13361.88  | 14777.538 | NM_001985 | 39230.973 | 45836.883 |
| M73792    | 2593.368  | 2704.702  | AB002336  | 3045.475  | 3021.577  | NM_002653 | 43292.469 | 50214.094 |
| NM_016127 | 21198.266 | 20813.486 | NM_003127 | 3021.524  | 3665.712  | NM_005604 | 5694.455  | 5434.585  |
| AF085939  | 4026.553  | 4091.239  | NM_013285 | 25249.156 | 29863.199 | S69023    | 5524.392  | 5823.816  |
| NM_006792 | 50931.566 | 51904.457 | NM_006082 | 66737.766 | 63528.543 | NM_003474 | 5209.392  | 5842.403  |
| NM_004934 | 4084.912  | 4437.947  | NM_006633 | 1681.026  | 2143.7    | NM_004625 | 23612.977 | 25741.77  |
| AF284436  | 6601.011  | 7748.503  | NM_016262 | 2707.843  | 2944.654  | NM_007175 | 62796.398 | 60439.008 |
| NM_004445 | 5384.658  | 7269.134  | AB011116  | 24146.729 | 27123.008 | NM_001305 | 5726.713  | 5646.321  |
| U39657    | 30161.969 | 39393.063 | AB037858  | 3882.45   | 4756.687  | AB046861  | 1942.1    | 2296.248  |
| NM_016340 | 7360.096  | 8203.66   | NM_005775 | 2820.195  | 2902.934  | AB028173  | 1908.041  | 1830.532  |
| NM_018373 | 1103.362  | 1085.528  | NM_004385 | 1740.735  | 1967.59   | NM_005940 | 2358.163  | 2266.298  |
| NM_006449 | 7608.992  | 9148.499  | L25629    | 2972.745  | 3557.795  | AF061034  | 51755.84  | 49931.434 |
| BF216030  | 5774.844  | 6360.462  | AJ245539  | 1493.049  | 2074.681  | X03655    | 4001.249  | 3897.992  |
| AF131839  | 749.331   | 1081.718  | NM_001490 | 6358.179  | 7772.037  | BG696293  | 10928.253 | 11419.083 |
| NM_002757 | 1767.128  | 1785.748  | NM_017740 | 21804.627 | 23137.141 | AA777410  | 2171.157  | 1643.127  |
| NM_003684 | 5883.857  | 6791.769  | AB033052  | 18284.025 | 20280.629 | BG113873  | 5505.172  | 6021.296  |
| NM_005657 | 4752.199  | 4334.896  | NM_018227 | 8382.455  | 8947.564  | BC013135  | 61880.426 | 58202.34  |
| NM_017671 | 1536.978  | 1528.632  | AF050199  | 2561.9    | 2473.485  | AI625002  | 1744.278  | 1701.258  |
| AB040883  | 1347.306  | 1381.095  | NM_003340 | 53685.113 | 52635.262 | H07899    | 1514.647  | 1681.734  |
| NM_018639 | 973.815   | 1135.688  | U46752    | 9726.677  | 9954.054  | X52479    | 9066.638  | 9634.615  |
| AF264628  | 1259.194  | 1273.768  | NM_002794 | 66161.359 | 60680.289 | BC013200  | 7584.076  | 7157.468  |
| NM_001715 | 16480.998 | 16650.666 | BF244646  | 65711.836 | 61559.59  | AW408832  | 6891.625  | 6276.466  |
| NM_004395 | 3093.842  | 2910.19   | AK024030  | 16992.43  | 18553.396 | AA486364  | 57427.238 | 48363.602 |
| NM_002663 | 1951.571  | 2147.292  | AF275808  | 5477.399  | 5133.93   | M15476    | 64955.84  | 61233.445 |
| NM_006094 | 8455.484  | 5803.671  | AK024038  | 13502.769 | 15088.498 | U57456    | 8676.062  | 7742.384  |

|           |           |           |           |           |           |           |           |           |
|-----------|-----------|-----------|-----------|-----------|-----------|-----------|-----------|-----------|
| AF080158  | 4217.424  | 3733.239  | NM_005803 | 28500.092 | 33145.43  | N70057    | 44614     | 47965.234 |
| AB037794  | 5510.088  | 5867.609  | NM_015515 | 18537.656 | 18857.223 | NM_002202 | 8243.045  | 8518.547  |
| NM_006605 | 1746.333  | 1405.213  | AK001579  | 54263.234 | 53499.699 | AL137938  | 23925.52  | 26390.297 |
| NM_018669 | 18335.584 | 20834.076 | NM_002670 | 23873.229 | 26963.938 | AF228704  | 9765.364  | 10430.659 |
| NM_002623 | 9025.808  | 8979.468  | AF163302  | 6585.286  | 6398.85   | NM_004215 | 20106.795 | 21733.406 |
| NM_018844 | 14105.604 | 14279.651 | NM_006408 | 6942.119  | 7116.397  | AK022746  | 8034.294  | 8053.762  |
| AF279778  | 6954.732  | 7227.307  | NM_002419 | 12902.889 | 13658.41  | NM_006568 | 13197.399 | 12672.082 |
| NM_015477 | 9084.516  | 9103.151  | NM_005935 | 1492.731  | 1671.847  | NM_006440 | 23632.047 | 25687.578 |
| AK023212  | 3908.045  | 4076.619  | NM_012415 | 7510.857  | 8245.795  | NM_004847 | 62043.379 | 57533.383 |
| AL353943  | 1919.065  | 2366.565  | NM_003924 | 1081.466  | 1553.843  | NM_002255 | 9859.41   | 10006.415 |
| BE568801  | 6107.229  | 7434.277  | NM_003454 | 8105.468  | 9418.464  | AF151889  | 19974.533 | 17964.891 |
| AB002336  | 1268.799  | 823.665   | NM_003418 | 64821.125 | 77619.953 | BC034483  | 3479.247  | 2746.313  |
| NM_003127 | 3124.469  | 2998.298  | NM_017908 | 6225.031  | 6928.763  | NM_003620 | 9821.173  | 9662.095  |
| NM_013286 | 14162.205 | 14405.245 | NM_006885 | 11464.864 | 9797.883  | NM_013288 | 2275.018  | 2215.137  |
| NM_006082 | 69539.758 | 66331.602 | M25077    | 21086.336 | 21460.564 | AA586375  | 8233.61   | 7985.811  |
| NM_006633 | 917.198   | 868.285   | NM_018702 | 17253.049 | 19194.361 | BE910339  | 64150.242 | 55936.805 |
| NM_016262 | 1506.682  | 1789.816  | M62843    | 2917.487  | 3516.17   | U89715    | 12109.283 | 13032.582 |
| AB011116  | 25498.746 | 23604.855 | U96131    | 6916.476  | 6547.538  | AF254067  | 38193.129 | 40384.809 |
| AB037858  | 3270.891  | 3253.776  | NM_001519 | 1316.977  | 1188.394  | NM_016363 | 31335.846 | 34694.664 |
| NM_000173 | 720.098   | 781.456   | NM_004593 | 9310.192  | 12626.904 | AY009090  | 29365.391 | 31632.838 |
| NM_005775 | 3137.812  | 2647.23   | NM_005778 | 63181.277 | 56224.059 | NM_005592 | 2316.575  | 2359.75   |
| NM_004385 | 1015.896  | 870.457   | NM_001032 | 65018.094 | 63514.051 | U81380    | 1303.991  | 491.804   |
| L25629    | 3291.344  | 3079.834  | NM_018084 | 62597.164 | 59640.176 | NM_002303 | 1950.918  | 1365.851  |
| AJ245539  | 2639.576  | 3218.108  | NM_017840 | 64601.695 | 62372.996 | NM_016509 | 6025.908  | 5591.537  |
| NM_001490 | 7126.097  | 8311.856  | AK001052  | 64946.082 | 62210.922 | NM_012296 | 5563.844  | 5869.647  |
| AB033052  | 12103.078 | 12568.758 | NM_001415 | 65412.859 | 63160.363 | NM_004536 | 14782.476 | 12129.816 |
| NM_018227 | 6836.229  | 7477.389  | NM_004564 | 43688.457 | 39437.355 | NM_014672 | 5891.239  | 5235.789  |
| AF050199  | 2300.939  | 2028.618  | NM_000968 | 66325.766 | 63758.012 | NM_016454 | 26461.988 | 30427.506 |
| NM_003340 | 46200.652 | 49360.004 | NM_003270 | 5129.394  | 6039.038  | NM_003469 | 10685.261 | 11915.875 |
| U46752    | 3930.688  | 3826.732  | NM_016591 | 1836.23   | 1264.514  | NM_016433 | 2351.45   | 1889.403  |
| NM_002794 | 65405.266 | 61028.777 | AL157437  | 37016.035 | 39731.813 | NM_000859 | 4506.601  | 5071.239  |
| BF244646  | 51176.805 | 50703.43  | NM_006005 | 17455.512 | 21392.125 | NM_005480 | 5550.297  | 5045.298  |
| AK024030  | 14958.733 | 15030.55  | NM_002629 | 61311.73  | 84033.953 | AB034694  | 1692.065  | 1994.824  |
| AF275808  | 2868.302  | 2627.814  | NM_014364 | 21857.861 | 24223.674 | NM_003273 | 6082.199  | 5784.479  |
| AK024038  | 11318.803 | 11256.786 | NM_001685 | 64904.391 | 76067.711 | AK026404  | 7891.537  | 8301.34   |
| NM_002055 | 4396.792  | 5069.819  | NM_006067 | 61410.32  | 61321.805 | NM_017948 | 18814.736 | 18269.586 |
| NM_005803 | 17188.82  | 16490.168 | NM_000284 | 39083.895 | 43734.77  | NM_006744 | 3503.443  | 3784.847  |
| NM_015515 | 12423.648 | 10653.137 | NM_004813 | 28873.361 | 37326.418 | NM_018231 | 29575.006 | 33568.012 |
| AK001579  | 18563.844 | 16550.168 | AK023008  | 8148.129  | 8378.864  | NM_005833 | 6563.131  | 7501.75   |
| NM_002670 | 17186.582 | 11191.628 | NM_004689 | 31585.578 | 33389.184 | NM_003100 | 19832.193 | 21885.002 |
| AF163302  | 3872.779  | 3170.208  | NM_006026 | 38984.301 | 42635.66  | NM_006768 | 14039.395 | 11523.717 |
| NM_006408 | 2137.924  | 1979.877  | BG339855  | 5643.944  | 4753.841  | NM_013322 | 15153.609 | 11959.493 |
| NM_002419 | 10533.948 | 8571.016  | AB040956  | 15504.493 | 15841.607 | AB020627  | 8274.934  | 8059.648  |
| NM_005935 | 1252.523  | 970.197   | NM_016587 | 7303.762  | 8295.587  | NM_002003 | 6593.205  | 6226.656  |
| NM_012415 | 6041.839  | 5963.359  | NM_003516 | 10643.518 | 11039.886 | NM_005387 | 19408.234 | 20022.775 |
| NM_003924 | 2129.847  | 2207.226  | NM_017953 | 10634.347 | 11128.579 | NM_006846 | 1637.131  | 1587.168  |
| NM_003454 | 7824.007  | 9058.537  | BC000124  | 8314.519  | 9784.86   | NM_018288 | 8760.874  | 8165.737  |
| NM_003418 | 69382.797 | 72312.906 | Z11773    | 6121.394  | 6827.327  | AB018260  | 7853.228  | 8536.607  |
| NM_017908 | 4496.478  | 4897.312  | NM_003446 | 63972.152 | 64751.32  | NM_015985 | 1918.212  | 2313.952  |
| NM_006885 | 11384.502 | 7814.652  | NM_001485 | 45373.223 | 45907.027 | NM_014766 | 8241.197  | 8471.304  |
| M25077    | 13558.271 | 12212.063 | NM_002702 | 3960.415  | 3168.193  | NM_016627 | 27303.184 | 30226.805 |
| NM_018702 | 22901.09  | 24143.551 | NM_001989 | 54399.617 | 55353.105 | NM_016121 | 6076.264  | 6415.695  |
| M62843    | 3323.323  | 3592.059  | NM_002653 | 52741.496 | 53472.563 | NM_014768 | 13424.792 | 12993.539 |

|           |           |           |           |           |           |           |           |           |
|-----------|-----------|-----------|-----------|-----------|-----------|-----------|-----------|-----------|
| U96131    | 6485.998  | 5418.049  | NM_005604 | 4484.403  | 4600.895  | NM_00634C | 63225.781 | 53798.402 |
| NM_00151C | 1916.869  | 1771.629  | S69023    | 6430.345  | 6582.077  | AK026264  | 58496.793 | 53736.188 |
| NM_00459C | 11048.932 | 10496.368 | NM_003474 | 7669.567  | 8780.619  | AF222927  | 4110.73   | 4072.957  |
| NM_00577E | 56155     | 50295.953 | NM_00462E | 23210.176 | 27306.037 | NM_01434E | 14699.27  | 14402.935 |
| NM_00103C | 65582.164 | 66444.016 | NM_00717E | 62860.148 | 71627.859 | NM_018217 | 9241.246  | 9248.773  |
| NM_018084 | 60529.449 | 55779.227 | NM_00130C | 9012.147  | 10334.237 | AF241831  | 8614.385  | 8578.358  |
| AF164797  | 66924.828 | 63036.762 | AB046861  | 2924.647  | 3127.931  | NM_00303C | 5227.501  | 5338.772  |
| NM_01784C | 63732.555 | 54560.813 | AB028173  | 1848.844  | 2125.76   | NM_00273C | 6515.252  | 5892.696  |
| AK001052  | 66269.016 | 58049.078 | NM_00594C | 2899.614  | 3947.487  | M31008    | 2484.453  | 2185.803  |
| NM_00141E | 66495.5   | 57911.238 | AF061034  | 61890.723 | 58068.383 | NM_00628E | 2046.295  | 2009.871  |
| NM_004564 | 44688.074 | 36335.148 | X03655    | 4697.293  | 4117.632  | NM_016224 | 14434.414 | 12787.596 |
| NM_00096E | 68031.664 | 61660.102 | BG696293  | 10869.086 | 10169.549 | NM_00717E | 58878.395 | 52538.055 |
| NM_00327C | 8493.696  | 6728.788  | AA777410  | 2252.218  | 2042.901  | NM_00130C | 5753.305  | 5901.592  |
| NM_016591 | 1720.102  | 1183.827  | BG113873  | 6474.803  | 6870.552  | AB046861  | 2434.331  | 2655.238  |
| AL157437  | 22038.666 | 18070.717 | BC013135  | 63000.527 | 72735.484 | AB028173  | 1656.182  | 1462.591  |
| NM_00600E | 17735.191 | 15830.771 | AI625002  | 1610.345  | 1645.706  | NM_00594C | 2417.2    | 2716.731  |
| NM_00262E | 63035.395 | 72097.117 | H07899    | 1673.91   | 1414.75   | AF061034  | 53296.961 | 51245.871 |
| NM_014364 | 8233.551  | 7966.048  | AA281652  | 21730.91  | 21559.133 | X03655    | 3781.386  | 3435.118  |
| NM_00168E | 64314.332 | 61324.707 | U31905    | 13170.382 | 14700.113 | BG696293  | 11349.832 | 11219.911 |
| NM_006067 | 64894.039 | 57160.75  | X52479    | 10446.545 | 10944.175 | AA777410  | 2066.481  | 1498.863  |
| NM_000284 | 34173.832 | 32814.566 | BC013200  | 12507.625 | 15035.939 | BG113873  | 6029.805  | 5306.002  |
| NM_00481C | 26397.332 | 23949.451 | AW408832  | 8896.872  | 9248.176  | BC013135  | 64622.605 | 63329.391 |
| AK023008  | 6324.509  | 4797.169  | AA486364  | 60822.852 | 53274.945 | AI625002  | 3448.69   | 3396.679  |
| NM_00468E | 27252.309 | 23881.545 | M15476    | 64849.512 | 60641.313 | H07899    | 1357.133  | 1541.04   |
| NM_00602E | 15984.871 | 14508.79  | U57456    | 6184.36   | 6018.458  | AA281652  | 20990.354 | 18873.17  |
| BG339855  | 3904.546  | 2907.43   | N70057    | 37442.379 | 41197.031 | U31905    | 13482.147 | 13810.185 |
| AB040956  | 11526.153 | 10527.313 | NM_002202 | 15428.261 | 15684.157 | X52479    | 9911.454  | 9307.704  |
| NM_016587 | 6962.464  | 5862.833  | AL137938  | 29416.443 | 32960.109 | BC013200  | 7705.257  | 7094.158  |
| NM_00351E | 11487.874 | 12326.526 | AF228704  | 13760.834 | 15225.449 | AW408832  | 7043.297  | 7562.48   |
| NM_01795C | 7325.691  | 6912.042  | NM_00421E | 23014.33  | 27439.303 | AA486364  | 60886.008 | 51837.734 |
| BC000124  | 2765.821  | 3072.926  | AK022746  | 10549.743 | 11746.305 | M15476    | 65838.25  | 57326.629 |
| Z11773    | 4798.246  | 5090.46   | NM_00656E | 20457.172 | 21657.932 | U57456    | 7051.393  | 5789.466  |
| NM_006914 | 1410.143  | 1091.494  | NM_00644C | 26204.6   | 29557.547 | N70057    | 47193.27  | 47155.215 |
| NM_00344E | 66220.258 | 52890.254 | NM_004847 | 61833.398 | 62224.043 | AK000124  | 4909.596  | 4838.253  |
| NM_00148E | 8502.375  | 8190.021  | NM_00225E | 13904.51  | 13523.913 | NM_00448C | 11578.009 | 12010.42  |
| NM_002702 | 3776.579  | 3327.603  | AF151889  | 21996.15  | 20932.689 | NM_014914 | 9933.846  | 9473.269  |
| NM_00198E | 29060.873 | 21928.309 | BC034483  | 2486.022  | 2475.811  | NM_00421E | 19879.809 | 20379.066 |
| NM_00265C | 48355.273 | 51755.602 | NM_00362C | 9417.469  | 9790.018  | AK022746  | 9124.306  | 8489.127  |
| NM_005604 | 3488.32   | 3066.495  | NM_01328E | 2045.364  | 2350.708  | NM_00656E | 15944.948 | 15996.516 |
| S69023    | 10281.75  | 9089.251  | AA586375  | 8331.748  | 8134.646  | NM_00644C | 24058.838 | 26507.578 |
| NM_003474 | 7118.487  | 6273.882  | BE910339  | 62784.359 | 52115.566 | NM_004847 | 62723.957 | 57893.027 |
| NM_00462E | 8274.763  | 8591.673  | U89715    | 11849.238 | 15295.461 | NM_00225E | 12769.758 | 12892.215 |
| NM_00717E | 24389.213 | 24909.943 | AF254067  | 38988.375 | 45778.625 | AF151889  | 20768.385 | 20007.367 |
| NM_00130C | 2381.799  | 2382.878  | NM_01636C | 26286.91  | 28169.199 | BC034483  | 2666.232  | 2438.461  |
| AB046861  | 3638.634  | 3658.647  | AY009090  | 30072.672 | 33933.977 | NM_00362C | 7390.071  | 8224.46   |
| AB028173  | 1662.964  | 1435.692  | NM_00559C | 1888.925  | 4496.808  | NM_01328E | 2733.958  | 2334.308  |
| NM_00594C | 4233.084  | 3355.352  | U81380    | 1356.413  | 821.293   | AA586375  | 8351.521  | 8335.948  |
| AF061034  | 21864.105 | 24294.455 | NM_00230C | 1852.066  | 2205.921  | BE910339  | 58000.586 | 53110.801 |
| X03655    | 1960.999  | 1875.484  | NM_01650E | 3579.521  | 4030.135  | U89715    | 12464.048 | 12589.92  |
| BG696293  | 5992.894  | 5617.253  | NM_01229E | 3662.023  | 3523.61   | AF254067  | 38745.254 | 43114.43  |
| AA777410  | 2593.763  | 1989.696  | NM_00453E | 11138.819 | 11880.599 | NM_01636C | 26992.547 | 24352.818 |
| BG113873  | 3377.37   | 3166.72   | NM_01467C | 6128.913  | 5689.948  | AY009090  | 27174.621 | 25515.152 |
| BC013135  | 63429.266 | 56071.258 | NM_005227 | 14644.533 | 16352.12  | NM_00559C | 2084.352  | 2421.637  |

|           |           |           |           |           |           |           |           |           |
|-----------|-----------|-----------|-----------|-----------|-----------|-----------|-----------|-----------|
| AI625002  | 1583.968  | 1611.142  | NM_000286 | 37437.813 | 39651.543 | U81380    | 1331.717  | 837.777   |
| H07899    | 1666.056  | 2023.617  | NM_016454 | 31982.16  | 39178.379 | NM_002303 | 2621.176  | 2527.157  |
| AA281652  | 17288.271 | 15469.915 | NM_003469 | 12056.239 | 14299.202 | NM_016509 | 7155.08   | 6933.016  |
| U31905    | 2497.69   | 2669.23   | NM_016433 | 4378.925  | 4582.357  | NM_012296 | 4703.94   | 5266.056  |
| X52479    | 7981.786  | 7945.353  | NM_000859 | 7468.705  | 9750.04   | NM_004536 | 15752.396 | 13868.696 |
| BC013200  | 10466.513 | 8739.586  | NM_005480 | 8945.429  | 8369.193  | NM_014672 | 6436.691  | 6009.939  |
| AW408832  | 3374.164  | 2739.996  | AB034694  | 3291.427  | 3776.636  | NM_003474 | 5792.408  | 4684.89   |
| AA486364  | 25814.076 | 23292.816 | NM_003273 | 7246.415  | 7509.282  | NM_004625 | 24900.162 | 23639.971 |
| M15476    | 37305.598 | 37559.262 | AK026404  | 10853.789 | 12081.945 | NM_016454 | 26811.139 | 26084.01  |
| U57456    | 5944.419  | 4474.121  | NM_017948 | 17524.09  | 20124.65  | NM_003469 | 19858.393 | 19474.852 |
| N70057    | 25271.828 | 23064.564 | NM_006744 | 3548.996  | 3879.598  | NM_016433 | 3269.399  | 3377.441  |
| NM_002202 | 21650.033 | 20816.768 | NM_018231 | 16407.24  | 17059.49  | NM_000859 | 4635.828  | 4084.632  |
| AL137938  | 32763.744 | 43141.012 | AF202889  | 31273.928 | 21444.385 | NM_005480 | 6369.258  | 5812.469  |
| AF228704  | 17581.172 | 18434.742 | NM_005833 | 11565.205 | 12370.771 | AB034694  | 1915.643  | 1652.468  |
| NM_004215 | 25362.467 | 28132.162 | NM_003100 | 29367.473 | 33031.102 | NM_003273 | 5939.668  | 5619.116  |
| AK022746  | 14714.713 | 12669.264 | NM_006768 | 16519.781 | 17482.953 | AK026404  | 7676.261  | 7562.068  |
| NM_006568 | 25145.629 | 24079.18  | NM_013322 | 16615.006 | 16725.08  | NM_017948 | 16367.627 | 17128.092 |
| NM_006440 | 16064.541 | 14952.015 | AB020627  | 9524.777  | 10983.041 | NM_006744 | 4720.462  | 4599.559  |
| NM_004847 | 31410.9   | 35753.723 | NM_002003 | 5363.664  | 5067.666  | NM_018231 | 28189.822 | 26321.082 |
| NM_002255 | 2576.931  | 2124.488  | NM_005387 | 18607.717 | 20639.252 | NM_005833 | 9544.279  | 8343.245  |
| AF151889  | 14415.78  | 12640.154 | NM_006846 | 1510.495  | 1402.163  | NM_003100 | 22042.039 | 21423.42  |
| BC034483  | 1660.761  | 1513.647  | NM_018289 | 9812.107  | 9243.194  | NM_006768 | 12927.477 | 13015.634 |
| NM_003620 | 4656.665  | 4285.565  | AB018260  | 11277.886 | 11001.739 | NM_013322 | 13622.834 | 13392.455 |
| NM_013289 | 1543.086  | 1655.353  | NM_015985 | 1434.75   | 1235.738  | AB020627  | 7427.398  | 6874.52   |
| AA586375  | 2850.345  | 3168.371  | NM_014766 | 11604.544 | 12583.029 | NM_002003 | 6657.593  | 5447.424  |
| BE910339  | 31135.156 | 27944.322 | NM_016627 | 37190.348 | 41863.539 | NM_005387 | 22130.689 | 19904.883 |
| U89715    | 11732.997 | 13711.093 | NM_016121 | 6833.286  | 7188.064  | NM_006846 | 1471.219  | 820.075   |
| AF254067  | 34431.012 | 33016.977 | NM_014769 | 14883.262 | 14946.448 | AL137938  | 25654.66  | 23505.27  |
| NM_016363 | 14246.486 | 13661.327 | NM_006349 | 63908.34  | 59274.496 | AF228704  | 9955.642  | 9122.489  |
| AY009090  | 24157.383 | 20209.559 | AK026264  | 52925.996 | 50234.344 | NM_018289 | 5393.996  | 4762.272  |
| NM_005592 | 1568.519  | 1203.936  | AF222927  | 4963.257  | 4537.964  | AB018260  | 9016.619  | 10040.781 |
| U81380    | 997.968   | 333.231   | NM_014345 | 17075.625 | 16599.092 | NM_014766 | 9802.284  | 9024.69   |
| NM_002303 | 2013.099  | 1651.37   | NM_018217 | 10187.637 | 9509.684  | NM_016627 | 26620.225 | 30874.707 |
| NM_016509 | 2745.833  | 2320.851  | AF241831  | 10635.084 | 9700.518  | NM_016121 | 5681.981  | 6948.305  |
| NM_012296 | 2080.833  | 1728.085  | NM_003033 | 6759.042  | 8124.554  | NM_014766 | 10713.209 | 10859.357 |
| NM_004536 | 6221.336  | 3928.147  | NM_002733 | 9771.6    | 9246.083  | NM_006349 | 59830.527 | 57740.191 |
| NM_014672 | 5673.441  | 3977.982  | M31008    | 3959.864  | 3320.279  | AK026264  | 56112.063 | 55204.27  |
| NM_005227 | 20056.432 | 20074.334 | NM_006288 | 2954.633  | 2677.812  | AF222927  | 4376.696  | 5130.914  |
| NM_000286 | 38747.055 | 41290.914 | NM_016224 | 10217.174 | 9951.746  | NM_014345 | 13996.367 | 12467.623 |
| NM_016454 | 34773.434 | 39251.801 | NM_007179 | 64492.23  | 75477.367 | NM_018217 | 9181.537  | 8895.323  |
| NM_003469 | 10426.867 | 9396.403  | NM_001306 | 8338.017  | 8553.067  | AF241831  | 9466.395  | 9893.966  |
| NM_016433 | 5062.257  | 3550.608  | AB046861  | 2645.481  | 3703.748  | NM_003033 | 5124.164  | 5955.299  |
| NM_000859 | 9818.255  | 7397.288  | AB028173  | 2256.226  | 2004.248  | NM_002733 | 6671.595  | 6505.185  |
| NM_005480 | 8941.278  | 4714.414  | NM_005940 | 3395.533  | 3066.941  | M31008    | 2669.916  | 1723.486  |
| AB034694  | 3403.689  | 2438.624  | AF061034  | 60184.016 | 62498.09  | NM_006288 | 1703.131  | 1515.745  |
| NM_003273 | 8153.535  | 5504.224  | X03655    | 5819.913  | 6052.067  | NM_016224 | 13942.844 | 12849.786 |
| AK026404  | 11732.836 | 9559.437  | BG696293  | 10503.247 | 10861.653 | NM_005227 | 10215.632 | 9368.365  |
| NM_017948 | 15735.957 | 13104.033 | AA777410  | 2700.017  | 2247.734  | NM_000286 | 32532.049 | 23539.957 |
| NM_006744 | 3119.236  | 2813.443  | BG113873  | 6052.784  | 6110.866  | AB046861  | 3590.333  | 3770.056  |
| NM_018231 | 3790.596  | 3349.899  | BC013135  | 65009.859 | 70621.141 | AB028173  | 1947.692  | 2014.664  |
| NM_005833 | 11084.06  | 9711.894  | AI625002  | 1943.695  | 1567.435  | X03655    | 4340.426  | 4277.879  |
| NM_003100 | 15417.13  | 14316.496 | H07899    | 1849.906  | 1639.815  | BG696293  | 12002.986 | 12465.608 |
| NM_006768 | 10686.632 | 8637.797  | AA281652  | 21790.635 | 20154.021 | AA777410  | 3165.789  | 2396.109  |

|           |           |           |           |           |           |           |           |           |
|-----------|-----------|-----------|-----------|-----------|-----------|-----------|-----------|-----------|
| NM_013322 | 14792.586 | 13658.787 | U31905    | 15851.063 | 14540.262 | BG113873  | 5527.279  | 5462.706  |
| AB020627  | 7165.719  | 6857.388  | X52479    | 9854.295  | 9097.798  | AI625002  | 4247.771  | 2792.633  |
| NM_002003 | 2221.944  | 2008.297  | BC013200  | 10562.426 | 9510.35   | H07899    | 3292.445  | 6226.546  |
| NM_005387 | 19408.105 | 16828.35  | AW408832  | 10258.342 | 14407.444 | AA281652  | 19389.645 | 18013.09  |
| NM_006846 | 1915.886  | 1793.379  | AA486364  | 58896.41  | 55731.098 | U31905    | 12930.864 | 12618.755 |
| NM_004484 | 1072.044  | 809.098   | M15476    | 62605.086 | 67587.258 | X52479    | 11628.388 | 10585.607 |
| AK027035  | 1173.076  | 945.213   | U57456    | 9595.234  | 9306.062  | BC013200  | 7581.827  | 7193.809  |
| NM_018289 | 5583.16   | 4276.113  | N70057    | 52783.25  | 52024.434 | AW408832  | 7552.433  | 7525.836  |
| AB018260  | 11655.021 | 8946.506  | AK000124  | 6019.065  | 7105.384  | AA486364  | 59464.191 | 56530.109 |
| NM_015985 | 3206.689  | 2913.465  | NM_004480 | 10368.147 | 9741.532  | M15476    | 63602.883 | 65318.082 |
| NM_014766 | 12084.051 | 10816.107 | NM_014914 | 16088.701 | 14425.426 | U57456    | 6398.436  | 6463.149  |
| NM_016627 | 21597.102 | 20751.375 | NM_004215 | 23108.057 | 25335.213 | N70057    | 40940.926 | 46345.777 |
| NM_016121 | 6592.103  | 6569.607  | AK022746  | 10472.574 | 10341.843 | AK000124  | 4195.643  | 5175.82   |
| NM_014769 | 4956.726  | 5357.449  | NM_006568 | 18598.338 | 18209.467 | NM_004480 | 10980.332 | 10494.93  |
| NM_006349 | 60465.582 | 57202.254 | NM_006440 | 25853.242 | 23943.389 | NM_014914 | 9752.53   | 8906.977  |
| AK026264  | 20313.512 | 24235.395 | NM_004847 | 56484.012 | 58905.281 | NM_003620 | 5202.058  | 4490.718  |
| AF222927  | 3963.352  | 4415.935  | NM_002255 | 14106.786 | 13747.884 | NM_013289 | 2643.411  | 2080.223  |
| NM_014345 | 9000.601  | 9917.634  | AF151889  | 23985.906 | 24966.271 | AA586375  | 3175.235  | 2775.68   |
| NM_018217 | 8256.689  | 9176.638  | BC034483  | 2984.153  | 2738.406  | BE910339  | 35941.836 | 37782.402 |
| AF241831  | 5784.253  | 5693.365  | NM_003620 | 9063.88   | 8251.821  | NM_016363 | 26646.807 | 26802.477 |
| NM_003033 | 5490.408  | 5586.404  | NM_013289 | 2059.482  | 1582.542  | AY009090  | 23813.004 | 23656.691 |
| NM_002733 | 10334.984 | 10062.919 | AA586375  | 8555.085  | 8279.199  | U81380    | 2607.236  | 1622.282  |
| M31008    | 2731.027  | 3515.485  | BE910339  | 61014.879 | 56473.48  | NM_002303 | 4058.204  | 3162.226  |
| NM_006288 | 1809.228  | 1637.173  | U89715    | 13367.655 | 14463.84  | NM_016509 | 5089.095  | 5648.51   |
| NM_016224 | 3784.556  | 3232.124  | AF254067  | 44311.68  | 49056.59  | NM_012296 | 5652.699  | 5112.413  |
| NM_007179 | 21524.627 | 19913.285 | NM_016363 | 27731.99  | 28399.105 | AF041038  | 6274.907  | 5778.868  |
| NM_001306 | 1796.275  | 1077.456  | AY009090  | 29325.225 | 25685.324 | NM_004536 | 15293.965 | 14553.059 |
| AB046861  | 3009.521  | 3235.24   | NM_005592 | 1942.382  | 1895.505  | NM_014672 | 6624.132  | 6261.532  |
| AB028173  | 2116.441  | 2420.194  | U81380    | 1191.611  | 6032.8    | AB058719  | 9713.728  | 9219.176  |
| NM_005940 | 4571.009  | 4756.762  | NM_002303 | 2089.473  | 2291.686  | AK025935  | 10007.234 | 9832.592  |
| AF061034  | 19802.631 | 21611.518 | NM_016509 | 5467.689  | 5480.008  | AB032953  | 2167.588  | 1978.17   |
| X03655    | 1187.655  | 811.735   | NM_012296 | 5554.577  | 5741.807  | NM_016441 | 7393.075  | 8845.041  |
| BG696293  | 4695.904  | 4164.901  | NM_004536 | 19618.299 | 17501.592 | NM_006334 | 4886.472  | 5738.162  |
| BG113873  | 2760.409  | 2168.694  | NM_014672 | 7775.659  | 6779.844  | NM_003474 | 4838.042  | 5385.451  |
| BC013135  | 59564.344 | 57408.977 | NM_003474 | 6715.596  | 6016.591  | NM_004625 | 27302.701 | 25669.75  |
| AI625002  | 1485.111  | 1320.785  | NM_004625 | 20526.283 | 17790.6   | NM_007179 | 61601.535 | 59547.098 |
| H07899    | 1087.328  | 1340.324  | NM_016454 | 30664.789 | 34259.637 | NM_001306 | 7460.531  | 5801.295  |
| AA281652  | 6993.464  | 6215.039  | NM_003469 | 12247.826 | 12797.03  | NM_007163 | 2556.095  | 1246.065  |
| U31905    | 1877.09   | 1895.798  | NM_016433 | 3615.872  | 2975.359  | NM_000583 | 5923.364  | 2428.345  |
| X52479    | 5882.532  | 6360.304  | NM_000859 | 7089.74   | 6699.174  | NM_004254 | 1348.784  | 1163.844  |
| BC013200  | 6407.108  | 6088.416  | NM_005480 | 6510.266  | 4882.436  | AB046833  | 2842.736  | 2864.052  |
| AW408832  | 3163.962  | 3065.014  | AB034694  | 2851.564  | 2353.616  | NM_005833 | 8323.101  | 8142.16   |
| AA486364  | 22520.461 | 21238.338 | NM_003273 | 6635.876  | 6291.836  | NM_003100 | 14556.003 | 15228.273 |
| M15476    | 32006.662 | 32902.133 | AK026404  | 9387.313  | 9406.284  | NM_006768 | 10776.509 | 10669.402 |
| U57456    | 5082.573  | 4714.984  | NM_017948 | 17576.23  | 16708.094 | NM_013322 | 13016.811 | 13078.955 |
| N70057    | 19167.193 | 19289.734 | NM_006744 | 3754.367  | 3697.557  | AB020627  | 7062.543  | 7233.131  |
| AK000124  | 3804.94   | 5185.683  | NM_018231 | 31592.352 | 31245.367 | NM_002003 | 6109.706  | 5522.979  |
| NM_004480 | 13525.026 | 16556.299 | NM_005833 | 11026.071 | 10460.178 | NM_005387 | 17764.887 | 17218.885 |
| NM_014914 | 9764.595  | 9747.084  | NM_003100 | 29358.877 | 26796.855 | NM_006846 | 1340.687  | 1313.561  |
| NM_004215 | 19594.424 | 19212.311 | NM_006768 | 16304.349 | 13422.187 | AL137938  | 25624.572 | 24764.02  |
| AK022746  | 12143.17  | 10062.935 | NM_013322 | 17308.945 | 15637.791 | AF228704  | 11187.976 | 10898.339 |
| NM_006568 | 20569.625 | 23044.793 | AB020627  | 10095.291 | 8906.823  | NM_004215 | 21202.082 | 20656.529 |
| NM_006440 | 17017.215 | 18420.984 | NM_002003 | 8491.063  | 7139.635  | AK022746  | 8810.014  | 8232.891  |

|           |           |           |           |           |           |           |           |           |
|-----------|-----------|-----------|-----------|-----------|-----------|-----------|-----------|-----------|
| NM_004847 | 29854.105 | 36290.469 | NM_005387 | 26337.691 | 27433.225 | NM_00656E | 16532.68  | 17742.262 |
| NM_00225E | 2844.894  | 3270.671  | NM_00684E | 2856.438  | 2117.728  | NM_00644C | 25625.74  | 28814.432 |
| BC034483  | 1035.397  | 713.207   | AL137938  | 33760.281 | 29605.463 | NM_004847 | 58317.5   | 55986.156 |
| NM_00362C | 3032.414  | 3385.22   | AF228704  | 12903.919 | 10084.234 | NM_00225E | 9350.371  | 9487.018  |
| NM_01328E | 1942.6    | 2068.612  | NM_01828E | 8487.827  | 8181.199  | AF151889  | 20886.271 | 17461.762 |
| AA586375  | 2602.446  | 2647.833  | AB018260  | 10444.476 | 9943.189  | BC034483  | 3009.443  | 2128.281  |
| BE910339  | 29413.604 | 30227.531 | NM_01476E | 10429.862 | 7923.677  | NM_016224 | 3207.883  | 1341.564  |
| U89715    | 6752.504  | 7901.009  | NM_016627 | 35002.93  | 27528.209 | NM_00028E | 29692.396 | 24888.289 |
| AF254067  | 30479.279 | 34075.902 | NM_016121 | 7792.304  | 5839.962  | NM_00346E | 7979.118  | 7755.973  |
| NM_01636E | 12086.021 | 11261.757 | NM_01476E | 16822.885 | 12057.431 | NM_01643E | 3387      | 3273.01   |
| AY009090  | 21927.658 | 20009.5   | NM_00634E | 66052.711 | 59146.559 | NM_00085E | 4890.884  | 4779.25   |
| NM_00230E | 2076.947  | 1806.74   | AK026264  | 50543.039 | 46936.074 | NM_00548C | 5119.876  | 4381.511  |
| NM_01650E | 2875.55   | 2727.169  | AF222927  | 5153.529  | 4286.977  | AB034694  | 1563.391  | 1665.847  |
| NM_01229E | 1970.282  | 2223.07   | NM_01434E | 17645.604 | 14891.482 | NM_00327E | 5389.227  | 4441.064  |
| NM_00453E | 4931.265  | 4222.455  | NM_018217 | 11175.313 | 8647.147  | AK026404  | 7149.916  | 6607.121  |
| NM_01467E | 4281.491  | 4604.684  | AF241831  | 11177.277 | 8287.694  | NM_01794E | 17149.775 | 14991.173 |
| NM_003474 | 4222.808  | 4007.267  | NM_00273E | 10323.613 | 10194.378 | NM_00039E | 8976.104  | 7512.414  |
| NM_00462E | 6309.793  | 5995.667  | M31008    | 4578.504  | 4049.448  | AF208536  | 2455.346  | 2018.075  |
| NM_016454 | 28037.324 | 25194.582 | NM_00628E | 3436.033  | 3454.726  | AB037848  | 2843.161  | 2740.446  |
| NM_00346E | 9215.92   | 8948.973  | NM_016224 | 24832.957 | 21793.416 | AF082657  | 5878.423  | 4990.241  |
| NM_01643E | 5359.159  | 6098.691  | NM_005227 | 18660.342 | 17002.518 | NM_006744 | 2856.441  | 2640.98   |
| NM_00085E | 9551.857  | 10783.427 | NM_00028E | 37603.211 | 27942.15  | AF297659  | 3387.02   | 2390.434  |
| AB034694  | 4161.794  | 5523.162  | AB046861  | 3663.712  | 2585.697  | NM_018231 | 24230.686 | 18815.512 |
| AK026404  | 7554.074  | 6644.913  | AB028173  | 2660.778  | 1836.423  | NM_014914 | 3129.116  | 1176.982  |
| NM_01794E | 14327.165 | 12506.62  | NM_00594C | 3815.406  | 2931.958  | NM_01828E | 5159.584  | 4814.001  |
| NM_006744 | 3056.145  | 3764.515  | AF061034  | 60658.777 | 58704.75  | NM_01476E | 6870.974  | 6509.533  |
| NM_018231 | 2515.627  | 1871.818  | X03655    | 5328.609  | 3490.081  | NM_016627 | 25831.82  | 25689.1   |
| AF202889  | 6834.688  | 6385.091  | BG696293  | 9659.519  | 7836.31   | NM_016121 | 5277.955  | 5106.891  |
| NM_00583E | 11991.991 | 11280.337 | AA777410  | 2360.882  | 1857.539  | NM_01476E | 8508.147  | 7651.732  |
| NM_00310C | 12626.08  | 13250.525 | BG113873  | 6444.635  | 5284.341  | NM_00634E | 56662.34  | 55607.902 |
| NM_00676E | 11735.751 | 10683.204 | BC013135  | 61524.645 | 61101.207 | AK026264  | 52221.836 | 57611.434 |
| NM_01332E | 11386.495 | 11551.036 | AI625002  | 1719.827  | 1018.249  | AF222927  | 4209.167  | 3942.541  |
| AB020627  | 7173.019  | 7673.531  | H07899    | 1684.352  | 1417.761  | NM_01434E | 12670.4   | 11699.909 |
| NM_00200E | 1817.032  | 1947.994  | AA281652  | 26751.982 | 22311.217 | NM_018217 | 8005.889  | 7574.069  |
| NM_005387 | 21113.461 | 23869.764 | U31905    | 19350.58  | 17165.938 | AF241831  | 8649.408  | 7692.783  |
| AL137938  | 21964.715 | 22129.205 | X52479    | 11990.137 | 10150.322 | NM_00303E | 4720.552  | 3439.765  |
| AF228704  | 11516.697 | 11530.573 | BC013200  | 12894.83  | 10036.359 | U96113    | 4732.44   | 4111.059  |
| NM_01828E | 4186.938  | 3364.104  | AW408832  | 9831.287  | 9523.955  | NM_00273E | 5224.119  | 4150.887  |
| AB018260  | 9298.466  | 5251.75   | U57456    | 11931.482 | 11274.047 | M31008    | 2289.127  | 1547.441  |
| NM_016121 | 4292.76   | 3117.846  | N70057    | 58129.859 | 54204.676 | CY3Cy5    | 14346.376 | 184.943   |
| NM_01476E | 4663.384  | 4682.74   | AK000124  | 7438.628  | 9174.16   | U93051    | 40198.953 | 45663.602 |
| NM_00634E | 50771.5   | 50725.828 | NM_00448C | 17586.223 | 18587.867 | AF086409  | 1147.456  | 1327.079  |
| AK026264  | 17187.867 | 19456.275 | NM_014914 | 21831.504 | 19150.412 | AK024268  | 4529.656  | 4754.471  |
| AF222927  | 2678.654  | 3559.138  | NM_00362C | 10113.812 | 8729.344  | AF086295  | 1965.469  | 2737.684  |
| NM_01434E | 11178.114 | 11484.008 | NM_01328E | 2504.419  | 2631.046  | AF086344  | 6687.145  | 9554.942  |
| NM_018217 | 7866.348  | 8448.909  | AA586375  | 10422.086 | 9301.347  | AF086424  | 3019.965  | 3910.906  |
| AF241831  | 6714.233  | 7703.808  | BE910339  | 52286.23  | 56695.773 | AL110130  | 1255.276  | 1409.761  |
| NM_00303E | 3677.776  | 4106.015  | U89715    | 13835.155 | 16626.58  | AF052116  | 1601.008  | 1986.436  |
| NM_00273E | 8701.358  | 9259.557  | AF254067  | 51399.973 | 52591.441 | NM_018087 | 12064.07  | 13074.126 |
| M31008    | 2158.157  | 2519.858  | NM_01636E | 34664.039 | 37974.242 | AL360260  | 1852.93   | 2094.465  |
| NM_00628E | 1952.6    | 2117.37   | AY009090  | 35281.824 | 34867.848 | AK023647  | 2704.078  | 3223.008  |
| NM_016224 | 5182.085  | 5033.148  | NM_00559E | 2502.52   | 2106.601  | AL096749  | 51671.383 | 52265.48  |
| NM_005227 | 13080.167 | 12928.543 | U81380    | 1597.637  | 1119.32   | AK023620  | 6619.924  | 6891.831  |



|           |           |           |           |           |           |           |           |           |
|-----------|-----------|-----------|-----------|-----------|-----------|-----------|-----------|-----------|
| NM_000286 | 29892.113 | 25878.639 | NM_002303 | 2239.529  | 2275.365  | AF086189  | 10274.502 | 10392.937 |
| AB046861  | 1597.878  | 1548.033  | NM_016509 | 5349.943  | 5497.94   | AL050055  | 9231.419  | 10448.279 |
| AB028173  | 1358.954  | 853.574   | NM_012296 | 5884.365  | 5992.416  | U93051    | 28750.625 | 32560.691 |
| BG113873  | 1875.286  | 883.448   | AF041038  | 6283.059  | 6125.907  | SR2       | 67652.719 | 57837.141 |
| BC013135  | 52308.227 | 52531.66  | NM_004536 | 21342.498 | 18244.438 | SR4       | 25866.422 | 40653.777 |
| AI625002  | 1155.118  | 983.768   | NM_014672 | 10443.95  | 8760.608  | SR6       | 4233.298  | 5950.045  |
| H07899    | 1344.943  | 1161.359  | AB032953  | 2689.564  | 2462.807  | SR8       | 13596.483 | 35650.531 |
| AA281652  | 15727.219 | 16075.57  | NM_016441 | 9198.411  | 8052.726  | SR10      | 46038.527 | 27478.814 |
| U31905    | 1898.951  | 2069.247  | NM_006334 | 3937.462  | 3216.132  | CY3Cy5    | 12233.164 | 89.827    |
| X52479    | 4832.804  | 5028.61   | NM_003474 | 8432.862  | 5793.256  | AL359931  | 6823.957  | 7932.07   |
| BC013200  | 7548.436  | 7441.854  | NM_004625 | 24191.102 | 16393.736 | AK000954  | 7294.254  | 6937.928  |
| AW408832  | 2737.218  | 2597.524  | NM_007179 | 59321.914 | 58550.609 | AF086099  | 3266.56   | 3869.43   |
| AA486364  | 20952.686 | 21221.576 | NM_001306 | 10740.384 | 7578.343  | AK021922  | 1392.515  | 1538.284  |
| M15476    | 29079.813 | 26297.973 | NM_007163 | 3840.079  | 4016.376  | AK025800  | 15166.911 | 18212.633 |
| U57456    | 5255.124  | 5325.468  | NM_000583 | 33165.063 | 35103.539 | AK022333  | 4794.718  | 5158.351  |
| N70057    | 20033.098 | 18400.658 | NM_004254 | 8784.394  | 8779.005  | AL137407  | 11680.374 | 13502.983 |
| AK000124  | 4199.471  | 6070.149  | AB046833  | 2598.787  | 2360.55   | AF085839  | 1300.152  | 1452.301  |
| NM_004480 | 9901.706  | 11357.549 | AY007135  | 60519.414 | 58811.523 | NM_018178 | 5366.396  | 5885.073  |
| NM_014914 | 10747.346 | 12323.496 | AF202889  | 49628.281 | 47072.445 | AK025204  | 2714.835  | 2840.917  |
| NM_004484 | 643.268   | 860.307   | NM_005833 | 12882.212 | 9028.397  | AK027256  | 1886.715  | 1792.639  |
| AK027035  | 1061.637  | 819.45    | NM_003100 | 32396.748 | 23316.725 | AL365406  | 890.18    | 1142.488  |
| NM_003620 | 3956.026  | 3572.71   | NM_006768 | 16728.654 | 11706.739 | NM_019000 | 5015.132  | 5810.944  |
| NM_013289 | 1915.466  | 1523.501  | NM_013322 | 17194.818 | 13669.918 | AF143330  | 2121.808  | 2678.988  |
| NM_016363 | 11007.585 | 10540.816 | AB020627  | 9839.354  | 7189.592  | AK025178  | 9331.651  | 11320.549 |
| NM_005592 | 807.281   | 1081.367  | NM_002003 | 7269.997  | 5311.234  | AF147359  | 3087.313  | 3250.278  |
| NM_002303 | 1384.147  | 1596.957  | NM_004215 | 22767.797 | 26128.838 | NM_014835 | 23437.313 | 28212.121 |
| NM_016509 | 1369.973  | 1773.773  | AK022746  | 12237.574 | 11609.383 | AK001822  | 12873.35  | 12738.775 |
| NM_012296 | 1691.99   | 1815.974  | NM_006568 | 20646.922 | 21211.842 | AK026969  | 9761.875  | 9295.799  |
| AF041038  | 1339.239  | 1101.753  | NM_006440 | 27729.109 | 29550.811 | AF086287  | 2750.966  | 2675.627  |
| NM_004536 | 3474.835  | 3599.724  | NM_004847 | 61374.891 | 55254.563 | AK022613  | 67141.281 | 74582.133 |
| NM_014672 | 4866.481  | 4357.036  | NM_002255 | 15933.975 | 13560.168 | AK023843  | 1014.81   | 1521.147  |
| AB058719  | 1909.606  | 1390.163  | AF151889  | 27944.496 | 22153.389 | AL359557  | 7594.129  | 7255.565  |
| AK025935  | 4121.68   | 3980.682  | BC034483  | 2932.058  | 2607.991  | AK027257  | 1708.517  | 1749.384  |
| AB032953  | 1286.832  | 1604.188  | NM_006288 | 3577.414  | 1958.644  | AK024582  | 1410.898  | 1559.061  |
| NM_016441 | 4197.623  | 4516.998  | NM_016224 | 16226.937 | 13055.313 | AK024143  | 1640.618  | 2043.058  |
| NM_006334 | 836.503   | 1016.534  | NM_005227 | 14407.046 | 11394.398 | AK022099  | 2187.917  | 2249.427  |
| NM_003474 | 4898.983  | 4651.704  | NM_000286 | 36641.918 | 26355.139 | AL137366  | 1024.602  | 1517.125  |
| NM_004625 | 5888.777  | 6878.988  | NM_016454 | 32251.904 | 30095.572 | BC031635  | 3846.997  | 3910.001  |
| NM_007179 | 19575.627 | 18195.795 | NM_003469 | 10283.002 | 11592.996 | AF085916  | 860.248   | 1142.664  |
| NM_001306 | 1568.275  | 1593.002  | NM_016433 | 3458.013  | 2769.442  | AF085950  | 1344.522  | 1325.435  |
| NM_007163 | 2420.327  | 2145.344  | NM_000859 | 7148.863  | 6203.468  | AL359598  | 2957.939  | 2980.765  |
| NM_000583 | 17240.955 | 12978.889 | NM_005480 | 6804.343  | 4936.509  | AF085980  | 2959.125  | 2954.66   |
| AB046833  | 4274.059  | 4850.501  | AB034694  | 2841.053  | 2804.653  | AF085927  | 4637.783  | 6231.203  |
| NM_006768 | 10654.891 | 10503.476 | NM_003273 | 6600.296  | 6193.092  | AF085954  | 12107.479 | 14930.948 |
| NM_013322 | 9630.789  | 10356.054 | NM_017948 | 19698.441 | 20275.115 | AL137337  | 2746.48   | 3567.561  |
| AB020627  | 6908.146  | 8422.254  | AF208536  | 5194.065  | 6760.46   | AL137541  | 911.876   | 902.48    |
| NM_002003 | 2071.154  | 2442.708  | AB037848  | 5906.913  | 6445.37   | AL161969  | 1870.564  | 1998.294  |
| NM_005387 | 10965.97  | 11617.757 | AF082657  | 12805.986 | 11528.039 | AL442095  | 7908.056  | 7746.591  |
| NM_006846 | 1493.639  | 1879.73   | NM_006744 | 3709.237  | 3366.429  | AL137378  | 4782.897  | 4625.647  |
| AL137938  | 18386.699 | 18860.783 | AF297659  | 3457.92   | 2585.414  | AL137609  | 43217.992 | 43758.961 |
| AF228704  | 12844.147 | 12885.138 | NM_018231 | 36577.785 | 35057.469 | AL353946  | 7626.308  | 8095.212  |
| NM_004215 | 17133.629 | 18295.174 | AK000124  | 5662.132  | 7458.166  | X69081    | 12178.577 | 12574.779 |
| AK022746  | 10356.879 | 10081.171 | NM_004480 | 13386.896 | 14286.813 | NM_005714 | 13455.785 | 13665.536 |

|           |           |           |           |           |           |           |           |           |
|-----------|-----------|-----------|-----------|-----------|-----------|-----------|-----------|-----------|
| NM_00656E | 17422.121 | 18147.916 | NM_014914 | 15708.821 | 15015.592 | AL137474  | 5055.249  | 5489.858  |
| NM_00644C | 12987.344 | 13174.485 | NM_01828E | 8124.234  | 7231.757  | AL133023  | 1467.994  | 1421.708  |
| NM_004847 | 26722.357 | 28152.061 | AB018260  | 9841.343  | 9698.245  | AK023484  | 2190.553  | 1154.012  |
| NM_00225E | 3105.08   | 3166.382  | NM_01476E | 11155.363 | 8837.731  | AK021572  | 5314.603  | 5438.255  |
| AF151889  | 14164.553 | 12840.771 | NM_016627 | 32228.857 | 31985.773 | AK021631  | 1010.875  | 1122.555  |
| BC034483  | 1452.31   | 1143.118  | NM_016121 | 6739.548  | 7140.761  | AK026757  | 2199.08   | 2001.679  |
| NM_00628E | 2685.539  | 2501.237  | NM_00634E | 63728.008 | 58289.992 | AF095854  | 4091.749  | 3474.26   |
| NM_014177 | 1465.896  | 892.042   | AK026264  | 61370.301 | 53687.113 | NM_01416E | 2615.366  | 2423.175  |
| NM_005227 | 15708.553 | 17755.635 | AF222927  | 5074.564  | 5270.289  | NM_01413E | 685.199   | 698.069   |
| NM_00028E | 34892.27  | 44542.781 | NM_01434E | 16977.256 | 16534.799 | AF159093  | 7646.349  | 7896.042  |
| NM_00085E | 8575.669  | 5227.809  | NM_018217 | 9752.329  | 11601.683 | AF113679  | 5539.502  | 5804.602  |
| NM_00548C | 7136.661  | 4255.075  | AF241831  | 10445.459 | 9345.752  | AK021997  | 8143.89   | 8781.941  |
| AB034694  | 3901.78   | 4032.918  | NM_00303E | 7193.059  | 6761.415  | AK022125  | 2493.944  | 2578.815  |
| NM_00327E | 6289.596  | 5485.917  | U96113    | 6348.418  | 5508.067  | AK022244  | 15148.328 | 13688.617 |
| AK026404  | 11586.756 | 12064.874 | NM_00273E | 10615.504 | 8302.684  | AK022381  | 10925.556 | 10269.857 |
| NM_01794E | 14094.327 | 13906.575 | M31008    | 4045.478  | 2835.349  | AK022012  | 2284.227  | 2408.535  |
| NM_00039E | 6862.269  | 6409.435  | CY3Cy5    | 11805.596 | 113.905   | AK022149  | 1061.424  | 869.468   |
| AL096777  | 398.79    | 641.459   | U93051    | 27916.246 | 29647.174 | AK022286  | 6253.896  | 6427.705  |
| AF208536  | 6412.015  | 6186.632  | AF086409  | 1484.399  | 2047.806  | AK022411  | 746.508   | 604.516   |
| AB037848  | 2421.795  | 2831.376  | AK024268  | 4397.448  | 4172.759  | AL137364  | 2903.954  | 3488.557  |
| NM_018417 | 651.549   | 812.925   | AF086295  | 1524.34   | 1460.932  | NM_00105E | 12374.451 | 13632.422 |
| AF082657  | 11133.911 | 12960.945 | AF086344  | 5555.384  | 5259.283  | Z70696    | 3179.794  | 3244.328  |
| NM_006744 | 3817.929  | 3949.689  | AF086424  | 5249.458  | 4390.831  | NM_00579E | 9287.514  | 10751.65  |
| AF297659  | 1044.867  | 1306.957  | AL110130  | 959.286   | 1111.24   | AF048847  | 12995.79  | 14062.342 |
| NM_018231 | 5068.998  | 4953.419  | NM_018087 | 10393.712 | 11348.822 | L37718    | 64263.672 | 93587.375 |
| AK000124  | 4491.463  | 7026.572  | AL360260  | 2474.649  | 2531.8    | AL137717  | 11427.181 | 10868.111 |
| NM_00448C | 10474.099 | 9330.183  | AK023647  | 2697.345  | 3064.38   | AK026181  | 33657.465 | 33285.488 |
| NM_014914 | 10865.372 | 5288.748  | AL096749  | 50578.902 | 48016.859 | NM_014367 | 5373.696  | 4818.605  |
| AK027035  | 1118.216  | 1203.537  | AK023620  | 4790.496  | 5456.039  | AK024901  | 1238.918  | 1340.734  |
| NM_01476E | 8490.128  | 6462.904  | AF086189  | 10999.688 | 10273.261 | NM_01907E | 1202.012  | 1308.996  |
| NM_016627 | 24266.971 | 24937.982 | AL050055  | 7420.073  | 8350.919  | AK025835  | 530.639   | 1149.048  |
| NM_016121 | 6401.824  | 7829.561  | U93051    | 26371.08  | 27010.791 | NM_00236E | 2688.539  | 2387.913  |
| NM_01476E | 4498.929  | 4893.02   | SR2       | 81572.32  | 65199.195 | AF161441  | 14832.084 | 14275.766 |
| NM_00634E | 57514     | 52700.473 | SR4       | 29719.17  | 37613.684 | AF067777  | 62711.156 | 116848.07 |
| AK026264  | 24538.258 | 29057.781 | SR6       | 3486.731  | 6186.167  | AK027211  | 1128.581  | 1295.793  |
| AF222927  | 3934.43   | 4268.309  | SR8       | 13620.292 | 45075.152 | AJ299406  | 3071.602  | 3407.507  |
| NM_01434E | 15790.241 | 17285.861 | SR10      | 47614.133 | 22810.453 | AK021891  | 5236.424  | 5571.845  |
| NM_018217 | 10190.08  | 12566.943 | CY3Cy5    | 12448.93  | 109.749   | Y10697    | 5521.528  | 5300.377  |
| AF241831  | 6260.896  | 6334.703  | AK000954  | 6066.097  | 6617.15   | AY007166  | 65217.965 | 81698.977 |
| NM_00303E | 4120.987  | 4264.513  | AF086099  | 2484.288  | 2907.368  | NM_004937 | 15995.023 | 17523.389 |
| U96113    | 5499.641  | 6055.935  | AK021922  | 1227.622  | 1304.697  | NM_00072E | 22533.064 | 22139.705 |
| NM_00273E | 8895.849  | 10174.224 | AK025800  | 14132.647 | 13130.24  | AK024007  | 7338.209  | 6962.574  |
| M31008    | 2537.404  | 3216.835  | AK022333  | 3388.153  | 3094.358  | AF116699  | 3618.527  | 2917.011  |
| CY3Cy5    | 8972.413  | 163.728   | AL137407  | 11481.801 | 11910.553 | AF119908  | 1448.552  | 1362.99   |
| U93051    | 16634.9   | 19137.152 | AF085839  | 1529.922  | 735.277   | U50539    | 1759.265  | 1766.915  |
| AF086409  | 1424.667  | 1610.595  | NM_01817E | 5141.779  | 5552.934  | AK000653  | 46592.422 | 52611.914 |
| AK024268  | 3028.773  | 3113.23   | AK027256  | 1755.45   | 1574.158  | AK000908  | 5558.742  | 4647.071  |
| AF086295  | 2080.235  | 2081.756  | NM_01900C | 4722.544  | 5708.975  | AF086211  | 853.903   | 733.964   |
| AF086344  | 3069.341  | 4243.738  | AK025178  | 6998.193  | 9292.094  | L77586    | 2328.347  | 1999.087  |
| AF086424  | 1017.376  | 1130.3    | NM_01483E | 16874.971 | 20711.586 | X96660    | 11146.76  | 8694.147  |
| AL110130  | 1157.079  | 1340.217  | AK001822  | 8592.682  | 9029.78   | AK000993  | 2159.072  | 2047.812  |
| AF052116  | 844.351   | 1019.117  | AK026969  | 10172.92  | 10655.472 | AK023519  | 7829.933  | 8194.657  |
| NM_018087 | 9411.943  | 9942.79   | AF086287  | 3518.573  | 5140.753  | NM_016444 | 3214.448  | 3750.193  |

|           |           |           |           |           |           |           |           |           |
|-----------|-----------|-----------|-----------|-----------|-----------|-----------|-----------|-----------|
| AL360260  | 1502.617  | 1756.579  | AK022613  | 61354.656 | 57143.035 | NM_01783  | 3135.322  | 3993.536  |
| AK023647  | 1942.533  | 2297.22   | AL359557  | 1860.039  | 2123.375  | NM_003707 | 38753.137 | 43197.254 |
| AL096749  | 20874.756 | 22207.379 | AK027257  | 1113.19   | 1111.923  | AL137718  | 3797.689  | 4812.616  |
| AK023620  | 4638.217  | 4787.878  | AK024582  | 1396.719  | 792.125   | NM_00346  | 23760.941 | 24607.391 |
| AF086189  | 5953.69   | 5478.141  | AK024143  | 816.86    | 712.824   | U94354    | 1334.613  | 977.268   |
| AL050055  | 7508.388  | 9158.528  | AK022099  | 248.697   | 3722.728  | NM_002904 | 32385.977 | 39190.41  |
| U93051    | 16995.27  | 20593.59  | AF085916  | 803.865   | 1526.062  | NM_01418  | 13580.046 | 15298.223 |
| SR2       | 50904.824 | 52453.465 | AF085950  | 1342.394  | 1201.642  | NM_00568  | 15192.882 | 17129.316 |
| SR4       | 19928.918 | 29898.885 | AL359598  | 2512.507  | 2752.071  | NM_006767 | 2820.531  | 3651.173  |
| SR6       | 2798.059  | 4509.234  | AF085980  | 2589.125  | 2813.158  | AK027239  | 5555.1    | 4824.921  |
| SR8       | 11030.934 | 41943.91  | AF085927  | 3780.313  | 4264.781  | AF005082  | 41074.934 | 41713.91  |
| SR10      | 33992.625 | 19303.551 | AF085954  | 8424.093  | 10760.187 | AL117595  | 11562.971 | 10840.008 |
| CY3Cy5    | 9008.534  | 199.294   | AL137337  | 2878.759  | 3321.061  | AB028988  | 55643.477 | 56112.859 |
| AL359931  | 4647.589  | 4848.038  | AL137541  | 687.81    | 826.883   | AK023072  | 3505.043  | 3064.244  |
| AK000954  | 4710.422  | 4330.256  | AL161969  | 1484.604  | 1789.297  | AF086105  | 24575.898 | 24966.906 |
| AF086099  | 2419.579  | 3302.271  | AL442095  | 5127.799  | 6068.821  | AK026600  | 5841.058  | 6151.734  |
| AK021922  | 1131.343  | 1652.812  | AL137378  | 4195.071  | 4246.035  | AF251189  | 1524.113  | 1547.681  |
| AK025800  | 10926.521 | 12205.582 | AL137609  | 41046.129 | 49166.766 | AK026733  | 924.258   | 868.048   |
| AK022333  | 1806.139  | 1674.499  | AL353946  | 6899.625  | 8456.336  | AF161429  | 22241.869 | 21518.688 |
| AL137407  | 4735.251  | 4923.705  | X69081    | 10598.326 | 10647.086 | AK021495  | 9614.29   | 9116.593  |
| AF085839  | 1440.073  | 1657.404  | NM_005714 | 16677.676 | 19014.803 | AF064846  | 5490.952  | 7273.108  |
| NM_01817  | 5223.441  | 5618.815  | AL137474  | 3072.022  | 3398.745  | AL110227  | 6119.277  | 6960.633  |
| AL365406  | 1132.773  | 1702.81   | AL133023  | 954.359   | 895.74    | NM_00140  | 47523.367 | 49522.984 |
| NM_01900  | 4816.605  | 6049.831  | AK021572  | 2995.859  | 3315.863  | AB033281  | 12566.613 | 15317.432 |
| AK025178  | 7147.197  | 7445.717  | AK021631  | 2138.144  | 1834.234  | NM_00288  | 60023.395 | 57182.457 |
| NM_01483  | 9090.215  | 10249.143 | AK026757  | 1045.554  | 1036.914  | AB011161  | 3592.407  | 4644.086  |
| AK001822  | 7415.184  | 7776.99   | AK023294  | 1380.791  | 1145.055  | NM_000827 | 2450.197  | 3419.501  |
| AK026969  | 9325.466  | 8833.544  | NM_01780  | 767.312   | 865.019   | NM_002944 | 38963.16  | 39829.074 |
| AF086287  | 3667.859  | 3965.29   | AF095854  | 3922.005  | 3288.423  | AF327354  | 6192.049  | 7462.437  |
| AK022613  | 6295.953  | 6053.733  | NM_014162 | 1258.447  | 1641.582  | AB014513  | 7024.909  | 6548.781  |
| AK027257  | 1362.782  | 1121.492  | AF288405  | 331.838   | 450.764   | NM_004747 | 4374.773  | 3123.857  |
| AL137366  | 1239.081  | 1244.404  | NM_014133 | 642.61    | 772.985   | AK024430  | 62473.402 | 65965.758 |
| BC031635  | 2037.911  | 2240.04   | AF159093  | 7184.579  | 7601.866  | NM_002341 | 43283.559 | 46646.766 |
| AF085916  | 1128.543  | 1046.229  | AF113679  | 2149.095  | 2940.653  | AL137651  | 7964.338  | 7645.675  |
| AF085950  | 794.985   | 1120.926  | AK021997  | 4374.884  | 5210.651  | NM_01894  | 15681.119 | 19659.881 |
| AL359598  | 3896.231  | 3007.196  | AK022125  | 1572.974  | 1561.659  | AB029018  | 1010.911  | 1430.998  |
| AF085980  | 4217.269  | 4093.938  | AK022244  | 9872.782  | 10229.755 | NM_00081  | 6134.189  | 6476.987  |
| AF085927  | 4784.73   | 5241.65   | AK022381  | 8251.457  | 9006.669  | NM_00665  | 6069.086  | 6410.65   |
| AF085954  | 7679.175  | 9183.235  | AK022012  | 2262.289  | 2749.81   | AK024436  | 2849.716  | 3247.46   |
| AL137337  | 2460.417  | 2569.849  | AK022286  | 4478.027  | 4540.161  | NM_00664  | 4184.015  | 4442.397  |
| AL137541  | 960.219   | 592.792   | AK022411  | 734.673   | 1096.203  | NM_00086  | 1291.959  | 890.012   |
| AL161969  | 880.227   | 935.334   | AL137364  | 1676.892  | 2176.523  | NM_004711 | 7391.116  | 7070.149  |
| AL442095  | 1848.26   | 1241.435  | NM_001052 | 3170.146  | 3479.382  | NM_00646  | 20872.248 | 24932.408 |
| AL137378  | 2767.303  | 2585.288  | Z70696    | 1579.263  | 1846.654  | NM_001444 | 61772.52  | 70575.492 |
| AL137609  | 37270.41  | 36511.102 | NM_005792 | 8963.854  | 9628.558  | AK027208  | 2171.082  | 2734.775  |
| AL353946  | 5762.566  | 4999.385  | AF048847  | 15420.647 | 18775.805 | NM_016521 | 24943.814 | 28674.906 |
| X69081    | 8340.878  | 7007.831  | L37718    | 64566.484 | 58764.641 | X98494    | 25396.184 | 25460.381 |
| NM_005714 | 1903.421  | 1478.695  | AL137717  | 7820.28   | 6793.788  | NM_00124  | 17700.473 | 15827.25  |
| AL137474  | 2219.517  | 2482.399  | AF035297  | 7147.654  | 8069.552  | NM_00270  | 23837.494 | 22801.789 |
| AK021572  | 2041.786  | 1637.323  | NM_01403  | 6994.288  | 9659.192  | NM_00109  | 3846.804  | 4091.403  |
| AK023294  | 812.008   | 753.75    | S67154    | 10122.169 | 12777.715 | NM_00682  | 8670.016  | 10196.449 |
| NM_01780  | 1039.094  | 749.305   | AK026181  | 27688.369 | 27344.143 | NM_016567 | 29289.494 | 35519.387 |
| AF095854  | 1936.12   | 1228.598  | NM_014367 | 2981.066  | 3199.465  | NM_007031 | 2252.868  | 2179.241  |

|           |           |           |           |           |           |           |           |           |
|-----------|-----------|-----------|-----------|-----------|-----------|-----------|-----------|-----------|
| NM_014133 | 1201.057  | 1106.404  | AK024901  | 968.303   | 1031.241  | NM_002657 | 3422.322  | 3270.171  |
| AF159093  | 4965.377  | 5140.111  | NM_019073 | 719.858   | 978.37    | NM_004088 | 27238.27  | 30343.414 |
| AF113679  | 1192.187  | 1398.794  | NM_002365 | 2781.728  | 3058.048  | NM_00135C | 20319.41  | 19669.635 |
| AK021997  | 5113.154  | 5239.357  | AF161441  | 11729.59  | 13606.679 | NM_014808 | 5959.257  | 6829.575  |
| AK022125  | 1848.505  | 1657.715  | AF067777  | 62575.359 | 70444.922 | NM_016074 | 43553.109 | 43692.422 |
| AK022244  | 9002.241  | 7654.684  | U17613    | 1241.258  | 1255.375  | NM_003921 | 8539.339  | 8013.5    |
| AK022381  | 6969.041  | 6887.075  | AK027211  | 1094.884  | 662.6     | NM_004208 | 41632.699 | 45692.195 |
| AK022012  | 2257.018  | 2472.158  | AJ299406  | 2116.466  | 1992.831  | NM_006338 | 1303.016  | 1217.106  |
| AK022286  | 3593.497  | 3420.523  | AK021891  | 2210.273  | 2616.248  | NM_001843 | 9939.326  | 10410.77  |
| AL137364  | 1264.071  | 1065.534  | Y10697    | 2272.245  | 2078.196  | NM_013268 | 1854.869  | 1959.652  |
| NM_001052 | 1507.885  | 1200.913  | AY007166  | 45036.688 | 46424.578 | NM_000418 | 4012.458  | 3987.361  |
| Z70696    | 1874.592  | 1458.989  | NM_004937 | 5354.41   | 6169.843  | NM_017768 | 9790.849  | 10028.603 |
| NM_005792 | 8538.524  | 7313.645  | L13197    | 12680.319 | 13397.903 | NM_002588 | 18610.27  | 16467.734 |
| AF048847  | 17016.986 | 17804.955 | AF056450  | 3635.491  | 3380.112  | NM_002778 | 15587.212 | 16154.239 |
| L37718    | 66688.57  | 69455.398 | NM_000729 | 12739.306 | 13157.893 | AK023398  | 16982.727 | 20438.303 |
| AL137717  | 8701.122  | 7072.014  | AK024007  | 6951.031  | 7827.081  | NM_001907 | 2012.427  | 2098.371  |
| AF035297  | 6493.042  | 6067.307  | AF116699  | 2441.366  | 2586.127  | NM_015711 | 63274.559 | 77964.047 |
| NM_014038 | 8022.024  | 10243.287 | AF119908  | 1765.731  | 1898.528  | NM_00005C | 6465.89   | 6043.458  |
| S67154    | 11156.772 | 12091.776 | U50539    | 1396.857  | 1544.448  | NM_000481 | 3303.819  | 2970.4    |
| AK026181  | 18061.076 | 15543.253 | AK000653  | 32711.609 | 41573.559 | AK025681  | 3909.704  | 4841.526  |
| NM_014367 | 2946.847  | 2393.958  | AK000908  | 3014.123  | 3024.204  | NM_014908 | 20160.859 | 22689.762 |
| AK024901  | 925.871   | 1005.881  | L77586    | 1546.317  | 1594.913  | NM_012137 | 16045.892 | 17632.377 |
| NM_019073 | 965.162   | 967.082   | X96660    | 6532.242  | 6682.403  | NM_004483 | 63243.992 | 64523.75  |
| NM_002365 | 2675.186  | 2325.625  | AK000993  | 1674.061  | 1648.865  | NM_001513 | 62232.871 | 62706.895 |
| AF161441  | 15022.448 | 13137.509 | AK023519  | 6871.571  | 8482.041  | NM_001281 | 16790.609 | 15021.362 |
| AF067777  | 65562.117 | 74212.07  | NM_016444 | 2545.958  | 2912.012  | NM_016838 | 1677.735  | 1324.464  |
| U17613    | 1065.073  | 1158.263  | NM_017838 | 1217.088  | 1348.24   | NM_003981 | 44407.922 | 44054.137 |
| AJ299406  | 1873.994  | 2075.154  | NM_003707 | 30496.777 | 34843.328 | U26596    | 64451.676 | 58045.816 |
| AK021891  | 1807.861  | 1581.435  | AL137718  | 3274.372  | 3443.268  | AF070600  | 61985.211 | 63084.348 |
| Y10697    | 1963.409  | 1980.722  | NM_00346C | 8860.78   | 8031.781  | AB014522  | 32814.945 | 41336.301 |
| AY007166  | 29066.184 | 34899.141 | U94354    | 1129.805  | 624.117   | NM_014878 | 17399.396 | 16458.303 |
| NM_004937 | 5477.099  | 4997.669  | NM_002904 | 30802.135 | 33453.098 | AB033023  | 45101.438 | 48957.172 |
| L13197    | 17012.588 | 15066.758 | NM_014188 | 9892.688  | 10014.912 | BC027895  | 2717.169  | 2692.786  |
| AF056450  | 3204.31   | 2982.238  | NM_005688 | 11145.095 | 11005.975 | NM_016528 | 643.167   | 516.216   |
| AK024122  | 365.669   | 976.917   | NM_006767 | 2025.823  | 2352.208  | U63542    | 2059.192  | 2041.456  |
| NM_000729 | 12142.836 | 10549.38  | AK021451  | 5395.215  | 3222.627  | AF161361  | 2944.231  | 2871.606  |
| AK024007  | 8861.187  | 9287.979  | AK001971  | 3164.24   | 3063.73   | AF024703  | 40885.414 | 45366.129 |
| AF116699  | 1734.7    | 1677.914  | AF086468  | 1871.22   | 1162.899  | NM_016531 | 2826.862  | 2848.162  |
| AF119908  | 1845.226  | 2012.903  | AK027239  | 4998.126  | 5443.426  | NM_003593 | 21015.369 | 22856.52  |
| U50539    | 1952.249  | 2272.91   | AF005082  | 51846.285 | 51226.332 | NM_014383 | 62409.477 | 75271.258 |
| AK000653  | 39837.391 | 44638.059 | AL117595  | 8438.692  | 8709.842  | NM_000244 | 15482.466 | 16711.518 |
| AK000908  | 3339.605  | 2959.462  | AB028988  | 39476.484 | 39206.766 | NM_014288 | 9200.865  | 8939.802  |
| AF086211  | 759.493   | 900.564   | AK023072  | 2086.21   | 2097.703  | AF026816  | 53739.859 | 50310.723 |
| L77586    | 3473.986  | 3110.67   | AF086105  | 9435.255  | 9010.167  | NM_004718 | 7814.086  | 6190.284  |
| X96660    | 9560.891  | 7221.473  | AK026600  | 4503.157  | 4762.965  | NM_018553 | 7158.361  | 7034.049  |
| AK000993  | 3098.579  | 2907.893  | AF251189  | 1073.465  | 1673.947  | NM_004704 | 12637.369 | 11623.291 |
| AK023519  | 9671.463  | 7912.888  | AK026733  | 1229.474  | 1184.137  | NM_005458 | 14892.143 | 13594.236 |
| NM_016444 | 3079.216  | 3218.439  | AF161429  | 19595.701 | 21674.793 | NM_014633 | 4757.055  | 4152.073  |
| NM_017838 | 1590.664  | 1541.43   | AK021495  | 14809.478 | 16286.488 | NM_00197C | 64225.195 | 60387.953 |
| NM_003707 | 23262.461 | 22047.424 | AF064846  | 4776.922  | 4958.181  | NM_00681C | 36323.57  | 39940.926 |
| AL137718  | 2156.901  | 2728.858  | AL110227  | 4116.548  | 4658.576  | AK024054  | 21984.057 | 20686.391 |
| NM_00346C | 6046.875  | 5373.325  | NM_00140C | 8615.558  | 7975.469  | AL049674  | 1381.169  | 1252.589  |
| U94354    | 1229.514  | 1221.62   | AB033281  | 12583.569 | 11895.205 | NM_001968 | 2360.777  | 2296.906  |

|           |           |           |           |           |           |           |           |           |
|-----------|-----------|-----------|-----------|-----------|-----------|-----------|-----------|-----------|
| NM_002904 | 26666.367 | 28522.59  | NM_002882 | 61393.637 | 58017.207 | NM_004116 | 12851.377 | 11345.89  |
| NM_014189 | 11295.054 | 10251.704 | AB011161  | 1615.077  | 1221.136  | AK024508  | 14155.502 | 14263.977 |
| NM_005686 | 10341.742 | 11595.908 | NM_000827 | 1161.654  | 616.29    | AK027213  | 19864.979 | 21276.738 |
| NM_006767 | 3291.735  | 3729.713  | NM_002944 | 3900.678  | 3899.48   | NM_014596 | 14236.611 | 18036.563 |
| AK021451  | 9824.811  | 5026.226  | AF327354  | 4189.321  | 3811.681  | NM_006703 | 24635.756 | 28752.025 |
| AK001971  | 3739.013  | 3614.984  | NM_006259 | 758.869   | 602.08    | NM_004037 | 7198.284  | 7869.76   |
| AF086468  | 2252.968  | 2800.194  | NM_003961 | 59317.492 | 60578.84  | NM_005116 | 11832.982 | 12578.229 |
| AK027239  | 6815.124  | 7881.157  | AB014513  | 6081.902  | 6079.174  | NM_002766 | 13543.356 | 15663.864 |
| AF005082  | 44974.082 | 49796.18  | NM_004747 | 4057.526  | 4624.923  | AJ404857  | 1280.605  | 1162.749  |
| AL117595  | 5056.218  | 5170.438  | AK024430  | 62911.984 | 61536.102 | NM_000788 | 27973.01  | 31211.281 |
| AB028988  | 20918.873 | 22964.785 | NM_002341 | 48327.023 | 48873.891 | AF254088  | 5658.39   | 6026.761  |
| AK023072  | 2495.969  | 2345.831  | AL137651  | 4137.454  | 4445.195  | NM_001420 | 5685.815  | 5664.348  |
| AF086105  | 5295.133  | 5413.832  | NM_018945 | 14859.121 | 17776.127 | NM_000248 | 12891.061 | 11121.503 |
| AK026600  | 5772.553  | 5237.927  | AB029018  | 952.893   | 1016.596  | AB031046  | 7359.331  | 6986.552  |
| Z70700    | 960.701   | 712.19    | NM_000818 | 4438.497  | 4849.727  | NM_002448 | 50945.809 | 53605.641 |
| AF251189  | 1456.984  | 1336.101  | NM_006650 | 4533.136  | 4827.594  | AK025388  | 3920.094  | 4038.475  |
| AK026733  | 885.633   | 995.61    | AK024436  | 2383.979  | 2660.308  | NM_006147 | 1010.367  | 836.139   |
| AF161429  | 18010.381 | 17007.1   | NM_006648 | 3781.497  | 4196.55   | AB006631  | 7685.703  | 7743.281  |
| AK021495  | 11680.044 | 10312.271 | NM_000868 | 1089.332  | 1525.644  | AF291181  | 1202.445  | 1085.625  |
| AF064846  | 5613.927  | 6104.646  | NM_004711 | 8351.748  | 8912.366  | NM_005741 | 9983.549  | 8906.922  |
| AL110227  | 5287.395  | 5067.075  | NM_006463 | 23572.088 | 21990.182 | NM_000964 | 12134.148 | 11267.497 |
| NM_001400 | 4186.814  | 4082.546  | NM_001444 | 56761.742 | 67753.063 | NM_012185 | 1286.976  | 1338.784  |
| AB033281  | 8334.475  | 8947.723  | AK027208  | 1847.746  | 1455.73   | BF343886  | 2185.21   | 1985.404  |
| NM_002882 | 54471.895 | 51663.09  | NM_016521 | 20249.176 | 17864.566 | NM_013263 | 26724.412 | 30606.564 |
| AB011161  | 1828.448  | 1399.524  | X98494    | 15312.438 | 12185.112 | AF116238  | 9125.273  | 9482.626  |
| NM_000827 | 1145.013  | 1332.84   | NM_001240 | 7622.963  | 6123.591  | NM_006982 | 4929.421  | 4948.615  |
| NM_002944 | 1213.27   | 1131.583  | NM_002709 | 21615.127 | 20937.311 | NM_003069 | 802.706   | 701.362   |
| AF327354  | 3530.402  | 3945.463  | NM_001099 | 3941.81   | 4061.56   | AB033085  | 11459.63  | 9818.145  |
| NM_006259 | 454.307   | 669.697   | NM_006823 | 6592.151  | 5860.961  | L09100    | 8053.327  | 8817.551  |
| NM_003961 | 60263.27  | 51805.496 | NM_016567 | 24104.764 | 21192.176 | NM_005472 | 13606.924 | 14606.272 |
| AB014513  | 2483.853  | 2793.793  | NM_007031 | 2326.058  | 1986.712  | NM_004313 | 2111.342  | 2481.917  |
| NM_004747 | 3095.33   | 2709.094  | NM_002657 | 3305.493  | 3312.606  | NM_013435 | 2249.993  | 2623.575  |
| AK024430  | 42678.098 | 44035.438 | NM_004089 | 29859.992 | 35500.648 | NM_000132 | 38404.996 | 37864.773 |
| NM_002341 | 59457.23  | 49550.766 | NM_001350 | 16938.289 | 20764.045 | NM_001727 | 33235.926 | 39445.121 |
| AL137651  | 4457.127  | 3628.815  | NM_014809 | 5724.057  | 6300.711  | NM_004076 | 9426.618  | 10051.335 |
| NM_018945 | 16382.61  | 16519.227 | NM_016074 | 47434.977 | 49682.91  | NM_007123 | 56389.074 | 52168.609 |
| AB029018  | 1055.282  | 1217.893  | NM_003921 | 7309.369  | 7591.863  | BG717460  | 9152.935  | 9539.179  |
| NM_000818 | 5204.109  | 5097.233  | NM_004208 | 39489.84  | 43332.129 | AA778392  | 48816.969 | 49943.551 |
| NM_006650 | 3619.395  | 3699.261  | NM_006336 | 1198.635  | 832.199   | AI478178  | 12034.815 | 12229.813 |
| AK024436  | 3163.485  | 3166.349  | NM_001843 | 4453.741  | 5331.215  | AA101279  | 4683.723  | 4432.628  |
| NM_006648 | 5383.174  | 5013.618  | NM_013266 | 1204.171  | 1764.198  | M19154    | 10644.792 | 10906.957 |
| NM_000868 | 1120.489  | 1089.662  | NM_000419 | 1948.368  | 2522.862  | AA399410  | 13349.058 | 14116.146 |
| NM_004711 | 8489.59   | 8900.854  | NM_017768 | 8825.078  | 9344.174  | AA137031  | 3891.893  | 3608.73   |
| NM_006463 | 22589.193 | 18991.912 | NM_002589 | 17538.656 | 19920.896 | AA292226  | 18005.646 | 18198.469 |
| AK023050  | 575.251   | 451.275   | NM_002776 | 4654.681  | 4374.695  | NM_000500 | 2295.622  | 2686.188  |
| NM_001444 | 65437.734 | 71537.805 | AK023398  | 7362.185  | 6117.248  | M29873    | 1120.575  | 1053.872  |
| AK027208  | 2235.866  | 1964.651  | NM_001907 | 1793.306  | 1456.042  | J04449    | 953.109   | 847.883   |
| NM_016521 | 23294.383 | 25044.689 | NM_015711 | 60803.371 | 56242.824 | BC007031  | 21595.641 | 22775.479 |
| X98494    | 12265.811 | 9540.196  | NM_000050 | 2014.292  | 1515.382  | AF129756  | 61724.535 | 56547.781 |
| NM_001240 | 8859.894  | 9308.241  | NM_000481 | 2157.124  | 1652.146  | NM_002957 | 52536.129 | 49162.203 |
| NM_002709 | 22237.889 | 24447.088 | AK025681  | 3785.372  | 4786.14   | BC036369  | 9326.772  | 9579.252  |
| NM_001099 | 7466.885  | 9355.881  | NM_014905 | 15017.561 | 17620.02  | X12492    | 62724.301 | 57018.414 |
| NM_006823 | 10024.921 | 10909.694 | NM_012137 | 10614.522 | 12371.646 | NM_005009 | 49826.566 | 52337.656 |

|           |           |           |           |           |           |           |           |           |
|-----------|-----------|-----------|-----------|-----------|-----------|-----------|-----------|-----------|
| NM_016567 | 30770.424 | 31593.328 | NM_004483 | 56851.082 | 53297.672 | NM_003110 | 8608.136  | 10363.104 |
| NM_007031 | 2395.229  | 2295.274  | NM_001513 | 65035.465 | 62637.711 | NM_003612 | 12137.594 | 13470.685 |
| NM_002657 | 4329.397  | 5055.046  | NM_001281 | 18067.211 | 18252.25  | NM_013230 | 4869.198  | 5719.759  |
| NM_004089 | 29306.92  | 36001.16  | NM_016835 | 1555.981  | 1721.777  | X72308    | 34253.93  | 40282.078 |
| NM_001350 | 20352.049 | 21642.332 | NM_003981 | 41647.922 | 43287     | NM_005408 | 2815.398  | 3484.206  |
| NM_014809 | 8631.03   | 9538.229  | U26596    | 54758.441 | 53111.684 | BC008376  | 55276.336 | 54185.57  |
| NM_016074 | 43293.145 | 48119.391 | AF070600  | 63609.844 | 56111.957 | X87895    | 1390.286  | 1203.33   |
| NM_003921 | 8716.696  | 8310.404  | AB014522  | 29137.049 | 32337.582 | AB041269  | 12292.576 | 12820.256 |
| NM_004208 | 50512.652 | 47822.684 | NM_014875 | 14264.251 | 15512.402 | AK024908  | 13559.689 | 13068.087 |
| NM_006336 | 1425.329  | 1349.814  | AB033023  | 32688.697 | 39859.863 | NM_018270 | 32615.977 | 36156.063 |
| NM_001843 | 6578.873  | 7756.259  | BC027895  | 2406.847  | 3201.368  | NM_000260 | 64226.691 | 62225.828 |
| NM_013266 | 1693.742  | 1927.488  | U63542    | 1441.103  | 1446.699  | NM_014160 | 10917.589 | 10122.986 |
| NM_000419 | 3447.901  | 3612.658  | AF161361  | 2623.781  | 2725.598  | AF230877  | 40906.625 | 43609.102 |
| NM_017768 | 9377.73   | 8654.615  | AF024703  | 25317.963 | 26481.832 | NM_017668 | 15586.778 | 14537.28  |
| NM_002589 | 27510.043 | 27138.424 | NM_016531 | 2664.131  | 2502.228  | AB033049  | 61707.809 | 53145.059 |
| NM_002776 | 2940.545  | 2827.055  | NM_003593 | 14341.362 | 11817.595 | NM_000406 | 1228.439  | 1316.106  |
| AK023398  | 10488.456 | 11244.09  | NM_014383 | 61280.191 | 55734.629 | NM_005682 | 2253.869  | 1758.143  |
| NM_001907 | 3246.14   | 3402.299  | NM_000244 | 14304.619 | 11963.027 | NM_002926 | 3207.136  | 2767.963  |
| NM_015711 | 59885.32  | 55280.961 | NM_014285 | 11087.301 | 10418.744 | NM_000233 | 1457.804  | 1335.708  |
| NM_000050 | 1446.986  | 1722.736  | AF026816  | 52648.316 | 49973.895 | NM_018697 | 5294.575  | 5690.094  |
| NM_000481 | 3304.423  | 2788.439  | NM_004719 | 8402.932  | 6530.553  | AF090116  | 1539.362  | 2106.767  |
| AK025681  | 4250.011  | 4986.878  | NM_018553 | 9416.265  | 9364.882  | NM_014030 | 62637.063 | 62780.477 |
| NM_014905 | 16945.082 | 19442.861 | NM_004704 | 11417.778 | 12226.414 | NM_004224 | 32051.17  | 36583.277 |
| NM_012137 | 8248.872  | 8615.214  | NM_005455 | 13743.873 | 12819.465 | Z21967    | 18971.301 | 19459.664 |
| NM_004483 | 58023.559 | 54788.727 | NM_014633 | 4954.876  | 4928.86   | NM_003738 | 2548.983  | 2444.203  |
| NM_001513 | 62890.633 | 57494.805 | NM_001970 | 61468.992 | 52755.293 | NM_004377 | 23186.977 | 21730.289 |
| NM_001281 | 27828.164 | 31824.465 | NM_006810 | 41456.594 | 43540.223 | AB037815  | 59519.949 | 53502.008 |
| NM_016835 | 2673.921  | 2696.537  | AK024054  | 25783.82  | 25495.967 | NM_003645 | 19323.768 | 19226.01  |
| NM_003981 | 42471.211 | 44897.539 | AL049674  | 1253.484  | 1227.093  | AF263613  | 11790.267 | 12911.77  |
| U26596    | 62280.898 | 57744.074 | NM_001969 | 2467.545  | 2013.786  | NM_000097 | 3409.43   | 4330.951  |
| AF070600  | 66248.484 | 68989.164 | NM_004116 | 13492.15  | 15222.162 | NM_001509 | 7577.832  | 8483.238  |
| AB014522  | 32478.305 | 39846.871 | AK024508  | 12392.164 | 13959.029 | AK022878  | 20034.799 | 19652.139 |
| NM_014875 | 14147.289 | 14701.587 | AK027213  | 18040.568 | 19543.148 | NM_018099 | 1065.396  | 1365.83   |
| AB033023  | 36276.344 | 39749.566 | NM_014596 | 20076.613 | 23297.25  | AF217187  | 12619.607 | 12747.603 |
| BC027895  | 5043.037  | 4847.468  | NM_006703 | 29545.379 | 30629.879 | NM_017750 | 4950.98   | 5336.486  |
| NM_016529 | 956.951   | 756.907   | NM_004037 | 7471.438  | 5756.742  | AK027122  | 29919.299 | 34228.734 |
| U63542    | 2258.71   | 1956.952  | NM_005116 | 10720.548 | 8852.278  | AK026196  | 8114.61   | 7544.306  |
| AF161361  | 3828.534  | 3250.285  | NM_002766 | 12941.675 | 10870.742 | NM_004977 | 29239.047 | 24081.203 |
| AF024703  | 18864.775 | 13707.192 | AJ404857  | 1401.112  | 456.416   | NM_004700 | 2432.626  | 2337.111  |
| NM_016531 | 3456.109  | 3007.07   | NM_000788 | 33438.984 | 37823.113 | NM_006868 | 24403.244 | 21281.861 |
| NM_003593 | 18005.557 | 14133.157 | AF254088  | 6647.436  | 7726.018  | NM_004161 | 31173.438 | 31218.48  |
| NM_014383 | 61593.523 | 59638.32  | NM_001420 | 4334.931  | 4247.875  | NM_001295 | 2364.429  | 1834.867  |
| NM_000244 | 17920.621 | 15718.456 | NM_000248 | 2622.328  | 2303.005  | NM_005161 | 2538.908  | 1940.612  |
| NM_014285 | 17321.535 | 14272.914 | AB031046  | 2091.714  | 1538.544  | AB037749  | 2186.923  | 2271.444  |
| AF026816  | 53590.125 | 51332.227 | NM_002449 | 60376.098 | 52870.902 | NM_020347 | 1581.514  | 1442.148  |
| NM_004719 | 12833.127 | 10186.063 | AK025388  | 5493.353  | 6040.901  | NM_001462 | 7677.245  | 7655.276  |
| NM_018553 | 11538.844 | 10256.866 | NM_006147 | 1263.855  | 819.048   | NM_004072 | 5435.917  | 6148.271  |
| NM_004704 | 13322.942 | 10509.898 | AB006631  | 6311.434  | 7072.286  | AF068286  | 2475.876  | 2564.63   |
| NM_005455 | 16287.663 | 9855.698  | AF291181  | 1692.961  | 1874.721  | AB040957  | 16147.977 | 11904.945 |
| NM_014633 | 6299.132  | 5320.5    | NM_005741 | 8720.391  | 9250.764  | NM_006890 | 1957.783  | 1645.799  |
| NM_001970 | 62929.043 | 61692.98  | NM_000964 | 11428.172 | 8888.854  | NM_005881 | 6821.888  | 7375.982  |
| NM_006810 | 48327.504 | 46320.832 | NM_012185 | 1313.996  | 843.696   | NM_005794 | 694.189   | 664.925   |
| AK024054  | 38810.438 | 32711.533 | BF343886  | 2489.476  | 2656.572  | L40519    | 2016.318  | 1599.235  |

|           |           |           |           |           |           |           |           |           |
|-----------|-----------|-----------|-----------|-----------|-----------|-----------|-----------|-----------|
| AL049674  | 1647.403  | 1415.324  | NM_013263 | 27706.332 | 31369.629 | NM_004204 | 8527.788  | 8499.238  |
| NM_001969 | 3401.001  | 2838.665  | AF116238  | 8387.558  | 8922.193  | AK002181  | 3041.869  | 3325.528  |
| NM_004116 | 16131.998 | 13546.565 | NM_006982 | 5693.321  | 5949.159  | NM_001641 | 38561.098 | 43905.992 |
| AK024508  | 19818.494 | 14181.708 | NM_003069 | 685.001   | 711.438   | BC015750  | 63128.977 | 68252.813 |
| AK027213  | 27211.594 | 21813.857 | AB033085  | 8188.424  | 6588.114  | AK025769  | 14770.072 | 16045.199 |
| NM_014596 | 26197.219 | 22916.412 | L09100    | 3084.992  | 3476.288  | AW945166  | 4140.573  | 3335.22   |
| NM_006703 | 33299.629 | 40835.09  | NM_005472 | 5621.783  | 5408.043  | NM_005236 | 12369.146 | 10973.033 |
| NM_004037 | 12583.878 | 13524.22  | NM_004313 | 1384.185  | 1356.738  | NM_006384 | 27339.199 | 25359.285 |
| NM_005116 | 19876.215 | 21915.033 | NM_013435 | 1137.567  | 1263.417  | NM_013257 | 4599.359  | 3458.059  |
| NM_002766 | 19425.445 | 22185.082 | NM_000132 | 36790.586 | 32887.539 | AB044546  | 2012.029  | 1533.375  |
| AJ404857  | 2378.757  | 2189.623  | NM_001727 | 26541.889 | 24809.066 | NM_014225 | 45477.754 | 46398.766 |
| NM_000788 | 48613.133 | 51574.152 | NM_004076 | 4116.968  | 4609.199  | AF163473  | 3778.111  | 3905.777  |
| AF254088  | 8889.337  | 9095.162  | NM_007123 | 52838.457 | 53298.063 | NM_006256 | 17475.811 | 14801.282 |
| NM_001420 | 5419.709  | 5492.146  | BG717460  | 9671.346  | 10095.392 | NM_002846 | 8173.569  | 22685.234 |
| NM_000248 | 1540.972  | 1042.15   | AA778392  | 44862.355 | 44743.773 | NM_002837 | 12814.272 | 13193.506 |
| AB031046  | 1376.588  | 833.011   | AI478178  | 11452.448 | 12619.157 | AL133077  | 50635.477 | 51361.453 |
| NM_002449 | 48432.836 | 49867.234 | AA101279  | 5284.266  | 4489.139  | AK025211  | 8780.052  | 10963.025 |
| AK025388  | 2418.931  | 2152.724  | M19154    | 9940.795  | 11201.988 | U06715    | 1747.178  | 1546.783  |
| NM_006147 | 1239.05   | 1185.136  | AA399410  | 14716.02  | 15876.797 | NM_013402 | 10376.369 | 10954.715 |
| AB006631  | 6161.954  | 5428.131  | AA137031  | 4425.002  | 4333.936  | NM_002662 | 1043.727  | 1312.065  |
| AF291181  | 2379.87   | 1765.128  | AA292226  | 13205.366 | 13813.672 | NM_004313 | 1442.342  | 1562.461  |
| NM_005741 | 11064.321 | 9831.378  | NM_000500 | 1795.877  | 2270.124  | NM_013435 | 2379.69   | 2720.082  |
| NM_000964 | 8608.587  | 7903.498  | M29873    | 1085.922  | 1167.456  | NM_000132 | 38478.465 | 39828.148 |
| NM_012185 | 990.778   | 1129.696  | J04449    | 1526.313  | 794.269   | NM_001727 | 32414.459 | 39010.699 |
| BF343886  | 2425.712  | 2344.26   | BC007031  | 16226.086 | 17889.064 | NM_004076 | 8706.815  | 9609.552  |
| NM_013263 | 27290.637 | 29136.461 | AF129756  | 62373.004 | 59108.66  | NM_007123 | 51841.836 | 52845.594 |
| AF116238  | 12524.84  | 13147.012 | NM_002957 | 46792.645 | 48112.598 | BG717460  | 8330.248  | 9431.975  |
| NM_006982 | 5613.655  | 5652.458  | BC036369  | 6839.31   | 7539.929  | AA778392  | 46281.324 | 49091.09  |
| NM_003069 | 1172.194  | 960.358   | X12492    | 52791.066 | 53253.609 | AI478178  | 11671.23  | 11942.068 |
| AB033085  | 12006.069 | 8834.143  | NM_005009 | 39402.363 | 46863.633 | AA101279  | 4204.275  | 4368.692  |
| L09100    | 2340.871  | 2821.463  | NM_003110 | 8312.735  | 10587.648 | M19154    | 16839.16  | 16905.012 |
| NM_005472 | 8611.442  | 7275.255  | NM_003612 | 3611.968  | 3724.373  | AA399410  | 16784.557 | 15918.803 |
| NM_004313 | 1977.945  | 2099.804  | NM_013230 | 4742.229  | 4786.032  | AA137031  | 8390.354  | 5633.271  |
| NM_013435 | 1465.992  | 1260.788  | X72308    | 6087.366  | 6465.861  | AA292226  | 42140.785 | 36767.023 |
| NM_000132 | 46181.492 | 48902.289 | NM_005408 | 1469.446  | 1169.934  | NM_000500 | 3333.411  | 3427.625  |
| NM_001727 | 23560.283 | 24864.01  | BC008376  | 21630.068 | 20396.84  | M29873    | 529.119   | 682.146   |
| NM_004076 | 4027.363  | 3796.803  | AB041269  | 3988.27   | 4692.124  | J04449    | 917.028   | 455.85    |
| NM_007123 | 61745.77  | 60799.668 | AK024908  | 11764.677 | 12777.517 | BC007031  | 27392.076 | 24043.139 |
| BG717460  | 10152.725 | 9093.771  | NM_018270 | 17315.23  | 19292.943 | AF129756  | 55635.176 | 55096.609 |
| AA778392  | 49660.707 | 48092.234 | NM_000260 | 61664.016 | 55565.703 | NM_002957 | 51216.316 | 48619.211 |
| AI478178  | 14175.985 | 14791.605 | NM_014160 | 9535.582  | 11039.671 | BC036369  | 9413.037  | 10082.619 |
| AA101279  | 5240.506  | 4916.236  | AF230877  | 34309.191 | 36656.477 | X12492    | 52117.934 | 54581.699 |
| M19154    | 4577.311  | 4814.962  | NM_017668 | 15479.874 | 17087.453 | NM_017540 | 4257.02   | 4930.329  |
| AA399410  | 15682.239 | 16656.273 | AB033049  | 63098.828 | 53879.238 | NM_006755 | 28247.502 | 33525.074 |
| AA137031  | 4325.257  | 4305.554  | NM_000406 | 1808.02   | 2319.069  | NM_013230 | 6043.547  | 6162.806  |
| AA292226  | 5784.292  | 5502.398  | NM_005682 | 2623.669  | 2366.687  | X72308    | 32640.723 | 37049.73  |
| NM_000500 | 2228.594  | 2041.507  | NM_002926 | 4015.135  | 5368.946  | NM_005408 | 3201.222  | 3568.961  |
| M29873    | 1049.839  | 1842.704  | NM_000233 | 1243.113  | 1503.621  | BC008376  | 51239.703 | 52528.824 |
| J04449    | 1534.257  | 2071.077  | NM_018697 | 4276.129  | 4441.714  | X87895    | 558.563   | 806.042   |
| BC007031  | 5154.266  | 5023.469  | AF090116  | 1650.661  | 1821.226  | AB041269  | 11104.77  | 11502.434 |
| AF129756  | 51340.023 | 49803.984 | NM_014030 | 64239.391 | 57348.191 | AK024908  | 12701.864 | 13434.943 |
| NM_002957 | 24318.744 | 22665.096 | NM_004224 | 10553.422 | 13392.736 | NM_018270 | 27228.783 | 30628.162 |
| BC036369  | 6873.035  | 6440.158  | Z21967    | 17826.352 | 19086.139 | NM_000260 | 60882.961 | 66443.703 |

|           |           |           |           |           |           |           |           |           |
|-----------|-----------|-----------|-----------|-----------|-----------|-----------|-----------|-----------|
| X12492    | 63051.457 | 54690.199 | NM_003738 | 2352.506  | 2066.258  | NM_01416C | 9223.774  | 9060.994  |
| NM_00500E | 53689.828 | 52894.66  | NM_004377 | 16460.324 | 14653.535 | AF230877  | 53751.977 | 53119.086 |
| NM_003110 | 10522.634 | 9774.522  | AB037815  | 29874.227 | 32980.512 | NM_01766E | 14813.978 | 12098.957 |
| NM_003612 | 2963.024  | 2277.301  | NM_00364E | 14980.307 | 16669.635 | AB033049  | 63825.988 | 56307.086 |
| NM_01323C | 7031.894  | 7425.031  | AF263613  | 10631.96  | 10703.414 | NM_00040E | 1519.148  | 914.636   |
| X72308    | 3539.712  | 3610.755  | NM_000097 | 3810.719  | 3045.931  | NM_00568E | 2736.09   | 2269.465  |
| NM_00540E | 2227.024  | 1707.607  | NM_00150E | 3535.385  | 3244.597  | NM_00292E | 2817.59   | 2514.321  |
| BC008376  | 16405.293 | 14517.685 | AK022878  | 15743.644 | 16031.855 | NM_00023E | 1142.372  | 598.58    |
| X87895    | 1101.494  | 636.748   | NM_01809E | 713.434   | 967.954   | NM_018697 | 5252.317  | 4772.85   |
| AB041269  | 2206.617  | 2166.331  | AF217187  | 12937.341 | 14520.646 | AF090116  | 1832.904  | 1077.352  |
| AK024908  | 12041.941 | 9812.683  | NM_01775C | 4938.272  | 5390.705  | NM_01403C | 64870.793 | 54808.734 |
| NM_01827C | 13551.018 | 11137.738 | AK027122  | 34280.328 | 45023.266 | NM_004224 | 31300.902 | 32345.609 |
| NM_00026C | 29635.488 | 27702.576 | AK026196  | 10080.241 | 9787.957  | Z21967    | 20687.311 | 19482.789 |
| NM_01416C | 9012.612  | 7473.611  | NM_004977 | 15240.227 | 16388.387 | NM_00373E | 2292.368  | 2593.95   |
| AF230877  | 11781.863 | 9521.002  | NM_00470C | 2526.511  | 2601.254  | L09100    | 5120.862  | 4579.311  |
| NM_01766E | 16004.157 | 12677.033 | NM_00686E | 31953.768 | 34652.578 | NM_00547E | 6225.807  | 5424.948  |
| AB033049  | 58398.039 | 51208.395 | NM_004161 | 35445.609 | 44483.191 | NM_00364E | 16459.996 | 16560.621 |
| NM_00040E | 2393.432  | 1548.922  | NM_00129E | 2528.606  | 2762.181  | AF263613  | 11296.642 | 11204.114 |
| NM_00568E | 4977.889  | 4078.127  | NM_005161 | 2710.113  | 2793.813  | NM_000097 | 3350.15   | 3429.848  |
| NM_00292E | 7428.955  | 6741.183  | AB037749  | 1834.208  | 1799.093  | NM_00150E | 6944.349  | 8178.948  |
| NM_00023E | 1816.128  | 1582.267  | NM_020347 | 1551.279  | 778.843   | AK022878  | 18118.432 | 16937.717 |
| NM_018697 | 5815.243  | 5010.486  | NM_00146E | 5559.296  | 7130.703  | NM_01809E | 1069.103  | 876.29    |
| AF090116  | 3587.629  | 3701.955  | NM_00407E | 3346.331  | 3896.645  | AF217187  | 13542.265 | 13720.345 |
| NM_01403C | 50798.113 | 43940.652 | AF068286  | 2330.231  | 1917.946  | NM_01775C | 4626.528  | 4606.474  |
| NM_004224 | 2542.826  | 2446.454  | AB040957  | 9204.844  | 7036.452  | AK027122  | 30454.402 | 37257.992 |
| Z21967    | 15946.54  | 11802.158 | NM_00689C | 1158.575  | 769.135   | AK026196  | 7371.265  | 7305.205  |
| NM_00373E | 4234.963  | 2997.131  | NM_005881 | 10445.944 | 10729.26  | NM_004977 | 27558.895 | 26211.65  |
| NM_004377 | 14231.18  | 10629.479 | NM_005794 | 1097.255  | 1321.585  | NM_00470C | 2167.132  | 2174.914  |
| AB037815  | 11762.102 | 11242.182 | L40519    | 2695.309  | 2774.244  | NM_00686E | 27213.756 | 20930.152 |
| NM_00364E | 14464.338 | 12563.578 | NM_004204 | 4095.944  | 3733.892  | NM_004161 | 31620.141 | 25858.48  |
| AF263613  | 9830.86   | 11294.383 | AK002181  | 1818.054  | 1019.403  | NM_00129E | 2978.714  | 2444.759  |
| NM_000097 | 4917.455  | 5538.373  | NM_001641 | 52223.887 | 53153.371 | NM_005161 | 4177.116  | 3143.456  |
| NM_00150E | 2658.441  | 2876.817  | BC015750  | 63093.285 | 59359.234 | AB037749  | 1827.521  | 1590.984  |
| AK022878  | 11929.433 | 10350.642 | AK025769  | 20575.535 | 20074.645 | NM_020347 | 1044.927  | 560.956   |
| NM_01809E | 857.935   | 917.135   | AW945166  | 5372.642  | 4993.898  | NM_00146E | 6038.822  | 4929.911  |
| AF217187  | 10695.87  | 8766.854  | NM_00523E | 15949.467 | 16457.303 | NM_00407E | 3675.184  | 3057.221  |
| NM_01775C | 6313.601  | 5135.381  | NM_006384 | 30608.451 | 35209.027 | AF068286  | 2801.598  | 2534.899  |
| AK027122  | 37969.09  | 43767.375 | NM_013257 | 5849.356  | 5246.035  | AB040957  | 15305.86  | 12605.676 |
| AK026196  | 10374.723 | 10964.166 | AB044546  | 3604.125  | 2909.679  | NM_00689C | 1465.979  | 1480.292  |
| NM_004977 | 21541.133 | 15509.466 | NM_01422E | 61711.199 | 52685.254 | NM_003110 | 11428.351 | 11635.587 |
| NM_00470C | 3093.128  | 2676.464  | AF163473  | 5779.979  | 6394.75   | NM_00361E | 5540.564  | 5649.152  |
| NM_00686E | 33220.895 | 23426.234 | NM_00625E | 18850.93  | 19822.639 | L40519    | 2715.141  | 2840.933  |
| NM_004161 | 33277.773 | 32767.648 | NM_00284E | 7226.293  | 25611.879 | NM_004204 | 7641.33   | 7221.641  |
| NM_00129E | 2983.691  | 2351.023  | NM_002837 | 13715.671 | 12410.515 | AK002181  | 3218.873  | 3014.118  |
| NM_005161 | 3973.15   | 2583.393  | AL133077  | 52264.773 | 51859.48  | NM_001641 | 39207.363 | 38776.617 |
| AB037749  | 1029.996  | 1168.753  | AK025211  | 9909.663  | 10723.058 | BC015750  | 65487.996 | 61340.094 |
| NM_020347 | 1790.703  | 1797.244  | U06715    | 1597.795  | 1154.338  | AK025769  | 16934.982 | 16857.914 |
| NM_00146E | 7636.616  | 7123.859  | NM_01340E | 10663.877 | 9405.644  | AW945166  | 5031.231  | 4425.009  |
| NM_00407E | 3953.721  | 3871.651  | NM_00266E | 1160.006  | 413.681   | NM_00523E | 11527.472 | 11865.837 |
| AF068286  | 3572.891  | 3142.916  | NM_00431E | 940.896   | 1562.754  | NM_006384 | 28496.6   | 30219.309 |
| AB040957  | 11323.621 | 7598.296  | NM_01343E | 1537.656  | 1477.738  | NM_013257 | 6663.538  | 5296.837  |
| NM_00689C | 1709.089  | 1825.858  | NM_00013E | 41290.598 | 52015.375 | AB044546  | 2664.677  | 2024.429  |
| NM_005881 | 10937.484 | 12942.361 | NM_001727 | 27737.619 | 26071.742 | NM_01422E | 45762.926 | 44228.719 |



|           |           |           |           |           |           |           |           |           |
|-----------|-----------|-----------|-----------|-----------|-----------|-----------|-----------|-----------|
| NM_005794 | 1356.36   | 1259.057  | NM_004076 | 4452.062  | 3695.619  | AF163473  | 3992.969  | 3186.021  |
| L40519    | 5941.483  | 6211.331  | NM_007123 | 48899.168 | 52163.852 | NM_006256 | 16122.94  | 10772.78  |
| NM_004204 | 4117.838  | 3864.839  | BG717460  | 10056.161 | 9833.971  | NM_002846 | 7480.245  | 19406.563 |
| AF118064  | 754.023   | 651.162   | AA778392  | 45061.609 | 47152.395 | NM_002837 | 10368.098 | 8311.625  |
| NM_001641 | 48958.977 | 49957.156 | AI478178  | 11959.668 | 13811.02  | AL133077  | 44855.887 | 39814.184 |
| BC015750  | 63345.406 | 58500.008 | AA101279  | 4558.167  | 4002.816  | AK025211  | 6654.625  | 5135.159  |
| AK025769  | 17525.238 | 18951.842 | M19154    | 8528.371  | 9349.451  | U06715    | 1019.317  | 700.758   |
| AW945166  | 4622.189  | 4791.8    | AA399410  | 18302.975 | 18013.727 | NM_013402 | 10945.266 | 10922.379 |
| NM_005236 | 18024.551 | 18986.684 | AA137031  | 4794.056  | 4221.508  | NM_004377 | 22666.146 | 19095.178 |
| NM_006384 | 30419.965 | 35563.285 | AA292226  | 14840.82  | 14043.226 | AB037815  | 48759.711 | 50080.605 |
| NM_013257 | 4831.1    | 4699.657  | NM_000500 | 2850.404  | 2587.99   | NM_000132 | 36504.992 | 39330.176 |
| AF163473  | 5748.704  | 5508.58   | M29873    | 1418.614  | 850.405   | NM_001727 | 30503.059 | 34336.258 |
| NM_006256 | 16970.439 | 17244.85  | J04449    | 1165.086  | 979.05    | NM_004076 | 9828.755  | 9616.834  |
| NM_002846 | 4604.612  | 13180.422 | BC007031  | 20901.416 | 17684.889 | NM_007123 | 50582.719 | 50302.949 |
| NM_002837 | 12636.965 | 13877.566 | AF129756  | 63023.613 | 60035.047 | BG717460  | 8112.801  | 7974.46   |
| AL133077  | 49930.574 | 54596.758 | NM_002957 | 54064.313 | 46915.609 | AA778392  | 47049.852 | 47848.09  |
| AK025211  | 12850.548 | 15103.317 | BC036369  | 7810.567  | 5686.353  | AI478178  | 10761.599 | 12036.59  |
| U06715    | 1495.13   | 1398.43   | X12492    | 60771.906 | 57477.152 | AA101279  | 4023.968  | 4128.662  |
| NM_013402 | 11909.746 | 11163.087 | NM_017540 | 5420.544  | 4447.321  | M19154    | 15056.402 | 17228.906 |
| NM_002662 | 1546.984  | 1489.079  | NM_002396 | 1180.226  | 737.681   | AA399410  | 14461.684 | 16212.606 |
| NM_004313 | 1500.035  | 1899.591  | NM_006755 | 36480.004 | 30178.771 | AA137031  | 5026.075  | 5238.135  |
| NM_013435 | 1109.729  | 1392.958  | NM_013230 | 4291.077  | 5541.827  | AA292226  | 37122.273 | 39712.242 |
| NM_000132 | 41457.918 | 45469.223 | X72308    | 7648.049  | 8175.024  | NM_000500 | 5024.333  | 4760.466  |
| NM_001727 | 16153.108 | 18740.332 | NM_005408 | 1879.127  | 1693.618  | M29873    | 763.726   | 962.266   |
| NM_004076 | 3521.437  | 4039.389  | BC008376  | 27900.416 | 27902.303 | J04449    | 775.247   | 610.647   |
| NM_007123 | 58030.246 | 56510.555 | X87895    | 1088.972  | 641.791   | BC007031  | 33454.328 | 27602.338 |
| BG717460  | 10871.951 | 11638.189 | AB041269  | 2819.263  | 2554.8    | AF129756  | 62260.746 | 50302.316 |
| AA778392  | 50431.414 | 52160.68  | AK024908  | 11536.622 | 10286.496 | NM_002957 | 46440.539 | 42633.914 |
| AI478178  | 13182.216 | 15963.17  | NM_018270 | 17072.719 | 13323.521 | BC036369  | 7349.014  | 5152.162  |
| AA101279  | 5002.145  | 5216.147  | NM_000260 | 59666.223 | 63088.27  | X12492    | 50575.137 | 49502.602 |
| M19154    | 5537.792  | 5760.688  | NM_014160 | 10806.489 | 9691.813  | NM_017540 | 3465.881  | 2216.883  |
| AA399410  | 18111.719 | 19319.953 | AF230877  | 35256.191 | 35201.34  | NM_006755 | 24140.869 | 26804.605 |
| AA137031  | 3900.838  | 3648.331  | NM_017668 | 17246.02  | 15473.153 | NM_005881 | 8593.594  | 8877.23   |
| J04449    | 1383.311  | 1213.103  | AB033049  | 61028.828 | 60434.137 | NM_005794 | 711.389   | 960.699   |
| BC007031  | 4863.115  | 4370.915  | NM_000406 | 1842.721  | 1382.311  | NM_000260 | 59604.469 | 55772.086 |
| AF129756  | 43207.277 | 46793.664 | NM_005682 | 3366.065  | 3356.406  | NM_014160 | 8991.999  | 10371.75  |
| NM_002957 | 17963.287 | 16953.975 | NM_002926 | 6323.659  | 5108.923  | AF230877  | 50111.848 | 52962.898 |
| BC036369  | 4291.424  | 3328.678  | NM_000233 | 1721.952  | 1860.891  | NM_017668 | 13103.057 | 12481.022 |
| X12492    | 55126.355 | 53592.648 | NM_018697 | 6185.363  | 7094.467  | AB033049  | 63019.195 | 55066.055 |
| NM_017540 | 4536.202  | 4468.994  | AF090116  | 2128.171  | 1866.271  | NM_000406 | 1343.17   | 1351.076  |
| NM_002396 | 1123.564  | 1528.468  | NM_014030 | 62873.051 | 62502.934 | NM_005682 | 2769.047  | 2362.531  |
| NM_006755 | 52001.5   | 48963.176 | NM_004224 | 15982.147 | 16136.046 | NM_002926 | 3062.655  | 3156.913  |
| NM_013230 | 6135.257  | 6705.63   | Z21967    | 21426.352 | 20620.361 | NM_000233 | 1197.588  | 1307.957  |
| X72308    | 3367.701  | 3786.138  | NM_003738 | 2369.47   | 2456.073  | NM_018697 | 4647.501  | 5884.884  |
| NM_005408 | 2247.75   | 2635.613  | L09100    | 5205.189  | 4395.731  | AF090116  | 1780.948  | 1805.446  |
| BC008376  | 16030.304 | 17277.984 | NM_005472 | 8305.335  | 6479.318  | NM_014030 | 62195.816 | 60383.195 |
| X87895    | 1003.839  | 1159.261  | NM_003645 | 18201.969 | 19506.783 | NM_004224 | 40816.57  | 44619.746 |
| AB041269  | 1986.545  | 2055.569  | AF263613  | 13592.206 | 14149.442 | NM_000254 | 15369.128 | 12302.962 |
| AK024908  | 9663.665  | 9723.484  | NM_000097 | 4080.101  | 5020.75   | Z21967    | 20223.438 | 17142.867 |
| NM_018270 | 13188.757 | 13254.666 | NM_001509 | 5220.038  | 5411.791  | NM_003738 | 2902.734  | 2000.828  |
| NM_000260 | 27285.039 | 31008.777 | AK022878  | 18425.941 | 15510.283 | NM_016185 | 54577.977 | 44177.008 |
| NM_014160 | 10377.492 | 11383.864 | AF217187  | 15477.281 | 13230.728 | NM_012110 | 31018.461 | 29547.043 |
| AF230877  | 12439.117 | 13685.361 | NM_017750 | 5780.856  | 4524.489  | NM_005461 | 650.364   | 554.183   |

|           |           |           |           |           |           |           |           |           |
|-----------|-----------|-----------|-----------|-----------|-----------|-----------|-----------|-----------|
| NM_01766E | 15578.271 | 16697.725 | AK027122  | 38160.883 | 47242.969 | AF052693  | 14111.879 | 10085.966 |
| NM_00292E | 7047.208  | 7665.604  | AK026196  | 9270.035  | 8997.907  | NM_001129 | 53761.367 | 47406.469 |
| NM_000233 | 1934.825  | 2164.789  | NM_004977 | 18148.904 | 14682.237 | L09100    | 4782.495  | 4432.142  |
| NM_018697 | 6579.229  | 6947.624  | NM_00470C | 2560.02   | 2160.465  | NM_005472 | 6480.107  | 5921.614  |
| AF090116  | 2842.401  | 2936.947  | NM_00686E | 31971.379 | 31090.158 | NM_004313 | 1478.862  | 1525.021  |
| NM_01403C | 57243.32  | 52813.199 | NM_004161 | 36167.98  | 41882.867 | NM_01343E | 1823.514  | 1720.188  |
| NM_004224 | 3285.428  | 3394.286  | NM_00129E | 3693.329  | 2770.433  | AB020706  | 6518.421  | 7002.398  |
| Z21967    | 17402.75  | 16605.652 | NM_005161 | 2962.754  | 2955.34   | NM_00716E | 17523.471 | 19111.516 |
| NM_00373E | 3534.605  | 3317.442  | AB037749  | 2882.51   | 2700.424  | NM_016223 | 61089.621 | 57853.668 |
| L09100    | 1800.634  | 1984.361  | NM_020347 | 1831.664  | 1583.121  | NM_00286E | 10386.423 | 12456.343 |
| NM_005472 | 8367.693  | 5912.737  | NM_001462 | 7275.081  | 6976.199  | NM_01808E | 39903.375 | 44629.016 |
| NM_00364E | 18567.061 | 21089.707 | NM_004072 | 4053.955  | 4031.664  | NM_004161 | 28249.174 | 28247.08  |
| AF263613  | 10651.408 | 15623.805 | AF068286  | 2866.335  | 2286.727  | NM_00129E | 3380.179  | 2901.265  |
| NM_000097 | 5905.24   | 7289.269  | AB040957  | 12711.973 | 10427.622 | NM_005161 | 4506.193  | 3711.885  |
| NM_00150E | 2503.652  | 3202.885  | NM_00689C | 1473.229  | 1535.93   | AB037749  | 2486.987  | 2588.577  |
| AK022878  | 13811.303 | 14125.765 | NM_003110 | 11566.188 | 11019.94  | NM_020347 | 1117.349  | 961.9     |
| NM_01809E | 903.712   | 1244.567  | NM_003612 | 9844.699  | 9383.511  | NM_001462 | 7891.949  | 7980.139  |
| AF217187  | 13196.466 | 15040.923 | L40519    | 3890.25   | 3578.1    | NM_004072 | 5810.134  | 5096.843  |
| NM_01775C | 5216.882  | 5883.871  | NM_004204 | 5198.758  | 5548.762  | AF068286  | 2750.088  | 1863.971  |
| AK027122  | 38252.496 | 47790.262 | AK002181  | 2329.152  | 2470.772  | AB040957  | 15303.364 | 13063.597 |
| AK026196  | 8599.319  | 9374.122  | NM_001641 | 49892.676 | 52956.422 | NM_00689C | 1229.396  | 1119.778  |
| NM_004977 | 23043.346 | 19478.209 | BC015750  | 58905.223 | 56663.75  | NM_003110 | 8555.591  | 6918.966  |
| NM_00129E | 2538.686  | 2413.231  | AK025769  | 22617.596 | 19654.629 | NM_003612 | 9663.233  | 5298.514  |
| NM_005161 | 5397.498  | 3880.491  | AW945166  | 5028.302  | 4514.388  | NM_01323C | 4968.329  | 3544.22   |
| AB037749  | 1186.278  | 1550.883  | NM_00523E | 18164.229 | 14830.189 | X72308    | 15579.403 | 13610.974 |
| NM_020347 | 2279.191  | 2195.949  | NM_006384 | 31212.127 | 31012.23  | NM_00540E | 2128.299  | 1424.096  |
| NM_001462 | 8357.314  | 8320.623  | NM_013257 | 7355.492  | 6393.425  | BC008376  | 37370.32  | 32145.885 |
| NM_004072 | 4247.859  | 4264.11   | AB044546  | 5147.417  | 3787.147  | AB041269  | 7355.534  | 6256.909  |
| AF068286  | 3861.074  | 3812.689  | NM_01422E | 60102.922 | 52523.801 | AK024908  | 12430.217 | 11036.116 |
| AB040957  | 12438.601 | 9636.151  | AF163473  | 6076.77   | 5897.216  | NM_01827C | 24539.725 | 24901.264 |
| NM_00689C | 2181.835  | 1787.58   | NM_00625E | 22756.498 | 20264.482 | U06715    | 1251.41   | 1214.047  |
| NM_003110 | 12778.721 | 12182.538 | NM_00284E | 9353.982  | 27104.662 | NM_013402 | 8471.866  | 8168.028  |
| NM_003612 | 3328.199  | 2741.519  | NM_002837 | 18313.488 | 14059.747 | NM_002662 | 1191.255  | 1087.262  |
| L40519    | 5602.574  | 5062.57   | AL133077  | 49879.504 | 51576.004 | NM_004377 | 20951.117 | 17629.238 |
| NM_004204 | 4659.239  | 4789.415  | AK025211  | 12202.13  | 9411.228  | AB037815  | 60736.605 | 49535.656 |
| AK002181  | 1228.66   | 1478.596  | U06715    | 2511.932  | 1117.999  | NM_00364E | 16095.289 | 16637.482 |
| AF118064  | 711.59    | 954.003   | NM_013402 | 11411.761 | 7304.26   | AF263613  | 10933.92  | 11498.671 |
| NM_001641 | 57078.254 | 52793.273 | NM_002662 | 2420.755  | 743.065   | NM_000097 | 3466.219  | 2842.891  |
| BC015750  | 62253.465 | 58882.98  | NM_004377 | 18372.293 | 11446.661 | NM_00150E | 7408.553  | 6896.379  |
| AK025769  | 18072.486 | 19714.721 | AB037815  | 50483.152 | 44890.832 | AK022878  | 17988.248 | 19509.404 |
| AW945166  | 5907.264  | 6156.23   | NM_001727 | 36037.395 | 44176.555 | AF217187  | 15062.604 | 14391.755 |
| AB044546  | 3253.814  | 3424.578  | NM_00407E | 6933.151  | 6804.52   | NM_01775C | 4283.871  | 4406.152  |
| NM_01422E | 63064.176 | 58688.305 | NM_007123 | 57886.664 | 62302.516 | AK027122  | 26568.666 | 26469.285 |
| AF163473  | 6470.601  | 6708.002  | BG717460  | 11339.816 | 11602.449 | AK026196  | 7126.41   | 6644.866  |
| NM_00625E | 21464.418 | 18615.328 | AA778392  | 51575.242 | 51423.801 | AL137668  | 2047.288  | 1278.713  |
| NM_00284E | 4116.893  | 13572.274 | AI478178  | 13811.909 | 12444.509 | NM_01334E | 10064.042 | 6420.333  |
| NM_002837 | 14725.247 | 14612.471 | AA101279  | 6106.662  | 3561.795  | NM_004977 | 15431.414 | 11820.612 |
| AL133077  | 54288.156 | 53301.176 | M19154    | 12367.375 | 9874.017  | NM_00488E | 46433.133 | 37371.879 |
| AK025211  | 14328.937 | 15543.516 | AA399410  | 18840.537 | 15167.435 | NM_012283 | 63896.957 | 50771.004 |
| U06715    | 1424.37   | 1516.821  | AA137031  | 4645.964  | 3125.807  | NM_00470C | 2710.492  | 2440.447  |
| NM_013402 | 11758.826 | 11299.417 | AA292226  | 16644.707 | 13855.674 | NM_004162 | 36969.027 | 40982.059 |
| NM_002662 | 1430.879  | 1596.859  | NM_00050C | 3466.167  | 2455.946  | NM_00686E | 27312.313 | 23767.277 |
| NM_004377 | 18634.189 | 13963.819 | M29873    | 1631.16   | 1185.016  | NM_01754C | 2995.291  | 3043.264  |

|           |           |           |           |           |           |           |           |           |
|-----------|-----------|-----------|-----------|-----------|-----------|-----------|-----------|-----------|
| AB037815  | 15222.496 | 14307.79  | J04449    | 1179.617  | 908.165   | NM_006755 | 18775.646 | 18671.506 |
| NM_000132 | 45259.215 | 53346.723 | BC007031  | 23624.836 | 20680.115 | NM_005881 | 5587.79   | 5996.96   |
| NM_001727 | 21103.994 | 24549.074 | AF129756  | 62586.793 | 61321.43  | NM_005794 | 622.942   | 760.799   |
| NM_004076 | 3081.702  | 3406.414  | NM_002957 | 60014.785 | 59618.48  | L40519    | 1972.819  | 1403.93   |
| NM_007123 | 55900.398 | 65707.375 | BC036369  | 8036.215  | 7299.896  | NM_004204 | 6468.229  | 5629.09   |
| BG717460  | 9535.349  | 10302.699 | X12492    | 57604.371 | 55107.805 | AK002181  | 2893.202  | 2281.723  |
| AA778392  | 45050.172 | 50725.074 | NM_017540 | 4483.047  | 3305.322  | NM_001641 | 36802.402 | 42164.102 |
| AI478178  | 9984.138  | 11357.518 | NM_002396 | 1174.215  | 315.973   | BC015750  | 65222.398 | 54581.984 |
| AA101279  | 4553.233  | 5055.266  | NM_006755 | 37562.332 | 18271.414 | AK025769  | 15278.772 | 14271.054 |
| AA292226  | 5789.254  | 6799.772  | NM_005881 | 10445.071 | 6865.638  | AW945166  | 3508.586  | 2820.651  |
| NM_000500 | 1866.996  | 2240.588  | NM_005794 | 1281.01   | 957.008   | NM_005236 | 9393.086  | 7149.553  |
| M29873    | 1378.304  | 1484.53   | AF230877  | 25800.688 | 28568.049 | NM_006384 | 24932.234 | 21398.92  |
| J04449    | 1276.37   | 1623.347  | NM_017668 | 16777.385 | 15588.124 | NM_013257 | 3785.734  | 2118.265  |
| BC007031  | 5759.274  | 5268.566  | AB033049  | 59456.375 | 61988.809 | AB044546  | 5145.924  | 2155.9    |
| AF129756  | 49443.418 | 51430.566 | NM_000406 | 1800.533  | 1496.137  | NM_014225 | 40662.691 | 35731.047 |
| NM_002957 | 23888.305 | 23896.008 | NM_005682 | 3288.163  | 2527.897  | AF163473  | 3268.035  | 2071.913  |
| BC036369  | 5323.414  | 5966.639  | NM_002926 | 4326.607  | 4357.556  | NM_006256 | 14512.47  | 10188.231 |
| X12492    | 61875.895 | 64207.668 | NM_000233 | 1681.473  | 1398.695  | NM_002846 | 7400.277  | 13537.194 |
| NM_017540 | 5583.869  | 5750.76   | NM_018697 | 5430.528  | 6166.619  | NM_002837 | 10368.188 | 7984.703  |
| NM_002396 | 1373.072  | 1816.591  | AF090116  | 1885.326  | 2075.868  | AL133077  | 44920.496 | 40623.629 |
| NM_006755 | 54362.746 | 55067.922 | NM_014030 | 61614.063 | 64640.301 | AK025211  | 8525.308  | 8511.317  |
| NM_005881 | 14027.775 | 13200.721 | NM_004224 | 16648.572 | 19806.32  | CY3Cy5    | 7146.946  | 543.854   |
| NM_005794 | 1232.883  | 1182.412  | NM_000254 | 22144.363 | 24338.32  | NM_005456 | 4418.14   | 4832.247  |
| NM_000260 | 27687.939 | 35558.504 | Z21967    | 23239.818 | 26293.242 | AL832550  | 1515.677  | 1804.192  |
| NM_014160 | 8244.846  | 9899.329  | NM_003738 | 3388.826  | 3722.064  | AF131798  | 910.789   | 1124.417  |
| AF230877  | 7478.727  | 8408.796  | NM_016185 | 62581.973 | 65611.461 | AK001731  | 3011.896  | 3631.006  |
| NM_017668 | 12253.389 | 13699.694 | NM_012110 | 34093.605 | 43456.777 | AF052108  | 1277.143  | 1351.994  |
| AB033049  | 55000.363 | 53371.602 | NM_005461 | 1071.835  | 1186.639  | AF052176  | 967.475   | 1251.199  |
| NM_000406 | 1803.752  | 1664.852  | AF052693  | 16103.905 | 17280.361 | AF086477  | 2729.587  | 2670.088  |
| NM_005682 | 4072.392  | 4076.846  | NM_001129 | 54992.172 | 54981.313 | NM_001412 | 8991.885  | 7354.301  |
| NM_002926 | 7097.952  | 7708.252  | L09100    | 4646.105  | 4254.875  | AF095771  | 1050.128  | 1135.609  |
| NM_014030 | 53248.938 | 52791.012 | NM_005472 | 8029.538  | 5926.622  | AF071111  | 1290.129  | 1260.751  |
| NM_004224 | 2808.211  | 3021.608  | NM_004313 | 1617.986  | 1344.119  | U00954    | 827.544   | 760.654   |
| NM_000254 | 23354.785 | 26680.889 | NM_013435 | 1634.938  | 2208.063  | NM_015942 | 12688.587 | 14275.566 |
| Z21967    | 17717.58  | 18824.943 | AB020706  | 11465.12  | 13887.214 | NM_017907 | 14860.48  | 16858.572 |
| NM_003738 | 3604.735  | 3661.469  | NM_007166 | 18200.566 | 20838.764 | NM_005456 | 3496.911  | 4716.937  |
| NM_016185 | 61092.613 | 58287.305 | NM_016223 | 56981.023 | 63801.219 | NM_006534 | 17085.283 | 19330.109 |
| NM_012110 | 13422.964 | 14836.896 | NM_002869 | 15061.042 | 18370.111 | SR1       | 69556.828 | 68325.039 |
| NM_005461 | 760.333   | 894.415   | NM_018086 | 30552.703 | 34508.414 | SR3       | 42659.734 | 53545.242 |
| AF052693  | 7689.198  | 8475.375  | NM_004161 | 31254.125 | 37684.734 | SR5       | 6307.223  | 8865.82   |
| NM_001129 | 54278.137 | 53741.801 | NM_001295 | 2364.505  | 2437.357  | SR9       | 15506.934 | 5568.462  |
| L09100    | 2234.364  | 2302.404  | NM_005161 | 2416.275  | 2121.968  | U40710    | 360.507   | 590.374   |
| NM_005472 | 8711.87   | 7498.161  | AB037749  | 2053.449  | 1390.768  | U58666    | 889.398   | 943.752   |
| NM_004313 | 2116.22   | 1914.693  | NM_020347 | 1634.474  | 964.05    | U03241    | 2367.547  | 2750.111  |
| NM_013435 | 1157.55   | 1258.469  | NM_001462 | 6311.306  | 7057.361  | U62539    | 1068.742  | 1068.763  |
| AB020706  | 10043.68  | 12624.314 | NM_004072 | 4028.26   | 4237.738  | AF086110  | 1138.674  | 1248.65   |
| NM_007166 | 12713.778 | 16240.625 | AF068286  | 2821.319  | 2478.747  | NM_016418 | 6886.82   | 6568.404  |
| NM_016223 | 59195.785 | 56169.477 | AB040957  | 11801.145 | 10313.075 | AK025908  | 11741.861 | 10656.159 |
| NM_002869 | 12278.64  | 14868.972 | NM_006890 | 1912.039  | 1884.629  | AK022204  | 2084.245  | 1829.428  |
| NM_018086 | 28783.924 | 30374.832 | NM_003110 | 11522.529 | 13419.746 | AF086147  | 587.214   | 462.268   |
| NM_004161 | 28626.512 | 31412.152 | NM_003612 | 9609.462  | 11176.198 | AL109726  | 784.2     | 995.437   |
| NM_001295 | 2338.297  | 2580.897  | NM_013230 | 6289.713  | 7508.495  | AL109716  | 848.606   | 856.291   |
| NM_005161 | 5309.048  | 4617.626  | X72308    | 16005.907 | 16688.496 | AK027065  | 5758.228  | 5657.75   |

|           |           |           |           |           |           |           |           |           |
|-----------|-----------|-----------|-----------|-----------|-----------|-----------|-----------|-----------|
| NM_020347 | 2278.692  | 2335.974  | NM_005408 | 2339.369  | 2169.429  | AL353944  | 1787.926  | 1944.032  |
| NM_001462 | 8200.668  | 9557.809  | BC008376  | 36180.176 | 39027.52  | AF085912  | 1064.155  | 1028.021  |
| NM_004072 | 3989.979  | 4411.246  | X87895    | 540.005   | 671.498   | AK023304  | 834.997   | 813.62    |
| AF068286  | 3616.158  | 3940.25   | AB041269  | 4740.142  | 3826.507  | AK023761  | 1057.245  | 1213.75   |
| AB040957  | 11924.586 | 11081.439 | AK024908  | 10368.586 | 6771.531  | AK023963  | 23161.074 | 30490.57  |
| NM_006890 | 2038.962  | 1903.252  | NM_018270 | 19935.533 | 16145.33  | AK022473  | 26495.154 | 37443.664 |
| NM_003110 | 12926.631 | 14131.753 | U06715    | 2034.55   | 1863.85   | AK023380  | 932.077   | 1233.916  |
| NM_003612 | 3704.906  | 3897.074  | NM_013402 | 9009.931  | 10730.493 | AK023810  | 3142.007  | 3392.034  |
| NM_013230 | 7543.568  | 8120.323  | NM_002662 | 1686.251  | 1473.722  | AK024133  | 591.561   | 421.963   |
| X72308    | 3722.479  | 3836.754  | NM_004377 | 15907.826 | 13730.165 | AK024860  | 888.25    | 832.023   |
| NM_005408 | 2309.619  | 2077.379  | AB037815  | 34175.359 | 36227.992 | AF086154  | 1262.958  | 1236.903  |
| BC008376  | 18571.596 | 16762.951 | NM_003645 | 14132.248 | 13995.188 | AF086205  | 2068.405  | 1957.38   |
| X87895    | 1370.725  | 1232.353  | AF263613  | 10756.687 | 12630.799 | AK026723  | 971.099   | 1220.899  |
| AB041269  | 2682.024  | 2921.668  | NM_000097 | 4318.545  | 3531.69   | AK024169  | 1455.944  | 1512.334  |
| AK024908  | 13704.014 | 11974.339 | NM_001509 | 3162.356  | 2798.863  | AF147395  | 5367.426  | 6157.542  |
| NM_018270 | 16878.996 | 14917.434 | AK022878  | 15477.901 | 8939.362  | AK026447  | 2262.555  | 2324.246  |
| U06715    | 1137.812  | 1439.671  | NM_018099 | 690.553   | 746.004   | AF087967  | 519.589   | 741.027   |
| NM_013402 | 9715.26   | 11608.067 | AF217187  | 13000.264 | 15043.004 | AK025217  | 1081.053  | 1231.392  |
| NM_002662 | 1135.07   | 1240.186  | NM_017750 | 5080.603  | 4801.822  | AF087972  | 6886.838  | 7416.045  |
| NM_004377 | 15801.346 | 14196.873 | AK027122  | 31210.088 | 35777.355 | AL137342  | 16865.633 | 21212.641 |
| AB037815  | 13251.742 | 14513.349 | AK026196  | 8745.625  | 8071.487  | AF075105  | 2926.162  | 3358.593  |
| NM_003645 | 19022.594 | 19680.504 | AL137668  | 2665.347  | 2966.829  | AK025102  | 3479.291  | 3756.964  |
| AF263613  | 11091.777 | 13543.704 | AV704019  | 726.494   | 745.681   | AF086562  | 4569.715  | 5845.092  |
| NM_000097 | 5889.758  | 6517.413  | NM_013348 | 6610.813  | 7551.148  | Y11897    | 609.345   | 746.244   |
| NM_001509 | 2640.512  | 3081.807  | NM_004977 | 20717.68  | 21794.291 | AK021749  | 1848.645  | 2134.919  |
| AK022878  | 15014.429 | 16605.223 | NM_004888 | 54852.797 | 51570.73  | AJ011980  | 1506.036  | 3000.26   |
| NM_018099 | 809.646   | 1007.219  | NM_012283 | 57614.461 | 68151.586 | AK025669  | 614.627   | 1337.501  |
| AF217187  | 14795.325 | 16030.11  | NM_004700 | 2181.068  | 1685.265  | AK022741  | 298.985   | 575.444   |
| NM_017750 | 6416.943  | 6540.066  | NM_004162 | 28727.586 | 23008.488 | NM_002237 | 3900.146  | 4189.447  |
| AK027122  | 40863.027 | 52063.5   | NM_006868 | 28846.766 | 20492.715 | NM_005117 | 5743.708  | 6815.997  |
| AK026196  | 11139.783 | 11779.876 | NM_017540 | 4863.714  | 5121.043  | AJ007733  | 2639.652  | 2886.69   |
| AL137668  | 3150.427  | 3331.522  | NM_006755 | 32550.418 | 37267.516 | AK021625  | 4946.049  | 5280.247  |
| AV704019  | 1105.594  | 1165.079  | NM_005881 | 9549.311  | 10335.258 | AK021679  | 843.781   | 1086.682  |
| NM_013348 | 2386.91   | 2093.331  | NM_005794 | 1148.475  | 677.293   | AK001380  | 4832.393  | 4119.201  |
| NM_004977 | 21748.951 | 18377.645 | L40519    | 3415.649  | 2998.341  | AK026753  | 893.673   | 952.532   |
| NM_004888 | 60123.641 | 53519.816 | NM_004204 | 3933.122  | 3335.575  | AL117553  | 500.158   | 616.832   |
| NM_002251 | 1554.861  | 1056.994  | AK002181  | 1544.53   | 1596.132  | AK024938  | 918.869   | 850.616   |
| NM_012283 | 57856.875 | 54536.297 | NM_001641 | 45302.949 | 38958.566 | AK025312  | 4588.803  | 5216.229  |
| NM_004700 | 3079.589  | 2863.917  | BC015750  | 60820.07  | 58874.594 | NM_018606 | 1219.901  | 1373.335  |
| NM_004162 | 29080.834 | 29301.66  | AK025769  | 17951.195 | 16296.687 | AK022062  | 1132.763  | 1159.221  |
| NM_006868 | 39904.57  | 36893.82  | AW945166  | 4452.959  | 3180.967  | AK026493  | 1013.732  | 893.13    |
| NM_017540 | 4148.308  | 4395.271  | NM_005236 | 13324.705 | 10302.833 | AK002042  | 1267.23   | 1627.08   |
| NM_002396 | 1259.736  | 970.369   | NM_006384 | 26479.758 | 23343.098 | AL049268  | 1768.179  | 1950.377  |
| NM_006755 | 45844.762 | 46706.984 | NM_013257 | 6826.729  | 6929.333  | AK025092  | 3349.235  | 3645.523  |
| NM_005881 | 11875.82  | 14365.273 | AB044546  | 3626.241  | 4669.779  | AF130047  | 1246.413  | 1148.975  |
| NM_005794 | 1664.785  | 851.333   | NM_014225 | 57432.297 | 58124.852 | AF085904  | 1131.485  | 1058.682  |
| L40519    | 6207.702  | 6317.928  | AF163473  | 5842.804  | 5747.143  | Z83944    | 2044.869  | 3483.734  |
| NM_004204 | 4766.282  | 4834.749  | NM_006256 | 16258.038 | 15360.752 | AF085871  | 3014.309  | 4248.681  |
| AK002181  | 1302.888  | 1603.024  | NM_002846 | 6315.799  | 18911.975 | AL137284  | 2654.508  | 3275.031  |
| AF118064  | 1032.938  | 769.137   | NM_002837 | 12575.259 | 9372.461  | AK001013  | 887.618   | 967.664   |
| NM_001641 | 59268.68  | 57782.5   | AL133077  | 50929.465 | 47337.281 | NM_005296 | 6233.445  | 4715.332  |
| BC015750  | 62114.438 | 67515.273 | AK025211  | 9139.735  | 5897.113  | AK001394  | 708.783   | 726.944   |
| AK025769  | 20842.406 | 21591.088 | CY3Cy5    | 7867.796  | 323.951   | AF026564  | 2102.31   | 1950.484  |

|           |           |           |           |           |           |           |           |           |
|-----------|-----------|-----------|-----------|-----------|-----------|-----------|-----------|-----------|
| AW945166  | 7342.405  | 7678.786  | NM_005456 | 3718.496  | 2641.927  | X97301    | 5899.871  | 6763.404  |
| NM_005236 | 20106.553 | 20922.646 | NM_006534 | 19105.098 | 15996.162 | AL110141  | 59272.484 | 56205.52  |
| NM_006384 | 32974.051 | 40635.469 | AL832550  | 1428.411  | 1534.302  | AF116636  | 1926.471  | 2195.749  |
| NM_013257 | 7496.614  | 8126.527  | AK001731  | 3696.457  | 3548.876  | U80761    | 28291.857 | 40213.691 |
| AB044546  | 3415.547  | 3880.11   | AF052108  | 1580.812  | 1292.355  | Y16701    | 6572.903  | 7190.654  |
| NM_014225 | 59404.652 | 55358.879 | AF052176  | 1497.833  | 1032.8    | U61100    | 1221.747  | 1423.964  |
| AF163473  | 6352.518  | 6640.945  | AF086477  | 1894.639  | 1678.918  | NM_018582 | 745.745   | 621.535   |
| NM_006256 | 22121.697 | 19694.432 | NM_001412 | 8750.827  | 7219.175  | Y11161    | 6758.348  | 7344.768  |
| NM_002846 | 4488.714  | 14400.56  | AF095771  | 1159.859  | 1050.945  | AF130117  | 1078.423  | 802.253   |
| NM_002837 | 15421.098 | 17297.127 | AF071111  | 1114.85   | 945.622   | AB007861  | 2066.143  | 2328.76   |
| AL133077  | 61038     | 60730.957 | NM_015942 | 14911.947 | 12429.41  | AK024125  | 979.574   | 979.361   |
| AK025211  | 15264.993 | 14764.853 | NM_017907 | 19248.408 | 16002.321 | AK024761  | 7235.483  | 8106.074  |
| CY3Cy5    | 11158.601 | 971.572   | NM_006534 | 9413.198  | 7588.635  | M55536    | 11210.377 | 12894.448 |
| NM_005456 | 1938.826  | 2299.764  | SR1       | 87050.398 | 63550.227 | AF086067  | 5184.648  | 6074.133  |
| NM_006534 | 20686.184 | 24008.434 | SR3       | 46164.43  | 49203.328 | Z70766    | 876.611   | 1059.037  |
| AF131798  | 1152.945  | 1029.839  | SR5       | 4776.896  | 4529.54   | AK000660  | 6094.798  | 7138.322  |
| AF086477  | 739.868   | 581.988   | SR7       | 4932.19   | 43710.598 | AK026298  | 507.43    | 686.54    |
| NM_001412 | 8775.215  | 7304.255  | SR9       | 17455.461 | 3004.649  | AL049289  | 914.239   | 1139.332  |
| AF095771  | 1053.322  | 1102.224  | CY3Cy5    | 9790.354  | 385.036   | NM_014711 | 2676.426  | 3276.28   |
| AF071111  | 1782.794  | 1890.878  | U03241    | 1808.338  | 1921.741  | AK022015  | 3329.104  | 4429.474  |
| U00954    | 838.89    | 698.698   | U62539    | 1357.307  | 1547.414  | D17234    | 610.386   | 521.07    |
| NM_015942 | 13935.918 | 15592.331 | AF086110  | 1037.911  | 1167.473  | AK002208  | 20819.217 | 23276.887 |
| NM_017907 | 21631.389 | 21656.027 | NM_016418 | 8809.174  | 6499.73   | D63135    | 2055.7    | 1941.316  |
| NM_005456 | 1946.337  | 1721.041  | AK025908  | 13006.999 | 9972.598  | AB033083  | 9683.004  | 10087.799 |
| NM_006534 | 19050.916 | 19255.133 | U79256    | 37596.305 | 36484.359 | NM_017828 | 13340.222 | 15322.362 |
| SR1       | 84880.766 | 57382.047 | AK023761  | 1092.922  | 665.691   | AY007113  | 1352.731  | 1034.655  |
| SR3       | 42097.199 | 46179.805 | AK023963  | 26610.383 | 27939.35  | AF130083  | 18857.057 | 20634.713 |
| SR5       | 5923.792  | 9160.666  | AK022473  | 29544.59  | 32099.223 | AL110185  | 63323.484 | 58706.648 |
| SR7       | 5999.279  | 46629.902 | AK023380  | 1355.893  | 928.068   | NM_002700 | 35302.094 | 41239.266 |
| SR9       | 23473.613 | 8665.653  | AK023810  | 4147.387  | 3800.806  | AB002437  | 47471.797 | 51127.852 |
| CY3Cy5    | 8405.609  | 733.22    | AF086205  | 2080.305  | 1688.296  | AK024013  | 2192.085  | 1710.39   |
| U62539    | 1273.294  | 339.622   | AK026723  | 1246.962  | 1112.528  | AK023496  | 826.477   | 434.783   |
| AF086110  | 839.366   | 686.623   | AK024169  | 1744.284  | 1177.303  | NM_006777 | 3118.117  | 3682.87   |
| NM_016418 | 8995.313  | 7430.196  | AF147395  | 4839.669  | 4293.268  | AK024969  | 6690.588  | 7492.315  |
| AK025908  | 10941.459 | 10176.019 | AK026447  | 3356.486  | 2859.766  | AL049471  | 3297.707  | 3953.983  |
| AF086147  | 608.704   | 760.804   | AF087972  | 4495.285  | 5745.088  | AK022250  | 1362.153  | 1678.679  |
| AL109726  | 572.247   | 788.531   | AL137342  | 10958.847 | 11142.559 | NM_019598 | 23711.486 | 26018.732 |
| AL109716  | 502.36    | 681.86    | AF075105  | 2462.495  | 2531.436  | J05063    | 1456.919  | 1701.369  |
| AK027065  | 5183.658  | 4338.263  | AK025102  | 3752.433  | 3624.641  | NM_012368 | 616.921   | 665.046   |
| AK001127  | 2311.912  | 2495.678  | AF086562  | 3116.621  | 2659.588  | AF222904  | 1383.17   | 1568.73   |
| U79256    | 7418.375  | 8235.167  | AK021749  | 2193.426  | 2047.054  | NM_006225 | 63803.938 | 58159.188 |
| AK023761  | 870.43    | 963.403   | AJ011980  | 1220.423  | 1157.694  | NM_003254 | 44645.715 | 52987.641 |
| AK022473  | 20803.15  | 8282.849  | NM_002237 | 3948.141  | 4730.611  | NM_017730 | 8538.432  | 10294.783 |
| AK023380  | 733.86    | 355.495   | NM_005117 | 6556.879  | 6668.972  | NM_014630 | 11014.289 | 13285.835 |
| AK023810  | 2478.047  | 1621.953  | AJ007733  | 2267.832  | 2119.007  | AF022728  | 1520.972  | 1795.851  |
| AK024860  | 1203.149  | 1190.742  | AK021625  | 2703.194  | 2734.483  | AK025813  | 837.951   | 1129.398  |
| AF086205  | 1664.324  | 1663.946  | AK021679  | 1367.369  | 1446.079  | AK021829  | 755.761   | 907.621   |
| AK026723  | 979.57    | 1288.623  | AK001380  | 5394.516  | 3918.863  | NM_014681 | 1428.303  | 1236.12   |
| AK024169  | 1052.002  | 956.355   | AK026753  | 1019.822  | 1032.808  | NM_007182 | 4908.598  | 5808.746  |
| AF147395  | 6105.043  | 6410.174  | AL117553  | 958.388   | 1220.623  | NM_019063 | 54374.207 | 53472.41  |
| AK026447  | 3199.035  | 2681.997  | AK024938  | 964.86    | 981.182   | NM_014336 | 4084.412  | 4157.599  |
| AF085985  | 1207.644  | 1342.641  | AK025312  | 4703.799  | 4261.469  | NM_012456 | 37415.082 | 44756.215 |
| AF086011  | 1066.52   | 895.987   | NM_018606 | 1360.38   | 1584.212  | AB002308  | 1474.085  | 1516.866  |

|           |           |           |           |           |           |           |           |           |
|-----------|-----------|-----------|-----------|-----------|-----------|-----------|-----------|-----------|
| AK025217  | 2000.105  | 2579.638  | AK022062  | 1801.001  | 1622.169  | NM_003324 | 40202.406 | 39566.313 |
| AF087972  | 955.582   | 1011.902  | AK026493  | 925.435   | 1176.587  | NM_012143 | 11495.037 | 12143.336 |
| AL137342  | 28264.65  | 33942.785 | AK002042  | 1155.173  | 1660.239  | NM_006658 | 3503.733  | 3454.946  |
| AF075105  | 5103.642  | 5893.18   | AL049268  | 2287.17   | 2327.58   | AF085892  | 4809.857  | 4828.527  |
| AK025102  | 4135.173  | 4027.846  | AK025092  | 3650.609  | 4536.056  | AF075114  | 16802.203 | 14897.541 |
| AF086562  | 2414.127  | 2202.988  | AF130047  | 1377.355  | 1208.9    | AL359562  | 4790.812  | 4889.978  |
| AJ011980  | 1351.859  | 679.059   | AF085904  | 1065.149  | 1302.197  | AK022218  | 63733.336 | 59180.957 |
| NM_002237 | 1151.321  | 872.755   | Z83944    | 3261.382  | 3145.605  | NM_007112 | 5057.224  | 5678.941  |
| NM_005117 | 1828.007  | 1256.743  | AF085871  | 3513.016  | 4021.492  | AK026037  | 1301.248  | 1470.015  |
| AJ007733  | 1967.947  | 2132.785  | AL137284  | 2929.046  | 3092.286  | S82075    | 1723.75   | 1664.215  |
| AK021625  | 2636.008  | 2454.669  | AK001013  | 2858.71   | 2578.782  | M34571    | 1948.758  | 1946.51   |
| AK021679  | 1000.97   | 1200.154  | NM_005298 | 7811.568  | 5500.424  | M98457    | 1081.422  | 961.914   |
| AK001380  | 6236.126  | 5235.392  | AK001394  | 858.993   | 794.589   | NM_003246 | 702.824   | 674.878   |
| AK026753  | 1107.284  | 1512.639  | AF026564  | 2655.789  | 2423.116  | AB037745  | 11632.153 | 13980.702 |
| AL117553  | 870.379   | 547.509   | X97301    | 6456.025  | 5516.024  | NM_017717 | 2421.483  | 3102.642  |
| AK024938  | 861.94    | 983.239   | AL110141  | 68096.305 | 64538.609 | AK026201  | 6666.361  | 8222.001  |
| AK025312  | 6092.512  | 5974.74   | AF116636  | 1605.474  | 1678.345  | AB028962  | 1558.031  | 1592.929  |
| AK022062  | 1551.104  | 1660.663  | U80761    | 25759.117 | 25861.223 | U63041    | 5894.781  | 6084.666  |
| AK026493  | 731.845   | 661.183   | Y16701    | 7459.78   | 6974.568  | NM_000297 | 36181.191 | 38559.242 |
| AK002042  | 798.17    | 1072.206  | U61100    | 1262.812  | 1125.445  | AF149019  | 53574.391 | 51589.883 |
| AL049268  | 1168.439  | 1095.587  | M21539    | 771.058   | 1131.268  | NM_013354 | 1788.35   | 2294.045  |
| AK025092  | 3293.627  | 2767.078  | Y11161    | 9323.725  | 9492.204  | AK023954  | 10154.638 | 9854.857  |
| AF085871  | 3035.939  | 2578.314  | AK024125  | 1064.131  | 1132.79   | NM_003930 | 2831.099  | 2906.71   |
| AL137284  | 2691.862  | 2510.45   | AK024761  | 10110.031 | 10154.97  | NM_013416 | 10628.893 | 10580.971 |
| AK001013  | 1494.96   | 1193.051  | M55536    | 14269.262 | 14297.262 | AB040934  | 1456.614  | 1531.171  |
| NM_005298 | 4448.992  | 2903.921  | AF086067  | 5887.955  | 5569.616  | NM_000598 | 607.186   | 297.144   |
| AK001394  | 559.958   | 846.643   | Z70766    | 966.824   | 893.597   | NM_005092 | 1472.862  | 1800.608  |
| AF026564  | 1895.804  | 2250.205  | AK000660  | 6837.157  | 7906.358  | NM_001883 | 4453.644  | 4873.505  |
| X97301    | 1034.969  | 820.867   | AL049289  | 1322.494  | 1135.458  | NM_015722 | 9521.89   | 8151.026  |
| AL110141  | 73792.875 | 66725.531 | NM_014711 | 4344.653  | 4211.83   | NM_000905 | 684.963   | 1590.333  |
| AF116636  | 2903.462  | 3255.477  | AK022015  | 4119.296  | 4484.996  | NM_016086 | 2758.628  | 2976.287  |
| U80761    | 4362.181  | 4668.743  | D17234    | 1147.303  | 1103.504  | NM_004382 | 1685.342  | 2000.164  |
| Y16701    | 7832.249  | 8083.923  | AK002208  | 17831.451 | 18939.178 | NM_000831 | 1986.503  | 2627.388  |
| U61100    | 2094.937  | 1968.466  | D63135    | 2581.712  | 2630.209  | NM_014618 | 10173.477 | 10859.146 |
| NM_018582 | 908.836   | 973.485   | AB033083  | 9698.522  | 9122.166  | AA902333  | 22781.385 | 28590.906 |
| M21539    | 1384.325  | 2059.843  | NM_017828 | 16958.787 | 15536.941 | NM_015641 | 9946.429  | 11264.035 |
| Y11161    | 10479.332 | 8157.681  | AF130083  | 21142.768 | 17783.01  | AF272377  | 6411.365  | 6850.878  |
| AF130117  | 903.852   | 1234.458  | AL110185  | 68344.461 | 61349.035 | NM_006566 | 3552.214  | 4039.058  |
| AB007861  | 2819.446  | 3117.365  | NM_002700 | 29802.715 | 32780.988 | NM_017795 | 14300.898 | 14567.602 |
| AK024125  | 807.133   | 1078.88   | AB002437  | 55452.074 | 51836.004 | NM_015216 | 2847.385  | 3198.54   |
| AK024761  | 13300.928 | 13534.169 | AK024013  | 1493.148  | 1506.484  | NM_018348 | 2428.664  | 2533.454  |
| M55536    | 16721.625 | 18394.871 | AK023496  | 504.411   | 577.007   | AF119900  | 22263.982 | 24218.859 |
| AF086067  | 6724.639  | 7419.309  | NM_006777 | 1947.92   | 2073.329  | AF130087  | 8106.876  | 8982.808  |
| AK000660  | 4901.38   | 1681.074  | AK022250  | 878.959   | 1105.899  | AK027031  | 23877.41  | 27214.449 |
| NM_014711 | 3745.297  | 2968.416  | NM_019598 | 30485.158 | 30479.502 | NM_018383 | 14322.516 | 15887.854 |
| AK022015  | 2562.664  | 2113.283  | J05063    | 1239.643  | 1457.532  | NM_003590 | 12926.004 | 14279.501 |
| D17234    | 1127.516  | 714.353   | AF222904  | 1467.871  | 1943.727  | AJ278476  | 16817.018 | 17913.068 |
| AK002208  | 4847.75   | 4705.369  | NM_006225 | 61501.691 | 62525.16  | NM_002358 | 2742.147  | 2558.682  |
| D63135    | 2027.089  | 1921.757  | NM_003254 | 38552.617 | 42034.094 | NM_012225 | 5389.325  | 5598.2    |
| AB033083  | 5683.084  | 5632.43   | NM_017730 | 10081.219 | 10755.24  | AB014595  | 15121.128 | 15462.396 |
| NM_017828 | 17356.725 | 17422.908 | NM_014630 | 13999.803 | 14288.433 | AB024704  | 58835.008 | 53200.988 |
| AY007113  | 1796.571  | 1706.703  | AF022728  | 1682.489  | 1894.924  | NM_006322 | 3814.048  | 4215.368  |
| AF130083  | 29854.178 | 35173.52  | AK025813  | 884.902   | 1486.52   | AK002081  | 2861.072  | 2865.527  |

|           |           |           |           |           |           |           |           |           |
|-----------|-----------|-----------|-----------|-----------|-----------|-----------|-----------|-----------|
| AL110185  | 73959.125 | 62130.93  | AK021829  | 1220.994  | 1555.842  | NM_002210 | 7581.982  | 7481.773  |
| NM_002700 | 2788.465  | 2625.358  | NM_014681 | 1992.125  | 1526.868  | NM_016360 | 930.346   | 1940.159  |
| AB002437  | 49972.492 | 48072.141 | NM_007182 | 6232.349  | 6713.125  | AF231022  | 54276.117 | 53774.031 |
| AK024013  | 1218.269  | 1496.219  | NM_019063 | 59057.938 | 54351.402 | NM_005500 | 9995.485  | 9707.229  |
| AK023496  | 898.357   | 659.302   | NM_014330 | 3725.463  | 3077.524  | U66702    | 61843.18  | 56095.621 |
| NM_006777 | 3325.189  | 3370.427  | NM_012450 | 42175.73  | 47986.273 | AK025582  | 7198.603  | 8579.477  |
| AK024969  | 6416.34   | 8026.891  | AB002308  | 1092.572  | 1239.94   | NM_003884 | 3354.387  | 3436.452  |
| AL049471  | 4282.458  | 5648.337  | NM_003324 | 44694.25  | 44238.355 | NM_014880 | 16959.361 | 19954.359 |
| AK022250  | 861.17    | 1206.861  | NM_012143 | 12947.537 | 13996.897 | NM_003344 | 10461.879 | 11635.154 |
| NM_019590 | 25051.873 | 23519.055 | NM_017500 | 1914.924  | 2321.165  | NM_002772 | 2071.823  | 2057.8    |
| J05063    | 1868.827  | 1893.178  | NM_006650 | 3372.482  | 3845.289  | U82970    | 1571.155  | 1366.048  |
| NM_006220 | 26390.08  | 18040.566 | AF085892  | 4775.869  | 5088.398  | NM_005920 | 1679.829  | 1342.688  |
| NM_003254 | 16759.418 | 11801.795 | AF075114  | 13599.714 | 15533.797 | NM_007170 | 507.727   | 781.685   |
| NM_017730 | 8430.863  | 6368.448  | AL359562  | 5823.366  | 7505.238  | AJ278478  | 4170.734  | 4549.648  |
| NM_014630 | 13365.78  | 11397.976 | AK022218  | 65462.086 | 62470.883 | NM_014300 | 28017.129 | 32686.785 |
| AF022728  | 1460.145  | 1099.344  | NM_007112 | 5934.021  | 7238.183  | NM_014600 | 1769.986  | 2039.938  |
| AK025813  | 977.913   | 1012.267  | AK026037  | 1721.693  | 1797.019  | Y19188    | 5808.379  | 5964.76   |
| AK021829  | 873.47    | 1103.739  | S82075    | 2406.8    | 2351.545  | NM_014460 | 2726.729  | 2565.793  |
| NM_014681 | 872.912   | 914.851   | M34571    | 1144.6    | 1685.166  | NM_003732 | 16619.041 | 17109.285 |
| NM_007182 | 6129.757  | 6384.651  | AB037745  | 9424.317  | 10353.29  | AF216381  | 31111.869 | 32487.891 |
| NM_019063 | 73593.391 | 62673.355 | NM_017717 | 1359.354  | 1261.874  | AL137614  | 2478.799  | 2236.726  |
| NM_014330 | 1813.137  | 1438.346  | AK026201  | 8554.762  | 8543.972  | AK023683  | 812.383   | 611.917   |
| NM_012450 | 34715.426 | 40129.891 | AB028962  | 2391.899  | 2397.657  | AK023093  | 590.383   | 652.116   |
| AB002308  | 3573.094  | 3222.567  | U63041    | 7325.746  | 6938.254  | AB023163  | 4857.061  | 4843.613  |
| NM_003324 | 51852.195 | 42322.84  | NM_000297 | 27997.928 | 27752.178 | NM_006610 | 7593.224  | 7481.871  |
| NM_012143 | 14490.373 | 15971.411 | AF149019  | 48100.883 | 51018.598 | AF272373  | 6871.907  | 7787.612  |
| NM_017500 | 735.873   | 538.611   | NM_013354 | 2109.92   | 2273.619  | NM_016327 | 9272.252  | 9243.406  |
| NM_006650 | 2445.221  | 2520.684  | AK023954  | 8413.003  | 7163.257  | NM_004980 | 9119.982  | 11738.405 |
| AF085892  | 6979.016  | 7262.528  | NM_003930 | 3479.294  | 3401.627  | AK074832  | 34116.535 | 40434.48  |
| AF075114  | 7967.087  | 7777.484  | NM_013410 | 10194.34  | 9293.517  | NM_016260 | 1611.281  | 1810.979  |
| AL359562  | 5798.218  | 6232.157  | AB040934  | 1477.203  | 1399.388  | NM_006230 | 47122.633 | 49686.484 |
| AK022218  | 71498.063 | 57456.859 | NM_005092 | 1279.229  | 1447.07   | AK026353  | 6073.354  | 6959.296  |
| NM_007112 | 8043.872  | 9309.145  | NM_001883 | 4852.685  | 6042.859  | L24123    | 13916.267 | 14281.265 |
| AK026037  | 1524.027  | 1812.99   | NM_015722 | 18567.207 | 20128.125 | D80001    | 6106.999  | 6261.69   |
| S82075    | 3878.618  | 4519.567  | NM_016080 | 3657.625  | 3756.282  | AK024288  | 16548.564 | 16580.279 |
| AB037745  | 1557.006  | 1412.717  | NM_004382 | 2122.196  | 2070.317  | NM_006521 | 26895.674 | 26588.215 |
| NM_017717 | 857.863   | 635.807   | NM_000831 | 2314.426  | 2447.908  | NM_002892 | 5375.514  | 3208.715  |
| AK026201  | 6370.424  | 6412.256  | NM_014610 | 7688.278  | 8911.28   | NM_003442 | 665.794   | 666.927   |
| AB028962  | 1816.573  | 1911.396  | AA902333  | 29163.08  | 38109.449 | M62324    | 4764.201  | 4754.64   |
| U63041    | 6086.184  | 5541.73   | NM_015641 | 12753.303 | 12651.104 | NM_016200 | 30160.922 | 30774.656 |
| NM_000297 | 3823.975  | 3259.02   | AF272377  | 7347.567  | 7040.304  | BE082230  | 24863.287 | 20561.008 |
| AF149019  | 3053.32   | 3457.8    | NM_006560 | 2907.754  | 3054.845  | AK025929  | 38044.387 | 35100.469 |
| NM_013354 | 2230.118  | 2308.324  | NM_017790 | 17624.748 | 15650.2   | NM_001384 | 3264.323  | 2498.211  |
| AK023954  | 1727.244  | 2021.572  | NM_015210 | 8105.925  | 8675.286  | NM_007030 | 3733.722  | 4631.227  |
| NM_003930 | 3938.349  | 3735.611  | NM_018340 | 4642.097  | 4896.562  | NM_017857 | 10189.406 | 9636.246  |
| NM_013410 | 3772.366  | 3746.612  | AF119900  | 25701.545 | 26038.842 | NM_006840 | 10434.311 | 9388.472  |
| AB040934  | 1486.983  | 1602.067  | AF130087  | 7961.021  | 7778.359  | AJ272267  | 4912.083  | 5387.866  |
| NM_005092 | 1264.935  | 1365.236  | AK027031  | 19756.756 | 18271.018 | NM_004660 | 575.039   | 601.411   |
| NM_001883 | 2724.832  | 3248.59   | NM_018383 | 16757.658 | 16138.147 | NM_000670 | 932.518   | 1440.51   |
| NM_015722 | 898.161   | 853.656   | NM_003590 | 19122.303 | 21971.088 | NM_002670 | 22260.879 | 28035.02  |
| NM_000900 | 520.607   | 826.15    | AJ278476  | 20821.592 | 20407.635 | NM_002100 | 5763.394  | 6480      |
| NM_016080 | 4639.72   | 5477.739  | NM_002350 | 2288.01   | 2420.757  | NM_006660 | 8455.674  | 10628.857 |
| NM_004382 | 968.099   | 1325.761  | NM_012220 | 7334.106  | 7035.196  | AK026256  | 4272.968  | 4129.354  |

|           |           |           |           |           |           |           |           |           |
|-----------|-----------|-----------|-----------|-----------|-----------|-----------|-----------|-----------|
| NM_000831 | 2613.415  | 3250.219  | AB014595  | 16360.768 | 18212.086 | NM_00027C | 31620.408 | 34044.375 |
| NM_01461E | 994.464   | 608.408   | AB024704  | 65001.168 | 57205.043 | U83111    | 1606.968  | 1625.877  |
| AA902333  | 22357.104 | 23399.973 | NM_006322 | 7199.555  | 6952.047  | U89277    | 10929.181 | 10893.157 |
| NM_015641 | 12427.05  | 12924.993 | AK002081  | 4777.375  | 4652.98   | AB046837  | 3670.112  | 3770.687  |
| AF272377  | 7172.335  | 6443.917  | NM_00221C | 10215.379 | 11088.174 | AK026670  | 700.464   | 718.767   |
| NM_00656E | 2686.402  | 2205.947  | NM_01636E | 762.174   | 1089.196  | NM_00287E | 2713.499  | 2146.648  |
| NM_01779E | 14944.622 | 13771.206 | AF231022  | 57582.734 | 50043.488 | AK022332  | 4247.173  | 3783.12   |
| NM_01521E | 9349.748  | 9848.056  | NM_00550C | 10843.773 | 11902.501 | NM_00646E | 1059.354  | 1043.649  |
| NM_01834E | 4991.199  | 4683.675  | U66702    | 64773.961 | 61891.199 | NM_00676E | 12798.371 | 11056.192 |
| AF119900  | 22976.014 | 23367.85  | AK025582  | 9040.902  | 9405.651  | NM_00118E | 2728.829  | 2308.707  |
| AF130087  | 2317.241  | 2357.545  | NM_003884 | 3534.184  | 3832.039  | NM_00699Z | 2065.842  | 1506.893  |
| AK027031  | 10849.937 | 11505.109 | NM_01488E | 25935.139 | 25231.705 | AF055009  | 64785.508 | 57073.191 |
| NM_01838E | 17540.697 | 18784.07  | NM_003344 | 15486.635 | 14546.135 | NM_01630E | 7426.792  | 7253.729  |
| NM_00359C | 18744.213 | 21633.465 | NM_00277Z | 3852.78   | 3080.756  | D12485    | 5937.383  | 6941.025  |
| AJ278476  | 22398.051 | 23429.684 | U82970    | 2150.172  | 2271.252  | AK023204  | 3052.826  | 3235.789  |
| NM_00235E | 1030.786  | 1045.524  | NM_00592E | 1730.845  | 1536.558  | NM_00344E | 5339.801  | 6086.976  |
| NM_01222E | 12626.339 | 11959.163 | AJ278478  | 4326.897  | 4477.828  | NM_00247E | 9752.104  | 12163.355 |
| AB014595  | 8995.085  | 11235.111 | NM_01430C | 35424.742 | 34510.348 | D38163    | 2939.626  | 2788.791  |
| AB024704  | 39327.621 | 45658.969 | NM_01460E | 2151.354  | 2217.855  | NM_004967 | 669.624   | 890.57    |
| NM_00632Z | 5435.206  | 6420.013  | Y19188    | 2995.621  | 3130.201  | D28449    | 22015.424 | 20533.162 |
| AK002081  | 6021.37   | 6507.572  | NM_01446E | 1643.539  | 1631.558  | NM_003281 | 2317.521  | 1972.962  |
| NM_00221C | 13261.272 | 14591.623 | NM_00373Z | 16280.584 | 17792.496 | AA460480  | 3952.601  | 4279.051  |
| NM_01636E | 1030.528  | 1163.274  | AF216381  | 38854.566 | 46197.688 | AI298884  | 29742.236 | 35746.969 |
| AF231022  | 10972.982 | 12965.304 | AL137614  | 3112.589  | 3364.543  | D87845    | 3592.324  | 4285.787  |
| NM_00550C | 7890.986  | 7921.663  | AK023683  | 637.127   | 1026.357  | X53279    | 1845.988  | 1708.028  |
| U66702    | 24720.811 | 26623.959 | AB023163  | 5166.729  | 6482.913  | M83254    | 9428.063  | 8934.529  |
| AK025582  | 5123.67   | 5757.28   | NM_00661E | 6596.783  | 7517.833  | S56770    | 6230.327  | 5858.274  |
| NM_003884 | 3002.106  | 3470.252  | AF272373  | 7741.411  | 7626.328  | AI193606  | 1659.147  | 1819.877  |
| NM_01488E | 21085.537 | 23008.6   | NM_016327 | 11614.476 | 11415.988 | H58872    | 25466.271 | 30941.721 |
| NM_003344 | 10994.19  | 12699.653 | NM_00498E | 10153.496 | 13372.813 | J02938    | 1488.814  | 1211.809  |
| NM_00277Z | 1382.668  | 1082.585  | AK074832  | 37954.777 | 47301.027 | J04543    | 14971.611 | 12776.74  |
| U82970    | 2075.521  | 2502.523  | NM_01626E | 1523.554  | 2087.959  | S60415    | 1310.235  | 1144.005  |
| NM_00592E | 644.879   | 710.916   | NM_00623E | 57745.977 | 56340.879 | AA456295  | 5934.376  | 4717.997  |
| NM_00717E | 833.919   | 760.646   | AK026353  | 7375.729  | 8054.002  | AA009484  | 1334.383  | 1282.679  |
| AJ278478  | 4527.833  | 5044.927  | L24123    | 17011.547 | 18665.549 | NM_002044 | 14987.625 | 15487.987 |
| NM_01430C | 32005.592 | 36384.156 | D80001    | 16503.238 | 16497.711 | AL137262  | 4518.283  | 4345.873  |
| NM_01460E | 2774.66   | 2588.276  | AK024288  | 26061.498 | 23859.176 | NM_020437 | 6894.74   | 7591.58   |
| Y19188    | 944.558   | 583.483   | NM_006521 | 35686.117 | 36887.832 | NM_00401C | 567.956   | 631.452   |
| NM_01446E | 1288.479  | 1401.065  | NM_00289Z | 5614.062  | 4399.788  | NM_01864E | 3742.026  | 3206.738  |
| NM_00373Z | 10964.964 | 11158.743 | NM_00344Z | 1112.058  | 914.536   | NM_01618E | 957.74    | 947.067   |
| AF216381  | 41333.566 | 46517.332 | M62324    | 7727.874  | 6114.699  | M30142    | 8830.299  | 8020.396  |
| AL137614  | 4822.634  | 4755.326  | NM_01620C | 37803.082 | 40646.055 | NM_00501E | 1253.337  | 1374.903  |
| AK023683  | 1616.485  | 1292.724  | BE082230  | 34783.898 | 43060.074 | NM_01337E | 33299.676 | 36070.387 |
| AK023093  | 809.775   | 874.783   | AK025929  | 51645.695 | 50950.109 | NM_00108E | 1457.904  | 1587.331  |
| AB023163  | 3386.966  | 4388.272  | NM_001384 | 5164.471  | 5846.325  | NM_00611C | 4759.658  | 4507.699  |
| NM_00661E | 6823.269  | 8691.99   | NM_01824E | 1782.339  | 1940.845  | NM_01645E | 3026.301  | 3673.898  |
| AF272373  | 12103.268 | 13562.125 | NM_00703E | 1949.322  | 1681.057  | NM_017701 | 3209.422  | 2791.86   |
| NM_016327 | 14227.701 | 17231.902 | NM_017857 | 12733.402 | 11001.082 | NM_01422E | 12374.067 | 11364.035 |
| NM_00498E | 12122.525 | 17600.936 | NM_00684E | 14118.422 | 14410.28  | AF142567  | 5130.04   | 4965.763  |
| AK074832  | 16504.098 | 16685.291 | AJ272267  | 6468.034  | 7357.269  | NM_01741C | 10239.867 | 10565.162 |
| NM_01626E | 1409.482  | 1557.685  | NM_00466E | 531.857   | 1010.864  | AY009398  | 885.97    | 920.935   |
| NM_00623E | 50244.813 | 51159.664 | NM_00067E | 1625.969  | 1126.938  | NM_00286C | 17415.16  | 19292.941 |
| AK026353  | 4326.327  | 4408.542  | NM_00267E | 25989.945 | 26587.385 | NM_00616E | 14207.041 | 15562.206 |



|           |           |           |           |           |           |           |           |           |
|-----------|-----------|-----------|-----------|-----------|-----------|-----------|-----------|-----------|
| L24123    | 14469.9   | 16474.391 | NM_002103 | 7208.065  | 7081.563  | NM_001218 | 2008.828  | 2716.148  |
| D80001    | 13539.977 | 14203.853 | NM_006665 | 10700.408 | 11349.188 | NM_014183 | 2482.26   | 2847.087  |
| AK024288  | 3920.206  | 3501.652  | AK026256  | 8122.833  | 7295.274  | AB046780  | 40398.969 | 47048.762 |
| NM_006521 | 9948.021  | 9737.353  | NM_000270 | 45703.449 | 51000.973 | NM_018353 | 6745.828  | 6579.971  |
| NM_002892 | 4545.268  | 4436.954  | U83111    | 2235.363  | 2166.699  | NM_016373 | 502.494   | 591.59    |
| NM_003442 | 947.38    | 1270.189  | U89277    | 13711.883 | 12785.618 | NM_003560 | 26510.164 | 31259.398 |
| M62324    | 2880.082  | 2568.573  | AB046837  | 4118.569  | 3699.063  | NM_014403 | 10184.03  | 10189.993 |
| NM_006164 | 1140.961  | 1373.804  | AK026670  | 1388.573  | 994.415   | AL050100  | 2931.868  | 3218.535  |
| NM_016200 | 45292.559 | 48040.492 | NM_002876 | 1932.299  | 1503.026  | NM_000748 | 27227.428 | 27494.547 |
| BE082230  | 43650.469 | 47291.477 | AK022332  | 2178.266  | 2262.419  | NM_004925 | 4129.643  | 3700.114  |
| AK025929  | 63290.41  | 50833.59  | NM_006769 | 12074.214 | 9500.513  | NM_004922 | 11238.659 | 10923.989 |
| NM_001384 | 7803.26   | 8125.577  | NM_001189 | 2696.526  | 2464.276  | NM_002871 | 1382.117  | 872.489   |
| NM_018246 | 3264.045  | 4059.513  | NM_006992 | 3395.365  | 3762.375  | BE873653  | 64018.223 | 55881.48  |
| NM_007039 | 2675.113  | 2727.795  | AF055009  | 65414.09  | 55711.234 | NM_006987 | 1562.319  | 1428.358  |
| NM_017857 | 8172.669  | 8563.254  | AL365370  | 4106.711  | 4529.647  | NM_001282 | 8217.979  | 9056.741  |
| NM_006849 | 8333.094  | 7919.723  | L08442    | 996.433   | 745.466   | AL133654  | 8701.881  | 7578.323  |
| AJ272267  | 7252.086  | 7710.409  | AB014593  | 2883.108  | 2736.87   | AB051826  | 865.504   | 662.823   |
| NM_004668 | 495.962   | 833.042   | NM_016305 | 10206.137 | 10485.059 | L25080    | 41249.027 | 43802.945 |
| NM_000673 | 1451.028  | 1585.739  | D12485    | 7714.532  | 8155.043  | NM_003143 | 63701.832 | 50678.332 |
| NM_002676 | 8271.163  | 9580.274  | AK023204  | 3802.79   | 4063.429  | AK026289  | 9044.017  | 9853.756  |
| NM_002103 | 6259.676  | 5966.332  | NM_003449 | 5650.691  | 5618.917  | NM_003258 | 9205.335  | 9783.083  |
| NM_006665 | 11685.236 | 13161.509 | NM_002478 | 9657.319  | 10370.363 | AL133068  | 25779.459 | 25721.412 |
| AK026256  | 8979.587  | 9124.439  | D38163    | 2323.099  | 2471.355  | NM_003463 | 9570.598  | 8769.524  |
| NM_000270 | 37520.438 | 46370.414 | NM_004967 | 779.744   | 995.514   | NM_004944 | 2302.902  | 2471.266  |
| U83111    | 1740.6    | 1724.815  | D28449    | 34077.625 | 30800.98  | AK024964  | 2193.546  | 2172.679  |
| U89277    | 9853.933  | 11792.196 | NM_003281 | 4893.185  | 4235.152  | M20697    | 1322.062  | 1111.577  |
| AB046837  | 3829.847  | 3340.401  | AA460480  | 4044.133  | 3803.108  | NM_015046 | 4108.685  | 3469.626  |
| AK026670  | 1106.596  | 1363.156  | AI298884  | 36655.012 | 41034.883 | NM_002014 | 39477.828 | 40412.707 |
| NM_002876 | 4040.291  | 4340.808  | D87845    | 4063.202  | 3919.345  | NM_002538 | 13098.336 | 11772.328 |
| AK022332  | 8627.074  | 8498.216  | X53279    | 1662.779  | 1905.25   | NM_016585 | 29142.201 | 28224.799 |
| NM_006465 | 1138.433  | 1223.416  | M83254    | 6504.054  | 6222.955  | NM_003333 | 64731.168 | 54206.887 |
| NM_006769 | 19210.787 | 21533.051 | S56770    | 4948.689  | 4172.457  | NM_002013 | 19672.283 | 15675.568 |
| NM_001189 | 2017.471  | 2355.219  | AI193606  | 1313.78   | 1428.289  | NM_006927 | 27969.73  | 25600.99  |
| NM_006992 | 3011.656  | 3143.34   | H58872    | 28134.063 | 30220.33  | AF237700  | 2329.236  | 1825.897  |
| AF055009  | 22476.453 | 20972.924 | J02938    | 1134.51   | 1126.657  | NM_003449 | 4392.798  | 4386.733  |
| AL365370  | 3719.328  | 4196.255  | J04543    | 18110.898 | 19270.93  | NM_002478 | 9453.094  | 9829.621  |
| L08442    | 742.164   | 970.416   | S60415    | 1894.578  | 1905.325  | D38163    | 2239.437  | 2607.019  |
| AB014593  | 3158.049  | 3132.259  | AA456295  | 6136.436  | 5581.963  | NM_004967 | 1136.723  | 1093.835  |
| NM_016305 | 10978.2   | 11768.833 | BE733577  | 8770.081  | 8098.73   | D28449    | 28109.02  | 30093.553 |
| D12485    | 6783.53   | 5910.454  | AI817942  | 5169.401  | 5519.443  | NM_003281 | 4032.093  | 4709.886  |
| AK023204  | 3465.158  | 3270.706  | BG762340  | 3485.18   | 3073.67   | AA460480  | 2520.51   | 2957.976  |
| NM_003449 | 5033.289  | 5031.295  | AA009484  | 1719.381  | 1646.952  | AI298884  | 18091.133 | 19351.73  |
| NM_002478 | 3961.257  | 4203.096  | NM_002044 | 25158.123 | 27594.762 | D87845    | 3025.557  | 3493.008  |
| D38163    | 800.291   | 937.984   | AL137262  | 6002.195  | 5754.041  | X53279    | 2185.785  | 2516.049  |
| NM_004967 | 684.425   | 683.202   | NM_020437 | 9446.213  | 10192.925 | M83254    | 17720.779 | 19234.73  |
| D28449    | 30116.201 | 34929.266 | X87888    | 901.147   | 847.41    | S56770    | 4955.043  | 4861.844  |
| NM_003281 | 3501.319  | 3814.726  | NM_018643 | 5498.532  | 4307.345  | AI193606  | 1158.89   | 1033.921  |
| AA460480  | 1126.743  | 894.386   | NM_016186 | 1334      | 1215.541  | H58872    | 19976     | 18361.463 |
| AI298884  | 34020.688 | 41038.836 | M30142    | 11919.467 | 8139.62   | J02938    | 1268.849  | 1353.971  |
| D87845    | 5509.169  | 5869.432  | NM_005018 | 1747.952  | 1825.282  | J04543    | 15516.393 | 14055.871 |
| X53279    | 891.516   | 856.059   | NM_013378 | 36068.941 | 37161.852 | S60415    | 1230.516  | 1195.356  |
| M83254    | 3080.328  | 3476.808  | NM_001085 | 2185.989  | 1830.061  | AA456295  | 5361.315  | 4010.538  |
| S56770    | 1409.944  | 1342.008  | NM_006110 | 7303.959  | 6737.663  | BE733577  | 7220.688  | 6518.083  |

|           |           |           |           |           |           |           |           |           |
|-----------|-----------|-----------|-----------|-----------|-----------|-----------|-----------|-----------|
| AI193606  | 1571.321  | 1721.711  | NM_016453 | 3175.304  | 4043.167  | AI817942  | 3778.398  | 3594.74   |
| H58872    | 24694.52  | 33453.07  | NM_017701 | 4230.585  | 4479.1    | AF209930  | 2508.235  | 2615.141  |
| J02938    | 1271.942  | 1471.775  | NM_014226 | 12522.396 | 15590.407 | AL133109  | 1167.53   | 1175.509  |
| J04543    | 19177.154 | 20127.291 | AF142567  | 4858.132  | 5838.917  | AF203728  | 1005.96   | 708.288   |
| S60415    | 1860.722  | 1913.126  | NM_006202 | 56698.66  | 49199.551 | X87888    | 686.321   | 291.588   |
| AA456295  | 1896.4    | 2763.557  | NM_017410 | 13093.969 | 14038.087 | NM_018643 | 2810.342  | 2319.101  |
| BE733577  | 5983.146  | 5897.946  | AY009398  | 1865.42   | 1784.927  | NM_016186 | 783.395   | 666.593   |
| AI817942  | 2422.868  | 2923.459  | NM_002860 | 24637.438 | 26626.293 | M30142    | 6521.137  | 5844.19   |
| BG762340  | 1773.31   | 1943.834  | NM_006169 | 18052.648 | 18654.965 | NM_005018 | 1881.595  | 1982.005  |
| AA009484  | 1344.128  | 1395.656  | NM_001218 | 2508.204  | 2526.592  | NM_013378 | 32423.178 | 34743.039 |
| NM_002044 | 26557.938 | 31186.262 | NM_014183 | 3195.55   | 3121.866  | NM_001085 | 1484.44   | 1317.043  |
| AL137262  | 3203.02   | 2216.71   | AB046780  | 43097.254 | 47615.719 | NM_006110 | 4081.795  | 3848.93   |
| NM_020437 | 7662.429  | 7469.32   | NM_018353 | 9112.045  | 8308.731  | NM_016453 | 2262.575  | 2646.902  |
| NM_018643 | 1427.399  | 1053.157  | NM_016373 | 1084.586  | 498.333   | NM_017701 | 3290.118  | 2812.557  |
| NM_016186 | 735.461   | 974.884   | NM_003560 | 31540.164 | 35716.238 | NM_014226 | 13160.673 | 11705.817 |
| M30142    | 10246.824 | 11293.508 | NM_014403 | 12841.838 | 11519.97  | AF142567  | 4538.083  | 3732.541  |
| NM_005018 | 2157.871  | 2179.237  | AL050100  | 2497.98   | 1992.258  | NM_005621 | 537.427   | 739.536   |
| NM_013378 | 30787.424 | 32220.396 | NM_000748 | 38197.594 | 39583.883 | NM_006202 | 52304.504 | 54044.797 |
| NM_001085 | 2030.501  | 1955.811  | NM_004925 | 4511.789  | 4106.314  | NM_017410 | 10051.711 | 8179.408  |
| NM_006110 | 8651.607  | 8341.623  | NM_004922 | 11865.023 | 13868.348 | AY009398  | 854.136   | 831.642   |
| NM_016453 | 4563.234  | 6103.722  | NM_002871 | 1812.514  | 2777.886  | D12485    | 4789.493  | 4403.13   |
| NM_017701 | 998.962   | 748.899   | NM_001282 | 7759.972  | 8709.982  | AK023204  | 2601.687  | 1985.443  |
| NM_014226 | 2410.125  | 1929.109  | NM_016830 | 29237.869 | 29044.51  | NM_001218 | 1646.864  | 1792.206  |
| AF142567  | 2277.191  | 2459.573  | U44105    | 1237.947  | 1513.904  | NM_014183 | 1977.327  | 2038.263  |
| NM_005621 | 487.581   | 554.656   | NM_016103 | 3984.039  | 4506.592  | AB046780  | 36130.594 | 44306.43  |
| NM_006202 | 24188.107 | 24181.441 | AL133654  | 11088.648 | 11557.765 | NM_018353 | 7580.763  | 7326.501  |
| NM_017410 | 15716.139 | 17869.764 | AB051826  | 948.579   | 843.895   | NM_016373 | 495.944   | 548.583   |
| NM_002860 | 26206.811 | 25268.463 | L25080    | 43676.816 | 44046.293 | NM_003560 | 17913.129 | 18664.283 |
| NM_006169 | 7887.068  | 8365.521  | NM_003143 | 71897.508 | 62346.879 | NM_014403 | 5681.574  | 4780.584  |
| NM_001218 | 2056.913  | 1956.413  | AK026289  | 10985.064 | 12395.84  | AL050100  | 2676.771  | 2343.56   |
| NM_014183 | 4277.568  | 3931.014  | NM_003258 | 13646.703 | 12617.95  | NM_000748 | 29028.051 | 29764.152 |
| AB046780  | 47601.879 | 48877.848 | AL133068  | 44978.996 | 46057.582 | NM_004925 | 3170.015  | 2760.387  |
| NM_018353 | 8553.007  | 8450.787  | NM_003463 | 12042.459 | 12478.765 | NM_004922 | 10488.155 | 11511.197 |
| NM_003560 | 41535.742 | 45698.711 | NM_004944 | 2569.418  | 2645.549  | NM_002871 | 1400.861  | 1054.729  |
| NM_014403 | 18619.779 | 16852.152 | AK024964  | 2439.782  | 2252.191  | BE873653  | 57747.691 | 49528.172 |
| AL050100  | 1439.153  | 1443.732  | M20697    | 1298.617  | 1200.676  | NM_006987 | 1518.541  | 1153.325  |
| NM_000748 | 8030.786  | 8110.138  | NM_015046 | 6214.674  | 6059.536  | NM_001282 | 7938.647  | 6400.801  |
| NM_004925 | 5108.787  | 4778.033  | NM_002014 | 47994.859 | 51266.531 | NM_016830 | 18928.01  | 15427.384 |
| NM_004922 | 15510.58  | 17931.35  | NM_002538 | 18839.469 | 22587.439 | U44105    | 1143.204  | 964.596   |
| NM_002871 | 2044.7    | 2221.542  | NM_016585 | 35063.613 | 42822.414 | NM_016103 | 3280.906  | 2332.551  |
| BE873653  | 33426.844 | 37480.531 | NM_003333 | 65394.055 | 58012.742 | AL133654  | 8350.799  | 5493.021  |
| NM_006987 | 1764.796  | 1911.4    | NM_002013 | 25205.85  | 28615.477 | AL137262  | 4218.74   | 2882.562  |
| NM_001282 | 7059.6    | 8630.425  | NM_006927 | 34847.469 | 38778.344 | NM_020437 | 5846.538  | 3894.594  |
| NM_016830 | 23683.934 | 22285.486 | NM_014601 | 4540.968  | 4979.202  | L25080    | 37656.234 | 39204.281 |
| U44105    | 1723.839  | 1448.449  | NM_017761 | 26791.15  | 29365.854 | NM_003143 | 60369.082 | 47310.438 |
| NM_016103 | 5635.728  | 6080.64   | NM_006928 | 1501.626  | 1177.243  | AK026289  | 8633.169  | 8925.224  |
| AL133654  | 14944.719 | 14650.376 | AF237700  | 4016.242  | 3596.569  | NM_003258 | 8871.168  | 8927.903  |
| AB051826  | 754.251   | 475.282   | NM_003449 | 5566.019  | 6241.038  | AL133068  | 32086.004 | 36665.074 |
| L25080    | 17015.627 | 17017.83  | NM_002478 | 9930.035  | 9945.018  | NM_003463 | 4366.585  | 3906.272  |
| NM_003143 | 74451.008 | 63007.191 | D38163    | 2166.598  | 1878.08   | NM_004944 | 1241.472  | 1222.869  |
| AK026289  | 9311.228  | 10323.152 | D28449    | 33230.219 | 31746.775 | AK024964  | 2075.12   | 1828.596  |
| NM_003258 | 17141.725 | 17290.639 | NM_003281 | 4722.544  | 3889.238  | M20697    | 1623.957  | 1581.806  |
| AL133068  | 5408.388  | 5793.177  | AA460480  | 3442.306  | 3786.656  | NM_015046 | 5558.221  | 5664.691  |

|           |           |           |           |           |           |           |           |           |
|-----------|-----------|-----------|-----------|-----------|-----------|-----------|-----------|-----------|
| NM_003463 | 12687.802 | 12365.658 | AI298884  | 35532.574 | 39164.289 | NM_002014 | 23281.527 | 18050.467 |
| NM_004944 | 3167.401  | 2910.858  | D87845    | 4548.943  | 4862.219  | NM_00253E | 8750.83   | 7133.781  |
| AK024964  | 3958.511  | 4096.633  | X53279    | 2222.44   | 1832.934  | NM_01658E | 23314.781 | 19647.75  |
| M20697    | 3183.248  | 3433.66   | M83254    | 9886.067  | 9388.611  | NM_003333 | 64306.297 | 50285.082 |
| NM_01504E | 8151.908  | 7193.215  | S56770    | 6224.606  | 4872.071  | NM_002013 | 20270.777 | 20707.979 |
| NM_002014 | 37489.535 | 35624.344 | AI193606  | 1643.022  | 1804.725  | NM_006927 | 26131.83  | 25948.424 |
| NM_00253E | 29649.822 | 36093.227 | H58872    | 30963.012 | 27184.975 | NM_014601 | 4894.329  | 4341.356  |
| NM_01658E | 35679.34  | 41367.051 | J02938    | 1563.474  | 1211.187  | NM_017761 | 24075.625 | 22524.055 |
| NM_002013 | 24240.855 | 24499.715 | J04543    | 18582.982 | 20068.451 | NM_00692E | 1057.679  | 731.403   |
| NM_006927 | 26164.756 | 24764.664 | S60415    | 1333.184  | 1858.48   | AF237700  | 2435.525  | 1764.425  |
| NM_014601 | 3031.059  | 3629.898  | AA456295  | 4956.899  | 4862.79   | NM_00286C | 15730.757 | 13116.669 |
| NM_017761 | 32592.666 | 33611.625 | BE733577  | 7779.951  | 8271.067  | NM_00616E | 12468.902 | 9422.118  |
| NM_00692E | 2153.238  | 2210.707  | AI817942  | 3815.918  | 4357.785  | D38163    | 1759.709  | 1736.825  |
| AF237700  | 2530.249  | 2342.858  | BG762340  | 2504.594  | 3204.531  | NM_004967 | 650.66    | 550.367   |
| NM_00344E | 5691.892  | 5414.319  | AA009484  | 1518.122  | 1682.904  | D28449    | 27779.822 | 23251     |
| NM_00247E | 4204.213  | 3816.891  | AF209930  | 3762.881  | 3473.37   | NM_003281 | 3409.635  | 3631.137  |
| D38163    | 776.929   | 859.247   | NM_00401C | 826.056   | 666.622   | AA460480  | 3612.815  | 4460.188  |
| D28449    | 31348.211 | 33312.492 | X87888    | 716.933   | 451.815   | AI298884  | 23334.77  | 22747.145 |
| NM_003281 | 3471.804  | 3680.579  | NM_018643 | 5262.262  | 4193.202  | D87845    | 1894.045  | 1725.781  |
| AA460480  | 1289.185  | 1009.431  | NM_01618E | 1426.923  | 1159.112  | X53279    | 1279.947  | 1157.996  |
| AI298884  | 33765.895 | 37730.48  | M30142    | 12361.791 | 9564.448  | M83254    | 15562.278 | 15782.519 |
| D87845    | 5633.91   | 5403.012  | NM_00501E | 1949.5    | 1547.09   | S56770    | 5271.559  | 5018.854  |
| X53279    | 751.728   | 850.383   | NM_01337E | 40598.902 | 39653.055 | AI193606  | 1433.585  | 1322.17   |
| M83254    | 3131.986  | 3260.766  | NM_00108E | 1472.291  | 1585.796  | H58872    | 20149     | 17273.758 |
| S56770    | 1338.83   | 1186.549  | NM_006110 | 7805.495  | 6631.579  | J02938    | 997.74    | 1026.673  |
| AI193606  | 1352.786  | 1021.291  | NM_016453 | 3591.539  | 4178.669  | J04543    | 14504.639 | 12567.38  |
| H58872    | 15155.417 | 16556.59  | NM_017701 | 3678.245  | 3539.698  | S60415    | 1018.347  | 1224.127  |
| J02938    | 1440.239  | 1822.869  | NM_01422E | 11937.321 | 12425.741 | AA456295  | 6047.343  | 6088.419  |
| J04543    | 22600.965 | 23736.693 | AF142567  | 4373.164  | 5006.802  | AI817942  | 4174.886  | 3889.788  |
| AA456295  | 2178.343  | 3046.803  | NM_005621 | 764.215   | 1174.315  | BG762340  | 2536.309  | 1924.796  |
| BE733577  | 6699.383  | 7060.441  | NM_006202 | 63890.527 | 63047.898 | AA009484  | 1167.102  | 818.014   |
| AI817942  | 2651.772  | 2481.381  | NM_01741C | 13364.966 | 15166.935 | AF209930  | 2878.881  | 2030.223  |
| BG762340  | 1826.585  | 1670.318  | NM_00121E | 2419.488  | 2869.886  | AL133109  | 989.921   | 643.3     |
| AA009484  | 1359.641  | 1121.277  | NM_014183 | 3549.409  | 3104.058  | AF203728  | 715.956   | 316.04    |
| AF209930  | 1001.795  | 1037.408  | AB046780  | 43207.754 | 47247.074 | AB051826  | 774.941   | 629.361   |
| AL133109  | 4359.359  | 4396.904  | NM_018353 | 9828.667  | 8882.845  | M30142    | 7300.258  | 6195.876  |
| AF203728  | 1238.636  | 1075.314  | NM_016373 | 813.882   | 533.538   | NM_00501E | 1578.292  | 1663.911  |
| X87888    | 617.548   | 687.719   | NM_00356C | 31891.865 | 35055.484 | NM_01337E | 34581.387 | 35126.105 |
| NM_018643 | 1667.087  | 1579.757  | NM_014403 | 13781.205 | 13211.248 | NM_00108E | 1692.577  | 1598.517  |
| NM_01618E | 719.06    | 599.827   | AL050100  | 3085.063  | 2703.169  | NM_006110 | 5152.572  | 4664.147  |
| M30142    | 11596.653 | 10399.268 | NM_00074E | 33080.023 | 32295.221 | NM_016453 | 2585.932  | 2634.988  |
| NM_00501E | 2734.331  | 2736.091  | NM_00492E | 3591.439  | 3228.749  | NM_017701 | 2032.23   | 1684.152  |
| NM_01337E | 30947.865 | 33420.215 | NM_004922 | 9300.934  | 9552.13   | NM_01422E | 10379.279 | 8929.511  |
| NM_00108E | 2057.868  | 2198.935  | NM_002871 | 1214.128  | 1378.674  | AF142567  | 4590.012  | 3807.774  |
| NM_006110 | 9456.169  | 8218.787  | BE873653  | 59906.156 | 56328.137 | NM_005621 | 369.299   | 533.196   |
| NM_016453 | 3831.885  | 4152.682  | NM_006987 | 1972.783  | 2560.844  | NM_006202 | 65552.016 | 54870.918 |
| NM_017701 | 1379.699  | 926.742   | NM_001282 | 15075.143 | 20353.664 | NM_01741C | 9026.388  | 8776.845  |
| NM_01422E | 2841.829  | 2404.972  | NM_01683C | 29136.184 | 33010.93  | AY009398  | 1269.211  | 1033.777  |
| AF142567  | 2616.934  | 2668.65   | U44105    | 1079.22   | 1396.005  | NM_00144E | 1791.497  | 1823.335  |
| NM_005621 | 443.533   | 802.105   | NM_016103 | 4671.774  | 5144.436  | NM_016072 | 11265.813 | 11670.802 |
| NM_006202 | 22997.266 | 21622.602 | L25080    | 43071.352 | 47358.781 | AK026349  | 1194.538  | 1260.057  |
| NM_01741C | 16672.943 | 17747.455 | NM_003143 | 64790.699 | 53142.117 | NM_014733 | 1826.23   | 1437.564  |
| AY009398  | 673.688   | 515.689   | AK026289  | 9875.482  | 10153.107 | D12485    | 5072.4    | 3699.3    |

|           |           |           |           |           |           |           |           |           |
|-----------|-----------|-----------|-----------|-----------|-----------|-----------|-----------|-----------|
| D12485    | 7527.139  | 7503.652  | NM_003258 | 13332.478 | 11673.646 | AK023204  | 2563.518  | 1937.749  |
| AK023204  | 3795.637  | 3846.017  | AL133068  | 47803.961 | 44729.793 | NM_003448 | 4170.42   | 2999.536  |
| NM_001218 | 2011.439  | 1639.884  | NM_003463 | 11431.801 | 11551.955 | NM_002478 | 6397.234  | 5152.759  |
| NM_014183 | 5103.088  | 4104.007  | NM_004944 | 2651.244  | 2569.333  | NM_003234 | 6995.528  | 6148.18   |
| AB046780  | 47113.813 | 51683.586 | AK024964  | 2942.471  | 3009.883  | NM_004858 | 5385.947  | 4912.445  |
| NM_018353 | 8838.363  | 6940.919  | M20697    | 1766.015  | 1455.581  | S78774    | 13497.915 | 13227.601 |
| NM_016373 | 567.874   | 782.426   | NM_015046 | 2045.458  | 1575.923  | NM_004922 | 8309.399  | 7287.846  |
| NM_003560 | 44991.715 | 52044.621 | NM_002014 | 38544.977 | 38211.988 | NM_002871 | 664.617   | 699.485   |
| NM_014403 | 15640.204 | 13207.899 | NM_002538 | 10030.962 | 8843.202  | BE873653  | 61774.785 | 54461.262 |
| AL050100  | 1026.4    | 991.972   | NM_016585 | 25255.365 | 24801.98  | NM_006987 | 1540.118  | 892.776   |
| NM_000748 | 8033.412  | 7197.203  | NM_003333 | 64334.867 | 53927.836 | NM_001282 | 6975.968  | 5739.047  |
| NM_004925 | 4940.537  | 4784.063  | NM_002013 | 20441.979 | 20470.471 | NM_016830 | 17162.412 | 14036.521 |
| NM_004922 | 14406.498 | 14762.765 | NM_006927 | 35844.758 | 42526.066 | U44105    | 845.187   | 611.044   |
| NM_002871 | 2667.812  | 2715.245  | NM_014601 | 6765.731  | 7092.784  | NM_016103 | 2832.452  | 2554.618  |
| BE873653  | 32069.232 | 35165.652 | NM_017761 | 26339.41  | 31421.174 | AL133654  | 7873.894  | 6922.403  |
| NM_006987 | 1605.236  | 1641.194  | NM_006928 | 2172.196  | 2130.136  | AL137262  | 4568.557  | 4633.658  |
| NM_001282 | 6849.698  | 8710.305  | AF237700  | 4284.83   | 3666.118  | NM_020437 | 10797.95  | 13283.682 |
| NM_016830 | 22955.537 | 19477.83  | D38163    | 2235.374  | 2093.399  | NM_004010 | 488.152   | 414.449   |
| U44105    | 1429.166  | 1389.691  | D28449    | 33239.348 | 29729.258 | NM_018643 | 4088.579  | 2289.116  |
| NM_016103 | 5537.449  | 5837.878  | NM_003281 | 4787.118  | 4190.157  | NM_016188 | 871.216   | 501.237   |
| AL133654  | 15266.784 | 14424.397 | AA460480  | 3707.715  | 4213.332  | NM_006928 | 978.78    | 1282.989  |
| AL137262  | 3575.332  | 3231.878  | AI298884  | 34975.074 | 39254.547 | AF237700  | 2533.793  | 2540.162  |
| NM_020437 | 10857.724 | 9610.881  | D87845    | 4671.189  | 4916.871  | NM_002860 | 17816.318 | 18375.318 |
| L25080    | 22957.047 | 22033.844 | X53279    | 1933.334  | 1991.258  | NM_006168 | 12380.984 | 11873.115 |
| NM_003143 | 65844.875 | 56223.77  | M83254    | 13914.741 | 14490.669 | NM_001218 | 2133.024  | 1725.553  |
| AK026289  | 8588.178  | 8535.222  | S56770    | 5632.616  | 3945.465  | NM_014183 | 1680.984  | 1417.507  |
| NM_003258 | 16270.022 | 13684.483 | AI193606  | 1461.071  | 1186.967  | AB046780  | 24926.465 | 20890.377 |
| AL133068  | 5289.261  | 5172.118  | H58872    | 18347.178 | 16210.896 | NM_018353 | 6691.083  | 3991.483  |
| NM_003463 | 13006.407 | 11936.405 | J02938    | 905.12    | 1524.065  | NM_003560 | 22687.018 | 18243.934 |
| NM_004944 | 2780.6    | 2739.046  | J04543    | 10662.462 | 10846.236 | NM_014403 | 7726.281  | 6487.899  |
| AK024964  | 3399.749  | 3695.153  | S60415    | 1027.929  | 1285.877  | AL050100  | 2251.028  | 1940.2    |
| M20697    | 3313.928  | 3321.112  | AA456295  | 5810.783  | 5910.128  | NM_020138 | 8361.532  | 9172.541  |
| NM_015046 | 7860.518  | 7063.173  | BE733577  | 7624.178  | 6973.404  | AL080207  | 3032.477  | 3608.426  |
| NM_002014 | 47684.133 | 46214.895 | AI817942  | 4924.231  | 6368.451  | NM_005688 | 817.393   | 577.655   |
| NM_002538 | 15601.521 | 14052.605 | BG762340  | 4835.132  | 4250.114  | NM_000748 | 32548.689 | 34375.57  |
| NM_016585 | 31008.889 | 31395.828 | AA009484  | 2763.048  | 3209.496  | NM_000048 | 6421.305  | 5810.768  |
| NM_003333 | 65647.875 | 57972.828 | AF209930  | 3236.751  | 3135.099  | AF104032  | 56452.559 | 50541.82  |
| NM_002013 | 23962.469 | 22472.684 | AL133109  | 1725.36   | 2330.815  | U53531    | 919.329   | 468.345   |
| NM_006927 | 25207.656 | 25212.643 | AF203728  | 1454.859  | 1032.264  | NM_004925 | 3761.572  | 2717.246  |
| NM_014601 | 3691.113  | 4688.375  | M30142    | 12054.002 | 9838.609  | AF209930  | 2141.106  | 1708.689  |
| NM_017761 | 27781.088 | 23763.166 | NM_005018 | 2648.643  | 2710.178  | AL133109  | 972.398   | 1137.518  |
| NM_006928 | 1899.291  | 2093.705  | NM_013378 | 43090.637 | 45583.211 | AF203728  | 1185.373  | 1493.94   |
| AF237700  | 2106.813  | 2000.14   | NM_001085 | 2425.012  | 2649.01   | AB051826  | 571.654   | 586.645   |
| NM_002860 | 30873.043 | 32716.049 | NM_006110 | 8041.789  | 7948.335  | L25080    | 30960.215 | 28272.689 |
| NM_006168 | 9811.545  | 9806.562  | NM_016453 | 3950.21   | 3778.394  | NM_003143 | 61266.523 | 51261.582 |
| D38163    | 1039.352  | 870.41    | NM_017701 | 4056.961  | 3848.867  | AK026289  | 3578.508  | 2703.123  |
| D28449    | 30078.736 | 27577.928 | NM_014226 | 12370.76  | 11203.702 | NM_003258 | 8502.779  | 5500.715  |
| NM_003281 | 3130.268  | 3252.842  | AF142567  | 1978.063  | 1300.438  | AL133068  | 35923.633 | 31019.955 |
| AA460480  | 1043.243  | 976.838   | NM_006202 | 62711     | 58826.621 | NM_003463 | 9082.221  | 6071.444  |
| AI298884  | 35015.449 | 37325.867 | AY009398  | 8345.72   | 5905.891  | NM_004944 | 1710.99   | 1404.446  |
| D87845    | 5613.669  | 6558.943  | X99680    | 27670.379 | 34208.289 | AK024964  | 2211.209  | 1649.155  |
| X53279    | 885.581   | 909.09    | NM_001448 | 2221.508  | 2841.713  | M20697    | 1735.892  | 1245.993  |
| M83254    | 3028.748  | 3059.544  | NM_016072 | 13580.255 | 15999.363 | NM_015046 | 5774.751  | 5263.414  |

|           |           |           |           |           |           |           |           |           |
|-----------|-----------|-----------|-----------|-----------|-----------|-----------|-----------|-----------|
| S56770    | 1683.802  | 1733.398  | AK026349  | 1310.276  | 1845.001  | NM_002014 | 41680.094 | 43527.656 |
| AI193606  | 1729.381  | 1337.448  | NM_014733 | 1384.87   | 1673      | NM_002538 | 14052.463 | 14277.089 |
| H58872    | 25447.617 | 28830.07  | D12485    | 5726.305  | 7279.488  | NM_016585 | 28430.943 | 29664.479 |
| J04543    | 20024.455 | 22007.182 | AK023204  | 4127.493  | 4071.244  | NM_003333 | 62721.359 | 58564.906 |
| S60415    | 1978.288  | 2195.11   | NM_003449 | 5216.201  | 5976.967  | NM_002013 | 19810.293 | 13628.113 |
| AA456295  | 2010.244  | 2937.24   | NM_003234 | 9566.487  | 9168.667  | NM_006927 | 26215.246 | 17953.563 |
| BE733577  | 6214.912  | 5820.217  | NM_004858 | 8150.767  | 6034.131  | NM_014601 | 4455.077  | 3177.014  |
| AI817942  | 2761.205  | 3036.277  | S78774    | 14910.663 | 14934.683 | NM_017761 | 24987.684 | 18031.234 |
| BG762340  | 1795.541  | 1679.299  | NM_004922 | 13344.717 | 14741.739 | CY3Cy5    | 3502.488  | 135.409   |
| AA009484  | 1348.129  | 1415.416  | NM_002871 | 1804.423  | 1486.864  | NM_006325 | 12969.054 | 14813.073 |
| AF209930  | 781.58    | 951.726   | BE873653  | 59444.418 | 63359.797 | AF088024  | 962.388   | 1189.755  |
| AL133109  | 611.75    | 684.369   | NM_006987 | 702.677   | 618.309   | AK025887  | 4294.391  | 6241.268  |
| AF203728  | 1190.597  | 1057.249  | NM_001282 | 4752.179  | 3973.968  | AB037719  | 4559.577  | 7515.313  |
| AB051826  | 578.69    | 1138.571  | NM_016830 | 20133.258 | 17141.086 | AK024694  | 3583.302  | 6559.975  |
| M30142    | 10110.395 | 8317.267  | U44105    | 854.036   | 1153.555  | AF086229  | 670.136   | 1304.844  |
| NM_005018 | 2125.736  | 1831.459  | NM_016103 | 3287.539  | 4342.221  | AK026143  | 5736.623  | 4779.325  |
| NM_013378 | 30487.953 | 28407.498 | AL133654  | 13985.174 | 14526.902 | AL137578  | 666.389   | 1040.143  |
| NM_001085 | 2087.342  | 2032.609  | AL137262  | 7603.759  | 7272.254  | AL110252  | 2314.217  | 3098.567  |
| NM_006110 | 9148.624  | 7542.393  | NM_020437 | 8234.187  | 10275.167 | AL050143  | 1572.456  | 2177.817  |
| NM_016453 | 4968.368  | 4607.364  | NM_004010 | 532.473   | 480.569   | AL080059  | 796.698   | 1008.145  |
| NM_017701 | 828.823   | 838.992   | X87888    | 767.271   | 818.554   | AL080219  | 2842.608  | 2599.591  |
| NM_014226 | 3020.287  | 2186.501  | NM_018643 | 5997.51   | 5538.874  | AK026709  | 782.889   | 1086.847  |
| AF142567  | 2409.021  | 2615.633  | NM_006928 | 1709.052  | 1393.455  | NM_006325 | 8957.927  | 6169.5    |
| NM_005621 | 545.773   | 607.915   | AF237700  | 3634.551  | 2918.308  | L35592    | 14092.747 | 15908.522 |
| NM_006202 | 23203.465 | 21619.781 | NM_002860 | 24130.646 | 25327.352 | NM_012079 | 1777.053  | 1983.969  |
| NM_003391 | 892.354   | 1213.919  | NM_006169 | 15099.975 | 13355.291 | AL360274  | 29980.389 | 35936.723 |
| NM_017410 | 15312.851 | 15615.891 | NM_001218 | 2722.001  | 2403.428  | NM_014050 | 21415.402 | 30359.373 |
| X99680    | 5004.813  | 4794.176  | NM_014183 | 3366.294  | 2910.019  | AF074997  | 1490.83   | 2140.639  |
| NM_001448 | 3373.999  | 3711.173  | AB046780  | 41624.055 | 47733.512 | NM_014068 | 852.333   | 1042.674  |
| NM_016072 | 10939.73  | 11639.132 | NM_018353 | 9049.045  | 6952.159  | NM_017814 | 7029.452  | 8227.526  |
| AK026349  | 2559.843  | 2177.794  | NM_003560 | 23164.43  | 22234.549 | AF074996  | 3650.081  | 4393.371  |
| NM_014733 | 2114.008  | 2074.796  | NM_014403 | 9796.963  | 11442.265 | AF131811  | 5525.596  | 4628.536  |
| D12485    | 6958.815  | 6225.926  | AL050100  | 2419.625  | 2589.254  | AF293026  | 15659.599 | 14558.735 |
| AK023204  | 4091.393  | 3990.587  | NM_020139 | 7976.385  | 10347.371 | AF236158  | 1701.26   | 1635.809  |
| NM_003449 | 6300.507  | 7440.552  | AL080207  | 1223.21   | 1310.348  | AF217986  | 9036.435  | 7891.081  |
| NM_002478 | 5105.004  | 5342.133  | NM_005688 | 881.957   | 697.352   | AK026320  | 1433.322  | 1234.612  |
| NM_003234 | 11740.342 | 8701.025  | NM_000748 | 41309.707 | 46631.422 | AL137530  | 2576.884  | 1876.728  |
| NM_004858 | 11484.146 | 8736.81   | NM_000048 | 5556.754  | 6924.804  | NM_015953 | 5934.93   | 3419.969  |
| S78774    | 5516.54   | 5297      | AF104032  | 50480.293 | 52860.617 | AK026699  | 3293.169  | 4119.441  |
| NM_004922 | 15054.971 | 15197.537 | U53531    | 1952.373  | 2473.413  | AK025182  | 1361.677  | 1574.287  |
| NM_002871 | 2214.724  | 2077.36   | NM_004925 | 5098.804  | 5471.217  | AK025589  | 10253.338 | 14312.598 |
| BE873653  | 30219.383 | 30976.342 | AF209930  | 2966.809  | 2449.378  | AL137616  | 4224.801  | 5819.249  |
| NM_006987 | 2163.196  | 1563.711  | AL133109  | 972.603   | 1010.583  | AK021752  | 1033.444  | 1069.693  |
| NM_001282 | 6714.19   | 6627.724  | AF203728  | 815.659   | 749.168   | AL050012  | 760.634   | 1187.213  |
| NM_016830 | 22045.887 | 18934.453 | L25080    | 44846.992 | 46820.68  | AL109706  | 13875.915 | 15152.48  |
| U44105    | 1287.814  | 1360.378  | NM_003143 | 60009.816 | 50826.738 | AK001118  | 1555.193  | 1732.034  |
| NM_016103 | 3647.678  | 3007.048  | AK026289  | 10972.815 | 12964.6   | AF035291  | 67262.367 | 73780.539 |
| AL133654  | 13840.826 | 13423.579 | NM_003258 | 11714.607 | 9107.768  | AK026291  | 14931.875 | 15473.575 |
| AL137262  | 3181.569  | 2870.201  | AL133068  | 33837.66  | 30038.738 | AL049285  | 890.575   | 993.129   |
| NM_020437 | 9571.178  | 10287.326 | NM_003463 | 8696.059  | 8233.544  | AL117520  | 2760.278  | 2009.162  |
| X87888    | 676.067   | 449.115   | NM_004944 | 2259.576  | 2137.223  | AL049303  | 1672.757  | 760.304   |
| NM_018643 | 2205.999  | 1908.53   | AK024964  | 3046.567  | 3447.509  | AK022310  | 963.122   | 1248.382  |
| NM_016186 | 879.168   | 1031.782  | M20697    | 3988.305  | 5633.218  | AF230800  | 4183.231  | 6207.083  |

|           |           |           |           |           |           |           |           |           |
|-----------|-----------|-----------|-----------|-----------|-----------|-----------|-----------|-----------|
| NM_00692E | 1792.093  | 1745.139  | NM_01504E | 7595.77   | 8985.783  | NM_01852C | 3350.981  | 4872.859  |
| AF237700  | 2198.22   | 1595.354  | NM_002014 | 43716.258 | 45700.809 | AK026647  | 1787.076  | 2650.208  |
| NM_00286C | 28915.096 | 25516.971 | NM_00253E | 19490.51  | 21881.67  | AK022152  | 4128.749  | 5833.687  |
| NM_00616E | 7947.906  | 6691.929  | NM_002013 | 19969.502 | 20533.844 | AK027027  | 2180.076  | 2737.238  |
| NM_00121E | 2148.083  | 1950.031  | NM_006927 | 32999.785 | 35592.348 | NM_014911 | 1582.605  | 2108.325  |
| NM_014183 | 4914.996  | 4145.109  | NM_014601 | 6043.756  | 6481.118  | AF009289  | 10425.918 | 12716.88  |
| AB046780  | 49342.867 | 50187.039 | NM_017761 | 33016.484 | 41151.777 | AF040247  | 1257.061  | 1308.86   |
| NM_018353 | 8865.974  | 6380.327  | CY3Cy5    | 4367.277  | 102.813   | AF056439  | 1762.617  | 1322.394  |
| NM_016373 | 537.275   | 460.934   | NM_00632E | 13844.087 | 11541.836 | AF007835  | 1328.543  | 1715.526  |
| NM_00356C | 43810.738 | 48575.141 | AF088024  | 3765.893  | 2374.56   | AF009303  | 6667.576  | 6643.667  |
| NM_014403 | 17631.1   | 14989.053 | AK024694  | 5034.052  | 4880.648  | NM_004474 | 8167.146  | 8705.512  |
| NM_02013E | 940.155   | 1043.147  | AF086229  | 1545.517  | 1454.502  | AF056449  | 4205.376  | 4059.87   |
| NM_00568E | 1385.518  | 1233.41   | AK026143  | 11149.486 | 9731.193  | AK001033  | 2456.841  | 2262.421  |
| NM_00074E | 8769.079  | 7666.013  | AL110252  | 5244.202  | 5766.015  | AK021463  | 1174.913  | 596.865   |
| NM_00004E | 5024.392  | 4665.381  | AL050143  | 2467.038  | 2287.639  | AK021698  | 1047.48   | 558.362   |
| AF104032  | 34945.641 | 40871.434 | AL080059  | 2153.155  | 1944.215  | AK001082  | 6619.77   | 3727.397  |
| U53531    | 1207.133  | 1158.208  | AL080219  | 5781.688  | 5395.979  | AK024144  | 13309.802 | 16310.5   |
| NM_00492E | 5902.995  | 5245.539  | AK026709  | 1266.003  | 1879.293  | NM_005343 | 66579.25  | 69447.297 |
| AF209930  | 1266.793  | 923.739   | NM_00632E | 18318.838 | 10414.529 | AB032985  | 1719.811  | 1325.947  |
| AL133109  | 323.322   | 495.518   | SR2       | 64489.742 | 55083.563 | AF116698  | 3080.263  | 6140.887  |
| AF203728  | 828.222   | 897.734   | SR4       | 28150.115 | 22036.584 | AF196865  | 3712.138  | 5076.609  |
| L25080    | 22285.148 | 20637.391 | SR6       | 3373.523  | 3700.603  | AJ008114  | 67916.18  | 67464.109 |
| NM_003143 | 63216.934 | 55811.73  | SR10      | 45401.473 | 19106.043 | AJ008141  | 1041.827  | 945.457   |
| AK026289  | 9407.069  | 9474.04   | CY3Cy5    | 5571.163  | 114.256   | AF147432  | 5778.863  | 5853.919  |
| NM_00325E | 15293.146 | 12551.145 | L35592    | 12474.735 | 10896.081 | AK024690  | 2119.796  | 2019.949  |
| AL133068  | 5412.296  | 4497.276  | AL360274  | 30020.406 | 16921.627 | NM_016633 | 58237.449 | 57754.176 |
| NM_003463 | 10823.72  | 9386.78   | AF085854  | 3275.803  | 3299.199  | AK023250  | 8113.167  | 9127.88   |
| NM_004944 | 2594.623  | 2723.706  | AF074997  | 2728.259  | 3038.058  | AK024882  | 2653.717  | 3287.851  |
| AK024964  | 3284.488  | 3026.491  | NM_017814 | 13007.017 | 14237.438 | NM_014062 | 26551.455 | 25890.842 |
| M20697    | 2690.052  | 2784.285  | AF074996  | 4171.759  | 3831.123  | NM_006304 | 65644.695 | 58866.723 |
| NM_01504E | 6901.954  | 6124.745  | AF131811  | 7198.25   | 7014.727  | X74804    | 2427.161  | 1539.039  |
| NM_002014 | 47069.148 | 45338.715 | AF236158  | 2724.845  | 2624.106  | AF293367  | 5405.583  | 3671.396  |
| NM_00253E | 33982.477 | 40932.031 | AF217986  | 17761.918 | 17509.408 | AF086231  | 6354.755  | 4092.761  |
| NM_01658E | 34133.184 | 38011.5   | AK025562  | 2429.496  | 1632.333  | AK001494  | 3492.347  | 2027.542  |
| NM_003333 | 59770.992 | 58234.59  | AK026699  | 4448.476  | 2500.753  | AL133438  | 4718.842  | 2122.636  |
| NM_002013 | 24170.428 | 22539.498 | AK025182  | 1628.374  | 554.716   | AK024978  | 34191.855 | 52516.125 |
| NM_006927 | 29137.725 | 25317.621 | AK026734  | 2046.918  | 1957.976  | U12897    | 3705.439  | 5095.418  |
| NM_014601 | 4174.248  | 3743.642  | AL137616  | 6844.636  | 7364.745  | NM_020357 | 23671.555 | 28433.191 |
| NM_017761 | 34658.641 | 40673.145 | AK021752  | 3682.34   | 3978.496  | AK026836  | 2875.872  | 3891.162  |
| CY3Cy5    | 5037.111  | 115.626   | AL109706  | 25798.885 | 30992.09  | T59562    | 59320.738 | 63224.906 |
| NM_00632E | 17012.316 | 16448.871 | AK001118  | 3438.022  | 3801.434  | NM_01821E | 4353.571  | 5063.955  |
| AF088024  | 2985.157  | 3312.812  | AK026291  | 27085.111 | 29721.203 | AK026368  | 751.881   | 905.23    |
| AK025887  | 940.909   | 949.053   | AL117520  | 4031.646  | 2706.821  | NM_014114 | 4425.792  | 6263.922  |
| AB037719  | 2511.755  | 2791.623  | AL049303  | 3125.894  | 2259.51   | U62822    | 8992.113  | 14671.474 |
| AK024694  | 6711.946  | 7852.872  | AL080208  | 1687.969  | 2075.934  | NM_003534 | 59637.586 | 62822.234 |
| AF086229  | 1211.004  | 1334.675  | L23851    | 1000.642  | 900.354   | L08437    | 6448.649  | 6576.765  |
| AK026143  | 10613.284 | 8236.759  | AK022310  | 1368.003  | 1292.164  | AK057143  | 9928.179  | 9445.404  |
| AL137578  | 1894.43   | 1770.394  | AK021784  | 1619.341  | 1086.667  | NM_015594 | 58878.543 | 54379.406 |
| AL110252  | 4422.721  | 4721.34   | AF230800  | 7220.731  | 5671.721  | AK024399  | 1265.314  | 1297.975  |
| AL050143  | 2160.766  | 2300.317  | NM_01852C | 3880.956  | 1783.614  | AF056423  | 6671.546  | 6871.749  |
| AL080059  | 1402.905  | 1682.351  | AK022152  | 6890.701  | 5740.589  | U00956    | 5602.929  | 5126.472  |
| AL080219  | 2893.896  | 2335.377  | AK097417  | 1214.937  | 843.177   | X04293    | 1112.019  | 767.511   |
| AK026709  | 998.311   | 1410.83   | AK027027  | 4000.286  | 3816.425  | AK026475  | 1016.883  | 834.642   |

|           |           |           |           |           |           |           |           |           |
|-----------|-----------|-----------|-----------|-----------|-----------|-----------|-----------|-----------|
| AK024165  | 2655.335  | 2575.01   | NM_014911 | 3924.406  | 3866.307  | K01884    | 1165.519  | 941.43    |
| NM_006325 | 19968.346 | 17745.047 | AF009289  | 18170.063 | 23745.613 | U00962    | 51492.836 | 43926.305 |
| SR4       | 23180.303 | 36860.84  | AF040247  | 2851.526  | 3419.558  | NM_000522 | 1061.572  | 547.606   |
| SR6       | 2482.915  | 4627.448  | AF056439  | 1670.459  | 2066.522  | AK026130  | 44546.301 | 30164.414 |
| SR8       | 10799.452 | 31184.309 | AF009303  | 10371.529 | 14302.191 | NM_012480 | 6107.525  | 3059.114  |
| SR10      | 34246.711 | 17470.662 | NM_004474 | 12547.354 | 14105.437 | NM_003830 | 1139.198  | 1620.7    |
| CY3Cy5    | 4804.693  | 180.089   | AK001033  | 2306.767  | 919.453   | NM_000842 | 1215.329  | 1740.251  |
| L35592    | 5210.369  | 4705.135  | AK001781  | 1419.272  | 664.63    | NM_015642 | 1544.625  | 2358.713  |
| NM_012075 | 2509.373  | 2485.225  | AK021463  | 865.751   | 832.885   | NM_004640 | 23194.951 | 29059.627 |
| AL360274  | 27518.59  | 26966.336 | AK021698  | 1583.248  | 1046.171  | NM_002901 | 838.103   | 1034.672  |
| NM_014050 | 20202.557 | 22328.307 | AK001082  | 7644.492  | 7012.516  | NM_016222 | 12606.454 | 15482.159 |
| AF085854  | 2165.985  | 2522.149  | AK001871  | 1407.139  | 1620.075  | AB037823  | 10425.756 | 13593.926 |
| AF074997  | 2195.181  | 2813.174  | AK021521  | 860.97    | 1316.7    | NM_015380 | 23130.492 | 27748.74  |
| NM_014065 | 1016.592  | 837.268   | AK021743  | 12316.639 | 10275.22  | BE254485  | 5559.789  | 6714.637  |
| NM_017814 | 7825.733  | 8571.335  | AK024144  | 23297.271 | 22014.854 | NM_002732 | 1034.253  | 1280.736  |
| AF074996  | 757.359   | 969.475   | Y08959    | 3695.078  | 3011.972  | AK022694  | 2137.518  | 2696.809  |
| AF131811  | 3660.203  | 4181.263  | NM_005346 | 52089.785 | 49971.309 | BC005946  | 66843.969 | 79894.078 |
| AF293026  | 20131.936 | 20272.084 | NM_005343 | 57918.965 | 52051.996 | AK021893  | 6491.345  | 6776.105  |
| AF236158  | 852.886   | 870.394   | AF196865  | 8299.767  | 8548.506  | NM_001045 | 11587.676 | 11556.974 |
| AF217986  | 7592.862  | 7835.328  | AJ008114  | 63224.559 | 75319.539 | AK026497  | 6851.796  | 6307.419  |
| AK026320  | 3112.292  | 3618.64   | AJ008141  | 2130.159  | 2099.902  | BE958139  | 2341.845  | 2428.7    |
| AL137530  | 2419.11   | 1909.906  | AF147432  | 9620.941  | 10925.347 | AF085359  | 1156.88   | 1229.334  |
| AK024775  | 3320.223  | 3301.544  | AK024690  | 3821.981  | 4575.107  | AF086516  | 1968.328  | 1718.536  |
| AK025562  | 2109.365  | 1771.922  | NM_014062 | 37176.359 | 15851.236 | D86978    | 13683.386 | 11529.731 |
| AK026699  | 1967.317  | 1866.193  | NM_006304 | 65153.055 | 56858.535 | AL080060  | 50442.355 | 47052.98  |
| AK025182  | 1489.82   | 1531.727  | X74804    | 2066.384  | 1487.156  | NM_005267 | 8484.972  | 6630.53   |
| AK025589  | 17843.18  | 20753.873 | AF293367  | 7620.82   | 6087.382  | AF086017  | 1922.94   | 1166.541  |
| AK026734  | 1243.876  | 1335.154  | AF086231  | 10508.959 | 8862.354  | NM_005780 | 14508.332 | 9524.083  |
| AL137616  | 2700.227  | 2537.837  | AK001494  | 5359.45   | 5087.465  | NM_003285 | 1653.931  | 1879.961  |
| AK021752  | 3500.19   | 3951.86   | AL133438  | 8088.601  | 8201.74   | NM_000885 | 11939.263 | 13414.564 |
| AL050012  | 1734.931  | 2399.999  | AK024978  | 45218.023 | 53310.941 | NM_000595 | 30537.188 | 34750.781 |
| AL109706  | 7302.498  | 7669.233  | U12897    | 9515.787  | 7337.098  | X99663    | 15030.621 | 19052.18  |
| AK001118  | 2898.952  | 3188.734  | NM_020357 | 29859.094 | 21055.75  | NM_016552 | 18690.621 | 18491.84  |
| AF035291  | 46741.055 | 49947.973 | AK026836  | 6134.724  | 3231.447  | AK025340  | 1636.959  | 1994.463  |
| AK026291  | 25587.166 | 25940.65  | T59562    | 64803.016 | 33130.574 | NM_003565 | 4395.488  | 4969.671  |
| AK021924  | 1821.403  | 2118.126  | NM_018219 | 4588.39   | 4214.346  | NM_004841 | 2551.21   | 3579.744  |
| AL049285  | 872.079   | 728.479   | AK026368  | 1899.491  | 1884.199  | NM_004114 | 721.432   | 857.037   |
| AL080106  | 950.64    | 669.435   | NM_014114 | 7430.823  | 8960.308  | NM_018440 | 11743.127 | 21233.146 |
| AL049303  | 1712.065  | 1844.471  | U62822    | 9450.883  | 21475.164 | AK025470  | 2095.896  | 2281.035  |
| AL050059  | 878.441   | 873.862   | NM_003534 | 62674.98  | 63966.121 | M35410    | 5400.993  | 6427.266  |
| AL080208  | 1953.594  | 2125.46   | NM_015594 | 64119.781 | 60146.477 | AB023227  | 2398.052  | 2589.471  |
| AL117577  | 853.064   | 1168.971  | AF056423  | 10253.02  | 4455.837  | NM_005775 | 30777.605 | 36699.207 |
| AK022310  | 2104.358  | 2208.363  | U00956    | 1173.703  | 586.494   | AK023071  | 8277.609  | 7202.348  |
| AK021784  | 2034.673  | 2112.382  | X04293    | 1656.177  | 1585.551  | NM_004041 | 4310.521  | 4284.136  |
| AF230800  | 4058.576  | 3862.184  | AK026475  | 1771.755  | 1714.607  | AK022888  | 5009.556  | 4954.891  |
| NM_018520 | 3504.924  | 4321.626  | K01884    | 2706.528  | 2670.271  | AK024484  | 9808.302  | 8343.277  |
| AK026647  | 1390.659  | 1234.888  | U00962    | 54500.742 | 49470.105 | NM_002632 | 1008.905  | 1024.384  |
| AK022152  | 4336.101  | 4201.922  | NM_000522 | 1188.885  | 1449.761  | NM_001953 | 67721.773 | 69209.273 |
| AK097417  | 702.202   | 889.989   | AK026130  | 60679.668 | 55871.199 | NM_001405 | 1233.172  | 763.202   |
| AK027027  | 2796.1    | 2965.684  | NM_012480 | 11506.57  | 12699.998 | NM_002292 | 9429.671  | 7193.167  |
| NM_014911 | 758.039   | 1293.235  | NM_003830 | 1578.038  | 1697.026  | NM_000165 | 1908.75   | 1542.811  |
| AF009289  | 2206.046  | 2332.899  | NM_000842 | 1932.748  | 1884.377  | AF305200  | 1655.056  | 1218.006  |
| AF040247  | 2275.5    | 2238.379  | NM_015642 | 2348.236  | 2906.22   | NM_014583 | 773.691   | 879.392   |

|           |           |           |           |           |           |           |           |           |
|-----------|-----------|-----------|-----------|-----------|-----------|-----------|-----------|-----------|
| AF009303  | 3583.149  | 4229.203  | NM_004640 | 31982.463 | 27901.547 | NM_006613 | 25141.391 | 29481.77  |
| NM_004474 | 2254.993  | 2617.885  | NM_016222 | 19437.623 | 9127.974  | NM_004638 | 24154.494 | 27173.184 |
| AF056449  | 1646.008  | 1453.989  | AB037823  | 12221.909 | 5642.227  | NM_005373 | 712.432   | 1047.728  |
| AK001033  | 2417.77   | 2118.72   | NM_015380 | 39004.902 | 37965.805 | L40027    | 6818.312  | 7264.903  |
| AK001781  | 1111.64   | 984.083   | BE254485  | 9058.7    | 9339.917  | NM_003718 | 59753.691 | 59626.914 |
| AK021463  | 2509.498  | 1887.092  | NM_002732 | 2826.099  | 2542.298  | NM_007062 | 1808.398  | 2200.325  |
| AK001082  | 1550.778  | 1371.272  | AK022694  | 4815.764  | 4577.021  | NM_014180 | 24870.457 | 29089.85  |
| AK001871  | 1648.374  | 1699.863  | BC005946  | 62590.496 | 64209.449 | NM_017706 | 2701.194  | 3064.739  |
| AK021521  | 892.091   | 709.268   | AK021893  | 13075.612 | 11004.266 | AF334406  | 2117.149  | 2424.867  |
| AK021743  | 1235.957  | 1151.272  | NM_001048 | 24373.924 | 24298.992 | NM_017444 | 11447.127 | 12701.1   |
| AK024144  | 19849.121 | 20516.416 | AK026497  | 10543.696 | 3548.065  | NM_018025 | 2191.287  | 2407.64   |
| Y08959    | 2558.819  | 3097.739  | BE958139  | 3359.921  | 1833.244  | NM_015995 | 10239.765 | 10082.678 |
| NM_005346 | 45801.52  | 55828.918 | AF085359  | 1528.369  | 1164.792  | NM_003804 | 22390.488 | 21486.896 |
| AF086047  | 1262.073  | 1298.26   | AF086516  | 3819.596  | 2896.561  | NM_018453 | 9612.135  | 9278.838  |
| NM_005343 | 43018.203 | 52259.043 | D86978    | 26344.635 | 20179.131 | NM_004708 | 67063.117 | 69770.156 |
| AB032985  | 1569.891  | 1983.853  | AL080060  | 40116.086 | 43839     | NM_016001 | 18153.938 | 14827.438 |
| AF196865  | 6171.645  | 7054.551  | NM_005267 | 10789.911 | 9616.321  | NM_016108 | 8051.711  | 7264.319  |
| AJ008114  | 66887.352 | 63444.074 | U80763    | 1406.022  | 1268.446  | S49432    | 13497.523 | 10534.146 |
| AJ008141  | 1998.334  | 2231.097  | AF086017  | 2924.96   | 3003.045  | D86984    | 4532.945  | 2729.362  |
| AF147432  | 6055.423  | 6699.965  | NM_005780 | 33241.137 | 28134.779 | NM_015955 | 1063.154  | 526.784   |
| AK024690  | 5426.473  | 5223.936  | NM_003285 | 2848.499  | 2744.267  | AF217974  | 10272.392 | 7114.122  |
| NM_016633 | 11971.993 | 12130.95  | NM_000888 | 16813.535 | 15108.123 | NM_001910 | 5816.517  | 5968.486  |
| AF083130  | 637.685   | 768.179   | NM_000595 | 58482.289 | 57037.137 | NM_003368 | 8423.335  | 9420.276  |
| AK023250  | 12627.467 | 16415.879 | X99663    | 21613.744 | 16895.354 | AB040886  | 2352.371  | 2729.599  |
| AK024882  | 6613.381  | 7211.896  | NM_016552 | 17157.98  | 9260.656  | AB029020  | 5322.807  | 6873.042  |
| NM_014062 | 32432.982 | 38108.344 | NM_003565 | 6509.58   | 2460.061  | AK022759  | 6629.889  | 7208.229  |
| AL109720  | 921.618   | 608.671   | NM_004841 | 3214.088  | 1485.861  | NM_012333 | 19672.035 | 21155.215 |
| NM_006304 | 67311.656 | 58710.461 | M35410    | 12293.604 | 11883.813 | AF217798  | 2856.778  | 3219.497  |
| X74804    | 2070.067  | 1559.951  | NM_005776 | 40124.23  | 14730.704 | AF161472  | 5166.474  | 5172.625  |
| AF293367  | 9596.245  | 10859.677 | AK023071  | 12613.881 | 6189.462  | AL133642  | 11968.855 | 11368.396 |
| AF086231  | 10287.881 | 9144.35   | NM_004041 | 5956.735  | 3266.344  | AB011154  | 4462.67   | 4460.189  |
| AK001494  | 2138.03   | 2227.048  | AK022888  | 7542.896  | 5511.262  | AF124432  | 3668.391  | 3275.654  |
| AL133438  | 12470.34  | 12412.996 | AK024484  | 14551.925 | 10851.411 | NM_006330 | 34584.23  | 37563     |
| AK024978  | 31454.227 | 35684.555 | NM_002632 | 1361.733  | 1120.759  | NM_015873 | 10041.176 | 9619.88   |
| U12897    | 8196.196  | 10567.034 | NM_001953 | 64112.883 | 61422.684 | NM_000377 | 8955.822  | 8976.465  |
| AJ227894  | 1231.79   | 1358.877  | NM_001406 | 1236.804  | 1201.496  | NM_006818 | 3056.87   | 2457.765  |
| NM_020357 | 29303.49  | 31789.662 | NM_002292 | 8274.111  | 7700.852  | NM_016823 | 7578.363  | 6281.824  |
| AK026836  | 4433.695  | 4774.168  | NM_000166 | 2783.141  | 2591.514  | AL570170  | 3612.986  | 2136.077  |
| T59562    | 36370.051 | 36933.551 | AF305200  | 1459.947  | 1827.741  | D56495    | 1011.443  | 499.052   |
| NM_018219 | 1395.92   | 1783.229  | NM_014583 | 938.789   | 909.456   | U09410    | 7608.275  | 7506.6    |
| AK026368  | 1028.295  | 1410.777  | NM_006613 | 39412.063 | 41535.449 | NM_020225 | 4380.71   | 4493.88   |
| NM_014114 | 6809.639  | 9510.407  | NM_004638 | 45137.242 | 45283.574 | NM_001186 | 9973.469  | 11531.094 |
| AF147414  | 873.92    | 1067.322  | L40027    | 9186.949  | 7804.559  | NM_013282 | 6647.344  | 6956.942  |
| NM_003534 | 66818.25  | 60496.402 | NM_003718 | 64109.211 | 66623.57  | NM_005777 | 18732.609 | 17347.133 |
| L08437    | 10979.703 | 11431.022 | NM_007062 | 2629.189  | 1470.885  | NM_012345 | 8025.053  | 7376.691  |
| AK057143  | 15172.285 | 17685.793 | NM_014180 | 33426.234 | 16304.287 | U94387    | 836.469   | 816.031   |
| NM_015594 | 18830.152 | 17704.869 | NM_017706 | 4765.436  | 1905.186  | NM_005826 | 41091.77  | 45545.438 |
| AK024399  | 1451.693  | 1252.856  | AF334406  | 3931.425  | 1371.399  | NM_004592 | 7468.224  | 9171.648  |
| AF056423  | 3163.365  | 2280.694  | NM_017444 | 14727.153 | 5203.989  | NM_019027 | 2245.265  | 2480.154  |
| U00956    | 969.919   | 893.763   | NM_018025 | 3733.965  | 1571.882  | NM_016107 | 11962.695 | 11750.725 |
| X04293    | 1370.992  | 1857.926  | NM_015999 | 16883.434 | 8028.54   | NM_002567 | 45696.414 | 48088.949 |
| AK026475  | 1986.979  | 1855.699  | NM_003804 | 26670.016 | 13504.881 | NM_001404 | 7682.513  | 6936.552  |
| K01884    | 2557.159  | 2559.22   | NM_018453 | 13573.905 | 7745.575  | NM_001605 | 42698.93  | 45050.82  |



|           |           |           |           |           |           |           |           |           |
|-----------|-----------|-----------|-----------|-----------|-----------|-----------|-----------|-----------|
| U00962    | 13901.235 | 12931.443 | NM_004708 | 61599.445 | 67016.852 | AF225422  | 35132.371 | 30756.84  |
| NM_000522 | 1258.154  | 1175.092  | NM_016001 | 26698.598 | 23828.303 | AB040960  | 23576.648 | 19570.506 |
| AK026130  | 17659.129 | 16550.533 | NM_016108 | 11061.245 | 10107.547 | NM_015946 | 5338.079  | 4172.736  |
| NM_012480 | 3009.328  | 2699.899  | S49432    | 13401.019 | 13153.166 | NM_006303 | 20006.848 | 16514.197 |
| NM_003830 | 2049.852  | 2842.543  | D86984    | 6860.394  | 6348.372  | AK026904  | 5006.105  | 3721.059  |
| NM_000842 | 3493.722  | 3459.557  | NM_015959 | 1901.028  | 2050.736  | AB002364  | 687.541   | 513.09    |
| NM_015642 | 4775.144  | 4886.281  | AF217974  | 13623.734 | 11492.059 | NM_001985 | 8700.286  | 9558.957  |
| NM_004640 | 33479.781 | 35644.422 | NM_001910 | 4316.287  | 4842.972  | NM_000102 | 6653.845  | 6662.711  |
| NM_016222 | 25669.406 | 29543.381 | J03210    | 845.269   | 1089.347  | NM_002490 | 23866.719 | 29076.047 |
| AB037823  | 6402.634  | 7092.749  | NM_001909 | 17117.254 | 15541.383 | BE563532  | 6809.96   | 11974.104 |
| NM_015380 | 34880.898 | 40838.637 | NM_012198 | 19587.129 | 15212.495 | NM_001916 | 20550.781 | 28231.289 |
| BE254485  | 7268.508  | 8715.715  | NM_003368 | 12391.193 | 6973.257  | NM_002491 | 1634.666  | 2099.246  |
| NM_002732 | 1906.708  | 1963.989  | AB040886  | 3971.727  | 2258.034  | NM_015425 | 6648.117  | 7035.524  |
| AK021893  | 4557.196  | 5236.06   | NM_001460 | 1337.195  | 545.167   | NM_015153 | 9743.466  | 9986.16   |
| NM_001048 | 26284.031 | 31249.309 | AB029020  | 4698.053  | 2168.964  | AB032966  | 54761.66  | 54670.215 |
| NM_001506 | 698.246   | 641.861   | AK022759  | 8036.096  | 3398.018  | M26747    | 2336.793  | 3004.868  |
| AK026497  | 11367.839 | 10448.663 | NM_012333 | 26450.725 | 12241.938 | NM_005035 | 5526.062  | 7112.536  |
| BE958139  | 4483.725  | 5027.063  | AF217798  | 5427.54   | 3357.542  | NM_019014 | 11803.845 | 12858.679 |
| AF085359  | 1583.052  | 1691.842  | AF161472  | 7444.411  | 6257.684  | NM_002097 | 38777.043 | 45531.375 |
| AF086516  | 7516.476  | 7020.029  | AL133642  | 17463.885 | 12683.701 | X04706    | 26416.852 | 26005.467 |
| D86978    | 22965.457 | 19917.387 | AB011154  | 5165.855  | 4974.828  | NM_018035 | 1867.643  | 2015.659  |
| AL080060  | 2136.765  | 1605.269  | AF124432  | 5525.865  | 5740.614  | NM_006494 | 22673.838 | 18213.703 |
| NM_005267 | 11465.241 | 11146.624 | NM_006330 | 46529.754 | 51076.984 | X52343    | 10889.738 | 9493.305  |
| U80763    | 2277.938  | 1892.79   | NM_015873 | 11996.023 | 11192.143 | NM_005853 | 3526.098  | 2958.176  |
| AF086017  | 3428.199  | 2897.631  | NM_000377 | 14838.485 | 14912.276 | X99681    | 2648.49   | 2115.294  |
| NM_005780 | 26934.416 | 21506.582 | NM_006818 | 3198.4    | 3209.377  | NM_003120 | 23197.416 | 18611.529 |
| NM_004948 | 635.3     | 758.397   | NM_016823 | 13469.545 | 14239.696 | X52360    | 10321.799 | 8573.169  |
| NM_003285 | 775.253   | 850.055   | AL570170  | 6349.666  | 4958.696  | NM_002636 | 65234.727 | 55560.309 |
| NM_000888 | 16297.659 | 16722.088 | D56495    | 2045.934  | 1580.238  | NM_016494 | 63346.586 | 57588.492 |
| NM_000595 | 31414.309 | 29950.678 | U09410    | 8826.696  | 8939.707  | NM_020384 | 7834.888  | 7915.041  |
| X99663    | 11147.161 | 11913.983 | NM_020229 | 7133.541  | 6653.912  | NM_006058 | 53433.484 | 58511.516 |
| NM_016552 | 1594.351  | 1667.193  | NM_001186 | 14129.296 | 13834.158 | NM_006628 | 26067.188 | 28321.367 |
| NM_003565 | 8849.965  | 8860.97   | NM_004502 | 13003.601 | 10793.802 | M97496    | 65206.027 | 68847.742 |
| NM_004841 | 2925.858  | 4047.566  | AF000560  | 18164.75  | 15380.539 | NM_002305 | 570.589   | 1134.096  |
| NM_004114 | 2211.121  | 2415.447  | NM_013282 | 8674.339  | 6538.125  | AK026074  | 4891.326  | 5683.977  |
| M35410    | 11261.329 | 13305.7   | NM_005777 | 23692.934 | 15979.365 | NM_003172 | 10007.079 | 12568.838 |
| AB023227  | 5065.326  | 4959.547  | NM_012345 | 9942.629  | 7625.196  | NM_004805 | 12236.087 | 13469.861 |
| NM_005776 | 38298.906 | 46690.504 | U94387    | 924.698   | 870.915   | AA903183  | 4482.143  | 6087.505  |
| AK023071  | 7319.782  | 7481.499  | NM_005826 | 52253.988 | 44487.164 | H41522    | 11585.666 | 12630.817 |
| NM_004041 | 1421.199  | 1283.039  | NM_004592 | 8544.689  | 5578.07   | AA460291  | 50710.789 | 57732.402 |
| AK022888  | 6429.849  | 7379.064  | NM_015001 | 37963.031 | 28642.143 | BI821333  | 18422.014 | 18694.414 |
| AK024484  | 15136.941 | 15065.249 | NM_019027 | 2752.454  | 2166.911  | X51841    | 59840.508 | 60727.176 |
| NM_001953 | 43111.629 | 45257.285 | NM_016107 | 18194.977 | 15011.403 | AF051344  | 51623.277 | 55922.324 |
| NM_001406 | 1266.015  | 971.455   | NM_002567 | 52964.742 | 50647.738 | BG506100  | 15958.324 | 17678.732 |
| NM_002292 | 1974.019  | 1913.167  | NM_001404 | 12335.331 | 10698.524 | X53586    | 2621.753  | 2852.922  |
| NM_000166 | 2291.391  | 2404.752  | NM_001605 | 60674.602 | 51618.004 | M17176    | 2318.276  | 2372.721  |
| AF305200  | 1121.687  | 404.864   | AF225422  | 55528.543 | 50110.539 | M26576    | 1351.816  | 1193.492  |
| NM_014583 | 1043.056  | 969.716   | AB040960  | 40554.266 | 45512.406 | M32972    | 16286.868 | 14017.823 |
| NM_006613 | 21390.961 | 21484.602 | NM_015946 | 9038.288  | 8847.885  | D11151    | 835.454   | 676.74    |
| NM_004638 | 21157.473 | 21247.928 | NM_006303 | 27859.311 | 31641.746 | D89854    | 1835.113  | 1619.675  |
| NM_005373 | 1790.342  | 1638.068  | AK026904  | 7805.618  | 8222.566  | M13207    | 3462.918  | 2781.124  |
| L40027    | 11958.506 | 12743.646 | AB002364  | 1314.112  | 1311.758  | X14885    | 1286.174  | 922.393   |
| NM_003718 | 68373.742 | 63023.961 | NM_001985 | 14175.467 | 14883.094 | M97815    | 2081.976  | 1993.602  |

|           |           |           |           |           |           |           |           |           |
|-----------|-----------|-----------|-----------|-----------|-----------|-----------|-----------|-----------|
| NM_007062 | 3397.104  | 3392.451  | NM_000102 | 7805.217  | 7997.59   | NM_003001 | 3585.004  | 3333.89   |
| NM_002010 | 780.037   | 530.671   | NM_002490 | 33163.574 | 31357.934 | NM_012400 | 1854.905  | 1553.54   |
| NM_014180 | 39288.852 | 46587.516 | BE563532  | 5226.294  | 4183.532  | NM_005384 | 4521.229  | 4220.965  |
| NM_017700 | 5880.542  | 6092.911  | NM_001916 | 35145.133 | 34328.941 | NM_006850 | 572.536   | 759.705   |
| NM_018025 | 3792.995  | 4028.342  | NM_002491 | 3213.517  | 2535.709  | AB013103  | 3060.518  | 4694.661  |
| NM_015990 | 19491.238 | 23006.705 | NM_015425 | 10232.249 | 8440.238  | AF019225  | 8348.851  | 9865.859  |
| NM_003804 | 7805.33   | 7075.915  | NM_015153 | 15134.528 | 9835.11   | Z36803    | 21148.625 | 22416.01  |
| NM_018453 | 15423.699 | 14380.333 | AB032966  | 60555.926 | 50990.215 | NM_013371 | 1575.669  | 1536.778  |
| NM_004700 | 67117.406 | 61435.824 | M26747    | 3402.256  | 2625.548  | NM_000707 | 16329.223 | 15817.507 |
| NM_016001 | 26294.32  | 26034.271 | NM_014820 | 22172.48  | 18121.939 | AF202092  | 26825.094 | 30114.471 |
| NM_016100 | 9995.525  | 9808.724  | NM_005035 | 11829.069 | 9458.867  | NM_003201 | 12506.782 | 13045.918 |
| S49432    | 1169.108  | 956.172   | NM_019014 | 15673.661 | 15982.393 | AB011139  | 5587.813  | 6373.495  |
| D86984    | 8054.436  | 6656.953  | NM_002097 | 53442.516 | 50143.828 | NM_006910 | 4463.333  | 4753.399  |
| NM_015950 | 1141.594  | 542.984   | X04706    | 28859.801 | 26274.959 | AK022625  | 54061.449 | 54316.305 |
| AF217974  | 4426.003  | 3007.843  | NM_018030 | 2361.87   | 2462.469  | NM_005425 | 2119.188  | 3266.243  |
| NM_001910 | 1067.566  | 1287.467  | NM_006494 | 38671.73  | 39374.113 | AK023084  | 15587.86  | 16650.83  |
| AK023354  | 583.016   | 622.885   | X52343    | 15825.59  | 15688.63  | AK025588  | 19596.377 | 18615.633 |
| NM_001900 | 16035.141 | 15642.753 | NM_005853 | 6053.781  | 6443.88   | NM_003180 | 6336.357  | 6313.593  |
| NM_012190 | 5817.833  | 5361.553  | X99681    | 2908.854  | 3043.31   | NM_007110 | 1572.704  | 1226.775  |
| AF090904  | 1040.139  | 896.12    | NM_003120 | 37171.582 | 43092.719 | U59431    | 34101.266 | 33237.027 |
| NM_003360 | 16947.018 | 16563.391 | X52360    | 14086.555 | 14364.842 | U49349    | 3196.043  | 2207.818  |
| AB040886  | 5692.055  | 5556.373  | NM_002630 | 62099.043 | 56207.793 | NM_020150 | 4386.393  | 3933.216  |
| NM_001460 | 1688.734  | 1903.649  | NM_016494 | 63140.938 | 57688.121 | NM_013404 | 4950.46   | 4688.74   |
| AF161472  | 7386.073  | 7958.738  | NM_020384 | 12436.323 | 13263.159 | NM_003960 | 1302.112  | 1153.528  |
| AL133642  | 4839.43   | 4931.497  | NM_006050 | 60427.664 | 60352.871 | BC012333  | 19244.254 | 18177.34  |
| AB011154  | 4807.159  | 5576.082  | NM_006620 | 35743.887 | 39489.004 | AF237952  | 12191.702 | 12783.272 |
| NM_006330 | 48154.465 | 49911.477 | M97496    | 62206.754 | 71995.602 | AL079287  | 3871.608  | 4298.28   |
| NM_015870 | 1167.293  | 1009.294  | AK026074  | 5890.7    | 5231.285  | NM_014427 | 14355.179 | 16138.936 |
| NM_000377 | 17538.064 | 16901.91  | NM_003170 | 14830.69  | 12686.797 | AB046769  | 11505.048 | 13588.822 |
| NM_006810 | 2472.943  | 2632.465  | NM_004800 | 18569.598 | 15803.804 | NM_015920 | 16202.465 | 17316.666 |
| NM_016820 | 17497.066 | 14053.664 | AA903183  | 3549.685  | 3272.905  | NM_020381 | 5804.917  | 5856.347  |
| AL570170  | 8094.083  | 5246.608  | H41522    | 15069.898 | 12570.521 | NM_002957 | 17702.854 | 16361.257 |
| D56495    | 1475.23   | 1110.709  | AA460291  | 54178.949 | 56869.223 | NM_018100 | 11677.513 | 13114.604 |
| U09410    | 10053.484 | 9372.879  | BI821333  | 28750.426 | 26628.049 | NM_003720 | 4831.986  | 4920.146  |
| NM_020220 | 1730.673  | 1680.603  | X51841    | 59586.637 | 47395.477 | BE899154  | 3588.172  | 4010.875  |
| NM_001180 | 15227.218 | 16150.831 | AF051344  | 59845.953 | 59478.379 | NM_004860 | 6651.191  | 7024.586  |
| NM_004500 | 7837.868  | 7240.708  | BG506100  | 22934.359 | 28477.299 | AB032963  | 1165.921  | 1664.484  |
| AF000560  | 20029.27  | 20082.6   | X53586    | 4578.111  | 5008.492  | U15688    | 6390.839  | 7863.042  |
| NM_013280 | 8258.866  | 8180.458  | M17176    | 4301.553  | 3983.233  | NM_018440 | 10567.655 | 12486.12  |
| NM_005777 | 29360.35  | 32043.395 | M26576    | 3128.119  | 3553.631  | NM_018184 | 14143.839 | 14342.748 |
| NM_012340 | 10452.89  | 8925.164  | M32972    | 25428.629 | 26657.682 | AB046823  | 2194.788  | 2220.492  |
| U94387    | 1316.445  | 1502.952  | D11151    | 1832.405  | 2054.351  | NM_004920 | 2357.537  | 2474.09   |
| NM_005820 | 36683.082 | 42203.18  | D89854    | 3505.745  | 3565.829  | NM_004660 | 1058.08   | 1136.311  |
| AB040960  | 40982.094 | 42011.254 | M13207    | 4506.382  | 4148.974  | NM_016630 | 62893.047 | 58904.605 |
| NM_015940 | 9199.348  | 8954.582  | X14885    | 2013.592  | 1695.3    | U61739    | 38805.344 | 38808.324 |
| NM_006300 | 34215.766 | 35013.086 | M97815    | 3440.715  | 3126.823  | AJ132089  | 1562.679  | 1469.43   |
| AK026904  | 6790.894  | 4910.719  | NM_003001 | 6905.324  | 6804      | U92819    | 8246.772  | 7639.137  |
| AB002364  | 1016.51   | 783.426   | NM_012400 | 2106.863  | 2093.624  | AB020626  | 4779.607  | 3907.272  |
| NM_003790 | 1046.364  | 587.089   | NM_005384 | 6292.591  | 5920.533  | NM_002030 | 46433.625 | 44816.914 |
| NM_001980 | 18093.482 | 17432.152 | NM_006850 | 980.808   | 1082.283  | NM_014300 | 5928.216  | 5156.957  |
| NM_000100 | 1894.128  | 1803.714  | AB013103  | 2651.147  | 2637.214  | NM_012120 | 31259.063 | 32076.664 |
| NM_002490 | 34575.883 | 36427.504 | AF019225  | 10213.264 | 10653.053 | U87972    | 6378.577  | 6904.957  |
| BE563532  | 7649.394  | 7810.452  | Z36803    | 29662.855 | 28689.811 | NM_017920 | 7080.472  | 7849.074  |

|           |           |           |           |           |           |           |           |           |
|-----------|-----------|-----------|-----------|-----------|-----------|-----------|-----------|-----------|
| NM_00191E | 48440.254 | 53408.113 | NM_013371 | 2218.187  | 2041.828  | AK022208  | 28311.809 | 27554.457 |
| NM_002491 | 3685.423  | 3376.156  | NM_000707 | 25761.668 | 23625.229 | NM_003171 | 12909.931 | 11422.226 |
| NM_01542E | 15445.467 | 14591.483 | AF202092  | 35894.285 | 36670.73  | NM_006437 | 25071.121 | 24248.328 |
| NM_01515E | 17564.846 | 17709.291 | NM_003201 | 17796.189 | 19449.072 | NM_01789C | 4668.181  | 4453.178  |
| AB032966  | 7527.878  | 7297.613  | AB011139  | 9201.559  | 10000.665 | AK021654  | 5361.278  | 4732.928  |
| M26747    | 3291.447  | 3742.672  | NM_00691E | 6194.724  | 6113.705  | NM_016481 | 2376.349  | 2229.338  |
| NM_01482C | 24357.059 | 27945.209 | AK022625  | 43213.75  | 42115.555 | NM_00392E | 16332.766 | 15731.664 |
| NM_00503E | 11170.794 | 10552.323 | NM_00542E | 2571.141  | 2727.004  | Z15114    | 13629.869 | 14572.247 |
| X04706    | 3278.577  | 3207.928  | AK023084  | 22214.117 | 22117.197 | AB040812  | 44611.453 | 46871.777 |
| NM_00585E | 6135.455  | 6266.755  | AK025588  | 30932.186 | 33979.246 | NM_01762E | 902.62    | 777.537   |
| X99681    | 1484.797  | 1284.148  | NM_00318E | 10242.416 | 11302.621 | NM_00628E | 13521.356 | 12846.331 |
| NM_00312C | 37973.258 | 39578.246 | NM_007118 | 3134.204  | 4172.339  | NM_00365E | 66308.961 | 63127.781 |
| X52360    | 4849.043  | 3418.349  | U59431    | 35325.098 | 39816.59  | NM_00134E | 33125.977 | 29159.666 |
| NM_00263E | 36737.723 | 22606.564 | U49349    | 3853.879  | 3340.391  | NM_00021E | 7620.875  | 8042.029  |
| NM_01649A | 52296.266 | 47033.188 | NM_02015E | 6453.115  | 7396.244  | AK027148  | 38364.641 | 34948.273 |
| NM_02038A | 10101.421 | 9380.827  | NM_01340A | 6346.781  | 7095.167  | NM_00508A | 8450.812  | 8031.756  |
| NM_00605E | 62586.188 | 59274.852 | AF300648  | 728.021   | 832.389   | NM_00728E | 13417.843 | 13372.198 |
| NM_00662E | 30476.877 | 29441.617 | NM_00236A | 813.98    | 1139.699  | NM_006111 | 12477.308 | 10757.999 |
| M97496    | 23229.547 | 22699.914 | NM_00396E | 1910.236  | 2120.558  | AK026071  | 23239.305 | 20986.242 |
| NM_00230E | 813.48    | 1084.483  | BC012333  | 20787.635 | 24415.104 | NM_00662E | 26246.461 | 26335.002 |
| AK026074  | 3820.496  | 4096.878  | AF237952  | 15834.609 | 16286.951 | M97496    | 62300.559 | 62895.422 |
| NM_00317E | 15688.064 | 16209.079 | AL079287  | 5846.638  | 6144.194  | NM_00230E | 1237.826  | 1368.992  |
| NM_00480E | 4298.917  | 3667.258  | NM_014427 | 14680.776 | 14551.228 | NM_00480E | 12340.395 | 15029.008 |
| AA903183  | 2159.783  | 2182.633  | AB046769  | 13152.092 | 14102.388 | AA903183  | 3320.097  | 3854.94   |
| H41522    | 1216.337  | 1147.229  | NM_01592E | 21135.631 | 21058.734 | H41522    | 12249.904 | 13032.126 |
| AA460291  | 18121.514 | 19224.041 | NM_020381 | 11380.619 | 10899.516 | AA460291  | 50844.113 | 52642.398 |
| BI821333  | 32635.266 | 39291.133 | NM_002957 | 29197.918 | 27099.121 | BI821333  | 17912.406 | 17311.498 |
| X51841    | 9293.589  | 7636.673  | NM_01810E | 15372.645 | 16603.475 | X51841    | 64801.422 | 62941.832 |
| BG506100  | 12515.667 | 13698.043 | NM_00372E | 7128.997  | 6770.745  | AF051344  | 61197.902 | 57850.262 |
| X53586    | 4130.402  | 4318.645  | BE899154  | 5793.255  | 5671.585  | BG506100  | 15720.94  | 15377.132 |
| M17176    | 2873.277  | 2623.596  | NM_00486E | 10984.474 | 11928.646 | X53586    | 2769.033  | 2779.239  |
| D11151    | 2175.083  | 1553.011  | AB032963  | 1742.318  | 2077.96   | M17176    | 1710.251  | 1561.586  |
| D89854    | 3705.844  | 3211.843  | U15688    | 6961.727  | 7079.682  | M26576    | 1072.076  | 926.871   |
| M13207    | 5249.725  | 3531.372  | NM_01844E | 21409.576 | 22226.475 | M32972    | 16070.905 | 14076.33  |
| X14885    | 1008.617  | 520.142   | NM_01818A | 19563.6   | 20123.377 | D89854    | 1727.16   | 1403.231  |
| M97815    | 2063.25   | 1185.055  | AB046823  | 3563.134  | 3344.325  | M13207    | 2838.765  | 2100.176  |
| NM_003001 | 8991.028  | 7440.769  | NM_00492E | 4337.529  | 4925.198  | X14885    | 1111.314  | 915.755   |
| NM_01240C | 1671.685  | 1617.83   | NM_00466E | 2184.534  | 2315.763  | M97815    | 2236.178  | 1551.253  |
| NM_00538A | 5254.36   | 5015.797  | NM_01663E | 59134.512 | 63602.895 | AF085893  | 3552.897  | 2601.726  |
| NM_00685C | 1782.938  | 1752.151  | U61739    | 39649.934 | 48067.676 | NM_00310E | 1691.678  | 1934.938  |
| AB013103  | 1384.583  | 1770.411  | AJ132089  | 2550.905  | 2835.338  | NM_00685C | 500.075   | 379.25    |
| AF019225  | 8282.606  | 9583.106  | U92819    | 14543.008 | 15898.564 | AB013103  | 1670.716  | 1690.988  |
| Z36803    | 13658.731 | 15637.234 | AB020626  | 6556.446  | 7401.05   | AF019225  | 7669.98   | 6985.199  |
| NM_013371 | 1881.913  | 2129.749  | NM_00203E | 55406.766 | 50192.332 | Z36803    | 22551.033 | 23486.504 |
| NM_000707 | 20669.104 | 18748.723 | NM_01430E | 7292.017  | 7859.414  | NM_013371 | 3121.661  | 4752.146  |
| AF202092  | 35510.891 | 40967.609 | NM_01212E | 36945.887 | 40366.695 | NM_000707 | 16249.571 | 16948.604 |
| NM_003201 | 22011.699 | 25414.248 | U87972    | 8245.544  | 8674.51   | AF202092  | 25387.154 | 28417.982 |
| AB011139  | 9277.816  | 10073.563 | NM_01792E | 9471.499  | 9295.271  | NM_003201 | 13567.308 | 14884.146 |
| NM_00691E | 2415.377  | 2489.715  | AK022208  | 35763.383 | 31474.346 | AB011139  | 6380.051  | 6357.243  |
| AK022625  | 4605.708  | 4589.498  | NM_003171 | 19372.936 | 15470.18  | NM_00691E | 4206.961  | 4561.016  |
| NM_00542E | 1323.601  | 1523.13   | NM_006437 | 35176.547 | 35228.703 | AK022625  | 53173.164 | 54425.246 |
| AK025588  | 5126.062  | 4626.299  | NM_01789C | 6544.494  | 6578.212  | NM_00542E | 1553.833  | 1556.167  |
| NM_00318E | 7364.983  | 8136.535  | AK021654  | 6924.461  | 7071.697  | AK023084  | 16660.543 | 16410.186 |

|           |           |           |           |           |           |           |           |           |
|-----------|-----------|-----------|-----------|-----------|-----------|-----------|-----------|-----------|
| NM_007118 | 4575.615  | 4318.913  | NM_016481 | 4247.096  | 4828.116  | AK025588  | 19298.994 | 16614.395 |
| U59431    | 3579.439  | 2875.405  | NM_003925 | 24748.707 | 22527.732 | NM_003188 | 6349.057  | 6602.537  |
| U49349    | 2746.443  | 2726.457  | Z15114    | 18822.619 | 17184.406 | NM_007118 | 1487.863  | 1614.51   |
| NM_020152 | 6667.279  | 6515.678  | AB040812  | 58848.371 | 55400.18  | U59431    | 30936.711 | 29455.223 |
| NM_013404 | 2795.57   | 2634.499  | NM_017625 | 1517.76   | 1321.728  | U49349    | 2686.213  | 2391.365  |
| NM_003966 | 1549.578  | 1230.555  | NM_006285 | 20482.32  | 22040.857 | NM_020152 | 3860.485  | 3626.351  |
| BC012333  | 24144.473 | 24246.564 | NM_003656 | 62733.516 | 61645.348 | NM_013404 | 5241.244  | 4703.469  |
| AF237952  | 15122.937 | 16413.273 | NM_001348 | 37089.727 | 40855.809 | NM_003966 | 1606.823  | 1468.432  |
| AL079287  | 5358.699  | 5152.386  | NM_000215 | 11795.576 | 11899.49  | NM_020384 | 6927.908  | 6585.835  |
| NM_014427 | 5491.615  | 4390.815  | AK027148  | 52645.941 | 45987.691 | NM_006058 | 51850.742 | 47669.613 |
| AB046769  | 9541.53   | 9292.315  | NM_005084 | 12443.472 | 14019.289 | AL079287  | 3343.604  | 3242.521  |
| NM_002957 | 8926.202  | 8890.838  | NM_007283 | 19264.834 | 21785.037 | NM_014427 | 11082.234 | 9651.945  |
| NM_018106 | 18297.889 | 20104.385 | NM_006111 | 19392.98  | 19220.713 | AB046769  | 10829.455 | 10667.055 |
| NM_003725 | 6740.766  | 7215.533  | AK026071  | 30334.238 | 32204.164 | NM_015922 | 14474.853 | 15226.699 |
| BE899154  | 3917.673  | 3671.111  | AK026074  | 5987.846  | 6663.487  | NM_020381 | 6266.503  | 7099.279  |
| AB032963  | 1946.594  | 2167.76   | NM_003172 | 13377.529 | 13858.536 | NM_002957 | 15923.985 | 17331.992 |
| U15688    | 5395.175  | 6144.38   | NM_004809 | 15104.858 | 15374.313 | NM_018106 | 11565.954 | 13135.647 |
| AB046823  | 3087.97   | 2295.26   | AA903183  | 1444.914  | 1184.867  | NM_003725 | 4984.048  | 5092.601  |
| NM_004929 | 5387.669  | 5762.046  | H41522    | 14375.352 | 14492.194 | BE899154  | 4091.471  | 4218.091  |
| NM_004662 | 2394.955  | 2027.317  | AA460291  | 50695.848 | 47146     | NM_004863 | 6879.108  | 9638.322  |
| NM_016639 | 40704.402 | 37170.387 | BI821333  | 27779.373 | 25971.963 | AB032963  | 1348.805  | 1545.261  |
| U61739    | 6634.832  | 5635.021  | X51841    | 58202.168 | 57765.984 | U15688    | 5002.276  | 4899.059  |
| AJ132089  | 3244.49   | 2432.051  | AF051344  | 58868.352 | 53346.852 | NM_018448 | 14731.406 | 14781.501 |
| U92819    | 11767.666 | 9852.906  | BG506100  | 22110.605 | 24007.473 | NM_018184 | 11788.567 | 13444.281 |
| AB020626  | 2681.279  | 1788.212  | X53586    | 4442.874  | 5414.64   | AB046823  | 2216.271  | 2102.02   |
| NM_002036 | 1880.558  | 1223.246  | M17176    | 3090.397  | 3059.93   | NM_004929 | 2558.062  | 2397.278  |
| NM_014305 | 7995.721  | 9443.592  | M26576    | 1609.009  | 1743.84   | NM_004662 | 1735.78   | 1971.256  |
| NM_012123 | 35894.684 | 40423.086 | M32972    | 24165.902 | 23968.467 | NM_016639 | 62954.699 | 61179.082 |
| NM_003171 | 23464.412 | 23782.869 | D89854    | 2839.896  | 2722.508  | U61739    | 38929.027 | 36476.551 |
| NM_006437 | 39115.98  | 43643.355 | M13207    | 4670.163  | 4145.307  | AJ132089  | 1615.409  | 1712.312  |
| NM_017890 | 6433.038  | 6339.016  | X14885    | 1878.207  | 1876.375  | U92819    | 8130.914  | 7097.266  |
| AK021654  | 4283.19   | 4105.963  | M97815    | 2598.419  | 2571.48   | AB020626  | 4951.903  | 3791.197  |
| NM_003656 | 36749.605 | 37516.41  | AF085893  | 4296.278  | 4580.007  | NM_002036 | 44876.156 | 44275.824 |
| NM_001348 | 10104.906 | 10543.232 | NM_003102 | 1980.396  | 2127.682  | NM_012400 | 1533.51   | 1202.203  |
| NM_000215 | 7260      | 6461.577  | Z36803    | 30959.398 | 31981.008 | NM_005384 | 4147.124  | 3697.184  |
| AK027148  | 22535.697 | 20987.154 | NM_013371 | 2149.353  | 2193.545  | NM_012123 | 28485.727 | 24221.848 |
| NM_005084 | 15787.836 | 13120.523 | NM_000707 | 21462.633 | 23676.324 | U87972    | 5391.397  | 4776.586  |
| NM_007283 | 22483.055 | 19185.514 | AF202092  | 24532.02  | 26307.305 | NM_003171 | 12810.355 | 11123.968 |
| NM_006111 | 20399.813 | 15610.707 | NM_003201 | 17834.273 | 25036.539 | NM_006437 | 23656.912 | 24261.281 |
| AK026071  | 9662.008  | 5669.258  | AB011139  | 9639.603  | 10720.96  | NM_017890 | 5191.312  | 4819.36   |
| NM_006628 | 28256.506 | 29090.42  | NM_006919 | 5020.455  | 5354.822  | AK021654  | 4736.299  | 4607.632  |
| M97496    | 23259.154 | 23116.732 | AK022625  | 48308.52  | 53578.637 | Z15114    | 15447.429 | 16561.041 |
| NM_002309 | 823.93    | 1008.34   | NM_005425 | 4013.062  | 4349.932  | AB040812  | 46272.211 | 49734.48  |
| AK026074  | 4019.143  | 3812.013  | AK023084  | 23462.232 | 25203.512 | NM_017625 | 796.578   | 960.551   |
| NM_003172 | 15832.306 | 17611.219 | AK025588  | 30794.703 | 36137.391 | NM_006285 | 13470.45  | 12391.853 |
| H41522    | 1789.437  | 1643.889  | NM_003188 | 9442.784  | 10744.155 | NM_003656 | 66016.023 | 56105.598 |
| AA460291  | 19226.311 | 18545.625 | NM_007118 | 3331.017  | 3216.632  | NM_001348 | 31153.148 | 28556.92  |
| BI821333  | 31204.037 | 33369.328 | U59431    | 36953.996 | 40202.703 | NM_000215 | 8729.313  | 8105.418  |
| X51841    | 10692.726 | 8069.116  | U49349    | 4074.994  | 4728.287  | AK027148  | 37905.496 | 37539.898 |
| D11151    | 1013.173  | 1165.876  | NM_020152 | 6786.909  | 7671.145  | NM_005084 | 8067.116  | 7796.996  |
| D89854    | 3772.015  | 3187.097  | NM_013404 | 7410.267  | 7144.837  | NM_007283 | 13211.796 | 13507.352 |
| M13207    | 4706.608  | 2958.94   | AF300648  | 886.274   | 1691.513  | NM_006111 | 12194.868 | 11364.939 |
| X14885    | 1041.734  | 729.672   | NM_002364 | 1259.586  | 1616.101  | AK026071  | 22730.596 | 19845.58  |

|           |           |           |           |           |           |           |           |           |
|-----------|-----------|-----------|-----------|-----------|-----------|-----------|-----------|-----------|
| M97815    | 1726.679  | 1442.022  | NM_003966 | 4537.138  | 5936.662  | BC012333  | 17028.041 | 16472.822 |
| AF085893  | 1489.242  | 1041.743  | NM_020384 | 10392.275 | 11201.094 | AF237952  | 10809.24  | 10868.481 |
| NM_003102 | 951.36    | 531.054   | NM_006058 | 61561.664 | 56568.59  | NM_002305 | 754.476   | 648.751   |
| NM_006850 | 1883.809  | 1870.614  | NM_015922 | 21885.162 | 22655.039 | AK026074  | 4229.739  | 4179.173  |
| AB013103  | 1991.085  | 1998.301  | NM_020381 | 10039.281 | 11695.904 | H41522    | 11879.743 | 13126.135 |
| AF019225  | 7832.37   | 6605.627  | NM_002957 | 28351.037 | 31035.428 | AA460291  | 50852.176 | 52211.523 |
| Z36803    | 11863.759 | 11289.115 | NM_018106 | 13915.052 | 15269.819 | BI821333  | 18201.375 | 17545.492 |
| NM_013371 | 1530.104  | 1197.473  | NM_003725 | 5746.375  | 6077.196  | X51841    | 63944.813 | 60059.961 |
| NM_000707 | 21728.854 | 20183.395 | BE899154  | 5496.131  | 5923.751  | AF051344  | 60263.59  | 54958.055 |
| AF202092  | 37395.813 | 45938.074 | NM_004863 | 9548.067  | 10546.351 | X53586    | 5689.19   | 6506.516  |
| NM_003201 | 23396.527 | 29784.475 | AB032963  | 2452.649  | 2929.315  | M17176    | 4014.079  | 5377.614  |
| AB011139  | 9500.215  | 10807.955 | U15688    | 7067.655  | 7788.541  | M26576    | 883.688   | 857.493   |
| NM_006919 | 2398.199  | 2617.528  | NM_018448 | 22122.898 | 23974.162 | M32972    | 16199.38  | 14756.771 |
| AK022625  | 4718.467  | 4818.423  | NM_018184 | 20316.664 | 24378.877 | D89854    | 1820.742  | 1315.687  |
| NM_005425 | 1617.462  | 2314.143  | AB046823  | 3741.512  | 3844.861  | M13207    | 3038.268  | 1942.029  |
| NM_020152 | 6051.472  | 6040.687  | NM_004929 | 3915.57   | 4162.405  | X14885    | 956.809   | 438.359   |
| NM_013404 | 2863.558  | 2471.011  | NM_004662 | 2730.345  | 3330.323  | M97815    | 2022.913  | 1706.019  |
| NM_002364 | 428.136   | 700.756   | NM_016639 | 55945.59  | 55905.801 | AF085893  | 4336.215  | 2823.236  |
| NM_003966 | 1853.859  | 2054.714  | U61739    | 40478.816 | 48252.484 | NM_003102 | 1526.847  | 1441.377  |
| NM_020384 | 10395.767 | 8715.436  | AJ132089  | 2749.344  | 2639.172  | NM_014305 | 5601.436  | 4837.813  |
| NM_006058 | 56736.934 | 45986.836 | U92819    | 9565      | 10027.562 | AB011139  | 6127.844  | 6718.268  |
| AL079287  | 5700.029  | 6320.929  | AB020626  | 5519.967  | 6360.488  | NM_006919 | 4500.711  | 4436.427  |
| NM_014427 | 4863.149  | 4862.058  | NM_002036 | 52046.414 | 48804.789 | NM_003188 | 6986.469  | 7212.337  |
| AB046769  | 6024.658  | 5898.176  | NM_012400 | 2243.598  | 2353.585  | NM_007118 | 1486.85   | 1546.931  |
| NM_015922 | 18848.953 | 18807.24  | NM_005384 | 6939.204  | 6632.963  | U59431    | 37586.332 | 41089.781 |
| NM_020381 | 7339.535  | 7684.984  | NM_012123 | 37640.43  | 43548.172 | U49349    | 2970.391  | 2597.216  |
| NM_002957 | 9208.163  | 7987.386  | NM_017925 | 10148.48  | 10994.803 | NM_020152 | 4804.547  | 5457.122  |
| NM_018106 | 18078.119 | 18657.566 | AK022208  | 37632.16  | 39806.672 | NM_013404 | 6545.179  | 7735.059  |
| NM_003725 | 7255.103  | 8494.303  | NM_003171 | 18729.16  | 17251.1   | AF300648  | 2681.129  | 1745.655  |
| BE899154  | 3917.363  | 3972.2    | NM_006437 | 32841.52  | 39324.078 | NM_006157 | 408.664   | 459.665   |
| NM_004863 | 11848.992 | 13456.501 | NM_017890 | 5426.421  | 5699.507  | NM_003966 | 1220.28   | 869.418   |
| AB032963  | 2131.904  | 1986.466  | AK021654  | 6427.011  | 7072.436  | AK024443  | 60785.938 | 59225.313 |
| U15688    | 6189.047  | 7000.892  | NM_016481 | 3119.653  | 3962.507  | X06710    | 4343.18   | 3405.078  |
| NM_004662 | 2973.406  | 3157.165  | NM_003925 | 23528.857 | 20949.25  | AK000896  | 3099.91   | 2663.248  |
| AJ132089  | 3346.994  | 2455.642  | Z15114    | 16559.551 | 17173.939 | NM_003872 | 1266.873  | 1191.215  |
| U92819    | 12479.443 | 10266.83  | AB040812  | 59857.047 | 50449.598 | NM_020384 | 7571.414  | 7079.284  |
| AB020626  | 2875.609  | 2766.42   | NM_017625 | 1277.114  | 1480.544  | NM_006058 | 48340.719 | 47178.582 |
| NM_002036 | 1605.548  | 1650.999  | NM_006285 | 20980.385 | 22432.645 | NM_006628 | 22534.229 | 20465.535 |
| NM_012400 | 1902.438  | 1037.661  | NM_003656 | 62338.328 | 56560.211 | M97496    | 64342.063 | 61065.375 |
| NM_012123 | 34764.43  | 34144.461 | NM_001348 | 36477.27  | 42976.77  | NM_001655 | 42839.875 | 51303.32  |
| NM_017925 | 13135.511 | 12281.861 | NM_000215 | 10837.807 | 12671.361 | AB020663  | 2213.493  | 2186.176  |
| AK022208  | 35766.828 | 28279.932 | AK027148  | 55353.617 | 48554.926 | AF297866  | 12720.139 | 13500.385 |
| NM_003171 | 21066.281 | 18400.104 | NM_005084 | 14479.931 | 16041.3   | NM_018184 | 16354.04  | 16802.717 |
| NM_006437 | 37887.297 | 41470.902 | NM_007283 | 16257.688 | 16730.459 | AB046823  | 3367.157  | 3456.613  |
| NM_017890 | 5895.178  | 6141.071  | NM_006111 | 17080.029 | 19660.256 | NM_004929 | 3860.683  | 3818.936  |
| AK021654  | 4126.54   | 4068.415  | AK026071  | 24649.25  | 25926.469 | NM_004662 | 1308.19   | 1175.843  |
| NM_016481 | 4456.676  | 4000.656  | BC012333  | 21495.416 | 21064.652 | NM_016639 | 63673.074 | 55429.973 |
| NM_003925 | 19385.576 | 16226.024 | AF237952  | 15642.324 | 16527.182 | U61739    | 36477.645 | 39491.836 |
| Z15114    | 9524.378  | 10074.384 | AK026074  | 6493.221  | 8054.136  | AJ132089  | 1578.558  | 1540.619  |
| AB040812  | 62916.5   | 58954.715 | NM_003172 | 15216.173 | 17707.559 | U92819    | 8930.164  | 9159.191  |
| NM_017625 | 2677.241  | 3134.892  | NM_004809 | 17760.801 | 19759.178 | AB020626  | 5808.857  | 4803.941  |
| NM_006285 | 30750     | 35965.754 | AA903183  | 3139.2    | 3571.054  | NM_002036 | 48037.371 | 46909.316 |
| NM_003656 | 42158.844 | 45910.945 | H41522    | 12568.339 | 13832.417 | NM_012400 | 1470.099  | 1145.063  |

|           |           |           |           |           |           |           |           |           |
|-----------|-----------|-----------|-----------|-----------|-----------|-----------|-----------|-----------|
| NM_00134E | 10959.71  | 11311.817 | AA460291  | 51009.363 | 55247.313 | NM_005384 | 3401.445  | 2348.601  |
| NM_00021E | 7255.631  | 6853.278  | BI821333  | 25989.408 | 29018.039 | AB013103  | 1693.113  | 1851.104  |
| AK027148  | 26265.998 | 26869.398 | X51841    | 56781.961 | 63502.918 | AF019225  | 7137.461  | 6379.273  |
| NM_005084 | 16431.354 | 16540.951 | AF051344  | 59361.309 | 57024.25  | Z36803    | 21037.445 | 16808.852 |
| NM_007283 | 23929.518 | 24816.039 | BG506100  | 22202.084 | 21985.781 | NM_013371 | 1654.882  | 1338.804  |
| NM_006111 | 22619.467 | 22266.293 | X53586    | 4465.542  | 4865.917  | NM_000707 | 15438.354 | 12191.405 |
| AK026071  | 11457.616 | 9929.229  | M17176    | 2880.413  | 2839.404  | AF202092  | 23898.736 | 21058.631 |
| BC012333  | 24012.582 | 17813.684 | M26576    | 1820.649  | 1632.564  | NM_003201 | 12827.823 | 12140.277 |
| NM_00230E | 1251.141  | 1267.9    | M32972    | 23247.869 | 22397.35  | NM_007283 | 15285.143 | 15569.656 |
| AK026074  | 3992.111  | 3853.156  | D11151    | 2145.731  | 2133.483  | NM_006111 | 11694.484 | 11839.942 |
| NM_003172 | 15649.456 | 15127.422 | D89854    | 2740.231  | 3033.035  | AK026071  | 23419.773 | 21056.514 |
| NM_00480E | 3349.721  | 3288.206  | M13207    | 4603.043  | 5154.53   | BC012333  | 19133.008 | 17094.895 |
| AA903183  | 1992.176  | 2011.656  | X14885    | 1682.563  | 1932.696  | AF237952  | 12950.968 | 14075.654 |
| H41522    | 1046.285  | 848.59    | M97815    | 3449.278  | 3622.205  | AL079287  | 4647.367  | 5303.85   |
| AA460291  | 18175.773 | 17255.719 | AF085893  | 4005.494  | 3983.076  | NM_014427 | 12170.231 | 10691.098 |
| BI821333  | 29993.723 | 31440.955 | NM_003102 | 1531.193  | 2104.326  | AB046769  | 11378.724 | 10677.96  |
| X51841    | 13833.484 | 12011.106 | NM_01430E | 8013.47   | 7445.971  | NM_015922 | 16021.304 | 15201.903 |
| AF051344  | 30893.059 | 31308.141 | AK022625  | 49149.906 | 57103.309 | NM_020381 | 5697.545  | 4609.23   |
| BG506100  | 17682.605 | 18625.721 | NM_00542E | 2203.465  | 2712.39   | NM_002957 | 18806.445 | 14551.015 |
| X53586    | 4632.516  | 4854.326  | AK023084  | 25708.564 | 28237.93  | NM_01810E | 10897.263 | 10053.808 |
| M17176    | 2806.145  | 2550.788  | AK025588  | 32369.795 | 36480.5   | NM_00372E | 4552.65   | 4157.412  |
| M26576    | 2261.139  | 2596.3    | NM_00318E | 8857.038  | 11104.71  | BE899154  | 3561.516  | 2718.768  |
| M32972    | 9273.325  | 9368.938  | NM_007118 | 2256.743  | 2474.455  | NM_004863 | 6755.05   | 5818.381  |
| D11151    | 1225.16   | 1410.412  | U59431    | 38996.535 | 43007.363 | AK024573  | 3529.594  | 2740.279  |
| D89854    | 3999.528  | 4234.971  | U49349    | 4151.846  | 3859.892  | NM_00229E | 8120.288  | 6142.365  |
| M13207    | 5897.648  | 5680.13   | NM_020152 | 6609.117  | 7763.418  | D79998    | 4826.09   | 3716.722  |
| X14885    | 1107.49   | 1098.393  | NM_013404 | 7458.227  | 8350.243  | AB032963  | 1641.358  | 1390.067  |
| M97815    | 2512.831  | 2672.57   | AF300648  | 645.842   | 961.461   | NM_00038E | 5550.444  | 5381.879  |
| AF085893  | 1466.301  | 1533.231  | NM_006157 | 872.601   | 1165.949  | AF301013  | 10114.717 | 8180.343  |
| NM_003102 | 1006.237  | 765.954   | NM_002364 | 1125.023  | 1203.939  | NM_018992 | 66038.008 | 60017.285 |
| NM_01430E | 8558.548  | 6372.281  | NM_00396E | 2170.402  | 2015.812  | U15688    | 5111.22   | 4076.904  |
| AB011139  | 9448.569  | 10842.029 | AK024443  | 57666.723 | 64714.895 | NM_000483 | 8832.206  | 7101.26   |
| NM_00691E | 1718.063  | 2067.328  | X06710    | 10260.548 | 13574.321 | NM_01844E | 13715.88  | 12129.627 |
| AK022625  | 4913.302  | 4585.938  | AK000896  | 6015.502  | 6254.797  | AF085893  | 3496.095  | 2311.342  |
| NM_00542E | 1038.636  | 1250.801  | AV682011  | 2560.63   | 3725.734  | NM_003102 | 1513.307  | 944.977   |
| AK023084  | 7076.729  | 7221.486  | NM_003872 | 2665.305  | 2670.616  | NM_01430E | 7816.088  | 7352.124  |
| AK025588  | 5569.166  | 4697.862  | NM_020384 | 14043.405 | 16075.628 | AF000416  | 5002.177  | 6445.402  |
| NM_00318E | 6750.917  | 7225.416  | NM_00605E | 56522.016 | 59393.059 | NM_012123 | 28727.635 | 24201.434 |
| NM_007118 | 3909.977  | 3444.982  | NM_00662E | 33619.352 | 34670.684 | U87972    | 6491.289  | 5164.378  |
| U59431    | 3304.359  | 3051.933  | M97496    | 61619.555 | 65021.582 | NM_01792E | 7059.094  | 5451.185  |
| U49349    | 2257.852  | 2434.004  | AF297866  | 13876.122 | 16937.543 | AK022208  | 26585.027 | 16994.914 |
| NM_020152 | 5582.509  | 6423.008  | NM_002864 | 4097.292  | 4759.717  | NM_003171 | 12801.161 | 8046.153  |
| NM_013404 | 2748.656  | 3086.393  | NM_017817 | 7139.123  | 8035.189  | NM_006437 | 22935.219 | 15594.961 |
| NM_006157 | 1569.733  | 1425.418  | NM_018184 | 16832.939 | 20036.666 | NM_01789C | 5150.603  | 3682.962  |
| NM_002364 | 837.265   | 344.912   | AB046823  | 3542.887  | 4800.528  | AK021654  | 4679.825  | 2895.06   |
| NM_00396E | 1650.654  | 1873.376  | NM_00492E | 3831.457  | 5478.915  | NM_016481 | 1628.128  | 1062.543  |
| AK024443  | 63062.492 | 59964.336 | NM_004662 | 1731.826  | 1902.573  | NM_00392E | 14865.805 | 9717.061  |
| X06710    | 8607.925  | 7836.345  | NM_01663E | 58264.602 | 65285.145 | Z15114    | 12821.357 | 10130.931 |
| AK000896  | 5764.972  | 6005.685  | U61739    | 39724.332 | 49629.574 | AB040812  | 41499.305 | 35457.152 |
| AV682011  | 669.508   | 824.843   | AJ132089  | 2316.545  | 2408.476  | NM_00628E | 13023.106 | 10327.413 |
| NM_003872 | 2774.218  | 2482.679  | U92819    | 13409.232 | 14149.874 | NM_00365E | 67900.016 | 64696.336 |
| NM_020384 | 11609.134 | 10365.775 | AB020626  | 8097.583  | 7598.28   | NM_00134E | 29014.047 | 24861.189 |
| NM_00605E | 63116.078 | 54872.238 | NM_00203E | 51780.711 | 55152.594 | NM_00021E | 8466.6    | 7681.713  |

|           |           |           |           |           |           |           |           |           |
|-----------|-----------|-----------|-----------|-----------|-----------|-----------|-----------|-----------|
| NM_00662E | 30476.99  | 27812.594 | NM_01240C | 2362.728  | 2343.845  | AK027148  | 38832.523 | 34662.707 |
| NM_00165E | 22093.244 | 22035.947 | NM_005384 | 6856.51   | 6901.338  | NM_005084 | 8808.786  | 8156.777  |
| AB020663  | 2764.299  | 2828.552  | NM_00685C | 3188.717  | 3509.47   | AF070628  | 1027.951  | 915.641   |
| AF297866  | 6256.753  | 5981.019  | AB013103  | 2681.606  | 2881.748  | AF038194  | 1066.551  | 1324.705  |
| NM_002864 | 4967.031  | 5282.951  | AF019225  | 14072.387 | 14948.474 | U79293    | 1626.584  | 2098.968  |
| NM_017817 | 7955.778  | 7606.984  | Z36803    | 31850.814 | 34795.703 | NM_015434 | 4085.899  | 4629.75   |
| NM_018184 | 17984.629 | 19163.107 | NM_013371 | 3230.405  | 2666.962  | NM_01405E | 4096.8    | 4509.791  |
| AB046823  | 2280.933  | 1970.73   | NM_000707 | 26903.547 | 26136.096 | AF086488  | 747.024   | 780.762   |
| NM_00492E | 3214.943  | 3136.207  | AF202092  | 33692.375 | 36335.359 | AK023940  | 3016.741  | 3358.05   |
| U61739    | 6341.585  | 5235.11   | NM_003201 | 19248.266 | 20512.238 | NM_018691 | 3044.121  | 3884.421  |
| AJ132089  | 3052.471  | 3043.303  | AK026071  | 28383.217 | 33646.25  | AK001020  | 2007.51   | 1771.664  |
| U92819    | 12574.339 | 11814.455 | BC012333  | 21611.633 | 25352.457 | AF086431  | 4405.468  | 6012.127  |
| AB020626  | 2996.325  | 3811.332  | AF237952  | 14072.247 | 15283.887 | AL110204  | 1702.005  | 1909.07   |
| NM_00203E | 2331.621  | 2371.444  | AL079287  | 4640.911  | 5092.843  | NM_01418E | 71268.375 | 65465.754 |
| NM_01240C | 2129.328  | 2023.974  | NM_014427 | 13099.682 | 14503.421 | AK026365  | 9908.565  | 15802.326 |
| NM_005384 | 6942.981  | 7328.259  | AB046769  | 14916.793 | 18602.262 | NM_00607E | 14599.404 | 19695.766 |
| NM_00685C | 2033.757  | 2124.22   | NM_015922 | 22255.789 | 25104.254 | NM_00669E | 5317.299  | 5751.84   |
| AB013103  | 2171.002  | 2272.459  | NM_020381 | 11389.628 | 12549.098 | SR1       | 73170.523 | 59352.871 |
| AF019225  | 9788.294  | 9462.862  | NM_002957 | 26620.297 | 24434.135 | SR3       | 46218.277 | 53292.184 |
| Z36803    | 16494.113 | 15325.736 | NM_01810E | 14551.709 | 15995.57  | SR5       | 5562.738  | 7108.341  |
| NM_013371 | 1922.234  | 1894.959  | NM_00372E | 7018.35   | 7599.691  | SR7       | 5828.963  | 51406.277 |
| NM_000707 | 23310.158 | 21631.287 | BE899154  | 5904.139  | 6030.438  | SR9       | 20703.662 | 6734.929  |
| AF202092  | 35820.613 | 31385.195 | NM_00486E | 11714.158 | 11893.368 | CY3Cy5    | 7067.662  | 274.112   |
| NM_003201 | 19842.59  | 13138.841 | AK024573  | 7678.162  | 6694.237  | U82311    | 889.736   | 663.686   |
| NM_00728E | 23767.09  | 24004.285 | NM_00229E | 14295.489 | 12204.184 | Z36846    | 1279.031  | 1161.563  |
| NM_006111 | 24717.42  | 24713.748 | D79998    | 10287.209 | 10786.275 | AF086157  | 4702.954  | 5117.746  |
| AK026071  | 11979.045 | 12328.431 | AB032963  | 1723.367  | 1892.705  | D17018    | 3420.171  | 4161.193  |
| BC012333  | 23613.779 | 25329.139 | NM_00038E | 6117.316  | 6832.714  | AB046852  | 6948.034  | 8976.077  |
| AF237952  | 14796.314 | 13593.988 | AF301013  | 12447.743 | 12891.032 | AF086167  | 4363.674  | 5647.277  |
| AL079287  | 5414.082  | 5411.46   | NM_01899E | 59202.707 | 63658.629 | AL109727  | 915.374   | 1437.172  |
| NM_014427 | 5357.053  | 4732.771  | U15688    | 6354.34   | 7101.472  | AF085891  | 15081.913 | 21672.676 |
| AB046769  | 5635.454  | 5653.993  | NM_00048E | 9365.206  | 8399.506  | AF019618  | 3526.759  | 4308.901  |
| NM_002957 | 9096.643  | 7311      | NM_01844E | 20752.977 | 19049.924 | AK025656  | 4430.674  | 4572.435  |
| NM_01810E | 17829.637 | 17896.539 | NM_00310E | 2063.691  | 1784.787  | AF161414  | 16154.582 | 16409.057 |
| NM_00372E | 7917.159  | 7784.203  | NM_01430E | 7464.263  | 7775.451  | AK025967  | 1475.935  | 1733.154  |
| BE899154  | 3569.52   | 3450.51   | AJ276567  | 587.23    | 525.678   | AL110177  | 4687.09   | 4493.706  |
| NM_00486E | 12101.631 | 12911.254 | NM_01212E | 35137.535 | 40849.469 | AK023610  | 1216.315  | 1551.17   |
| AK024573  | 7792.245  | 7844.016  | U87972    | 9261.97   | 9938.102  | AK023908  | 17728.967 | 18810.146 |
| NM_00229E | 8352.797  | 7239.047  | NM_01792E | 11223.698 | 11708.154 | AK024236  | 2707.928  | 2798.319  |
| D79998    | 5427.497  | 4710.254  | AK022208  | 36942.332 | 35900.762 | AK022098  | 2656.111  | 3107.019  |
| AB032963  | 2167.274  | 2272.417  | NM_003171 | 19716.838 | 14849.28  | AB040933  | 2840.607  | 3221.749  |
| NM_00038E | 3096.659  | 2881.844  | NM_006437 | 34224.152 | 34007.043 | AK022072  | 1872.428  | 2657.439  |
| AF301013  | 14157.346 | 14343.417 | NM_01789C | 6655.223  | 6104.781  | AK026900  | 5123.887  | 6640.266  |
| NM_01899E | 63632.328 | 65273.957 | AK021654  | 7705.702  | 7308.528  | AK025020  | 13859.125 | 18929.863 |
| U15688    | 6797.776  | 6187.751  | NM_016481 | 3960.977  | 3736.355  | AF086009  | 1208.719  | 1616.78   |
| NM_00048E | 3618.652  | 2379.422  | NM_00392E | 22889.83  | 18412.902 | AF086463  | 12888.656 | 15845.64  |
| NM_01844E | 20218.699 | 12778.073 | Z15114    | 16659.254 | 16862.27  | AK024130  | 1910.668  | 1862.388  |
| AF085893  | 1705.561  | 1669.655  | AB040812  | 59127.324 | 55519.781 | AL137270  | 852.829   | 490.147   |
| NM_00310E | 1526.779  | 1270.655  | NM_01762E | 1453.733  | 1253.587  | AK024598  | 5992.481  | 6233.532  |
| NM_01430E | 8970.509  | 8885.182  | NM_00628E | 22197.619 | 21910.48  | AF087983  | 2068.597  | 2189.87   |
| NM_01212E | 34557.934 | 34924.906 | NM_00365E | 60613.953 | 63297.816 | NM_020234 | 3826.667  | 3885.125  |
| U87972    | 3926.532  | 3338.622  | NM_00134E | 37698.66  | 42437.34  | AL137734  | 3843.895  | 3535.222  |
| NM_01792E | 16777.021 | 18231.174 | NM_00021E | 10369.087 | 12142.435 | AK023784  | 2141.928  | 1344.049  |

|           |           |           |           |           |           |           |           |           |
|-----------|-----------|-----------|-----------|-----------|-----------|-----------|-----------|-----------|
| AK022208  | 40645.199 | 42098.023 | AK027148  | 49554.555 | 49567.75  | AK026323  | 4502.067  | 5285.854  |
| NM_003171 | 21960.684 | 18315.646 | NM_005084 | 9520.409  | 8761.247  | AL109710  | 1960.439  | 2136.368  |
| NM_006437 | 38519.184 | 39994.313 | CY3Cy5    | 16070.39  | 463.703   | AK021538  | 1747.861  | 2406.901  |
| NM_017890 | 8026.573  | 7149.962  | NM_006079 | 20323.365 | 18478.531 | AK023793  | 13025.994 | 15637.96  |
| AK021654  | 3771.522  | 3294.733  | U79293    | 1514.729  | 1569.279  | AK023286  | 8139.839  | 10135.263 |
| NM_016481 | 4582.618  | 4040.713  | NM_015434 | 5713.986  | 6130.671  | AK021544  | 1941.193  | 2574.988  |
| NM_003925 | 18621.34  | 16687.143 | NM_014055 | 4965.134  | 3639.756  | AL079282  | 1862.145  | 2644.24   |
| Z15114    | 9548.493  | 8404.908  | AK023940  | 1085.486  | 845.194   | AK022079  | 1356.206  | 2096.449  |
| AB040812  | 58247.352 | 53589.902 | AK001020  | 1701.916  | 1748.909  | AF116714  | 2700.775  | 3040.746  |
| NM_017625 | 1195.178  | 1358.59   | AF086431  | 4536.426  | 4578.875  | NM_014055 | 7629.483  | 7537.493  |
| NM_006285 | 34060.23  | 38606.574 | AL110204  | 1282.684  | 1656.705  | AK025045  | 789.24    | 975.203   |
| NM_003656 | 40722.797 | 43115.371 | NM_014188 | 74361.648 | 65962.188 | AK026340  | 1169.042  | 1158.062  |
| NM_001348 | 11521.27  | 12027.505 | AK026365  | 9207.046  | 10090.985 | AK022388  | 610.38    | 821.8     |
| NM_000215 | 7940.089  | 8484.59   | NM_006079 | 21405.436 | 18645.092 | AY007126  | 14467.381 | 7516.285  |
| AK027148  | 23807.088 | 20314.965 | NM_006696 | 7138.379  | 7475.735  | AF085951  | 9522.427  | 7089.915  |
| NM_005084 | 15021.351 | 12329.847 | SR1       | 73461.898 | 65814.172 | AF131787  | 653.108   | 992.136   |
| CY3Cy5    | 9241.701  | 482.455   | SR3       | 58784.75  | 56383.809 | AF087989  | 2630.9    | 2617.093  |
| NM_006079 | 16787.949 | 10317.14  | SR5       | 9606.111  | 10340.763 | Z70715    | 1851.336  | 2586.648  |
| NM_006696 | 5576.256  | 1697.8    | SR7       | 9710.848  | 49164.895 | NM_018182 | 9393.162  | 12001.549 |
| AF070628  | 2133.436  | 2366.188  | SR9       | 37379.203 | 7068.214  | U80771    | 8347.109  | 9079.716  |
| AF038194  | 781.44    | 888.874   | CY3Cy5    | 11390.642 | 236.427   | NM_006185 | 1175.122  | 1120.643  |
| NM_014055 | 4341.193  | 2661.546  | Z36846    | 911.995   | 1745.082  | AJ272173  | 30498.533 | 38557.395 |
| AK023940  | 507.107   | 900.005   | AF086127  | 1220.093  | 1541.326  | Z24724    | 12319.748 | 15444.56  |
| NM_018691 | 1588.472  | 1673.655  | AF086157  | 6535.811  | 4922.312  | AK022712  | 17497.928 | 23799.123 |
| AK001020  | 850.535   | 1081.59   | AF088026  | 920.497   | 1179.524  | AK024132  | 5517.246  | 7218.263  |
| AF086431  | 1418.923  | 1338.177  | D17018    | 3039.172  | 2694.744  | AK021863  | 50196     | 57735.387 |
| AL110204  | 759.14    | 1119.276  | AB046852  | 1500.16   | 1446.622  | AK024208  | 2143.365  | 2292.072  |
| NM_014188 | 53649.777 | 50594.605 | AF086167  | 2239.972  | 1975.909  | NM_020426 | 724.624   | 871.588   |
| AK026365  | 6885.339  | 7565.166  | AL109727  | 822.451   | 1080.906  | NM_005684 | 1315.454  | 996.981   |
| NM_006079 | 15043.748 | 15585.499 | AF085891  | 8473.292  | 9790.335  | AK022293  | 1951.06   | 1899.998  |
| NM_006696 | 6317.317  | 5141.485  | AF019618  | 3940.571  | 3816.388  | AL117439  | 2576.158  | 2784.47   |
| SR1       | 72731.43  | 59716.477 | AK025656  | 5974.029  | 6131.862  | AL133065  | 3775.146  | 4315.47   |
| SR3       | 47326.777 | 50481.063 | AF161414  | 13301.249 | 13642.279 | NM_005297 | 7965.474  | 8566.191  |
| SR5       | 6195.038  | 9225.356  | AK025967  | 2082.648  | 1995.482  | U80769    | 1946.553  | 2031.471  |
| SR7       | 7441.306  | 47848.895 | AL110177  | 6715.476  | 5137.997  | NM_014565 | 948.924   | 1020.171  |
| SR9       | 27511.145 | 10038.659 | AK022686  | 16836.301 | 17514.766 | AK025052  | 4700.317  | 1923.333  |
| CY3Cy5    | 10466.352 | 468.199   | AK023516  | 11103.017 | 11716.796 | NM_014385 | 1712.079  | 715.797   |
| Z36825    | 1638.251  | 282.553   | AK023864  | 19777.266 | 20515.6   | U85044    | 1329.194  | 609.275   |
| U52838    | 1019.171  | 1112.445  | AK023610  | 942.022   | 928.507   | BC018880  | 1607.937  | 1213.042  |
| AF086157  | 5540.542  | 3425.212  | AK023908  | 20816.537 | 20722.188 | AF086090  | 4233.988  | 4275.21   |
| AF088026  | 1748.133  | 1362.835  | AK024236  | 2958.116  | 3016.865  | AK002173  | 36580.809 | 43024.469 |
| D17018    | 976.192   | 1071.68   | AK022098  | 3150.166  | 2824.825  | NM_017746 | 6795.736  | 7024.352  |
| AB046852  | 1185.585  | 896.154   | AK026751  | 667.066   | 722.277   | NM_020185 | 41412.449 | 45547.645 |
| AF086167  | 1455.512  | 1759.256  | AB040933  | 3549.669  | 3022.733  | U88897    | 14117.799 | 13263.461 |
| AL109727  | 624.974   | 857.906   | AK021875  | 1293.138  | 1239.844  | NM_003493 | 70345.789 | 78375.594 |
| AF085891  | 3636.828  | 3577.012  | AK022072  | 2173.4    | 2290.125  | AL133430  | 44758.73  | 49348.762 |
| AF019618  | 3136.727  | 2697.758  | AK026900  | 5946.912  | 5801.8    | AF070633  | 68689.203 | 61252.387 |
| AK025656  | 5194.11   | 4364.461  | AK025020  | 17523.824 | 14984.854 | S51971    | 70671.898 | 79953.344 |
| AF138859  | 1689.733  | 6309.641  | AF086009  | 2406.424  | 2090.932  | NM_018370 | 1404.139  | 1951.153  |
| AF161414  | 6023.275  | 5918.146  | AF086463  | 10028.014 | 9901.973  | AF054996  | 38098.047 | 49012.484 |
| AK025967  | 2276.657  | 2405.019  | AK024130  | 1911.837  | 2035.801  | AF090098  | 10223.088 | 12083.955 |
| AL110177  | 6177.155  | 5477.108  | AL137270  | 923.663   | 1391.935  | AF146694  | 5578.102  | 6260.818  |
| AK022686  | 4248.452  | 2373.539  | AK024598  | 8684.025  | 7985.477  | AK057104  | 3129.489  | 3434.595  |



|           |           |           |           |           |           |           |           |           |
|-----------|-----------|-----------|-----------|-----------|-----------|-----------|-----------|-----------|
| AK023516  | 13907.85  | 4928.809  | AF087983  | 4044.497  | 3860.71   | AL133555  | 1849.719  | 2373.497  |
| AK023017  | 6493.967  | 7664.457  | NM_020234 | 5681.523  | 4960.381  | AK024979  | 65870.281 | 67261.133 |
| AK023610  | 1013.186  | 887.5     | AK021678  | 1528.307  | 1123.9    | AF233648  | 3935.605  | 4135.703  |
| AK022098  | 2213.266  | 1792.398  | AJ011377  | 8560.668  | 7954.32   | NM_013435 | 47190.23  | 37460.605 |
| AK026751  | 757.307   | 761.368   | AL137734  | 4507.9    | 4427.932  | NM_003406 | 52947.07  | 48187.766 |
| AB040933  | 2146.285  | 2633.238  | AK023784  | 3054.954  | 2277.261  | NM_018316 | 6175.128  | 4541.27   |
| AK021875  | 1452.609  | 1413.834  | AK026323  | 6580.73   | 7116.912  | AB011180  | 7534.639  | 6050.692  |
| AK026900  | 3744.69   | 4513.966  | AL109710  | 1740.907  | 1882.805  | NM_007167 | 7197.85   | 6688.409  |
| AK025020  | 8108.989  | 7535.379  | AK021538  | 2962.767  | 2442.424  | NM_014832 | 3417.169  | 3893.369  |
| AF086009  | 1496.547  | 1542.238  | AK021986  | 813.847   | 1259.618  | NM_003243 | 2203.17   | 3539.316  |
| AF086463  | 1337.391  | 1687.765  | AK023793  | 13140.512 | 13819.346 | NM_002477 | 43637.977 | 47002.719 |
| AK024130  | 1283.187  | 1140.69   | AK022185  | 1210.93   | 1196.933  | NM_004673 | 1970.393  | 2227.765  |
| AK024598  | 7716.796  | 7759.331  | AK023286  | 8691.444  | 8804.261  | AK021566  | 1113.731  | 1238.772  |
| AF087983  | 4090.801  | 4796.766  | AK021544  | 2135.531  | 2238.841  | NM_002037 | 3378.445  | 4249.914  |
| NM_020234 | 5093.375  | 5025      | AL079282  | 2586.622  | 2892.514  | NM_016346 | 6360.331  | 7590.799  |
| AL137734  | 2947.09   | 3104.891  | AF116714  | 2501.314  | 2770.383  | NM_020157 | 66246.445 | 65789.828 |
| AK023784  | 1013.593  | 874.59    | NM_014058 | 7548.618  | 6131.73   | X64991    | 3088.046  | 4266.548  |
| AK023793  | 1269.566  | 1440.731  | AK026340  | 1682.338  | 1636.825  | NM_014320 | 1759.924  | 1488.097  |
| AK021544  | 683.051   | 831.966   | AK022388  | 1699.077  | 1372.321  | AK025703  | 13185.665 | 15031.595 |
| AL079282  | 1259.942  | 1362.259  | AK027170  | 1324.924  | 1242.253  | NM_018185 | 9860.921  | 10854.821 |
| NM_014058 | 1344.636  | 1038.788  | AK021781  | 1143.903  | 1246.217  | AK022598  | 9899.907  | 11245.76  |
| AK002005  | 480.424   | 621.287   | NM_018584 | 1994.932  | 1836.661  | AK024306  | 1727.695  | 1586.326  |
| AK026340  | 1034.644  | 915.294   | AK026776  | 487.908   | 539.328   | NM_018322 | 25636.756 | 26140.254 |
| AK022388  | 1121.186  | 1134.329  | AY007126  | 29538.414 | 31144.668 | AK025862  | 12342.349 | 10722.533 |
| AK027170  | 943.08    | 782.804   | AF085951  | 15746.005 | 16761.713 | AK026495  | 2683.841  | 2346.736  |
| AK021781  | 1323.317  | 299.214   | AF131787  | 1474.397  | 1373.101  | AL137493  | 1954.043  | 1534.917  |
| AK026776  | 3573.255  | 1840.789  | AF087989  | 3946.488  | 4227.262  | NM_002457 | 721.84    | 773.933   |
| AF131787  | 3086.863  | 2128.801  | Z70715    | 3508.948  | 3608.924  | NM_001338 | 15069.675 | 13470.062 |
| Z70715    | 2794.508  | 1327.779  | NM_018182 | 12465.662 | 12621.75  | NM_003637 | 1481.982  | 1240.508  |
| NM_018182 | 10518.639 | 8632.236  | U80771    | 12773.868 | 14245.424 | BC035133  | 1553.746  | 1357.815  |
| U80771    | 11089.875 | 11491.022 | AJ272173  | 32947.566 | 39091.594 | NM_004233 | 18912.57  | 19890.744 |
| NM_006188 | 1008.345  | 1136.239  | Z24724    | 17219.973 | 17287.971 | NM_001544 | 21253     | 22316.574 |
| AJ272173  | 10208.18  | 9351.101  | AK022712  | 13742.025 | 14213.12  | X58531    | 3467.845  | 3281.419  |
| Z24724    | 9454.204  | 11880.11  | AK024132  | 6684.99   | 6678.979  | AB011168  | 19796.006 | 19359.33  |
| AK022712  | 4200.039  | 4910.445  | AK021863  | 60763.914 | 56197.523 | NM_003212 | 26126.969 | 24504.328 |
| AK024132  | 3395.88   | 3495.46   | AK024208  | 2091.747  | 1865.359  | NM_006382 | 10153.869 | 10294.799 |
| AK021863  | 55591.746 | 49878.246 | NM_020426 | 988.966   | 1082.128  | NM_004811 | 27349.637 | 31761.686 |
| AK024208  | 1118.173  | 1121.267  | NM_005684 | 1435.151  | 1430.725  | AK021910  | 63947.797 | 71827.547 |
| NM_020426 | 725.063   | 822.02    | AK022293  | 2568.967  | 2596.983  | M62402    | 896.187   | 1462.905  |
| NM_005684 | 1095.838  | 802.214   | AL117439  | 3569.546  | 4025.36   | NM_002547 | 1510.523  | 2364.198  |
| AK022293  | 1399.11   | 1432.438  | AL133065  | 4758.889  | 4767.233  | NM_004748 | 9737.548  | 14368.061 |
| AL117439  | 2472.958  | 2220.267  | NM_005297 | 10748.543 | 10329.625 | NM_002668 | 47785.422 | 58135.879 |
| AL133065  | 3645.44   | 3690.603  | U80769    | 2903.404  | 2811.908  | NM_001058 | 1197.337  | 2137.998  |
| NM_005297 | 5003.075  | 4903.081  | NM_014565 | 1216.676  | 1493.259  | NM_001380 | 541.315   | 538.85    |
| U80769    | 938.718   | 1731.27   | AK025052  | 7190.478  | 8616.681  | NM_014316 | 22494.295 | 22417.955 |
| NM_014565 | 958.279   | 873.786   | NM_014388 | 3412.896  | 3881.444  | NM_004054 | 12848.809 | 15463.763 |
| NM_014388 | 6587.616  | 6130.912  | NM_002548 | 1416.111  | 1083.719  | NM_001138 | 19633.42  | 19924.928 |
| NM_002548 | 1490.885  | 1939.74   | U85044    | 2743.197  | 2206.084  | NM_003443 | 63818.047 | 68187.242 |
| U85044    | 3806.305  | 5256.469  | BC018880  | 2521.928  | 2621.174  | NM_002025 | 4103.72   | 3940.049  |
| BC018880  | 4048.845  | 5092.701  | AF086090  | 4312.647  | 4467.54   | AB015228  | 3201.45   | 2976.549  |
| AF086090  | 7618.238  | 8786.96   | AK002173  | 53054.793 | 53865.246 | AL049685  | 3068.445  | 2355.14   |
| NM_017746 | 11907.764 | 5240.344  | NM_017746 | 9543.12   | 10721.973 | AK026800  | 14432.402 | 11320.056 |
| NM_020188 | 33202.016 | 28035.072 | NM_020188 | 46061.891 | 50273.086 | NM_001442 | 1782.841  | 1914      |

|           |           |           |           |           |           |           |           |           |
|-----------|-----------|-----------|-----------|-----------|-----------|-----------|-----------|-----------|
| M87929    | 1550.063  | 681.692   | NM_003493 | 63977.836 | 59510.805 | NM_017775 | 17423.227 | 17372.99  |
| U88897    | 14887.471 | 14347.769 | AL133430  | 42432.422 | 49229.625 | AK001958  | 2065.216  | 1795.547  |
| NM_003493 | 65661.266 | 60679.59  | AF070633  | 62696.363 | 58376.43  | AK025947  | 5834.231  | 6924.797  |
| AL133430  | 19316     | 17401.111 | S51971    | 62023.211 | 61957.34  | AF217973  | 18225.137 | 18482.768 |
| AF070633  | 43500.359 | 37346.578 | NM_018370 | 1036.555  | 785.521   | NM_007033 | 21290.238 | 21839.084 |
| S51971    | 66758.531 | 56302.711 | AF054996  | 51445.449 | 54108.375 | AF226048  | 15026.528 | 16641.949 |
| NM_018370 | 1018.458  | 500.066   | AF090098  | 13123.328 | 15995.448 | NM_005573 | 15920.363 | 14722.022 |
| AF054996  | 42663.063 | 39543.996 | AF146694  | 6674.134  | 8747.296  | AV723708  | 575.418   | 671.765   |
| AF090098  | 12573.965 | 11499.702 | AK057104  | 4030.458  | 4657.856  | D50918    | 44157.469 | 51467.055 |
| AF146694  | 5280.119  | 4909.047  | AL133555  | 959.494   | 1074.443  | U48734    | 18608.77  | 22496.453 |
| AK057104  | 4329.709  | 3307.582  | AK024979  | 61285.887 | 51244.105 | NM_017955 | 10730.584 | 11161.725 |
| AL133555  | 1845.944  | 739.089   | AF233648  | 5953.634  | 5980.722  | NM_016060 | 10124.622 | 12907.456 |
| AK024979  | 2668.884  | 2813.752  | NM_013439 | 61454.781 | 67678.305 | NM_002205 | 26387.637 | 28658.061 |
| AF233648  | 3397.396  | 2821.043  | NM_003406 | 62466.684 | 65106.379 | NM_007216 | 6177.017  | 5858.875  |
| NM_018316 | 4890.124  | 6688.267  | NM_018316 | 10730.053 | 10499.705 | AK023518  | 5392.13   | 5332.979  |
| AB011180  | 4333.471  | 5990.222  | AB011180  | 11282.822 | 10700.528 | NM_000095 | 12159.736 | 14766.219 |
| NM_007167 | 13648.865 | 17466.75  | NM_007167 | 16242.512 | 15836.706 | NM_013390 | 13047.287 | 10942.714 |
| NM_014832 | 11263.828 | 13569.99  | NM_014832 | 7207.889  | 7495.097  | NM_002825 | 1693.421  | 1292.078  |
| NM_002477 | 7300.111  | 6309.15   | NM_003243 | 729.836   | 1176.411  | J02783    | 42640.902 | 46789.82  |
| NM_004673 | 579.307   | 778.932   | NM_002477 | 37998.117 | 42431.344 | NM_018137 | 1189.987  | 489.464   |
| Y17180    | 69601.336 | 74892.5   | NM_004673 | 1411.484  | 1203.055  | NM_006577 | 40654.457 | 44861.195 |
| NM_005649 | 6488.839  | 6746.937  | NM_005649 | 6368.835  | 5946.258  | NM_004413 | 608.562   | 821.451   |
| AK021566  | 2081.379  | 1301.297  | AK021566  | 1791.932  | 1195.368  | NM_005317 | 4989.269  | 4528.448  |
| NM_002037 | 2565.563  | 3132.557  | NM_002037 | 4366.648  | 5224.02   | AF120493  | 1883.945  | 1491.172  |
| NM_016346 | 2801.084  | 2872.528  | NM_016346 | 7625.993  | 6445.969  | U12597    | 7268.913  | 7566.626  |
| NM_020157 | 4614.421  | 4267.439  | NM_020157 | 61324.41  | 51649.797 | U28055    | 1300.301  | 1193.492  |
| X64991    | 1826.386  | 1578.531  | X64991    | 3938.139  | 4277.728  | AB044343  | 38612.895 | 42318.207 |
| NM_014320 | 1342.83   | 1493.678  | NM_014320 | 1052.84   | 1409.304  | NM_001285 | 980.893   | 1083.852  |
| AK025703  | 20490.693 | 21219.285 | AK025703  | 17201.047 | 18212.648 | NM_018405 | 2189.067  | 1954.922  |
| NM_018185 | 10118.321 | 8678.578  | NM_018185 | 11762.689 | 12997.222 | NM_014662 | 2330.29   | 2550.654  |
| AK022598  | 15212.029 | 12805.696 | AK022598  | 19245.744 | 21844.738 | NM_005175 | 41182.125 | 46556.629 |
| AK024306  | 2144.616  | 2051.554  | AK024306  | 3312.758  | 3487.617  | NM_017702 | 14185.154 | 16827.461 |
| NM_018322 | 14454.289 | 11726.497 | NM_018322 | 36415.422 | 38062.547 | AB014516  | 22810.914 | 28480.873 |
| AK025862  | 25141.895 | 22238.42  | AK025862  | 20825.953 | 21318.652 | Z83950    | 4769.428  | 5909.474  |
| AK026495  | 4622.89   | 4872.21   | AK026495  | 3484.195  | 3544.359  | AL080063  | 5456.861  | 6476.249  |
| NM_002457 | 1404.929  | 1883.221  | AL137493  | 3392.674  | 3622.257  | NM_016590 | 1634.047  | 1845.793  |
| NM_001335 | 6747.467  | 7604.365  | NM_004797 | 828.057   | 1286.853  | NM_005625 | 23756.604 | 30786.629 |
| NM_003637 | 3474.842  | 3731.005  | NM_002457 | 1401.093  | 1503.554  | X15262    | 10385.707 | 9376.118  |
| BC035133  | 1476.738  | 2156.848  | NM_001335 | 33155.266 | 35618.762 | NM_005475 | 2766.973  | 2586.21   |
| NM_001544 | 38841.832 | 26300.572 | NM_003637 | 2956.714  | 2460.73   | NM_007285 | 7352.938  | 8754.899  |
| X58531    | 2121.24   | 1542.116  | BC035133  | 3057.927  | 3156.99   | NM_004215 | 70932.102 | 66938.531 |
| AB011168  | 4165.32   | 3141.392  | NM_004233 | 26622.072 | 33476.07  | NM_004575 | 642.904   | 647.795   |
| BE794262  | 3300.247  | 3021.145  | NM_001544 | 37669.828 | 44642.754 | AB023232  | 4835.535  | 4516.99   |
| NM_003212 | 6752.935  | 5770.158  | X58531    | 4002.275  | 3806.26   | NM_017420 | 1284.075  | 1126.635  |
| NM_006382 | 1738.45   | 944.796   | AB011168  | 28411.01  | 30474.428 | AL137589  | 3444.211  | 2947.951  |
| NM_004811 | 33303.688 | 34628.578 | NM_003212 | 40046.906 | 47373.992 | AF036943  | 943.444   | 1002.722  |
| AK021910  | 57321.453 | 50793.359 | NM_006382 | 8283.131  | 9228.406  | NM_002502 | 20563.492 | 19403.607 |
| M62402    | 1521.664  | 1364.952  | NM_004811 | 39369.016 | 43080.82  | AF226732  | 25418.617 | 19538.863 |
| NM_004745 | 5522.639  | 5067.53   | AK021910  | 60645.055 | 58839.082 | NM_006312 | 13988.683 | 12772.417 |
| NM_002665 | 54080.102 | 51360.031 | M62402    | 1755.916  | 1822.919  | NM_002805 | 2393.506  | 2948.592  |
| NM_001055 | 1595.806  | 1607.313  | NM_002547 | 1206.584  | 2845.099  | NM_004290 | 591.245   | 1015.517  |
| NM_001380 | 1459.546  | 1416.995  | NM_004745 | 11649.995 | 15302.121 | NM_003662 | 996.627   | 1537.939  |
| NM_014316 | 37834.645 | 43447.875 | NM_002665 | 50182.23  | 51014.137 | NM_002935 | 33016.496 | 35670.141 |

|           |           |           |           |           |           |           |           |           |
|-----------|-----------|-----------|-----------|-----------|-----------|-----------|-----------|-----------|
| NM_004054 | 5048.482  | 5897.625  | NM_001058 | 1732.434  | 1696.765  | NM_015836 | 59955.363 | 57072.75  |
| NM_001138 | 5189.135  | 5399.784  | NM_001380 | 1142.346  | 1356.763  | NM_004713 | 5227.589  | 5233.205  |
| NM_003443 | 52331.285 | 53583.641 | NM_014316 | 36528.938 | 35189.031 | NM_003766 | 1744.757  | 1674.083  |
| NM_002025 | 8165.469  | 11438.333 | NM_004054 | 14861.095 | 14826.549 | NM_001698 | 34967.191 | 41144.891 |
| AB015228  | 8043.301  | 10655.946 | NM_001138 | 35235.457 | 35417.75  | NM_000661 | 70723.984 | 72394.625 |
| AL049685  | 6796.075  | 8029.037  | NM_003443 | 60922.406 | 71026.219 | NM_000973 | 71148.008 | 70469.625 |
| AK026800  | 35596.75  | 35841.02  | NM_002025 | 8167.005  | 8303.741  | NM_000944 | 10175.146 | 9512.092  |
| NM_001442 | 4049.66   | 4492.36   | AB015228  | 5801.887  | 5994.597  | NM_012236 | 5349.813  | 5730.104  |
| AK001958  | 5977.837  | 2958.967  | AL049685  | 5664.269  | 5655.358  | NM_012262 | 2736.888  | 2578.534  |
| AK025947  | 6972.13   | 5505.022  | AK026800  | 27928.389 | 26241.072 | S70004    | 9258.53   | 8505.84   |
| AF217973  | 7728.632  | 7582.262  | NM_001442 | 3553.739  | 4308.302  | AF105378  | 17673.26  | 16492.902 |
| NM_007033 | 27498.568 | 32777.172 | NM_017775 | 26879.465 | 27981.992 | NM_000167 | 6422.924  | 5625.515  |
| AF226048  | 19525.064 | 24379.164 | AK001958  | 3700.311  | 4338.065  | AY007125  | 5628.973  | 4670.493  |
| NM_005573 | 6195.253  | 7628.193  | AK025947  | 10787.09  | 10643.187 | AB032987  | 6849.112  | 5408.764  |
| AV723708  | 851.329   | 823.537   | AF217973  | 20351.523 | 22639.189 | NM_017567 | 26091.938 | 23336.697 |
| D50918    | 48042.48  | 49437.32  | NM_007033 | 26667.85  | 31483.996 | NM_000691 | 13899.603 | 15474.754 |
| U48734    | 22086.021 | 17644.486 | AF226048  | 20641.369 | 24393.623 | Y18643    | 913.529   | 912.954   |
| NM_006400 | 17719.604 | 21384.191 | NM_005573 | 21751.713 | 21309.217 | NM_000305 | 730.145   | 600.156   |
| NM_003903 | 13398.808 | 11393.462 | AV723708  | 1106.12   | 907.758   | D86971    | 38533.332 | 37490.098 |
| NM_017955 | 11666.985 | 10539.19  | D50918    | 55587.012 | 54004.625 | NM_002434 | 1759.308  | 6553.493  |
| NM_016060 | 14390.542 | 15648.964 | U48734    | 30144.441 | 26517.732 | NM_003073 | 17659.211 | 24013.49  |
| NM_002208 | 39486.668 | 45086.113 | NM_006400 | 23105.674 | 28002.521 | NM_014048 | 1869.735  | 2357.043  |
| NM_007216 | 8246.56   | 7999.097  | NM_003903 | 14906.913 | 15182.684 | AF274863  | 2379.489  | 2474.615  |
| AK023518  | 3138.626  | 3057.125  | NM_017955 | 18770.844 | 16982.748 | AF319458  | 1868.063  | 2044.724  |
| NM_000095 | 1436.987  | 1349.496  | NM_016060 | 14123.908 | 15043.382 | AF024697  | 12687.2   | 13259.837 |
| NM_002829 | 3952.12   | 5725.293  | NM_002208 | 38582.5   | 39719.875 | NM_018651 | 1871.218  | 1750.595  |
| J02783    | 68015.352 | 71205.313 | NM_007216 | 8441.41   | 9458.077  | AF164156  | 2177.935  | 1688.725  |
| NM_018137 | 3655.613  | 4387.386  | AK023518  | 7555.835  | 6967.704  | NM_005612 | 6075.413  | 5596.44   |
| NM_006577 | 70528.398 | 67544.266 | NM_000095 | 15624.971 | 16196.897 | AK025281  | 1054.411  | 812.18    |
| NM_004413 | 3063.672  | 3561.081  | NM_013390 | 23152.359 | 25152.605 | AB040918  | 19963.088 | 19121.262 |
| AF120493  | 1542.328  | 485.417   | NM_002829 | 2319.268  | 2962.606  | NM_015855 | 7839.121  | 7976.448  |
| U12597    | 6891.94   | 5662.658  | J02783    | 54498.367 | 62434.73  | X60152    | 2807.035  | 2750.331  |
| U28055    | 2402.58   | 2811.963  | NM_018137 | 2462.804  | 2305.175  | NM_002316 | 5756.681  | 5563.61   |
| AB044343  | 15340.472 | 15426.605 | NM_006577 | 51866.727 | 55063.313 | NM_012421 | 24446.098 | 24245.029 |
| NM_018409 | 841.331   | 978.198   | NM_004413 | 2240.732  | 2355.356  | AB014601  | 3109.504  | 3196.055  |
| NM_014662 | 2154.167  | 2218.194  | NM_005317 | 6091.72   | 7125.845  | AK001393  | 31260.654 | 29785.018 |
| NM_005178 | 11811.728 | 12118.164 | AF120493  | 2998.999  | 3006.218  | NM_000023 | 13436.07  | 12242.91  |
| NM_017702 | 17142.559 | 15679.132 | U12597    | 10830.606 | 11341.438 | AF022654  | 1420.335  | 950.794   |
| AB014516  | 10416.26  | 8707.41   | U28055    | 2244.17   | 2415.125  | NM_001143 | 1967.425  | 1813.098  |
| Z83950    | 3142.652  | 3017.326  | AB044343  | 42803.867 | 44038.539 | NM_003282 | 1405.023  | 1276.803  |
| AL080063  | 5601.582  | 5432.45   | NM_001285 | 1302.59   | 1268.316  | AK022638  | 20033.912 | 17720.896 |
| NM_016590 | 1224.916  | 1031.87   | NM_018409 | 2877.332  | 2696.148  | BG698409  | 13747.211 | 14694.855 |
| NM_005625 | 28157.754 | 37879.875 | NM_014662 | 2794.616  | 2645.83   | U36798    | 817.086   | 698.828   |
| X15262    | 7342.854  | 6342.389  | NM_005178 | 38899.324 | 43015.082 | AA220921  | 19276.559 | 22885.148 |
| NM_005475 | 6768.855  | 6008.45   | NM_017702 | 20594.389 | 20154.457 | N67770    | 4376.083  | 4507.394  |
| NM_007289 | 9805.764  | 10828.71  | AB014516  | 34295.387 | 36069.418 | AA486200  | 68370.836 | 66764.641 |
| NM_004219 | 70942.508 | 62247.023 | Z83950    | 6557.438  | 7030.547  | U90065    | 1439.006  | 1530.897  |
| AB023232  | 5392.421  | 5736.805  | AL080063  | 7931.388  | 9148.281  | AJ005898  | 23253.305 | 24740.699 |
| NM_017420 | 2432.424  | 2993.559  | NM_016590 | 1749.454  | 1489.371  | X57303    | 13927.987 | 18115.631 |
| AL137589  | 7475.786  | 8663.696  | NM_005625 | 33972.414 | 38184.273 | AA463224  | 3122.09   | 3426.281  |
| AF036943  | 1462.003  | 1680.06   | X15262    | 15308.61  | 13785.826 | BG248802  | 18345.516 | 21053.709 |
| NM_002502 | 43493.988 | 50862.914 | NM_005475 | 5433.66   | 4812.302  | L19605    | 3376.095  | 3498.177  |
| AF226732  | 11990.2   | 5825.196  | NM_007289 | 10810.199 | 12437.916 | AA876532  | 19447.533 | 22083.146 |

|           |           |           |           |           |           |           |           |           |
|-----------|-----------|-----------|-----------|-----------|-----------|-----------|-----------|-----------|
| NM_006312 | 21834.592 | 17023.543 | NM_004219 | 65466.941 | 63420.34  | S74349    | 1561.916  | 1841.073  |
| NM_002805 | 3225.991  | 3795.394  | NM_004575 | 1202.371  | 1140.616  | X07979    | 59525.016 | 55136.254 |
| NM_004290 | 1271.274  | 1263.229  | AB023232  | 7141.594  | 8332.844  | BG324670  | 1531.029  | 1909.52   |
| NM_016135 | 1087.55   | 1074.625  | NM_017420 | 2585.462  | 2656.521  | BG744224  | 46717.496 | 51571.633 |
| NM_003662 | 2053.757  | 2333.265  | AL137589  | 5391.44   | 5175.896  | NM_006393 | 6281.3    | 5614.582  |
| NM_002939 | 46646.043 | 48233.039 | AF036943  | 1382.374  | 1598.309  | NM_014923 | 1010.868  | 932.283   |
| NM_015836 | 64920.074 | 54148.016 | NM_002502 | 32501.307 | 34860.191 | NM_005477 | 32981.07  | 29264.049 |
| NM_004713 | 7925.567  | 6720.75   | AF226732  | 35595.043 | 34170.449 | NM_007018 | 1006.452  | 623.835   |
| NM_003769 | 4256.533  | 3945.686  | NM_006312 | 22146.148 | 20747.186 | NM_004318 | 2978.522  | 2614.768  |
| NM_001698 | 63757.859 | 56908.68  | NM_002805 | 4217.784  | 4279.419  | L09089    | 4301.989  | 3026.277  |
| NM_000944 | 12672.384 | 12133.873 | NM_004290 | 1277.046  | 984.728   | NM_002640 | 3291.849  | 3165.57   |
| NM_012239 | 5724.82   | 6011.995  | NM_016135 | 806.044   | 778.714   | M15530    | 10691.706 | 12775.13  |
| NM_012262 | 4767.433  | 5542.479  | NM_003662 | 1412.339  | 1653.316  | NM_000488 | 2346.766  | 2849.297  |
| AF105378  | 2111.698  | 2720.714  | NM_002939 | 46232.766 | 49667.645 | NM_001877 | 6872.897  | 8413.893  |
| NM_000167 | 13502.203 | 18170.797 | NM_015836 | 65707.836 | 55644.211 | NM_014207 | 18443.986 | 18309.398 |
| AY007125  | 14925.766 | 18476.48  | NM_004713 | 8025.992  | 7022.893  | AK002163  | 6154.393  | 7576.822  |
| AB032987  | 7928.58   | 7606.75   | NM_003769 | 3613.797  | 3099.294  | NM_002287 | 4263.069  | 4949.292  |
| NM_017567 | 28372.457 | 31876.152 | NM_001698 | 55001.605 | 52643.504 | NM_012344 | 5743.669  | 6513.927  |
| Y18643    | 1788.823  | 793.313   | NM_000661 | 63292.793 | 64719.113 | NM_002351 | 4745.359  | 5205.417  |
| NM_000305 | 867.693   | 641.818   | NM_000973 | 64292.469 | 59971.656 | NM_014385 | 3537.516  | 4319.239  |
| D86971    | 32367.727 | 29804.49  | NM_000944 | 13176.235 | 13110.185 | NM_001704 | 2622.831  | 2596.895  |
| NM_002434 | 476.336   | 759.819   | NM_012239 | 7214.966  | 8020.455  | AB036432  | 45312.656 | 45339.23  |
| NM_003073 | 23503.291 | 28270.82  | NM_012262 | 5079.548  | 5844.604  | NM_003643 | 1300.534  | 1451.13   |
| NM_014048 | 885.138   | 883.514   | S70004    | 14642.145 | 12896.728 | NM_003480 | 7022.405  | 6861.651  |
| AF274863  | 3092.821  | 2011.604  | AF105378  | 17803.387 | 18152.84  | NM_004059 | 869.26    | 832.938   |
| AF319458  | 1991.908  | 1765.947  | NM_000167 | 11334.032 | 10475.057 | NM_001634 | 31982.336 | 28689.104 |
| AF024697  | 6829.97   | 7426.698  | AY007125  | 9137.499  | 9683.356  | NM_002267 | 14969.21  | 12228.901 |
| NM_018651 | 1372.365  | 1148.129  | AB032987  | 11061.723 | 10855.083 | NM_006412 | 5995.507  | 5711.904  |
| AF164156  | 849.761   | 786.562   | NM_017567 | 38036.23  | 41920.723 | NM_003063 | 18874.086 | 15752.375 |
| NM_005612 | 7867.436  | 8776.623  | NM_000691 | 21258.1   | 24673.988 | NM_014041 | 33940.535 | 30816.672 |
| AK025281  | 1401.474  | 1246.046  | Y18643    | 1739.169  | 1555.136  | NM_007169 | 16369     | 16029.155 |
| AB040918  | 8336.167  | 8000.581  | NM_000305 | 1414.566  | 1101.599  | NM_014313 | 923.512   | 892.728   |
| NM_015859 | 13135.341 | 14347.281 | D86971    | 54930.789 | 56623.969 | AK024966  | 9227.241  | 10219.387 |
| X60152    | 3824.762  | 3850.816  | NM_003073 | 26096.145 | 25656.18  | NM_017585 | 32264.289 | 32218.389 |
| NM_002316 | 1230.906  | 1311.068  | NM_014048 | 1567.72   | 2232.842  | NM_000033 | 6110.172  | 6057.529  |
| AB014601  | 5481.698  | 7486.13   | AF274863  | 3813.118  | 2298.91   | AF224741  | 2210.517  | 1703.105  |
| AK001393  | 38116.488 | 49801.184 | AF024697  | 18164.389 | 20515.105 | NM_006594 | 7035.264  | 6458.207  |
| NM_000023 | 7338.263  | 7566.007  | NM_018651 | 2385.151  | 2824.422  | NM_004177 | 2411.883  | 2368.275  |
| AF022654  | 4242.258  | 4549.465  | AF164156  | 1510.953  | 1970.022  | NM_012429 | 2183.074  | 2139.019  |
| NM_001143 | 3234.259  | 4053.237  | NM_005612 | 7533.41   | 7047.559  | NM_004871 | 10656.271 | 10933.081 |
| AK022638  | 29602.402 | 20412.318 | AK025281  | 1449.082  | 1506.879  | NM_005698 | 12673.203 | 10726.621 |
| BG698409  | 5994.609  | 5511.352  | AB040918  | 24569.064 | 25013.693 | AF202146  | 11185.499 | 9432.327  |
| U36798    | 1095.066  | 880.618   | NM_015859 | 12277.362 | 11830.291 | NM_014868 | 16011.539 | 14508.343 |
| AA220921  | 19903.691 | 28752     | X60152    | 4646.309  | 4305.576  | AL442089  | 33444.91  | 36195.355 |
| N67770    | 1403.836  | 1819.22   | NM_002316 | 8457.567  | 8726.372  | NM_001200 | 3591.479  | 3147.086  |
| AA486200  | 66344.969 | 60860.758 | NM_012421 | 34510.48  | 41194.691 | AB007964  | 613.696   | 638.284   |
| U90065    | 847.611   | 1092.802  | AB014601  | 6751.447  | 7362.746  | AF128541  | 9273.708  | 8128.697  |
| AJ005898  | 7697.928  | 6711.741  | AK001393  | 44145.664 | 47863.898 | AK026305  | 13747.303 | 10454.125 |
| X57303    | 6847.385  | 9712.034  | NM_000023 | 22179.578 | 21130.904 | NM_002552 | 5313.152  | 4432.064  |
| AA463224  | 2266.153  | 2151.507  | AF022654  | 2197.465  | 2786.607  | NM_014321 | 11318.457 | 9093.38   |
| BG248802  | 25001.918 | 27591.988 | NM_001143 | 2976.074  | 3451.946  | AK022733  | 3764.18   | 3887.159  |
| L19605    | 2864.527  | 2921.553  | NM_003282 | 2638.554  | 3009.574  | AB011132  | 12674.084 | 19582.861 |
| AA876532  | 27643.117 | 37809.879 | AK022638  | 34387.645 | 38091.969 | NM_020362 | 17909.146 | 19507.648 |

|           |           |           |           |           |           |           |           |           |
|-----------|-----------|-----------|-----------|-----------|-----------|-----------|-----------|-----------|
| S74349    | 2254.969  | 2698.485  | BG698409  | 18110.088 | 18808.406 | AB040937  | 5570.838  | 5088.841  |
| X07979    | 44803.563 | 47771.547 | U36798    | 1317.54   | 1100.653  | AF275798  | 43673.777 | 43408.879 |
| BG324670  | 770.093   | 994.917   | AA220921  | 28144.773 | 31777.051 | NM_005441 | 16161.455 | 14947.479 |
| BG744224  | 11231.971 | 12178.272 | N67770    | 4364.964  | 4136.25   | NM_016079 | 33849.363 | 33945.598 |
| NM_000015 | 780.773   | 952.558   | AA486200  | 62117.746 | 61061.078 | AK023108  | 7890.593  | 8837.262  |
| NM_014923 | 1646.116  | 1607.373  | U90065    | 3320.07   | 2944.537  | AK026409  | 64643.41  | 53223.941 |
| NM_005477 | 19702.852 | 22868.096 | AA463224  | 4779.34   | 4989.394  | AF097025  | 21402.08  | 21835.318 |
| NM_007018 | 2403.684  | 2775.049  | BG248802  | 30607.664 | 31787.537 | Y11339    | 18475.348 | 20394.371 |
| NM_004318 | 5983.779  | 7149.212  | L19605    | 4730.471  | 5090.521  | AB030176  | 1897.995  | 2722.806  |
| L09089    | 1239.009  | 289.081   | AA876532  | 34661.855 | 39170.168 | NM_003937 | 982.882   | 1029.911  |
| NM_002640 | 4789.846  | 4876.625  | S74349    | 2967.014  | 2602.238  | NM_002537 | 17301.523 | 16534.143 |
| X03084    | 1233.524  | 821.231   | X07979    | 61991.621 | 65254.375 | NM_003139 | 7657.332  | 7246.878  |
| NM_000949 | 938.466   | 1087.506  | BG324670  | 1470.828  | 1418.476  | NM_012316 | 9144.78   | 9206.994  |
| M15530    | 14562.284 | 13951.656 | BG744224  | 52860.93  | 55451.586 | AK001393  | 28572.689 | 29037.506 |
| NM_000488 | 2722.844  | 3199.125  | NM_006393 | 10647.742 | 10598.319 | NM_000023 | 12999.919 | 12330.197 |
| NM_001877 | 9224.993  | 9573.794  | NM_014923 | 2775.913  | 2762.348  | AF022654  | 1487.556  | 1291.142  |
| NM_014207 | 26471.729 | 30563.66  | NM_005477 | 38084.457 | 43524.141 | NM_001143 | 1582.426  | 1218.417  |
| AK002163  | 6487.711  | 6155.228  | NM_007018 | 2421.634  | 1867.062  | NM_003282 | 1446.837  | 958.614   |
| NM_002287 | 6187.514  | 6120.769  | NM_004318 | 6296.241  | 7076.994  | AK022638  | 18513.564 | 15771.823 |
| NM_012344 | 8130.728  | 8126.138  | L09089    | 9958.843  | 9140.473  | BG698409  | 11666.406 | 9696.076  |
| NM_002351 | 9103.92   | 11292.278 | NM_002640 | 5283.985  | 4821.069  | U36798    | 788.788   | 734.614   |
| NM_014385 | 1617.367  | 1989.8    | NM_000949 | 937.879   | 848.454   | AA220921  | 18461.535 | 19831.504 |
| NM_001704 | 2149.57   | 1992.671  | M15530    | 16912.861 | 16591.164 | N67770    | 3371.517  | 3280.209  |
| AB036432  | 13145.836 | 12183.275 | NM_000488 | 3861.427  | 3739.307  | AA486200  | 70705.703 | 65959.273 |
| NM_003643 | 1995.335  | 2185.308  | NM_001877 | 11492.016 | 11632.509 | U90065    | 1102.297  | 1065.474  |
| NM_003480 | 2417.935  | 2740.67   | NM_014207 | 28530.107 | 30518.311 | AJ005898  | 20155.107 | 20506.889 |
| NM_001634 | 43563.59  | 54156.988 | AK002163  | 9116.75   | 9463.429  | X57303    | 11867.646 | 14806.643 |
| NM_002267 | 25731.967 | 29215.061 | NM_002287 | 7177.95   | 6670.521  | AA463224  | 2922.963  | 2469.156  |
| NM_006412 | 12748.714 | 15250.237 | NM_012344 | 10866.925 | 10268.618 | BG248802  | 16003.041 | 15606.865 |
| NM_003063 | 11272.823 | 13719.591 | NM_002351 | 7814.011  | 8442.206  | L19605    | 3843.304  | 3725.13   |
| NM_014041 | 45305.359 | 33562.055 | NM_014385 | 5341.994  | 4994.864  | AA876532  | 18906.867 | 18258.564 |
| NM_007169 | 25113.242 | 25255.99  | NM_001704 | 4018.563  | 4215.662  | S74349    | 1581.799  | 1550.26   |
| NM_014313 | 1535.194  | 1799.049  | AB036432  | 60056.754 | 53534.875 | X07979    | 60083.297 | 56334.676 |
| AK024966  | 2034.353  | 2353.918  | NM_003643 | 2115.699  | 2154.441  | BG324670  | 1313.3    | 1618.781  |
| NM_017585 | 10708.895 | 10106.138 | NM_003480 | 10332.27  | 10471.807 | BG744224  | 40328.855 | 44403.898 |
| NM_000033 | 2898.215  | 2769.376  | NM_004059 | 1676.651  | 2033.115  | NM_018026 | 11712.468 | 12274.504 |
| AF224741  | 4017.163  | 3059.135  | NM_001634 | 40052.602 | 46784.336 | NM_001707 | 32982.215 | 30491.146 |
| NM_006594 | 6493.417  | 4886.666  | NM_002267 | 25884.322 | 26454.283 | AK022983  | 1910.461  | 1321.418  |
| NM_004177 | 3956.863  | 3821.522  | NM_006412 | 10354.8   | 11231.263 | NM_014923 | 940.328   | 1116.587  |
| NM_012429 | 3788.699  | 4077.884  | NM_003063 | 30954.367 | 33514.773 | NM_005477 | 32501.221 | 31232.756 |
| NM_004871 | 19487.961 | 23004.961 | NM_014041 | 48241.297 | 52150.555 | NM_004318 | 2875.133  | 2322.114  |
| AB040903  | 1206.727  | 1249.646  | NM_007169 | 23974.143 | 25200.502 | L09089    | 4001.803  | 3164.841  |
| NM_005698 | 24016.783 | 22634.357 | NM_014313 | 1650.687  | 1696.002  | NM_002640 | 3349.255  | 2372.999  |
| AF202146  | 21100.574 | 22048.539 | AK024966  | 10423.343 | 9429.223  | M15530    | 9740.979  | 9373.74   |
| NM_014868 | 25055.371 | 27136.564 | NM_017585 | 37265.605 | 38768.363 | NM_000488 | 2121.422  | 2101.477  |
| AL442089  | 25737.824 | 30409.91  | NM_000033 | 7077.615  | 6881.229  | NM_001877 | 6062.351  | 5855.271  |
| NM_001200 | 9876.047  | 11506.498 | AF224741  | 4592.91   | 5091.799  | NM_014207 | 16788.361 | 14606.388 |
| AB007964  | 1767.975  | 1954.369  | NM_006594 | 9924.94   | 10566.585 | AK002163  | 6299.029  | 6047.246  |
| AF128541  | 5460.046  | 5599.311  | NM_004177 | 3965.905  | 3305.056  | NM_002287 | 4272.683  | 3978.573  |
| NM_002552 | 7018.218  | 3931.585  | NM_012429 | 3763.633  | 3714.121  | NM_012344 | 6899.116  | 7104.917  |
| NM_014321 | 12421.628 | 9886.377  | NM_004871 | 15108.161 | 13777.9   | NM_002351 | 4025.024  | 4191.213  |
| AK022733  | 3836.086  | 4112.487  | AB040903  | 1051.046  | 773.151   | NM_014385 | 2538.69   | 2753.312  |
| AB011132  | 12344.521 | 13915.295 | NM_005698 | 21074.574 | 20131.439 | NM_001704 | 2567.129  | 2823.102  |

|           |           |           |           |           |           |           |           |           |
|-----------|-----------|-----------|-----------|-----------|-----------|-----------|-----------|-----------|
| NM_020362 | 20994.74  | 18001.846 | AF202146  | 20908.387 | 19825.816 | AB036432  | 44561.078 | 46744.707 |
| AB040937  | 6833.323  | 6194.948  | NM_014868 | 22430.492 | 24719.865 | NM_003643 | 1454.72   | 1473.814  |
| AF275798  | 66723.742 | 54506.086 | AL442089  | 41222.277 | 45728.313 | NM_003480 | 6605.474  | 6514.106  |
| NM_005441 | 36253.223 | 41336.063 | X83412    | 1189.987  | 951.812   | NM_012421 | 25490.412 | 26529.436 |
| NM_016079 | 54789.098 | 49608.828 | NM_001200 | 6144.597  | 6164.094  | AB014601  | 3241.802  | 2897.105  |
| AK023108  | 3506.601  | 4177.879  | AB007964  | 928.558   | 1446.632  | NM_002267 | 15348.982 | 15304.464 |
| AK026409  | 15461.92  | 14821.954 | AF128541  | 11673.112 | 12409.786 | NM_006412 | 8456.284  | 8731.704  |
| AF097025  | 12506.991 | 13332.566 | AK026305  | 30546.738 | 28880.086 | NM_003063 | 11830.639 | 11423.09  |
| Y11339    | 14443.972 | 14687.938 | NM_002552 | 8662.805  | 9905.449  | NM_014041 | 33315.48  | 30924.602 |
| AB030176  | 2707.322  | 2864.571  | NM_014321 | 18162.561 | 15918.052 | NM_007169 | 15245.944 | 12749.088 |
| NM_003937 | 1679.231  | 1743.378  | AK022733  | 4695.432  | 5031.285  | NM_014313 | 834.08    | 518.363   |
| NM_002537 | 17322.568 | 17740.648 | AB011132  | 15057.308 | 17953.85  | AK024966  | 7072.452  | 7220.65   |
| NM_003139 | 16184.14  | 17424.109 | NM_020362 | 24879.246 | 22707.395 | NM_017585 | 31644.217 | 29506.188 |
| NM_012316 | 11897.527 | 13932.139 | AB040937  | 7148.512  | 7795.967  | NM_000033 | 4966.83   | 4351.9    |
| AK001393  | 38925.074 | 48368.02  | AF275798  | 63349.52  | 56574.707 | AF224741  | 1903.626  | 1625.732  |
| NM_000023 | 8275.455  | 9656.799  | NM_005441 | 28863.133 | 29476.807 | NM_006594 | 6802.61   | 5980.361  |
| AF022654  | 3976.283  | 4614      | NM_016079 | 56563.387 | 50178.43  | NM_004177 | 2648.54   | 1973.763  |
| NM_001143 | 3103.556  | 4073.299  | AK023108  | 9486.826  | 10148.578 | NM_012429 | 2632.758  | 2425.991  |
| NM_003282 | 3199.141  | 4344.008  | AK026409  | 63777.195 | 56373.176 | NM_004871 | 10493.968 | 11044.271 |
| AK022638  | 39655.551 | 52236.699 | AF097025  | 31304.029 | 30318.68  | NM_005698 | 12455.154 | 10856.739 |
| AA220921  | 16981.559 | 20107.266 | Y11339    | 29140.072 | 25580.881 | AF202146  | 11761.028 | 10294.819 |
| N67770    | 1828.406  | 1564.501  | AB030176  | 2041.716  | 2635.182  | NM_006393 | 7929.513  | 6159.818  |
| AA486200  | 65217.547 | 60597.203 | NM_003937 | 2081.103  | 1500.062  | NM_001200 | 4426.455  | 4460.505  |
| U90065    | 1286.569  | 904.815   | NM_002537 | 25543.752 | 24645.045 | AF128541  | 8288.334  | 7329.294  |
| AJ005898  | 6764.123  | 5341.794  | NM_003139 | 17567.047 | 19975.723 | AK026305  | 12407.508 | 9753.312  |
| X57303    | 6397.36   | 10669.473 | NM_012316 | 19463.975 | 22890.246 | NM_002552 | 5431.413  | 4680.748  |
| AA463224  | 2093.535  | 2278.983  | AK001393  | 41466.297 | 47878.348 | NM_014321 | 10332.034 | 7388.005  |
| BG248802  | 24703.943 | 27658.367 | NM_000023 | 17724.602 | 17730.455 | AK022733  | 3058.557  | 2864.835  |
| L19605    | 2086.23   | 1965.747  | AF022654  | 2476.324  | 2468.654  | AB011132  | 8606.826  | 8381.471  |
| AA876532  | 21094.504 | 24616.643 | NM_001143 | 2580.775  | 2612.535  | NM_020362 | 14723.509 | 11785.327 |
| S74349    | 1328.547  | 1693.166  | NM_003282 | 2390.923  | 2743.777  | AB040937  | 5121.966  | 3505.499  |
| X07979    | 47306.379 | 50715.605 | AK022638  | 31361.299 | 34281.031 | AF275798  | 40069.984 | 38693.957 |
| BG324670  | 945.106   | 826.323   | BG698409  | 14909.392 | 16541.213 | NM_005441 | 14430.85  | 12105.113 |
| BG744224  | 10702.891 | 10971.719 | U36798    | 978.599   | 1094.094  | NM_016079 | 32813.797 | 32103.416 |
| NM_018026 | 11204.081 | 11429.245 | AA220921  | 26682.078 | 30028.932 | AK023108  | 7171.314  | 7161.149  |
| NM_001707 | 40639.543 | 43690.234 | N67770    | 4169.338  | 4632.345  | AF097025  | 26088.822 | 28749.434 |
| AK022983  | 2247.666  | 2195.521  | AA486200  | 61207.844 | 62469.758 | Y11339    | 25833.758 | 32144.162 |
| NM_014923 | 2188.984  | 1971.578  | U90065    | 1902.723  | 1729.377  | AB030176  | 2430.323  | 2846.277  |
| NM_005477 | 21010.637 | 25954.613 | AJ005898  | 34115.102 | 33584.617 | NM_003937 | 1115.086  | 972.111   |
| NM_007018 | 3033.751  | 2631.86   | X57303    | 16909.867 | 18851.289 | NM_002537 | 16678.707 | 16124.615 |
| NM_004318 | 5502.944  | 6475.139  | AA463224  | 4381.199  | 4246.145  | NM_003139 | 7193.547  | 7327.182  |
| L09089    | 2822.531  | 2798.878  | BG248802  | 28662.838 | 28728.979 | NM_012316 | 9097.773  | 9598.877  |
| X03084    | 835.734   | 199.413   | L19605    | 4840.888  | 4055.168  | NM_004059 | 934.071   | 676.747   |
| NM_000949 | 1152.2    | 936.098   | AA876532  | 34411.715 | 33084.477 | NM_001634 | 31325.131 | 23777.994 |
| M15530    | 14011.929 | 13737.135 | S74349    | 2308.696  | 2450.437  | AF022654  | 3257.475  | 2876.426  |
| NM_000488 | 2673.554  | 2649.916  | X07979    | 60926.324 | 59256.324 | NM_003282 | 1660.613  | 2371.71   |
| NM_001877 | 7209.145  | 6275.284  | BG324670  | 1318.467  | 1055.626  | AK022638  | 17213.596 | 15054.909 |
| NM_014207 | 20055.248 | 19320.787 | BG744224  | 53866.703 | 52219.723 | BG698409  | 10614.192 | 8799.662  |
| AK002163  | 5597.054  | 5512.228  | NM_018026 | 19315.99  | 20115.939 | U36798    | 605.897   | 652.956   |
| NM_002287 | 5680.687  | 5827.412  | NM_001707 | 55570.965 | 53157.57  | AA220921  | 17141.777 | 16674.178 |
| NM_012344 | 7215.412  | 7219.895  | AK022983  | 3508.913  | 3773.46   | N67770    | 3327.557  | 2235.428  |
| NM_002351 | 7253.726  | 7978.391  | NM_014923 | 2592.121  | 2877.999  | AA486200  | 71119.047 | 66574.57  |
| NM_014385 | 1534.145  | 1733.044  | NM_005477 | 40998.914 | 41151.047 | U90065    | 1188.2    | 777.522   |

|           |           |           |           |           |           |           |           |           |
|-----------|-----------|-----------|-----------|-----------|-----------|-----------|-----------|-----------|
| NM_001704 | 1789.787  | 2009.437  | NM_007018 | 2459.364  | 1863.329  | AJ005898  | 19317.795 | 13978.025 |
| AB036432  | 12155.495 | 9336.588  | NM_004318 | 4004.089  | 3815.023  | X57303    | 10477.304 | 9989.68   |
| NM_003643 | 1856.174  | 2084.488  | L09089    | 9394.918  | 8107.966  | AA463224  | 3060.32   | 1948.904  |
| NM_003480 | 2191.765  | 2219.841  | NM_002640 | 5049.214  | 4913.684  | BG248802  | 15790.492 | 14907.14  |
| NM_012421 | 33756.961 | 42750.125 | NM_000949 | 999.809   | 809.15    | L19605    | 3132.101  | 2519.347  |
| AB014601  | 4977.747  | 5355.198  | M15530    | 16888.75  | 16723.252 | S74349    | 1822.368  | 1816.23   |
| NM_002267 | 27298.199 | 34906.789 | NM_000488 | 4088.999  | 5215.625  | X07979    | 63899.355 | 56246.563 |
| NM_006412 | 13462.917 | 15316.049 | NM_001877 | 11982.734 | 11011.676 | BG324670  | 881.54    | 1035.064  |
| NM_003063 | 11319.336 | 14995.513 | NM_014207 | 26972.824 | 26529.826 | BG744224  | 43444.711 | 46838.441 |
| NM_014041 | 52793.945 | 53343.992 | AK002163  | 8970.651  | 11039.982 | NM_018026 | 10803.993 | 13719.996 |
| NM_014313 | 2134.837  | 1327.283  | NM_002287 | 6712.017  | 6823.33   | NM_001707 | 29794.088 | 34463.762 |
| AK024966  | 2618.145  | 2411.026  | NM_012344 | 9782.921  | 9356.5    | AK022983  | 1575.497  | 1799.507  |
| NM_017585 | 9947.2    | 8325.034  | NM_002351 | 7018.706  | 6703.443  | NM_014868 | 16522.84  | 13621.903 |
| NM_000033 | 2606.962  | 2588.773  | NM_014385 | 4291.689  | 5469.578  | AL442089  | 33292.152 | 26607.301 |
| AF224741  | 4114.024  | 3075.922  | NM_001704 | 4189.633  | 3066.361  | NM_001877 | 5989.407  | 5867.663  |
| NM_006594 | 6055.028  | 4722.725  | AB036432  | 55920.734 | 54846.293 | NM_014207 | 14982.552 | 14021.256 |
| NM_004177 | 3890.351  | 3747.137  | NM_003643 | 1970.167  | 1676.778  | AK002163  | 5345.741  | 4379.479  |
| NM_012429 | 3223.889  | 3471.848  | NM_003480 | 10202.832 | 9055.094  | NM_002287 | 3753.185  | 2451.299  |
| NM_004871 | 13623.534 | 12415.42  | NM_012421 | 43143.852 | 42448.883 | NM_012344 | 5682.46   | 5140.709  |
| AB040903  | 931.178   | 895.569   | AB014601  | 6270.256  | 6721.591  | NM_002351 | 3966.295  | 3003.637  |
| NM_005698 | 21688.143 | 18452.924 | NM_002267 | 25365.158 | 26685.551 | NM_014385 | 2715.12   | 2438.012  |
| AF202146  | 19179.145 | 18484.377 | NM_006412 | 9442.526  | 9357.759  | NM_001704 | 2491.23   | 1749.808  |
| NM_006393 | 1011.393  | 1106.632  | NM_003063 | 23943.186 | 22759.551 | AB036432  | 41233.961 | 38050.984 |
| X83412    | 1195.843  | 713.383   | NM_014041 | 45044.664 | 53115.141 | NM_014872 | 7271.91   | 7157.261  |
| NM_001200 | 9548.835  | 11092.704 | NM_007169 | 24007.713 | 25166.725 | NM_003643 | 2578.605  | 2464.998  |
| AF128541  | 4188.579  | 4304.774  | NM_014313 | 1650.505  | 1675.715  | NM_003480 | 6669.697  | 6050.171  |
| AK026305  | 15342.645 | 19075.359 | AK024966  | 10446.188 | 10716.847 | NM_000899 | 1649.946  | 1567.446  |
| AK022733  | 2804.409  | 1989.457  | NM_017585 | 37556.168 | 40592.84  | NM_032951 | 3863.26   | 4046.934  |
| AB011132  | 11271.998 | 9738.262  | NM_000033 | 6540.285  | 7295.464  | NM_000503 | 22324.41  | 21823.066 |
| NM_020362 | 22173.951 | 21330.701 | AF224741  | 3168.244  | 2967.896  | NM_002405 | 31509.344 | 36039.66  |
| AB040937  | 5767.685  | 5797.308  | NM_006594 | 9362.172  | 8946.143  | AK000004  | 6453.486  | 8772.717  |
| AF275798  | 62551.992 | 55608.48  | NM_004177 | 3869.517  | 4254.866  | NM_012421 | 33968.547 | 44402.922 |
| NM_005441 | 29785.66  | 30561.594 | NM_012429 | 3340.828  | 3515.531  | AB014601  | 4328.991  | 4579.233  |
| NM_016079 | 41680.945 | 43096.191 | NM_004871 | 15344.977 | 13519.093 | AK001393  | 31716.357 | 27245.459 |
| AK023108  | 2842.937  | 3230.912  | AB040903  | 1107.167  | 752.481   | NM_000023 | 14954.52  | 10875.155 |
| AK026409  | 15413.63  | 14639.99  | NM_005698 | 18090.871 | 15726.633 | NM_014861 | 1702.303  | 1918.763  |
| AF097025  | 12160.526 | 12385.166 | AF202146  | 19409.68  | 18707.275 | NM_012434 | 4052.574  | 4694.201  |
| Y11339    | 11454.485 | 10351.487 | NM_006393 | 11455.231 | 10997.326 | NM_005694 | 16223.218 | 12168.138 |
| AB030176  | 2458.191  | 2219.99   | X83412    | 1264.581  | 1072.476  | AF224741  | 1506.459  | 968.103   |
| NM_003937 | 1571.54   | 1678.053  | NM_001200 | 6530.491  | 6470.657  | NM_006594 | 9225.466  | 7396.926  |
| NM_002537 | 15370.583 | 12750.239 | AB007964  | 1409.33   | 1198.63   | NM_004177 | 3162.343  | 1926.037  |
| NM_003139 | 14500.081 | 13969.377 | AF128541  | 10025.837 | 8388.128  | NM_012429 | 2021.024  | 1113.75   |
| NM_012316 | 10402.033 | 11119.656 | AK026305  | 28711.58  | 25607.77  | NM_004871 | 8283.481  | 5323.145  |
| NM_004059 | 1570.563  | 1696.892  | NM_002552 | 8828.528  | 9831.098  | NM_005698 | 13174.334 | 13448.563 |
| NM_001634 | 38660.516 | 45575.07  | NM_014321 | 18512.379 | 15700.474 | AF202146  | 12403.867 | 11928.666 |
| AF022654  | 4059.115  | 3927.013  | AK022733  | 5559.031  | 5271.354  | NM_006393 | 9034.098  | 7044.08   |
| NM_001143 | 3380.014  | 3759.585  | AF275798  | 61149.711 | 54166.066 | NM_014923 | 1968.712  | 1564.013  |
| NM_003282 | 4526.582  | 3835.572  | NM_005441 | 30106.416 | 30959.123 | NM_005477 | 32323.725 | 27591.574 |
| AK022638  | 35667.566 | 46503.832 | NM_016079 | 49699.641 | 52058.645 | NM_007018 | 1129.644  | 1129.224  |
| BG698409  | 6806.034  | 9924.18   | AK023108  | 7883.984  | 9348.618  | NM_004318 | 3334.925  | 3843.102  |
| N67770    | 1321.685  | 726.269   | AF097025  | 30092.662 | 30959.654 | L09089    | 4592.574  | 3829.848  |
| AA486200  | 64196.176 | 62272.887 | Y11339    | 27872.412 | 25507.539 | NM_002640 | 3804.231  | 3013.086  |
| U90065    | 1344.58   | 1500.976  | AB030176  | 2106.398  | 2381.737  | NM_002537 | 14643.057 | 13287.308 |

|           |           |           |           |           |           |           |           |           |
|-----------|-----------|-----------|-----------|-----------|-----------|-----------|-----------|-----------|
| AJ005898  | 6648.228  | 5798.224  | NM_003937 | 1046.447  | 1186.031  | NM_003139 | 6585.399  | 7096.452  |
| X57303    | 6035.825  | 9249.852  | NM_002537 | 25177.889 | 20761.916 | NM_012316 | 13178.511 | 16872.012 |
| AA463224  | 2189.855  | 2158.73   | NM_003139 | 11982.407 | 11882.39  | NM_001634 | 30320.379 | 24463.678 |
| BG248802  | 21267.709 | 20416.223 | NM_012316 | 13968.746 | 14309.056 | NM_002267 | 15153.271 | 10462.313 |
| L19605    | 2000.974  | 1697.771  | NM_004059 | 1543.592  | 2141.014  | NM_006412 | 15823.238 | 11059.392 |
| AA876532  | 24839.797 | 31462.123 | NM_001634 | 43073.465 | 43888.469 | NM_003063 | 16964.328 | 10956.738 |
| S74349    | 1629.536  | 1910.078  | AF022654  | 1952.079  | 2138.598  | NM_014041 | 34701.676 | 30586.57  |
| X07979    | 39325.348 | 40846.469 | NM_001143 | 2464.693  | 2853.558  | AK024966  | 9408.354  | 10798.085 |
| BG324670  | 804.522   | 1175.722  | NM_003282 | 2721.362  | 2397.239  | AF178941  | 61431.543 | 52317.777 |
| BG744224  | 10947.1   | 11083.811 | AK022638  | 32567.844 | 32430.344 | NM_016033 | 16785.281 | 14681.876 |
| NM_018026 | 12097.494 | 10311.504 | BG698409  | 15522.415 | 14499.696 | NM_017585 | 34780.984 | 30559.049 |
| NM_001707 | 40918.582 | 42725.309 | U36798    | 1125.048  | 1548.282  | U61737    | 61698.102 | 53087.574 |
| AK022983  | 1931.023  | 1931.862  | AA220921  | 27481.287 | 30504.051 | Y10506    | 782.351   | 1047.619  |
| NM_014868 | 20513.82  | 22103.32  | N67770    | 4583.29   | 4850.111  | X06389    | 3169.193  | 3112.157  |
| AL442089  | 20929.207 | 22878.195 | AA486200  | 60066.117 | 70873.719 | NM_000033 | 5318.082  | 5184.071  |
| NM_000949 | 1518.629  | 1480.514  | AJ005898  | 31833.076 | 34999.809 | NM_018026 | 11881.682 | 10782.915 |
| M15530    | 16505.473 | 20731.404 | X57303    | 16527.563 | 21889.5   | NM_001707 | 32321.141 | 34846.316 |
| NM_000488 | 4485.417  | 5211.673  | AA463224  | 4569.822  | 4051.699  | AK022983  | 4121.376  | 4152.112  |
| NM_001877 | 11414.75  | 15411.813 | BG248802  | 27724.727 | 30218.973 | NM_014868 | 17100.689 | 19132.9   |
| AK002163  | 6483.106  | 2709.217  | L19605    | 6308.645  | 7406.337  | AL442089  | 35739.813 | 31612.07  |
| NM_002287 | 5316.86   | 3937.631  | S74349    | 2490.048  | 2554.312  | NM_001200 | 5158.461  | 3712.582  |
| NM_012344 | 8001.532  | 7352.043  | X07979    | 61720.531 | 61591.836 | AF128541  | 8487.448  | 5593.502  |
| NM_002351 | 7441.995  | 7989.538  | BG324670  | 1599.81   | 1123.195  | AK026305  | 12711.293 | 6921.469  |
| NM_014385 | 1585.835  | 1709.601  | BG744224  | 54154.805 | 50465.715 | NM_002552 | 5584.932  | 4439.098  |
| NM_001704 | 1891.975  | 1897.431  | NM_018026 | 19518.154 | 19864.441 | NM_014321 | 12264.677 | 10752.469 |
| AB036432  | 11551.045 | 10295.493 | NM_001707 | 46838.387 | 41663.293 | AB011132  | 10880.151 | 10577.254 |
| NM_014872 | 7986.251  | 7247.75   | AK022983  | 2766.062  | 2640.507  | NM_020362 | 17467.104 | 15452.398 |
| NM_003643 | 1549.579  | 1811.187  | NM_014868 | 25897.512 | 21564.939 | AB040937  | 5292.76   | 4085.334  |
| NM_003480 | 2108.569  | 2190.261  | NM_000949 | 1070.671  | 723.295   | AF275798  | 43066.762 | 44810.164 |
| NM_000899 | 1288.223  | 1386.168  | M15530    | 17972.268 | 18552.645 | NM_005441 | 16122.658 | 13244.362 |
| NM_032951 | 4099.917  | 4771.658  | NM_000488 | 4199.429  | 4550.746  | NM_016079 | 30776.754 | 24733.014 |
| NM_000503 | 3211.645  | 3326.691  | NM_001877 | 11445.503 | 10002.133 | AK023108  | 8909.871  | 7862.017  |
| NM_002405 | 52331.355 | 50536.438 | NM_014207 | 27602.947 | 27526.07  | AK026409  | 63336.301 | 50777.641 |
| AK000004  | 6728.577  | 6418.308  | AK002163  | 7953.976  | 7606.51   | AF097025  | 23139.291 | 19699.424 |
| NM_012421 | 36817.449 | 42888.215 | NM_002287 | 6994.445  | 6227.424  | Y11339    | 19588.426 | 15527.635 |
| AB014601  | 6107.753  | 6671.091  | NM_012344 | 10706.148 | 10252.703 | AB030176  | 1736.183  | 1558.133  |
| AK001393  | 37346.551 | 42069.098 | NM_002351 | 7790.729  | 8409.994  | NM_003937 | 850.747   | 831.15    |
| NM_000023 | 8029.369  | 7976.737  | NM_014385 | 4527.924  | 5158.042  | NM_172140 | 10884.768 | 15602.553 |
| NM_014861 | 3828.94   | 4474.046  | NM_001704 | 3943.565  | 3749.392  | AK026783  | 967.417   | 1696.133  |
| NM_012434 | 12394.811 | 14933.799 | AB036432  | 55989.105 | 58559.418 | AK021814  | 2224.824  | 3078.589  |
| NM_006594 | 6412.316  | 2860.462  | NM_014872 | 11981.968 | 11413.183 | AF088035  | 3519.6    | 5019.824  |
| NM_004177 | 4683.676  | 4428.968  | NM_003480 | 10487.107 | 10052.504 | AF086251  | 936.552   | 1331.685  |
| NM_012429 | 3698.851  | 3203.529  | NM_000899 | 2485.706  | 2470.917  | NM_018092 | 1758.579  | 2388.752  |
| NM_004871 | 14478.224 | 16658.348 | NM_032951 | 6889.883  | 6235.865  | AL109698  | 1956.757  | 2553.192  |
| AB040903  | 912.999   | 1443.184  | NM_000503 | 23856.35  | 22292.236 | AF217980  | 21154.16  | 23335.773 |
| NM_005698 | 17646.988 | 14764.781 | NM_002405 | 44594.57  | 40848.43  | AL117461  | 3422.821  | 3689.087  |
| AF202146  | 16360.395 | 15078.313 | AK000004  | 10570.599 | 11041.064 | NM_016499 | 3102.049  | 2810.6    |
| NM_006393 | 863.238   | 667.888   | NM_012421 | 38438.078 | 43876.266 | NM_172140 | 11271.428 | 10697.53  |
| NM_014923 | 1748.592  | 1120.14   | AB014601  | 5057.502  | 4433.755  | SR4       | 16803.742 | 22030.939 |
| NM_005477 | 19481.855 | 17664.869 | AK001393  | 46150.238 | 44398.453 | SR6       | 2288.804  | 2424.141  |
| NM_007018 | 3352.345  | 2233.569  | NM_014861 | 2504.287  | 3150.729  | SR8       | 9332.685  | 34686.504 |
| NM_004318 | 3681.967  | 3008.289  | NM_012434 | 8874.106  | 9810.348  | SR10      | 34086.996 | 17778.83  |
| L09089    | 1871.056  | 1549.047  | NM_005694 | 31607.4   | 22320.697 | AK000122  | 31521.324 | 41816.574 |



|           |           |           |           |           |           |           |           |           |
|-----------|-----------|-----------|-----------|-----------|-----------|-----------|-----------|-----------|
| NM_002640 | 5365.885  | 6124.044  | M91368    | 857.245   | 595.544   | AK023159  | 6870.877  | 7878.449  |
| X03084    | 1208.836  | 890.215   | AF224741  | 3250.97   | 2376.006  | AK001091  | 23732.398 | 31419.641 |
| NM_014302 | 1536.083  | 727.771   | NM_006594 | 9151.165  | 6917.869  | U80775    | 741.439   | 1137.505  |
| NM_002267 | 20425.611 | 13160.958 | NM_004177 | 3893.171  | 3281.618  | AF086428  | 4369.124  | 5873.768  |
| NM_006412 | 10629.097 | 9359.384  | NM_012429 | 3411.82   | 3816.995  | AK025310  | 3438.492  | 3983.06   |
| NM_003063 | 8632.735  | 7617.888  | NM_004871 | 14552.325 | 13697.259 | AL049353  | 858.998   | 1122.921  |
| NM_014041 | 51479.641 | 53027.813 | AB040903  | 1169.889  | 894.214   | AL117598  | 3217.413  | 5434.717  |
| NM_007169 | 24801.039 | 23160.939 | NM_005698 | 20487.322 | 17994.752 | AL109670  | 3119.122  | 4497.133  |
| NM_014313 | 1529.098  | 1474.396  | AF202146  | 21102.928 | 21063.207 | AF085831  | 2160.388  | 2373.615  |
| AK024966  | 1075.82   | 851.799   | NM_006393 | 18319.029 | 16630.268 | AL832149  | 4698.237  | 5573.002  |
| AF178941  | 6818.26   | 6301.67   | NM_014923 | 2588.46   | 2194.396  | AK022839  | 4339.023  | 5866.335  |
| NM_016033 | 20754.799 | 20022.666 | NM_005477 | 48417.207 | 42832.09  | NM_018350 | 3424.407  | 5044.598  |
| NM_017585 | 12925.682 | 10968.727 | NM_007018 | 2428.209  | 1546.815  | AK025839  | 3450.53   | 2383.285  |
| U61737    | 55733.063 | 51413.852 | NM_004318 | 4832.296  | 3641.486  | NM_003946 | 2839.867  | 2640.752  |
| Y10506    | 575.698   | 624.274   | L09089    | 10489.854 | 8196.693  | AB045292  | 2984.542  | 3091.891  |
| X06389    | 1080.957  | 822.903   | NM_002640 | 5737.838  | 5337.154  | AK025699  | 26854.148 | 27908.203 |
| NM_000033 | 3193.491  | 3327.065  | NM_002537 | 20695.719 | 19421.662 | AK025826  | 7323.998  | 10429.338 |
| NM_018026 | 12485.267 | 9778.375  | NM_003139 | 11374.433 | 11869.545 | AK026439  | 5539.69   | 6761.519  |
| NM_001707 | 34963.168 | 25803.49  | NM_012316 | 10922.57  | 10448.043 | AK025278  | 2194.253  | 2834.744  |
| AK022983  | 1974.869  | 1057.57   | NM_004059 | 1647.896  | 1229.885  | AK026466  | 1421.392  | 1571.349  |
| NM_014868 | 18267.057 | 13028.92  | NM_001634 | 39849.484 | 38327.844 | NM_003787 | 655.146   | 1380.557  |
| AL442089  | 21262.932 | 15497.067 | NM_014302 | 1537.043  | 450.508   | AK024492  | 280.638   | 1353.635  |
| NM_001200 | 6906.526  | 4728.456  | NM_002267 | 24788.906 | 21316.773 | AF147419  | 14910.912 | 20746.473 |
| AB007964  | 690.323   | 1178.953  | NM_006412 | 10257.563 | 10365.779 | AK024280  | 3262.241  | 4061.385  |
| AF128541  | 3268.986  | 2909.881  | NM_003063 | 33037.73  | 31683.273 | AF075036  | 5844.005  | 6965.048  |
| AK026305  | 13825.108 | 15609.575 | NM_014041 | 47647.699 | 50670.887 | NM_014797 | 7822.271  | 9457.164  |
| NM_002552 | 8244.179  | 8858.503  | NM_007169 | 22498.453 | 25975.139 | AK027139  | 1084.995  | 1245.733  |
| NM_014321 | 11925.282 | 9080.527  | NM_014313 | 1608.997  | 1916.744  | AL831841  | 10854.088 | 10170.205 |
| AK022733  | 3594.768  | 3530.683  | AK024966  | 9425.916  | 7978.362  | AL110165  | 11928.349 | 10424.88  |
| AB011132  | 9793.793  | 9093.7    | AF178941  | 59510.813 | 64663.133 | AL117652  | 3003.745  | 2456.429  |
| NM_020362 | 19936.344 | 17455.758 | NM_016033 | 20949.898 | 23311.113 | AL050168  | 7777.204  | 6307.999  |
| AB040937  | 7527.592  | 6487.563  | NM_017585 | 38386.316 | 41418.02  | AL117447  | 4276.608  | 3103.513  |
| AF275798  | 62877.383 | 58202.746 | U61737    | 58552.574 | 73083.602 | AK022135  | 7321.508  | 8714.697  |
| NM_005441 | 36642.441 | 40182.234 | X06389    | 3303.39   | 2721.028  | AK022898  | 1294.344  | 1845.104  |
| NM_016079 | 52365.457 | 51072.469 | NM_000033 | 7034.598  | 6840.173  | NM_014896 | 1330.633  | 1805.731  |
| AK023108  | 7545.038  | 8537.511  | NM_018026 | 14581.318 | 15575.139 | AF009269  | 2931.458  | 3453.84   |
| AK026409  | 19787.26  | 19229.588 | NM_001707 | 39265.516 | 41244.953 | AF009313  | 7632.319  | 8390.971  |
| AF097025  | 13719.406 | 14767.344 | AK022983  | 2944.502  | 1945.441  | AF090887  | 2131.387  | 2361.773  |
| Y11339    | 12228.485 | 12840.753 | NM_014868 | 22525.955 | 19922.49  | AF009279  | 610.865   | 1852.434  |
| AB030176  | 2899.767  | 3750.497  | AL442089  | 41577.547 | 40133.84  | NM_015883 | 4249.597  | 4343.792  |
| NM_003937 | 1606.677  | 2248.848  | X83412    | 1383.267  | 920.229   | AF056429  | 1918.305  | 2109.227  |
| CY3Cy5    | 2129.661  | 227.222   | NM_001200 | 8531.362  | 5839.89   | AF070547  | 10235.571 | 9292.535  |
| AK021814  | 2747.26   | 2710.306  | AB007964  | 1104.97   | 701.004   | AK001110  | 40902.137 | 34024.742 |
| AF086221  | 1193.222  | 1140.055  | AF128541  | 11492.63  | 9194.953  | AK002184  | 1364.837  | 684.637   |
| AF088035  | 4465.772  | 4563.011  | AK026305  | 33366.539 | 25641.004 | AK021652  | 1558.157  | 2025.582  |
| AF086251  | 1457.262  | 1848.378  | NM_002552 | 8926.686  | 8729.28   | AK021859  | 1742.564  | 1202.342  |
| AL137344  | 997.371   | 1023.957  | NM_014321 | 15314.234 | 13823.398 | M64700    | 1571.174  | 3727.546  |
| AK023128  | 878.588   | 847.56    | AK022733  | 4983.066  | 4571.789  | NM_001267 | 1699.631  | 2236.324  |
| NM_018092 | 1705.946  | 1589.621  | AB011132  | 13772.181 | 12958.919 | NM_005331 | 67665.852 | 63305.969 |
| AL109698  | 2859.269  | 2702.624  | NM_020362 | 24175.848 | 20843.475 | NM_014111 | 3231.824  | 3938.927  |
| AF217980  | 6419.605  | 5429.454  | AB040937  | 8188.097  | 7193.613  | S85075    | 1680.612  | 2104.44   |
| AL117461  | 6771.154  | 5962.288  | AF275798  | 61593.129 | 53825.664 | AJ008129  | 7275.877  | 9499.277  |
| NM_016496 | 2616.455  | 2469.949  | NM_005441 | 28774.502 | 28061.648 | AF161451  | 20688.572 | 25523.797 |

|           |           |           |           |           |           |           |           |           |
|-----------|-----------|-----------|-----------|-----------|-----------|-----------|-----------|-----------|
| NM_172140 | 7767.827  | 7403.705  | NM_016079 | 48649.199 | 49074.246 | X02067    | 37031.316 | 47376.664 |
| SR4       | 26892.43  | 36782.918 | AK023108  | 10150.696 | 8825.522  | AY007163  | 27920.252 | 32184.111 |
| SR6       | 3791.09   | 5299.613  | AK026409  | 60892.883 | 55565.953 | NM_006236 | 70195.391 | 63317.848 |
| SR8       | 14794.018 | 46398.711 | AF097025  | 29335.707 | 21377.678 | AK023734  | 3810.319  | 4235.708  |
| SR10      | 45374.59  | 24079.48  | Y11339    | 27139.914 | 19288.26  | AF085827  | 2090.223  | 1775.072  |
| CY3Cy5    | 7718.819  | 371.914   | AB030176  | 2441.89   | 2095.936  | Y08266    | 46975.152 | 44553.156 |
| AK000122  | 6389.581  | 6109.892  | NM_003937 | 1872.558  | 1340.453  | AK002171  | 9229.583  | 7260.613  |
| AK001091  | 3358.788  | 3375.917  | CY3Cy5    | 5857.901  | 2074.215  | AJ002572  | 3076.491  | 2562.319  |
| AF033199  | 1403.373  | 1660.214  | AK021814  | 2218.493  | 3007.076  | AK026897  | 10856.977 | 10884.605 |
| U80775    | 1866.817  | 1787.202  | AF088035  | 3178.199  | 4154.392  | AB037861  | 14289.185 | 12535.146 |
| AF086428  | 5096.154  | 5832.832  | AF086251  | 1926.283  | 927.519   | AK021887  | 8893.368  | 6208.999  |
| AK025310  | 4981.89   | 5201.725  | AL109698  | 1699.544  | 1824.343  | AF086180  | 57919.945 | 48619.383 |
| AL049353  | 1733.548  | 1654.704  | AF217980  | 8729.513  | 8643.65   | NM_002503 | 66971.328 | 70557.117 |
| AL117598  | 5837.865  | 6276.474  | AL117461  | 3543.512  | 4089.58   | NM_005319 | 7584.743  | 9561.577  |
| AL109670  | 2570.067  | 2077.309  | NM_016499 | 2228.368  | 2905.068  | NM_019058 | 1158.038  | 1472.046  |
| AF085831  | 4533.916  | 4671.689  | NM_172140 | 8101.201  | 9043.606  | AK022351  | 2757.877  | 3636.674  |
| AL832149  | 12143.052 | 10628.634 | SR6       | 2932.938  | 2656.283  | NM_020194 | 7081.133  | 9954.244  |
| NM_018350 | 3250.513  | 3533.698  | SR8       | 11741.135 | 30603.133 | AK026853  | 1724.99   | 1942.754  |
| AK025839  | 5644.604  | 5918.672  | SR10      | 37536.355 | 10072.215 | AF038183  | 35087.355 | 45940.855 |
| NM_003946 | 3759.184  | 2889.844  | AK000122  | 25787.414 | 29320.361 | NM_017882 | 7050.328  | 10187.926 |
| AB045292  | 7118.178  | 6650.612  | AK001091  | 9351.157  | 9556.25   | NM_003521 | 3615.522  | 4326.956  |
| AK025699  | 17606.264 | 15314.596 | AF033199  | 945.323   | 1779.879  | NM_003547 | 3295.291  | 4667.827  |
| AK026439  | 847.359   | 841.12    | U80775    | 1075.835  | 1119.65   | AL049980  | 7072.994  | 8309.648  |
| AK025278  | 1404.239  | 1166.241  | AF086428  | 4190.327  | 4579.454  | AF070529  | 3472.705  | 3319.176  |
| AK026466  | 1112.723  | 781.91    | AK025310  | 3905.316  | 4044.058  | AK021447  | 19226.689 | 15168.424 |
| NM_003787 | 1004.34   | 1336.95   | AL117598  | 4149.047  | 4437.055  | AK025096  | 6969.614  | 4993.237  |
| AK024492  | 4214.293  | 5068.064  | AL109670  | 2576.528  | 1872.225  | AF131774  | 4772.301  | 3461.439  |
| AF147419  | 1431.513  | 1572.316  | AF085831  | 2198.504  | 2044.381  | AK025793  | 1189.572  | 1034.867  |
| AK024280  | 2506.788  | 2550.321  | AL832149  | 6582.14   | 5476.342  | AK000151  | 743.905   | 690.517   |
| AF075036  | 6188.886  | 5745.524  | NM_018350 | 2447.94   | 4354.332  | AL389942  | 3929.058  | 1749.247  |
| NM_014797 | 9934.962  | 8830.661  | AK025839  | 4540.2    | 4146.108  | D17052    | 6530.246  | 4492.529  |
| AK027139  | 2862.207  | 3389.355  | NM_003946 | 4249.579  | 5405.456  | AL137479  | 756.737   | 1290.74   |
| AL831841  | 3896.373  | 3640.649  | NM_018024 | 13514.979 | 10371.836 | NM_004211 | 5024.127  | 6905.806  |
| AL050123  | 3093.106  | 2448.62   | AK025826  | 9067.737  | 10000.726 | Y10776    | 4703.638  | 6461.952  |
| AL110165  | 5963.762  | 4952.513  | AK026439  | 2024.854  | 2280.007  | AK027241  | 18817.965 | 23881.555 |
| AL050263  | 12665.893 | 11106.245 | AK026792  | 1206.655  | 1586.721  | NM_006978 | 6593.948  | 8954.677  |
| AL050168  | 4609.971  | 3574.749  | AK025278  | 1095.664  | 1193.407  | NM_004561 | 1705.286  | 2246.705  |
| AL117447  | 1453.34   | 979.364   | AF147419  | 5576.785  | 4807.975  | AK024812  | 4766.528  | 7254.663  |
| AK022135  | 1014.502  | 775.79    | AK024280  | 1953.804  | 2054.673  | M20642    | 1879.388  | 1660.738  |
| AK022898  | 1445.368  | 1625.377  | AF075036  | 4217.217  | 5733.055  | AK026412  | 2621.263  | 3145.407  |
| NM_017559 | 9379.49   | 10036.072 | NM_014797 | 7990.657  | 7138.479  | X89669    | 5846.94   | 7658.107  |
| AL117592  | 1383.616  | 1775.171  | AK027139  | 1738.387  | 2094.976  | U92013    | 47069.719 | 43808.09  |
| AK024897  | 737.544   | 1342.045  | AL831841  | 6193.189  | 5378.628  | AK023965  | 3511.576  | 4293.661  |
| NM_014896 | 3057.635  | 3263.152  | AL110165  | 5924.921  | 5671.04   | AK026211  | 1356.705  | 1513.444  |
| AF009269  | 1067.842  | 916.579   | AL117652  | 3610.988  | 4185.248  | X58968    | 7088.495  | 9259.997  |
| AF009313  | 1174.594  | 875.337   | AL050168  | 6222.517  | 6061.349  | U92020    | 15043.891 | 15403.089 |
| AF056420  | 1049.031  | 824.158   | AL117447  | 1295.625  | 1022.819  | AL117542  | 12980.033 | 13272.962 |
| AF090887  | 3641.163  | 2707.056  | AL122122  | 5141.502  | 4219.319  | AL109712  | 64151.297 | 66050.82  |
| AF009279  | 1443.277  | 1167.965  | AK022135  | 4218.373  | 4340.604  | NM_017782 | 11517.751 | 8516.794  |
| NM_015883 | 5358.397  | 5802.029  | AK022898  | 1162.158  | 2172.915  | NM_018149 | 7384.291  | 6542.44   |
| AF056429  | 2204.653  | 2188.803  | NM_017559 | 20002.467 | 23936.215 | D16944    | 812.914   | 682.717   |
| AF070547  | 2286.337  | 1918.746  | NM_014896 | 1771.545  | 2151.151  | NM_018468 | 20411.863 | 17987.229 |
| AK001110  | 9387.343  | 7993.01   | AF009269  | 1907.455  | 2074.787  | Z36814    | 2084.788  | 1178.911  |

|           |           |           |           |           |           |           |           |           |
|-----------|-----------|-----------|-----------|-----------|-----------|-----------|-----------|-----------|
| AK002184  | 1914.228  | 1422.628  | AF009313  | 5715.044  | 4636.709  | D17045    | 2207.976  | 1303.21   |
| AK021652  | 2072.985  | 2340.754  | AF090887  | 1623.413  | 2014.439  | NM_000242 | 652.837   | 1022.109  |
| AK021859  | 1005.346  | 1179.175  | AF009279  | 632.164   | 1886.015  | AB040878  | 5189.834  | 6106.425  |
| M64700    | 594.461   | 1060.993  | NM_015883 | 4134.693  | 4422.959  | S74647    | 1907.59   | 2340.841  |
| NM_001267 | 1481.522  | 1736.912  | AF056429  | 1529.416  | 1547.346  | NM_003506 | 3096.255  | 4246.771  |
| L41143    | 28775.525 | 32479.738 | AF070547  | 5025.508  | 4103.433  | NM_018093 | 24494.986 | 34244.094 |
| NM_005331 | 31522.725 | 37756.539 | AK001110  | 15267.501 | 14017.731 | NM_003388 | 2909.645  | 3995.871  |
| NM_014111 | 2936.265  | 3104.782  | AK002184  | 1788.365  | 1549.211  | NM_000430 | 3007.115  | 3056.167  |
| S85075    | 3163.726  | 3133.47   | AK021652  | 1648.381  | 1852.589  | AB033030  | 3024.99   | 3726.892  |
| AJ008129  | 10906.357 | 11240.492 | AK021859  | 1465.069  | 1180.01   | NM_016656 | 1305.236  | 1160.166  |
| AJ008158  | 1566.158  | 1656.613  | NM_001267 | 1511.778  | 1543.306  | NM_015963 | 14643.596 | 16147.54  |
| AF161451  | 35962.41  | 36859.215 | L41143    | 17497.35  | 22162.979 | AB007871  | 50858.289 | 57299.121 |
| NM_006236 | 23837.738 | 20845.328 | NM_005331 | 41195.773 | 47814.816 | NM_017813 | 11191.189 | 13995.212 |
| AK023734  | 4003.27   | 3691.426  | NM_014111 | 1654.277  | 1601.73   | NM_003840 | 21737.93  | 24640.422 |
| D17265    | 61558.906 | 55526.906 | S85075    | 1712.457  | 2115.361  | NM_018378 | 3258.447  | 3917.607  |
| AF085827  | 6648.425  | 6737.196  | AJ008129  | 9249.516  | 9019.771  | NM_018423 | 3126.423  | 2403.34   |
| Y08266    | 31313.471 | 29236.996 | AJ008158  | 1187.084  | 1281.713  | NM_001741 | 15621.381 | 14796.367 |
| AK002171  | 17811.547 | 16505.65  | AF161451  | 27386.49  | 26871.357 | NM_000745 | 4821.413  | 3834.025  |
| AJ002572  | 6405.536  | 5789.279  | X02067    | 52505.758 | 49658.129 | AF116705  | 45394.316 | 28385.563 |
| AK026897  | 20707.488 | 18454.422 | AY007163  | 22987.922 | 20558.449 | NM_004460 | 1871.706  | 1383.545  |
| AB037861  | 13709.525 | 11180.065 | NM_006236 | 68939.281 | 63179.902 | NM_006072 | 6841.529  | 6589.538  |
| AK021887  | 23378.809 | 20448.314 | AK023734  | 2721.463  | 2996.758  | BE794490  | 2645.811  | 2083.699  |
| NM_019058 | 2152.307  | 2159.016  | D17265    | 54092.367 | 54769.117 | NM_003561 | 7566.039  | 5419.294  |
| AK022351  | 7855.125  | 7607.542  | AF085827  | 3577.89   | 3982.944  | NM_002991 | 1754.361  | 1983.389  |
| S74319    | 1558.925  | 1156.468  | Y08266    | 46763.91  | 48914.254 | AJ008149  | 56828.418 | 62788.383 |
| AK022059  | 1707.994  | 1970.033  | AK002171  | 17109.563 | 19832.539 | NM_001192 | 2519.619  | 2028.015  |
| NM_020194 | 12801.818 | 13190.825 | AJ002572  | 5274.583  | 7712.985  | NM_002353 | 1844.988  | 2384.961  |
| AK026853  | 2215.546  | 1722.621  | AK026897  | 17213.83  | 22330.318 | NM_012153 | 3761.243  | 4836.998  |
| AF038183  | 56063.023 | 54345.797 | AB037861  | 14754.243 | 17711.939 | NM_013241 | 2739.525  | 3072.4    |
| NM_017882 | 15063.242 | 14471.739 | AF086180  | 56114.543 | 54090.625 | AF161362  | 6287.35   | 6535.109  |
| NM_003521 | 3275.998  | 3413.068  | NM_005319 | 11732.329 | 14485.278 | NM_015938 | 13772.155 | 15268.365 |
| AL049980  | 17604.822 | 16376.94  | NM_019058 | 1638.527  | 1772.683  | AB046840  | 2421.427  | 2548.113  |
| AF070529  | 2069.472  | 1378.485  | AK022351  | 4822.437  | 5581.398  | AF174487  | 8444.731  | 9011.229  |
| AK022978  | 12783.721 | 13275.058 | NM_020194 | 8813.373  | 10775.899 | NM_005041 | 1067.378  | 573.605   |
| AK021447  | 7468.67   | 6685.425  | AK026853  | 899.608   | 1012.039  | NM_006407 | 10181.053 | 6036.098  |
| AK025096  | 5058.33   | 4722.542  | AF038183  | 47520.762 | 53102.34  | NM_007373 | 5902.324  | 3588.608  |
| AF131774  | 6180.701  | 5683.009  | NM_017882 | 9431.039  | 10416.144 | M34572    | 1383.32   | 700.151   |
| AK025793  | 2948.75   | 1822.22   | NM_003521 | 3852.386  | 4417.741  | NM_006263 | 63397.801 | 41959.523 |
| AK000151  | 1856.021  | 1451.395  | NM_003547 | 4971.607  | 5093.379  | NM_004791 | 6485.146  | 8701.193  |
| AL389942  | 5969.851  | 4240.82   | AL049980  | 9053.923  | 6918.275  | X55525    | 4269.495  | 5687.667  |
| AL137479  | 3133.954  | 2661.624  | AF070529  | 2155.625  | 2691.757  | NM_005046 | 699.391   | 943.463   |
| NM_004211 | 4118.632  | 4220.52   | AK022978  | 7215.433  | 6596.467  | NM_001873 | 1246.376  | 1692.196  |
| Y10776    | 11977.574 | 13689.982 | AK021447  | 12511.304 | 11437.362 | AB029025  | 1136.913  | 1720.5    |
| AK027241  | 6544.861  | 6060.61   | AK025096  | 3943.686  | 3617.746  | NM_007100 | 66748.063 | 81918.703 |
| NM_006978 | 13155.056 | 14818.986 | AF131774  | 6779.271  | 8607.262  | NM_003940 | 1461.289  | 1064.919  |
| NM_004561 | 4538.291  | 4695.511  | AK025793  | 1878.749  | 1789.494  | M26880    | 685.777   | 747.85    |
| AK024812  | 13016.884 | 14321.073 | AK000151  | 1556.314  | 2015.436  | NM_017548 | 61829.359 | 60425.934 |
| M20642    | 1720.6    | 1561.734  | D17052    | 8696.822  | 9437.856  | AF134802  | 10336.375 | 11088.214 |
| AK026412  | 6817.159  | 5845.55   | D28378    | 73398.148 | 63741.523 | NM_018222 | 1698.849  | 1966.557  |
| X89669    | 4205.246  | 3875.537  | NM_004211 | 7608.408  | 9237.322  | NM_005740 | 5228.969  | 4186.038  |
| U92013    | 65442.207 | 51677.59  | Y10776    | 6591.962  | 8153.585  | NM_004308 | 23459.629 | 15649.319 |
| AK023965  | 10470.678 | 11034.308 | AK027241  | 23303.807 | 25114.4   | AF112366  | 8016.143  | 4029.75   |
| AK026211  | 5363.944  | 4705.662  | NM_006978 | 9944.126  | 11778.702 | NM_004274 | 5038.966  | 3273.275  |

|          |           |           |           |           |           |           |           |           |
|----------|-----------|-----------|-----------|-----------|-----------|-----------|-----------|-----------|
| X58968   | 4183.518  | 3542.411  | NM_004561 | 2661.221  | 2575.674  | AK024002  | 37427.691 | 33638.773 |
| U92020   | 6520.272  | 4801.288  | AK024812  | 7269.455  | 9048.89   | NM_02039  | 20170.883 | 14647.88  |
| AL117542 | 957.95    | 856.369   | M20642    | 1240.023  | 1197.706  | AB011117  | 7533.984  | 10028.749 |
| AL109712 | 14320.835 | 12768.041 | AK026412  | 3806.078  | 4283.978  | NM_004071 | 4330.229  | 7464.118  |
| X04215   | 1450.817  | 2103.751  | X89669    | 4416.557  | 4175.892  | NM_00131  | 28440.666 | 45325.641 |
| NM_01778 | 18880.482 | 15401.519 | U92013    | 55417.27  | 49041.094 | NM_00426  | 2514.043  | 3184.705  |
| NM_01814 | 14418.426 | 11657.016 | AK023965  | 5351.874  | 5420.539  | AK024788  | 4186.737  | 4577.539  |
| D16944   | 2445.676  | 1882.883  | AK026211  | 1944.031  | 1593.663  | NM_00447  | 1000.081  | 1445.106  |
| NM_01846 | 36781.438 | 38187.383 | X58968    | 6472.907  | 7024.406  | AK022696  | 4105.211  | 4896.136  |
| Z36814   | 3549.873  | 3622.516  | U92020    | 13212.232 | 12418.069 | NM_00120  | 3018.177  | 4018.704  |
| D17045   | 3309.108  | 3455.069  | AL117542  | 2624.744  | 2290.652  | NM_00501  | 4602.564  | 5327.271  |
| NM_00024 | 1778.942  | 1556.196  | AL109712  | 41017.805 | 45940.734 | NM_01446  | 6611.73   | 6326.326  |
| AB040878 | 2473.004  | 1999.78   | NM_01778  | 13924.284 | 12776.541 | NM_01485  | 12931.784 | 13746.797 |
| S74647   | 2959.978  | 2226.072  | NM_01814  | 14336.958 | 17054.445 | NM_00034  | 23442.104 | 27613.549 |
| NM_00350 | 1327.037  | 1059.269  | D16944    | 1745.397  | 2582.302  | AF248650  | 8439.738  | 7406.578  |
| NM_01809 | 31815.121 | 31612.492 | NM_01846  | 31037.936 | 43416.664 | S74678    | 56450.348 | 55162.695 |
| NM_00301 | 1203.127  | 1169.174  | Z36814    | 4062.221  | 4067.062  | AF248651  | 3299.734  | 3575.876  |
| NM_00338 | 1908.058  | 1786.691  | D17045    | 2212.604  | 2428.163  | NM_00135  | 37132.238 | 37576.785 |
| NM_00043 | 5486.493  | 5622.451  | AK000827  | 6725.896  | 6636.333  | NM_00483  | 27691.018 | 22806.643 |
| AB033030 | 3262.803  | 3596.455  | NM_00024  | 2409.019  | 3416.387  | AB037751  | 11230.758 | 8317.331  |
| NM_01665 | 2876.484  | 2154.984  | AB040878  | 8988.576  | 12278.225 | S79281    | 12301.881 | 7730.885  |
| AB007871 | 3252.347  | 2895.476  | S74647    | 2367.356  | 2932.915  | AK025585  | 6264.419  | 3203.316  |
| NM_01781 | 17762.811 | 19423.209 | NM_00350  | 3136.607  | 3512.359  | NM_00141  | 11625.728 | 4696.487  |
| NM_00384 | 9176.722  | 9706.331  | NM_01809  | 34121.324 | 37190.348 | D16891    | 13864.448 | 13610.552 |
| NM_01837 | 2503.614  | 2594.077  | NM_00338  | 1745.7    | 2161.71   | NM_01776  | 16001.787 | 10477.596 |
| NM_01842 | 3884.339  | 4098.599  | NM_00043  | 3593.648  | 4143.629  | NM_01593  | 28207.395 | 23710.451 |
| NM_00174 | 32575.424 | 39319.938 | AB033030  | 2621.869  | 3072.564  | Z36876    | 3498.874  | 4004.159  |
| NM_00074 | 13339.479 | 14347.767 | NM_01665  | 1690.074  | 1678.712  | NM_00089  | 4774.953  | 6463.317  |
| AF116705 | 36654.539 | 41465.723 | NM_01596  | 24528.959 | 24951.123 | X75363    | 727.045   | 1241.37   |
| NM_00446 | 808.113   | 926.452   | AB007871  | 27836.049 | 29921.785 | NM_00012  | 29495.314 | 37661.754 |
| NM_00607 | 6735.316  | 9687.473  | NM_01781  | 13154.963 | 13378.593 | AK022291  | 2488.151  | 3032.482  |
| NM_00356 | 5928.029  | 5103.332  | NM_00384  | 14500.051 | 14586.656 | BF239974  | 8745.458  | 11130.41  |
| NM_00299 | 2304.622  | 2341.249  | NM_01837  | 3441.311  | 3258.735  | NM_00010  | 2180.792  | 3309.322  |
| AJ008149 | 5051.466  | 5184.082  | NM_01842  | 3907.75   | 3393.359  | NM_00501  | 30165.424 | 38114.48  |
| NM_00119 | 4011.671  | 4898.112  | NM_00174  | 22709.98  | 18685.447 | NM_00425  | 66463.609 | 78572.695 |
| NM_00235 | 4058.748  | 3144.823  | NM_00074  | 7224.728  | 5302.248  | NM_00026  | 66925.219 | 77529.398 |
| NM_01215 | 8148.595  | 9144.712  | AF116705  | 37701.66  | 27983.346 | AF182288  | 6697.729  | 7409.722  |
| NM_01324 | 7719.476  | 7163.365  | NM_00446  | 3397.707  | 3378.214  | NM_00449  | 3807.281  | 3440.556  |
| Z24725   | 800.97    | 1250.427  | NM_00607  | 10763.394 | 15202.033 | AK026810  | 5495.358  | 5311.223  |
| AF161362 | 18749.949 | 21043.705 | NM_00299  | 1975.809  | 1521.611  | NM_01562  | 15286.209 | 13961.979 |
| AK024078 | 2445.087  | 2479.661  | AJ008149  | 63479.246 | 77497.719 | AF218032  | 10892.276 | 8864.16   |
| NM_01593 | 26729.857 | 27437.467 | NM_00119  | 3924.299  | 4620.158  | NM_01754  | 12392.364 | 11177.801 |
| AB046840 | 3823.142  | 4104.269  | NM_00235  | 2849.27   | 3203.123  | AK024407  | 2879.052  | 1973.778  |
| AF174487 | 3025.031  | 3409.862  | NM_01215  | 6014.659  | 6550.079  | NM_00418  | 49762.781 | 34165.938 |
| NM_00504 | 2853.037  | 2046.465  | NM_01324  | 4893.428  | 4077.212  | NM_01841  | 1307.952  | 698.608   |
| NM_00640 | 23784.699 | 22806.424 | NM_01798  | 66921.328 | 71008.172 | NM_01424  | 4573.934  | 1838.029  |
| NM_00737 | 13698.2   | 12483.29  | AF161362  | 10491.442 | 10409.386 | BE379399  | 2621.284  | 1684.221  |
| M34572   | 1042.745  | 1029.428  | NM_01593  | 17628.646 | 16031.924 | NM_01587  | 16463.537 | 8536.818  |
| NM_00626 | 72043.508 | 60060.137 | AB046840  | 2805.409  | 3048.62   | AF060935  | 8227.837  | 8770.189  |
| NM_00479 | 5928.834  | 5501.423  | AF174487  | 6351.908  | 7314.683  | AK026886  | 1995.983  | 2708.205  |
| X55525   | 6546.992  | 6204.781  | NM_00504  | 1891.698  | 819.809   | D83778    | 3523.175  | 5317.458  |
| NM_00504 | 977.205   | 1094.528  | NM_00640  | 16308.282 | 12631.994 | NM_00647  | 5297.969  | 6650.278  |
| NM_00187 | 2453.893  | 3071.859  | NM_00737  | 11043.729 | 13633.35  | NM_00285  | 49882.766 | 56659.887 |

|           |           |           |           |           |           |           |           |           |
|-----------|-----------|-----------|-----------|-----------|-----------|-----------|-----------|-----------|
| AB029025  | 1711.957  | 1782.419  | M34572    | 1024.193  | 1641.954  | AB038463  | 2216.301  | 2441.233  |
| NM_00130E | 1075.717  | 1993.482  | NM_006263 | 76303.578 | 63739.301 | M30262    | 12456.779 | 15884.932 |
| NM_00710C | 69962.578 | 66913.43  | NM_004791 | 6528.349  | 5360.277  | NM_00546C | 1697.048  | 2246.722  |
| NM_00394C | 4936.401  | 6318.238  | X55525    | 5327.09   | 4843.511  | AF160477  | 10168.589 | 12560.801 |
| NM_006552 | 1084.778  | 875.7     | NM_00504E | 1790.074  | 1980.25   | M12883    | 6607.022  | 7100.677  |
| M26880    | 2782.707  | 3086.332  | NM_001873 | 2680.257  | 2472.006  | BG288747  | 9820.093  | 10600.142 |
| NM_000027 | 5430.595  | 6326.094  | AB029025  | 2614.653  | 3004.432  | BG617923  | 772.237   | 1034.1    |
| NM_01754E | 65723.055 | 54561.961 | NM_00710C | 66785.859 | 73320.438 | U37448    | 2777.161  | 2474.659  |
| AF134802  | 21021.998 | 23627.469 | NM_002954 | 66687.703 | 73871.859 | BG435851  | 787.545   | 814.443   |
| NM_018222 | 3495.448  | 3472.266  | NM_00394C | 3251.909  | 2767.254  | AA927698  | 1429.946  | 1346.924  |
| NM_00574C | 7216.801  | 6998.722  | M26880    | 1894.898  | 1251.713  | AI498426  | 2427.033  | 2039.66   |
| NM_00430E | 46530.781 | 48659.027 | NM_000027 | 3180.002  | 3475.306  | BG824773  | 1128.32   | 909.125   |
| AF112366  | 4008.718  | 3694.18   | NM_001824 | 855.554   | 466.2     | D01038    | 52637.379 | 50447.246 |
| NM_004274 | 2239.008  | 1766.042  | NM_01754E | 59745.848 | 49895.051 | AB019205  | 4107.771  | 2852.541  |
| AK024002  | 15699.066 | 14573.08  | AF134802  | 15925.932 | 19504.875 | J05008    | 3282.523  | 1528.913  |
| NM_02039E | 17257.148 | 19178.152 | NM_018222 | 2258.671  | 2007.783  | U11087    | 2770.906  | 838.558   |
| AB011117  | 10793.021 | 10681.476 | NM_00574C | 5475.819  | 4308.593  | D50640    | 1126.654  | 708.409   |
| NM_004071 | 7780.083  | 8796.625  | NM_00430E | 32104.242 | 26317.359 | D43747    | 1341.721  | 828.241   |
| NM_00131E | 41271.348 | 44722.195 | AF112366  | 6494.653  | 5365.63   | M98776    | 3658.091  | 4267.582  |
| NM_004264 | 3975.123  | 5519.893  | NM_004274 | 3437.244  | 2521.672  | X99135    | 65941.688 | 64679.703 |
| AK024788  | 7480.625  | 7047.659  | AK024002  | 35272.461 | 36173.027 | AF009744  | 4914.226  | 8736.029  |
| NM_004473 | 2440.783  | 2464.787  | NM_02039E | 17709.176 | 22076.617 | AF104921  | 58725.043 | 66070.352 |
| AK022696  | 6157.507  | 6292.042  | AB011117  | 8509.456  | 8987.899  | NM_00069E | 65507.586 | 69545.313 |
| NM_00120E | 4467.685  | 4517.778  | NM_004071 | 5966.955  | 5577.217  | NM_005091 | 1074.747  | 1370.333  |
| NM_00501E | 9223.557  | 9549.856  | NM_00131E | 34443.43  | 25235.801 | AF031167  | 793.125   | 914.83    |
| NM_01446E | 5725.558  | 5592.889  | NM_004264 | 4167.385  | 4368.222  | NM_003204 | 14819.559 | 17232.016 |
| NM_014852 | 7729.473  | 7929.221  | AK024788  | 7202.192  | 7103.279  | AF254069  | 1120.344  | 1387.199  |
| NM_000344 | 42627.051 | 46342.93  | NM_004473 | 1712.458  | 1940.129  | AL117600  | 22970.82  | 25314.148 |
| AF248650  | 22745.152 | 21615.381 | AK022696  | 4756.712  | 5140.577  | NM_001712 | 1823.918  | 2098.753  |
| S74678    | 67852.922 | 60195.109 | NM_00120E | 4504.209  | 4342.742  | NM_004487 | 55090.262 | 55024.836 |
| AF248651  | 5551.178  | 6148.718  | NM_00501E | 8739.64   | 7952.23   | AB029000  | 7892.222  | 8433.021  |
| NM_00135E | 62332.664 | 53676.012 | NM_01446E | 7057.135  | 7477.321  | AK026965  | 62505.652 | 57747.492 |
| NM_00483E | 38697.988 | 45590.617 | NM_014852 | 8742.262  | 8494.599  | AK025859  | 9858.16   | 8119.226  |
| AB037751  | 35101.637 | 40557.234 | NM_000344 | 31872.523 | 38326.434 | AL117499  | 26650.34  | 27446.26  |
| S79281    | 36265.934 | 40781.98  | AF248650  | 14894.282 | 14902.502 | NM_007054 | 2737.984  | 2745.505  |
| AK025585  | 17609.604 | 18224.123 | S74678    | 64952.684 | 56887.852 | AB007957  | 1204.232  | 1284.665  |
| NM_001414 | 35528.902 | 37592.773 | AF248651  | 4559.281  | 4243.376  | AK000160  | 3461.226  | 3077.161  |
| D16891    | 34937.418 | 40346.883 | NM_00135E | 48110.973 | 45316.75  | NM_005311 | 2013.737  | 1302.312  |
| NM_01776C | 25757.389 | 15932.312 | NM_00483E | 33061.949 | 32989.633 | NM_00590E | 6470.43   | 3535.412  |
| NM_01593E | 32103.068 | 37335.523 | AB037751  | 21346.51  | 19307.275 | NM_00096C | 2059.676  | 575.686   |
| Z36876    | 5929.536  | 6240.641  | S79281    | 24114.029 | 20149.004 | NM_00535E | 13541.296 | 19299.035 |
| NM_000892 | 1272.492  | 1115.765  | AK025585  | 10423.783 | 9723.128  | NM_002511 | 1574.826  | 2244.189  |
| X75363    | 1278.557  | 1244.755  | NM_001414 | 24430.533 | 20173.234 | NM_000794 | 744.007   | 1472.301  |
| NM_00012E | 44365.957 | 52738.559 | D16891    | 19727.074 | 14084.601 | NM_00408E | 11311.289 | 15098.744 |
| AK022291  | 5060.751  | 4621.567  | NM_01776C | 22426.684 | 10306.559 | NM_006032 | 20305.754 | 22467.896 |
| BF239974  | 7868.842  | 8658.371  | NM_01593E | 27780.797 | 28462.008 | NM_01478E | 8324.444  | 10863.514 |
| NM_000104 | 5323.538  | 6040.677  | Z36876    | 4011.249  | 3588.008  | NM_002153 | 1919.945  | 2103.834  |
| NM_00501E | 48688.246 | 56012.5   | NM_000892 | 4028.576  | 3518.663  | AB040890  | 2679.179  | 3401.6    |
| NM_00425E | 69689.734 | 69150.234 | NM_00012E | 41548.531 | 51779.57  | AK024233  | 3409.521  | 4088.357  |
| NM_00026E | 68942.102 | 77585.984 | AK022291  | 2966.631  | 3404.898  | AK021870  | 1436.932  | 1866.801  |
| AF182288  | 16617.17  | 18351.322 | BF239974  | 13713.723 | 13658.924 | U06680    | 3528.343  | 3961.338  |
| NM_004491 | 9519.006  | 7825.941  | NM_000104 | 4230.31   | 4392.959  | NM_005123 | 791.01    | 897.235   |
| L14787    | 2114.578  | 2134.192  | NM_00501E | 41636.594 | 46148.164 | NM_015584 | 18204.84  | 18638.637 |

|           |           |           |           |           |           |           |           |           |
|-----------|-----------|-----------|-----------|-----------|-----------|-----------|-----------|-----------|
| AK026810  | 17501.725 | 17643.637 | NM_004255 | 64622.449 | 64106.938 | NM_001697 | 65606.602 | 61782.695 |
| NM_015629 | 35718.172 | 41559.828 | NM_000269 | 65660.734 | 67072.484 | NM_016098 | 54089.629 | 53972.199 |
| AF218032  | 24406.012 | 21148.789 | AF182288  | 14164.202 | 13756.733 | AK025125  | 803.3     | 1080.734  |
| NM_017542 | 34039.438 | 42505.152 | NM_004491 | 5541.771  | 4845.833  | AF156548  | 4142.224  | 4643.722  |
| AK024407  | 3979.844  | 3754.473  | L14787    | 1177.589  | 827.851   | NM_004663 | 3492.665  | 2817.926  |
| NM_004182 | 64727.16  | 57400.719 | AK026810  | 10627.354 | 9476.371  | AB024411  | 3723.213  | 3138.742  |
| NM_018419 | 2050.086  | 2358.269  | NM_015629 | 25484.025 | 23731.492 | NM_002444 | 17965.152 | 13008.438 |
| NM_014240 | 2711.317  | 2770.12   | AF218032  | 16959.322 | 10333.74  | NM_001104 | 7826.069  | 3276.335  |
| BE379399  | 4121.599  | 3922.932  | NM_017542 | 21475.658 | 19624.645 | NM_002988 | 25546.076 | 18402.625 |
| NM_015877 | 7266.473  | 7818.938  | AK024407  | 2960.695  | 2921.89   | U88898    | 2333.487  | 3147.472  |
| AF060935  | 20407.809 | 20718.762 | NM_004182 | 63448.484 | 54716.344 | NM_020154 | 36222.566 | 47209.699 |
| AK026886  | 2418.584  | 2185.401  | NM_018419 | 1686.774  | 1567.68   | NM_004665 | 13190.12  | 20392.193 |
| D83778    | 7084.496  | 7371.458  | NM_014240 | 4746.924  | 4089.429  | NM_005300 | 5890.924  | 8498.848  |
| NM_006470 | 6568.877  | 6724.758  | BE379399  | 3208.513  | 2269.968  | NM_000893 | 2474.075  | 3208.389  |
| NM_002855 | 24408.109 | 31317.15  | NM_015877 | 9928.571  | 7084.641  | NM_014070 | 4640.725  | 4448.561  |
| AB038463  | 5680.251  | 6606.023  | AF060935  | 10829.631 | 8935.065  | NM_016280 | 3039.455  | 2976.829  |
| M30262    | 2224.687  | 2153.79   | AK026886  | 2659.801  | 3098.81   | NM_016027 | 2068.207  | 1692.352  |
| NM_005460 | 3138.52   | 3560.236  | D83778    | 4209.913  | 2471.989  | NM_014297 | 5549.259  | 5544.19   |
| AF160477  | 5891.512  | 6434.812  | NM_006470 | 6518.679  | 7815.957  | NM_018150 | 55721.348 | 55314.551 |
| NM_003220 | 1069.648  | 1098.684  | NM_002855 | 55406.102 | 58136.004 | X98266    | 3686.323  | 3316.324  |
| M12883    | 4287.011  | 4174.356  | AB038463  | 3595.304  | 4347.104  | U00930    | 30999.793 | 29683.615 |
| BG617923  | 1250.288  | 1385.492  | M30262    | 12529.476 | 14045.455 | AK024958  | 1928.348  | 1671.956  |
| U37448    | 3901.001  | 4020.684  | NM_005460 | 2459.072  | 2759.356  | NM_014575 | 10803.882 | 10545.552 |
| BG435851  | 1989.319  | 2055.367  | AF160477  | 11278.725 | 10579.573 | NM_002430 | 11121.266 | 10231.165 |
| AA927698  | 717.744   | 737.937   | M12883    | 13020.125 | 12924.465 | AL117552  | 2486.459  | 2097.648  |
| AI498426  | 5233.867  | 6445.741  | BG288747  | 15361.376 | 13344.787 | NM_002692 | 21231.275 | 18492.574 |
| BG824773  | 1198.233  | 1756.109  | BG617923  | 954.486   | 1529.497  | AB023190  | 68677.492 | 63291.047 |
| D01038    | 25486.131 | 27488.053 | U37448    | 2726.708  | 2858.714  | NM_007064 | 7095.571  | 6303.767  |
| AB019205  | 6058.085  | 6363.999  | BG435851  | 1112.72   | 1521.762  | NM_006281 | 1846.202  | 1365.544  |
| J05008    | 3309.639  | 3526.473  | AA927698  | 1247.588  | 1139.967  | NM_002738 | 2116.171  | 1183.482  |
| U11087    | 1764.382  | 1774.711  | AI498426  | 3154.859  | 2894.441  | U23460    | 70790.648 | 63100.102 |
| D50640    | 1966.224  | 1830.099  | BG824773  | 962.123   | 796.523   | NM_005350 | 8752.017  | 5306.053  |
| D43747    | 1194.377  | 1435.957  | D01038    | 60682.387 | 54738.09  | Z25434    | 14107.325 | 14524.183 |
| M98776    | 3497.927  | 2906.975  | AB019205  | 4031.841  | 3319.424  | NM_012390 | 20902.527 | 29182.598 |
| X99135    | 62497.41  | 53375.52  | J05008    | 3058.69   | 2484.838  | AF229804  | 41170.84  | 48073.199 |
| AF009744  | 6208.786  | 7475.969  | U11087    | 2193.801  | 1522.892  | AF151638  | 1734.456  | 2586.781  |
| AF104921  | 64811.34  | 56748.414 | D50640    | 1366.239  | 880.087   | U90552    | 14465.313 | 21386.318 |
| NM_000690 | 38882.285 | 43789.906 | D43747    | 753.058   | 468.265   | AB038463  | 2105.166  | 2647.33   |
| NM_005091 | 1629.807  | 1607.812  | M98776    | 3005.742  | 1958.756  | M30262    | 11691.047 | 16539.17  |
| AF031167  | 1452.545  | 1798.986  | X99135    | 64545.75  | 59756.582 | NM_005460 | 1568.901  | 1873.289  |
| NM_003204 | 9659.129  | 9883.73   | AF009744  | 5091.87   | 3951.402  | AF160477  | 9522.447  | 10411.006 |
| AF254069  | 2327.866  | 2909.072  | AF104921  | 57287.043 | 39200.105 | M12883    | 6813.849  | 8072.157  |
| AL117600  | 18765.869 | 20645.697 | NM_000690 | 65640.891 | 85916.078 | BG288747  | 8880.979  | 10025.83  |
| NM_001712 | 4170.661  | 4953.717  | NM_005091 | 1748.178  | 2011.208  | U37448    | 2421.634  | 2218.638  |
| NM_004487 | 28631.787 | 30570.58  | AF031167  | 1299.75   | 1453.696  | AA927698  | 1223.635  | 1411.938  |
| AK026965  | 27538.303 | 24617.104 | NM_003204 | 25376.172 | 25500.396 | AI498426  | 2008.109  | 2148.475  |
| AK025859  | 14171.185 | 12245.939 | AF254069  | 2642.436  | 2546.012  | BG824773  | 1021.754  | 778.005   |
| AL117499  | 44948.957 | 50929.234 | AL117600  | 26024.311 | 24084.4   | D01038    | 54764.391 | 53503.238 |
| NM_007054 | 5830.03   | 6305.08   | NM_001712 | 2537.798  | 2453.058  | AB019205  | 3906.359  | 3047.653  |
| AB007957  | 2133.899  | 2634.987  | NM_004487 | 54944.832 | 60715.859 | J05008    | 3072.391  | 1727.194  |
| AK000160  | 2987.432  | 2448.468  | AB029000  | 15321.448 | 14659.541 | U11087    | 2300.049  | 1141.266  |
| NM_005311 | 4458.349  | 4652.28   | AK026965  | 58988.074 | 53351.117 | M98776    | 8920.707  | 8861.406  |
| NM_005905 | 1378.96   | 1660.913  | AK025859  | 8819.956  | 8130.132  | AF009744  | 4736.455  | 8080.772  |

|           |           |           |           |           |           |           |           |           |
|-----------|-----------|-----------|-----------|-----------|-----------|-----------|-----------|-----------|
| NM_016235 | 1389.021  | 1621.526  | AL117499  | 36204.047 | 40929.992 | NM_001072 | 2716.016  | 4430.163  |
| NM_000960 | 935.1     | 799.76    | NM_007054 | 4424.978  | 4311.757  | AF031167  | 462.106   | 970.414   |
| NM_005355 | 15422.137 | 13902.875 | AB007957  | 2014.266  | 1920.3    | NM_003204 | 16905.656 | 20129.424 |
| NM_002511 | 1082.714  | 1180.394  | AK000160  | 2161.513  | 1990.316  | AF254069  | 1111.92   | 1394.016  |
| NM_004085 | 10043.98  | 8500.175  | NM_005311 | 2948.993  | 2521.537  | AL117600  | 22044.703 | 21191.211 |
| NM_006032 | 5988.242  | 5712.198  | NM_005905 | 3843.08   | 3258.481  | NM_001712 | 1738.524  | 1791.442  |
| NM_014785 | 14386.918 | 17909.383 | NM_016235 | 906.368   | 1206.133  | NM_004487 | 59332.508 | 57558.043 |
| NM_002153 | 1877.849  | 1791.185  | NM_000960 | 2010.495  | 1807.163  | AB029000  | 7987.748  | 8704.913  |
| AB040890  | 5019.163  | 5712.858  | NM_005355 | 11450.935 | 7711.245  | AK026965  | 47293.449 | 44065.168 |
| AK024233  | 4999.429  | 5192.445  | NM_002511 | 1921.887  | 1086.488  | AK025859  | 9705.138  | 8821.283  |
| AK021870  | 4617.13   | 4616.704  | NM_000794 | 2005.013  | 718.137   | AL117499  | 25180.254 | 24260.73  |
| U06680    | 5354.623  | 5586.396  | NM_004085 | 25630.723 | 15148.588 | NM_007054 | 2370.214  | 2132.919  |
| NM_017855 | 1015.789  | 980.549   | NM_006032 | 21702.58  | 22658.172 | AB007957  | 1081.309  | 1219.654  |
| NM_005123 | 2263.736  | 2229.137  | NM_014785 | 12837.949 | 13848.514 | AK000160  | 2886.235  | 2548.418  |
| NM_015584 | 39140.129 | 45154.445 | NM_002153 | 2633.93   | 3065.575  | NM_005311 | 1858.645  | 1509.778  |
| NM_001697 | 66662.383 | 65906.898 | AB040890  | 4336.423  | 4974.858  | NM_005905 | 6261.827  | 4221.394  |
| NM_016095 | 67982.391 | 59988.738 | AK024233  | 4784.657  | 5897.163  | NM_000960 | 1899.051  | 862.684   |
| AK025125  | 1916.481  | 2060.138  | AK021870  | 2792.065  | 3256.561  | NM_005355 | 14861.571 | 8228.963  |
| AF156548  | 4852.515  | 6065.39   | U06680    | 5088.902  | 5040.212  | NM_002511 | 5760.64   | 6123.881  |
| NM_004663 | 5610.217  | 5520.647  | NM_017855 | 928.227   | 826.699   | NM_004085 | 9046.665  | 12078.422 |
| AB024411  | 2273.002  | 2119.738  | NM_005123 | 1316.851  | 1403.153  | NM_006470 | 4969.448  | 6996.194  |
| NM_002444 | 34903.063 | 41919.84  | NM_015584 | 27370.465 | 27962.359 | NM_002855 | 25641.797 | 40264.844 |
| NM_001104 | 1805.185  | 1609.39   | NM_001697 | 58428.137 | 61342.137 | NM_002153 | 1479.984  | 1872.535  |
| NM_002985 | 12015.92  | 12704.784 | NM_016095 | 52845.25  | 59432.016 | AB040890  | 2644.931  | 4000.516  |
| U88898    | 2426.422  | 2208.259  | AK025125  | 1480.946  | 1706.269  | AK024233  | 3483.735  | 4005.496  |
| NM_020154 | 44986     | 48279.492 | AF156548  | 4590.226  | 4492.101  | AK021870  | 1579.28   | 1406.391  |
| NM_004665 | 17346.877 | 19918.381 | NM_004663 | 3793.773  | 2670.08   | U06680    | 3969.976  | 3578.109  |
| NM_005300 | 6551.851  | 6653.143  | AB024411  | 2299.201  | 2394.909  | NM_015584 | 15603.641 | 15176.463 |
| NM_000893 | 3145.124  | 2853.091  | NM_002444 | 27200.857 | 25655.799 | NM_001697 | 56575.992 | 59976.137 |
| NM_014070 | 1930.467  | 1837.943  | NM_001104 | 3195.417  | 2840.725  | NM_016095 | 51821.324 | 53920.301 |
| NM_014297 | 8577.762  | 7295.785  | NM_002985 | 16712.941 | 13120.021 | AK025125  | 694.845   | 711.132   |
| NM_018155 | 29540.031 | 31375.658 | U88898    | 3039.15   | 1925.243  | AF156548  | 3349.026  | 3363.107  |
| X98266    | 5907.2    | 5204.675  | NM_020154 | 42633.918 | 38422.684 | NM_004663 | 3227.929  | 2537.259  |
| U00930    | 50080.676 | 49929.879 | NM_004665 | 15368.188 | 14414.475 | AB024411  | 3536.251  | 3436.479  |
| AK024958  | 4859.823  | 5261.878  | NM_005300 | 5951.039  | 5723.281  | NM_002444 | 16636.055 | 13984.648 |
| NM_014575 | 23092.973 | 22737.51  | NM_000893 | 4356.146  | 4337.183  | NM_001104 | 6556.047  | 3772.792  |
| NM_002435 | 14198.28  | 14438.449 | NM_014070 | 5102.193  | 4399.104  | NM_002985 | 16876.469 | 9028.551  |
| AL117552  | 6732.58   | 6259.621  | NM_016280 | 3071.701  | 2304.545  | U88898    | 1380.422  | 604.559   |
| NM_002692 | 23051.574 | 22433.314 | NM_016027 | 1719.336  | 1518.785  | NM_020154 | 41964.137 | 26691.512 |
| AB023190  | 16343.963 | 17808.779 | NM_014297 | 8018.012  | 6387.866  | NM_004665 | 11694.102 | 14164.021 |
| NM_007064 | 4780.506  | 4289.163  | NM_018155 | 59365.965 | 50005.891 | NM_005300 | 3776.298  | 4826.886  |
| NM_006281 | 5810.531  | 6008.827  | X98266    | 5189.601  | 4291.91   | NM_000893 | 3584.87   | 4908.184  |
| NM_002735 | 3499.287  | 3445.207  | U00930    | 49283.727 | 45343.484 | NM_000695 | 39905.41  | 55266.551 |
| U23460    | 41152.578 | 41560.512 | AK024958  | 3253.647  | 3304.497  | NM_005091 | 1172.463  | 1803.428  |
| NM_005355 | 17958.939 | 18087.295 | NM_014575 | 18348.924 | 14507.968 | NM_016280 | 3150.735  | 3274.95   |
| Z25434    | 6154.771  | 4890.336  | NM_002435 | 11642.196 | 10934.867 | NM_016027 | 1395.699  | 1234.137  |
| NM_005884 | 34574.914 | 37840.574 | AL117552  | 4750.262  | 3947.053  | NM_014297 | 5082.08   | 5171.052  |
| NM_012395 | 24525.949 | 25345.137 | NM_002692 | 21911.324 | 16613.693 | NM_018155 | 54698.773 | 49894.582 |
| AF229804  | 33543.613 | 30457.127 | NM_007064 | 5096.468  | 2764.82   | X98266    | 3448.068  | 2890.36   |
| AF151638  | 1253.409  | 1343.453  | NM_006281 | 3225.173  | 2957.347  | U00930    | 28536.742 | 27342.602 |
| U90552    | 12038.193 | 12346.003 | NM_002735 | 2967.901  | 2564.894  | AK024958  | 1623.525  | 1621.133  |
| AB038463  | 6468.64   | 7723.093  | U23460    | 66422.938 | 59418.82  | NM_014575 | 8974.521  | 7870.987  |
| M30262    | 2524.642  | 2968.506  | NM_005355 | 13691.183 | 11248.703 | NM_002435 | 11967.132 | 10636.42  |

|           |           |           |           |           |           |           |           |           |
|-----------|-----------|-----------|-----------|-----------|-----------|-----------|-----------|-----------|
| NM_00546C | 2682.314  | 3090.873  | Z25434    | 9953.925  | 5709.803  | AL117552  | 2115.478  | 1753.491  |
| AF160477  | 5589.371  | 6090.636  | NM_005884 | 29126.73  | 26464.973 | NM_002692 | 18868.178 | 14556.406 |
| M12883    | 3873.249  | 4158.906  | NM_012399 | 26604.77  | 25525.631 | AB023190  | 65848.477 | 59566.105 |
| BG288747  | 18588.412 | 18279.709 | AF229804  | 50277.926 | 53065.938 | NM_007064 | 6774.555  | 5256.421  |
| BG617923  | 1140.437  | 1551.995  | AF151638  | 1172.247  | 1837.29   | NM_006281 | 2246.158  | 1568.872  |
| U37448    | 2801.673  | 2538.461  | U90552    | 13682.603 | 18626.146 | NM_00273E | 2249.783  | 1451.147  |
| BG435851  | 2143.968  | 2419.895  | AB038463  | 3712.889  | 5058.494  | U23460    | 67529.633 | 62264.961 |
| AA927698  | 1193.174  | 1025.412  | M30262    | 11778.365 | 13672.947 | NM_00535E | 6807.326  | 3820.917  |
| AI498426  | 4835.581  | 5182.743  | NM_00546C | 2270.862  | 2944.686  | Z25434    | 9490.156  | 3723.865  |
| BG824773  | 1802.987  | 1760.941  | AF160477  | 11325.262 | 10430.752 | NM_005884 | 15846.177 | 10581.512 |
| D01038    | 20989.066 | 22932.424 | M12883    | 11038.449 | 10851.241 | NM_01239E | 16678.252 | 5309.48   |
| AB019205  | 5980.361  | 6346.289  | BG288747  | 12897.793 | 10349.479 | AF229804  | 66553.531 | 61455.898 |
| J05008    | 2799.505  | 2703.17   | BG617923  | 1463.435  | 1289.165  | AF151638  | 1297.902  | 1640.671  |
| U11087    | 1772.818  | 1891.762  | U37448    | 4335.401  | 3949.181  | U90552    | 7297.821  | 10655.559 |
| D50640    | 1721.819  | 1739.635  | BG435851  | 1181.22   | 1501.56   | NM_006032 | 7519.456  | 10727.093 |
| D43747    | 1174.774  | 816.063   | AA927698  | 1345.781  | 1308.284  | NM_01478E | 8235.393  | 12466.849 |
| M98776    | 2739.676  | 2300.629  | AI498426  | 3043.207  | 3365.837  | NM_00546C | 1643.318  | 1955.861  |
| X99135    | 51573.633 | 53384.461 | BG824773  | 804.681   | 852.609   | AF160477  | 9492.695  | 11262.509 |
| AF009744  | 6172.926  | 6497.045  | AB019205  | 3649.172  | 2334.147  | M12883    | 6514.496  | 6941.928  |
| NM_001072 | 4463.328  | 3906.764  | J05008    | 3285.851  | 1971.167  | BG288747  | 8598.781  | 8417.838  |
| AF031167  | 1559.409  | 2135.599  | U11087    | 1882.062  | 1820.098  | U37448    | 2739.511  | 2451.997  |
| NM_003204 | 9904.822  | 12332.432 | D50640    | 2039.984  | 1426.319  | AA927698  | 1404.894  | 1269.991  |
| AF254069  | 2146.477  | 2347.454  | D43747    | 2198.743  | 1140.677  | AI498426  | 2042.932  | 1798.731  |
| AL117600  | 17546.088 | 18655.914 | M98776    | 5673.207  | 3764.8    | BG824773  | 813.01    | 597.051   |
| NM_001712 | 3555.04   | 3277.984  | X99135    | 65687.078 | 65112.656 | D01038    | 50719.527 | 50054.438 |
| NM_004487 | 25574.367 | 26693.238 | AF009744  | 5856.532  | 8811.757  | AB019205  | 3469.284  | 2701.628  |
| AB029000  | 17200.109 | 17166.535 | NM_001072 | 3946.502  | 4953.281  | J05008    | 1939.472  | 1245.745  |
| AK026965  | 24195.049 | 22794.789 | AF031167  | 1445.222  | 1599.82   | U11087    | 2398.667  | 1524.801  |
| AK025859  | 11246.516 | 10640.274 | NM_003204 | 23218.711 | 27706.148 | D50640    | 855.9     | 545.357   |
| AL117499  | 49066.512 | 52586.582 | AF254069  | 2367.027  | 2495.51   | M98776    | 6133.948  | 2473.791  |
| NM_007054 | 7073.976  | 7476.854  | AL117600  | 28428.629 | 29715.984 | X99135    | 60133.523 | 56557.367 |
| AB007957  | 2745.9    | 3103.402  | NM_001712 | 2970.323  | 3198.284  | AF009744  | 3324.79   | 1030.636  |
| AK000160  | 2380.157  | 2677.87   | NM_004487 | 62429.273 | 62739.645 | NM_001072 | 2094.466  | 2682.741  |
| NM_005311 | 3737.29   | 4334.994  | AB029000  | 12452.452 | 11239.718 | NM_01407C | 1274.26   | 2087.947  |
| NM_00590E | 974.16    | 1138.048  | AK026965  | 63870.066 | 65244.617 | AK025859  | 9491.029  | 10049.876 |
| NM_01623E | 810.947   | 1337.407  | AK025859  | 14381.218 | 13203.824 | AL117499  | 24401.211 | 27082.232 |
| AF172932  | 905.843   | 1061.885  | AL117499  | 36872.109 | 38223.766 | NM_007054 | 3842.584  | 5618.767  |
| NM_00535E | 14599.538 | 14127.158 | NM_007054 | 4610.361  | 4605.05   | AB007957  | 1221.869  | 951.848   |
| NM_002511 | 919.76    | 1037.755  | AB007957  | 1996.996  | 1983.679  | AK000160  | 3045.422  | 2880.293  |
| NM_00408E | 8465.866  | 6495.001  | AK000160  | 2565.536  | 2217.037  | NM_005311 | 1710.892  | 1389.466  |
| NM_00647C | 5735.672  | 5024.696  | NM_005311 | 3097.785  | 2297.486  | NM_00590E | 6355.513  | 4678.627  |
| NM_00285E | 26636.5   | 28774.752 | NM_00590E | 3716.01   | 1863.636  | NM_00096C | 1633.125  | 1301.547  |
| NM_00215E | 1765.503  | 2104.579  | NM_01623E | 1030.945  | 720.521   | NM_00535E | 11118.181 | 7280.636  |
| AB040890  | 5221.284  | 6224.508  | NM_00096C | 1987.054  | 1860.673  | NM_002511 | 4518.296  | 4044.855  |
| AK024233  | 4773.696  | 5024.61   | AF172932  | 1858.184  | 1200.514  | NM_000794 | 581.406   | 687.498   |
| AK021870  | 3281.652  | 4497.695  | NM_00535E | 14899.538 | 11195.134 | AF295378  | 5895.701  | 4247.542  |
| U06680    | 3369.032  | 3053.826  | NM_002511 | 2912.847  | 2759.983  | NM_00408E | 16337.406 | 10981.423 |
| NM_01785E | 1169.693  | 1102.955  | NM_00408E | 20601.131 | 26398.537 | NM_01244E | 60711.738 | 51995.41  |
| NM_00512E | 1772.608  | 2347.796  | NM_00647C | 5292.203  | 7357.327  | NM_018104 | 7999.521  | 4629.03   |
| NM_015584 | 35484.719 | 39739.488 | NM_00285E | 45043.324 | 53133.484 | NM_00442E | 13073.744 | 3369.919  |
| NM_001697 | 66735.063 | 65474.574 | NM_00215E | 2684.482  | 3109.323  | U64564    | 3736.339  | 693.056   |
| NM_01609E | 66707.594 | 58399.723 | AB040890  | 4312.931  | 5973.752  | NM_00647C | 4691.399  | 2702.073  |
| AK025125  | 2415.377  | 2804.868  | AK024233  | 4853.75   | 5717.26   | NM_00285E | 22435.234 | 28200.109 |



|           |           |           |           |           |           |           |           |           |
|-----------|-----------|-----------|-----------|-----------|-----------|-----------|-----------|-----------|
| AF156548  | 4998.779  | 5952.957  | AK021870  | 2418.277  | 2892.83   | AB038463  | 2244.785  | 2647.753  |
| NM_004663 | 5322.509  | 4700.635  | U06680    | 5255.805  | 5572.97   | M30262    | 1412.939  | 2094.067  |
| AB024411  | 1571.405  | 1547.298  | NM_017859 | 1046.755  | 860.76    | NM_015310 | 4142.846  | 3997.357  |
| NM_002444 | 31849.301 | 35230.664 | NM_005123 | 967.966   | 998.252   | NM_016154 | 35297.738 | 42942.371 |
| Z83802    | 220.911   | 1154.53   | NM_015584 | 28493.811 | 30385.574 | NM_005013 | 34201.242 | 36974.367 |
| NM_001104 | 1951.949  | 2028.575  | NM_001697 | 60516.668 | 61934.934 | AB002338  | 2755.411  | 2477.875  |
| NM_002989 | 13758.748 | 13277.741 | NM_016098 | 58001.117 | 61403.102 | AI524814  | 3896.99   | 3775.351  |
| U88898    | 2208.948  | 2259.757  | AK025125  | 2027.709  | 1741.04   | AB024411  | 3430.68   | 3215.734  |
| NM_020154 | 39611.113 | 45519.523 | AF156548  | 4021.687  | 4915.293  | NM_002444 | 17498.475 | 16377.691 |
| NM_004665 | 14884.682 | 15297.704 | NM_004663 | 3899.271  | 3766.339  | NM_001104 | 6032.777  | 5484.645  |
| NM_005300 | 5913.98   | 6854.25   | AB024411  | 2429.218  | 2204.952  | NM_002989 | 17075.871 | 16433.826 |
| NM_000893 | 3048.126  | 2571.824  | NM_002444 | 27245.891 | 18880.443 | U88898    | 1227.612  | 1002.317  |
| NM_000698 | 43512.02  | 46405.078 | NM_001104 | 3633.385  | 3667.686  | NM_020154 | 26369.533 | 19398.246 |
| NM_005091 | 1051.593  | 801.123   | NM_002989 | 20752.965 | 16512.156 | NM_004665 | 9013.457  | 7245.522  |
| NM_014297 | 7172.319  | 7738.277  | U88898    | 2946.143  | 2292.559  | NM_005300 | 3212.535  | 2618.025  |
| NM_018156 | 26663.723 | 30289.26  | NM_020154 | 41278.477 | 55264.023 | NM_000893 | 3816.352  | 2666.905  |
| X98266    | 5479.017  | 4519.724  | NM_004665 | 14662.057 | 23741.813 | NM_000698 | 55575.898 | 53354.059 |
| U00930    | 48423.133 | 52047.852 | NM_005300 | 5920.861  | 8222.985  | NM_005091 | 661.773   | 344.905   |
| AK024958  | 5434.714  | 5335.407  | NM_000893 | 3674.377  | 4942.967  | NM_003204 | 13801.51  | 5987.354  |
| NM_014575 | 20896.834 | 22293.529 | NM_000698 | 49883.977 | 57353.406 | AF254069  | 839.022   | 361.725   |
| NM_002439 | 13298.321 | 14302.614 | NM_005091 | 1731.902  | 2240.56   | AL117600  | 19002.961 | 3241.632  |
| AL117552  | 7271.381  | 8004.088  | NM_016280 | 2343.856  | 3687.46   | NM_001712 | 4018.77   | 2244.555  |
| NM_002692 | 22297.725 | 21810.916 | NM_016027 | 2127.604  | 2653.524  | NM_004487 | 24950.877 | 26794.275 |
| AB023190  | 15739.959 | 17200.18  | NM_014297 | 7617.25   | 7953.908  | AB029000  | 10256.16  | 11341.25  |
| NM_007064 | 3647.747  | 2952.792  | NM_018156 | 58039.902 | 51461.262 | AK026965  | 8434.973  | 9282.566  |
| NM_006281 | 5753.314  | 5985.797  | X98266    | 5926.551  | 5244.465  | AF229804  | 61847.34  | 60131.828 |
| NM_002738 | 3447.813  | 3304.34   | U00930    | 46107.316 | 46989.93  | U90552    | 13165.965 | 14714.292 |
| U23460    | 42115.145 | 39511.141 | AK024958  | 2498.898  | 2219.333  | NM_006032 | 16969.242 | 14179.241 |
| NM_005356 | 15224.507 | 15381.462 | NM_014575 | 17032.557 | 15355.555 | NM_014788 | 7697.55   | 6886.99   |
| Z25434    | 7642.967  | 6605.134  | NM_002439 | 16762.971 | 15249.651 | NM_002153 | 1399.062  | 1137.938  |
| NM_005884 | 36191.918 | 41326.711 | AL117552  | 4128.688  | 4385.366  | AB040890  | 2424.927  | 3006.771  |
| NM_012399 | 27066.623 | 26922.471 | NM_002692 | 27632.92  | 23948.418 | AK024233  | 3013.103  | 2840.478  |
| AF229804  | 34573.594 | 34947.992 | AB023190  | 65854.867 | 56417.051 | AK021870  | 1452.899  | 1236.402  |
| AF151638  | 1875.12   | 1563.28   | NM_007064 | 5383.436  | 4085.509  | U06680    | 3718.815  | 2740.167  |
| U90552    | 11796.752 | 12601.141 | NM_006281 | 3228.033  | 2966.163  | NM_015584 | 16311.798 | 13195.315 |
| NM_006032 | 6010.126  | 5878.468  | NM_002738 | 3066.893  | 1688.124  | NM_001697 | 57400.539 | 58811.566 |
| NM_014788 | 16849.055 | 17729.986 | U23460    | 57770.77  | 52763.535 | NM_016098 | 49184.57  | 39685.391 |
| NM_005460 | 2906.007  | 3662.126  | NM_005356 | 15086.662 | 12885.303 | NM_006667 | 60129.41  | 53713.527 |
| AF160477  | 5280.752  | 5910.313  | Z25434    | 9278.329  | 6900.394  | AK025125  | 795.646   | 489.216   |
| NM_003226 | 677.266   | 848.563   | NM_005884 | 29501.361 | 30482.943 | NM_000815 | 2566.469  | 761.988   |
| M12883    | 3460.055  | 3826.956  | NM_012399 | 25439.271 | 35228.625 | AB023173  | 7532.462  | 3267.26   |
| BG288747  | 13892.549 | 13139.77  | AF229804  | 59025.809 | 54913.094 | AF156548  | 3400.409  | 3700.206  |
| BG617923  | 1362.576  | 1390.133  | AF151638  | 1335.973  | 1802.123  | NM_000387 | 6115.936  | 5703.45   |
| U37448    | 3513.456  | 3049.574  | U90552    | 14086.971 | 20055.953 | NM_004663 | 2895.696  | 3632.307  |
| BG435851  | 1820.843  | 1953.565  | NM_006032 | 13479.988 | 16839.918 | NM_001072 | 1486.045  | 1290.221  |
| AA927698  | 818.695   | 939.48    | NM_014788 | 11460.251 | 16790.576 | NM_014070 | 4115.535  | 2696.185  |
| AI498426  | 4742.543  | 5064.858  | NM_005460 | 2863.281  | 3600.586  | NM_016280 | 2959.754  | 2062.911  |
| BG824773  | 1944.527  | 2154.146  | AF160477  | 11643.698 | 12162.07  | NM_016027 | 1202.389  | 927.241   |
| D01038    | 18276.457 | 19749.912 | NM_003226 | 1019.646  | 1092.224  | NM_014297 | 4395.824  | 2875.826  |
| AB019205  | 5028.794  | 5149.554  | M12883    | 11332.651 | 11596.345 | NM_018156 | 52583.465 | 46209.973 |
| J05008    | 2452.893  | 2637.546  | BG288747  | 14796.698 | 12248.754 | X98266    | 3422.511  | 2421.424  |
| U11087    | 1837.011  | 2061.84   | BG617923  | 1141.951  | 1400.921  | U00930    | 29728.512 | 21197.9   |
| D50640    | 1918.569  | 1860.881  | U37448    | 3559.368  | 2968.249  | AK024958  | 1794.32   | 1389.474  |

|           |           |           |           |           |           |           |           |           |
|-----------|-----------|-----------|-----------|-----------|-----------|-----------|-----------|-----------|
| D43747    | 1166.692  | 1391.755  | BG435851  | 912.201   | 1446.038  | NM_014575 | 9931.021  | 6867.299  |
| M98776    | 4130.886  | 3710.836  | AA927698  | 2262.945  | 1836.633  | NM_002435 | 12699.528 | 9972.907  |
| X99135    | 64940.594 | 59477.484 | AI498426  | 4049.992  | 3677.644  | AL117552  | 2437.224  | 1171.336  |
| AF009744  | 6255.612  | 7328.113  | BG824773  | 1375.106  | 1072.41   | NM_002692 | 18994.422 | 11193.941 |
| NM_001072 | 5300.849  | 5590.545  | D01038    | 56354.41  | 57622.586 | AB023190  | 67113.328 | 55061.031 |
| NM_014070 | 2016.753  | 1683.281  | AB019205  | 4853.228  | 3832.218  | NM_007064 | 6203.597  | 3335.967  |
| AK025859  | 10299.426 | 10348.789 | J05008    | 3539.057  | 1986.603  | NM_006281 | 1654.96   | 721.762   |
| AL117499  | 38064.129 | 49874.711 | U11087    | 2218.002  | 1080.099  | NM_002735 | 1661.065  | 591.269   |
| NM_007054 | 4781.883  | 5226.939  | D50640    | 912.72    | 406.599   | U23460    | 65295.125 | 33922.723 |
| AB007957  | 1848.497  | 2104.839  | D43747    | 1879.724  | 877.447   | NM_005355 | 7953.856  | 1054.451  |
| AK000160  | 2205.991  | 1675.397  | M98776    | 5931.026  | 4042.726  | Z25434    | 3740.687  | 3609.03   |
| NM_005311 | 4365.416  | 4292.528  | X99135    | 59715.965 | 69305.453 | NM_005884 | 19014.99  | 21756.41  |
| NM_005905 | 1435.739  | 1509.061  | AF009744  | 5368.213  | 8702.528  | NM_012395 | 19267.117 | 19459.42  |
| NM_016235 | 1329.762  | 1423.852  | AF086109  | 567.512   | 1532.437  | CY3Cy5    | 3461.178  | 380.17    |
| NM_000960 | 1029.553  | 1188.305  | NM_001072 | 3743.108  | 5594.777  | NM_004774 | 6768.335  | 9528.784  |
| AF172932  | 658.503   | 939.775   | NM_014070 | 4069.632  | 4837.68   | NM_005234 | 12651.763 | 18615.246 |
| NM_005355 | 14397.693 | 13652.823 | AK025859  | 12862.625 | 14869.789 | NM_015400 | 13462.541 | 20220.117 |
| NM_002511 | 893.048   | 1370.943  | AL117499  | 35024.531 | 42017.641 | AL359561  | 3715.355  | 2772.417  |
| AF295378  | 9861.269  | 10509.536 | NM_007054 | 4999.731  | 5444.174  | AK026464  | 2683.61   | 3539.088  |
| AF320908  | 387.312   | 1266.776  | AB007957  | 2157.378  | 2282.717  | AK023491  | 749.085   | 1144.854  |
| NM_004085 | 9485.997  | 8747.443  | AK000160  | 3804.163  | 3460.524  | AK022400  | 3469.039  | 4249.72   |
| NM_012445 | 47886.332 | 51103.391 | NM_005311 | 4559.406  | 4004.773  | AF052100  | 3014.388  | 2889.941  |
| NM_018104 | 3294.161  | 3026.068  | NM_005905 | 8598.702  | 7006.432  | AL110235  | 1615.702  | 2201.892  |
| NM_006080 | 1496.393  | 1586.155  | NM_016235 | 1073.091  | 1045.006  | U79245    | 873.336   | 1430.215  |
| NM_004425 | 4998.305  | 4447.246  | NM_000960 | 3535.853  | 3638.231  | AF085983  | 1325.2    | 1413.027  |
| U64564    | 6067.686  | 5686.117  | AF172932  | 946.549   | 1079.975  | AF052105  | 2069.771  | 2436.916  |
| NM_006470 | 7263.924  | 6927.873  | NM_005355 | 21262.322 | 17689.26  | AK001204  | 17458.297 | 19494.865 |
| NM_002855 | 26333.773 | 27477.791 | NM_002511 | 6392.782  | 5652.623  | NM_004774 | 6279.799  | 6538.654  |
| AB038463  | 8302.331  | 7024.748  | NM_000794 | 541.671   | 538.435   | NM_005234 | 11105.211 | 12567.528 |
| M30262    | 2452.03   | 2596.344  | AF295378  | 9038.297  | 5714.053  | SR1       | 67368.609 | 67018.234 |
| NM_015310 | 2497.198  | 2599.302  | NM_004085 | 21205.238 | 6758.563  | SR5       | 4298.01   | 6381.788  |
| NM_016154 | 19721.25  | 24283.885 | NM_012445 | 62491.203 | 59980.184 | CY3Cy5    | 3574.855  | 338.493   |
| NM_005013 | 45278.992 | 53181.336 | NM_018104 | 7799.165  | 6032.281  | L34409    | 35906.387 | 48687.605 |
| AB002338  | 4040.121  | 4638.216  | NM_006080 | 1205.015  | 2071.909  | U12210    | 6036.753  | 7906.585  |
| AI524814  | 6476.753  | 6371.279  | NM_004425 | 16425.664 | 17144.057 | Z83936    | 713.486   | 1062.342  |
| AB024411  | 2034.587  | 1815.881  | U64564    | 4706.299  | 6148.93   | L08440    | 15431.736 | 17951.693 |
| NM_002444 | 33084.25  | 38173.402 | NM_006470 | 5282.22   | 7344.39   | M73799    | 3565.571  | 4563.842  |
| Z83802    | 491.105   | 1573.589  | NM_002855 | 39891.566 | 47902.344 | AF086119  | 1985.285  | 2256.584  |
| NM_001104 | 2160.986  | 2180.621  | AB038463  | 3946.88   | 5419.761  | NM_018364 | 6345.89   | 8264.19   |
| NM_002985 | 12759.493 | 14128.427 | M30262    | 8823.509  | 11917.91  | NM_006775 | 1423.281  | 1385.02   |
| U88898    | 2382.589  | 2562.891  | NM_015310 | 3960.468  | 4152.342  | NM_007022 | 3594.439  | 3916.646  |
| NM_020154 | 41231.305 | 48403.613 | NM_016154 | 50378.129 | 56132.852 | AL049943  | 40922.016 | 35498.516 |
| NM_004665 | 16097.16  | 18511.283 | NM_005013 | 48126.234 | 53890.648 | AL137303  | 2287.486  | 2490.588  |
| NM_005300 | 7970.286  | 8650.022  | AB002338  | 4214.772  | 4731.769  | AL355708  | 1518.339  | 1741.911  |
| NM_000893 | 3298.318  | 3444.987  | AI524814  | 5660.568  | 5436.216  | AB002449  | 1347.589  | 1058.772  |
| NM_000695 | 39491.191 | 44255.367 | AB024411  | 4633.212  | 4180.479  | AK001489  | 1135.903  | 1442.523  |
| NM_005091 | 1582.326  | 1492.313  | NM_002444 | 25593.225 | 24225.871 | AF070582  | 2786.78   | 5348.531  |
| AF031167  | 2317.892  | 2035.793  | NM_001104 | 9018.921  | 8295.938  | NM_006383 | 7125.697  | 9738.645  |
| NM_003204 | 12707.188 | 11904.879 | NM_002985 | 33528.438 | 37492.586 | AK024867  | 2183.925  | 2763.892  |
| AF254069  | 2038.479  | 2073.238  | U88898    | 2566.381  | 2698.556  | AK025002  | 6450.333  | 8509.542  |
| AL117600  | 21752.594 | 18153.475 | NM_020154 | 38006.504 | 33180.629 | AF086124  | 1679.713  | 2314.987  |
| NM_001712 | 4218.583  | 4076.957  | NM_004665 | 15006.819 | 13759.021 | AK024820  | 1781.465  | 2248.235  |
| NM_004487 | 29998.34  | 28280.916 | NM_005300 | 5847.765  | 4286.915  | AF052117  | 762.77    | 835.303   |

|           |           |           |           |           |           |           |           |           |
|-----------|-----------|-----------|-----------|-----------|-----------|-----------|-----------|-----------|
| AB029000  | 20141.455 | 18209.416 | NM_000893 | 3594.178  | 2718.919  | AB033105  | 1437.488  | 1728.453  |
| AK026965  | 24841.105 | 20698.377 | NM_000698 | 54688.082 | 26806.832 | AF038192  | 1343.458  | 1638.993  |
| AF229804  | 31987.73  | 33040.473 | NM_005091 | 3385.044  | 1901.277  | AJ001865  | 2032.338  | 2291.325  |
| AF151638  | 1283.849  | 1612.009  | AF031167  | 2112.239  | 1609.564  | D61704    | 31412.816 | 34073.168 |
| U90552    | 12901.931 | 14153.974 | NM_003204 | 21991.605 | 30680.594 | AJ227889  | 1879.597  | 2334.493  |
| NM_006032 | 5303.5    | 4688.281  | AF254069  | 2082.526  | 3345.598  | X64989    | 2116.383  | 2924.299  |
| NM_014788 | 12566.18  | 13357.529 | AL117600  | 24246.859 | 33912.965 | Y10512    | 1945.401  | 2362.347  |
| NM_002153 | 2011.887  | 1611.449  | NM_001712 | 2956.556  | 4687.136  | AL110175  | 2474.335  | 3590.33   |
| AB040890  | 5328.112  | 5767.791  | NM_004487 | 45202.094 | 53583.703 | AF288406  | 1468.33   | 1890.586  |
| AK024233  | 5334.606  | 6829.148  | AB029000  | 15272.582 | 22265.055 | AK027156  | 20151.367 | 27617.713 |
| AK021870  | 4047.409  | 4518.717  | AK026965  | 62060.234 | 62547.016 | AL157504  | 3212.971  | 3655.632  |
| U06680    | 3936.241  | 3827.318  | AF229804  | 64079.707 | 60878.195 | AK023328  | 7502.054  | 11097.968 |
| NM_017859 | 687.414   | 705.144   | AF151638  | 1138.917  | 842.774   | AL442096  | 4144.054  | 5469.895  |
| NM_005123 | 1987.019  | 1997.353  | U90552    | 13588.271 | 14108.542 | NM_018228 | 2842.274  | 2086.946  |
| NM_015584 | 35351.445 | 43059.113 | NM_006032 | 17741.898 | 16381.503 | AJ270693  | 2222.902  | 1830.268  |
| NM_001697 | 68661.93  | 72359.258 | NM_014788 | 10278.714 | 8867.775  | NM_01779C | 4998.882  | 4883.639  |
| NM_016098 | 68306.758 | 70139.484 | NM_002153 | 2819.167  | 2453.94   | AK000861  | 952.426   | 894.169   |
| AB032525  | 1318.284  | 1389.818  | AB040890  | 3546.837  | 3788.184  | AK000023  | 6868.216  | 9046.083  |
| NM_002063 | 925.059   | 1062.2    | AK024233  | 4275.123  | 4986.313  | AK000901  | 1813.555  | 1934.854  |
| NM_006667 | 54538.957 | 53190.188 | AK021870  | 2951.589  | 3186.051  | AB007866  | 1776.847  | 2519.523  |
| AK025125  | 2131.924  | 2491.473  | U06680    | 6376.012  | 5520.127  | X77485    | 63626.207 | 66354.102 |
| NM_000815 | 2840.854  | 3063.387  | NM_017859 | 1184.153  | 1403.717  | NM_01449C | 1677.655  | 2436.908  |
| NM_001293 | 1581.49   | 1737.715  | NM_005123 | 1451.676  | 1164.863  | AB046765  | 1484.822  | 2035.184  |
| AB023173  | 11723.648 | 11534.634 | NM_015584 | 28136.152 | 22576.311 | NM_018368 | 2032.12   | 2061.3    |
| AF156548  | 5394.291  | 5932.813  | NM_001697 | 63376.398 | 63008.352 | AK024011  | 1225.391  | 1304.462  |
| NM_000387 | 13083.081 | 11895.866 | NM_016098 | 55567.852 | 50114.855 | AL390145  | 815.687   | 617.843   |
| NM_004663 | 6011.738  | 5164.84   | AB032525  | 516.619   | 342.555   | AF119913  | 1705.144  | 1185.658  |
| AF086109  | 432.837   | 1248.646  | NM_002063 | 2844.553  | 680.691   | NM_01834C | 2341.086  | 2468.055  |
| NM_001072 | 5701.471  | 6297.511  | NM_006667 | 65066.293 | 72211.141 | AF049883  | 2501.469  | 2032.569  |
| NM_01407C | 1450.914  | 1356.535  | AK025125  | 1608.8    | 2428.824  | L10148    | 66649.977 | 65627.227 |
| NM_014297 | 8810.938  | 9229.759  | NM_000815 | 3614.785  | 4699.144  | AK026247  | 929.957   | 1009.354  |
| NM_018156 | 25222.117 | 25812.506 | NM_001293 | 1575.631  | 2280.919  | AK024893  | 390.117   | 695.745   |
| X98266    | 5486.956  | 4690.751  | AB023173  | 12147.263 | 16873.428 | AK023302  | 10144.533 | 11293.237 |
| U00930    | 46338.527 | 49395.945 | AF156548  | 5172.162  | 6365.847  | L37703    | 56866.688 | 60065.07  |
| AK024958  | 5357.014  | 5369.327  | NM_000387 | 32735.545 | 45310.148 | AF084516  | 1547.59   | 2355.496  |
| NM_014575 | 20537.357 | 21631.795 | NM_004663 | 5262.148  | 6477.447  | AJ001907  | 2432.044  | 2607.498  |
| NM_002439 | 12695.296 | 15075.161 | AF086109  | 503.48    | 582.445   | M32220    | 8171.59   | 12135.654 |
| AL117552  | 8030.993  | 7578.302  | NM_001072 | 3415.187  | 2427.23   | NM_02043E | 22372.545 | 35433.543 |
| NM_002692 | 25574.172 | 25906.846 | NM_01407C | 4356.651  | 2590.501  | AF052169  | 2382.817  | 2481.621  |
| AB023190  | 20801.883 | 19406.703 | NM_01628C | 2387.377  | 1746.539  | AK024900  | 5559.563  | 6464.384  |
| NM_007064 | 4731.946  | 4881.649  | NM_016027 | 1545.881  | 1087.096  | AF119879  | 61909.789 | 57028.762 |
| NM_006281 | 6821.063  | 6075.572  | NM_014297 | 7155.849  | 5915.047  | Y10482    | 67344.414 | 71823.961 |
| NM_002738 | 4604.81   | 4417.176  | NM_018156 | 58670.711 | 48222.176 | AF086244  | 6390.849  | 5833.448  |
| U23460    | 42759.602 | 40981.227 | X98266    | 5838.968  | 4893.65   | AL161992  | 6071.87   | 5552.522  |
| NM_005356 | 17082.123 | 16923.121 | U00930    | 46931.023 | 43512.406 | AK023551  | 794.228   | 948.059   |
| Z25434    | 8317.995  | 6247.417  | AK024958  | 3466.75   | 2801.17   | AK023910  | 4713.681  | 5273.978  |
| NM_005884 | 40151.906 | 39370.723 | NM_014575 | 18472.762 | 12568.074 | D16991    | 3959.787  | 5424.71   |
| NM_012399 | 33934.508 | 29321.467 | NM_002439 | 13124.313 | 8603.31   | AK023538  | 2923.811  | 2886.525  |
| CY3Cy5    | 5188.965  | 377.297   | AL117552  | 4258.133  | 2479.733  | U17620    | 1465.228  | 981.948   |
| NM_004774 | 9006.938  | 8533.569  | NM_002692 | 20460.52  | 7488.046  | NM_00669E | 6444.167  | 8575.716  |
| NM_005234 | 13545.636 | 11258.467 | AB023190  | 62510.773 | 42241.711 | NM_00481E | 2055.604  | 2840.901  |
| NM_01540C | 5527.397  | 5881.785  | NM_007064 | 6723.577  | 7310.484  | NM_004147 | 1301.739  | 1721.947  |
| AL359561  | 739.968   | 593.535   | NM_006281 | 3862.015  | 4533.486  | AK000959  | 1113.379  | 1684.7    |

|           |           |           |           |           |           |           |           |           |
|-----------|-----------|-----------|-----------|-----------|-----------|-----------|-----------|-----------|
| AK026464  | 1089.538  | 1074.6    | NM_002738 | 3507.095  | 4653.272  | AB037743  | 3217.118  | 4086.245  |
| AK001362  | 1004.483  | 1055.132  | U23460    | 61811.613 | 59312.805 | AB046820  | 1875.349  | 2576.042  |
| AK022400  | 1379.167  | 1261.464  | NM_005356 | 13459.314 | 17136.346 | AK025922  | 1617.584  | 2374.047  |
| AF052100  | 2064.017  | 1720.861  | Z25434    | 8119.884  | 11895.75  | NM_006375 | 1850.781  | 1867.706  |
| AL110235  | 1473.328  | 1167.375  | NM_005884 | 27632.535 | 38939.23  | AF123659  | 5661.007  | 8894.184  |
| U79245    | 1858.039  | 1654.786  | NM_012399 | 26275.717 | 34379.41  | U94903    | 2099.932  | 1802.569  |
| AF085983  | 1492.518  | 1535.765  | CY3Cy5    | 7391.771  | 374.843   | AF009300  | 1175.956  | 1068.466  |
| AF052105  | 3530.943  | 3856.259  | NM_004774 | 9767.829  | 9561.433  | NM_005155 | 29397.93  | 29801.5   |
| AF131806  | 624.471   | 905.4     | NM_005234 | 17446.123 | 14545.798 | NM_019095 | 15942.961 | 14845.588 |
| AK001204  | 33817.758 | 33292.785 | NM_015400 | 17365.156 | 17148.543 | U80764    | 14526.294 | 13442.777 |
| NM_004774 | 10443.577 | 11562.229 | AL359561  | 1143.96   | 1082.221  | AB020684  | 9594.808  | 7676.774  |
| NM_005234 | 15348.691 | 15386.809 | AK026464  | 4362.583  | 3522.668  | AF077036  | 55052.82  | 51338.676 |
| SR5       | 6321.315  | 12104.957 | AK001362  | 1388.269  | 1147.493  | NM_020421 | 2259.415  | 1833.337  |
| SR7       | 5732.792  | 51666.16  | AK023491  | 742.833   | 785.91    | D17094    | 3361.841  | 3128.576  |
| SR9       | 20945.479 | 7193.496  | AK022400  | 1666.915  | 1186.101  | L37690    | 43300.418 | 44633.086 |
| CY3Cy5    | 7784.568  | 611.431   | AF052100  | 2042.771  | 2152.031  | D61707    | 1651.185  | 1907.996  |
| L34409    | 8749.307  | 8201.436  | AL110235  | 1594.465  | 1328.454  | AK021610  | 2215.724  | 2217.442  |
| L08440    | 1132.677  | 674.268   | U79245    | 1915.686  | 1685.657  | Z36835    | 13942.329 | 12136.783 |
| M73799    | 1659.025  | 1226.866  | AF085983  | 1844.299  | 1213.599  | NM_004645 | 321.663   | 705.581   |
| AF086119  | 972.828   | 622.442   | NM_004774 | 8363.31   | 10237.01  | AF029325  | 2118.974  | 2549.642  |
| NM_018364 | 7475.904  | 5190.841  | SR5       | 6478.314  | 6921.384  | NM_005704 | 3050.903  | 3284.75   |
| NM_006775 | 1085.79   | 977.535   | SR7       | 8430.647  | 48979.801 | AF097021  | 2227.118  | 2960.473  |
| NM_007022 | 5739.672  | 5914.811  | SR9       | 27218.178 | 6367.391  | NM_001365 | 2132.467  | 2878.107  |
| AL049943  | 26071.334 | 27606.59  | L34409    | 40101.027 | 43431.156 | NM_000677 | 9434.346  | 11856.393 |
| AL137303  | 4054.524  | 4516.59   | U12210    | 5013.978  | 6759.778  | BF308728  | 5080.732  | 7439.792  |
| AL355708  | 2468.138  | 2723.732  | L08440    | 13683.729 | 11709.562 | NM_018315 | 57114.945 | 59752.711 |
| AB002449  | 2429.213  | 2186.288  | M73799    | 7183.287  | 5894.072  | AF051151  | 1235.413  | 1329.528  |
| AK001489  | 2606.399  | 3765.983  | AF086119  | 3347.677  | 2677.327  | AF142421  | 7116.957  | 5124.212  |
| AF070582  | 3763.028  | 4674.843  | NM_018364 | 7374.832  | 4357.613  | AB037836  | 3391.403  | 2854.512  |
| NM_006383 | 2485.453  | 2376.351  | NM_006775 | 1483.8    | 1185.373  | NM_014247 | 2397.466  | 2413      |
| AK024351  | 931.036   | 486.819   | NM_007022 | 4750.136  | 4474.34   | NM_018695 | 67466.844 | 79721.477 |
| AK024867  | 939.662   | 693.096   | NM_016480 | 37629.742 | 45197.074 | NM_006343 | 807.524   | 762.752   |
| AK025002  | 1793.455  | 1528.789  | NM_015681 | 11453.863 | 11048.314 | NM_014786 | 2242.5    | 1866.248  |
| AF086124  | 1010.415  | 707.089   | AF070582  | 3616.802  | 3548.81   | NM_015716 | 13452.415 | 12773.034 |
| AK024820  | 2349.728  | 2241.455  | AK024351  | 4043.872  | 3239.912  | NM_003955 | 751.299   | 827.207   |
| AF052117  | 1807.039  | 1732.404  | AK024867  | 1985.95   | 1819.305  | NM_005733 | 4517.104  | 5740.078  |
| AB033105  | 2581.298  | 2320.308  | AK025002  | 10353.292 | 9722.647  | AB023166  | 1243.416  | 1486.905  |
| AF038192  | 1594.106  | 2234.376  | AF086124  | 1625.883  | 1521.124  | AB028966  | 23970.072 | 20793.35  |
| NM_017935 | 459.314   | 562.667   | AF052117  | 1455.523  | 1314.285  | NM_005402 | 10086.938 | 12954.796 |
| AJ001865  | 3119.971  | 3501.479  | AB033105  | 2914.543  | 2693.784  | AF055027  | 11872.456 | 13935.77  |
| AJ227875  | 718.776   | 856.269   | D61704    | 36183.512 | 43418.445 | U63541    | 10013.927 | 11784.503 |
| D61704    | 16121.35  | 19172.016 | AJ227889  | 2168.889  | 2821.178  | AB033045  | 2410.731  | 2971.146  |
| AJ227889  | 558.829   | 817.512   | AL110175  | 3245.679  | 2537.714  | AF055006  | 13342.518 | 15251.546 |
| Y12017    | 1436.654  | 1967.885  | AF288406  | 2258.539  | 1743.599  | NM_004935 | 4114.933  | 4091.119  |
| X64989    | 805.654   | 1286.463  | AK027156  | 34847.934 | 35148.848 | NM_006951 | 1102.512  | 1045.65   |
| Y10512    | 3116.396  | 3985.459  | AL157504  | 8863.747  | 9059.053  | NM_001896 | 11686.521 | 12435.541 |
| AL110175  | 1691.863  | 1035.901  | AK023328  | 19673.154 | 18072.633 | NM_014023 | 1534.826  | 1305.105  |
| AF288406  | 2144.044  | 1944.221  | AL442096  | 3841.788  | 3963.456  | NM_002745 | 16655.697 | 16806.561 |
| AK027156  | 20994.279 | 16617.883 | AK023299  | 852.504   | 664.35    | D26488    | 12061.137 | 8235.134  |
| AL157504  | 6177.75   | 5379.478  | NM_018225 | 2551.734  | 2840.136  | NM_001432 | 620.775   | 747.871   |
| AK023328  | 12774.518 | 10891.281 | AJ270693  | 3091.2    | 3502.719  | AK002193  | 809.404   | 842.379   |
| AL442096  | 2766.956  | 2365.314  | NM_017790 | 6900.986  | 7470.842  | AB014554  | 3130.799  | 2488.624  |
| AK023299  | 871.274   | 943.121   | AK000861  | 2703.081  | 3374.417  | AF097431  | 5499.317  | 3585.349  |

|           |           |           |           |           |           |           |           |           |
|-----------|-----------|-----------|-----------|-----------|-----------|-----------|-----------|-----------|
| NM_01822E | 2367.187  | 3120.016  | AK025009  | 1316.059  | 1712.936  | NM_00197E | 2084.188  | 1577.326  |
| AJ270693  | 3965.699  | 4286.257  | AK000023  | 11068.204 | 10780.719 | NM_004221 | 3301.349  | 3188.897  |
| NM_01779C | 5783.335  | 6895.408  | AK000652  | 1070.033  | 1239.392  | NM_00301E | 2814.871  | 3262.986  |
| AK000861  | 2477.735  | 2209.743  | AK000901  | 2524.686  | 2369.209  | AL109790  | 2792.628  | 2881.566  |
| AK025009  | 1233.907  | 1606.448  | AB007866  | 3244.197  | 3082.753  | NM_00362E | 3440.177  | 2674.317  |
| AK000023  | 10616.219 | 12861.799 | AF075086  | 68335.227 | 73740.828 | M90657    | 810.242   | 1127.185  |
| AK000652  | 732.38    | 1562.599  | X77485    | 59597.047 | 54719.379 | NM_00669E | 3893.199  | 4910.917  |
| AK000901  | 2424.726  | 3189.538  | NM_01449E | 5019.508  | 4382.797  | AK025645  | 3047.519  | 4238.277  |
| AB007866  | 2664.828  | 1984.032  | AK021555  | 1024.277  | 1151.929  | AK023266  | 1073.546  | 1826.6    |
| AF075086  | 59696.719 | 49532.852 | AB046765  | 3730.641  | 3521.507  | NM_006814 | 14429.375 | 18338.543 |
| NM_01449E | 2799.116  | 2482.81   | AF133333  | 16828.172 | 17046.457 | NM_005067 | 5098.583  | 5523.561  |
| AK021555  | 628.212   | 665.406   | NM_01836E | 3272.321  | 3044.267  | NM_002817 | 15832.639 | 15275.528 |
| AB046765  | 3637.181  | 2574.208  | AK024011  | 1993.598  | 1563.033  | NM_002801 | 27934.488 | 27964.121 |
| AF133333  | 13429.118 | 14373.471 | AL390145  | 1485.383  | 1075.034  | BE905810  | 2517.761  | 1702.193  |
| NM_01836E | 3674.225  | 3715.803  | AF119913  | 3194.256  | 2201.167  | NM_01478C | 1879.774  | 1510.09   |
| AK024011  | 3789.969  | 3902.6    | NM_01834C | 2443.163  | 3079.088  | NM_01473C | 4777.129  | 4580.042  |
| AL390145  | 1474.168  | 1883.58   | AF049883  | 2935.232  | 4025.974  | NM_014167 | 1229.843  | 1043.653  |
| AF119913  | 4459.949  | 4031.265  | L10148    | 68818.438 | 69083.977 | NM_01606E | 4462.682  | 3721.545  |
| NM_01834C | 3537.44   | 5219.242  | AK026247  | 1707.553  | 2687.572  | U82987    | 8348.086  | 7865.333  |
| AF049883  | 2577.945  | 2931.305  | M14755    | 3255.039  | 5819.634  | NM_00573E | 1885.572  | 2017.298  |
| U10512    | 577.899   | 634.52    | L37703    | 63355.789 | 71716.969 | NM_01489C | 845.376   | 824.008   |
| L10148    | 67436.188 | 63489.09  | AK023767  | 44816.473 | 46413.551 | AK056481  | 5346.391  | 6204.39   |
| AK026247  | 1620.79   | 1692.962  | AF084516  | 2367.036  | 3217.169  | NM_00543E | 836.605   | 895.359   |
| AK024893  | 655.019   | 1077.964  | AJ001907  | 4877.517  | 4590.887  | AF232000  | 67345.477 | 71512.32  |
| AK023302  | 600.562   | 1086.932  | M32220    | 14638.924 | 13804.519 | NM_00575E | 6395.627  | 8605.207  |
| L37703    | 11956.618 | 8929.675  | D17188    | 37609.449 | 47590.234 | AF044774  | 2800.175  | 2540.541  |
| AK023767  | 21439.994 | 17896.156 | AJ001432  | 67951.398 | 72910.797 | NM_00295E | 1779.12   | 2096.519  |
| AF084516  | 2105.017  | 2272.066  | NM_02043E | 21659.865 | 22860.283 | NM_00193E | 6341.167  | 6894.377  |
| AL137554  | 1091.858  | 1064.089  | AF052169  | 3011.301  | 2290.899  | AF230808  | 10521.61  | 10679.45  |
| AJ001907  | 2161.64   | 1253.472  | AJ012499  | 67997.766 | 75924.023 | U18910    | 2229.581  | 2244.148  |
| M32220    | 4060.532  | 3546.012  | AK024900  | 9008.724  | 8689.705  | NM_00523E | 27968.74  | 28112.791 |
| D17188    | 48270.008 | 49437.98  | AK026249  | 826.635   | 965.148   | AK075306  | 8119.09   | 7100.626  |
| AJ001432  | 51683.391 | 50874.059 | AF119879  | 63440.582 | 58163.125 | AB037820  | 1765.65   | 1682.063  |
| NM_02043E | 34038.449 | 41301.82  | AF086244  | 9426.481  | 10921.343 | NM_00128C | 25464.648 | 22694.486 |
| AF052169  | 909.833   | 997.68    | AL161992  | 11593.966 | 12367.422 | AB019572  | 63507.305 | 61891.875 |
| AK024900  | 12156.76  | 12595.443 | AK023551  | 2080.32   | 2538.752  | NM_00294E | 61205.816 | 52958.367 |
| AK026249  | 993.06    | 1162.794  | AK023910  | 7481.376  | 8123.764  | AF113008  | 4101.508  | 3001.973  |
| AF119879  | 21617.98  | 19481.182 | D16991    | 8036.547  | 8432.24   | NM_020217 | 5102.048  | 5410.763  |
| L16951    | 747.181   | 726.087   | AK023538  | 4490.78   | 4366.576  | NM_01813E | 64804.234 | 59644.844 |
| Y10482    | 4116.025  | 4341.322  | U17620    | 759.125   | 966.492   | AF205435  | 24774.4   | 22665.861 |
| AY007095  | 1535.413  | 1385.545  | NM_00669E | 6955.711  | 7541.858  | L05093    | 66149.828 | 63004.688 |
| AF086244  | 1953.567  | 1760.12   | NM_00481E | 2715.923  | 2912.346  | NM_00692E | 5567.497  | 7537.269  |
| AL161992  | 9271.135  | 10236.984 | NM_004147 | 1957.101  | 2170.436  | NM_00461E | 2462.379  | 4127.127  |
| AK023551  | 1777.961  | 2004.511  | AK000959  | 1906.695  | 1617.422  | AF119889  | 37317.09  | 37628.387 |
| AK023910  | 2408.557  | 3143.692  | AB037743  | 6298.496  | 6434.985  | J03866    | 18092.422 | 18934.469 |
| D16991    | 6191.339  | 7583.536  | AB046820  | 4014.548  | 3944.716  | AK022836  | 11376.965 | 13712.762 |
| AK023538  | 665.01    | 1007.872  | AK025922  | 3493.157  | 3484.935  | NM_01234E | 51996.113 | 50974.352 |
| U17620    | 1509.647  | 1937.517  | NM_01464E | 1392.727  | 1158.826  | NM_000397 | 2231.55   | 2076.698  |
| NM_00669E | 1739.186  | 1455.675  | NM_00637E | 987.57    | 1174.405  | NM_00204E | 62958.953 | 66108.633 |
| NM_00481E | 3210.031  | 2830.18   | AF123659  | 8083.579  | 7115.714  | AL157461  | 1158.079  | 910.089   |
| NM_004147 | 1280.269  | 1313.816  | NM_004881 | 49021.723 | 49462.445 | BF217340  | 994.05    | 770.185   |
| AK000959  | 1176.842  | 873.875   | U94903    | 2870.144  | 2311.182  | NM_00307E | 3821.269  | 2375.255  |
| AB037743  | 6285.092  | 5034.5    | AF009300  | 1278.63   | 1329.595  | AL137703  | 1722.529  | 1608.984  |

|           |           |           |           |           |           |           |           |           |
|-----------|-----------|-----------|-----------|-----------|-----------|-----------|-----------|-----------|
| AB046820  | 3540.611  | 3033.587  | NM_005155 | 33788.035 | 35923.09  | NM_001805 | 6790.337  | 5669.355  |
| AK025922  | 1141.732  | 1169.804  | AF077036  | 68447.461 | 67181.68  | AL117477  | 6086.933  | 5793.954  |
| NM_014646 | 1469.977  | 1546.223  | NM_020421 | 3757.702  | 4111.6    | NM_012107 | 6735.717  | 6834.539  |
| NM_006375 | 1588.166  | 1823.124  | D17094    | 7420.555  | 7884.617  | AB037760  | 3909.851  | 3551.415  |
| AF123659  | 3294.174  | 3100.375  | L37690    | 54007.586 | 53398.688 | NM_015680 | 8436.954  | 8234.387  |
| U94903    | 990.545   | 1000.927  | D61707    | 3795.433  | 3663.789  | M22637    | 6842.944  | 7025.63   |
| AF009300  | 947.687   | 1197.778  | AK021610  | 4776.999  | 4435.566  | L35035    | 8656.906  | 11326.674 |
| NM_005155 | 2652.773  | 2936.895  | Z36835    | 25021.416 | 23398.588 | NM_007152 | 5427.442  | 6324.669  |
| NM_019095 | 26404.883 | 30859.092 | AF029325  | 4320.143  | 4012.535  | NM_018293 | 3849.541  | 3503.207  |
| U80764    | 32181.697 | 47116.762 | NM_005704 | 2997.509  | 2600.459  | NM_018047 | 3728.364  | 5282.536  |
| AB020684  | 15766.081 | 17113.441 | AF097021  | 3010.049  | 2995.534  | NM_005022 | 3066.677  | 4264.208  |
| AF077036  | 63976.391 | 57748.301 | NM_001365 | 3838.602  | 4347.846  | NM_001288 | 1369.263  | 1868.504  |
| NM_020421 | 3580.14   | 4339.984  | NM_000677 | 17048.742 | 16196.72  | NM_003564 | 8397.979  | 9324.816  |
| D17094    | 9118.423  | 9403.9    | BF308728  | 7215.999  | 8016.146  | AF317516  | 8786.46   | 9682.465  |
| L37690    | 15307.659 | 18320.553 | NM_013280 | 768.352   | 943.308   | NM_002581 | 3927.302  | 3691.341  |
| D61707    | 2530.761  | 2436.225  | NM_018315 | 60967.254 | 58236.625 | AI417964  | 8517.59   | 7750.873  |
| AK021610  | 3984.752  | 4178.226  | AF051151  | 1574.865  | 1727.225  | J03571    | 49253.992 | 42313.109 |
| Z36835    | 24753.277 | 31285.258 | AF142421  | 8602.056  | 9547.138  | X56134    | 5681.543  | 6108.105  |
| NM_004648 | 779.312   | 551.434   | AB037836  | 4504.629  | 4270.534  | NM_001456 | 2446.898  | 2061.699  |
| AF029325  | 2387.508  | 2167.756  | NM_014247 | 2628.069  | 2824.473  | H44784    | 907.354   | 914.376   |
| NM_005704 | 884.154   | 789.642   | NM_018695 | 69608.375 | 61660.699 | AI421041  | 59898.836 | 60280.219 |
| AF097021  | 1462.544  | 1119.207  | NM_006343 | 1952.425  | 2212.746  | BI759091  | 4760.37   | 6227.974  |
| NM_001365 | 2064.112  | 1730.674  | NM_014786 | 3261.841  | 3957.359  | BG685843  | 30043.537 | 24244.357 |
| NM_000677 | 19809.348 | 18606.605 | NM_001423 | 1330.178  | 1126.513  | BI490011  | 6405.096  | 6203.238  |
| BF308728  | 2355.597  | 2328.292  | NM_015716 | 24673.834 | 25067.178 | AF035771  | 757.525   | 815.708   |
| NM_013280 | 957.163   | 1155.133  | NM_003955 | 1327.341  | 1732.734  | N20475    | 11382.2   | 13551.958 |
| NM_018315 | 10691.705 | 8767.847  | NM_005739 | 7451.203  | 7290.199  | BI199286  | 3908.301  | 4423.579  |
| AF051151  | 1174.007  | 1163.299  | AB023166  | 2301.018  | 2119.282  | AA026626  | 4256.187  | 5192.513  |
| AF142421  | 9869.236  | 10148.079 | AB028966  | 36199.328 | 34326.613 | H61726    | 1492.457  | 1681.205  |
| AB037836  | 5563.29   | 6046.773  | NM_005402 | 15322.304 | 15172.151 | M15465    | 11949.782 | 9675.291  |
| NM_014247 | 2925.751  | 2758.925  | AF055027  | 20558.945 | 19344.697 | NM_007181 | 16282.328 | 20259.813 |
| NM_018695 | 36950.805 | 44785.66  | U63541    | 14111.197 | 13773.302 | AB007857  | 2154.484  | 3019.211  |
| AL122065  | 610.518   | 624.663   | AB033045  | 3284.231  | 3451.059  | NM_001778 | 55903.023 | 64220.105 |
| NM_006343 | 2642.774  | 2709.744  | AF055006  | 20333.078 | 21728.053 | NM_004997 | 54657.219 | 56509.273 |
| NM_014786 | 3112.275  | 2888.767  | NM_004935 | 10655.249 | 10815.562 | NM_005923 | 7785.949  | 8485.748  |
| NM_001423 | 1576.876  | 2315.918  | NM_006951 | 3948.249  | 4024.105  | NM_003465 | 3079.022  | 3084.654  |
| NM_015716 | 6840.416  | 7586.738  | NM_001896 | 18622.488 | 18157.186 | AF289028  | 1855.795  | 1486.195  |
| NM_005739 | 7216.848  | 8662.007  | NM_014023 | 2227.96   | 2554.547  | NM_005127 | 25566.217 | 25013.938 |
| AB023166  | 2167.282  | 2445.076  | NM_002745 | 25919.02  | 26818.084 | NM_005567 | 27829.461 | 23676.049 |
| AB028966  | 2345.449  | 3183.273  | D26488    | 17636.256 | 15777.98  | NM_005216 | 9833.687  | 7759.351  |
| NM_005402 | 12126.862 | 8977.813  | NM_001432 | 2631.03   | 3185.137  | NM_003965 | 1366.499  | 1251.001  |
| AF055027  | 21706.023 | 15997.67  | AK002193  | 1149.579  | 955.73    | NM_004584 | 6053.795  | 5503.595  |
| U63541    | 13167.447 | 10104.224 | AB014554  | 3567.776  | 3066.119  | X15183    | 62410.914 | 62724.773 |
| AB033045  | 2423.278  | 1812.914  | AF097431  | 6410.353  | 6239.433  | AK023618  | 8826.678  | 8210.354  |
| AF055006  | 13855.586 | 12434.559 | NM_001978 | 3237.925  | 3327.182  | AF212842  | 2479.156  | 5324.85   |
| NM_004935 | 11260.927 | 10313.534 | NM_005897 | 1025.934  | 1124.361  | NM_018404 | 1418.324  | 1518.51   |
| NM_006951 | 3553.297  | 3404.267  | NM_002579 | 832.241   | 775.935   | M27544    | 17367.883 | 15672.863 |
| NM_001896 | 16497.877 | 18017.018 | NM_004221 | 5357.659  | 5774.149  | NM_002258 | 804.691   | 741.397   |
| NM_014023 | 1630.795  | 1819.625  | NM_003019 | 3783.245  | 3610.823  | NM_001118 | 5725.212  | 5503.391  |
| NM_002745 | 22513.695 | 21953.957 | AL109790  | 5097.762  | 4076.512  | AL133097  | 10328.516 | 10265.429 |
| D26488    | 20028.77  | 16704.182 | NM_003628 | 6168.85   | 5667.868  | NM_001165 | 26259.887 | 24900.129 |
| NM_001432 | 3277.852  | 3214.092  | M90657    | 1524.755  | 2043.1    | NM_001381 | 63102.043 | 61002.867 |
| AK002193  | 1472.777  | 1226.47   | NM_006699 | 5738.418  | 6527.679  | NM_006458 | 7616.554  | 7703.046  |

|           |           |           |           |           |           |           |           |           |
|-----------|-----------|-----------|-----------|-----------|-----------|-----------|-----------|-----------|
| AB014554  | 1847.732  | 1909.235  | AK025645  | 4118.733  | 4296.798  | NM_01445E | 810.234   | 835.036   |
| AF097431  | 6071.227  | 6844.331  | AK023266  | 2870.258  | 3235.004  | NM_00149Z | 1688.476  | 3136.935  |
| NM_00197E | 1083.895  | 929.175   | NM_006814 | 29352.436 | 35973.969 | AB012643  | 53411.363 | 59282.203 |
| NM_005897 | 653.973   | 704.592   | NM_005067 | 11602.825 | 13495.638 | AB023170  | 3698.471  | 5585.693  |
| NM_00257E | 569.405   | 390.015   | AB007899  | 2284.275  | 2409.963  | NM_01415Z | 26333.529 | 33234.043 |
| NM_004221 | 3091.768  | 3272.193  | NM_002817 | 21991.805 | 24470.094 | NM_00229E | 25498.389 | 25282.945 |
| NM_00301E | 882.474   | 881.769   | NM_002801 | 35696.73  | 42698.629 | NM_000414 | 10591.595 | 9113.781  |
| AL109790  | 1823.733  | 2607.6    | BE905810  | 2784.73   | 2796.249  | NM_01884E | 9001.262  | 6727.553  |
| NM_00362E | 6301.77   | 7628.545  | NM_01478C | 2502.617  | 2577.167  | AY008372  | 903.452   | 558.571   |
| M90657    | 1573.217  | 1558.177  | NM_01473C | 8219.641  | 7883.265  | NM_00550E | 6357.465  | 4877.493  |
| NM_00669E | 5832.847  | 6024.859  | NM_014167 | 2307.792  | 2806.624  | AK026964  | 1206.649  | 1009.574  |
| AK025645  | 1236.592  | 1330.649  | NM_01606Z | 6920.592  | 6283.038  | NM_00007E | 5801.628  | 5929.083  |
| AK023266  | 2063.59   | 2444.911  | U82987    | 12595.432 | 14475.57  | AL110245  | 11065.486 | 11735.193 |
| NM_006814 | 19058.584 | 20850.822 | NM_00573Z | 3802.054  | 4033.596  | NM_01620E | 29450.096 | 37723.672 |
| NM_005067 | 11088.228 | 12473.156 | NM_01489C | 2022.824  | 1633.99   | NM_00563E | 9849.482  | 10672.378 |
| AB007899  | 2379.304  | 2551.609  | AK056481  | 9737.749  | 10781.102 | NM_00723E | 20050.445 | 21520.949 |
| NM_002817 | 22153.02  | 19834.381 | NM_00543Z | 1752.262  | 1583.728  | NM_00726E | 4682.489  | 4943.888  |
| NM_002801 | 33394.059 | 37855.535 | AF232000  | 66144     | 61611.555 | AK026014  | 5344.498  | 6124.649  |
| BE905810  | 1674.09   | 1532.347  | NM_00575E | 12339.211 | 9991.448  | NM_01484E | 4587.669  | 5644.087  |
| NM_01478C | 2719.043  | 2744.441  | AF044774  | 5408.134  | 4700.491  | NM_00429E | 4170.99   | 4040.851  |
| NM_018116 | 694.001   | 787.187   | NM_00443C | 699.355   | 846.371   | NM_00123Z | 851.62    | 974.393   |
| NM_01473C | 5504.029  | 5683.449  | NM_00295E | 2984.547  | 2859.44   | AF007190  | 561.57    | 1180.838  |
| NM_014167 | 2380.76   | 2916.834  | NM_00193E | 10190.799 | 10949.487 | X74609    | 61178.621 | 62741.398 |
| NM_01606Z | 8102.198  | 8522.113  | AF230808  | 15345.827 | 15253.396 | AB002316  | 2458.978  | 2678.489  |
| U82987    | 6799.438  | 7269.891  | U18910    | 4694.126  | 6067.228  | NM_01899C | 8714.277  | 9669.607  |
| NM_00573Z | 2746.502  | 2536.272  | NM_00523E | 49753.723 | 50885.875 | NM_01336Z | 1171.67   | 1126.835  |
| NM_01489C | 1907.341  | 2213.975  | S83390    | 1513.725  | 1558.779  | NM_000947 | 2442.06   | 2226.902  |
| AK056481  | 6327.738  | 6931.027  | AK075306  | 22569.357 | 25517.684 | AL096750  | 61933.254 | 55315.711 |
| NM_00543Z | 1353.059  | 1809.049  | U37689    | 856.467   | 1001.167  | NM_016061 | 8011.732  | 7440.982  |
| AF232000  | 64725.852 | 59827.945 | NM_00128C | 29066.416 | 32056.604 | NM_01606Z | 24299.098 | 19369.033 |
| NM_00575E | 14660.997 | 17515.178 | AB019572  | 64401.695 | 64818.434 | NM_00415Z | 5309.3    | 4485.413  |
| AF044774  | 4914.011  | 4993.875  | NM_00294E | 64510.531 | 54549.602 | AK024740  | 4685.026  | 3496.68   |
| NM_00443C | 788.448   | 579.776   | AF113008  | 10642.909 | 9810.665  | AF078164  | 8275.588  | 6209.703  |
| NM_00295E | 1738.394  | 1517.683  | NM_020217 | 11551.8   | 11823.437 | NM_01904E | 2700.044  | 2775.999  |
| NM_00193E | 10223.491 | 9614.178  | NM_01813E | 65950.656 | 60698.805 | NM_01241Z | 792.183   | 872.252   |
| AF230808  | 6101.486  | 5057.495  | AF205435  | 50709.211 | 48834.246 | AF130101  | 2169.427  | 4067.34   |
| U18910    | 3676.578  | 4405.886  | L05093    | 67461.164 | 58460.254 | NM_00465E | 4488.184  | 5088.083  |
| NM_00523E | 29569.957 | 31157.035 | NM_00692Z | 8744.434  | 7634.06   | AF071569  | 6697.521  | 6264.837  |
| S83390    | 2266.82   | 2084.181  | NM_00461E | 794.299   | 733.923   | NM_00226E | 5016.208  | 5357.748  |
| AK075306  | 20975.381 | 21414.846 | AF119889  | 52526.051 | 48274.824 | J04948    | 2744.854  | 2951.642  |
| AB037820  | 2173.014  | 2317.813  | J03866    | 29529.576 | 31305.455 | NM_01804Z | 1038.277  | 834.607   |
| NM_00632E | 553.902   | 395.414   | AK022836  | 18296.047 | 21151.314 | AK022564  | 80788.5   | 63076.594 |
| U37689    | 1777.909  | 1379.179  | NM_01234Z | 57019.891 | 53182.453 | NM_00502Z | 2951.099  | 3553.447  |
| NM_00128C | 30444.727 | 36056.156 | NM_000397 | 6561.161  | 7430.558  | NM_00128E | 1216.746  | 1831.187  |
| AB019572  | 62231.152 | 57982.504 | NM_00204E | 63864.238 | 74336.813 | NM_003564 | 10708.265 | 13695.987 |
| BC008865  | 1000.17   | 919.451   | AL157461  | 3582.547  | 3689.646  | AK023414  | 552.213   | 957.94    |
| NM_00294E | 60504.945 | 54599.863 | NM_00307E | 6268.625  | 7182.798  | AF317516  | 9995.574  | 11147.505 |
| AF113008  | 8050.862  | 7960.189  | AL137703  | 1926.34   | 2188.344  | NM_002581 | 3142.229  | 3359.409  |
| NM_020217 | 12394.039 | 13989.772 | NM_00180E | 9961.99   | 10207.238 | AI417964  | 5689.775  | 5874.348  |
| AF205435  | 49371.863 | 52104.52  | NM_01825E | 670.303   | 551.688   | J03571    | 48374.078 | 45905.414 |
| L05093    | 64945.633 | 59720.973 | AL117477  | 13894.777 | 13854.397 | T64134    | 696.031   | 384.314   |
| NM_00692Z | 9090.53   | 9212.797  | NM_012107 | 10827.401 | 12030.622 | X56134    | 5236.589  | 4455.007  |
| NM_00461E | 1052.098  | 1308.602  | AB037760  | 8649.512  | 9517.551  | NM_00145E | 2105.876  | 1464.097  |

|           |           |           |           |           |           |           |           |           |
|-----------|-----------|-----------|-----------|-----------|-----------|-----------|-----------|-----------|
| AF119889  | 14413.225 | 15415.9   | NM_015680 | 17926.305 | 16677.221 | H44784    | 867.531   | 628.29    |
| J03866    | 28858.271 | 21310.719 | M22637    | 10172.818 | 9134.902  | AI421041  | 57319.969 | 54203.828 |
| AK022836  | 23354.449 | 19963.891 | AB037770  | 1332.899  | 818.233   | BI759091  | 5450.909  | 6812.97   |
| NM_012343 | 27735.816 | 24569.453 | NM_018118 | 1498.75   | 1354.844  | BG685843  | 34271.125 | 37431.449 |
| NM_000397 | 6800.682  | 7074.878  | L35035    | 14733.396 | 14538.997 | BI490011  | 7452.98   | 9850.659  |
| NM_012140 | 1090.21   | 992.282   | NM_007152 | 7362.813  | 6390.773  | AF035771  | 1143.895  | 1081.526  |
| NM_002046 | 64538.395 | 71168.188 | NM_018293 | 6529.565  | 4959.592  | N20475    | 11122.439 | 13454.996 |
| AL157461  | 3948.53   | 3583.76   | AF073931  | 599.797   | 986.822   | BI199286  | 4045.943  | 5423.521  |
| BF217340  | 1405.438  | 1738.085  | NM_018047 | 5849.179  | 6564.896  | AA026626  | 4021.505  | 4094.691  |
| NM_003078 | 4406.917  | 4189.198  | NM_005022 | 4001.692  | 4844.483  | H61726    | 1475.114  | 1543.833  |
| AL137703  | 1448.115  | 1544.614  | NM_003564 | 14557.848 | 17344.494 | NM_001778 | 53919.414 | 58374.656 |
| NM_001808 | 13683.139 | 14566.896 | AF317516  | 17444.969 | 21056.361 | NM_004997 | 52641.449 | 57295.375 |
| NM_018258 | 1048.618  | 1183.966  | NM_002581 | 5462.745  | 6794.224  | NM_005923 | 10294.462 | 13628.805 |
| AL117477  | 16870.039 | 18963.217 | AI417964  | 8043.214  | 9255.708  | NM_003465 | 4572.212  | 4771.765  |
| NM_012107 | 12887.272 | 16467.467 | J03571    | 55234.34  | 52182.25  | AF289028  | 2551.354  | 1995.265  |
| AB037760  | 5867.288  | 5560.774  | T57791    | 1622.928  | 2170.832  | NM_005127 | 24084.938 | 25747.395 |
| NM_015680 | 9694.813  | 7257.695  | T64134    | 700.872   | 758.439   | NM_005567 | 17719.42  | 16068.235 |
| AB037770  | 1007.087  | 987.224   | X56134    | 5990.912  | 6829.8    | NM_005216 | 9704.713  | 8300.981  |
| NM_018118 | 2294.595  | 2129.081  | NM_001456 | 3371.02   | 3094.528  | NM_006626 | 550.176   | 375.654   |
| L35035    | 17796.551 | 20133.408 | H44784    | 1891.737  | 1735.467  | NM_003965 | 1286.947  | 1452.161  |
| NM_007152 | 8829.682  | 9909.074  | AI421041  | 66409.93  | 58297.316 | NM_004584 | 5592.946  | 4115.356  |
| NM_018293 | 2829.811  | 3549.069  | BI759091  | 6884.196  | 9126.763  | X15183    | 60578.223 | 55108.055 |
| AF073931  | 798.534   | 681.272   | BG685843  | 48670.902 | 50654.207 | AK023618  | 8224.843  | 7781.762  |
| NM_018047 | 4410.149  | 3585.203  | BI490011  | 9837.172  | 9785.773  | AF212842  | 2134.701  | 4070.543  |
| NM_005022 | 2630.272  | 2869.002  | AF035771  | 1387.55   | 1266.09   | NM_018404 | 1834.497  | 1746.836  |
| NM_001288 | 1640.206  | 1958.411  | N20475    | 19406.393 | 18538.838 | M27544    | 22227.045 | 22621.197 |
| NM_003564 | 7584.679  | 6962.143  | BI199286  | 7562.692  | 7579.882  | NM_002258 | 656.806   | 607.618   |
| AK023414  | 1398.964  | 1448.274  | AA026626  | 5253.663  | 4693.53   | NM_001118 | 6440.018  | 6787.433  |
| AF317516  | 23653.422 | 26407.41  | H61726    | 2759.175  | 2653.785  | AL133097  | 12517.339 | 13892.575 |
| NM_002581 | 2221.745  | 2074.839  | M15465    | 26111.809 | 19588.471 | NM_001165 | 25900.467 | 28528.396 |
| AI417964  | 547.891   | 650.319   | NM_007181 | 29158.807 | 35647.938 | NM_001381 | 64373.059 | 64058.859 |
| J03571    | 27829.539 | 29461.715 | AB007857  | 3975.557  | 4316.113  | NM_006458 | 7816.453  | 6950.39   |
| T57791    | 718.253   | 728.205   | NM_001778 | 65932.516 | 81859.477 | NM_014458 | 669.578   | 789.911   |
| X56134    | 3615.038  | 3513.026  | NM_005923 | 15507.031 | 16514.283 | NM_018047 | 3226.159  | 2670.974  |
| NM_001456 | 4070.765  | 3337.591  | NM_003465 | 8422.527  | 8695.154  | AB023170  | 3167.672  | 3354.282  |
| H44784    | 1477.499  | 1200.658  | AF289028  | 5454.822  | 6050.367  | NM_014153 | 23965.684 | 29913.238 |
| AI421041  | 62117.883 | 61421.055 | NM_005127 | 42745.922 | 47425.785 | NM_002296 | 27868.217 | 30500.859 |
| BI759091  | 7342.144  | 9916.472  | NM_005567 | 33269.613 | 39001.629 | NM_000414 | 10579.853 | 9566.319  |
| BG685843  | 42149.41  | 43890.051 | NM_005216 | 14417.885 | 15300.596 | NM_018845 | 6957.625  | 5070.616  |
| BI490011  | 2885.275  | 2609.483  | NM_006626 | 956.832   | 1171.395  | NM_005505 | 6670.04   | 4907.014  |
| AF035771  | 804.822   | 1020.516  | NM_003965 | 1146      | 1184.887  | AK026964  | 1638.197  | 782.967   |
| N20475    | 18116.504 | 19934.826 | NM_004584 | 8895.104  | 9429.142  | NM_000079 | 4264.111  | 3957.545  |
| BI199286  | 10283.431 | 12738.712 | X15183    | 65586.688 | 63340.871 | AL110245  | 9033.773  | 8349.54   |
| AA026626  | 3160.046  | 3523.733  | AK023618  | 15179.79  | 14243.127 | NM_016208 | 27293.789 | 26753.59  |
| H61726    | 3895.815  | 5077.9    | AF212842  | 2583.305  | 6434.593  | NM_005638 | 9873.98   | 9415.03   |
| M15465    | 10771.433 | 13237.82  | NM_018404 | 2493.943  | 2521.485  | NM_007235 | 20636.896 | 19711.096 |
| NM_007181 | 32265.305 | 25312.617 | M27544    | 32109.326 | 32168.848 | NM_007268 | 5068.721  | 5815.708  |
| AB007857  | 3167.383  | 2235.386  | NM_002258 | 1301.221  | 1281.493  | AK026014  | 5152.577  | 6140.272  |
| NM_001778 | 62256.672 | 58591.109 | NM_001118 | 6908.354  | 7023.013  | NM_014845 | 4743.878  | 4161.164  |
| NM_004997 | 13022.089 | 11144.524 | AL133097  | 20113.166 | 16858.83  | NM_004298 | 4400.625  | 4503.661  |
| NM_005923 | 11715.21  | 10977.154 | NM_001165 | 34825.793 | 35101.313 | NM_001232 | 918.321   | 997.898   |
| NM_003465 | 4755.555  | 5124.438  | NM_001381 | 63493.172 | 65665.508 | NM_007181 | 13306.45  | 12472.521 |
| AF289028  | 6093.354  | 5478.591  | NM_006458 | 14284.111 | 10643.859 | AB007857  | 1630.229  | 1277.805  |



|           |           |           |           |           |           |           |           |           |
|-----------|-----------|-----------|-----------|-----------|-----------|-----------|-----------|-----------|
| NM_005127 | 32295.877 | 39744.742 | NM_014459 | 1812.039  | 1495.81   | AB002316  | 2423.369  | 1828.443  |
| NM_005567 | 5454.158  | 5515.548  | NM_001492 | 2880.541  | 3561.13   | NM_01899C | 8287.098  | 8868.322  |
| NM_00521E | 23741.531 | 24957.289 | AB012643  | 47173.84  | 57443.758 | NM_013363 | 1357.343  | 1413.467  |
| NM_00662E | 1404.256  | 1539.926  | AB023170  | 5134.25   | 6517.679  | NM_000947 | 3079.008  | 2653.443  |
| NM_00396E | 740.422   | 875.195   | NM_014153 | 36684.441 | 44784.227 | AL096750  | 60875.191 | 54440.965 |
| NM_004584 | 6229.965  | 5855.357  | NM_00229E | 38535.039 | 46876.664 | NM_016061 | 5380.107  | 4842.648  |
| X15183    | 63964.441 | 58398.809 | NM_000414 | 21203.391 | 19529.115 | NM_016062 | 22284.807 | 19272.854 |
| AK023618  | 8226.828  | 8357.758  | AL133033  | 1168.48   | 1115.842  | NM_004153 | 5504.413  | 4570.6    |
| AF212842  | 1481.478  | 4613.188  | NM_01884E | 18346.254 | 17620.313 | AK024740  | 5574.591  | 4165.439  |
| NM_018404 | 1204.106  | 1598.054  | AY008372  | 1096.628  | 1525.534  | AF078164  | 8339.187  | 6401.796  |
| M27544    | 2111.954  | 2202.847  | NM_00550E | 10076.067 | 10868.972 | NM_01904E | 2833.429  | 2404.859  |
| NM_00225E | 761.309   | 965.832   | AK026964  | 2034.554  | 2069.165  | AF130101  | 1050.285  | 973.833   |
| NM_001118 | 1669.227  | 2095.794  | NM_000079 | 9220.682  | 10356.2   | NM_00465E | 4353.272  | 3023.017  |
| AL133097  | 11689.02  | 11273.209 | AL110245  | 13984.132 | 15423.748 | AF071569  | 6733.953  | 5735.583  |
| NM_00116E | 27883.807 | 34924.859 | NM_01620E | 39319.352 | 44667.824 | NM_00226E | 5142.523  | 5619.602  |
| NM_001381 | 62187.32  | 58808.781 | NM_00163E | 2474.587  | 2351.231  | J04948    | 3295.276  | 2746.461  |
| NM_00645E | 9695.499  | 10245.413 | NM_00563E | 15877.223 | 17684.17  | NM_018043 | 954.75    | 1119.815  |
| NM_01445E | 1929.807  | 3304.996  | NM_00723E | 32386.256 | 33687.664 | AK022564  | 65197.152 | 56078.469 |
| NM_001492 | 1477.949  | 1553.232  | NM_00726E | 8243.342  | 7835.665  | NM_001492 | 1907.362  | 1892.167  |
| AB012643  | 6767.506  | 4815.979  | AK026014  | 8885.177  | 8946.19   | AB012643  | 36736.949 | 27518.664 |
| AB023170  | 1662.426  | 1440.634  | NM_01484E | 7032.959  | 6956.331  | NM_003564 | 9668.411  | 10670.324 |
| NM_014153 | 28681.119 | 30000.32  | NM_00429E | 8317.863  | 7235.954  | AK023414  | 645.919   | 868.788   |
| NM_00229E | 35670.703 | 33640.238 | NM_001232 | 1970.844  | 1286.851  | AF317516  | 13003.643 | 14428.688 |
| NM_000414 | 6624.778  | 5661.536  | AF007190  | 1154.998  | 1377.599  | NM_002581 | 4406.13   | 4310.819  |
| AL133033  | 1192.697  | 990.758   | X74609    | 64429.672 | 62638.977 | AI417964  | 5938.657  | 5960.488  |
| NM_01884E | 20698.041 | 16812.564 | AB002316  | 2767.056  | 3552.317  | J03571    | 44938.871 | 38590.355 |
| AY008372  | 1576.335  | 1636.349  | NM_01899C | 13013.055 | 15439.675 | X56134    | 5189.526  | 4580.532  |
| NM_00550E | 14276.038 | 13454.962 | NM_013363 | 2643.938  | 2671.023  | NM_00145E | 2358.02   | 1449.253  |
| AK026964  | 2786.577  | 2654.535  | NM_000947 | 4657.739  | 4801.063  | H44784    | 1063.198  | 879.898   |
| NM_000079 | 9065.387  | 9708.841  | AL096750  | 66236.352 | 60064.492 | AI421041  | 53421.094 | 49011.75  |
| AL110245  | 3077.51   | 2703.646  | NM_016061 | 13521.547 | 15518.541 | BI759091  | 3852.46   | 4034.797  |
| NM_01620E | 15960.112 | 20439.699 | AK024740  | 11087.689 | 16786.533 | BG685843  | 22897.664 | 13439.129 |
| NM_00163E | 827.396   | 819.215   | AF078164  | 12084.605 | 12592.705 | BI490011  | 5561.968  | 3922.335  |
| NM_00563E | 13083.724 | 13127.298 | NM_01904E | 3657.814  | 4285.633  | AF035771  | 659.367   | 542.995   |
| NM_00723E | 29891     | 33238.527 | NM_005447 | 1050.992  | 993.35    | N20475    | 11202.593 | 9256.478  |
| NM_00726E | 7929.051  | 7590.076  | NM_012413 | 1271.137  | 1141.048  | BI199286  | 3458.48   | 3122.799  |
| AK026014  | 7340.932  | 8626.964  | AF130101  | 2244.761  | 2349.938  | AA026626  | 3419.777  | 2992.624  |
| NM_01484E | 6820.129  | 8426.194  | NM_00465E | 8398.171  | 8191.318  | H61726    | 1570.609  | 1466.17   |
| NM_00429E | 7148.904  | 9424.668  | AF071569  | 11238.242 | 9899.31   | X74609    | 66607.539 | 58758.609 |
| NM_001232 | 705.022   | 1225.68   | NM_00226E | 8138.889  | 8549.209  | NM_00662E | 528.934   | 556.408   |
| AF007190  | 1191.342  | 1205.253  | J04948    | 3934.149  | 3383.305  | NM_00396E | 1496.61   | 1493.638  |
| X74609    | 35370.293 | 33792.227 | NM_018043 | 2478.244  | 1650.031  | NM_004584 | 6480.131  | 5890.684  |
| AB002316  | 2217.912  | 1657.149  | AK022564  | 66378.391 | 59377.621 | X15183    | 60851.699 | 60845.477 |
| NM_01899C | 12970.561 | 13596.256 | NM_005022 | 3837.962  | 5496.362  | AK023618  | 6766.164  | 6528.129  |
| NM_013363 | 2445.686  | 2219.929  | NM_00128E | 2077.991  | 2239.747  | AF212842  | 1534.737  | 2898.857  |
| NM_000947 | 4893.232  | 4597.649  | NM_003564 | 12581.489 | 13479.171 | NM_018404 | 647.97    | 581.206   |
| AL096750  | 17540.123 | 16625.469 | AK023414  | 826.48    | 1148.483  | M27544    | 19828.658 | 16223.153 |
| NM_016061 | 11966.187 | 13426.586 | AF317516  | 15579.635 | 18631.047 | NM_001118 | 6427.3    | 5704.536  |
| NM_016062 | 37137.434 | 38157.16  | NM_002581 | 5485.771  | 6505.593  | AL133097  | 10556.142 | 7243.003  |
| NM_004153 | 7428.04   | 6768.198  | AI417964  | 8883.706  | 9635.056  | NM_00116E | 22957.223 | 18343.867 |
| AK024740  | 8492.905  | 7540.306  | J03571    | 57932.563 | 53162.656 | NM_001381 | 58732.113 | 66736.25  |
| AF078164  | 17965.83  | 16808.148 | T57791    | 1048.613  | 1189.531  | NM_00645E | 7424.37   | 5715.975  |
| NM_01904E | 5301.776  | 6355.824  | X56134    | 6789.878  | 7387.241  | NM_01445E | 601.978   | 488.911   |

|           |           |           |           |           |           |           |           |           |
|-----------|-----------|-----------|-----------|-----------|-----------|-----------|-----------|-----------|
| NM_005447 | 829.47    | 886.502   | NM_001456 | 2151.347  | 2462.642  | NM_004093 | 2648.118  | 1585.3    |
| NM_012413 | 738.532   | 905.691   | H44784    | 1231.591  | 1526.224  | NM_001446 | 15499.322 | 12745.882 |
| AF130101  | 3348      | 4174.417  | AI421041  | 63168.41  | 58102.773 | NM_001387 | 1754.124  | 1454.98   |
| NM_004656 | 7845.682  | 7512.822  | BI759091  | 6057.103  | 8982.953  | AF086122  | 1770.454  | 1666.53   |
| AF071569  | 11300.538 | 10959.757 | BG685843  | 47100.484 | 47353.746 | AK024397  | 33653.152 | 33702.418 |
| NM_002266 | 7723.325  | 9473.995  | N20475    | 20435.652 | 20742.52  | NM_018047 | 3172.632  | 2564.757  |
| J04948    | 3686.652  | 4909.527  | BI199286  | 7725.694  | 6891.255  | NM_005022 | 2623.676  | 2363.337  |
| NM_018043 | 1673.443  | 1768.695  | AA026626  | 5034.104  | 4965.396  | NM_001286 | 922.536   | 1358.325  |
| AK022564  | 61075.328 | 55225.898 | H61726    | 2566.611  | 2846.298  | NM_005626 | 26222.125 | 25649.576 |
| NM_005022 | 2060.207  | 2304.477  | NM_016436 | 1163.731  | 741.343   | NM_016605 | 60594.332 | 60569.191 |
| NM_001286 | 1723.042  | 1555.407  | AL050355  | 1377.26   | 894.221   | NM_004172 | 2204.722  | 3700.45   |
| NM_003564 | 7008.509  | 7331.865  | NM_001776 | 56039.676 | 55796.941 | S78203    | 2648.851  | 2251.521  |
| AK023414  | 1461.227  | 1322.024  | NM_004997 | 61262.992 | 60952.25  | NM_016206 | 19636.139 | 16133.067 |
| AF317516  | 23004.619 | 23315.324 | NM_005923 | 13703.101 | 13918.313 | NM_005636 | 9328.572  | 7536.647  |
| NM_002581 | 1803.633  | 1722.119  | NM_003465 | 6908.456  | 6998.521  | NM_007235 | 20075.445 | 16643.809 |
| AI417964  | 694.304   | 495.242   | AF289028  | 5624.571  | 5945.146  | NM_007266 | 4221.494  | 3436.051  |
| J03571    | 27329.123 | 27849.088 | NM_005127 | 40189.805 | 43425.52  | AK026014  | 4512.535  | 4096.879  |
| T57791    | 658.348   | 900.638   | NM_005567 | 34087.305 | 39313.414 | NM_014845 | 4040.735  | 3892.193  |
| X56134    | 3420.113  | 2678.1    | NM_005216 | 18714.252 | 21110.76  | NM_004296 | 3091.387  | 2317.411  |
| NM_001456 | 4093.022  | 3420.586  | NM_006626 | 2446.152  | 2393.538  | NM_001232 | 690.051   | 606.314   |
| H44784    | 1910.359  | 1873.292  | NM_003965 | 1522.578  | 1794.847  | NM_007181 | 15589.61  | 10145.06  |
| AI421041  | 62778.227 | 62974.523 | NM_004584 | 6521.202  | 6081.811  | AB007857  | 1820.124  | 1025.219  |
| BI759091  | 6371.179  | 7982.639  | X15183    | 64213.609 | 58003.754 | NM_001776 | 53393.859 | 39856.063 |
| BG685843  | 29561.656 | 26530.658 | AK023618  | 12497.626 | 11884.766 | NM_004997 | 52310.809 | 52641.074 |
| BI490011  | 3377.063  | 3790.575  | AF212842  | 2534.602  | 6318.808  | NM_005923 | 8938.545  | 7262.14   |
| AF035771  | 961.745   | 971.312   | AL133097  | 20702.914 | 20650.6   | NM_003465 | 3825.696  | 3577.789  |
| N20475    | 18247.402 | 20279.91  | NM_001165 | 33959.508 | 32531.293 | AF289028  | 2329.693  | 1528.426  |
| BI199286  | 9508.094  | 9702.91   | NM_001381 | 60230.762 | 61836.305 | NM_005127 | 25000.334 | 23865.471 |
| AA026626  | 3347.008  | 3430.387  | NM_006456 | 14119.474 | 12576.976 | NM_005567 | 28089.742 | 22816.012 |
| H61726    | 4040.772  | 6019.609  | NM_014459 | 2390.532  | 2303.556  | NM_005216 | 9356.084  | 5758.288  |
| NM_016436 | 1094.392  | 967.167   | AF073931  | 2269.667  | 1518.883  | J04948    | 2458.414  | 2507.645  |
| AL050355  | 1409.317  | 2168.414  | NM_018047 | 7061.383  | 6444.592  | NM_018043 | 1187.295  | 1167.171  |
| NM_001776 | 61002.406 | 57919.195 | AB023170  | 5366.767  | 4726.063  | AK022564  | 64469.129 | 62639.852 |
| NM_004997 | 13614.276 | 11707.491 | NM_014153 | 36358.281 | 45296.938 | NM_001492 | 1808.671  | 2094.033  |
| NM_005923 | 12367.466 | 10132.473 | NM_002296 | 39068.199 | 44208.664 | AB012643  | 28857.299 | 23390.705 |
| NM_003465 | 5263.977  | 4593.322  | NM_000414 | 18935.322 | 19250.746 | AB023170  | 1816.989  | 1614.474  |
| AF289028  | 5624.157  | 5273.206  | AL133033  | 827.922   | 1247.479  | NM_014153 | 16690.65  | 15194.793 |
| NM_005127 | 32986.176 | 36273.742 | NM_018845 | 17981.975 | 17083.838 | NM_002296 | 24957.141 | 17188.568 |
| NM_005567 | 5155.348  | 5280.424  | AY008372  | 1371.342  | 1246.553  | NM_000414 | 9727.566  | 5769.763  |
| NM_005216 | 23976.012 | 26155.57  | NM_005505 | 13253.738 | 13737.42  | NM_018845 | 7709.859  | 4961.732  |
| NM_006626 | 1370.626  | 1549.87   | AK026964  | 2150.175  | 1963.786  | AY008372  | 497.897   | 479.237   |
| NM_003965 | 827.743   | 840.61    | NM_000079 | 7273.314  | 7014.349  | NM_005505 | 6174.29   | 4854.108  |
| NM_004584 | 6543.628  | 5046.333  | AL110245  | 11953.704 | 11689.228 | AK026964  | 964.775   | 713.521   |
| X15183    | 65131.004 | 60997.602 | NM_001635 | 5011.943  | 1629.538  | NM_001134 | 8482.834  | 6689.768  |
| AK023618  | 11002.918 | 10837.455 | NM_005636 | 19031.617 | 21164.154 | NM_016016 | 17578.266 | 10810.006 |
| AF212842  | 1490.248  | 4123.902  | NM_007235 | 35736.086 | 40456.953 | NM_020407 | 3909.617  | 3847.134  |
| NM_018404 | 997.884   | 998.395   | NM_007266 | 8624.229  | 8408.315  | AF118274  | 23827.801 | 21634.361 |
| M27544    | 1902.939  | 1655.987  | AK026014  | 8328.306  | 7251.979  | NM_018344 | 2177.663  | 1680.679  |
| NM_002256 | 1127.356  | 1694.417  | NM_014845 | 7035.357  | 7268.667  | NM_000079 | 4967.15   | 4691.353  |
| NM_001118 | 1679.868  | 1818.757  | NM_004296 | 7491.998  | 8079.725  | NM_000083 | 1405.855  | 1289.742  |
| AL133097  | 12088.24  | 13176.057 | NM_001232 | 1520.188  | 1595.361  | AL110245  | 10543.322 | 7071.239  |
| NM_001165 | 27586.332 | 29059.965 | NM_007181 | 30298.768 | 37139.816 | X74609    | 64099.504 | 57052.973 |
| NM_001381 | 59830.84  | 63349.332 | AB007857  | 4873.788  | 4458.924  | AB002316  | 1000.475  | 737.625   |

|           |           |           |           |           |           |           |           |           |
|-----------|-----------|-----------|-----------|-----------|-----------|-----------|-----------|-----------|
| NM_00645E | 12154.337 | 13862.713 | AB002316  | 2668.365  | 2839.869  | NM_01899C | 6290.204  | 6438.437  |
| NM_01445E | 1589.232  | 2637.938  | NM_01899C | 12896.366 | 13195.098 | NM_01336E | 1551.798  | 1271.33   |
| AF073931  | 1255.334  | 1592.214  | NM_01336E | 2368.567  | 3032.451  | NM_000947 | 2771.451  | 1845.011  |
| NM_018047 | 3386.28   | 3689.319  | NM_000947 | 5924.945  | 6941.521  | AL096750  | 59934.977 | 53355.824 |
| AB023170  | 1695.38   | 1191.119  | AL096750  | 63326.73  | 57260.93  | NM_016061 | 4146.096  | 2172.441  |
| NM_01415E | 28615.109 | 30125.457 | NM_016061 | 12588.698 | 13477.029 | NM_01606E | 22733.498 | 17587.922 |
| NM_00229E | 35958.105 | 31813.342 | AF078164  | 8690.622  | 7702.54   | NM_00415E | 4015.241  | 3163.776  |
| NM_000414 | 6953.565  | 5558.776  | NM_01904E | 3054.035  | 3603.099  | AK024740  | 5313.238  | 4422.375  |
| AL133033  | 1118.518  | 1002.574  | NM_005447 | 573.023   | 851.55    | AF078164  | 8840.766  | 6862.788  |
| NM_01884E | 20251.154 | 16446.475 | NM_01241E | 884.208   | 952.729   | NM_01904E | 2897.111  | 2407.321  |
| AY008372  | 1929.019  | 1482.394  | AF130101  | 1967.299  | 2551.58   | NM_01241E | 425.673   | 432.448   |
| NM_00550E | 14211.536 | 12690.875 | NM_00465E | 7795.125  | 7555.302  | AF130101  | 1509.896  | 1119.855  |
| AK026964  | 3149.531  | 2260.873  | AF071569  | 11272.388 | 9701.75   | NM_00465E | 4184.548  | 3087.815  |
| NM_00007E | 9413.06   | 9053.836  | NM_00226E | 7139.432  | 6730.933  | AF071569  | 5958.931  | 3664.097  |
| AL110245  | 2964.475  | 3136.597  | J04948    | 4435.504  | 4966.775  | NM_00226E | 4148.626  | 2814.22   |
| NM_01620E | 14344.421 | 15959.146 | NM_01804E | 1695.255  | 1811.612  | CY3Cy5    | 2129.964  | 176.559   |
| NM_00163E | 774.864   | 710.274   | AK022564  | 64123.758 | 60211.18  | AK001099  | 490.601   | 783.645   |
| NM_00563E | 11872.375 | 16613.021 | NM_00149E | 3140.168  | 2789.502  | AK023753  | 6660.324  | 7141.796  |
| NM_00723E | 31711.545 | 39514.688 | AB012643  | 38965.102 | 41151.414 | AF086441  | 46207.945 | 35468.152 |
| NM_00726E | 8817.586  | 10125.419 | NM_003564 | 13120.331 | 14691.66  | AK022487  | 1761.556  | 2064.672  |
| AK026014  | 7024.332  | 6567.31   | AK023414  | 733.411   | 1143.304  | NM_014117 | 6882.46   | 5313.644  |
| NM_01484E | 6265.71   | 7564.398  | AF317516  | 19771.025 | 22328.836 | AK023609  | 2680.744  | 2829.063  |
| NM_00429E | 8729.135  | 11859.42  | NM_002581 | 6722.353  | 7081.976  | NM_01801E | 4190.392  | 4486.643  |
| NM_00123E | 961.876   | 1255.43   | AI417964  | 9170.431  | 9375.605  | AK027220  | 2076.745  | 2668.093  |
| NM_007181 | 36197.324 | 39805.609 | J03571    | 58909.277 | 53794.477 | NM_018011 | 10319.056 | 10413.902 |
| AB007857  | 2883.49   | 2744.744  | NM_00145E | 1939.154  | 1776.683  | NM_080824 | 843.809   | 930.365   |
| AB002316  | 2151.01   | 1716.795  | H44784    | 1105.691  | 1102.129  | SR2       | 41329     | 48816.672 |
| NM_01899C | 13135.464 | 11784.454 | AI421041  | 62345.309 | 58195.434 | SR4       | 11853.052 | 12521.665 |
| NM_01336E | 2447.956  | 2195.049  | BI759091  | 6334.576  | 7247.973  | SR6       | 1567.276  | 2124.776  |
| NM_000947 | 4765.671  | 3850.856  | BG685843  | 44147.234 | 48553.387 | SR8       | 10270.711 | 22127.498 |
| AL096750  | 18422.473 | 15287.956 | BI490011  | 8764.89   | 9441.827  | SR10      | 19663.135 | 9899.36   |
| NM_016061 | 11863.306 | 12046.913 | AF035771  | 1748.332  | 1521.819  | CY3Cy5    | 1749.176  | 169.283   |
| NM_01606E | 35709.531 | 34855.594 | N20475    | 20162.785 | 19229.813 | AK023086  | 7728.531  | 5728.019  |
| NM_00415E | 6925.072  | 6490.612  | BI199286  | 8578.46   | 7958.099  | AF241534  | 3292.15   | 3098.753  |
| AK024740  | 7872.477  | 7247.729  | AA026626  | 5361.908  | 5578.794  | AF085877  | 1481.668  | 1309.516  |
| AF078164  | 15462.089 | 14683.326 | H61726    | 2967.63   | 2025.617  | AK002078  | 1602.182  | 1640.38   |
| NM_01904E | 5787.867  | 5951.913  | AL050355  | 1331.412  | 660.419   | AF085837  | 3611.014  | 2957.699  |
| NM_005447 | 918.143   | 1087.43   | AF007190  | 1272.313  | 1160.376  | AK023165  | 1623.201  | 1423.924  |
| NM_01241E | 1287.508  | 1407.305  | X74609    | 63596.742 | 59834.465 | AK023857  | 4087.329  | 5745.11   |
| AF130101  | 2598.501  | 2622.226  | NM_00662E | 1322.826  | 1647.367  | NM_01611E | 7396.713  | 8688.94   |
| NM_00465E | 5391.778  | 4812.502  | NM_00396E | 1379.447  | 1542.803  | NM_01495C | 4575.769  | 5068.465  |
| AF071569  | 12018.671 | 13334.992 | NM_004584 | 9500.572  | 8419.622  | AL080180  | 1236.197  | 2022.926  |
| NM_00226E | 6149.941  | 6748.242  | X15183    | 64311.195 | 58993.527 | X89067    | 3562.599  | 4362.315  |
| J04948    | 3453.672  | 3992.259  | AK023618  | 14292.276 | 14682.025 | AF147376  | 2480.636  | 2535.419  |
| NM_01804E | 1445.768  | 1588.348  | AF212842  | 2854.982  | 6045.656  | AK027190  | 2177.389  | 2496.195  |
| AK022564  | 62984.852 | 53707.684 | NM_001118 | 4862.603  | 4821.997  | AF086259  | 3748.24   | 4552.416  |
| NM_00149E | 1946.673  | 2034.728  | AL133097  | 14814.3   | 12695.594 | AF086369  | 924.289   | 1143.042  |
| AB012643  | 5512.655  | 5768.597  | NM_00116E | 34035.41  | 32335.029 | NM_01828C | 2493.438  | 3483.474  |
| NM_003564 | 7631.124  | 7123.366  | NM_001381 | 57543.945 | 64925.996 | AK024381  | 582.466   | 602.489   |
| AK023414  | 1518.776  | 1253.859  | U90908    | 1427.172  | 1870.401  | AK026503  | 1594.907  | 1463.515  |
| AF317516  | 24781.426 | 24603.051 | NM_00645E | 12671.149 | 12054.089 | AK026671  | 2823.752  | 2887.872  |
| NM_002581 | 2197.396  | 1744.332  | NM_01445E | 2069.942  | 1827.328  | AF086087  | 13867.997 | 9198.378  |
| J03571    | 28717.127 | 28431.168 | NM_00409E | 4749.976  | 4731.76   | AF075084  | 1363.852  | 993.468   |

|           |           |           |           |           |           |           |           |           |
|-----------|-----------|-----------|-----------|-----------|-----------|-----------|-----------|-----------|
| T57791    | 852.44    | 750.289   | NM_001449 | 28380.184 | 28748.367 | AF085915  | 1141.452  | 1120.057  |
| X56134    | 3509.069  | 2812.713  | NM_001387 | 2061.281  | 1776.258  | AF075091  | 775.969   | 690.863   |
| NM_001456 | 4288.325  | 3487.197  | AF086122  | 2881.104  | 2154.302  | AK000671  | 68671.438 | 63315.035 |
| H44784    | 1796.348  | 1684.423  | AK024397  | 43228.379 | 40754.727 | AL137425  | 1444.542  | 2130.933  |
| AI421041  | 63104.133 | 62579.785 | AF073931  | 626.451   | 691.249   | AL137637  | 1096.219  | 1421.738  |
| BI759091  | 6719.516  | 8923.65   | NM_018047 | 7095.451  | 5818.039  | AL359584  | 2818.524  | 3902.099  |
| BG685843  | 45290.059 | 49352.176 | NM_005022 | 3907.59   | 3498.21   | AL137285  | 3672.6    | 4011.647  |
| BI490011  | 3274.134  | 3246.441  | NM_001288 | 2237.142  | 1966.948  | AL137456  | 1938.766  | 2155.713  |
| N20475    | 19617.338 | 19891.359 | NM_005628 | 38939     | 36619.324 | AL157489  | 996.525   | 858.852   |
| BI199286  | 10243.687 | 12312.793 | NM_003951 | 399.784   | 885.425   | AL390157  | 876.939   | 1347.335  |
| AA026626  | 2977.51   | 3276.669  | NM_016605 | 67522.961 | 69449.102 | AK021649  | 980.692   | 854.161   |
| H61726    | 3445.798  | 3312.622  | NM_004172 | 649.013   | 642.738   | AL080151  | 1731.96   | 1602.591  |
| NM_016436 | 880.531   | 612.527   | S78203    | 4585.747  | 4196.695  | AL050085  | 1042.703  | 735.233   |
| AL050355  | 1529.377  | 1505.499  | NM_016208 | 35378.984 | 38696.746 | AK024127  | 6353.176  | 6340.437  |
| AF007190  | 1612.531  | 1788.171  | NM_001635 | 2045.305  | 2153.476  | AK021574  | 4464.286  | 3547.326  |
| X74609    | 45941.969 | 51807.5   | NM_005638 | 3859.886  | 2914.493  | NM_017621 | 15384.66  | 9215.524  |
| NM_006626 | 1176.318  | 1242.988  | NM_007235 | 19931.252 | 20518.932 | AF131767  | 9672.423  | 7801.336  |
| NM_003965 | 936.872   | 826.215   | NM_007269 | 4173.388  | 4189.303  | AF090920  | 952.828   | 1197.37   |
| NM_004584 | 6478.78   | 5286.244  | AK026014  | 7708.397  | 6862.965  | AK021907  | 2529.134  | 3422.144  |
| X15183    | 68458.859 | 62426.707 | NM_014845 | 6412.124  | 6158.112  | AK022029  | 2736.915  | 3633.564  |
| AK023618  | 11144.646 | 10157.249 | NM_004298 | 7659.054  | 7254.708  | AK022167  | 6290.212  | 4776.854  |
| AF212842  | 1473.755  | 3868.191  | NM_001232 | 1651.226  | 2231.171  | AK022320  | 4695.34   | 5621.931  |
| NM_018404 | 1031.33   | 1370.586  | NM_007181 | 31780.361 | 28768.518 | AK022058  | 3618.042  | 4088.703  |
| M27544    | 2507.486  | 2476.155  | AB007857  | 3269.416  | 2919.233  | AK024326  | 3278.904  | 2577.487  |
| NM_002258 | 978.935   | 1136.631  | NM_001778 | 63294.266 | 55710.105 | U61088    | 1484.876  | 838.608   |
| NM_001118 | 1703.58   | 1812.724  | NM_004997 | 63460.176 | 59272.539 | AF086467  | 1635.944  | 1171.469  |
| AL133097  | 13815.685 | 11021.342 | NM_005923 | 15493.395 | 9058.739  | AK021583  | 2577.68   | 1264.835  |
| NM_001165 | 27210.537 | 29073.65  | NM_003465 | 10230.261 | 6775.034  | AL137442  | 2517.195  | 1662.304  |
| NM_001381 | 62155.473 | 67138.688 | AF289028  | 6684.188  | 4573.446  | AL049281  | 822.799   | 680.367   |
| U90908    | 1963.501  | 1807.231  | NM_005127 | 40716.969 | 29594.121 | NM_001208 | 39378.688 | 22871.928 |
| NM_006458 | 10540.513 | 9260.27   | NM_005567 | 35268.242 | 25332.525 | AL050061  | 5781.485  | 4636.158  |
| NM_014458 | 1592.197  | 2223.783  | NM_005216 | 20343.34  | 14413.46  | AK025522  | 21463.025 | 19356.33  |
| NM_004093 | 5575.066  | 5401.937  | J04948    | 3923.017  | 3756.761  | AK025464  | 66414.367 | 64195.418 |
| NM_001448 | 26161.418 | 30614.641 | NM_018043 | 1628.08   | 1319.057  | AL049962  | 4971.295  | 4638.806  |
| NM_001387 | 607.109   | 576.334   | AK022564  | 62211.797 | 70727.93  | NM_004988 | 27982.873 | 24899.008 |
| AF086122  | 2758.175  | 2858.659  | NM_001492 | 1970.89   | 1967.999  | AF147362  | 592.677   | 468.276   |
| AK024397  | 4831.042  | 4721.797  | AB012643  | 36672.512 | 35087.703 | AK023291  | 9301.246  | 6036.258  |
| AF073931  | 705.435   | 827.615   | AB023170  | 4451.964  | 3693.879  | AF119911  | 9155.846  | 8136.333  |
| NM_018047 | 4299.773  | 4289.747  | NM_014153 | 36948.477 | 43573.734 | AF116656  | 7917.4    | 7262.487  |
| NM_005022 | 2549.852  | 3355.836  | NM_002296 | 41643.164 | 43935.434 | NM_001050 | 7787.5    | 6437.229  |
| NM_001288 | 2160.063  | 2970.575  | NM_000414 | 11132.61  | 8005.805  | AF132206  | 2500.194  | 2315.152  |
| NM_005628 | 40546.684 | 42943.508 | NM_018845 | 16110.653 | 12820.344 | AJ001869  | 20729.473 | 16556.826 |
| NM_003951 | 898.195   | 785.6     | AY008372  | 1258.195  | 1317.123  | AB040944  | 5621.707  | 5229.842  |
| NM_016605 | 52508.508 | 54551.488 | NM_005505 | 11579.777 | 10831.442 | NM_018145 | 4357.221  | 4622.838  |
| S78203    | 4146.4    | 4169.016  | AK026964  | 2952.038  | 2499.592  | NM_018476 | 28976.348 | 18227.053 |
| NM_016208 | 14298.359 | 15131.836 | NM_001134 | 13546.727 | 12905.824 | AF220492  | 20693.859 | 9250.044  |
| NM_001635 | 901.361   | 870.849   | NM_016016 | 35264.078 | 29328.012 | NM_003814 | 2258.112  | 1401.659  |
| NM_005638 | 13114.794 | 11858.78  | NM_020407 | 4920.48   | 3722.48   | NM_002968 | 939.716   | 685.197   |
| NM_007235 | 30705.576 | 34302.145 | AF118274  | 39898.016 | 29571.234 | AK026898  | 3386.773  | 2398.995  |
| NM_007269 | 7601.712  | 7272.026  | NM_018344 | 4040.289  | 2692.509  | AK022419  | 3191.525  | 4802.464  |
| AK026014  | 7027.744  | 7371.771  | NM_000079 | 10729.592 | 7310.885  | AJ251832  | 517.366   | 581.271   |
| NM_014845 | 6530.238  | 6629.404  | NM_000083 | 2852.581  | 2122.902  | NM_013936 | 3750.721  | 3465.623  |
| NM_004298 | 7610.305  | 7963.441  | AL110245  | 15297.921 | 10051.917 | AL078636  | 2921.31   | 3551.684  |

|           |           |           |           |           |           |           |           |           |
|-----------|-----------|-----------|-----------|-----------|-----------|-----------|-----------|-----------|
| NM_001232 | 975.533   | 975.847   | AL050355  | 1106.307  | 581.204   | AK022382  | 1644.438  | 1800.234  |
| NM_007181 | 36881.887 | 39528.32  | AF007190  | 1061.069  | 529.919   | AL080128  | 11064.702 | 6636.497  |
| AB007857  | 2888.519  | 2401.848  | X74609    | 54315.848 | 52987.238 | AB037787  | 11512.239 | 5518.049  |
| NM_001778 | 59134.422 | 57453.723 | AB002316  | 2909.512  | 2254.07   | NM_001822 | 3141.798  | 5849.59   |
| NM_004997 | 14231.627 | 10328.63  | NM_018990 | 12963.159 | 13368.459 | NM_017596 | 6373.721  | 3832.834  |
| NM_005923 | 12992.114 | 10336.776 | NM_013363 | 2957.862  | 2222.042  | AL157480  | 3267.022  | 2203.568  |
| NM_003465 | 6233.961  | 6126.671  | NM_000947 | 1939.617  | 2466.168  | NM_014386 | 1906.441  | 1502.823  |
| AF289028  | 7840.568  | 6753.475  | AL096750  | 59417.883 | 52587.035 | NM_018110 | 4053.189  | 6867.737  |
| NM_005127 | 35798.48  | 45987.566 | NM_016061 | 10503.468 | 10348.276 | AF312678  | 3192.065  | 2583.152  |
| NM_005567 | 5646.005  | 6755.844  | NM_016062 | 37634.988 | 35012.652 | NM_006253 | 4986.143  | 4726.022  |
| NM_005216 | 28102.563 | 33075.895 | NM_004153 | 8201.941  | 8312.676  | NM_003866 | 914.012   | 1078.641  |
| J04948    | 3760.856  | 3515.338  | NM_019049 | 3768.271  | 3650.195  | NM_018262 | 2516.767  | 4309.781  |
| NM_018043 | 1360.285  | 1178.397  | NM_012413 | 935.708   | 706.664   | NM_003220 | 5600.46   | 5818.154  |
| AK022564  | 59678.5   | 53415.223 | AF130101  | 1954.138  | 1332.022  | AF009674  | 20179.447 | 18454.664 |
| NM_001492 | 1497.339  | 1793.294  | NM_004656 | 6964.519  | 4097.102  | NM_000360 | 1831.677  | 2153.084  |
| AB012643  | 5774.718  | 4286.006  | AF071569  | 10680.32  | 5302.377  | NM_000844 | 3533.693  | 3995.22   |
| AB023170  | 1935.229  | 1419.713  | NM_002269 | 6570.333  | 4819.854  | NM_005510 | 19424.127 | 17784.07  |
| NM_014153 | 34514.359 | 37139.191 | CY3Cy5    | 5716.54   | 112.647   | Z36817    | 1307.403  | 1474.823  |
| NM_002296 | 37114.863 | 36442.773 | NM_080824 | 1274.814  | 1101.446  | NM_014505 | 39784.199 | 34616.758 |
| NM_000414 | 6856.702  | 5121.462  | AF086328  | 10324.442 | 9151.106  | NM_004209 | 11252.048 | 9934.666  |
| AL133033  | 1158.406  | 1229.658  | AF086427  | 676.946   | 893.597   | NM_002201 | 66933.492 | 65746.109 |
| NM_018845 | 21074.682 | 17283.916 | AK024196  | 1106.194  | 782.151   | AK025047  | 3692.986  | 1803.156  |
| AY008372  | 1753.638  | 1778.862  | AK001099  | 877.523   | 896.135   | NM_006763 | 18289.322 | 23009.883 |
| NM_005505 | 15707.946 | 12205.043 | AK023753  | 6568.185  | 5904.865  | NM_006119 | 14528.071 | 21786.822 |
| AK026964  | 3261.8    | 3116.063  | AF086441  | 39674.914 | 37386.086 | NM_004465 | 4257.673  | 6137.08   |
| NM_001134 | 2357.351  | 2776.702  | AK027255  | 1107.818  | 1108.146  | NM_001761 | 5324.565  | 2237.944  |
| NM_016016 | 41470.223 | 40261.363 | NM_014117 | 6568.664  | 6488.519  | BE884341  | 4014.817  | 2469.679  |
| NM_020407 | 2159.176  | 1896.702  | AK023609  | 5948.141  | 5342.529  | AF231997  | 2965.275  | 2268.219  |
| AF118274  | 5201.183  | 3963.339  | NM_018019 | 7173.346  | 6930.372  | NM_007125 | 3231.235  | 3250.696  |
| NM_018344 | 2401.948  | 2541.132  | AK027220  | 3506.42   | 4157.515  | NM_002598 | 11680.382 | 9510.406  |
| NM_000079 | 11579.277 | 13154.416 | NM_018011 | 19671.096 | 24302.59  | NM_020184 | 2339.651  | 2595.919  |
| NM_000083 | 4564.844  | 4809.975  | NM_080824 | 1301.343  | 1276.774  | NM_005815 | 1534.464  | 1699.174  |
| AL110245  | 3238.216  | 3590.538  | SR2       | 71297.813 | 60653.391 | NM_001229 | 3043.745  | 3201.805  |
| NM_016436 | 995.949   | 588.637   | SR4       | 23300.084 | 31989.357 | NM_014916 | 1024.468  | 1048.323  |
| AL050355  | 1171.968  | 824.422   | SR6       | 3055.223  | 3908.041  | NM_000250 | 1096.999  | 1253.794  |
| AF007190  | 1442.684  | 1291.114  | SR8       | 11857.986 | 42881.871 | NM_018147 | 16197.221 | 14205.574 |
| X74609    | 38707.551 | 37376.313 | SR10      | 38046.387 | 15321.511 | NM_018967 | 11578.979 | 11350.132 |
| AB002316  | 2237.613  | 1899.555  | CY3Cy5    | 6662.993  | 293.35    | NM_001850 | 1557.063  | 2126.134  |
| NM_018990 | 13919.633 | 12961.594 | AK024874  | 1358.957  | 1165.557  | NM_002160 | 3468.151  | 5784.995  |
| NM_013363 | 2686.296  | 2520.84   | AF086071  | 765.965   | 1112.804  | NM_005675 | 1231.617  | 1635.117  |
| NM_000947 | 5526.536  | 4396.492  | AK023086  | 10423.774 | 7334.749  | NM_002812 | 10906.914 | 16284.576 |
| AL096750  | 19565.963 | 18722.105 | AK002078  | 3590.359  | 2994.71   | NM_020365 | 6090.164  | 10918.626 |
| NM_016061 | 12058.591 | 11107.708 | AF085837  | 5973.515  | 4203.285  | NM_003982 | 7057.764  | 10449.431 |
| NM_016062 | 37764.652 | 39750.766 | AK023165  | 2835.147  | 2381.417  | NM_002112 | 10097.026 | 4344.265  |
| NM_004153 | 7134.342  | 6393.082  | NM_016115 | 3135.124  | 3518.615  | NM_004121 | 11334.387 | 6445.541  |
| AK024740  | 8368.498  | 8120.924  | NM_014950 | 6641.095  | 8895.201  | AY007092  | 3442.963  | 2377.695  |
| AF078164  | 18342.963 | 17424.043 | AL080180  | 1433.105  | 2000.987  | NM_001902 | 1159.686  | 928.247   |
| NM_019049 | 3927.303  | 3970.125  | X89067    | 2894.439  | 3019.026  | AL137605  | 52296.906 | 52180.906 |
| NM_005447 | 1267.788  | 1423.033  | AK027190  | 3780.844  | 4309.747  | NM_016261 | 1257.116  | 1033.404  |
| NM_012413 | 1329.637  | 983.335   | AF086259  | 6167.665  | 5290.946  | NM_006519 | 856.947   | 847.946   |
| AF130101  | 2727.668  | 2281.156  | AF086369  | 1547.987  | 1904.996  | NM_004607 | 64257.398 | 60341.938 |
| NM_004656 | 7892.533  | 5903.826  | NM_018280 | 5277.033  | 5257.588  | NM_012076 | 2348.129  | 2097.262  |
| AF071569  | 12412.121 | 12249.119 | AK024381  | 1203.673  | 1247.453  | NM_007285 | 40228.051 | 36463.797 |

|           |           |           |           |           |           |           |           |           |
|-----------|-----------|-----------|-----------|-----------|-----------|-----------|-----------|-----------|
| NM_002269 | 7530.789  | 9385.762  | AK026503  | 2912.112  | 3387.364  | D14678    | 11969.345 | 10760.792 |
| CY3Cy5    | 9372.003  | 391.813   | AK026671  | 4195.76   | 3637.033  | NM_016221 | 4125.288  | 6046.653  |
| NM_080824 | 1377.563  | 949.529   | AF086087  | 17959.6   | 17753.723 | NM_018113 | 1076.745  | 1367.4    |
| AF086328  | 1296.486  | 1310.764  | AK000671  | 73521.648 | 62477.555 | U73377    | 6132.067  | 8126.749  |
| AF086427  | 740.663   | 854.068   | AK094020  | 1244.658  | 1525.499  | NM_016162 | 3713.726  | 4123.563  |
| AK024196  | 976.424   | 936.158   | AL137425  | 2396.659  | 3060.926  | NM_006662 | 28225.049 | 16736.139 |
| AK001099  | 903.642   | 946.314   | AL137637  | 1519.443  | 1699.101  | NM_004031 | 3702.798  | 1926.256  |
| AK023753  | 1828.115  | 1777.508  | AL359584  | 2522.042  | 2892.471  | NM_016303 | 1915.856  | 3086.013  |
| AF086441  | 2455.063  | 2318.626  | AL137285  | 3977.32   | 3477.058  | D17129    | 60245.418 | 31155.998 |
| AK027255  | 1620.244  | 1690.978  | AL137456  | 4061.24   | 4746.56   | NM_003091 | 26996.043 | 12451.608 |
| AK022487  | 638.543   | 668.542   | AL157489  | 2723.849  | 2867.314  | NM_004247 | 5097.207  | 3280.007  |
| NM_014117 | 1688.31   | 1471.411  | AL390157  | 3099.999  | 3663.093  | NM_017722 | 7537.956  | 5705.119  |
| AK023609  | 7757.767  | 10040.537 | AK021649  | 1428.511  | 1257.785  | AL137730  | 9715.287  | 6953.712  |
| NM_018019 | 7208.971  | 7221.52   | AL080151  | 3340.836  | 3909.688  | NM_004500 | 49960.078 | 32307.65  |
| AK027220  | 4304.482  | 4407.304  | AL050085  | 1674.967  | 1789.011  | NM_003276 | 11375.921 | 8178.469  |
| NM_018011 | 21802.465 | 22011.426 | AK001308  | 882.429   | 966.099   | AL137681  | 3923.914  | 3707.897  |
| NM_080824 | 1087.095  | 1091.107  | AK024127  | 2424.793  | 2780.236  | AK025694  | 68736.563 | 59408.492 |
| SR2       | 57611.359 | 52654.355 | AK024243  | 1785.094  | 2176.265  | NM_002157 | 65668.031 | 57859.059 |
| SR4       | 18897.877 | 26248.922 | AK021574  | 6404.312  | 6440.278  | NM_004095 | 10923.503 | 8784.299  |
| SR6       | 2035.555  | 2951.185  | NM_017621 | 18490.328 | 15622.67  | NM_014365 | 1018.959  | 1692.754  |
| SR8       | 8434.817  | 33440.934 | AK023574  | 1660.371  | 1628.911  | NM_005147 | 11928.418 | 15146.04  |
| SR10      | 27877.895 | 10672.85  | AF131767  | 10645.33  | 10179.45  | NM_014665 | 7604.184  | 8506.53   |
| CY3Cy5    | 3464.403  | 170.766   | AK021807  | 796.059   | 481.395   | NM_000476 | 1767.447  | 1256.949  |
| AK024874  | 1221.241  | 1316.27   | AK021907  | 3928.922  | 4209.31   | AB033016  | 16734.057 | 10775.056 |
| AK021847  | 3974.465  | 4205.097  | AK022029  | 4063.528  | 3680.968  | D87452    | 5062.383  | 3647.53   |
| AK023086  | 11163.318 | 9097.463  | AK022167  | 1444.893  | 1421.894  | AB037864  | 3210.547  | 2868.538  |
| AF085855  | 859.227   | 1101.327  | AK022320  | 4634.869  | 4622.354  | L26494    | 5487.201  | 4781.422  |
| AF085877  | 788.127   | 445.375   | AK022058  | 5757.07   | 6146.6    | AK024322  | 978.137   | 1191.663  |
| AK002078  | 2724.405  | 2522.64   | AK022196  | 1209.537  | 1523.853  | BF382513  | 23397.432 | 26055.441 |
| AF085837  | 4885.153  | 3643.417  | AK022350  | 738.388   | 675.06    | AB020713  | 23819.998 | 19850.604 |
| AK023165  | 4053.214  | 4349.084  | AK024326  | 4450.125  | 7360.129  | AK025426  | 4855.419  | 4686.042  |
| AK023857  | 656.104   | 993.174   | U61088    | 1628.225  | 2211.761  | NM_016555 | 8003.568  | 6438.207  |
| NM_016115 | 4322.332  | 5408.422  | AF086467  | 2138.971  | 2385.42   | NM_007145 | 11689.038 | 13416.389 |
| NM_014950 | 6194.438  | 6594.375  | AL137345  | 5241.642  | 5390.996  | AL133112  | 1670.357  | 4024.269  |
| AF147376  | 2240.454  | 3119.076  | AK000967  | 8567.893  | 9992.6    | NM_002195 | 6738.479  | 8308.197  |
| AK027190  | 1421.617  | 1267.817  | AK021583  | 4793.913  | 5398.284  | BC005219  | 4491.623  | 4652.282  |
| AF086259  | 1621.659  | 1497.219  | AL137442  | 4100.308  | 4066.517  | NM_000950 | 65260.648 | 62542.434 |
| NM_018280 | 834.716   | 876.242   | AL049281  | 1909.322  | 1877.479  | NM_005135 | 6755.905  | 4460.71   |
| AK024381  | 1060.399  | 1195.76   | NM_001208 | 62932.512 | 60292.566 | AA478950  | 7067.887  | 4647.394  |
| AK026503  | 3019.22   | 3367.186  | AL050061  | 4826.271  | 4709.238  | BF942101  | 9154.314  | 5953.196  |
| AK026671  | 3344.981  | 4147.9    | AL050206  | 1130.896  | 1309.923  | BI825012  | 53686.684 | 51226.344 |
| AF086087  | 27680.135 | 35050.055 | AK025522  | 33476     | 31280.287 | M21574    | 1311.33   | 1496.77   |
| AF147422  | 595.997   | 836.757   | AK025464  | 68297.805 | 63411.867 | BM051302  | 1878.038  | 1893.562  |
| AK000671  | 71538.711 | 60980.902 | AL049962  | 9367.65   | 7513.005  | BE314182  | 21582.428 | 18328.545 |
| AK002016  | 949.215   | 976.978   | BE746723  | 2122.699  | 1609.447  | AI808029  | 1564.082  | 2612.505  |
| AK094020  | 1020.514  | 1112.694  | NM_020408 | 2770.381  | 2895.97   | AI971217  | 3879.304  | 9346.543  |
| AL137425  | 2046.137  | 1779.766  | NM_004988 | 42598.832 | 46044.805 | X03225    | 5839.435  | 8274.674  |
| AL137637  | 1324.088  | 1113.594  | AF147362  | 2386.982  | 2885.316  | AK097395  | 43860.301 | 41555.477 |
| AL359584  | 2441.604  | 2393.194  | AF147365  | 2221.837  | 2418.483  | M12783    | 3563.154  | 3402.415  |
| AL137285  | 1971.141  | 1802.018  | S72917    | 1709.099  | 2260.776  | AK091535  | 1273.36   | 1410.178  |
| AL137456  | 3314.032  | 3738.431  | AF076617  | 68131.836 | 68141.875 | AF085357  | 4999.777  | 5943.869  |
| AL157489  | 2001.43   | 1791.149  | AK025129  | 1346.901  | 1277.88   | NM_003841 | 53038.047 | 39680.898 |
| AL390157  | 1706.93   | 1489.449  | NM_014392 | 37544.867 | 43228.91  | AF296673  | 8156.768  | 10433.903 |

|           |           |           |           |           |           |           |           |           |
|-----------|-----------|-----------|-----------|-----------|-----------|-----------|-----------|-----------|
| AK021649  | 1349.968  | 1024.382  | AK023291  | 13271.876 | 12137.938 | NM_004079 | 21167.096 | 12969.776 |
| AL080151  | 2847.369  | 3136.149  | AK001117  | 768.147   | 744.549   | NM_002996 | 708.184   | 458.848   |
| AK001308  | 916.396   | 659.468   | BF541820  | 1526.074  | 1563.097  | AF317425  | 3219.768  | 2277.812  |
| AK024127  | 1758.383  | 1679.161  | AF119911  | 18458.131 | 20554.736 | NM_018002 | 3974.723  | 3651.214  |
| AK024243  | 1065.734  | 1210.612  | AF116656  | 12937.286 | 12343.298 | AK024821  | 6124.648  | 4215.24   |
| AK021574  | 4242.385  | 4987.823  | NM_001050 | 12161.595 | 12091.802 | AB002340  | 10245.42  | 8147.224  |
| NM_017621 | 13718.77  | 14899.422 | AF132206  | 4612.177  | 3698.171  | NM_000224 | 13437.034 | 10843.665 |
| AK023574  | 2406.229  | 2728.248  | AJ001869  | 20552.977 | 17595.76  | NM_014328 | 4847.209  | 5141.708  |
| AF131767  | 2168.035  | 2456.759  | AJ002969  | 375.992   | 791.854   | NM_006414 | 9903.555  | 12174.225 |
| AK021807  | 786.674   | 779.891   | AF070579  | 1109.084  | 1123.205  | NM_014322 | 28968.631 | 51243.73  |
| NM_013343 | 1128.518  | 2886.008  | NM_005295 | 4111.269  | 4323.838  | NM_004122 | 6484.263  | 7871.306  |
| AK021907  | 3963.796  | 3822.298  | NM_020213 | 8970.066  | 7530.091  | NM_002928 | 32298.895 | 30129.324 |
| AK022029  | 2277.505  | 2142.337  | D17267    | 14313.147 | 13941.066 | NM_000160 | 2260.427  | 2116.486  |
| AK022167  | 1055.637  | 967.055   | AF200341  | 1648.313  | 1515.21   | NM_003301 | 1320.054  | 1591.934  |
| AK022320  | 2437.045  | 3024.033  | AJ238214  | 2984.29   | 3457.092  | NM_000955 | 2678.975  | 2991.085  |
| AK022058  | 855.561   | 753.819   | AB040944  | 7671.955  | 7198.961  | U27768    | 4576.055  | 4265.234  |
| AK022196  | 730.525   | 733.283   | NM_018145 | 8759.509  | 8162.27   | NM_018479 | 11873.491 | 9663.041  |
| AK022350  | 1038.129  | 619.66    | NM_018476 | 23675.676 | 35058.02  | NM_014362 | 1401.326  | 900.754   |
| AK024326  | 4942.56   | 5345.493  | AF220492  | 35604.969 | 52152.738 | NM_018308 | 5835.495  | 3332.588  |
| U61088    | 1179.345  | 1415.121  | X89671    | 9737.208  | 15009.323 | NM_001832 | 47528.398 | 47539.199 |
| AF086467  | 2168.052  | 2207.624  | NM_014941 | 7423.284  | 10702.614 | NM_017774 | 26692.781 | 17941.01  |
| AL137345  | 6072.275  | 5568.371  | NM_018372 | 6570.14   | 8990.248  | AB037716  | 2576.675  | 2050.669  |
| AK000967  | 10152.068 | 10162.784 | NM_013253 | 3201.813  | 3113.819  | NM_001926 | 4643.714  | 3605.063  |
| AK021583  | 8622.004  | 8040.084  | NM_005895 | 9520.182  | 9694.702  | NM_016297 | 3949.492  | 2826.702  |
| AL137442  | 4211.125  | 4447.726  | D82345    | 1559.982  | 1460.127  | NM_001752 | 5656.411  | 4349.522  |
| AL049281  | 1226.268  | 1331.993  | NM_003814 | 4236.121  | 4509.66   | AL137672  | 3618.428  | 2940.104  |
| NM_001208 | 50805.18  | 47900.887 | NM_002968 | 1781.071  | 1893.356  | NM_002241 | 3301.616  | 3425.455  |
| AL050061  | 994.633   | 1022.215  | AK026898  | 6588.966  | 5041.247  | NM_012281 | 10366.854 | 8496.407  |
| AL050206  | 1948.268  | 1989.456  | NM_006637 | 1333.775  | 1525.886  | NM_005509 | 1538.374  | 1768.022  |
| AK025522  | 34434.371 | 43207.316 | AK022419  | 2132.759  | 1741.582  | AF091034  | 7331.469  | 16796.861 |
| AK025464  | 66937.477 | 54797.316 | AJ251832  | 1659.598  | 2131.946  | NM_005301 | 59943.254 | 57766.656 |
| AL049962  | 13107.248 | 13584.931 | NM_014624 | 1033.698  | 576.481   | NM_016653 | 1776.453  | 1865.927  |
| BE746723  | 3534.481  | 2835.143  | NM_013936 | 5937.927  | 4929.922  | AB035124  | 10561.87  | 8376.667  |
| NM_020408 | 3528.731  | 4183.758  | AF086145  | 2775.521  | 2733.738  | AF060170  | 1411.344  | 1516.081  |
| NM_004988 | 5324.998  | 4403.418  | Z70709    | 3967.182  | 3757.269  | NM_016602 | 1108.34   | 977.349   |
| AF147362  | 1188.031  | 1251.807  | BC002538  | 6845.021  | 6773.764  | NM_004409 | 8708.389  | 6596.14   |
| AF147365  | 1372.848  | 1371.714  | AK022355  | 2599.096  | 2486.666  | AK023397  | 2010.563  | 1428.521  |
| S72917    | 1218.26   | 1478.014  | NM_017836 | 5155.387  | 6142.252  | NM_000262 | 3669.403  | 2632.303  |
| M91159    | 1782.25   | 2070.259  | AK096584  | 67139.852 | 58948.828 | AK024393  | 7359.024  | 10120.193 |
| AK025129  | 1535.907  | 1534.094  | Z29070    | 2021.899  | 2387.524  | AK022537  | 8375.653  | 8296.74   |
| NM_014392 | 39090.297 | 48165.965 | AL078636  | 6309.393  | 6673.293  | AF064597  | 1268.702  | 1005.862  |
| AK023291  | 17220.844 | 17287.688 | AK022382  | 2672.084  | 2372.403  | NM_006345 | 4039.456  | 4081.714  |
| AK001117  | 653.979   | 943.978   | AL080128  | 16880.365 | 21465.688 | NM_006875 | 15979.127 | 12730.151 |
| BF541820  | 937.186   | 1149.995  | AB037787  | 18612.453 | 27276.334 | D87119    | 22069.439 | 34336.582 |
| AF119911  | 27086.852 | 37686.898 | AB033072  | 3467.668  | 5316.284  | NM_006556 | 17995.83  | 20569.146 |
| AF116656  | 15073.386 | 16750.922 | AB040892  | 6125.417  | 7152.468  | AL133066  | 1894.902  | 2518.904  |
| NM_001050 | 12983.589 | 11780.776 | NM_001822 | 396.61    | 1225.543  | AF264717  | 2428.448  | 2388.082  |
| AF132206  | 7156.91   | 7735.181  | NM_018268 | 57840.352 | 58631.668 | NM_012260 | 14667.421 | 10256.789 |
| AJ001869  | 3093.192  | 3140.41   | AF230904  | 22921.416 | 21804.592 | NM_001141 | 1335.508  | 1357.229  |
| AJ002969  | 633.144   | 742.686   | NM_017596 | 10127.976 | 11149.713 | NM_000018 | 8767.634  | 6266.112  |
| AF070579  | 1490.702  | 1552.416  | AL157480  | 6109.769  | 6202.102  | NM_001275 | 61951.406 | 59769.586 |
| NM_005295 | 681.393   | 766.692   | NM_014386 | 3442.709  | 3775.654  | NM_000322 | 42518.309 | 30657.438 |
| NM_020213 | 12825.809 | 12552.158 | NM_018110 | 4873.339  | 4826.837  | L10139    | 4936.999  | 4622.804  |

|           |           |           |           |           |           |           |           |           |
|-----------|-----------|-----------|-----------|-----------|-----------|-----------|-----------|-----------|
| D17267    | 17263.412 | 17662.338 | AF312678  | 1040.191  | 1188.111  | NM_00003E | 56590.82  | 47355.355 |
| AF200341  | 1286.975  | 1148.218  | NM_006253 | 8761.563  | 7453.465  | NM_02047C | 17484.594 | 14063.216 |
| AJ238214  | 2466.687  | 2437.264  | NM_00386E | 1403.003  | 1203.768  | NM_006574 | 1077.303  | 1310.507  |
| AB040944  | 4532.343  | 3555.955  | NM_018262 | 3950.553  | 3684.699  | AA478950  | 11236.031 | 17944.785 |
| NM_01814E | 7338.203  | 6553.168  | NM_006207 | 2280.644  | 2098.702  | BF942101  | 20675.932 | 28071.332 |
| NM_01847E | 3066.346  | 3309.481  | NM_00322C | 10161.705 | 10023.686 | BI825012  | 56752.945 | 56268.09  |
| AF220492  | 39964.965 | 43639.43  | AF009674  | 24267.322 | 22041.477 | M21574    | 1516.202  | 1357.535  |
| X89671    | 10025.414 | 10013.622 | NM_00036C | 4089.163  | 4076.072  | BM051302  | 1925.91   | 1827.13   |
| NM_018372 | 10574.929 | 11271.106 | NM_000844 | 3641.85   | 3323.799  | BE314182  | 21169.045 | 16180.318 |
| NM_013253 | 4067.075  | 4030.012  | NM_00551C | 29123.447 | 29315.207 | AI808029  | 1434.435  | 1646.973  |
| NM_00589E | 16009.765 | 18419.414 | Z36817    | 3012.301  | 3196.154  | X03225    | 5214.13   | 7070.872  |
| D82345    | 1994.445  | 2911.149  | NM_01450E | 38375.465 | 45541.184 | AK097395  | 44937.316 | 49453.664 |
| NM_003814 | 6716.937  | 8040.631  | NM_00420E | 17056.449 | 18652.834 | AK091535  | 1343.615  | 2149.408  |
| NM_00296E | 1097.439  | 1380.046  | NM_002201 | 67094.297 | 78767.992 | AF085357  | 6453.957  | 7595.889  |
| AK026898  | 7522.207  | 6377.313  | AK025047  | 6066.324  | 7492.277  | NM_003841 | 53783.773 | 40114.938 |
| NM_006637 | 1547.808  | 1848.832  | NM_00680E | 10046.376 | 13464.004 | AF296673  | 6082.828  | 5417.422  |
| AK022419  | 1977.025  | 2668.561  | NM_006763 | 16439.092 | 18417.758 | AL137698  | 4198.128  | 5391.042  |
| AJ251832  | 2386.815  | 2410.138  | NM_006119 | 13597.588 | 17063.867 | NM_000383 | 2848.188  | 2915.588  |
| NM_014624 | 988.644   | 1391.164  | NM_00446E | 4336.03   | 4537.319  | NM_004633 | 2803.291  | 2219.879  |
| NM_01393E | 5401.471  | 6185.261  | AK026927  | 8355.552  | 8625.557  | X01394    | 62009.648 | 58691.895 |
| AF086145  | 3649.415  | 3928.153  | NM_01405E | 21053.047 | 18584.6   | NM_000041 | 61486.223 | 60536.832 |
| Z70709    | 4809.214  | 4472.68   | NM_001761 | 8459.024  | 6930.699  | NM_002984 | 11753.729 | 9507.904  |
| BC002538  | 11345.511 | 14461.269 | BE884341  | 7601.961  | 7038.391  | AB037752  | 27764.703 | 29534.73  |
| AK022355  | 1703.784  | 2992.194  | AF231997  | 4602.267  | 4171.478  | AF317425  | 3464.799  | 6040.691  |
| NM_01783E | 6483.951  | 7105.055  | NM_00712E | 6200.54   | 5543.646  | NM_018002 | 5534.002  | 8932.772  |
| AK096584  | 9315.295  | 7187.239  | NM_00259E | 22051.154 | 21746.266 | AK024821  | 6769.278  | 7319.619  |
| Z29070    | 1547.484  | 1603.479  | NM_020184 | 3704.672  | 4023.458  | AB002340  | 12599.931 | 10782.691 |
| AL078636  | 1932.686  | 1883.981  | NM_00581E | 1698.454  | 1582.159  | NM_000224 | 13059.088 | 11521.629 |
| AK022382  | 1956.074  | 1806.168  | NM_00122E | 4290.124  | 4253.285  | NM_01432E | 7935.4    | 7092.346  |
| AL080128  | 10743.31  | 10364.7   | NM_01491E | 1728.785  | 1459.972  | NM_006414 | 9387.262  | 8693.057  |
| AB037787  | 6059.207  | 4907.223  | NM_00025C | 2040.635  | 2212.781  | NM_014322 | 20221.385 | 17164.455 |
| AB033072  | 3077.337  | 2919.064  | NM_018147 | 25324.322 | 26002.34  | NM_004122 | 6070.723  | 6689.167  |
| AB040892  | 2776.949  | 2368.316  | NM_018967 | 15004.513 | 13720.211 | NM_00292E | 35389.699 | 37344.012 |
| AB002360  | 1134.908  | 1020.209  | AJ278018  | 1276.707  | 1209.332  | NM_00095E | 3314.466  | 4852.75   |
| NM_01826E | 20617.992 | 25328.816 | NM_00185C | 3215.588  | 2612.097  | U27768    | 3895.848  | 4709.336  |
| AF230904  | 28327.32  | 37978.059 | NM_00216C | 4948.886  | 5311.55   | U66582    | 17353.93  | 18216.336 |
| NM_01759E | 18450.414 | 22157.004 | NM_00567E | 3467.349  | 3490.173  | NM_00095C | 60661.961 | 58941.504 |
| AL157480  | 9804.728  | 10399.128 | NM_00325E | 59986.168 | 55146.906 | NM_00513E | 5058.951  | 2919.862  |
| NM_01438E | 2603.678  | 2895.045  | NM_006587 | 2191.288  | 2277.677  | NM_01830E | 4831.686  | 4028.73   |
| NM_018110 | 5785.287  | 6809.021  | D21064    | 2120.56   | 2475.999  | NM_001832 | 50814.023 | 48562.84  |
| NM_006253 | 11724.003 | 11966.267 | NM_002812 | 12053.964 | 13617.85  | NM_017774 | 23432.018 | 19949.982 |
| NM_00386E | 2109.7    | 2225.199  | NM_02036E | 5711.725  | 7669.578  | AB037716  | 2243.999  | 2556.782  |
| NM_018262 | 8083.764  | 8914.069  | NM_003982 | 6494.286  | 7238.62   | NM_016297 | 4688.116  | 9167.547  |
| NM_006207 | 1162.046  | 1239.577  | NM_00207E | 11973.326 | 12658.647 | NM_001752 | 9038.021  | 13660.95  |
| NM_00322C | 1186.701  | 1216.793  | NM_002112 | 15404.728 | 12994.543 | BC003406  | 564.282   | 1520.171  |
| AF009674  | 12330.758 | 11940.19  | NM_004121 | 13025.567 | 13500.237 | AL137672  | 1110.743  | 1112.771  |
| NM_00036C | 5394.782  | 5318.244  | AY007092  | 6059.916  | 5977.457  | NM_012281 | 11168.054 | 8857.054  |
| NM_000844 | 2448.123  | 2252.252  | NM_001902 | 2164.882  | 2131.902  | NM_00550E | 1374.306  | 1352.057  |
| NM_00551C | 31393.285 | 30514.854 | AL137605  | 63946.652 | 57551.852 | AF091034  | 4434.454  | 4075.019  |
| Z36817    | 2553.859  | 2754.263  | NM_016261 | 2034.623  | 2300.487  | NM_005301 | 49643.516 | 54379.742 |
| NM_01450E | 12170.199 | 12785.783 | NM_00651E | 1857.237  | 1526.652  | NM_016653 | 2542.993  | 3746.248  |
| NM_00420E | 16872.973 | 16962.383 | NM_004607 | 66389.148 | 63901.098 | AF060170  | 4496.638  | 6067.963  |
| NM_002201 | 68358.531 | 70239.648 | NM_01207E | 3292.318  | 3054.552  | NM_016602 | 2265.972  | 2615.623  |



|           |           |           |           |           |           |           |           |           |
|-----------|-----------|-----------|-----------|-----------|-----------|-----------|-----------|-----------|
| AK025047  | 1269.695  | 1345.644  | NM_007285 | 60656.617 | 57921.73  | NM_004405 | 9698.154  | 9621.264  |
| NM_006806 | 11876.813 | 10636.87  | D14678    | 15560.867 | 14915.676 | NM_002996 | 1123.066  | 752.242   |
| NM_006763 | 20033.338 | 15950.624 | NM_016221 | 6766.274  | 5845.157  | NM_000262 | 3507.53   | 3335.12   |
| NM_006119 | 10208.217 | 10482.473 | NM_018113 | 2339.088  | 2286.489  | NM_017831 | 2302.847  | 3150.006  |
| NM_004465 | 6552.189  | 7422.777  | NM_005187 | 779.963   | 1036.874  | AK022537  | 10417.718 | 15294.373 |
| AK026927  | 11889.137 | 12039.043 | U73377    | 8408.379  | 8860.179  | AF064597  | 1326.769  | 1623.481  |
| NM_014055 | 28086.283 | 30112.436 | NM_016162 | 8110.543  | 7897.392  | NM_006345 | 3786.294  | 3427.077  |
| NM_001761 | 11680.697 | 10789.836 | AF130056  | 6406.915  | 6785.342  | NM_006875 | 18131.84  | 12103.261 |
| BE884341  | 6326.79   | 7752.439  | NM_006662 | 28170.016 | 31097.057 | D87119    | 15047.378 | 12331.491 |
| AF231997  | 4514.221  | 4799.628  | NM_004031 | 7193.315  | 8183.703  | AL050040  | 1090.157  | 1545.671  |
| NM_007125 | 8694.293  | 10660.686 | NM_004514 | 11786.298 | 13672.872 | NM_006556 | 19396.799 | 20975.898 |
| NM_002595 | 29793.635 | 28762.807 | NM_006163 | 4123.524  | 4619.221  | AF264717  | 3126.523  | 3359.161  |
| NM_020184 | 4803.074  | 5364.46   | NM_001272 | 23300.705 | 23429.287 | NM_012260 | 17404     | 15773.724 |
| NM_005815 | 1538.758  | 1754.083  | NM_016303 | 2130.927  | 3363.285  | NM_001141 | 1488.217  | 1681.018  |
| NM_001225 | 4410.906  | 4880.149  | NM_006196 | 39101.871 | 44070.133 | NM_014362 | 2448.228  | 1916.557  |
| NM_014916 | 2390.817  | 2815.33   | AV733560  | 7273.906  | 8004.364  | L10139    | 5168.975  | 5376.021  |
| NM_000250 | 2623.095  | 2599.201  | D17129    | 67237.938 | 60500.004 | NM_000035 | 60023.074 | 61202.672 |
| NM_018147 | 30345.666 | 35309.395 | NM_003091 | 41884.52  | 42210.078 | NM_020470 | 17738.037 | 18848.957 |
| NM_018967 | 6705.82   | 7473.378  | NM_004247 | 10715.054 | 9810.615  | NM_006574 | 951.137   | 1284.288  |
| AJ278018  | 1157.384  | 1012.757  | NM_017722 | 12405.916 | 12258.291 | AA478950  | 7020.748  | 9378.413  |
| NM_001850 | 1646.56   | 1772.487  | AL137730  | 19443.148 | 18436.309 | BF942101  | 11942.518 | 15890.336 |
| NM_002160 | 2877.141  | 3094.38   | NM_004500 | 63998.559 | 55652.797 | BI825012  | 61676.695 | 61389.313 |
| NM_005675 | 4563.351  | 5272.871  | NM_003276 | 14137.239 | 9676.204  | M21574    | 1981.338  | 2511.709  |
| NM_003255 | 37371.172 | 44896.406 | AL137681  | 7136.648  | 7543.271  | BM051302  | 1890.506  | 2372.908  |
| NM_006587 | 1193.046  | 1294.925  | AK025694  | 65663.945 | 62196.723 | BE314182  | 18789.225 | 13824.343 |
| D21064    | 2697.562  | 2738.965  | NM_002157 | 66206.008 | 63494.309 | AI808029  | 1545.828  | 1439.184  |
| NM_002812 | 16994.734 | 15973.396 | NM_004095 | 15863.711 | 15609.859 | X03225    | 5936.292  | 6036.489  |
| NM_020365 | 8420.636  | 10312.188 | NM_014365 | 3160.944  | 2921.807  | AK097395  | 37221.391 | 27046.576 |
| NM_003982 | 8038.11   | 8684.438  | NM_005147 | 18039.297 | 17269.805 | M12783    | 5643.303  | 6778.354  |
| NM_002075 | 15947.903 | 16065.857 | NM_014665 | 16786.582 | 17015.891 | AK091535  | 5785.728  | 8727.466  |
| NM_002112 | 15039.007 | 12221.242 | NM_005585 | 1001.148  | 1030.886  | AF085357  | 11239.412 | 16779.678 |
| NM_004121 | 5274.505  | 5084.623  | NM_002770 | 821.757   | 709.987   | NM_003841 | 53964.043 | 43401.105 |
| AY007092  | 9879.813  | 11176.286 | BC030636  | 6852.824  | 7762.598  | AF296673  | 6611.029  | 6539.687  |
| NM_001902 | 2655.022  | 2963.019  | NM_000476 | 2427.138  | 2685.371  | AK024821  | 6886.244  | 5215.53   |
| AL137605  | 14532.527 | 13375.446 | AF132733  | 6907.232  | 8914.447  | AB002340  | 12693.483 | 10602.474 |
| NM_016261 | 3317.545  | 3733.139  | NM_001071 | 19038.012 | 20831.512 | NM_000224 | 12793.936 | 13473.543 |
| NM_006519 | 3019.884  | 2330.11   | NM_006187 | 9265.704  | 10292.797 | NM_014325 | 5815.803  | 7765.637  |
| NM_004607 | 68490.445 | 56091.855 | NM_020354 | 16376.281 | 19177.668 | NM_006414 | 22281.223 | 28241.121 |
| NM_012076 | 2758.066  | 2493.444  | AF202637  | 15381.935 | 17802.273 | NM_014322 | 23380.059 | 28411.43  |
| NM_007285 | 65084.293 | 59207.875 | NM_000026 | 64074.172 | 60711.059 | NM_004122 | 7617.086  | 8275.939  |
| D14678    | 12284.237 | 13406.304 | AB033016  | 29755.703 | 30396.477 | NM_002925 | 40821.277 | 37322.773 |
| NM_016221 | 11037.329 | 12127.37  | D87452    | 11199.649 | 11006.924 | NM_000160 | 3381.168  | 3441.82   |
| NM_018113 | 3465.311  | 3538.97   | AB037864  | 4903.406  | 5059.887  | NM_003301 | 1913.64   | 1644.738  |
| NM_005187 | 1125.336  | 955.989   | L26494    | 10104.776 | 10909.342 | NM_000955 | 3759.115  | 3221.931  |
| U73377    | 7022.516  | 7305.739  | NM_000346 | 1289.163  | 1266.105  | U27768    | 5360.778  | 4437.8    |
| NM_016162 | 9526.511  | 9452.628  | AK024322  | 1517.486  | 1367.798  | AF305550  | 5705.954  | 5118.363  |
| AF130056  | 6734.619  | 5479.804  | BF382513  | 28241.463 | 26394.424 | U66582    | 14007.979 | 13331.631 |
| NM_006662 | 5516.705  | 4665.531  | AB020713  | 34030.949 | 39038.707 | S73288    | 1024.249  | 1526.546  |
| NM_004031 | 3164.853  | 2896.679  | AK025426  | 8278.673  | 9078.333  | NM_006195 | 3205.882  | 3700.951  |
| NM_004514 | 13336.854 | 14042.593 | NM_016555 | 15671.412 | 13901.12  | NM_003812 | 2150.241  | 2173.49   |
| NM_006163 | 4786.577  | 5983.399  | NM_007145 | 15653.094 | 13571.361 | NM_004675 | 1668.461  | 1606.086  |
| NM_001272 | 32123.309 | 29153.945 | AL133112  | 2314.647  | 2224.312  | NM_000322 | 39357.633 | 14578.047 |
| NM_006196 | 35341.621 | 48885.574 | NM_002195 | 11720.187 | 14489.397 | NM_152747 | 1664.7    | 1423.398  |

|           |           |           |           |           |           |           |           |           |
|-----------|-----------|-----------|-----------|-----------|-----------|-----------|-----------|-----------|
| AV733560  | 12302.472 | 13513.365 | BC005219  | 10768.585 | 12846.84  | NM_017415 | 1562.168  | 1462.097  |
| D17129    | 66764.297 | 60370.152 | NM_004268 | 3952.133  | 4705.815  | NM_001667 | 61060.992 | 59614.883 |
| NM_003091 | 54159.074 | 54683.625 | NM_001546 | 708.996   | 871.353   | AB029033  | 60069.414 | 62545.945 |
| NM_004247 | 13101.901 | 12187.327 | NM_000950 | 67271.82  | 70319.484 | AF091034  | 5529.702  | 6285.046  |
| NM_017722 | 18133.189 | 16554.885 | NM_005139 | 11580.289 | 13359.747 | NM_005301 | 61537.656 | 61045.246 |
| AL137730  | 4964.241  | 4187.896  | NM_001275 | 67882.977 | 72290.656 | NM_016653 | 2568.818  | 2834.271  |
| NM_004500 | 68064.797 | 56563.832 | NM_000322 | 53002.824 | 58088.078 | AB035124  | 11922.148 | 8273.529  |
| NM_003276 | 27398.67  | 24798.213 | L10139    | 5366.536  | 6287.989  | AF060170  | 2239.241  | 2323.225  |
| AL137681  | 11174.645 | 9656.196  | NM_000039 | 67406.742 | 72906.039 | NM_016602 | 1228.304  | 1277.949  |
| AK025694  | 65763.773 | 57770.098 | NM_020470 | 15659.439 | 18239.467 | NM_004409 | 13181.043 | 11695.674 |
| NM_002157 | 67824.836 | 59325.008 | NM_006574 | 1880.026  | 1531.976  | AK023397  | 3727.01   | 4429.157  |
| NM_004095 | 16838.217 | 18108.721 | AA478950  | 7975.219  | 7903.325  | NM_001725 | 7472.227  | 7153.646  |
| NM_014365 | 3481.053  | 3769.066  | BF942101  | 19503.756 | 18006.016 | NM_004079 | 21036.924 | 13801.521 |
| NM_005147 | 24847.779 | 28581.326 | BI825012  | 61080.504 | 59753.43  | NM_002996 | 933.907   | 858.393   |
| NM_014665 | 23205.145 | 23399.266 | M21574    | 3400.208  | 3392.802  | NM_000383 | 3411.317  | 3938.126  |
| NM_005588 | 904.891   | 685.898   | BM051302  | 3777.772  | 3643.124  | NM_004633 | 3460.73   | 3123.672  |
| BC030636  | 6378.541  | 4845.81   | BE314182  | 33494.355 | 37180.125 | X01394    | 60387.234 | 59272.332 |
| NM_000476 | 1788.426  | 1498.47   | AI808029  | 2587.717  | 2006.38   | NM_000041 | 59446.887 | 58537.094 |
| AF132733  | 7502.631  | 8350.439  | AI971217  | 1363.937  | 1351.754  | NM_002984 | 11667.603 | 6805.302  |
| NM_001071 | 27127.02  | 31952.559 | X03225    | 9616.887  | 9322.852  | AB037752  | 31003.605 | 20993.619 |
| NM_006187 | 12035.032 | 13346.848 | AK097395  | 42038.609 | 46325.309 | AF317425  | 4673.656  | 2108.576  |
| NM_020354 | 21185.822 | 22356.332 | M12783    | 8543.059  | 8051.858  | NM_018002 | 2451.7    | 1025.967  |
| AF202637  | 23793.344 | 23941.695 | AK091535  | 3659.787  | 3697.026  | NM_001141 | 1777.514  | 1516.74   |
| NM_000026 | 68404.43  | 67438.938 | AF085357  | 15221.496 | 14918.564 | NM_000018 | 10689.548 | 10270.974 |
| AB033016  | 30783.73  | 50842.395 | AK092768  | 941.357   | 1552.862  | NM_018479 | 14408.208 | 16870.547 |
| D87452    | 17572.203 | 16681.154 | NM_003841 | 58101.344 | 53926.902 | NM_014362 | 2269.365  | 3901.714  |
| AB037864  | 5847.33   | 5189.127  | AF296673  | 13007.976 | 14436.52  | NM_018308 | 5708.979  | 6440.537  |
| L26494    | 1443.136  | 1882.316  | AK022132  | 1438.073  | 1289.266  | NM_001832 | 46980.086 | 51927.863 |
| NM_000346 | 1358.852  | 1209.025  | NM_004079 | 29031.705 | 31707.16  | NM_017774 | 27328.285 | 18952.633 |
| AK024322  | 690.476   | 729.792   | NM_002996 | 1363.196  | 1806.78   | AB037716  | 2420.215  | 1769.111  |
| BF382513  | 15709.42  | 16549.078 | NM_000383 | 6763.807  | 8471.215  | NM_016297 | 3473.744  | 2679.227  |
| AB020713  | 42533.598 | 47754.82  | NM_002984 | 21410.803 | 20368.99  | NM_001752 | 5775.756  | 5206.226  |
| AK025426  | 2896.55   | 2444.987  | AB037752  | 30732.602 | 34194.262 | BC003406  | 539.315   | 465.657   |
| NM_016558 | 23000.918 | 20481.121 | AF317425  | 6083.16   | 5782.317  | AL137672  | 1324.005  | 1314.566  |
| NM_007145 | 20196.746 | 18466.391 | NM_018002 | 6160.271  | 6873.865  | X64177    | 3020.191  | 1342.885  |
| AL133112  | 2770.875  | 2838.219  | AK024821  | 9107.235  | 8739.078  | NM_015994 | 5050.813  | 5278.624  |
| NM_004268 | 5461.305  | 5491.862  | AB002340  | 17725.951 | 17811.338 | NM_002235 | 919.906   | 1024.671  |
| NM_001546 | 1086.971  | 1127.005  | NM_000224 | 13955.491 | 14986.727 | NM_014065 | 2051.98   | 1804.193  |
| NM_000950 | 22910.393 | 21517.453 | NM_014328 | 10414.718 | 10187.833 | NM_001695 | 6530.676  | 3610.767  |
| NM_005139 | 11685.54  | 12983.347 | NM_006414 | 14076.437 | 13968.685 | NM_002248 | 5108.911  | 3301.2    |
| NM_001275 | 70628.867 | 75961.078 | NM_014322 | 28722.949 | 27568.182 | NM_012281 | 12684.496 | 5571.457  |
| NM_000322 | 63280.773 | 62792.922 | NM_004122 | 11237.964 | 11762.379 | AK025772  | 4326.085  | 1362.434  |
| L10139    | 1003.895  | 1118.462  | NM_002928 | 43346.617 | 47163.473 | NM_000262 | 4982.144  | 3936.928  |
| NM_000039 | 68561.367 | 67289.164 | NM_000160 | 7495.61   | 7347.135  | NM_017831 | 1888.122  | 1379.728  |
| NM_020470 | 4368.546  | 5026.965  | NM_003301 | 3365.177  | 3415.002  | AK022537  | 6843.585  | 4661.787  |
| NM_006574 | 1404.262  | 1318.699  | NM_000955 | 5987.453  | 6212.913  | AF064597  | 887.775   | 859.273   |
| AA478950  | 6058.215  | 6399.069  | U27768    | 9024.273  | 9329.354  | NM_006345 | 4767.927  | 4158.438  |
| BF942101  | 29406.525 | 38778.633 | NM_001742 | 1026.683  | 1579.865  | NM_006875 | 20349.695 | 21838.963 |
| BI825012  | 67807.313 | 65870.398 | U66582    | 36135.996 | 44062.926 | AB037769  | 657.804   | 867.013   |
| M21574    | 3612.256  | 3796.787  | NM_018479 | 17967.252 | 20371.492 | AL050040  | 802.037   | 761.487   |
| BM051302  | 3851.536  | 3101.911  | NM_014362 | 3088.888  | 3174.007  | NM_006556 | 16838.52  | 10034.476 |
| BE314182  | 21661.203 | 18954.791 | NM_018308 | 8008.548  | 8477.138  | AL133066  | 904.063   | 630.081   |
| AI808029  | 4691.956  | 4902.701  | NM_017774 | 40085.734 | 52529.273 | AF264717  | 2539.605  | 844.548   |

|           |           |           |           |           |           |           |           |           |
|-----------|-----------|-----------|-----------|-----------|-----------|-----------|-----------|-----------|
| AI971217  | 1620.194  | 1577.738  | AB037716  | 10019.918 | 10365.642 | NM_01226C | 14216.389 | 3081.623  |
| X03225    | 8086.207  | 8973.542  | NM_004827 | 1942.167  | 2364.31   | CY3Cy5    | 3632.369  | 289.213   |
| AK097395  | 30827.781 | 35086.355 | NM_001926 | 1527.799  | 1577.962  | NM_00506C | 3818.92   | 6343.568  |
| M12783    | 14316.993 | 13982.967 | NM_016297 | 4662.605  | 5169.943  | NM_005437 | 15307.778 | 35378.887 |
| AK091535  | 10034.791 | 10868.364 | NM_001752 | 8270.634  | 8725.672  | NM_01831C | 6294.121  | 9260.487  |
| AF085357  | 18006.113 | 20609.111 | BC003406  | 1042.523  | 1182.929  | AK021714  | 2289.166  | 2605.668  |
| AF296673  | 13239.468 | 13918.746 | AL137672  | 1724.56   | 1993.538  | NM_020314 | 4130.698  | 4698.355  |
| AK022132  | 1272.573  | 1229.333  | NM_002241 | 1199.27   | 1507.148  | AK022972  | 3796.627  | 3665.053  |
| NM_004079 | 23638.471 | 21788.328 | NM_012281 | 13310.032 | 11977.964 | AK025996  | 2960.656  | 2683.853  |
| NM_000383 | 5652.967  | 6520.291  | NM_005509 | 2369.603  | 2129.621  | AF088015  | 3973.032  | 4051.829  |
| NM_004633 | 5009.876  | 4040.324  | AF091034  | 6393.287  | 5923.607  | NM_005715 | 16160.965 | 22358.412 |
| X01394    | 43347.574 | 46841.254 | NM_005301 | 61695.129 | 57172.02  | AK026992  | 3829.537  | 4393.549  |
| NM_000041 | 39225.141 | 46689.688 | NM_004167 | 842.375   | 1041.43   | X81895    | 857.032   | 1335.74   |
| NM_002984 | 25469.693 | 21356.043 | NM_016653 | 4244.292  | 4562.612  | AL137343  | 1488.855  | 2503.443  |
| AB037752  | 11353.616 | 13499.002 | AB035124  | 21538.387 | 20782.76  | SR3       | 38466.906 | 38657.723 |
| AF317425  | 6205.738  | 6946.658  | AF060170  | 4013.778  | 3991.282  | SR5       | 5495.234  | 5708.163  |
| NM_018002 | 7363.823  | 10761.05  | NM_016602 | 3048.91   | 3616.572  | SR7       | 4535.708  | 43298.758 |
| AK024821  | 12168.013 | 13634.262 | NM_004409 | 16784.193 | 19919.496 | SR9       | 14594.837 | 3684.342  |
| AB002340  | 12742.482 | 11740.869 | AK023397  | 5504.002  | 6672.096  | CY3Cy5    | 3246.099  | 305.098   |
| NM_000224 | 2952.403  | 2254.95   | NM_001725 | 13411.841 | 17090.545 | M25785    | 1382.347  | 1834.548  |
| NM_014328 | 11207.141 | 10008.927 | NM_015957 | 855.535   | 420.987   | M32443    | 4661.304  | 6190.465  |
| NM_006414 | 12763.969 | 11391.407 | NM_000262 | 6439.89   | 6109.605  | M73048    | 2119.969  | 3549.249  |
| NM_014322 | 33389.863 | 31838.271 | NM_017831 | 2436.311  | 2336.322  | D16908    | 1320.577  | 1493.802  |
| NM_004122 | 11534.086 | 11959.129 | AK024393  | 1150.6    | 820.576   | D16477    | 1274.958  | 1662.555  |
| NM_002928 | 48575.586 | 49999.156 | AK022537  | 11957.443 | 11912.588 | AK023754  | 1781.756  | 1687.665  |
| NM_00016C | 10980.257 | 12210.06  | AF064597  | 1664.428  | 1655.972  | AK021689  | 693.698   | 679.278   |
| NM_003301 | 3910.032  | 4938.957  | NM_006345 | 5988.052  | 6561      | AK024737  | 4524.703  | 5011.824  |
| NM_000955 | 4638.652  | 4834.914  | NM_006875 | 27771.238 | 23440.465 | AB007890  | 25830.865 | 30074.559 |
| U27768    | 6105.199  | 5717.154  | D87119    | 12171.3   | 13024.311 | AL359605  | 11367.975 | 10573.637 |
| U66582    | 34322.027 | 33920.32  | AB037769  | 1603.307  | 1198.23   | AB020633  | 4920.966  | 4254.18   |
| NM_018479 | 22129.871 | 21403.609 | AL050040  | 1977.272  | 1812.27   | AK025445  | 15306.761 | 13419.369 |
| NM_014362 | 4023.479  | 4074.016  | NM_006556 | 24473.068 | 27951.68  | AL357200  | 4078.805  | 4858.325  |
| NM_018308 | 1887.038  | 1749.827  | AL133066  | 1899.911  | 2066.468  | NM_017727 | 11782.432 | 12748.968 |
| NM_001832 | 8326.244  | 7618.176  | AF264717  | 5032.424  | 4912.209  | AK025051  | 1888.737  | 1678.397  |
| NM_017774 | 40785.563 | 43457.848 | NM_01226C | 22379.246 | 26710.068 | AK024553  | 69173.984 | 77947.578 |
| AB037716  | 5571.659  | 6283.511  | NM_001141 | 6306.123  | 9410.108  | AK024930  | 1164.349  | 1191.341  |
| NM_004827 | 916.393   | 1090.283  | NM_000018 | 21051.965 | 30335.607 | AF086168  | 1054.012  | 766.409   |
| NM_001926 | 869.513   | 806.202   | AB028992  | 1408.149  | 2111.159  | NM_017864 | 10218.926 | 10121.974 |
| NM_016297 | 3654.534  | 3731.32   | NM_001275 | 67475.82  | 75808.617 | NM_00486C | 4596.767  | 5387.158  |
| NM_001752 | 11290.963 | 11844.841 | NM_000322 | 54198     | 58062.973 | AF136408  | 1476.458  | 1448.402  |
| BC003406  | 1681.331  | 1931.853  | L10139    | 4994.78   | 5123.417  | AL110203  | 857.161   | 1189.552  |
| AL137672  | 2401.263  | 1923.367  | NM_000039 | 62819.711 | 61668.305 | X51527    | 5484.857  | 5928.008  |
| NM_012281 | 6739.728  | 5062.584  | NM_02047C | 12033.618 | 14148.44  | X93501    | 6284.724  | 7681.394  |
| NM_005509 | 2968.993  | 2720.051  | NM_006574 | 2013.229  | 1996.881  | AJ011602  | 3381.714  | 3403.796  |
| AF091034  | 8088.93   | 7123.253  | AA478950  | 8096.485  | 9118.092  | AJ002787  | 15576.917 | 13663.148 |
| NM_005301 | 49263.215 | 47446.277 | BF942101  | 17870.615 | 15170.939 | Z70764    | 3145.581  | 2853.563  |
| NM_004167 | 1460.446  | 1664.229  | BI825012  | 56751.797 | 59286.824 | AL049252  | 5886.954  | 7432.104  |
| NM_016653 | 5372.072  | 5807.246  | M21574    | 2518.47   | 2504.538  | Z83948    | 3740.387  | 3218.75   |
| AB035124  | 33266.629 | 36653.883 | BM051302  | 2924.976  | 2773.582  | AK026860  | 4243.785  | 4238.962  |
| AF060170  | 3510.108  | 4124.249  | BE314182  | 30393.197 | 33653.738 | AK024211  | 1660.088  | 1304.493  |
| NM_016602 | 2157.214  | 2247.408  | AI808029  | 2910.383  | 3103.975  | NM_01489E | 865.485   | 973.69    |
| NM_004409 | 13694.932 | 11438.756 | AI971217  | 1055.471  | 871.429   | AK023435  | 2437.145  | 1686.089  |
| NM_001725 | 4231.915  | 3928.568  | X03225    | 8654.479  | 8134.547  | AK022309  | 4447.27   | 4796.71   |

|           |           |           |           |           |           |           |           |           |
|-----------|-----------|-----------|-----------|-----------|-----------|-----------|-----------|-----------|
| NM_000262 | 1864.636  | 1750.213  | AK097395  | 39761.676 | 40199.664 | AK000063  | 2808.615  | 2803.347  |
| NM_017831 | 1633.451  | 1907.72   | M12783    | 7832.254  | 8531.118  | AK000792  | 1226.647  | 1215.912  |
| AK024393  | 1205.305  | 1474.344  | AK091535  | 4020.337  | 4023.771  | AK000949  | 3118.933  | 2931.393  |
| AK022537  | 15539.729 | 18792.535 | AF085357  | 12665.667 | 13616.252 | AK027068  | 2222.481  | 1716.172  |
| AF116632  | 872.885   | 690.919   | AK092768  | 837.51    | 1100.386  | AK000165  | 871.388   | 646.794   |
| AF064597  | 3258.115  | 3753.351  | NM_003841 | 53429.559 | 49345.324 | AK000974  | 5837.008  | 6591.922  |
| AF198444  | 621.626   | 614.746   | AF296673  | 11921.77  | 13670.152 | NM_006233 | 15057.583 | 15029.074 |
| NM_006345 | 7292.994  | 6252.576  | AB032956  | 1323.1    | 2008.41   | AK021889  | 3590      | 4792.74   |
| NM_006875 | 37471.766 | 33550.336 | AL137698  | 1519.76   | 1313.825  | AK000992  | 1294.235  | 1232.616  |
| D87119    | 6126.1    | 5419.35   | NM_000383 | 5843.327  | 5906.921  | L23544    | 18711.289 | 15420.164 |
| AB037769  | 2300.332  | 1868.676  | NM_004633 | 4819.15   | 5026.598  | NM_019020 | 2883.459  | 2498.55   |
| AL050040  | 1635.966  | 1325.332  | X01394    | 66921.938 | 79141.938 | AF143879  | 7607.903  | 6617.06   |
| NM_006556 | 28429.496 | 29985     | NM_000041 | 65507.355 | 63346.469 | AK024621  | 20526.639 | 21017.582 |
| AL133066  | 1607.083  | 1539.006  | NM_002984 | 20286.453 | 17143.984 | AL157449  | 37847.598 | 33664.203 |
| AF264717  | 6857.901  | 7924.613  | AB037752  | 28439.807 | 28726.359 | AL117582  | 2618.937  | 2012.381  |
| NM_012260 | 9730.664  | 9510.456  | AF317425  | 6607.317  | 6151.288  | AK025525  | 2008.675  | 2267.774  |
| NM_001141 | 1269.746  | 1194.043  | NM_018002 | 5721.188  | 6127.546  | NM_018166 | 1387.032  | 1444.55   |
| AB028992  | 1181.528  | 1144.673  | AK024821  | 8546.07   | 8039.641  | L09095    | 19008.111 | 19617.855 |
| NM_001275 | 70942.047 | 72606.414 | AB002340  | 17609.688 | 16451.254 | NM_018233 | 40358.762 | 41570.82  |
| NM_000322 | 41289.789 | 45703.688 | NM_000224 | 9932.863  | 9539.066  | AV740891  | 5178.244  | 5414.496  |
| L10139    | 1356.529  | 1343.51   | NM_014328 | 9324.191  | 9818.205  | AF143329  | 1008.617  | 1032.418  |
| NM_000039 | 70990.586 | 70554.82  | NM_006414 | 11563.705 | 13041.971 | AF090916  | 2015.673  | 3258.67   |
| NM_020470 | 4269.836  | 4482.491  | NM_014322 | 28924.824 | 29794.551 | AL390183  | 1009.76   | 837.524   |
| NM_006574 | 1620.557  | 1977.605  | NM_004122 | 10756.353 | 9634.719  | Y13897    | 1487.702  | 1668.261  |
| AA478950  | 7083.347  | 6868.73   | NM_002928 | 43987.52  | 40890.738 | AK001857  | 1440.326  | 1375.265  |
| BF942101  | 30327.039 | 33722.891 | NM_000160 | 7595.649  | 7346.898  | AL133577  | 4580.831  | 2896.277  |
| BI825012  | 67683.141 | 60956.766 | NM_003301 | 2813.01   | 2884.264  | AK025378  | 6488.442  | 4549.269  |
| M21574    | 4076.603  | 4847.51   | NM_000955 | 5540.683  | 5610.962  | AF038199  | 3438.033  | 5537.126  |
| BM051302  | 4158.704  | 4341.023  | U66582    | 33796.363 | 46728.07  | AF086035  | 11498.845 | 10285.371 |
| BE314182  | 26123.83  | 30245.205 | NM_000950 | 62966.27  | 57615.242 | AK022159  | 8127.896  | 6816.807  |
| AI808029  | 4257.782  | 4251.73   | NM_005139 | 12555.44  | 11855.222 | D16905    | 1209.546  | 1492.063  |
| AI971217  | 1492.906  | 1623.677  | NM_018308 | 7253.157  | 6998.233  | AJ012491  | 1227.441  | 1527.446  |
| X03225    | 6971.899  | 6440.178  | NM_001832 | 49308.773 | 55792.043 | AF007136  | 1175.028  | 1018.403  |
| AK097395  | 28813.412 | 26476.398 | NM_017774 | 37591.035 | 43581.168 | U25750    | 15269.332 | 13825.419 |
| M12783    | 11259.366 | 9560.541  | AB037716  | 3926.24   | 3644.212  | AK023691  | 11593.437 | 11342.631 |
| AK091535  | 8121.646  | 7114.239  | NM_016297 | 4756.617  | 5747.587  | AK023502  | 1307.057  | 1560.844  |
| AF085357  | 16465.195 | 15603.15  | NM_001752 | 8757.733  | 8936.435  | AK026744  | 1938.958  | 2058.314  |
| AK092768  | 729.622   | 811.034   | BC003406  | 939.428   | 867.973   | NM_005234 | 15114.117 | 16061.71  |
| NM_003841 | 6066.506  | 4461.168  | AL137672  | 2078.604  | 2064.742  | BC023536  | 6771.133  | 12016.688 |
| AF296673  | 12275.488 | 12221.699 | NM_002241 | 644.695   | 832.561   | NM_001803 | 24897.041 | 30608.775 |
| AB032956  | 998.88    | 967.429   | NM_012281 | 13450.253 | 12930.195 | NM_012297 | 17592.002 | 19848.672 |
| NM_000383 | 8621.459  | 9391.297  | NM_005509 | 2546.807  | 2651.792  | NM_018180 | 1503.477  | 1466.562  |
| NM_004633 | 4281.994  | 3339.938  | AF091034  | 6430.878  | 6870.221  | NM_000361 | 13559.87  | 9830.686  |
| X01394    | 35632.363 | 33389.605 | NM_005301 | 58306.336 | 54639     | NM_002475 | 44198.957 | 30125.957 |
| NM_000041 | 40327.918 | 48371.781 | NM_004167 | 1381.617  | 1403.447  | NM_003836 | 23624.191 | 14002.648 |
| NM_002984 | 25916.189 | 22259.092 | NM_016653 | 5689.662  | 5171.103  | NM_017987 | 2130.345  | 1324.256  |
| AB037752  | 11264.309 | 14212.949 | AB035124  | 21369.744 | 20673.264 | NM_014244 | 922.844   | 1117.058  |
| AF317425  | 6446.188  | 6125.666  | AF060170  | 3465.092  | 3617.343  | NM_000910 | 2706.793  | 2360.455  |
| NM_018002 | 7867.215  | 8685.065  | AK023397  | 4934.453  | 5461.908  | AF086001  | 65865.609 | 56350.734 |
| AK024821  | 10711.047 | 14487.408 | NM_001725 | 11619.499 | 12893.233 | AL117560  | 23453.832 | 15405.356 |
| AB002340  | 14081.149 | 14280.873 | NM_004079 | 31939.668 | 30311.742 | M24749    | 7714.582  | 7313.295  |
| NM_000224 | 3130.919  | 3260.416  | NM_002996 | 1266.062  | 1327.988  | NM_005831 | 55761.105 | 48337.301 |
| NM_014328 | 12875.188 | 13277.073 | NM_000262 | 5903.186  | 4763.993  | NM_005850 | 68672.156 | 65036.078 |

|           |           |           |           |           |           |           |           |           |
|-----------|-----------|-----------|-----------|-----------|-----------|-----------|-----------|-----------|
| NM_006414 | 13070.76  | 12598.018 | NM_017831 | 2347.332  | 1567.87   | NM_000554 | 39908.512 | 36680.207 |
| NM_014322 | 31952.23  | 28725.348 | AK024393  | 1480.76   | 878.475   | AF009317  | 7473.578  | 8061.144  |
| NM_004122 | 9816.87   | 8502.12   | AK022537  | 12517.683 | 9606.085  | AK026583  | 10308.149 | 8867.463  |
| NM_002922 | 42685.012 | 39085.652 | AF064597  | 2027.829  | 1595.125  | AF218031  | 10560.912 | 12434.737 |
| NM_000160 | 9942.951  | 8645.085  | NM_006345 | 5925.547  | 6454.656  | AF210650  | 4031.128  | 4066.673  |
| NM_003301 | 2639.483  | 2622.821  | NM_006875 | 33581.711 | 45893.313 | NM_018350 | 3695.323  | 3761.032  |
| NM_000955 | 3893.181  | 3240.462  | D87119    | 11391.289 | 12426.943 | AF085896  | 1440.449  | 1353.341  |
| U27768    | 6163.979  | 7301.73   | AB037769  | 1382.872  | 1140.169  | X74613    | 64231.965 | 60944.82  |
| NM_001742 | 1297.175  | 1496.377  | AL050040  | 1492.292  | 1129.689  | AF075080  | 44935.75  | 49310.535 |
| U66582    | 36408.52  | 42605.398 | NM_006550 | 23072.008 | 22907.426 | NM_004610 | 2008.089  | 1574.504  |
| NM_000950 | 24829.354 | 24934.643 | AL133066  | 1424.509  | 1450.236  | NM_003821 | 11215.557 | 6216.886  |
| NM_005130 | 14034.622 | 12979.858 | AF264717  | 5607.513  | 5194.1    | NM_017692 | 4203.544  | 1969.083  |
| NM_018300 | 1567.912  | 1565.201  | NM_012260 | 21641.107 | 23701.979 | NM_003975 | 1466.001  | 469.843   |
| NM_001832 | 7486.593  | 7336.902  | NM_001141 | 2103.859  | 2475.76   | NM_004834 | 13220.293 | 5407.321  |
| NM_017774 | 40188.887 | 43202.734 | NM_000010 | 19815.695 | 25135.064 | NM_000812 | 2503.397  | 1182.175  |
| AB037716  | 5586.34   | 6405.302  | AB028992  | 2228.132  | 2833.738  | AK024747  | 13868.876 | 6397.99   |
| NM_004827 | 795.483   | 723.843   | NM_018470 | 20004.18  | 19929.146 | NM_006390 | 3038.961  | 1846.588  |
| NM_001920 | 971.907   | 1050.32   | NM_014362 | 4238.131  | 2756.055  | NM_003580 | 6286.952  | 3819.065  |
| NM_016297 | 3795.387  | 3670.442  | L10139    | 5200.748  | 5635.78   | NM_006500 | 3560.557  | 1630.217  |
| NM_001752 | 10299.702 | 11604.55  | NM_000030 | 63043.305 | 66400.477 | NM_003235 | 27583.736 | 22383.74  |
| BC003406  | 1836.739  | 2350.75   | NM_020470 | 12143.686 | 11791.141 | AB042562  | 1979.711  | 1973.834  |
| AL137672  | 2315.811  | 2125.519  | NM_006574 | 1418.241  | 1389.12   | NM_016000 | 7556.464  | 7570.115  |
| NM_002241 | 1816.159  | 1240.761  | AA478950  | 7984.233  | 7659.65   | NM_002370 | 7800.871  | 8126.909  |
| NM_012281 | 8341.201  | 7861.577  | BF942101  | 20224.746 | 17644.875 | NM_001364 | 2071.49   | 1894.455  |
| NM_005500 | 3384.195  | 3402.113  | BI825012  | 61918.25  | 60462.922 | NM_003720 | 1354.895  | 1293.315  |
| AF091034  | 7827.279  | 7918.189  | M21574    | 3010.071  | 2437.136  | NM_017431 | 701.99    | 779.767   |
| NM_005301 | 45587.18  | 46726.418 | BM051302  | 2913.394  | 2453.29   | NM_006097 | 6112.521  | 6715.493  |
| NM_004167 | 1207.27   | 1450.18   | BE314182  | 31261.258 | 27985.068 | NM_006113 | 2493.46   | 3123.797  |
| NM_016653 | 5177.538  | 4927.259  | AI808029  | 2833.426  | 3448.503  | NM_015313 | 2578.083  | 3701.244  |
| AB035124  | 28459.15  | 22916.004 | AI971217  | 1607.358  | 2262.367  | AK022287  | 11479.777 | 11785.883 |
| AF060170  | 2915.244  | 3682.464  | X03225    | 7639.684  | 9475.667  | NM_015897 | 1619.426  | 2021.896  |
| NM_016602 | 2484.971  | 2491.433  | AK097395  | 43361.105 | 48327.719 | NM_000540 | 33861.914 | 26727.172 |
| NM_004400 | 16096.255 | 15714.771 | M12783    | 8056.386  | 6834.646  | AB023223  | 1164.349  | 745.063   |
| AK023397  | 5231.474  | 6104.535  | AK091535  | 3560.187  | 2853.577  | AB018257  | 4901.196  | 1645.281  |
| NM_001725 | 4411.816  | 4093.591  | AF085357  | 13478.354 | 11025.738 | NM_002700 | 18034.797 | 7061.106  |
| NM_004070 | 32221.061 | 35097.18  | AK092768  | 810.617   | 890.281   | AK001059  | 2259.955  | 1238.375  |
| NM_000262 | 1689.998  | 1458.398  | NM_003841 | 40390.426 | 30512.002 | NM_007282 | 5447.134  | 3571.255  |
| NM_017831 | 1138.795  | 1154.127  | AF296673  | 10704.304 | 10494.885 | NM_017610 | 1453.035  | 945.924   |
| AK024393  | 1069.988  | 939.701   | AB032956  | 1428.869  | 1215.046  | AK025133  | 30765.992 | 16613.693 |
| AK022537  | 16948.783 | 18848.09  | AL137698  | 1392.933  | 1367.438  | AB020704  | 2789.767  | 2759.033  |
| AF116632  | 990.444   | 1326.666  | NM_015957 | 1097.927  | 788.868   | NM_020197 | 845.952   | 808.71    |
| AF064597  | 2764.842  | 2701.706  | AK024821  | 9085.511  | 7599.113  | NM_004087 | 5045.074  | 6868.946  |
| AF198444  | 687.012   | 455.907   | AB002340  | 17132.75  | 13397.482 | NM_018700 | 2719.788  | 3450.219  |
| NM_006345 | 7579.177  | 6989.338  | NM_000224 | 12828.527 | 12005.476 | NM_000119 | 7873.368  | 8913.033  |
| NM_006875 | 42859.234 | 47721.938 | NM_014320 | 9438.396  | 8003.855  | NM_001065 | 3233.554  | 4319.652  |
| D87119    | 6627.959  | 8016.725  | NM_006414 | 13401.158 | 12902.529 | AK027100  | 1154.001  | 1259.584  |
| AB037769  | 2828.11   | 2102.577  | NM_014322 | 27680.486 | 23567.271 | AY010111  | 850.76    | 1652.036  |
| AL050040  | 1373.654  | 1335.422  | NM_004122 | 11078.969 | 9446.795  | NM_003622 | 4882.76   | 4225.561  |
| NM_006550 | 27154.066 | 26675.26  | NM_002920 | 41720.758 | 37654.352 | NM_007115 | 2190.724  | 2204.666  |
| AL133066  | 1514.529  | 1243.855  | NM_000160 | 6055.639  | 5208.577  | NM_013330 | 3578.519  | 4452.625  |
| AF264717  | 5380.319  | 4466.843  | NM_003301 | 2498.889  | 2196.438  | NM_001491 | 6368.644  | 3625.061  |
| NM_012260 | 10171.676 | 9510.017  | NM_000955 | 6730.036  | 6736.859  | AK026541  | 3837.673  | 2189.011  |
| NM_001141 | 1403.082  | 1195.852  | U27768    | 7397.838  | 7825.306  | NM_005890 | 38637.16  | 24592.68  |

|           |           |           |           |           |           |           |           |           |
|-----------|-----------|-----------|-----------|-----------|-----------|-----------|-----------|-----------|
| NM_00001E | 31824.426 | 39140.91  | NM_001742 | 924.005   | 2416.373  | D42055    | 8887.35   | 8219.104  |
| AB028992  | 1279.448  | 1421.432  | AF305550  | 11622.003 | 12036.869 | AL137349  | 4955.623  | 5220.568  |
| NM_01847E | 25475.979 | 24832.385 | U66582    | 32419.807 | 27469.303 | NM_00333E | 1482.14   | 1729.263  |
| NM_01436E | 4889.263  | 4164.693  | S73288    | 1250.933  | 1273.126  | NM_01647E | 49709.41  | 36973.75  |
| L10139    | 1275.842  | 1164.82   | NM_00619E | 4809.958  | 4507.646  | NM_01590E | 5200.01   | 3244.549  |
| NM_00003E | 70675.836 | 63937.691 | NM_00381E | 2559.312  | 2016.131  | NM_02015E | 7449.84   | 3416.763  |
| NM_02047C | 3745.997  | 2846.772  | NM_00467E | 3641.448  | 2605.992  | BE874471  | 4339.93   | 4070.615  |
| NM_006574 | 1463.966  | 1397.653  | NM_00095C | 65309.426 | 59350.898 | NM_00469E | 1087.005  | 1596.35   |
| AA478950  | 7037.549  | 7369.357  | NM_00513E | 11966.778 | 11134.196 | NM_007211 | 11169.246 | 12189.886 |
| BF942101  | 28228.262 | 25440.002 | NM_00127E | 67111.781 | 63442.863 | AB011152  | 2301.883  | 2671.415  |
| BI825012  | 65694.875 | 59033.469 | NM_00032E | 60281.559 | 53288.355 | NM_01495E | 10592.634 | 11676.246 |
| M21574    | 4751.889  | 5433.698  | NM_152747 | 2626.291  | 2170.23   | AB014592  | 1084.281  | 1486.025  |
| BM051302  | 3908.519  | 4388.42   | NM_01741E | 2845.733  | 2282.875  | NM_00543E | 18038.617 | 18194.047 |
| BE314182  | 26178.598 | 26767.826 | NM_001667 | 64055.305 | 67822.719 | AK024418  | 3612.733  | 4940.793  |
| AI808029  | 4925.417  | 4677.583  | AB046834  | 1971.493  | 1413.549  | NM_003367 | 13271.331 | 9156.116  |
| AI971217  | 1551.198  | 1623.361  | AB029033  | 52983.766 | 51158.926 | NM_005194 | 13831.136 | 6325.428  |
| X03225    | 8625.656  | 9487.216  | AF091034  | 6501.737  | 4811.41   | AB002296  | 4859.483  | 4755.846  |
| AK097395  | 31181.793 | 33861.297 | NM_005301 | 60275.59  | 57129.07  | NM_01431E | 10212.122 | 8952.08   |
| M12783    | 11944.827 | 10701.404 | NM_01665E | 4326.645  | 4726.232  | NM_012087 | 3896.889  | 3772.317  |
| AK091535  | 8920.79   | 8155.302  | AB035124  | 20840.545 | 15391.279 | AF165520  | 7527.559  | 6200.646  |
| AF085357  | 17035.268 | 14870.001 | AF060170  | 4247.702  | 3847.823  | AK026072  | 1642.336  | 1663.533  |
| AK092768  | 628.127   | 724.922   | NM_01660E | 2584.131  | 3522.902  | NM_00428E | 1488.275  | 1185.149  |
| NM_003841 | 4640.118  | 3150.598  | NM_00440E | 17622.102 | 21941.146 | NM_01567E | 8588.033  | 4833.872  |
| AF296673  | 13003.883 | 11796.919 | AK023397  | 5950.292  | 7079.146  | AF299118  | 65424.238 | 61693.922 |
| AB032956  | 702.93    | 674.344   | NM_00172E | 10227.771 | 11379.562 | AK022763  | 37711.27  | 40416.234 |
| AL137698  | 1264.543  | 1570.736  | NM_00407E | 30793.34  | 22620.211 | NM_00097E | 68553.445 | 73229.969 |
| NM_015957 | 1082.31   | 719.742   | NM_00299E | 1460.92   | 1167.422  | NM_00100C | 63221.652 | 62270.641 |
| AK024821  | 9604.996  | 9096.635  | NM_00038E | 6734.149  | 5410.549  | AF288207  | 40071.629 | 42290.516 |
| AB002340  | 12873.635 | 9833.063  | NM_00463E | 6716.817  | 5154.466  | NM_001001 | 61404.625 | 61392.352 |
| NM_000224 | 2850.415  | 1993.901  | X01394    | 62881.602 | 58960.129 | NM_001774 | 61405.277 | 59689.547 |
| NM_01432E | 12474.794 | 10422.674 | NM_000041 | 61947.492 | 60268.605 | AK026414  | 27736.484 | 10302.774 |
| NM_006414 | 14356.253 | 13056.084 | NM_002984 | 22550.893 | 16470.615 | D17297    | 3478.568  | 3820.819  |
| NM_01432E | 34346.715 | 33317.133 | AB037752  | 28525.434 | 27764.109 | AJ223353  | 14957.296 | 18543.908 |
| NM_00412E | 11966.21  | 11275.132 | AF317425  | 7073.358  | 6010.474  | NM_012241 | 11675.469 | 13055.837 |
| NM_00292E | 45555.086 | 47034.16  | NM_01800E | 7247.122  | 6244.215  | AF250288  | 1047.598  | 715.386   |
| NM_00016C | 12172.202 | 14084.37  | NM_001141 | 1946.2    | 1474.218  | NM_01848E | 3356.786  | 1646.448  |
| NM_003301 | 2882.768  | 3291.461  | NM_00001E | 17300.607 | 16196.941 | NM_005324 | 23220.045 | 11892.367 |
| NM_00095E | 3946.691  | 4341.155  | AB028992  | 1177.381  | 1161.226  | AL080201  | 44963.293 | 40813.293 |
| U27768    | 6575.998  | 6268.674  | NM_01847E | 16973.264 | 16018.682 | NM_01536E | 2944.762  | 2760.043  |
| NM_00174E | 880.694   | 449.139   | NM_01436E | 3102.354  | 1750.909  | NM_00180E | 10307.108 | 9798.412  |
| AF305550  | 15148.006 | 16771.406 | NM_01830E | 6485.644  | 3913.248  | AB040941  | 7042.22   | 6747.715  |
| U66582    | 38484.117 | 37566.191 | NM_00183E | 51058.086 | 49715.16  | AL137241  | 1380.131  | 1245.528  |
| NM_00619E | 4671.304  | 5081.408  | NM_017774 | 39275.438 | 30777.414 | AB037742  | 3747.85   | 3788.443  |
| NM_00381E | 2218.97   | 1820.382  | AB037716  | 4189.646  | 3691.036  | AF272375  | 3374.155  | 4043.988  |
| NM_00084E | 1357.773  | 957.707   | NM_00192E | 1050.71   | 615.813   | NM_01451E | 6094.679  | 6644.409  |
| NM_00467E | 4364.212  | 4972.887  | NM_016297 | 5340.546  | 5453.458  | NM_002517 | 3282.231  | 3830.638  |
| NM_00095C | 28770.822 | 28303.463 | NM_00175E | 9697.101  | 12203.276 | NM_007147 | 63024.043 | 56726.512 |
| NM_00513E | 15589.621 | 15174.516 | BC003406  | 2058.955  | 2043.277  | X65463    | 6349.257  | 4974.95   |
| NM_00127E | 70505.891 | 71094.75  | AL137672  | 2012.873  | 1962.599  | NM_00486E | 3284.832  | 2255.654  |
| NM_00032E | 70248.078 | 68625.195 | X64177    | 6480.699  | 1805.754  | NM_00466E | 7346.888  | 7485.618  |
| NM_152747 | 4147.949  | 3365.26   | NM_015994 | 7441.421  | 5347.048  | X07696    | 17740.852 | 11625.21  |
| NM_01741E | 2843.065  | 2661.615  | NM_00223E | 1431.777  | 813.481   | AA481015  | 1397.417  | 594.562   |
| NM_001667 | 55462.973 | 52681.082 | NM_002241 | 839.188   | 808.362   | AI925826  | 26373.051 | 18514.369 |

|           |           |           |           |           |           |           |           |           |
|-----------|-----------|-----------|-----------|-----------|-----------|-----------|-----------|-----------|
| AB046834  | 966.195   | 651.026   | NM_014065 | 3287.279  | 2449.017  | U04209    | 15483.69  | 13630.785 |
| AB029033  | 16413.4   | 14750.037 | NM_001695 | 12096.27  | 9290.931  | AI393201  | 24384.871 | 27501.619 |
| AF091034  | 8892.608  | 7890.46   | NM_002248 | 10302.354 | 8707.512  | M34664    | 67869.352 | 64102.711 |
| NM_005301 | 50265.078 | 49599.348 | NM_012281 | 13921.796 | 12150.773 | Z15108    | 7387.244  | 7580.153  |
| NM_004167 | 2047.004  | 3072.748  | AK025772  | 7380.992  | 6280.15   | M55284    | 2144.201  | 2822.544  |
| NM_016653 | 8176.258  | 9106.92   | NM_005509 | 3304.163  | 2534.761  | AA001218  | 3598.962  | 4478.744  |
| AB035124  | 39352.332 | 43796.574 | AL137698  | 942.493   | 764.987   | AA679391  | 3627.677  | 4879.646  |
| AF060170  | 3061.432  | 3834.143  | NM_000262 | 5365.87   | 2771.229  | BG682146  | 8565.816  | 9868.173  |
| NM_016602 | 2410.337  | 2307.423  | NM_017831 | 2263.876  | 1785.628  | AA884709  | 1869.007  | 1586.611  |
| NM_004409 | 13301.911 | 10286.71  | AK024393  | 1303.106  | 1006.347  | NM_004541 | 57720.672 | 47371.25  |
| AK023397  | 5071.916  | 5424.854  | AK022537  | 11473.038 | 8533.126  | NM_006705 | 7220.407  | 6014.331  |
| NM_001725 | 4902.753  | 4998.312  | AF064597  | 2564.217  | 2174.742  | X56692    | 53987.918 | 54378.836 |
| NM_004079 | 28307.082 | 27535.988 | NM_006345 | 5516.376  | 3443.301  | NM_000734 | 16732.67  | 27165.984 |
| NM_002996 | 545.684   | 477.984   | NM_006875 | 28959.662 | 14746.157 | NM_012331 | 7600.834  | 5614.775  |
| NM_000383 | 8299.825  | 7180.594  | D87119    | 14788.43  | 11187.002 | NM_006644 | 9391.094  | 3050.148  |
| NM_004633 | 5155.297  | 3847.58   | AB037769  | 1618.542  | 811.507   | NM_006583 | 49371.398 | 7403.468  |
| X01394    | 50502.805 | 49009.344 | AL050040  | 1685.837  | 1483.007  | NM_006065 | 1752.635  | 2061.581  |
| NM_000041 | 47327.301 | 51584.863 | NM_006556 | 25073.912 | 25586.15  | NM_014333 | 47464.086 | 46016.84  |
| NM_002984 | 29643.232 | 27097.467 | AL133066  | 1947.972  | 2021.207  | NM_001495 | 3403.058  | 3727.547  |
| AB037752  | 12017.261 | 13392.484 | AF264717  | 4951.17   | 3919.304  | NM_002288 | 1231.493  | 1431.879  |
| AF317425  | 7150.327  | 5895.068  | NM_012260 | 24018.621 | 18503.324 | NM_004416 | 23511.264 | 29144.086 |
| NM_018002 | 10618.218 | 11973.696 | CY3Cy5    | 11283.009 | 609.877   | NM_000628 | 4860.212  | 6658.853  |
| NM_001141 | 1094.836  | 978.866   | NM_005060 | 4661.525  | 5038.584  | AB005216  | 1409.739  | 1991.092  |
| NM_000018 | 24791.988 | 21573.385 | NM_005437 | 21594.66  | 22466.182 | AF015041  | 7786.071  | 6322.648  |
| AB028992  | 1238.029  | 783.879   | NM_018319 | 9453.62   | 8600.479  | NM_002363 | 1505.809  | 1502.702  |
| NM_018479 | 21873.293 | 19628.656 | AL359559  | 844.488   | 607.742   | X82693    | 34924.66  | 16280.441 |
| NM_014362 | 3896.494  | 2830.804  | AK024063  | 1139.906  | 1169.179  | NM_002722 | 5420.629  | 7460.143  |
| NM_018308 | 1726.078  | 1406.325  | AK021714  | 3759.379  | 3096.115  | AF317058  | 1609.786  | 2655.465  |
| NM_001832 | 8956.053  | 8374.29   | NM_020314 | 7258.317  | 6579.121  | AK025965  | 1067.52   | 2060.93   |
| NM_017774 | 51625.168 | 53379.5   | AK022972  | 7834.75   | 9233.762  | NM_006516 | 16764.275 | 12588.607 |
| AB037716  | 6954.823  | 8947.74   | AK025996  | 5697.017  | 5783.449  | NM_000355 | 6684.439  | 10766.19  |
| NM_004827 | 1142.483  | 1335.216  | NM_017598 | 4071.964  | 3228.125  | NM_005451 | 3792.003  | 5647.073  |
| NM_001926 | 854.533   | 925.227   | NM_005715 | 17373.309 | 20299.301 | NM_007172 | 6006.462  | 7394.539  |
| NM_016297 | 3682.955  | 3054.833  | AK026992  | 5155.484  | 5118.495  | NM_013333 | 43528.895 | 50969.707 |
| NM_001752 | 11112.367 | 9644.708  | X81895    | 1273.459  | 1518.052  | NM_002333 | 9872.483  | 10802.028 |
| BC003406  | 2120.083  | 2098.851  | AL137343  | 2247.741  | 2676.936  | NM_003400 | 16126.923 | 17523.174 |
| AL137672  | 2332.073  | 1838.824  | NM_005060 | 5790.162  | 7333.106  | NM_014824 | 4093.767  | 1152.448  |
| X64177    | 9556.948  | 3615.888  | NM_005437 | 23819.734 | 32896.395 | NM_014504 | 3391.027  | 5539.26   |
| NM_015994 | 9278.382  | 7183.195  | SR3       | 55981.141 | 55948.098 | NM_014741 | 11088.138 | 17041.553 |
| NM_002235 | 1119.977  | 823.458   | SR5       | 7622.422  | 8346.008  | AF212247  | 9180.462  | 14769.919 |
| NM_014065 | 4434.699  | 4091.392  | SR7       | 8742.807  | 53709.285 | AF161407  | 54549.527 | 52648.355 |
| NM_001695 | 15768.372 | 17026.043 | SR9       | 31411.324 | 5859.057  | NM_014738 | 9302.311  | 12824.14  |
| NM_002248 | 5543.573  | 4120.449  | CY3Cy5    | 8638.858  | 365.965   | NM_005713 | 5488.391  | 7639.093  |
| NM_012281 | 8681.851  | 6768.847  | M25785    | 2646.903  | 3168.764  | AK021951  | 1684.365  | 2784.149  |
| AK025772  | 7142.877  | 6086.81   | M32443    | 5564.311  | 5780.359  | AK023553  | 10010.408 | 10588.635 |
| NM_005509 | 4836.092  | 5294.501  | D16908    | 2441.93   | 2475.374  | NM_014600 | 3921.978  | 7076.19   |
| AL137698  | 1329.403  | 1208.278  | D16477    | 1941.159  | 2108.34   | NM_016733 | 2582.725  | 4935.762  |
| NM_000262 | 1872.805  | 1734.626  | AK023754  | 3421.611  | 2854.861  | NM_018962 | 12672.135 | 18965.439 |
| NM_017831 | 1472.135  | 1736.461  | AK021689  | 2204.271  | 2340.516  | AF125100  | 6507.986  | 7791.455  |
| AK024393  | 1345.288  | 1306.437  | AK024737  | 6545.722  | 7502.657  | NM_004666 | 3297.317  | 1481.585  |
| AK022537  | 15748.133 | 13462.192 | AB007890  | 26552.193 | 28371.668 | AF130728  | 1360.858  | 1950.823  |
| AF116632  | 801.965   | 380.866   | AF070591  | 3450.456  | 3481.548  | NM_004987 | 1336.947  | 2423.984  |
| AF064597  | 2618.766  | 2650.646  | AL359605  | 8387.148  | 11707.621 | NM_001288 | 41034.785 | 51159.746 |

|           |           |           |           |           |           |           |           |           |
|-----------|-----------|-----------|-----------|-----------|-----------|-----------|-----------|-----------|
| AF198444  | 685.927   | 695.045   | AB020633  | 3220.58   | 3593.831  | M54894    | 1928.725  | 2689.96   |
| NM_006345 | 8648.509  | 8432.453  | AK025445  | 30419.42  | 26172.768 | BG752013  | 1902.96   | 3227.28   |
| NM_006875 | 39909.16  | 38552.297 | AL357200  | 4388.124  | 4760.263  | X07696    | 25468.916 | 38459.828 |
| D87119    | 6748.757  | 5557.732  | NM_017727 | 19192.996 | 19080.691 | U04209    | 19279.535 | 12310.215 |
| AB037769  | 4003.542  | 1739.419  | AK024527  | 724.158   | 1120.545  | AI393201  | 31691.639 | 34026.336 |
| AL050040  | 1956.893  | 1252.56   | AK025051  | 3049.983  | 2687.902  | Z15108    | 10841.185 | 14886.571 |
| NM_006556 | 30178.535 | 31068.721 | AK024553  | 68701.094 | 62129.422 | M55284    | 4173.242  | 5115.884  |
| AL133066  | 1974.069  | 1910.675  | AK024930  | 1842.67   | 1727.594  | AA001218  | 7929.222  | 6294.637  |
| AF264717  | 5684.592  | 4683.667  | AF086168  | 2415.199  | 2540.238  | AA679391  | 3915.19   | 5233.329  |
| NM_012260 | 12196.84  | 12496.005 | AF007132  | 998.627   | 1426.676  | BG682146  | 9712.387  | 14939.991 |
| CY3Cy5    | 3801.168  | 309.318   | AK026711  | 1385.88   | 1430.012  | AK022417  | 12395.127 | 17310.359 |
| NM_005060 | 2066.6    | 1424.872  | NM_017864 | 19368.42  | 17991.217 | U50534    | 4817.26   | 5460.509  |
| NM_005437 | 16479.549 | 14235.058 | NM_004869 | 7060.254  | 7364.83   | NM_012266 | 9506.624  | 14795.685 |
| NM_018319 | 3211.982  | 3040.195  | AF136408  | 1819.842  | 1382.354  | NM_004559 | 7684.515  | 11718.417 |
| AY008301  | 586.286   | 553.41    | AL110203  | 2008.492  | 2558.139  | X56692    | 52598.32  | 57237.637 |
| AK024063  | 1205.853  | 1005.818  | AJ011595  | 2648.109  | 2599.682  | NM_014476 | 1503.64   | 2406.55   |
| AK021714  | 4477.425  | 4511.191  | X93501    | 2032.646  | 2496.633  | NM_014278 | 3112.147  | 4108.24   |
| NM_020314 | 5539.986  | 6539.882  | AJ011602  | 2196.733  | 2223.258  | NM_005838 | 1968.684  | 3248.58   |
| AK022972  | 10908.905 | 16129.151 | AJ002787  | 13089.606 | 13243.552 | NM_000734 | 18586.326 | 33984.023 |
| AK025996  | 3304.902  | 3023.22   | Z70764    | 4983.816  | 5269.149  | NM_012331 | 10282.233 | 16402.377 |
| AF088015  | 544.641   | 543.692   | AL049252  | 1427.884  | 1407.809  | NM_006583 | 56733.004 | 10194.391 |
| NM_005715 | 6273.587  | 6713.857  | Z83948    | 3699.063  | 3928.051  | NM_006065 | 1995.885  | 2018.726  |
| AK026992  | 3122.778  | 2812.237  | AF086214  | 613.131   | 956.846   | NM_001495 | 5104.176  | 6347.09   |
| X81895    | 1291.929  | 1469.266  | AK026860  | 7617.814  | 7570.418  | NM_002288 | 1574.258  | 2034.249  |
| AL137343  | 1873.823  | 2110.311  | AK024211  | 2453.573  | 1969.234  | NM_004416 | 32077.4   | 40767.352 |
| NM_005060 | 2807.081  | 2474.707  | NM_014898 | 1827.347  | 1829.875  | NM_000628 | 4993.701  | 6394.867  |
| NM_005437 | 21816.219 | 19419.385 | AK023435  | 1946.308  | 2322.569  | AB005216  | 2977.693  | 4057.445  |
| SR5       | 5490.925  | 8114.935  | AK026808  | 1732.429  | 1756.394  | AF015041  | 10227.758 | 12257.388 |
| SR7       | 6641.847  | 53647.113 | AK022309  | 3607.382  | 3767.304  | NM_002238 | 5424.082  | 5401.681  |
| SR9       | 26075.748 | 10174.217 | AK000063  | 2414.672  | 2391.025  | NM_004868 | 4796.794  | 5483.847  |
| CY3Cy5    | 9675.489  | 834.033   | AK000792  | 1069.219  | 893.942   | AF317058  | 1554.98   | 3079.493  |
| M25785    | 3068.458  | 2944.581  | AK000949  | 4894.188  | 3993.611  | AK025965  | 1566.446  | 1918.487  |
| M32443    | 1643.581  | 1196.301  | AK027068  | 2578.537  | 2434.073  | NM_016242 | 707.266   | 1320.601  |
| D16908    | 1572.522  | 1295.891  | AK000165  | 1506.553  | 1266.27   | AL137576  | 14897.36  | 24784.68  |
| D16477    | 1268.924  | 1634.318  | AK000974  | 9245.896  | 9001.116  | NM_006516 | 19910.418 | 11790.379 |
| AK024759  | 1348.662  | 1439.478  | NM_006233 | 25784.711 | 26847.508 | NM_000355 | 4677.618  | 2842.534  |
| AK025078  | 982.063   | 956.84    | AK021889  | 1930.861  | 2377.535  | NM_005451 | 4052.66   | 3276.732  |
| AK023754  | 554.603   | 442.559   | AK000992  | 3088.807  | 3146.442  | NM_007172 | 4402.331  | 4265.59   |
| AK024737  | 2990.293  | 2640.703  | L23544    | 39689.824 | 42149.152 | NM_013333 | 35665.809 | 33519.164 |
| AB007890  | 8900.065  | 7469.216  | NM_019020 | 7037.429  | 8134.149  | NM_002333 | 6581.934  | 5892.288  |
| AF070591  | 3050.293  | 3024.903  | AF119892  | 2705.605  | 2491.168  | NM_003400 | 14814.366 | 14433.717 |
| AB020633  | 3311.344  | 3219.206  | NM_016474 | 2194.028  | 2665.003  | NM_006705 | 17638.242 | 15828.876 |
| AK025445  | 24337.645 | 26073.164 | AF143879  | 15703.311 | 17241.08  | NM_014439 | 2654.372  | 2699.752  |
| AL357200  | 2141.588  | 2562.911  | AL117582  | 4951.06   | 5653.73   | NM_014741 | 13149.599 | 19751.77  |
| NM_017727 | 22503.252 | 29629.889 | AK025525  | 2662.229  | 4022.665  | AF212247  | 6763.93   | 10204.45  |
| AK025051  | 2257.23   | 2298.657  | NM_018166 | 731.913   | 841.701   | AF161407  | 46261.129 | 51015.094 |
| AK024553  | 9944.457  | 8716.863  | L09095    | 40580.5   | 37315.422 | NM_014738 | 8791.564  | 14909.609 |
| AK025101  | 887.883   | 932.347   | NM_018233 | 47527.789 | 50326.566 | NM_016406 | 7888.729  | 12033.628 |
| AK026702  | 618.882   | 639.969   | AV740891  | 5704.276  | 5744.152  | NM_018080 | 16168.81  | 25261.002 |
| AF086168  | 1899.406  | 1954.512  | AF143329  | 1085.289  | 1005.74   | NM_014453 | 31965.758 | 12704.155 |
| AF007132  | 1092.35   | 1127.405  | AF090916  | 2045.597  | 1901.714  | NM_005713 | 1937.281  | 1044.946  |
| AK026711  | 1244.378  | 1469.711  | AL390183  | 1463.313  | 1842.421  | AK021951  | 1299.343  | 384.389   |
| NM_017864 | 10735.594 | 10893.51  | Y13897    | 3193.731  | 3544.301  | AK023553  | 2986.959  | 1804.838  |



|           |           |           |           |           |           |           |           |           |
|-----------|-----------|-----------|-----------|-----------|-----------|-----------|-----------|-----------|
| NM_00486  | 4597.717  | 4723.989  | AK001857  | 3515.523  | 3598.5    | NM_01460  | 2426.971  | 1930.647  |
| AF136408  | 826.939   | 805.6     | AK021525  | 977.91    | 733.888   | NM_01673  | 1889.251  | 1327.706  |
| AL110203  | 1294.63   | 1277.459  | AF067801  | 1474.216  | 1584.716  | AF181994  | 4217.006  | 3376.814  |
| AJ011595  | 832.142   | 982.105   | AL133577  | 7880.81   | 7468.774  | NM_01896  | 6001.594  | 4777.528  |
| AJ011602  | 1853.566  | 1891.815  | AF279773  | 1415.365  | 1118.547  | AF125100  | 3850.568  | 3232.788  |
| AJ002787  | 2287.995  | 2335.641  | AK025378  | 13137.32  | 15706.39  | X82693    | 47724.297 | 36653.207 |
| Z70764    | 2003.005  | 2383.007  | NM_00047  | 10734.212 | 10643.914 | NM_00128  | 45774.137 | 51670.5   |
| AL049252  | 987.492   | 805.497   | AF038199  | 4238.448  | 4730.389  | AA831963  | 2324.239  | 3318.907  |
| Z83948    | 14194.601 | 18339.537 | AF086035  | 20638.225 | 26041.414 | M54894    | 2807.479  | 4041.802  |
| AF086214  | 661.789   | 1341.875  | AK022159  | 13925.509 | 15965.67  | BG752013  | 1860.499  | 2940.022  |
| AK026860  | 6794.672  | 6862.11   | D16905    | 1081.004  | 1271.686  | X07696    | 25922.783 | 37088.203 |
| NM_01489  | 1065.209  | 991.208   | AJ012491  | 1761.951  | 1422.137  | AA481015  | 3357.871  | 5612.043  |
| AK026808  | 805.956   | 1042.906  | AF007136  | 1958.892  | 1587.079  | AI925826  | 34722.223 | 41810.652 |
| AK022309  | 3031.75   | 3369.883  | U25750    | 23465.156 | 22407.135 | AI393201  | 19226.549 | 4750.877  |
| AK000063  | 2060.722  | 1874.678  | AK023691  | 23204.18  | 20649.969 | M34664    | 63615.699 | 34978.805 |
| AK000792  | 1091.244  | 1315.018  | AK023502  | 2136.039  | 2733.794  | Z15108    | 6496.333  | 2689.691  |
| AK000949  | 5866.141  | 7429.105  | AF014456  | 1437.105  | 803.415   | M55284    | 1361.103  | 659.013   |
| AK027068  | 2265.689  | 3332.621  | AK026744  | 2238.105  | 1971.56   | AA001218  | 2624.818  | 1626.75   |
| AK000165  | 1291.904  | 1521.284  | AK002105  | 1046.971  | 1242.713  | AA679391  | 1916.065  | 1437.442  |
| AK000974  | 7676.573  | 9696.55   | NM_005234 | 22544.881 | 19485.09  | BG682146  | 5862.859  | 3850.265  |
| NM_00623  | 24375.412 | 19318.621 | BC023536  | 2305.356  | 2581.295  | AA884709  | 940.205   | 641.468   |
| AK021889  | 2450.259  | 1644.335  | NM_00180  | 42114.781 | 42674.109 | AK022417  | 7846.164  | 5052.93   |
| AK000992  | 2713.179  | 2538.928  | NM_012297 | 22813.084 | 26584.467 | U50534    | 2803.301  | 2072.966  |
| L23544    | 26282.99  | 21729.816 | AB007925  | 67744.609 | 74902.945 | NM_014824 | 5270.605  | 3435.251  |
| NM_01902  | 5120.423  | 5296.211  | NM_01818  | 3445.914  | 4203.855  | NM_00583  | 4469.715  | 8766.119  |
| AF119892  | 958.465   | 1234.953  | NM_000361 | 28757.354 | 28020.299 | NM_012331 | 9695.513  | 8656.191  |
| NM_016474 | 1901.271  | 2430.97   | NM_00247  | 65603.508 | 58832.934 | NM_006644 | 14701.358 | 19086.975 |
| AL833081  | 442.702   | 616.569   | NM_00383  | 42675.215 | 49403.77  | NM_00658  | 66306.992 | 24028.209 |
| AF143879  | 12030.949 | 12831.963 | NM_017987 | 3559.775  | 4323.794  | NM_00606  | 1712.873  | 2483.314  |
| AK024621  | 38272.609 | 47046.496 | NM_01820  | 1468.566  | 1674.355  | NM_01433  | 57480.941 | 57811.48  |
| AL157449  | 50331.625 | 54957.449 | NM_014244 | 1256.111  | 1624.857  | NM_00149  | 5133.425  | 9125.336  |
| AL117582  | 5250.496  | 4310.366  | NM_00091  | 4752.24   | 5313.76   | NM_00228  | 1333.409  | 2632.681  |
| AK025525  | 1451.783  | 1419.898  | AF086001  | 67755.398 | 69532.945 | NM_00441  | 36594.875 | 51688.359 |
| NM_01816  | 893.424   | 803.205   | AL117560  | 50997.004 | 50999.73  | NM_00032  | 9657.223  | 4386.837  |
| L09095    | 2582.681  | 2548.057  | M24749    | 15497.517 | 19654.207 | AF015041  | 6008.033  | 3194.516  |
| NM_01823  | 12983.56  | 15654.637 | NM_005831 | 68014.094 | 68638.422 | NM_00236  | 1008.646  | 410.079   |
| AV740891  | 3472.178  | 3870.812  | NM_00585  | 68127.422 | 69623.523 | AK000184  | 1959.237  | 1186.025  |
| AL390183  | 1107.275  | 786.113   | NM_000554 | 65907.5   | 57949.676 | AF055020  | 38915.707 | 27436.656 |
| Y13897    | 1990.864  | 1857.24   | NM_01835  | 6208.679  | 5927.04   | NM_00698  | 5288.804  | 3679.94   |
| AK001857  | 2777.165  | 2030.076  | AF085896  | 2376.506  | 2232.894  | AF272043  | 1656.978  | 1358.63   |
| AF067801  | 875.01    | 554.588   | X74613    | 71581.445 | 62158.148 | NM_00258  | 63900.523 | 58290.613 |
| AL133577  | 3377.227  | 2878.222  | AF075080  | 36999.156 | 37023.773 | NM_00223  | 3544.701  | 2497.691  |
| AK025378  | 1110.93   | 1247.784  | NM_00461  | 3431.7    | 3346.076  | NM_00486  | 3576.294  | 3003.13   |
| NM_00047  | 6994.676  | 5920.843  | NM_00436  | 2207.973  | 2924.241  | NM_00466  | 5089.532  | 3226.359  |
| AK000677  | 769.607   | 650.097   | NM_003821 | 21955.365 | 20646.465 | NM_00702  | 13447.428 | 11417.116 |
| AF038199  | 3658.41   | 4478.238  | NM_01769  | 7319.102  | 7612.508  | NM_01586  | 1876.002  | 2134.547  |
| AF086035  | 18217.582 | 20242.506 | NM_00397  | 2363.897  | 2869.795  | NM_00305  | 21279.74  | 28182.801 |
| AK022159  | 9607.903  | 9603.771  | NM_004834 | 25435.461 | 29974.191 | NM_00035  | 5799.649  | 8072.913  |
| D16905    | 669.175   | 780.184   | NM_01817  | 1563.274  | 1834.389  | NM_005451 | 5372.623  | 9378.054  |
| AJ012491  | 1523.55   | 1225.596  | NM_00081  | 6541.097  | 6397.805  | NM_00717  | 7928.41   | 11665.883 |
| U25750    | 5794.198  | 5059.039  | AK024747  | 24443.84  | 23717.756 | NM_00233  | 6974.78   | 1781.209  |
| AK023691  | 24549.795 | 19426.045 | NM_00639  | 6568.387  | 5563.934  | NM_00340  | 12958.663 | 8192.757  |
| AK023502  | 853.842   | 690.448   | NM_00358  | 9540.01   | 11002.722 | NM_00670  | 12698.236 | 7510.102  |

|           |           |           |           |           |           |           |           |           |
|-----------|-----------|-----------|-----------|-----------|-----------|-----------|-----------|-----------|
| AF014456  | 817.261   | 918.742   | NM_006506 | 2666.369  | 3026.759  | NM_014436 | 2307.421  | 1506.218  |
| AK026744  | 1758.714  | 2474.119  | NM_003235 | 32219.594 | 39818.629 | NM_005582 | 21068.625 | 14948.268 |
| AK002105  | 755.947   | 697.927   | AB042562  | 2702.862  | 2785.813  | NM_012266 | 7220.125  | 5199.219  |
| NM_005234 | 18340.258 | 19056.021 | NM_016009 | 12514.115 | 12802.44  | NM_004556 | 5251.104  | 3870.494  |
| BC023536  | 1522.75   | 2046.351  | NM_002378 | 10357.62  | 11328.126 | X56692    | 40176.32  | 30501.486 |
| NM_001803 | 40498.391 | 49912.723 | NM_006113 | 3320.006  | 3456.364  | NM_014476 | 892.984   | 915.768   |
| NM_012297 | 15688.72  | 17862.387 | NM_015313 | 4535.995  | 4760.227  | NM_014278 | 2288.746  | 1913.725  |
| AB007925  | 20830.627 | 21827.174 | AK022287  | 18380.678 | 17886.428 | NM_018962 | 7276.891  | 6924.935  |
| NM_000361 | 24274.521 | 22786.527 | NM_015897 | 3431.97   | 3534.587  | AF125100  | 4048.616  | 5775.264  |
| NM_002475 | 40886.578 | 48312.398 | AF177473  | 68068.445 | 70310.516 | NM_007176 | 15603.126 | 16653.51  |
| NM_003836 | 6462.743  | 5827.253  | NM_000546 | 51672.887 | 57844.453 | NM_002722 | 6705.135  | 7507.811  |
| NM_017987 | 1230.968  | 1262.223  | AB023223  | 2259.571  | 2795.479  | AF317058  | 1921.851  | 2128.69   |
| NM_018203 | 1763.219  | 2066.947  | AB018257  | 13589.243 | 12620.954 | M22538    | 18204.314 | 10133.11  |
| NM_014244 | 773.459   | 1275.479  | NM_002708 | 44604.434 | 52497.57  | NM_006028 | 1502.578  | 847.948   |
| NM_000910 | 5630.187  | 6910.618  | AK001059  | 5086.207  | 4752.185  | NM_014904 | 1556.125  | 1109.815  |
| AF086001  | 48993.535 | 51430.785 | NM_007282 | 12474.241 | 12643.584 | AL137576  | 8728.985  | 5199.136  |
| AL117560  | 49663.09  | 53107.223 | NM_017770 | 947.921   | 1360.346  | NM_018358 | 7872.085  | 6302.88   |
| M24749    | 16096.896 | 18480.664 | NM_017610 | 2695.677  | 2824.442  | NM_016321 | 1542.679  | 1260.528  |
| NM_005831 | 70690.484 | 63329.082 | AL122070  | 1172.795  | 1705.127  | AF131781  | 7502.027  | 7667.329  |
| NM_005850 | 64136.938 | 59382.926 | AK025133  | 48705.598 | 53813.891 | NM_006516 | 17326.814 | 18855.014 |
| NM_000554 | 60073.133 | 56959.258 | AB020704  | 2443.23   | 2534.412  | AK022417  | 5824.033  | 2373.889  |
| AF009317  | 10073.854 | 9711.638  | NM_020197 | 1423.49   | 1455.898  | U50534    | 3592.061  | 3050.523  |
| AK026583  | 11542.229 | 11364.833 | NM_004087 | 7982.874  | 8288.503  | NM_014824 | 4728.255  | 6084.87   |
| AF218031  | 15408.093 | 17051.082 | AK027100  | 1371.464  | 1739.049  | AF161407  | 29160.623 | 10422.912 |
| AF210650  | 8255.14   | 10090.624 | AY010111  | 1316.384  | 1561.21   | NM_014738 | 5004.988  | 1925.356  |
| NM_018356 | 5789.092  | 6276.531  | NM_016950 | 725.351   | 965.361   | NM_016406 | 4119.978  | 2122.507  |
| AF085896  | 2346.668  | 2829.389  | NM_003622 | 6439.628  | 6394.378  | NM_018080 | 10634.619 | 5972.086  |
| X74613    | 12414.352 | 13932.259 | NM_007115 | 5588.502  | 5641.473  | NM_014453 | 31975     | 18201.844 |
| AF075080  | 4940.674  | 5582.875  | AK021645  | 2250.958  | 2224.491  | NM_005713 | 2298.002  | 2563.425  |
| NM_004616 | 2007.612  | 1718.576  | NM_013339 | 6030.751  | 7005.597  | AK021951  | 1387.577  | 904.427   |
| NM_004360 | 808.091   | 845.094   | NM_001491 | 10966.841 | 12361.809 | AK023553  | 4089.922  | 4486.639  |
| NM_003821 | 19401.098 | 19402.473 | NM_002642 | 2104.146  | 2555.802  | NM_014600 | 2837.799  | 3610.348  |
| NM_017692 | 5152.805  | 4300.907  | AK026541  | 7365.325  | 8259.688  | NM_016733 | 1755.541  | 1685.979  |
| NM_003975 | 934.625   | 811.94    | NM_005899 | 51347.434 | 55451.922 | AF181994  | 8039.86   | 12853.004 |
| NM_004834 | 11618.345 | 11415.499 | D42055    | 17391.867 | 20174.816 | CY3Cy5    | 1784.936  | 252.913   |
| NM_018173 | 998.837   | 975.72    | AL137349  | 7714.296  | 8545.057  | NM_058197 | 2581.746  | 3853.131  |
| NM_000812 | 6006.143  | 6949.687  | NM_003339 | 2192.353  | 2135.48   | AF086452  | 348.4     | 597.314   |
| AK024747  | 23417.641 | 27754.035 | NM_004562 | 1711.271  | 1145.108  | AF086314  | 648.86    | 1102.065  |
| NM_006390 | 5077.952  | 5522.536  | NM_016476 | 61638.656 | 55327.832 | NM_016364 | 1314.396  | 1571.453  |
| NM_003580 | 6031.938  | 6573.157  | NM_015902 | 7624.679  | 6136.296  | AF086419  | 4548.228  | 4740.777  |
| NM_006506 | 1812.219  | 2079.224  | NM_020155 | 14262.82  | 13567.496 | AF086461  | 891.896   | 1141.46   |
| NM_003235 | 2332.066  | 2263.184  | BE874471  | 7393.498  | 7428.323  | AF131795  | 378.933   | 573.738   |
| AB042562  | 2548.27   | 2184.049  | NM_006121 | 5676.047  | 6276.649  | AL833296  | 5181.361  | 6162.939  |
| NM_016009 | 10146.511 | 9649.314  | AK023520  | 13357.657 | 13683.636 | AL110240  | 4677.889  | 5285.444  |
| NM_002378 | 914.786   | 859.752   | NM_004693 | 1583.359  | 1686.932  | AF070549  | 322.377   | 648.744   |
| NM_001364 | 1085.376  | 1217.835  | NM_007211 | 14286.261 | 13386.854 | AK025695  | 3086.504  | 3365.434  |
| NM_006097 | 4283.263  | 4570.034  | AB011152  | 1689.188  | 1938.692  | AK025442  | 2147.815  | 2495.787  |
| NM_006113 | 1356.455  | 1420.658  | NM_014956 | 10597.848 | 11989.157 | AL050041  | 1106.196  | 1050.022  |
| NM_015313 | 4948.113  | 6614.802  | AB014592  | 1083.748  | 1454.898  | NM_058197 | 2448.961  | 2127.163  |
| AK022287  | 17699.855 | 19753.432 | NM_016952 | 1221.48   | 1114.863  | SR2       | 29708.791 | 18334.926 |
| NM_015897 | 3934.001  | 4232.903  | NM_001654 | 8374.491  | 11454.349 | SR4       | 8838.671  | 3325.968  |
| AF177473  | 21406.551 | 20849.805 | U48728    | 1670.097  | 2215.914  | SR6       | 1104.785  | 369.462   |
| NM_000546 | 43762.586 | 49682.234 | NM_005436 | 27046.379 | 31349.422 | SR8       | 4896.171  | 25016.744 |

|           |           |           |           |           |           |           |           |           |
|-----------|-----------|-----------|-----------|-----------|-----------|-----------|-----------|-----------|
| AB018257  | 13742.068 | 12367.018 | AK024418  | 4453.232  | 5258.58   | SR10      | 17083.865 | 11134.976 |
| NM_00270E | 37981.5   | 50088.195 | NM_003367 | 30418.977 | 36480.922 | CY3Cy5    | 3667.717  | 457.25    |
| AK001059  | 2631.75   | 2429.165  | NM_005194 | 30506.699 | 30406.221 | AK024713  | 728.891   | 918.643   |
| NM_00728E | 12447.915 | 13249.541 | AB002296  | 7751.025  | 9019.038  | AK024204  | 536.665   | 1064.183  |
| NM_01777C | 1017.084  | 1172.675  | NM_01431E | 16135.292 | 14605.391 | AK023737  | 1274.354  | 1335.774  |
| NM_01761C | 2468.042  | 3379.345  | NM_012087 | 7346.799  | 6541.533  | NM_00660E | 3416.207  | 3468.495  |
| AL122070  | 1247.69   | 1404.823  | AF165520  | 15726.991 | 12079.262 | NM_01411E | 395.761   | 472.2     |
| AK025133  | 36861.695 | 47126.164 | AK026072  | 3345.931  | 2827.104  | AK023525  | 4959.674  | 4732.844  |
| NM_01664E | 467.617   | 624.14    | NM_00428E | 2965.572  | 2233.747  | AF085829  | 1844.825  | 2054.312  |
| AB020704  | 1285.001  | 1224.912  | NM_001521 | 916.846   | 885.751   | AF075029  | 1005.036  | 827.22    |
| NM_020197 | 1117.018  | 1018.024  | NM_01567E | 11197.567 | 11023.65  | AK021903  | 6588.571  | 6370.848  |
| NM_004087 | 5116.475  | 5391.028  | AF299118  | 63184.551 | 57052.445 | AL390143  | 5484.293  | 5961.46   |
| NM_01870C | 1035.871  | 1022.516  | AK025353  | 37827.984 | 25903.111 | AL162075  | 1456.985  | 1367.033  |
| NM_000119 | 7487.261  | 7560.5    | AK056896  | 64418.406 | 54099.176 | AF147384  | 1958.94   | 1847.904  |
| NM_00106E | 3878.508  | 3770.738  | AK022763  | 58894.934 | 54243.188 | AK021595  | 1174.583  | 1149.862  |
| AK027100  | 992.989   | 1130.882  | NM_00097E | 66514.297 | 60286.441 | AK021648  | 480.027   | 548.913   |
| AY010111  | 1338.761  | 1407.324  | NM_00100C | 68193.906 | 60803.953 | AF147358  | 7661.262  | 3872.701  |
| NM_01695C | 692.317   | 1199.637  | AF288207  | 55960.719 | 52782.266 | NM_01841C | 2272.519  | 619.443   |
| NM_00362E | 6164.181  | 7042.621  | NM_00102E | 1154.737  | 463.567   | AF086355  | 732.722   | 832.81    |
| NM_00711E | 5695.172  | 6668.595  | NM_001001 | 67331.898 | 59874.684 | AK027174  | 455.456   | 506.838   |
| AK021645  | 1754.507  | 1424.086  | NM_001774 | 68099.359 | 65818.352 | AL110173  | 1055.436  | 1277.133  |
| NM_01333E | 6267.627  | 8091.912  | NM_00502E | 1030.014  | 1999.806  | AK024106  | 1219.909  | 1498.032  |
| NM_001491 | 6009.365  | 7641.365  | NM_00683C | 64616.93  | 65314.449 | AK025833  | 610.984   | 894.72    |
| NM_00264E | 1674.307  | 1867.936  | NM_00197E | 542.611   | 809.735   | AK027254  | 3379.031  | 4823.636  |
| AK026541  | 7545.089  | 8066.149  | AK026414  | 52813.152 | 55810.078 | AK021772  | 4515.084  | 5111.916  |
| NM_00589E | 10234.116 | 9482.234  | D17297    | 4209.646  | 4878.109  | AK026297  | 4193.8    | 4950.188  |
| D42055    | 16351.134 | 17667.816 | NM_004074 | 53622.098 | 57136.934 | NM_01537E | 1256.157  | 1421.381  |
| AL137349  | 3806.088  | 4517.192  | NM_00262E | 62048.223 | 61004.371 | AF085919  | 650.645   | 838.778   |
| NM_00333E | 1822.605  | 2298.531  | NM_01843E | 50455.574 | 56146.16  | AF085933  | 1187.078  | 1403.369  |
| NM_00456E | 764.716   | 967.861   | AF157115  | 15977.193 | 13905.675 | AF147431  | 727.112   | 957.81    |
| NM_01647E | 53572.711 | 55408.688 | AJ223353  | 21513.848 | 19064.412 | AK026422  | 12826.638 | 13700.802 |
| NM_01590E | 4449.278  | 3117.763  | NM_012241 | 21200.445 | 22890.371 | AF085938  | 606.173   | 916.714   |
| NM_02015E | 8836.047  | 8518.467  | NM_01536E | 2490.682  | 1652.717  | AK022264  | 1013.083  | 988.707   |
| BE874471  | 6432.239  | 6277.084  | NM_00180E | 13845.339 | 11866.903 | AL137331  | 1641.279  | 1471.876  |
| NM_006121 | 6008.48   | 6474.553  | AB040941  | 12285.204 | 10706.499 | AL162040  | 6723.401  | 4740.364  |
| AK023520  | 16296.848 | 23203.162 | AL137241  | 2058.139  | 1963.559  | AL442084  | 736.817   | 457.304   |
| NM_007211 | 5993.49   | 6111.097  | AB037742  | 3908.961  | 4099.548  | AL137371  | 7679.882  | 2874.514  |
| AB011152  | 3810.965  | 3817.587  | AF272375  | 3792.912  | 3807.594  | AL137596  | 2638.563  | 656.269   |
| NM_01495E | 18258.627 | 17134.67  | NM_01451E | 8067.511  | 7811.992  | AL353942  | 19641.887 | 21480.924 |
| AB014592  | 2240.86   | 2409.787  | NM_002517 | 4410.063  | 3857.777  | Z38010    | 7535.39   | 11395.079 |
| NM_01695E | 1512.26   | 1630.902  | NM_007147 | 62123.742 | 54936.859 | AF088003  | 448.971   | 943.338   |
| NM_001654 | 7638.371  | 9225.578  | X65463    | 10398.049 | 8960.077  | AK025799  | 710.527   | 1190.786  |
| NM_00543E | 7511.392  | 9135.791  | NM_00223E | 8649.496  | 8934.625  | AK022857  | 923.756   | 1189.874  |
| AK024418  | 899.987   | 845.235   | NM_00486E | 5519.547  | 7102.476  | AL110206  | 3843.165  | 5014.777  |
| NM_003367 | 37915.746 | 44030.797 | NM_00466E | 9808.041  | 13389.296 | NM_004821 | 1901.749  | 2971.609  |
| NM_005194 | 29105.414 | 27005.701 | NM_00702E | 24519.293 | 25817.791 | AK024292  | 983.656   | 1500.223  |
| AB002296  | 6995.325  | 8196.274  | AF130728  | 2772.737  | 2854.673  | AK026263  | 2649.841  | 3904.453  |
| NM_01431E | 16558.594 | 16146.994 | NM_004987 | 1459.195  | 1448.806  | AK023643  | 932.499   | 1334.262  |
| NM_012087 | 6004.481  | 6345.569  | NM_00128E | 54475.895 | 59192.012 | AL390159  | 1265.456  | 1867.547  |
| AF165520  | 13618.136 | 15556.56  | AA831963  | 1860.001  | 1953.519  | AF095853  | 320.74    | 491.333   |
| AK026072  | 2778.622  | 3222.057  | M54894    | 2164.296  | 1504.803  | NM_014157 | 727.713   | 1100.467  |
| NM_00428E | 2645.865  | 3376.082  | BG752013  | 1439.039  | 930.659   | AF090933  | 1143.498  | 1589.73   |
| NM_001521 | 583.831   | 819.766   | U04209    | 15411.959 | 10923.135 | AF111851  | 7135.467  | 7554.874  |

|           |           |           |           |           |           |           |           |           |
|-----------|-----------|-----------|-----------|-----------|-----------|-----------|-----------|-----------|
| NM_015679 | 9601.849  | 9520.897  | AI393201  | 30784     | 27668.248 | AF152529  | 562.59    | 810.243   |
| AF299118  | 63621.887 | 55786.492 | M34664    | 66888.453 | 60683.695 | AL360200  | 724.644   | 768.897   |
| AK025353  | 48953.387 | 49676.391 | Z15108    | 9321.45   | 8826.488  | AK021992  | 1118.974  | 1089.002  |
| AF288207  | 44907.805 | 47136.746 | M55284    | 2429.927  | 2439.638  | AK022102  | 521.19    | 287.73    |
| NM_00102E | 1007.735  | 713.424   | AA001218  | 2669.472  | 2295.789  | AK022235  | 865.454   | 562.758   |
| NM_001001 | 67812.734 | 57466.859 | AA679391  | 2645.011  | 2877.641  | AK022378  | 2537.787  | 907.747   |
| NM_001774 | 68694.023 | 59905.82  | BG682146  | 8739.968  | 8572.781  | AK022274  | 467.117   | 835.255   |
| NM_005023 | 932.441   | 1217.934  | AA884709  | 1478.342  | 1486.08   | AK022401  | 400.787   | 953.799   |
| NM_006830 | 71086.516 | 67136.977 | NM_004541 | 62533.063 | 56368.059 | AK022078  | 606.61    | 926.747   |
| AK026414  | 49889.719 | 49085.414 | NM_006705 | 16050.005 | 18997.484 | AL133104  | 545.861   | 830.261   |
| D17297    | 4607.551  | 5254.216  | NM_012266 | 14824.104 | 15216.285 | AF075101  | 1423.398  | 2018.836  |
| NM_004074 | 65931.227 | 60663.105 | NM_004559 | 11590.683 | 12034.507 | AF130108  | 547.246   | 721.305   |
| NM_00262E | 70333.883 | 67917.961 | NM_014476 | 2684.296  | 2513.357  | NM_020224 | 9285.913  | 11287.324 |
| NM_01843E | 62735.004 | 61569.09  | NM_01427E | 3361.34   | 3327.82   | U17617    | 7559.195  | 8603.613  |
| AF157115  | 7123.652  | 7941.188  | NM_000734 | 21388.436 | 20331.482 | NM_014100 | 500.334   | 625.682   |
| AJ223353  | 23370.674 | 23550.582 | NM_006065 | 1817.135  | 1884.995  | AK022952  | 5946.498  | 7168.04   |
| NM_012241 | 17959.363 | 19849.348 | NM_014339 | 49202.164 | 49592.816 | BF218888  | 837.589   | 1147.958  |
| AF250288  | 953.289   | 1013.954  | NM_001495 | 3395.098  | 2902.03   | AK027248  | 1929.075  | 1956.445  |
| NM_01848E | 4286.342  | 4033.32   | NM_00228E | 930.217   | 923.775   | AK022804  | 9463.666  | 9207.115  |
| NM_005324 | 32920.805 | 28683.219 | NM_00441E | 29552.262 | 28221.24  | AF009263  | 2242.956  | 1163.363  |
| AL080201  | 62742.156 | 56334.574 | NM_00062E | 5577.878  | 5609.786  | AF009283  | 512.64    | 173.749   |
| NM_015363 | 1013.765  | 859.804   | AB005216  | 1368.898  | 1606.699  | AF086329  | 4011.972  | 5713.79   |
| NM_00180E | 11832.339 | 11085.388 | AF015041  | 7142.666  | 6811.466  | U92989    | 4205.948  | 5886.54   |
| AB040941  | 8106.93   | 6809.074  | NM_002363 | 1687.711  | 1532.592  | AF075102  | 2837.565  | 3261.344  |
| AL137241  | 2419.348  | 1784.479  | X82693    | 49429.652 | 49998.008 | NM_018463 | 29026.092 | 33377.199 |
| AB037742  | 5706.948  | 5627.321  | NM_00717E | 19388.943 | 18634.977 | X74956    | 45010.254 | 54743.719 |
| AF272375  | 4381.215  | 4389.069  | NM_002722 | 6551.372  | 6953.611  | AF132197  | 7437.779  | 11022.865 |
| NM_01451E | 10266.554 | 9629.844  | AF317058  | 1984.751  | 2013.385  | AK025546  | 780.811   | 909.57    |
| NM_002517 | 2915.637  | 3585.516  | AK025965  | 1196.731  | 1133.783  | AF278761  | 335.503   | 384.146   |
| NM_007147 | 8883.517  | 8841.665  | NM_00035E | 5145.531  | 5024.775  | AL137487  | 1727.14   | 1959.273  |
| X65463    | 9586.448  | 10643.448 | NM_005451 | 4818.417  | 4226.133  | AK023800  | 901.597   | 1201.528  |
| NM_00223E | 7086.453  | 6584.989  | NM_007172 | 5398.013  | 5326.365  | AK024120  | 2994.731  | 3003.019  |
| NM_00486E | 3229.043  | 3459.145  | NM_013333 | 49990.07  | 59163.414 | U50526    | 767.376   | 943.805   |
| NM_00466E | 6728.761  | 6620.838  | NM_002333 | 10641.235 | 11365.95  | AF056455  | 17554.889 | 20255.314 |
| NM_00702E | 25752.441 | 33190.703 | NM_003400 | 15921.114 | 20087.035 | NM_018510 | 1181.45   | 1545.207  |
| AF130728  | 1195.044  | 1299.962  | NM_014824 | 7287.896  | 7114.631  | U50537    | 598.925   | 1121.888  |
| NM_00128E | 54004.898 | 57292.383 | NM_014504 | 6435.575  | 6017.102  | AK024988  | 707.667   | 843.067   |
| NM_001131 | 10722.878 | 12604.153 | NM_01440E | 28089.111 | 31804.863 | AK025719  | 825.129   | 875.501   |
| M54894    | 2501.82   | 2070.875  | NM_014741 | 14324.215 | 14133.112 | AF026943  | 1960.921  | 1640.654  |
| X07696    | 3740.08   | 3516.45   | AF212247  | 9235.24   | 7816.773  | L77582    | 473.995   | 313.346   |
| AA481015  | 2951.274  | 3372.222  | AF161407  | 37915.164 | 37862.156 | NM_02044E | 738.561   | 238.122   |
| AI925826  | 7306.405  | 6241.738  | NM_01473E | 9840.875  | 8205.935  | NM_00541E | 2071.912  | 522.121   |
| U04209    | 13379.22  | 11795.895 | NM_01640E | 7934.821  | 8195.447  | NM_00347E | 12511.967 | 21126.258 |
| AI393201  | 11237.396 | 11271.023 | NM_018080 | 14483.644 | 13404.211 | NM_006773 | 3403.691  | 4472.342  |
| M34664    | 67906.008 | 60610.277 | NM_005713 | 2819.893  | 2228.04   | AK024439  | 12625.419 | 18452.332 |
| Z15108    | 2741.641  | 2839.121  | AK021951  | 1724.839  | 1910.31   | X89676    | 2173.732  | 2970.359  |
| M55284    | 1538.446  | 1647.614  | AK023553  | 3919.267  | 3839.669  | NM_012444 | 886.678   | 1102.639  |
| AA001218  | 556.622   | 673.715   | NM_014600 | 2588.735  | 2505.92   | Z32684    | 3811.061  | 6005.317  |
| AA679391  | 1909.332  | 2276.438  | NM_016733 | 2723.611  | 2341.047  | NM_016512 | 1832.359  | 2079.667  |
| BG682146  | 5794.208  | 7362.281  | AF181994  | 6860.417  | 7078.335  | NM_01748E | 4894.777  | 5362.736  |
| AA884709  | 1218.607  | 1214.393  | NM_018962 | 5366.849  | 7137.047  | AY009400  | 7608.885  | 7361.966  |
| NM_004541 | 66357.914 | 63259.566 | AF125100  | 6657.855  | 7512.904  | NM_00506E | 826.188   | 1109.712  |
| NM_005582 | 14965.5   | 20500.783 | NM_00466E | 8269.051  | 6647.599  | AF086401  | 3542.337  | 3776.59   |

|           |           |           |           |           |           |           |           |           |
|-----------|-----------|-----------|-----------|-----------|-----------|-----------|-----------|-----------|
| NM_012266 | 11701.356 | 13879.167 | NM_007028 | 21394.402 | 19626.094 | L23869    | 1459.514  | 1434.781  |
| NM_004559 | 7200.13   | 6391.977  | NM_001289 | 52494.66  | 56778.949 | Z21853    | 2265.711  | 1713.278  |
| X56692    | 13113.586 | 17124.783 | NM_001131 | 66045     | 66036.625 | U80770    | 915.421   | 674.666   |
| NM_014476 | 1292.936  | 1677.009  | M54894    | 2613.874  | 2013.225  | AB075846  | 685.403   | 430.313   |
| NM_005838 | 1072.018  | 996.631   | BG752013  | 1457.504  | 847.952   | NM_018342 | 1902.418  | 1562.848  |
| NM_000734 | 4059.33   | 3737.182  | X07696    | 32343.826 | 26715.111 | BC020260  | 5299.044  | 3897.096  |
| NM_012331 | 4493.642  | 4414.789  | AA481015  | 2840.469  | 2977.478  | D17156    | 6030.102  | 4143.038  |
| NM_006644 | 13585.881 | 12348.375 | AI925826  | 30702.445 | 31925.059 | L04461    | 495.818   | 278.346   |
| NM_006583 | 61745.418 | 10200.931 | U04209    | 15048.657 | 12283.975 | AK026938  | 16165.159 | 7282.536  |
| NM_006065 | 1787.745  | 1696.316  | AI393201  | 29644.412 | 25479.5   | AK024373  | 8762.721  | 3156.745  |
| NM_014339 | 20948.504 | 18016.191 | Z15108    | 7786.878  | 6435.789  | AK022343  | 13863.933 | 4883.362  |
| NM_001495 | 1004.391  | 1029.437  | M55284    | 1811.351  | 1924.937  | AK026400  | 1172.703  | 1346.966  |
| NM_002288 | 1099.537  | 1291.628  | AA001218  | 1893.443  | 1910.269  | NM_004148 | 6808.798  | 7944.19   |
| NM_004416 | 32355.266 | 31564.504 | AA679391  | 2156.182  | 2472.103  | X03168    | 3512.269  | 4261.84   |
| NM_000628 | 5349.022  | 5986.082  | BG682146  | 8650.326  | 8489.391  | NM_005168 | 6376.512  | 7669.394  |
| AB005216  | 1972.699  | 2345.438  | AA884709  | 1484.036  | 1373.728  | NM_017801 | 6513.772  | 7815.453  |
| AF015041  | 4079.55   | 5131.33   | AK022417  | 6825.063  | 6967.711  | NM_007348 | 2960.729  | 3640.48   |
| NM_002363 | 1849.74   | 1589.622  | U50534    | 5005.236  | 4665.628  | NM_016953 | 669.279   | 818.955   |
| X82693    | 9069.35   | 7245.325  | NM_005582 | 24947.518 | 24246.42  | U65473    | 16172.715 | 21119.031 |
| NM_007176 | 22419.068 | 24190.613 | NM_014476 | 1578.086  | 1458.214  | D63481    | 43141.27  | 42286.313 |
| NM_002722 | 3001.038  | 4579.853  | NM_014278 | 3393.451  | 2430.772  | AY009951  | 725.635   | 814.995   |
| AF317058  | 1538.842  | 1282.997  | NM_005838 | 1448.436  | 1441.809  | AL157424  | 1131.772  | 1287.903  |
| AL137576  | 15002.412 | 13129.951 | NM_000734 | 19477.26  | 18537.068 | AK024422  | 636.022   | 700.47    |
| NM_006516 | 22636.195 | 22001.234 | NM_012331 | 10429.347 | 10587.858 | NM_002673 | 514.064   | 665.851   |
| NM_000355 | 969.713   | 744.755   | NM_006644 | 15402.838 | 18233.551 | NM_003876 | 4819.1    | 4249.422  |
| NM_005451 | 4898.725  | 4374.3    | NM_006583 | 69790.438 | 19797.361 | AJ276310  | 848.244   | 724.376   |
| NM_007172 | 7690.554  | 8340.28   | NM_006065 | 1910.486  | 1709.604  | NM_012295 | 10597.111 | 11252.591 |
| NM_013333 | 50958.91  | 54752.105 | NM_014339 | 49984.496 | 45647.992 | NM_015910 | 831.984   | 667.486   |
| NM_002333 | 4178.254  | 4357.597  | NM_001495 | 3244.017  | 3475.284  | AL133666  | 3675.792  | 3085.421  |
| NM_003400 | 21643.123 | 29033.115 | NM_002288 | 1204.499  | 1128.505  | NM_000663 | 1398.111  | 894.423   |
| NM_014824 | 5791.499  | 5420.064  | NM_004416 | 31072.018 | 30737.18  | NM_004710 | 4880.631  | 2304.47   |
| NM_014504 | 5077.838  | 5598.669  | NM_000628 | 5332.065  | 4465.142  | NM_004396 | 11696.772 | 4545.888  |
| NM_014408 | 25234.119 | 24140.119 | AB005216  | 1617.578  | 1706.794  | NM_017995 | 3142.52   | 966.514   |
| NM_014741 | 13947.167 | 13014.853 | AF015041  | 7440.669  | 6825.99   | NM_015988 | 69688.352 | 56934.512 |
| AF212247  | 6941.745  | 7087.057  | NM_002363 | 1375.001  | 1333.87   | NM_001043 | 6686.922  | 10569.16  |
| AF161407  | 19944.295 | 21819.533 | NM_002238 | 7217.106  | 6398.647  | NM_014395 | 2788.327  | 4780.151  |
| NM_014738 | 11080.122 | 9830.277  | NM_004868 | 6935.108  | 8653.006  | AF113685  | 2697.996  | 3687.01   |
| NM_016406 | 8873.701  | 9289.522  | NM_007176 | 18846.691 | 15730.896 | NM_005470 | 8118.653  | 10063.748 |
| NM_018080 | 6841.981  | 6054.988  | NM_002722 | 6741.666  | 7103.454  | AF142570  | 1976.745  | 1911.769  |
| AL050107  | 661.228   | 460.188   | AL137576  | 22506.564 | 30542.174 | NM_004225 | 13477.144 | 16000.089 |
| NM_005713 | 2121.319  | 2607.737  | NM_006516 | 27137.916 | 26198.908 | NM_003862 | 1443.043  | 1343.824  |
| AK021951  | 1554.891  | 1958.45   | NM_000355 | 4830.421  | 5431.542  | NM_002873 | 5351.189  | 5601.649  |
| AK023553  | 3388.65   | 3119.054  | NM_005451 | 5833.142  | 5815.871  | NM_015571 | 13803.513 | 12976.574 |
| NM_014600 | 1474.147  | 1219.206  | NM_007172 | 6741.276  | 7519.147  | NM_004701 | 6731.113  | 7977.866  |
| NM_016733 | 2718.787  | 2507.687  | NM_013333 | 48505.328 | 50875.234 | AK025554  | 1669.568  | 2089.857  |
| AF181994  | 6931.654  | 7728.865  | NM_002333 | 12952.309 | 11101.346 | BI824151  | 4001.433  | 4706.277  |
| NM_018962 | 2121.672  | 2904.83   | NM_003400 | 17223.688 | 16890.791 | AK021791  | 5588.578  | 5685.456  |
| AF125100  | 6633.027  | 8570.618  | NM_006705 | 13284.92  | 12319.407 | NM_005019 | 344.49    | 317.22    |
| NM_004669 | 6559.833  | 6101.834  | NM_014439 | 2219.714  | 2256.73   | NM_004052 | 2207.077  | 2419.825  |
| NM_007028 | 26393.723 | 33511.742 | NM_014504 | 7196.245  | 5372.897  | NM_004394 | 7562.733  | 7969.666  |
| AF130728  | 1102.662  | 1096.587  | NM_014741 | 14960.813 | 16119.211 | NM_005727 | 52208.254 | 54362.633 |
| NM_001289 | 52436.109 | 55350.809 | AF212247  | 9867.981  | 8623.025  | AK027242  | 2237.241  | 2312.521  |
| NM_001131 | 9644.245  | 10011.287 | AF161407  | 35388.477 | 38456.418 | NM_001279 | 23375.203 | 14948.624 |

|           |           |           |           |           |           |           |           |           |
|-----------|-----------|-----------|-----------|-----------|-----------|-----------|-----------|-----------|
| M54894    | 1942.083  | 1532.957  | NM_014738 | 10866.153 | 9186.2    | NM_00501C | 3495.383  | 1845.576  |
| X07696    | 3780.299  | 3612.105  | NM_016406 | 7159.506  | 7062.769  | NM_01905E | 3502.764  | 1427.69   |
| AA481015  | 2989.718  | 3202.288  | NM_01808C | 13829.032 | 15546.121 | NM_02019E | 809.993   | 202.063   |
| AI925826  | 6539.896  | 5937.207  | AL050107  | 483.165   | 940.183   | U96136    | 965.069   | 362.924   |
| U04209    | 12923.335 | 11069.586 | NM_014453 | 52739.664 | 48403.359 | NM_01758E | 24550.984 | 31950.709 |
| AI393201  | 12765.018 | 11891.118 | NM_005713 | 4028.146  | 6199.957  | NM_005941 | 1388.732  | 1324.99   |
| Z15108    | 2698.153  | 2664.071  | AK021951  | 1833.987  | 3270.12   | NM_015884 | 647.533   | 824.028   |
| M55284    | 1068.405  | 1147.81   | AK023553  | 3790.927  | 4057.343  | AF201380  | 2795.913  | 4020.95   |
| AA679391  | 1875.844  | 2182.856  | NM_01460C | 2218.951  | 2232.058  | NM_00361E | 450.143   | 459.669   |
| BG682146  | 5319.792  | 4584.438  | NM_016733 | 2399.62   | 2347.995  | NM_01239E | 3193.438  | 3537.765  |
| AA884709  | 1068.514  | 1054.745  | AF181994  | 6077.689  | 6171.399  | NM_01483E | 26466.258 | 26288.281 |
| AK022417  | 3152.919  | 3073.716  | NM_018962 | 5009.059  | 4065.961  | NM_00004E | 2158.976  | 2250.924  |
| U50534    | 3738.946  | 3785.435  | AF125100  | 6089.904  | 5270.814  | NM_00387E | 9629.798  | 7954.921  |
| X56692    | 11454.771 | 12574.464 | X82693    | 50429.109 | 44464.887 | NM_00483E | 1544.236  | 2250.957  |
| NM_01447E | 1116.166  | 1542.516  | AF130728  | 2316.954  | 2512.64   | NM_005957 | 965.338   | 1089.234  |
| NM_00583E | 1039.31   | 643.369   | NM_004987 | 4488.213  | 5468.395  | AK024374  | 2081.999  | 1911.141  |
| NM_000734 | 3008.565  | 2812.001  | AA831963  | 1168.918  | 2049.278  | NM_007101 | 2768.701  | 2385.026  |
| NM_012331 | 4724.419  | 4661.683  | M54894    | 2058.084  | 1771.813  | NM_018234 | 450.51    | 390.371   |
| NM_006644 | 14679.06  | 13341.393 | BG752013  | 1506.508  | 1557.511  | AB033062  | 1807.547  | 1637.521  |
| NM_00658E | 64796.094 | 8740.109  | X07696    | 31359.418 | 24545.477 | NM_016437 | 32399.039 | 27427.441 |
| NM_00606E | 1884.143  | 2111.276  | AA481015  | 3083.714  | 2735.797  | NM_00272C | 6559.764  | 4575.755  |
| NM_01433E | 20502.594 | 17651.152 | AI925826  | 32762.33  | 37800.82  | AK024716  | 23581.563 | 18213.705 |
| NM_00149E | 1040.506  | 965.709   | U04209    | 14519.544 | 13603.117 | X67155    | 1513.248  | 1442.441  |
| NM_00228E | 1008.077  | 941.43    | AI393201  | 27002.453 | 31877.67  | NM_02038C | 3701.273  | 3468.139  |
| NM_00441E | 29269.201 | 26810.225 | M34664    | 65317.07  | 64792.879 | AL137519  | 382.871   | 347.49    |
| NM_00062E | 4889.664  | 4672.116  | Z15108    | 8708.087  | 10262.858 | NM_00289C | 40019.633 | 20484.076 |
| AB005216  | 1656.871  | 1607.585  | M55284    | 2171.683  | 2336.168  | NM_00133C | 54101.367 | 34068.531 |
| AF015041  | 3574.056  | 3367.774  | AA001218  | 3034.629  | 3073.875  | NM_015927 | 2045.838  | 502.743   |
| NM_00236E | 1595.658  | 1710.248  | AA679391  | 2492.187  | 2550.813  | NM_00477E | 10979.323 | 6466.209  |
| NM_00223E | 9369.533  | 9399.518  | BG682146  | 8389.693  | 8819.158  | NM_019071 | 6853.168  | 10184.747 |
| NM_00486E | 3360.672  | 4145.334  | AA884709  | 1339.836  | 1141.743  | NM_00191E | 6869.445  | 8162.296  |
| NM_00717E | 19712.195 | 18267.012 | AK022417  | 6033.403  | 5745.623  | AK025594  | 1633.387  | 2572.333  |
| NM_00272E | 2455.576  | 3042.72   | U50534    | 4407.605  | 3683.62   | AB040931  | 6236.82   | 5830.368  |
| AF317058  | 1540.13   | 1438.106  | NM_014824 | 6025.492  | 5190.023  | NM_00359E | 804.414   | 812.564   |
| AF016693  | 434.01    | 563.461   | NM_00583E | 2130.602  | 1665.546  | NM_015911 | 1316.507  | 1732.517  |
| AL137576  | 15146.094 | 16163.044 | NM_000734 | 20296.521 | 19699.502 | BC011826  | 5123.054  | 4682.27   |
| NM_00651E | 20562.547 | 19317.234 | NM_012331 | 10709.751 | 9718.018  | NM_017647 | 4094.871  | 4078.514  |
| NM_00035E | 1172.748  | 946.065   | NM_006644 | 18199.592 | 17449.848 | NM_012091 | 1430.457  | 793.781   |
| NM_005451 | 5028.737  | 4479.444  | NM_00658E | 58986.566 | 15954.443 | NM_012321 | 7222.273  | 6021.351  |
| NM_00717E | 6994.099  | 6328.379  | NM_00606E | 2087.086  | 1566.505  | D13642    | 5283.493  | 4864.509  |
| NM_01333E | 43726.309 | 47945.586 | NM_01433E | 49278.238 | 45765.387 | NM_004741 | 18071.115 | 14873.714 |
| NM_00233E | 3262.539  | 2266.526  | NM_00149E | 3710.777  | 3118.229  | NM_01803E | 4788.692  | 3542.163  |
| NM_00340C | 18383.543 | 18712.672 | NM_00228E | 1509.96   | 1340.429  | NM_00367E | 23561.445 | 18070.445 |
| NM_00670E | 1640.366  | 1925.319  | NM_00441E | 32507.904 | 32950.695 | NM_01751E | 3193.928  | 3027.176  |
| NM_01443E | 777.082   | 932.152   | NM_00062E | 4801.781  | 5077.021  | NM_004117 | 4835.323  | 3232.035  |
| AK000782  | 712.393   | 569.944   | AB005216  | 1497.669  | 1779.353  | NM_016594 | 16972.832 | 10653.857 |
| NM_014504 | 5499.221  | 4547.712  | NM_00032E | 20994.281 | 22585.422 | NM_03075E | 9420.046  | 7128.385  |
| NM_00570E | 728.717   | 240.355   | AF015041  | 6638.117  | 6311.664  | D26068    | 28013.129 | 20284.23  |
| NM_01440E | 25370.465 | 28338.01  | NM_00236E | 1306.241  | 1351.219  | NM_01855E | 35540.441 | 20624.459 |
| NM_014741 | 15061.423 | 18635.592 | AK000184  | 2340.378  | 2132.448  | NM_01759E | 4830.325  | 2762.475  |
| AF212247  | 6297.39   | 5823.766  | AF055020  | 34044.996 | 37698.543 | NM_00428E | 17212.676 | 10034.623 |
| AF161407  | 20845.725 | 25211.178 | NM_00698E | 8881.383  | 9674.305  | AF188747  | 1331.097  | 422.621   |
| NM_01473E | 11116.472 | 10186.17  | AF272043  | 3301.564  | 4591.421  | NM_00277E | 1429.446  | 712.275   |

|           |           |           |           |           |           |           |           |           |
|-----------|-----------|-----------|-----------|-----------|-----------|-----------|-----------|-----------|
| NM_01640E | 9556.756  | 10127.195 | NM_002587 | 65562.633 | 78047.578 | NM_013411 | 2369.434  | 2598.226  |
| NM_01808C | 7479.802  | 7387.977  | NM_00223E | 8065.679  | 8006.495  | AB007956  | 528.804   | 900.1     |
| AL050107  | 610.212   | 497.148   | NM_00486E | 5370.542  | 5244.703  | NM_02020C | 2656.707  | 2703.894  |
| NM_00571E | 2593.716  | 2372.281  | NM_00466E | 8621.837  | 7594.253  | NM_00124E | 609.019   | 652.692   |
| AK021951  | 1623.065  | 1521.234  | NM_00702E | 22702.99  | 17591.16  | NM_00015E | 410.605   | 422.465   |
| AK023553  | 3705.55   | 3253.637  | NM_01586E | 2361.92   | 1801.74   | NM_00018C | 43552.785 | 46460.816 |
| NM_01460C | 1120.464  | 1002.031  | NM_00305E | 27428.604 | 25095.592 | NM_00085E | 13018.314 | 11737.853 |
| NM_01673E | 2327.318  | 1912.01   | NM_00507E | 1386.973  | 1343.642  | AF254087  | 2778.356  | 2727.495  |
| AF181994  | 5879.703  | 5794.161  | NM_006841 | 3204.46   | 3287.654  | NM_01771E | 2275.611  | 2654.391  |
| NM_01896E | 1627.023  | 1181.216  | NM_002414 | 40595.941 | 31945.566 | AL117607  | 3485.856  | 3189.338  |
| AF125100  | 6018.295  | 5243.467  | NM_00035E | 8040.277  | 5989.302  | AB037774  | 2614.207  | 2573.413  |
| X82693    | 9592.232  | 8900.811  | AL133580  | 8186.749  | 8174.202  | NM_00543E | 2050.809  | 1708.97   |
| AF130728  | 1507.766  | 2187.72   | NM_01466E | 11537.593 | 10662.573 | AK024361  | 2480.88   | 2212.87   |
| NM_00128E | 57126.559 | 58082.891 | NM_005451 | 5465.063  | 4476.188  | NM_00435C | 9582.012  | 8339.595  |
| NM_001131 | 13782.882 | 17406.213 | NM_00717E | 7147.66   | 6416.651  | NM_018044 | 6631.3    | 4748.085  |
| M54894    | 2319.843  | 1480.546  | NM_00615E | 57197.961 | 56377.43  | NM_00450E | 343.038   | 318.242   |
| X07696    | 4241.168  | 4151.914  | NM_01333E | 52128.824 | 52310.594 | NM_001717 | 1070.757  | 773.422   |
| AA481015  | 2755.288  | 3210.163  | NM_00233E | 15059.469 | 14332.652 | AF274347  | 6605.558  | 4715.186  |
| AI925826  | 7606.443  | 6841.04   | NM_00340C | 20482.127 | 21096.164 | AK001144  | 578.558   | 405.165   |
| U04209    | 13114.201 | 11279.689 | NM_00670E | 18494.568 | 17948.213 | NM_01855E | 5270.003  | 4019.35   |
| AI393201  | 12766.811 | 11141.738 | NM_01443E | 2223.709  | 2383.759  | NM_00512E | 929.947   | 519.941   |
| Z15108    | 3082.651  | 3070.49   | NM_00558E | 30826.438 | 31600.205 | NM_01455E | 8340.182  | 3482.957  |
| M55284    | 1333.669  | 1117.315  | NM_00382E | 996.965   | 648.204   | NM_00307E | 15308.954 | 4393.922  |
| AA001218  | 586.034   | 582.799   | NM_01226E | 19035.842 | 26338.205 | L09081    | 23135.227 | 32162.385 |
| AA679391  | 1692.235  | 1695.61   | NM_00455E | 13957.22  | 16844.043 | NM_00021E | 53496.367 | 60801.758 |
| BG682146  | 5080.286  | 4299.965  | X56692    | 60117.887 | 65589.695 | NM_01611E | 21008.902 | 27207.084 |
| AA884709  | 874.43    | 825.87    | NM_01447E | 1666.077  | 1424.501  | NM_01422E | 4403.583  | 6142.299  |
| AK022417  | 2795.55   | 1611.713  | NM_01427E | 3746.366  | 2543.642  | L14819    | 913.95    | 1331.356  |
| U50534    | 3425.223  | 2594.572  | NM_01896E | 4920.215  | 3771.669  | NM_00050E | 4082.636  | 4464.935  |
| NM_014824 | 7233.712  | 6689.534  | AF125100  | 7008.668  | 7191.86   | NM_00454E | 959.68    | 1549.893  |
| NM_000734 | 4072.69   | 4516.627  | NM_00717E | 19083.994 | 15148.876 | X06182    | 4584.287  | 5022.077  |
| NM_012331 | 6991.746  | 6471.292  | NM_00272E | 5389.693  | 4721.927  | BE908993  | 46719.938 | 39721.594 |
| NM_006644 | 14366.264 | 14349.005 | AF317058  | 1868.272  | 928.172   | AB012701  | 6520.185  | 6905.683  |
| NM_00658E | 64115.266 | 10929.66  | AK025965  | 1277.537  | 841.838   | M61156    | 6615.136  | 6705.756  |
| NM_00606E | 1691.107  | 2280.195  | M22538    | 37658.484 | 44982.863 | R44005    | 41085.793 | 36998.43  |
| NM_01433E | 23854.404 | 21161.195 | NM_00602E | 1801.781  | 1878.878  | AI942392  | 3807.812  | 3751.989  |
| NM_00149E | 1483.707  | 1567.9    | NM_014904 | 2842.913  | 3621.286  | M55040    | 1412.761  | 1428.368  |
| NM_00228E | 1320.771  | 1570.236  | AL137576  | 19679.688 | 19787.291 | AW009739  | 2161.918  | 2133.898  |
| NM_00441E | 34036.867 | 35029.668 | NM_01835E | 15005.897 | 16572.082 | BC036805  | 4703.71   | 3675.399  |
| NM_00062E | 5368.52   | 4911.559  | NM_016321 | 5535.938  | 7947.717  | Z74615    | 51895.277 | 63173.301 |
| AB005216  | 1816.74   | 1794.691  | NM_01335E | 1080.038  | 927.205   | X03884    | 11830.259 | 10643.783 |
| NM_00032E | 19597.807 | 18661.822 | AF131781  | 17137.963 | 15245.107 | U36759    | 1114.565  | 1002.985  |
| AF015041  | 3832.971  | 3253.619  | NM_00651E | 27671.617 | 19022.482 | X91625    | 2698.848  | 2246.308  |
| NM_00236E | 1409.284  | 1139.24   | AK022417  | 6824.059  | 5532.416  | AF090901  | 1061.003  | 741.844   |
| AK000184  | 1966.056  | 1891.524  | U50534    | 4399.057  | 4146.801  | AF004231  | 3991.868  | 2567.582  |
| AF055020  | 3773.958  | 3731.697  | NM_014824 | 6744.589  | 6208.47   | AF001862  | 8093.711  | 5724.134  |
| NM_00698E | 7792.808  | 7859.181  | NM_014504 | 5310.273  | 3944.201  | NM_002451 | 4166.229  | 2119.75   |
| AF272043  | 2786.666  | 2418.993  | NM_01440E | 23537.473 | 15121.13  | AF119902  | 978.873   | 1700.289  |
| NM_002587 | 4096.32   | 3876.159  | NM_014741 | 12619.281 | 10011.653 | NM_02052E | 35027.723 | 40252.199 |
| NM_00223E | 9588.217  | 6754.748  | AF212247  | 7196.95   | 5554.022  | X62468    | 1371.554  | 1897.71   |
| NM_00486E | 3582.98   | 3939.172  | AF161407  | 35500.438 | 32291.537 | NM_00389C | 12147.845 | 15915.747 |
| NM_00466E | 9326.408  | 9391.339  | NM_01473E | 9534.401  | 8049.877  | BF127978  | 6151.172  | 7491.697  |
| NM_00702E | 26685.885 | 28106.813 | NM_01640E | 7791.668  | 9408.67   | AF110801  | 873.44    | 966.416   |

|           |           |           |           |           |           |           |           |           |
|-----------|-----------|-----------|-----------|-----------|-----------|-----------|-----------|-----------|
| NM_015865 | 1003.617  | 1181.685  | NM_018080 | 18805.186 | 23596.576 | NM_016575 | 55332.926 | 58793.906 |
| NM_003055 | 7150.903  | 8115.522  | AF174605  | 1175.357  | 1111.389  | AB018297  | 1974.849  | 2035.965  |
| NM_005075 | 1310.777  | 1104.289  | AL050107  | 760.068   | 1066.83   | AK022565  | 7638.519  | 8151.452  |
| NM_006841 | 1104.607  | 949.173   | NM_014453 | 54257.41  | 44630.191 | AK023151  | 4731.564  | 5548.546  |
| NM_002414 | 36632.09  | 45185.313 | NM_005713 | 2648.571  | 3049.195  | AB033076  | 1755.679  | 1846.621  |
| NM_000355 | 909.807   | 1006.728  | AK021951  | 2448.001  | 3064.337  | AK022876  | 2977.598  | 3524.162  |
| AL133580  | 8005.896  | 9312.729  | AK023553  | 5105.82   | 4485.567  | AF134894  | 45588.883 | 38634.945 |
| NM_014665 | 11675.069 | 11652.921 | NM_014600 | 2662.593  | 1930.357  | NM_003935 | 7602.198  | 8137.222  |
| NM_005451 | 5661.092  | 5161.136  | NM_016733 | 2575.601  | 1968.266  | NM_014827 | 12138.383 | 13318.52  |
| NM_007172 | 7875.673  | 7990.985  | AF181994  | 6128.789  | 4718.775  | NM_004125 | 4842.441  | 5399.783  |
| NM_006152 | 56894.754 | 62751.336 | CY3Cy5    | 6111.41   | 348.127   | U87460    | 11189.91  | 10983.495 |
| NM_013333 | 51137.32  | 53998.992 | NM_058197 | 6184.68   | 5986.922  | NM_003617 | 1234.668  | 1121.493  |
| NM_003400 | 19125.857 | 19878.795 | AF086314  | 1359.756  | 1470.531  | NM_001841 | 2796.678  | 3076.628  |
| NM_006705 | 2429.856  | 2432.184  | NM_016364 | 1627.944  | 1484.674  | NM_002054 | 4457.676  | 4151.495  |
| NM_014435 | 780.203   | 723.865   | AF086419  | 6755.827  | 6742.784  | AF300649  | 16156.731 | 16594.08  |
| NM_005582 | 15736.906 | 14808.686 | AF086461  | 1712.362  | 1393.284  | NM_004125 | 5538.503  | 5966.93   |
| NM_012265 | 12497.877 | 11336.288 | AF131795  | 979.658   | 942.14    | NM_000823 | 8976.977  | 10134.9   |
| NM_004555 | 8349.843  | 4923.385  | AL833296  | 7859.451  | 7169.733  | NM_003317 | 22654.074 | 22893.766 |
| X56692    | 16439.785 | 16422.873 | AL110240  | 9798.573  | 7872.181  | NM_001135 | 7816.292  | 6935.242  |
| AK024467  | 861.981   | 1264.253  | AK025695  | 5177.717  | 2853.893  | NM_001441 | 3247.624  | 5188.38   |
| NM_014475 | 1532.931  | 1910.276  | AK025442  | 3850.018  | 1983.652  | NM_018324 | 2369.741  | 4003.509  |
| NM_014275 | 812.909   | 935.873   | SR4       | 27906.611 | 49977.266 | AF064255  | 53914.691 | 56161.535 |
| NM_018962 | 2327.472  | 1956.65   | SR6       | 3775.311  | 7382.77   | NM_016365 | 55443.539 | 60583.816 |
| AF125100  | 5989.633  | 6490.348  | SR8       | 11988.308 | 40215.371 | U08853    | 4559.175  | 6148.379  |
| NM_006114 | 31096.762 | 26637.279 | SR10      | 47363.832 | 32568.225 | NM_004261 | 26421.609 | 30018.305 |
| X82693    | 16132.773 | 13072.977 | CY3Cy5    | 19693.871 | 641.374   | NM_016005 | 1707.879  | 2868.238  |
| NM_007175 | 22016.539 | 18481.705 | AK024204  | 1452.34   | 1591.386  | NM_016245 | 5210.085  | 6929.966  |
| NM_002722 | 3045.053  | 2922.415  | AK023737  | 1747.295  | 1725.079  | AF005632  | 9779.51   | 13404.923 |
| AF317058  | 1737.952  | 1604.184  | NM_006605 | 6127.524  | 6061.124  | NM_000903 | 3920.612  | 6141.543  |
| AK025965  | 1034.729  | 793.997   | NM_014118 | 902.81    | 559.078   | NM_004493 | 20010.141 | 27228.543 |
| M22538    | 27734.576 | 21821.369 | AK023525  | 8962.187  | 8078.435  | AF309489  | 1921.535  | 3029.334  |
| NM_006025 | 1017.073  | 870.493   | AF085829  | 2835.436  | 2278.223  | AB013889  | 510.329   | 402.011   |
| NM_014904 | 3114.829  | 2366.533  | AK021903  | 8523.048  | 5017.79   | NM_000285 | 3632.373  | 5746.1    |
| AL137576  | 14715.444 | 10721.456 | AL390143  | 5916.05   | 4004.886  | NM_004762 | 11223.438 | 16668.955 |
| NM_018355 | 7884.891  | 6850.489  | AL162075  | 2733.085  | 1145.209  | NM_006641 | 54162.496 | 60147.465 |
| NM_016321 | 909.69    | 280.372   | AK021648  | 708.882   | 1835.303  | NM_000634 | 39790.523 | 49428.203 |
| NM_013355 | 1285.376  | 1441.983  | NM_018410 | 6002.131  | 10170.113 | NM_014675 | 55959.18  | 60321.012 |
| AF131781  | 19815.068 | 19823.848 | AF086355  | 1167.394  | 1690.822  | AB040969  | 4592.082  | 6550.13   |
| NM_006515 | 25583.496 | 29283.799 | AK027174  | 2041.309  | 2052.958  | NM_003467 | 17269.732 | 25597.768 |
| AK022417  | 2718.974  | 2260.735  | AK024106  | 1868.246  | 1707.612  | NM_014935 | 3647.303  | 4863.555  |
| U50534    | 3696.823  | 3418.449  | AK025833  | 1370.123  | 953.139   | NM_003943 | 4663.341  | 6739.03   |
| NM_014824 | 6522.543  | 5561.186  | AK027254  | 3153.877  | 3155.986  | NM_019052 | 7478.5    | 11426.132 |
| NM_014504 | 5797.432  | 4342.089  | AK021772  | 4938.421  | 4570.75   | NM_003202 | 1178.539  | 1482.007  |
| NM_005705 | 533.235   | 505.432   | AK026297  | 10015.628 | 8873.592  | NM_000285 | 18441.801 | 24881.355 |
| NM_014405 | 29134.123 | 32643.801 | AF075081  | 593.212   | 1160.063  | NM_001500 | 1693.796  | 2230.447  |
| NM_014741 | 17133.156 | 17308.963 | NM_015372 | 1605.149  | 1862.563  | NM_004385 | 5370.477  | 9664.725  |
| AF212247  | 7807.823  | 7661.955  | AF085919  | 1238.968  | 1846.141  | NM_020375 | 1247.114  | 1522.759  |
| AF161407  | 18565.035 | 15171.291 | AF085933  | 1720.634  | 1540.816  | AL110127  | 3239.504  | 5483.246  |
| NM_014735 | 11083.104 | 9091.871  | AF147431  | 1600.243  | 1226.272  | AK001997  | 972.864   | 1660.143  |
| NM_016405 | 9411.953  | 9257.729  | AK026422  | 15322.994 | 11150.878 | NM_002525 | 6919.764  | 8162.078  |
| NM_018080 | 8211.292  | 5824.387  | AK022264  | 2208.938  | 1133.689  | D38438    | 18380.059 | 26559.295 |
| AL050107  | 828.89    | 580.389   | AL137331  | 2258.778  | 857.359   | AV714945  | 1856.114  | 2795.889  |
| NM_014453 | 26683.963 | 19156.439 | AL162040  | 12884.259 | 19660.359 | AF089897  | 752.673   | 648.688   |



|           |           |           |           |           |           |           |           |           |
|-----------|-----------|-----------|-----------|-----------|-----------|-----------|-----------|-----------|
| NM_005713 | 1933.054  | 1860.693  | AL442084  | 1838.474  | 3217.787  | AF007872  | 2699.598  | 3630.52   |
| AK021951  | 1452      | 1234.345  | AL137371  | 19873.393 | 30187.887 | M30938    | 11838.98  | 15236.266 |
| AK023553  | 4123.984  | 3374.22   | AL137596  | 6784.435  | 11703.647 | NM_015148 | 3287.919  | 4409.997  |
| NM_014600 | 1799.317  | 1826.408  | AL353942  | 35132.605 | 50097.727 | NM_004714 | 4540.736  | 6764.942  |
| NM_016733 | 2980.954  | 2681.291  | Z38010    | 24598.971 | 37357.004 | NM_005401 | 982.846   | 1564.728  |
| AF181994  | 7584.654  | 6792.579  | AF088003  | 876.861   | 2326.565  | NM_017677 | 493.257   | 803.57    |
| CY3Cy5    | 8520.459  | 527.025   | AK025799  | 2020.903  | 2296.561  | NM_002497 | 22535.07  | 28866.631 |
| NM_058197 | 8668.994  | 10020.347 | AK022857  | 1704.975  | 2151.47   | AB025194  | 21004.158 | 27123.166 |
| AF086452  | 667.995   | 772.963   | AL110206  | 6170.942  | 6472.419  | NM_006238 | 5027.291  | 9875.558  |
| AF086314  | 694.701   | 522.778   | NM_004821 | 2962.866  | 3115.069  | BC020863  | 1399.557  | 1814.307  |
| NM_016364 | 743.845   | 686.24    | AK024292  | 1468.383  | 1807.984  | NM_017897 | 5679.304  | 7252.942  |
| AF086419  | 2567.128  | 2497.819  | AK026263  | 4148.63   | 4308.5    | NM_004265 | 1696.385  | 2288.157  |
| AF086461  | 1281.867  | 1173.804  | AK023643  | 1322.274  | 1609.41   | NM_002572 | 4819.827  | 6096.907  |
| AK000789  | 632.614   | 844.952   | AL390159  | 1640.628  | 1870.902  | NM_016113 | 35297.941 | 50153.043 |
| AF131795  | 825.518   | 1173.341  | AF095853  | 657.899   | 946.539   | NM_014222 | 7040.69   | 12976.821 |
| AL833296  | 4586.814  | 5531.457  | NM_014157 | 1637.053  | 2207.185  | L14819    | 1359.705  | 2011.407  |
| AL110240  | 13300.01  | 15538.222 | AF090933  | 1664.791  | 1359.019  | NM_000508 | 5964.565  | 7936.291  |
| AF070549  | 895.243   | 1454.563  | AF111851  | 8066.28   | 5521.868  | NM_004542 | 1777.051  | 3275.919  |
| AK025695  | 8049.615  | 8407.826  | AF152529  | 1229.118  | 881.992   | AI742810  | 467.012   | 725.986   |
| AK025442  | 4891.982  | 4999.456  | AL360200  | 1333.971  | 779.655   | X06182    | 7007.131  | 10544.157 |
| AL050041  | 2811.749  | 2728.011  | AK022235  | 1785.126  | 2766.042  | BE908993  | 55389.375 | 54894.227 |
| NM_058197 | 11046.893 | 11226.122 | AK022378  | 5183.029  | 7902.305  | AB012701  | 11175.923 | 16349.282 |
| SB        | 1105.889  | 1184.186  | AK022009  | 1410.324  | 1785.843  | M61156    | 9107.719  | 12481.595 |
| SR4       | 26540.07  | 40605.098 | AK022139  | 1007.155  | 1895.967  | R44005    | 51622.113 | 52936.957 |
| SR6       | 3653.365  | 6587.095  | AK022274  | 1648.773  | 2243.86   | AI942392  | 5340.555  | 7471.001  |
| SR8       | 14076.398 | 47370.367 | AK022401  | 1322.514  | 2175.519  | M55040    | 1767.504  | 2523.504  |
| SR10      | 41622.07  | 26599.457 | AK022078  | 973.081   | 1378.929  | AW009739  | 3185.153  | 4646.494  |
| CY3Cy5    | 12884.771 | 532.458   | AL133104  | 1312.824  | 2173.289  | BC036805  | 6550.003  | 8331.052  |
| AK024713  | 1473.488  | 2243.863  | AF075101  | 885.871   | 1079.181  | Z74615    | 54250.445 | 60209     |
| AF086114  | 754.836   | 935.946   | AF130108  | 969.049   | 1513.752  | X03884    | 12710.375 | 12216.646 |
| AK024204  | 1050.85   | 1372.992  | NM_020224 | 17212.281 | 19310.908 | U36759    | 1497.061  | 1964.84   |
| AK023737  | 2529.888  | 1603.003  | U17617    | 5597.804  | 5298.347  | X91625    | 2927.125  | 2720.295  |
| NM_006608 | 5752.547  | 5740.495  | AK022952  | 13737.667 | 14493.775 | AF090901  | 965.173   | 777.091   |
| NM_014118 | 902.969   | 807.722   | BF218888  | 1793.513  | 1801.546  | AF004231  | 4105.367  | 4345.879  |
| AK023525  | 11420.909 | 11259.769 | AK054831  | 65223.043 | 54532.086 | AF001862  | 8119.828  | 7823.376  |
| AF085829  | 1778.4    | 2177.966  | AK021770  | 896.188   | 992.359   | NM_016044 | 1985.629  | 1714.708  |
| AF075029  | 1444.177  | 1387.699  | AK027248  | 3402.82   | 3012.26   | NM_000520 | 1385.509  | 1157.438  |
| AK021903  | 4395.876  | 3797.837  | AK022804  | 19506.26  | 13444.544 | X62468    | 2821.596  | 4569.575  |
| AL390143  | 8205.192  | 8959.9    | AF009263  | 2945.653  | 4514.257  | NM_003890 | 12894.051 | 19368.023 |
| AL162075  | 6928.245  | 5781.604  | AF009283  | 2514.638  | 3908.164  | BF127978  | 5733.358  | 6942.723  |
| AK021595  | 2950.388  | 3365.797  | M15640    | 1422.54   | 2318.795  | AF110801  | 1010.252  | 1041.199  |
| AK021648  | 1597.204  | 1462.82   | AF086329  | 5564.431  | 7768.114  | NM_016578 | 56191.816 | 57508.25  |
| NM_018410 | 11770.021 | 10007.027 | U92989    | 7394.858  | 9293.262  | AB018297  | 2003.908  | 2634.021  |
| AF086355  | 971.888   | 1140.375  | AF075102  | 4184.067  | 5051.062  | AK022565  | 7415.088  | 9051.672  |
| AK027174  | 675.241   | 783.543   | NM_018463 | 31671.898 | 42792.566 | AK023151  | 4704.927  | 4615.339  |
| AL110173  | 677.586   | 694.639   | X74956    | 64781.523 | 67256.547 | AB033076  | 1818.038  | 1838.787  |
| AK025833  | 508.099   | 688.142   | AF132197  | 12764.084 | 16583.596 | AK022876  | 2773.286  | 3441.455  |
| AK021772  | 2335.198  | 2259.387  | AK025546  | 1411.179  | 1788.768  | AF134894  | 40189.09  | 32402.414 |
| AK026297  | 8910.174  | 7620.214  | AL137487  | 3396.62   | 4041.681  | NM_003938 | 7390.228  | 7604.489  |
| AF075081  | 1155.887  | 1341.648  | AK023800  | 1978.753  | 2337.263  | NM_014827 | 11210.876 | 10797.765 |
| AF085919  | 1145.828  | 1766.917  | AK024120  | 4592.267  | 4689.556  | NM_004128 | 4923.724  | 4893.837  |
| AF085933  | 1756.173  | 2213.692  | U50526    | 1892.301  | 1894.709  | U87460    | 11399.458 | 10649.882 |
| AF147431  | 2522.622  | 3175.9    | S75105    | 11882.335 | 10540.039 | NM_003617 | 1039.459  | 984.623   |

|           |           |           |           |           |           |           |           |           |
|-----------|-----------|-----------|-----------|-----------|-----------|-----------|-----------|-----------|
| AK026422  | 6545.082  | 6501.662  | AF056455  | 26574.521 | 21150.193 | NM_001841 | 2562.24   | 2226.516  |
| AF085938  | 1602.178  | 1461.593  | NM_018510 | 2583.446  | 1773.318  | NM_002054 | 4706.943  | 4348.464  |
| AK022264  | 3081.169  | 3390.207  | U50537    | 1551.033  | 1449.079  | AF300649  | 14188.691 | 13279.049 |
| AL137331  | 2948.617  | 2958.099  | AK024988  | 1684.014  | 1292.531  | NM_004125 | 4406.629  | 3398.116  |
| AL162040  | 12606.742 | 13772.421 | AF026943  | 5870.534  | 10438.876 | NM_000823 | 7201.293  | 6723.829  |
| AL442084  | 2189.768  | 2223.748  | L77582    | 1775.614  | 2910.659  | NM_003317 | 17691.109 | 14542.236 |
| AL137371  | 20652.408 | 22543.035 | NM_020448 | 1801.276  | 3490.45   | NM_001139 | 5766.067  | 4320.911  |
| AL137596  | 8531.547  | 8206.364  | NM_005419 | 5932.473  | 9336.202  | L09081    | 16987.418 | 14335.605 |
| AL353942  | 39664.473 | 41020.828 | L31956    | 1058.898  | 1461.514  | NM_000218 | 57678.586 | 60863.063 |
| Z38010    | 5376.585  | 5712.17   | NM_003479 | 27325.35  | 45938.688 | AF064255  | 56462.879 | 58465.848 |
| AF088003  | 1181.73   | 1227.553  | NM_006773 | 8306.932  | 8780.491  | NM_016368 | 54971.914 | 61858.734 |
| AK025799  | 1054.972  | 1508.19   | AK024439  | 25050.859 | 31630.041 | U08853    | 4206.653  | 4408.664  |
| AK022857  | 731.197   | 768.191   | X89676    | 3354.957  | 4384.172  | NM_004261 | 22357.49  | 21552.172 |
| AL110206  | 2103.646  | 2087.312  | NM_012444 | 1559.046  | 1858.686  | NM_016006 | 1336.746  | 1788.421  |
| AK024292  | 1608.634  | 1568.626  | Z32684    | 7206.843  | 9489.584  | NM_016245 | 3982.059  | 4504.868  |
| AK026263  | 2767.29   | 2707.055  | NM_016512 | 2888.212  | 2472.426  | AF005632  | 7345.836  | 7574.165  |
| AK023643  | 880.551   | 942.924   | NM_017488 | 8830.339  | 12290.471 | NM_000903 | 2995.798  | 2349.858  |
| AL390159  | 802.969   | 608.574   | AY009400  | 17987.791 | 16228.603 | NM_004493 | 12571.251 | 12256.511 |
| AF095853  | 526.923   | 1266.313  | NM_005069 | 1992.202  | 2214.223  | AF309489  | 1034.776  | 736.443   |
| NM_014157 | 2722.497  | 3943.832  | AF086401  | 6890.69   | 8109.027  | NM_000288 | 2207.349  | 2520.408  |
| AF090933  | 1789.349  | 1327.801  | L23869    | 3599.323  | 3787.885  | NM_004762 | 7723.698  | 7896.351  |
| AF111851  | 3152.473  | 2771.577  | Z21853    | 6513.993  | 5339.124  | NM_006641 | 55377.949 | 61645.418 |
| AF152529  | 1152.555  | 1312.763  | AL050183  | 656.803   | 922.61    | NM_000634 | 20156.793 | 19232.297 |
| AL360200  | 1717.572  | 2276.148  | U80770    | 2092.228  | 1623.502  | NM_014679 | 38813.602 | 27344.629 |
| NM_014083 | 884.589   | 807.874   | AB075846  | 1967.13   | 1386.017  | AB040969  | 3023.792  | 3500.893  |
| AK021992  | 4271.689  | 3971.661  | NM_018342 | 2989.458  | 1923.636  | NM_003467 | 9663.739  | 8223.466  |
| AK022102  | 1697.111  | 1742.281  | BC020260  | 4200.214  | 1696.194  | NM_014936 | 2044.229  | 1403.05   |
| AK022235  | 2424.036  | 2605.825  | D17156    | 10934.487 | 2488.39   | NM_003943 | 3079.822  | 3421.828  |
| AK022378  | 4812.354  | 4831.397  | AK026938  | 26006.066 | 36343.297 | NM_019052 | 5266.633  | 6097.955  |
| AK022009  | 972.299   | 1042.221  | AK024373  | 16652.418 | 26012.982 | NM_003202 | 775.15    | 622.633   |
| AK022274  | 1014.551  | 1110.42   | AK022343  | 9516.938  | 15691.598 | AF119902  | 1023.956  | 736.1     |
| AK022401  | 1192.054  | 1577.218  | AF119870  | 597.334   | 1704.989  | NM_020525 | 33135.16  | 23657.006 |
| AK022078  | 1021.295  | 1214.309  | AK026400  | 2847.375  | 4382.578  | NM_004388 | 2929.052  | 3665.289  |
| AL133104  | 1151.489  | 1355.211  | NM_004148 | 9261.305  | 9883.475  | NM_020379 | 1719.917  | 2280.844  |
| AF075101  | 772.57    | 966.667   | X03168    | 5643.073  | 6246.457  | AL110127  | 2001.646  | 1937.885  |
| AF130108  | 1370.679  | 1372.394  | NM_005168 | 10412.66  | 14094.65  | AK001997  | 556.108   | 658.173   |
| NM_020224 | 12592.622 | 11972.146 | NM_017801 | 13202.005 | 16129.396 | NM_002528 | 4747.659  | 3585.765  |
| U17617    | 2887.286  | 3539.103  | NM_007348 | 5363.584  | 5501.56   | D38438    | 10504.437 | 10258.294 |
| NM_014100 | 731.086   | 957.711   | NM_016953 | 1454.299  | 1674.108  | AV714945  | 1020.447  | 609.614   |
| AK022952  | 17413.174 | 21692.316 | U65473    | 22316.971 | 22342.934 | AF007872  | 1712.391  | 1576.641  |
| BF218888  | 1835.771  | 2273.066  | D63481    | 60893.008 | 59401.914 | M30938    | 6772.584  | 4635.696  |
| AF147407  | 852.954   | 926.202   | AY009951  | 1589.377  | 1827.892  | NM_015148 | 2063.631  | 1649.383  |
| AK054831  | 3621.107  | 3980.369  | AL157424  | 2536.873  | 2756.799  | NM_004714 | 2636.042  | 2182.719  |
| AK021770  | 1881.449  | 1912.016  | AK024422  | 1191.34   | 1342.242  | NM_005401 | 540.713   | 484.419   |
| AK027248  | 6983.023  | 8426.535  | NM_002673 | 963.04    | 983.367   | NM_002497 | 11992.287 | 7352.28   |
| AK022804  | 32308.629 | 43645.09  | NM_003876 | 10768.122 | 9716.099  | AB025194  | 15827.196 | 14192.313 |
| AF009263  | 2143.646  | 2295.992  | AJ276310  | 1795.934  | 1430.63   | NM_006239 | 3384.353  | 3434.715  |
| AF009283  | 3121.279  | 3795.131  | NM_012295 | 19522.572 | 18390.865 | BC020863  | 861.534   | 509.157   |
| AF086329  | 2958.076  | 3216.495  | NM_015910 | 2091.83   | 1828.991  | NM_017897 | 3744.085  | 2914.022  |
| U92989    | 8405.642  | 11605.625 | AL133666  | 2424.21   | 1493.476  | NM_004265 | 1063.413  | 873.971   |
| AF075102  | 7767.286  | 6597.604  | NM_004710 | 13844.336 | 19580.188 | NM_002572 | 2792.629  | 2243.197  |
| NM_018463 | 8468.597  | 7693.564  | NM_004396 | 31053.07  | 54157.758 | NM_001441 | 2167.455  | 1851.92   |
| X74956    | 23361.01  | 24345.955 | NM_017999 | 8319.204  | 13205.373 | NM_018324 | 1754.465  | 984.921   |

|           |           |           |           |           |           |           |           |           |
|-----------|-----------|-----------|-----------|-----------|-----------|-----------|-----------|-----------|
| AF132197  | 18356.863 | 18358.049 | NM_015989 | 64638.367 | 60401.66  | L14819    | 527.262   | 1012.599  |
| AK025546  | 2003.123  | 2055.171  | NM_001043 | 12971.557 | 21233.566 | NM_000509 | 3750.188  | 4274.627  |
| AF278761  | 1185.821  | 1267.436  | NM_014399 | 2141.098  | 2944.944  | NM_004542 | 1155.808  | 1026.888  |
| AL137487  | 4009.226  | 4178.21   | AF113685  | 4238.645  | 5613.041  | X06182    | 4075.082  | 3644.666  |
| AK023800  | 2193.969  | 3451.136  | NM_005470 | 18306.227 | 19437.445 | BE908993  | 41741.262 | 25356.766 |
| AK024120  | 2181.875  | 2286.217  | AF142570  | 3476.468  | 4259.535  | AB012701  | 7342.057  | 6309.952  |
| U50526    | 2755.546  | 3226.928  | NM_004225 | 33705.785 | 33511.258 | M61156    | 4726.124  | 3686.798  |
| S75105    | 10629.339 | 11177.597 | NM_003862 | 3530.952  | 3662.52   | R44005    | 36747.262 | 30156.381 |
| AF056455  | 3198.655  | 2964.73   | NM_002873 | 10329.716 | 10194.931 | AI942392  | 3040.408  | 3002.299  |
| NM_018510 | 2863.852  | 2735.873  | NM_015571 | 30962.256 | 30641.934 | M55040    | 1201.399  | 976.952   |
| U50537    | 1938.791  | 2080.744  | NM_004701 | 15557.238 | 17639.133 | AW009739  | 2109.74   | 2143.594  |
| AK024988  | 3545.331  | 3281.239  | AK025554  | 3635.555  | 4298.714  | BC036805  | 4234.694  | 2983.155  |
| AV749548  | 938.677   | 950.396   | BI824151  | 9286.388  | 9585.087  | Z74615    | 56465.219 | 59292.094 |
| AK025719  | 657.088   | 935.017   | AK021791  | 12546.919 | 12141.097 | X03884    | 10782.886 | 7551.57   |
| AF026943  | 9668.849  | 12668.175 | NM_005019 | 1293.006  | 979.629   | U36759    | 1120.846  | 817.204   |
| L77582    | 2179.231  | 2004.383  | NM_005727 | 50761.605 | 50641.227 | X91625    | 2106.754  | 1504.315  |
| NM_020448 | 2250.781  | 2705.496  | AK027242  | 4379.725  | 3164.637  | AF090901  | 1069.185  | 679.174   |
| NM_005419 | 8589.271  | 8984.81   | NM_001279 | 31798.719 | 12961.301 | AF004231  | 4052.64   | 3019.368  |
| NM_003479 | 31540.379 | 40937.32  | NM_005010 | 7655.226  | 4955.351  | AF001862  | 6797.442  | 4278.835  |
| NM_006773 | 10774.313 | 11373.581 | NM_019055 | 8178.052  | 15605.458 | NM_016044 | 1733.561  | 1281.937  |
| AK024439  | 32813.434 | 46208.688 | NM_020199 | 2081.78   | 3429.766  | NM_000520 | 1289.485  | 796.429   |
| X89676    | 2023.137  | 2557.221  | U96136    | 974.68    | 1791.369  | NM_000289 | 9581.611  | 4710.131  |
| NM_012444 | 1417.859  | 1434.276  | NM_017586 | 21099.627 | 34541.266 | NM_001500 | 723.333   | 488.716   |
| Z32684    | 10001.422 | 11153.242 | NM_005941 | 2277.179  | 3472.862  | AB033076  | 2452.152  | 2799.608  |
| NM_016512 | 1757.85   | 1899.109  | NM_015884 | 1903.854  | 2297.926  | AK022876  | 3817.763  | 4946.057  |
| NM_017488 | 10103.22  | 12570.476 | AF201380  | 6043.716  | 8836.509  | AF134894  | 35152.734 | 28964.775 |
| AY009400  | 19030.314 | 17372.648 | NM_003619 | 1257.765  | 1685.305  | NM_003938 | 7364.258  | 6105.722  |
| NM_005069 | 1046.019  | 1520.657  | NM_012392 | 7165.632  | 6785.688  | NM_014827 | 11133.24  | 9660.642  |
| AF086401  | 7818.976  | 9252.777  | NM_014833 | 53017.609 | 49945.715 | NM_004126 | 4150.943  | 3743.976  |
| L23869    | 3836.363  | 4399.946  | NM_000045 | 2555.127  | 2288.419  | U87460    | 10430     | 9546.332  |
| Z21853    | 8530.413  | 7032.445  | NM_003878 | 23272.361 | 22643.816 | NM_003617 | 814.138   | 695.229   |
| AL050183  | 932.441   | 568.206   | NM_004832 | 3605.695  | 3596.393  | NM_001841 | 2472.091  | 2069.778  |
| U80770    | 1744.039  | 1869.823  | NM_005957 | 1778.943  | 2041.383  | NM_002054 | 4109.665  | 3049.855  |
| AB075846  | 1337.877  | 1449.411  | AK024374  | 4101.018  | 4584.686  | AF300649  | 12603.815 | 9985.371  |
| NM_018342 | 4292.723  | 4612.667  | NM_007101 | 5162.133  | 5633.432  | NM_004125 | 4857.056  | 4154.604  |
| BC020260  | 2854.84   | 2536.533  | NM_018234 | 890.438   | 711.017   | NM_000823 | 5360.61   | 4907.651  |
| D17156    | 17706.473 | 21213.467 | NM_002720 | 15066.445 | 14378.772 | NM_004414 | 1922.282  | 1722.58   |
| L04461    | 2243.312  | 2692.894  | AK024716  | 50644.207 | 44825.441 | NM_003317 | 17522.188 | 12207.485 |
| AK026938  | 26775.998 | 28877.33  | X67155    | 3964.463  | 2515.123  | NM_001139 | 5515.401  | 3578.804  |
| AK024373  | 21745.834 | 22073.23  | NM_020380 | 7847.207  | 4616.272  | NM_004609 | 54231.008 | 57939.289 |
| AK022343  | 8030.028  | 8111.946  | NM_015927 | 1661.465  | 3132.671  | NM_003772 | 1139.507  | 996.67    |
| AF119870  | 740.058   | 797.75    | NM_004779 | 14339.485 | 23812.57  | NM_001541 | 12666.807 | 11199.916 |
| AK026400  | 4935.629  | 4267.74   | NM_019071 | 9910.213  | 17888.973 | NM_005416 | 1639.915  | 973.607   |
| NM_004148 | 3640.056  | 4556.966  | NM_001913 | 11866.323 | 16163.742 | L09081    | 16802.57  | 14335.482 |
| X03168    | 5494.354  | 6448.633  | AK025594  | 2915.991  | 4014.175  | NM_000218 | 57847.797 | 61474.711 |
| NM_005168 | 11128.398 | 12182.797 | AB040931  | 10596.468 | 10780.711 | NM_016113 | 18218.631 | 15657.333 |
| NM_017801 | 12108.297 | 14841.577 | NM_003599 | 2152.09   | 2730.82   | NM_014222 | 4023.052  | 3710.147  |
| NM_007348 | 8185.58   | 7616.618  | NM_015911 | 3614.623  | 4064.505  | AK026317  | 11173.364 | 13275.448 |
| U65473    | 8712.277  | 10576.862 | BC011826  | 10121.111 | 8642.407  | X82207    | 55445.391 | 57893.016 |
| D63481    | 11207.608 | 11006.549 | NM_017647 | 8177.83   | 7027.641  | NM_015044 | 6780.415  | 7709.687  |
| AY009951  | 1733.368  | 1959.712  | NM_012091 | 2582.722  | 2995.817  | NM_002867 | 711.662   | 469.483   |
| AL157424  | 2648.589  | 3394.062  | NM_012321 | 15195.275 | 13948.318 | BF217496  | 15505.519 | 15755.341 |
| AK024422  | 1165.87   | 1124.112  | D13642    | 14646.574 | 14177.392 | NM_004762 | 6479.768  | 5642.78   |

|           |           |           |           |           |           |           |           |           |
|-----------|-----------|-----------|-----------|-----------|-----------|-----------|-----------|-----------|
| NM_002673 | 1295.836  | 1496.316  | NM_004741 | 44416.355 | 43546.043 | NM_006641 | 55393.363 | 56977.656 |
| NM_003876 | 16852.506 | 19919.346 | NM_018032 | 10615.196 | 8969.558  | NM_000634 | 16918.848 | 12886.557 |
| AJ276310  | 1003.899  | 989.992   | NM_003675 | 41965.863 | 37299.117 | NM_014679 | 32633.799 | 24204.025 |
| NM_012295 | 16255.72  | 18653.273 | NM_004117 | 11000.915 | 8640.662  | AB040969  | 2932.449  | 2509.12   |
| NM_015910 | 2701.867  | 2815.642  | NM_016594 | 36004.582 | 29287.746 | NM_003467 | 9387.896  | 5659.123  |
| NM_000222 | 758.951   | 650.73    | NM_030752 | 21889.68  | 14776.978 | NM_014936 | 1983.779  | 1576.706  |
| AL133666  | 1318.294  | 1363.259  | D26068    | 55271.086 | 30599.746 | NM_003943 | 2559.239  | 2452.576  |
| NM_000663 | 4521.742  | 4895.618  | NM_018559 | 23715.936 | 8298.305  | NM_019052 | 5386.481  | 6387.831  |
| NM_004710 | 15974.063 | 16350.256 | NM_017593 | 9430.938  | 2270.952  | NM_003202 | 793.8     | 738.957   |
| NM_004396 | 36420.469 | 40450.238 | AF188747  | 4267.177  | 6743.361  | AF119902  | 978.263   | 827.661   |
| NM_017999 | 12924.588 | 12708.644 | NM_002773 | 2497.427  | 4539.12   | NM_020525 | 25720.639 | 17344.676 |
| NM_015989 | 66271.367 | 58991.344 | NM_013411 | 6020.1    | 7628.271  | X62468    | 1333.404  | 1177.714  |
| NM_001043 | 15007.585 | 16595.209 | AB007956  | 501.608   | 1098.011  | NM_003890 | 11103.026 | 9241.308  |
| NM_014399 | 1391.029  | 1525.974  | NM_020200 | 3454.872  | 4050.343  | BF127978  | 5318.578  | 2901.731  |
| AF113685  | 2116.265  | 2348.193  | NM_001248 | 1757.284  | 2018.689  | AF110801  | 780.113   | 436.549   |
| NM_005470 | 16295.973 | 19419.287 | NM_000156 | 1230.393  | 1166.193  | NM_016579 | 52310.105 | 49423.633 |
| AF142570  | 1698.722  | 1719.548  | NM_000180 | 52230.426 | 57913.621 | AB018297  | 1855.137  | 1405.123  |
| NM_004225 | 30324.535 | 34005.227 | NM_000858 | 33864.801 | 26462.703 | AK022565  | 6578.286  | 4954.783  |
| NM_003862 | 4874.805  | 4612.656  | AF254087  | 5848.49   | 6621.508  | AK023151  | 4050.314  | 3226.366  |
| NM_002873 | 10154.66  | 11832.937 | NM_017715 | 5017.037  | 6105.444  | NM_017897 | 3317.381  | 3006.948  |
| NM_015571 | 34415.609 | 33056.719 | AL117607  | 8414.391  | 7881.059  | NM_004265 | 971.231   | 1205.949  |
| NM_004701 | 21688.922 | 27327.586 | AB037774  | 4471.627  | 5125.788  | NM_002572 | 2870.627  | 2746.187  |
| AK025554  | 5419.806  | 5531.098  | NM_005438 | 3781.447  | 3708.182  | NM_001441 | 1987.604  | 1674.115  |
| BI824151  | 10580.155 | 11861.626 | AK024361  | 4499.693  | 4425.197  | NM_018324 | 1767.816  | 1530.625  |
| AK021791  | 16214.77  | 17950.988 | NM_004350 | 18530.684 | 15815.122 | AF064255  | 53218.402 | 42219.492 |
| NM_005019 | 1260.933  | 1363.576  | NM_018044 | 15869.108 | 13806.827 | NM_016368 | 55929.566 | 55270.516 |
| NM_004052 | 6200.67   | 7278.968  | NM_004503 | 985.24    | 844.218   | U08853    | 3575.175  | 2429.602  |
| NM_004394 | 25796.633 | 32236.975 | NM_001717 | 852.163   | 571.35    | NM_004261 | 20575.242 | 15977.696 |
| NM_005727 | 23244.406 | 25085.811 | AF274347  | 5505.979  | 2994.586  | NM_016006 | 1453.085  | 1117.155  |
| AF210247  | 559.862   | 154.01    | AK001144  | 939.215   | 436.538   | NM_016245 | 3725.192  | 3157.693  |
| AK027242  | 8926.123  | 10362.747 | NM_018555 | 5403.687  | 2194.149  | AF005632  | 6971.292  | 5613.272  |
| NM_001279 | 33605.367 | 33927.953 | NM_005122 | 1197.745  | 212.977   | NM_000903 | 2915.218  | 1882.205  |
| NM_005010 | 5715.899  | 4658.235  | AL133055  | 3586.865  | 403.673   | NM_004493 | 12070.799 | 8709.123  |
| NM_019055 | 6645.744  | 6226.651  | NM_014552 | 8447.407  | 13007.582 | AF309489  | 1085.786  | 615.647   |
| NM_020199 | 2387.992  | 2888.115  | NM_003072 | 36151.684 | 50301.828 | NM_004047 | 17541.766 | 13108.507 |
| U96136    | 906.531   | 628.5     | L09081    | 31882.68  | 41277.121 | NM_004823 | 3445.228  | 2400.523  |
| NM_017586 | 12189.37  | 12322.8   | NM_000218 | 67965.938 | 79017.742 | Y17179    | 53876.402 | 47278.777 |
| NM_015884 | 2302.095  | 2382.307  | NM_016113 | 29979.145 | 38111.184 | NM_000891 | 1601.109  | 1053.681  |
| AF201380  | 7176.098  | 8556.192  | NM_014222 | 8476.353  | 10583.998 | AK026840  | 2571.807  | 1844.601  |
| NM_003619 | 1698.752  | 1911.107  | L14819    | 1193.436  | 1436.131  | NM_000288 | 2083.532  | 1652.747  |
| NM_012392 | 6130.081  | 6386.961  | NM_000509 | 7901.792  | 8619.126  | NM_016044 | 1787.741  | 1519.147  |
| NM_014833 | 36364.891 | 42908.715 | NM_004542 | 2087.326  | 2222.42   | NM_000520 | 1271.864  | 763.123   |
| NM_000045 | 1315.049  | 473.654   | X06182    | 8181.496  | 8622.912  | NM_000289 | 8232.036  | 4117.141  |
| NM_003878 | 25780.09  | 28842.16  | BE908993  | 67419.664 | 61107.848 | NM_001500 | 603.215   | 492.545   |
| NM_004832 | 2045.955  | 2257.778  | AB012701  | 14986.09  | 15869.988 | NM_004388 | 2356.091  | 1827.034  |
| NM_005957 | 1866.265  | 1928.46   | M61156    | 15506.323 | 16720.191 | NM_020379 | 502.818   | 327.812   |
| AK024374  | 4798.318  | 4794.769  | R44005    | 57683.234 | 54521.266 | AL110127  | 1943.082  | 1387.892  |
| NM_007101 | 2426.414  | 2403.176  | AI942392  | 8370.229  | 8028.356  | AK001997  | 440.665   | 266.961   |
| NM_018234 | 819.175   | 837.47    | M55040    | 2680.681  | 2284.419  | NM_002528 | 3687.101  | 2082.825  |
| AB033062  | 2774.23   | 3204.035  | AW009739  | 4367.368  | 4055.375  | D38438    | 9825.668  | 7610.864  |
| NM_016437 | 50495.637 | 50528.621 | BC036805  | 4401.492  | 4173.314  | AV714945  | 870.322   | 426.339   |
| NM_002720 | 30185.383 | 34735.43  | Z74615    | 64382.891 | 56605.797 | AF089897  | 238.649   | 175.844   |
| AK024716  | 56919.609 | 53140.672 | X03884    | 13250.391 | 8841.008  | AF007872  | 1707.761  | 1180.555  |

|           |           |           |           |           |           |           |           |           |
|-----------|-----------|-----------|-----------|-----------|-----------|-----------|-----------|-----------|
| X67155    | 7516.089  | 8226.531  | U36759    | 1136.368  | 938.061   | M30938    | 6298.848  | 3659.068  |
| NM_02038C | 10364.112 | 9576.408  | X91625    | 4191.384  | 1820.888  | NM_01514E | 1666.48   | 833.272   |
| AL137519  | 1307.34   | 782.634   | AF090901  | 1362.681  | 386.812   | NM_004714 | 2329.563  | 1534.456  |
| NM_00289C | 63332.328 | 54860.027 | NM_002451 | 13393.028 | 23395.895 | NM_005401 | 385.856   | 394.525   |
| NM_00133C | 38346.855 | 34120.703 | AF119902  | 1711.987  | 2209.184  | NM_002497 | 11559.585 | 5983.521  |
| NM_015927 | 1012.397  | 778.95    | NM_02052E | 41200.703 | 50766.281 | AB025194  | 13465.491 | 9025.36   |
| NM_00477E | 12493.719 | 11927.118 | X62468    | 1757.274  | 1997.882  | NM_00623E | 3377.211  | 3010.193  |
| NM_019071 | 12880.508 | 14495.614 | NM_00389C | 20126.818 | 25887.061 | BC020863  | 908.182   | 483.623   |
| NM_00191E | 16859.418 | 18400.271 | BF127978  | 8064.595  | 7883.129  | CY3Cy5    | 2782.22   | 655.864   |
| AK025594  | 3542.126  | 4203.596  | AF110801  | 2892.365  | 3207.354  | NM_00475E | 918.49    | 1333.743  |
| AB040931  | 6478.839  | 6633.47   | NM_01657E | 67989.813 | 76590.242 | NM_00516E | 5139.915  | 7000.746  |
| NM_00359E | 2897.835  | 3206.26   | AB018297  | 4692.081  | 5836.908  | AL117623  | 757.876   | 924.774   |
| NM_015911 | 2914.131  | 2856.3    | AK022565  | 12830.084 | 12978.941 | AF085988  | 976.492   | 1523.131  |
| BC011826  | 10181.868 | 9382.902  | AK023151  | 7800.151  | 8572.835  | AK025785  | 3573.353  | 4501.362  |
| NM_017647 | 9566.973  | 6176.94   | AB033076  | 3039.884  | 3334.488  | AF038190  | 520.014   | 636.771   |
| NM_012091 | 3132.902  | 2576.806  | AK022876  | 5332.654  | 5273.302  | AF143877  | 834.596   | 988.002   |
| NM_012321 | 6875.532  | 6667.727  | AF134894  | 61546.77  | 58275.543 | NM_00073E | 54386.43  | 57150.418 |
| D13642    | 16544.936 | 15280.727 | NM_00393E | 13426.582 | 14368.492 | AF086474  | 593.297   | 1077.756  |
| NM_004741 | 27419.703 | 30918.414 | NM_014827 | 20768.363 | 17231.273 | AF086529  | 616.976   | 950.35    |
| NM_01803E | 14180.91  | 13357.817 | NM_00412E | 10234.213 | 10387.792 | AF086023  | 5016.572  | 5913.856  |
| AF049525  | 626.111   | 493.79    | U87460    | 24076.967 | 23345.916 | AF131803  | 14683.094 | 24710.285 |
| NM_00367E | 27181.742 | 24280.488 | NM_003617 | 1693.291  | 1351.918  | AF086538  | 1356.366  | 2035.03   |
| NM_01751E | 14124.237 | 15612.2   | NM_001841 | 5472.296  | 4129.513  | NM_00477E | 1803.865  | 2986.221  |
| NM_004117 | 15112.954 | 13634.483 | NM_002054 | 3867.853  | 2377.699  | AK023353  | 4938.472  | 8642.492  |
| NM_016594 | 56782.641 | 52034.359 | AF300649  | 7716.709  | 4545.863  | NM_00516E | 5237.498  | 9081.427  |
| NM_03075E | 29298.309 | 31911.438 | NM_00412E | 3191.339  | 1503.184  | SR1       | 67084.211 | 66213.805 |
| D26068    | 61769.68  | 51704.094 | NM_00082E | 4064.329  | 1558.239  | SR3       | 27293.666 | 32100.877 |
| NM_01855E | 12542.609 | 13892.598 | NM_001441 | 4082.906  | 4718.089  | SR5       | 2820.868  | 3553.828  |
| NM_01759E | 17683.205 | 17752.133 | NM_018324 | 2747.01   | 3055.793  | SR7       | 2721.571  | 30151     |
| NM_00428E | 39797.738 | 46847.715 | AF064255  | 63594.313 | 68748.797 | SR9       | 7623.731  | 1676.687  |
| AF188747  | 5417.59   | 5026.592  | NM_01636E | 62676.16  | 61391.152 | CY3Cy5    | 2009.424  | 344.781   |
| NM_00277E | 3910.392  | 2132.85   | U08853    | 10083.293 | 9937.13   | AF182420  | 635.934   | 748.084   |
| NM_013411 | 7911.715  | 8579.88   | NM_004261 | 42346.453 | 48353.516 | U84517    | 15021.6   | 22739.676 |
| AB007956  | 906.903   | 989.587   | NM_01600E | 2610.734  | 3076.163  | U03237    | 609.586   | 1020.721  |
| NM_02020C | 2663.698  | 2677.393  | NM_01624E | 7048.538  | 8086.955  | AB033113  | 1309.874  | 1518.234  |
| NM_00124E | 865.946   | 999.012   | AF005632  | 17175.199 | 18886.816 | AK025877  | 2072.137  | 2224.071  |
| NM_00015E | 2813.433  | 2177.691  | NM_00090E | 5524.664  | 5574.748  | NM_01814E | 564.573   | 895.605   |
| NM_00018C | 13496.784 | 13339.212 | NM_00449E | 25058.494 | 28099.832 | AK001921  | 5512.199  | 6615.083  |
| NM_00085E | 25073.414 | 15496.626 | AF309489  | 2108.262  | 1960.967  | AF088004  | 2099.571  | 2979.055  |
| AF254087  | 7357.668  | 7848.98   | NM_00028E | 5469.138  | 5555.583  | AF086149  | 1461.832  | 2445.154  |
| NM_01771E | 4417.172  | 5087.705  | NM_00476E | 13610.809 | 12733.221 | NM_01827E | 2767.281  | 3149.652  |
| AL117607  | 3620.591  | 4056.345  | NM_006641 | 62128.535 | 60583.105 | AK024944  | 3094.321  | 4133.084  |
| AB037774  | 6810.068  | 6750.278  | NM_000634 | 18619.621 | 17226.811 | AK022034  | 397.439   | 882.222   |
| NM_00543E | 1734.74   | 2165.207  | NM_01467E | 54275.297 | 48166.996 | NM_00720E | 1509.682  | 1623.359  |
| AK024361  | 4449.971  | 4544.316  | AB040969  | 4912.239  | 4194.101  | NM_00366E | 2843.583  | 2351.03   |
| NM_00435C | 32466.104 | 34908.359 | NM_003467 | 22620.512 | 13843.169 | AK021777  | 1650.198  | 2106.491  |
| NM_018044 | 35486.762 | 38042.281 | NM_01493E | 4007.89   | 2410.816  | AF007137  | 1688.609  | 1327.266  |
| NM_00450E | 2027.699  | 2537.646  | NM_00394E | 3522.962  | 2198.853  | AK023292  | 709.039   | 1064.922  |
| NM_001717 | 1088.563  | 972.835   | NM_01905E | 9395.362  | 6463.306  | AK023752  | 409.963   | 1036.592  |
| AF274347  | 2424.514  | 2389.715  | NM_00320E | 1580.041  | 600.645   | AK022452  | 649.529   | 701.511   |
| AK001144  | 1529.388  | 1117.537  | NM_00028E | 26203.088 | 21751.893 | AK023375  | 1386.926  | 2053.751  |
| NM_01855E | 6865.111  | 6810.072  | NM_00150C | 1939.112  | 1402.168  | AK023781  | 715.82    | 663.648   |
| NM_00512E | 2098.103  | 1853.102  | NM_00438E | 5443.77   | 5710.354  | AK024366  | 934.797   | 780.769   |

|           |           |           |           |           |           |           |           |           |
|-----------|-----------|-----------|-----------|-----------|-----------|-----------|-----------|-----------|
| AL133055  | 874.985   | 1345.502  | NM_020379 | 1788.426  | 1554.282  | AK022171  | 2308.304  | 2410.004  |
| NM_014552 | 7133.36   | 7516.606  | AL110127  | 4250.375  | 4297.157  | AK025913  | 1349.948  | 1748.109  |
| NM_003072 | 41447.52  | 37224.457 | AK001997  | 891.354   | 1018.979  | AK021930  | 388.854   | 664.063   |
| L09081    | 2285.243  | 2240.89   | NM_002528 | 8935.951  | 9094.478  | NM_01650C | 3170.823  | 5036.352  |
| NM_000218 | 69650.492 | 78997.188 | D38438    | 16072.025 | 16060.591 | AF087971  | 743.658   | 796.968   |
| NM_016113 | 5636.968  | 6765.678  | AV714945  | 2009.147  | 2139.701  | AF087974  | 2738.476  | 2451.367  |
| NM_014222 | 6901.075  | 8366.441  | AF089897  | 831.952   | 723.468   | NM_018004 | 675.315   | 591.526   |
| L14819    | 499.386   | 596.897   | AF007872  | 4620.156  | 4676.808  | X78938    | 2736.172  | 1846.979  |
| NM_000509 | 9084.176  | 10070.583 | M30938    | 13757.545 | 13596.611 | AK021497  | 2028.595  | 2814.293  |
| NM_004542 | 2563.525  | 2159.966  | NM_015148 | 3792.309  | 3447.428  | AF124367  | 638.148   | 1197.003  |
| X06182    | 7360.015  | 7960.604  | NM_004714 | 5550.621  | 4830.272  | AK025615  | 15555.489 | 15643.685 |
| BE908993  | 66655.555 | 59632.738 | NM_002497 | 24645.381 | 18422.512 | AK023803  | 571.945   | 410.768   |
| AB012701  | 18418.324 | 19932.998 | AB025194  | 13910.267 | 11721.01  | AK022379  | 811.437   | 901.368   |
| M61156    | 1913.752  | 2268.554  | NM_006239 | 1503.925  | 1420.168  | AK025231  | 64711.793 | 75038.891 |
| R44005    | 16478.961 | 20321.352 | BC020863  | 1541.173  | 915.425   | AK025338  | 2878.806  | 2995.718  |
| AI942392  | 11889.51  | 12569.665 | NM_017897 | 3681.694  | 2266.329  | AK001132  | 511.259   | 447.168   |
| M55040    | 3800.881  | 3936.357  | NM_004265 | 1824.775  | 756.735   | AK023462  | 2787.795  | 4293.87   |
| AW009739  | 6469.126  | 7318.31   | NM_002572 | 4655.782  | 2305.693  | AF210649  | 530.001   | 883.703   |
| BC036805  | 5049.026  | 5031.368  | NM_016113 | 30348.701 | 36343.02  | AK001115  | 3181.63   | 4658.583  |
| Z74615    | 27813.129 | 24387.012 | NM_014222 | 7476.465  | 8620.326  | NM_014099 | 2141.458  | 3207.416  |
| X03884    | 13805.94  | 15572.133 | L14819    | 1181.367  | 1226.661  | AL133050  | 1538.893  | 2233.224  |
| U36759    | 1783.84   | 1536.814  | NM_000509 | 7046.659  | 6857.867  | AK027233  | 3663.49   | 4509.471  |
| X91625    | 6389.17   | 5349.879  | NM_004542 | 2024.833  | 2511.311  | AK023343  | 1219.634  | 1243.485  |
| AF090901  | 1971.253  | 1813.1    | X06182    | 6554.164  | 6293.558  | AK025323  | 603.211   | 614.186   |
| AF004231  | 2407.91   | 2245.531  | BE908993  | 60398.902 | 60815.145 | NM_013326 | 9697.794  | 12543.662 |
| AF001862  | 18373.346 | 19752.082 | AB012701  | 14097.679 | 13793.603 | BC037322  | 554.136   | 753.973   |
| NM_002451 | 15639.546 | 15103.549 | M61156    | 13825.788 | 13724.232 | Y12022    | 815.433   | 1085.855  |
| AF119902  | 1595.914  | 2142.171  | R44005    | 58747.215 | 55522.355 | NM_019597 | 5379.587  | 6222.462  |
| NM_020525 | 5790.114  | 6819.117  | AI942392  | 7631.212  | 8046.867  | AL137559  | 914.028   | 951.763   |
| X62468    | 777.702   | 892.909   | M55040    | 2243.361  | 2352.264  | AF026944  | 5823.675  | 4633.02   |
| NM_00389C | 3554.189  | 3212.155  | AW009739  | 4962.045  | 4643.111  | AK021493  | 4186.265  | 4664.117  |
| BF127978  | 1657.715  | 1776.579  | BC036805  | 9613.358  | 8926.729  | NM_006161 | 17426.461 | 15857.596 |
| AF110801  | 1488.327  | 1198.065  | Z74615    | 60824.648 | 58250.531 | NM_006192 | 484.475   | 331.16    |
| NM_016579 | 29523.555 | 30210.48  | X03884    | 16623.156 | 15452.041 | AF085881  | 700.479   | 866.208   |
| AB018297  | 5296.106  | 7873.522  | U36759    | 1455.834  | 1393.05   | AK022737  | 6888.003  | 8938.385  |
| AK022565  | 15329.652 | 15572.669 | X91625    | 4427.704  | 4227.36   | U92980    | 1354.782  | 1952.063  |
| AK023151  | 6463.186  | 6619.64   | AF090901  | 1173.863  | 1022.987  | AF133658  | 834.127   | 1215.195  |
| AB033076  | 2566.395  | 3456.751  | AF004231  | 1778.672  | 1151.789  | AB048287  | 10812.124 | 15345.892 |
| AK022876  | 3691.965  | 3962.408  | AF001862  | 11846.494 | 8543.885  | Y11159    | 1823.423  | 2950.144  |
| AF134894  | 64231.02  | 58021.852 | NM_016044 | 3967.032  | 1644.409  | AB020648  | 2439.891  | 4130.984  |
| NM_003938 | 15980.952 | 13970.147 | NM_00052C | 3485.448  | 1300.503  | AK025798  | 15856.381 | 18313.791 |
| NM_014827 | 23748.553 | 21482.855 | X62468    | 1410.383  | 1664.573  | AK025164  | 447.788   | 428.328   |
| NM_004126 | 12363.202 | 10873.344 | NM_00389C | 20352.449 | 21831.758 | NM_018366 | 5566.529  | 6108.825  |
| U87460    | 28695.561 | 24546.24  | BF127978  | 6716.568  | 6237.654  | NM_019848 | 14344.737 | 13345.357 |
| NM_003617 | 2698.498  | 2267.05   | AF110801  | 1653.92   | 1430.996  | AL833005  | 3343.564  | 4701.542  |
| NM_001841 | 9506.093  | 7184.69   | NM_016579 | 63723.957 | 62064.977 | L43366    | 2848.184  | 3745.706  |
| NM_002054 | 5633.154  | 5125.407  | AB018297  | 3372.46   | 4222.958  | AK026124  | 4240.904  | 5060.381  |
| AF300649  | 8689.68   | 8951.212  | AK022565  | 9013.502  | 7666.685  | NM_015509 | 6315.74   | 6586.6    |
| NM_004125 | 2480.398  | 2284.562  | AK023151  | 7375.093  | 7094.599  | AL110157  | 1946.665  | 2252.162  |
| NM_000823 | 3365.83   | 2478.291  | AB033076  | 2572.052  | 2794.06   | NM_002319 | 1942.45   | 2090.271  |
| NM_003317 | 11666.283 | 6231.607  | AK022876  | 4233.842  | 4644.262  | L38712    | 17781.688 | 16763.727 |
| NM_001139 | 7684.532  | 8136.002  | AF134894  | 54972.625 | 55854.402 | U84508    | 1411.624  | 1515.266  |
| NM_001441 | 2580.431  | 2796.205  | NM_003938 | 13198.14  | 13907.902 | NM_017793 | 2556.271  | 2304.622  |

|           |           |           |           |           |           |           |           |           |
|-----------|-----------|-----------|-----------|-----------|-----------|-----------|-----------|-----------|
| NM_018324 | 2088.578  | 2437.95   | NM_014827 | 20661.855 | 18020.803 | NM_012131 | 2226.728  | 2045.606  |
| AF064255  | 33310.48  | 35461.441 | NM_004126 | 9336.799  | 8602.866  | S41540    | 1414.012  | 1478.673  |
| NM_016368 | 25103.797 | 29864.113 | U87460    | 23883.766 | 22196.518 | AK026947  | 50596.727 | 50856.867 |
| U08853    | 12154.625 | 12543.091 | NM_003617 | 2067.796  | 1602.436  | U84526    | 8530.092  | 10105.729 |
| NM_004261 | 38551.883 | 44033.352 | NM_001841 | 5060.221  | 5887.712  | L23401    | 2973.572  | 2896.27   |
| NM_016006 | 1823.775  | 2136.384  | NM_002054 | 5266.509  | 4774.928  | AK022728  | 39942.02  | 39220.859 |
| NM_016245 | 7944.964  | 10040.144 | AF300649  | 11065.168 | 9528.063  | AL109678  | 1398.804  | 1487.916  |
| AF005632  | 2904.962  | 1993.413  | NM_004125 | 3613.164  | 3236.573  | AL137524  | 5326.904  | 7525.82   |
| NM_000903 | 6017.909  | 5699.524  | NM_000823 | 3553.03   | 3198.182  | AF052115  | 884.354   | 1271.636  |
| NM_004493 | 30055.066 | 33750.008 | NM_003317 | 9996.103  | 6871.513  | NM_014019 | 23254.824 | 31853.064 |
| AB013889  | 492.201   | 1002.596  | NM_001139 | 6206.038  | 4542.306  | Z70711    | 1174.187  | 1109.288  |
| NM_000288 | 6726.689  | 5084.841  | L09081    | 5567.55   | 4223.564  | NM_012368 | 1617.808  | 1210.079  |
| NM_004762 | 13623.658 | 10694.292 | NM_000218 | 63368.059 | 60063.07  | AK022097  | 12668.774 | 16629.418 |
| NM_006641 | 57565.602 | 52953.648 | AF064255  | 65516.172 | 72905.641 | NM_002166 | 21425.73  | 22644.33  |
| NM_000634 | 19175.572 | 14466.967 | NM_016368 | 66711.508 | 68259.164 | NM_004660 | 5780.118  | 5640.277  |
| NM_014679 | 51322.809 | 47076.945 | U08853    | 9104.62   | 8821.233  | NM_006165 | 751.074   | 622.646   |
| AB040969  | 8762.056  | 7382.348  | NM_004261 | 39937.398 | 41281.035 | NM_016011 | 12620.404 | 13249.709 |
| NM_003467 | 30200.803 | 38462.363 | NM_016006 | 2679.781  | 3078.079  | AL035307  | 2531.174  | 2808.826  |
| NM_014936 | 6569.893  | 7969.846  | NM_016245 | 6948.38   | 7986.874  | AK023772  | 502.432   | 353.257   |
| NM_003943 | 3198.359  | 2939.34   | AF005632  | 12377.285 | 11603.676 | NM_012234 | 2387.907  | 2563.475  |
| NM_019052 | 14913.522 | 10297.174 | NM_000903 | 5512.187  | 5835.357  | NM_006204 | 336.049   | 461.396   |
| NM_003202 | 2429.028  | 1846.806  | NM_004493 | 25588.475 | 28391.049 | NM_012155 | 9389.35   | 8787.67   |
| NM_000288 | 27633.703 | 26043.322 | AF309489  | 2052.841  | 1575.832  | AF144700  | 2561.266  | 2820.395  |
| NM_001500 | 2965.488  | 2457.938  | NM_000288 | 5186.383  | 5504.229  | NM_004105 | 9557.931  | 10638.258 |
| NM_004388 | 3705.549  | 4745.663  | NM_004762 | 12432.045 | 12263.448 | AB046825  | 2484.461  | 2935.529  |
| NM_020379 | 670.822   | 838.795   | NM_006641 | 60627.805 | 59378.332 | X64975    | 1795.307  | 1997.075  |
| AL110127  | 3654.613  | 3592.404  | NM_000634 | 38017.223 | 35111.422 | AF071509  | 548.102   | 1330.253  |
| AK001997  | 1340.208  | 1044.179  | NM_014679 | 58310.625 | 54941.273 | AK026966  | 3523.289  | 5728.034  |
| NM_002528 | 11523.985 | 12238.24  | AB040969  | 6043.223  | 6812.093  | AK025268  | 652.993   | 646.266   |
| D38438    | 3320.153  | 3289.95   | NM_003467 | 24995.863 | 18864.859 | NM_005203 | 591.251   | 749.279   |
| AV714945  | 2332.456  | 2254.813  | NM_014936 | 4152.877  | 3716.768  | NM_006566 | 401.188   | 591.316   |
| AF089897  | 1465.358  | 857.324   | NM_003943 | 3150.195  | 3427.188  | AK026154  | 11024.166 | 12759.561 |
| AF007872  | 6095.182  | 5791.247  | NM_019052 | 9962.301  | 11780.14  | AL117546  | 33056.406 | 31387.887 |
| M30938    | 18328.693 | 13534.313 | NM_003202 | 1122.398  | 1269.138  | AB018325  | 7843.545  | 7960.742  |
| NM_015148 | 3952.116  | 2630.121  | AF119902  | 1425.549  | 1263.312  | NM_005428 | 5291.931  | 5434.686  |
| NM_004714 | 3367.465  | 2145.688  | NM_020525 | 11103.542 | 8157.613  | NM_017974 | 1114.46   | 1478.252  |
| NM_005401 | 1090.72   | 831.976   | NM_004388 | 4754.428  | 5318.386  | NM_003979 | 1095.29   | 1247.505  |
| NM_002497 | 29129.258 | 20764     | NM_020379 | 1187.098  | 1083.517  | X14677    | 5720.202  | 6453.256  |
| AB025194  | 18894.365 | 17193.164 | AL110127  | 3669.134  | 4058.014  | NM_005863 | 3646.175  | 3577      |
| NM_006239 | 2194.266  | 1916.298  | AK001997  | 1196.61   | 1010.981  | U17077    | 4748.987  | 4831.596  |
| BC020863  | 3088.288  | 3300.725  | NM_002528 | 8449.79   | 8609.773  | NM_000915 | 4299.195  | 4191.101  |
| NM_017897 | 5091.706  | 6162.725  | D38438    | 14095.816 | 12787.262 | AK024475  | 698.977   | 529.416   |
| NM_004265 | 2822.411  | 2668.917  | AV714945  | 2154.002  | 1883.121  | AB026542  | 13628.497 | 20567.713 |
| NM_002572 | 7347.796  | 5415.286  | AF089897  | 761.21    | 886.127   | NM_019846 | 7508.71   | 8852.304  |
| NM_016113 | 5004.496  | 5747.333  | AF007872  | 4241.736  | 4247.32   | NM_014433 | 1847.1    | 2109.712  |
| NM_014222 | 6446.72   | 8170.425  | M30938    | 12523.656 | 10513.814 | NM_002062 | 18617.398 | 17329.623 |
| L14819    | 593.513   | 783.199   | NM_015148 | 3808.788  | 3260.047  | NM_014394 | 55432.047 | 41078.578 |
| NM_000509 | 9417.758  | 9572.568  | NM_004714 | 5222.683  | 4624.798  | NM_018140 | 4614.187  | 6432.093  |
| NM_004542 | 2588.378  | 2912.395  | NM_005401 | 852.973   | 929.365   | NM_016948 | 3752.772  | 4954.245  |
| X06182    | 5892.067  | 6389.763  | NM_002497 | 23675.742 | 17962.092 | NM_000142 | 2055.314  | 2765.355  |
| BE908993  | 64911.863 | 58991.359 | AB025194  | 21158.291 | 19845.793 | AF272372  | 36744.992 | 36571.52  |
| AB012701  | 15871.587 | 13891.778 | NM_006239 | 2471.724  | 2949.396  | AK097045  | 1169.508  | 1409.703  |
| M61156    | 1384.989  | 1282.524  | BC020863  | 1697.733  | 1511.483  | AB014548  | 6309.904  | 8392.73   |

|           |           |           |           |           |           |           |           |           |
|-----------|-----------|-----------|-----------|-----------|-----------|-----------|-----------|-----------|
| R44005    | 11971.008 | 13354.554 | NM_017897 | 3383.134  | 3420.624  | NM_018256 | 5141.634  | 4608.502  |
| AI942392  | 9824.93   | 10750.962 | NM_004265 | 1568.765  | 1790.557  | AK025150  | 1602.02   | 1703.121  |
| M55040    | 3016.696  | 3538.814  | NM_002572 | 4824.222  | 4378.412  | AK024611  | 18449.225 | 20181.252 |
| AW009739  | 5296.423  | 5356.717  | NM_001441 | 2087.044  | 1784.067  | NM_018172 | 7349.803  | 7543.113  |
| BC036805  | 3981.93   | 2952.439  | NM_018324 | 1591.901  | 1198.411  | U03886    | 4231.775  | 3815.373  |
| Z74615    | 23688.627 | 19516.406 | L14819    | 905.509   | 928.424   | AK022040  | 1085.929  | 941.08    |
| X03884    | 13934.571 | 10769.932 | NM_000509 | 6471.677  | 5086.402  | AK022722  | 1161.114  | 1159.932  |
| U36759    | 2041.611  | 1014.603  | NM_004542 | 2136.539  | 1989.303  | NM_003591 | 14960.498 | 15411.115 |
| X91625    | 7592.427  | 7040.064  | X06182    | 7431.94   | 6750.057  | AL080111  | 3515.464  | 3776.243  |
| AF090901  | 2611.06   | 2250.381  | BE908993  | 63068.496 | 60711.766 | NM_003550 | 6353.96   | 7592.587  |
| AF004231  | 1194.184  | 1343.002  | AB012701  | 14055.13  | 13161.757 | NM_014642 | 6800.985  | 7886.101  |
| AF001862  | 20910.131 | 24198.514 | M61156    | 14030.215 | 14033.444 | NM_003829 | 2539.714  | 2790.874  |
| NM_016044 | 5903.725  | 7192.958  | R44005    | 57675.688 | 56246.598 | AL110168  | 6061.983  | 6474.117  |
| X62468    | 921.072   | 941.696   | AI942392  | 7913.416  | 7514.342  | NM_016147 | 6842.623  | 9430.981  |
| NM_003890 | 2996.255  | 3560.172  | M55040    | 2419.76   | 2344.945  | NM_002833 | 1612.338  | 2614.665  |
| BF127978  | 1555.734  | 1644.402  | AW009739  | 4583.222  | 4782.932  | NM_016592 | 1054.239  | 1471.596  |
| AF110801  | 1552.646  | 1077.468  | BC036805  | 9998.779  | 8502.376  | NM_018527 | 578.526   | 560.797   |
| NM_016579 | 29071.266 | 36411.184 | Z74615    | 61137.383 | 62564.824 | NM_001866 | 643.987   | 577.781   |
| AB018297  | 4725.06   | 6204.618  | X03884    | 23989.391 | 18529.852 | NM_014773 | 705.755   | 444.274   |
| AK022565  | 15133.414 | 14367.951 | U36759    | 1831.279  | 1520.295  | NM_005606 | 3464.14   | 2816.499  |
| AK023151  | 7363.008  | 7285.271  | X91625    | 5503.028  | 4665.618  | AF134707  | 982.143   | 903.201   |
| AB033076  | 2441.164  | 2634.89   | AF090901  | 1732.833  | 1620.161  | BE730629  | 1264.068  | 1263.234  |
| AK022876  | 2980.44   | 2737.742  | AF004231  | 2722.214  | 2474.705  | AK027167  | 4368.18   | 4114.385  |
| AF134894  | 63198.953 | 58188.672 | AF001862  | 11239.114 | 11200.263 | AK025265  | 2486.493  | 1868.305  |
| NM_003938 | 15309.919 | 15944.938 | NM_016044 | 3401.06   | 3296.09   | NM_013279 | 383.613   | 487.469   |
| NM_014827 | 25450.951 | 23419.643 | NM_000520 | 3555.977  | 2326.67   | NM_018652 | 26059.799 | 28586     |
| NM_004126 | 14132.532 | 13480.357 | NM_000289 | 19831.379 | 12796.765 | AB011166  | 2491.222  | 2397.457  |
| U87460    | 31060.344 | 35312.684 | NM_001500 | 2188.013  | 1536.675  | AK024460  | 4600.359  | 5221.347  |
| NM_003617 | 1949.173  | 2288.748  | AB033076  | 2565.073  | 2683.504  | NM_006606 | 6452.326  | 6049.025  |
| NM_001841 | 7658.18   | 6077.051  | AK022876  | 4269.913  | 3536.901  | S78570    | 539.346   | 581.034   |
| NM_002054 | 5633.532  | 3910.146  | AF134894  | 57032.555 | 46593.949 | NM_005243 | 14471.186 | 15132.631 |
| AF300649  | 8133.611  | 7637.875  | NM_003938 | 13170.913 | 12824.081 | NM_006218 | 1991.783  | 2052.527  |
| NM_004125 | 2792.366  | 3060.048  | NM_014827 | 17924.414 | 15506.975 | NM_016265 | 3866.031  | 4604.458  |
| NM_000823 | 3554.113  | 3622.04   | NM_004126 | 9735.538  | 10390.068 | NM_002095 | 8937.867  | 11063.084 |
| NM_003317 | 5399.168  | 5993.266  | U87460    | 21685.982 | 19723.732 | AK022814  | 2571.735  | 3738.22   |
| NM_001139 | 9833.015  | 11498.806 | NM_003617 | 2174.936  | 1979.248  | NM_006266 | 1712.248  | 1898.744  |
| L09081    | 2797.377  | 2563.975  | NM_001841 | 5400.662  | 5962.814  | X78931    | 502.368   | 633.273   |
| AF064255  | 34531.492 | 41368.102 | NM_002054 | 8716.986  | 7885.92   | NM_006442 | 49965.543 | 44282.535 |
| NM_016366 | 23741.979 | 26938.656 | AF300649  | 21508.725 | 20607.381 | NM_003902 | 19423.252 | 15926.646 |
| U08853    | 12924.32  | 15360.396 | NM_004125 | 6232.313  | 5145.454  | NM_016427 | 5188.877  | 3930.697  |
| NM_004261 | 37877.336 | 49212.793 | NM_000823 | 10220.526 | 9261.872  | U80741    | 7396.662  | 5577.331  |
| NM_016006 | 1830.87   | 2240.19   | NM_004414 | 3793.916  | 3692.837  | NM_014497 | 1451.695  | 1342.609  |
| NM_016245 | 6542.571  | 7740.031  | NM_003317 | 24564.555 | 18039.465 | AL133598  | 7821.801  | 7472.455  |
| AF005632  | 2695.752  | 2515.604  | NM_001139 | 9649.693  | 8994.704  | NM_015511 | 6934.131  | 6933.7    |
| NM_000903 | 6713.244  | 6363.087  | NM_004609 | 66480.781 | 75921.688 | NM_006625 | 6330.743  | 5930.961  |
| NM_004493 | 28660.736 | 26860.25  | NM_003772 | 2113.235  | 1988.322  | NM_004891 | 17038.004 | 14313.991 |
| AB013889  | 428.039   | 513.56    | NM_001541 | 8332.162  | 9426.729  | NM_002831 | 11807.238 | 13040.421 |
| NM_000288 | 6246.09   | 6341.78   | NM_005416 | 3031.162  | 2842.131  | AL833409  | 7118.562  | 8178.867  |
| NM_004762 | 13894.289 | 11794.119 | L09081    | 1895.775  | 1924.43   | NM_015966 | 726.147   | 486.458   |
| NM_006641 | 60428.563 | 54837.191 | NM_000218 | 66785.602 | 67863.172 | NM_000147 | 2610.73   | 2834.583  |
| NM_000634 | 18109.387 | 14437.484 | NM_016113 | 6254.125  | 7129.972  | NM_000158 | 4168.177  | 4773.523  |
| NM_014679 | 41797.117 | 36974.977 | NM_014222 | 6307.097  | 7330.51   | NM_000670 | 820.433   | 960.744   |
| AB040969  | 8043.96   | 5698.633  | AK026317  | 26656.625 | 23917.539 | NM_006416 | 2857.766  | 3088.631  |



|           |           |           |           |           |           |           |           |           |
|-----------|-----------|-----------|-----------|-----------|-----------|-----------|-----------|-----------|
| NM_003467 | 32303.467 | 38571.48  | X82207    | 59693.301 | 58538.949 | NM_000151 | 6512.336  | 6568.526  |
| NM_014936 | 7669.123  | 9387.831  | NM_015044 | 15668.169 | 12792.972 | NM_003773 | 645.595   | 533.845   |
| NM_003943 | 3002.392  | 3192.66   | NM_002867 | 1100.649  | 1520.376  | NM_003935 | 829.362   | 731.209   |
| NM_019052 | 14130.854 | 14333.967 | BF217496  | 19476.619 | 19072.061 | NM_002879 | 1609.221  | 1059.135  |
| NM_003202 | 2109.617  | 2713.154  | NM_004762 | 11637.954 | 10547.648 | AB028999  | 785.379   | 609.461   |
| AF119902  | 2081.844  | 2116.096  | NM_006641 | 59588.883 | 58819.254 | AB018348  | 8841.341  | 7212.937  |
| NM_004388 | 3853.714  | 4813.106  | NM_000634 | 38067.984 | 38437.828 | NM_013368 | 893.099   | 825.779   |
| NM_020379 | 671.992   | 615.913   | NM_014679 | 58022.422 | 58747.453 | NM_003686 | 1671.787  | 1234.166  |
| AL110127  | 3672.344  | 4016.922  | AB040969  | 6241.72   | 6466.508  | NM_014812 | 1784.357  | 1432.692  |
| AK001997  | 1273.436  | 1282.078  | NM_003467 | 25687.828 | 21416.012 | NM_004641 | 1163.349  | 1131.95   |
| NM_002528 | 9836.444  | 10613.208 | NM_014936 | 4919.21   | 4594.281  | NM_002048 | 3238.564  | 4309.373  |
| D38438    | 3113.39   | 3022.558  | NM_003943 | 6501.563  | 6209.427  | AK026312  | 1428.601  | 2504.919  |
| AV714945  | 2493.283  | 1998.933  | NM_019052 | 10076.77  | 11697.74  | NM_017776 | 1565.936  | 1739.971  |
| AF089897  | 1276.695  | 772.563   | NM_003202 | 1743.802  | 1739.765  | U81599    | 1016.402  | 1115.048  |
| AF007872  | 5739.666  | 4658.748  | AF119902  | 1868.15   | 1858.452  | AF275722  | 929.425   | 772.518   |
| M30938    | 16185.426 | 13694.088 | NM_020525 | 53715.984 | 46645.891 | NM_003206 | 1005.704  | 843.499   |
| NM_015148 | 4051.122  | 2701.706  | X62468    | 1563.184  | 1655.329  | AK000564  | 597.913   | 542.812   |
| NM_004714 | 2926.816  | 2404.334  | NM_003890 | 11252.687 | 12149.763 | X60155    | 997.415   | 983.025   |
| NM_005401 | 1256.024  | 1179.985  | BF127978  | 3525.343  | 3110.363  | AB037901  | 13491.212 | 14428.906 |
| NM_017677 | 760.761   | 385.745   | AF110801  | 1127.174  | 998.41    | NM_006129 | 1795.237  | 2315.886  |
| NM_002497 | 23363.238 | 20819.5   | NM_016579 | 27564.004 | 32392.314 | NM_000582 | 21284.361 | 31039.703 |
| AB025194  | 18238.604 | 12464.797 | AB018297  | 3226.914  | 3582.877  | NM_005593 | 2521.03   | 2509.914  |
| NM_006238 | 1744.291  | 1640.461  | AK022565  | 11630.531 | 11065.511 | NM_004684 | 2882.095  | 2795.485  |
| BC020863  | 3552.82   | 3924.167  | AK023151  | 5927.589  | 6433.669  | BF338709  | 3463.557  | 3614.498  |
| NM_017897 | 4203.753  | 4666.448  | NM_017897 | 6111.093  | 5420.199  | AF204171  | 670.019   | 556.319   |
| NM_004265 | 2819.311  | 3605.199  | NM_004265 | 2149.569  | 1514.784  | W96179    | 1854.831  | 1636.692  |
| NM_002572 | 7041.504  | 8255.669  | NM_002572 | 4640.441  | 4233.337  | AW247841  | 12766.665 | 11186.328 |
| NM_001441 | 3472.258  | 3539.558  | NM_001441 | 3615.515  | 3011.801  | BG568198  | 2740.003  | 2082.282  |
| L14819    | 656.246   | 675.257   | NM_018324 | 2725.92   | 2377.668  | M76559    | 4411.22   | 3808.855  |
| NM_000508 | 9355.279  | 9551.86   | AF064255  | 61487.32  | 60860.699 | U03884    | 934.675   | 787.196   |
| NM_004542 | 2536.674  | 3026.946  | NM_016368 | 66273.875 | 65340.754 | U11058    | 1132.302  | 1355.911  |
| X06182    | 7817.692  | 7834.5    | U08853    | 9819.223  | 9810.886  | AI222585  | 843.992   | 1092.369  |
| BE908993  | 63784.414 | 59646.082 | NM_004261 | 40711.602 | 40129.484 | AA411678  | 7839.363  | 6989.981  |
| AB012701  | 17141.02  | 17831.68  | NM_016006 | 2894.966  | 2770.954  | AA862813  | 23075.508 | 22085.629 |
| M61156    | 1721.813  | 1357.593  | NM_016245 | 6902.466  | 7711.097  | AA398427  | 2344.406  | 2348.909  |
| R44005    | 13009.796 | 12794.917 | AF005632  | 16528.652 | 15192.235 | T55728    | 7057.248  | 7483.638  |
| AI942392  | 9161.462  | 8494.282  | NM_000903 | 5875.375  | 4972.569  | H20856    | 2267.751  | 1745.059  |
| M55040    | 3036.837  | 2228.996  | NM_004493 | 25994.756 | 22653.01  | AA242743  | 42822.086 | 44548.496 |
| AW009739  | 5622.865  | 5127.049  | AF309489  | 2460.806  | 2112.083  | NM_006758 | 9272.772  | 9274.577  |
| BC036805  | 4781.633  | 4151.53   | NM_004047 | 41741.492 | 38327.973 | NM_006831 | 3473.151  | 3870.29   |
| Z74615    | 27571.533 | 27296.637 | NM_004823 | 4780.353  | 4645.674  | AL162044  | 6864.011  | 7387.573  |
| X03884    | 12133.464 | 12049.722 | Y17179    | 61078.504 | 58073.086 | AK024004  | 862.397   | 771.699   |
| U36759    | 1214.651  | 1045.153  | NM_000891 | 1342.176  | 1503.696  | AK022365  | 1036.306  | 999.025   |
| X91625    | 5680.342  | 3520.414  | AK026840  | 4679.854  | 5292.401  | BE892273  | 50373.699 | 57940.238 |
| AF090901  | 2107.735  | 1460.717  | NM_000288 | 5725.078  | 5891.14   | AF026929  | 652.766   | 603.895   |
| AF004231  | 923.017   | 718.816   | NM_016044 | 4608.259  | 3724.671  | NM_016734 | 1431.691  | 928.206   |
| AF001862  | 18635.299 | 21224.408 | NM_000520 | 3227.299  | 1570.677  | Y08147    | 9245.193  | 7249.502  |
| NM_016044 | 5717.078  | 5908.723  | NM_000289 | 24107.084 | 15659.627 | D00174    | 20659.139 | 13753.811 |
| NM_000520 | 5875.28   | 7451.568  | NM_001500 | 2078.332  | 1266.808  | AB000520  | 9759.562  | 7879.012  |
| NM_000288 | 31628.686 | 29959.25  | NM_004388 | 5147.547  | 5202.571  | AK023117  | 2285.246  | 1734.241  |
| NM_001500 | 3276.419  | 2616.083  | NM_020379 | 1823.742  | 1200.653  | AL122046  | 2358.149  | 1932.193  |
| AB033076  | 2215.542  | 2263.103  | AL110127  | 3913.893  | 3769.878  | AF119914  | 1241.768  | 1430.181  |
| AK022876  | 2804.49   | 2942.591  | AK001997  | 1148.002  | 856.559   | NM_000855 | 5628.32   | 5466.824  |

|           |           |           |           |           |           |           |           |           |
|-----------|-----------|-----------|-----------|-----------|-----------|-----------|-----------|-----------|
| AF134894  | 57901.93  | 57752.285 | NM_002528 | 7713.806  | 7616.127  | NM_005536 | 7665.87   | 7739.502  |
| NM_003938 | 17015.701 | 17863.912 | D38438    | 13728.95  | 15040.853 | NM_001990 | 2215.593  | 3276.975  |
| NM_014827 | 22963.063 | 22571.771 | AV714945  | 1997.107  | 1397.33   | NM_002141 | 2626.669  | 2832.992  |
| NM_004126 | 13008.036 | 13890.471 | AF007872  | 4401.839  | 3824.574  | NM_006907 | 1635.607  | 1594.813  |
| U87460    | 28816.91  | 31535.084 | M30938    | 14269.316 | 9913.208  | NM_002686 | 568.037   | 978.565   |
| NM_003617 | 1626.715  | 1299.102  | NM_015148 | 3718.999  | 2522.555  | NM_006267 | 1419.466  | 1654.312  |
| NM_001841 | 7440.439  | 7411.132  | NM_004714 | 5097.675  | 3805.754  | NM_002661 | 15083.781 | 15598.244 |
| NM_002054 | 4330.882  | 3492.647  | NM_005401 | 1083.385  | 1014.616  | AK023982  | 997.351   | 616.561   |
| AF300649  | 7215.907  | 6025.798  | NM_002497 | 24225.695 | 19186.355 | NM_018466 | 1333.846  | 1156.349  |
| NM_004125 | 2344.842  | 1862.701  | AB025194  | 12645.367 | 12735.638 | Y11312    | 1677.904  | 1037.417  |
| NM_000823 | 2805.886  | 2544.087  | NM_006239 | 1481.932  | 1555.013  | NM_003036 | 8401.139  | 5497.893  |
| NM_004414 | 1396.08   | 1449.417  | BC020863  | 1381.905  | 2003.497  | NM_002635 | 36377.949 | 23393.689 |
| NM_003317 | 4421.736  | 3416.869  | CY3Cy5    | 7864.965  | 937.734   | AF100756  | 5150.026  | 4231.466  |
| NM_001139 | 8237.166  | 6491.718  | NM_004758 | 1125.651  | 1590.436  | NM_006825 | 5799.271  | 5355.819  |
| NM_004609 | 27510.824 | 21093.957 | NM_005163 | 7541.014  | 9663.097  | NM_004862 | 1338.075  | 1230.821  |
| NM_003772 | 2458.567  | 1434.355  | AL117623  | 1129.879  | 1341.147  | NM_001661 | 1362.699  | 1300.437  |
| NM_001541 | 1691.808  | 1082.922  | AF085988  | 1137.679  | 1597.339  | NM_014563 | 1568.185  | 1902.854  |
| NM_005416 | 3803.4    | 3602.127  | AK025785  | 8571.349  | 10287.472 | NM_020150 | 3245.619  | 3868.456  |
| NM_004670 | 638.943   | 843.283   | AF038190  | 798.092   | 1136.933  | NM_007150 | 5964.29   | 4463.082  |
| L09081    | 2719.872  | 3033.589  | AF143877  | 913.331   | 1249.763  | NM_016520 | 14046.261 | 16951.65  |
| NM_000218 | 69311.43  | 74944.133 | NM_000738 | 35229.91  | 37210.969 | AB018353  | 5357.086  | 5443.652  |
| NM_016113 | 8410.685  | 4854.009  | AF086474  | 923.438   | 1589.292  | NM_007036 | 1517.747  | 1291.941  |
| NM_014222 | 7821.387  | 6981.987  | AF131803  | 19137.4   | 21406.871 | NM_002617 | 1709.927  | 1699.313  |
| AK026317  | 15329.676 | 18727.578 | AF086538  | 1393.102  | 2028.751  | NM_003313 | 30160.934 | 27868.957 |
| X82207    | 16641.469 | 18258.221 | NM_004776 | 2629.374  | 3175.866  | AF090907  | 3375.205  | 3309.944  |
| NM_015044 | 19371.605 | 19847.141 | AK023353  | 4902.341  | 5993.915  | AK024476  | 7205.489  | 6295.456  |
| NM_002867 | 983.7     | 1191.038  | NM_004758 | 1333.493  | 1269.762  | X74794    | 13909.616 | 8398.043  |
| BF217496  | 4342.739  | 4718.126  | NM_005163 | 7844.25   | 7229.717  | AL050298  | 2760.642  | 2282.24   |
| NM_004762 | 11346.538 | 11308.547 | SR1       | 90300.195 | 63310.641 | NM_007079 | 36496.426 | 24436.629 |
| NM_006641 | 55135.078 | 54321.652 | SR3       | 40111.293 | 39830.004 | M20696    | 3116.441  | 2092.929  |
| NM_000634 | 17953.365 | 12865.177 | SR5       | 4408.435  | 4940.885  | NM_002915 | 1008.632  | 1022.158  |
| NM_014679 | 42653.414 | 46981.926 | SR7       | 4114.132  | 31589.699 | NM_006736 | 2916.589  | 2371.113  |
| AB040969  | 6864.839  | 6332.207  | SR9       | 14013.573 | 2777.277  | NM_003640 | 1364.329  | 971.242   |
| NM_003467 | 25659.746 | 20997.24  | CY3Cy5    | 5459.784  | 486.873   | NM_014444 | 4853.997  | 4646.308  |
| NM_014936 | 5308.255  | 4968.188  | AF182420  | 1053.57   | 2093.656  | NM_012248 | 5013.205  | 5962.163  |
| NM_003943 | 2652.657  | 2281.439  | U84517    | 13129.602 | 18328.836 | NM_014970 | 5802.387  | 5528.929  |
| NM_019052 | 13443.477 | 12542.181 | U03237    | 1147.252  | 1439.223  | NM_014393 | 3417.221  | 3636.353  |
| NM_003202 | 1855.731  | 1729.694  | AB033113  | 1482.218  | 2144.434  | NM_004223 | 21728.592 | 19170.064 |
| AF119902  | 1629.492  | 1067.607  | NM_018148 | 449.408   | 1141.897  | NM_006813 | 817.682   | 653.934   |
| NM_020525 | 6226.52   | 3812.116  | AK001921  | 6333.035  | 8700.375  | NM_001355 | 24774.281 | 27052.576 |
| X62468    | 890.723   | 595.096   | AF088004  | 3880.672  | 5320.202  | NM_000582 | 19537.75  | 27053.73  |
| NM_003890 | 4204.652  | 2658.146  | NM_018273 | 3800.166  | 4182.782  | NM_005593 | 3216.243  | 3471.194  |
| BF127978  | 2512.421  | 2052.4    | AK024944  | 4228.31   | 5811.874  | AJ224741  | 959.537   | 1283.728  |
| AF110801  | 2324.334  | 1275.726  | S81893    | 17246.674 | 17057.441 | NM_004684 | 1680.091  | 1834.926  |
| NM_016579 | 40583.977 | 37408.277 | AK021777  | 1658.414  | 1770.054  | BF338709  | 2641.667  | 3115.473  |
| AB018297  | 6296.451  | 5076.992  | AF007137  | 2894.618  | 2360.72   | AF204171  | 623.01    | 457.143   |
| AK022565  | 18765.816 | 15055.128 | AK023292  | 1301.251  | 2387.182  | W96179    | 1731.938  | 1523.737  |
| AK023151  | 7854.825  | 7277.851  | AK022452  | 1412.239  | 2063.701  | AW247841  | 11757.033 | 9640.207  |
| NM_017897 | 3876.343  | 4017.322  | AK023375  | 2210.095  | 3680.319  | BG568198  | 2227.687  | 1435.604  |
| NM_004265 | 2107.817  | 2433.551  | AK023781  | 448.278   | 961.536   | M76559    | 4868.748  | 3804.49   |
| NM_002572 | 5315.505  | 6429.266  | AK024366  | 738.582   | 1546.203  | U03884    | 907.049   | 771.411   |
| NM_001441 | 2140.19   | 1938.857  | AK022171  | 2089.368  | 2833.987  | U11058    | 1187.31   | 1180.772  |
| NM_018324 | 2096.348  | 2010.495  | AK025913  | 1485.878  | 3064.797  | AI222585  | 846.761   | 1221.369  |

|           |           |           |           |           |           |           |           |           |
|-----------|-----------|-----------|-----------|-----------|-----------|-----------|-----------|-----------|
| AF064255  | 38893.426 | 42573.383 | AK021930  | 799.286   | 1347.509  | AA411678  | 7362.038  | 6889.578  |
| NM_01636E | 27854.063 | 30527.814 | NM_01650C | 4143.899  | 6031.862  | AA862813  | 23145.811 | 18496.367 |
| U08853    | 12455.595 | 8522.944  | AF087966  | 542.89    | 651.175   | AA398427  | 2384.674  | 2296.383  |
| NM_004261 | 42046.586 | 48557.762 | NM_018004 | 906.112   | 841.103   | T55728    | 6410.857  | 5740.31   |
| NM_01600E | 1815.038  | 1913.506  | X78938    | 3030.764  | 3008.675  | H20856    | 2092.684  | 1300.414  |
| NM_01624E | 6182.304  | 5472.671  | AL359056  | 434.005   | 959.105   | N62586    | 2513.472  | 2582.121  |
| AF005632  | 2751.561  | 2373.045  | AK021497  | 2594.12   | 4207.74   | AA242743  | 38258.121 | 31892.451 |
| NM_00090E | 6282.293  | 4516.556  | AF124367  | 728.347   | 969.493   | NM_015361 | 34619.344 | 30868.131 |
| NM_00449E | 29752.404 | 21896.178 | AK025615  | 29641.148 | 41548.813 | NM_00431C | 7056.68   | 7192.742  |
| NM_004047 | 46966.25  | 41721.367 | AK023803  | 1164.496  | 1289.345  | NM_015537 | 8114.821  | 6417.514  |
| NM_00482E | 1172.131  | 409.563   | AK025168  | 1131.126  | 1809.014  | AK024004  | 775.192   | 1091.044  |
| AB013889  | 749.4     | 697.905   | AK025338  | 3654.111  | 5322.06   | AK022365  | 592.941   | 921.328   |
| Y17179    | 61014.652 | 54246.688 | AK001132  | 640.025   | 867.128   | BE892273  | 54545.559 | 61530.285 |
| NM_000891 | 1716.245  | 1135.344  | AK022321  | 726.213   | 576.031   | AF026929  | 606.215   | 768.661   |
| AF239613  | 1505.695  | 2383.98   | AK023296  | 671.48    | 894.224   | NM_016734 | 1461.846  | 1384.754  |
| AK026840  | 7512.426  | 7017.79   | AK001439  | 986.376   | 1395.262  | Y08147    | 10700.249 | 8065.419  |
| NM_00028E | 7062.997  | 6219.248  | AK023462  | 2943.49   | 3443.164  | D00174    | 21877.936 | 15803.686 |
| NM_016044 | 5122.46   | 5487.902  | AF210649  | 1457.722  | 1619.893  | AB000520  | 10071.476 | 7574.137  |
| NM_00052C | 4176.22   | 3616.763  | AK001115  | 3415.224  | 3811.9    | AK023117  | 2095.672  | 1705.891  |
| NM_00028E | 26286.842 | 21245.279 | NM_01409E | 3000.624  | 3973.373  | AL122046  | 2058.575  | 1829.745  |
| NM_00150C | 2098.867  | 1954.718  | AL133050  | 742.45    | 908.906   | NM_00085E | 4605.198  | 3994.154  |
| NM_00438E | 3982.553  | 4476.768  | AK027233  | 5695.092  | 7234.007  | NM_00553E | 8229.727  | 5703.517  |
| NM_02037E | 779.085   | 761.182   | AK023343  | 1577.548  | 1363.36   | NM_005077 | 1805.423  | 1979.27   |
| AL110127  | 4171.453  | 4062.468  | AK025323  | 833.709   | 1244.784  | NM_00199C | 2231.364  | 1891.872  |
| AK001997  | 1332.489  | 852.099   | NM_01332E | 11950.822 | 18234.631 | NM_002141 | 3502.673  | 3529.736  |
| NM_00252E | 8796.234  | 5520.294  | BC037322  | 1895.357  | 2635.277  | NM_00612E | 1760.974  | 1430.061  |
| D38438    | 2989.442  | 2104.766  | Y10202    | 316.111   | 970.434   | NM_006267 | 1443.065  | 1774.556  |
| AV714945  | 1761.961  | 1089.896  | Y12022    | 2239.551  | 3173.569  | NM_002661 | 20427.504 | 23051.537 |
| AF089897  | 1231.339  | 512.171   | NM_019597 | 3590.641  | 5206.074  | AK023982  | 827.041   | 817.37    |
| AF007872  | 5805.33   | 4004.341  | AK021493  | 5484.636  | 7419.858  | NM_01846E | 1620.445  | 1178.238  |
| M30938    | 17343.998 | 11267.437 | NM_006161 | 22568.396 | 25775.336 | Y11312    | 1578.02   | 797.281   |
| NM_01514E | 3859.158  | 1822.397  | NM_00619E | 775.398   | 847.798   | NM_00303E | 10101.206 | 8333.637  |
| NM_004714 | 3425.816  | 1759.135  | AF085881  | 1193.987  | 1427.958  | NM_00263E | 42327.359 | 26966.324 |
| NM_005401 | 1129.173  | 803.388   | AK022737  | 10452.216 | 12114.599 | AF100756  | 5253.546  | 3604.843  |
| NM_017677 | 835.94    | 713.71    | NM_00347E | 47163.543 | 45590.078 | NM_00682E | 5321.792  | 3449.192  |
| NM_002497 | 25950.332 | 19889.807 | U92980    | 2078.106  | 2367.504  | NM_00486E | 1280.785  | 966.209   |
| AB025194  | 16499.945 | 13227.666 | AF133658  | 1496.535  | 1820.478  | NM_001661 | 1174.888  | 839.918   |
| NM_00623E | 1406.515  | 1359.85   | AB048287  | 12647.709 | 16169.717 | NM_01456E | 1403.779  | 998.858   |
| BC020863  | 2615.881  | 2407.99   | Y11159    | 2190.675  | 2174.303  | NM_02015C | 3023.903  | 2481.747  |
| CY3Cy5    | 5651.266  | 546.811   | AB020648  | 3727.499  | 3990.079  | NM_00715C | 5976.018  | 5512.821  |
| NM_00475E | 1211.558  | 966.883   | AK025798  | 20229.975 | 18600.781 | NM_006831 | 3491.017  | 2824.848  |
| NM_00516E | 12937.522 | 12429.72  | AF086173  | 908.54    | 957.328   | AL162044  | 5989.393  | 4430.534  |
| AL117623  | 1485.099  | 1454.669  | AK025164  | 1012.792  | 829.626   | AB018353  | 5338.164  | 6118.17   |
| AF085988  | 1440.066  | 1461.043  | NM_01836E | 6743.886  | 7477.468  | NM_00703E | 3669.787  | 4028.48   |
| AK025785  | 9448.838  | 9566.882  | NM_01984E | 20185.383 | 22174.264 | NM_002617 | 3122.463  | 3463.26   |
| AF038190  | 1047.068  | 1073.551  | AL833005  | 4607.421  | 6720.856  | NM_00331E | 31576.502 | 29826.871 |
| AF143877  | 1304.347  | 1446.297  | L43366    | 4179.871  | 5214.999  | AF090907  | 3395.184  | 3462.462  |
| NM_00073E | 13709.013 | 13223.158 | AK026124  | 5025.651  | 5372.111  | AK024476  | 7571.67   | 6742.99   |
| AF086474  | 1345.86   | 1641.316  | NM_00231E | 969.634   | 1069.872  | X74794    | 15381.833 | 11124.028 |
| AF086023  | 8052.891  | 6780.362  | L38712    | 10029.531 | 9256.257  | AL050298  | 3247.969  | 2538.715  |
| AF131803  | 21038.479 | 20527.113 | U84508    | 630.858   | 832.89    | NM_00707E | 40006.324 | 24786.861 |
| AF086558  | 897.892   | 663.152   | NM_01779E | 2359.636  | 2916.771  | M20696    | 3807.688  | 1976.144  |
| AF086538  | 758.264   | 788.812   | NM_012131 | 3230.963  | 3749.55   | NM_00291E | 964.251   | 895.856   |

|           |           |           |           |           |           |           |           |           |
|-----------|-----------|-----------|-----------|-----------|-----------|-----------|-----------|-----------|
| NM_004776 | 2424.583  | 2149.034  | S41540    | 1120.301  | 1202.67   | NM_006736 | 2964.297  | 2692.142  |
| AK023353  | 3836.554  | 3783.684  | AK026947  | 52989.289 | 54807.535 | NM_003640 | 1660.602  | 1575.614  |
| NM_005163 | 12175.227 | 9789.677  | U84526    | 9562.392  | 11412.174 | NM_014444 | 5196.034  | 3744.572  |
| SR1       | 83975.492 | 62407.891 | AK022728  | 36977.844 | 42734.055 | NM_012248 | 5082.033  | 3745.535  |
| SR5       | 4114.537  | 5745.219  | AL109678  | 2604.078  | 2506.927  | NM_014970 | 5605.092  | 3160.757  |
| SR9       | 16358.162 | 5153.443  | AL137524  | 5434.405  | 7093.825  | NM_014393 | 3051.381  | 2555.462  |
| CY3Cy5    | 6232.574  | 687.755   | AF218008  | 4791.652  | 3983.638  | NM_004223 | 19378.418 | 16655.873 |
| AF182420  | 2274.182  | 1807.689  | M22404    | 29999.584 | 18100.453 | NM_006813 | 856.693   | 524.487   |
| U84517    | 3381.228  | 3559.79   | AF052115  | 1369.056  | 1336.467  | NM_001355 | 22692.006 | 19812.008 |
| AB033113  | 2594.377  | 2944.146  | NM_014019 | 37790.078 | 27465.799 | U63336    | 748.175   | 1497.382  |
| AK025877  | 4442.468  | 4169.096  | Z70711    | 1176.278  | 943.613   | NM_006907 | 1246.044  | 1518.059  |
| NM_018148 | 1656.909  | 1803.469  | NM_012368 | 1827.912  | 2332.665  | NM_002686 | 1293.316  | 730.622   |
| AK001921  | 6265.921  | 5574.977  | NM_016011 | 6192.747  | 5494.503  | AJ224741  | 783.434   | 1179.369  |
| AF088004  | 3483.578  | 3462.189  | AL035307  | 1527.71   | 1853.737  | NM_004684 | 3038.102  | 2934.382  |
| AF086149  | 2934.32   | 4499.336  | NM_012234 | 1468.514  | 1689.234  | BF338709  | 2533.169  | 3106.497  |
| NM_018273 | 3351.012  | 3486.941  | NM_012155 | 6951.598  | 6418.07   | AF204171  | 545.81    | 433.733   |
| AK024944  | 7188.39   | 6911.486  | AF144700  | 1971.308  | 2046.476  | M18182    | 406.67    | 552.292   |
| S81893    | 12779.081 | 12826.401 | AB046825  | 2916.374  | 3586.133  | W96179    | 2270.994  | 2013.814  |
| NM_007202 | 2721.313  | 2340.944  | X64975    | 2497.419  | 2835.948  | AW247841  | 14004.764 | 12361.658 |
| AK021777  | 1516.853  | 1452.238  | AF064876  | 526.744   | 780.543   | BG568198  | 2304.944  | 1591.896  |
| AF007137  | 4053.949  | 4163.499  | AL050297  | 6488.725  | 5242.114  | M76559    | 4405.231  | 2831.734  |
| AK023292  | 825.068   | 552.671   | AK026966  | 4815.075  | 3972.58   | U03884    | 656.46    | 381.823   |
| AK022452  | 736.335   | 735.317   | AF185573  | 736.581   | 592.074   | U11058    | 1112.099  | 751.926   |
| AK023375  | 417.303   | 422.948   | AK025268  | 1288.857  | 973.071   | AI222585  | 1011.294  | 824.264   |
| AK023781  | 922.781   | 876.379   | NM_005203 | 650.729   | 1115.277  | AA411678  | 7057.728  | 4792.296  |
| AK024366  | 424.992   | 928.42    | AB018325  | 1897.216  | 2096.021  | AA862813  | 20419.92  | 13165.266 |
| AK025913  | 2433.326  | 2835.354  | NM_003603 | 1252.289  | 776.264   | AA398427  | 1755.805  | 1415.883  |
| AF147389  | 776.151   | 1189.304  | NM_005428 | 3112.353  | 3359.969  | T55728    | 6030.769  | 3529.529  |
| AK021930  | 887.526   | 798.859   | NM_017974 | 753.97    | 857.999   | H20856    | 2032.497  | 1127.147  |
| NM_016500 | 7443.148  | 9829.93   | NM_003979 | 743.549   | 652.817   | N62586    | 2603.016  | 2815.975  |
| AF087966  | 754.51    | 548.192   | X14677    | 5869.815  | 5697.29   | AA242743  | 38944.754 | 33890.57  |
| AF087971  | 1875.602  | 2360.419  | NM_000915 | 5312.279  | 5738.698  | NM_015361 | 25527.457 | 22197.961 |
| AF087974  | 2113.482  | 3456.93   | AK024475  | 869.671   | 925.036   | NM_015537 | 10067.304 | 11557.199 |
| NM_018004 | 811.638   | 815.508   | AB026542  | 16503.832 | 12311.727 | NM_016520 | 12883.715 | 11257.267 |
| AL359056  | 656.657   | 629.988   | NM_019846 | 8694.738  | 6197.475  | AF035803  | 388.631   | 274.692   |
| AF124367  | 670.382   | 784.087   | NM_014433 | 2316.199  | 2265.821  | Y08147    | 9912.12   | 8584.667  |
| AK000798  | 710.042   | 732.836   | NM_002062 | 17006.998 | 14267.634 | D00174    | 22670.084 | 16447.469 |
| AK025615  | 37926.77  | 44054.457 | NM_014394 | 58813.504 | 57258.871 | AB000520  | 11217.755 | 9326.44   |
| AK023803  | 1373.525  | 1309.875  | NM_018140 | 5635.788  | 8072.229  | AK023117  | 2351.998  | 1876.499  |
| AK022379  | 1517.036  | 1745.087  | NM_016948 | 4931.308  | 7697.1    | AL122046  | 2354.314  | 1734.839  |
| AK025231  | 43239.867 | 50859.512 | NM_000142 | 1873.45   | 2036.649  | AF119914  | 556.693   | 262.901   |
| AK025338  | 5564.85   | 5882.717  | AF161356  | 63065.5   | 64558.07  | NM_000855 | 6510.795  | 5542.685  |
| AK022321  | 747.799   | 613.227   | AB014548  | 1715.718  | 2212.083  | NM_005536 | 7207.097  | 4504.705  |
| AK023296  | 1085.527  | 1086.762  | NM_018256 | 2506.144  | 2300.864  | NM_005077 | 1623.423  | 1471.006  |
| AK001439  | 773.037   | 1001.464  | AK025150  | 801.6     | 608.653   | NM_004423 | 8813.622  | 7466.496  |
| AK023462  | 1175.089  | 1356.076  | AK024611  | 18174.236 | 19789.549 | NM_001990 | 2023.583  | 1454.368  |
| AK001115  | 1462.986  | 1271.29   | BC010420  | 3944.993  | 4270.755  | NM_002141 | 2827.295  | 1843.79   |
| AL117586  | 301.955   | 467.097   | NM_012280 | 43412.074 | 43003.059 | NM_003311 | 3052.559  | 1844.548  |
| NM_014095 | 459.835   | 387.992   | NM_018172 | 4839.542  | 4470.316  | NM_003776 | 4811.616  | 4736.346  |
| AK027233  | 4036.52   | 3852.651  | U03886    | 3494.552  | 3383.755  | NM_007098 | 1554.109  | 2154.334  |
| AK023343  | 1119.696  | 1357.01   | AK022040  | 999.912   | 971.308   | NM_000582 | 17732.639 | 24095.438 |
| AK025323  | 904.628   | 725.873   | AK022722  | 1313.544  | 1144.674  | NM_005593 | 2907.509  | 2490.724  |
| NM_013326 | 4616.305  | 4940.515  | NM_003591 | 17286.234 | 16140.273 | NM_016077 | 4440.683  | 2637.814  |

|           |           |           |           |           |           |           |           |           |
|-----------|-----------|-----------|-----------|-----------|-----------|-----------|-----------|-----------|
| BC037322  | 948.312   | 971.314   | AL080111  | 3643.526  | 3783.905  | AF100756  | 5563.311  | 4146.005  |
| Y12022    | 2775.236  | 3414.435  | NM_003550 | 7506.745  | 5711.001  | NM_006825 | 4922.988  | 3189.843  |
| AK001375  | 1762.698  | 2204.034  | NM_014642 | 8292.069  | 5500.812  | NM_004862 | 1285.595  | 1006.305  |
| NM_019597 | 9360.355  | 11124.449 | NM_003829 | 2745.491  | 2398.68   | NM_001661 | 868.522   | 525.491   |
| AL137559  | 1876.494  | 2172.754  | AL110168  | 12152.961 | 22346.469 | NM_014563 | 1202.246  | 945.554   |
| AF026944  | 11063.583 | 10760.854 | NM_016147 | 10217.419 | 14541.204 | NM_020150 | 2294.034  | 1751.674  |
| AK021493  | 8809.173  | 10265.264 | NM_002833 | 2446.854  | 3775.731  | NM_007150 | 5406.41   | 2711.604  |
| NM_006161 | 4642.079  | 4272.333  | NM_016592 | 1168.713  | 1326.715  | NM_006831 | 3280.814  | 1910.258  |
| NM_006192 | 933.801   | 934.856   | NM_018527 | 388.191   | 549.448   | AL162044  | 6158.251  | 3356.046  |
| AF085881  | 1887.897  | 1876.315  | NM_018326 | 411.425   | 888.855   | AK024004  | 723.881   | 616.91    |
| AK022737  | 18068.492 | 19915.691 | NM_014773 | 356.142   | 436.3     | AK022365  | 1439.464  | 2732.017  |
| NM_003472 | 55706.223 | 57201.023 | NM_005606 | 3460.937  | 2558.287  | NM_001355 | 21474.063 | 20460.016 |
| U92980    | 2731.338  | 2605.256  | AF134707  | 1068.001  | 820.432   | U63336    | 389.497   | 380.913   |
| AF133658  | 2298.002  | 2692.86   | BE730629  | 1027.951  | 787.294   | NM_006907 | 1140.762  | 674.793   |
| AB048287  | 3730.656  | 3379.022  | AK027167  | 4546.331  | 3438.822  | NM_006267 | 1362.889  | 978.4     |
| Y11159    | 1672.651  | 1224.778  | AK025265  | 2739.011  | 1854.531  | NM_002661 | 18558.705 | 15828.347 |
| AB020648  | 4221.364  | 3804.935  | NM_013279 | 653.106   | 485.489   | AK023982  | 794.679   | 495.264   |
| AK025798  | 24264.652 | 20964.645 | NM_018652 | 29608.906 | 18779.807 | NM_018466 | 1145.887  | 697.827   |
| AF086173  | 373.627   | 674.961   | AB011166  | 2562.061  | 1523.124  | Y11312    | 1941.276  | 1325.282  |
| AK025164  | 795.041   | 865.617   | AK024460  | 5197.607  | 4303.195  | AB014533  | 13444.722 | 13265.302 |
| NM_018366 | 9842.811  | 10283.809 | NM_006606 | 9489.74   | 7003.375  | NM_000744 | 672.736   | 244.722   |
| NM_019845 | 11037.089 | 10277.457 | S78570    | 831.16    | 686.567   | NM_003035 | 11712.582 | 9121.043  |
| AL833005  | 4072.6    | 3985.132  | NM_005243 | 23967.094 | 18307.197 | NM_014505 | 1528.081  | 2171.211  |
| L43366    | 2743.806  | 3162.298  | NM_006218 | 3404.291  | 2434.311  | NM_015361 | 23517.244 | 20789.18  |
| AK026124  | 4812.48   | 4638.979  | NM_016265 | 4817.527  | 8102.171  | NM_004310 | 6138.03   | 5719.538  |
| NM_015505 | 9966.51   | 10497.339 | NM_002095 | 11326.822 | 15385.759 | NM_015537 | 5922.317  | 4327.298  |
| AL110157  | 8229.619  | 8349.353  | AK022814  | 1794.742  | 2474.746  | NM_016520 | 11700.793 | 9193.477  |
| NM_002315 | 7104.479  | 8074.729  | NM_006268 | 1455.465  | 2026.156  | AB018353  | 5249.986  | 4143.405  |
| L38712    | 20869.861 | 19269.021 | NM_006442 | 51986.773 | 55067.813 | NM_007036 | 3299.339  | 2263.339  |
| U84508    | 1420.83   | 1409.999  | NM_003902 | 25391.689 | 21906.424 | NM_002617 | 2779.68   | 2362.188  |
| NM_017793 | 3929.307  | 4080.067  | NM_016427 | 5255.78   | 3894.786  | NM_003313 | 26447.754 | 19087.678 |
| NM_012131 | 8006.121  | 6855.401  | NM_006706 | 569.521   | 397.832   | AF090907  | 3113.684  | 2987.479  |
| S41540    | 3090.728  | 2925.212  | U80741    | 11358.025 | 7611.147  | AK024476  | 4888.045  | 2968.765  |
| AK026947  | 10693.959 | 10070.443 | NM_014497 | 1550.858  | 1338.813  | X74794    | 15856.476 | 8378.899  |
| U84526    | 19912.141 | 19698.998 | AL133598  | 10891.179 | 6924.706  | AL050298  | 3692.161  | 2487.385  |
| L23401    | 1485.97   | 1166.605  | NM_015511 | 7618.459  | 4570.375  | NM_007075 | 37700.387 | 19533.324 |
| NM_018090 | 24395.598 | 25318.328 | NM_006625 | 7406.659  | 3572.608  | M20696    | 4146.697  | 2159.524  |
| AK022728  | 18566.289 | 17051.299 | NM_004891 | 20149.959 | 10827.609 | NM_002915 | 1224.835  | 740.859   |
| AL109678  | 2864.318  | 3057.016  | NM_002831 | 13267.588 | 8982.657  | NM_006736 | 2907.992  | 2272.969  |
| AL137524  | 1530.104  | 1431.446  | AL833409  | 9013.971  | 6241.47   | NM_003640 | 2017.959  | 1576.372  |
| AF218008  | 6000.904  | 4405.895  | NM_015966 | 1237.183  | 1020.254  | NM_014444 | 5632.675  | 5336.763  |
| M22404    | 2310.601  | 1537.206  | NM_000147 | 3181.364  | 3591.364  | NM_012248 | 5205.954  | 4931.461  |
| AF052115  | 1439.882  | 1464.971  | NM_000158 | 2789.706  | 3790.103  | NM_014970 | 6712.195  | 7221.678  |
| NM_014015 | 17267.51  | 24376.916 | NM_006416 | 3755.493  | 5084.717  | NM_014393 | 4790.076  | 6883.825  |
| Z70711    | 492.001   | 503.33    | NM_000151 | 542.834   | 987.7     | NM_004223 | 22612.785 | 24819.15  |
| AF116653  | 366.577   | 399.694   | NM_003935 | 752.559   | 462.445   | NM_006813 | 652.864   | 337.096   |
| AK022097  | 4462.752  | 5034.662  | NM_002879 | 1474.442  | 1102.244  | NM_078467 | 6561.794  | 8556.714  |
| NM_002166 | 41164.516 | 48353.91  | AB028999  | 1261.326  | 1131.77   | NM_013345 | 2045.075  | 4862.787  |
| NM_004660 | 22571.301 | 21638.271 | AB018348  | 10395.271 | 9358.243  | AL117454  | 30503.154 | 26622.553 |
| NM_006165 | 2698.121  | 3466.932  | NM_013369 | 1114.163  | 728.284   | AF272890  | 10689.726 | 11110.202 |
| NM_016011 | 7075.392  | 8164.843  | NM_003686 | 3366.244  | 2204.909  | U00684    | 2687.041  | 2579.87   |
| AL035307  | 2608.903  | 3049.431  | NM_014812 | 3051.606  | 2093.222  | NM_016455 | 28849.77  | 18382.973 |
| AK023772  | 1011.352  | 1171.481  | NM_004641 | 1384.72   | 825.491   | AF086227  | 1317.919  | 1360.863  |

|           |           |           |           |           |           |           |           |           |
|-----------|-----------|-----------|-----------|-----------|-----------|-----------|-----------|-----------|
| NM_012234 | 4314.708  | 4580.819  | NM_002049 | 6132.501  | 3650.925  | AK026246  | 2492.97   | 1952.231  |
| NM_006204 | 849.619   | 720.137   | AK026312  | 1374.228  | 594.253   | AF070524  | 867.788   | 781.163   |
| NM_012155 | 15302.01  | 14383.454 | NM_017776 | 2160.052  | 998.684   | AF035281  | 1363.724  | 1146.591  |
| AF144700  | 5494.688  | 5924.526  | U81599    | 1164.524  | 407.79    | AF070625  | 2660.475  | 2761.384  |
| NM_004105 | 4366.214  | 4521.872  | AF275722  | 586.7     | 276.836   | AL365512  | 1075.688  | 1006.944  |
| AB046825  | 5088.21   | 4794.897  | NM_003206 | 1220.763  | 504.04    | AK001740  | 5806.874  | 5998.702  |
| X64975    | 739.88    | 494.601   | AK000564  | 830.501   | 450.477   | AF131793  | 594.391   | 902.312   |
| AF064876  | 390.973   | 573.518   | X60155    | 891.532   | 437.312   | NM_078467 | 8423.007  | 13496.292 |
| AF071509  | 448.008   | 472.054   | AB037901  | 16063.731 | 8846.145  | SR2       | 33621.129 | 47785.145 |
| AL050297  | 3798.944  | 3178.912  | AV762646  | 674.273   | 318.744   | SR4       | 8102.487  | 8666.499  |
| AK026966  | 6782.27   | 6493.983  | NM_006129 | 873.533   | 1136.292  | SR6       | 739.585   | 779.789   |
| AF147398  | 971.898   | 962.461   | NM_000582 | 21860.436 | 40119.137 | SR8       | 3348.712  | 7676.77   |
| AF185573  | 452.885   | 627.052   | NM_005593 | 1795.273  | 2433.626  | SR10      | 9614.863  | 929.217   |
| AK025268  | 1788.508  | 1402.185  | NM_004684 | 1263.378  | 1382.267  | AK091573  | 1823.767  | 2996.51   |
| NM_006566 | 461.539   | 639.838   | BF338709  | 2203.856  | 2754.118  | AF131814  | 1454.945  | 1368.647  |
| AK026154  | 10423.795 | 9497.521  | AF204171  | 725.774   | 1594.585  | AL359600  | 1829.459  | 2274.828  |
| AL117546  | 19436.869 | 17830.252 | AW247841  | 19558.494 | 18426.012 | BC028617  | 3407.53   | 3342.68   |
| AK027073  | 1976.414  | 2356.917  | BG568198  | 2151.992  | 1836.392  | AF087999  | 2015.911  | 1933.441  |
| NM_000384 | 1552.329  | 1721.115  | M76559    | 5908.863  | 4327.182  | NM_003740 | 3078.308  | 2688.419  |
| AB018325  | 7406.272  | 8108.407  | U03884    | 1031.707  | 493.552   | AL050078  | 3350.48   | 2326.046  |
| NM_003603 | 917.943   | 893.64    | U11058    | 1498.688  | 683.999   | NM_018538 | 466.408   | 387.584   |
| NM_005428 | 13402.181 | 13072.379 | AI222585  | 1083.62   | 613.853   | NM_013346 | 971.219   | 640.018   |
| NM_017974 | 2677.07   | 2354.436  | AA411678  | 8134.777  | 3573.15   | NM_017851 | 849.54    | 810.356   |
| NM_003979 | 1726.074  | 1805.209  | AA862813  | 31897.566 | 13097.637 | AK026182  | 62088.234 | 60651.258 |
| X14677    | 1797.744  | 1517.067  | AA398427  | 1920.423  | 740.874   | AK025603  | 1228.025  | 892.811   |
| NM_005863 | 5139.134  | 6254.885  | T55728    | 6435.275  | 2556.061  | NM_016085 | 13382.52  | 11874.205 |
| U17077    | 2182.761  | 2299.826  | H20856    | 2892.424  | 885.066   | AK025768  | 1570.882  | 2515.188  |
| NM_000915 | 7014.447  | 6718.805  | N62586    | 2828.038  | 1752.037  | AK001846  | 1186.856  | 1330.358  |
| NM_002344 | 479.157   | 573.134   | AA242743  | 24957.537 | 12826.475 | AK024637  | 4402.426  | 1751.626  |
| AK024475  | 1807.241  | 1429.226  | NM_006759 | 7678.635  | 4731.377  | AK026238  | 895.241   | 1874.339  |
| AB026542  | 23137.957 | 23452.516 | NM_006831 | 1989.314  | 2238.959  | AK025564  | 1197.413  | 1015.063  |
| NM_019846 | 1984.719  | 1701.968  | AL162044  | 5226.711  | 6985.014  | AK026286  | 1811.86   | 1611.504  |
| NM_014433 | 2141.048  | 2133.046  | AK024004  | 1010.097  | 1886.411  | AK026731  | 1293.333  | 1105.225  |
| NM_002062 | 10461.498 | 8537.823  | BE892273  | 58109.953 | 61849.422 | AL133446  | 3097.806  | 2340.007  |
| NM_014394 | 58620.441 | 47278.879 | AF026929  | 805.223   | 1335.896  | AF147406  | 1145.971  | 985.905   |
| NM_018140 | 6737.89   | 6774.818  | Y08147    | 12471.529 | 6617.768  | NM_006553 | 993.466   | 902.18    |
| NM_016948 | 4025.377  | 4155.792  | D00174    | 29495.34  | 15074.171 | U56251    | 1824.801  | 1642.188  |
| NM_000142 | 6152.251  | 5688.41   | AB000520  | 12068.11  | 6638.761  | AL049277  | 3189.903  | 4555.228  |
| AF272372  | 49387.547 | 53155.727 | AK023117  | 2483.557  | 1601.246  | AL050043  | 1423.078  | 724.366   |
| AK097045  | 4775.553  | 5270.297  | AL122046  | 3143.13   | 1597.576  | AL117571  | 698.679   | 242.72    |
| NM_018256 | 6495.931  | 6682.156  | AF119914  | 427.894   | 215.182   | AK025010  | 366.315   | 645.602   |
| AK025150  | 978.893   | 877.671   | NM_000855 | 5078.759  | 2567.532  | AL137470  | 695.529   | 2265.563  |
| AK024611  | 27226.344 | 30410.289 | NM_005536 | 7930.762  | 3059.956  | AL137709  | 2377.626  | 2667.019  |
| BC010420  | 13318.492 | 15144.642 | NM_005077 | 2090.159  | 766.852   | AK023277  | 639.128   | 647.535   |
| NM_012280 | 24184.795 | 23803.555 | NM_001990 | 2858.755  | 1520.861  | AK000425  | 3471.094  | 3295.094  |
| NM_018172 | 15662.093 | 17117.918 | NM_002141 | 2432.433  | 1186.211  | NM_014276 | 5766.263  | 4200.663  |
| U03886    | 6643.215  | 7389.97   | NM_006907 | 1005.512  | 1395.097  | AF056438  | 2207.603  | 2265.938  |
| AK022040  | 2841.275  | 2894.939  | NM_002661 | 23797.412 | 28273.25  | AF003737  | 58837.484 | 56321.309 |
| AK022722  | 2571.81   | 3029.745  | AK023982  | 1527.546  | 1475.934  | AF009296  | 657.679   | 586.65    |
| NM_003591 | 26463.744 | 29998.383 | NM_018466 | 2034.121  | 1745.614  | AF056448  | 621.273   | 3025.599  |
| AL080111  | 5363.439  | 6287.376  | Y11312    | 2418.624  | 1625.261  | AK001011  | 8444.749  | 13257.984 |
| NM_003550 | 3609.779  | 3881.891  | NM_003039 | 13756.42  | 7023.383  | NM_005444 | 3513.779  | 3478.018  |
| NM_014642 | 11761.326 | 11491.948 | NM_002635 | 48452.113 | 22719.984 | V00589    | 47405.098 | 32209.701 |

|           |           |           |           |           |           |           |           |           |
|-----------|-----------|-----------|-----------|-----------|-----------|-----------|-----------|-----------|
| AB037821  | 680.844   | 801.736   | AF100756  | 6969.403  | 4040.269  | NM_018572 | 1279.019  | 1557.45   |
| NM_003829 | 4804.6    | 4555.25   | NM_006825 | 5977.184  | 3634.221  | AL109959  | 5008.367  | 7287.038  |
| AL110168  | 2526.454  | 2498.05   | NM_004862 | 2083.274  | 959.942   | AK000175  | 3666.946  | 2776.365  |
| NM_014522 | 483.016   | 443.64    | NM_001661 | 1425.181  | 754.986   | AL137736  | 4293.892  | 3434.685  |
| AK026015  | 434.704   | 355.506   | NM_014563 | 2475.468  | 702.606   | AF143870  | 483.243   | 436.419   |
| NM_016147 | 6292.845  | 5320.717  | NM_020150 | 2937.284  | 1849.362  | NM_004192 | 5771.595  | 4624.14   |
| NM_002833 | 3028.635  | 2923.772  | NM_007150 | 8156.936  | 3512.235  | AK024160  | 662.591   | 347.28    |
| NM_016592 | 1190.473  | 1207.102  | AB018353  | 1583.604  | 1804.835  | AK025077  | 547.382   | 402.56    |
| NM_018527 | 1135.788  | 1166.288  | NM_007036 | 3915.293  | 4041.844  | NM_006417 | 8014.986  | 6716.813  |
| NM_014773 | 3667.434  | 3199.682  | NM_002617 | 3378.022  | 3719.835  | L43350    | 785.461   | 847.921   |
| NM_005606 | 8339.674  | 8415.26   | NM_003313 | 26980.514 | 25372.664 | NM_020317 | 4868.445  | 5772.666  |
| AF134707  | 2060.087  | 1961.63   | AF090907  | 3351.515  | 3916.19   | AL080234  | 3303.18   | 5273.522  |
| NM_018162 | 449.347   | 719.296   | AK024476  | 6268.038  | 5814.271  | AK027025  | 1366.522  | 1031.665  |
| AK027167  | 1441.436  | 1784.638  | X74794    | 24734.658 | 13491.555 | AF147387  | 3192.27   | 4171.179  |
| AK025265  | 3824.979  | 3197.573  | AL050298  | 4461.165  | 2922.775  | NM_012081 | 965.18    | 1411.068  |
| NM_013279 | 623.867   | 610.299   | NM_007079 | 38124.383 | 21672.191 | AF085909  | 35977.602 | 44840.949 |
| NM_018652 | 15103.296 | 16265.952 | M20696    | 4703.676  | 2130.005  | AF090888  | 489.322   | 1235.572  |
| AB011166  | 5218.24   | 7683.551  | NM_002915 | 1865.464  | 853.173   | AK027193  | 1613.236  | 1694.377  |
| AK024460  | 7211.629  | 9647.62   | NM_006736 | 3519.568  | 2587.891  | AF086471  | 6595.252  | 6164.126  |
| NM_006606 | 6191.248  | 5503.253  | NM_003640 | 1541.103  | 927.783   | NM_018455 | 6458.426  | 5548.745  |
| S78570    | 1323.461  | 1108.782  | NM_014444 | 6149.865  | 3291.7    | AF113018  | 1005.808  | 613.159   |
| NM_005243 | 30622.66  | 24186.734 | NM_012248 | 5673.146  | 3908.882  | AK021996  | 679.7     | 650.456   |
| NM_006218 | 4767.912  | 4124.484  | NM_014970 | 7753.214  | 4748.018  | AL049337  | 6052.136  | 4700.256  |
| NM_016265 | 6767.411  | 5889.431  | NM_014393 | 3549.486  | 1756.275  | Z27200    | 1085.736  | 1103.658  |
| NM_002095 | 16115.745 | 15884.562 | NM_004223 | 23555.295 | 13541.885 | AF070571  | 3929.271  | 2819.669  |
| AK022814  | 6268.746  | 5815.88   | NM_006813 | 705.099   | 290.262   | AK023554  | 3232.767  | 2735.362  |
| NM_006268 | 5359.32   | 5098.344  | NM_001355 | 27498.502 | 13711.869 | NM_003513 | 5338.573  | 6860.715  |
| NM_005515 | 612.712   | 545.651   | U63336    | 614.185   | 319.195   | AL079294  | 3246.071  | 3116.032  |
| NM_006442 | 36096.809 | 41239.719 | AJ224741  | 784.358   | 807.917   | AF161427  | 58715.504 | 66760.18  |
| NM_003902 | 19724.027 | 18937.229 | NM_004684 | 3231.677  | 3116.573  | AK021715  | 10079.881 | 7700.148  |
| NM_005098 | 661.661   | 508.926   | BF338709  | 2977.773  | 3716.213  | L29496    | 676.698   | 2494.059  |
| NM_016427 | 6507.734  | 5067.978  | AF204171  | 680.025   | 748.16    | NM_000928 | 1877.928  | 5414.616  |
| NM_006706 | 2689.996  | 2081.516  | W96179    | 3019.103  | 2549.929  | NM_007002 | 11817.16  | 17528.359 |
| NM_002505 | 833.5     | 662.111   | AW247841  | 17036.48  | 12426.281 | NM_012121 | 2995.827  | 8878.447  |
| U80741    | 28920.078 | 32490.082 | BG568198  | 2110.059  | 1210.981  | NM_014155 | 2757.019  | 2563.934  |
| NM_014497 | 2829.556  | 3196.211  | M76559    | 5502.29   | 3407.231  | AK026331  | 18303.463 | 14068.534 |
| AL133598  | 24462.508 | 28423.506 | U03884    | 1029.725  | 525.168   | M30773    | 2103.888  | 2186.37   |
| NM_015511 | 11109.323 | 10138.108 | U11058    | 1565.549  | 779.027   | NM_016338 | 8984.855  | 6704.789  |
| NM_006625 | 18858.932 | 19970.578 | AI222585  | 924.753   | 751.786   | AF113699  | 30786.912 | 19905.422 |
| NM_004891 | 38186.246 | 53274.734 | AA411678  | 8559.794  | 4668.281  | AK021897  | 4956.938  | 3685.946  |
| NM_002831 | 18359.949 | 18927.75  | AA862813  | 29645.17  | 13592.969 | AK001051  | 1471.265  | 1239.771  |
| AL833409  | 2455.475  | 2092.498  | AA398427  | 2379.385  | 1263.332  | NM_018317 | 353.206   | 436.026   |
| NM_015966 | 1386.214  | 1223.368  | T55728    | 5927.732  | 3424.887  | AF086051  | 990.353   | 1084.155  |
| NM_000147 | 8199.176  | 9304.425  | H20856    | 2708.982  | 989.049   | AK024356  | 2077.486  | 1902.131  |
| NM_000158 | 9234.041  | 8784.979  | N62586    | 3277.977  | 2170.215  | AL049370  | 5724.388  | 4662.438  |
| NM_000670 | 1229.812  | 1249.744  | AA242743  | 23492.496 | 14772.928 | AL365410  | 5400.22   | 5917.699  |
| NM_006416 | 5939.969  | 6371.358  | NM_015361 | 24795.494 | 11777.879 | D17082    | 13744.96  | 8961.021  |
| NM_000151 | 14447.876 | 16750.877 | NM_004310 | 9671.449  | 3959.273  | D17252    | 39143.555 | 22854.789 |
| NM_003773 | 2316.875  | 2205.519  | NM_015537 | 14887.28  | 5922.128  | NM_001848 | 2821.787  | 3587.55   |
| NM_003935 | 2195.344  | 1976.431  | BE892273  | 57039.082 | 59626.277 | NM_003734 | 26795.395 | 29386.359 |
| NM_002879 | 3333.03   | 2628.829  | AF026929  | 541.397   | 652.159   | NM_014935 | 18303.041 | 25260.293 |
| AB028999  | 2761.705  | 3052.348  | NM_016734 | 1980.665  | 1750.858  | X99660    | 37873.5   | 39901.105 |
| AB018348  | 8214.44   | 7756.685  | Y08147    | 12495.434 | 7715.203  | X03635    | 3889.402  | 5177.76   |

|           |           |           |           |           |           |           |           |           |
|-----------|-----------|-----------|-----------|-----------|-----------|-----------|-----------|-----------|
| NM_01336E | 881.813   | 1271.773  | D00174    | 28422.504 | 23688.262 | NM_004351 | 9115.249  | 7223.538  |
| NM_00368E | 6038.398  | 6312.322  | AB000520  | 14213.523 | 13168.271 | NM_00423E | 6296.074  | 5778.391  |
| NM_01481E | 6120.596  | 7981.639  | AK023117  | 3365.18   | 3391.427  | AB011093  | 8041.086  | 6746.166  |
| NM_004641 | 3191.587  | 2982.919  | AL122046  | 2728.974  | 2110.567  | NM_02053E | 18822.77  | 17105.131 |
| NM_00204E | 2420.751  | 2657.462  | AF119914  | 660.79    | 417.209   | NM_001894 | 15433.445 | 11064.909 |
| AK026312  | 1468.698  | 1400.66   | NM_00085E | 5863.122  | 3273.982  | NM_000614 | 557.033   | 624.952   |
| NM_01777E | 2652.204  | 2323.212  | NM_00553E | 7466.382  | 3247.071  | AK022884  | 2299.168  | 1692.663  |
| U81599    | 1517.567  | 2187.069  | NM_005077 | 2051.574  | 1173.523  | NM_00662C | 6225.628  | 3349.871  |
| AF275722  | 1250.642  | 1063.486  | NM_00199C | 2929.137  | 1679.918  | NM_001397 | 813.036   | 895.443   |
| NM_00320E | 2534.184  | 2874.093  | NM_002141 | 2331.754  | 1270.526  | Y08770    | 563.392   | 1436.533  |
| AK000564  | 1539.927  | 2308.737  | NM_00612E | 2143.199  | 1191.432  | NM_00477E | 6085.335  | 10789.97  |
| X60155    | 1274.929  | 1489.211  | NM_006267 | 1756.366  | 2174.817  | NM_003714 | 3195.301  | 9168.427  |
| AB037901  | 5830.141  | 5853.03   | NM_002661 | 21661.113 | 20583.012 | U42977    | 8773.398  | 9071.474  |
| AV762646  | 1015.62   | 873.384   | AK023982  | 1340.148  | 1236.914  | NM_002881 | 11434.185 | 10949.468 |
| NM_012464 | 515.064   | 689.605   | NM_01846E | 2215.111  | 1934.625  | NM_00366E | 10149.603 | 10223.26  |
| NM_00612E | 3213.641  | 3490.517  | Y11312    | 2744.805  | 1017.206  | NM_00328E | 5327.373  | 7978.396  |
| NM_00058E | 2750.708  | 3131.722  | NM_00303E | 18482.441 | 20097.404 | NM_01824E | 2973.546  | 5518.386  |
| NM_00559E | 3715.588  | 5064.463  | NM_00263E | 53158.09  | 53637.453 | M83822    | 2876.109  | 3644.016  |
| AJ224741  | 630.298   | 602.699   | AF100756  | 8721.306  | 9665.777  | NM_02042E | 1246.569  | 1105.52   |
| NM_004684 | 5685.599  | 7457.308  | NM_00682E | 8294.458  | 8519.438  | AK021437  | 2954.193  | 2127.869  |
| BF338709  | 1070.983  | 1207.84   | NM_00486E | 2911.668  | 2813.033  | NM_003831 | 3077.396  | 2182.425  |
| AF204171  | 1302.713  | 1187.263  | NM_001661 | 1873.797  | 1821.679  | NM_00175E | 422.531   | 574.026   |
| W96179    | 7236.746  | 8288.759  | NM_01456E | 2453.375  | 921.056   | AB007965  | 8436.207  | 7152.351  |
| AW247841  | 24371.582 | 25285.494 | NM_02015C | 3047.188  | 1868.591  | NM_01764E | 1029.024  | 809.861   |
| BG568198  | 798.545   | 999.596   | NM_00715C | 8172.23   | 3157.179  | NM_00006E | 1239.008  | 1179.524  |
| M76559    | 13285.739 | 13690.358 | NM_006831 | 6057.003  | 1785.334  | NM_00119E | 7635.625  | 6153      |
| AF043473  | 517.622   | 947.858   | AL162044  | 9029.367  | 4072.751  | NM_01600E | 954.896   | 947.473   |
| U03884    | 2018.954  | 2022.768  | AB018353  | 8285.959  | 9337.072  | NM_001924 | 5781.904  | 6168.855  |
| U11058    | 3133.703  | 3670.119  | NM_00703E | 5173.581  | 4733.596  | NM_00179E | 12351.886 | 16904.018 |
| AI222585  | 2025.465  | 2054.763  | NM_002617 | 3299.771  | 3151.217  | AB040880  | 1465.341  | 3822.438  |
| AA411678  | 12143.283 | 13648.054 | NM_00331E | 26684.217 | 28313.092 | NM_009587 | 29403.129 | 46558.871 |
| AA862813  | 61276.969 | 60882.414 | AF090907  | 4317.807  | 4689.003  | NM_00263C | 1430.837  | 1773.079  |
| AA398427  | 3353.687  | 3471.09   | AK024476  | 7277.096  | 5933.425  | AJ295149  | 67286.844 | 66500.039 |
| T55728    | 8246.322  | 8181.114  | X74794    | 29740.152 | 12935.307 | NM_01343E | 7015.896  | 10279.327 |
| H20856    | 5106.546  | 4859.599  | AL050298  | 5903.47   | 6799.204  | NM_01468E | 7800.848  | 5574.608  |
| N62586    | 5939.294  | 7187.089  | NM_00707E | 42455.688 | 43067.129 | AL359623  | 1475.465  | 1511.98   |
| AA242743  | 4901.16   | 6995.227  | M20696    | 7531.63   | 8088.963  | AK026920  | 4485.728  | 3500.131  |
| NM_00675E | 12018.096 | 12898.074 | NM_00291E | 2542.189  | 2481.148  | AL137255  | 4003.73   | 3956.601  |
| NM_006831 | 9478.762  | 7970.743  | NM_00673E | 4997.865  | 6102.438  | NM_00337C | 10756.989 | 9629.484  |
| AL162044  | 14069.838 | 13280.751 | NM_00364C | 2532.917  | 3284.085  | AB037715  | 7338.521  | 5006.89   |
| AK024004  | 1910.432  | 2415.748  | NM_014444 | 7385.967  | 8107.761  | AF250924  | 20244.303 | 16885.832 |
| AK022365  | 1142.45   | 1270.157  | NM_01224E | 8546.343  | 8825.513  | D86979    | 3840.19   | 7648.985  |
| BE892273  | 53522.078 | 54587.832 | NM_01497C | 9684.549  | 11592.759 | NM_01821E | 970.185   | 1562.01   |
| AF026929  | 1505.026  | 1327.173  | NM_01439E | 5116.274  | 7473.598  | AF018081  | 56999.629 | 62372.113 |
| NM_016734 | 3246.813  | 3662.779  | NM_00422E | 28492.73  | 34040.164 | NM_02020E | 41366.676 | 57720.703 |
| AF035803  | 879.853   | 837.648   | NM_00681E | 1182.697  | 940.535   | AF024540  | 3172.411  | 5308.316  |
| Y08147    | 4138.733  | 3898.3    | NM_00135E | 34909.676 | 39324.582 | NM_00166E | 2687.255  | 4066.728  |
| D00174    | 9924.295  | 9655.389  | U63336    | 740.233   | 430.075   | AK025362  | 1892.666  | 2274.676  |
| AB000520  | 24917.793 | 25299.195 | NM_006907 | 2787.07   | 656.005   | AK021776  | 2002.343  | 2825.932  |
| AK023117  | 1912.474  | 2078.133  | AJ224741  | 1228.227  | 1527.325  | AK026042  | 2745.046  | 4885.085  |
| AL122046  | 4069.976  | 5213.316  | NM_004684 | 3914.993  | 3869.107  | NM_01423E | 44608.574 | 48503.539 |
| AF119914  | 716.525   | 785.699   | BF338709  | 2857.924  | 2822.217  | NM_002137 | 57327.098 | 48152.719 |
| NM_00085E | 1515.427  | 1612.406  | AF204171  | 820.738   | 689.974   | NM_002911 | 2096.987  | 1852.726  |



|           |           |           |           |           |           |           |           |           |
|-----------|-----------|-----------|-----------|-----------|-----------|-----------|-----------|-----------|
| NM_005536 | 12662.691 | 14783.115 | W96179    | 3556.34   | 2887.29   | U94386    | 931.608   | 885.901   |
| NM_005077 | 1217.679  | 1354.445  | AW247841  | 23099.469 | 25157.201 | NM_01600C | 49814.996 | 40310.73  |
| NM_00199C | 4821.504  | 5018.862  | BG568198  | 2493.3    | 2307.519  | NM_006372 | 9810.652  | 6524.487  |
| NM_002141 | 639.479   | 644.091   | M76559    | 7181.56   | 8516.445  | NM_01415C | 3465.722  | 3961.105  |
| NM_006907 | 7344.006  | 6619.31   | U03884    | 1247.619  | 1370.962  | NM_00680E | 43267.039 | 33668.598 |
| NM_00268E | 1081.329  | 1002.285  | U11058    | 1861.869  | 2213.151  | AF132027  | 47598.648 | 27776.449 |
| NM_006267 | 3752.167  | 3790.625  | AI222585  | 1154.876  | 1469.894  | NM_004681 | 26813.543 | 45205.051 |
| NM_002661 | 24760.164 | 29953.598 | AA411678  | 11336.401 | 13722.711 | AB033096  | 10606.81  | 5599.375  |
| NM_001263 | 648.808   | 784.678   | AA862813  | 44249.156 | 46682.027 | NM_01488E | 1780.425  | 871.452   |
| AK023982  | 2521.345  | 2694.177  | AA398427  | 2986.474  | 3438.453  | NM_00444E | 45491.098 | 58546.664 |
| NM_01846E | 5691.318  | 6306.609  | T55728    | 6906.505  | 7234.046  | AL133566  | 1690.221  | 3659.304  |
| Y11312    | 4943.914  | 4396.629  | H20856    | 3007.248  | 2304.79   | M36118    | 44269.832 | 57842.695 |
| NM_00303E | 25804.918 | 22816.451 | N62586    | 3942.441  | 4587.824  | J02625    | 22648.225 | 22605.518 |
| NM_00263E | 57782.664 | 53665.813 | AA242743  | 34407.672 | 32112.143 | Y17175    | 63670.563 | 64047.672 |
| AF100756  | 16495.865 | 23951.709 | NM_015361 | 31949.35  | 37653.668 | NM_00454E | 28876.539 | 35458.859 |
| NM_00682E | 8950.3    | 12629.403 | NM_00431C | 12251.11  | 12620.298 | NM_00533E | 32971.664 | 40294.031 |
| NM_004862 | 6058.191  | 5188.314  | NM_015537 | 15105.82  | 16968.293 | NM_000767 | 485.287   | 785.285   |
| NM_001661 | 2470.101  | 2495.094  | NM_01652C | 15094.409 | 6831.338  | AK026161  | 1592.679  | 1767.546  |
| NM_01456E | 3494.053  | 3535.185  | AF035803  | 383.922   | 276.408   | NM_00455E | 47973.48  | 36686.277 |
| NM_02015C | 5425.486  | 6003.363  | Y08147    | 15392.11  | 12319.641 | D63484    | 2830.812  | 2350.159  |
| NM_00715C | 13586.609 | 10787.817 | D00174    | 35970.895 | 35872.754 | AK026745  | 4827.806  | 3695.327  |
| NM_01652C | 22110.443 | 20664.973 | AB000520  | 14022.172 | 12812.967 | AL157440  | 3140.763  | 2768.686  |
| AB018353  | 11690.576 | 11101.12  | AK023117  | 2872.889  | 3131.855  | NM_01642E | 7405.457  | 5406.016  |
| NM_00703E | 8547.829  | 9091.609  | AL122046  | 3573.797  | 2745.161  | AB040975  | 3257.188  | 7597.27   |
| NM_002617 | 6423.642  | 7186.442  | AF119914  | 559.149   | 815.189   | NM_00511E | 12080.245 | 6151.158  |
| NM_00331E | 14414.52  | 14287.038 | NM_00085E | 8700.562  | 11962.981 | NM_00316E | 7334.623  | 6171.524  |
| AF090907  | 5522.882  | 5714.689  | NM_00553E | 10424.061 | 12329.904 | AK055844  | 1552.563  | 1259.588  |
| AK024476  | 6728.207  | 5998.681  | NM_005077 | 2380.479  | 3428.018  | NM_01828E | 11353.158 | 7463.268  |
| X74794    | 35103.367 | 28376.332 | NM_00442E | 10338.462 | 14187.913 | NM_00314E | 6121.702  | 3162.282  |
| AL050298  | 10276.491 | 11055.615 | NM_00199C | 3323.486  | 3763.079  | NM_00379E | 32732.199 | 30957.672 |
| NM_00707E | 24712.553 | 22684.563 | NM_002141 | 3101.681  | 3891.46   | NM_00297E | 4702.182  | 7577.429  |
| M20696    | 4616.815  | 4432.023  | NM_003311 | 4572.198  | 5751.684  | NM_00443E | 18973.076 | 27234.516 |
| NM_00291E | 4290.956  | 4724.302  | NM_00377E | 7402.133  | 9466.379  | NM_00658C | 10595.976 | 14197.215 |
| NM_00673E | 6961.04   | 7370.138  | NM_01571E | 1092.458  | 2268.566  | NM_00130E | 11273.992 | 11879.411 |
| NM_00364C | 3861.459  | 3663.357  | NM_00612E | 2764.055  | 3365.488  | NM_00508E | 1897.157  | 3115.295  |
| NM_014444 | 12309.541 | 13105.808 | NM_00058E | 25615.533 | 30519.705 | D17028    | 51581.195 | 49532.121 |
| NM_01224E | 16304.936 | 22078.076 | NM_00559E | 4615.081  | 1741.162  | NM_01344E | 42919.172 | 30219.5   |
| NM_01497C | 17599.176 | 21307.42  | NM_016077 | 5710.945  | 3947.765  | BG611243  | 5481.189  | 5894.165  |
| NM_01439E | 6720.448  | 7605.611  | AF100756  | 8094.612  | 9606.545  | AI417481  | 807.187   | 825.838   |
| NM_00422E | 33698.023 | 49061.539 | NM_00682E | 8174.371  | 9987.824  | BI906766  | 6345.56   | 5244.851  |
| NM_00681E | 965.262   | 833.699   | NM_00486E | 3097.322  | 4313.979  | U60519    | 773.325   | 725.457   |
| NM_00135E | 36000.41  | 38924.066 | NM_001661 | 1865.371  | 2627.075  | AA282906  | 9562.33   | 8612.76   |
| U63336    | 1016.481  | 1342.052  | NM_01456E | 3457.145  | 3843.073  | L02870    | 29921.771 | 25594.748 |
| NM_00058E | 2310.829  | 2350.453  | NM_02015C | 3812.383  | 5571.226  | BG755482  | 24704.191 | 18858.857 |
| NM_00559E | 3157.942  | 2762.703  | NM_00715C | 9759.242  | 11269.003 | AI480307  | 9035.194  | 7146.821  |
| NM_004684 | 5482.784  | 6123.724  | NM_006831 | 8628.112  | 11136.744 | X51420    | 3264.385  | 2269.448  |
| BF338709  | 1038.127  | 1242.899  | AL162044  | 9808.876  | 13116.651 | X51757    | 1581.803  | 454.092   |
| AF204171  | 961.454   | 1294.888  | AK024004  | 2065.511  | 2203.382  | L24038    | 2465.708  | 2037.473  |
| M18182    | 511.234   | 388.216   | AK022365  | 809.926   | 1128.789  | AK023011  | 49154.922 | 44365.625 |
| W96179    | 7172.995  | 7672.167  | BE892273  | 59475.004 | 62484.031 | NM_01681E | 1983.585  | 2336.47   |
| AW247841  | 22540.285 | 21759.111 | AF026929  | 1068.246  | 1191.942  | L17325    | 1621.587  | 2295.417  |
| BG568198  | 832.51    | 725.189   | NM_016734 | 2381.768  | 2485.345  | NM_01771E | 1847.639  | 3281.091  |
| M76559    | 12492.997 | 12181.952 | NM_00135E | 25860.811 | 22880.393 | M58603    | 11978.73  | 11112.956 |

|           |           |           |           |           |           |           |           |           |
|-----------|-----------|-----------|-----------|-----------|-----------|-----------|-----------|-----------|
| AF043473  | 556.059   | 739.848   | U63336    | 628.15    | 529.07    | NM_00363  | 10506.741 | 10125.83  |
| U03884    | 1854.431  | 1648.052  | NM_006907 | 3447.419  | 2672.563  | NM_00154  | 733.552   | 634.123   |
| U11058    | 3365.157  | 2763.743  | NM_00268  | 1472.957  | 2066.376  | NM_000115 | 6095.535  | 6241.086  |
| AI222585  | 1837.571  | 1654.868  | NM_006267 | 2048.808  | 2388.492  | AF308801  | 3124.609  | 3380.381  |
| AA411678  | 12476.683 | 12575.874 | NM_002661 | 29406.842 | 39605.992 | NM_00731  | 57942.742 | 58359.449 |
| AA862813  | 55265.27  | 52833.816 | NM_001263 | 358.212   | 657.474   | NM_014874 | 2025.946  | 2076.344  |
| AA398427  | 3559.323  | 3429.758  | AK023982  | 2245.784  | 2795.694  | NM_00576  | 15276.584 | 10157.387 |
| T55728    | 7535.193  | 8256.398  | NM_01846  | 3234.139  | 4473.91   | NM_00276  | 4208.124  | 3295.042  |
| H20856    | 5193.408  | 5844.02   | Y11312    | 3724.665  | 4197.939  | NM_006324 | 8430.521  | 7277.831  |
| N62586    | 4388.371  | 4557.842  | AB014533  | 18174.107 | 23802.918 | NM_01684  | 17027.148 | 10795.734 |
| AA242743  | 3482.805  | 3497.589  | M11427    | 786.793   | 1123.781  | NM_000514 | 13896.465 | 7056.208  |
| NM_015361 | 17523.225 | 18789.295 | NM_000744 | 1200.093  | 1916.62   | AL137432  | 1133.081  | 622.188   |
| NM_004310 | 14558.943 | 15907.646 | NM_00303  | 25059.445 | 33977.527 | NM_000957 | 3442.583  | 834.514   |
| NM_015537 | 12946.169 | 11662.465 | NM_01450  | 1702.149  | 2178.634  | NM_01904  | 3187.674  | 727.02    |
| AK024004  | 1651.912  | 1646.434  | NM_02037  | 40226.418 | 43890.262 | NM_00546  | 5663.53   | 7195.227  |
| AK022365  | 901.281   | 894.057   | NM_00263  | 61427.473 | 54723.305 | NM_016361 | 3334.002  | 3524.021  |
| BE892273  | 50344.012 | 49900.969 | NM_00497  | 2252.992  | 1521.951  | NM_00370  | 58628.406 | 61382.309 |
| AF026929  | 1410.363  | 1564.742  | NM_015361 | 20164.119 | 19031.203 | NM_01434  | 12540.776 | 14238.252 |
| NM_016734 | 3794.337  | 3993.772  | NM_004310 | 10791.565 | 7247.773  | AB040895  | 681.559   | 1437.031  |
| AF035803  | 768.857   | 638.388   | NM_015537 | 11707.709 | 6970.141  | NM_018210 | 1762.794  | 1871.44   |
| Y08147    | 3795.922  | 2963.602  | NM_016520 | 16611.346 | 12000.398 | NM_00109  | 5716.215  | 4860.832  |
| D00174    | 9908.675  | 8850.68   | AB018353  | 6474.834  | 5603.502  | NM_016014 | 2551.749  | 2695.91   |
| AB000520  | 25850.182 | 23360.189 | NM_00703  | 5224.698  | 5683.733  | NM_018327 | 2805.883  | 2454.012  |
| AK023117  | 1746.657  | 1655.43   | NM_002617 | 3668.177  | 5257.998  | NM_001684 | 1264.782  | 1187.018  |
| AL122046  | 4616.29   | 3631.473  | NM_00331  | 28412.561 | 37785.656 | NM_01330  | 2050.212  | 1630.673  |
| NM_00085  | 1360.469  | 1221.619  | AF090907  | 6059.315  | 8447.993  | AF038186  | 3883.687  | 3734.264  |
| NM_00553  | 16015.998 | 23663.984 | AK024476  | 9045.076  | 10116.201 | NM_003664 | 3855.2    | 3220.832  |
| NM_005077 | 1204.844  | 1155.552  | X74794    | 33099.469 | 25878.717 | NM_00242  | 4142.257  | 2914.214  |
| NM_001990 | 5183.815  | 5208.81   | AL050298  | 7979.12   | 10513.699 | AK027182  | 796.684   | 437.136   |
| NM_002141 | 1074.01   | 2068.88   | NM_00707  | 56559.121 | 56268.258 | J03651    | 6922.758  | 2135.965  |
| NM_00612  | 3054.347  | 2942.873  | M20696    | 8815.089  | 12406.363 | NM_00044  | 4587.586  | 1528.012  |
| NM_006267 | 3757.827  | 3845.154  | NM_00291  | 3325.466  | 5470.906  | NM_002934 | 1886.108  | 320.125   |
| NM_002661 | 23138.326 | 25647.279 | NM_00673  | 5210.051  | 8116.575  | AL050114  | 825.235   | 1030.936  |
| NM_00126  | 600.411   | 736.463   | NM_003640 | 3156.686  | 4116.852  | AK021492  | 5544.063  | 5227.589  |
| AK023982  | 2418.456  | 2507.821  | NM_014444 | 9358.049  | 13402.97  | AK023794  | 42958.836 | 45760.902 |
| NM_01846  | 5622.791  | 5867.427  | NM_01224  | 10003.178 | 12897.327 | NM_01988  | 2640.845  | 3252.973  |
| Y11312    | 5413.111  | 4649.078  | NM_014970 | 13260.576 | 17887.846 | AB033103  | 1804.715  | 1727.083  |
| NM_00303  | 26592.102 | 21831.27  | NM_01439  | 5556.952  | 6835.941  | NM_002907 | 2730.792  | 2234.269  |
| NM_00263  | 56473.598 | 52129.699 | NM_00422  | 32199.166 | 30884.432 | AK024098  | 1750.139  | 1514.742  |
| AF100756  | 12123.295 | 10034.049 | NM_00681  | 1299.646  | 1232.672  | AK001116  | 546.373   | 534.691   |
| NM_00682  | 6402.603  | 5649.88   | NM_078467 | 7581.46   | 9552.177  | AK022371  | 4794.897  | 4671.728  |
| NM_00486  | 5870.905  | 4484.821  | NM_01334  | 1863.136  | 1692.853  | D42045    | 3334.258  | 3660.017  |
| NM_001661 | 8799.004  | 8170.218  | AL117454  | 25674.816 | 21531.176 | AB007953  | 2585.915  | 2929.473  |
| NM_01456  | 3411.627  | 2005.273  | AF272890  | 1289.535  | 1060.979  | NM_01400  | 8266.163  | 7425.479  |
| NM_020150 | 5357.82   | 5325.83   | U00684    | 1696.645  | 1623.565  | NM_004197 | 20516.916 | 14464.078 |
| NM_007150 | 15272.724 | 18307.639 | NM_01645  | 39975.828 | 27935.057 | NM_00407  | 2867.566  | 2551.289  |
| NM_006831 | 11186.568 | 12825.287 | AF086227  | 2445.502  | 3276.464  | NM_00127  | 3818.89   | 3287.522  |
| AL162044  | 14212.729 | 12735.713 | AK026246  | 3128.329  | 4386.057  | NM_01910  | 7272.425  | 4543.92   |
| AB018353  | 12075.282 | 12438.848 | AF070524  | 1119.624  | 1378.115  | NM_000294 | 6056.11   | 2738.392  |
| NM_00703  | 8750.654  | 7332.318  | AF035281  | 1491.409  | 1011.51   | AJ272212  | 2323.115  | 737.619   |
| NM_002617 | 5724.169  | 5913.933  | AK026304  | 332.406   | 590.783   | NM_00162  | 52330.629 | 25338.1   |
| NM_00331  | 13979.08  | 13148.949 | AF070625  | 3418.609  | 3639.677  | NM_005677 | 5682.325  | 1551.523  |
| AF090907  | 5357.172  | 5851.827  | AL365512  | 2042.863  | 1714.147  | AF229803  | 1213.247  | 284.104   |

|           |           |           |           |           |           |           |           |           |
|-----------|-----------|-----------|-----------|-----------|-----------|-----------|-----------|-----------|
| AK024476  | 6676.359  | 6085.38   | AK001740  | 6358.505  | 4812.051  | AF151810  | 1537.806  | 952.526   |
| X74794    | 35859.719 | 33346.465 | AF131793  | 1201.325  | 1118.313  | NM_00213C | 18897.42  | 3965.691  |
| AL050298  | 10789.148 | 11062.573 | NM_078467 | 8266.529  | 8123.503  | NM_00443E | 17157.072 | 14474.385 |
| NM_00707E | 26026.668 | 22407.068 | SR2       | 55874.184 | 55549.93  | NM_00658C | 8862.14   | 7950.426  |
| M20696    | 5193.134  | 6732.707  | SR4       | 15645.516 | 20458.975 | NM_00130E | 9360.998  | 11473.818 |
| NM_00291E | 3850.15   | 3271.557  | SR6       | 1872.087  | 2762.044  | NM_00508E | 744.379   | 1842.213  |
| NM_00673E | 6194.025  | 6328.333  | SR8       | 7605.931  | 31862.357 | D17028    | 51138.004 | 45239.594 |
| NM_00364C | 4145.202  | 4232.111  | SR10      | 24846.129 | 11728.896 | NM_01344E | 45013.02  | 36279.984 |
| NM_01444A | 14364.971 | 20678.248 | CY3Cy5    | 1328.973  | 122.328   | BG611243  | 6792.638  | 7009.815  |
| NM_01224E | 14751.66  | 14685.422 | AK091573  | 708.863   | 643.857   | AI417481  | 798.224   | 812.461   |
| NM_01497C | 20368.863 | 24437.23  | AF131814  | 1814.514  | 1815.867  | BI906766  | 6677.694  | 5796.782  |
| NM_01439E | 6252.547  | 5207.604  | AL359600  | 2234.519  | 2568.445  | U60519    | 719.232   | 963.03    |
| NM_00422E | 28206.947 | 24327.922 | AL360144  | 2454.822  | 2316.617  | AA282906  | 9233.85   | 8346.146  |
| NM_00681E | 875.939   | 684.561   | AL117653  | 582.529   | 661.939   | L02870    | 36179.914 | 35444.023 |
| NM_00135E | 33348.043 | 26471.656 | AF087999  | 2063.471  | 1844.027  | BG755482  | 24124.209 | 27637.682 |
| U63336    | 1405.95   | 1072.436  | NM_00374C | 3407.104  | 3165.678  | AI480307  | 8264.164  | 8049.4    |
| NM_006907 | 8270.517  | 8132.23   | AL050078  | 1737.047  | 1629.494  | X51420    | 3428.627  | 3689.782  |
| NM_00268E | 1266.407  | 1169.409  | NM_01853E | 864.543   | 1115.229  | D28235    | 439.067   | 435.729   |
| AJ224741  | 417.132   | 688.179   | NM_01334E | 1260.545  | 1057.813  | X51757    | 1526.501  | 1049.769  |
| NM_00468A | 6220.138  | 6381.89   | NM_017851 | 1872.855  | 1951.316  | L24038    | 1955.294  | 1356.659  |
| BF338709  | 788.368   | 1223.08   | AK026182  | 81456.859 | 61403.832 | NM_05305E | 910.495   | 273.153   |
| AF204171  | 1135.512  | 1241.151  | AK025603  | 2821.616  | 2186.162  | NM_00618E | 1013.529  | 463.692   |
| M18182    | 604.088   | 651.942   | NM_01608E | 17268.855 | 13521.162 | NM_002751 | 6937.733  | 3515.389  |
| W96179    | 7632.222  | 8420.971  | AK025768  | 3175.944  | 4019.499  | M55593    | 3145.194  | 1676.395  |
| AW247841  | 25440.365 | 29956.904 | AL117502  | 6983.502  | 8673.985  | AK001883  | 35599.344 | 13327.066 |
| BG568198  | 1138.488  | 967.716   | AK001846  | 1775.641  | 2585.26   | NM_01462E | 971.42    | 367.502   |
| M76559    | 15249.878 | 18446.428 | AK024637  | 10044.687 | 13131.521 | L17325    | 1635.762  | 1515.893  |
| AF043473  | 417.803   | 489.684   | AL110293  | 763.038   | 1070.074  | NM_01771E | 1572.693  | 2236.545  |
| U03884    | 1824.69   | 1316.735  | AK026238  | 1082.901  | 1641.259  | M58603    | 12420.042 | 13796.228 |
| U11058    | 2859.272  | 2633.238  | AK026694  | 484.967   | 581.875   | NM_00363E | 12689.474 | 16853.43  |
| AA411678  | 13536.511 | 14405.896 | AK025564  | 1394.214  | 1275.305  | NM_00154E | 866.026   | 916.052   |
| AA862813  | 59224.922 | 57258.992 | AK026286  | 2097.484  | 2415.582  | NM_00011E | 7131.909  | 7941.857  |
| AA398427  | 4482.138  | 6452.417  | AK026731  | 1701.191  | 1862.266  | AF308801  | 4365.509  | 4414.569  |
| T55728    | 8437.292  | 6999.516  | AK023501  | 357.421   | 925.214   | NM_00731E | 61957.434 | 60350.07  |
| H20856    | 3927.803  | 2861.364  | AL133446  | 4238.807  | 4544.391  | NM_01487A | 2241.605  | 2065.668  |
| N62586    | 4891.305  | 4799.715  | NM_00655E | 1825.397  | 2045.985  | NM_00576E | 16815.527 | 10962.021 |
| AA242743  | 3359.371  | 2438.113  | U56251    | 3620.155  | 4166.452  | NM_00276E | 8131.52   | 14650.402 |
| NM_015361 | 16156.117 | 10398.502 | BC035667  | 1018.676  | 967.236   | NM_00632A | 9646.15   | 12963.247 |
| NM_00431C | 13902.002 | 12621.334 | AL049277  | 2933.934  | 3146.726  | NM_01684E | 18611.668 | 19724.271 |
| NM_015537 | 12112.202 | 10540.44  | AL049988  | 2783.901  | 2716.294  | NM_00051A | 15651.26  | 16986.316 |
| NM_01652C | 25835.395 | 28079.006 | AL080104  | 3723.208  | 6621.642  | AL137432  | 1886.75   | 2535.763  |
| AF035803  | 871.755   | 736.745   | AL117506  | 1164.047  | 1973.491  | NM_000957 | 4924.116  | 4225.505  |
| Y08147    | 4139.493  | 4132.434  | AL049302  | 533.415   | 1421.597  | NM_01904E | 3756.478  | 2765.724  |
| D00174    | 11016.084 | 11175.43  | AL050043  | 1546.91   | 1825.245  | NM_00324C | 21369.633 | 11461.702 |
| AB000520  | 26285.115 | 26576.113 | AL117571  | 2099.365  | 3229.006  | NM_01656A | 63648.121 | 50542.672 |
| AK023117  | 2086.506  | 2463.741  | L22263    | 932.975   | 1397.064  | AK021660  | 4611.704  | 2398.664  |
| AL122046  | 4890.189  | 5340.837  | AL137470  | 756.889   | 889.106   | AB007933  | 60969.113 | 56688.473 |
| NM_00085E | 1716.363  | 1980.783  | AL137709  | 3292.002  | 2869.74   | NM_00379E | 22643.738 | 8403.25   |
| NM_00553E | 12505.399 | 10759.06  | AK023277  | 1202.104  | 1002.259  | NM_00297E | 3008.325  | 1696.543  |
| NM_005077 | 1502.644  | 1407.432  | AK000425  | 5459.794  | 5375.841  | NM_00370E | 61296.988 | 57529     |
| NM_00442E | 7352.637  | 7051.737  | AK021616  | 325.97    | 279.782   | NM_01434E | 8791.924  | 7993.613  |
| NM_00199C | 4156.464  | 4562.781  | AK022933  | 1328.685  | 3142.585  | NM_00482C | 1270.029  | 4877.472  |
| NM_002141 | 788.342   | 822.561   | NM_01427E | 7328.252  | 10276.258 | NM_01821C | 2856.22   | 3766.383  |

|           |           |           |           |           |           |           |           |           |
|-----------|-----------|-----------|-----------|-----------|-----------|-----------|-----------|-----------|
| NM_003311 | 3573.72   | 2983.671  | AF056438  | 2870.554  | 3174.62   | NM_001096 | 7067.327  | 6902.979  |
| NM_003776 | 13974.546 | 19775.52  | AF003737  | 59163.473 | 58029.453 | NM_016014 | 2717.243  | 2621.036  |
| NM_015719 | 1452.771  | 2318.23   | AF009296  | 1038.673  | 998.429   | NM_018327 | 3486.97   | 3121.951  |
| NM_012464 | 537.715   | 474.067   | AK001011  | 10876.457 | 10901.348 | NM_001684 | 798.404   | 1139.128  |
| NM_006129 | 3351.399  | 3488.261  | AK001398  | 699.757   | 1650.28   | NM_013309 | 2490.24   | 4100.483  |
| NM_000582 | 2409.58   | 2696.265  | AK021457  | 820.747   | 1602.872  | AF038186  | 3209.818  | 5403.893  |
| NM_005593 | 5624.92   | 6766.665  | AK021690  | 1135.99   | 1962.888  | NM_003664 | 4418.36   | 6137.867  |
| NM_016077 | 9020.413  | 8022.443  | AK001078  | 762.209   | 807.011   | NM_002426 | 6151.947  | 10798.207 |
| AF100756  | 14028.967 | 13905.722 | AK001840  | 1042.329  | 1503.354  | AK027182  | 2093.113  | 5412.345  |
| NM_006825 | 6993.778  | 6165.733  | AK021486  | 1361.33   | 1480.082  | J03651    | 10277.407 | 7423.263  |
| NM_004862 | 6363.106  | 5151.764  | AK021740  | 479.383   | 952.625   | U61738    | 10815.417 | 6810.833  |
| NM_001661 | 2260.132  | 2197.92   | NM_005444 | 5085.891  | 7812.137  | AJ132087  | 722.864   | 566.864   |
| NM_014563 | 3664.295  | 2807.066  | V00589    | 58244.465 | 64083.574 | U92818    | 2012.494  | 965.109   |
| NM_020150 | 5499.118  | 5498.542  | AL390163  | 1279.619  | 1501.805  | NM_000442 | 4487.667  | 2975.704  |
| NM_007150 | 14732.725 | 13214.712 | NM_018572 | 1524.379  | 1616.181  | NM_002934 | 3101.048  | 1425.911  |
| NM_006831 | 13560.381 | 14817.129 | AK024838  | 529.515   | 484.776   | AK023011  | 39972.082 | 18488.164 |
| AL162044  | 13077.143 | 10957.082 | AK000175  | 6444.433  | 7605.07   | NM_016816 | 1259.808  | 710.992   |
| AK024004  | 1763.495  | 1653.885  | AL137736  | 4146.445  | 5166.321  | AK023794  | 42463.746 | 31576.297 |
| AK022365  | 1147.08   | 1601.72   | AF143870  | 592.458   | 885.629   | NM_019885 | 1440.085  | 1152.279  |
| BE892273  | 47727.938 | 38243.914 | NM_004192 | 11596.951 | 11955.436 | AB033103  | 1418.15   | 2164.892  |
| AF026929  | 1132.891  | 1111.324  | AK024160  | 1342.293  | 1404.525  | NM_002907 | 3138.431  | 2989.893  |
| NM_016734 | 3796.284  | 5108.467  | AK025077  | 1511.68   | 974.96    | AK024098  | 2502.839  | 2249.156  |
| M16006    | 643.598   | 592.424   | NM_006417 | 8587.909  | 7212.129  | AK001116  | 775.486   | 475.331   |
| NM_001355 | 36343.512 | 40695.992 | L43350    | 1534.746  | 1063.877  | AK022371  | 5642.306  | 4492.575  |
| U63336    | 1148.161  | 1182.973  | NM_020317 | 5637.381  | 4353.167  | D42045    | 3595.068  | 3043.285  |
| NM_006907 | 7526.522  | 7146      | AL080234  | 6329.652  | 7721.969  | AB007953  | 2486.821  | 2254.203  |
| NM_002686 | 1042.748  | 1146.035  | AK027025  | 2751.376  | 3505.382  | NM_014002 | 9694.553  | 10555.959 |
| NM_006267 | 5286.147  | 7158.777  | AK025105  | 1297.577  | 1874.878  | NM_004197 | 24874.98  | 24813.17  |
| NM_002661 | 24210.834 | 28220.744 | AB002446  | 684.716   | 795.236   | NM_004073 | 3382.73   | 4210.315  |
| NM_001263 | 461.576   | 334.271   | AF212220  | 9887.937  | 11514.12  | NM_001278 | 5234.528  | 8555.307  |
| AK023982  | 2379.067  | 1692.102  | AF147387  | 4415.014  | 5725.652  | NM_019105 | 11012.485 | 13714.383 |
| NM_018466 | 5415.327  | 4796.334  | NM_012081 | 1366.386  | 2260.319  | NM_000294 | 9084.211  | 10221.299 |
| Y11312    | 5250.042  | 3384.68   | AL137463  | 404.481   | 757.678   | AJ272212  | 3644.283  | 3110.544  |
| AB014533  | 5691.15   | 5710.481  | AF085909  | 34590.305 | 33749.199 | NM_001626 | 55152.746 | 45541.262 |
| NM_000744 | 964.683   | 568.449   | AF090888  | 1054.741  | 754.07    | NM_005677 | 6592.881  | 4605.599  |
| NM_003039 | 25702.244 | 18929.506 | AK027193  | 2442.745  | 2403.724  | AF229803  | 1668.771  | 1385.446  |
| NM_014509 | 1403.151  | 841.025   | AF086471  | 10745.499 | 9988.503  | AF151810  | 422.23    | 437.976   |
| NM_020372 | 1660.038  | 1039.495  | NM_018455 | 8784.628  | 7157.433  | NM_002130 | 24270.416 | 10296.424 |
| NM_002635 | 54168.676 | 47350.191 | AF113018  | 1669.778  | 1779.929  | NM_005469 | 4624.785  | 3064.921  |
| NM_004979 | 1926.191  | 1335.287  | AK021996  | 1490.837  | 1487.029  | NM_016361 | 2942.617  | 1537.418  |
| NM_015361 | 18045.074 | 17724.627 | AL049337  | 6544.434  | 6791.014  | NM_001305 | 7120.577  | 6078.602  |
| NM_004310 | 14119.374 | 14224.54  | Z27200    | 1862.848  | 2249.345  | NM_005082 | 566.584   | 583.642   |
| NM_015537 | 10542.188 | 10456.498 | AF070571  | 8586.474  | 11110.79  | D17028    | 47269.375 | 43995.699 |
| NM_016520 | 22149.98  | 19538.754 | AK023554  | 6618.23   | 7151.193  | NM_013442 | 41230.133 | 38710.938 |
| AB018353  | 11329.668 | 9282.922  | NM_003513 | 7808.121  | 18065.965 | BG611243  | 5694.04   | 6835.985  |
| NM_007036 | 8375.824  | 7071.722  | AL079294  | 397.263   | 551.572   | AI417481  | 1865.264  | 2509.297  |
| NM_002617 | 6288.258  | 6035.955  | AK024844  | 1183.526  | 1340.18   | BI906766  | 7872.695  | 6237.307  |
| NM_003313 | 11348.689 | 7877.106  | AL049437  | 491.325   | 559.004   | AA282906  | 9463.687  | 7193.902  |
| AF090907  | 4620.904  | 3838.485  | AF161427  | 59361.297 | 60531.758 | L02870    | 37614.094 | 25874.502 |
| AK024476  | 5834.467  | 4262.246  | AK021715  | 13783.286 | 17363.287 | BG755482  | 26763.049 | 18405.672 |
| X74794    | 35506.367 | 26630.873 | AK000315  | 15037.271 | 16192.456 | AI480307  | 10204.68  | 9954.126  |
| AL050298  | 9901.247  | 9300.452  | AK023248  | 2080.598  | 2616.982  | X51420    | 3677.844  | 6589.647  |
| NM_007079 | 28860.9   | 21719.395 | NM_012404 | 35974.012 | 36128.137 | D28235    | 543.762   | 968.535   |

|           |           |           |           |           |           |           |           |           |
|-----------|-----------|-----------|-----------|-----------|-----------|-----------|-----------|-----------|
| M20696    | 4403.753  | 3352.383  | AF251190  | 823.942   | 1170.971  | X51757    | 1931.883  | 2668.166  |
| NM_002915 | 4008.691  | 3766.267  | AF130075  | 14043.007 | 13250.607 | L24038    | 2501.345  | 4835.64   |
| NM_006736 | 6359.138  | 6186.12   | L29496    | 1598.193  | 1338.761  | NM_053056 | 1526.919  | 2513.282  |
| NM_003640 | 3702.558  | 3859.538  | NM_007002 | 10923.324 | 15619.305 | NM_006186 | 1601.785  | 1465.231  |
| NM_014444 | 10754.457 | 8049.627  | NM_012121 | 1334.91   | 1625.07   | NM_002751 | 7093.936  | 4293.879  |
| NM_012246 | 11992.567 | 8516.324  | NM_014155 | 4014.989  | 2574.204  | M55593    | 2455.093  | 1665.208  |
| NM_006145 | 1002.196  | 352.932   | AK026331  | 23559.688 | 26745.229 | AK001883  | 39488.738 | 22615.934 |
| NM_014970 | 17272.139 | 12904.472 | M30773    | 2507.149  | 2546.956  | NM_014625 | 1354.309  | 723.721   |
| NM_014393 | 7004.468  | 6411.766  | NM_016338 | 15266.769 | 15626.156 | AL050114  | 660.647   | 630.594   |
| NM_004223 | 32498.262 | 27318.402 | AF113699  | 37825.918 | 29927.354 | AK021492  | 5672.12   | 3291.128  |
| NM_006813 | 933.765   | 505.711   | AK021897  | 9074.464  | 8758.844  | NM_014874 | 738.11    | 848.514   |
| CY3Cy5    | 1259.715  | 120.111   | AK001051  | 2892.298  | 3164.654  | NM_005765 | 14849.084 | 12374.866 |
| NM_078467 | 6996.586  | 4387.768  | NM_018317 | 1649.271  | 4638.44   | NM_002762 | 5119.814  | 8159.514  |
| NM_013345 | 2355.503  | 1988.087  | AF086051  | 1286.703  | 3387.371  | NM_006324 | 10656.97  | 9376.364  |
| AL117454  | 6413.076  | 4365.167  | AL049370  | 3904.655  | 2481.32   | NM_016846 | 18345.586 | 14400.097 |
| AF272890  | 712.304   | 553.031   | AL365410  | 8352.494  | 6587.396  | NM_000514 | 18361.76  | 12662.888 |
| NM_016456 | 48834.555 | 41359.516 | D17082    | 18784.523 | 17972.463 | AL137432  | 1522.665  | 1376.595  |
| AF086227  | 1768.917  | 1839.975  | D17252    | 46404.434 | 44688.844 | NM_000957 | 5260.354  | 3779.052  |
| AK026246  | 3918.032  | 3702.889  | D16476    | 966.286   | 1283.06   | NM_019043 | 4237.788  | 3665.752  |
| AF035281  | 3332.439  | 2108.358  | NM_003673 | 7538.333  | 7185.795  | NM_003240 | 24577.412 | 17284.223 |
| AK026304  | 520.948   | 678.274   | Z36823    | 23544.395 | 27282.074 | NM_016564 | 62604.344 | 59683.902 |
| AF070625  | 2282.174  | 2212.014  | AK022110  | 418.428   | 449.271   | NM_000796 | 1387.799  | 3403.987  |
| AL365512  | 3222.191  | 3554.767  | NM_014935 | 19244.563 | 17518.877 | AF279656  | 1872.624  | 2561.673  |
| AK001740  | 2738.718  | 2485.421  | X99660    | 35393.23  | 33033.859 | AK021660  | 7747.554  | 11776.049 |
| AF131793  | 2027.171  | 1888.69   | X03635    | 5104.71   | 4358.321  | AB007933  | 60402.133 | 72595.945 |
| NM_078467 | 7670.384  | 5745.892  | X97671    | 746.329   | 655.413   | NM_006702 | 8466.925  | 11180.286 |
| SR2       | 45793.434 | 50054.012 | NM_004351 | 14305.077 | 11612.264 | NM_001396 | 40346.363 | 34872.977 |
| SR4       | 14530.631 | 19978.686 | NM_004236 | 10921.518 | 9759.083  | NM_014474 | 2257.887  | 1961.293  |
| SR6       | 1601.414  | 3096.145  | AB011093  | 15147.75  | 14338.605 | NM_016246 | 3585.836  | 3026.587  |
| SR8       | 9238.32   | 44719.926 | NM_020533 | 20653.436 | 24466.861 | NM_006181 | 1634.994  | 1642.095  |
| SR10      | 25123.857 | 11167.603 | NM_001894 | 19586.582 | 18564.414 | NM_003796 | 24629.094 | 14444.662 |
| CY3Cy5    | 1571.125  | 158.394   | NM_000614 | 1166.758  | 971.612   | NM_002973 | 3747.849  | 2923.087  |
| AK091573  | 1300.313  | 1083.871  | AK022884  | 2108.848  | 1675.046  | NM_004436 | 14381.214 | 10304.79  |
| AF131814  | 2574.7    | 2388.297  | NM_006620 | 8479.308  | 5751.782  | NM_006580 | 8310.117  | 5774.583  |
| AL359600  | 2954.537  | 1763.966  | NM_001397 | 1442.986  | 1588.44   | NM_016277 | 1105.801  | 1107.657  |
| AL360144  | 659.575   | 598.601   | NM_005543 | 771.658   | 998.057   | NM_007247 | 2488.261  | 1624.969  |
| BC028617  | 811.488   | 711.212   | Y08770    | 751.264   | 739.72    | NM_006554 | 3660.497  | 2971.1    |
| AL117653  | 963.861   | 658.185   | NM_004772 | 5047.619  | 4558.597  | X99962    | 13032.66  | 12190.691 |
| AF087999  | 3249.853  | 2144.446  | NM_003714 | 2059.601  | 2392.302  | AK023221  | 18891.477 | 11289.608 |
| NM_003740 | 1918.723  | 1517.893  | NM_004004 | 658.344   | 379.984   | NM_003664 | 4557.814  | 4841.041  |
| AL050078  | 626.838   | 663.325   | U42977    | 11207.412 | 8976.196  | NM_002426 | 4946.174  | 4791.441  |
| NM_018536 | 1445.214  | 1472.925  | NM_002881 | 16487.348 | 19130.748 | AK027182  | 1081.424  | 1061.013  |
| NM_013346 | 2469.614  | 2465.341  | NM_003666 | 11428.584 | 13916.522 | J03651    | 8413.533  | 6252.071  |
| AF131784  | 432.883   | 507.403   | NM_003286 | 6802.717  | 5202.066  | U61738    | 13165.132 | 10528.45  |
| NM_017851 | 2776.18   | 2958.679  | NM_018242 | 1255.514  | 1278.299  | AJ132087  | 1031.095  | 1267.145  |
| AK026182  | 65082.277 | 51707.387 | M83822    | 4902.865  | 3772.123  | U92818    | 2561.624  | 4395.858  |
| AK025603  | 4530.41   | 4376.482  | NM_018434 | 1021.283  | 1221.075  | NM_000442 | 5138.203  | 7971.328  |
| NM_016085 | 23009.199 | 19028.109 | NM_003914 | 809.727   | 881.407   | NM_002934 | 3771.972  | 6213.394  |
| AK025768  | 3440.494  | 3784.358  | NM_020423 | 2753.823  | 2849.773  | AK023011  | 58655.59  | 60197.602 |
| AL117502  | 8106.584  | 6947.973  | AK021437  | 4484.57   | 6407.034  | NM_016816 | 1767.595  | 2885.921  |
| AK001846  | 928.449   | 1076.54   | NM_003831 | 5933.052  | 6629.316  | L17325    | 1483.151  | 1669.124  |
| AF147300  | 551.852   | 453.846   | NM_001759 | 1303.255  | 864.668   | NM_017716 | 1250.32   | 1189.019  |
| AK024637  | 12541.866 | 11196.04  | AB007965  | 12290.647 | 13383.301 | M58603    | 8463.79   | 5661.644  |

|           |           |           |           |           |           |           |           |           |
|-----------|-----------|-----------|-----------|-----------|-----------|-----------|-----------|-----------|
| AK024108  | 683.932   | 763.9     | NM_017649 | 1243.552  | 1193.248  | NM_003639 | 7715.251  | 5969.013  |
| AL110293  | 490.838   | 555.503   | NM_000066 | 1766.317  | 1384.215  | NM_001549 | 618.475   | 508.463   |
| AK025148  | 430.92    | 588.935   | NM_001196 | 13586.272 | 10065.968 | NM_000115 | 5684.953  | 3925.148  |
| AK026238  | 1665.337  | 1168.542  | NM_016008 | 1625.379  | 1796.157  | AF308801  | 3207.967  | 3335.634  |
| AK025564  | 683.241   | 451.773   | NM_017744 | 875.172   | 634.545   | NM_002130 | 21794.99  | 15356.48  |
| AK026286  | 1080.513  | 792.774   | NM_001924 | 8737.994  | 6607.561  | NM_005469 | 3737.566  | 4222.301  |
| AK026731  | 2466.705  | 2022.186  | NM_017705 | 9949.354  | 8463.065  | NM_016361 | 3129.673  | 2620.761  |
| AK021754  | 480.427   | 446.902   | AB002325  | 791.566   | 733.308   | NM_003708 | 59103.668 | 55936.727 |
| AL133446  | 755.672   | 1187.559  | NM_001796 | 5913.93   | 5502.984  | NM_014349 | 10660.406 | 8494.321  |
| AF147406  | 563.374   | 878.205   | AB040880  | 1746.443  | 2001.687  | AB040895  | 788.19    | 605.585   |
| NM_006553 | 3186.816  | 2892.118  | NM_009587 | 18308.398 | 16566.105 | NM_018210 | 1517.059  | 1396.635  |
| U56251    | 5479.011  | 5313.278  | NM_017820 | 3001.486  | 3205.21   | NM_001099 | 6312.983  | 4819.897  |
| BC035667  | 1398.865  | 2213.867  | NM_002630 | 2178.273  | 2292.914  | NM_016014 | 2443.365  | 2482.411  |
| AL049277  | 2242.958  | 2421.026  | AJ295149  | 66234.719 | 65687.891 | NM_018327 | 3707.951  | 5311.753  |
| AL050043  | 659.121   | 648.854   | NM_013438 | 7209.929  | 7509.834  | NM_017581 | 2751.785  | 5168.35   |
| AL117571  | 1936.331  | 3021.29   | NM_014688 | 14606.668 | 9966.815  | AA488804  | 7619.103  | 9192.464  |
| AK025010  | 540.158   | 744.211   | AB037784  | 667.694   | 675.078   | NM_001684 | 556.914   | 432.594   |
| AL137709  | 5288.179  | 3080.548  | AL359623  | 4223.829  | 6475.174  | NM_016318 | 20814.615 | 13217.428 |
| AK023277  | 1299.003  | 1030.682  | AK026920  | 8001.963  | 9756.134  | NM_013309 | 1942.337  | 1626.913  |
| AK000425  | 5611.484  | 3336.659  | AL137255  | 2100.223  | 1801.227  | NM_019891 | 1915.192  | 2455.476  |
| AK022933  | 1021.302  | 1061.018  | NM_003370 | 14318.375 | 12348.021 | AF038186  | 4432.891  | 5370.91   |
| NM_014276 | 1520.669  | 1521.132  | AB037715  | 6182.804  | 4514.892  | AK001883  | 37742.934 | 22253.24  |
| AF009288  | 782.573   | 1247.127  | AF250924  | 15588.549 | 12135.393 | NM_014629 | 468.902   | 582.158   |
| AF056438  | 1251.805  | 1347.451  | D86979    | 3148.784  | 2495.821  | AL050114  | 681.433   | 408.896   |
| AF003737  | 10541.778 | 11317.555 | NM_018212 | 547.69    | 584.174   | AK021492  | 4954.602  | 3679.647  |
| AF009296  | 1868.178  | 2407.75   | AB023230  | 4540.371  | 3471.576  | AK023794  | 43672.176 | 34287.781 |
| AF041410  | 314.055   | 354.658   | AF018081  | 54209.82  | 43375.145 | NM_019885 | 2030.281  | 1354.192  |
| AK001011  | 2800.664  | 3027.218  | NM_020202 | 29312.686 | 30536.336 | AB033103  | 1401.722  | 1036.674  |
| AK001398  | 194.057   | 1183.974  | AF024540  | 2987.486  | 3082.248  | NM_002907 | 2436.564  | 1464.898  |
| AK021457  | 1595.679  | 1231.317  | NM_002189 | 5838.884  | 4821.304  | AK024098  | 1866.686  | 1663.57   |
| AK021690  | 1304.963  | 941.473   | NM_001668 | 3288.653  | 2603.731  | AK001116  | 411.871   | 659.144   |
| AK001078  | 611.399   | 542.016   | AK025362  | 3368.813  | 2619.291  | AK022371  | 5412.9    | 4886.542  |
| AK021486  | 958.151   | 729.137   | AK021776  | 3102.974  | 2748.915  | D42045    | 3641.818  | 3716.431  |
| AK021740  | 871.381   | 1198.866  | AK026042  | 3158.869  | 3272.62   | AB007953  | 2528.769  | 2481.241  |
| NM_005444 | 8366.556  | 12543.452 | NM_014233 | 54475.031 | 52921.18  | NM_014002 | 8681.821  | 7549.215  |
| V00589    | 27838.74  | 29977.283 | NM_002137 | 62203.281 | 62031.922 | NM_004197 | 22631.891 | 13848.201 |
| AL390163  | 1995.29   | 1499.879  | NM_002911 | 3877.247  | 3672.421  | NM_004073 | 2359.936  | 1386.093  |
| NM_018572 | 2102.138  | 1276.525  | U94386    | 2179.379  | 2707.011  | NM_001278 | 4034.545  | 2431.716  |
| AL109959  | 528.503   | 605.055   | NM_016000 | 52824.441 | 52405.039 | NM_019105 | 7890.905  | 5020.494  |
| AK024838  | 835.07    | 776.949   | NM_006372 | 13458.768 | 13273.261 | NM_000294 | 7221.625  | 5206.697  |
| AK000175  | 4312.317  | 3155.27   | NM_014150 | 2022.744  | 1461.492  | AJ272212  | 2644.282  | 1809.736  |
| AL137736  | 1891.622  | 1698.89   | NM_006805 | 51049.844 | 52815.332 | NM_001626 | 50996.176 | 54023.105 |
| AK021427  | 535.97    | 981.012   | AF132027  | 55153.938 | 57486.832 | NM_005677 | 11071.937 | 10053.912 |
| NM_004192 | 19405.799 | 22060.891 | NM_004681 | 27881.688 | 20817.781 | CY3Cy5    | 6046.826  | 1039.946  |
| AK024160  | 2232.791  | 2811.127  | AB033096  | 21029.338 | 13901.052 | NM_004957 | 2999.472  | 4989.408  |
| AK025077  | 2006.577  | 2246.612  | NM_014886 | 2867.026  | 2334.115  | NM_005252 | 1069.261  | 475.177   |
| NM_006417 | 6735.583  | 9389.091  | L31408    | 32451.338 | 27589.172 | AL359211  | 458.233   | 234.128   |
| L43350    | 1568.352  | 1964.229  | NM_001545 | 20445.555 | 16909.609 | AF070526  | 360.864   | 77.949    |
| NM_020317 | 9491.385  | 5968.556  | NM_004446 | 33974.137 | 29514.025 | U79264    | 2423.085  | 1332.339  |
| AL080234  | 7855.45   | 5580.708  | AL133566  | 1664.509  | 1938.069  | NM_015699 | 7459.043  | 4308.522  |
| AK027025  | 2554.344  | 2857.443  | M36118    | 20157.41  | 20373.625 | AF070530  | 5080.815  | 1981.871  |
| AK025105  | 1535.552  | 1667.547  | NM_003399 | 28258.09  | 28144.195 | AF086487  | 417.053   | 293.613   |
| AK021675  | 415.274   | 522.21    | J02625    | 27173.539 | 21016.094 | NM_006420 | 1349.185  | 761.529   |

|           |           |           |           |           |           |           |           |           |
|-----------|-----------|-----------|-----------|-----------|-----------|-----------|-----------|-----------|
| AB002446  | 745.041   | 974.11    | Y17175    | 65926.492 | 68342.547 | AF131855  | 792.124   | 437.612   |
| AF212220  | 13962.022 | 11732.329 | NM_004549 | 28305.77  | 25193.471 | AF086046  | 3097.379  | 1955.389  |
| AF147387  | 1296.29   | 1416.66   | NM_005333 | 40531.449 | 33347.449 | AK023309  | 584.474   | 609.42    |
| NM_012081 | 2029.173  | 2407.843  | NM_000767 | 698.141   | 587.375   | AK000724  | 4741.924  | 15083.029 |
| AL137463  | 404.535   | 278.488   | AK026161  | 2384.581  | 2346.63   | NM_003720 | 19174.807 | 25223.109 |
| AF085909  | 17721.682 | 12797.588 | NM_004553 | 54887.805 | 56448.984 | NM_004957 | 2200.068  | 2946.82   |
| AF090888  | 601.317   | 753.503   | D63484    | 5960.427  | 5698.171  | NM_005252 | 1607.744  | 1930.909  |
| AK027193  | 986.813   | 718.932   | AK026745  | 9155.187  | 10176.342 | SR1       | 62093.922 | 72737.492 |
| AF086471  | 14332.472 | 10442.395 | AL157440  | 6554.773  | 6304.606  | SR3       | 26024.174 | 33319.621 |
| NM_018455 | 10467.709 | 7550.948  | NM_016423 | 16177.084 | 13607.206 | SR5       | 2965.867  | 3484.461  |
| AF113018  | 1513.236  | 1212.511  | AB040975  | 3920.277  | 3882.482  | CY3Cy5    | 1743.121  | 252.644   |
| AK021996  | 2056.96   | 1591.211  | AK026213  | 2123.022  | 1894.263  | Z36818    | 410.004   | 249.813   |
| AL049337  | 1771.378  | 1678.518  | NM_005119 | 17055.41  | 15924.564 | Z36842    | 1173.104  | 369.362   |
| Z27200    | 2222.252  | 2644.742  | NM_003168 | 11850.068 | 11827.539 | AF086137  | 1982.585  | 674.141   |
| AF070571  | 15942.514 | 16937.082 | AK055844  | 2727.164  | 2556.306  | AF086155  | 667.397   | 339.822   |
| AK023554  | 10772.125 | 14611.886 | NM_018288 | 20451.043 | 16633.676 | AF086526  | 1110.702  | 460.628   |
| NM_003513 | 13825.097 | 31588.125 | NM_003146 | 12964.547 | 9895.738  | AK025788  | 4628.726  | 2893.209  |
| AL079294  | 1109.214  | 1251.869  | X52342    | 691.008   | 409.151   | AF086164  | 1188.29   | 695.687   |
| AK024844  | 2017.259  | 1976.304  | NM_003131 | 15602.768 | 15625.608 | AK025577  | 2325.323  | 2324.053  |
| AL049437  | 504.447   | 680.507   | NM_005239 | 11093.868 | 10539.737 | AK000216  | 1133.242  | 983.317   |
| AF161427  | 34874.586 | 32060.447 | AK022889  | 19857.914 | 20322.555 | AK023440  | 1124.127  | 1688.99   |
| AK021715  | 22604.486 | 21475.16  | X52357    | 55659.367 | 52745.895 | AB033041  | 18374.41  | 19586.387 |
| AK000315  | 16634.725 | 16549.623 | AF211891  | 2546.119  | 3383.491  | NM_014894 | 57680.621 | 65326.75  |
| AK023248  | 3543.53   | 3495.58   | NM_005641 | 5139.297  | 4116.854  | AY007155  | 968.866   | 950.984   |
| NM_012404 | 45321.063 | 44343.652 | NM_003796 | 34609.57  | 28244.449 | AK022678  | 471.64    | 255.113   |
| AF251190  | 1388.514  | 1211.769  | NM_002973 | 5995.126  | 6937.526  | AK023835  | 1663.39   | 874.206   |
| AF130075  | 3180.341  | 3423.067  | NM_004436 | 18675.752 | 18718.453 | AK023906  | 2283.186  | 1104.601  |
| L29496    | 489.061   | 909.671   | NM_006580 | 9732.084  | 7791.347  | AK024234  | 361.299   | 297.905   |
| NM_000928 | 936.813   | 888.31    | NM_001305 | 10227.931 | 10720.883 | AK024962  | 1133.929  | 784.856   |
| NM_007002 | 17959.977 | 13408.568 | NM_005082 | 1293.448  | 1393.214  | AK022164  | 1073.994  | 637.994   |
| NM_012121 | 953.454   | 605.558   | D17028    | 55166.523 | 58763.637 | AK025135  | 6520.724  | 4524.694  |
| NM_014155 | 6083.147  | 8003.73   | NM_013442 | 50447.781 | 48846.559 | NM_017926 | 1900.123  | 1685.717  |
| M30773    | 3032.553  | 3614.373  | BG611243  | 9950.821  | 23368.664 | AY007145  | 3434.6    | 2657.339  |
| NM_016338 | 12208.578 | 9274.798  | AI417481  | 1370.482  | 2005.032  | AK021573  | 762.285   | 678.793   |
| AF113699  | 13775.318 | 8545.898  | BI906766  | 11208.271 | 9390.991  | D38549    | 2267.761  | 2618.079  |
| AK021897  | 15579.037 | 12923.769 | AA282906  | 8519.229  | 9306.642  | AK024780  | 1417.267  | 1552.662  |
| AK001051  | 5278.755  | 4883.346  | L02870    | 34168.938 | 32188.496 | AF085947  | 1207.386  | 1891.172  |
| NM_018317 | 1516.809  | 1567.609  | BG755482  | 23172.471 | 22864.512 | AF086000  | 998.872   | 1310.717  |
| AF086051  | 3107.78   | 3709.972  | AI480307  | 11039.99  | 9292.453  | AL359591  | 685.303   | 1089.039  |
| AK024356  | 463.133   | 946.404   | X51420    | 5209.217  | 4290.658  | AK022389  | 570.381   | 1057.989  |
| AL365410  | 13437.138 | 10609.153 | D28235    | 726.773   | 664.856   | AK022123  | 747.413   | 1717.651  |
| D17082    | 28579.826 | 22489.264 | X51757    | 3159.813  | 1680.239  | AK023018  | 1414.208  | 746.143   |
| D17252    | 49931.133 | 51899.191 | L24038    | 3560.715  | 3975.407  | AK022672  | 1430.779  | 739       |
| D16476    | 1062.272  | 1206.911  | NM_053056 | 1274.634  | 1074.592  | AK023870  | 3105.247  | 1734.462  |
| NM_003673 | 4904.446  | 3879.205  | NM_006186 | 1570.603  | 1210.388  | AK021599  | 1033.388  | 640.631   |
| Z36823    | 29668.932 | 35283.984 | NM_002751 | 7522.954  | 7875.695  | BC030975  | 604.42    | 454.663   |
| AK022110  | 578.8     | 1207.338  | M55593    | 4820.861  | 5688.956  | AF116677  | 777.059   | 620.472   |
| NM_001849 | 1712.663  | 1649.714  | NM_005918 | 57078.48  | 54200.664 | NM_014155 | 3870.872  | 2152.057  |
| NM_003734 | 21915.455 | 19381.939 | AK023011  | 47918.734 | 40479.391 | AK021795  | 1498.588  | 1420.609  |
| NM_014935 | 4250.273  | 3548.427  | NM_016816 | 2570.282  | 2413.048  | AL162042  | 4133.362  | 5717.682  |
| X99660    | 15393.057 | 11237.651 | L17325    | 2433.443  | 2360.883  | AK026131  | 1009.111  | 1049.397  |
| X03635    | 2908.877  | 3180.501  | NM_017716 | 2694.69   | 3013.051  | AK023312  | 1524.469  | 1338.823  |
| NM_004236 | 15207.744 | 13330.615 | M58603    | 12592.137 | 11494.787 | AK022483  | 756.641   | 892.961   |

|           |           |           |           |           |           |           |           |           |
|-----------|-----------|-----------|-----------|-----------|-----------|-----------|-----------|-----------|
| AB011093  | 23549.887 | 19378.768 | NM_003639 | 14942.78  | 14835.362 | AL133570  | 914.175   | 1134.331  |
| NM_002462 | 610.1     | 529.698   | NM_001549 | 1318.857  | 1182.548  | AK021462  | 613.013   | 666.776   |
| NM_020533 | 16817.947 | 20714.701 | NM_000115 | 10132.421 | 10852.595 | AF131836  | 2265.863  | 899.508   |
| NM_001894 | 25002.021 | 28935.605 | AF308801  | 5650.397  | 6805.244  | AF275804  | 6343.438  | 3265.212  |
| NM_000614 | 1789.255  | 2456.669  | NM_007318 | 61054.668 | 62499.461 | AL137488  | 1358.659  | 544.608   |
| AK022884  | 1367.253  | 1266.106  | NM_014874 | 3580.375  | 3849.373  | AL049447  | 33670.215 | 15867.068 |
| AF305072  | 478.523   | 460.264   | NM_005765 | 18007.186 | 20040.414 | NM_020527 | 2550.649  | 1580.995  |
| NM_006620 | 11375.57  | 9745.291  | NM_002762 | 4309.376  | 4215.093  | AB020637  | 1254.801  | 752.903   |
| NM_001397 | 2594.029  | 2504.652  | NM_006324 | 13447.015 | 13602.525 | NM_005286 | 6870.238  | 4637.875  |
| NM_005543 | 423.497   | 541.798   | NM_016848 | 21423.191 | 20985.043 | AK024365  | 5299.402  | 3390.594  |
| Y08770    | 1503.315  | 1587.597  | NM_000514 | 17725.359 | 15379.289 | AJ251759  | 1442.694  | 1033.636  |
| NM_004772 | 7937.746  | 8202.769  | AL137432  | 5331.495  | 3812.432  | AK024371  | 3207.115  | 2556.71   |
| NM_003714 | 417.219   | 644.049   | NM_000957 | 9222.573  | 5826.959  | NM_005454 | 1179.336  | 938.356   |
| NM_004004 | 1073.997  | 1345.536  | NM_019043 | 6482.622  | 5633.321  | AB019569  | 61662.84  | 71712.008 |
| U42977    | 15663.555 | 18705.127 | NM_003240 | 22828.842 | 26243.119 | NM_012409 | 2063.701  | 2035.166  |
| NM_002881 | 24731.771 | 30918.889 | NM_016564 | 60241.402 | 59659.219 | AL050205  | 5645.889  | 5051.108  |
| NM_003666 | 3494.18   | 2964.675  | NM_000796 | 1085.811  | 1782.835  | AK023947  | 565.622   | 800.078   |
| NM_003288 | 10535.385 | 8101.043  | AK021660  | 4429.885  | 5161.091  | NM_005691 | 1013.649  | 1461.451  |
| NM_018242 | 816.169   | 611.678   | AB007933  | 60759.914 | 60496.844 | AF086156  | 398.63    | 484.792   |
| NM_020423 | 2437.815  | 2002.227  | NM_005469 | 8312.449  | 11478.658 | AK023814  | 477.624   | 469.701   |
| AK021437  | 1350.851  | 792.464   | NM_016361 | 3619.721  | 3126.712  | AF130063  | 593.772   | 952.685   |
| NM_003831 | 9379.49   | 6938.753  | NM_003708 | 64959.738 | 70978.836 | AF086528  | 942.688   | 1008.663  |
| NM_001759 | 2247.893  | 1745.166  | NM_014349 | 14290.068 | 16875.184 | AL162043  | 606.978   | 734.646   |
| NM_000066 | 1469.273  | 1820.389  | AB040895  | 921.845   | 680.864   | NM_006543 | 1047.742  | 1388.481  |
| NM_016008 | 3638.259  | 3626.844  | NM_018210 | 2748.871  | 3808.915  | AF086252  | 1189.896  | 498.646   |
| NM_017744 | 978.804   | 864.386   | NM_001096 | 12325.265 | 10681.855 | AK026703  | 940.121   | 751.764   |
| NM_001924 | 11958.266 | 9285.722  | NM_016014 | 3594.241  | 3723.486  | NM_017866 | 5518.266  | 3486.375  |
| NM_017705 | 10821.859 | 10429.636 | NM_000198 | 685.247   | 662.938   | NM_003536 | 1347.844  | 980.678   |
| AB002325  | 1136.057  | 852.33    | NM_018327 | 3664.155  | 3568.965  | AF116707  | 5081.078  | 3577.109  |
| NM_001796 | 1235.193  | 1174.652  | NM_001684 | 2121.328  | 3133.158  | U90910    | 7973.526  | 6313.551  |
| AB040880  | 3413.46   | 3499.462  | NM_013309 | 2009.414  | 2860.443  | AK025765  | 1725.55   | 1337.063  |
| NM_009587 | 7305.969  | 6536.627  | AF038186  | 5643.637  | 6881.219  | AK024263  | 987.717   | 969.247   |
| NM_017820 | 3250.985  | 4239.27   | NM_003664 | 5259.477  | 5266.34   | NM_016613 | 4340.589  | 3841.461  |
| NM_001097 | 848.85    | 1661.576  | NM_002426 | 5244.844  | 5667.759  | AF086414  | 4624.746  | 3966.633  |
| NM_002630 | 2533.261  | 3867.172  | AK027182  | 1919.186  | 1854.098  | AJ012490  | 9529.119  | 9934.11   |
| AJ295149  | 44871.43  | 49507.367 | J03651    | 15620.151 | 16086.85  | U84516    | 10882.883 | 9869.113  |
| NM_013438 | 6628.001  | 9085.148  | U61738    | 10296.929 | 14293.196 | AL049270  | 1705.357  | 1527.02   |
| AB037784  | 783.169   | 738.921   | AJ132087  | 2348.191  | 2958.265  | U88834    | 13614.589 | 14931.229 |
| AL359623  | 5679.208  | 4222.606  | U92818    | 3600.967  | 3428.224  | BC025324  | 1582.644  | 1871.829  |
| AB037715  | 2534.674  | 2916.399  | NM_000442 | 8729.051  | 12679.66  | NM_003533 | 1279.452  | 1308.424  |
| AF250924  | 8722.072  | 8090.761  | NM_002934 | 5354.679  | 6638.73   | AL157478  | 867.772   | 1161.494  |
| D86979    | 4383.188  | 3776.46   | AL050114  | 1589.712  | 1497.917  | AK023726  | 12464.628 | 15032.229 |
| NM_018212 | 735.421   | 698.391   | AK021492  | 10268.49  | 7541.299  | AK024906  | 769.82    | 663.592   |
| AF018081  | 29172.055 | 28933.09  | AK023794  | 51836.305 | 49921.246 | NM_005607 | 1880.673  | 2489.867  |
| NM_020202 | 32268.668 | 31499.279 | NM_019885 | 3445.413  | 4158.886  | NM_014897 | 921.27    | 1243.748  |
| AF024540  | 4116.128  | 3125.723  | AB033103  | 2109.421  | 1675.427  | NM_003453 | 4879.579  | 3167.143  |
| NM_002189 | 6208.19   | 6294.909  | NM_002907 | 4086.353  | 3234.816  | NM_018371 | 13047.452 | 8804.302  |
| NM_001668 | 3058.352  | 3817.475  | AK024098  | 2686.084  | 2236.454  | NM_014390 | 14784.123 | 11773.327 |
| AK025362  | 5218.242  | 5301.302  | AK001116  | 715.954   | 636.209   | NM_018143 | 610.86    | 600.463   |
| AK021776  | 4417.724  | 4205.395  | AK022371  | 8688.046  | 9869.815  | X78924    | 10455.235 | 8825.157  |
| AK026042  | 5085.689  | 5683.236  | D42045    | 5564.318  | 5886.494  | NM_013250 | 895.666   | 1015.559  |
| NM_014233 | 33080.688 | 30879.43  | AB007953  | 4963.54   | 5720.572  | NM_001888 | 9110.115  | 6993.512  |
| U94386    | 2805.455  | 2375.047  | NM_014002 | 14200.452 | 18054.443 | X89668    | 30681.191 | 18456.883 |



|           |           |           |           |           |           |           |           |           |
|-----------|-----------|-----------|-----------|-----------|-----------|-----------|-----------|-----------|
| NM_01600C | 7982.612  | 5961.672  | NM_004197 | 17495.463 | 17765.416 | NM_00445E | 2170.959  | 1702.395  |
| NM_00637Z | 21067.635 | 14221.121 | NM_004073 | 3438.982  | 3520.484  | NM_006901 | 1833.569  | 2183.352  |
| NM_01415C | 3241.997  | 2603.925  | NM_00127E | 7527.497  | 7523.685  | NM_01853C | 9041.467  | 8343.606  |
| NM_00680E | 21725.152 | 26377.504 | NM_01910E | 9417.732  | 8699.619  | AJ003145  | 687.489   | 631.912   |
| AF132027  | 50941.941 | 50410.742 | NM_000294 | 9056.932  | 8550.115  | AK022855  | 11467.964 | 13734.651 |
| NM_01595C | 682.62    | 874.805   | AJ272212  | 4025.017  | 4607.422  | AK023816  | 1620.479  | 1651.771  |
| AB033096  | 34037.527 | 26862.514 | NM_00162E | 59101.52  | 57493.949 | AF305686  | 4218.299  | 4385.806  |
| NM_01488E | 3982.269  | 2617.611  | NM_005677 | 9369.102  | 12538.892 | AF085832  | 1399.31   | 1694.493  |
| L31408    | 38264.797 | 35225.676 | AF229803  | 2018.077  | 3103.471  | AK025981  | 2887.544  | 3576.056  |
| NM_00154E | 27565.719 | 21673.037 | NM_00443E | 15825.995 | 13155.563 | AF113212  | 878.079   | 936.156   |
| NM_00444E | 41110.195 | 36420.559 | NM_00658C | 9143.954  | 6758.897  | AF086266  | 962.373   | 1417.703  |
| AL133566  | 1672.313  | 1640.674  | NM_00130E | 9788.688  | 12410.102 | AK025337  | 1371.476  | 1313.948  |
| M36118    | 4758.479  | 3757.373  | NM_00508Z | 1595.06   | 4415.751  | NM_00560Z | 2025.56   | 3111.021  |
| NM_00339E | 6616.109  | 6337.178  | D17028    | 48036.738 | 56319.785 | NM_00357Z | 16752.965 | 13999.417 |
| J02625    | 40786.777 | 42630.105 | NM_01344Z | 44204.742 | 41086.395 | NM_00029E | 6232.81   | 4450.009  |
| Y17175    | 69483     | 66797.484 | BG611243  | 7947.241  | 8580.924  | NM_01230Z | 393.657   | 466.346   |
| NM_00454E | 39043.078 | 33918.59  | AI417481  | 1704.558  | 1388.999  | NM_01742Z | 42288.461 | 33591.641 |
| NM_00533Z | 57082.617 | 57638.938 | BI906766  | 11647.428 | 10041.651 | NM_00587E | 566.286   | 562.614   |
| NM_000767 | 1701.453  | 2311.596  | U60519    | 547.854   | 754.715   | NM_00411Z | 6990.99   | 5700.161  |
| AK026161  | 4750.907  | 5410.684  | AA282906  | 8981.688  | 11892.536 | AK025592  | 1364.159  | 1538.376  |
| NM_00455Z | 62292.813 | 57472.762 | L02870    | 31536.205 | 35328.719 | NM_00463E | 2870.454  | 2922.901  |
| D63484    | 7991.437  | 6094.928  | BG755482  | 23254.664 | 28483.795 | AK023023  | 6611.565  | 6330.279  |
| AK026745  | 12916.21  | 10194.706 | AI480307  | 10797.47  | 12973.639 | NM_01599Z | 3596.531  | 4505.846  |
| AL157440  | 10545.44  | 8164.061  | X51420    | 5581.48   | 6236.918  | NM_00265E | 2952.013  | 2812.591  |
| NM_01642Z | 25250.926 | 16836.939 | D28235    | 789.579   | 680.187   | Z36776    | 2920.985  | 3392.081  |
| AB040975  | 3216.632  | 2465.73   | X51757    | 3411.261  | 1748.51   | AB029015  | 1316.373  | 1749.298  |
| NM_005119 | 19390.893 | 23206.766 | L24038    | 3329.474  | 2882.468  | NM_02034E | 1332.288  | 831.366   |
| NM_00316E | 21181.016 | 27345.428 | NM_05305E | 1122.242  | 873.811   | NM_003287 | 1411.41   | 1002.068  |
| AK055844  | 5553.694  | 8379.813  | NM_00618E | 1130.973  | 920.704   | NM_01232E | 12977.384 | 10692.555 |
| NM_01828E | 33974.547 | 35842.055 | NM_002751 | 7324.297  | 7133.498  | NM_014434 | 2024.314  | 2163.338  |
| NM_00314E | 28267.889 | 26670.803 | M55593    | 4811.143  | 5648.202  | NM_019607 | 5829.518  | 4135.601  |
| X52342    | 1111.812  | 789.427   | AK001883  | 35668.055 | 38927.688 | U79260    | 3173.566  | 2409.639  |
| NM_003131 | 25305.395 | 28153.232 | NM_01462Z | 4069.179  | 5578.495  | NM_00189E | 8140.461  | 9533.783  |
| NM_00523E | 13206.323 | 14527.482 | L17325    | 2206.638  | 2051.824  | NM_006447 | 2569.819  | 2422.825  |
| AK022889  | 30973.58  | 28594.186 | NM_01771E | 2601.658  | 2487.833  | AF119851  | 1131.226  | 1171.463  |
| X52357    | 54196.523 | 50425.539 | M58603    | 12337.641 | 12813.211 | NM_01412E | 4403.465  | 5061.288  |
| AF211891  | 3152.531  | 3106.457  | NM_00363E | 14789.83  | 16943.938 | D87455    | 1595.565  | 1632.899  |
| NM_005641 | 8738.914  | 7936.868  | NM_00154E | 1071.09   | 793.727   | AF080577  | 762.394   | 958.143   |
| NM_00379E | 42350.719 | 51123.848 | NM_000115 | 9794.14   | 8594.706  | L22005    | 10023.866 | 10260.772 |
| NM_00297Z | 8452.001  | 10779.532 | AF308801  | 4979.922  | 4763.4    | NM_012291 | 12813.328 | 13110.37  |
| NM_00443E | 29527.875 | 24207.271 | NM_00731E | 56728.883 | 59491.012 | NM_01336E | 1572.1    | 2052.313  |
| NM_00658C | 8774.402  | 8167.635  | NM_014874 | 4136.204  | 4034.74   | NM_003807 | 41363.094 | 32785.684 |
| NM_00130E | 7725.146  | 8937.143  | NM_012397 | 643.099   | 1057.924  | NM_00435E | 3331.434  | 3181.227  |
| NM_00508Z | 2743.676  | 3649.421  | NM_00576E | 16743.453 | 26597.566 | NM_00179C | 2083.252  | 2709.441  |
| D17028    | 59563.766 | 57638.539 | NM_00276Z | 3936.397  | 4733.263  | NM_01824Z | 2649.348  | 2408.391  |
| NM_01344Z | 47807.656 | 45850.633 | NM_006324 | 14643.513 | 17636.734 | NM_01493E | 3982.548  | 10056.072 |
| BG611243  | 11074.98  | 11687.747 | NM_01684E | 18539.529 | 22244.051 | Y17866    | 1388.458  | 1932.969  |
| AI417481  | 1124.33   | 1161.515  | NM_000514 | 16119.992 | 19172.111 | AK024247  | 516.776   | 576.038   |
| BI906766  | 15193.253 | 11906.032 | AL137432  | 3041.182  | 2853.499  | NM_00300E | 6653.147  | 6826.643  |
| AA282906  | 724.105   | 984.452   | NM_000957 | 5465.601  | 4332.77   | NM_00087Z | 2452.968  | 3292.487  |
| L02870    | 3515.152  | 3582.33   | NM_01904Z | 6109.395  | 5207.082  | AB033025  | 444.405   | 263.282   |
| BG755482  | 17614.342 | 23411.395 | NM_00324C | 19968.326 | 16827.973 | NM_00441E | 7118.354  | 3285.611  |
| AI480307  | 13902.353 | 16102.524 | NM_016564 | 60362.086 | 57225.75  | NM_000917 | 12658.5   | 8407.241  |

|           |           |           |           |           |           |           |           |           |
|-----------|-----------|-----------|-----------|-----------|-----------|-----------|-----------|-----------|
| X51420    | 6740.495  | 6927.689  | NM_000796 | 846.601   | 1386.632  | NM_005386 | 15264.095 | 10815.626 |
| D28235    | 938.384   | 1005.329  | AK021660  | 3722.144  | 4307.16   | NM_014445 | 18316.453 | 15170.753 |
| X51757    | 3433.799  | 1700.78   | AB007933  | 57252.074 | 57954.895 | AL832826  | 980.036   | 827.165   |
| L24038    | 4158.067  | 3584.452  | NM_003796 | 43114.664 | 49104.965 | NM_016123 | 789.387   | 634.967   |
| NM_053056 | 1014.415  | 792.861   | NM_002973 | 7506.694  | 13427.273 | AB048365  | 1290.754  | 1524.819  |
| NM_006186 | 1186.868  | 1030.813  | NM_003708 | 55494.602 | 68579.492 | NM_000391 | 4721.405  | 5208.344  |
| NM_002751 | 4068.241  | 3344.921  | NM_014349 | 15352.902 | 17858.875 | AF229179  | 610.461   | 616.902   |
| M55593    | 2870.932  | 2942.903  | AB040895  | 839.962   | 1128.369  | NM_014771 | 5133.634  | 4831.751  |
| NM_005918 | 62510.871 | 58376.391 | NM_018210 | 2557.757  | 2378.69   | NM_002275 | 8660.844  | 8245.156  |
| AK023011  | 20958.162 | 26794.617 | NM_001096 | 12673.994 | 8389.271  | AB032945  | 782.609   | 875.87    |
| NM_016816 | 3368.093  | 3326.502  | NM_016014 | 3201.907  | 3190.237  | AK025215  | 10115.538 | 11619.056 |
| L17325    | 2426.097  | 2113.378  | NM_000198 | 852.807   | 557.831   | BF569160  | 1167.791  | 1501.174  |
| NM_017716 | 4392.248  | 4569.762  | NM_018327 | 4808.157  | 5599.095  | AK024625  | 828.945   | 845.573   |
| M58603    | 19305.203 | 14745.404 | NM_001684 | 1878.652  | 4752.547  | NM_018131 | 3347.928  | 4864.751  |
| NM_003639 | 25165.287 | 20780.57  | NM_013309 | 2149.841  | 3311.037  | NM_014834 | 733.474   | 1072.91   |
| NM_001549 | 852.459   | 563.184   | AF038186  | 5930.549  | 9539.194  | NM_017636 | 9995.919  | 11196.125 |
| NM_000115 | 12321.883 | 11127.987 | NM_003664 | 5158.348  | 6534.619  | NM_012468 | 694.438   | 820.399   |
| AF308801  | 6181.606  | 6442.096  | NM_002426 | 6008.335  | 7702.136  | NM_006150 | 3825.62   | 4481.123  |
| NM_007318 | 59381.262 | 53943.594 | AK027182  | 2137.106  | 2229.546  | NM_014943 | 6685.794  | 2506.659  |
| NM_014874 | 6958.075  | 6375.149  | J03651    | 15146.607 | 13971.766 | AK024392  | 1722.521  | 898.933   |
| NM_012397 | 907.352   | 808.506   | U61738    | 10305.325 | 9593.424  | NM_013260 | 1262.757  | 745.705   |
| NM_005765 | 25502.186 | 23874.104 | AJ132087  | 1754.996  | 1996.101  | NM_005249 | 274.664   | 311.724   |
| NM_002762 | 1001.238  | 1097.539  | U92818    | 3502.109  | 2913.123  | NM_018300 | 1041.069  | 619.057   |
| NM_006324 | 21450.229 | 26315.555 | NM_000442 | 7750.359  | 8940.169  | NM_004875 | 2840.769  | 2637.803  |
| NM_016848 | 9094.682  | 12814.961 | NM_002934 | 4699.816  | 5146.892  | NM_018254 | 16285.452 | 12497.012 |
| NM_000514 | 3391.763  | 3652.654  | AK023011  | 51502.516 | 49495.707 | NM_017745 | 2943.709  | 2706.825  |
| AL137432  | 2834.37   | 2310.25   | NM_016816 | 2903.482  | 3440.594  | NM_018433 | 2368.111  | 2282.597  |
| NM_000957 | 2706.835  | 2351.245  | AK023794  | 52003.07  | 60908.262 | NM_000937 | 524.566   | 415.951   |
| NM_019043 | 8301.264  | 7074.827  | NM_019885 | 3741.619  | 3940.263  | AB028451  | 1381.706  | 1317.99   |
| NM_003240 | 4588.065  | 3632.994  | AB033103  | 2473.515  | 1406.256  | AK024810  | 11793.02  | 11918.479 |
| NM_016564 | 37434.098 | 38157.887 | NM_002907 | 4129.087  | 2066.042  | AK022615  | 36242.828 | 29044.836 |
| AK021660  | 1312.445  | 1643.101  | AK024098  | 2435.38   | 1394.718  | NM_004043 | 6199.053  | 6827.132  |
| AB007933  | 20586.652 | 20828.191 | AK001116  | 740.771   | 555.57    | BM458096  | 14798.683 | 18970.963 |
| NM_005469 | 10157.188 | 11573.322 | AK022371  | 8988.381  | 7381.827  | NM_005626 | 9049.31   | 11913.654 |
| NM_016361 | 1739.249  | 1650.963  | D42045    | 6475.363  | 6173.96   | D29958    | 19910.793 | 21797.934 |
| NM_003708 | 21052.377 | 19245.303 | AB007953  | 5519.11   | 7932.548  | NM_015971 | 13256.036 | 16079.903 |
| NM_014349 | 11285.202 | 10930.436 | NM_014002 | 17133.977 | 37467.367 | D17257    | 56717.805 | 66024.211 |
| AB040895  | 865.707   | 627.537   | NM_004197 | 24213.582 | 48103.633 | NM_002842 | 5201.903  | 5735.704  |
| NM_004820 | 324.476   | 746.068   | NM_004073 | 3579.129  | 4378.083  | AF290204  | 426.398   | 352.105   |
| NM_018210 | 3281.885  | 2894.677  | NM_001278 | 8250.889  | 11311.839 | NM_012126 | 914.907   | 862.072   |
| NM_001096 | 22734.938 | 18287.344 | NM_019105 | 9042.748  | 8712.964  | NM_003918 | 329.077   | 123.822   |
| NM_016014 | 4394.276  | 5324.087  | NM_000294 | 9247.058  | 9490.547  | NM_004807 | 626.227   | 380.037   |
| NM_000198 | 1017.273  | 989.102   | AJ272212  | 4067.459  | 3888.239  | J03569    | 49592.883 | 55062.457 |
| NM_018327 | 826.317   | 660.251   | NM_001626 | 54770.082 | 55011.828 | NM_003115 | 5585.4    | 3730.071  |
| NM_001684 | 1878.843  | 2651.467  | NM_005677 | 8909.604  | 8188.902  | NM_000687 | 15913.22  | 12441.311 |
| NM_013309 | 776.055   | 1034.967  | AF229803  | 1894.271  | 1953.052  | NM_000446 | 564.107   | 674.193   |
| AF038186  | 8198.359  | 10003.724 | AF151810  | 1043.796  | 1217.821  | NM_018200 | 1689.882  | 1253.063  |
| NM_003664 | 4933.68   | 5677.901  | NM_002130 | 31624.629 | 33010.988 | NM_014838 | 1363.734  | 1509.11   |
| NM_002426 | 3455.397  | 4292.861  | NM_005469 | 8709.022  | 10768.07  | NM_007212 | 596.813   | 541.659   |
| AK027182  | 1511.124  | 1824.66   | NM_016361 | 3855.422  | 4129.546  | AF005067  | 2093.13   | 2081.517  |
| J03651    | 14402.927 | 10351.492 | NM_001305 | 9998.871  | 9469.844  | NM_005710 | 12293.434 | 12789.318 |
| U61738    | 2332.802  | 2172.271  | NM_005082 | 1343.605  | 1500.045  | AF252284  | 2684.589  | 2922.252  |
| AJ132087  | 3098.358  | 2929.567  | D17028    | 55356.355 | 57255.855 | NM_014930 | 4623.938  | 8205.623  |

|           |           |           |           |           |           |           |           |           |
|-----------|-----------|-----------|-----------|-----------|-----------|-----------|-----------|-----------|
| U92818    | 2225.993  | 2315.285  | NM_013442 | 48549.133 | 36719.203 | NM_00153C | 4168.537  | 5163.163  |
| NM_000442 | 7818.083  | 9465.383  | BG611243  | 7707.457  | 7368.978  | U80232    | 10638.448 | 13486.532 |
| NM_002934 | 3847.852  | 4136.567  | AI417481  | 1183.551  | 920.314   | M27877    | 29274.98  | 29830.658 |
| AL050114  | 2792.375  | 3263.417  | BI906766  | 11394.817 | 8282.754  | D70836    | 39616.633 | 29854.518 |
| AK021492  | 7503.084  | 6840.072  | U60519    | 700.177   | 745.505   | D16878    | 861.439   | 856.745   |
| AK023794  | 11816.701 | 10189.126 | AA282906  | 9067.107  | 9170.947  | NM_00703E | 3754.561  | 1894.459  |
| NM_01988E | 3988.052  | 3746.858  | L02870    | 24424.988 | 26891.477 | AB019562  | 1240.409  | 782.158   |
| NM_00532E | 517.829   | 489.463   | BG755482  | 24938.025 | 37069.109 | AF036364  | 2236.934  | 1918.113  |
| AB033103  | 3011.025  | 2475.813  | AI480307  | 13616.376 | 24531.111 | AK022847  | 3135.309  | 2462.958  |
| NM_002907 | 5759.098  | 4204.844  | X51420    | 6212.75   | 9104.601  | NM_02020E | 2550.875  | 2414.569  |
| AK024098  | 2547.057  | 3074.441  | D28235    | 778.895   | 1302.064  | L40992    | 601.542   | 535.667   |
| AK023920  | 587.714   | 601.949   | X51757    | 3340.832  | 2825.547  | U20582    | 8624.268  | 8273.264  |
| AK001116  | 566.878   | 746.621   | L24038    | 3773.755  | 3290.305  | NM_000337 | 458.46    | 673.604   |
| AK022371  | 11244.932 | 9774.804  | NM_05305E | 1508.305  | 1068.452  | NM_00207E | 5040.934  | 6086.649  |
| D42045    | 8955.648  | 7562.27   | NM_00618E | 1430.6    | 1169.899  | U13697    | 633.499   | 927.445   |
| AB007953  | 7261.009  | 6780.946  | NM_002751 | 9719.093  | 7716.38   | X75308    | 401.859   | 445.47    |
| NM_014002 | 17450.08  | 19727.521 | M55593    | 4207.482  | 4852.938  | U04270    | 25034.58  | 27684.262 |
| NM_004197 | 6158.513  | 6739.554  | AK001883  | 34524.73  | 34718.438 | J03810    | 792.808   | 1047.736  |
| NM_00407E | 4008.998  | 4833.713  | NM_01462E | 3681.965  | 4033.522  | Z34820    | 707.064   | 813.642   |
| NM_00127E | 12510.752 | 17878.406 | AK025587  | 509.553   | 635.489   | L02840    | 11531.362 | 8076.005  |
| NM_01910E | 8321.46   | 8659.232  | AL050114  | 2047.103  | 1669.112  | BG569143  | 364.946   | 554.807   |
| NM_000294 | 10769.404 | 9703.792  | AK021492  | 11591.119 | 10066.08  | AA629719  | 56187.875 | 65817.117 |
| AJ272212  | 3235.456  | 3153.96   | NM_014874 | 4163.173  | 3029.413  | AA927528  | 4515.611  | 5002.129  |
| NM_00162E | 27560.846 | 23442.371 | NM_00576E | 19395.646 | 16832.576 | X02152    | 51943.91  | 66221.789 |
| NM_005677 | 6069.798  | 6083.146  | NM_002762 | 4453.707  | 3023.679  | BG676364  | 5727.7    | 7622.757  |
| AF229803  | 1606.085  | 2326.723  | NM_006324 | 13823.613 | 10585.21  | BG181154  | 1300.727  | 1932.676  |
| AF151810  | 2213.909  | 2388.428  | NM_01684E | 18080.934 | 15210.605 | AA843679  | 13476.23  | 14670.717 |
| NM_00213C | 45507.332 | 43818.539 | NM_000514 | 14667.644 | 12731.674 | H68922    | 903.505   | 853.128   |
| NM_00443E | 28294.098 | 25711.756 | AL137432  | 3113.381  | 2297.504  | AF097159  | 974       | 889.55    |
| NM_00658C | 8418.15   | 8108.893  | NM_000957 | 6352.853  | 4654.687  | NM_014684 | 644.5     | 384.182   |
| NM_00130E | 7006.666  | 5375.048  | NM_01904E | 6126.319  | 5811.059  | AK027247  | 864.737   | 411.208   |
| NM_005082 | 2592.86   | 2855.934  | NM_00324C | 28462.664 | 29971.771 | NM_00248C | 5257.22   | 3126.258  |
| BG611243  | 9920.575  | 9017.169  | NM_016564 | 56908.266 | 59463.637 | NM_017571 | 6203.539  | 4931.49   |
| AI417481  | 1114.399  | 1394.495  | NM_00079E | 900.639   | 815.739   | L03169    | 600.678   | 702.688   |
| BI906766  | 16100.316 | 14445.24  | AF279656  | 2268.413  | 2536.879  | NM_00192E | 2218.944  | 2353.375  |
| AA282906  | 761.279   | 633.794   | AK021660  | 3944.789  | 4084.633  | NM_00639E | 1110.041  | 973.853   |
| L02870    | 2752.304  | 1843.677  | AB007933  | 58110.359 | 56627.91  | NM_01896E | 672.699   | 803.255   |
| BG755482  | 13012.069 | 11814.781 | NM_006702 | 8319.194  | 7909.128  | NM_00018E | 5736.762  | 7211.982  |
| AI480307  | 9649.345  | 9067.09   | NM_00139E | 31636.242 | 30479.004 | Y00816    | 1087.87   | 1719.155  |
| X51420    | 7499.76   | 7034.877  | NM_014474 | 4114.749  | 4490.583  | NM_004512 | 7449.369  | 9367.189  |
| D28235    | 843.836   | 1059.893  | NM_01624E | 3520.402  | 3978.818  | NM_00438C | 14475.035 | 19763.027 |
| X51757    | 4674.643  | 4709.695  | NM_006181 | 3385.431  | 3935.077  | U86813    | 590.102   | 730.603   |
| L24038    | 4246.907  | 4420.52   | NM_00379E | 46913.617 | 56851.848 | NM_00411E | 2138.212  | 2553.056  |
| NM_05305E | 1312.584  | 1094.078  | NM_00297E | 6786.181  | 9452.753  | AY007378  | 3810.869  | 5179.315  |
| NM_00618E | 1299.757  | 907.888   | NM_00443E | 19067.193 | 20838.064 | D26070    | 2157.951  | 4018.944  |
| NM_002751 | 3608.125  | 3002.083  | NM_00658C | 11383.836 | 10242.51  | NM_001642 | 7974.661  | 11931.03  |
| M55593    | 2653.357  | 3020.506  | NM_016277 | 3093.177  | 2496.828  | NM_001542 | 765.786   | 880.565   |
| AK001883  | 15549.469 | 13334.21  | NM_007247 | 6024.434  | 4487.147  | NM_00228C | 1610.995  | 1618.81   |
| NM_01462E | 6386.985  | 6640.997  | NM_006554 | 11709.841 | 7305.464  | NM_01745E | 306.301   | 466.871   |
| AK025587  | 758.676   | 1143.5    | X99962    | 19967.129 | 17799.717 | NM_00105E | 23811.207 | 14640.497 |
| L17325    | 2843.57   | 3123.418  | AK023221  | 20583.025 | 17134.971 | NM_002271 | 42994.465 | 29317.795 |
| NM_01771E | 4459.582  | 5287.477  | NM_003664 | 4521.373  | 3760.241  | NM_018361 | 2496.864  | 2193.421  |
| M58603    | 21410.83  | 17916.9   | NM_00242E | 5313.356  | 5675.205  | AB040966  | 4770.887  | 3834.609  |

|           |           |           |           |           |           |           |           |           |
|-----------|-----------|-----------|-----------|-----------|-----------|-----------|-----------|-----------|
| NM_003639 | 24735.883 | 24460.461 | AK027182  | 1811.549  | 1673.219  | NM_020132 | 5930.17   | 5142.368  |
| AF308801  | 5670.632  | 5222.454  | J03651    | 15276.987 | 13948.674 | NM_016467 | 6032.28   | 5567.014  |
| NM_007318 | 58959.438 | 55738.621 | U61738    | 10151.821 | 9621.217  | NM_007253 | 3159.548  | 3342.842  |
| NM_014874 | 7350.579  | 7774.046  | AJ132087  | 2009.57   | 1873.223  | NM_000558 | 3902.112  | 5000.738  |
| NM_012397 | 932.121   | 770.68    | U92818    | 4908.044  | 3319.107  | NM_000835 | 540.324   | 843.191   |
| NM_005765 | 24281.807 | 19634.668 | NM_000442 | 8373.794  | 8659.133  | NM_006808 | 17467.104 | 17711.717 |
| NM_002762 | 722.086   | 674.018   | NM_002934 | 5196.158  | 4448.24   | NM_006634 | 1082.834  | 1110.355  |
| NM_006324 | 18716.857 | 14814.343 | AK023011  | 41861.789 | 31642.424 | NM_016465 | 3782.659  | 4773.627  |
| NM_016848 | 7872.831  | 8937.476  | NM_016816 | 2613.894  | 2588.382  | NM_000328 | 719.798   | 1031.522  |
| NM_000514 | 4102.793  | 4455.404  | L17325    | 3140.177  | 2961.308  | NM_013395 | 1750.479  | 2810.11   |
| AL137432  | 3010.486  | 2857.746  | NM_017716 | 3601.635  | 8796.715  | NM_002410 | 719.679   | 634.904   |
| NM_000957 | 1131.378  | 1131.675  | M58603    | 12939.968 | 18380.836 | AL122120  | 4101.192  | 2903.645  |
| NM_019043 | 9426.014  | 9818.809  | NM_003639 | 17629.381 | 19483.984 | NM_018835 | 2000.559  | 957.55    |
| NM_003240 | 3998.993  | 3374.127  | NM_001549 | 1390.386  | 1599.434  | NM_003401 | 1049.292  | 672.595   |
| NM_016564 | 35806.234 | 36704.801 | NM_000115 | 12269.11  | 13790.73  | AL137724  | 1845.609  | 1208.114  |
| AK021660  | 1040.642  | 1421.777  | AF308801  | 5645.792  | 6579.616  | NM_004758 | 2396.454  | 1344.845  |
| AB007933  | 20660.994 | 21307.287 | NM_007318 | 61096.91  | 63306.387 | NM_002913 | 1640.455  | 1513.747  |
| NM_003796 | 40859.969 | 40007.238 | AF229803  | 1760.743  | 1615.966  | AK022797  | 918.162   | 727.261   |
| NM_002973 | 9062.915  | 11290.758 | AF151810  | 960.157   | 906.238   | NM_007370 | 2787.948  | 2638.931  |
| NM_003708 | 29620.576 | 38282.02  | NM_002130 | 32763.068 | 24401.09  | NM_006231 | 823.073   | 889.66    |
| NM_014349 | 16895.379 | 25447.41  | NM_005469 | 7811.769  | 6429.441  | AK023471  | 1133.726  | 1343.147  |
| AB040895  | 911.878   | 1052.172  | NM_016361 | 2591.714  | 2214.727  | AF044578  | 3817.659  | 4047.501  |
| NM_018210 | 5501.324  | 7710.222  | NM_003708 | 56635.766 | 57812.828 | NM_001948 | 2897.875  | 3243.465  |
| NM_001096 | 26339.602 | 30892.895 | NM_014349 | 14803.555 | 14486.13  | NM_001067 | 8224.332  | 9410.545  |
| NM_016014 | 4417.465  | 4600.511  | AB040895  | 713.112   | 513.864   | NM_014034 | 4078.281  | 4780.324  |
| NM_000198 | 777.967   | 1024.696  | NM_004820 | 479.271   | 285.238   | NM_005335 | 17926.547 | 18028.08  |
| NM_018327 | 933.058   | 1079.179  | NM_018210 | 2279.114  | 2234.159  | J04474    | 5673.987  | 6793.45   |
| NM_001684 | 1746.157  | 1554.626  | NM_001096 | 11948.429 | 8361.794  | NM_003761 | 30175.508 | 25694.545 |
| NM_013309 | 584.345   | 534.542   | NM_016014 | 3353.312  | 3710.697  | NM_004726 | 335.096   | 439.019   |
| AF038186  | 7676.66   | 8278.424  | NM_000198 | 718.206   | 667.459   | NM_014011 | 4465.131  | 5393.382  |
| NM_003664 | 4743.339  | 5525.685  | NM_018327 | 4469.512  | 4083.594  | AK025994  | 3868.124  | 5494.081  |
| NM_002426 | 4145.155  | 4423.266  | NM_017581 | 3447.673  | 2793.051  | L29306    | 666.302   | 878.603   |
| AK027182  | 1717.396  | 1705.175  | AA488804  | 14189.333 | 13226.787 | NM_013985 | 6711.707  | 19223.893 |
| J03651    | 15472.536 | 15050.604 | NM_006539 | 1030.612  | 958.585   | NM_001738 | 1435.306  | 1434.173  |
| U61738    | 2530.557  | 2114.733  | NM_001684 | 1127.617  | 1033.778  | AF036364  | 1617.47   | 1424.003  |
| AJ132087  | 3027.644  | 2978.823  | NM_000808 | 704.689   | 487.532   | AK022847  | 2733.329  | 1542.959  |
| U92818    | 2162.993  | 1619.8    | NM_016318 | 20613.236 | 20617.953 | NM_020203 | 2125.699  | 1479.69   |
| NM_000442 | 7879.439  | 8286.762  | NM_013309 | 2296.958  | 2456.747  | L40992    | 423.975   | 305.732   |
| NM_002934 | 4147.62   | 4642.778  | NM_019891 | 2506.123  | 3271.079  | U20582    | 7512.081  | 5993.748  |
| AK023011  | 17737.775 | 17980.283 | AF038186  | 6310.27   | 9857.132  | NM_000337 | 361.651   | 411.989   |
| NM_016816 | 2981.058  | 3029.343  | AK001883  | 32236.656 | 21108.217 | NM_002079 | 5004.294  | 4877.96   |
| AK023794  | 15538.24  | 17414.293 | NM_014629 | 3242.809  | 1543.296  | U13697    | 688.428   | 681.4     |
| NM_019885 | 5048.462  | 5364.86   | AL050114  | 1470.116  | 705.081   | U04270    | 16550.879 | 21119.086 |
| NM_005328 | 760.255   | 647.044   | AK021492  | 6909.371  | 3686.569  | Z34820    | 476.502   | 634.94    |
| AB033103  | 3252.936  | 3575.886  | AK023794  | 37859.957 | 32029.225 | L02840    | 5493.926  | 4049.016  |
| NM_002907 | 8892.915  | 13092.497 | NM_019885 | 2994.563  | 2143.342  | BG569143  | 305.599   | 647.67    |
| AK001116  | 722.72    | 1075.095  | NM_005328 | 648.472   | 529.879   | AA629719  | 55941.605 | 64736.184 |
| AK022371  | 13037.141 | 14943.878 | AB033103  | 1994.589  | 1475.972  | AA927528  | 3782.601  | 4577.556  |
| D42045    | 8563.816  | 8825.23   | NM_002907 | 4466.365  | 2105.068  | X02152    | 54689.105 | 62750.25  |
| AB007953  | 6537.064  | 5269.863  | AK024098  | 2464.791  | 1501.083  | BG676364  | 5040.451  | 5069.539  |
| NM_014002 | 14750.734 | 12035.601 | AK001116  | 968.711   | 711.578   | BG181154  | 1414.178  | 1404.589  |
| NM_004197 | 5372.393  | 4598.46   | AK022371  | 9403.119  | 7545.413  | AA843679  | 14608.249 | 15491.656 |
| NM_004073 | 3723.739  | 4110.562  | D42045    | 6562.508  | 5120.324  | H68922    | 917.853   | 1240.746  |

|           |           |           |           |           |           |           |           |           |
|-----------|-----------|-----------|-----------|-----------|-----------|-----------|-----------|-----------|
| NM_00127E | 14531.051 | 18667.016 | AB007953  | 4052.244  | 3114.488  | AF090906  | 3142.245  | 5030.044  |
| NM_01910E | 9648.612  | 11498.34  | NM_014002 | 12172.637 | 11529.264 | AB023219  | 3434.163  | 2749.653  |
| NM_000294 | 11532.836 | 11989.79  | NM_004197 | 17771.766 | 16696.738 | NM_01414E | 508.326   | 578.734   |
| AJ272212  | 4385.791  | 4613.895  | NM_004073 | 3138.983  | 2557.957  | NM_00248C | 4669.824  | 2795.746  |
| NM_00162E | 28330.688 | 25602.305 | NM_00127E | 7577.342  | 8103.805  | NM_017571 | 5912.163  | 2695.454  |
| NM_005677 | 5615.432  | 5336.001  | NM_01910E | 9484.747  | 8572.65   | L03169    | 689.299   | 719.533   |
| AF229803  | 1739.42   | 1788.856  | NM_000294 | 9356.487  | 10047.471 | NM_00192E | 2044.466  | 1969.95   |
| AF151810  | 1944.568  | 2142.545  | AJ272212  | 4127.154  | 4100.028  | NM_00639E | 956.997   | 815.82    |
| NM_00213C | 49612.73  | 48582.953 | NM_00162E | 56831.738 | 53930.469 | NM_01896E | 403.398   | 496.738   |
| NM_00546E | 10806.417 | 11715.106 | NM_005677 | 10408.517 | 13733.815 | NM_00018E | 6964.395  | 7071.916  |
| NM_016361 | 1952.295  | 1646.43   | CY3Cy5    | 5078.649  | 347.9     | Y00816    | 1484.13   | 1745.378  |
| NM_00130E | 8504.879  | 8809.378  | NM_004957 | 4283.698  | 5126.585  | NM_00451E | 8708.339  | 10649.334 |
| NM_00508E | 2648.008  | 3469.786  | NM_00525E | 3387.083  | 3435.173  | NM_00293C | 424.636   | 522.866   |
| D17028    | 68128.625 | 61839.027 | AL359211  | 1225.062  | 980.937   | NM_00438C | 12625.393 | 14769.317 |
| NM_01344E | 65475.328 | 63675.168 | AF070526  | 1628.173  | 1304.72   | U86813    | 761.326   | 789.93    |
| BG611243  | 16427.662 | 22456.451 | U79264    | 6041.366  | 6365.031  | NM_00411E | 1161.518  | 1469.393  |
| AI417481  | 1650.234  | 2802.085  | NM_01569E | 17875.186 | 18896.135 | AY007378  | 2709.866  | 3095.361  |
| AA282906  | 680.956   | 750.337   | AK023619  | 953.672   | 915.917   | D26070    | 1655.646  | 1612.5    |
| L02870    | 3377.938  | 2824.271  | AF070530  | 18818.33  | 17046.166 | NM_00164E | 8426.553  | 8044.703  |
| BG755482  | 14192.458 | 12209.584 | AF086487  | 566.981   | 819.92    | NM_00154E | 721.437   | 823.841   |
| AI480307  | 9601.976  | 7393.066  | NM_00642C | 2731.266  | 2419.707  | NM_00228C | 1968.487  | 2931.523  |
| X51420    | 7312.271  | 6643.864  | AF131855  | 2647.153  | 2523.868  | NM_01745E | 456.539   | 535.249   |
| D28235    | 996.182   | 850.281   | AF086046  | 5830.938  | 5727.877  | NM_00703E | 4269.785  | 3965.953  |
| X51757    | 3843.648  | 2934.889  | AK023309  | 885.754   | 1062.767  | AB019562  | 1405.93   | 1552.634  |
| L24038    | 4393.442  | 4241.596  | AK000724  | 6515.987  | 6584.693  | NM_002271 | 41639.898 | 23641.197 |
| NM_05305E | 1063.821  | 755       | NM_00372C | 32420.338 | 38362.512 | NM_018361 | 2367.324  | 1732.909  |
| NM_00618E | 1819.424  | 1936.261  | NM_004957 | 5455.523  | 5244.187  | NM_01989E | 303.859   | 179.881   |
| NM_002751 | 4302.367  | 3719.781  | NM_00525E | 2867.425  | 2841.309  | AB040966  | 4602.675  | 3597.542  |
| M55593    | 3034.117  | 3232.433  | SR1       | 86147.766 | 65576.516 | NM_02013E | 6687.865  | 6676.585  |
| AK001883  | 17038.92  | 13206.332 | SR3       | 53163.531 | 58099.098 | NM_016467 | 6007.65   | 4472.216  |
| NM_01462E | 6332.55   | 5287.899  | SR5       | 6141.479  | 9634.741  | NM_00725E | 2982.335  | 2811.019  |
| AK025587  | 1092.305  | 730.09    | SR7       | 6801.899  | 60820.898 | NM_00055E | 12533.735 | 14570.012 |
| AL050114  | 2653.295  | 2649.475  | SR9       | 23720.57  | 5571.676  | NM_00083E | 749.222   | 1233.029  |
| AK021492  | 8060.274  | 6732.904  | CY3Cy5    | 4344.095  | 300.009   | NM_00183C | 424.724   | 433.221   |
| NM_014874 | 9695.643  | 13928.025 | AF086137  | 4976.327  | 5160.564  | NM_00114E | 582.709   | 493.179   |
| NM_012397 | 1138.604  | 1228.618  | AF086526  | 1865.472  | 1798.703  | NM_00680E | 16740.346 | 15463.092 |
| NM_00576E | 26597.559 | 29775.773 | AK025788  | 9979.3    | 10833.305 | NM_006634 | 1191.824  | 1119.14   |
| NM_00276E | 1757.977  | 2102.477  | AF086164  | 2604.811  | 3288.687  | NM_01646E | 2834.576  | 3374.302  |
| NM_006324 | 25910.658 | 34608.484 | AK025577  | 5332.911  | 5427.213  | NM_00032E | 891.277   | 570.66    |
| NM_01684E | 11559.163 | 15821.118 | AK000216  | 2809.406  | 2715.206  | NM_01339E | 1977.033  | 2216.707  |
| NM_000514 | 5862.046  | 8119.259  | AK023440  | 2936.105  | 4190.148  | NM_00241C | 872.773   | 923.188   |
| NM_000957 | 861.536   | 934.643   | AB033041  | 44177.703 | 41719.055 | AL122120  | 4113.815  | 4209.699  |
| NM_01904E | 9214.604  | 8989.268  | NM_014894 | 76690.203 | 65598.305 | NM_014684 | 944.691   | 892.979   |
| NM_00324C | 5006.133  | 3948.664  | AK022678  | 1642.546  | 1708.393  | AK027247  | 1303.977  | 1038.336  |
| NM_016564 | 40005.723 | 42328.691 | AK023473  | 771.583   | 1084.502  | AL137724  | 2216.011  | 1842.942  |
| AF279656  | 1110.712  | 1264.23   | AK023835  | 5249.842  | 5188.25   | NM_00475E | 2277.114  | 838.264   |
| AK021660  | 945.243   | 1250.381  | AK024159  | 642.236   | 719.296   | NM_00291E | 1796.867  | 904.546   |
| AB007933  | 21287.254 | 20070.746 | AK023012  | 1176.356  | 2585.496  | AK022797  | 1114.026  | 849.026   |
| NM_00670E | 7800.201  | 7333.07   | AK023906  | 8699.869  | 17002.803 | NM_00737C | 2645.778  | 1584.406  |
| NM_00139E | 4613.562  | 5980.337  | AK024962  | 2835.363  | 2891.478  | NM_006231 | 848.886   | 750.271   |
| NM_014474 | 4969.667  | 5149.591  | AK025135  | 12011.051 | 13641.569 | AK023471  | 1118.234  | 1043.797  |
| NM_01624E | 1569.835  | 1420.391  | NM_01792E | 5745.759  | 10889.686 | AF044578  | 2724.409  | 2590.252  |
| NM_006181 | 5075.203  | 5726.276  | AY007145  | 6653.858  | 8459.916  | NM_00194E | 3025.482  | 2233.52   |

|           |           |           |           |           |           |           |           |           |
|-----------|-----------|-----------|-----------|-----------|-----------|-----------|-----------|-----------|
| NM_003796 | 44606.652 | 48212.559 | AK021573  | 1161.918  | 1725.185  | NM_014034 | 4180.389  | 4417.677  |
| NM_002973 | 9984.763  | 12334.703 | D38549    | 4412.479  | 4792.893  | NM_005335 | 18431.229 | 18375.604 |
| NM_004436 | 36365.691 | 41089.402 | AK024780  | 2539.802  | 3031.469  | J04474    | 6201.489  | 6184.439  |
| NM_006580 | 9916.05   | 9779.587  | AF085947  | 1693.557  | 1662.573  | NM_004726 | 869.454   | 930.44    |
| NM_016277 | 4314.781  | 6815.626  | AK022389  | 674.737   | 715.724   | NM_014011 | 4757.362  | 4448.996  |
| NM_007247 | 5987.889  | 9340.621  | AK022123  | 991.733   | 1729.756  | L29306    | 700.403   | 777.637   |
| NM_006554 | 21342.008 | 19426.648 | AK024184  | 5717.232  | 25622.434 | NM_013985 | 5021.81   | 8612.804  |
| X99962    | 24789.588 | 29350.535 | AF075116  | 773.678   | 672.612   | NM_001735 | 2342.981  | 3720.001  |
| AK023221  | 33007.777 | 37338.324 | AK023018  | 3907.313  | 4304.812  | NM_001055 | 39521.852 | 28373.721 |
| NM_003664 | 7260.308  | 10500.598 | AK022672  | 3446.923  | 3343.45   | NM_020203 | 2998.158  | 3461.621  |
| NM_002426 | 10671.691 | 13073.813 | AK023870  | 6963.413  | 6601.611  | L40992    | 1203.894  | 1266.474  |
| AK027182  | 1973.285  | 2267.583  | AK021599  | 2797.971  | 3598.467  | U20582    | 8439.153  | 6780.906  |
| J03651    | 14190.988 | 12675.457 | BC030975  | 1132.175  | 1939.462  | NM_000337 | 1114.379  | 1123.227  |
| U61738    | 2468.027  | 2324.836  | AF116677  | 900.394   | 1115.694  | NM_002075 | 5312.218  | 5107.428  |
| AJ132087  | 3133.689  | 2580.472  | NM_014159 | 7739.697  | 6533.002  | U13697    | 523.965   | 571.614   |
| U92818    | 2430.709  | 1842.346  | AK021795  | 2373.42   | 2579.946  | U04270    | 23702.771 | 22260.281 |
| NM_000442 | 8192.32   | 9462.57   | AL162042  | 5424.937  | 8037.963  | J03810    | 450.114   | 355.719   |
| NM_002934 | 4200.193  | 5685.685  | AK026131  | 1982.469  | 1899.299  | Z34820    | 438.156   | 519.533   |
| AK023011  | 15741.436 | 15851.843 | AK023312  | 3055.875  | 2937.895  | BG569143  | 547.389   | 642.332   |
| NM_016816 | 3452.743  | 3980.121  | AK022483  | 787.317   | 420.955   | AA629719  | 55934.563 | 62257.82  |
| L17325    | 3771.419  | 5267.507  | AL133570  | 2020.596  | 1863.612  | AA927528  | 3635.291  | 3517.934  |
| NM_017716 | 5625.274  | 6410.18   | AK021462  | 2274.695  | 4128.491  | BG676364  | 3599.443  | 3834.162  |
| M58603    | 24424.861 | 22706.191 | AK023392  | 655.856   | 802.726   | BG181154  | 1200.254  | 1290.173  |
| NM_003635 | 28974.125 | 28352.514 | AF131836  | 3541.083  | 4527.098  | H68922    | 916.902   | 1246.751  |
| NM_001545 | 1312.727  | 1233.078  | AF275804  | 12846.593 | 12160.97  | AF090906  | 3531.299  | 6174.055  |
| NM_000115 | 15856.87  | 16806.773 | AL137488  | 2694.616  | 2406.082  | AB023219  | 6313.837  | 17897.453 |
| AF308801  | 8062.326  | 8561.255  | AL049447  | 65812.258 | 57245.527 | NM_014145 | 1804.935  | 3241.671  |
| NM_007315 | 59835.492 | 58154.77  | NM_020527 | 5989.9    | 5013.465  | NM_018835 | 3423.508  | 4163.693  |
| AF229803  | 1729.552  | 1755.062  | AB020637  | 3536.884  | 3846.137  | NM_003401 | 1615.644  | 2405.075  |
| AF151810  | 1906.206  | 1956.517  | NM_005286 | 12415.724 | 12275.341 | NM_000185 | 9124.251  | 7364.176  |
| NM_002130 | 44593.105 | 37524.84  | AK024365  | 10504.044 | 10796.166 | Y00816    | 1426.341  | 1223.829  |
| NM_005465 | 10294.043 | 10230.252 | AJ251759  | 4074.11   | 3391.896  | NM_004512 | 12339.771 | 9099.737  |
| NM_016361 | 1635.633  | 1763.53   | AK024371  | 6274.106  | 6258.766  | NM_004380 | 18111.242 | 15242.357 |
| NM_003705 | 23890.779 | 26676.813 | NM_005454 | 1640.824  | 1220.271  | U86813    | 631.095   | 412.993   |
| NM_014345 | 16150.876 | 20757.646 | AB019569  | 66330.406 | 65987.086 | NM_004119 | 1695.302  | 1536.39   |
| AB040895  | 902.553   | 989.547   | NM_012405 | 4714.751  | 4842.569  | AY007378  | 3573.06   | 3267.392  |
| NM_004820 | 330.814   | 510.092   | AK021708  | 789.786   | 689.284   | D26070    | 1727.328  | 1799.635  |
| NM_018210 | 3664.499  | 3274.456  | AL050205  | 14089.13  | 12309.461 | NM_001542 | 605.422   | 565.514   |
| NM_001095 | 23800.027 | 16617.988 | AK023947  | 751.431   | 898.703   | NM_003392 | 826.472   | 1025.552  |
| NM_016014 | 4275.129  | 3674.499  | NM_005691 | 2428.156  | 2603.632  | NM_002280 | 602.719   | 711.675   |
| NM_000195 | 1403.45   | 1328.517  | AF086156  | 904.888   | 1087.167  | NM_000501 | 37276.949 | 38488.824 |
| NM_018327 | 868.981   | 1191.843  | AK023814  | 1161.347  | 1819.235  | NM_000114 | 2172.541  | 2429.199  |
| NM_017581 | 4209.15   | 5851.699  | AF130063  | 2256.547  | 4297.533  | NM_015193 | 2620.028  | 3627.655  |
| AA488804  | 21368.08  | 27408.4   | AF086528  | 1713.925  | 2009.418  | AB019562  | 3351.699  | 6670.025  |
| NM_006535 | 1079.755  | 1528.886  | AL162043  | 1070.532  | 1454.694  | AF036364  | 2545.027  | 3981.32   |
| NM_001684 | 2225.227  | 2438.737  | NM_006543 | 2016.662  | 2108.954  | AK022847  | 4503.503  | 5595.507  |
| AB028977  | 560.675   | 684.396   | AF086252  | 2255.608  | 2400.908  | NM_006805 | 17065.682 | 11598.985 |
| NM_000805 | 650.548   | 742.247   | AK026703  | 1536.406  | 1818.146  | NM_006634 | 1096.07   | 854.384   |
| NM_016315 | 7799.799  | 6806.078  | AK024367  | 753.447   | 932.787   | NM_016465 | 3364.03   | 3127.892  |
| NM_013305 | 951.453   | 1287.197  | NM_017866 | 12270.554 | 11477.203 | NM_013395 | 713.043   | 847.573   |
| NM_019891 | 4116.031  | 5190.16   | NM_003536 | 3523.066  | 3841.342  | NM_002410 | 522.346   | 547.397   |
| AF038186  | 9642.687  | 10020.955 | AF116707  | 10546.626 | 10636.946 | AL122120  | 3108.169  | 2374.009  |
| AK001883  | 17564.99  | 11944.532 | U90910    | 11296.732 | 10472.442 | NM_014684 | 1916.122  | 1589.023  |

|           |           |           |           |           |           |           |           |           |
|-----------|-----------|-----------|-----------|-----------|-----------|-----------|-----------|-----------|
| NM_01462E | 6173.006  | 5323.211  | AL049979  | 894.252   | 686.294   | AK027247  | 1417.208  | 1376.517  |
| AK025587  | 806.59    | 748.448   | AK025765  | 3040.294  | 2008.838  | NM_00248C | 4490.132  | 4543.007  |
| AL050114  | 2637.468  | 2658.952  | AK024263  | 2537.619  | 1770.43   | NM_017571 | 6986.022  | 4135.325  |
| AK021492  | 8675.646  | 8554.951  | NM_016613 | 8743.164  | 7439.311  | NM_001391 | 1512.089  | 1993.035  |
| AK023794  | 14367.334 | 17673.531 | AF086414  | 9742.097  | 8096.248  | L03169    | 2471.562  | 4372.043  |
| NM_01988E | 6157.29   | 8675.78   | AJ012490  | 12978.172 | 9904.899  | NM_00192E | 2664.76   | 3583.987  |
| NM_00532E | 561.499   | 751.031   | U84516    | 28830.127 | 21267.742 | NM_00105E | 24714.447 | 22018.121 |
| AB033103  | 3411.481  | 2556.949  | AL049270  | 4466.263  | 3467.024  | NM_002271 | 40429.734 | 31018.07  |
| NM_002907 | 6065.976  | 3221.928  | U88834    | 20748.043 | 18647.746 | NM_018361 | 3083.446  | 2800.153  |
| AK024098  | 2600.794  | 1797.017  | BC025324  | 2495.468  | 2374.446  | NM_01989E | 385.702   | 293.269   |
| AK001116  | 663.502   | 426.076   | AK023564  | 731.963   | 909.936   | AB040966  | 5541.012  | 5335.581  |
| AK022371  | 14919.63  | 17468.707 | NM_003533 | 3058.228  | 5399.106  | NM_016467 | 6372.736  | 6157.281  |
| D42045    | 12012.953 | 13363.665 | AL157478  | 1237.527  | 1804.536  | NM_00725E | 2055.344  | 2046.676  |
| AB007953  | 8902.767  | 9819.139  | AK023726  | 15939.5   | 18856.424 | L08436    | 370.497   | 616.602   |
| NM_01400E | 19394.277 | 20772.596 | AK024906  | 1298.491  | 1496.819  | NM_00055E | 2215.55   | 1862.544  |
| NM_004197 | 6042.679  | 6581.889  | NM_005607 | 5340.568  | 4783.656  | NM_01417C | 3387.816  | 4588.667  |
| NM_00407E | 3823.132  | 3072.76   | NM_006761 | 53704.164 | 54517.063 | AF116652  | 56239.793 | 64099.055 |
| NM_00127E | 15048.025 | 18710.457 | NM_00345E | 13129.599 | 10419.455 | NM_00083E | 666.827   | 1002.893  |
| NM_01910E | 10375.314 | 12216.41  | NM_018371 | 27018.33  | 23824.074 | NM_01883E | 2595.583  | 2504.509  |
| NM_000294 | 14264.435 | 16127.584 | NM_01439C | 29966.529 | 28233.875 | NM_003401 | 1371.045  | 1543.294  |
| AJ272212  | 3486.4    | 3455.535  | NM_01814E | 1546.192  | 1368.988  | AL137724  | 2239.622  | 1860.801  |
| NM_00162E | 29076.904 | 26924.6   | X78924    | 13895.939 | 11525.417 | NM_00475E | 2741.518  | 2517.961  |
| NM_005677 | 7242.38   | 7500.229  | NM_01325C | 2309.002  | 2119.584  | NM_00291E | 2178.902  | 2294.964  |
| CY3Cy5    | 3315.325  | 402.155   | NM_00188E | 23009.91  | 16772.344 | AK022797  | 978.593   | 897.673   |
| AF070526  | 533.881   | 629.343   | X89668    | 48201.867 | 37213.281 | NM_00737C | 2767.812  | 2803.091  |
| U79264    | 1975.167  | 2810.238  | NM_00445E | 6363.191  | 4819.304  | NM_006231 | 923.703   | 1068.891  |
| NM_01569E | 3487.818  | 3690.116  | NM_006901 | 3289.546  | 3432.896  | AF044578  | 3703.757  | 3647.62   |
| AK023619  | 468.496   | 658.058   | NM_01853C | 13761.908 | 10981.519 | NM_00194E | 2998.854  | 2604.137  |
| AF070530  | 24749.705 | 25862.939 | AJ003145  | 1126.298  | 990.737   | NM_001067 | 8315.008  | 8574.576  |
| AF086487  | 593.297   | 823.121   | AK022855  | 21581.682 | 23806.141 | NM_014034 | 4109.102  | 5233.176  |
| NM_00642C | 3999.067  | 4788.879  | AK023816  | 2562.692  | 2461.16   | NM_00533E | 17201.314 | 11914.72  |
| AF131855  | 2232.144  | 2399.187  | AF305686  | 8904.653  | 12892.258 | NM_003761 | 34378.668 | 26653.799 |
| AF086046  | 5329.277  | 4866.623  | AF085832  | 3954.417  | 7338.027  | NM_00472E | 671.651   | 503.988   |
| AK023309  | 336.969   | 412.313   | AK025981  | 7172.658  | 8306.633  | NM_014011 | 4182.6    | 4628.647  |
| AK000724  | 4715.419  | 4576.494  | AK025337  | 3592.397  | 3227.635  | AK025994  | 4395.627  | 6226.09   |
| NM_00372C | 27905.736 | 28118.391 | AB028984  | 1611.852  | 1948.649  | L29306    | 775.387   | 1027.128  |
| NM_004957 | 3880.618  | 3357.695  | NM_00560E | 2831.887  | 3014.228  | CY3Cy5    | 679.826   | 181.144   |
| NM_00525E | 1325.383  | 1242.103  | NM_00357E | 29337.57  | 23774.387 | AK022262  | 971.083   | 1002.869  |
| SR1       | 77762.445 | 64476.727 | NM_00029E | 11035.832 | 9773.212  | AF088039  | 66457.594 | 71349.742 |
| SR3       | 27547.432 | 20345.826 | NM_01230E | 1189.525  | 1045.96   | AF086220  | 1482.917  | 1713.715  |
| SR5       | 3809.299  | 4464.93   | NM_01742E | 32162.063 | 24851.943 | AK023941  | 1399.775  | 1439.016  |
| SR7       | 4314.28   | 39705.98  | NM_00587E | 1262.699  | 1183.621  | AF086265  | 426.937   | 735.087   |
| SR9       | 15930.354 | 4682.671  | AF147790  | 1050.963  | 936.355   | AL390083  | 5904.381  | 6602.535  |
| CY3Cy5    | 3682.332  | 420.119   | NM_01896E | 752.145   | 504.073   | AB020702  | 1105.256  | 1239.574  |
| Z36842    | 1413.815  | 1357.626  | NM_00411E | 12320.832 | 9414.091  | AL050227  | 524.172   | 403.573   |
| AF086137  | 1338.881  | 1469.576  | AK025592  | 3328.856  | 2284.571  | AK075087  | 376.964   | 347.855   |
| AF086155  | 1563.079  | 1722.556  | NM_00463E | 6144.348  | 5300.079  | AK026571  | 2071.393  | 2366.732  |
| AF086526  | 1903.984  | 2403.822  | AK023023  | 11243.539 | 9538.002  | AK024673  | 2919.574  | 2786.684  |
| AK025788  | 10347.067 | 12679.471 | NM_01599E | 8661.527  | 8460.041  | AF070618  | 1103.561  | 1265.102  |
| AF086164  | 2128.995  | 1686.235  | NM_00265E | 7017.706  | 5983.956  | SR2       | 21480.76  | 17750.678 |
| AK025577  | 2950.592  | 3015.786  | Z36776    | 5811.266  | 6495.884  | SR4       | 6809.33   | 7882.473  |
| AK000216  | 1819.801  | 1436.082  | NM_02034E | 2467.711  | 2722.49   | SR6       | 795.009   | 846.414   |
| AK023440  | 1428.986  | 1562.074  | NM_003287 | 2956.468  | 3573.577  | SR8       | 3073.002  | 12183.355 |

|           |           |           |           |           |           |           |           |           |
|-----------|-----------|-----------|-----------|-----------|-----------|-----------|-----------|-----------|
| AB033041  | 36207.715 | 32348.428 | NM_012325 | 24682.117 | 33566.234 | SR10      | 10091.397 | 4860.39   |
| NM_014894 | 38315.785 | 38296.652 | NM_014434 | 5956.838  | 6288.634  | AL049365  | 11266.207 | 18235.582 |
| AY007155  | 1480.82   | 1134.388  | NM_019607 | 16159.593 | 13606.021 | AK025132  | 676.79    | 719.281   |
| AK027160  | 24808.789 | 18071.836 | U79260    | 9751.629  | 7131.911  | AK025157  | 2571.112  | 2479.586  |
| AK022678  | 1712.939  | 1970.76   | NM_001895 | 14747.36  | 18226.295 | AK022001  | 1027.694  | 782.948   |
| AK023473  | 1335.901  | 1098.491  | NM_006447 | 5425.649  | 4832.685  | AK022633  | 949.174   | 1363.627  |
| AK023835  | 4740.422  | 5774.209  | AF119851  | 1860.286  | 2146.427  | AK000079  | 571.24    | 497.488   |
| AK024159  | 467.082   | 538.732   | NM_014129 | 10039.791 | 10348.053 | NM_012243 | 1339.955  | 1164.471  |
| AK023012  | 815.08    | 1407.957  | D87455    | 3171.764  | 2577.305  | AK025743  | 2089.165  | 1774.91   |
| AK023906  | 4337.911  | 4979.168  | AF080577  | 1710.95   | 1769.517  | AK023974  | 2541.365  | 2559.774  |
| AK024234  | 715.171   | 977.991   | L22005    | 18513.018 | 15250.945 | AK023768  | 1053.68   | 1161.854  |
| AK024962  | 1230.05   | 1735.269  | NM_012291 | 32510.549 | 28403.662 | NM_014725 | 503.413   | 337.617   |
| AK022164  | 792.481   | 723.302   | NM_013368 | 3021.289  | 3297.806  | AF147335  | 1232.988  | 1106.436  |
| AK025135  | 9665.045  | 10949.246 | NM_003807 | 41628.797 | 30947.061 | AK000711  | 1327.173  | 1041.28   |
| NM_017926 | 4317.713  | 5577.115  | NM_004358 | 8673.877  | 6100.714  | BI768072  | 561.364   | 770.607   |
| AY007145  | 1403.063  | 1146.265  | NM_001790 | 4453.847  | 4472.67   | AK022216  | 5682.392  | 4403.428  |
| AK021573  | 743.285   | 496.985   | NM_018243 | 5547.803  | 6240.664  | AK025812  | 5500.049  | 5597.53   |
| D38549    | 541.289   | 448.612   | NM_014939 | 6017.319  | 7964.502  | U00960    | 1500.516  | 1529.239  |
| AK024780  | 2119.239  | 2423.368  | Y17866    | 4179.316  | 7904.714  | AK026419  | 522.578   | 670.762   |
| AF085947  | 644.007   | 711.499   | AK024247  | 1073.627  | 1289.897  | AK025276  | 5039.988  | 5320.021  |
| AF087982  | 567.208   | 328.505   | AB033025  | 2446.285  | 2192.418  | AK026457  | 2251      | 2185.817  |
| AF075116  | 614.146   | 466.297   | NM_004418 | 19164.545 | 23628.473 | AK026825  | 922.452   | 895.372   |
| U10510    | 5437.357  | 5800.975  | NM_000917 | 28702.227 | 53855.688 | NM_013355 | 1374.619  | 1301.981  |
| AK023018  | 4870.205  | 5916.645  | NM_005389 | 36832.402 | 41430.613 | NM_003847 | 22610.602 | 19270.979 |
| AK022672  | 3804.17   | 3197.144  | NM_014445 | 47792.832 | 41172.551 | AK021973  | 1476.701  | 1084.648  |
| AK023870  | 3532.461  | 3805.099  | AL832826  | 3552.743  | 2764.832  | AL050165  | 67242.57  | 71165.352 |
| AK023474  | 782.021   | 1667.766  | NM_016123 | 1926.597  | 1222.892  | AL117445  | 1938.722  | 2110.824  |
| AK021599  | 3419.005  | 4635.364  | AB048365  | 3401.336  | 2999.21   | AL122113  | 6716.462  | 8803.354  |
| BC030975  | 717.971   | 932.763   | NM_000391 | 10540.489 | 9056.5    | AK024415  | 2214.905  | 2127.909  |
| AK025619  | 359.017   | 435.365   | AF229179  | 1215.235  | 917.085   | AK023515  | 432.843   | 539.391   |
| AK001872  | 342.051   | 536.604   | NM_014771 | 10415.286 | 8654.962  | AL137544  | 473.651   | 159.575   |
| AF116677  | 945.756   | 1194.409  | NM_002275 | 17125.115 | 10785.062 | AL137623  | 18176.857 | 15790.35  |
| AK022010  | 463.353   | 486.103   | AB032945  | 1846.81   | 1833.011  | AK026485  | 390.507   | 306.347   |
| NM_014155 | 7428.142  | 5829.575  | AK025215  | 26535.553 | 23140.627 | AJ227874  | 1154.288  | 1604.522  |
| AK021795  | 743.693   | 695.156   | BF569160  | 1975.755  | 2030.973  | AF009276  | 510.852   | 391.398   |
| AL162042  | 1328.528  | 1774.909  | AK024625  | 1288.045  | 1471.455  | AF056428  | 11824.011 | 10588.421 |
| AK026131  | 573.176   | 658.963   | NM_018131 | 6474.832  | 7309.324  | AK001995  | 323.631   | 180.744   |
| AK023312  | 2458.47   | 2165.648  | NM_014834 | 1579.162  | 2170.839  | AK021594  | 414.841   | 475.144   |
| AL133570  | 1763.847  | 1334.924  | NM_017636 | 15526.282 | 18092.08  | AK021635  | 1083.131  | 1086.241  |
| AK023392  | 521.693   | 501.048   | NM_012468 | 1836.114  | 2766.561  | AK021856  | 1720.084  | 1710.113  |
| AF131836  | 3276.919  | 4769.006  | NM_006150 | 5078.156  | 6337.523  | S97393    | 607.765   | 1019.643  |
| AF275804  | 15153.577 | 17961.709 | NM_014943 | 11672.52  | 13225.82  | BE698533  | 438.829   | 746.494   |
| AL137488  | 1180.987  | 1675.618  | AK024392  | 5329.184  | 7183.963  | NM_017925 | 627.506   | 725.469   |
| AL049447  | 65656.031 | 67654.188 | NM_013260 | 2978.951  | 3379.585  | NM_018472 | 2622.941  | 3105.934  |
| NM_020527 | 3881.63   | 5106.646  | NM_018300 | 2671.352  | 2141.731  | AF085923  | 391.776   | 239.105   |
| AB020637  | 3853.035  | 5008.436  | NM_004875 | 7035.696  | 6097.973  | AJ008128  | 30590.17  | 22841.504 |
| NM_005286 | 2391.314  | 2482.029  | NM_018254 | 19994.6   | 16364.396 | AL449243  | 8386.022  | 6818.222  |
| AK024365  | 4484.821  | 4167.114  | NM_017745 | 5762.371  | 4797.17   | M12211    | 4960.739  | 4833.594  |
| AJ251759  | 3033.46   | 2815.109  | NM_018433 | 5667.025  | 4378.878  | AJ008131  | 24044.025 | 22141.02  |
| AK024371  | 1023.504  | 1262.285  | NM_000937 | 1534.194  | 1028.047  | AF086338  | 413.54    | 394.809   |
| NM_005454 | 601.028   | 673.408   | AB028451  | 3773.576  | 2835.503  | AK024303  | 530.256   | 502.948   |
| AB019569  | 56071.387 | 61273.695 | AK024810  | 26909.949 | 19687.713 | AL160131  | 6992.373  | 6250.024  |
| NM_012405 | 2871.145  | 3220.421  | AK022615  | 59895.617 | 57167.41  | AF086045  | 1984.083  | 1925.575  |



|           |           |           |           |           |           |           |           |           |
|-----------|-----------|-----------|-----------|-----------|-----------|-----------|-----------|-----------|
| AK021708  | 477.212   | 703.219   | NM_004043 | 16086.942 | 13072.585 | AK027028  | 2485.136  | 2373.89   |
| AL050205  | 13999.959 | 12332.304 | BM458096  | 35512.816 | 33718.875 | AK027069  | 533.422   | 497.381   |
| AK023947  | 562.656   | 608.083   | NM_005626 | 21646.473 | 20243.389 | AK026916  | 1868.238  | 1696.528  |
| NM_005691 | 2041.889  | 1770.218  | D29958    | 51269.57  | 51607.016 | AK026914  | 2048.122  | 1838.679  |
| AF086156  | 877.68    | 771.282   | NM_015971 | 36506.078 | 43907.48  | Y13808    | 416.409   | 282.128   |
| AK023814  | 770.088   | 509.795   | D17257    | 62726.125 | 65590.727 | Y11166    | 1567.796  | 1861.868  |
| AF130063  | 692.315   | 1058.343  | NM_002842 | 8520.105  | 9719.932  | AK024942  | 2634.375  | 3077.857  |
| AF086528  | 1613.771  | 1626.624  | AF290204  | 1107.957  | 1238.982  | AJ227873  | 9887.069  | 10546.808 |
| AL162043  | 1015.11   | 1417.52   | NM_012126 | 2546.45   | 2011.636  | AK022886  | 2354.416  | 2708.22   |
| NM_006543 | 1764.576  | 2125.685  | NM_003918 | 1019.817  | 1040.993  | AK024665  | 2888.884  | 2628.634  |
| AF086252  | 2301.595  | 4491.359  | NM_004807 | 2519.255  | 3593.088  | AF147363  | 786.383   | 939.435   |
| AK026703  | 814.494   | 1246.03   | AF219140  | 1258.207  | 1749.247  | AJ227880  | 2731.899  | 3181.22   |
| NM_017596 | 696.079   | 667.655   | J03569    | 61359.777 | 68894.75  | AK000691  | 1279.563  | 1183.503  |
| AK024367  | 687.155   | 1016.46   | NM_003115 | 10978.373 | 8658.608  | AK001448  | 1194.051  | 896.125   |
| NM_017866 | 15156.709 | 20148.779 | NM_000687 | 38375.316 | 35647.398 | AK026890  | 375.227   | 681.695   |
| AJ131244  | 1043.472  | 1378.687  | NM_000446 | 1230.102  | 1772.107  | AF131817  | 524.658   | 538.315   |
| NM_003536 | 3614.077  | 4409.607  | NM_018200 | 4194.668  | 2985.001  | AL049321  | 1977.017  | 1585.339  |
| AF116707  | 11519.311 | 12269.931 | NM_014838 | 3411.858  | 3298.729  | NM_003546 | 2114.023  | 2637.146  |
| U90910    | 1794.073  | 1900.492  | NM_007212 | 1046.821  | 1005.411  | AF118077  | 2188.668  | 2317.2    |
| AL049979  | 1016.065  | 1217.845  | AF005067  | 3554.3    | 2857.346  | AL137625  | 665.432   | 601.463   |
| AK025765  | 1339.3    | 1157.892  | NM_005710 | 18729.381 | 19017.992 | AK025750  | 966.177   | 1048.614  |
| AK024263  | 2754.591  | 2662.561  | AF252284  | 4415.972  | 4811.487  | BF031253  | 1719.835  | 1715.984  |
| NM_016613 | 6888.958  | 6792.782  | NM_014930 | 4431.604  | 5162.078  | AK025783  | 1780.558  | 1486.026  |
| AF086414  | 2893.923  | 2359.065  | NM_001530 | 11102.273 | 13056.15  | AF113675  | 1113.165  | 990.352   |
| AJ012490  | 9370.282  | 8687.577  | U80232    | 22013.711 | 33241.691 | AK024514  | 479.753   | 381.17    |
| U84516    | 17954.242 | 15858.444 | AJ237589  | 854.989   | 1679.679  | NM_020119 | 1422.148  | 1400.155  |
| AL049270  | 3667.745  | 2929.906  | M27877    | 49956.246 | 57408.809 | AL049417  | 2502.675  | 2331.777  |
| U88834    | 4333.514  | 3327.389  | D70836    | 59223.348 | 62187.996 | AK023507  | 548.418   | 534.166   |
| BC025324  | 906.094   | 585.276   | D16878    | 1999.496  | 2161.221  | NM_005166 | 7680.486  | 8537.383  |
| AK023564  | 583.209   | 396.513   | NM_007035 | 9935.727  | 13265.213 | AL109818  | 359.704   | 340.239   |
| NM_003533 | 2214.865  | 2308.822  | AB019562  | 3069.727  | 4075.667  | NM_000066 | 2943.377  | 3553.388  |
| AK023726  | 5124.612  | 6685.117  | AF036364  | 5076.584  | 8779.117  | AB033046  | 11714.378 | 15558.529 |
| AK024906  | 799.338   | 832.254   | AK022847  | 7472.479  | 7796.601  | NM_015918 | 5119.664  | 6767.402  |
| NM_005607 | 7840.894  | 11875.017 | NM_020203 | 3222.161  | 3238.712  | AB029041  | 46573.465 | 40263.145 |
| NM_006761 | 53452.508 | 61349.418 | L40992    | 1054.631  | 993.703   | AK026642  | 459.983   | 468.382   |
| NM_014897 | 3018.228  | 3048.449  | U20582    | 18781.699 | 18036.617 | AL359063  | 364.585   | 625.358   |
| NM_003453 | 16194.758 | 17067.164 | NM_000337 | 1134.368  | 968.274   | AL079292  | 1621.384  | 1686.225  |
| NM_018371 | 34958.102 | 47236.316 | NM_002079 | 10219.097 | 10988.115 | X89667    | 4896.624  | 5154.961  |
| AF052095  | 408.437   | 368.939   | U13697    | 1392.647  | 1484.428  | NM_014027 | 2915.819  | 2963.463  |
| NM_014390 | 32194.609 | 43992.535 | X75308    | 366.621   | 423.7     | AF116621  | 4650.061  | 3827.871  |
| NM_018143 | 1382.869  | 1309.239  | U04270    | 38805.762 | 40088.793 | AF086554  | 3875.691  | 4506.012  |
| X78924    | 3658.662  | 3091.484  | J03810    | 430.264   | 747.137   | AL390136  | 24196.406 | 17064.238 |
| NM_013250 | 2514.252  | 3050.956  | Z34820    | 861.866   | 726.038   | AF086398  | 50232.289 | 46878.156 |
| NM_001886 | 30158.453 | 24316.182 | L02840    | 6357.328  | 3188.373  | AK024545  | 1334.646  | 789.683   |
| NM_004996 | 500.855   | 566.938   | BG569143  | 1130.86   | 2031.438  | AK023444  | 582.864   | 476.289   |
| X89668    | 23704.729 | 14529.814 | AA629719  | 59168.59  | 66385.273 | AK025953  | 732.843   | 873.255   |
| NM_004456 | 6623.383  | 4182.171  | AA927528  | 8076.371  | 8752.257  | NM_003180 | 1305.298  | 1288.942  |
| NM_006901 | 2315.17   | 2409.291  | X02152    | 62768.34  | 67324.563 | AF086406  | 10036.717 | 8095.447  |
| NM_018530 | 4595.837  | 3197.139  | BG676364  | 17121.26  | 27400.803 | D17216    | 3368.703  | 2846.14   |
| AJ003145  | 1168.779  | 896.296   | BG181154  | 3669.96   | 6917.22   | AL137581  | 1160.548  | 1412.148  |
| AK022855  | 9627.021  | 10708.865 | AA843679  | 22577.508 | 27100.645 | J05158    | 493.074   | 485.222   |
| AK023816  | 855.985   | 726.409   | H68922    | 1487.017  | 1321.357  | NM_015564 | 1156.556  | 1222.374  |
| AF305686  | 7047.883  | 4409.914  | AF097159  | 2108.637  | 1967.172  | AF160476  | 612.327   | 1186.818  |

|           |           |           |           |           |           |           |           |           |
|-----------|-----------|-----------|-----------|-----------|-----------|-----------|-----------|-----------|
| AF085832  | 1978.005  | 2148.194  | NM_014684 | 1910.316  | 1539.101  | L22650    | 1491.569  | 1439.939  |
| AK025981  | 11775.205 | 18538.355 | AK027247  | 2954.818  | 2690.251  | AB014520  | 25189.846 | 20334.365 |
| AF113212  | 1049.563  | 1847.121  | NM_002480 | 12011.521 | 14142.792 | AF161420  | 1271.711  | 848.917   |
| AK025337  | 4193.854  | 5931.917  | NM_017571 | 12560.261 | 9021.987  | NM_004907 | 3337.903  | 3165.133  |
| AB028984  | 1348.387  | 1745.004  | AB007946  | 378.976   | 353.428   | NM_002891 | 568.184   | 719.459   |
| NM_005602 | 1182.208  | 1440.74   | L03169    | 2182.822  | 2036.919  | NM_001775 | 1598.95   | 1850.29   |
| NM_003573 | 8927.15   | 9554.769  | NM_001928 | 4296.528  | 3948.889  | X04526    | 12864.75  | 9414.729  |
| NM_000296 | 8751.388  | 8620.047  | NM_006399 | 2501.474  | 1606.362  | D26067    | 2185.916  | 1967.601  |
| NM_012302 | 1023.107  | 1303.587  | NM_018965 | 930.983   | 823.932   | AF227924  | 2125.298  | 1543.709  |
| NM_017422 | 4772.517  | 5093.248  | NM_000185 | 12345.502 | 10546.022 | NM_005716 | 22597.865 | 19954.441 |
| NM_005879 | 2591.714  | 2959.939  | Y00816    | 2908.077  | 2610.151  | NM_006183 | 1960.505  | 2231.111  |
| AF147790  | 1062.413  | 1300.088  | NM_004512 | 19000.033 | 15770.784 | S59184    | 944.773   | 749.086   |
| NM_018969 | 784.364   | 928.437   | NM_004380 | 36534     | 35605.953 | NM_005130 | 350.503   | 446.91    |
| NM_004112 | 1710.244  | 1479.927  | U86813    | 1200.129  | 1540.137  | NM_006661 | 4721.525  | 4280.586  |
| AK025592  | 3180.471  | 2929.674  | NM_004119 | 1881.179  | 1924.815  | NM_005746 | 11360.802 | 11556.952 |
| NM_004635 | 5920.015  | 6363.509  | AY007378  | 5961.799  | 7145.706  | NM_004588 | 1072.465  | 1352.641  |
| AK023023  | 8582.296  | 7418.56   | D26070    | 4085.813  | 5625.419  | U16126    | 1477.297  | 1675.59   |
| NM_015993 | 5003.934  | 5097.627  | NM_001642 | 13962.772 | 17513.527 | NM_002172 | 30884.256 | 24740.43  |
| NM_002659 | 4823.751  | 2606.508  | NM_001542 | 1333.22   | 1318.028  | AJ008144  | 1199.015  | 1573.403  |
| Z36776    | 5842.196  | 4208.854  | NM_002280 | 854.3     | 934.605   | NM_007314 | 4986.831  | 5377.203  |
| AB029015  | 2482.349  | 2760.518  | NM_017459 | 857.193   | 661.389   | NM_016073 | 820.154   | 902.429   |
| NM_002067 | 29082.865 | 26843.371 | NM_001055 | 41572.906 | 39141.16  | NM_006600 | 11275.416 | 9139.729  |
| NM_020345 | 3204.548  | 4699.977  | NM_015878 | 470.486   | 658.253   | AF297709  | 3127.805  | 2772.439  |
| NM_003287 | 3649.315  | 4467.648  | NM_002271 | 64549.969 | 67430.672 | L77564    | 985.502   | 824.767   |
| NM_012325 | 27376.773 | 35047.668 | NM_018361 | 6281.471  | 4956.725  | NM_015384 | 2202.944  | 1821.948  |
| NM_014434 | 7657.563  | 9523.759  | NM_019893 | 1217.153  | 782.394   | AK023327  | 2772.453  | 2172.886  |
| NM_019607 | 20639.818 | 25328.043 | AB040966  | 12446.548 | 12398.019 | AB046858  | 1510.725  | 1224.104  |
| U79260    | 9720.756  | 13147.84  | NM_020132 | 10621.211 | 11038.771 | D50914    | 4550.623  | 4115.236  |
| NM_001895 | 18579.725 | 28573.244 | NM_016467 | 12591.744 | 10926.235 | BE878692  | 523.169   | 482.745   |
| NM_006447 | 6775.692  | 7797.657  | NM_007253 | 5135.817  | 4187.477  | NM_002007 | 474.234   | 546.799   |
| AF119851  | 1466.78   | 1784.932  | NM_000558 | 24673.975 | 27079.006 | NM_002305 | 5651.048  | 5393.892  |
| NM_014129 | 10670.525 | 16460.01  | NM_000835 | 1269.555  | 1305.385  | AK025439  | 2272.198  | 2053.878  |
| D87455    | 4341.18   | 4412.173  | NM_001830 | 695.825   | 526.483   | NM_001737 | 4385.233  | 3274.482  |
| AF080577  | 2676.048  | 3237.975  | NM_006808 | 37558.973 | 33738.234 | Z36784    | 541.101   | 511.34    |
| L22005    | 15502.207 | 15201.424 | NM_006634 | 2701.977  | 2643.076  | NM_016626 | 6518.137  | 7408.309  |
| NM_012291 | 31052.271 | 31844.686 | NM_016465 | 7073.017  | 8250.601  | NM_007213 | 436.93    | 285.813   |
| NM_013368 | 3358.307  | 3755.864  | NM_000328 | 2087.976  | 2267.965  | NM_019064 | 1026.711  | 885.531   |
| NM_003807 | 7100.799  | 6557.136  | NM_013399 | 2044.454  | 2383.694  | NM_000094 | 16174.056 | 14199.333 |
| NM_004358 | 7271.753  | 6168.365  | NM_002410 | 1957.611  | 1904.664  | AK024732  | 6144.941  | 7146.094  |
| NM_001790 | 4081.294  | 3767.721  | AL122120  | 9634.337  | 6572.092  | NM_016302 | 1287.423  | 1472.173  |
| NM_018243 | 5303.454  | 3881.02   | NM_018835 | 6583.479  | 8010.691  | NM_004159 | 14192.872 | 17397.432 |
| NM_014939 | 4662.794  | 3780.919  | NM_003401 | 2580.205  | 3041.058  | AK021866  | 446.471   | 706.354   |
| Y17866    | 1444.656  | 916.064   | AL137724  | 4056.463  | 3845.924  | NM_003249 | 4968.199  | 4698.14   |
| AK024247  | 462.246   | 308.776   | NM_004758 | 3006.09   | 2284.977  | M21897    | 1174.247  | 1540.728  |
| NM_003005 | 7050.715  | 7083.212  | NM_002913 | 5605.813  | 5176.334  | AF301463  | 632.471   | 382.166   |
| NM_000873 | 9199.561  | 10652.122 | AK022797  | 2008.232  | 2732.571  | NM_015984 | 3875.056  | 3006.182  |
| AB033025  | 1207.205  | 1913.502  | NM_007370 | 6395.737  | 9447.674  | AK022471  | 431.657   | 193.58    |
| NM_004418 | 20816.793 | 26803.494 | NM_006231 | 1998.674  | 2738.361  | NM_006894 | 3280.548  | 2223.594  |
| NM_000917 | 13412.155 | 16206.84  | AK023471  | 2611.427  | 2525.861  | AK023031  | 1810.953  | 2251.34   |
| NM_005389 | 37702.055 | 46172.664 | AF044578  | 6055.966  | 4127.287  | NM_005717 | 48762.824 | 43456.926 |
| NM_014445 | 52573.141 | 58565.66  | NM_001948 | 6477.657  | 4132.136  | NM_012090 | 1617.219  | 1325.185  |
| AL832826  | 3905.77   | 7108.499  | NM_001067 | 17598.051 | 13594.756 | BE793385  | 796.394   | 1787.829  |
| NM_016123 | 2396.791  | 2952.562  | NM_014034 | 7990.676  | 6615.275  | AF177292  | 588.876   | 746.294   |

|           |           |           |           |           |           |           |           |           |
|-----------|-----------|-----------|-----------|-----------|-----------|-----------|-----------|-----------|
| AB048365  | 3624.979  | 3714.9    | J04474    | 14254.816 | 13042.23  | NM_00308E | 5573.132  | 5646.558  |
| NM_000391 | 11660.534 | 13901.191 | NM_00472E | 807.768   | 956.688   | AF043290  | 806.567   | 634.39    |
| AF229179  | 1414.701  | 1675.156  | L29306    | 1488.698  | 1664.977  | NM_00408E | 2661.982  | 2913.491  |
| NM_014771 | 9880.251  | 8783.362  | NM_01398E | 4925.963  | 5984.767  | NM_01439E | 6404.101  | 6331.897  |
| NM_00227E | 2191.001  | 1761.812  | NM_00173E | 2910.192  | 3354.759  | NM_005934 | 36852.797 | 24439.861 |
| AB032945  | 727.086   | 812.368   | NM_00227C | 783.078   | 1096.454  | NM_002614 | 1348.604  | 1099.114  |
| AK025215  | 24856.965 | 24085.318 | AF036364  | 5146.402  | 7202.187  | NM_00565E | 3844.324  | 3550.996  |
| BF569160  | 604.096   | 547.156   | AK022847  | 7179.67   | 9679.566  | NM_00269E | 3848.105  | 4064.491  |
| NM_018131 | 5203.082  | 4070.963  | NM_02020E | 3149.735  | 3221.901  | NM_00214E | 873.263   | 786.192   |
| NM_014834 | 931.903   | 542.333   | L40992    | 1066.852  | 1039.181  | AL137449  | 1289.196  | 1455.549  |
| NM_01763E | 8308.15   | 7009.135  | U20582    | 19021.205 | 18410.098 | U88153    | 3120.886  | 2482.929  |
| NM_01246E | 984.63    | 882.331   | NM_000337 | 1132.882  | 991.673   | X03910    | 13729.784 | 12900.464 |
| NM_00243C | 1228.81   | 1312.914  | NM_00207E | 11097.647 | 19932.254 | NM_01842E | 14364.741 | 12022.836 |
| NM_00615C | 2893.214  | 3447.389  | AI660957  | 1646.909  | 2989.506  | NM_00505E | 547.787   | 680.952   |
| NM_01494E | 14314.991 | 19053.932 | U13697    | 1363.886  | 1952.257  | NM_006924 | 17080.498 | 15767.661 |
| AK024392  | 7207.568  | 7596.616  | U04270    | 35563.75  | 31665.949 | NM_016024 | 3632.351  | 2792.216  |
| NM_01326C | 3350.757  | 3005.909  | Z34820    | 727.094   | 860.458   | NM_018107 | 2937.556  | 2408.659  |
| NM_01830C | 3923.78   | 4237.147  | L02840    | 5702.496  | 3562.257  | NM_01227E | 732.441   | 651.183   |
| NM_00487E | 11219.041 | 13138.24  | BG569143  | 609.098   | 530.199   | NM_018387 | 13254.865 | 12126.253 |
| NM_018254 | 6032.185  | 6099.893  | AA927528  | 7131.133  | 7532.671  | BF310673  | 1939.742  | 1405.446  |
| NM_01774E | 4805.153  | 4669.691  | BG676364  | 10229.821 | 10321.303 | R97012    | 40743.203 | 28838.73  |
| NM_01843E | 5524.724  | 5732.762  | BG181154  | 3781.679  | 4574.024  | U77700    | 7806.699  | 5249.011  |
| NM_000937 | 1662.106  | 1916.023  | H68922    | 1375.597  | 1377.224  | NM_006567 | 6645.475  | 5618.455  |
| AB028451  | 2902.189  | 2528.165  | AF090906  | 2853.438  | 2956.971  | AF038554  | 17314.178 | 11889.441 |
| AK024810  | 26386.006 | 24130.58  | AB023219  | 7007.561  | 6496.27   | AF264621  | 7867.036  | 4587.123  |
| AK022615  | 57717.348 | 55210.461 | NM_01414E | 1293.329  | 2247.321  | NM_00587E | 14656.92  | 12329.552 |
| NM_00404E | 13590.612 | 11394.001 | NM_00248C | 13155.006 | 23847.639 | NM_004184 | 11548.387 | 9068.059  |
| BM458096  | 31304.627 | 25948.68  | NM_017571 | 12091.229 | 13430.055 | NM_00043E | 810.37    | 627.699   |
| NM_00562E | 18418.418 | 13641.536 | L03169    | 1922.035  | 1490.452  | AJ295148  | 562.875   | 590.252   |
| D29958    | 43755.551 | 35132.809 | M81349    | 574.436   | 1263.609  | AF176701  | 350.192   | 353.555   |
| NM_015971 | 29022.58  | 13888.902 | NM_00192E | 4568.503  | 5545.545  | NM_00045E | 2584.99   | 4400.03   |
| D17257    | 59246.867 | 60900.586 | NM_00639E | 2799.744  | 1936.834  | NM_00249E | 17464.793 | 21708.744 |
| NM_00284E | 2667.668  | 2487.019  | NM_01896E | 778.571   | 843.206   | NM_01624E | 3056.31   | 3138.881  |
| AF290204  | 654.309   | 905.633   | NM_00018E | 13040.898 | 10211.66  | X53943    | 563.998   | 1298.067  |
| NM_01212E | 2265.773  | 2035.673  | Y00816    | 3012.175  | 2328.449  | NM_01440E | 30164.842 | 24135.18  |
| NM_00391E | 1187.673  | 1226.098  | NM_00451E | 20099.568 | 16685.313 | NM_00464E | 7167.349  | 6888.574  |
| NM_004807 | 3621.569  | 4935.802  | NM_00438C | 35974.875 | 36404.352 | NM_00654C | 4149.096  | 3168.814  |
| AF219140  | 1243.004  | 1439.24   | U86813    | 889.005   | 1301.18   | NM_01776E | 1818.778  | 1581.416  |
| J03569    | 52356.445 | 55915.594 | NM_004119 | 2088.776  | 2424.682  | NM_002811 | 7958.333  | 5654.068  |
| NM_00311E | 15547.527 | 21033.031 | AY007378  | 5836.422  | 4992.584  | NM_02031C | 2112.396  | 1691.179  |
| NM_000694 | 854.713   | 1079.125  | D26070    | 2643.65   | 2684.631  | NM_00580E | 3092.302  | 2132.135  |
| NM_000687 | 42895.605 | 43118.66  | NM_00164E | 13233.993 | 12006.442 | AB002331  | 2320.838  | 1594.886  |
| NM_00044E | 981.303   | 1122.105  | NM_00154E | 1341.3    | 1433.457  | NM_002504 | 2680.098  | 2126.79   |
| NM_01820C | 4157.238  | 4300.44   | NM_01745E | 545.471   | 794.569   | AB046775  | 1955.122  | 1350.849  |
| NM_01483E | 3575.116  | 3145.538  | NM_00703E | 10749.244 | 11766.817 | X74862    | 1047.085  | 997.296   |
| NM_00721E | 891.548   | 1041.455  | AB019562  | 3311.931  | 3939.705  | X65663    | 7381.693  | 6037.267  |
| AF005067  | 4123.901  | 3517.78   | NM_002271 | 60363.375 | 67280.727 | NM_00318E | 2154.883  | 1634.472  |
| NM_00571C | 16063.532 | 12879.596 | NM_018361 | 5904.678  | 5322.09   | NM_00445E | 4383.421  | 2362.426  |
| AF252284  | 3316.781  | 2932.704  | NM_01989E | 912.155   | 580.607   | NM_004284 | 6761.048  | 5811.218  |
| NM_01493C | 1372.013  | 815.194   | AB040966  | 11569.019 | 8020.389  | NM_00712E | 5468.07   | 4213.993  |
| NM_00153C | 7190.989  | 6543.396  | NM_02013E | 10767.35  | 7802.481  | AY004253  | 8938.199  | 8416.848  |
| U80232    | 7983.726  | 4651.626  | NM_016467 | 11524.342 | 9603.989  | Z46967    | 736.104   | 715.555   |
| M27877    | 25431.029 | 21173.531 | NM_00725E | 4362.556  | 3104.375  | NM_01758E | 9854.24   | 15819.407 |

|           |           |           |           |           |           |           |           |           |
|-----------|-----------|-----------|-----------|-----------|-----------|-----------|-----------|-----------|
| D70836    | 56727.676 | 56020.523 | NM_000558 | 23645.91  | 20590.617 | Y16132    | 22200.783 | 32102.438 |
| D16878    | 2314.983  | 2713.93   | NM_000835 | 1110.519  | 1017.203  | NM_016593 | 2239.827  | 4327.661  |
| NM_007035 | 12065.506 | 19084.338 | NM_001830 | 745.414   | 669.13    | NM_002521 | 1527.66   | 2900.554  |
| AB019562  | 2484.574  | 3563.803  | NM_001149 | 3071.419  | 4039.177  | NM_001150 | 2404.791  | 3237.656  |
| AF036364  | 5065.542  | 7847.283  | NM_006808 | 38906.73  | 35143.398 | NM_002856 | 3993.637  | 4912.028  |
| AK022847  | 8064.416  | 9309.184  | NM_006634 | 3023.451  | 2035.961  | NM_003225 | 1099.196  | 1349.701  |
| NM_020203 | 3040.235  | 3464.558  | NM_016465 | 6396.763  | 5485.037  | NM_000096 | 942.12    | 980.093   |
| L40992    | 622.347   | 1236.544  | NM_000328 | 1571.064  | 1148.612  | AA418251  | 963.409   | 1310.608  |
| U20582    | 24331.432 | 32779.652 | NM_013399 | 2863.418  | 2822.685  | AA143087  | 14020.832 | 12634.944 |
| NM_000337 | 670.78    | 724.578   | NM_002410 | 1748.178  | 1591.487  | BI870965  | 6757.93   | 5974.085  |
| NM_002079 | 13717.931 | 25831.633 | AL122120  | 9216.21   | 7151.565  | BI835536  | 6777.742  | 7643.384  |
| U13697    | 1258.252  | 1707.397  | NM_014684 | 2373.798  | 2026.079  | BF205051  | 4841.646  | 4771.986  |
| U04270    | 11556.657 | 11243.856 | AK027247  | 2931.35   | 2486.018  | X02761    | 10667.018 | 8504.894  |
| Z34820    | 561.091   | 974.489   | AL137724  | 5182.974  | 8460.258  | M91463    | 1015.883  | 722.168   |
| L02840    | 518.499   | 418.713   | NM_004758 | 2147.078  | 2384.464  | U88317    | 469.512   | 317.139   |
| BG569143  | 510.402   | 492.578   | NM_002913 | 4890.387  | 3286.604  | J03060    | 2113.071  | 1750.705  |
| AA629719  | 60373.078 | 60193.82  | AK022797  | 1733.806  | 1402.593  | X54156    | 513.092   | 340.786   |
| AA927528  | 6246.283  | 4993.411  | NM_007370 | 5462.386  | 3610.262  | NM_003743 | 1194.725  | 902.953   |
| BG676364  | 7146.462  | 4981.323  | NM_006231 | 1912.842  | 1287.609  | AA829383  | 6443.842  | 6353.167  |
| BG181154  | 1876.275  | 1630.91   | AK023471  | 2216.155  | 1600.351  | AF012434  | 20489.461 | 18065.072 |
| AA843679  | 7800.077  | 10096.738 | AF044578  | 5141.033  | 3183.725  | AF131748  | 3944.911  | 3545.862  |
| H68922    | 1020.072  | 1520.686  | NM_001948 | 6774.665  | 4027.198  | NM_002349 | 1298.381  | 2087.667  |
| AF097159  | 2673.077  | 3165.459  | NM_001067 | 17278.176 | 12974.202 | NM_005080 | 10843.513 | 21070.92  |
| NM_014684 | 2464.123  | 3011.885  | NM_014034 | 8146.366  | 7220.381  | NM_004887 | 7469.675  | 14709.04  |
| AK027247  | 2953.585  | 2749.714  | NM_005335 | 34861.148 | 37945.539 | NM_006404 | 1446.607  | 6152.932  |
| NM_002480 | 11729.149 | 15112.951 | J04474    | 18678.516 | 28002.152 | NM_014795 | 964.815   | 1886.809  |
| NM_017571 | 15378.332 | 12725.48  | NM_003761 | 53151.473 | 56734.465 | NM_002986 | 1291.589  | 1851.774  |
| AB007946  | 423.985   | 491.8     | NM_004726 | 586.296   | 972.665   | M15330    | 1586.122  | 4438.788  |
| L03169    | 3055.473  | 3321.582  | NM_014011 | 11254.62  | 9948.775  | NM_014396 | 2512.266  | 2675.064  |
| M81349    | 349.069   | 440.015   | AK025994  | 8473.369  | 7023.372  | AK027201  | 2014.526  | 2054.459  |
| NM_001928 | 3364.359  | 3590.382  | L29306    | 1454.018  | 998.939   | NM_000489 | 19812.564 | 19835.311 |
| NM_006399 | 2413.023  | 1971.781  | NM_002270 | 986.836   | 791.377   | X98507    | 6138.147  | 5733.425  |
| NM_018965 | 873.69    | 1157.73   | NM_001055 | 49172.504 | 50115.77  | NM_016030 | 52528.805 | 66999.922 |
| NM_000185 | 2943.419  | 2579.929  | NM_015878 | 626.337   | 849.918   | NM_014669 | 7200.472  | 8486.828  |
| Y00816    | 3830.283  | 3237.236  | NM_020203 | 3819.18   | 4430.815  | NM_005652 | 25340.25  | 23388.283 |
| NM_004512 | 6673.45   | 7358.356  | L40992    | 730.506   | 656.143   | AK026686  | 340.634   | 453.883   |
| NM_002930 | 446.231   | 525.957   | U20582    | 18743.748 | 16444.25  | NM_005902 | 2684.042  | 2137.326  |
| NM_004380 | 21639.889 | 23419.273 | NM_000337 | 1177.431  | 934.304   | NM_002850 | 54472.02  | 71359.836 |
| D26070    | 1842.634  | 1087.331  | NM_002079 | 9749.244  | 7412.197  | NM_004302 | 305.232   | 258.703   |
| NM_001642 | 11198.594 | 8962.277  | U13697    | 1275.58   | 830.867   | NM_005903 | 1155.716  | 1320.88   |
| NM_001542 | 1009.568  | 743.554   | X75308    | 628.307   | 309.551   | NM_000861 | 1446.755  | 1339.44   |
| NM_002280 | 269.622   | 845.622   | U04270    | 38811.805 | 32098.314 | U77493    | 1048.218  | 1174.026  |
| NM_017459 | 296.127   | 616.488   | Z34820    | 740.293   | 787.36    | NM_019062 | 1305.728  | 1751.073  |
| NM_001055 | 20364.84  | 22431.375 | L02840    | 5185.785  | 2556.065  | AL133064  | 3235.578  | 5252.852  |
| NM_015878 | 613.031   | 630.164   | BG569143  | 577.88    | 769.585   | NM_006227 | 4726.047  | 8032.034  |
| NM_002271 | 52565.629 | 58751.863 | AA629719  | 58663.035 | 63341.426 | NM_002905 | 4863.84   | 9224.644  |
| NM_018361 | 6419.381  | 7029.543  | AA927528  | 13346.138 | 24225.326 | NM_000700 | 2925.196  | 6109.987  |
| NM_019893 | 1519.884  | 870.592   | X02152    | 59258.672 | 67502.016 | NM_019028 | 19961.998 | 28320.773 |
| AB040966  | 12848.508 | 14806.01  | BG676364  | 11459.9   | 13519.379 | NM_000431 | 2140.669  | 2285.669  |
| NM_020132 | 11723.845 | 12188.01  | BG181154  | 2498.226  | 2622.945  | NM_013421 | 2583.26   | 3872.048  |
| NM_016467 | 13516.378 | 13653.669 | AA843679  | 20160.896 | 20332.299 | NM_012474 | 4517.344  | 5545.933  |
| NM_007253 | 2452.58   | 2587.147  | H68922    | 1244.963  | 1830.051  | AB033118  | 1004.421  | 1225.244  |
| NM_000558 | 3391.682  | 3374.9    | NM_006399 | 2250.561  | 1991.631  | NM_019606 | 2990.308  | 3219.926  |

|           |           |           |           |           |           |           |           |           |
|-----------|-----------|-----------|-----------|-----------|-----------|-----------|-----------|-----------|
| NM_00083E | 1043.841  | 1053.092  | NM_01896E | 864.411   | 664.734   | NM_00169C | 7485.303  | 5841.044  |
| NM_00183C | 836.565   | 483.149   | NM_00018E | 10817.692 | 6994.002  | AF034374  | 13354.552 | 14073.954 |
| NM_00680E | 40250.539 | 28236.221 | Y00816    | 2694.917  | 1918.896  | NM_00168E | 3624.178  | 3089.976  |
| NM_006634 | 1827.612  | 1082.336  | NM_00451E | 17885.529 | 12406.819 | AK025130  | 3174.736  | 3710.444  |
| NM_01646E | 5895.422  | 4573.063  | NM_00438C | 31860.23  | 20938.912 | AK023232  | 6693.072  | 7978.275  |
| NM_00032E | 1264.418  | 776.859   | U86813    | 602.626   | 616.143   | NM_00638C | 1551.631  | 1488.721  |
| NM_01339E | 956.293   | 787.437   | NM_004119 | 1526.373  | 1205.643  | AB020710  | 1457.768  | 1339.279  |
| NM_00241C | 1235.677  | 2409.584  | AY007378  | 5610.257  | 4165.297  | NM_016174 | 7662.804  | 7744.319  |
| AL122120  | 8894.21   | 8331.738  | D26070    | 2764.458  | 2076.121  | NM_020377 | 1128.418  | 815.575   |
| NM_01883E | 8404.476  | 11987.64  | NM_00164E | 10885.524 | 10257.626 | U88896    | 1728.884  | 1443.062  |
| NM_003401 | 2986.124  | 4004.692  | NM_00154E | 1101.056  | 1218.968  | AF116702  | 42968.441 | 30002.105 |
| AL137724  | 4232.304  | 4375.183  | NM_00339E | 1625.99   | 1793.464  | NM_005724 | 6216.438  | 6075.702  |
| NM_00475E | 625.802   | 564.391   | NM_00228C | 1869.983  | 3015.25   | X58794    | 1984.726  | 2818.433  |
| NM_00291E | 5561.459  | 5911.234  | NM_01745E | 654.512   | 1034.609  | NM_00173E | 2362.514  | 2429.443  |
| AK022797  | 2677.633  | 3603.513  | NM_000501 | 56513.285 | 61531.246 | Z70701    | 12692.225 | 15600.18  |
| NM_00737C | 6060.396  | 7401.72   | NM_000114 | 7224.913  | 11225.045 | AB040972  | 5994.41   | 10175.169 |
| NM_006231 | 2544.386  | 3256.751  | NM_00515E | 4332.206  | 5000.807  | AF148505  | 2811.659  | 4265.804  |
| AK023471  | 2537.911  | 4901.014  | NM_01519E | 2933.022  | 3273.823  | NM_01868E | 10910.6   | 15660.832 |
| AF044578  | 3035.429  | 2846.689  | NM_00703E | 14103.408 | 27625.633 | NM_01767E | 1697.166  | 2644.461  |
| NM_00194E | 6324.614  | 6628.205  | AB019562  | 5285.543  | 9890.178  | AK021764  | 987.178   | 1769.784  |
| NM_001067 | 15333.017 | 14268.23  | AF036364  | 7498.442  | 14708.053 | NM_005431 | 4060.949  | 4904.724  |
| NM_014034 | 8474.048  | 7692.174  | AK000271  | 2040.035  | 931.442   | NM_002894 | 7321.635  | 6451.439  |
| J04474    | 15337.423 | 12434.202 | NM_00517E | 979.852   | 378.764   | NM_00426C | 7976.578  | 7444.197  |
| NM_014011 | 13058.542 | 9661.009  | NM_00183C | 619.369   | 187.722   | AL050067  | 3086.957  | 2680.241  |
| AK025994  | 8055.672  | 4500.484  | NM_00680E | 34332.766 | 19451.217 | NM_00497E | 7174.758  | 7270.883  |
| L29306    | 1197.669  | 670.894   | NM_006634 | 2446.78   | 1017.813  | NM_006251 | 3042      | 2622.149  |
| NM_01398E | 3283.512  | 2820.083  | NM_01646E | 6424.62   | 4947.854  | NM_00410E | 10623.311 | 8789.987  |
| NM_00173E | 2733.208  | 3531.376  | NM_00032E | 1435.153  | 896.042   | NM_002314 | 5410.616  | 4082.778  |
| NM_00227C | 776.023   | 917.618   | NM_01339E | 2040.307  | 2735.727  | NM_001744 | 1638.867  | 1663.464  |
| AF036364  | 5701.209  | 9926.135  | NM_00241C | 3294.502  | 5114.662  | NM_00629E | 1830.66   | 2417.88   |
| AK022847  | 8958.028  | 12908.205 | AL122120  | 10156.431 | 14424.808 | Z25433    | 1821.996  | 1159.637  |
| NM_02020E | 2960.141  | 3395.151  | NM_014684 | 2546.24   | 2380.778  | NM_00592E | 2024.084  | 2078.671  |
| L40992    | 532.501   | 607.258   | AK027247  | 3073.752  | 3145.316  | NM_01863E | 6717.26   | 6390.73   |
| U20582    | 21023.496 | 26133.043 | NM_00248C | 13467.087 | 14957.526 | AL137593  | 21243.379 | 17527.229 |
| NM_000337 | 576.971   | 783.568   | NM_017571 | 14111.52  | 9686.856  | NM_00391E | 2797.821  | 2631.465  |
| NM_00207E | 13012.896 | 20581.523 | AB007946  | 468.363   | 525.559   | NM_00038E | 1940.198  | 2760.424  |
| U13697    | 1158.911  | 1723.574  | L03169    | 3951.445  | 8063.083  | NM_01659E | 3537.663  | 4738.112  |
| X75308    | 298.364   | 445.085   | M81349    | 708.19    | 2421.259  | NM_002521 | 2249.95   | 3785.408  |
| U04270    | 9877.217  | 12215.52  | NM_00192E | 7509.001  | 14075.156 | NM_00115C | 3190.092  | 5285.578  |
| Z34820    | 409.344   | 562.976   | NM_01398E | 5396.739  | 5836.32   | NM_00285E | 4887.413  | 6580.15   |
| AA927528  | 6143.743  | 4887.806  | NM_00173E | 2179.107  | 2194.624  | NM_00322E | 856.319   | 1493.564  |
| BG676364  | 7539.399  | 7030.866  | NM_00105E | 34479.996 | 20914.262 | NM_00009E | 1240.546  | 1880.267  |
| BG181154  | 1882.633  | 1621.39   | NM_002271 | 58266.484 | 51067.367 | AA418251  | 1307.484  | 2164.057  |
| AA843679  | 8095.611  | 5765.366  | NM_018361 | 6148.113  | 3426.44   | AA143087  | 15773.954 | 16520.941 |
| H68922    | 679.913   | 794.382   | NM_01989E | 1161.593  | 484.851   | U25804    | 1004.717  | 990.982   |
| AF090906  | 1733.839  | 1279.326  | AB040966  | 12091.154 | 8281.273  | BI870965  | 5976.886  | 5601.389  |
| AB023219  | 7017.92   | 7162.662  | NM_02013E | 11135.174 | 9060.591  | BI835536  | 6542.652  | 6304.835  |
| NM_01414E | 656.11    | 963.703   | NM_016467 | 11889.613 | 11583.109 | BF205051  | 5210.536  | 3963.069  |
| NM_00248C | 15289.747 | 23062.611 | NM_00725E | 4499.215  | 5112.776  | X02761    | 9776.459  | 8130.637  |
| NM_017571 | 17186.834 | 17555.643 | NM_01910E | 1733.417  | 1786.641  | M91463    | 1191.128  | 917.842   |
| AB007946  | 488.778   | 626.016   | L08436    | 1165.414  | 1000.561  | U88317    | 359.786   | 167.621   |
| L03169    | 3289.032  | 3066.338  | AB033002  | 1050.59   | 871.12    | J03060    | 1960.712  | 1150.964  |
| M81349    | 515.519   | 542.374   | NM_00055E | 19662.346 | 19116.906 | X54156    | 579.775   | 388.366   |

|           |           |           |           |           |           |           |           |           |
|-----------|-----------|-----------|-----------|-----------|-----------|-----------|-----------|-----------|
| NM_00192E | 3165.925  | 3053.72   | NM_00419E | 1033.609  | 1134.093  | NM_00374E | 1174.975  | 1149.345  |
| NM_00639E | 2228.674  | 2091.458  | NM_01417C | 5131.872  | 5886.353  | AA829383  | 6155.525  | 5049.106  |
| NM_01896E | 1241.068  | 1824.907  | AF116652  | 59089.023 | 64962.102 | AF012434  | 18375.127 | 13072.431 |
| NM_00018E | 3112.013  | 3099.203  | AF090906  | 2556.777  | 2580.559  | NM_018124 | 6940.665  | 6697.403  |
| Y00816    | 3910.694  | 3601.699  | AB023219  | 5461.214  | 3028.877  | NM_004887 | 7190.15   | 10423.392 |
| NM_00451E | 6829.106  | 6491.478  | NM_01883E | 6159.789  | 2856.215  | NM_006404 | 958.051   | 1355.168  |
| NM_00293C | 477.563   | 673.227   | NM_003401 | 2445.764  | 1390.416  | NM_01479E | 1033.706  | 1899.28   |
| NM_00438C | 22213.408 | 21128.502 | AL137724  | 3661.281  | 1895.472  | NM_00298E | 1145.77   | 1694.015  |
| NM_004119 | 525.344   | 565.834   | NM_00475E | 2398.121  | 1116.356  | M15330    | 1652.461  | 4787.319  |
| AY007378  | 4596.463  | 3710.391  | NM_00291E | 4977.954  | 2956.823  | NM_01439E | 3310.97   | 4402.058  |
| D26070    | 2138.014  | 1539.947  | AK022797  | 2413.193  | 1416.51   | AK027201  | 2424.72   | 2811.382  |
| NM_00164E | 10843.962 | 8082.412  | NM_00737C | 6147.298  | 4329.628  | NM_00048E | 22023.781 | 25990.963 |
| NM_00154E | 809.204   | 504.416   | NM_006231 | 2148.2    | 1505.842  | X98507    | 6865.632  | 6148.196  |
| NM_00703E | 11102.748 | 13607.485 | AK023471  | 2188.178  | 1970.198  | NM_01603C | 52783.953 | 59425.359 |
| AB019562  | 2362.178  | 2998.497  | AF044578  | 5177.724  | 3952.26   | NM_01466E | 7098.065  | 6965      |
| NM_002271 | 59858.668 | 63459.805 | NM_00194E | 6353.589  | 3884.854  | NM_00565E | 25962.313 | 21037.209 |
| NM_018361 | 7418.471  | 8112.93   | NM_001067 | 16795.615 | 12034.585 | AK026686  | 403.768   | 441.939   |
| NM_01989E | 1712.439  | 1247.288  | NM_014034 | 7882.23   | 4866.309  | NM_00590E | 2801      | 2384.77   |
| AB040966  | 13539.973 | 13977.489 | NM_00533E | 30265.76  | 19391.07  | NM_00285C | 57317.582 | 68862.508 |
| NM_02013E | 13550.395 | 18572.344 | J04474    | 14955.893 | 9707.009  | NM_00430E | 440.392   | 235.777   |
| NM_016467 | 13814.724 | 13537.06  | NM_003761 | 51447.242 | 40014.582 | NM_00590E | 1271.071  | 1295.168  |
| NM_00725E | 2573.449  | 2517.71   | NM_00472E | 1023.938  | 863.592   | NM_000861 | 1089      | 736.081   |
| NM_00055E | 3154.304  | 3934.293  | NM_014011 | 12009.063 | 13707.54  | U77493    | 814.406   | 877.256   |
| NM_00083E | 994.586   | 1125.368  | AK025994  | 13370.43  | 22362.982 | NM_01906E | 1198.465  | 1300.084  |
| NM_00183C | 820.185   | 504.993   | CY3Cy5    | 4895.766  | 481.232   | NM_01758E | 10147.66  | 10930.118 |
| NM_00680E | 40833.242 | 26799.309 | AK022262  | 2780.725  | 3153.293  | Y16132    | 22058.473 | 19934.945 |
| NM_006634 | 1937.211  | 1407.817  | AF088039  | 78344.039 | 66373.969 | NM_00290E | 5544.028  | 8088.321  |
| NM_01646E | 6832.373  | 5461.583  | AF086220  | 2761.85   | 2452.668  | NM_00070C | 2891.81   | 5368.952  |
| NM_00032E | 1187.427  | 700.754   | AK023941  | 2941.197  | 3160.137  | NM_01902E | 17575.092 | 26419.545 |
| NM_01339E | 658.424   | 446.992   | AF086265  | 1040.044  | 782.835   | NM_000431 | 2024.695  | 2525.46   |
| NM_00241C | 1145.854  | 760.352   | AL390083  | 8100.393  | 8238.861  | NM_013421 | 3016.055  | 5106.501  |
| AL122120  | 8123.614  | 4789.587  | AB020702  | 686.253   | 906.82    | NM_012474 | 4827.777  | 9681.655  |
| NM_014684 | 2403.785  | 1981.84   | AL050227  | 738.511   | 849.489   | AB033118  | 1453.167  | 2046.268  |
| AK027247  | 3755.934  | 6861.197  | AF085905  | 683.2     | 715.591   | NM_00169C | 8369.235  | 6170.856  |
| AL137724  | 4766.9    | 5916.332  | AK075087  | 1009.549  | 993.663   | AF034374  | 13191.646 | 13050.01  |
| NM_00475E | 653.784   | 669.078   | AK026571  | 4861.39   | 4864.774  | NM_00168E | 3037.572  | 2431.171  |
| NM_00291E | 6156.69   | 7196.176  | AK024673  | 6929.713  | 7031.569  | AK025130  | 3337.952  | 3272.189  |
| AK022797  | 2220.768  | 1811.339  | AF070618  | 2320.408  | 2936.341  | AK023232  | 6920.921  | 8470.793  |
| NM_00737C | 6031.917  | 6600.42   | NM_033334 | 412.387   | 231.21    | NM_00638C | 1712.136  | 1800.562  |
| NM_006231 | 2366.613  | 2327.973  | SR4       | 14961.378 | 21442.146 | AB020710  | 1567.172  | 1706.643  |
| AK023471  | 2519.802  | 3748.689  | SR6       | 2235.257  | 2633.326  | NM_016174 | 7410.485  | 5666.17   |
| AF044578  | 2860.782  | 2670.664  | SR8       | 8923.53   | 38593.691 | NM_020377 | 1467.347  | 1179.666  |
| NM_00194E | 6558.609  | 6325.445  | SR10      | 29804.307 | 15722.367 | U88896    | 1697.387  | 1267.009  |
| NM_001067 | 20921.721 | 30639.67  | CY3Cy5    | 3422.769  | 334.627   | AF116702  | 42141.984 | 23300.389 |
| NM_014034 | 8730.651  | 8098.375  | AL049365  | 29393.051 | 38056.012 | NM_005724 | 6439.576  | 5503.098  |
| NM_00533E | 31979.221 | 22555.246 | AK025132  | 1676.403  | 1655.455  | X58794    | 1929.262  | 2068.885  |
| J04474    | 15702.5   | 12300.415 | AK025157  | 8617.888  | 9326.137  | NM_00173E | 2052.112  | 2025.645  |
| NM_003761 | 41730.129 | 28390.303 | AK022633  | 1444.885  | 1295.671  | NM_00234E | 1344.116  | 1643.377  |
| NM_00472E | 721.771   | 467.774   | AK027199  | 627.619   | 352.738   | NM_00508C | 10841.333 | 14300.838 |
| NM_014011 | 12958.95  | 8318.96   | AK000079  | 1685.21   | 1404.399  | AF148505  | 2629.293  | 4097.201  |
| AK025994  | 7473.875  | 4555.04   | NM_01224E | 3878.732  | 3207.995  | NM_01868E | 11846.903 | 21460.975 |
| L29306    | 1044.128  | 633.085   | AK025743  | 2780.246  | 2842.496  | NM_01767E | 2010.463  | 7371.903  |
| NM_01398E | 2937.946  | 1766.141  | AL137466  | 490.503   | 589.937   | AK021764  | 703.672   | 2580.197  |

|           |           |           |           |           |           |           |           |           |
|-----------|-----------|-----------|-----------|-----------|-----------|-----------|-----------|-----------|
| NM_00173E | 2377.117  | 1715.871  | AK023974  | 6096.167  | 5680.88   | NM_005431 | 3975.686  | 5650.542  |
| NM_00227C | 807.373   | 375.432   | AK023768  | 2587.809  | 2758.514  | AL050067  | 3218.511  | 2249.656  |
| NM_00105E | 17892.496 | 13713.106 | AF147335  | 2273.561  | 2019.313  | NM_00497Z | 9546.856  | 8929.596  |
| NM_01587E | 760.34    | 852.225   | AK022216  | 2426.302  | 2516.604  | NM_006251 | 3060.676  | 2634.418  |
| NM_02020Z | 3197.297  | 3998.188  | U00960    | 1434.982  | 1801.488  | NM_00410Z | 11206.883 | 8750.153  |
| U20582    | 23665.301 | 25770.119 | AK026419  | 1066.281  | 1206.633  | NM_002314 | 5871.907  | 5421.67   |
| NM_000337 | 751.174   | 1050.991  | AK025276  | 7775.59   | 9222.985  | NM_001744 | 1681.422  | 1192.665  |
| NM_00207E | 11530.085 | 12467.516 | AK026457  | 4971.905  | 3869.29   | NM_00629E | 2064.695  | 1531.76   |
| U13697    | 1101.338  | 1546.424  | AK026825  | 2828.762  | 2865.066  | Z25433    | 1871.375  | 1784.932  |
| X75308    | 538.611   | 699.724   | NM_01335E | 1457.275  | 1714.812  | NM_00592Z | 2145.101  | 2040.975  |
| U04270    | 13166.425 | 13750.132 | NM_003847 | 30508.426 | 28858.168 | NM_01863E | 6590.068  | 4282.182  |
| Z34820    | 702.28    | 1236.741  | AK021973  | 1432.913  | 1306.138  | AL137593  | 21621.75  | 16425.469 |
| L02840    | 729.933   | 704.304   | AL050165  | 70446.922 | 66433.125 | NM_00391E | 2377.121  | 1657.368  |
| BG569143  | 494.097   | 493.465   | AL117445  | 1172.167  | 1693.76   | NM_00038Z | 1876.216  | 2243.216  |
| AA629719  | 57585.422 | 59226.422 | AL122113  | 3663.826  | 6055.932  | AL133064  | 4140.812  | 4474.651  |
| AA927528  | 6605.688  | 5389.272  | AK024415  | 1277.975  | 1776.12   | NM_006227 | 5545.841  | 6454.635  |
| X02152    | 60671.844 | 61249.082 | AK023515  | 1544.093  | 1286.208  | NM_00115C | 3199.863  | 4064.986  |
| BG676364  | 7687.25   | 7255.943  | AL137623  | 47194.266 | 43278.781 | NM_00285E | 5252.189  | 8650.348  |
| BG181154  | 1766.275  | 1271.418  | AK026485  | 998.99    | 826.612   | NM_00322E | 1075.875  | 2426.485  |
| AA843679  | 8964.974  | 7049.269  | AJ227874  | 2148.432  | 3066.292  | NM_00009E | 1432.891  | 5836.134  |
| H68922    | 863.085   | 705.726   | AF009268  | 791.284   | 558.464   | AA418251  | 1213.084  | 3769.932  |
| AF090906  | 1327.116  | 673.974   | AF009312  | 832.336   | 434.126   | AA143087  | 18908.389 | 22993.15  |
| AB023219  | 6183.583  | 3508.188  | AF056418  | 473.563   | 742.46    | U25804    | 357.885   | 449.917   |
| NM_01414E | 485.679   | 277.282   | AF009276  | 1166.579  | 1231.823  | BI870965  | 8639.101  | 8708.888  |
| NM_01883E | 7757.158  | 7514.909  | AF056428  | 18845.494 | 17700.414 | BF205051  | 5397.446  | 4049.952  |
| NM_003401 | 2877.785  | 2559.573  | AF069136  | 717.259   | 668.811   | X02761    | 13578.755 | 9728.596  |
| NM_00639E | 2188.605  | 1683.007  | AK001995  | 786.15    | 879.055   | M91463    | 1202.134  | 819.607   |
| NM_01896E | 1089.548  | 1805.636  | AK021594  | 870.74    | 933.863   | U88317    | 520.447   | 359.013   |
| NM_00018E | 3407.129  | 3380.734  | AK021635  | 2000.971  | 2508.344  | J03060    | 2219.689  | 1498.942  |
| Y00816    | 4962.786  | 7187.781  | AK021856  | 527.001   | 890.426   | X54156    | 481.608   | 383.987   |
| NM_00451Z | 7737.476  | 7775.584  | S97393    | 1140.548  | 1545.973  | NM_00374Z | 1254.839  | 740.637   |
| NM_00293C | 565.642   | 566.41    | BE698533  | 1397.13   | 1184.359  | AA829383  | 6655.431  | 6290.22   |
| NM_00438C | 25251.254 | 32678.225 | NM_01792E | 2009.945  | 1817.595  | AF012434  | 16900.549 | 9150.351  |
| U86813    | 406.358   | 650.707   | NM_01847Z | 2005.182  | 1995.044  | NM_018124 | 6964.448  | 4593.328  |
| NM_004119 | 522.016   | 1181.533  | AF085923  | 448.416   | 568.139   | Z70701    | 13042.439 | 10482.085 |
| AY007378  | 5275.187  | 6637.367  | AJ008128  | 48811.953 | 42862.121 | AB040972  | 5127.334  | 5853.971  |
| D26070    | 2412.84   | 2599.476  | AL449243  | 22093.297 | 21293.766 | X98507    | 7789.043  | 13709.42  |
| NM_00164Z | 12108.436 | 11161.972 | M12211    | 6482.492  | 8102.209  | NM_01603C | 50766.348 | 70548.094 |
| NM_00154Z | 840.712   | 767.953   | AJ008131  | 42475.664 | 39427.445 | NM_01466E | 8793.986  | 16453.879 |
| NM_00339Z | 1350.299  | 941.568   | AF086338  | 1151.427  | 1101.518  | NM_00565Z | 30584.684 | 41853.734 |
| NM_000501 | 17352.168 | 15248.854 | NM_00627Z | 664.858   | 602.48    | AK026686  | 705.076   | 1726.556  |
| NM_000114 | 1429.313  | 943.434   | AK024303  | 1646.904  | 1511.466  | NM_00590Z | 3126.854  | 3976.005  |
| NM_00515E | 4379.901  | 3452.737  | AL160131  | 16345.462 | 14926.596 | NM_00285C | 54438.211 | 69751.305 |
| NM_01519Z | 927.846   | 695.296   | AF086045  | 4961.366  | 4216.951  | NM_00590Z | 959.472   | 989.616   |
| X98834    | 7412.425  | 4540.348  | AK027028  | 5377.949  | 6049.453  | NM_000861 | 1442.651  | 1212.753  |
| NM_00703E | 9616.907  | 8736.59   | AK027069  | 1005.588  | 1091.634  | U77493    | 776.246   | 756.867   |
| AB019562  | 2086.432  | 1838.521  | AK026916  | 3197.52   | 3270.75   | NM_01906Z | 1136.15   | 1150.547  |
| AF036364  | 4855.793  | 5672.202  | AK026914  | 2167.714  | 2344.452  | NM_00387Z | 571.538   | 498.258   |
| AK022847  | 8591.68   | 8476.029  | Y13808    | 931.131   | 979.644   | NM_00026Z | 1989.741  | 1762.816  |
| AK000271  | 3091.688  | 2917.899  | Y11166    | 4314.857  | 6112.852  | AF073519  | 8414.423  | 4904.367  |
| NM_00517Z | 1189.664  | 579.964   | AK024942  | 4813.714  | 4371.301  | AB001451  | 541.891   | 436.364   |
| NM_00183C | 754.535   | 585.507   | AJ227873  | 17672.102 | 13344.716 | NM_01758Z | 8429.368  | 7711.496  |
| NM_00114E | 561.871   | 457.718   | AK022886  | 4740.089  | 4020.91   | Y16132    | 15577.032 | 11940.128 |

|           |           |           |           |           |           |           |           |           |
|-----------|-----------|-----------|-----------|-----------|-----------|-----------|-----------|-----------|
| NM_00680E | 45559.875 | 48628.656 | AK024665  | 7935.31   | 7715.758  | NM_01659E | 2528.889  | 2410.706  |
| NM_006634 | 2983.137  | 4049.425  | AF147363  | 1193.538  | 1482.84   | NM_002521 | 1670.291  | 1599.046  |
| NM_01646E | 7658.794  | 10912.272 | AJ227880  | 917.97    | 1161.747  | NM_000271 | 32220.098 | 42064.563 |
| NM_00032E | 1275.235  | 1026.753  | AK000691  | 1858.793  | 1797.105  | NM_01820E | 4156.622  | 8123.934  |
| NM_01339E | 998.799   | 805.014   | AK001448  | 2479.29   | 2870.593  | NM_006184 | 10857.178 | 17527.641 |
| NM_00241C | 873.112   | 754.724   | AK026890  | 961.158   | 1496.179  | AB018268  | 12827.284 | 19701.869 |
| AL122120  | 8186.667  | 5420.676  | AF131817  | 1271.838  | 1411.264  | NM_01904E | 400.668   | 396.385   |
| NM_014684 | 2000.29   | 915.143   | AL049321  | 3774.758  | 3878.766  | NM_00638C | 1699.526  | 2169.314  |
| AK027247  | 2524.081  | 1745.777  | NM_00354E | 5292.999  | 5936.083  | AB020710  | 1576.559  | 1875.533  |
| NM_00248C | 9752.042  | 7381.075  | AF118077  | 5103.606  | 5197.972  | NM_016174 | 8375.004  | 7621.833  |
| NM_017571 | 12488.037 | 6496.241  | AL137625  | 1175.473  | 998.085   | NM_020377 | 1064.384  | 870.482   |
| AB007946  | 586.898   | 347.517   | AK025750  | 2055.967  | 2290.484  | U88896    | 1281.467  | 833.363   |
| L03169    | 3004.271  | 1621.357  | BF031253  | 1490.782  | 1497.776  | AF116702  | 41241.965 | 25240.77  |
| M81349    | 421.906   | 284.608   | AK025783  | 3323.473  | 3077.101  | NM_005724 | 5800.575  | 5110.564  |
| NM_00192E | 3651.996  | 2826.104  | AF113675  | 1836.144  | 1948.887  | X58794    | 1995.869  | 2240.954  |
| NM_01398E | 4029.218  | 3719.397  | AK024514  | 1293.657  | 1440.585  | NM_00173E | 1982.969  | 1611.115  |
| NM_00173E | 3043.207  | 3641.707  | NM_020119 | 3099.695  | 3200.805  | NM_00234E | 1284.434  | 1356.637  |
| NM_00227C | 760.466   | 792.731   | AL049417  | 2865.918  | 3025.977  | NM_00508C | 9230.371  | 9660.045  |
| NM_00105E | 19841.445 | 18334.668 | AK023507  | 1893.705  | 2180.278  | NM_004887 | 8199.459  | 6623.528  |
| NM_01587E | 855.449   | 581.935   | NM_00516E | 1575.867  | 2619.483  | NM_006404 | 764.354   | 911.763   |
| NM_002271 | 60586.094 | 66781.258 | AL109818  | 796.971   | 1400.85   | NM_01479E | 977.343   | 677.935   |
| NM_018361 | 8398.304  | 12067.403 | NM_00006E | 5783.239  | 5959.834  | NM_00298E | 1023.284  | 1010.785  |
| NM_01989E | 1742.914  | 1564.108  | AB033046  | 24471.58  | 23614.064 | M15330    | 1427.393  | 2470.283  |
| AB040966  | 13320.408 | 13732.128 | NM_01591E | 9434.959  | 8485.263  | NM_01439E | 2925.333  | 2339.513  |
| NM_02013E | 11045.787 | 10386.11  | AK023228  | 740.776   | 1207.108  | AK027201  | 2270.217  | 2304.864  |
| NM_016467 | 12762.727 | 9234.207  | NM_01324E | 883.064   | 1008.717  | NM_00048E | 23563.086 | 22035.957 |
| NM_00725E | 2789.299  | 1579.893  | AB029041  | 65761.188 | 66345.672 | AL137593  | 25014.545 | 32119.846 |
| NM_01910E | 717.675   | 339.927   | AK026642  | 675.887   | 1172.869  | NM_00391E | 2777.107  | 4158.4    |
| L08436    | 838.125   | 912.318   | AL359063  | 1249.244  | 1414.826  | NM_00038E | 2014.328  | 3557.577  |
| NM_00055E | 2870.234  | 2065.691  | AL079292  | 3837.179  | 3679.39   | AL133064  | 3277.546  | 4419.295  |
| NM_00419E | 744.591   | 534.198   | X89667    | 5666.057  | 6463.653  | NM_006227 | 4831.708  | 6211.907  |
| NM_01417C | 3809.536  | 2267.261  | NM_014027 | 7010.415  | 7174.576  | NM_00290E | 4619.005  | 4472.406  |
| AF116652  | 26652.609 | 19326.785 | NM_020467 | 467.134   | 463.219   | NM_00070C | 2711.899  | 3367.771  |
| NM_00083E | 1147.062  | 846.948   | AF116621  | 8184.2    | 7906.298  | NM_01902E | 15499.584 | 13250.752 |
| AF090906  | 1913.921  | 1921.411  | AF086554  | 3918.24   | 4764.354  | NM_000431 | 1830.417  | 1142.444  |
| AB023219  | 6758.545  | 9041.515  | AL390136  | 49283.031 | 37786.344 | NM_013421 | 1774.227  | 1640.856  |
| NM_01414E | 981.543   | 1446.349  | AK023156  | 798.587   | 660.894   | NM_012474 | 3908.416  | 3294.761  |
| NM_01883E | 10345.988 | 12578.059 | AF086398  | 59501.348 | 63853.305 | AB033118  | 976.792   | 848.724   |
| NM_003401 | 3091.924  | 4642.421  | AK024545  | 2559.125  | 2199.99   | NM_01960E | 3091.311  | 2516.959  |
| AL137724  | 4033.691  | 3534.52   | AK023444  | 1451.912  | 1559.591  | NM_00169C | 7868.468  | 6064.038  |
| NM_00475E | 585.092   | 354.025   | AK025953  | 2243.253  | 2311.486  | AF034374  | 14552.811 | 14796.665 |
| NM_00291E | 5572.405  | 7735.502  | NM_00318C | 1803.849  | 2393.562  | NM_01611E | 5153.754  | 3031.356  |
| AK022797  | 3291.434  | 4975.542  | AF086406  | 17806.902 | 19004.037 | NM_018674 | 27409.926 | 22780.473 |
| NM_00737C | 6214.909  | 6124.604  | D17216    | 5326.587  | 7537.229  | NM_00168E | 17008.418 | 13029.661 |
| NM_006231 | 2226.949  | 1707.406  | AL137581  | 3967.672  | 5372.506  | NM_00168E | 3117.375  | 2510.014  |
| AK023471  | 2194.403  | 1714.625  | J05158    | 1384.864  | 1852.427  | NM_01440E | 3791.059  | 2188.316  |
| AF044578  | 2603.289  | 1712.696  | NM_015564 | 3057.066  | 2800.654  | NM_00081E | 517.423   | 557.43    |
| NM_00194E | 6542.205  | 3515.517  | AF160476  | 1641.45   | 1953.101  | NM_01492E | 1699.145  | 1659.63   |
| NM_001067 | 15978.951 | 8917.015  | L22650    | 2909.779  | 2980.991  | AK025130  | 3495.664  | 3287.235  |
| NM_014034 | 8192.035  | 6103.332  | AB014520  | 44952.5   | 33645.988 | NM_01787E | 1797.66   | 1798.4    |
| NM_00533E | 28869.855 | 16096.428 | AF161420  | 1784.023  | 1986.894  | AK023232  | 7113.429  | 8425.252  |
| J04474    | 16070.196 | 10937.158 | NM_004907 | 3866.02   | 3751.49   | NM_018124 | 8076.42   | 13594.977 |
| NM_003761 | 36579.934 | 14598.827 | NM_002891 | 832.865   | 1099.651  | Z70701    | 12899.707 | 10608.604 |



|           |           |           |           |           |           |           |           |           |
|-----------|-----------|-----------|-----------|-----------|-----------|-----------|-----------|-----------|
| NM_004726 | 667.458   | 532.707   | NM_001775 | 3749.491  | 3352.043  | AB040972  | 5204.524  | 6072.885  |
| NM_014011 | 12714.305 | 6862.578  | BE083789  | 550.623   | 872.796   | AF148505  | 2161.428  | 2085.609  |
| AK025994  | 8335.996  | 5268.897  | X04526    | 27223.848 | 25168.17  | NM_018686 | 9564.235  | 8581.895  |
| L29306    | 1058.135  | 701.775   | D26067    | 5026.813  | 4678.162  | NM_017676 | 990.025   | 963.951   |
| CY3Cy5    | 2910.091  | 398.483   | AF227924  | 5699.69   | 4874.372  | AK021764  | 451.842   | 268.57    |
| NM_033334 | 347.749   | 750.993   | NM_005716 | 43685.887 | 36466.055 | NM_005431 | 3249.893  | 2393.833  |
| AF088039  | 31282.463 | 38509.07  | NM_006183 | 5049.805  | 5983.322  | NM_002894 | 7555.299  | 5646.367  |
| AF086220  | 1530.328  | 2127.902  | NM_016087 | 738.329   | 935.812   | NM_004625 | 2912.237  | 2339.248  |
| AK023941  | 1268.782  | 1288.663  | S59184    | 2649.306  | 2584.544  | NM_004260 | 9363.779  | 8237.733  |
| AL390083  | 3419.159  | 3315.668  | NM_005130 | 731.616   | 950.929   | AL050067  | 2416.295  | 1841.312  |
| AB020702  | 615.164   | 772.985   | NM_006661 | 5057.222  | 4950.625  | NM_004972 | 7617.028  | 4930.659  |
| AL050227  | 628.413   | 488.894   | M54886    | 472.085   | 757.556   | NM_006251 | 3226.228  | 2562.021  |
| AK075087  | 467.034   | 481.228   | NM_005746 | 25719.756 | 25422.152 | NM_004103 | 12499.396 | 9380.645  |
| AK026571  | 2301.943  | 1978.585  | NM_004588 | 2076.243  | 2547.311  | NM_002314 | 5916.695  | 4094.468  |
| AK024673  | 6287.666  | 5950.076  | U16126    | 1213.122  | 1301.55   | NM_001744 | 1520.756  | 1396.075  |
| AF070618  | 2140.178  | 2061.319  | NM_004572 | 895.531   | 1018.56   | NM_006296 | 2017.576  | 1752.184  |
| SR2       | 56104.484 | 54244.594 | NM_002172 | 17998.699 | 25805.826 | Z25433    | 1961.825  | 1431.883  |
| SR4       | 13987.294 | 23032.266 | AJ008144  | 1645.653  | 1780.955  | NM_005922 | 2585.674  | 2394.93   |
| SR6       | 2785.03   | 7429.708  | NM_007314 | 12325.136 | 8527.825  | NM_018638 | 8056.992  | 7884.113  |
| SR8       | 8065.826  | 39226.492 | NM_016073 | 2245.104  | 1649.125  | CY3Cy5    | 950.707   | 218.503   |
| SR10      | 28565.84  | 18615.053 | NM_006600 | 24015.574 | 19185.881 | NM_003942 | 1543.947  | 1980.571  |
| CY3Cy5    | 2024.987  | 317.187   | AF297709  | 8218.52   | 7099.285  | NM_004452 | 1358.064  | 1369.171  |
| AL049365  | 40469.18  | 53255.781 | L77564    | 1304.34   | 1039.072  | AK022632  | 830.197   | 964.007   |
| AK025132  | 2040.398  | 2314.777  | NM_015384 | 2795.516  | 2111.733  | AK021554  | 2204.625  | 2234.749  |
| AK025157  | 9980.271  | 12444.951 | AK023327  | 7074.02   | 6324.78   | AF070620  | 279.86    | 401.844   |
| AK022633  | 992.362   | 1238.127  | AB046858  | 3018.518  | 2586.878  | NM_020235 | 3234.034  | 3091.353  |
| AK000079  | 1653.12   | 931.557   | D50914    | 10498.389 | 10132.934 | AK000532  | 775.317   | 837.971   |
| NM_012243 | 4425.184  | 3388.032  | BE878692  | 908.613   | 694.538   | AL109681  | 350.951   | 658.07    |
| AK025743  | 598.622   | 728.042   | NM_002007 | 1512.903  | 1701.595  | AL162039  | 3329.815  | 2556.8    |
| AK023974  | 5813.977  | 6204.027  | NM_002305 | 10831.703 | 9955.636  | AK024896  | 1998.629  | 1417.899  |
| AK023768  | 2518.907  | 3563.606  | AK025439  | 5731.748  | 5708.343  | BU165106  | 1267.226  | 1235.882  |
| NM_014729 | 1755.489  | 1778.03   | NM_001737 | 6735.963  | 5527.397  | AF038202  | 1026.127  | 846.656   |
| AF147335  | 832.8     | 833.067   | Z36784    | 2081.973  | 1723.354  | AB040925  | 1177.649  | 922.753   |
| AK000711  | 3419.854  | 3766.154  | NM_016626 | 14916.128 | 15902.126 | NM_003942 | 1527.455  | 1604.538  |
| BI768072  | 1152.543  | 2113.616  | NM_007213 | 1565.438  | 1426.148  | NM_004452 | 1636.045  | 2082.451  |
| AK022216  | 2291.403  | 3978.908  | NM_019064 | 2481.684  | 2320.865  | SR1       | 54812.492 | 50394.688 |
| U00960    | 1764.478  | 2147.467  | NM_000094 | 11019.055 | 14385.898 | SR5       | 4311.54   | 5089.965  |
| AK025276  | 1971.359  | 2268.246  | AK024732  | 12116.749 | 19896.084 | SR7       | 2411.203  | 22484.852 |
| AK026027  | 503.314   | 787.844   | NM_016302 | 2695.945  | 3379.817  | SR9       | 5622.941  | 1342.94   |
| AK026825  | 1603.643  | 1516.659  | NM_004159 | 26523.432 | 24314.318 | CY3Cy5    | 845.64    | 271.542   |
| NM_003847 | 1335.745  | 1582.215  | AK021866  | 1013.32   | 752.342   | M26147    | 305.555   | 369.523   |
| NM_007197 | 1062.641  | 952.602   | NM_003249 | 10188.689 | 9104.354  | AF018254  | 365.187   | 219.498   |
| AK021973  | 751.217   | 1038.388  | M21897    | 1845.626  | 1879.978  | NM_016240 | 1700.485  | 1572.328  |
| AL050116  | 536.071   | 607.07    | AF301463  | 1686.835  | 1405.076  | AK026459  | 544.02    | 636.846   |
| AL050165  | 34542.832 | 32592.031 | NM_015984 | 7680.528  | 6114.588  | AL049390  | 1657.82   | 1341.833  |
| AL117445  | 1051.128  | 1245.347  | NM_006894 | 4937.054  | 4044.478  | AK000584  | 2711.325  | 1726.13   |
| AL122113  | 6714.537  | 9541.143  | AK023031  | 4438.377  | 5467.259  | AJ297363  | 701.479   | 659.598   |
| AK024415  | 1944.987  | 2181.204  | NM_005717 | 60987.266 | 59939.977 | AK026379  | 1324.07   | 813.702   |
| AK023515  | 908.442   | 1674.953  | NM_012090 | 3290.216  | 3015.969  | AK022965  | 898.077   | 638.466   |
| AL137623  | 27713.494 | 33230.609 | BE793385  | 1947.716  | 3502.582  | AK024278  | 3253.99   | 2580.5    |
| AK026485  | 616.878   | 468.455   | AF177292  | 1146.223  | 1284.51   | NM_018022 | 1069.66   | 1255.845  |
| AL137361  | 402.875   | 466.171   | NM_003088 | 12445.8   | 13641.793 | AB056722  | 5525.632  | 5573.133  |
| AJ227874  | 2792.85   | 2849.343  | AF043290  | 1901.757  | 1808.583  | AK023198  | 3114.179  | 2849.641  |

|           |           |           |           |           |           |           |           |           |
|-----------|-----------|-----------|-----------|-----------|-----------|-----------|-----------|-----------|
| AF009268  | 531.646   | 533.744   | NM_004082 | 6173.209  | 7213.26   | NM_012066 | 13041.038 | 11738.525 |
| AF056418  | 401.541   | 599.265   | NM_014398 | 8205.731  | 7580.323  | AF052168  | 10516.276 | 7817.759  |
| AF009276  | 546.48    | 653.559   | NM_005934 | 52571.273 | 48386.316 | AK024947  | 3527.904  | 3406.896  |
| AF056428  | 1891.461  | 2001.746  | NM_002614 | 1767.639  | 1846.459  | AK095125  | 634.064   | 562.787   |
| AF069136  | 738.335   | 1091.351  | NM_005655 | 10167.12  | 13193.751 | AK024059  | 1104.185  | 887.042   |
| AK001995  | 814.282   | 935.007   | NM_002698 | 5608.719  | 5441.909  | AB007928  | 779.546   | 737.582   |
| AK021594  | 492.299   | 345.83    | NM_002148 | 1952.02   | 1576.246  | AK023645  | 1212.871  | 1078.911  |
| AK021635  | 3752.601  | 3617.177  | AL137449  | 2588.839  | 2176.053  | D83543    | 573.888   | 227.184   |
| AK021856  | 753.551   | 1005.736  | U88153    | 6293.279  | 5572.205  | NM_01693C | 1715.176  | 1356.917  |
| S97393    | 556.492   | 820.406   | X03910    | 28971.074 | 26395.889 | AJ001861  | 2160.985  | 2029.586  |
| BE698533  | 2085.035  | 2605.642  | NM_018428 | 20515.443 | 21807.061 | X64981    | 1138.187  | 1045.382  |
| NM_017929 | 1701.635  | 2285.354  | NM_005058 | 693.9     | 1049.961  | X75692    | 5349.94   | 4138.784  |
| NM_018472 | 1206.58   | 1557.558  | NM_006924 | 32467.705 | 34738.68  | X64988    | 426.458   | 321.715   |
| AL133108  | 1025.11   | 754.401   | NM_016024 | 8369.684  | 7980.488  | Y10511    | 6131.954  | 5123.689  |
| AJ008128  | 6409.471  | 4705.963  | NM_018107 | 5917.038  | 5896.972  | AK021832  | 615.494   | 580.463   |
| AL449243  | 30780.23  | 25603.48  | NM_012279 | 1803.218  | 1920.766  | AK021505  | 3971.945  | 3732.74   |
| M12211    | 476.933   | 851.709   | NM_018387 | 30693.752 | 29331.885 | AK021598  | 3041.42   | 2274.089  |
| AJ008131  | 5656.98   | 6095.556  | BF310673  | 4814.708  | 4717.478  | AK026416  | 43303.973 | 68514.68  |
| NM_006272 | 627.214   | 813.267   | R97012    | 60993.32  | 62552.816 | AK025797  | 1184.737  | 1617.025  |
| AK024303  | 1698.931  | 1827.504  | U77700    | 17112.953 | 15326.03  | AK000853  | 403.627   | 345.889   |
| AL160131  | 20932.662 | 19857.791 | NM_006567 | 17736.617 | 18847.898 | AK000085  | 472.45    | 286.252   |
| AF086045  | 5235.305  | 4978.413  | AF038554  | 41409.445 | 33865.016 | AK000019  | 578.68    | 455.044   |
| AK027028  | 6810.319  | 8365.076  | AF264621  | 18695.592 | 17189.939 | AK000645  | 764.49    | 848.794   |
| AK027069  | 690.154   | 939.93    | NM_005875 | 36950.73  | 32285.352 | AK024156  | 836.615   | 1084.329  |
| AK026916  | 2335.664  | 3196.328  | NM_004184 | 28036.057 | 27920.35  | AF086288  | 1059.649  | 1295.847  |
| AK026914  | 1654.325  | 2268.647  | NM_000439 | 1349.04   | 1178.96   | AK023109  | 1243.679  | 1181.167  |
| Y13808    | 1554.336  | 1770.802  | AJ295148  | 1481.63   | 1502.557  | NM_005293 | 15076.756 | 13520.199 |
| Y11166    | 6688.843  | 9853.875  | AF176701  | 855.41    | 1196.242  | S50185    | 501.388   | 563.018   |
| AK024942  | 2484.984  | 3729.956  | NM_000456 | 5941.778  | 7249.107  | AF133332  | 3311.169  | 2802.395  |
| AJ227873  | 8766.563  | 9984.822  | AF190122  | 590.043   | 538.278   | AK022805  | 1483.995  | 912.805   |
| AK022886  | 5094.337  | 7235.484  | NM_002496 | 35681.414 | 34612.473 | NM_017503 | 648.347   | 448.37    |
| AK024665  | 9749.015  | 13023.872 | NM_016243 | 5947.226  | 6368.923  | AK024606  | 2785      | 2535.238  |
| AF147363  | 2037.824  | 2696.831  | X53943    | 1020.967  | 763.55    | NM_016417 | 19203.209 | 22497.234 |
| AJ227880  | 1395.36   | 2004.597  | NM_014402 | 52053.797 | 50936.293 | NM_019108 | 787.745   | 1277.106  |
| AK000691  | 599.713   | 695.004   | NM_004649 | 18309.314 | 16939.424 | L10147    | 12774.167 | 11673.768 |
| AK001448  | 2061.8    | 2192.572  | NM_006540 | 9917.451  | 9025.39   | AL080118  | 4102.58   | 4299.505  |
| AK026890  | 647.793   | 718.458   | NM_017766 | 3314.501  | 3607.204  | AL049378  | 2748.198  | 2477.896  |
| AF131817  | 1342.653  | 1185.214  | NM_002811 | 15815.884 | 12109.31  | L09086    | 1232.473  | 1342.59   |
| AL049321  | 4828.49   | 4469.504  | NM_020310 | 5231.83   | 4502.584  | L37702    | 16992.166 | 25941.809 |
| NM_003546 | 7381.226  | 9214.926  | AK024444  | 829.69    | 1006.537  | AK022812  | 566.958   | 679.702   |
| AK025750  | 2509.366  | 3189.511  | NM_005802 | 7030.419  | 5383.184  | U79301    | 6410.797  | 5490.963  |
| BF031253  | 471.962   | 515.805   | AB002331  | 5428.301  | 4174.059  | AK022260  | 6130.81   | 4804.408  |
| AK025783  | 1446.416  | 1048.317  | NM_002504 | 5340.546  | 5090.997  | M32219    | 6448.167  | 5692.633  |
| AF113675  | 1466.21   | 1589.251  | AB046775  | 4717.319  | 3738.349  | BC018868  | 967.32    | 597.416   |
| AK024514  | 1869.91   | 2388.847  | X74862    | 3590.379  | 3592.107  | AF086174  | 359.275   | 195.483   |
| NM_020119 | 4527.636  | 6814.878  | X65663    | 13776.342 | 12030.443 | AF007128  | 5690.749  | 3827.905  |
| AL049417  | 2438.833  | 3626.396  | NM_003185 | 5067.612  | 4500.578  | AJ012498  | 729.267   | 663.115   |
| AK023507  | 1792.164  | 2201.284  | NM_004456 | 11033.278 | 10688.329 | NM_005973 | 12434.765 | 9937.396  |
| NM_005169 | 1721.688  | 1758.866  | NM_004284 | 14917.23  | 15842.236 | X04547    | 1543.785  | 1317.185  |
| AL109818  | 1180.941  | 2010.177  | NM_007129 | 13012.493 | 13313.824 | AK025823  | 1745.777  | 1864.73   |
| NM_000068 | 1890.2    | 2405.807  | AY004253  | 21085.197 | 22467.805 | AK026691  | 583.33    | 801.811   |
| NM_015918 | 11263.37  | 16019.012 | Z46967    | 1461.359  | 1620.76   | AL359941  | 4246.152  | 4651.917  |
| AK023228  | 611.435   | 1199.252  | NM_017583 | 18576.873 | 20506.674 | U52076    | 670.334   | 712.427   |

|           |           |           |           |           |           |           |           |           |
|-----------|-----------|-----------|-----------|-----------|-----------|-----------|-----------|-----------|
| NM_01324  | 1150.422  | 1759.066  | Y16132    | 29563.457 | 29036.033 | AF035278  | 1432.978  | 1278.429  |
| AB029041  | 4115.092  | 5441.198  | NM_016593 | 5136.069  | 4931.199  | AF086493  | 1797.226  | 1589.15   |
| AK026642  | 1478.749  | 2025.743  | NM_002521 | 2919.173  | 2757.244  | AL050202  | 1258.769  | 1186.733  |
| AL359063  | 1695.717  | 1885.303  | NM_001150 | 3177.354  | 3004.595  | U32999    | 11668.653 | 11278.549 |
| AL079292  | 4054.296  | 3195.311  | NM_002856 | 7742.485  | 8018.901  | U66052    | 4266.946  | 4054.578  |
| X89667    | 707.562   | 722.059   | NM_003225 | 1525.624  | 1225.828  | NM_000857 | 1345.816  | 1848.455  |
| NM_014027 | 7227.924  | 7475.536  | NM_000096 | 1729.137  | 2107.013  | L20688    | 23646.566 | 22478.338 |
| AF116621  | 8322.596  | 7754.546  | AA418251  | 1371.211  | 1290.506  | X69111    | 17068.969 | 14564.726 |
| AF086554  | 2534.621  | 2080.773  | AA143087  | 22432.115 | 19747.143 | AF252283  | 349.308   | 394.698   |
| AL390136  | 13371.476 | 10013.423 | BI870965  | 14308.915 | 13394.173 | AB037799  | 3827.685  | 3636.016  |
| AF086398  | 37322.523 | 23669.27  | BI835536  | 14151.845 | 14771.653 | AB007950  | 14026.882 | 12365.11  |
| AK025953  | 3791.601  | 4392.045  | BF205051  | 11815.227 | 11124.784 | AK025593  | 1465.262  | 1182.366  |
| NM_00318C | 1789.082  | 1912.505  | X02761    | 14891.666 | 12994.883 | AB018304  | 1683.891  | 1471.586  |
| AL137581  | 5385.987  | 7648.531  | M91463    | 2901.825  | 2209.08   | NM_007061 | 9488.152  | 6709.833  |
| J05158    | 671.213   | 1135.282  | U88317    | 1446.977  | 1241.454  | NM_00108E | 13223.013 | 11522.956 |
| AF160476  | 2196.598  | 3002.861  | J03060    | 4112.418  | 3608.659  | BC015991  | 5108.561  | 4510.157  |
| L22650    | 2267.539  | 2864.523  | X54156    | 1526.919  | 1258.082  | U94902    | 448.104   | 423.927   |
| AB014520  | 10409.358 | 18024.734 | NM_003743 | 2632.656  | 2485.601  | U46214    | 5464.384  | 4503.896  |
| AF161420  | 1816.267  | 2354.692  | AA829383  | 16043.48  | 16240.891 | NM_00031C | 11713.617 | 12237.931 |
| NM_004907 | 1562.797  | 2030.204  | AF012434  | 41183.875 | 37172.074 | AF161343  | 4803.45   | 4150.883  |
| NM_002891 | 851.518   | 795.689   | AF131748  | 9539.937  | 8655.892  | NM_00476E | 984.92    | 991.675   |
| NM_00177E | 3328.192  | 2968.453  | NM_002349 | 1968.532  | 2560.706  | AF009307  | 319.364   | 449.444   |
| BE083789  | 531.456   | 805.412   | NM_00508C | 17226.873 | 27298.688 | AK022246  | 2249.14   | 3012.001  |
| X04526    | 27493.986 | 24811.738 | NM_004887 | 13256.903 | 14666.975 | X75684    | 1058.078  | 1105.926  |
| D26067    | 5841.317  | 6010.095  | NM_006404 | 1877.149  | 1834.374  | D17200    | 276.043   | 190.967   |
| NM_00571E | 1781.216  | 1269.048  | NM_01479E | 2272.702  | 2751.93   | AF113701  | 12486.962 | 11424.605 |
| NM_00618E | 6534.048  | 9266.316  | NM_00298E | 1941.303  | 2070.851  | Y11158    | 2034.871  | 1643.791  |
| NM_016087 | 941.097   | 1011.301  | M15330    | 2510.184  | 4164.434  | NM_006771 | 16228.104 | 16031.656 |
| S59184    | 3064.773  | 2676.615  | NM_01439E | 4413.556  | 4591.202  | NM_01471E | 3528.047  | 3278.675  |
| M54886    | 629.582   | 1163.916  | AK027201  | 3791.009  | 3798.657  | AB028953  | 241.065   | 220.48    |
| NM_00574E | 40847.363 | 52697.969 | NM_00048E | 23559.199 | 26651.324 | NM_00063E | 1104.299  | 974.194   |
| NM_00458E | 2037.819  | 2293.965  | X98507    | 14199.223 | 13734.453 | AB002298  | 857.114   | 988.319   |
| U16126    | 1191.295  | 1446.131  | NM_01603C | 55057.449 | 63603.828 | AK024488  | 1095.15   | 841.565   |
| AJ008144  | 695.171   | 1106.677  | NM_01466E | 15579.988 | 16062.772 | AK023249  | 38493.473 | 27968.76  |
| NM_007314 | 15151.969 | 17547.25  | NM_00565E | 40485.953 | 36559.219 | NM_01744E | 6682.297  | 5143.693  |
| NM_01607E | 702.772   | 997.693   | AK026686  | 999.77    | 1077.044  | NM_00074E | 1342.911  | 1054.738  |
| NM_00660C | 30644.705 | 31470.404 | NM_00590E | 6364.979  | 6312.384  | NM_00721E | 2159.778  | 1905.271  |
| AF297709  | 6828.46   | 8836.133  | NM_00285C | 60299.012 | 65677.805 | Z25436    | 1913.809  | 1626.44   |
| L77564    | 958.108   | 1261.698  | NM_00430E | 1097.666  | 1007.917  | NM_00527E | 3029.815  | 2318.776  |
| NM_015384 | 2854.25   | 3197.217  | NM_00590E | 2640.063  | 3310.233  | NM_003844 | 31724.213 | 22472.076 |
| AK023327  | 4197.049  | 4083.528  | NM_000861 | 2097.778  | 1723.808  | NM_00200E | 22187.783 | 18546.352 |
| AB046858  | 3387.912  | 2388.279  | U77493    | 1717.559  | 1974.591  | NM_012324 | 4171.029  | 4011.076  |
| D50914    | 10054.321 | 7171.746  | NM_01906E | 2904.08   | 3059.599  | AK000039  | 850.695   | 929.347   |
| BE878692  | 730.333   | 682.507   | AL133064  | 7287.434  | 9750.897  | AL137352  | 2384.183  | 2430.774  |
| NM_002007 | 1652.342  | 1343.841  | NM_006227 | 9532.884  | 15466.866 | NM_01474E | 1385.097  | 1493.648  |
| NM_00230E | 1594.262  | 1032.261  | NM_00290E | 8666.945  | 10760.962 | D49958    | 441.989   | 531.497   |
| AK025439  | 6746.131  | 6769.509  | NM_00070C | 4364.615  | 6456.266  | NM_00448E | 4111.178  | 4736.309  |
| NM_001737 | 1402.304  | 1354.128  | NM_01902E | 31557.545 | 45385.617 | BF240063  | 949.458   | 1309.105  |
| Z36784    | 2213.817  | 1784.895  | NM_000431 | 4268.808  | 3786.616  | BI461699  | 870.593   | 956.613   |
| NM_01662E | 19659.201 | 16229.139 | NM_013421 | 3412.549  | 3214.893  | AF172264  | 346.712   | 333.999   |
| NM_00721E | 3122.672  | 4056.211  | NM_012474 | 9363.52   | 10232.044 | U80756    | 38797.801 | 27788.125 |
| AF131842  | 665.735   | 998.475   | AB033118  | 2578.745  | 2452.521  | NM_018161 | 2661.997  | 2613.183  |
| NM_019064 | 2804.244  | 5132.197  | NM_01906E | 6463.021  | 5710.439  | NM_00524E | 24090.645 | 18446.9   |

|           |           |           |           |           |           |           |           |           |
|-----------|-----------|-----------|-----------|-----------|-----------|-----------|-----------|-----------|
| NM_01893C | 666.139   | 1371.598  | NM_00169C | 17083.26  | 13664.627 | NM_00481C | 2307.262  | 2516.307  |
| NM_000094 | 3392.813  | 4131.046  | AF034374  | 23726.727 | 26438.875 | AL117629  | 3622.698  | 2946.053  |
| NM_016302 | 3642.677  | 5412.788  | NM_001682 | 5752.659  | 5032.543  | NM_00259E | 1263.868  | 1641.435  |
| NM_00415E | 34383.152 | 43051.578 | AK025130  | 7156.055  | 7618.667  | NM_01572E | 1023.666  | 698.484   |
| AK021866  | 1354.181  | 1899.904  | AK023232  | 11059.09  | 13510.232 | AF174604  | 2644.113  | 2080.767  |
| NM_00324E | 16366.124 | 20296.092 | NM_00638C | 3142.981  | 3230.52   | AB002379  | 5164.214  | 4776.924  |
| NM_015984 | 10805.083 | 13845.314 | AB020710  | 3204.228  | 3215.789  | AF113223  | 2151.323  | 1696.908  |
| AK022471  | 640.326   | 677.801   | Z83801    | 406.522   | 295.67    | AB046851  | 1081.063  | 770.359   |
| NM_006894 | 1323.532  | 1121.801  | NM_016174 | 12984.486 | 13778.286 | NM_00574E | 11958.902 | 8168.049  |
| AK023031  | 4414.435  | 4733.054  | NM_020377 | 2387.671  | 2018.66   | NM_01985E | 53444.637 | 58001.563 |
| NM_005717 | 36060.406 | 34010.09  | U88896    | 4018.499  | 3775.032  | NM_018174 | 999.732   | 768.911   |
| NM_01209C | 1721.659  | 1277.298  | AF116702  | 59749.781 | 61263.621 | NM_01454E | 3848.212  | 3461.843  |
| BE793385  | 1783.461  | 2082.947  | NM_005724 | 12922.617 | 13956.807 | NM_004437 | 1906.701  | 2125.442  |
| AF177292  | 639.497   | 756.869   | X58794    | 3659.453  | 4822.251  | AK025875  | 1138.755  | 940.826   |
| AF043290  | 2115.734  | 2966.329  | NM_00173E | 4659.878  | 4787.111  | BC014152  | 52978.133 | 64047.691 |
| NM_004082 | 11440.06  | 15948.885 | Z70701    | 27884.195 | 35014     | NM_01241E | 636.401   | 703.476   |
| NM_01439E | 2741.814  | 3565.552  | AB040972  | 8036.142  | 18923.639 | NM_00022E | 1179.274  | 1710.972  |
| NM_005934 | 14441.096 | 20986.58  | AF148505  | 4381.56   | 6274.703  | AB037779  | 52204.738 | 61639.055 |
| NM_002614 | 2310.561  | 3208.516  | NM_01868E | 20198.424 | 22802.473 | NM_00065E | 765.64    | 876.767   |
| NM_00269E | 3653.128  | 4289.042  | NM_01767E | 2909.504  | 2591.592  | NM_00039E | 473.673   | 666.904   |
| AF069138  | 554.28    | 771.227   | AK021764  | 1227.884  | 1124.131  | NM_00088E | 3275.409  | 3154.435  |
| NM_00214E | 3221.95   | 5130.534  | NM_005431 | 5966.354  | 5663.569  | NM_01233E | 933.569   | 1103.786  |
| NM_017691 | 689.38    | 1619.972  | NM_002894 | 15627.806 | 11996.514 | NM_005787 | 16660.521 | 16150.908 |
| U88153    | 4095.221  | 6694.921  | NM_00426C | 19366.07  | 18972.311 | NM_00214E | 3123.948  | 2967.444  |
| X03910    | 32865.156 | 39795.672 | AL050067  | 2564.393  | 2314.125  | AF284421  | 29122.484 | 23388.631 |
| NM_01842E | 11831.343 | 11408.971 | NM_004972 | 11938.815 | 13119.859 | NM_00604E | 8272.435  | 9217.888  |
| NM_00505E | 729.009   | 1013.777  | NM_006251 | 8203.557  | 7626.383  | NM_00636C | 27816.213 | 18925.139 |
| NM_006924 | 23522.578 | 18043.127 | NM_00410E | 21082.775 | 18840.225 | NM_00396E | 4307.659  | 3522.639  |
| NM_016024 | 7888.79   | 6881.418  | NM_002314 | 13742.752 | 15110.313 | NM_00281C | 52644.902 | 65834.211 |
| NM_018107 | 6387.468  | 5199.875  | NM_001744 | 4145.049  | 4366.227  | NM_00334E | 15772.813 | 11331.961 |
| NM_01227E | 2959.408  | 2690.604  | NM_00629E | 4075.133  | 5130.626  | NM_00278E | 25484.268 | 20431.018 |
| NM_018387 | 29079.756 | 24083.654 | Z25433    | 3407.963  | 3280.48   | NM_00347C | 11361.536 | 11157.006 |
| BF310673  | 5470.403  | 4888.664  | NM_005922 | 4079.576  | 4865.834  | AL080137  | 1008.754  | 1638.376  |
| R97012    | 65317.75  | 55999.836 | NM_01863E | 13851.709 | 13858.114 | NM_01767E | 5674.462  | 6191.153  |
| U77700    | 18997.887 | 11793.551 | AL137593  | 42679     | 39330.445 | AF155103  | 3856.112  | 4671.415  |
| NM_006567 | 19795.283 | 16892.623 | NM_00391E | 5240.852  | 4719.489  | NM_017704 | 2373.15   | 2931.62   |
| AF264621  | 23873.787 | 29591.707 | NM_00038E | 4854.373  | 5275.279  | BC006359  | 2970.166  | 3543.882  |
| NM_00587E | 50011.895 | 54890.57  | NM_01659E | 5657.775  | 7697.95   | AK026127  | 1239.175  | 1884.706  |
| NM_004184 | 54698.586 | 54449.176 | NM_002521 | 3709.66   | 8632.347  | BC016062  | 16953.457 | 28062.377 |
| NM_00043E | 819.94    | 1672.234  | NM_00115C | 2720.646  | 3596.514  | NM_002814 | 4035.359  | 5063.032  |
| AJ295148  | 1739.189  | 3221.636  | NM_00285E | 6842.699  | 8149.858  | NM_01225C | 10895.242 | 11423.075 |
| AF176701  | 908.499   | 1316.887  | NM_00322E | 1503.118  | 1587.805  | NM_00628E | 8980.196  | 10275.116 |
| NM_00045E | 6614.749  | 7859.121  | NM_00009E | 1727.937  | 1824.736  | Y08267    | 2043.102  | 2224.478  |
| AF190122  | 962.125   | 1360.086  | AA418251  | 1401      | 944.793   | AB016898  | 601.049   | 734.616   |
| NM_00249E | 29330.498 | 40400.52  | AA143087  | 20370.703 | 18233.539 | NM_01753C | 5114.25   | 4941.311  |
| NM_01624E | 7070.096  | 13788.889 | BI870965  | 13763.554 | 10132.114 | AL360183  | 1990.96   | 1823.358  |
| X53943    | 1033.923  | 1900.839  | BI835536  | 12991.272 | 12511.264 | AK027046  | 933.664   | 697.811   |
| NM_01440E | 58829.215 | 54789.609 | BF205051  | 10604.264 | 9774.566  | NM_00311E | 3210.792  | 2349.362  |
| NM_00654C | 9290.868  | 7283.562  | X02761    | 15039.534 | 12463.877 | NM_01657E | 5276.166  | 4723.809  |
| NM_01776E | 2847.343  | 2828.292  | M91463    | 2703.204  | 2156.909  | NM_00382E | 479.652   | 369.282   |
| NM_002811 | 16522.551 | 6854.128  | U88317    | 1343.047  | 927.293   | NM_01583E | 9821.245  | 9012.673  |
| NM_02031C | 5436.125  | 4162.863  | J03060    | 3674.271  | 2966.012  | NM_00132E | 8744.328  | 6367.874  |
| AK024444  | 1352.186  | 954.642   | X54156    | 1512.897  | 1083.951  | NM_01431E | 1991.337  | 1986.129  |

|           |           |           |           |           |           |           |           |           |
|-----------|-----------|-----------|-----------|-----------|-----------|-----------|-----------|-----------|
| NM_005802 | 7624.458  | 5272.487  | NM_003743 | 2548.422  | 1976.09   | NM_004865 | 4573.924  | 5033.741  |
| AB002331  | 7255.005  | 5825.853  | AA829383  | 15456.353 | 15562.1   | NM_017923 | 884.635   | 1167.161  |
| NM_002504 | 5920.938  | 5136.671  | AF012434  | 38365.32  | 31397.18  | NM_000981 | 50104.977 | 59694.258 |
| AB046775  | 3333.155  | 2639.582  | NM_018124 | 16400.943 | 14756.6   | NM_002047 | 24127.977 | 21625.256 |
| X74862    | 2096.035  | 1296.878  | NM_004887 | 15034.712 | 19313.227 | NM_001031 | 53173.84  | 64702.203 |
| X65663    | 5763.259  | 4841.747  | NM_006404 | 1397.22   | 1905.936  | NM_007208 | 13891.703 | 15713.572 |
| NM_004456 | 22334.525 | 26781.145 | NM_014795 | 1993.91   | 2148.394  | NM_000996 | 51535.539 | 62414.977 |
| NM_004284 | 24413.121 | 32133.965 | NM_002986 | 2084.204  | 2581.345  | NM_000985 | 15288.546 | 15414.925 |
| NM_007129 | 22685.492 | 33578.219 | M15330    | 2569.161  | 4935.991  | BF130622  | 16387.162 | 15655.938 |
| AY004253  | 13269.398 | 20631.963 | NM_014396 | 3848.184  | 4258.43   | NM_003856 | 8319.965  | 10059.271 |
| Z46967    | 2464.576  | 2752.098  | AK027201  | 3677.393  | 3232.622  | NM_000236 | 886.888   | 741.446   |
| NM_017583 | 23645.971 | 28440.271 | NM_000489 | 21830.037 | 24651.697 | NM_002903 | 42935.047 | 52489.023 |
| Y16132    | 13477.821 | 18823.578 | X98507    | 13039.845 | 13093.267 | NM_001861 | 1111.885  | 1049.526  |
| NM_016593 | 5317.834  | 7949.712  | NM_016030 | 56509.953 | 65197.391 | AK025558  | 9537.27   | 8223.56   |
| NM_002521 | 1268.69   | 1943.43   | NM_014669 | 14981.87  | 14755.533 | AK024355  | 1770.176  | 1795.891  |
| NM_001150 | 655.199   | 915.342   | NM_005652 | 37953.031 | 34516.715 | NM_001864 | 30433.904 | 22152.484 |
| NM_002856 | 1388.062  | 1884.372  | AK026686  | 1068.928  | 924.109   | NM_003477 | 13208.503 | 10372.641 |
| NM_000096 | 2247.346  | 2497.7    | NM_005902 | 6330.446  | 6107.729  | NM_002654 | 40455.227 | 30801.191 |
| AA418251  | 1474.806  | 1432.412  | NM_002850 | 60587.57  | 70720.547 | NM_015478 | 1311.048  | 933.063   |
| AA143087  | 3213.94   | 2012.008  | NM_004302 | 1063.279  | 1075.513  | NM_020382 | 4007.73   | 2609.595  |
| BI870965  | 3044.097  | 2096.054  | NM_005903 | 2743.292  | 2865.241  | NM_007192 | 12152.718 | 10880.592 |
| BI835536  | 16457.043 | 13713.983 | NM_000861 | 1994.264  | 2031.97   | AB002337  | 10120.583 | 10158.219 |
| BF205051  | 5859.344  | 5163.638  | U77493    | 1797.984  | 1556.32   | NM_014933 | 6950.401  | 8201.217  |
| X02761    | 3510.779  | 3126.299  | NM_019062 | 2802.483  | 2902.649  | NM_006385 | 624.045   | 884.834   |
| M91463    | 1789.068  | 1009.984  | NM_017583 | 20007.053 | 20623.129 | AK024250  | 859.567   | 1016.379  |
| U88317    | 850.048   | 644.523   | Y16132    | 33974.102 | 33284.082 | NM_003456 | 8596.965  | 10325.911 |
| X54156    | 2256.449  | 2075.283  | NM_002905 | 9144.781  | 11201.131 | NM_002585 | 4701.797  | 5321.701  |
| NM_003743 | 3395.538  | 4939.416  | NM_000700 | 4416.908  | 6402.324  | AB029016  | 1875.755  | 2792.887  |
| AA829383  | 26387.76  | 34288.105 | NM_019028 | 27241.123 | 31239.262 | AK000445  | 555.453   | 576.213   |
| AF012434  | 49871.316 | 53142.113 | NM_000431 | 4852.405  | 5492.204  | NM_002701 | 2785.058  | 3643.77   |
| NM_002349 | 1429.698  | 2282.396  | NM_013421 | 3489.203  | 4771.373  | NM_005693 | 670.602   | 673.759   |
| NM_005080 | 24654.57  | 38224.016 | NM_012474 | 9366.424  | 10991.929 | X97303    | 7621.181  | 6973.846  |
| NM_004887 | 19255.242 | 23888.758 | AB033118  | 2560.23   | 3075.072  | AJ290954  | 2086.727  | 2489.768  |
| NM_006404 | 2043.901  | 3943.053  | NM_019606 | 6511.238  | 7102.587  | AK025451  | 3290.935  | 3129.583  |
| NM_014795 | 2369.914  | 3158.43   | NM_001690 | 17565.504 | 13871.288 | NM_002783 | 5800.968  | 6430.866  |
| NM_002986 | 1139.039  | 1544.501  | AF034374  | 23325.627 | 22032.982 | X52005    | 27175.004 | 16144.039 |
| M15330    | 2230.3    | 4179.623  | NM_001682 | 5178.722  | 4636.051  | NM_001047 | 1120.7    | 1090.727  |
| NM_014396 | 4083.025  | 4348.551  | AK025130  | 6258.906  | 6537.709  | AK024396  | 9051.674  | 10135.787 |
| AK027201  | 3177.113  | 3424.343  | AK023232  | 10314.911 | 10892.653 | U58514    | 2441.749  | 2227.344  |
| NM_000489 | 5180.746  | 3687.005  | NM_006380 | 2956.511  | 3047.958  | M57627    | 921.259   | 892.794   |
| X98507    | 12144.607 | 9670.56   | AB020710  | 3137.668  | 2939.129  | W74254    | 1238.908  | 1333.194  |
| NM_016030 | 43986.637 | 35162.219 | Z83801    | 322.598   | 229.708   | M58603    | 6154.612  | 7584.713  |
| NM_014669 | 15871.391 | 11834.053 | NM_016174 | 12421.748 | 11845.801 | AA443286  | 2716.208  | 4665.138  |
| NM_005652 | 10738.487 | 9274.317  | NM_020377 | 2488.547  | 1969.659  | AB003334  | 8492.778  | 14221.086 |
| AK026686  | 1164.862  | 1185.151  | U88896    | 4104.13   | 3382.203  | AW276315  | 2034.055  | 2079.907  |
| NM_005902 | 7092.256  | 8565.983  | AF116702  | 67018.625 | 63516.711 | AA490737  | 4972.577  | 5780.14   |
| NM_002850 | 70595.922 | 66178.406 | NM_005724 | 13061.171 | 13339.263 | AI878886  | 32700.207 | 37389.824 |
| NM_004302 | 1965.603  | 2010.352  | X58794    | 3649.983  | 4179.5    | BG697179  | 20610.516 | 31084.307 |
| NM_005903 | 4337.132  | 7581.395  | NM_001735 | 4756.832  | 4595.314  | NM_002136 | 52210.355 | 52666.07  |
| NM_000861 | 662.454   | 1149.843  | NM_002349 | 2058.744  | 2440.454  | BM012504  | 15091.544 | 19812.271 |
| AL133064  | 6690.542  | 9629.387  | NM_005080 | 19293.193 | 26527.512 | AA664145  | 3149.974  | 3227.612  |
| NM_006227 | 7851.61   | 13225.71  | AF148505  | 5157.655  | 6245.715  | X72308    | 53299.887 | 62366.191 |
| NM_002905 | 7364.225  | 10481.428 | NM_018686 | 19474.93  | 21071.246 | T70999    | 494.688   | 661.965   |

|           |           |           |           |           |           |           |           |           |
|-----------|-----------|-----------|-----------|-----------|-----------|-----------|-----------|-----------|
| NM_00070C | 2764.409  | 4752.288  | NM_01767E | 2917.982  | 3441.401  | T50790    | 4961.061  | 6177.079  |
| NM_01902E | 6463.586  | 9906.236  | AK021764  | 1356.12   | 1574.273  | R48168    | 11012.933 | 13034.665 |
| NM_000431 | 8493.379  | 11908.829 | NM_005431 | 6236.914  | 6501.003  | BC008837  | 1635.044  | 3361.827  |
| NM_013421 | 2327.668  | 2904.095  | NM_00426C | 16718.121 | 14831.016 | NM_00681E | 45866.102 | 46904.543 |
| NM_012474 | 10913.379 | 13204.826 | AL050067  | 1997.724  | 1955.37   | NM_014744 | 1944.877  | 2452.097  |
| AB033118  | 3100.815  | 2986.95   | NM_004972 | 11489.122 | 11282.917 | AF146759  | 2750.723  | 2861.69   |
| NM_01960E | 6854.295  | 4308.026  | NM_006251 | 7513.879  | 6371.191  | AB032993  | 6168.693  | 5591.526  |
| NM_00169C | 17983.162 | 9766.612  | NM_004103 | 21394.199 | 17362.699 | NM_000854 | 4431.87   | 4359.497  |
| AF034374  | 3176.325  | 2779.081  | NM_002314 | 13473.914 | 12614.193 | NM_001901 | 652.076   | 709.139   |
| NM_001682 | 5969.206  | 4212.803  | NM_001744 | 4320.768  | 3564.12   | AL117423  | 7728.275  | 8128.397  |
| AK025130  | 5598.849  | 5769.268  | NM_00629E | 4293.492  | 3795.302  | NM_002084 | 2283.605  | 2858.635  |
| AK023232  | 3512.802  | 3991.243  | Z25433    | 3639.06   | 3139.128  | D16892    | 8064.163  | 12556.74  |
| NM_00638C | 3796.103  | 4692.326  | NM_005922 | 4304.775  | 4422.594  | NM_00475C | 4760.427  | 16506.225 |
| AB020710  | 3296.041  | 3068.178  | NM_01863E | 14086.648 | 12660.909 | NM_00729E | 6499.976  | 15089.094 |
| Z83801    | 572.242   | 344.807   | AL137593  | 41735.277 | 35983.773 | NM_003651 | 22245.869 | 26059.035 |
| NM_016174 | 3536.103  | 2433.115  | NM_00391E | 4861.015  | 4223.598  | NM_014012 | 714.162   | 1331.913  |
| NM_020377 | 1737.487  | 2162.797  | NM_000382 | 4628.735  | 4612.191  | NM_00041E | 2829.777  | 7359.88   |
| U88896    | 4476.111  | 4336.322  | AL133064  | 7404.993  | 7472.764  | NM_01324E | 1398.443  | 1525.698  |
| AF116702  | 70419.273 | 60841.68  | NM_006227 | 10919.92  | 13368.419 | NM_018431 | 712.731   | 1036.652  |
| NM_005724 | 21817.26  | 21323.127 | NM_001150 | 3072.713  | 4047.619  | NM_000591 | 3404.307  | 4778.642  |
| NM_00173E | 4755.81   | 6722.618  | NM_00285E | 7483.048  | 10515.715 | NM_00056E | 2256.918  | 2540.973  |
| Z70701    | 20715.426 | 23259.025 | NM_00322E | 1677.805  | 2356.042  | NM_00201E | 593.152   | 606.866   |
| AB040972  | 3825.5    | 4967.618  | NM_00009E | 2095.44   | 2474.424  | AF253318  | 4567.389  | 5793.118  |
| AF148505  | 3502.916  | 5313.843  | AA418251  | 1438.106  | 1423.445  | NM_017767 | 26230.736 | 37644.285 |
| NM_01868E | 25653.412 | 34533.793 | AA143087  | 24021.328 | 26405.137 | NM_003262 | 3779.964  | 4456.777  |
| NM_01767E | 3916.088  | 5313.904  | NM_001903 | 584.524   | 301.255   | NM_02012E | 571.089   | 535.746   |
| AK021764  | 1945.641  | 2383.979  | BI835536  | 13126.056 | 12156.144 | AK022832  | 1879.216  | 1787.052  |
| NM_005431 | 6589.62   | 7639.312  | BF205051  | 11035.438 | 8864.223  | NM_017784 | 1094.581  | 1035.172  |
| NM_002894 | 16315.901 | 10111.093 | X02761    | 15695.771 | 12423.113 | NM_014641 | 2195.466  | 2088.99   |
| NM_00426C | 7385.116  | 4184.257  | M91463    | 2514.705  | 1448.43   | NM_004462 | 3518.679  | 2948.6    |
| AL050067  | 878.579   | 515.66    | U88317    | 1292.581  | 931.299   | NM_000343 | 582.29    | 1961.179  |
| NM_004972 | 7203.811  | 5875.854  | J03060    | 3846.814  | 2630.62   | NM_02024E | 2285.471  | 3162.782  |
| NM_006251 | 9324.273  | 9284.342  | X54156    | 1213.929  | 851.919   | NM_016354 | 2807.808  | 3932.242  |
| NM_004103 | 11996.784 | 9927.85   | NM_003743 | 2672.479  | 1866.193  | NM_001044 | 732.644   | 967.549   |
| NM_002314 | 22860.545 | 28848.291 | AA829383  | 14737.024 | 13536.918 | NM_004644 | 2064.018  | 4170.231  |
| NM_001744 | 4642.629  | 4588.386  | AF012434  | 38206.945 | 29896.521 | AV681967  | 1032.677  | 1635.89   |
| NM_00629E | 3861.815  | 2644.98   | NM_018124 | 16178.688 | 12310.388 | NM_01825C | 1550.547  | 1806.173  |
| Z25433    | 3402.709  | 2166.535  | Z70701    | 25520.742 | 22278.99  | NM_016553 | 8106.993  | 8911.274  |
| NM_005922 | 6247.697  | 7207.621  | AB040972  | 8708.651  | 9180.599  | AB023136  | 633.441   | 893.596   |
| NM_01863E | 8381.236  | 10753.921 | X98507    | 15500.696 | 22178.75  | NM_00379E | 30115.416 | 33662.543 |
| AL137593  | 21166.742 | 20328.307 | NM_01603C | 55635.613 | 65245.141 | NM_014232 | 4091.658  | 6135.194  |
| NM_00391E | 5761.55   | 6411.26   | NM_01466E | 22403.92  | 49582.32  | NM_005701 | 1566.542  | 2870.263  |
| NM_000382 | 4685.889  | 4670.184  | NM_005652 | 41286.895 | 50340.859 | NM_001231 | 1011.356  | 2397.07   |
| NM_016593 | 5690.392  | 6718.091  | AK026686  | 1030.447  | 1197.719  | AB023139  | 8031.912  | 6853.55   |
| NM_002521 | 1818.495  | 1746.97   | NM_005902 | 5297.068  | 6109.572  | NM_01788E | 3043.477  | 2507.2    |
| NM_001150 | 626.055   | 824.17    | NM_00285C | 57875.434 | 69204.648 | D80004    | 520.27    | 513.526   |
| NM_00285E | 1026.863  | 1536.754  | NM_005302 | 460.386   | 351.887   | X63966    | 239.619   | 285.124   |
| NM_00322E | 2432.179  | 3606.373  | NM_004302 | 922.43    | 900.6     | NM_00094E | 3324.04   | 3396.237  |
| NM_00009E | 2682.458  | 3300.845  | NM_005903 | 2483.19   | 2483.373  | NM_01607C | 3565.38   | 3064.323  |
| AA418251  | 1784.286  | 1844.793  | NM_000861 | 2160.013  | 1682.997  | NM_01639C | 2417.972  | 2795.953  |
| AA143087  | 3842.892  | 3307.187  | U77493    | 1642.014  | 1182.226  | NM_016101 | 7058.179  | 6845.968  |
| BI870965  | 3558.291  | 1906.714  | NM_019062 | 2827.059  | 2425.137  | NM_00585E | 51457.875 | 53970.02  |
| BI835536  | 13824.235 | 9247.897  | NM_003873 | 1515.623  | 1321.685  | NM_020313 | 1033.242  | 2193.561  |

|           |           |           |           |           |           |           |           |           |
|-----------|-----------|-----------|-----------|-----------|-----------|-----------|-----------|-----------|
| BF205051  | 5229.191  | 3722.516  | NM_000263 | 4558.292  | 4333.655  | NM_014628 | 5751.408  | 20985.119 |
| X02761    | 3087.394  | 1998.374  | AF073519  | 17406.85  | 14747.931 | AK025630  | 2971.131  | 8198.376  |
| M91463    | 1526.364  | 1141.096  | AB001451  | 1300.373  | 1287.128  | AK022907  | 15335.806 | 17583.746 |
| U88317    | 673.839   | 956.903   | NM_017583 | 19499.742 | 19067.002 | NM_014793 | 2920.808  | 2836.906  |
| J03060    | 3200.585  | 3011.855  | Y16132    | 33942.926 | 28617.123 | NM_004245 | 5297.498  | 5632.894  |
| X54156    | 1500.267  | 685.124   | NM_016593 | 5741.157  | 5623.531  | NM_003241 | 2401.935  | 2563.257  |
| NM_003743 | 1897.332  | 893.935   | NM_002521 | 3569.316  | 3065.142  | NM_002685 | 3321.839  | 2873.343  |
| AA829383  | 17443.996 | 9944.304  | NM_000271 | 34824.926 | 43966.293 | AK024504  | 1728.394  | 2035.433  |
| AF012434  | 38627.676 | 27895.547 | NM_018209 | 8290.16   | 12003.109 | AF039023  | 3259.201  | 4415.007  |
| NM_018124 | 15581.241 | 8146.376  | NM_006184 | 19205.648 | 28869.174 | NM_005511 | 3896.434  | 6046.702  |
| NM_004887 | 14985.902 | 16442.014 | AB018268  | 28139.648 | 37057.023 | NM_018475 | 5962.882  | 8044.954  |
| NM_006404 | 1201.302  | 1431.066  | NM_019045 | 728.854   | 756.578   | AK025451  | 3611.116  | 3290.135  |
| NM_014795 | 2240.568  | 3250.17   | NM_006380 | 3714.47   | 8151.673  | NM_002783 | 5762.986  | 5915.139  |
| NM_002986 | 989.067   | 1290.223  | AB020710  | 3136.212  | 3853.891  | X52005    | 24516.838 | 13706.527 |
| M15330    | 2577.162  | 4700.687  | NM_016174 | 12599.369 | 12857.707 | NM_001047 | 1106.034  | 1309.723  |
| NM_014396 | 4257.395  | 5284.009  | NM_020377 | 2224.185  | 1800.947  | AK024396  | 9465.819  | 12830.915 |
| AK027201  | 3464.661  | 3480.34   | U88896    | 2835.169  | 2186.908  | U58514    | 2567.005  | 2628.904  |
| NM_000489 | 5860.309  | 5361.882  | AF116702  | 57834.363 | 57662.652 | M57627    | 982.014   | 1136.486  |
| X98507    | 12620.032 | 12287.476 | NM_005724 | 10756.543 | 9057.674  | W74254    | 1018.082  | 917.515   |
| NM_016030 | 50345.223 | 33109.453 | X58794    | 3249.245  | 3530.272  | M58603    | 6072.341  | 4895.868  |
| NM_014669 | 15355.005 | 9918.857  | NM_001735 | 4524.972  | 4159.609  | AA443286  | 1826.734  | 1859.041  |
| NM_005652 | 10306.697 | 5464.911  | NM_002349 | 2062.969  | 2255.377  | AB003334  | 8238.37   | 12038.007 |
| AK026686  | 1098.592  | 795.393   | NM_005080 | 18376.59  | 23152.572 | AW276315  | 2481.922  | 5190.272  |
| NM_005902 | 6722.497  | 6818.391  | NM_004887 | 20107.99  | 15795.462 | AA490737  | 4808.972  | 9575.57   |
| NM_002850 | 66060.234 | 56677.82  | NM_006404 | 1698.393  | 1767.457  | BG697179  | 18075.117 | 19127.344 |
| NM_004302 | 1276.076  | 714.319   | NM_014795 | 2404.645  | 1893.236  | NM_002136 | 48198.977 | 43885.707 |
| NM_005903 | 2645.24   | 1476.777  | NM_002986 | 2576.502  | 2486.68   | BM012504  | 14319.29  | 14466.76  |
| U77493    | 1293.602  | 960.992   | M15330    | 3409.117  | 5787.766  | AA664145  | 2994.967  | 3061.77   |
| NM_019062 | 812.911   | 611.355   | NM_014396 | 5581.54   | 4341.209  | X72308    | 49657.559 | 47099.48  |
| NM_017583 | 18751.24  | 11182.918 | AK027201  | 5228.15   | 4839.489  | T50790    | 5106.256  | 6761.297  |
| Y16132    | 12365.514 | 12288.232 | NM_000489 | 26375.143 | 27643.252 | R48168    | 11575.738 | 13286.554 |
| NM_002905 | 6593.846  | 8090.606  | AL137593  | 46908.051 | 52375.395 | AB040954  | 6855.629  | 9604.278  |
| NM_000700 | 2998.105  | 4480.805  | NM_003915 | 4599.636  | 5443.907  | AF146759  | 3173.718  | 3618.713  |
| NM_019028 | 8852.428  | 14150.136 | NM_000382 | 4220.195  | 6061.256  | AB032993  | 5377.683  | 3688.379  |
| NM_000431 | 7720.432  | 7655.834  | AL133064  | 6400.706  | 8244.11   | NM_000854 | 4557.62   | 3761.157  |
| NM_013421 | 2060.841  | 2483.891  | NM_006227 | 8223.706  | 8167.697  | NM_001901 | 690.505   | 465.251   |
| NM_012474 | 12480.077 | 17360.59  | NM_002905 | 9316.656  | 12139.063 | AL117423  | 7545.039  | 8059.892  |
| AB033118  | 3536.576  | 3843.491  | NM_000700 | 3738.951  | 5298.364  | NM_002084 | 2141.497  | 2034.675  |
| NM_019606 | 7746.96   | 7433.007  | NM_019028 | 32190.273 | 33998.637 | D16892    | 7949.984  | 5780.445  |
| NM_001690 | 20634.736 | 14022.17  | NM_000431 | 4738.825  | 3904.197  | NM_004750 | 2098.753  | 2302.786  |
| AF034374  | 4078.612  | 3353.759  | NM_013421 | 3362.638  | 3256.669  | NM_007295 | 4857.939  | 6487.042  |
| NM_001682 | 5593.985  | 3386.134  | NM_012474 | 9393.282  | 8347.901  | AK023317  | 352.032   | 522.556   |
| AK025130  | 5438.42   | 4251.082  | AB033118  | 2640.759  | 2240.215  | NM_003651 | 25137.645 | 37049.121 |
| AK023232  | 3653.036  | 3400.137  | NM_019606 | 6055.222  | 4333.716  | NM_014012 | 543.646   | 846.458   |
| NM_006380 | 3780.205  | 3198.491  | NM_001690 | 16505.521 | 11630.199 | NM_000418 | 1714.431  | 1836.968  |
| AB020710  | 3206.009  | 3192.545  | AF034374  | 27082.154 | 25804.779 | NM_013246 | 1314.489  | 1167.398  |
| Z83801    | 694.298   | 460.211   | NM_016118 | 11124.907 | 7933.61   | NM_018431 | 587.663   | 459.457   |
| NM_016174 | 3043.282  | 1845.627  | NM_018674 | 29984.285 | 29616.627 | NM_000591 | 2925.751  | 3103.365  |
| NM_020377 | 1108.546  | 575.431   | NM_001683 | 38113.18  | 28821.709 | NM_000565 | 2511.894  | 2855.502  |
| U88896    | 3041.974  | 1173.498  | NM_001682 | 5756.023  | 5400.186  | NM_002019 | 490.299   | 491.85    |
| AF116702  | 66475.195 | 36228.48  | NM_014405 | 6619.688  | 5384.73   | AF253318  | 4254.675  | 5036.38   |
| NM_005724 | 13135.969 | 5594.813  | NM_000816 | 1732.432  | 1871.69   | NM_017767 | 25775.457 | 25419.215 |
| X58794    | 1537.257  | 1177.748  | NM_014928 | 2769.748  | 2513.508  | NM_006148 | 303.976   | 928.865   |

|           |           |           |           |           |           |           |           |           |
|-----------|-----------|-----------|-----------|-----------|-----------|-----------|-----------|-----------|
| NM_001735 | 3406.564  | 2536.995  | AK025130  | 7870.819  | 8910.719  | AJ290954  | 2269.308  | 3855.114  |
| NM_002345 | 1289.038  | 836.618   | NM_017875 | 3571.002  | 3999.469  | AK022832  | 1638.505  | 1490.771  |
| NM_005080 | 22174.576 | 19134.668 | AK023232  | 12618.911 | 15253.082 | NM_017784 | 894.198   | 698.619   |
| AF148505  | 3877.167  | 4872.991  | NM_018124 | 16014.471 | 16062.218 | NM_014641 | 2774.576  | 2309.625  |
| NM_018685 | 21122.094 | 26426.654 | Z70701    | 27555.041 | 26146.094 | NM_004462 | 3701.577  | 2830.121  |
| NM_017675 | 3792.786  | 4539.521  | AB040972  | 7620.729  | 5672.926  | NM_000343 | 628.674   | 681.756   |
| AK021764  | 2034.977  | 2008.98   | AF148505  | 4044.903  | 4231.816  | NM_020245 | 2378.104  | 4076.061  |
| NM_005431 | 6241.775  | 7749.217  | NM_018685 | 20036.033 | 21658.336 | NM_016354 | 3796.102  | 14021.031 |
| NM_004260 | 8187.554  | 5067.544  | NM_017675 | 2706.207  | 2844.03   | NM_001044 | 598.565   | 592.68    |
| AL050067  | 1395.646  | 896.631   | AK021764  | 1223.329  | 1206.4    | NM_004644 | 1461.713  | 1739.946  |
| NM_004972 | 7216.985  | 4632.924  | NM_005431 | 6051.437  | 4413.242  | AV681967  | 995.962   | 1506.955  |
| NM_006251 | 9096.929  | 6518.176  | NM_002894 | 15193.863 | 11290.937 | NM_018250 | 1358.374  | 1357.592  |
| NM_004103 | 10567.382 | 6111.104  | NM_004629 | 6517.708  | 3583.759  | NM_016553 | 7678.34   | 6488.518  |
| NM_002314 | 16389.697 | 12912.233 | NM_004260 | 19244.693 | 16535.82  | AB023136  | 1227.497  | 1643.618  |
| NM_001744 | 4850.495  | 5467.048  | AL050067  | 2513.456  | 1786.654  | NM_003795 | 30715.596 | 24400.537 |
| NM_006295 | 3831.642  | 3035.695  | NM_004972 | 12702.837 | 11324.271 | NM_014232 | 3661.728  | 4401.934  |
| Z25433    | 2893.907  | 1230.067  | NM_006251 | 8371.396  | 7443.989  | NM_005701 | 1392.637  | 1366.847  |
| NM_005922 | 4916.044  | 2344.95   | NM_004103 | 20673.936 | 16868.59  | NM_001231 | 718.017   | 939.961   |
| NM_018635 | 4349.036  | 1496.554  | NM_002314 | 14090.332 | 14235.507 | NM_006815 | 52992.824 | 53410.633 |
| AL137593  | 13593.204 | 5261.314  | NM_001744 | 3666.993  | 3266.234  | NM_014744 | 2668.633  | 4935.775  |
| NM_003915 | 4508.197  | 2055.117  | NM_006295 | 4373.975  | 3851.196  | D80004    | 597.659   | 609.637   |
| NM_000382 | 4588.917  | 3230.993  | Z25433    | 4033.316  | 3409.729  | NM_000945 | 3587.129  | 3198.229  |
| AL133064  | 6572.244  | 3734.765  | NM_005922 | 5463.81   | 5640.665  | NM_016070 | 3406.773  | 3074.158  |
| NM_006227 | 7421.79   | 5326.919  | NM_018635 | 14576.581 | 13371.458 | NM_016390 | 2632.072  | 2598.295  |
| NM_001150 | 695.705   | 812.057   | CY3Cy5    | 1671.784  | 136.043   | NM_016101 | 7621.286  | 7021.108  |
| NM_002855 | 1272.929  | 1504.168  | NM_003942 | 2491.616  | 1043.175  | NM_005855 | 55138.215 | 53480.703 |
| NM_003225 | 2551.6    | 5124.753  | NM_004452 | 1414.224  | 642.955   | NM_020313 | 879.162   | 460.196   |
| NM_000095 | 2607.062  | 3275.563  | AK022632  | 1460.191  | 553.094   | NM_014625 | 2541.544  | 2914.011  |
| AA418251  | 1840.444  | 1988.35   | AK021554  | 3175.734  | 1796.691  | AK025630  | 2066.542  | 2329.637  |
| AA143087  | 5586.556  | 8115.599  | NM_020235 | 5764.109  | 4895.98   | AK022907  | 16430.668 | 27352.133 |
| NM_001903 | 951.81    | 390.782   | AK000532  | 1651.501  | 1563.432  | NM_014793 | 2226.361  | 2291.826  |
| BI835536  | 14880.394 | 10512.517 | AL109681  | 756.393   | 815.191   | NM_004245 | 4682.998  | 4982.055  |
| BF205051  | 5715.026  | 2583.87   | AL162039  | 9972.52   | 11599.162 | NM_003241 | 2372.239  | 2450.396  |
| X02761    | 2674.143  | 1335.409  | AK024896  | 6225.3    | 5725.734  | NM_002685 | 3353.23   | 2440.55   |
| M91463    | 1397.516  | 606.862   | AL353952  | 797.86    | 1294.289  | AK024504  | 1388.797  | 1565.535  |
| U88317    | 772.388   | 469.968   | BU165106  | 2589.728  | 3142.948  | AF039023  | 2125.913  | 2404.615  |
| J03060    | 3115.413  | 1948.338  | AF038202  | 2955.552  | 3477.897  | NM_005511 | 3212.644  | 3669.746  |
| X54156    | 1516.495  | 744.504   | AB040925  | 3223.234  | 2909.54   | NM_014695 | 45885.52  | 49833.281 |
| NM_003743 | 2145.919  | 990.687   | NM_003942 | 3235.608  | 2728.591  | NM_018475 | 5003.775  | 5984.487  |
| AA829383  | 18329.564 | 9682.791  | NM_004452 | 2463.09   | 2264.097  | NM_003262 | 3768.066  | 5148.602  |
| AF012434  | 28095.377 | 7806.395  | SR1       | 90730.586 | 65760.523 | X52005    | 27362.605 | 16632.535 |
| NM_018124 | 18289.828 | 11333.939 | SR3       | 47665.063 | 50748.281 | NM_001047 | 901.284   | 996.453   |
| Z70701    | 13025.874 | 4526.464  | SR5       | 4951.227  | 4628.846  | AK024396  | 9967.586  | 12768.247 |
| AB040972  | 3220.459  | 1991.107  | SR7       | 5302.935  | 38796.629 | U58514    | 2561.423  | 2380.212  |
| X98507    | 12936.924 | 12990.126 | SR9       | 14820.985 | 2057.648  | M57627    | 992.265   | 941.249   |
| NM_016030 | 52167.016 | 53151.836 | CY3Cy5    | 913.376   | 182.486   | W74254    | 1263.509  | 1106.126  |
| NM_014665 | 18559.104 | 21270     | AF018254  | 887.964   | 566.739   | M58603    | 6873.639  | 5251.335  |
| NM_005652 | 11993.604 | 13659.519 | NM_016240 | 3282.017  | 3631.341  | AA443286  | 1888.163  | 1128.802  |
| AK026686  | 1280.796  | 1750.826  | AK026459  | 1467.173  | 1573.427  | AB003334  | 6822.285  | 5069.937  |
| NM_005902 | 7297.83   | 9072.884  | AL049390  | 3986.804  | 4252.362  | AW276315  | 1646.635  | 1232.111  |
| NM_002850 | 65157.254 | 60195.809 | AK000584  | 6659.331  | 4475.889  | AA490737  | 4239.183  | 3325.733  |
| NM_005302 | 557.38    | 320.093   | AJ297363  | 1863.04   | 1546.811  | BG697179  | 18143.66  | 20438.396 |
| NM_004302 | 1093.348  | 1059.835  | AK026379  | 4201.489  | 4364.682  | NM_002135 | 47800.188 | 35866.426 |



|           |           |           |           |           |           |           |           |           |
|-----------|-----------|-----------|-----------|-----------|-----------|-----------|-----------|-----------|
| NM_005903 | 2464.48   | 1530.495  | AF075002  | 1016.912  | 1443.17   | BM012504  | 13732.896 | 14408.407 |
| AB037734  | 643.615   | 618.605   | AK022965  | 2301.992  | 1766.264  | AA664145  | 2976.268  | 2811.426  |
| U77493    | 1049.987  | 571.122   | AK024278  | 9168.328  | 11708.298 | X72308    | 46321.727 | 39519.352 |
| NM_019062 | 948.984   | 494.519   | NM_018022 | 3048.793  | 2638.467  | T70999    | 372.234   | 338.855   |
| NM_003873 | 738.215   | 405.846   | AB056722  | 13711.119 | 13268.852 | T50790    | 4673.952  | 4412.596  |
| NM_000263 | 4199.021  | 1231.368  | AK023198  | 9715.527  | 7302.284  | R48168    | 10526.366 | 9255.895  |
| AF073519  | 16176.368 | 3650.095  | NM_012066 | 23727.537 | 18581.473 | AB040954  | 6128.192  | 6391.065  |
| AB001451  | 1367.985  | 577.073   | AF052168  | 21430.102 | 15032.998 | NM_002081 | 1093.038  | 1360.232  |
| NM_017583 | 28950.465 | 23199.643 | AK024864  | 958.596   | 552.166   | AB023139  | 7920.009  | 7321.014  |
| Y16132    | 12230.634 | 7224.075  | AK024947  | 7628.987  | 5474.455  | NM_017885 | 3454.251  | 4314.747  |
| NM_016593 | 5148.775  | 2185.743  | AK024879  | 597.895   | 600.544   | D16892    | 8649.453  | 6200.168  |
| NM_002521 | 1512.239  | 703.671   | AK095125  | 1663.462  | 1988.457  | NM_004750 | 2532.938  | 2603.988  |
| NM_000271 | 8597.395  | 11551.302 | AK024059  | 2957.023  | 2994.759  | NM_007295 | 5686.245  | 5182.871  |
| NM_018209 | 8879.473  | 14934.438 | AB007928  | 2265.921  | 2321.32   | NM_003651 | 22239.768 | 18838.982 |
| NM_006184 | 22225.539 | 25969.805 | AK023645  | 2502.13   | 1830.223  | NM_014012 | 645.372   | 1052.384  |
| AB018268  | 2621.514  | 3603.952  | D83543    | 1338.888  | 1184.48   | NM_000418 | 1814.315  | 1649.785  |
| NM_019045 | 1256.808  | 1554.254  | NM_016930 | 4899.636  | 5115.479  | NM_013246 | 1223.847  | 791.683   |
| NM_006380 | 3863.521  | 5009.909  | AJ001861  | 6473.757  | 6755.271  | NM_018431 | 516.395   | 487.336   |
| AB020710  | 3498.927  | 4870.935  | AJ227865  | 447.614   | 960.802   | NM_000591 | 2495.363  | 1887.802  |
| Z83801    | 665.51    | 552.186   | NM_005188 | 754.351   | 983.191   | NM_000565 | 1669.486  | 1315.776  |
| NM_016174 | 3626.637  | 3172.147  | X64981    | 3018.632  | 3282.859  | NM_002019 | 498.426   | 403.247   |
| NM_020377 | 1123.473  | 738.487   | X75692    | 13285.549 | 9539.469  | AF253318  | 3537.242  | 3424.051  |
| U88896    | 2111.805  | 870.962   | X64988    | 700.074   | 1331.964  | NM_017767 | 20491.455 | 14972.746 |
| AF116702  | 68760.977 | 31250.705 | Y10511    | 20428.455 | 7952.814  | AK024848  | 10276.443 | 9136.257  |
| NM_005724 | 13217.377 | 6994.456  | AK021832  | 1205.545  | 478.373   | NM_004852 | 383.698   | 392.615   |
| X58794    | 1262      | 780.507   | AK021505  | 7103.455  | 6389.199  | NM_000543 | 728.897   | 500.581   |
| NM_001735 | 3171.845  | 1839.097  | AK021598  | 6521.583  | 5992.485  | U06699    | 18536.072 | 18254.047 |
| NM_002349 | 978.508   | 561.878   | AK025238  | 831.747   | 1016.319  | NM_006148 | 455.686   | 546.039   |
| NM_005080 | 18626.01  | 11123.707 | NM_004129 | 797.822   | 1262.648  | AJ290954  | 1937.416  | 2356.634  |
| NM_004887 | 13198.195 | 4679.495  | AK026416  | 42828.488 | 36044.32  | AK025451  | 3140.668  | 3060.238  |
| NM_006404 | 900.898   | 209.662   | AK025797  | 2664.375  | 2510.499  | NM_002783 | 7642.246  | 11474.771 |
| NM_014795 | 1876.055  | 326.453   | NM_017759 | 506.578   | 1029.252  | NM_003038 | 1067.511  | 850.042   |
| AK027201  | 3723.426  | 1199.842  | AK000853  | 831.681   | 940.121   | NM_018155 | 7096.749  | 5871.622  |
| NM_000489 | 6497.125  | 2226.203  | AK000085  | 950.199   | 1117.079  | AL050358  | 3210.142  | 3152.357  |
| AL137593  | 18536.785 | 17142.793 | AK000019  | 1427.175  | 1511.135  | NM_004731 | 650.303   | 719.988   |
| NM_003915 | 4834.202  | 5309.207  | AK000645  | 1473.014  | 1218.041  | NM_000544 | 3681.904  | 2322.51   |
| NM_000382 | 4473.101  | 4646.517  | AK024156  | 1353.045  | 588.714   | NM_001044 | 690.328   | 515.042   |
| AL133064  | 7712.825  | 12735.112 | AF086288  | 2009.557  | 828.22    | NM_004644 | 1249.67   | 1248.742  |
| NM_006227 | 7600.4    | 9568.626  | NM_016944 | 660.392   | 790.074   | AV681967  | 1008.058  | 925.561   |
| NM_002905 | 8669.949  | 11933.577 | AK023109  | 2485.752  | 2772.779  | NM_018250 | 1164.715  | 829.49    |
| NM_000700 | 2982.321  | 3675.563  | NM_005293 | 29443.367 | 27130.326 | NM_016553 | 6470.261  | 4711.49   |
| NM_019028 | 8667.216  | 12359.704 | S50185    | 1431.019  | 1804.96   | AB023136  | 487.146   | 399.135   |
| NM_000431 | 7508.728  | 6744.496  | AF133332  | 9888.899  | 10923.538 | NM_003795 | 27753.238 | 19691.342 |
| NM_013421 | 1955.625  | 1540.466  | AK022805  | 6139.441  | 6427.836  | NM_014232 | 3908.676  | 3095.845  |
| NM_012474 | 8977.02   | 4608.868  | NM_017503 | 1229.34   | 1006.755  | NM_005701 | 1216.537  | 1070.018  |
| AB033118  | 2919.798  | 1150.298  | AK024606  | 6279.839  | 5754.828  | NM_001231 | 531.887   | 375.293   |
| NM_019606 | 7012.552  | 3664.654  | NM_016417 | 39909.625 | 37561.613 | NM_006819 | 49670.242 | 36308.41  |
| NM_001690 | 17332.432 | 5509.536  | NM_019108 | 2562.028  | 2558.654  | NM_014744 | 2107.332  | 1937.244  |
| AF034374  | 2949.034  | 1766.958  | L10147    | 41557.359 | 45073.57  | AF146759  | 2550.461  | 2552.284  |
| NM_016118 | 11044.416 | 3585.998  | AL080118  | 9512.858  | 8466.983  | AB032993  | 5641.089  | 4679.717  |
| NM_018674 | 2419.698  | 1101.984  | AL049378  | 6584.123  | 6469.195  | NM_000854 | 4231.815  | 3592.351  |
| NM_001683 | 7164.268  | 2117.128  | L09086    | 2258.77   | 1544.34   | NM_001901 | 519.608   | 352.691   |
| NM_001682 | 5491.892  | 1014.392  | L37702    | 24201.578 | 11399.496 | AL117423  | 7301.791  | 7007.505  |

|           |           |           |           |           |           |           |           |           |
|-----------|-----------|-----------|-----------|-----------|-----------|-----------|-----------|-----------|
| NM_01492E | 1305.688  | 1815.344  | AK022812  | 523.827   | 259.313   | NM_00614C | 393.069   | 255.724   |
| AK025130  | 8514.87   | 11463.196 | AF238318  | 550.852   | 356.76    | NM_002084 | 2657.196  | 4448.435  |
| NM_01787E | 3934.32   | 4899.929  | U79301    | 13576.975 | 13485.108 | NM_005511 | 3182.776  | 2838.476  |
| AK023232  | 5837.69   | 3561.785  | AK022260  | 16188.423 | 16305.701 | NM_01469E | 40209.117 | 29095.244 |
| NM_018124 | 20943.254 | 27485.969 | M32219    | 16201.998 | 19256.459 | NM_01847E | 4628.276  | 3467.317  |
| Z70701    | 18224.295 | 16219.734 | BC018868  | 2960.271  | 3255.488  | NM_00326E | 3527.91   | 2920.572  |
| AB040972  | 3479.057  | 3664.067  | AF086174  | 1238.453  | 1550.694  | NM_02012E | 544.034   | 492.19    |
| AF148505  | 4167.725  | 4383.257  | AF007128  | 15836.398 | 17496.518 | AK022832  | 1850.385  | 1355.776  |
| NM_01868E | 20342.352 | 15398.387 | AJ012498  | 1764.446  | 1969.053  | NM_017784 | 801.417   | 566.205   |
| NM_01767E | 3655.654  | 2918.497  | NM_005973 | 33157.938 | 34357.727 | NM_014641 | 2273.302  | 1295.726  |
| AK021764  | 1902.382  | 1208.646  | X04547    | 3479.188  | 3467.969  | NM_00446E | 3211.231  | 1923.285  |
| NM_005431 | 5403.051  | 1944.018  | AK025823  | 3328.137  | 2283.995  | AB020664  | 1160.803  | 1346.985  |
| NM_002894 | 17041.689 | 7104.178  | AK026691  | 1556.778  | 998.264   | NM_00664C | 12931.592 | 12333.627 |
| NM_00462E | 6329.97   | 2307.105  | AL359941  | 8570.4    | 7989.297  | NM_00086E | 177.535   | 484.847   |
| NM_00426C | 6964.732  | 2236.786  | U52076    | 2028.875  | 2316.505  | NM_00034E | 716.663   | 996.966   |
| AL050067  | 922.358   | 264.894   | AF035278  | 3730.342  | 3401.069  | NM_01911E | 6162.479  | 5253.559  |
| NM_00497E | 7125.29   | 2009.706  | AF086493  | 3548.212  | 3137.478  | NM_01233E | 6115.604  | 7094.573  |
| NM_006251 | 7118.243  | 1593.872  | AL050202  | 2576.913  | 2706.333  | NM_020161 | 379.813   | 292.343   |
| NM_00410E | 13396.727 | 3567.957  | U32999    | 21927.043 | 11173.541 | NM_02024E | 2000.754  | 2280.535  |
| NM_002314 | 19897.412 | 19833.049 | U66052    | 6158.093  | 2212.896  | NM_000084 | 3069.138  | 4674.847  |
| NM_001744 | 4745.596  | 7286.144  | NM_000857 | 2671.052  | 1116.376  | NM_016354 | 3249.032  | 5461.436  |
| NM_00629E | 6492.182  | 11679.289 | L20688    | 53670.906 | 20673.934 | AB040954  | 5199.838  | 4200.184  |
| Z25433    | 5093.782  | 8122.359  | X69111    | 35014.059 | 18764.555 | NM_002081 | 881.405   | 535.24    |
| NM_00592E | 7894.041  | 12320.663 | AF252283  | 835.544   | 687.138   | AB023139  | 7361.73   | 5886.207  |
| NM_01863E | 10022.131 | 16107.926 | AB037799  | 9010.176  | 9480.291  | NM_01788E | 2989.4    | 2128.47   |
| CY3Cy5    | 2432.794  | 283.049   | AB007950  | 24172.508 | 23275.146 | D80004    | 571.521   | 350.809   |
| NM_00394E | 3094.682  | 2906.062  | AL133111  | 802.427   | 1034.477  | NM_00094E | 2711.873  | 1481.059  |
| NM_00445E | 1280.04   | 1385.643  | AK025593  | 5131.302  | 6023.907  | NM_01607C | 2745.173  | 1642.643  |
| AK022632  | 2470.922  | 1993.744  | AB018304  | 4852.67   | 5153.435  | NM_01639C | 2089.229  | 1381.957  |
| AK021554  | 769.849   | 780.531   | NM_007061 | 28565.809 | 28988.887 | NM_016101 | 7393.995  | 5338.173  |
| NM_02023E | 5148.131  | 4265.381  | NM_00108E | 25920.465 | 24495.625 | NM_00585E | 42634.594 | 33869.012 |
| AK000532  | 949.896   | 893.987   | BC015991  | 14410.704 | 15316.661 | NM_02031E | 1037.671  | 1195.255  |
| AL109681  | 681.277   | 1182.444  | U94902    | 1137.159  | 1151.572  | NM_01462E | 3312.393  | 4199.345  |
| AL162039  | 7352.466  | 6537.173  | U46214    | 15342.614 | 14893.342 | AK025630  | 2006.514  | 2053.249  |
| AK024896  | 5223.654  | 4562.792  | NM_00031C | 32319.486 | 35622.922 | AL365404  | 40898.957 | 33593.324 |
| AL353952  | 601.815   | 724.12    | AF161343  | 11307.668 | 8819.851  | AK022907  | 13390.036 | 14521.043 |
| AK021912  | 434.946   | 525.733   | NM_00476E | 2061.438  | 1004.588  | NM_01479E | 2385.988  | 2647.75   |
| BU165106  | 2951.597  | 3578.064  | AF009307  | 585.01    | 287.531   | NM_00424E | 5300.551  | 5050.358  |
| AF038202  | 2223.228  | 1698.478  | AK022246  | 4707.271  | 5463.501  | NM_003241 | 3062.949  | 3495.085  |
| AB040925  | 2805.903  | 1963.628  | X75684    | 3103.026  | 3271.177  | NM_00268E | 3384.662  | 3500.261  |
| NM_00394E | 2978.059  | 2434.626  | D17200    | 913.616   | 1248.884  | AK024504  | 1435.247  | 1586.74   |
| NM_00445E | 805.212   | 651.076   | AF113701  | 35230.414 | 35670.297 | AF039023  | 2391.852  | 4330.699  |
| SR1       | 72587.922 | 62733.484 | Y11158    | 4514.576  | 1358.225  | CY3Cy5    | 678.311   | 150.815   |
| SR3       | 28619.922 | 32139.982 | NM_006771 | 36626.422 | 36192.25  | NM_145904 | 15676.304 | 10093.633 |
| SR5       | 3202.877  | 4272.981  | NM_01471E | 6641.584  | 2012.526  | AF086434  | 806.994   | 1243.525  |
| SR7       | 4931.835  | 64693.156 | AB028953  | 383.46    | 187.524   | AF086464  | 599.073   | 823.482   |
| SR9       | 11668.797 | 3024.456  | NM_00063E | 2000.635  | 1258.504  | AL049278  | 2085.247  | 1494.86   |
| CY3Cy5    | 1760.769  | 258.506   | AB002298  | 1980.477  | 1816.779  | AL117519  | 2449.089  | 1872.249  |
| M26147    | 561.994   | 691.915   | AK024488  | 2624.681  | 2937.4    | AK055338  | 537.796   | 526.14    |
| AF018254  | 1860.02   | 2828.594  | AK023249  | 63431.316 | 57337.77  | AK001595  | 2327.369  | 1926.255  |
| NM_01624C | 3929.941  | 3276.037  | NM_00736C | 689.882   | 818       | NM_01801E | 1684.163  | 1404.08   |
| AK026459  | 559.237   | 1129.643  | NM_01744E | 17651.84  | 20618.762 | NM_00371E | 4146.927  | 2225.188  |
| AL049390  | 863.789   | 973.759   | AF055084  | 677.867   | 1238.705  | NM_145904 | 22462.545 | 11815.78  |

|           |           |           |           |           |           |           |           |           |
|-----------|-----------|-----------|-----------|-----------|-----------|-----------|-----------|-----------|
| AK000584  | 5246.237  | 4341.356  | NM_000743 | 4530.371  | 4702.841  | SR2       | 24202.074 | 12686.701 |
| AJ297363  | 1430.408  | 1571.192  | NM_007218 | 6158.971  | 7430.265  | SR4       | 7328.997  | 4725.683  |
| AK026379  | 3414.814  | 6014.236  | Z25436    | 4874.585  | 5319.172  | SR6       | 657.713   | 703.207   |
| AF075002  | 545.939   | 369.951   | NM_005275 | 8380.528  | 8696.802  | SR8       | 3009.149  | 6808.399  |
| AK022965  | 1787.68   | 1339.374  | NM_003844 | 53990.422 | 49538.875 | SR10      | 13436.43  | 6467.155  |
| AK024278  | 5388.972  | 4355.08   | NM_002005 | 52481.117 | 50501.746 | CY3Cy5    | 1516.668  | 257.722   |
| NM_018022 | 2804.529  | 5468.366  | NM_012324 | 9016.379  | 10601.439 | AF086395  | 13117.24  | 12045.706 |
| AB056722  | 1177.251  | 1551.529  | AK000039  | 1928.188  | 1683.244  | AF086049  | 2915.217  | 3766.41   |
| NM_013242 | 7547.513  | 7104.02   | AL137352  | 4565.753  | 3961.911  | AK026142  | 3724.303  | 3991.047  |
| NM_012066 | 14846.322 | 16847.678 | NM_014749 | 4165.945  | 3706.244  | AK021494  | 3245.069  | 1956.425  |
| AF052168  | 6186.092  | 5027.768  | D49958    | 1282.267  | 1436.479  | AK022117  | 1203.105  | 1249.048  |
| NM_014650 | 399.407   | 488.924   | NM_004489 | 12750.645 | 13304.325 | AF075023  | 2185.432  | 1746.034  |
| AK024947  | 745.734   | 1004.303  | BF240063  | 2159.873  | 2726      | AL360160  | 48639.285 | 31729.049 |
| AK095125  | 1613.845  | 2363.915  | BI461699  | 2040.683  | 1134.473  | AK001092  | 54621.227 | 46534.598 |
| AK024059  | 2125.625  | 2136.084  | AF172264  | 2910.837  | 2066.999  | NM_014144 | 1173.642  | 613.902   |
| AK023663  | 361.342   | 343.666   | U80756    | 59248.18  | 18326.973 | AF147345  | 2699.28   | 1215.179  |
| AB007928  | 1812.834  | 1407.823  | NM_018161 | 5010.358  | 2267.025  | AF147373  | 2791.492  | 1506.002  |
| AK023645  | 2562.62   | 2655.45   | NM_005248 | 42642.781 | 30175.453 | AF086253  | 761.915   | 606.268   |
| D83543    | 1029.775  | 821.686   | NM_004810 | 3125.208  | 3255.627  | AF086337  | 561.646   | 388.774   |
| NM_016930 | 3511.382  | 2537.189  | AL117629  | 10053.208 | 9936.737  | AK021642  | 3593.952  | 4481.842  |
| AJ001861  | 4254.083  | 4274.045  | NM_002595 | 2903.214  | 3474.454  | AK021987  | 1668.395  | 2169.089  |
| NM_005188 | 689.875   | 886.864   | NM_015726 | 2427.381  | 2279.563  | AK026905  | 1150.267  | 1089.016  |
| X64981    | 2033.925  | 2211.437  | AF174604  | 6990.909  | 6459.261  | AK023449  | 442.57    | 462.798   |
| X75692    | 2024.557  | 2716.619  | AB002379  | 12717.78  | 14018.422 | NM_000134 | 626.21    | 635.938   |
| X64988    | 900.542   | 915.537   | AF113223  | 6583.15   | 7569.938  | AF075108  | 932.847   | 814.165   |
| Y10511    | 18283.342 | 15066.858 | AB046851  | 3466.326  | 3514.089  | NM_005060 | 656.064   | 601.743   |
| AK021832  | 300.85    | 261.458   | NM_005745 | 31323.912 | 36639.125 | AL035369  | 1513.039  | 1320.856  |
| AK021505  | 604.151   | 650.717   | NM_019858 | 61039.762 | 57417.164 | AF075097  | 6598.192  | 4401.026  |
| AK021598  | 5065.459  | 4392.228  | NM_018174 | 4039.043  | 4794.597  | AL133075  | 6613.953  | 4203.608  |
| AK025238  | 1117.641  | 878.54    | NM_014548 | 9007.343  | 9402.521  | AL137630  | 1373.395  | 646.559   |
| AK026416  | 1673.519  | 2633.057  | NM_004437 | 5572.506  | 5979.566  | AL137277  | 10516.489 | 3265.149  |
| AK025797  | 2173.306  | 1997.129  | AK025875  | 3906.106  | 4252.284  | BC023609  | 836.747   | 581.328   |
| AK000853  | 453.332   | 643.073   | BC014152  | 63785.832 | 58248.277 | AK023264  | 660.329   | 1051.339  |
| AK000085  | 929.369   | 1242.715  | NM_012418 | 1939.481  | 2223.616  | AK024457  | 9671.401  | 13639.263 |
| AK000019  | 1114.766  | 1137.493  | NM_000226 | 2496.24   | 1658.13   | AK026894  | 1169.696  | 1186.926  |
| AK000645  | 762.097   | 1081.939  | AB037779  | 63181.816 | 55329.539 | AF161369  | 4329.669  | 3313.809  |
| AK000893  | 397.305   | 488.001   | NM_000655 | 2250.571  | 1969.617  | AK027176  | 6528.223  | 4516.298  |
| AK024156  | 2666.445  | 3606.869  | NM_000393 | 1518.393  | 663.276   | AF073328  | 879.073   | 654.638   |
| AF086288  | 2573.24   | 2719.992  | NM_000889 | 6996.05   | 1792.047  | AF129266  | 459.81    | 360.33    |
| AF119866  | 586.517   | 587.54    | NM_005761 | 1608.693  | 1263.516  | Y12019    | 3573.925  | 2487.794  |
| NM_016944 | 699.819   | 574.533   | NM_012339 | 2568.569  | 1493.99   | AF147418  | 476.307   | 367.855   |
| AK023109  | 1964.82   | 1836.222  | NM_005787 | 32539.041 | 27624.32  | AK021898  | 2133.479  | 1305.653  |
| NM_005293 | 3288.962  | 4084.92   | NM_002143 | 7647.027  | 8105.769  | AK022024  | 1442.292  | 689.632   |
| S50185    | 988.343   | 1261.732  | AF284421  | 54174.348 | 49432.637 | AK022301  | 647.183   | 407.836   |
| AF133332  | 6522.572  | 7707.534  | NM_006048 | 12862.722 | 13821.02  | AK021948  | 2520.636  | 1242.186  |
| AK022805  | 3677.195  | 2970.415  | NM_006360 | 59897.383 | 58118.848 | AF230317  | 1748.947  | 3417.816  |
| NM_017503 | 1165.203  | 865.046   | NM_003968 | 13451.807 | 15799.053 | AK023806  | 3304.323  | 3861.381  |
| AK024606  | 1590.411  | 996.02    | NM_002786 | 872.591   | 789.232   | Y16696    | 16592.477 | 12118.926 |
| NM_016417 | 20534.473 | 24921.775 | NM_002810 | 60681.512 | 59117.699 | AK026094  | 3143.974  | 2615.044  |
| NM_019108 | 2003.297  | 3555.111  | NM_003343 | 42011.316 | 46805.09  | AF161344  | 10536.616 | 6828.718  |
| L10147    | 16357.705 | 13956.621 | NM_002789 | 57650.16  | 54871.523 | AF086027  | 904.874   | 722.814   |
| AL080118  | 6564.843  | 6612.967  | NM_003470 | 30588.133 | 32824.594 | NM_001207 | 54496.078 | 39238.984 |
| AL049378  | 2543.236  | 2307.684  | AL080137  | 2847.492  | 3962.066  | AK023655  | 2950.195  | 2635.599  |

|           |           |           |           |           |           |           |           |           |
|-----------|-----------|-----------|-----------|-----------|-----------|-----------|-----------|-----------|
| L09086    | 1495.397  | 1661.768  | NM_017679 | 13142.093 | 12619.71  | AF075045  | 1633.501  | 1430.013  |
| L37702    | 7816.306  | 9550.439  | AF155103  | 9131.707  | 8217.901  | NM_00663E | 5975.325  | 10334.403 |
| AK022812  | 283.117   | 608.805   | NM_017704 | 7037.073  | 7080.867  | X14675    | 1800.081  | 1567.386  |
| AF238318  | 1024.267  | 731.003   | BC006359  | 8992.066  | 9728.672  | AF161364  | 522.722   | 509.82    |
| U79301    | 1865.043  | 1836.349  | AK026127  | 3926.213  | 4311.466  | AF075075  | 761.632   | 676.845   |
| AK022260  | 4247.407  | 3055.004  | BC016062  | 38814.527 | 42766.055 | NM_018304 | 3183.286  | 1090.529  |
| M32219    | 13425.926 | 14483.612 | NM_002814 | 9449.739  | 9228.647  | NM_016472 | 641.298   | 1444.076  |
| BC018868  | 2295.516  | 1952.089  | NM_012250 | 32939.75  | 36223.332 | AF086064  | 933.015   | 2713.777  |
| AF086174  | 983.689   | 581.798   | NM_006283 | 18570.125 | 11413.083 | AK023042  | 1276.908  | 1451.489  |
| AF007128  | 10488.735 | 9023.814  | Y08267    | 5352.12   | 1579.072  | AK026429  | 264.034   | 460.314   |
| AJ012498  | 1926.657  | 1944.477  | AB016898  | 2037.673  | 594.613   | NM_016550 | 3875.876  | 3057.335  |
| NM_005973 | 13036.476 | 11114.391 | NM_017530 | 10988.547 | 5028.162  | AK024813  | 5518.373  | 3681.869  |
| X04547    | 2271.773  | 1630.691  | AB029030  | 528.412   | 504.729   | AJ227909  | 20872.629 | 18574.014 |
| AK025823  | 4071.859  | 5398.786  | AL360183  | 4440.292  | 3515.724  | AK021880  | 503.586   | 449.987   |
| AK026691  | 1450.79   | 1581.805  | AK027046  | 2193.031  | 2680.256  | AK024107  | 472.432   | 541.082   |
| AL359941  | 1650.552  | 1229.465  | NM_003113 | 8595.071  | 7579.918  | NM_01418E | 6924.988  | 5916.917  |
| U52076    | 1140.184  | 1249.658  | NM_01657E | 11012.875 | 12875.734 | AF056442  | 1467.326  | 1373.136  |
| AF035278  | 1195.029  | 1417.305  | NM_003822 | 1390.467  | 1567.621  | AK024752  | 30076.271 | 19753.938 |
| AL050202  | 1101.792  | 886.89    | NM_015832 | 27705.734 | 31574.91  | BG117194  | 586.887   | 481.304   |
| U32999    | 6841.497  | 7223.539  | NM_00132E | 28343.736 | 30368.914 | AF131859  | 3646.109  | 1991.295  |
| U66052    | 1574.105  | 1292.901  | NM_014319 | 6009.313  | 7357.917  | AF086118  | 3970.903  | 1180.991  |
| NM_000857 | 801.141   | 1075.844  | NM_00486E | 16667.746 | 18010.578 | NM_01413E | 732.16    | 327.672   |
| L20688    | 44235.445 | 44213.348 | NM_017923 | 1966.792  | 2991.431  | AK025044  | 1666.767  | 546.064   |
| X69111    | 19920.129 | 14522.933 | AB019566  | 63018.582 | 68707.719 | D26362    | 791.674   | 812.902   |
| AF252283  | 1299.257  | 882.403   | NM_000981 | 61431.285 | 63677.859 | NM_013452 | 2887.417  | 2343.062  |
| AB037799  | 6038.336  | 5114.927  | NM_002047 | 52051.102 | 50759.879 | AY009402  | 2914.265  | 2162.743  |
| AB007950  | 3747.544  | 2919.584  | NM_001031 | 62019.836 | 61164.039 | NM_018451 | 750.339   | 495.827   |
| AL133111  | 851.463   | 637.431   | NM_00720E | 36333.828 | 42236.125 | NM_012443 | 386.826   | 340.206   |
| AK025593  | 3740.024  | 3285.218  | NM_00099E | 62687.957 | 62478.695 | NM_002584 | 3823.254  | 2677.161  |
| AB018304  | 3634.451  | 3476.011  | NM_00098E | 44134.02  | 46844.809 | AK022199  | 685.065   | 580.762   |
| NM_007061 | 8955.887  | 7558.861  | BF130622  | 56876.137 | 56649.422 | NM_006211 | 680.299   | 673.585   |
| NM_00108E | 3154.239  | 6089.274  | NM_00385E | 15347.258 | 6302.613  | NM_003524 | 5506.671  | 2800.741  |
| BC015991  | 10691.721 | 11328.197 | NM_00023E | 1698.156  | 635.736   | AK021438  | 335.865   | 396.49    |
| U94902    | 1124.269  | 1005.627  | NM_002903 | 58345.547 | 29095.686 | NM_005913 | 604.197   | 550.496   |
| U46214    | 1198.653  | 1121.672  | NM_001861 | 3688.232  | 1819.003  | S39891    | 1844.143  | 999.169   |
| NM_000310 | 16651.371 | 15935.654 | AK025558  | 19186.436 | 13873.199 | R17536    | 1616.014  | 710.767   |
| AF161343  | 3770.802  | 3992.041  | AK024355  | 4196.189  | 4290.587  | AK021624  | 494.176   | 367.571   |
| NM_00476E | 2236.851  | 3726.104  | NM_001864 | 61519.059 | 59383.836 | AF278605  | 4081.28   | 633.939   |
| AF009307  | 599.529   | 699.259   | NM_003477 | 36868.738 | 38914.695 | NM_006497 | 26265.631 | 28129.199 |
| AK022246  | 2255.679  | 2016.457  | NM_002654 | 59610.16  | 59741.539 | AF196976  | 5525.774  | 3815.941  |
| X75684    | 2165.205  | 2573.077  | NM_01547E | 3159.856  | 4112.075  | AL050379  | 1512.51   | 1372.933  |
| D17200    | 633.095   | 529.233   | NM_020382 | 13415.916 | 14565.836 | NM_003161 | 2641.386  | 2385.182  |
| AF113701  | 24351.279 | 23380.359 | NM_018267 | 550.526   | 758.209   | NM_00545E | 365.352   | 306.468   |
| Y11158    | 5240.418  | 4157.895  | NM_007192 | 40470.777 | 43455.211 | NM_01449E | 786.503   | 646.777   |
| NM_006771 | 17564.092 | 11260.086 | AB002337  | 30551.369 | 31063.002 | NM_01621E | 28862.99  | 20658.164 |
| NM_01471E | 2976.334  | 3098.424  | NM_014933 | 19245.367 | 21136.887 | AK026919  | 704.552   | 738.938   |
| NM_000632 | 2214.201  | 1983.691  | NM_00307E | 56543.258 | 57606.922 | NM_001501 | 11181.601 | 6512.759  |
| AB002298  | 1792.45   | 1994.881  | NM_00638E | 1623.413  | 1896.159  | NM_00617E | 32789.734 | 21711.818 |
| AK024488  | 2051.533  | 2005.484  | AK024250  | 2108.873  | 1167.546  | AL137459  | 1447.358  | 1153.268  |
| AK023249  | 56411.211 | 54314.496 | NM_00345E | 22322.428 | 21241.232 | AB037812  | 356.019   | 248.542   |
| NM_007360 | 462.414   | 647.159   | NM_00258E | 13721.621 | 13079.162 | AB007932  | 4629.175  | 2790.203  |
| NM_017442 | 10078.84  | 9179.76   | AB029016  | 4235.647  | 3563.022  | AF219257  | 31819.283 | 16842.096 |
| AF055084  | 497.301   | 418.402   | AK000445  | 794.445   | 580.415   | NM_00397E | 733.231   | 584.91    |

|           |           |           |           |           |           |           |           |           |
|-----------|-----------|-----------|-----------|-----------|-----------|-----------|-----------|-----------|
| NM_000743 | 3686.644  | 3855.429  | NM_002701 | 4663.153  | 1774.579  | NM_002561 | 20100.801 | 7913.255  |
| NM_007218 | 4274.906  | 3786.126  | NM_005693 | 2022.205  | 1744.569  | NM_006103 | 40257.82  | 14227.363 |
| Z25436    | 2585.564  | 2382.292  | X97303    | 15176.406 | 3961.092  | NM_000805 | 607.52    | 209.526   |
| NM_005275 | 4994.864  | 3778.465  | AJ290954  | 3738.183  | 3218.726  | AL359933  | 14814.967 | 2701.176  |
| NM_003844 | 8183.779  | 6557.324  | AK025451  | 7520.326  | 7711.995  | NM_002607 | 695.527   | 1435.021  |
| NM_002005 | 14015.398 | 10749.323 | NM_002783 | 11411.912 | 12479.244 | AF116712  | 411.897   | 411.109   |
| NM_012324 | 2686.317  | 3004.21   | X52005    | 48246.078 | 45278.727 | AF116626  | 4094.746  | 3084.854  |
| AK000039  | 1377.722  | 1324.989  | NM_001047 | 2811.156  | 2955.994  | NM_001760 | 20360.576 | 13748.183 |
| AL137352  | 1480.944  | 1346.301  | AK024396  | 25773.322 | 31335.586 | NM_002527 | 1039.374  | 1182.478  |
| NM_014749 | 1973.316  | 2054.781  | U58514    | 6839.382  | 8230.578  | NM_005890 | 1386.516  | 1037.543  |
| D49958    | 776.083   | 598.354   | M57627    | 2045.725  | 2668.092  | NM_007065 | 38732.438 | 22527.951 |
| NM_004489 | 8019.626  | 8555.406  | W74254    | 2535.42   | 3479.016  | AF149785  | 8314.148  | 4803.871  |
| BF240063  | 1394.878  | 1293.952  | M58603    | 14738.195 | 15348.055 | NM_012068 | 10897.274 | 7073.055  |
| BI461699  | 2007.673  | 2184.047  | AA443286  | 5980.67   | 4475.664  | NM_004064 | 6617.414  | 4991.239  |
| AK090409  | 461.042   | 655.696   | AB003334  | 21117.199 | 22189.244 | NM_001256 | 4064.647  | 3625.927  |
| AF172264  | 1583.748  | 1130.168  | AW276315  | 5558.671  | 5936.33   | NM_014704 | 6207.481  | 4430.763  |
| U80756    | 50289.496 | 44153.098 | AA490737  | 15348.438 | 11917.01  | NM_020205 | 629.306   | 478.691   |
| NM_018161 | 3147.93   | 2713.697  | AI878886  | 52075.527 | 53897.465 | NM_001227 | 621.192   | 501.499   |
| NM_005248 | 35014.113 | 26560.371 | BG697179  | 36284.695 | 40543.84  | NM_001191 | 12431.66  | 3390.142  |
| NM_004810 | 570.109   | 735.467   | NM_002136 | 59647.098 | 60122.301 | NM_013342 | 1172.681  | 299.79    |
| AL117629  | 6460.003  | 7495.57   | BM012504  | 32072.865 | 35406.754 | NM_004279 | 5488.204  | 3254.887  |
| NM_002595 | 2644.314  | 2197.175  | AA664145  | 7238.913  | 5750.756  | NM_004851 | 14649.338 | 10066.45  |
| NM_015726 | 2761.776  | 2678.066  | X72308    | 62046.484 | 54522.539 | NM_001908 | 5142      | 4110.112  |
| AF174604  | 2761.621  | 2151.06   | T50790    | 7426.421  | 5373.363  | NM_000285 | 13114.612 | 8140.493  |
| AB002379  | 2208.996  | 2436.981  | R48168    | 19715.465 | 11779.603 | NM_005911 | 44304.02  | 39655.879 |
| AF113223  | 5710.604  | 5261.477  | BC008837  | 3169.804  | 828.29    | AV702690  | 1762.366  | 1312.343  |
| AB046851  | 2715.314  | 2049.681  | NM_006819 | 59070.918 | 57816.164 | AL117452  | 11089.065 | 7663.786  |
| NM_005745 | 22152.826 | 18513.557 | NM_014744 | 3570.475  | 4146.807  | NM_012230 | 1285.148  | 1243.971  |
| NM_019858 | 27324.252 | 23700.895 | AF146759  | 5836.362  | 6411.102  | NM_014038 | 8095.68   | 8493.814  |
| NM_018174 | 3448.855  | 2378.813  | AB032993  | 12908.979 | 10792.498 | NM_002061 | 4847.387  | 10469.977 |
| NM_014548 | 3825.118  | 2853.293  | NM_000854 | 10044.072 | 9485.525  | AF169974  | 3479.718  | 2468.314  |
| NM_004437 | 5388.361  | 6585.812  | NM_001901 | 1374.647  | 1469.197  | NM_004522 | 643.093   | 391.182   |
| AK025875  | 4110.878  | 4140.494  | AL117423  | 20255.758 | 23405.986 | NM_005733 | 1381.449  | 898.42    |
| BC014152  | 55510.43  | 57008.883 | NM_006140 | 1206.584  | 1300.585  | NM_018138 | 3127.013  | 1485.623  |
| NM_012418 | 1583.275  | 2807.401  | NM_007003 | 828.723   | 927.687   | NM_019619 | 2222.384  | 858.703   |
| NM_000226 | 1289.648  | 1237.701  | NM_002084 | 5875.969  | 6399.85   | AF183411  | 1759.688  | 526.113   |
| AB037779  | 18060.752 | 22259.502 | D16892    | 19017.1   | 20045.094 | NM_005653 | 1503.843  | 1267.193  |
| NM_000655 | 1433.376  | 1417.527  | NM_004750 | 6983.072  | 7925.139  | NM_014553 | 3044.542  | 2538.967  |
| NM_000393 | 1258.113  | 1480.91   | NM_007295 | 13157.717 | 13629.145 | NM_003440 | 937.378   | 635.813   |
| NM_000889 | 6393.262  | 6063.261  | AK023317  | 873.146   | 883.45    | NM_004698 | 6368.865  | 4027.127  |
| NM_005761 | 963.093   | 888.316   | NM_003651 | 48283.16  | 52234.012 | U41387    | 30989.707 | 22591.057 |
| NM_012339 | 2767.032  | 2535.432  | NM_014012 | 1872.568  | 2016.947  | NM_004516 | 14186.954 | 12686.637 |
| NM_005787 | 27489.48  | 29512.848 | NM_000418 | 5373.114  | 6693.35   | NM_006513 | 2757.807  | 2441.081  |
| NM_002143 | 8359.867  | 13537.912 | NM_013246 | 4597.682  | 4367.836  | NM_003685 | 18429.668 | 10380.53  |
| AF284421  | 3052.86   | 3807.49   | NM_018431 | 1241.398  | 1347.686  | NM_006295 | 7166.295  | 3187.796  |
| NM_006048 | 4487.126  | 4750.833  | NM_000591 | 6625.012  | 6220.131  | NM_001540 | 3106.716  | 1230.565  |
| NM_006360 | 52560.859 | 47848.605 | NM_000565 | 4589.247  | 3593.552  | NM_012111 | 16686.508 | 3779.051  |
| NM_003968 | 9924.088  | 9397.281  | NM_002019 | 1072.037  | 1243.944  | NM_004470 | 18302.652 | 3740.092  |
| NM_002786 | 825.062   | 1555.956  | AF253318  | 5555.914  | 3861.63   | BF036874  | 2199.585  | 1917.482  |
| NM_002810 | 21357.449 | 23086.225 | NM_017767 | 25599.648 | 10727.429 | BE888487  | 352.172   | 323.068   |
| NM_003343 | 22224.842 | 17036.549 | NM_003262 | 7714.117  | 6889.946  | AF182419  | 4627.059  | 4050.311  |
| NM_002789 | 41259.148 | 36157.754 | NM_020125 | 1167.991  | 1448.146  | NM_004293 | 902.203   | 2466.836  |
| NM_003470 | 21448.893 | 18134.623 | AK022832  | 4730.651  | 5911.866  | NM_007016 | 2521.949  | 1937.24   |

|           |           |           |           |           |           |           |           |           |
|-----------|-----------|-----------|-----------|-----------|-----------|-----------|-----------|-----------|
| AL080137  | 1938.824  | 1712.243  | NM_017784 | 2531.246  | 2450.952  | NM_002703 | 8473.021  | 7021.22   |
| NM_017679 | 2273.801  | 1702.805  | NM_014641 | 9459.184  | 8622.385  | NM_005375 | 2297.819  | 1663.984  |
| AF155103  | 6000.752  | 7302.491  | NM_004462 | 13174.918 | 13123.559 | NM_005985 | 16591.787 | 10976.012 |
| NM_017704 | 4863.47   | 5940.332  | AB037739  | 698.986   | 675.173   | NM_015906 | 6684.351  | 4993.089  |
| BC006359  | 9763.509  | 12657.76  | NM_000343 | 1442.34   | 1854.875  | AK023759  | 4689.732  | 3552.425  |
| AK026127  | 4383.837  | 6567.858  | NM_020246 | 6103.122  | 6955.635  | L25270    | 35299.379 | 21450.688 |
| BC016062  | 26664.693 | 33799.168 | NM_016354 | 7347.199  | 7670.891  | AB033111  | 1505.98   | 829.941   |
| NM_002814 | 7773.763  | 8554.41   | NM_001044 | 2146.795  | 2620.924  | AJ276316  | 1322.478  | 524.785   |
| NM_012250 | 19650.553 | 19595.35  | NM_004644 | 4048.317  | 4346.829  | AF229246  | 30102.648 | 6325.902  |
| NM_006283 | 13225.636 | 13867.382 | AV681967  | 2959.9    | 3131.033  | X84370    | 10635.979 | 10240.859 |
| Y08267    | 2943.406  | 3648.955  | NM_018250 | 3439.271  | 3161.316  | NM_004035 | 948.427   | 1127.5    |
| NM_017530 | 2544.877  | 2232.68   | NM_016553 | 22123.873 | 24407.633 | NM_000508 | 1081.932  | 1795.783  |
| AB029030  | 805.89    | 720.607   | AB023136  | 1849.753  | 2458.298  | AB014558  | 5751.48   | 6346.996  |
| AL360183  | 5040.244  | 5923.278  | NM_003795 | 50273.332 | 48038.746 | NM_006287 | 1197.013  | 1572.725  |
| AK027046  | 2224.258  | 2618.486  | NM_014232 | 7494.378  | 3149.765  | NM_000118 | 5520.712  | 4575.121  |
| NM_003113 | 6440.167  | 6347.174  | NM_005701 | 3435.03   | 1658.309  | NM_000913 | 1294.58   | 1325.607  |
| NM_016578 | 8155.148  | 7587.936  | NM_001231 | 1101.332  | 712.729   | NM_001298 | 50200.375 | 49299.078 |
| NM_003822 | 945.705   | 1249.807  | AB023139  | 17317.947 | 15015.774 | BG325046  | 7040.846  | 5713.331  |
| NM_015832 | 18556.684 | 18732.742 | NM_017885 | 9830.427  | 9378.105  | AI351740  | 22519.5   | 15641.693 |
| NM_001326 | 22199.039 | 24891.451 | D80004    | 1637.336  | 2041.712  | AA444051  | 16499.869 | 13904.677 |
| NM_014319 | 3155.093  | 3423.677  | X63966    | 579.285   | 1014.212  | NM_007164 | 24014.291 | 19818.301 |
| NM_004865 | 11627.974 | 11861.231 | NM_000946 | 8829.978  | 10214.274 | BE783826  | 50068.156 | 55761.5   |
| NM_017923 | 1671.684  | 1647.357  | NM_016070 | 9346.058  | 11132.659 | X04827    | 2307.365  | 2132.718  |
| AB019566  | 58278.578 | 60654.863 | NM_016390 | 6504.244  | 5918.134  | H07088    | 3003.345  | 1833.183  |
| NM_000981 | 54731.762 | 58239.066 | NM_016101 | 16558.906 | 15757.031 | AI004656  | 1990.898  | 942.124   |
| NM_002047 | 39663.488 | 41691.434 | NM_005859 | 61343.523 | 58053.387 | NM_006068 | 2069.81   | 2109.97   |
| NM_001031 | 52987.391 | 61096.051 | NM_020313 | 3626.692  | 3934.82   | NM_002704 | 682.112   | 822.487   |
| NM_007208 | 38350.625 | 54685.172 | NM_014628 | 9251.924  | 12207.755 | U16752    | 1432.826  | 2092.747  |
| NM_000995 | 53874.625 | 57806.082 | AK025630  | 5114.172  | 5941.804  | M30134    | 1119.195  | 2910.616  |
| NM_000985 | 47266.195 | 56609.621 | AK022907  | 31416.719 | 34914.117 | NM_002038 | 15808.184 | 11859.135 |
| BF130622  | 35212.703 | 34562.191 | NM_014793 | 5936.705  | 6652.734  | NM_005725 | 24879.52  | 22308.674 |
| NM_003859 | 13506.638 | 17229.781 | NM_004245 | 10771.035 | 2974.276  | NM_015493 | 2914.619  | 2946.298  |
| NM_000236 | 1534.707  | 2027.727  | NM_003241 | 3789.491  | 3083.443  | NM_003747 | 2822.333  | 3261.948  |
| NM_002903 | 14817.152 | 11668.812 | NM_002685 | 10048.992 | 11474.21  | AB037744  | 2157.265  | 2062.22   |
| NM_001861 | 4012.441  | 4031.441  | AK024504  | 4821.019  | 2478.787  | AF141901  | 420.538   | 847.76    |
| AK025558  | 10492.331 | 11303.426 | AF039023  | 6389.237  | 7699.666  | NM_007008 | 1246.542  | 1570.195  |
| AK024355  | 4426.989  | 5091.341  | NM_005511 | 7779.202  | 6964.95   | AL109708  | 933.492   | 1135.306  |
| NM_001864 | 51780.508 | 55671.918 | NM_014698 | 55103.648 | 54829.402 | L29143    | 3432.111  | 5579.409  |
| NM_003477 | 31113.424 | 27968.611 | NM_018475 | 8822.734  | 4347.191  | AF234532  | 2834.553  | 2262.471  |
| NM_002654 | 58094.047 | 57356.387 | AK025451  | 6435.368  | 5817.429  | NM_002418 | 1570.6    | 1448.278  |
| NM_015478 | 863.005   | 794.803   | NM_002783 | 10592.646 | 11743.816 | NM_002090 | 658.894   | 406.385   |
| NM_020382 | 10256.781 | 10809.201 | X52005    | 50619.91  | 49233     | NM_005208 | 7558.915  | 14610.667 |
| NM_007192 | 24237.705 | 17826.783 | NM_001047 | 2353.681  | 2924.398  | NM_006117 | 6471.487  | 6129.199  |
| AB002337  | 18391.844 | 13451.844 | AK024396  | 20199.117 | 23406.57  | NM_002225 | 1278.685  | 1695.792  |
| NM_014933 | 14038.699 | 12198     | U58514    | 5750.338  | 6780.379  | NM_006225 | 541.539   | 761.966   |
| NM_003076 | 46911.18  | 46148.793 | M57627    | 2731.797  | 2333.898  | NM_015415 | 27749.641 | 23015.332 |
| NM_006385 | 951.303   | 1663.259  | W74254    | 3570.33   | 3546.389  | NM_004897 | 2824.19   | 3173.054  |
| AK024250  | 2109.833  | 3545.532  | M58603    | 16191.818 | 17760.354 | NM_002555 | 1569.601  | 1429.706  |
| NM_003456 | 7923.188  | 12145.503 | AA443286  | 7023.655  | 6937.798  | AF225418  | 1718.785  | 1649.468  |
| NM_002585 | 2612.909  | 2790.394  | AB003334  | 25348.129 | 22082.672 | NM_000305 | 1795.284  | 1960.452  |
| AB029016  | 4754.513  | 6683.229  | AW276315  | 5734.825  | 6885.971  | NM_004528 | 19862.758 | 18756.01  |
| AK000445  | 706.356   | 918.762   | AA490737  | 11448.186 | 10963.659 | AK026381  | 24280.938 | 25438.537 |
| NM_002701 | 1433.779  | 1683.436  | BG697179  | 43051.688 | 50264.082 | AF004711  | 503.635   | 1363.429  |

|           |           |           |           |           |           |           |           |           |
|-----------|-----------|-----------|-----------|-----------|-----------|-----------|-----------|-----------|
| NM_005693 | 2107.754  | 2703.381  | NM_002136 | 59436.141 | 57461.203 | AK023107  | 5802.132  | 3834.237  |
| X97303    | 12663.498 | 12152.197 | BM012504  | 28457.602 | 27453.268 | NM_000647 | 1481.356  | 724.807   |
| L32162    | 570.461   | 544.821   | AA664145  | 6533.465  | 4696.906  | AF150735  | 7596.881  | 5810.913  |
| NM_006148 | 524.97    | 652.929   | X72308    | 58282.734 | 56391.324 | NM_018183 | 1558.379  | 1902.839  |
| AJ290954  | 2523.444  | 2699.99   | T70999    | 1142.676  | 1560.687  | NM_012382 | 5605.999  | 5437.957  |
| AK025451  | 8855.942  | 11638.255 | T50790    | 9896.438  | 10813.007 | BF038366  | 1245.329  | 1545.501  |
| NM_002783 | 4083.229  | 7113.672  | R48168    | 26369.572 | 26835.551 | NM_002452 | 10171.898 | 8808.387  |
| X52005    | 56036.844 | 41651.891 | AB040954  | 11550.724 | 6727.277  | NM_016440 | 23170.523 | 15116.175 |
| NM_001047 | 2137.155  | 2220.315  | NM_002081 | 2098.988  | 1783.322  | NM_007194 | 2079.02   | 1416.618  |
| AK024396  | 4904.306  | 5913.27   | AF146759  | 3951.598  | 5051.192  | NM_000314 | 6240.207  | 2000.436  |
| U58514    | 5078.132  | 5359.733  | AB032993  | 12338.077 | 10777.168 | AB002369  | 912.219   | 389.77    |
| M57627    | 1856.032  | 2772.358  | NM_000854 | 10840.723 | 11345.294 | AB014558  | 1012.066  | 1626.498  |
| W74254    | 1380.159  | 1102.32   | NM_001901 | 1563.269  | 1516.501  | NM_006287 | 1309.094  | 1273.977  |
| M58603    | 10733.55  | 8706.598  | AL117423  | 14270.393 | 8504.325  | NM_000118 | 4615.094  | 3757.729  |
| AA443286  | 876.447   | 614.719   | NM_006140 | 577.77    | 610.823   | NM_000913 | 990.783   | 1053.693  |
| AB003334  | 13757.897 | 12805.337 | NM_007003 | 528.029   | 705.383   | NM_001298 | 43897.379 | 56602.824 |
| AW276315  | 2350.775  | 2157.896  | NM_002084 | 4018.082  | 4111.349  | BG325046  | 5937.915  | 5645.981  |
| AA490737  | 6238.626  | 5482.051  | D16892    | 20802.045 | 25524.508 | AI351740  | 23988.883 | 22689.705 |
| AI878886  | 50237.563 | 57343.398 | NM_004750 | 8857.579  | 7516.195  | AA444051  | 17172.615 | 16732.879 |
| BG697179  | 24469.516 | 39393.227 | NM_007295 | 16148.054 | 14674.59  | NM_007164 | 26645.24  | 20942.559 |
| NM_002136 | 51788.707 | 55549.152 | AK023317  | 1265.08   | 966.468   | BE783826  | 49330.723 | 62807.035 |
| BM012504  | 13170.875 | 13807.71  | NM_003651 | 46874.035 | 51998.254 | X04827    | 4583.655  | 9871.689  |
| AA664145  | 7048.682  | 6593.779  | NM_014012 | 1959.638  | 1968.587  | H07088    | 3373.973  | 2878.101  |
| X72308    | 12340.364 | 11037.673 | NM_000418 | 5101.3    | 6272.019  | AI004656  | 2238.109  | 1598.365  |
| T50790    | 2797.152  | 4242.58   | NM_013246 | 4333.908  | 4823.306  | BC020596  | 1503.674  | 528.769   |
| R48168    | 18506.232 | 17231.16  | NM_018431 | 1807.403  | 2144.779  | AF116606  | 38009.57  | 13947.763 |
| BC008837  | 2747.505  | 2113.121  | NM_000591 | 7017.262  | 6656.06   | X98922    | 4928.456  | 1741.93   |
| NM_006819 | 47132.25  | 42707.23  | NM_000565 | 4073.939  | 3323.176  | U16752    | 1332.789  | 2120.465  |
| NM_014744 | 2761.185  | 3470.22   | NM_016614 | 580.312   | 471.655   | M30134    | 445.583   | 838.53    |
| AF146759  | 1206.193  | 2001.587  | NM_002019 | 1495.023  | 1399.418  | NM_002038 | 15822.956 | 11779.679 |
| AB032993  | 8938.29   | 9873.128  | AF253318  | 5012.767  | 5340.47   | NM_005728 | 23642.598 | 22712.941 |
| NM_000854 | 7794.538  | 8093.155  | NM_017767 | 31917.572 | 29788.092 | NM_015493 | 1495.178  | 2094.351  |
| NM_001901 | 1421.459  | 1442.021  | AJ290954  | 3865.641  | 2255.256  | NM_003747 | 916.644   | 1623.352  |
| AL117423  | 9955.732  | 11899.159 | AK022832  | 4933.405  | 5810.823  | AB037744  | 2319.082  | 2913.364  |
| NM_006140 | 475.901   | 674.488   | NM_017784 | 2499.201  | 2960.216  | AF141901  | 466.408   | 1041.738  |
| NM_007003 | 699.742   | 915.687   | NM_014641 | 6638.923  | 2531.543  | NM_007008 | 903.059   | 1520.921  |
| NM_002084 | 4278.918  | 4369.594  | NM_004462 | 9544.634  | 5950.942  | AL109708  | 1118.17   | 1357.247  |
| D16892    | 14617.046 | 11205.679 | NM_000343 | 1943.932  | 2201.606  | L29143    | 3304.944  | 3442.601  |
| NM_004750 | 2803.307  | 3132.255  | NM_020246 | 7307.563  | 6617.621  | AF234532  | 2841.115  | 2528.938  |
| NM_007295 | 5656.458  | 5519.043  | NM_016354 | 7621.36   | 7028.463  | NM_002418 | 1200.367  | 1151.672  |
| AK023317  | 485.713   | 916.979   | NM_001044 | 2516.627  | 2134.758  | NM_002090 | 879.603   | 907.049   |
| NM_003651 | 47228.176 | 48544.027 | NM_004644 | 3446.151  | 3570.283  | NM_004485 | 713.016   | 382.809   |
| NM_014012 | 953.97    | 1613.534  | AV681967  | 2957.096  | 3426.111  | NM_013296 | 6505.848  | 2259.604  |
| NM_000418 | 5392.458  | 7036.075  | NM_018250 | 3277.603  | 3152.858  | NM_002225 | 1741.114  | 2529.112  |
| NM_013246 | 4073.291  | 5787.116  | NM_016553 | 10658.123 | 7766.558  | NM_015415 | 30037.547 | 24858.186 |
| NM_018431 | 636.886   | 594.251   | AB023136  | 1367.451  | 1287.376  | NM_004897 | 3181.869  | 3563.865  |
| NM_000591 | 4698.649  | 4927.758  | NM_003795 | 57072.555 | 54441.293 | NM_002555 | 1417.732  | 1457.957  |
| NM_000565 | 2243.454  | 2031.33   | NM_014232 | 8152.207  | 4775.58   | AF225418  | 1426.985  | 1637.863  |
| NM_016614 | 506.896   | 621.258   | NM_005701 | 3808.543  | 2303.883  | NM_000309 | 2039.78   | 3051.451  |
| NM_002019 | 1245.236  | 1736.466  | NM_001231 | 1215.734  | 1203.136  | AK026381  | 28801.684 | 32629.146 |
| AF253318  | 555.562   | 472.349   | NM_006819 | 57811.145 | 56248.922 | AK023107  | 6444.92   | 5863.697  |
| NM_017767 | 11424.247 | 8487.049  | NM_014744 | 3888.002  | 2422.356  | NM_000647 | 1630.674  | 786.922   |
| NM_003262 | 5591.575  | 6066.314  | D80004    | 1438.689  | 1391.792  | NM_017604 | 2556.283  | 1189.873  |

|           |           |           |           |           |           |           |           |           |
|-----------|-----------|-----------|-----------|-----------|-----------|-----------|-----------|-----------|
| NM_020125 | 1225.212  | 1218.343  | X63966    | 658.979   | 1166.409  | NM_017735 | 14353.385 | 5794.016  |
| AK022832  | 3923.193  | 4509.676  | NM_000946 | 9241.246  | 9836.007  | NM_016557 | 1752.322  | 803.734   |
| NM_017784 | 2885.64   | 2857.286  | NM_016070 | 7978.991  | 8688.954  | NM_000623 | 1372.185  | 485.968   |
| U10991    | 251.854   | 715.922   | NM_016390 | 6687.125  | 6404.889  | AF150735  | 7173.158  | 5992.552  |
| NM_014641 | 7546.407  | 10329.232 | NM_016101 | 16082.024 | 17144.422 | NM_018183 | 1438.511  | 1637.045  |
| NM_004462 | 8821.933  | 7702.515  | NM_005859 | 63269.969 | 64473.203 | NM_012382 | 5790.407  | 6835.981  |
| AB037739  | 671.643   | 440.174   | NM_020313 | 2498.486  | 2742.062  | NM_012304 | 908.172   | 1051.639  |
| NM_000343 | 1314.658  | 1593.181  | NM_014628 | 9729.336  | 14036.03  | NM_016440 | 30626.482 | 27867.125 |
| NM_020246 | 3900.708  | 3904.924  | AK025630  | 8658.127  | 8302.034  | NM_007194 | 2319.364  | 2181.581  |
| NM_016354 | 2711.223  | 2614.24   | AK022907  | 31073.063 | 30271.107 | NM_000314 | 7086.173  | 3620.385  |
| NM_001044 | 1881.793  | 2858.141  | NM_014793 | 6835.583  | 8096.521  | AB002369  | 1062.69   | 1344.231  |
| NM_004644 | 2078.798  | 3342.003  | NM_004245 | 20039.461 | 23500.658 | S74620    | 944.398   | 797.884   |
| AV681967  | 3419.48   | 7026.268  | NM_003241 | 6504.541  | 7001.893  | AF305239  | 1368.579  | 756.568   |
| NM_018250 | 2650.229  | 2651.003  | NM_002685 | 7956.13   | 7995.865  | NM_002827 | 11543.88  | 3679.62   |
| NM_016553 | 17427.432 | 16552.963 | AK024504  | 4476.226  | 3926.983  | BF035425  | 53117.625 | 42000.547 |
| AB023136  | 1155.154  | 1293.784  | AF039023  | 5747.648  | 6399.376  | NM_000155 | 51007.977 | 46869.684 |
| NM_003795 | 52376.398 | 57040.914 | NM_005511 | 8877.497  | 9026.651  | NM_014635 | 687.353   | 252.956   |
| NM_014232 | 7967.946  | 6671.12   | NM_014695 | 57677.371 | 63326.102 | NM_006287 | 1560.846  | 1765.009  |
| NM_005701 | 3459.91   | 2739.234  | NM_018475 | 11082.207 | 8441.453  | NM_000118 | 5315.907  | 5239.824  |
| NM_001231 | 762.873   | 596.004   | NM_003262 | 7492.236  | 6831.7    | NM_000913 | 776.882   | 693.219   |
| AB023139  | 13852.282 | 13519.048 | NM_020125 | 1316.56   | 869.792   | NM_001295 | 49047.48  | 54449.988 |
| NM_017885 | 9511.361  | 8311.058  | X52005    | 53678.969 | 54516.129 | BG325046  | 5147.153  | 4490.576  |
| D80004    | 1689.898  | 2772.48   | NM_001047 | 2642.924  | 3187.507  | AI351740  | 21940.867 | 18810.713 |
| X63966    | 726.506   | 460.613   | AK024396  | 25952.52  | 29564.629 | AA444051  | 16744.123 | 16049.876 |
| NM_000946 | 6202.647  | 7007.316  | U58514    | 5731.352  | 5566.678  | NM_007164 | 30136.404 | 34360.039 |
| NM_016070 | 4444.841  | 5292.914  | M57627    | 2073.403  | 2104.237  | BE783826  | 51689.875 | 66232.414 |
| NM_016390 | 4752.046  | 5423.111  | W74254    | 2049.866  | 777.885   | X04827    | 2740.406  | 3210.903  |
| NM_016101 | 12131.231 | 11671.231 | M58603    | 13843.632 | 12821.26  | H07088    | 4497.205  | 5846.661  |
| NM_005859 | 11089.604 | 10222.937 | AA443286  | 5999.832  | 5144.402  | AI004656  | 2359.671  | 3136.206  |
| NM_020313 | 1483.75   | 894.08    | AB003334  | 19571.068 | 18408.467 | BC020596  | 1592.537  | 1455.56   |
| NM_014628 | 6912.904  | 7279.648  | AW276315  | 6164.192  | 7817.124  | AF116606  | 46441.566 | 47112.785 |
| AK025630  | 4331.589  | 4619.682  | AA490737  | 16002.1   | 17377.594 | X98922    | 5327.304  | 2974.69   |
| AL365404  | 10844.434 | 13335.934 | BG697179  | 35132.992 | 31936.023 | AK098435  | 5316.024  | 2463.186  |
| AK022907  | 6856.82   | 9026.548  | NM_002136 | 57945.113 | 59768.367 | AK092872  | 2969.884  | 1462.127  |
| NM_014793 | 1605.289  | 1984.217  | BM012504  | 43152.043 | 43998.449 | AF230496  | 651.313   | 764.984   |
| NM_004245 | 1465.6    | 1122.782  | AA664145  | 12607.493 | 12506.067 | M16801    | 826.885   | 533.201   |
| NM_003241 | 761.353   | 622.122   | X72308    | 56504.09  | 60275.953 | NM_013334 | 13204.809 | 3715.104  |
| NM_002685 | 6198.907  | 4330.943  | T70999    | 1414.852  | 1961.425  | NM_007005 | 736.849   | 980.557   |
| AK024504  | 4428.163  | 4654.069  | T50790    | 13532.745 | 13943.666 | AL109708  | 782.992   | 642.633   |
| AF039023  | 6082.168  | 8439.96   | R48168    | 29421.299 | 33489.547 | L29143    | 2170.724  | 2169.328  |
| NM_005511 | 4983.665  | 4872.607  | AB040954  | 16877.596 | 19092.811 | AF234532  | 2525.425  | 2170.737  |
| NM_014695 | 7811.437  | 6359.046  | NM_002081 | 2631.853  | 3312.765  | NM_002415 | 1000.804  | 1150.173  |
| NM_018475 | 9555.642  | 7126.639  | NM_006141 | 304.015   | 357.626   | NM_002090 | 591.688   | 971.22    |
| AK025451  | 7886.682  | 8421.42   | AB023139  | 18340.848 | 15316.669 | NM_004485 | 756.455   | 1412.539  |
| NM_002783 | 2999.871  | 3663.618  | NM_017885 | 9508.886  | 4361.824  | NM_013296 | 11732.757 | 17179.01  |
| X52005    | 56836.262 | 46513.484 | D16892    | 18443.957 | 18648.061 | AL117478  | 6921.828  | 14282.011 |
| NM_001047 | 3020.483  | 4295.797  | NM_004750 | 7419.43   | 8229.813  | NM_005307 | 7401.867  | 7348.967  |
| AK024396  | 4934.811  | 6125.449  | NM_007295 | 11303.448 | 12412.484 | NM_005955 | 3814.323  | 3320.236  |
| U58514    | 4764.569  | 4516.4    | NM_003651 | 43982.457 | 25118.773 | NM_013436 | 559.64    | 875.981   |
| M57627    | 1603.344  | 2278.044  | NM_014012 | 1024.021  | 746.96    | AF225426  | 899.289   | 1330.451  |
| W74254    | 1511.577  | 1137.578  | NM_000415 | 4112.372  | 2955.587  | NM_005205 | 14465.599 | 8349.054  |
| M58603    | 11007.349 | 9791.212  | NM_013246 | 3271.07   | 3574.444  | NM_000421 | 1223.759  | 1163.347  |
| AA443286  | 647.69    | 454.484   | NM_018431 | 1420.383  | 1494.906  | AK025687  | 22460.732 | 11182.169 |



|           |           |           |           |           |           |           |           |           |
|-----------|-----------|-----------|-----------|-----------|-----------|-----------|-----------|-----------|
| AB003334  | 12051.438 | 11121.271 | NM_000591 | 8707.76   | 9811.718  | AF218941  | 2645.816  | 1433.297  |
| AW276315  | 2376.085  | 1762.076  | NM_000565 | 6274.903  | 6898.278  | AL137264  | 29024.15  | 15044.999 |
| AA490737  | 5711.904  | 4734.365  | NM_016614 | 556.456   | 379.783   | NM_002226 | 483.443   | 332.494   |
| AI878886  | 45368.867 | 46101.273 | NM_002019 | 1670.081  | 1817.624  | X84370    | 8723.9    | 5247.632  |
| BG697179  | 19633.162 | 23255.563 | NM_000799 | 939.566   | 873.948   | NM_004039 | 849.765   | 618.722   |
| NM_002136 | 53807.547 | 57677.906 | AF253318  | 10357.393 | 9523.813  | NM_000508 | 581.995   | 429.921   |
| BM012504  | 16210.684 | 24163.717 | NM_017767 | 40722.586 | 48353.039 | AB014558  | 1206.688  | 702.811   |
| AA664145  | 7303.617  | 7250.891  | AK024848  | 30714.896 | 40863.305 | NM_006854 | 14734.298 | 10035.374 |
| X72308    | 12939.613 | 11635.085 | NM_004852 | 1065.902  | 1630.536  | NM_004580 | 3418.267  | 2762.553  |
| T50790    | 2544.319  | 2497.014  | NM_000543 | 1893.164  | 1355.468  | NM_020387 | 52526.961 | 53399.113 |
| R48168    | 24311.395 | 38534.168 | U06699    | 40460.52  | 40796.609 | NM_007246 | 1131.971  | 1169.605  |
| AB040954  | 5468.683  | 5127.969  | AJ290954  | 3758.313  | 2113.301  | AK026248  | 1289.228  | 1488.91   |
| NM_002081 | 982.657   | 814.708   | AK025451  | 7833.042  | 6944.847  | NM_000647 | 1865.879  | 1409.655  |
| NM_006141 | 356.814   | 252.488   | NM_002783 | 10177.81  | 6394.881  | NM_017604 | 3749.641  | 4308.342  |
| AF146759  | 1026.831  | 1112.339  | NM_003038 | 3039.318  | 3803.75   | NM_017738 | 22756.314 | 35107.145 |
| AB032993  | 8320.104  | 6947.007  | NM_018155 | 21515.975 | 26959.277 | NM_016557 | 2085.527  | 3550.808  |
| NM_000854 | 10182.496 | 14820.221 | AL050358  | 6212.434  | 6501.703  | NM_000623 | 2153.661  | 2411.325  |
| NM_001901 | 1842.954  | 2660.733  | NM_004731 | 1406.421  | 1494.858  | AF161348  | 1326.026  | 1232.885  |
| AL117423  | 9902.439  | 10769.172 | NM_000544 | 6955.856  | 2596.805  | NM_018467 | 25488.461 | 24206.627 |
| NM_007003 | 1476.949  | 1289.572  | NM_001044 | 849.36    | 457.818   | NM_006068 | 2953.011  | 2852.91   |
| NM_002084 | 4633.434  | 5039.356  | NM_004644 | 3360.904  | 3089.415  | NM_002704 | 683.226   | 1414.266  |
| D16892    | 15338.687 | 12863.461 | AV681967  | 2285.373  | 2987.734  | U16752    | 1283.394  | 866.662   |
| NM_004750 | 2744.902  | 2607.271  | NM_018250 | 3651.863  | 3671.315  | M30134    | 545.368   | 301.449   |
| NM_007295 | 5447.196  | 4583.569  | NM_016553 | 19631.156 | 20707.285 | NM_002038 | 12280.067 | 4118.855  |
| AK023317  | 646.081   | 645.426   | AB023136  | 1674.883  | 2396.126  | NM_005729 | 20358.303 | 7887.124  |
| NM_003651 | 51212.832 | 47817.168 | NM_003795 | 58541.578 | 54821.145 | NM_015493 | 1110.981  | 949.747   |
| NM_014012 | 857.398   | 1195.069  | NM_014232 | 14699.188 | 13753.826 | NM_003747 | 792.964   | 547.956   |
| NM_000418 | 5969.456  | 9312.943  | NM_005701 | 6058.821  | 6711.903  | AB037744  | 1528.92   | 837.233   |
| NM_013246 | 4494.599  | 5229.796  | NM_001231 | 1742.931  | 1802.199  | NM_000159 | 54140.398 | 71386.555 |
| NM_018431 | 763.532   | 886.261   | NM_006819 | 58544.063 | 57851.504 | NM_014638 | 1274.113  | 990.2     |
| NM_000591 | 4248.641  | 5260.859  | NM_014744 | 5443.042  | 6706.821  | AF099740  | 887.221   | 937.164   |
| NM_000565 | 2216.757  | 1786.093  | AF146759  | 8644.313  | 10085.771 | NM_006117 | 7951.903  | 6702.842  |
| NM_016614 | 647.489   | 378.714   | AB032993  | 13437.732 | 11675.425 | NM_002225 | 1843.807  | 1538.284  |
| NM_002019 | 958.784   | 1055.156  | NM_000854 | 7938.983  | 4365.896  | NM_006229 | 580.089   | 756.482   |
| AF253318  | 443.131   | 454.106   | NM_001901 | 1189.745  | 429.741   | NM_015415 | 31296.48  | 26379.926 |
| NM_017767 | 12552.436 | 12958.28  | AL117423  | 19819.504 | 15881.029 | NM_004897 | 3268.174  | 3579.746  |
| NM_006148 | 439.399   | 393.143   | NM_006140 | 414.487   | 505.649   | NM_002555 | 1640.432  | 1723.097  |
| AJ290954  | 2263.188  | 1829.914  | NM_002084 | 5235.734  | 2577.643  | AF225418  | 1737.408  | 2071.826  |
| AK022832  | 3826.427  | 3511.995  | NM_005511 | 6778.77   | 7791.689  | NM_000309 | 1618.083  | 1782.245  |
| NM_017784 | 4393.927  | 5205.298  | NM_014698 | 55033.516 | 54651.629 | NM_004528 | 18973.99  | 18445.713 |
| NM_014641 | 4524.151  | 3545.861  | NM_018475 | 13107.611 | 15926.119 | AK026381  | 27567.363 | 24017.293 |
| NM_004462 | 9219.662  | 8862.089  | NM_003262 | 9923.726  | 11175.947 | NM_002450 | 28977.139 | 9346.657  |
| AB037739  | 544.916   | 335.901   | NM_020125 | 889.601   | 481.277   | NM_001686 | 622.097   | 958.98    |
| NM_000343 | 1004.554  | 1196.425  | AK022832  | 3771.672  | 2190.944  | NM_004978 | 584.094   | 728.392   |
| NM_020246 | 3977.559  | 3685.731  | NM_017784 | 1879.12   | 799.256   | NM_000705 | 453.211   | 495.803   |
| NM_016354 | 2984.143  | 2617.629  | U10991    | 215.851   | 179.123   | NM_004231 | 49574.195 | 33906.707 |
| NM_001044 | 1294.464  | 1174.198  | NM_014641 | 8221.939  | 7068.109  | NM_016577 | 824.42    | 627.623   |
| NM_004644 | 2419.67   | 4017.335  | NM_004462 | 16315.963 | 17062.398 | AK023107  | 5753.71   | 3396.338  |
| AV681967  | 3429.419  | 4829.808  | AB037739  | 897.934   | 854.96    | NM_013334 | 19208.789 | 11903.257 |
| NM_018250 | 2870.726  | 3642.025  | AB020664  | 3921.331  | 4356.784  | AF150735  | 7035.821  | 5031.75   |
| NM_016553 | 16362.546 | 14224.286 | NM_006640 | 43131.141 | 50075.719 | NM_018183 | 1194.755  | 980.938   |
| AB023136  | 1087.856  | 1222.216  | NM_000869 | 717.008   | 815.773   | NM_012382 | 4897.354  | 3661.788  |
| NM_003795 | 46259.277 | 41588.289 | NM_000343 | 1574.162  | 1835.823  | BF038366  | 1116.393  | 1038.22   |

|           |           |           |           |           |           |           |           |           |
|-----------|-----------|-----------|-----------|-----------|-----------|-----------|-----------|-----------|
| NM_014232 | 8057.565  | 7209.501  | NM_019112 | 13850.708 | 5923.278  | NM_002452 | 8614.486  | 4493.053  |
| NM_005701 | 4121.601  | 3608.114  | NM_012336 | 13687.756 | 7483.643  | NM_012304 | 611.052   | 766.91    |
| NM_001231 | 719.555   | 1180.144  | NM_020161 | 523.615   | 417.262   | NM_016440 | 23828.535 | 14580.755 |
| NM_006819 | 47149.102 | 40546.23  | NM_020246 | 7723.517  | 7121.216  | NM_007194 | 1475.383  | 1006.892  |
| NM_014744 | 2595.246  | 1905.97   | NM_000084 | 8288.064  | 9911.377  | NM_000314 | 5243.364  | 2413.619  |
| D80004    | 1269.705  | 1147.408  | NM_016354 | 6268.188  | 2779.887  | AB002369  | 489.075   | 390.454   |
| NM_000946 | 5796.174  | 5740.967  | AB040954  | 15213.526 | 16575.996 | S74620    | 465.879   | 437.22    |
| NM_016070 | 4464.996  | 5001.114  | NM_002081 | 2960.109  | 3460.067  | AF305239  | 1030.927  | 438.805   |
| NM_016390 | 4789.96   | 5419.903  | AB023139  | 22495.834 | 22608.318 | NM_002827 | 11509.958 | 4709.322  |
| NM_016101 | 15392.816 | 21160.75  | NM_017885 | 9085.542  | 9152.222  | NM_001946 | 414.678   | 441.512   |
| NM_005859 | 10701.686 | 11918.94  | D80004    | 1505.273  | 1309.136  | BF035425  | 49946.523 | 46119.926 |
| NM_020313 | 1555.022  | 1147.86   | X63966    | 348.474   | 833.665   | CY3Cy5    | 1393.494  | 539.253   |
| NM_014628 | 7836.423  | 12349.833 | NM_000946 | 8680.254  | 8309.991  | NM_004176 | 3812.146  | 4107.358  |
| AK025630  | 5510.284  | 7299.386  | NM_016070 | 9778.72   | 10250.894 | NM_004548 | 25065.588 | 14873.043 |
| AL365404  | 11201.272 | 12523.545 | NM_016390 | 10857.007 | 11082.125 | AB029001  | 1731.479  | 2105.683  |
| AK022907  | 6897.45   | 6745.549  | NM_016101 | 21271.811 | 22481.531 | AB006624  | 4078.186  | 4282.42   |
| NM_014793 | 1626.257  | 1576.758  | NM_005859 | 58491.871 | 62263.191 | AL109717  | 6192.589  | 16839.521 |
| NM_004245 | 1647.833  | 1805.919  | NM_020313 | 4160.866  | 4787.989  | AF271070  | 14403.733 | 13675.438 |
| NM_003241 | 1186.278  | 1495.568  | NM_014628 | 11606.434 | 13656.367 | AK055959  | 1009.266  | 1609.872  |
| NM_002685 | 5465.998  | 5176.673  | AK025630  | 7045.025  | 8473.116  | AF052141  | 1048.405  | 2406.086  |
| AK024504  | 5101.004  | 4321.084  | AL365404  | 56732.988 | 62093.246 | NM_004176 | 2559.644  | 2203.578  |
| AF039023  | 6261.335  | 8037.955  | AK022907  | 27119.809 | 32438.721 | NM_004548 | 27626.648 | 17919.85  |
| NM_005511 | 5503.39   | 5961.315  | NM_014793 | 5759.708  | 5370.574  | SR1       | 68057.336 | 64276.832 |
| NM_014698 | 8214.494  | 10318.429 | NM_004245 | 12203.601 | 4302.575  | SR3       | 23879.686 | 21779.152 |
| NM_018475 | 10472.678 | 9816.667  | NM_003241 | 6170.945  | 5211.491  | SR5       | 2477.43   | 2740.287  |
| NM_003262 | 4890.498  | 4619.64   | NM_002685 | 10718.214 | 11375.653 | SR7       | 3308.985  | 30230.195 |
| NM_020125 | 1006.056  | 706.505   | AK024504  | 4697.965  | 1936.883  | SR9       | 10762.106 | 5797.985  |
| X52005    | 50599.727 | 30705.146 | AF039023  | 4804.309  | 2116.343  | CY3Cy5    | 3795.235  | 810.928   |
| NM_001047 | 2492.848  | 2513.037  | CY3Cy5    | 555.792   | 190.275   | L32606    | 910.868   | 847.766   |
| AK024396  | 5211.878  | 6081.415  | NM_145904 | 34758.922 | 17479.811 | L05148    | 721.634   | 780.46    |
| U58514    | 5203.786  | 4996.275  | AF086303  | 361.239   | 320.85    | AK091125  | 602.039   | 514.471   |
| M57627    | 1683.446  | 1695.093  | AK022063  | 5677.022  | 4207.194  | D16474    | 9546.38   | 15163.877 |
| W74254    | 1956.545  | 2139.43   | AF086345  | 6088.536  | 4525.47   | NM_017687 | 2753.819  | 5256.824  |
| M58603    | 11492.872 | 11245.169 | AF086464  | 782.091   | 684.855   | NM_017975 | 4159.399  | 8686.576  |
| AA443286  | 856.625   | 729.038   | AL049278  | 2493.385  | 1735.13   | AK025036  | 874.27    | 1300.331  |
| AB003334  | 13433.347 | 13225.569 | AL117519  | 1858.669  | 1794.458  | BC033020  | 890.068   | 987.582   |
| AW276315  | 2579.809  | 2294.664  | AK001595  | 2453.662  | 2210.466  | NM_004366 | 11141.812 | 10803.172 |
| AA490737  | 6648.218  | 4909.495  | NM_018015 | 3450.911  | 4351.166  | AK026168  | 1687.975  | 1543.426  |
| AI878886  | 45745.891 | 46495.762 | NM_145904 | 45981.191 | 29099.734 | AJ296152  | 7599.159  | 6263.822  |
| BG697179  | 19224.15  | 19677.865 | SR2       | 48073.672 | 40437.254 | AK001067  | 2722.716  | 4654.042  |
| NM_002136 | 53448.234 | 53604.074 | SR4       | 13213.331 | 21188.707 | AK027088  | 17773.305 | 37157.867 |
| BM012504  | 14059.73  | 14434.434 | SR6       | 1467.438  | 1645.794  | AB037721  | 20876.662 | 41857.719 |
| AA664145  | 8175.921  | 9611.412  | SR8       | 5337.622  | 14288.432 | AK024525  | 7081.21   | 3311.201  |
| X72308    | 15627.312 | 17144.264 | SR10      | 17762.924 | 4944.716  | AK024544  | 1454.581  | 795.042   |
| T50790    | 2864.785  | 2950.686  | CY3Cy5    | 867.768   | 121.176   | AK021705  | 1932.745  | 1960.16   |
| R48168    | 19376.838 | 21609.344 | AF086395  | 8470.122  | 5558.993  | NM_016141 | 41300.617 | 36649.008 |
| AB040954  | 6416.334  | 6444.22   | AF086049  | 2611.863  | 1806.152  | AK025624  | 13932.514 | 38023.637 |
| NM_002081 | 1246.539  | 1370.887  | AK026142  | 4219.233  | 2836.279  | AK026684  | 1400.064  | 2035.679  |
| NM_006141 | 391.599   | 338.388   | AK021494  | 3947.518  | 2803.405  | AL110125  | 12180.169 | 12391.364 |
| AB023139  | 13956.076 | 10591.755 | AL360160  | 57050.359 | 46599.125 | AJ243673  | 1123.7    | 861.318   |
| NM_017885 | 9617.903  | 5384.551  | AK001092  | 95506.797 | 60692.234 | AJ011600  | 2046.765  | 1744.42   |
| D16892    | 14442.66  | 10108.404 | NM_014144 | 1816.222  | 1431.444  | AJ002785  | 2861.695  | 2420.54   |
| NM_004750 | 3266.052  | 3373.974  | AF147373  | 3215.096  | 2708.153  | Z70716    | 851.05    | 978.805   |

|           |           |           |           |           |           |           |           |           |
|-----------|-----------|-----------|-----------|-----------|-----------|-----------|-----------|-----------|
| NM_00729E | 6183.1    | 5048.149  | AF086337  | 780.808   | 502.033   | Z83945    | 1914.209  | 2290.83   |
| AK023317  | 524.751   | 670.356   | AK021642  | 5627.006  | 3263.129  | AK022474  | 9343.979  | 3409.654  |
| NM_003651 | 45453.523 | 51975.621 | AK021987  | 1919.015  | 1162.583  | AK022392  | 1962.654  | 1918.64   |
| NM_014012 | 809.682   | 942.81    | AK026905  | 1710.986  | 1303.792  | AL049280  | 2711.763  | 1720.619  |
| NM_00041E | 5438.574  | 4617.286  | NM_000134 | 978.557   | 721.851   | AK025212  | 4252.115  | 3591.142  |
| NM_01324E | 3391.696  | 2617.789  | AF075108  | 2025.611  | 1445.82   | AB021925  | 503.495   | 279.457   |
| NM_018431 | 794.66    | 683.439   | NM_00506C | 861.788   | 1456.054  | AL157503  | 4975.284  | 4030.083  |
| NM_000591 | 5923.772  | 8680.146  | AL035369  | 3727.621  | 6422.662  | AK000053  | 547.812   | 784.472   |
| NM_00056E | 2472.99   | 2048.531  | AF075097  | 9848.179  | 8364.416  | AK000786  | 1118.831  | 818.877   |
| NM_016614 | 729.972   | 654.388   | AK022801  | 738.057   | 560.592   | AK000935  | 1116.133  | 819.508   |
| NM_00201E | 888.938   | 1084.214  | AL133075  | 4883.54   | 3668.967  | AK021458  | 4670.244  | 3280.046  |
| NM_00079E | 313.889   | 913.732   | AL137692  | 417.258   | 537.567   | NM_017674 | 12272.267 | 9496.929  |
| AF253318  | 587.599   | 513.275   | AL137630  | 3012.694  | 2409.392  | AK000966  | 1327.024  | 1344.909  |
| NM_017767 | 12558.443 | 12927.267 | AL137277  | 8469.777  | 6117.883  | NM_01863C | 3085.51   | 1636.462  |
| AK024848  | 17402.027 | 18323.855 | AL137447  | 633.588   | 438.11    | AF086175  | 921.063   | 356.096   |
| NM_004852 | 786.054   | 826.697   | BC023609  | 1837.832  | 1618.957  | AK002196  | 746.026   | 771.6     |
| NM_000543 | 1991.444  | 1598.489  | AK023264  | 620.12    | 321.51    | NM_00457E | 1108.261  | 392.957   |
| U06699    | 7584.895  | 9207.366  | AK024457  | 6365.856  | 5118.556  | AF040097  | 676.489   | 295.072   |
| NM_00614E | 917.555   | 1636.552  | AL389977  | 525.061   | 363.747   | AK024182  | 1601.51   | 1386.748  |
| AJ290954  | 2643.709  | 2359.149  | AK026894  | 1502.745  | 1715.726  | NM_006913 | 10515.433 | 11833.758 |
| AK025451  | 8206.674  | 6302.208  | AF161369  | 2377.406  | 2869.967  | NM_00049E | 10658.252 | 8733.297  |
| NM_002783 | 2801.771  | 2480.91   | AK027176  | 6041.905  | 4931.764  | AK001880  | 4415.38   | 4890.703  |
| NM_00303E | 3863.798  | 2723.413  | AF073328  | 857.451   | 758.411   | AF156166  | 7935.949  | 7476.773  |
| NM_01815E | 8735.037  | 8597.507  | AF129266  | 808.94    | 658.04    | NM_014373 | 3285.051  | 3337.691  |
| AL050358  | 512.72    | 564.504   | Y12019    | 3227.536  | 4142.039  | NM_01420E | 17505.127 | 9793.188  |
| NM_004731 | 1300.17   | 1779.035  | AF147418  | 565.574   | 367.057   | NM_001651 | 6074.593  | 6478.947  |
| NM_000544 | 4231.143  | 11612.084 | AK021898  | 2561.541  | 2745.399  | L32786    | 1348.116  | 1250.828  |
| NM_001044 | 1180.58   | 829.973   | AK022024  | 3274.863  | 2428.5    | AL355720  | 3998.695  | 2927.563  |
| NM_004644 | 1876.155  | 2443.837  | AK022301  | 1417.162  | 1874.598  | AK002023  | 3360.473  | 2773.192  |
| AV681967  | 2836.3    | 3253.773  | AK021948  | 3030.11   | 2757.733  | AF150156  | 727.302   | 719.336   |
| NM_01825C | 2782.538  | 2633.579  | AK022341  | 690.116   | 497.298   | NM_016464 | 856.912   | 849.003   |
| NM_016553 | 21012.252 | 21994.367 | AF230317  | 626.97    | 402.893   | L40402    | 4465.5    | 4361.42   |
| AB023136  | 1182.82   | 1040.434  | AK023806  | 5266.706  | 4935.202  | Z36780    | 1687.998  | 2589.987  |
| NM_00379E | 46243.883 | 41099.246 | Y16696    | 22799.391 | 15106.535 | AK022403  | 791.74    | 698.933   |
| NM_014232 | 8047.735  | 7205.486  | AK026094  | 3976.988  | 3479.811  | AK022955  | 3783.161  | 1578.384  |
| NM_005701 | 4667.679  | 4759.489  | AF161344  | 6000.527  | 5099.623  | BC035855  | 2436.487  | 668.164   |
| NM_001231 | 638.898   | 980.856   | AF086027  | 2038.343  | 2104.582  | AL137408  | 17000.377 | 6325.1    |
| NM_00681E | 48636.73  | 43923.309 | NM_001207 | 67249.891 | 63020.949 | AF054995  | 2458.23   | 2456.523  |
| NM_014744 | 2889.593  | 2953.345  | NM_00663E | 5577.538  | 7019.209  | AL080176  | 2813.246  | 2407.112  |
| AF146759  | 928.917   | 923.651   | X14675    | 2266.756  | 2911.242  | AK023627  | 2360.275  | 2244.358  |
| AB032993  | 8237.677  | 6782.836  | AF071170  | 826.876   | 1098.172  | AK025949  | 1418.144  | 1546.737  |
| NM_000854 | 11078.275 | 14826.829 | AF075075  | 1603.686  | 1347.505  | Y10259    | 2657.71   | 2887.021  |
| NM_001901 | 1919.333  | 1993.599  | NM_018304 | 8818.752  | 7253.006  | AK021725  | 4446.761  | 3713.165  |
| AL117423  | 11047.908 | 13728.099 | NM_016472 | 2085.63   | 1322.356  | AF119893  | 622.197   | 738.551   |
| NM_007003 | 356.423   | 447.292   | AF086064  | 614.094   | 382.543   | NM_00240E | 4432.585  | 2980.83   |
| NM_002084 | 3572.999  | 2704.08   | AK023042  | 1642.791  | 1561.646  | AK024282  | 972.451   | 867.92    |
| NM_005511 | 5331.676  | 4174.377  | AK026429  | 629.677   | 429.832   | AF085838  | 3546      | 2670.774  |
| NM_01469E | 9203.909  | 6589.533  | NM_01655C | 5352.156  | 5186.478  | NM_018277 | 1027.473  | 882.544   |
| NM_01847E | 9580.08   | 7267.022  | AK024813  | 7296.176  | 7628.49   | AF086335  | 1938.02   | 1497.227  |
| NM_003262 | 5813.148  | 6584.741  | AJ227909  | 25891.107 | 31318.756 | AB011118  | 27421.932 | 18685.424 |
| NM_02012E | 1302.786  | 1534.745  | AK021880  | 838.513   | 1182.468  | AK021476  | 2077.724  | 1752.504  |
| AK022832  | 3358.903  | 2789.573  | AK024107  | 566.229   | 644.482   | NM_013341 | 645.835   | 1709.323  |
| NM_017784 | 2668.638  | 1926.226  | NM_01418E | 9917.873  | 10879.58  | NM_004941 | 4219.308  | 1429.152  |

|           |           |           |           |           |           |           |           |           |
|-----------|-----------|-----------|-----------|-----------|-----------|-----------|-----------|-----------|
| NM_014641 | 4428.42   | 2348.036  | AF056442  | 1714.865  | 1885.864  | AF151831  | 1849.006  | 495.541   |
| NM_004462 | 8646.812  | 5524.968  | AK024752  | 41378.703 | 33219.078 | AF083255  | 5258.765  | 3483.609  |
| AB037739  | 811.716   | 1073.182  | BG117194  | 1574.761  | 1531.173  | AK022605  | 1104.63   | 1412.806  |
| AB020664  | 1430.423  | 1745.509  | AF131859  | 4683.332  | 4776.943  | AL049955  | 17661.092 | 13396.166 |
| NM_006640 | 24423.156 | 20376.494 | AK023632  | 1445.929  | 2567.793  | AF155654  | 7881.569  | 6735.167  |
| NM_000869 | 637.821   | 677.454   | AF086118  | 10201.845 | 26795.654 | AF088044  | 680.589   | 1196.425  |
| NM_000343 | 1020.875  | 1019.813  | NM_014138 | 2264.076  | 2705.741  | AK000028  | 2494.258  | 2565.915  |
| NM_019112 | 4924.933  | 4678.817  | AK025044  | 2318.496  | 1778.007  | NM_013320 | 35102.555 | 22215.438 |
| NM_012336 | 11314.086 | 11376.723 | AK023690  | 1038.42   | 706.971   | AL050039  | 649.917   | 742.063   |
| NM_020161 | 548.381   | 495.508   | NM_014723 | 1344.693  | 911.066   | AF009316  | 492.716   | 646.089   |
| NM_020246 | 3727.608  | 3160.509  | AB011106  | 2500.038  | 1770.808  | AF087987  | 787.824   | 744.745   |
| NM_000084 | 3027.832  | 2757.667  | D26362    | 2691.811  | 1968.789  | H09474    | 4352.071  | 3349.067  |
| NM_016354 | 2502.946  | 1261.403  | NM_013452 | 3197.869  | 2820.195  | AB002368  | 9681.763  | 8287.895  |
| AB040954  | 5404.875  | 4055.63   | AY009402  | 3886.797  | 3562.395  | AL360263  | 48556.453 | 33362.066 |
| NM_002081 | 906.994   | 605.913   | NM_018451 | 1500.699  | 910.31    | NM_004449 | 1755.978  | 3432.288  |
| AB023139  | 13791.188 | 11753.513 | NM_012443 | 747.72    | 769.487   | NM_014591 | 2250.57   | 1284.846  |
| NM_017885 | 10674.562 | 9419.07   | NM_007009 | 559.1     | 680.087   | NM_014592 | 1359.129  | 916.544   |
| D80004    | 1231.281  | 964.144   | NM_002584 | 10043.473 | 10993.812 | NM_020039 | 3022.1    | 1407.047  |
| X63966    | 443.598   | 458.849   | AK022154  | 458.849   | 422.414   | NM_006653 | 865.119   | 1336.517  |
| NM_000946 | 5241.522  | 4819.425  | AK022199  | 1088.636  | 1005.663  | NM_014442 | 13225.05  | 11214.852 |
| NM_016070 | 3885.085  | 2190.902  | NM_006211 | 1230.356  | 957.472   | AB002313  | 1161.301  | 927.218   |
| NM_016390 | 3953.052  | 2908.172  | NM_003524 | 8309.662  | 6608.701  | AB011167  | 2695.012  | 2830.846  |
| NM_016101 | 11958.399 | 9524.398  | AK021438  | 828.931   | 739.908   | NM_005409 | 1704.128  | 1490.677  |
| NM_005859 | 11624.607 | 10140.661 | NM_005913 | 1466.572  | 1470.937  | NM_000208 | 5139.103  | 3441.441  |
| NM_020313 | 1741.314  | 1483.413  | S39891    | 2230.563  | 2941.732  | NM_002188 | 47328.027 | 30545.285 |
| NM_014628 | 7746.803  | 11812.469 | R17536    | 804.601   | 1215.703  | AK027119  | 24565.582 | 15572.726 |
| AK025630  | 4845.009  | 4328.444  | AK021624  | 706.471   | 950.935   | AB037727  | 51706.492 | 40857.598 |
| AL365404  | 9114.247  | 7680.656  | AF278605  | 9233.123  | 10976.015 | NM_005426 | 549.716   | 607.276   |
| AK022907  | 6222.427  | 4888.245  | NM_006497 | 45146.848 | 46200.797 | NM_004763 | 381.025   | 263.033   |
| NM_014793 | 2011.724  | 2943.44   | AK022329  | 882.894   | 745.826   | NM_014063 | 9700.308  | 5562.97   |
| NM_004245 | 1402.104  | 726.555   | AL133599  | 1584.734  | 1150.166  | D86964    | 4458.767  | 2537.745  |
| NM_003241 | 666.632   | 467.893   | AK022380  | 491.441   | 440.493   | AL049801  | 746.669   | 741.25    |
| NM_002685 | 5443.66   | 2987.449  | AB037776  | 1098.342  | 720.718   | NM_016395 | 9908.402  | 6405.043  |
| AK024504  | 4662.425  | 2986.375  | AF196976  | 8036.777  | 4847.855  | NM_003152 | 1384.077  | 998.643   |
| AF039023  | 4531.376  | 2495.552  | AL050379  | 2713.313  | 2248.245  | NM_006342 | 7040.404  | 17835.529 |
| CY3Cy5    | 2436.719  | 196.673   | NM_003161 | 3010.422  | 2444.665  | NM_016396 | 4764.336  | 10819.543 |
| NM_145904 | 68507.906 | 70312.875 | NM_014496 | 1216.512  | 1523.744  | NM_005689 | 4128.265  | 10180.328 |
| AF086303  | 751.702   | 587.88    | NM_016215 | 33247.785 | 37642.371 | NM_006717 | 3833.374  | 8391.637  |
| AF086434  | 1543.308  | 1839.922  | AK026919  | 486.699   | 752.361   | AL109786  | 1722.41   | 1103.291  |
| AK022063  | 4925.143  | 5256.44   | NM_001501 | 14125.345 | 17036.637 | AK026479  | 4232.85   | 1007.152  |
| AF086345  | 2675.494  | 2741.184  | NM_006176 | 37750.977 | 33563.441 | AK022860  | 4780.587  | 2319.547  |
| AF086464  | 674.215   | 644.597   | AL137459  | 2305.336  | 2121.916  | X60188    | 20167.098 | 17665.701 |
| AL049278  | 6082.48   | 6606.243  | AB037812  | 586.153   | 710.17    | NM_005977 | 2147.433  | 2095.306  |
| NM_018015 | 3733.279  | 2992.602  | AB007932  | 7391.934  | 6031.478  | NM_002747 | 429.528   | 524.403   |
| NM_003715 | 8628.951  | 6517.481  | AF219257  | 48250.445 | 44140.086 | NM_006265 | 14124.984 | 16479.871 |
| NM_145904 | 72840.211 | 62150.078 | NM_003978 | 883.882   | 911.113   | NM_003126 | 646.634   | 862.069   |
| SR2       | 62076.215 | 61794.563 | NM_002561 | 35516.758 | 27684.945 | NM_006059 | 3100.524  | 1989.891  |
| SR4       | 15288.942 | 24903.088 | NM_006103 | 62155.559 | 63262.629 | NM_000347 | 24791.408 | 16803.877 |
| SR6       | 1653.4    | 1946.446  | NM_000805 | 974.411   | 471.501   | M13452    | 1786.176  | 1348.508  |
| SR8       | 6341.198  | 21493.721 | AL359933  | 29514.025 | 41211.184 | AF082075  | 1196.695  | 1217.001  |
| SR10      | 19456.08  | 6231.636  | NM_001302 | 1492.295  | 2333.616  | NM_016114 | 2022.076  | 1383.271  |
| CY3Cy5    | 1350.202  | 131.595   | M17783    | 8782.441  | 8395.89   | AY007114  | 1190.331  | 974.357   |
| AF086395  | 14695.898 | 13949.331 | NM_018590 | 5139.24   | 4376.15   | AF086604  | 752.696   | 587.503   |

|           |           |           |           |           |           |           |           |           |
|-----------|-----------|-----------|-----------|-----------|-----------|-----------|-----------|-----------|
| AF114263  | 621.242   | 844.687   | NM_003178 | 2725.514  | 2257.885  | AB000895  | 988.875   | 793.806   |
| AK026142  | 10275.637 | 12928.043 | NM_012437 | 6076.127  | 5187.236  | X80031    | 550.447   | 571.861   |
| AK001092  | 22458.869 | 19899.055 | NM_002607 | 1099.29   | 580.743   | AF019382  | 1936.396  | 1452.379  |
| NM_014144 | 2355.876  | 2067.415  | AF116712  | 880.851   | 882.194   | NM_015601 | 1585.677  | 4581.012  |
| AF147373  | 1008.232  | 1178.468  | AF116626  | 6369.245  | 5684.839  | NM_004566 | 4396.279  | 11041.519 |
| AF086253  | 1037.652  | 678.629   | NM_001760 | 23234.137 | 23068.742 | AF089088  | 3289.232  | 8144.833  |
| AK021642  | 5663.323  | 7332.714  | NM_002527 | 1427.405  | 2761.309  | D78514    | 6712.116  | 2594.763  |
| AK026905  | 264.824   | 261.604   | NM_005890 | 2791.488  | 4650.218  | AK021665  | 1182.093  | 869.769   |
| AL035369  | 1636.909  | 1606.371  | NM_007065 | 49460.031 | 55894.375 | NM_013366 | 488.781   | 470.596   |
| AF075097  | 799.966   | 799.813   | AF149785  | 11365.887 | 15380.521 | NM_002787 | 25570.332 | 18952.643 |
| AK022801  | 1367.842  | 1799.783  | NM_012068 | 16741.986 | 21732.012 | U95006    | 12425.174 | 10934.593 |
| AL133075  | 4256.145  | 4381.027  | NM_004064 | 10287.2   | 7353.101  | NM_003347 | 10929.274 | 10531.817 |
| AL137630  | 3754.272  | 3217.266  | NM_001256 | 5891.42   | 5782.914  | AF273051  | 912.878   | 750.124   |
| AK055236  | 579.318   | 662.952   | NM_014704 | 7672.688  | 7395.228  | NM_014516 | 14525.582 | 12658.373 |
| AL137277  | 2142.102  | 1727.034  | NM_020205 | 1434.08   | 1411.801  | AK021868  | 1521.991  | 1384.303  |
| AL137447  | 939.008   | 1026.474  | NM_001227 | 1468.642  | 1585.469  | AK000643  | 64179.945 | 75252.93  |
| AL157467  | 531.533   | 397.848   | NM_001191 | 15677.248 | 15309.592 | NM_018421 | 3952.097  | 3866.834  |
| BC023609  | 1313.199  | 841.958   | U15174    | 827.862   | 1190.199  | AB014574  | 58011.734 | 64526.563 |
| AK023264  | 1174.117  | 1637.041  | NM_013342 | 2224.777  | 2691.519  | NM_020127 | 1937.451  | 2324.2    |
| AK024457  | 1316.197  | 1224.327  | NM_014344 | 1217.929  | 1539.814  | NM_015623 | 9254.695  | 9798.818  |
| AK026894  | 1772.776  | 1417.268  | AB040917  | 606.97    | 606.735   | AB045116  | 1536.647  | 1666.41   |
| AK026372  | 475.775   | 560.953   | AL110261  | 17945.889 | 14889.509 | L49054    | 918.238   | 1332.701  |
| Y12019    | 1090.788  | 620.262   | AA203539  | 760.217   | 637.934   | NM_014727 | 5027.538  | 5198.104  |
| AF085224  | 367.619   | 468.486   | AK021786  | 1500.524  | 1352.612  | BE885010  | 1902.147  | 2129.838  |
| AF232217  | 709.891   | 1039.587  | AF245505  | 2947.578  | 2249.984  | NM_000192 | 973.18    | 3406.121  |
| AK021898  | 2267.645  | 2986.635  | NM_004279 | 18859.945 | 13839.167 | NM_002943 | 4275.895  | 11788.225 |
| AK022024  | 3441.053  | 3119.137  | NM_004851 | 20619.627 | 16676.691 | AB018303  | 1549.754  | 4585.218  |
| AK022301  | 1657.157  | 1599.192  | NM_001908 | 6932.71   | 7969.571  | NM_015972 | 26865.092 | 23052.822 |
| AK021948  | 4647.16   | 5136.784  | NM_000285 | 24353.508 | 38647.574 | NM_001644 | 787.564   | 974.92    |
| AK022054  | 401.116   | 413.807   | NM_005911 | 58758.219 | 68942.906 | NM_018006 | 4123.552  | 7150.375  |
| AK022341  | 339.388   | 415.816   | AV702690  | 3966.475  | 9619.716  | NM_016090 | 1797.938  | 3017.297  |
| U48697    | 616.614   | 749.88    | AL117452  | 15861.312 | 26855.508 | NM_001013 | 59005.484 | 60959.77  |
| AK023806  | 3277.097  | 4879.949  | NM_012230 | 1506.276  | 1964.668  | AK024040  | 10189.188 | 10569.947 |
| AF088068  | 653.613   | 661.988   | NM_014038 | 10626.221 | 8453.929  | NM_005061 | 9055.128  | 10413.804 |
| Y16696    | 21141.9   | 14566.344 | NM_002061 | 4944.659  | 4066.741  | NM_000997 | 61947.363 | 68071.656 |
| AK026094  | 5790.168  | 4581.388  | AF169974  | 3963.173  | 3867.905  | AF182417  | 53720.816 | 51721.031 |
| AF161344  | 6118.309  | 4142.261  | NM_004522 | 2017.297  | 2056.633  | AL137354  | 45127.809 | 35436.449 |
| AF086027  | 3044.935  | 2779.824  | NM_005733 | 2862.399  | 2045.776  | NM_001023 | 55646.84  | 65895.102 |
| AF075045  | 437.466   | 570.272   | NM_018138 | 4589.991  | 5072.342  | AK021571  | 15103.432 | 14325.746 |
| NM_006638 | 8608.377  | 7514.005  | NM_019619 | 4767.139  | 4361.6    | AK022178  | 3437.787  | 2789.687  |
| X14675    | 994.005   | 860.69    | AF183411  | 3059.54   | 2945.018  | NM_006011 | 2228.979  | 2364.836  |
| AF071170  | 1886.9    | 2366.945  | BF244591  | 1723.929  | 1566.705  | L00635    | 4507.656  | 4679.798  |
| AF161364  | 743.773   | 812.576   | NM_005886 | 11994.374 | 8599.646  | NM_002541 | 3616.81   | 10615.183 |
| AF075075  | 2407.85   | 3513.99   | U63785    | 2477.068  | 2012.383  | NM_000056 | 8782.021  | 21288.313 |
| NM_005453 | 514.487   | 572.861   | NM_005966 | 2610      | 2260.455  | NM_001867 | 55048.387 | 65359.645 |
| NM_018304 | 12456.731 | 9266.777  | NM_003156 | 4987.595  | 3477      | NM_016538 | 6623.83   | 4973.394  |
| NM_016472 | 3780.701  | 2983.595  | AF090944  | 1575.609  | 1093.524  | AK023275  | 17000.441 | 17242.238 |
| AF086064  | 1041.057  | 1022.322  | NM_006473 | 1911.591  | 1254.874  | AJ223352  | 9336.848  | 9020.427  |
| AK023042  | 1676.455  | 2285.286  | NM_005653 | 2938.479  | 4122.263  | NM_006807 | 26628.691 | 36372.613 |
| AF086501  | 649.587   | 1124.892  | NM_014553 | 4730.303  | 5035.957  | NM_000326 | 2580.833  | 4763.129  |
| AK026429  | 645.811   | 525.431   | NM_003440 | 1365.029  | 2373.575  | L16464    | 1745.083  | 1810.119  |
| NM_016550 | 7743.284  | 6154.895  | NM_004698 | 11004.295 | 18142.23  | NM_006532 | 19570.008 | 23405.23  |
| AK024813  | 7488.183  | 4715.291  | U41387    | 46744.785 | 58787.797 | U07132    | 16358.032 | 17546.584 |

|           |           |           |           |           |           |           |           |           |
|-----------|-----------|-----------|-----------|-----------|-----------|-----------|-----------|-----------|
| AJ227909  | 14440.528 | 14085.148 | NM_004516 | 19896.932 | 14654.411 | NM_003436 | 1415.095  | 1555.932  |
| AK021880  | 1751      | 1602.11   | NM_006513 | 5248.519  | 3641.198  | NM_001675 | 2428.013  | 764.012   |
| AK024107  | 1074.144  | 1999.819  | NM_003685 | 22863.313 | 16728.607 | NM_003422 | 3113.942  | 2136.483  |
| AL109684  | 999.013   | 1148.204  | NM_002486 | 1116.433  | 724.603   | NM_001451 | 2090.339  | 1487.369  |
| NM_014186 | 14556.559 | 13705.944 | NM_006295 | 10796.302 | 8374.253  | NM_014779 | 2789.396  | 2049.772  |
| AF056442  | 1360.355  | 1438.879  | NM_001540 | 7404.975  | 5560.547  | NM_016929 | 14504.078 | 35731.035 |
| AK024752  | 57850.617 | 59122.141 | NM_012111 | 25913.879 | 22222.211 | NM_006942 | 887.26    | 3087.511  |
| BG117194  | 3510.602  | 3946.277  | NM_004470 | 27804.779 | 22538.275 | H39560    | 665.961   | 1383.338  |
| AF131859  | 10893.497 | 12554.741 | NM_001418 | 14267.208 | 12988.73  | BG534366  | 26387.359 | 22863.879 |
| AK001864  | 740.229   | 977.401   | NM_003756 | 48638.496 | 31751.025 | BG698522  | 47550.656 | 47722.641 |
| AK023632  | 1033.91   | 1450.066  | AL049680  | 5831.315  | 4380.593  | L15189    | 4454.905  | 7817.472  |
| AF086118  | 13361.396 | 16546.928 | AL133660  | 2505.591  | 2659.853  | AB023420  | 21190.061 | 20137.355 |
| NM_014138 | 4709.765  | 3874.425  | NM_005932 | 1993.295  | 1580.824  | BI822179  | 13858.782 | 8315.337  |
| AK023690  | 659.794   | 517.608   | BF036874  | 3907.974  | 2596.328  | AF022912  | 6507.785  | 4631.062  |
| NM_014723 | 2060.351  | 2142.863  | BE888487  | 1229.601  | 1167.341  | AA477428  | 18590.59  | 14844.805 |
| AB011106  | 3737.684  | 3467.698  | AF182419  | 5629.198  | 4514.996  | AA156342  | 2978.247  | 2005.638  |
| D26362    | 3787.587  | 3767.818  | NM_004293 | 839.661   | 921.697   | R45594    | 14836.896 | 10821.421 |
| NM_013452 | 1984.545  | 2568.202  | NM_004450 | 422.155   | 366.348   | H46425    | 10149.221 | 6288.58   |
| AL133073  | 490.795   | 596.234   | NM_007016 | 3302.29   | 3791.485  | AI355949  | 1144.773  | 741.656   |
| AY009402  | 2159.954  | 2131.253  | NM_002703 | 12306.136 | 16138.548 | AA278152  | 11488.997 | 7395.805  |
| NM_018451 | 1882.167  | 972.51    | NM_005375 | 3250.438  | 3761.198  | H75530    | 5379.788  | 3932.307  |
| NM_012443 | 1366.68   | 1049.735  | NM_005985 | 20145.684 | 26379.271 | NM_005036 | 715.975   | 724.549   |
| NM_007009 | 902.367   | 1239.627  | AK021699  | 645.488   | 1239.052  | NM_014438 | 7091.329  | 17079.428 |
| NM_002584 | 21413.719 | 23699.742 | NM_015906 | 5063.43   | 4894.093  | NM_014880 | 2480.421  | 7157.962  |
| AK022154  | 1190.596  | 1774.261  | AK023759  | 5055.943  | 4345.015  | NM_004829 | 3476.378  | 1201.036  |
| AK022199  | 1765.024  | 1960.938  | L25270    | 47605.75  | 42598.039 | NM_006793 | 34281.961 | 21055.217 |
| NM_006211 | 1036.123  | 863.188   | AB033111  | 2457.663  | 1979.718  | NM_001538 | 20147.988 | 11910.016 |
| NM_003524 | 12259.493 | 9366.67   | AJ276316  | 2977.318  | 2216.91   | X97261    | 21027.482 | 6850.457  |
| AK021438  | 1188.974  | 1378.026  | AF229246  | 40044.598 | 27704.674 | NM_005410 | 1185.045  | 1515.235  |
| NM_005913 | 910.813   | 888.583   | S64709    | 4134.834  | 3099.286  | D87666    | 53228.895 | 34230.508 |
| AK022315  | 420.794   | 1012.736  | NM_018488 | 3179.939  | 2342.949  | NM_002921 | 2251.569  | 2280.131  |
| S39891    | 4040.465  | 5792.975  | X56465    | 1393.572  | 1003.2    | NM_001315 | 4525.855  | 4000.406  |
| R17536    | 990.904   | 1093.238  | NM_003071 | 17972.264 | 12024.414 | AF286095  | 5988.19   | 5505.012  |
| AK021624  | 882.696   | 567.817   | NM_003108 | 749.859   | 650.1     | NM_000878 | 6778.542  | 5559.145  |
| AF278605  | 13337.89  | 11331.35  | NM_013310 | 8969.254  | 17635.092 | NM_018727 | 1686.967  | 1656.537  |
| NM_006497 | 13981.941 | 12919.744 | BC004958  | 5061.402  | 3817.842  | NM_004258 | 58804.469 | 50651.305 |
| AK022329  | 857.5     | 1101.05   | NM_005762 | 12782.788 | 8269.511  | NM_001981 | 7745.768  | 5426.852  |
| AK022380  | 590.91    | 483.253   | X84370    | 10323.175 | 10705.634 | NM_001585 | 58939.129 | 60903.93  |
| AB037776  | 1955.183  | 1340.042  | NM_004039 | 1375.331  | 1547.11   | AK026108  | 24225.492 | 16136.667 |
| AF196976  | 5014.763  | 3737.648  | NM_000508 | 279.342   | 766.75    | AF149304  | 1561.008  | 4066.889  |
| AL050379  | 2701.389  | 1888.193  | AB014558  | 1600.975  | 2060.672  | NM_019091 | 1364.617  | 4154.618  |
| NM_003161 | 5774.213  | 8448.229  | NM_006287 | 1679.207  | 1657.816  | AF264781  | 1484.447  | 444.624   |
| NM_014496 | 1696.827  | 1580.625  | NM_000118 | 6355.464  | 6628.827  | NM_015948 | 8452.653  | 6921.557  |
| NM_016215 | 14015.443 | 12792.158 | NM_000913 | 1615.747  | 1472.093  | NM_000804 | 2970.636  | 2937.896  |
| NM_001501 | 8146.153  | 8188.874  | NM_001298 | 56764.125 | 57987.84  | NM_006555 | 6513.98   | 5674.659  |
| NM_006176 | 18432.385 | 17376.818 | BG325046  | 5921.516  | 9243.433  | D63877    | 5935.444  | 3838.599  |
| AL137459  | 1672.41   | 2186.558  | AI351740  | 30676.195 | 27651.316 | AF131760  | 2756.64   | 2329.771  |
| AB037812  | 774.062   | 969.146   | AA444051  | 22728.043 | 22529.271 | NM_018698 | 1448.812  | 1531.627  |
| AB007932  | 2286.942  | 2021.494  | NM_007164 | 27565.381 | 22618.246 | NM_006461 | 2303.684  | 2239.215  |
| AF219257  | 21445.135 | 18009.227 | BE783826  | 50233.641 | 58400.301 | NM_002826 | 5541.442  | 15069.459 |
| NM_003978 | 492.131   | 567.089   | X04827    | 2050.979  | 2157.286  | AK022233  | 3148.194  | 1376.726  |
| NM_002561 | 46437.773 | 45591.137 | H07088    | 5949.239  | 5348.519  | AK026410  | 18422.605 | 10472.192 |
| NM_006103 | 39182.883 | 38125.996 | AI004656  | 3593.912  | 3354.354  | NM_014637 | 6481.111  | 5106.391  |

|           |           |           |           |           |           |           |           |           |
|-----------|-----------|-----------|-----------|-----------|-----------|-----------|-----------|-----------|
| NM_000805 | 537.237   | 612.549   | BC020596  | 2971.304  | 3375.197  | NM_013375 | 28100.811 | 19408.324 |
| AL359933  | 26121.461 | 23046.76  | AF116606  | 54960.977 | 62213.406 | AF113208  | 14831.929 | 16065.427 |
| NM_001302 | 1770.679  | 1966.753  | X98922    | 5966.031  | 5166.762  | NM_006153 | 6347.792  | 5245.066  |
| M17783    | 11106.208 | 11155.305 | AK098435  | 7887.929  | 5901.288  | NM_006752 | 7372.134  | 4850.424  |
| NM_018590 | 11780.534 | 13436.793 | AK092872  | 5254.207  | 4752.535  | NM_006805 | 7222.524  | 5835.376  |
| NM_003178 | 3137.616  | 3288.767  | AF230496  | 1455.709  | 1567.988  | NM_016925 | 13367.876 | 28333.063 |
| NM_012437 | 9675.797  | 8752.998  | M16801    | 1631.857  | 1122.287  | BG534366  | 14150.767 | 5126.187  |
| NM_002607 | 2199.245  | 2254.327  | M94065    | 2988.099  | 1467.884  | BG698522  | 26478.482 | 18004.332 |
| AF116712  | 826.85    | 706.822   | NM_006068 | 3083.569  | 2281.811  | AA152346  | 1067.78   | 1035.896  |
| AF116626  | 9371.552  | 9478.779  | NM_002704 | 744.07    | 760.98    | L15189    | 2885.68   | 2683.165  |
| NM_001760 | 50645.953 | 64487.391 | U16752    | 1237.517  | 1165.244  | AB023420  | 15766.446 | 12547.645 |
| NM_002527 | 1577.663  | 1507.755  | M30134    | 558.974   | 460.677   | BI822179  | 12620.982 | 10189.355 |
| NM_005890 | 2480.283  | 2122.834  | NM_002038 | 17353.232 | 14242.636 | AF022912  | 4921.609  | 4074.605  |
| NM_007065 | 54398.723 | 44643.16  | NM_005729 | 29974.506 | 27654.432 | AA477428  | 16202.994 | 14613.59  |
| AF149785  | 10218.787 | 7976.306  | NM_015493 | 2495.319  | 2772.036  | AA156342  | 2376.882  | 2222.744  |
| NM_012068 | 25548.635 | 24176.354 | NM_003747 | 1074.981  | 1648.869  | R45594    | 16085.085 | 17096.525 |
| NM_004064 | 13594.728 | 18760.891 | AB037744  | 2260.593  | 2762.132  | AI355949  | 5326.001  | 4984.678  |
| NM_001256 | 9027.791  | 10359.071 | NM_007008 | 1235.16   | 1375.141  | AA278152  | 11876.656 | 10764.87  |
| NM_014704 | 5211.535  | 5294.549  | AL109708  | 1340.449  | 1198.63   | H75530    | 3643.701  | 2543.5    |
| NM_020205 | 1276.25   | 1056.899  | L29143    | 3677.966  | 3181.971  | AK000554  | 1541.14   | 1307.512  |
| NM_001227 | 2252.781  | 1869.528  | AF234532  | 3851.833  | 3912.093  | NM_006472 | 3254.313  | 2161.856  |
| NM_001191 | 16017.969 | 11882.494 | NM_002418 | 1879.064  | 1778.06   | NM_006793 | 37213.23  | 26089.609 |
| U15174    | 1385.889  | 1450.987  | NM_002090 | 1603.799  | 1607.518  | NM_001538 | 19911.725 | 10124.386 |
| NM_013342 | 4237.286  | 5182.483  | NM_004485 | 881.242   | 772.235   | X97261    | 18993.949 | 6691.137  |
| NM_014344 | 1810.416  | 2023.786  | NM_013296 | 15161.474 | 12892.581 | NM_001468 | 2031.747  | 1715.84   |
| AB040917  | 418.099   | 528.124   | AL117478  | 2461.112  | 1430.305  | NM_005410 | 816.303   | 803.946   |
| AL110261  | 5675.281  | 4018.471  | NM_005307 | 5899.776  | 3523.302  | D87666    | 53528.926 | 38477.598 |
| AA203539  | 712.528   | 564.994   | NM_005958 | 5043.177  | 2937.309  | NM_001315 | 2485.944  | 3338.587  |
| AK021786  | 2415.073  | 2523.645  | AF225426  | 1153.432  | 1428.808  | AF286095  | 3795.016  | 3673.62   |
| AF245505  | 3829.562  | 3954.248  | NM_005208 | 13977.143 | 6624.18   | NM_000878 | 2431.371  | 2433.454  |
| M26663    | 451.055   | 441.556   | AF099740  | 1180.074  | 1419.037  | S66407    | 3100.107  | 3698.632  |
| NM_004279 | 24673.393 | 15011.806 | NM_006117 | 13511.188 | 26875.664 | NM_004258 | 57493.738 | 55113.461 |
| NM_004851 | 30094.57  | 20882.705 | NM_002225 | 2414.675  | 2318.766  | NM_001981 | 7813.355  | 6766.763  |
| NM_001908 | 7814.086  | 9958.681  | NM_006229 | 852.48    | 775.752   | NM_001585 | 59023.219 | 62005.875 |
| NM_000285 | 26814.92  | 29585.303 | NM_015415 | 39247.625 | 27022.566 | AK026108  | 24855.52  | 17405.119 |
| NM_005911 | 26414.443 | 23164.566 | NM_004897 | 3536.869  | 4078.467  | NM_014446 | 2150.182  | 1985.245  |
| AV702690  | 5333.46   | 4391.335  | NM_002555 | 2211.198  | 1979.824  | U58096    | 16659.736 | 10109     |
| AL117452  | 23801.918 | 18241.324 | AF225418  | 1877.975  | 1799.633  | NM_016124 | 3378.003  | 3140.012  |
| NM_012230 | 2397.004  | 2012.399  | NM_000309 | 2243.411  | 2618.301  | NM_015948 | 8990.182  | 21138.16  |
| NM_014038 | 21860.957 | 29111.576 | NM_004528 | 12127.6   | 10120.622 | NM_000804 | 723.462   | 1370.11   |
| NM_002061 | 11118.433 | 12970.701 | AK026381  | 18399.264 | 13838.841 | NM_006555 | 3830.833  | 3667.898  |
| AF169974  | 3663.953  | 3494.326  | AF004711  | 369.199   | 1173.775  | NM_014521 | 4689.785  | 4472.434  |
| NM_004522 | 2757.141  | 2654.403  | AK023107  | 5603.665  | 5164.856  | NM_002445 | 3364.311  | 3531.186  |
| NM_005733 | 4219.549  | 3317.867  | NM_004578 | 485.49    | 736.9     | NM_017805 | 752.151   | 1091.928  |
| NM_018138 | 4779.026  | 4187.002  | NM_000647 | 2437.733  | 1699.634  | AK023202  | 3080.623  | 3380.411  |
| NM_019619 | 7111.266  | 5995.873  | NM_017604 | 4010.038  | 3068.417  | D63877    | 3349.229  | 3156.406  |
| AF183411  | 5175.271  | 5175.272  | NM_017738 | 18239.074 | 11844.807 | AF131760  | 2083.774  | 2383.997  |
| BF244591  | 3076.203  | 3374.62   | NM_016557 | 2548.711  | 1561.643  | NM_018698 | 1507.095  | 1597.95   |
| NM_005886 | 12329.825 | 11662.842 | NM_000623 | 2846.427  | 1296.601  | NM_006461 | 2616.888  | 2445.517  |
| U63785    | 4290.229  | 3141.184  | AF161348  | 1764.66   | 1182.9    | NM_018201 | 4709.063  | 4181.582  |
| NM_005966 | 4295.438  | 3683.706  | NM_018467 | 22726.387 | 9842.934  | NM_014438 | 1284.121  | 1381.285  |
| NM_003156 | 6567.142  | 5701.398  | AF150735  | 10040.725 | 8301.026  | AF159141  | 5913.436  | 1723.635  |
| NM_004744 | 730.594   | 1153.205  | NM_018183 | 2746.364  | 2057.068  | NM_016458 | 39657.395 | 15548.819 |

|           |           |           |           |           |           |           |           |           |
|-----------|-----------|-----------|-----------|-----------|-----------|-----------|-----------|-----------|
| NM_006473 | 2768.306  | 1811.466  | NM_012382 | 4225.391  | 4028.363  | AK022233  | 5705.536  | 4714.228  |
| NM_005653 | 4068.39   | 3061.376  | BF038366  | 1444.244  | 1026.865  | AK026410  | 25290.795 | 29891.893 |
| NM_014553 | 5335.551  | 4857.155  | NM_002452 | 9867.643  | 7040.566  | NM_014637 | 8003.657  | 12651.398 |
| NM_003440 | 2436.496  | 4393.072  | NM_012304 | 541.537   | 585.134   | NM_013379 | 32328.693 | 24944.961 |
| NM_004698 | 12809.86  | 11917.938 | NM_016440 | 37052.355 | 28782.848 | AF113208  | 22642.707 | 18886.396 |
| U41387    | 47932.168 | 38514.48  | NM_007194 | 2907.479  | 3163.903  | NM_006153 | 6789.288  | 6039.602  |
| NM_004516 | 22991.059 | 23605.299 | S74620    | 969.243   | 1000.931  | NM_012164 | 2955.118  | 4922.479  |
| NM_006513 | 10693.731 | 16035.131 | AF305239  | 1976.876  | 1174.546  | AK026010  | 780.019   | 1661.686  |
| NM_003685 | 38114.418 | 31050.16  | NM_002827 | 13682.566 | 7667.583  | AB011156  | 887.174   | 1383.449  |
| NM_002486 | 1781.657  | 1633.326  | NM_001946 | 735.02    | 556.467   | NM_018079 | 677.41    | 1169.862  |
| NM_006295 | 17846.279 | 12480.887 | BF035425  | 45995.465 | 31932.16  | NM_006752 | 4954.282  | 4306.868  |
| NM_001540 | 13475.608 | 10260.491 | NM_000508 | 1727.031  | 2053.88   | NM_006809 | 7477.029  | 7435.964  |
| NM_012111 | 24159.414 | 23540.727 | AB014558  | 2238.339  | 3157.516  | AF149304  | 1039.131  | 947.964   |
| NM_004470 | 37303.219 | 39168.52  | NM_006287 | 1689.218  | 1717.55   | NM_012095 | 8285.534  | 7249.625  |
| NM_001418 | 30046.939 | 37263.898 | NM_000118 | 6205.132  | 5575.37   | NM_018199 | 586.849   | 369.802   |
| NM_003756 | 61295.383 | 56531.133 | NM_000913 | 1128.327  | 957.454   | NM_013943 | 1438.216  | 1197.05   |
| AL049680  | 10207.65  | 9906.442  | NM_001298 | 51057.59  | 58965.504 | NM_001639 | 8373.497  | 6351.675  |
| AL133660  | 3773.519  | 4230.887  | BG325046  | 5548.565  | 5051.618  | BG698522  | 35577.371 | 33239.219 |
| NM_005932 | 2760.057  | 2261.954  | AI351740  | 31066.463 | 19453.17  | AA152346  | 1251.249  | 1141.507  |
| BF036874  | 3632.853  | 3540.922  | AA444051  | 20449.121 | 16629.25  | L15189    | 2134.059  | 1935.105  |
| BE888487  | 867.039   | 524.753   | NM_007164 | 22012.916 | 16930.027 | AB023420  | 15165.92  | 12558.292 |
| AF182419  | 3991.828  | 2475.737  | BE783826  | 50468.707 | 58292.523 | BI822179  | 12310.283 | 8175.939  |
| NM_004293 | 1479.901  | 1018.021  | X04827    | 2328.7    | 2143.566  | AF022912  | 5044.257  | 4876.709  |
| NM_004450 | 854.963   | 774.444   | H07088    | 6083.689  | 6165.045  | AA477428  | 16297.258 | 17014.463 |
| NM_007016 | 6401.168  | 10274.088 | AI004656  | 3016.518  | 3691.85   | AA156342  | 2578.889  | 2872.898  |
| NM_002703 | 19140.6   | 20538.861 | BC008428  | 517.577   | 892.765   | R45594    | 16732.553 | 15308.561 |
| NM_005375 | 4337.085  | 2994.668  | X98922    | 6025.149  | 7758.903  | AI143386  | 540.949   | 447.099   |
| NM_005985 | 4820.671  | 2651.434  | AK098435  | 7425.816  | 5618.331  | H46425    | 10353.624 | 11561.237 |
| AK021699  | 733.367   | 711.138   | AK092872  | 5408.809  | 3787.103  | AI355949  | 1441.441  | 1942.94   |
| NM_015906 | 8455.938  | 9939.791  | AF230496  | 1383.909  | 739.136   | H75530    | 4868.061  | 6601.19   |
| AK023759  | 3607.812  | 4014.571  | M16801    | 1223.603  | 413.839   | AK000554  | 1487.837  | 1892.317  |
| L25270    | 28712.697 | 23897.854 | U16752    | 1722.561  | 3105.451  | NM_006472 | 2815.068  | 2521.198  |
| AB033111  | 3143.203  | 2458.837  | M30134    | 1384.914  | 3016.323  | NM_002826 | 2838.004  | 2331.223  |
| AJ276316  | 1806.121  | 1333.727  | NM_000880 | 639.495   | 974.577   | X97261    | 19681.561 | 5987.126  |
| AF229246  | 13370.93  | 9258.649  | NM_002038 | 17166.344 | 14251.855 | NM_001468 | 512.867   | 882.806   |
| S64709    | 5535.958  | 6380.033  | NM_005729 | 27949.063 | 22298.611 | D87666    | 51580.504 | 33398.063 |
| NM_018488 | 1034.392  | 864.404   | NM_015493 | 2105.713  | 2298.344  | AF286095  | 4114.729  | 3640.656  |
| X56465    | 2271.414  | 1873.033  | NM_003747 | 1259.671  | 1756.356  | NM_000878 | 2449.709  | 2085.115  |
| NM_003071 | 19728.43  | 24311.816 | AB037744  | 2456.456  | 1621.503  | S66407    | 2798.379  | 2757.724  |
| NM_003108 | 758.511   | 1074.426  | NM_007008 | 1211.869  | 1403.202  | NM_016523 | 930.751   | 1091.238  |
| NM_013310 | 11970.027 | 9649.592  | AL109708  | 1453.573  | 1210.215  | NM_004258 | 59512.438 | 61381.699 |
| BC004958  | 10536.411 | 9950.386  | L29143    | 2707.304  | 2455.206  | NM_001981 | 7772.827  | 8294.933  |
| NM_005762 | 30395.371 | 25749.117 | AF234532  | 2310.711  | 2789.049  | NM_014654 | 1240.783  | 1443.73   |
| X84370    | 9536.787  | 9109.6    | NM_002418 | 1422.2    | 1506.818  | NM_001585 | 58186.059 | 59345.668 |
| NM_004039 | 2747.388  | 2107.428  | NM_002090 | 966.643   | 1974.158  | AK026108  | 27156.072 | 22808.908 |
| AB014558  | 3450.696  | 2529.16   | NM_013296 | 14882.044 | 22540.934 | NM_006379 | 4763.261  | 5651.733  |
| NM_006287 | 603.981   | 766.305   | AL117478  | 2573.458  | 2114.053  | BF571428  | 16914.695 | 17281.652 |
| NM_000118 | 10361.394 | 10087.867 | NM_005307 | 9306.236  | 12189.142 | NM_006246 | 4619.551  | 5667.867  |
| NM_000913 | 1134.835  | 1005.703  | NM_005958 | 5187.931  | 2396.059  | NM_004316 | 1269.897  | 1604.135  |
| NM_001298 | 62264.27  | 55314.977 | NM_002225 | 3207.823  | 6230.133  | NM_014446 | 1719.531  | 1977.37   |
| BG325046  | 6618.716  | 5368.451  | NM_006229 | 1929.058  | 5594.509  | U58096    | 16434.738 | 12008.509 |
| AI351740  | 42828.559 | 27607.422 | NM_015415 | 46895.84  | 46936.203 | NM_016929 | 18798.887 | 12028.118 |
| AA444051  | 37830.152 | 34377.266 | NM_004897 | 3622.777  | 3594.669  | NM_012323 | 2364.719  | 2202.634  |



|           |           |           |           |           |           |           |           |           |
|-----------|-----------|-----------|-----------|-----------|-----------|-----------|-----------|-----------|
| NM_007164 | 9647.436  | 8351.922  | NM_002555 | 1982.869  | 1854.739  | NM_003054 | 1168.547  | 1327.04   |
| BE783826  | 35928.227 | 42725.512 | AF225418  | 1947.642  | 1804.779  | NM_003042 | 2368.863  | 4821.157  |
| X04827    | 2675.758  | 2963.627  | NM_000309 | 2637.225  | 2588.24   | NM_00479C | 1062.029  | 2804.126  |
| H07088    | 12721.696 | 11675.3   | NM_004528 | 15876.085 | 12345.052 | NM_002219 | 6031.3    | 5738.099  |
| AI004656  | 5519.904  | 4629.672  | AK026381  | 17115.588 | 17240.631 | NM_006555 | 3502.375  | 3322.567  |
| BC020596  | 3169.902  | 3322.558  | AK023107  | 7502.21   | 7659.79   | NM_014521 | 4362.651  | 3968.221  |
| AF116606  | 63541.164 | 60236.383 | NM_004578 | 425.96    | 552.182   | NM_002445 | 2970.555  | 2910.869  |
| X98922    | 9551.721  | 9474.096  | NM_000647 | 1148.012  | 1342.542  | NM_017809 | 850.775   | 1068.589  |
| AK098435  | 15680.61  | 16752.328 | AB046793  | 186.268   | 654.166   | AK023202  | 3066.31   | 3707.447  |
| AK092872  | 12297.244 | 14025.118 | NM_017604 | 5259.248  | 7424.269  | D63877    | 3661.214  | 6504.75   |
| AF230496  | 2395.91   | 2921.861  | NM_017738 | 9678.913  | 22626.139 | AF131760  | 1860.045  | 2282.84   |
| M16801    | 1384.55   | 1464.966  | NM_016557 | 2358.427  | 2386.562  | NM_018698 | 1252.475  | 1663.634  |
| M94065    | 7294.958  | 6632.229  | NM_000623 | 3131.188  | 2118.89   | NM_006461 | 2408.222  | 2884.19   |
| NM_006068 | 3955.023  | 2761.197  | AF150735  | 9271.011  | 6821.037  | NM_018201 | 4445.556  | 4407.486  |
| NM_00088C | 439.296   | 375.439   | NM_018183 | 1969.319  | 2037.658  | NM_014438 | 1388.102  | 1553.611  |
| NM_002038 | 7388.715  | 6113.13   | NM_012382 | 5267.468  | 5048.342  | NM_01488C | 5520.211  | 4901.247  |
| NM_005729 | 44728.105 | 51035.516 | BF038366  | 1472.908  | 1179.905  | NM_003764 | 5201.002  | 4264.806  |
| NM_015493 | 3394.108  | 2562.535  | NM_002452 | 10819.499 | 8792.956  | NM_004829 | 4152.143  | 3309.977  |
| NM_003747 | 1937.201  | 1591.529  | NM_012304 | 513.499   | 598.842   | NM_006793 | 38314.059 | 24629.652 |
| AB037744  | 3159.129  | 2036.449  | NM_01644C | 31438.809 | 26079.451 | NM_001538 | 21792.045 | 13436.338 |
| AF141901  | 736.887   | 921.017   | NM_007194 | 3142.627  | 2984.155  | NM_006809 | 10114.842 | 24890.031 |
| NM_007008 | 1710.297  | 2001.383  | NM_000314 | 10531.559 | 9391.467  | AF149304  | 651.615   | 1111.591  |
| AL109708  | 3166.237  | 3400.204  | AB002369  | 1712.288  | 2247.663  | NM_012095 | 8650.146  | 9089.119  |
| L29143    | 2345.443  | 3275.428  | AF305239  | 1949.99   | 2377      | NM_016438 | 1803.515  | 2253.673  |
| AF234532  | 1917.349  | 2142.169  | NM_002827 | 12299.841 | 16409.379 | X73079    | 24518.869 | 20875.496 |
| NM_002418 | 2195.439  | 1997.614  | NM_001946 | 973.436   | 862.131   | NM_019091 | 948.473   | 832.53    |
| NM_00209C | 1990.712  | 2072.433  | BF035425  | 61673.074 | 67549.914 | AF264781  | 2013.446  | 1874.692  |
| NM_004485 | 1583.869  | 1471.595  | NM_001608 | 1226.102  | 612.567   | AK024215  | 6480.444  | 5160.792  |
| NM_012419 | 555.886   | 992.403   | NM_006287 | 2739.927  | 8443.303  | AB044661  | 3005.126  | 2689.812  |
| NM_013296 | 27802.629 | 37829.848 | NM_000118 | 7593.051  | 10795.969 | NM_000606 | 26845.756 | 17535.52  |
| AL117478  | 3503.845  | 4354.199  | NM_000913 | 1689.166  | 1927.596  | NM_016124 | 2994.781  | 2372.65   |
| NM_005307 | 3564.41   | 4340.277  | NM_001298 | 52573.914 | 57313.703 | NM_019079 | 500.235   | 512.671   |
| NM_005958 | 8778.529  | 9179.578  | BG325046  | 6489.613  | 4734.288  | U53530    | 3106.438  | 2386.327  |
| AF225426  | 1628.234  | 1895.8    | AI351740  | 33110.082 | 24711.096 | NM_006598 | 1098.518  | 955.627   |
| NM_005208 | 6487.955  | 6526.303  | AA444051  | 22248.627 | 20994.836 | NM_015948 | 8387.903  | 6552.874  |
| AF099740  | 1226.126  | 992.858   | NM_007164 | 30666.176 | 22825.195 | AK000554  | 3153.5    | 3003.508  |
| NM_006117 | 13701.192 | 9561.887  | BE783826  | 48335.348 | 57353.242 | NM_006472 | 2571.611  | 3438.742  |
| NM_002225 | 2523.097  | 1350.819  | X04827    | 2390.907  | 3044.499  | NM_002826 | 2371.667  | 2203.974  |
| NM_006229 | 984.127   | 751.423   | H07088    | 6057.332  | 6318.952  | AF159141  | 7948.715  | 6315.032  |
| NM_015415 | 46631.605 | 45678.984 | AI004656  | 2753.942  | 2891.065  | NM_016458 | 47259.305 | 32890.711 |
| NM_004897 | 6401.837  | 9766.341  | BC020596  | 3298.541  | 4293.146  | AK022233  | 2838.102  | 3354.215  |
| NM_002555 | 1773.105  | 1763.308  | AF116606  | 54266.012 | 58718.086 | AK026410  | 19790.926 | 24261.668 |
| AF225418  | 3425.488  | 2493.677  | X98922    | 5616.109  | 7533.506  | NM_014637 | 9563.363  | 17034.344 |
| NM_000309 | 4233.602  | 3068.091  | AK098435  | 7424.13   | 9355.517  | NM_013379 | 30869.834 | 27848.162 |
| NM_004528 | 11353.257 | 9338.393  | AK092872  | 4965.246  | 6542.022  | AF113208  | 21822.932 | 18971.676 |
| AK026381  | 11426.19  | 12203.52  | AF230496  | 1611.72   | 1721.612  | NM_006153 | 6518.635  | 4536.181  |
| AF004711  | 1181.885  | 849.164   | M16801    | 1637.268  | 1736.342  | NM_012164 | 3153.951  | 2234.966  |
| AK023107  | 15857.903 | 20630.711 | AF141901  | 932.226   | 2081.551  | AB011156  | 918.304   | 653.814   |
| NM_004578 | 815.91    | 888.411   | NM_007008 | 1466.163  | 2835.098  | NM_018079 | 508.167   | 632.55    |
| NM_000647 | 1727.302  | 1096.973  | AL109708  | 1809.027  | 2481.474  | NM_00476C | 11751.885 | 7615.964  |
| NM_017604 | 7133.889  | 8170.599  | L29143    | 3072.324  | 2497.435  | NM_006752 | 4900.616  | 4012.42   |
| NM_017738 | 23091.979 | 24310.336 | AF234532  | 3457      | 3180.285  | CY3Cy5    | 1046.149  | 308.034   |
| NM_016557 | 4140.787  | 5476.39   | NM_002418 | 1504.082  | 1074.139  | NM_021005 | 715.38    | 1212.022  |

|           |           |           |           |           |           |           |           |           |
|-----------|-----------|-----------|-----------|-----------|-----------|-----------|-----------|-----------|
| NM_000623 | 5641.573  | 5692.033  | NM_002090 | 806.406   | 1161.222  | SB        | 795.576   | 696.233   |
| AF161348  | 3180.375  | 3080.415  | NM_004485 | 1002.354  | 982.866   | AF086342  | 250.283   | 319.69    |
| NM_018467 | 13566.18  | 15512.176 | NM_013296 | 13834.904 | 14224.181 | AF086451  | 273.939   | 323.479   |
| AF113125  | 641.221   | 346.986   | AL117478  | 2117.978  | 2006.548  | AF086387  | 524.878   | 581.166   |
| AF150735  | 17828.279 | 27162.141 | NM_005307 | 3592.545  | 3509.414  | AF086443  | 665.658   | 1171.625  |
| NM_018183 | 3014.52   | 3458.221  | NM_005958 | 5497.457  | 5680.313  | AL389941  | 784.01    | 760.947   |
| NM_012382 | 6833.689  | 8215.854  | NM_013436 | 572.967   | 1183.941  | AB037756  | 998.644   | 722.39    |
| BF038366  | 2310.583  | 2086.91   | AF225426  | 703.204   | 1141.396  | AK001853  | 2465.127  | 1770.002  |
| NM_002452 | 13708.731 | 11564.264 | NM_005208 | 6922.356  | 8891.011  | AK025071  | 416.87    | 480.54    |
| NM_012304 | 944.684   | 911.239   | NM_000421 | 896.846   | 1367.928  | AK021888  | 377.86    | 386.315   |
| NM_016440 | 40276.563 | 47587.883 | AK025687  | 10759.043 | 20726.264 | AK022848  | 3903.865  | 3049.846  |
| NM_007194 | 6753.947  | 9176.49   | AF218941  | 2486.117  | 2645.353  | AL049957  | 890.464   | 697.152   |
| NM_000314 | 16271.015 | 17236.15  | AL137264  | 41350.621 | 33599.855 | NM_021005 | 413.14    | 393.429   |
| AB002369  | 2930.324  | 2786.807  | NM_002226 | 1139.693  | 686.536   | SB        | 552.453   | 323.955   |
| S74620    | 519.242   | 758.736   | NM_006854 | 16580.121 | 14306.947 | SR2       | 18177.988 | 11269.75  |
| AF305239  | 3013.887  | 2659.949  | NM_004580 | 5280.713  | 5624.636  | SR4       | 6018.257  | 5062.509  |
| NM_002827 | 13801.926 | 13988.351 | NM_020387 | 51430.238 | 62837.031 | SR6       | 682.944   | 789.109   |
| NM_001946 | 1480.573  | 1940.689  | NM_007246 | 2314.048  | 2462.071  | SR8       | 2529.108  | 7264.729  |
| BF035425  | 3173.156  | 3796.672  | AK026248  | 2356.302  | 2315.51   | SR10      | 9500.13   | 3104.353  |
| NM_001608 | 696.675   | 752.809   | NM_004578 | 346.992   | 410.113   | CY3Cy5    | 424.006   | 112.441   |
| NM_000159 | 30253.719 | 30005.557 | NM_000647 | 2193.716  | 1725.784  | AF086063  | 1085.021  | 1291.845  |
| NM_014638 | 3405.989  | 4300.179  | NM_017604 | 4531.34   | 4974.036  | AF086098  | 1223.974  | 1372.47   |
| AB014558  | 3409.477  | 2346.137  | NM_017738 | 19374.029 | 17583.004 | AF086076  | 444.935   | 402.123   |
| NM_000118 | 9509.665  | 8182.943  | NM_016557 | 2265.217  | 2951.31   | AL833393  | 1206.746  | 884.788   |
| NM_000913 | 1201.693  | 1234.886  | NM_000623 | 2761.694  | 2943.877  | AF088005  | 1284.805  | 1000.353  |
| NM_001298 | 62729.645 | 61252.059 | AF161348  | 2029.881  | 2471.483  | AF086096  | 2690.575  | 2177.247  |
| BG325046  | 7018.439  | 5928.104  | NM_018467 | 11904.935 | 14991.194 | AL390132  | 441.483   | 423.047   |
| AI351740  | 44451.016 | 33586.375 | NM_006068 | 2595.391  | 3608.431  | NM_017933 | 10132.696 | 5548.893  |
| AA444051  | 44121.625 | 50057.75  | NM_002038 | 23103.988 | 13984.859 | NM_017819 | 4333.01   | 2960.901  |
| NM_007164 | 8990.232  | 7870.288  | NM_005729 | 30699.855 | 14881.659 | NM_014803 | 513.842   | 352.106   |
| BE783826  | 30851.678 | 32465.039 | NM_001608 | 534.555   | 480.473   | AK024956  | 423.889   | 321.764   |
| X04827    | 2628.238  | 4077.521  | NM_000159 | 55255.367 | 64760.426 | AF147386  | 941.84    | 778.271   |
| H07088    | 14802.056 | 18091.311 | NM_014638 | 1801.729  | 2773.504  | AF273052  | 6109.91   | 3563.744  |
| AI004656  | 6683.406  | 8721.456  | AF099740  | 1255.686  | 1631.145  | NM_017943 | 3094.892  | 1985.348  |
| BC020596  | 3980.667  | 4984.389  | NM_006117 | 11465.37  | 10834.152 | AF147383  | 1776.308  | 956.885   |
| AF116606  | 60060.977 | 61438.82  | NM_002225 | 1984.452  | 1968.833  | AK025682  | 1167.135  | 689.938   |
| X98922    | 8754.61   | 7750.729  | NM_006229 | 801.528   | 1153.435  | NM_016478 | 12063.534 | 8354.606  |
| AK098435  | 13827.929 | 12545.327 | NM_015415 | 41866.027 | 33304.941 | AL389986  | 3199.742  | 2520.344  |
| AK092872  | 10755.416 | 9990.193  | NM_004897 | 3672.122  | 4566.246  | AF088052  | 1181.195  | 1003.264  |
| NM_013334 | 6220.692  | 4477.554  | NM_002555 | 2152.891  | 1601.542  | AK027155  | 9731.213  | 22817.201 |
| NM_002038 | 8092.397  | 7484.98   | AF225418  | 2456.485  | 2864.357  | AF221846  | 542.641   | 467.295   |
| NM_005729 | 52306.391 | 57738.742 | NM_000309 | 2521.253  | 2921.539  | AF264626  | 335.029   | 366.601   |
| NM_015493 | 4574.399  | 4865.657  | NM_004528 | 12031.998 | 13046.955 | AK024528  | 12454.481 | 7045.002  |
| NM_003747 | 1689.654  | 1450.985  | AK026381  | 11708.87  | 14606.64  | NM_015370 | 4001.684  | 2980.216  |
| AB037744  | 4116.215  | 3513.526  | NM_002450 | 33990.957 | 15726.838 | AF085917  | 787.216   | 653.554   |
| AF141901  | 1025.526  | 950.481   | NM_001686 | 1424.634  | 1883.253  | AF085989  | 627.31    | 824.078   |
| NM_007008 | 1947.98   | 2490.427  | NM_000705 | 929.231   | 1220.897  | AL360139  | 56860.285 | 47955.438 |
| AL109708  | 2548.958  | 2687.168  | NM_004231 | 55516.488 | 64302.703 | AF075110  | 1817.139  | 1376.44   |
| L29143    | 1364.389  | 1432.335  | NM_016577 | 1472.47   | 408.849   | AL137323  | 360.409   | 272.376   |
| AF234532  | 1722.384  | 1762.285  | AK023107  | 7357.949  | 3268.92   | AL137494  | 2587.278  | 1908.018  |
| NM_002418 | 2378.274  | 2456.634  | NM_013334 | 23347.281 | 18848.139 | AL162037  | 2482.093  | 2003.954  |
| NM_002090 | 2547.439  | 3798.837  | AL137675  | 255.587   | 290.931   | AL390150  | 728.806   | 474.288   |
| NM_004485 | 1707.879  | 1980.103  | AF150735  | 9304.095  | 8883.246  | NM_002761 | 452.75    | 556.402   |

|           |           |           |           |           |           |           |           |           |
|-----------|-----------|-----------|-----------|-----------|-----------|-----------|-----------|-----------|
| NM_012419 | 416.001   | 843.173   | NM_018183 | 2202.705  | 2205.863  | AK021962  | 421.204   | 646.444   |
| NM_013296 | 24064.613 | 22113.242 | NM_012382 | 4839.291  | 5645.266  | AK056674  | 870.089   | 925       |
| AL117478  | 2632.884  | 1761.007  | BF038366  | 1714.17   | 1954.278  | AK022856  | 374.955   | 401.837   |
| NM_005307 | 2733.82   | 2481.98   | NM_002452 | 10967.149 | 11280.663 | AK022042  | 604.065   | 656.771   |
| NM_005958 | 9450.15   | 10363.408 | NM_012304 | 507.231   | 676.714   | AL117588  | 485.799   | 450.058   |
| AF225426  | 2103.216  | 2649.471  | NM_016440 | 31122.896 | 42064.527 | AK024653  | 19451.48  | 10837.235 |
| NM_005208 | 7259.317  | 7805.846  | NM_007194 | 3145.138  | 3671.706  | AF103907  | 865.862   | 628.948   |
| X84370    | 11176.526 | 13012.568 | NM_000314 | 10453.615 | 11123.817 | AF094508  | 687.998   | 741.948   |
| NM_004039 | 3930.612  | 4479.788  | AB002369  | 1717.901  | 2860.978  | AF161351  | 923.28    | 760.11    |
| NM_002225 | 2789.949  | 2049.427  | S74620    | 1075.472  | 1705.901  | AF111782  | 3981.501  | 2649.704  |
| NM_006229 | 1314.182  | 1194.661  | AF305239  | 2013.795  | 927.262   | AF151530  | 1552.259  | 1058.775  |
| NM_015415 | 51827.887 | 53744.645 | NM_002827 | 16175.284 | 6544.334  | AK021991  | 402.532   | 376.511   |
| NM_004897 | 6112.552  | 8476.994  | NM_001946 | 2216.424  | 2259.086  | AK022093  | 3092.915  | 1924.742  |
| NM_002555 | 2754.506  | 3578.807  | BF035425  | 40636.805 | 22331.891 | AK022376  | 1059.59   | 642.118   |
| AF225418  | 4289.896  | 4531.184  | CY3Cy5    | 1723.029  | 130.508   | AK022005  | 507.789   | 404.026   |
| NM_000309 | 4464.95   | 4038.997  | NM_004176 | 6456.178  | 3087.221  | AK022137  | 542.974   | 403.081   |
| NM_004528 | 12440.469 | 10930.131 | NM_004548 | 32801.523 | 19821.066 | AK022272  | 2226.474  | 2002.742  |
| AK026381  | 13771.251 | 14623.478 | AB029001  | 2004.448  | 1470.042  | AL357201  | 418.892   | 455.063   |
| AK023107  | 12008.139 | 10876.963 | AB006624  | 4234.753  | 4083.225  | AF279780  | 24415.16  | 21803.891 |
| NM_004578 | 902.295   | 672.379   | AL109717  | 3041.329  | 5086.054  | AK022510  | 1416.113  | 1218.382  |
| NM_000647 | 1806.566  | 1792.38   | AK025473  | 1223.643  | 2215.668  | AK023878  | 787.189   | 1024.686  |
| AB046793  | 527.523   | 616.942   | AF146693  | 888.165   | 1160.138  | AK021851  | 743.094   | 880.83    |
| NM_017604 | 7535.948  | 7131.453  | AF271070  | 16987.717 | 16872.592 | L37717    | 563.787   | 556.04    |
| NM_017738 | 16759.691 | 13005.849 | NM_014903 | 668.786   | 1101.214  | AJ131609  | 2852.858  | 2610.969  |
| NM_016557 | 3039.711  | 2744.627  | AK055959  | 993.178   | 836.37    | BC019280  | 3009.424  | 1985.041  |
| NM_000623 | 4778.335  | 3551.047  | AF052141  | 1287.453  | 1177.141  | AF086498  | 665.514   | 455.302   |
| NM_018301 | 456.156   | 397.071   | AF052149  | 3035.265  | 2137.97   | AK000687  | 490.927   | 494.643   |
| AF161348  | 3945.084  | 3905.271  | AK025586  | 2019.675  | 1822.69   | AF079567  | 947.476   | 699.601   |
| NM_018467 | 14253.844 | 16459.816 | NM_004176 | 6603.011  | 6448.449  | AL049311  | 516.671   | 561.693   |
| NM_006068 | 5651.305  | 6478.655  | SR3       | 36678.246 | 28149.57  | AK000016  | 2752.772  | 2304.11   |
| NM_002704 | 664.015   | 1091.066  | SR5       | 3669.813  | 3524.726  | AK023367  | 1338.84   | 964.557   |
| AF150735  | 12666.901 | 10778.256 | L32606    | 1178.509  | 1326.807  | AL080209  | 1153.738  | 928.352   |
| NM_018183 | 4357.36   | 7217.956  | AK091125  | 1100.734  | 948.796   | AL137431  | 426.392   | 555.313   |
| NM_012382 | 7829.497  | 11075.415 | D16474    | 3831.761  | 4834.008  | NM_016255 | 519.102   | 247.348   |
| BF038366  | 2495.306  | 2638.967  | AL080072  | 1129.929  | 1465.606  | NM_014318 | 1561.237  | 1447.923  |
| NM_002452 | 15666.181 | 15436.471 | AK024898  | 575.652   | 729.231   | AL133089  | 4550.772  | 4900.063  |
| NM_012304 | 830.187   | 750.534   | NM_017687 | 3349.693  | 6374.814  | AK023526  | 750.302   | 1101.808  |
| NM_016440 | 38050.613 | 39886.523 | NM_017975 | 3504.401  | 2436.936  | BE266129  | 737.891   | 1131.194  |
| NM_007194 | 4772.181  | 4565.06   | AK025036  | 989.31    | 1169.494  | AK025602  | 6016.427  | 5244.48   |
| NM_000314 | 16025.839 | 14107.944 | AK024843  | 18883.48  | 16395.205 | AK026309  | 3469.427  | 3207.784  |
| AB002369  | 3467.381  | 3708.445  | AF074994  | 1059.235  | 733.177   | AL137486  | 7133.638  | 5552.253  |
| S74620    | 662.259   | 659.902   | NM_017670 | 10024.235 | 9190.154  | AL110162  | 1109.631  | 1027.513  |
| AF305239  | 2981.564  | 3008.253  | AF286598  | 931.8     | 2742.18   | AF119880  | 396.606   | 374.898   |
| NM_002827 | 12050.837 | 10233.129 | NM_004366 | 14971.463 | 15820.736 | AK022681  | 4027.414  | 3500.396  |
| NM_001946 | 1252.848  | 1646.774  | AJ296152  | 10015.48  | 6968.65   | NM_017708 | 524.018   | 645.692   |
| BF035425  | 3691.85   | 3068.149  | AB037721  | 9919.757  | 8207.804  | BE895529  | 3751.551  | 2857.929  |
| NM_001608 | 1444.772  | 1041.147  | AK024525  | 6016.921  | 3563.987  | AK000964  | 356.059   | 408.46    |
| NM_000158 | 34605.793 | 41844.668 | AK024544  | 1970.903  | 1431.791  | AL117536  | 5642.87   | 4662.673  |
| NM_014638 | 3335.307  | 3877.227  | AK021705  | 2690.306  | 2499.147  | NM_017751 | 6538.546  | 4173.95   |
| AF099740  | 1828.385  | 1992.846  | NM_016141 | 41262.715 | 45225.387 | NM_003771 | 1977.847  | 1814.831  |
| NM_006117 | 19435.512 | 24630.734 | AL109702  | 1077.789  | 1241.124  | NM_017860 | 800.51    | 588.812   |
| NM_006287 | 609.849   | 463.252   | AK025624  | 10656.839 | 8115.758  | X91195    | 40146.555 | 19003.248 |
| NM_000118 | 10026.994 | 10369.899 | AK026684  | 983.931   | 907.413   | AF086190  | 866.043   | 737.486   |

|           |           |           |           |           |           |           |           |           |
|-----------|-----------|-----------|-----------|-----------|-----------|-----------|-----------|-----------|
| NM_000913 | 1230.274  | 941.912   | AL110125  | 7886.185  | 5694.805  | NM_006143 | 439.618   | 379.208   |
| NM_001298 | 68073.93  | 66591.281 | AK022764  | 731.589   | 795.481   | AL050035  | 4358.932  | 3576.415  |
| BG325046  | 7715.911  | 8292.57   | Z83945    | 2156.49   | 2620.137  | AK024449  | 201.628   | 252.564   |
| AI351740  | 49538.336 | 51675.984 | AK022422  | 512.926   | 319.611   | AF090101  | 391.939   | 556.992   |
| AA444051  | 40298.508 | 41846.184 | AK023485  | 864.186   | 308.018   | AF040723  | 32686.18  | 25165.74  |
| NM_007164 | 10544.497 | 9574.046  | AK022474  | 15480.533 | 7041.447  | NM_015527 | 2969.588  | 3267.453  |
| BE783826  | 41324.82  | 47381.75  | AK022392  | 1351.141  | 1101.782  | X89675    | 1547.527  | 1407.873  |
| X04827    | 3330.586  | 4104.773  | AL117451  | 434.329   | 345.059   | NM_012188 | 1082.241  | 2164.388  |
| H07088    | 17509.529 | 23269.777 | AL049280  | 2048.587  | 1372.697  | NM_005798 | 7435.308  | 9581.742  |
| AI004656  | 6711.33   | 8946.725  | AK025212  | 5726.422  | 3965.999  | NM_004216 | 1734.061  | 1702.574  |
| BC008428  | 390.928   | 785.512   | AB021925  | 936.181   | 735.454   | NM_016288 | 35903.078 | 20591.604 |
| BC020596  | 3432.783  | 3722.07   | AL157503  | 7215.149  | 4772.5    | NM_001464 | 573.545   | 538.541   |
| AF116606  | 58284.129 | 56748.637 | NM_017674 | 14830.025 | 11234.424 | NM_002051 | 2478.499  | 2131.01   |
| X98922    | 9219.208  | 9464.514  | AK000811  | 890.617   | 1186.282  | AK022177  | 652.647   | 505.427   |
| AK098435  | 17244.646 | 21148.848 | AK000966  | 1801.768  | 1982.928  | AK023852  | 347.094   | 299.924   |
| AK092872  | 10890.103 | 9763.71   | NM_018630 | 5370.931  | 4975.747  | AF086466  | 2472.725  | 1937.973  |
| AF230496  | 1983.01   | 1700.317  | AF086175  | 926.226   | 550.851   | AB007962  | 3997.728  | 3526.435  |
| M16801    | 1483.934  | 1227.034  | AK002196  | 728.447   | 426.317   | AF005081  | 1224.383  | 1145.703  |
| NM_013334 | 6983.807  | 6467.594  | NM_004576 | 2165.893  | 1224.587  | AK026438  | 302.326   | 307.155   |
| AF113125  | 970.587   | 778.091   | AF040097  | 1017.958  | 543.653   | AK021546  | 368.365   | 315.769   |
| AL137675  | 1404.146  | 1870.637  | NM_020436 | 569.84    | 710.458   | AL050186  | 8716.2    | 7540.791  |
| AF141901  | 678.714   | 765.54    | AK024182  | 1920.427  | 1514.259  | AK021918  | 2684.861  | 2459.683  |
| NM_007008 | 2857.651  | 3800.573  | NM_006913 | 11822.607 | 10114.876 | AK021669  | 2674.023  | 2512.348  |
| AL109708  | 2365.465  | 2042.201  | NM_000499 | 12510.59  | 6100.665  | AL080113  | 25321.666 | 16542.102 |
| L29143    | 1759.785  | 1653.855  | AK001880  | 5267.708  | 5715.974  | AL050083  | 887.064   | 1081.111  |
| AF234532  | 2360.107  | 3169.048  | AF156166  | 5979.361  | 5157.367  | AK022766  | 375.34    | 599.904   |
| NM_002418 | 2732.046  | 2958.152  | NM_014373 | 4307.833  | 3314.741  | AL049422  | 3698.067  | 4358.495  |
| NM_002090 | 2106.526  | 2922.594  | NM_014206 | 34092.25  | 30985.311 | NM_000093 | 1551.49   | 1820.292  |
| NM_004485 | 1493.861  | 1669.619  | NM_001651 | 6595.894  | 6254.104  | NM_001779 | 6416.759  | 5704.035  |
| NM_012419 | 426.714   | 797.806   | L32786    | 2624.922  | 1891.808  | AB033059  | 1326.034  | 1349.193  |
| NM_013296 | 26967.096 | 28347.809 | AF150156  | 827.69    | 765.91    | NM_016484 | 2007.619  | 1963.34   |
| AL117478  | 4027.205  | 4940.058  | NM_016464 | 899.876   | 685.686   | AK026114  | 1051.259  | 1089.478  |
| NM_005307 | 2945.853  | 3073.565  | L40402    | 2078.127  | 1845.766  | NM_014452 | 676.187   | 601.544   |
| NM_005958 | 10319.688 | 12765.32  | Z36780    | 3086.731  | 2991.128  | NM_014683 | 616.603   | 851.305   |
| NM_013436 | 1491.21   | 2610.501  | AK022403  | 2409.246  | 2114.847  | AF023130  | 211.106   | 311.004   |
| AF225426  | 1385.795  | 2244.17   | AK022955  | 8702.302  | 5058.145  | AK021536  | 5590.693  | 5067.444  |
| NM_005208 | 6489.359  | 6343.373  | AK021760  | 830.864   | 503.494   | AF079529  | 357.846   | 342.21    |
| NM_000421 | 1645.673  | 2476.529  | BC035855  | 2380.619  | 1327.59   | NM_002600 | 906.737   | 860.681   |
| AK025687  | 37049.586 | 42482.102 | AL137408  | 18964.51  | 12152.697 | NM_003646 | 12909.808 | 7412.462  |
| AF218941  | 1997.765  | 2261.509  | AF054995  | 2671.073  | 2028.082  | NM_006663 | 772.964   | 736.422   |
| AL137264  | 12819.365 | 10704.519 | AL080176  | 4429.651  | 4058.965  | NM_006092 | 910.632   | 937.526   |
| NM_002226 | 1534.159  | 1148.089  | AK023627  | 4441.375  | 3328.497  | NM_003939 | 460.744   | 439.827   |
| X84370    | 12272.041 | 17015.969 | AK025949  | 1804.855  | 1736.866  | NM_012424 | 548.273   | 516.189   |
| NM_004039 | 4140.944  | 4885.972  | Y10259    | 4640.948  | 3431.138  | NM_002446 | 2293.706  | 2349.624  |
| NM_000508 | 421.47    | 787.348   | AK021725  | 5081.574  | 4436.549  | NM_000863 | 1176.303  | 778.558   |
| AB014558  | 5114.219  | 5901.024  | AF119893  | 762.439   | 564.469   | NM_006651 | 5942.225  | 5407.728  |
| NM_006854 | 24629.594 | 19795.613 | NM_002408 | 6919.741  | 7204.198  | NM_005336 | 7196.453  | 7141.68   |
| NM_004580 | 4377.277  | 4551.24   | AK024282  | 1989.328  | 1606.905  | NM_001419 | 7591.745  | 7610.668  |
| NM_020387 | 55225.941 | 51237.113 | AF085838  | 7377.933  | 4494.292  | AF119817  | 50800.625 | 46889.215 |
| NM_007246 | 4079.435  | 3259.29   | NM_018277 | 1684.947  | 1297.843  | AL035306  | 3414.968  | 4321.591  |
| AK026248  | 3647.042  | 4434.489  | AF014455  | 709.631   | 550.195   | NM_004230 | 9725.878  | 9130.639  |
| NM_004578 | 1674.605  | 2396.667  | AF086335  | 2740.405  | 2010.167  | AK024372  | 341.911   | 582.446   |
| NM_000647 | 1817.974  | 2367.928  | AB011118  | 24375.279 | 22718.215 | NM_014503 | 947.069   | 1264.68   |

|           |           |           |           |           |           |           |           |           |
|-----------|-----------|-----------|-----------|-----------|-----------|-----------|-----------|-----------|
| AB046793  | 726.884   | 816.937   | S66666    | 1024.376  | 834.683   | NM_01465  | 2822.477  | 3195.211  |
| NM_017604 | 10000.063 | 11777.414 | AK021476  | 3023.717  | 2849.391  | NM_00439  | 5998.872  | 5314.458  |
| NM_01773  | 21595.406 | 17821.717 | NM_01537  | 10084.962 | 5782.384  | NM_006337 | 6067.36   | 5255.547  |
| NM_016557 | 3823.074  | 5036.65   | NM_001176 | 1887.461  | 1141.293  | NM_004507 | 3196.545  | 3846.46   |
| NM_000623 | 6402.508  | 4966.728  | NM_013341 | 1093.02   | 891.202   | NM_00271  | 18163.053 | 16852.602 |
| AF161348  | 3149.547  | 3753.212  | NM_00406  | 603.389   | 844.516   | NM_01406  | 5357.419  | 7525.505  |
| NM_018467 | 13873.117 | 15784.15  | NM_004941 | 5857.7    | 3835.664  | NM_00474  | 14364.266 | 18345     |
| NM_00606  | 5530.77   | 6949.252  | AF151831  | 3337.465  | 2365.646  | BQ446064  | 1681.515  | 2225.624  |
| NM_002704 | 418.514   | 726.824   | AB011121  | 544.028   | 587.177   | AF302502  | 4296.564  | 6945.138  |
| U16752    | 951.923   | 1099.435  | AF083255  | 7604.154  | 6007.368  | AF274571  | 2222.219  | 4363.357  |
| NM_00088  | 601.696   | 434.382   | AK022605  | 1570.625  | 1506.981  | NM_00544  | 1105.329  | 2371.678  |
| NM_00203  | 10095.268 | 7484.226  | AL049955  | 27551.82  | 19017.816 | NM_00387  | 3468.427  | 5639.4    |
| NM_00572  | 42970.309 | 42518.262 | AF155654  | 7808.951  | 6731.058  | U69263    | 401.146   | 403.178   |
| NM_01549  | 4908.856  | 4823.569  | AF088044  | 929.888   | 1072.61   | NM_01605  | 15744.16  | 18215.338 |
| NM_003747 | 1571.764  | 1694.433  | AK000028  | 4289.121  | 3131.815  | NM_005427 | 1700.417  | 3350.859  |
| AB037744  | 3591.206  | 3092.636  | NM_01332  | 52582.512 | 39222.074 | NM_01631  | 1191.446  | 1852.113  |
| NM_00160  | 489.372   | 455.149   | AJ245902  | 1901.006  | 1670.42   | AF234887  | 666.799   | 1243.245  |
| NM_00015  | 35994.953 | 32402.08  | AL050039  | 1165.774  | 1181.365  | NM_00177  | 1806.837  | 3478.534  |
| NM_01463  | 2613.917  | 1887.938  | AF009316  | 860.817   | 790.041   | NM_00179  | 907.118   | 1657.527  |
| AF099740  | 1490.835  | 1288.381  | BE816678  | 550.069   | 420.835   | NM_00190  | 530.672   | 1129.352  |
| NM_006117 | 16275.266 | 16939.75  | AF087987  | 1394.793  | 1098.042  | U87223    | 25581.012 | 30416.34  |
| NM_00222  | 5394.409  | 8577.47   | H09474    | 4506.531  | 4015.189  | NM_005857 | 5543.649  | 10653.415 |
| NM_00255  | 2273.313  | 2470.003  | AB002368  | 18501.912 | 37493.203 | NM_00242  | 581.567   | 807.222   |
| AF225418  | 5448.98   | 6358.688  | AL360263  | 54229     | 65956.141 | NM_00042  | 3651.304  | 6910.692  |
| NM_00030  | 5051.447  | 5346.689  | BC012757  | 1167.055  | 1211.909  | AK027037  | 1065.477  | 2623.735  |
| NM_00452  | 13825.704 | 14131.639 | M96686    | 762.065   | 806.75    | NM_00387  | 14005.938 | 21257.715 |
| AK026381  | 13922.193 | 14557.235 | NM_00406  | 6448.255  | 5690.042  | AF191687  | 5530.748  | 10209.752 |
| NM_00245  | 53595.914 | 26702.293 | NM_00588  | 753.529   | 907.351   | NM_00304  | 403.365   | 731.118   |
| NM_00168  | 2775.349  | 3075.9    | NM_00444  | 1925.051  | 1653.823  | NM_000274 | 25108.434 | 27986.676 |
| NM_00497  | 674.263   | 1099.012  | NM_014591 | 4255.38   | 4346.702  | NM_00017  | 11174.582 | 17673.678 |
| NM_00070  | 1571.082  | 1396.883  | NM_014592 | 1036.458  | 951.378   | NM_000281 | 635.342   | 1467.271  |
| NM_004231 | 60799.746 | 57394.496 | NM_00194  | 635.156   | 601.081   | AK001295  | 3797.023  | 6066.432  |
| NM_016577 | 419.334   | 832.904   | NM_02003  | 3024.382  | 2363.284  | NM_006031 | 4906.612  | 7411.027  |
| AK023107  | 13106.646 | 13368.925 | NM_00665  | 1333.435  | 1699.459  | NM_00271  | 8792.568  | 10855.542 |
| NM_013334 | 6904.168  | 5234.761  | NM_014442 | 7541.025  | 6314.601  | NM_00102  | 56708.656 | 66136.563 |
| AF113125  | 666.842   | 358.433   | AB002313  | 1620.522  | 1521.217  | AB020660  | 2223.923  | 4195.164  |
| AL137675  | 428.592   | 906.877   | AB011167  | 4294.251  | 3689.978  | NM_00665  | 54030.848 | 64115.457 |
| NM_01818  | 3995.16   | 5870.789  | NM_00540  | 1208.397  | 1261.165  | NM_018051 | 2101.718  | 3033.187  |
| NM_01238  | 8281.601  | 11098.012 | NM_00020  | 7009.685  | 6000.608  | NM_015371 | 14939.157 | 22970.131 |
| BF038366  | 3446.08   | 4115.599  | NM_00218  | 57356.48  | 55994.66  | AB040915  | 6245.866  | 8914.472  |
| NM_00245  | 14385.299 | 10102.664 | AK027119  | 27592.197 | 19605.648 | AF147791  | 553.952   | 852.539   |
| NM_012304 | 807.292   | 434.612   | AB037727  | 50932.266 | 38286.66  | NM_00132  | 50887.984 | 62425.965 |
| NM_01644  | 43835.055 | 45920.754 | NM_00542  | 1022.639  | 887.618   | NM_00574  | 7753.141  | 8515.777  |
| NM_007194 | 5325.215  | 5433.825  | NM_00476  | 735.82    | 554.601   | NM_00669  | 4399.208  | 9095.002  |
| NM_000314 | 19247.174 | 27144.287 | NM_01406  | 12578.451 | 10417.333 | NM_00459  | 12428.878 | 22742.211 |
| AB002369  | 2625.16   | 1887.116  | D86964    | 7464.768  | 5997.21   | NM_006037 | 2247.674  | 4353.959  |
| S74620    | 352.329   | 348.138   | AL049801  | 1292.936  | 1929.859  | NM_015871 | 11015.444 | 18755.277 |
| AF305239  | 2631.776  | 2133.58   | NM_01639  | 14954.187 | 18221.768 | NM_019037 | 25170.611 | 28042.133 |
| NM_002827 | 12776.503 | 13946.142 | NM_003152 | 2733.721  | 3580.25   | NM_015891 | 5567.757  | 7794.659  |
| NM_00194  | 1163.471  | 918.827   | NM_006342 | 4878.597  | 4717.643  | NM_00680  | 1819.253  | 2280.558  |
| BF035425  | 3364.935  | 3422.788  | NM_01639  | 3778.311  | 4532.123  | AB037778  | 3214.113  | 3425.889  |
| CY3Cy5    | 1415.244  | 217.013   | NM_00568  | 3088.951  | 3862.46   | NM_00506  | 24044.365 | 19995.219 |
| NM_00417  | 9655.862  | 9473.942  | NM_00555  | 43853.102 | 28308.834 | NM_00308  | 8560.124  | 5856.258  |

|           |           |           |           |           |           |           |           |           |
|-----------|-----------|-----------|-----------|-----------|-----------|-----------|-----------|-----------|
| NM_00454E | 57434.992 | 63230.164 | NM_006717 | 2821.321  | 2769.534  | NM_00375E | 13932.11  | 11168.23  |
| AK027120  | 657.255   | 775.041   | AL109786  | 3235.727  | 2887.64   | NM_00622E | 441.726   | 449.876   |
| AB029001  | 2276.542  | 4322.934  | AK026479  | 6368.541  | 4040.928  | NM_01759C | 2349.835  | 1341.901  |
| AB006624  | 2813.252  | 3109.897  | AK022860  | 5542.705  | 5181.354  | AB011145  | 5183.119  | 4903.648  |
| AL109717  | 905.625   | 883.495   | X60188    | 46276.398 | 36988.156 | NM_00375C | 27531.906 | 16986.281 |
| AK025473  | 1041.48   | 746.592   | NM_005977 | 2811.758  | 3007.596  | M92422    | 3181.389  | 2282.909  |
| AF146693  | 451.418   | 722.805   | NM_002747 | 683.702   | 609.772   | NM_01786E | 2612.113  | 1928.787  |
| AF271070  | 19394.906 | 19218.633 | NM_00626E | 19043.721 | 24306.752 | NM_00186E | 290.215   | 196.516   |
| NM_01490E | 729.289   | 600.18    | NM_00312E | 1154.302  | 1542.509  | X69637    | 243.817   | 260.902   |
| AK055959  | 1251.134  | 1155.271  | NM_00605E | 4501.398  | 4622.672  | NM_00421E | 1267.407  | 1702.1    |
| AF052141  | 1558.823  | 1650.287  | NM_000347 | 12303.189 | 10242.295 | NM_01815E | 47212.418 | 48799.266 |
| AF052149  | 3190.946  | 2331.861  | M13452    | 2725.949  | 1961.343  | NM_00081E | 15544.751 | 20574.018 |
| AK025586  | 1775.986  | 1178.384  | AF082075  | 1867.603  | 1662.301  | NM_00251E | 5528.298  | 6070.241  |
| NM_00417E | 7421.873  | 5209.219  | NM_016114 | 2554.184  | 2131.257  | NM_01742E | 2523.264  | 3160.09   |
| NM_00454E | 34397.898 | 18094.744 | AY007114  | 1656.407  | 1435.094  | NM_00152E | 14305.013 | 16090.476 |
| SR1       | 83255.055 | 62606.879 | AF086604  | 798.762   | 755.785   | NM_00088E | 8310.813  | 9398.947  |
| SR3       | 21969.643 | 16304.049 | AB000895  | 1227.148  | 1803.932  | AF254086  | 2728.596  | 2512.718  |
| SR5       | 2646.452  | 3043.694  | X80031    | 1195.448  | 4445.837  | AL390142  | 3011.72   | 2789.725  |
| SR7       | 3051.407  | 22737.836 | AF019382  | 1399.653  | 2524.689  | NM_00656E | 2019.464  | 1638.988  |
| SR9       | 11210.562 | 2701.78   | NM_015601 | 1242.937  | 953.889   | AB007930  | 4206.823  | 3676.183  |
| CY3Cy5    | 1739.52   | 307.447   | NM_00178C | 24835.947 | 24747.961 | X76978    | 719.697   | 774.582   |
| L32606    | 689.356   | 1029.304  | AJ277442  | 1307.899  | 1574.252  | AJ005273  | 1629.901  | 1569.417  |
| D16474    | 814.298   | 846.783   | NM_00456E | 3106.721  | 2185.26   | AK021892  | 1654.452  | 1235      |
| AL080072  | 615.482   | 406.772   | AF089088  | 2053.165  | 1591.822  | NM_017637 | 255.805   | 333.393   |
| AL035301  | 470.609   | 600.356   | L07557    | 6067.253  | 4937.877  | NM_003121 | 17658.529 | 9802.408  |
| NM_017687 | 2604.237  | 2609.776  | NM_00279E | 40372.484 | 23378.066 | NM_003437 | 4319.192  | 2785.851  |
| NM_01797E | 5960.991  | 13726.009 | D78514    | 10143.674 | 6252.387  | NM_018337 | 12986.726 | 9580.72   |
| AK025036  | 1312.629  | 1086.164  | AK021665  | 1707.2    | 2046.193  | NM_01804E | 3453.866  | 2303.336  |
| AK024843  | 16881.561 | 12018.347 | NM_01336E | 1125.721  | 1572.875  | NM_006481 | 3518.825  | 2670.442  |
| AF074994  | 864.686   | 758.258   | NM_002787 | 38019.699 | 43723.543 | AB011115  | 812.959   | 603.27    |
| NM_01767C | 8966.258  | 6299.15   | U95006    | 16723.525 | 19758.955 | NM_00391C | 18380.807 | 14603.275 |
| AK021468  | 451.106   | 365.714   | NM_003347 | 13084.521 | 31716.146 | AB007913  | 3665.777  | 3726.981  |
| BC033020  | 902.006   | 744.9     | AF273051  | 2044.601  | 3316.269  | L09080    | 16589.068 | 19319.621 |
| NM_00436E | 5241.37   | 5200.214  | NM_01451E | 9978.811  | 13825.307 | NM_00732E | 12890.551 | 18672.285 |
| AK026168  | 2209.764  | 1566.641  | AK021868  | 2469.054  | 4327.769  | AK023080  | 379.064   | 372.078   |
| AJ296152  | 8960.361  | 6426.464  | AK000643  | 54946.277 | 69454.398 | NM_00188E | 4883.281  | 7046.337  |
| AK001067  | 3084.737  | 2166.917  | NM_018421 | 5134.579  | 3940.671  | NM_004467 | 972.819   | 1443.081  |
| AK027088  | 12743.813 | 8445.112  | AB014574  | 54218.414 | 58734.719 | NM_00562E | 283.463   | 171.761   |
| AB037721  | 968.491   | 730.443   | NM_020127 | 2738.481  | 2818.489  | NM_01805E | 15399.789 | 17072.576 |
| AK024525  | 849.807   | 861.262   | NM_01562E | 8965.328  | 9053.691  | NM_00454E | 14231.296 | 13006.973 |
| AK024909  | 510.685   | 1101.841  | AB045116  | 796.57    | 857.711   | X69079    | 47297.004 | 45956.082 |
| AK024544  | 656.61    | 892.493   | L49054    | 1113.322  | 2126.312  | BI759406  | 24016.256 | 17951.43  |
| AK021705  | 2425.273  | 2749.884  | NM_014727 | 4735.249  | 10864.216 | R76099    | 5441.104  | 4735.673  |
| NM_016141 | 9333.401  | 9811.915  | BE885010  | 1410.22   | 2275.478  | S74445    | 1489.474  | 1370.081  |
| AL109702  | 1198.194  | 1387.884  | NM_00019E | 455.127   | 455.142   | BI763360  | 4683.904  | 3421.306  |
| AK025624  | 13132.021 | 16164.892 | NM_00294E | 4562.334  | 4964.823  | D25538    | 1448.553  | 1119.282  |
| AK026684  | 948.461   | 932.661   | AL133649  | 1771.984  | 1789.364  | NM_00036C | 21126.896 | 16647.947 |
| AL110125  | 1304.39   | 806.694   | AB018303  | 719.673   | 729.918   | D49950    | 387.063   | 306.671   |
| AK022764  | 895.961   | 727.193   | NM_006454 | 8622.501  | 7419.669  | NM_00184E | 549.466   | 517.792   |
| X89744    | 484.602   | 248.065   | NM_01584E | 6029.601  | 5595.807  | X03635    | 5030.783  | 4623.949  |
| AJ002785  | 609.802   | 438.101   | NM_01597E | 25778.146 | 21920.924 | BC011847  | 58519.012 | 63254.086 |
| Z83945    | 354.636   | 263.77    | NM_01613E | 3492.535  | 9774.963  | X03348    | 1134.728  | 1018.268  |
| AK022422  | 856.434   | 1463.953  | NM_01800E | 4396.874  | 6363.179  | AF353674  | 3656.69   | 3065.641  |

|           |           |           |           |           |           |           |           |           |
|-----------|-----------|-----------|-----------|-----------|-----------|-----------|-----------|-----------|
| AK023485  | 1583.025  | 1648.605  | NM_016090 | 2554.533  | 3374.175  | BC002645  | 4098.634  | 3041.799  |
| AK022474  | 15244.192 | 15861.52  | NM_001013 | 52480.906 | 65664.047 | NM_021138 | 3709.666  | 3354.331  |
| AK022392  | 515.043   | 720.083   | AK024040  | 13862.533 | 41008.883 | BC002792  | 4724.868  | 7221.399  |
| AL117451  | 822.193   | 796.515   | NM_005061 | 11576.168 | 15067.443 | NM_002286 | 52839.238 | 62563.305 |
| AL049280  | 1441.633  | 572.66    | NM_000997 | 53727.152 | 63720.699 | NM_002164 | 1291.831  | 2655.416  |
| AK025212  | 4469.683  | 4632.952  | AF182417  | 56000.633 | 50428.23  | NM_003811 | 15294.521 | 28732.502 |
| AB021925  | 603.394   | 401.734   | AL137354  | 41415.746 | 27659.205 | NM_002981 | 6910.991  | 8201.677  |
| AL157503  | 6857.451  | 5113.942  | NM_001023 | 53891.395 | 66991.055 | NM_001244 | 2813.952  | 3863.06   |
| AK000053  | 792.252   | 594.389   | AK021571  | 17343.859 | 16631.154 | NM_012275 | 475.711   | 706.618   |
| AK000786  | 564.232   | 295.02    | AK022178  | 2712.562  | 3497.415  | NM_006137 | 2081.322  | 2108.44   |
| AK000935  | 1370.993  | 964.588   | NM_006011 | 2278.096  | 4645.861  | NM_016135 | 27977.047 | 20604.111 |
| AK021458  | 2039.274  | 1337.248  | L00635    | 3600.406  | 5918.774  | AL117468  | 5865.572  | 7241.873  |
| NM_017674 | 931.104   | 617.018   | NM_002541 | 4301.844  | 2922.734  | NM_019613 | 5176.244  | 5124.145  |
| AK000811  | 727.851   | 689.806   | NM_000056 | 8650.268  | 5587.183  | NM_005382 | 1240.695  | 1132.891  |
| AK000966  | 1639.022  | 1196.102  | NM_016311 | 17191.477 | 10685.095 | AK027086  | 2586.925  | 2354.842  |
| NM_018630 | 9038.277  | 16123.776 | NM_001867 | 51980.27  | 40075.281 | AB032997  | 761.043   | 750.468   |
| AF086175  | 1487.285  | 2029.801  | NM_002300 | 54784.629 | 69744.914 | AL096857  | 2696.62   | 2759.826  |
| AK002196  | 1228.702  | 1589.776  | NM_000290 | 10110.191 | 7925.009  | AB002351  | 331.039   | 226.461   |
| NM_004576 | 552.262   | 634.691   | NM_016538 | 5061.259  | 3853.324  | X07203    | 18958.908 | 12839.955 |
| AF040097  | 944.052   | 973.655   | AK023275  | 9353.516  | 7092.417  | AB040104  | 557.987   | 395.115   |
| AK024182  | 3227.861  | 4070.128  | AJ223352  | 7764.943  | 8026.034  | NM_003834 | 6181.704  | 6149.251  |
| NM_006913 | 9611.927  | 12123.643 | NM_012238 | 4117.488  | 5908.179  | NM_005955 | 5646.789  | 4829.983  |
| NM_000495 | 13549.805 | 9037.958  | NM_016539 | 11757.868 | 19118.34  | NM_003381 | 1530.866  | 1035.929  |
| AK001880  | 6173.608  | 9396.727  | NM_006807 | 21382.629 | 24163.893 | NM_005756 | 1111.383  | 1089.82   |
| AF156166  | 3473.352  | 3162.681  | NM_000326 | 491.93    | 822.959   | NM_003702 | 15325.166 | 11145.888 |
| NM_014373 | 3968.406  | 3847.061  | L16464    | 1387.198  | 2793.585  | NM_000365 | 1064.174  | 1215.43   |
| NM_014206 | 27903.256 | 15039.26  | NM_006532 | 13032.991 | 16870.957 | NM_004405 | 2087.096  | 2521.281  |
| NM_001651 | 1625.032  | 1419.79   | U07132    | 11953.984 | 10693.223 | NM_001988 | 6990.155  | 7863.9    |
| L32786    | 1221.21   | 1060.51   | NM_003436 | 806.282   | 1493.92   | AF073770  | 1904.654  | 2076.937  |
| AL355720  | 5422.448  | 3742.061  | AK027006  | 536.334   | 575.748   | AL359401  | 5236.383  | 7144.75   |
| AK002023  | 686.05    | 568.356   | AB034691  | 375.564   | 657.775   | NM_012213 | 1453.809  | 1975.325  |
| NM_016464 | 768.235   | 550.346   | NM_001675 | 2496.354  | 1545.554  | NM_016573 | 5611.652  | 4890.293  |
| Z36780    | 3819.911  | 7389.193  | NM_003422 | 3487.667  | 4571.853  | NM_001303 | 13190.798 | 14108.855 |
| AK022403  | 1575.294  | 3027.356  | NM_001451 | 2519.418  | 3420.313  | M21304    | 438.708   | 410.885   |
| AK022955  | 12084.027 | 14075.8   | NM_014779 | 3316.562  | 5361.304  | NM_001975 | 859.526   | 1085.225  |
| AF131741  | 520.452   | 1120.647  | NM_014446 | 1050.459  | 1008.403  | AB040896  | 970.683   | 975.507   |
| AK021760  | 1174.775  | 1435.874  | U58096    | 18749.096 | 15939.525 | NM_001107 | 3061.522  | 3210.833  |
| BC035855  | 922.387   | 870.688   | NM_016929 | 12093.657 | 12610.405 | AF084645  | 682.36    | 723.815   |
| AL137408  | 4894.539  | 3817.047  | NM_012323 | 1869.114  | 2244.955  | AF151851  | 7640.492  | 7882.44   |
| AF054995  | 3327.863  | 3616.979  | NM_006942 | 596.492   | 763.535   | NM_003471 | 339.339   | 263.504   |
| AL080176  | 6221.248  | 8774.842  | NM_018199 | 1028.495  | 644.828   | AF220417  | 1328.81   | 1562.356  |
| AK023627  | 4524.754  | 5958.423  | NM_013943 | 1557.453  | 1450.044  | NM_001122 | 30240.156 | 21758.92  |
| AK025949  | 1041.927  | 1640.177  | NM_001639 | 14908.469 | 16615.146 | NM_004591 | 6870.254  | 4119.446  |
| Y10259    | 7195.145  | 12289.359 | H39560    | 779.589   | 829.487   | NM_006274 | 256.782   | 147.897   |
| AK021725  | 4610.871  | 4039.929  | BG534366  | 19599.426 | 16159.038 | AL133027  | 2246.272  | 1958.477  |
| AF119893  | 531.839   | 612.401   | BG698522  | 22803.793 | 27839.086 | AB037732  | 1403.562  | 1211.436  |
| NM_002408 | 6305.126  | 4387.665  | AA152346  | 1458.601  | 1484.914  | NM_005767 | 466.803   | 399.786   |
| AK024282  | 1274.615  | 1204.116  | L15189    | 3257.929  | 4074.99   | NM_001837 | 508.344   | 541.311   |
| AF085838  | 9349.469  | 6925.312  | AB023420  | 20895.264 | 24603.684 | NM_001835 | 53112.09  | 64773.652 |
| NM_018277 | 399.484   | 257.549   | BI822179  | 15663.896 | 16986.35  | BC016029  | 633.62    | 874.802   |
| AF014455  | 725.629   | 586.289   | AF022912  | 7249.535  | 8980.177  | M27487    | 37593.73  | 31507.512 |
| AF086335  | 992.623   | 659.197   | AA477428  | 19659.451 | 26292.563 | NM_002611 | 2088.185  | 2278.469  |
| AL355741  | 458.028   | 376.379   | AA156342  | 3714.926  | 3837.119  | NM_017417 | 791.202   | 576.317   |

|           |           |           |           |           |           |           |           |           |
|-----------|-----------|-----------|-----------|-----------|-----------|-----------|-----------|-----------|
| AB011118  | 11284.105 | 8328.771  | R45594    | 22272.199 | 25902.539 | AL133602  | 2376.9    | 2835.558  |
| S66666    | 902.064   | 692.643   | H46425    | 5928.609  | 7671.656  | AF037219  | 3122.994  | 2859.723  |
| AK021476  | 503.784   | 364.218   | AI355949  | 1648.999  | 2416.176  | AK026075  | 409.73    | 447.469   |
| NM_015376 | 15571.502 | 26969.246 | AA278152  | 17477.059 | 28024.238 | NM_000251 | 3206.542  | 3261.265  |
| NM_001176 | 1497.354  | 2208.106  | H75530    | 6380.75   | 9598.254  | AF118071  | 334.427   | 213.983   |
| NM_013341 | 1209.395  | 1135.854  | NM_005036 | 1738.55   | 2411.261  | NM_006036 | 2882.029  | 2343.269  |
| NM_016536 | 832.775   | 1193.478  | NM_018201 | 4661.782  | 3228.338  | AB011133  | 2703.281  | 1776.347  |
| NM_004066 | 1096.558  | 1108.55   | NM_014438 | 1522.718  | 1696.723  | NM_017572 | 26472.695 | 15671.713 |
| NM_004941 | 5245.093  | 5111.522  | NM_014880 | 2354.906  | 6130.868  | NM_018444 | 1508.037  | 922.164   |
| AF151831  | 4008.738  | 4427.582  | NM_003764 | 6272.579  | 5327.84   | NM_000252 | 1055.52   | 755.083   |
| AB011121  | 815.171   | 688.126   | NM_004829 | 2335.942  | 2154.612  | NM_006947 | 7745.642  | 5540.894  |
| AF083255  | 9161.63   | 8950.308  | NM_006793 | 41735.645 | 29891.891 | NM_017917 | 2132.969  | 1745.148  |
| AK022605  | 1509.212  | 1893.543  | NM_001538 | 9664.718  | 7799.076  | NM_004090 | 3724.651  | 2507.648  |
| AL049955  | 39906.988 | 54981.336 | X97261    | 36031.434 | 23189.84  | NM_014634 | 6861.458  | 5328.455  |
| AF155654  | 7980.616  | 16568.029 | NM_001468 | 830.905   | 881.315   | NM_001919 | 19098.947 | 15453.8   |
| AF088044  | 691.085   | 1280.169  | NM_005410 | 587.483   | 830.685   | BC031485  | 1923.298  | 1992.622  |
| AK000028  | 3811.139  | 3429.752  | D87666    | 54471.035 | 59076.512 | NM_004092 | 5734.53   | 7953.919  |
| NM_013320 | 55155.199 | 41813.133 | NM_002921 | 1267.996  | 1973.174  | X15624    | 1375.975  | 2188.287  |
| AJ245902  | 1105.395  | 973.37    | NM_001315 | 3774.027  | 10290.718 | AK023080  | 456.67    | 664.627   |
| AL050039  | 765.73    | 733.202   | AF286095  | 7983.453  | 11619.229 | NM_001886 | 4388.802  | 6536.644  |
| AF009316  | 811.547   | 769.803   | NM_000878 | 2511.925  | 3292.355  | NM_004467 | 885.847   | 1348.105  |
| BE816678  | 638.806   | 536.044   | S66407    | 3071.963  | 4357.323  | NM_005622 | 290.984   | 268.99    |
| AF087987  | 1431.964  | 971.088   | NM_016523 | 299.233   | 1103.078  | NM_018058 | 15424.346 | 18661.248 |
| Z36840    | 434.443   | 255.532   | NM_018727 | 467.296   | 430.412   | NM_004548 | 13898.404 | 16042.12  |
| AK021723  | 490.73    | 458.148   | NM_004258 | 51734.836 | 61804.715 | X69079    | 47215.699 | 41536.191 |
| H09474    | 1065.738  | 646.389   | NM_001981 | 10169.764 | 15408.176 | BI759406  | 20562.453 | 14893.603 |
| AB002368  | 14328.861 | 13379.155 | NM_001585 | 51762.57  | 65358.438 | R76099    | 6087.375  | 5094.054  |
| AL360263  | 54020.129 | 42372.434 | AK026108  | 34417.215 | 61020.727 | S74445    | 3027.453  | 2837.393  |
| BC012757  | 2598.594  | 4626.443  | AF149304  | 966.868   | 626.433   | BI763360  | 4526.25   | 3326.53   |
| M96686    | 1354.012  | 1321.408  | NM_012095 | 8990.875  | 6909.779  | D25538    | 1431.033  | 1201.779  |
| NM_004062 | 5927.003  | 7553.43   | X73079    | 38694.652 | 30047.035 | NM_000360 | 19365.814 | 14888.402 |
| NM_005883 | 632.038   | 811.31    | NM_019091 | 910.114   | 452.224   | D49950    | 407.838   | 302.82    |
| NM_004449 | 2293.239  | 2643.631  | AF264781  | 2441.311  | 1592.847  | NM_001849 | 537.117   | 453.79    |
| NM_014591 | 5621.988  | 6676.192  | AK022823  | 621.616   | 103.697   | X03635    | 4557.106  | 2999.621  |
| NM_014592 | 807.409   | 994.673   | NM_002456 | 522.847   | 325.531   | BC011847  | 49495.348 | 61255.191 |
| NM_020039 | 1343.339  | 946.059   | NM_016124 | 6498.1    | 7906.208  | X03348    | 1238.609  | 1096.221  |
| NM_006653 | 1473.509  | 1507.865  | NM_015948 | 6090.048  | 11145.604 | AF353674  | 3412.636  | 2930.462  |
| NM_014442 | 863.27    | 1436.12   | NM_000804 | 1912.521  | 2970.883  | BC002645  | 3727.956  | 2115.365  |
| AB002313  | 1701.843  | 3006.485  | NM_006555 | 5983.311  | 8491.992  | NM_021138 | 4115.864  | 3505.983  |
| AB011167  | 6741.392  | 9110.053  | NM_014521 | 4203.986  | 5700.771  | BC002792  | 4238.662  | 5430.267  |
| NM_005409 | 385.065   | 436.013   | NM_002445 | 3975.051  | 6646.257  | NM_001523 | 765.341   | 586.857   |
| NM_000208 | 1907.906  | 1477.544  | NM_017809 | 2613.249  | 6383.441  | NM_017423 | 886.537   | 1136.181  |
| NM_002188 | 20863.01  | 13885.661 | AK023202  | 6294.019  | 15040.416 | Z70705    | 869.662   | 1325.936  |
| AK027119  | 7460.486  | 4466.365  | D63877    | 4703.007  | 6597.711  | NM_003811 | 12756.264 | 23357.496 |
| AB037727  | 5739.842  | 4017.445  | AF131760  | 2370.729  | 4136.131  | NM_002981 | 6743.196  | 9196.836  |
| NM_005426 | 408.909   | 405.856   | NM_018698 | 2791.658  | 7773.409  | NM_001244 | 3149.502  | 4386.373  |
| NM_004763 | 742.779   | 724.933   | NM_006461 | 5420.732  | 9700.739  | NM_012275 | 517.933   | 846.94    |
| NM_014063 | 5830.762  | 3403.532  | NM_002826 | 3566.278  | 1230.922  | NM_006137 | 2100.018  | 2949.578  |
| D86964    | 8029.234  | 5616.001  | AF159141  | 7748.002  | 3092.058  | NM_016139 | 30774.299 | 26301.627 |
| AL049801  | 1593.442  | 1059.859  | NM_016458 | 27482.414 | 14288.103 | AL117468  | 6462.889  | 7425.323  |
| NM_016395 | 13384.327 | 8538.103  | AK022233  | 4201.937  | 2323.988  | NM_019613 | 5560.915  | 5179.315  |
| NM_003152 | 2880.185  | 2508.159  | AK026410  | 17757.555 | 11278.76  | NM_005382 | 1734.64   | 1849.348  |
| NM_006342 | 6375.645  | 6957.432  | NM_014637 | 8884.109  | 6231.997  | AK027086  | 3756.24   | 3487.167  |



|           |           |           |           |           |           |           |           |           |
|-----------|-----------|-----------|-----------|-----------|-----------|-----------|-----------|-----------|
| NM_016396 | 4226.174  | 7678.118  | NM_013379 | 39160.043 | 30436.584 | AB032997  | 742.207   | 553.649   |
| NM_005689 | 3938.165  | 4083.321  | AF113208  | 14495.051 | 34006.836 | AL096857  | 2687.688  | 2711.316  |
| AF086546  | 241.616   | 337.894   | NM_006153 | 6420.506  | 8927.229  | AB002351  | 331.985   | 211.353   |
| NM_005552 | 28685.602 | 33555.555 | NM_012164 | 4552.114  | 7683.448  | X07203    | 19395.439 | 11808.446 |
| NM_006717 | 4368.432  | 4685.298  | AK026010  | 715.823   | 1257.943  | AB040104  | 522.163   | 508.593   |
| AL109786  | 4042.956  | 4444.229  | NM_004721 | 514.584   | 1202.859  | NM_003834 | 4915.058  | 3971.793  |
| AK026479  | 7709.017  | 7591.442  | AB011156  | 1428.511  | 3263.414  | NM_005959 | 4486.325  | 3183.361  |
| AK022860  | 6715.54   | 6136.179  | NM_018079 | 1702.653  | 4523.754  | NM_003381 | 1659.624  | 1374.313  |
| X60188    | 23615.381 | 22410.713 | NM_004760 | 20351.742 | 39413.453 | NM_005756 | 1092.708  | 957.287   |
| NM_005977 | 3867.445  | 5246.503  | NM_006752 | 7861.909  | 13080.615 | NM_003702 | 12338.465 | 6475.801  |
| NM_002747 | 562.067   | 1427.381  | NM_006809 | 11300.707 | 14839.015 | NM_000369 | 969.185   | 1173.344  |
| NM_006265 | 24952.248 | 42101.117 | NM_012323 | 1834.336  | 940.326   | NM_004405 | 1964.585  | 1408.454  |
| NM_003126 | 1345.234  | 1658.113  | NM_018199 | 959.865   | 628.674   | NM_001988 | 7415.76   | 6148.885  |
| NM_006059 | 5454.644  | 4670.074  | NM_013943 | 1470.234  | 1115.256  | L09080    | 17622.795 | 17548.539 |
| NM_000347 | 563.207   | 513.814   | NM_001639 | 13901.924 | 10509.644 | NM_007326 | 13325.722 | 19019.811 |
| M13452    | 1118.104  | 720.321   | H39560    | 698.868   | 420.548   | NM_012213 | 1316.392  | 1955.456  |
| AF082075  | 2063.409  | 1659.448  | BG534366  | 16579.23  | 6291.934  | NM_016573 | 5460.08   | 7470.789  |
| NM_016114 | 2335.119  | 1620.354  | BG698522  | 22255.535 | 12189.202 | NM_001303 | 13445.666 | 16472.922 |
| AY007114  | 962.964   | 543.016   | AA152346  | 1158.051  | 763.013   | M21304    | 456.156   | 568.769   |
| AB000895  | 1177.715  | 659.453   | L15189    | 2693.583  | 2134.138  | NM_001979 | 1127.189  | 1324.447  |
| X80031    | 924.858   | 731.838   | AB023420  | 17964.379 | 13623.645 | AB040896  | 1089.332  | 1382.814  |
| AF019382  | 558.418   | 528.347   | BI822179  | 16572.398 | 14976.668 | NM_001107 | 3470.907  | 3849.478  |
| NM_015601 | 1610.287  | 1795.75   | AF022912  | 7262.6    | 6364.186  | AF084645  | 1423.37   | 1656.938  |
| NM_001780 | 30889.877 | 43144.758 | AA477428  | 20443.5   | 25278.281 | AB049758  | 571.613   | 274.306   |
| AJ277442  | 1180.676  | 1486.049  | AA156342  | 3562.604  | 4913.58   | AF151851  | 7485.341  | 8095.56   |
| NM_004569 | 3340.317  | 3776.814  | R45594    | 22130.389 | 26318.518 | NM_003471 | 241.916   | 256.971   |
| AF089088  | 2439.177  | 3050.016  | AI143386  | 694.324   | 1287.477  | AF220417  | 1297.39   | 1366.983  |
| L07557    | 6965.502  | 8524.584  | H46425    | 6180.187  | 7749.129  | NM_001122 | 34236.438 | 22432.066 |
| NM_002796 | 45420.121 | 39700.797 | AI355949  | 2415.094  | 3882.161  | NM_004591 | 8356.576  | 6011.391  |
| D78514    | 11923.544 | 11525.946 | AA278152  | 17559.076 | 31625.85  | AL133027  | 2199.786  | 1635.319  |
| AK021665  | 1540.146  | 1953.017  | H75530    | 6515.108  | 9892.771  | AB037732  | 1365.934  | 1313.663  |
| NM_013366 | 1276.053  | 1172.183  | AK000554  | 2384.787  | 3066.478  | NM_005767 | 389.37    | 284.505   |
| NM_002787 | 35766.063 | 37073.262 | NM_006472 | 4514.04   | 3981.702  | NM_001837 | 436.854   | 290.138   |
| U95006    | 19963.369 | 24589.734 | NM_003764 | 5247.178  | 1429.784  | NM_001839 | 55742.438 | 64359.637 |
| NM_003347 | 10036     | 19575.811 | NM_004829 | 1828.171  | 1263.237  | BC016029  | 556.313   | 471.608   |
| AF273051  | 2276.757  | 2485.936  | NM_006793 | 31391.449 | 11390.738 | M27487    | 32132.27  | 23580.395 |
| NM_014516 | 1554.421  | 1873.196  | NM_001538 | 8324.172  | 3693.349  | NM_002286 | 53776.488 | 57270.863 |
| AK021868  | 1968.078  | 1772.788  | X97261    | 25456.092 | 5340.947  | NM_002164 | 1056.859  | 1651.5    |
| AK000643  | 55877.723 | 56643.957 | NM_001468 | 888.749   | 601.363   | NM_017417 | 1028.034  | 1201.366  |
| NM_018421 | 4813.092  | 3624.58   | D87666    | 49275.789 | 26156.492 | AL133602  | 2619.732  | 3412.222  |
| AB014574  | 21271.945 | 15543.522 | NM_002921 | 385.47    | 510.287   | AF037219  | 3064.082  | 3919.369  |
| NM_020127 | 3019.614  | 2801.805  | NM_001315 | 3142.041  | 3076.087  | AK026075  | 547.551   | 660.69    |
| NM_015623 | 9719.979  | 5947.489  | AF286095  | 6401.853  | 6515.003  | NM_000251 | 3825.147  | 5203.47   |
| L49054    | 1006.286  | 743.132   | NM_000878 | 2542.183  | 3169.469  | NM_006038 | 3543.51   | 4858.255  |
| NM_014727 | 1833.997  | 1297.13   | S66407    | 2965.908  | 3743.89   | AB011133  | 2851.938  | 2287.943  |
| BE885010  | 856.185   | 603.321   | NM_004258 | 51040.426 | 62308.777 | NM_017572 | 26019.576 | 14700.608 |
| NM_000192 | 835.347   | 870.639   | NM_001981 | 9786.174  | 13213.879 | NM_018444 | 1591.315  | 1285.037  |
| NM_002943 | 2959.671  | 4288.881  | NM_001585 | 50530.863 | 63716.926 | NM_000252 | 951.619   | 1072.457  |
| AL133649  | 3049.04   | 3567.579  | AK026108  | 22605.498 | 28125.418 | NM_006947 | 7338.542  | 5035.158  |
| AB018303  | 1120.064  | 1149.02   | NM_014446 | 1506.236  | 1938.355  | NM_017917 | 1804.377  | 1000.498  |
| NM_006454 | 11221.813 | 15227.321 | U58096    | 21603.379 | 20732.158 | NM_004090 | 4148.873  | 3320.43   |
| NM_015846 | 6223.146  | 8684.741  | NM_019091 | 741.916   | 204.002   | NM_014634 | 5613.183  | 3693.319  |
| NM_015972 | 28769.486 | 27900.861 | AF264781  | 2082.731  | 732.931   | NM_001919 | 18179.238 | 8119.406  |

|           |           |           |           |           |           |           |           |           |
|-----------|-----------|-----------|-----------|-----------|-----------|-----------|-----------|-----------|
| NM_016132 | 2654.467  | 3408.838  | NM_002456 | 376.789   | 351.879   | BC031485  | 2070.773  | 1558.537  |
| NM_018006 | 4815.85   | 7520.175  | NM_016124 | 3989.623  | 3061.189  | NM_004092 | 5652.135  | 5309.857  |
| NM_016090 | 2088.15   | 2898.362  | NM_015948 | 5790.196  | 7798.79   | X15624    | 989.027   | 1161.666  |
| NM_001013 | 52771.715 | 57843.891 | NM_000804 | 600.686   | 977.144   | AF073770  | 1662.417  | 1968.009  |
| AK024040  | 11076.521 | 8366.741  | NM_006555 | 5447.243  | 6223.209  | AL359401  | 5168.346  | 5906.244  |
| NM_005061 | 10972.28  | 7768.22   | NM_014521 | 3811.251  | 6057.958  | NM_004467 | 978.88    | 1907.933  |
| NM_000997 | 58824.914 | 60464.5   | NM_002445 | 3621.785  | 5281.674  | NM_005622 | 389.627   | 645.129   |
| AF182417  | 55420.367 | 32133.809 | NM_017809 | 876.055   | 1203.954  | NM_018058 | 17708.23  | 25484.625 |
| AL137354  | 36372.676 | 22602.297 | AK023202  | 4747.103  | 6092.511  | NM_004548 | 15014.304 | 20892.213 |
| NM_001023 | 57419.395 | 57694.25  | D63877    | 4031.363  | 3752.896  | X69079    | 46565.094 | 52503.152 |
| AK021571  | 17784.15  | 11265.063 | AF131760  | 2543.029  | 3089.749  | BI759406  | 21748.656 | 23875.385 |
| AK022178  | 1723.439  | 869.888   | NM_018698 | 3464.21   | 4614.648  | R76099    | 6595.689  | 9668.357  |
| NM_006011 | 552.281   | 400.881   | NM_006461 | 4606.584  | 5487.303  | S74445    | 1139.271  | 1658.305  |
| L00635    | 1323.872  | 757.298   | NM_018201 | 5932.393  | 8099.583  | BI763360  | 3232.69   | 3369.036  |
| NM_002541 | 4846.816  | 5091.158  | NM_014438 | 1892.324  | 2347.929  | D25538    | 2146.054  | 2531.997  |
| NM_000056 | 12581.34  | 19079.402 | NM_016458 | 33871.59  | 9197.565  | NM_000360 | 22562.09  | 19296.43  |
| NM_016311 | 22613.859 | 21786.773 | AK022233  | 3432.88   | 1558.614  | D49950    | 430.823   | 387.356   |
| NM_001867 | 54339.813 | 53924.047 | AK026410  | 15959.753 | 15624.172 | NM_001848 | 503.831   | 344.356   |
| NM_002300 | 54440.262 | 61265.453 | NM_014637 | 8795.601  | 5666.336  | X03635    | 4923.029  | 3903.819  |
| NM_000290 | 8715.19   | 9734.145  | NM_013379 | 35697.48  | 29271.893 | BC011847  | 47795.234 | 60784.992 |
| NM_016538 | 4662.417  | 4106.472  | AF113208  | 11678.341 | 15999.329 | X03348    | 966.385   | 985.552   |
| AK023275  | 9316.001  | 7894.132  | NM_006153 | 5327.187  | 5291.738  | AF353674  | 3258.092  | 1908.641  |
| AJ223352  | 9541.631  | 7424.64   | NM_012164 | 5622.676  | 12692.873 | BC002645  | 4871.806  | 3242.764  |
| NM_012238 | 3554.316  | 4077.404  | AK026010  | 930.774   | 2236.121  | NM_021138 | 3741.092  | 2336.794  |
| NM_016539 | 12705.484 | 17363.035 | NM_004721 | 855.357   | 2679.146  | BC002792  | 3815.639  | 3415.6    |
| NM_006807 | 28147.426 | 48371.168 | AB011156  | 1172.157  | 1989.503  | NM_001523 | 759.112   | 404.749   |
| NM_000326 | 394.906   | 434.553   | NM_018079 | 893.313   | 1432.234  | NM_017423 | 835.608   | 596.544   |
| L16464    | 690.356   | 576.852   | NM_004760 | 16286.237 | 15976.594 | Z70705    | 638.928   | 397.215   |
| NM_006532 | 2940.517  | 2416.56   | NM_006752 | 8353.104  | 8008.947  | NM_002611 | 1759.927  | 1316.907  |
| U07132    | 6817.36   | 4640.355  | NM_006809 | 10390.494 | 12462.511 | NM_005382 | 1012.879  | 1323.746  |
| NM_003436 | 795.96    | 868.168   | AF149304  | 1700.989  | 2199.699  | AK027086  | 2434.67   | 3769.441  |
| NM_001675 | 2942.637  | 973.533   | NM_012095 | 10101.552 | 11880.786 | AB032997  | 1501.384  | 2521.799  |
| NM_003422 | 2354.979  | 1429.535  | NM_013943 | 1880.689  | 782.646   | NM_003834 | 3537.515  | 5518.319  |
| NM_001451 | 994.394   | 707.218   | NM_001639 | 12971.816 | 4111.533  | NM_005958 | 4102.46   | 5802.348  |
| NM_014779 | 2706.521  | 1827.117  | H39560    | 470.534   | 588.461   | NM_003381 | 1481.147  | 1530.111  |
| NM_014446 | 791.992   | 1142.455  | BG534366  | 20259.191 | 15832.879 | NM_005756 | 1331.778  | 1407.986  |
| U58096    | 25729.037 | 28362.963 | BG698522  | 18322.619 | 10923.906 | NM_003702 | 14418.531 | 10818.414 |
| NM_016929 | 11939.911 | 19537.646 | AA152346  | 1228.21   | 805.271   | NM_000368 | 844.286   | 981.884   |
| NM_012323 | 1434.325  | 2514.36   | L15189    | 2399.454  | 1863.03   | NM_016351 | 1857.044  | 1721.993  |
| NM_006942 | 883.854   | 1028.057  | AB023420  | 16943.777 | 8551.508  | NM_004405 | 1960.727  | 1440.57   |
| NM_018199 | 1516.969  | 1836.04   | BI822179  | 14216.162 | 8334.533  | NM_001988 | 6896.438  | 4404.312  |
| NM_013943 | 1098.729  | 1538.311  | AF022912  | 5913.857  | 3602.686  | NM_006060 | 1083.199  | 572.363   |
| NM_001639 | 22353.41  | 26728.063 | AA477428  | 19812.102 | 18081.377 | NM_005667 | 2689.01   | 2260.038  |
| H39560    | 533.168   | 512.758   | AA156342  | 3190.891  | 2845.875  | NM_006308 | 900.521   | 732.61    |
| BG534366  | 22870.258 | 16162.361 | R45594    | 24109.664 | 28488.836 | NM_000060 | 401.822   | 247.946   |
| BG698522  | 2846.11   | 3077.153  | AI143386  | 922.308   | 1303.036  | L09080    | 15186.728 | 11183.267 |
| AA152346  | 937.949   | 1142.351  | H46425    | 6785.838  | 8567.172  | NM_007326 | 11430.258 | 8212.712  |
| L15189    | 3869.734  | 5680.199  | AI355949  | 1815.94   | 2311.949  | AK023080  | 251.629   | 223.043   |
| AB023420  | 19952.557 | 24906.912 | AA278152  | 17919.494 | 21852.727 | NM_001886 | 4398.865  | 4548.157  |
| BI822179  | 17664.455 | 15786.345 | H75530    | 6349.772  | 5991.296  | D83782    | 8546.61   | 11612.447 |
| AF022912  | 6316.361  | 4851.667  | NM_002826 | 5253.771  | 4347.447  | NM_002078 | 3386.507  | 6555.856  |
| AA477428  | 17195.93  | 13009.33  | NM_005410 | 574.92    | 267.633   | NM_001656 | 2072.093  | 3718.007  |
| AA156342  | 2933.48   | 2453.765  | D87666    | 49091.957 | 18095.008 | AF091033  | 1763.999  | 3124.418  |

|           |           |           |           |           |           |           |           |           |
|-----------|-----------|-----------|-----------|-----------|-----------|-----------|-----------|-----------|
| R45594    | 20299.094 | 15256.733 | NM_001315 | 2217.697  | 1350.541  | NM_001122 | 29779.051 | 45790.813 |
| AI143386  | 931.642   | 688.433   | AF286095  | 5371.126  | 2608.157  | NM_004591 | 3626.322  | 5788.252  |
| H46425    | 1343.825  | 982.957   | NM_000878 | 2290.828  | 1746.03   | NM_006274 | 733.086   | 1114.395  |
| AI355949  | 1202.606  | 888.632   | S66407    | 2719.391  | 2229.333  | AB037732  | 1691.633  | 2424.226  |
| AA278152  | 15870.449 | 12330.987 | NM_004258 | 46418.781 | 55618.996 | NM_005767 | 778.226   | 776.616   |
| H75530    | 6722.831  | 5451.585  | NM_001981 | 7048.176  | 4722.391  | NM_001837 | 480.042   | 707.8     |
| NM_005036 | 2047.315  | 1514.812  | NM_014654 | 1230.697  | 891.758   | NM_001836 | 52633.68  | 61361.746 |
| NM_018201 | 4946.68   | 6170.601  | NM_001585 | 48754.871 | 57402.727 | BC016029  | 565.752   | 654.661   |
| NM_014438 | 909.005   | 1406.563  | AK026108  | 24817.811 | 31648.984 | M27487    | 29856.174 | 18744.582 |
| NM_014880 | 431.384   | 678.19    | NM_006379 | 4192.947  | 6018.746  | NM_002286 | 50773.289 | 43630.254 |
| NM_003764 | 7642.003  | 10822.649 | BF571428  | 14487.25  | 18909.07  | NM_002164 | 842.071   | 689.555   |
| NM_019618 | 366.985   | 412.377   | AB037723  | 30676.555 | 32113.734 | NM_003811 | 11017.175 | 12514.112 |
| NM_004829 | 813.637   | 912.561   | NM_014446 | 1577.436  | 2234.963  | NM_002981 | 6100.976  | 5006.164  |
| NM_006793 | 36837.023 | 37301.047 | NM_012323 | 2728.785  | 4178.356  | NM_001244 | 2128.713  | 1240.662  |
| NM_001538 | 1823.177  | 1472.406  | NM_004790 | 847.371   | 56.373    | NM_012275 | 429.633   | 511.12    |
| X97261    | 42682.809 | 15723.685 | NM_002219 | 7965.209  | 2095.669  | NM_006137 | 1636.208  | 1065.817  |
| NM_001468 | 704.906   | 705.274   | AF182404  | 7072.455  | 2574.189  | NM_016136 | 28269.637 | 17688.016 |
| NM_005410 | 339.133   | 612.294   | NM_000804 | 415.232   | 324.612   | AL117468  | 5498.057  | 4733.864  |
| D87666    | 57256.832 | 54729.895 | NM_006555 | 4375.938  | 3180.58   | NM_019613 | 5150.592  | 4087.043  |
| NM_002921 | 451.17    | 734.355   | NM_014521 | 3557.646  | 2240.346  | BC031485  | 2469.356  | 3575.862  |
| NM_001315 | 3168.554  | 2798.443  | NM_002445 | 3169.587  | 2448.439  | X15624    | 1986.452  | 4290.72   |
| AF286095  | 7529.561  | 6686.385  | NM_017809 | 777.78    | 712.303   | AF073770  | 2336.908  | 3585.875  |
| NM_000878 | 1463.55   | 1216.835  | AK023202  | 4434.115  | 3459.367  | AL359401  | 5910.917  | 9630.575  |
| S66407    | 558.76    | 619.328   | D63877    | 3260.14   | 2026.849  | NM_012213 | 1757.536  | 3114.526  |
| NM_018727 | 351.054   | 217.987   | AF131760  | 1710.298  | 1185.652  | NM_016573 | 4150.237  | 5730.205  |
| NM_004258 | 21173.838 | 15548.242 | NM_018698 | 1738.488  | 1024.516  | NM_001303 | 8684.225  | 11052.998 |
| NM_001981 | 8356.305  | 6511.59   | NM_006461 | 4223.45   | 3186.906  | NM_001107 | 3124.671  | 3030.93   |
| NM_001585 | 9472.102  | 7657.505  | NM_018201 | 6606.342  | 12417.546 | AF084645  | 350.673   | 336.097   |
| AK026108  | 3179.923  | 2347.112  | NM_014438 | 2088.881  | 4765.826  | AF151851  | 7730.397  | 6542.747  |
| AF149304  | 803.816   | 1034.365  | NM_014880 | 2864.249  | 3601.922  | NM_005176 | 817.402   | 590.976   |
| NM_012095 | 9276.681  | 13338.333 | NM_003764 | 6793.049  | 6411.447  | NM_003636 | 2169.635  | 1578.196  |
| NM_016438 | 514.03    | 654.046   | NM_006793 | 49186.012 | 48899.57  | NM_002234 | 3654.326  | 3101.495  |
| X73079    | 42681.586 | 59801.898 | NM_001538 | 12853.66  | 14407.502 | NM_003471 | 263.754   | 335.371   |
| NM_019091 | 1145.862  | 964.317   | NM_006809 | 7698.193  | 1747.588  | NM_000701 | 2186.983  | 1582.3    |
| AF264781  | 4048.247  | 5662.84   | AF149304  | 784.361   | 206.442   | AB022696  | 13819.123 | 9197.857  |
| AK022823  | 487.639   | 572.316   | NM_012095 | 7276.594  | 2372.965  | AF137372  | 2907.069  | 2116.469  |
| NM_002456 | 445.522   | 410.184   | X73079    | 33504.625 | 15020.722 | AF220417  | 1404.867  | 1180.551  |
| NM_016124 | 4688.478  | 4719.235  | NM_019091 | 815.501   | 415.422   | NM_001523 | 1002.69   | 967.427   |
| NM_015948 | 1975.268  | 3062.48   | L07518    | 396.586   | 310.526   | Z70705    | 1198.707  | 1835.572  |
| NM_000804 | 569.254   | 646.024   | AF264781  | 2374.869  | 1007.578  | NM_002611 | 1485.572  | 1912.577  |
| NM_006555 | 5193.22   | 4621.855  | AK022823  | 534.841   | 78.685    | NM_017829 | 313.491   | 305.198   |
| NM_014521 | 442.914   | 439.514   | NM_002456 | 646.187   | 189.361   | NM_017417 | 943.592   | 1041.85   |
| NM_002445 | 1901.37   | 1429.18   | AK024215  | 9784.379  | 10215.879 | AL133602  | 1950.253  | 2466.12   |
| NM_017809 | 866.017   | 836.707   | AB044661  | 5881.34   | 13782.711 | AK026075  | 1768.266  | 2277.461  |
| AK023202  | 4573.684  | 3221.401  | NM_000606 | 34010.926 | 37748.016 | NM_000251 | 3309.096  | 2918.1    |
| D63877    | 4154.401  | 3237.707  | NM_016124 | 7298.212  | 7126.717  | NM_006038 | 3865.732  | 3155.127  |
| AF131760  | 1619.482  | 1414.192  | NM_019079 | 1111.746  | 975.071   | AB011133  | 2292.939  | 1432.675  |
| NM_018698 | 1926.778  | 2086.438  | AF179481  | 1691.823  | 1226.212  | NM_017572 | 25188.365 | 14578.103 |
| NM_006461 | 4566.531  | 4544.095  | NM_015948 | 8080.973  | 9364.9    | NM_018444 | 1664.312  | 1112.276  |
| NM_002826 | 3846.589  | 4539.709  | AK000554  | 1633.72   | 369.152   | NM_000252 | 1039.04   | 725.287   |
| AF159141  | 4814.707  | 5364.057  | NM_006472 | 3552.777  | 747.43    | NM_006947 | 7415.511  | 4751.166  |
| NM_016458 | 9761.237  | 9285.262  | NM_002826 | 3051.993  | 1127.283  | NM_017917 | 2116.178  | 1387.142  |
| AK022233  | 5184.555  | 7455.521  | AF159141  | 8166.723  | 3207.681  | NM_004090 | 3955.746  | 2812.002  |

|           |           |           |           |           |           |           |           |           |
|-----------|-----------|-----------|-----------|-----------|-----------|-----------|-----------|-----------|
| AL137713  | 454.355   | 579.222   | NM_016458 | 42482.547 | 31946.912 | NM_014634 | 6523.657  | 4396.95   |
| AK026410  | 11318.316 | 15247.794 | AK022233  | 4732.333  | 3450.349  | NM_001919 | 16633.793 | 10839.984 |
| NM_014637 | 11028.378 | 12453.864 | AK026410  | 15625.157 | 7851.794  | CY3Cy5    | 562.726   | 237.701   |
| NM_013379 | 30060.891 | 27422.311 | NM_014637 | 9043.361  | 5104.609  | NM_003822 | 676.156   | 684.147   |
| AF113208  | 7118.543  | 9681.811  | NM_013379 | 35223.309 | 16350.803 | NM_004412 | 5218.083  | 5249.396  |
| NM_006153 | 4192.578  | 4495.426  | AF113208  | 10210.764 | 9129.823  | NM_016647 | 712.108   | 804.44    |
| NM_012164 | 4356.333  | 4521.472  | NM_006153 | 6326.773  | 6314.886  | AK024695  | 654.922   | 703.178   |
| AK026010  | 746.229   | 990.417   | NM_012164 | 4580.404  | 4784.897  | NM_018659 | 360.802   | 420.856   |
| NM_004721 | 377.908   | 445.232   | NM_004721 | 1799.581  | 2178.65   | AF038174  | 2228.821  | 1991.775  |
| AB011156  | 899.773   | 654.309   | AB011156  | 1657.881  | 1805.955  | NM_013243 | 435.382   | 373.632   |
| NM_018079 | 757.438   | 745.194   | NM_018079 | 4444.623  | 4829.858  | AF070632  | 391.994   | 289.346   |
| NM_004760 | 12887.081 | 7353.23   | NM_004760 | 17362.104 | 16930.375 | AF161359  | 876.127   | 707.391   |
| NM_006752 | 7961.521  | 5947.098  | NM_006752 | 8118.451  | 7850.024  | AL365520  | 896.317   | 804.758   |
| NM_006809 | 8681.314  | 6740.608  | CY3Cy5    | 2335.165  | 133.301   | AL359338  | 378.073   | 516.431   |
| NM_016929 | 9449.74   | 9802.316  | NM_021005 | 1088.249  | 680.527   | AK023623  | 6071.42   | 5813.728  |
| NM_012323 | 1468.72   | 2695.581  | SB        | 2376.927  | 1296.404  | NM_014918 | 1636.558  | 2712.324  |
| NM_006942 | 969.857   | 1849.768  | AF086387  | 883.763   | 816.071   | NM_004412 | 7760.174  | 29078.74  |
| NM_018199 | 1343.757  | 1716.205  | AL389941  | 1164.729  | 837.792   | SR1       | 55985.699 | 60363.305 |
| NM_013943 | 1134.249  | 1427.954  | AB037756  | 2121.614  | 1580.378  | SR3       | 23104.979 | 28530.924 |
| NM_001639 | 23040.127 | 28978.51  | AK001853  | 3042.566  | 2248.343  | SR5       | 2347.614  | 5193.393  |
| H39560    | 575.167   | 914.136   | AK025071  | 1016.268  | 931.015   | SR7       | 2489.899  | 39005.641 |
| BG534366  | 33723.324 | 42499.777 | AK021888  | 762.633   | 642.023   | SR9       | 6044.702  | 3113.222  |
| BG698522  | 3937.735  | 6505.835  | AK022848  | 10315.197 | 8132.297  | CY3Cy5    | 1310.573  | 464.914   |
| AA152346  | 1055.745  | 1003.575  | AL049957  | 1932.387  | 1228.549  | U84515    | 806.606   | 834.173   |
| L15189    | 3576.504  | 3846.34   | NM_021005 | 966.159   | 915.875   | AF086106  | 375.014   | 291.948   |
| AB023420  | 16399.117 | 18237.346 | SB        | 1810.106  | 980.055   | AF086143  | 4783.745  | 3499.011  |
| BI822179  | 17108.133 | 15154.104 | SR2       | 51736.094 | 31496.207 | AF086112  | 230.653   | 281.836   |
| AF022912  | 6807.883  | 7061.048  | SR4       | 14585.673 | 10457.228 | AL137254  | 973.918   | 1099.197  |
| AA477428  | 19853.094 | 23187.896 | SR6       | 1804.041  | 1409.877  | AK026359  | 761.22    | 1378.984  |
| AA156342  | 3395.962  | 4092.914  | SR8       | 7390.075  | 16453.871 | AF085884  | 1339.399  | 3277.659  |
| R45594    | 20748.762 | 18984.705 | SR10      | 24260.598 | 6474.439  | S81522    | 3998.823  | 6543.713  |
| AI143386  | 626.642   | 569.87    | CY3Cy5    | 2006.499  | 84.054    | AF085911  | 280.504   | 784.018   |
| H46425    | 931.513   | 751.167   | AF086063  | 1668.788  | 1124.593  | S94541    | 774.581   | 1359.725  |
| AI355949  | 1090.467  | 810.487   | AF086098  | 2091.838  | 1399.721  | L36587    | 22092.299 | 32731.816 |
| AA278152  | 15202.173 | 10756.655 | AF086076  | 639.826   | 654.719   | AK024228  | 1362.44   | 2726.455  |
| H75530    | 6315.427  | 4774.623  | AL833393  | 2743.391  | 2275.213  | AK022420  | 1989.557  | 2160.906  |
| AK000554  | 1910.721  | 1312.44   | AF088005  | 2654.458  | 1828.734  | AK023254  | 518.889   | 481.616   |
| NM_006472 | 3022.411  | 1390.263  | AF086096  | 3371.264  | 2253.145  | AK023945  | 11498.623 | 10325.768 |
| NM_003764 | 7088.469  | 7610.816  | AL390132  | 851.442   | 484.215   | AK022446  | 526.617   | 589.591   |
| NM_004829 | 897.34    | 825.296   | NM_017933 | 16305.443 | 11949.934 | AK023352  | 282.036   | 296.226   |
| NM_006793 | 41596.289 | 48746.379 | NM_017819 | 8300.329  | 6649.834  | AK023773  | 668.793   | 558.117   |
| NM_001538 | 1914.237  | 2084.484  | NM_014803 | 1223.46   | 774.408   | AK024123  | 248.089   | 286.329   |
| X97261    | 49062.461 | 26753.611 | AK024956  | 732.027   | 807.588   | AK021539  | 4896.359  | 4565.513  |
| NM_001468 | 837.673   | 951.363   | AF147386  | 1389.147  | 1432.442  | AK021819  | 286.769   | 313.554   |
| NM_005410 | 312.971   | 426.479   | AF273052  | 12794.698 | 8438.556  | AK026738  | 1202.623  | 1585.08   |
| D87666    | 57291.055 | 59432.633 | NM_017943 | 8136.958  | 5063.205  | AK025011  | 977.601   | 1431.793  |
| NM_002921 | 582.869   | 920.263   | AF147383  | 1697.962  | 1382.462  | AL157491  | 1178.112  | 2556.794  |
| NM_001315 | 3601.522  | 6361.099  | AK025682  | 1812.993  | 1342.593  | NM_005266 | 2239.221  | 3969.724  |
| AF286095  | 10397.607 | 22108.098 | NM_016478 | 17728.502 | 12674.234 | AF087965  | 450.548   | 801.784   |
| NM_000878 | 1892.138  | 2803.419  | AL389986  | 7319.682  | 4971.229  | AF085998  | 594.639   | 906.22    |
| S66407    | 598.138   | 766.056   | AF086279  | 708.562   | 509.056   | AB030240  | 335.576   | 834.155   |
| NM_018727 | 550.625   | 315.901   | AF088052  | 2479.279  | 1883.886  | AK024681  | 980.906   | 1595.058  |
| NM_004258 | 20273.1   | 13391.315 | AK027155  | 7120.61   | 5394.936  | X68742    | 650.13    | 1204.102  |

|           |           |           |           |           |           |           |           |           |
|-----------|-----------|-----------|-----------|-----------|-----------|-----------|-----------|-----------|
| NM_001981 | 8125.424  | 5387.383  | AF221846  | 590.256   | 477.06    | AF085990  | 997.583   | 2031.047  |
| NM_00158E | 10534.576 | 7867.789  | AF264626  | 548.41    | 468.16    | NM_014907 | 19593.639 | 25953.219 |
| AK026108  | 3027.294  | 1907.537  | AK027219  | 314.309   | 506.988   | AB007977  | 13816.38  | 23247.203 |
| NM_01444E | 587.97    | 510.043   | AK024528  | 22280.025 | 16926.939 | NM_014221 | 5317.34   | 9123.138  |
| U58096    | 19698.16  | 10737.798 | NM_01537C | 6034.865  | 4816.343  | AK025181  | 331.32    | 356.612   |
| NM_01643E | 629.778   | 1109.461  | AF085917  | 1711.714  | 1947.41   | AK021773  | 1191.748  | 872.327   |
| X73079    | 33841.238 | 42988.926 | AF085989  | 1243.717  | 1270.007  | AK027074  | 630.657   | 706.469   |
| NM_019091 | 849.903   | 882.596   | AL360139  | 58407.746 | 60842.629 | AL365456  | 375.427   | 461.612   |
| AF264781  | 3438.137  | 2949.018  | AF075110  | 4195.062  | 2803.152  | NM_01803E | 395.927   | 389.867   |
| NM_00245E | 643.342   | 593.22    | AK022157  | 417.155   | 506.799   | AK024674  | 304.189   | 275.383   |
| NM_016124 | 4291.004  | 4059.209  | AL137323  | 884.677   | 697.04    | AK024244  | 3107.868  | 2809.125  |
| NM_01594E | 2379.052  | 3246.134  | AL137494  | 5879.028  | 4448.014  | AK023812  | 419.861   | 433.38    |
| NM_000804 | 689.567   | 1788.118  | AL162037  | 6169.512  | 4288.052  | AL390084  | 807.958   | 865.904   |
| NM_00655E | 6069.923  | 9324.328  | AL390150  | 1949.104  | 1599.504  | AK023565  | 342.28    | 663.46    |
| NM_014521 | 447.936   | 768.183   | NM_002761 | 1010.26   | 955.474   | AK021479  | 611.06    | 854.988   |
| NM_00244E | 2036.469  | 2317.012  | AK056674  | 1408.418  | 1259.465  | NM_00383E | 4336.534  | 6648.713  |
| NM_01780E | 727.276   | 848.003   | AK022856  | 626.587   | 404.068   | AK000245  | 1817.342  | 2797.865  |
| AK023202  | 4730.703  | 4566.313  | AK022042  | 972.807   | 711.921   | AK024112  | 357.881   | 1026.77   |
| D63877    | 4309.892  | 3090.768  | AL117588  | 687.576   | 684.992   | AF085900  | 19711.926 | 27342.217 |
| AF131760  | 1651.187  | 1251.994  | AK024653  | 32886.93  | 24348.314 | AK026195  | 400.328   | 456.695   |
| NM_01869E | 2087.713  | 1792.098  | AF103907  | 1284.43   | 1420.548  | AL049443  | 449.207   | 583.841   |
| NM_006461 | 4520.935  | 3367.396  | AF094508  | 830.823   | 719.104   | AL079274  | 20831.348 | 16436.055 |
| NM_018201 | 4865.621  | 3656.535  | AF161351  | 1919.969  | 1384.061  | S46403    | 238.313   | 285.57    |
| NM_01443E | 883.096   | 629.95    | NM_01413C | 306.902   | 223.117   | AL137398  | 1485.544  | 950.68    |
| AF159141  | 4281.003  | 4996.226  | AF111782  | 5405.745  | 3890.313  | Y12021    | 1738.147  | 1594.005  |
| NM_01645E | 10522.994 | 10829.692 | AF151530  | 2904.413  | 1989.484  | AF127771  | 279.366   | 247.418   |
| AK022233  | 6448.917  | 12081.808 | AK021991  | 897.191   | 864.249   | NM_01330C | 18454.463 | 14021.004 |
| AL137713  | 318.948   | 400.714   | AK022093  | 5323.211  | 3469.519  | AK026039  | 2096.746  | 2177.902  |
| AK026410  | 12088.746 | 13546.904 | AK022376  | 1756.599  | 1258.1    | AF108756  | 4916.509  | 4456.293  |
| NM_014637 | 11171.815 | 11493.474 | AK022005  | 1094.498  | 730.219   | AF116709  | 780.047   | 874.96    |
| NM_01337E | 33184.332 | 31138.764 | AK022137  | 1036.66   | 700.576   | AK025533  | 984.79    | 1354.519  |
| AF113208  | 5851.181  | 6772.13   | AK022272  | 3115.811  | 2362.17   | AK026499  | 278.033   | 383.717   |
| NM_00615E | 3737.728  | 3574.712  | AF279780  | 49694.742 | 35424.852 | AK021911  | 5904.711  | 7066.089  |
| NM_012164 | 4816.606  | 5890.434  | AK022510  | 2464.55   | 2056.82   | U35875    | 33870.59  | 56795.637 |
| AK026010  | 840.191   | 1684.381  | AK023878  | 1330.008  | 1174.132  | AK021857  | 34694.539 | 41768.023 |
| NM_004721 | 537.117   | 1688.667  | AK021851  | 671.033   | 800.901   | AK022257  | 824.665   | 1607.558  |
| AB011156  | 1081.22   | 1316.005  | L37717    | 1038.321  | 1524.522  | BE887356  | 51189.77  | 53957.258 |
| NM_01807E | 914.704   | 807.717   | AJ131609  | 6430.369  | 5345.139  | AK001074  | 1819.625  | 2303.905  |
| NM_00476C | 14494.347 | 10228.491 | BC019280  | 7348.066  | 6061.523  | AK024756  | 1389.965  | 1220.312  |
| NM_00675E | 8518.236  | 6934.45   | AF086498  | 797.002   | 810.662   | NM_017911 | 1236.011  | 979.632   |
| NM_00442E | 258.914   | 112.201   | AK000687  | 1091.442  | 1063.382  | AJ224168  | 5205.733  | 4621.696  |
| NM_00680E | 8135.749  | 5947.037  | AF079567  | 1942.261  | 1457.917  | S69873    | 485.968   | 354.296   |
| AF149304  | 965.833   | 742.504   | AL049311  | 1031.807  | 926.908   | AF147325  | 51778.098 | 46997.27  |
| NM_01209E | 8316.006  | 6118.132  | AK000016  | 3691.708  | 3066.798  | NM_01442E | 581.552   | 536.725   |
| NM_00694E | 909.35    | 1065.661  | AK023367  | 1940.84   | 1551.849  | NM_018497 | 226.563   | 306.188   |
| NM_01819E | 1713.247  | 2109.286  | AL080209  | 2060.627  | 1794.276  | AK023584  | 251.144   | 197.183   |
| NM_01394E | 1235.013  | 1487.661  | AL137431  | 812.118   | 675.717   | NM_003774 | 266.69    | 154.935   |
| NM_00163E | 26579.83  | 36743.527 | NM_01625E | 1510.309  | 927.442   | D87466    | 2407.684  | 2145.851  |
| H39560    | 567.274   | 792.285   | NM_01431E | 2694.203  | 1908.953  | AK025048  | 278.49    | 222.488   |
| BG534366  | 31545.738 | 35436.801 | AL133089  | 4632.344  | 8657.01   | U84522    | 1403.289  | 1113.39   |
| BG698522  | 3771.992  | 4991.366  | AK023526  | 2174.124  | 3682.913  | AK021694  | 1317.575  | 1308.323  |
| AA152346  | 1124.147  | 1102.263  | BE266129  | 1645.972  | 1658.365  | AF086013  | 378.244   | 411.61    |
| L15189    | 3677.381  | 4053.208  | AK025602  | 15084.91  | 17378.842 | U84505    | 2980.695  | 3359.639  |

|           |           |           |           |           |           |           |           |           |
|-----------|-----------|-----------|-----------|-----------|-----------|-----------|-----------|-----------|
| AB023420  | 20324.197 | 20179.523 | AK026309  | 4413.823  | 4724.786  | X81005    | 1611.132  | 2201.37   |
| BI822179  | 17720.248 | 12458.514 | AL137486  | 8596.468  | 8656.294  | NM_012352 | 177.631   | 233.963   |
| AF022912  | 6947.681  | 5073.402  | AL110162  | 1874.644  | 2020.125  | AL137635  | 658.743   | 1217.313  |
| AA477428  | 20238.113 | 21544.779 | AF119880  | 651.875   | 619.7     | AL049430  | 1540.422  | 2786.716  |
| AA156342  | 3681.405  | 4233.933  | AK022681  | 8277.013  | 8320.076  | AK021461  | 1036.507  | 3716.425  |
| R45594    | 26424.121 | 31174.789 | NM_017708 | 769.097   | 923.518   | AB015349  | 1029.649  | 1402.334  |
| AI143386  | 914.505   | 1285.774  | BE895529  | 4760.821  | 3326.776  | NM_014913 | 14939.274 | 12411.454 |
| H46425    | 1394.17   | 1501.842  | AK000964  | 748.132   | 762.434   | NM_005864 | 336.762   | 386.631   |
| AI355949  | 1271.477  | 1237.032  | AL117536  | 12354.883 | 10173.572 | NM_012341 | 3640.067  | 3208.61   |
| AA278152  | 17211.453 | 13978.007 | NM_017751 | 11861.99  | 9325.405  | NM_003256 | 16301.982 | 13027.028 |
| H75530    | 6754.813  | 5488.238  | NM_003771 | 3083.554  | 2628.557  | D87450    | 2148.871  | 1919.819  |
| AK000554  | 2086.566  | 1350.008  | NM_017860 | 1423.649  | 1443.243  | NM_017797 | 2560.814  | 2438.241  |
| NM_006472 | 3034.049  | 1669.373  | X91195    | 60555.027 | 56771.504 | AK021919  | 211.623   | 214.269   |
| NM_002826 | 4122.89   | 2714.38   | AF086190  | 1277.648  | 1163.361  | AF000562  | 3025.405  | 2968.21   |
| X97261    | 47996.957 | 20663.084 | NM_006143 | 783.638   | 634.841   | AK025713  | 2578.169  | 2167.717  |
| NM_001468 | 1151.287  | 1233.385  | AL050035  | 9123.757  | 6837.907  | NM_018100 | 310.265   | 261.462   |
| D87666    | 59844.715 | 57686.453 | AF090101  | 730.624   | 900.337   | NM_004075 | 2569.345  | 2421.144  |
| NM_002921 | 560.16    | 864.535   | AF040723  | 52983.094 | 64978.785 | NM_001887 | 3090.304  | 2004.232  |
| NM_001315 | 4136.528  | 7734.754  | NM_015527 | 6311.338  | 7155.319  | NM_006533 | 3253.336  | 3631.78   |
| AF286095  | 10931.802 | 17959.285 | X89675    | 2169.539  | 1746.784  | AK026747  | 4538.598  | 3635.509  |
| NM_000878 | 2012.225  | 2756.89   | NM_012189 | 1177.429  | 1309.751  | AL110150  | 6592.434  | 9492.473  |
| S66407    | 729.216   | 904.788   | NM_005798 | 15401.98  | 17698.664 | NM_001998 | 4144.574  | 4622.119  |
| NM_016523 | 316.531   | 602.488   | NM_004216 | 3292.125  | 2774.606  | X87825    | 2260.27   | 2715.087  |
| NM_018727 | 423.521   | 386.168   | NM_016289 | 52216.75  | 40411.191 | NM_000914 | 216.852   | 242.695   |
| NM_004258 | 20880.676 | 16180.664 | NM_001464 | 767.803   | 812.714   | AK001285  | 22496.361 | 36088.254 |
| NM_001981 | 9142.963  | 10096.901 | NM_002051 | 4760.398  | 4382.243  | D17215    | 6837.386  | 15897.253 |
| NM_014654 | 819.784   | 966.908   | AK022177  | 1548.627  | 1388.045  | BE781513  | 970.592   | 2089.002  |
| NM_001585 | 10734.162 | 12371.526 | AK023852  | 789.048   | 852.81    | NM_015714 | 32622.391 | 33598.328 |
| AK026108  | 3789.484  | 4527.492  | AF086466  | 4115.727  | 3072.255  | AK075564  | 475.286   | 978.836   |
| NM_006379 | 3036.178  | 3446.652  | AB007962  | 8670.158  | 9021.155  | AK026219  | 729.075   | 1828.139  |
| BF571428  | 2061.463  | 1969.663  | AF005081  | 2594.454  | 2236.865  | D28446    | 1619.287  | 3016.264  |
| AB037723  | 2377.413  | 1891.359  | AK026438  | 467.161   | 472.621   | NM_016279 | 417.503   | 475.565   |
| NM_006246 | 5621.858  | 5015.315  | AK021546  | 908.328   | 956.083   | NM_000211 | 5327.575  | 4836.381  |
| NM_004316 | 328.979   | 283.424   | AL050186  | 17688.238 | 15008.881 | AB037830  | 946.362   | 777.82    |
| NM_014446 | 566.73    | 464.821   | AK021918  | 6019.539  | 4913.653  | NM_015685 | 5869.072  | 5550.927  |
| U58096    | 19336.75  | 11111.151 | AK021669  | 5767.107  | 5088.937  | NM_004357 | 37726.762 | 28212.934 |
| NM_016929 | 8795.442  | 5843.585  | AL080113  | 45532.457 | 30694.926 | X03324    | 2570.465  | 2174.531  |
| NM_012323 | 1643.384  | 1571.866  | AL050083  | 1972.424  | 1885.949  | AF130988  | 730.548   | 488.916   |
| NM_003054 | 1743.38   | 1808.443  | AK022766  | 1066.769  | 1140.467  | NM_015385 | 621.344   | 435.793   |
| NM_002219 | 11143.034 | 12966.859 | AL049422  | 7177.052  | 7804.857  | NM_003690 | 3554.941  | 3018.65   |
| AF182404  | 11256.542 | 13794.7   | NM_000093 | 2062.898  | 2663.412  | NM_000876 | 3385.132  | 2383.765  |
| NM_000804 | 727.685   | 1383.576  | NM_001779 | 10570.761 | 7561.496  | NM_014214 | 3370.746  | 3254.532  |
| NM_006555 | 8433.004  | 15520.472 | AB033059  | 2033.922  | 2292.201  | NM_000856 | 401.578   | 374.953   |
| NM_014521 | 634.84    | 1103.151  | NM_016484 | 4341.263  | 3692.582  | NM_002752 | 1694.156  | 1992.272  |
| NM_002445 | 2070.558  | 2379.457  | AK026114  | 1139.638  | 883.916   | NM_013281 | 917.056   | 1015.568  |
| NM_017809 | 624.169   | 599.599   | NM_014452 | 1269.972  | 1796.381  | Y11306    | 888.19    | 930.407   |
| AK023202  | 5543.962  | 8458.908  | NM_014683 | 905.194   | 730.848   | NM_016112 | 408.201   | 576.348   |
| D63877    | 3823.587  | 3362.81   | AK021536  | 11546.802 | 10735.266 | X85106    | 569.138   | 815.261   |
| AF131760  | 2035.75   | 2233.337  | U31285    | 402.549   | 478.774   | NM_003931 | 2094.832  | 4039.191  |
| NM_018698 | 2219.841  | 2835.676  | AF079529  | 578.097   | 503.949   | NM_006681 | 490.761   | 1107.219  |
| NM_006461 | 4850.473  | 5966.399  | NM_002600 | 1770.595  | 1727.345  | NM_012479 | 44810.676 | 44069.879 |
| NM_018201 | 4977.376  | 5392.75   | NM_003646 | 24341.443 | 12877.677 | AF250226  | 12873.174 | 21471.971 |
| NM_014438 | 873.894   | 1142.771  | NM_006663 | 1209.147  | 1040.166  | NM_003217 | 22104.23  | 33298.109 |

|           |           |           |           |           |           |           |           |           |
|-----------|-----------|-----------|-----------|-----------|-----------|-----------|-----------|-----------|
| NM_003764 | 6178.865  | 4255.2    | NM_006092 | 1277.123  | 1143.829  | NM_006534 | 7871.003  | 8121.98   |
| NM_004829 | 691.032   | 493.83    | NM_003939 | 760.337   | 461.921   | NM_017601 | 2041.241  | 1509.604  |
| NM_006793 | 37063.164 | 25765.42  | NM_012424 | 990.955   | 898.496   | AF110265  | 8653.714  | 7145.724  |
| NM_001538 | 2061.87   | 1133.236  | NM_002446 | 3608.672  | 3686.201  | AF272371  | 49206.793 | 63098.086 |
| NM_004428 | 798.41    | 844.484   | NM_000863 | 2494.845  | 2053.924  | AK021848  | 2180      | 2097.108  |
| AF149304  | 1066.644  | 1167      | NM_006651 | 8108.434  | 6406.547  | NM_003704 | 2041.048  | 2214.63   |
| NM_012095 | 8441.693  | 12371.847 | NM_005336 | 13525.168 | 10347.672 | AK023140  | 403.721   | 401.847   |
| NM_016438 | 1325.939  | 1993.976  | NM_001419 | 14937.64  | 11748.011 | AF084362  | 550.238   | 398.566   |
| X73079    | 40780.637 | 55771.906 | AF119817  | 54756.012 | 48108.914 | NM_001553 | 2075.34   | 1356.954  |
| NM_019091 | 1089.595  | 1236.299  | AL035306  | 4826.404  | 4049.178  | NM_014173 | 7053.987  | 5736.528  |
| AF264781  | 3497.378  | 3199.689  | NM_004230 | 14126.03  | 14498.948 | NM_001731 | 13605.221 | 11332.613 |
| AK022823  | 539.845   | 413.244   | NM_014503 | 1663.251  | 1638.043  | AL137506  | 444.892   | 443.384   |
| NM_002456 | 682.687   | 818.818   | NM_014659 | 4357.848  | 3576.067  | AK022961  | 1902.97   | 1801.841  |
| AK024215  | 9767.305  | 12293.077 | NM_004399 | 11551.463 | 6601.605  | NM_007375 | 4203.691  | 3955.134  |
| AB044661  | 5810.659  | 6918.222  | NM_006337 | 9418.651  | 9620.989  | NM_014371 | 2583.087  | 2819.208  |
| NM_000606 | 5911.99   | 4424.038  | NM_004507 | 5612.833  | 4591.19   | AF290512  | 5259.556  | 8097.502  |
| NM_016124 | 4348.63   | 2519.822  | NM_002710 | 35118.152 | 29545.01  | NM_006716 | 6304.876  | 6735.624  |
| NM_019079 | 600.425   | 450.008   | NM_014060 | 9910.101  | 10182.815 | AB002323  | 3969.353  | 4976.428  |
| U53530    | 3397.041  | 2282.558  | NM_004749 | 16257.542 | 16481.447 | AK022241  | 8008.683  | 10809.517 |
| NM_006598 | 1491.497  | 1162.015  | BQ446064  | 2438.196  | 2651.528  | AK022587  | 2635.941  | 3812.441  |
| NM_000111 | 267.924   | 129.394   | AF302502  | 3390.776  | 3624.761  | NM_005512 | 713.557   | 1254.755  |
| NM_015948 | 1987.743  | 1298.4    | AF274571  | 2370.966  | 1944.478  | NM_005506 | 1268.397  | 1502.62   |
| AK000554  | 2352.986  | 2709.078  | NM_005449 | 973.685   | 1184.183  | NM_005723 | 570.984   | 804.738   |
| NM_006472 | 3578.867  | 2725.358  | NM_003879 | 3952.158  | 3372.431  | NM_005814 | 3866.598  | 9993.514  |
| NM_002826 | 3993.786  | 4039.598  | NM_016052 | 17566.807 | 11310.729 | NM_002851 | 1172.826  | 926.357   |
| AF159141  | 4356.717  | 3882.795  | NM_005427 | 2006.819  | 1952.996  | NM_002071 | 1025.174  | 726.697   |
| NM_002420 | 295.72    | 488.249   | NM_016312 | 1407.875  | 1206.673  | NM_005339 | 22410.408 | 14575.472 |
| NM_016458 | 9919.9    | 9379.396  | AF234887  | 876.1     | 647.159   | NM_001906 | 5932.372  | 5052.71   |
| AK022233  | 5149.661  | 6268.946  | NM_001776 | 2599.935  | 2222.558  | NM_004142 | 729.349   | 593.115   |
| AL137713  | 294.512   | 389.896   | NM_001792 | 603.669   | 557.429   | AF108138  | 3249.705  | 2451.444  |
| AK026410  | 11618.487 | 11376.056 | NM_001903 | 810.911   | 741.941   | NM_004347 | 199.745   | 136.631   |
| NM_014637 | 9414.098  | 7175.961  | U87223    | 16418.885 | 12356.813 | BF340302  | 4251.003  | 3323.88   |
| NM_013379 | 28810.762 | 22079.865 | NM_005857 | 5613.753  | 7895.974  | AK024210  | 1624.65   | 1435.914  |
| AF113208  | 7300.98   | 15428.524 | NM_002429 | 702.472   | 482.351   | NM_002276 | 3115.796  | 3415.424  |
| NM_006153 | 6234.174  | 13283.483 | NM_000429 | 3862.756  | 4384.391  | AL133087  | 2624.196  | 3287.594  |
| NM_012164 | 4921.502  | 5310.145  | AK027037  | 1081.008  | 1426.378  | NM_018010 | 1727.2    | 2841.472  |
| AK026010  | 576.869   | 489.634   | NM_003875 | 16379.888 | 17676.039 | NM_002274 | 16843.895 | 20691.025 |
| AB011156  | 931.731   | 814.523   | AF191687  | 6120.386  | 8295.102  | AL080200  | 650.155   | 1086.167  |
| NM_018079 | 801.92    | 577.03    | NM_003046 | 606.951   | 755.628   | BF337874  | 4596.714  | 6039.834  |
| NM_004760 | 14060.632 | 9019.741  | NM_000274 | 21101.004 | 15512.545 | NM_003475 | 25728.137 | 26605.482 |
| NM_006752 | 8000.782  | 5039.009  | NM_000170 | 7923.778  | 7169.475  | NM_000243 | 4446.102  | 5620.534  |
| CY3Cy5    | 1777.618  | 155.455   | NM_000281 | 452.028   | 568.287   | NM_004383 | 14085.336 | 18917.248 |
| NM_021005 | 1298.856  | 1803.577  | AK001295  | 3581.518  | 2595.565  | NM_006069 | 49472.621 | 60053.102 |
| SB        | 3550.551  | 2292.841  | NM_006031 | 5857.265  | 4843.122  | NM_017656 | 1903.48   | 1585.778  |
| AF086342  | 600.132   | 830.527   | NM_002715 | 8735.942  | 5429.969  | X16282    | 8906.821  | 6334.909  |
| AF086310  | 251.683   | 824.228   | NM_001020 | 59363.926 | 62403.758 | AK022519  | 266.994   | 233.743   |
| AF086387  | 1809.173  | 2345.701  | AB020660  | 2918.972  | 2567.88   | NM_014415 | 1628.102  | 1186.519  |
| AL389941  | 971.418   | 523.084   | NM_006659 | 55351.402 | 60752.863 | S75264    | 6263.572  | 5236.708  |
| AB037756  | 2276.252  | 900.296   | NM_018051 | 2373.654  | 2030.649  | AF027513  | 1059.308  | 933.256   |
| AK001853  | 2926.677  | 1338.252  | NM_015371 | 12425.772 | 11577.074 | NM_001379 | 4437.605  | 3746.589  |
| AK025071  | 1158.801  | 574.486   | AB040915  | 5608.707  | 3539.702  | NM_018664 | 759.751   | 464.881   |
| AK021888  | 640.174   | 256.496   | AF147791  | 644.031   | 539.628   | BC006428  | 2192.171  | 1709.288  |
| AK022848  | 1772.736  | 251.54    | NM_001328 | 53390.406 | 54631.168 | NM_005034 | 720.994   | 664.617   |

|           |           |           |           |           |           |           |           |           |
|-----------|-----------|-----------|-----------|-----------|-----------|-----------|-----------|-----------|
| AL049957  | 2397.736  | 2107.591  | NM_005749 | 11366.357 | 9068.242  | NM_003926 | 8535.881  | 7980.449  |
| NM_021005 | 1018.925  | 1107.987  | NM_006696 | 4291.725  | 3672.916  | AF085356  | 1205.286  | 1337.469  |
| SR2       | 53072.813 | 64176.598 | NM_004599 | 19658.248 | 17342.479 | NM_016047 | 20989.701 | 18009.635 |
| SR4       | 19445.209 | 43241.5   | NM_006037 | 2062.511  | 2329.531  | NM_001496 | 7302.463  | 7191.183  |
| SR6       | 2348.683  | 8307.346  | NM_015871 | 13342.229 | 14464.573 | BF030165  | 10490.034 | 12831.318 |
| SR8       | 11238.549 | 59327.848 | NM_019037 | 19953.266 | 21269.723 | NM_016732 | 8666.477  | 10453.377 |
| CY3Cy5    | 6521.182  | 284.576   | NM_015891 | 6850.608  | 9186.908  | NM_014763 | 11249.065 | 10309.327 |
| AF086063  | 1227.111  | 929.884   | NM_006802 | 2108.174  | 2458.369  | NM_020185 | 6358.905  | 9075.358  |
| AF086098  | 947.663   | 649.508   | AB037778  | 3252.184  | 2859.623  | NM_002832 | 5010.547  | 7679.558  |
| AF086076  | 1217.947  | 1684.274  | NM_005066 | 32362.004 | 22749.451 | NM_017732 | 4051.642  | 7581.504  |
| AL833393  | 3302.479  | 4947.604  | NM_003089 | 16408.885 | 10792.687 | NM_003654 | 270.428   | 234.206   |
| AF088005  | 1930.318  | 1959.695  | NM_003753 | 29772.547 | 23084.506 | NM_000152 | 40146.965 | 29229.432 |
| AF086096  | 1505.987  | 1528.98   | NM_006223 | 987.501   | 919.374   | D17222    | 12481.889 | 9657.077  |
| AL390132  | 491.522   | 708.134   | NM_017590 | 5102.557  | 3681.743  | NM_000154 | 3381.129  | 2514.26   |
| NM_017933 | 1319.194  | 893.737   | AB011145  | 11662.294 | 9996.699  | NM_006213 | 238.917   | 222.05    |
| NM_017819 | 9851.688  | 5682.425  | NM_003750 | 51119.883 | 33899.387 | NM_003546 | 309.293   | 209.072   |
| NM_014803 | 1458.416  | 448.579   | M92422    | 9049.357  | 6326.347  | NM_000671 | 1529.738  | 1144.183  |
| AK024956  | 346.271   | 115.945   | NM_017868 | 5879.24   | 4943.05   | NM_006297 | 14434.133 | 11972.137 |
| AF147386  | 450.004   | 239.612   | NM_004212 | 465.528   | 730.457   | X85325    | 36489.996 | 21032.977 |
| AF273052  | 21643.859 | 7383.609  | NM_018159 | 53737.984 | 56715.383 | AF318366  | 5368.329  | 4035.262  |
| NM_017943 | 10192.476 | 10328.128 | NM_000819 | 24918.434 | 23699.838 | AF182423  | 1370.851  | 1371.2    |
| AF147383  | 572.625   | 1125.735  | NM_002513 | 12554.605 | 11148.961 | D26018    | 2579.692  | 2265.921  |
| AK025682  | 520.433   | 1203.53   | NM_017424 | 4529.701  | 4364.616  | NM_017643 | 201.292   | 209.243   |
| NM_016478 | 16599.422 | 25274.828 | NM_001522 | 27059.738 | 30362.91  | AB037863  | 1361.306  | 1714.008  |
| AL389986  | 15127.24  | 24353.279 | NM_000883 | 20897.232 | 38499.656 | BC000363  | 1093.121  | 1122.29   |
| AF086279  | 1035.92   | 2385.362  | AF254086  | 4656.013  | 5476.599  | NM_007237 | 1302.419  | 1315.686  |
| AF088052  | 1645.659  | 2275.762  | AL390142  | 4138.095  | 4453.541  | NM_004608 | 677.252   | 576.348   |
| AK027155  | 1291.501  | 1155.426  | NM_006565 | 4695.986  | 4164.788  | NM_018257 | 8319.912  | 8510.71   |
| AF264626  | 567.694   | 569.617   | AB007930  | 8702.654  | 6943.609  | NM_005919 | 2080.589  | 2421.111  |
| AK024528  | 3661.775  | 3118.922  | X76978    | 1172.379  | 1105.639  | NM_012256 | 43414.238 | 39166.07  |
| NM_015370 | 1156.053  | 367.161   | AJ005273  | 3511.775  | 3134.148  | NM_006006 | 1109.332  | 1022.633  |
| AF085917  | 1892.448  | 866.944   | AK021892  | 3046.603  | 2836.916  | NM_016325 | 2088.52   | 3641.972  |
| AF085989  | 1521.18   | 816.985   | NM_017637 | 465.931   | 646.035   | NM_001604 | 633.219   | 788.059   |
| AL360139  | 54687.359 | 48286.117 | NM_003121 | 43787.262 | 27630.926 | NM_000908 | 1141.006  | 798.846   |
| AF075110  | 7341.441  | 11202.85  | NM_003437 | 7579.438  | 6291.902  | AB011102  | 2966.314  | 3240.273  |
| AL137323  | 1576.552  | 2867.491  | NM_018337 | 23318.732 | 18215.422 | D63480    | 2605.154  | 2430.746  |
| AL137494  | 9276.45   | 12500.513 | NM_018045 | 6390.307  | 5683.515  | NM_002966 | 6008.469  | 4955.892  |
| AL162037  | 8308.458  | 12287.417 | NM_006481 | 9996.484  | 9487.758  | NM_006475 | 472.335   | 449.566   |
| AL390150  | 3653.646  | 4978.474  | AB011115  | 1779.822  | 2019.606  | NM_004620 | 2252.485  | 2078.078  |
| AL137575  | 436.129   | 933.583   | NM_003910 | 33866.355 | 28208.533 | AF087940  | 6800.684  | 6722.398  |
| NM_002761 | 860.489   | 2058.131  | AB007913  | 5843.96   | 5086.303  | AJ277587  | 1529.925  | 1305.677  |
| AK021962  | 369.404   | 252.802   | L09080    | 14787.583 | 16823.848 | D87432    | 3479.64   | 4032.135  |
| AK056674  | 701.534   | 586.999   | NM_007326 | 13792.024 | 14243.022 | Y18483    | 310.32    | 236.186   |
| AK022042  | 688.328   | 533.211   | AK023080  | 505.858   | 685.451   | AI565117  | 41896.086 | 58744.684 |
| AK024653  | 6121.263  | 3428.938  | NM_001886 | 7855.975  | 9030.45   | AI299075  | 4169.693  | 4455.293  |
| AF103907  | 506.382   | 285.328   | NM_004467 | 747.419   | 917.967   | M59979    | 2134.8    | 1970.712  |
| AF161351  | 1060.373  | 571.665   | NM_018058 | 26942.953 | 31776.697 | AB011098  | 1531.73   | 1918.287  |
| AF257098  | 1603.343  | 161.72    | NM_004548 | 36396.98  | 39291.023 | AA609759  | 2762.895  | 3679.151  |
| AF111782  | 713.479   | 1029.734  | X69079    | 49752.438 | 62615.406 | AA029418  | 8150.068  | 8368.233  |
| AF151530  | 1643.431  | 2578.337  | BI759406  | 43291.82  | 33768.465 | L20815    | 7668.789  | 8602.705  |
| AF090948  | 344.77    | 1122.717  | R76099    | 13387.27  | 12978.103 | AI364483  | 48656.254 | 50389.848 |
| AK021991  | 1784.043  | 2712.196  | S74445    | 2186.192  | 2564.711  | AA456001  | 13777.28  | 13142.209 |
| AK022093  | 1378.959  | 2538.264  | BI763360  | 6447.627  | 5198.951  | AA176581  | 1157.83   | 1154.099  |



|           |           |           |           |           |           |           |           |           |
|-----------|-----------|-----------|-----------|-----------|-----------|-----------|-----------|-----------|
| AK02232   | 600.343   | 721.258   | D25538    | 3261.8    | 2760.078  | BI818232  | 656.058   | 428.984   |
| AK022376  | 1601.004  | 1902.309  | NM_000360 | 43039.387 | 42736.113 | AA451686  | 5907.969  | 6800.784  |
| AK022137  | 537.169   | 775.279   | D49950    | 1133.68   | 835.909   | AA934644  | 1262.34   | 1662.346  |
| AK022272  | 628.402   | 1359.87   | NM_001849 | 1346.289  | 1666.498  | NM_017896 | 10094.749 | 7552.141  |
| AL357201  | 335.341   | 315.352   | X03635    | 8737.692  | 7606.393  | AB002374  | 3178.738  | 2206.804  |
| AF279780  | 43675.832 | 28022.826 | BC011847  | 58886.492 | 66054.141 | U17327    | 1313.141  | 644.577   |
| AK022510  | 3080.741  | 1502.547  | X03348    | 2848.902  | 3210.689  | AB046781  | 271.098   | 115.401   |
| L37717    | 671.886   | 1000.391  | AF353674  | 8475.964  | 7479.404  | M87790    | 36495.305 | 27565.145 |
| AJ131609  | 8099.336  | 5992.953  | BC002645  | 9420.646  | 8473.74   | NM_001766 | 1581.977  | 1130.521  |
| BC019280  | 6584.768  | 3167.38   | NM_021138 | 9050.329  | 8775.211  | NM_000026 | 8111.097  | 5970.756  |
| AF086498  | 893.264   | 394.089   | BC002792  | 9983.983  | 12450.784 | NM_000715 | 482.021   | 322.012   |
| AK000687  | 917.358   | 429.021   | NM_005847 | 380.625   | 521.33    | AF035802  | 4921.434  | 4788.562  |
| AF079567  | 3593.016  | 1657.937  | NM_002286 | 54667.527 | 62728.762 | Y08145    | 2755.72   | 2767.886  |
| AL049311  | 791.038   | 2016.685  | NM_002164 | 2054.933  | 3920.81   | M26123    | 296.424   | 365.381   |
| AK000016  | 1989.754  | 3227.692  | NM_003811 | 21059.842 | 26591.145 | NM_001836 | 9407.521  | 7295.489  |
| AK023367  | 3249.618  | 5159.334  | NM_002981 | 13482.163 | 14820.474 | NM_019556 | 978.971   | 1210.53   |
| AL080209  | 3477.696  | 5847.028  | NM_001244 | 4858.18   | 6078.198  | NM_012096 | 6618.459  | 7496.225  |
| NM_016256 | 2326.919  | 2530.17   | NM_012275 | 763.358   | 1459.057  | NM_003905 | 13720.984 | 12612.642 |
| NM_014316 | 4890.493  | 7562.687  | NM_006137 | 2617.582  | 2728.403  | L12052    | 3117.505  | 3648.323  |
| AK023526  | 1606.437  | 1983.859  | NM_016139 | 50673.875 | 61595.422 | AB028976  | 5925.876  | 6630.715  |
| BE266129  | 1273.749  | 1173.69   | AL117468  | 8610.401  | 9928.508  | AK026337  | 5529.577  | 4806.418  |
| X66227    | 452.821   | 592.156   | NM_019613 | 9855.72   | 10987.437 | NM_015866 | 1375.318  | 1341.691  |
| AK025602  | 20360.734 | 23212.307 | NM_005382 | 1809.397  | 1554.562  | NM_004626 | 1045.196  | 1217.456  |
| AK026309  | 3944.454  | 3715.15   | AK027086  | 5485.623  | 5485.07   | NM_001896 | 602.355   | 605.157   |
| AL137486  | 2002.654  | 1135.971  | AB032997  | 1514.416  | 1608.364  | NM_013326 | 11877.701 | 8990.144  |
| AL110162  | 1315.172  | 906.755   | AL096857  | 5251.497  | 6370.584  | NM_000790 | 315.777   | 244.265   |
| AF119880  | 460.053   | 300.566   | AB002351  | 590.649   | 772.187   | NM_002660 | 2748.492  | 3055.918  |
| NM_017706 | 782.389   | 846.903   | X07203    | 39410.68  | 29880.367 | NM_015900 | 462.277   | 367.068   |
| BE895529  | 7331.854  | 11565.493 | AB040104  | 1178.84   | 1462.2    | NM_003706 | 748.74    | 754.85    |
| AK000964  | 1407.197  | 2981.579  | NM_003834 | 8740.99   | 10686.067 | AF182218  | 253.995   | 280.629   |
| AL117536  | 26406.143 | 35044.473 | NM_005959 | 14331.937 | 13452.923 | NM_016122 | 1222.204  | 1017.357  |
| NM_017751 | 15676.336 | 18340.268 | NM_003381 | 3432.485  | 3235.027  | AK023749  | 385.956   | 580.254   |
| NM_003771 | 811.804   | 1687.875  | NM_005756 | 2954.526  | 3075.111  | NM_002337 | 2683.756  | 2615.704  |
| NM_017860 | 2480.528  | 3145.002  | NM_003702 | 36942.609 | 29348.902 | NM_013245 | 1339.294  | 1355.912  |
| X91195    | 63568.582 | 67098.484 | NM_000369 | 2266.363  | 2611.849  | NM_006423 | 34246.008 | 26878.387 |
| AF086190  | 934.558   | 1648.95   | NM_004405 | 3068.73   | 3032.487  | NM_004766 | 1023.127  | 993.392   |
| NM_006143 | 796.356   | 2068.508  | NM_001986 | 13862.614 | 13297.902 | NM_005816 | 24411.045 | 19945.316 |
| AL050035  | 10760.279 | 15267.035 | AF073770  | 3464.267  | 5222.19   | AK025520  | 1897.66   | 1099.641  |
| AK024449  | 354.116   | 1106.586  | AL359401  | 10280.534 | 12585.604 | NM_004892 | 2477.344  | 3179.281  |
| AF090101  | 642.421   | 1334.416  | NM_012213 | 1892.706  | 2222.621  | NM_014597 | 13711.4   | 13048.087 |
| AF040723  | 10924.259 | 7506.15   | NM_016573 | 9187.47   | 9307.231  | BF540935  | 9946.91   | 8536.439  |
| NM_015527 | 11179.083 | 19277.791 | NM_001303 | 21258.361 | 24683.439 | NM_004466 | 367.325   | 403.867   |
| X89675    | 794.021   | 816.979   | M21304    | 1044.943  | 1053.068  | NM_007081 | 1827.863  | 1427.354  |
| NM_012186 | 811.105   | 876.537   | NM_001979 | 891.247   | 1202.378  | AB032964  | 1938.65   | 1697.784  |
| NM_005796 | 18806.08  | 21513.139 | AB040896  | 2030.279  | 2905.796  | BE733605  | 3807.976  | 3176.746  |
| NM_004216 | 4354.841  | 5267.186  | NM_001107 | 7099.387  | 6244.262  | NM_003334 | 22674.957 | 14644.972 |
| NM_016286 | 32707.486 | 19824.939 | AF084645  | 832.38    | 768.305   | NM_002693 | 1787.108  | 1378.923  |
| NM_001464 | 801.179   | 515.327   | AF151851  | 12001.688 | 13544.62  | NM_003671 | 892.314   | 838.471   |
| NM_002051 | 5010.832  | 1492.989  | NM_003471 | 307.24    | 624.035   | AK026000  | 3137.85   | 3157.516  |
| AK023852  | 1143.23   | 748.215   | AF220417  | 3874.903  | 4898.651  | NM_017833 | 1540.645  | 1845.187  |
| AF086466  | 2269.953  | 3466.534  | NM_001122 | 47998.57  | 42293.141 | NM_006675 | 5241.752  | 6626.146  |
| AB007962  | 8844.059  | 13575.383 | NM_004591 | 11210.563 | 11292.607 | NM_003022 | 4640.54   | 5871.931  |
| AF005081  | 3573.109  | 6685.761  | NM_006274 | 557.075   | 641.452   | NM_004873 | 3970.697  | 5489.876  |

|           |           |           |           |           |           |           |           |           |
|-----------|-----------|-----------|-----------|-----------|-----------|-----------|-----------|-----------|
| AK026438  | 1219.606  | 2563.249  | AL133027  | 3347.674  | 3393.359  | NM_019842 | 1218.005  | 1477.653  |
| AK021546  | 2423.708  | 3583.263  | AB037732  | 2830.106  | 3677.469  | NM_002951 | 11269.196 | 16962.34  |
| AL050186  | 31545.352 | 42371.051 | NM_005767 | 1124.73   | 1273.161  | NM_002317 | 1532.983  | 1391.397  |
| AK021918  | 11397.402 | 15670.413 | NM_001837 | 1035.197  | 1360.084  | NM_000320 | 1015.022  | 909.201   |
| AF069137  | 609.361   | 1046.214  | NM_001839 | 57991.645 | 64050.637 | NM_017921 | 189.924   | 175.908   |
| AK021669  | 10080.686 | 13778.343 | BC016029  | 1380.822  | 1981.757  | NM_003136 | 4430.377  | 4049.655  |
| AL080113  | 60398.637 | 61618.43  | M27487    | 56422.105 | 54506.074 | D63480    | 2394.655  | 2319.585  |
| AL050083  | 2287.384  | 3419.381  | NM_002611 | 3377.089  | 3797.144  | NM_002965 | 5723.715  | 4846.436  |
| AK022766  | 1944      | 2707.399  | NM_017417 | 1064.402  | 1166.479  | NM_006475 | 435.455   | 483.507   |
| AL049422  | 14078.772 | 22279.156 | AL133602  | 2951.224  | 6842.471  | NM_004620 | 2315.159  | 2001.235  |
| NM_000093 | 1890.82   | 1391.236  | AF037219  | 7824.167  | 7270.621  | AF087940  | 7033.479  | 7226.609  |
| NM_001779 | 10718.124 | 8253.448  | AK026075  | 868.664   | 1065.398  | AJ277587  | 1492.37   | 1446.818  |
| AB033059  | 1741.706  | 1819.455  | NM_000251 | 7220.316  | 7663.519  | D87432    | 3708.03   | 4759.39   |
| NM_016484 | 4775.198  | 4894.331  | AF118071  | 676.876   | 713.894   | Y18483    | 417.901   | 382.436   |
| AK026114  | 803.344   | 812.665   | NM_006038 | 6096.342  | 8915.749  | AI565117  | 49443.273 | 46063.262 |
| NM_014452 | 2960.7    | 5787.204  | AB011133  | 6717.569  | 6968.663  | AI299075  | 3442.261  | 2816.36   |
| NM_014683 | 582.402   | 1015.481  | NM_017572 | 53279.418 | 46527.281 | M59979    | 2055.4    | 1551.542  |
| AK021536  | 13371.551 | 5431.278  | NM_018444 | 3630.562  | 3017.431  | AB011098  | 1411.662  | 1247.139  |
| NM_002600 | 1651.604  | 1362.008  | NM_000252 | 2464.256  | 3306.649  | AA609759  | 2492.765  | 2866.92   |
| NM_003646 | 49986.715 | 50501.082 | NM_006947 | 16388.174 | 17483.234 | AA029418  | 8795.127  | 9771.581  |
| NM_006663 | 3620.984  | 5977.855  | NM_017917 | 4430.646  | 5046.097  | L20815    | 9414.723  | 11833.447 |
| NM_006092 | 1836.667  | 2542.129  | NM_004090 | 11315.327 | 11782.478 | AI364483  | 41808.688 | 36430.941 |
| NM_003939 | 1359.803  | 2558.845  | NM_014634 | 15114.439 | 14727.924 | AA456001  | 11583.21  | 11513.152 |
| NM_012424 | 1478.592  | 2084.948  | NM_001919 | 42670.891 | 36656.633 | AA176581  | 1534.438  | 2215.763  |
| NM_002446 | 1658.055  | 2453.058  | BC031485  | 4600.318  | 4979.392  | BI818232  | 225.4     | 249.413   |
| NM_004440 | 218.356   | 839.748   | NM_004092 | 13458.076 | 16438.432 | AA451686  | 5972.658  | 5974.25   |
| NM_000863 | 2559.067  | 3753.277  | X15624    | 2376.656  | 3339.831  | NM_002050 | 2972.816  | 3198      |
| NM_006651 | 6014.684  | 9255.813  | AK023080  | 533.931   | 525.791   | NM_007097 | 6057.393  | 5352.757  |
| NM_005336 | 25838.281 | 35365.16  | NM_001886 | 7627.851  | 8459.453  | D87446    | 3966.566  | 3115.086  |
| NM_001419 | 23365.777 | 33901.867 | NM_004467 | 913.214   | 996.586   | U17327    | 1494.047  | 956.31    |
| AF119817  | 32848.25  | 38700.027 | NM_018058 | 28766.043 | 36257.898 | AB046781  | 301.723   | 122.212   |
| AL035306  | 8408.314  | 11499.713 | NM_004548 | 38024.879 | 50427.371 | M87790    | 37938.594 | 23936.332 |
| NM_004230 | 7654.957  | 4566.095  | X69079    | 55103.391 | 63751.949 | NM_001768 | 1842.86   | 1304.102  |
| NM_014503 | 2253.831  | 4653.22   | BI759406  | 45211.055 | 38290.684 | NM_000029 | 9913.66   | 6290.029  |
| NM_014659 | 2402.009  | 1746.984  | R76099    | 14538.365 | 14180.66  | NM_000715 | 3777.247  | 9118.689  |
| NM_004399 | 13999.508 | 7825.05   | S74445    | 2822.14   | 2764.157  | AF035802  | 3473.98   | 2533.265  |
| NM_006337 | 10070.43  | 7331.259  | BI763360  | 8042.493  | 8517.392  | Y08145    | 2725.13   | 2132.094  |
| NM_004507 | 7564.585  | 8606.487  | D25538    | 3150.27   | 3789.434  | M26123    | 255.501   | 333.31    |
| NM_002710 | 34547.48  | 17690.633 | NM_000360 | 39763.68  | 34474.574 | NM_001838 | 9055.826  | 5982.77   |
| NM_014060 | 8756.552  | 3907.156  | D49950    | 792.199   | 960.572   | NM_019555 | 1050.187  | 1142.797  |
| NM_004749 | 11618.05  | 2551.302  | NM_001849 | 1210.881  | 1661.049  | NM_012096 | 6803.675  | 7671.501  |
| AF302502  | 1132.158  | 1237.535  | X03635    | 8246.515  | 7215.238  | NM_003905 | 14157.515 | 12650.47  |
| AF274571  | 5018.024  | 7660.812  | BC011847  | 61678.473 | 76944.375 | L12052    | 3146.4    | 3010.104  |
| NM_005449 | 2151.712  | 3821.264  | X03348    | 2934.115  | 3270.899  | AB028976  | 5601.923  | 6320.819  |
| NM_003879 | 8037.244  | 10087.232 | AF353674  | 7405.417  | 7457.675  | AK026337  | 4361.891  | 4452.538  |
| U69263    | 443.493   | 1007.736  | BC002645  | 10088.362 | 8686.214  | NM_015869 | 774.134   | 568.044   |
| NM_016052 | 23541.523 | 28625.057 | NM_021138 | 8504.007  | 8431.118  | NM_004626 | 515.595   | 573.722   |
| NM_005427 | 2575.831  | 3759.468  | BC002792  | 9403.819  | 11977.17  | NM_001899 | 758.367   | 628.555   |
| NM_016312 | 2412.067  | 3484.19   | NM_001523 | 1647.463  | 1242.246  | NM_000908 | 1039.26   | 1078.277  |
| AF234887  | 1796.439  | 3003.255  | NM_017423 | 1864.172  | 2286.679  | AB011102  | 2641.429  | 3249.527  |
| NM_001776 | 4802.186  | 7635.921  | Z70705    | 1272.103  | 1100.114  | NM_002660 | 2733.517  | 2993.435  |
| NM_001792 | 536.163   | 1087.606  | NM_003811 | 22254.252 | 27103.482 | NM_015900 | 681.051   | 398.172   |
| NM_001903 | 925.448   | 1558.303  | NM_002981 | 14805.968 | 14327.684 | NM_003706 | 955.753   | 938.401   |

|           |           |           |           |           |           |           |           |           |
|-----------|-----------|-----------|-----------|-----------|-----------|-----------|-----------|-----------|
| U87223    | 6319.308  | 8703.441  | NM_001244 | 5486.069  | 6147.524  | AF182218  | 209.26    | 149.71    |
| NM_005857 | 6217.831  | 4656.401  | NM_012275 | 852.212   | 1120.856  | NM_016122 | 1008.246  | 578.076   |
| NM_002429 | 1142.781  | 814.509   | NM_006137 | 3182.045  | 5342.226  | AK023749  | 452.158   | 593.212   |
| NM_000429 | 4887.097  | 3425.064  | NM_016139 | 49889.371 | 62403.125 | NM_002337 | 2952.585  | 3464.133  |
| AK027037  | 1174.629  | 1085.595  | AL117468  | 7554.129  | 8917.589  | NM_013245 | 1377.901  | 1445.433  |
| NM_003875 | 17607.711 | 11491.151 | NM_019613 | 11491.232 | 13540.106 | NM_006423 | 31792.096 | 20502.225 |
| AF191687  | 5013.182  | 2598.501  | NM_005382 | 2233.543  | 2234.746  | NM_004766 | 1186.784  | 1456.668  |
| NM_003046 | 429.672   | 225.087   | AK027086  | 5526.296  | 5642.583  | NM_005819 | 28982.148 | 25698.42  |
| NM_000170 | 1851.304  | 1154.266  | AB032997  | 1860.04   | 2189.618  | AK025520  | 2445.353  | 1487.25   |
| NM_000281 | 990.215   | 1635.745  | AL096857  | 6246.597  | 7377.083  | NM_004892 | 2418.407  | 2354.863  |
| AK001295  | 6936.888  | 10041.806 | AB002351  | 667.866   | 708.201   | NM_014597 | 14627.158 | 13330.331 |
| NM_006031 | 12965.403 | 14448.967 | X07203    | 38476.383 | 33840.844 | NM_017896 | 11396.37  | 9609.23   |
| NM_002715 | 20415.775 | 19732.207 | AB040104  | 1040.28   | 1134.796  | AB002374  | 3510.8    | 2501.879  |
| NM_001020 | 66174.961 | 69263.484 | NM_003834 | 8678.478  | 8940.564  | NM_004466 | 384.317   | 340.727   |
| AB020660  | 5694.013  | 6942.528  | NM_005959 | 13461.974 | 13323.022 | NM_007081 | 1778      | 1476.818  |
| NM_006659 | 28473.15  | 36674.395 | NM_003381 | 3210.421  | 3690.242  | AB032964  | 2121.446  | 1787.494  |
| NM_018051 | 3925.68   | 6054.005  | NM_005756 | 2904.276  | 2852.444  | BE733605  | 4113.106  | 3670.866  |
| NM_015371 | 5436.672  | 7626.81   | NM_003702 | 37036.254 | 32180.758 | NM_003334 | 25512.115 | 16024.017 |
| AB040915  | 9358.9    | 10234.437 | NM_000369 | 2014.471  | 3026.101  | NM_002693 | 2344.721  | 1956.932  |
| AF147791  | 784.94    | 1444.97   | NM_004405 | 2760.601  | 2642.464  | NM_003671 | 739.984   | 552.203   |
| NM_001328 | 55457.355 | 59220.43  | NM_001988 | 12131.755 | 10941.547 | AK026000  | 2960.796  | 2221.787  |
| NM_005749 | 21281.205 | 23184.234 | L09080    | 20197.445 | 21682.006 | NM_017833 | 1407.828  | 1626.917  |
| NM_006696 | 5597.03   | 5087.633  | NM_007326 | 18889.338 | 19980.729 | NM_006675 | 3457.443  | 3044.697  |
| NM_004599 | 36034.125 | 52256.355 | NM_012213 | 2104.123  | 2216.98   | NM_003022 | 4727.05   | 4910.927  |
| NM_006037 | 2615.654  | 1630.621  | NM_016573 | 9065.135  | 8755.748  | NM_004873 | 4460.851  | 5580.387  |
| NM_015871 | 17376.896 | 10455.482 | NM_001303 | 22095.742 | 21330.029 | NM_019842 | 1303.269  | 1558.858  |
| NM_019037 | 10915.748 | 4623.269  | M21304    | 940.369   | 879.984   | NM_002951 | 11559.826 | 15515.043 |
| NM_015891 | 6794.781  | 2630.153  | NM_001979 | 840.713   | 1342.164  | NM_002317 | 2659.462  | 2947.586  |
| NM_006802 | 1657.833  | 495.034   | AB040896  | 2273.824  | 2471.116  | NM_000320 | 2248.447  | 3002.468  |
| NM_005066 | 48193.516 | 52518.598 | NM_001107 | 6693.526  | 6438.308  | NM_000550 | 246.42    | 111.111   |
| NM_003089 | 23409.045 | 27554.084 | AF084645  | 772.76    | 975.775   | NM_017921 | 737.921   | 527.039   |
| NM_003753 | 50914.102 | 62675.422 | AB049758  | 571.127   | 1079.174  | NM_003136 | 4372.338  | 4808.339  |
| NM_006223 | 2270.21   | 3517.136  | NM_003471 | 587.037   | 940.011   | NM_013328 | 13317.128 | 12915.992 |
| NM_017590 | 10135.597 | 14822.353 | NM_014379 | 665.909   | 788.746   | NM_000790 | 289.958   | 217.736   |
| AB011145  | 22515.602 | 27368.949 | AF220417  | 3654.896  | 3129.492  | NM_004620 | 2210.989  | 1690.914  |
| NM_003750 | 54483.52  | 57749.898 | NM_001122 | 47965.348 | 44309.539 | AF087940  | 6560.319  | 5808.041  |
| NM_015251 | 542.054   | 1322.995  | NM_004591 | 10444.16  | 11470.479 | AJ277587  | 1539.032  | 1125.246  |
| M92422    | 15965.393 | 14783.744 | NM_006274 | 603.927   | 631.486   | D87432    | 4006.789  | 4720.742  |
| NM_017868 | 8274.957  | 7315.081  | AL133027  | 2924.766  | 3438.731  | Y18483    | 440.441   | 465.045   |
| NM_001869 | 556.957   | 1025.568  | AB037732  | 2752.316  | 3742.065  | AI565117  | 48235.266 | 52587.793 |
| X69637    | 521.798   | 1194.831  | NM_005767 | 953.564   | 1135.011  | AI299075  | 3342.321  | 2456.923  |
| NM_004212 | 598.51    | 306.458   | NM_001837 | 749.375   | 1212.974  | M59979    | 1607.252  | 1132.357  |
| NM_018159 | 38226.492 | 25062.752 | NM_001839 | 63074.527 | 66509.5   | AB011098  | 885.053   | 307.348   |
| NM_000819 | 29229.764 | 41233.828 | BC016029  | 1402.794  | 1645.481  | AA609759  | 2316.68   | 1879.618  |
| NM_002513 | 18924.547 | 22965.551 | M27487    | 55178.293 | 57688.457 | AA029418  | 8020.944  | 6875.246  |
| NM_017424 | 6311.664  | 4847.644  | NM_002286 | 59383.77  | 63656.996 | L20815    | 7998.74   | 7742.866  |
| NM_001522 | 19954.098 | 12020.75  | NM_002164 | 1752.616  | 2536.478  | AI364483  | 41891.773 | 39932.656 |
| NM_000883 | 18002.664 | 9658.474  | NM_017417 | 933.789   | 1217.901  | AA456001  | 13511.073 | 13608.989 |
| AF254086  | 4410.218  | 2228.565  | AL133602  | 2596.026  | 2535.406  | AA176581  | 1137.949  | 1136.77   |
| AL390142  | 1418.222  | 537.238   | AF037219  | 8322.176  | 6803.843  | AA451686  | 6985.974  | 7932.241  |
| NM_006565 | 5368.196  | 1457.943  | AK026075  | 789.164   | 900.26    | AA934644  | 1263.229  | 1261.386  |
| AB007930  | 7762.861  | 1103.091  | NM_000251 | 7208.368  | 6709.707  | NM_002050 | 5091.378  | 4557.366  |
| AJ005273  | 6693.358  | 10118.104 | AF118071  | 670.893   | 660.995   | NM_007097 | 5248.278  | 3970.279  |

|           |           |           |           |           |           |           |           |           |
|-----------|-----------|-----------|-----------|-----------|-----------|-----------|-----------|-----------|
| AK021892  | 5270.287  | 8652.156  | NM_006038 | 9087.733  | 14897.342 | D87446    | 4292.439  | 4271.365  |
| NM_017637 | 783.784   | 1744.162  | AB011133  | 7127.156  | 6434.764  | BF540935  | 12437.261 | 12792.708 |
| NM_003121 | 57490.551 | 59636.898 | NM_017572 | 50414.309 | 33116.133 | NM_000715 | 534.389   | 400.155   |
| NM_003437 | 2779.662  | 3598.172  | NM_018444 | 4231.88   | 3888.65   | AF035802  | 4561.603  | 3878.292  |
| NM_018337 | 13482.182 | 17737.543 | NM_000252 | 2262.22   | 3036.646  | Y08145    | 2814.403  | 2216.967  |
| AA193295  | 706.061   | 974.888   | NM_006947 | 16084.289 | 14848.729 | M26123    | 264.387   | 231.927   |
| NM_018045 | 7380.102  | 9168.978  | NM_017917 | 4062.161  | 4643.918  | NM_001838 | 8968.888  | 5469.431  |
| NM_006481 | 19636.643 | 23633.594 | NM_004090 | 10836.593 | 12349.26  | NM_019555 | 1024.081  | 1034.582  |
| AB011115  | 1502.995  | 2359.361  | NM_014634 | 15284.967 | 14909.916 | NM_012096 | 6929.106  | 5853.136  |
| NM_003910 | 55090.559 | 59006.875 | NM_001919 | 42325.516 | 37137.523 | NM_003905 | 11973.936 | 7488.61   |
| AB007913  | 1854.982  | 2605.386  | BC031485  | 4651.62   | 5718.728  | L12052    | 2912.14   | 2072.755  |
| L09080    | 873.396   | 570.109   | NM_004092 | 12258.513 | 15488.041 | AB028976  | 4255.517  | 3368.622  |
| NM_007326 | 2371.392  | 1746.155  | X15624    | 2310.594  | 3249.254  | AK026337  | 4760.621  | 3533.515  |
| AK023080  | 516.19    | 792.784   | AF073770  | 3701.43   | 3996.724  | NM_015865 | 679.68    | 453.487   |
| NM_001886 | 5610.846  | 7102.575  | AL359401  | 11031.571 | 14673.571 | AB031038  | 268.562   | 296.805   |
| NM_018055 | 27613.461 | 22373.318 | NM_004467 | 1792.673  | 4134.615  | NM_004626 | 571.308   | 499.863   |
| NM_004545 | 42541.621 | 23980.943 | NM_018055 | 29155.492 | 30995.965 | NM_001895 | 708.199   | 878.219   |
| X69079    | 33904.391 | 15093.671 | NM_004545 | 39163.844 | 40672.148 | NM_004305 | 49174.941 | 52963.004 |
| BI759406  | 34568.938 | 10960.722 | X69079    | 58240.719 | 62578.492 | NM_005992 | 1086.118  | 1022.657  |
| R76099    | 13260.963 | 2851.183  | BI759406  | 46219.238 | 42811.777 | NM_003144 | 8542.584  | 7948.747  |
| BI763360  | 4025.322  | 5408.928  | R76099    | 15047.804 | 14124.902 | NM_000908 | 855.808   | 709.563   |
| D25538    | 7869.209  | 10897.045 | S74445    | 3069.174  | 3140.477  | AB011102  | 2719.346  | 3114.608  |
| NM_000360 | 59804.133 | 61627.008 | BI763360  | 11232.924 | 10674.111 | D63480    | 2434.804  | 2545.938  |
| D49950    | 1649.607  | 3047.468  | D25538    | 4149.936  | 4305.332  | NM_002965 | 5295.457  | 4799.277  |
| NM_001845 | 2133.004  | 2885.769  | NM_000360 | 48951.203 | 46506.434 | M81768    | 329.345   | 290.544   |
| X03635    | 3231.849  | 4416.246  | D49950    | 1338.033  | 1547.799  | AK023749  | 422.723   | 431.083   |
| BC011847  | 62592.234 | 66078.477 | NM_001845 | 1521.701  | 1283.722  | NM_002337 | 3431.471  | 2170.68   |
| X03348    | 4786.626  | 8159.217  | X03635    | 12191.693 | 11420.722 | NM_013245 | 1266.451  | 638.955   |
| AF353674  | 12906.815 | 15567.409 | BC011847  | 55817.887 | 74911.594 | NM_006423 | 26926.209 | 13804.112 |
| BC002645  | 15329.323 | 17856.119 | X03348    | 2655.07   | 3648.479  | NM_004766 | 984.591   | 567.252   |
| NM_021138 | 8320.481  | 10214.82  | AF353674  | 8280.695  | 9268.023  | NM_005815 | 19736.514 | 8964.696  |
| BC002792  | 15525.176 | 20854.111 | BC002645  | 9923.249  | 9778.074  | AK025520  | 2132.444  | 1078.556  |
| NM_005847 | 887.393   | 1111.453  | NM_021138 | 10672.702 | 10232.77  | NM_004892 | 2526.11   | 2882.09   |
| NM_002286 | 56288.852 | 49509.426 | BC002792  | 10061.285 | 13451.922 | NM_014597 | 15432.191 | 13498.927 |
| NM_002164 | 1637.34   | 1120.746  | NM_001523 | 1486.473  | 1689.036  | NM_017896 | 10991.316 | 9191.891  |
| NM_003811 | 24137.859 | 21467.969 | NM_017423 | 1951.04   | 2114.614  | AB002374  | 3147.044  | 2502.594  |
| NM_002981 | 16507.135 | 14845.515 | Z70705    | 1255.189  | 1314.822  | U17327    | 1503.502  | 1265.776  |
| NM_001244 | 4017.965  | 3447.071  | NM_002611 | 4119.685  | 3694.592  | AB046781  | 349.83    | 253.76    |
| NM_012275 | 474.526   | 430.585   | NM_005382 | 3055.24   | 6831.04   | M87790    | 37803.551 | 30211.451 |
| NM_006137 | 387.079   | 310.361   | AK027086  | 5201.346  | 8162.486  | NM_001768 | 1699.812  | 1768.042  |
| NM_016135 | 60907.727 | 43782.258 | AB032997  | 1733.168  | 2509.24   | NM_000025 | 10519.99  | 7581.673  |
| AL117468  | 3236.115  | 1520.844  | AL096857  | 6387.254  | 7832.727  | NM_003136 | 5257.824  | 4888.44   |
| NM_019613 | 10070.851 | 4026.021  | AB002351  | 678.187   | 567.912   | NM_013328 | 13259.602 | 11055.105 |
| NM_005382 | 1585.469  | 284.186   | X07203    | 40274.969 | 33308.23  | NM_000790 | 328.347   | 363.289   |
| AK027086  | 9672.305  | 4764.453  | AB040104  | 1265.319  | 1313.102  | NM_002660 | 2561.695  | 2494.577  |
| AB032997  | 3000.654  | 4429.742  | NM_003834 | 11511.603 | 11931.957 | NM_015900 | 484.585   | 210.019   |
| AL096857  | 11465.842 | 15698.566 | NM_005959 | 16448.727 | 17639.672 | NM_003706 | 835.743   | 980.758   |
| AB002351  | 471.078   | 787.788   | NM_003381 | 4002.094  | 4707.78   | AF182218  | 251.32    | 235.125   |
| X07203    | 58054.559 | 56148.316 | NM_005756 | 3266.415  | 3007.115  | AB033054  | 6921.939  | 7699.987  |
| AB040104  | 1397.719  | 1932.314  | NM_003702 | 40321.449 | 32194.479 | NM_016122 | 1358.579  | 1364.331  |
| NM_003834 | 8862.11   | 12911.149 | NM_000369 | 2995.493  | 2960.647  | AF153330  | 547.476   | 568.445   |
| NM_005959 | 15977.411 | 17777.445 | NM_016351 | 4573.022  | 5209.345  | NM_002050 | 2976.544  | 2886.812  |
| NM_003381 | 4192.483  | 7387.694  | NM_004405 | 3440.068  | 3304.794  | NM_007097 | 5719.12   | 4538.318  |

|           |           |           |           |           |           |           |           |           |
|-----------|-----------|-----------|-----------|-----------|-----------|-----------|-----------|-----------|
| NM_005756 | 4885.225  | 7623.416  | NM_001988 | 11333.614 | 11250.839 | D87446    | 5191.392  | 3876.5    |
| NM_003702 | 58475.422 | 59212.488 | NM_006060 | 2468.097  | 2689.095  | BF540935  | 10867.903 | 9832.904  |
| NM_000369 | 2963.553  | 5156.68   | NM_005667 | 5219.873  | 7541.374  | NM_007081 | 1744.41   | 1498.273  |
| NM_004405 | 2528.131  | 3587.514  | NM_006308 | 1520.134  | 1825.93   | AB032964  | 1834.358  | 1456.336  |
| NM_001988 | 5798.969  | 7284.9    | NM_000060 | 830.328   | 1397.955  | BE733605  | 3300.673  | 2487.409  |
| AF073770  | 3231.708  | 2285.918  | NM_009589 | 968.457   | 1570.723  | NM_003334 | 24165.229 | 17717.758 |
| AL359401  | 9912.012  | 6966.843  | L09080    | 22069.602 | 24460.881 | NM_002693 | 1969.995  | 1950.806  |
| NM_012213 | 1382.284  | 1140.47   | NM_007326 | 19024.252 | 23763.061 | NM_003671 | 800.582   | 896.593   |
| NM_016573 | 7889.969  | 6425.917  | AK023080  | 357.133   | 794.164   | AK026000  | 3606.391  | 3742.461  |
| NM_001303 | 16534.195 | 13238.343 | NM_001886 | 11049.963 | 14789.671 | NM_017833 | 1576.317  | 1675.841  |
| M21304    | 660.689   | 480.704   | D83782    | 10637.773 | 13195.797 | NM_006675 | 4849.649  | 5467.563  |
| AB040896  | 2298.515  | 1256.739  | NM_002078 | 4646.755  | 4943.464  | NM_003022 | 5187.515  | 5721.783  |
| NM_001107 | 8151.808  | 6325.192  | NM_000287 | 3919.073  | 4201.58   | NM_013306 | 382.098   | 399.292   |
| AF084645  | 755.469   | 367.856   | NM_001656 | 3555.683  | 4343.591  | NM_004873 | 4122.785  | 3969.663  |
| AF151851  | 8693.903  | 3988.646  | AF091033  | 2420.17   | 2452.839  | NM_019842 | 1109.072  | 1022.129  |
| NM_003471 | 876.892   | 1396.719  | NM_001122 | 50161.832 | 47353.379 | NM_002951 | 10971.996 | 16592.244 |
| NM_014379 | 537.074   | 750.196   | NM_004591 | 17706.51  | 16511.063 | NM_002317 | 1953.209  | 1925.241  |
| AF220417  | 12473.191 | 17824.734 | NM_006274 | 675.615   | 662.568   | NM_000320 | 1119.382  | 1115.124  |
| NM_001122 | 13905.425 | 20275.35  | AL133027  | 4949.263  | 5681.578  | NM_145655 | 1198.896  | 1246.29   |
| NM_004591 | 1243.578  | 1874.588  | AB037732  | 3011.763  | 3399.231  | NM_021957 | 771.722   | 823.362   |
| NM_006274 | 872.157   | 1794.488  | NM_005767 | 1465.836  | 1486.872  | AK022138  | 3398.804  | 3713.571  |
| AL133027  | 2455.804  | 3401.644  | NM_001837 | 1223.009  | 1387.717  | AF086191  | 6578.745  | 4365.688  |
| AB037732  | 3671.747  | 6573.15   | NM_001839 | 56472.355 | 70578.484 | NM_017638 | 3390.45   | 1499.479  |
| NM_005767 | 2063.085  | 2731.96   | BC016029  | 1631.612  | 1514.083  | AL133052  | 1444.062  | 770.98    |
| NM_001837 | 1582.758  | 2272.035  | M27487    | 57197.934 | 55787.934 | AB037824  | 1221.433  | 1140.481  |
| NM_001839 | 60744.438 | 66895.602 | NM_002286 | 54095.32  | 61030.379 | AF361494  | 552.172   | 670.053   |
| BC016029  | 2199.899  | 3276.437  | NM_002164 | 1800.213  | 2306.851  | AK022810  | 2458.92   | 5465.554  |
| M27487    | 62786.555 | 62515.863 | NM_003811 | 22157.719 | 30183.785 | AK001384  | 1436.83   | 1449.148  |
| NM_002611 | 3348.957  | 1566.963  | NM_002981 | 16757.254 | 19570.346 | AK025437  | 1974.061  | 1832.061  |
| NM_017417 | 604.35    | 821.357   | NM_001244 | 5095.305  | 6441.346  | AK074164  | 464.714   | 433.04    |
| AL133602  | 765.788   | 581.952   | NM_012275 | 1205.849  | 1852.979  | NM_145655 | 1219.645  | 767.897   |
| AF037219  | 8791.521  | 4127.492  | NM_006137 | 3496.343  | 3817.053  | SR2       | 20415.887 | 11955.434 |
| AK026075  | 829.636   | 523.128   | NM_016139 | 60065.18  | 62926.211 | SR4       | 6461.034  | 3577.21   |
| NM_000251 | 6770.54   | 3223.285  | AL117468  | 11994.865 | 13652.85  | SR6       | 786.948   | 604.302   |
| AF118071  | 504.674   | 365.656   | NM_019613 | 12251.444 | 15679.496 | SR8       | 3506.172  | 6116.708  |
| NM_006038 | 3718.295  | 1134.036  | BC031485  | 4557.367  | 4924.773  | SR10      | 11372.957 | 2695.787  |
| AB011133  | 15373.698 | 17664.129 | NM_004092 | 12060.611 | 13866.68  | NM_018465 | 899.654   | 983.93    |
| NM_017572 | 61885.199 | 61554.762 | X15624    | 2594.959  | 3474.069  | AL359932  | 683.814   | 572.135   |
| NM_018444 | 5679.522  | 9618.174  | AF073770  | 3479.606  | 4224.431  | AB037850  | 2998.341  | 2430.006  |
| NM_000252 | 3968.342  | 6201.955  | AL359401  | 9290.495  | 11462.498 | AK002197  | 2599.094  | 1835.021  |
| NM_006947 | 28166.943 | 32662.68  | NM_012213 | 2447.657  | 2406.543  | AF087996  | 7352.381  | 4125.624  |
| NM_017917 | 8488.978  | 10386.175 | NM_016573 | 11243.531 | 10986.031 | AK021710  | 2028.269  | 1512.591  |
| NM_004090 | 19544.764 | 24900.113 | NM_001303 | 24754.119 | 26574.447 | AK024551  | 707.683   | 554.149   |
| NM_014634 | 14125.508 | 15553.303 | M21304    | 1397.047  | 1403.914  | AL833249  | 4292.004  | 2989.201  |
| NM_001919 | 45931.582 | 50395.715 | NM_001979 | 1469.137  | 1707.386  | AF131852  | 363.966   | 414.111   |
| BC031485  | 6360.879  | 8345.993  | AB040896  | 2533.971  | 2776.043  | AK021894  | 1555.54   | 1293.936  |
| NM_004092 | 22195.531 | 26991.219 | NM_001107 | 8277.039  | 6390.959  | NM_020424 | 3597.822  | 3201.294  |
| X15624    | 3843.512  | 6113.057  | AF084645  | 997.748   | 1054.282  | AF147341  | 657.039   | 409.261   |
| NM_001886 | 5089.078  | 3698.39   | AF151851  | 15646.126 | 18251.67  | AB033009  | 21243.051 | 9922.433  |
| NM_018058 | 26785.172 | 23980.018 | NM_005176 | 2015.897  | 2486.514  | AK022086  | 359.929   | 271.298   |
| NM_004548 | 43521.535 | 38641.441 | NM_003636 | 6308.077  | 7890.043  | AF147320  | 1840.756  | 659.103   |
| X69079    | 37616.91  | 22608.115 | NM_002234 | 6276.45   | 8536.953  | AK027024  | 752.879   | 626.857   |
| BI759406  | 33741.227 | 14278.735 | NM_003471 | 454.803   | 1042.663  | AK022339  | 2191.938  | 1115.733  |

|           |           |           |           |           |           |           |           |           |
|-----------|-----------|-----------|-----------|-----------|-----------|-----------|-----------|-----------|
| R76099    | 14970.127 | 6695.541  | NM_000701 | 5260.269  | 6574.538  | AK025126  | 530.479   | 1286.851  |
| S74445    | 1484.092  | 1035.98   | AB022696  | 31016.92  | 30760.713 | AK025317  | 10753.642 | 9794.096  |
| BI763360  | 2009.186  | 819.3     | AF137372  | 6552.647  | 9878.715  | AK026725  | 3040.951  | 2343.094  |
| D25538    | 3286.196  | 443.645   | AF220417  | 4624.489  | 6477.869  | AF147408  | 2523.028  | 2259.028  |
| NM_000360 | 49361.84  | 41651.176 | NM_001523 | 1939.512  | 1576.116  | AK027222  | 5644.32   | 4872.749  |
| D49950    | 1943.452  | 3200.643  | NM_017423 | 1774.192  | 1867.657  | AL080086  | 446.264   | 333.027   |
| NM_001849 | 2177.136  | 4041.412  | Z70705    | 1008.472  | 798.61    | AL049301  | 1411.917  | 855.611   |
| X03635    | 2973.302  | 4201.616  | NM_002611 | 3622.334  | 4249.779  | AL050042  | 1825.299  | 874.317   |
| BC011847  | 58945.047 | 64928.082 | NM_017417 | 1509.001  | 1165.316  | AL117570  | 852.176   | 1126.905  |
| X03348    | 5242.303  | 7322.902  | AL133602  | 3625.493  | 3533.971  | L23402    | 1172.577  | 904.86    |
| AF353674  | 14526.279 | 14196.104 | AF037219  | 8303.101  | 7221.117  | AL157458  | 596.343   | 351.539   |
| BC002645  | 15193.664 | 16789.328 | AK026075  | 883.564   | 958.746   | NM_015377 | 880.375   | 807.554   |
| NM_021138 | 8933.189  | 8399.084  | NM_000251 | 7233.716  | 7506.445  | AL137531  | 1201.587  | 793.794   |
| BC002792  | 16588.391 | 18752.072 | AF118071  | 583.55    | 507.34    | AK022210  | 280.678   | 245.53    |
| NM_001523 | 2762.053  | 2775.603  | NM_006038 | 7744.809  | 9112.29   | AL080085  | 3652.265  | 2670.954  |
| NM_017423 | 4009.445  | 4693.525  | NM_002485 | 404.409   | 174.013   | NM_007017 | 2014.412  | 1876.546  |
| Z70705    | 1906.01   | 1910.24   | AB011133  | 7874.742  | 7673.266  | AL137446  | 5145.404  | 4155.408  |
| NM_003811 | 21811.721 | 16635.9   | NM_017572 | 54222.074 | 49228.32  | AB025286  | 4048.6    | 2835.96   |
| NM_002981 | 14237.185 | 8020.646  | NM_018444 | 3557.896  | 4472.174  | AF009286  | 598.817   | 489.994   |
| NM_001244 | 4548.963  | 3084.984  | NM_000252 | 2082.424  | 2151.194  | AF056437  | 837.646   | 750.19    |
| NM_012275 | 580.88    | 789.574   | NM_006947 | 18726.508 | 22237.02  | NM_005029 | 1148.105  | 878.055   |
| NM_006137 | 320.634   | 340.98    | NM_017917 | 4724.769  | 5932.137  | AF056447  | 1128.863  | 1000.858  |
| NM_016139 | 59682.301 | 62729.707 | NM_004090 | 12155.941 | 13462.89  | AK001010  | 1764.965  | 1038.96   |
| AL117468  | 3045.261  | 2743.981  | NM_014634 | 17099.492 | 19681.344 | NM_018076 | 1073.426  | 1119.991  |
| NM_019613 | 10278.594 | 5476.775  | NM_001919 | 47949.43  | 52077.031 | AK021442  | 2474.497  | 1256.721  |
| NM_005382 | 1704.087  | 806.297   | CY3Cy5    | 5804.941  | 429.09    | AK001076  | 652.599   | 710.25    |
| AK027086  | 8084.827  | 3362.165  | NM_003822 | 2050.774  | 2856.195  | AK001820  | 1365.678  | 695.522   |
| AB032997  | 1600.251  | 708.744   | NM_004412 | 18954.76  | 21867.961 | AK021482  | 11287.332 | 10129.44  |
| AL096857  | 5668.612  | 1213.991  | NM_016647 | 2565.212  | 3123.991  | NM_006158 | 28308.324 | 24411.949 |
| X07203    | 56284.258 | 55425.219 | AK024695  | 2135.431  | 1861.33   | NM_006346 | 1941.021  | 1540.95   |
| AB040104  | 1340.663  | 2376.561  | NM_018659 | 910.524   | 1191.899  | AK025240  | 3207.946  | 2500.302  |
| NM_003834 | 10077.149 | 15045.419 | AF038174  | 4878.509  | 6039.027  | NM_017633 | 8065.157  | 5451.734  |
| NM_005959 | 17863.674 | 20351.861 | NM_013243 | 1474.264  | 1840.853  | AF086186  | 27342.738 | 17708.035 |
| NM_003381 | 4162.618  | 6487.884  | AF070632  | 1127.305  | 1236.4    | NM_017802 | 5581.281  | 4028.745  |
| NM_005756 | 5130.446  | 7352.475  | AF161359  | 2718.537  | 1768.077  | AF155194  | 289.564   | 308.305   |
| NM_003702 | 60848.211 | 60248.715 | AL365520  | 2015.144  | 2659.345  | AK023667  | 1104.875  | 969.143   |
| NM_000369 | 3311.161  | 4422.359  | AL359338  | 1535.67   | 2278.667  | AJ008137  | 12938.059 | 8839.015  |
| NM_004405 | 2593.458  | 3321.311  | AK023623  | 16197.811 | 15586.662 | AF085841  | 566.066   | 403.011   |
| NM_001988 | 5781.966  | 6316.896  | AF086534  | 2533.429  | 3246.792  | AJ008118  | 59043.012 | 59948.934 |
| L09080    | 1715.124  | 1945.652  | AF070617  | 1812.505  | 2221.566  | AL109674  | 1577.234  | 1344.201  |
| NM_007326 | 4629.128  | 5728.478  | NM_014918 | 6104.713  | 7614.999  | AK024512  | 5082.165  | 3667.286  |
| NM_012213 | 1424.854  | 1005.888  | NM_003822 | 1764.488  | 2459.964  | AK023454  | 2689.393  | 2215.363  |
| NM_016573 | 6572.098  | 3148.484  | NM_004412 | 18446.668 | 22994.115 | L23207    | 1270.595  | 639.313   |
| NM_001303 | 15108.321 | 8982.013  | SR1       | 75550.93  | 62158.219 | NM_018062 | 974.953   | 701.186   |
| M21304    | 816.719   | 633.933   | SR3       | 49920.301 | 47860.996 | NM_007128 | 16418.816 | 8946.261  |
| AB040896  | 2575.875  | 1980.879  | SR5       | 6472.193  | 8317.718  | NM_018627 | 1197.938  | 873.245   |
| NM_001107 | 7087.6    | 4052.351  | SR7       | 4680.208  | 19673.408 | S82164    | 1903.671  | 1794.332  |
| AF084645  | 717.907   | 638.252   | SR9       | 14096.121 | 1236.125  | AK024394  | 2094.336  | 2066.086  |
| AF151851  | 6957.816  | 4302.809  | CY3Cy5    | 1152.109  | 138.078   | AF147374  | 760.531   | 753.526   |
| NM_001122 | 13596.267 | 13502.776 | U84515    | 1220.89   | 1997.929  | AF130091  | 517.605   | 646.471   |
| NM_004591 | 1955.246  | 3081.809  | AF086106  | 1740.377  | 2599.722  | L43338    | 14652.281 | 10378.482 |
| NM_006274 | 1113.199  | 1701.086  | AF086143  | 23869.518 | 28047.381 | AJ227866  | 24614.99  | 18364.111 |
| AL133027  | 2566.721  | 3611.251  | AF086112  | 775.912   | 585.518   | AF458223  | 3178.269  | 2848.164  |

|           |           |           |           |           |           |           |           |           |
|-----------|-----------|-----------|-----------|-----------|-----------|-----------|-----------|-----------|
| AB037732  | 4059.546  | 7024.662  | AL137254  | 3319.205  | 5053.08   | AK022838  | 11366.703 | 7563.545  |
| NM_005767 | 1418.667  | 2204.909  | AK026359  | 2113.874  | 3223.544  | NM_003505 | 522.356   | 316.069   |
| NM_001837 | 1962.828  | 2335.1    | AF085884  | 4393.625  | 5941.018  | AF086519  | 1059.334  | 868.739   |
| NM_001835 | 60209.977 | 61707.867 | S81522    | 10858.266 | 7903.955  | AF055012  | 5681.847  | 3083.732  |
| BC016029  | 2774.67   | 3231.813  | L36587    | 35118.125 | 26269.439 | AK022307  | 2646.728  | 1809.336  |
| M27487    | 61029.77  | 62615.59  | AK024228  | 2072.449  | 823.239   | X60482    | 708.033   | 641.587   |
| NM_002285 | 60634.098 | 60218.637 | AK022420  | 6863.828  | 10561.763 | AF132201  | 495.334   | 529.401   |
| NM_002164 | 2311.357  | 2688.682  | AK023254  | 1607.747  | 1814.624  | AF085997  | 842.498   | 821.267   |
| AL133602  | 921.228   | 639.926   | AK023748  | 1190.757  | 1456.477  | NM_005172 | 5406.905  | 3060.701  |
| AF037219  | 9035.403  | 5565.313  | AK023945  | 36166.203 | 47554.371 | AK025192  | 26170.645 | 14346.401 |
| AK026075  | 942.777   | 713.245   | AK022446  | 1455.883  | 2562.117  | NM_012403 | 3872.993  | 2227.298  |
| NM_000251 | 7113.884  | 4552.383  | AK023773  | 2130.312  | 2795.51   | AK022611  | 4422.228  | 2331.888  |
| AF118071  | 542.574   | 450.605   | AK024123  | 789.198   | 1348.345  | NM_004952 | 3707.134  | 5002.044  |
| NM_006035 | 3521.043  | 1866.788  | AK026202  | 775.811   | 1077.118  | AY007239  | 2649.005  | 9601      |
| NM_002485 | 292.436   | 159.568   | AK021523  | 4994.98   | 6911.819  | NM_020414 | 4506.253  | 4608.264  |
| AB011133  | 7781.718  | 2346.625  | AK021539  | 22893.801 | 25833.074 | AB037730  | 3115.413  | 3294.682  |
| NM_017572 | 48455.813 | 8032.659  | AK021819  | 1384.089  | 1851.104  | NM_001357 | 7963.067  | 6112.252  |
| NM_000252 | 3785.9    | 5609.631  | AK026738  | 3797.69   | 4422.936  | NM_003893 | 2744.537  | 2554.135  |
| NM_006947 | 32243.777 | 41877.891 | AK025011  | 2945.85   | 3971.115  | AB037816  | 1669.259  | 1526.344  |
| NM_017917 | 8678.092  | 12895.603 | AL157491  | 4194.659  | 5761.099  | NM_014265 | 628.107   | 451.699   |
| NM_004090 | 20131.4   | 23672.408 | NM_005265 | 6153.194  | 8071.357  | U92026    | 1184.527  | 1050.385  |
| NM_014634 | 13787.295 | 15404.286 | AF087965  | 1084.709  | 1171.254  | AF086234  | 17986.211 | 13557.214 |
| BC031485  | 6860.568  | 7708.175  | AF085998  | 1461.202  | 918.549   | AK023680  | 4589.869  | 2940.864  |
| NM_004092 | 23226.572 | 26818.053 | AB030240  | 547.771   | 412.317   | AF009324  | 1554.876  | 1753.662  |
| X15624    | 3987.1    | 6269.414  | AK024681  | 1133.696  | 645.164   | AF144056  | 1629.111  | 1106.964  |
| AF073770  | 6352.546  | 8069.9    | X68742    | 492.167   | 354.218   | AK022112  | 929.866   | 1222.711  |
| AL359401  | 19504.766 | 22735.436 | NM_014907 | 35899.41  | 34059.973 | AL137480  | 31239.459 | 21226.887 |
| NM_004467 | 682.713   | 778.553   | AB007977  | 25312.975 | 23768.908 | AK022182  | 875.414   | 770.41    |
| NM_018055 | 26637.715 | 15962.255 | NM_014221 | 10534.665 | 4156.991  | D16473    | 1927.246  | 1274.324  |
| NM_004545 | 46223.691 | 37502     | AK025181  | 554.683   | 1069.581  | AB028968  | 1753.614  | 983.682   |
| X69079    | 41643.648 | 36921.207 | AK021773  | 3268.976  | 3118.394  | AK001202  | 735.395   | 447.704   |
| BI759406  | 38813.105 | 24448.672 | AK027074  | 1449.921  | 1247.129  | AF195764  | 54805.59  | 41509.754 |
| R76099    | 17756.123 | 12542.003 | AL365456  | 905.93    | 1399.481  | AF055029  | 1667.105  | 1093.535  |
| S74445    | 1400.105  | 1246.487  | NM_018035 | 788.033   | 1137.855  | AB011542  | 2362.118  | 2725.678  |
| BI763360  | 2836.877  | 1510.495  | AK022364  | 930.991   | 707.551   | NM_001853 | 5522.553  | 6861.444  |
| D25538    | 4212.216  | 2265.823  | AK024674  | 1435.985  | 1587.706  | U41737    | 1843.795  | 4141.972  |
| NM_000360 | 37965.867 | 17003.654 | AK024244  | 11212.433 | 12973.065 | NM_005795 | 1509.083  | 1703.424  |
| D49950    | 735.185   | 363.291   | AK023812  | 1797.358  | 2308.978  | X99661    | 1062.087  | 1040.614  |
| NM_001845 | 1232.049  | 260.828   | AL390084  | 3549.067  | 3757.747  | NM_005927 | 2022.502  | 1879.992  |
| BC011847  | 53705.781 | 62283.871 | AK023565  | 1156.397  | 1398.641  | AB028983  | 4840.679  | 4013.225  |
| X03348    | 5302.329  | 8053.603  | AK021479  | 1782.82   | 2638.884  | AB037800  | 2179.546  | 1648.882  |
| AF353674  | 16085.645 | 17756.678 | NM_003835 | 15158.696 | 19381.572 | AK026377  | 1370.958  | 1191.126  |
| BC002645  | 16528.084 | 18387.74  | AK000245  | 5554.291  | 8327.729  | NM_018660 | 2675.632  | 1999.929  |
| NM_021138 | 10978.869 | 10106.987 | AF118072  | 1929.939  | 3004.07   | NM_003394 | 5077.302  | 3520.128  |
| NM_001523 | 2897.654  | 2888.705  | AK024112  | 498.219   | 444.988   | NM_006747 | 2422.699  | 2061.523  |
| NM_017423 | 4218.028  | 5011.598  | AF085900  | 30957.656 | 33154.352 | NM_007085 | 1111.464  | 881.118   |
| Z70705    | 2235.341  | 2195.878  | AK026195  | 784.814   | 1476.507  | NM_003870 | 10416.508 | 14326.407 |
| NM_002611 | 6667.521  | 6182.553  | AL079274  | 33050.539 | 38149.027 | NM_001243 | 2441.122  | 2062.799  |
| NM_005382 | 1966.972  | 976.891   | AL137398  | 2814.952  | 1052.981  | AK025997  | 832.756   | 874.066   |
| AK027086  | 8639.502  | 4259.863  | Y12021    | 4100.772  | 3031.404  | NM_014887 | 1797.11   | 1031.78   |
| AB032997  | 1560.052  | 1349.409  | AF127771  | 11725.36  | 8092.786  | NM_018555 | 9392.911  | 8371.374  |
| AL096857  | 6648.815  | 5174.48   | Z83949    | 2501.569  | 1217.834  | NM_005235 | 1960.961  | 2284.861  |
| X07203    | 42921.895 | 32216.963 | NM_013300 | 42745.961 | 37959.605 | AB014566  | 2591.786  | 2375.441  |

|           |           |           |           |           |           |           |           |           |
|-----------|-----------|-----------|-----------|-----------|-----------|-----------|-----------|-----------|
| AB040104  | 1064.986  | 863.589   | AK026039  | 6397.41   | 5159.529  | NM_015678 | 602.726   | 652.216   |
| NM_003834 | 6097.996  | 5346.571  | AF108756  | 17535.291 | 20005.158 | AK025950  | 325.526   | 502.465   |
| NM_005958 | 17215.465 | 9342.43   | AF086394  | 660.015   | 951.2     | NM_014223 | 1994.343  | 1571.708  |
| NM_003381 | 2971.374  | 1900.798  | AF116709  | 2947.976  | 3664.111  | NM_016194 | 791.426   | 541.225   |
| NM_005756 | 2827.023  | 1634.811  | AK025533  | 3649.609  | 4772.298  | AL050385  | 899.797   | 671.63    |
| NM_003702 | 37213.648 | 12213.182 | AK026499  | 1508.979  | 2671.936  | NM_007027 | 3978.312  | 3610.084  |
| NM_000368 | 1775.829  | 1033.018  | AK021911  | 20367.457 | 28207.797 | NM_000633 | 48577.898 | 41496.215 |
| NM_016351 | 2917.104  | 619.029   | D17225    | 1786.351  | 2248.374  | AB037855  | 1869.634  | 1515.856  |
| NM_004405 | 2625.335  | 953.978   | AF147430  | 746.472   | 1559.45   | AK024524  | 3286.244  | 2430.783  |
| NM_001988 | 4909.404  | 4805.595  | AK025766  | 18528.883 | 23145.293 | NM_000562 | 4554.451  | 3850.62   |
| NM_006060 | 6516.307  | 8546.149  | U35875    | 44217.066 | 44756.68  | NM_020353 | 261.01    | 287.249   |
| NM_005667 | 13559.161 | 15434.145 | AK021857  | 55792.848 | 54175.043 | NM_019011 | 12176.854 | 7944.919  |
| NM_006308 | 2091.954  | 2869.445  | AK022257  | 1813.299  | 821.092   | NM_004879 | 3199.165  | 2875.232  |
| NM_000060 | 1541.233  | 1835.477  | BE887356  | 42373.215 | 33172.078 | AB020694  | 1458.16   | 1207.578  |
| NM_009588 | 2099.342  | 2347.56   | AK024756  | 3688.273  | 5539.878  | NM_016071 | 22521.652 | 15437.291 |
| L09080    | 2193.322  | 2561.799  | NM_017911 | 3621.319  | 5641.85   | AL050131  | 1298.125  | 730.411   |
| NM_007328 | 5694.231  | 6308.001  | AJ224168  | 11977.507 | 12193.841 | NM_004475 | 11310.968 | 5826.424  |
| AK023080  | 1203.266  | 1350.715  | S69873    | 1206.683  | 956.859   | NM_001627 | 2913.234  | 1667.067  |
| NM_001888 | 10569.584 | 11470.229 | AF147325  | 68502.273 | 83393.672 | NM_002544 | 1146.825  | 606.308   |
| D83782    | 3915.526  | 2586.991  | NM_014428 | 2700.614  | 2070.594  | NM_006690 | 5373.607  | 4698.376  |
| NM_002078 | 4560.772  | 2149.826  | NM_018497 | 598.771   | 603.436   | NM_006156 | 206.969   | 313.581   |
| NM_000287 | 3550.066  | 1787.619  | AK023584  | 1146.807  | 1620.96   | AF218022  | 3065.494  | 2008.614  |
| NM_001656 | 3252.539  | 2669.481  | NM_003774 | 1432.711  | 2028.58   | NM_003348 | 2761.91   | 1990.479  |
| NM_001122 | 10599.711 | 11113.308 | D87466    | 11298.552 | 15203.839 | AB006198  | 11547.715 | 9864.4    |
| NM_004591 | 1105.862  | 1467.103  | AK025048  | 1230.011  | 1608.774  | U72518    | 2885.515  | 2366.125  |
| NM_006274 | 432.031   | 493.453   | U84522    | 7137.575  | 7516.321  | AF264765  | 703.589   | 490.002   |
| AL133027  | 1414.594  | 1247.269  | AK021694  | 4681.571  | 6496.62   | NM_015322 | 1792.807  | 1556.857  |
| AB037732  | 2660.039  | 2215.743  | AF086013  | 1784.899  | 2606.628  | NM_016607 | 7296.752  | 4860.657  |
| NM_005767 | 1001.771  | 592.265   | U84505    | 9576.175  | 12027.39  | NM_003275 | 580.385   | 354.299   |
| NM_001837 | 941.43    | 513.042   | X81005    | 3451.703  | 3437.745  | NM_000268 | 49920.715 | 33626.734 |
| NM_001838 | 63195.105 | 46513.379 | AL049265  | 2870.271  | 2937.494  | M30493    | 43227.266 | 31317.986 |
| BC016029  | 903.259   | 183.292   | AK022225  | 630.458   | 430.878   | AJ008160  | 756.839   | 464.209   |
| M27487    | 50960.633 | 8686.862  | AL137635  | 1527.174  | 2175.983  | NM_005824 | 1213.87   | 675.812   |
| NM_002164 | 2578.688  | 2752.352  | AL049430  | 2825.313  | 1947.856  | AF052211  | 5079.137  | 2825.161  |
| NM_003811 | 43390.934 | 47224.195 | AK021461  | 879.307   | 995.543   | NM_016307 | 8363.004  | 6820.672  |
| NM_002981 | 28547.646 | 32672.139 | AB015349  | 852.782   | 519.779   | AB028449  | 3886.491  | 3362.562  |
| NM_001244 | 6701.182  | 7812.787  | NM_014913 | 42544.645 | 55765.531 | NM_004697 | 4923.217  | 4572.228  |
| NM_012275 | 1279.301  | 1852.72   | NM_012341 | 12824.412 | 17793.828 | AF131776  | 6470.716  | 4916.74   |
| NM_006137 | 1212.475  | 1284.058  | NM_003256 | 52159.879 | 57458.648 | NM_020528 | 7051.26   | 6300.586  |
| NM_016138 | 60186.242 | 62430.734 | D87450    | 6876.812  | 10982.108 | NM_007040 | 46514.238 | 39768.723 |
| AL117468  | 6587.702  | 7493.642  | NM_017797 | 8389.046  | 11592.633 | NM_014483 | 11683.049 | 10131.943 |
| NM_019613 | 21887.684 | 24028.635 | AK021919  | 883.132   | 1290.116  | AK024249  | 2985.127  | 2420.007  |
| BC031485  | 3454.248  | 2055.829  | AF000562  | 13013.702 | 16335.881 | AF239156  | 8549.621  | 6952.352  |
| NM_004092 | 12047.139 | 6731.553  | AK025713  | 10958.448 | 13599.447 | NM_020390 | 4548.349  | 3168.211  |
| X15624    | 2257.803  | 1512.008  | NM_018100 | 1531.427  | 1973.359  | NM_003321 | 20645.195 | 15433.158 |
| AF073770  | 3083.821  | 2225.524  | NM_004075 | 12204.603 | 14194.776 | U18937    | 11277.558 | 8608.147  |
| AL359401  | 12201.623 | 15406.017 | NM_001887 | 14266.896 | 11670.592 | U01925    | 567.573   | 450.79    |
| NM_012213 | 2195.576  | 4412.482  | NM_006533 | 12966.785 | 13463.549 | AJ420488  | 64225.727 | 68692.43  |
| NM_016573 | 8114.209  | 7512.684  | AK026747  | 17252.857 | 16030.038 | AF268872  | 2503.553  | 1634.941  |
| NM_001303 | 15803.449 | 10046.174 | AL110150  | 13836.801 | 17543.379 | AK022180  | 56484.652 | 52525.434 |
| M21304    | 587.348   | 356.389   | NM_001998 | 21279.744 | 23768.094 | NM_001226 | 1223.819  | 1181.506  |
| AB040896  | 2220.353  | 1531.082  | X87825    | 7746.224  | 8606.943  | NM_001336 | 1901.045  | 1014.457  |
| NM_001107 | 6568.073  | 2829.94   | NM_000914 | 662.074   | 817.26    | AB050716  | 864.343   | 385.379   |



|           |           |           |           |           |           |            |           |           |
|-----------|-----------|-----------|-----------|-----------|-----------|------------|-----------|-----------|
| AF084645  | 792.663   | 469.779   | AK001285  | 37762.625 | 38131.621 | NM_005004  | 40423.758 | 30276.781 |
| AF151851  | 5621.698  | 1571.875  | D17215    | 13720.14  | 8523.378  | NM_014639  | 7064.27   | 6311.493  |
| NM_005176 | 862.787   | 236.458   | BE781513  | 2332.382  | 1210.313  | NM_006392  | 4584.937  | 3695.399  |
| NM_003636 | 10404.365 | 9025.84   | NM_015714 | 54962.891 | 54415.336 | NM_014717  | 3360.784  | 2498.885  |
| NM_002234 | 1388.986  | 2022.522  | AK075564  | 1099.408  | 819.675   | NM_017922  | 3373.119  | 2262.234  |
| NM_003471 | 905.681   | 1514.567  | AK026219  | 1578.946  | 1548.401  | NM_002823  | 59777.477 | 59421.043 |
| NM_000701 | 9590.977  | 11151.207 | D28446    | 3077.466  | 2069.813  | NM_017916  | 15564.95  | 11296.053 |
| AB022696  | 4456.977  | 4725.125  | NM_016279 | 1334.442  | 1734.241  | NM_001805  | 21791.721 | 18558.336 |
| NM_002233 | 847.795   | 703.968   | NM_000211 | 18006.49  | 23749.305 | AK022360   | 5491.538  | 5407.641  |
| NM_014379 | 616.37    | 874.062   | AB037830  | 2964.917  | 4283.458  | AK095694   | 677.041   | 674.279   |
| AF137372  | 12606.177 | 14427.475 | NM_015685 | 14581.107 | 17864.617 | X52341     | 54684.566 | 47258.094 |
| AF220417  | 12509.671 | 14444.479 | NM_004357 | 67523.227 | 69321.297 | NM_003082  | 2324.87   | 2256.537  |
| NM_001523 | 1354.255  | 730.1     | X03324    | 7678.566  | 9939.749  | AL133632   | 6207.127  | 5158      |
| NM_017423 | 2152.201  | 1207.677  | AF130988  | 2655.53   | 4343.958  | NM_004343  | 18870.088 | 12428.369 |
| Z70705    | 653.325   | 337.324   | NM_014934 | 779.508   | 1158.067  | X52355     | 9287.539  | 6643.899  |
| NM_002611 | 2826.121  | 1545.021  | NM_015385 | 2092.076  | 1324.88   | NM_006963  | 9264.572  | 6348.993  |
| AL133602  | 1443.679  | 2580.706  | NM_003690 | 11071.138 | 10105.697 | NM_000307  | 907.122   | 617.121   |
| AF037219  | 8199.426  | 3989.531  | NM_000876 | 9734.13   | 9763.732  | AJ011497   | 8512.94   | 10385.318 |
| AK026075  | 837.29    | 518.578   | NM_014214 | 14365.896 | 17919.006 | NM_003018  | 711.155   | 750.947   |
| NM_000251 | 6974.561  | 3334.294  | NM_000856 | 2027.376  | 2418.67   | NM_000336  | 1952.389  | 2687.6    |
| AF118071  | 466.422   | 283.339   | NM_002752 | 7571.526  | 9125.158  | W61100     | 58694.035 | 63935.949 |
| NM_006038 | 2816.517  | 887.974   | NM_013281 | 2743.38   | 3989.211  | AA608568   | 9106.071  | 9100.914  |
| AB011133  | 6675.517  | 766.508   | Y11306    | 3118.636  | 3899.094  | BG831301   | 56143.43  | 61516.434 |
| NM_017572 | 52820.383 | 50812.141 | NM_016112 | 1183.013  | 1219.488  | M14764     | 2827.497  | 2421.159  |
| NM_018444 | 5659.497  | 7881.484  | X85106    | 1561.682  | 1170.754  | AA478647   | 7945.023  | 7454.866  |
| NM_000252 | 4193.706  | 5485.556  | NM_003931 | 5614.177  | 4304.78   | M35999     | 1411.898  | 1263.003  |
| NM_006947 | 29860.568 | 33495.5   | NM_006681 | 1293.853  | 1561.948  | AW058501   | 1953.039  | 1996.076  |
| NM_017917 | 9489.228  | 10769.36  | NM_012479 | 59014.391 | 45394.992 | M81379     | 924.274   | 1194.957  |
| NM_004090 | 22413.863 | 25540.033 | AF250226  | 26911.365 | 22756.418 | ID 2623896 | 3465.151  | 3994.583  |
| NM_014634 | 19815.543 | 17836.607 | NM_003217 | 34193.48  | 18114.764 | ID 2602214 | 12086.969 | 10267.992 |
| NM_001919 | 47389.676 | 50220.656 | NM_006534 | 21593.211 | 30389.467 | ID 2071279 | 8320.459  | 6723.885  |
| CY3Cy5    | 2408.642  | 250.941   | NM_017601 | 4331.485  | 6109.516  | L10709     | 4793.677  | 3797.859  |
| NM_003822 | 786.317   | 753.173   | AF110265  | 20952.797 | 25522.564 | N35489     | 2365.668  | 1984.396  |
| NM_004412 | 18326.393 | 12878.626 | AF272371  | 60280.137 | 70298.961 | AA482489   | 364.961   | 357.243   |
| NM_016647 | 2298.955  | 1425.036  | AK021848  | 4614.198  | 4547.5    | AA458922   | 2840.133  | 1721.72   |
| AK024695  | 1744.289  | 1702.969  | NM_003704 | 4787.545  | 3633.091  | NM_004168  | 12430.107 | 6160.24   |
| NM_018659 | 733.602   | 520.119   | AK023140  | 917.027   | 1408.469  | NM_006332  | 59157.496 | 60383.313 |
| AF038174  | 2654.87   | 2062.784  | AF084362  | 1469.607  | 1511.131  | NM_002000  | 769.91    | 800.415   |
| AF070632  | 1108.143  | 730.388   | NM_001553 | 5302.243  | 3569.475  | NM_000916  | 5184.933  | 5920.313  |
| AF161359  | 2735.746  | 1923.216  | NM_014173 | 21623.488 | 19491.678 | NM_018663  | 6536.847  | 8458.161  |
| AK023623  | 1551.224  | 2309.875  | NM_001731 | 51811.57  | 59516.816 | NM_145904  | 15383.242 | 15145.684 |
| AF086534  | 1056.062  | 856.004   | AL137506  | 1267.835  | 1933.309  | NM_006796  | 13709.198 | 14878.903 |
| AF070617  | 1162.609  | 1069.635  | AK022961  | 9274.931  | 10565.208 | NM_000706  | 1356.908  | 1487.352  |
| NM_014918 | 3290.273  | 1719.513  | NM_007375 | 15670.625 | 19166.701 | NM_015941  | 3338.245  | 4521.312  |
| NM_003822 | 634.25    | 327.431   | NM_014371 | 10421.74  | 14400.626 | NM_003655  | 3672.35   | 3712.069  |
| NM_004412 | 23701.219 | 30050.641 | AF290512  | 14184.805 | 19495.428 | NM_014837  | 5177.47   | 5759.433  |
| SR1       | 84870.727 | 63521.855 | NM_006716 | 13406.161 | 13449.567 | NM_017729  | 600.496   | 738.07    |
| SR3       | 24983.393 | 19242.523 | AB002323  | 11346.725 | 11347.086 | NM_005259  | 22502.881 | 22505.535 |
| SR5       | 2876.735  | 2745.129  | AK022241  | 16351.018 | 13208.564 | NM_002840  | 434.805   | 906.318   |
| SR7       | 3067.015  | 21242.193 | AK022587  | 6516.966  | 3514.518  | NM_006174  | 1835.254  | 1864.401  |
| CY3Cy5    | 1156.548  | 156.946   | NM_005512 | 626.125   | 1018.253  | NM_015850  | 7784.223  | 7960.397  |
| U84515    | 1185.536  | 1386.756  | NM_005506 | 4304.302  | 5993.12   | NM_004864  | 1356.501  | 1360.677  |
| AF086106  | 1003.97   | 690.735   | NM_005723 | 974.174   | 669.589   | NM_002838  | 6147.984  | 5620.105  |

|           |           |           |           |           |           |           |           |           |
|-----------|-----------|-----------|-----------|-----------|-----------|-----------|-----------|-----------|
| AF086143  | 6553.546  | 3649.974  | AL137404  | 62919.488 | 57869.473 | AK027377  | 435.077   | 588.729   |
| AF086112  | 629.442   | 820.614   | NM_005814 | 4625.438  | 2848.835  | BF528358  | 713.646   | 779.405   |
| AL137254  | 1228.562  | 1442.403  | NM_002851 | 3961.56   | 5239.34   | NM_016335 | 801.891   | 558.161   |
| AK026359  | 789.705   | 688.129   | NM_002071 | 1556.826  | 935.543   | AK025111  | 571.602   | 967.172   |
| AF085884  | 2592.867  | 2455.778  | NM_005339 | 59314.531 | 56672.898 | NM_001732 | 2896.057  | 3842.437  |
| S81522    | 12807.009 | 10766.433 | NM_001906 | 13749.677 | 13041.587 | AB037798  | 2125.734  | 2771.047  |
| S94541    | 1096.292  | 759.689   | NM_004142 | 1373.155  | 705.181   | NM_000780 | 427.253   | 859.087   |
| L36587    | 27461.053 | 18839.605 | AF108138  | 11704.896 | 11124.229 | AF272663  | 22465.781 | 23817.549 |
| AK024228  | 724.476   | 374.175   | NM_004347 | 654.97    | 841.687   | NM_012190 | 4098.609  | 4932.615  |
| AK022420  | 4757.085  | 5592.343  | BF340302  | 9739.521  | 11492.338 | AB033015  | 746.224   | 1934.245  |
| AK023254  | 1171.869  | 948.442   | AB037728  | 869.488   | 1214.718  | AF277719  | 794.725   | 1375.622  |
| AK023945  | 28671.072 | 23650.912 | AK024210  | 6501.367  | 8148.892  | NM_000791 | 2295.153  | 2912.094  |
| AK022446  | 678.663   | 463.38    | NM_002276 | 8653.438  | 9731.363  | NM_003681 | 3434.775  | 4465.96   |
| AK023352  | 434.754   | 393.783   | AL133087  | 7028.422  | 9491.227  | NM_014905 | 9083.986  | 9875.262  |
| AK023773  | 573.679   | 314.331   | NM_018010 | 4495.55   | 5270.937  | NM_015700 | 4596.355  | 6719.187  |
| AK021539  | 9416.81   | 7458.814  | NM_002274 | 44143.008 | 48573.16  | U66621    | 11774.947 | 14367.081 |
| AK021819  | 821.393   | 708.215   | AL080200  | 2075.639  | 1928.056  | NM_005720 | 51371.379 | 50737.328 |
| AK026738  | 1330.412  | 1521.629  | BF337874  | 12155.02  | 10253.698 | AB040936  | 1229.721  | 1550.78   |
| AK025011  | 2270.834  | 2651.392  | NM_003475 | 47862.996 | 47175.117 | U61736    | 1453.098  | 1862.893  |
| AL157491  | 2925.068  | 6339.161  | NM_000243 | 14802.115 | 14264.433 | AJ132086  | 1837.343  | 2421.519  |
| NM_005266 | 2144.087  | 1807.329  | NM_004383 | 34312.566 | 36300.852 | U92816    | 22011.449 | 21055.904 |
| AF087965  | 680.365   | 543.98    | AL157475  | 9806.19   | 7664.323  | NM_004106 | 1741.473  | 2113.217  |
| AF085998  | 858.889   | 981.893   | NM_006069 | 55856.34  | 38529.418 | S76984    | 7944.002  | 6166.753  |
| AK024681  | 464.346   | 322.923   | NM_017656 | 5178.598  | 7279.189  | NM_005651 | 1218.731  | 1460.049  |
| NM_014907 | 29436.951 | 21266.563 | X16282    | 26412.729 | 21306.051 | NM_007195 | 1345.621  | 1595.726  |
| NM_014221 | 10318.271 | 9212.078  | NM_014415 | 3730.414  | 3541.628  | AK023337  | 6723.753  | 8702.74   |
| AF116686  | 471.568   | 814.9     | S75264    | 19025.219 | 16016.677 | NM_013275 | 19634.492 | 24638.982 |
| AK025181  | 770.241   | 750.085   | AF027513  | 3610.473  | 6012.877  | AB037842  | 1221.676  | 1847.785  |
| AK021773  | 2918.186  | 2128.591  | NM_001379 | 8790.238  | 2431.262  | U92074    | 330.73    | 703.06    |
| AK027074  | 2088.574  | 1409.806  | NM_018664 | 1441.047  | 640.923   | NM_019011 | 2891.048  | 4995.559  |
| AL365456  | 808.42    | 603.913   | BC006428  | 8225.534  | 4615.16   | AF459094  | 6892.121  | 8228.602  |
| NM_018035 | 614.973   | 486.232   | NM_005034 | 3166.662  | 1693.737  | NM_003157 | 4530.903  | 6417.712  |
| AK022364  | 1090.977  | 1173.617  | NM_003926 | 34366.004 | 44428.191 | NM_004935 | 1748.574  | 4735.103  |
| AK024674  | 844.915   | 865.926   | AF085356  | 4314.029  | 6224.506  | NM_014326 | 1858.331  | 2212.564  |
| AK024244  | 1622.662  | 1246.583  | NM_016047 | 55051.695 | 53901.793 | NM_004445 | 972.177   | 1157.906  |
| AK023812  | 433.881   | 541.975   | NM_001499 | 22829.77  | 29310.588 | NM_015981 | 2161.042  | 2761.72   |
| AL390084  | 1034.492  | 1457.554  | BF030165  | 26913.604 | 23023.734 | NM_000455 | 5752.357  | 7343.308  |
| AK023565  | 449.712   | 397.806   | NM_016732 | 21563.318 | 17235.629 | NM_014791 | 8516.851  | 10345.581 |
| AK021479  | 500.331   | 500.827   | NM_014763 | 28083.248 | 11298.339 | NM_003315 | 3095.633  | 3508.854  |
| NM_003835 | 2622.646  | 2203.8    | NM_020185 | 18340.432 | 18631.6   | NM_004362 | 9555.468  | 11086.523 |
| AK000245  | 1087.433  | 975.882   | NM_002832 | 8076.226  | 4847.763  | NM_000182 | 12543.661 | 12745.686 |
| AF118072  | 1610.229  | 2370.426  | NM_017732 | 9805.938  | 3756.49   | AK023384  | 3126.762  | 2580.523  |
| AF085900  | 3430.875  | 2835.299  | NM_003654 | 814.149   | 1238.004  | NM_016026 | 10777.427 | 7336.881  |
| AK026195  | 653.08    | 409.863   | NM_000152 | 59642.734 | 54825.82  | NM_020245 | 7290.842  | 6454.507  |
| AL079274  | 6247.854  | 6805.626  | D17222    | 30290.018 | 10801.635 | AB046381  | 1055.443  | 1581.536  |
| S46403    | 733.757   | 660.352   | NM_000154 | 9339.081  | 10654.027 | AJ011497  | 8166.069  | 9655.961  |
| AL137398  | 1789.674  | 1082.74   | NM_006213 | 1300.268  | 2735.183  | NM_003015 | 693.502   | 1353.309  |
| Y12021    | 1776.634  | 1640.061  | NM_000671 | 4103.419  | 5674.8    | NM_000336 | 2508.537  | 4154.399  |
| AF127771  | 1054.309  | 1024.884  | NM_006297 | 35036.59  | 25737.922 | W61100    | 57606.676 | 64744.637 |
| Z83949    | 625.882   | 841.302   | X85325    | 54682.188 | 54807.891 | AA608568  | 9868.528  | 13372.845 |
| NM_013300 | 42732.539 | 47651.176 | AF318366  | 18997.246 | 20272.594 | BG831301  | 56311.16  | 59665.914 |
| AK026039  | 8689.922  | 13374.377 | AF182423  | 5723.757  | 7860.943  | M14764    | 3250.494  | 3527.135  |
| AF108756  | 18188.156 | 22639.547 | D26018    | 8970.205  | 12812.559 | AA478647  | 8665.697  | 10973.822 |

|           |           |           |           |           |           |            |           |           |
|-----------|-----------|-----------|-----------|-----------|-----------|------------|-----------|-----------|
| AF086394  | 336.715   | 639.607   | AK023029  | 1004.679  | 1642.25   | M35999     | 1678.452  | 2006.336  |
| AF116709  | 1022.48   | 1070.159  | NM_017643 | 833.945   | 783.095   | AW058501   | 2096.918  | 2863.875  |
| AK025533  | 2928.058  | 2990.522  | AB037863  | 5140.177  | 6814.919  | M81379     | 924.576   | 1044.327  |
| AK026499  | 901.428   | 745.26    | BC000363  | 5015.628  | 7748.162  | ID 2623896 | 4340.234  | 6295.336  |
| AK021911  | 11110.468 | 9637.072  | NM_007237 | 3508.314  | 3645.5    | ID 2602214 | 11951.276 | 13577.206 |
| D17225    | 1252.322  | 1156.307  | NM_004608 | 2014.987  | 2106.759  | ID 2071279 | 9988.707  | 9884.565  |
| AF147430  | 574.253   | 1165.753  | NM_018257 | 16879.506 | 14430.756 | L10709     | 10419.066 | 13419.635 |
| AK025766  | 16020.064 | 13746.722 | NM_005919 | 6665.763  | 4291.939  | N35489     | 2449.81   | 2860.885  |
| U35875    | 9535.741  | 14104.969 | NM_012256 | 55913.164 | 48245.227 | AI928195   | 898.353   | 2126.844  |
| AK021857  | 16906.148 | 16052.517 | NM_006006 | 4062.723  | 4127.625  | AA482489   | 765.62    | 1441.323  |
| AK022257  | 1661.238  | 1945.252  | NM_016325 | 4780.971  | 3189.701  | AA458922   | 3223.965  | 3898.771  |
| BE887356  | 8449.604  | 8990.406  | NM_001604 | 1534.068  | 804.551   | NM_001719  | 16353.04  | 15095.179 |
| AK024756  | 3673.257  | 2705.397  | NM_000908 | 2636.856  | 2604.254  | AL080062   | 2474.855  | 1662.905  |
| NM_017911 | 3247.865  | 2416.79   | AB011102  | 7405.043  | 7061.825  | AF308802   | 2071.627  | 1270.094  |
| AJ224168  | 11213.502 | 7780.483  | D63480    | 6817.639  | 3517.288  | M95923     | 4678.969  | 3548.359  |
| S69873    | 1620.015  | 1138.076  | NM_002969 | 14524.277 | 14822.837 | NM_002415  | 54917.086 | 57069.426 |
| AF147325  | 66355.57  | 63882.621 | NM_006475 | 2590.945  | 13887.87  | NM_006332  | 54288.23  | 60859.898 |
| NM_014428 | 2018.711  | 1483.622  | NM_004620 | 4525.44   | 7139.425  | NM_002000  | 576.71    | 582.732   |
| NM_018497 | 622.393   | 604.875   | AF087940  | 13030.486 | 10894.509 | NM_000916  | 5236.536  | 6919.223  |
| AK023584  | 782.82    | 870.906   | AJ277587  | 2944.602  | 1820.468  | NM_018663  | 6979.4    | 8754.029  |
| NM_003774 | 760.689   | 999.909   | D87432    | 10026.118 | 11287.2   | NM_015941  | 4448.791  | 6521.656  |
| D87466    | 9470.663  | 12045.081 | Y18483    | 1709.654  | 2482.419  | NM_003655  | 4933.841  | 6942.591  |
| AK025048  | 999.94    | 1180.439  | AI565117  | 58751.086 | 64534.223 | NM_014837  | 5606.314  | 7889.865  |
| U84522    | 1565.434  | 1229.791  | U28015    | 944.047   | 1243.2    | NM_017729  | 1985.237  | 2486.109  |
| AK021694  | 4317.504  | 5319.759  | AI299075  | 12392.725 | 13941.899 | NM_005255  | 18631.289 | 23998.34  |
| AF086013  | 1376.305  | 931.252   | M59979    | 6165.845  | 8061.365  | NM_002840  | 636.433   | 782.951   |
| U84505    | 3003.212  | 2052.059  | AB011098  | 6273.448  | 7660.787  | NM_006174  | 2186.505  | 3099.476  |
| X81005    | 3179.849  | 2186.011  | AA609759  | 9964.941  | 12547.169 | NM_015850  | 17459.541 | 34902.379 |
| AK023486  | 329.002   | 547.804   | AA029418  | 23547.883 | 33281.473 | NM_004864  | 1407.553  | 1981.512  |
| AL049265  | 2306.786  | 2353.282  | L20815    | 28744.965 | 37750.336 | NM_002838  | 6081.623  | 7047.666  |
| AL137635  | 576.32    | 850.572   | AI364483  | 53804.273 | 52894.664 | AK027377   | 469.295   | 848.041   |
| AK021461  | 982.436   | 1921.639  | AA456001  | 31282.666 | 33482.137 | BF528358   | 639.496   | 811.337   |
| AB015349  | 478.117   | 640.506   | AA176581  | 4379.472  | 5823.591  | NM_016339  | 895.454   | 1085.355  |
| NM_014913 | 32057.998 | 22182.426 | BI818232  | 1160.943  | 1884.049  | NM_006510  | 23666.926 | 20885.025 |
| NM_005864 | 880.516   | 624.93    | AA451686  | 14223.98  | 10229.408 | NM_003141  | 8693.698  | 7147.631  |
| NM_012341 | 10225.918 | 7275.187  | AA934644  | 490.789   | 412.359   | NM_018690  | 7782.044  | 6885.977  |
| NM_003256 | 34928.973 | 24578.154 | NM_017896 | 28984.342 | 19000.797 | NM_000860  | 1872.978  | 2046.606  |
| D87450    | 5495.69   | 5402.877  | AB002374  | 7769.233  | 3424.831  | AB037798   | 2469.642  | 3908.326  |
| NM_017797 | 6038.929  | 4618.158  | U17327    | 3368.285  | 1008.482  | NM_000791  | 2632.29   | 2858.013  |
| AF000562  | 7442.515  | 6153.909  | AB046781  | 643.32    | 183.166   | NM_004677  | 1002.367  | 2253.688  |
| AK025713  | 5797.863  | 6833.759  | M87790    | 57693.457 | 52862.023 | NM_015700  | 5002.453  | 7222.653  |
| NM_018100 | 1618.813  | 2154.339  | NM_001768 | 3832.106  | 3210.395  | U66621     | 11522.328 | 13236.625 |
| NM_004075 | 1020.004  | 1385.016  | NM_000029 | 29892.166 | 36964.836 | NM_005720  | 51981.875 | 54122.707 |
| NM_001887 | 12940.84  | 8035.302  | NM_000715 | 3022.604  | 3992.343  | AB040936   | 1116.811  | 1671.697  |
| NM_006533 | 2557.469  | 3153.337  | AF035802  | 15700.605 | 16052.563 | AB023161   | 201.199   | 607.14    |
| AK026747  | 15405.247 | 8428.123  | Y08145    | 6174.297  | 4757.118  | U61736     | 1546.121  | 1875.665  |
| AL110150  | 1106.656  | 1043.254  | M26123    | 1009.846  | 1560.281  | AJ132086   | 1874.418  | 2547.326  |
| NM_001998 | 3021.331  | 2221.463  | NM_001838 | 31910.596 | 27706.521 | U92816     | 23188.9   | 24399.07  |
| X87825    | 1587.719  | 1307.221  | NM_019555 | 3210.979  | 4389.881  | NM_004106  | 1143.104  | 1271.761  |
| NM_000914 | 523.825   | 925.367   | NM_012096 | 17454.395 | 20625.145 | NM_003485  | 9910.308  | 7213.566  |
| AK001285  | 26497.146 | 21307.705 | NM_003905 | 34124.602 | 32996.113 | NM_005038  | 4281.829  | 2435.021  |
| D17215    | 3989.914  | 4445.245  | L12052    | 8142.18   | 9052.01   | NM_014081  | 1910.207  | 1927.216  |
| BE781513  | 1351.398  | 2212.04   | AB028976  | 15772.146 | 15146.709 | NM_005651  | 1146.573  | 1674.331  |

|           |           |           |           |           |           |            |           |           |
|-----------|-----------|-----------|-----------|-----------|-----------|------------|-----------|-----------|
| NM_015714 | 7356.456  | 11273.307 | AK026337  | 17590.211 | 24331.717 | NM_00719E  | 1645.554  | 2580.344  |
| D28446    | 964.315   | 1202.271  | NM_015869 | 1764.7    | 972.877   | AK023337   | 7756.666  | 8178.317  |
| NM_000211 | 15458.703 | 14774.835 | NM_004626 | 1497.279  | 843.102   | NM_00493E  | 1289.989  | 1917.312  |
| AB037830  | 1894.123  | 1574.562  | NM_001899 | 1675.307  | 1174.798  | NM_01432E  | 5294.554  | 5360.377  |
| NM_01568E | 1776.752  | 1610.44   | NM_01332E | 24287.014 | 12948.005 | NM_00444E  | 1375.108  | 1459.774  |
| NM_004357 | 23663.309 | 24062.416 | NM_00079C | 545.231   | 111.849   | NM_015981  | 2413.55   | 2764.725  |
| X03324    | 6924.139  | 5843.866  | NM_00266C | 4776.224  | 4509.252  | NM_00045E  | 5639.899  | 6670.939  |
| AF130988  | 929.878   | 750.727   | NM_01590C | 1435.7    | 664.131   | NM_014791  | 8496.763  | 9809.808  |
| NM_014934 | 607.393   | 601.996   | NM_00370E | 1908.979  | 1908.063  | NM_00331E  | 3797.213  | 4477.709  |
| NM_01538E | 1673.638  | 1854.36   | AF182218  | 1090.69   | 582.869   | NM_00436E  | 8610.106  | 9587.321  |
| NM_00369C | 11840.245 | 19386.205 | NM_01612E | 4374.908  | 4948.875  | NM_00018E  | 12401.196 | 12954.668 |
| NM_00087E | 4496.74   | 4735.253  | AK023749  | 1249.173  | 1624.468  | AK023384   | 3255.529  | 3248.824  |
| NM_014214 | 8717.768  | 9277.865  | NM_002337 | 10694.187 | 13863.652 | NM_01602E  | 11344.958 | 10286.16  |
| NM_00085E | 1661.369  | 1286.725  | NM_01324E | 4359.862  | 2485.582  | AK025111   | 479.732   | 821.034   |
| NM_00275E | 4566.144  | 3803.418  | NM_00642E | 60253.531 | 54037.098 | NM_00173E  | 3465.65   | 2346.178  |
| Y11306    | 1940.175  | 1449.538  | NM_00476E | 3413.582  | 2226.767  | AB046381   | 649.695   | 741.051   |
| NM_016112 | 1565.618  | 2678.61   | NM_00581E | 56921.82  | 54166.035 | AJ011497   | 10317.009 | 15774.985 |
| X85106    | 483.976   | 437.181   | AK024722  | 325.803   | 765.697   | NM_00301E  | 880.807   | 1425.525  |
| NM_003931 | 6844.063  | 7211.1    | AK025520  | 4929.549  | 1652.679  | NM_00033E  | 1873.242  | 2752.123  |
| NM_004367 | 375.81    | 704.106   | NM_00489E | 5399.689  | 3309.932  | W61100     | 55992.297 | 63784.363 |
| NM_006681 | 883.14    | 1583.811  | NM_014597 | 35347.949 | 19816.049 | AA608568   | 9875.266  | 12014.659 |
| NM_01247E | 60826.27  | 56628.309 | BF540935  | 10228.226 | 5016.798  | ID 2623896 | 3669.937  | 4332.855  |
| AF250226  | 13331.397 | 17265.148 | NM_00446E | 700.207   | 414.208   | ID 2602214 | 9718.774  | 8480.082  |
| NM_003217 | 26565.143 | 30245.258 | NM_007081 | 2935.309  | 967.095   | ID 2071279 | 9888.166  | 9716.964  |
| NM_006534 | 9724.029  | 9324.316  | AB032964  | 5087.482  | 5829.973  | L10709     | 10089.772 | 10475.993 |
| NM_017601 | 4482.144  | 4000.272  | BE733605  | 9967.923  | 7478.34   | N35489     | 2452.078  | 2684.724  |
| AF110265  | 24784.049 | 34778.316 | NM_003334 | 48063.508 | 33153.727 | AA482489   | 401.685   | 406.312   |
| AF272371  | 61577.156 | 61534.348 | NM_00269E | 5185.841  | 4508.703  | AA458922   | 2830.62   | 3409.433  |
| AK021848  | 5501.872  | 7753.515  | NM_003671 | 2504.795  | 1769.186  | NM_00171E  | 16555.744 | 16394.416 |
| NM_003704 | 5508.873  | 6116.654  | AK026000  | 14729.018 | 16800.438 | AL080062   | 2317.322  | 1917.466  |
| AK023140  | 668.76    | 629.316   | NM_01783E | 5055.894  | 7038.963  | AF308802   | 2619.233  | 2275.678  |
| AF084362  | 868.742   | 807.034   | NM_00667E | 17533.117 | 23598.336 | S76984     | 8471.332  | 4653.74   |
| NM_00155E | 1431.631  | 1322.237  | NM_00302E | 15049.009 | 19216.6   | NM_01449E  | 69328.164 | 66042.625 |
| NM_01417E | 19191.387 | 16481.408 | NM_00487E | 16286.355 | 19812.863 | NM_00679E  | 15000.049 | 15469.697 |
| NM_001731 | 35118.102 | 33518.156 | NM_01984E | 2858.756  | 4055.767  | NM_00070E  | 1658.06   | 2589.838  |
| AL137506  | 638.269   | 681.873   | NM_002951 | 27026.174 | 26992.742 | NM_015941  | 4827.656  | 5819.618  |
| AK022961  | 4992.531  | 4540.516  | NM_002317 | 5344.524  | 5561.193  | NM_00365E  | 3834.093  | 3846.625  |
| NM_00737E | 9586.45   | 6934.652  | NM_00032C | 2809.114  | 3653.816  | NM_014837  | 5373.093  | 6940.228  |
| NM_014371 | 7443.21   | 5216.292  | NM_017921 | 623.605   | 370.142   | NM_01772E  | 509.998   | 831.341   |
| AF290512  | 506.014   | 445.873   | NM_00313E | 10671.979 | 5930.976  | NM_00525E  | 20669.824 | 23169.16  |
| NM_00671E | 11707.997 | 9250.136  | D63480    | 8270.486  | 9509.109  | NM_00284C  | 926.927   | 1066.27   |
| AB002323  | 11501.852 | 10403.69  | NM_00296E | 11228.779 | 7624.696  | NM_01585C  | 7617.91   | 8680.713  |
| AK022241  | 11493.28  | 9093.438  | NM_00647E | 784.951   | 606.322   | NM_004864  | 1959.508  | 3224.223  |
| AK022587  | 7512.525  | 7635.783  | NM_00462C | 4719.194  | 3367.49   | NM_00283E  | 5821.539  | 6473.318  |
| NM_00551E | 575.232   | 310.51    | AF087940  | 13339.308 | 12164.864 | AK027377   | 462.704   | 668.387   |
| NM_00550E | 967.672   | 1203.457  | AJ277587  | 3300.427  | 3274.505  | NM_01468E  | 54513.641 | 53970.918 |
| NM_00572E | 876.242   | 1076.662  | D87432    | 11046.181 | 15332.253 | BF528358   | 830.376   | 1042.254  |
| NM_005814 | 332.928   | 486.716   | Y18483    | 1283.83   | 1424.271  | NM_01633E  | 808.337   | 1015.65   |
| NM_002851 | 2451.276  | 2637.262  | AI565117  | 58965.406 | 63316.469 | NM_002487  | 4642.396  | 4470.652  |
| NM_00533E | 21196.086 | 18561.398 | U28015    | 917.236   | 815.178   | NM_01334C  | 1763.268  | 2441.822  |
| NM_00190E | 14632.614 | 12692.384 | M59979    | 7078.386  | 9015.434  | NM_00546E  | 1597.473  | 1619.206  |
| NM_00414E | 613.297   | 475.082   | AB011098  | 6079.841  | 6156.259  | NM_01231E  | 3225.102  | 4891.019  |
| AF108138  | 9975.837  | 6970.047  | AA609759  | 9935.974  | 13924.374 | AK026235   | 484.825   | 726.167   |

|           |           |           |           |           |           |           |           |           |
|-----------|-----------|-----------|-----------|-----------|-----------|-----------|-----------|-----------|
| NM_004347 | 655.191   | 631.289   | AA029418  | 24427.406 | 27982.881 | NM_00651C | 25082.113 | 26363.418 |
| BF340302  | 981.14    | 706.133   | L20815    | 24021.475 | 25442.895 | NM_003141 | 9177.084  | 9571.068  |
| AB037728  | 465.872   | 800.869   | AI364483  | 57964.566 | 56724.105 | NM_02024E | 8290.602  | 5068.75   |
| AK024210  | 1966.832  | 1436.479  | AA456001  | 37790.133 | 38111.664 | NM_019087 | 2323.469  | 2272.009  |
| NM_00227E | 1377.168  | 664.174   | AA176581  | 2776.891  | 3591.682  | NM_01632Z | 869.976   | 1105.029  |
| AL133087  | 2557.017  | 1722.974  | BI818232  | 1027.809  | 1616.927  | NM_004277 | 1212.749  | 2294.856  |
| NM_01801C | 4813.342  | 4093.322  | AA451686  | 20795.916 | 30940.691 | NM_00507Z | 691.705   | 852.816   |
| NM_002274 | 6273.839  | 6623.64   | AA934644  | 769.45    | 1019.116  | AF215923  | 4406.128  | 5104.063  |
| AL080200  | 1433.556  | 1762.852  | NM_00205C | 7686.647  | 4346.758  | U66621    | 13061.717 | 14555.262 |
| BF337874  | 6972.772  | 6517.525  | NM_007097 | 15076.026 | 8139.957  | NM_00572C | 50215.281 | 48467.113 |
| NM_00347E | 12710.07  | 17896.475 | D87446    | 9939.052  | 5743.342  | AB040936  | 837.729   | 1089.425  |
| NM_00024Z | 5065.654  | 5227.562  | U17327    | 3312.564  | 1443.263  | AB023161  | 413.889   | 545.265   |
| NM_00438Z | 42890.543 | 48377.156 | AB046781  | 681.365   | 193.319   | U61736    | 1702.828  | 2395.782  |
| NM_00606E | 12196.431 | 21042.41  | M87790    | 58845.586 | 57389.098 | AJ132086  | 1774.269  | 2357.425  |
| NM_01765E | 6098.563  | 9915.444  | NM_00176E | 4666.705  | 6262.895  | U92816    | 21712.957 | 23400.709 |
| X16282    | 21509.293 | 21992.691 | NM_00002Z | 27731.264 | 29985.836 | NM_00410E | 1178.527  | 1894.224  |
| AK022519  | 772.773   | 846.987   | NM_00071E | 1874.12   | 1352.77   | NM_00348E | 11919.408 | 13229.197 |
| NM_01441E | 7067.47   | 10339.791 | AF035802  | 9729.525  | 11557.481 | NM_00503E | 5007.044  | 5882.146  |
| S75264    | 8895.553  | 8386.756  | NM_00183E | 29464.297 | 27617.818 | M95923    | 7183.904  | 6977.481  |
| AF027513  | 3198.742  | 2844.206  | NM_01955E | 4419.479  | 5258.776  | NM_00241E | 55041.133 | 54581.695 |
| NM_00137E | 18004.268 | 12479.85  | NM_01209E | 19398.965 | 27707.141 | NM_00633Z | 56118.277 | 57353.105 |
| NM_018664 | 2885.172  | 2269.127  | NM_00390E | 34037.996 | 38060.023 | NM_00200C | 454.95    | 534.653   |
| BC006428  | 9154.278  | 6602.715  | L12052    | 8077.512  | 9828.423  | NM_00091E | 6109.753  | 5931.906  |
| NM_005034 | 3088.409  | 2324.515  | AB028976  | 16543.674 | 15539.689 | NM_01866Z | 6730.825  | 4788.073  |
| NM_00392E | 11370.999 | 7622.604  | AK026337  | 15391.868 | 15809.233 | NM_145904 | 14383.161 | 7967.74   |
| AF085356  | 1406.251  | 1099.451  | NM_01586E | 2918.979  | 3074.308  | NM_00018Z | 12961.604 | 11636.591 |
| NM_016047 | 39346.063 | 22796.494 | NM_00462E | 2097.954  | 1942.446  | AK023384  | 3092.172  | 3549.686  |
| NM_00149E | 15273.249 | 11688.66  | NM_00189E | 1922.29   | 2260.572  | NM_01602E | 12062.13  | 13685.037 |
| BF030165  | 31827.883 | 41208.922 | NM_00090E | 2265.531  | 1930.445  | NM_00173Z | 2277.462  | 2955.044  |
| NM_01673Z | 19929.002 | 15784.802 | AB011102  | 6926.386  | 5351.005  | NM_01869C | 7916.756  | 7755.391  |
| NM_01476Z | 34464.984 | 26767.914 | NM_00266C | 5894.009  | 4910.671  | NM_00086C | 1998.224  | 1945.55   |
| NM_02018E | 16097.443 | 16725.947 | NM_01590C | 1924.97   | 1207.023  | AB037798  | 2341.069  | 2497.995  |
| NM_00283Z | 10346.652 | 12027.008 | NM_00370E | 2578.533  | 4494.917  | NM_00078C | 482.158   | 781.083   |
| NM_01773Z | 11799.483 | 13615.451 | AF182218  | 646.647   | 302.613   | AF272663  | 18031.867 | 16271.71  |
| NM_003654 | 487.43    | 635.373   | NM_01612Z | 4421.452  | 5907.69   | NM_01219C | 3212.839  | 3322.666  |
| NM_00015Z | 13841.866 | 15720.392 | AK023749  | 2185.863  | 2958.896  | AF277719  | 604.115   | 1123.376  |
| D17222    | 53116.785 | 44692.891 | NM_002337 | 11131.629 | 15098.778 | NM_000791 | 2447.738  | 2768.977  |
| NM_000154 | 8609.477  | 8150.463  | NM_01324E | 4702.105  | 4268.88   | NM_003681 | 4398.618  | 5861.27   |
| NM_00621Z | 719.039   | 472.691   | NM_00642Z | 59452.531 | 55495.434 | NM_00480C | 8341.57   | 9621.571  |
| NM_00354E | 2223.799  | 1456.178  | NM_00476E | 3014.646  | 2498.568  | AB037738  | 352.991   | 891.109   |
| NM_000671 | 4698.367  | 4450.323  | NM_00581E | 56791.645 | 51886.68  | NM_014954 | 53258.57  | 58191     |
| NM_006297 | 5965.875  | 6086.345  | AK025520  | 8329.876  | 10718.763 | NM_000807 | 510.521   | 821.232   |
| X85325    | 49919.34  | 40889.707 | NM_00489Z | 6810      | 9728.938  | NM_01490E | 12111.496 | 12405.059 |
| AF318366  | 17001.5   | 13745.552 | NM_014597 | 36366.125 | 33198.129 | X91148    | 1705.207  | 1837.287  |
| AF182423  | 5187.235  | 7945.738  | NM_01789E | 26487.422 | 12916.238 | NM_01570C | 4188.188  | 3137.573  |
| D26018    | 6298.756  | 4564.934  | AB002374  | 10470.797 | 3284.775  | NM_00171E | 13350.19  | 11573.123 |
| NM_01764Z | 483.887   | 337.482   | NM_00446E | 819.487   | 399.219   | AL080062  | 2060.455  | 1730.98   |
| AB037863  | 1039.866  | 759.333   | NM_007081 | 2879.845  | 1440.267  | AF308802  | 1935.648  | 1618.186  |
| BC000363  | 2666.114  | 2437.626  | AB032964  | 4856.146  | 5144.075  | S76984    | 7294.559  | 8512.207  |
| NM_007237 | 3896.256  | 5690.292  | BE733605  | 10180.516 | 8371.863  | NM_01449E | 58141.008 | 60710.422 |
| NM_00460E | 1029.674  | 1032.823  | NM_003334 | 55096.199 | 53135.625 | NM_014081 | 1851.622  | 1529.237  |
| NM_018257 | 7901.099  | 7376.773  | NM_00269Z | 7811.933  | 10620.519 | NM_005651 | 1021.919  | 870.618   |
| NM_00591E | 3090.292  | 2585.27   | NM_003671 | 3413.999  | 4717.781  | NM_00719E | 1257.175  | 1299.126  |

|           |           |           |           |           |           |           |           |           |
|-----------|-----------|-----------|-----------|-----------|-----------|-----------|-----------|-----------|
| NM_01225E | 5634.925  | 4026.298  | M20695    | 1551.179  | 1568.032  | AK023337  | 8064.369  | 8855.235  |
| NM_00600E | 1622.045  | 1496.42   | AK026000  | 13412.992 | 16642.16  | NM_019011 | 2737.838  | 3684.105  |
| NM_01632E | 7000.634  | 12179.246 | NM_017833 | 4602.84   | 6444.899  | AF459094  | 5740.133  | 6411.073  |
| NM_001604 | 1470.225  | 1803.767  | NM_00667E | 17796.475 | 19612.912 | NM_003157 | 4757.753  | 5901.396  |
| NM_00090E | 2539.135  | 3145.644  | NM_003022 | 17402.32  | 20145.99  | NM_00493E | 1382.927  | 1851.22   |
| AB011102  | 6457.309  | 9632.8    | NM_004873 | 14985.399 | 21117.512 | NM_01432E | 1568.672  | 2384.305  |
| D63480    | 5987.603  | 5789.189  | NM_019842 | 4200.059  | 6128.154  | NM_00444E | 1328.972  | 1854.64   |
| NM_00296E | 10722.188 | 9199.157  | NM_002951 | 31993.92  | 43235.422 | NM_015981 | 2438.847  | 2631.058  |
| NM_00647E | 619.658   | 1245.646  | NM_002317 | 5445.793  | 5429.576  | NM_00045E | 5909.415  | 7604.814  |
| NM_00462C | 2019.482  | 2416.774  | NM_00032C | 3236.143  | 2961.738  | NM_014791 | 7646.854  | 9973.384  |
| AF087940  | 2522.054  | 3188.293  | NM_017921 | 528.7     | 503.255   | NM_00331E | 4054.604  | 3859.084  |
| AJ277587  | 2965.29   | 5449.844  | NM_00313E | 11026.511 | 9597.768  | NM_00436E | 8506.303  | 5933.91   |
| D87432    | 8049.998  | 10316.423 | NM_01332E | 26726.467 | 14249.403 | CY3Cy5    | 1136.793  | 284.154   |
| Y18483    | 1166.549  | 1497.647  | NM_00079C | 886.018   | 402.434   | NM_00410E | 4841.341  | 3072.249  |
| AI565117  | 53552.16  | 58301.926 | NM_00647E | 936.249   | 966.514   | NM_004544 | 4524.958  | 3424.828  |
| U28015    | 310.664   | 526.583   | NM_00462C | 4023.688  | 2508.332  | AF052140  | 451.323   | 475.966   |
| AI299075  | 1076.242  | 650.293   | AF087940  | 13463.97  | 10964.46  | NM_01883E | 1502.104  | 1123.466  |
| M59979    | 3947.507  | 2977.296  | AJ277587  | 3777.167  | 2717.904  | AK024261  | 5223.974  | 6542.796  |
| AB011098  | 3337.094  | 2645.035  | D87432    | 11531.712 | 12378.359 | AK024885  | 2619.025  | 7171.344  |
| AA609759  | 4690.867  | 4549.108  | Y18483    | 1179.478  | 1116.29   | AK022664  | 681.425   | 1870.37   |
| AA029418  | 4214.15   | 4074.041  | AI565117  | 67068.609 | 76146.859 | AL080223  | 2146.818  | 1945.699  |
| L20815    | 7300.01   | 7223.411  | U28015    | 1075.828  | 1563.06   | AK001630  | 4103.118  | 3658.16   |
| AI364483  | 7870.146  | 5889.526  | AI299075  | 17326.828 | 16419.348 | NM_01461E | 28742.453 | 19529.896 |
| AA456001  | 13638.307 | 11181.826 | M59979    | 7542.825  | 11474.431 | NM_00410E | 4764.359  | 2832.707  |
| BI818232  | 620.644   | 564.95    | AB011098  | 3544.469  | 2425.275  | NM_004544 | 4140.461  | 2456.605  |
| AA451686  | 16077.587 | 15417.104 | AA609759  | 6981.22   | 8419.968  | SR1       | 59340.016 | 53602.441 |
| AA934644  | 681.433   | 859.96    | AA029418  | 26439.654 | 28724.119 | SR3       | 20520.217 | 15214.848 |
| NM_01789E | 37739.977 | 48958.645 | L20815    | 30369.664 | 36312.457 | SR5       | 2443.853  | 1945.899  |
| AB002374  | 11749.572 | 11395.895 | AI364483  | 58363.621 | 59224.574 | SR7       | 2330.694  | 18560.775 |
| U17327    | 4780.814  | 4549.247  | AA456001  | 46153.512 | 49474.258 | SR9       | 7637.769  | 1406.858  |
| AB046781  | 869.305   | 421.398   | AA176581  | 2099.287  | 3010.949  | CY3Cy5    | 1399.39   | 260.098   |
| M87790    | 38481.34  | 41332.031 | BI818232  | 649.478   | 936.841   | Z36807    | 26462.342 | 12659.451 |
| NM_00176E | 1805.805  | 1525.862  | AA451686  | 17000.932 | 14087.422 | U20896    | 585.947   | 381.664   |
| NM_00002E | 7211.302  | 5565.571  | AA934644  | 369.561   | 438.889   | U52836    | 675.685   | 546.525   |
| NM_00071E | 1050.372  | 763.706   | NM_00205C | 8429.919  | 6991.346  | NM_01793E | 5812.95   | 5577.81   |
| AF035802  | 3046.519  | 3355.45   | NM_007097 | 15922.991 | 9310.015  | AF075112  | 772.287   | 989.252   |
| Y08145    | 479.594   | 372.103   | D87446    | 10774.248 | 7175.594  | AK001796  | 815.005   | 912.189   |
| M26123    | 692.842   | 456.746   | BF540935  | 12211.026 | 6027.062  | AF086152  | 39853.129 | 32105.342 |
| NM_00183E | 18168.088 | 10144.959 | NM_00071E | 1656.982  | 1050.518  | U78519    | 2106.394  | 2711.646  |
| NM_01955E | 856.193   | 736.456   | AF035802  | 9442.472  | 8316.925  | AK026872  | 2437.236  | 2601.821  |
| NM_01209E | 15722.502 | 20853.055 | Y08145    | 6942.302  | 5541.082  | AL157505  | 1368.115  | 796.322   |
| NM_00390E | 25350.588 | 19137.684 | M26123    | 801.032   | 594.906   | NM_00719C | 6411.456  | 3672.811  |
| L12052    | 7118.195  | 4983.795  | NM_00183E | 22125.971 | 12311.6   | AF043897  | 1291.623  | 1068.957  |
| AB028976  | 2389.739  | 2259.61   | NM_01955E | 2013.106  | 2621.583  | U79246    | 1755.605  | 1552.841  |
| AK026337  | 392.163   | 485.802   | NM_01209E | 22845.629 | 29415.152 | AK022619  | 500.865   | 432.492   |
| NM_01586E | 1406.711  | 1235.515  | NM_00390E | 46309.059 | 50843.02  | AK023464  | 586.433   | 509.238   |
| NM_00462E | 947.539   | 1048.266  | L12052    | 12252.952 | 12702.776 | AK024157  | 444.784   | 337.148   |
| NM_00189E | 1549.102  | 1740.18   | AB028976  | 18121.58  | 19694.035 | AK022963  | 468.935   | 434.954   |
| NM_01332E | 30914.588 | 30139.602 | AK026337  | 11676.286 | 8528.611  | AK023905  | 7581.808  | 7598.151  |
| NM_00079C | 943.332   | 972.728   | NM_01586E | 2482.135  | 1914.266  | AK024231  | 3355.729  | 4193.144  |
| NM_00266C | 6219.566  | 7848.518  | AB031038  | 824.606   | 1114.053  | AK026208  | 1975.28   | 1952.589  |
| NM_01590C | 1027.868  | 1758.795  | NM_00462E | 1590.157  | 1504.639  | NM_016947 | 44458.559 | 32749.941 |
| NM_00370E | 2112.975  | 3788.453  | NM_00189E | 1661.075  | 1579.117  | AY007136  | 909.452   | 908.495   |

|           |           |           |           |           |           |           |           |           |
|-----------|-----------|-----------|-----------|-----------|-----------|-----------|-----------|-----------|
| AF182218  | 552.79    | 430.416   | NM_004305 | 59800.625 | 67721.422 | AK026759  | 301.716   | 231.688   |
| NM_016122 | 3011.575  | 2055.906  | NM_006089 | 334.374   | 762.683   | AL359940  | 2337.212  | 2139.696  |
| AK023749  | 942.461   | 896.628   | AF072506  | 466.581   | 957.636   | NM_018286 | 1233.197  | 1173.544  |
| NM_002337 | 9156.955  | 9028.651  | NM_005992 | 622.568   | 513.995   | AF085961  | 671.67    | 741.856   |
| NM_013245 | 4337.952  | 2800.884  | NM_003144 | 19543.33  | 21618.145 | AK024925  | 22708.924 | 15512.085 |
| NM_006423 | 48742     | 32601.156 | NM_000908 | 2781.328  | 3303.792  | AL049460  | 12370.475 | 7931.805  |
| NM_004766 | 3453.079  | 2727.22   | AB011102  | 6331.354  | 4457.327  | AK022396  | 1371.027  | 1027.526  |
| NM_005819 | 7494.171  | 7837.238  | D63480    | 7116.502  | 6113.776  | AF075113  | 998.041   | 799.276   |
| AK025520  | 5416.302  | 4443.268  | NM_002969 | 12901.752 | 6773.563  | AK022892  | 7365.955  | 3680.217  |
| NM_004892 | 6017.053  | 5697.447  | M81768    | 886.667   | 296.64    | AK002162  | 271.516   | 220.356   |
| NM_014597 | 35281.035 | 29517.748 | AK023749  | 974.511   | 962.347   | AK022980  | 373.079   | 305.922   |
| BF540935  | 525.64    | 700.222   | NM_002337 | 9179.087  | 9159.562  | AL359058  | 1544.984  | 1036.605  |
| NM_004466 | 801.938   | 792.482   | NM_013245 | 5880.506  | 7761.622  | AK026237  | 2612.333  | 1911.609  |
| NM_007081 | 3483.296  | 3610.811  | NM_006423 | 54489.25  | 55052.055 | AK023687  | 2302.927  | 2347.178  |
| AB032964  | 5671.765  | 5639.193  | NM_004766 | 4005.528  | 2980.169  | AK002088  | 30909.58  | 34303.078 |
| BE733605  | 15054.277 | 21814.453 | NM_005819 | 57880.129 | 56483.969 | X98206    | 536.561   | 724.522   |
| NM_003334 | 21367.744 | 22909.539 | AK025520  | 5472.383  | 1970.534  | AK022193  | 445.319   | 443.435   |
| NM_002693 | 4361.261  | 8184.542  | NM_004892 | 5919.804  | 4489.982  | AK000106  | 2657.329  | 2377.059  |
| NM_003671 | 3074.358  | 3798.901  | NM_014597 | 36100.855 | 33767.336 | AK022370  | 878.601   | 828.935   |
| AK026000  | 8054.555  | 6108.422  | NM_017896 | 30673.77  | 25461.381 | AK026765  | 1575.727  | 1218.596  |
| NM_017833 | 1068.164  | 1104.601  | AB002374  | 9099.472  | 4158.21   | AL117530  | 610.451   | 608.276   |
| NM_006675 | 13908.993 | 14438.918 | U17327    | 3775.832  | 1508.13   | AL080191  | 5783.321  | 3741.64   |
| NM_003022 | 16147.451 | 21229.633 | AB046781  | 658.593   | 247.77    | AK021639  | 1037.387  | 709.947   |
| NM_004873 | 11482.271 | 10441.021 | M87790    | 56558.926 | 49411.375 | AK023189  | 2386.356  | 1456.546  |
| NM_019842 | 2473.07   | 2093.839  | NM_001768 | 4110.315  | 2063.931  | AK023872  | 417.017   | 369.031   |
| NM_002951 | 25160.854 | 29425.51  | NM_000029 | 31305.213 | 14999.141 | AK022127  | 312.983   | 198.485   |
| NM_000320 | 1539.122  | 2004.187  | NM_017921 | 343.723   | 109.628   | AF118062  | 310.827   | 337.36    |
| NM_017921 | 986.797   | 1042.928  | NM_003136 | 12144.145 | 11180.48  | AF306347  | 1326.277  | 1372.002  |
| NM_003136 | 10737.971 | 13757.019 | NM_013328 | 33611.273 | 35888.793 | AF070599  | 854       | 542.112   |
| D63480    | 6411.039  | 7634.138  | NM_000790 | 691.861   | 576.044   | NM_005450 | 2926.986  | 1983.037  |
| NM_002969 | 12362.049 | 15985.33  | NM_002660 | 10499.352 | 12383.158 | AK023600  | 622.284   | 514.555   |
| NM_006475 | 475.078   | 588.267   | NM_015900 | 1904.563  | 1725.256  | NM_005210 | 354.109   | 366.635   |
| NM_004620 | 1909.968  | 2757.911  | NM_003706 | 2194.695  | 1883.124  | NM_005525 | 479.97    | 406.004   |
| AF087940  | 1979.097  | 2622.187  | AF182218  | 1107.853  | 497.535   | NM_005285 | 7687.525  | 7864.16   |
| AJ277587  | 2691.119  | 5723.52   | AB033054  | 18511.84  | 10692.289 | AK001918  | 708.253   | 1324.251  |
| D87432    | 7070.093  | 9006.012  | NM_016122 | 3156.725  | 2353.271  | AF086048  | 2246.431  | 2582.939  |
| Y18483    | 970.227   | 1174.783  | AF153330  | 1457.646  | 1152.099  | L15616    | 7909.791  | 9339.937  |
| AI565117  | 57062.375 | 58691.109 | NM_001652 | 463.917   | 687.135   | AB019565  | 6897.705  | 6150.117  |
| U28015    | 1309.727  | 1652.686  | NM_002050 | 8442.591  | 8553.5    | NM_016940 | 2384.364  | 1771.763  |
| AI299075  | 1077.909  | 1078.159  | NM_007097 | 17856.232 | 16912.164 | AK025757  | 2455.335  | 2655.198  |
| M59979    | 3905.788  | 3881.243  | D87446    | 11292.962 | 9005.233  | Y16713    | 473.424   | 300.267   |
| AB011098  | 3289.351  | 3066.631  | BF540935  | 15789.198 | 13536.496 | L07394    | 11582.646 | 10000.188 |
| AA609759  | 5696.835  | 5767.966  | NM_004466 | 1801.398  | 2471.094  | AK056133  | 863.17    | 565.151   |
| AA029418  | 3667.808  | 3950.411  | NM_007081 | 5397.408  | 7970      | NM_017845 | 6635.56   | 4491.389  |
| L20815    | 6538.138  | 6288.108  | AB032964  | 5189.349  | 5099.146  | AF130080  | 439.095   | 297.679   |
| AI364483  | 9128.487  | 7487.987  | BE733605  | 9174.991  | 6502.38   | AK026006  | 1317.697  | 1205.542  |
| AA456001  | 13739.064 | 11949.123 | NM_003334 | 50284.844 | 41791.691 | NM_019089 | 12583.552 | 9599.784  |
| BI818232  | 705.614   | 666.426   | NM_002693 | 4838.961  | 3081.121  | AF147440  | 420.493   | 368.027   |
| NM_002050 | 1188.019  | 1150.526  | NM_003671 | 2232.544  | 1564.854  | AL122072  | 4344.58   | 3288.446  |
| NM_007097 | 20285.252 | 22819.23  | AK026000  | 7857.333  | 3390.59   | AK026221  | 592.189   | 581.115   |
| D87446    | 9430.095  | 10571.653 | NM_017833 | 2883.386  | 2375.997  | AK026403  | 2165.539  | 1936.542  |
| U17327    | 5843.009  | 9190.427  | NM_006675 | 12497.627 | 7609.827  | U90904    | 5381.272  | 3668.263  |
| AB046781  | 670.124   | 641.297   | NM_003022 | 11645.777 | 7198.461  | AF088053  | 2100.745  | 1369.327  |

|           |           |           |           |           |           |           |           |           |
|-----------|-----------|-----------|-----------|-----------|-----------|-----------|-----------|-----------|
| M87790    | 44108.098 | 50050.215 | NM_004873 | 9766.261  | 5890.963  | AL133662  | 632.641   | 426.619   |
| NM_00176E | 1846.539  | 1314.263  | NM_019842 | 2822.591  | 2265.762  | NM_00256E | 518.322   | 348.376   |
| NM_00002E | 6956.168  | 5315.546  | NM_002951 | 26084.336 | 16109.319 | U90903    | 1035.054  | 1071.067  |
| NM_00071E | 1246.203  | 1483.114  | NM_002317 | 4822.335  | 3084.68   | AF278760  | 2280.641  | 2012.919  |
| AF035802  | 3070.095  | 3848.364  | NM_00032C | 3348.748  | 3664.23   | X58061    | 400.029   | 562.517   |
| Y08145    | 810.288   | 453.509   | CY3Cy5    | 372.568   | 95.882    | AB032954  | 7181.007  | 9800.629  |
| M26123    | 639.094   | 541.053   | NM_14565E | 3058.892  | 6186.557  | AL110197  | 880.179   | 887.584   |
| NM_00183E | 17317.352 | 10341.329 | NM_021957 | 1072.846  | 1705.537  | AF085995  | 760.592   | 834.451   |
| NM_01955E | 848.498   | 909.974   | AK022138  | 1521.656  | 1629.74   | NM_01763E | 2112.736  | 1853.369  |
| NM_01209E | 15673.63  | 21801.92  | AF086191  | 8574.642  | 5425.068  | AK026655  | 1574.504  | 1393.548  |
| NM_00390E | 28596.379 | 24400.896 | NM_01763E | 5120.344  | 8662.104  | S41522    | 384.331   | 183.062   |
| L12052    | 7419.05   | 6212.684  | AL133052  | 2400.379  | 1298.62   | NM_00527E | 1026.224  | 798.26    |
| AB028976  | 2437.208  | 2062.966  | AB037824  | 2006.874  | 1169.454  | AF129926  | 1781.135  | 1113.276  |
| AK026337  | 478.53    | 698.531   | AF361494  | 649.62    | 454.984   | AK025822  | 2430.829  | 2051.436  |
| NM_00462E | 1395.307  | 2345.458  | AK022810  | 1232.172  | 1219.27   | AL360140  | 979.481   | 803.22    |
| NM_00189E | 1734.455  | 1864.519  | AK001384  | 1588.014  | 1550.351  | AF201937  | 28833.705 | 22804.707 |
| NM_00090E | 2578.306  | 2403.893  | AK025437  | 3125.26   | 3104.916  | AL390128  | 4049.376  | 3478.725  |
| AB011102  | 6524      | 6925.516  | AK074164  | 701.243   | 832.048   | AL157429  | 16996.674 | 16629.447 |
| NM_00266C | 5829.134  | 5867.703  | NM_14565E | 1273.824  | 1379.995  | NM_012071 | 9142.479  | 7811.831  |
| NM_01590C | 1082.315  | 1168.072  | SR2       | 55422.672 | 51175.727 | NM_001777 | 15399.154 | 10500.108 |
| NM_00370E | 1952.384  | 1842.856  | SR4       | 11893.108 | 11903.518 | U79457    | 5613.071  | 3465.909  |
| AF182218  | 549.007   | 378.745   | SR6       | 1427.069  | 808.427   | AB037832  | 2203.651  | 1543.337  |
| NM_01612E | 2659.104  | 1572.367  | SR8       | 5293.019  | 6017.343  | NM_014347 | 11069.462 | 8575.955  |
| AK023749  | 908.251   | 1092.464  | SR10      | 17790.977 | 2032.614  | NM_00129E | 10723.468 | 8491.997  |
| NM_002337 | 11246.995 | 13968.725 | NM_01846E | 1888.909  | 2210.121  | NM_00434E | 9443.54   | 9631.643  |
| NM_01324E | 4811.983  | 3903.525  | AL359932  | 988.771   | 780.689   | AF085972  | 450.534   | 1049.461  |
| NM_00642E | 50541.797 | 39716.695 | AB037850  | 4789.035  | 3154.205  | NM_000757 | 1617.396  | 3289.192  |
| NM_00476E | 3477.311  | 1818.561  | AK002197  | 2215.432  | 1136.042  | AB046786  | 1263.247  | 1523.081  |
| NM_00581E | 7016.285  | 4594.779  | AF087996  | 1904.531  | 1645.718  | NM_01662C | 27164.227 | 26011.715 |
| AK024722  | 603.079   | 397.614   | AK021710  | 2590.83   | 2647.187  | D16914    | 55080.398 | 65256.316 |
| AK025520  | 5346.239  | 2885.1    | AK024551  | 755.421   | 473.142   | AA084879  | 1262.899  | 949.331   |
| NM_00489E | 5834.677  | 6355.55   | AL833249  | 5901.906  | 4206.659  | NM_00083E | 2137.398  | 1692.895  |
| NM_01789E | 32170.107 | 31057.213 | AK021894  | 2576.638  | 2994.348  | NM_00028E | 3503.688  | 2021.226  |
| AB002374  | 9709.966  | 7381.182  | NM_02042E | 6576.018  | 6982.772  | NM_01246C | 2654.696  | 2357.019  |
| NM_00446E | 752.187   | 881.243   | AF438313  | 606.538   | 751.795   | NM_01211E | 2604.3    | 2385.321  |
| NM_007081 | 3489.771  | 3311.246  | AB033009  | 20769.033 | 18356.65  | AK001133  | 373.816   | 338.755   |
| AB032964  | 5477.845  | 4674.552  | AK022086  | 599.727   | 393.406   | AK024092  | 1780.446  | 1874.704  |
| BE733605  | 10500.801 | 8909.903  | AF147320  | 1801.662  | 726.224   | AK026285  | 589.41    | 1024.225  |
| NM_00333E | 19051.723 | 14696.012 | AK027024  | 531.558   | 286.478   | AK002044  | 4097.251  | 3525.653  |
| NM_00269E | 3304.748  | 3429.655  | AK022339  | 2923.96   | 1935.525  | BC032460  | 3588.707  | 2254.765  |
| NM_003671 | 2559.398  | 2871.14   | AK025126  | 529.394   | 388.461   | NM_014071 | 1915.449  | 1501.262  |
| AK026000  | 7880.515  | 6298.604  | AK025317  | 22647.023 | 27930.461 | NM_00632E | 558.8     | 615.352   |
| NM_01783E | 1144.742  | 1189.967  | AK026119  | 448.137   | 747.607   | AB032369  | 302.214   | 488.127   |
| NM_00667E | 12983.245 | 11828.047 | AK026725  | 1975.083  | 1699.574  | NM_00516E | 589.248   | 729.891   |
| NM_00302E | 14521.093 | 13940.845 | NM_00511C | 904.658   | 590.286   | NM_00021E | 46881.656 | 46718.723 |
| NM_00487E | 13564.521 | 14051.051 | AK023122  | 631.525   | 616.103   | BE906107  | 15275.71  | 20126.977 |
| NM_01984E | 3300.354  | 3866.297  | AF147408  | 4186.805  | 3976.547  | NM_01551E | 4082.893  | 4043.117  |
| NM_002951 | 23563.23  | 24495.127 | AK027222  | 5830.178  | 6026.792  | AB033065  | 592.893   | 580.455   |
| NM_002317 | 2538.821  | 1566.399  | AF085868  | 539.314   | 827.295   | NM_005211 | 880.514   | 817.086   |
| NM_00032C | 1076.381  | 951.357   | AL049275  | 197.671   | 1115.896  | NM_004857 | 16446.393 | 14107.723 |
| NM_017921 | 1352.751  | 1074.686  | AK054767  | 744.187   | 850.31    | NM_01210E | 4264.108  | 2888.949  |
| NM_01332E | 32123.715 | 42110.184 | AL050042  | 1817.212  | 1202.593  | NM_00325E | 1335.844  | 1284.93   |
| NM_00079C | 895.528   | 966.118   | AL117570  | 487.997   | 190.541   | NM_00287E | 7839.59   | 6293.898  |



|           |           |           |           |           |           |           |           |           |
|-----------|-----------|-----------|-----------|-----------|-----------|-----------|-----------|-----------|
| NM_006475 | 454.559   | 847.196   | AL157458  | 1060.578  | 1018.083  | NM_00049C | 1338.446  | 1341.886  |
| NM_00462C | 1843.675  | 2499.246  | NM_015377 | 1397.86   | 2320.014  | AJ225028  | 314.225   | 311.574   |
| AF087940  | 2001.266  | 2319.87   | AL137531  | 1623.765  | 1139.823  | NM_00483C | 2740.751  | 2743.463  |
| AJ277587  | 2651.231  | 3256.777  | AK022210  | 838.27    | 792.64    | NM_01219C | 5132.996  | 4313.813  |
| D87432    | 6446.989  | 8701.457  | AL080085  | 4882.719  | 2926.063  | NM_00340E | 12445.48  | 9499.154  |
| Y18483    | 1012.152  | 888.891   | NM_007017 | 1038.259  | 746.752   | NM_00472C | 4558.357  | 3587.936  |
| AI565117  | 52651.281 | 57916.742 | AL137446  | 4555.773  | 2524.096  | NM_004524 | 2530.958  | 1789.597  |
| U28015    | 920.831   | 942.13    | AB025286  | 4129.975  | 2337.866  | NM_00631E | 3709.992  | 2363.722  |
| AI299075  | 1299.593  | 917.802   | AF009286  | 820.991   | 506.556   | NM_018401 | 894.904   | 679.738   |
| M59979    | 5924.096  | 9728.496  | NM_01588C | 1573.015  | 1626.931  | NM_00516C | 3373.163  | 3537.737  |
| AB011098  | 3840.193  | 3544.219  | AF056437  | 1575.538  | 2543.45   | NM_00727C | 48611.602 | 53171.289 |
| AA609759  | 6123.534  | 7264.929  | AB032364  | 1316.199  | 2581.585  | BE894943  | 1667.215  | 1832.155  |
| AA029418  | 3772.153  | 3372.874  | NM_00502C | 1643.827  | 2225.88   | AF085994  | 349.46    | 216.242   |
| L20815    | 8714.624  | 9805.562  | AF056447  | 1406.121  | 1954.665  | NM_01642C | 3194.562  | 4770.723  |
| AI364483  | 13590.523 | 17963.604 | AK001010  | 840.338   | 1075.396  | NM_01787E | 14867.584 | 25982.471 |
| AA456001  | 13261.092 | 13429.851 | NM_01807C | 408.667   | 567.104   | NM_004494 | 50498.645 | 58341.762 |
| AA176581  | 297.758   | 587.77    | AK021442  | 1113.191  | 1267.456  | AL049687  | 442.259   | 667.198   |
| BI818232  | 734.676   | 626.06    | AK001076  | 1116.082  | 755.601   | NM_00564C | 9196.558  | 11553.279 |
| AA451686  | 16428.016 | 11071.306 | AK001820  | 842.578   | 480.091   | NM_00359C | 7357.522  | 5937.659  |
| AA934644  | 675.908   | 653.966   | AK021482  | 6761.657  | 3013.099  | NM_01495C | 4534.583  | 2830.803  |
| NM_00205C | 1294.846  | 943.492   | NM_00615E | 37491.215 | 19359.199 | AF179995  | 813.62    | 594.242   |
| NM_007097 | 21189.045 | 23174.322 | NM_00634C | 2439.172  | 2544.298  | NM_00452C | 2033.718  | 1453.047  |
| BF540935  | 905.914   | 1673.414  | AK025240  | 4798.589  | 6495.347  | NM_004404 | 9090.195  | 6597.188  |
| NM_00071E | 1121.608  | 924.666   | NM_01763C | 11577.963 | 8638.642  | NM_00296C | 8603.39   | 9296.203  |
| AF035802  | 2730.385  | 2824.433  | AF086186  | 30363.012 | 11735.874 | AB046788  | 509.456   | 465.042   |
| Y08145    | 491.217   | 713.844   | NM_01780C | 6986.076  | 2936.02   | NM_00679C | 2603.031  | 1857.018  |
| M26123    | 774.989   | 1041.109  | AK023667  | 2147.197  | 889.241   | AB011541  | 1447.249  | 1467      |
| NM_00183E | 18768.375 | 12773.45  | AJ008137  | 14065.197 | 5644.608  | NM_019061 | 5551.201  | 5146.915  |
| NM_01955E | 761.384   | 960.131   | AF085841  | 702.85    | 414.838   | AB033007  | 4366.448  | 3314.01   |
| NM_01209E | 12617.842 | 11734.273 | AJ008118  | 63972.441 | 63612.5   | NM_003781 | 596.664   | 607.351   |
| NM_00390E | 26508.986 | 20913.535 | AK000939  | 515.508   | 1257.37   | NM_001304 | 587.929   | 428.519   |
| L12052    | 7618.003  | 7601.979  | AL109674  | 573.131   | 789.142   | NM_000504 | 242.845   | 297.734   |
| AB028976  | 3621.197  | 5056.754  | AK024512  | 8843.168  | 11261.347 | NM_00313C | 3576.257  | 7516.138  |
| AK026337  | 515.601   | 623.5     | AK023454  | 1800.23   | 2012.864  | NM_00471E | 44247.246 | 41690.566 |
| NM_01586E | 1057.473  | 842.486   | NM_01806C | 1211.868  | 1578.514  | D29810    | 2790.796  | 2446.9    |
| AB031038  | 1382.165  | 2298.925  | NM_00712E | 17425.389 | 15191.639 | NM_00012E | 5104.524  | 4476.222  |
| NM_00462E | 1072.99   | 1319      | NM_00716C | 431.55    | 399.702   | AB002384  | 6615.856  | 5187.444  |
| NM_00189E | 1858.208  | 2410.907  | NM_018627 | 1264.66   | 572.541   | NM_018437 | 654.937   | 453.813   |
| NM_00430E | 25299.227 | 29885.1   | S82164    | 1910.413  | 1386.89   | NM_00042C | 2168.21   | 2607.973  |
| NM_00608E | 300.871   | 876.678   | AK024394  | 3123.361  | 3737.628  | AK023164  | 1401.412  | 1305.432  |
| NM_00599C | 787.61    | 957.158   | AF147374  | 2001.04   | 5465.332  | NM_00537C | 2790.158  | 2336.623  |
| NM_003144 | 15729.601 | 15477.329 | AF130091  | 1692.943  | 3788.188  | AK027121  | 10585.642 | 7365.745  |
| NM_00090E | 2966.135  | 2803.706  | L43338    | 18497.988 | 15771.681 | NM_01743C | 6359.337  | 5741.292  |
| NM_00296E | 12970.471 | 16143.224 | AJ227866  | 18802.564 | 7147.091  | AL117661  | 3272.23   | 2600.496  |
| NM_01761C | 357.086   | 256.546   | AF458223  | 3509.088  | 2386.624  | X64643    | 2059.098  | 1582.332  |
| M81768    | 868.593   | 539.315   | AK026822  | 283.668   | 268.848   | NM_00538C | 14306.11  | 11948.653 |
| NM_001037 | 434.382   | 302.663   | AK022838  | 11193.913 | 4526.761  | AF272381  | 10791.529 | 10242.071 |
| AK023749  | 1199.094  | 1417.721  | NM_00350C | 908.742   | 420.897   | NM_00151E | 10923.991 | 8410.886  |
| NM_002337 | 8990.845  | 6833.325  | AF086519  | 1329.143  | 1079.257  | NM_00341C | 39077.883 | 26766.41  |
| NM_01324E | 4335.852  | 2736.823  | AF055012  | 11380.34  | 13396.475 | NM_01833E | 1225.727  | 1254.025  |
| NM_00642C | 49480.242 | 39290.902 | AK022307  | 2634.977  | 3611.92   | AK022668  | 4305.971  | 3188.023  |
| NM_00476E | 4347.488  | 4969.793  | AF132201  | 388.21    | 650.332   | AW975132  | 3172.633  | 3086.766  |
| NM_00581E | 6623.201  | 5949.914  | AF085997  | 463.688   | 740.546   | NM_006051 | 7990.378  | 6282.186  |

|           |           |           |           |           |           |           |           |           |
|-----------|-----------|-----------|-----------|-----------|-----------|-----------|-----------|-----------|
| AK025520  | 5571.005  | 3982.457  | NM_005172 | 1170.868  | 1512.85   | NM_018427 | 5874.695  | 5798.701  |
| NM_004892 | 5973.695  | 8035.368  | AK025192  | 14497.131 | 8261.067  | AB037814  | 369.444   | 430.325   |
| NM_014597 | 36183.398 | 38267.746 | NM_012403 | 3370.088  | 1838.043  | NM_014663 | 1321.88   | 2407.185  |
| NM_017896 | 28858.068 | 26711.406 | AK022611  | 6261.593  | 1653.192  | AF007217  | 1378.909  | 1170.636  |
| AB002374  | 9711.1    | 8261.564  | NM_004952 | 3307.442  | 2434.668  | AB037753  | 4031.011  | 3621.184  |
| U17327    | 4537.128  | 4450.333  | AY007239  | 639.745   | 541.803   | NM_004674 | 1656.807  | 1093.927  |
| AB046781  | 676.664   | 268.823   | NM_020414 | 6851.652  | 9849.479  | AB037801  | 2576.189  | 1848.508  |
| NM_001768 | 2793.221  | 3771.084  | AB037730  | 4196.096  | 5577.902  | AL080159  | 30356.422 | 20461.795 |
| NM_000028 | 12182.802 | 15397.322 | NM_001357 | 10498.741 | 3844.584  | NM_017823 | 32131.311 | 22362.076 |
| NM_017921 | 1197.151  | 1279.101  | NM_003893 | 3762.524  | 2089.877  | U55185    | 896.725   | 739.356   |
| NM_003136 | 10313.941 | 10856.371 | AB037816  | 2335.704  | 1203.862  | U30828    | 10111.832 | 6500.143  |
| NM_013328 | 35705.324 | 46050.848 | NM_014265 | 884.318   | 293.255   | AF085886  | 47422.602 | 41548.008 |
| NM_000790 | 782.369   | 539.34    | U92026    | 1336.657  | 1176.105  | AK023828  | 18319.957 | 12616.752 |
| NM_002660 | 5946.98   | 5799.099  | AF086234  | 30437.297 | 22296.105 | NM_004784 | 450.464   | 367.118   |
| NM_015900 | 942.867   | 543.232   | AK023680  | 11377.624 | 13570.53  | AK021815  | 970.439   | 826.666   |
| NM_003706 | 2096.656  | 1871.109  | AF009324  | 5471.647  | 8638.437  | NM_001543 | 1669.813  | 2058.21   |
| AF182218  | 645.318   | 553.009   | AF019226  | 362.245   | 810.142   | NM_016641 | 5442.767  | 6078.635  |
| AL122071  | 333.494   | 939.515   | AK022112  | 480.092   | 1353.695  | AB018010  | 1766.72   | 1586.531  |
| AB033054  | 13923.781 | 14278.737 | AL137480  | 20253.463 | 18849.256 | NM_014610 | 11147.437 | 11943.2   |
| NM_016122 | 2685.886  | 1806.744  | AK022182  | 1557.254  | 1617.298  | NM_004737 | 301.053   | 396.402   |
| AF153330  | 1706.202  | 2023.781  | D16473    | 3593.146  | 3416.224  | NM_000688 | 1664.691  | 1495.551  |
| NM_002976 | 417.361   | 852.609   | AB028968  | 2837.412  | 1786.038  | NM_006621 | 2912.021  | 3030      |
| NM_002050 | 1323.982  | 1447.093  | AK001202  | 913.793   | 529.756   | BF347398  | 21513.434 | 32644.607 |
| NM_007097 | 20044.715 | 20393.973 | AF195764  | 61399.594 | 32506.432 | AK026762  | 2973.874  | 3839.701  |
| D87446    | 8609.578  | 8079.771  | AF055029  | 2234.408  | 862.23    | AF078844  | 318.975   | 400.473   |
| BF540935  | 400.107   | 444.832   | AB011542  | 2973.641  | 1930.993  | NM_004412 | 758.064   | 748.787   |
| NM_004466 | 821.92    | 664.131   | NM_001853 | 6095.049  | 4011.159  | L48516    | 2994.186  | 2018.435  |
| NM_007081 | 3406.834  | 2488.276  | U41737    | 755.63    | 718.972   | NM_016648 | 6902.86   | 4650.21   |
| AB032964  | 5056.119  | 3973.912  | NM_005799 | 1512.781  | 1297.305  | AF083930  | 1793.588  | 2066.434  |
| BE733605  | 8933.845  | 6984.367  | X99661    | 1444.397  | 945.213   | AB040907  | 412.143   | 462.325   |
| NM_003334 | 15307.137 | 13941.175 | NM_005927 | 2368.085  | 1425.071  | NM_003426 | 601.534   | 446.511   |
| NM_002693 | 3388.752  | 3450.086  | AB028983  | 5909.008  | 4876.06   | NM_014862 | 1286.878  | 1338.765  |
| NM_003671 | 5107.536  | 9261.511  | AB037800  | 3929.156  | 3991.63   | AK027159  | 1138.864  | 1190.295  |
| M20695    | 396.003   | 852.198   | AK026377  | 2043.15   | 2222.346  | AF060169  | 292.472   | 261.546   |
| AK026000  | 11882.622 | 16465.631 | NM_018660 | 4331.465  | 3517.211  | NM_005268 | 641.757   | 800.498   |
| NM_017833 | 1486.417  | 2343.679  | NM_003394 | 5961.725  | 2159.081  | NM_002697 | 3636.693  | 3732.774  |
| NM_006675 | 14152.239 | 12809.442 | NM_014636 | 1260.909  | 662.746   | NM_002448 | 697.203   | 1103.694  |
| NM_003022 | 13460.615 | 10681.589 | NM_006747 | 5730.987  | 4796.837  | AF053952  | 38330.094 | 61142.152 |
| NM_004873 | 11575.464 | 8689.926  | NM_007086 | 3372.354  | 7340.645  | NM_003213 | 10535.209 | 14521.148 |
| NM_019842 | 3726.417  | 4541.617  | NM_003870 | 14477.281 | 18620.029 | BF184738  | 3392.393  | 11924.739 |
| NM_002951 | 30075.814 | 45575.16  | AK024507  | 1539.103  | 2269.828  | NM_014044 | 3848.59   | 4526.503  |
| NM_002317 | 4182.397  | 6698.771  | NM_001243 | 5707.03   | 7798.72   | NM_000900 | 4218.27   | 5747.547  |
| NM_000320 | 1725.417  | 2881.855  | AK025997  | 1481.735  | 2724.265  | AK023684  | 5862.556  | 8100.269  |
| NM_145658 | 2568.457  | 1833.154  | NM_005546 | 357.709   | 424.161   | NM_000232 | 3235.23   | 3810.112  |
| AK022138  | 1785.721  | 1687.052  | NM_000299 | 607.272   | 617.946   | J05070    | 1059.595  | 1655.716  |
| AF086191  | 2448.194  | 1735.073  | NM_014887 | 2192.457  | 1079.318  | AA700390  | 3534.179  | 5115.909  |
| AF143880  | 632.661   | 484.508   | NM_018556 | 8855.88   | 3046.32   | Y18474    | 1124.28   | 1284.044  |
| AK024567  | 146.801   | 775.855   | NM_005235 | 523.135   | 486.101   | AA436163  | 2325.297  | 1986.714  |
| NM_017638 | 6731.621  | 5056.858  | NM_005600 | 3221.67   | 2755.479  | BI907981  | 5561.651  | 5927.858  |
| AL050013  | 625.46    | 594.654   | NM_005967 | 15102.288 | 9901.289  | BI603841  | 10461.297 | 9418.048  |
| AL133052  | 3202.542  | 2553.673  | AB014566  | 3157.343  | 1780.219  | M19888    | 1285.531  | 1179.667  |
| AB037824  | 3637.711  | 5466.003  | NM_015678 | 724.287   | 826.944   | Y08136    | 1220.167  | 1231.82   |
| AF361494  | 878.746   | 883.595   | AK025950  | 470       | 971.368   | AA156863  | 13982.65  | 11486.646 |

|           |           |           |           |           |           |           |           |           |
|-----------|-----------|-----------|-----------|-----------|-----------|-----------|-----------|-----------|
| AK022810  | 1247.581  | 1270.597  | NM_014223 | 3624.336  | 5189.005  | BI915199  | 1091.694  | 1270.608  |
| AK001384  | 3349.751  | 2128.032  | NM_016194 | 1401.345  | 2479.722  | R82957    | 47445.145 | 50783.422 |
| AK025437  | 4004.45   | 2682.856  | AL050385  | 1700.916  | 1958.489  | BI830442  | 6049.127  | 4874.761  |
| AK074164  | 774.203   | 575.763   | NM_007027 | 5617.422  | 4728.399  | AK023448  | 1582.494  | 1678.16   |
| NM_145659 | 2670.605  | 2358.785  | NM_000633 | 52240.902 | 35337.84  | Y18213    | 7790.809  | 8905.449  |
| NM_021957 | 815.958   | 739.678   | AB037855  | 3860.141  | 3051.662  | NM_003283 | 5618.791  | 5446.374  |
| SR2       | 42465.699 | 41369.453 | AK024524  | 7321.188  | 7665.153  | AF249898  | 6676.645  | 6916.29   |
| SR4       | 11392.126 | 11542.128 | NM_000562 | 4660.614  | 5679.876  | M69181    | 13547.01  | 17807.473 |
| SR6       | 1348.783  | 1509.597  | NM_020353 | 1078.056  | 1504.166  | L09078    | 697.429   | 960.922   |
| SR8       | 5984.593  | 24449.479 | NM_019011 | 10937.663 | 14697.031 | NM_002652 | 874.202   | 2890.523  |
| SR10      | 19111.559 | 7072.577  | NM_004879 | 11791.135 | 26639.08  | NM_001311 | 16210.851 | 16581.258 |
| AK026818  | 672.691   | 550.893   | AB020694  | 2427.805  | 3311.77   | NM_017799 | 9382.925  | 9588.538  |
| NM_018469 | 1874.802  | 1396.877  | NM_016071 | 41297.445 | 38211.453 | NM_012410 | 3536.195  | 3173.781  |
| AL359932  | 1373.497  | 818.256   | AL050131  | 612.141   | 622.337   | NM_001111 | 13513.074 | 12901.173 |
| AB037850  | 5496.814  | 4244.703  | NM_004475 | 11256.051 | 7011.848  | NM_018049 | 8311.397  | 6718.754  |
| AK002197  | 1998.378  | 1597.564  | NM_001627 | 3576.51   | 2123.301  | AJ133439  | 1439.539  | 1248.522  |
| AF087996  | 816.267   | 1434.123  | NM_002544 | 986.166   | 258.615   | NM_014399 | 2681.293  | 1923.449  |
| AK021710  | 2167.888  | 1702.137  | X77690    | 4401.368  | 3641.098  | NM_001561 | 2035.462  | 1831.89   |
| AK024551  | 517.006   | 449.176   | NM_006536 | 2044.17   | 1873.808  | NM_005160 | 3890.905  | 3456.979  |
| AL833249  | 2447.646  | 4175.449  | NM_005658 | 13163.318 | 16942.598 | NM_000599 | 953.296   | 817.559   |
| NM_018374 | 1073.02   | 1745.352  | NM_002422 | 1749.932  | 1658.608  | X78817    | 47714.906 | 36165.539 |
| AF131852  | 630.112   | 570.29    | NM_006690 | 5058.632  | 4210.768  | AB023135  | 2770.819  | 2582.086  |
| AK021894  | 2182.654  | 1902.201  | NM_006156 | 620.58    | 556.5     | AY009401  | 1037.281  | 1203.614  |
| NM_020424 | 8120.554  | 5515.654  | AF218022  | 4359.259  | 5517.067  | AF294628  | 1507.607  | 1620.38   |
| AF147341  | 356.946   | 281.182   | NM_003348 | 4855.182  | 6656.365  | BU565263  | 57984.125 | 67180.609 |
| AB033009  | 35423.25  | 28155.283 | AL137663  | 595.055   | 728.171   | NM_005029 | 3890.518  | 6800.223  |
| AK022086  | 888.316   | 610.883   | AB006198  | 18149.285 | 20676.934 | NM_001611 | 1103.593  | 1321.774  |
| AF147320  | 1050.391  | 551.341   | U72518    | 8235.481  | 16346.438 | M59979    | 1053.427  | 1036.416  |
| AK027024  | 1115.505  | 981.623   | AF264765  | 663.359   | 1112.503  | AB018310  | 1810.154  | 2544.374  |
| AK022339  | 4662.525  | 4756.463  | NM_015322 | 3063.303  | 5967.706  | NM_020133 | 815.736   | 865.094   |
| AK025126  | 549.646   | 656.662   | NM_016607 | 2946.067  | 3883      | NM_015379 | 25155.504 | 39339.941 |
| AK025317  | 12556.444 | 7036.817  | NM_003275 | 406.808   | 867.606   | NM_004878 | 578.302   | 1165.855  |
| AK026725  | 1036.846  | 705.278   | NM_000268 | 22927.188 | 19086.541 | NM_015057 | 245.49    | 286.55    |
| NM_005110 | 419.24    | 517.737   | M30493    | 28322.771 | 23030.238 | AF303398  | 23294.197 | 19873.176 |
| X92110    | 346.845   | 235.644   | AJ008160  | 459.937   | 302.355   | NM_014810 | 1740.361  | 2036.812  |
| AK023122  | 769.083   | 975.532   | NM_005824 | 1705.545  | 673.6     | NM_004738 | 3329.631  | 3038.29   |
| AF147408  | 6400.043  | 5802.899  | AF052211  | 7675.167  | 2595.026  | NM_007357 | 5236.649  | 6199.755  |
| AK027222  | 2804.675  | 2831.351  | U66561    | 2946.454  | 2581.74   | NM_003763 | 9564.552  | 11921.743 |
| AF054994  | 568.682   | 539.74    | NM_000306 | 4625.529  | 4620.63   | AB046836  | 2191.313  | 3300.13   |
| AF085868  | 688.52    | 482.035   | NM_002200 | 2630.839  | 5871.256  | NM_017816 | 10413.949 | 21880.51  |
| AK054767  | 792.949   | 1187.658  | AF017433  | 1831.683  | 1356.534  | AJ224166  | 4861.653  | 7233.895  |
| AL117486  | 424.41    | 839.425   | AF130111  | 3473.012  | 3921.581  | AK026098  | 3803.321  | 4446.732  |
| AL049301  | 420.556   | 398.047   | NM_016307 | 11745.039 | 16806.613 | NM_012381 | 2040.076  | 2348.363  |
| AL050042  | 1591.849  | 1290.876  | AB028449  | 6199.871  | 8504.379  | M20702    | 574.611   | 653.393   |
| AL157458  | 1095.623  | 963.197   | NM_004697 | 7986.29   | 13808.172 | NM_006397 | 43891.855 | 41757.117 |
| NM_015377 | 922.859   | 534.454   | U94384    | 891.989   | 1846.123  | D83776    | 2659.754  | 4253.626  |
| AL137531  | 1661.063  | 1018.119  | AF131776  | 11942.162 | 16338.643 | NM_004088 | 7099.747  | 8897.944  |
| AL080085  | 7224.66   | 5677.802  | NM_020528 | 10748.746 | 12432.337 | NM_002180 | 1519.34   | 2341.148  |
| AK022106  | 639.111   | 932.855   | NM_007040 | 53311.391 | 32123.518 | NM_000138 | 3299.51   | 3992.106  |
| AL137446  | 847.236   | 780.07    | NM_014483 | 18864.154 | 16143.891 | NM_018163 | 2149.137  | 2267.747  |
| AB025286  | 920.153   | 780.631   | AK024249  | 4642.273  | 5756.105  | AK026362  | 5533.168  | 5383.804  |
| AF009286  | 1095.436  | 1396.391  | AF239156  | 12693.409 | 16920.494 | NM_004968 | 2401.05   | 2912.395  |
| NM_015880 | 399.079   | 621.381   | NM_020390 | 7009.638  | 9981.839  | NM_005908 | 3100.656  | 3004.398  |

|           |           |           |            |           |           |           |           |           |
|-----------|-----------|-----------|------------|-----------|-----------|-----------|-----------|-----------|
| AF056437  | 704.296   | 719.896   | NM_003321  | 30252.309 | 38388.379 | NM_004785 | 2377.191  | 2653.165  |
| AB032364  | 709.347   | 961.263   | U18937     | 32261.42  | 33295.074 | NM_002428 | 2490.528  | 3408.685  |
| NM_005029 | 1488.86   | 1134.37   | U01925     | 1297.228  | 1961.859  | NM_014674 | 3716.743  | 4695.09   |
| AF056447  | 1341.369  | 945.042   | AJ420488   | 57834.516 | 55878.988 | NM_018271 | 1841.883  | 2041.275  |
| AK001010  | 1131.324  | 1312.347  | AF268872   | 3863.282  | 4352.111  | NM_000547 | 503.117   | 650.103   |
| NM_018076 | 411.172   | 336.478   | AK022180   | 53472.355 | 54580.621 | NM_014652 | 1390.831  | 1468.063  |
| AK021442  | 1233.336  | 1666.193  | NM_001226  | 1785.329  | 1260.817  | AL133020  | 5319.871  | 6484.327  |
| AK001076  | 1281.727  | 1160.64   | NM_001336  | 1850.534  | 576.524   | NM_003213 | 10225.833 | 19095.289 |
| AK001820  | 546.487   | 542.661   | AB050716   | 1479.16   | 461.395   | BF184738  | 2102.144  | 2381.612  |
| AK021482  | 1910.325  | 1626.731  | AF161353   | 28012.08  | 20265.352 | NM_014044 | 3444.178  | 4290.596  |
| NM_006158 | 4500.067  | 3027.604  | NM_000764  | 4986.088  | 3525.165  | NM_000900 | 4457.631  | 5825.71   |
| NM_006346 | 1394.652  | 1034.066  | NM_004146  | 44556.496 | 28687.494 | AK023684  | 5170.637  | 6148.283  |
| AK025240  | 4334.777  | 2610.267  | NM_003002  | 21482.279 | 13493.212 | NM_000232 | 3015.453  | 3166.803  |
| NM_017633 | 10662.373 | 7257.457  | D42047     | 7050.873  | 9447.952  | J05070    | 999.809   | 1115.06   |
| AF086186  | 4044.22   | 3165.988  | AB009282   | 19225.662 | 15543.229 | AA700390  | 3599.349  | 4951.499  |
| NM_017802 | 11348.285 | 16164.879 | NM_005004  | 54710.395 | 39439.008 | Y18474    | 1300.222  | 2270.89   |
| AK023667  | 2382.598  | 2268.913  | NM_014639  | 10501.624 | 9328.74   | AA436163  | 2458.006  | 2934.739  |
| AJ008137  | 5874.134  | 4448.745  | NM_006392  | 8309.21   | 11103.42  | BI907981  | 6319.68   | 7183.053  |
| AF085841  | 890.94    | 1192.508  | NM_014717  | 3998.536  | 3798.581  | BI603841  | 11202.673 | 11046.418 |
| AL049232  | 350.44    | 249.755   | NM_017922  | 4214.558  | 2185.362  | M19888    | 1501.85   | 1414.752  |
| AJ008118  | 53274.004 | 43293.32  | NM_002823  | 56135.816 | 52329.313 | Y08136    | 1075.679  | 1081.564  |
| AL109674  | 410.763   | 547.334   | NM_017916  | 28961.537 | 28717.467 | AA156863  | 14477.128 | 13215.928 |
| AK024512  | 11020.891 | 8965.032  | NM_006756  | 575.982   | 983.749   | BI915199  | 955.066   | 919.178   |
| AK023454  | 3115.552  | 2175.074  | NM_001805  | 25817.924 | 39939.004 | R82957    | 52827.223 | 45219.258 |
| L23207    | 395.498   | 483.669   | AK022360   | 7211.84   | 11246.157 | BI830442  | 8986.573  | 17586.529 |
| NM_018062 | 2380.736  | 3463.038  | AK095694   | 1571.677  | 3671.094  | AA398951  | 648.179   | 1119.503  |
| NM_007128 | 19707.924 | 18185.26  | X52341     | 56278.148 | 56577.797 | AI218732  | 1989.852  | 2311.008  |
| NM_007160 | 691.777   | 697.197   | NM_003082  | 7715.372  | 9536.686  | NM_018890 | 33305.359 | 31799.781 |
| NM_018627 | 1420.672  | 1401.418  | AL133632   | 7436.799  | 8097.945  | NM_016204 | 16360.681 | 33525.285 |
| S82164    | 487.851   | 698.1     | NM_004343  | 28497.232 | 20341.629 | NM_003283 | 5233.479  | 4869.196  |
| AK024394  | 3818.384  | 4096.172  | X52355     | 9870.857  | 4718.859  | AF249898  | 5953.453  | 5049.68   |
| AF147374  | 2228.879  | 1409.299  | NM_006963  | 11272.386 | 5642.218  | M69181    | 12525.885 | 11986.518 |
| AF130091  | 1552.323  | 1529.212  | NM_006510  | 29326.979 | 24044.02  | L09078    | 696.375   | 675.47    |
| L43338    | 2255.459  | 1399.366  | NM_003141  | 6278.788  | 6629.243  | NM_002652 | 338.634   | 531.529   |
| AJ227866  | 1781.685  | 1677.422  | NM_020245  | 9290.526  | 8629.441  | NM_001311 | 13834.493 | 11394.066 |
| AF458223  | 8117.553  | 14385.507 | NM_007175  | 1100.492  | 1447.254  | NM_017798 | 9832.874  | 13191.708 |
| AK026822  | 757.331   | 816.49    | AB046381   | 1209.382  | 1763.575  | NM_012410 | 4004.203  | 3487.343  |
| NM_018587 | 1766.564  | 1974.853  | AJ011497   | 5562.051  | 7459.825  | NM_001111 | 13299.696 | 10001.286 |
| AK022838  | 13015.529 | 11052.502 | NM_003018  | 1940.106  | 2338.868  | NM_018046 | 9030.938  | 7494.287  |
| NM_003509 | 949.539   | 729.426   | NM_000336  | 3421.031  | 4749.943  | AJ133439  | 1589.538  | 1604.72   |
| AF086519  | 914.956   | 670.074   | W61100     | 57457.98  | 59271.316 | NM_014395 | 2587.973  | 2128.542  |
| AF055012  | 15964.264 | 11623.111 | AA608568   | 12093.892 | 9423.465  | NM_001561 | 1534.578  | 1069.452  |
| AK022307  | 3186.584  | 3085.076  | BG831301   | 57249.559 | 55120.172 | NM_005160 | 2239.84   | 1884.16   |
| X60482    | 394.974   | 372.939   | M14764     | 2540.719  | 2467.428  | NM_000596 | 2240.468  | 3494.886  |
| AF085997  | 599.032   | 1085.754  | AA478647   | 8347.121  | 6873.889  | X78817    | 54195.996 | 61965.23  |
| NM_005172 | 2683.265  | 3342.723  | M35999     | 2178.863  | 2560.791  | AB023135  | 2437.458  | 3060.082  |
| AK025192  | 10804.366 | 8904.388  | AW058501   | 2160.14   | 2689.322  | AY009401  | 1031.485  | 1403.1    |
| NM_012403 | 2706.842  | 2616.627  | M81379     | 1160.916  | 1591.713  | AF294628  | 1249.575  | 1829.439  |
| AK023251  | 349.662   | 321.813   | ID 2623896 | 5598.544  | 8527.347  | NM_002448 | 775.368   | 1112.195  |
| AK022611  | 10346.475 | 11006.353 | ID 2602214 | 9090.896  | 11373.914 | AF053952  | 43329.672 | 53056.703 |
| NM_004952 | 5710.369  | 7343.234  | ID 2071279 | 13440.492 | 12579.343 | NM_001611 | 966.463   | 1272.316  |
| AY007239  | 506.561   | 544.426   | L10709     | 12066.442 | 12441.477 | M59979    | 1003.59   | 741.122   |
| NM_020414 | 9312.442  | 8396.594  | N35489     | 3873.746  | 7113.949  | AB018310  | 1764.953  | 1704.382  |

|           |           |           |           |           |           |           |           |           |
|-----------|-----------|-----------|-----------|-----------|-----------|-----------|-----------|-----------|
| AB037730  | 7357.337  | 6542.316  | NM_003485 | 13418.382 | 10057.45  | NM_020133 | 651.71    | 616.9     |
| AF147429  | 679.376   | 1185.585  | NM_005038 | 5632.162  | 3858.287  | NM_015379 | 17432.449 | 15073.286 |
| NM_001357 | 16555.561 | 11763.893 | M95923    | 6728.837  | 6613.995  | NM_004878 | 402.045   | 596.125   |
| NM_003893 | 6561.049  | 5223.733  | NM_002415 | 50690.863 | 57987.848 | NM_015057 | 312.016   | 238.516   |
| AB037816  | 4381.117  | 7407.981  | NM_006332 | 57694.746 | 56928.117 | AF303398  | 21429.795 | 15212.019 |
| NM_014265 | 1903.433  | 1384.109  | NM_002000 | 692.279   | 693.463   | NM_014810 | 1029.55   | 745.932   |
| U92026    | 661.596   | 587.799   | NM_000916 | 8778.499  | 16378.968 | NM_004738 | 2059.36   | 1930.79   |
| AF086234  | 34268.164 | 25940.904 | NM_018663 | 8934.313  | 9849.863  | NM_007357 | 5646.58   | 7000.771  |
| AK023680  | 14729.367 | 13260.185 | NM_145904 | 24275.418 | 20568.398 | NM_003763 | 7853.604  | 9296.248  |
| AF009324  | 8488.449  | 9511.16   | NM_006796 | 17460.559 | 14053.416 | AK023448  | 2020.301  | 2190.995  |
| AF144056  | 209.362   | 613.09    | NM_000706 | 1549.363  | 1503.308  | Y18213    | 7778.135  | 8344.987  |
| AL137480  | 35147.086 | 35775.121 | NM_015941 | 6616.756  | 5942.608  | NM_017816 | 8724.914  | 8571.521  |
| AK022182  | 1794.241  | 1883.094  | NM_003655 | 5546.201  | 4491.752  | AJ224166  | 4945.64   | 4744.725  |
| D16473    | 7876.008  | 11929.887 | NM_014837 | 6398.798  | 7318.72   | AK026098  | 4374.328  | 7206.073  |
| AB028968  | 5221.21   | 5371.21   | NM_017729 | 936.978   | 1192.598  | NM_012381 | 1987.359  | 2198.107  |
| AK001202  | 1612.363  | 1344.932  | NM_005259 | 15039.381 | 19870.434 | M20702    | 472.822   | 582.138   |
| AF195764  | 57120.223 | 49532.02  | NM_002840 | 738.386   | 1163.581  | NM_006397 | 38523.898 | 31022.432 |
| AF055029  | 3277.786  | 3499.32   | NM_006174 | 2271.076  | 3041.686  | D83776    | 2621.503  | 2720.546  |
| AB011542  | 4924.753  | 8715.521  | NM_015850 | 5326.401  | 6509.985  | NM_004088 | 7445.904  | 8531.697  |
| NM_001853 | 3594.458  | 3805.261  | NM_004864 | 1579.11   | 1713.118  | NM_002180 | 1505.706  | 3326.816  |
| NM_005798 | 1624.043  | 1349.195  | NM_002838 | 7764.705  | 6427.759  | NM_000138 | 2866.638  | 3570.81   |
| X99661    | 3010.437  | 2148.734  | AK025111  | 1409.142  | 1153.583  | NM_018163 | 1866.286  | 2025.16   |
| NM_005927 | 3160.926  | 2707.563  | NM_001732 | 2783.807  | 2558.609  | AK026362  | 5833.29   | 5689.421  |
| AB028983  | 795.236   | 668.84    | NM_018690 | 13594.364 | 14028.526 | NM_004968 | 2274.719  | 2446.534  |
| AB037800  | 1111.221  | 1211.475  | NM_000860 | 2362.942  | 3172.386  | NM_005908 | 2905.743  | 2785.921  |
| AK026377  | 3140.66   | 4287.937  | AB037798  | 3465.858  | 4618.966  | NM_004785 | 2353.076  | 1957.334  |
| NM_018660 | 6371.171  | 6369.964  | NM_000780 | 995.631   | 788.705   | NM_002428 | 1459.356  | 1325.637  |
| NM_003394 | 2204.455  | 1675.357  | AF272663  | 21687.832 | 23718.033 | NM_014674 | 1777.931  | 1450.647  |
| NM_014636 | 1369.479  | 965.977   | NM_012190 | 6331.024  | 12134.945 | NM_018271 | 596.222   | 660.16    |
| NM_006747 | 7348.94   | 6248.135  | AB033015  | 571.106   | 1184.747  | NM_014652 | 978.21    | 595.227   |
| NM_007086 | 3350.061  | 4217.698  | AF277719  | 766.158   | 985.302   | AL133020  | 5181.162  | 6456.467  |
| NM_003870 | 18593.961 | 25007.885 | NM_000791 | 2541.838  | 1505.912  | NM_004152 | 441.157   | 367.439   |
| AK024507  | 1499.694  | 2408.945  | NM_003681 | 4012.371  | 3094.845  | NM_014044 | 3842.997  | 3868.515  |
| NM_001243 | 7562.42   | 7645.485  | NM_004677 | 1091.687  | 1238.008  | NM_000900 | 4690.673  | 6276.001  |
| AK025997  | 1890.834  | 2076.49   | NM_014909 | 7716.008  | 6216.579  | AK023684  | 6257.921  | 8887.674  |
| NM_005546 | 513.919   | 650.639   | NM_015700 | 6510.931  | 6911.348  | NM_000232 | 3463.956  | 3721.338  |
| NM_000298 | 778.246   | 718.142   | U66621    | 17375.348 | 19547.668 | J05070    | 992.847   | 1250.115  |
| S51112    | 475.935   | 625.377   | NM_005720 | 56840.465 | 55878.316 | U76368    | 381.056   | 305.839   |
| NM_014887 | 3517.425  | 3396.643  | AB040936  | 810.692   | 1142.609  | AA700390  | 3498.426  | 4492.909  |
| NM_002590 | 376.127   | 387.551   | U61736    | 963.698   | 1516.965  | Y18474    | 1201.391  | 1592.095  |
| NM_018556 | 2295.453  | 2143.68   | AJ132086  | 2367.901  | 3074.791  | AA436163  | 2568.233  | 3358.926  |
| NM_005235 | 621.941   | 679.455   | U92816    | 18554.314 | 11010.252 | BI907981  | 7565.919  | 15998.211 |
| NM_005600 | 4326.331  | 5267.93   | S76984    | 12715.309 | 7949.323  | BI603841  | 12452.555 | 14584.31  |
| NM_005967 | 4249.039  | 4508.045  | NM_014495 | 56526.754 | 58607.445 | M19888    | 1400.525  | 1250.245  |
| NM_015678 | 987.331   | 1246.71   | NM_014081 | 1776.297  | 1549.904  | Y08136    | 1112.328  | 1032.379  |
| AK025950  | 614.496   | 485.852   | NM_005651 | 2193.871  | 2943.238  | AA156863  | 11632.681 | 10119.435 |
| NM_014223 | 3584.079  | 3563.521  | NM_007195 | 2523.035  | 3482.08   | BI915199  | 630.335   | 465.707   |
| NM_016194 | 2126.479  | 2824.007  | AK023337  | 12100.39  | 21869.469 | R82957    | 48290.199 | 37689.668 |
| AL050385  | 2091.154  | 1811.545  | NM_013275 | 28165.188 | 30609.412 | BI830442  | 3545.252  | 2507.328  |
| NM_007027 | 7812.383  | 5541.646  | AB037842  | 844.494   | 822.965   | AI218732  | 616.201   | 502.694   |
| NM_000633 | 21801.098 | 24983.813 | U92074    | 383.318   | 185.245   | NM_018890 | 7055.553  | 6530.604  |
| AB037855  | 5508.398  | 4501.06   | NM_019011 | 2759.601  | 1788.457  | NM_016204 | 6928.86   | 7869.871  |
| AK024524  | 9460.24   | 11146.359 | AF459094  | 6240.815  | 5009.325  | AB046836  | 1854.315  | 2297.587  |

|           |           |           |            |           |           |           |           |           |
|-----------|-----------|-----------|------------|-----------|-----------|-----------|-----------|-----------|
| NM_019011 | 10033.385 | 9723.652  | NM_003157  | 4972.811  | 5198.348  | AF262992  | 1141.604  | 1169.662  |
| NM_004879 | 12559.416 | 11931.645 | NM_004938  | 2066.027  | 2314.179  | NM_001311 | 13256.512 | 7714.428  |
| AB020694  | 4298.254  | 2923.947  | NM_014326  | 2438.114  | 2724.214  | NM_017798 | 8323.873  | 8230.238  |
| NM_016071 | 49011.664 | 46345.223 | NM_004448  | 1428.759  | 1598.935  | NM_012410 | 3312.935  | 2956.934  |
| AL050131  | 1132.934  | 1562.512  | NM_015981  | 1890.706  | 2524.243  | NM_001111 | 13147.063 | 15100.935 |
| NM_004475 | 15668.842 | 12242.292 | NM_000455  | 6167.584  | 7161      | NM_018048 | 8025.278  | 7229.437  |
| NM_001627 | 5867.007  | 6118.467  | NM_014791  | 7879.511  | 8452.768  | AJ133439  | 1731.951  | 2018.136  |
| NM_002544 | 473.473   | 402.316   | NM_003318  | 6158.206  | 6951.99   | NM_014395 | 2907.161  | 3092.409  |
| X77690    | 3616.78   | 4057.484  | NM_004362  | 5041.826  | 5385.81   | NM_001561 | 1779.32   | 2099.251  |
| NM_006536 | 906.379   | 957.492   | NM_000182  | 17530.896 | 11653.385 | NM_005160 | 3029.907  | 4473.404  |
| NM_005658 | 26425.064 | 32717.617 | AK023384   | 3440.28   | 2781.56   | NM_000596 | 881.868   | 1129.748  |
| NM_002422 | 2925.166  | 4712.541  | NM_020245  | 9926.519  | 7587.262  | X78817    | 47799.559 | 42726.211 |
| NM_006156 | 1351.867  | 992.901   | AB046381   | 1242.903  | 1752.052  | AB023135  | 1917.073  | 1902.347  |
| AF218022  | 4143.371  | 4657.455  | AJ011497   | 8422.88   | 9282.689  | AY009401  | 690.973   | 498.609   |
| NM_003348 | 6039.045  | 5137.506  | NM_003018  | 960.76    | 1343.758  | AF294628  | 983.527   | 884.938   |
| AB033029  | 877.174   | 831.033   | NM_000336  | 3390.536  | 4429.965  | AK026960  | 453.017   | 391.512   |
| AL137663  | 706.64    | 892.221   | W61100     | 54690.07  | 59185.453 | NM_001991 | 853.899   | 730.618   |
| AF264765  | 747.559   | 858.35    | AA608568   | 16714.402 | 28133.342 | NM_000193 | 2821.738  | 2871.428  |
| NM_015322 | 4695.786  | 4780.439  | BG831301   | 57476.57  | 57909.145 | AF053952  | 24809.615 | 26122.225 |
| NM_016607 | 4267.505  | 3255.271  | M14764     | 3617.533  | 2945.795  | NM_003213 | 8155.877  | 12160.103 |
| NM_003275 | 956.354   | 1151.726  | AA478647   | 7070.505  | 5403.162  | BF184738  | 1767.799  | 2454.675  |
| NM_000268 | 12207.835 | 14287.639 | M35999     | 1803.766  | 1135.529  | NM_020388 | 309.548   | 176.886   |
| M30493    | 15161.463 | 14365.374 | AW058501   | 2008.128  | 1261.169  | NM_005070 | 425.73    | 506.63    |
| AJ008160  | 798.244   | 721.194   | M81379     | 902.115   | 1201.822  | NM_015057 | 415.101   | 544.217   |
| NM_005824 | 2888.511  | 2255.123  | ID 2623896 | 5037.416  | 7431.61   | AF303398  | 24473.379 | 32277.418 |
| AF052211  | 10391.593 | 9054.045  | ID 2602214 | 13256.292 | 11055.645 | NM_014810 | 1388.132  | 1914.649  |
| U66561    | 2583.329  | 2705.13   | ID 2071279 | 13324.228 | 11170.755 | NM_004738 | 2412.022  | 2376.226  |
| NM_000306 | 2022.313  | 1869.004  | L10709     | 13643.551 | 14759.822 | NM_007357 | 3829.899  | 4036.419  |
| NM_002200 | 3594.921  | 4511.606  | N35489     | 3647.786  | 4361.154  | NM_003763 | 7755.02   | 7897.524  |
| AB028449  | 12129.523 | 16130.54  | AA482489   | 498.769   | 416.564   | AK023448  | 1066.45   | 576.788   |
| NM_004697 | 10270.011 | 8737.899  | AA458922   | 3734.268  | 3783.438  | Y18213    | 6412.597  | 3764.972  |
| U94384    | 1131.472  | 1851.437  | NM_001719  | 17714.781 | 11592.166 | NM_003283 | 1858.126  | 1237.376  |
| AF131776  | 13557.283 | 10061.021 | AL080062   | 3757.265  | 2240.456  | AF249898  | 2743.915  | 1970.146  |
| NM_020528 | 13701.786 | 12270.133 | M95923     | 7081.675  | 3590.144  | M69181    | 1777.136  | 1839.818  |
| NM_007040 | 37401.359 | 37943.922 | NM_002415  | 51898.004 | 55851.512 | L09078    | 537.026   | 836.246   |
| NM_014483 | 41324.512 | 48814.754 | NM_002000  | 1492.071  | 940.134   | NM_002652 | 789.957   | 1176.093  |
| AF239156  | 19228.629 | 19138.311 | NM_000916  | 5470.869  | 5353.937  | NM_014652 | 1119.904  | 993.126   |
| NM_003321 | 36648.973 | 43565.234 | NM_018663  | 9321.715  | 10777.744 | AL133020  | 4211.282  | 4438.923  |
| U18937    | 37559.922 | 34879.996 | NM_145904  | 39251.73  | 55180.836 | BU565263  | 54460.703 | 63544.891 |
| AF268872  | 8091.374  | 10904.216 | NM_006796  | 20630.318 | 26054.775 | NM_005028 | 4432.457  | 6567.206  |
| AK022180  | 54074.496 | 47556.004 | NM_000706  | 1627.593  | 1825.534  | NM_001611 | 1150.421  | 1375.445  |
| NM_001226 | 3632.511  | 3488.078  | NM_015941  | 5836.935  | 4832.239  | M59979    | 1319.22   | 2808.433  |
| NM_001336 | 2006.766  | 2324.954  | NM_003655  | 5059.474  | 3359.988  | AB018310  | 1600.181  | 3052.81   |
| AB050716  | 1952.632  | 1691.578  | NM_014837  | 5200.277  | 3926.492  | NM_020133 | 929.691   | 922.377   |
| AF161353  | 32915.938 | 25276.076 | NM_017729  | 1528.969  | 2268.983  | NM_015379 | 14758.491 | 13046.69  |
| NM_000764 | 1571.014  | 1250.034  | NM_005259  | 31901.344 | 51785.441 | NM_004878 | 1791.292  | 2320.167  |
| NM_004146 | 33954.777 | 33722.93  | NM_002840  | 824.279   | 693.198   | AF144638  | 53608.352 | 61479.277 |
| AB009282  | 28578.463 | 33501.719 | NM_006174  | 2579.675  | 2823.458  | NM_000742 | 745.483   | 1093.796  |
| NM_005004 | 55416.305 | 52837.199 | NM_015850  | 12611.358 | 16074.623 | NM_002355 | 8636.484  | 9407.764  |
| NM_014639 | 16420.516 | 19217.395 | NM_004864  | 1852.509  | 1927.693  | AK026608  | 2411.689  | 2809.891  |
| NM_006392 | 14549.674 | 14043.09  | NM_002838  | 8173.693  | 9601.994  | NM_018890 | 27561.629 | 19904.691 |
| NM_014717 | 4342.509  | 3665.965  | AK027377   | 364.698   | 789.054   | NM_016204 | 11489.57  | 12353.126 |
| NM_017922 | 8136.827  | 7256.758  | BF528358   | 1169.85   | 1364.623  | AB046836  | 1480.214  | 1496.516  |

|            |           |           |           |           |           |           |           |           |
|------------|-----------|-----------|-----------|-----------|-----------|-----------|-----------|-----------|
| NM_002823  | 56939.82  | 57557.883 | NM_016339 | 937.646   | 686.043   | NM_017816 | 7140.585  | 5328.625  |
| NM_006756  | 509.863   | 521.225   | NM_006510 | 21017.898 | 15030.645 | AJ224166  | 4246.613  | 3349.447  |
| NM_001805  | 3742.839  | 4545.321  | NM_018690 | 10555.423 | 9238.675  | AK026098  | 4053.061  | 5040.751  |
| AK022360   | 12474.357 | 17980.168 | NM_000860 | 3000.059  | 2716.903  | NM_012381 | 2001.512  | 3544.5    |
| AK095694   | 1315.164  | 1672.068  | AB037798  | 3275.267  | 2894.704  | M20702    | 873.944   | 782.65    |
| X52341     | 53500.742 | 51863.762 | AF272663  | 11341.318 | 7954.754  | NM_006397 | 33295.809 | 27670.629 |
| NM_003082  | 13401.824 | 16823.371 | NM_012190 | 5022.735  | 4044.893  | D83776    | 2972.073  | 3150.92   |
| AL133632   | 12129.083 | 13227.455 | AB033015  | 631.873   | 965.133   | NM_004088 | 6484.392  | 7737.502  |
| NM_004343  | 54456.203 | 53905.719 | AF277719  | 1001.911  | 2056.209  | NM_002180 | 1142.557  | 1323.82   |
| X52355     | 12963.781 | 12843.318 | NM_000791 | 3387.401  | 4425.808  | NM_000138 | 2355.986  | 3198.078  |
| NM_006963  | 13375.198 | 10157.228 | NM_003681 | 4916.963  | 4026.859  | NM_018163 | 1553.583  | 1495.739  |
| NM_000307  | 1014.107  | 831.419   | NM_014909 | 7775.217  | 4926.251  | AK026362  | 3810.329  | 3513.865  |
| NM_006510  | 18357.393 | 17362.561 | NM_015700 | 4755.439  | 3590.354  | NM_004968 | 412.286   | 490.226   |
| NM_003141  | 2448.655  | 2643.366  | U66621    | 9808.645  | 11574.896 | NM_004785 | 2822.074  | 3511.158  |
| NM_020245  | 5588.184  | 5830.094  | NM_005720 | 57350.945 | 53690.867 | AK024079  | 406.438   | 563.474   |
| AJ011497   | 2454.873  | 3138.196  | AB040936  | 1334.593  | 1424.11   | NM_002428 | 2124.082  | 2626.135  |
| NM_003018  | 863.732   | 1022.102  | U61736    | 1236.32   | 1318.834  | NM_014674 | 2686.538  | 4129.63   |
| NM_000336  | 3375.806  | 3488.038  | AJ132086  | 2525.534  | 2993.805  | NM_018271 | 1629.004  | 3821.683  |
| W61100     | 30838.418 | 40222.09  | U92816    | 21177.477 | 20891.598 | NM_020967 | 948.814   | 1884.766  |
| AA608568   | 23975.174 | 37591.336 | NM_004106 | 1597.553  | 1434.875  | NM_001071 | 9159.55   | 11797.82  |
| BG831301   | 50903.512 | 50143.918 | NM_003485 | 8099.836  | 5218.882  | D86985    | 776.261   | 1411.962  |
| M14764     | 661.539   | 668.888   | NM_014081 | 2181.597  | 1421.995  | AK022258  | 1774.223  | 2813.343  |
| AA478647   | 2153.249  | 2347.853  | NM_005651 | 1443.39   | 1102.776  | AK000930  | 755.56    | 840.765   |
| M35999     | 627.33    | 610.276   | NM_007195 | 2278.707  | 1697.376  | AF088043  | 1344.898  | 2121.819  |
| AW058501   | 1436.222  | 1513.678  | AK023337  | 7958.093  | 7937.317  | AK000455  | 1025.192  | 855.17    |
| M81379     | 671.854   | 890.402   | NM_013275 | 28017.625 | 25929.832 | NM_005230 | 315.33    | 572.421   |
| ID 2623896 | 9827.122  | 14179.182 | AB037842  | 915.907   | 1050.016  | AK023719  | 4253.351  | 2981.26   |
| ID 2602214 | 15773.594 | 19707.592 | U92074    | 575.925   | 552.574   | AK025590  | 2217.383  | 1224.115  |
| ID 2071279 | 16475.539 | 14238.144 | NM_019011 | 3648.253  | 3031.529  | AY007149  | 788.768   | 630.48    |
| L10709     | 16753.92  | 20191.672 | AF459094  | 6591.925  | 4692.531  | NM_020967 | 522.551   | 496.955   |
| N35489     | 6756.857  | 7505.068  | NM_003157 | 3369.291  | 2697.939  | NM_001071 | 6740.647  | 3662.002  |
| AI928195   | 472.281   | 873.256   | NM_004938 | 1827.311  | 1594.688  | SR2       | 17510.646 | 8765.762  |
| AA458922   | 5324.322  | 4100.889  | NM_014326 | 1843.875  | 1130.309  | SR4       | 5563.617  | 3532.389  |
| NM_004168  | 30515.902 | 27539.537 | NM_004448 | 1187.924  | 978.989   | SR6       | 516.397   | 455.471   |
| NM_003485  | 3818.699  | 4172.506  | NM_015981 | 2791.279  | 2230.305  | SR8       | 2531.909  | 5266.936  |
| NM_005038  | 8811.399  | 9465.712  | NM_000455 | 6918.968  | 7127.925  | SR10      | 7955.438  | 1839.645  |
| NM_002415  | 59534.375 | 56397.906 | NM_014791 | 10921.84  | 11667.769 | AL157484  | 8130.343  | 11784.16  |
| NM_006332  | 60656.234 | 55995.453 | NM_003318 | 5930.329  | 6454.436  | AK024850  | 1086.49   | 2365.253  |
| NM_002000  | 852.092   | 654.844   | NM_004362 | 6761.074  | 7662.821  | NM_014926 | 815.782   | 929.979   |
| NM_000916  | 2035.993  | 2051.259  | NM_000182 | 19594.232 | 18712.412 | AF131790  | 1203.365  | 1464.752  |
| NM_018663  | 13941.212 | 13274.982 | AK023384  | 3217.325  | 3876.115  | AB004851  | 634.392   | 482.662   |
| NM_145904  | 55279.672 | 53891.207 | NM_016026 | 13825.915 | 12567.637 | AK023911  | 7790.487  | 5450.941  |
| NM_006796  | 17488.859 | 13901.546 | AK025111  | 642.311   | 761.494   | NM_001283 | 3655.987  | 2485.767  |
| NM_000706  | 1553.78   | 1594.457  | NM_001732 | 1746.985  | 912.744   | AL110237  | 494.21    | 515.286   |
| NM_015941  | 10161.881 | 9318.294  | AB046381  | 1266.508  | 1320.104  | D87470    | 780.897   | 594.053   |
| NM_003655  | 5770.647  | 5979.134  | NM_000336 | 3698.611  | 3543.466  | AF147307  | 1942.514  | 1169.02   |
| NM_014837  | 6494.779  | 7500.956  | W61100    | 55618.066 | 57184.148 | AK001829  | 1019.274  | 773.031   |
| NM_017729  | 1088.72   | 1248.958  | AA608568  | 14705.645 | 15402.739 | NM_016525 | 1872.952  | 963.383   |
| NM_005259  | 2659.581  | 2823.454  | BG831301  | 54916.883 | 56012.527 | AK024931  | 9610.355  | 4566.386  |
| NM_002840  | 714.51    | 1348.94   | M14764    | 5318.059  | 4905.725  | AK026824  | 614.715   | 648.782   |
| NM_006174  | 2784.198  | 3274.849  | AA478647  | 9188.616  | 10277.396 | AK000840  | 28923.602 | 19101.701 |
| NM_015850  | 3271.552  | 4389.176  | M35999    | 2009.768  | 1606.307  | AL162073  | 1396.965  | 1382.897  |
| NM_004864  | 3096.692  | 3451.663  | AW058501  | 2229.408  | 2001.802  | AL390160  | 1048.944  | 848.116   |

|           |           |           |            |           |           |           |           |           |
|-----------|-----------|-----------|------------|-----------|-----------|-----------|-----------|-----------|
| NM_00283E | 12119.495 | 15941.638 | M81379     | 680.183   | 464.546   | AJ006835  | 9053.438  | 5146.292  |
| AK027377  | 347.004   | 506.557   | ID 2623896 | 4747.671  | 3529.82   | AL110138  | 908.001   | 506.17    |
| BF528358  | 1808.118  | 1955.443  | ID 2602214 | 12301.74  | 4073.378  | AL122039  | 383.539   | 297.555   |
| NM_01633E | 1162.655  | 983.456   | ID 2071279 | 12369.913 | 4556.857  | AF070577  | 11902     | 6770.479  |
| NM_00086C | 2116.45   | 2275.274  | L10709     | 12910.493 | 8030.849  | AF009266  | 380.682   | 430.469   |
| AB037798  | 3646.03   | 3402.588  | N35489     | 3865.462  | 3514.645  | AF009310  | 1630.856  | 1074.689  |
| NM_00078C | 912.075   | 928.566   | AI928195   | 405.895   | 356.32    | AF054991  | 418.821   | 211.699   |
| AF272663  | 4054.905  | 2803.624  | AA482489   | 532.99    | 533.3     | AF060168  | 874.073   | 725.329   |
| NM_01219C | 7516.533  | 6262.843  | AA458922   | 3460.221  | 4165.001  | AF009275  | 798.62    | 575.439   |
| AF277719  | 1775.096  | 2587.827  | NM_00171E  | 20063.629 | 18437.918 | AF015251  | 320.898   | 244.759   |
| NM_000791 | 5199.374  | 4560.996  | AL080062   | 3469.449  | 3263.801  | AF056426  | 798.029   | 530.874   |
| NM_003681 | 6638.71   | 6679.44   | AF308802   | 2563.899  | 2431.233  | NM_01832E | 512.537   | 335.158   |
| NM_01490E | 3640.234  | 3412.318  | S76984     | 14322.63  | 10884.176 | AK021778  | 371.905   | 547.268   |
| NM_01570C | 9375.797  | 11600.485 | NM_01449E  | 64665.984 | 55644.094 | AK001150  | 3618.185  | 2035.19   |
| U66621    | 10067.814 | 13097.32  | NM_014837  | 7285.565  | 9206.184  | AK002123  | 349.685   | 394.088   |
| NM_00572C | 58471.848 | 55892.434 | NM_01772E  | 835.35    | 1093.784  | AK021633  | 1242.766  | 948.303   |
| AB040936  | 2064.34   | 2711.807  | NM_00525E  | 29509.98  | 28212.055 | AL080077  | 842.714   | 2009.754  |
| AB023161  | 513.218   | 693.759   | NM_00284C  | 911.455   | 1151.17   | NM_01421C | 3483.232  | 3208.898  |
| U61736    | 1008.009  | 1520.081  | NM_006174  | 2937.022  | 3559.653  | AK021603  | 7852.987  | 5897.914  |
| AJ132086  | 4412.889  | 7004.341  | NM_01585C  | 13711.424 | 13440.834 | AL110136  | 3483.075  | 2009.102  |
| U92816    | 18114.02  | 14969.608 | NM_004864  | 2279.402  | 2154.728  | AJ008130  | 33252.727 | 18607.523 |
| NM_00410E | 2039.156  | 2396.367  | NM_00283E  | 9133.465  | 8559.567  | NM_00366E | 461.759   | 346.308   |
| S76984    | 25108.779 | 29266.322 | AK027377   | 693.317   | 553.78    | AF086502  | 1169.233  | 852.991   |
| NM_005651 | 1873.927  | 1907.53   | NM_01468E  | 62407.52  | 54069.863 | L39924    | 808.733   | 690.156   |
| NM_00541E | 488.031   | 321.149   | BF528358   | 1048.427  | 379.55    | U52054    | 3265.346  | 1977.983  |
| NM_00719E | 2538.015  | 2234.202  | NM_01633E  | 1067.557  | 995.643   | AK023325  | 1338.88   | 764.698   |
| AK023337  | 3902.64   | 3342.627  | NM_002487  | 4163.107  | 3589.003  | NM_01798E | 2285.807  | 1260.188  |
| AB037842  | 1662.479  | 3045.38   | NM_01334C  | 2639.651  | 3296.135  | AK025866  | 2452.033  | 1856.26   |
| U92074    | 934.653   | 649.595   | NM_00546E  | 2430.187  | 2771.49   | AF088058  | 3963.428  | 2428.378  |
| NM_019011 | 4277.04   | 4217.181  | NM_01231E  | 4417.084  | 6045.586  | NM_00051E | 831.447   | 708.946   |
| AF459094  | 10868.184 | 8840.72   | NM_00651C  | 24797.877 | 26038.555 | Y11165    | 1533.541  | 997.136   |
| NM_003157 | 5145.498  | 8349.995  | NM_003141  | 3936.651  | 4220.945  | NM_017937 | 1444.714  | 1661.692  |
| NM_00493E | 5449.175  | 6964.487  | NM_02024E  | 6667.897  | 6399.587  | AL360266  | 2046.772  | 1712.103  |
| NM_01432E | 2555.435  | 3616.926  | NM_00717E  | 1178.562  | 1137.796  | AL160132  | 40647.68  | 28856.43  |
| NM_00444E | 1535.803  | 1590.032  | U66621     | 18041.975 | 22476.613 | NM_019557 | 1185.461  | 807.235   |
| NM_015981 | 1092.639  | 2143.992  | NM_00572C  | 53309.496 | 59146.496 | AK024413  | 1219.105  | 1304.205  |
| NM_00045E | 8510.201  | 8114.1    | AB040936   | 1969.999  | 4404.716  | AK022247  | 725.79    | 617.57    |
| NM_014791 | 8546.259  | 7677.428  | AB023161   | 1262.352  | 2342.268  | AK001453  | 1509.802  | 908.767   |
| NM_00331E | 7520.322  | 9270.824  | AB037785   | 864.912   | 1645.335  | AB007972  | 2991.372  | 1949.636  |
| NM_00436E | 3669.045  | 5512.038  | U61736     | 2228.818  | 4715.445  | AL390144  | 3307.055  | 2179.252  |
| NM_00018E | 24585.879 | 21828.457 | AJ132086   | 3555.377  | 7273.264  | AK024017  | 1097.765  | 717.479   |
| AK023384  | 3807.572  | 2994.067  | U92816     | 34848.613 | 38888.875 | X56196    | 424.877   | 318.314   |
| NM_01602E | 18626.148 | 14152.41  | NM_00410E  | 1484.022  | 881.284   | D17220    | 4410.084  | 3217.458  |
| NM_02024E | 5662.768  | 5822.445  | NM_00348E  | 20456.414 | 26060.297 | D28363    | 51158.242 | 26567.395 |
| AB046381  | 1487.523  | 1448.823  | NM_00503E  | 6802.846  | 5648.012  | AB011171  | 733.262   | 496.471   |
| AJ011497  | 2228.763  | 2258.761  | M95923     | 9348.671  | 8970.116  | AF090099  | 372.039   | 519.34    |
| NM_00301E | 804.248   | 806.466   | NM_00241E  | 59822.219 | 61467.258 | AK000770  | 1874.243  | 2761.894  |
| NM_00033E | 3339.711  | 2949.817  | NM_00633E  | 65572.258 | 58996.523 | NM_00237C | 6820.655  | 6497.526  |
| W61100    | 28881.568 | 34844.465 | NM_00200C  | 941.322   | 1221.391  | NM_01567C | 1902.256  | 1976.658  |
| AA608568  | 23203.385 | 35158.313 | NM_00091E  | 4137.144  | 4268.334  | NM_01470E | 637.492   | 732.769   |
| M14764    | 635.935   | 948.858   | NM_01866E  | 9513.077  | 9674.64   | AK002203  | 429.263   | 268.637   |
| AA478647  | 2049.735  | 1753.878  | NM_145904  | 28675.197 | 21484.838 | AK026469  | 10530.726 | 7463.238  |
| M35999    | 542.728   | 491.449   | NM_01869C  | 16210.484 | 27977.291 | D16935    | 2295.631  | 2064.591  |



|            |           |           |           |           |           |           |           |           |
|------------|-----------|-----------|-----------|-----------|-----------|-----------|-----------|-----------|
| AW058501   | 1211.247  | 1048.826  | NM_000860 | 4155.237  | 9671.889  | U92019    | 705.334   | 493.796   |
| M81379     | 900.728   | 694.167   | AB037798  | 4481.595  | 9792.154  | U52835    | 1082.74   | 708.574   |
| ID 2623896 | 8106.875  | 9783.741  | NM_000780 | 1329.877  | 2674.383  | NM_000756 | 2295.736  | 1158.348  |
| ID 2602214 | 12678.604 | 12912.636 | AF272663  | 31107.467 | 48030.352 | AK022148  | 781.993   | 504.206   |
| ID 2071279 | 16415.531 | 13806.735 | NM_012190 | 7363.41   | 16121.105 | Z36811    | 50883.762 | 57676.027 |
| L10709     | 13327.965 | 13276.156 | AB033015  | 767.598   | 1271.231  | NM_018950 | 9343.085  | 3749.826  |
| N35489     | 6258.863  | 5354.061  | AF277719  | 1215.556  | 2179.724  | K03200    | 3386.509  | 3097.717  |
| AI928195   | 460.338   | 512.704   | NM_000791 | 4268.293  | 7116.568  | U17629    | 2316.787  | 1903.124  |
| AA482489   | 415.894   | 615.481   | NM_003681 | 5418.474  | 2843.627  | NM_020428 | 4929.641  | 3314.55   |
| AA458922   | 7348.448  | 8531.799  | NM_004800 | 9200.074  | 6189.976  | U79265    | 1676.99   | 1034.028  |
| NM_001719  | 18089.898 | 15083.361 | AB037738  | 584.475   | 599.067   | AK022868  | 3272.043  | 2865.005  |
| AL080062   | 4746.959  | 3129.1    | S82769    | 263.907   | 1052.761  | AF217289  | 464.717   | 853.392   |
| AF308802   | 3482.6    | 3184.098  | NM_014954 | 50472.867 | 52365.055 | NM_002687 | 11616.962 | 19383.305 |
| M95923     | 2655.164  | 2963.41   | NM_000807 | 901.907   | 1384.537  | NM_000627 | 3159.102  | 5508.163  |
| NM_002415  | 60443.223 | 54813.836 | NM_014909 | 4612.598  | 4517.673  | NM_000038 | 995.282   | 1206.746  |
| NM_006332  | 61405.449 | 59164.934 | X91148    | 2119.289  | 3250.779  | NM_004334 | 4163.611  | 4618.049  |
| NM_002000  | 959.749   | 473.534   | NM_015700 | 6153.597  | 7038.108  | NM_003886 | 12674.598 | 10956.719 |
| NM_000916  | 1978.39   | 1899.413  | NM_014081 | 2931.314  | 6082.224  | NM_005843 | 1853.132  | 1848.106  |
| NM_018663  | 14112.54  | 14247.078 | NM_005651 | 2440.88   | 4869.752  | NM_003854 | 454.749   | 394.893   |
| NM_145904  | 52936.895 | 54083.023 | NM_005418 | 758.499   | 1611.736  | NM_017980 | 520.737   | 458.786   |
| NM_006796  | 20014.705 | 20785.041 | NM_007195 | 2865.982  | 6054.611  | NM_001252 | 26250.949 | 16081.456 |
| NM_000706  | 1707.977  | 3921.663  | AK023337  | 13596.69  | 24179.107 | AF053712  | 5204.156  | 3551.222  |
| NM_015941  | 9584.896  | 8871.534  | NM_013275 | 41505.402 | 53186.781 | NM_003947 | 1113.776  | 868.944   |
| NM_003655  | 4775.822  | 3838.089  | AB037842  | 1184.407  | 2650.545  | NM_002821 | 12742.521 | 6797.902  |
| NM_014837  | 5340.811  | 4719.636  | U92074    | 1267.979  | 2018.033  | M96652    | 41471.559 | 23375.9   |
| NM_017729  | 1022.165  | 1211.623  | NM_019011 | 3939.983  | 6215.179  | L41690    | 1348.226  | 884.024   |
| NM_005259  | 2759.063  | 2746.115  | AF459094  | 8103.797  | 7898.461  | NM_018059 | 957.106   | 371.833   |
| NM_002840  | 570.389   | 881.519   | NM_003157 | 5490.498  | 4237.356  | NM_000939 | 45213.18  | 30538.148 |
| NM_006174  | 3152.799  | 4979.88   | NM_004938 | 2290.343  | 2384.138  | NM_006514 | 2167.351  | 1454.274  |
| NM_015850  | 2896.765  | 2927.527  | NM_014326 | 2512.121  | 2743.841  | AF065164  | 7918.79   | 5063.795  |
| NM_004864  | 2567.9    | 2313.201  | NM_004448 | 1401.716  | 1911.272  | AJ008143  | 30999.357 | 49560.883 |
| NM_002838  | 10016.689 | 9442.964  | NM_015981 | 2391.354  | 2789.807  | NM_007144 | 957.692   | 1621.225  |
| AK027377   | 640.084   | 1214.237  | NM_000455 | 6979.861  | 8311.346  | NM_005093 | 432.135   | 565.329   |
| BF528358   | 1702.372  | 2234.168  | NM_014791 | 7698.915  | 7341.895  | NM_004424 | 11590.063 | 13457.707 |
| NM_016339  | 1389.299  | 1221.434  | NM_003318 | 6068.687  | 6247.067  | AF070586  | 16070.774 | 15249.241 |
| NM_006510  | 19077.57  | 14749.636 | NM_004362 | 6694.024  | 6703.237  | NM_014412 | 1531.157  | 1558.582  |
| NM_003141  | 2595.376  | 2813.981  | CY3Cy5    | 991.713   | 123.431   | NM_013303 | 1531.59   | 770.156   |
| NM_018690  | 7449.845  | 5380.475  | NM_004102 | 4959.811  | 713.808   | NM_012227 | 3378.098  | 2558.444  |
| NM_000860  | 2144.338  | 2197.554  | NM_004544 | 7783.026  | 2328.121  | NM_006101 | 1473.085  | 893.181   |
| AB037798   | 3997.648  | 3728.291  | NM_018836 | 3965.573  | 5592.643  | NM_001237 | 5459.292  | 4045.102  |
| NM_000780  | 1027.255  | 2269.319  | AF007147  | 2301.714  | 3989.425  | NM_002507 | 1803.675  | 1591.492  |
| AF272663   | 4464.371  | 3353.99   | AF052127  | 5695.713  | 8452.402  | NM_015962 | 3114.419  | 2839.445  |
| NM_012190  | 7102.466  | 5561.918  | AK024261  | 1969.811  | 3618.614  | NM_016145 | 424.578   | 305.005   |
| AB033015   | 526.573   | 747.002   | AF052150  | 1631.189  | 1979.535  | NM_016078 | 10634.863 | 5880.505  |
| AF277719   | 1055.049  | 972.649   | AF086481  | 1434.838  | 2010.193  | NM_003798 | 507.746   | 224.157   |
| NM_000791  | 5839.547  | 6523.99   | AL355689  | 1043.403  | 1536.732  | NM_004401 | 3913.451  | 1379.1    |
| NM_003681  | 9391.981  | 12914.737 | AL080223  | 4581.219  | 1789.76   | NM_001849 | 17034.861 | 7491.22   |
| NM_014909  | 3004.475  | 2034.864  | AK001630  | 6245.501  | 1560.14   | AF255910  | 1436.166  | 797.824   |
| NM_015700  | 7416.296  | 6791.722  | NM_014612 | 26085.865 | 9042.274  | NM_016146 | 2988.492  | 2019.884  |
| U66621     | 9856.865  | 10526.232 | NM_004102 | 5213.023  | 2270.433  | AB046776  | 1750.628  | 1165.898  |
| NM_005720  | 55477.402 | 52506.148 | NM_004544 | 10623.472 | 7185.105  | D42084    | 4380.622  | 7324.147  |
| AB040936   | 1422.557  | 1769.03   | SR1       | 88683.266 | 62749.41  | NM_001734 | 1124.452  | 2199.061  |
| AB023161   | 683.152   | 1005.589  | SR3       | 58816.508 | 57094.648 | NM_014693 | 5493.731  | 8698.877  |

|            |           |           |           |           |           |           |           |           |
|------------|-----------|-----------|-----------|-----------|-----------|-----------|-----------|-----------|
| U61736     | 830.622   | 756.79    | SR5       | 5594.274  | 7200.357  | AB007896  | 1940.074  | 3425.43   |
| AJ132086   | 3627.818  | 3794.63   | SR9       | 19884.006 | 2792.692  | NM_002874 | 608.407   | 464.623   |
| U92816     | 19906.348 | 20329.68  | CY3Cy5    | 3261.345  | 205.785   | AF049140  | 2355.927  | 1691.5    |
| NM_00410E  | 2460.256  | 3467.773  | Z36807    | 51352.32  | 36904.074 | AB037793  | 232.843   | 171.5     |
| NM_00348E  | 3607.431  | 3151.422  | U52836    | 2732.846  | 4974.913  | AL136794  | 867.444   | 600.462   |
| NM_00503E  | 8703.019  | 7398.516  | NM_01793E | 4959.063  | 8455.827  | BC035601  | 46646.164 | 37072.539 |
| NM_014081  | 1243.754  | 1041.711  | AK021837  | 6552.222  | 9142.175  | NM_00145E | 2345.994  | 1578.294  |
| NM_005651  | 1665.44   | 1284.706  | AF075112  | 2392.817  | 4527.721  | NM_02038E | 10034.674 | 5977.34   |
| NM_00541E  | 553.119   | 533.996   | AK001796  | 2168.569  | 3777.762  | NM_00420E | 44955.621 | 31294.98  |
| NM_00719E  | 2394.333  | 1620.567  | AF086152  | 50789.941 | 57149.332 | AB046829  | 976.214   | 1035.138  |
| AK023337   | 3549.12   | 2788.267  | AK026872  | 4400.018  | 5549.753  | NM_01644E | 2047.82   | 1309.388  |
| NM_01327E  | 26341.25  | 29747.732 | AL157505  | 1323.883  | 1048.904  | NM_00337E | 35521.254 | 16958.129 |
| AB037842   | 1060.1    | 1172.802  | NM_00719C | 13939.321 | 11174.223 | NM_004521 | 8191.156  | 4723.576  |
| U92074     | 804.786   | 707.54    | AF043897  | 2349.624  | 1459.833  | AF229162  | 1539.596  | 841.532   |
| NM_019011  | 5119.145  | 5935.42   | U79246    | 3304.521  | 1800.425  | U02309    | 45796.207 | 27851.656 |
| AF459094   | 10181.304 | 8177.654  | AK022619  | 331.341   | 237.562   | AB028991  | 5522.201  | 3399.31   |
| NM_003157  | 4063.125  | 3587.559  | AK023464  | 1112.25   | 1152.315  | AF263547  | 7599.312  | 4580.08   |
| NM_00493E  | 3148.084  | 2467.79   | AK024157  | 995.126   | 1790.374  | NM_00392E | 431.834   | 720.852   |
| NM_01432E  | 2418.612  | 2065.818  | AK022963  | 979.93    | 1851.186  | NM_004831 | 1689.563  | 2955.001  |
| NM_00444E  | 2108.623  | 3165.736  | AK023563  | 941.164   | 2131.781  | NM_01421E | 8404.645  | 11149.412 |
| NM_015981  | 1218.893  | 2013.446  | AK023905  | 6766.911  | 10889.39  | NM_00016E | 4252.942  | 5069.09   |
| NM_00045E  | 10545.559 | 16112.979 | AK024231  | 6410.757  | 10019.23  | AF294629  | 14117.153 | 16172.712 |
| NM_014791  | 8323.592  | 9237.361  | AK022441  | 2294.802  | 3981.135  | NM_00054E | 14188.119 | 15253.19  |
| NM_00331E  | 7052.431  | 8042.092  | AK026208  | 5721.401  | 11353.298 | NM_00213E | 44598.215 | 40555.016 |
| NM_00436E  | 3214.883  | 3404.21   | NM_016947 | 77573.922 | 63032.809 | AK025571  | 4248.405  | 3893.192  |
| NM_00018E  | 27992.416 | 28575.234 | AY007136  | 2909.412  | 6345.775  | NM_01446E | 19400.961 | 15122.641 |
| AK023384   | 4128.018  | 3997.814  | AK024925  | 26681.033 | 11133.631 | NM_00552C | 11244.915 | 7547.251  |
| NM_01602E  | 25078.057 | 31620.213 | AL049460  | 11499.041 | 9369.969  | AK023265  | 2172.291  | 2157.159  |
| AK025111   | 1093.175  | 1102.089  | AK022396  | 1668.467  | 1375.712  | NM_01872E | 958.766   | 968.908   |
| NM_00173E  | 1232.696  | 1748.245  | AF075113  | 2350.228  | 2361.971  | AB029009  | 3203.436  | 2349.31   |
| AB046381   | 1702.339  | 1881.391  | AK022892  | 6721.979  | 3423.062  | AF112207  | 2243.493  | 1364.22   |
| AJ011497   | 2469.343  | 2589.025  | AK022980  | 1174.047  | 1843.813  | AJ420488  | 57571.59  | 70964.813 |
| NM_00301E  | 781.641   | 896.293   | AL359058  | 5180.125  | 7549.353  | NM_005594 | 49230.141 | 42581.895 |
| NM_00033E  | 4087.28   | 4486.315  | AK026237  | 3185.95   | 5217.895  | NM_004461 | 50822.934 | 54766.973 |
| W61100     | 28874.598 | 33315.172 | AK023687  | 3714.952  | 6054.588  | NM_01847E | 2618.944  | 1238.838  |
| AA608568   | 17481.277 | 16375.161 | AK002088  | 44333.246 | 58498.156 | BF106121  | 1224.56   | 1170.881  |
| BG831301   | 57254.539 | 55209.516 | X98206    | 855.319   | 1960.252  | AK022590  | 1550.953  | 1045.039  |
| AA478647   | 2113.928  | 1950.43   | AK022193  | 1547.449  | 2698.045  | AK024343  | 1285.987  | 824.925   |
| M35999     | 658.275   | 978.279   | AK000106  | 9011.868  | 15633.99  | NM_00193E | 425.912   | 333.206   |
| AW058501   | 1335.614  | 1282.728  | AK022370  | 3183.712  | 6300.62   | NM_00256E | 863.893   | 739.634   |
| M81379     | 831.763   | 800.372   | AK026765  | 3278.38   | 6080.267  | M12078    | 5170.617  | 7314.822  |
| ID 2623896 | 6022.515  | 4484.117  | AL117530  | 1020.902  | 2310.312  | NM_00455C | 7379.906  | 10051.358 |
| ID 2602214 | 10709.133 | 7405.906  | AK025016  | 1050.814  | 1586.021  | NM_00078E | 1941.877  | 2921.469  |
| ID 2071279 | 17066.619 | 12425.578 | AK021639  | 1009.296  | 300.842   | NM_00411C | 29871.326 | 29320.314 |
| L10709     | 15339.454 | 14567.085 | AK023189  | 4502.906  | 4324.182  | NM_013387 | 45152.668 | 47271.746 |
| N35489     | 8394.058  | 10417.745 | AK023872  | 1431.236  | 2459.609  | NM_00526E | 32364.719 | 31021.506 |
| AI928195   | 481.169   | 462.751   | AF306347  | 1478.27   | 1826.445  | NM_005757 | 829.607   | 898.55    |
| AA482489   | 454.519   | 447.725   | AF070599  | 312.92    | 145.802   | NM_01648E | 318.802   | 282.832   |
| AA458922   | 5406.191  | 4419.912  | NM_00545C | 4179.052  | 5077.043  | NM_02012E | 846.821   | 687.954   |
| NM_00171E  | 21572.063 | 21894.711 | NM_00552E | 1002.927  | 1983.254  | NM_00506E | 11941.933 | 10246.543 |
| AL080062   | 5666.883  | 6340.328  | NM_00528E | 11506.981 | 17276.631 | NM_01822E | 4181.614  | 3375.095  |
| AF308802   | 4766.163  | 6394.045  | AK001918  | 1829.38   | 3235.212  | NM_00669E | 16253.362 | 11112.858 |
| S76984     | 19402.246 | 14858.539 | NM_01863E | 66622.32  | 68811     | NM_00172E | 1466.511  | 1237.943  |

|           |           |           |           |           |           |            |           |           |
|-----------|-----------|-----------|-----------|-----------|-----------|------------|-----------|-----------|
| NM_01449E | 56904.609 | 48296.793 | AF086048  | 6670.296  | 10429.713 | AB046802   | 4350.312  | 3083.728  |
| NM_00679E | 25148.031 | 37053.715 | L15616    | 19925.436 | 29782.775 | NM_003297  | 870.671   | 593.929   |
| NM_00070E | 1764.675  | 2646.047  | AB019565  | 19425.527 | 23926.695 | NM_00694C  | 567.845   | 391.076   |
| NM_015941 | 9774.968  | 8626.387  | NM_01694C | 6174.326  | 8731.801  | NM_01826E  | 6175.327  | 3452.814  |
| NM_00365E | 5732.292  | 4773.977  | AK025757  | 5915.422  | 8999.866  | AK024633   | 2996.379  | 1780.409  |
| NM_014837 | 5509.827  | 4621.665  | Y16713    | 1505.145  | 2617.38   | NM_00145E  | 3412.429  | 2031.041  |
| NM_01772E | 811.289   | 865.153   | AK056133  | 2175.468  | 567.89    | NM_005257  | 13875.86  | 7563.417  |
| NM_00525E | 3361.97   | 3462.742  | NM_01784E | 13593.728 | 6596.847  | AF011573   | 9497.28   | 5583.055  |
| NM_00284C | 372.393   | 445.639   | AF130080  | 1137.48   | 1043.146  | NM_00214E  | 4666.75   | 3196.766  |
| NM_006174 | 2421.336  | 2069.289  | AK026006  | 3868.317  | 6038.968  | NM_00724E  | 6721.273  | 12282.249 |
| NM_01585C | 2987.339  | 2808.836  | NM_01908E | 18212.121 | 21009.143 | NM_00189C  | 977.357   | 1980.33   |
| NM_004864 | 3061.5    | 2803.211  | AF147440  | 823.558   | 999.389   | NM_00128E  | 3873.556  | 5878.799  |
| NM_00283E | 9904.273  | 8658.542  | AL122072  | 4930.247  | 4220.842  | NM_01464E  | 1012.109  | 1656.788  |
| AK027377  | 448.511   | 426.016   | AK026221  | 1053.515  | 828.441   | NM_019604  | 1143.406  | 1476.503  |
| NM_01468E | 52989.801 | 50026.883 | AK026403  | 3459.259  | 2353.041  | NM_00507E  | 996.508   | 1464.545  |
| BF528358  | 1605.016  | 1617.551  | U90904    | 9250.946  | 1215.034  | NM_000951  | 6577.926  | 11371.255 |
| NM_01633E | 1249.398  | 720.298   | AF088053  | 4467.112  | 5934.325  | X52599     | 5605.514  | 5722.638  |
| NM_002487 | 606.696   | 865.691   | NM_00256E | 1268.431  | 2074.046  | AA029300   | 2457.85   | 2517.355  |
| NM_01334C | 1830.608  | 2335.667  | U90903    | 2417.199  | 4568.998  | BG708842   | 47491.867 | 58089.566 |
| NM_00546E | 1330.739  | 1073.714  | AF278760  | 5341.151  | 7334.741  | M19723     | 51684.043 | 66084.68  |
| NM_01231E | 6445.815  | 6629.026  | X58061    | 1414.162  | 1739.728  | X06256     | 6265.275  | 5218.054  |
| AK026235  | 411.842   | 529.48    | AB032954  | 9578.867  | 14412.354 | AA709271   | 2259.225  | 2013.051  |
| NM_00651C | 22265.656 | 22628.371 | NM_00600E | 33728.285 | 40602.676 | M34057     | 5300.207  | 3695.056  |
| NM_003141 | 2696.134  | 4244.021  | AL110197  | 1647.937  | 2615.792  | ID 1984668 | 1337.178  | 744.914   |
| NM_02024E | 5120.352  | 5153.608  | AF085995  | 1660.44   | 2737.547  | ID 1832579 | 2289.687  | 1698.143  |
| NM_00717E | 1394.565  | 1615.996  | NM_01763E | 4194.792  | 5311.322  | H-430185 N | 1236.904  | 693.283   |
| NM_019087 | 6332.928  | 10188.56  | AK026655  | 3052.903  | 4759.531  | D16583     | 3763.732  | 1520.241  |
| NM_01632E | 1138.066  | 1286.654  | S41522    | 586.897   | 1510.506  | H44051     | 3375.658  | 2097.16   |
| NM_004277 | 1961.6    | 1580.131  | AF129926  | 4704.375  | 3016.804  | AA481547   | 20249.961 | 11711.495 |
| NM_00507E | 1398.65   | 1388.467  | AK025822  | 4335.621  | 2843.77   | AA831880   | 1991.744  | 1231.418  |
| AF215923  | 9156.262  | 9708.7    | AL360140  | 1088.865  | 875.231   | T64880     | 7253.486  | 5621.008  |
| U66621    | 9034.999  | 10107.877 | AF201937  | 55147.383 | 40221.504 | NM_00285E  | 5767.875  | 9696.656  |
| NM_00572C | 57231.797 | 56222.992 | AL390128  | 5377.097  | 4818.89   | NM_001817  | 7685.958  | 23648.641 |
| AB040936  | 1473.531  | 1116.928  | AL157429  | 19578.143 | 15375.261 | AF063611   | 1068.55   | 2332.335  |
| U61736    | 1211.921  | 1644.382  | NM_012071 | 18024.748 | 14243.824 | NM_00603E  | 2628.873  | 4869.897  |
| AJ132086  | 3345.46   | 3575.323  | AF055018  | 11133.628 | 8234.479  | NM_00208E  | 1396.914  | 4440.874  |
| U92816    | 15709.129 | 10505.548 | NM_001777 | 26263.041 | 2513.088  | NM_00459C  | 279.917   | 251.983   |
| NM_00410E | 2079.383  | 1792.798  | U79457    | 18016.389 | 21154.395 | M28983     | 322.381   | 494.069   |
| NM_00348E | 3426.875  | 3294.733  | AB037832  | 5604.086  | 5336.784  | NM_01465E  | 14183.87  | 17089.703 |
| NM_00503E | 10008.062 | 10165.585 | NM_014347 | 23320.615 | 29068.271 | NM_00207E  | 5113.926  | 4971.58   |
| M95923    | 2100.384  | 1493.497  | NM_00129E | 28354.846 | 35084.469 | X05299     | 2736.317  | 2546.834  |
| NM_00241E | 55829.277 | 50349.691 | NM_004344 | 23657.879 | 35883.898 | BM468475   | 741.178   | 761.625   |
| NM_00633E | 59480.727 | 53996.023 | NM_000757 | 2675.62   | 5805.134  | NM_00031E  | 3491.721  | 3391.312  |
| NM_00200C | 1744.957  | 1180.029  | AB046786  | 1572.985  | 1193.88   | NM_00206C  | 34491.246 | 25022.088 |
| NM_00091E | 2146.185  | 2534.825  | NM_01662C | 65226.941 | 68521.906 | AK001230   | 6910.653  | 6113.78   |
| NM_01866E | 14369.76  | 13046.459 | AA084879  | 3346.105  | 3276.27   | NM_01468C  | 13030.388 | 8470.163  |
| NM_145904 | 49920.406 | 40679.996 | NM_00083E | 3801.001  | 4586.802  | NM_005027  | 3706.563  | 2712.168  |
| NM_00018E | 27359.494 | 31881.473 | NM_00028E | 7777.717  | 8745.522  | NM_00461E  | 1233.329  | 784.197   |
| AK023384  | 4206.286  | 4387.104  | NM_01246C | 6013.825  | 6854.51   | NM_00560E  | 22535.637 | 15088.849 |
| NM_01602E | 19292.521 | 12910.984 | NM_01211E | 6510.012  | 6453.24   | NM_012294  | 298.529   | 183.428   |
| AK025111  | 1186.3    | 1119.467  | AK02222E  | 1294.295  | 1384.22   | NM_00110E  | 419.938   | 307.997   |
| NM_00173E | 1331.653  | 2147.08   | AK002044  | 13206.649 | 12465.918 | NM_01849C  | 2537.181  | 1836.195  |
| NM_01869C | 8647.257  | 9037.643  | AK02220E  | 1312.244  | 1791.934  | NM_00477E  | 1359      | 898.527   |

|           |           |           |           |           |           |           |           |           |
|-----------|-----------|-----------|-----------|-----------|-----------|-----------|-----------|-----------|
| NM_00086C | 2435.555  | 3046.587  | BC032460  | 9282.297  | 13516.528 | NM_00435Z | 418.342   | 478.813   |
| AB037798  | 3697      | 3626.555  | NM_014071 | 4089.401  | 5756.813  | NM_01225E | 385.433   | 394.233   |
| NM_00078C | 736.812   | 741.055   | AK024404  | 1610.19   | 1051.372  | NM_006224 | 57665.496 | 71778.336 |
| AF272663  | 5409.842  | 4004.298  | NM_006329 | 993.528   | 1760.528  | AL137300  | 8066.702  | 13140.233 |
| NM_01219C | 10325.423 | 14541.869 | NM_005166 | 1335.184  | 3054.51   | NM_00022E | 4469.795  | 8443.363  |
| AB033015  | 631.03    | 734.021   | NM_000213 | 59399.223 | 63650.023 | NM_00699E | 23562.598 | 28016.438 |
| AF277719  | 1028.397  | 717.154   | AB033065  | 1563.887  | 2333.24   | NM_00312E | 11315.969 | 17645.482 |
| NM_000791 | 5373.952  | 4067.166  | NM_005211 | 1715.077  | 2620.736  | NM_00195E | 7589.732  | 7641.694  |
| NM_003681 | 8027.307  | 6317.342  | NM_004857 | 32389.773 | 39745.73  | AB033064  | 6017.505  | 8294.739  |
| NM_00480C | 11997.304 | 11720.684 | NM_01210E | 15979.152 | 19730.627 | AK022317  | 12325.206 | 15118.691 |
| AB037738  | 770.705   | 1092.073  | NM_003253 | 2958.082  | 3879.555  | NM_01839E | 7655.939  | 8253.643  |
| NM_004677 | 367.989   | 411.232   | NM_01328E | 10915.789 | 5249.503  | NM_003124 | 20689.395 | 24516.164 |
| NM_014954 | 12244.236 | 9771.208  | NM_002872 | 30046.85  | 16161.664 | NM_00688E | 46342.715 | 35167.961 |
| NM_000807 | 1526.54   | 1668.523  | NM_00049C | 1817.966  | 1855.876  | NM_004531 | 4106.519  | 5104.798  |
| NM_01490E | 2668.031  | 2058.646  | NM_00340E | 28878.166 | 19978.477 | AB040920  | 887.003   | 1352.671  |
| X91148    | 3301.551  | 4547.945  | NM_00472C | 11775.786 | 10217.145 | NM_01572C | 16920.82  | 14461.309 |
| NM_01570C | 8445.595  | 8457.893  | NM_001057 | 3331.689  | 3751.054  | AB033070  | 693.962   | 1165.168  |
| NM_00171E | 19927.43  | 19878.549 | NM_004524 | 4864.24   | 833.695   | AK000158  | 10336.89  | 10849.654 |
| AL080062  | 4370.055  | 4314.681  | NM_00631E | 11660.575 | 12380.268 | NM_00576E | 2049.268  | 1845.748  |
| AF308802  | 3664.654  | 2555.139  | NM_018401 | 3410.04   | 5215.594  | AK024500  | 25381.059 | 17603.588 |
| S76984    | 21015.947 | 16528.953 | NM_005163 | 10421.147 | 13860.291 | NM_002564 | 30605.549 | 17186.74  |
| NM_01449E | 53842.883 | 58064.992 | NM_007273 | 67428.398 | 82647.063 | NM_00096E | 499.017   | 499.872   |
| NM_014081 | 1212.261  | 1547.48   | AF085994  | 623.005   | 1269.43   | NM_01330E | 7109.197  | 6009.392  |
| NM_005651 | 2608.08   | 3558.004  | NM_016422 | 8264.522  | 14275.707 | AF027302  | 5180.314  | 4023.121  |
| NM_00541E | 426.351   | 290.67    | NM_01787E | 19419.004 | 28566.605 | NM_00670E | 36452.977 | 36614.516 |
| NM_00719E | 2317.26   | 1841.531  | NM_004494 | 65215.168 | 80638.813 | AB037835  | 1953.963  | 3427.754  |
| AK023337  | 4818.869  | 6383.67   | AL049687  | 752.543   | 1174.537  | NM_01622E | 544.928   | 1219.587  |
| NM_01327E | 21854.471 | 16061.208 | NM_005643 | 14482.804 | 19333.602 | NM_000157 | 3066.71   | 3842.496  |
| AB037842  | 1101.238  | 681.992   | NM_003592 | 17157.795 | 19563.619 | NM_000712 | 699.637   | 1158.953  |
| U92074    | 816.912   | 547.243   | NM_014953 | 9950.09   | 10706.874 | NM_01808E | 3076.783  | 3287.5    |
| NM_019011 | 3997.868  | 3674.256  | AF179995  | 2473.433  | 2982.023  | BC013695  | 8246.628  | 8134.777  |
| AF459094  | 9996.57   | 9140.972  | NM_01619E | 6598.46   | 1906.802  | NM_00720E | 1216.907  | 967.541   |
| NM_003157 | 5286.418  | 7396.156  | NM_004523 | 4832.977  | 2840.308  | AK023035  | 3632.165  | 3607.938  |
| NM_00493E | 3465.247  | 3302.835  | NM_004404 | 21987.926 | 19877.887 | NM_01484E | 2323.437  | 2403.236  |
| NM_01432E | 2103.582  | 2473.704  | NM_00296C | 8552.933  | 7896.546  | AB011164  | 5410.38   | 4849.764  |
| NM_00444E | 1287.384  | 1238.126  | NM_00679C | 3124.451  | 2735.723  | M24750    | 1081.031  | 1032.571  |
| NM_015981 | 954.375   | 706.404   | AL117522  | 35385.98  | 27966.625 | NM_00596E | 3203.687  | 2810.509  |
| NM_00045E | 8353.347  | 7747.954  | AB011541  | 2125.03   | 2083.169  | NM_00274C | 3823.058  | 3324.585  |
| NM_014791 | 8163.392  | 6719.755  | NM_019061 | 16618.941 | 12527.496 | AL117482  | 3191.143  | 2311.035  |
| NM_00331E | 8620.658  | 11674.42  | AB033007  | 6752.76   | 6533.808  | NM_00654E | 39176.418 | 26385.838 |
| NM_004362 | 2713.126  | 2514.646  | NM_003781 | 1034      | 1878.139  | AB018324  | 12486.798 | 9184.465  |
| CY3Cy5    | 12022.883 | 1996.978  | NM_001304 | 2336.122  | 4297.459  | NM_002742 | 65946.07  | 68760.68  |
| NM_004102 | 2697.731  | 3840.636  | NM_000504 | 419.204   | 1190.469  | Z25431    | 1980.425  | 1275.01   |
| NM_004544 | 10830.769 | 9177.383  | NM_00313C | 8160.815  | 13611.991 | NM_005627 | 10909.714 | 8056.425  |
| AF052140  | 647.927   | 389.368   | NM_00471E | 65419.52  | 73231.906 | M64497    | 499.922   | 592.807   |
| NM_01883E | 493.299   | 458.408   | D29810    | 6760.509  | 8386.257  | NM_007274 | 17333.473 | 10847.822 |
| AF007147  | 1097.786  | 943.557   | NM_00012E | 6762.813  | 8326.373  | NM_00335E | 17399.932 | 14434.064 |
| AF052127  | 2072.114  | 2263.033  | AB002384  | 16873.158 | 20466.457 | AF238315  | 971.978   | 1222.223  |
| AK024261  | 856.984   | 1378.752  | NM_018437 | 2304.189  | 2769.644  | NM_00189C | 1046.14   | 1852.104  |
| AF052150  | 637.94    | 1048.673  | NM_000422 | 2331.29   | 3109.804  | NM_00128E | 3947.235  | 6338.966  |
| AF086481  | 677.049   | 585.649   | NM_00537E | 3501.691  | 3469.561  | NM_01464E | 1122.865  | 1641.808  |
| AK024885  | 2371.72   | 2371.308  | AK027121  | 29485.537 | 27308.443 | NM_019604 | 717.883   | 1071.401  |
| AL080223  | 4242.985  | 2794.908  | NM_017433 | 2695.438  | 4384.574  | NM_00507E | 1443.278  | 2034.662  |

|           |           |           |           |           |           |            |           |           |
|-----------|-----------|-----------|-----------|-----------|-----------|------------|-----------|-----------|
| AK001630  | 7945.062  | 7335.956  | AL117661  | 6692.819  | 6212.11   | NM_000951  | 6632.167  | 7733.054  |
| NM_014612 | 12116.353 | 21592.645 | NM_005380 | 41325.262 | 34067.34  | X52599     | 6122.246  | 6896.71   |
| NM_004102 | 2196.615  | 1928.525  | NM_005561 | 15655.551 | 16812.184 | AA029300   | 2671.088  | 3326.188  |
| NM_004544 | 8422.09   | 4662.897  | AF272381  | 39231.898 | 31466.887 | BG708842   | 53879.207 | 63123.34  |
| SR1       | 99400.078 | 58203.109 | NM_001518 | 18934.922 | 4124.722  | M19723     | 55332.52  | 70227.531 |
| SR3       | 24084.418 | 11168.39  | AK022668  | 9663.665  | 10530.259 | X06256     | 6021.776  | 6370.137  |
| SR5       | 2713.959  | 2222.585  | AW975132  | 6621.673  | 9020.884  | AA709271   | 2614.473  | 2574.345  |
| SR7       | 2836.923  | 13200.304 | NM_006051 | 16210.039 | 21109.883 | M34057     | 4423.529  | 3651.552  |
| SR9       | 10064.21  | 1730.013  | NM_018427 | 11632.933 | 18600.51  | ID 1984668 | 1504.637  | 1163.266  |
| CY3Cy5    | 1283.797  | 184.482   | AB037814  | 1098.142  | 2721.622  | ID 1832579 | 2239.975  | 1885.472  |
| Z36807    | 23598.27  | 15934.813 | NM_014663 | 4644.812  | 7924.604  | H-430185 N | 1082.409  | 800.019   |
| U20896    | 836.635   | 729.059   | AF007217  | 2935.967  | 4289.821  | D16583     | 4583.872  | 2887.239  |
| U52836    | 1709.171  | 1039.899  | AB037753  | 12542.88  | 15486.542 | H44051     | 3391.592  | 2105.737  |
| NM_017936 | 3404.278  | 5546.411  | NM_004674 | 3952.082  | 5544.002  | AA481547   | 19592.184 | 9177.299  |
| AK021837  | 1881.249  | 2350.52   | AB037801  | 6916.312  | 8267.088  | AA831880   | 1836.084  | 1263.745  |
| AF075112  | 1633.989  | 1709.161  | AL080159  | 36064.637 | 42570.844 | T64880     | 6809.463  | 4474.065  |
| AK001796  | 1489.497  | 1467.965  | NM_017823 | 60615.137 | 56459.789 | AB028990   | 701.596   | 472.807   |
| AF086152  | 2355.161  | 2157.756  | U30828    | 29787.355 | 19816.604 | AF063611   | 907.634   | 1875.034  |
| U78519    | 1621.564  | 1016.485  | AF085886  | 62753.707 | 59284.645 | NM_006036  | 3705.104  | 5898.89   |
| AK026872  | 981.858   | 633.167   | AK023828  | 12729.355 | 9580.34   | NM_002086  | 1649.516  | 2391.562  |
| NM_007190 | 6570.347  | 3554.435  | NM_006572 | 28954.318 | 19314.414 | NM_004590  | 527.166   | 1037.083  |
| AF043897  | 1814.247  | 839.935   | NM_004784 | 422.565   | 463.346   | M28983     | 1070.551  | 1584.665  |
| U79246    | 3323.764  | 1596.137  | NM_016641 | 13281.979 | 8008.577  | NM_014656  | 15023.812 | 19309.902 |
| AK022619  | 706.768   | 825.52    | AB018010  | 4360.333  | 2988.243  | NM_002076  | 6266.254  | 7447.936  |
| AK023464  | 486.428   | 823.963   | NM_014610 | 28209.201 | 38302.387 | X05299     | 2738.482  | 3261.594  |
| AK024157  | 461.535   | 454.7     | NM_004737 | 1089.469  | 1981.843  | BM468475   | 775.34    | 1139.369  |
| AK022963  | 651.895   | 493.803   | NM_000689 | 3396.33   | 6020.896  | NM_000318  | 3725.687  | 3635.073  |
| AK023905  | 622.101   | 898.172   | NM_006621 | 6982.52   | 11108.721 | NM_002060  | 37001.004 | 29834.428 |
| AK024231  | 1213.18   | 1639.332  | BF347398  | 23625.84  | 36756.371 | AK001230   | 6737.437  | 7652.033  |
| AK022441  | 614.988   | 1009.645  | AK026762  | 7253.412  | 11122.453 | NM_014680  | 13102.241 | 9127.682  |
| AK026208  | 3885.895  | 4651.89   | AF078844  | 619.003   | 1485.299  | NM_005027  | 3310.886  | 3576.755  |
| NM_016947 | 59754.875 | 49606.383 | NM_004412 | 2200.147  | 4563.738  | NM_004612  | 1425.014  | 1461.931  |
| AY007136  | 1448.126  | 1593.781  | L48516    | 11892.166 | 15818.689 | NM_005608  | 22485.998 | 14610.907 |
| AL359940  | 2421.089  | 1556.691  | NM_016648 | 21202.453 | 26184.336 | NM_001106  | 521.279   | 470.163   |
| NM_018286 | 1202.664  | 1083.125  | AF083930  | 6953.892  | 10815.306 | NM_015583  | 836.012   | 733.253   |
| AF085961  | 620.24    | 1402.093  | NM_003426 | 1179.994  | 935.592   | NM_018490  | 2402.28   | 1333.781  |
| AK024925  | 6898.063  | 6629.716  | NM_014862 | 2823.623  | 2394.239  | NM_004778  | 1305.197  | 1026.752  |
| AL049460  | 1401.09   | 572.896   | AK027159  | 2992.281  | 3443.75   | NM_004352  | 418.279   | 399.3     |
| AK022396  | 635.698   | 359.053   | D70835    | 63660.832 | 51938.074 | NM_012258  | 449.871   | 537.241   |
| AF075113  | 1845.093  | 1151.013  | NM_002697 | 8225.213  | 6110.119  | NM_007245  | 6064.397  | 4374.441  |
| AK022892  | 1642.833  | 623.248   | NM_003213 | 15578.665 | 9815.499  | NM_000226  | 6384.977  | 13109.621 |
| AK002162  | 552.951   | 768.349   | BF184738  | 1787.823  | 765.315   | NM_006995  | 26302.65  | 36947.66  |
| AK022980  | 1084.299  | 950.881   | NM_014044 | 6040.397  | 5252.71   | NM_003126  | 13046.273 | 21536.209 |
| AL359058  | 3946.356  | 4315.536  | NM_000900 | 8217.748  | 10118.429 | NM_001956  | 7236.023  | 11683.199 |
| AK022439  | 336.884   | 230.105   | AK023684  | 13903.862 | 19909.123 | AB033064   | 8345.736  | 28793.779 |
| AK026237  | 1263.476  | 1311.504  | NM_000232 | 4993.803  | 7938.9    | AK022317   | 13239.186 | 19597.611 |
| AK023687  | 643.564   | 735.252   | J05070    | 2494.575  | 4203.468  | NM_018396  | 9022.729  | 11942.535 |
| AK002088  | 10582.733 | 11369.751 | AA700390  | 9886.492  | 16657.924 | NM_003124  | 21748.979 | 24516.225 |
| X98206    | 528.385   | 700.818   | Y18474    | 2007.495  | 3887.308  | NM_006886  | 47099.598 | 56611.457 |
| AK022193  | 1254.58   | 1906.053  | AA436163  | 4168.832  | 6309.501  | NM_004531  | 4171.329  | 6310.671  |
| AK000106  | 6303.275  | 8811.684  | BI603841  | 6034.578  | 9014.1    | AB040920   | 908.444   | 1273.036  |
| AK022370  | 1198.448  | 1236.293  | M19888    | 3164.757  | 3209.664  | NM_015720  | 18083.789 | 19513.922 |
| AK026765  | 654.638   | 410.233   | Y08136    | 2467.78   | 1235.286  | AB033070   | 742.721   | 1208.839  |

|           |           |           |           |           |           |            |           |           |
|-----------|-----------|-----------|-----------|-----------|-----------|------------|-----------|-----------|
| AL080191  | 850.03    | 681.535   | AA156863  | 8365.884  | 7703.718  | AK000158   | 9119.441  | 11070.008 |
| AK021639  | 1769.985  | 3589.024  | BI915199  | 2281.107  | 2177.628  | NM_005765  | 2398.6    | 2945.9    |
| AK023189  | 2903.268  | 1916.812  | BI830442  | 1750.54   | 1764.193  | AK024500   | 22593.031 | 14788.321 |
| AK022127  | 374.489   | 107.579   | AI218732  | 3045.171  | 3410.361  | NM_002564  | 30468.701 | 22596.498 |
| AF070599  | 531.748   | 1084.254  | AF079098  | 3234.326  | 2461.783  | NM_000963  | 581.266   | 594.386   |
| NM_005450 | 1369.039  | 2251.296  | AK023448  | 2186.904  | 3733.135  | NM_013308  | 6615.689  | 4970.816  |
| AK023600  | 686.449   | 812.662   | AF249898  | 12875.023 | 5190.882  | AF027302   | 4774.742  | 3262.033  |
| NM_005525 | 698.419   | 809.554   | M69181    | 21340.977 | 4801.25   | NM_002852  | 4449.606  | 3772.671  |
| NM_005285 | 1522.492  | 1946.349  | L09078    | 1378.03   | 2293.916  | NM_001817  | 5146.945  | 3686.99   |
| AK001918  | 733.277   | 962.483   | NM_002652 | 1536.902  | 3051.861  | NM_016228  | 604.364   | 1201.859  |
| NM_018635 | 25440.867 | 21619.217 | NM_001311 | 34956.496 | 39874.246 | NM_000157  | 4370.896  | 7148.448  |
| AF086048  | 2603.896  | 2981.972  | NM_017798 | 22678.725 | 40320.246 | NM_000712  | 579.659   | 1177.266  |
| L15616    | 13777.268 | 16573.111 | NM_000354 | 467.862   | 1563.9    | NM_018088  | 3872.43   | 6789.147  |
| AB019565  | 10822.009 | 11466.049 | NM_005160 | 5485.31   | 5122.62   | BC013695   | 8602.792  | 10932.69  |
| NM_016940 | 4141.858  | 3661.472  | X78817    | 46303.59  | 36686.039 | NM_007205  | 1525.746  | 1410.185  |
| AK025757  | 3292.017  | 3814.299  | AY009401  | 1887.619  | 1594.994  | AK023035   | 3719.061  | 3887.77   |
| Y16713    | 677.483   | 464.181   | AF294628  | 2025.704  | 1905.341  | NM_014846  | 2594.954  | 3206.934  |
| L07394    | 4256.526  | 4775.085  | NM_004152 | 690.243   | 1163.68   | AB011164   | 6457.021  | 6010.852  |
| AK056133  | 2157.182  | 1840.506  | BU565263  | 66784.313 | 65201.16  | M24750     | 1146.664  | 1135.641  |
| NM_017845 | 13478.247 | 11540.521 | NM_005028 | 6580.777  | 5752.893  | NM_005965  | 3422.124  | 4246.464  |
| AF130080  | 702.255   | 484.17    | NM_001611 | 1580.323  | 925.968   | NM_002740  | 4041.604  | 4364.837  |
| AK026006  | 2170.728  | 1471.729  | M59979    | 2052.586  | 380.609   | AL117482   | 3242.211  | 2999.11   |
| NM_019085 | 1237.047  | 470.414   | AB018310  | 2779.591  | 2104.982  | NM_006545  | 46068.406 | 34308.5   |
| AF147440  | 453.702   | 135.079   | NM_020133 | 1945.517  | 3110.609  | AB018324   | 11995.654 | 8355.396  |
| AL122072  | 2515.539  | 919.882   | NM_015379 | 46358.922 | 59919.195 | NM_002742  | 62524.43  | 67322.398 |
| AK026221  | 478.506   | 291.438   | NM_004878 | 1189.483  | 2310.375  | Z25431     | 2119.266  | 2013.175  |
| AK026403  | 2694.343  | 1120.307  | AF303398  | 6567.626  | 5562.492  | NM_005627  | 11332.782 | 8269.311  |
| U90904    | 15802.591 | 20737.77  | NM_007357 | 8075.22   | 7938.034  | M64497     | 501.443   | 590.195   |
| AF088053  | 3544.085  | 5431.107  | NM_003763 | 12117.686 | 10238.408 | NM_007274  | 18929.127 | 13339.317 |
| AL133662  | 1587.432  | 1563.017  | AB046836  | 2242.317  | 3836.742  | NM_003356  | 16458.943 | 12445.245 |
| NM_002565 | 916.099   | 844.301   | AJ224166  | 7410.584  | 3408.377  | AF238315   | 915.16    | 888.097   |
| U90903    | 2943.285  | 4294.046  | AK026098  | 8908.961  | 5431.839  | NM_006224  | 64974.094 | 69179.391 |
| AF278760  | 563.284   | 1302.166  | NM_012381 | 3297.829  | 2801.321  | AL137300   | 8157.821  | 6336.571  |
| X58061    | 566.899   | 906.378   | M20702    | 659.233   | 325.036   | NM_019604  | 1299.436  | 2607.289  |
| AB032954  | 3209.128  | 4013.639  | NM_006397 | 49363.047 | 10176.371 | NM_005073  | 968.578   | 1936.94   |
| NM_006003 | 26025.645 | 24815.221 | AK026362  | 6451.527  | 2810.49   | NM_000951  | 6553.374  | 10593.245 |
| AL110197  | 491.697   | 804.142   | NM_004968 | 6433.941  | 5984.462  | X52599     | 6316.416  | 9280.801  |
| AF085995  | 1556.35   | 1807.854  | NM_005908 | 6691.047  | 4282.774  | AA029300   | 3025.514  | 4526.58   |
| NM_017632 | 3536.411  | 6009.636  | NM_004785 | 4819.521  | 4738.414  | BG708842   | 47755.484 | 65398.664 |
| AK026655  | 2375.878  | 2804.665  | NM_002428 | 4354.892  | 4561.33   | M19723     | 47184.254 | 67331.109 |
| S41522    | 464.757   | 332.125   | NM_014674 | 6208.863  | 6758.793  | X06256     | 7005.057  | 8993.372  |
| NM_005275 | 542.911   | 397.117   | NM_014652 | 2002.114  | 1265.601  | AA709271   | 2959.197  | 3643.333  |
| AF129926  | 3172.418  | 2098.438  | AL133020  | 7934.018  | 7452.953  | M34057     | 5631.61   | 5951.247  |
| AK025822  | 4671.647  | 4382.075  | NM_003213 | 11568.663 | 28199.123 | ID 1984668 | 1397.801  | 1193.896  |
| AL360140  | 483.26    | 409.365   | BF184738  | 3168.508  | 4900.351  | ID 1832579 | 2410.027  | 1997.309  |
| AF201937  | 29325.914 | 15984.832 | NM_000900 | 4872.162  | 2629.784  | H-430185 N | 1168.097  | 932.935   |
| AL390128  | 2593.84   | 1262.65   | AK023684  | 10240.334 | 5895.377  | D16583     | 4755.611  | 2983.002  |
| AL157429  | 1847.048  | 911.545   | NM_000232 | 3893.008  | 2884.561  | H44051     | 3306.583  | 2234.875  |
| NM_012071 | 12235.022 | 5559.149  | J05070    | 1925.625  | 1098.6    | AA481547   | 22073.914 | 15626.286 |
| AF055018  | 2657.601  | 1407.963  | AA700390  | 5464.746  | 2879.684  | AA831880   | 1991.638  | 1642.004  |
| NM_001777 | 34310.23  | 50682.531 | Y18474    | 1389.003  | 390.227   | T64880     | 6832.894  | 3773.358  |
| U79457    | 16470.039 | 17086.416 | AA436163  | 3063.256  | 966.598   | AB028990   | 713.475   | 625.318   |
| AB037832  | 3917.772  | 4170.441  | BI907981  | 6120.966  | 3337.99   | NM_006708  | 26877.23  | 15363.416 |

|           |           |           |           |           |           |           |           |           |
|-----------|-----------|-----------|-----------|-----------|-----------|-----------|-----------|-----------|
| NM_014347 | 7346.261  | 7451.631  | BI603841  | 14597.894 | 5450.002  | AB037835  | 1952.035  | 1320.038  |
| NM_001296 | 18920.797 | 21666.82  | Y08136    | 2224.496  | 2145.625  | NM_000318 | 4966.386  | 9888.888  |
| NM_004344 | 23637.066 | 37151.746 | AA156863  | 7409.704  | 5881.456  | NM_002060 | 42976.832 | 57306.281 |
| AF085972  | 1115.951  | 1762.849  | BI915199  | 3211.808  | 2742.245  | AK001230  | 7785.54   | 11065.061 |
| NM_000757 | 604.435   | 713.769   | BI830442  | 2420.347  | 2236.786  | NM_014680 | 15583.216 | 19151.922 |
| AB046786  | 382.112   | 528.63    | AA398951  | 1036.767  | 898.483   | NM_005027 | 4126.812  | 5531.323  |
| NM_016620 | 44008.773 | 40739.262 | NM_018890 | 56108.25  | 57749.523 | NM_004612 | 1654.824  | 2835.235  |
| D16914    | 62899.676 | 63121.895 | NM_016204 | 17465.035 | 16348.849 | NM_005608 | 25854.533 | 27100.23  |
| AA084879  | 3147.387  | 2531.668  | NM_003283 | 11839.736 | 22540.34  | NM_012294 | 269.785   | 870.449   |
| NM_000833 | 2040.93   | 1391.213  | AF249898  | 19070.859 | 28550.539 | NM_001106 | 626.333   | 903.675   |
| NM_000283 | 3349.233  | 2501.174  | L09078    | 729.006   | 723.942   | NM_015583 | 1038.423  | 933.676   |
| NM_012460 | 3307.057  | 2481.024  | NM_002652 | 761.144   | 783.009   | NM_018490 | 3306.459  | 2992.848  |
| NM_012118 | 3489.12   | 3896.143  | NM_001311 | 28139.223 | 11346.369 | NM_004778 | 1305.566  | 1253.289  |
| AK024092  | 1769.872  | 1132.354  | NM_017798 | 13828.396 | 6995.427  | NM_006248 | 2256.58   | 1953.008  |
| AK022226  | 364.141   | 203.252   | NM_012410 | 4589.154  | 1901.432  | NM_004352 | 457.64    | 387.339   |
| AK002044  | 7060.337  | 3480.296  | NM_001111 | 19547.68  | 11287.183 | NM_012258 | 429.597   | 329.507   |
| AK021967  | 404.035   | 239.23    | NM_018049 | 16616.42  | 9046.356  | NM_005103 | 492.996   | 531.823   |
| BC032460  | 7885.716  | 9073.189  | NM_014395 | 6629.573  | 4925.259  | NM_004822 | 3058.342  | 3114.708  |
| NM_014071 | 2300.174  | 3263.864  | NM_001561 | 1645.411  | 1498.281  | AK022349  | 1946.643  | 1168.937  |
| AK024404  | 1596.619  | 2586.466  | NM_005160 | 4627.749  | 4221.406  | NM_005750 | 562.778   | 241.739   |
| NM_006329 | 839.986   | 1459.035  | NM_000596 | 3111.081  | 2813.864  | NM_004973 | 466.698   | 344.711   |
| AB032369  | 507.704   | 1064.686  | X78817    | 52873.809 | 39817.613 | NM_007248 | 5834.232  | 4345.565  |
| NM_005166 | 1129.448  | 1474.703  | AB023135  | 2756.592  | 3355.573  | NM_001890 | 1163.539  | 963.799   |
| NM_000213 | 2624.054  | 2956.619  | AY009401  | 2013.932  | 2595.704  | NM_001286 | 3633.908  | 3111.541  |
| BE906107  | 4253.974  | 4231.991  | NM_002448 | 1068.571  | 1453.889  | NM_018229 | 2048.414  | 3752.429  |
| NM_015516 | 1521.073  | 1699.068  | AF053952  | 54028.539 | 49131.832 | NM_006328 | 13489.679 | 22562.824 |
| AB033065  | 1691.842  | 1894.57   | NM_001611 | 1395.842  | 566.177   | AY009127  | 19541.236 | 30044.408 |
| NM_005211 | 363.119   | 326.554   | M59979    | 1825.945  | 819.872   | NM_014866 | 6628.595  | 8516.633  |
| NM_004857 | 1304.453  | 1257.569  | AB018310  | 2478.052  | 1793.532  | NM_003929 | 373.902   | 355.231   |
| NM_012108 | 8724.243  | 7076.424  | NM_020133 | 1302.46   | 843.206   | AK000158  | 12791.241 | 20228.225 |
| NM_003253 | 729.811   | 636.379   | NM_015379 | 35517.918 | 30008.715 | NM_005766 | 3519.188  | 8996.122  |
| NM_013285 | 6690.927  | 4287.331  | AF303398  | 17815.15  | 19003.496 | AK024500  | 33010.684 | 36721.25  |
| NM_002872 | 29969.172 | 26828.805 | NM_014810 | 2964.983  | 3169.348  | NM_002564 | 40722.57  | 47915.918 |
| NM_000490 | 931.085   | 1182.668  | NM_004738 | 6455.572  | 5568.907  | Z83806    | 286.606   | 223.9     |
| AJ225028  | 283.33    | 199.59    | NM_007357 | 8217.274  | 8542.726  | NM_000963 | 760.632   | 724.433   |
| NM_004839 | 803.762   | 452.825   | NM_003763 | 11858.36  | 11702.536 | NM_013308 | 7087.271  | 6421.163  |
| NM_012193 | 1680.192  | 954.023   | AK023448  | 4337.774  | 3282.182  | AF027302  | 4402.283  | 3821.149  |
| NM_003405 | 9661.527  | 4022.611  | Y18213    | 12444.732 | 9503.188  | NM_002852 | 4962.947  | 4526.32   |
| NM_004720 | 7258.611  | 3261.925  | AK026098  | 7053.809  | 3248.67   | NM_001817 | 4537.099  | 2767.322  |
| NM_001057 | 2508.69   | 1068.093  | NM_012381 | 3217.844  | 1852.397  | AF063611  | 867.399   | 852.267   |
| NM_004524 | 5411.081  | 6674.583  | M20702    | 1363.292  | 750.757   | NM_006039 | 2692.195  | 1939.849  |
| NM_006315 | 9744.312  | 11771.438 | NM_006397 | 48552.297 | 33258.008 | NM_002089 | 1036.872  | 629.561   |
| NM_018401 | 3164.733  | 3193.586  | D83776    | 4151.789  | 6496.803  | NM_004590 | 224.562   | 142.799   |
| NM_005163 | 9452.165  | 11307.142 | NM_004088 | 12219.044 | 12386.262 | M28983    | 327.947   | 282.613   |
| NM_007273 | 56170.949 | 62643.336 | NM_002180 | 2888.997  | 2956.83   | NM_014656 | 11887.21  | 6646.127  |
| BE894943  | 801.649   | 930.917   | NM_000138 | 6935.45   | 5321.818  | NM_002076 | 5251.752  | 3502.652  |
| AF085994  | 944.454   | 1592.888  | NM_018163 | 3506.287  | 2442.071  | X05299    | 3024.489  | 2312.579  |
| NM_016422 | 5928.659  | 9807.026  | AK026362  | 8488.909  | 6443.491  | NM_007274 | 29522.908 | 33932.16  |
| NM_017878 | 1459.553  | 1541.697  | NM_004968 | 5615.849  | 5044.521  | NM_003356 | 28040.248 | 37531.016 |
| NM_004494 | 59038.621 | 63806.645 | NM_005908 | 5984.824  | 4800.494  | AF238315  | 944.478   | 2429.514  |
| AL049687  | 576.863   | 675.209   | AK024079  | 1578.377  | 1709.407  | NM_006224 | 48617.809 | 65544.453 |
| NM_005643 | 7064.649  | 10239.059 | NM_002428 | 4966.938  | 6113.064  | AL137300  | 9115.812  | 13133.003 |
| NM_003592 | 9107.475  | 8161.211  | NM_014674 | 6308.422  | 6398.784  | NM_000229 | 5889.835  | 8360.938  |

|           |           |           |           |           |           |           |           |           |
|-----------|-----------|-----------|-----------|-----------|-----------|-----------|-----------|-----------|
| NM_014953 | 4792.224  | 3396.63   | NM_018271 | 2281.11   | 2417.779  | NM_006995 | 25301.609 | 32026.543 |
| AF179995  | 1332.284  | 1206.316  | NM_000547 | 674.438   | 521.776   | NM_003125 | 11101.128 | 14535.709 |
| NM_002095 | 372.111   | 302.395   | NM_014652 | 1950.915  | 1940.662  | NM_001955 | 8427.658  | 8606.07   |
| NM_016195 | 4060.086  | 1640.573  | AL133020  | 9815.087  | 16179.335 | AB033064  | 6553.733  | 7598.194  |
| NM_004523 | 3807.303  | 3410.169  | NM_004152 | 504.156   | 527.398   | AK022317  | 12713.98  | 14375.298 |
| NM_004404 | 17061.139 | 14750.524 | NM_000232 | 3938.537  | 1677.585  | NM_018395 | 8210.139  | 8711.345  |
| NM_002960 | 4332.183  | 3541.495  | J05070    | 1958.667  | 936.244   | NM_003124 | 18933.918 | 19599.279 |
| AB046788  | 1201.712  | 925.456   | AA700390  | 6243.053  | 4938.955  | NM_006885 | 44029.504 | 35164.039 |
| NM_006790 | 927.203   | 662.474   | Y18474    | 2032.513  | 1883.635  | NM_004531 | 4100.504  | 4785.393  |
| AL117522  | 6246.228  | 3448.251  | AA436163  | 3370.542  | 3660.656  | AL133581  | 2439.34   | 2339.192  |
| AB011541  | 1582.227  | 743.136   | BI907981  | 8318.698  | 6076.414  | NM_002555 | 899.8     | 818.402   |
| NM_019105 | 1128.209  | 1161.136  | BI603841  | 19757.174 | 13341.061 | NM_005031 | 6991.93   | 6490.302  |
| NM_019061 | 12901.805 | 15210.368 | M19888    | 2699.661  | 2122.754  | AB040920  | 937.879   | 1036.785  |
| AB033007  | 3014.457  | 6637.684  | Y08136    | 3117.568  | 2579.643  | NM_000720 | 580.786   | 459.692   |
| NM_003781 | 688.265   | 1109.56   | AA156863  | 21306.189 | 19657.691 | NM_004842 | 493.948   | 485.419   |
| NM_001304 | 1297.398  | 1692.701  | R82957    | 61069.242 | 61047.441 | AK024639  | 2555.17   | 1924.872  |
| NM_003130 | 5697.572  | 8779.702  | BI830442  | 4335.817  | 5084.275  | NM_015720 | 18591.66  | 13328.32  |
| NM_004715 | 17080.658 | 13784.141 | AI218732  | 3440.949  | 4314.906  | AB007915  | 493.598   | 721.198   |
| D29810    | 2923.901  | 3367.424  | NM_018890 | 53002.195 | 39582.234 | AB033070  | 976.449   | 1183.202  |
| NM_000125 | 585.053   | 996.488   | NM_016204 | 13997.131 | 12873.575 | AB028990  | 1023.404  | 1274.806  |
| AB002384  | 6516.018  | 5350.551  | AB046836  | 3248.375  | 3565.375  | NM_006705 | 31916.691 | 31625.684 |
| NM_018437 | 737.064   | 608.908   | NM_012410 | 6614.704  | 2706.964  | AB037835  | 2187.809  | 4443.838  |
| NM_000422 | 791.281   | 584.162   | NM_001111 | 24476.354 | 11035.992 | NM_016225 | 766.481   | 1622.477  |
| AK023164  | 1892.13   | 1472.805  | NM_018045 | 21300.824 | 12414.378 | NM_000157 | 3725.536  | 5466.716  |
| NM_005375 | 498.197   | 222.362   | AJ133439  | 2637.128  | 1728.613  | NM_000712 | 337.068   | 652.465   |
| AK027121  | 24756.266 | 33156.48  | NM_014395 | 5009.316  | 4220.144  | NM_018085 | 3153.902  | 3229.315  |
| AL117661  | 5221.12   | 2915.492  | NM_001561 | 2258.606  | 1834.146  | BC013695  | 8027.584  | 7252.646  |
| X64643    | 2836.81   | 1428.177  | NM_005160 | 6491.219  | 4601.879  | NM_007205 | 1060.157  | 900.082   |
| NM_005380 | 23918.238 | 10474.525 | NM_000595 | 1707.514  | 1140.316  | AK023035  | 3671.777  | 3377.05   |
| NM_005561 | 7918.623  | 5257.585  | X78817    | 60379.875 | 47062.18  | NM_014845 | 2583.609  | 2893.386  |
| AF272381  | 5924.944  | 2987.187  | AB023135  | 3330.847  | 3034.132  | AB011164  | 4878.078  | 4144.515  |
| NM_001515 | 19835.377 | 18154.291 | AY009401  | 1808.855  | 1703.478  | M24750    | 1051.434  | 1111.896  |
| NM_003412 | 6400.183  | 6905.396  | AF294628  | 2029.179  | 2176.947  | NM_005965 | 3367.602  | 2431.97   |
| NM_018335 | 3555.708  | 5053.978  | AK026960  | 2856.508  | 3840.411  | NM_002740 | 3999.979  | 3654.06   |
| AK022668  | 3410.518  | 4811.932  | NM_001991 | 4639.429  | 3489.354  | AL117482  | 3294.855  | 2358.971  |
| AW975132  | 2932.43   | 4635.81   | NM_000193 | 15519.179 | 16238.247 | NM_006545 | 35352.238 | 21410.354 |
| NM_006051 | 8494.277  | 6752.702  | BC014586  | 2062.924  | 2533.414  | AB018324  | 12844.241 | 9084.734  |
| NM_018427 | 7210.208  | 7736.982  | NM_002445 | 1157.803  | 1220.758  | NM_002742 | 60038.18  | 62290.461 |
| AB037814  | 622.67    | 595.261   | AF053952  | 60233.527 | 58660.781 | Z25431    | 2416.926  | 2046.777  |
| NM_014663 | 2923.365  | 3828.498  | NM_003213 | 13269.376 | 13397.379 | NM_005627 | 12227.302 | 9036.832  |
| AF007217  | 1914.944  | 1455.467  | BF184738  | 1903.759  | 1954.39   | M64497    | 661.911   | 750.158   |
| AB037753  | 8419.926  | 6394.881  | NM_015057 | 717.677   | 914.388   | CY3Cy5    | 539.76    | 98        |
| NM_004674 | 4566.735  | 3831.62   | AF303398  | 27068.9   | 16381.086 | NM_002711 | 1518.778  | 1179.182  |
| AB037801  | 5212.095  | 4639.837  | NM_014810 | 2908.292  | 2187.366  | AL355732  | 1063.983  | 785.303   |
| AL080159  | 19007.26  | 11625.729 | NM_004735 | 6095.602  | 3872.616  | NM_017965 | 2278.239  | 1935.798  |
| NM_017823 | 52141.691 | 38261.695 | NM_007357 | 7873.372  | 7765.786  | AF143327  | 1103.994  | 802.666   |
| U55185    | 3206.793  | 2317.842  | NM_003763 | 14453.642 | 13235.839 | AL049990  | 756.687   | 683.533   |
| U30828    | 37822.824 | 45706.121 | AK023448  | 4288.925  | 2675.904  | AF131843  | 647.693   | 524.62    |
| AF085886  | 54548.414 | 48413.195 | Y18213    | 12440.677 | 8431.676  | AK026653  | 532.89    | 119.013   |
| AK023828  | 2708.623  | 1754.545  | NM_003283 | 10536.644 | 6953.467  | NM_020231 | 823.723   | 740.975   |
| NM_006572 | 21112.715 | 10767.881 | AF249898  | 13923.552 | 10181.489 | AF075008  | 1661.612  | 1331.722  |
| NM_004784 | 388.798   | 195.089   | M69181    | 25940.125 | 19388.805 | NM_006504 | 1254.382  | 1151.382  |
| AK021815  | 1957.902  | 2790.925  | L09078    | 1266.929  | 2723.339  | NM_002711 | 1198.417  | 1072.979  |



|           |           |           |           |           |           |           |           |           |
|-----------|-----------|-----------|-----------|-----------|-----------|-----------|-----------|-----------|
| NM_001543 | 3881.076  | 5157.085  | NM_002652 | 1246.356  | 1069.241  | SR7       | 1936.72   | 13549.182 |
| NM_016641 | 14079.756 | 14316.65  | NM_000547 | 666.928   | 1615.355  | SR9       | 4921.896  | 767.366   |
| AB018010  | 2877.875  | 2566.424  | NM_014652 | 2096.237  | 4291.537  | NM_01900E | 1718.154  | 1250.736  |
| NM_014610 | 15463.237 | 15243.835 | AL133020  | 9935.735  | 20383.846 | M20838    | 756.083   | 338.134   |
| NM_004737 | 823.192   | 1047.927  | NM_004152 | 599.85    | 332.118   | AK022738  | 643.921   | 432.845   |
| NM_00068E | 1255.432  | 1350.114  | BU565263  | 65762.734 | 73337.031 | AK023505  | 1468.265  | 1261.574  |
| NM_006621 | 5532.689  | 6856.324  | NM_00502E | 9029.672  | 9045.924  | AB037851  | 5266.499  | 4377.792  |
| BF347398  | 989.965   | 1169.237  | NM_001611 | 2162.184  | 2058.834  | AL050389  | 4284.611  | 3562.423  |
| AK026762  | 4883.023  | 8028.5    | M59979    | 2372.264  | 1489.399  | AK024684  | 838.262   | 778.282   |
| NM_004412 | 1228.391  | 1251.189  | AB018310  | 2713.878  | 2193.803  | NM_01494E | 10628.593 | 10579.64  |
| L48516    | 5647.352  | 3791.525  | NM_020133 | 1435.38   | 988.561   | AK001546  | 562.41    | 848.725   |
| NM_01664E | 11024.086 | 5810.604  | NM_01537E | 34723.723 | 21426.547 | NM_006537 | 4078.608  | 4233.383  |
| AF083930  | 4467.61   | 3424.544  | NM_00487E | 944.138   | 755.476   | AK021443  | 2340.928  | 1508.591  |
| NM_00598E | 517.305   | 357.464   | AF144638  | 64234.141 | 66219.828 | AF070569  | 448.012   | 203.904   |
| NM_00342E | 565.535   | 1512.684  | BF028822  | 2271.923  | 2614.265  | NM_02023E | 1125.023  | 897.051   |
| NM_014862 | 2414.835  | 2889.803  | NM_005502 | 1803.377  | 1827.633  | AK024315  | 8481.24   | 6594.796  |
| AK027159  | 1840.86   | 1134.025  | NM_000742 | 4892      | 6074.496  | AK024945  | 2866.791  | 2223.438  |
| AF060169  | 387.154   | 533.234   | NM_00235E | 21719.666 | 17114.885 | AK024579  | 1953.878  | 1596.063  |
| NM_00526E | 869.774   | 822.09    | AK026608  | 4777.883  | 4035.114  | AL133118  | 3164.275  | 2445.231  |
| D70835    | 51104.734 | 26086.166 | NM_018890 | 65194.465 | 78383.242 | AK023571  | 2742.111  | 2147.906  |
| NM_002697 | 7946.167  | 4351.043  | NM_016204 | 12927.132 | 20302.945 | NM_001702 | 1553.067  | 1459.871  |
| NM_00244E | 1387.128  | 2275.655  | AB046836  | 3103.148  | 2035.655  | AK026657  | 1432.925  | 1559.882  |
| AF053952  | 23813.732 | 27838.146 | NM_01781E | 15650.129 | 9697.386  | AF087991  | 13061.046 | 10246.066 |
| NM_00321E | 8815.314  | 10797.021 | AJ224166  | 7574.373  | 4892.408  | Y12839    | 453.278   | 473.935   |
| BF184738  | 796.63    | 1247.752  | AK026098  | 8576.313  | 7528.347  | X64979    | 511.896   | 693.729   |
| NM_014044 | 3376.177  | 4151.125  | NM_012381 | 3665.758  | 2870.414  | AJ227884  | 1802.04   | 1579.792  |
| NM_000900 | 3306.316  | 3308.776  | M20702    | 1312.088  | 950.727   | X64986    | 5514.253  | 4266.4    |
| AK023684  | 11222.576 | 13701.791 | NM_006397 | 45069.895 | 27251.189 | AK000842  | 8101.576  | 6838.04   |
| NM_000232 | 1132.919  | 1592.231  | D83776    | 3670.733  | 3750.907  | AK023386  | 12173.33  | 9179.492  |
| J05070    | 2519.319  | 2667.668  | NM_00408E | 11602.882 | 8955.911  | NM_00705E | 16263.05  | 12136.479 |
| U76368    | 472.781   | 689.411   | NM_002180 | 3233.942  | 2674.101  | AK022789  | 1242.251  | 1089.045  |
| AA700390  | 5089.579  | 7259.007  | NM_00013E | 7155.1    | 6539.763  | AK002095  | 862.37    | 648.499   |
| Y18474    | 1409.602  | 1478.632  | NM_01816E | 4388.777  | 3941.984  | AK000821  | 5714.943  | 4985.898  |
| AA436163  | 1631.579  | 1869.108  | AK026362  | 8107.782  | 9069.811  | AK024526  | 10332.745 | 10571.967 |
| BI907981  | 1799.348  | 1858.689  | NM_00496E | 7427.001  | 8814.928  | AK000848  | 616.239   | 793.472   |
| BI603841  | 2489.607  | 1756.259  | NM_00590E | 7003.397  | 6251.722  | AK023307  | 521.019   | 214.812   |
| M19888    | 2575.274  | 2025.443  | NM_00478E | 9373.461  | 7112.245  | NM_01761E | 1710.289  | 1265.787  |
| Y08136    | 1777.581  | 1417.079  | AK024079  | 1247.834  | 1090.937  | NM_01905E | 4568.325  | 3325.126  |
| AA156863  | 10712.439 | 16085.106 | NM_00242E | 5770.686  | 6629.136  | AF279783  | 3328.044  | 2397.708  |
| R82957    | 55783.777 | 51066.305 | NM_014674 | 6514.423  | 6341.94   | AF182422  | 7998.036  | 6339.713  |
| BI830442  | 704.813   | 597.076   | NM_018271 | 1848.031  | 1653.485  | AF070602  | 891.979   | 751.258   |
| AI218732  | 2630.412  | 1866.104  | CY3Cy5    | 1312.706  | 75.057    | BE393290  | 1215.545  | 1298.795  |
| AF079098  | 2980.008  | 1249.674  | NM_020967 | 2065.266  | 1301.863  | NM_017622 | 807.939   | 658.502   |
| AK023448  | 4098.737  | 3913.63   | NM_001071 | 17528.93  | 8804.479  | AF133331  | 3452.777  | 2928.419  |
| Y18213    | 9949.544  | 8997.413  | AF086181  | 721.301   | 463.034   | AK022289  | 2018.776  | 1115.881  |
| NM_00328E | 10232.305 | 13220.918 | AK021540  | 1136.01   | 897.351   | AF161403  | 15710.56  | 12316.136 |
| AF249898  | 17455.879 | 21156.199 | AK022258  | 2205.498  | 1809.308  | S75708    | 7598.941  | 6033.259  |
| M69181    | 6978.23   | 6880.33   | AF088043  | 698.858   | 903.067   | U79291    | 5130.801  | 3989.87   |
| AK027224  | 479.545   | 484.9     | AF131799  | 1428.885  | 1285.71   | D17172    | 15505.923 | 14036.328 |
| L09078    | 504.874   | 776.092   | AK000455  | 2536.146  | 2055.723  | AJ227859  | 1668.729  | 1647.249  |
| NM_002652 | 1062.882  | 987.87    | NM_005230 | 737.768   | 411.471   | NM_018544 | 849.317   | 821.019   |
| NM_001311 | 17584.537 | 12145.061 | AK023719  | 7505.094  | 5238.936  | L10141    | 7907.721  | 7547.281  |
| NM_01779E | 14940.32  | 13984.391 | AK025590  | 4622.525  | 3808.617  | AB020699  | 3175.289  | 3172.175  |

|           |           |           |           |           |           |           |           |           |
|-----------|-----------|-----------|-----------|-----------|-----------|-----------|-----------|-----------|
| NM_000354 | 291.239   | 297.774   | AY007149  | 2012.922  | 1751.701  | AF086269  | 1600.534  | 1320.052  |
| NM_012410 | 3869.535  | 2429.69   | NM_020967 | 2138.8    | 1732.627  | U90437    | 2619.347  | 2139.507  |
| NM_001111 | 11507.473 | 7781.683  | NM_001071 | 18907.639 | 11467.577 | D17169    | 29622.979 | 21471.828 |
| NM_018049 | 17178.932 | 9995.055  | SR2       | 55648.969 | 35781.402 | NM_017549 | 5009.648  | 4312.979  |
| NM_014395 | 4631.959  | 3331.466  | SR4       | 16663.559 | 13463.395 | NM_006511 | 1059.835  | 681.946   |
| NM_005160 | 6655.654  | 7560.432  | SR6       | 2417.326  | 2197.655  | AF007142  | 644.439   | 485.564   |
| X78817    | 17911.387 | 10026.541 | SR8       | 8633.132  | 20410.498 | AF119853  | 2633.623  | 1350.78   |
| AB023135  | 980.732   | 631.961   | SR10      | 28368.037 | 7804.417  | NM_001126 | 3101.759  | 2699.13   |
| AY009401  | 846.075   | 496.706   | CY3Cy5    | 1659.58   | 78.221    | AK023673  | 1425.661  | 1378.832  |
| AF294628  | 805.492   | 691.777   | AL157484  | 15380.889 | 8270.6    | NM_018252 | 1088.494  | 850.879   |
| NM_004152 | 1008.567  | 970.69    | Y09836    | 1733.018  | 1381.813  | NM_018000 | 45010.75  | 39993.473 |
| BU565263  | 64228.367 | 77285.406 | AL137597  | 3950.604  | 3165.999  | AF124366  | 21942.072 | 20316.326 |
| NM_005028 | 6663.721  | 11527.943 | AK022144  | 610.24    | 549.98    | AF130112  | 845.755   | 1078.489  |
| NM_001611 | 1386.835  | 2366.075  | AF086044  | 1200.067  | 986.11    | NM_000551 | 3665.215  | 3914.401  |
| M59979    | 2065.865  | 1971.958  | NM_014926 | 875.096   | 778.315   | AL365518  | 432.796   | 501.902   |
| AB018310  | 1453.9    | 1890.202  | AF131790  | 1160.598  | 906.25    | AF086257  | 3358.189  | 2789.145  |
| NM_020133 | 1615.284  | 1867.871  | NM_012075 | 3604.212  | 2768.545  | AF075056  | 1060.011  | 1592.226  |
| NM_015379 | 33404.102 | 29624.309 | AB004851  | 1198.43   | 958.731   | U00928    | 907.419   | 867.869   |
| NM_004878 | 838.904   | 1124.887  | AK023911  | 5532.715  | 3188.125  | AK002114  | 2196.849  | 2063.427  |
| NM_015057 | 780.332   | 738.229   | NM_001283 | 7783.623  | 6951.226  | NM_018699 | 2183.931  | 1689.72   |
| AF303398  | 5555.938  | 8979.428  | AL110237  | 1184.703  | 877.396   | AK026318  | 896.183   | 875.666   |
| NM_014810 | 2658.882  | 2151.418  | D87470    | 2516.463  | 1856.677  | AF291673  | 752.069   | 897.366   |
| NM_004738 | 5646.166  | 4200.376  | AF147307  | 6947.622  | 5096.84   | NM_004365 | 10023.827 | 7663.763  |
| NM_007357 | 5616.201  | 3944.478  | AK001829  | 2758.229  | 2354.437  | NM_016355 | 3989.535  | 2757.083  |
| NM_003763 | 7915.645  | 5265.385  | NM_016525 | 5314.372  | 3904.016  | AJ296290  | 2260.283  | 1489.487  |
| AB046836  | 2201.433  | 4136.441  | AK024931  | 20230.184 | 11724.364 | NM_020183 | 2814.377  | 2783.311  |
| NM_017816 | 18662.658 | 20538.34  | AL109715  | 1916.41   | 1568.85   | AL389954  | 413.099   | 298.335   |
| AJ224166  | 10214.921 | 14251.17  | AK025659  | 3567.225  | 1925.395  | NM_019852 | 2633.634  | 2149.921  |
| AK026098  | 9444.522  | 11954.451 | AK026788  | 4800.462  | 4520.695  | NM_006118 | 4817.799  | 4506.426  |
| NM_012381 | 3518.939  | 4889.447  | AK025272  | 7169.636  | 5825.565  | AK026225  | 13080.037 | 12554.489 |
| M20702    | 1240.662  | 1094.978  | AK026824  | 1034.048  | 926.556   | AL050032  | 5210.657  | 5053.051  |
| NM_006397 | 23016.053 | 28346.697 | AL365407  | 2809.66   | 2557.767  | AF086177  | 5875.824  | 6254.443  |
| D83776    | 3841.682  | 4833.018  | AK000840  | 24670.689 | 18113.832 | NM_018949 | 1953.679  | 1940.476  |
| NM_004088 | 10691.742 | 12859.825 | AL162073  | 2119.799  | 1899.005  | D17187    | 1381.284  | 1335.852  |
| NM_002180 | 3961.825  | 7191.3    | AL390160  | 1270.847  | 916.014   | AJ243672  | 1684.736  | 2195.428  |
| NM_000138 | 9059.714  | 11160.09  | AJ006835  | 29774.557 | 18435.178 | AL122087  | 470.785   | 446.888   |
| NM_018163 | 3798.479  | 3657.888  | AL110138  | 2083.146  | 1544.201  | NM_014767 | 536.259   | 234.077   |
| AK026362  | 6000.741  | 4940.438  | AL050153  | 624.432   | 675.805   | Y17867    | 3322.375  | 2678.623  |
| NM_004968 | 4922.37   | 4473.958  | AL122039  | 1496.14   | 1608.909  | M92642    | 861.697   | 813.042   |
| NM_005908 | 5041.3    | 4344.371  | AF070577  | 16890.854 | 15344.373 | NM_018071 | 3143.245  | 2971.476  |
| NM_004785 | 8098.776  | 6387.63   | AL137445  | 911.963   | 561.273   | NM_004333 | 2673.579  | 2933.499  |
| NM_002428 | 8409.376  | 14693.964 | BC028422  | 1494.285  | 1490.297  | M31520    | 56876.859 | 71477.195 |
| NM_014674 | 5929.063  | 5909.727  | AK022219  | 573.618   | 805.132   | NM_002020 | 15897.456 | 12951.426 |
| NM_018271 | 3590.588  | 2983.299  | AJ011378  | 2593.582  | 2692.515  | AL050137  | 2034.534  | 1716.189  |
| NM_000547 | 563.749   | 437.289   | AF009266  | 979.63    | 1224.259  | AK024423  | 2676.585  | 1876.658  |
| NM_014652 | 1740.455  | 693.253   | AF009310  | 1477.241  | 1051.703  | NM_005043 | 26853.186 | 19194.924 |
| AL133020  | 7383.475  | 4772.576  | AF054991  | 842.554   | 698.587   | NM_005979 | 9206.176  | 7032.352  |
| NM_003213 | 9906.158  | 13280.734 | AF060168  | 2956.714  | 2232.413  | NM_006282 | 4255.833  | 4076.239  |
| BF184738  | 1001.7    | 1416.808  | AF009275  | 1925.141  | 1576.61   | NM_015920 | 25948.561 | 17647.996 |
| NM_014044 | 4555.858  | 7129.173  | AF015251  | 879.153   | 853.893   | AB011113  | 2037.587  | 2094.528  |
| NM_000900 | 3705.015  | 5197.704  | AF056426  | 2061.241  | 1686.401  | NM_004115 | 734.322   | 740.291   |
| AK023684  | 13362.804 | 19162.275 | AF064850  | 685.222   | 390.564   | NM_018287 | 693.281   | 636.429   |
| NM_000232 | 1286.104  | 1924.44   | AK001096  | 522.105   | 687.867   | NM_001955 | 2281.156  | 2350.334  |

|           |           |           |           |           |           |           |           |           |
|-----------|-----------|-----------|-----------|-----------|-----------|-----------|-----------|-----------|
| J05070    | 3163.359  | 4703.811  | NM_018329 | 1307.871  | 1331.441  | AF016004  | 2051.853  | 4477.691  |
| U76368    | 506.623   | 875.296   | AK021565  | 604.001   | 565.372   | NM_003567 | 4553.987  | 4092.845  |
| AA700390  | 5366.291  | 7302.483  | AK021778  | 1042.026  | 979.591   | NM_007315 | 511.994   | 284.796   |
| Y18474    | 1552.01   | 2089.674  | AK001150  | 9890.39   | 7940.78   | L20686    | 3540.267  | 4319.747  |
| AA436163  | 2285.083  | 3474.452  | AK002123  | 1270.918  | 885.887   | NM_000304 | 380.22    | 400.275   |
| BI907981  | 2273.375  | 3507.073  | AK021633  | 3222.751  | 3197.726  | AK023362  | 481.108   | 500.186   |
| BI603841  | 3524.732  | 4020.712  | AF189251  | 1227.469  | 1093.093  | NM_002460 | 487.16    | 531.821   |
| M19888    | 2816.042  | 2460.889  | NM_005322 | 2625.181  | 2029.646  | NM_002675 | 2757.348  | 2443.529  |
| Y08136    | 1975.957  | 1718.789  | AK024465  | 17373.912 | 10852.745 | NM_012432 | 41943.75  | 29420.125 |
| AA156863  | 6361.168  | 5203.855  | AF075119  | 1042.739  | 895.883   | NM_005007 | 7158.123  | 6077.223  |
| BI915199  | 1805.833  | 1507.797  | AK021478  | 6827.657  | 5076.141  | AK024996  | 2872.598  | 2497.596  |
| R82957    | 56130.508 | 59742.813 | AF131782  | 2131.822  | 1393.376  | NM_004417 | 436.531   | 122.771   |
| BI830442  | 935.15    | 1596.246  | NM_014210 | 8439.938  | 6505.773  | NM_012290 | 4973.767  | 3950.482  |
| AI218732  | 2855.355  | 2406.043  | AK021603  | 5081.969  | 3691.357  | NM_002431 | 2134.65   | 1097.368  |
| NM_018890 | 35590     | 16391.051 | AL110136  | 7165.571  | 4722.875  | NM_001827 | 32768.07  | 20401.705 |
| NM_016204 | 963.528   | 720.898   | AJ008130  | 55179.824 | 40760.719 | NM_020460 | 5541.286  | 4427.186  |
| NM_003283 | 12175.88  | 16630.654 | NM_003669 | 927.536   | 496.81    | NM_002853 | 3313.257  | 3499.536  |
| AF249898  | 15714.393 | 16107.673 | AF086502  | 2376.155  | 2089.307  | NM_003174 | 1152.098  | 1282.141  |
| M69181    | 10311.142 | 14586.406 | L39924    | 2893.198  | 2460.326  | NM_012307 | 12074.169 | 9840.436  |
| AK027224  | 840.837   | 974.61    | U52054    | 11529.55  | 8727.467  | NM_002540 | 887.872   | 866.482   |
| L09078    | 1245.772  | 1765.827  | D17226    | 723.506   | 512.816   | NM_006371 | 2024.48   | 1615.334  |
| NM_002652 | 1151.852  | 2080.338  | AK023325  | 2719.621  | 2700.144  | NM_018834 | 866.846   | 809.749   |
| NM_001311 | 23951.631 | 27889.934 | NM_017985 | 3793.287  | 4931.151  | AK026882  | 2080.425  | 2258.678  |
| NM_017790 | 18363.102 | 24000.053 | AK025866  | 8555.529  | 10360.898 | NM_004574 | 1151.209  | 1320.483  |
| NM_000354 | 304.375   | 693.384   | AF088058  | 7574.887  | 11095.937 | NM_004840 | 4588.547  | 4893.933  |
| NM_012410 | 5892.887  | 7442.755  | NM_000513 | 2625.764  | 5143.478  | NM_014813 | 828.187   | 1189.241  |
| NM_001111 | 16588.711 | 22769.727 | Y11165    | 4284.597  | 7436.806  | AF014459  | 3455.067  | 4436.048  |
| NM_018040 | 19620.926 | 16888.908 | NM_003530 | 1803.877  | 1682.191  | M64108    | 914.654   | 923.354   |
| AJ133439  | 408.098   | 313.704   | AJ227871  | 1323.798  | 1108.317  | NM_001503 | 3591.123  | 2956.874  |
| NM_014390 | 4306.74   | 3198.474  | AK025344  | 3279.556  | 2257.871  | NM_006302 | 2513.355  | 2315.005  |
| NM_001561 | 1063.566  | 828.906   | D28589    | 39604.438 | 22460.076 | AJ224875  | 3024.079  | 2428.809  |
| NM_005160 | 5196.271  | 4142.029  | AF301223  | 1607.127  | 976.494   | NM_002140 | 1896.896  | 1530.114  |
| NM_000590 | 746.525   | 884.854   | NM_017867 | 5783.106  | 3999.08   | AF043324  | 4891.778  | 4016.692  |
| X78817    | 25763.186 | 39888.945 | U92820    | 4696.875  | 2942.292  | AK024172  | 1584.825  | 1524.247  |
| AB023135  | 970.256   | 1146.141  | NM_017937 | 2728.895  | 2169.087  | NM_014814 | 4041.88   | 3904.213  |
| AY009401  | 879.01    | 637.065   | AL360266  | 5027.731  | 3342.69   | NM_002797 | 18535.998 | 16345.168 |
| AF294628  | 728.331   | 515.618   | AL160132  | 53394.824 | 35113.535 | AK024318  | 867.006   | 992.05    |
| NM_002440 | 1004.953  | 655.343   | NM_019557 | 3437.061  | 2704.255  | NM_016120 | 3570.747  | 3823.329  |
| AF053952  | 17799.553 | 10040.31  | NM_003545 | 810.343   | 594.879   | NM_002800 | 7135.512  | 7443.745  |
| BU565263  | 54342.25  | 68942.953 | AK024413  | 2127.136  | 1674.584  | NM_017912 | 24395.939 | 18891.684 |
| NM_005020 | 6514.686  | 11596.247 | AL137752  | 358.096   | 865.46    | NM_000423 | 5473.697  | 6431.672  |
| NM_001611 | 1063.591  | 1270.14   | AK022247  | 1877.786  | 2591.261  | AB046838  | 3883.521  | 3611.199  |
| M59979    | 2411.658  | 2988.322  | AK001453  | 5172.132  | 6954.766  | X98411    | 1700.991  | 1535.649  |
| AB018310  | 1776.002  | 2818.292  | AB007972  | 9307.169  | 14901.05  | AF116658  | 15521.408 | 13387.757 |
| NM_020133 | 2129.826  | 2900.562  | AL390144  | 13490.721 | 18647.18  | NM_014860 | 12120.086 | 14414.271 |
| NM_015370 | 32932.609 | 35429.34  | AK024017  | 3921.582  | 6443.845  | AB032977  | 12192.179 | 14003.459 |
| NM_004870 | 945.71    | 1302.459  | X56196    | 2441.582  | 4312.296  | AK001725  | 748.839   | 1106.381  |
| NM_015057 | 981.765   | 852.904   | D17220    | 18249.389 | 28047.59  | NM_003030 | 1511.137  | 1658.145  |
| AF303398  | 4529.459  | 3501.884  | D28363    | 61133.145 | 61027.109 | NM_020520 | 8599.623  | 10998.058 |
| NM_014810 | 2888.808  | 2667.041  | AB011171  | 2679.699  | 4130.339  | S72604    | 26688.537 | 26531.379 |
| NM_004730 | 9534.98   | 15367.949 | AF090099  | 1387.184  | 1663.632  | AF038951  | 9290.294  | 6719.457  |
| NM_007357 | 6048.194  | 5992.723  | AK023606  | 518.788   | 1281.911  | NM_006492 | 1460.771  | 1210.972  |
| NM_003763 | 8182.393  | 5915.44   | NM_003580 | 3256.65   | 3260.024  | AK021811  | 1063.863  | 972.143   |

|           |           |           |           |           |           |           |           |           |
|-----------|-----------|-----------|-----------|-----------|-----------|-----------|-----------|-----------|
| AK023448  | 3404.068  | 1479.55   | NM_000922 | 7602.569  | 8272.38   | NM_00342E | 3058.713  | 2767.05   |
| Y18213    | 7753.866  | 3509.286  | NM_013232 | 20575.777 | 17156.955 | AF055030  | 2173.199  | 2098.798  |
| NM_01781E | 20189.24  | 25512.158 | NM_017993 | 1981.781  | 2755.007  | AK000589  | 2538.311  | 1665.72   |
| AJ224166  | 8411.315  | 9991.22   | NM_000362 | 1558.134  | 1431.813  | X53281    | 17047.08  | 15136.313 |
| AK026098  | 10577.707 | 14410.133 | NM_014429 | 4688.079  | 3606.743  | BC012782  | 2550.695  | 1895.105  |
| NM_012381 | 3973.631  | 5779.713  | AK000770  | 3177.319  | 2437.651  | AF132026  | 54001.09  | 44278.156 |
| M20702    | 1276.076  | 1267.859  | NM_00237C | 18934.254 | 15366.155 | AL050353  | 1240.026  | 918.096   |
| NM_006397 | 20606.396 | 21316.619 | NM_01567C | 5961.318  | 5390.646  | AB037788  | 9142.535  | 9435.061  |
| D83776    | 3930.84   | 5451.218  | NM_014709 | 2552.121  | 3154.642  | NM_004587 | 8246.396  | 6088.917  |
| NM_00408E | 12157.734 | 16429.801 | AK002203  | 1459.181  | 1650.794  | NM_00097E | 66969.781 | 73296.25  |
| NM_00218C | 3565.106  | 5373.435  | AK026469  | 17602.65  | 22066.598 | AF147412  | 27371.869 | 19474.088 |
| NM_00013E | 9272.052  | 12051.567 | D16935    | 10568.366 | 15985.188 | AK024570  | 10485.433 | 9525.951  |
| NM_018163 | 5017.672  | 6386.073  | AK027019  | 410.234   | 1446.848  | AF161401  | 10548.769 | 10771.284 |
| AK026362  | 7662.022  | 8435.604  | U92019    | 2708.062  | 4176.794  | NM_00099C | 13273.322 | 13948.283 |
| NM_00496E | 5577.007  | 7669.297  | U52835    | 4093.23   | 5130.082  | NM_01474C | 4186.169  | 4573.927  |
| NM_00590E | 6016.131  | 6398.637  | NM_00075E | 10181.835 | 14886.262 | NM_01595E | 12307.594 | 12485.282 |
| NM_00478E | 8314.429  | 6946.878  | AK022148  | 1891.015  | 2437.489  | AK024601  | 7517.511  | 10859.359 |
| AK024079  | 1115.655  | 1282.711  | Z36811    | 62984.926 | 66130.516 | S68069    | 1977.576  | 2997.483  |
| NM_00242E | 5575.517  | 4126.752  | NM_01895C | 37278.48  | 48070.336 | AB011095  | 3205.529  | 3462.344  |
| NM_014674 | 5697.174  | 5543.074  | K03200    | 13233.127 | 20654.07  | NM_00248E | 15436.366 | 10927.261 |
| NM_018271 | 1416.859  | 1979.079  | U17629    | 9792.96   | 13679.843 | NM_004003 | 15104.283 | 11440.272 |
| NM_000547 | 668.155   | 438.406   | NM_02042E | 21059.209 | 31412.498 | NM_00018E | 1617.063  | 1255.564  |
| NM_014652 | 2041.138  | 933.686   | U79265    | 6688.109  | 9627.737  | BF244401  | 6620.47   | 5072.345  |
| AL133020  | 7078.632  | 4898.519  | AK022868  | 11918.178 | 19642.535 | NM_00471E | 34774.828 | 23039.635 |
| NM_004152 | 709.128   | 533.325   | AF217289  | 500.292   | 535.404   | AL359585  | 5221.239  | 3800.825  |
| NM_014044 | 4445.63   | 7351.77   | NM_002687 | 30098.686 | 23314.604 | AB046850  | 5475.988  | 4737.977  |
| NM_00090C | 4066.574  | 6817.349  | NM_000627 | 7958.512  | 7358.31   | NM_014801 | 5506.607  | 4791.08   |
| AK023684  | 12230.165 | 15835.575 | NM_00003E | 1943.106  | 1537.074  | NM_003642 | 4965.321  | 3312.84   |
| NM_000232 | 1441.838  | 2540.316  | NM_00082E | 3334.423  | 3275.037  | AB027013  | 7799.346  | 7930.264  |
| J05070    | 3008.131  | 3749.154  | NM_001963 | 1216.295  | 1523.601  | BF185480  | 2394.644  | 2526.23   |
| U76368    | 439.086   | 757.034   | NM_004334 | 6299.099  | 6910.606  | NM_00212E | 17483.174 | 16176.756 |
| AA700390  | 6388.292  | 9551.629  | S62027    | 868.131   | 969.022   | NM_003074 | 5316.99   | 5034.108  |
| Y18474    | 1597.162  | 2316.051  | NM_00388E | 20927.205 | 26943.533 | AL360195  | 7926.074  | 9293.916  |
| AA436163  | 2447.269  | 4345.954  | NM_005843 | 6639.526  | 9024.813  | U14383    | 1090.29   | 733.086   |
| BI907981  | 2563.54   | 4340.676  | NM_003854 | 1214.263  | 1762.134  | NM_01781C | 1262.414  | 1265.091  |
| BI603841  | 3227.722  | 4323.662  | NM_01798C | 1675.376  | 2931.201  | NM_003181 | 59680.965 | 73715.984 |
| M19888    | 3100.815  | 4010.303  | NM_001252 | 60570     | 63696.52  | NM_004451 | 3958.263  | 6135.727  |
| Y08136    | 1924.429  | 2422.575  | AF053712  | 6557.462  | 8519.074  | NM_004364 | 811.453   | 441.229   |
| AA156863  | 7609.869  | 7607.724  | NM_003947 | 3086.867  | 4396.408  | NM_02039E | 2567.497  | 2760.85   |
| BI915199  | 1879.639  | 1472.845  | NM_002821 | 48689.293 | 54058.352 | NM_00342E | 1821.74   | 4305.354  |
| R82957    | 53152.934 | 56389.844 | M96652    | 58280.469 | 59983.664 | NM_01338E | 5512.104  | 7245.224  |
| BI830442  | 990.981   | 916.428   | L41690    | 5293.258  | 8898.098  | AK026232  | 5524.426  | 5800.607  |
| AI218732  | 3309.518  | 3743.622  | NM_018059 | 4054.671  | 5840.243  | NM_014892 | 7481.318  | 5669.275  |
| NM_01889C | 37025.914 | 19367.309 | NM_00217C | 612.879   | 1215.556  | AK023827  | 5680.319  | 5636.459  |
| NM_016204 | 1277.492  | 1073.082  | NM_000939 | 61392.938 | 64370.68  | L07517    | 1966.415  | 2380.091  |
| AB046836  | 1383.807  | 698.529   | NM_005183 | 1601.543  | 2179.243  | AK022451  | 16094.368 | 17991.824 |
| NM_001311 | 19113.912 | 13690.688 | NM_006514 | 7527.897  | 12013.532 | NM_01435E | 50816.723 | 69222.789 |
| NM_01779E | 18700.455 | 23557.398 | AF065164  | 20038.24  | 29970.908 | BM918441  | 5384.068  | 6213.242  |
| NM_000354 | 558.725   | 876.678   | K01900    | 1076.452  | 1529.614  | AA150828  | 3787.661  | 4378.985  |
| NM_01241C | 6543.729  | 6686.476  | AJ008143  | 50434.922 | 49594.984 | H90764    | 1665.289  | 2195.455  |
| NM_001111 | 12923.21  | 12089.037 | NM_007144 | 2633.677  | 2146.74   | AI859208  | 390.326   | 357.919   |
| NM_01804E | 19542.154 | 18889.295 | NM_005093 | 1409.14   | 1187.371  | H64379    | 21191.998 | 19831.215 |
| AJ133439  | 547.94    | 820.358   | NM_004424 | 30612.088 | 28594.457 | BE208258  | 47545.199 | 42199.781 |

|           |           |           |           |           |           |           |           |           |
|-----------|-----------|-----------|-----------|-----------|-----------|-----------|-----------|-----------|
| NM_01439E | 5165.425  | 5727.335  | AL133117  | 4935.393  | 3392.754  | T72202    | 1498.274  | 1676.438  |
| NM_001561 | 1338.263  | 1746.812  | AB033040  | 640.851   | 401.488   | BI831922  | 1948.547  | 2445.038  |
| NM_00516C | 6382.795  | 7233.105  | AF070586  | 27526.09  | 16203.611 | M69238    | 3348.805  | 4290.828  |
| NM_00059E | 1087.729  | 1733.851  | NM_014412 | 4076.998  | 3085.023  | AA664180  | 1148.741  | 1477.179  |
| X78817    | 22802.531 | 26802.02  | NM_013303 | 1735.24   | 1261.871  | AA599158  | 25129.508 | 67415.57  |
| AB023135  | 1409.188  | 2136.217  | NM_012227 | 11504.872 | 7641.529  | BE294756  | 1477.764  | 3741.253  |
| NM_003393 | 637.46    | 768.18    | NM_006101 | 4258.965  | 2516.367  | NM_00069E | 4951.905  | 6479.961  |
| AY009401  | 959.651   | 1042.098  | NM_001237 | 17396.213 | 13248.819 | L08240    | 1615.287  | 1405.262  |
| AF294628  | 1246.622  | 1346.828  | NM_002507 | 5070.066  | 3396.973  | NM_017952 | 1731.828  | 1588.72   |
| AK026960  | 1086.254  | 1025.904  | NM_015962 | 6679.985  | 4973.153  | NM_00294C | 2440.759  | 1963.743  |
| NM_001991 | 3824.512  | 2215.565  | NM_016145 | 1825.455  | 1462.216  | NM_016081 | 16070.598 | 17599.295 |
| NM_017852 | 436.876   | 392.017   | NM_01607E | 24073.58  | 18907.332 | NM_00638E | 3669.376  | 3631.364  |
| NM_000193 | 1470.757  | 1403.42   | NM_00379E | 2078.119  | 1784.952  | M30818    | 1231.121  | 1563.861  |
| BC014586  | 1845.266  | 1859.422  | NM_004401 | 13858.491 | 9551.787  | NM_000163 | 449.524   | 715.339   |
| NM_00244E | 1174.522  | 802.198   | NM_001849 | 23325.318 | 17233.615 | NM_00575E | 4230.04   | 3675.722  |
| AF053952  | 16344.602 | 8382.472  | AF255910  | 3176.733  | 2926.154  | NM_00332E | 45467.66  | 40086.566 |
| NM_003213 | 7464.374  | 5141.157  | NM_01614E | 8102.889  | 8163.488  | NM_00329E | 48155.297 | 62687.348 |
| BF184738  | 530.052   | 340.008   | AB046776  | 3388.865  | 3667.49   | NM_01433C | 49882.434 | 65919.617 |
| NM_015057 | 1121.978  | 1382.329  | D42084    | 12468.432 | 12426.764 | NM_007034 | 758.218   | 1004.913  |
| AF303398  | 5657.851  | 7792.843  | NM_001734 | 1468.767  | 1536.192  | NM_00156C | 874.221   | 760.491   |
| NM_01481C | 3554.015  | 5309.328  | NM_014693 | 13728.71  | 7260.438  | NM_001783 | 46254.441 | 42909.434 |
| NM_00473E | 6631.72   | 7147.695  | AB007896  | 3263.899  | 2616.715  | J03171    | 3557.375  | 4570.155  |
| NM_007357 | 6895.099  | 7740.571  | AB007916  | 6824.589  | 4578.574  | NM_00585E | 1812.033  | 2185.941  |
| NM_003763 | 9212.611  | 9305.341  | NM_002874 | 2507.231  | 923.52    | NM_004323 | 43586.074 | 48905.719 |
| AK023448  | 3425.57   | 2069.141  | AB028980  | 683.141   | 242.551   | NM_005312 | 2729.364  | 5619.688  |
| Y18213    | 8184.003  | 4522.935  | AF049140  | 6081.897  | 4701.767  | NM_00421C | 10355.022 | 18038.656 |
| NM_003283 | 6865.915  | 4004.207  | AB037793  | 1139.853  | 553.616   | NM_02014C | 1734.267  | 2877.934  |
| AF249898  | 12252.392 | 6029.707  | AL136794  | 3409.293  | 2454.868  | NM_007214 | 7271.021  | 7130.084  |
| M69181    | 7690.656  | 4578.483  | BC035601  | 60075.402 | 57544.578 | NM_000311 | 10084.21  | 7977.486  |
| AK027224  | 359.137   | 197.15    | NM_00145E | 4570.135  | 4066.891  | NM_01790E | 2151.508  | 1497.044  |
| L09078    | 782.903   | 595.753   | NM_02038E | 20410.801 | 16126.781 | NM_00633E | 10836.114 | 10189.319 |
| NM_002652 | 888.969   | 457.521   | NM_004202 | 59193.355 | 59475.336 | NM_00078E | 4129.362  | 2879.001  |
| NM_000547 | 782.102   | 788.162   | AB046829  | 1845.391  | 2001.568  | NM_017731 | 395.392   | 415.788   |
| NM_014652 | 2533.746  | 2285.688  | NM_01644E | 3255.992  | 3882.519  | AB040891  | 1981.153  | 2325.674  |
| AL133020  | 10799.169 | 12353.651 | NM_003379 | 55457.191 | 58119.945 | NM_00725E | 2520.765  | 2818.213  |
| NM_004152 | 1352.187  | 1742.001  | NM_004521 | 21978.709 | 20157.025 | NM_00104E | 25516.531 | 25286.041 |
| BU565263  | 52880.422 | 65382.367 | AF229162  | 4161.7    | 4352.509  | NM_005697 | 21643.271 | 20937.822 |
| NM_00502E | 8711.598  | 12690.191 | U02309    | 61670.473 | 60058.344 | NM_00309E | 3780.116  | 4316.135  |
| NM_001611 | 1776.42   | 2911.397  | AB028991  | 12878.763 | 11903.831 | NM_004781 | 1550.358  | 1991.83   |
| M59979    | 2405.419  | 2696.274  | AF263547  | 23657.256 | 21661.008 | NM_018303 | 1592.179  | 2167.795  |
| AB018310  | 1619.065  | 2418.547  | NM_003923 | 1060.897  | 782.69    | NM_01475E | 9349.111  | 11792.599 |
| NM_020133 | 1812.267  | 1670.429  | NM_004831 | 3496.292  | 2855.611  | NM_005124 | 1976.658  | 3856.816  |
| NM_01537E | 36671.199 | 39354.809 | NM_014213 | 18838.262 | 14675.146 | AK000947  | 3424.718  | 5346.431  |
| NM_00487E | 695.281   | 1158.585  | NM_00016E | 9190.793  | 7315.103  | NM_003897 | 3068.54   | 2872.385  |
| AF144638  | 14135.462 | 9913.332  | AF294629  | 23753.203 | 15763.545 | NM_01416E | 16940.969 | 15549.16  |
| BF028822  | 386.951   | 434.571   | NM_00054E | 22326.096 | 19399.484 | AL442085  | 6870.174  | 6576.083  |
| NM_005502 | 704.108   | 457.509   | NM_00213E | 57565.863 | 55003.188 | NM_013313 | 3507.024  | 4611.229  |
| NM_000742 | 2235.265  | 1748.494  | AK025571  | 5801.116  | 4621.783  | NM_01473E | 5900.488  | 5544.527  |
| NM_00235E | 17059.35  | 7837.939  | NM_014463 | 44251.031 | 31657.439 | AK023886  | 1598.855  | 1658.565  |
| AK026608  | 3297.472  | 2099.036  | NM_00552C | 30081.756 | 22596.334 | NM_002553 | 2920.424  | 3587.294  |
| NM_01889C | 42140.645 | 35177.609 | AK023265  | 3545.791  | 3508.73   | AJ404615  | 1996.147  | 1905.441  |
| NM_016204 | 1423.715  | 2305.018  | NM_018723 | 1885.426  | 1293.234  | NM_016053 | 23815.559 | 23076.766 |
| AB046836  | 1672.394  | 1659.075  | AB029009  | 9295.33   | 7583.891  | AB007869  | 4008.251  | 4630.146  |

|           |           |           |            |           |           |           |           |           |
|-----------|-----------|-----------|------------|-----------|-----------|-----------|-----------|-----------|
| NM_01781E | 16878.764 | 13874.362 | AF112207   | 6311.03   | 4848.885  | AB046844  | 1229.943  | 1944.501  |
| AJ224166  | 10018.284 | 10947.896 | AJ420488   | 58780.313 | 58434.734 | NM_00030Z | 2186.994  | 2354.199  |
| AK026098  | 11490.111 | 14936.051 | NM_005594  | 59246.109 | 55474.207 | NM_01323E | 38966.391 | 32927.281 |
| NM_012381 | 4320.139  | 7065.74   | NM_004461  | 61778.23  | 61660.988 | NM_01601E | 6373.904  | 6484.755  |
| M20702    | 1274.934  | 1629.909  | NM_01847Z  | 9093.341  | 7130.443  | NM_02012C | 998.779   | 1324.544  |
| NM_006397 | 17618.23  | 16665.289 | BF106121   | 3310.381  | 3898.208  | AK022900  | 704.563   | 967.197   |
| D83776    | 4187.678  | 5656.586  | AK022590   | 4581.443  | 4000.226  | AB023216  | 605.007   | 584.584   |
| NM_00408E | 12050.462 | 15027.378 | AK024343   | 3127.379  | 3570.922  | NM_00226E | 47524.383 | 46564.918 |
| NM_00218C | 3636.937  | 4064.239  | NM_00193E  | 876.242   | 1105.568  | NM_01440C | 5402.146  | 8003.991  |
| NM_00013E | 7265.709  | 6946.478  | NM_00256E  | 2554.192  | 2598.355  | AL157492  | 1268.448  | 1944.563  |
| NM_01816Z | 4265.8    | 2791.109  | M12078     | 11059.284 | 8077.547  | AL353957  | 2879.634  | 3256.133  |
| AK026362  | 5856.48   | 3957.543  | NM_00455C  | 15822.114 | 12884.328 | AK023827  | 6724.08   | 6908.5    |
| NM_00496E | 4820.67   | 3771.79   | NM_00078E  | 4781.031  | 4553.708  | L07517    | 1973.75   | 2065.338  |
| NM_00590E | 5424.503  | 4378.167  | NM_004110  | 25327.555 | 29276.623 | AK022451  | 16384.008 | 20242.834 |
| NM_00478E | 7351.247  | 4537.03   | NM_013387  | 59471.488 | 60595.371 | NM_01435E | 56984.617 | 69787.945 |
| AK024079  | 1151.436  | 811.869   | NM_00526Z  | 45680.371 | 36754.738 | BM918441  | 6800.31   | 8728.228  |
| NM_00242E | 5252.41   | 3355.508  | NM_005757  | 2465.041  | 2037.734  | AA150828  | 4037.805  | 4044.202  |
| NM_014674 | 5017.962  | 3510.49   | NM_01648Z  | 825.824   | 738.649   | H90764    | 1416.49   | 1961.843  |
| NM_018271 | 1353.098  | 772.039   | NM_02012E  | 2532.337  | 2006.121  | AI859208  | 546.419   | 478.937   |
| CY3Cy5    | 355.987   | 190.818   | NM_00506E  | 22081.029 | 20684.014 | H64379    | 22126.998 | 21774.207 |
| NM_020967 | 2025.92   | 1776.452  | NM_01822Z  | 12987.271 | 10725.077 | BE208258  | 45193.602 | 40519.734 |
| NM_001071 | 8399.682  | 5328.062  | NM_00669Z  | 46165.422 | 30179.191 | T72202    | 1602.437  | 2296.855  |
| AK021540  | 321.134   | 434.208   | NM_00172Z  | 4236.515  | 3919.213  | BI831922  | 1952.435  | 2182.795  |
| D86985    | 339.897   | 373.297   | AB046802   | 9116.275  | 7131.424  | M69238    | 3610.526  | 4682.818  |
| AK022258  | 2068.867  | 3274.641  | NM_003297  | 2660.858  | 2464.951  | AA664180  | 1357.757  | 1768.247  |
| AF088043  | 443.163   | 561.335   | X74861     | 894.69    | 1508.36   | M80244    | 395.753   | 683.945   |
| AF131799  | 865.912   | 841.245   | NM_00694C  | 1704.659  | 1605.016  | AA599158  | 13403.51  | 16133.277 |
| AK000455  | 1082.218  | 1089.473  | NM_01826E  | 13619.302 | 12222.16  | BE294756  | 917.893   | 1616.107  |
| NM_00523C | 352.678   | 279.649   | AK024633   | 8537.557  | 8366.325  | AK026092  | 9736.837  | 13914.133 |
| AK023719  | 2363.329  | 1176.197  | NM_00145Z  | 10435.865 | 9104.613  | AK001175  | 1612.368  | 2164.479  |
| AK025590  | 2523.834  | 1136.035  | NM_005257  | 32161.174 | 29707.408 | NM_00294C | 2569.521  | 2274.138  |
| AY007149  | 1376.76   | 432.291   | AF011573   | 24988.123 | 23057.99  | NM_016081 | 17313.162 | 17583.977 |
| NM_020967 | 1631.214  | 374.87    | NM_00214E  | 12594.105 | 11298.612 | NM_00638E | 3759.445  | 3443.436  |
| NM_001071 | 13803.803 | 12487.374 | NM_00724E  | 14176.995 | 9306.386  | M30818    | 1269.972  | 1588.954  |
| SR4       | 15773.202 | 46593.816 | NM_00189C  | 2153.377  | 1795.228  | NM_00016Z | 558.684   | 785.305   |
| SR6       | 1890.659  | 8413.679  | NM_00128E  | 9076.581  | 9003.561  | NM_00575E | 5125.255  | 4643.176  |
| SR8       | 7931.239  | 66308.398 | NM_01464E  | 1837.044  | 1807.682  | NM_00332E | 44466.57  | 38591.629 |
| SR10      | 26730.072 | 27957.611 | NM_019604  | 1730.873  | 2015.668  | NM_00329E | 47953.672 | 53862.871 |
| CY3Cy5    | 2873.522  | 414.759   | NM_00507Z  | 2258.391  | 2280.23   | NM_01433C | 49791.828 | 63405.387 |
| AL157484  | 578.894   | 333.557   | NM_000951  | 9663.608  | 9048.318  | NM_007034 | 926.57    | 821.112   |
| AK024850  | 563.713   | 689.718   | X52599     | 6720.237  | 6017.972  | NM_00156C | 813.417   | 913.858   |
| Y09836    | 1027.14   | 744.314   | AA029300   | 6588.599  | 6575.467  | NM_00178Z | 48701.77  | 51392.172 |
| AL137597  | 2787.07   | 2516.11   | BG708842   | 57867.973 | 63585.898 | J03171    | 3809.603  | 4348.916  |
| AK022144  | 299.301   | 272.205   | M19723     | 56684.102 | 62538.02  | NM_00585E | 1971.22   | 2120.051  |
| AF086044  | 519.292   | 519.687   | X06256     | 6551.202  | 6001.932  | NM_00432Z | 43469.648 | 54320.852 |
| NM_01492E | 524.652   | 518.697   | AA709271   | 4331.309  | 4922.033  | NM_00231C | 488.745   | 623.379   |
| AF131790  | 641.193   | 978.13    | M34057     | 8246.283  | 7169.167  | NM_00531Z | 2600.373  | 3467.668  |
| NM_01207E | 1849.148  | 2033.637  | ID 1984668 | 4484.292  | 4438.657  | NM_00421C | 9625.034  | 12733.837 |
| AB004851  | 374.604   | 716.219   | ID 1832579 | 6177.604  | 6387.704  | NM_02014C | 1826.654  | 2845.396  |
| AK023911  | 535.923   | 476.548   | H-430185 N | 2946.537  | 3455.893  | AK026232  | 4707.032  | 6009.026  |
| NM_00128Z | 4489.622  | 3306.223  | D16583     | 12192.756 | 9326.246  | NM_01489Z | 6007.332  | 5946.718  |
| AL110237  | 378.952   | 240.269   | H44051     | 4987.419  | 5032.574  | NM_01790E | 2480.53   | 1908.299  |
| D87470    | 1502.162  | 592.41    | AA481547   | 52701.559 | 52819.43  | NM_00633E | 10685.411 | 10261.843 |

|           |           |           |           |           |           |           |           |           |
|-----------|-----------|-----------|-----------|-----------|-----------|-----------|-----------|-----------|
| AF147307  | 3603.131  | 958.155   | AA831880  | 5043.829  | 5260.227  | NM_000786 | 3685.972  | 2475.235  |
| AK001829  | 1204.225  | 552.924   | T64880    | 15445.421 | 16250.078 | NM_017731 | 596.807   | 625.611   |
| AK024931  | 11231.446 | 21840.043 | NM_002852 | 9417.915  | 8322.103  | AB040891  | 1726.106  | 1844.921  |
| AL109715  | 1792.857  | 5207.977  | NM_001817 | 9743.884  | 6602.89   | NM_007256 | 2441.776  | 2921.506  |
| U00958    | 507.65    | 1390.031  | AF063611  | 2030.667  | 2229.836  | NM_001045 | 22005.721 | 20883.77  |
| AK025659  | 2153.321  | 1870.83   | NM_006039 | 3730.172  | 3863.625  | NM_005697 | 19857.992 | 19555.762 |
| AK026788  | 1353.78   | 1037.975  | NM_002089 | 1445.315  | 1752.288  | NM_003096 | 4148.87   | 4778.758  |
| AK025272  | 3332.912  | 3161.377  | NM_004590 | 599.111   | 743.713   | NM_004781 | 1986.851  | 2173.275  |
| AK026824  | 523.653   | 547.604   | M28983    | 953.257   | 623.5     | NM_018303 | 1811.082  | 2362.184  |
| AL365407  | 1242.642  | 1702.253  | NM_014656 | 22124.396 | 22700.24  | NM_014758 | 10448.754 | 12419.803 |
| AK000840  | 284.552   | 201.252   | NM_002076 | 6211.753  | 6824.749  | NM_005124 | 2158.468  | 3188.63   |
| AL162073  | 518.035   | 359.982   | X05299    | 6511.782  | 6292.682  | AK000947  | 3672.942  | 5436.107  |
| AJ006835  | 20387.051 | 11627.256 | BM468475  | 1976.068  | 2146.148  | L08240    | 1720.165  | 1896.95   |
| AF085890  | 379.803   | 183.735   | NM_000318 | 8380.986  | 7407.001  | NM_017952 | 1452.342  | 1763.85   |
| AL110138  | 385.861   | 130.012   | NM_002060 | 47907.73  | 46175.992 | NM_014165 | 18447.025 | 15655.69  |
| AL049445  | 527.715   | 952.72    | AK001230  | 11347.939 | 11798.809 | AL442085  | 6069.893  | 5381.584  |
| AL050153  | 617.023   | 2090.382  | NM_014680 | 22695.092 | 20014.578 | NM_013313 | 3692.266  | 4663.511  |
| AL122039  | 1158.009  | 2639.378  | NM_005027 | 7965.875  | 7557.902  | NM_014736 | 6383.594  | 6396.272  |
| AF070577  | 2902.87   | 7341.822  | NM_004612 | 3726.224  | 4372.324  | AK023886  | 1846.746  | 2133.992  |
| U92992    | 270.003   | 267.507   | NM_005608 | 51452.461 | 48958.266 | NM_002553 | 3089.148  | 3736.771  |
| BC028422  | 665.191   | 466.742   | NM_012294 | 432.129   | 651.29    | AJ404615  | 1930.616  | 1744.735  |
| AK022219  | 328.013   | 280.63    | NM_001106 | 1333.517  | 1218.06   | NM_016053 | 19398.402 | 21135.006 |
| AJ011378  | 279.551   | 444.047   | NM_018490 | 6270.084  | 5932.967  | AB007869  | 3612.973  | 3980.859  |
| AF009266  | 647.474   | 756.766   | NM_004778 | 1936.045  | 1928.231  | AB046844  | 1403.285  | 2401.841  |
| AF009310  | 362.012   | 375.899   | NM_004352 | 823.972   | 1174.245  | NM_000302 | 2406.708  | 2505.593  |
| AF054991  | 291.338   | 249.47    | NM_012258 | 1345.817  | 1439.94   | NM_013235 | 35279.281 | 29692.84  |
| AF060168  | 1107.891  | 989.343   | NM_006224 | 66790.938 | 67522.688 | NM_016015 | 6335.822  | 6017.751  |
| AF009275  | 425.559   | 309.198   | AL137300  | 18287.559 | 14319.437 | NM_020120 | 1021.178  | 1298.874  |
| AF015251  | 380.356   | 273.125   | NM_000229 | 8141.254  | 7202.895  | AK022900  | 770.797   | 968.108   |
| NM_018325 | 268.482   | 154.139   | NM_006995 | 52241.152 | 48247.547 | AB023216  | 462.322   | 669.829   |
| AK021778  | 508.791   | 658.61    | NM_003129 | 22656.195 | 23054.738 | NM_002266 | 49658.398 | 50234.488 |
| AK001150  | 3510.851  | 9579.373  | NM_001956 | 13907.761 | 13144.073 | NM_014400 | 5685.974  | 7038.853  |
| AK002123  | 1031.895  | 2110.271  | AB033064  | 8573.515  | 8922.022  | AL157492  | 1260.187  | 1833.716  |
| AK021633  | 1406.964  | 2889.471  | AK022317  | 19248.389 | 21122.705 | AL353957  | 3340.363  | 3880.422  |
| NM_005322 | 1305.083  | 1011.072  | NM_018396 | 16485.732 | 19907.799 | NM_007214 | 6452.663  | 9097.403  |
| AK024465  | 7384.807  | 4946.708  | NM_003124 | 21975.816 | 23827.436 | NM_000311 | 8742.349  | 8801.271  |
| AF075119  | 765.852   | 583.453   | NM_006886 | 56776.945 | 54444.094 | L07517    | 2136.347  | 2271.139  |
| AK021478  | 2884.435  | 3051.862  | NM_004531 | 8698.348  | 9909.737  | AK022451  | 16885.969 | 17355.943 |
| AF131782  | 1090.711  | 1373.993  | AB040920  | 1871.27   | 2235.433  | NM_014355 | 58113.047 | 70090.57  |
| NM_014210 | 6143.179  | 10306.76  | NM_015720 | 32180.783 | 30763.305 | BM918441  | 7541.412  | 8944.329  |
| AK021603  | 319.368   | 432.012   | AB033070  | 1687.079  | 2488.565  | AA425102  | 356.422   | 418.608   |
| AL110136  | 3617.377  | 2752.333  | AK000158  | 14139.056 | 17164.154 | AA150828  | 4258.023  | 4371.953  |
| AJ008130  | 18157.83  | 15287.724 | NM_005769 | 3606.517  | 4481.303  | H90764    | 1656.204  | 1983.056  |
| AF086502  | 458.839   | 436.352   | AK024500  | 39055.613 | 37022.414 | AI859208  | 672.987   | 709.777   |
| L39924    | 1778.716  | 1427.335  | NM_002564 | 44116.801 | 41545.027 | H64379    | 18387.188 | 18685.814 |
| U52054    | 5093.475  | 2988.901  | Z83806    | 471.947   | 703.32    | BE208258  | 48681.762 | 41194.695 |
| D17226    | 299.147   | 133.754   | NM_000963 | 1422.212  | 1872.843  | T72202    | 1401.841  | 1458.297  |
| AK023325  | 757.445   | 358.43    | NM_013308 | 17900.424 | 19403.994 | BI831922  | 2146.479  | 1993.197  |
| NM_017985 | 1010.686  | 204.485   | AF027302  | 13274.2   | 13776.45  | M69238    | 3758.855  | 4318.721  |
| AK025866  | 6032.294  | 8696.655  | NM_006708 | 51085.906 | 41113.359 | AA664180  | 1217.403  | 1404.516  |
| AF088058  | 973.343   | 2334.658  | AB037835  | 3985.175  | 3473.367  | AA599158  | 15128.64  | 19176.873 |
| NM_000513 | 2211.011  | 5606.256  | NM_016228 | 1206.64   | 1114.427  | BE294756  | 1154.269  | 1800.955  |
| Y11165    | 2533.305  | 5848.61   | NM_000157 | 6303.615  | 5672.925  | AK026092  | 10262.498 | 12784.646 |

|           |           |           |            |           |           |           |           |           |
|-----------|-----------|-----------|------------|-----------|-----------|-----------|-----------|-----------|
| NM_00353C | 1088.646  | 1088.711  | NM_000712  | 619.287   | 682.537   | AK001175  | 1838.87   | 2157.938  |
| AJ227871  | 883.224   | 716.739   | NM_01808E  | 3293.484  | 3079.085  | NM_003897 | 2907.939  | 3274.923  |
| AK025344  | 2017.162  | 1412.905  | BC013695   | 18419.707 | 16649.207 | NM_00329E | 50944.395 | 62632.223 |
| D28589    | 15763.487 | 10836.439 | NM_00720E  | 1912.678  | 1528.71   | NM_01433C | 53527.141 | 62647.938 |
| AF301223  | 1048.155  | 778.939   | AK023035   | 9122.293  | 7559.755  | NM_007034 | 860.766   | 899.652   |
| NM_017867 | 3215.142  | 3486.591  | NM_01484E  | 6164.024  | 5815.569  | NM_00156C | 1037.964  | 1059.862  |
| U92820    | 2970.668  | 2767.197  | AB011164   | 13090.978 | 11500.367 | NM_00178E | 45448.801 | 41802.582 |
| NM_017937 | 952.225   | 1086.618  | M24750     | 2709.275  | 2403.116  | J03171    | 3693.039  | 4208.729  |
| AL360266  | 3006.967  | 3405.689  | NM_00596E  | 6696.394  | 7057.088  | NM_00585E | 1808.671  | 2001.084  |
| AL160132  | 6599.292  | 7544.168  | NM_00274C  | 10445.971 | 9926.033  | NM_00432E | 40711.344 | 38206.762 |
| NM_019557 | 2112.146  | 2020.73   | AL117482   | 6990.664  | 7687.392  | NM_00531E | 2931.209  | 3324.339  |
| AK024413  | 415.055   | 525.896   | NM_00654E  | 59718.441 | 58287.156 | NM_001711 | 1906.138  | 2073.906  |
| AK022247  | 482.219   | 574.924   | AB018324   | 28407.328 | 29255.174 | NM_00421C | 11290.464 | 11872.889 |
| AK001453  | 2738.591  | 1993.193  | NM_00274E  | 60350.938 | 61790.48  | NM_02014C | 1686.795  | 2025.465  |
| AB007972  | 930.899   | 578.985   | Z25431     | 5848.076  | 6507.105  | NM_00149E | 8305.048  | 9071.872  |
| AL390144  | 4769.128  | 2541.775  | NM_005627  | 27089.922 | 30468.479 | NM_00196E | 976.317   | 1406.087  |
| AK024017  | 918.742   | 331.721   | M64497     | 1702.172  | 2366.092  | NM_00250C | 4986.939  | 6370.879  |
| X56196    | 861.382   | 282.945   | NM_007274  | 42006.906 | 41045.203 | AK026232  | 5773.762  | 7511.747  |
| D17220    | 10125.171 | 10074.469 | NM_00335E  | 22375.41  | 23651.389 | NM_01489E | 7984.178  | 8429.523  |
| D28363    | 51647.664 | 71140.82  | AF238315   | 1757.014  | 2445.714  | AK023827  | 6790.458  | 9291.138  |
| AB011171  | 1086.189  | 2375.514  | NM_00189C  | 2331.053  | 2415.669  | NM_001117 | 497.027   | 507.101   |
| AF090099  | 453.764   | 955.852   | NM_00128E  | 8620.34   | 7474.364  | AF283645  | 6994.675  | 5851.455  |
| AK023606  | 465.786   | 1214.433  | NM_01464E  | 1927.595  | 1687.194  | NM_01657E | 5618.832  | 5724.051  |
| NM_00358E | 667.37    | 1024.28   | NM_019604  | 1768.317  | 2000.994  | NM_00104E | 22161.572 | 20748.631 |
| NM_00092E | 3581.072  | 3425.327  | NM_00507E  | 2220.107  | 2283.146  | NM_005697 | 22135.494 | 22048.648 |
| NM_01323E | 2036.918  | 1517.684  | NM_000951  | 9776.158  | 9975.521  | NM_00309E | 4116.124  | 4151.192  |
| NM_01799E | 945.38    | 1153.009  | X52599     | 6783.661  | 6578.272  | NM_004781 | 1969.984  | 1610.131  |
| NM_00036E | 941.393   | 638.59    | AA029300   | 6654.142  | 7816.922  | NM_01830E | 1734.685  | 1912.18   |
| NM_01442E | 2282.763  | 2184.043  | BG708842   | 56163.16  | 59508.359 | NM_01475E | 7320.571  | 7618.719  |
| AK000770  | 525.316   | 553.132   | M19723     | 57486.652 | 61560.164 | NM_005124 | 2183.114  | 2537.928  |
| NM_00237C | 11008.645 | 11130.307 | X06256     | 7019.741  | 7431.307  | AK000947  | 3433.792  | 4338.428  |
| NM_01567C | 5264.176  | 5605.826  | AA709271   | 3137.434  | 3497.114  | L08240    | 1383.547  | 1419.198  |
| NM_01470E | 1426.742  | 1431.415  | M34057     | 7994.526  | 8291.149  | NM_01795E | 1549      | 1863.399  |
| AK002203  | 548.441   | 442.946   | ID 1984668 | 4708.737  | 4184.944  | NM_00294C | 2193.031  | 2386.508  |
| AK026469  | 481.37    | 653.05    | ID 1832579 | 5694.059  | 5659.997  | NM_016081 | 17291.133 | 22078.262 |
| D16935    | 4615.594  | 4781.629  | H-430185 N | 2955.403  | 3057.714  | NM_00638E | 3437.065  | 4524.467  |
| U92019    | 646.951   | 546.89    | D16583     | 11105.339 | 9914.775  | M30818    | 1454.235  | 2056.936  |
| U52835    | 1188.963  | 762.846   | H44051     | 4175.423  | 3924.701  | NM_00016E | 509.11    | 732.989   |
| NM_00075E | 1941.118  | 1338.044  | AA481547   | 49333.246 | 44649.863 | NM_00575E | 5024.503  | 5291.73   |
| AK022148  | 251.147   | 131.221   | AA831880   | 4854.833  | 5232.696  | NM_00332E | 45157     | 42347.617 |
| Z36811    | 46679.324 | 31723.73  | T64880     | 14689.192 | 15193.814 | NM_01440C | 6174.53   | 5451.973  |
| NM_01895C | 11988.842 | 3130.652  | AB028990   | 2224.554  | 2413.235  | AL157492  | 1483.733  | 1428.943  |
| K03200    | 5522.857  | 1142.435  | AK002089   | 786.134   | 879.785   | AL353957  | 3389.894  | 2511.361  |
| U17629    | 5960.791  | 10818.499 | AF063611   | 2352.25   | 2157.525  | NM_007214 | 7403.369  | 7574.474  |
| NM_02042E | 14875.203 | 33691.727 | NM_00603E  | 4187.476  | 3935.887  | NM_000311 | 10509.706 | 9360.476  |
| U79265    | 7273.388  | 14973.229 | NM_00208E  | 1536.924  | 1620.417  | NM_01790E | 2353.757  | 2374.256  |
| AK022868  | 10340.771 | 27037.822 | NM_00459C  | 641.054   | 866.813   | NM_00633E | 11487.626 | 12877.455 |
| NM_002687 | 8799.23   | 5738.069  | M28983     | 614.409   | 672.154   | NM_00078E | 4187.526  | 3155.231  |
| NM_000627 | 2410.61   | 1694.068  | NM_01465E  | 23917.91  | 22413.369 | NM_017731 | 637.307   | 366.192   |
| NM_00003E | 830.587   | 527.006   | NM_00207E  | 6918.777  | 6695.303  | AB040891  | 1936.661  | 2114.979  |
| NM_00082E | 390.516   | 307.312   | X05299     | 6182.141  | 6832.859  | NM_00584E | 18700.598 | 19000.508 |
| NM_00196E | 381.973   | 305.781   | BM468475   | 2001.582  | 2030.913  | NM_01620E | 7889.263  | 7499.209  |
| NM_00388E | 3080.482  | 3253.166  | NM_00031E  | 7976.389  | 7819.729  | AK075415  | 745.033   | 1163.18   |



|           |           |           |           |           |           |           |           |           |
|-----------|-----------|-----------|-----------|-----------|-----------|-----------|-----------|-----------|
| NM_005843 | 3512.153  | 3607.225  | NM_002060 | 47614.016 | 54264.512 | NM_018964 | 5845.115  | 8761.642  |
| NM_003854 | 340.456   | 372.522   | AK001230  | 12215.004 | 13513.722 | NM_000080 | 1508.998  | 1785.68   |
| NM_017980 | 572.092   | 699.389   | NM_014680 | 21208.172 | 17586.596 | NM_001825 | 1221.086  | 1995.225  |
| NM_001252 | 43003.172 | 33345.949 | NM_005027 | 8124.427  | 8120.877  | NM_007256 | 2362.544  | 2584.411  |
| AF053712  | 624.281   | 438.751   | NM_004612 | 3480.458  | 4319.001  | AK026092  | 8628.683  | 7913.503  |
| NM_003947 | 424.958   | 405.991   | NM_005608 | 50513.484 | 48460.039 | AK001175  | 1974.987  | 1619.743  |
| NM_002821 | 15563.291 | 10808.448 | NM_012294 | 543.538   | 686.513   | NM_003897 | 3117.706  | 3135.516  |
| M96652    | 3532.254  | 2649.252  | NM_001106 | 1278.293  | 1568.566  | NM_014165 | 18010.563 | 17284.918 |
| L41690    | 2477.847  | 1640.783  | NM_015583 | 1913.306  | 2154.833  | AL442085  | 6126.862  | 5803.888  |
| NM_018059 | 1861.855  | 500.297   | NM_018490 | 6393.808  | 6524.862  | NM_013313 | 3442.019  | 4100.959  |
| NM_000939 | 43298.398 | 13726.852 | NM_004778 | 1599.011  | 1914.789  | NM_014736 | 5791.648  | 6089.87   |
| NM_005183 | 707.932   | 638.753   | NM_004352 | 698.62    | 1031.148  | AK023886  | 1632.993  | 1774.796  |
| NM_006514 | 2310.129  | 4687.69   | NM_012258 | 1310.84   | 1664.358  | NM_002553 | 2855.506  | 3302.339  |
| AF065164  | 1751.059  | 3762.438  | NM_007245 | 15060.129 | 15677.438 | AJ404615  | 1837.464  | 1518.245  |
| K01900    | 287.229   | 1099.673  | NM_000229 | 7511.504  | 7361.18   | NM_016053 | 22092.855 | 21152.877 |
| AJ008143  | 6428.333  | 6053.458  | NM_006995 | 50892.523 | 46410.484 | AB007869  | 3484.834  | 3870.25   |
| NM_007144 | 911.166   | 837.056   | NM_003129 | 22258.813 | 23536.082 | AB046844  | 776.222   | 1197.049  |
| NM_005093 | 469.766   | 291.816   | NM_001956 | 14560.896 | 14112.312 | NM_000302 | 1997.969  | 2375.393  |
| NM_004424 | 4210.95   | 2734.193  | AB033064  | 8487.635  | 9878.409  | NM_013235 | 34524.004 | 32931.293 |
| AL133117  | 2401.67   | 1491.589  | AK022317  | 18823.889 | 21342.162 | NM_016015 | 6228.617  | 7793.896  |
| AB033040  | 341.259   | 394.916   | NM_018396 | 16440.566 | 20138.143 | NM_020120 | 891.71    | 1438.244  |
| AF070586  | 1362.964  | 920.937   | NM_003124 | 26882.027 | 34061.77  | AK022900  | 784.729   | 1127.33   |
| NM_014412 | 2491.506  | 2697.404  | NM_006886 | 56780.188 | 58342.938 | AB023216  | 407.107   | 283.856   |
| NM_013303 | 478.868   | 404.218   | NM_004531 | 8516.438  | 10646.131 | NM_002266 | 45786.559 | 38779.672 |
| NM_012227 | 7136.643  | 7623.018  | AB040920  | 1851.623  | 2669.636  | NM_033195 | 1271.024  | 570.945   |
| NM_006101 | 2480.542  | 2438.324  | NM_015720 | 31106.316 | 34655.059 | NM_015001 | 1530.726  | 786.204   |
| NM_001237 | 9045.75   | 10624.953 | AB033070  | 1830.224  | 2212.397  | AF086261  | 1843.975  | 1798.214  |
| NM_002507 | 1042.56   | 1298.839  | AK000158  | 15362.448 | 18719.322 | AF086367  | 485.841   | 385.02    |
| NM_015962 | 2469.219  | 1956.886  | NM_005769 | 3592.981  | 4465.849  | AF086437  | 2072.296  | 2068.838  |
| NM_016145 | 1147.352  | 986.962   | AK024500  | 43594.438 | 43838.07  | AK025088  | 3154.193  | 2561.231  |
| NM_016078 | 5217.578  | 3329.096  | NM_002564 | 39543.555 | 39856.938 | U79295    | 1132.987  | 1986.031  |
| NM_003798 | 898.863   | 501.504   | Z83806    | 406.796   | 811.555   | AK002107  | 1472.485  | 1204.827  |
| NM_004401 | 7587.436  | 2635.653  | NM_000963 | 1394.937  | 1824.748  | NM_003596 | 3546.266  | 3445.646  |
| NM_001849 | 658.225   | 220.736   | NM_013308 | 17513.406 | 17068.836 | AF052181  | 3726.1    | 4011.965  |
| AF255910  | 678.914   | 137.691   | AF027302  | 13034.482 | 13822.281 | AL050074  | 4736.05   | 4620.117  |
| NM_000425 | 259.968   | 382.391   | NM_002852 | 10696.233 | 11581.426 | AK026436  | 1572.598  | 1714.25   |
| NM_016146 | 9435.093  | 20994.49  | NM_001817 | 11075.813 | 11254.143 | NM_015001 | 2051.332  | 2150.855  |
| AB046776  | 1390.293  | 2562.35   | NM_016228 | 3164.779  | 2761.385  | SR2       | 33646.809 | 44351.453 |
| D42084    | 4924.232  | 5452.813  | NM_000157 | 7648.308  | 7455.864  | SR4       | 11219.539 | 17054.805 |
| NM_001734 | 820.298   | 788.984   | NM_000712 | 1189.988  | 735.445   | SR6       | 1243.947  | 1899.829  |
| NM_014693 | 4456.088  | 3365.313  | NM_018088 | 4128.092  | 4544.583  | SR8       | 4193.422  | 19996     |
| AB007896  | 1836.488  | 1730.477  | BC013695  | 18229.039 | 17911.912 | SR10      | 14639.376 | 4487.313  |
| AB007916  | 3879.247  | 2832.313  | NM_007205 | 2157.549  | 1750.241  | AL109719  | 1671.624  | 932.779   |
| NM_002874 | 1033.904  | 1762.645  | AK023035  | 9992.673  | 8718.386  | AF086093  | 875.6     | 367.052   |
| AB028980  | 479.98    | 389.072   | NM_014846 | 6106.86   | 6069.532  | NM_003650 | 749.42    | 440.084   |
| AF049140  | 4649.554  | 6896.067  | AB011164  | 11761.58  | 11391.333 | AK022119  | 8600.596  | 5036.421  |
| AB037793  | 535.345   | 599.505   | M24750    | 2911.253  | 3107.63   | NM_016644 | 1536.869  | 1244.811  |
| AL136794  | 2367.606  | 2099.267  | NM_005965 | 7790.165  | 8383.252  | AF147397  | 721.416   | 780.94    |
| BC035601  | 27549.932 | 22565.082 | NM_002740 | 9980.399  | 9767.922  | AK027158  | 602.987   | 693.82    |
| NM_001458 | 1094.387  | 1147.797  | AL117482  | 7470.653  | 8210.603  | AK002187  | 625.887   | 999.327   |
| NM_020388 | 4271.451  | 4445.376  | NM_006549 | 55584.633 | 58567.113 | AF085836  | 5742.631  | 6488.78   |
| NM_004202 | 13859.781 | 10775.498 | AB018324  | 28423.002 | 27563.994 | AK026659  | 7069.06   | 9358.051  |
| AB046829  | 1058.266  | 1064.96   | NM_002742 | 55861.805 | 61216.246 | AL049449  | 5777.711  | 6407.037  |

|           |           |           |            |           |           |           |           |           |
|-----------|-----------|-----------|------------|-----------|-----------|-----------|-----------|-----------|
| NM_01644E | 554.123   | 349.024   | Z25431     | 5506.794  | 6880.296  | NM_01536E | 10808.238 | 12716.635 |
| NM_00337E | 15678.474 | 7255.806  | NM_005627  | 27364.816 | 28243.27  | AF147344  | 609.79    | 763.159   |
| NM_004521 | 11458.495 | 5380.911  | M64497     | 1749.658  | 2428.427  | AK023745  | 1503.64   | 1785.711  |
| AF229162  | 2674.251  | 698.662   | NM_007274  | 40499.48  | 41233.473 | NM_01898E | 2528.565  | 3120.287  |
| AB028991  | 6097.387  | 8491.695  | NM_00335E  | 20976.426 | 24107.656 | AF086254  | 3566.175  | 2984.018  |
| AF263547  | 25176.254 | 38226.727 | AF238315   | 1667.303  | 2416.339  | AK026856  | 923.114   | 792.662   |
| NM_00392E | 553.894   | 501.318   | NM_006224  | 61409.367 | 63244.996 | AL162033  | 3999.605  | 2342.291  |
| NM_004831 | 2819.078  | 2706.731  | AL137300   | 20288.156 | 21700.17  | AK026893  | 649.762   | 403.045   |
| NM_01421E | 9644.416  | 6332.21   | NM_01464E  | 2481.848  | 2694.636  | AK026761  | 517.235   | 556.222   |
| NM_00016E | 2116.274  | 1847.187  | NM_019604  | 2601.342  | 3038.156  | NM_01883E | 7880.067  | 7502.667  |
| AF294629  | 3504.365  | 2425.171  | NM_00507E  | 3021.389  | 2903.964  | AF075083  | 795.02    | 887.208   |
| NM_00054E | 4112.874  | 4187.489  | NM_000951  | 11749.278 | 12322.971 | AK021454  | 1155.774  | 993.26    |
| NM_00213E | 49907.441 | 42151.375 | X52599     | 7478.88   | 8549.854  | AK022069  | 2579.355  | 2475.583  |
| AK025571  | 782.997   | 849.826   | AA029300   | 6650.618  | 7652.113  | AL137457  | 1934.279  | 1995.368  |
| NM_00494C | 320.784   | 429.383   | BG708842   | 58162.195 | 62961.223 | AF075092  | 628.766   | 1105.368  |
| NM_01446E | 27744.025 | 25507.131 | M19723     | 64200.059 | 66433.68  | AF085944  | 1394.342  | 1710.246  |
| NM_00552C | 22871.441 | 31124.295 | X06256     | 8916.384  | 9153.139  | AL133038  | 2204.65   | 4336.938  |
| AK023265  | 964.888   | 1314.521  | AA709271   | 4493.437  | 5392.127  | AL137414  | 1458.726  | 1760.672  |
| NM_01872E | 934.168   | 1278.89   | M34057     | 9355.708  | 9578.156  | AL359574  | 1697.699  | 1959.703  |
| AB029009  | 5738.414  | 5097.193  | ID 1984668 | 4671.826  | 4484.717  | AL137435  | 1458.039  | 1855.627  |
| AF112207  | 3551.511  | 3529.925  | ID 1832579 | 6146.067  | 7046.798  | AL157463  | 794.471   | 1099.752  |
| AJ420488  | 51864.859 | 71318.93  | H-430185 M | 3496.519  | 3468.263  | AL359604  | 831.629   | 578.855   |
| NM_005594 | 11313.368 | 8242.16   | D16583     | 12484.678 | 9931.236  | AK027189  | 859.761   | 567.371   |
| NM_004461 | 54489.027 | 58862.363 | H44051     | 4836.786  | 4828.453  | AK001910  | 3442.008  | 1600.585  |
| NM_01847E | 4621.313  | 3382.854  | AA481547   | 52320.719 | 51751.559 | AK023892  | 362.176   | 276.255   |
| BF106121  | 2054.359  | 1137.434  | AA831880   | 5489.897  | 5830.488  | AF124368  | 1364.507  | 926.428   |
| AK022590  | 3294.899  | 1499.15   | T64880     | 14902.209 | 14724.331 | AF265210  | 2450.729  | 1231.377  |
| AK024343  | 2185.995  | 634.116   | AB028990   | 2180.844  | 2086.316  | AK024241  | 1019.272  | 771.189   |
| M12078    | 1910.483  | 2319.122  | AK002089   | 866.565   | 840.481   | AK025061  | 2052.744  | 2082.052  |
| NM_00455C | 8469.245  | 7044.036  | NM_00670E  | 55646.902 | 52046.074 | AK023882  | 538.212   | 391.911   |
| NM_00078E | 2770.893  | 2693.6    | AB037835   | 4573.448  | 5251.548  | AK026750  | 1542.116  | 1582.676  |
| NM_004110 | 6478.515  | 4276.096  | NM_00206C  | 58173.762 | 58418.543 | AF072164  | 3123.984  | 2969.68   |
| NM_013387 | 46308.105 | 37280.105 | AK001230   | 13670.506 | 16334.331 | NM_01861C | 500.426   | 613.297   |
| NM_00526E | 6021.013  | 5005.786  | NM_01468C  | 26357.17  | 23566.119 | AF147317  | 1519.25   | 2348.874  |
| NM_005757 | 1587.146  | 1027.83   | NM_005027  | 9637.435  | 9616.814  | AF232216  | 1336.88   | 1925.788  |
| NM_01648E | 514.216   | 446.83    | NM_00461E  | 3984.428  | 4391.773  | NM_01777E | 9804.063  | 12954.189 |
| NM_02012E | 2007.43   | 2034.75   | NM_00560E  | 51554.734 | 52486.48  | AK021885  | 450.507   | 472.669   |
| NM_00506E | 4071.382  | 5258.24   | NM_012294  | 643.017   | 933.366   | AK022296  | 835.864   | 827.751   |
| NM_01822E | 7977.565  | 9671.311  | NM_00110E  | 2258.593  | 2486.727  | AK021940  | 1595.771  | 1537.78   |
| NM_00669E | 33501.699 | 33032.332 | NM_01558E  | 2762.423  | 3330.589  | AK022189  | 842.091   | 691.738   |
| NM_00172E | 2115.931  | 2023.688  | NM_01849C  | 7998.979  | 8649.647  | AK022338  | 790.913   | 691.835   |
| AB046802  | 801.433   | 794.858   | NM_00477E  | 1624.294  | 1655.022  | U48696    | 1745.283  | 1291.696  |
| NM_003297 | 2046.126  | 2192.115  | NM_00624E  | 6172.472  | 7292.857  | AF230316  | 4395.653  | 2720.728  |
| X74861    | 261.785   | 307.607   | NM_00435E  | 788.31    | 1059.24   | AK024515  | 8226.571  | 5502.09   |
| NM_00694C | 1044.9    | 1039.042  | NM_01225E  | 1116.973  | 1434.082  | AF085862  | 4089.152  | 3416.146  |
| NM_01826E | 7389.243  | 6333.654  | NM_00510E  | 1665.868  | 1893.515  | NM_01799E | 1893.466  | 1719.573  |
| AK024633  | 4123.238  | 2816.823  | NM_00482E  | 4888.214  | 6322.3    | AL049271  | 51338.707 | 48599.191 |
| NM_00145E | 5565.287  | 2998.111  | AK022349   | 3986.667  | 4451.365  | NM_01960E | 2991.281  | 3335.927  |
| NM_005257 | 12207.763 | 6799.078  | NM_00575C  | 2522.21   | 1876.364  | AK026198  | 4409.828  | 4066.566  |
| AF011573  | 6506.594  | 2618.692  | NM_00497E  | 1384.8    | 1531.844  | NM_005001 | 19371.178 | 28124.211 |
| NM_00214E | 5173.687  | 1252.389  | AF101051   | 514.91    | 1231.188  | AK024175  | 2460.582  | 2597.36   |
| NM_00724E | 7570.313  | 6683.787  | NM_00724E  | 16081.559 | 17209.26  | NM_00051C | 2099.413  | 2715.233  |
| NM_00189C | 1312.781  | 1125.837  | NM_00189C  | 2702.382  | 3325.933  | NM_017787 | 1357.897  | 1303.875  |

|            |           |           |           |           |           |           |           |           |
|------------|-----------|-----------|-----------|-----------|-----------|-----------|-----------|-----------|
| NM_001286  | 4999.95   | 5402.298  | NM_001286 | 10437.785 | 12496.856 | NM_020315 | 11592.405 | 9470.247  |
| NM_014648  | 1135.863  | 1039.612  | AY009127  | 35868.023 | 41304.285 | NM_005683 | 1349.748  | 992.353   |
| NM_019604  | 244.588   | 288.558   | NM_014869 | 12345.085 | 13591.632 | NM_020427 | 22102.443 | 12008.458 |
| NM_005073  | 1058.175  | 1044.754  | NM_003929 | 1228.661  | 928.914   | AF085920  | 964.458   | 764.408   |
| NM_000951  | 2131.692  | 2083.024  | AK000158  | 16317.415 | 19118.299 | AK023173  | 21891.207 | 13030.722 |
| AA029300   | 3878.458  | 4701.209  | NM_005769 | 4074.324  | 5695.906  | U79275    | 13256.016 | 11211.577 |
| BG708842   | 32455.117 | 33434.301 | AK024500  | 49780.309 | 56424.023 | AJ227908  | 775.574   | 992.257   |
| M19723     | 47993.141 | 68054.375 | NM_002564 | 46364.082 | 51599.816 | AF007193  | 1479.793  | 1786.829  |
| X06256     | 279.004   | 430.401   | Z83806    | 726.915   | 780.211   | AF088067  | 15127.07  | 21079.959 |
| M34057     | 2772.708  | 3905.394  | NM_000963 | 1352.204  | 1391.399  | AK022213  | 1397.527  | 2575.208  |
| ID 1984668 | 3397.313  | 2701.123  | NM_013308 | 17821.719 | 22015.279 | AF056441  | 4947.456  | 6877.65   |
| ID 1832579 | 3522.192  | 3527.634  | AF027302  | 12642.538 | 14087.476 | Y10509    | 787.135   | 1144.25   |
| H-430185 N | 1449.809  | 1275.462  | NM_002852 | 9024.609  | 10536.915 | AK024389  | 11297.86  | 12810.846 |
| D16583     | 4425.298  | 2376.742  | NM_001817 | 11244.74  | 11763.321 | AK026793  | 2573.854  | 2997.971  |
| H44051     | 335.134   | 280.915   | AF063611  | 2104.564  | 2590.553  | NM_001672 | 619.305   | 784.337   |
| AA481547   | 24859.684 | 14664.53  | NM_006039 | 4596.397  | 5382.368  | AJ276253  | 19367.041 | 16479.885 |
| AA831880   | 1997.722  | 976.38    | NM_002089 | 1760.919  | 2268.171  | AF147314  | 1719.999  | 1734.407  |
| T64880     | 5153.711  | 2651.927  | NM_004590 | 648.131   | 762.225   | NM_018980 | 11497.002 | 12533.051 |
| NM_002852  | 2540.433  | 3853.533  | M28983    | 860.946   | 984.698   | AF086201  | 1010.071  | 802.061   |
| NM_001817  | 4303.057  | 4011.696  | NM_014656 | 28015.027 | 29198.389 | AK024712  | 1568.45   | 1098.845  |
| AF063611   | 1197.615  | 1118.38   | NM_002076 | 8591.18   | 10361.461 | NM_002902 | 6198.638  | 4518.68   |
| NM_006039  | 770.769   | 685.623   | X05299    | 7430.863  | 7997.888  | NM_020248 | 33234.227 | 22185.346 |
| NM_002089  | 482.046   | 644.561   | NM_007274 | 41573.777 | 36160.445 | X89670    | 1578.756  | 1088.829  |
| NM_004590  | 251.326   | 317.413   | NM_003356 | 21636.652 | 20860.018 | NM_001726 | 352.162   | 277.254   |
| M28983     | 305.248   | 428.921   | AF238315  | 3884.195  | 6658.025  | NM_004053 | 3741.999  | 2659.077  |
| NM_014656  | 3018.985  | 3429.225  | NM_006224 | 53744.051 | 61772.828 | NM_001489 | 1020.194  | 916.821   |
| NM_002076  | 2309.398  | 2385.14   | AL137300  | 20021.426 | 18130.824 | NM_020374 | 2893.798  | 2882.193  |
| X05299     | 4445.688  | 4697.341  | NM_000229 | 9839.381  | 10331.426 | NM_014922 | 2284.835  | 2387.544  |
| BM468475   | 1034.498  | 1107.263  | NM_006995 | 51556.672 | 50659.484 | AF183570  | 487.06    | 640.803   |
| NM_000318  | 4426.711  | 5306.629  | NM_003129 | 25214.16  | 28084.625 | NM_005497 | 56942.145 | 58288.238 |
| NM_002060  | 7351.37   | 9687.165  | NM_001956 | 17439.648 | 17458.508 | AK024048  | 3623.376  | 4368.813  |
| AK001230   | 3443.085  | 5226.285  | AB033064  | 9245.686  | 11227.44  | AB033093  | 4173.751  | 4942.001  |
| NM_014680  | 8015.833  | 9232.426  | AK022317  | 22444.313 | 24999.557 | NM_005912 | 2419.26   | 4495.519  |
| NM_005027  | 4472.685  | 5874.411  | NM_018396 | 18628.83  | 23287.34  | NM_005909 | 61020.172 | 64920.164 |
| NM_004612  | 2385.276  | 2656.543  | NM_003124 | 27484.973 | 28089.297 | AK001948  | 809.703   | 1399.579  |
| NM_005608  | 30817.893 | 28178.141 | NM_006886 | 56940.629 | 59237.977 | AK021879  | 486.759   | 885.557   |
| NM_012294  | 284.091   | 343.289   | NM_004531 | 10540.793 | 13809.419 | AL355717  | 432.248   | 383.633   |
| NM_001106  | 380.902   | 329.278   | AL133581  | 4174.234  | 5394.906  | AK055991  | 844.255   | 987.208   |
| NM_018490  | 601.128   | 404.33    | NM_002558 | 2426.333  | 2555.325  | AF113697  | 917.689   | 1097.911  |
| NM_004778  | 224.393   | 310.684   | NM_005031 | 16357.993 | 20873.148 | AK022326  | 2864.351  | 2802.233  |
| NM_012258  | 744.716   | 461.154   | AB040920  | 1956.245  | 2739.027  | AF085991  | 1723.066  | 1741.324  |
| NM_006224  | 41189.699 | 36870.797 | NM_000720 | 1421.996  | 1886.701  | NM_001943 | 1064.094  | 543.359   |
| AL137300   | 8462.623  | 9740.021  | NM_004842 | 1263.514  | 1855.131  | NM_004927 | 9212.117  | 6068.71   |
| NM_000229  | 2010.613  | 1479.998  | AK024639  | 7574.744  | 8187.485  | AB040928  | 598.556   | 437.282   |
| NM_006995  | 28268.797 | 27276.762 | NM_015720 | 42245.648 | 46591.223 | NM_001459 | 2178.268  | 1449.331  |
| NM_003129  | 13738.05  | 12873.268 | AB007915  | 2013.317  | 2782.376  | NM_015513 | 26622.824 | 18309.246 |
| NM_001956  | 2435.212  | 1954.259  | AB033070  | 2020.682  | 3018.293  | NM_006219 | 4677.538  | 3888.199  |
| AB033064   | 1501.994  | 1780.264  | AB028990  | 2237.011  | 1994.294  | NM_004443 | 13836.008 | 10619.287 |
| AK022317   | 3781.759  | 4071.236  | AK002089  | 624.423   | 418.834   | NM_017412 | 1646.207  | 1593.244  |
| NM_018396  | 10599.883 | 9998.675  | NM_006708 | 52204.586 | 53015.734 | NM_005544 | 656.241   | 328.526   |
| NM_003124  | 820.76    | 953.098   | AB037835  | 5148.278  | 5226.909  | NM_002964 | 60160.93  | 60800.484 |
| NM_006886  | 48227.625 | 46201.332 | NM_016228 | 1590.67   | 2024.004  | AF311862  | 60955.188 | 62230.754 |
| NM_004531  | 4881.481  | 6934.626  | NM_000157 | 7033.587  | 7464.155  | NM_003215 | 2506.765  | 2668.764  |

|            |           |           |           |           |           |           |           |           |
|------------|-----------|-----------|-----------|-----------|-----------|-----------|-----------|-----------|
| AB040920   | 1219.394  | 2246.799  | NM_000712 | 775.604   | 1087.456  | NM_016447 | 2616.867  | 2796.102  |
| NM_015720  | 2248.349  | 2540.352  | NM_018088 | 4088.562  | 3950.285  | NM_015626 | 9802.475  | 13122.497 |
| AB033070   | 947.206   | 1397.824  | BC013695  | 19946.807 | 19837.477 | NM_004896 | 8333.412  | 10142.835 |
| AK000158   | 2019.237  | 3817.797  | NM_007205 | 2465.91   | 2277.77   | AB006628  | 32602.551 | 36182.449 |
| NM_005766  | 1342.432  | 1532.546  | AK023035  | 9944.373  | 9882.954  | AF272036  | 2761.372  | 3334.969  |
| AK024500   | 11362.931 | 9876.021  | NM_014846 | 7651.581  | 8357.968  | AF231023  | 2820.253  | 2846.668  |
| NM_002564  | 4467.663  | 3322.381  | AB011164  | 13188.106 | 14809.891 | NM_005148 | 7277.309  | 8287.149  |
| Z83806     | 331.74    | 329.188   | M24750    | 3259.681  | 3566.238  | NM_004746 | 2723.225  | 3354.369  |
| NM_000963  | 725.568   | 830.253   | NM_005965 | 7724.948  | 9208.025  | AF146019  | 4436.52   | 5145.329  |
| NM_013308  | 969.883   | 963.495   | NM_002740 | 10482.637 | 11484.511 | Z36782    | 9216.842  | 12477.498 |
| AF027302   | 7141.404  | 4647.293  | AL117482  | 8340.106  | 8597.679  | NM_003490 | 39683.758 | 26399.922 |
| NM_006708  | 25928.713 | 22978.121 | NM_006549 | 59893.863 | 57797.738 | AF508940  | 4937.484  | 2767.555  |
| AB037835   | 1967.596  | 1871.434  | AB018324  | 31067.977 | 32162.047 | NM_020237 | 664.276   | 336.902   |
| NM_016228  | 469.326   | 717.147   | NM_002742 | 58499.176 | 61097.219 | AF130051  | 534.548   | 380.323   |
| NM_000157  | 3240.984  | 2433.062  | Z25431    | 6397.485  | 8183.482  | M25753    | 11712.107 | 6844.873  |
| NM_018088  | 610.163   | 489.86    | NM_005627 | 30979.82  | 33811.926 | NM_003883 | 1705.825  | 976.938   |
| BC013695   | 9817.693  | 7560.725  | M64497    | 1976.416  | 2726.085  | NM_014928 | 2208.561  | 1179.894  |
| NM_007205  | 518.253   | 411.699   | CY3Cy5    | 892.838   | 128.446   | NM_004203 | 13369.215 | 8285.208  |
| AK023035   | 5447.377  | 4438.876  | NM_002711 | 2877.164  | 1304.889  | NM_001951 | 863.565   | 922.749   |
| NM_014846  | 3823.28   | 3104.833  | AF143873  | 1052.346  | 1771.101  | NM_002391 | 1739.388  | 1030.091  |
| AB011164   | 5209.433  | 6151.602  | AL049990  | 1502.816  | 1276.842  | NM_007066 | 3630.98   | 2466.953  |
| M24750     | 2652.416  | 4107.562  | AF131843  | 1602.868  | 1704.127  | NM_003674 | 59592.316 | 58817.469 |
| NM_005965  | 3143.736  | 3964.326  | NM_020231 | 1638.492  | 1292.345  | NM_001197 | 6125.824  | 5640.949  |
| NM_002740  | 6642.538  | 9174.903  | AF075008  | 2803.359  | 1542.239  | NM_006682 | 1139.309  | 1042.232  |
| AL117482   | 4425.126  | 4355.833  | NM_006504 | 2157.965  | 1296.087  | NM_006410 | 1175.208  | 1063.479  |
| NM_006549  | 21321.445 | 20675.314 | NM_002711 | 2744.632  | 1750.224  | NM_014977 | 58924.34  | 63730.84  |
| AB018324   | 15255.918 | 16933.535 | SR3       | 45594.25  | 43042.832 | AK026325  | 4381.545  | 4595.901  |
| NM_002742  | 17070.754 | 16450.395 | SR5       | 4976.475  | 6912.849  | U83857    | 828.333   | 1394.24   |
| Z25431     | 3231.973  | 2831.371  | SR7       | 5299.691  | 36844.793 | NM_001230 | 986.366   | 1757.593  |
| NM_005627  | 18497.605 | 15193.321 | SR9       | 15607.889 | 2699.221  | AK025662  | 2313.788  | 2865.624  |
| M64497     | 1475.974  | 1485.778  | CY3Cy5    | 2509.271  | 207.481   | NM_000201 | 13134.467 | 16588.91  |
| NM_007274  | 8903.841  | 6302.49   | L38282    | 5247.356  | 3631.285  | AB011539  | 2525.11   | 3266.679  |
| NM_003356  | 1643.804  | 884.166   | NM_018056 | 2368.605  | 1141.807  | U37028    | 7389.586  | 8689.561  |
| AF238315   | 805.738   | 626.915   | NM_019008 | 5943.577  | 10321.957 | AB014597  | 2808.798  | 2140.075  |
| NM_001890  | 1509.998  | 2094.522  | M20838    | 2288.424  | 5601.622  | NM_001793 | 42752.008 | 27361.605 |
| NM_001286  | 5228.094  | 5601.207  | AK022738  | 1662.901  | 3131.843  | AK024313  | 10400.947 | 4895.497  |
| NM_014648  | 934.583   | 720.709   | AK023505  | 3650.38   | 2812.899  | NM_003891 | 3866.207  | 2168.941  |
| NM_019604  | 264.768   | 198.616   | AB037851  | 9607.231  | 4544.34   | AL359575  | 1118.749  | 664.874   |
| NM_005073  | 870.944   | 764.025   | AL050389  | 9475.438  | 4754.532  | NM_002022 | 697.021   | 623.744   |
| NM_000951  | 2210.197  | 2017.572  | AK024684  | 1930.539  | 935.738   | NM_015524 | 1213.459  | 1098.587  |
| X52599     | 196.478   | 186.332   | NM_014945 | 21518.383 | 18177.002 | NM_001673 | 16327.387 | 12178.451 |
| AA029300   | 3732.084  | 3619.992  | AK001546  | 1549.748  | 1650.007  | AK023167  | 721.721   | 488.123   |
| BG708842   | 33324.934 | 30271.402 | NM_006537 | 8813.637  | 5803.634  | NM_016510 | 3642.174  | 2498.801  |
| M19723     | 47916.41  | 62189.375 | AL049282  | 7991.976  | 6204.039  | NM_014270 | 2290.19   | 1695.28   |
| M34057     | 3025.746  | 4164.449  | AK021443  | 5342.577  | 3675.358  | NM_000071 | 10620.256 | 8179.03   |
| ID 1984668 | 3466.029  | 3739.738  | AF070569  | 1491.251  | 1470.325  | NM_006843 | 7180.559  | 5839.558  |
| ID 1832579 | 3652.13   | 4208.894  | NM_020233 | 3813.429  | 6867.245  | NM_004321 | 3373.967  | 2988.614  |
| H-430185 N | 1356.554  | 1381.598  | AK024315  | 15011.35  | 10829.291 | AF311212  | 6031.539  | 5832.848  |
| D16583     | 4631.665  | 4768.879  | AK024945  | 8068.784  | 12653.739 | NM_006915 | 1930.939  | 1490.711  |
| H44051     | 258.589   | 227.374   | AK024411  | 324.016   | 1400.3    | NM_006035 | 1816.791  | 1819.393  |
| AA481547   | 25256.086 | 17606.369 | AK024579  | 7070.308  | 10853.429 | NM_006086 | 19793.162 | 23195.543 |
| AA831880   | 2173.862  | 1788.328  | AL133118  | 4809.362  | 2370.282  | NM_004520 | 12125.231 | 13637.85  |
| T64880     | 5734.105  | 5783.973  | AK023571  | 5780.961  | 3280.089  | NM_006105 | 6940.393  | 9350.759  |

|           |           |           |           |           |           |           |           |           |
|-----------|-----------|-----------|-----------|-----------|-----------|-----------|-----------|-----------|
| AB028990  | 1592.885  | 940.266   | NM_001702 | 2644.09   | 925.201   | NM_005981 | 2707.87   | 3289.812  |
| AK002089  | 357.509   | 231.569   | AK026657  | 2499.86   | 1380.37   | AF210651  | 1731.306  | 1191.351  |
| AF063611  | 1500.625  | 1944.438  | AL833558  | 549.033   | 780.995   | AF090942  | 1161.233  | 1049.916  |
| NM_006039 | 887.335   | 974.075   | AF087991  | 34953.527 | 50360.797 | NM_014595 | 12480.58  | 8334.298  |
| NM_002089 | 424.557   | 587.872   | Y12839    | 1426.072  | 1559.311  | NM_014789 | 1583.453  | 885.885   |
| NM_004590 | 244.539   | 238.376   | X64979    | 1359.296  | 1615.856  | AB046784  | 3849.285  | 2094.938  |
| NM_014656 | 2683.676  | 2809.248  | AJ001876  | 1093.473  | 1356.344  | X52402    | 6371.324  | 3791.659  |
| NM_002076 | 2041.399  | 1725.656  | AJ227884  | 5081.114  | 4893.865  | AL133663  | 768.541   | 514.766   |
| X05299    | 4633.917  | 3900.25   | X64986    | 14489.129 | 11855.101 | NM_004992 | 996.842   | 668.551   |
| BM468475  | 864.783   | 895.262   | Y10510    | 380.919   | 1216.023  | NM_014462 | 4069.089  | 3327.888  |
| NM_000318 | 3951.394  | 2881.296  | AK000842  | 12150.785 | 6934.801  | NM_014156 | 61044.223 | 59657.883 |
| NM_002060 | 7138.094  | 6250.698  | AK023386  | 26807.146 | 37116.926 | NM_003137 | 9859.913  | 8346.348  |
| AK001230  | 3322.786  | 4134.816  | NM_007053 | 42884.707 | 55431.371 | NM_006938 | 30952.393 | 17605.428 |
| NM_014680 | 8152.777  | 10857.411 | AK022153  | 10273.146 | 16788.549 | NM_004515 | 499.298   | 421.156   |
| NM_005027 | 4099.875  | 4499.246  | AK022789  | 3515.889  | 4729.346  | NM_020158 | 5996.604  | 4134.456  |
| NM_004612 | 2469.311  | 3495.704  | AK023756  | 1182.871  | 2077.116  | AF176085  | 4880.262  | 3748.698  |
| NM_005608 | 29897.24  | 27866.207 | AK024252  | 451.975   | 373.526   | NM_006985 | 32691.6   | 24296.854 |
| NM_012294 | 283.258   | 486.48    | AK002095  | 1999.234  | 1546.567  | AF265228  | 2553.438  | 2350.331  |
| NM_001106 | 453.936   | 537.563   | AK000821  | 11643.295 | 8847.509  | NM_003757 | 28457.467 | 24474.734 |
| NM_015583 | 787.344   | 571.156   | AK024526  | 26389.189 | 32804.605 | AK025561  | 4670.489  | 4847.053  |
| NM_018490 | 558.607   | 457.283   | AK000848  | 1542.605  | 1671.071  | NM_018602 | 56022.246 | 55626.07  |
| NM_004778 | 260.659   | 192.002   | AK023307  | 1116.504  | 943.672   | NM_004096 | 4630.243  | 4917.264  |
| NM_012258 | 747.033   | 641.101   | NM_017618 | 5140.933  | 9771.865  | NM_017629 | 20986.699 | 25067.775 |
| NM_007245 | 8050.685  | 5907.201  | NM_017848 | 1083.122  | 974.17    | NM_003551 | 6440.54   | 4533.252  |
| NM_000229 | 2097.593  | 1926.721  | NM_019056 | 7039.606  | 4212.883  | AF305210  | 1320.928  | 1278.011  |
| NM_006995 | 27818.229 | 27002.779 | AF279783  | 5405.432  | 2577.743  | AK021900  | 4793.017  | 2738.19   |
| NM_003129 | 12221.26  | 9622.253  | AF182422  | 24190.285 | 40050.074 | NM_002764 | 17435.449 | 11431.614 |
| NM_001956 | 2456.466  | 1450.724  | NM_016943 | 1164.333  | 2476.206  | NM_019857 | 2163.265  | 1579.666  |
| AB033064  | 1370.765  | 1251.393  | AF070602  | 2487.172  | 4794.019  | NM_015455 | 50145.711 | 37546.004 |
| AK022317  | 3527.814  | 3595.773  | BE393290  | 4855.764  | 7968.587  | AF024702  | 15141.98  | 12372.949 |
| NM_018396 | 9464.493  | 9485.804  | NM_017622 | 3252.227  | 6291.811  | NM_001964 | 2886.287  | 1939.207  |
| NM_003124 | 794.813   | 775.136   | AF133331  | 7016.167  | 4637.283  | NM_005962 | 14566.771 | 10669.674 |
| NM_006886 | 45044.719 | 41233.328 | AK022289  | 4630.539  | 2242.81   | X74864    | 7283.461  | 5561.127  |
| NM_004531 | 4596.074  | 5383.964  | L34408    | 438.526   | 208.546   | AK026804  | 4162.159  | 3692.783  |
| AB040920  | 994.515   | 1250.449  | AF161403  | 29133.313 | 11535.34  | NM_016170 | 28214.133 | 22764.83  |
| NM_015720 | 2525.797  | 3152.993  | S75708    | 15724.197 | 7484.05   | NM_002114 | 422.188   | 692.385   |
| AB033070  | 713.958   | 1014.468  | U79291    | 9483.387  | 6984.059  | NM_006166 | 4358.477  | 4672.09   |
| AK000158  | 1838.259  | 2532.366  | D17172    | 27170.664 | 21048.219 | S72620    | 57354.633 | 56817.531 |
| NM_005769 | 1207.277  | 2264.567  | AJ227859  | 2001.696  | 1602.413  | NM_016831 | 1264.855  | 1192.093  |
| AK024500  | 10883.953 | 11064.567 | NM_018544 | 2205.756  | 1618.163  | S73501    | 586.3     | 898.103   |
| NM_002564 | 4431.01   | 5115.454  | L10141    | 18671.938 | 14889.009 | NM_005263 | 11745.564 | 14424.11  |
| Z83806    | 303.535   | 419.425   | AB020699  | 7201.174  | 7013.979  | AB033022  | 14645.671 | 16536.662 |
| NM_000963 | 472.24    | 734.422   | AF086269  | 4039.059  | 4406.914  | NM_000474 | 812.535   | 1178.545  |
| NM_013308 | 968.007   | 1098.911  | U90437    | 6909.707  | 5372.271  | NM_016264 | 1820.75   | 1935.656  |
| AF027302  | 7130.531  | 5590.444  | S71604    | 3928.893  | 5200.992  | NM_006079 | 31498.467 | 22124.721 |
| NM_002852 | 2023.504  | 1880.72   | D17169    | 51502.277 | 42686.902 | AB037837  | 3037.754  | 2012.578  |
| NM_016228 | 657.598   | 743.003   | NM_017924 | 3968.624  | 3293.514  | NM_001155 | 16644.703 | 14321.457 |
| NM_000157 | 2844.925  | 2487.401  | S81578    | 2125.21   | 4177.843  | M62896    | 48446.492 | 39364.375 |
| NM_000712 | 315.892   | 335.184   | NM_017546 | 13434.609 | 23758.742 | NM_017736 | 2652.431  | 1721.97   |
| NM_018088 | 691.781   | 480.596   | AJ001889  | 793.353   | 1869.875  | NM_000313 | 656.399   | 476.91    |
| BC013695  | 9469.262  | 8009.661  | AF086210  | 1732.949  | 3663.54   | NM_001498 | 62429.945 | 64449.125 |
| NM_007205 | 470.794   | 274.016   | AL137400  | 1416.95   | 2209.782  | AF263523  | 2467.09   | 3150.059  |
| AK023035  | 5001.187  | 3767.292  | NM_006511 | 2145.521  | 1351.181  | L08441    | 27174.357 | 20417.627 |

|            |           |           |           |           |           |           |           |           |
|------------|-----------|-----------|-----------|-----------|-----------|-----------|-----------|-----------|
| NM_01484E  | 3869.195  | 3360.733  | AF007142  | 1627.229  | 768.096   | AA641953  | 1974.715  | 2042.98   |
| AB011164   | 4782.957  | 3668.982  | AF119853  | 4973.306  | 2282.842  | AI248827  | 6383.664  | 4715.021  |
| M24750     | 2211.042  | 1441.646  | NM_001126 | 6202.176  | 4505.952  | R45026    | 51601.703 | 51117.141 |
| NM_00596E  | 2935.068  | 2865.693  | AK023673  | 2518.456  | 1854.221  | BI768063  | 2384.748  | 1754.962  |
| NM_00274C  | 5989.804  | 7750.329  | NM_018252 | 2248.368  | 1727.77   | BG386057  | 770.377   | 856.276   |
| AL117482   | 3829.196  | 3479.752  | NM_01800C | 62872.926 | 62223.012 | AI970239  | 7795.127  | 8032.396  |
| NM_00654E  | 24155.004 | 25047.934 | AF164963  | 1464.949  | 2101.76   | AA496452  | 30126.906 | 31735.855 |
| AB018324   | 17017.25  | 21118.443 | AF124366  | 43779.98  | 29245.6   | X67594    | 16022.655 | 18471.838 |
| NM_00274E  | 15599.944 | 18852.533 | AF130112  | 2197.157  | 1904.814  | AF363393  | 558.003   | 975.497   |
| Z25431     | 3092.021  | 4079.573  | NM_000551 | 10237.264 | 17712.035 | BC008837  | 494.823   | 1073.316  |
| NM_005627  | 18052.219 | 19608.816 | AL365518  | 1227.243  | 1630.723  | NM_01586E | 1581.017  | 1957.235  |
| M64497     | 1411.275  | 1612.665  | AF086257  | 7629.157  | 6936.779  | NM_001631 | 2662.548  | 3374.579  |
| NM_007274  | 8485.609  | 8063.111  | AF075056  | 612.257   | 463.495   | AB000734  | 23935.051 | 24786.553 |
| NM_00335E  | 1466.913  | 1860.416  | AC119751  | 958.696   | 742.857   | NM_00086E | 332.428   | 700.355   |
| AF238315   | 426.027   | 692.152   | U00928    | 2826.832  | 2572.116  | NM_005987 | 57939.371 | 58983.91  |
| NM_006224  | 39795.383 | 33480.785 | AK002114  | 3515.279  | 2547.253  | X87838    | 6566.138  | 6854.27   |
| NM_01464E  | 1205.868  | 1143.224  | AL390184  | 1410.578  | 3288.689  | AK023059  | 1140.626  | 697.058   |
| NM_019604  | 343.969   | 430.407   | NM_01869E | 4955.522  | 9651.505  | AF224266  | 9116.075  | 8027.437  |
| NM_00507E  | 756.965   | 614.308   | NM_01804E | 482.389   | 1536.533  | U72882    | 50241.391 | 51761.813 |
| NM_000951  | 2308.176  | 2090.732  | AK026318  | 3617.775  | 5640.998  | NM_014337 | 25688.143 | 22438.51  |
| AA029300   | 3743.524  | 3544.883  | AF291673  | 3298.142  | 6981.494  | NM_007161 | 29749.027 | 27169.365 |
| BG708842   | 33127.23  | 28873.207 | NM_00436E | 22324.863 | 11100.729 | NM_014387 | 3257.348  | 2777.252  |
| M19723     | 45582.855 | 58435.074 | NM_01635E | 6840.178  | 2978.704  | NM_003641 | 7448.701  | 7350.383  |
| M34057     | 2675.97   | 2711.405  | AJ296290  | 4194.488  | 1949.325  | NM_01246E | 2782.473  | 2613.945  |
| ID 1984668 | 3325.498  | 3718.15   | NM_02018E | 4189.333  | 2408.63   | L29140    | 59714.371 | 60746.691 |
| ID 1832579 | 3298.226  | 3212.181  | AL389954  | 823.616   | 515.172   | AK026448  | 7708.048  | 8086.709  |
| H-430185 M | 1364.278  | 1571.222  | NM_01985E | 5840.318  | 3597.639  | AK057418  | 4344.466  | 3631.883  |
| D16583     | 4821.355  | 5127.609  | NM_006118 | 9718.822  | 7295.764  | NM_00726C | 3160.66   | 3257.292  |
| AA481547   | 30132.539 | 30806.246 | AK026225  | 26798.473 | 27135.906 | AF148646  | 19253.238 | 21431.16  |
| AA831880   | 2396.745  | 3361.299  | AL050032  | 9126.499  | 6637.093  | AL110218  | 3823.35   | 3948.315  |
| T64880     | 6023.658  | 7890.616  | AF009304  | 1331.688  | 667.158   | AB023201  | 3583.966  | 4561.516  |
| AB028990   | 1681.476  | 1417.333  | AF086177  | 15423.936 | 10647.563 | X00094    | 3628.062  | 4657.923  |
| AK002089   | 336.346   | 336.598   | NM_01894E | 4186.56   | 3536.766  | NM_00377E | 17436.48  | 24194.615 |
| NM_00670E  | 27607.768 | 21123.469 | AK021593  | 421.98    | 498.512   | NM_00208E | 45447.426 | 58860.207 |
| AB037835   | 2197.553  | 2205.287  | D17187    | 3047.275  | 1906.241  | NM_00292E | 17931.77  | 27897.66  |
| BM468475   | 1017.331  | 1048.34   | AJ243672  | 4419.317  | 4194.588  | AF155657  | 13438.217 | 17186.346 |
| NM_00031E  | 3945.724  | 3694.624  | AL122087  | 1165.193  | 964.433   | NM_00605E | 18958.76  | 21575.074 |
| NM_00206C  | 6145.854  | 4574.744  | NM_014767 | 698.66    | 280.208   | AF045229  | 19769.992 | 20500.742 |
| AK001230   | 3508.479  | 4273.521  | Y17867    | 3327.202  | 1718.861  | NM_00184C | 15802.064 | 16354.111 |
| NM_01468C  | 6283.735  | 4325.294  | M92642    | 2021.185  | 4421.542  | NM_01609E | 56280.023 | 53985.848 |
| NM_005027  | 4363.259  | 3919.57   | NM_018071 | 9405.313  | 14176.867 | NM_000394 | 600.272   | 522.158   |
| NM_00461E  | 2261.375  | 2164.242  | NM_00433E | 8153.973  | 12110.067 | NM_00007E | 900.924   | 775.001   |
| NM_00560E  | 24727.271 | 18595.727 | M31520    | 66745.164 | 79563.164 | NM_000697 | 2624.961  | 1820.826  |
| NM_001106  | 304.897   | 281.392   | NM_00202C | 27973.881 | 35609.758 | NM_000017 | 15742.863 | 13122.928 |
| NM_01558E  | 670.124   | 493.087   | AL050137  | 3513.475  | 2028.255  | NM_000237 | 1126.724  | 1359.931  |
| NM_01849C  | 494.848   | 398.926   | AK024423  | 4481.01   | 2140.458  | NM_01834E | 10525.047 | 8942.484  |
| NM_00477E  | 363.144   | 345.332   | NM_00504E | 50337.891 | 26961.453 | AL122054  | 1639.586  | 1394.275  |
| NM_00624E  | 3633.677  | 3565.519  | NM_00597E | 13180.402 | 5274.126  | AB023151  | 1350.931  | 1393.812  |
| NM_01225E  | 786.167   | 1416.947  | NM_00628E | 9088.097  | 9436.985  | NM_00014C | 30772.496 | 32770.059 |
| NM_00482E  | 955.846   | 1822.641  | NM_020321 | 740.068   | 573.82    | NM_00512E | 7697.949  | 6235.169  |
| AK022349   | 2042.375  | 2709.88   | NM_01592C | 44981.313 | 32306.486 | NM_02003E | 3043.798  | 2180.796  |
| NM_00575C  | 899.393   | 658.377   | AB011113  | 3503.573  | 3199.329  | NM_01624E | 5693.273  | 5100.298  |
| NM_00497E  | 814.579   | 1035.354  | NM_004115 | 1538.129  | 1044.538  | NM_00513E | 1438.286  | 1783.281  |

|           |           |           |           |           |           |           |           |           |
|-----------|-----------|-----------|-----------|-----------|-----------|-----------|-----------|-----------|
| NM_00724E | 8085.386  | 8438.9    | NM_018287 | 1466.856  | 1271.882  | NM_00497E | 34067.84  | 34899.66  |
| NM_00189C | 1452.837  | 1462.661  | NM_001955 | 4210.834  | 3323.666  | NM_005737 | 52264.527 | 55504.785 |
| NM_00128E | 5356.811  | 5340.885  | AF016004  | 4024.784  | 6385.73   | NM_00166C | 22053.707 | 32469.781 |
| NM_01822E | 2347.332  | 2560.731  | NM_003567 | 11014.854 | 7415.052  | NM_00071C | 846.287   | 1362.453  |
| NM_00632E | 7100.092  | 8820.106  | NM_007315 | 1380.478  | 681.481   | NM_00075Z | 4693.565  | 6022.149  |
| AY009127  | 17010.393 | 16794.705 | L20686    | 6765.216  | 4814.028  | AB040945  | 4096.082  | 4255.62   |
| NM_01486E | 6509.231  | 5567.443  | NM_000304 | 1006.481  | 907.11    | NM_00201E | 22051.936 | 25122.053 |
| NM_00392E | 586.394   | 263.533   | AK023362  | 1431.95   | 1282.194  | NM_002377 | 653.614   | 879.024   |
| AK000158  | 2024.288  | 2175.654  | NM_00246C | 953.41    | 762.963   | NM_00601E | 2070.99   | 1832.293  |
| NM_00576E | 1117.202  | 1234.15   | NM_00267E | 4087.252  | 3123.565  | AF161383  | 9290.946  | 10646.277 |
| AK024500  | 10372.766 | 8246.187  | NM_01243Z | 50611.43  | 59427.457 | NM_00041C | 21768.102 | 23130.363 |
| NM_002564 | 4169.563  | 3964.377  | NM_005007 | 20022.215 | 28706.65  | AF182814  | 2897.799  | 1760.014  |
| Z83806    | 356.342   | 252.234   | AK024996  | 8092.066  | 13361.688 | NM_00532E | 1905.498  | 2050.536  |
| NM_00096E | 486.685   | 932.945   | NM_00125E | 1016.441  | 1746.698  | NM_000107 | 17677.711 | 17113.145 |
| NM_01330E | 817.584   | 852.396   | NM_004417 | 711.815   | 640.554   | AL157445  | 7743.035  | 8411.649  |
| AF027302  | 8109.407  | 8614.881  | NM_01229C | 8902.322  | 4523.184  | NM_001517 | 30015.426 | 27806.832 |
| NM_00285Z | 2305.947  | 3367.327  | NM_002431 | 3386.637  | 1389.282  | NM_00505E | 15858.593 | 17795.361 |
| NM_001817 | 4182.403  | 4441.134  | NM_001827 | 51146.203 | 28885.301 | D86974    | 8565.428  | 7226.267  |
| AF063611  | 1498.774  | 2118.068  | NM_02046E | 6257.648  | 2191.553  | NM_01828E | 10969.103 | 9528.396  |
| NM_00603E | 1065.969  | 1115.082  | AL079280  | 739.689   | 564.487   | NM_00198E | 3852.43   | 3305.612  |
| NM_00208E | 442.507   | 679.132   | NM_00285E | 5601.933  | 4587.128  | NM_00499E | 956.806   | 1696.135  |
| NM_00459C | 312.992   | 544.699   | NM_003174 | 2186.177  | 2427.445  | NM_003384 | 11098.301 | 10930.727 |
| M28983    | 301.071   | 397.005   | NM_012307 | 20704.768 | 13075.195 | Y12337    | 6444.843  | 6802.97   |
| NM_01465E | 2946.299  | 3339.232  | NM_00254C | 2858.843  | 1816.218  | M29551    | 32603.791 | 35601.023 |
| NM_00207E | 2463.147  | 2268.535  | NM_006371 | 3767.875  | 2894.906  | AB023148  | 1292.21   | 1524.909  |
| X05299    | 4369.607  | 5353.285  | NM_018834 | 2179.036  | 1741.833  | NM_00292E | 2258.042  | 3358.791  |
| NM_007274 | 8856.886  | 9349.916  | AK026882  | 5137.592  | 3927.839  | BC028375  | 1938.665  | 2673.2    |
| NM_00335E | 1459.136  | 1485.038  | NM_004574 | 2194.825  | 1920.843  | AB026436  | 4696.867  | 6191.703  |
| AF238315  | 404.503   | 586.602   | NM_00484E | 10900.167 | 9740.677  | NM_01602E | 14790.496 | 16819.557 |
| NM_006224 | 38140.621 | 29426.172 | NM_001944 | 502.042   | 663.812   | AK024562  | 4803.976  | 5783.123  |
| AL137300  | 6987.859  | 5687.125  | NM_01481E | 870.301   | 653.858   | NM_01406E | 2570.256  | 2533.103  |
| NM_00022E | 2193.928  | 1649.275  | AF014459  | 7563.517  | 5836.891  | NM_00457E | 2318.221  | 2207.001  |
| NM_00699E | 25913.359 | 22224.309 | M64108    | 2225.022  | 2239.933  | NM_01773E | 4380.319  | 3583.446  |
| NM_00312E | 14141.291 | 12217.021 | NM_00150E | 4734.966  | 2178.064  | NM_00031E | 2342.387  | 2105.413  |
| NM_00195E | 2939.736  | 2219.735  | NM_00630E | 3649.167  | 2104.483  | NM_00149E | 60426.727 | 63669.867 |
| AB033064  | 1401.831  | 1526.917  | AJ224875  | 6870.637  | 13398.45  | AF263523  | 2701.461  | 2976.356  |
| AK022317  | 3345.056  | 3632.14   | NM_00214E | 5759.582  | 9332.847  | L08441    | 27016.588 | 18374.137 |
| NM_01839E | 9358.713  | 8343.677  | AF043324  | 14116.436 | 21412.617 | AA641953  | 1816.484  | 2107.586  |
| NM_003124 | 797.168   | 906.83    | AK024172  | 3885.426  | 6233.198  | AI248827  | 7311.667  | 6173.684  |
| NM_00688E | 46142.102 | 52686.648 | NM_014814 | 7927.667  | 6250.419  | R45026    | 56693.988 | 58302.496 |
| NM_004531 | 5632.09   | 7532.768  | NM_002797 | 32450.408 | 22785.195 | BI768063  | 2445.246  | 2107.161  |
| AL133581  | 2736.344  | 3345.869  | AK024318  | 1660.314  | 1215.332  | BG386057  | 593.944   | 818.933   |
| NM_00255E | 783.017   | 824.22    | NM_01612E | 5345.278  | 3570.887  | AI970239  | 7280.089  | 7314.125  |
| NM_005031 | 11463.478 | 14022.21  | NM_00280E | 12051.59  | 6695.303  | AA496452  | 30376.354 | 29256.201 |
| AB040920  | 1239.143  | 1935.453  | NM_01791E | 31636.619 | 19673.002 | X67594    | 16935.994 | 17540.457 |
| NM_00072C | 844.571   | 855.911   | NM_00042E | 14339.235 | 12362.084 | AF363393  | 1132.457  | 1200.245  |
| NM_00484Z | 495.639   | 1222.377  | AB046838  | 7492.42   | 5252.84   | BC008837  | 821.943   | 929.5     |
| AK024639  | 4528.791  | 5620.044  | AK026339  | 605.529   | 586.042   | NM_01586E | 1146.402  | 1907.138  |
| NM_01572C | 2733.688  | 3814.144  | X98411    | 2961.129  | 2483.086  | NM_001631 | 3703.273  | 5936.952  |
| AB007915  | 1476.809  | 1594.934  | AF116658  | 33042.363 | 24755.635 | AB000734  | 26357.277 | 30527.094 |
| AB033070  | 717.201   | 1036.553  | NM_01486E | 27894.117 | 22036.322 | NM_00086E | 718.171   | 757.099   |
| AB028990  | 1690.875  | 1105.21   | AB032977  | 23571.439 | 18841.113 | NM_005987 | 58920.715 | 65331.992 |
| NM_00670E | 24229.957 | 16997.133 | AK001725  | 1943.729  | 2333.861  | X87838    | 7856.099  | 9372.021  |

|           |           |           |           |           |           |           |           |           |
|-----------|-----------|-----------|-----------|-----------|-----------|-----------|-----------|-----------|
| AB037835  | 2118.019  | 1628.449  | NM_003036 | 2835.37   | 2881.76   | NM_000166 | 10484.035 | 11340.431 |
| NM_01622E | 631.775   | 414.668   | NM_020529 | 19874.826 | 13035.145 | NM_014337 | 25867.094 | 23550.869 |
| NM_000157 | 2933.87   | 2618.744  | S72604    | 41556.082 | 30302.475 | NM_007161 | 29844.969 | 25187.436 |
| NM_000712 | 365.911   | 371.225   | NM_017984 | 1006.26   | 1033.442  | NM_014387 | 2795.224  | 2996.643  |
| NM_01808E | 746.267   | 658.282   | AF038951  | 16820.512 | 6359.865  | NM_003641 | 7968.396  | 7074.226  |
| BC013695  | 9769.081  | 7841.376  | NM_006492 | 2195.812  | 1046.292  | NM_012463 | 3408.677  | 3423.438  |
| NM_00720E | 513.819   | 263.061   | AK021811  | 2231.359  | 4159.65   | L29140    | 61348.168 | 60134.625 |
| AK023035  | 5209.492  | 4260.696  | NM_00342E | 5328.473  | 7972.308  | AK026448  | 8055.878  | 7002.675  |
| NM_01484E | 3939.52   | 3310.795  | AF055030  | 6435.452  | 11119.986 | AK057418  | 4735.634  | 4292.352  |
| AB011164  | 5469.502  | 5661.41   | AK000589  | 5843.009  | 9168.731  | L37199    | 1171.251  | 1535.295  |
| M24750    | 2349.706  | 2816.662  | X53281    | 35645.906 | 31939.988 | NM_00726C | 2884.399  | 2668.746  |
| NM_00596E | 2938.04   | 3452.68   | BC012782  | 4138.016  | 2926.631  | AF148646  | 19411.078 | 18864.643 |
| NM_00274C | 6738.452  | 9076.208  | AF132026  | 59624.609 | 56943.945 | AL110218  | 3631.179  | 3551.502  |
| AL117482  | 4402.534  | 5328.545  | AL050353  | 1827.547  | 919.674   | AB023201  | 3548.896  | 3814.306  |
| NM_00654E | 21170.566 | 19230.346 | AB037788  | 14948.647 | 10831.069 | X00094    | 3593.712  | 3573.997  |
| AB018324  | 15844.403 | 16321.12  | NM_004587 | 17295.35  | 9956.292  | NM_00377E | 17045.438 | 19441.699 |
| NM_00274E | 15650.271 | 18171.619 | NM_00097E | 60231.043 | 57789.289 | NM_00208E | 36149.211 | 37867.301 |
| Z25431    | 3377.532  | 4265.519  | AF147412  | 56918.742 | 39016.246 | NM_00292E | 17305.879 | 26357.629 |
| NM_005627 | 21670.383 | 26091.055 | AK024570  | 23404.529 | 15978.653 | AF155657  | 13620.35  | 17158.736 |
| M64497    | 1733.741  | 2720.503  | AF161401  | 18742.211 | 16362.575 | NM_00605E | 22068.859 | 25276.119 |
| CY3Cy5    | 1990.187  | 302.91    | NM_00099C | 31294.215 | 20931.58  | AF045229  | 20474.059 | 21788.469 |
| NM_002711 | 6336.266  | 5579.41   | NM_01474C | 11028.431 | 8578.323  | NM_00184C | 16144.664 | 18096.564 |
| AL355732  | 731.869   | 772.837   | NM_01595E | 29212.863 | 25357.465 | NM_01609E | 57455.902 | 55750.699 |
| NM_01796E | 8416.137  | 15674.647 | AK024601  | 10828.915 | 8560.287  | NM_000394 | 773.411   | 1186.159  |
| AF143327  | 1416.996  | 1047.81   | S68069    | 3990.981  | 4518.688  | NM_00115E | 20524.387 | 21859.156 |
| AL137535  | 428.447   | 431.285   | AB011095  | 2464.496  | 2187.994  | M62896    | 55559.082 | 53733.227 |
| AL049991  | 489.028   | 532.174   | NM_00248E | 24579.799 | 9423.137  | NM_000017 | 14011.011 | 10080.724 |
| AL049990  | 2180.563  | 3593.974  | NM_00400E | 19085.078 | 8266.771  | NM_000237 | 1244.419  | 1313.911  |
| AF131843  | 1363.242  | 867.407   | NM_00018E | 4101.889  | 3703.816  | NM_01834E | 9437.577  | 8326.442  |
| AK026653  | 1185.903  | 798.753   | BF244401  | 13492.893 | 22746.572 | AL122054  | 1361.245  | 1231.301  |
| NM_020231 | 2391.358  | 1636.4    | NM_00471E | 60013.34  | 63507.02  | AB023151  | 1132.938  | 1229.201  |
| AF075008  | 3842.396  | 3906.785  | AL359585  | 16145.936 | 26633.729 | NM_00014C | 27271.404 | 24754.803 |
| NM_006504 | 1991.524  | 3271.591  | AB046850  | 11401.668 | 7795.938  | NM_00512E | 7732.122  | 6956.806  |
| AF070538  | 720.971   | 760.755   | NM_014801 | 7436.917  | 4025.178  | NM_02003E | 2875.938  | 1900.712  |
| AL137430  | 528.292   | 345.352   | NM_00364E | 7134.237  | 2441.494  | NM_01624E | 4723.85   | 5390.882  |
| NM_002711 | 5145.375  | 3646.596  | AB027013  | 14482.735 | 6510.377  | NM_00513E | 1611.611  | 2216.32   |
| SR1       | 88333.023 | 62079.672 | BF185480  | 6391.366  | 11664.883 | NM_00497E | 31403.379 | 27912.836 |
| SR3       | 24781.502 | 20338.732 | NM_00212E | 37344.641 | 29549.865 | NM_005737 | 47493.695 | 47573.055 |
| SR5       | 2929.08   | 4186.17   | NM_003074 | 10734.196 | 7264.577  | NM_00166C | 18152.668 | 17222.918 |
| SR7       | 3914.349  | 35503.508 | AL360195  | 15332.365 | 12357.178 | NM_00071C | 1032.459  | 1626.385  |
| SR9       | 12559.992 | 3127.12   | U14383    | 3622.336  | 1728.108  | NM_00075E | 4817.912  | 4683.993  |
| CY3Cy5    | 1844.066  | 310.554   | NM_01781C | 2859.114  | 2842.108  | AB040945  | 3991.612  | 3490.802  |
| L38282    | 1518.319  | 1831.791  | NM_003181 | 60215.152 | 57355.777 | NM_00201E | 20779.635 | 20986.875 |
| NM_01805E | 3166.195  | 3302.255  | NM_004451 | 9108.363  | 8523.78   | NM_002377 | 682.961   | 898.558   |
| NM_01900E | 4115.343  | 4234.668  | NM_004364 | 1307.425  | 741.268   | NM_00601E | 1860.286  | 2188.833  |
| M20838    | 893.375   | 1041.704  | NM_02039E | 4627.208  | 5141.226  | AF161383  | 8747.872  | 10299.403 |
| AK022738  | 1294.233  | 937.729   | NM_00342E | 2993.049  | 2987.766  | NM_00041C | 21083.816 | 26087.408 |
| AK023505  | 971.092   | 723.408   | NM_01338E | 11645.238 | 11552.019 | AF224266  | 11531.094 | 11723.821 |
| AB037851  | 6204.054  | 4698.352  | AK026232  | 8779.862  | 8025.99   | U72882    | 58563.594 | 53626.441 |
| AL050389  | 4054.001  | 3547.088  | NM_01489E | 7269.556  | 4360.865  | NM_00532E | 1373.693  | 1389.942  |
| AK024684  | 1924.687  | 1574.526  | AK023827  | 5161.959  | 5381.227  | NM_000107 | 18139.32  | 16084.23  |
| NM_01494E | 21255.654 | 22122.318 | NM_001117 | 884.451   | 2326.647  | AL157445  | 7539.919  | 7924.056  |
| AK001546  | 2238.331  | 1928.228  | NM_000231 | 1432.284  | 2094.844  | NM_001517 | 29825.16  | 24589.104 |



|           |           |           |           |           |           |           |           |           |
|-----------|-----------|-----------|-----------|-----------|-----------|-----------|-----------|-----------|
| NM_006537 | 7676.845  | 6217.119  | L07517    | 4972.332  | 8774.719  | NM_005053 | 14407.987 | 12951.439 |
| AF007155  | 14182.252 | 13525.458 | AK022451  | 17864.182 | 19098.426 | D86974    | 8841.415  | 7689.053  |
| AL049282  | 6148.946  | 5138.712  | NM_014359 | 56978.246 | 62902.934 | NM_018283 | 11388.904 | 10423.463 |
| AK021443  | 6755.047  | 8362.91   | BM918441  | 14427.063 | 11055.074 | NM_001983 | 4222.067  | 4677.048  |
| AF070569  | 1230.279  | 1524.578  | AA425102  | 934.7     | 548.796   | NM_003384 | 10541.507 | 10421.32  |
| NM_020233 | 3142.547  | 4992.743  | AA878880  | 1552.541  | 1343.51   | Y12337    | 5289.158  | 4355.464  |
| AK024315  | 18434.611 | 20152.807 | AA150828  | 6870.61   | 7318.014  | M29551    | 29973.344 | 24489.932 |
| AK024945  | 1101.439  | 808.664   | H90764    | 2963.212  | 3396.592  | AB023148  | 1269.122  | 1158.286  |
| AK024579  | 1693.776  | 2614.059  | AI859208  | 2385.359  | 2418.381  | NM_002925 | 2525.718  | 2257.53   |
| AL133118  | 5539.691  | 5282.593  | H64379    | 38103.223 | 38421.68  | BC028375  | 1802.524  | 2136.817  |
| AK023571  | 1093.984  | 1576.072  | BE208258  | 58244.59  | 56408.008 | AB026436  | 5144.821  | 6000.987  |
| AF052148  | 464.855   | 314.267   | T72202    | 3081.194  | 3445.588  | NM_016025 | 15881.854 | 16481.592 |
| AF131783  | 488.467   | 280.725   | BI831922  | 3590.303  | 3247.442  | AK024562  | 4802.266  | 5182.431  |
| NM_001702 | 1644.116  | 1394.491  | M69238    | 5356.135  | 5369.097  | NM_014066 | 2744.505  | 3318.705  |
| AK026657  | 2997.887  | 2730.011  | AA664180  | 2084.599  | 2237.907  | NM_004573 | 2604.769  | 3034.82   |
| AL833558  | 654.793   | 693.312   | M80244    | 604.549   | 613.625   | NM_000072 | 964.101   | 651.764   |
| AF087991  | 29397.803 | 23878.346 | AA599158  | 22182.779 | 20567.121 | NM_000697 | 2832.476  | 2484.516  |
| AJ001876  | 581.152   | 584.823   | BE294756  | 1212.561  | 1484.768  | NM_000313 | 1020.042  | 936.382   |
| AJ227884  | 756.435   | 1383.994  | NM_000696 | 10850.916 | 10324.298 | NM_001495 | 65118.922 | 67049.133 |
| X64986    | 1102.427  | 1945.199  | L08240    | 2430.994  | 1407.857  | AF263523  | 3481.424  | 4577.73   |
| Y10510    | 947.407   | 2771.799  | NM_017952 | 2591.816  | 1953.837  | L08441    | 30483.643 | 20425.24  |
| AK000842  | 10027.98  | 10302.317 | NM_002940 | 3506.837  | 3883.261  | AA641953  | 2091.543  | 2226.657  |
| AK023386  | 13457.17  | 12246.468 | NM_016081 | 30490.389 | 42619.641 | AI248827  | 7664.333  | 6138.653  |
| NM_007053 | 22349.672 | 20520.197 | NM_006389 | 10375.747 | 20983.389 | R45026    | 54763.203 | 54304.738 |
| AK022153  | 516.569   | 454.553   | M30818    | 1933.762  | 2744.649  | BI768063  | 2538.768  | 2411.939  |
| AK022789  | 1637.951  | 1829.953  | NM_005755 | 10182.679 | 6744.858  | BG386057  | 1284.526  | 2449.61   |
| AK023756  | 724.766   | 668.839   | NM_003329 | 54145.813 | 50285.594 | AI970239  | 8464.012  | 8245.077  |
| AK024252  | 695.148   | 478.882   | NM_003299 | 57371.926 | 54169.355 | AA496452  | 29908.303 | 29111.207 |
| AK002095  | 838.681   | 556.289   | NM_014330 | 57188.012 | 58487.473 | X67594    | 14953.587 | 14603.935 |
| AK000821  | 11373.087 | 11111.507 | NM_007034 | 1433.46   | 1206.997  | AF363393  | 691.988   | 1362.621  |
| AK024526  | 2791.464  | 2389.597  | NM_005261 | 713.353   | 777.488   | NM_015865 | 1807.46   | 2454.727  |
| AK023307  | 497.13    | 511.993   | NM_001560 | 2034.666  | 1733.441  | NM_001631 | 2399.183  | 2772.964  |
| NM_017615 | 1255.225  | 1447.534  | NM_001783 | 58655.348 | 57563.703 | AB000734  | 25878.479 | 26780.279 |
| NM_017845 | 1013.342  | 1498.045  | J03171    | 6915.66   | 7427.84   | NM_000862 | 499.877   | 609.851   |
| AK000881  | 549.346   | 1612.77   | NM_005856 | 2064.425  | 2317.168  | NM_005987 | 59277.668 | 60098.262 |
| NM_019056 | 9512.683  | 8291.986  | NM_004323 | 55148.652 | 54545.879 | X87838    | 7564.967  | 9066.13   |
| AF279783  | 4645.059  | 5427.058  | NM_002310 | 581.314   | 854.81    | NM_000165 | 10607.258 | 10796.102 |
| AF182422  | 14342.717 | 12770.051 | NM_005312 | 4515.916  | 5463.8    | AF182814  | 2751.11   | 1903.953  |
| AF070602  | 1392.594  | 1587.849  | NM_004210 | 20108.664 | 22908.691 | L37199    | 2481.162  | 2479.141  |
| BE393290  | 3907.334  | 7443.191  | NM_020140 | 3458.961  | 5009.063  | NM_007260 | 2951.934  | 3333.94   |
| NM_017622 | 2226.902  | 2295.861  | NM_007214 | 9883.111  | 6757.186  | AF148646  | 18348.398 | 20447.291 |
| AF133331  | 7494.275  | 7798.713  | NM_000311 | 14646.009 | 8790.555  | AL110218  | 3971.625  | 4159.705  |
| AK022289  | 4843.937  | 3732.43   | NM_017909 | 3572.311  | 2167.012  | AB023201  | 3533.843  | 3865.625  |
| L34408    | 381.117   | 196.269   | NM_006335 | 22922.531 | 41585.109 | X00094    | 2981.632  | 3024.706  |
| AF161403  | 3153.106  | 2069.157  | NM_000786 | 10965.41  | 15891.009 | NM_003775 | 16149.756 | 18258.832 |
| S75708    | 5842.343  | 3765.54   | NM_002519 | 449.417   | 438.844   | NM_002082 | 33559.609 | 33841.828 |
| U79291    | 8856.916  | 5905.03   | NM_017731 | 945.942   | 533.799   | NM_002922 | 19600.057 | 33955.816 |
| D17172    | 28692.684 | 29848.783 | NM_000351 | 4306.626  | 4156.958  | AF155657  | 12299.37  | 13207.229 |
| AF161370  | 316.625   | 293.822   | AB040891  | 3462.37   | 4484.376  | NM_006056 | 19157.732 | 17316.252 |
| AJ227859  | 2530.66   | 2597.539  | AB037780  | 545.746   | 777.131   | AF045229  | 19430.629 | 17821.771 |
| NM_018544 | 1186.842  | 1203.757  | AK025616  | 493.926   | 461.139   | NM_001840 | 14564.094 | 14260.206 |
| L10141    | 1723.28   | 1042.624  | NM_007256 | 4427.211  | 4858.873  | AK025099  | 3373.031  | 2876.935  |
| AB020699  | 3788.591  | 2141.813  | NM_001045 | 29373.709 | 21602.783 | NM_016095 | 57771.223 | 53161.137 |

|           |           |           |           |           |           |           |           |           |
|-----------|-----------|-----------|-----------|-----------|-----------|-----------|-----------|-----------|
| AF086269  | 2503.141  | 1457.32   | NM_005697 | 40104.887 | 32857.211 | NM_000394 | 423.354   | 480.273   |
| U90437    | 6572.079  | 8572.744  | NM_003099 | 7037.961  | 6835.272  | NM_000228 | 1059.895  | 1083.412  |
| S71604    | 531.342   | 1255.384  | NM_004781 | 3664.936  | 3980.005  | NM_000830 | 2086.982  | 2661.771  |
| D17169    | 47370.367 | 42120.258 | NM_018303 | 2846.42   | 3716.912  | NM_005209 | 944.83    | 1807.377  |
| NM_017924 | 5570.48   | 10715.807 | NM_014758 | 9346.244  | 10344.868 | AF148950  | 2627.962  | 3606.668  |
| S81578    | 833.522   | 699.399   | AL133047  | 450.82    | 582.816   | NM_001155 | 22439.543 | 28170.361 |
| NM_017546 | 8173.016  | 7777.376  | NM_005124 | 3546.128  | 5199.999  | M62896    | 59081.977 | 57692.719 |
| AF086210  | 834.113   | 1101.639  | AK000947  | 7468.396  | 10042.465 | NM_017736 | 3123.775  | 2828.673  |
| AL137400  | 665.4     | 498.177   | NM_003897 | 4477.034  | 2792.05   | NM_000390 | 302.511   | 379.621   |
| NM_006511 | 2707.899  | 2499.253  | NM_014165 | 33167.281 | 35800.348 | NM_000014 | 1968.614  | 2381.873  |
| AF007142  | 1930.759  | 1083.946  | AL442085  | 12342.064 | 17361.959 | NM_006803 | 1779.46   | 1770.446  |
| AF119853  | 3712.434  | 2498.227  | NM_013313 | 3559.334  | 4145.497  | NM_002533 | 2234.341  | 2127.621  |
| AF279782  | 661.735   | 314.722   | NM_014736 | 10847.392 | 9668.514  | AF235022  | 1499.083  | 1477.611  |
| NM_001126 | 6291.626  | 2889.167  | AK023886  | 2637.809  | 2208.676  | AL137764  | 39278.832 | 37559.301 |
| AK023673  | 2672.067  | 1810.592  | NM_002553 | 3971.587  | 4872.86   | NM_001660 | 18063.32  | 17080.521 |
| NM_018252 | 3012.867  | 2449.984  | AJ404615  | 3345.538  | 2336.769  | NM_000710 | 662.344   | 1045.067  |
| NM_018000 | 19083.703 | 16953.281 | NM_016053 | 43455.309 | 55380.172 | NM_000752 | 3731.229  | 3776.74   |
| AF164963  | 578.325   | 328.799   | AB007869  | 6965.231  | 7066.718  | AB040945  | 2825.376  | 2703.898  |
| AF124366  | 35644.496 | 29424.297 | AB046844  | 1909.849  | 2424.505  | NM_002018 | 15167.644 | 13049.015 |
| AF130112  | 1856.885  | 1721.543  | NM_000302 | 3404.142  | 3249.857  | NM_002377 | 716.359   | 735.525   |
| NM_000551 | 9955.186  | 8298.593  | NM_013235 | 54343.754 | 41500.051 | NM_006018 | 1722.495  | 1408.43   |
| AL365518  | 1561.562  | 1140.673  | NM_016015 | 11828.139 | 9485.071  | AF161383  | 8212.137  | 9460.047  |
| AF086257  | 8643.399  | 9676.648  | NM_020120 | 1885.791  | 2347.273  | NM_000410 | 21922.334 | 27686.176 |
| AF075056  | 552.742   | 1221.866  | AK022900  | 1205.871  | 1398.339  | AF224266  | 11420.133 | 11031.958 |
| AC119751  | 1215.9    | 2124.857  | AB023216  | 1231.815  | 1616.332  | U72882    | 59060.988 | 54651.809 |
| U00928    | 967.275   | 1187.595  | NM_002266 | 59731.684 | 61546.098 | NM_014337 | 37980.625 | 41899.84  |
| AK002114  | 3040.002  | 4398.606  | NM_014400 | 8084.856  | 9586.567  | NM_007161 | 39034.484 | 41605.234 |
| AL390184  | 1092.23   | 709.693   | AL157492  | 2199.721  | 2877.624  | NM_014387 | 4306.711  | 5472.971  |
| NM_018699 | 496.16    | 636.203   | AL353957  | 4551.716  | 5252.436  | NM_003641 | 11151.513 | 19798.369 |
| NM_018048 | 525.519   | 694.388   | AK023827  | 5260.234  | 4072.299  | NM_012463 | 4308.299  | 5930.424  |
| AK026318  | 3138.653  | 2800.273  | NM_001117 | 648.118   | 508.614   | L29140    | 61249.957 | 60126.461 |
| AF291673  | 2510.777  | 2957.255  | L07517    | 2918.289  | 3424.451  | AK026448  | 9169.838  | 9812.554  |
| NM_004365 | 8813.135  | 7894.013  | AK022451  | 12002.845 | 18157.734 | AK057418  | 5370.136  | 4883.454  |
| NM_016355 | 9202.63   | 7683.013  | NM_014359 | 53666.98  | 63561.77  | AK024562  | 3662.624  | 3059.806  |
| AJ296290  | 7027.709  | 8569.032  | BM918441  | 6955.057  | 6559.492  | NM_014066 | 2755.921  | 2356.512  |
| NM_020183 | 5443.812  | 3270.754  | AA425102  | 5104.52   | 7225.811  | NM_004573 | 2392.109  | 2433.492  |
| NM_018029 | 1083.186  | 541.569   | AA878880  | 581.787   | 662.523   | NM_000072 | 962.815   | 967.489   |
| AL389954  | 1427.509  | 961.622   | AA150828  | 5443.703  | 4600.936  | NM_000697 | 2538.638  | 2387.581  |
| NM_019852 | 6498.774  | 3880.291  | H90764    | 1817.478  | 1887.475  | NM_000017 | 17140.975 | 14245.146 |
| NM_006118 | 6873.513  | 6061.655  | AI859208  | 1959.952  | 4270.503  | NM_000237 | 1345.053  | 1664.754  |
| AK026225  | 38677.691 | 41416.465 | H64379    | 29214.551 | 27847.332 | NM_018346 | 10501.317 | 9376.342  |
| AL050032  | 1918.729  | 1715.92   | BE208258  | 55176.031 | 53796.715 | AL122054  | 1884.95   | 1890.667  |
| AF009304  | 2436.175  | 1376.703  | T72202    | 2590.234  | 3013.159  | AB023151  | 1039.013  | 1103.957  |
| AF086177  | 19417.381 | 15319.49  | BI831922  | 3391.989  | 3325.066  | NM_000140 | 29839.582 | 27489.674 |
| NM_018949 | 1304.005  | 1422.585  | M69238    | 3968.849  | 4299.592  | NM_005125 | 9582.247  | 10236.29  |
| AK021593  | 591.986   | 1106.392  | AA664180  | 1471.344  | 1713.897  | NM_020038 | 2704.922  | 3124.691  |
| D17187    | 5725.889  | 9107.72   | M80244    | 417.698   | 565.44    | NM_016246 | 5419.242  | 5767.13   |
| AJ243672  | 2043.408  | 5049.495  | AA599158  | 18752.742 | 21865.488 | NM_015926 | 24475.584 | 22751.838 |
| AL122087  | 1458.248  | 1417.016  | AK026092  | 4016.043  | 4706.343  | X03757    | 9432.352  | 9535.513  |
| NM_014767 | 1200.078  | 2647.172  | AK001175  | 2162.402  | 2658.394  | NM_018658 | 43333.828 | 44516.043 |
| Y17867    | 662.574   | 654.173   | NM_002940 | 3120.584  | 2528.223  | NM_005136 | 1624.205  | 1947.68   |
| NM_018071 | 4410.577  | 4579.563  | NM_016081 | 17540.711 | 15786.671 | AK094513  | 1528.434  | 1746.644  |
| NM_004333 | 5691.855  | 6031.017  | NM_006389 | 5733.296  | 5406.706  | NM_001183 | 12514.174 | 19617.305 |

|           |           |           |           |           |           |           |           |           |
|-----------|-----------|-----------|-----------|-----------|-----------|-----------|-----------|-----------|
| M31520    | 57960.063 | 64456.652 | M30818    | 1018.308  | 1947.18   | NM_00089C | 7854.522  | 9717.975  |
| NM_00202C | 1257.053  | 986.564   | NM_000163 | 1180.799  | 2566.308  | NM_00497C | 42644.602 | 46399.719 |
| AL050137  | 1454.302  | 1552.234  | NM_005755 | 5138.778  | 4250.875  | AK021597  | 3939.083  | 4832.579  |
| AK024423  | 4190.698  | 4176.541  | NM_003329 | 52141.059 | 49989.559 | NM_005737 | 54528.727 | 52628.922 |
| NM_005043 | 18549.898 | 20242.801 | NM_003299 | 50199.465 | 41387.602 | NM_00016C | 7675.702  | 6011.935  |
| NM_005979 | 3641.745  | 1925.023  | NM_01433C | 45909.918 | 42542.066 | AF182814  | 2339.178  | 1744.644  |
| NM_006282 | 6554.259  | 4206.401  | NM_007034 | 1276.781  | 1227.214  | NM_00532C | 1480.166  | 1373.132  |
| NM_020321 | 684.327   | 519.801   | NM_005261 | 839.661   | 1094.108  | NM_000107 | 18797.238 | 19477.287 |
| NM_01592C | 55061.43  | 52328.797 | NM_00156C | 1234.182  | 1244.534  | AL157445  | 6850.191  | 6567.384  |
| AB011113  | 2083.48   | 2613.92   | NM_001783 | 58631.766 | 59852.605 | NM_001517 | 36080.551 | 30279.285 |
| NM_004115 | 920.503   | 701.289   | J03171    | 6234.909  | 6894.293  | NM_005053 | 18819.615 | 15424.48  |
| NM_018287 | 1845.244  | 1363.676  | NM_005856 | 1195.862  | 1276.536  | D86974    | 10057.101 | 8921.263  |
| NM_001955 | 1487.483  | 1221.473  | NM_004323 | 32356.471 | 34342.793 | NM_018283 | 11322.987 | 11208.504 |
| AF016004  | 3349.234  | 7047.33   | NM_005312 | 4096.078  | 5907.859  | NM_001983 | 3743.97   | 3933.575  |
| NM_003567 | 3511.034  | 6039.237  | NM_00421C | 19864.426 | 23664.662 | NM_004993 | 1230.908  | 1396.712  |
| NM_007315 | 1107.477  | 1179.563  | NM_02014C | 3239.445  | 4836.096  | NM_003384 | 11220.656 | 10919.239 |
| L20686    | 1952.781  | 4322.699  | AK026232  | 9944.246  | 10922.961 | Y12337    | 6402.677  | 7692.806  |
| NM_000304 | 1696.577  | 2255.121  | NM_014892 | 8229.653  | 8495.786  | M29551    | 37840.316 | 49030.238 |
| AK023362  | 482.177   | 469.771   | NM_017909 | 3470.583  | 2423.732  | AB023148  | 1250.514  | 1804.061  |
| NM_00246C | 1224.562  | 1299.872  | NM_006335 | 17954.557 | 16719.795 | NM_00292C | 2313.009  | 2722.337  |
| NM_002675 | 3284.635  | 2353.208  | NM_000786 | 7691.209  | 4230.16   | BC028375  | 1854.597  | 2515.209  |
| NM_012432 | 14743.943 | 13998.104 | AB040891  | 2556.545  | 2704.59   | AB026436  | 4470.861  | 6113.8    |
| NM_005007 | 6053.361  | 5792.854  | AK025616  | 462.627   | 573.071   | NM_01602C | 14893.235 | 14551.864 |
| AK024996  | 6890.556  | 5465.39   | NM_007256 | 2537.2    | 2798.941  | CY3Cy5    | 1225.103  | 121.247   |
| NM_001258 | 784.25    | 556.786   | NM_001045 | 20968.002 | 18361.588 | NM_002103 | 51878.066 | 34182.988 |
| NM_004417 | 907.518   | 871.853   | NM_005697 | 12585.889 | 13908.334 | NM_00337C | 27386.996 | 16893.797 |
| NM_01229C | 11673.841 | 9625.084  | NM_003099 | 6650.412  | 6299.109  | AF143331  | 843.416   | 449.939   |
| NM_002431 | 4577.818  | 3667.956  | NM_004781 | 3471.445  | 3322.074  | AK000819  | 2166.858  | 1457.171  |
| NM_001827 | 57439.105 | 58312.77  | NM_018303 | 2333.474  | 3089.051  | AF201941  | 1472.473  | 738.174   |
| NM_02046C | 685.069   | 477.46    | NM_014758 | 8432.456  | 10082.461 | NM_00707C | 2478.996  | 2055.231  |
| AL079280  | 447.978   | 200.863   | AL133047  | 578.187   | 861.165   | AL133019  | 2741.794  | 2082.036  |
| NM_002853 | 5633.245  | 3618.862  | NM_005124 | 2847.628  | 4618.189  | AK026192  | 940.885   | 471.889   |
| NM_003174 | 3070.784  | 2113.468  | AK000947  | 6568.929  | 9048.851  | NM_014895 | 1109.905  | 768.123   |
| NM_012307 | 4434.02   | 3419.7    | L08240    | 2689.583  | 3535.5    | NM_01774E | 5435.79   | 3770.57   |
| NM_00254C | 4452.805  | 4429.874  | NM_017952 | 3155.66   | 4784.342  | AK025374  | 1328.527  | 1092.378  |
| NM_006371 | 5296.371  | 4661.182  | NM_014165 | 26896.762 | 17178.063 | NM_014901 | 7063.37   | 4905.445  |
| NM_018834 | 2169.53   | 1681.694  | AL442085  | 7049.308  | 4460.715  | AK000005  | 4604.958  | 3010.72   |
| AK026882  | 1822.968  | 1453.956  | J03250    | 431.398   | 442.558   | NM_002103 | 26512.117 | 17779.961 |
| NM_004574 | 2913.265  | 3108.913  | NM_013313 | 6476.351  | 10250.962 | NM_00337C | 20324.195 | 9949.359  |
| NM_00484E | 10129.161 | 10793.217 | NM_014736 | 13520.478 | 20645.762 | SR1       | 95008.961 | 63957.402 |
| NM_001944 | 597.51    | 1157.768  | AK023886  | 2004.396  | 2147.238  | SR3       | 25663.531 | 19946.971 |
| NM_014813 | 1377.311  | 2498.733  | NM_002553 | 3665.053  | 5207.763  | SR5       | 2896.962  | 2565.021  |
| AF014459  | 2278.792  | 2571.087  | AJ404615  | 3098.08   | 2497.645  | SR7       | 2859.095  | 19602.094 |
| M64108    | 576.923   | 354.29    | NM_016053 | 27949.77  | 23593.631 | SR9       | 8287.313  | 1074.482  |
| NM_001503 | 2058.833  | 2167.656  | AB007869  | 4686.358  | 3565.087  | CY3Cy5    | 1880.661  | 200.178   |
| NM_006302 | 4554.54   | 5314.897  | AB046844  | 2171.641  | 3297.078  | NM_01328E | 1482.318  | 1141.912  |
| AJ224875  | 5064.401  | 4536.486  | NM_000302 | 2774.823  | 2982.245  | AF071508  | 1985.392  | 630.482   |
| NM_00214C | 4411.857  | 3674.825  | NM_013235 | 49008.328 | 41285.031 | L07265    | 55652.523 | 48750.152 |
| AF043324  | 10514.163 | 9348.181  | NM_016015 | 10320.293 | 10350.616 | D16472    | 7471.313  | 6666.295  |
| AK024172  | 3924.479  | 5663.175  | NM_02012C | 1754.575  | 1685.28   | NM_002813 | 40296.059 | 37655.512 |
| NM_014814 | 9271.397  | 8226.146  | AK022900  | 1211.355  | 1185.902  | AK022745  | 13802.663 | 9660.715  |
| NM_002797 | 31937.848 | 26431.4   | AB023216  | 981.195   | 1241.834  | AL049450  | 5415.996  | 3196.651  |
| AK024318  | 2458.074  | 2659.109  | NM_00226C | 59291.934 | 58594.758 | NM_00508C | 45800.309 | 28512.133 |

|           |           |           |           |           |           |           |           |           |
|-----------|-----------|-----------|-----------|-----------|-----------|-----------|-----------|-----------|
| NM_016129 | 7032.251  | 8068.444  | NM_014400 | 10318.811 | 13195.167 | NM_007239 | 1019.028  | 537.216   |
| NM_002809 | 15645.423 | 13026.735 | AL157492  | 2332.459  | 3502.245  | NM_017609 | 2065.176  | 1604.931  |
| NM_017912 | 4569.433  | 3600.345  | AL353957  | 4306.718  | 4930.364  | U68494    | 3071.865  | 1585.616  |
| NM_000423 | 12345.952 | 10548.252 | NM_007214 | 12125.377 | 16842.314 | AL137360  | 4529.459  | 3673.479  |
| AB046838  | 9970.228  | 15484.077 | NM_000311 | 19457.541 | 22861.832 | AK024523  | 1112.522  | 821.945   |
| AK026339  | 752.233   | 1407.935  | L07517    | 3340.091  | 3257.3    | AK024600  | 3755.896  | 2207.755  |
| X98411    | 4145.602  | 3713.389  | AK022451  | 6109.229  | 5992.269  | AK024543  | 2786.043  | 2117.23   |
| AF116658  | 32093.219 | 28577.162 | NM_014359 | 61858.98  | 77049.969 | AK024624  | 37942.734 | 27346.648 |
| NM_014865 | 7960.575  | 6557.529  | BM918441  | 11422.183 | 17734.682 | AK025090  | 1998.399  | 1632.563  |
| AB032977  | 5284.915  | 5250.559  | AA425102  | 786.01    | 704.583   | AK024883  | 5250.162  | 3559.922  |
| AK001725  | 2169.593  | 2243.472  | AA878880  | 675.977   | 969.353   | AF217989  | 9243.999  | 10174.629 |
| NM_003039 | 4010.989  | 6804.099  | AA150828  | 1615.676  | 1419.47   | AL109696  | 1986.511  | 1313.696  |
| NM_020529 | 19192.51  | 17496.494 | H64379    | 12798.505 | 11213.053 | AJ011593  | 2954.763  | 2289.836  |
| S72604    | 11015.387 | 5536.536  | BE208258  | 57252.066 | 68712.938 | X89743    | 1027.408  | 829.791   |
| NM_017984 | 887.355   | 407.048   | T72202    | 2647.719  | 2926.793  | NM_002179 | 738.923   | 537.831   |
| AF038951  | 17650.33  | 11566.327 | BI831922  | 3542.956  | 3854.665  | AJ011599  | 972.354   | 1022.837  |
| NM_006492 | 779.244   | 800.229   | M69238    | 2082.851  | 2483.8    | AJ002784  | 1032.651  | 863.044   |
| AK021811  | 2102.832  | 1745.362  | AA664180  | 1154.856  | 1025.014  | U17621    | 1169.984  | 1073.264  |
| NM_003429 | 2018.195  | 1667.795  | AA599158  | 22147.012 | 23746.221 | AL049239  | 4414.134  | 3090.38   |
| AF055030  | 4373.385  | 4569.062  | BE294756  | 1038.333  | 1587.729  | AF086208  | 3840.549  | 2621.522  |
| AK000589  | 4622.256  | 3771.085  | AK026092  | 6581.772  | 8632.664  | AK023335  | 7949.858  | 5332.125  |
| X53281    | 11229.065 | 10899.735 | AK001175  | 1875.002  | 2880.572  | AK023187  | 770.197   | 524.359   |
| BC012782  | 6474.535  | 5051.255  | NM_003897 | 6085.149  | 7554.745  | AK022231  | 590.714   | 553.185   |
| AF132026  | 60242.488 | 60478.398 | NM_003299 | 59956.422 | 60404.207 | NM_019033 | 1993.556  | 3370.604  |
| AL050353  | 3850.909  | 4772.556  | NM_014330 | 42576.305 | 42628.168 | AL133101  | 3005.169  | 2983.62   |
| AB037788  | 20899.311 | 17536.709 | NM_007034 | 1634.992  | 2506.38   | AL157459  | 2701.042  | 1844.445  |
| NM_004587 | 16654.205 | 21425.027 | NM_005261 | 534.727   | 1120.982  | AK000778  | 3445.662  | 3543.277  |
| NM_000975 | 55426.555 | 69009.539 | NM_001560 | 1282.517  | 2740.822  | AK000932  | 1115.505  | 1223.534  |
| AF147412  | 13847.877 | 14122.805 | NM_001783 | 58553.609 | 60592.367 | AL133573  | 5754.449  | 4803.117  |
| AK024570  | 21747.6   | 17413.225 | J03171    | 2644.642  | 1147.668  | AK000115  | 3954.976  | 2576.885  |
| AF161401  | 14855.044 | 12320.844 | NM_004323 | 41539.125 | 28786.439 | AK000958  | 1735.355  | 1068.964  |
| NM_000990 | 33194.305 | 18040.938 | NM_002310 | 548.352   | 983.708   | BC024924  | 9846.17   | 7060.936  |
| NM_014740 | 18417.205 | 18532.672 | NM_005312 | 4461.523  | 4513.668  | NM_017909 | 5578.635  | 4561.447  |
| NM_015959 | 53141.711 | 59557.844 | NM_001711 | 2316.921  | 2920.583  | AL110286  | 7319.888  | 5253.992  |
| AK024601  | 8861.128  | 7022.391  | NM_004210 | 16980.369 | 16183.471 | AL162066  | 38393.105 | 33713.512 |
| S68069    | 3283.437  | 1314.697  | NM_020140 | 3580.613  | 4288.694  | NM_016099 | 42130.961 | 53205.852 |
| AB011095  | 1086.582  | 769.372   | NM_001496 | 12223.287 | 12025.804 | U79290    | 2945.905  | 4011.717  |
| NM_002489 | 31183.314 | 21605.059 | NM_001962 | 1058.823  | 1589.624  | X98114    | 494.212   | 379.883   |
| NM_004003 | 6830.318  | 5113.092  | NM_002500 | 3257.76   | 5480.372  | D87682    | 5599.638  | 4428.668  |
| NM_000189 | 6441.139  | 5507.544  | AK026232  | 10670.577 | 14966.249 | AF321617  | 4326.698  | 4215.883  |
| BF244401  | 7415.628  | 6636.171  | NM_014892 | 8401.678  | 9677.771  | NM_006950 | 964.362   | 904.317   |
| NM_004719 | 56469.77  | 53167.238 | AK023827  | 5435.378  | 8723.364  | NM_000682 | 1098.626  | 1084.728  |
| AL359585  | 9524.389  | 7063.09   | NM_001117 | 680.558   | 1287.41   | NM_016299 | 1924.24   | 1528.761  |
| AB046850  | 12804.529 | 10672.063 | AF283645  | 10218.989 | 7947.542  | AK002146  | 1276.121  | 947.093   |
| NM_014801 | 1385.634  | 1229.789  | NM_016575 | 2688.288  | 3562.248  | NM_003159 | 2148.708  | 1672.577  |
| NM_003642 | 8921.278  | 8008.58   | NM_018557 | 449.699   | 1007.111  | AK023494  | 783.612   | 561.503   |
| AB027013  | 520.303   | 318.429   | NM_001045 | 23902.539 | 40320.012 | NM_015492 | 14461.392 | 14130.318 |
| BC032686  | 1011.581  | 879.011   | NM_005697 | 33457.773 | 52124.285 | NM_006933 | 431.27    | 1020.873  |
| BF185480  | 4374.599  | 3886.195  | NM_003099 | 7274.394  | 8675.694  | AF132204  | 9590.985  | 12272.947 |
| NM_002129 | 50226.723 | 36087.371 | NM_004781 | 2489.699  | 977.976   | AK022874  | 9464.616  | 7445.416  |
| NM_007105 | 586.249   | 475.42    | NM_018303 | 1363.001  | 930.946   | AK025503  | 2971.619  | 3325.178  |
| NM_003074 | 10880.741 | 11877.564 | NM_014759 | 10822.873 | 13065.819 | AF130073  | 2646.67   | 2408.394  |
| AL360195  | 3161.595  | 4648.112  | AL133047  | 368.603   | 377.563   | AK024225  | 13108.456 | 10871.689 |

|           |           |           |           |           |           |           |           |           |
|-----------|-----------|-----------|-----------|-----------|-----------|-----------|-----------|-----------|
| U14383    | 1748.368  | 1501.735  | NM_005124 | 3624.531  | 6619.283  | AF086334  | 1452.38   | 1289.795  |
| NM_01781C | 2674.944  | 2361.824  | AK000947  | 6797.993  | 8776.369  | NM_00369E | 1186.207  | 1011.819  |
| NM_003181 | 32677.102 | 27328.414 | L08240    | 2527.098  | 2786.949  | AF075035  | 14191.601 | 12173.339 |
| NM_004451 | 14487.082 | 15860.669 | NM_017952 | 2264.973  | 2956.813  | NM_007262 | 30043.34  | 23093.645 |
| NM_004364 | 636.265   | 563.097   | NM_00294C | 3427.909  | 4556.286  | NM_014783 | 5490.799  | 4682.11   |
| NM_02039E | 5453.176  | 8930.129  | NM_016081 | 18589.506 | 23682.131 | NM_014053 | 5725.72   | 5007.093  |
| NM_00342E | 2059.847  | 876.523   | NM_006389 | 7247.623  | 11070.863 | NM_002571 | 569.409   | 594.956   |
| NM_01338E | 11307.802 | 11796.739 | M30818    | 930.925   | 2047.193  | NM_00493E | 4876.125  | 4600.792  |
| AK026232  | 9030.457  | 7899.359  | NM_000163 | 869.522   | 1307.361  | NM_00142E | 9692.795  | 7644.323  |
| NM_014892 | 4897.826  | 3755.223  | NM_00575E | 10395.395 | 10401.85  | NM_01571C | 1531.002  | 1466.923  |
| AK023827  | 4500.814  | 5138.18   | NM_003329 | 63134.926 | 65554.219 | NM_01415E | 4970.654  | 4746.736  |
| NM_001117 | 995.863   | 2340.452  | NM_01440C | 7554.302  | 4461.101  | AK021591  | 2483.422  | 2736.564  |
| NM_000231 | 595.649   | 764.578   | AL157492  | 2176.892  | 1897.808  | NM_01467E | 3006.097  | 6027.414  |
| L07517    | 3662.917  | 3384.965  | AL353957  | 4033.325  | 3627.875  | NM_01404C | 6380.227  | 6987.644  |
| AK022451  | 1572.902  | 2283.69   | NM_007214 | 12875.253 | 23369.455 | NM_00152E | 2173.359  | 2713.93   |
| NM_01435E | 58345.07  | 60438.512 | NM_000311 | 21573.145 | 37898.488 | U31738    | 3136.885  | 2643.563  |
| BM918441  | 1455.133  | 1334.334  | NM_017909 | 6332.218  | 11300.485 | AF179890  | 10202.649 | 16697.814 |
| AA425102  | 466.865   | 800.797   | NM_00633E | 25904.566 | 43847.953 | AK023536  | 12519.177 | 13149.326 |
| AA878880  | 945.735   | 1064.811  | NM_00078E | 8408.276  | 6502.812  | AK021568  | 7657.412  | 6786.987  |
| AA150828  | 4249.214  | 3784.286  | AB040891  | 3279.112  | 6031.904  | AF088054  | 1301.867  | 1330.775  |
| H90764    | 948.893   | 1293.893  | AB037780  | 616.419   | 345.688   | AK027114  | 67148.922 | 66673.797 |
| AI859208  | 1586.492  | 1387.507  | NM_00584E | 33060.473 | 29186.148 | NM_00107E | 4718.606  | 5206.787  |
| H64379    | 10178.563 | 9180.783  | NM_016209 | 12563.247 | 11400.639 | NM_000552 | 9330.941  | 9040.146  |
| BE208258  | 51354.074 | 58495.883 | AK075415  | 1027.786  | 1454.192  | NM_00380E | 965.401   | 1040.491  |
| BI833114  | 360.744   | 338.485   | AK025616  | 677.425   | 936.534   | AK000860  | 6742.126  | 6094.313  |
| T72202    | 4774.141  | 5487.598  | NM_018964 | 7936.831  | 10461.34  | NM_014961 | 908.648   | 787.289   |
| BI831922  | 3744.911  | 3650.221  | NM_00008C | 2621.856  | 3674.822  | NM_02014E | 3940.501  | 3632.389  |
| M69238    | 2135.74   | 2161.888  | NM_001829 | 2093.925  | 4139.05   | AK021529  | 7684.82   | 6415.792  |
| AA664180  | 1096.553  | 1398.496  | NM_00725E | 2628.631  | 3429.249  | AB037845  | 7285.726  | 7358.388  |
| M80244    | 669.148   | 769.846   | AK026092  | 3829.005  | 3164.838  | NM_00598C | 2077.826  | 3485.108  |
| AA599158  | 16717.795 | 12044.174 | AK001175  | 1491.012  | 820.852   | NM_01619C | 63791.27  | 71743.266 |
| BE294756  | 400.325   | 621.429   | NM_003897 | 8386.149  | 14769.222 | AK026682  | 3260.043  | 2861.843  |
| NM_00069E | 9801.269  | 10736.342 | NM_01416E | 45403.563 | 61521.07  | NM_01772C | 44685.535 | 47122.781 |
| L08240    | 3014.808  | 2452.922  | AL442085  | 6886.593  | 7004.357  | NM_00465E | 1451.831  | 1046.636  |
| NM_017952 | 3223.54   | 2932.4    | NM_013313 | 6093.361  | 9894.009  | NM_003942 | 3526.671  | 3364.466  |
| NM_00294C | 4145.986  | 4059.969  | NM_01473E | 6442.738  | 5749.268  | NM_006471 | 7801.809  | 8962.78   |
| NM_016081 | 13783.559 | 14519.771 | AK023886  | 2483.096  | 2921.658  | NM_01658E | 2182.293  | 1744.798  |
| NM_00638E | 13798.29  | 11156.997 | NM_002553 | 4492.876  | 4945.899  | AK023847  | 577.964   | 586.217   |
| M30818    | 2151.454  | 3816.439  | AJ404615  | 3892.953  | 5105.756  | NM_00386C | 6820.262  | 6243.239  |
| NM_000163 | 1124.013  | 1329.729  | NM_016053 | 28835.975 | 25518.875 | NM_00446E | 32456.51  | 39450.766 |
| NM_00575E | 10708.427 | 7862.994  | AB007869  | 5612.339  | 4817.41   | NM_016031 | 10453.849 | 12782.62  |
| NM_00332E | 55604.055 | 57368.664 | AB046844  | 1764.02   | 2448.212  | NM_004804 | 2175.236  | 2045.254  |
| NM_00329E | 50161.469 | 50552.668 | NM_000302 | 2937.608  | 3109.709  | M92439    | 22118.287 | 20513.113 |
| U70981    | 408.494   | 388.937   | NM_01323E | 48171.266 | 50972.828 | AL117665  | 5773.896  | 5601.274  |
| NM_01433C | 10614.211 | 10451.231 | NM_01601E | 12541.793 | 13019.651 | AF263541  | 2411.053  | 2547.458  |
| NM_007034 | 1767.716  | 1386.484  | NM_02012C | 1733.95   | 2790.664  | NM_001262 | 5805.224  | 6347.752  |
| NM_005261 | 429.764   | 632.366   | AK022900  | 1335.037  | 1984.502  | BC006990  | 10821.204 | 13821.245 |
| NM_00156C | 599.26    | 445.005   | NM_00112E | 369.681   | 357.743   | NM_002277 | 4228.101  | 4281.087  |
| NM_001783 | 55222.211 | 58167.602 | AB023216  | 1119.511  | 1546.411  | NM_019114 | 3378.383  | 3751.264  |
| J03171    | 6573.65   | 7496.822  | NM_00226E | 58537.977 | 60126.617 | M33552    | 19969.361 | 17653.26  |
| NM_00585E | 524.804   | 591.795   | CY3Cy5    | 624.867   | 222.304   | AJ252060  | 2922.835  | 2765.548  |
| NM_004323 | 27554.588 | 28766.523 | NM_03319E | 1123.122  | 380.046   | NM_006403 | 5507.954  | 6590.971  |
| NM_00231C | 1123.893  | 1919.154  | NM_015001 | 2103.32   | 403.979   | AJ001402  | 3369.103  | 4879.578  |

|           |           |           |           |           |           |           |           |           |
|-----------|-----------|-----------|-----------|-----------|-----------|-----------|-----------|-----------|
| NM_005312 | 5872.521  | 4553.063  | AF086324  | 2521.148  | 3183.115  | NM_00454C | 724.325   | 975.137   |
| NM_00421C | 15325.692 | 17791.852 | AF086261  | 2559.582  | 3287.241  | L25628    | 1486.981  | 2072.587  |
| NM_02014C | 4286.626  | 6429.987  | AF086367  | 1746.406  | 1915.106  | M37033    | 22089.508 | 23030.877 |
| NM_007214 | 11362.427 | 11024.372 | AF086437  | 3626.788  | 5181.572  | NM_007171 | 3557.691  | 3082.164  |
| NM_000311 | 16346.702 | 12211.385 | AK025088  | 8051.078  | 10429.937 | NM_00427E | 3044.594  | 2929.698  |
| NM_01790E | 4259.66   | 3152.863  | U79295    | 2563.272  | 2718.685  | NM_00563Z | 1791.864  | 1827.142  |
| NM_00633E | 17476.072 | 15528.194 | AK002107  | 1524.387  | 2487.842  | AK021499  | 955.689   | 1202.676  |
| NM_00078E | 9799.896  | 7134.798  | NM_00359E | 8071.303  | 10743.422 | AK000336  | 3113.509  | 2856.435  |
| NM_00251E | 721.01    | 721.183   | AF052181  | 5203.711  | 5956.541  | NM_00279E | 34187.113 | 29829.828 |
| NM_017731 | 1281.455  | 973.256   | AL050074  | 9768.303  | 6139.172  | NM_00629Z | 10695.057 | 10494.657 |
| AB040891  | 2863.691  | 3751.512  | AK026436  | 485.65    | 190.371   | AB007948  | 2771.655  | 2764.766  |
| AK025616  | 733.283   | 559.527   | NM_018061 | 1924.086  | 681.407   | AB033066  | 4315.959  | 3560.768  |
| NM_00725E | 1759.83   | 2400.583  | NM_03319E | 1702.206  | 682.069   | AF126028  | 2444.379  | 2504.52   |
| NM_00104E | 4802.136  | 4326.216  | NM_015001 | 3208.166  | 2029.954  | NM_01764C | 2798.902  | 4205.694  |
| NM_005697 | 21073.828 | 20152.291 | SR2       | 59123.477 | 41652.105 | NM_01908E | 12504.996 | 13162.089 |
| NM_00309E | 7125.142  | 8736.348  | SR4       | 16665.928 | 13843.354 | AB002373  | 2297.239  | 2206.966  |
| NM_004781 | 5321.924  | 8743.57   | SR6       | 2119.197  | 1732.839  | NM_01635C | 30096.734 | 33062.547 |
| NM_01830E | 2420.167  | 2338.67   | SR8       | 8768.412  | 34249.641 | NM_00502E | 9593.938  | 13435.953 |
| NM_01475E | 5167.271  | 5308.508  | SR10      | 26724.969 | 7209.086  | NM_00414C | 1010.762  | 974.774   |
| AL133047  | 506.583   | 506.543   | CY3Cy5    | 1401.165  | 257.108   | NM_00286E | 41852.359 | 34235.039 |
| NM_005124 | 4525.063  | 6949.61   | AL109719  | 885.693   | 478.255   | AF230809  | 6225.593  | 5263.531  |
| AK000947  | 10269.343 | 15338.256 | AF086093  | 1613.669  | 315.48    | NM_017894 | 61461.656 | 66007.563 |
| NM_003897 | 6593.755  | 5545.273  | U92022    | 3151.029  | 4036.35   | NM_00650E | 14801.928 | 12879.745 |
| NM_01416E | 26956.805 | 20287.414 | NM_00365C | 2290.181  | 3904.46   | AK025447  | 2803.557  | 2639.775  |
| AL442085  | 10104.37  | 9600.426  | AK022119  | 18386.072 | 23921.439 | NM_002624 | 63763.168 | 68901.352 |
| J03250    | 482.064   | 531.519   | NM_016644 | 3819.13   | 6330.98   | AF006199  | 1809.75   | 1691.769  |
| NM_01331E | 6469.183  | 10451.125 | AF085842  | 1089.336  | 1748.606  | NM_004554 | 45077.086 | 44250.074 |
| NM_01473E | 11326.499 | 10771.963 | AK027158  | 2137.713  | 2703.308  | NM_01811E | 8974.559  | 7823.336  |
| AK023886  | 3170.29   | 3392.966  | AK002187  | 2094.357  | 2657.021  | NM_01457E | 1306.781  | 1152.478  |
| NM_00255E | 5590.817  | 6498.367  | AF085836  | 11661.508 | 19080.9   | AL162035  | 3128.808  | 3387.869  |
| AJ404615  | 9001.146  | 15474.427 | AL049449  | 3937.46   | 4259.792  | NM_00669Z | 1962.858  | 1870.363  |
| NM_01605E | 34208.16  | 31695.545 | AL359654  | 1627.395  | 664.216   | NM_003084 | 2586.036  | 2759.519  |
| AB007869  | 4622.018  | 4037.467  | AK024224  | 3425.839  | 1742.778  | NM_00258Z | 15645.16  | 17203.951 |
| AB046844  | 1599.329  | 2432.913  | NM_01536Z | 13471.952 | 8049.521  | AB061315  | 2647.106  | 2035.601  |
| NM_00030Z | 5029.804  | 6933.28   | AK023745  | 986.357   | 750.61    | D17289    | 12895.736 | 9921.286  |
| NM_01323E | 51283.168 | 43290.48  | NM_01898Z | 3485.005  | 2250.489  | NM_01423C | 12441.375 | 11065.07  |
| NM_01601E | 10074.171 | 8776.838  | AF086254  | 6837.314  | 4614.042  | NM_00023E | 3234.888  | 3295.493  |
| NM_02012C | 2170.29   | 2366.849  | AF086294  | 622.661   | 694.485   | NM_01587E | 1239.491  | 1097.252  |
| AK022900  | 1903.796  | 2984.656  | AK026856  | 775.859   | 837.466   | AF068236  | 66831.656 | 66674.234 |
| NM_00112E | 545.986   | 449.508   | AL162033  | 5763.503  | 2142.518  | U28480    | 953.672   | 989.336   |
| AB023216  | 2180.978  | 3748.133  | AL162010  | 819.728   | 1116.115  | NM_00010E | 22998.914 | 17274.172 |
| NM_00226E | 55274.512 | 50620.152 | AK026893  | 2795.617  | 3394.928  | NM_01812E | 6572.77   | 6324.28   |
| NM_01440C | 9737.611  | 10247.215 | AK026761  | 955.314   | 1365.921  | NM_016931 | 19602.51  | 24089.289 |
| AL157492  | 3969.656  | 6024.621  | NM_01883E | 14582.163 | 24165.814 | NM_00437Z | 61127.133 | 64959.336 |
| AL353957  | 8127.101  | 12667.055 | AF075083  | 1327.856  | 2117.623  | NM_00556E | 63256.82  | 70112.07  |
| AK023827  | 4303.354  | 4160.242  | AK021454  | 2854.162  | 3651.171  | NM_00016Z | 10407.173 | 9419.403  |
| NM_001117 | 818.626   | 1274.464  | AK022069  | 5002.992  | 7540.79   | AK027067  | 731.229   | 719.673   |
| NM_000231 | 416.741   | 530.505   | AL137457  | 2648.192  | 4244.341  | NM_016287 | 18253.064 | 19245.813 |
| L07517    | 3564.383  | 3438.692  | AF075092  | 1102.6    | 1763.971  | AK021661  | 557.373   | 728.65    |
| AK022451  | 1812.109  | 2599.264  | AF085944  | 2304.181  | 400.726   | NM_003864 | 15820.853 | 16298.85  |
| NM_01435E | 51565.215 | 60168.082 | AL133038  | 2466.407  | 865.522   | NM_006824 | 20697.828 | 24576.338 |
| BM918441  | 1891.082  | 1920.526  | AL137414  | 2461.495  | 1180.322  | NM_002107 | 3454.5    | 7279.404  |
| AA878880  | 652.635   | 658.776   | AL359574  | 3702.813  | 3425.358  | U13706    | 1938.774  | 1548.82   |

|           |           |           |           |           |           |           |           |           |
|-----------|-----------|-----------|-----------|-----------|-----------|-----------|-----------|-----------|
| AA150828  | 4622.812  | 4444.385  | AL133569  | 4705.96   | 3415.271  | AF213356  | 1871.428  | 1678.766  |
| H90764    | 1286.782  | 1904.99   | AL137435  | 1131.377  | 1014.183  | BC035716  | 10445.23  | 9842.316  |
| AI859208  | 1508.372  | 1470.767  | AL157463  | 1025.653  | 1109.992  | NM_018014 | 6711.456  | 5424.615  |
| H64379    | 9274.212  | 6568.625  | AL359604  | 777.588   | 890.202   | NM_002356 | 53250.887 | 46903.969 |
| BE208258  | 52835.492 | 58894.047 | AK027189  | 2038.714  | 1385.345  | AF007192  | 1394.315  | 1426.528  |
| BI833114  | 448.779   | 629.456   | AK001910  | 5267.995  | 3543.332  | NM_001276 | 9556.435  | 11981.867 |
| T72202    | 5013.587  | 4896.422  | AF124368  | 3164.392  | 2082.814  | NM_016157 | 2801.727  | 2888      |
| BI831922  | 3587.077  | 3689.171  | AF265210  | 8117.461  | 8409.586  | NM_014915 | 50332.727 | 37433.926 |
| M69238    | 1918.05   | 1802.112  | AK024241  | 2238.774  | 3302.781  | NM_012286 | 7801.316  | 7786.209  |
| AA664180  | 1150.145  | 923.362   | AK025061  | 3089.748  | 4602.688  | NM_002195 | 19857.15  | 20311.646 |
| M80244    | 451.478   | 634.063   | AK023882  | 1115.424  | 1605.025  | D84294    | 5902.273  | 4846.102  |
| AA599158  | 23736.188 | 33054.047 | AK026750  | 2102.001  | 2917.823  | X59770    | 2612.864  | 2281.58   |
| AK026092  | 2272.498  | 2758.511  | AF072164  | 6109.021  | 7873.074  | K02765    | 20442.318 | 19197.271 |
| AK001175  | 3611.964  | 5051.252  | NM_018610 | 937.167   | 1609.611  | M65134    | 1952.304  | 2305.185  |
| NM_002940 | 3716.494  | 3540.822  | AF181286  | 512.434   | 1295.345  | BG539651  | 18881.053 | 19793.279 |
| NM_016081 | 13289.43  | 15685.005 | AK025234  | 752.029   | 1662.168  | N52646    | 60203.434 | 62200.449 |
| NM_006386 | 13231.625 | 9661.604  | AF083122  | 1058.258  | 1794.658  | AW160671  | 58965.914 | 63947.473 |
| M30818    | 2044.545  | 2016.807  | AF147317  | 1789.132  | 2543.346  | BI870529  | 17451.174 | 21822.367 |
| NM_000163 | 1281.872  | 1474.514  | AF232216  | 3813.608  | 1962.409  | AA702698  | 1636.096  | 2882.648  |
| NM_005755 | 12147.146 | 9538.393  | NM_017773 | 8860.835  | 2317.51   | AI681514  | 2545.132  | 2612.983  |
| NM_003326 | 53338.027 | 56408.496 | AK021885  | 1453.165  | 1126.993  | NM_001300 | 4198.039  | 4652.804  |
| NM_003296 | 50313.297 | 49348.043 | AK022161  | 1234.352  | 1015.7    | BG748827  | 11200.923 | 10507.83  |
| U70981    | 466.981   | 612.497   | AK022296  | 1507.837  | 1603.73   | AA952897  | 15735.241 | 16219.045 |
| NM_014330 | 12039.505 | 15663.575 | AK021940  | 1311.085  | 1271.096  | BG760342  | 6447.372  | 7036.358  |
| NM_007034 | 1584.17   | 1456.534  | AK022189  | 1756.63   | 1408.665  | AA703141  | 2766.668  | 3150.311  |
| NM_005261 | 432.084   | 511.458   | AK022338  | 1446.056  | 1490.969  | AA195244  | 767.442   | 880.53    |
| NM_001560 | 696.484   | 743.758   | U48696    | 5293.991  | 5494.673  | AI122630  | 13140.545 | 14371.902 |
| NM_001783 | 56729.125 | 59669.082 | NM_004486 | 1143.647  | 1153.784  | AF086790  | 6668.705  | 8010.735  |
| J03171    | 7106.662  | 6610.558  | AK024515  | 14665.231 | 20378.859 | AK025966  | 7009.066  | 7464.669  |
| NM_005856 | 571.828   | 628.318   | AF085862  | 8541.101  | 11374.097 | NM_014440 | 624.89    | 724.39    |
| NM_004323 | 32758.068 | 38808.594 | NM_017996 | 3129.788  | 5058.173  | NM_018725 | 1474.795  | 2228.834  |
| NM_002310 | 604.881   | 718.669   | AL049271  | 68390.125 | 72626.023 | NM_003081 | 48939.383 | 54451.34  |
| NM_005312 | 9578.165  | 19460.592 | AK023079  | 66563.406 | 64502.777 | NM_016495 | 3063.725  | 4070.465  |
| NM_004210 | 15182.292 | 12951.599 | NM_019609 | 6244.563  | 7738.451  | D50402    | 53254.547 | 52150.137 |
| NM_020140 | 3710.309  | 3772.278  | AK026198  | 7532.393  | 9957.332  | M73547    | 19371.346 | 24140.359 |
| AK026232  | 12197.175 | 14644.062 | NM_005001 | 46036.379 | 55056.457 | AF181722  | 854.424   | 714.375   |
| NM_014892 | 9497.795  | 14540.144 | AK024175  | 4647.155  | 4303.599  | NM_003687 | 7493.757  | 7296.818  |
| NM_017906 | 3858.52   | 3305.033  | NM_000510 | 3519.133  | 4815.277  | NM_004134 | 8462.797  | 8856.857  |
| NM_006335 | 17800.193 | 16877.07  | BE067520  | 1780.659  | 575.288   | NM_005955 | 26381.391 | 35981.316 |
| NM_000786 | 8542.851  | 5611.375  | NM_017787 | 3103.793  | 2941.692  | NM_004046 | 2200.816  | 2409.627  |
| NM_002516 | 708.807   | 500.391   | NM_020315 | 16019.085 | 11435.531 | BE548044  | 725.489   | 802.677   |
| NM_017731 | 1161.787  | 825.641   | NM_005683 | 2802.374  | 1752.209  | NM_006017 | 648.529   | 1120.098  |
| AB040891  | 3049.895  | 3220.336  | NM_020427 | 33583.891 | 11263.187 | NM_012426 | 5451.491  | 6691.945  |
| AB037780  | 521.061   | 348.886   | AF085920  | 1434.9    | 346.888   | NM_013266 | 15641.71  | 15204.968 |
| AK025616  | 792.427   | 880.603   | AK023173  | 28175.934 | 24553.338 | NM_001726 | 7883.928  | 10879.188 |
| NM_007256 | 1355.122  | 1200.519  | AK025225  | 1646.069  | 2152.02   | NM_003824 | 24842.305 | 39394.797 |
| NM_001045 | 5207.307  | 5013.69   | U79275    | 19888.902 | 25377.398 | NM_000686 | 3301.189  | 4314.961  |
| NM_005697 | 30036.65  | 36826.031 | AJ227908  | 1537.288  | 2333.959  | NM_012452 | 15831.85  | 19116.9   |
| NM_003096 | 7139.737  | 7156.368  | AF007193  | 2243.392  | 3006.09   | AF229166  | 1888.445  | 2528.448  |
| NM_004781 | 3984.328  | 3473.988  | AK022367  | 2188.506  | 3294.633  | NM_006764 | 7313.45   | 8544.047  |
| NM_016315 | 440.097   | 392.965   | BC028589  | 5382.511  | 8122.112  | NM_001386 | 10313.419 | 8685.646  |
| NM_018303 | 2622.533  | 3032.188  | AF088067  | 18382.508 | 19697.867 | NM_005313 | 43572.938 | 50593.859 |
| NM_014756 | 6733.647  | 8878.382  | AK022213  | 920.528   | 1373.067  | NM_017765 | 48283.52  | 52194.5   |

|           |           |           |           |           |           |           |           |           |
|-----------|-----------|-----------|-----------|-----------|-----------|-----------|-----------|-----------|
| AL133047  | 486.786   | 662.608   | AF056441  | 6760.936  | 7410.117  | NM_00042E | 1301.955  | 2446.914  |
| NM_005124 | 3362.182  | 3062.116  | AK024142  | 476.399   | 1446.726  | NM_00357E | 1205.322  | 900.82    |
| AK000947  | 8228.386  | 8767.522  | Y10509    | 1941.731  | 1328.367  | NM_014721 | 1261.331  | 1938.413  |
| L08240    | 4473.118  | 6755.817  | AK024389  | 19709.672 | 14981.492 | AK026352  | 2308.831  | 4103.182  |
| NM_017952 | 5833.281  | 8915.449  | AK026793  | 3575.876  | 3327.703  | NM_01618C | 1541.685  | 1475.157  |
| NM_01416E | 25998.621 | 21499.016 | NM_001672 | 1364.877  | 1274.988  | NM_005827 | 12260.274 | 12633.499 |
| AL442085  | 8866.517  | 6435.955  | AJ276253  | 36008.469 | 26090.617 | NM_00305E | 12978.151 | 15874.067 |
| NM_013313 | 5930.32   | 8007.323  | AF147314  | 1724.331  | 1635.458  | NM_01622E | 9516.932  | 9953.742  |
| NM_01473E | 10262.983 | 8847.241  | NM_01898C | 2512.172  | 2557.854  | AF052155  | 5195.54   | 4020.34   |
| AK023886  | 3349.873  | 2892.378  | AF086201  | 2972.173  | 2719.019  | NM_00508E | 12444.51  | 13927.188 |
| NM_002553 | 5621.217  | 5324.524  | AK024712  | 1525.363  | 1574.806  | AF060902  | 8295.042  | 9841.011  |
| AJ404615  | 6398.016  | 5797.887  | NM_002902 | 8608.682  | 3446.705  | AF121858  | 34028.281 | 39071.25  |
| NM_016053 | 33224.496 | 30828.4   | NM_02024E | 37774.129 | 10761.478 | NM_013437 | 1717.563  | 2750.941  |
| AB007869  | 6535.101  | 10101.282 | NM_004053 | 10801.17  | 6234.762  | NM_017681 | 2324.117  | 2541.596  |
| AB046844  | 1713.398  | 2451.929  | NM_00148E | 2000.314  | 2818.727  | X57655    | 35583.246 | 30586.941 |
| NM_000302 | 4112.781  | 3840.106  | M20259    | 1060.398  | 1424.51   | NM_018261 | 2291.244  | 2786.989  |
| NM_01323E | 47349.75  | 42647.766 | NM_020374 | 5270.223  | 8247.811  | NM_01479E | 4033.11   | 8717.389  |
| NM_01601E | 13380.618 | 17552.836 | NM_014922 | 3422.503  | 2650.76   | NM_001147 | 778.113   | 1317.322  |
| NM_02012C | 2633.686  | 2564.878  | AF183570  | 1494.624  | 2321.277  | AL050288  | 36783.773 | 34540.75  |
| AK022900  | 1401.924  | 1364.921  | NM_005497 | 61215.797 | 59156.488 | NM_00504C | 8172.527  | 10105.413 |
| NM_001125 | 524.25    | 908.958   | AK024048  | 7010.719  | 7048.843  | NM_016391 | 30610.963 | 29937.297 |
| AB023216  | 1440.098  | 1580.453  | AB033093  | 7198.908  | 6597.945  | M80783    | 270.169   | 410.458   |
| NM_00226E | 60060.844 | 61405.281 | NM_005912 | 1886.107  | 2834.157  | AF075033  | 8237.556  | 7497.452  |
| NM_01440C | 9605.92   | 7434.595  | NM_00590E | 59483.965 | 24252.07  | D50911    | 16924.48  | 15063.882 |
| AL157492  | 2713.036  | 1565.78   | AK021879  | 2254.337  | 1656.394  | AB011104  | 1754.368  | 1913.333  |
| AL353957  | 5667.562  | 5649.111  | AL355717  | 1181.72   | 876.465   | AK024069  | 11723.27  | 9256.72   |
| NM_007214 | 19099.484 | 30597.246 | AK055991  | 2798.935  | 2554.508  | NM_004582 | 22287.533 | 21562.234 |
| NM_000311 | 28126.275 | 37395.438 | AF113697  | 1972.457  | 3005.001  | NM_01564C | 33165.629 | 48827.152 |
| NM_000231 | 373.159   | 334.226   | AK022326  | 1972.519  | 1696.066  | AF233450  | 1158.484  | 1164.174  |
| L07517    | 3567.842  | 3399.675  | AF085991  | 2805.579  | 2840.916  | NM_016233 | 4590.812  | 3991.804  |
| AK022451  | 1302.033  | 1440.026  | AF075007  | 1358.462  | 1273.346  | NM_000821 | 57832.844 | 53802.875 |
| NM_01435E | 63427.727 | 65917.789 | NM_001943 | 857.363   | 436.897   | NM_020121 | 1836.62   | 2197.486  |
| BM918441  | 2866.645  | 2868.046  | NM_004927 | 13560.742 | 3026.718  | NM_00314E | 42860.57  | 44563.012 |
| AA878880  | 640.181   | 634.852   | NM_00145E | 3140.597  | 575.262   | NM_001632 | 3388.194  | 6548.319  |
| AA150828  | 4772.565  | 3801.948  | NM_015513 | 50033.684 | 20357.225 | NM_012264 | 1740.356  | 1350.505  |
| H90764    | 1378.209  | 1647.514  | NM_00621E | 11508.953 | 12978.317 | AF311312  | 2559.488  | 2335.802  |
| AI859208  | 2116.581  | 3009.434  | NM_004443 | 20314.984 | 26510.02  | NM_00127E | 9781.574  | 11173.798 |
| H64379    | 14223.538 | 18215.838 | NM_001932 | 631.239   | 1427.229  | NM_016157 | 3015.149  | 3031.518  |
| BE208258  | 51778.559 | 56322.926 | NM_017412 | 2990.924  | 4766.711  | NM_01491E | 54219.055 | 44904.305 |
| T72202    | 5525.451  | 5751.899  | NM_005544 | 925.856   | 1416.962  | NM_01228E | 8646.103  | 13586.133 |
| BI831922  | 4737.238  | 7355.18   | NM_002964 | 61253.355 | 62175.75  | NM_00219E | 22381.373 | 26049.742 |
| M69238    | 5911.408  | 6599.376  | AF311862  | 59780.332 | 60562.246 | D84294    | 6480.344  | 5119.838  |
| AA664180  | 1045.643  | 1026.523  | NM_00321E | 4421.216  | 4434.454  | X59770    | 3090.963  | 3374.966  |
| AA599158  | 18504.279 | 16762.51  | NM_016447 | 4383.908  | 4808.694  | K02765    | 20110.002 | 17843.873 |
| BE294756  | 555.307   | 1115.516  | NM_01562E | 19169.004 | 19541.336 | M65134    | 2269.685  | 2577.076  |
| AK026092  | 2010.017  | 1141.034  | NM_00489E | 13184.272 | 13328.15  | BG539651  | 21499.748 | 19803.35  |
| AK001175  | 2732.595  | 1768.526  | AB006628  | 37582.895 | 25535.852 | N52646    | 68587.148 | 66045.82  |
| NM_003897 | 5530.978  | 2478.178  | AF272036  | 3519.618  | 1213.857  | AW160671  | 65463.59  | 58805.652 |
| NM_00329E | 48300.656 | 51001.738 | AF231023  | 4643.677  | 3577.011  | BI870529  | 18232.629 | 16386.076 |
| U70981    | 569.766   | 607.575   | NM_00514E | 16363.392 | 15791.018 | AA702698  | 2090.473  | 2629.763  |
| NM_01433C | 12386.987 | 14766.293 | NM_00474E | 3032.917  | 3185.91   | AI681514  | 2963.451  | 3032.192  |
| NM_007034 | 2272.973  | 3940.934  | AF146019  | 9202.495  | 7226.97   | NM_00130C | 3929.343  | 4744.198  |
| NM_005261 | 545.861   | 510.63    | Z36782    | 7156.06   | 6338.426  | BG748827  | 12219.14  | 12724.102 |



|           |           |           |           |           |           |           |           |           |
|-----------|-----------|-----------|-----------|-----------|-----------|-----------|-----------|-----------|
| NM_00156C | 571.813   | 562.129   | M70435    | 712.569   | 1460.212  | AA952897  | 14918.823 | 15497.863 |
| NM_00178C | 52961.609 | 57479.945 | NM_00349C | 22589.928 | 22557.533 | BG760342  | 7445.152  | 8442.653  |
| J03171    | 7556.782  | 8779.999  | AF508940  | 6510.759  | 2234.44   | AA703141  | 3949.29   | 4766.832  |
| NM_00585C | 750.961   | 1074.428  | NM_020237 | 863.486   | 399.726   | AA195244  | 516.193   | 714.27    |
| NM_00432C | 26253.348 | 25383.834 | AF130051  | 604.925   | 251.126   | AI122630  | 13971.755 | 15187.214 |
| NM_00231C | 592.357   | 569.171   | M25753    | 22828.611 | 9861.454  | NM_00658C | 11577.012 | 12731.902 |
| NM_00531C | 7281.314  | 6677.197  | NM_00388C | 6935.428  | 6647.826  | NM_002191 | 389.865   | 396.568   |
| NM_001711 | 2884.499  | 3567.024  | NM_01492C | 5325.076  | 6756.132  | AB007875  | 4986.772  | 4375.454  |
| NM_00421C | 20525.805 | 28299.039 | NM_00420C | 32011.789 | 42550.02  | NM_01872C | 1528.134  | 1890.793  |
| NM_02014C | 3955.061  | 4914.505  | NM_001951 | 2257.261  | 3252.244  | NM_003081 | 52523.883 | 56753.824 |
| NM_00149C | 11439.695 | 12294.536 | NM_002391 | 4572.741  | 5955.666  | NM_01649C | 2351.538  | 2773.292  |
| NM_00702C | 790.897   | 844.094   | NM_00706C | 14052.765 | 17093.693 | D50402    | 57794.953 | 61088.738 |
| NM_00196C | 933.682   | 1788.007  | NM_003674 | 62653.266 | 63060.637 | M73547    | 25366.699 | 29788.418 |
| AK026232  | 10401.637 | 8580.599  | NM_001197 | 10184.678 | 10848.917 | AF181722  | 2331.277  | 2612.566  |
| NM_01489C | 8696.664  | 13686.016 | NM_00668C | 1460.193  | 2009.35   | NM_003687 | 9695.105  | 10326.677 |
| AK023827  | 4687.363  | 2091.796  | NM_00641C | 1597.682  | 2333.074  | NM_004134 | 9322.626  | 8860.021  |
| NM_001117 | 1323.918  | 1537.612  | NM_014977 | 60654.414 | 64358.898 | NM_00595C | 24442.793 | 22509.436 |
| AF283645  | 13743.649 | 12533.785 | AK026325  | 6699.214  | 5669.954  | NM_00404C | 2151.827  | 1824.029  |
| NM_01657C | 1486.407  | 1729.51   | NM_00123C | 1349.832  | 1517.801  | BE548044  | 1059.153  | 1350.883  |
| M33375    | 309.795   | 683.762   | AK025662  | 5301.014  | 4488.254  | NM_01242C | 5361.561  | 5801.311  |
| NM_018557 | 711.95    | 570.995   | NM_000201 | 24450.039 | 25047.678 | NM_01326C | 16463.02  | 16241.11  |
| NM_00104C | 4518.563  | 3498.807  | AB011539  | 1231.634  | 1530.867  | NM_00172C | 7436.175  | 10110.156 |
| NM_005697 | 24830.246 | 21300.957 | U37028    | 1771.326  | 2214.242  | NM_00556C | 277.74    | 363.459   |
| NM_00309C | 7606.197  | 7362.149  | AB014597  | 4834.785  | 6003.87   | NM_003824 | 20302.549 | 24099.217 |
| NM_004781 | 4064.499  | 4044.009  | NM_00179C | 31382.496 | 33791.219 | NM_00068C | 2953.313  | 3551.173  |
| NM_01631C | 672.846   | 824.596   | S81361    | 527.522   | 519.325   | NM_01245C | 14903.427 | 16121.302 |
| NM_01830C | 2129.877  | 2249.613  | AK024313  | 15495.799 | 3019.784  | AF229166  | 1211.622  | 1930.772  |
| NM_01475C | 6359.247  | 5684.902  | NM_003891 | 5293.065  | 833.085   | NM_006764 | 7673.445  | 8244.894  |
| AL133047  | 752.065   | 774.604   | AL359575  | 1868.613  | 378.454   | NM_00138C | 10751.56  | 9378.5    |
| NM_005124 | 4008.54   | 5461.303  | NM_00202C | 1698.917  | 1148.379  | AF007192  | 1812.514  | 2230.945  |
| AK000947  | 7683.041  | 9635.672  | NM_015524 | 2337.008  | 3325.784  | NM_01776C | 45223.898 | 48223.93  |
| L08240    | 3381.824  | 2706.164  | NM_00167C | 43937.914 | 54963.523 | NM_00042C | 1323.746  | 1591.231  |
| NM_01795C | 3425.225  | 3584.258  | AK023167  | 1235.719  | 2509.457  | NM_00357C | 973.11    | 574.958   |
| NM_00294C | 4377.399  | 4176.833  | NM_01651C | 9346.19   | 10975.034 | NM_014721 | 857.059   | 1049.013  |
| NM_016081 | 11427.438 | 9857.657  | NM_01427C | 5121.325  | 5397.216  | AK026352  | 2330.33   | 4623.428  |
| NM_00638C | 19252.936 | 26843.986 | NM_000071 | 24718.5   | 38854.09  | NM_01618C | 1689.763  | 1130.961  |
| M30818    | 3017.147  | 5599.346  | NM_00684C | 13989.86  | 18301.324 | NM_005827 | 13038.092 | 10886.321 |
| NM_00016C | 783.388   | 397.813   | NM_004321 | 7754.595  | 10503.64  | NM_00305C | 12495.229 | 13501.243 |
| NM_00575C | 17530.607 | 25793.947 | AF311212  | 9946.438  | 10833.46  | NM_01622C | 8836.221  | 9208.833  |
| NM_00332C | 54877.449 | 66168.516 | NM_00691C | 2920.48   | 3378.373  | AK024311  | 1156.573  | 1704.429  |
| NM_01440C | 11263.652 | 11617.791 | NM_00603C | 2965.289  | 3416.645  | AF052155  | 5256.448  | 4777.52   |
| AL157492  | 3234.012  | 4009.639  | NM_00452C | 18908.617 | 15319.543 | NM_00508C | 11866.255 | 13872.244 |
| AL353957  | 4712.619  | 4841.912  | AK027118  | 8910.958  | 7838.772  | AF060902  | 8236.78   | 8496.131  |
| NM_007214 | 13746.492 | 18053.865 | AK022882  | 42214.156 | 25988.635 | AF121858  | 44146.434 | 52959.902 |
| NM_000311 | 16733.031 | 13605.723 | NM_00610C | 8014.76   | 7230.596  | NM_013437 | 1739.812  | 2800.766  |
| NM_01790C | 4389.231  | 3470.338  | NM_005981 | 4219.118  | 3626.622  | NM_017681 | 2111.473  | 1973.027  |
| NM_00633C | 17771.979 | 14437.459 | AF210651  | 2390.196  | 2339.659  | X57655    | 31022.705 | 28724.432 |
| NM_00078C | 8990.74   | 5924.703  | AF090942  | 1775.295  | 2127.596  | AK025966  | 9277.997  | 8596.544  |
| NM_00251C | 895.501   | 632.344   | NM_01459C | 14607.45  | 4717.139  | NM_01444C | 712.448   | 1633.661  |
| NM_017731 | 1209.116  | 955.502   | NM_01478C | 1449.168  | 497.494   | NM_01479C | 2168.677  | 1971.703  |
| AB040891  | 3919.873  | 6210.63   | AB046784  | 9368.336  | 2239.391  | AL050288  | 38525.27  | 32370.18  |
| AB037780  | 544.612   | 563.345   | X52402    | 6520.46   | 1069.998  | NM_00504C | 7860.354  | 7199.733  |
| NM_00584C | 35851.504 | 31164.109 | AL133663  | 661.296   | 264.667   | NM_016391 | 26725.365 | 22358.891 |

|           |           |           |           |           |           |           |           |           |
|-----------|-----------|-----------|-----------|-----------|-----------|-----------|-----------|-----------|
| NM_016209 | 13597.764 | 12245.568 | NM_004992 | 3452.89   | 1280.712  | AF075033  | 7275.156  | 5894.627  |
| AK075415  | 870.973   | 844.063   | NM_014462 | 7255.055  | 9515.906  | D50911    | 16159.321 | 12722.493 |
| AK025616  | 597.401   | 426.12    | NM_014156 | 60326.621 | 58783.527 | AB011104  | 1814.959  | 2123.986  |
| NM_018964 | 3952.124  | 2590.345  | NM_003137 | 21901.721 | 36939.055 | AK024069  | 11574.904 | 9251.799  |
| NM_000080 | 1909.205  | 2582.307  | NM_006938 | 55938.715 | 57752.773 | NM_004582 | 20886.447 | 17904.045 |
| NM_001829 | 3567.674  | 7868.711  | NM_004515 | 1774.609  | 2887.31   | NM_015640 | 25077.736 | 22685.279 |
| NM_007256 | 1819.434  | 2836.797  | NM_020158 | 15661.449 | 23153.105 | AF233450  | 1155.115  | 1356.203  |
| AK026092  | 2346.458  | 1822.807  | AF176085  | 9777.943  | 10263.512 | NM_016233 | 4273.677  | 4780.564  |
| AK001175  | 2926.778  | 2304.674  | NM_006985 | 50956.555 | 48379.695 | NM_000821 | 57729.262 | 58122.809 |
| NM_003897 | 5641.208  | 5508.885  | AF265228  | 5522.335  | 7526.991  | NM_020121 | 1328.02   | 1561.188  |
| NM_014165 | 30051.092 | 23671.164 | NM_003757 | 58878.727 | 55605.164 | NM_003145 | 42973.102 | 41419.914 |
| AL442085  | 9717.081  | 7764.815  | AK025561  | 8002.235  | 8413.583  | NM_001632 | 2228.356  | 2764.612  |
| J03250    | 417.77    | 442.454   | NM_004096 | 6217.926  | 3818.239  | NM_012264 | 1157.313  | 1192.69   |
| NM_013313 | 6812.855  | 9909.426  | NM_017629 | 14025.217 | 11229.78  | AF311312  | 2177.02   | 2340.866  |
| NM_014736 | 13318.096 | 16920.328 | AL049681  | 3209.63   | 3193.695  | NM_001179 | 620.412   | 824.589   |
| AK023886  | 3570.34   | 3407.504  | NM_006584 | 1186.822  | 1238.66   | NM_005313 | 47220.273 | 50980.172 |
| NM_002553 | 5481.88   | 6069.786  | NM_003551 | 9252.057  | 3924.833  | NM_014915 | 47975.719 | 22438.223 |
| AJ404615  | 7059.621  | 6965.427  | AF305210  | 1103.385  | 645.986   | NM_012286 | 8326.783  | 8786.092  |
| NM_016053 | 34061.219 | 30769.215 | AK021900  | 6847.229  | 2112.495  | NM_002195 | 21841.033 | 21818.889 |
| AB007869  | 4408.917  | 3919.257  | NM_002764 | 21781.975 | 3305.619  | D84294    | 5983.297  | 4632.462  |
| AB046844  | 2175.896  | 3648.041  | NM_019857 | 3479.741  | 1268.63   | X59770    | 3109.329  | 3372.611  |
| NM_000302 | 4242.903  | 3384.342  | NM_015455 | 60482.578 | 59047.82  | K02765    | 18161.412 | 12545.751 |
| NM_013235 | 38832.34  | 21971.156 | AF024702  | 30189.047 | 47141.34  | M65134    | 2531.102  | 2399.895  |
| NM_016015 | 9633.698  | 4802.728  | NM_001964 | 7810.141  | 8529.938  | BG539651  | 22351.203 | 19018.871 |
| NM_020120 | 3099.788  | 5480.496  | NM_005962 | 35572.422 | 45656.207 | N52646    | 59219.746 | 60786.156 |
| AK022900  | 1581.54   | 1811.845  | X74864    | 13178.374 | 16765.557 | AW160671  | 56535.18  | 56425.688 |
| NM_001125 | 1149.797  | 1632.964  | AK026804  | 7574.593  | 8016.699  | BI870529  | 23817.35  | 39847     |
| AB023216  | 3213.631  | 4816.045  | NM_016170 | 32041.801 | 34060.602 | AA702698  | 2118.237  | 2783.721  |
| NM_002266 | 56092.707 | 61543.156 | NM_002114 | 807.908   | 1253.238  | AI681514  | 2889.404  | 2868.369  |
| CY3Cy5    | 1149.106  | 99.289    | NM_006166 | 6951.873  | 7171.685  | NM_001300 | 3840.884  | 3583.536  |
| NM_033196 | 1235.987  | 1465.98   | NM_005263 | 6928.839  | 7503.002  | BG748827  | 12613.364 | 11641.037 |
| NM_015001 | 5886.594  | 8600.337  | AB033022  | 5387.041  | 5571.022  | AA952897  | 15930.838 | 15987.81  |
| AF086261  | 629.326   | 571.521   | NM_000474 | 930.111   | 1078.866  | BG760342  | 6208.118  | 6957.781  |
| AF086367  | 1000.196  | 1034.112  | NM_016264 | 1669.302  | 1342.679  | AA703141  | 3319.915  | 3976.955  |
| AF086437  | 520.475   | 402.019   | NM_006079 | 49734.773 | 43670.383 | AA195244  | 432.402   | 861.543   |
| AK025088  | 3989.677  | 2927.089  | AB037837  | 4782.532  | 4431.198  | AI122630  | 14323.277 | 19157.51  |
| U79295    | 570.678   | 430.932   | NM_001155 | 24575.764 | 12978.903 | NM_006585 | 11602.405 | 13047.21  |
| AK002107  | 561.055   | 441       | M62896    | 56268.973 | 25541.131 | AB007875  | 4756.298  | 4561.127  |
| NM_003596 | 1228.626  | 762.304   | NM_017736 | 3045.125  | 1156.661  | NM_018261 | 3175.198  | 3516.316  |
| AF052181  | 2065.734  | 1581.29   | NM_000313 | 690.37    | 323.827   | NM_005955 | 22518.238 | 20118.486 |
| AL050074  | 1743.639  | 970.689   | NM_001498 | 61858.051 | 22567.543 | NM_004048 | 4190.448  | 3625.886  |
| AK026436  | 1060.343  | 772.998   | AF263523  | 6107.471  | 3528.184  | BE548044  | 2315.422  | 2048.648  |
| NM_018061 | 1634.914  | 1547.528  | L08441    | 43596.461 | 49109.07  | NM_012428 | 5236.64   | 5076.874  |
| NM_033195 | 819.131   | 792.142   | AA641953  | 3436.59   | 4789.554  | NM_013265 | 16261.86  | 14089.629 |
| SR4       | 11414.686 | 17270.434 | AI248827  | 15012.004 | 19273.111 | NM_001728 | 5928.479  | 5607.503  |
| SR6       | 1167.496  | 1523.416  | R45026    | 60014.859 | 63155.926 | NM_003824 | 19003.287 | 19448.338 |
| SR8       | 5096.673  | 17419.326 | BI768063  | 5937.547  | 9108.221  | NM_000686 | 3225.605  | 3811.291  |
| SR10      | 15662.648 | 5025.097  | BG386057  | 2762.05   | 3035.358  | NM_012452 | 15081.055 | 15149.352 |
| CY3Cy5    | 814.784   | 129.051   | AI970239  | 11895.185 | 15284.491 | AF229166  | 986.694   | 1345.163  |
| AF088014  | 711.678   | 775.006   | AA496452  | 40713.672 | 50960.535 | NM_005137 | 13604.646 | 12376.445 |
| AL109719  | 561.31    | 847.418   | X67594    | 25022.301 | 35948.965 | NM_006764 | 7174.022  | 7336.551  |
| AF086093  | 2791.007  | 4597.672  | BC008837  | 1715.913  | 1067.702  | NM_001386 | 10058.752 | 8392.903  |
| U92022    | 2528.753  | 4593.658  | NM_001631 | 1323.928  | 2048.679  | NM_001163 | 5692.424  | 6931.427  |

|           |           |           |           |           |           |           |           |           |
|-----------|-----------|-----------|-----------|-----------|-----------|-----------|-----------|-----------|
| NM_00365C | 460.959   | 502.684   | AB000734  | 12537.83  | 10041.785 | NM_00587E | 11123.062 | 11179.402 |
| AK022119  | 785.64    | 1395.526  | NM_000862 | 713.825   | 1124.342  | AF308602  | 5417.523  | 6904.408  |
| AL157488  | 458.816   | 701.899   | NM_005987 | 62142.047 | 57520.516 | AB011089  | 5430.801  | 9714.929  |
| NM_016644 | 2656.823  | 2247.889  | X87838    | 9497.665  | 10651.926 | NM_001312 | 2094.341  | 2556.684  |
| AF085842  | 412.352   | 385.968   | AK023059  | 1675.674  | 1901.402  | AF007192  | 2344.926  | 2890.313  |
| AF147397  | 753.265   | 696.117   | AF224266  | 10758.295 | 5863.956  | NM_00127E | 9901.154  | 11432.063 |
| AK027158  | 598.28    | 609.434   | U72882    | 53511.023 | 40781.191 | NM_016157 | 3386.236  | 3046.271  |
| AK002187  | 1143.897  | 2305.149  | NM_014337 | 21102.205 | 9760.3    | NM_003053 | 12866.494 | 13522.703 |
| AF085836  | 1400.086  | 1209.271  | NM_007161 | 34846.961 | 13206.095 | NM_003044 | 9444.886  | 8902.822  |
| AL049449  | 531.263   | 392.567   | NM_014387 | 2928.605  | 785.98    | NM_006672 | 34335.637 | 36657.301 |
| AL359654  | 826.427   | 1181.476  | NM_003641 | 8726.411  | 1922.067  | NM_00033E | 696.498   | 821.781   |
| AK024224  | 2609.949  | 2346.754  | NM_012463 | 4606.624  | 1429.768  | M31659    | 832.822   | 932.27    |
| NM_015362 | 10570.728 | 9766.059  | L29140    | 57730.23  | 56936     | NM_00305E | 12032.232 | 9958.835  |
| AF147371  | 809.927   | 840.729   | AK026448  | 14758.781 | 20259.033 | NM_01622E | 9053.892  | 8033.141  |
| NM_018982 | 2829.819  | 3055.083  | AK057418  | 9408.435  | 10719.406 | AK024311  | 843.222   | 912.965   |
| AF086254  | 5305.927  | 4614.675  | L37199    | 1188.889  | 1819.261  | AF052155  | 4265.474  | 3248.921  |
| AF086294  | 534.309   | 1196.315  | NM_00726C | 4985.88   | 7712.636  | NM_00508E | 11437.925 | 10913.971 |
| AK026856  | 1291.771  | 1038.476  | AF148646  | 34851.496 | 46000.695 | AF060902  | 7640.895  | 8242.697  |
| AL162033  | 729.98    | 754.811   | AL110218  | 6856.97   | 9285.452  | AF121858  | 38637.699 | 45717.516 |
| NM_01883E | 12999.837 | 14605.753 | AB023201  | 9067.358  | 12705.577 | NM_013437 | 689.908   | 686.212   |
| AK021454  | 1875.943  | 1875.521  | X00094    | 6328.464  | 4196.669  | NM_017681 | 1941.23   | 1681.87   |
| AK022069  | 1111.631  | 948.161   | NM_00377E | 27035.08  | 25869.223 | X57655    | 32301.434 | 27122.09  |
| AF075092  | 326.24    | 372.055   | NM_002082 | 30378.313 | 21447.859 | AK025966  | 8438.336  | 8354.737  |
| AF085944  | 396.532   | 342.76    | AF155657  | 18696.246 | 18975.49  | NM_01444C | 869.918   | 1226.131  |
| AL133038  | 2203.544  | 3426.128  | NM_00605E | 8712.369  | 8505.723  | NM_01872E | 1802.689  | 1901.243  |
| AL137414  | 2099.885  | 2235.671  | AF045229  | 28119.809 | 28600.328 | NM_003081 | 47962.016 | 55531.438 |
| AL359574  | 1311.858  | 1816.48   | NM_00184C | 21360.08  | 21855.08  | NM_01649E | 2140.696  | 2433.515  |
| AL133569  | 2220.319  | 1459.608  | NM_01609E | 30637.391 | 31291.455 | D50402    | 58773.477 | 61028.77  |
| AL137435  | 454.029   | 428.496   | NM_000394 | 453.054   | 885.031   | M73547    | 24274.697 | 27996.691 |
| AK027189  | 2277.71   | 3144.599  | NM_000072 | 1000.739  | 629.263   | AF181722  | 1405.629  | 2118.858  |
| AK001910  | 450.386   | 369.474   | NM_000697 | 3818.736  | 1289.638  | NM_003687 | 8920.016  | 8007.188  |
| AK023892  | 539.059   | 388.208   | NM_000017 | 17051.412 | 4955.642  | NM_004134 | 9426.055  | 8251.026  |
| AF265210  | 4306.762  | 3347.11   | NM_000237 | 534.978   | 389.344   | NM_001632 | 1955.492  | 2264.699  |
| AK025061  | 555.68    | 402.316   | NM_01834E | 10189.095 | 2529.535  | NM_012264 | 1402.421  | 1094.782  |
| AK023882  | 424.31    | 269.971   | AL122054  | 1565.673  | 451.774   | AF311312  | 1828.217  | 1860.332  |
| AF072164  | 2969.255  | 2562.088  | AB023151  | 833.556   | 447.078   | NM_005313 | 42080.961 | 39841.332 |
| NM_017773 | 1128.048  | 1039.487  | NM_00014C | 39753.449 | 23895.441 | NM_01776E | 45952.395 | 38034.813 |
| AK021885  | 837.849   | 929.576   | NM_00512E | 13206.273 | 12346.539 | NM_00042E | 1265.208  | 1024.231  |
| AK022161  | 547.692   | 692.311   | NM_02003E | 3309.884  | 3409.225  | NM_00357E | 691.463   | 567.984   |
| AK022296  | 830.322   | 922.244   | NM_01624E | 8361.268  | 11335.815 | NM_014721 | 661.538   | 929.677   |
| AK021940  | 790.23    | 908.205   | NM_00513E | 2561.781  | 2957.136  | AK026352  | 2271.145  | 6538.468  |
| AK022189  | 531.276   | 541.216   | NM_00497E | 53959.953 | 45884.168 | AL137705  | 4188.812  | 5333.759  |
| AK022338  | 595.675   | 965.513   | NM_005737 | 55814.277 | 48361.301 | U41898    | 1566.78   | 2020.19   |
| U48696    | 2369.392  | 1509.817  | NM_00166C | 25661.281 | 18738.422 | NM_02034E | 589.536   | 641.061   |
| AF230316  | 5982.841  | 3846.627  | NM_000752 | 5012.658  | 4079.386  | NM_01484E | 2352.62   | 2494.556  |
| NM_00448E | 1166.154  | 1017.646  | NM_00201E | 10565.245 | 9669.467  | BF217766  | 1079.878  | 1288.33   |
| AK024515  | 1464.354  | 1134.042  | NM_002377 | 448.973   | 1458.76   | NM_000184 | 4128.576  | 7041.015  |
| AF085862  | 2531.359  | 1640.27   | NM_00601E | 2886.779  | 3286.178  | NM_00658E | 10594.33  | 9806.787  |
| NM_01799E | 2690.768  | 2627.144  | AF161383  | 12599.311 | 13339.036 | NM_002191 | 666.456   | 940.636   |
| AL049271  | 63004.516 | 55338.16  | NM_00041C | 30117.732 | 36425.508 | AB007875  | 4473.953  | 3571.108  |
| AK023079  | 53184.75  | 42955.293 | AF182814  | 3734.528  | 991.651   | NM_018261 | 2407.422  | 1972.771  |
| NM_01960E | 3574.18   | 4124.829  | NM_000107 | 20168.4   | 4012.753  | NM_01479E | 1756.15   | 1673.257  |
| AK026198  | 2381.581  | 1083.02   | AL157445  | 5615.086  | 1215.172  | AL050288  | 36029.262 | 26571.99  |

|           |           |           |           |           |           |           |           |           |
|-----------|-----------|-----------|-----------|-----------|-----------|-----------|-----------|-----------|
| NM_005001 | 28915.479 | 23467.563 | NM_001517 | 30998.121 | 6880.862  | NM_005040 | 7362.121  | 5969.122  |
| AK024175  | 3646.136  | 2269.033  | NM_005053 | 12522.356 | 3337.877  | NM_016391 | 29286.668 | 23421.838 |
| NM_000510 | 2234.263  | 1942.323  | D86974    | 9757.901  | 3049.091  | AF075033  | 7169.635  | 5568.384  |
| NM_017787 | 2868.209  | 4768.08   | NM_018283 | 13588.707 | 4232.066  | D50911    | 16353.158 | 13650.582 |
| M20839    | 592.683   | 366.739   | NM_001983 | 6043.513  | 2993.63   | AB011104  | 1930.494  | 2440.782  |
| NM_020315 | 12908.895 | 10447.526 | NM_004993 | 662.374   | 543.527   | AK024069  | 12180.431 | 11599.446 |
| NM_005683 | 1574.855  | 1031.804  | NM_003384 | 15250.978 | 12254.409 | NM_004582 | 21822.861 | 22112.297 |
| NM_020427 | 17773.193 | 11416.428 | Y12337    | 4507.504  | 2663.76   | NM_015640 | 26653.066 | 22672.381 |
| AF085920  | 906.924   | 565.109   | M29551    | 31249.104 | 16521.463 | CY3Cy5    | 808.052   | 182.779   |
| AK023173  | 4996.112  | 6676.479  | AB023148  | 1852.116  | 1211.402  | NM_012465 | 10379.805 | 11443.141 |
| AK025225  | 377.795   | 309.55    | NM_002929 | 3570.715  | 3037.531  | NM_134260 | 7415.119  | 8160.135  |
| U79275    | 1303.103  | 975.745   | BC028375  | 2478.4    | 2663.972  | AF086448  | 2293.241  | 1952.536  |
| AJ227908  | 1186.283  | 1687.976  | NM_016029 | 19947.236 | 22344.975 | AF086386  | 1843.604  | 2210.32   |
| AF007193  | 921.999   | 1635.174  | AK024562  | 2557.788  | 3136.252  | AF086457  | 1075.108  | 1165.038  |
| AK022367  | 1334.24   | 1132.366  | NM_014066 | 3963.576  | 4817.373  | AK025469  | 1384.476  | 1462.043  |
| BC028589  | 3646.68   | 3935.973  | NM_004573 | 1670.561  | 1774.699  | NM_020235 | 2968.075  | 3777.651  |
| AF088067  | 8041.502  | 5173.409  | NM_017736 | 3625.104  | 1702.494  | AF070581  | 2245.616  | 1262.076  |
| AK022213  | 489.591   | 618.144   | NM_001498 | 62253.434 | 32930.367 | AK024187  | 877.732   | 840.552   |
| AF056441  | 3652.913  | 3130.961  | AF263523  | 2983.674  | 736.034   | NM_003307 | 510.398   | 280.458   |
| AK024142  | 757.178   | 481.041   | L08441    | 28471.58  | 6587.09   | AF070565  | 921.128   | 682.278   |
| Y10509    | 587.814   | 930.541   | AA641953  | 2438.387  | 667.659   | AK021644  | 1371.812  | 832.299   |
| AK024389  | 8129.468  | 8435.234  | AI248827  | 9756.162  | 2317.367  | NM_012465 | 5719.035  | 3408.976  |
| AK026793  | 2194.53   | 3458.686  | R45026    | 58832.75  | 31880.504 | NM_134260 | 5633.697  | 2973.2    |
| NM_001672 | 1166.109  | 1648.695  | BI768063  | 2667.57   | 1358.889  | SR2       | 22151.576 | 7889.792  |
| AJ276253  | 18733.254 | 15239.91  | BG386057  | 688.743   | 855.339   | SR4       | 6764.406  | 3171.833  |
| AF147314  | 1132.263  | 943.32    | AI970239  | 5706.127  | 3944.68   | SR6       | 738.016   | 379.072   |
| NM_018980 | 1626.369  | 1137.369  | AA496452  | 38893.57  | 22209.559 | SR8       | 2654.99   | 4676.14   |
| AF086201  | 4213.005  | 4412.252  | X67594    | 16376.779 | 10510.228 | SR10      | 8973.653  | 2109.691  |
| AK024712  | 702.244   | 1305.588  | AF363393  | 796.167   | 676.663   | AK023038  | 1453.035  | 1472.54   |
| NM_002902 | 6683.379  | 4821.016  | BC008837  | 761.768   | 816.043   | AK026206  | 2230.219  | 5579.676  |
| NM_020248 | 17124.01  | 9101.615  | NM_015869 | 1617.014  | 1758.53   | AF086074  | 7156.56   | 7207.919  |
| X89670    | 677.574   | 515.774   | NM_001631 | 3256.584  | 2836.736  | AK023964  | 3836.851  | 3990.025  |
| NM_001726 | 698.611   | 601.863   | AB000734  | 22525.686 | 19462.783 | AF086084  | 805.598   | 1158.446  |
| NM_004053 | 11559.459 | 17939.316 | X87838    | 10366.855 | 11889.792 | AL050184  | 727.906   | 891.556   |
| NM_014420 | 371.481   | 217.262   | NM_000169 | 9003.713  | 7673.959  | AF085853  | 461.263   | 603.752   |
| NM_001489 | 2099.837  | 1420.161  | NM_014337 | 28469.453 | 16400.432 | AK027185  | 1169.274  | 896.452   |
| M20259    | 442.756   | 582.941   | NM_007161 | 31029.418 | 14128.787 | AK025576  | 2565.012  | 1673.356  |
| NM_020374 | 4350.284  | 4916.982  | NM_014387 | 3771.156  | 1682.948  | AF147385  | 482.282   | 544.267   |
| NM_014922 | 648.133   | 705.936   | AK057418  | 6158.314  | 1958.434  | AL442086  | 6749.548  | 4277.56   |
| AF183570  | 816.151   | 703.322   | L37199    | 710.27    | 619.869   | BC034819  | 3169.82   | 2278.217  |
| NM_005497 | 3594.964  | 3132.537  | NM_007260 | 3738.831  | 2934.679  | AF147313  | 21246.398 | 10060.179 |
| AK024048  | 6508.523  | 6686.297  | AF148646  | 24058.607 | 18789.121 | AF147382  | 69755.211 | 43155.281 |
| AB033093  | 3744.752  | 2692.733  | AL110218  | 3980.667  | 3259.125  | AK001957  | 2378.967  | 1230.291  |
| NM_005912 | 1497.389  | 1387.256  | AB023201  | 5786.368  | 5244.293  | AK021833  | 1240.432  | 551.615   |
| NM_005909 | 35093.824 | 40335.648 | X00094    | 3871.655  | 3479.172  | AF143867  | 1492.322  | 726.813   |
| AK001948  | 532.558   | 450.796   | NM_003775 | 29477.404 | 51816.301 | AK025889  | 3472.241  | 1451.215  |
| AK021879  | 386.44    | 521.279   | NM_002082 | 39710.133 | 35863.66  | NM_014715 | 2486.422  | 1469.119  |
| AL355717  | 442.253   | 393.383   | NM_002922 | 30140.58  | 33073.898 | AK027134  | 1347.284  | 1720.216  |
| AK055991  | 2165.405  | 1937.744  | AF155657  | 21794.328 | 23977.645 | AK024168  | 1392.273  | 1471.755  |
| AF113697  | 1306.252  | 1517.818  | NM_006056 | 24938.09  | 25450.109 | AF264622  | 1535.797  | 1476.361  |
| AK022326  | 1135.061  | 694.793   | AF045229  | 30406.701 | 28748.465 | AK027203  | 433.355   | 497.391   |
| AF085991  | 2983.512  | 2350.67   | NM_001840 | 25075.635 | 25812.65  | AK021793  | 3575.984  | 3511.844  |
| AF075007  | 927.614   | 1690.944  | NM_016099 | 56046.801 | 52669.758 | AK022255  | 17741.404 | 18291.973 |

|           |           |           |           |           |           |           |           |           |
|-----------|-----------|-----------|-----------|-----------|-----------|-----------|-----------|-----------|
| NM_001943 | 543.416   | 355.734   | NM_000394 | 1360.117  | 1401.548  | AK022479  | 598.918   | 747.06    |
| NM_004927 | 11219.967 | 5391.217  | NM_001155 | 24678.807 | 28792.213 | AK023572  | 787.947   | 624.307   |
| AB040928  | 777.538   | 461.337   | M62896    | 31865.4   | 46121.281 | AF086004  | 28043.139 | 18425.33  |
| NM_001459 | 2121.409  | 1560.765  | NM_000017 | 19027.875 | 8553.251  | AF147433  | 886.826   | 1091.941  |
| NM_015513 | 5289.334  | 7243.804  | AB023151  | 1507.358  | 2155.063  | AF086006  | 421.319   | 346.788   |
| NM_006219 | 9747.577  | 8677.876  | NM_020038 | 2992.432  | 1231.229  | AL137318  | 1280.742  | 617.438   |
| NM_004443 | 2558.433  | 1917.05   | NM_016246 | 7774.515  | 4945.272  | AL137482  | 831.314   | 600.873   |
| NM_001932 | 424.484   | 478.232   | NM_005136 | 2012.577  | 1622.545  | AL162011  | 6665.88   | 3043.62   |
| NM_017412 | 1871.53   | 2462.946  | NM_004976 | 47440.898 | 55404.457 | AL390177  | 335.222   | 165.898   |
| NM_005544 | 958.057   | 1245.613  | NM_005737 | 61227.305 | 58762.121 | AK056111  | 785.701   | 402.926   |
| NM_002964 | 3650.233  | 4982.773  | NM_001660 | 26863.414 | 30738.344 | Y13807    | 820.572   | 608.649   |
| AF311862  | 18952.459 | 18262.324 | NM_000710 | 1295.251  | 1410.996  | AB037792  | 991.183   | 1513.829  |
| NM_003215 | 3789.102  | 3181.095  | NM_000752 | 6800.885  | 7093.653  | AK022480  | 1039.78   | 2710.095  |
| NM_016447 | 3788.778  | 3549.743  | AB040945  | 5198.146  | 6180.966  | AK024158  | 1789.312  | 1833.873  |
| NM_015626 | 18803.742 | 15692.775 | NM_002018 | 17993.623 | 21362.916 | AL080082  | 506.799   | 661.07    |
| NM_004899 | 14919.33  | 14406.138 | NM_002377 | 805.195   | 1579.704  | AK021623  | 552.865   | 854.469   |
| AB006628  | 8172.626  | 10299.039 | NM_006018 | 3506.918  | 3495.378  | AK027112  | 3390.34   | 3461.879  |
| AF272036  | 1183.706  | 1372.532  | AF161383  | 15346.363 | 16665.787 | AL049314  | 3889.113  | 4224.116  |
| AF231023  | 3920.852  | 4235.675  | NM_000410 | 30470.594 | 34240.363 | AF093016  | 21780.773 | 18101.973 |
| NM_005148 | 20139.875 | 22012.965 | AL157445  | 9751.701  | 10820.764 | AF161345  | 1036.852  | 691.346   |
| NM_004746 | 2720.217  | 3621.211  | NM_001517 | 44598.32  | 48709.449 | -         | 486.991   | 484.959   |
| AF146019  | 13000.502 | 16575.912 | NM_005053 | 18644     | 23766.814 | AF090925  | 445.208   | 536.218   |
| Z36782    | 4881.779  | 4839.275  | NM_018283 | 14287.405 | 5681.112  | NM_014163 | 22173.781 | 12211.223 |
| M70435    | 965.851   | 1163.919  | NM_001983 | 6403.474  | 4730.458  | NM_014137 | 367.931   | 200.592   |
| NM_003490 | 13439.086 | 9785.434  | NM_004993 | 681.139   | 990.461   | AK021974  | 799.696   | 546.1     |
| AF508940  | 5412.697  | 2214.872  | NM_003384 | 15267.1   | 14772.636 | AK022068  | 492.097   | 371.362   |
| NM_020237 | 1648.682  | 537.851   | Y12337    | 5578.262  | 5377.039  | AK022229  | 2203.025  | 953.444   |
| AF130051  | 1732.602  | 941.452   | M29551    | 35236.629 | 34782.953 | AK022362  | 5755.371  | 3104.208  |
| M25753    | 25536.443 | 29486.898 | AB023148  | 2261.522  | 2697.128  | AK022004  | 5724.134  | 2784.39   |
| NM_003883 | 5719.772  | 5286.823  | NM_002929 | 3690.078  | 5496.358  | AK022390  | 1434.657  | 827.093   |
| NM_014929 | 3987.435  | 2599.535  | BC028375  | 10885.967 | 18065.391 | U61096    | 454.116   | 993.294   |
| NM_004203 | 11779.712 | 6980.786  | AB026436  | 7167.735  | 8014.086  | AF085865  | 4265.6    | 6831.127  |
| NM_001951 | 1885.042  | 1482.873  | NM_016029 | 23294.451 | 22257.457 | X78261    | 1223.466  | 1987.279  |
| NM_002391 | 2998.716  | 2365.706  | AK024562  | 3898.743  | 4458.007  | AK025521  | 1619.557  | 2535.261  |
| NM_007066 | 8914.81   | 10174.928 | NM_014066 | 4144.836  | 5150.626  | NM_001053 | 62938.531 | 70417.055 |
| NM_003674 | 16435.023 | 15130.055 | NM_004573 | 2839.018  | 3069.897  | Z70694    | 4608.989  | 5575.721  |
| NM_001197 | 11010.318 | 11131.636 | NM_000072 | 1745.936  | 1887.658  | L77602    | 1840.912  | 1954.379  |
| NM_006682 | 994.249   | 815.827   | NM_000697 | 3720.573  | 3843.927  | NM_015421 | 8978.091  | 7195.354  |
| NM_006410 | 474.62    | 427.765   | NM_000313 | 795.947   | 731.566   | AF086081  | 3484.842  | 3870.787  |
| NM_014977 | 25510.342 | 23481.447 | AA641953  | 3858.264  | 5998.558  | NM_018111 | 524.124   | 576.853   |
| AK026325  | 7107.113  | 8829.257  | AI248827  | 19256.424 | 24611.852 | AF161360  | 1584.546  | 1328.48   |
| U83857    | 1430.298  | 1904.63   | R45026    | 58263.055 | 63682.012 | AK021720  | 681.993   | 537.562   |
| NM_001230 | 697.088   | 1264.386  | BG386057  | 735.885   | 981.091   | NM_016497 | 31308.146 | 13376.606 |
| AK025662  | 5650.218  | 8642.934  | AI970239  | 10355.084 | 6777.184  | AF009261  | 824.06    | 484.862   |
| NM_000201 | 27069.475 | 26863.076 | AA496452  | 45128.129 | 39494.926 | AL133086  | 1970.352  | 3284.23   |
| AB011539  | 802.128   | 1442.03   | X67594    | 23953.938 | 22647.662 | NM_012151 | 9144.866  | 11120.069 |
| U37028    | 635.701   | 736.884   | AF363393  | 489.83    | 986.62    | AF087994  | 1442.594  | 2288.507  |
| AB014597  | 4356.76   | 4317.775  | NM_015869 | 6150.794  | 6113.18   | AJ227912  | 626.143   | 800.922   |
| NM_001793 | 13601.95  | 10534.779 | NM_001631 | 4007.481  | 5919.401  | NM_018195 | 1855.115  | 2095.173  |
| S81361    | 1084.432  | 1196.898  | AB000734  | 27328.854 | 29042.949 | AK025532  | 23686.078 | 19836.135 |
| AK024313  | 5264.633  | 1426.968  | NM_000862 | 1398.378  | 3140.302  | AK021789  | 439.926   | 628.941   |
| NM_003891 | 3475.58   | 1636.836  | NM_005987 | 57493.039 | 63313.883 | NM_003522 | 593.726   | 809.542   |
| AL359575  | 3218.412  | 2186.793  | X87838    | 11347.951 | 11196.781 | BF217847  | 1266.283  | 1270.978  |

|           |           |           |           |           |           |           |           |           |
|-----------|-----------|-----------|-----------|-----------|-----------|-----------|-----------|-----------|
| NM_002022 | 720.643   | 1395.539  | NM_000169 | 15908.687 | 13340.694 | NM_00532C | 7437.668  | 5625.717  |
| NM_015524 | 1787.021  | 1706.895  | AF182814  | 4928.109  | 4749.088  | U79242    | 384.034   | 521.576   |
| NM_001673 | 39079.949 | 28447.938 | L37199    | 690.205   | 963.837   | Y10519    | 602.759   | 720.653   |
| AK023167  | 856.085   | 807.708   | NM_00726C | 4592.688  | 3048.177  | AF056452  | 349.591   | 505.171   |
| NM_01651C | 4626.251  | 4747.181  | NM_002922 | 28057.777 | 20072.566 | AF119901  | 3405.497  | 2691.979  |
| NM_01427C | 2277.174  | 1942.985  | AF155657  | 20596.119 | 17250.73  | AK001936  | 768.824   | 626.171   |
| NM_000071 | 17488.436 | 14093.13  | NM_006056 | 26441.83  | 23423.178 | NM_00377C | 63875.816 | 66460.789 |
| NM_006843 | 3050.615  | 2673.149  | AF045229  | 30845.938 | 27842.76  | AK001395  | 3680.123  | 1808.911  |
| NM_004321 | 3104.328  | 2430.162  | NM_00184C | 26257.113 | 29776.363 | S57803    | 7146.379  | 4848.311  |
| AF311212  | 8208.58   | 7876.529  | AK025099  | 6312.577  | 6960.075  | AK023131  | 2759.938  | 1523.049  |
| NM_006915 | 3222.427  | 2990.683  | NM_016099 | 58177.602 | 55436.336 | AJ276248  | 365.453   | 198.502   |
| NM_006035 | 2834.826  | 2742.483  | NM_000228 | 2191.554  | 3430.224  | X78926    | 1731.465  | 2305.42   |
| NM_006086 | 9018.044  | 8816.305  | NM_00083C | 4695.077  | 6557.634  | AJ278110  | 1272.127  | 1922.915  |
| NM_00452C | 14059.927 | 12527.933 | NM_014587 | 976.667   | 1141.7    | NM_014237 | 2660.611  | 3141.815  |
| AK027118  | 9101.151  | 11660.185 | NM_005209 | 1074.554  | 2003.676  | NM_020396 | 588.498   | 861.369   |
| AK022882  | 45200.871 | 28040.637 | AF148950  | 2456.504  | 2863.23   | AF029900  | 5164.329  | 7127.975  |
| NM_006105 | 10400.229 | 14948.84  | NM_001155 | 30349.369 | 32277.748 | NM_003325 | 5769.237  | 6845.938  |
| NM_005981 | 5223.762  | 6017.796  | M62896    | 51451.422 | 47156.41  | NM_016178 | 2040.568  | 2303.579  |
| AF210651  | 2740.339  | 1952.968  | NM_017736 | 3818.236  | 4173.924  | AK022639  | 7108.579  | 7039.623  |
| AF090942  | 2769.521  | 3583.607  | NM_000014 | 1966.3    | 2172.765  | D31766    | 1223.402  | 1306.279  |
| NM_014595 | 6214.609  | 5089.121  | NM_006803 | 3126.756  | 2609.91   | NM_006547 | 3382.165  | 2522.662  |
| NM_014789 | 2245.539  | 1893.221  | AB040945  | 4101.258  | 2313.68   | L23867    | 882.909   | 897.911   |
| AB046784  | 3576.797  | 1508.718  | NM_002018 | 16633.322 | 13039.908 | AL138690  | 2790.491  | 2338.062  |
| X52402    | 1565.139  | 585.198   | NM_002377 | 754.518   | 1202.346  | AK000394  | 549.858   | 579.596   |
| AL133663  | 1341.972  | 1322.264  | NM_006018 | 3302.479  | 2876.539  | NM_013941 | 1210.178  | 858.128   |
| NM_004992 | 3551.289  | 5343.405  | AF161383  | 16041.793 | 18896.404 | AF074989  | 1229.844  | 601.926   |
| NM_014462 | 5793.386  | 5005.085  | NM_00041C | 34902.598 | 36810.746 | AK001107  | 916.628   | 500.947   |
| NM_014156 | 46442.75  | 34820.371 | NM_014337 | 38010.84  | 46437.488 | AF147393  | 435.49    | 315.082   |
| NM_003137 | 20345.939 | 23738.559 | NM_007161 | 49877.203 | 48529.688 | AL080112  | 1727.929  | 795.541   |
| NM_006938 | 51319.953 | 42446.316 | NM_014387 | 4400.821  | 5077.582  | AL137325  | 694.527   | 620.41    |
| NM_004515 | 1754.874  | 1545.472  | NM_003641 | 13840     | 15879.173 | AF147361  | 1624.273  | 995.088   |
| NM_020158 | 12496.731 | 10008.044 | NM_012463 | 6490.294  | 6823.26   | NM_001851 | 6497.432  | 7910.64   |
| AF176085  | 6457.9    | 5629.599  | L29140    | 65520.172 | 61447.207 | S67789    | 1560.908  | 1693.15   |
| NM_006985 | 33313.598 | 34605.555 | AK026448  | 14045.635 | 13284.474 | AK022689  | 10058.195 | 10225.101 |
| AF265228  | 3953.701  | 3381.103  | AK057418  | 9022.506  | 8093.129  | NM_016227 | 1144.168  | 1254.844  |
| NM_003757 | 43169.801 | 33020.992 | AK024562  | 5838.81   | 4896.41   | NM_004195 | 34927.609 | 28766.771 |
| AK025561  | 5373.194  | 4214.769  | NM_014066 | 3991.095  | 3595.955  | NM_004705 | 3662.326  | 4002.782  |
| NM_018602 | 20491.885 | 16680.527 | NM_004573 | 3137.347  | 2397.138  | NM_02019C | 44639.867 | 37973.629 |
| NM_004096 | 6562.55   | 5490.839  | NM_018346 | 12220.035 | 7726.759  | AK024003  | 615.902   | 782.354   |
| NM_017629 | 17031.113 | 20508.357 | AL122054  | 2350.804  | 1833.559  | NM_014357 | 5875.721  | 5744.687  |
| AL049681  | 7002.887  | 8695.422  | AB011182  | 359.506   | 876.728   | NM_004067 | 510.339   | 577.949   |
| NM_006584 | 1570.711  | 1842.964  | AB023151  | 1950.926  | 1845.838  | NM_000121 | 14206.393 | 8792.729  |
| AJ001495  | 351.183   | 443.171   | NM_00014C | 36549.113 | 37171.266 | NM_002091 | 16107.852 | 11030.847 |
| NM_003551 | 15209.059 | 13855.426 | NM_005125 | 13276.873 | 12698.615 | AB033092  | 6157.551  | 6241.925  |
| AF305210  | 558.587   | 559.634   | NM_020038 | 2291.63   | 2115.516  | M89957    | 18250.404 | 9565.958  |
| AK021900  | 5845.572  | 5635.875  | NM_016246 | 8877.201  | 9334.53   | NM_003023 | 546.449   | 589.736   |
| NM_002764 | 17674.883 | 10490.335 | NM_015926 | 24938.422 | 28470.805 | BC035030  | 6413.01   | 3683.267  |
| NM_019857 | 3644.53   | 5020.42   | X03757    | 17193.793 | 18600.574 | NM_00534C | 33732.086 | 14438.45  |
| NM_015455 | 57105.656 | 55667.652 | NM_018658 | 45719.828 | 45035.941 | NM_016201 | 7626.754  | 4112.852  |
| AF024702  | 3519.31   | 3211.346  | NM_005136 | 2129.301  | 2749.292  | NM_000864 | 2113.051  | 1006.166  |
| NM_001964 | 4031.912  | 3312.171  | AK094513  | 2219.95   | 2257.384  | NM_017977 | 2384.595  | 1211.239  |
| NM_005962 | 26228.828 | 28562.625 | NM_001183 | 22218.303 | 25792.412 | AF147727  | 2438.909  | 1225.382  |
| X74864    | 3088.086  | 2795.729  | NM_00089C | 6494.106  | 6693.057  | NM_006751 | 495.99    | 415.602   |

|           |           |           |           |           |           |           |           |           |
|-----------|-----------|-----------|-----------|-----------|-----------|-----------|-----------|-----------|
| AK026804  | 2589.956  | 2445.23   | NM_004976 | 48984.559 | 43100.051 | AB037834  | 1313.92   | 731.746   |
| NM_016170 | 5112.24   | 5311.665  | AK021597  | 5482.106  | 5997.568  | NM_003566 | 2482.376  | 1340.732  |
| NM_002114 | 1074.978  | 1064.5    | NM_005737 | 63685.113 | 58840.879 | NM_002777 | 638.611   | 770.729   |
| NM_006166 | 4597.687  | 3889.376  | NM_000169 | 16331.46  | 11650.991 | AF202635  | 889.397   | 1263.569  |
| S72620    | 51953.707 | 38656.801 | AF182814  | 5217.104  | 3309.526  | NM_014125 | 1379.041  | 1843.942  |
| NM_016831 | 677.671   | 804.634   | NM_005329 | 3717.035  | 3391.436  | NM_017904 | 2257.365  | 2228.659  |
| S73501    | 476.296   | 449.247   | NM_000107 | 26396.564 | 24885.861 | NM_013367 | 2819.007  | 2938.865  |
| NM_005263 | 6411.031  | 7450.755  | AL157445  | 8348.147  | 7140.054  | NM_000321 | 2751.468  | 2861.613  |
| AB033022  | 3403.885  | 4960.815  | NM_001517 | 40459.23  | 36337.367 | NM_006341 | 14430.464 | 9456.078  |
| NM_000474 | 1361.485  | 1077.122  | NM_005053 | 15587.63  | 16301.438 | NM_001709 | 2666.953  | 3225.13   |
| NM_016264 | 1367.26   | 1238.27   | D86974    | 12245.544 | 11963.167 | NM_006191 | 4091.084  | 4308.857  |
| NM_006079 | 48803.527 | 33432.496 | NM_018283 | 15408.801 | 14147.467 | NM_001800 | 1785.007  | 1266.364  |
| AB037837  | 5301.484  | 4266.461  | NM_001983 | 5267.977  | 5422.862  | NM_004336 | 6831.225  | 5920.467  |
| NM_001155 | 26939.041 | 31796.479 | NM_004993 | 1298.828  | 3084.292  | NM_015946 | 2210.404  | 2192.829  |
| M62896    | 11115.714 | 12058.398 | NM_003384 | 16767.676 | 19238.318 | NM_013979 | 2431.971  | 2309.586  |
| NM_017736 | 5036.053  | 3544.953  | Y12337    | 5519.852  | 6060.196  | NM_003790 | 4371.351  | 3396.759  |
| NM_000390 | 561.049   | 658.57    | M29551    | 36642.43  | 39923.965 | NM_000494 | 7577.276  | 5062.547  |
| NM_000313 | 998.727   | 692.506   | AB023148  | 1785.527  | 1679.71   | NM_016023 | 1311.764  | 598.698   |
| NM_001498 | 29819.234 | 40974.223 | NM_002929 | 3485.032  | 3474.464  | NM_003722 | 26908.637 | 14256.351 |
| AF263523  | 5155.502  | 4900.783  | BC028375  | 2572.71   | 2796.825  | NM_000495 | 765.235   | 416.749   |
| L08441    | 52464.059 | 31734.135 | AB026436  | 6398.802  | 5200.632  | AF085883  | 2153.556  | 963.749   |
| AA641953  | 3790.917  | 3641.487  | NM_016029 | 22809.109 | 23146.568 | NM_016571 | 1834.047  | 1029.529  |
| AI248827  | 13525.322 | 11257.141 | CY3Cy5    | 7280.088  | 428.005   | NM_003686 | 1343.677  | 715.818   |
| R45026    | 52221.676 | 58104.68  | NM_002103 | 41751.18  | 28962.619 | NM_016446 | 8394.794  | 4659.015  |
| BI768063  | 3368.289  | 4328.413  | NM_003379 | 45908.18  | 30680.48  | BC036368  | 656.766   | 436.216   |
| BG386057  | 880.069   | 1226.378  | AK000819  | 1257.536  | 774.469   | AK023237  | 325.271   | 486.103   |
| AI970239  | 3465.327  | 4282.132  | AF201941  | 3645.426  | 1779.155  | NM_001870 | 1841.101  | 2617.553  |
| AA496452  | 42853.793 | 37403.605 | NM_007070 | 3679.611  | 2012.678  | AJ271216  | 1903.115  | 2071.674  |
| X67594    | 5861.875  | 5498.792  | AL133019  | 4741.328  | 2366.421  | U23028    | 2966.973  | 3904.432  |
| BC008837  | 1671.383  | 2785.337  | AK026192  | 1320.4    | 892.113   | NM_000817 | 4546.06   | 5135.19   |
| NM_015869 | 1212.537  | 1525      | NM_014895 | 1734.414  | 735.377   | AF113132  | 41864.336 | 46058.109 |
| NM_001631 | 1158.229  | 1110.314  | NM_017748 | 9940.803  | 5922.119  | NM_006571 | 2691.359  | 3265.553  |
| AB000734  | 10631.517 | 12815.314 | AK025374  | 2390.335  | 1832.643  | AK022680  | 2197.568  | 2014.315  |
| NM_000862 | 1056.944  | 1289.571  | NM_014901 | 14548.606 | 8083.677  | NM_018946 | 13419.384 | 10334.135 |
| AF224266  | 1685.229  | 2210.393  | AK000005  | 7994.575  | 7226.75   | NM_016356 | 8394.895  | 5696.595  |
| U72882    | 8903.739  | 10425.703 | NM_002103 | 58692.871 | 47192.598 | NM_001066 | 54751.617 | 63388.555 |
| NM_014337 | 14999.481 | 16389.807 | NM_003379 | 50257.305 | 29602.205 | NM_004156 | 1390.034  | 881.254   |
| NM_007161 | 20658.463 | 18316.455 | SR1       | 96903.961 | 66098.461 | AK000561  | 1006.314  | 686.056   |
| NM_014387 | 1355.474  | 620.166   | SR3       | 48701.781 | 22132.334 | AB051449  | 23127.016 | 13230.829 |
| NM_003641 | 6714.563  | 6374.354  | SR5       | 6013.109  | 2618.441  | BC009187  | 4162.309  | 2999.165  |
| NM_012463 | 4718.355  | 3705.34   | SR7       | 6440.499  | 24121.654 | AL133617  | 836.887   | 424.137   |
| L29140    | 32589.012 | 30249.299 | SR9       | 20263.746 | 1961.089  | NM_016485 | 4797.027  | 2858.169  |
| AK026448  | 11500.968 | 8373.713  | CY3Cy5    | 3567.054  | 109.046   | NM_002615 | 394.617   | 239.928   |
| AK057418  | 7073.384  | 5724.426  | NM_013288 | 2468.366  | 1729.225  | AF090894  | 1142.11   | 424.021   |
| L37199    | 939.05    | 902.512   | AF071508  | 2326.182  | 2977.681  | NM_014052 | 13845.414 | 6762.844  |
| NM_007260 | 5144.206  | 6014.439  | L07265    | 48890.629 | 26009.404 | NM_020146 | 2635.211  | 4768.415  |
| AF148646  | 13132.194 | 14140.53  | D16472    | 6915.784  | 4319.372  | NM_006237 | 2116.332  | 3388.636  |
| AL110218  | 1561.137  | 2045.616  | NM_002813 | 50175.176 | 20950.602 | NM_001271 | 3796.89   | 4362.143  |
| AB023201  | 4071.992  | 3809.712  | AK022745  | 25725.469 | 13113.91  | NM_003683 | 7837.791  | 11719.62  |
| X00094    | 2207.098  | 2148.831  | AL049450  | 8691.822  | 5066.418  | AF039019  | 4052.811  | 8146.792  |
| NM_003775 | 18932.313 | 18802.289 | NM_005086 | 76538.063 | 55843.77  | NM_012255 | 4494.049  | 5456.821  |
| NM_002082 | 12769.794 | 16641.627 | U68494    | 4677.897  | 1469.693  | NM_018196 | 1119.645  | 1321.178  |
| NM_002922 | 24477.297 | 37519.543 | AL137360  | 8091.119  | 4471.248  | NM_004818 | 4731.841  | 4903.205  |

|           |           |           |           |           |           |           |           |           |
|-----------|-----------|-----------|-----------|-----------|-----------|-----------|-----------|-----------|
| AF155657  | 21808.689 | 20646.07  | AK024523  | 2069.872  | 1136.25   | J04205    | 12292.788 | 10436.736 |
| NM_006056 | 4706.139  | 6519.583  | AK024600  | 1543.963  | 2420.625  | D38491    | 3805.974  | 2697.308  |
| NM_001840 | 34365.477 | 46353.922 | AK024907  | 704.566   | 1611.598  | AK026835  | 2895.568  | 2721.66   |
| NM_000072 | 2662.432  | 3357.991  | AK025038  | 1045.02   | 1007.096  | NM_002819 | 14438.785 | 9676.997  |
| NM_000697 | 3623.29   | 4327.664  | AK024543  | 3752.355  | 3228.475  | NM_003090 | 50457.457 | 28641.619 |
| NM_000017 | 6658.194  | 7388.849  | AK024624  | 32207.756 | 15479.424 | NM_013264 | 3761.762  | 2258.765  |
| NM_000237 | 1631.265  | 2475.759  | AK025090  | 1957.287  | 1018.931  | NM_003315 | 11096.874 | 6002.467  |
| NM_018346 | 7581.647  | 3375.292  | AK024883  | 8799.131  | 4400.497  | NM_005570 | 6183.166  | 3631.464  |
| AL122054  | 2200.767  | 1327.992  | AF217989  | 12119.105 | 6192.695  | NM_000086 | 11616.86  | 8179.224  |
| AB023151  | 1913.568  | 3752.705  | L77561    | 758.405   | 345.704   | NM_003752 | 3429.722  | 1712.01   |
| NM_000140 | 8625.176  | 8279.046  | AL109696  | 2994.957  | 1118.17   | NM_003932 | 8401.01   | 3674.003  |
| NM_005125 | 4675.793  | 3489.572  | AJ011593  | 7221.206  | 4714.069  | NM_016491 | 14470.777 | 5456.567  |
| NM_020038 | 465.158   | 313.284   | AJ227907  | 806.938   | 675.093   | NM_006429 | 22954.619 | 8015.411  |
| NM_016246 | 1831.406  | 1738.422  | X89743    | 1226.842  | 709.968   | NM_002516 | 1550.741  | 717.252   |
| NM_005136 | 1104.557  | 1102.7    | U17621    | 2474.186  | 1332.476  | NM_002064 | 1215.413  | 2316.182  |
| NM_004976 | 41236.457 | 42381.813 | AL049239  | 5652.156  | 3589.428  | NM_015523 | 9794.548  | 14432.456 |
| NM_005737 | 47195.234 | 43357.82  | AF086208  | 7479.696  | 8534.548  | NM_015960 | 39813.398 | 62093.527 |
| NM_001660 | 25272.232 | 22486.793 | AK023335  | 4680.869  | 5542.066  | NM_006085 | 7119.136  | 8914.116  |
| NM_000710 | 866.413   | 951.899   | AK023187  | 1824.164  | 2265.81   | NM_000907 | 8975.925  | 9796.556  |
| NM_000752 | 3917.216  | 3406.519  | NM_019033 | 1002.971  | 898.794   | AF254085  | 6150.865  | 9491.023  |
| AB040945  | 2335.191  | 2729.496  | AL133101  | 5775.698  | 3327.245  | NM_001987 | 2477.541  | 2303.712  |
| NM_002018 | 7822.913  | 9972.703  | AL157459  | 4805.633  | 2254.064  | AF244088  | 3801.999  | 3903.661  |
| NM_002377 | 894.376   | 2074.25   | AL353954  | 3884.802  | 2092.017  | NM_007136 | 1893.408  | 1688.608  |
| NM_000410 | 27283.996 | 23951.631 | NM_017630 | 2783.201  | 1279.043  | AJ251845  | 558.224   | 554.308   |
| AF182814  | 7896.783  | 9438.529  | AK000778  | 5400.839  | 2568.314  | AK000435  | 2817.986  | 1643.979  |
| NM_005329 | 2375.724  | 3237.85   | AK000115  | 13587.7   | 5293.89   | AK000569  | 4198.653  | 2212.264  |
| NM_000107 | 19812.957 | 11842.454 | NM_017959 | 2869.078  | 1601.205  | NM_006049 | 2087.757  | 1341.502  |
| AL157445  | 1217.713  | 988.981   | AK000958  | 2863.394  | 2134.912  | BC016698  | 4523.359  | 2020.357  |
| NM_001517 | 11192.977 | 13699.946 | BC024924  | 17336.313 | 13513.777 | NM_007374 | 657.971   | 330.702   |
| NM_005053 | 1340.747  | 1044.641  | NM_017906 | 8065.147  | 6577.283  | NM_006167 | 497.458   | 222.545   |
| D86974    | 6975.789  | 5154.184  | AL110286  | 9069.761  | 7466.491  | NM_016357 | 1107.011  | 645.795   |
| NM_018283 | 13885.223 | 9222.158  | AF086374  | 1233.015  | 929.663   | NM_014500 | 17230.879 | 8613.709  |
| NM_001983 | 8233.026  | 7097.818  | AL162066  | 14771.075 | 13065.514 | L09071    | 782.631   | 1479.411  |
| NM_004993 | 858.756   | 654.703   | NM_016096 | 53331.117 | 45834.844 | NM_005924 | 987.375   | 1815.511  |
| NM_003384 | 14574.76  | 16404.57  | U79290    | 3342.434  | 2815.755  | NM_019841 | 845.975   | 1718.034  |
| Y12337    | 922.681   | 859.472   | AK022121  | 2607.799  | 1909.405  | NM_003322 | 1266.126  | 2160.806  |
| M29551    | 11085.571 | 11156.706 | X98114    | 766.25    | 796.216   | NM_003568 | 879.305   | 1467.281  |
| AB023148  | 1340.374  | 994.571   | AK024197  | 790.065   | 476.96    | BC036375  | 15890.998 | 19844.029 |
| NM_002929 | 2686.101  | 2525.318  | NM_014152 | 943.158   | 678.346   | NM_000496 | 578.787   | 1503.548  |
| BC028375  | 2279.053  | 3094.835  | AF086473  | 848.987   | 702.371   | BF347926  | 10755.562 | 30024.984 |
| AB026436  | 7518.064  | 11956.788 | D87682    | 2810.245  | 1166.921  | N54821    | 20755.602 | 35580.609 |
| NM_016029 | 27021.885 | 32169.568 | AF321617  | 16768.461 | 12465.314 | BI912037  | 7097.575  | 9411.495  |
| AK024562  | 1862.91   | 2172.411  | M85205    | 1319.57   | 1025.614  | AA454646  | 16061.168 | 15995.872 |
| NM_014066 | 5649.637  | 4788.596  | AF223389  | 1509.466  | 684.722   | BF063899  | 1531.062  | 2253.969  |
| NM_004573 | 1553.963  | 1316.792  | NM_016298 | 3000.122  | 2719.079  | U18087    | 52253.082 | 66340.109 |
| NM_017736 | 6346.143  | 5791.257  | AK002146  | 1370.569  | 1436.62   | U66349    | 1603.562  | 1644.478  |
| NM_000313 | 1364.69   | 1920.767  | AB007970  | 938.927   | 1162.092  | AA057156  | 9348.391  | 8381.541  |
| NM_001498 | 31806.992 | 33485.309 | NM_003159 | 2634.87   | 2361.81   | U19487    | 1160.048  | 1357.595  |
| AF263523  | 4005.551  | 2688.168  | AK023494  | 2140.942  | 1454.098  | AF166327  | 38059.199 | 18936.512 |
| L08441    | 52389.52  | 22196.346 | AF086256  | 1000.116  | 709.196   | AF260739  | 3018.53   | 2511.96   |
| AA641953  | 3967.831  | 5099.537  | NM_015492 | 12432.287 | 9464.754  | AF531423  | 21411.514 | 13534.301 |
| AI248827  | 15573.16  | 14246.768 | AF132204  | 8218.744  | 5714.132  | X76555    | 771.44    | 518.401   |
| R45026    | 55789.359 | 58891.695 | AK022874  | 20802.906 | 12311.863 | NM_005432 | 7907.521  | 4058.774  |



|           |           |           |           |           |           |           |           |           |
|-----------|-----------|-----------|-----------|-----------|-----------|-----------|-----------|-----------|
| BI768063  | 3468.802  | 3123.712  | AK024602  | 48626.852 | 44438.43  | L10386    | 12472.991 | 5418.736  |
| BG386057  | 899.821   | 782.125   | NM_018507 | 1134.695  | 1041.631  | AF061812  | 36182.086 | 18927.215 |
| AI970239  | 3702.006  | 3995.516  | NM_000485 | 18210.023 | 14637.868 | AL136756  | 5015.978  | 3938.844  |
| AA496452  | 44055.434 | 41917.457 | NM_018542 | 3505.415  | 2781.64   | NM_015944 | 1529.067  | 915.277   |
| X67594    | 6248.392  | 7631.212  | AK025503  | 4767.819  | 4046.647  | NM_00154E | 563.799   | 985.532   |
| AF363393  | 518.614   | 601.942   | AF130073  | 6113.11   | 3358.376  | NM_00075E | 7383.731  | 9174.477  |
| BC008837  | 784.178   | 880.528   | AK024225  | 38275.117 | 16474.08  | M17017    | 1092.489  | 1915.171  |
| NM_01586E | 816.769   | 783.223   | AL110180  | 11246.668 | 10808.7   | NM_00299C | 4039.145  | 5905.284  |
| NM_001631 | 1006.211  | 1058.94   | NM_007262 | 57636.703 | 52461.113 | NM_002432 | 7492.727  | 8221.934  |
| AB000734  | 11108.272 | 12307.317 | NM_014783 | 10576.259 | 9448.108  | NM_01242C | 856.407   | 1281.427  |
| NM_000862 | 1214.418  | 1961.406  | NM_014053 | 12685.338 | 12536.628 | NM_002343 | 6257.955  | 8615.991  |
| NM_005987 | 58058.148 | 66508.102 | NM_002571 | 1741.479  | 1333.916  | AB033037  | 1800.302  | 3016.045  |
| X87838    | 15321.368 | 20718.518 | NM_004939 | 11778.406 | 10902.906 | L40400    | 9145.626  | 11981.039 |
| NM_00016E | 7735.976  | 7599.01   | NM_001425 | 24147.941 | 22222.105 | AK025688  | 1968.003  | 2918.15   |
| NM_014337 | 18351.611 | 19668.557 | NM_01571C | 3062.164  | 2558.498  | NM_00593C | 516.742   | 678.442   |
| NM_007161 | 27062.049 | 28125.119 | NM_01415E | 10391.486 | 8932.892  | Z36819    | 6654.029  | 7824.13   |
| NM_014387 | 2643.471  | 2983.285  | NM_01404C | 15727.627 | 14211.401 | NM_014847 | 49470.105 | 44728.934 |
| NM_003641 | 7424.417  | 7522.662  | AK000799  | 15295.944 | 13515.178 | NM_01444E | 6554.376  | 6737.701  |
| NM_012463 | 4194.6    | 1886.601  | NM_015582 | 3827.615  | 4141.574  | AL080157  | 5427.484  | 5285.11   |
| L29140    | 29184.189 | 19098.695 | AK027091  | 2656.081  | 2260.775  | NM_00510C | 407.58    | 396.45    |
| AK026448  | 13080.736 | 13297.885 | NM_00152E | 4747.34   | 4127.813  | NM_00530E | 2527.983  | 2139.338  |
| AK057418  | 7169.78   | 6044.018  | U31738    | 6436.656  | 4823.883  | NM_000911 | 1123.996  | 929.6     |
| L37199    | 1381.998  | 2081.628  | AF179890  | 26526.713 | 18539.08  | NM_007227 | 785.888   | 487.772   |
| NM_00726C | 4691.889  | 4868.308  | AK023536  | 31436.73  | 10485.147 | NM_007023 | 907.25    | 496.683   |
| AF148646  | 12798.917 | 12489.999 | AF088054  | 1481.463  | 2432.012  | NM_005873 | 9148.219  | 4715.38   |
| AL110218  | 1188.742  | 1110.357  | AK023881  | 10513.28  | 11603.084 | NM_004624 | 3291.354  | 2581.802  |
| AB023201  | 4430.2    | 4364.416  | AK027114  | 65891.32  | 66056.18  | NM_00386E | 1699.323  | 1260.038  |
| X00094    | 2570.174  | 4016.94   | NM_00107E | 2074.739  | 2122.954  | AB015330  | 19353.922 | 9228.079  |
| NM_00377E | 20245.598 | 22682.947 | NM_000552 | 13541.658 | 13997.369 | NM_00431E | 11604.299 | 18084.102 |
| NM_002082 | 11017.642 | 11557.824 | NM_003809 | 1089.624  | 1494.951  | NM_02016E | 8117.839  | 10871.916 |
| NM_002922 | 20070.764 | 22879.828 | AK000860  | 5113.514  | 4981.226  | S56138    | 346.112   | 792.645   |
| AF155657  | 19599.35  | 18733.863 | NM_014961 | 3465.474  | 3383.635  | AK023860  | 9964.557  | 13606.682 |
| NM_00605E | 3730.769  | 3839.481  | NM_02014E | 6557.111  | 6219.585  | NM_000031 | 3541.373  | 6296.886  |
| AF045229  | 31294.125 | 32568.525 | AK021529  | 6123.594  | 6912.08   | NM_00208E | 24434.322 | 23351.586 |
| NM_00184C | 29872.129 | 41749.027 | AB037845  | 15595.718 | 14682.215 | AK026061  | 590.936   | 1122.104  |
| NM_01609E | 15253.148 | 17465.496 | NM_01619C | 61315.609 | 62916.355 | NM_01628E | 11420.862 | 14767.849 |
| NM_000394 | 789.947   | 1419.555  | AL137579  | 18318.543 | 11859.45  | NM_001567 | 3098.286  | 4782.786  |
| NM_00115E | 22256.674 | 20367.09  | NM_012383 | 9861.352  | 6922.502  | NM_00490E | 11305.443 | 9857.304  |
| M62896    | 8876.458  | 8638.649  | AJ271684  | 2742.03   | 1580.4    | AF217971  | 11503.843 | 10280.319 |
| NM_000017 | 6980.636  | 8706.549  | AF255342  | 19308.836 | 12893.291 | NM_00192E | 937.406   | 1634.974  |
| NM_000237 | 1755.33   | 2438.891  | NM_00330C | 26451.771 | 15319.861 | NM_004982 | 4567.596  | 5491.205  |
| NM_01834E | 12879.853 | 13885.663 | AK026682  | 5679.403  | 3386.869  | NM_004732 | 4045.044  | 4030.957  |
| AL122054  | 4038.213  | 5630.195  | NM_01772C | 67841.852 | 57149.91  | NM_01834E | 5112.489  | 6076.779  |
| AB023151  | 1383.438  | 832.296   | NM_00416E | 3894.405  | 3123.591  | NM_006363 | 5333.013  | 4725.294  |
| NM_00014C | 9444.086  | 11092.5   | NM_00036E | 4279.929  | 5433.282  | NM_02041E | 1918.214  | 1213.563  |
| NM_00512E | 4634.08   | 3270.427  | NM_01658E | 4950.027  | 5711.704  | AL049667  | 3744.35   | 2134.838  |
| NM_02003E | 369.1     | 496.12    | NM_00386C | 2155.114  | 2502.968  | NM_000334 | 8291.612  | 5879.283  |
| NM_01624E | 1753.422  | 1586.086  | NM_005414 | 2162.839  | 1940.214  | NM_02040C | 1638.947  | 1191.947  |
| NM_00513E | 1105.403  | 946.33    | NM_00446E | 8647.199  | 7675.994  | NM_001504 | 5600.914  | 2575.444  |
| NM_00497E | 38060.664 | 30497.148 | NM_016031 | 14753.999 | 16175.383 | D50926    | 3962.291  | 2716.424  |
| NM_005737 | 50065.223 | 48001.914 | NM_004804 | 5774.853  | 5366.341  | BF205683  | 5348.238  | 4776.776  |
| NM_00166C | 30721.424 | 40701.676 | M92439    | 26249.656 | 22728.736 | NM_00156E | 785.258   | 636.062   |
| NM_00071C | 1305.296  | 1752.425  | AL117665  | 11767.359 | 10745.15  | NM_002612 | 451.251   | 1077.307  |

|           |           |           |           |           |           |           |           |           |
|-----------|-----------|-----------|-----------|-----------|-----------|-----------|-----------|-----------|
| NM_000752 | 3395.192  | 3111.517  | AF263541  | 4053.166  | 4228.999  | AF135422  | 2245.5    | 3575.537  |
| AB040945  | 1618.876  | 1200.474  | NM_001262 | 10610.256 | 8292.187  | NM_002610 | 1668.835  | 2336.146  |
| NM_002018 | 6811.398  | 7097.942  | BE873030  | 5663.647  | 4373.783  | AF070587  | 3968.163  | 5433.604  |
| NM_002377 | 743.777   | 1135.064  | NM_002440 | 3344.305  | 2854.129  | BE250526  | 2022.38   | 2812.441  |
| NM_006018 | 4008.443  | 5892.599  | NM_003625 | 3235.854  | 2915.518  | NM_016819 | 5178.861  | 5723.287  |
| AF161383  | 18407.189 | 19475.971 | BC006990  | 15167.131 | 10809.376 | NM_012222 | 13723.347 | 16180.079 |
| NM_000410 | 29703.857 | 37258.453 | NM_002277 | 5565.234  | 2413.982  | NM_005002 | 2573.685  | 3449.255  |
| AF224266  | 1413.608  | 1158.712  | NM_006403 | 15817.075 | 13311.425 | NM_006596 | 3727.965  | 5204.471  |
| U72882    | 6675.347  | 7306.922  | NM_018977 | 2133.414  | 3102.61   | AK023214  | 16859.223 | 20424.41  |
| NM_005329 | 1749.306  | 551.323   | AJ001402  | 4736.243  | 5564.608  | NM_001469 | 9030.929  | 7833.282  |
| NM_000107 | 22857.176 | 11644.275 | NM_004540 | 1659.87   | 2099.611  | NM_003600 | 23012.055 | 18317.42  |
| AL157445  | 1843.866  | 2142.37   | L25628    | 746.01    | 815.201   | NM_017490 | 7064.396  | 5507.602  |
| NM_001517 | 9028.346  | 3555.535  | M37033    | 36317.863 | 37863.75  | NM_002718 | 2403.958  | 1815.42   |
| NM_005053 | 1091.123  | 650.174   | NM_007171 | 4431.492  | 4828.505  | AK026727  | 3181.754  | 2804.215  |
| D86974    | 7413.461  | 6532.287  | NM_004278 | 2625.339  | 3831.523  | NM_006247 | 5173.056  | 3214.01   |
| NM_018283 | 14538.567 | 10602.314 | NM_005632 | 2907.135  | 4639.88   | AB032983  | 4123.68   | 2452.288  |
| NM_001983 | 8338.928  | 6286.463  | AK021499  | 1150.03   | 1326.781  | NM_018281 | 12911.037 | 6922.498  |
| NM_004993 | 989.58    | 752.534   | AK000336  | 4821.448  | 4736.522  | NM_004457 | 3615.917  | 2088.524  |
| NM_003384 | 12890.923 | 10446.468 | NM_002795 | 47004.961 | 49835.219 | NM_014049 | 2676.717  | 1812.889  |
| Y12337    | 923.27    | 920.419   | NM_006292 | 17434.367 | 17196.498 | NM_005396 | 1726.194  | 1096.917  |
| M29551    | 13422.138 | 14995.297 | AB033066  | 4697.15   | 4464.276  | NM_019841 | 813.372   | 2119.15   |
| AB023148  | 1365.821  | 1407.583  | AF126028  | 5314.445  | 6175.926  | NM_003322 | 2618.364  | 6972.695  |
| NM_002929 | 2698.87   | 2586.896  | NM_007019 | 30323.186 | 25240.904 | NM_003568 | 2016.925  | 4213.156  |
| BC028375  | 1909.448  | 2034.071  | NM_007075 | 2218.878  | 1761.665  | NM_000496 | 446.069   | 830.385   |
| AB026436  | 4818.514  | 4144.917  | NM_016042 | 1908.729  | 1529.983  | BF347926  | 7149.081  | 8920.814  |
| NM_016029 | 27324.645 | 33641.793 | NM_017640 | 2028.452  | 1357.766  | N54821    | 15976.902 | 20133.99  |
| AK024562  | 2207.576  | 2328.847  | NM_017721 | 5342.375  | 3274.16   | BI912037  | 7534.937  | 8709.074  |
| NM_014066 | 6046.712  | 6046.878  | AK024167  | 15269.41  | 15797.041 | AA454646  | 18412.967 | 20625.342 |
| NM_004573 | 1851.46   | 2625.446  | AK025308  | 740.536   | 1351.199  | BF063899  | 1572.06   | 2190.066  |
| NM_000072 | 1900.238  | 1665.858  | NM_005026 | 14502.088 | 15377.646 | U66349    | 1635.213  | 2302.65   |
| NM_000697 | 2402.148  | 2831.659  | NM_004140 | 1852.464  | 2070.085  | AA057156  | 10161.917 | 11837.292 |
| NM_000313 | 1645.188  | 1863.348  | NM_002866 | 53825.676 | 59438.328 | U19487    | 1395.573  | 1572.02   |
| AI248827  | 16675.16  | 9390.54   | AF230809  | 5255.851  | 4472.523  | AF166327  | 43997.98  | 31539.471 |
| R45026    | 47197.148 | 20476.512 | NM_017894 | 9628.59   | 9434.594  | AF260739  | 3256.757  | 3108.638  |
| BI768063  | 3829.27   | 3885.001  | NM_006509 | 21370.209 | 20849.387 | AF531423  | 22472.631 | 14815.412 |
| BG386057  | 1031.471  | 1296.653  | AK025447  | 3648.771  | 4215.295  | X76555    | 972.234   | 857.503   |
| AI970239  | 4475.38   | 4860.203  | NM_002624 | 8000.019  | 11966.523 | NM_005432 | 9078.726  | 5186.609  |
| AA496452  | 42499.402 | 31098.475 | AF006199  | 2172.83   | 2589.641  | L10386    | 12766.869 | 6012.761  |
| X67594    | 6207.544  | 6118.554  | NM_004554 | 14735.327 | 13514.791 | AF061812  | 39057.176 | 19583.148 |
| AF363393  | 518.23    | 744.925   | NM_018119 | 11557.114 | 10494.563 | AL136756  | 4985.657  | 3511.179  |
| BC008837  | 919.706   | 1315.503  | NM_014576 | 2052.945  | 2011.406  | NM_001478 | 52118.457 | 32152.244 |
| NM_015869 | 946.609   | 1384.214  | AL162035  | 3780.757  | 4075.984  | M17017    | 1388.941  | 2683.501  |
| NM_001631 | 1063.749  | 973.144   | NM_003084 | 4848.42   | 4754.692  | NM_002990 | 4835.38   | 7850.02   |
| AB000734  | 8837.7    | 6963.211  | NM_002582 | 21503.596 | 18452.189 | NM_002432 | 8128.292  | 10599.285 |
| NM_000862 | 816.396   | 820.753   | NM_001009 | 64893.777 | 61805.426 | NM_012420 | 570.302   | 1335.056  |
| NM_005987 | 59826.293 | 60268.699 | NM_001026 | 63596.551 | 60574.777 | NM_002343 | 6639.343  | 10349.045 |
| X87838    | 16509.004 | 23680.75  | NM_001011 | 62839.434 | 55793.539 | AB033037  | 1757.763  | 2718.15   |
| NM_000169 | 9692.173  | 9741.211  | NM_014230 | 29989.146 | 40838.379 | L40400    | 9204.236  | 11640.517 |
| AF182814  | 5876.574  | 4794.755  | NM_000235 | 6894.234  | 10924.278 | AK025688  | 2087.676  | 3263.162  |
| L37199    | 1404.966  | 2178.597  | NM_015879 | 2309.764  | 3310.312  | NM_005930 | 569.609   | 1126.888  |
| NM_007260 | 7120.465  | 11812.391 | U28480    | 1290.997  | 1225.103  | Z36819    | 7905.252  | 12536.314 |
| AF148646  | 20140.74  | 31633.486 | NM_000108 | 30483.465 | 33436.84  | NM_014448 | 7625.631  | 9976.829  |
| AL110218  | 1971.682  | 3223.353  | NM_018128 | 9343.089  | 9995.8    | AL080157  | 6765.074  | 8679.013  |

|           |           |           |           |           |           |           |           |           |
|-----------|-----------|-----------|-----------|-----------|-----------|-----------|-----------|-----------|
| NM_002082 | 10436.54  | 7172.951  | NM_016931 | 3931.141  | 5428.426  | NM_00510C | 477.735   | 651.241   |
| NM_002922 | 23415.053 | 28747.061 | NM_004373 | 60346.633 | 62699.25  | NM_00530E | 2596.898  | 3226.118  |
| AF155657  | 22128.479 | 20953.883 | NM_00556E | 60048.691 | 64106.855 | NM_000911 | 1126.014  | 1035.537  |
| NM_00605E | 4431.536  | 3605.036  | NM_000162 | 2963.536  | 4059.441  | NM_007227 | 899.381   | 746.978   |
| AF045229  | 27974.26  | 21921.832 | AK027067  | 1217.486  | 1344.247  | NM_007023 | 967.617   | 763.921   |
| NM_00184C | 30206.865 | 28629.545 | NM_016287 | 17422.486 | 17753.137 | NM_005873 | 9100.944  | 4427.436  |
| AK025099  | 2503.502  | 2319.171  | AK021661  | 2272.622  | 2364.932  | NM_004624 | 3556.318  | 2913.321  |
| NM_01609E | 13421.797 | 13200.616 | NM_003864 | 29883.355 | 29850.787 | NM_00386E | 1584.548  | 1105.925  |
| NM_000394 | 867.88    | 846.846   | NM_006824 | 31439.713 | 30201.344 | AB015330  | 19093.164 | 7564.393  |
| NM_00022E | 853.717   | 1010.22   | NM_002107 | 5559.475  | 5200.854  | L09071    | 638.958   | 614.708   |
| NM_00083C | 4347.872  | 5417.655  | NM_002694 | 23631.383 | 25684.934 | NM_005924 | 838.169   | 980.869   |
| NM_014587 | 558.049   | 595.421   | NM_004454 | 3290.582  | 4279.639  | S56138    | 310.626   | 541.229   |
| NM_00520E | 576.132   | 1002.479  | NM_00096E | 712.575   | 464.481   | AK023860  | 10743.164 | 16566.469 |
| AF148950  | 435.221   | 721.796   | AF213356  | 3732.461  | 5463.186  | NM_000031 | 4992.784  | 14104.889 |
| NM_00115E | 26022.104 | 33916.48  | BC035716  | 16255.178 | 18692.703 | NM_00208E | 22442.484 | 24009.494 |
| M62896    | 11955.365 | 15177.952 | NM_018014 | 13366.651 | 19036.611 | AK026061  | 814.736   | 1540.812  |
| NM_01773E | 5134.88   | 5109.802  | AF007192  | 1525.355  | 1942.249  | NM_01628E | 10315.449 | 15060.462 |
| NM_00039C | 425.058   | 640.55    | NM_00127E | 16172.478 | 20635.555 | NM_001567 | 3355.455  | 5927.554  |
| NM_000014 | 1300.727  | 2022.72   | NM_01491E | 61002.734 | 62972.145 | NM_00490E | 11403.771 | 12360.077 |
| NM_006803 | 2844.631  | 4573.341  | NM_01228E | 6091.976  | 9180.392  | AF217971  | 12571.161 | 15021.093 |
| NM_002533 | 3957.844  | 5897.206  | NM_00219E | 23931.736 | 25821.609 | NM_00192E | 1039.894  | 2558.908  |
| AF235022  | 3809.643  | 6748.822  | D84294    | 10511.703 | 9114.808  | NM_004982 | 8064.262  | 21024.756 |
| AL137764  | 38071.965 | 58952.996 | X59770    | 3350.649  | 3405.646  | NM_004732 | 4567.125  | 7643.737  |
| NM_00166C | 37308.953 | 58011.945 | K02765    | 4665.198  | 5048.278  | NM_01834E | 5506.947  | 8737.013  |
| NM_002377 | 974.255   | 1028.765  | M65134    | 2702.491  | 2793.082  | NM_006363 | 6118.84   | 8101.059  |
| NM_00601E | 3172.41   | 2372.437  | BG539651  | 30283.291 | 36717.016 | NM_02041E | 2088.192  | 2410.243  |
| AF161383  | 16229.475 | 13880.587 | N52646    | 63567.582 | 65200.82  | NM_01487E | 356.35    | 603.348   |
| NM_00041C | 27397.637 | 30398.629 | AW160671  | 62703.836 | 64158.422 | AL049667  | 3488.907  | 2765.159  |
| AF224266  | 1675.62   | 1491.893  | BI870529  | 34914.957 | 31440.576 | NM_000334 | 9262.385  | 8416.745  |
| U72882    | 7194.288  | 5764.359  | AA702698  | 3484.585  | 5196.851  | NM_02040C | 1855.477  | 1351.373  |
| NM_014337 | 13708.044 | 13061.67  | AI681514  | 3384.062  | 1912.168  | NM_001504 | 6010.803  | 2635.806  |
| NM_007161 | 21231.738 | 17179.998 | AI122630  | 24457.416 | 33862.527 | D50926    | 4022.101  | 3251.301  |
| NM_014387 | 1948.29   | 1753.186  | AF086790  | 8569.824  | 9671.073  | BF205683  | 4654.643  | 3939.777  |
| NM_003641 | 6878.173  | 7685.179  | AK025966  | 2671.374  | 3362.855  | NM_00156E | 706.072   | 615.645   |
| NM_012463 | 6025.769  | 7649.493  | NM_01872E | 1874.954  | 2526.068  | NM_00075E | 7340.462  | 4947.148  |
| L29140    | 39947.68  | 46462.484 | NM_003081 | 21962.539 | 25167.521 | NM_00447E | 38020.605 | 44001.895 |
| AK026448  | 14642.766 | 17946.184 | NM_01649E | 1814.674  | 2707.736  | NM_00261C | 1607.108  | 2273.177  |
| AK057418  | 9363.74   | 9432.211  | D50402    | 12007.53  | 16250.137 | AF070587  | 2878.784  | 3613.263  |
| AK024562  | 3427.707  | 4877.605  | M73547    | 21204.354 | 24012.777 | BE250526  | 2437.936  | 5825.565  |
| NM_01406E | 8851.511  | 13950.848 | AF181722  | 426.939   | 741.145   | NM_01681E | 4990.096  | 7062.797  |
| NM_004573 | 3244.129  | 4265.95   | NM_003687 | 2735.035  | 2980.773  | NM_012222 | 13277.796 | 20962.205 |
| AL122054  | 3277.34   | 2472.085  | NM_004134 | 13967.398 | 14501.592 | NM_005002 | 2475.894  | 4371.718  |
| AB023151  | 1409.462  | 1391.402  | NM_00595E | 19847.594 | 16745.648 | NM_00659E | 3877.749  | 5408.295  |
| NM_00014C | 8010.023  | 6402.36   | NM_00404E | 4091.746  | 3259.451  | AK023214  | 19619.715 | 26678.162 |
| NM_00512E | 4640.283  | 3158.938  | BE548044  | 1439.069  | 1726.279  | NM_00146E | 11013.155 | 18858.764 |
| NM_01624E | 2596.722  | 3077.015  | AF028832  | 254.484   | 3484.704  | NM_00360C | 25362.799 | 26730.246 |
| NM_01592E | 3211.106  | 2675.188  | NM_006017 | 579.758   | 1571.087  | NM_01749C | 6482.244  | 7400.154  |
| X03757    | 6046.893  | 4424.723  | NM_01242E | 9259.647  | 9026.319  | NM_00271E | 2606.376  | 3641.314  |
| NM_01865E | 2011.969  | 1574.354  | NM_01326E | 22655.123 | 15688.914 | AK026727  | 3482.296  | 4081.556  |
| NM_00513E | 1100.239  | 888.896   | NM_00172E | 16872.857 | 26353.521 | NM_00283C | 352.123   | 222.124   |
| AK094513  | 1485.177  | 1366.153  | NM_001179 | 856.64    | 1177.65   | NM_006247 | 5703.791  | 4488.695  |
| NM_001183 | 29914.92  | 37894.422 | NM_005313 | 50041.438 | 60346.203 | AB032983  | 4072.235  | 3120.578  |
| NM_00089C | 933.277   | 1542.508  | NM_01776E | 5222.711  | 7192.829  | NM_018281 | 13367.005 | 7573.544  |

|           |           |           |           |           |           |           |           |           |
|-----------|-----------|-----------|-----------|-----------|-----------|-----------|-----------|-----------|
| NM_004976 | 51609.84  | 56029.047 | NM_000428 | 1575.446  | 2585.827  | NM_004457 | 3532.344  | 2428.649  |
| AK021597  | 2926.568  | 3196.542  | NM_014721 | 1463.409  | 2277.47   | NM_014046 | 2640.661  | 1408.356  |
| NM_005737 | 53588.414 | 52853.41  | AK026352  | 1613.061  | 2618.533  | NM_005396 | 1449.739  | 809.9     |
| NM_000166 | 13323.466 | 21212.533 | AF169257  | 750.62    | 995.49    | NM_004315 | 10310.122 | 6945.158  |
| NM_000696 | 1756.39   | 301.041   | NM_016180 | 2285.003  | 2424.425  | NM_020166 | 6749.8    | 4670.55   |
| NM_005329 | 3326.359  | 3576.743  | NM_003056 | 17736.705 | 20111.852 | NM_003566 | 789.954   | 1412.752  |
| AL157445  | 1082.674  | 399.754   | NM_016226 | 14482.707 | 12944.859 | BC036375  | 20552.627 | 28140.652 |
| NM_001517 | 6992.319  | 6107.979  | AK024311  | 1072.66   | 1115.341  | NM_000496 | 486.646   | 850.967   |
| NM_005053 | 1109.512  | 689.265   | AF052155  | 9090.007  | 9983.393  | BF347926  | 7651.743  | 8887.225  |
| D86974    | 6533.651  | 4375.773  | NM_005085 | 9546.074  | 11085.071 | N54821    | 19044.957 | 24317.672 |
| NM_018283 | 14642.335 | 10712.846 | NM_017681 | 2915.664  | 2273.884  | BI912037  | 7817.652  | 10596.773 |
| NM_001983 | 7883.426  | 7804.288  | X57655    | 50089.113 | 46420.852 | AA454646  | 20282.898 | 27692.426 |
| NM_004993 | 1228.536  | 827.958   | NM_018261 | 3381.52   | 4547.938  | BF063899  | 1768.95   | 3508.943  |
| NM_003384 | 12561.898 | 9154.601  | NM_014796 | 2459.768  | 4264.087  | U18087    | 53292.277 | 66452.344 |
| Y12337    | 861.636   | 576.355   | NM_001147 | 443.12    | 1087.976  | U66349    | 1858.723  | 2607.205  |
| M29551    | 9712.979  | 6998.792  | AL050288  | 50894.613 | 54426.688 | AA057156  | 11855.93  | 16038.138 |
| AB023148  | 1651.647  | 1179.998  | NM_005040 | 12518.831 | 12936.441 | U19487    | 1418.029  | 2086.986  |
| NM_002929 | 2842.884  | 2830.646  | NM_016391 | 30026.045 | 35657.121 | AF166327  | 45096.094 | 42777.691 |
| BC028375  | 2327.437  | 2768.324  | AF075033  | 13953.925 | 13777.605 | AF260739  | 3888.712  | 5698.508  |
| AB026436  | 5447.437  | 5742.933  | D50911    | 31846.91  | 25103.504 | AF531423  | 27805.709 | 26488.162 |
| NM_016029 | 26139.938 | 25849.473 | AB011104  | 3994.295  | 6075.613  | X76555    | 1099.453  | 1334.198  |
| CY3Cy5    | 1532.269  | 118.222   | AK024069  | 17564.395 | 24266.629 | NM_005432 | 9113.063  | 6401.506  |
| NM_002103 | 28616.625 | 28637.738 | NM_004582 | 37537.227 | 50225.031 | L10386    | 14664.66  | 10536.88  |
| AK000819  | 2729.662  | 4309.818  | AF233450  | 1986.659  | 2304.232  | AF061812  | 45871.496 | 27358.484 |
| AF201941  | 3494.587  | 4278.645  | NM_016233 | 3513.504  | 4068.082  | AL136756  | 5352.476  | 3266.029  |
| AF143878  | 1270.545  | 1532.673  | NM_000821 | 51509.785 | 43092.684 | NM_001478 | 43392.473 | 22586.326 |
| NM_007070 | 3791.446  | 3351.969  | NM_003145 | 47198.391 | 41386.508 | NM_002612 | 361.236   | 371.22    |
| AL133019  | 3915.555  | 4315.961  | NM_001632 | 3604.448  | 3302.115  | AF135422  | 1965.077  | 1173.317  |
| AK026192  | 1660.56   | 1750.686  | NM_012264 | 2235.995  | 888.762   | NM_005930 | 632.676   | 1610.176  |
| NM_014895 | 881.918   | 810.988   | AF311312  | 3758.802  | 2506.136  | Z36819    | 7588.551  | 12769.553 |
| NM_017748 | 6204.667  | 7300.917  | NM_001276 | 15528.79  | 22829.049 | NM_014847 | 53452.145 | 64424.453 |
| AK025374  | 2579.003  | 2150.586  | NM_014915 | 59321.809 | 61819.66  | NM_001195 | 637.459   | 1075.03   |
| NM_014901 | 9983.755  | 6831.177  | NM_012286 | 5697.924  | 8063.935  | NM_014448 | 9046.302  | 12904.317 |
| AK000005  | 4980.696  | 2767.35   | NM_002195 | 26019.686 | 29168.453 | AL080157  | 7801.934  | 11212.948 |
| NM_002103 | 19297.008 | 12456.876 | D84294    | 10172.639 | 10554.169 | NM_005100 | 568.55    | 1041.623  |
| NM_003379 | 34769.855 | 20321.789 | X59770    | 3422.672  | 4078.45   | NM_005308 | 3251.423  | 5113.783  |
| SR1       | 77758.625 | 65858.203 | K02765    | 10226.688 | 10777.378 | NM_000911 | 1735.635  | 2721.897  |
| SR7       | 3665.194  | 39136.98  | M65134    | 2108.302  | 2231.9    | NM_007227 | 1092.535  | 1731.767  |
| SR9       | 12062.849 | 2241.276  | BG539651  | 22698.471 | 19755.219 | NM_007023 | 1196.446  | 1681.031  |
| CY3Cy5    | 1248.058  | 141.491   | N52646    | 62725.195 | 61982.137 | NM_005873 | 11963.146 | 13995.973 |
| NM_013288 | 842.271   | 704.594   | AW160671  | 60229.539 | 58528.152 | NM_004624 | 4112.566  | 7198.816  |
| M60721    | 2124.282  | 2129.562  | BI870529  | 34801.547 | 40797.496 | NM_014461 | 999.416   | 1433.453  |
| AF071508  | 1539.574  | 983.576   | AA702698  | 4017.809  | 6966.123  | NM_003865 | 1801.03   | 2290.25   |
| L07265    | 14377.697 | 12789.325 | BG748827  | 25004.545 | 23143.41  | AB015330  | 20136.365 | 15328.49  |
| AK022467  | 627.951   | 592.441   | AA952897  | 27409.467 | 34827.215 | NM_001455 | 3167.765  | 3387.477  |
| NM_002813 | 11890.104 | 10925.726 | BG760342  | 9107.738  | 7527.399  | NM_002385 | 5741.801  | 4519.845  |
| NM_001198 | 580.008   | 869.965   | AA703141  | 4185.494  | 3544.844  | NM_001885 | 498.944   | 286.704   |
| AK022745  | 33550.355 | 28765.363 | AA195244  | 632.646   | 675.121   | AF039196  | 627.095   | 387.474   |
| AL049450  | 6230.697  | 5483.533  | AI122630  | 17904.752 | 16469.967 | L09071    | 703.011   | 588.659   |
| AK022011  | 536.502   | 694.583   | NM_006589 | 15745.643 | 11955.701 | NM_005924 | 646.015   | 657.53    |
| NM_005086 | 7774.365  | 6091.389  | AB007875  | 5600.273  | 3610.059  | NM_019841 | 804.231   | 562.963   |
| NM_007238 | 1240.151  | 744.05    | NM_018725 | 2029.753  | 2722.515  | NM_003322 | 1010.438  | 1112.231  |
| AL049340  | 796.729   | 448.477   | NM_003081 | 40144.547 | 47444.176 | NM_013365 | 4629.07   | 8473.28   |

|           |           |           |           |           |           |           |           |           |
|-----------|-----------|-----------|-----------|-----------|-----------|-----------|-----------|-----------|
| NM_01760E | 3121.241  | 3099.253  | NM_01649E | 2267.46   | 3524.69   | NM_005817 | 8454.068  | 16311.816 |
| AK024644  | 9331.365  | 12530.481 | D50402    | 42054.953 | 49235.398 | NM_00391E | 11989.216 | 17981.273 |
| U68494    | 6760.553  | 7602.081  | M73547    | 23471.975 | 30375.49  | NM_00287C | 50207.664 | 63660.371 |
| AF064254  | 3058.893  | 5295.429  | NM_003687 | 5857.146  | 8278.594  | NM_00280Z | 657.432   | 1551.779  |
| AL137360  | 4316.234  | 2939.831  | NM_004134 | 14300.435 | 15087.439 | NM_00636Z | 6792.837  | 9152.964  |
| AK024523  | 1388.346  | 1230.615  | NM_00595E | 14774.064 | 16252.104 | NM_02041E | 2502.088  | 4551.807  |
| AK024600  | 799.818   | 521.796   | NM_00404E | 3786.102  | 2784.361  | NM_01487E | 308.455   | 526.693   |
| AK024543  | 2268.618  | 2875.937  | BE548044  | 1368.614  | 1567.425  | AL049667  | 4371.552  | 6525.27   |
| AK024624  | 6794.871  | 8053.177  | NM_006017 | 873.201   | 1469.139  | NM_000334 | 12135.122 | 19071.219 |
| AK025090  | 613.094   | 748.015   | NM_01242E | 12306.779 | 19939.686 | NM_02040C | 2002.455  | 3084.258  |
| AK024883  | 8010.424  | 7952.16   | NM_01326E | 32386.73  | 44772.207 | NM_001504 | 8939.236  | 8972.267  |
| AF217989  | 10089.279 | 10198.308 | NM_00172E | 14868.163 | 14917.021 | D50926    | 5626.253  | 8057.717  |
| NM_017654 | 688.434   | 885.717   | NM_00556E | 569.82    | 564.133   | BF205683  | 6247.725  | 9892.271  |
| L77561    | 649.454   | 887.64    | NM_003824 | 23168.23  | 23824.18  | NM_00156E | 897.648   | 1341.784  |
| AL109696  | 3050.306  | 3851.128  | NM_00068E | 2646.518  | 2412.066  | NM_00075E | 7094.492  | 5877.195  |
| AJ011593  | 4987.401  | 3816.477  | NM_01245Z | 24161.484 | 17085.178 | M17017    | 665.163   | 968.927   |
| X89743    | 820.295   | 870.537   | AF229166  | 2126.71   | 1965.943  | NM_00299C | 4322.549  | 3321.894  |
| AJ002784  | 1000.289  | 2614.709  | NM_006764 | 7641.629  | 6708.077  | NM_00243Z | 5990.633  | 2737.452  |
| U17621    | 1336.343  | 2894.469  | NM_00138E | 6279.408  | 5309.902  | NM_01242C | 541       | 360.912   |
| AL049239  | 2592.457  | 2032.939  | AF007192  | 2724.434  | 2413.826  | NM_00234Z | 5016.65   | 3880.136  |
| AF086208  | 4763.025  | 4570.081  | NM_01776E | 25638.17  | 27722.096 | AB033037  | 1562.271  | 1149.397  |
| AK023335  | 1193.7    | 2091.772  | NM_00042E | 1603.97   | 2112.846  | L40400    | 7456.724  | 5128.302  |
| AK023187  | 1080.723  | 879.576   | NM_00357E | 1092.009  | 1494.14   | AK025688  | 2198.787  | 2025.326  |
| AL133101  | 2816.12   | 3239.907  | NM_014721 | 1869.115  | 2835.639  | NM_004457 | 4306.221  | 7141.707  |
| AL157459  | 3475.266  | 2690.312  | AK026352  | 2202.32   | 3593.948  | NM_01404E | 3163.94   | 5328.329  |
| AB020654  | 434.438   | 278.569   | AF169257  | 473.263   | 698.795   | NM_00539E | 2173.28   | 4314.929  |
| AL353954  | 1963.528  | 1524.74   | NM_01618C | 2076.542  | 1773.506  | AK023860  | 11007.235 | 12531.551 |
| NM_01763C | 1805.181  | 1681.503  | NM_005827 | 22898.574 | 24853.047 | NM_000031 | 3527.364  | 4743.676  |
| AK000778  | 3733.728  | 5515.388  | NM_00305E | 19287.781 | 23308.146 | NM_00208E | 25883.65  | 30064.285 |
| AK000932  | 703.73    | 1497.559  | NM_01622E | 15166.365 | 16471.85  | AK026061  | 694.495   | 1161.834  |
| AL133573  | 3229.924  | 5783.895  | AK024311  | 1738.779  | 1872.217  | NM_01628E | 11470.871 | 15148.551 |
| AK000115  | 8558.509  | 11129.279 | AF052155  | 8344.142  | 8358.649  | NM_001567 | 3686.205  | 5620.431  |
| NM_01795E | 416.74    | 520.445   | NM_00508E | 10608.58  | 13012.558 | NM_00490E | 12891.746 | 17567.563 |
| AK000958  | 900.351   | 650.677   | AF060902  | 10305.004 | 9983.178  | AF217971  | 13177.31  | 16249.557 |
| BC024924  | 13527.22  | 10833.826 | AF121858  | 39951.477 | 41736.734 | NM_00192E | 912.274   | 1884.16   |
| NM_01790E | 5822.888  | 4762.47   | NM_013437 | 1184.752  | 1916.922  | AF245517  | 2034.636  | 2296.6    |
| AL110286  | 7923.207  | 10562.082 | NM_017681 | 3174.975  | 4597.285  | NM_004137 | 580.412   | 610.033   |
| AF086374  | 5665.245  | 2955.373  | X57655    | 50173.258 | 45203.641 | NM_014407 | 1018.996  | 1054.583  |
| AL162066  | 5674.287  | 7771.723  | AK025966  | 6800.943  | 5686.629  | NM_00498Z | 4189.85   | 3173.586  |
| NM_01609E | 45006.531 | 52100.777 | NM_01444C | 1078.352  | 970.147   | NM_001694 | 54993.305 | 64087.504 |
| U79290    | 2314.239  | 2870.799  | NM_01479E | 2782.936  | 2902.064  | AF286370  | 1840.766  | 1299.754  |
| X98114    | 514.332   | 512.062   | AL050288  | 53242.34  | 50772.398 | NM_000217 | 491.022   | 310.944   |
| AK024197  | 399.611   | 383.613   | NM_00504C | 12799.995 | 12974.446 | NM_00473Z | 3334.941  | 1959.903  |
| NM_01415Z | 738.961   | 1202.869  | NM_016391 | 37680.797 | 49817.84  | AK026180  | 916.074   | 680.389   |
| NM_01860E | 304.296   | 188.485   | M80783    | 481.434   | 1508.217  | NM_01834E | 4746.498  | 4684.219  |
| AF086473  | 698.094   | 820.217   | AF075033  | 14039.442 | 14878.121 | NM_00147E | 53005.617 | 62002.77  |
| D87682    | 3200.112  | 3554.531  | D50911    | 30682.67  | 24889.691 | NM_00447E | 36288.707 | 35528.004 |
| AF321617  | 5822.419  | 5077.616  | AB011104  | 3190.013  | 3629.752  | NM_00261C | 1753.324  | 1795.731  |
| M85205    | 555.093   | 510.542   | AK024069  | 15508.125 | 14592.572 | AF070587  | 2881.436  | 3256.023  |
| AF223389  | 420.358   | 454.044   | NM_00458Z | 31357.377 | 34847.426 | BE250526  | 2066.739  | 2885.172  |
| AV710479  | 767.014   | 1222.778  | NM_01564C | 39128.039 | 38475.586 | NM_01681E | 5034.048  | 6664.781  |
| NM_00695C | 904.701   | 2076.73   | AF233450  | 1835.183  | 2293.207  | NM_01222Z | 13911.091 | 26948.049 |
| NM_00068Z | 1206.632  | 1675.239  | NM_01623Z | 5042.08   | 5201.029  | NM_00500Z | 4546.542  | 15422.089 |

|            |           |           |           |           |           |           |           |           |
|------------|-----------|-----------|-----------|-----------|-----------|-----------|-----------|-----------|
| unknown (4 | 634.688   | 432.127   | NM_000821 | 59228.508 | 51320.586 | NM_006596 | 4239.872  | 7508.575  |
| NM_016296  | 1839.863  | 1642.107  | NM_020121 | 1027.559  | 1276.784  | AK023214  | 17164.648 | 22753.959 |
| NM_003156  | 1821.494  | 2433.898  | NM_003145 | 49400.863 | 46641.379 | NM_001466 | 9820.393  | 10083.154 |
| AK023494   | 1343.826  | 1583.342  | NM_001632 | 3691.41   | 3905.241  | NM_003600 | 21449.783 | 15997.199 |
| AF086256   | 965.197   | 1463.785  | NM_012264 | 2594.931  | 1937.614  | NM_017490 | 6720.462  | 4977.673  |
| NM_015492  | 4525.592  | 5058.213  | AF311312  | 3579.594  | 3529.619  | NM_002716 | 2469.292  | 1993.467  |
| NM_006933  | 635.204   | 1137.936  | NM_005313 | 61969.91  | 64686.523 | AK026727  | 2898.305  | 2301.366  |
| AF132204   | 2489.963  | 2881.143  | NM_014915 | 62176.695 | 60843.234 | NM_002830 | 321.266   | 200.923   |
| AK022874   | 13124.78  | 15391.637 | NM_012286 | 9328.765  | 10016.848 | NM_006247 | 5519.157  | 3186.065  |
| AK024602   | 2804.897  | 3160.223  | NM_002195 | 35164.578 | 50534.863 | AB032983  | 3927.701  | 2768.057  |
| NM_018507  | 877.795   | 912.121   | D84294    | 10954.318 | 9441.786  | NM_018281 | 14031.354 | 9410.707  |
| NM_000485  | 18984.146 | 19455.43  | X59770    | 3592.27   | 3938.815  | CY3Cy5    | 664.23    | 181.537   |
| NM_018542  | 567.428   | 608.152   | K02765    | 19006.771 | 23874.387 | NM_000945 | 1386.256  | 1111.419  |
| AK025503   | 1636.827  | 1227.922  | M65134    | 2842.883  | 3499.661  | NM_002574 | 67851.547 | 39245.27  |
| AF130073   | 2112.071  | 1711.457  | BG539651  | 26639.654 | 24125.475 | NM_001310 | 2657.525  | 2251.484  |
| AK024225   | 26979.488 | 19357     | N52646    | 62143.266 | 62757.961 | AK026924  | 3942.917  | 2574.118  |
| AF086334   | 1228.146  | 939.215   | AW160671  | 62273.07  | 61613.719 | AL122047  | 2029.139  | 1863.805  |
| AL137602   | 970.348   | 314.044   | BI870529  | 37631.422 | 34273.406 | AF052091  | 1569.746  | 1460.053  |
| NM_003696  | 447.132   | 375.368   | AA702698  | 3663.913  | 6171.957  | AK024447  | 62949.102 | 44278.074 |
| AF075035   | 696.294   | 839.86    | AI681514  | 3236.947  | 3621.416  | AF086458  | 1745.287  | 1497.021  |
| AL110180   | 6762.364  | 7440.866  | NM_001300 | 6472.668  | 6592.374  | AF086548  | 1595.898  | 965.789   |
| NM_007262  | 52490.906 | 42747.855 | BG748827  | 26399.006 | 21809.393 | AK023717  | 1531.994  | 1396.872  |
| NM_014783  | 8424.787  | 7357.458  | AA952897  | 26501.346 | 23712.434 | AK022294  | 1041.3    | 853.884   |
| NM_014053  | 11742.783 | 14856.061 | BG760342  | 9245.275  | 10398.896 | AF086507  | 669.625   | 504.449   |
| NM_002571  | 1246.734  | 1666.319  | AA703141  | 4850.85   | 6956.167  | U79289    | 772.534   | 609.854   |
| NM_004939  | 9262.854  | 9554.317  | AI122630  | 20053.082 | 18776.461 | NM_014026 | 1656.62   | 1171.878  |
| NM_001425  | 23733.947 | 27305.879 | NM_006589 | 18990.994 | 17395.434 | NM_000945 | 1233.896  | 1147.438  |
| NM_015710  | 1785.4    | 1845.72   | NM_002191 | 802.59    | 1102.057  | NM_002574 | 69515.859 | 53164.133 |
| NM_014156  | 7668.879  | 7494.119  | AB007875  | 6885.291  | 6502.174  | SR1       | 79815.5   | 69653.641 |
| AK021591   | 4173.817  | 5484.516  | NM_018261 | 3945.67   | 3943.811  | SR3       | 21530.863 | 22812.324 |
| NM_014675  | 4144.098  | 4418.436  | NM_005955 | 17048.139 | 16285.884 | SR5       | 3436.092  | 4347.424  |
| NM_014040  | 11980.784 | 15626.192 | NM_004046 | 3991.16   | 3711.619  | SR7       | 2037.615  | 19594.975 |
| AK000799   | 9446.686  | 8900.312  | BE548044  | 1148.631  | 1396.902  | SR9       | 5445.936  | 1123.024  |
| NM_015582  | 1075.85   | 970.917   | NM_012426 | 10511.386 | 14262.653 | CY3Cy5    | 601.699   | 151.886   |
| AK027091   | 1971.105  | 2266.534  | NM_013269 | 29071.594 | 39155.281 | AK026923  | 1448.624  | 805.221   |
| NM_001526  | 774.022   | 1280.889  | NM_001726 | 13943.496 | 14527.588 | AK021691  | 20041.977 | 13654.854 |
| U31738     | 5377.297  | 3598.179  | NM_005565 | 392.721   | 884.704   | AK023595  | 723.733   | 416.567   |
| AF179890   | 22153.381 | 18855.939 | NM_003824 | 26451.287 | 26196.602 | NM_015721 | 2727.981  | 1894.259  |
| AK023536   | 17143.301 | 11725.911 | NM_000686 | 2999.824  | 2892.06   | AF086298  | 545.4     | 477.653   |
| AK026561   | 597.729   | 317.831   | NM_012452 | 26789.861 | 24293.313 | AK027238  | 506.043   | 305.064   |
| AK021568   | 6933.639  | 5930.156  | AF229166  | 2055.583  | 2338.741  | AK000032  | 631.132   | 300.707   |
| AF088054   | 998.195   | 805.294   | NM_005137 | 23549.365 | 21424.947 | AL360201  | 355.556   | 173.22    |
| AK023881   | 6781.216  | 6354.824  | NM_006764 | 8727.904  | 8725.909  | S94540    | 44611.926 | 35352.57  |
| AK027114   | 54476.996 | 40746.68  | NM_001386 | 8064.341  | 8253.996  | U79297    | 1185.994  | 1336.997  |
| NM_000552  | 8413.25   | 8310.373  | NM_001163 | 8170.581  | 10614.154 | AF052122  | 14248.934 | 13239.043 |
| NM_003809  | 1291.219  | 1853.453  | NM_005876 | 14042.786 | 18816.832 | AK022416  | 737.917   | 555.035   |
| AK000860   | 2791.647  | 3946.882  | AF308602  | 8274.728  | 7828.841  | AK023224  | 2360.882  | 1529.755  |
| NM_014961  | 2074.797  | 2641.889  | AB011089  | 5951.125  | 6069.322  | AK023731  | 1803.384  | 821.525   |
| NM_020145  | 7514.628  | 8608.37   | AF007192  | 2460.861  | 2263.073  | AK023336  | 429.556   | 401.942   |
| AK021529   | 4029.651  | 4182.516  | NM_001276 | 22755.266 | 30397.285 | AK023727  | 885.159   | 778.291   |
| AB037845   | 13050.519 | 15515.084 | NM_016157 | 4103.36   | 5532.875  | AF086204  | 4280.563  | 2882.847  |
| NM_005980  | 887.327   | 1089.012  | NM_003053 | 15229.652 | 16173.811 | NM_007021 | 982.117   | 746.186   |
| NM_016190  | 8691.544  | 9059.582  | NM_003044 | 8990.342  | 10421.695 | AK021570  | 608.714   | 470.889   |

|           |           |           |           |           |           |           |           |           |
|-----------|-----------|-----------|-----------|-----------|-----------|-----------|-----------|-----------|
| AL137579  | 7284.543  | 8660.747  | NM_006672 | 43965.035 | 55867.824 | AK000103  | 837.111   | 1116.39   |
| NM_012383 | 6896.477  | 8014.845  | NM_000338 | 1851.17   | 2033.609  | AF085959  | 431.499   | 748.47    |
| AJ271684  | 1371.721  | 1442.351  | M31659    | 1793.512  | 2093.368  | AK023104  | 495.354   | 391.809   |
| AF255342  | 1537.456  | 1558.893  | NM_003056 | 19456.275 | 22939.109 | AK022181  | 893.021   | 591.462   |
| NM_003300 | 9557.767  | 11414.651 | NM_016226 | 16943.512 | 24251.279 | NM_018474 | 7182.112  | 4306.732  |
| AK026682  | 3452.779  | 2895.483  | AK024311  | 1703.114  | 1851.154  | AK024937  | 2495.29   | 1702.484  |
| NM_017720 | 46938.996 | 32960.051 | AF052155  | 8898.17   | 7845.19   | D17178    | 1098.13   | 835.234   |
| NM_004655 | 355.764   | 270.04    | NM_005085 | 11329.672 | 11239.644 | AK022094  | 1886.332  | 1361.097  |
| NM_003942 | 3497.385  | 3372.406  | AF060902  | 10014.11  | 10738.015 | AK026695  | 727.494   | 609.788   |
| NM_006471 | 10432.932 | 7047.77   | AF121858  | 39587.473 | 40391.875 | AK000141  | 4843.88   | 3634.563  |
| NM_004165 | 1483.515  | 1028.483  | NM_013437 | 1389.447  | 1848.446  | AL137758  | 2138.127  | 1745.846  |
| NM_000368 | 3943.489  | 3089.576  | NM_017681 | 3067.66   | 2532.38   | AK025786  | 494.853   | 332.083   |
| NM_016586 | 3802.795  | 3039.582  | X57655    | 53207.883 | 50430.543 | AK024188  | 478.244   | 389.827   |
| NM_003860 | 1204.388  | 1430.025  | AK025966  | 8253.91   | 8754.467  | AK001716  | 3037.937  | 2632.18   |
| NM_005414 | 1729.865  | 1473.195  | NM_014440 | 1067.031  | 1684.623  | AK026821  | 1738.53   | 1754.907  |
| NM_004468 | 3078.207  | 3801.879  | NM_018725 | 2344.079  | 3145.284  | AK026280  | 1659.012  | 2547.012  |
| NM_016031 | 12460.058 | 13316.468 | NM_003081 | 65149.027 | 74556     | AF113017  | 6922.083  | 10137.402 |
| NM_004804 | 10143.325 | 11778.854 | NM_016495 | 3416.982  | 3289.916  | AL080232  | 16253.066 | 17128.785 |
| M92439    | 20339.01  | 29265.23  | D50402    | 65686.063 | 67557.867 | AK001120  | 8417.429  | 8130.91   |
| AL117665  | 13681.85  | 14279.804 | M73547    | 33422.063 | 32858.777 | AK021980  | 3419      | 2239.85   |
| AF263541  | 4330.786  | 4615.315  | AF181722  | 1205.555  | 1432.256  | S46402    | 625.231   | 563.578   |
| AK027169  | 721.405   | 1064.173  | NM_003687 | 10943.768 | 10084.297 | AF075048  | 329.151   | 270.27    |
| NM_001262 | 7279.572  | 10439.441 | NM_004134 | 23172.344 | 33265.195 | Z83940    | 589.353   | 576.826   |
| BE873030  | 628.379   | 758.926   | NM_001632 | 3949.058  | 4469.847  | NM_005800 | 1257.224  | 959.546   |
| NM_002440 | 913.468   | 1316.205  | NM_012264 | 2712.755  | 2995.29   | AF019617  | 15658.459 | 11521.134 |
| NM_003625 | 1550.039  | 1292.992  | AF311312  | 3610.603  | 4235.522  | AL137305  | 4712.875  | 3834.811  |
| BC006990  | 12838.591 | 18259.736 | NM_001179 | 904.242   | 1402.951  | AK025802  | 701.213   | 477.002   |
| NM_002277 | 920.949   | 637.148   | NM_005313 | 51080.848 | 54617.535 | NM_018013 | 2237.668  | 1700.118  |
| NM_019114 | 5703.008  | 4208.057  | NM_017765 | 52277.484 | 55851.379 | AK026873  | 1730.962  | 1555.027  |
| M33552    | 31947.465 | 16420.883 | NM_000428 | 1589.101  | 2652.23   | AK026394  | 2172.059  | 1651.726  |
| AJ252060  | 3373.385  | 2520.969  | NM_003578 | 771.666   | 1131.376  | NM_005448 | 552.981   | 500.187   |
| NM_006403 | 8259.316  | 5919.028  | NM_014721 | 1617.411  | 1816.933  | AK025943  | 21766.645 | 16069.157 |
| NM_018977 | 1357.264  | 1010.097  | AK026352  | 2503.331  | 4679.649  | BG106479  | 495.29    | 397.385   |
| AJ001402  | 322.871   | 245.935   | AL137705  | 7576.385  | 8310.93   | AF130069  | 20403.424 | 21010.635 |
| NM_004540 | 729.86    | 503.305   | U41898    | 1733.819  | 2223.67   | AL109669  | 3064.569  | 3466.012  |
| M37033    | 32408.369 | 27971.146 | NM_020346 | 648.709   | 689.646   | AB037766  | 2220.889  | 2061.022  |
| NM_007171 | 5488.194  | 5948.893  | AF169257  | 487.992   | 736.797   | AL133091  | 616.426   | 634.253   |
| NM_004278 | 3069.583  | 3469.873  | NM_014848 | 2588.527  | 2549.317  | BF842915  | 278.639   | 291.086   |
| NM_005632 | 3709.111  | 4428.258  | BF217766  | 1382.294  | 1352.451  | X82545    | 6268.109  | 6592.1    |
| AK021499  | 1807.978  | 1873.497  | NM_000184 | 4396.866  | 4877.317  | AF302079  | 13911.672 | 9029.81   |
| AK000336  | 5578.361  | 5403.089  | NM_016180 | 6580.706  | 17488.584 | NM_000692 | 1064.619  | 912.463   |
| NM_002795 | 39500.648 | 39007.57  | NM_000112 | 1742.009  | 1459.235  | AF086062  | 864.641   | 827.338   |
| NM_006292 | 15161.832 | 16856.861 | NM_005827 | 26070.604 | 36194.098 | L47668    | 45536.594 | 33163.141 |
| AB007948  | 3256.97   | 3211.144  | NM_006589 | 20163.387 | 19034.563 | NM_017920 | 3912.482  | 2346.619  |
| AB033066  | 1980.746  | 2170.069  | NM_002191 | 676.807   | 1226.633  | AK025345  | 587.026   | 608.533   |
| AF126028  | 2429.184  | 2576.452  | AB007875  | 8901.878  | 12053.649 | D25274    | 9353.133  | 6681.126  |
| NM_007019 | 40278.422 | 40137.449 | NM_018261 | 3818.656  | 4062.15   | U84520    | 5027.772  | 4393.81   |
| NM_007075 | 1115.297  | 1267.358  | NM_014796 | 3239.627  | 5527.113  | AL133616  | 2997.987  | 2600.354  |
| NM_016042 | 1594.485  | 1978.928  | NM_001147 | 396.386   | 765.911   | AK026382  | 2712.718  | 1955.653  |
| NM_017640 | 1977.594  | 1925.387  | AL050288  | 56254.512 | 58248.68  | AK091169  | 2500.059  | 2769.033  |
| NM_017721 | 5195.053  | 5696.114  | NM_005040 | 13204.261 | 12887.775 | NM_014745 | 54629.68  | 63295.848 |
| NM_019088 | 17015.756 | 13732.169 | NM_016391 | 41121.938 | 42921.754 | AF086026  | 7717.087  | 9393.746  |
| AB002373  | 3099.343  | 1996.407  | M80783    | 833.526   | 739.016   | AL133011  | 979.821   | 1278.121  |

|           |           |           |           |           |           |           |           |           |
|-----------|-----------|-----------|-----------|-----------|-----------|-----------|-----------|-----------|
| NM_01635C | 4527.599  | 2806.831  | AF075033  | 14786.372 | 14130.254 | NM_01630C | 333.212   | 413.176   |
| AK024167  | 7493.384  | 4417.826  | D50911    | 32255.77  | 27739.727 | NM_015607 | 11232.049 | 12147.679 |
| AK025308  | 453.241   | 398.384   | AB011104  | 3180.622  | 3869.585  | AK026955  | 600.757   | 578.625   |
| NM_00502E | 9547.883  | 5762.702  | AK024069  | 17062.883 | 22327.627 | AL110202  | 15401.54  | 17779.676 |
| NM_00414C | 877.292   | 864.704   | NM_004582 | 29711.188 | 25974.883 | NM_00622E | 1404.403  | 1351.209  |
| NM_00286E | 13287.6   | 18546.516 | NM_01564C | 39771.457 | 34020.41  | NM_00376E | 10698.146 | 7935.059  |
| AF230809  | 4078.483  | 2741.312  | AF233450  | 1771.41   | 2123.544  | NM_01839E | 1173.657  | 1005.145  |
| NM_017894 | 8597.055  | 10177.966 | NM_016233 | 6187.638  | 5732.644  | BF032535  | 1373.665  | 1008.681  |
| NM_00650E | 18270.684 | 15479.887 | NM_000821 | 61720.676 | 56251.258 | NM_01833E | 1591.917  | 1239.362  |
| AK025447  | 4202.62   | 5174.055  | NM_020121 | 1430.803  | 1624.266  | NM_00509E | 4810.72   | 3995.124  |
| NM_002624 | 8492.371  | 9167.045  | NM_00314E | 54500.305 | 56185.875 | NM_00676C | 749.863   | 936.527   |
| AF006199  | 2568.32   | 3061.335  | CY3Cy5    | 1928.015  | 64.421    | NM_01228E | 4514.575  | 3191.629  |
| NM_004554 | 9961.246  | 9854.912  | NM_01246E | 13627.77  | 6449.43   | L27560    | 1097.213  | 838.709   |
| NM_018119 | 13256.136 | 13614.132 | NM_13426C | 16137.966 | 11772.878 | AK022517  | 1689.241  | 1410.025  |
| NM_01457E | 2361.125  | 2900.916  | AF086448  | 4560.629  | 3041.468  | NM_00032E | 13355.516 | 11249.103 |
| AL162035  | 3023.665  | 2868.887  | AF086386  | 3542.814  | 2426.503  | NM_001182 | 14789.26  | 12074.354 |
| NM_00669E | 725.203   | 814.175   | AF086413  | 443.074   | 834.689   | NM_00033E | 1985.152  | 1495.895  |
| NM_003084 | 3560.825  | 3354.392  | AF086457  | 2175.275  | 1543.707  | NM_00017E | 6655.859  | 6166.081  |
| NM_00258E | 11284.033 | 14410.129 | AK025469  | 3369.396  | 2953.139  | NM_002297 | 4999.783  | 4351.961  |
| NM_001011 | 58893.723 | 63121.773 | NM_02023E | 6679.877  | 4799.271  | AB040968  | 17745.145 | 17272.785 |
| AB061315  | 5888.307  | 3777.017  | AF070581  | 4640.422  | 2807.424  | X85323    | 819.369   | 837.436   |
| D17289    | 22370.76  | 11219.586 | AK024187  | 2461.282  | 1713.88   | U17615    | 2793.865  | 2906.769  |
| NM_00294E | 39051.891 | 19010.1   | NM_003307 | 1659.175  | 1205.774  | NM_00530E | 4426.182  | 5067.178  |
| NM_01423C | 19016.502 | 19338.852 | AF070565  | 2366.618  | 1630.94   | NM_01612E | 7469.003  | 7530.65   |
| NM_00023E | 5080.328  | 3943.001  | AK021644  | 3350.636  | 1745.844  | U84119    | 718.518   | 591.271   |
| NM_01587E | 1084.58   | 1038.751  | NM_01659E | 1640.21   | 1417.406  | NM_00360E | 1963.988  | 1788.605  |
| AF068236  | 32043.92  | 46021.898 | NM_01246E | 16546.527 | 12309.881 | NM_00646C | 2219.287  | 1789.662  |
| U28480    | 866.073   | 704.373   | NM_13426C | 17842.467 | 11609.921 | L34156    | 621.72    | 605.973   |
| NM_00010E | 28971.182 | 28994.611 | SR4       | 24546.465 | 20801.076 | NM_003557 | 6242.296  | 5215.706  |
| NM_01812E | 10442.204 | 11208.022 | SR6       | 3573.132  | 3117.504  | NM_001257 | 17413.057 | 12218.153 |
| NM_016931 | 9868.639  | 10031.422 | SR8       | 13062.368 | 35441.426 | D85245    | 5121.152  | 3995.316  |
| NM_00437E | 59008.891 | 62657.918 | SR10      | 40673.27  | 13787.548 | NM_00094E | 659.523   | 410.179   |
| NM_00556E | 64154.441 | 70823.852 | CY3Cy5    | 6368.147  | 151.206   | NM_00465E | 4328.4    | 3624.685  |
| NM_00016E | 2578.501  | 2816.123  | AK023038  | 3347.68   | 1137.292  | NM_00125C | 18197.027 | 12556.947 |
| AK027067  | 1362.313  | 1353.219  | AK026206  | 3702.38   | 2394.838  | AF298812  | 1237.367  | 950.289   |
| NM_016287 | 15703.748 | 15149.58  | AK023964  | 10065.218 | 6486.783  | NM_00496E | 1499.119  | 1490.016  |
| AK021661  | 834.964   | 887.233   | AF086084  | 2404.449  | 1884.339  | AJ249900  | 408.574   | 293.462   |
| NM_003864 | 16378.146 | 15872.015 | AK000156  | 1007.022  | 1173.585  | AK022581  | 5288.668  | 3986.553  |
| NM_006824 | 28726.311 | 31158.264 | AL050184  | 2443.595  | 1886.283  | NM_018054 | 1829.188  | 1852.582  |
| NM_002107 | 5299.651  | 6151.167  | AF085853  | 1405.949  | 1042.221  | NM_00618E | 707.56    | 800.49    |
| NM_002694 | 11094.72  | 13465.545 | AK027185  | 3653.415  | 2931.771  | NM_00095E | 6184.356  | 6862.119  |
| NM_004454 | 3994.799  | 4396.097  | AK025576  | 4282.8    | 3952.094  | NM_001401 | 374.251   | 560.999   |
| NM_00096E | 722.839   | 754.798   | AF147385  | 1450.24   | 1413.289  | NM_013271 | 30798.297 | 24382.621 |
| NM_01248E | 5182.828  | 3961.631  | AL442086  | 15840.738 | 11254.153 | NM_004157 | 2960.38   | 2669.882  |
| AF217227  | 2496.234  | 1749.644  | BC034819  | 9236.926  | 8668.693  | NM_007354 | 807.455   | 661.618   |
| AK024141  | 776.014   | 961.315   | AF147313  | 39358.555 | 34753.762 | U67037    | 1084.221  | 968.899   |
| U13706    | 830.446   | 601.511   | AF147382  | 73810.977 | 63586.102 | NM_00496C | 20477.879 | 14830.109 |
| AF213356  | 1199.393  | 648.333   | AK001957  | 6552.664  | 5620.33   | AF272370  | 13483.719 | 11530.564 |
| BC035716  | 4366.916  | 5999.957  | AK025889  | 11722.899 | 9861.279  | AF130050  | 10543.37  | 8965.455  |
| NM_018014 | 7693.334  | 6121.091  | NM_01471E | 7682.377  | 7156.11   | AF119898  | 411.528   | 318.618   |
| NM_00235E | 14002.458 | 10848.335 | AK027134  | 16545.865 | 5830.876  | AK023045  | 462.53    | 430.158   |
| AF007192  | 1668.357  | 2129.044  | AK024168  | 3339.666  | 1187.369  | NM_012197 | 6058.664  | 4467.604  |
| NM_00127E | 16541.57  | 23764.656 | AF264622  | 3097.789  | 2620.393  | AK024016  | 2992.295  | 2444.458  |



|           |           |           |           |           |           |           |           |           |
|-----------|-----------|-----------|-----------|-----------|-----------|-----------|-----------|-----------|
| NM_01491E | 49939.461 | 41657.355 | AK027203  | 930.708   | 723.602   | NM_003581 | 2411.106  | 2549.865  |
| NM_01228E | 5974.544  | 6765.056  | AK021793  | 8568.832  | 7538.056  | NM_012407 | 1055.413  | 1060.889  |
| NM_00219E | 23047.783 | 27610.457 | AK022255  | 16693.762 | 14249.097 | AF302505  | 1379.823  | 1508.185  |
| D84294    | 12680.635 | 11337.927 | AF075079  | 1982.618  | 2066.439  | NM_00718E | 3948.819  | 3230.494  |
| X59770    | 2963.879  | 3188.654  | AK022479  | 2709.988  | 2165.148  | NM_007044 | 2257.257  | 2497.233  |
| K02765    | 1536.996  | 1977.232  | AK023572  | 2147.625  | 1981.546  | AF294326  | 4754.854  | 4802.045  |
| M65134    | 1721.889  | 2506.729  | AF086004  | 48414.277 | 43708.668 | NM_01467E | 2218.306  | 2290.75   |
| BG539651  | 14160.853 | 15354.529 | AF147433  | 895.072   | 1075.587  | NM_012317 | 59259.266 | 72337.75  |
| N52646    | 20352.453 | 22865.994 | AF085978  | 841.313   | 677.595   | NM_01785E | 3311.128  | 3193.06   |
| AW160671  | 59107.676 | 66266.055 | AL137318  | 5180.111  | 4679.396  | NM_016097 | 7258.359  | 8033.622  |
| BI870529  | 31852.965 | 37639.938 | AL137482  | 3368.85   | 2593.864  | AB035301  | 541.569   | 547.511   |
| AA702698  | 3040.527  | 4893.064  | AL162011  | 25502.709 | 21987.59  | AB046800  | 8070.109  | 6786.854  |
| AI681514  | 1447.041  | 1729.833  | AL390177  | 1674.521  | 1178.509  | NM_00216E | 2391.97   | 1633.609  |
| NM_00130C | 4706.653  | 4861.469  | AL137678  | 1184.854  | 1052.727  | AF209198  | 5659.691  | 3955.111  |
| BG748827  | 20513.432 | 14778.378 | AK056111  | 2969.995  | 3261.924  | M69012    | 51705.648 | 55552.125 |
| AA952897  | 19030.674 | 17811.867 | AL162055  | 753.851   | 896.688   | NM_00693E | 14505.298 | 11550.468 |
| BG760342  | 3781.517  | 2490.866  | Y13807    | 4006.144  | 3902.642  | NM_001327 | 23147.75  | 18414.563 |
| AA703141  | 4042.868  | 3440.836  | AK022053  | 1018.119  | 1065.078  | AB037722  | 699.108   | 740.975   |
| AA195244  | 404.279   | 228.073   | AK024158  | 5735.051  | 6872.373  | NM_00006E | 1923.221  | 2018.398  |
| AI122630  | 15380.908 | 14465.953 | AL080082  | 2110.055  | 2653.015  | NM_01838E | 1478.247  | 1311.897  |
| AF086790  | 1026.988  | 748.649   | AK021623  | 2290.353  | 2382.25   | AB033026  | 532.252   | 588.206   |
| AK025966  | 2769.691  | 2404.017  | AK027112  | 11762.632 | 11185.06  | AF104914  | 15341.398 | 13686.407 |
| NM_01872E | 1885.99   | 1943.08   | AL049314  | 15049.556 | 13517.78  | NM_01471E | 8734.658  | 8641.489  |
| NM_003081 | 43358.262 | 43611.227 | AF093016  | 57117.848 | 53550.887 | NM_00263E | 10135.093 | 11183.045 |
| NM_01649E | 2061.993  | 2112.826  | AF161345  | 2442.849  | 2145.266  | NM_016487 | 2561.491  | 3111.92   |
| D50402    | 14629.879 | 18486.148 | -         | 2290.219  | 2080.513  | NM_00580E | 15983.815 | 16054.453 |
| M73547    | 21460.145 | 29494.615 | AF090925  | 1537.628  | 1367.399  | NM_006401 | 24282.514 | 19664.959 |
| AF181722  | 392.332   | 530.28    | NM_01416E | 43471.082 | 48146.461 | NM_01816E | 2456.723  | 1851.956  |
| NM_003687 | 1814.026  | 2165.123  | NM_014137 | 1484.443  | 1286.749  | AK021452  | 785.546   | 678.093   |
| NM_004134 | 11584.292 | 13802.939 | AK021974  | 3518.354  | 3669.356  | NM_00450E | 3526.252  | 2989.805  |
| NM_00595E | 4440.06   | 4829.425  | AK022068  | 2366.222  | 2059.857  | S74529    | 51089.184 | 49749.609 |
| NM_00404E | 3461.509  | 3291.9    | AK022229  | 4594.865  | 4142.589  | NM_020227 | 1287.438  | 1570.075  |
| BE548044  | 890.522   | 1000.381  | AK022362  | 24172.547 | 23014.17  | NM_00559E | 631.239   | 428.504   |
| AF028832  | 921.766   | 1302.645  | AK022004  | 21999.58  | 20450.176 | NM_001421 | 432.22    | 604.733   |
| NM_006017 | 771.055   | 934.606   | AK022136  | 1102.596  | 1198.353  | U97060    | 554.246   | 612.19    |
| NM_01242E | 8240.142  | 9856.971  | AK022390  | 3718.589  | 3935.57   | M73837    | 2629.336  | 1794.576  |
| NM_01326E | 22896.26  | 29338.635 | AL360138  | 2474.597  | 693.149   | U69127    | 35658.594 | 24242.746 |
| NM_003824 | 7516.533  | 6645.395  | U61096    | 4059.769  | 1233.615  | NM_00583E | 10645.645 | 7447.992  |
| NM_00068E | 771.031   | 498.757   | AF085865  | 13692.27  | 11579.527 | AK023379  | 3823.068  | 3611.447  |
| NM_01245E | 3988.091  | 2692.573  | X78261    | 4175.702  | 6132.134  | NM_00607E | 851.265   | 714.519   |
| AF229166  | 757.971   | 658.472   | AK025521  | 1638.041  | 1655.74   | AK021904  | 9153.173  | 8201.154  |
| NM_006764 | 4979.66   | 3945.083  | NM_00105E | 67009.398 | 67859.406 | NM_01829E | 794.348   | 757.556   |
| NM_001179 | 710.55    | 778.393   | Z70694    | 10799.625 | 10044.397 | AL049705  | 7538.441  | 6803.905  |
| NM_00531E | 49290.262 | 52154.887 | L77602    | 4055.563  | 4267.521  | NM_01545E | 3638.948  | 3044.66   |
| NM_01776E | 6110.79   | 6874.07   | NM_015421 | 30198.836 | 30659.799 | NM_00427E | 485.252   | 400.138   |
| NM_00042E | 1413.182  | 2030.043  | AF086081  | 14763.473 | 15743.93  | NM_00069C | 2443.874  | 2066.777  |
| NM_014721 | 1827.229  | 2326.71   | NM_018634 | 1586.923  | 1506.379  | NM_00015E | 13164.009 | 10420.089 |
| AK026352  | 1210.359  | 1588.574  | NM_018111 | 1913.836  | 2118.5    | AK024489  | 1160.01   | 1057.425  |
| AF169257  | 509.614   | 687.762   | AK023730  | 1258.396  | 1297.399  | NM_000181 | 5869.812  | 4635.642  |
| NM_01618C | 544.458   | 480.093   | AF161360  | 3755.759  | 4182.66   | NM_014121 | 1049.734  | 1032.322  |
| NM_005827 | 7578.267  | 8432.239  | AK021720  | 2541.368  | 2759.82   | NM_00673C | 1393.026  | 1229.657  |
| NM_00305E | 12485.291 | 15310.704 | NM_016497 | 65277.059 | 61644.164 | NM_005644 | 2082.998  | 1917.557  |
| NM_01622E | 14278.771 | 15748.958 | AK000617  | 1222.06   | 883.986   | NM_01844E | 6351.178  | 5141.813  |

|           |           |           |           |           |           |           |           |           |
|-----------|-----------|-----------|-----------|-----------|-----------|-----------|-----------|-----------|
| AF052155  | 6500.729  | 3994.647  | AF009261  | 2409.714  | 1722.947  | AF182416  | 8382.456  | 7103.712  |
| NM_00508E | 1531.815  | 1378.384  | NM_012151 | 19935.922 | 17608.174 | NM_00599E | 21384.195 | 17504.977 |
| AF060902  | 3279.932  | 2553.925  | AF087994  | 4374.062  | 3620.543  | NM_00601E | 1135.554  | 1024.029  |
| AF121858  | 7856.318  | 6491.078  | AJ227912  | 2701.426  | 1956.829  | NM_004634 | 3457.378  | 3344.146  |
| NM_013437 | 667.441   | 550.115   | NM_01819E | 4037.665  | 3936.839  | NM_002017 | 4007.171  | 4370.792  |
| NM_017681 | 2217.711  | 1380.719  | AK025532  | 29229.295 | 24171.947 | NM_01752E | 8923.198  | 7591.698  |
| X57655    | 35169.367 | 22528.012 | AK021789  | 880.274   | 715.247   | NM_00238E | 50090.344 | 40092.664 |
| NM_018261 | 3227.54   | 2528.533  | AF086383  | 1592.518  | 1516.695  | U13223    | 21068.84  | 21753.23  |
| NM_01479E | 2493.035  | 2998.627  | NM_00352E | 1543.78   | 1418.426  | NM_01627C | 5047.294  | 5200.453  |
| NM_001147 | 429.724   | 445.415   | BF217847  | 2411.493  | 1773.573  | AF269249  | 753.401   | 683.728   |
| AL050288  | 46597.254 | 40947.203 | NM_00532C | 10949.299 | 8819.085  | NM_01481E | 2032.776  | 2084.54   |
| NM_00504C | 12383.285 | 14791.697 | U79242    | 1138.261  | 1347.785  | NM_00544E | 3140.613  | 3160.734  |
| NM_016391 | 30794.441 | 31146.035 | Y10519    | 1195.86   | 913.819   | NM_007221 | 9010.821  | 8226.031  |
| M80783    | 1021.69   | 1029.48   | AF056452  | 716.41    | 690.29    | X54163    | 45018.316 | 37097.566 |
| AF075033  | 15327.813 | 15883.711 | AF119901  | 6869.08   | 6637.716  | AK025395  | 937.607   | 1297.364  |
| D50911    | 32601.244 | 36974.445 | AL049782  | 706.34    | 741.326   | NM_00038E | 1697.594  | 1977.071  |
| AB011104  | 3217.627  | 3642.703  | AK001936  | 2383.588  | 2664.541  | X58377    | 581.756   | 408.582   |
| AK024069  | 12069.188 | 12928.488 | NM_00377C | 65517.227 | 64296.875 | BI830936  | 932.576   | 1173.29   |
| NM_00458E | 25667.344 | 26565.236 | AK001395  | 10621.333 | 9260.54   | U79292    | 41384.148 | 41073.297 |
| NM_01564C | 29997.701 | 29610.178 | S57803    | 14058.513 | 15263.479 | AA947915  | 815.808   | 1006.34   |
| AF233450  | 1766.762  | 2989.196  | AF131822  | 885.268   | 670.472   | BI830753  | 1293.364  | 1820.111  |
| NM_01623E | 1060.75   | 882.718   | AK023131  | 4988.056  | 5024.885  | X68314    | 3074.672  | 3263.595  |
| NM_000821 | 9791.433  | 7001.196  | AJ276248  | 393.489   | 993.715   | X71973    | 28661.375 | 25239.182 |
| NM_020121 | 617.957   | 491.808   | AF029900  | 9663.032  | 10136.49  | T49651    | 23866.105 | 26543.354 |
| NM_00314E | 31044.012 | 22718.199 | NM_00332E | 11246.141 | 10978.563 | N51014    | 1105.225  | 1307.109  |
| NM_00163E | 2855.691  | 2328.917  | NM_01617E | 5094.947  | 4022.653  | BE392471  | 16652.465 | 16509.553 |
| NM_012264 | 2439.448  | 1206.718  | AK022639  | 10065.644 | 8670.077  | AI741278  | 563.426   | 748.661   |
| AF311312  | 2509.502  | 1632.972  | D31766    | 2530.613  | 2112.369  | AA682423  | 1427.416  | 2048.952  |
| NM_00127E | 15085.06  | 23027.715 | NM_006547 | 8028.958  | 6447.408  | AL043686  | 6463.358  | 7404.177  |
| NM_01491E | 60888.441 | 48322.602 | L23867    | 1626.961  | 1352.761  | AK026266  | 26862.754 | 18013.701 |
| NM_01228E | 6369.981  | 7471.698  | AB020968  | 673.742   | 507.444   | NM_007124 | 10909.948 | 7703.943  |
| NM_00219E | 21402.488 | 21054.193 | AL138690  | 6795.773  | 6285.91   | NM_00317E | 7853.064  | 6044.69   |
| D84294    | 12843.71  | 10019.258 | AK000394  | 1830.87   | 1492.925  | NM_00072E | 1551.894  | 1258.289  |
| X59770    | 2715.374  | 2372.46   | NM_013941 | 3598.3    | 2924.114  | AL096751  | 12676.146 | 12912.763 |
| K02765    | 2074.368  | 1877.03   | AF074989  | 3085.022  | 2474.243  | NM_000364 | 1134.454  | 1043.517  |
| M65134    | 1708.91   | 2081.222  | AK001107  | 1964.194  | 1541.457  | AF026920  | 18926.42  | 18676.865 |
| BG539651  | 14125.474 | 16888.027 | AF147393  | 1215.976  | 1125.839  | NM_004931 | 5052.475  | 3665.522  |
| N52646    | 15306.968 | 17862.162 | AL080112  | 5071.171  | 4611.934  | NM_000607 | 31461.203 | 28430.447 |
| AW160671  | 56689.387 | 62356.004 | AL137325  | 2144.295  | 2570.12   | NM_00257E | 4585.186  | 5205.631  |
| BI870529  | 28076.023 | 29665.191 | AF147361  | 3733.749  | 3620.451  | NM_004244 | 4501.513  | 4277.624  |
| AA702698  | 3351.926  | 5237.736  | NM_00419E | 58451.863 | 54085.699 | NM_003371 | 55459.207 | 65498.883 |
| AI681514  | 1067.131  | 1145.204  | NM_00470E | 9274.627  | 6863.077  | AK023114  | 5147.326  | 5725.376  |
| NM_00130C | 4755.081  | 4932.522  | NM_02019C | 53450.785 | 47243.148 | NM_00367E | 3176.88   | 3831.647  |
| BG748827  | 26020.865 | 29220.691 | AK024003  | 1481.127  | 1346.774  | NM_012301 | 3780.8    | 5016.217  |
| AA952897  | 23843.988 | 29402.877 | NM_014357 | 9116.959  | 6869.43   | AK001500  | 2240.911  | 1521.668  |
| BG760342  | 3937.066  | 3236.096  | NM_004067 | 1080.472  | 968.598   | NM_006774 | 881.2     | 912.573   |
| AA703141  | 3733.152  | 2975.991  | NM_000121 | 27389.914 | 21366.316 | NM_02012E | 1922.44   | 2486.446  |
| AI122630  | 13012.926 | 10066.89  | NM_002091 | 23894.939 | 20242.832 | Y16521    | 7225.775  | 6320.576  |
| NM_00658E | 11517.646 | 7554.892  | AB033092  | 15461.021 | 14072.338 | AL050371  | 5290.871  | 5002.045  |
| AB007875  | 1696.708  | 998.231   | M89957    | 48796.133 | 37680.746 | NM_002651 | 2575.116  | 1973.6    |
| NM_01872E | 2047.477  | 4256.429  | NM_00302E | 1345.006  | 1559.133  | NM_00241E | 13112.081 | 10330.852 |
| NM_003081 | 45082.676 | 50178.828 | BC035030  | 10549.136 | 8627.923  | NM_017577 | 765       | 778.14    |
| NM_01649E | 2014.567  | 2080.378  | NM_00534C | 67103.891 | 63425.199 | NM_016301 | 9872.031  | 10908.592 |

|           |           |           |           |           |           |           |           |           |
|-----------|-----------|-----------|-----------|-----------|-----------|-----------|-----------|-----------|
| D50402    | 16982.66  | 20392.863 | NM_016201 | 13913.4   | 13898.438 | NM_01466E | 9781.883  | 11199.429 |
| M73547    | 18679.779 | 18947.523 | NM_000864 | 5887.242  | 5596.788  | NM_00472E | 5273.892  | 5505.139  |
| AF181722  | 473.215   | 719.982   | NM_017977 | 5559.576  | 4654.573  | NM_01442E | 2051.466  | 2645.51   |
| NM_003687 | 1472.417  | 1318.834  | AF147727  | 3779.497  | 3873.966  | NM_01213E | 6890.34   | 8444.078  |
| NM_004134 | 12384.923 | 12284.637 | NM_006751 | 1783.568  | 2101.091  | NM_017954 | 388.037   | 1228.862  |
| NM_00595E | 3689.981  | 3031.497  | AB037834  | 3374.574  | 3885.665  | NM_00661E | 6545.047  | 8060.99   |
| NM_00404E | 3034.607  | 2763.91   | NM_00356E | 6195.929  | 6681.337  | NM_016451 | 2088.284  | 2414.698  |
| BE548044  | 646.773   | 833.722   | NM_017904 | 6185.866  | 6116.076  | AL049935  | 15143.94  | 11931.161 |
| AF028832  | 505.377   | 793.688   | NM_013367 | 7426.824  | 5957.639  | AB033043  | 21898.404 | 21356.715 |
| NM_006017 | 747.579   | 640.564   | AL137550  | 879.591   | 1046.96   | NM_01499E | 7132.332  | 5141.614  |
| NM_01242E | 7468.936  | 7837.796  | NM_000321 | 6219.334  | 4980.551  | AK025220  | 3394.931  | 3067.296  |
| NM_01326E | 20379.492 | 22341.658 | NM_006341 | 27858.291 | 21785.246 | NM_01630E | 19684.348 | 17737.848 |
| NM_00172E | 18732.982 | 18725.516 | NM_00170E | 2568.75   | 1741.257  | D42046    | 4295.166  | 4564.283  |
| NM_00556E | 716.422   | 1222.204  | NM_006191 | 11124.869 | 9266.351  | NM_00103E | 8717.906  | 8451.303  |
| NM_003824 | 9219.326  | 9921.462  | NM_00180C | 4972.844  | 3556.978  | NM_00452E | 10768.657 | 9303.902  |
| NM_00068E | 908.199   | 700.192   | NM_00433E | 17532.355 | 16406.98  | NM_00252E | 16104.842 | 14619.913 |
| NM_01245E | 2477.81   | 1870.313  | NM_01594E | 5875.219  | 4872.122  | NM_02013E | 3307.188  | 3655.923  |
| AF229166  | 647.937   | 408.024   | NM_01397E | 6587.044  | 6343.026  | NM_01851E | 4773.665  | 4312.945  |
| NM_006764 | 4564.9    | 3587.576  | NM_00379C | 8028.052  | 7876.767  | AK023149  | 2112.093  | 1591.488  |
| NM_00138E | 1326.314  | 1110.318  | NM_000494 | 13506.516 | 12202.121 | AK023168  | 4517.369  | 6010.228  |
| AF007192  | 1558.836  | 1163.099  | NM_01602E | 3581.719  | 2915.791  | NM_00664E | 524.749   | 682.009   |
| NM_01776E | 6181.719  | 9913.62   | NM_00372E | 51604.879 | 48745.074 | NM_00474E | 2963.616  | 3058.437  |
| NM_00042E | 1133.734  | 1475.984  | NM_01443C | 863.347   | 1028.322  | NM_01475E | 1831.812  | 1817.622  |
| NM_014721 | 1977.501  | 2214.633  | NM_00049E | 2087.689  | 1960.07   | NM_00658E | 33852.043 | 38727.746 |
| AK026352  | 1376.39   | 1783.369  | AF085883  | 4709.438  | 4051.836  | NM_014331 | 4781.614  | 7076.59   |
| AF169257  | 449.517   | 434.46    | NM_016571 | 4097.777  | 4236.552  | NM_00679E | 33723.555 | 35072.305 |
| NM_01618C | 508.357   | 553.696   | NM_00368E | 3044.822  | 3029.505  | AF070568  | 1741.33   | 2319.476  |
| NM_005827 | 6764.632  | 6324.17   | NM_01644E | 17165.396 | 19616.957 | NM_000277 | 521.888   | 723.935   |
| NM_00305E | 12317.234 | 14768.479 | BC036368  | 1860.047  | 2287.609  | NM_00024C | 12798.997 | 16138.691 |
| NM_01622E | 12481.016 | 12165.261 | NM_00187C | 3076.851  | 1853      | AK055733  | 13487.073 | 18529.838 |
| AK024311  | 1631.031  | 1533.906  | AJ271216  | 4408.818  | 3242.755  | NM_007221 | 9021.181  | 8399.228  |
| AF052155  | 7917.499  | 8701.818  | U23028    | 9645.016  | 12646.083 | X54163    | 46273.672 | 34157.523 |
| NM_00508E | 1959.493  | 1899.824  | NM_000817 | 9761.169  | 8782.291  | AK025395  | 1320.303  | 883.667   |
| AF060902  | 3485.163  | 2877.187  | AF113132  | 42003.383 | 42281.605 | NM_00038E | 1931.143  | 1381.554  |
| AF121858  | 7042.253  | 5578.122  | NM_006571 | 6041.315  | 6213.918  | X58377    | 719.598   | 648.622   |
| NM_013437 | 483.378   | 362.27    | NM_00187E | 870.571   | 1121.942  | NM_00246E | 416.78    | 321.271   |
| NM_017681 | 1735.345  | 1262.884  | AK022680  | 5542.581  | 4953.42   | AI673575  | 333.886   | 447.335   |
| X57655    | 28253.82  | 16055.052 | NM_01894E | 26627.67  | 26020.066 | BI830936  | 953.107   | 1665.462  |
| AK025966  | 2457.245  | 1732.898  | NM_01635E | 19470.848 | 16259.399 | U79292    | 38503.242 | 30328.014 |
| NM_01479E | 2154.246  | 2378.487  | NM_00106E | 65237.367 | 68488.227 | AA947915  | 787.982   | 1044.632  |
| NM_001147 | 362.927   | 375.542   | NM_00415E | 3860.18   | 3348.86   | BI830753  | 1135.683  | 1360.452  |
| AL050288  | 49647.293 | 38564.18  | AK000561  | 3131.559  | 2875.149  | X68314    | 3045.04   | 2788.823  |
| NM_00504C | 10420.841 | 8207.845  | AB051449  | 50484.719 | 50183.809 | X71973    | 26078.799 | 20246.143 |
| NM_016391 | 30309.689 | 27836.289 | BC009187  | 9565.623  | 10372.405 | T49651    | 21175.77  | 18712.129 |
| M80783    | 844.139   | 932.884   | AL133617  | 2426.799  | 1721.225  | N51014    | 1007.748  | 1197.06   |
| AF075033  | 15144.465 | 14297.688 | NM_01648E | 12332.893 | 11743.859 | BE392471  | 15322.368 | 13170.847 |
| D50911    | 27364.025 | 25239.17  | NM_00261E | 711.921   | 795.486   | AI802950  | 4410.338  | 4637.412  |
| AB011104  | 3686.473  | 4717.504  | AF090894  | 2002.574  | 1801.079  | AI741278  | 493.604   | 561.837   |
| AK024069  | 10435.106 | 11210.284 | NM_01405E | 28483.607 | 29944.156 | AA682423  | 1371.187  | 2487.462  |
| NM_00458E | 24897.242 | 31328.861 | NM_006237 | 1905.306  | 1042.744  | AL043686  | 7748.909  | 10772.579 |
| NM_01564C | 25316.65  | 23643.633 | NM_001271 | 7337.775  | 4401.364  | AA490172  | 1414.918  | 1971.589  |
| AF233450  | 823.451   | 1891.25   | NM_00368E | 11860.039 | 9369.573  | AA775212  | 2943.409  | 3575.702  |
| NM_01623E | 1243.6    | 1093.095  | AF039019  | 7292.998  | 7466.519  | AB011174  | 4613.475  | 7303.125  |

|           |           |           |           |           |           |           |           |           |
|-----------|-----------|-----------|-----------|-----------|-----------|-----------|-----------|-----------|
| NM_000821 | 12017.908 | 11026.543 | NM_012255 | 10884.319 | 9186.077  | NM_003176 | 7377.544  | 5508.805  |
| NM_003145 | 27238.07  | 19534.611 | NM_018196 | 2728.409  | 2452.124  | NM_000723 | 1631.289  | 1179.719  |
| NM_001632 | 2663.445  | 1774.597  | NM_004818 | 9458.451  | 8292.187  | AL096751  | 13168.49  | 10783.484 |
| NM_012264 | 2316.418  | 1289.64   | J04205    | 27729.68  | 27118.635 | NM_000364 | 1168.949  | 981.553   |
| AF311312  | 2374.98   | 1262.861  | D38491    | 10863.414 | 8285.048  | AF026920  | 20043.693 | 21362.355 |
| NM_001179 | 860.756   | 704.164   | AK026835  | 7068.907  | 7752.604  | NM_004931 | 5401.327  | 4322.284  |
| NM_005313 | 41777.145 | 30133.814 | NM_002819 | 34210.824 | 29138.061 | NM_000607 | 29773.516 | 26294.383 |
| NM_014915 | 63891.824 | 60465.754 | NM_003090 | 61279.891 | 52205.266 | NM_002575 | 3939.6    | 4012.831  |
| NM_012286 | 6476.656  | 7654.924  | NM_013264 | 9881.854  | 9108.766  | NM_004244 | 4159.299  | 3373.805  |
| NM_002195 | 22872.781 | 20361.725 | NM_003315 | 26480.682 | 22455     | NM_003371 | 55667.898 | 60938.344 |
| D84294    | 12201.922 | 8079.699  | NM_005570 | 16205.516 | 14989.802 | AK023114  | 5232.722  | 6034.993  |
| X59770    | 2187.005  | 1964.065  | NM_000086 | 20393.443 | 21788.5   | NM_003678 | 3187.356  | 3671.812  |
| K02765    | 2062.151  | 1462.343  | NM_003752 | 6933.583  | 6614.545  | NM_012301 | 4047.637  | 5439.636  |
| M65134    | 1621.281  | 1393.224  | NM_003932 | 23319.486 | 21241.506 | NM_005631 | 329.966   | 374.221   |
| BG539651  | 14170.229 | 14308.765 | NM_016491 | 35908.555 | 31821.02  | NM_014938 | 3379.002  | 4195.232  |
| N52646    | 20484.473 | 23420.58  | NM_006429 | 52098.977 | 48562.605 | AF049460  | 523.93    | 816.102   |
| AW160671  | 58660.602 | 62975.898 | NM_002516 | 3410.633  | 3260.251  | NM_014815 | 2113.143  | 3511.911  |
| BI870529  | 31285.814 | 34450.012 | NM_015960 | 34266.258 | 22419.281 | NM_005443 | 2937.951  | 3892.246  |
| AA702698  | 3556.804  | 5361.777  | NM_006085 | 15561.614 | 11389.06  | NM_020125 | 1602.09   | 2058.567  |
| AI681514  | 1433.884  | 1775.89   | NM_000907 | 20375.488 | 17171.158 | Y16521    | 6280.884  | 4562.494  |
| NM_001300 | 4511.051  | 5157.396  | AF254085  | 13180.063 | 12426.815 | AL050371  | 5938.072  | 6916.681  |
| BG748827  | 22919.346 | 20950.842 | AK023541  | 670.257   | 808.678   | NM_002651 | 2523.796  | 2446.151  |
| AA952897  | 23506.018 | 25750.658 | NM_001987 | 6126.975  | 5107.803  | NM_002413 | 9903.894  | 7729.386  |
| BG760342  | 4199.481  | 4109.677  | AF244088  | 6177.533  | 6121.694  | NM_017577 | 615.998   | 714.239   |
| AA703141  | 4698.976  | 4880.94   | NM_007136 | 3587.346  | 3105.341  | NM_016301 | 9102.506  | 9898.544  |
| AI122630  | 13511.794 | 11834.519 | AK025434  | 1117.722  | 1160.097  | NM_014668 | 7841.387  | 8235.376  |
| NM_006589 | 10915.963 | 5545.009  | AJ251845  | 1949.442  | 1947.914  | NM_004722 | 4949.514  | 5324.576  |
| AB007875  | 1535.465  | 815.505   | AK000435  | 6834.72   | 5922.278  | NM_014425 | 2330.684  | 2679.651  |
| NM_018261 | 2979.585  | 1796.692  | AK000569  | 8896.533  | 7979.288  | NM_012133 | 6431.541  | 7189.316  |
| NM_005955 | 4470.23   | 3990.015  | NM_006049 | 5976.563  | 4835.45   | NM_017954 | 467.669   | 868.801   |
| NM_004048 | 3766.96   | 3898.815  | BC016698  | 11854.856 | 10763.172 | NM_006612 | 6479.017  | 10022.148 |
| BE548044  | 1765.652  | 943.433   | NM_007374 | 1605.349  | 1723.973  | NM_016451 | 2010.215  | 3165.072  |
| AF028832  | 588.1     | 469.289   | NM_006167 | 1569.492  | 1529.274  | NM_007351 | 48334.711 | 60243.566 |
| NM_012428 | 7491.301  | 7327.421  | NM_016357 | 2874.448  | 3404.886  | AK026266  | 28984.988 | 30836.039 |
| NM_013269 | 20175.594 | 17670.543 | NM_014500 | 31047.639 | 32378.822 | NM_007124 | 12543.841 | 14267.313 |
| NM_001728 | 19223.502 | 17644.596 | L09071    | 1739.645  | 2467.062  | AB033043  | 23110.201 | 20231.904 |
| NM_005565 | 619.953   | 840.364   | NM_005924 | 1852.289  | 804.135   | NM_014999 | 6611.54   | 4429.873  |
| NM_003824 | 8869.943  | 11267.977 | NM_019841 | 1313.165  | 1200.185  | AK025220  | 3112.487  | 2410.854  |
| NM_000686 | 898.649   | 1668.187  | NM_003322 | 1469.077  | 1406.907  | NM_016308 | 19521.861 | 15317.132 |
| NM_012452 | 3870.217  | 3583.699  | NM_003568 | 1519.089  | 1398.735  | D42046    | 4166.208  | 4410.971  |
| AF229166  | 1246.431  | 1528.413  | BC036375  | 25752.188 | 31030.07  | NM_001033 | 9647.574  | 10498.837 |
| NM_005137 | 5751.127  | 7019.689  | NM_000496 | 885.453   | 1037.915  | NM_004526 | 12672.284 | 12695.844 |
| NM_006764 | 5217.693  | 7094.316  | BF347926  | 13769.082 | 13201.428 | NM_002526 | 16288.878 | 16246.079 |
| NM_001163 | 3671.794  | 4585.813  | N54821    | 31845.037 | 33240.68  | NM_020135 | 2980.958  | 2670.579  |
| NM_005878 | 1369.646  | 1334.64   | BI912037  | 11551.239 | 13426.712 | NM_018518 | 4319.408  | 4038.347  |
| AB006713  | 712.602   | 1051.521  | AA454646  | 36136.301 | 43146.738 | AK023149  | 1587.405  | 1518.475  |
| AF308602  | 5538.723  | 4604.561  | BF063899  | 3686.003  | 4409.525  | AK023168  | 4763.557  | 5992.093  |
| AB011089  | 2148.643  | 1423      | U18087    | 60182.512 | 63082.117 | NM_004742 | 3066.534  | 2333.724  |
| AF007192  | 1324.613  | 928.412   | U66349    | 3350.905  | 3712.905  | NM_014753 | 2045.175  | 2122.251  |
| NM_001276 | 12372.605 | 10634.01  | AA057156  | 20476.012 | 23183.328 | NM_006585 | 34363.848 | 39509.184 |
| NM_003053 | 4400.144  | 5398.418  | U19487    | 2224.429  | 2061.446  | NM_014331 | 4429.064  | 5376.958  |
| NM_003044 | 673.991   | 1114.76   | AF166327  | 61963.668 | 59903.684 | NM_006795 | 34907.051 | 32621.742 |
| NM_006672 | 4239.691  | 5121.188  | AF260739  | 5873.477  | 5711.836  | AF070568  | 2075.003  | 2900.541  |

|           |           |           |           |           |           |           |           |           |
|-----------|-----------|-----------|-----------|-----------|-----------|-----------|-----------|-----------|
| M31659    | 1933.138  | 1832.645  | AF531423  | 46863.48  | 50604.387 | NM_000277 | 411.663   | 1029.906  |
| NM_003056 | 12063.484 | 12903.664 | X76555    | 2170.026  | 2275.884  | NM_000240 | 12171.968 | 17202.898 |
| NM_016226 | 13612.163 | 12740.645 | NM_005432 | 10707.745 | 10130.621 | AK055733  | 13815.331 | 20272.227 |
| AK024311  | 1421.251  | 1562.235  | L10386    | 31961.23  | 32306.775 | AF298880  | 8643.658  | 13730.725 |
| AF052155  | 7712.404  | 5998.808  | AF061812  | 57399.234 | 54248.004 | AK001500  | 2789.896  | 3184.807  |
| NM_005085 | 2287.354  | 2415.967  | AL136756  | 8179.714  | 9358.607  | NM_006774 | 969.67    | 1576.548  |
| AF060902  | 4752.814  | 5525.788  | NM_015944 | 3536.182  | 3904.796  | AK025395  | 969.356   | 884.094   |
| AF121858  | 8420.136  | 9890.593  | NM_001548 | 1096.116  | 585.376   | NM_000388 | 1562.003  | 1354.216  |
| NM_013437 | 1014.423  | 1550.462  | NM_000758 | 12205.804 | 7317.327  | X58377    | 456.306   | 448.831   |
| NM_017681 | 2604.242  | 3336.587  | M17017    | 1252.337  | 1177.229  | AI673575  | 463.482   | 303.39    |
| X57655    | 41793.5   | 47319.324 | NM_002990 | 8493.718  | 6716.558  | BI830936  | 1013.44   | 1422.762  |
| AK025966  | 3399.305  | 4014.881  | NM_002432 | 7383.233  | 5572.426  | U79292    | 41063.488 | 40111.746 |
| NM_018725 | 2291.076  | 3167.747  | NM_012420 | 838.107   | 1415.882  | AA947915  | 830.737   | 1039.743  |
| NM_003081 | 43795.266 | 46690.898 | NM_002343 | 9585.521  | 10211.774 | BI830753  | 1167.631  | 1020.756  |
| NM_016495 | 1866.827  | 1783.429  | AB033037  | 3921.937  | 4044.209  | X68314    | 2815.917  | 2683.228  |
| D50402    | 12777.629 | 7849.066  | L40400    | 9993.046  | 10360.946 | X71973    | 26288.164 | 21795.09  |
| M73547    | 15192.625 | 10876.088 | AK025688  | 4430.994  | 5099.682  | T49651    | 21620.123 | 20600.037 |
| NM_003687 | 1246.224  | 1274.675  | NM_005930 | 1001.193  | 1021.506  | N51014    | 1041.341  | 1317.704  |
| NM_004134 | 10535.176 | 6112.663  | Z36819    | 13045.387 | 15136.936 | BE392471  | 15071.646 | 13510.597 |
| NM_001632 | 3176.218  | 4319.376  | NM_014847 | 53369.766 | 54922.508 | AI802950  | 4562.462  | 5381.173  |
| NM_012264 | 3815.575  | 4528.316  | NM_014448 | 10195.151 | 11878.213 | AI741278  | 467.59    | 748.51    |
| AF311312  | 3033.575  | 3189.823  | AL080157  | 10888.633 | 12563.64  | AA682423  | 1258.19   | 1752.007  |
| NM_001179 | 1227.332  | 1626.804  | NM_005100 | 1116.492  | 1565.498  | AL043686  | 6947.521  | 9360.983  |
| NM_005313 | 44139.535 | 44909.316 | NM_005308 | 5623.368  | 6201.039  | AA490172  | 1602.956  | 2619.841  |
| NM_017765 | 5466.305  | 4335.922  | NM_000911 | 1881.959  | 2226.211  | AA775212  | 2947.12   | 4615.729  |
| NM_000428 | 1155.966  | 945.361   | NM_007227 | 2190.885  | 2512.953  | AB011174  | 4195.275  | 7771.327  |
| NM_014721 | 1946.813  | 2356.409  | NM_007023 | 2082.91   | 2194.273  | AB040879  | 1987.897  | 3608.535  |
| AK026352  | 1411.352  | 1555.505  | NM_005873 | 22774.664 | 22346.479 | AL049935  | 14303.533 | 17940.811 |
| AL137705  | 4955.175  | 6212.692  | NM_004624 | 7778.413  | 9291.025  | AB011099  | 252.412   | 403.452   |
| U41898    | 902.975   | 919.694   | NM_003865 | 3206.023  | 4022.229  | NM_002575 | 4120.664  | 3823.287  |
| NM_014848 | 879.57    | 722.849   | AB015330  | 42948.34  | 46551.121 | NM_004244 | 4142.771  | 3881.66   |
| BF217766  | 855.158   | 454.114   | NM_004315 | 18254.848 | 15596.404 | NM_003371 | 57390.789 | 65875.453 |
| NM_000184 | 2180.084  | 1282.694  | NM_020166 | 12343.086 | 8242.451  | AK023114  | 5473.399  | 5165.774  |
| NM_016180 | 680.006   | 458.484   | AK023860  | 9655.202  | 8588.931  | NM_003678 | 3274.891  | 3099.002  |
| NM_000112 | 666.09    | 404.883   | NM_000031 | 7968.116  | 6724.827  | NM_012301 | 3817.635  | 3577.624  |
| NM_005827 | 7260.514  | 3879.799  | NM_002085 | 50532.668 | 54310.168 | NM_014419 | 19408.551 | 21207.191 |
| NM_006588 | 18381.592 | 23439.18  | AK026061  | 1262.533  | 1153.062  | NM_014938 | 3575.769  | 3806.584  |
| AB007875  | 2114.682  | 1600.135  | NM_016286 | 21422.434 | 23589.119 | AK026066  | 1950.437  | 2815.877  |
| NM_018261 | 3425.489  | 2881.361  | NM_001567 | 6650.649  | 8049.208  | NM_005244 | 11565.77  | 18755.223 |
| NM_014796 | 2394.268  | 2192.143  | NM_004905 | 21641.02  | 20663.26  | AF054589  | 3411.158  | 5928.243  |
| AL050288  | 47820.434 | 33245.816 | AF217971  | 15832.588 | 15286.981 | NM_014815 | 2011.349  | 4266.201  |
| NM_005040 | 10134.652 | 9229.624  | NM_001925 | 1685.702  | 2021.459  | NM_005443 | 3268.31   | 5799.521  |
| NM_016391 | 28494.977 | 26090.105 | NM_004982 | 6957.447  | 7341.243  | NM_007221 | 9760.541  | 18060.768 |
| M80783    | 999.747   | 737.267   | NM_004732 | 5478.481  | 5869.536  | X54163    | 48517.902 | 61617.773 |
| AF075033  | 15932.987 | 14062.823 | NM_018349 | 6629.249  | 9026.027  | NM_018607 | 362.772   | 255.394   |
| D50911    | 35262.629 | 42249.535 | NM_006363 | 11148.953 | 13052.199 | NM_002978 | 6463.959  | 4319.135  |
| AB011104  | 4152.178  | 5483.692  | NM_020415 | 4588.04   | 4874.063  | NM_014668 | 8655.24   | 9462.361  |
| AK024069  | 12804.823 | 11261.606 | NM_014879 | 385.749   | 1249.287  | NM_004722 | 4867.613  | 5466.354  |
| NM_004582 | 26135.674 | 25166.988 | AL049667  | 5631.579  | 6080.149  | NM_014425 | 2143.288  | 2380.872  |
| NM_015640 | 37748.512 | 41713.473 | NM_000334 | 10430.187 | 12711.911 | NM_012133 | 6296.268  | 5074.283  |
| AF233450  | 1743.327  | 1716.65   | NM_020400 | 3330.068  | 4128.646  | NM_017954 | 341.356   | 438.546   |
| NM_016233 | 1032.217  | 598.932   | NM_001504 | 9621.174  | 7898.627  | NM_006612 | 5767.525  | 6233.167  |
| NM_000821 | 11988.687 | 7111.17   | D50926    | 8457.955  | 10765.763 | NM_016451 | 1701.219  | 2158.752  |

|           |           |           |           |           |           |           |           |           |
|-----------|-----------|-----------|-----------|-----------|-----------|-----------|-----------|-----------|
| NM_00314E | 27898.096 | 14601.082 | BF205683  | 8425.449  | 10746.531 | NM_007351 | 46805.629 | 38843.113 |
| CY3Cy5    | 609.884   | 154.46    | NM_001565 | 2362.634  | 2937.206  | AK026266  | 24406.809 | 21758.502 |
| NM_01246E | 4186.317  | 4499.867  | NM_002612 | 805.579   | 804.63    | NM_007124 | 11157.852 | 10238.646 |
| NM_13426C | 5367.808  | 4338.825  | AF135422  | 4111.26   | 2548.159  | NM_00317E | 8152.765  | 10080.574 |
| AF086448  | 1712.61   | 1226.387  | NM_004479 | 43320.656 | 33674.113 | NM_00072E | 1593.58   | 2374.634  |
| AB019391  | 174.654   | 167.787   | NM_00261C | 4767.252  | 3916.6    | AL096751  | 14300.71  | 19938.68  |
| AF086386  | 1576.182  | 1248.111  | AF070587  | 6874.579  | 4588.351  | NM_000364 | 972.868   | 1584.043  |
| AF086413  | 255.022   | 278.585   | BE250526  | 2167.298  | 2469.267  | AF026920  | 24749.363 | 40495.348 |
| AF086457  | 407.353   | 420.349   | NM_016819 | 8583.779  | 8058.103  | NM_004931 | 5725.586  | 9223.765  |
| AK025469  | 1493.296  | 1485.416  | NM_012222 | 12525.324 | 14637.576 | NM_000607 | 37830.305 | 45128.961 |
| NM_02023E | 2601.047  | 2327.134  | NM_005002 | 5735.968  | 5969.977  | NM_00024C | 10486.223 | 9578.427  |
| AF070581  | 264.536   | 120.033   | NM_00659E | 8185.522  | 9040.336  | AK055733  | 14101.621 | 13124.774 |
| AK024187  | 459.178   | 399.339   | AK023214  | 27555.674 | 26503.566 | AF298880  | 8795.906  | 6958.587  |
| NM_003307 | 442.171   | 240.081   | NM_001469 | 22094.744 | 21192.381 | AK001500  | 2351.852  | 1681.216  |
| AF070565  | 235.977   | 387.995   | NM_00360C | 32245.041 | 33711.949 | NM_006774 | 934.799   | 889.035   |
| AK021644  | 899.176   | 669.358   | NM_01749C | 12139.125 | 13015.598 | NM_02012E | 1425.244  | 2113.719  |
| NM_01659E | 319.089   | 261.292   | NM_00271E | 4991.125  | 4778.05   | Y16521    | 5966.363  | 3895.805  |
| NM_01246E | 4208.168  | 4003.92   | AK026727  | 5835.467  | 6683.082  | AL050371  | 5180.854  | 5324.621  |
| NM_13426C | 4187.912  | 3481.944  | NM_00283C | 933.489   | 870.876   | NM_002651 | 2573.332  | 2129.679  |
| SR2       | 20310.182 | 19919.717 | NM_006247 | 13891.427 | 13184.237 | NM_00241E | 12174.235 | 10496.955 |
| SR4       | 5523.286  | 6905.373  | AB032983  | 5131.14   | 5858.68   | NM_017577 | 543.812   | 824.875   |
| SR6       | 800.292   | 1102.525  | NM_018281 | 24578.695 | 26873.186 | NM_001647 | 11202.275 | 12283.921 |
| SR8       | 3211.177  | 16438.32  | NM_004457 | 7546.437  | 8511.217  | NM_01815E | 1594.573  | 2355.7    |
| SR10      | 10970.978 | 6721.262  | NM_01404E | 6224.789  | 6241.896  | NM_016301 | 9943.89   | 16464.725 |
| CY3Cy5    | 1336.214  | 332.395   | NM_00539E | 1957.604  | 2132.551  | AK021975  | 1437.219  | 3348.25   |
| AK026206  | 1132.555  | 1286.415  | NM_019841 | 1218.364  | 1034.489  | AB032952  | 40880.625 | 52062.793 |
| AF086074  | 1054.722  | 1333.406  | NM_003322 | 1747.141  | 1370.135  | NM_002522 | 49171.25  | 65913.633 |
| AK023964  | 3306.946  | 2462.274  | NM_00356E | 2024.572  | 1714.16   | AB011174  | 4074.405  | 3808.637  |
| AF086084  | 451.98    | 414.938   | BC036375  | 26593.232 | 26409.67  | AB040879  | 1620.034  | 1496.461  |
| AL050184  | 716.855   | 621.67    | NM_00049E | 925.468   | 1190.956  | AL049935  | 15423.206 | 12106.911 |
| AK027185  | 1248.508  | 870.029   | BF347926  | 13308.912 | 12100.187 | AB033043  | 24770.729 | 25785.01  |
| AK025576  | 716.593   | 799.762   | N54821    | 30486.027 | 30149.492 | NM_01499E | 6758.042  | 6074.544  |
| AF147385  | 580.244   | 449.31    | BI912037  | 11276.576 | 11030.313 | AK025220  | 2886.136  | 2754      |
| AL442086  | 1702.698  | 1244.01   | AA454646  | 36450.902 | 39904.547 | NM_01630E | 16852.354 | 13472.876 |
| BC034819  | 1567.077  | 1274.286  | BF063899  | 3892.32   | 3837.122  | D42046    | 4050.268  | 4191.982  |
| AF147313  | 787.52    | 1254.088  | U18087    | 63204.816 | 64968.488 | NM_00103E | 8301.017  | 8323.467  |
| AF147382  | 3034.417  | 3628.661  | U66349    | 3420.728  | 3624.232  | NM_00452E | 11314.348 | 11093.975 |
| AK001957  | 2059.64   | 2093.742  | AA057156  | 18216.818 | 20192.127 | NM_00252E | 18117.352 | 17702.824 |
| AK021833  | 2024.937  | 2483.045  | U19487    | 2501.649  | 2414.921  | NM_02013E | 3039.79   | 3322.18   |
| AK025889  | 3714.84   | 3758.297  | AF166327  | 62461.465 | 61795.082 | NM_01851E | 4501.439  | 5507.265  |
| AK024168  | 561.555   | 593.706   | AF260739  | 5866.62   | 6280.332  | AK023149  | 1842.344  | 1936.164  |
| AF264622  | 294.65    | 111.984   | AF531423  | 45300.289 | 53935.566 | AK023168  | 3578.523  | 4940.855  |
| AK021793  | 649.052   | 530.899   | X76555    | 2144.339  | 2538.75   | NM_00664E | 500.236   | 772.138   |
| AK022255  | 385.317   | 383.493   | NM_005432 | 11338.297 | 11611.435 | NM_004742 | 3392.228  | 4826.228  |
| AF075079  | 441.255   | 458.651   | L10386    | 31974.314 | 31023.822 | NM_01475E | 2115.805  | 3425.107  |
| AK022479  | 345.513   | 291.73    | AF061812  | 53809.141 | 53805.672 | NM_00658E | 36625.457 | 49734.719 |
| AF086004  | 3432.923  | 2818.235  | AL136756  | 8970.559  | 8446.666  | NM_014331 | 4502.236  | 7318.576  |
| AF147433  | 292.485   | 271.76    | NM_00147E | 62202.469 | 58618.371 | NM_00679E | 37257.164 | 48436.289 |
| AF085930  | 229.151   | 53.757    | M17017    | 1621.946  | 1495.558  | AF070568  | 1828.21   | 3208.945  |
| AF086006  | 352.359   | 343.396   | NM_00299C | 9514.341  | 7207.018  | NM_000277 | 545.112   | 973.315   |
| AL137318  | 1229.393  | 1030.357  | NM_002432 | 7473.992  | 6679.948  | NM_022552 | 2554.145  | 1521.53   |
| AL137482  | 846.426   | 962.043   | NM_01242C | 919.024   | 1238.536  | NM_01438E | 12236.857 | 6918.255  |
| AL162011  | 5243.573  | 4548.331  | NM_002343 | 9561.374  | 10630.647 | AF086187  | 2013.648  | 1231.603  |

|           |           |           |           |           |           |           |           |           |
|-----------|-----------|-----------|-----------|-----------|-----------|-----------|-----------|-----------|
| AL390177  | 306.048   | 151.083   | AB033037  | 4145.397  | 3737.953  | AF305836  | 70403.477 | 65506.438 |
| AL137678  | 188.422   | 92.098    | L40400    | 9004.169  | 10062.249 | AL109784  | 796.588   | 690.152   |
| AK056111  | 328.092   | 342.074   | AK025688  | 4496.259  | 5849.107  | AL035295  | 5521.625  | 4397.024  |
| Y13807    | 660.138   | 490.473   | NM_005930 | 1010.484  | 1203.44   | NM_018302 | 6766.133  | 3851.205  |
| AK022053  | 211.447   | 200.902   | Z36819    | 12738.485 | 15043.144 | AK027252  | 7076.559  | 5780.02   |
| AB037792  | 903.715   | 959.065   | NM_014847 | 60124.652 | 63382.73  | AF165527  | 3436.775  | 2272.617  |
| AK024158  | 177.873   | 181.741   | NM_014448 | 9322.52   | 9743.44   | NM_014092 | 796.092   | 730.805   |
| AL080082  | 432.93    | 575.447   | AL080157  | 10979.653 | 13130.9   | AL359596  | 2098.856  | 1572.992  |
| AK021623  | 440.221   | 518.78    | NM_005100 | 1381.196  | 1770.388  | U79249    | 1015.943  | 1291.571  |
| AK023733  | 182.747   | 226.312   | NM_005308 | 6018.906  | 7399.443  | AK022114  | 1452.951  | 2090.827  |
| AK027112  | 2844.36   | 2230.905  | NM_000911 | 1845.063  | 2557.648  | AL133585  | 1199.028  | 1248.39   |
| AL049314  | 3838.26   | 3733.479  | NM_007227 | 2376.3    | 2693.471  | NM_022552 | 2918.138  | 2294.927  |
| AF093016  | 9919.638  | 8795.261  | NM_007023 | 1972.171  | 2194.071  | NM_014388 | 13665.848 | 9772.909  |
| AF161345  | 304.298   | 151.987   | NM_005873 | 23291.564 | 22036.191 | SR6       | 2039.223  | 2645.792  |
| -         | 263.548   | 87.38     | NM_004624 | 7392.68   | 8144.953  | SR10      | 17799.721 | 7580.211  |
| AF090925  | 381.492   | 344.038   | NM_003865 | 3236.819  | 3707.604  | NM_003887 | 2182.323  | 1531.782  |
| NM_014163 | 985.221   | 640.037   | AB015330  | 43387.227 | 40419.395 | NM_004267 | 11668.677 | 6621.355  |
| NM_014137 | 234.029   | 271.726   | L09071    | 1595.996  | 1815.767  | AL357212  | 709.884   | 573.493   |
| AK021974  | 834.775   | 991.464   | NM_005924 | 1866.918  | 2402.894  | AK026687  | 1402.654  | 1148.103  |
| AK022068  | 573.672   | 486.9     | S56138    | 462.538   | 898.132   | AL117444  | 1532.218  | 1153.871  |
| AK022229  | 652.977   | 458.293   | AK023860  | 10513.915 | 9976.894  | NM_017994 | 6692.642  | 4857.106  |
| AK022362  | 4248.469  | 3664.146  | NM_000031 | 8474.674  | 9813.099  | AK021693  | 3206.026  | 2051.569  |
| AK022004  | 4806.285  | 4758.422  | NM_002085 | 52544.723 | 61585.66  | AL050015  | 1070.988  | 703.503   |
| AK022390  | 301.328   | 340.038   | AK026061  | 1171.8    | 1243.802  | AY007117  | 3488.012  | 2673.238  |
| AL360138  | 315.879   | 352.643   | NM_016286 | 22280.771 | 26415.754 | AF039698  | 2733.173  | 2077.732  |
| U61096    | 444.875   | 402.017   | NM_001567 | 6683.562  | 6999.534  | AB046828  | 3417.972  | 2433.589  |
| AF085865  | 3533.167  | 3433.522  | NM_004905 | 21751.078 | 21869.809 | AL137532  | 2502.747  | 1960.017  |
| AK025521  | 220.929   | 331.986   | AF217971  | 17017.66  | 15805.896 | AK025419  | 3688.789  | 3128.26   |
| NM_001053 | 16451.943 | 16184.332 | NM_001925 | 1651.651  | 1640.983  | AK026838  | 3489.181  | 3602.015  |
| Z70694    | 1232.245  | 1160.415  | NM_004982 | 8090.988  | 8900.353  | AK022443  | 1604.914  | 1250.188  |
| NM_015421 | 9214.49   | 8011.039  | NM_004732 | 5786.615  | 5323.5    | AK023371  | 5716.396  | 4130.623  |
| AF086081  | 4325.437  | 4086.468  | NM_018349 | 6557.021  | 8342.907  | AK025112  | 2579.876  | 1663.139  |
| NM_018634 | 298.063   | 244.376   | NM_006363 | 12056.836 | 14444.836 | AK026079  | 3094.621  | 2689.413  |
| NM_018111 | 502.9     | 289.271   | NM_020415 | 4760.251  | 5901.064  | AK025173  | 11655.271 | 8209.471  |
| AK023730  | 396.878   | 352.499   | NM_014879 | 759.826   | 1141.784  | AK025430  | 706.428   | 608.696   |
| AF161360  | 244.278   | 223.963   | AL049667  | 5892.7    | 7365.95   | AK026722  | 912.624   | 779.362   |
| AK021720  | 648.786   | 436.823   | NM_000334 | 11619.208 | 14496.09  | AL110133  | 7207.996  | 5119.155  |
| NM_016497 | 27670.785 | 20433.016 | NM_020400 | 3491.253  | 4469.839  | AK000529  | 4663.137  | 3503.113  |
| AK000617  | 581.4     | 360.104   | NM_001504 | 10630.562 | 8509.142  | AK027243  | 955.098   | 830.251   |
| AF009261  | 896.968   | 626.649   | D50926    | 8954.791  | 9395.024  | AF147415  | 1518.341  | 1514.468  |
| AF086264  | 196.169   | 126.766   | BF205683  | 8609.512  | 9924.187  | AK098474  | 801.307   | 771.156   |
| AL133086  | 1149.57   | 1259.443  | NM_001565 | 2168.708  | 2363.87   | AL117475  | 4568.305  | 4400.202  |
| NM_012151 | 6524.769  | 8527.832  | NM_001548 | 1733.991  | 2101.826  | AL049300  | 13515.559 | 13518.91  |
| AF087994  | 1811.893  | 1950.921  | NM_000758 | 16880.219 | 18220.525 | NM_017535 | 6807.819  | 5903.789  |
| AJ227912  | 584.147   | 680.922   | NM_004479 | 42601.336 | 38825.973 | AK025365  | 1871.054  | 1297.301  |
| NM_018195 | 1588.318  | 1232.62   | NM_002610 | 4696.041  | 4248.287  | AK021561  | 7036.441  | 4786.291  |
| AK025532  | 1961.542  | 2193.455  | AF070587  | 6949.225  | 6125.356  | AK025222  | 875.349   | 930.653   |
| AK021789  | 296.297   | 202.868   | BE250526  | 2658.621  | 2779.641  | Y11609    | 6343.866  | 4495.182  |
| AF086383  | 241.326   | 215.781   | NM_016819 | 8980.431  | 10136.443 | NM_012122 | 17358.377 | 11075.301 |
| NM_003522 | 606.164   | 550.67    | NM_012222 | 12494.86  | 14480.662 | AF009285  | 13183.776 | 8726.82   |
| BF217847  | 856.361   | 701.581   | NM_005002 | 5751.136  | 5597.537  | NM_012125 | 3551.203  | 2700.39   |
| NM_005320 | 647.77    | 451.877   | NM_006596 | 8714.642  | 8725.436  | AB032363  | 314.985   | 393.123   |
| U79242    | 553.794   | 422.014   | AK023214  | 25957.85  | 22807.455 | AF009294  | 4843.154  | 4706.402  |

|           |           |           |           |           |           |           |           |           |
|-----------|-----------|-----------|-----------|-----------|-----------|-----------|-----------|-----------|
| Y10519    | 283.911   | 384.267   | NM_001469 | 23324.691 | 23450.051 | NM_001524 | 1530.864  | 1781.153  |
| AF119901  | 2800.596  | 2658.113  | NM_003600 | 34888.484 | 36897.148 | AK000998  | 633.044   | 938.304   |
| AL049782  | 335.578   | 257.318   | NM_017490 | 10798.465 | 11132.535 | AK001225  | 632.782   | 825.609   |
| AK001936  | 1181.115  | 1198.392  | NM_002718 | 4877.07   | 5637.838  | AK021684  | 4357.067  | 4088.644  |
| NM_003770 | 3300.967  | 3025.848  | AK026727  | 6086.304  | 7426.37   | AK001060  | 601.065   | 636.916   |
| AF222023  | 336.368   | 327.774   | NM_002830 | 930.652   | 912.38    | AK021480  | 823.648   | 706.285   |
| AK001395  | 6278.662  | 6026.184  | NM_006247 | 13200.672 | 13849.16  | AL080186  | 929.582   | 701.371   |
| S57803    | 3142.191  | 4544.354  | AB032983  | 5568.772  | 5720.104  | NM_005306 | 58308.922 | 40118.699 |
| AF131822  | 317.468   | 300.584   | NM_018281 | 24492.723 | 26668.801 | NM_001646 | 16669.607 | 10183.115 |
| AK023131  | 826.292   | 855.475   | NM_004457 | 7760.69   | 8461.623  | AL137327  | 3670.823  | 3099.663  |
| AJ276248  | 220.936   | 274.934   | NM_014049 | 5394.715  | 5749.507  | AF358454  | 681.833   | 279.466   |
| X78926    | 1756.396  | 1777.2    | NM_005396 | 2273.969  | 2577.614  | AK026090  | 2732.591  | 1863.755  |
| AJ278110  | 1241.619  | 1266.73   | NM_004315 | 21033.922 | 27556.541 | AF070637  | 1897.754  | 1603.913  |
| NM_014237 | 882.655   | 744.929   | NM_020166 | 12959.74  | 15779.37  | AL137634  | 722.558   | 590.507   |
| NM_020396 | 314.621   | 418.949   | NM_003568 | 1468.505  | 1400.414  | AK024863  | 6833.056  | 5141.644  |
| AF029900  | 1073.456  | 1192.938  | BC036375  | 28948.674 | 30081.293 | AK026908  | 21260.949 | 15023.379 |
| NM_003325 | 5075.699  | 6706.676  | NM_000496 | 1359.295  | 1254.24   | AF117338  | 16233.473 | 12301.396 |
| NM_016178 | 2494.549  | 2631.178  | BF347926  | 14398.921 | 17358.295 | AK025567  | 3545.72   | 2423.183  |
| AK022639  | 1751.436  | 1763.408  | N54821    | 33537.211 | 36045.758 | U56857    | 37454.609 | 33281.5   |
| D31766    | 856.557   | 1096.133  | BI912037  | 12293.117 | 13340.694 | L43349    | 642.851   | 651.926   |
| NM_006547 | 3043.176  | 3107.378  | AA454646  | 38929.234 | 44240.898 | AF086421  | 1536.246  | 1526.411  |
| AK022175  | 205.442   | 119.546   | BF063899  | 3951.08   | 4662.888  | AK001612  | 644.495   | 414.643   |
| L23867    | 372.73    | 375.283   | U18087    | 63686.266 | 67412.57  | AF161522  | 3077.035  | 3245.26   |
| AB020968  | 197.241   | 127.732   | U66349    | 3572.903  | 3564.075  | AF086028  | 23976.734 | 15908.557 |
| AL138690  | 2848.469  | 2160.924  | AA057156  | 20331.797 | 22504.246 | AF157562  | 3507.441  | 2906.921  |
| AK000394  | 541.589   | 404.605   | U19487    | 2782.4    | 2634.125  | AK021958  | 11315.971 | 5873.668  |
| NM_013941 | 1599.781  | 1564.143  | AF166327  | 60148.164 | 57368.152 | M31164    | 2026.553  | 1212.313  |
| AF074989  | 1068.763  | 772.611   | AF260739  | 6190.785  | 7243.937  | NM_003511 | 826.58    | 2923.559  |
| AK001107  | 424.598   | 312.241   | AF531423  | 48179.043 | 54784.637 | NM_003531 | 2581.713  | 2048.133  |
| AF147393  | 367.622   | 372.705   | X76555    | 2648.086  | 2886.234  | NM_017796 | 1328.195  | 986.009   |
| AK022368  | 213.589   | 294.425   | NM_005432 | 12736.537 | 13154.305 | NM_003510 | 922.949   | 816.387   |
| AL137339  | 174.771   | 202.098   | L10386    | 33354.289 | 36967.828 | AL137403  | 6337.45   | 5981.335  |
| AL080112  | 1402.297  | 1310.413  | AF061812  | 57607.684 | 59404.754 | AL049348  | 2490.429  | 2603.772  |
| AL137325  | 1102.247  | 1545.984  | AL136756  | 8867.387  | 8493.643  | NM_018534 | 1634.062  | 1922.35   |
| AF147361  | 1246.929  | 1230.276  | NM_001478 | 63167.242 | 61353.309 | AB037847  | 2699.95   | 2862.28   |
| NM_001851 | 3912.835  | 5038.776  | NM_002612 | 913.944   | 1215.995  | NM_005170 | 3965.216  | 3927.232  |
| S67789    | 1439.793  | 1564.69   | AF135422  | 4838.956  | 4764.88   | S96437    | 5375.724  | 4925.055  |
| AK022689  | 5155.255  | 5050.854  | NM_005930 | 983.451   | 1226.908  | NM_015176 | 1431.386  | 1677.158  |
| NM_016227 | 1230.46   | 1302.1    | Z36819    | 13123.679 | 14147.307 | AL353939  | 955.616   | 1462.813  |
| NM_004195 | 3274.267  | 2573.674  | NM_014847 | 66216.859 | 70003.805 | AL117573  | 4901.755  | 4815.184  |
| NM_004705 | 3814.097  | 3719.559  | NM_001195 | 390.042   | 651.334   | NM_018655 | 2925.941  | 2014.966  |
| NM_020190 | 3109.909  | 3875.518  | NM_014448 | 11647.686 | 13172.855 | NM_005663 | 2786.347  | 2115.64   |
| AK024003  | 396.475   | 292.889   | AL080157  | 13075.582 | 14651.638 | X89960    | 1320.739  | 636.106   |
| NM_014357 | 1000.875  | 945.703   | NM_005100 | 1391.492  | 1343.937  | NM_017644 | 8035.272  | 7334.574  |
| NM_004067 | 142.502   | 175.079   | NM_005308 | 6881.363  | 6829.738  | NM_002482 | 1311.727  | 1082.835  |
| NM_000121 | 3728.525  | 3560.307  | NM_000911 | 2317.149  | 2546.517  | AL050068  | 1094.709  | 1083.431  |
| NM_002091 | 268.044   | 210.391   | NM_007227 | 2813.992  | 3191.879  | U92025    | 484.496   | 387.137   |
| AB033092  | 5039.876  | 5555.471  | NM_007023 | 2499.119  | 2426.355  | AF009323  | 668.794   | 494.125   |
| M89957    | 24228.375 | 15644.252 | NM_005873 | 26209.287 | 26136.064 | AK001526  | 5785.048  | 5013.104  |
| NM_003023 | 802.035   | 738.52    | NM_004624 | 7332.523  | 8771.87   | AF086183  | 1839.157  | 1904.095  |
| BC035030  | 494.1     | 539.483   | NM_014461 | 1666.186  | 2024.329  | AK000525  | 2438.418  | 2358.147  |
| NM_005340 | 33635.16  | 30427.242 | NM_003865 | 3499.978  | 4258.509  | AL137434  | 2162.354  | 2445.171  |
| NM_016201 | 348.808   | 420.036   | AB015330  | 47370.762 | 46712.008 | Z36795    | 2472.725  | 2641.44   |



|           |           |           |           |           |           |           |           |           |
|-----------|-----------|-----------|-----------|-----------|-----------|-----------|-----------|-----------|
| NM_000864 | 2325.413  | 2206.758  | NM_001455 | 7318.615  | 8911.245  | U55186    | 733.847   | 2635.058  |
| NM_017977 | 1112.253  | 1181.957  | NM_002385 | 8051.068  | 8077.998  | AL080216  | 2360.45   | 2768.339  |
| AF147727  | 1294.005  | 1284.729  | NM_001885 | 1452.578  | 1386.623  | NM_012425 | 2464.808  | 1181.756  |
| NM_006751 | 760.583   | 1088.534  | AF039196  | 1500.065  | 1294.043  | NM_002750 | 4160.451  | 2964.921  |
| AB037834  | 1458.507  | 1444.643  | L09071    | 1749.193  | 1967.167  | NM_000081 | 3332.703  | 3583.341  |
| NM_003569 | 2270.236  | 2699.943  | NM_005924 | 2311.374  | 2928.547  | AK024134  | 10290.351 | 10022.112 |
| NM_002777 | 885.786   | 1134.329  | NM_019841 | 2032.583  | 2301.629  | NM_018555 | 1466.349  | 1326.313  |
| AF202635  | 1163.508  | 1005.934  | NM_003322 | 2047.027  | 2711.013  | NM_001974 | 4478.492  | 4009.188  |
| NM_014125 | 713.095   | 702.812   | NM_013365 | 9736.752  | 10771.188 | NM_013957 | 1294.775  | 1057.778  |
| NM_017904 | 1434.545  | 1669.899  | NM_005817 | 16357.712 | 19024.527 | NM_002465 | 5811.299  | 6042.461  |
| NM_013367 | 3260.806  | 2717.17   | NM_003916 | 19659.344 | 26775.068 | NM_003025 | 1878.851  | 1880.313  |
| AL137550  | 286.745   | 253.875   | NM_002870 | 62065.289 | 68242.453 | NM_001566 | 1060.076  | 1021.853  |
| NM_000321 | 2739.78   | 2558.62   | NM_002802 | 1513.271  | 1880.843  | NM_016541 | 4233.658  | 3421.723  |
| NM_006341 | 6618.812  | 5098.293  | NM_006363 | 12963.017 | 14391.58  | NM_018545 | 3546.112  | 3704.963  |
| NM_001709 | 384.909   | 374.927   | NM_020415 | 5086.513  | 5177.587  | NM_013401 | 999.847   | 983.577   |
| NM_006191 | 5516.361  | 4632.966  | NM_014879 | 925.583   | 1207.144  | NM_018235 | 7807.539  | 7818.94   |
| NM_001800 | 1848.602  | 1412.993  | AL049667  | 6783.528  | 7338.188  | NM_006855 | 30085.113 | 25729.014 |
| NM_004336 | 6849.67   | 5460.396  | NM_000334 | 11455.43  | 13261.098 | NM_001405 | 11633.763 | 11696.232 |
| NM_015949 | 3230.285  | 3681.287  | NM_020400 | 3445.627  | 4578.133  | NM_003880 | 2134.397  | 1996.837  |
| NM_013979 | 2612.989  | 1926.876  | NM_001504 | 13047.65  | 11398.649 | AF131778  | 3502.955  | 3612.797  |
| NM_003790 | 647.167   | 457.658   | D50926    | 9661.834  | 10870.532 | NM_001562 | 4642.644  | 7967.877  |
| NM_000494 | 3655.233  | 4228.544  | BF205683  | 9223.164  | 10553.897 | NM_013275 | 2103.312  | 2599.08   |
| NM_016023 | 1609.779  | 1066.178  | NM_001565 | 1905.359  | 2338.165  | NM_000675 | 8807.707  | 5231.816  |
| NM_003722 | 2463.533  | 2291.711  | NM_001545 | 1179.988  | 1514.106  | NM_001066 | 2222.57   | 1689.853  |
| NM_014430 | 632.272   | 1084.497  | NM_000755 | 15009.448 | 15973.106 | NM_006291 | 1354.894  | 1430.777  |
| NM_000495 | 598.644   | 670.811   | M17017    | 1298.047  | 1380.746  | AL162062  | 609.659   | 592.902   |
| AF085883  | 2178.466  | 2503.219  | NM_002990 | 10425.479 | 10759.446 | NM_003173 | 15163.836 | 13992.958 |
| NM_016571 | 513.493   | 568.279   | NM_002432 | 8632.085  | 8590.844  | NM_005030 | 14954.513 | 11421.987 |
| NM_003685 | 1392.594  | 1336.582  | NM_012420 | 860.218   | 1385.264  | NM_017584 | 4369.53   | 3818.038  |
| NM_016446 | 1400.457  | 1206.273  | NM_002343 | 11057.462 | 12745.32  | NM_020355 | 4237.696  | 2974.735  |
| BC036368  | 385.079   | 451.382   | AB033037  | 4288.504  | 5140.346  | AB014541  | 40687.742 | 29912.084 |
| AK023237  | 885.229   | 621.839   | L40400    | 12381.615 | 14814.872 | NM_002583 | 16156.225 | 14246.873 |
| NM_001870 | 290.042   | 159.635   | AK025688  | 5126.001  | 7192.858  | NM_006570 | 28926.293 | 28565.844 |
| AJ271216  | 2605.654  | 2074.207  | NM_004457 | 7616.905  | 8611.588  | NM_020345 | 1747.646  | 2039.045  |
| U23028    | 3527.609  | 3119.965  | NM_014049 | 5036.408  | 5422.042  | NM_006034 | 32814.363 | 34698.84  |
| NM_000817 | 2954.486  | 2664.628  | NM_005396 | 2507.425  | 4365.661  | AB040943  | 1400.471  | 1370.402  |
| AF113132  | 12516.495 | 11624.242 | NM_004315 | 21141.994 | 28639.943 | NM_005201 | 65811.258 | 65153.535 |
| NM_006571 | 2552.423  | 3039.06   | NM_020166 | 16010.479 | 23909.045 | NM_000092 | 3144.955  | 4983.677  |
| NM_001875 | 234.676   | 305.487   | S56138    | 1119.352  | 1310.035  | NM_019086 | 13062.233 | 19313.637 |
| AK022680  | 2208.084  | 1818.789  | AK023860  | 10903.917 | 12889.027 | AF157323  | 1786.217  | 2150.808  |
| NM_018946 | 11833.344 | 11666.022 | NM_000031 | 8209.447  | 8512.462  | NM_003335 | 4585.484  | 5372.592  |
| NM_016355 | 7555.199  | 4723.552  | NM_002085 | 52870.672 | 56049.32  | NM_013396 | 2521.02   | 2880.182  |
| NM_001065 | 43436.984 | 84112.531 | AK026061  | 1784.786  | 2026.007  | NM_017752 | 2378.374  | 1276.62   |
| NM_004156 | 1640.068  | 1445.586  | NM_016286 | 24696.576 | 29200.344 | D26069    | 11556.553 | 6963.89   |
| AK000561  | 1421.698  | 1376.374  | NM_001567 | 7417.705  | 9829.361  | BF107577  | 50554.508 | 44873.992 |
| AB051449  | 8038.043  | 8010.023  | NM_004905 | 22294.412 | 21868.734 | NM_005837 | 16892.984 | 16450.143 |
| BC009187  | 4708.331  | 4099.278  | AF217971  | 17952.242 | 18458.313 | NM_016625 | 8737.101  | 7659.904  |
| AL133617  | 1308.663  | 837.061   | NM_001925 | 1593.735  | 1959.797  | NM_017493 | 2702.24   | 2742.787  |
| NM_016485 | 5626.356  | 5573.58   | AF245517  | 4152.834  | 4901.416  | NM_006136 | 13867.496 | 14352.372 |
| NM_002615 | 287.982   | 207.892   | NM_004137 | 1329.995  | 1712.409  | AF237772  | 1646.314  | 1834.409  |
| AF090894  | 390.823   | 351.685   | NM_014407 | 1803.488  | 1985.646  | AK025934  | 3666.302  | 4320.763  |
| NM_013344 | 340.98    | 332.824   | NM_004982 | 8350.692  | 10031.278 | AJ008154  | 2429.116  | 2841.554  |
| NM_014052 | 12008.735 | 11241.243 | NM_001694 | 62455.219 | 63799.039 | NM_003487 | 12500.488 | 10574.248 |

|           |           |           |           |           |           |             |           |           |
|-----------|-----------|-----------|-----------|-----------|-----------|-------------|-----------|-----------|
| AK023792  | 257.919   | 263.191   | AF286370  | 2752.536  | 3048.5    | NM_006887   | 11745.761 | 18144.32  |
| NM_020149 | 1538.132  | 1573.614  | NM_000217 | 1189.874  | 1386.348  | NM_013293   | 7902.959  | 8057.983  |
| NM_006237 | 729.106   | 743.759   | NM_004732 | 6081.374  | 7029.745  | AF315592    | 11242.871 | 19031.393 |
| NM_001271 | 3046.025  | 2108.783  | AK026180  | 2218.057  | 3373.177  | AF095844    | 5600.911  | 7131.712  |
| NM_003683 | 4845.313  | 4210.174  | NM_018349 | 8210.428  | 10104.765 | NM_015833   | 5086.135  | 5620.733  |
| AF039019  | 2805.296  | 3067.889  | NM_001478 | 63559.828 | 62025.586 | NM_000986   | 65454.293 | 59431.27  |
| NM_012255 | 4949.619  | 4525.906  | NM_002612 | 780.914   | 1126.168  | AK026760    | 40994.488 | 20150.518 |
| NM_018196 | 1178.346  | 954.965   | AF135422  | 5692.485  | 6022.499  | NM_014772   | 3926.32   | 2967.223  |
| NM_004818 | 3368.508  | 2741.106  | NM_004479 | 48307.18  | 56714.824 | AK025248    | 4272.797  | 3861.75   |
| J04205    | 12163.48  | 11622.063 | NM_002610 | 4516.24   | 4958.423  | NM_004536   | 19891.178 | 18560.242 |
| D38491    | 5193.119  | 3998.038  | AF070587  | 7542.146  | 8116.901  | NM_006428   | 25468.221 | 21391.58  |
| AK026835  | 3381.437  | 2925.609  | BE250526  | 2990.087  | 3249.204  | NM_004280   | 16198.298 | 17086.518 |
| NM_002819 | 13169.681 | 11631.314 | NM_016819 | 9783.433  | 9687.895  | AF110399    | 3921.159  | 4264.929  |
| NM_003090 | 12394.904 | 8214.306  | NM_012222 | 13568.081 | 16650.451 | AK027094    | 6208.137  | 5975.972  |
| NM_013264 | 5534.052  | 4441.876  | NM_005002 | 5589.84   | 5296.656  | AF174600    | 7170.936  | 8314.9    |
| NM_003315 | 12790.938 | 9739.08   | NM_006596 | 8430.016  | 9785.368  | AK001003    | 2446.473  | 2822.041  |
| NM_005570 | 5137.796  | 4119.802  | AK023214  | 27687.354 | 30761.727 | NM_002800   | 28145.535 | 44019.246 |
| NM_000086 | 3312.095  | 4341.498  | NM_001469 | 23488.822 | 24328.357 | AV758498    | 2371.258  | 2697.679  |
| NM_003752 | 3852.765  | 3239.545  | NM_003600 | 34648.02  | 38769.117 | NM_020196   | 3096.765  | 3471.012  |
| NM_003932 | 11250.067 | 8221.061  | NM_017490 | 13584.595 | 13427.04  | AK024113    | 1018.788  | 1286.812  |
| NM_016491 | 14602.55  | 10776.843 | NM_002718 | 4766.58   | 5280.324  | NM_018657   | 1939.871  | 2483.813  |
| NM_006429 | 22295.254 | 18654.057 | AK026727  | 5811.301  | 6702.594  | L40410      | 16924.41  | 18098.078 |
| NM_002516 | 560.19    | 416.754   | NM_002830 | 1062.854  | 931.456   | NM_007055   | 3185.33   | 2549.219  |
| NM_002064 | 1422.866  | 2384.678  | NM_006247 | 14726.107 | 15489.191 | NM_016652   | 1794.325  | 770.1     |
| NM_015523 | 8088.173  | 9116.623  | AB032983  | 6383.718  | 7678.257  | NM_016310   | 24405.365 | 12664.187 |
| NM_015960 | 10479.943 | 9580.188  | NM_018281 | 28091.314 | 33897.113 | AK021562    | 1241.988  | 1095.744  |
| NM_006085 | 8424.387  | 6714.677  | CY3Cy5    | 984.179   | 116.311   | BC006560    | 3715.002  | 3679.715  |
| NM_000907 | 8763.435  | 8667.152  | NM_000945 | 2011.763  | 1068.159  | NM_006298   | 1224.464  | 1275.051  |
| AF254085  | 5770.263  | 6035.847  | NM_002574 | 88626.891 | 61703.75  | AF060938    | 45333.273 | 42857.637 |
| AK023541  | 408.86    | 428.273   | NM_001310 | 10013.09  | 10869.663 | NM_001973   | 10512.176 | 11750.137 |
| NM_000451 | 193.972   | 85.343    | AK026924  | 9644.968  | 15435.63  | NM_014468   | 9667.25   | 11477.839 |
| NM_001987 | 2649.852  | 2049.746  | AL122047  | 5679.463  | 7788.367  | NM_006856   | 12452.176 | 12699.121 |
| AF244088  | 937       | 759.943   | AF052091  | 2549.125  | 3869.063  | X52350      | 68833.688 | 65043.715 |
| NM_007136 | 1101.641  | 1321.638  | AK024447  | 75068.727 | 63992.285 | AF071554    | 3213.674  | 4087.365  |
| AK025434  | 460.952   | 329.496   | AF086458  | 2235.134  | 1451.563  | NM_002147   | 1111.284  | 1165.136  |
| AJ251845  | 854.337   | 855.773   | AF086548  | 1192.447  | 668.649   | NM_004736   | 13839.92  | 16511.277 |
| AK000435  | 1657.669  | 1152.794  | AK024350  | 276.003   | 761.584   | NM_006895   | 900.829   | 1256.153  |
| AK000569  | 318.532   | 322.051   | AK023717  | 1920.452  | 1394.195  | NM_006455   | 19712.639 | 21778.906 |
| NM_006049 | 2805.712  | 2465.151  | AK022294  | 1098.512  | 714.295   | AA427949    | 2463.258  | 2758.342  |
| BC016698  | 4608.476  | 3957.026  | AF086507  | 1315.237  | 930.471   | D50373      | 1606.64   | 1919.286  |
| NM_007374 | 517.546   | 380.987   | U79289    | 1000.11   | 652.048   | AA488757    | 57621.563 | 60775.367 |
| AK000049  | 188.346   | 323.411   | NM_014028 | 2887.23   | 2036.364  | AA205399    | 1490.679  | 2153.703  |
| NM_006167 | 637.833   | 695.292   | NM_000945 | 2212.942  | 2292.391  | H07071      | 8473.685  | 7452.481  |
| NM_016357 | 1221.433  | 985.878   | NM_002574 | 79045.438 | 64213.797 | M25322      | 20453.109 | 18624.238 |
| NM_014500 | 5705.066  | 4383.588  | SR1       | 74833.242 | 64050.215 | AA436187    | 743.324   | 1147.004  |
| L09071    | 597.469   | 1025.561  | SR3       | 49795.949 | 47217.48  | H-L 27586 I | 4868.832  | 4734.764  |
| NM_005924 | 942.505   | 1632.292  | SR5       | 5002.921  | 6287.471  | ID 214180   | 1876.293  | 2399.681  |
| NM_019841 | 601.12    | 839.243   | SR7       | 6406.317  | 46626.297 | ID 1867426  | 49038.707 | 48715.57  |
| NM_003322 | 422.989   | 579.119   | SR9       | 21347.014 | 4491.377  | ID 396450   | 493.675   | 1135.446  |
| NM_003568 | 742.399   | 707.831   | CY3Cy5    | 3436.796  | 171.194   | W99328      | 4343.889  | 5691.613  |
| BC036375  | 8866.226  | 10060.77  | AK026923  | 1923.923  | 560.484   | AI434176    | 2296.534  | 2357.268  |
| NM_000496 | 433.023   | 518.669   | AK021691  | 47921.07  | 57520.77  | H08563      | 8401.962  | 8786.601  |
| BF347926  | 5604.714  | 6567.928  | NM_015721 | 4124.281  | 1855.851  | BE735403    | 4111.526  | 4815.18   |

|           |           |           |           |           |           |           |           |           |
|-----------|-----------|-----------|-----------|-----------|-----------|-----------|-----------|-----------|
| N54821    | 13489.889 | 16999.793 | AK027238  | 782.898   | 1080.321  | NM_002631 | 21957.73  | 22113.723 |
| BI912037  | 3357.813  | 4245.264  | AK000032  | 393.723   | 225.507   | NM_000755 | 3309.794  | 3949.982  |
| AA454646  | 14742.148 | 15111.931 | S94540    | 23195.156 | 23319.611 | AK023334  | 12129.671 | 12634.465 |
| BF063899  | 2293.088  | 2317.561  | AK002164  | 924.846   | 876.686   | NM_002563 | 39981.852 | 38541.496 |
| U18087    | 7255.019  | 7448.769  | AF052122  | 12237.515 | 11435.914 | NM_002437 | 7767.555  | 7697.159  |
| U66349    | 1601.74   | 1521.454  | AK022416  | 1015.654  | 364.364   | D79991    | 3649.048  | 3670.403  |
| AA057156  | 10602.15  | 12601.561 | AK023224  | 1335.802  | 567.606   | AK022425  | 2863.458  | 2960.754  |
| U19487    | 469.847   | 568.029   | AK022442  | 1214.49   | 2647.127  | NM_000054 | 45536.617 | 47843.273 |
| AF166327  | 28890.363 | 25032.82  | AK023336  | 1411.476  | 1693.055  | NM_014713 | 16688.875 | 18544.645 |
| AF260739  | 996.418   | 1024.319  | AK023771  | 974.762   | 1161.519  | NM_001812 | 2876.287  | 2468.01   |
| AF531423  | 22156.324 | 23483.152 | AK023727  | 1781.932  | 811.383   | NM_014785 | 1786.756  | 1951.648  |
| X76555    | 426.572   | 474.628   | AK025271  | 634.896   | 300.055   | NM_005811 | 16310.344 | 15804.751 |
| NM_005432 | 1530.345  | 1192.886  | AF086204  | 5250.11   | 2011.931  | NM_005764 | 3568.049  | 3952.4    |
| L10386    | 15510.712 | 15009.927 | NM_007021 | 1285.783  | 639.394   | NM_016362 | 5985.453  | 7796.084  |
| AF061812  | 2481.681  | 2349.507  | AK026283  | 760.09    | 1397.589  | NM_004214 | 13169.175 | 14385.743 |
| AL136756  | 1952.391  | 1857.577  | AK021570  | 579.153   | 554.79    | NM_004325 | 23629.322 | 24359.148 |
| NM_015944 | 1117.366  | 840.496   | AL360204  | 1086.54   | 779.766   | NM_002836 | 17581.514 | 20554.684 |
| NM_001548 | 524.406   | 1140.257  | AK000103  | 970.774   | 863.657   | NM_020167 | 6289.741  | 5877.706  |
| NM_000758 | 6308.618  | 8871.438  | AK026294  | 413.658   | 514.958   | NM_016058 | 16746.646 | 16947.063 |
| M17017    | 438.856   | 408.781   | AF085959  | 1075.067  | 1223.194  | NM_014005 | 11020.465 | 11500.197 |
| NM_002990 | 5132.252  | 6357.522  | AK023104  | 996.916   | 1502.519  | AY005822  | 8922.208  | 8189.373  |
| NM_002432 | 924.702   | 772.856   | AK022181  | 1368.503  | 1456.326  | NM_018125 | 61229.59  | 60162.781 |
| NM_012420 | 186.786   | 329.897   | NM_018474 | 5236.029  | 1790.677  | AF289022  | 5749.4    | 5951.449  |
| NM_002343 | 1492.236  | 2451.409  | AK024937  | 3477.688  | 1717.589  | M17252    | 917.935   | 682.969   |
| AB033037  | 1513.69   | 1779.272  | D17178    | 1698.043  | 886.195   | NM_016025 | 14932.892 | 13517.327 |
| L40400    | 2547.904  | 3211.391  | AK022094  | 2590.142  | 3832.318  | NM_013315 | 4681.928  | 5066.323  |
| AK025688  | 2007.872  | 2176.557  | AK026695  | 2132.342  | 3976.383  | NM_020410 | 8026.343  | 7542.308  |
| NM_005930 | 269.822   | 302.584   | AK022220  | 681.879   | 1016.249  | NM_000453 | 4110.28   | 4519.451  |
| Z36819    | 5360.662  | 6432.22   | AL137539  | 429.503   | 1007.513  | J03048    | 21680.736 | 15423.456 |
| NM_014847 | 7489.925  | 7242.109  | AK000141  | 7139.912  | 3229.602  | NM_004583 | 896.484   | 1146.167  |
| NM_001195 | 200.17    | 156.212   | AL137758  | 3712      | 1953.767  | NM_001103 | 1425.499  | 1488.614  |
| NM_014448 | 529.621   | 606.527   | AK025786  | 1428.971  | 2793.185  | AF228710  | 52730.813 | 52852.496 |
| AL080157  | 1681.674  | 1867.638  | AK024188  | 792.195   | 846.21    | NM_018395 | 1222.824  | 1434.859  |
| NM_005100 | 552.14    | 547.055   | AK026820  | 507.43    | 435.771   | AY007131  | 68731.102 | 65448.5   |
| NM_005308 | 2168.801  | 2440.056  | AK001716  | 3253.429  | 2598.22   | U61735    | 5529.527  | 6276.228  |
| NM_000911 | 282.737   | 376.077   | AF113683  | 498.824   | 417.026   | NM_001144 | 29913.373 | 34945     |
| NM_007227 | 1077.469  | 1018.03   | AK026821  | 1706.758  | 1584.278  | AK023766  | 9009.386  | 10596.838 |
| NM_007023 | 1153.915  | 1095.175  | AK026280  | 1680.838  | 1756.634  | NM_001897 | 2419.804  | 2767.858  |
| NM_005873 | 10320.401 | 9724.327  | AF113017  | 4190.177  | 5300.755  | NM_003853 | 3383.068  | 3660.391  |
| NM_004624 | 2541.683  | 3163.215  | AL080232  | 11336.19  | 11595.365 | U59209    | 7041.137  | 7178.899  |
| NM_003865 | 657.774   | 810.503   | AK001120  | 11270.723 | 10390.22  | NM_020195 | 9123.517  | 7349.054  |
| AB015330  | 5761.775  | 4824.707  | AK021980  | 4652.669  | 2104.422  | AK023824  | 12956.277 | 12591.666 |
| NM_004315 | 10962.288 | 30909.59  | S46402    | 917.202   | 525.104   | AK026055  | 12455.451 | 12904.777 |
| NM_020166 | 4787.417  | 7440.243  | Z83940    | 1530.782  | 2460.842  | AK024126  | 1138.853  | 906.973   |
| S56138    | 317.893   | 354.481   | NM_005800 | 2916.274  | 3957.515  | NM_001516 | 7451.275  | 7318.492  |
| AK023860  | 1165.418  | 1330.1    | AF019617  | 20946.646 | 22687.795 | NM_002744 | 16334.397 | 14784.546 |
| NM_000031 | 3353.822  | 3339.475  | AL137305  | 10884.691 | 14457.447 | NM_015917 | 18103.707 | 17114.484 |
| NM_002085 | 23682.426 | 21170.693 | NM_005290 | 1214.076  | 2738.212  | NM_020397 | 1961.992  | 1989.38   |
| AK026061  | 334.31    | 357.407   | AK025802  | 1430.427  | 1039.276  | NM_000061 | 7125.964  | 7587.646  |
| NM_016286 | 11207.134 | 13119.247 | NM_018013 | 1891.616  | 1244.023  | AB046859  | 46798.566 | 46049.965 |
| NM_001567 | 3415.184  | 4226.184  | AK026873  | 3626.229  | 2135.944  | NM_005105 | 12902.294 | 11686.463 |
| NM_004905 | 8854.894  | 8521.726  | AK026394  | 5152.748  | 5112.555  | AK023573  | 11766.75  | 12552.567 |
| AF217971  | 2773.926  | 2476.451  | NM_005448 | 952.027   | 431.208   | NM_002730 | 4416.805  | 4944.512  |

|           |           |           |           |           |           |             |           |           |
|-----------|-----------|-----------|-----------|-----------|-----------|-------------|-----------|-----------|
| NM_001925 | 372.259   | 364.55    | AK025943  | 44215.855 | 32398.293 | NM_004825   | 3982.03   | 8029.898  |
| NM_004982 | 877.077   | 746.91    | BG106479  | 1189.689  | 1132.137  | AB011540    | 62938.676 | 63146.945 |
| NM_004732 | 993.431   | 572.93    | AF130069  | 19035.934 | 15297.587 | NM_000040   | 28386.088 | 28938.084 |
| NM_018349 | 1655.9    | 2354.385  | AL109669  | 2768.75   | 3444.29   | NM_004631   | 10196.689 | 10505.671 |
| NM_006363 | 5030.352  | 4843.226  | AB037766  | 2990.786  | 2996.737  | NM_003295   | 919.292   | 1349.658  |
| NM_020415 | 889.368   | 726.725   | AK026995  | 651.778   | 844.809   | NM_004735   | 14442.125 | 13842.872 |
| NM_014875 | 429.121   | 532.196   | AL133091  | 787.224   | 741.341   | NM_006895   | 405.93    | 628.405   |
| AL049667  | 1093.724  | 1019.128  | BF842915  | 585.114   | 980.068   | NM_006455   | 21381.965 | 21506.625 |
| NM_000334 | 1215.637  | 1230.961  | X82545    | 11573.299 | 11672.914 | AA427949    | 641.717   | 629.449   |
| NM_020400 | 1617.847  | 1452.409  | AF302079  | 17366.15  | 6816.199  | AA205399    | 2605.754  | 2566.003  |
| NM_001504 | 525.149   | 317.102   | NM_002550 | 882.745   | 1645.575  | H07071      | 8751.12   | 9691.414  |
| D50926    | 2280.525  | 2420.959  | NM_000692 | 2808.948  | 4906.884  | M25322      | 20799.328 | 21162.547 |
| BF205683  | 1041.381  | 1359.293  | AF086062  | 2613.794  | 3846.998  | AA436187    | 523.719   | 598.955   |
| NM_001565 | 1067.84   | 1173.873  | L47668    | 66568.563 | 72691.945 | H-L 27586 I | 4606.43   | 5368.35   |
| NM_002612 | 448.371   | 1579.873  | NM_017920 | 4900.442  | 3208.145  | ID 214180   | 1123.888  | 1444.949  |
| AF135422  | 1556.855  | 2086.331  | AK025345  | 1114.276  | 582.349   | ID 1867426  | 44221.852 | 41869.844 |
| NM_004475 | 1476.837  | 1681.092  | D25274    | 16942.232 | 6733.548  | W99328      | 3461.346  | 3912.338  |
| NM_002610 | 2620.386  | 1738.376  | U84520    | 4309.792  | 5382.244  | AI434176    | 1741.558  | 1977.513  |
| AF070587  | 2809.991  | 2034.252  | Z11853    | 538.895   | 1084.071  | H08563      | 7893.337  | 8058.236  |
| BE250526  | 683.953   | 776.089   | AL133616  | 6640.659  | 8069.175  | BE735403    | 5408.826  | 6734.438  |
| NM_016815 | 2862.243  | 2851.902  | AK026382  | 4518.475  | 3131.262  | AF116659    | 6559.698  | 4387.116  |
| NM_012222 | 1722.349  | 2206.961  | AK091169  | 5529.859  | 5535.43   | NM_000317   | 38157.621 | 30813.352 |
| NM_005002 | 2239.662  | 2441.74   | NM_014745 | 62626.332 | 60107.758 | NM_002435   | 9393.006  | 9924.184  |
| NM_006595 | 4174.251  | 4281.864  | AF086026  | 10273.309 | 11006.815 | NM_014585   | 14123.466 | 12109.741 |
| AK023214  | 5869.129  | 5917.04   | AL133011  | 731.022   | 1145.053  | NM_000755   | 3542.936  | 2854.299  |
| NM_001465 | 10498.134 | 10415.64  | NM_015607 | 21916.166 | 22032.896 | AK023334    | 11974.473 | 10298.605 |
| NM_003600 | 2699.692  | 2003.721  | AK026955  | 1330.75   | 1814.473  | NM_002563   | 34912.313 | 32726.701 |
| NM_017490 | 2582.651  | 2150.027  | AL110202  | 36140.5   | 40048.605 | NM_002437   | 7311.881  | 6383.684  |
| NM_002715 | 1792.838  | 1672.966  | NM_006225 | 2119.144  | 1027.601  | D79991      | 3906.994  | 3514.287  |
| AK026727  | 844.446   | 946.628   | NM_003765 | 14473.982 | 6948.987  | AK022425    | 3748.782  | 3490.719  |
| NM_002830 | 461.46    | 265.082   | NM_018393 | 1897.435  | 1088.756  | NM_000054   | 41662.488 | 37286.355 |
| NM_006247 | 6047.938  | 4798.092  | BF032535  | 3276.51   | 4362.304  | NM_014713   | 17498.514 | 18079.93  |
| AB032983  | 415.756   | 394.533   | NM_018332 | 5362.833  | 8796.666  | NM_001812   | 2543.379  | 2701.935  |
| NM_018281 | 4701.885  | 6094.724  | AB037775  | 879.105   | 1046.638  | NM_014785   | 1840.525  | 1912.061  |
| NM_004457 | 3271.248  | 2979.341  | L27560    | 1402.366  | 499.671   | NM_005811   | 14927.561 | 15014.158 |
| NM_014045 | 2401.399  | 1927.06   | AK022517  | 3232.402  | 1236.516  | NM_005764   | 3261.928  | 3458.925  |
| NM_005395 | 271.276   | 234.792   | NM_000325 | 24410.629 | 16074.276 | NM_016362   | 6092.569  | 7678.717  |
| NM_019841 | 761.91    | 2634.584  | NM_001182 | 12877.773 | 14948.907 | NM_004214   | 12263.31  | 12284.938 |
| NM_003322 | 423.56    | 777.721   | NM_000333 | 3671.771  | 4401.979  | NM_004325   | 19673.592 | 19439.818 |
| NM_003565 | 709.2     | 871.794   | NM_002297 | 5044.896  | 4351.403  | NM_002835   | 16521.965 | 18778.959 |
| BC036375  | 9119.275  | 11458.689 | AB040968  | 13758.162 | 13857.039 | NM_020167   | 5112.481  | 5841.15   |
| NM_000495 | 522.3     | 462.671   | X85323    | 1013.719  | 1007.608  | NM_016055   | 16633.523 | 19003.053 |
| BF347926  | 5590.551  | 6409.995  | U17615    | 3188.628  | 3667.77   | NM_014005   | 11419.181 | 12060.158 |
| N54821    | 13468.258 | 16330.115 | NM_005303 | 6033.868  | 7005.314  | NM_017685   | 7160.959  | 6697.474  |
| BI912037  | 3342.797  | 4002.297  | NM_016125 | 16794.139 | 16288.78  | AK025612    | 54689.738 | 55442.176 |
| AA454646  | 15919.881 | 19085.715 | U84119    | 1675.735  | 2209.696  | NM_000370   | 1873.988  | 1480.91   |
| BF063899  | 2413.677  | 2688.061  | NM_003605 | 5211.827  | 6201.97   | BE865893    | 13500.135 | 9721.216  |
| U18087    | 7021.064  | 7142.484  | NM_006460 | 5325.473  | 8006.681  | NM_003123   | 57864.738 | 56042.176 |
| U66349    | 1894.54   | 1988.507  | L34156    | 1828.02   | 3306.66   | AY005822    | 8441.05   | 6459.504  |
| AA057156  | 9961.956  | 11737.165 | NM_001795 | 421.204   | 1042.243  | NM_018125   | 54865.723 | 54654.547 |
| U19487    | 323.742   | 507.839   | D85245    | 3607.859  | 1793.96   | AF289022    | 4870.892  | 5008.984  |
| AF166327  | 31292.699 | 30395.389 | NM_000943 | 744.386   | 335.734   | M17252      | 842.255   | 593.733   |
| AF260739  | 885.54    | 855.259   | NM_004655 | 4994.745  | 2616.445  | NM_016025   | 13377.549 | 10710.274 |

|           |           |           |           |           |           |             |           |           |
|-----------|-----------|-----------|-----------|-----------|-----------|-------------|-----------|-----------|
| AF531423  | 20735.988 | 21035.959 | NM_001250 | 31130.514 | 26264.307 | NM_013319   | 4207.856  | 3954.427  |
| X76555    | 389.656   | 610.89    | AF298812  | 1833.77   | 2424.336  | NM_020410   | 7972.054  | 7336.442  |
| NM_005432 | 1599.83   | 1410.648  | NM_004969 | 2833.695  | 2830.269  | NM_000453   | 3971.242  | 3634.76   |
| L10386    | 15264.727 | 12752.079 | AJ249900  | 884.441   | 830.974   | J03048      | 20779.627 | 16474.592 |
| AF061812  | 2341.888  | 1866.239  | AK022581  | 11002.31  | 8478.737  | NM_004583   | 840.934   | 1202.518  |
| AL136756  | 1804.358  | 2000.633  | NM_018054 | 5148.713  | 3924.782  | NM_001103   | 1546.702  | 1476.886  |
| NM_016383 | 242.772   | 171.832   | NM_006186 | 802.986   | 749.995   | AF228710    | 52589.105 | 47680.324 |
| NM_001478 | 8332.523  | 7805.938  | NM_000958 | 13010.884 | 13150.424 | NM_018399   | 804.179   | 1056.476  |
| M17017    | 461.454   | 1318.698  | NM_001401 | 765.107   | 1086.116  | AY007131    | 62506.172 | 61368.289 |
| NM_002990 | 5459.126  | 11430.636 | NM_013271 | 32534.697 | 31609.002 | U61735      | 4768.721  | 4997.834  |
| NM_002432 | 865.195   | 1046.979  | NM_004157 | 7788.779  | 7510.099  | NM_001144   | 26001.674 | 29335.926 |
| NM_012420 | 168.872   | 287.075   | NM_000684 | 549.779   | 744.845   | AK023766    | 8855.849  | 9609.356  |
| NM_002343 | 1803.964  | 2364.015  | NM_007354 | 659.309   | 409.639   | NM_001897   | 2299.976  | 3090.347  |
| AB033037  | 1538.909  | 2052.472  | U67037    | 873.052   | 473.972   | NM_003853   | 3121.021  | 4147.096  |
| L40400    | 2509.749  | 3080.366  | NM_004960 | 26118.33  | 10245.646 | AB033109    | 3033.167  | 3242.854  |
| AK025688  | 1882.37   | 2230.877  | AF272370  | 20890.764 | 29927.139 | NM_002053   | 61246.387 | 59290.121 |
| NM_005930 | 358.617   | 430.158   | AF130050  | 26754.201 | 39811.02  | NM_017438   | 5157.702  | 3613.476  |
| Z36819    | 6003.678  | 8231.584  | AF119898  | 1116.687  | 1163.577  | U59209      | 5572.822  | 3999.897  |
| NM_014847 | 7581.809  | 7079.531  | AK023045  | 1446.958  | 1876.427  | NM_020195   | 9000.501  | 7206.219  |
| NM_014448 | 423.461   | 608.91    | NM_012197 | 13635.539 | 18007.096 | AK023824    | 9648.66   | 9317.598  |
| AL080157  | 1518.75   | 1540.889  | AK024016  | 7312.533  | 9942.497  | AL133069    | 9260.966  | 9947.405  |
| NM_005100 | 596.162   | 713.823   | NM_003581 | 3507.367  | 2303.579  | AL117574    | 667.653   | 663.044   |
| NM_005308 | 2025.059  | 1955.405  | NM_012407 | 1447.297  | 986.396   | AK026055    | 10861.737 | 10482.597 |
| NM_000911 | 282.152   | 262.139   | AF302505  | 2993.19   | 2628.087  | AK024126    | 1269.793  | 1176.465  |
| NM_007227 | 1032.401  | 1297.55   | NM_007186 | 3819.234  | 2356.165  | NM_001516   | 7459.177  | 7247.987  |
| NM_007023 | 1042.46   | 991.755   | NM_007044 | 5569.496  | 8171.305  | NM_002744   | 14785.349 | 13994.147 |
| NM_005873 | 9138.2    | 7137.248  | AF294326  | 9772.802  | 8589.559  | NM_015917   | 17623.479 | 18001.34  |
| NM_004624 | 2660.609  | 3078.362  | NM_014678 | 3147.272  | 2862.292  | NM_020397   | 1588.371  | 1842.184  |
| NM_003865 | 698.996   | 878.24    | NM_012317 | 57975.277 | 58922.996 | NM_000061   | 6589.881  | 7664.84   |
| AB015330  | 5507.649  | 4087.5    | NM_017853 | 8060.195  | 6821.531  | AB046859    | 43995.063 | 43071.785 |
| L09071    | 624.973   | 531.824   | NM_016097 | 14290.432 | 13318.8   | NM_005109   | 12498.01  | 10845.665 |
| NM_005924 | 1059.766  | 1340.909  | AB035301  | 1048.807  | 1406.203  | AK023573    | 10885.897 | 10517.285 |
| S56138    | 401.013   | 697.413   | AB046800  | 7302.196  | 6424.012  | NM_002730   | 3746.816  | 3407.162  |
| AK023860  | 1208.35   | 4218.605  | NM_002162 | 4910.181  | 5297.621  | NM_004828   | 2456.251  | 2568.816  |
| NM_000031 | 3397.286  | 4220.108  | NM_006438 | 1607.845  | 1616.285  | AB011540    | 67419.484 | 65374.617 |
| NM_002085 | 24406.988 | 21785.59  | AF209198  | 8196.303  | 2476.581  | NM_000040   | 30536.217 | 29647.691 |
| AK026061  | 356.916   | 396.563   | M69012    | 61534.164 | 56096.781 | NM_004631   | 8481.146  | 9406.544  |
| NM_016286 | 11091.278 | 14232.484 | NM_016347 | 819.89    | 964.622   | NM_006033   | 36580.242 | 37438.961 |
| NM_001567 | 3291.469  | 3570.092  | NM_006936 | 32649.619 | 46561.902 | NM_004837   | 8447.362  | 10118.557 |
| NM_004905 | 8714.424  | 6972.393  | NM_001327 | 46230.336 | 56348.094 | NM_003296   | 340.235   | 340.76    |
| AF217971  | 3084.429  | 3265.069  | AF321182  | 659.845   | 1137.07   | NM_004736   | 12801.442 | 12043.73  |
| NM_001925 | 358.557   | 496.617   | AB037722  | 1195.437  | 667.842   | NM_006895   | 519.774   | 773.441   |
| NM_004982 | 943.878   | 1209.961  | NM_000063 | 1984.356  | 3074.47   | NM_006459   | 21528.182 | 24582.713 |
| NM_004732 | 1052.667  | 775.642   | NM_018389 | 3928.147  | 6644.597  | AA427949    | 1667.198  | 1546.006  |
| NM_018349 | 1654.85   | 2426.62   | AB033026  | 592.535   | 719.229   | D50373      | 2106.688  | 2892.878  |
| NM_006363 | 4406.962  | 3989.27   | AF104914  | 28090.033 | 21279.732 | AA488757    | 52416.16  | 51631.352 |
| NM_020415 | 904.711   | 1074.642  | NM_014716 | 16354.188 | 15606.624 | AA205399    | 1511.136  | 1693.319  |
| NM_014879 | 329.914   | 518.151   | AB002354  | 468.572   | 431.465   | H07071      | 8046.684  | 7182.458  |
| AL049667  | 1073.634  | 815.919   | NM_002278 | 436.023   | 594.256   | M25322      | 19238.652 | 20198.32  |
| NM_000334 | 1271.621  | 1492.931  | AK023845  | 4245.88   | 4039.525  | AA436187    | 623.938   | 892.826   |
| NM_020400 | 1549.652  | 1599.946  | NM_002638 | 11793.994 | 11637.999 | H-L 27586 I | 4285.408  | 4934.181  |
| NM_001504 | 386.695   | 257.17    | NM_016487 | 3431.089  | 4110.946  | ID 214180   | 943.914   | 1295.355  |
| D50926    | 2050.08   | 2001.06   | NM_005808 | 29119.963 | 32484.908 | ID 1867426  | 47070.953 | 47762.012 |

|           |           |           |           |           |           |           |           |           |
|-----------|-----------|-----------|-----------|-----------|-----------|-----------|-----------|-----------|
| BF205683  | 1001.991  | 1324.593  | NM_006401 | 53192.18  | 56630.75  | W99328    | 3740.583  | 3902.77   |
| NM_001565 | 941.335   | 910.941   | NM_015913 | 20108.066 | 22757.234 | AI434176  | 1929.646  | 1868.352  |
| NM_000758 | 5341.454  | 4874.309  | NM_005157 | 10866.054 | 13216.182 | H08563    | 7163.228  | 6058.656  |
| NM_004479 | 2013.295  | 5907.482  | NM_018169 | 3083.992  | 1039.122  | BE735403  | 3403.482  | 3491.398  |
| NM_002610 | 2453.923  | 2524.763  | NM_004506 | 8695.078  | 10849.61  | AF116659  | 5289.682  | 4604.771  |
| AF070587  | 2978.654  | 2180.377  | S74529    | 63616.363 | 60741.301 | NM_000317 | 37588.363 | 36896.125 |
| BE250526  | 668.883   | 658.382   | NM_020227 | 827.132   | 1676.167  | NM_018376 | 5173.176  | 5135.952  |
| NM_016819 | 2774.95   | 2925.564  | NM_005933 | 754.69    | 1751.976  | NM_017615 | 1560.936  | 1937.447  |
| NM_012222 | 1699.712  | 1975.175  | NM_005596 | 1388.658  | 2030.137  | AK022425  | 2588.807  | 2068.121  |
| NM_005002 | 2323.787  | 2120.459  | NM_001421 | 732.873   | 313.326   | NM_000054 | 43180.523 | 37134.586 |
| NM_006596 | 4704.495  | 4861.567  | U97060    | 904.119   | 358.549   | NM_014713 | 17235.561 | 16276.725 |
| AK023214  | 6040.919  | 6247.735  | M73837    | 4036.775  | 2172.922  | NM_001812 | 4325.633  | 4968.81   |
| NM_001469 | 10727.479 | 10094.116 | U69127    | 58255.258 | 50993.105 | NM_005811 | 14901.802 | 15534.159 |
| NM_003600 | 3064.615  | 3180.528  | NM_005839 | 17112.545 | 10366.165 | NM_005764 | 3041.731  | 3387.457  |
| NM_017490 | 2686.526  | 2122.192  | AK023379  | 7253.479  | 7987.589  | NM_016362 | 5821.542  | 7405.014  |
| NM_002718 | 1813.226  | 1428.37   | NM_006076 | 1368.982  | 1290.875  | NM_004214 | 12275.637 | 12310.08  |
| AK026727  | 739.732   | 709.711   | AK021904  | 18113.828 | 14118.165 | NM_004329 | 20079.904 | 21201.01  |
| NM_002830 | 365.589   | 354.765   | -         | 4036.972  | 3998.665  | NM_002836 | 14056.679 | 17210.367 |
| NM_006247 | 5843.816  | 5499.436  | NM_018292 | 1467.132  | 2194.365  | NM_020167 | 5697.896  | 6136.758  |
| AB032983  | 378.286   | 288.417   | AL049705  | 18210.777 | 19580.932 | AL049963  | 24300.475 | 31057.813 |
| NM_018281 | 4252.223  | 3968.025  | NM_015458 | 6310.103  | 6473.04   | NM_016058 | 16177.082 | 18202.793 |
| NM_004457 | 3382.171  | 3041.652  | D13540    | 10811.548 | 14101.545 | NM_014005 | 9329.751  | 9910.035  |
| NM_014049 | 2435.513  | 2146.37   | NM_016570 | 10681.672 | 13213.029 | NM_004636 | 20628.518 | 20242.275 |
| NM_005396 | 236.408   | 161.844   | NM_000690 | 1433.193  | 527.682   | AK022603  | 726.361   | 777.458   |
| NM_004315 | 7801.034  | 8071.875  | NM_000155 | 16389.479 | 16584.535 | NM_004896 | 8087.007  | 6946.509  |
| NM_020166 | 4093.896  | 3703.761  | AK024489  | 3138.494  | 5351.471  | NM_013372 | 870.102   | 869.308   |
| NM_003568 | 784.871   | 1558.668  | NM_000181 | 13474.014 | 14292.705 | NM_003976 | 2205.747  | 2543.188  |
| BC036375  | 11611.556 | 28767.717 | NM_000667 | 450.091   | 1244.289  | NM_017688 | 6549.496  | 6876.693  |
| NM_000496 | 552.376   | 788.012   | NM_014121 | 2654.016  | 4294.615  | AK025612  | 58266.578 | 62547.789 |
| BF347926  | 5811.632  | 7784.417  | NM_006730 | 3356.286  | 5295.392  | AL157469  | 510.209   | 608.649   |
| N54821    | 14366.699 | 16020.388 | NM_005644 | 3314.957  | 1610.422  | NM_002868 | 4840.516  | 5989.611  |
| BI912037  | 3770.105  | 5297.234  | NM_018442 | 9833.537  | 3249.122  | AK024100  | 10860.194 | 11157.158 |
| AA454646  | 16779.252 | 20150.324 | AF182416  | 15992.886 | 12306.328 | NM_005135 | 1515.473  | 1562.513  |
| BF063899  | 2343.797  | 2592.97   | NM_005999 | 47259.887 | 47552.266 | NM_001103 | 1481.526  | 1637.858  |
| U18087    | 9018.965  | 9212.47   | NM_006015 | 2489.573  | 4044.117  | AF228710  | 50980.938 | 47928.512 |
| U66349    | 1987.596  | 2598.938  | NM_004634 | 4025.87   | 3032.293  | NM_018399 | 909.907   | 1283.374  |
| AA057156  | 11190.39  | 14712.207 | NM_002017 | 7431.463  | 10480.345 | AY007131  | 59307.52  | 64218.867 |
| U19487    | 341.257   | 486.246   | NM_017523 | 15890.924 | 11794.655 | U61735    | 5311.787  | 6862.057  |
| AF166327  | 33672.949 | 33256.043 | NM_002382 | 44216.254 | 39304.523 | NM_001144 | 26159.588 | 35764.148 |
| AF260739  | 1084.127  | 787.124   | NM_002158 | 1528.244  | 1973.87   | AK023766  | 10553.121 | 17920.795 |
| AF531423  | 23185.854 | 24268.873 | U13223    | 27429.301 | 31131.912 | NM_001897 | 2167.081  | 3884.31   |
| X76555    | 539.339   | 560.434   | NM_016270 | 10133.511 | 12087.16  | NM_003853 | 2581.019  | 3729.254  |
| NM_005432 | 1489.34   | 1139.018  | AF269249  | 1954.343  | 2406.345  | AB033109  | 2979.698  | 3302.659  |
| L10386    | 16162.549 | 14275.793 | X51417    | 786.81    | 860.741   | NM_002053 | 58414.785 | 58945.559 |
| AF061812  | 2513.088  | 1749.821  | D31763    | 10844.725 | 9734.221  | NM_006889 | 5036.522  | 6159.881  |
| AL136756  | 1765.243  | 1382.238  | NM_014815 | 2765.89   | 1292.845  | NM_002438 | 9894.193  | 9776.537  |
| NM_016383 | 194.531   | 205.49    | NM_005443 | 4598.761  | 2530.572  | NM_014589 | 17205.773 | 19472.037 |
| NM_001478 | 7389.258  | 5415.455  | NM_007221 | 13512.622 | 7563.382  | NM_000759 | 4282.823  | 4130.823  |
| NM_002612 | 245.356   | 242.574   | X54163    | 56078.652 | 47818.977 | AK023334  | 14930.557 | 15433.28  |
| AF135422  | 1185.581  | 667.437   | AK025395  | 2092.131  | 3191.19   | NM_002563 | 36390.672 | 39368.105 |
| NM_005930 | 328.951   | 897.896   | NM_000388 | 3359.138  | 3625.56   | AB011540  | 59254.129 | 54842.867 |
| Z36819    | 6116.311  | 11228.707 | X58377    | 1344.624  | 1494.555  | NM_000040 | 22169.932 | 21076.564 |
| NM_014847 | 10373.902 | 18973.77  | NM_002469 | 940.06    | 2097.277  | NM_004631 | 6380.514  | 5542.041  |

|           |           |           |           |           |           |           |           |           |
|-----------|-----------|-----------|-----------|-----------|-----------|-----------|-----------|-----------|
| NM_001195 | 231.239   | 215.763   | AI673575  | 1450.783  | 1607.279  | NM_006033 | 28729.424 | 28913.584 |
| NM_01444E | 578.724   | 894.013   | BI830936  | 916.247   | 614.342   | NM_004837 | 8348.79   | 10449.749 |
| AL080157  | 1908.982  | 2551.51   | U79292    | 21516.045 | 10753.622 | NM_00037C | 3036.301  | 3346.101  |
| NM_00510C | 575.679   | 893.036   | BI830753  | 2354.485  | 3270.029  | BE865893  | 16566.799 | 16216.56  |
| NM_00530E | 2067.668  | 2949.154  | X68314    | 2805.574  | 4359.106  | NM_003123 | 56277.715 | 57114.5   |
| NM_000911 | 392.769   | 744.804   | X71973    | 51335.969 | 43116.582 | AY005822  | 8787.233  | 8913.4    |
| NM_007227 | 1202.8    | 2247.85   | T49651    | 40999.898 | 51977.758 | NM_01812E | 55124.648 | 54666.082 |
| NM_007023 | 1220.04   | 1182.067  | N51014    | 1767.167  | 1573.355  | AF289022  | 5904.126  | 7825.706  |
| NM_005873 | 10238.146 | 10777.865 | BE392471  | 33813.078 | 25753.428 | AB002326  | 505.999   | 657.94    |
| NM_004624 | 2854.674  | 4184.591  | AI802950  | 5699.659  | 6200.522  | M17252    | 1566.762  | 1937.357  |
| NM_014461 | 253.999   | 320.2     | AI741278  | 864.836   | 1181.613  | NM_01602E | 12699.443 | 13906.972 |
| NM_00386E | 678.492   | 869.548   | AA682423  | 1961.798  | 2653.678  | NM_01331E | 4393.58   | 5406.902  |
| AB015330  | 5895.019  | 4650.856  | AL043686  | 8986.186  | 10385.912 | NM_00074E | 2728.489  | 2899.303  |
| NM_00145E | 2838.482  | 3893.033  | AA490172  | 2023.549  | 2413.795  | NM_000722 | 1945.481  | 2854.802  |
| NM_00238E | 477.06    | 273.708   | AA775212  | 4740.306  | 5513.79   | NM_00603C | 2185.512  | 2590.494  |
| NM_00188E | 554.843   | 458.994   | NM_000402 | 3162.902  | 4449.161  | NM_02041C | 7473.715  | 7503.269  |
| AF039196  | 245.499   | 261.798   | AK026266  | 36126.246 | 10925.199 | AF000143  | 54874.078 | 49592.051 |
| NM_001463 | 219.473   | 169.659   | NM_007124 | 16727.324 | 4692.354  | NM_014211 | 1346.142  | 1068.92   |
| L09071    | 600.839   | 768.645   | NM_00317E | 9576.051  | 3582.843  | NM_000814 | 4850.202  | 4458.68   |
| NM_005924 | 1024.178  | 923.925   | NM_000723 | 2479.997  | 951.013   | NM_000453 | 4005.908  | 4130.198  |
| NM_019841 | 624.997   | 529.612   | AL096751  | 20251.707 | 24956.996 | J03077    | 38852.68  | 40577.273 |
| NM_003322 | 324.908   | 434.234   | NM_000364 | 2268.987  | 4202.084  | J03048    | 20826.525 | 15970.285 |
| NM_01336E | 5107.581  | 9730.807  | AF026920  | 29875.715 | 33509.582 | AF116659  | 3892.983  | 2805.512  |
| NM_005817 | 7148.333  | 13632.797 | NM_004931 | 13251.645 | 16769.342 | NM_000317 | 26833.32  | 20017.408 |
| NM_00391E | 8115.011  | 18675.762 | NM_000607 | 41658.734 | 19757.357 | NM_01837E | 4204.677  | 3704.345  |
| NM_00287C | 19530.811 | 37666.914 | NM_00257E | 3361.307  | 3655.639  | NM_01761E | 1176.082  | 1124.825  |
| NM_002802 | 540.893   | 804.391   | NM_004244 | 7889.36   | 8173.684  | NM_01743E | 4701.432  | 4249.545  |
| NM_006363 | 5571.727  | 7153.162  | NM_003371 | 57379.145 | 55622.777 | U59209    | 5813.417  | 5551.579  |
| NM_02041E | 1198.357  | 1179.869  | AK023114  | 9739.715  | 8704.468  | NM_02019E | 9489.29   | 6995.042  |
| NM_01487E | 400.264   | 549.497   | NM_00367E | 6000.182  | 6012.864  | AK023824  | 12693.472 | 12290.682 |
| AL049667  | 1299.183  | 1090.703  | NM_012301 | 3696.238  | 4309.288  | AL133069  | 9431.516  | 12069.854 |
| NM_000334 | 1398.571  | 2215.815  | NM_01493E | 6666.5    | 7603.164  | AL117574  | 1423.994  | 1534.613  |
| NM_02040C | 1736.458  | 1896.572  | AF049460  | 559.226   | 1085.084  | AK026055  | 10598.72  | 13648.059 |
| NM_001504 | 510.444   | 344.418   | AK001500  | 2278.502  | 605.678   | AK024126  | 1001.927  | 1463.089  |
| D50926    | 2079.203  | 2750.965  | NM_006774 | 970.088   | 439.352   | NM_00151E | 7919.23   | 7920.973  |
| BF205683  | 994.552   | 1145.682  | NM_02012E | 3159.28   | 5623.931  | NM_002744 | 17501.395 | 17220.293 |
| NM_00156E | 1029.632  | 1197.372  | Y16521    | 10111.468 | 14394.532 | NM_015917 | 18201.434 | 17786.922 |
| NM_00154E | 302.813   | 308.044   | AL050371  | 12550.289 | 17364.225 | NM_020397 | 2062.202  | 2176.978  |
| NM_00075E | 5409.261  | 3846.125  | NM_002651 | 4270.571  | 1312.012  | NM_000061 | 6725.597  | 8722.056  |
| M17017    | 331.058   | 219.043   | NM_002413 | 15238.281 | 4988.324  | AB046859  | 45794.637 | 46892.91  |
| NM_00299C | 4987.676  | 4550.157  | NM_017577 | 1036.472  | 930.453   | NM_00510E | 12252.285 | 12233.107 |
| NM_002432 | 1015.616  | 600.908   | NM_016301 | 15990.605 | 9982.212  | AK023573  | 10845.149 | 11291.467 |
| NM_01242C | 229.461   | 108.479   | NM_01466E | 6491.416  | 7185.189  | NM_00273C | 4404.126  | 4509.918  |
| NM_002343 | 1752.106  | 2521.404  | NM_004722 | 6616.664  | 6548.101  | NM_00482E | 2860.988  | 3731.292  |
| AB033037  | 1361.454  | 1234.156  | NM_01442E | 2426.524  | 1947.814  | CY3Cy5    | 2026.01   | 186.704   |
| L40400    | 2377.557  | 2066.707  | NM_012133 | 12712.852 | 12501.838 | NM_001824 | 70783.711 | 64336.375 |
| AK025688  | 1942.158  | 1908.027  | NM_017954 | 1136.002  | 1452.082  | AF035314  | 796.811   | 620.64    |
| NM_004457 | 3343.776  | 5420.564  | NM_006612 | 11423.254 | 12516.364 | NM_01803E | 1520.37   | 971.214   |
| NM_01404E | 2529.49   | 3577.251  | NM_016451 | 5296.486  | 6134.938  | AF052087  | 853.546   | 897.093   |
| NM_00539E | 313.821   | 544.45    | NM_007351 | 61411.453 | 61413.086 | AF007143  | 1715.92   | 1186.347  |
| NM_00431E | 13391.076 | 50405     | AL049935  | 23070.039 | 9662.122  | AF147417  | 673.626   | 439.412   |
| NM_02016E | 4270.351  | 5095.154  | AB033043  | 14671.923 | 8390.86   | AK023656  | 1659.126  | 1118.74   |
| S56138    | 322.108   | 396.872   | NM_01499E | 10690.179 | 5172.433  | AF086511  | 3636.762  | 2585.27   |

|           |           |           |           |           |           |           |           |           |
|-----------|-----------|-----------|-----------|-----------|-----------|-----------|-----------|-----------|
| AK023860  | 1070.279  | 1299.549  | AK025220  | 7059.142  | 8998.444  | AK022989  | 8461.901  | 6336.102  |
| NM_000031 | 3837.096  | 3668.826  | NM_016308 | 39528.109 | 48104.402 | AK001604  | 5013.186  | 3740.587  |
| NM_002085 | 25626.943 | 19966.438 | D42046    | 8387.713  | 9329.149  | AF086497  | 680.529   | 862.51    |
| AK026061  | 388.654   | 402.786   | NM_001033 | 22371.73  | 29723.959 | NM_020141 | 7590.054  | 6504.604  |
| NM_016286 | 12433.387 | 13553.136 | NM_004526 | 29698.826 | 36756.813 | NM_006482 | 1693.512  | 1927.485  |
| NM_001567 | 3700.314  | 4814.667  | NM_002526 | 16889.172 | 8147.85   | NM_001824 | 78384.914 | 64163.883 |
| NM_004905 | 9084.877  | 7081.026  | NM_020135 | 4856.559  | 2422.309  | SR9       | 10907.669 | 2158.396  |
| AF217971  | 3050.022  | 2403.154  | NM_018518 | 6670.669  | 3184.583  | CY3Cy5    | 3658.82   | 853.138   |
| NM_001925 | 338.192   | 476.669   | AK023149  | 5077      | 6055.365  | U15553    | 8823.171  | 5181.122  |
| AF245517  | 1895.607  | 1761.546  | AK023168  | 7725.77   | 10156.71  | Z36829    | 1338.359  | 936.073   |
| NM_004137 | 465.149   | 388.695   | NM_006646 | 577.228   | 717.642   | AK024734  | 9940.703  | 5807.958  |
| NM_004982 | 907.56    | 796.259   | NM_004742 | 3326.472  | 3652.288  | NM_017741 | 1766.515  | 1240.892  |
| NM_001694 | 32116.672 | 26663.139 | NM_014753 | 3049.341  | 2746.853  | NM_005887 | 4580.703  | 3309.283  |
| AF286370  | 353.278   | 230.047   | NM_006585 | 51945.645 | 55877.18  | AK024921  | 947.679   | 781.435   |
| NM_000217 | 245.331   | 169.399   | NM_014331 | 7826.352  | 7534.083  | AL110232  | 1418.339  | 1056.044  |
| NM_004732 | 1275.562  | 615.414   | NM_006795 | 42078.375 | 41786.09  | AK026103  | 3191.963  | 2293.832  |
| AK026180  | 1052.856  | 1097.584  | AF070568  | 3549.992  | 4108.67   | NM_016353 | 25532.238 | 19340.746 |
| NM_018349 | 1851.738  | 1643.881  | NM_000277 | 777.34    | 890.116   | AK022567  | 795.065   | 393.825   |
| NM_016383 | 275.305   | 317.515   | NM_000240 | 8963.872  | 10224.694 | AL080280  | 14022.752 | 12497.088 |
| NM_001478 | 8858.545  | 12957.636 | AK055733  | 27416.057 | 32505.221 | AK022556  | 403.896   | 511.085   |
| NM_002612 | 412.234   | 1325.413  | AF298880  | 12432.586 | 13955.315 | AK023437  | 6434.382  | 5189.493  |
| AF135422  | 1584.322  | 1037.41   | NM_007221 | 11983.472 | 4482.642  | AK024147  | 1190.857  | 1072.568  |
| NM_004479 | 1595.58   | 1615.909  | X54163    | 55490.574 | 34477.523 | AK022897  | 955.857   | 866.415   |
| NM_002610 | 3211.403  | 2153.898  | AK025395  | 985.462   | 666.554   | AK023898  | 8866.813  | 6441.935  |
| AF070587  | 2868.077  | 2447.767  | NM_000388 | 2057.887  | 988.644   | AK021619  | 707.815   | 591.005   |
| BE250526  | 779.233   | 837.676   | X58377    | 1244.162  | 1589.174  | AK025872  | 1066.124  | 879.772   |
| NM_016819 | 3197.412  | 3460.836  | NM_002469 | 886.485   | 1274.292  | AF131762  | 6610.661  | 4603.12   |
| NM_012222 | 1925.904  | 2330.465  | AI673575  | 744.153   | 908.143   | AY007089  | 2781.806  | 2133.463  |
| NM_005002 | 2590.83   | 2779.602  | BI830936  | 1313.963  | 2724.298  | AK021816  | 8518.048  | 6335.775  |
| NM_006596 | 4950.93   | 4183.266  | U79292    | 22527.324 | 28921.941 | D43770    | 20617.064 | 14980.89  |
| AK023214  | 7199.313  | 6746.731  | AA947915  | 570.233   | 427.107   | AF085960  | 1162.556  | 1509.043  |
| NM_001469 | 12840.868 | 10752.965 | BI830753  | 1324.617  | 896.299   | AF085993  | 1394.28   | 1444.294  |
| NM_003600 | 3298.836  | 2668.208  | X68314    | 1543.112  | 1293.453  | AK021519  | 1871.484  | 1575.826  |
| NM_017490 | 3027.849  | 2303.586  | X71973    | 52203.676 | 50457.367 | NM_014254 | 6142.111  | 4767.764  |
| NM_002718 | 1892.751  | 1530.522  | T49651    | 35796.02  | 30285.914 | AF086010  | 1641.367  | 1597.693  |
| AK026727  | 948.72    | 559.908   | N51014    | 1739.038  | 2406.244  | AK025218  | 925.01    | 761.924   |
| NM_002830 | 546.369   | 335.876   | BE392471  | 35186.531 | 35402.617 | AJ227899  | 2542.231  | 2417.946  |
| NM_006247 | 7030.529  | 5367.955  | AI802950  | 4843.383  | 4226.156  | AL359607  | 4884.426  | 5515.657  |
| AB032983  | 431.897   | 440.611   | AA682423  | 1349.423  | 1479.594  | AF161371  | 7704.833  | 6049.741  |
| NM_018281 | 5486.033  | 5290.633  | AL043686  | 8107.259  | 7701.75   | AK022464  | 2836.35   | 2210.668  |
| CY3Cy5    | 1824.822  | 166.773   | AA490172  | 1854.787  | 2456.58   | AF086230  | 2271.916  | 1946.203  |
| NM_000945 | 2054.696  | 2904.528  | AA775212  | 4304.099  | 4774.52   | AK023408  | 4386.735  | 3062.175  |
| NM_002574 | 115328.79 | 63038.418 | AB011174  | 5738.469  | 6595.164  | AK000144  | 2291.853  | 1889.272  |
| NM_001310 | 5419.229  | 3743.325  | AB040879  | 2087.978  | 2349.73   | AK022275  | 917.226   | 578.136   |
| AK026924  | 1356.827  | 1009.267  | NM_003176 | 10055.383 | 2802.805  | AK000942  | 813.47    | 698.413   |
| AL122047  | 3416.932  | 3876.501  | NM_000723 | 2199.003  | 825.33    | AL117533  | 2424.818  | 1911.484  |
| AF052091  | 887.311   | 715.743   | AL096751  | 13563.609 | 6722.365  | AK026036  | 1314.852  | 979.935   |
| AK024447  | 79089.227 | 60674.406 | NM_000364 | 2208.037  | 2920.738  | AK023422  | 5204.027  | 4277.065  |
| AF052145  | 1562.751  | 1536.179  | AF026920  | 24842.717 | 27551.869 | AK022796  | 2435.3    | 2432.876  |
| AF086458  | 3755.93   | 4869.9    | NM_004931 | 14063.74  | 17657.408 | AK095193  | 1762.337  | 1528.978  |
| AF086548  | 698.192   | 411.166   | NM_000607 | 53000.5   | 59229.074 | AK025081  | 2867.159  | 2032.636  |
| AK023717  | 1829.332  | 1646.377  | AB011099  | 1036.132  | 1279.713  | AL122088  | 2445.9    | 2116.677  |
| AK022294  | 751.292   | 554.979   | NM_002575 | 2421.874  | 2128.384  | AF116633  | 384.179   | 532.907   |



|           |           |           |           |           |           |           |           |           |
|-----------|-----------|-----------|-----------|-----------|-----------|-----------|-----------|-----------|
| AF086507  | 1373.609  | 927.664   | NM_004244 | 6534.62   | 3658.529  | T99941    | 10770.683 | 11719.097 |
| U79289    | 887.842   | 577.654   | NM_003371 | 42002.98  | 37365.949 | AF113678  | 2332.704  | 2243.667  |
| NM_01402E | 2764.956  | 1911.103  | NM_001164 | 371.474   | 732.172   | AL137313  | 66439.234 | 73201.93  |
| NM_00094E | 1982.453  | 1545.226  | AK023114  | 10272.078 | 8568.871  | AB002363  | 7284.582  | 4978.948  |
| NM_002574 | 76943.914 | 61159.613 | NM_00367E | 5588.959  | 5105.583  | NM_005284 | 6076.993  | 5137.558  |
| SR1       | 78590.781 | 62228.648 | NM_012301 | 3041.967  | 2521.235  | AF086351  | 691.704   | 592.771   |
| SR3       | 33378.371 | 38185.836 | NM_005631 | 606.611   | 750.623   | D83199    | 15243.681 | 12870.765 |
| SR5       | 5408.67   | 11817.941 | NM_01493E | 6442.62   | 6738.681  | AK025957  | 825.006   | 789.74    |
| SR9       | 18953.191 | 8980.925  | AF049460  | 627.595   | 945.872   | Y16708    | 2291.227  | 1972.194  |
| CY3Cy5    | 8449.772  | 758.933   | NM_01481E | 3554.823  | 4598.174  | AL157453  | 2742.148  | 2124.305  |
| AK026923  | 1893.774  | 865.271   | NM_00544E | 6402.282  | 7787.335  | NM_01904C | 10652.944 | 9575.311  |
| U61091    | 832.99    | 1064.365  | NM_02012E | 2322.645  | 1433.859  | NM_00597E | 2355.154  | 1714.521  |
| AK021691  | 36123.664 | 27732.814 | Y16521    | 7251.885  | 3289.608  | Y16711    | 965.093   | 879.17    |
| AK023595  | 1143.713  | 1241.015  | AL050371  | 11346.509 | 13100.585 | AJ272179  | 6440.194  | 5629.947  |
| NM_015721 | 4675.355  | 3206.043  | NM_002651 | 6740.994  | 8438.574  | AJ007015  | 3551.586  | 5077.867  |
| AF086298  | 990.194   | 805.368   | NM_00241E | 19641.592 | 23417.123 | AL049317  | 2352.867  | 2911.173  |
| AK027238  | 1004.869  | 1166.974  | NM_017577 | 988.974   | 914.182   | AL050090  | 1795.418  | 1747.865  |
| AK000032  | 526.968   | 330.763   | NM_016301 | 15294.563 | 9411.43   | AF086309  | 693.976   | 600.753   |
| S94540    | 2639.354  | 3832.275  | NM_01466E | 5035.448  | 5761.058  | AF238870  | 1392.763  | 1261.193  |
| AF052122  | 6303.841  | 10789.342 | NM_00472E | 7596.213  | 9096.01   | AK026279  | 2873.266  | 2710.722  |
| AK022416  | 1494.361  | 1440.266  | NM_01442E | 2837.24   | 2812.601  | AK026673  | 4199.211  | 3324.167  |
| AK023224  | 3149.452  | 3898.028  | NM_01213E | 12341.744 | 11160.719 | AF170935  | 17051.617 | 14449.306 |
| AK022442  | 763.172   | 882.961   | NM_017954 | 874.229   | 965.094   | AB007978  | 1313.395  | 1097.382  |
| AK023336  | 624.199   | 638.676   | NM_00661E | 10977.726 | 10483.09  | AF217970  | 1505.371  | 1194.733  |
| AK023771  | 482.733   | 368.433   | NM_016451 | 5108.819  | 5315.594  | AF086297  | 2035.104  | 2397.557  |
| AK023727  | 2295.081  | 2734.952  | NM_007351 | 64496.922 | 66718.813 | AK025455  | 2449.246  | 2008.153  |
| AK025271  | 1229.662  | 1073.118  | AK026266  | 46325.152 | 48311.387 | AK026799  | 12087.719 | 7498.195  |
| AF086204  | 2425.806  | 1261.75   | NM_007124 | 22159.396 | 22183.42  | NM_01486C | 469.347   | 344.068   |
| NM_007021 | 735.721   | 623.39    | AB033043  | 19779.186 | 21546.268 | AK022549  | 1513.026  | 1334.33   |
| AK026283  | 879.581   | 1183.308  | NM_01499E | 10340.693 | 4701.251  | NM_018157 | 622.389   | 360.394   |
| AK022076  | 648.566   | 487.916   | AK025220  | 4850.398  | 2099.42   | Z70714    | 4297.855  | 3464.352  |
| AL360204  | 962.114   | 746.759   | NM_01630E | 30310.035 | 22451.27  | AK021640  | 18248.773 | 11283.519 |
| AK026294  | 567.593   | 576.186   | D42046    | 8156.252  | 11837.342 | NM_01656E | 63172.398 | 60444.586 |
| AF085959  | 791.57    | 611.807   | NM_00103E | 21591.654 | 25814.686 | U84509    | 5168.776  | 4179.105  |
| AK023104  | 1858.537  | 2999.004  | NM_00252E | 22651.82  | 30059.422 | AL110201  | 1260.254  | 856.361   |
| NM_018474 | 8520.084  | 11586.493 | NM_02013E | 7841.833  | 11108.24  | AK002036  | 3438.931  | 2387.069  |
| AK024937  | 4383.453  | 4556.978  | NM_01851E | 8735.184  | 8412.396  | AK025775  | 5398.048  | 4805.045  |
| D17178    | 2277.923  | 2052.282  | AK023149  | 3342.213  | 1994.052  | AB046791  | 1431.165  | 1311.32   |
| AK022094  | 1883.455  | 1291.01   | AK023168  | 5341.006  | 4924.858  | AF043469  | 2478.966  | 2179.05   |
| AK026695  | 1187.906  | 1119.523  | NM_00474E | 2272.628  | 2590.676  | AL109671  | 1519.699  | 1182.297  |
| AK022220  | 946.772   | 879.552   | NM_01475E | 5127.243  | 6407.61   | NM_01237E | 1272.461  | 1402.176  |
| AL137539  | 389.808   | 432.729   | NM_00658E | 50562.926 | 58476.918 | AK022008  | 2829.261  | 2046.048  |
| AK000141  | 7833.426  | 6486.892  | NM_014331 | 7907.145  | 7435.436  | NM_01818E | 2504.318  | 1663.496  |
| AL137758  | 3343.404  | 2664.904  | NM_00679E | 34633.504 | 32647.797 | AL080188  | 4741.836  | 3068.992  |
| AK025786  | 1382.187  | 1437.597  | AF070568  | 3050.014  | 3158.685  | NM_00239C | 3866.596  | 4061.337  |
| AK024188  | 672.206   | 675.216   | NM_000277 | 1001.454  | 905.792   | NM_00614E | 2866.201  | 2305.317  |
| AK024379  | 936.579   | 724.241   | NM_00024C | 9025.017  | 10586.455 | NM_01491C | 13765.045 | 13586.569 |
| AK026820  | 573.147   | 663.492   | AK055733  | 25959.139 | 29596.361 | AK001064  | 6106.165  | 4968.933  |
| AK001716  | 1810.587  | 1565.04   | AF298880  | 9399.544  | 9932.013  | AB029031  | 3480.761  | 3037.227  |
| AF113683  | 718.343   | 582.361   | AK001500  | 3047.818  | 3653.429  | NM_001294 | 10557.472 | 10045.283 |
| NM_01409E | 436.876   | 674.296   | NM_006774 | 1391.432  | 1815.6    | AF302786  | 4399.577  | 3494.202  |
| AK026280  | 766.586   | 495.685   | AK025395  | 1154.447  | 572.273   | AL122083  | 12487.828 | 10315.227 |
| AF113017  | 2437.797  | 3449.527  | NM_00038E | 1981.781  | 920.092   | NM_01909E | 14218.302 | 8701.271  |

|           |           |           |           |           |           |           |           |           |
|-----------|-----------|-----------|-----------|-----------|-----------|-----------|-----------|-----------|
| AL080232  | 3590.835  | 5283.847  | X58377    | 586.847   | 280.057   | AK022212  | 62276.695 | 61758.852 |
| AK001120  | 3736.645  | 5615.752  | NM_002469 | 868.048   | 569.219   | X64974    | 7603.061  | 4983.914  |
| AK021980  | 7504.963  | 11760.029 | AI673575  | 536.398   | 1149.411  | NM_000834 | 12526.621 | 7839.601  |
| S46402    | 1735.948  | 2026.544  | BI830936  | 1190.705  | 1762.859  | NM_006485 | 53714.219 | 46747.602 |
| AF075048  | 223.89    | 264.477   | BI830753  | 2531.512  | 3768.162  | NM_012455 | 4529.398  | 4264.219  |
| Z83940    | 1359.373  | 2207.769  | X68314    | 2445.677  | 2684.075  | NM_01236C | 785.358   | 946.49    |
| NM_00580C | 2936.911  | 2996.813  | X71973    | 49655.367 | 33270.609 | AL137268  | 3684.953  | 3412.532  |
| AF019617  | 7527.064  | 6332.472  | T49651    | 36787.453 | 27604.703 | AK001130  | 636.928   | 424.854   |
| AL137305  | 9759.885  | 10254.876 | N51014    | 1438.518  | 1395.051  | AK022398  | 916.546   | 1079.577  |
| NM_00529C | 1569.782  | 2428.171  | BE392471  | 31256.006 | 20658.445 | AK024109  | 6986.641  | 5551.688  |
| AK025802  | 1763.074  | 1444.413  | AI802950  | 4549.71   | 4814.714  | AF088048  | 2310.061  | 2083.808  |
| AF085973  | 596.638   | 497.082   | AI741278  | 766.266   | 773.094   | AK001701  | 4628.047  | 2797.917  |
| NM_018013 | 1601.675  | 1276.823  | AA682423  | 1766.892  | 1924.785  | AK022205  | 1789.107  | 1412.832  |
| AK026873  | 4306.987  | 4347.726  | AL043686  | 7994.405  | 6979.703  | AK024955  | 65749.32  | 66697.828 |
| AK026394  | 4561.901  | 4837.342  | AA490172  | 1415.044  | 1566.493  | NM_01658C | 3346.635  | 3770.781  |
| NM_00544E | 1561.155  | 1344.547  | AA775212  | 4218.653  | 4356.014  | AF169693  | 2265.451  | 2462.399  |
| AK025943  | 44099.25  | 30398.797 | AB011174  | 4846.016  | 6513.491  | L23206    | 16452.033 | 14192.256 |
| BG106479  | 2275.943  | 1557.928  | AB040879  | 1747.886  | 1670.141  | NM_012192 | 6165.799  | 4474.257  |
| AF130069  | 5560.588  | 6374.595  | AL049935  | 27845.561 | 28930.734 | NM_006293 | 3309.096  | 2304.153  |
| AL109669  | 9117.91   | 7234.636  | AB011099  | 255.898   | 168.181   | NM_007225 | 8967.784  | 7600.507  |
| AB037766  | 1140.445  | 386.714   | NM_002575 | 3317.142  | 2447.632  | AB011105  | 5182.82   | 4463.822  |
| AK026995  | 1113.779  | 1162.512  | NM_004244 | 10547.846 | 9612.982  | NM_002213 | 1382.201  | 849.957   |
| AL133091  | 819.364   | 1346.624  | NM_003371 | 59400.844 | 60788.91  | NM_01897C | 666.14    | 555.973   |
| BF842915  | 1028.893  | 1333.917  | AK023114  | 14302.465 | 17991.834 | NM_004814 | 5151.354  | 4698.122  |
| X82545    | 13681.422 | 24431.852 | NM_003678 | 8046.862  | 10218.497 | D86976    | 17825.748 | 13104.734 |
| AF302079  | 18274.674 | 14503.383 | NM_012301 | 3136.525  | 1307.194  | AF307080  | 780.267   | 744.874   |
| AJ224167  | 1360.827  | 1017.846  | NM_005631 | 903.794   | 1017.771  | NM_004057 | 6944.78   | 5920.842  |
| NM_00255C | 483.532   | 508.897   | NM_014419 | 13469.835 | 12077.078 | NM_018971 | 1885.44   | 1818.331  |
| NM_000692 | 2637.215  | 2280.147  | NM_014938 | 8892.685  | 10655.831 | K03175    | 1287.028  | 1257.996  |
| AF086062  | 1789.515  | 2085.298  | AF049460  | 750.828   | 703.948   | NM_003015 | 3099.077  | 3003.505  |
| AF000268  | 490.177   | 747.107   | AK026066  | 2583.857  | 3761.89   | NM_003711 | 1900.048  | 1538.276  |
| L47668    | 43590.242 | 33940.652 | NM_005244 | 6899.978  | 6377.077  | NM_00649C | 7131.655  | 5757.824  |
| NM_01792C | 2390.722  | 1990.124  | AF054589  | 7193.389  | 7076.685  | NM_00082E | 1166.89   | 844.775   |
| AK025345  | 1448.755  | 1118.359  | NM_00527C | 600.506   | 1092.365  | NM_00482E | 7366.606  | 5604.179  |
| D25274    | 16086.104 | 9441.672  | NM_014815 | 3501.411  | 4213.323  | NM_003182 | 705.268   | 552.419   |
| U84520    | 1454.826  | 1426.76   | NM_005443 | 6031.479  | 6137.923  | NM_004431 | 35532.168 | 40105.965 |
| AL133616  | 5036.724  | 4845.177  | NM_007221 | 16538.088 | 19000.775 | NM_002012 | 5368.925  | 5577.836  |
| AK023391  | 592.398   | 648.306   | X54163    | 62613.852 | 65560.57  | NM_00207C | 35650.375 | 30296.006 |
| AK026382  | 2866.088  | 1865.301  | NM_018607 | 595.709   | 234.748   | AF227969  | 6485.221  | 7903.676  |
| AK091169  | 6567.307  | 6807.282  | NM_002978 | 9325.104  | 3081.534  | AF116657  | 1810.406  | 2088.421  |
| NM_01474E | 47121.91  | 58180.105 | NM_014668 | 8056.325  | 9531.155  | NM_004102 | 1170.204  | 1053.091  |
| AF086026  | 6071.432  | 6158.995  | NM_004722 | 8980.013  | 10302.261 | NM_003944 | 56614.598 | 58789.531 |
| NM_015607 | 28808.389 | 43746.129 | NM_014425 | 4880.837  | 5732.49   | NM_01612C | 58972.723 | 60795.559 |
| AK026955  | 2116.155  | 3227.599  | NM_012133 | 17849.574 | 17909.906 | NM_002893 | 1889.779  | 1877.305  |
| AL110202  | 44328.273 | 62684.77  | NM_017954 | 1369.725  | 997.75    | NM_002393 | 47914.199 | 43708.637 |
| NM_00622E | 2832.02   | 2912.824  | NM_006612 | 8168.912  | 5287.197  | NM_002665 | 5311.168  | 5314.814  |
| NM_00376E | 18800.17  | 14841.34  | NM_016451 | 4208.621  | 2966.657  | AB014600  | 8698.866  | 8338.763  |
| NM_018393 | 2609.634  | 3045.109  | NM_007351 | 57658.91  | 54493.086 | NM_018312 | 5394.343  | 4459.072  |
| BF032535  | 2709.203  | 2405.172  | AK026266  | 45676.074 | 38563.895 | X98259    | 2546.737  | 2693.176  |
| NM_018332 | 6837.708  | 6006.473  | NM_007124 | 21473.293 | 15824.249 | NM_014792 | 1161.487  | 1717.583  |
| NM_00509E | 7311.219  | 8574.365  | NM_003176 | 12055.568 | 11446.835 | U05255    | 1251.283  | 1358.735  |
| NM_00676C | 2260.571  | 3751.429  | NM_000723 | 2815.968  | 2769.302  | X98260    | 11430.932 | 9187.343  |
| NM_01228E | 9981.413  | 8397.622  | AL096751  | 17748.541 | 17838.572 | NM_007217 | 9543.686  | 10625.237 |

|           |           |           |           |           |           |           |           |           |
|-----------|-----------|-----------|-----------|-----------|-----------|-----------|-----------|-----------|
| AB037775  | 704.111   | 633.094   | NM_000364 | 2022.081  | 2307.918  | NM_014777 | 41119.109 | 30920.473 |
| L27560    | 1010.313  | 631.758   | AF026920  | 24413.246 | 24513.645 | NM_001102 | 7000.346  | 5891.808  |
| AK022517  | 3316.646  | 2136.898  | NM_004931 | 9954.67   | 10293.463 | NM_003803 | 8774.584  | 7070.53   |
| NM_000329 | 23252.365 | 21376.23  | NM_000607 | 52331.953 | 56942.434 | NM_002818 | 60809.543 | 50523.035 |
| NM_001182 | 4194.408  | 2947.772  | NM_000240 | 8172.324  | 2952.589  | NM_001937 | 15830.489 | 13074.555 |
| NM_000333 | 4600.405  | 4504.445  | AK055733  | 25302.305 | 13590.791 | AK024778  | 1044.782  | 652.117   |
| NM_000172 | 6004.5    | 6573.314  | AF298880  | 11674.781 | 5292.259  | AK025498  | 3105.022  | 3816.814  |
| NM_002297 | 1452.464  | 1147.015  | AK001500  | 3901.92   | 1810.671  | NM_001395 | 45211.961 | 47587.59  |
| AB040968  | 4676.853  | 5081.629  | NM_006774 | 1782.834  | 2722.339  | NM_002068 | 1478.635  | 2011.892  |
| X85323    | 1325.817  | 1845.186  | NM_020129 | 3808.027  | 4955.669  | NM_019854 | 998.133   | 1140.871  |
| AK000802  | 533.114   | 493.674   | Y16521    | 11083.568 | 14166.466 | NM_013338 | 3558.342  | 3021.491  |
| U17615    | 2497.314  | 1574.617  | AL050371  | 9886.894  | 7133.437  | NM_014671 | 18153.158 | 12258.244 |
| NM_005303 | 895.654   | 293.861   | NM_002651 | 5366.831  | 3344.7    | NM_001814 | 9051.128  | 7198.54   |
| NM_016126 | 14230.88  | 9762.689  | NM_002413 | 10709.815 | 9586.041  | NM_018438 | 724.903   | 577.955   |
| U84119    | 2348.754  | 3441.482  | NM_017577 | 1305.046  | 1231.461  | NM_005658 | 3957.176  | 3059.567  |
| NM_003608 | 8037.387  | 15145.17  | NM_001757 | 788.898   | 793.086   | NM_006012 | 9166.049  | 8830.903  |
| AK024697  | 633.568   | 831.434   | NM_001647 | 11294.35  | 11543.823 | NM_002151 | 3420.631  | 3474.948  |
| NM_006460 | 5102.65   | 4457.629  | NM_018158 | 3340.543  | 4065.617  | NM_014888 | 3718.682  | 3248.839  |
| L34156    | 1458.522  | 1961.352  | NM_016301 | 19524.529 | 19884.035 | AF173935  | 952.469   | 1284.234  |
| NM_003748 | 940.755   | 1044.545  | AK021975  | 1738.316  | 2535.581  | AK025322  | 49959.754 | 49989.895 |
| NM_003557 | 5659.354  | 7366.401  | AB032952  | 50529.816 | 50692.914 | NM_017887 | 5544.359  | 5857.261  |
| NM_001257 | 4570.02   | 4209.224  | NM_002522 | 52181.398 | 57654.098 | NM_017650 | 543.752   | 509.667   |
| NM_001795 | 472.33    | 600.623   | AB011174  | 5223.494  | 2074.234  | NM_000526 | 8919.878  | 10423.08  |
| D85245    | 2955.765  | 2383.336  | AB040879  | 1991.36   | 653.706   | AF007152  | 3418.988  | 3350.813  |
| NM_000943 | 1291.396  | 1144.112  | AL049935  | 37433.867 | 40967.66  | NM_017575 | 1246.729  | 1176.151  |
| NM_004658 | 6209.103  | 5655.936  | AB033043  | 21722.906 | 33262.785 | AL122100  | 4383.275  | 5039.11   |
| NM_001250 | 19789.371 | 13706.974 | NM_014999 | 17562.463 | 19850.039 | NM_005310 | 12924.778 | 8840.3    |
| AF298812  | 1186.144  | 994.159   | AK025220  | 8014.555  | 11269.183 | NM_014423 | 12403.933 | 10067.138 |
| NM_004968 | 3997.371  | 5410.594  | NM_016308 | 43517.16  | 56387.059 | BE904126  | 60196.52  | 59568.031 |
| AJ249900  | 1404.111  | 1172.13   | D42046    | 7718.531  | 7367.613  | AF272380  | 69720.281 | 61965.008 |
| AK022581  | 10140.619 | 7320.448  | NM_001033 | 15808.624 | 6770.812  | NM_033288 | 606.441   | 936.038   |
| NM_006188 | 700.388   | 892.427   | NM_004526 | 28198.225 | 31031.848 | AK000102  | 3689.583  | 5119.2    |
| NM_000958 | 17669.457 | 25287.479 | NM_002526 | 17046.193 | 19893.438 | AB040916  | 7220.172  | 8334.094  |
| NM_001401 | 798.939   | 782.061   | NM_020135 | 7751.253  | 11108.88  | NM_005587 | 5330.816  | 4234.075  |
| NM_013271 | 1485.249  | 525.925   | NM_018518 | 6819.205  | 6877.72   | AF038362  | 5154.536  | 3960.658  |
| NM_004157 | 3718.943  | 861.753   | AK023149  | 2721.079  | 2352.52   | NM_005195 | 57819.441 | 53841.41  |
| NM_007354 | 503.507   | 340.861   | AK023168  | 4656.251  | 5779.418  | NM_005481 | 2694.691  | 2212.007  |
| U67037    | 906.245   | 981.37    | NM_004742 | 2663.82   | 2490.805  | NM_004715 | 12284.128 | 11310.736 |
| NM_004960 | 38256.301 | 30794.766 | NM_014753 | 3712.172  | 4033.864  | L40392    | 3969.001  | 4267.946  |
| AF272370  | 18325.766 | 16962.697 | NM_006585 | 52443.484 | 61137.203 | BF541482  | 671.096   | 532.848   |
| AF130050  | 21892.576 | 23085.461 | NM_014331 | 8065.018  | 8820.43   | NM_001007 | 66174.969 | 64407.895 |
| AF119898  | 1477.382  | 1767.889  | NM_006795 | 38362.48  | 40817.219 | NM_003017 | 12484.68  | 11624.326 |
| AK023045  | 869.12    | 581.656   | AF070568  | 3530.4    | 3722.274  | NM_020366 | 7692.725  | 8121.478  |
| NM_012197 | 7816.062  | 6557.634  | NM_000277 | 1022.373  | 1245.676  | AK021608  | 3261.039  | 3098.265  |
| AK024016  | 6018.407  | 5824.758  | CY3Cy5    | 757.457   | 71.604    | NM_004297 | 3079.796  | 2482.199  |
| NM_003581 | 4111.132  | 4201.412  | NM_022552 | 5792.919  | 3316.078  | NM_006044 | 14105.024 | 15804.444 |
| NM_002888 | 673.571   | 1034.524  | NM_014389 | 22735.078 | 14516.567 | NM_003635 | 6636.965  | 6730.372  |
| NM_012407 | 2037.236  | 1730.446  | AK025015  | 814.994   | 807.277   | NM_000662 | 3486.306  | 3114.659  |
| AF302505  | 3008.261  | 2506.395  | AF086187  | 4020.32   | 3049.221  | NM_000292 | 3343.801  | 2852.798  |
| NM_007188 | 2314.953  | 2047.507  | AF305836  | 77271.328 | 62380.133 | NM_003688 | 61703.461 | 59957.531 |
| NM_007044 | 6145.821  | 8404.075  | AL109784  | 1433.188  | 985.55    | NM_016173 | 1679.147  | 1640.388  |
| AF294326  | 11541.402 | 10749.964 | AL137383  | 682.071   | 677.563   | NM_002875 | 8045.396  | 7388.431  |
| NM_014678 | 2648.772  | 2451.005  | AL035295  | 4690.329  | 3971.262  | NM_004427 | 16207.627 | 14855.674 |

|           |           |           |           |           |           |           |           |           |
|-----------|-----------|-----------|-----------|-----------|-----------|-----------|-----------|-----------|
| NM_017853 | 9978.902  | 9417.968  | NM_018302 | 15387.269 | 13081.855 | U90549    | 8818.314  | 10843.894 |
| NM_016097 | 10941.631 | 9484.575  | AK027252  | 11130.779 | 8993.145  | NM_013240 | 17754.953 | 16579.941 |
| AB035301  | 939.338   | 845.867   | AF165527  | 5547.706  | 4773.511  | NM_015874 | 29422.113 | 25107.809 |
| AB046800  | 1160.263  | 366.42    | NM_014092 | 1349.341  | 1058.547  | NM_004965 | 58944.168 | 60333.074 |
| NM_002162 | 2696.747  | 710.249   | AL359596  | 3189.518  | 2271.212  | AF312393  | 59558.336 | 53973.547 |
| NM_006438 | 341.211   | 126.177   | U79249    | 1704.279  | 1055.952  | AF272898  | 22538.123 | 20111.943 |
| AF209198  | 9914.736  | 8417.531  | AK022114  | 1554.354  | 1611.956  | AB037817  | 2256.654  | 2523.684  |
| M69012    | 23356.402 | 20825.703 | AL133585  | 3278.261  | 3480.974  | AB032951  | 22316.697 | 25877.314 |
| NM_006936 | 24795.563 | 21824.57  | NM_022552 | 6927.792  | 5828.091  | NM_003417 | 660.768   | 684.237   |
| NM_001327 | 36653.191 | 31094.043 | NM_014389 | 17530.443 | 14230.533 | NM_005146 | 18576.469 | 15583.632 |
| AF321182  | 410.08    | 278.011   | SR2       | 59131.879 | 53150.902 | AK024073  | 1492.624  | 1571.412  |
| AB037722  | 1339.191  | 1514.444  | SR4       | 21532.277 | 18826.082 | NM_018083 | 3947.473  | 3953.427  |
| NM_000063 | 409.357   | 400.145   | SR6       | 2877.871  | 2033.14   | AL110188  | 11785.354 | 10091.523 |
| NM_018389 | 2494.966  | 1988.239  | SR8       | 8933.526  | 22771.904 | D70834    | 51752.254 | 37378.992 |
| AB033026  | 609.777   | 668.312   | SR10      | 31396.367 | 9644.678  | NM_000970 | 70886.391 | 64326.004 |
| AF104914  | 25037.51  | 22612.227 | CY3Cy5    | 945.539   | 83.149    | NM_012465 | 2510.933  | 2561.341  |
| NM_014716 | 16260.163 | 15160.351 | NM_003887 | 2148.781  | 1899.863  | M60499    | 3400.528  | 5572.555  |
| AB002354  | 1003.06   | 793.592   | NM_004267 | 31196.346 | 20188.578 | NM_001614 | 58834.738 | 64124.414 |
| NM_002278 | 877.245   | 1222.402  | AL357212  | 1146.267  | 756.349   | NM_000366 | 1553.057  | 2085.909  |
| AK023845  | 4290.353  | 4079.732  | AK026687  | 2625.109  | 2167.314  | NM_003833 | 50504.414 | 52792.211 |
| NM_002638 | 2809.777  | 2243.402  | AL117444  | 3139.183  | 2235.34   | AK000868  | 16461.07  | 13606.093 |
| NM_016487 | 1071.15   | 929.966   | NM_017994 | 12047.597 | 9018.451  | NM_001233 | 4325.566  | 4757.254  |
| NM_005808 | 19106.625 | 13902.109 | AK021693  | 5739.972  | 3505.147  | NM_001234 | 2460.821  | 2541.06   |
| NM_006401 | 35218.727 | 17134.008 | AB023177  | 3326.043  | 2964.741  | BF679789  | 15504.27  | 17491.189 |
| NM_015913 | 14957.631 | 5645.208  | AL050015  | 4455.907  | 4064.978  | H97792    | 25325.814 | 28683.162 |
| NM_005157 | 5580.953  | 1887.316  | AF039698  | 7072.958  | 5981.191  | L33404    | 1200.408  | 1221.877  |
| NM_018169 | 4231.317  | 3615.296  | AL109679  | 695.674   | 426.383   | M13509    | 6213.627  | 6735.749  |
| AK021452  | 918.971   | 1066.718  | AB046828  | 5533.7    | 4280.494  | X04076    | 8884.04   | 10194.848 |
| NM_004506 | 6796.73   | 5684.304  | AF144487  | 877.359   | 556.754   | W95082    | 721.555   | 1640.821  |
| S74529    | 56691.395 | 57526.625 | AL137532  | 3794.639  | 4249.209  | AA485362  | 3143.018  | 3486.274  |
| NM_005933 | 922.704   | 865.38    | AK025419  | 9329.352  | 10421.597 | AJ222801  | 25203.918 | 23962.098 |
| NM_005596 | 882.476   | 663.873   | NM_013259 | 24985.49  | 19019.959 | W72207    | 31810.209 | 33274.867 |
| NM_001421 | 2295.714  | 3481.419  | NM_018375 | 14240.749 | 11634.574 | BI772354  | 2310.043  | 3155.102  |
| U97060    | 1703.137  | 1196.098  | AK026838  | 3877.169  | 2878.418  | AA733033  | 4142.675  | 4560.123  |
| M73837    | 4576.775  | 3697.801  | AK022443  | 2792.624  | 2589.396  | AA583574  | 2892.933  | 3472.524  |
| NM_004229 | 969.612   | 766.096   | AK023371  | 8074.943  | 7369.232  | U67733    | 677.968   | 899.097   |
| U69127    | 55127.215 | 59364.289 | AK025112  | 4441.027  | 3210.261  | AI690184  | 63943.66  | 66090.656 |
| NM_005839 | 15565.61  | 12016.64  | AK026675  | 812.581   | 815.838   | T48692    | 1017.502  | 1224.761  |
| AK023379  | 7876.687  | 6956.418  | AK025173  | 15620.511 | 10657.405 | AA927490  | 3140.378  | 3053.762  |
| NM_006076 | 1704.323  | 1628.662  | AK025430  | 1253.075  | 1001.218  | NM_003779 | 2312.049  | 2169.821  |
| AK021904  | 30399.164 | 31254.055 | AK026722  | 1234.083  | 1171.738  | NM_020164 | 22013.531 | 19311.332 |
| -         | 5057.179  | 3978.43   | AL110133  | 11022.073 | 8781.259  | AK023521  | 23158.166 | 22585.617 |
| NM_018292 | 2321.838  | 1573.451  | AL050053  | 2593.775  | 2891.066  | NM_014267 | 37401.766 | 39999.867 |
| AL049705  | 15028.915 | 11005.648 | AK027243  | 3150.096  | 2586.014  | NM_001481 | 759.28    | 531.826   |
| NM_015458 | 5215.102  | 4723.597  | AF147415  | 1981.463  | 1798.763  | U30872    | 2955.355  | 3020.616  |
| D13540    | 7143.356  | 6346.403  | AL049273  | 3638.567  | 3357.564  | AF111783  | 561.418   | 434.495   |
| NM_016570 | 6945.55   | 3296.547  | AL049984  | 2477.335  | 1995.22   | NM_000256 | 2117.436  | 1411.868  |
| NM_004273 | 534.148   | 469.018   | AK098474  | 1247.187  | 1197.627  | NM_020466 | 10486.841 | 10308.646 |
| NM_000690 | 958.381   | 772.106   | AL117475  | 5786.569  | 4476.912  | NM_002639 | 2137.09   | 2287.842  |
| NM_000155 | 10921.122 | 12302.543 | AL049300  | 11131.295 | 9362.136  | NM_014734 | 4462.392  | 5196.233  |
| AK024489  | 2775.352  | 2138.586  | NM_017535 | 7660.934  | 6537.627  | NM_002289 | 2385.566  | 1981.558  |
| NM_000181 | 7498.547  | 5279.285  | AK025365  | 3544.97   | 3214.653  | AK026408  | 4115.257  | 4165.724  |
| NM_000667 | 515.175   | 732.47    | AK023445  | 501.118   | 336.987   | NM_005025 | 849.062   | 1012.286  |

|           |           |           |           |           |           |           |           |           |
|-----------|-----------|-----------|-----------|-----------|-----------|-----------|-----------|-----------|
| NM_014121 | 1743.871  | 1456.478  | AK023489  | 1501.108  | 1296.621  | NM_006307 | 2208.066  | 3337.825  |
| NM_006730 | 2351.375  | 2116.115  | AK021561  | 11929.821 | 8699.514  | M74782    | 7601.254  | 7744.889  |
| NM_005644 | 3862.201  | 3437.643  | AL050145  | 702.828   | 539.174   | NM_017818 | 5711.427  | 6109.761  |
| NM_018442 | 8481.701  | 6423.789  | AK025222  | 750.552   | 862.415   | NM_020433 | 1799.483  | 2143.012  |
| AF182416  | 15661.409 | 13704.417 | Y11609    | 8979.919  | 7144.091  | NM_001767 | 756.048   | 1224.108  |
| NM_005998 | 42927.57  | 42928.215 | AJ278482  | 981.774   | 1011.895  | AF028823  | 10878.157 | 12828.149 |
| NM_006015 | 3316.571  | 3143.291  | NM_012122 | 33633.574 | 37820.551 | NM_004970 | 610.201   | 745.302   |
| NM_004634 | 4950.289  | 5026.168  | AF009285  | 22845.039 | 19759.678 | NM_004295 | 57338.242 | 59859.16  |
| NM_002017 | 7227.279  | 8665.329  | NM_012125 | 5820.532  | 5722.407  | NM_002087 | 38206.836 | 31824.467 |
| NM_017523 | 21135.682 | 28286.885 | AB032363  | 1052.465  | 923.918   | AB023154  | 1765.336  | 1555.503  |
| NM_002382 | 11099.298 | 10966.272 | AF009294  | 8498.141  | 8061.468  | NM_014585 | 1826.117  | 2071.506  |
| NM_002158 | 1639.756  | 1542.737  | NM_001524 | 1313.441  | 1434.385  | AF200815  | 2400.187  | 2961.041  |
| U13223    | 16943.037 | 13408.781 | AK000998  | 1226.985  | 2174.822  | NM_001056 | 1449.86   | 1942.17   |
| NM_016270 | 6392.471  | 5323.787  | AK001225  | 1333.465  | 1105.31   | AK025708  | 7518.396  | 7277.296  |
| AF269249  | 1835.238  | 1940.979  | AK021435  | 507.712   | 900.298   | NM_000405 | 2429.144  | 2094.559  |
| D31763    | 9664.04   | 10452.409 | AK021684  | 6577.657  | 5769.749  | NM_005564 | 58513.684 | 56211.863 |
| AB040889  | 248.376   | 293.93    | AK001060  | 1130.542  | 1901.354  | NM_004508 | 6036.75   | 6160.76   |
| NM_014815 | 4418.827  | 5745.527  | AK001819  | 629.898   | 1530.711  | AL137619  | 16586.672 | 21286.383 |
| NM_005443 | 5544.465  | 6012.225  | AK021480  | 4346.682  | 3709.625  | NM_000085 | 420.074   | 247.646   |
| NM_007221 | 12665.287 | 12813.19  | AL080186  | 1391.519  | 1009.396  | AB007859  | 2024.51   | 2615.22   |
| X54163    | 57192.789 | 61418.383 | NM_005306 | 57817.914 | 53244.613 | NM_006754 | 841.842   | 1427.335  |
| AK025395  | 1326.983  | 1504.185  | NM_001646 | 29284.836 | 24510.395 | NM_001127 | 5218.014  | 5550.269  |
| NM_000388 | 3154.158  | 3292.444  | AL137327  | 6236.228  | 6022.579  | NM_012430 | 4868.27   | 4806.067  |
| X58377    | 634.728   | 624.328   | AK026090  | 3256.305  | 2278.737  | NM_003917 | 56142.031 | 56352.246 |
| NM_002468 | 892.506   | 1278.356  | AF070637  | 1834.186  | 1575.522  | NM_007077 | 5422.523  | 4921.399  |
| AI673575  | 920.712   | 673.874   | AL137634  | 1520.964  | 1252.964  | NM_002956 | 4384.412  | 4360.16   |
| BI830936  | 1723.875  | 1738.158  | AK024863  | 12453.675 | 10509.731 | AB018739  | 4104.606  | 3596.539  |
| U79292    | 2606.834  | 2101.176  | AJ008135  | 68897.805 | 64294.371 | NM_006750 | 57130.445 | 52784.133 |
| BI830753  | 1955.029  | 3047.478  | AK026908  | 26690.111 | 24941.945 | NM_018046 | 1694.451  | 2020.265  |
| X71973    | 51741.977 | 50955.945 | AF117338  | 19645.326 | 21679.625 | NM_013316 | 6970.891  | 6866.255  |
| T49651    | 38648.266 | 51530.574 | AK025567  | 4268.837  | 3570.764  | M20701    | 44440.727 | 40274.816 |
| N51014    | 2097.042  | 2387.426  | NM_019102 | 713.633   | 591.963   | NM_002912 | 2721.889  | 2957.851  |
| BE392471  | 33789.082 | 27955.205 | U56857    | 29463.666 | 22830.053 | NM_013284 | 6680.388  | 7857.34   |
| AI802950  | 2848.098  | 2856.819  | L43349    | 2965.297  | 3326.615  | NM_006739 | 4127.038  | 2906.946  |
| AA682423  | 1415.38   | 1244.612  | BE905682  | 1674.973  | 2111.539  | NM_013274 | 7676.167  | 8595.128  |
| AL043686  | 5799.208  | 6146.686  | AF086421  | 2574.746  | 2654.956  | AL050187  | 2802.918  | 3967.217  |
| AA490172  | 968.055   | 1081.038  | AK001612  | 878.655   | 1221.186  | NM_007127 | 1529.653  | 3179.651  |
| AA775212  | 4043.709  | 5539.517  | AF161522  | 6031.295  | 7146.642  | NM_012387 | 43461.367 | 43725.836 |
| NM_000402 | 3797.066  | 3545.974  | AF086028  | 19029.621 | 14495.14  | NM_014735 | 2400.141  | 2408.736  |
| AK026266  | 40936.395 | 31838.072 | U46119    | 716.046   | 711.104   | NM_004252 | 38157.941 | 44015.473 |
| NM_007124 | 17786.637 | 15505.035 | AF038188  | 12657.06  | 12760.83  | AF172929  | 8157.572  | 7269.615  |
| NM_003176 | 10995.235 | 12093.628 | D17046    | 4375.798  | 3258.432  | NM_006398 | 34984.863 | 30311.654 |
| NM_000723 | 3115.406  | 2358.821  | NM_017645 | 15371.985 | 11545.64  | AK025655  | 3462.958  | 3580.816  |
| AL096751  | 8226.625  | 5861.183  | AJ227864  | 1547.676  | 988.234   | NM_001362 | 3079.608  | 2632.607  |
| NM_000364 | 1295.378  | 977.583   | AF157562  | 6836.622  | 6312.325  | NM_004056 | 1449.781  | 1032.996  |
| AF026920  | 13074.883 | 15231.023 | AK021958  | 21057.926 | 13405.351 | NM_001614 | 57987.855 | 62536.527 |
| NM_004931 | 5618.16   | 4168.212  | M31164    | 3491.937  | 3262.11   | NM_003833 | 44295.961 | 45366.879 |
| NM_000607 | 25373.998 | 23049.889 | AF113674  | 30584.5   | 31508.779 | AK000868  | 16027.355 | 20142.932 |
| AF090409  | 442.511   | 568.668   | NM_003511 | 1246.26   | 5933.569  | BF679789  | 15129.077 | 18465.115 |
| NM_002575 | 1192.094  | 1191.742  | NM_003531 | 3994.844  | 4207.23   | H97792    | 24183.5   | 25397.336 |
| NM_004244 | 6978.821  | 6482.259  | NM_017799 | 2141.893  | 1927.548  | L33404    | 1201.702  | 1458.101  |
| NM_003371 | 7124.93   | 10490.901 | NM_003510 | 1390.356  | 1240.774  | M13509    | 6358.767  | 6611.967  |
| AK023114  | 10530.501 | 8555.728  | NM_003538 | 2006.557  | 1760.727  | X04076    | 9054.188  | 9597.403  |

|           |           |           |           |           |           |           |           |           |
|-----------|-----------|-----------|-----------|-----------|-----------|-----------|-----------|-----------|
| NM_00367E | 5853.486  | 5156.283  | AL137403  | 8790.265  | 9732.208  | W95082    | 705.664   | 1110.264  |
| NM_005631 | 448.862   | 768.347   | AL049348  | 4200.051  | 5069.673  | AA485362  | 3504.661  | 4104.788  |
| NM_01493E | 8606.604  | 12188.545 | NM_018534 | 3508.344  | 4260.232  | AJ222801  | 21001.697 | 23773.984 |
| AF049460  | 647.478   | 1025.855  | AB037847  | 4436.695  | 4733.719  | W72207    | 33676.023 | 44988.605 |
| AK001500  | 2974.249  | 2260.994  | NM_005170 | 7731.831  | 8998.073  | BI772354  | 1984.915  | 2581.94   |
| NM_006774 | 1059.69   | 1102.895  | S96437    | 4388.339  | 4716.958  | AA733033  | 3951.052  | 5198.739  |
| NM_02012E | 2335.207  | 2822.708  | NM_01517E | 2162.808  | 2893.235  | AA583574  | 3077.688  | 3672.554  |
| Y16521    | 4790.006  | 3270.365  | AL353939  | 1347.469  | 1410.217  | AI690184  | 58628.309 | 62475.875 |
| AL050371  | 9359.5    | 10914.537 | AL117573  | 8320.389  | 7796.839  | T48692    | 1357.848  | 1388.164  |
| NM_002651 | 4729.31   | 3966.395  | NM_01865E | 4335.286  | 4320.608  | AA927490  | 3494.133  | 3736.732  |
| NM_00241E | 3531.553  | 2840.595  | NM_00566E | 4316.542  | 4202.334  | NM_00505E | 13300.775 | 11764.505 |
| NM_017577 | 1075.739  | 1519.653  | X89960    | 856.549   | 1100.831  | BF038439  | 2218.78   | 2422.17   |
| NM_016301 | 14222.813 | 12597.786 | NM_006550 | 1815.218  | 1477.223  | AF319476  | 2190.732  | 2389.118  |
| NM_01466E | 1703.444  | 2592.749  | NM_017644 | 15297.245 | 14415.032 | NM_014267 | 36010.563 | 40324.703 |
| NM_00472E | 3266.398  | 3482.891  | NM_00248E | 3514.327  | 3001.59   | U30872    | 2572.724  | 2142.487  |
| NM_01442E | 3260.726  | 3092.955  | AL050068  | 1776.946  | 1366.486  | AF111783  | 838.752   | 1006.745  |
| NM_01213E | 11591.586 | 10395.708 | U92025    | 927.926   | 1065.797  | NM_00263E | 2074.166  | 2362.923  |
| NM_017954 | 648.653   | 514.131   | AF009323  | 1294.218  | 1266.315  | NM_014734 | 4635.202  | 4813.324  |
| NM_00661E | 5954.444  | 6194.742  | U52829    | 1311.794  | 1382.444  | NM_00228E | 2318.799  | 2106.076  |
| NM_016451 | 5358.141  | 5445.101  | Z25437    | 1362.562  | 2209.112  | AK026408  | 3629.228  | 3679.427  |
| NM_007351 | 56071.328 | 60149.25  | AK001526  | 9146.963  | 9909.081  | NM_00502E | 741.264   | 1102.206  |
| AL049935  | 24332.063 | 19609.551 | NM_00051E | 1712.742  | 2587.868  | NM_006307 | 2260.61   | 2762.057  |
| AB033043  | 6870.64   | 5701.381  | AF086183  | 3194.542  | 3621.66   | M74782    | 7445.91   | 7153.532  |
| NM_01499E | 10638.085 | 7560.605  | AK000525  | 5337.187  | 4904.279  | NM_01781E | 5778.865  | 7853.857  |
| AK025220  | 6439.12   | 5248.058  | AL137434  | 2810.031  | 3285.109  | NM_02043E | 1890.33   | 2376.996  |
| NM_01630E | 27319.725 | 22715.016 | Z36795    | 4000.885  | 3733.897  | NM_001767 | 657.308   | 903.72    |
| D42046    | 6366.734  | 6213.168  | AL080216  | 3620.632  | 3589.764  | AF028823  | 12458.443 | 16505.186 |
| NM_00103E | 23735.258 | 37420.113 | NM_006670 | 5342.075  | 4554.457  | NM_004970 | 583.703   | 600.301   |
| NM_00452E | 22791.326 | 21138.162 | NM_01242E | 6415.821  | 6120.527  | NM_00429E | 57116.539 | 61198.453 |
| NM_00252E | 2283.572  | 2032.831  | NM_002750 | 11292.936 | 10864.51  | NM_002087 | 38917.422 | 36941.082 |
| NM_02013E | 7739.971  | 8549.616  | AK024134  | 18528.498 | 14884.064 | AB023154  | 1627.028  | 1487.643  |
| NM_01851E | 7521.949  | 6878.94   | NM_003014 | 2216.843  | 1811.992  | NM_01458E | 1594.559  | 1824.626  |
| AK023149  | 3420.237  | 2955.114  | NM_01855E | 2407.922  | 2165.539  | NM_01246E | 1893.656  | 1906.99   |
| AK023168  | 5879.312  | 7982.148  | NM_001974 | 8852.672  | 8432.114  | M60499    | 3693.622  | 4114.005  |
| NM_00664E | 702.816   | 1016.778  | NM_013957 | 2202.986  | 2064.176  | NM_005564 | 54050.918 | 59802.613 |
| NM_00474E | 1447.719  | 2136.036  | NM_00246E | 9784.357  | 10022.367 | NM_00450E | 6223.945  | 6291.517  |
| NM_01475E | 3846.014  | 4156.205  | NM_00302E | 2914.285  | 2504.383  | AL137619  | 15062.756 | 20442.455 |
| NM_00658E | 53653.441 | 60345.902 | NM_00156E | 1656.973  | 1500.357  | NM_00008E | 626.441   | 593.707   |
| NM_014331 | 9473.603  | 9928.717  | NM_016541 | 7448.178  | 9428.5    | AB007859  | 1613.054  | 2334.479  |
| NM_00679E | 27426.428 | 22517.309 | NM_01854E | 7780.242  | 9772.788  | NM_006754 | 755.108   | 1021.883  |
| AF070568  | 3851.84   | 3668.424  | NM_013401 | 1165.09   | 1086.348  | NM_001127 | 5311.615  | 6562.505  |
| NM_000277 | 831.907   | 776.501   | AB046770  | 3645.731  | 4203.633  | NM_012430 | 4726.324  | 5433.022  |
| AK055733  | 31508.258 | 40187.875 | NM_01823E | 11412.055 | 12179.984 | NM_003917 | 57943.699 | 58459.293 |
| AF298880  | 8206.609  | 10746.978 | NM_00685E | 32934.379 | 34435.02  | NM_007077 | 5504.074  | 6742.709  |
| NM_007221 | 13056.666 | 13074.406 | NM_00140E | 15412.809 | 16667.357 | NM_00295E | 4019.305  | 4228.112  |
| X54163    | 53343.207 | 43439.359 | NM_003880 | 3025.88   | 2905.019  | AB018739  | 3604.333  | 3605.963  |
| AK025395  | 1165.296  | 1259.404  | NM_00546E | 5122.663  | 5545.623  | AK023521  | 28090.523 | 35515.539 |
| NM_00038E | 2768.396  | 2903.18   | AF131778  | 3866.724  | 3489.406  | NM_01331E | 5888.041  | 6973.345  |
| X58377    | 602.244   | 509.014   | NM_00156E | 3757.263  | 3286.462  | M20701    | 39417.773 | 33342.645 |
| NM_00246E | 750.007   | 751.429   | NM_01327E | 3542.84   | 3443.561  | NM_00291E | 2883.295  | 3164.719  |
| AI673575  | 1063.847  | 613.17    | NM_006477 | 3045.958  | 2922.913  | NM_013284 | 5405.221  | 5648.15   |
| BI830936  | 1703.994  | 1985.668  | NM_002880 | 7631.913  | 7338.946  | NM_00673E | 3962.122  | 2713.371  |
| U79292    | 2673.07   | 2526.826  | NM_00067E | 31199.574 | 29036.055 | NM_013274 | 8640.14   | 8044.818  |

|           |           |           |           |           |           |           |           |           |
|-----------|-----------|-----------|-----------|-----------|-----------|-----------|-----------|-----------|
| BI830753  | 1604.922  | 1899.895  | NM_001066 | 1917.218  | 1843.726  | AL050187  | 1556.336  | 2522.893  |
| X71973    | 53572.02  | 45439.723 | NM_004657 | 10082.505 | 8402.457  | NM_007127 | 1031.451  | 1394.267  |
| T49651    | 40026.25  | 51713.684 | NM_006291 | 511.962   | 850.346   | NM_012387 | 44441.375 | 46024.797 |
| N51014    | 2040.688  | 3025.62   | NM_018170 | 8252.078  | 6863.247  | NM_014735 | 2967.184  | 4052.487  |
| BE392471  | 39070.938 | 46053.551 | NM_003867 | 8648.564  | 8208.262  | NM_004252 | 40295.508 | 50455.281 |
| AI802950  | 3377.744  | 4527.418  | AL162062  | 1487.341  | 1521.879  | AF172929  | 8990.454  | 11257.6   |
| AI741278  | 1557.109  | 1835.355  | NM_003173 | 21088.912 | 18291.379 | AK025655  | 3433.814  | 4516.686  |
| AA682423  | 772.715   | 645.969   | NM_005030 | 24189.596 | 18742.152 | NM_001362 | 2873.168  | 2647.07   |
| AL043686  | 5680.043  | 5521.155  | NM_017584 | 7848.847  | 7318.986  | NM_004056 | 1441.443  | 1188.202  |
| AA490172  | 670.119   | 744.732   | NM_020359 | 8392.368  | 9152.216  | NM_001234 | 2207.994  | 3257.237  |
| AA775212  | 2773.493  | 3121.155  | AB014541  | 56143.754 | 58396.605 | BF679789  | 17480.717 | 22909.57  |
| AB043635  | 1850.759  | 2066.956  | NM_002583 | 28732.775 | 25577.229 | H97792    | 24249.703 | 24039.818 |
| AB040879  | 519.318   | 624.332   | NM_006570 | 35117.137 | 39131.184 | L33404    | 1526.644  | 1937.365  |
| NM_003176 | 12642.19  | 19524.35  | NM_006034 | 35907.262 | 43419.313 | M13509    | 6411.605  | 6847.861  |
| NM_000723 | 2957.831  | 2548.262  | AB040943  | 2022.866  | 2077.807  | X04076    | 8738.764  | 9175.344  |
| AL096751  | 7910.499  | 6034.663  | NM_005201 | 63772.035 | 59358.625 | W95082    | 485.051   | 891.094   |
| NM_000364 | 1111.562  | 897.546   | NM_000092 | 2800.384  | 2389.731  | AA485362  | 3821.435  | 4112.881  |
| AF026920  | 12654.825 | 15340.938 | NM_019086 | 13893.851 | 13598.148 | AJ222801  | 24717.168 | 26336.516 |
| NM_004931 | 6125.668  | 4555.965  | NM_018384 | 24288.08  | 22449.234 | W72207    | 33316.57  | 37110.473 |
| NM_000607 | 24031.174 | 21137.938 | NM_001872 | 2067.51   | 1758.973  | BI772354  | 2372.125  | 3667.988  |
| AB011099  | 722.731   | 613.68    | AF157323  | 3803.232  | 3923.734  | AA733033  | 6022.269  | 9603.152  |
| AF090409  | 419.286   | 569.606   | NM_006025 | 1314.859  | 1303.406  | AA583574  | 4055.007  | 7014.967  |
| NM_002575 | 812.829   | 950.624   | NM_005877 | 25708.473 | 19473.354 | U67733    | 735.024   | 750.86    |
| NM_004244 | 7198.874  | 6966.377  | AK024458  | 599.318   | 429.134   | T48692    | 1796.29   | 3336.25   |
| NM_003371 | 6958.133  | 9385.046  | NM_003338 | 7957.563  | 8160.696  | AA927490  | 4813.876  | 8110.624  |
| AK023114  | 11212.035 | 15481.735 | NM_013396 | 5444.142  | 4895.795  | NM_005052 | 13987.832 | 13905.488 |
| NM_003678 | 7724.021  | 10828.524 | NM_017752 | 5023.938  | 5121.646  | BF038439  | 1714.109  | 1755.591  |
| NM_014271 | 1482.969  | 1744.193  | D26069    | 24404.838 | 23492.91  | AF319476  | 4922.21   | 5305.919  |
| NM_000680 | 843.633   | 1140.287  | BF107577  | 56079.547 | 50903.496 | AK001913  | 7211.811  | 7867.228  |
| NM_005631 | 811.395   | 1020.116  | NM_005837 | 25313.904 | 29204.873 | NM_006307 | 2485.431  | 4695.351  |
| NM_014938 | 5990.711  | 5226.143  | NM_017493 | 7466.042  | 7828.636  | M74782    | 6143.083  | 6055.845  |
| AF049460  | 1107.439  | 1225.146  | NM_006136 | 23241.23  | 23380.377 | NM_017818 | 4407.442  | 4016.881  |
| NM_014815 | 4607.489  | 9162.545  | AF237772  | 2345.409  | 2604.936  | NM_020433 | 1877.875  | 1749.371  |
| NM_005443 | 5605.709  | 7298.938  | AK025934  | 6412.862  | 6009.459  | NM_001767 | 558.667   | 750.938   |
| NM_020129 | 2286.622  | 2248.98   | AJ008154  | 4000.83   | 3710.257  | AF028823  | 12430.87  | 12475.106 |
| Y16521    | 4303.556  | 3077.105  | NM_003487 | 17738.66  | 14531.608 | NM_004970 | 910.163   | 841.282   |
| AL050371  | 9185.028  | 7666.598  | NM_006887 | 13969.461 | 15557.602 | NM_004295 | 57499.063 | 58770.914 |
| NM_002651 | 4607.167  | 3738.88   | U90919    | 5968.883  | 7017.042  | NM_002087 | 45094.922 | 46289.094 |
| NM_002413 | 4512.814  | 5507.355  | NM_006177 | 8587.44   | 8728.526  | AB023154  | 2560.243  | 3570.598  |
| NM_017577 | 877.775   | 1266.813  | AL137286  | 12468.322 | 13857.193 | NM_001714 | 838.271   | 1176.3    |
| NM_016301 | 13061.668 | 10990.724 | NM_016358 | 41410.371 | 38491.379 | NM_014585 | 2548.853  | 3653.863  |
| NM_014668 | 1831.474  | 2777.298  | NM_016275 | 23910.139 | 25335.572 | AF200815  | 2153.41   | 2714.816  |
| NM_004722 | 3227.088  | 4147.726  | NM_020418 | 18555.756 | 18139.67  | NM_014564 | 690.08    | 1167.202  |
| NM_014425 | 3157.162  | 3387.304  | NM_013293 | 8367.706  | 7827.852  | NM_013441 | 8748.87   | 9998.932  |
| NM_012133 | 13586.89  | 18730.9   | AF315592  | 11105.17  | 10575.571 | NM_014421 | 6891.871  | 8249.704  |
| NM_017954 | 816.3     | 1142.134  | AF095844  | 7131.173  | 6953.197  | AB033028  | 1210.447  | 1677.004  |
| NM_006612 | 5679.518  | 4430.295  | NM_015833 | 5516.878  | 5831.261  | NM_017680 | 1169.606  | 1450.452  |
| NM_016451 | 4681.868  | 4352.625  | NM_000986 | 58766.781 | 60853.355 | NM_012465 | 2194.029  | 2434.39   |
| NM_007351 | 54743.727 | 59205.371 | AK026760  | 58068.488 | 52654.379 | M60499    | 4457.024  | 7168.871  |
| AK026266  | 42464.5   | 38008.672 | NM_014772 | 8415.526  | 8251.274  | NM_001614 | 56739.723 | 66336.68  |
| NM_007124 | 18472.275 | 19125.078 | AK025248  | 7726.372  | 8647.059  | NM_000366 | 1941.015  | 2218.281  |
| AB033043  | 6703.493  | 5247.137  | NM_004539 | 31628.094 | 35647.422 | NM_004300 | 3694.137  | 3858.69   |
| NM_014999 | 10233.946 | 6786.774  | NM_006428 | 35465.652 | 39324.738 | AB007859  | 1490.707  | 1989.626  |

|           |           |           |           |           |           |           |           |           |
|-----------|-----------|-----------|-----------|-----------|-----------|-----------|-----------|-----------|
| AK025220  | 5723.194  | 3997.131  | NM_004280 | 23322.73  | 24029.646 | NM_006754 | 885.917   | 871.37    |
| NM_01630E | 25040.908 | 21639.578 | AF110399  | 6710.367  | 7347.01   | NM_001127 | 5182.472  | 5637.583  |
| D42046    | 6281.442  | 5983.064  | AK027094  | 9368.104  | 9554.794  | NM_012430 | 4428.757  | 4459.618  |
| NM_001033 | 15875.888 | 14924.36  | AF174600  | 9523.101  | 10573.247 | NM_003917 | 56300.727 | 59314.625 |
| NM_00452E | 21317.291 | 19498.463 | AK001003  | 2567.473  | 2868.301  | NM_007077 | 5826.565  | 7496.731  |
| NM_00252E | 2331.208  | 2357.899  | NM_002800 | 30028.59  | 35219.516 | NM_00295E | 4612.518  | 5059.162  |
| NM_02013E | 6515.947  | 6861.492  | NM_00077E | 5239.665  | 4680.188  | AB018739  | 3899.479  | 4850.306  |
| NM_01851E | 7774.147  | 7144.943  | AB032981  | 1756.922  | 2113.326  | NM_006750 | 59955.906 | 62359.191 |
| AK023149  | 3010.237  | 2951.728  | BF217864  | 21578.551 | 22181.842 | NM_020164 | 24289.623 | 24387.854 |
| AK023168  | 4800.83   | 6776.292  | NM_005917 | 50535.52  | 47617.301 | AK023521  | 25011.182 | 26956.746 |
| NM_00664E | 915.607   | 1367.627  | NM_007052 | 1298.765  | 1708.284  | NM_014267 | 40405.703 | 41960.789 |
| NM_004742 | 1424.2    | 1814.663  | BC017044  | 845.113   | 1206.553  | NM_001481 | 830.807   | 929.521   |
| NM_014753 | 4118.232  | 4311.257  | AV758498  | 3572.825  | 3670.044  | U30872    | 2872.28   | 3698.766  |
| NM_00658E | 50745.547 | 60588.352 | NM_02019E | 5375.209  | 5130.325  | AF111783  | 579.99    | 648.534   |
| NM_014331 | 11437.135 | 16594.613 | AK024113  | 1327.106  | 1290.582  | NM_00025E | 491.837   | 627.304   |
| NM_00679E | 28787.922 | 25738.766 | NM_018657 | 2917.238  | 3086.589  | NM_02046E | 12947.48  | 14076.001 |
| AF070568  | 3787.259  | 3493.356  | L40410    | 26036.377 | 31720.098 | NM_00263E | 3014.734  | 3731.056  |
| NM_000277 | 670.398   | 722.007   | NM_00705E | 7264.525  | 8817.482  | NM_014734 | 5792.113  | 6725.464  |
| NM_000240 | 4894.252  | 5049.173  | NM_016652 | 3824.685  | 3987.99   | NM_001362 | 2358.334  | 2119.282  |
| AK055733  | 24893.092 | 24636.957 | NM_016310 | 41348.262 | 44358.078 | NM_00405E | 931.449   | 984.875   |
| AF298880  | 6934.577  | 6499.716  | AK021562  | 1940.132  | 2404.016  | NM_00105E | 1122.327  | 1713.167  |
| AK001500  | 3082.733  | 3175.542  | BC006560  | 6578.342  | 7903.503  | AY026461  | 6221.556  | 6256.103  |
| NM_006774 | 1331.633  | 2919.362  | NM_00629E | 4391.022  | 3378.696  | AK025708  | 7803.989  | 6684.45   |
| AK025395  | 1216.316  | 952.976   | AF060938  | 60542.457 | 51608.688 | NM_00040E | 2677.387  | 2876.532  |
| NM_00038E | 3058.113  | 2838.681  | NM_001973 | 15597.362 | 17453.41  | NM_005564 | 59532.754 | 62186.777 |
| X58377    | 572.453   | 537.062   | NM_01446E | 17984.922 | 19401.984 | NM_00450E | 7544.868  | 8256.521  |
| NM_00246E | 658.567   | 726.292   | NM_00685E | 16465.131 | 16162.792 | NM_00640E | 58189.383 | 61596.258 |
| AI673575  | 522.355   | 487.484   | X52350    | 59879.152 | 52961.793 | AJ245946  | 770.997   | 685.547   |
| BI830936  | 1902.521  | 1711.899  | AF071554  | 4066.215  | 5305.24   | NM_00674E | 741.26    | 1144.388  |
| U79292    | 3237.214  | 3830.323  | NM_002147 | 1521.787  | 1768.19   | NM_004694 | 3382.033  | 4031.419  |
| BI830753  | 1920.617  | 2270.365  | NM_01768E | 5311.568  | 5956.816  | NM_000324 | 1572.585  | 2264.007  |
| X68314    | 387.188   | 409.948   | AK025612  | 27418.557 | 30723.551 | NM_01220E | 596.789   | 529.431   |
| X71973    | 52424.371 | 59245.32  | NM_01226E | 43570.719 | 44799.676 | AL137619  | 16449.285 | 18687.465 |
| T49651    | 34200.445 | 35405.328 | NM_012203 | 3694.7    | 3843.241  | NM_00361E | 585.267   | 688.434   |
| N51014    | 2118.661  | 2383.259  | NM_00329E | 789.025   | 855.732   | NM_005052 | 10851.715 | 9735.352  |
| BE392471  | 35463.547 | 33601.902 | NM_00473E | 18057.545 | 20498.516 | BF038439  | 1279.462  | 1329.863  |
| AI802950  | 2947.879  | 3159.592  | NM_00689E | 879.2     | 1192.828  | AF319476  | 1294.203  | 1423.138  |
| AA682423  | 1317.9    | 1474.306  | NM_00645E | 19237.225 | 19335.824 | AK001913  | 6980.347  | 11931.12  |
| AL043686  | 6578.773  | 6499.022  | AA427949  | 950.796   | 1187.473  | NM_004292 | 3260.278  | 3523.379  |
| AA490172  | 967.258   | 761.399   | D50373    | 2725.942  | 2324.388  | NM_015484 | 8013.593  | 7337.43   |
| AA775212  | 3096.726  | 2360.915  | AA488757  | 53689.266 | 50339.359 | NM_01804E | 1129.66   | 1267.701  |
| AB011174  | 4919.955  | 5289.273  | AA205399  | 1861.512  | 1927.46   | NM_01331E | 7113.82   | 7621.956  |
| AB043635  | 442.78    | 394.562   | H07071    | 17536.314 | 18917.754 | M20701    | 49954.188 | 42130.641 |
| AB011099  | 688.41    | 624.142   | M25322    | 26204.166 | 26247.09  | NM_002912 | 2980.945  | 2889.194  |
| AF090409  | 444.618   | 464.614   | W99328    | 5937.077  | 6506.067  | NM_013284 | 6080.009  | 5781.905  |
| NM_00257E | 1143.295  | 1369.366  | AI434176  | 4037.01   | 4484.086  | NM_00673E | 3878.561  | 3128.701  |
| NM_004244 | 5916.165  | 5596.55   | H08563    | 5813.802  | 6922.181  | NM_013274 | 8366.379  | 11487.325 |
| NM_003371 | 6739.189  | 8077.978  | BE735403  | 6092.28   | 6121.628  | AL050187  | 1721.167  | 2158.221  |
| NM_001164 | 349.784   | 590.667   | NM_002631 | 34356.164 | 38653.383 | NM_007127 | 1105.866  | 1301.453  |
| AK023114  | 11051.429 | 9953.305  | AB033109  | 4472.919  | 5585.206  | NM_012387 | 34367.133 | 30550.592 |
| NM_00367E | 6502.124  | 6922.579  | NM_002053 | 55533.293 | 56071.438 | NM_01473E | 2352.956  | 1881.005  |
| NM_012301 | 483.312   | 614.225   | NM_00688E | 7325.323  | 8105.423  | NM_004252 | 34275.598 | 31690.156 |
| NM_005631 | 686.44    | 1317.944  | NM_00243E | 7222.292  | 7472.576  | AF172929  | 9286.097  | 10929.967 |



|           |           |           |           |           |           |           |           |           |
|-----------|-----------|-----------|-----------|-----------|-----------|-----------|-----------|-----------|
| NM_014419 | 5648.559  | 7661.446  | NM_014589 | 6807.628  | 8117.345  | NM_006399 | 36922.465 | 35065.07  |
| NM_014938 | 7066.866  | 6792.919  | NM_000759 | 2298.241  | 2471.576  | AK025655  | 3499.181  | 4027.853  |
| AF049460  | 831.17    | 1520.227  | AK023334  | 5563.977  | 5023.844  | CY3Cy5    | 1016.413  | 93.643    |
| AK026066  | 3419.535  | 6018.299  | NM_002563 | 47948.438 | 50894.816 | NM_012245 | 49440.789 | 35307.551 |
| NM_005244 | 1688.724  | 1601.944  | NM_002437 | 8787.989  | 8051.384  | NM_133263 | 1930.573  | 1633.296  |
| AF054589  | 5785.707  | 5899.337  | D79991    | 5137.416  | 5062.596  | AF086176  | 2224.242  | 1738.682  |
| NM_005270 | 940.056   | 1354.217  | AK022425  | 3898.771  | 3630.69   | AF086232  | 279.13    | 571.525   |
| NM_014815 | 3613.198  | 4155.379  | NM_000054 | 54335.965 | 57202.496 | NM_017742 | 1421.737  | 1300.331  |
| NM_005443 | 5211.522  | 6290.352  | NM_014713 | 27175.977 | 25748.875 | NM_005108 | 2404.34   | 2633.369  |
| NM_007221 | 14142.016 | 18569.939 | NM_001812 | 5134.023  | 4774.557  | AK022292  | 8753.16   | 6810.889  |
| NM_018607 | 925.845   | 725.103   | NM_014785 | 3436.899  | 4754.399  | AK024173  | 478.219   | 778.871   |
| NM_002978 | 1776.354  | 1209.133  | NM_005764 | 6233.266  | 7044.475  | AB051436  | 2915.36   | 2693.408  |
| NM_014668 | 1738.971  | 1930.217  | NM_016362 | 10423.575 | 15169.309 | AK026482  | 28235.164 | 21827.166 |
| NM_004722 | 3663.61   | 3322.703  | NM_002836 | 29018.865 | 32473.652 | AL137473  | 3327.914  | 4177.551  |
| NM_014425 | 3327.343  | 2793.413  | NM_020167 | 6334.692  | 6630.652  | AJ001873  | 26777.652 | 40986.566 |
| NM_012133 | 11888.651 | 12120.889 | NM_016058 | 24802.361 | 26475.668 | AL137476  | 26796.824 | 45585.059 |
| NM_017954 | 1128.24   | 1677.27   | NM_014005 | 11662.395 | 12759.048 | AF052174  | 4969.746  | 4567.434  |
| NM_006612 | 6088.331  | 6717.613  | NM_006033 | 14531.425 | 15901.601 | AF070590  | 1152.204  | 871.332   |
| NM_016451 | 5403.685  | 6362.738  | NM_004837 | 9792.24   | 10107.808 | NM_004709 | 425.713   | 422.965   |
| NM_007351 | 49298.156 | 54465.355 | NM_000370 | 2845.15   | 3257.52   | NM_012245 | 34367.629 | 16037.393 |
| AK026266  | 40472.602 | 38883.941 | BE865893  | 9314.58   | 8925.051  | NM_133263 | 1589.493  | 757.813   |
| NM_007124 | 17815.824 | 16678.752 | NM_003123 | 60072.656 | 57942.902 | SR2       | 24471.814 | 10568.924 |
| NM_003176 | 12188.504 | 15760.735 | AY005822  | 6276.727  | 6029.082  | SR4       | 8139.939  | 3714.138  |
| NM_000723 | 3361.477  | 2548.539  | NM_018129 | 27005.393 | 29071.189 | SR6       | 912.833   | 469.572   |
| AL096751  | 8541.993  | 7881.644  | AF289022  | 7122.067  | 7308.017  | SR8       | 3265.65   | 4853.617  |
| NM_000364 | 1407.263  | 1255.834  | AB002326  | 937.034   | 813.435   | SR10      | 11071.9   | 2186.583  |
| AF026920  | 12280.963 | 13701.684 | M17252    | 1201.144  | 1114.797  | CY3Cy5    | 483.395   | 109.638   |
| NM_004931 | 6756.751  | 5849.144  | NM_016025 | 23005.748 | 20895.199 | AK024432  | 2109.47   | 2046.608  |
| NM_000607 | 27068.447 | 28525.174 | NM_013319 | 7232.142  | 7636.923  | AL137513  | 1030.246  | 926.922   |
| NM_000240 | 4700.357  | 3508.722  | NM_020410 | 10785.977 | 10683.971 | AF088001  | 758.042   | 951.965   |
| AK055733  | 22602.537 | 19314.238 | NM_000453 | 5535.752  | 5880.666  | NM_018067 | 7489.331  | 6182.978  |
| AF298880  | 8830.329  | 9180.182  | J03048    | 33354.047 | 28665.59  | NM_018956 | 29600.246 | 23236.844 |
| AK001500  | 2937.251  | 1943.057  | NM_004583 | 2143.763  | 2384.01   | NM_014787 | 1323.323  | 1307.539  |
| NM_006774 | 1260.01   | 1243.623  | NM_001144 | 39725.391 | 48196.914 | AL122109  | 1048.792  | 1110.793  |
| NM_020129 | 2438.632  | 2933.273  | AK023766  | 16228.416 | 18421.842 | AF074988  | 2579.189  | 2188.706  |
| Y16521    | 4864.331  | 4109.963  | NM_001897 | 3500.335  | 4081.499  | AK024946  | 861.4     | 950.735   |
| AL050371  | 10915.177 | 17139.92  | NM_003853 | 4044.002  | 4828.027  | AF052497  | 433.949   | 707.252   |
| NM_002651 | 4831.05   | 4232.941  | NM_018376 | 6569.656  | 6409.691  | AK026375  | 3805.027  | 4168.233  |
| NM_002413 | 4096.842  | 3925.124  | NM_017615 | 1987.753  | 1642.471  | NM_014710 | 311.714   | 409.591   |
| NM_017577 | 1185.085  | 1287.004  | NM_017438 | 8727.063  | 7259.36   | U85992    | 1148.521  | 1660.282  |
| NM_001647 | 2313.318  | 2672.787  | U59209    | 8906.306  | 7422.14   | AL110152  | 1437.422  | 1685.745  |
| NM_018158 | 3809.592  | 5777.406  | NM_020195 | 11465.671 | 10382.421 | AF131745  | 2692.908  | 2079.863  |
| NM_016301 | 12847.603 | 11563.49  | BC002753  | 808.611   | 505.05    | AL117565  | 4681.296  | 2808.27   |
| AK021975  | 1143.765  | 1334.435  | AK023824  | 6594.14   | 6393.427  | AF147305  | 385.791   | 273.367   |
| AB032952  | 18565.324 | 17567.672 | AL133069  | 9453.377  | 9287.379  | AK022109  | 4143.042  | 2049.239  |
| NM_002522 | 2490.198  | 3480.229  | AL117574  | 1028.821  | 976.826   | AK022103  | 582.147   | 234.718   |
| AB011174  | 5364.273  | 4735.461  | AK026055  | 17882.76  | 20743.52  | AK022111  | 542.285   | 142.354   |
| AB043635  | 390.754   | 247.151   | AK024126  | 1259.924  | 1445.144  | AK021527  | 547.822   | 280.538   |
| AB040879  | 458.277   | 435.799   | NM_001516 | 11164.92  | 10667.141 | AF143882  | 706.47    | 495.944   |
| AL049935  | 26628.625 | 27364.32  | NM_002744 | 21891.344 | 23832.703 | U00953    | 660.034   | 437.637   |
| AB033043  | 6883.188  | 6462.567  | NM_015917 | 29450.32  | 33447.094 | AK025650  | 4602.52   | 4212.784  |
| NM_014999 | 10553.629 | 7438.693  | NM_020397 | 2302.127  | 3406.928  | AK026401  | 3639.815  | 4070.233  |
| AK025220  | 6574.575  | 5186.558  | NM_000061 | 14301.77  | 19368.953 | AK022604  | 1031.549  | 1127.802  |

|           |           |           |             |           |           |           |           |           |
|-----------|-----------|-----------|-------------|-----------|-----------|-----------|-----------|-----------|
| NM_01630E | 26072.582 | 22850.736 | AB046859    | 60156.574 | 55173.613 | U66048    | 1887.738  | 1924.043  |
| D42046    | 7582.23   | 10935.228 | NM_00273C   | 7422.563  | 7648.558  | AK023401  | 8559.327  | 8327.022  |
| NM_00103E | 16493.826 | 14507.667 | NM_00482E   | 4874.134  | 5759.018  | AK001865  | 1606.025  | 1821.849  |
| NM_00452E | 23301.883 | 23496.588 | NM_00004C   | 31242.75  | 31720.4   | AK024035  | 38224.242 | 28315.184 |
| NM_00252E | 2345.478  | 1961.447  | NM_004631   | 11188.964 | 16313.062 | AL050079  | 2296.878  | 1495.912  |
| NM_02013E | 7110.911  | 7148.793  | NM_01226E   | 55710     | 52647.328 | AL080233  | 2279.331  | 843.448   |
| NM_01851E | 7774.946  | 6980.467  | NM_01220E   | 3797.882  | 3538.334  | AL117663  | 2390.521  | 1075.407  |
| AK023149  | 3637.651  | 4990.183  | NM_00329E   | 871.848   | 866.27    | NM_01429E | 10463.84  | 4831.915  |
| AK023168  | 5312.562  | 6441.462  | NM_00473E   | 19440.576 | 19101.361 | AK023429  | 830.339   | 695.324   |
| NM_00664E | 953.445   | 1086.604  | NM_00689E   | 712.174   | 1055.418  | AK022276  | 997.882   | 1177.376  |
| NM_00474E | 1094.464  | 1101.523  | NM_00645E   | 15044.153 | 14140.888 | AK026881  | 537.309   | 520.228   |
| NM_01475E | 3544.758  | 2845.931  | D50373      | 1351.349  | 1513.002  | AL133653  | 702.812   | 926.949   |
| NM_00658E | 48131.445 | 53950.699 | AA488757    | 29472.471 | 24923.422 | AK023774  | 994.756   | 950.892   |
| NM_014331 | 10220.533 | 11332.153 | AA205399    | 2110.031  | 2305.062  | AL049377  | 2056.857  | 2432.937  |
| NM_00679E | 28613.941 | 28819.154 | H07071      | 18087.139 | 17582.291 | AF009265  | 3220.921  | 3297.199  |
| AF070568  | 3856.021  | 3974.188  | M25322      | 23992.447 | 22524.721 | AF009309  | 8073.06   | 8674.314  |
| NM_000277 | 848.404   | 800.743   | AA436187    | 567.617   | 878.169   | NM_00236C | 3833.849  | 4028.061  |
| CY3Cy5    | 2007.404  | 90.792    | H-L 27586 I | 6853.591  | 7862.212  | AF009274  | 238.992   | 363.576   |
| AF086187  | 12511.126 | 16022.998 | ID 214180   | 2037.755  | 2007.52   | AF009322  | 580.424   | 589.607   |
| AF305836  | 30738.355 | 33406.98  | ID 1867426  | 50644.098 | 54593.047 | AF056425  | 5012.125  | 3673.498  |
| AL109784  | 1102.561  | 1176.862  | ID 396450   | 758.303   | 1437.195  | AF090893  | 483.874   | 473.331   |
| AL137383  | 1804.739  | 1605.699  | W99328      | 5208.463  | 5831.625  | NM_01803E | 13101.529 | 6016.313  |
| U79249    | 1376.421  | 739.026   | AI434176    | 3263.71   | 3265.199  | AK001945  | 2050.663  | 942.291   |
| NM_02255E | 2636.89   | 1414.868  | H08563      | 6249.08   | 6808.231  | AK001147  | 495.938   | 319.575   |
| NM_01438E | 14124.388 | 7722.717  | NM_000317   | 48446.02  | 52905.758 | AK021630  | 999.172   | 631.4     |
| SR2       | 58944.508 | 49988.992 | NM_00688E   | 7322.24   | 7666.8    | AK021831  | 891.026   | 681.771   |
| SR4       | 17465.725 | 17540.824 | NM_00243E   | 9798.846  | 8587.099  | NM_02015E | 1763.656  | 1713.891  |
| SR6       | 2197.786  | 2569.361  | NM_01458E   | 5788.04   | 6212.094  | NM_005321 | 1843.203  | 1677.494  |
| SR8       | 8879.333  | 27670.975 | NM_00075E   | 3827.948  | 3903.22   | AF073520  | 6525.346  | 6380.047  |
| SR10      | 29601.41  | 11820.743 | AK023334    | 13647.749 | 11470.863 | AF143885  | 544.034   | 468.118   |
| CY3Cy5    | 810.687   | 106.761   | NM_00256E   | 46895.496 | 47683.871 | NM_01401E | 19464.287 | 16366.322 |
| AK026687  | 3477.76   | 4838.771  | NM_002437   | 5530.64   | 4582.211  | AK026839  | 1811.851  | 1840.078  |
| AL117444  | 4415.12   | 6861.996  | D79991      | 4794.221  | 4483.573  | Z34278    | 1139.569  | 1692.199  |
| NM_017994 | 12658.547 | 14150.96  | AK022425    | 3976.254  | 3322.114  | AJ008123  | 12190.49  | 12848.722 |
| AK021693  | 5489.476  | 5346.762  | NM_000054   | 47173.012 | 51185.008 | AJ008156  | 1247.146  | 1141.872  |
| AL109679  | 1898.478  | 506.687   | NM_01471E   | 27201.188 | 26932.316 | AF161437  | 3775.14   | 2823.978  |
| AB046828  | 6967.39   | 5044.867  | NM_00181E   | 4869.167  | 5034.489  | U73530    | 516.03    | 371.064   |
| AK025419  | 16452.305 | 15991.861 | NM_01478E   | 3344.912  | 3976.749  | AF086158  | 6770.804  | 5550.162  |
| NM_01837E | 5416.692  | 4394.825  | AK025175    | 545.977   | 1194.455  | AF086050  | 2178.572  | 1642.062  |
| AK022443  | 3738.649  | 3460.365  | NM_005811   | 21531.258 | 21031.898 | AF147375  | 1718.188  | 1024.96   |
| AK023371  | 2510.805  | 1865.823  | NM_005764   | 5368.113  | 5713.855  | X51524    | 10358.565 | 5202.588  |
| AK025112  | 2721.644  | 3900.608  | NM_01636E   | 11068.927 | 14303.242 | AK025759  | 3162.457  | 1791.297  |
| AK026079  | 726.204   | 537.129   | NM_004214   | 20366.875 | 21818.33  | AK024105  | 735.571   | 470.279   |
| AK025173  | 2601.788  | 3175.03   | NM_00432E   | 31228.113 | 31364.24  | AJ238556  | 645.615   | 248.127   |
| AK025430  | 847.974   | 1130.559  | NM_00283E   | 24655.418 | 28268.35  | AK021516  | 4650.235  | 2168.437  |
| AK026722  | 963.668   | 732.322   | AK025612    | 46440.816 | 51167.047 | Z70699    | 647.549   | 323.898   |
| AL110133  | 2823.998  | 1781.581  | NM_00037C   | 2819.186  | 2880.746  | NM_00689E | 4581.729  | 2258.467  |
| AK027243  | 2767.672  | 2275.387  | BE865893    | 10497.177 | 11004.468 | AL080066  | 15657.878 | 15329.461 |
| AL109783  | 591.103   | 510.263   | NM_00312E   | 60729.898 | 64489.723 | AL137620  | 1220.51   | 1462.323  |
| AF147415  | 1593.104  | 1031.426  | AY005822    | 7389.611  | 7688.145  | NM_005294 | 5979.408  | 4101.2    |
| AL049273  | 757.228   | 651.362   | NM_01812E   | 63423.637 | 60259.91  | AF085826  | 2840.961  | 1076.169  |
| AK098474  | 735.026   | 490.919   | AF289022    | 7081.126  | 6685.653  | AK024362  | 1573.421  | 1359.253  |
| AL117475  | 2883.305  | 1635.034  | AB002326    | 988.626   | 890.079   | AF118068  | 4304.055  | 3178.584  |

|            |           |           |             |           |           |           |           |           |
|------------|-----------|-----------|-------------|-----------|-----------|-----------|-----------|-----------|
| AL049300   | 667.332   | 417.953   | M17252      | 871.382   | 799.282   | NM_004164 | 397.704   | 477.695   |
| NM_01753E  | 2001.09   | 1128.705  | NM_016025   | 23199.238 | 19178.773 | NM_01901E | 1442.616  | 1248.076  |
| L23852     | 576.603   | 990.775   | NM_013319   | 6297.842  | 7110.679  | M87931    | 589.505   | 734.402   |
| AK023445   | 1074.031  | 1560.893  | NM_020410   | 11965.843 | 11653.229 | NM_003544 | 46479.902 | 31666.211 |
| AK023489   | 1468.098  | 1807.072  | NM_000453   | 5753.537  | 5705.816  | U17640    | 492.756   | 547.529   |
| AK021561   | 752.631   | 1203.923  | J03048      | 34669.477 | 28730.76  | AK001187  | 2011.301  | 1563.086  |
| AL050145   | 825.928   | 1320.662  | NM_004583   | 1623.617  | 1765.377  | NM_00352E | 23394.736 | 16467.297 |
| AK025222   | 1452.394  | 1495.833  | NM_001103   | 1876.829  | 2283.622  | AF056436  | 2321.013  | 1332.309  |
| Y11609     | 2276.214  | 2196.876  | AF228710    | 57372.074 | 56632.363 | AB023191  | 1172.472  | 572.272   |
| AJ278482   | 582.829   | 761.476   | NM_018399   | 2212.812  | 2258.535  | AK027212  | 4798.498  | 2535.498  |
| NM_01212E  | 2533.815  | 1204.226  | AY007131    | 59575.957 | 62930.691 | X56197    | 971.247   | 424.107   |
| AB032363   | 491.574   | 275.824   | U61735      | 10462.646 | 10009.363 | NM_00519E | 9240.908  | 4557.024  |
| AF009294   | 3832.208  | 2342.109  | NM_002053   | 62386.152 | 65121.754 | U90905    | 1070.651  | 673.926   |
| AK000998   | 887.123   | 942.777   | NM_01743E   | 8405.467  | 6616.94   | AF161422  | 1096.792  | 457.833   |
| AK001225   | 489.556   | 452.497   | U59209      | 8289.555  | 8614.458  | AL137384  | 716.759   | 242.709   |
| AK021684   | 3935.163  | 2272.923  | NM_02019E   | 12551.85  | 12270.19  | AF070619  | 2480.269  | 1497.589  |
| AK001060   | 600.323   | 551.151   | BC002753    | 1019.721  | 628.653   | NM_000787 | 742.174   | 871.292   |
| AK021480   | 1184.94   | 834.223   | AK023824    | 10040.811 | 10234.913 | U57962    | 4834.979  | 5562.824  |
| AK021726   | 770.195   | 1204.286  | AL133069    | 10089.463 | 10753.32  | NM_01617E | 6529.343  | 6338.326  |
| AL080186   | 1640.306  | 1810.297  | AL117574    | 1006.73   | 1255.449  | NM_005574 | 12281.115 | 9764.991  |
| AL137327   | 7975.386  | 10811.807 | AK026055    | 15167.043 | 13764.438 | NM_01789E | 13900.082 | 14264.251 |
| AK026090   | 1580.146  | 1805.43   | AK024126    | 1223.115  | 1281.306  | NM_004610 | 7152.964  | 7330.293  |
| AF070637   | 725.299   | 1246.667  | NM_00151E   | 10952.314 | 9742.833  | NM_00161E | 2394.207  | 2234.706  |
| AL137634   | 1648.506  | 1375.054  | NM_002744   | 20960.648 | 22212.59  | AK027002  | 4627.777  | 4777.517  |
| AJ008135   | 5166.553  | 3773.611  | NM_015917   | 29524.33  | 36995.785 | AB025254  | 5395.006  | 4326.841  |
| AK026908   | 7323.226  | 3667.244  | NM_020397   | 2194.591  | 2885.17   | NM_004081 | 3050.988  | 2639.31   |
| AF117338   | 4783.656  | 5211.565  | NM_000061   | 11367.311 | 15070.99  | AK001039  | 7268.722  | 5634.822  |
| AK025567   | 1187.699  | 809.926   | AB046859    | 55084.324 | 49278.281 | AK026465  | 1851.036  | 1312.262  |
| NM_01910E  | 601.354   | 648.68    | NM_00510E   | 18894.729 | 19237.414 | AK024321  | 736.623   | 706.501   |
| U56857     | 1904.691  | 944.603   | AK023573    | 17107.559 | 19298.25  | U52834    | 829.241   | 527.868   |
| L43349     | 880.119   | 674.209   | NM_002730   | 6956.256  | 6987.877  | NM_00353E | 1334.557  | 563.342   |
| BE905682   | 1151.302  | 1240.56   | AB011540    | 58384.977 | 56546.457 | NM_01786E | 8604.031  | 3257.068  |
| AF086421   | 1603.848  | 1218.174  | NM_000040   | 18844.225 | 21083.594 | AF075100  | 379.582   | 213.664   |
| AK001612   | 863.177   | 513.228   | NM_004631   | 8248.913  | 8960.866  | AF203447  | 12112.533 | 5841.844  |
| AF161522   | 3789.471  | 2848.452  | NM_004837   | 11166.303 | 13266.521 | NM_01850E | 2712.36   | 1415.903  |
| AF086028   | 602.813   | 502.822   | NM_00329E   | 924.074   | 648.326   | AB040976  | 15282.358 | 14615.268 |
| U46119     | 858.64    | 915.191   | NM_00473E   | 19011.229 | 20358.154 | NM_018641 | 3225.375  | 3250.898  |
| unknown (4 | 435.039   | 411.526   | NM_00689E   | 785.549   | 1174.122  | U49089    | 1670.061  | 1681.385  |
| NM_01764E  | 7658.882  | 10220.64  | NM_00645E   | 21768.771 | 24004.779 | NM_002221 | 4853.533  | 4775.14   |
| AJ227864   | 2630.903  | 2731.475  | AA427949    | 896.77    | 776.333   | NM_002371 | 439.983   | 678.409   |
| AF157562   | 8370.414  | 9694.277  | D50373      | 1668.809  | 1944.435  | AK024502  | 8579.851  | 6800.104  |
| AF113674   | 23084.973 | 7476.113  | AA488757    | 34114.43  | 32370.658 | NM_001124 | 712.468   | 826.781   |
| NM_003511  | 1695.997  | 5166.647  | AA205399    | 740.109   | 688.483   | NM_00458E | 3235.316  | 2635.527  |
| NM_003531  | 2270.599  | 2058.612  | H07071      | 6187.034  | 6486.721  | NM_004844 | 4988.241  | 5066.763  |
| NM_01779E  | 1550.15   | 1547.883  | M25322      | 23552.354 | 21279.746 | NM_000051 | 3348.196  | 2452.489  |
| NM_003510  | 396.199   | 375.67    | AA436187    | 692.045   | 875.002   | NM_00570E | 608.721   | 434.303   |
| AL137403   | 914.511   | 785.163   | H-L 27586 I | 6765.963  | 6976.441  | NM_004180 | 5765.94   | 3811.844  |
| AL049348   | 332.553   | 401.626   | ID 214180   | 1803.97   | 2587.397  | NM_00478E | 21574.902 | 15601.291 |
| NM_018534  | 1003.309  | 1245.151  | ID 1867426  | 50717.367 | 52835.699 | AF302109  | 1071.801  | 927.207   |
| AB037847   | 2198.882  | 1554.673  | ID 396450   | 921.723   | 965.234   | AL117485  | 19077.979 | 10134.83  |
| NM_005170  | 7315.351  | 6860.518  | W99328      | 5767.13   | 6607.182  | NM_00350E | 453.151   | 360.392   |
| S96437     | 1021.911  | 793.457   | AI434176    | 4481.812  | 4227.482  | NM_007191 | 2343.649  | 864.484   |
| NM_01517E  | 1910.705  | 1569.089  | H08563      | 5901.319  | 5263.354  | AL109667  | 885.1     | 596.339   |

|           |           |           |           |           |           |           |           |           |
|-----------|-----------|-----------|-----------|-----------|-----------|-----------|-----------|-----------|
| AL353939  | 892.1     | 966.231   | NM_001718 | 1648.801  | 1993.466  | NM_000840 | 801.83    | 419.964   |
| AL117573  | 7532.087  | 8632.825  | AF116659  | 5363.952  | 4927.308  | AJ008142  | 53284.785 | 51521.777 |
| NM_016116 | 1011.814  | 1277.21   | NM_018376 | 7779.584  | 8684.48   | AL035289  | 569.597   | 1122.903  |
| NM_000929 | 1288.047  | 1149.827  | NM_017615 | 2182.392  | 2261.19   | NM_001343 | 3151.566  | 3598.976  |
| NM_002482 | 2139.542  | 632.866   | AK022425  | 4091.309  | 3839.134  | NM_007275 | 27772.793 | 23081.799 |
| AL050068  | 444.018   | 490.091   | NM_000054 | 47613.738 | 49483.039 | NM_019025 | 55640.27  | 58051.25  |
| U92025    | 978.474   | 704.009   | NM_014713 | 27479.947 | 27267.053 | NM_018461 | 6125.429  | 5298.339  |
| AF095856  | 437.114   | 452.834   | NM_001812 | 4826.288  | 4685.231  | AF235023  | 4357.007  | 4263.372  |
| AF009323  | 624.909   | 683.614   | NM_014785 | 2437.864  | 2857.826  | NM_006910 | 4763.826  | 4186.375  |
| AK001526  | 6448.109  | 4862.007  | AK025175  | 492.819   | 900.646   | AF162667  | 3563.693  | 3297.035  |
| NM_000519 | 748.714   | 912.208   | NM_005811 | 16717.936 | 15575.944 | AB046847  | 3203.749  | 2769.653  |
| AF086183  | 811.091   | 625.388   | NM_005764 | 1824.369  | 1976.984  | NM_000447 | 3796.277  | 2705.181  |
| AK000525  | 5620.756  | 4881.982  | NM_016362 | 6831.564  | 8006.166  | NM_006354 | 4989.525  | 4118.12   |
| AL080216  | 2914.327  | 3425.404  | NM_004214 | 17903.016 | 18563.182 | AF303378  | 7571.864  | 5505.005  |
| NM_018558 | 1739.191  | 288.573   | NM_004329 | 29750.131 | 26456.291 | NM_016037 | 10423.563 | 7394.215  |
| NM_001974 | 5605.112  | 1168.235  | NM_002836 | 26540.219 | 25052.787 | NM_000043 | 5343.117  | 4453.199  |
| NM_013957 | 866.56    | 375.004   | NM_020167 | 7838.414  | 7144.714  | NM_016140 | 552.853   | 542.432   |
| NM_002468 | 7912.677  | 5290.11   | AL049963  | 37632.59  | 47357.48  | NM_015965 | 516.08    | 189.311   |
| NM_003028 | 2078.473  | 2014.997  | NM_016058 | 26972.531 | 33754.93  | NM_000417 | 4252.288  | 2475.885  |
| NM_001566 | 1654.217  | 1054.686  | NM_014005 | 13292.955 | 12316.538 | NM_020356 | 9862.615  | 4019.262  |
| NM_018548 | 6201.393  | 6107.095  | NM_004636 | 35165.184 | 36685.426 | NM_004063 | 696.609   | 514.603   |
| NM_013401 | 588.939   | 803.148   | AK022603  | 1309.839  | 1288.71   | NM_006144 | 1970.917  | 2177.651  |
| NM_018238 | 2494.838  | 1929.687  | NM_004896 | 13409.321 | 12722.349 | AL136549  | 20069.443 | 20690.307 |
| NM_006858 | 6491.638  | 5447.304  | NM_017688 | 6097.9    | 6013.915  | NM_012168 | 2552.51   | 2693.466  |
| NM_001405 | 2041.932  | 2490.014  | NM_012268 | 66167.078 | 66765.484 | NM_007038 | 6617.002  | 7215.541  |
| NM_003880 | 1177.199  | 1057.2    | NM_012203 | 4820.264  | 4992.24   | AF311324  | 6483.925  | 6844.651  |
| NM_005468 | 1455.744  | 1286.204  | AL157469  | 1049.939  | 1380.743  | AF124433  | 2087.59   | 1844.706  |
| NM_013278 | 976.968   | 970.192   | NM_002868 | 7602.613  | 9317.272  | AK001647  | 1124.171  | 1324.069  |
| NM_002880 | 8722.598  | 3578.948  | AK024100  | 17716.033 | 18012.158 | NM_001461 | 716.666   | 867.907   |
| NM_001066 | 1595.129  | 723.196   | NM_005135 | 1791.369  | 2034.785  | AF061556  | 1590.258  | 1481.209  |
| NM_004657 | 897.578   | 520.588   | NM_003827 | 15503.78  | 17959.936 | AL162049  | 2672.859  | 1813.085  |
| NM_018170 | 4198.733  | 577.9     | NM_004583 | 1228.423  | 1540.409  | AF036144  | 482.842   | 534.96    |
| NM_003867 | 517.066   | 188.932   | NM_001103 | 2450.625  | 2584.476  | NM_005032 | 1172.716  | 1102.18   |
| AL162062  | 1295.745  | 610.681   | NM_018399 | 910.792   | 1054.356  | NM_004160 | 7899.452  | 7273.886  |
| NM_003173 | 7744.156  | 4255.584  | AY007131  | 59983.457 | 59620.309 | AL109677  | 1840.416  | 1450.246  |
| NM_005030 | 15579.864 | 11525.081 | U61735    | 8154.12   | 7207.418  | NM_003941 | 56372.469 | 47775.996 |
| NM_017584 | 5709.834  | 4964.346  | NM_001144 | 42562.691 | 47560.793 | AF177909  | 2274.844  | 1728.553  |
| NM_020359 | 6467.736  | 6299.206  | AK023766  | 16367.544 | 17586.074 | NM_002664 | 17032.711 | 9132.566  |
| AB014541  | 17962.447 | 14903.706 | NM_001897 | 3216.252  | 3465.694  | AB018271  | 1408.601  | 790.099   |
| NM_002583 | 13724.346 | 9446.571  | NM_003853 | 3395.046  | 4008.43   | AL137665  | 6767.822  | 3650.518  |
| NM_006570 | 17301.436 | 13198.684 | AB033109  | 5592.769  | 5253.669  | NM_016434 | 5136.979  | 2195.639  |
| NM_020348 | 2585.861  | 1960.005  | NM_002053 | 60901.141 | 58494.805 | U36561    | 59559.137 | 58468.992 |
| NM_006034 | 5636.075  | 4835.292  | NM_006889 | 8453.262  | 9590.338  | AF205437  | 1386.239  | 723.086   |
| AB040943  | 1632.865  | 1864.831  | NM_002438 | 14554.519 | 13217.752 | AF034102  | 31677.736 | 14758.111 |
| NM_005201 | 3658.874  | 2502.655  | NM_002437 | 10684.268 | 10185.002 | AB037748  | 1803.268  | 2366.326  |
| NM_000092 | 1995.859  | 963.877   | D79991    | 7026.661  | 8561.355  | AB002306  | 3329.483  | 4753.184  |
| NM_019086 | 1344.397  | 1124.713  | AB011540  | 55518.754 | 54136.898 | NM_001300 | 3360.668  | 4160.876  |
| NM_018384 | 14129.156 | 2362.003  | NM_000040 | 23831.791 | 24091.172 | NM_012472 | 786.489   | 783.726   |
| NM_001872 | 572.114   | 217.113   | NM_004631 | 9018.24   | 8546.072  | NM_018187 | 11255.946 | 14364.379 |
| AF157323  | 1751.916  | 546.045   | NM_006033 | 18989.369 | 20533.23  | NM_003016 | 40632.648 | 38693.027 |
| NM_006025 | 1073.654  | 319.815   | NM_004837 | 9899.708  | 11080.851 | NM_005463 | 56231.699 | 64645.953 |
| NM_005877 | 11547.782 | 2246.582  | NM_000370 | 2967.034  | 3255.819  | NM_001325 | 3518.704  | 3462.186  |
| AK024458  | 411.002   | 238.527   | BE865893  | 9464.862  | 8617.854  | NM_018282 | 32122.115 | 25041.111 |

|           |           |           |           |           |           |            |           |           |
|-----------|-----------|-----------|-----------|-----------|-----------|------------|-----------|-----------|
| NM_00333E | 5004.018  | 2984.645  | AY005822  | 7565.975  | 7459.557  | BC019932   | 3397.439  | 3078.624  |
| NM_01339E | 4434.477  | 3497.299  | NM_018129 | 53425.035 | 53222.68  | AF114818   | 7379.437  | 7865.114  |
| NM_005151 | 487.177   | 503.54    | AF289022  | 7013.078  | 6899.436  | AK025106   | 2784.839  | 2894.225  |
| NM_017752 | 3454.77   | 3628.823  | AB002326  | 790.909   | 807.971   | NM_020144  | 6420.001  | 7080.414  |
| D26069    | 20489.277 | 20166.188 | M17252    | 1666.227  | 1494.207  | NM_00390E  | 54755.855 | 46919.652 |
| BF107577  | 5430.582  | 5414.503  | NM_016025 | 25479.621 | 20406.961 | BE893142   | 3864.644  | 3121.677  |
| NM_005837 | 21954.955 | 15149.196 | NM_013319 | 8295.837  | 8989.476  | NM_003103  | 6056.71   | 3872.43   |
| NM_01662E | 10074.685 | 7739.392  | NM_00074E | 4608.821  | 4738.336  | NM_01534C  | 12463.543 | 8037.551  |
| NM_017493 | 3176.293  | 2844.586  | NM_000722 | 2942.878  | 3404.608  | NM_006451  | 6353.61   | 3536.568  |
| NM_00613E | 17017.467 | 16361.611 | NM_00603C | 3883.414  | 4505.62   | NM_002094  | 2429.031  | 910.777   |
| AF237772  | 1768.893  | 2301.024  | NM_02041C | 12127.212 | 12249.16  | NM_002937  | 1149.985  | 449.571   |
| AK025934  | 4620.641  | 4242.08   | NM_014211 | 1170.89   | 1331.962  | NM_003191  | 11076.32  | 5316.834  |
| AJ008154  | 2669.499  | 1912.463  | NM_000814 | 3522.417  | 3693.093  | NM_01823E  | 55638.008 | 39404.063 |
| NM_003487 | 8606.932  | 6335.415  | J03077    | 64613.484 | 62295.055 | NM_012104  | 52865.504 | 32053.479 |
| NM_006887 | 8695.677  | 5868.861  | J03048    | 36093.18  | 27509.037 | NM_000761  | 58740.875 | 58725.734 |
| U90919    | 3526.058  | 1138.006  | NM_00171E | 1208.051  | 990.823   | NM_020142  | 8818.277  | 11765.68  |
| NM_006177 | 4730.275  | 1112.539  | AF116659  | 6375.643  | 4648.261  | NM_000774  | 13182.951 | 22295.23  |
| AL137286  | 4909.484  | 989.335   | NM_000317 | 37438.266 | 31557.75  | NM_017781  | 53496.523 | 62644.688 |
| NM_01635E | 2439.066  | 579.779   | NM_01837E | 7116.273  | 6272.229  | NM_006004  | 57879.41  | 55449.469 |
| NM_01627E | 18611.717 | 6270.768  | NM_01761E | 1642.81   | 2155.8    | NM_004894  | 34831.824 | 34045.191 |
| NM_02041E | 3776.701  | 2054.542  | NM_01743E | 7153.836  | 5473.894  | AB028960   | 994.425   | 1496.304  |
| NM_013293 | 6699.634  | 3880.438  | U59209    | 7946.797  | 6694.18   | NM_00564E  | 44029.121 | 32314.258 |
| AF315592  | 8424.042  | 4832.902  | NM_02019E | 9388.057  | 9257.343  | NM_006943  | 16520.689 | 13655.711 |
| AF095844  | 5129.29   | 4883.718  | BC002753  | 1096.727  | 607.722   | NM_006741  | 38292.586 | 29857.621 |
| NM_015833 | 2402.056  | 2301.863  | AK023824  | 9421.708  | 7855.662  | NM_01416E  | 9563.828  | 9385.421  |
| NM_00098E | 57013.641 | 55330.027 | AL133069  | 9889.218  | 9956.479  | AL117606   | 21876.078 | 23378.508 |
| AK026760  | 13657.581 | 12060.618 | AL117574  | 1187.602  | 1054.008  | NM_01233C  | 3929.771  | 3620.031  |
| NM_014772 | 5956.488  | 7081.387  | AK026055  | 16925.59  | 15517.838 | AF294278   | 12842.704 | 11763.393 |
| AK025248  | 5515.673  | 4628.099  | AK024126  | 958.117   | 1152.24   | NM_018211  | 4656.907  | 3563.693  |
| NM_00453E | 25256.217 | 21897.854 | NM_00151E | 10360.11  | 9813.536  | NM_01452C  | 7694.112  | 5585.591  |
| NM_00642E | 24282.08  | 17814.498 | NM_002744 | 22605.932 | 22323.838 | NM_00261E  | 3335.533  | 1791.483  |
| NM_00428C | 18637.254 | 15574.321 | NM_015917 | 28674.254 | 29148.244 | AK025712   | 27922.869 | 12675.189 |
| AF110399  | 5084.072  | 6221.135  | NM_020397 | 2808.448  | 2743.883  | NM_005634  | 3483.878  | 1669.147  |
| AK027094  | 8371.126  | 8733.747  | AB046859  | 49802.805 | 48518.41  | NM_017757  | 8979.861  | 4229.778  |
| AF174600  | 9965.043  | 7295.396  | NM_00510E | 14935.661 | 15394.194 | NM_00214E  | 49197.379 | 26133.277 |
| AK001003  | 1994.703  | 1705.163  | NM_00273C | 6676.123  | 6611.566  | AB007892   | 2521.659  | 1581.781  |
| NM_00280C | 22703.939 | 17421.643 | NM_00482E | 5289.976  | 6811.272  | NM_018207  | 5088.388  | 6910.455  |
| NM_00077E | 2416.03   | 1001.845  | CY3Cy5    | 8027.011  | 342.608   | NM_00034E  | 53963.352 | 62417.402 |
| AB032981  | 663.608   | 277.715   | AF035314  | 1813.999  | 1590.335  | NM_001862  | 60661.906 | 66715.102 |
| BF217864  | 3436.573  | 1056.535  | NM_01803E | 2487.909  | 2164.94   | NM_006531  | 9169.942  | 13190.405 |
| NM_005917 | 32269.986 | 11781.85  | AF052087  | 1261.771  | 1532.573  | AB029021   | 54742.402 | 58036.609 |
| NM_007052 | 1191.377  | 629.706   | AF007143  | 2442.065  | 2509.542  | NM_002101  | 2465.346  | 3116.966  |
| BC017044  | 1017.009  | 653.53    | AF147417  | 796.322   | 834.557   | NM_005423  | 1944.157  | 2673.54   |
| AV758498  | 4320.68   | 2925.335  | AK023656  | 2952.258  | 2637.274  | Z36789     | 351.882   | 604.802   |
| NM_02019E | 4701.229  | 2791.813  | AF086511  | 5654.235  | 5046.954  | J02874     | 13079.553 | 16726.922 |
| AK024113  | 1080.935  | 768.034   | AK022989  | 10796.222 | 7358.75   | BF310427   | 21395.619 | 25231.189 |
| NM_018657 | 3605.121  | 3087.743  | AK001604  | 7241.45   | 5247.595  | N94424     | 880.268   | 1326.822  |
| L40410    | 21331.553 | 19339.633 | AF086497  | 1315.84   | 1113.134  | AA045192   | 5465.991  | 6935.551  |
| NM_00705E | 7278.771  | 7959.556  | NM_020141 | 12198.552 | 9310.549  | H45617     | 1274.772  | 1764.244  |
| NM_016652 | 5414.042  | 5394.868  | NM_006482 | 2535.531  | 2737.525  | M92642     | 11928.186 | 13377.176 |
| NM_01631C | 34885.117 | 29072.088 | NM_001824 | 75260.969 | 61625.566 | H-U 44385  | 37463.383 | 24020.582 |
| AK021562  | 1756.899  | 2157.339  | SR1       | 77373.797 | 61102.789 | ID 1654970 | 14494.593 | 11506.854 |
| BC006560  | 1458.322  | 1381.148  | SR3       | 52727.93  | 48235.848 | ID 2531132 | 15399.947 | 11057.422 |

|             |           |           |           |           |           |            |           |           |
|-------------|-----------|-----------|-----------|-----------|-----------|------------|-----------|-----------|
| NM_00629E   | 1491.611  | 1516.99   | SR5       | 5857.491  | 6055.847  | ID 4365538 | 2582.563  | 1553.408  |
| AF060938    | 30050.939 | 24776.957 | SR7       | 8132.653  | 45671.938 | AA485665   | 505.546   | 292.75    |
| NM_001973   | 4907.122  | 5348.851  | SR9       | 23852.35  | 4305.233  | BF125928   | 13586.115 | 7144.128  |
| NM_01446E   | 18088.098 | 17933.42  | CY3Cy5    | 6328.984  | 324.302   | BG571026   | 4586.505  | 2521.634  |
| NM_00685E   | 15502.329 | 17153.352 | U15553    | 13989.172 | 10416.245 | AA489017   | 12730.523 | 7774.971  |
| X52350      | 59781.563 | 55113.457 | Z36829    | 2351.94   | 2123.545  | NM_001140  | 1621.961  | 2439.899  |
| AF071554    | 1187.88   | 1249.353  | AK024734  | 23198.4   | 27264.012 | NM_01605E  | 408.987   | 370.473   |
| NM_01768E   | 1576.964  | 1105.257  | NM_017741 | 3471.028  | 3069.419  | NM_004843  | 2294.635  | 3347.905  |
| AK025612    | 7131.88   | 5042.154  | AK022223  | 800.763   | 533.642   | AK022845   | 1424.409  | 1877.79   |
| NM_01226E   | 4029.938  | 2468.789  | NM_005887 | 7988.62   | 6837.739  | NM_003004  | 658.328   | 1323.349  |
| NM_012203   | 3055.188  | 1576.824  | AK024921  | 972.156   | 694.19    | S77835     | 1233.75   | 2072.439  |
| NM_00329E   | 331.578   | 392.186   | AL110232  | 1544.158  | 1302.207  | NM_00298E  | 2842.144  | 4026.076  |
| NM_00473E   | 16250.128 | 14299.412 | AK026103  | 6216.552  | 4363.976  | AB018347   | 44669.805 | 46075.738 |
| NM_00689E   | 886.082   | 813.859   | NM_016353 | 38658.094 | 32988.742 | AB033073   | 21182.75  | 22555.732 |
| NM_00645E   | 7393.203  | 6927.976  | AK022567  | 1271.712  | 1058.172  | NM_003284  | 12934.76  | 14562.466 |
| AA427949    | 666.986   | 853.413   | AL080280  | 19054.594 | 15592.145 | NM_018152  | 1399.932  | 1899.62   |
| D50373      | 1764.87   | 1804.556  | AB028947  | 4525.572  | 3617.208  | NM_00031E  | 6407.46   | 8418.39   |
| AA488757    | 2644.923  | 2339.258  | AK022556  | 1101.786  | 2029.376  | NM_003257  | 521.145   | 1199.27   |
| H07071      | 614.255   | 818.569   | AK023437  | 12510.875 | 14220.308 | NM_012461  | 6692.094  | 7982.657  |
| M25322      | 956.231   | 959.494   | AK024147  | 1239.77   | 1152.498  | AK001379   | 3086.259  | 3265.03   |
| H-L 27586 I | 5044.957  | 6691.46   | AK022897  | 1553.824  | 1561.997  | NM_01745C  | 5375.356  | 5671.316  |
| ID 214180   | 1850.788  | 2437.083  | AK023898  | 12284.608 | 11667.463 | NM_002023  | 2115.213  | 2238.342  |
| ID 1867426  | 9571.169  | 8033.092  | AK021619  | 1570.548  | 1377.173  | NM_00283E  | 3274.083  | 2971.06   |
| ID 396450   | 506.872   | 863.882   | AK025872  | 1343.389  | 1191.523  | AF190500   | 1660.341  | 1464.734  |
| W99328      | 3017.125  | 3364.027  | AF131762  | 9717.888  | 7007.804  | NM_00161E  | 487.183   | 360.011   |
| AI434176    | 3276.336  | 4298.833  | AY007089  | 5084.654  | 4825.567  | NM_005904  | 537.629   | 317.378   |
| H08563      | 753.254   | 835.964   | AK021816  | 12384.771 | 11878.958 | NM_005273  | 27073.412 | 14198.661 |
| BE735403    | 3020.932  | 2421.663  | D43770    | 32891.824 | 24845.588 | NM_000524  | 486.634   | 512.58    |
| NM_002631   | 28132.561 | 22857.092 | AF085960  | 1116.401  | 1145.465  | NM_01820E  | 3906.075  | 4608.965  |
| AB033109    | 4311.434  | 3882.018  | AK021519  | 2295.647  | 1899.959  | NM_01592E  | 4782.168  | 6080.875  |
| NM_002053   | 13297.733 | 15107.439 | NM_014254 | 11132.789 | 15011.289 | U90653     | 9485.453  | 11942.18  |
| NM_00688E   | 6353.363  | 5753.206  | AF086036  | 841.367   | 893.048   | NM_00019E  | 890.94    | 1116.869  |
| NM_00243E   | 3878.696  | 3544.66   | U09197    | 2174.11   | 1777.435  | NM_01833E  | 5188.37   | 6196.008  |
| NM_01458E   | 1043.358  | 822.967   | AK025218  | 1379.607  | 1367.644  | NM_00674E  | 26246.24  | 28224.545 |
| NM_00075E   | 1654.339  | 1610.348  | AJ227899  | 4369.694  | 4606.352  | NM_00027E  | 1693.197  | 2219.505  |
| AK023334    | 2787.704  | 2714.469  | AL359607  | 3514.201  | 4606.363  | AK000037   | 2511.62   | 3298.503  |
| NM_002563   | 48126.578 | 41890.527 | AF161371  | 11527.137 | 14975.839 | NM_01476C  | 2679.488  | 3666.358  |
| NM_002437   | 5549.848  | 6942.512  | AK022464  | 3418.171  | 2899.19   | NM_018713  | 2255.076  | 3241.041  |
| D79991      | 4424.903  | 4905.383  | AF086230  | 2341.016  | 2265.01   | AJ006268   | 1388.358  | 1536.428  |
| AK022425    | 6340.897  | 4965.342  | AK023408  | 7118.355  | 6503.511  | AF190864   | 7282.863  | 8382.297  |
| NM_000054   | 3314.866  | 3520.575  | AK000144  | 3940.938  | 2873.71   | NM_001177  | 3861.046  | 6017.091  |
| NM_014713   | 19317.414 | 20696.072 | AK000942  | 1406.277  | 768.685   | NM_014447  | 3132.355  | 8025.682  |
| NM_001812   | 3392.284  | 3705.509  | AL117533  | 2656.084  | 2086.962  | NM_00235E  | 2334.173  | 1599.88   |
| NM_01478E   | 1402.599  | 1546.767  | AK026036  | 2224.177  | 2046.486  | NM_006691  | 2008.682  | 1439.326  |
| AK025175    | 553.824   | 741.126   | AK023422  | 6012.009  | 5203.351  | NM_00150E  | 1198.185  | 798.868   |
| NM_005811   | 6320.106  | 6211.154  | AK022796  | 2851.985  | 2907.925  | NM_00371C  | 14571.952 | 8532.711  |
| NM_005764   | 782.337   | 1452.407  | AK095193  | 2201.634  | 2242.73   | Z83805     | 739.737   | 524.761   |
| NM_016362   | 3463.191  | 4709.614  | AL122088  | 3616.446  | 3742.479  | NM_00466E  | 1050.098  | 623.949   |
| NM_004214   | 14329.354 | 13959.654 | AF119912  | 1736.569  | 1350.319  | NM_003614  | 11861.991 | 7193.224  |
| NM_00432E   | 12986.334 | 12055.445 | AL137518  | 3350.424  | 2834.824  | NM_014257  | 14097.702 | 9162.469  |
| NM_00283E   | 5206.958  | 5191.61   | AK023134  | 716.668   | 603.972   | NM_000403  | 31726.896 | 27943.939 |
| NM_020167   | 1081.658  | 1618.592  | T99941    | 14704.916 | 14925.04  | NM_018127  | 17297.799 | 21894.254 |
| NM_01605E   | 20127.654 | 19750.191 | AF113678  | 3343.786  | 2798.87   | AB020677   | 23129.803 | 26329.707 |

|           |           |           |           |           |           |            |           |           |
|-----------|-----------|-----------|-----------|-----------|-----------|------------|-----------|-----------|
| NM_01400E | 1878.416  | 1308.471  | AL137313  | 66921.844 | 69663.211 | AB033097   | 7554.931  | 8382.792  |
| NM_00603E | 2315.963  | 2466.929  | AB002363  | 15849.187 | 12956.723 | NM_00013E  | 5376.35   | 5177.508  |
| NM_004837 | 7939.654  | 9096.83   | NM_005284 | 8629.486  | 9094.4    | AJ223948   | 9443.59   | 13933.628 |
| NM_00037C | 2677.088  | 2682.672  | AF086351  | 1298.187  | 986.281   | NM_01621E  | 667.101   | 1044.651  |
| BE865893  | 1811.718  | 2349.045  | D83199    | 29438.305 | 25124.473 | AK022947   | 2204.322  | 3368.206  |
| NM_00312E | 37842.969 | 37054.902 | AK025957  | 1352.765  | 1090.727  | AL050029   | 3028.765  | 6579.699  |
| AY005822  | 2515.999  | 2961.807  | Y16708    | 2559.924  | 2257.82   | AL049966   | 612.61    | 941.233   |
| NM_01812E | 12096.246 | 10162.621 | AL157453  | 4895.995  | 3253.887  | NM_005204  | 10336.121 | 11191.629 |
| AF289022  | 9501.353  | 12349.59  | NM_01904C | 14635.279 | 12769.969 | NM_01620E  | 1645.172  | 2162.216  |
| AB002326  | 776.693   | 760.197   | NM_00597E | 3487.453  | 2844.435  | NM_00275E  | 3658.021  | 4821.409  |
| M17252    | 379.908   | 402.574   | Y16711    | 1735.117  | 1513.731  | NM_007271  | 2776.29   | 3703.528  |
| NM_01602E | 18258.91  | 14458.407 | AJ272179  | 9678.734  | 8493.886  | NM_00625E  | 3615.923  | 3879.291  |
| NM_01331E | 6513.1    | 6397.534  | AJ007015  | 5572.803  | 5410.867  | BE392143   | 5738.732  | 5056.198  |
| NM_02041C | 9504.93   | 8157.184  | AL049317  | 3313.581  | 3485.5    | NM_00581E  | 3378.398  | 1911.904  |
| NM_00045E | 2167.521  | 2275.01   | AL050090  | 2283.89   | 2350.498  | AB037718   | 9541.956  | 5977.674  |
| J03048    | 20396.018 | 13949.479 | AF086309  | 2051.355  | 2654.76   | AL389994   | 1441.197  | 1090.623  |
| NM_00458E | 1447.385  | 1860.454  | AF238870  | 1514.43   | 1633.472  | NM_00390E  | 5926.731  | 3545.628  |
| NM_001103 | 941.111   | 789.57    | AK026279  | 4986.961  | 3821.237  | NM_001277  | 17022.475 | 10659.201 |
| AF228710  | 18097.207 | 18675.775 | AF130094  | 27952.992 | 27398.465 | NM_00365E  | 8292.993  | 6563.07   |
| NM_01839E | 1180.861  | 1439.866  | AK026673  | 5574.921  | 4235.702  | NM_00186E  | 57266.203 | 62135.078 |
| AY007131  | 52121.746 | 51277.074 | AF170935  | 27371.469 | 28926.285 | NM_006531  | 10051.744 | 15262.549 |
| U61735    | 6671.106  | 6668.626  | AB007978  | 2061.368  | 1726.66   | AB029021   | 54879.938 | 58856.145 |
| NM_001144 | 36576.523 | 39167.074 | AF217970  | 3352.914  | 4225.64   | NM_002101  | 2652.64   | 3407.02   |
| AK023766  | 25202.916 | 33536.023 | AF086297  | 2535.724  | 2903.76   | NM_00542E  | 3377.627  | 5688.244  |
| NM_001897 | 1347.991  | 1743.602  | AK025455  | 4221.099  | 4271.805  | Z36789     | 408.572   | 829.487   |
| NM_00385E | 1173.236  | 1195.494  | AK026799  | 26731.334 | 19311.129 | J02874     | 14405.437 | 19544.318 |
| NM_01837E | 7336.181  | 11113.6   | NM_01486C | 754.442   | 668.672   | BF310427   | 19232.283 | 22183.578 |
| NM_01761E | 1948.994  | 2338.176  | AK022549  | 2727.629  | 3190.907  | N94424     | 1446.885  | 3073.633  |
| NM_01743E | 10671.092 | 9077.891  | NM_018157 | 1091.887  | 916.971   | AA045192   | 6496.356  | 9948.644  |
| U59209    | 12467.486 | 10414.578 | Z70714    | 7834.664  | 6909.66   | H45617     | 1338.119  | 1757.58   |
| NM_02019E | 11739.36  | 10835.831 | AK021640  | 18845.486 | 13413.623 | M92642     | 11805.654 | 16356.48  |
| BC002753  | 979.394   | 1037.797  | NM_01656E | 69252.047 | 70425.695 | H-U 44385  | 45559.285 | 39903.566 |
| AK023824  | 6203.942  | 8292.111  | U84509    | 5870.459  | 5393.162  | ID 1654970 | 17056.297 | 18024.008 |
| AL133069  | 13166.653 | 17705.508 | AK002036  | 5612.234  | 4020.625  | ID 2531132 | 17500.514 | 16886.848 |
| AL117574  | 1771.747  | 1838.44   | U84512    | 671.178   | 702.548   | ID 4365538 | 2680.825  | 2668.766  |
| AK026055  | 15874.44  | 13044.074 | AK025775  | 7006.908  | 6432.417  | AA485665   | 906.812   | 620.273   |
| AK024126  | 1382.4    | 1713.996  | AB046791  | 1513.442  | 1511.136  | BF125928   | 15319.788 | 10447.298 |
| NM_00151E | 9364.021  | 8898.993  | AF043469  | 3990.154  | 3644.733  | BG571026   | 4616.41   | 3072.412  |
| NM_002744 | 6857.102  | 6878.442  | AL109671  | 1805.189  | 2058.805  | AA489017   | 11618.068 | 7439.49   |
| NM_015917 | 23871.68  | 23807.166 | NM_01237E | 1283.649  | 1302.966  | NM_00484E  | 2602.688  | 3957.561  |
| NM_020397 | 1833.77   | 2557.532  | AK022008  | 5451.516  | 4186.267  | AK022845   | 1953.358  | 2240.733  |
| NM_000061 | 12463.803 | 12643.17  | NM_01818E | 4225.063  | 3448.599  | NM_003004  | 725.491   | 1681.479  |
| AB046859  | 2784.632  | 3400.249  | AL080188  | 4894.701  | 4384.081  | S77835     | 1330.541  | 2422.01   |
| NM_00510E | 10243.226 | 10057.023 | NM_00239C | 10015.298 | 11555.09  | NM_00298E  | 3220.037  | 5093.167  |
| AK023573  | 10096.117 | 10415.476 | NM_00614E | 4227.487  | 4349.315  | AB018347   | 47323.656 | 53126.852 |
| NM_00273C | 5453.364  | 4595.266  | NM_01491C | 17741.934 | 17656.816 | AB033073   | 25740.398 | 29489.334 |
| NM_00482E | 4945.308  | 6366.458  | AK001064  | 9373.868  | 9167.504  | NM_003284  | 12344.274 | 17028.529 |
| AB011540  | 10593.872 | 12647.233 | AB029031  | 7343.313  | 7294.249  | NM_01815E  | 1802.03   | 2452.808  |
| NM_00004C | 2750.261  | 4339.07   | NM_001294 | 18527.867 | 25143.799 | NM_00031E  | 7020.505  | 11104.148 |
| NM_004631 | 7616.62   | 7135.55   | AF302786  | 5955.421  | 5509.462  | NM_003257  | 646.946   | 1480.876  |
| NM_01226E | 5330.812  | 6073.837  | AL122083  | 9301.822  | 8456.867  | NM_012461  | 6742.869  | 10092.591 |
| NM_01220E | 4084.732  | 4299.725  | NM_01909E | 19633.363 | 12767.224 | AK001379   | 3309.174  | 4248.274  |
| NM_00329E | 688.865   | 661.733   | AK022212  | 62085.137 | 56690.453 | NM_01745C  | 5636.659  | 7343.104  |

|             |           |           |           |           |           |           |           |           |
|-------------|-----------|-----------|-----------|-----------|-----------|-----------|-----------|-----------|
| NM_004736   | 17114.645 | 19727.117 | X64974    | 12038.853 | 8246.56   | NM_002023 | 1950.786  | 2525.905  |
| NM_006895   | 912.255   | 1398.066  | NM_000834 | 20308.15  | 13696.644 | NM_002835 | 3585.733  | 4145.741  |
| NM_006455   | 7935.964  | 10088.455 | NM_006485 | 53614.109 | 49633.027 | AF190500  | 1884.871  | 1995.206  |
| AA427949    | 652.449   | 663.726   | NM_012459 | 6848.614  | 6208.06   | NM_001616 | 550.187   | 494.492   |
| D50373      | 2072.928  | 1806.807  | NM_012360 | 1391.078  | 1908.091  | NM_005904 | 618.526   | 662.305   |
| AA488757    | 3601.562  | 3266.297  | AL137268  | 6054.083  | 5139.511  | NM_005273 | 30114.732 | 18969.662 |
| AA205399    | 619.593   | 1100.64   | AK001130  | 838.583   | 954.622   | NM_000524 | 495.505   | 505.365   |
| H07071      | 421.589   | 898.471   | AK022398  | 1225.625  | 1029.54   | NM_018207 | 4583.716  | 2783.461  |
| M25322      | 1306.985  | 1206.859  | AK024109  | 11914.48  | 9996.827  | NM_000345 | 57618.918 | 58157.176 |
| H-L 27586 I | 4489.991  | 5638.497  | AF088048  | 5695.763  | 5480.183  | NM_018208 | 4775.768  | 6665.437  |
| ID 214180   | 1921.926  | 2274.344  | AK001143  | 5921.761  | 5054.229  | NM_015925 | 5126.252  | 8001.431  |
| ID 1867426  | 9144.018  | 9795.736  | AK001701  | 7155.286  | 5201.767  | U90653    | 10445.5   | 15817.757 |
| ID 396450   | 680.71    | 989.189   | AK022205  | 1063.171  | 935.255   | NM_000196 | 1475.914  | 3755.339  |
| W99328      | 2958.717  | 3046.496  | AK024955  | 68522.891 | 61224.141 | NM_018335 | 4839.474  | 8184.688  |
| AI434176    | 3338.781  | 4003.762  | AF169693  | 3381.044  | 3799.376  | NM_006745 | 31049.531 | 44018.523 |
| H08563      | 512.394   | 656.878   | L23206    | 18801.758 | 17041.916 | NM_000275 | 1989.433  | 3042.517  |
| BE735403    | 2982.744  | 2829.408  | NM_012192 | 9957.745  | 8438.062  | AK000037  | 2829.534  | 3403.684  |
| NM_001718   | 1105.771  | 1259.654  | NM_006293 | 5897.597  | 5958.008  | NM_014760 | 3226.209  | 5023.497  |
| AF116659    | 4591.776  | 5412.449  | NM_007229 | 12334.224 | 13496.523 | NM_018713 | 2397.604  | 3505.422  |
| NM_000317   | 20547.357 | 18466.494 | AB011105  | 6854.711  | 6962.3    | AJ006268  | 1464.504  | 2023.279  |
| NM_006885   | 6023.234  | 7496.854  | NM_002213 | 2401.893  | 2039.38   | AF190864  | 8689.797  | 10677.291 |
| NM_002435   | 4649.167  | 6119.934  | NM_018970 | 832.727   | 841.638   | NM_001177 | 4363.117  | 5593.071  |
| NM_014585   | 1150.272  | 1313.156  | NM_004814 | 7122.389  | 7114.209  | NM_014447 | 2263.575  | 3093.208  |
| NM_000755   | 1614.936  | 1792.742  | D86976    | 26756.469 | 20588.066 | NM_002355 | 2339.503  | 1857.329  |
| AK023334    | 3108.834  | 3256.96   | AF307080  | 930.832   | 943.861   | NM_006691 | 2208.213  | 1838.944  |
| NM_002563   | 50997.125 | 54058.516 | NM_004057 | 8809.264  | 6397.337  | NM_001505 | 1383.163  | 1400.289  |
| NM_002437   | 4364.152  | 4311.564  | NM_018971 | 2175.188  | 1988.065  | NM_003710 | 15459.962 | 12919.591 |
| D79991      | 5136.517  | 6276.188  | K03175    | 2518.323  | 2081.789  | Z83805    | 932.185   | 816.507   |
| AK022425    | 7031.549  | 6819.245  | NM_003015 | 3074.24   | 2756.258  | NM_004665 | 1287.899  | 835.977   |
| NM_000054   | 4105.878  | 4115.303  | NM_003711 | 4144.597  | 5032.572  | NM_003614 | 11713.279 | 7105.484  |
| NM_014713   | 18474.709 | 16082.965 | NM_006496 | 10703.137 | 10494.041 | NM_014257 | 14607.319 | 7105.179  |
| NM_001812   | 2693.067  | 2004.92   | NM_000828 | 1202.893  | 1274.492  | NM_001140 | 1398.097  | 1333.455  |
| NM_014785   | 1522.105  | 1659.827  | NM_004826 | 7462.533  | 5756.672  | NM_000403 | 33365.543 | 37308.762 |
| AK025175    | 768.34    | 1072.615  | NM_013314 | 7529.524  | 6596.663  | NM_018127 | 18737.895 | 24192.117 |
| NM_005811   | 6217.751  | 5464.619  | NM_002072 | 522.206   | 493.578   | AB020677  | 23039.229 | 26181.957 |
| NM_005764   | 596.158   | 668.569   | NM_003182 | 1313.831  | 1174.868  | AB033097  | 7808.315  | 11058.713 |
| NM_016362   | 3710.176  | 6640.999  | NM_004431 | 42414.617 | 45579.445 | NM_000135 | 5253.686  | 7576.464  |
| NM_004214   | 16957.607 | 24710.191 | NM_002012 | 8501.352  | 8463.518  | AJ223948  | 9889.219  | 14888.37  |
| NM_004325   | 12366.362 | 11159.013 | NM_002070 | 52296.184 | 53704.098 | NM_016218 | 691.476   | 1578.157  |
| NM_002835   | 6799.406  | 6289.748  | AF227969  | 12574.904 | 12635.157 | AK022947  | 2176.803  | 2702.253  |
| NM_020167   | 1315.727  | 1444.683  | AF116657  | 2473.819  | 2403.034  | AL050029  | 2388.954  | 2607.957  |
| NM_016055   | 18698.537 | 18173.553 | NM_004102 | 1530.901  | 1320.267  | AL049966  | 665.383   | 1173.052  |
| NM_014005   | 2088.214  | 2123.535  | NM_003944 | 65340.789 | 65632.055 | NM_005204 | 10700.066 | 11427.522 |
| NM_017685   | 2246.926  | 3243.918  | NM_016120 | 69127.086 | 66683.75  | NM_016203 | 1608.719  | 1922.391  |
| AK025612    | 9907.57   | 12149.843 | NM_002893 | 2567.977  | 2989.351  | NM_002755 | 3818.299  | 5186.176  |
| NM_000370   | 2418.391  | 4336.38   | NM_002393 | 33314.113 | 35452.855 | NM_007271 | 3015.981  | 4094.868  |
| BE865893    | 1510.588  | 1248.661  | NM_002669 | 7092.612  | 7536.777  | NM_006255 | 4079.165  | 4825.806  |
| NM_003123   | 41191.512 | 42225.473 | AB014600  | 11570.08  | 10609.75  | BE392143  | 6340.171  | 7318.461  |
| AY005822    | 1528.31   | 1785.054  | NM_018312 | 6994.071  | 5657.893  | NM_005813 | 3878.872  | 3831.178  |
| NM_018125   | 12535.905 | 15526.456 | X98259    | 2546.857  | 2806.731  | AB037718  | 9445.979  | 7522.404  |
| AF289022    | 7814.986  | 8874.415  | NM_014792 | 731.278   | 982.4     | AL389994  | 1723.118  | 1479.366  |
| AB002326    | 623.333   | 576.018   | U05255    | 2351.566  | 1851.375  | NM_003905 | 6198.476  | 3936.542  |
| NM_016025   | 19108.699 | 16690.393 | X98260    | 15946.423 | 15244.674 | NM_001277 | 17035.168 | 10748.312 |



|             |           |           |           |           |           |            |           |           |
|-------------|-----------|-----------|-----------|-----------|-----------|------------|-----------|-----------|
| NM_013319   | 7016.563  | 6653.901  | NM_007217 | 13878.855 | 13351.46  | NM_003659  | 8030.981  | 5741.872  |
| NM_020410   | 9582.37   | 7355.146  | NM_014777 | 54123.41  | 56667.625 | NM_007072  | 5681.921  | 4308.087  |
| NM_000453   | 2093.455  | 1914.995  | NM_001102 | 11386.913 | 11387.135 | NM_012320  | 4695.148  | 3338.728  |
| J03048      | 17888.922 | 8533.316  | NM_003803 | 4806.218  | 4695.218  | AB029021   | 55950.574 | 62751.313 |
| NM_004583   | 1421.731  | 1619.409  | NM_002818 | 68912.32  | 67105.039 | NM_002101  | 2713.251  | 3744.551  |
| NM_001103   | 751.632   | 825.964   | NM_001937 | 24476.715 | 20599.248 | NM_005423  | 1491.893  | 2243.104  |
| AF228710    | 15965.304 | 14185.629 | AK024778  | 2065.194  | 1690.057  | Z36789     | 1124.533  | 1886.884  |
| NM_018399   | 1082.077  | 1210.351  | AL157500  | 883.656   | 740.632   | J02874     | 16752.328 | 25712.418 |
| AY007131    | 50024.004 | 54865.41  | AK025498  | 5333.424  | 5869.147  | BF310427   | 22646.297 | 31125.939 |
| U61735      | 9714.682  | 11547.765 | NM_001395 | 38772.938 | 44872.438 | N94424     | 1109.998  | 2010.986  |
| NM_001144   | 39840.102 | 45564.895 | NM_002068 | 2871.156  | 2830.488  | AA045192   | 9458.426  | 22033.26  |
| AK023766    | 19997.059 | 20321.281 | NM_019854 | 1235.901  | 1213.04   | AI521645   | 702.068   | 1270.973  |
| NM_001897   | 1351.345  | 1939.024  | NM_013338 | 7101.29   | 6584.432  | H45617     | 1202.371  | 1676.606  |
| NM_003853   | 910.495   | 943.85    | NM_014671 | 21896.133 | 21984.73  | M92642     | 13301.62  | 17322.639 |
| AB033109    | 4542.057  | 4564.4    | NM_001814 | 17953.041 | 19967.563 | H-U 44385  | 44921.883 | 37688.516 |
| NM_002053   | 12349.75  | 16576.449 | NM_018439 | 793.249   | 657.007   | ID 1654970 | 17156.162 | 19497.334 |
| NM_017438   | 10240.417 | 9638.043  | NM_005656 | 5421.95   | 4335.688  | ID 2531132 | 19147.908 | 19977.324 |
| U59209      | 12862.105 | 12422.341 | NM_006012 | 17489.445 | 16874.588 | ID 4365538 | 3081.407  | 3346.146  |
| NM_020195   | 14270.775 | 14549.191 | NM_002151 | 3465.264  | 3164.752  | AA485665   | 1085.106  | 1473.868  |
| BC002753    | 909.139   | 946.23    | NM_014889 | 5647.322  | 5251.103  | BF125928   | 16754.654 | 15542.17  |
| AK023824    | 5624.352  | 6881.518  | AF173935  | 1526.107  | 1574.857  | BG571026   | 4863.988  | 4328.609  |
| AL133069    | 10932.664 | 13399.188 | AK025322  | 46554.855 | 47799.57  | AA489017   | 13019.224 | 9387.386  |
| AL117574    | 1520.008  | 1336.545  | NM_017887 | 9343.247  | 9124.036  | NM_000025  | 23992.473 | 12410.82  |
| AK026055    | 19259.604 | 21292.277 | NM_017650 | 685.781   | 909.452   | D38521     | 4904.807  | 2575.815  |
| AK024126    | 1886.074  | 2050.382  | NM_000526 | 5774.922  | 5887.882  | NM_018152  | 1807.225  | 2696.105  |
| NM_001516   | 10562.476 | 10120.781 | AF007152  | 6714.073  | 8871.114  | NM_000319  | 7036.566  | 10905.382 |
| NM_002744   | 7837.661  | 8711.315  | NM_017575 | 1541.731  | 1660.842  | NM_003257  | 670.619   | 1346.506  |
| NM_015917   | 23107.91  | 21648.91  | AL122100  | 3804.604  | 4213.169  | NM_012461  | 7164.748  | 10061.369 |
| NM_020397   | 1285.748  | 1624.506  | NM_005310 | 13380.905 | 10486.877 | AK001379   | 3572.012  | 5854.298  |
| NM_000061   | 13137.29  | 15815.771 | NM_014423 | 23213.941 | 23599.906 | NM_017450  | 6280.206  | 9490.16   |
| AB046859    | 2991.943  | 3216.761  | BE904126  | 62394.242 | 57991.148 | NM_002023  | 2381.409  | 4486.906  |
| NM_004828   | 6623.557  | 11014.327 | AF272380  | 64241.973 | 57606.941 | NM_002839  | 3878.271  | 5820.08   |
| AB011540    | 11191.922 | 12901.445 | NM_033288 | 1312.013  | 1787.114  | AF190500   | 2674.374  | 3481.154  |
| NM_000040   | 2449.77   | 2810.002  | AK000102  | 5434.302  | 5571.524  | NM_001616  | 1346.526  | 2712.767  |
| NM_004631   | 8193.759  | 7319.831  | AB040916  | 11065.196 | 10193.096 | NM_005904  | 2388.626  | 2347.416  |
| NM_006033   | 2031.633  | 1955.727  | NM_005587 | 7136.029  | 8055.478  | NM_006576  | 23494.098 | 25763.682 |
| NM_004837   | 8779.806  | 11042.32  | AF038362  | 7131.059  | 6530.217  | AB035266   | 35270.672 | 55965.645 |
| NM_003296   | 643.071   | 746.249   | NM_005195 | 67739.875 | 64243.977 | NM_003744  | 7652.033  | 7644.788  |
| NM_004736   | 20658.115 | 26911.012 | NM_005481 | 4653.002  | 4278.638  | NM_006378  | 3609.48   | 2613.739  |
| NM_006895   | 1215.554  | 1604.133  | NM_004715 | 17404.729 | 16834.52  | NM_018132  | 1079.54   | 811.148   |
| NM_006459   | 8394.934  | 8444.952  | L40392    | 6294.181  | 5161.875  | NM_018207  | 4160.481  | 2305.793  |
| AA427949    | 822.936   | 821.947   | BF541482  | 988.434   | 1038.157  | NM_000345  | 56221.617 | 53342.863 |
| D50373      | 2698.202  | 2813.369  | NM_001007 | 64754.516 | 64108.957 | NM_001862  | 62067.668 | 57149.504 |
| AA205399    | 650.975   | 640.134   | NM_003017 | 22588.803 | 20998.77  | NM_006531  | 7216.392  | 6409.162  |
| H07071      | 1098.722  | 1104.988  | NM_020366 | 14023.763 | 13490.469 | NM_002779  | 8159.382  | 11873.317 |
| M25322      | 2396.779  | 2485.627  | AK021608  | 5678.485  | 6708.285  | L40397     | 27572.4   | 38037.242 |
| H-L 27586 I | 5287.545  | 6766.511  | NM_004297 | 3108.737  | 2895.458  | AA098879   | 707.853   | 1407.898  |
| ID 214180   | 1962.795  | 2664.893  | NM_006044 | 16679.424 | 18279.277 | AF070525   | 12121.646 | 21367.65  |
| ID 1867426  | 10373.591 | 11035.615 | NM_003635 | 9372.68   | 8809.055  | NM_001177  | 4403.253  | 8055.303  |
| ID 396450   | 515.074   | 857.56    | NM_000662 | 5447.125  | 4902.647  | NM_014447  | 3530.914  | 9416.206  |
| AI434176    | 4028.93   | 4163.62   | NM_000292 | 6950.761  | 6362.384  | NM_002356  | 2696.952  | 4294.492  |
| BE735403    | 3992.395  | 4353.193  | NM_003689 | 67481.383 | 63827.855 | NM_006691  | 2751.851  | 3005.971  |
| NM_001718   | 1208.452  | 1443.265  | NM_016173 | 2683.928  | 2353.411  | NM_001505  | 2907.787  | 4877.373  |

|           |           |           |           |           |           |           |           |           |
|-----------|-----------|-----------|-----------|-----------|-----------|-----------|-----------|-----------|
| AF116659  | 4022.815  | 3178.68   | NM_002875 | 12096.039 | 12192.656 | NM_003614 | 15793.98  | 20876.01  |
| NM_000317 | 20283.172 | 14473.296 | NM_004427 | 23282.588 | 23564.33  | NM_014257 | 18258.635 | 19942.406 |
| NM_018376 | 5948.339  | 5197.302  | U90549    | 15417.995 | 18250.854 | NM_001140 | 1547.731  | 2133.245  |
| NM_017615 | 1936.126  | 1876.185  | NM_013240 | 31355.977 | 27188.566 | NM_004843 | 2479.447  | 2769.882  |
| AK022425  | 7291.649  | 7476.834  | NM_015874 | 41842.59  | 42880.75  | AK022845  | 1338.671  | 1424.896  |
| NM_000054 | 5623.329  | 7673.621  | NM_004965 | 63141.512 | 59656.703 | NM_003004 | 483.327   | 506.856   |
| NM_014713 | 20403.975 | 22387.893 | AF312393  | 55564.117 | 54013.215 | S77835    | 960.799   | 773.28    |
| NM_001812 | 3093.202  | 3153.025  | AF272898  | 30375.729 | 29146.367 | NM_002985 | 2694.258  | 1922.758  |
| NM_014785 | 1881.815  | 2839.564  | AB037817  | 2902.778  | 2970.335  | AB018347  | 39415.262 | 21300.504 |
| NM_016362 | 3769.268  | 5576.876  | AB032951  | 21003.834 | 22410.645 | AB033073  | 18737.238 | 11453.334 |
| NM_004214 | 15686.55  | 16655.551 | NM_003417 | 919.684   | 863.314   | NM_003284 | 10096.628 | 6623.538  |
| NM_004329 | 13295.631 | 14217.058 | NM_005149 | 24839.697 | 24045.688 | NM_003909 | 5940.268  | 8511.266  |
| NM_002836 | 6924.729  | 7066.409  | AK024073  | 2633.936  | 2451.046  | NM_001277 | 26824.533 | 33195.02  |
| NM_020167 | 842.403   | 949.067   | NM_018083 | 6707.286  | 6490.476  | NM_007072 | 6346.744  | 10255.328 |
| AL049963  | 33120.32  | 42282.438 | AL110188  | 20177.434 | 18726.566 | NM_012320 | 5483.284  | 7636.719  |
| NM_016058 | 21246.455 | 25938.008 | D70834    | 57730.668 | 55301.824 | NM_018208 | 4267.31   | 5911.168  |
| NM_014005 | 1827.184  | 1741.608  | NM_000970 | 64304.609 | 61447.695 | NM_015929 | 6294.23   | 10465.869 |
| NM_004636 | 4907.094  | 6058.348  | NM_012465 | 3211.929  | 4379.606  | U90653    | 10805.275 | 14270.819 |
| AK022603  | 484.084   | 556.639   | M60499    | 5076.78   | 5827.451  | NM_000196 | 1548.559  | 2209.347  |
| NM_004896 | 11742.452 | 14546.064 | NM_001614 | 68835.07  | 71232.805 | AK000037  | 2835.185  | 2996.795  |
| NM_013372 | 986.159   | 1522.48   | NM_000366 | 1442.518  | 1539.643  | NM_014760 | 2978.426  | 3487.832  |
| NM_003976 | 1058.426  | 1227.562  | NM_003833 | 63163.379 | 60669     | NM_018398 | 1861.522  | 2565.542  |
| NM_017688 | 2223.095  | 3036.414  | AK000868  | 19254.371 | 22024.176 | NM_002560 | 50873.551 | 54289.211 |
| AK025612  | 8502.896  | 8816.201  | NM_001233 | 6917.103  | 8440.089  | NM_014404 | 6965.485  | 7610.821  |
| NM_012268 | 5071.155  | 5444.158  | NM_001234 | 3837.229  | 4196.558  | NM_018713 | 2064.765  | 2225.259  |
| NM_012203 | 3300.867  | 3135.415  | BF679789  | 17743.359 | 20390.848 | NM_015947 | 10615.406 | 8890.801  |
| AL157469  | 1014.047  | 1114.548  | H97792    | 30766.193 | 34124.191 | NM_002042 | 52856.531 | 55071.098 |
| NM_002868 | 6366.045  | 10023.623 | L33404    | 1451.542  | 1407.478  | AB028944  | 676.308   | 637.358   |
| AK024100  | 14483.693 | 16479.764 | M13509    | 6670.063  | 6491.703  | AJ006268  | 1064.411  | 792.754   |
| NM_005135 | 1364.755  | 1906.429  | X04076    | 12561.347 | 15328.57  | M74089    | 4480.278  | 3311.168  |
| NM_003827 | 16111.645 | 20830.307 | W95082    | 776.387   | 914.982   | AF190864  | 6922.377  | 4555.573  |
| NM_004583 | 2301.754  | 3376.398  | AA485362  | 3693.252  | 3457.622  | NM_000025 | 29441.863 | 31243.223 |
| NM_018399 | 1153.327  | 1110.979  | AJ222801  | 19219.4   | 16129.99  | D38521    | 5743.339  | 6939.941  |
| AY007131  | 52940.699 | 54561.867 | W72207    | 42892.719 | 52295.48  | NM_000403 | 29850.209 | 33123.367 |
| U61735    | 8747.337  | 10332.625 | BI772354  | 2902.673  | 3054.132  | NM_018127 | 17775.42  | 20254.102 |
| NM_001144 | 38500.941 | 44456.516 | AA733033  | 6742.725  | 5795.362  | AB020677  | 21729.254 | 24007.631 |
| AK023766  | 20679.305 | 21135.633 | AA583574  | 4337.315  | 4923.867  | AB033097  | 9265.64   | 11461.027 |
| NM_001897 | 1517.031  | 1840.593  | AI690184  | 62835.758 | 63290.629 | NM_000135 | 6165.424  | 9627.246  |
| NM_003853 | 1274.097  | 1776.201  | T48692    | 1167.815  | 1020.396  | AK022947  | 2009.384  | 2831.206  |
| AB033109  | 5019.507  | 5757.977  | AA927490  | 5078.148  | 4800.004  | AL050029  | 2290.054  | 2078.97   |
| NM_002053 | 10185.029 | 11136.621 | NM_003779 | 1698.553  | 1643.358  | AL049966  | 570.425   | 1167.193  |
| NM_006889 | 6881.038  | 8023.91   | NM_020164 | 35368.598 | 39152.617 | NM_005204 | 9493.561  | 8475.814  |
| NM_002438 | 5156.085  | 6515.149  | AK023521  | 31110.514 | 34535.305 | NM_016203 | 1596.745  | 1641.308  |
| NM_014589 | 1290.496  | 1960.96   | NM_014267 | 54485.484 | 55955.98  | NM_002759 | 3183.881  | 2974.165  |
| NM_000759 | 2176.613  | 2527.341  | NM_001481 | 1409.27   | 1459.93   | NM_007271 | 2388.827  | 2257.041  |
| AK023334  | 3409.872  | 4210.433  | U30872    | 5401.826  | 5915.654  | NM_006255 | 3279.66   | 3253.906  |
| NM_002563 | 64489.91  | 61107.445 | AF111783  | 1336.453  | 1335.187  | BE392143  | 5648.8    | 3852.583  |
| NM_002437 | 4695.22   | 4306.771  | NM_020469 | 18629.596 | 23099.504 | NM_005813 | 3325.209  | 1678.53   |
| D79991    | 4763.721  | 5697.494  | NM_002639 | 3983.086  | 4396.892  | AB037718  | 9274.024  | 5994.535  |
| AB011540  | 10383.836 | 10163.018 | NM_014734 | 6097.329  | 6760.949  | AL389994  | 1537.733  | 1344.035  |
| NM_000040 | 2387.525  | 2815.241  | NM_002289 | 3689.747  | 3366.823  | CY3Cy5    | 1128.651  | 154.514   |
| NM_004631 | 7954.749  | 7446.006  | AK026408  | 5447.865  | 5617.035  | NM_000588 | 22626.148 | 12605.348 |
| NM_006033 | 2259.48   | 2784.975  | NM_005025 | 1080.175  | 997.977   | AF143872  | 29859.791 | 17718.746 |

|           |           |           |           |           |           |           |           |           |
|-----------|-----------|-----------|-----------|-----------|-----------|-----------|-----------|-----------|
| NM_004837 | 7652.438  | 9443.22   | NM_006307 | 1761.46   | 1829.134  | AK025686  | 486.504   | 352.909   |
| NM_00037C | 2606.329  | 3377.832  | M74782    | 6314.193  | 6467.957  | AF143326  | 2640.725  | 2136.179  |
| BE865893  | 1676.811  | 1747.558  | NM_01781E | 7438.44   | 7796.617  | AL049229  | 2842.733  | 1340.276  |
| NM_00312E | 37128.172 | 36381.445 | NM_02043E | 2473.521  | 3775.24   | NM_01830E | 63170.578 | 51021.77  |
| AY005822  | 2292.043  | 3256.049  | NM_001767 | 765.426   | 1149.478  | AK026146  | 4226.201  | 2452.683  |
| NM_01812E | 12908.158 | 14255.864 | AF028823  | 13800.696 | 14727.827 | AK000155  | 707.346   | 560.929   |
| AF289022  | 9864.285  | 11167.005 | NM_00497C | 770.523   | 622.815   | AL389937  | 3953.295  | 2530.254  |
| AB002326  | 836.637   | 724.547   | NM_00429E | 63019.516 | 56733.809 | AK025201  | 3965.823  | 2967.912  |
| M17252    | 529.834   | 481.569   | NM_002087 | 49486.34  | 46382.484 | AK021927  | 661.287   | 524.699   |
| NM_01602E | 19233.086 | 18438.303 | AB023154  | 2974.408  | 2311.888  | AK022995  | 2000.874  | 1414.98   |
| NM_01331E | 6108.688  | 6907.916  | NM_01458E | 1555.907  | 1592.474  | NM_00058E | 20517.459 | 15494.623 |
| NM_00074E | 1926.819  | 2047.154  | AF200815  | 1829.472  | 1807.224  | SR3       | 30260.102 | 35068.227 |
| NM_00072E | 923.689   | 997.158   | NM_00105E | 2524.832  | 3195.466  | SR5       | 3402.104  | 4510.102  |
| NM_00603C | 1698.106  | 1999.208  | AY026461  | 10147.733 | 12521.085 | SR7       | 3275.086  | 37338.207 |
| NM_02041C | 10717.678 | 8831.51   | AK025708  | 11482.962 | 13995.123 | SR9       | 8811.804  | 2730.226  |
| AF000143  | 10257.271 | 10838.077 | NM_00040E | 3478.899  | 5451.46   | CY3Cy5    | 1933.85   | 178.2     |
| NM_014211 | 577.047   | 941.361   | NM_005564 | 63341.34  | 63840.227 | L13433    | 1866.846  | 1442.587  |
| NM_000814 | 494.222   | 751.075   | NM_00450E | 9309.023  | 9398.729  | NM_00722C | 1137.567  | 918.456   |
| NM_00045E | 2665.116  | 2843.077  | AL137619  | 14490.174 | 15473.064 | NM_017777 | 2199.161  | 1525.748  |
| J03077    | 58060.156 | 55664.879 | NM_00008E | 613.858   | 828.273   | AK001499  | 3610.632  | 1860.909  |
| J03048    | 21513.695 | 12054.813 | AB007859  | 2636.116  | 3104.888  | AK023568  | 518.84    | 230.002   |
| NM_00171E | 1181.382  | 1315.931  | NM_006754 | 2156.012  | 2313.396  | AK026852  | 1343.709  | 1065.377  |
| AF116659  | 3723.241  | 3535.602  | NM_001127 | 8979.689  | 10364.627 | AK021629  | 1003.96   | 928.822   |
| NM_000317 | 19387.773 | 16269.311 | NM_01243C | 6064.646  | 6328.891  | AL110257  | 64189.934 | 39821.133 |
| NM_01837E | 6245.327  | 6461.66   | NM_003917 | 60773.762 | 58529.672 | AB013384  | 2571.049  | 2287.182  |
| NM_01761E | 2436.291  | 2646.749  | NM_007077 | 6954.855  | 6930.897  | AK024824  | 1463.112  | 1551.477  |
| NM_01743E | 11549.267 | 12956.833 | NM_00295E | 5932.162  | 6504.132  | AK024270  | 3970.693  | 4731.778  |
| U59209    | 11993.321 | 10826.334 | AB018739  | 5473.004  | 5515.409  | AK023060  | 1798.063  | 2300.031  |
| NM_02019E | 13832.798 | 14960.617 | NM_00675C | 62699.898 | 60492.188 | NM_01487C | 707.899   | 856.198   |
| BC002753  | 826.225   | 1032.059  | AK001913  | 11373.348 | 12159.915 | AK021917  | 889.677   | 1068.406  |
| AK023824  | 5080.193  | 4742.723  | NM_00429E | 6079.006  | 7799.03   | AF052146  | 63847.902 | 57704.738 |
| AL133069  | 10678.553 | 10755.917 | NM_015484 | 14262.966 | 18525.047 | NM_00487C | 6453.018  | 6417.279  |
| AL117574  | 1690.581  | 1669.631  | NM_01804E | 2758.921  | 2661.909  | AK024242  | 22886.832 | 11701.985 |
| AK026055  | 19751.645 | 20178.074 | NM_01331E | 9167.608  | 10819.558 | AK024559  | 1718.627  | 1160.132  |
| AK024126  | 1426.995  | 1230.99   | M20701    | 57921.367 | 56746.379 | AK024851  | 1719.428  | 1033.551  |
| NM_00151E | 9826.063  | 9099.191  | NM_00291E | 4025.585  | 5621.164  | AK024943  | 736.96    | 386.248   |
| NM_002744 | 6701.391  | 7748.46   | NM_013284 | 8541.566  | 9599.092  | AK024410  | 387.502   | 253.13    |
| NM_015917 | 30067.344 | 39254.785 | NM_00673E | 8170.869  | 8236.791  | AK024995  | 588.249   | 542.081   |
| NM_020397 | 1400.222  | 1569.081  | NM_013274 | 12511.285 | 15220.78  | AK022628  | 60348.328 | 33736.609 |
| NM_000061 | 14318.126 | 17095.363 | AL050187  | 2296.943  | 2920.728  | AK021737  | 10725.729 | 5173.242  |
| AB046859  | 3808.465  | 3694.846  | NM_007127 | 1416.505  | 2354.783  | AL357454  | 707.906   | 557.594   |
| NM_00510E | 9762.141  | 8642.775  | NM_012387 | 58286.164 | 58090.457 | AK026295  | 1890.313  | 1371.068  |
| AK023573  | 11003.734 | 9391.725  | NM_01473E | 3309.625  | 3340.896  | AK022346  | 619.858   | 445.719   |
| NM_00273C | 5436.486  | 4189.586  | NM_00425E | 44575.266 | 45360.273 | AK025007  | 3310.589  | 2455.256  |
| NM_00482E | 4767.556  | 5600.36   | AF172929  | 13215.763 | 13446.986 | NM_01648E | 8896.702  | 6358.016  |
| CY3Cy5    | 5001.56   | 404.374   | NM_00639E | 46124.422 | 47619.195 | AL117601  | 656.696   | 540.944   |
| NM_001824 | 52033.465 | 36473.113 | AK025655  | 5869.026  | 6324.571  | AK026490  | 58211.332 | 33856.637 |
| AF035314  | 2042.127  | 1328.479  | NM_00136E | 3473.28   | 2413.681  | AJ227861  | 3012.849  | 2564.55   |
| NM_01803E | 2745.079  | 1456.051  | NM_00405E | 2477.378  | 1529.543  | AJ001020  | 742.441   | 716.814   |
| AF052087  | 2952.217  | 2050.011  | NM_001614 | 67525.734 | 78592.547 | AJ001875  | 2814.37   | 3150.187  |
| AF007143  | 1698.496  | 929.503   | NM_00036E | 1705.7    | 2161.442  | Y10204    | 304.158   | 265.464   |
| AF147417  | 841.196   | 368.032   | NM_00383E | 65709.836 | 64682.887 | X64985    | 872.178   | 1052.732  |
| AK023656  | 3346.65   | 1962.095  | AK000868  | 21895.43  | 25927.262 | Y10507    | 687.305   | 825.561   |

|           |           |           |           |           |           |           |           |           |
|-----------|-----------|-----------|-----------|-----------|-----------|-----------|-----------|-----------|
| AF086485  | 794.696   | 284.248   | NM_001233 | 7284.181  | 10567.608 | AK002028  | 52845.582 | 31810.906 |
| AK022989  | 1866.397  | 1385.881  | NM_001234 | 4051.878  | 4552.808  | AL050127  | 4806.994  | 3104.387  |
| AK001604  | 8417.308  | 6301.625  | BF679789  | 18624.666 | 20399.666 | AK024805  | 11801.691 | 7747.525  |
| AF086497  | 1628.373  | 1184.494  | H97792    | 29782.986 | 33959.699 | AK000189  | 661.679   | 552.043   |
| NM_020141 | 10366.92  | 8214.291  | L33404    | 1567.594  | 1685.314  | AK001423  | 2317.507  | 1736.481  |
| NM_006482 | 3272.901  | 2848.936  | M13509    | 6879.229  | 7134.23   | AK021989  | 680.373   | 608.3     |
| NM_001824 | 46368.004 | 30858.408 | X04076    | 12419.43  | 13633.165 | NM_018625 | 1385.179  | 1057.483  |
| NM_002964 | 661.8     | 253.825   | W95082    | 545.275   | 802.131   | AK023407  | 507.689   | 614.565   |
| SR1       | 78031.453 | 64781.781 | AA485362  | 3571.314  | 4191.561  | AK022298  | 6883.853  | 7429.858  |
| SR3       | 47969.969 | 35413.695 | AJ222801  | 18225.555 | 17151.865 | AJ277441  | 59714.398 | 57185.477 |
| SR5       | 5501.857  | 5201.851  | W72207    | 37585.285 | 44484.949 | AK022760  | 402.952   | 472.915   |
| CY3Cy5    | 6824.762  | 439.418   | BI772354  | 2964.118  | 3243.846  | NM_006057 | 4459.722  | 5142.894  |
| U15553    | 2072.898  | 1479.301  | AA733033  | 6171.177  | 6055.953  | AK025784  | 42849.762 | 25271.068 |
| U52831    | 408.192   | 361.972   | AA583574  | 3985.199  | 5034.104  | U07199    | 5897.069  | 3731.006  |
| AK024734  | 22695.846 | 15204.948 | AI690184  | 64373.191 | 66048.469 | AK023713  | 1795.41   | 1288.901  |
| NM_017741 | 10643.189 | 10521.489 | T48692    | 1014.813  | 1034.951  | X81445    | 1555.158  | 1084.571  |
| AK022223  | 1442.629  | 1372.695  | AA927490  | 5183.834  | 5417.731  | U95091    | 2460.29   | 1664.003  |
| NM_005887 | 9585.34   | 9183.879  | NM_005052 | 19373.922 | 19508.896 | NM_017900 | 45157.969 | 30620.607 |
| AK024921  | 1174.29   | 787.039   | BF038439  | 1178.596  | 1193.863  | S50182    | 1678.967  | 1089.591  |
| AL110232  | 1919.984  | 1582.394  | AF319476  | 2575.653  | 2067.339  | AL360145  | 1499.178  | 1094.135  |
| AK026103  | 8401.518  | 5815.176  | NM_014267 | 55367.348 | 56305.766 | Y12016    | 2780.768  | 1429.99   |
| NM_016353 | 14544.829 | 13531.101 | NM_001481 | 1255.252  | 1225.328  | S75763    | 65405.156 | 62596.555 |
| AF075077  | 545.147   | 713.616   | U30872    | 5119.055  | 5737.948  | AL359943  | 63454.469 | 55993.348 |
| AK022567  | 1437.336  | 1051.434  | AF111783  | 1405.839  | 1694.535  | NM_000534 | 3809.996  | 3190.747  |
| S77357    | 765.537   | 544.815   | NM_020469 | 18507.756 | 20217.25  | NM_005365 | 434.954   | 1393.907  |
| AL080280  | 2362.86   | 2110.6    | NM_002639 | 3809.792  | 4279.892  | L10140    | 748.621   | 1077.099  |
| AB028947  | 887.715   | 535.437   | NM_014734 | 7559.024  | 7907.265  | AL133447  | 1710.503  | 2376.28   |
| AK022556  | 905.915   | 427.79    | NM_002289 | 5491.64   | 4900.179  | AB037853  | 61796.582 | 61472.301 |
| AK023437  | 1798.203  | 1016.221  | AK026408  | 7890.528  | 8530.919  | D28450    | 59789.133 | 60706.875 |
| AK024147  | 677.958   | 311.403   | NM_005025 | 2563.342  | 3090.145  | AK056222  | 2948.857  | 4034.337  |
| AK022897  | 2915.642  | 2135.727  | NM_006307 | 2351.956  | 3357.674  | L37700    | 1528.303  | 938.925   |
| AK023556  | 837.103   | 651.854   | M74782    | 5977.969  | 6650.511  | NM_017665 | 5959.615  | 3335.446  |
| AK023898  | 1876.664  | 1284.387  | NM_017818 | 7692.094  | 9368.856  | AB007966  | 489.477   | 317.604   |
| AK021619  | 4857.193  | 3785.164  | NM_020433 | 1835.681  | 2002.058  | AB007976  | 939.308   | 701.355   |
| AK025872  | 942.842   | 693.666   | NM_001767 | 966.446   | 1275.997  | AK024819  | 729.54    | 386.546   |
| AF131762  | 6300.849  | 4331.684  | AF028823  | 16162.133 | 17439.156 | AF052106  | 5258.786  | 3820.089  |
| AY007089  | 6913.23   | 5051.219  | NM_004970 | 872.371   | 701.211   | AK000441  | 683.672   | 574.639   |
| AK021816  | 686.128   | 533.006   | NM_004295 | 67450.086 | 68001.688 | AK022391  | 2162.035  | 1647.557  |
| AK024018  | 484.491   | 527.209   | NM_002087 | 55711.324 | 56094.602 | NM_016167 | 6472.578  | 4038.176  |
| D43770    | 29869.314 | 21000.68  | AB023154  | 3371.766  | 2669.781  | NM_016125 | 841.271   | 629.461   |
| AF085960  | 1559.132  | 1469.095  | NM_014585 | 1646.636  | 1786.607  | AK024090  | 27033.186 | 22152.646 |
| AL109691  | 390.535   | 357.195   | AF200815  | 1982.454  | 1945.388  | AL133574  | 8263.206  | 6442.577  |
| AF087976  | 499.031   | 308.913   | NM_012465 | 2535.589  | 2180.169  | AK021936  | 1876.292  | 1864.607  |
| AF085993  | 809.077   | 478.27    | M60499    | 5030.644  | 4451.379  | AF147339  | 56371.879 | 52723.598 |
| AK021519  | 2225.961  | 1574.209  | AY026461  | 9045.899  | 10063.498 | AL390181  | 56391.43  | 47977.52  |
| NM_014254 | 10248.281 | 6851.506  | AK025708  | 12304.95  | 14945.608 | NM_017914 | 56734.625 | 59256.313 |
| AF086036  | 852.552   | 512.759   | NM_000405 | 3090.279  | 3098.2    | NM_006350 | 274.694   | 615.255   |
| AF086010  | 670.721   | 393.099   | NM_005564 | 68475.563 | 67410.852 | AK024953  | 15092.612 | 19589.098 |
| U09197    | 2707.826  | 1340.731  | NM_004508 | 12329.056 | 14771.963 | AK024276  | 6188.616  | 6721.146  |
| AK025218  | 901.651   | 777.074   | AL137619  | 18588.619 | 22622.09  | S83374    | 6082.043  | 6623.901  |
| AJ227899  | 2510.331  | 2239.884  | NM_000085 | 659.726   | 650.655   | AL161979  | 460.782   | 732.816   |
| AL359607  | 1109.536  | 1383.817  | AB007859  | 2771.229  | 2651.386  | NM_003150 | 1922.423  | 1229.178  |
| AF161371  | 13233.209 | 17452.246 | NM_006754 | 1321.442  | 1640.888  | NM_014784 | 3000.432  | 1882.775  |

|           |           |           |           |           |           |           |           |           |
|-----------|-----------|-----------|-----------|-----------|-----------|-----------|-----------|-----------|
| AK022464  | 1641.564  | 974.485   | NM_001127 | 9098.83   | 9864.587  | AK026383  | 5125.871  | 3352.5    |
| AF086230  | 1579.456  | 1261.554  | NM_012430 | 6603.857  | 5941.333  | AK023821  | 377.109   | 332.221   |
| AK023408  | 4854.268  | 3291.378  | NM_003917 | 68241.695 | 67981.758 | AB014594  | 3670.644  | 2605.693  |
| AK024375  | 1434.77   | 1146.538  | NM_007077 | 7435.51   | 7802.031  | M94547    | 1389.207  | 1221.66   |
| AK000144  | 3395.292  | 2798.781  | NM_002956 | 5832.906  | 6329.76   | NM_005087 | 16754.607 | 11039.802 |
| AK022275  | 792.227   | 879.479   | AB018739  | 5831.833  | 6028.229  | NM_012096 | 3963.829  | 2952.402  |
| AK000942  | 1257.115  | 880.376   | NM_006750 | 68111.5   | 66717.531 | NM_018095 | 1929.203  | 1057.963  |
| NM_016346 | 614.26    | 490.743   | NM_020164 | 32631.6   | 21496.072 | AB023164  | 4275.841  | 2557.038  |
| AL117533  | 440.605   | 465.568   | AK023521  | 27641.541 | 23928.279 | NM_001178 | 738.817   | 610.801   |
| AK026036  | 2136.383  | 1740.86   | NM_017737 | 995.51    | 1225.918  | AK023696  | 14516.51  | 9875.844  |
| AK023422  | 674.569   | 643.43    | NM_004292 | 5360.723  | 5838.707  | NM_000704 | 1692.199  | 1390.27   |
| AK022796  | 1529.798  | 1359.224  | NM_015484 | 11982.936 | 14299.987 | NM_015987 | 698.706   | 650.627   |
| AF090910  | 445.883   | 745.096   | NM_018046 | 2256      | 2510.072  | NM_019605 | 2628.922  | 1959.437  |
| AK025081  | 672.341   | 681.546   | NM_013316 | 9193.059  | 9427.809  | NM_015366 | 1043.73   | 928.652   |
| AL122088  | 2415.436  | 1339.166  | M20701    | 53766.398 | 49767.867 | Z49090    | 20603.66  | 23978.824 |
| AF119912  | 673.549   | 342.41    | NM_002912 | 4207.399  | 5022.778  | AK021592  | 15809.788 | 19517.77  |
| AL137518  | 580.845   | 245.84    | NM_013284 | 6698.271  | 7336.899  | AK025467  | 8714.108  | 9886.391  |
| AK023134  | 376.281   | 228.467   | NM_006739 | 3224.393  | 3218.478  | AK026593  | 10464.013 | 10769.709 |
| T99941    | 1747.759  | 2007.392  | NM_013274 | 12938.305 | 18408.137 | AL117666  | 1742.45   | 1243.105  |
| AF113678  | 652.67    | 617.5     | AL050187  | 2109.227  | 2629.166  | Y17865    | 4267.498  | 2714.567  |
| AL137313  | 3476.653  | 4273.75   | NM_007127 | 1187.03   | 1365.172  | NM_005825 | 29414.199 | 17357.705 |
| Z83951    | 944.618   | 1455.231  | NM_012387 | 50029.813 | 53780.348 | NM_002756 | 8806.669  | 5948.773  |
| AL833529  | 550.431   | 961.948   | NM_014735 | 3018.165  | 3148.067  | U79299    | 466.394   | 265.883   |
| AB002363  | 15031.737 | 11268.301 | NM_004252 | 46763.172 | 51088.113 | AJ000414  | 1384.945  | 993.322   |
| NM_005284 | 1212.485  | 881.904   | AF172929  | 12566.72  | 12035.643 | AK025674  | 22429.26  | 15548.664 |
| AF086351  | 768.048   | 635.285   | NM_006398 | 42475.926 | 44052.082 | AF007194  | 11999.706 | 5995.704  |
| D83199    | 20813.615 | 15596.585 | AK025655  | 5238.979  | 6025.635  | NM_019066 | 1770.931  | 1091.948  |
| AK025957  | 951.792   | 904.384   | NM_001362 | 3390.155  | 2442.937  | NM_004761 | 4844.811  | 3421.569  |
| Y16708    | 1307.444  | 1117.574  | NM_004056 | 2213.566  | 1501.381  | Z25424    | 5675.111  | 4266.397  |
| AL157453  | 5483.14   | 5590.687  | NM_001056 | 2412.154  | 1940.616  | U79458    | 5610.251  | 5029.494  |
| NM_019040 | 5308.572  | 5090.943  | NM_003833 | 68107.32  | 71226.125 | NM_014920 | 871.922   | 765.952   |
| NM_005978 | 1432.157  | 1069.181  | AK000868  | 23091.113 | 33791.246 | NM_002961 | 6288.397  | 4752.444  |
| Y16711    | 1366.578  | 1139.891  | NM_001233 | 6463.326  | 7540.451  | NM_018296 | 1177.848  | 1291.073  |
| AJ272179  | 10673.338 | 10962.835 | NM_001234 | 3654.633  | 4469.432  | NM_000676 | 5746.819  | 5413.723  |
| AJ007015  | 3677.866  | 4286.03   | BF679789  | 21518.418 | 23440.463 | NM_005766 | 2148.571  | 2859.801  |
| AL049317  | 2918.156  | 2448.505  | H97792    | 33640.648 | 37698.152 | NM_004127 | 57053.082 | 63722.668 |
| AL050090  | 1551.052  | 1378.369  | L33404    | 1721.477  | 1980.546  | NM_013324 | 5845.543  | 6578.256  |
| AF086309  | 1071.926  | 1132.225  | M13509    | 3279.52   | 4074.328  | AL133022  | 1330.547  | 1880.389  |
| AK026279  | 3755.695  | 2189.418  | X04076    | 5153.583  | 6710.552  | NM_003953 | 5355.899  | 7025.67   |
| AF130094  | 9898.952  | 5246.68   | AA485362  | 4017.843  | 5323.792  | NM_006301 | 1132.806  | 1596.635  |
| AK026673  | 4162.35   | 2033.071  | AJ222801  | 22541.998 | 23568.889 | NM_012219 | 1074.676  | 656.261   |
| AF170935  | 17920.41  | 11174.792 | W72207    | 40882.859 | 48428.781 | X72887    | 1416.862  | 975.153   |
| AB007978  | 1239.609  | 1325.132  | BI772354  | 3870.666  | 4762.027  | NM_004526 | 1983.634  | 1328.942  |
| AF217970  | 2998.373  | 2664.039  | AA733033  | 6612.524  | 7170.604  | NM_000127 | 1882.32   | 1124.203  |
| AF086297  | 1557.139  | 1497.997  | AA583574  | 3985.616  | 4748.568  | Y10483    | 27961.498 | 18998.379 |
| AK025455  | 4284.215  | 3949.714  | U67733    | 597.983   | 607.44    | NM_006784 | 1952.057  | 1680.838  |
| AK026799  | 25399.846 | 33779.145 | AI690184  | 61518.867 | 74298.938 | NM_017876 | 2684.684  | 1793.21   |
| NM_014860 | 823.774   | 1062.747  | T48692    | 894.477   | 1094.511  | NM_001087 | 59008.703 | 62205.414 |
| AK022549  | 3067.671  | 3848.868  | AA927490  | 5561.835  | 5406.238  | NM_001826 | 349.833   | 236.625   |
| NM_018157 | 904.02    | 557.745   | NM_005052 | 19639.48  | 18329.215 | AK025352  | 525.302   | 594.957   |
| Z70714    | 7168.016  | 5804.119  | BF038439  | 1247.755  | 1211.543  | NM_003721 | 9021.911  | 6627.579  |
| AK021640  | 1259.809  | 974.872   | AF319476  | 2643.253  | 2595.78   | NM_004724 | 1341.729  | 1273.458  |
| NM_016565 | 54554.52  | 52824.695 | NM_005538 | 1538.643  | 1728.7    | NM_001431 | 6598.057  | 5358.745  |

|           |           |           |           |           |           |           |           |           |
|-----------|-----------|-----------|-----------|-----------|-----------|-----------|-----------|-----------|
| U84509    | 1368.536  | 1545.473  | AK001913  | 10054.053 | 9003.633  | NM_000381 | 1254.72   | 1133.731  |
| AL110201  | 317.767   | 202.671   | NM_002289 | 4730.633  | 4154.534  | NM_000427 | 2602.829  | 3193.851  |
| AK002036  | 4285.731  | 2664.318  | AK026408  | 6192.366  | 7538.097  | NM_014924 | 971.775   | 1478.597  |
| U84512    | 510.067   | 671.051   | NM_005025 | 1169.911  | 1354.629  | NM_006946 | 2041.257  | 2430.297  |
| AK025775  | 5486.764  | 4705.485  | NM_006307 | 2087.395  | 2530.89   | NM_000174 | 58967.672 | 60719.383 |
| AB046791  | 424.855   | 502.174   | M74782    | 7704.018  | 7346.18   | NM_002506 | 1506.517  | 1986.631  |
| AF043469  | 3195.206  | 2598.006  | NM_017816 | 9547.777  | 9792.51   | NM_014343 | 6056.455  | 8591.617  |
| AL109671  | 1034.634  | 909.846   | NM_020433 | 1880.69   | 2649.751  | D25303    | 1478.528  | 2161.278  |
| NM_012375 | 1334.209  | 1082.535  | NM_001767 | 435.979   | 567.498   | NM_002336 | 9073.524  | 11468.931 |
| AK022008  | 3827.644  | 1972.821  | AF028823  | 3791.646  | 4277.621  | AF022913  | 2434.652  | 1625.156  |
| NM_018186 | 4814.445  | 1844.305  | NM_004295 | 64962.004 | 66358.977 | NM_000026 | 1757.607  | 1412.924  |
| AL080188  | 2311.724  | 1314.022  | NM_002087 | 42923.824 | 50939.133 | NM_001382 | 10700.441 | 6035.745  |
| NM_002390 | 7789.089  | 9258.155  | AB023154  | 3576.644  | 3932.61   | M93718    | 12076.103 | 7042.807  |
| NM_006142 | 2514.715  | 2401.493  | NM_001714 | 1387.549  | 1462.211  | NM_005386 | 2752.438  | 2112.941  |
| NM_014910 | 4535.357  | 5940.883  | NM_014585 | 1348.065  | 2055.181  | AK023807  | 18524.938 | 12747.998 |
| AK001064  | 10133.952 | 14708.896 | AF200815  | 1986.679  | 2200.247  | NM_018186 | 22488.688 | 18792.818 |
| AB029031  | 7557.713  | 8616.438  | NM_014564 | 777.913   | 898.106   | AK024273  | 2619.821  | 2220.274  |
| NM_001294 | 17965.512 | 20909.414 | NM_013441 | 10509.435 | 9649.936  | X59417    | 18290.596 | 10381.569 |
| NM_014241 | 1010.083  | 1100.73   | NM_014421 | 5973.702  | 6077.288  | NM_005655 | 59361.633 | 63058.176 |
| AF302786  | 6428.221  | 6091.906  | AB033028  | 696.556   | 1036.641  | D28476    | 5565.33   | 4532.605  |
| AL122083  | 1988.37   | 2013.338  | NM_017680 | 1083.992  | 1302.238  | NM_016263 | 7547.493  | 6653.427  |
| NM_019096 | 16480.289 | 8285.445  | NM_012465 | 3179.632  | 2217.29   | NM_003335 | 49928.074 | 52819.305 |
| AK022212  | 37997.953 | 25876.512 | M60499    | 4953.13   | 5049.437  | AB002376  | 11292.631 | 11730.046 |
| X64974    | 13640.71  | 6461.665  | NM_001614 | 66331.227 | 71806.352 | NM_018246 | 1112.731  | 1320.134  |
| NM_000834 | 22485.021 | 11199.462 | NM_000366 | 1790.583  | 2224.141  | NM_005556 | 3181.776  | 3798.005  |
| NM_006485 | 1473.621  | 884.424   | NM_004300 | 7600.839  | 6702.119  | NM_016631 | 1258.843  | 1758.176  |
| NM_012459 | 5328.485  | 4945.726  | NM_000052 | 501.614   | 557.048   | AB015617  | 28052.928 | 34412.762 |
| NM_012360 | 359.89    | 551.464   | AB007859  | 2109.999  | 2385.538  | AK022730  | 2755.935  | 3906.174  |
| AL137268  | 3876.162  | 3500.992  | NM_006754 | 842.198   | 606.445   | NM_002256 | 10682.233 | 14891.422 |
| AK001130  | 737.299   | 768.255   | NM_001127 | 4075.631  | 3461.514  | AF064839  | 50482.363 | 56307.879 |
| AK022398  | 1567.34   | 1727.67   | NM_012430 | 3253.844  | 3376.678  | NM_005436 | 20739.246 | 27811.209 |
| AK024109  | 5510.879  | 3768.54   | NM_003917 | 47330.355 | 56783.328 | AB037810  | 2246.241  | 3492.466  |
| AF088048  | 7058.903  | 4814.428  | NM_007077 | 4757.272  | 6027.971  | AF222694  | 1140.934  | 1724.289  |
| AK001143  | 4490.948  | 2353.441  | NM_002956 | 5541.37   | 7511.463  | AL049925  | 4637.031  | 6588.099  |
| AK001701  | 6698.384  | 3526.121  | AB018739  | 6675.117  | 8374.47   | NM_016153 | 1267.787  | 911.545   |
| AK022205  | 404.483   | 251.257   | NM_006750 | 64133.539 | 64245.953 | AK027089  | 4839.495  | 3019.561  |
| AK024955  | 18395.104 | 17739.992 | NM_020164 | 36804.566 | 31088.645 | X59845    | 1435.928  | 1086.302  |
| NM_016580 | 1055.271  | 963.513   | AK023521  | 32537.207 | 32621.08  | NM_006284 | 18060.039 | 11620.471 |
| AF169693  | 2255.966  | 2025.472  | NM_014267 | 51274.395 | 54144.629 | U18909    | 3653.218  | 2831.789  |
| L23206    | 5902.401  | 5872.25   | NM_001481 | 1364.181  | 1321.158  | NM_003486 | 4248.202  | 3417.265  |
| NM_012192 | 9566.3    | 8347.944  | U30872    | 5567.107  | 5339.215  | NM_016586 | 17979.602 | 14352.234 |
| NM_006293 | 6824.617  | 6850.459  | AF111783  | 1407.182  | 1183.066  | NM_003597 | 1044.914  | 1037.835  |
| NM_007229 | 7155.343  | 7079.655  | NM_000256 | 668.687   | 848.902   | NM_002566 | 53453.551 | 48723.996 |
| AB011105  | 3251.627  | 3287.003  | NM_020469 | 19662.465 | 18332.695 | NM_006561 | 849.326   | 853.261   |
| NM_002213 | 1699.271  | 1922.854  | NM_002639 | 4015.785  | 4513.628  | NM_017521 | 1920.228  | 1744.611  |
| NM_004814 | 5607.182  | 5368.455  | NM_014734 | 7901.554  | 8814.349  | AK025200  | 29446.621 | 27714.844 |
| D86976    | 22567.799 | 15717.396 | NM_001362 | 3718.782  | 3232.014  | NM_001383 | 11168.636 | 9913.08   |
| AF307080  | 481.189   | 572.221   | NM_004056 | 2415.351  | 2003.45   | NM_001026 | 57913.422 | 60783.848 |
| NM_004057 | 1599.674  | 1845.914  | NM_001056 | 1954.943  | 2415.062  | NM_005006 | 27937.369 | 26833.32  |
| NM_018971 | 582.337   | 519.567   | AY026461  | 8495.683  | 7828.538  | NM_016304 | 48816.355 | 56722.258 |
| K03175    | 1597.287  | 1137.68   | AK025708  | 4245.399  | 3980.373  | NM_006013 | 23208.986 | 27038.057 |
| NM_003015 | 676.878   | 576.659   | NM_000405 | 1637.719  | 1354.137  | NM_014046 | 26950.459 | 30958.949 |
| NM_003711 | 2921.562  | 2387.731  | NM_005564 | 64053.898 | 67657.125 | L34071    | 12998.584 | 14955.547 |

|           |           |           |           |           |           |           |           |           |
|-----------|-----------|-----------|-----------|-----------|-----------|-----------|-----------|-----------|
| NM_006496 | 7581.356  | 6628.84   | NM_004508 | 10861.714 | 10220.486 | AB043007  | 45470.539 | 48870.352 |
| NM_000828 | 609.079   | 632.485   | NM_006405 | 63041.082 | 66038.133 | NM_004861 | 8917.168  | 10086.896 |
| NM_004826 | 944.423   | 797.724   | AJ245946  | 1201.459  | 1395.868  | NM_016161 | 699.622   | 873.618   |
| NM_013314 | 5278.667  | 2700.662  | NM_006749 | 1173.34   | 1368.291  | AV718258  | 1039.106  | 1014.773  |
| NM_003182 | 1385.672  | 712.898   | NM_004694 | 4686.916  | 5508.178  | NM_005165 | 7550.161  | 4692.865  |
| NM_004431 | 2982.383  | 3740.94   | NM_000324 | 1584.697  | 1285.765  | NM_005138 | 48986.922 | 35282.133 |
| NM_002012 | 5473.899  | 5579.088  | AL137619  | 16775.133 | 17445.137 | NM_002115 | 57235.484 | 58808.703 |
| NM_002070 | 52223.371 | 51598.023 | NM_003615 | 2504.939  | 1858.491  | AK023162  | 2675.235  | 1670.756  |
| AF227969  | 15792.062 | 24338.238 | NM_005052 | 17583.936 | 18663.627 | NM_006396 | 6855.154  | 4718.554  |
| AF116657  | 1527.896  | 2202.793  | BF038439  | 1315.971  | 1596.16   | NM_018648 | 7056.106  | 4504.229  |
| NM_004102 | 649.934   | 532.702   | AF319476  | 2375.067  | 2249.488  | NM_018263 | 598.102   | 687.332   |
| NM_003944 | 11590.693 | 11229.695 | AK001913  | 11103.25  | 11348.102 | NM_013448 | 3189.607  | 3062.03   |
| NM_016120 | 43430.371 | 38271.656 | NM_004292 | 3284.01   | 2381.38   | NM_004537 | 3159.813  | 3011.18   |
| NM_002893 | 3071.978  | 5046.448  | NM_015484 | 4656.896  | 3471.716  | AL390134  | 1594.32   | 1773.059  |
| NM_002393 | 10088.056 | 11918.506 | NM_018046 | 1220.155  | 854.808   | NM_020226 | 8516.55   | 8684.587  |
| NM_002668 | 6722.392  | 8111.701  | NM_013316 | 4050.9    | 3768.204  | NM_017865 | 6065.813  | 5035.912  |
| AB014600  | 3693.012  | 3161.965  | M20701    | 33151.738 | 24623.006 | NM_003427 | 3106.227  | 3623.434  |
| NM_018312 | 4359.552  | 3755.528  | NM_002912 | 1849.609  | 2239.556  | AK021842  | 384.499   | 745.61    |
| X98259    | 1758.858  | 1910.11   | NM_013284 | 7150.375  | 8475.372  | NM_005920 | 4045.582  | 5111.942  |
| NM_014792 | 2203.739  | 2959.93   | NM_006739 | 8733.83   | 6729.751  | Y09321    | 3216.335  | 5202.454  |
| U05255    | 541.104   | 566.637   | NM_013274 | 12469.923 | 12164.642 | NM_006593 | 1927.445  | 2618.019  |
| X98260    | 13752.23  | 10246.569 | AL050187  | 1865.189  | 2448.259  | NM_000376 | 43822.41  | 52344.137 |
| NM_007217 | 13276.661 | 13113.551 | NM_007127 | 1186.641  | 1359.002  | NM_000475 | 14515.5   | 17867.994 |
| NM_014777 | 7890.655  | 6241.155  | NM_012387 | 49956.074 | 48408.223 | M61872    | 24573.307 | 27474.328 |
| NM_001102 | 15878.105 | 14948.772 | NM_014735 | 3133.095  | 2829.083  | NM_005721 | 4189.114  | 3048.638  |
| NM_003803 | 527.29    | 353.198   | NM_004252 | 45841.926 | 44505.438 | AF284223  | 3412.871  | 2825.988  |
| NM_002818 | 61351.438 | 60285.094 | AF172929  | 13002.979 | 11302.32  | AF176012  | 1225.128  | 1059.169  |
| NM_001937 | 2105.594  | 1049.468  | NM_006398 | 46250.758 | 47009.707 | BE743838  | 11449.763 | 7348.656  |
| AK024778  | 1793.418  | 902.534   | AK025655  | 6672.003  | 9321.938  | AF273046  | 11061.562 | 9273.63   |
| AL157500  | 914.73    | 560.449   | CY3Cy5    | 3034.083  | 81.594    | NM_001081 | 4880.238  | 3671.469  |
| AK025498  | 5346.274  | 7139.867  | NM_012245 | 62845.84  | 50214.641 | NM_002483 | 11344.711 | 11017.784 |
| NM_001395 | 2239.536  | 2645.339  | NM_133263 | 3906.35   | 3076.322  | BF002026  | 3102.181  | 2898.26   |
| NM_002068 | 3123.289  | 3018.763  | AF086176  | 2526.747  | 2011.756  | L35594    | 1754.455  | 1329.058  |
| NM_019854 | 547.635   | 960.395   | AF086232  | 613.182   | 566.776   | BE790116  | 5603.27   | 3606.961  |
| NM_013338 | 8092.26   | 6830.976  | NM_017742 | 2461.954  | 2334.955  | AI922341  | 13486.358 | 12356.808 |
| NM_014671 | 10328.731 | 9775.341  | NM_005108 | 3927.507  | 2990.648  | S57283    | 1292.387  | 1561.764  |
| NM_001814 | 13812.912 | 14204.553 | AK022292  | 14360.537 | 12191.012 | AA410517  | 2080.982  | 2113.319  |
| NM_005656 | 2797.633  | 2839.802  | AB051436  | 5644.506  | 4240.8    | M12824    | 6020.903  | 6632.359  |
| NM_006012 | 19868.861 | 22392.52  | AK026482  | 41413.352 | 29885.193 | W60100    | 2568.198  | 2841.926  |
| NM_002151 | 1550.029  | 1624.215  | AL137473  | 7142.963  | 4754.547  | M24898    | 3494.242  | 4299.194  |
| NM_014888 | 3518.878  | 3084.173  | AJ001873  | 26696.623 | 21522.002 | U72508    | 2214.777  | 2069.912  |
| AF173935  | 1626.173  | 1551.281  | AL137476  | 18138.557 | 14864.83  | AA457153  | 9332.742  | 10852.73  |
| AK025322  | 5569.773  | 6496.433  | AF052174  | 6395.479  | 6487.412  | AA283122  | 46794.371 | 53523.305 |
| NM_017887 | 10575.125 | 8841.853  | AF070590  | 1875.865  | 1601.433  | AA868504  | 3186.895  | 4773.143  |
| NM_017650 | 484.369   | 493.411   | NM_004709 | 752.202   | 841.524   | AA877845  | 10734.193 | 15243.623 |
| NM_000526 | 358.533   | 757.446   | NM_012245 | 55459.516 | 49847.949 | AA664241  | 58619.934 | 66410.305 |
| AF007152  | 6527.743  | 6022.941  | NM_133263 | 3556.576  | 3408.27   | AI016456  | 9818.098  | 12709.542 |
| NM_017575 | 950.914   | 921.072   | SR2       | 59423.902 | 55005.875 | NM_006066 | 40349.914 | 39407.883 |
| AL122100  | 382.98    | 476.896   | SR4       | 19228.846 | 17573.063 | AK022230  | 22342.488 | 16698.297 |
| NM_005310 | 2350.951  | 1382.997  | SR6       | 2213.439  | 2311.968  | AK022147  | 23353.209 | 17975.803 |
| NM_014423 | 21756.488 | 13486.462 | SR8       | 9712.05   | 25238.732 | L25664    | 16057.469 | 12078.901 |
| BE904126  | 4090.134  | 2678.108  | SR10      | 32120.736 | 12099.377 | NM_014940 | 4355.306  | 2628.246  |
| AF272380  | 23949.729 | 13411.653 | CY3Cy5    | 3945.925  | 166.104   | NM_005783 | 1069.822  | 823.705   |

|           |           |           |           |           |           |           |           |           |
|-----------|-----------|-----------|-----------|-----------|-----------|-----------|-----------|-----------|
| NM_03328E | 1460.938  | 1702.923  | AK024432  | 3297.966  | 2182.217  | AK000851  | 1247.847  | 898.62    |
| NM_00326E | 455.496   | 495.368   | AF088001  | 2089.256  | 1579.172  | NM_00690C | 10911.513 | 10022.15  |
| AK000102  | 4816.768  | 5324.132  | NM_018067 | 18288.023 | 16719.473 | AJ289111  | 25549.518 | 24034.145 |
| AB040916  | 9627.835  | 10338.373 | NM_01895E | 33657.223 | 25465.418 | NM_01635E | 42176.957 | 29887.582 |
| NM_005587 | 8438.32   | 13457.978 | NM_014787 | 3482.697  | 2623.029  | NM_00640E | 12380.043 | 7860.833  |
| AF038362  | 6064.563  | 4884.553  | AL122109  | 1329.547  | 1238.321  | AF216292  | 45323.992 | 27902.223 |
| NM_00519E | 14794.986 | 15103.925 | AF074988  | 5158.917  | 4925.857  | NM_00095Z | 13031.915 | 12379.601 |
| NM_005481 | 4945.876  | 6220.838  | AK024946  | 2019.742  | 1772.877  | NM_005894 | 632.072   | 956.813   |
| NM_00471E | 8924.553  | 9304.519  | AF052497  | 523.386   | 242.058   | NM_014584 | 7726.198  | 6391.677  |
| L40392    | 5739.775  | 3433.913  | AK026375  | 8109.83   | 5605.168  | M30627    | 968.284   | 842.704   |
| BF541482  | 1127.233  | 1165.048  | U85992    | 1743.759  | 1538.73   | NM_00581C | 45469.313 | 49931.281 |
| NM_001007 | 58831.594 | 59227.664 | AL110152  | 1926.04   | 1692.192  | M28170    | 32418.299 | 29926.645 |
| NM_003017 | 23640.455 | 18361.605 | AF131745  | 5727.256  | 4814.34   | NM_00155E | 1623.022  | 1994.788  |
| NM_02036E | 15033.602 | 12598.359 | AL117565  | 10001.636 | 8212.188  | AK026223  | 11984.521 | 15406.976 |
| AK021608  | 5292.348  | 3457.319  | AK022109  | 5195.057  | 5069.338  | NM_000874 | 8696.59   | 9109.733  |
| NM_004297 | 999.192   | 680.216   | AK022111  | 608.267   | 384.768   | NM_005854 | 1644.788  | 2348.573  |
| NM_006044 | 7410.892  | 6624.359  | AF143882  | 2115.626  | 1835.218  | AB007863  | 57757.27  | 60608.609 |
| NM_00363E | 3982.353  | 4708.732  | U00953    | 1176.339  | 1308.261  | NM_01778E | 2649.94   | 3708.519  |
| NM_01327E | 524.292   | 701.462   | AK025650  | 5541.137  | 3262.797  | D31887    | 4991.145  | 7166.486  |
| NM_00066Z | 7528.702  | 13063.455 | AK026401  | 5951.618  | 5742.262  | NM_01664E | 5477.423  | 4487.384  |
| NM_00029Z | 5942.805  | 7134.071  | AK026773  | 4462.388  | 2980.706  | AK090536  | 19542.391 | 13084.389 |
| NM_00368E | 56737.578 | 60465.512 | AB026054  | 780.868   | 638.226   | D63477    | 978.617   | 506.071   |
| NM_01617E | 2204.546  | 2842.098  | AK022604  | 1903.587  | 1512.582  | NM_02024Z | 30414.701 | 23049.664 |
| NM_00287E | 11720.42  | 14891.885 | U66048    | 2691.204  | 2083.961  | NM_014051 | 9441.136  | 8194.228  |
| NM_004427 | 16187.285 | 17897.389 | AL080095  | 989.554   | 742.986   | AK025398  | 3596.916  | 2867.931  |
| U90549    | 14046.605 | 15602.395 | AK023401  | 12132.633 | 9707.435  | AK027082  | 435.649   | 296.749   |
| NM_01324C | 29322.553 | 26471.932 | AK001865  | 2771.58   | 3072.343  | AB037750  | 408.448   | 399.616   |
| NM_015874 | 38423.199 | 40144.383 | AK024035  | 45424.02  | 42333.449 | AK023056  | 1771.527  | 1607.239  |
| NM_00496E | 57453.297 | 58882.828 | AL050079  | 2740.338  | 2893.542  | AK022207  | 1865.379  | 1778.109  |
| AF312393  | 30360.285 | 24223.691 | AL080233  | 4586.626  | 3472.744  | NM_00499E | 4963.897  | 4990.351  |
| AF272898  | 10490.427 | 8989.935  | AL050132  | 640.817   | 580.243   | NM_01743E | 4659.509  | 1919.667  |
| AB037817  | 1132.483  | 1013.716  | AL117663  | 2336.219  | 2473.915  | NM_014037 | 18600.885 | 20452.893 |
| AB032951  | 5029.042  | 4110.611  | NM_01429Z | 11990.326 | 12605.225 | NM_00486E | 31905.785 | 36036.16  |
| NM_003417 | 1110.853  | 955.916   | AK023429  | 1549.464  | 1125.333  | NM_01868E | 2117.703  | 2672.863  |
| NM_00514E | 11765.226 | 11357.159 | AK022276  | 1846.306  | 1775.714  | AK056652  | 10663.199 | 15597.203 |
| AK024073  | 2419.582  | 2000.953  | AK026881  | 1069.318  | 834.403   | NM_01583E | 663.519   | 1245.195  |
| NM_01808E | 7707.125  | 7323.728  | AL133653  | 756.363   | 1069.848  | AL137438  | 1950.065  | 3326.947  |
| AL110188  | 7777.705  | 5403.958  | AK023774  | 2214.729  | 1792.11   | NM_017957 | 18697.242 | 24535.217 |
| D70834    | 37541.664 | 22262.215 | AL049377  | 1601.085  | 1697.732  | NM_003024 | 6281.676  | 8509.507  |
| NM_00097C | 65245.859 | 61998.633 | AK001432  | 3946.972  | 3271.06   | NM_01324E | 7842.455  | 11233.877 |
| NM_01246E | 1198.731  | 1370.906  | AL133568  | 10640.032 | 8935.663  | NM_000034 | 59287.848 | 64744.301 |
| M60499    | 5425.095  | 7265.485  | AF009265  | 5559.805  | 4577.474  | NM_01243E | 49119.973 | 55993.434 |
| NM_001614 | 57291.094 | 66231.016 | AF009309  | 7292.674  | 6467.343  | AK001299  | 48993.137 | 42826.004 |
| NM_00036E | 987.05    | 1257.853  | NM_00236C | 6408.008  | 6269.495  | AB014559  | 27472.967 | 20369.154 |
| NM_00383E | 18093.717 | 21431.408 | AF009322  | 966.13    | 1036.64   | NM_01648E | 14159.937 | 11928.963 |
| AK000868  | 14212.953 | 19086.877 | AF056425  | 7649.643  | 7131.047  | NM_00503E | 8456.017  | 9279.12   |
| NM_00123E | 6020.052  | 9529.225  | AF090893  | 1317.01   | 1229.197  | NM_01593Z | 53721.934 | 51906.91  |
| NM_001234 | 3709.692  | 5955.611  | NM_01803E | 21662.811 | 20417.764 | NM_01794E | 1074.737  | 1362.941  |
| BF679789  | 2409.153  | 3455.525  | AK001945  | 2732.443  | 2278.261  | AK022169  | 2032.163  | 1752.799  |
| H97792    | 1488.749  | 1977.686  | AK021541  | 628.693   | 562.557   | AF015592  | 3431.121  | 2767.222  |
| L33404    | 941.59    | 1706.777  | AK021766  | 430.757   | 545.766   | AK026795  | 1216.654  | 1499.416  |
| M13509    | 1002.346  | 1273.611  | AK001147  | 904.635   | 612.647   | NM_01639E | 5973.58   | 5726.964  |
| X04076    | 12599.982 | 15475.163 | AK021630  | 2004.253  | 1808.665  | NM_016617 | 12464.949 | 11508.281 |



|           |           |           |           |           |           |           |           |           |
|-----------|-----------|-----------|-----------|-----------|-----------|-----------|-----------|-----------|
| W95082    | 1191.781  | 1451.246  | AK021831  | 1818.897  | 1984.719  | NM_002027 | 10644.983 | 14033.398 |
| AA485362  | 2104.053  | 1912.764  | NM_020153 | 2145.386  | 1702.068  | AL162078  | 10534.004 | 11360.673 |
| AJ222801  | 3616.147  | 2473.521  | NM_005321 | 2217.53   | 2173.972  | NM_000919 | 648.907   | 907.633   |
| W72207    | 32107.859 | 34948.652 | AF073520  | 11963.579 | 9929.565  | NM_013382 | 15270.242 | 16661.168 |
| BI772354  | 1789.831  | 1696.599  | AF143885  | 1321.544  | 928.524   | AB002314  | 1922.955  | 2405.425  |
| AA733033  | 3672.508  | 2917.921  | NM_014015 | 17986.783 | 15022.128 | NM_014043 | 7093.851  | 8775.636  |
| AA583574  | 2360.016  | 3171.354  | AK026839  | 3955.42   | 5442.046  | NM_014622 | 1195.625  | 1852.891  |
| U67733    | 741.481   | 688.152   | Z34278    | 455.655   | 1038.119  | D11466    | 46245.879 | 55324.461 |
| AI690184  | 56185.145 | 60098.527 | AJ008123  | 14411.408 | 11129.291 | NM_014056 | 48323.016 | 51912.664 |
| AA927490  | 4409.911  | 3324.973  | AJ008156  | 2448.546  | 1850.69   | D31885    | 55697.246 | 55490.793 |
| NM_003779 | 835.076   | 960.02    | AF147321  | 1045.777  | 598.265   | AF176012  | 1155.24   | 953.53    |
| NM_020164 | 27471.236 | 28364.799 | AF161437  | 6566.287  | 4893.204  | BE743838  | 11191.273 | 7573.659  |
| AK023521  | 18965.15  | 22572.17  | U73530    | 950.312   | 988.743   | AF273046  | 11377.428 | 8607.585  |
| NM_014267 | 45494.316 | 52286.367 | AF086158  | 14940.511 | 14733.295 | NM_001081 | 5662.523  | 3757.706  |
| NM_001481 | 1218.669  | 1070.351  | AF086050  | 4503.04   | 4357.341  | NM_002483 | 12132.478 | 12477.63  |
| U30872    | 4943.911  | 5084.622  | AF147375  | 3216.039  | 2705.893  | BF002026  | 2919.978  | 3240.473  |
| AF111783  | 1045.767  | 1261.839  | X51524    | 12924.893 | 12067.532 | L35594    | 1658.671  | 2096.447  |
| NM_000256 | 585.102   | 814.284   | AK025759  | 7314.85   | 7844.859  | BE790116  | 5185.132  | 4040.948  |
| NM_020469 | 16131.45  | 25159.457 | AK024105  | 1528.573  | 1401.854  | AI922341  | 11375.258 | 10040.708 |
| NM_002639 | 3411.033  | 3850.541  | AJ238556  | 1757.929  | 1407.327  | S57283    | 1208.633  | 1360.874  |
| NM_014734 | 6870.594  | 8418.693  | AK021516  | 5344.967  | 4576.025  | AA410517  | 1732.91   | 1741.057  |
| NM_002289 | 3966.876  | 4482.924  | Z70699    | 1318.111  | 974.227   | M12824    | 6096.452  | 6558.616  |
| AK026408  | 6568.291  | 7546.281  | NM_006898 | 7242.055  | 6240.522  | W60100    | 2633.642  | 2605.156  |
| NM_005025 | 853.149   | 1088.07   | AL080066  | 29092.389 | 24831.154 | M24898    | 3179.977  | 4144.775  |
| NM_006307 | 493.357   | 723.658   | AL137620  | 1765.183  | 2406.039  | U72508    | 1887.906  | 2106.805  |
| M74782    | 1852.447  | 3059.254  | NM_005294 | 7927.454  | 6929.818  | AA457153  | 8808.466  | 9381.122  |
| NM_017818 | 4939.765  | 4574.806  | AF085826  | 3164.252  | 3036.991  | AA283122  | 44566.387 | 44977.586 |
| NM_020433 | 1037.549  | 1242.239  | AK024362  | 2389.967  | 1979.946  | AA868504  | 3110.113  | 4377.273  |
| NM_001767 | 1340.326  | 1343.21   | AF118068  | 10019.442 | 7640.283  | AA877845  | 10440.578 | 14711.503 |
| AF028823  | 5712.649  | 5001.894  | NM_004164 | 1223.443  | 964.206   | AA664241  | 58377.363 | 62719.109 |
| NM_004970 | 1564.044  | 1873.548  | NM_019018 | 3279.709  | 2793.95   | AK026281  | 2768.193  | 4538.702  |
| NM_004295 | 27491.113 | 23671.82  | M87931    | 1538.098  | 1844.498  | U23862    | 1055.644  | 1732.014  |
| NM_002087 | 38729.473 | 32713.219 | NM_003544 | 66241.094 | 62568.18  | AK026680  | 19173.236 | 26394.488 |
| AB023154  | 2434.287  | 2024.912  | U17640    | 844.914   | 898.488   | L25664    | 16429.492 | 13648.492 |
| NM_014585 | 558.887   | 591.237   | AK001187  | 3916.835  | 4260.649  | NM_014940 | 4179.746  | 3023.158  |
| AF200815  | 1306.32   | 881.613   | NM_003529 | 46605.504 | 47777.152 | NM_005783 | 1125.189  | 896.18    |
| NM_001056 | 2087.699  | 1964.715  | AF056436  | 5615.648  | 5958.235  | AK000851  | 1546.557  | 895.948   |
| AY026461  | 5311.413  | 6335.773  | AB023191  | 2497.213  | 2925.024  | AJ289111  | 30465.207 | 30222.848 |
| AK025708  | 7596.981  | 7862.804  | AK027212  | 10599.357 | 11175.046 | NM_016356 | 50460.145 | 46520.859 |
| NM_000405 | 1262.254  | 1377.516  | X56197    | 2389.158  | 2013.312  | NM_006406 | 13533.083 | 11463.011 |
| NM_005564 | 44468.297 | 50294.254 | NM_005199 | 13449.378 | 12660.099 | AF216292  | 48581.66  | 37587.031 |
| NM_004508 | 4820.611  | 4682.841  | U90905    | 2583.168  | 2149.744  | NM_000952 | 12521.518 | 13176.304 |
| AL137619  | 1937.549  | 2029.704  | AF161422  | 2846.436  | 2181.371  | NM_005894 | 543.196   | 795.157   |
| AB007859  | 2543.489  | 2114.451  | AL137384  | 1980.248  | 1365.589  | NM_014584 | 8210.671  | 7925.09   |
| NM_006754 | 1480.006  | 1474.123  | AF070619  | 4467.158  | 4252.167  | M30627    | 1050.091  | 1122.475  |
| NM_001127 | 7882.359  | 6972.458  | NM_000787 | 2451.149  | 3152.215  | NM_005810 | 49902.387 | 53199.551 |
| NM_012430 | 4504.101  | 4034.441  | U57962    | 7909.778  | 8590.207  | M28170    | 32770.242 | 31392.549 |
| NM_003917 | 9572.704  | 7555.019  | NM_016176 | 14735.312 | 16641.783 | NM_001555 | 1644.894  | 2031.485  |
| NM_007077 | 1571.901  | 2387.865  | NM_004610 | 9864.32   | 10420.638 | AK026223  | 11722.927 | 14624.466 |
| NM_002956 | 4849.775  | 5416.467  | NM_001612 | 4856.632  | 3767.299  | NM_000874 | 9409.557  | 10671.254 |
| AB018739  | 6873.24   | 5822.273  | AK027002  | 6318.053  | 6310.454  | NM_005854 | 1688.591  | 2502.688  |
| NM_006750 | 52253.125 | 40632.621 | AB025254  | 6625.081  | 5985.588  | AB007863  | 57989.688 | 64460.18  |
| AK001913  | 10051.02  | 10089.135 | NM_004081 | 3536.742  | 3080.38   | NM_017785 | 2590.218  | 4401.779  |

|           |           |           |           |           |           |           |           |           |
|-----------|-----------|-----------|-----------|-----------|-----------|-----------|-----------|-----------|
| NM_017737 | 960.596   | 1649.451  | AK001039  | 10453.709 | 8859.823  | D31887    | 5564.879  | 9368.51   |
| NM_004292 | 5097.915  | 6438.759  | AK026465  | 4050.761  | 3025.89   | NM_005721 | 4073.852  | 6627.622  |
| NM_015484 | 8319.958  | 10171.688 | AK024321  | 1403.453  | 1524.138  | AF284223  | 3568.256  | 5156.827  |
| NM_018046 | 2865.915  | 2970.095  | U52834    | 1802.86   | 2129.604  | D63477    | 780.427   | 612.331   |
| NM_013316 | 2922.501  | 3179.135  | M34428    | 801.147   | 902.692   | NM_020243 | 33158.547 | 25412.193 |
| NM_013284 | 7923.227  | 8252.368  | NM_003532 | 2211.868  | 2410.696  | AK027082  | 559.37    | 617.302   |
| NM_006739 | 7779.132  | 7078.617  | NM_017869 | 18930.27  | 14950.765 | AB037750  | 590.604   | 631.762   |
| NM_013274 | 15267.577 | 21390.938 | AF075100  | 1094.551  | 837.557   | AK023056  | 1722.374  | 1809.081  |
| AL050187  | 2364.208  | 3106.273  | AF203447  | 25417.646 | 20780.578 | AK022207  | 1929.46   | 2266.9    |
| NM_007127 | 579.625   | 605.92    | NM_018502 | 4394.231  | 4373.907  | NM_004996 | 5105.483  | 5796.788  |
| NM_012387 | 44910.688 | 47197.73  | AB040976  | 23784.588 | 20460.961 | NM_017435 | 5207.942  | 2709.426  |
| NM_014735 | 1494.957  | 1530.774  | NM_018641 | 5881.949  | 5917.511  | NM_014037 | 20295.873 | 23960.137 |
| NM_004252 | 26748.289 | 29084.482 | U49089    | 997.564   | 1037.411  | NM_004866 | 34516.082 | 39840.785 |
| AF172929  | 12032.406 | 10710.367 | NM_002221 | 7423.822  | 6664.922  | NM_018688 | 2308.222  | 2911.155  |
| NM_006398 | 20794.756 | 19897.674 | NM_002371 | 1159.028  | 1008.72   | AK056652  | 10123.374 | 11477.097 |
| AK025655  | 5577.922  | 5877.48   | NM_002562 | 911.474   | 896.312   | NM_015839 | 579.558   | 1152.647  |
| NM_004056 | 1650.704  | 1148.742  | AK024502  | 18422.998 | 15532.877 | AL137438  | 1875.928  | 3055.355  |
| NM_001614 | 63869.34  | 65406.957 | NM_001124 | 1781.507  | 1908.304  | NM_017957 | 19767.029 | 29597.006 |
| NM_000366 | 933.253   | 1149.154  | NM_004586 | 6190.822  | 5414.604  | NM_003024 | 5827.944  | 8368.01   |
| NM_003833 | 17682.387 | 18554.096 | NM_004844 | 8948.134  | 8684.936  | NM_013248 | 7684.695  | 12609.433 |
| AK000868  | 11104.852 | 12534.641 | NM_013447 | 785.355   | 1476.297  | NM_000034 | 57548.219 | 68601.156 |
| NM_001233 | 5138.566  | 7387.334  | NM_000051 | 5384.241  | 5293.457  | AK022230  | 32259.932 | 41613.992 |
| NM_001234 | 2805.408  | 3365.888  | NM_005709 | 1259.254  | 1318.068  | AK022147  | 30825.031 | 41203.477 |
| BF679789  | 1870.611  | 2444.934  | NM_004180 | 11934.028 | 10753.366 | AK001299  | 48544.434 | 45737.656 |
| H97792    | 1557.624  | 2021.784  | NM_004786 | 38951.645 | 43444.395 | AB014559  | 26761.371 | 20145.789 |
| L33404    | 1011.824  | 1370.128  | AF302109  | 2363.296  | 2132.767  | NM_016489 | 13385.429 | 12156.935 |
| M13509    | 1303.366  | 1481.946  | AL117485  | 28766.818 | 25025.018 | NM_005033 | 8431.046  | 8427.78   |
| X04076    | 12439.134 | 16876.641 | NM_003505 | 1035.963  | 1181.62   | NM_015932 | 52762.035 | 52295.418 |
| W95082    | 531.653   | 952.689   | NM_007191 | 4702.449  | 4815.619  | NM_017949 | 1095.067  | 1532.551  |
| AA485362  | 2454.441  | 3328.373  | AL109667  | 1809.597  | 1669.804  | AK022169  | 1948.409  | 2047.494  |
| AJ222801  | 3923.981  | 3698.302  | NM_000840 | 1639.011  | 1155.004  | AF015592  | 3349.312  | 2986.184  |
| W72207    | 31910.26  | 37553.762 | AJ008142  | 57689.344 | 55600.953 | AK026795  | 1118.984  | 1327.834  |
| BI772354  | 2285.37   | 2783.748  | AL035289  | 1104.169  | 1061.62   | NM_016399 | 6925.844  | 7485.367  |
| AA733033  | 3696.783  | 3091.76   | NM_001343 | 4329.253  | 4242.424  | NM_016617 | 12710.33  | 10640.373 |
| AA583574  | 3208.51   | 4046.83   | NM_007275 | 40132.125 | 38885.879 | NM_002027 | 10628.314 | 13573.365 |
| U67733    | 346.533   | 567.874   | NM_019025 | 68347.281 | 64012.18  | AL162078  | 11789.467 | 12222.15  |
| AI690184  | 55937.859 | 59507.266 | NM_018461 | 10575.296 | 8640.387  | NM_000919 | 596.383   | 1220.683  |
| AA927490  | 5570.374  | 5063.25   | AF235023  | 8996.693  | 7115.191  | NM_013382 | 16644.129 | 18623.395 |
| NM_005052 | 16354.466 | 14233.687 | NM_006910 | 8320.503  | 7863.746  | AB002314  | 1904.082  | 2570.438  |
| BF038439  | 484.447   | 331.006   | AF162667  | 6623.021  | 6780.651  | NM_014043 | 5872.345  | 6869.264  |
| AF319476  | 1236.826  | 1029.624  | AB046847  | 5174.864  | 5690.096  | NM_014622 | 1039.525  | 1974.055  |
| NM_014267 | 39670.156 | 37014.32  | NM_000447 | 5839.258  | 5351.835  | D11466    | 42132.473 | 51929.105 |
| NM_001481 | 1191.349  | 1097.998  | NM_006354 | 10278.139 | 10057.132 | NM_014056 | 44509.91  | 49436.113 |
| U30872    | 4732.273  | 4097.518  | AF303378  | 9081.495  | 9614.54   | D31885    | 58786.945 | 61859.141 |
| AF111783  | 1049.218  | 1162.338  | NM_016037 | 21680.143 | 22649.686 | NM_016649 | 5997.07   | 8426.054  |
| NM_020469 | 15738.547 | 21163.875 | NM_000043 | 11125.626 | 10634.516 | AK090536  | 21312.445 | 25775.369 |
| NM_002639 | 3172.399  | 3895.43   | NM_016140 | 611.097   | 1085.972  | BE743838  | 11056.19  | 7828.413  |
| NM_014734 | 6748.107  | 8441.849  | NM_015965 | 2026.858  | 1758.612  | AF273046  | 11819.943 | 10149.011 |
| NM_002289 | 4239.088  | 5688.783  | NM_000417 | 8172.171  | 8603.682  | NM_001081 | 5288.091  | 3833.585  |
| AK026408  | 5731.776  | 6280.092  | NM_020356 | 10045.146 | 9608.669  | NM_002483 | 11363.638 | 11915.812 |
| NM_005025 | 1057.984  | 1305.547  | AF152527  | 259.7     | 516.215   | BF002026  | 3301.135  | 4006.605  |
| NM_006307 | 540.46    | 711.552   | NM_004063 | 936.063   | 1011.649  | L35594    | 1761.126  | 2038.421  |
| M74782    | 1824.25   | 2338.36   | NM_006144 | 3141.286  | 3026.493  | BE790116  | 6152.132  | 5374.78   |

|           |           |           |           |           |           |           |           |           |
|-----------|-----------|-----------|-----------|-----------|-----------|-----------|-----------|-----------|
| NM_01781E | 5682.883  | 6105.516  | AL136549  | 34993.039 | 36507.684 | AI922341  | 11260.74  | 9660.789  |
| NM_02043E | 1075.245  | 1103.521  | NM_01216E | 4535.212  | 3495.466  | S57283    | 1263.776  | 1292.907  |
| NM_001767 | 1268.504  | 1688.105  | NM_00703E | 9801.416  | 7928.289  | AA410517  | 1778.881  | 1915.08   |
| AF028823  | 6215.392  | 7172.313  | AF311324  | 13884.59  | 10895.98  | M12824    | 5555.732  | 5634.44   |
| NM_00429E | 33432.082 | 37199.957 | AF124433  | 3671.196  | 2275.972  | W60100    | 2813.853  | 3291.867  |
| NM_002087 | 39583.59  | 35312.352 | AK001647  | 938.543   | 821.207   | M24898    | 3433.634  | 4497.892  |
| AB023154  | 2564.524  | 1996.73   | NM_001461 | 1191.963  | 1339.991  | U72508    | 2153.632  | 2649.066  |
| NM_01458E | 805.498   | 1007.853  | AF061556  | 2752.555  | 2411.596  | AA457153  | 9111.25   | 9803.469  |
| AF200815  | 1368.746  | 1174.792  | AL162049  | 5666.836  | 5879.748  | AA283122  | 47657.891 | 51747.68  |
| NM_01246E | 997.806   | 972.573   | AF036144  | 2015.972  | 1886.667  | AA868504  | 2831.485  | 3778.322  |
| M60499    | 4900.021  | 4412.072  | NM_00182E | 803.003   | 927.509   | AA877845  | 9909.463  | 13009.205 |
| AY026461  | 5547.677  | 5989.913  | NM_00503E | 2596.75   | 3065.057  | AK026281  | 2225.842  | 3908.776  |
| AK025708  | 7833.27   | 7607.424  | NM_00416C | 16685.615 | 17223.334 | U23862    | 953.696   | 1343.083  |
| NM_00040E | 974.291   | 1251.299  | AL109677  | 4313.876  | 4540.702  | AK026680  | 18213.063 | 25135.549 |
| NM_00556E | 43631.789 | 47893.891 | NM_003941 | 66388.445 | 60695.746 | NM_01243E | 56636.16  | 63543.148 |
| NM_00450E | 5474.782  | 5179.114  | AF177909  | 3930.696  | 4574.662  | AF216292  | 47417.844 | 34569.785 |
| AL137619  | 1982.936  | 2404.852  | NM_00266E | 36701.246 | 40272.961 | NM_00095E | 13085.803 | 12428.085 |
| NM_00008E | 515.939   | 572.478   | AB018271  | 3680.323  | 2998.949  | NM_00589E | 732.332   | 966.494   |
| AB007859  | 2133.321  | 3021.64   | AL137665  | 10583.722 | 8689.122  | NM_01458E | 8550.633  | 7922.322  |
| NM_00675E | 1706.26   | 2169.467  | NM_01643E | 6826.795  | 6177.369  | M30627    | 1002.389  | 1268.135  |
| NM_001127 | 8593.889  | 9381.459  | U36561    | 63639.406 | 64223.699 | NM_00581C | 48129.41  | 45914.512 |
| NM_01243C | 4690.155  | 5356.048  | AF205437  | 2649.989  | 2955.283  | M28170    | 33320.922 | 27531.354 |
| NM_003917 | 10132.743 | 9937.665  | AF034102  | 60421.359 | 56253.023 | NM_00155E | 1783.954  | 1959.23   |
| NM_007077 | 1767.525  | 1656.084  | AB037748  | 3987.25   | 4887.869  | AK026223  | 13281.147 | 14243.652 |
| NM_00295E | 4406.395  | 4015.409  | AB002306  | 6646.187  | 7994.292  | NM_00087E | 9286.478  | 8312.67   |
| AB018739  | 7412.334  | 8520.31   | NM_00130C | 6398.916  | 5747.433  | NM_00585E | 1656.484  | 2190.927  |
| NM_00675C | 53802.125 | 57053.43  | NM_01247E | 1633.963  | 1413.505  | AB007863  | 64059.23  | 66854.773 |
| NM_02016E | 24481.039 | 19185.393 | NM_018187 | 16227.07  | 15844.393 | AK024456  | 16256.241 | 20158.334 |
| AK023521  | 16969.986 | 13155.746 | NM_00301E | 54416.75  | 52640.977 | NM_01778E | 2691.67   | 3458.54   |
| NM_017737 | 1630.354  | 619.652   | NM_00546E | 65236.617 | 63102.566 | D31887    | 4939.104  | 6953.732  |
| NM_00429E | 4560.1    | 4292.952  | NM_00132E | 4972.009  | 5036.745  | NM_00618C | 362.526   | 749.617   |
| NM_01548E | 7024.193  | 7642.451  | NM_01828E | 45731.945 | 44786.297 | NM_00231E | 4090.119  | 5510.071  |
| NM_01804E | 2943.164  | 3433.503  | BC019932  | 6849.408  | 6528.972  | NM_00550E | 822.997   | 962.147   |
| NM_01331E | 2392.27   | 2483.011  | AF114818  | 10491.476 | 11044.052 | NM_00150E | 5776.165  | 8150.56   |
| M20701    | 11694.725 | 9677.672  | AK025106  | 5126.541  | 5786.741  | NM_005721 | 3385.548  | 5246.392  |
| NM_00291E | 3202.016  | 3874.6    | NM_02014E | 11307.991 | 13206.885 | AF284223  | 3614.117  | 4803.711  |
| NM_01328E | 7638.852  | 7695.069  | NM_00390E | 63878.195 | 61030.047 | AF176012  | 1097.868  | 1650.903  |
| NM_00673E | 7234.543  | 5969.415  | BE893142  | 6873.394  | 6771.161  | NM_01338E | 691.749   | 778.886   |
| NM_01327E | 11609.202 | 13128.601 | NM_00310E | 12799.723 | 14979.582 | NM_006517 | 659.433   | 915.371   |
| AL050187  | 2875.417  | 4591.412  | NM_01534C | 23083.742 | 26268.018 | NM_004171 | 6306.731  | 6478.719  |
| NM_007127 | 421.085   | 608.386   | NM_006451 | 13154.579 | 13582.326 | NM_014037 | 20577.918 | 21252.188 |
| NM_012387 | 42144.742 | 47548.207 | NM_00209E | 7030.213  | 6255.696  | NM_00486E | 39555.332 | 38587.496 |
| NM_01473E | 2100.291  | 2062.43   | NM_002937 | 2677.07   | 2412.316  | NM_01868E | 2561.49   | 3033.817  |
| NM_00425E | 27604.18  | 32874.164 | NM_003191 | 17129.129 | 14954.494 | AK056652  | 11230.811 | 11395.634 |
| AF172929  | 14254.506 | 16528.252 | NM_01823E | 62761.195 | 63575.094 | NM_01583E | 713.126   | 946.118   |
| NM_00639E | 23376.402 | 25026.939 | NM_00242E | 736.224   | 705.611   | AL137438  | 2185.637  | 2589.566  |
| AK025655  | 5826.697  | 5992.559  | NM_01210E | 65542.383 | 61621.754 | NM_017957 | 18053.496 | 21303.35  |
| NM_00136E | 269.915   | 250.215   | NM_000761 | 61812.945 | 69817.125 | NM_00302E | 6214.407  | 6810.042  |
| NM_00405E | 1799.352  | 1929.186  | NM_02014E | 12694.294 | 12713.608 | NM_01324E | 7766.568  | 10355.596 |
| NM_00105E | 2311.759  | 2397.634  | NM_00077E | 17622.668 | 15320.137 | NM_00003E | 65993.766 | 71128.109 |
| NM_00383E | 18957.139 | 18019.877 | NM_017781 | 63696.137 | 60647.574 | AK022230  | 28230.789 | 33474.707 |
| AK000868  | 10670.443 | 10401.077 | NM_00600E | 62790.219 | 59312.191 | AK022147  | 27403.846 | 32179.531 |
| NM_00123E | 5192.253  | 6900.89   | NM_00489E | 51899.586 | 52617.461 | L25664    | 16196.84  | 20425.941 |

|           |           |           |            |           |           |           |           |           |
|-----------|-----------|-----------|------------|-----------|-----------|-----------|-----------|-----------|
| NM_001234 | 3000.209  | 4277.582  | AB028960   | 1245.155  | 1339.46   | NM_014940 | 4042.56   | 5746.573  |
| BF679789  | 1771.502  | 2064.448  | NM_005648  | 55846.66  | 52991.977 | NM_005783 | 1147.104  | 1781.261  |
| H97792    | 1607.229  | 1985.507  | AK000689   | 996.382   | 789.586   | AK000851  | 1131.772  | 1904.279  |
| L33404    | 786.044   | 1064.652  | NM_006943  | 25979.512 | 22734.299 | NM_006900 | 11458.829 | 15462.543 |
| M13509    | 1562.718  | 1399.406  | NM_006741  | 40052.059 | 38626.277 | AJ289111  | 30282.057 | 39556.973 |
| X04076    | 10967.788 | 12047.367 | NM_014166  | 16698.617 | 17624.547 | NM_016350 | 52428.195 | 58077.051 |
| W95082    | 528.943   | 935.099   | AL117606   | 32611.352 | 46168.828 | NM_006400 | 13195.483 | 17455.9   |
| AA485362  | 2637.158  | 3028.175  | NM_012330  | 6864.856  | 8041.573  | D11466    | 39333.742 | 34284.18  |
| AJ222801  | 4436.086  | 4116.685  | AF294278   | 13097.366 | 14694.105 | NM_014050 | 42056.176 | 31837.613 |
| W72207    | 35084.34  | 38820.363 | NM_018211  | 7772.329  | 9063.315  | D31885    | 47765.605 | 49435.52  |
| BI772354  | 2170.158  | 2646.866  | NM_014520  | 13341.897 | 15003.247 | NM_016640 | 6219.316  | 5918.296  |
| AA733033  | 4403.091  | 4667.925  | AL117508   | 682.705   | 855.979   | AK090536  | 21283.232 | 17631.301 |
| AA583574  | 3606.024  | 3756.046  | NM_002610  | 6824.801  | 6573.969  | D63477    | 1068.171  | 754.687   |
| U67733    | 469.151   | 531.417   | AK025712   | 49079.633 | 49343.48  | NM_020243 | 31684.391 | 30516.27  |
| AI690184  | 58499.41  | 60766.551 | NM_005634  | 7428.313  | 6500.427  | NM_014051 | 8914.495  | 9761.289  |
| T48692    | 294.829   | 685.604   | NM_017757  | 16695.047 | 13812.228 | AK025398  | 3602.626  | 4116.334  |
| AA927490  | 6227.946  | 8781.2    | NM_002140  | 44202.117 | 29767.152 | AK027082  | 413.92    | 420.531   |
| NM_005052 | 16263.349 | 12902.902 | AB007892   | 5099.729  | 4798.587  | AB037750  | 485.99    | 774.977   |
| BF038439  | 539.407   | 476.808   | NM_018207  | 9409.172  | 12047.216 | AK023056  | 1909.329  | 2986.976  |
| AF319476  | 1546.103  | 1182.693  | NM_000345  | 62547.75  | 63740.414 | NM_001120 | 64633.141 | 68086.563 |
| NM_005530 | 1278.05   | 1300.083  | NM_001862  | 63283.668 | 63781.941 | NM_017880 | 4648.563  | 5689.212  |
| AK001913  | 9615.943  | 8613.957  | NM_006531  | 11741.198 | 12211.286 | NM_004910 | 8703.413  | 11092.996 |
| NM_002280 | 3033.162  | 2139.301  | AB029021   | 62104.996 | 59924.258 | AK022207  | 1989.338  | 3494.548  |
| AK026408  | 5115.852  | 4549.196  | NM_002101  | 3366.297  | 3529.185  | AV708752  | 5178.414  | 7997.295  |
| NM_005020 | 945.748   | 1436.585  | NM_005423  | 2593.684  | 2882.531  | AF119885  | 3768.542  | 5960.291  |
| NM_006307 | 407.458   | 671.752   | Z36789     | 985.913   | 999.12    | NM_000750 | 1161.073  | 1606.645  |
| M74782    | 1720.131  | 2044.024  | J02874     | 14860.944 | 15869.233 | NM_004990 | 4961.62   | 6978.805  |
| NM_017810 | 5916.124  | 6451.263  | BF310427   | 26130.094 | 26150.787 | NM_005971 | 6943.49   | 9540.911  |
| NM_020433 | 984.107   | 1468.941  | N94424     | 1762.412  | 1641.061  | NM_017430 | 4088.195  | 2165.836  |
| NM_001767 | 1263.36   | 1545.033  | AA045192   | 6851.804  | 6427.949  | AK026281  | 2009.07   | 1761.817  |
| AF028823  | 5521.932  | 5966.948  | H45617     | 1831.296  | 2754.471  | U23862    | 834.747   | 708.404   |
| NM_004970 | 723.986   | 623.409   | M92642     | 11660.976 | 13547.539 | AK026680  | 14765.909 | 14118.942 |
| NM_004290 | 41483.469 | 46421.629 | H-U 44385  | 51164.141 | 54894.141 | NM_012430 | 55592.605 | 64269.313 |
| NM_002087 | 49237.016 | 56990.086 | ID 1654970 | 26494.074 | 30808.934 | AK001299  | 47779.348 | 51584.598 |
| AB023154  | 3931.799  | 4608.817  | ID 2531132 | 31907.143 | 34216.82  | AB014559  | 28879.377 | 26091.018 |
| NM_001714 | 1067.988  | 1263.246  | ID 4365538 | 2921.069  | 2661.657  | NM_016480 | 14877.026 | 14917.375 |
| NM_014580 | 780.316   | 880.418   | AA485665   | 1302.972  | 1299.556  | NM_005033 | 8230.62   | 9031.133  |
| AF200815  | 2189.171  | 2229.548  | BF125928   | 28913.033 | 27122.213 | NM_015932 | 51691.813 | 54189.086 |
| NM_014564 | 967.676   | 1564.822  | BG571026   | 8345.07   | 7644.403  | NM_017940 | 1090.06   | 1499.877  |
| NM_013441 | 3604.493  | 4189.024  | AA489017   | 22241.334 | 18839.752 | AK022169  | 1982.523  | 2171.795  |
| NM_014421 | 1199.118  | 1644.835  | NM_001140  | 3246.46   | 3202.998  | AF015592  | 3128.535  | 3964.682  |
| NM_017680 | 373.247   | 765.723   | NM_016050  | 942.415   | 839.501   | AK026795  | 1307.185  | 1679.111  |
| NM_012460 | 1066.862  | 1511.369  | NM_004843  | 4077.161  | 4317.642  | NM_016390 | 6389.288  | 8456.5    |
| M60499    | 6212.992  | 7491.606  | AK022845   | 2492.355  | 2597.005  | NM_016617 | 13243.687 | 14743.531 |
| NM_001614 | 56929.254 | 66600.273 | NM_003004  | 555.579   | 809.657   | NM_002027 | 10173.35  | 13634.706 |
| NM_000360 | 1516.179  | 2301.305  | S77835     | 2394.843  | 2293.251  | AL162078  | 10436.058 | 11963.906 |
| NM_004300 | 7199.419  | 7563.034  | NM_002980  | 5179.226  | 5234.929  | NM_000910 | 590.109   | 1229.522  |
| AB007859  | 2075.966  | 2738.667  | AB018347   | 44983.707 | 49743.695 | NM_013380 | 18327.699 | 25153.842 |
| NM_006754 | 1389.14   | 1663.106  | AB033073   | 19540.467 | 19777.303 | AB002314  | 2023.954  | 3101.943  |
| NM_001127 | 7919.418  | 9285.195  | NM_003284  | 16835.898 | 15370.078 | NM_014040 | 6361.372  | 8742.911  |
| NM_012430 | 4940.756  | 5027.953  | NM_018152  | 2868.46   | 3168.264  | NM_014620 | 1150.527  | 1709.739  |
| NM_003917 | 10100.688 | 9082.34   | NM_000310  | 12933.371 | 14631.464 | AB011114  | 57594.883 | 61009.918 |
| NM_007077 | 1499.31   | 1567.103  | NM_003257  | 1165.008  | 1512.774  | CY3Cy5    | 1556.541  | 147.859   |

|           |           |           |           |           |           |           |           |           |
|-----------|-----------|-----------|-----------|-----------|-----------|-----------|-----------|-----------|
| NM_002956 | 4946.02   | 4967.388  | NM_012461 | 9878.196  | 7724.298  | NM_019884 | 5879.14   | 5531.87   |
| AB018739  | 7741.04   | 7854.89   | AK001379  | 4910.82   | 5895.415  | AF088051  | 3173.065  | 2488.781  |
| NM_006750 | 54331.09  | 57300.555 | NM_017450 | 8045.668  | 9801.287  | AF086366  | 1347.561  | 899.092   |
| NM_020164 | 25428.76  | 25815.068 | NM_002023 | 2983.68   | 3074.329  | AF086360  | 6617.58   | 4848.289  |
| AK023521  | 19451.955 | 26045.809 | NM_002839 | 2767.519  | 3234.993  | AF086436  | 858.076   | 722.208   |
| NM_014267 | 41941.109 | 42523.199 | AF190500  | 1623.402  | 1990.053  | AF087993  | 5840.378  | 3892.15   |
| NM_001481 | 1567.132  | 1352.337  | NM_001616 | 995.808   | 1049.745  | AF035282  | 1106.395  | 1318.691  |
| U30872    | 5620.054  | 5172.139  | NM_005904 | 1455.247  | 1233.347  | AK021966  | 3461.623  | 3537.904  |
| AF111783  | 1374.516  | 1371.193  | NM_005273 | 49265.031 | 47213.719 | AB018292  | 29004.15  | 32989.148 |
| NM_020469 | 12346.229 | 12420.36  | NM_000524 | 1368.126  | 1285.032  | AK022842  | 1303.133  | 1473.173  |
| NM_002639 | 3014.063  | 3009.058  | NM_007072 | 6621.659  | 6279.526  | NM_007006 | 19357.043 | 19240.531 |
| NM_014734 | 6047.794  | 6035.254  | NM_012320 | 7375.854  | 7911.442  | AL137346  | 4074.251  | 3608.774  |
| NM_001362 | 482.678   | 491.213   | NM_018208 | 6084.195  | 5374.505  | NM_017756 | 65908.25  | 59705.582 |
| NM_004056 | 2556.209  | 4394.825  | NM_015929 | 8729.555  | 9429.163  | NM_019884 | 5724.917  | 5721.551  |
| NM_001056 | 2376.477  | 3229.644  | U90653    | 18581.391 | 18284.008 | SR2       | 42545.414 | 48287.199 |
| AY026461  | 5770.337  | 7054.646  | NM_000196 | 1296.864  | 1585.701  | SR4       | 13389.405 | 13702.91  |
| AK025708  | 7983.87   | 7571.022  | NM_018339 | 8650.705  | 9061.518  | SR6       | 1399.63   | 1690.956  |
| NM_000405 | 1026.584  | 1260.626  | NM_006745 | 37423.441 | 42346.121 | SR8       | 4972.324  | 17080.922 |
| NM_005564 | 45755.918 | 44828.664 | NM_000275 | 2375.983  | 2581.674  | SR10      | 16835.113 | 5431.917  |
| NM_004508 | 5944.428  | 7009.091  | AK000037  | 3892.773  | 3712.41   | CY3Cy5    | 1042.016  | 78.697    |
| NM_006405 | 8186.119  | 9389.834  | NM_014760 | 4858.143  | 6040.299  | AF086054  | 4999.987  | 4144.814  |
| AJ245946  | 463.733   | 329.974   | NM_018713 | 2289.179  | 2570.898  | AK022259  | 67301.602 | 63974.563 |
| NM_006749 | 964.41    | 852.559   | AJ006268  | 2383.033  | 2747.198  | AK022461  | 943.157   | 813.29    |
| NM_004694 | 3884.515  | 5788.607  | AF190864  | 14364.052 | 20666.814 | NM_016010 | 7817.637  | 6143.642  |
| NM_000324 | 632.557   | 981.318   | NM_001177 | 7031.353  | 9083.997  | AF147401  | 1511.309  | 1107.407  |
| AL137619  | 1747.19   | 1941.96   | NM_014447 | 3753.247  | 4756.154  | AJ001904  | 781.173   | 926.695   |
| NM_003615 | 1723.153  | 1386.826  | NM_002356 | 3915.823  | 4256.472  | AF075022  | 3066.09   | 2910.333  |
| NM_005052 | 19253.527 | 19108.855 | NM_006691 | 3789.097  | 3678.867  | AF075060  | 4458.302  | 4931.699  |
| BF038439  | 975.272   | 1533.576  | NM_001505 | 2848.711  | 2643.657  | AB002438  | 2534.338  | 2983.371  |
| AF319476  | 2422.291  | 4028.43   | NM_003710 | 15269.859 | 14668.244 | AF147436  | 1445.974  | 1701.619  |
| NM_005538 | 708.936   | 1410.677  | Z83805    | 1676.784  | 1675.888  | AK021441  | 2284.077  | 2335.357  |
| AK001913  | 11499.376 | 15679.024 | NM_004666 | 2915.792  | 2656.128  | AK026018  | 654.491   | 1133.984  |
| NM_004292 | 5075.604  | 5440.412  | NM_003614 | 17845.723 | 15941.142 | AF085846  | 3204.911  | 3480.328  |
| NM_015484 | 7996.168  | 9255.336  | NM_014257 | 26357.088 | 22167.258 | AK023901  | 21027.135 | 19110.783 |
| NM_018046 | 3786.253  | 4729.482  | NM_000025 | 34258.098 | 32512.938 | AL109705  | 1520.132  | 1600.601  |
| NM_013316 | 2497.707  | 2307.408  | D38521    | 10227.649 | 10182.707 | AF088057  | 10392.301 | 9149.534  |
| M20701    | 11809.544 | 9596.043  | NM_000403 | 36362.367 | 33581.918 | AF086255  | 53655.402 | 36865.953 |
| NM_002912 | 3111.904  | 3107.687  | NM_018127 | 30047.971 | 37068.766 | AK022660  | 568.382   | 405.061   |
| NM_013284 | 6925.146  | 6389.696  | AB020677  | 25394.412 | 23244.453 | AK026847  | 1704.359  | 1390.97   |
| NM_006739 | 6858.06   | 4959.575  | AB033097  | 10861.948 | 11513.753 | AK023048  | 445.131   | 471.299   |
| NM_002691 | 1590.149  | 1766.273  | NM_000135 | 8417.127  | 7536.599  | AK026891  | 2825.28   | 2579.024  |
| NM_013274 | 11177.129 | 10998.672 | AJ223948  | 14797.649 | 15968.853 | AK025573  | 5222.667  | 12363.511 |
| AL050187  | 1993.686  | 2267.112  | NM_016218 | 1870.464  | 1584.863  | AK024595  | 5435.334  | 4587.933  |
| NM_007127 | 378.856   | 930.5     | AK022947  | 4074.201  | 4705.23   | AF075032  | 1053.509  | 900.005   |
| NM_012387 | 43418.125 | 44178.66  | AL050029  | 3983.051  | 5049.421  | AF085971  | 1705.341  | 1346.791  |
| NM_014735 | 1703.81   | 1888.83   | AL049966  | 2098.053  | 2858.476  | AF147302  | 5146.446  | 5152.123  |
| NM_004252 | 22818.822 | 25368.883 | NM_005204 | 19753.563 | 19532.246 | AF085929  | 6787.859  | 7424.594  |
| AF172929  | 13799.093 | 15832.113 | NM_016203 | 3254.341  | 3739.399  | AK001126  | 7514.646  | 7760.314  |
| NM_006398 | 20552.699 | 20535.564 | NM_002759 | 5988.236  | 7404.057  | AF085976  | 6428.619  | 9500.619  |
| AK025655  | 5287.798  | 5992.702  | NM_007271 | 4589.107  | 6355.677  | AF075104  | 8705.502  | 9099.859  |
| CY3Cy5    | 2615.315  | 197.399   | NM_006255 | 6724.521  | 8918.826  | AK021724  | 542.615   | 504.604   |
| NM_012245 | 27404.545 | 25073.895 | BE392143  | 9193.361  | 10183.54  | AL133025  | 1253.671  | 1806.666  |
| NM_133263 | 4224.894  | 5115.876  | NM_005813 | 7442.259  | 6483.7    | AL137402  | 11162.882 | 12047.576 |

|           |           |           |            |           |           |           |           |           |
|-----------|-----------|-----------|------------|-----------|-----------|-----------|-----------|-----------|
| AF086176  | 445.637   | 610.72    | AB037718   | 16372.361 | 14944.572 | AL137617  | 4568.029  | 5145.286  |
| AF086232  | 581.061   | 772.069   | AL389994   | 3218.031  | 3878.657  | AL359568  | 24862.834 | 25170.1   |
| NM_017742 | 2411.853  | 3546.149  | NM_003909  | 12458.618 | 12560.835 | AL133564  | 16579.176 | 16005.639 |
| NM_005108 | 1563.572  | 1837.055  | NM_001277  | 23229.934 | 19450.336 | AL137428  | 1217.227  | 1519.644  |
| AK022292  | 5155.401  | 5652.676  | NM_003659  | 11677.207 | 11126.334 | AL157462  | 1958.886  | 1477.422  |
| AB051436  | 5330.796  | 6583.946  | NM_001862  | 64547.594 | 63640.129 | AL359602  | 15476.897 | 11991.604 |
| AK026482  | 12069.174 | 9608.084  | NM_006531  | 12963.264 | 15229.754 | NM_018190 | 66228.133 | 51974.68  |
| AL137473  | 6321.046  | 7976.089  | AB029021   | 59191.414 | 58874.82  | AK021744  | 1983.127  | 1781.306  |
| AJ001873  | 890.595   | 1180.355  | NM_002101  | 3047.255  | 3189.132  | NM_018430 | 11993.383 | 9251.815  |
| AL137476  | 1688.969  | 1496.458  | NM_005423  | 2019.228  | 2342.52   | AL110200  | 5799.329  | 4699.42   |
| AF052174  | 5621.809  | 6741.289  | Z36789     | 769.854   | 852.109   | AL133640  | 4617.287  | 4165.352  |
| AF070590  | 2307.367  | 2229.501  | J02874     | 17777.236 | 18298.633 | AK023783  | 1045.085  | 922.069   |
| NM_004709 | 655.95    | 485.946   | BF310427   | 27385.203 | 27644.455 | AF070647  | 56088.711 | 55409.785 |
| NM_012245 | 21471.895 | 15751.619 | N94424     | 1948.975  | 2374.527  | AF116649  | 1674.783  | 1654.359  |
| NM_133263 | 3140.777  | 2501.761  | AA045192   | 7981.118  | 7448.67   | AF174394  | 2828.432  | 2941.351  |
| SR2       | 44201.184 | 39787.5   | H45617     | 1840.02   | 1889.01   | AF144054  | 739.119   | 1111.012  |
| SR4       | 11963.799 | 11874.647 | M92642     | 16113.256 | 24180.619 | AF230315  | 592.722   | 895.086   |
| SR6       | 1597.656  | 2053.11   | H-U 44385  | 51328.969 | 55416.988 | AK025924  | 1563.956  | 2259.003  |
| SR8       | 6382.835  | 18702.744 | ID 1654970 | 21044.75  | 22287.941 | AK021935  | 7060.754  | 6550.1    |
| SR10      | 20853.682 | 7452.499  | ID 2531132 | 33376.68  | 36414.813 | AK022187  | 13917.039 | 13014.741 |
| CY3Cy5    | 1862.912  | 348.974   | ID 4365538 | 2783.225  | 3394.785  | AK022337  | 6660.771  | 5045.642  |
| AK024432  | 696.084   | 695.406   | AA485665   | 1434.47   | 1342.536  | AL133618  | 11272.003 | 10565.457 |
| AL137513  | 950.547   | 1235.245  | BF125928   | 30643.07  | 30151.205 | AF230314  | 2772.113  | 2171.243  |
| AF088001  | 782.345   | 824.67    | BG571026   | 7594.749  | 7231.671  | AK001086  | 1591.688  | 1424.005  |
| NM_018067 | 17752.648 | 23658.791 | AA489017   | 29793.352 | 27103.893 | AJ131610  | 4974.086  | 4254.404  |
| NM_018956 | 5737.327  | 5892.975  | NM_004843  | 3917.806  | 3938.105  | AF119872  | 17847.23  | 14393.541 |
| NM_014787 | 2582.118  | 3122.451  | AK022845   | 2161.338  | 2322.248  | X99687    | 1534.321  | 1376.126  |
| AL122109  | 764.909   | 656.742   | NM_003004  | 889.146   | 599.569   | AK023255  | 67304.867 | 65687.492 |
| AF074988  | 2736.537  | 2878.46   | S77835     | 2305.655  | 2458.564  | NM_002622 | 19772.453 | 18825.172 |
| AK024946  | 1340.4    | 1622.769  | NM_002985  | 5263.69   | 4598.413  | AK024185  | 2578.274  | 2389.927  |
| AF052497  | 314.643   | 233.14    | AB018347   | 48399.746 | 47588.035 | NM_015417 | 847.639   | 971.485   |
| AK026375  | 5339.369  | 4799.114  | AB033073   | 23799.605 | 21627.002 | AL137562  | 7628.694  | 8571.967  |
| NM_014710 | 438.341   | 445.136   | NM_003284  | 16955.797 | 17224.639 | M90355    | 66006.938 | 63066.09  |
| U85992    | 1412.148  | 1467.937  | NM_018152  | 2746.624  | 2936.449  | AK022495  | 3589.457  | 3245.362  |
| AL110152  | 429.982   | 334.395   | NM_000319  | 14212.378 | 14282.612 | AK021632  | 2668.894  | 3416.124  |
| AF131745  | 3659.714  | 2954.399  | NM_012461  | 13015.422 | 14205.833 | AK023143  | 1624.679  | 1712.46   |
| AL117565  | 3710.966  | 2524.992  | AK001379   | 4188.289  | 5116.425  | AK026373  | 12386.196 | 11638.8   |
| AF147305  | 439.123   | 558.651   | NM_017450  | 9025.371  | 9046.185  | AK021581  | 4984.478  | 4564.781  |
| AK022111  | 288.987   | 129.278   | NM_002023  | 3163.727  | 2996.939  | NM_006687 | 5381.349  | 4258.172  |
| AK021527  | 541.67    | 1120.595  | NM_002839  | 2949.895  | 3054.049  | NM_013301 | 3786.717  | 2780.861  |
| AF143882  | 1380.99   | 657.685   | AF190500   | 1880.819  | 2066.457  | NM_017673 | 2107.555  | 1884.244  |
| U00953    | 475.346   | 249.188   | NM_001616  | 959.731   | 1050.609  | AB046857  | 1969.418  | 1556.815  |
| AK025650  | 424.728   | 561.247   | NM_005904  | 1509.609  | 1580.661  | AK024408  | 38581.926 | 33687.305 |
| AK026401  | 1233.591  | 1196.31   | NM_005273  | 49930.574 | 52722.129 | AJ227905  | 830.718   | 832.322   |
| AK026773  | 305.567   | 585.358   | NM_000524  | 1146.614  | 1454.758  | AF086307  | 31809.92  | 34290.895 |
| AB026054  | 398.558   | 283.155   | NM_018207  | 6906.486  | 6352.143  | L19364    | 5582.713  | 5927.356  |
| AK022604  | 920.005   | 827.479   | NM_000345  | 66652.461 | 63234.098 | NM_005390 | 5951.531  | 5582.642  |
| U66048    | 988.191   | 611.279   | NM_018208  | 5636.068  | 4576.315  | AJ012502  | 19771.98  | 22402.738 |
| AK023401  | 413.377   | 342.502   | NM_015929  | 8850.323  | 9643.219  | AK021722  | 1268.894  | 1291.086  |
| AK001865  | 1421.325  | 956.459   | U90653     | 18268.82  | 19032.625 | NM_000681 | 713.873   | 1104.719  |
| AK024035  | 3342.193  | 2281.653  | NM_000196  | 1516.785  | 1823.028  | AF147445  | 4507.513  | 4667.348  |
| AL050079  | 205.214   | 160.442   | NM_018339  | 8899.03   | 9115.534  | Y10508    | 28428.111 | 31219.549 |
| AL080233  | 297.214   | 178.363   | NM_006745  | 40518.844 | 45877.68  | D17074    | 1950.2    | 2440.543  |

|           |           |           |           |           |           |           |           |           |
|-----------|-----------|-----------|-----------|-----------|-----------|-----------|-----------|-----------|
| AL110230  | 183.054   | 200.959   | NM_000275 | 2940.251  | 2897.931  | AK021716  | 14605.031 | 14328.763 |
| AL117663  | 295.453   | 157.484   | AK000037  | 4389.224  | 3727.926  | AK025035  | 11299.551 | 11949.253 |
| NM_014293 | 642.081   | 297.476   | NM_014760 | 4509.694  | 4065.801  | AK002085  | 5564.361  | 5030.988  |
| AK023429  | 365.058   | 350.957   | NM_018713 | 2493.699  | 3522.114  | AF086200  | 2286.309  | 2185.249  |
| AK022276  | 643.662   | 787.688   | AJ006268  | 2486.119  | 3385.487  | AB018338  | 32453.543 | 26243.98  |
| AK026881  | 518.775   | 792.365   | AF190864  | 13605.188 | 13195.243 | D80010    | 2207.901  | 2014.189  |
| AK023774  | 1238.266  | 870.635   | NM_001177 | 7611.644  | 8869.459  | NM_004923 | 1451.872  | 1273.011  |
| AL049377  | 381.873   | 348.084   | NM_014447 | 4179.02   | 5156.109  | NM_003971 | 4583.873  | 4071.784  |
| AK001432  | 307.026   | 278.399   | NM_002356 | 3542.516  | 3142.847  | AK026973  | 778.621   | 839.083   |
| AL133568  | 4285.981  | 3723.88   | NM_006691 | 3877.051  | 3853.375  | NM_005822 | 1355.249  | 1318.109  |
| AF009265  | 2808.293  | 2307.419  | NM_001505 | 3012.159  | 2905.104  | U81002    | 7905.932  | 7398.582  |
| NM_002360 | 939.475   | 883.507   | NM_003710 | 16432.816 | 18059.447 | NM_016295 | 23948.508 | 30833.291 |
| AF009322  | 344.283   | 320.778   | Z83805    | 1560.748  | 1739.419  | NM_014185 | 37377.598 | 49944.656 |
| AF056425  | 332.566   | 277.516   | NM_004666 | 2576.129  | 2975.505  | L38517    | 11665.798 | 10527.696 |
| AF090893  | 274.564   | 202.396   | NM_003614 | 18917.957 | 19220.07  | AK026101  | 28594.791 | 25098.723 |
| NM_018033 | 934.809   | 556.599   | NM_014257 | 30285.707 | 30145.104 | AK022194  | 51027.484 | 48873.477 |
| AK001945  | 267.923   | 147.658   | NM_001140 | 3065.391  | 3508.132  | AF085963  | 3154.46   | 3451.499  |
| AK021766  | 247.386   | 102.978   | NM_016059 | 1040.7    | 478.192   | AK021436  | 3268.565  | 3483.155  |
| AK021630  | 620.034   | 371.694   | NM_000403 | 35313.098 | 41693.645 | U58664    | 2125.001  | 2251.268  |
| AK021831  | 499.087   | 335.457   | NM_018127 | 28417.881 | 29243.311 | AK021920  | 5162.004  | 6243.389  |
| NM_020153 | 885.638   | 730.697   | AB020677  | 23288.492 | 21514.262 | AL049415  | 9631.869  | 9473.508  |
| NM_005321 | 1056.801  | 896.339   | AB033097  | 11746.512 | 10301.873 | AK022375  | 2801.528  | 2911.996  |
| AF073520  | 4287.676  | 3565.576  | NM_000135 | 8950.375  | 7419.83   | AI065056  | 656.453   | 677.53    |
| AF143885  | 501.755   | 605.643   | AJ223948  | 16556.697 | 18398.59  | NM_003378 | 61302.117 | 59467.824 |
| NM_014015 | 1612.159  | 1402.213  | NM_016218 | 1618.106  | 1530.741  | AL110194  | 16348.908 | 12547.904 |
| AK026839  | 1115.732  | 941.986   | AK022947  | 3864.022  | 4299.067  | AF138860  | 1861.023  | 1443.43   |
| AK024973  | 248.898   | 213.889   | AL050029  | 3415.094  | 3289.637  | NM_001942 | 423.395   | 347.738   |
| AJ008123  | 3099.833  | 2433.999  | AL049966  | 1104.286  | 1737.703  | AF200348  | 3356.583  | 2665.8    |
| AJ008156  | 761.798   | 867.807   | NM_005204 | 18419.574 | 18401.879 | Y11710    | 910.499   | 965.578   |
| AF161437  | 2235.183  | 1439.114  | NM_016203 | 3266.911  | 3483.964  | J03756    | 744.831   | 902.007   |
| U73530    | 337.059   | 310.134   | NM_002759 | 5961.786  | 6056.724  | NM_002650 | 4076.137  | 4259.097  |
| AF086158  | 7529.383  | 4301.596  | NM_007271 | 5116.08   | 6149.994  | NM_003260 | 49933.219 | 43167.711 |
| AF086050  | 2413.43   | 1120.483  | NM_006255 | 6884.337  | 8132.49   | AK024071  | 2735.792  | 2679.325  |
| AF147375  | 893.047   | 494.865   | BE392143  | 9405.975  | 9852.108  | AF056490  | 5018.4    | 5340.831  |
| X51524    | 863.698   | 442.986   | NM_005813 | 7391.682  | 8148.699  | NM_005535 | 6016.435  | 6744.402  |
| AK025759  | 4036.981  | 2762.982  | AB037718  | 16784.266 | 19794.342 | BF341504  | 695.877   | 623.518   |
| AK024105  | 643.076   | 452.807   | AL389994  | 3303.243  | 3998.583  | NM_005541 | 9020.593  | 8748.055  |
| AJ238556  | 767.848   | 449.238   | NM_003909 | 11769.777 | 14157.885 | AB002319  | 4099.397  | 3952.531  |
| AK021516  | 197.453   | 278.863   | NM_001277 | 23786.652 | 24686.318 | AF039942  | 4893.136  | 4531.289  |
| Z70699    | 238.305   | 292.781   | NM_003659 | 15181.307 | 21345.301 | NM_004421 | 4286.232  | 4604.346  |
| NM_006895 | 580.774   | 438.031   | NM_007072 | 6982.448  | 7368.104  | AB046863  | 38730.27  | 51480.805 |
| AL080066  | 14007.398 | 11584.436 | NM_012320 | 6453.212  | 6272.245  | M62403    | 19401.715 | 18357.066 |
| AJ227870  | 343.472   | 294.212   | AB029021  | 68480.039 | 68154.906 | NM_017883 | 10654.051 | 17155.164 |
| AL137620  | 896.624   | 908.158   | NM_002101 | 3637.747  | 3063.057  | AK025131  | 6228.583  | 6641.646  |
| NM_005294 | 564.143   | 554.968   | NM_005423 | 2611.797  | 2407.892  | NM_000754 | 39586.949 | 42786.805 |
| AK026879  | 299.611   | 574.783   | Z36789    | 863.555   | 971.986   | NM_014615 | 3549.992  | 4096.285  |
| AF085826  | 2160.518  | 1816.608  | J02874    | 19379.387 | 21520.35  | NM_005625 | 48623.094 | 47732.984 |
| AK024362  | 1510.477  | 1142.912  | BF310427  | 30995.264 | 34344.086 | J04621    | 1115.404  | 1377.09   |
| AF118068  | 6063.75   | 2668.234  | N94424    | 1765.878  | 1500.512  | NM_000718 | 5323.744  | 4343.289  |
| NM_004164 | 619.072   | 457.579   | AA045192  | 8650.476  | 8303.692  | NM_000161 | 6668.909  | 5905.168  |
| NM_019018 | 1429.504  | 1114.782  | H45617    | 1309.531  | 1502.531  | NM_001972 | 671.5     | 538.6     |
| M87931    | 703.182   | 619.542   | M92642    | 16698.475 | 17003.658 | NM_001445 | 2302.812  | 1840.416  |
| NM_003544 | 32689.262 | 26070.496 | H-U 44385 | 53389.266 | 52312.668 | AK024455  | 545.426   | 521.535   |

|           |           |           |            |           |           |           |           |           |
|-----------|-----------|-----------|------------|-----------|-----------|-----------|-----------|-----------|
| AK001187  | 661.883   | 314.508   | ID 1654970 | 26977.361 | 28179.391 | NM_002006 | 53235.664 | 43465.492 |
| NM_003529 | 4713.939  | 3793.832  | ID 2531132 | 31611.529 | 33993.07  | NM_007111 | 20502.578 | 16135.128 |
| AF056436  | 1500.342  | 910.228   | ID 4365538 | 2910.143  | 2961.633  | NM_002048 | 861.92    | 769.567   |
| AB023191  | 859.502   | 736.195   | AA485665   | 1425.582  | 1262.643  | NM_004702 | 1806.347  | 2245.799  |
| AK027212  | 5538.846  | 3641.54   | BF125928   | 30433.387 | 37668.148 | NM_007109 | 4791.601  | 4457.26   |
| X56197    | 1040.026  | 594.444   | BG571026   | 8550.202  | 9107.429  | AK023404  | 19942.012 | 12066.59  |
| NM_005199 | 984.611   | 592.636   | AA489017   | 30560.826 | 39990.613 | NM_013239 | 2236.985  | 1790.995  |
| U90905    | 852.268   | 620.632   | NM_000025  | 34050.078 | 33813.086 | NM_001789 | 4157.629  | 3133.413  |
| AF161422  | 1151.542  | 704.159   | D38521     | 9537.472  | 9002.056  | NM_016004 | 6791.616  | 6764.915  |
| AL137384  | 697.026   | 233.884   | NM_018152  | 2465.071  | 2620.083  | NM_002655 | 1934.744  | 1949.628  |
| AF070619  | 779.148   | 464.296   | NM_000319  | 13496.157 | 13474.831 | AB028955  | 53395.883 | 53671.738 |
| NM_000787 | 397.055   | 498.597   | NM_003257  | 1279.34   | 1697.925  | U66879    | 44053.367 | 43488.305 |
| U57962    | 1478.31   | 2082.713  | NM_012461  | 13390.8   | 15169.501 | NM_016022 | 6560.827  | 7514.181  |
| NM_016176 | 8873.938  | 8173.979  | AK001379   | 5824.79   | 5763.156  | NM_004874 | 2255.709  | 2560.348  |
| NM_005574 | 9114.136  | 9562.65   | NM_017450  | 9876.123  | 9841.959  | NM_014204 | 3250.847  | 3442.226  |
| NM_004610 | 1543.849  | 1803.721  | NM_002023  | 3769.245  | 3616.281  | S70385    | 36103.867 | 36520.914 |
| NM_001612 | 2382.685  | 2870.399  | NM_002839  | 4004.478  | 3668.579  | M34671    | 11329.225 | 11970.853 |
| AK027002  | 2144.517  | 2115.299  | AF190500   | 2220.12   | 2625.35   | NM_018509 | 12270.938 | 11920.14  |
| AB025254  | 1130.218  | 948.608   | NM_001616  | 992.433   | 1239.552  | NM_004086 | 1558.482  | 1505.759  |
| NM_004081 | 480.171   | 559.6     | NM_005904  | 1433.731  | 1857.174  | NM_014944 | 19959.887 | 16754.148 |
| AK001039  | 1728.774  | 915.18    | NM_005273  | 52473.34  | 55018.008 | NM_007352 | 715.988   | 552.584   |
| AK026465  | 1014.135  | 561.648   | NM_000524  | 1263.765  | 1788.19   | AF176706  | 5728.044  | 5180.061  |
| U52834    | 370.405   | 300.504   | NM_006576  | 16064.772 | 16555.715 | NM_014484 | 1507.349  | 1106.586  |
| AJ227898  | 294.2     | 161.847   | AB035266   | 21975.018 | 26290.104 | NM_001086 | 6022.589  | 5455.588  |
| M34428    | 363.004   | 222.751   | NM_003744  | 10710.286 | 12909.304 | NM_014670 | 13154.9   | 13008.205 |
| NM_003532 | 518.547   | 291.229   | NM_006378  | 7817.596  | 7675.302  | NM_019048 | 11637.099 | 12642.004 |
| NM_017869 | 4917.987  | 2807.561  | NM_018132  | 2435.851  | 2465.148  | NM_001040 | 3357.339  | 3350.11   |
| U17627    | 164.77    | 167.715   | NM_018207  | 7452.767  | 8246.221  | AF279698  | 10731.601 | 9310.084  |
| AF075100  | 485.955   | 208.538   | NM_000345  | 66543.398 | 64445.195 | NM_019849 | 5819.576  | 4614.939  |
| AF203447  | 7415.739  | 5295.054  | NM_001862  | 65560.75  | 65705.391 | NM_000049 | 705.469   | 734.111   |
| NM_018502 | 1371.825  | 759.702   | NM_006531  | 9103.347  | 9903.412  | AB032996  | 61597.707 | 64075.141 |
| AB040976  | 3080.864  | 3416.995  | NM_002779  | 14180.291 | 13770.407 | AB040881  | 10735.504 | 8744.438  |
| NM_018641 | 2743.186  | 2620.79   | L40397     | 37156.301 | 44930.465 | AY007121  | 4989.275  | 4568.936  |
| NM_002371 | 831.294   | 719.25    | NM_020198  | 47418.145 | 46629.27  | NM_003372 | 13140.523 | 13492.296 |
| NM_002562 | 367.782   | 599.686   | AA098879   | 1152.226  | 1553.024  | NM_007317 | 10186.376 | 9453.437  |
| AK024502  | 9873.741  | 6797.563  | AF070525   | 20686.549 | 27827.738 | AB037826  | 699.143   | 632.799   |
| NM_001124 | 654.171   | 704.344   | NM_001177  | 7219.042  | 8330.302  | AK021466  | 3974.114  | 3777.415  |
| NM_004586 | 2690.773  | 2339.174  | NM_014447  | 3948.774  | 6119.56   | Z36796    | 62774.297 | 62456.762 |
| NM_004844 | 4259.205  | 3882.01   | NM_002356  | 6031.429  | 4185.86   | NM_006443 | 61590.859 | 59209.637 |
| NM_013447 | 303.336   | 246.997   | NM_006691  | 4413.635  | 4990.731  | NM_001559 | 987.65    | 963.69    |
| NM_000051 | 2501.635  | 1797.869  | NM_001505  | 2973.326  | 3067.014  | NM_002634 | 35692.301 | 33231.898 |
| NM_005709 | 439.394   | 274.029   | NM_003710  | 17506.369 | 18298.146 | NM_017749 | 5416.46   | 4994.783  |
| NM_004180 | 5633.657  | 5003.637  | Z83805     | 1947.983  | 2535.833  | NM_002938 | 17439.6   | 15839.951 |
| NM_004786 | 19845.227 | 15848.836 | NM_004666  | 2721.791  | 2838.741  | AK023652  | 33113.289 | 29541.307 |
| AF302109  | 703.61    | 545.83    | NM_003614  | 20905.945 | 21598.113 | AF099032  | 1735.315  | 1637.612  |
| AL117485  | 3542.035  | 2980.967  | NM_014257  | 31465.127 | 35907.184 | NM_003070 | 6332.94   | 5502.57   |
| NM_003505 | 396.874   | 379.597   | NM_001140  | 3183.413  | 3611.215  | AL122101  | 29639.602 | 23091.982 |
| NM_007191 | 598.783   | 409.567   | NM_016059  | 758.205   | 1143.096  | NM_016216 | 16487.506 | 13505.632 |
| AL109667  | 268.583   | 204.921   | NM_004843  | 4039.435  | 4704.122  | AK001649  | 981.705   | 1006.161  |
| NM_000840 | 271.619   | 284.912   | AK022845   | 2027.205  | 2173.478  | NM_016638 | 35969.832 | 31329.182 |
| AJ008142  | 4964.618  | 5245.21   | NM_003004  | 975.095   | 1051.384  | AB018274  | 19092.797 | 16377.263 |
| AL035289  | 450.542   | 451.84    | S77835     | 2837.21   | 3236.057  | NM_005871 | 10773.369 | 7733.343  |
| NM_001343 | 2508.752  | 2887.67   | NM_002985  | 5683.598  | 5412.48   | AK000511  | 13324.931 | 10633.533 |



|           |           |           |           |           |           |           |           |           |
|-----------|-----------|-----------|-----------|-----------|-----------|-----------|-----------|-----------|
| NM_007275 | 9641.239  | 9715.142  | AB018347  | 45078.652 | 50876.727 | AF121255  | 4991.343  | 5935.11   |
| NM_019025 | 7513.073  | 14731.818 | AB033073  | 23208.135 | 30071.234 | NM_005494 | 11129.603 | 10699.261 |
| NM_018461 | 3082.194  | 3671.435  | NM_003284 | 14967.273 | 13889.228 | NM_017946 | 1305.085  | 1027.981  |
| AF235023  | 4397.607  | 4229.57   | NM_003909 | 10683.143 | 11154.722 | NM_004953 | 14027.011 | 12633.411 |
| NM_006910 | 4136.63   | 2739.143  | NM_001277 | 29072.141 | 27940.348 | NM_012195 | 5004.346  | 4338.763  |
| AF162667  | 3059.286  | 2870.363  | NM_003659 | 14150.344 | 14729.558 | AL049682  | 3091.719  | 2633.847  |
| AB046847  | 1785.109  | 1515.307  | NM_007072 | 7254.952  | 8116.204  | NM_005528 | 20703.58  | 18663.77  |
| NM_000447 | 1377.201  | 901.691   | NM_012320 | 6764.229  | 5860.152  | AL050199  | 6734.334  | 5638.445  |
| NM_006354 | 3740.761  | 3530.725  | NM_018208 | 5944.099  | 5327.175  | NM_004901 | 2002.232  | 1652.492  |
| AF303378  | 2713.377  | 2254.079  | NM_015929 | 10065.974 | 9498.585  | NM_006721 | 21492.854 | 19591.607 |
| NM_016037 | 9753.553  | 6131.39   | U90653    | 19954.232 | 21479.432 | NM_016282 | 35230.512 | 30859.842 |
| NM_000043 | 5108.045  | 5401.241  | NM_000196 | 1718.32   | 1892.016  | NM_002765 | 12121.92  | 10264.582 |
| NM_015965 | 1165.679  | 656.818   | NM_018339 | 8342.024  | 9127.914  | NM_001905 | 5338.906  | 3873.602  |
| NM_000417 | 3980.229  | 2812.458  | NM_006745 | 39488.652 | 48044.277 | AF292100  | 12347.78  | 11153.218 |
| NM_020356 | 241.199   | 228.435   | NM_000275 | 3023.371  | 3099.061  | NM_003434 | 62630.094 | 61197.59  |
| AF152527  | 367.102   | 230.985   | AK000037  | 4241.589  | 4182.753  | NM_018181 | 987.93    | 1345.885  |
| NM_006144 | 317.757   | 429.616   | NM_014760 | 5503.345  | 6342.45   | X68880    | 679.333   | 714.9     |
| AL136549  | 15866.753 | 14179.729 | NM_018398 | 3098.961  | 3541.434  | AF091081  | 26466.551 | 19781.146 |
| NM_012168 | 650.474   | 430.864   | NM_002560 | 60175.293 | 61184.047 | AK001758  | 4034.924  | 3047.884  |
| NM_002216 | 205.357   | 270.188   | NM_014404 | 6257.131  | 8182.58   | U90842    | 1660.057  | 1275.14   |
| NM_007038 | 945.297   | 1404.218  | NM_018713 | 2784.196  | 3423.532  | AK025076  | 411.288   | 602.714   |
| AF311324  | 7222.634  | 8066.804  | NM_015947 | 22222.113 | 26790.998 | AF086325  | 14897.185 | 13095.722 |
| AF124433  | 1603.868  | 1614.039  | NM_002042 | 62472.969 | 61280.672 | NM_004928 | 1810.832  | 1662.473  |
| AK001647  | 248.996   | 283.427   | AB028944  | 1107.573  | 1180.914  | NM_005081 | 619.897   | 512.057   |
| NM_001461 | 607.083   | 529.555   | AJ006268  | 3316.606  | 3948.789  | NM_004955 | 1565.74   | 1611.458  |
| AF061556  | 853.211   | 751.653   | M74089    | 9102.188  | 11851.606 | AK026022  | 61043.469 | 57706.891 |
| AL162049  | 2920.683  | 1838.533  | AF190864  | 12349.708 | 11530.02  | NM_003195 | 11925.628 | 12831.637 |
| AF036144  | 1081.889  | 1001.607  | NM_000025 | 39128.91  | 39384.301 | NM_004306 | 60312.023 | 62702.211 |
| NM_001823 | 463.001   | 422.475   | D38521    | 10906.755 | 8735.831  | NM_001153 | 938.819   | 797.518   |
| NM_005032 | 1381.222  | 1058.14   | NM_000403 | 33136.234 | 33166.898 | NM_006786 | 15964.554 | 13860.027 |
| NM_004160 | 4857.791  | 4643.514  | NM_018127 | 26923.738 | 29393.145 | NM_006205 | 2821.754  | 3174.901  |
| AL109677  | 2354.712  | 1927.633  | AB020677  | 23861.221 | 23339.084 | NM_004034 | 27743.773 | 24621.027 |
| NM_003941 | 15702.386 | 11201.813 | AB033097  | 10469.667 | 10444.162 | NM_000130 | 30157.656 | 25154.467 |
| AF177909  | 631.082   | 474.479   | NM_000135 | 8350.512  | 8493.791  | AF193756  | 1265.037  | 1129.636  |
| NM_002664 | 18647.361 | 12570.871 | AJ223948  | 14967.488 | 17810.318 | AI492087  | 1521.583  | 1884.066  |
| AB018271  | 1630.066  | 925.848   | NM_016218 | 1791.485  | 1770.493  | R72122    | 10640.013 | 10751.155 |
| AL137665  | 2835.92   | 1417.214  | AK022947  | 4195.676  | 4579.563  | X04571    | 1983.709  | 3288.496  |
| NM_016434 | 1321.54   | 805.993   | AL050029  | 3727.711  | 4334.371  | XM_056359 | 3843.142  | 3210.073  |
| U36561    | 45594.445 | 72036.297 | AL049966  | 1932.099  | 2280.566  | D10353/NM | 44400.926 | 41065.063 |
| AF205437  | 1393.783  | 1125.118  | NM_005204 | 18005.199 | 18837.236 | M15042    | 16819.178 | 15312.432 |
| AF034102  | 31880.902 | 20916.924 | NM_016203 | 2960.681  | 3731.759  | AK056843  | 19685.527 | 19332.076 |
| AB037748  | 1935.687  | 2017.635  | NM_002759 | 7618.42   | 8989.44   | U49928    | 61461.133 | 61565.852 |
| AB002306  | 3484.883  | 3236.986  | NM_007271 | 5420.396  | 7262.905  | AK096645  | 59987.359 | 59805.129 |
| NM_001300 | 2397.094  | 1896.904  | NM_006255 | 6399.551  | 8528.395  | AK092859  | 3438.586  | 4091.646  |
| NM_012472 | 826.809   | 909.368   | BE392143  | 9164.793  | 10697.854 | NM_005793 | 17547.607 | 18454.17  |
| NM_018187 | 7861.063  | 12225.611 | NM_005813 | 6704.56   | 6904.391  | M55646    | 51465.672 | 50706.215 |
| NM_003016 | 28790.287 | 28309.469 | AB037718  | 15779.492 | 15186.999 | NM_006112 | 37376.902 | 36015.281 |
| NM_005463 | 9845.385  | 8420.528  | AL389994  | 3225.389  | 3316.807  | M12807    | 3207.215  | 2956.191  |
| NM_001325 | 1801.323  | 2164.174  | CY3Cy5    | 465.691   | 85.764    | NM_001765 | 6834.414  | 6392.037  |
| NM_018282 | 7674.817  | 6331.949  | NM_000588 | 21321.33  | 4449.568  | NM_003361 | 4463.618  | 4239.199  |
| BC019932  | 3470.598  | 3452.455  | AF143872  | 36232.742 | 38003.059 | NM_012095 | 28289.775 | 27664.082 |
| AF114818  | 4971.043  | 4795.845  | AF143326  | 3034.656  | 5562.122  | NM_018684 | 61643.008 | 64066.504 |
| AK025106  | 2912.153  | 2686.305  | AL049229  | 6045.117  | 8133.584  | NM_017983 | 1907.802  | 1804.405  |

|            |           |           |           |           |           |           |           |           |
|------------|-----------|-----------|-----------|-----------|-----------|-----------|-----------|-----------|
| NM_020144  | 5705.857  | 4421.513  | NM_018306 | 72804.477 | 60459.273 | AF116909  | 1536.914  | 1376.991  |
| NM_003908  | 40025.449 | 28500.896 | AK026146  | 6016.046  | 2730.887  | AF253316  | 964.056   | 896.818   |
| BE893142   | 3994.348  | 3409.072  | AL389937  | 2788.998  | 2355.244  | NM_005855 | 1028.219  | 945.112   |
| NM_003103  | 6187.267  | 3674.405  | AK025201  | 4924.316  | 4053.667  | NM_002923 | 4894.705  | 5332.539  |
| NM_015340  | 9089.083  | 7230.577  | AK022995  | 2362.002  | 2344.371  | NM_006794 | 4075.52   | 4019.922  |
| NM_006451  | 6749.771  | 3893.172  | SR3       | 49750.57  | 48671.215 | NM_018653 | 1391.234  | 1361.131  |
| NM_002094  | 2908.989  | 1508.169  | SR5       | 4966.417  | 6229.021  | NM_005388 | 19440.148 | 19826.85  |
| NM_002937  | 1263.127  | 822.247   | SR9       | 19182.068 | 4587.52   | NM_007232 | 60157.34  | 59036.395 |
| NM_003191  | 5305.32   | 3969.447  | CY3Cy5    | 3226.661  | 144.515   | NM_016257 | 2613.855  | 2723.613  |
| NM_018235  | 14018     | 9172.38   | L13433    | 2253.768  | 3035.154  | NM_002717 | 5718.082  | 6015.895  |
| NM_002424  | 337.971   | 306.899   | NM_007220 | 2528.523  | 4682.05   | AF231916  | 17165.924 | 16000.369 |
| NM_012104  | 1804.986  | 1170.836  | NM_017777 | 4660.798  | 5552.608  | NM_003501 | 14050.416 | 13756.428 |
| NM_000761  | 20504.227 | 21222.619 | AK001499  | 5595.78   | 3044.519  | AK022654  | 57067.055 | 56936.48  |
| NM_020142  | 2189.53   | 1824.717  | AK026852  | 1896.396  | 915.075   | BC002905  | 12051.582 | 11476.79  |
| NM_000774  | 3074.182  | 3985.399  | AK021629  | 1570.963  | 826.888   | NM_018091 | 18771.232 | 19469.014 |
| NM_017781  | 11908.042 | 18747.283 | AL110257  | 88599.328 | 63847.75  | NM_001108 | 9555.53   | 9963.424  |
| NM_006004  | 48081.152 | 52339.898 | AB013384  | 4174.203  | 4729.425  | NM_001637 | 1425.832  | 1334.113  |
| NM_004894  | 25412.859 | 24161.396 | AK024824  | 3278.772  | 5316.952  | NM_016630 | 22115.713 | 26558.561 |
| AB028960   | 708.946   | 635.132   | AK024270  | 5680.953  | 5422.238  | NM_014291 | 14362.661 | 12407.645 |
| NM_005648  | 32405.627 | 22872.34  | AK023060  | 10716.064 | 16662.801 | NM_014631 | 767.985   | 800.819   |
| AK000689   | 270.347   | 309.383   | NM_014870 | 806.124   | 1001.715  | NM_005508 | 4653.71   | 5297.866  |
| NM_006943  | 8522.594  | 5590.264  | AF052146  | 55470.152 | 58642.742 | NM_018485 | 867.992   | 1149.345  |
| NM_006741  | 3663.369  | 3079.299  | NM_004870 | 8930.931  | 10115.351 | NM_006788 | 2690.805  | 2867.971  |
| NM_014166  | 8436.423  | 7089.928  | AK024242  | 27346.363 | 10885.501 | NM_016568 | 2229.19   | 2693.414  |
| AL117606   | 9778.559  | 6714.084  | AK024559  | 1842.338  | 791.521   | NM_002987 | 633.242   | 592.485   |
| NM_012330  | 3638.677  | 2618.386  | AK024851  | 1137.747  | 683.381   | AB033102  | 51896.008 | 56134.316 |
| AF294278   | 1158.407  | 1001.189  | AK024943  | 1142.542  | 1717.895  | NM_014774 | 4613.415  | 5511.95   |
| NM_018211  | 693.84    | 429.136   | AK024410  | 574.27    | 1105.639  | NM_014143 | 27577.074 | 29608.043 |
| NM_014520  | 5969.272  | 3646.313  | AK022628  | 76203.438 | 64434.215 | NM_012200 | 4393.294  | 4445.388  |
| AL117508   | 225.591   | 436.643   | AK021737  | 14466.935 | 6431.98   | NM_001724 | 3612.735  | 3389.857  |
| NM_002616  | 3431.594  | 2208.758  | AL357454  | 568.741   | 706.236   | NM_000150 | 6994.013  | 6223.416  |
| AK025712   | 22590.777 | 14671.377 | AK026295  | 2490.615  | 1623.756  | AB023152  | 867.016   | 786.791   |
| NM_005634  | 3563.84   | 2875.516  | AK022346  | 846.453   | 684.772   | NM_006212 | 4370.55   | 3635.86   |
| NM_017757  | 8130.7    | 5245.689  | AK025007  | 3133.288  | 2049.85   | AK022872  | 2513.458  | 1971.216  |
| NM_002146  | 6088.718  | 4178.037  | NM_016486 | 11654.836 | 7491.33   | AK024272  | 4086.407  | 3339.972  |
| AB007892   | 2558.409  | 1940.559  | AK026490  | 57106.672 | 55000.18  | NM_016381 | 1332.472  | 1212.262  |
| NM_018207  | 2156.875  | 2519.553  | AJ227861  | 3598.585  | 3926.051  | AL591715  | 1699.81   | 1522.684  |
| NM_000345  | 9709.913  | 11247.763 | AJ001875  | 2465.329  | 2954.368  | BE741525  | 2251.198  | 3506.004  |
| NM_001862  | 43249.465 | 48639.063 | AK002028  | 61099.934 | 20206.102 | BF030555  | 60771.281 | 59975.547 |
| NM_006531  | 1004.114  | 1765.774  | AL050127  | 4217.79   | 2188.113  | NM_012433 | 12833.147 | 14541.335 |
| AB029021   | 7606.999  | 16396.162 | AK024805  | 20610.777 | 27675.408 | NM_005605 | 10291.4   | 11258.749 |
| NM_002101  | 1129.177  | 1751.284  | AK000189  | 911.777   | 1529.01   | NM_002576 | 3416.73   | 3897.073  |
| NM_005423  | 1283.762  | 1854.699  | AK001423  | 2607.252  | 4196.315  | NM_003582 | 2830.64   | 2830.072  |
| Z36789     | 603.753   | 646.658   | AK021989  | 982.295   | 1214.484  | AF057354  | 779.746   | 821.403   |
| J02874     | 1097.565  | 1282.278  | NM_018629 | 2243.657  | 1371.591  | AF169351  | 17765.33  | 20032.59  |
| BF310427   | 859.217   | 971.793   | AK022298  | 8636.329  | 8272.667  | M14200    | 64266.84  | 61134.852 |
| N94424     | 401.021   | 380.283   | AJ277441  | 28273.125 | 28839.25  | NM_000282 | 3829.881  | 4409.536  |
| AA045192   | 670.306   | 893.044   | AK022760  | 456.228   | 952.766   | NM_000532 | 20690.197 | 21189.588 |
| H45617     | 302.933   | 366.752   | NM_006057 | 2424.545  | 3159.695  | NM_016341 | 1854.416  | 2530.514  |
| M92642     | 336.463   | 560.945   | AK025784  | 51475.969 | 21054.623 | NM_006786 | 16722.887 | 15645.525 |
| H-U 44385  | 20321.42  | 12124.292 | U07199    | 6193.88   | 1780.318  | NM_006205 | 3130.385  | 2976.316  |
| ID 1654970 | 7028.121  | 5575.484  | AK023713  | 2106.661  | 1173.041  | NM_004034 | 29052.031 | 27399.48  |
| ID 2531132 | 14814.7   | 11872.793 | X81445    | 1323.75   | 2109.182  | NM_000130 | 27028.605 | 23401.42  |

|           |           |           |           |           |           |           |           |           |
|-----------|-----------|-----------|-----------|-----------|-----------|-----------|-----------|-----------|
| AA485665  | 303.665   | 271.266   | U95091    | 3728.899  | 5635.773  | AF193756  | 547.364   | 419.105   |
| BF125928  | 13890.194 | 10675.627 | NM_017900 | 65502.574 | 66895.922 | AI492087  | 965.126   | 634.844   |
| BG571026  | 1446.006  | 984.885   | S50182    | 3537.708  | 5544.021  | R72122    | 5701.444  | 4980.757  |
| AA489017  | 16737.936 | 11826.744 | AL360145  | 2696.589  | 4516.672  | Z35309    | 11225.12  | 8288.879  |
| NM_001140 | 1535.262  | 2597.53   | Y12016    | 3982.612  | 1098.87   | X04571    | 851.171   | 880.301   |
| NM_016059 | 229.901   | 359.399   | S75763    | 70880.234 | 64329.043 | AA292025  | 6509.37   | 7614.024  |
| NM_004843 | 780.587   | 922.139   | AL359943  | 66629.008 | 61113.367 | R36143    | 6279.134  | 8022.195  |
| AK022845  | 619.304   | 856.565   | NM_000534 | 4993.733  | 5293.118  | XM_056359 | 4029.084  | 4119.822  |
| NM_003004 | 518.112   | 1579.715  | L10140    | 859.244   | 1101.59   | D10353/NM | 50194.934 | 44187.492 |
| S77835    | 1507.637  | 2153.251  | AL133447  | 2772.623  | 3174.699  | M15042    | 13632.007 | 12878.086 |
| NM_002985 | 2784.593  | 4432.426  | AB037853  | 45100.691 | 51006.73  | AK056843  | 15518.467 | 17226.492 |
| AB018347  | 3305.08   | 4243.018  | D28450    | 66265.516 | 67199.742 | AK092859  | 3368.58   | 5149.182  |
| AB033073  | 1369.116  | 1466      | AK056222  | 3995.857  | 5315.203  | NM_018291 | 28042.471 | 28959.793 |
| NM_003284 | 873.434   | 822.706   | L37700    | 874.694   | 299.164   | NM_005530 | 12443.771 | 12664.563 |
| NM_018152 | 490.983   | 380.584   | NM_017665 | 5270.782  | 1496.146  | NM_006899 | 7677.208  | 6412.217  |
| NM_000319 | 7665.377  | 8146.055  | AB007976  | 1367.64   | 2061.735  | M12807    | 3508.381  | 3545.258  |
| NM_003257 | 482.963   | 641.989   | AF052106  | 8066.249  | 9685.486  | NM_001765 | 7383.13   | 7514.585  |
| NM_012461 | 5944.895  | 6150.148  | AK000441  | 1750.476  | 3478.082  | NM_003361 | 2690.43   | 2448.687  |
| AK001379  | 2790.57   | 2578.995  | NM_016167 | 5861.773  | 6192.253  | NM_012099 | 21616.012 | 19915.514 |
| NM_017450 | 1904.582  | 2006.813  | NM_016125 | 1073.215  | 1372.413  | NM_018684 | 54822.574 | 52977.945 |
| NM_002023 | 590.171   | 496.125   | AK024090  | 37266.543 | 29211.941 | NM_017983 | 707.076   | 825.391   |
| NM_002839 | 308.93    | 211.856   | AL133574  | 2964.782  | 2346.172  | AF116909  | 1138.009  | 1246.83   |
| NM_001616 | 436.571   | 429.906   | AF147339  | 33607.555 | 30772.787 | BE906724  | 1930.649  | 1479.258  |
| NM_005904 | 590.62    | 555.892   | AL390181  | 59890.266 | 56003.078 | NM_002283 | 28564.963 | 25422.449 |
| NM_005273 | 17916.75  | 15697.312 | NM_017914 | 53822.816 | 52225.668 | AJ276095  | 18341.637 | 23820.17  |
| NM_000524 | 387.995   | 365.408   | AK024953  | 20694.266 | 26291.184 | NM_004819 | 5564.696  | 5272.327  |
| NM_018645 | 157.612   | 206.651   | AK024276  | 5410.515  | 6300.167  | NM_007184 | 4621.6    | 4957.045  |
| NM_007072 | 1807.083  | 2883.819  | S83374    | 4527.124  | 5399.715  | AF253316  | 680.004   | 941.708   |
| NM_012320 | 2172.794  | 2616.13   | NM_003150 | 1812.544  | 482.962   | NM_005855 | 1013.602  | 1154.83   |
| NM_018208 | 2029.903  | 1768.241  | NM_014784 | 2024.755  | 676.671   | NM_002923 | 4074.868  | 4826.589  |
| NM_015929 | 4438.841  | 6260.751  | AK026383  | 5565.228  | 2967.925  | NM_006794 | 3808.295  | 4405.701  |
| U90653    | 11314.754 | 18264.305 | AB014594  | 3735.224  | 4459.343  | NM_018653 | 1379.596  | 1721.479  |
| NM_000196 | 747.103   | 1204.953  | M94547    | 2081.942  | 2573.718  | NM_005388 | 17763.381 | 21599.666 |
| NM_018339 | 4255.906  | 5013.472  | NM_005087 | 23198.846 | 27644.768 | NM_016257 | 2258.184  | 2707.214  |
| NM_006745 | 21438.596 | 24590.123 | NM_012098 | 2281.727  | 1160.102  | NM_002717 | 5160.274  | 6045.717  |
| NM_000275 | 1436.558  | 1780.389  | NM_018095 | 2549.921  | 1165.636  | NM_004306 | 59154.313 | 64782.375 |
| AK000037  | 1167.353  | 727.865   | AB023164  | 4546.576  | 2199.558  | NM_001153 | 432.569   | 662.942   |
| NM_014760 | 2717.571  | 2243.824  | NM_001178 | 1024.371  | 983.685   | AK022654  | 58689.051 | 60366.719 |
| NM_018713 | 622.864   | 923.057   | AK023696  | 18268.539 | 10493.735 | BC002905  | 13538.38  | 12698.538 |
| AJ006268  | 1088.792  | 1230.988  | NM_000704 | 1910.449  | 1515.989  | NM_018091 | 19902.74  | 20609.643 |
| AF190864  | 6337.658  | 6053.939  | NM_015987 | 1380.681  | 594.592   | NM_001108 | 10742.657 | 12293.188 |
| NM_001177 | 3837.702  | 4801.405  | NM_019605 | 3422.845  | 3532.171  | NM_001637 | 743.063   | 889.432   |
| NM_014447 | 1684.872  | 1521.011  | NM_015369 | 1476.619  | 1433.463  | NM_016630 | 13520.951 | 12021.112 |
| NM_002356 | 329.425   | 397.985   | Z49090    | 10759.112 | 10089.987 | NM_014291 | 10541.237 | 8572.706  |
| NM_006691 | 968.575   | 566.193   | AK021592  | 12854.126 | 13900.258 | NM_001089 | 10728.1   | 9809.322  |
| NM_001505 | 844.798   | 651.881   | AK025467  | 11676.094 | 14494.562 | NM_000120 | 2170.48   | 1862.934  |
| NM_003710 | 866.261   | 718.268   | AK026593  | 16066.611 | 19745.623 | U09384    | 2620.758  | 2370.834  |
| Z83805    | 443.799   | 460.501   | AL117666  | 1121.267  | 458.186   | NM_018485 | 1314.194  | 1803.794  |
| NM_004666 | 1185.685  | 1003.134  | Y17865    | 1316.388  | 450.296   | NM_006788 | 2929.075  | 3332.326  |
| NM_003614 | 806.767   | 991.427   | NM_005825 | 34483.289 | 11785.622 | NM_016568 | 2854.283  | 4208.938  |
| NM_014257 | 2806.231  | 1961.417  | NM_002756 | 11343.126 | 6647.239  | NM_002987 | 665.553   | 563.367   |
| NM_000025 | 7234.246  | 7683.252  | AJ000414  | 1593.349  | 800.996   | NM_014774 | 4382.382  | 4873.812  |
| D38521    | 5144.85   | 4583.451  | AK025674  | 17944.521 | 8913.645  | NM_014143 | 26471.793 | 27553.568 |

|            |           |           |           |           |           |           |           |           |
|------------|-----------|-----------|-----------|-----------|-----------|-----------|-----------|-----------|
| NM_000403  | 4028.059  | 4228.802  | AF007194  | 9256.235  | 3855.444  | M55646    | 51824.77  | 52880.516 |
| NM_018127  | 15865.771 | 29848.98  | NM_019069 | 2545.796  | 1255.487  | NM_006112 | 31212.311 | 37707.137 |
| AB020677   | 2815.425  | 3649.817  | NM_004761 | 5880.914  | 3332.578  | NM_000150 | 5811.243  | 5270.46   |
| AB033097   | 2439.438  | 3411.983  | Z25424    | 7342.007  | 3360.152  | AB023152  | 688.557   | 845.52    |
| NM_000135  | 2251.354  | 1543.529  | U79458    | 8138.969  | 8461.153  | NM_006212 | 4276.661  | 4341.976  |
| AJ223948   | 6363.362  | 6866.542  | NM_014920 | 781.868   | 498.948   | AK022872  | 6403.241  | 7497.408  |
| NM_016218  | 889.995   | 783.78    | NM_002961 | 8415.316  | 4554.231  | AK024272  | 5160.72   | 4973.075  |
| AK022947   | 2622.673  | 2369.634  | NM_018298 | 1656.152  | 1733.352  | NM_016381 | 486.483   | 559.772   |
| AL050029   | 2115.147  | 1732.997  | NM_000676 | 2704.792  | 2652.157  | AL591715  | 2083.55   | 2092.221  |
| AL049966   | 837.188   | 1004.048  | NM_005766 | 1442.313  | 1454.906  | NM_018042 | 27602.291 | 29234.072 |
| NM_005204  | 10047.521 | 7520.284  | NM_004127 | 64867.109 | 72414.492 | BE741525  | 1314.778  | 1530.04   |
| NM_016203  | 1751.859  | 1702.913  | NM_013324 | 6703.548  | 7101.498  | BF030555  | 60761.059 | 58211.715 |
| NM_002759  | 3028.255  | 3499.274  | AL133022  | 1438.098  | 2042.221  | NM_012433 | 14098.507 | 15649.895 |
| NM_007271  | 2476.267  | 2314.772  | NM_003953 | 7660.809  | 11060.568 | NM_005605 | 12478.755 | 12749.033 |
| NM_006255  | 3338.088  | 4155.667  | NM_006301 | 1285.199  | 1654.749  | NM_002576 | 3541.272  | 4095.802  |
| BE392143   | 3909.607  | 3848.166  | NM_012219 | 587.781   | 334.28    | NM_003582 | 2474.117  | 2629.761  |
| NM_005813  | 3005.896  | 1732.078  | X72887    | 702.505   | 442.533   | AF057354  | 710.44    | 1210.629  |
| AB037718   | 4545.273  | 3570.954  | NM_004529 | 2396.673  | 835.745   | AF169351  | 18812.869 | 21164.244 |
| AL389994   | 1833.251  | 1799.436  | NM_000127 | 1251.947  | 560.556   | M14200    | 64090.504 | 57407.789 |
| NM_003909  | 4619.352  | 4161.462  | Y10483    | 45083.82  | 50584.035 | NM_000282 | 3717.446  | 4107.251  |
| NM_001277  | 4524.97   | 3613.862  | NM_006784 | 2464.085  | 1172.612  | NM_000532 | 20288.379 | 22947.164 |
| NM_003659  | 3649.073  | 3033.697  | NM_017876 | 3108.661  | 1274.373  | NM_016341 | 1593.51   | 1610.393  |
| NM_001862  | 45026.852 | 66943.742 | NM_001087 | 61236.371 | 55180.094 | AF231916  | 25219.807 | 24783.209 |
| NM_006531  | 974.261   | 1593.263  | NM_001826 | 260.127   | 256.285   | NM_003501 | 14140.855 | 16326.674 |
| AB029021   | 6168.511  | 6485.058  | NM_003721 | 8875.919  | 7845.684  | NM_004034 | 26190.459 | 24137.793 |
| NM_002101  | 1163.912  | 1434.602  | NM_004724 | 1937.839  | 1490.485  | NM_000130 | 27437.533 | 23455.73  |
| NM_005423  | 1621.041  | 3720.679  | NM_001431 | 8082.47   | 5997.933  | AF193756  | 1159.255  | 1605.169  |
| Z36789     | 623.195   | 1256.593  | NM_000381 | 814.557   | 975.916   | NM_004183 | 1153.83   | 1650.977  |
| J02874     | 1069.467  | 1389.331  | NM_000427 | 3802.637  | 4309.435  | AI492087  | 1831.453  | 2286.455  |
| BF310427   | 833.151   | 1389.028  | NM_014924 | 1373.85   | 1789.451  | R72122    | 4131.033  | 4116.167  |
| N94424     | 419.125   | 611.766   | NM_006946 | 1778.922  | 2557.521  | Z35309    | 7123.29   | 5239.035  |
| AA045192   | 644.734   | 1114.974  | NM_000174 | 59531.563 | 60258.961 | X04571    | 568.049   | 434.319   |
| H45617     | 305.471   | 502.373   | NM_002508 | 1079.875  | 1697.009  | AA700005  | 690.767   | 692.11    |
| M92642     | 243.894   | 365.818   | NM_014343 | 6063.19   | 7881.093  | AA292025  | 3700.112  | 3401.295  |
| H-U 44385  | 23371.422 | 18982.285 | D25303    | 1348.497  | 2274.826  | AA437226  | 9545.681  | 9275.821  |
| ID 1654970 | 7958.525  | 8712.705  | NM_002338 | 7938.035  | 9483.084  | R36143    | 5019.422  | 4849.028  |
| ID 2531132 | 15024.696 | 12673.496 | AF022913  | 2390.101  | 970.96    | XM_056359 | 2651.754  | 2163.094  |
| ID 4365538 | 301.388   | 355.525   | NM_000028 | 1680.091  | 601.854   | D10353/NM | 47682.527 | 49364.625 |
| AA485665   | 364.835   | 241.353   | NM_001382 | 7552.182  | 3284.434  | M15042    | 16116.647 | 15370.843 |
| BF125928   | 12438.367 | 9141.814  | M93718    | 12189.613 | 5433.079  | AK056843  | 17867.154 | 19592.695 |
| BG571026   | 1476.437  | 1029.372  | NM_005386 | 2411.446  | 1590.705  | U49928    | 59277.738 | 60021.066 |
| AA489017   | 17359.02  | 15477.627 | AK023807  | 22845.658 | 8159.072  | AK096645  | 58836.516 | 61804.621 |
| NM_004843  | 1493.743  | 2763.529  | NM_018188 | 20694.016 | 10549.298 | AK092859  | 2189.728  | 2661.127  |
| AK022845   | 850.325   | 1066.582  | AK024273  | 2061.338  | 1099.933  | NM_018291 | 30763.023 | 33332.203 |
| NM_003004  | 1091.251  | 1483.001  | X59417    | 27403.625 | 16228.164 | NM_005530 | 11830.186 | 13767.792 |
| S77835     | 1431.483  | 1889.667  | NM_005659 | 65315.672 | 63981.141 | NM_006899 | 7405.613  | 7152.651  |
| NM_002985  | 2868.473  | 4945.018  | D28476    | 7729.115  | 6467.854  | NM_012200 | 4241.014  | 3865.656  |
| AB018347   | 4075.509  | 9020.569  | NM_016263 | 6175.598  | 5037.356  | NM_001724 | 3595.87   | 3251.773  |
| AB033073   | 1557.719  | 2179.461  | NM_003335 | 32598.166 | 22236.025 | BE906724  | 2851.811  | 2258.734  |
| NM_003284  | 853.962   | 920.723   | AB002376  | 9765.438  | 9664.684  | NM_002283 | 32760.543 | 29452.859 |
| NM_018152  | 555.934   | 692.357   | NM_018249 | 775.972   | 1116.669  | AJ276095  | 18750.758 | 16933.543 |
| NM_000319  | 8332.052  | 9898.042  | NM_005558 | 3236.726  | 3104.468  | NM_004819 | 6776.99   | 7097.555  |
| NM_003257  | 473.585   | 562.115   | NM_016631 | 1921.828  | 2433.535  | NM_007184 | 5572.546  | 5567.746  |

|           |           |           |           |           |           |           |           |           |
|-----------|-----------|-----------|-----------|-----------|-----------|-----------|-----------|-----------|
| NM_012461 | 5874.888  | 6567.72   | AB015617  | 27011.203 | 29786.982 | NM_005291 | 61431.109 | 60744.848 |
| AK001379  | 2344.889  | 2205.377  | AK022730  | 3780.841  | 5632.804  | NM_002923 | 2009.684  | 2119.652  |
| NM_017450 | 1663.007  | 1937.648  | NM_002256 | 16258.054 | 19234.951 | NM_006794 | 2426.188  | 2397.542  |
| NM_002023 | 740.524   | 731.102   | AF064839  | 59338.293 | 59209.59  | NM_018653 | 1006.437  | 1082.667  |
| NM_002839 | 278.287   | 374.2     | NM_005439 | 28359.486 | 31095.846 | NM_005388 | 15714.358 | 16362.241 |
| NM_001616 | 341.445   | 628.788   | AB037810  | 1335.243  | 1760.731  | NM_007232 | 59891.27  | 60944.277 |
| NM_005904 | 524.667   | 746.279   | AF222694  | 1087.15   | 1770.794  | NM_003027 | 1773.696  | 1510.434  |
| NM_005273 | 18523.18  | 15683.109 | AL049925  | 5745.084  | 7289.079  | NM_016257 | 1819.846  | 2006.027  |
| NM_000524 | 472.186   | 625.209   | AK027089  | 5173.152  | 1413.149  | NM_002717 | 5705.31   | 6309.746  |
| NM_018645 | 181.052   | 194.159   | X59845    | 549.28    | 353.261   | NM_012114 | 1645.32   | 2085.659  |
| NM_018207 | 1953.647  | 1663.022  | NM_006284 | 25344.127 | 10538.27  | NM_003025 | 50954.32  | 52443.875 |
| NM_000345 | 8949.325  | 6562.625  | U18909    | 3358.57   | 1560.926  | NM_020179 | 18706.385 | 18494.277 |
| NM_018208 | 2120.362  | 2658.529  | NM_003489 | 4694.717  | 2027.244  | NM_004306 | 61856.09  | 65293.328 |
| NM_015929 | 4529.219  | 6041.846  | NM_016589 | 23132.941 | 12202.61  | NM_001153 | 677.776   | 575.222   |
| U90653    | 8721.179  | 8371.094  | NM_003597 | 1363.907  | 993.315   | NM_006786 | 14474.508 | 14599.498 |
| NM_000196 | 838.575   | 974.266   | NM_002568 | 66217.039 | 70384.172 | NM_006205 | 2443.516  | 2837.293  |
| NM_018339 | 5292.939  | 8153.869  | NM_006561 | 1201.416  | 988.76    | NM_004283 | 2211.578  | 2165.41   |
| NM_006745 | 22889.125 | 32055.982 | NM_017521 | 2265.629  | 2170.224  | NM_004163 | 60413.824 | 58309.914 |
| NM_000275 | 1351.853  | 1694.6    | NM_006743 | 374.587   | 188.403   | AK026308  | 3696.26   | 3824.31   |
| AK000037  | 1475.454  | 1261.68   | AK025200  | 26874.965 | 23314.166 | NM_013337 | 5454.271  | 5843.757  |
| NM_014760 | 2541.154  | 2695.095  | NM_001383 | 17629.211 | 14821.802 | NM_004193 | 4384.98   | 4416.759  |
| NM_018713 | 444.359   | 689.345   | NM_001029 | 68992.297 | 64188.555 | NM_002803 | 14849.286 | 15975.333 |
| AJ006268  | 1187.878  | 1503.469  | NM_005008 | 47068.113 | 48892.539 | NM_005508 | 1836.677  | 1930.4    |
| AF190864  | 5997.378  | 6088.533  | NM_016304 | 64083.344 | 66823.563 | NM_018485 | 877.868   | 970.474   |
| NM_001177 | 3593.176  | 4287.468  | NM_006013 | 36819.961 | 41605.469 | NM_006788 | 2124.74   | 2029.637  |
| NM_014447 | 2038.721  | 2797.51   | NM_014046 | 42316.426 | 48269.156 | NM_016568 | 1653.782  | 1688.882  |
| NM_002356 | 389.845   | 316.002   | L34071    | 22034.336 | 25793.117 | NM_002987 | 357.602   | 443.579   |
| NM_006691 | 1201.911  | 1148.235  | AB043007  | 51122.684 | 61121.66  | AB033102  | 59702.449 | 60121.066 |
| NM_001505 | 1039.319  | 1090.762  | NM_004861 | 8361.764  | 10434.037 | NM_014774 | 3699.167  | 3576.66   |
| NM_003710 | 945.487   | 1002.149  | NM_016161 | 598.262   | 1147.848  | NM_014143 | 27143.855 | 27185.801 |
| Z83805    | 378.222   | 499.581   | AV718258  | 1805.711  | 339.121   | M55646    | 54563.777 | 54040.98  |
| NM_004666 | 1179.681  | 1288.159  | NM_005165 | 15846.467 | 5839.263  | NM_006112 | 33270.762 | 37924.574 |
| NM_003614 | 898.469   | 1005.641  | NM_005138 | 62514.68  | 53994.32  | NM_000879 | 6223.144  | 8403.688  |
| NM_014257 | 2716.681  | 2060.583  | NM_002115 | 58362.848 | 34538.441 | M12807    | 4143.484  | 4676.387  |
| NM_001140 | 1356.605  | 1668.844  | AK023162  | 4893.762  | 5661.856  | NM_001765 | 6761.463  | 7192.071  |
| NM_016059 | 275.483   | 165.052   | NM_006396 | 9628.433  | 10522.979 | NM_003361 | 4110.736  | 4778.07   |
| NM_000403 | 4219.015  | 4398.503  | NM_018649 | 9014.807  | 6016.316  | NM_012099 | 28938.074 | 31702.844 |
| NM_018127 | 11699.019 | 11221.535 | NM_018263 | 1107.304  | 859.303   | NM_018684 | 61070.707 | 60556.699 |
| AB020677  | 3012.556  | 2875.256  | NM_013449 | 3306.474  | 3472.334  | NM_017983 | 1896.384  | 1740.851  |
| AB033097  | 2650.856  | 2813.08   | NM_004537 | 4087.424  | 2514.775  | AF116909  | 1472.838  | 1537.095  |
| NM_000135 | 2799.521  | 3600.149  | AL390134  | 1461.156  | 1677.339  | NM_000282 | 3694.192  | 3953.295  |
| AJ223948  | 6411.024  | 8431.211  | NM_020226 | 9587.688  | 9107.183  | NM_000532 | 20657.254 | 20810.369 |
| NM_016218 | 879.067   | 879.067   | NM_017865 | 9970.304  | 9140.747  | NM_016341 | 1614.892  | 1887.477  |
| AK022947  | 2699.899  | 2926.599  | NM_003427 | 3923.849  | 5821.167  | AF231916  | 18935.4   | 18763.041 |
| AL050029  | 1978.852  | 2100.573  | NM_005920 | 3932.078  | 5365.868  | NM_003501 | 13808.896 | 13338.684 |
| AL049966  | 792.926   | 852.681   | Y09321    | 4623.26   | 7096.33   | AK022654  | 57181.758 | 57912.863 |
| NM_005204 | 9225.147  | 8302.964  | NM_006593 | 1328.832  | 2157.131  | BC002905  | 5791.076  | 5046.04   |
| NM_016203 | 1742.906  | 1946.504  | NM_000376 | 21789.891 | 25394.223 | NM_018091 | 13381.481 | 12674.627 |
| NM_002759 | 2715.932  | 3295.89   | NM_000475 | 21205.727 | 26628.854 | NM_001108 | 4644.717  | 4307.095  |
| NM_007271 | 2524.796  | 3555.447  | M61872    | 35172.266 | 39228.992 | NM_001637 | 1121.097  | 878.891   |
| NM_006255 | 3431.865  | 5201.794  | NM_005721 | 6360.772  | 7116.888  | NM_016630 | 20950.537 | 23935.654 |
| BE392143  | 6579.558  | 11527.249 | AF284223  | 4750.176  | 7188.381  | NM_014291 | 15942.645 | 14696.369 |
| NM_005813 | 4017.776  | 6174.82   | AF176012  | 1384.107  | 1343.391  | NM_014631 | 896.49    | 938.426   |

|            |           |           |           |           |           |           |           |           |
|------------|-----------|-----------|-----------|-----------|-----------|-----------|-----------|-----------|
| AB037718   | 4321.384  | 4300.604  | BE743838  | 16869.279 | 20837.889 | NM_001085 | 15120.787 | 13474.833 |
| AL389994   | 1693.018  | 1440.594  | AF273046  | 11155.706 | 8513.546  | NM_000120 | 3579.558  | 3959.4    |
| NM_003905  | 5060.652  | 5339.163  | NM_001081 | 7387.938  | 3528.516  | AF172327  | 58913.816 | 58174.191 |
| NM_001277  | 4335.94   | 4406.162  | NM_002483 | 9054.291  | 5416.986  | NM_001675 | 21289.498 | 20969.479 |
| NM_003655  | 3729.676  | 3111.203  | BF002026  | 3242.706  | 3577.487  | NM_000220 | 1914.569  | 2322.813  |
| NM_007072  | 1591.778  | 1595.824  | L35594    | 1420.696  | 2043.612  | NM_001675 | 50570.719 | 50536.004 |
| NM_012320  | 2064.163  | 1784.241  | BE790116  | 2449.462  | 2179.428  | U09384    | 2597.508  | 2577.813  |
| AB029021   | 8605.461  | 14043.861 | AI922341  | 5358.308  | 5415.036  | NM_006860 | 12779.372 | 11597.376 |
| NM_002101  | 1259.314  | 1374.159  | S57283    | 1021.54   | 798.914   | NM_004794 | 17767.838 | 19275.99  |
| NM_005423  | 1263.781  | 1366.281  | AA410517  | 934.184   | 863.317   | NM_018291 | 22384.643 | 22870.025 |
| Z36789     | 710.579   | 895.403   | M12824    | 3081.893  | 2915.535  | NM_005530 | 12148.054 | 11388.859 |
| J02874     | 1242.895  | 1816.905  | W60100    | 2990.563  | 3003.398  | NM_006895 | 7967.867  | 6744.083  |
| BF310427   | 1133.292  | 2316.667  | M24898    | 2415.406  | 3269.654  | NM_012200 | 4201.829  | 3617.74   |
| N94424     | 528.566   | 807.238   | U72508    | 1868.125  | 2673.342  | NM_001724 | 3416.181  | 2749.207  |
| AA045192   | 799.498   | 1177.757  | AA457153  | 12462.941 | 14855.185 | NM_000150 | 5465.999  | 4216.448  |
| H45617     | 450.618   | 478.652   | AA283122  | 22308.305 | 24072.635 | NM_006212 | 2286.946  | 1735.579  |
| M92642     | 333.858   | 377.083   | AA868504  | 4775.087  | 7137.654  | AK022872  | 2766.541  | 2110.391  |
| H-U 44385  | 22876.951 | 19254.621 | AA877845  | 11476.375 | 16038.514 | AK024272  | 4427.642  | 3934.317  |
| ID 1654970 | 8406.16   | 8459.112  | AA664241  | 66272.438 | 67653.648 | NM_016381 | 1303.542  | 1699.513  |
| ID 2531132 | 18080.057 | 19705.043 | AI016456  | 5024.875  | 6589.667  | AL591715  | 1866.844  | 1392.487  |
| ID 4365538 | 360.336   | 678.935   | NM_006065 | 51985.465 | 56738.871 | NM_018042 | 30853.223 | 29212.543 |
| AA485665   | 410.613   | 510.872   | AK022230  | 18420.287 | 19977.742 | NM_005605 | 8883.573  | 9961.339  |
| BF125928   | 13608.416 | 15077.84  | AK022147  | 21503.412 | 23125.621 | NM_002575 | 3637.528  | 4782.241  |
| BG571026   | 1532.92   | 1249.986  | L25664    | 17153.934 | 19965.988 | NM_003582 | 2509.717  | 2862.863  |
| AA489017   | 16651.85  | 13091.568 | NM_014940 | 6883.158  | 9955.204  | AF057354  | 829.968   | 696.058   |
| NM_000025  | 7468.877  | 4825.771  | NM_005783 | 1728.533  | 1772.5    | AF169351  | 22689.045 | 18546.01  |
| D38521     | 5039.24   | 3164.033  | AK000851  | 2228.05   | 2631.288  | M14200    | 62295.602 | 60597.93  |
| NM_018152  | 514.529   | 1165.743  | NM_006900 | 7891.955  | 10605.299 | CY3Cy5    | 3069.638  | 198.746   |
| NM_000315  | 8495.125  | 12286.302 | AJ289111  | 39897.324 | 15853.747 | NM_000941 | 3043.328  | 2853.888  |
| NM_003257  | 510.928   | 598.265   | NM_016355 | 40811.43  | 28399.955 | AK026844  | 4215.328  | 3353.823  |
| NM_012461  | 6414.838  | 8973.915  | NM_006405 | 21660.008 | 20503.605 | AK026735  | 7783.144  | 5795.568  |
| AK001379   | 2892.944  | 3148.151  | AF216292  | 53176.531 | 52256.988 | AL110104  | 55421.867 | 36608.57  |
| NM_017450  | 2446.212  | 5516.348  | NM_000952 | 12833.605 | 15109.526 | AF240633  | 2266.17   | 1876.75   |
| NM_002023  | 865.338   | 1367.189  | NM_005894 | 10903.906 | 12370.648 | AK027056  | 6836.13   | 4736.835  |
| NM_002835  | 297.867   | 528.603   | NM_014584 | 13948.548 | 13226.474 | AK024294  | 1583.214  | 1498.149  |
| NM_001615  | 565.701   | 815.323   | M30627    | 1192.519  | 1292.887  | AL110126  | 3392.289  | 2942.788  |
| NM_005904  | 644.83    | 747.608   | NM_005810 | 22273.023 | 23248.506 | AF052172  | 60913.723 | 51416.223 |
| NM_005273  | 18724.508 | 20475.625 | M28170    | 34766.105 | 39643.586 | AB014573  | 9488.466  | 7481.315  |
| NM_000524  | 478.45    | 795.961   | NM_001555 | 1678.564  | 2561.612  | AK025418  | 678.794   | 609.784   |
| NM_006575  | 1604.931  | 1983.314  | AK026223  | 15650.688 | 19999.943 | AB020643  | 621.056   | 881.045   |
| NM_014682  | 200.105   | 257.732   | NM_000874 | 13689.696 | 14981.51  | AK025496  | 10677.62  | 10629.441 |
| AB035266   | 1410.188  | 1608.384  | NM_005854 | 1276.51   | 1800.426  | NM_000623 | 1162.674  | 1077.783  |
| NM_003744  | 3005.923  | 3464.583  | AB007863  | 59910.469 | 60441.605 | NM_000941 | 2946.413  | 1914.855  |
| NM_006375  | 3120.916  | 2266.963  | NM_017785 | 1990.592  | 3106.912  | SR1       | 67606.125 | 63488.078 |
| NM_018132  | 1284.176  | 719.519   | D31887    | 6542.942  | 10244.419 | SR3       | 39428.699 | 34836.844 |
| NM_018207  | 1996.895  | 1803.286  | NM_016645 | 9975.212  | 11540.605 | SR5       | 4747.334  | 4795.851  |
| NM_000345  | 9929.882  | 8599.038  | AK090536  | 42319.457 | 51883.754 | SR7       | 4896.84   | 53457.914 |
| NM_001862  | 45644.754 | 46571.352 | D63477    | 2393.578  | 4244.427  | SR9       | 12071.744 | 2436.278  |
| NM_006531  | 1076.198  | 1047.994  | NM_020243 | 53447.441 | 57304.168 | CY3Cy5    | 3013.909  | 240.431   |
| NM_002775  | 4979.011  | 8493.3    | NM_014051 | 16474.754 | 20152.111 | L10404    | 1172.618  | 899.466   |
| L40397     | 15313.813 | 25708.604 | AK025398  | 11380.43  | 12769.085 | AF283776  | 3363.509  | 2928.295  |
| NM_020195  | 6308.484  | 7031.136  | AK027082  | 917.5     | 833.989   | L10123    | 42732.617 | 34368.445 |
| AA098879   | 718.759   | 1029.55   | AB037750  | 1416.737  | 1121.21   | D16877    | 11925.37  | 11647.386 |

|           |           |           |           |           |           |           |           |           |
|-----------|-----------|-----------|-----------|-----------|-----------|-----------|-----------|-----------|
| AF070525  | 12062.87  | 17625.313 | AK023056  | 2673.945  | 2878.976  | AL049992  | 729.792   | 892.464   |
| NM_001177 | 4554.387  | 9408.864  | AK022207  | 3449.035  | 2652.171  | AL109781  | 5025.347  | 3439.734  |
| NM_014447 | 2126.294  | 4573.14   | NM_004996 | 8268.056  | 6614.083  | AL079289  | 1056.791  | 935.673   |
| NM_002356 | 684.067   | 713.079   | NM_017435 | 12544.781 | 8349.813  | NM_018484 | 1193.953  | 786.02    |
| NM_006691 | 1203.489  | 1338.603  | NM_014037 | 12658.331 | 13485.734 | NM_017594 | 1685.229  | 1388.54   |
| NM_001505 | 1320.982  | 1475.445  | NM_004866 | 47397.355 | 57323.414 | AK027237  | 935.732   | 568.757   |
| NM_003710 | 1139.656  | 1275.789  | NM_018688 | 3070.41   | 3725.033  | AK027104  | 4335.095  | 6071.407  |
| Z83805    | 416.867   | 466.165   | AK056652  | 12446.449 | 14581.564 | AL133090  | 53466     | 44771.246 |
| NM_004666 | 1548.581  | 1724.43   | NM_015839 | 861.941   | 1503.806  | AF085867  | 4643.787  | 3393.701  |
| NM_003614 | 859.093   | 1084.97   | AL137438  | 2202.722  | 3969.263  | AF086510  | 5139.523  | 3538.213  |
| NM_014257 | 3511.57   | 4867.236  | NM_017957 | 5080.551  | 6068.357  | Z36779    | 7130.348  | 5712.271  |
| NM_001140 | 1457.085  | 2815.893  | NM_003024 | 6114.455  | 8206.408  | NM_018422 | 679.617   | 672.975   |
| NM_016059 | 289.228   | 296.315   | NM_013248 | 12220.538 | 16205.528 | NM_002816 | 2891.019  | 2138.08   |
| NM_004843 | 888.737   | 1385.811  | NM_000034 | 66191.633 | 72624.102 | NM_017513 | 1122.747  | 840.403   |
| AK022845  | 682.754   | 913.566   | NM_012436 | 68942.188 | 64344.633 | NM_017822 | 7657.276  | 6196.759  |
| NM_003004 | 396.701   | 395.04    | AK001299  | 54300.441 | 53414.648 | AK024520  | 8006.625  | 5714.068  |
| S77835    | 1602.467  | 1706.58   | AB014559  | 30048.756 | 27671.945 | AK024592  | 7988.112  | 5576.958  |
| NM_002985 | 2952.478  | 3638.718  | NM_016489 | 18044.584 | 18526.287 | AK024904  | 3122.839  | 2596.834  |
| AB018347  | 3330.234  | 3234.46   | NM_005033 | 16346.482 | 16414.141 | AK025030  | 2679.265  | 2117.81   |
| AB033073  | 1524.568  | 1207.178  | NM_015932 | 63855.734 | 62900.934 | AK024542  | 2505.923  | 2404.394  |
| NM_003284 | 775.278   | 614.686   | NM_017949 | 1513.536  | 1354.617  | AK024915  | 2085.462  | 2294.673  |
| NM_003909 | 6469.103  | 15133.016 | AK022169  | 3302.389  | 4693.439  | AK091109  | 63454.195 | 56046.508 |
| NM_001277 | 4451.192  | 7947.087  | AF015592  | 5701.311  | 2959.25   | NM_014967 | 5762.071  | 3882.265  |
| NM_003659 | 4105.414  | 5020.642  | AK026795  | 4835.623  | 3637.939  | AK022915  | 5422.863  | 4183.375  |
| NM_007072 | 2133.438  | 2903.492  | NM_016399 | 10948.795 | 12371.838 | AK021736  | 2029.935  | 1514.871  |
| NM_012320 | 2195.221  | 3004.066  | NM_016617 | 15164.255 | 7117.847  | AF131834  | 1954.115  | 1778.525  |
| NM_018208 | 2728.365  | 4148.367  | NM_002027 | 15668.438 | 15451.781 | AL355711  | 2117.741  | 2938.683  |
| NM_015929 | 7084.33   | 18434.27  | AL162078  | 6299.823  | 6844.004  | AK025851  | 2615.566  | 2154.6    |
| U90653    | 10480.716 | 13708.168 | NM_000919 | 1126.136  | 1706.668  | AJ011409  | 37839.082 | 28481.068 |
| NM_000196 | 841.109   | 1231.112  | AB002314  | 1442.157  | 1798.995  | AJ227906  | 4250.853  | 3367.36   |
| NM_018339 | 4525.277  | 4700.589  | NM_014043 | 10319.431 | 13469.922 | AJ011598  | 698.456   | 838.634   |
| NM_006745 | 20777.945 | 22884.059 | NM_014622 | 714.182   | 1133.696  | AJ001906  | 1825.596  | 1583.455  |
| NM_000275 | 1344.189  | 1555.131  | AB011114  | 63536.488 | 68198.914 | U17633    | 2073.434  | 1413.424  |
| AK000037  | 1271.374  | 1007.996  | D11466    | 40267.242 | 49568.035 | AF086202  | 25754.115 | 24362.891 |
| NM_014760 | 2938.604  | 2909.023  | NM_014056 | 54231.227 | 62698.109 | AK023270  | 5052.531  | 5360.415  |
| NM_018398 | 912.845   | 1066.435  | D31885    | 60149.602 | 62876.539 | AF085979  | 27196.633 | 25049.955 |
| NM_002560 | 10902.413 | 11790.952 | AF176012  | 1223.906  | 1506.972  | AK023112  | 2899.526  | 3028.293  |
| NM_014404 | 1284.559  | 1622.607  | BE743838  | 14687.099 | 17681.707 | NM_017806 | 67493.453 | 63871.906 |
| NM_018713 | 572.837   | 1157.617  | AF273046  | 7968.924  | 8569.303  | AK021895  | 7906.883  | 6703.377  |
| NM_015947 | 8405.632  | 7328.613  | NM_001081 | 7750.243  | 9066.911  | AK000036  | 12157.756 | 9862.39   |
| NM_002042 | 972.512   | 923.855   | NM_002483 | 13535.594 | 14282.404 | AK000769  | 902.964   | 629.126   |
| AB028944  | 503.159   | 578.461   | BF002026  | 3134.09   | 3229.186  | AK000924  | 1756.463  | 1710.28   |
| AJ006268  | 1249.026  | 1088.567  | L35594    | 1394.896  | 1670.631  | AK022252  | 1021.819  | 1048.21   |
| M74089    | 4699.769  | 4824.647  | BE790116  | 1773.844  | 1809.226  | AK000114  | 3431.272  | 2593.542  |
| AF190864  | 5376.973  | 4130.209  | AI922341  | 7123.348  | 2177.882  | AK000952  | 31618.172 | 24086.215 |
| NM_000025 | 7905.717  | 7295.202  | S57283    | 1935.515  | 2226.512  | AF119862  | 23169.588 | 19601.127 |
| D38521    | 5731.372  | 6028.258  | AA410517  | 1695.065  | 1235.382  | U17628    | 1864.057  | 1847.779  |
| NM_000403 | 6799.371  | 17569.641 | M12824    | 2845.092  | 2044.001  | AF119867  | 21984.637 | 20082.496 |
| NM_018127 | 13529.353 | 17804.508 | W60100    | 3468.658  | 2460.429  | AL357205  | 7132.087  | 15724.981 |
| AB020677  | 2909.782  | 3669.372  | M24898    | 1682.848  | 1767.938  | AF124819  | 2164.784  | 2455.118  |
| AB033097  | 2617.528  | 2543.827  | U72508    | 10382.444 | 10506.484 | D17091    | 2771.141  | 2581.382  |
| NM_000135 | 2020.084  | 1346.982  | AA283122  | 17365.715 | 17603.17  | AL133074  | 1949.837  | 2089.989  |
| AJ223948  | 6135.104  | 6369.327  | AA868504  | 4745.874  | 6630.795  | AF086318  | 32504.662 | 28571.779 |

|           |           |           |           |           |           |           |           |           |
|-----------|-----------|-----------|-----------|-----------|-----------|-----------|-----------|-----------|
| NM_01621E | 894.454   | 728.542   | AA877845  | 11080.615 | 14798.217 | AF088012  | 748.979   | 473.047   |
| AK022947  | 2384.121  | 2139.135  | AA664241  | 61926.77  | 63773.832 | NM_018121 | 1295.033  | 995.211   |
| AL050029  | 2037.237  | 2212.137  | AI016456  | 3882.58   | 4701.166  | AB050477  | 8255.266  | 7184.354  |
| AL049966  | 859.846   | 1075.688  | AK026281  | 6709.527  | 7587.911  | AK000152  | 2249.162  | 1771.189  |
| NM_005204 | 9810.014  | 8490.402  | U23862    | 686.049   | 1281.385  | AK024300  | 4419.625  | 3740.598  |
| NM_016203 | 1670.205  | 2048.037  | AK026680  | 16072.563 | 21251.533 | L09092    | 1305.989  | 1404.826  |
| NM_002759 | 2684.239  | 2923.364  | L25664    | 16193.92  | 14844.073 | NM_012132 | 1652.998  | 1585.414  |
| NM_007271 | 2525.473  | 2559.391  | NM_014940 | 5427.317  | 5820.989  | NM_012129 | 1572.545  | 1400.652  |
| NM_006255 | 3004.52   | 3504.676  | NM_005783 | 1155.989  | 808.158   | AK025716  | 2998.268  | 2332.171  |
| BE392143  | 4156.459  | 4135.106  | AK000851  | 1831.68   | 1407.102  | L09268    | 486.799   | 561.938   |
| NM_005813 | 2994.835  | 2059.82   | NM_006900 | 6490.196  | 7578.375  | NM_020186 | 9995.597  | 9301.968  |
| AB037718  | 5180.793  | 4529.668  | AJ289111  | 37439.191 | 41771.465 | AF090947  | 11402.218 | 12072.213 |
| AL389994  | 1719.085  | 1391.651  | NM_016356 | 41678.922 | 47939.938 | BC016962  | 2263.125  | 3155.603  |
| CY3Cy5    | 1727.485  | 275.236   | NM_006406 | 26900.352 | 34975.406 | NM_005047 | 4061.708  | 5322.788  |
| NM_00058E | 22514.729 | 11224.484 | AF216292  | 47105.469 | 50268.84  | AJ272196  | 27779.021 | 23422.211 |
| AF143872  | 4450.342  | 3080.141  | NM_000952 | 16469.717 | 20330.889 | X58162    | 25662.943 | 14671.011 |
| AK025686  | 774.492   | 694.539   | NM_014584 | 9899.282  | 5071.801  | AK022825  | 3909.749  | 3400.073  |
| AF143326  | 1256.556  | 911.581   | NM_005810 | 15633.616 | 13387.984 | L04552    | 1672.192  | 2328.232  |
| AL049229  | 7471.993  | 8443.142  | M28170    | 28623.967 | 27887.141 | AK001937  | 68096.766 | 64559.133 |
| NM_01830E | 4586.951  | 3775.1    | AK026223  | 14892.433 | 17117.023 | AL365517  | 3724.941  | 4418.01   |
| AK026146  | 3164.984  | 2900.691  | NM_000874 | 11647.212 | 12120.916 | AK021988  | 23537.615 | 20267.617 |
| AK023152  | 6193.446  | 4895.625  | NM_005854 | 1293.311  | 2022.973  | AF086494  | 46676.535 | 41425.691 |
| AL389937  | 1854.75   | 1144.36   | AB007863  | 59733.48  | 61022.238 | BI769977  | 1256.948  | 1250.614  |
| AK025201  | 5538.363  | 4621.164  | NM_017789 | 1702.587  | 2630.006  | AL137567  | 1573.885  | 1378.339  |
| AK021927  | 590.828   | 735.525   | D31887    | 6972.043  | 10136.696 | AK024913  | 4471.752  | 3717.069  |
| AK022995  | 3754.997  | 2754.685  | NM_005721 | 4997.939  | 7099.961  | AB007961  | 10980.968 | 7850.361  |
| NM_00058E | 22052.756 | 14060.888 | AF284223  | 4315.948  | 5826.378  | NM_005547 | 2489.492  | 1975.707  |
| SR3       | 31621.256 | 26122.211 | D63477    | 1393.937  | 983.857   | AF164794  | 9486.979  | 10154.671 |
| SR5       | 3638.943  | 4015.294  | NM_020243 | 47054.441 | 49331.672 | NM_001173 | 1537.4    | 1803.998  |
| SR7       | 4389.514  | 32389.012 | AK025398  | 7054.458  | 7605.056  | AB020656  | 2940.947  | 2925.312  |
| SR9       | 11568.649 | 1958.216  | AK027082  | 1397.356  | 2051.862  | AK023648  | 8402.158  | 13177.84  |
| CY3Cy5    | 1637.931  | 158.855   | AK023056  | 3156.549  | 3577.911  | NM_000412 | 1799.011  | 1823.272  |
| L13433    | 1246.878  | 853.781   | AK022207  | 2933.6    | 1201.72   | AF077033  | 5216.512  | 4336.874  |
| NM_007220 | 2673.731  | 2551.398  | NM_004996 | 7017.75   | 3262.784  | D50406    | 2458.592  | 2517.487  |
| D25271    | 1155.325  | 1369.307  | NM_017435 | 7356.376  | 3152.625  | NM_004991 | 1949.243  | 1838.474  |
| NM_017777 | 3268.913  | 2679.573  | NM_014037 | 8898.593  | 8421.323  | AK026708  | 14411.171 | 15217.955 |
| AK001499  | 7337.067  | 7032.178  | NM_004866 | 46226.301 | 53256.348 | NM_017903 | 7989.92   | 9071.946  |
| AK026852  | 2397.919  | 1558.986  | NM_015839 | 627.584   | 1014.635  | NM_018074 | 4146.858  | 4485.533  |
| AK021629  | 2299.951  | 1825.004  | AL137438  | 2481.786  | 3329.182  | NM_000909 | 7971.273  | 7348.488  |
| AL110257  | 79833.781 | 65125.215 | NM_017957 | 14600.809 | 16704.68  | U31737    | 1183.593  | 1635.198  |
| AB013384  | 7647.295  | 6888.802  | NM_003024 | 6335.176  | 7700.803  | AK024828  | 2382.468  | 2704.224  |
| AK024270  | 6873.744  | 7665.333  | NM_013248 | 11003.174 | 15721.316 | AF009315  | 4586.376  | 4175.184  |
| NM_014870 | 1463.789  | 747.291   | NM_000034 | 65576.672 | 68778.703 | NM_019013 | 1250.184  | 976.262   |
| AF052146  | 31737.486 | 26175.195 | AK022230  | 19764.789 | 24369.576 | NM_006783 | 911.27    | 869.577   |
| NM_004870 | 8821.186  | 6101.231  | AK022147  | 22064.123 | 23999.211 | L37711    | 1232.099  | 897.553   |
| AK024242  | 32709.584 | 17008.602 | AK001299  | 64639.867 | 65392.32  | S70313    | 24892.977 | 18987.988 |
| AK024559  | 2618.942  | 2131.55   | AB014559  | 31893.242 | 37969.969 | AK021607  | 2158.028  | 2178.725  |
| AK024943  | 2738.816  | 1680.955  | NM_016489 | 18356.17  | 18419.797 | AK025860  | 875.769   | 751.049   |
| AK024410  | 933.952   | 838.58    | NM_005033 | 10964.477 | 10926.027 | NM_000216 | 3083.2    | 2937.749  |
| AK024577  | 1131.451  | 773.743   | NM_015932 | 63956.691 | 63455.457 | AF135960  | 4720.947  | 5087.664  |
| AK022628  | 73406.578 | 66005.297 | NM_017949 | 1784.482  | 2111.184  | NM_014216 | 47334.602 | 54705.18  |
| AK021737  | 18494.303 | 13566.347 | AK022169  | 3286.287  | 4214.318  | NM_003010 | 3771.921  | 3897.788  |
| AL357454  | 1225.64   | 1167.926  | AF015592  | 6261.914  | 6918.358  | NM_006871 | 2443.038  | 2689.696  |



|           |           |           |           |           |           |           |           |           |
|-----------|-----------|-----------|-----------|-----------|-----------|-----------|-----------|-----------|
| AK026295  | 3092.588  | 2647.36   | AK026795  | 7083.62   | 10450.494 | NM_019074 | 13100.104 | 13475.792 |
| AK022346  | 1603.384  | 1217.904  | NM_016399 | 10127.854 | 12472.359 | NM_018494 | 68512.742 | 79428.68  |
| AK025007  | 5384.499  | 4378.958  | NM_016617 | 18640.51  | 11986.084 | AK000006  | 1277.105  | 1619.78   |
| NM_016486 | 14641.116 | 11191.179 | NM_002027 | 20054.035 | 12947.684 | NM_001115 | 4655.672  | 4540.837  |
| AK026490  | 71196.641 | 65951.492 | AL162078  | 5086.011  | 4326.962  | NM_014921 | 1075.163  | 1255.528  |
| AJ227861  | 2663.539  | 2772.455  | NM_000919 | 1559.359  | 1759.688  | NM_016581 | 68476.016 | 72436.367 |
| AJ001875  | 1395.205  | 1040.124  | NM_013382 | 10142.782 | 10135.221 | NM_013255 | 2728.557  | 2482.342  |
| Y10507    | 1681.221  | 1871.742  | NM_014043 | 10171.833 | 10998.502 | NM_007183 | 1309.833  | 1220.155  |
| AK002028  | 69339.023 | 51413.641 | AB011114  | 68190.188 | 64271.816 | AJ238243  | 28784.986 | 27461.514 |
| AL050127  | 3492.05   | 2318.168  | D11466    | 42167.621 | 40794.203 | J05046    | 63225.703 | 60895.891 |
| AK024805  | 13767.642 | 9641.476  | NM_014056 | 55184.379 | 54084.391 | NM_012318 | 5242.294  | 5147.089  |
| AK000189  | 1172.245  | 1069.218  | D31885    | 54775.773 | 54751.145 | NM_002751 | 24041.578 | 25845.01  |
| AK001423  | 1060.655  | 978.156   | NM_016649 | 8399.819  | 7517.051  | NM_004291 | 7181.359  | 6618.925  |
| NM_018629 | 1007.553  | 847.861   | AK090536  | 32922.816 | 24097.061 | NM_003816 | 9811.427  | 9002.599  |
| AK022298  | 11860.61  | 11406.812 | BE743838  | 15228.926 | 14020.195 | AK022635  | 2740.164  | 2191.126  |
| AJ277441  | 24823.875 | 29701.199 | AF273046  | 8057.421  | 7270.574  | NM_004912 | 3880.532  | 3105.609  |
| AK000834  | 654.124   | 521.453   | NM_001081 | 7210.687  | 6698.9    | U79304    | 27658.061 | 22227.656 |
| AK022760  | 434.148   | 420.154   | NM_002483 | 10368.956 | 10890.884 | NM_016267 | 12033.118 | 9688.118  |
| NM_006057 | 476.829   | 375.185   | BF002026  | 3751.619  | 4337.148  | NM_004671 | 13547.647 | 12112.018 |
| AK025784  | 57788.523 | 34518.426 | L35594    | 1863.46   | 1575.155  | NM_006526 | 6152.906  | 6732.556  |
| U07199    | 10808.909 | 6881.645  | BE790116  | 2502.794  | 2618.89   | U35622    | 1059.572  | 1517.049  |
| AK023713  | 2965.695  | 1780.102  | AI922341  | 5904.691  | 4753.095  | NM_007045 | 3478.885  | 3976.624  |
| X81445    | 784.925   | 545.231   | S57283    | 1750.663  | 1628.983  | NM_003627 | 8193.567  | 10126.348 |
| U95091    | 3819.205  | 4595.979  | AA410517  | 1452.936  | 1419.322  | NM_012145 | 32606.777 | 33811.648 |
| NM_017900 | 49500.879 | 42064.438 | M12824    | 2765.376  | 2026.156  | AF305779  | 2847.742  | 2855.89   |
| S50182    | 4133.813  | 3328.302  | W60100    | 3871.594  | 2659.208  | AF225416  | 11147.498 | 12189.126 |
| AL360145  | 2600.255  | 1740.828  | M24898    | 2538.676  | 2884.641  | NM_016231 | 4752.274  | 5383.226  |
| Y12016    | 5152.774  | 4330.914  | U72508    | 2114.628  | 1852.879  | NM_002093 | 5357.338  | 5599.259  |
| S75763    | 60827.211 | 60636.813 | AA457153  | 13359.921 | 9576.175  | AB042555  | 28405.727 | 27889.01  |
| AL359943  | 67122.266 | 66104.969 | AA868504  | 4518.082  | 3538.725  | NM_001729 | 3157.893  | 3788.064  |
| NM_000534 | 6878.439  | 7330.094  | AA877845  | 12162.757 | 9151.783  | NM_017763 | 2641.694  | 2614.736  |
| L10140    | 1046.67   | 1068.75   | AA664241  | 61008.059 | 63428.309 | NM_013975 | 4359.437  | 3956.057  |
| AL133447  | 2904.833  | 2505.837  | AI016456  | 4001.456  | 2759.809  | NM_003843 | 17585.611 | 16122.509 |
| AB037853  | 16930.273 | 12974.602 | AK026281  | 2150.899  | 1630.314  | NM_012216 | 3471.836  | 3643.34   |
| D28450    | 75624.563 | 65722.336 | AK026680  | 15332.08  | 10511.92  | NM_005338 | 960.423   | 1161.642  |
| AK056222  | 5086.146  | 3937.587  | NM_012436 | 65231.277 | 68288.656 | X73502    | 4895.275  | 5150.38   |
| L37700    | 678.378   | 483.098   | AF216292  | 59540.887 | 62864.152 | NM_020445 | 67818.109 | 69800.242 |
| NM_017665 | 6717.487  | 3918.183  | NM_000952 | 14674.854 | 13864.115 | NM_016376 | 54127.289 | 45596.074 |
| AB007976  | 1297.163  | 912.842   | NM_005894 | 832.706   | 1121.468  | AB046848  | 27388.078 | 21932.205 |
| AF052106  | 5200.884  | 4609.946  | NM_014584 | 12352.86  | 12755.68  | AL133057  | 10169.113 | 8449.624  |
| AK000441  | 1566.663  | 1300.132  | M30627    | 1257.572  | 1665.7    | U04845    | 17106.666 | 13535.186 |
| AK022391  | 3900.399  | 4315.361  | NM_005810 | 33262.941 | 35285.344 | NM_018103 | 11474.262 | 9291.859  |
| NM_016167 | 4136.694  | 4028.494  | M28170    | 40364.672 | 43730.574 | AL049689  | 1122.05   | 813.852   |
| NM_016125 | 1685.523  | 1354.684  | NM_001555 | 3496.245  | 3855.94   | NM_000312 | 8295.615  | 8806.674  |
| AJ012496  | 765.238   | 725.787   | AK026223  | 13261.941 | 14582.953 | NM_003963 | 4428.714  | 4614.771  |
| AK024090  | 47621.875 | 46088.262 | NM_000874 | 14202.633 | 9236.328  | AC009729  | 909.878   | 1327.346  |
| AL133574  | 929.189   | 901.521   | NM_005854 | 2045.744  | 789.167   | AL136719  | 8612.071  | 12866.716 |
| AK021936  | 722.681   | 698.409   | AB007863  | 42648.738 | 39062.285 | NM_014109 | 15906.185 | 23119.332 |
| AF147339  | 10819.088 | 9147.58   | AK024456  | 22350.354 | 23612.814 | NM_012160 | 4940.879  | 5048.766  |
| AL390181  | 66943.992 | 65535.785 | NM_002313 | 5745.031  | 5272.349  | NM_006357 | 68250.828 | 71709.109 |
| NM_017914 | 30470.482 | 25078.002 | NM_004459 | 4091.303  | 2719.567  | NM_014248 | 68241.266 | 66256.742 |
| NM_006350 | 888.509   | 1075.196  | NM_001502 | 4152.521  | 3225.757  | AK027070  | 3316.029  | 2926.59   |
| AK024953  | 21831.324 | 21167.197 | NM_005721 | 4681.737  | 3765.434  | AF129533  | 1243.832  | 1204.307  |

|           |           |           |           |           |           |           |           |           |
|-----------|-----------|-----------|-----------|-----------|-----------|-----------|-----------|-----------|
| AK024276  | 2763.16   | 2062.51   | AF284223  | 4080.16   | 3465.538  | NM_003341 | 21761.535 | 17807.93  |
| S83374    | 2937.342  | 2005.805  | AF176012  | 1457.019  | 956.244   | NM_017785 | 1945.194  | 2424.987  |
| NM_003150 | 3182.389  | 2195.014  | NM_013386 | 805.913   | 920.772   | NM_006245 | 12322.965 | 10591.079 |
| NM_014784 | 2215.87   | 1229.76   | NM_006517 | 630.639   | 948.984   | NM_018318 | 614.67    | 660.734   |
| AK026383  | 2328.946  | 1763.401  | NM_004171 | 7680.043  | 10919.51  | AB020640  | 21551.676 | 22075.002 |
| AK023821  | 1014.531  | 829.108   | NM_014037 | 18811.527 | 17734.078 | D29954    | 26337.613 | 27551.189 |
| AB014594  | 3786.126  | 3386.95   | NM_004866 | 55294.148 | 51013.512 | AF007131  | 13071.904 | 12825.699 |
| M94547    | 2465.53   | 2275.125  | NM_018688 | 9012.322  | 10326.32  | NM_006835 | 2793.833  | 2163.297  |
| NM_005087 | 16314.322 | 14623.735 | AK056652  | 8101.974  | 7377.162  | NM_000223 | 1266.434  | 1213.79   |
| NM_012095 | 1237.353  | 1079.77   | NM_015839 | 2314.705  | 2583.907  | NM_005851 | 2380.2    | 1850.762  |
| NM_018095 | 3746.485  | 3369.814  | AL137438  | 3245.604  | 3381.851  | AF119256  | 3194.8    | 2724.181  |
| AB023164  | 6951.358  | 6456.594  | NM_017957 | 8784.804  | 5871.37   | NM_005180 | 8923.757  | 7354.715  |
| NM_001178 | 1534.009  | 1473.402  | NM_003024 | 6890.899  | 6380.747  | NM_003410 | 16205.253 | 16084.967 |
| AK023696  | 29693.162 | 35399.77  | NM_013248 | 14414.609 | 16032.293 | NM_007146 | 3021.058  | 3455.073  |
| AF116613  | 1466.282  | 1394.58   | AK022230  | 19570.152 | 14851.177 | NM_002225 | 4467.584  | 5741.792  |
| NM_000704 | 5160.858  | 7979.545  | AK022147  | 21539.568 | 17018.791 | S69027    | 9234.592  | 9817.09   |
| NM_015987 | 2553.65   | 2545.776  | L25664    | 15936.331 | 13451.045 | X99631    | 41548.598 | 40187.734 |
| NM_019605 | 6776.043  | 5241.751  | NM_014940 | 5123.395  | 3189.569  | NM_001730 | 5441.175  | 5375.755  |
| NM_015365 | 2489.746  | 2125.665  | NM_005783 | 1469.894  | 806.475   | AK026290  | 9183.845  | 9427.696  |
| Z49090    | 4953.056  | 4065.365  | AK000851  | 2158.901  | 1702.109  | AB014589  | 3954.467  | 3633.275  |
| AK025467  | 11216.917 | 8203.03   | NM_006900 | 5866.957  | 5656.94   | NM_012086 | 3540.617  | 4103.693  |
| AK026593  | 25951.092 | 32669.945 | AJ289111  | 41214.176 | 38396.996 | AB040431  | 18891.469 | 18131.781 |
| AL117666  | 2618.828  | 2151.913  | NM_016356 | 50656.992 | 44316.348 | NM_000991 | 68282.852 | 72190.664 |
| NM_005825 | 42160.23  | 28053.352 | NM_006406 | 22152.781 | 19588.662 | NM_016034 | 50869.895 | 51821.863 |
| NM_002756 | 15771.695 | 13186.73  | D11466    | 50069.68  | 47948.637 | NM_018285 | 36954.707 | 28169.637 |
| U79299    | 954.761   | 1051.902  | NM_014056 | 56956.105 | 55534.742 | AK022393  | 26975.633 | 17824.744 |
| AJ000414  | 3198.475  | 2919.305  | D31885    | 55806.434 | 55210.281 | AK026302  | 23430.17  | 16831.652 |
| AK025674  | 11218.329 | 8396.31   | NM_016649 | 8954.415  | 8659.938  | NM_012214 | 6863.997  | 4958.002  |
| AF007194  | 5461.525  | 4924.616  | AK090536  | 39528.504 | 45109.535 | AF049656  | 57830.352 | 51950.301 |
| NM_019065 | 2606.205  | 2757.114  | D63477    | 1374.003  | 1737.233  | NM_001966 | 5090.648  | 5455.544  |
| NM_004761 | 10267.672 | 9977.606  | NM_020243 | 46048.102 | 44714.441 | NM_016135 | 7354.231  | 8861.003  |
| Z25424    | 15655.694 | 17114.801 | NM_014051 | 14436.22  | 13900.49  | Z36833    | 68206.07  | 66958.391 |
| U79458    | 15758.354 | 17615.113 | AK027082  | 1630.974  | 2041.867  | NM_014355 | 13325.409 | 12826.158 |
| NM_014920 | 1581.576  | 1869.029  | NM_001120 | 63042.48  | 62910.852 | M21191    | 58467.23  | 56858.734 |
| NM_002961 | 12020.848 | 9107.705  | NM_017888 | 6488.422  | 7264.466  | AF072810  | 3247.011  | 2564.489  |
| NM_018295 | 2826.405  | 2305.75   | NM_004915 | 5658.111  | 6557.708  | L19778    | 1818.211  | 1939.236  |
| NM_000676 | 1864.276  | 1527.717  | AK022207  | 1758.565  | 2071.236  | AF174482  | 52381.746 | 55877.73  |
| AF064770  | 711.94    | 993.31    | AV708752  | 7173.133  | 6023.726  | NM_003525 | 14412.117 | 13561.651 |
| NM_005766 | 875.271   | 979.964   | AF119885  | 4579.422  | 3852.138  | NM_017765 | 1266.07   | 1435.456  |
| NM_013324 | 7717.596  | 7668.687  | NM_000750 | 1880.734  | 1246.012  | D85131    | 18285.926 | 17469.934 |
| AL133022  | 2130.758  | 2474.708  | NM_004996 | 7359.286  | 6517.866  | NM_004956 | 1720.899  | 2002.958  |
| NM_003953 | 8858.223  | 9166.661  | NM_005971 | 9357.197  | 9695.464  | NM_002163 | 13935.537 | 14487.636 |
| NM_006301 | 997.625   | 630.468   | NM_017435 | 7703.066  | 2938.394  | U52097    | 38021.621 | 30082.141 |
| NM_012219 | 1065.071  | 720.612   | AK026281  | 2055.915  | 2329.151  | NM_003416 | 5321.804  | 5804.276  |
| X72887    | 1192.83   | 926.792   | U23862    | 797.584   | 863.134   | X74497    | 6487.26   | 5239.908  |
| NM_004525 | 3800.655  | 3071.033  | AK026680  | 15074.519 | 14161.322 | NM_012210 | 3898.484  | 3167.839  |
| NM_000127 | 1553.423  | 1350.279  | NM_012436 | 59285.164 | 64585.914 | U10072    | 4895.076  | 3426.864  |
| Y10483    | 41043.77  | 44474.441 | AK001299  | 54954.363 | 56759.828 | AF222749  | 41833.27  | 30253.676 |
| NM_006784 | 5565.052  | 6136.511  | AB014559  | 28396.172 | 26316.371 | NM_001321 | 18890.957 | 19561.998 |
| NM_017876 | 5443.415  | 5690.076  | NM_016489 | 17557.777 | 15903.109 | AB018264  | 19997.916 | 23687.852 |
| NM_001087 | 30876.725 | 27780.566 | NM_005033 | 11447.438 | 11164.409 | NM_006911 | 1822.298  | 2381.732  |
| NM_001826 | 1008.052  | 937.612   | NM_016617 | 21437.125 | 19000.83  | U92544    | 14220.721 | 12843.923 |
| AK025352  | 1271.228  | 1640.055  | NM_002027 | 17789.711 | 20855.525 | NM_019644 | 2600.725  | 3083.988  |

|           |           |           |           |           |           |           |           |           |
|-----------|-----------|-----------|-----------|-----------|-----------|-----------|-----------|-----------|
| NM_003721 | 12632.483 | 14480.267 | AL162078  | 9961.075  | 9955.046  | NM_006791 | 5353.421  | 4983.774  |
| NM_004724 | 2824.904  | 3042.01   | NM_000919 | 822.351   | 1032.636  | AJ278348  | 52608.676 | 52058.613 |
| NM_001431 | 13059.336 | 15680.717 | NM_013382 | 16090.517 | 14082.961 | NM_015872 | 1383.901  | 1427.749  |
| AK022666  | 622.952   | 823.414   | AB002314  | 1790.927  | 1998.905  | AI285199  | 32355.092 | 33698     |
| NM_000381 | 481.566   | 445.678   | NM_014043 | 10088.102 | 8992.231  | AA757170  | 988.554   | 978.004   |
| NM_000427 | 4511.474  | 4901.13   | NM_014622 | 1042.39   | 1474.427  | L07738    | 3942.193  | 4166.281  |
| NM_014924 | 1975.012  | 2226.113  | AB011114  | 65762.516 | 67418.367 | Z48054    | 10051.901 | 10993.625 |
| NM_006946 | 2092.615  | 2480.661  | CY3Cy5    | 3364.301  | 98.672    | H90415    | 15789.153 | 15451.646 |
| NM_000174 | 22409.732 | 25274.506 | NM_019884 | 9865.173  | 9576.896  | AA676470  | 59217.23  | 62253.645 |
| NM_002508 | 1058.018  | 1427.89   | AF088051  | 3398.596  | 3144.763  | AA430512  | 13632.694 | 14039.126 |
| NM_014343 | 5903.665  | 4920.731  | AF086366  | 1163.321  | 1170.158  | M38258    | 2498.421  | 2505.067  |
| AF022913  | 2893.308  | 2275.626  | AF086360  | 3712.82   | 2954.632  | AA457155  | 62065.461 | 61907.09  |
| NM_000028 | 2282.768  | 1945.951  | AF086436  | 1210.99   | 1176.6    | BM014365  | 2831.453  | 2641.678  |
| NM_001382 | 9976.536  | 7343.141  | AF087993  | 7180.729  | 6744.072  | H91842    | 1162.297  | 1387.136  |
| M93718    | 16390.594 | 17795.002 | AF035282  | 1247.263  | 1416.511  | U78045    | 7898.969  | 6571.705  |
| NM_005386 | 2399.573  | 2952.527  | AK021966  | 6013.696  | 6499.099  | AA878561  | 63368.672 | 59862.887 |
| AK023807  | 30360.736 | 24719.025 | AB018292  | 28249.338 | 28886.879 | BF688309  | 1700.242  | 1562.045  |
| NM_018188 | 22414.988 | 18339.232 | AK022842  | 1730.07   | 1704.1    | AI538525  | 3252.548  | 2630.253  |
| AK024273  | 2059.164  | 2054.488  | NM_007006 | 28841.273 | 36424.332 | NM_005205 | 68109.828 | 62526.227 |
| X59417    | 33225.758 | 28259.428 | AL137346  | 4796.076  | 4956.247  | BE878426  | 60452.02  | 70553.5   |
| NM_005659 | 29778.432 | 20793.611 | NM_017756 | 55358.82  | 52787.383 | NM_001745 | 57761.199 | 63313.59  |
| D28476    | 10631.467 | 13736.504 | NM_019884 | 10907.94  | 10686.639 | NM_003825 | 18572.102 | 24843.682 |
| NM_016263 | 6715.139  | 8454.559  | SR2       | 59563.723 | 56091.945 | AK025006  | 18541.605 | 25117.947 |
| NM_003335 | 11799.854 | 13264.605 | SR4       | 21662.955 | 22918.924 | AF218014  | 57985.695 | 57567.531 |
| AB002376  | 13412.446 | 15036.705 | SR6       | 3881.236  | 3939.349  | NM_006678 | 16095.073 | 17730.828 |
| NM_018249 | 1028.335  | 1229.555  | SR8       | 8745.951  | 30749.758 | AY007729  | 61832.77  | 59994.316 |
| NM_005558 | 4463.655  | 5547.954  | SR10      | 32366.309 | 12871.291 | NM_014424 | 828.182   | 1030.201  |
| NM_016631 | 2680.963  | 3987.965  | CY3Cy5    | 3693.287  | 65.713    | AF159092  | 3007.038  | 3094.474  |
| AB015617  | 20496.266 | 20242.492 | AF086054  | 7247.367  | 6529.233  | BC007318  | 6637.087  | 8432.321  |
| AK022730  | 6166.364  | 6735.853  | AK022259  | 67802.266 | 63520.109 | M36693    | 18622.385 | 23728.602 |
| NM_002256 | 15957.339 | 17446.273 | AK022461  | 1116.599  | 957.943   | NM_016292 | 38198.133 | 51789.707 |
| NM_005439 | 45721.887 | 56202.602 | NM_016010 | 9652.34   | 8885.419  | NM_002601 | 9602.505  | 10318.771 |
| AB037810  | 551.582   | 607.946   | AF147401  | 1327.269  | 1300.888  | NM_001781 | 2769.103  | 2225.149  |
| AF222694  | 3593.024  | 2328.647  | AF075022  | 2759.058  | 2978      | NM_014432 | 8683.078  | 8563.876  |
| AL049925  | 10011.878 | 12319.703 | AF075060  | 5337.25   | 5287.252  | NM_001558 | 11137.171 | 11272.988 |
| AK027089  | 9418.396  | 7493.214  | AB002438  | 2685.177  | 2587.797  | NM_006953 | 559.94    | 620.741   |
| X59845    | 1024.075  | 911.269   | AF147436  | 1156.016  | 1662.569  | NM_002530 | 2399.496  | 2178.847  |
| NM_006284 | 33904.031 | 34428.109 | AK021441  | 3178.607  | 3279.069  | NM_018941 | 6411.606  | 4620.108  |
| U18909    | 4427.038  | 4245.232  | AF085846  | 3830.071  | 5259.911  | NM_020241 | 721.394   | 529.496   |
| NM_003489 | 7173.743  | 6674.782  | AK023901  | 21804.072 | 20157.475 | NM_005896 | 33589.828 | 39368.336 |
| NM_016589 | 28251.348 | 26610.93  | AL109705  | 2372.916  | 3234.121  | NM_002889 | 57347.063 | 64533.332 |
| NM_003597 | 957.862   | 797.99    | AF088057  | 12075.324 | 12535.488 | AF078866  | 2383.281  | 3648.215  |
| NM_002568 | 61848.855 | 65471.961 | AF086255  | 57952.641 | 56833.445 | NM_016075 | 672.15    | 666.932   |
| NM_006561 | 2278.756  | 1923.28   | AK022660  | 1183.464  | 1294.485  | NM_001360 | 17807.174 | 15881.854 |
| NM_017521 | 3299.903  | 3127.16   | AK026847  | 1875.849  | 2020.688  | AK026656  | 23259.25  | 21876.152 |
| NM_004128 | 529.716   | 357.829   | AK023048  | 611.261   | 587.956   | NM_000751 | 60492.98  | 60040.012 |
| AK022973  | 526.581   | 640.571   | AK026891  | 2130.912  | 2175.692  | NM_005071 | 3414.972  | 4017.826  |
| NM_006743 | 981.009   | 961.644   | AK025573  | 823.799   | 1424.256  | NM_016730 | 59682.645 | 60803.613 |
| AK025200  | 27171.002 | 32246.367 | AK024595  | 1147.122  | 1048.67   | AL035297  | 3860.188  | 3482.295  |
| NM_001383 | 22595.1   | 23051.027 | AF075032  | 655.321   | 676.046   | NM_004408 | 15646.634 | 14915.687 |
| NM_001029 | 61022.176 | 62464.219 | AF085971  | 1992.822  | 2159.866  | AJ131244  | 4564.101  | 4897.554  |
| NM_005008 | 57422.93  | 56111.453 | AF147302  | 5873.126  | 8007.089  | NM_002532 | 10816.947 | 12416.001 |
| NM_016304 | 64407.785 | 66677.539 | AF085929  | 5399.096  | 6276.107  | NM_012388 | 15832.868 | 20047.416 |

|           |           |           |           |           |           |           |           |           |
|-----------|-----------|-----------|-----------|-----------|-----------|-----------|-----------|-----------|
| NM_006013 | 42469.398 | 44895.879 | AK001126  | 7572.154  | 7623.251  | NM_016651 | 3700.555  | 3882.405  |
| L34071    | 21742.98  | 16675.75  | AF085976  | 6681.104  | 7216.199  | NM_001671 | 1057.133  | 1064.639  |
| AB043007  | 51898.961 | 49553.516 | AF075104  | 10334.467 | 10660.122 | NM_019843 | 7122.001  | 5852.358  |
| NM_004861 | 3175.453  | 4055.961  | AL133025  | 1365.455  | 1685.027  | NM_016192 | 16112.089 | 11649.283 |
| NM_016161 | 1223.837  | 1806.184  | AL137402  | 14501.319 | 16483.543 | AB046774  | 1074.151  | 1562.145  |
| AV718258  | 1728.436  | 1356.759  | AL137617  | 5123.377  | 4689.096  | AK022385  | 58904.41  | 54428.258 |
| NM_005165 | 17687.936 | 12572.826 | AL359568  | 36074.805 | 42175.258 | NM_002775 | 3364.83   | 4599.275  |
| NM_005135 | 58593.164 | 54747.418 | AL133564  | 16418.744 | 16460.809 | NM_007267 | 4360.354  | 4594.86   |
| NM_002115 | 15312.294 | 15009.403 | AL137428  | 2108.935  | 1859.646  | Z36816    | 9519.672  | 10770.618 |
| AK023162  | 5548.598  | 4710.974  | AL157462  | 2685.024  | 2604.791  | NM_005865 | 18342.436 | 16093.686 |
| NM_006395 | 14516.568 | 15148.227 | AL359602  | 17569.479 | 17222.426 | NM_006413 | 14137.019 | 13767.008 |
| NM_018645 | 9476.564  | 8451.604  | NM_018190 | 66913.539 | 67680.492 | NM_017684 | 901.604   | 791.48    |
| NM_018263 | 1252.195  | 1384.748  | AK021744  | 2510.173  | 2070.863  | AK025542  | 11462.557 | 10699.652 |
| NM_013445 | 3335.826  | 4299.514  | NM_018430 | 12976.352 | 12446.277 | AF207547  | 2029.24   | 2802.56   |
| NM_004537 | 5726.892  | 6256.199  | AL110200  | 7597.393  | 6706.087  | NM_002765 | 26516.162 | 33813.672 |
| AL390134  | 1119.623  | 1417.056  | AK022308  | 890.377   | 1381.198  | NM_003691 | 4973.712  | 5685.677  |
| NM_020225 | 12468.237 | 13446.756 | AL133640  | 5471.954  | 5706.097  | NM_002950 | 26253.826 | 24337.666 |
| NM_017865 | 11225.722 | 8740.038  | AK023783  | 964.018   | 451.35    | NM_002315 | 9998.926  | 8677.402  |
| NM_003427 | 5552.719  | 7365.756  | AF070647  | 56253.934 | 59180.598 | NM_001433 | 990.378   | 1006.997  |
| AK021842  | 494.569   | 554.702   | AF116649  | 1226.911  | 1776.691  | NM_003134 | 57723.262 | 53652.762 |
| NM_005920 | 4459.39   | 4358.641  | AF174394  | 3635.2    | 3095.483  | NM_004314 | 7009.74   | 6972.979  |
| Y09321    | 5163.509  | 6135.307  | AK025384  | 830.334   | 653.206   | NM_018247 | 22276.234 | 21783.088 |
| NM_006593 | 649.426   | 938.732   | AF083121  | 615.594   | 737.253   | NM_017975 | 24073.799 | 21631.396 |
| NM_000375 | 2624.034  | 4102.251  | AF144054  | 1097.798  | 1093.089  | NM_006911 | 1901.755  | 2241.391  |
| NM_000475 | 25153.949 | 37284.07  | AK025924  | 1090.723  | 1054.508  | U92544    | 15279.796 | 13333.663 |
| M61872    | 39951.594 | 52219.332 | AK021876  | 34613.254 | 34681.754 | NM_019644 | 4070.458  | 5224.272  |
| NM_005721 | 4499.195  | 3603.746  | AK022017  | 2357.086  | 2204.431  | AI285199  | 36089.68  | 42141.613 |
| AF284223  | 4448.848  | 3621.567  | AK022160  | 5664.273  | 6921.178  | BI906283  | 421.389   | 1600.024  |
| AF176012  | 2134.372  | 2226.251  | AK022295  | 1823.727  | 1605.577  | AA757170  | 627.589   | 593.56    |
| BE743838  | 17382.248 | 16942.037 | AK021935  | 7430.965  | 6730.028  | L07738    | 3960.546  | 3649.168  |
| AF273046  | 4887.957  | 4071.995  | AK022187  | 19310.258 | 20819.225 | Z48054    | 8217.9    | 7319.27   |
| NM_001081 | 13226.049 | 14780.619 | AK022337  | 5543.523  | 5864.291  | H90415    | 24659.051 | 14490.089 |
| NM_002483 | 10362.772 | 12700.944 | AL133618  | 10232.395 | 10615.059 | AA676470  | 55811.895 | 55137.793 |
| BF002026  | 1744.437  | 1895.766  | AF230314  | 3365.63   | 3517.867  | AA430512  | 13565.161 | 15176.198 |
| L35594    | 915.201   | 1066.672  | AK001086  | 1371.315  | 1279.807  | M38258    | 2376.562  | 3082.308  |
| BE790116  | 1349.405  | 1717.945  | AJ131610  | 5855.795  | 5255.105  | AA457155  | 59091.805 | 64433.172 |
| AI922341  | 9293.299  | 11994.541 | AF119872  | 20818.502 | 19571.658 | BM014365  | 2563.241  | 2737.244  |
| S57283    | 956.632   | 1421.164  | X99687    | 940.195   | 989.786   | H91842    | 1533.951  | 1619.101  |
| AA410517  | 535.902   | 460.883   | AK023255  | 67716.305 | 64456.125 | U78045    | 8523.835  | 7469.228  |
| M12824    | 1924.444  | 1808.194  | NM_002622 | 23065.598 | 20825.164 | AA878561  | 57651.719 | 58409.816 |
| W60100    | 3686.813  | 4272.929  | AK024185  | 2828.095  | 2699.02   | BF688309  | 2282.679  | 2902.424  |
| M24898    | 1162.468  | 1541.664  | NM_015417 | 1222.951  | 1343.857  | AI538525  | 2825.273  | 3305.923  |
| U72508    | 2995.346  | 3810.052  | AL137562  | 10704.535 | 11189.533 | AF222980  | 1894.934  | 2111.293  |
| AA457153  | 15330.474 | 16589.135 | M90355    | 66915.18  | 64030.23  | AK026758  | 15667.422 | 18232.061 |
| AA283122  | 2602.791  | 2728.395  | AK022495  | 4407.457  | 4423.361  | NM_012201 | 9350.463  | 11672.296 |
| AA868504  | 8029.377  | 6536.568  | AK021632  | 1427.381  | 1560.605  | NM_001745 | 49629.012 | 51464.504 |
| AA877845  | 14393.692 | 14634.185 | AK023143  | 1939.654  | 1797.317  | NM_003825 | 17447.912 | 23516.021 |
| AA664241  | 31146.373 | 40953.605 | AK026373  | 16189.738 | 15682.4   | AK025006  | 17263.953 | 21251.945 |
| AI016456  | 2120.171  | 2877.186  | AK021581  | 8786.739  | 7892.568  | NM_006675 | 18235.168 | 17909.063 |
| NM_006065 | 54401.648 | 60054.344 | NM_006687 | 6717.895  | 7064.286  | AY007729  | 59317.367 | 59409.895 |
| AK022230  | 10265.039 | 7996.842  | NM_013301 | 5861.65   | 6028.902  | NM_014424 | 873.459   | 1013.888  |
| AK022147  | 6519.977  | 5626.43   | NM_017673 | 3121.983  | 3501.973  | AF159092  | 3277.07   | 2844.785  |
| L25664    | 6598.36   | 5984.836  | AB046857  | 2290.008  | 2576.009  | BC007318  | 6964.946  | 7950.628  |

|           |           |           |           |           |           |           |           |           |
|-----------|-----------|-----------|-----------|-----------|-----------|-----------|-----------|-----------|
| NM_01494C | 6832.871  | 7304.703  | AK024408  | 33584.195 | 30910.992 | M36693    | 16091.145 | 14758.17  |
| NM_005783 | 1373.633  | 1229.114  | AF086307  | 32858.156 | 32793.973 | NM_016292 | 33718.492 | 32580.209 |
| AK000851  | 3325.217  | 3172.601  | L19364    | 6844.993  | 7006.241  | NM_002601 | 9479.517  | 9943.19   |
| NM_00690C | 1483.934  | 1412.857  | NM_00539C | 4899.241  | 5123.066  | NM_001781 | 2563.995  | 2336.633  |
| AJ289111  | 31695.428 | 36259.059 | AJ012502  | 26511.504 | 30522.184 | NM_014432 | 10034.936 | 10436.573 |
| NM_01635E | 2880.16   | 3241.637  | AK024170  | 1072.271  | 846.752   | NM_00155E | 10454.146 | 9963.93   |
| NM_00640E | 34513.926 | 41485.789 | AK021722  | 1252.534  | 1615.33   | NM_006953 | 721.715   | 761.679   |
| AF216292  | 54764.156 | 62487.98  | NM_000681 | 975.424   | 960.857   | NM_00253C | 3339.98   | 3520.964  |
| NM_000952 | 18969.99  | 26484.967 | AF147445  | 4787.066  | 4770.02   | NM_018941 | 6763.806  | 6154.986  |
| NM_005894 | 1511.683  | 2213.683  | Y10508    | 28350.547 | 32537.492 | NM_020241 | 516.098   | 657.049   |
| NM_014584 | 10941.973 | 11663.836 | NM_005182 | 65990.258 | 69164.336 | NM_001321 | 20330.594 | 16929.551 |
| M30627    | 999.548   | 1320.523  | D17074    | 3318.889  | 3935.369  | AB018264  | 20297.789 | 18167.523 |
| NM_00581C | 12797.446 | 15007.936 | AF039944  | 7759.631  | 8977.078  | AF078866  | 2494.116  | 2220.399  |
| M28170    | 39239.715 | 40798.496 | AJ276252  | 1821.448  | 2522.751  | BF311880  | 53841.367 | 41819.055 |
| NM_00155E | 2282.552  | 2729.457  | AK021716  | 13360.149 | 13700.119 | NM_00007E | 1075.618  | 884.868   |
| AK026223  | 15590.588 | 14080.563 | AK025035  | 16444.32  | 18203.813 | NM_01607E | 793.203   | 475.046   |
| NM_000874 | 14550.004 | 9668.293  | AK002085  | 6803.29   | 8292.564  | NM_00136C | 19013.021 | 19258.219 |
| AB007863  | 22668.918 | 26941.434 | AF086200  | 1565.568  | 1314.271  | AK026656  | 24360.922 | 24037.42  |
| NM_01778E | 1660.131  | 2040.839  | AB018338  | 30840.07  | 35075.391 | NM_000751 | 58571.418 | 57786.75  |
| D31887    | 8589.447  | 12926.949 | D80010    | 3451.465  | 3257.116  | NM_005071 | 2506.832  | 2632.649  |
| NM_01664E | 8435.885  | 6995.473  | NM_004923 | 2034.911  | 2155.129  | NM_01673C | 59483.434 | 62763.984 |
| AK090536  | 25349.92  | 16990.813 | NM_003971 | 5860.567  | 6557.499  | AL035297  | 2927.753  | 3320.261  |
| D63477    | 1971.171  | 1645.442  | AK026973  | 1251.568  | 1490.493  | NM_00440E | 19732.791 | 21447.088 |
| NM_020243 | 42376.387 | 37090.586 | NM_005822 | 1425.936  | 1453.346  | AJ131244  | 4187.777  | 4742.09   |
| NM_014051 | 12517.005 | 13183.529 | U81002    | 9601.652  | 8539.58   | NM_002532 | 11743.289 | 11619.533 |
| AK025398  | 6237.346  | 6138.003  | NM_016299 | 18660.932 | 17226.451 | NM_01238E | 13384.835 | 13737.738 |
| AK027082  | 696.835   | 698.721   | NM_01418E | 26889.646 | 26534.309 | NM_016651 | 4062.563  | 3946.997  |
| AK023056  | 3061.772  | 3900.283  | L38517    | 8804.758  | 9349.929  | NM_001671 | 1391.38   | 1539.868  |
| AK022207  | 2016.933  | 2595.782  | AK026101  | 31201.102 | 32626.998 | NM_019843 | 7711.152  | 7052.283  |
| NM_00499E | 7835.16   | 9449.898  | AK022194  | 54252.629 | 52788.93  | NM_016192 | 17901.793 | 13662.204 |
| NM_01743E | 9351.076  | 4344.119  | AF085963  | 3639.609  | 4128.592  | BE878426  | 56910.387 | 58399.977 |
| NM_014037 | 5718.547  | 6609.203  | AF131851  | 1977.827  | 1626.871  | AK022385  | 59445.723 | 55586.688 |
| NM_00486E | 50423.465 | 54097.301 | AK021436  | 3830.547  | 4031.211  | NM_00277E | 1231.661  | 1458.535  |
| NM_01868E | 3150.864  | 3279.556  | U58664    | 2258.728  | 2294.21   | AK024584  | 11917.304 | 8719.022  |
| AK056652  | 11508.001 | 10586.832 | AF085937  | 1227.567  | 1150.477  | NM_003504 | 10753.938 | 8840.939  |
| NM_01583E | 836.189   | 724.434   | AL137569  | 12253.41  | 13864.465 | NM_01329E | 8109.321  | 7616.212  |
| AL137438  | 2836.734  | 2889.415  | AK021920  | 6442.862  | 7672.177  | NM_007267 | 4269.65   | 3624.66   |
| NM_017957 | 2838.439  | 2796.352  | AL049415  | 11185.641 | 12335.197 | Z36816    | 9396.406  | 10147.431 |
| NM_01324E | 17179.455 | 21026.932 | AK022375  | 3070.632  | 3244.104  | NM_00586E | 19526.027 | 18020.861 |
| NM_000034 | 61892.824 | 71436.633 | NM_00337E | 59207.426 | 57178.594 | NM_006413 | 14394.089 | 13746.563 |
| NM_01243E | 50455.324 | 40393.84  | AL110194  | 20924.412 | 24344.533 | NM_017684 | 950.311   | 901.247   |
| AK001299  | 36224.691 | 35351.465 | AF138860  | 3948.146  | 3939.183  | AK025542  | 11797.066 | 12356.741 |
| AB014559  | 4751.034  | 4611.97   | AF200348  | 3471.606  | 3508.713  | AF207547  | 1691.182  | 1990.475  |
| NM_01648E | 14104.358 | 16392.299 | Y11710    | 1484.635  | 1459.907  | NM_00276E | 25895.443 | 29298.938 |
| NM_005033 | 12481.736 | 12005.044 | J03756    | 1276.759  | 1406.899  | NM_003691 | 3703.827  | 3719.118  |
| NM_015932 | 60818.902 | 63372.355 | NM_00265C | 5765.362  | 6764.62   | NM_00295C | 27563.818 | 29183.77  |
| NM_01794E | 1897.413  | 1884.788  | NM_00326C | 41127.605 | 43623.223 | NM_00231E | 13038.75  | 11637.389 |
| AK022169  | 1741.464  | 1701.357  | AK024071  | 2825.701  | 2808.539  | NM_001433 | 1039.275  | 1393.274  |
| AF015592  | 6675      | 7013.411  | AF056490  | 4868.306  | 5250.135  | NM_003134 | 61412.492 | 56723.996 |
| AK026795  | 1220.336  | 1388.93   | NM_00553E | 7146.889  | 7782.437  | NM_004314 | 7058.037  | 7538.197  |
| NM_01639E | 11706.377 | 11903.92  | BF341504  | 1122.185  | 1162.781  | NM_018247 | 23853.221 | 20662.836 |
| NM_016617 | 19828.24  | 15388.899 | NM_005541 | 11351.557 | 11070.873 | NM_01797E | 21272.486 | 19814.23  |
| NM_002027 | 17258.285 | 22557.215 | AB002319  | 5219.439  | 5068.318  | NM_00589E | 33983.754 | 29583.301 |

|           |           |           |           |           |           |           |           |           |
|-----------|-----------|-----------|-----------|-----------|-----------|-----------|-----------|-----------|
| AL162078  | 3375.689  | 4229.886  | AF039942  | 6686.6    | 6172.604  | NM_002888 | 60457.023 | 57289.668 |
| NM_000919 | 1249.386  | 1611.768  | NM_018654 | 612.549   | 599.149   | NM_019644 | 4127.095  | 5052.202  |
| NM_013382 | 6226.975  | 6043.931  | AB046863  | 30215.063 | 35550.465 | NM_006791 | 5757.211  | 6914.952  |
| AB002314  | 1548.427  | 1435.822  | M62403    | 23791.98  | 22112.465 | AJ278348  | 52655.277 | 55611.23  |
| NM_014043 | 12432.791 | 14569.755 | NM_017883 | 9845.973  | 9533.317  | NM_015872 | 1796.654  | 1866.922  |
| NM_014622 | 726.91    | 588.967   | AK025131  | 5606.527  | 6339.695  | AI285199  | 39783.871 | 45674.445 |
| AB011114  | 60577.512 | 61042.785 | NM_000754 | 48054.91  | 59031.684 | AA757170  | 609.249   | 628.413   |
| D11466    | 42390.984 | 36477.969 | NM_014619 | 3707.925  | 5275.878  | L07738    | 3604.126  | 3264.631  |
| NM_014056 | 55018.902 | 49713.086 | NM_005629 | 40116.664 | 50085.23  | Z48054    | 8752.112  | 8466.418  |
| D31885    | 38715.008 | 35585.277 | J04621    | 1700.901  | 2304.447  | H90415    | 21788.74  | 21635.203 |
| AF176012  | 1917.029  | 1496.104  | NM_000718 | 7397.936  | 8666.211  | AA676470  | 59481.879 | 60680.258 |
| BE743838  | 15396.862 | 12681.286 | NM_000161 | 7583.037  | 8536.844  | AA430512  | 17392.961 | 23656.914 |
| AF273046  | 4737.013  | 4134.379  | NM_001972 | 1140.362  | 1042.477  | M38258    | 3186.007  | 3996.849  |
| NM_001081 | 12421.429 | 12237.222 | NM_001445 | 3371.897  | 3456.714  | AA457155  | 60138.785 | 67532.172 |
| NM_002483 | 10492.145 | 12101.621 | AK024455  | 1216.185  | 1098.611  | BM014365  | 2724.548  | 3209.107  |
| BF002026  | 1712.698  | 2300.57   | NM_002006 | 56499.195 | 58241.367 | H91842    | 2030.014  | 2363.887  |
| L35594    | 752.967   | 938.18    | NM_007111 | 25564.164 | 21905.295 | U78045    | 10103.876 | 9854.878  |
| BE790116  | 1022.262  | 1210.589  | NM_002048 | 1297.841  | 1080.466  | AI538525  | 2771.112  | 3177.306  |
| AI922341  | 7852.331  | 9044.919  | NM_004702 | 2368.027  | 2581.911  | AF222980  | 2144.956  | 2345.996  |
| S57283    | 1227.104  | 1344.21   | NM_007109 | 5767.086  | 5284.15   | AK026758  | 12244.289 | 10823.179 |
| M12824    | 1823.141  | 1754.737  | AK023404  | 15270.493 | 15909.56  | NM_012201 | 9329.263  | 11032.839 |
| W60100    | 3730.569  | 4412.625  | NM_013239 | 3329.812  | 3302.686  | AB046774  | 1550.858  | 1456.011  |
| M24898    | 957.352   | 879.279   | NM_001789 | 6052.608  | 6578.279  | AF159092  | 3006.577  | 2925.209  |
| U72508    | 2484.833  | 2733.329  | NM_016004 | 9491.474  | 10071.153 | NM_002601 | 11729.965 | 13953.562 |
| AA457153  | 13353.774 | 12766.578 | U66879    | 42682.785 | 47070.766 | U62858    | 1265.075  | 1931.276  |
| AA283122  | 1591.625  | 1382.075  | NM_016022 | 10395.971 | 11625.769 | NM_000877 | 1328.208  | 3579.66   |
| AA868504  | 6511.917  | 5039.17   | NM_004874 | 3040.594  | 3741.809  | NM_001781 | 2295.109  | 2161.41   |
| AA877845  | 14620.206 | 14619.933 | NM_014204 | 4050.063  | 4643.063  | NM_014432 | 11442.083 | 14804.379 |
| AA664241  | 25060.914 | 24827.369 | S70385    | 45701.164 | 56529.234 | NM_001558 | 11000.579 | 10455.634 |
| AI016456  | 1473.099  | 1570.27   | M34671    | 13739.759 | 17653.377 | NM_006953 | 1661.134  | 1958.536  |
| AK026281  | 2611.541  | 3257.715  | NM_018509 | 15974.237 | 17634.447 | NM_002530 | 3550.182  | 5031.446  |
| U23862    | 733.347   | 1067.674  | NM_004086 | 2157.299  | 2649.297  | U96173    | 3485.545  | 4030.175  |
| AK026680  | 8573.344  | 6774.457  | NM_014944 | 27237.732 | 29607.766 | NM_018941 | 8077.678  | 8817.313  |
| L25664    | 5949.988  | 4799.182  | NM_001109 | 580.583   | 628.074   | NM_020241 | 2651.509  | 2914.768  |
| NM_014940 | 5514.849  | 5035.248  | NM_007352 | 984.152   | 921.199   | BE730585  | 6773.787  | 9321.889  |
| NM_005783 | 1456.544  | 1210.245  | AF176706  | 6787.188  | 6726.67   | NM_001980 | 2866.723  | 3238.087  |
| AK000851  | 3454.953  | 3269.281  | NM_014484 | 2636.562  | 2441.463  | NM_005954 | 2057.036  | 2142.265  |
| NM_006900 | 1566.862  | 1958.221  | AF163762  | 3987.083  | 4252.229  | NM_012471 | 2258.565  | 2331.584  |
| AJ289111  | 33096.859 | 40589.602 | NM_001086 | 11435.178 | 10716.165 | NM_001321 | 17589.682 | 14943.525 |
| NM_016356 | 3200.853  | 3655.919  | NM_014670 | 12977.881 | 14616.523 | AB018264  | 22236.111 | 21114.408 |
| NM_006406 | 28138.416 | 27271.789 | NM_019048 | 12789.158 | 14161.372 | NM_006911 | 1681.875  | 1672.556  |
| AF216292  | 54748.848 | 57331.309 | NM_001040 | 4276.209  | 4513.873  | U92544    | 18895.428 | 13746.802 |
| NM_000952 | 14403.915 | 16015.195 | AF279698  | 11078.451 | 14203.428 | NM_005630 | 1736.597  | 2865.208  |
| NM_005894 | 1329.447  | 1835.933  | NM_019849 | 6933.894  | 6886.321  | AK023106  | 4848.025  | 4973.958  |
| NM_014584 | 11948.617 | 11697.887 | NM_000049 | 1683.801  | 2128.225  | NM_016730 | 60496.012 | 62037.879 |
| M30627    | 950.084   | 1490.376  | AB032996  | 62359.406 | 64525.637 | AL035297  | 2546.195  | 2410.665  |
| NM_005810 | 10834.318 | 11962.362 | AB040881  | 18291.682 | 21463.48  | NM_004408 | 23469.924 | 22231.18  |
| M28170    | 35532.023 | 33120.352 | AY007121  | 9916.923  | 9459.362  | AJ131244  | 4464.133  | 6430.394  |
| NM_001555 | 1879.492  | 2371.919  | NM_003372 | 18772.617 | 22016.008 | NM_002532 | 12096.21  | 13633.937 |
| NM_005849 | 470.807   | 652.532   | NM_007317 | 15058.993 | 16951.717 | NM_012388 | 15805.158 | 16919.438 |
| AK026223  | 17161.275 | 16916.85  | AB037826  | 1098.657  | 1104.399  | NM_016651 | 4456.277  | 5136.888  |
| NM_000874 | 11154.161 | 4938.614  | AK021466  | 4339.538  | 4724.483  | NM_001671 | 1343.376  | 1640.632  |
| NM_005854 | 661.413   | 423.297   | Z36796    | 64686.148 | 62658.602 | NM_019843 | 9463.32   | 9896.925  |

|           |           |           |           |           |           |           |           |           |
|-----------|-----------|-----------|-----------|-----------|-----------|-----------|-----------|-----------|
| AB007863  | 18337.623 | 15480.389 | NM_006443 | 65075.309 | 62236.379 | NM_016192 | 20390.504 | 19338.465 |
| NM_017789 | 697.142   | 972.089   | NM_001559 | 1094.673  | 1109.316  | BE878426  | 59817.305 | 64215.641 |
| D31887    | 6846.349  | 7338.021  | NM_002634 | 46212.406 | 53169.043 | NM_001745 | 53472.52  | 57164.652 |
| NM_005721 | 4288.328  | 4162.852  | NM_017749 | 7532.55   | 8064.927  | NM_003825 | 18307.514 | 23491.803 |
| AF284223  | 4137.809  | 4209.153  | NM_002938 | 20496.857 | 18796.996 | AK025006  | 17496.738 | 18071.652 |
| D63477    | 1691.373  | 1183.814  | AK023652  | 34033.734 | 29353.826 | AF218014  | 61508.93  | 57806.066 |
| NM_020243 | 40487.176 | 33251     | AF099032  | 2278.88   | 2801.448  | NM_006678 | 19044.348 | 18054.369 |
| AK025398  | 6281.278  | 6497.369  | NM_003070 | 12835.71  | 12385.54  | AY007729  | 66575.75  | 62569.168 |
| AK027082  | 641.269   | 687.573   | AL122101  | 22301.676 | 21371.215 | NM_014424 | 1058.098  | 1082.701  |
| AK023056  | 2885.057  | 3169.423  | AK001649  | 4902.125  | 4937.944  | NM_002889 | 61229.512 | 59664.906 |
| AK022207  | 1748.343  | 2146.344  | NM_016638 | 40264.785 | 39133.688 | AF078866  | 1486.689  | 1137.824  |
| NM_004996 | 8840.739  | 9580.171  | AB018274  | 29958.211 | 29205.518 | BF311880  | 55437.258 | 44210.191 |
| NM_017435 | 8748.228  | 3988.005  | NM_005871 | 14711.393 | 14130.047 | NM_000078 | 1166.107  | 1096.838  |
| NM_014037 | 5269.797  | 6023.52   | NM_007042 | 11464.53  | 11618.152 | NM_016075 | 980.733   | 909.885   |
| NM_004866 | 49330.555 | 53685.484 | NM_016333 | 22460.918 | 20026.57  | NM_001360 | 21093.047 | 22203.834 |
| NM_018688 | 3105.03   | 3541.525  | BE875028  | 11897.5   | 12714.271 | AK026656  | 30934.176 | 32128.592 |
| AK056652  | 11328.704 | 10741.137 | AF121255  | 7971.786  | 11552.693 | AJ276207  | 29021.578 | 33526.688 |
| NM_015839 | 554.329   | 574.847   | NM_005494 | 17983.328 | 22724.754 | AB011131  | 13941.164 | 13942.22  |
| AL137438  | 2224.071  | 1823.534  | NM_017946 | 1942.11   | 2174.042  | NM_000749 | 1825.368  | 1825.919  |
| NM_017957 | 2977.443  | 2214.024  | NM_004953 | 21024.891 | 29457.807 | NM_000751 | 52113.59  | 54841.133 |
| NM_003024 | 4333.826  | 3147.785  | NM_012199 | 8513.789  | 7587.408  | NM_014849 | 14489.744 | 12529.764 |
| NM_013248 | 12296.677 | 9368.935  | AL049682  | 3661.707  | 4076.337  | NM_001042 | 11436.634 | 10045.369 |
| NM_000034 | 62375.602 | 69155.609 | NM_005528 | 24529.287 | 28660.867 | NM_012229 | 7035.933  | 9356.563  |
| AK022230  | 10331.168 | 9619.43   | AL050199  | 10497.178 | 8791.017  | NM_005071 | 3982.887  | 4248.668  |
| AK022147  | 6762.707  | 7467.515  | NM_004901 | 2449.344  | 2275.08   | AK022385  | 55346.109 | 52813.32  |
| AK001299  | 28204.936 | 19383.232 | U77088    | 890.092   | 1178.653  | NM_002775 | 874.068   | 900.003   |
| AB014559  | 4249.283  | 3721.197  | NM_006721 | 25232.574 | 25829.242 | AK024584  | 9911.372  | 6077.725  |
| NM_016489 | 13717.336 | 16428.592 | NM_016282 | 34868.004 | 37854.484 | NM_003504 | 8510.873  | 7362.728  |
| NM_005033 | 11933.749 | 12516.719 | NM_002765 | 15925.438 | 14288.358 | NM_013298 | 8881.944  | 10697.363 |
| NM_015932 | 61644.965 | 63146.094 | NM_003434 | 58666.23  | 59063.633 | NM_007267 | 5645.262  | 6258.39   |
| NM_017949 | 1860.537  | 2312.771  | NM_018181 | 2332.642  | 1781.883  | Z36816    | 12464.795 | 17365.896 |
| AK022169  | 1854.042  | 1713.971  | X68880    | 975.134   | 1160.896  | NM_005865 | 25031.021 | 30203.754 |
| AF015592  | 6749.707  | 6329.133  | NM_005654 | 1168.809  | 901.12    | NM_006413 | 15107.598 | 15781.781 |
| AK026795  | 1041.179  | 1220.467  | AF024698  | 60923.387 | 65052.973 | NM_017684 | 1462.83   | 1398.95   |
| NM_016399 | 11419.148 | 11731.12  | BE904617  | 59579.773 | 59247.078 | AK025542  | 16060.502 | 19620.906 |
| NM_016617 | 18629.082 | 17390.783 | AK024495  | 4017.579  | 5224.336  | AF207547  | 2169.594  | 2117.623  |
| NM_002027 | 15107.267 | 18879.152 | AK001758  | 8271.164  | 7814.69   | NM_002768 | 29153.332 | 30395.797 |
| AL162078  | 3655.958  | 4880.308  | U90842    | 2763.526  | 2768.325  | NM_003691 | 4385.834  | 5645.572  |
| NM_000919 | 1267.779  | 1721.906  | AK025076  | 1028.87   | 976.849   | NM_002950 | 26922.678 | 26669.744 |
| NM_013382 | 6192.382  | 6828.598  | AF086325  | 9767.896  | 10753.926 | NM_002318 | 13639.974 | 13000.562 |
| AB002314  | 1500.633  | 1573.233  | NM_004928 | 2356.528  | 2942.128  | NM_001433 | 1697.407  | 1877.599  |
| NM_014043 | 10364.565 | 10861.499 | NM_005081 | 1035.41   | 1068.729  | NM_003134 | 62768.523 | 61286.629 |
| AB011114  | 69095.563 | 65934.477 | NM_004959 | 2032.813  | 2219.84   | NM_022095 | 1850.621  | 2131.75   |
| D11466    | 38195.105 | 30984.092 | AK026022  | 62809.227 | 59511.645 | AF088061  | 3179.261  | 3569.561  |
| NM_014056 | 51369.527 | 40590.938 | NM_003199 | 17437.305 | 20519.643 | AF086425  | 2028.511  | 2144.544  |
| D31885    | 38692.891 | 46245.727 | NM_004306 | 64097.012 | 65713.789 | AF086286  | 3710.414  | 3807.99   |
| NM_016649 | 8776.94   | 8722.022  | NM_006786 | 20574.604 | 21618.18  | AF086376  | 5073.442  | 5707.138  |
| AK090536  | 27076.939 | 25911.02  | NM_004183 | 3585.088  | 3274.699  | AF086410  | 1180.929  | 1378.083  |
| BE743838  | 14070.216 | 9583.205  | AI492087  | 1914.469  | 1946.906  | AK022997  | 15994.786 | 15980.606 |
| AF273046  | 4786.804  | 3919.47   | R72122    | 13459.71  | 15636.596 | NM_017617 | 4780.831  | 4744.472  |
| NM_001081 | 10606.663 | 7992.749  | Z35309    | 17633.197 | 19056.713 | AF131830  | 1610.851  | 2037.322  |
| NM_002483 | 11130.317 | 14511.157 | X04571    | 2076.095  | 2318.854  | NM_014811 | 695.71    | 631.73    |
| BF002026  | 1570.098  | 1815.958  | AA700005  | 2031.165  | 2376.735  | AK027232  | 9727.573  | 9270.989  |

|           |           |           |           |           |           |           |           |           |
|-----------|-----------|-----------|-----------|-----------|-----------|-----------|-----------|-----------|
| L35594    | 875.724   | 859.374   | AA292025  | 8872.982  | 12205.69  | NM_012204 | 443.868   | 505.763   |
| BE790116  | 1173.412  | 1339.169  | AA437226  | 14036.991 | 17271.771 | NM_004342 | 513.778   | 1849.119  |
| AI922341  | 6052.692  | 6196.43   | XM_056359 | 4529.312  | 5811.916  | NM_022095 | 1195.065  | 993.528   |
| S57283    | 1188.657  | 1148.781  | D10353/NM | 52552.344 | 55736.332 | SR2       | 31159.811 | 22172.85  |
| M12824    | 2247.171  | 2258.087  | M15042    | 22466.648 | 23789.178 | SR4       | 9819.589  | 5139.94   |
| W60100    | 3735.96   | 3946.735  | AK056843  | 19186.148 | 22890.086 | SR6       | 1020.855  | 546.429   |
| M24898    | 939.353   | 1358.445  | U49928    | 60184.238 | 61368.602 | SR8       | 4102.571  | 5814.845  |
| U72508    | 2632.466  | 3131.025  | AK096645  | 64151.176 | 58994.531 | SR10      | 13554.565 | 2470.026  |
| AA457153  | 14986.167 | 15233.353 | AK092859  | 3219.535  | 3841.015  | AF086103  | 1645.41   | 1868.313  |
| AA283122  | 1926.732  | 2486.916  | NM_005793 | 24749.268 | 27960.504 | AL080135  | 1201.442  | 1437.888  |
| AA868504  | 8543.893  | 10944.934 | M55646    | 54883.762 | 56991.488 | AK023158  | 2627.269  | 2356.158  |
| AA877845  | 16769.158 | 17371.27  | NM_006112 | 46805.621 | 51096.613 | AF075062  | 11597.501 | 9694.406  |
| AA664241  | 21654.768 | 19421.725 | M12807    | 4593.449  | 4765.288  | NM_004185 | 2096.271  | 2484.218  |
| AI016456  | 2116.776  | 1417.977  | NM_001765 | 7764.149  | 8684.004  | AF147381  | 16097.085 | 27085.287 |
| AK026281  | 2320.527  | 2456.778  | NM_012099 | 24362.047 | 25253.203 | AK027101  | 33734.777 | 22553.162 |
| U23862    | 535.771   | 583.529   | NM_018684 | 55063.656 | 56594.34  | AF010236  | 783.577   | 643.776   |
| AK026680  | 10269.42  | 10020.263 | NM_017983 | 2713.454  | 3285.133  | AK024358  | 3180.51   | 1297.93   |
| NM_012436 | 43233.109 | 45806.66  | AF116909  | 2490.008  | 2656.048  | AF088075  | 1704.981  | 859.236   |
| AF216292  | 48429.449 | 32987.117 | BE906724  | 3737.956  | 4081.789  | AK026376  | 2233.299  | 792.741   |
| NM_000952 | 14216.368 | 13948.107 | NM_002283 | 36388.914 | 41626.785 | AL117437  | 989.918   | 1271.412  |
| NM_005894 | 1466.714  | 1499.676  | AJ276095  | 17739.387 | 20348.688 | AK027198  | 3560.942  | 3837.82   |
| NM_014584 | 11433.897 | 11064.368 | NM_004819 | 9403.613  | 12510.283 | AL162077  | 2480.396  | 1603.897  |
| M30627    | 918.431   | 1083.935  | NM_007184 | 8537.077  | 9939.467  | AK022404  | 2750.281  | 4276.049  |
| NM_005810 | 12756.768 | 13576.148 | AF253316  | 3363.507  | 4646.811  | Z69892    | 14647.508 | 13588.905 |
| M28170    | 37287.203 | 38174.664 | NM_005855 | 1531.305  | 2025.511  | AK023590  | 969.347   | 789.502   |
| NM_001555 | 2238.007  | 2736.375  | NM_002923 | 7876.05   | 8393.387  | AF087961  | 817.978   | 1082.925  |
| NM_005849 | 432.29    | 734.542   | NM_006794 | 4640.685  | 5745.41   | AL137309  | 3634.384  | 2842.528  |
| AK026223  | 18569.486 | 22041.496 | NM_018653 | 1549.094  | 1890.522  | AL137475  | 1533.599  | 1525.163  |
| NM_000874 | 14591.757 | 12189.634 | NM_005388 | 25629.143 | 31757.242 | AL161956  | 4579.637  | 2909.23   |
| NM_005854 | 874.297   | 887.078   | NM_007232 | 61978.105 | 59112.992 | AL390176  | 2295.397  | 1348.214  |
| AB007863  | 18001.328 | 18057.35  | NM_016257 | 2492.004  | 3077.721  | AL137356  | 936.913   | 418.281   |
| AK024456  | 22101.264 | 23135.295 | NM_002717 | 8882.482  | 9742.599  | AL137547  | 1290.386  | 715.126   |
| NM_017789 | 1099.07   | 1476.427  | AF231916  | 13715.146 | 14152.739 | AK021994  | 1031.713  | 499.432   |
| D31887    | 7258.948  | 9074.735  | NM_003501 | 18673.328 | 19224.166 | Z70763    | 1000.719  | 526.619   |
| NM_006180 | 653.626   | 1122.438  | AK022654  | 61515.164 | 61842.48  | AK023802  | 29479.596 | 14323.146 |
| NM_002313 | 7350.91   | 10386.833 | BC002905  | 14098.609 | 13587.051 | AK021981  | 2427.518  | 2386.592  |
| NM_004459 | 7565.815  | 8172.793  | NM_018091 | 23567.434 | 27463.014 | AL359567  | 2972.007  | 3961.776  |
| NM_005503 | 645.55    | 843.705   | NM_001108 | 12620.635 | 13913.16  | AL049325  | 24059.404 | 20424.059 |
| NM_001502 | 3893.632  | 4369.558  | NM_001637 | 1964.181  | 1751.2    | AK023952  | 4564.532  | 3449.883  |
| NM_005721 | 5676.206  | 6510.945  | NM_016630 | 34683.301 | 35591.195 | NM_014082 | 3752.187  | 4247.891  |
| AF284223  | 4301.424  | 4848.612  | NM_014291 | 21058.572 | 21372.613 | AF100636  | 768.767   | 907.169   |
| AF176012  | 2100.055  | 2149.981  | NM_014631 | 1857.604  | 2190.051  | AF161366  | 456.202   | 765.445   |
| NM_013386 | 1574.321  | 2144.096  | NM_001089 | 17960.822 | 20570.961 | AK022197  | 3567.199  | 3013.472  |
| NM_006517 | 1636.379  | 2213.358  | NM_000120 | 4169.35   | 6032.458  | AK021970  | 780.324   | 739.035   |
| NM_004171 | 1327.948  | 1592.194  | NM_004519 | 606.615   | 881.876   | AK022066  | 73658.352 | 63866.891 |
| NM_014037 | 5495.333  | 6548.479  | U09384    | 4974.974  | 4760.011  | AK022224  | 2036.768  | 1443.608  |
| NM_004866 | 52066.391 | 59919.516 | NM_004794 | 23366.801 | 28963.785 | AK022359  | 862.212   | 627.937   |
| NM_018688 | 3372.313  | 5127.052  | NM_002803 | 23166.322 | 26559.408 | AK022000  | 1992.925  | 1045.388  |
| AK056652  | 13009.877 | 15684.967 | NM_005508 | 8151.204  | 10370.011 | AK022129  | 5487.705  | 2300.297  |
| NM_015839 | 697.402   | 905.406   | NM_018485 | 2440.09   | 3132.221  | AK022263  | 4417.516  | 2412.949  |
| AL137438  | 2548.564  | 3400.991  | NM_006788 | 4342.354  | 4741.633  | AK022384  | 978.405   | 677.764   |
| NM_017957 | 3069.717  | 3994.251  | NM_016568 | 2705.149  | 3693.648  | AF086304  | 33849.355 | 42379.359 |
| NM_003024 | 6228.409  | 8066.626  | NM_002987 | 1160.996  | 1099.609  | AB032976  | 2802.035  | 3034.943  |



|           |           |           |           |           |           |           |           |           |
|-----------|-----------|-----------|-----------|-----------|-----------|-----------|-----------|-----------|
| NM_01324E | 15801.366 | 20285.227 | AB033102  | 62714.512 | 61182.922 | AF301222  | 19998     | 23827.086 |
| NM_000034 | 58625.598 | 73307.469 | NM_014774 | 5719.724  | 7366.66   | AF215981  | 20514.855 | 19057.188 |
| AK022230  | 12963.278 | 16263.397 | NM_014143 | 40279.012 | 50215.379 | AK000257  | 1038.714  | 1105.643  |
| AK022147  | 7764.286  | 8326.259  | NM_012200 | 7250.637  | 6372.547  | NM_006160 | 18212     | 12867.531 |
| L25664    | 8187.469  | 9845.558  | NM_001724 | 5177.553  | 4847.8    | NM_00052E | 3448.086  | 2941.479  |
| NM_014940 | 6694.794  | 7087.437  | NM_000150 | 5874.657  | 5394.504  | AF009259  | 1217.293  | 902.871   |
| NM_005783 | 1364.122  | 1216.58   | AB023152  | 1171.929  | 1013.266  | AF009260  | 913.972   | 449.169   |
| AK000851  | 3471.776  | 3975.442  | NM_006212 | 5614.42   | 5153.9    | NM_00307E | 1899.721  | 895.309   |
| NM_006900 | 1561.586  | 1636.384  | AK022872  | 8052.057  | 6728.432  | NM_017902 | 3194.061  | 1903.624  |
| AJ289111  | 28662.355 | 30741.215 | AK024272  | 8619.655  | 8635.476  | NM_01783E | 29578.955 | 30359.805 |
| NM_01635E | 2566.166  | 2353.985  | NM_016381 | 2546.383  | 2622.593  | NM_018347 | 9409.076  | 9116.81   |
| NM_00640E | 29189.094 | 28815.111 | AL591715  | 2536.6    | 2481.703  | AK024986  | 453.786   | 675.536   |
| D11466    | 38891.238 | 28716.295 | NM_007254 | 530.781   | 635.421   | AK026730  | 2047.398  | 2356.865  |
| NM_01405E | 47233.734 | 41033.727 | NM_018042 | 26009.264 | 31756.949 | AK024739  | 2355.24   | 2051.627  |
| D31885    | 35997.293 | 40763.711 | BE741525  | 2805.403  | 3011.134  | AK098681  | 2376.906  | 1960.999  |
| NM_01664E | 8649.187  | 9483.816  | BF030555  | 59527.063 | 58828.719 | AK026772  | 5489.729  | 4336.159  |
| AK090536  | 29568.418 | 33849.492 | NM_012433 | 14672.787 | 19017.072 | AK026458  | 2385.016  | 3659.347  |
| D63477    | 2585.921  | 2632.856  | NM_00560E | 9941.299  | 10296.216 | AK022266  | 660.327   | 1125.435  |
| NM_020243 | 45801.125 | 52531.113 | NM_00257E | 6292.017  | 7301.303  | AK024154  | 14151.686 | 14551.55  |
| NM_014051 | 13424.701 | 14163.437 | NM_003582 | 3901.601  | 4412.016  | AF086341  | 1425.69   | 1603.408  |
| AK025398  | 7190.001  | 8481.229  | AF057354  | 1931.177  | 2150.208  | AK026672  | 1233.537  | 1437.605  |
| AK027082  | 545.137   | 1094.932  | AF169351  | 20904.299 | 24066.738 | S83282    | 75671.414 | 64094     |
| AK023056  | 2635.718  | 2521.377  | M14200    | 67067.508 | 70369.578 | AK024164  | 56279.246 | 53906.746 |
| NM_001120 | 57619.754 | 67200.703 | NM_000282 | 3884.954  | 4911.114  | AF052130  | 5969.538  | 4767.289  |
| NM_01788E | 6656.625  | 6678.833  | NM_000532 | 27204.266 | 31299.34  | AF130090  | 33824.414 | 23775.977 |
| NM_00491E | 1067.562  | 1107.623  | NM_016341 | 2192.282  | 2795.478  | AL096727  | 2745.236  | 2237.862  |
| AK022207  | 1802.43   | 1860.691  | NM_00678E | 20456.92  | 20146.92  | AL080110  | 5706.796  | 3373.435  |
| AV708752  | 6072.05   | 6818.156  | NM_00620E | 3662.414  | 4728.514  | NM_02042E | 1201.94   | 819.929   |
| AF119885  | 4413.513  | 4674.2    | NM_004034 | 17838.135 | 19129.834 | AK024076  | 5158.432  | 2917.295  |
| NM_000750 | 771.654   | 580.914   | NM_000130 | 27038.301 | 25519.779 | M87940    | 1655.692  | 799.095   |
| NM_00499E | 7596.924  | 9137.979  | AF193756  | 1215.962  | 1231.861  | L77588    | 4092.559  | 2138.185  |
| NM_005971 | 9543.267  | 9556.525  | AI492087  | 1641.034  | 1468.045  | NM_014273 | 24069.295 | 22807.156 |
| NM_01743E | 10216.664 | 4083.316  | R72122    | 12386.12  | 12752.566 | AF039442  | 1669.689  | 1810.325  |
| AK026281  | 1853.622  | 1487.593  | Z35309    | 16232.355 | 16090.973 | NM_004680 | 1645.259  | 1969.67   |
| U23862    | 538.908   | 422.353   | X04571    | 1921.524  | 1917.265  | NM_005671 | 1276.033  | 1922.345  |
| AK026680  | 8393.251  | 6962.446  | AA700005  | 1948.666  | 2170.565  | NM_01962E | 31488.592 | 27599.557 |
| NM_01243E | 50296.367 | 50789.152 | AA292025  | 6920.28   | 7637.616  | NM_00672E | 5127.569  | 4283.185  |
| AK001299  | 31216.451 | 35120.727 | AA437226  | 13142.845 | 15600.651 | NM_006071 | 3294.254  | 3954.971  |
| AB014559  | 5043.041  | 5436.687  | R36143    | 5047.695  | 5643.15   | NM_01223E | 16020.813 | 17516.066 |
| NM_01648E | 11450.391 | 9965.478  | XM_056359 | 4541.332  | 4401.285  | AB038651  | 6186.066  | 6575.31   |
| NM_005033 | 13450.756 | 16901.502 | D10353/NM | 44364.379 | 42732.535 | AL359603  | 2391.081  | 4405.465  |
| NM_015932 | 59541.859 | 63714.766 | M15042    | 21108.701 | 26033.508 | X84838    | 610.836   | 805.991   |
| NM_01794E | 2011.024  | 1939.252  | AK056843  | 13923.336 | 15423.332 | NM_013940 | 485.24    | 495.98    |
| AK022169  | 1761.637  | 1583.478  | AK096645  | 66416.461 | 65922.922 | AL117643  | 2112.009  | 1375.901  |
| AF015592  | 6394.697  | 7246.784  | AK092859  | 3443.263  | 4152.089  | AF069135  | 11709.634 | 6566.386  |
| AK026795  | 1169.056  | 1132.202  | NM_018291 | 24873.354 | 29014.859 | AK026524  | 1209.313  | 761.993   |
| NM_01639E | 12862.92  | 16594.795 | NM_005530 | 16841.906 | 16888.766 | AB011157  | 5245.393  | 2936.75   |
| NM_016617 | 19118.975 | 21160.143 | NM_00689E | 12334.432 | 11532.98  | U17632    | 745.209   | 507.405   |
| NM_002027 | 17414.408 | 27377.359 | M12807    | 4312.103  | 4663.364  | AK026764  | 1896.027  | 986.736   |
| AL162078  | 4105.256  | 5318.378  | NM_00176E | 4346.788  | 5073.549  | AF113700  | 3607.425  | 2069.561  |
| NM_00091E | 1211.433  | 1464.001  | NM_003361 | 4790.187  | 5064.877  | X91348    | 55795.883 | 51385.906 |
| NM_013382 | 6164.945  | 5339.833  | NM_01209E | 23514.879 | 24172.623 | Z36505    | 5082.222  | 4810.887  |
| AB002314  | 1718.876  | 1576.946  | NM_018684 | 57896.719 | 58947.188 | NM_001854 | 3648.331  | 3610.542  |

|           |           |           |           |           |           |           |           |           |
|-----------|-----------|-----------|-----------|-----------|-----------|-----------|-----------|-----------|
| NM_014043 | 10600.064 | 11771.938 | NM_017983 | 2668.243  | 3092.638  | NM_017913 | 2735.784  | 3119.725  |
| AB011114  | 60313.125 | 67394.938 | AF116909  | 2286.95   | 2459.758  | NM_002755 | 22688.4   | 26284.322 |
| CY3Cy5    | 1565.981  | 150.645   | BE906724  | 3103.262  | 3100.481  | AK024799  | 66055.813 | 67201.086 |
| NM_019884 | 10159.505 | 8462.889  | NM_002283 | 32950.898 | 31348.291 | NM_000924 | 11200.623 | 12542.288 |
| AF086366  | 1468.706  | 1296.252  | AJ276095  | 15976.163 | 15500.357 | NM_003330 | 9637.104  | 9129.586  |
| AF086360  | 2902.894  | 3467.584  | NM_004819 | 8149.402  | 9536.676  | NM_002481 | 454.667   | 763.675   |
| AF086436  | 862.016   | 965.87    | NM_007184 | 7657.584  | 9230.682  | NM_003647 | 686.316   | 1019.934  |
| AF087993  | 7891.242  | 7104.721  | NM_005291 | 59419.492 | 56687.934 | NM_001695 | 66744.273 | 63964.68  |
| AF035282  | 1336.692  | 1160.235  | AF253316  | 1246.057  | 1357.675  | NM_018351 | 2121.712  | 2384.061  |
| AK022842  | 1302.85   | 1185.584  | NM_005855 | 2430.736  | 2561.21   | AK023019  | 816.787   | 972.351   |
| NM_007006 | 22944.324 | 19643.109 | NM_002923 | 9196.355  | 9644.431  | NM_147171 | 9204.586  | 9744.173  |
| AL137346  | 6186.442  | 6790.414  | NM_006794 | 3611.711  | 4292.568  | AF238083  | 45914.055 | 32127.643 |
| NM_017756 | 2931.541  | 2823.478  | NM_018653 | 2178.511  | 2575.13   | NM_016388 | 4584.257  | 3594.002  |
| NM_019884 | 12301.145 | 12435.402 | NM_007232 | 64491.211 | 61996.406 | AB046783  | 1325.12   | 1109.745  |
| SR4       | 13046.385 | 16699.701 | NM_016257 | 2518.019  | 2513.351  | NM_000845 | 1078.786  | 785.865   |
| SR6       | 1561.56   | 3052.638  | NM_002717 | 8116.067  | 8219.938  | NM_004604 | 65728.844 | 66838.648 |
| SR8       | 6544.068  | 24181.285 | NM_004306 | 66205.195 | 72502.227 | NM_014965 | 10628.444 | 5568.463  |
| SR10      | 21469.992 | 8846.025  | NM_001153 | 609.264   | 762.584   | NM_004882 | 44277.555 | 18567.715 |
| CY3Cy5    | 1165.865  | 87.248    | AK022654  | 58475.43  | 55902.82  | AL390148  | 19328.648 | 9923.53   |
| AF086054  | 7758.475  | 7937.487  | BC002905  | 13969.552 | 12650.06  | AK024055  | 1210      | 630.834   |
| AF086089  | 414.411   | 665.831   | NM_018091 | 22681.537 | 22707.84  | NM_013376 | 1171.604  | 1605.974  |
| AK022259  | 51592.961 | 46080.602 | NM_001108 | 12216.99  | 14198.636 | NM_017964 | 3733.302  | 3582.945  |
| AK022461  | 775.23    | 999.48    | NM_001637 | 1584.429  | 1918.335  | NM_016272 | 694.253   | 816.324   |
| NM_016010 | 11438.826 | 11448.868 | NM_016630 | 34771.531 | 36854.008 | NM_016428 | 7600.992  | 8053.752  |
| AF161442  | 1131.222  | 466.056   | NM_014291 | 20341.701 | 18421.273 | NM_004083 | 12491.16  | 14823.044 |
| AF147401  | 1144.197  | 777.865   | NM_014631 | 1744.893  | 1869.466  | NM_016035 | 44099.238 | 38991.43  |
| AF075060  | 3509.559  | 1938.252  | NM_001089 | 15831.29  | 12785.813 | NM_001184 | 4494.674  | 4351.775  |
| AB002438  | 2845.138  | 3046.467  | NM_000120 | 3164.332  | 2893.392  | NM_015530 | 11986.347 | 11881.11  |
| AK021441  | 3654.984  | 4299.962  | U09384    | 4750.285  | 4546.491  | NM_016238 | 7407.947  | 8976.745  |
| AK026018  | 2751.524  | 2766.232  | NM_004794 | 22391.578 | 22788.965 | NM_001758 | 2400.817  | 5246.892  |
| AF085846  | 3563.998  | 3564.576  | NM_002803 | 26958.287 | 27399.609 | BE546276  | 2394.659  | 3876.906  |
| AF147392  | 2117.177  | 2403.864  | NM_005508 | 10567.982 | 10024.956 | NM_004725 | 12524.347 | 11543.625 |
| AF088057  | 6718.581  | 7167.127  | NM_018485 | 2973.213  | 2506.234  | NM_015997 | 17876.678 | 18450.402 |
| AF086255  | 10167.618 | 9384.173  | NM_006788 | 5755.015  | 4582.413  | NM_001167 | 17605.512 | 17442.869 |
| AK022660  | 895.477   | 677.881   | NM_016568 | 4745.804  | 4356.827  | NM_012115 | 8431.209  | 8140.983  |
| AK026847  | 1800.571  | 1418.644  | AB033102  | 60476.512 | 57537.516 | NM_004933 | 54010.789 | 43264.254 |
| AK023048  | 545.84    | 261.098   | NM_014774 | 5925.891  | 5699.172  | M96577    | 29369.512 | 21854.918 |
| AL359560  | 600.104   | 506.203   | NM_014143 | 40070.707 | 29619.074 | NM_013258 | 63141.488 | 58870.738 |
| AK026891  | 1217.599  | 1267.938  | M55646    | 56472.961 | 47545.594 | NM_003842 | 6140.158  | 4288.997  |
| AK025573  | 502.146   | 456.957   | NM_006112 | 48579.055 | 36167.129 | NM_016184 | 2084.836  | 1514.072  |
| AF075032  | 2352.014  | 2827.671  | NM_000150 | 6066.48   | 3257.494  | L11238    | 21901.635 | 11919.979 |
| AF085971  | 2640.541  | 2928.681  | AB023152  | 1423.528  | 568.591   | AK025684  | 1313.845  | 1024.512  |
| AF085929  | 2558.829  | 1731.595  | NM_006212 | 5285.371  | 3658.115  | NM_012205 | 15384.675 | 7322.965  |
| AK001126  | 3301.676  | 2632.621  | AK022872  | 7911.312  | 4749.337  | K02046    | 4060.831  | 2240.603  |
| AF085976  | 4767.888  | 3765.609  | AK024272  | 8580.881  | 5723.281  | U87223    | 2822.405  | 1413.061  |
| AF075104  | 1729.443  | 1642.021  | NM_016381 | 2632.661  | 1723.543  | NM_002217 | 1131.924  | 1160.428  |
| AL133025  | 1295.732  | 1276.453  | AL591715  | 2102.469  | 1644.523  | NM_004995 | 4842.504  | 6335.708  |
| AL137402  | 10719.474 | 10405.196 | NM_018042 | 26782.703 | 17026.172 | NM_000386 | 14793.923 | 22662.764 |
| AL133564  | 1520.386  | 1300.744  | BE741525  | 2805.238  | 2096.73   | NM_007231 | 1074.091  | 1652.088  |
| AL137428  | 2371.288  | 2464.642  | BF030555  | 59502.5   | 55119.215 | NM_001190 | 5874.719  | 6227.723  |
| AL157462  | 2671.165  | 2961.112  | NM_012433 | 15089.219 | 9543.419  | NM_005271 | 22362.354 | 30868.619 |
| AL359602  | 1118.094  | 1162.39   | NM_005605 | 10615.258 | 6477.293  | NM_015654 | 8000.132  | 10879.475 |
| NM_018190 | 72295.234 | 58280.617 | NM_002576 | 6888.253  | 4952.068  | NM_012244 | 3229.463  | 4356.621  |

|           |           |           |           |           |           |           |           |           |
|-----------|-----------|-----------|-----------|-----------|-----------|-----------|-----------|-----------|
| AK021744  | 1916.519  | 1399.827  | NM_003582 | 4155.618  | 2842.129  | NM_004341 | 3053.023  | 3735.461  |
| NM_01843C | 5492.318  | 5035.56   | AF057354  | 1723.483  | 1116.563  | AB082521  | 20647.922 | 22591.455 |
| AL110200  | 3114.932  | 2540.847  | AF169351  | 20662.145 | 14765.359 | AL050182  | 5964.375  | 5050.764  |
| AK022308  | 1040.565  | 953.229   | M14200    | 67255.172 | 64557.566 | NM_02004C | 2024.506  | 2114.86   |
| NM_003667 | 1110.227  | 1204      | NM_000282 | 4242.823  | 3280.118  | NM_002374 | 7475.785  | 6454.238  |
| AL133640  | 4915.25   | 6001.097  | NM_000532 | 27181.707 | 21671.682 | AK026940  | 9414.624  | 7119.104  |
| AK023783  | 1139.501  | 687.953   | NM_016341 | 2442.367  | 1897.744  | AF155117  | 9625.107  | 8716.095  |
| AF070647  | 59877.043 | 53308.934 | AF231916  | 12793.357 | 9832.706  | AB014527  | 1095.666  | 1076.078  |
| AF116649  | 594.529   | 507.39    | NM_003501 | 18450.09  | 14032.455 | NM_004411 | 2783.539  | 1255.4    |
| AF174394  | 1650.097  | 1619.275  | NM_004034 | 18642.951 | 12902.99  | NM_01593E | 10613.311 | 5541.173  |
| AF083121  | 543.076   | 288.968   | NM_00013C | 28128.293 | 16308.136 | NM_00074C | 1255.403  | 615.717   |
| AK025924  | 514.16    | 689.775   | AF193756  | 1554.57   | 1230.448  | NM_017843 | 8571.78   | 3556.617  |
| AK021876  | 10831.792 | 10907.256 | AI492087  | 1770.294  | 1274.96   | U10485    | 1059.4    | 523.248   |
| AK022017  | 1307.748  | 1486.377  | R72122    | 13408.191 | 9369.229  | AK025326  | 44861.684 | 22783.877 |
| AK022160  | 1222.827  | 1027.934  | Z35309    | 19842.83  | 12933.485 | NM_01632E | 18183.285 | 16101.187 |
| AK022295  | 719.659   | 822.658   | X04571    | 2066.496  | 1703.6    | NM_017544 | 51547.512 | 51992.457 |
| AK021935  | 6555.987  | 6163.851  | AA700005  | 1844.683  | 1754.888  | NM_003153 | 2600.774  | 2989.325  |
| AK022187  | 604.269   | 500.54    | AA292025  | 6856.479  | 4993.86   | NM_01628E | 1986.569  | 2276.899  |
| AK022337  | 794.41    | 1013.632  | AA437226  | 12740.623 | 8381.527  | NM_014707 | 1300.19   | 1708.127  |
| AL133618  | 2086.944  | 1734.94   | R36143    | 5273.654  | 4119.731  | AF025771  | 3633.365  | 4000.414  |
| AF230314  | 593.548   | 559.973   | XM_056359 | 4580.47   | 3649.73   | NM_01821E | 3413.129  | 3980.087  |
| AK001086  | 577.346   | 846.308   | D10353/NM | 51415.023 | 41527.621 | AB033110  | 3981.007  | 4092.271  |
| AJ131610  | 5717.755  | 6184.028  | M15042    | 20755.379 | 14598.02  | NM_005083 | 62241.961 | 62956.234 |
| S50207    | 905.484   | 732.208   | AK056843  | 19663.229 | 15797.862 | NM_007187 | 18217.754 | 20675.064 |
| AF119872  | 22247.066 | 21388.588 | U49928    | 60001.996 | 59912.793 | NM_00182E | 548.676   | 679.008   |
| NM_002622 | 22572.379 | 20791.852 | AK096645  | 66630.602 | 68442.297 | NM_018983 | 18139.699 | 18669.865 |
| AK024185  | 1095.789  | 1093.704  | AK092859  | 3405.984  | 2647.528  | NM_00309E | 11562.613 | 10947.05  |
| NM_015417 | 563.071   | 702.314   | NM_018291 | 32521.4   | 25332.031 | NM_00727E | 11851.402 | 10735.756 |
| AL137562  | 8718.587  | 7869.234  | NM_00553C | 18224.586 | 12777.158 | BE390833  | 29898.008 | 21975.893 |
| AK022495  | 4348.224  | 4786.806  | NM_00689E | 12907.38  | 7765.39   | NM_00473C | 16880.684 | 12654.52  |
| AK021632  | 1687.903  | 1963.682  | NM_01220C | 7023.922  | 4852.111  | NM_000801 | 7524.719  | 5109.274  |
| AK023143  | 2096.43   | 2177.745  | NM_001724 | 4743.823  | 3207.385  | NM_00611E | 60209.188 | 58419.48  |
| AK026373  | 19323.15  | 14210.084 | BE906724  | 3755.431  | 2471.779  | NM_005801 | 6666.277  | 4037.409  |
| AK021581  | 18286.461 | 22730.166 | NM_002283 | 34268.324 | 22611.41  | NM_01819E | 4104.466  | 2575.31   |
| NM_006687 | 4234.707  | 2967.967  | AJ276095  | 16777.096 | 13124.532 | NM_00153E | 32495.08  | 20614.816 |
| NM_013301 | 6954.397  | 4166.159  | NM_00481E | 8197.696  | 6915.749  | NM_012267 | 664.747   | 405.749   |
| NM_017673 | 1525.465  | 1124.677  | NM_007184 | 7324.862  | 6015.648  | NM_01661E | 620.07    | 868.409   |
| AB046857  | 2691.391  | 1973.288  | NM_005291 | 63013.621 | 57633.691 | NM_000022 | 18490.139 | 16155.912 |
| AK024408  | 2836.073  | 1917.467  | AF253316  | 1427.551  | 1255.291  | NM_01657E | 8373.477  | 9057.563  |
| AF270490  | 429.997   | 430.468   | NM_00585E | 1707.885  | 1401.925  | NM_004213 | 2349.556  | 2162.103  |
| AJ227905  | 707.567   | 638.614   | NM_002923 | 7277.783  | 6900.719  | NM_00192E | 65928.844 | 65487.754 |
| L19364    | 8328.64   | 8816.756  | NM_006794 | 4489.521  | 2863.816  | NM_00090E | 4687.429  | 5133.606  |
| NM_00539C | 1270.874  | 1238.868  | NM_018653 | 1640.494  | 1033.845  | NM_00048C | 7687.925  | 9595.188  |
| AJ012502  | 23752.652 | 19609.375 | NM_00538E | 23981.232 | 19628.555 | AF254084  | 60195.031 | 59549.5   |
| AK024170  | 694.534   | 440.042   | NM_007232 | 60345     | 62659.781 | AK022648  | 524.961   | 972.133   |
| NM_000681 | 739.602   | 840.332   | NM_003027 | 2891.984  | 2512.528  | AK022976  | 2044.327  | 2683.428  |
| AF147445  | 1432.372  | 1539.369  | NM_016257 | 3144.738  | 2340.159  | AB048791  | 13474.244 | 15357.624 |
| Y10508    | 6292.343  | 6627.814  | NM_002717 | 10361.199 | 9726.032  | NM_003107 | 1596.447  | 2025.707  |
| NM_005182 | 64291.813 | 60401.484 | NM_012114 | 1639.595  | 1143.524  | NM_006874 | 8165.317  | 9683.435  |
| D17074    | 4112.854  | 5029.698  | NM_01448E | 1162.203  | 892.783   | AB046777  | 2241.615  | 2777.316  |
| AF039944  | 1916.663  | 2125.564  | NM_00302E | 60974.422 | 61734.629 | AJ251844  | 25275.783 | 21711.24  |
| AJ276252  | 1556.152  | 2101.987  | U52051    | 614.766   | 743.267   | D16815    | 2041.697  | 1948.128  |
| AK021716  | 3683.269  | 3085.942  | NM_02017E | 39328.059 | 40432.746 | NM_00188C | 2564.656  | 2197.957  |

|           |           |           |           |           |           |           |           |           |
|-----------|-----------|-----------|-----------|-----------|-----------|-----------|-----------|-----------|
| AK025035  | 13702.594 | 12363.933 | NM_004306 | 64766.719 | 73668.008 | AB028943  | 8593.558  | 6277.874  |
| AK002085  | 7197.018  | 8798.854  | NM_001153 | 874.039   | 794.204   | NM_006194 | 2310.729  | 1874.648  |
| AB018338  | 3367.934  | 2427.072  | NM_006786 | 28290.111 | 25868.682 | AK001603  | 27684.701 | 17318.859 |
| D80010    | 3277.984  | 1646.041  | NM_006205 | 4320.152  | 4347.213  | U71601    | 4592.12   | 2277.468  |
| NM_004923 | 1173.954  | 746.756   | NM_004283 | 2699.303  | 2003.349  | AK025985  | 62499.961 | 59061.43  |
| NM_003971 | 5000.311  | 2613.627  | NM_004163 | 61636.934 | 57530.238 | NM_013256 | 4952.507  | 2404.932  |
| AK026973  | 1265.567  | 742.469   | AK026308  | 4055.737  | 3356.806  | NM_004143 | 2480.231  | 1458.292  |
| NM_005822 | 1370.529  | 1652.756  | NM_013337 | 6991.955  | 6443.395  | X66087    | 3372.112  | 1730.776  |
| U81002    | 10748.958 | 7277.86   | NM_004193 | 6510.952  | 4925.536  | L09070    | 532.589   | 801.641   |
| NM_016296 | 13356.085 | 12703.633 | NM_002803 | 26215.982 | 24766.896 | NM_000062 | 9633.024  | 10673.561 |
| NM_014185 | 21933.668 | 19924.902 | NM_005508 | 9598.3    | 10414.753 | NM_009590 | 20708.094 | 23294.299 |
| L38517    | 1219.879  | 1043.053  | NM_018485 | 1760.561  | 1644.523  | AL133037  | 1416.485  | 2059.553  |
| AK026101  | 10306.074 | 7443.454  | NM_006788 | 4140.136  | 4105.809  | NM_020350 | 6031.627  | 6555.339  |
| AK022194  | 9452.413  | 6345.617  | AK025039  | 728.233   | 801.091   | NM_000350 | 13737.28  | 17388.424 |
| AF085963  | 1472.056  | 1004.587  | NM_016568 | 3239.433  | 2915.175  | X91103    | 30732.463 | 42197.805 |
| AK021436  | 575.764   | 801.824   | NM_002987 | 1048.238  | 907.581   | AA419164  | 2762.402  | 3948.33   |
| U58664    | 456.629   | 635.433   | AB033102  | 63020.262 | 57955.012 | L35251    | 7512.694  | 9558.75   |
| AF085937  | 1304.544  | 1324.36   | NM_014774 | 6826.61   | 6833.108  | BE910395  | 11772.036 | 13966.546 |
| AL137569  | 996.67    | 1418.994  | NM_014143 | 47334.742 | 39698.473 | N46828    | 25579.666 | 28467.537 |
| AK021920  | 5157.492  | 5580.281  | M55646    | 55673.68  | 53770.68  | BI908302  | 59867.289 | 62136.336 |
| AL049415  | 5704.584  | 5607.175  | NM_006112 | 53532.785 | 51267.805 | AA460969  | 5686.971  | 5974.363  |
| AK022375  | 2819.803  | 2384.275  | NM_000879 | 356.176   | 773.698   | BG695859  | 4970.684  | 4177.411  |
| NM_003378 | 22652.811 | 24404.604 | M12807    | 5281.921  | 5491.317  | M85079    | 29562.275 | 25128.18  |
| AL110194  | 20826.018 | 15938.636 | NM_001765 | 6500.208  | 6260.062  | AA457671  | 31657.006 | 24456.963 |
| AF138860  | 1930.08   | 1921.569  | NM_003361 | 6666.937  | 5558.963  | X07437    | 24687.244 | 23515.785 |
| NM_001942 | 532.84    | 313.248   | NM_012099 | 25022.934 | 20875.076 | NM_000641 | 4536.212  | 3449.988  |
| AF200348  | 1623.773  | 786.576   | NM_018684 | 63578.012 | 59871.258 | AE006466  | 30805.996 | 20220.875 |
| Y11710    | 1560.2    | 959.086   | NM_017983 | 3735.253  | 3218.982  | BC008737  | 68968     | 62949.93  |
| J03756    | 1734.014  | 1620.09   | AF116909  | 3020.965  | 2880.45   | BC011655  | 4756.711  | 2807.038  |
| NM_002650 | 8698.328  | 11065.692 | NM_000282 | 4034.231  | 3181.896  | BC002396  | 9790.076  | 7048.585  |
| NM_003260 | 2239.131  | 2125.705  | NM_000532 | 30212.146 | 25698.553 | NM_003613 | 3275.743  | 1854.468  |
| AK024071  | 5431.22   | 6575.749  | NM_016341 | 2742.608  | 2212.3    | NM_005385 | 10904.987 | 11052.008 |
| AF056490  | 5616.033  | 6299.484  | AF231916  | 11482.979 | 8016.861  | NM_018985 | 5295.338  | 5421.628  |
| NM_005539 | 7908.155  | 6710.087  | NM_003501 | 17506.836 | 14002.252 | NM_006074 | 64221.723 | 65229.883 |
| NM_005541 | 11108.134 | 6664.858  | AK022654  | 59180.965 | 60108.027 | AF208232  | 12261.092 | 11693.577 |
| AB002319  | 2646.54   | 1502.142  | BC002905  | 16121.541 | 15496.47  | NM_002988 | 15623.438 | 18443.273 |
| AF039942  | 6087.047  | 4348.799  | NM_018091 | 28497.264 | 26829.637 | NM_004186 | 2455.968  | 2803.275  |
| NM_004421 | 3800.065  | 3964.882  | NM_001108 | 14030.342 | 15686.801 | NM_016258 | 10750.527 | 16290.524 |
| AB046863  | 3948.785  | 5561.768  | NM_001637 | 1697.331  | 1890.716  | AF203032  | 31508.4   | 51571.137 |
| M62403    | 2870.822  | 2832.016  | NM_016630 | 43380.031 | 41960.715 | AB014542  | 45830.531 | 60641.152 |
| NM_017883 | 5748.91   | 6003.585  | NM_014291 | 27575.992 | 22505.779 | NM_014640 | 2771.374  | 4397.533  |
| AK025131  | 3788.15   | 3686.272  | NM_014631 | 2269.773  | 1887.563  | Y10518    | 66293.336 | 69185.938 |
| NM_000754 | 38214.93  | 40734.52  | NM_001089 | 19393.785 | 14902.924 | AF155135  | 14103.396 | 17625.887 |
| NM_014619 | 1734.501  | 2241.505  | NM_000120 | 4754.379  | 3650.15   | NM_014790 | 3922.793  | 4440.864  |
| NM_005629 | 3555.158  | 4532.254  | AF172327  | 65190.844 | 64681.449 | NM_003571 | 40008.844 | 38642.59  |
| J04621    | 1756.338  | 2154.535  | NM_001676 | 21858.25  | 17624.34  | AB032965  | 63870.836 | 65268.32  |
| NM_000718 | 9194      | 9197.38   | NM_000220 | 2514.74   | 2511.38   | NM_020370 | 938.709   | 1112.214  |
| NM_000161 | 6130.27   | 7271.084  | NM_001679 | 62489.883 | 58531.789 | NM_004767 | 3626.965  | 3818.418  |
| BQ893560  | 1014.996  | 646.701   | NM_004046 | 65707.422 | 71610.656 | BF310159  | 25807.025 | 20727.975 |
| NM_001972 | 2112.523  | 2767.938  | NM_004983 | 4329.725  | 3851.001  | NM_018986 | 4100.736  | 3107.046  |
| NM_001445 | 5124.7    | 6687.158  | U09384    | 6073.659  | 4483.458  | AB044934  | 753.55    | 673.691   |
| AK024455  | 1672.063  | 1870.04   | NM_006860 | 23420.191 | 20915.82  | U27655    | 15762.826 | 9807.191  |
| NM_002006 | 60644.023 | 63812.754 | NM_004794 | 27715.424 | 25319.566 | Z21965    | 65803.68  | 52029.957 |

|           |           |           |           |           |           |           |           |           |
|-----------|-----------|-----------|-----------|-----------|-----------|-----------|-----------|-----------|
| NM_007111 | 35054.176 | 49390.719 | NM_018291 | 28154.736 | 21867.371 | NM_012427 | 3105.481  | 2000.579  |
| NM_002048 | 2401.857  | 3148.311  | NM_005530 | 21659.994 | 20417.746 | AF133424  | 10028.815 | 12643.637 |
| NM_004702 | 3654.23   | 4745.987  | NM_006899 | 15751.999 | 13722.776 | NM_005003 | 34641.281 | 34396.699 |
| NM_007109 | 10968.947 | 15017.936 | NM_012200 | 7629.484  | 5647.577  | AF084560  | 24005.828 | 27786.691 |
| AK023404  | 3271.072  | 3117.504  | NM_001724 | 6079.255  | 5058.068  | NM_015715 | 2375.549  | 3035.554  |
| NM_013239 | 4640.678  | 2453.355  | NM_000150 | 6114.124  | 4606.285  | NM_000032 | 26197.225 | 35057.508 |
| NM_001789 | 4578.626  | 2788.813  | AB023152  | 1400.145  | 925.596   | NM_002083 | 6036.024  | 7887.716  |
| NM_016004 | 6287.873  | 5875.306  | NM_006212 | 6226.43   | 5197.587  | NM_002035 | 8225.015  | 10917.925 |
| NM_002655 | 2781.229  | 2606.615  | AK022872  | 8541.717  | 6864.119  | NM_014900 | 3736.704  | 4529.03   |
| AB028955  | 4333.579  | 4581.265  | AK024272  | 9638.155  | 7913.514  | BF342908  | 2559.405  | 3939.826  |
| U66879    | 14285.689 | 14309.281 | NM_016381 | 3050.802  | 2506.802  | AK023510  | 8226.75   | 11222.813 |
| NM_016022 | 12038.904 | 13167.245 | AL591715  | 2376.512  | 2032.077  | NM_004345 | 5376.424  | 7222.175  |
| NM_004874 | 3895.505  | 4287.068  | NM_007254 | 719.462   | 296.064   | NM_002232 | 445.935   | 722.709   |
| NM_014204 | 4186.908  | 4467.226  | NM_018042 | 29495.992 | 24114.045 | NM_014570 | 4514.349  | 4402.715  |
| S70385    | 39067.75  | 38184.711 | BE741525  | 3164.591  | 2607.662  | NM_014822 | 3295.048  | 3530.979  |
| M34671    | 12968.476 | 13018.742 | BF030555  | 62096.152 | 58942.348 | NM_005296 | 3729.784  | 3722.005  |
| NM_018509 | 15596.17  | 16361.792 | NM_012433 | 17311.637 | 14578.525 | NM_001337 | 731.288   | 673.665   |
| NM_004086 | 1577.742  | 2333.271  | NM_005605 | 12038.92  | 9786.062  | NM_003611 | 8040.441  | 6551.22   |
| NM_014944 | 15639     | 14521.55  | NM_002576 | 7344.626  | 6189.364  | AB014538  | 9128.201  | 8680.509  |
| NM_001109 | 1027.506  | 1140.714  | NM_003582 | 4538.753  | 4317.573  | NM_006209 | 1732.032  | 1588.646  |
| NM_007352 | 1178.368  | 1489.733  | AF057354  | 2078.15   | 1626.721  | AK025118  | 6883.715  | 5733.653  |
| AF176706  | 9493.755  | 12655.078 | AF169351  | 27898.941 | 23870.619 | NM_000727 | 4376.241  | 3155.575  |
| NM_014484 | 2953.726  | 3668.162  | M14200    | 67289     | 68978.039 | NM_002621 | 930.335   | 626.973   |
| NM_001086 | 9298.052  | 14271.807 | CY3Cy5    | 6514.9    | 283.327   | NM_002625 | 506.963   | 989.603   |
| NM_014670 | 2622.928  | 3041.599  | NM_000623 | 613.066   | 692.948   | NM_004135 | 4141.993  | 4676.001  |
| NM_019048 | 16902.084 | 22154.646 | NM_000941 | 5709.32   | 5636.402  | NM_000203 | 660.328   | 702.117   |
| NM_001040 | 7808.96   | 9180.307  | AK026844  | 5005.66   | 4334.981  | NM_013443 | 2261.033  | 3214.98   |
| AF279698  | 6444.498  | 7732.784  | AK026735  | 8606.788  | 8833.13   | NM_000925 | 17224.027 | 21323.236 |
| NM_019849 | 6704.857  | 7071.006  | AL110104  | 49671.301 | 52203.98  | NM_000465 | 3623.45   | 5040.548  |
| AB032996  | 27784.117 | 19541.561 | AF240633  | 2492.331  | 2748.405  | NM_000123 | 4114.282  | 6636.415  |
| AB040881  | 18423.885 | 13851.728 | AK027056  | 12133.611 | 15316.146 | AL137501  | 3073.743  | 4676.967  |
| AY007121  | 8055.049  | 5843.688  | AK024294  | 2638.392  | 2748.187  | BE858979  | 1269.367  | 1668.369  |
| NM_003372 | 18521.633 | 18478.092 | AL110126  | 3972.943  | 4041.633  | NM_000122 | 3516.459  | 3467.941  |
| NM_007317 | 14845.966 | 15551.955 | AF052172  | 61342.617 | 58894.699 | NM_006712 | 67388.602 | 61159.367 |
| AB037826  | 1749.474  | 2087.714  | AB014573  | 11903.34  | 13036.731 | NM_006240 | 6717.45   | 5694.732  |
| AK021466  | 3640.16   | 3043.685  | AK025418  | 1347.268  | 1111.231  | NM_007026 | 6426.702  | 5945.946  |
| Z36796    | 62829.305 | 60192.219 | AB020643  | 846.143   | 1030.59   | M37712    | 11847.809 | 7554.892  |
| NM_006443 | 63890.145 | 60805.469 | AK025245  | 573.087   | 827.58    | NM_002648 | 11124.46  | 7899.343  |
| NM_001559 | 951.816   | 1139.713  | NM_000623 | 528.41    | 484.775   | AF070670  | 21965.76  | 12354.665 |
| NM_002634 | 38707.859 | 40625.074 | NM_000941 | 4339.205  | 3454.087  | NM_016156 | 5200.12   | 4607.811  |
| NM_017749 | 6985.197  | 6876.976  | SR1       | 84075.313 | 64435.852 | NM_016528 | 2659.094  | 2022.177  |
| AF099032  | 5150.002  | 6825.615  | SR3       | 51631.113 | 55834.574 | NM_015974 | 2490.512  | 1391.724  |
| NM_003070 | 9835.085  | 14805.492 | SR5       | 6406.735  | 6841.883  | NM_014384 | 2325.9    | 1672.493  |
| AL122101  | 3762.73   | 6824.444  | SR7       | 6017.031  | 50961.027 | NM_002573 | 4873.217  | 3231.375  |
| AK001649  | 1516.689  | 1666.236  | SR9       | 21082.426 | 3211.235  | NM_009590 | 18554.877 | 24989.91  |
| NM_016333 | 20659.285 | 9491.622  | CY3Cy5    | 5072.182  | 255.685   | AL133037  | 2066.061  | 3217.888  |
| BE875028  | 7355.769  | 5743.268  | L10404    | 2014.642  | 1902.549  | NM_020350 | 5421.819  | 5576.892  |
| AK000511  | 11459.175 | 9156.808  | AF283776  | 5938.533  | 5822.046  | NM_000350 | 12573.24  | 14605.516 |
| AF121255  | 6439.29   | 9511.893  | L10123    | 56181.422 | 56123.848 | X91103    | 31006.221 | 36030.926 |
| NM_005494 | 20315.156 | 17140.02  | D16877    | 10749.22  | 12119.028 | AA419164  | 2843.154  | 3176.528  |
| NM_017946 | 1912.17   | 1664.129  | AL109781  | 6053.181  | 6008.973  | L35251    | 6742.138  | 8693.472  |
| NM_004953 | 20969.912 | 15210.956 | AK027237  | 1303.741  | 1344.869  | BE910395  | 10425.478 | 14720.986 |
| NM_012199 | 8804.359  | 7403.489  | AK027104  | 4996.042  | 4295.539  | N46828    | 26413.686 | 34117.086 |

|           |           |           |           |           |           |           |           |           |
|-----------|-----------|-----------|-----------|-----------|-----------|-----------|-----------|-----------|
| AL049682  | 3683.318  | 3793.109  | AL133090  | 70102.633 | 63797.289 | BI908302  | 61813.766 | 63469.406 |
| NM_00552E | 13283.711 | 13024.444 | AF085867  | 7492.807  | 7445.77   | AA460969  | 5827.815  | 6092.197  |
| AL050199  | 8808.356  | 8021.06   | AF086510  | 6640.563  | 5557.379  | BG695859  | 4732.8    | 5082.222  |
| NM_006721 | 31735.504 | 42806.227 | NM_00281E | 3404.23   | 3284.347  | M85079    | 29481.113 | 26820.396 |
| NM_01628E | 17229.518 | 24412.166 | NM_01782E | 10153.104 | 9545.444  | AA457671  | 31638.049 | 27673.045 |
| NM_00276E | 20242.553 | 30500.549 | AK024520  | 12642.749 | 12338.561 | X07437    | 25449.545 | 24808.75  |
| AF292100  | 15725.825 | 20329.848 | AK024592  | 10128.779 | 9644.946  | NM_000641 | 4438.214  | 3710.193  |
| NM_00343A | 63320.855 | 64154.086 | AK024904  | 4305.702  | 3912.7    | AE006466  | 30184.727 | 25590.221 |
| NM_018181 | 2266.958  | 3592.375  | AK025030  | 3700.415  | 3555.723  | BC008737  | 61776.207 | 60868.926 |
| BE904617  | 4420.997  | 3067.554  | AK024542  | 3921.506  | 4490.773  | BC011655  | 5067.792  | 3665.699  |
| AK024495  | 4135.327  | 5140.336  | AK024915  | 2628.728  | 3589.869  | BC002396  | 9414.26   | 8096.417  |
| AF024694  | 1889.411  | 2064.604  | AK091109  | 75080.781 | 63960.809 | AF112219  | 9960.517  | 5097.992  |
| AF091081  | 35985.195 | 29279.883 | AF032897  | 1071.082  | 1534.608  | NM_00607A | 62458.125 | 64558.766 |
| AK001758  | 5508.87   | 4315.627  | NM_014967 | 6462.913  | 6644.471  | AF208232  | 12438.796 | 14914.638 |
| U90842    | 983.078   | 794.579   | AK022915  | 5802.742  | 6056.677  | NM_00298E | 13645.351 | 16144.481 |
| AK025076  | 1144.251  | 791.575   | AK021736  | 907.818   | 705.58    | NM_00418E | 2837.672  | 3591.659  |
| AF086325  | 1915.465  | 1774.284  | AF131834  | 3016.071  | 2860.812  | NM_01625E | 10945.998 | 14318.333 |
| NM_00492E | 3193.034  | 3457.167  | AL355711  | 2456.276  | 2593.08   | AF203032  | 24191.768 | 30067.961 |
| NM_005081 | 1345.938  | 1353.111  | AJ011409  | 52845.25  | 52781.68  | AB014542  | 33181.766 | 35746.777 |
| NM_00495E | 1753.586  | 2054.848  | AJ227906  | 3758.418  | 4078.92   | NM_01464C | 2472.131  | 3798.165  |
| AK026022  | 61825.293 | 58021.863 | AJ011598  | 657.658   | 936.731   | Y10518    | 66282.75  | 75178.273 |
| NM_00319E | 14673.669 | 14318.193 | AJ001906  | 1500.583  | 2098.907  | AF155135  | 13955.983 | 19707.949 |
| NM_00430E | 66433.992 | 68674.352 | U17633    | 2903.772  | 2098.392  | NM_01479C | 4011.15   | 4328.674  |
| NM_001153 | 1938.394  | 1965.873  | AF086202  | 38622.926 | 45424.84  | NM_003571 | 41719.656 | 41683.797 |
| NM_00678E | 27927.18  | 30885.516 | AK022352  | 849.923   | 804.546   | AB032965  | 63419.332 | 65392.918 |
| NM_00620E | 8239.411  | 10481.241 | AK023270  | 5860.91   | 7645.846  | NM_02037C | 962.496   | 1298.415  |
| NM_00403A | 6446.565  | 9910.159  | AF085979  | 37016.34  | 43199.078 | NM_004767 | 3846.354  | 4560.294  |
| NM_00013C | 6325.934  | 7459.691  | AK023112  | 3412.048  | 4734.652  | BF310159  | 26447.084 | 23605.934 |
| AF193756  | 700.882   | 1041.219  | NM_01780E | 67953.906 | 63678.879 | NM_00031E | 386.515   | 630.971   |
| NM_00418E | 860.184   | 1284.155  | AK021712  | 355.407   | 465.361   | NM_01898E | 4330.423  | 4347.218  |
| X04571    | 3225.055  | 4066.518  | AK021895  | 5618.474  | 5909.399  | AB044934  | 843.38    | 1019.69   |
| AA700005  | 2113.353  | 1752.857  | AK024293  | 1002.186  | 857.399   | U27655    | 16594.09  | 13415.875 |
| AA292025  | 7258.072  | 6462.575  | AL080107  | 509.821   | 473.022   | Z21965    | 63811.539 | 56474.152 |
| AA437226  | 15053.772 | 13999.587 | AK000036  | 17301.359 | 19735.438 | NM_012427 | 3064.091  | 1936.458  |
| R36143    | 1170.876  | 1603.312  | AK000769  | 1121.475  | 1142.521  | NM_00006E | 9327.819  | 6786.652  |
| XM_056359 | 2762.646  | 2127.44   | AK000924  | 2019.352  | 1704.325  | AF084560  | 25561.896 | 29107.375 |
| D10353/NM | 7409.182  | 6203.896  | AK022252  | 1136.838  | 1219.242  | NM_01571E | 1763.184  | 2562.266  |
| M15042    | 22808.404 | 19210.727 | AK000114  | 4989.89   | 4645.318  | NM_00003E | 22243.592 | 29854.48  |
| AK056843  | 2241.763  | 2456.337  | AK000952  | 16430.334 | 14764.161 | NM_00208E | 5787.746  | 6802.972  |
| U49928    | 56953.727 | 56308.117 | AF119862  | 32657.119 | 37021.73  | NM_00203E | 8453.37   | 10800.955 |
| AK096645  | 64767.668 | 62973.723 | U17628    | 3439.901  | 4137.15   | NM_01490C | 3621.051  | 4664.831  |
| AK092859  | 1954.969  | 2224.744  | AF119867  | 14832.284 | 15668.643 | BF342908  | 3607.336  | 4486.49   |
| NM_00579E | 26332.887 | 25291.895 | AL357205  | 13194.772 | 26799.896 | AF118073  | 2032.49   | 2523.556  |
| M55646    | 4355.136  | 3073.234  | AF124819  | 1828.543  | 2123.505  | AK023510  | 8650.288  | 11709.666 |
| NM_00611E | 50823.703 | 53080.809 | D17091    | 4852.007  | 7321.685  | NM_00434E | 5133.591  | 6855.768  |
| NM_00087E | 1378.034  | 1006.28   | AL133074  | 1863.758  | 2451.209  | NM_00223E | 531.726   | 772.521   |
| M12807    | 7476.765  | 8481.748  | AF086318  | 24153.051 | 28137.313 | NM_01457C | 4771.231  | 5525.501  |
| NM_00176E | 2114.674  | 2211.82   | AF088012  | 1520.026  | 1456.394  | NM_01482E | 3075.866  | 3734.204  |
| NM_003361 | 2710.509  | 3421.865  | NM_018121 | 2124.214  | 1883.665  | NM_00529E | 3558.789  | 4447.732  |
| NM_01209E | 11077.426 | 15285.659 | AB050477  | 11724.075 | 11839.006 | NM_001337 | 613.659   | 645.549   |
| NM_01868A | 34919.18  | 46666.727 | AK000152  | 3434.662  | 2810.316  | NM_003611 | 8837.096  | 7761.562  |
| NM_01798E | 3982.136  | 4680.956  | AK024300  | 3947.936  | 4273.749  | AB014538  | 10308.717 | 12092.394 |
| AF116909  | 4329.282  | 4483.969  | L09092    | 2018.409  | 2231.197  | NM_00620E | 1764.925  | 1567.373  |

|           |           |           |           |           |           |           |           |           |
|-----------|-----------|-----------|-----------|-----------|-----------|-----------|-----------|-----------|
| BE906724  | 3820.061  | 3745.627  | NM_012132 | 2203.642  | 2600.993  | AK025118  | 7471.286  | 7759.731  |
| NM_002283 | 9414.312  | 11456.516 | NM_012129 | 1751.132  | 1834.946  | NM_000727 | 4966.107  | 3489.804  |
| AJ276095  | 7209.441  | 5730.658  | AK024881  | 441.454   | 497.585   | NM_002621 | 924.742   | 626.875   |
| NM_004819 | 7378.477  | 6627.472  | AK025716  | 3903.67   | 3678.433  | NM_005385 | 8826.883  | 6491.354  |
| NM_007184 | 7689.51   | 7098.516  | L09268    | 1992.106  | 2651.465  | NM_018985 | 5712.713  | 3254.136  |
| NM_005291 | 7994.784  | 7713.88   | NM_020186 | 15937.563 | 17563.098 | NM_000203 | 611.165   | 350.05    |
| AF253316  | 1070.548  | 1046.075  | AF090947  | 8372.538  | 9258.334  | NM_013443 | 1764.712  | 2037.673  |
| NM_005855 | 1368.858  | 1833.241  | NM_005047 | 4890.818  | 6625.015  | NM_000925 | 16645.463 | 17780.783 |
| NM_002923 | 7312.499  | 9418.44   | AJ272196  | 35060.844 | 40981.527 | NM_000465 | 3968.701  | 4471.034  |
| NM_006794 | 2251.85   | 2588.08   | X58162    | 19350.396 | 20081.568 | AF116685  | 495.282   | 1239.623  |
| NM_018653 | 2262.503  | 2983.002  | AK022825  | 2097.616  | 2718.559  | NM_000123 | 3851.826  | 7186.696  |
| NM_005385 | 15422.313 | 18449.51  | AV756662  | 1486.284  | 1445.26   | AL137501  | 2325.353  | 2981.222  |
| NM_007232 | 23107.939 | 21906.504 | AK001937  | 67728.344 | 63721.055 | BE858979  | 1665.972  | 3758.035  |
| NM_002717 | 8215.6    | 10080.379 | AL365517  | 3737.068  | 3759.821  | NM_000122 | 3248.859  | 4421.32   |
| AF231916  | 1757.129  | 1969.294  | AK021988  | 31359.543 | 27494.98  | NM_006712 | 61983.168 | 61120.016 |
| NM_003501 | 10747.756 | 6795.088  | AF086494  | 62827.867 | 61958.461 | NM_006240 | 6253.625  | 6639.224  |
| AK022654  | 9927.789  | 8900.579  | BI769977  | 2224.679  | 2408.506  | NM_007026 | 6500.493  | 7518.422  |
| BC002905  | 10564.758 | 9900.887  | AL137567  | 2765.96   | 2409.684  | M37712    | 11749.023 | 8907.488  |
| NM_018091 | 23197.049 | 23960.967 | AK024913  | 6992.486  | 8312.593  | NM_002648 | 11516.283 | 9276.994  |
| NM_001108 | 17003.684 | 21254.563 | AB007961  | 15301.255 | 14272.259 | AF070670  | 24082.883 | 17443.717 |
| NM_001637 | 1845.914  | 1486.126  | NM_005547 | 2293.375  | 2455.533  | NM_016156 | 5156.012  | 4819.38   |
| NM_016630 | 38260.285 | 51940.91  | AF164794  | 13967.419 | 17284.467 | NM_016528 | 2793.634  | 2379.05   |
| NM_014291 | 14757.424 | 17427.709 | NM_001173 | 2509.729  | 3385.388  | NM_015974 | 2762.699  | 1845.491  |
| NM_014631 | 4706.58   | 6343.842  | AB020656  | 4099.468  | 4739.932  | NM_014384 | 2186.577  | 1829.152  |
| NM_001089 | 9438.548  | 8715.354  | AK023648  | 7005.706  | 7235.74   | NM_002573 | 4689.972  | 2724.128  |
| NM_000120 | 848.964   | 611.443   | NM_000412 | 2561.005  | 3389.122  | AF133424  | 9787.326  | 6881.263  |
| U09384    | 5545.599  | 4473.252  | AF077033  | 9017.105  | 9752.934  | NM_005003 | 32606.83  | 21841.992 |
| NM_004794 | 14185.858 | 14921.913 | D50406    | 1570.519  | 1813.755  | AL133037  | 1106.288  | 1641.673  |
| NM_002803 | 20200.811 | 17375.771 | NM_004991 | 1948.316  | 2131.725  | NM_020350 | 5141.797  | 5549.065  |
| NM_005508 | 10204.017 | 9194.069  | NM_014191 | 439.194   | 626.423   | NM_000350 | 13919.696 | 16384.193 |
| NM_018485 | 1906.743  | 2377.453  | AK026708  | 16025.165 | 18674.461 | X91103    | 30567.195 | 33842.629 |
| NM_006788 | 4396.261  | 3547.205  | NM_017903 | 7540.348  | 7493.328  | AA419164  | 2823.056  | 3680.507  |
| AK025039  | 775.599   | 718.453   | NM_018074 | 7435.928  | 7753.058  | L35251    | 7249.111  | 10170.33  |
| NM_016568 | 2839.411  | 2735.842  | NM_000909 | 9123.104  | 8685.628  | BE910395  | 10244.323 | 14831.434 |
| NM_002987 | 668.119   | 1273.411  | U31737    | 1196.611  | 1347.959  | N46828    | 23388.5   | 30680.723 |
| AB033102  | 15629.644 | 18778.938 | AK024828  | 3224.967  | 3376.77   | BI908302  | 56505.527 | 65007.887 |
| NM_014774 | 6238.957  | 9005.624  | AF009315  | 4707.104  | 4462.657  | AA460969  | 5335.056  | 7457.394  |
| NM_014143 | 46594.066 | 54360.352 | NM_019013 | 2296.719  | 2284.785  | BG695859  | 5302.425  | 5123.902  |
| NM_012200 | 7161.721  | 4210.812  | NM_006783 | 1189.206  | 1052.325  | M85079    | 30011.795 | 27716.881 |
| NM_001724 | 5077.09   | 3633.712  | L37711    | 1635.002  | 1594.023  | AA457671  | 31898.764 | 31703.594 |
| NM_000150 | 705.439   | 374.26    | S70313    | 33477.762 | 33788.641 | X07437    | 24740.201 | 27906.404 |
| AB023152  | 1195.317  | 543.629   | AK021607  | 2421.428  | 2277.003  | NM_000641 | 4336.871  | 3897.96   |
| NM_006212 | 3336.657  | 1917.409  | AK025860  | 1034.902  | 1039.425  | AE006466  | 30468.537 | 28084.389 |
| AK022872  | 5633.552  | 3872.634  | NM_000216 | 1971.322  | 1973.869  | BC008737  | 60426.902 | 57759.137 |
| AK024272  | 5846.258  | 4641.349  | AF135960  | 4007.318  | 3833.237  | BC011655  | 5305.478  | 5108.245  |
| NM_016381 | 3464.162  | 2590.117  | NM_014216 | 43933.441 | 55420.738 | BC002396  | 9941.128  | 8435.353  |
| AL591715  | 1076.279  | 677.165   | NM_003010 | 5177.51   | 5865.227  | AF112219  | 10401.054 | 7329.735  |
| NM_007254 | 776.484   | 994.874   | NM_006871 | 2227.919  | 2827.756  | NM_004135 | 4081.925  | 2293.401  |
| NM_018042 | 6692.138  | 4604.356  | NM_019074 | 14657.816 | 17596.043 | Y10518    | 59855.539 | 61059.555 |
| BE741525  | 2930.419  | 3508.136  | NM_018494 | 66353.914 | 73914.68  | AF155135  | 12984.336 | 15219.692 |
| BF030555  | 13382.646 | 10280.839 | AK000006  | 1341.378  | 2358.512  | NM_014790 | 3809.457  | 4325.956  |
| NM_012433 | 12211.02  | 11216.869 | NM_001115 | 4845.23   | 5208.06   | NM_003571 | 39417.008 | 40094.707 |
| NM_005605 | 3116.167  | 3257.769  | NM_014921 | 1779.426  | 1788.078  | AB032965  | 58838.883 | 64822.156 |

|           |           |           |           |           |           |           |           |           |
|-----------|-----------|-----------|-----------|-----------|-----------|-----------|-----------|-----------|
| NM_002576 | 7069.589  | 7100.218  | NM_016581 | 62887.652 | 67232.906 | NM_02037C | 1185.013  | 2487.015  |
| NM_003582 | 3096.729  | 2961.375  | NM_013255 | 3975.413  | 4711.083  | NM_004767 | 4551.388  | 6979.946  |
| AF057354  | 2116.405  | 1667.274  | NM_007183 | 1001.265  | 1013.849  | BF310159  | 28396.254 | 39120.766 |
| AF169351  | 4704.159  | 4544.736  | AJ238243  | 31543.555 | 29790.672 | NM_00031E | 431.965   | 829.029   |
| M14200    | 62133.406 | 59962.387 | J05046    | 62247.203 | 57534.328 | NM_01898E | 3856.105  | 5187.201  |
| NM_000282 | 2806.194  | 3632.106  | NM_01231E | 6294.107  | 6077.394  | AB044934  | 957.868   | 1365.004  |
| NM_016341 | 3654.977  | 5344.042  | NM_002751 | 21178.447 | 21795.844 | U27655    | 18951.072 | 18364.012 |
| NM_00678E | 20483.355 | 13450.508 | NM_004291 | 3947.332  | 4375.723  | NM_00336C | 4601.594  | 4677.266  |
| NM_00620E | 6822.693  | 7374.588  | NM_00381E | 11698.223 | 13293.237 | Z21965    | 61066.215 | 58798.352 |
| NM_004034 | 5318.384  | 4007.131  | AK022635  | 803.113   | 748.693   | NM_012427 | 3092.267  | 3203.951  |
| NM_00013C | 5905.783  | 4719.174  | NM_004912 | 4859.68   | 5062.879  | AF131857  | 22337.945 | 17174.545 |
| AF193756  | 790.233   | 638.513   | U79304    | 29050.473 | 30811.766 | NM_00085Z | 743.126   | 880.285   |
| NM_004183 | 690.992   | 705.28    | NM_016267 | 9753.463  | 9335.032  | NM_00039E | 2701.604  | 2280.37   |
| AI492087  | 1420.68   | 994.192   | NM_004671 | 11029.925 | 11765.908 | AW797282  | 603.364   | 505.749   |
| R72122    | 10682.691 | 8540.737  | NM_00652E | 10062.916 | 13640.713 | NM_00240Z | 793.286   | 490.403   |
| Z35309    | 12926.708 | 9857.568  | U35622    | 1626.884  | 2203.377  | L09070    | 467.525   | 451.365   |
| X04571    | 1932.938  | 1726.559  | NM_00704E | 4960.422  | 5624.884  | NM_00006Z | 9165.348  | 6227.76   |
| AA700005  | 1780.177  | 1518.118  | NM_003627 | 11804.888 | 17063.078 | NM_00959C | 20413.742 | 17315.561 |
| AA292025  | 7064.493  | 6105.319  | NM_01214E | 41512.758 | 48174.289 | NM_014747 | 18124.17  | 21003.922 |
| AA437226  | 12868.967 | 9971.287  | AF305779  | 4876.07   | 5120.439  | Y19240    | 14036.396 | 17406.461 |
| R36143    | 1351.771  | 1467.152  | AF225416  | 15485.506 | 19628.295 | AF091029  | 25047.709 | 27537.67  |
| XM_056359 | 2526.036  | 1778.571  | NM_016231 | 7040.128  | 7379.751  | X97074    | 62280.328 | 59344.043 |
| D10353/NM | 7021.788  | 5212.822  | NM_002093 | 6292.358  | 6999.381  | AL117235  | 1069.569  | 1706.359  |
| M15042    | 25168.158 | 19878.795 | AB042555  | 33072.016 | 33295.395 | NM_01482Z | 3363.064  | 5015.425  |
| AK056843  | 2596.959  | 2666.143  | NM_00172E | 2955.296  | 2935.844  | NM_00529E | 3878.825  | 5796.161  |
| U49928    | 57402.426 | 55046.469 | NM_01776Z | 3262.332  | 3571.257  | NM_001337 | 1687.33   | 2829.924  |
| AK096645  | 61211.648 | 58901.98  | NM_01397E | 5241.426  | 5304.123  | NM_003611 | 11065.233 | 18353.035 |
| AK092859  | 1961.063  | 2323.408  | NM_00384Z | 16750.207 | 18149.289 | AB014538  | 10914.664 | 14383.399 |
| NM_018291 | 6280.171  | 7174.048  | NM_01221E | 4934.135  | 4717.939  | NM_00620E | 2047.53   | 2381.185  |
| NM_00689E | 16921.164 | 18272.393 | NM_00533E | 1754.38   | 1691.645  | AK025118  | 7872.099  | 10274.234 |
| NM_00087E | 597.547   | 824.151   | X73502    | 5085.82   | 5239.273  | NM_000727 | 5296.124  | 5726.849  |
| M12807    | 5606.155  | 5453.763  | NM_02044E | 65175.699 | 60161.477 | NM_002621 | 6823.446  | 677.003   |
| NM_00176E | 912.264   | 1117.524  | NM_01637E | 59858.102 | 55683.02  | NM_00538E | 10576.434 | 10881.986 |
| NM_003361 | 1478.15   | 1371.447  | AB046848  | 26564.092 | 27464.193 | NM_01898E | 6101.302  | 4853.817  |
| NM_01209E | 8125.238  | 6409.659  | AL133057  | 12068.963 | 12372.868 | NM_006074 | 63667.102 | 63657.301 |
| NM_018684 | 29075.277 | 25591.799 | U04845    | 16770.848 | 16918.834 | AF208232  | 10938.196 | 11431.921 |
| NM_01798Z | 3461.171  | 4326.048  | NM_01810Z | 13624.895 | 12706.732 | NM_00298E | 12294.136 | 10262.91  |
| AF116909  | 3040.292  | 3491.377  | NM_00031Z | 9411.539  | 10990.82  | NM_00418E | 2319.438  | 1980.456  |
| BE906724  | 3456.036  | 3799.95   | NM_00396Z | 5566.583  | 5278.542  | NM_01625E | 8705.102  | 7649.49   |
| NM_00228Z | 6256.243  | 6184.678  | AC009729  | 1601.019  | 2628.371  | AF203032  | 22588.236 | 17043.02  |
| AJ276095  | 7125.293  | 6247.631  | NM_01659E | 8198.354  | 8250.895  | AB014542  | 25296.545 | 16522.053 |
| NM_00481E | 6689.732  | 5903.478  | BE874867  | 66924.328 | 65343.949 | NM_01464C | 1811.197  | 1539.065  |
| NM_007184 | 6819.285  | 6406.164  | AL136719  | 8559.694  | 11280.703 | NM_015974 | 2711.763  | 3142.892  |
| NM_005291 | 7391.472  | 7397.944  | NM_01410E | 17123.975 | 20234.537 | NM_014384 | 2298.501  | 3234.784  |
| AF253316  | 1075.476  | 1230.548  | NM_01216C | 6469.622  | 6048.576  | NM_00257Z | 4909.182  | 5397.366  |
| NM_00585E | 1803.234  | 1545.609  | NM_006357 | 66750.344 | 70212.086 | AF133424  | 9422.77   | 10527.257 |
| NM_00292Z | 9101.722  | 12328.487 | NM_01424E | 65804.641 | 58882.348 | NM_00500Z | 33386.391 | 33415.578 |
| NM_006794 | 1713.142  | 1934.931  | AK027070  | 3731.373  | 3855.081  | AF084560  | 22116.473 | 25503.553 |
| NM_01865Z | 1628.201  | 1555.831  | AF129533  | 1388.867  | 1532.425  | NM_01571E | 1762.864  | 2839.24   |
| NM_00538E | 13081.434 | 12949.518 | NM_003341 | 19937.459 | 23106.025 | NM_00003Z | 23062.717 | 28064.611 |
| NM_00723Z | 24618.168 | 23272.881 | NM_01778E | 2044.21   | 2544.121  | NM_00208Z | 5932.703  | 8003.911  |
| NM_002717 | 8371.962  | 9627.754  | NM_00624E | 12361.97  | 13142.488 | NM_00203E | 8472.682  | 9957.717  |
| NM_00430E | 48072.699 | 53658.832 | NM_01831E | 593.439   | 955.847   | NM_01490C | 3761.477  | 4202.793  |



|           |           |           |           |           |           |           |           |           |
|-----------|-----------|-----------|-----------|-----------|-----------|-----------|-----------|-----------|
| NM_001153 | 990.875   | 1338.447  | AB020640  | 22158.596 | 25111.928 | BF342908  | 2120.363  | 2745.031  |
| AK022654  | 9457.506  | 8522.413  | D29954    | 35338.395 | 36562.984 | AF118073  | 531.872   | 723.061   |
| BC002905  | 8133.77   | 6382.991  | AF007131  | 10074.769 | 9900.665  | AK023510  | 7874.432  | 8802.455  |
| NM_018091 | 21585.209 | 24006.674 | NM_006839 | 3449.161  | 4116.807  | NM_004345 | 5390.526  | 6307.856  |
| NM_001108 | 12962.24  | 14303.729 | NM_000223 | 1357.265  | 1682.975  | NM_000702 | 53924.105 | 52122.262 |
| NM_001637 | 1003.796  | 1309.925  | NM_005851 | 2429.946  | 2690.08   | X71490    | 36979.293 | 36690.258 |
| NM_016630 | 31654.195 | 29807.24  | AF119256  | 3795.068  | 4355.088  | AF257081  | 14784.705 | 14875.58  |
| NM_014291 | 10926.202 | 8816.866  | NM_005180 | 11763.865 | 12813.501 | NM_001688 | 30108.48  | 19529.074 |
| NM_014631 | 3346.675  | 3893.103  | NM_003410 | 19312.523 | 21622.973 | NM_000219 | 665.047   | 407.99    |
| NM_001089 | 6523.669  | 5360.279  | NM_007146 | 4672.402  | 5089.544  | NM_016106 | 6174.901  | 5497.908  |
| NM_000120 | 963.413   | 866.197   | NM_002229 | 5787.242  | 7300.972  | NM_014570 | 4606.316  | 3132.442  |
| U09384    | 6721.102  | 7527.435  | S69027    | 12853.095 | 14565.081 | AF112219  | 11193.4   | 11369.692 |
| NM_004794 | 17517.541 | 19252.906 | NM_012119 | 17097.689 | 18378.729 | NM_004135 | 3934.146  | 3348.686  |
| NM_002803 | 21152.195 | 20722.059 | X99631    | 49503.973 | 55224.992 | NM_013443 | 1572.959  | 1419.576  |
| NM_005508 | 9461.429  | 10320.143 | NM_001730 | 7432.116  | 8083.557  | NM_000925 | 16011.311 | 15045.875 |
| NM_018485 | 2187.626  | 2744.926  | AK026290  | 13452.635 | 16001.096 | NM_000465 | 3701.602  | 4634.46   |
| NM_006788 | 3523.57   | 3275.664  | AB014589  | 3283.006  | 4067.21   | NM_000123 | 4385.056  | 5376.558  |
| NM_016568 | 2351.71   | 2402.551  | AF248649  | 2281.322  | 2550.541  | AL137501  | 2037.791  | 2324.864  |
| NM_002987 | 995.888   | 1378.146  | U37146    | 60510.969 | 60173.676 | BE858979  | 844.612   | 976.514   |
| AB033102  | 15072.842 | 17863.295 | NM_012086 | 4202.214  | 4625.813  | NM_000122 | 3285.076  | 2609.578  |
| NM_014774 | 6245.031  | 8404.915  | AB040431  | 25292.502 | 25090.965 | NM_006712 | 63653.664 | 61960.809 |
| NM_014143 | 45929.535 | 53926.449 | NM_000991 | 64564.238 | 67520.211 | NM_006240 | 6416.427  | 5458.385  |
| M55646    | 3525.931  | 4005.007  | NM_016034 | 57006.895 | 58381.625 | NM_007026 | 6441.444  | 5686.214  |
| NM_006112 | 40289.898 | 36238.25  | X69150    | 66553.594 | 63062.516 | M37712    | 11450.938 | 6704.68   |
| NM_000150 | 970.475   | 937.514   | NM_001025 | 66828.688 | 67323.211 | NM_002648 | 11570.296 | 6529.196  |
| AB023152  | 1413.836  | 1149.765  | NM_016067 | 63132.301 | 63449.742 | AF070670  | 20879.486 | 11357.66  |
| NM_006212 | 3034.757  | 2735.161  | NM_018285 | 45311.059 | 48482.285 | NM_016156 | 4757.997  | 4024.536  |
| AK022872  | 6576.74   | 6279.287  | AK022393  | 34882.773 | 34545.129 | NM_016528 | 2739.009  | 2329.542  |
| AK024272  | 5874.733  | 7094.162  | AK026302  | 31252.984 | 31000.301 | CY3Cy5    | 2442.361  | 176.034   |
| NM_016381 | 3474.072  | 3316.412  | NM_012214 | 8588.096  | 7860.914  | NM_000498 | 900.783   | 416.365   |
| AL591715  | 883.966   | 869.555   | AF049656  | 62595.645 | 61473.711 | NM_000664 | 2699.136  | 1806.904  |
| NM_007254 | 697.007   | 703.363   | NM_001966 | 4908.56   | 5162.072  | AK026155  | 2008.137  | 1289.525  |
| NM_018042 | 6574.528  | 5806.377  | NM_016138 | 10845.39  | 14447.098 | NM_018052 | 57521.84  | 45755.813 |
| BE741525  | 2826.181  | 2693.12   | Z36833    | 66529.75  | 71315.18  | AF143322  | 826.914   | 602.188   |
| BF030555  | 10779.927 | 7977.418  | AW963246  | 782.868   | 1144.04   | AK022386  | 16603.227 | 11376.503 |
| NM_012433 | 11098.907 | 10560.771 | NM_014355 | 15949.214 | 19317.629 | NM_002767 | 25003.842 | 16088.341 |
| NM_005605 | 3157.003  | 2990.228  | M21191    | 63318.164 | 58952.457 | AF131846  | 30613.465 | 22225.219 |
| NM_002576 | 6480.803  | 7800.783  | AF072810  | 4006.878  | 3886.213  | AF088069  | 7575.936  | 5657.865  |
| NM_003582 | 3975.041  | 4782.949  | L19778    | 1756.406  | 2303.119  | AF086551  | 1411.317  | 1289.873  |
| AF057354  | 2541.349  | 2205.644  | AF174482  | 51795.949 | 56451.816 | NM_013393 | 7314.25   | 6348.822  |
| AF169351  | 5865.801  | 5272.94   | Y08836    | 572.154   | 718.033   | AK025082  | 2737.31   | 2236.954  |
| M14200    | 65694.133 | 65115.883 | NM_003528 | 6812.533  | 6498.829  | AF086535  | 1099.711  | 1294.014  |
| NM_000282 | 9891.044  | 9413.021  | NM_017769 | 1572.759  | 1614.422  | AB040901  | 2064.066  | 1825.065  |
| NM_000532 | 26611.58  | 29237.109 | D85131    | 28499.344 | 31363.047 | AL137406  | 4765.223  | 4287.356  |
| NM_016341 | 3324.467  | 5679.843  | NM_004956 | 1866.383  | 1955.086  | NM_000498 | 786.578   | 665.724   |
| AF231916  | 1573.181  | 2145.681  | D30612    | 13616.249 | 14959.469 | NM_000664 | 2170.694  | 2646.434  |
| NM_003501 | 12362.719 | 13608.708 | NM_002163 | 16384.514 | 18635.141 | SR1       | 67191.242 | 64338.621 |
| NM_004034 | 7468.596  | 8804.04   | U52097    | 38543.238 | 48202.039 | SR3       | 35873.324 | 43993.52  |
| NM_000130 | 5318.902  | 3982.457  | NM_003416 | 6086.671  | 8729.271  | SR5       | 4404.53   | 5980.036  |
| NM_004183 | 632.017   | 796.859   | X74497    | 7180.818  | 9667.671  | SR7       | 3827.686  | 43184.93  |
| AI492087  | 1358.353  | 1709.776  | NM_012210 | 4403.542  | 4615.732  | SR9       | 12411.736 | 3521.883  |
| R72122    | 13581.237 | 14818.354 | U10072    | 7481.354  | 6935.409  | CY3Cy5    | 3476.605  | 209.437   |
| Z35309    | 14746.269 | 12643.655 | AF222749  | 46055.328 | 52308.887 | U54734    | 665.163   | 473.074   |

|           |           |           |           |           |           |           |           |           |
|-----------|-----------|-----------|-----------|-----------|-----------|-----------|-----------|-----------|
| X04571    | 2058.623  | 2109.107  | NM_001321 | 18686.898 | 21047.391 | U84507    | 880.882   | 605.333   |
| AA700005  | 1976.321  | 2410.033  | AB018264  | 19251.35  | 24902.119 | U61086    | 521.807   | 272.133   |
| AA292025  | 8791.965  | 9108.49   | NM_006911 | 2175.021  | 2633.876  | AK000872  | 2605.484  | 1760.383  |
| AA437226  | 13529.424 | 11708.456 | U92544    | 14360.366 | 13725.35  | AK027147  | 28412.203 | 17422.91  |
| R36143    | 1180.457  | 1079.852  | NM_019644 | 1984.316  | 2502.239  | AF086285  | 909.145   | 718.262   |
| XM_056359 | 2644.382  | 1960.092  | NM_006791 | 7410.432  | 9316.698  | AF085924  | 470.173   | 614.028   |
| D10353/NM | 6800.685  | 5052.115  | AJ278348  | 57053.961 | 55238.613 | AK023887  | 1666.015  | 1389.183  |
| M15042    | 24855.891 | 25531.59  | NM_015872 | 1667.56   | 1855.168  | AF088022  | 16262.617 | 13559.608 |
| AK056843  | 2740.772  | 2567.837  | AI285199  | 22266.844 | 25541.963 | AK026537  | 3155.981  | 3132.842  |
| U49928    | 55578.324 | 50349.254 | BI906283  | 2426.286  | 2143.341  | NM_015485 | 4572.854  | 4135.066  |
| AK096645  | 59397.617 | 58961.742 | AA757170  | 450.575   | 720.272   | AF147411  | 1254.471  | 1595.368  |
| AK092859  | 2384.619  | 2487.994  | L07738    | 3329.244  | 3011.945  | NM_002666 | 15470.543 | 16868.332 |
| NM_018291 | 7895.807  | 7773.661  | Z48054    | 11182.854 | 12684.352 | AF202145  | 5361.749  | 4632.346  |
| NM_005530 | 16357.022 | 12130.31  | H90415    | 11251.236 | 11396.18  | AK022412  | 12174.174 | 7908.965  |
| NM_006895 | 13854.889 | 10507.303 | AA676470  | 56780.527 | 51666.566 | AK023073  | 19281.416 | 11697.245 |
| NM_012200 | 7569.661  | 6262.811  | AA430512  | 17339.018 | 17346.822 | AK023697  | 576.901   | 268.652   |
| NM_001724 | 4967.22   | 5576.504  | M38258    | 1995.093  | 2275.863  | AK023922  | 847.154   | 678.305   |
| BE906724  | 2560.546  | 2910.893  | AA457155  | 57500.902 | 54700.031 | AK022438  | 1628.966  | 1325.895  |
| NM_002283 | 6822.552  | 6286.581  | BM014365  | 2814.159  | 3079.656  | AK023316  | 1021.139  | 513.49    |
| AJ276095  | 7589.273  | 7199.021  | H91842    | 1531.8    | 2128.327  | AK023764  | 1214.324  | 883.922   |
| NM_004819 | 8249.359  | 8939.021  | U78045    | 7702.637  | 8354.601  | AK024082  | 1051.331  | 893.299   |
| NM_007184 | 7918.04   | 8508.486  | AA878561  | 59965.719 | 62676     | AK025072  | 4986.884  | 3301.415  |
| NM_005291 | 8420.606  | 10498.461 | BF688309  | 1675.162  | 1622.77   | AK022410  | 1265.359  | 1016.194  |
| AF253316  | 1463.945  | 1729.688  | AI538525  | 2972.75   | 3320.247  | AF086541  | 1253.777  | 834.185   |
| NM_005855 | 1716.696  | 1994.146  | NM_005205 | 63969.52  | 64628.207 | L10378    | 13078.718 | 10928.155 |
| NM_002923 | 6417.211  | 8238.684  | BE878426  | 62123.852 | 63758.691 | AK022179  | 1576.189  | 1543.986  |
| NM_006794 | 1618.91   | 1619.79   | NM_001745 | 57914.414 | 60511.461 | AK022173  | 921.964   | 885.001   |
| NM_018653 | 1733.951  | 1878.918  | NM_003825 | 22559.602 | 32744.922 | AJ227860  | 2155.801  | 1860.963  |
| NM_005385 | 14081.366 | 13293.519 | AK025006  | 20231.023 | 24253.035 | AL157448  | 1410.984  | 1334.543  |
| NM_007232 | 33451.848 | 24342.254 | AF218014  | 56802.309 | 54659.836 | AF026942  | 4707.171  | 4529.918  |
| NM_003027 | 2032.837  | 2318.382  | NM_006678 | 16770.771 | 17806.977 | AJ276429  | 4234.18   | 3820.035  |
| NM_016257 | 1079.071  | 1263.215  | AY007729  | 54497.84  | 53252.449 | AL117657  | 528.167   | 723.04    |
| NM_002717 | 9920.581  | 11520.816 | NM_014424 | 6117.724  | 6888.019  | AK023589  | 1630.319  | 1697.901  |
| NM_012114 | 859.721   | 990.471   | AF159092  | 2585.742  | 2791.69   | AK021590  | 3616.545  | 3818.554  |
| NM_014486 | 1065.185  | 1102.796  | BC007318  | 8241.114  | 8933.313  | AB002441  | 793.01    | 767.591   |
| NM_003025 | 33845.387 | 23589.279 | M36693    | 18357.348 | 19172.021 | AK023998  | 1837.517  | 2099.313  |
| U52051    | 1370.518  | 1049.416  | NM_016292 | 33126.848 | 35496.754 | AK021643  | 1014.687  | 980.47    |
| NM_020179 | 29364.109 | 25117.752 | NM_002601 | 10743.728 | 9487.869  | Z11802    | 1003.506  | 979.198   |
| NM_001153 | 959.141   | 726.686   | NM_001781 | 3177.374  | 2704.85   | NM_014054 | 2688.9    | 1898.232  |
| NM_006786 | 21826.404 | 18594.328 | NM_014432 | 11574.904 | 14189.214 | AK021840  | 64270.352 | 57581.18  |
| NM_006205 | 7643.108  | 8758.974  | NM_001558 | 10067.694 | 10791.233 | AK022228  | 5233.23   | 3935.162  |
| NM_004283 | 2777.227  | 3076.23   | NM_006953 | 787.828   | 851.993   | AK022031  | 890.165   | 785.012   |
| NM_004163 | 9028.883  | 9628.164  | NM_002530 | 2278.874  | 2545.752  | AF003738  | 598.695   | 376.827   |
| AK026308  | 1839.833  | 1908.005  | NM_018941 | 6345.608  | 7031.58   | AF086480  | 4402.806  | 2951.836  |
| NM_013337 | 6578.553  | 7716.735  | NM_020241 | 856.981   | 1439.81   | AK022122  | 1556.024  | 1145.418  |
| NM_004193 | 4813.435  | 4645.736  | NM_005898 | 43577.082 | 52367.551 | AL109713  | 409.135   | 396.001   |
| NM_002803 | 21961.785 | 25727.791 | NM_002889 | 62308.246 | 65666.805 | AK026084  | 679.908   | 443.956   |
| NM_005505 | 10764.146 | 13024.795 | AF078866  | 4538.01   | 4744.288  | AK022415  | 61119.379 | 51103.023 |
| NM_018485 | 2408.062  | 2900.073  | BF311880  | 48789.016 | 42224.02  | AL137368  | 2897.816  | 2415.006  |
| NM_006788 | 2828.923  | 3216.5    | NM_000078 | 804.008   | 1034.608  | AK021932  | 1494.36   | 1470.602  |
| AK025039  | 566.262   | 491.253   | NM_016075 | 1305.293  | 1444.308  | AK026787  | 9941.708  | 8457.527  |
| NM_016568 | 2177.99   | 2720.057  | NM_001360 | 30296.375 | 43915.406 | AK023542  | 1878.612  | 1695.961  |
| NM_002987 | 946.404   | 1099.381  | AK026656  | 23557.836 | 22871     | AK000203  | 2353.469  | 2076.886  |

|           |           |           |           |           |           |           |           |           |
|-----------|-----------|-----------|-----------|-----------|-----------|-----------|-----------|-----------|
| AB033102  | 17104.26  | 14958.797 | NM_000751 | 58186.184 | 55264.488 | AK021845  | 26117.35  | 28773.738 |
| NM_014774 | 6259.034  | 6618.98   | NM_005071 | 2556.052  | 2628.371  | AK022434  | 949.518   | 961.013   |
| NM_014143 | 40387.602 | 40093.551 | NM_016730 | 58450.043 | 57460.844 | NM_018592 | 6422.035  | 5972.351  |
| M55646    | 4765.185  | 5385.174  | AL035297  | 3203.789  | 3426.816  | NM_018503 | 59021.277 | 57165.508 |
| NM_006112 | 42536.473 | 36880.059 | NM_004408 | 11229.797 | 13182.349 | NM_016448 | 43370.004 | 43232.938 |
| NM_000879 | 409.304   | 551.119   | AJ131244  | 4959.41   | 5884.199  | AL049670  | 7077.704  | 6903.163  |
| M12807    | 4636.545  | 4420.679  | NM_002532 | 14444.683 | 16951.564 | AK021465  | 898.022   | 964.322   |
| NM_001765 | 997.238   | 1130.443  | NM_012388 | 16542.824 | 17451.832 | NM_018512 | 37992.613 | 37246.293 |
| NM_017983 | 3106.434  | 3328.114  | NM_016651 | 3672.167  | 3764.589  | NM_018568 | 727.394   | 897.727   |
| AF116909  | 3856.934  | 4865.917  | NM_001671 | 1159.913  | 1153.964  | AL161991  | 19677.811 | 11284.794 |
| NM_000282 | 2769.754  | 3303.735  | NM_019843 | 7321.003  | 9626.441  | D17032    | 25813.029 | 16315.653 |
| NM_000532 | 26184.748 | 26831.242 | NM_016192 | 19728.564 | 20834.604 | AL137292  | 1402.757  | 905.989   |
| NM_016341 | 2630.713  | 2537.411  | AB046774  | 1876.326  | 1967.544  | NM_017941 | 3091.233  | 2567.616  |
| AF231916  | 1540.041  | 1873.545  | AK022385  | 56557.219 | 61042.129 | AF301016  | 770.059   | 649.958   |
| NM_003501 | 11887.477 | 12284.605 | NM_002775 | 1795.588  | 1782.142  | BE900527  | 2748.626  | 2579.383  |
| AK022654  | 8673.176  | 10262.383 | AK024584  | 14116.508 | 12780.934 | D28384    | 60701.559 | 60076.34  |
| BC002905  | 9183.681  | 8823.192  | NM_003504 | 13413.096 | 13316.248 | AF118079  | 62510.938 | 47758.527 |
| NM_018091 | 18063.885 | 19359.387 | NM_013298 | 10995.043 | 13719.337 | AF277572  | 632.489   | 356.509   |
| NM_001108 | 11742.171 | 13141.562 | NM_007267 | 7080.037  | 8345.725  | AL365413  | 2951.974  | 2109.997  |
| NM_001637 | 808.683   | 908.087   | AK022830  | 732.145   | 862.866   | NM_005258 | 11886.22  | 10372.032 |
| NM_016630 | 32033.693 | 30000.684 | Z36816    | 18823.281 | 26667.229 | NM_003948 | 1016.136  | 1068.075  |
| NM_014291 | 11730.687 | 10352.046 | NM_005865 | 16462.84  | 16940.254 | AK025062  | 2207.631  | 2286.115  |
| NM_014631 | 2942.658  | 3064.781  | NM_006413 | 16914.693 | 17239.002 | Z27405    | 61264.496 | 58003.602 |
| NM_001088 | 7185.752  | 6469.259  | NM_017684 | 1727.14   | 1838.06   | AK023412  | 2483.898  | 2348.645  |
| NM_000120 | 975.482   | 1182.938  | AK025542  | 12191.109 | 12145.811 | NM_014617 | 59296.676 | 56926.746 |
| AF172327  | 58088.086 | 59718.152 | AF207547  | 1686.639  | 1587.39   | AK074682  | 5597.993  | 5318.526  |
| NM_001676 | 4442.198  | 4416.452  | NM_002768 | 24337.129 | 26827.393 | X74605    | 2024.293  | 2247.572  |
| NM_000220 | 2362.975  | 2686.051  | NM_003691 | 4163.784  | 4269.493  | AK024513  | 1322.171  | 1360.063  |
| NM_001679 | 38857.234 | 31974.695 | NM_002950 | 29125.053 | 33024.102 | BC036692  | 3887.66   | 4127.434  |
| NM_006860 | 14182.455 | 15947.783 | NM_002318 | 11003.26  | 11783.725 | AJ009640  | 2940.219  | 3053.509  |
| NM_004794 | 14025.574 | 14186.69  | NM_001433 | 925.692   | 1253.447  | Y11163    | 1324.236  | 1469.028  |
| NM_018291 | 6852.898  | 7885.811  | NM_003134 | 60845.035 | 65999.563 | AF086391  | 622.216   | 955.056   |
| NM_005530 | 17837.014 | 18809.162 | NM_004314 | 8271.268  | 8818.226  | AF147340  | 771.808   | 739.985   |
| NM_006899 | 13727.152 | 9406.899  | NM_018247 | 26965.018 | 40534.203 | L31901    | 569.081   | 382.103   |
| NM_012200 | 7655.652  | 6421.286  | NM_017979 | 32243.807 | 41416.273 | AK025119  | 1071.602  | 650.296   |
| NM_001724 | 4565.781  | 4464.777  | NM_006911 | 2249.235  | 2285.305  | NM_006368 | 476.389   | 220.629   |
| NM_000150 | 1045.751  | 1045.053  | U92544    | 8965.209  | 8061.499  | AJ224170  | 2922.322  | 2402.357  |
| AB023152  | 1875.495  | 1898.712  | NM_019644 | 1766.516  | 2055.837  | AF085866  | 12531.733 | 9754.506  |
| NM_006212 | 2935.803  | 3698.164  | NM_006791 | 7422.859  | 8707.907  | AK000806  | 60239.621 | 58840.375 |
| AK022872  | 5997.953  | 6479.446  | AJ278348  | 55308.496 | 55138.664 | NM_016471 | 6993.98   | 7256.569  |
| AK024272  | 6262.814  | 5796.41   | NM_015872 | 1392.238  | 1933.319  | Z11852    | 585.45    | 556.854   |
| NM_016381 | 3217.044  | 3168.668  | AI285199  | 32041.932 | 35752.285 | NM_001145 | 1025.436  | 826.756   |
| AL591715  | 2839.849  | 2078.385  | BI906283  | 270.787   | 693.42    | NM_005364 | 19759.379 | 17835.566 |
| NM_007254 | 647.799   | 639.047   | AA757170  | 369.689   | 825.194   | AK023482  | 8789.473  | 8160.379  |
| NM_018042 | 5695.316  | 5934.991  | L07738    | 4380.688  | 4610.297  | AK022798  | 877.985   | 1012.164  |
| BE741525  | 2985.313  | 3113.891  | Z48054    | 10977.989 | 13177.68  | AL157423  | 899.818   | 1038.686  |
| BF030555  | 11879.271 | 9889.817  | H90415    | 10549.887 | 10742.539 | AK023115  | 779.198   | 917.731   |
| NM_012433 | 11579.887 | 8914.187  | AA676470  | 58502.824 | 61723.523 | AK023176  | 2595.68   | 2952.91   |
| NM_005605 | 3153.322  | 2655.075  | AA430512  | 18414.648 | 18005.914 | NM_006826 | 22548.686 | 14437.895 |
| NM_003582 | 4830.852  | 5296.028  | M38258    | 1771.014  | 1670.372  | AB007973  | 18641.426 | 14003.208 |
| M14200    | 60352.352 | 59014.379 | AA457155  | 57369.695 | 55608.938 | NM_002998 | 974.826   | 776.947   |
| CY3Cy5    | 3008.748  | 189.342   | BM014365  | 2359.148  | 2451.818  | M96843    | 11603.068 | 8599.646  |
| NM_000623 | 1628.35   | 1145.473  | H91842    | 1472.827  | 1695.511  | NM_017791 | 6735.296  | 5219.325  |

|           |           |           |           |           |           |           |           |           |
|-----------|-----------|-----------|-----------|-----------|-----------|-----------|-----------|-----------|
| AK026844  | 6479.578  | 7639.78   | U78045    | 5413.026  | 5460.815  | NM_005882 | 12234.015 | 9375.617  |
| AK026735  | 3002.052  | 3324.396  | AA878561  | 60790.965 | 64874.246 | BC012304  | 5546.118  | 4124.328  |
| AL110104  | 43854.469 | 52549.676 | BF688309  | 1937.765  | 1813.542  | AB046815  | 3891.094  | 2449.825  |
| AK027056  | 5406.994  | 4074.38   | AI538525  | 3078.746  | 2842.455  | NM_000440 | 7594.655  | 6575.048  |
| AK024294  | 2313.142  | 2373.21   | AF222980  | 2039.553  | 1735.214  | NM_001297 | 7224.954  | 5601.97   |
| AL110126  | 6974.936  | 6414.063  | AK026758  | 9897.766  | 9863.533  | NM_004403 | 15340.734 | 11104.543 |
| AF052172  | 7597.818  | 6130.509  | NM_012201 | 10230.876 | 11475.14  | X64993    | 2531.285  | 2337.969  |
| AB014573  | 5540.188  | 5086.084  | NM_001745 | 51874.906 | 56275.449 | NM_004434 | 29459.197 | 22196.043 |
| AK025418  | 1623.471  | 1247.708  | NM_003825 | 22274.096 | 30400.311 | NM_006265 | 1263.758  | 1471.734  |
| AB020643  | 988.76    | 776.893   | AK025006  | 22366.191 | 33209.285 | NM_016230 | 5495.488  | 6306.202  |
| AK025245  | 609.806   | 546.222   | AF218014  | 55325.18  | 53345.164 | NM_001083 | 4581.439  | 5529.256  |
| AK025496  | 8454.623  | 6872.139  | NM_006678 | 17249.863 | 16492.85  | AK023966  | 16272.174 | 17744.73  |
| NM_000623 | 841.247   | 812.042   | AY007729  | 61268.5   | 59616.77  | AK025702  | 6317.777  | 6980.961  |
| NM_000941 | 7263.412  | 7282.951  | NM_014424 | 938.808   | 1049.324  | NM_018958 | 3122.106  | 2972.104  |
| SR3       | 33910     | 35278.164 | AF159092  | 2470.517  | 2312.427  | AL050200  | 786.345   | 893.132   |
| SR5       | 4103.835  | 4526.192  | BC007318  | 8142.431  | 7747.333  | NM_002367 | 910.248   | 1026.556  |
| SR7       | 4016.844  | 34221.414 | M36693    | 17982.361 | 15141.878 | AK022038  | 2619.46   | 2482.398  |
| SR9       | 15117.323 | 3034.567  | NM_016292 | 32140.359 | 26786.76  | AF253321  | 4663.839  | 3335.218  |
| CY3Cy5    | 2428.44   | 151.459   | NM_002601 | 11590.494 | 7154.148  | U80735    | 9188.933  | 8024.583  |
| L10404    | 831.396   | 638.095   | NM_001781 | 2916.691  | 1672.973  | NM_017850 | 5147.096  | 5203.335  |
| AF283776  | 5726.121  | 4419.098  | NM_014432 | 10565.192 | 8128.525  | NM_016522 | 2934.559  | 2495.736  |
| D16877    | 2109.979  | 2508.977  | NM_001558 | 9977.105  | 6720.728  | NM_002224 | 15912.163 | 11561.352 |
| AL049992  | 1392.47   | 1314.707  | NM_006953 | 2093.523  | 1745.37   | X07979    | 53992.559 | 53150.578 |
| AL109781  | 3345.595  | 3101.448  | NM_002530 | 2965.685  | 2369.117  | NM_003874 | 2035.274  | 1402.42   |
| NM_017594 | 1945.245  | 1265.422  | NM_018941 | 6962.544  | 4390.946  | NM_000082 | 1357.393  | 1187.668  |
| AK027237  | 863.681   | 484.574   | NM_020241 | 799.104   | 593.717   | L13857    | 2344.069  | 1913.957  |
| AF075017  | 601.705   | 286.179   | NM_001321 | 15517.865 | 9957.826  | NM_018098 | 9873.914  | 9438.857  |
| AK027104  | 3344.964  | 2305.377  | AB018264  | 19369.367 | 14069.523 | AF286164  | 1662.129  | 1864.982  |
| AL133090  | 68055.305 | 50355.293 | AF078866  | 3849.124  | 2446.656  | AF146277  | 11150.905 | 11549.464 |
| AF085867  | 5980.777  | 5113.222  | BF311880  | 46568.949 | 24043.682 | NM_002555 | 1020.742  | 1085.789  |
| AF086510  | 4990.063  | 4335.167  | NM_000078 | 1237.639  | 511.17    | AF055033  | 53497.34  | 49935.367 |
| NM_002816 | 4373.871  | 3261.512  | NM_016075 | 1251.214  | 866.352   | NM_017700 | 1074.758  | 1078.252  |
| NM_017822 | 9808.41   | 8120.773  | NM_001360 | 24312.9   | 17264.006 | M37191    | 30406.758 | 36401.68  |
| AK024520  | 11041.381 | 7463.027  | AK026656  | 25539.891 | 16507.715 | NM_005242 | 664.523   | 873.31    |
| AK024592  | 1565.52   | 839.307   | NM_000751 | 57384.766 | 53168.988 | NM_003020 | 916.63    | 889.654   |
| AK024904  | 3869.749  | 3185.605  | NM_005071 | 2848.202  | 1705.327  | NM_003404 | 50274.57  | 48425.813 |
| AK025030  | 1905.694  | 1875.476  | NM_016730 | 61559.352 | 58174.508 | NM_001114 | 2177.605  | 2070.503  |
| AK024542  | 5842.086  | 4520.956  | AL035297  | 3626.575  | 2316.152  | NM_004455 | 1638.382  | 1151.718  |
| AK024623  | 562.988   | 559.791   | NM_004408 | 12885.42  | 8795.967  | NM_006010 | 23666.832 | 17816.117 |
| AK091109  | 71732.336 | 63487.32  | AJ131244  | 5919.608  | 4278.227  | K03191    | 5424.924  | 4737.255  |
| AF032897  | 1363.082  | 1569.361  | NM_002532 | 13979.539 | 12145.593 | NM_005079 | 33457.164 | 31572.146 |
| NM_014967 | 3379.441  | 2311.917  | NM_012388 | 12975.284 | 9958.846  | NM_005192 | 47948.086 | 42861.012 |
| AK022915  | 5846.494  | 5613.672  | NM_016651 | 4309.049  | 2947.994  | NM_004585 | 2881.829  | 2841.22   |
| AK021736  | 852.22    | 732.452   | NM_001671 | 1474.394  | 885.206   | NM_015032 | 6139.78   | 4498.112  |
| AF131834  | 3603.043  | 2368.116  | NM_019843 | 8017.374  | 5224.185  | AK022956  | 6898.401  | 7662.371  |
| AL355711  | 610.306   | 480.591   | NM_016192 | 20402.512 | 12194.798 | AK023121  | 1749.761  | 1352.059  |
| AK025851  | 2314.96   | 1765.006  | BE878426  | 58800.605 | 58841.723 | NM_014104 | 57596.055 | 58860.801 |
| AJ011409  | 47717.902 | 35006.18  | AK022385  | 54207.438 | 47398.625 | NM_002392 | 1889.033  | 2126.797  |
| AJ227906  | 1380.987  | 1841.15   | NM_002775 | 2128.886  | 1721.368  | NM_002745 | 62622.418 | 60403.285 |
| AJ001906  | 816.42    | 749.87    | AK024584  | 14790.754 | 7529.354  | NM_018216 | 16112.832 | 16335.032 |
| U17633    | 1868.928  | 1566.547  | NM_003504 | 14571.821 | 8430.177  | NM_003390 | 8290.025  | 8594.082  |
| AF086202  | 41076.82  | 36011.82  | NM_013298 | 11697.393 | 7697.499  | AL137747  | 6976.012  | 6892.593  |
| AK022352  | 683.279   | 617.658   | NM_007267 | 7610.239  | 5536.325  | NM_014755 | 7550.999  | 8139.379  |

|           |           |           |           |           |           |           |           |           |
|-----------|-----------|-----------|-----------|-----------|-----------|-----------|-----------|-----------|
| AK023270  | 701.314   | 653.46    | AK022830  | 515.799   | 433.87    | AF077188  | 23099.219 | 25755.068 |
| AF085979  | 33622.359 | 28668.459 | Z36816    | 16079.478 | 12052.963 | NM_012446 | 5880.414  | 6593.858  |
| AK023112  | 2712.377  | 2528.396  | NM_005865 | 18379.576 | 11549.815 | NM_018336 | 2655.427  | 3420.757  |
| NM_017806 | 17126.391 | 13839.844 | NM_006413 | 16246.863 | 12080.564 | NM_018685 | 55535.586 | 58089.973 |
| AK021712  | 481.567   | 256.508   | NM_017684 | 1670.738  | 1255.336  | NM_006984 | 11972.04  | 14397.087 |
| AK021895  | 601.769   | 844.382   | AK025542  | 13870.869 | 10410.137 | AF231919  | 3189.552  | 3688.541  |
| AK024293  | 1501.614  | 740.004   | AF207547  | 1747.549  | 1273.01   | NM_018214 | 2816.541  | 3274.624  |
| AL080107  | 590.814   | 205.505   | NM_002768 | 28610.059 | 23397.354 | Y11718    | 815.163   | 1070.78   |
| AK000036  | 23754.25  | 25698.746 | NM_003691 | 4586.275  | 3780.928  | NM_005076 | 31242.467 | 30999.375 |
| AK000769  | 1946.688  | 1906.849  | NM_002950 | 33813.77  | 30524.488 | NM_019023 | 52773.613 | 54909.918 |
| AK000924  | 1301.42   | 1636.429  | NM_002318 | 12696.23  | 9141.274  | NM_004420 | 1278.357  | 1144.382  |
| AK022252  | 857.574   | 986.952   | NM_001433 | 1304.632  | 1368.985  | NM_002970 | 1758.908  | 1680.472  |
| AK000114  | 4625.699  | 4149.528  | NM_003134 | 61310.18  | 62519.184 | NM_005496 | 36549.422 | 33879.121 |
| AK000952  | 2037.508  | 1613.372  | NM_004314 | 10292.422 | 9944.266  | NM_013270 | 2405.016  | 2110.439  |
| AF119862  | 35168.773 | 26272.406 | NM_018247 | 29604.648 | 28088.158 | NM_015387 | 6778.513  | 6347.525  |
| U17628    | 3970.699  | 3511.469  | NM_017979 | 31901.09  | 26701.414 | NM_001733 | 13089.009 | 10079.436 |
| AF119867  | 4641.956  | 4405.614  | NM_005898 | 44000.727 | 37580.137 | NM_005065 | 1559.95   | 1577.292  |
| AL357205  | 13188.024 | 15002.475 | NM_002889 | 62470.996 | 58353.461 | NM_017825 | 39628.141 | 41680.508 |
| AF124819  | 2281.152  | 2324.468  | NM_019644 | 2256.6    | 1659.163  | NM_014035 | 4871.783  | 4908.776  |
| D17091    | 5654.202  | 6208.727  | NM_006791 | 7804.323  | 5993.625  | NM_020122 | 28476.783 | 29518.467 |
| AL133074  | 2446.34   | 2880.301  | AJ278348  | 55151.859 | 53977.676 | NM_013432 | 22235.928 | 23976.545 |
| AF086318  | 2254.786  | 2042.634  | NM_015872 | 2085.662  | 1579.745  | AB020716  | 1443.569  | 1555.714  |
| AF088012  | 1503.878  | 1117.484  | AI285199  | 32210.141 | 23524.111 | U57341    | 1169.824  | 1618.319  |
| NM_018121 | 2803.862  | 2246.426  | BI906283  | 641.814   | 558.092   | NM_002296 | 59282.754 | 58023.266 |
| AL355692  | 575.975   | 317.633   | AA757170  | 881.53    | 726.029   | AK027130  | 1750.902  | 2080.954  |
| AB050477  | 11056.707 | 7773.777  | L07738    | 3680.659  | 2908.069  | NM_005479 | 50667.223 | 51944.074 |
| AK000152  | 3287.012  | 2240.122  | Z48054    | 13510.854 | 9979.823  | NM_005730 | 61459.875 | 61239.586 |
| AK024300  | 517.504   | 408.754   | H90415    | 12438.617 | 8663.93   | X82240    | 21189.459 | 26199.518 |
| L09092    | 813.619   | 913.63    | AA676470  | 54065.473 | 49024.398 | NM_013995 | 10025.485 | 9693.035  |
| NM_012132 | 3400.284  | 3555.557  | AA430512  | 18832.02  | 15066.264 | BC021298  | 1209.978  | 879.254   |
| NM_012129 | 1881.321  | 1753.331  | M38258    | 2527.233  | 1863.809  | U52096    | 14946.831 | 11127.952 |
| AK024881  | 680.573   | 605.012   | AA457155  | 60496.707 | 62180.285 | AB013897  | 3797.403  | 2958.496  |
| AK025716  | 3460.077  | 3451.047  | BM014365  | 3389.102  | 2862.11   | NM_005526 | 46288.438 | 37995.82  |
| L09268    | 638.18    | 596.767   | H91842    | 1678.945  | 1607.174  | AK001669  | 5056.322  | 4025.963  |
| NM_020186 | 14116.245 | 13162.247 | U78045    | 10524.26  | 9372.852  | NM_006195 | 2327.12   | 2220.834  |
| AF090947  | 1890.409  | 1770.391  | AA878561  | 64153.551 | 65775.594 | NM_006190 | 38043.445 | 31966.316 |
| BC016962  | 757.832   | 958.164   | BF688309  | 2405.132  | 2623.714  | NM_006366 | 7072.45   | 5156.549  |
| NM_005047 | 6864.123  | 8967.121  | AI538525  | 4363.749  | 3430.999  | NM_004133 | 1944.113  | 1335.054  |
| AJ272196  | 32096.951 | 26837.689 | AF222980  | 3059.688  | 2614.297  | NM_004433 | 1349.275  | 892.133   |
| X58162    | 1799.53   | 1801.988  | AK026758  | 14408.989 | 12003.87  | NM_001618 | 21239.438 | 20706.885 |
| AK022825  | 889.434   | 1032.362  | NM_012201 | 11404.23  | 8950.505  | BC000401  | 21158.844 | 24907.279 |
| AV756662  | 557.973   | 514.272   | AB046774  | 2365.689  | 2111.929  | NM_006425 | 6836.592  | 7545.573  |
| AK001937  | 8866.626  | 7405.45   | AF159092  | 3396.333  | 3335.409  | BF344046  | 7214.07   | 8348.644  |
| AL365517  | 1021.825  | 796.289   | BC007318  | 10810.726 | 12121.395 | AF432218  | 34020.293 | 37854.531 |
| AK021988  | 9002.308  | 6298.679  | M36693    | 23495.389 | 23721.268 | NM_004286 | 8834.712  | 8560.797  |
| AF086494  | 59184.504 | 47303.301 | NM_016292 | 45376.473 | 45550.828 | AL133644  | 39197.438 | 34325.664 |
| BI769977  | 1731.606  | 1518.772  | NM_002601 | 14964.684 | 12597.256 | NM_002706 | 7355.762  | 8717.688  |
| AL137567  | 2543.356  | 1862.414  | U62858    | 1062.001  | 1374.192  | NM_004196 | 1139.754  | 1014.835  |
| AK024913  | 6918.707  | 7669.256  | NM_000877 | 2252.598  | 2372.771  | NM_006876 | 2887.894  | 2487.216  |
| AB007961  | 4509.034  | 4234.091  | NM_001781 | 3858.803  | 3013.092  | NM_000293 | 2363.331  | 1800.007  |
| NM_005547 | 1413.797  | 1066.523  | AF035121  | 1630.345  | 1349.496  | NM_003748 | 2246.041  | 2154.84   |
| S81973    | 498.392   | 378.05    | NM_014432 | 14727.43  | 16417.938 | NM_005396 | 675.429   | 423.054   |
| U00942    | 391.996   | 445.784   | NM_001558 | 13650.209 | 11932.154 | NM_012266 | 1165.293  | 829.469   |

|           |           |           |           |           |           |           |           |           |
|-----------|-----------|-----------|-----------|-----------|-----------|-----------|-----------|-----------|
| AF164794  | 13614.729 | 11005.663 | NM_006953 | 1275.683  | 1104.882  | AF153821  | 6494.919  | 5102.815  |
| NM_001173 | 2292.462  | 2079.104  | NM_002530 | 3072.358  | 2662.039  | NM_013370 | 5374.076  | 5205.088  |
| AB020656  | 5087.515  | 5065.603  | U96173    | 4898.976  | 4538.315  | NM_001374 | 3035.888  | 2506.12   |
| AK023648  | 927.964   | 1033.809  | NM_018941 | 8423.951  | 7073.413  | NM_003310 | 8624.993  | 7533.252  |
| NM_000412 | 2309.177  | 2612.697  | NM_020241 | 936.1     | 870.246   | AK024461  | 12434.76  | 11843.109 |
| AF077033  | 8284.1    | 9456.713  | BE730585  | 4568.057  | 4095.863  | AK025485  | 2516.936  | 2302.811  |
| D50406    | 521.731   | 461.003   | NM_001980 | 4149.592  | 3500.24   | NM_017635 | 6254.833  | 7135.831  |
| NM_004991 | 958.789   | 948.003   | NM_005954 | 3048.547  | 2608.232  | X62534    | 3301.524  | 4219.315  |
| AK026708  | 16663.619 | 16143.423 | NM_012471 | 2040.108  | 1746.284  | AF027147  | 50295.891 | 52230.656 |
| NM_017903 | 8793.137  | 6373.26   | NM_001321 | 24386.07  | 19180.736 | M62399    | 9419.326  | 10129.574 |
| NM_018074 | 10988.343 | 9339.398  | AB018264  | 28349.518 | 23908.131 | NM_002357 | 1699.428  | 1939.465  |
| NM_000909 | 12655.2   | 10619.561 | NM_006911 | 2905.385  | 2404.268  | U71600    | 8619.674  | 9729.448  |
| U31737    | 1496.511  | 1056.038  | U92544    | 10391.398 | 8960.169  | NM_004472 | 2196.148  | 2600.389  |
| AK024828  | 5492.442  | 3929.877  | AB023147  | 8984.085  | 9041.804  | AB037862  | 4414.715  | 5385.246  |
| AF009315  | 3297.084  | 1945.853  | NM_016615 | 50704.828 | 49082.078 | NM_005392 | 2581.633  | 2594.81   |
| NM_019013 | 2769.876  | 2205.343  | NM_005630 | 4397.786  | 4272.099  | AL133572  | 11921.269 | 13902.789 |
| NM_006783 | 1442.503  | 1570.792  | NM_001046 | 1509.95   | 900.52    | AK022500  | 13173.761 | 14766.186 |
| L37711    | 630.563   | 943.035   | AK023106  | 7368.651  | 5764.462  | NM_003447 | 939.152   | 896.37    |
| S70313    | 8619.384  | 7323.358  | NM_016730 | 63888.816 | 65561.813 | NM_005014 | 3738.235  | 3347.881  |
| AK021607  | 2467.825  | 2091.356  | AL035297  | 4836.697  | 3701.128  | NM_006944 | 1157.95   | 1455.728  |
| AK025860  | 394.432   | 203.802   | NM_004408 | 13171.034 | 11587.505 | NM_004407 | 1986.326  | 1538.143  |
| NM_000216 | 700.879   | 519.98    | AJ131244  | 7212.256  | 7480.179  | NM_000070 | 12958.434 | 12243.121 |
| NM_014216 | 12374.356 | 15658.266 | NM_002532 | 17270.275 | 17426.336 | NM_001202 | 3596.782  | 4002.018  |
| NM_003010 | 5558.003  | 5683.98   | NM_012388 | 21575.189 | 18783.764 | AB037804  | 1210.204  | 1175.433  |
| NM_006871 | 2009.525  | 2380.967  | NM_016651 | 5176.816  | 3916.014  | U34249    | 4086.43   | 3950.8    |
| NM_019074 | 7620.093  | 7396.672  | NM_001671 | 1679.533  | 1313.385  | NM_003288 | 53869.344 | 57999.379 |
| NM_018494 | 17047.92  | 13513.901 | NM_019843 | 9690.686  | 8914.916  | AI200114  | 6543.276  | 5680.14   |
| AK000006  | 1254.428  | 1373.803  | NM_016192 | 29174.793 | 21082.99  | M74220    | 617.498   | 919.834   |
| NM_001115 | 2184.723  | 1874.738  | BE878426  | 61971.102 | 62419.676 | M23254    | 2661.068  | 3206.066  |
| NM_014921 | 1808.888  | 2181.959  | NM_001745 | 58849.977 | 57363.457 | BE618539  | 15748.076 | 17986.168 |
| NM_016581 | 42375.957 | 42879.559 | NM_003825 | 26513.193 | 29142.563 | R28062    | 10253.835 | 11767.817 |
| NM_013255 | 4780.516  | 5065.092  | AK025006  | 23730.301 | 25365.574 | U38545    | 735.316   | 1017.026  |
| NM_007183 | 1735.244  | 2065.787  | AF218014  | 63666.234 | 62966.75  | AI627464  | 1606.056  | 2014.128  |
| AJ238243  | 11460.024 | 11006.209 | NM_006678 | 24529.264 | 21697.365 | BI756258  | 7952.317  | 9802.411  |
| J05046    | 6184.231  | 5379.828  | AY007729  | 62340.574 | 61211.758 | AI342225  | 52859.016 | 63279.48  |
| NM_012318 | 6240.96   | 5137.233  | NM_014424 | 2172.309  | 2200.757  | AA634103  | 53624.699 | 58023.07  |
| NM_002751 | 4006.615  | 3080.401  | NM_004314 | 11651.523 | 10549.503 | J04599    | 3113.283  | 4324.269  |
| NM_004291 | 664.095   | 407.863   | NM_018247 | 30966.947 | 25802.994 | AF110020  | 10521.075 | 10050.508 |
| NM_003816 | 9076.987  | 8823.07   | NM_017979 | 36965.055 | 30786.158 | AA608557  | 12864.149 | 13874.545 |
| AK022635  | 1575.703  | 1876.366  | NM_005898 | 53832.836 | 52881.535 | AL050095  | 27704.082 | 30259.918 |
| NM_004912 | 8295.069  | 9395.74   | NM_002889 | 63996.949 | 64431.066 | U03272    | 1340.123  | 1798.725  |
| U79304    | 12842.935 | 12200.917 | AF078866  | 5311.438  | 5238.959  | NM_012253 | 20777.072 | 22437.664 |
| NM_016267 | 1619.44   | 1383.444  | BF311880  | 30943.281 | 19535.473 | NM_000258 | 57708.918 | 56571.258 |
| NM_004671 | 3903.713  | 4454.173  | NM_000078 | 1137.889  | 979.439   | AB033055  | 45027.414 | 36031.66  |
| NM_006526 | 13512.538 | 17174.818 | NM_018403 | 1757.43   | 1711.225  | AF311287  | 35169.691 | 27852.541 |
| U35622    | 911.392   | 960.581   | NM_016075 | 2174.462  | 1818.078  | NM_003098 | 4743.44   | 4447.931  |
| NM_007045 | 5660.479  | 5901.018  | NM_001360 | 33630.875 | 33025.824 | NM_014781 | 7949.45   | 7327.189  |
| NM_003627 | 13561.378 | 16384.736 | AK026656  | 35215.488 | 30278.037 | BU629989  | 2961.682  | 2653.728  |
| NM_012145 | 41823.445 | 37232.805 | AJ276207  | 41829.535 | 39448.41  | X87896    | 5478.193  | 5372.642  |
| AF305779  | 6198.196  | 5397.107  | AB011131  | 16956.67  | 12545.741 | M88310    | 6108.085  | 5729.349  |
| AF225416  | 19559.359 | 20658.982 | NM_000749 | 2182.201  | 1963.929  | D16856    | 895.941   | 839.002   |
| NM_016231 | 9362.675  | 10468.647 | NM_000751 | 65562.945 | 67286.086 | NM_000042 | 4691.761  | 4736.05   |
| NM_002093 | 6359.34   | 6267.903  | NM_014849 | 14489.805 | 11826.687 | AF035787  | 22424.982 | 25035.479 |

|           |           |           |           |           |           |           |           |           |
|-----------|-----------|-----------|-----------|-----------|-----------|-----------|-----------|-----------|
| AB042555  | 8368.797  | 8567.737  | NM_001042 | 19849.652 | 16971.867 | AF090405  | 535.294   | 693.952   |
| NM_001729 | 894.152   | 1052.035  | NM_012229 | 7730.181  | 7112.677  | NM_005024 | 859.157   | 954.791   |
| NM_017763 | 3828.269  | 3228.679  | NM_005071 | 4001.215  | 3774.923  | NM_003403 | 2494.376  | 3506.536  |
| NM_013975 | 4393.559  | 5214.91   | AF222980  | 3534.307  | 2654.393  | NM_014808 | 8653.148  | 10895.671 |
| NM_003843 | 14241.951 | 16058.839 | AK026758  | 21703.967 | 17952.941 | AB006627  | 10012.311 | 11013.773 |
| NM_012216 | 9095.593  | 9789.519  | NM_012201 | 13719.041 | 12805.708 | NM_000416 | 13218.634 | 15331.966 |
| NM_005338 | 2265.902  | 1817.157  | AB046774  | 2554.725  | 2229.055  | NM_003382 | 578.376   | 1160.102  |
| X73502    | 3947.759  | 3760.018  | AK022385  | 59594.941 | 61771.75  | NM_002965 | 975.635   | 1488.16   |
| NM_020445 | 26356.178 | 21823.164 | NM_002775 | 2796.984  | 3204.321  | AB007883  | 21879.107 | 25653.035 |
| NM_016376 | 34512.52  | 29345.713 | AK024584  | 16389.814 | 13224.288 | NM_006391 | 1127.128  | 844.137   |
| AB046848  | 5081.242  | 5398.086  | NM_003504 | 16039.908 | 14681.792 | AY009397  | 52364.629 | 60016.098 |
| AL133057  | 15723.438 | 17314.893 | NM_013298 | 13404.098 | 14470.025 | NM_007037 | 57369.859 | 56889.457 |
| U04845    | 17181.916 | 16953.262 | NM_007267 | 9642.601  | 8310.654  | NM_016335 | 8270.643  | 6943.66   |
| NM_018103 | 12947.516 | 13300.771 | AK022830  | 798.547   | 1005.693  | NM_003165 | 12724.546 | 10514.977 |
| AL049689  | 463.233   | 622.197   | Z36816    | 21161.555 | 19673.801 | NM_003906 | 55982.961 | 51064.109 |
| NM_000312 | 1771.097  | 1850.744  | NM_005865 | 25040.057 | 22010.217 | AL359590  | 55665.832 | 55568.016 |
| NM_003963 | 3344.8    | 3672.311  | NM_006413 | 23315.631 | 22216.264 | NM_002861 | 20570.629 | 21582.057 |
| AC009729  | 1626.554  | 1634.711  | NM_017684 | 2417.742  | 1769.69   | NM_003080 | 16669.338 | 14933.071 |
| NM_016598 | 6232.081  | 6959.599  | AK025542  | 18070.406 | 14778.947 | NM_004042 | 607.756   | 688.364   |
| BE874867  | 24300.686 | 26081.627 | AF207547  | 2267.454  | 2074.432  | NM_013268 | 1415.606  | 1266.538  |
| AL136719  | 7901.45   | 10025.14  | NM_002768 | 34212.688 | 34169.879 | NM_002645 | 8180.871  | 7912.511  |
| NM_014105 | 17705.438 | 18815.662 | NM_003691 | 5583.467  | 4302.852  | AB033027  | 4302.929  | 4298.354  |
| NM_012160 | 5702.336  | 6213.304  | NM_002950 | 39076.426 | 39757.188 | AF320293  | 1514.807  | 1524.037  |
| NM_006357 | 55282.926 | 55791.453 | NM_002318 | 18817.516 | 16312.882 | NM_001171 | 3351.815  | 4507.737  |
| NM_014248 | 57654.875 | 57827.316 | NM_001433 | 1938.065  | 1983.475  | S81591    | 768.255   | 1268.408  |
| AK027070  | 2193.641  | 2179.302  | NM_003134 | 66323.023 | 66043.195 | NM_006323 | 25932.563 | 29012.166 |
| AF129533  | 1174.588  | 1191.837  | CY3Cy5    | 3084.41   | 100.147   | NM_016466 | 4648.209  | 5087.515  |
| NM_003341 | 8278.717  | 16737.672 | NM_022095 | 2674.4    | 2492.803  | NM_001493 | 11086.808 | 12455.169 |
| NM_017785 | 1715.616  | 2057.493  | AF088061  | 4377.162  | 4614.689  | NM_003716 | 1031.04   | 1411.58   |
| NM_006249 | 5695.264  | 6132.315  | AF086425  | 596.791   | 355.054   | NM_014841 | 1658.494  | 2261.413  |
| NM_018318 | 948.466   | 977.268   | AF086286  | 7380.422  | 9225.363  | NM_014426 | 16866.52  | 21732.416 |
| AB020640  | 4085.29   | 4191.873  | AF086376  | 4807.642  | 4905.644  | NM_006816 | 54657.281 | 57122.309 |
| D29954    | 26221.762 | 23588.248 | AF086410  | 1851.651  | 1913.022  | AK026518  | 57519.188 | 58483.91  |
| AF007131  | 3025.302  | 2625.471  | AK022997  | 24878.607 | 27939.691 | AF132734  | 37788.73  | 31254.9   |
| NM_006839 | 4491.412  | 4105.401  | NM_017617 | 5652.242  | 5881.942  | NM_018379 | 8983.845  | 7264.411  |
| NM_000223 | 1358.565  | 1489.641  | AF131830  | 2475.753  | 2199.332  | NM_016403 | 49118.5   | 50401.965 |
| NM_005851 | 2574.7    | 3028.889  | NM_014811 | 1097.682  | 1343.541  | NM_015603 | 2720.387  | 2388.513  |
| AF119256  | 3933.757  | 4743.729  | AK027232  | 10446.285 | 12965.286 | AK021788  | 1754.844  | 1296.953  |
| NM_007015 | 787.971   | 787.793   | NM_012204 | 914.739   | 922.026   | NM_001921 | 14106.102 | 14341.009 |
| NM_005180 | 12956.386 | 12730.922 | NM_022095 | 2605.136  | 2403.459  | NM_006230 | 18539.518 | 18979.785 |
| NM_003410 | 10719.591 | 10847.148 | SR2       | 56625.277 | 56494.148 | NM_014695 | 28696.439 | 25818.424 |
| NM_007146 | 5849.804  | 6952.236  | SR4       | 20018.258 | 21391.842 | NM_013400 | 23854.023 | 20482.934 |
| NM_002229 | 9043.01   | 9807.244  | SR6       | 2434.144  | 2796.112  | AK026257  | 4336.468  | 4124.241  |
| S69027    | 8032.774  | 10064.585 | SR8       | 8918.884  | 30305.014 | AK023836  | 21017.195 | 21666.146 |
| NM_012119 | 1838.32   | 2393.568  | SR10      | 29474.807 | 10732.085 | NM_018105 | 6481.808  | 7211.361  |
| X99631    | 28011.303 | 31221.434 | CY3Cy5    | 4043.566  | 100.284   | AJ299442  | 13646.72  | 19508.859 |
| NM_001730 | 9041.985  | 9239.343  | AF086103  | 1545.611  | 1503.477  | AB040897  | 1100.654  | 1552.897  |
| AK026290  | 15190.139 | 12965.822 | AL080135  | 2699.652  | 2289.643  | NM_000125 | 6511.923  | 7191.463  |
| AB014589  | 3358.954  | 4068.667  | AK023158  | 3596.229  | 3473.097  | NM_003762 | 10072.357 | 13937.186 |
| AF248649  | 2945.605  | 2998.906  | AK000580  | 949.889   | 1094.922  | NM_018446 | 6390.763  | 8595.947  |
| U37146    | 20792.207 | 21351.072 | AF085852  | 12678.116 | 12460.226 | NM_000187 | 1708.508  | 2185.901  |
| NM_012086 | 4264.689  | 3981.085  | AF042838  | 3757.422  | 3982.373  | NM_014465 | 2327.133  | 3045.641  |
| AB040431  | 21274.549 | 21283.393 | AL137511  | 1452.582  | 1516.772  | D87292    | 2939.071  | 3906.429  |

|           |           |           |           |           |           |           |           |           |
|-----------|-----------|-----------|-----------|-----------|-----------|-----------|-----------|-----------|
| NM_000991 | 59783.738 | 63611.906 | X91221    | 780.446   | 1066.115  | NM_00549E | 4225.764  | 5384.079  |
| NM_016034 | 54133.266 | 54229.645 | AF075062  | 17371.73  | 16757.926 | NM_004407 | 1674.581  | 1642.773  |
| X69150    | 57651.836 | 59765.828 | NM_00418E | 3023.476  | 2980.469  | NM_00007C | 12491.576 | 11748.302 |
| NM_00102E | 60355.77  | 64596.594 | AF147381  | 18333.266 | 18449.598 | NM_00120Z | 3760.047  | 3649.972  |
| NM_016067 | 56190.879 | 56068.414 | AB002452  | 723.975   | 836.434   | AB037804  | 1161.011  | 1019.786  |
| NM_01828E | 42718.273 | 34922.16  | AK027101  | 37558.852 | 35905.141 | U34249    | 3546.999  | 3400.064  |
| AK022393  | 37223.969 | 33834.203 | AK024358  | 4769.309  | 4560.877  | NM_00328E | 53475.008 | 55997.809 |
| AK026302  | 33803.012 | 35654.508 | AF088075  | 3800.934  | 3941.65   | AI200114  | 6271.685  | 7388.389  |
| NM_012214 | 6449.948  | 6900.879  | AK026376  | 3949.702  | 3659.289  | M74220    | 737.873   | 774.927   |
| AF049656  | 18965.271 | 17242.301 | AK027097  | 1232.44   | 1216.689  | M23254    | 2539.973  | 2612.614  |
| NM_00196E | 2394.978  | 2583.122  | AK024613  | 728.712   | 602.479   | BE618539  | 14892.908 | 15581.591 |
| NM_01613E | 13175.667 | 14565.06  | AL117437  | 704.357   | 1196.597  | R28062    | 8843.746  | 8860.188  |
| NM_01435E | 14340.507 | 14659.878 | AK027198  | 4137.492  | 5377.673  | U38545    | 586.78    | 854.974   |
| AF072810  | 5560.899  | 7516.318  | AL162077  | 1465.591  | 1669.409  | AI627464  | 1487.456  | 1695.727  |
| L19778    | 2156.609  | 2621.06   | AK023324  | 1235.84   | 1527.911  | BI756258  | 7343.827  | 10267.11  |
| AF174482  | 5169.917  | 5846.689  | AK022404  | 1539.681  | 1627.017  | AI342225  | 53807.645 | 61263.742 |
| Y08836    | 1325.843  | 1288.37   | AF147426  | 4226.818  | 5286      | AA634103  | 51284.641 | 57778.652 |
| NM_00352E | 1263.559  | 1259.382  | BC019667  | 54793.465 | 55066.082 | J04599    | 2986.407  | 3780.632  |
| NM_01776E | 1567.007  | 1483.33   | AK026026  | 37192.855 | 38663.477 | AF110020  | 9287.629  | 7459.244  |
| D85131    | 39080.168 | 36298.461 | AF085941  | 32599.965 | 38852.938 | AA707922  | 241.042   | 708.914   |
| NM_00495E | 1149.326  | 1163.546  | Z69892    | 19886.791 | 21222.305 | AA608557  | 12462.604 | 16071.773 |
| D30612    | 14930.333 | 13921.31  | AF087961  | 1583.5    | 1290.57   | AL050095  | 27554.527 | 33259.781 |
| NM_00216E | 15412.443 | 12784.656 | AL137309  | 5102.382  | 4898.529  | U03272    | 1347.767  | 1598.863  |
| U52097    | 8193.022  | 6929.387  | AL137475  | 1936.813  | 2055.908  | AF075085  | 47552.992 | 55865.055 |
| NM_00341E | 6664.816  | 6967.661  | AL161956  | 7831.642  | 7528.12   | NM_00589Z | 10768.555 | 12885.851 |
| X74497    | 952.103   | 703.972   | AL390176  | 4117.495  | 4443.034  | NM_00647E | 1457.246  | 2169.821  |
| NM_01221C | 3611.178  | 3663.62   | AL137356  | 1091.824  | 1160.856  | AF311287  | 35256.004 | 33349.496 |
| U10072    | 8205.268  | 7686.287  | AL137547  | 2533.361  | 2274.561  | NM_00309E | 4814.343  | 4671.543  |
| AF222749  | 20117.648 | 20677.67  | AK021994  | 2113.49   | 2129.704  | NM_014781 | 8565.642  | 6780.401  |
| NM_001321 | 4249.07   | 4086.331  | Z70763    | 2085.21   | 1912.447  | BU629989  | 3166.19   | 2286.766  |
| AB018264  | 3739.668  | 4155.902  | AK023802  | 36341.426 | 42420.992 | X87896    | 5011.813  | 5815.041  |
| U92544    | 2516.865  | 3403.435  | AK021981  | 650.663   | 928.674   | M88310    | 6365.004  | 6699.441  |
| NM_019644 | 1106.179  | 1218.718  | AL359567  | 3414.361  | 3571.234  | D16856    | 831.359   | 1002.575  |
| NM_006791 | 10506.116 | 10474.903 | NM_01772E | 13208.922 | 12998.316 | NM_00004Z | 4553.487  | 4389.329  |
| NM_01587Z | 1091.742  | 943.923   | AK026716  | 1315.119  | 1641.24   | AF035787  | 18842.047 | 18905.521 |
| AI285199  | 1452.676  | 1510.876  | AL049325  | 28759.705 | 33042.934 | NM_005024 | 735.911   | 839.711   |
| AA757170  | 479.969   | 561.438   | AK023952  | 2659.785  | 3507.588  | NM_00340Z | 2094.91   | 2668.875  |
| L07738    | 1849.448  | 1697.282  | AK000787  | 1528.154  | 1721.096  | NM_01480E | 7680.581  | 10867.639 |
| Z48054    | 17201.189 | 17023.465 | AF090885  | 38177.898 | 44484.52  | AB006627  | 9654.038  | 11989.521 |
| H90415    | 6609.777  | 5607.542  | AF161342  | 986.886   | 1149.082  | NM_00041E | 12747.473 | 16137.598 |
| AA676470  | 11221.13  | 9856.924  | NM_01664E | 1128.918  | 1024.24   | NM_00338Z | 714.102   | 823.152   |
| AA430512  | 18485.947 | 16341.795 | NM_01408Z | 4342.275  | 4816.355  | NM_00296E | 897.248   | 1212.578  |
| M38258    | 1923.682  | 2051.341  | AF100636  | 1164.018  | 981.959   | AB007883  | 22013.051 | 25262.33  |
| AA457155  | 12149.955 | 11057.08  | AF161366  | 759.6     | 616.508   | NM_006391 | 962.109   | 697.49    |
| BM014365  | 2752.946  | 2600.782  | AK022197  | 3695.434  | 4001.245  | NM_007037 | 56778.875 | 56599.254 |
| H91842    | 1686.992  | 1699.729  | AK021970  | 1313.092  | 1356.11   | NM_005014 | 3848.766  | 5124.673  |
| U78045    | 1077.771  | 917.884   | AK022066  | 67195.961 | 66072.945 | NM_006944 | 1439.07   | 1798.912  |
| AA878561  | 59394.629 | 60243.727 | AK022224  | 2910.995  | 2731.771  | NM_00316E | 11734.462 | 10627.041 |
| BF688309  | 820.959   | 989.44    | AK022359  | 1690.463  | 1562.367  | NM_00390E | 52149.949 | 51674.453 |
| AI538525  | 3159.558  | 3829.391  | AK022000  | 2667.537  | 2536.68   | AL359590  | 57183.43  | 53551.527 |
| NM_00520E | 62399.746 | 60176.707 | AK022129  | 5229.57   | 4757.453  | NM_002861 | 21080.178 | 18069.76  |
| BE878426  | 58781.133 | 63321.898 | AK022263  | 5597.565  | 6422.878  | NM_00308C | 15354.109 | 12544.942 |
| NM_00174E | 54374.891 | 56343.199 | AK022384  | 1626.556  | 1492.092  | NM_00404Z | 730.582   | 741.808   |



|           |           |           |           |           |           |           |           |           |
|-----------|-----------|-----------|-----------|-----------|-----------|-----------|-----------|-----------|
| NM_003825 | 19050.225 | 26037.119 | AF086304  | 34982.949 | 33870.66  | NM_013265 | 1323.037  | 1636.548  |
| AK025006  | 18637.059 | 19593.668 | AB032976  | 4073.407  | 4570.139  | NM_002645 | 8937.126  | 8311.598  |
| AF218014  | 10040.003 | 10777.74  | AF301222  | 32726.172 | 35811.656 | AB033027  | 4040.63   | 4453.479  |
| NM_006675 | 2009.771  | 2013.556  | AF215981  | 19395.381 | 22822.371 | AF320293  | 1102.855  | 1138.015  |
| AY007729  | 26862.385 | 25110.535 | NM_000732 | 61029.777 | 57593.98  | NM_001171 | 3005.049  | 3068.446  |
| NM_014424 | 1096.022  | 1164.536  | AF130044  | 1729.31   | 1929.909  | NM_006323 | 24483.16  | 29732.107 |
| AF159092  | 722.094   | 721.433   | AF116709  | 771.846   | 1352.847  | NM_016465 | 4790.704  | 6212.945  |
| BC007318  | 6791.202  | 7711.826  | AF087980  | 2008.792  | 1902.645  | NM_001493 | 11286.013 | 11415.752 |
| M36693    | 22080.506 | 25116.029 | AK000257  | 2090.966  | 2138.125  | NM_003715 | 1040.007  | 1450.145  |
| NM_016292 | 23275.037 | 25036.48  | NM_006160 | 11731.458 | 9823.76   | NM_014841 | 1492.479  | 1802.577  |
| NM_002601 | 10250.241 | 8398.196  | NM_000529 | 2843.342  | 3058.666  | NM_014425 | 15883.647 | 22158.965 |
| NM_001781 | 2518.867  | 2696.377  | AL110159  | 669.484   | 763.041   | AK026518  | 56881.078 | 59349.152 |
| NM_014432 | 12983.063 | 13506.962 | AF009259  | 1957.084  | 1875.144  | NM_000255 | 56950.063 | 56086.141 |
| NM_001555 | 6096.51   | 5098.222  | AF009260  | 2077.636  | 2026.847  | AB033055  | 39926.227 | 35771.746 |
| NM_006953 | 759.012   | 969.399   | NM_003079 | 4044.446  | 4848.198  | NM_016403 | 49446.813 | 46301.145 |
| NM_002530 | 747.006   | 656.306   | NM_017902 | 5565.117  | 6084.163  | NM_015603 | 2750.273  | 2328.992  |
| NM_018941 | 2760.636  | 2515.411  | NM_018347 | 8558.745  | 7705.191  | AK021788  | 1677.975  | 1061.495  |
| NM_020241 | 511.19    | 707.816   | AK024986  | 1002.326  | 694.163   | NM_001921 | 15342.511 | 13508.726 |
| NM_005895 | 34925.801 | 38375.23  | AK026730  | 2969.532  | 3088.5    | NM_006230 | 18890.299 | 18455.303 |
| NM_002885 | 9242.711  | 9841.169  | AK024739  | 3050.141  | 3465.316  | NM_014695 | 30738.912 | 28399.441 |
| AF078866  | 8480.362  | 11325.053 | AK098681  | 2922.74   | 3300.414  | NM_013400 | 26707.545 | 26050.873 |
| BF311880  | 1823.261  | 1830.261  | AK026772  | 8762.156  | 9151.786  | AK026257  | 3962.175  | 3120.252  |
| NM_000075 | 539.979   | 674.146   | NM_014260 | 21178.877 | 24692.193 | AK023836  | 21335.484 | 19378.59  |
| NM_016075 | 1589.439  | 1559.352  | AK026458  | 2165.81   | 2146.573  | NM_018105 | 5695.125  | 5784.55   |
| NM_001360 | 27147.992 | 25674.322 | AK024154  | 16002.268 | 17672.156 | AJ299442  | 12380.818 | 15733.37  |
| AK026656  | 4342.626  | 4731.086  | AF086341  | 2078.149  | 1859.302  | AB040897  | 1058.515  | 1545.078  |
| NM_000751 | 7758.796  | 8517.826  | AK026672  | 2326.608  | 2052.438  | NM_000125 | 6389.77   | 8597.125  |
| NM_005071 | 1171.343  | 1426.325  | S83282    | 67948.75  | 63685.914 | NM_003762 | 11897.601 | 13898.025 |
| NM_016730 | 2533.8    | 2890.76   | AK024164  | 51704.629 | 55877.875 | NM_018445 | 6648.563  | 8630.565  |
| AL035297  | 3614.599  | 3128.384  | AF052130  | 10250.9   | 13816.537 | NM_000187 | 1633.515  | 2565.323  |
| NM_004405 | 2149.634  | 2008.074  | AF130090  | 53886.137 | 57714.996 | NM_014465 | 2667.259  | 3000.213  |
| AJ131244  | 5023.545  | 5708.282  | AL096727  | 4643.899  | 6460.646  | D87292    | 2776.262  | 3067.328  |
| NM_002532 | 12175.597 | 13219.188 | AL080110  | 9285.119  | 10547.77  | NM_005495 | 4521.875  | 4838.356  |
| NM_012385 | 7572.052  | 6428.581  | NM_020425 | 2593.871  | 3839.705  | NM_016335 | 7733.35   | 8364.219  |
| NM_016651 | 1508.351  | 1435.143  | AK024076  | 9168.957  | 10612.713 | NM_001202 | 3745.16   | 4033.12   |
| NM_001671 | 636.807   | 365.534   | M87940    | 3280.765  | 2998.982  | AB037804  | 1253.654  | 1053.259  |
| NM_019843 | 6212.468  | 5806.853  | L77588    | 5135.908  | 5393.229  | U34249    | 3501.997  | 3415.726  |
| NM_016192 | 16605.57  | 16710.563 | AF039442  | 2954.453  | 4547.332  | NM_003285 | 55945.84  | 58416.203 |
| AB046774  | 2119.171  | 1701.325  | NM_004680 | 2744.797  | 2713.117  | AI200114  | 6524.498  | 6868.972  |
| AK022385  | 35247.633 | 36015.453 | NM_005671 | 1987.554  | 2322.794  | M74220    | 824.215   | 892.605   |
| NM_002775 | 1473.251  | 1536.832  | NM_017409 | 1212.284  | 1652.613  | M23254    | 2735.363  | 3206.969  |
| AK024584  | 13617.937 | 11817.689 | NM_019625 | 42375.664 | 48259.746 | BE618539  | 15379.841 | 17230.012 |
| NM_003504 | 12158.713 | 12242.661 | NM_006729 | 7792.782  | 8828.358  | R28062    | 8732.82   | 7745.159  |
| NM_013295 | 10155.853 | 10903.973 | NM_006071 | 3870.684  | 4852.284  | U38545    | 571.06    | 736.509   |
| NM_007267 | 9134.77   | 9362.151  | NM_012236 | 16351.099 | 22370.043 | AI627464  | 1496.722  | 1767.05   |
| AK022830  | 776.281   | 645.415   | AF075111  | 1358.147  | 2217.295  | BI756258  | 7280.75   | 8060.145  |
| Z36816    | 22355.264 | 22834.15  | NM_013939 | 1810.069  | 2485.17   | AI342225  | 54332.941 | 66844.328 |
| NM_005865 | 3756.805  | 4352.434  | AB038651  | 7938      | 8183.481  | AA634103  | 55838.563 | 57605.738 |
| NM_006413 | 16736.838 | 19092.086 | AL359603  | 2815.23   | 3652.689  | J04599    | 3455.411  | 4702.852  |
| NM_017684 | 2439.038  | 2468.597  | X84838    | 1163.167  | 2042.63   | AF110020  | 11166.872 | 10278.029 |
| AK025542  | 1157.088  | 1595.539  | NM_013940 | 1277.897  | 1587.147  | AA707922  | 503.384   | 625.541   |
| AF207547  | 624.868   | 580.401   | AL117643  | 2991.079  | 3355.968  | AA608557  | 13611.362 | 13828.607 |
| NM_002765 | 7457.522  | 7771.701  | AF069135  | 13072.678 | 13469.4   | AL050095  | 31762.93  | 32478.877 |

|           |           |           |           |           |           |           |           |           |
|-----------|-----------|-----------|-----------|-----------|-----------|-----------|-----------|-----------|
| NM_003691 | 4011.118  | 4524.69   | AK026524  | 2243.217  | 2835.715  | U03272    | 1580.851  | 1766.619  |
| NM_002950 | 28867.727 | 25606.635 | AB011157  | 7555.113  | 8677.453  | AF075085  | 56550.527 | 57649.871 |
| NM_002318 | 4133.452  | 4152.93   | U17632    | 1234.29   | 1411.833  | NM_005892 | 10189.938 | 10217.087 |
| NM_001433 | 1340.589  | 1413.093  | AK026764  | 4050.024  | 3817.919  | NM_006478 | 1471.791  | 1362.695  |
| NM_003134 | 55938.242 | 55636.262 | AF113700  | 5171.694  | 6181.925  | AF132734  | 28365.473 | 28845.771 |
| NM_004314 | 7496.244  | 6720.811  | X91348    | 53665.906 | 54380.629 | NM_018379 | 7177.585  | 6550.589  |
| NM_018247 | 19890.895 | 14687.391 | Z36505    | 8106.385  | 9432.112  | NM_000042 | 4912.266  | 4389.03   |
| NM_017979 | 9884.218  | 7521.733  | NM_001854 | 5526.568  | 6700.831  | AF035787  | 18108.951 | 16881.457 |
| NM_006911 | 2322.637  | 2418.256  | NM_017913 | 3773.615  | 4778.92   | AF090405  | 633.971   | 379.036   |
| U92544    | 1844.888  | 1968.699  | NM_002755 | 28375.336 | 33283.578 | NM_005024 | 915.081   | 684.506   |
| NM_006791 | 10052.113 | 11643.115 | AK024799  | 67819.578 | 72691.906 | NM_003403 | 3052.887  | 2689.187  |
| AJ278348  | 57622.461 | 60262.887 | NM_000924 | 14567.893 | 17404.377 | NM_014808 | 8451.355  | 10096.188 |
| NM_015872 | 1297.751  | 1366.308  | NM_003330 | 15701.454 | 18741.984 | AB006627  | 8219.596  | 9350.994  |
| AI285199  | 881.389   | 942.537   | NM_002481 | 1019.632  | 1790.132  | NM_000416 | 11231.079 | 11649.737 |
| L07738    | 2122.408  | 1624.114  | NM_018351 | 2381.551  | 2949.395  | NM_003382 | 584.81    | 716.086   |
| Z48054    | 14941.563 | 16401.129 | AK023019  | 1404.509  | 1740.513  | NM_002965 | 918.441   | 1125.875  |
| H90415    | 6782.764  | 6854.172  | NM_147171 | 8220.615  | 9168.678  | AB007883  | 20413.924 | 19471.676 |
| AA676470  | 10046.43  | 11443.642 | AF238083  | 26480.516 | 27861.164 | NM_006391 | 1282.286  | 975.212   |
| AA430512  | 18970.883 | 21160.066 | NM_002962 | 487.483   | 727.003   | AK093780  | 30447.443 | 41529.77  |
| M38258    | 1305.008  | 1084.683  | NM_016388 | 4656.125  | 5720.21   | NM_007037 | 56536.023 | 58146.188 |
| AA457155  | 11871.524 | 10653.584 | AB046783  | 2298.281  | 2461.988  | NM_001649 | 1438.749  | 1429.894  |
| BM014365  | 3061.716  | 3204.595  | NM_000845 | 1977.239  | 2087.771  | NM_005492 | 11201.837 | 11863.619 |
| H91842    | 1326.372  | 1433.538  | NM_004604 | 62645.73  | 66313.328 | AF038196  | 5304.861  | 6420.273  |
| U78045    | 1400.322  | 1154.212  | NM_014965 | 15016.293 | 15854.957 | NM_004859 | 51560.945 | 52306.316 |
| AA878561  | 52179.094 | 56807.137 | NM_004882 | 47287.172 | 50574.203 | NM_016352 | 6224.249  | 6726.945  |
| BF688309  | 808.911   | 1094.682  | AL390148  | 18150.1   | 18715.715 | NM_005014 | 2742.373  | 3562.808  |
| AI538525  | 2798.774  | 3016.995  | AK024055  | 2430.418  | 2338.958  | NM_006944 | 1051.134  | 1545.919  |
| AF222980  | 1781.113  | 1469.751  | NM_013376 | 2076.917  | 2033.74   | NM_004407 | 1619.826  | 1701.514  |
| AK026758  | 6113.439  | 4663.144  | NM_017964 | 4454.956  | 6968.243  | NM_000070 | 13220.808 | 15600.042 |
| NM_012201 | 10361.242 | 8336.057  | NM_016272 | 799.094   | 910.573   | NM_003304 | 619.957   | 413.602   |
| NM_001745 | 52516.977 | 56276.184 | NM_016428 | 11145.38  | 13716.543 | NM_006323 | 23033.08  | 25489.84  |
| NM_003825 | 19969.26  | 23279.369 | NM_004083 | 21470.094 | 23020.418 | NM_016466 | 4465.677  | 4588.558  |
| AK025006  | 18906.934 | 22158.504 | NM_016039 | 57314.762 | 53842.5   | NM_001493 | 10364.817 | 8559.773  |
| AF218014  | 8841.282  | 9533.059  | NM_001184 | 6295.726  | 7233.683  | NM_003716 | 969.983   | 1088.933  |
| NM_006678 | 1607.327  | 1561.408  | NM_015530 | 18456.289 | 19344.686 | NM_014841 | 1706.78   | 2084.923  |
| AY007729  | 20103.354 | 20231.043 | NM_016238 | 11202.066 | 12612.674 | NM_014426 | 16759.322 | 21583.975 |
| NM_014424 | 902.238   | 1073.333  | NM_001758 | 2167.651  | 2247.357  | NM_006816 | 55002.273 | 56939.848 |
| AF159092  | 595.196   | 691.988   | BE546276  | 2882.476  | 3616.172  | NM_000258 | 59245.18  | 56835.051 |
| BC007318  | 6566.439  | 8310.235  | NM_004725 | 18666.391 | 20933.742 | AB033055  | 45957.074 | 43868.684 |
| M36693    | 20346.951 | 20275.984 | NM_015997 | 15266.283 | 18320.803 | AF311287  | 37903.727 | 32171.773 |
| NM_016292 | 21329.467 | 24474.164 | NM_001167 | 15585.387 | 16933.766 | NM_003098 | 4603.508  | 4580.236  |
| NM_002601 | 10979.913 | 9911.554  | NM_012115 | 12407.855 | 14136.416 | NM_014781 | 7570.785  | 7904.185  |
| U62858    | 404.958   | 644.5     | NM_004933 | 61833.102 | 59938.574 | BU629989  | 2398.881  | 2310.348  |
| NM_001781 | 2299.574  | 2252.931  | M96577    | 42117.41  | 48680.578 | X87896    | 5220.314  | 6357.14   |
| NM_014432 | 13488.179 | 14180.104 | NM_013258 | 56453.066 | 60259.914 | M88310    | 5039.362  | 7407.014  |
| NM_001558 | 6319.046  | 5078.806  | NM_003842 | 9350.249  | 10153.433 | D16856    | 1925.914  | 1429.586  |
| NM_006953 | 719.185   | 912.853   | NM_016184 | 3490.061  | 4646.123  | NM_014465 | 2475.75   | 2513.567  |
| NM_002530 | 1034.933  | 758.397   | L11238    | 33535.461 | 35878.91  | D87292    | 2797.598  | 2762.349  |
| NM_018941 | 3124.022  | 3012.331  | AK025684  | 2133.031  | 2118.361  | NM_005498 | 4596.13   | 3615.5    |
| NM_001321 | 4173.807  | 3299.68   | NM_012205 | 22487.332 | 22966.434 | NM_016335 | 7332.462  | 5691.475  |
| AB018264  | 3473.447  | 3448.875  | K02046    | 7570.064  | 7072.461  | NM_003165 | 10637.036 | 10302.765 |
| AF078866  | 7792.53   | 8817.375  | U87223    | 3611.326  | 3163.217  | NM_003906 | 47601.891 | 48107.379 |
| BF311880  | 2084.282  | 2630.162  | NM_002217 | 1937.858  | 1891.777  | AL359590  | 59583.578 | 57752.352 |

|           |           |           |           |           |           |           |           |           |
|-----------|-----------|-----------|-----------|-----------|-----------|-----------|-----------|-----------|
| NM_00007E | 414.659   | 487.438   | NM_00499E | 8734.889  | 10155.603 | NM_002861 | 20454.221 | 19428.648 |
| NM_01607E | 1823.172  | 1859.806  | NM_00038E | 19006.482 | 22704.443 | NM_00308C | 17466.539 | 14726.149 |
| NM_00136C | 30090.063 | 30645.391 | NM_007231 | 2098.36   | 2139.181  | NM_00404Z | 758.268   | 652.891   |
| AK026656  | 2767.459  | 3147.446  | NM_001190 | 8347.215  | 7860.181  | NM_01326E | 1536.594  | 1710.66   |
| NM_000751 | 5367.791  | 5077.909  | NM_005271 | 28920.715 | 38146.172 | NM_00264E | 9404.972  | 10687.657 |
| NM_005071 | 1180.617  | 1297.17   | NM_015654 | 12265.831 | 14366.354 | AB033027  | 5614.27   | 6162.297  |
| NM_01673C | 2217.913  | 2544.961  | NM_012244 | 5818.81   | 6791.786  | AK021805  | 47174.789 | 51862.359 |
| AL035297  | 3493.945  | 3444.598  | NM_004341 | 4636.414  | 5806.313  | AB014550  | 5334.573  | 5385.482  |
| NM_00440E | 1822.885  | 2022.628  | AB082521  | 20674.17  | 22311.531 | AF320294  | 13859.723 | 12514.299 |
| AJ131244  | 4424.718  | 4977.417  | AK026806  | 903.586   | 1330.106  | AF320293  | 1153.921  | 1177.361  |
| NM_00253Z | 14501.213 | 16655.654 | AL050182  | 6265.936  | 7563.125  | AF161436  | 10165.172 | 13513.856 |
| NM_01238E | 8812.105  | 9633.888  | NM_02004C | 2972.108  | 3469.98   | NM_02040Z | 13967.565 | 18393.729 |
| NM_016651 | 1051.397  | 1033.593  | NM_002374 | 9613.512  | 11024.883 | NM_00429E | 3650.474  | 5000.914  |
| NM_001671 | 538.843   | 489.307   | AK026940  | 12982.57  | 14679.844 | NM_001171 | 2728.403  | 4390.621  |
| NM_01984Z | 7177.832  | 7596.711  | AF155117  | 11556.332 | 13549.799 | NM_00225C | 16080.153 | 26213.283 |
| NM_01619Z | 16416.73  | 17198.086 | AB014527  | 1832.423  | 1882.773  | S81591    | 1241.913  | 1157.496  |
| BE878426  | 54617.262 | 57008.098 | NM_004411 | 4395.718  | 4194.096  | AF075085  | 54564.77  | 57277.34  |
| AK022385  | 29797.535 | 24423.674 | NM_01593E | 18149.205 | 16380.852 | NM_00589Z | 7484.359  | 5795.859  |
| NM_00277E | 1255.565  | 1177.201  | NM_00074C | 2018.529  | 1863.521  | NM_00647E | 1255.704  | 1313.139  |
| AK024584  | 13379.205 | 9901.676  | NM_01784Z | 16459.721 | 15166.46  | AF132734  | 31509.529 | 25608.26  |
| NM_003504 | 12354.129 | 11330.378 | U10485    | 2265.522  | 2115.895  | NM_01837E | 7601.916  | 6185.57   |
| NM_01329E | 10225.337 | 12160.896 | AK025326  | 49054.781 | 45291.855 | NM_01640Z | 48546.629 | 48832.148 |
| NM_007267 | 9234.326  | 11125.311 | NM_01632E | 18989.891 | 20154.908 | NM_01560Z | 2032.577  | 2212.803  |
| AK022830  | 675.726   | 705.748   | NM_017544 | 63796.16  | 65011.949 | AK021788  | 1557.587  | 1405.581  |
| Z36816    | 23042.711 | 25130.814 | NM_00315Z | 4240.528  | 5073.337  | NM_001921 | 12073.339 | 10257.565 |
| NM_00586E | 3175.127  | 3153.44   | NM_01628E | 3886.241  | 3392.505  | NM_00623C | 17424.016 | 16522.502 |
| NM_00641Z | 14875.667 | 14154.593 | NM_014707 | 1837.873  | 2052.622  | NM_01469E | 30768.432 | 24874.811 |
| NM_017684 | 2985.244  | 2707.81   | AF025771  | 3254.415  | 3964.737  | NM_01340C | 22956.805 | 20905.934 |
| NM_00276E | 8005.729  | 10766.83  | NM_01821E | 5556.958  | 5118.317  | AK026257  | 4042.479  | 3176.28   |
| NM_003691 | 3068.281  | 4306.906  | AB033110  | 5393.714  | 5580.177  | AK023836  | 23402.322 | 22175.012 |
| NM_00295C | 29401.592 | 31231.547 | NM_00508Z | 67850.328 | 64213.863 | NM_01810E | 5935.078  | 5554.12   |
| NM_00231E | 4319.904  | 4376.499  | NM_007187 | 22551.045 | 23629.203 | AJ299442  | 13364.435 | 17049.77  |
| NM_00143Z | 981.928   | 1201.393  | NM_00182E | 1101.919  | 1262.521  | AB040897  | 991.055   | 1090.802  |
| NM_004314 | 9210.85   | 9879.043  | NM_01898Z | 26146.039 | 33298.594 | NM_00012E | 7045.169  | 8565.125  |
| NM_018247 | 19815.576 | 17857.707 | NM_00309E | 19566.861 | 20324.527 | NM_00376Z | 12443.007 | 18689.547 |
| NM_01797E | 9431.6    | 8598.227  | NM_00727E | 18345.82  | 20377.51  | NM_01844E | 6958.826  | 10749.777 |
| NM_00589E | 35768.785 | 34387.125 | BE390833  | 44086.75  | 45407.715 | NM_000187 | 1681.844  | 2878.915  |
| NM_00288E | 11275.513 | 8933.425  | NM_00473C | 23431.363 | 25038.559 | CY3Cy5    | 743.736   | 103.717   |
| NM_019644 | 769.362   | 530.188   | NM_000801 | 12633.659 | 11863.313 | NM_01753Z | 5190.201  | 4444.696  |
| NM_006791 | 9679.065  | 9729.665  | NM_00611E | 63176.926 | 59850.574 | AF086184  | 32555.988 | 29609.674 |
| AJ278348  | 56061.742 | 56417.824 | NM_005801 | 12348.963 | 10876.936 | NM_01827E | 16964.809 | 15773.707 |
| NM_01587Z | 1631.818  | 2009.51   | NM_01819E | 7594.189  | 7579.607  | AL049266  | 7449.042  | 5664.427  |
| AI285199  | 1010.227  | 1174.8    | NM_00153E | 38994.285 | 44378.98  | AK021560  | 1177.863  | 961.604   |
| L07738    | 2118.823  | 2077.498  | NM_012267 | 1796.191  | 1502.889  | AF088045  | 1055.834  | 1051.423  |
| Z48054    | 15482.615 | 17052.586 | NM_00329Z | 615.846   | 483.172   | AF007149  | 1539.57   | 1116.608  |
| H90415    | 6566.512  | 6833.797  | NM_01661E | 2250.506  | 2492.494  | AK001469  | 3948.484  | 3421.588  |
| AA676470  | 11194.364 | 10279.062 | NM_00002Z | 30491.783 | 32970.496 | AF035318  | 1995.666  | 1661.036  |
| AA430512  | 17828.834 | 17183.764 | NM_01657E | 15409.258 | 17851.914 | NM_01545E | 5703.833  | 4723.75   |
| M38258    | 1416.076  | 1288.44   | NM_00421Z | 4197.025  | 4536.218  | AK025056  | 2184.706  | 1949.208  |
| AA457155  | 10359.286 | 8950.776  | NM_00192E | 67943.273 | 65260.758 | AF140710  | 7205.297  | 6207.684  |
| AA878561  | 60433.367 | 62907.621 | NM_00090E | 6325.967  | 6748.264  | NM_01753Z | 4038.392  | 4248.524  |
| BF688309  | 1076.201  | 1175.562  | NM_00048C | 11747.619 | 12982.667 | SR2       | 40637.016 | 49868.289 |
| AF222980  | 1746.933  | 1636.905  | AF254084  | 67663.117 | 70287.305 | SR4       | 12833.921 | 14914.671 |

|           |           |           |           |           |           |           |           |           |
|-----------|-----------|-----------|-----------|-----------|-----------|-----------|-----------|-----------|
| AK026758  | 7015.206  | 6586.868  | AK022648  | 1431.039  | 1745.849  | SR6       | 1417.989  | 1995.945  |
| NM_012201 | 10864.206 | 10565.329 | AK022976  | 3109.07   | 3210.359  | SR8       | 5025.912  | 23687.357 |
| AB046774  | 2684.958  | 2595.989  | AB048791  | 17557.883 | 19500.549 | SR10      | 19131.58  | 9036.477  |
| AF159092  | 750.69    | 801.787   | NM_003107 | 2492.744  | 2994.382  | CY3Cy5    | 735.674   | 87.219    |
| BC007318  | 6858.081  | 7632.728  | NM_006874 | 9717.56   | 12579.831 | AL157477  | 4660.035  | 4155.665  |
| M36693    | 21996.846 | 22371.424 | AB046777  | 3630.664  | 4199.578  | AB002318  | 3286.602  | 3065.548  |
| NM_016292 | 24300.752 | 25628.373 | AJ251844  | 19746.357 | 22246.078 | AL357535  | 5420.439  | 7565.952  |
| NM_002601 | 12016.659 | 12349.002 | D16815    | 3574.149  | 3951.56   | AL049951  | 2602.21   | 2078.458  |
| U62858    | 557.938   | 813.515   | NM_001880 | 4008.773  | 4319.728  | AK024963  | 965.304   | 888.358   |
| NM_001781 | 2712.066  | 2544.107  | AB028943  | 9470.424  | 9901.496  | AK023725  | 1059.858  | 961.633   |
| NM_014432 | 13318.635 | 15007.204 | NM_006194 | 3044.224  | 3036.328  | AK022936  | 8410.277  | 7775.12   |
| NM_001558 | 6494.219  | 6407.677  | AK001603  | 29530.914 | 32738.324 | AK024385  | 4905.564  | 4095.672  |
| NM_006953 | 956.612   | 1004.588  | U71601    | 5648.068  | 5843.11   | AL137727  | 2589.229  | 1900.68   |
| NM_002530 | 763.223   | 914.404   | AK025985  | 48685.219 | 58902.871 | L17327    | 502.582   | 451.142   |
| U96173    | 4465.874  | 4326.873  | NM_013256 | 7156.3    | 7743.42   | AF074986  | 1321.881  | 1270.822  |
| NM_001980 | 3362.297  | 4193.237  | NM_004143 | 4309.465  | 4107.58   | AL049240  | 7303.713  | 5943.116  |
| NM_005954 | 2329.503  | 2708.835  | X66087    | 5158.918  | 5358.948  | U80773    | 1282.453  | 1200.383  |
| NM_012471 | 1518.775  | 2003.172  | L09070    | 1232.454  | 1993.854  | AK021745  | 3103.82   | 3048.58   |
| NM_001321 | 5577.986  | 5742.877  | NM_000062 | 17547.393 | 21732.715 | L38937    | 5483.278  | 4663.119  |
| AB018264  | 4462.045  | 4449.133  | NM_009590 | 16757.666 | 21446.643 | U90907    | 2453.253  | 2623.857  |
| NM_006911 | 2631.649  | 2571.933  | AL133037  | 2335.443  | 2535.95   | AK024327  | 1224.01   | 1149.988  |
| U92544    | 2768.979  | 3399.336  | NM_020350 | 8344.619  | 8778.509  | AF147327  | 2878.309  | 5671.843  |
| AB023147  | 5825.32   | 6569.887  | NM_000350 | 10628.957 | 11501.734 | AK000801  | 11474.359 | 14574.388 |
| NM_016615 | 3052.346  | 2307.378  | X91103    | 30248.822 | 37765.277 | D85433    | 5091.253  | 4173.471  |
| NM_005630 | 4426.272  | 4413.512  | AA419164  | 3725.886  | 4722.069  | AK025109  | 6743.996  | 6219.664  |
| NM_001046 | 1695.22   | 1527.649  | L35251    | 8870.551  | 11132.96  | AK026057  | 3226.219  | 3036.289  |
| AK023106  | 7293.2    | 7876.323  | BE910395  | 13446.256 | 15597.999 | AK026713  | 626.574   | 472.209   |
| NM_016730 | 3112.798  | 3449.384  | N46828    | 21707.287 | 24975.881 | AK021627  | 3026.598  | 2640.523  |
| AL035297  | 4759.639  | 4755.843  | BI908302  | 64328.691 | 64898.23  | AF085859  | 1934.519  | 1450.733  |
| NM_004408 | 2661.44   | 2825.685  | AA460969  | 7844.54   | 9857.938  | AK026307  | 1784.154  | 1290.567  |
| AJ131244  | 5055.555  | 7140.845  | BG695859  | 7334.828  | 8402.638  | AF075047  | 599.409   | 534.171   |
| NM_002532 | 13474.494 | 15828.944 | M85079    | 33921.977 | 38747.805 | AL049975  | 747.719   | 673.033   |
| NM_012388 | 6793.247  | 6994.409  | AA457671  | 31175.5   | 37361.281 | AL080067  | 1744.584  | 1409.026  |
| NM_016651 | 1107.469  | 1547.794  | X07437    | 30650.969 | 38363.68  | AL117464  | 3895.501  | 4259.891  |
| NM_001671 | 1520.914  | 1877.879  | NM_000641 | 5734.698  | 5747.239  | AL049291  | 3558.964  | 5344.771  |
| NM_019843 | 7217.3    | 8814.469  | AE006466  | 34112.926 | 39999.371 | AL080160  | 1940.5    | 1773.248  |
| NM_000065 | 1072.885  | 611.613   | BC008737  | 62634.879 | 64002.27  | L23849    | 1161.761  | 1203.214  |
| NM_001745 | 55944.738 | 61441.625 | BC011655  | 7650.118  | 8749.688  | AL049997  | 23888.639 | 21562.686 |
| NM_003825 | 18832.693 | 21595.504 | BC002396  | 13959.895 | 15568.111 | AK024118  | 2607.427  | 2306.26   |
| AK025006  | 20169.33  | 23827.049 | NM_003613 | 4750.305  | 5104.868  | AK024509  | 1904.643  | 1736.458  |
| AF218014  | 12419.476 | 13850.371 | NM_005385 | 13507.432 | 14753.689 | NM_017705 | 1089.621  | 1007.155  |
| NM_006678 | 3054.631  | 3365.116  | NM_018985 | 8783.204  | 8717.937  | AF049615  | 1285.924  | 1226.001  |
| AY007729  | 26597.805 | 23324.344 | NM_006074 | 67283.203 | 71221.141 | NM_014358 | 45054.574 | 38613.77  |
| NM_014424 | 945.467   | 870.269   | AF208232  | 12249.809 | 15642.195 | AF009282  | 13953.116 | 11481.177 |
| NM_004314 | 10285.507 | 9838.293  | NM_002988 | 14649.008 | 16445.256 | AF024704  | 11570.556 | 9246.01   |
| NM_018247 | 22750.625 | 19645.76  | NM_004186 | 3772.143  | 3582.454  | AF056431  | 638.291   | 849.671   |
| NM_017979 | 11869.137 | 11323.757 | NM_016258 | 15371.008 | 21406.795 | NM_016412 | 3622.332  | 2981.806  |
| NM_005898 | 41061.168 | 47519.016 | AF203032  | 21671.355 | 26531.299 | AF009293  | 1530.25   | 1471.644  |
| NM_002888 | 13579.351 | 13851.261 | AB014542  | 41491.133 | 46904.855 | NM_004158 | 65582.531 | 72967.805 |
| AF078866  | 9169.929  | 9310.759  | NM_014640 | 3430.99   | 4070.687  | AF056444  | 17772.49  | 17264.709 |
| BF311880  | 1923.396  | 1576.396  | Y10518    | 62100.629 | 62062.191 | AK000989  | 4482.189  | 3847.009  |
| NM_000078 | 1106.216  | 872.39    | AF155135  | 17951.668 | 20495.879 | AK002210  | 7273.963  | 6274.261  |
| NM_016075 | 2174.079  | 1670.607  | NM_014790 | 5304.119  | 6186.762  | AK021677  | 3384.158  | 3406.608  |

|           |           |           |           |           |           |           |           |           |
|-----------|-----------|-----------|-----------|-----------|-----------|-----------|-----------|-----------|
| NM_014064 | 856.706   | 688.57    | NM_003571 | 44874.254 | 48800.594 | AK001057  | 1799.579  | 1574.167  |
| NM_001360 | 24725.299 | 26358.041 | AB032965  | 62571.961 | 62759.914 | AK021471  | 1116.255  | 1157.805  |
| AK026656  | 3655.075  | 4136.32   | NM_020370 | 1821.719  | 1905.428  | AK021709  | 1594.42   | 1534.839  |
| AB011131  | 13924.58  | 14433.498 | NM_004767 | 4163.138  | 4954.4    | AL359563  | 3269.354  | 3054.013  |
| NM_000749 | 454.48    | 695.107   | BF310159  | 33534.262 | 39430.594 | NM_005304 | 960.064   | 764.955   |
| NM_000751 | 9251.409  | 7717.269  | NM_000316 | 841.837   | 841.426   | NM_014477 | 5691.793  | 4789.986  |
| NM_014849 | 3733.814  | 3277.584  | NM_018986 | 7087.167  | 8430.748  | L40521    | 1025.693  | 1028.214  |
| NM_001042 | 10558.523 | 10513.465 | AB044934  | 1460.319  | 2133.771  | AF086478  | 4072.442  | 3847.202  |
| NM_012229 | 6839.609  | 7414.258  | U27655    | 13991.099 | 14800.398 | AF086022  | 801.923   | 869.826   |
| NM_005071 | 1320.994  | 1409.284  | Z21965    | 61938.07  | 62738.094 | AK021514  | 64551.801 | 64896.09  |
| AF222980  | 1955.043  | 1795.716  | NM_012427 | 4580.588  | 5361.975  | AJ008134  | 21388.268 | 19796.406 |
| AK026758  | 6453.572  | 5688.125  | AF133424  | 8978.58   | 10694.066 | S71486    | 3889.357  | 3219.789  |
| NM_012201 | 11179.488 | 10408.396 | NM_005003 | 53190.551 | 54413.93  | L33808    | 25377.207 | 17159.951 |
| AB046774  | 1953.04   | 2109.983  | AF084560  | 27852.469 | 31533.809 | AJ008117  | 20779.742 | 20578.105 |
| AK022385  | 40863.176 | 46415.594 | NM_015715 | 2876.215  | 3618.468  | AJ008147  | 67918.398 | 64966.719 |
| NM_002775 | 1848.828  | 1776.952  | NM_000032 | 26617.564 | 31501.104 | AK024369  | 1617.386  | 1131.84   |
| AK024584  | 12602.769 | 8671.14   | NM_002083 | 5319.822  | 6703.184  | L43345    | 2023.282  | 2285.246  |
| NM_003504 | 11983.697 | 11793.079 | NM_002035 | 12527.414 | 15489.186 | AF180297  | 7928.653  | 7264.841  |
| NM_013298 | 11379.695 | 11257.438 | NM_014900 | 5917.545  | 8045.643  | AK023245  | 1311.903  | 994.558   |
| NM_007267 | 9780.311  | 9989.572  | BF342908  | 4567.091  | 4855.037  | AF147303  | 621.263   | 778.092   |
| AK022830  | 1317.198  | 1683.709  | AF118073  | 1174.89   | 1668.937  | AK023607  | 2249.838  | 2291.319  |
| Z36816    | 27675.783 | 39299.984 | AK023510  | 8665.656  | 8666.948  | AK027209  | 1653.591  | 2060.302  |
| NM_005865 | 4962.177  | 6833.338  | NM_004345 | 6115.965  | 7526.003  | AK026874  | 3954.29   | 3624.548  |
| NM_006413 | 16154.462 | 18743.852 | NM_002232 | 744.357   | 989.466   | AK024178  | 469.006   | 466.782   |
| NM_017684 | 2954.95   | 2373.845  | NM_014570 | 6658.086  | 8102.14   | AF088033  | 6096.875  | 5218.315  |
| AK025542  | 1092.136  | 1023.59   | NM_014822 | 3872.666  | 5331.771  | NM_020422 | 6144.763  | 5444.375  |
| AF207547  | 722.195   | 526.044   | NM_005296 | 5178.277  | 5793.939  | AY007156  | 1398.204  | 1290.906  |
| NM_002768 | 7348.042  | 6860.463  | NM_001337 | 938.596   | 1216.337  | AF086408  | 62451.004 | 63219.039 |
| NM_003691 | 4062.581  | 5561.184  | NM_003611 | 9422.081  | 10210.14  | AK023979  | 7112.407  | 6271.253  |
| NM_002950 | 30372.986 | 32703.785 | AB014538  | 10612.929 | 11909.589 | NM_017847 | 2145.407  | 1674.688  |
| NM_002318 | 4962.825  | 5667.294  | NM_006209 | 2293.778  | 2648.581  | AL049675  | 4193.685  | 3575.855  |
| NM_001433 | 1137.706  | 1325.706  | AK025118  | 12243.082 | 13644.913 | AL050151  | 1054.156  | 790.469   |
| NM_003134 | 60874.391 | 63946.816 | NM_000727 | 3841.384  | 4144.015  | NM_003537 | 39632.117 | 35237.652 |
| CY3Cy5    | 1110.024  | 119.241   | NM_002621 | 1023.507  | 860.572   | AF056419  | 45441.418 | 45146.344 |
| NM_022095 | 2812.979  | 1764.965  | NM_002625 | 554.742   | 786.941   | AF074983  | 2048.967  | 2376.436  |
| AF088061  | 1554.537  | 960.308   | NM_004135 | 8408.979  | 9400.037  | AK021862  | 820.649   | 990.65    |
| AF086286  | 4356.361  | 2613.267  | NM_000203 | 1043.6    | 950.044   | AK024177  | 1445.821  | 1325.628  |
| AF086376  | 1259.47   | 701.678   | NM_013443 | 3382.823  | 3152.372  | K01564    | 3998.395  | 4497.293  |
| AF086410  | 1168.397  | 1083.567  | NM_000925 | 24815.141 | 26904.533 | AB023175  | 2542.219  | 2779.618  |
| AK022997  | 17070.018 | 12839.998 | NM_000465 | 6749.937  | 9119.722  | NM_000737 | 7536.828  | 7170.428  |
| NM_017617 | 590.357   | 425.206   | AF116685  | 3131.473  | 3183.276  | NM_000839 | 14433.182 | 13965.334 |
| AF131830  | 799.398   | 566.429   | AL137501  | 3820.055  | 4598.858  | AK024102  | 29781.656 | 25652.533 |
| NM_014811 | 488.139   | 385.773   | BE858979  | 1656.287  | 1893.343  | NM_001290 | 1163.675  | 1191.302  |
| AK027232  | 532.09    | 326.356   | NM_000122 | 5280.099  | 4911.441  | AL079273  | 7397.486  | 6220.452  |
| NM_012204 | 824.272   | 722.445   | NM_006712 | 63429.949 | 63207.516 | AK026129  | 4190.74   | 3200.986  |
| NM_004342 | 294.786   | 290.226   | NM_006240 | 6672.331  | 7661.88   | NM_001743 | 54780.523 | 55980.109 |
| NM_022095 | 3354.713  | 2182.599  | NM_007026 | 10109.393 | 11409.909 | NM_003713 | 18874.988 | 15151.704 |
| SR2       | 28676.326 | 17179.805 | M37712    | 18249.873 | 12161.262 | D31886    | 5251.034  | 4450.539  |
| SR4       | 7658.148  | 4913.207  | NM_002648 | 24021.775 | 14141.672 | U92024    | 596.558   | 494.304   |
| SR6       | 911.609   | 921.922   | AF070670  | 35738.805 | 21710.395 | AK023330  | 9185.614  | 9027.063  |
| SR8       | 3970.065  | 6809.017  | NM_016156 | 8157.557  | 6272.232  | AF075071  | 3927.335  | 3001.686  |
| SR10      | 13033.021 | 3143.904  | NM_016528 | 4917.168  | 3046.935  | AF075003  | 2701.246  | 2976.3    |
| CY3Cy5    | 622.063   | 111.426   | NM_015974 | 4467.037  | 2595.111  | X93500    | 2193.82   | 2083.669  |

|           |           |           |           |           |           |           |           |           |
|-----------|-----------|-----------|-----------|-----------|-----------|-----------|-----------|-----------|
| AF088064  | 330.759   | 274.409   | NM_014384 | 3733.491  | 2542.432  | U79271    | 3093.577  | 3330.104  |
| AF086103  | 882.64    | 800.396   | NM_002573 | 7663.626  | 5366.16   | NM_01988E | 3006.149  | 3906.261  |
| AL080135  | 1205.312  | 810.142   | NM_00959C | 19208.221 | 25870.83  | AK024609  | 11166.672 | 14865.313 |
| AK023158  | 1850.893  | 946.778   | AL133037  | 1808.172  | 2295.536  | AK023660  | 685.422   | 762.353   |
| AK000580  | 520.196   | 824.698   | NM_02035C | 7752.191  | 7979.612  | NM_01812C | 39345.508 | 51855.391 |
| AF085852  | 7887.046  | 5201.631  | NM_00035C | 10439.13  | 11571.784 | NM_015991 | 2519.368  | 2413.416  |
| AL137511  | 664.188   | 414.911   | X91103    | 34207.422 | 47156.016 | NM_005562 | 2613.178  | 2601.66   |
| AF075062  | 7810.857  | 4553.645  | BI908302  | 58246.141 | 58442.516 | NM_004932 | 4718.795  | 6493.53   |
| NM_00418E | 1893.052  | 1609.706  | AA460969  | 7614.634  | 7427.605  | NM_005233 | 637.428   | 677.109   |
| AF147381  | 12734.359 | 8182.442  | BG695859  | 7179.763  | 5681.943  | NM_006654 | 1062.325  | 1100.358  |
| AK027101  | 7850.022  | 5123.412  | M85079    | 34656.949 | 27721.93  | NM_003162 | 1644.507  | 1524.905  |
| AF010236  | 4557.716  | 5344.806  | AA457671  | 32540.775 | 25695.822 | NM_00039E | 4600.755  | 4777.736  |
| AK024358  | 3406.01   | 1667.74   | X07437    | 29981.125 | 24675.313 | NM_00326E | 1067.139  | 939.311   |
| AK026376  | 2148.532  | 903.542   | NM_000641 | 5301.9    | 3782.598  | NM_00235C | 7677.088  | 7537.499  |
| AK027097  | 1506.499  | 1653.052  | AE006466  | 37807.992 | 26870.773 | NM_012417 | 2902.773  | 2636.229  |
| AK027198  | 1226.587  | 813.945   | BC008737  | 62509.328 | 61955.391 | NM_00254E | 1610.575  | 1300.134  |
| AF147426  | 3492.642  | 3261.322  | BC011655  | 8653.148  | 5945.699  | NM_00296E | 910.04    | 1282.164  |
| BC019667  | 3548.674  | 2767.254  | BC002396  | 15391.348 | 11259.356 | BF246606  | 630.627   | 600.418   |
| AK026026  | 6805.964  | 3672.227  | AF112219  | 16721.938 | 11812.554 | NM_01428E | 1255.806  | 1164.113  |
| AF085941  | 21546.697 | 12521.373 | NM_000521 | 953.84    | 395.35    | NM_002342 | 920.883   | 917.343   |
| Z69892    | 13144.937 | 7708.845  | NM_006074 | 63938.715 | 59947.914 | D13631    | 2833.733  | 3220.749  |
| AL137309  | 2888.654  | 1848.416  | AF208232  | 13475.913 | 10148.548 | NM_003712 | 4964.082  | 3465.686  |
| AL137475  | 548.173   | 503.646   | NM_00298E | 14790.342 | 11747.7   | NM_002184 | 2339.642  | 2154.084  |
| AL161956  | 4147.63   | 3056.218  | NM_00418E | 3698.405  | 2659.589  | NM_014883 | 5770.809  | 5806.915  |
| AL390176  | 2565.009  | 1402.871  | NM_01625E | 14808.837 | 13520.468 | NM_01780E | 7740.297  | 6906.664  |
| AL137356  | 478.878   | 244.668   | AF203032  | 20138.943 | 14533.354 | M86841    | 1329.41   | 1544.063  |
| AL137547  | 500.383   | 467.506   | AB014542  | 44022.238 | 28160.195 | U56387    | 1457.303  | 1605.617  |
| AK021994  | 1083.123  | 501.11    | NM_01479C | 5765.338  | 5649.984  | AL049296  | 5425.756  | 5831.89   |
| Z70763    | 604.59    | 266.382   | NM_003571 | 45308     | 44109.035 | NM_014471 | 62308.684 | 62272.008 |
| AK023802  | 7901.741  | 2957.297  | AB032965  | 62932.848 | 61109.738 | NM_004397 | 3762.201  | 3136.453  |
| AK021981  | 688.023   | 739.499   | NM_02037C | 1528.549  | 1219.611  | NM_00318E | 659.346   | 563.084   |
| AL359567  | 431.517   | 531.757   | NM_004767 | 4097.93   | 3346.971  | NM_02023E | 7138.936  | 4645.752  |
| NM_01772E | 1334.556  | 1400.455  | BF310159  | 35618.75  | 24923.729 | D49356    | 839.181   | 910.615   |
| AK026716  | 615.722   | 577.435   | NM_00031E | 870.186   | 618.077   | AJ250475  | 2603.115  | 3169.531  |
| AL049325  | 5521.102  | 3338.16   | NM_01898E | 7636.831  | 5350.569  | NM_00080C | 4609.756  | 5072.657  |
| AK023952  | 1362.968  | 2413.856  | AB044934  | 1906.746  | 1548.773  | NM_01857E | 3088.479  | 2784.533  |
| AK000787  | 342.674   | 330.923   | U27655    | 22298.447 | 18019.629 | NM_006201 | 3976.37   | 3045.528  |
| AF090885  | 31851.617 | 24146.02  | Z21965    | 60842.633 | 59740.383 | NM_00711C | 2557.662  | 2259.797  |
| AF161342  | 695.513   | 435.847   | NM_012427 | 5223.92   | 4239.317  | NM_00125E | 14313.094 | 12083.896 |
| NM_01664E | 378.994   | 307.351   | L09070    | 1233.016  | 1004.266  | U50383    | 30644.891 | 29758.344 |
| NM_014082 | 2026.568  | 1524.854  | NM_000062 | 21487.389 | 21309.279 | AK025085  | 9233.728  | 8038.833  |
| AF100636  | 437.645   | 228.271   | AF084560  | 29825.045 | 23494.043 | NM_00629C | 11681.321 | 10022.364 |
| AF161366  | 305.723   | 223.819   | NM_01571E | 3664.927  | 3258.798  | AK022290  | 1353.016  | 1284.349  |
| AK022197  | 658.584   | 630.273   | NM_000032 | 24466.49  | 22494.344 | NM_00368C | 26900.414 | 26971.311 |
| AK021970  | 645.704   | 518.032   | NM_002083 | 5094.312  | 4152.142  | AF118124  | 16249.428 | 22746.826 |
| AK022066  | 25376.637 | 14519.326 | NM_00203E | 12796.888 | 12319.14  | NM_00484E | 21939.881 | 23849.414 |
| AK022224  | 981.624   | 803.848   | NM_01490C | 7045.374  | 6549.622  | AL137527  | 14814.027 | 14608.398 |
| AK022359  | 914.075   | 588.252   | BF342908  | 7336.122  | 5813.111  | AK026068  | 1506.852  | 1400.925  |
| AK022129  | 690.981   | 314.762   | NM_00434E | 7794.205  | 8807.415  | AK024186  | 1342.248  | 1799.022  |
| AK022263  | 989.793   | 472.847   | NM_00652E | 931.334   | 399.186   | J04974    | 47495.367 | 43790.082 |
| AK022384  | 334.307   | 244.887   | NM_002232 | 693.393   | 621.413   | NM_01767E | 5778.875  | 5942.433  |
| AF086304  | 18181.762 | 19720.574 | NM_01457C | 7690.636  | 5645.664  | NM_007014 | 4786.528  | 5447.226  |
| D55641    | 345.417   | 283.967   | NM_014822 | 4515.999  | 3474.942  | AL096740  | 1840.705  | 1878.433  |

|           |           |           |           |           |           |           |           |           |
|-----------|-----------|-----------|-----------|-----------|-----------|-----------|-----------|-----------|
| AB032976  | 2603.113  | 2816.22   | NM_005296 | 5381.185  | 3760.088  | AF191545  | 1975.532  | 1823.067  |
| AF301222  | 20731.846 | 15694.704 | NM_001337 | 1297.631  | 977.503   | NM_014554 | 7414.333  | 8450.4    |
| AF215981  | 856.032   | 847.333   | NM_003611 | 10409.19  | 8666.176  | AL137484  | 3890.985  | 3631.207  |
| NM_000732 | 51844.434 | 47910.129 | AB014538  | 13794.481 | 12696.75  | AK023968  | 3078.152  | 2587.676  |
| AF130044  | 418.317   | 262.291   | NM_006209 | 3276.352  | 2848.937  | NM_004652 | 1505.192  | 1355.458  |
| AF116709  | 341.118   | 265.099   | AK025118  | 14560.432 | 12708.065 | NM_000353 | 997.68    | 844.087   |
| AF087980  | 1302.837  | 1036.035  | NM_000727 | 5674.81   | 4411.762  | AK025425  | 61996.98  | 60523.414 |
| AK000257  | 1254.05   | 1153.812  | NM_002621 | 1440.726  | 1203.64   | AK025974  | 53295.984 | 53695.504 |
| NM_006160 | 869.506   | 494.396   | NM_005385 | 15224.809 | 12565.938 | NM_016532 | 5308.521  | 5034.182  |
| AL110159  | 430.432   | 342.411   | NM_018985 | 10448.032 | 8583.149  | X98115    | 3623.357  | 4247.027  |
| AF009259  | 598.226   | 519.959   | NM_000203 | 1206.095  | 610.768   | NM_005781 | 7762.062  | 7002.344  |
| AF009260  | 720.216   | 441.753   | NM_013443 | 3632.011  | 2802.923  | BC036740  | 42098.152 | 40861.73  |
| NM_003079 | 3144.313  | 1321.621  | NM_000925 | 28678.572 | 24526.701 | NM_001747 | 6304.521  | 6986.24   |
| NM_017902 | 3255.355  | 1982.084  | NM_000465 | 5710.911  | 4843.54   | NM_001148 | 28504.721 | 20345.113 |
| NM_017835 | 19066.277 | 18206.932 | NM_000123 | 8719.802  | 8624.611  | AF242522  | 20496.971 | 23190.543 |
| NM_018347 | 2031.358  | 2308.041  | AL137501  | 4395.593  | 4130.729  | AJ008152  | 12872.221 | 14248.238 |
| AK024986  | 574.845   | 501.403   | BE858979  | 3477.378  | 3267.785  | NM_003657 | 2539.555  | 2314.638  |
| AK026730  | 1863.088  | 1395.348  | NM_000122 | 6882.131  | 5033.076  | NM_000588 | 631.807   | 613.224   |
| AK024739  | 1725.634  | 1366.633  | NM_006712 | 63205.961 | 61605.012 | S67970    | 1417.962  | 1831.895  |
| AK098681  | 587.122   | 639.502   | NM_006240 | 7685.934  | 5901.863  | AF221520  | 5732.993  | 6037.543  |
| AK026772  | 6237.392  | 5126.639  | NM_007026 | 12791.443 | 11758.944 | NM_006941 | 64624.813 | 69868.43  |
| NM_014260 | 9336.1    | 15238.461 | M37712    | 22648.41  | 14329.759 | AB037852  | 1968.544  | 2077.716  |
| AK026458  | 1097.578  | 1213.651  | NM_002648 | 30266.074 | 23102.607 | NM_005360 | 3111.736  | 3246.823  |
| AK022266  | 227.551   | 235.825   | AF070670  | 44860.328 | 33346.543 | NM_004349 | 8315.535  | 6973.585  |
| AK024154  | 2120.324  | 2118.625  | NM_016156 | 9707.557  | 8989.805  | NM_002092 | 23288.979 | 24232.641 |
| AF086341  | 1172.92   | 926.141   | NM_016528 | 5572.378  | 4573.834  | NM_018077 | 6109.104  | 5075.047  |
| AK026672  | 760.361   | 495.091   | NM_015974 | 4918.513  | 4410.901  | NM_016839 | 50360.379 | 48728.125 |
| S83282    | 69667.93  | 67553.438 | NM_014384 | 4434.684  | 3676.223  | NM_005968 | 65116.363 | 68769.336 |
| AK024164  | 17816.824 | 15552.979 | NM_002573 | 10507.073 | 8782.29   | AK021416  | 1920.057  | 1791.753  |
| AF052130  | 6053.566  | 5038.371  | AF133424  | 9104.469  | 6795.326  | NM_018471 | 19722.75  | 17712.674 |
| AF130090  | 34137.734 | 21862.27  | NM_005003 | 57494.875 | 51551.273 | NM_003819 | 20714.986 | 27392.557 |
| AL096727  | 2018.104  | 1945.385  | AL133037  | 2381.964  | 1789.779  | NM_006560 | 8245.218  | 8247.375  |
| AL080110  | 6206.659  | 3750.67   | NM_020350 | 9681.662  | 8274.897  | NM_016183 | 14007.729 | 12163.465 |
| NM_020425 | 1578.523  | 1185.694  | NM_000350 | 12932.775 | 10525.1   | NM_004872 | 9045.116  | 7199.034  |
| AK024076  | 1920.08   | 1165.599  | X91103    | 36739.828 | 33880.359 | NM_001958 | 68024.641 | 65021.145 |
| M87940    | 1679.457  | 642.885   | AA419164  | 4561.481  | 3594.612  | NM_004757 | 5844.693  | 5029.254  |
| L77588    | 673.38    | 468.841   | L35251    | 11452.664 | 9885.236  | NM_015904 | 10327.321 | 10473.201 |
| NM_014273 | 9318.799  | 10925.616 | BE910395  | 16550.77  | 15194.313 | NM_001960 | 61895.496 | 64221.484 |
| AF039442  | 1916.158  | 2118.623  | N46828    | 26642.4   | 27245.061 | NM_018122 | 6853.785  | 6444.357  |
| NM_004680 | 1901.207  | 2091.985  | BI908302  | 65894.188 | 64638.332 | NM_007058 | 18070.844 | 16520.52  |
| AF104260  | 727.021   | 784.695   | AA460969  | 9863.058  | 9234.988  | NM_001528 | 7771.764  | 7075.169  |
| NM_005671 | 1337.125  | 1482.453  | BG695859  | 8793.819  | 7729.879  | NM_017947 | 3030.342  | 3371.825  |
| NM_017409 | 314.31    | 415.676   | M85079    | 40357.711 | 33509.184 | NM_002494 | 40756.426 | 40271.672 |
| NM_019625 | 2733.82   | 2390.193  | AA457671  | 42032.898 | 38089.223 | M58510    | 26742.219 | 26864.197 |
| NM_006729 | 5180.407  | 4094.222  | X07437    | 37667.625 | 32697.027 | NM_000782 | 4555.118  | 4391.583  |
| NM_006071 | 3153.115  | 3988.168  | NM_000641 | 7144.315  | 5422.325  | BE396003  | 3335.418  | 3489.753  |
| NM_012236 | 5186.383  | 5129.452  | AE006466  | 43620.813 | 38419.367 | AK023300  | 8720.729  | 8146.973  |
| NM_013939 | 678.476   | 783.522   | BC008737  | 62900.707 | 60664.977 | NM_018082 | 4588.626  | 4003.213  |
| AB038651  | 4189.011  | 2573.49   | BC011655  | 11815.927 | 9568.115  | NM_003904 | 9963.822  | 9720.711  |
| AL359603  | 1984.803  | 1608.214  | BC002396  | 17975.254 | 16666.594 | NM_006234 | 43975.414 | 36930.961 |
| X84838    | 1127.67   | 1278.25   | AF112219  | 20316.684 | 20355.672 | AK026387  | 2476.825  | 2695.073  |
| NM_013940 | 502.028   | 514.676   | NM_000521 | 932.748   | 623.992   | AB028987  | 30356.914 | 26504.115 |
| AL117643  | 1969.5    | 1408.125  | NM_004135 | 8869.754  | 7742.309  | NM_003594 | 3760.457  | 3232.82   |

|           |           |           |           |           |           |           |           |           |
|-----------|-----------|-----------|-----------|-----------|-----------|-----------|-----------|-----------|
| AF075063  | 504.002   | 366.611   | Y10518    | 68051.594 | 64574.633 | NM_005521 | 15873.232 | 13918.715 |
| AF069135  | 717.344   | 317.477   | AF155135  | 21225.066 | 18087.008 | AF164438  | 27128.57  | 28308.436 |
| AK026524  | 1642.627  | 904.1     | NM_014790 | 6588.137  | 5845.892  | AK022284  | 3068.92   | 3016.722  |
| AB011157  | 4628.64   | 2835.579  | NM_003571 | 53126.164 | 48644.148 | AF060937  | 760.163   | 633.23    |
| U17632    | 438       | 184.846   | AB032965  | 66889.469 | 64233.965 | AB040893  | 7547.793  | 8180.951  |
| AK026764  | 2442.582  | 1233.54   | NM_020370 | 2426.878  | 1778.733  | AK025844  | 5205.947  | 5274.268  |
| AF113700  | 2303.207  | 1258.856  | NM_004767 | 5453.495  | 4319.997  | NM_004024 | 14581.013 | 13458.859 |
| X91348    | 4733.805  | 5366.375  | BF310159  | 44840.09  | 37106.93  | X52345    | 42814.477 | 36626.594 |
| Z36505    | 3824.99   | 4342.836  | NM_000316 | 1217.682  | 986.393   | NM_006965 | 8678.021  | 7788.025  |
| NM_001854 | 912.461   | 977.603   | NM_018986 | 7804.146  | 7286.76   | AF027142  | 62828.125 | 59437.555 |
| NM_017913 | 2452.997  | 2439.847  | AB044934  | 2070.827  | 1962.237  | NM_016372 | 61153.16  | 61784.188 |
| NM_002755 | 13041.979 | 10606.936 | U27655    | 27810.654 | 24483.604 | AB020705  | 6488.094  | 6169.792  |
| AK024799  | 4490.721  | 3567.482  | NM_003360 | 7698.706  | 7224.331  | NM_014333 | 658.686   | 953.585   |
| NM_000924 | 7716.514  | 6169.272  | Z21965    | 59827.918 | 58543.68  | NM_002980 | 3850.877  | 3670.901  |
| NM_003330 | 8411.479  | 7524.591  | NM_012427 | 5691.098  | 4928.546  | NM_015886 | 1443.539  | 1633.817  |
| NM_002481 | 490.539   | 628.598   | AF131857  | 43754.461 | 44814.973 | NM_004262 | 491.079   | 778.457   |
| NM_003647 | 593.017   | 1120.154  | NM_000852 | 1340.557  | 1010.799  | NM_007102 | 60529.953 | 61971.273 |
| NM_001699 | 3110.337  | 2640.784  | NM_000399 | 3961.588  | 2827.452  | BG491613  | 14357.863 | 15415.186 |
| AB006589  | 573.983   | 683.605   | AW797282  | 1062.286  | 1027.483  | AA397813  | 59444.859 | 57702.598 |
| NM_018351 | 533.895   | 447.788   | NM_002402 | 1217.098  | 1184.025  | W47350    | 11745.068 | 10254.695 |
| AK023019  | 886.088   | 592.572   | L09070    | 744.97    | 751.172   | AI160964  | 1713.501  | 2055.04   |
| NM_147171 | 3711.001  | 2161.128  | NM_000062 | 21945.859 | 18869.438 | W68291    | 21962.096 | 22353.268 |
| AF238083  | 579.02    | 493.246   | NM_009590 | 16672.748 | 14041.928 | N64384    | 10987.623 | 11164.739 |
| NM_002962 | 494.594   | 464.595   | NM_014747 | 23601.139 | 22212.809 | H-X 53655 | 3672.6    | 3370.968  |
| NM_016388 | 2631.108  | 2531.136  | Y19240    | 18498.207 | 17514.086 | H-U 05770 | 10571.436 | 11957.886 |
| AB046783  | 1600.489  | 1396.015  | AF091029  | 35095.945 | 28460.594 | H-M 65199 | 29361.721 | 29515.32  |
| NM_000845 | 687.869   | 557.95    | X97074    | 59350.375 | 59632.074 | H-M 32315 | 3112.28   | 3737.277  |
| NM_004604 | 46973.586 | 29946.689 | AL117235  | 2451.962  | 1905.257  | H-V00536M | 6988.331  | 7341.13   |
| NM_014965 | 4858.671  | 3229.089  | NM_014822 | 5420.473  | 5137.25   | H-D85429M | 18561.045 | 18038.658 |
| NM_004882 | 4476.049  | 2318.694  | NM_005296 | 6342.331  | 4959.672  | BF439832  | 2844.882  | 2726.051  |
| AL390148  | 6083.514  | 3096.494  | NM_001337 | 1384.962  | 1185.157  | BG819162  | 3664.134  | 3318.05   |
| AK024055  | 1175.567  | 625.552   | NM_003611 | 11616.768 | 8943.601  | NM_012088 | 55610.625 | 53151.559 |
| NM_013376 | 1437.152  | 2421.982  | AB014538  | 13626.619 | 12080.101 | NM_000139 | 2013.136  | 2059.522  |
| NM_017964 | 2391.943  | 2775.182  | NM_006209 | 3506.11   | 2819.7    | NM_006664 | 8455.36   | 10334.273 |
| NM_016272 | 774.672   | 1158.21   | AK025118  | 16268.946 | 14313.921 | NM_002416 | 1202.808  | 1520.872  |
| NM_016428 | 7281.677  | 6744.083  | NM_000727 | 7073.117  | 5396.382  | NM_002728 | 4548.503  | 4705.086  |
| NM_004083 | 16982.131 | 12967.183 | NM_002621 | 1395.637  | 977.123   | NM_000450 | 929.243   | 1072.736  |
| NM_016039 | 11902.508 | 9621.82   | NM_005385 | 16309.253 | 13193.41  | NM_000448 | 4420.358  | 4282.05   |
| NM_001184 | 4364.236  | 2676.607  | NM_018985 | 11107.681 | 8310.609  | NM_004513 | 13333.682 | 12310.026 |
| NM_015530 | 10235.272 | 8379.601  | NM_006074 | 62405.496 | 61466.844 | NM_001708 | 61186.75  | 60125.566 |
| NM_016238 | 7438.119  | 6747.065  | AF208232  | 14485.126 | 13357.623 | NM_017735 | 8829.563  | 9036.635  |
| NM_001758 | 960.924   | 1300.199  | NM_002988 | 17729.656 | 15353.776 | AB033044  | 39097.746 | 36434.445 |
| BE546276  | 802.988   | 667.825   | NM_004186 | 4362.988  | 4320.582  | AB014564  | 3365.678  | 3361.963  |
| NM_004725 | 11374.368 | 8939.794  | NM_016258 | 17140.723 | 15897.266 | NM_020230 | 7831.252  | 7381.892  |
| NM_015997 | 3534.136  | 2511.614  | AF203032  | 25529.201 | 20951.391 | NM_006762 | 60761.676 | 64194.188 |
| NM_001167 | 2508.529  | 1900.812  | AB014542  | 44626.262 | 36642.766 | NM_006352 | 2322.281  | 2579.613  |
| NM_012115 | 2397.593  | 2018.22   | NM_014640 | 4102.833  | 3165.222  | NM_016430 | 1599.616  | 2684.75   |
| NM_004933 | 12878.555 | 11346.891 | NM_015974 | 4813.375  | 3912.519  | NM_004447 | 13623.481 | 13112.291 |
| M96577    | 25806.186 | 17486.385 | NM_014384 | 5211.896  | 5041.023  | NM_001204 | 9992.851  | 8864.514  |
| NM_013258 | 5927.039  | 5253.874  | NM_002573 | 9972.15   | 9269.653  | BF131321  | 4027.501  | 4297.356  |
| NM_003842 | 6727.161  | 5702.084  | AF133424  | 10588.364 | 9917.921  | NM_016540 | 902.128   | 1063.533  |
| NM_016184 | 2347.027  | 2162.496  | NM_005003 | 57439.922 | 55801.672 | NM_012116 | 7103.725  | 9062.896  |
| L11238    | 23914.84  | 16004.734 | AF084560  | 34874.34  | 31540.25  | NM_000020 | 19586.943 | 21233.773 |



|           |           |           |           |           |           |           |           |           |
|-----------|-----------|-----------|-----------|-----------|-----------|-----------|-----------|-----------|
| AK025684  | 986.599   | 1166.614  | NM_015715 | 4009.419  | 2930.587  | NM_000956 | 1350.956  | 1280.218  |
| NM_012205 | 2222.874  | 1397.324  | NM_000032 | 35240.629 | 24180.826 | AB033091  | 12042.866 | 9889.854  |
| K02046    | 7241.36   | 5054.018  | NM_002083 | 6336.741  | 4863.046  | NM_004557 | 27087.52  | 25215.922 |
| U87223    | 786.875   | 431.946   | NM_002035 | 13576.913 | 11548.444 | NM_003742 | 6394.235  | 7671.779  |
| NM_004995 | 7336.985  | 9421.261  | NM_014900 | 6815.55   | 5994.046  | NM_005094 | 6092.125  | 7741.554  |
| NM_000386 | 8748.635  | 9273.114  | BF342908  | 3833.323  | 3534.295  | BE382905  | 1444.017  | 1704.129  |
| NM_007231 | 1310.817  | 1561.568  | AF118073  | 1491.213  | 1113.639  | NM_002152 | 33759.203 | 37667.25  |
| NM_001190 | 4436.055  | 2836.743  | AK023510  | 11205.743 | 9250.387  | NM_001701 | 819.555   | 713.162   |
| NM_005271 | 15619.259 | 18686.289 | NM_004345 | 8436.25   | 8201.304  | AK022558  | 4297.078  | 5252.223  |
| NM_015654 | 7794.59   | 6924.3    | NM_000702 | 67192.969 | 64750.891 | NM_006476 | 60645.625 | 59600.41  |
| NM_012244 | 4487.849  | 5029.159  | X71490    | 55505.426 | 51630     | AK023787  | 4964.823  | 4135.902  |
| NM_004341 | 3969.283  | 3982.502  | AF257081  | 18701.275 | 17310.961 | NM_002133 | 5742.647  | 5521.251  |
| AB082521  | 6653.881  | 7775.081  | NM_001688 | 62019.875 | 62016.188 | NM_015697 | 11464.803 | 11754.985 |
| AK026806  | 241.694   | 557.323   | NM_003631 | 1442.262  | 1360.002  | AF086489  | 799.786   | 917.295   |
| AL050182  | 1099.307  | 937.471   | NM_000219 | 1230.992  | 823.188   | AB018258  | 1293.689  | 1230.332  |
| NM_020040 | 986.743   | 1271.399  | NM_002232 | 1060.425  | 1019.745  | NM_005953 | 60524.238 | 38498.348 |
| AK026940  | 8949.108  | 7948.866  | NM_016106 | 11258.537 | 11856.789 | BF337921  | 14516.659 | 14530.665 |
| AF155117  | 4825.06   | 5468.419  | NM_014570 | 8428.305  | 8585.143  | U53532    | 4578.414  | 4808.823  |
| AB014527  | 1734.188  | 1747.667  | AF112219  | 21608.395 | 14933.49  | NM_001740 | 5752.776  | 6342.791  |
| NM_004411 | 3442.435  | 1820.529  | NM_000521 | 1443.939  | 782.43    | NM_012484 | 7051.916  | 7391.815  |
| NM_015938 | 15174.51  | 8617.103  | NM_002625 | 999.721   | 707.905   | AL096732  | 7711.193  | 9312.757  |
| NM_000740 | 1050.207  | 1043.716  | NM_004135 | 10522.972 | 9573.885  | AB006423  | 2016.057  | 3069.941  |
| NM_017843 | 11765.424 | 6450.893  | NM_000203 | 1552.663  | 906.134   | NM_005719 | 61099.336 | 63049.98  |
| U10485    | 2271.527  | 1264.562  | NM_013443 | 4794.703  | 3439.221  | NM_003462 | 63129.281 | 63578.234 |
| AK025326  | 3141      | 1875.434  | NM_000925 | 31265.736 | 24007.309 | NM_006093 | 13127.926 | 12685.843 |
| NM_016328 | 3303.45   | 4284.489  | NM_000465 | 8020.691  | 6631.991  | AK023915  | 23342.748 | 30819.936 |
| NM_017544 | 19270.35  | 30308.898 | NM_000123 | 7710.634  | 7420.215  | AB051453  | 3881.961  | 5439.619  |
| NM_003153 | 4303.94   | 4079.954  | AL137501  | 4878.604  | 4809.674  | AK026842  | 801.528   | 948.847   |
| NM_016285 | 1910.58   | 2727.184  | BE858979  | 1994.986  | 1541.51   | NM_002395 | 1726.306  | 1700.232  |
| NM_014707 | 1158.319  | 1283.597  | NM_000122 | 7089.397  | 6274.191  | AB023203  | 3327.045  | 3014.98   |
| AF025771  | 2469.362  | 2669.791  | NM_006712 | 58825.695 | 60641.031 | NM_014963 | 2969.452  | 3228.687  |
| NM_018215 | 3473.281  | 2394.956  | NM_006240 | 8603.502  | 7849.357  | NM_004259 | 3868.069  | 3189.48   |
| AB033110  | 2337.972  | 1762.206  | NM_007026 | 11901.078 | 11108.254 | NM_016271 | 15033.835 | 11959.372 |
| NM_005083 | 8245.298  | 5502.726  | M37712    | 22261.438 | 13178.856 | NM_016619 | 2224.907  | 1902.247  |
| NM_007187 | 11014.084 | 9739.253  | NM_002648 | 23150.58  | 13153.636 | NM_014481 | 1753.268  | 1962.576  |
| NM_001828 | 1035.12   | 1477.39   | AF070670  | 38534.383 | 21111.738 | U22172    | 10376.1   | 9916.821  |
| NM_018983 | 24111.863 | 34143.273 | NM_016156 | 9506.022  | 7701.412  | AB032960  | 2520.467  | 2495.51   |
| NM_003096 | 11544.214 | 9216.463  | NM_016528 | 4910.644  | 4033.951  | NM_014264 | 20136.682 | 15891.283 |
| NM_007279 | 10113.718 | 7787.81   | CY3Cy5    | 2828.216  | 157.478   | AF020089  | 4388.365  | 4156.215  |
| BE390833  | 37392.023 | 25168.779 | NM_000498 | 700.83    | 720.547   | NM_006257 | 2462.857  | 1935.703  |
| NM_004730 | 15592.587 | 11763.065 | NM_000664 | 3164.571  | 3011.838  | NM_016281 | 20056.096 | 16349.885 |
| NM_000801 | 8447.164  | 6037.083  | AK026155  | 2447.537  | 2124.116  | NM_004734 | 36810.391 | 37936.434 |
| NM_006115 | 12692.842 | 12675.163 | NM_018052 | 54330.547 | 45986.574 | NM_000276 | 3696.89   | 2983.43   |
| NM_005801 | 7564.9    | 5683.345  | AF143322  | 856.6     | 777.911   | NM_000019 | 74738.344 | 64947.148 |
| NM_018198 | 6748.947  | 4905.159  | AK022386  | 12482.967 | 10795.51  | AK023701  | 3969.656  | 3001.279  |
| NM_001539 | 24880.203 | 19919.973 | NM_002767 | 39661.535 | 34968.145 | NM_014333 | 331.259   | 766.642   |
| NM_012267 | 1402.987  | 979.848   | AF131846  | 26165.623 | 23174.02  | NM_002980 | 3030.839  | 3685.036  |
| AL110151  | 409.163   | 178.988   | AF088069  | 17109.961 | 13769.53  | NM_015886 | 1194.051  | 1382.613  |
| NM_003293 | 289.68    | 223.331   | AF086551  | 1875.222  | 1526.494  | NM_007102 | 59291.793 | 63669.242 |
| NM_000022 | 18290.652 | 19517.404 | NM_013393 | 13122.602 | 9229.361  | BG491613  | 13977.226 | 16212.314 |
| NM_016576 | 14938.125 | 14785.852 | AK025082  | 1427.247  | 916.168   | AA397813  | 53893.996 | 53836.988 |
| NM_004213 | 2422.45   | 2909.268  | AF086535  | 1915.348  | 1320.423  | W47350    | 10892.296 | 10060.356 |
| NM_001929 | 27770.57  | 26495.523 | AB040901  | 2705.87   | 2203.911  | AI160964  | 1884.717  | 2185.96   |

|           |           |           |           |           |           |             |           |           |
|-----------|-----------|-----------|-----------|-----------|-----------|-------------|-----------|-----------|
| NM_000906 | 5006.333  | 4989.82   | AL137406  | 8382.624  | 6297.501  | W68291      | 20686.461 | 18447.92  |
| NM_00048C | 7737      | 5577.773  | NM_00049E | 915.36    | 944.051   | N64384      | 10325.21  | 10132.118 |
| AF254084  | 56083.188 | 48216.652 | NM_000664 | 3306.404  | 2989.02   | H-X 53655 I | 4023.53   | 3912.191  |
| AK022648  | 598.823   | 778.454   | SR1       | 88578.281 | 64216.996 | H-U 05770 I | 9515.363  | 10166.853 |
| AK022976  | 1993.186  | 1879.599  | SR3       | 54853.617 | 55946.348 | H-M 65199   | 34608.32  | 36541.645 |
| AB048791  | 5743.17   | 6403.522  | SR5       | 7226.555  | 7470.856  | NM_001091   | 6738.846  | 5650.055  |
| NM_003107 | 2300.751  | 4298.722  | SR7       | 7453.637  | 49903.32  | NM_00241E   | 864.894   | 849.888   |
| NM_006874 | 5087.796  | 5485.25   | SR9       | 23340.182 | 3336.942  | NM_00272E   | 3671.851  | 4007.218  |
| AB046777  | 2094.347  | 2469.823  | CY3Cy5    | 4569.727  | 205.742   | NM_00045C   | 1394.862  | 1594.884  |
| AJ251844  | 2101.768  | 1982.188  | AK027147  | 34561.367 | 33030.805 | NM_00044E   | 4454.911  | 5398.997  |
| D16815    | 3346.066  | 3437.512  | AK023887  | 2169.045  | 2037.379  | NM_004513   | 15251.21  | 16739.045 |
| NM_00188C | 2637.683  | 1936.174  | AF088022  | 24734.25  | 18798.473 | NM_00170E   | 58289.77  | 57404.039 |
| AB028943  | 2369.932  | 1842.707  | AK026537  | 5861.625  | 3608.994  | NM_01773E   | 10135.997 | 10763.479 |
| NM_006194 | 881.309   | 726.079   | NM_01548E | 7520.218  | 5241.212  | AB033044    | 38203.645 | 35251.352 |
| AK001603  | 2828.879  | 2211.908  | NM_00266E | 25918.541 | 25739.584 | AB014564    | 3177.584  | 3238.902  |
| U71601    | 2699.537  | 2122.22   | AF202145  | 8160.377  | 7087.208  | NM_02023C   | 6857.593  | 6986.218  |
| AK025985  | 2048.842  | 3328.868  | AK022412  | 14645.558 | 10484.03  | NM_00676E   | 58230.602 | 61380.285 |
| NM_01325E | 4339.93   | 2627.858  | AK023073  | 5847.975  | 3621.69   | NM_00635E   | 1888.178  | 2009.987  |
| NM_004143 | 1620.736  | 1093.625  | AK023922  | 812.889   | 962.909   | NM_01643C   | 1365.812  | 2113.818  |
| X66087    | 4492.99   | 2673.735  | AK022438  | 2830.534  | 3149.512  | NM_004447   | 11384.086 | 10506.32  |
| L09070    | 641.31    | 918.033   | AK023316  | 749.663   | 664.065   | NM_001204   | 9644.035  | 9598.236  |
| NM_00006E | 21686.816 | 24558.059 | AK023764  | 1509.518  | 1396.826  | BF131321    | 4149.329  | 3951.206  |
| NM_00959C | 4783.601  | 6045.194  | AK024082  | 1591.447  | 1572.751  | NM_01654C   | 641.654   | 844.331   |
| AL133037  | 1419.042  | 1959.175  | AK025072  | 7276.613  | 6332.871  | NM_01637E   | 61287.719 | 56764.078 |
| NM_02035C | 5493.708  | 4952.219  | AK022410  | 2080.568  | 2048.168  | AB020705    | 5871.139  | 4977.229  |
| NM_00035C | 2616.523  | 2247.634  | AF086541  | 1209.357  | 975.357   | BE382905    | 1306.858  | 1738.857  |
| X91103    | 4837.715  | 4352.092  | L10378    | 22658.094 | 21211.377 | NM_00215E   | 35797.852 | 40187.289 |
| AA419164  | 3256.578  | 3123.217  | AK022179  | 2987.399  | 3711.124  | NM_001701   | 711.411   | 977.865   |
| L35251    | 5830.104  | 4726.388  | AK022173  | 1029.885  | 775.784   | AK022558    | 4503.236  | 5521.455  |
| BE910395  | 6049.18   | 6259.59   | AJ227860  | 3991.181  | 2306.335  | NM_00647E   | 61446.281 | 60732.633 |
| N46828    | 3429.557  | 3817.706  | AL157448  | 1688.544  | 1603.814  | AK023787    | 4927.027  | 5194.492  |
| BI908302  | 13812.933 | 14464.442 | AF026942  | 6833.306  | 5285.756  | NM_00213E   | 5623.426  | 6109.656  |
| AA460969  | 5985.922  | 6151.63   | AJ276429  | 5361.254  | 5205.033  | NM_015697   | 10151.784 | 10145.287 |
| BG695859  | 5977.838  | 5652.699  | AL117657  | 785.314   | 792.643   | AF086489    | 1032.945  | 699.403   |
| M85079    | 1967.924  | 2193.076  | AK023589  | 2943.471  | 2480.68   | NM_00595E   | 61781.234 | 32001.977 |
| AA457671  | 9746.517  | 9271.262  | AK021590  | 2973.449  | 2661.033  | BF337921    | 14733.391 | 14991.16  |
| X07437    | 3407.377  | 2794.042  | AB002441  | 999.246   | 1122.963  | U53532      | 4622.998  | 5586.196  |
| NM_000641 | 3296.868  | 2831.28   | AK023998  | 3658.881  | 3144.098  | NM_00174C   | 6211.001  | 6542.829  |
| AE006466  | 1984.199  | 1631.403  | AK021643  | 1413.458  | 2048.669  | NM_012484   | 6480.669  | 7122.034  |
| BC008737  | 57512.93  | 63466.531 | Z11802    | 3521.728  | 3798.19   | NM_00013E   | 1620.704  | 1501.899  |
| BC011655  | 7914.596  | 5653.291  | NM_014054 | 3417.928  | 2124.265  | NM_006664   | 7185.748  | 7143.134  |
| BC002396  | 11206.118 | 8485.792  | AK021840  | 92456.789 | 64264.422 | AB051453    | 3018.151  | 3360.092  |
| NM_00361E | 3014.345  | 2438.808  | AK022228  | 7194.055  | 6395.915  | AK026842    | 2422.767  | 3296.904  |
| NM_00538E | 6467.537  | 7970.544  | AK022031  | 1362.123  | 1232.616  | NM_00239E   | 1948.996  | 2084.749  |
| NM_01898E | 6521.125  | 7478.387  | AF003738  | 422.137   | 831.724   | AB023203    | 3765.022  | 3857.249  |
| NM_006074 | 49724.039 | 55025.523 | AF086480  | 2125.444  | 1698.947  | NM_01496E   | 3480.109  | 4093.771  |
| AF208232  | 2947.884  | 3738.92   | AK022122  | 1560.796  | 1349.921  | NM_00425E   | 5026.204  | 6582.168  |
| NM_00298E | 1718.888  | 1903.714  | AK022415  | 75795.414 | 55209.723 | NM_016271   | 17381.211 | 16671.914 |
| NM_00418E | 1267.034  | 1412.71   | AL137368  | 5519.766  | 4917.362  | NM_01661E   | 3384.8    | 4144.161  |
| NM_01625E | 10255.795 | 10751.472 | AK021932  | 1976.938  | 1948.371  | NM_014481   | 1644.479  | 1657.033  |
| AF203032  | 2149.591  | 2513.758  | AK026787  | 7529.311  | 6410.251  | U22172      | 10091.729 | 9592.633  |
| AB014542  | 13811.751 | 12535.883 | AK023542  | 1948.663  | 1659.055  | AB032960    | 2618.734  | 3183.095  |
| NM_01464C | 2236.443  | 2150.203  | AK000203  | 3064.219  | 2252.017  | NM_014264   | 19449.996 | 15990.581 |

|           |           |           |           |           |           |           |           |           |
|-----------|-----------|-----------|-----------|-----------|-----------|-----------|-----------|-----------|
| Y10518    | 18253.932 | 19645.758 | AK021845  | 16874.416 | 14458.355 | AF020089  | 3837.403  | 3887.758  |
| AF155135  | 10173.056 | 12677.401 | NM_018592 | 8876.43   | 8210.176  | NM_006257 | 1919.794  | 2146.135  |
| NM_01479C | 3206.442  | 3474.445  | NM_018503 | 50684.945 | 45887.18  | NM_016281 | 21216.947 | 19613.586 |
| NM_003571 | 12483.353 | 13015.043 | NM_016449 | 37874.391 | 34916.891 | NM_004734 | 41813.816 | 41734.313 |
| AB032965  | 15569.18  | 16489.963 | AL049670  | 11330.516 | 10135.397 | AK024793  | 4037.866  | 4542.317  |
| NM_02037C | 1029.12   | 1026.474  | AK021465  | 1648.407  | 1282.741  | AF208291  | 1897.631  | 1893.878  |
| NM_004767 | 1059.815  | 1289.646  | NM_018512 | 18451.715 | 15325.891 | NM_004877 | 44645.879 | 46096.332 |
| BF310159  | 22374.408 | 18730.943 | AL161991  | 25346.732 | 22047.684 | L10284    | 73044.539 | 64219.445 |
| NM_00031E | 448.635   | 396.342   | D17032    | 37344.469 | 31787.111 | NM_00027E | 3295.828  | 4553.412  |
| NM_01898E | 9281.774  | 11847.535 | AL137292  | 1457      | 1446.047  | NM_003742 | 5542.181  | 5260.426  |
| AB044934  | 1678.14   | 1722.92   | NM_017941 | 3381.009  | 4047.461  | NM_007102 | 56526.504 | 62222.766 |
| U27655    | 8794.193  | 9102.241  | AF301016  | 497.973   | 841.607   | BG491613  | 18717.887 | 24615.129 |
| Z21965    | 13053.386 | 9008.246  | BE900527  | 2322.625  | 1783.684  | AA397813  | 55523.492 | 57110.727 |
| NM_012427 | 2185.8    | 2196.074  | D28384    | 65908.477 | 63459.32  | W47350    | 13743.051 | 14000.064 |
| AF133424  | 2346.962  | 3234.174  | AF118079  | 68335.516 | 64131.676 | AI160964  | 1674.252  | 1734.265  |
| NM_005003 | 36984.559 | 39054.504 | AF277572  | 694.354   | 969.443   | W68291    | 20629.863 | 19176.527 |
| AF084560  | 10499.76  | 17598.258 | AL365413  | 3066.724  | 2466.348  | N64384    | 10283.835 | 9696.951  |
| NM_01571E | 3218.212  | 4624.282  | NM_00525E | 17669.225 | 15249.203 | H-X 53655 | 4351.752  | 4183.494  |
| NM_000032 | 3976.469  | 5213.793  | NM_00394E | 1666.336  | 1201.465  | H-U 05770 | 11541.268 | 10638.839 |
| NM_002083 | 377.139   | 461.108   | AK025062  | 3175.249  | 1580.669  | H-M 65199 | 43509.438 | 44257.117 |
| NM_00203E | 6552.012  | 6169.97   | Z27405    | 60701.574 | 51564.656 | H-M 32315 | 3541.93   | 3581.598  |
| NM_01490C | 2764.551  | 2940.704  | AK023412  | 2627.182  | 2170.996  | H-V00536M | 6998.212  | 7258.236  |
| BF342908  | 357.731   | 468.454   | AK074682  | 8518.347  | 8122.143  | H-D85429M | 15938.518 | 16182.424 |
| AF118073  | 836.275   | 852.107   | X74605    | 2432.26   | 2220.31   | BF439832  | 2805.611  | 3241.539  |
| AK023510  | 4509.715  | 3962.814  | AK024513  | 1313.193  | 1253.279  | BG819162  | 3574.403  | 4881.794  |
| NM_00434E | 3728.94   | 5105.106  | BC036692  | 3249.009  | 2368.718  | M38449    | 9960.949  | 9212.24   |
| NM_00652E | 381.012   | 452.155   | AJ009640  | 3621.484  | 2715.913  | NM_001091 | 5062.422  | 4465.913  |
| NM_002232 | 442.118   | 389.935   | Y11163    | 1847.507  | 1220.701  | AB014564  | 5876.69   | 4507.436  |
| NM_01457C | 5036.815  | 4506.5    | AF147340  | 596.961   | 553.421   | NM_02023C | 11107.385 | 11896.237 |
| NM_014822 | 2527.895  | 3346.319  | AK025119  | 1409.495  | 688.093   | NM_006352 | 2861.473  | 4825.464  |
| NM_00529E | 2246.428  | 2697.979  | AJ224170  | 5656.433  | 4660.466  | NM_01643C | 1718.994  | 3073.82   |
| NM_001337 | 1004.616  | 1184.331  | AF085866  | 12479.441 | 10147.517 | NM_004447 | 12566.633 | 11948.126 |
| NM_003611 | 2508.6    | 2500.75   | NM_00610E | 1176.195  | 1086.395  | NM_001204 | 9107.238  | 9446.481  |
| AB014538  | 4644.858  | 4321.857  | AK000806  | 63703.434 | 60862.734 | BF131321  | 5093.043  | 6474.564  |
| NM_00620E | 1155.008  | 1366.451  | NM_016471 | 11041.762 | 9524.017  | NM_01654C | 2063.641  | 2904.195  |
| AK025118  | 9134.959  | 8528.839  | NM_001145 | 1142.534  | 787.679   | NM_01211E | 6347.008  | 5849.679  |
| NM_000727 | 1325.447  | 1305.053  | AK023482  | 13035.635 | 13458.462 | NM_00002C | 20817.617 | 17833.16  |
| NM_002621 | 445.434   | 400.769   | AK022798  | 940.946   | 641.375   | NM_00095E | 994.381   | 1392.036  |
| NM_00262E | 309.743   | 305.261   | AL157423  | 1852.074  | 813.634   | NM_002442 | 9675.359  | 9354.424  |
| NM_00413E | 6674.198  | 7355.239  | AK023115  | 486.457   | 365.275   | AB033091  | 10362.779 | 9733.41   |
| NM_000203 | 445.991   | 174.344   | AK023176  | 2056.264  | 1093.695  | NM_004557 | 25202.654 | 24253.859 |
| NM_013443 | 3291.378  | 3094.803  | NM_00682E | 32924.941 | 22022.158 | NM_014757 | 11056.021 | 10693.817 |
| NM_00092E | 18383.934 | 18888.639 | AB007973  | 23557.455 | 19865.314 | NM_017893 | 1001.996  | 1230.574  |
| NM_00046E | 4611.093  | 4762.658  | M96843    | 12943.308 | 13031.724 | NM_001584 | 7506.376  | 8126.504  |
| AF116685  | 371.34    | 671.824   | NM_017791 | 2954.143  | 2273.733  | NM_01225E | 62823     | 61426.004 |
| NM_000123 | 3792.393  | 4293.433  | NM_005882 | 14551.923 | 13018.261 | AF272357  | 6508.545  | 6308.994  |
| AL137501  | 4145.803  | 3075.027  | BC012304  | 8600.325  | 6042.8    | NM_016372 | 60467.598 | 59211.27  |
| BE858979  | 469.069   | 582.179   | AB046815  | 5879.663  | 4568.949  | NM_016274 | 10387.105 | 9518.451  |
| NM_000122 | 4496.773  | 3584.622  | NM_00044C | 10481.037 | 9742.121  | NM_01494E | 3991.291  | 3639.599  |
| NM_006712 | 54990.543 | 49877.512 | NM_001297 | 11812.509 | 10081.604 | AK022750  | 14581.882 | 16807.064 |
| NM_00624C | 876.445   | 938.229   | NM_004403 | 23229.326 | 14751.366 | NM_004251 | 14774.357 | 16823.324 |
| NM_00702E | 5540.077  | 5606.724  | X64993    | 4080.114  | 1689.303  | BF337921  | 13747.371 | 14707.928 |
| M37712    | 12052.957 | 8676.008  | NM_004434 | 41711.414 | 27864.402 | U53532    | 5457.118  | 5789.401  |

|           |           |           |           |           |           |           |           |           |
|-----------|-----------|-----------|-----------|-----------|-----------|-----------|-----------|-----------|
| NM_00264E | 13291.926 | 10706.668 | NM_006269 | 1297.291  | 1259.069  | NM_00174C | 6764.715  | 7489.836  |
| AF070670  | 9799.605  | 6820.732  | NM_01623C | 7359.965  | 7736.419  | NM_01248A | 7837.318  | 7793.994  |
| NM_01615E | 5163.97   | 5625.647  | NM_001083 | 1808.103  | 1537.593  | AL096732  | 8210.367  | 6668.351  |
| NM_01652E | 3740.313  | 3631.602  | AK023966  | 16926.752 | 7722.302  | AB006423  | 1454.109  | 1233.739  |
| NM_01597A | 2388.537  | 1861.035  | AK025702  | 4131.849  | 2172.008  | AJ132084  | 313.531   | 501.678   |
| NM_01438A | 3064.528  | 2434.137  | NM_01895E | 1843.376  | 1049.942  | NM_00571E | 59078.473 | 60811.777 |
| NM_002573 | 6456.167  | 5401.171  | AL050200  | 452.363   | 517.214   | NM_003462 | 60813.84  | 60227.445 |
| NM_00959C | 4532.348  | 6465.799  | NM_002367 | 864.75    | 658.253   | NM_006093 | 11672.549 | 13142.595 |
| AL133037  | 1297.933  | 2371.663  | AK022038  | 2597.89   | 1622.733  | NM_00013E | 1824.232  | 1759.908  |
| NM_02035C | 5553.599  | 6658.792  | AF253321  | 2424.286  | 2304.653  | NM_00666A | 8217.201  | 8261.9    |
| NM_00035C | 3638.855  | 4267.806  | U80735    | 11173.288 | 12328.148 | NM_00241E | 965.82    | 1149.381  |
| X91103    | 5535.061  | 6788.595  | NM_01785C | 5091.523  | 5162.513  | NM_00272E | 3315.089  | 3388.575  |
| AA419164  | 2573.112  | 3047.696  | NM_016522 | 2610.493  | 2311.625  | NM_00045C | 1045.867  | 1923.531  |
| L35251    | 5188.955  | 5038.722  | NM_00222A | 22139.203 | 19717.824 | NM_00027E | 3179.455  | 3271.979  |
| BE910395  | 5248.16   | 4880.371  | X07979    | 51926.785 | 46140.148 | NM_00001E | 61720.426 | 64825.352 |
| N46828    | 2958.075  | 2918.143  | NM_00387A | 4415.529  | 5445.027  | AK023701  | 4326.238  | 4469.521  |
| BI908302  | 12107.241 | 9370.938  | NM_000082 | 2443.918  | 3082.591  | NM_003742 | 6043.355  | 6517.62   |
| AA460969  | 5708.111  | 6185.484  | L13857    | 3842.461  | 4148.675  | NM_00509A | 5829.951  | 6153.126  |
| BG695859  | 5933.555  | 7776.133  | NM_01809E | 11308.807 | 10337.86  | BE382905  | 2036.154  | 2274.619  |
| M85079    | 2150.888  | 2541.583  | AF286164  | 2384.515  | 1558.923  | NM_002152 | 33671.117 | 34793.043 |
| AA457671  | 9865.525  | 10240.987 | AF146277  | 11598.913 | 9619.392  | NM_001701 | 766.465   | 859.429   |
| X07437    | 3693.588  | 3420.221  | NM_002559 | 1185.012  | 931.902   | AK022558  | 4673.311  | 4744.849  |
| NM_000641 | 2965.593  | 2621.994  | AF055033  | 25294.893 | 19889.191 | NM_00647E | 58133.918 | 58082.383 |
| AE006466  | 1775.826  | 1836.443  | NM_01770C | 924.1     | 507.392   | AK023787  | 5458.518  | 4859.907  |
| BC008737  | 57512.34  | 61925.816 | M37191    | 15053.795 | 8594.382  | NM_002133 | 6180.239  | 7550.974  |
| BC011655  | 8072.957  | 7636.173  | NM_005242 | 621.378   | 452.396   | NM_015697 | 12492.433 | 13595.294 |
| BC002396  | 10954.533 | 11312.062 | NM_00302C | 1008.643  | 618.181   | AF086489  | 728.198   | 676.408   |
| AF112219  | 10680.961 | 7645.969  | NM_00340A | 52850.441 | 32387.09  | NM_032943 | 6451.002  | 7099.373  |
| NM_000521 | 442.952   | 308.676   | NM_00111A | 2400.783  | 1418.26   | NM_007177 | 50341.402 | 49751.738 |
| NM_00607A | 46420.902 | 58095.559 | NM_00445E | 1136.652  | 1157.43   | NM_00607E | 16945.961 | 18479.223 |
| AF208232  | 2752.328  | 3447.355  | NM_00601C | 26983.949 | 32217.824 | M38449    | 11199.809 | 9322.124  |
| NM_00298E | 1905.501  | 2960.899  | K03191    | 4631.393  | 5782.046  | NM_001091 | 4479.862  | 3973.239  |
| NM_00418E | 1086.869  | 1500.928  | NM_005079 | 48132.527 | 52920.02  | AK023915  | 19426.949 | 20227.504 |
| NM_01625E | 12088.826 | 17540.428 | NM_005192 | 51415.57  | 52431.078 | AB051453  | 2375.869  | 2663.758  |
| AF203032  | 3056.265  | 4169.775  | NM_00458E | 3209.127  | 2949.37   | NM_00239E | 1825.853  | 1658.663  |
| AB014542  | 14597.196 | 14220.152 | NM_015032 | 6718.975  | 4516.176  | AB023203  | 3166.098  | 2816.854  |
| NM_01464C | 2241.38   | 2567.805  | AK022956  | 10460.646 | 11764.722 | NM_014963 | 3249.06   | 3053.262  |
| Y10518    | 17907.602 | 18807.209 | AK023121  | 4456.498  | 4115.099  | NM_00425E | 4572.226  | 3882.229  |
| AF155135  | 9671.364  | 9526.591  | NM_002392 | 3246.141  | 3204.941  | NM_016271 | 17046.076 | 14128.715 |
| NM_01479C | 3392.846  | 2760.589  | AL137747  | 7618.345  | 6461.004  | NM_01661E | 2127.818  | 2332.484  |
| NM_003571 | 11778.049 | 12014.041 | NM_01475E | 9314.362  | 5007.917  | NM_01426A | 21447.676 | 20861.893 |
| AB032965  | 17012.965 | 22218.441 | AF077188  | 22482.807 | 15837.439 | AF208291  | 1936.339  | 1456.552  |
| NM_02037C | 1072.308  | 1182.885  | NM_01244E | 8300.798  | 5040.784  | NM_00090E | 10638.166 | 12544.464 |
| NM_004767 | 1432.028  | 1719.614  | NM_01833E | 1489.104  | 785.074   | AF070564  | 18959.785 | 13825.54  |
| BF310159  | 22547.559 | 18954.055 | NM_01868E | 63043.844 | 55431.375 | AK021439  | 57806.438 | 33176.109 |
| NM_00031E | 424.704   | 444.384   | NM_00698A | 5242.553  | 4122.735  | AF052099  | 5794.703  | 4359.392  |
| NM_01898E | 8405.334  | 9092.296  | AF231919  | 3412.995  | 3262.098  | AL110111  | 4071.198  | 2861.85   |
| AB044934  | 1661.1    | 2003.947  | NM_01821A | 2232.059  | 2355.526  | AF070543  | 1533.497  | 1256.443  |
| U27655    | 8170.888  | 7752.131  | NM_00507E | 16468.648 | 18509.703 | AF086525  | 657.503   | 473.087   |
| NM_00579E | 1341.615  | 1962.341  | NM_019023 | 62836.664 | 59977.773 | AF086509  | 998.496   | 805.192   |
| Z21965    | 13251.344 | 11735.077 | NM_00442C | 1540.738  | 1540.815  | NM_01477E | 6446.721  | 5831.43   |
| NM_012427 | 2261.554  | 2251.919  | NM_00297C | 1466.504  | 1531.15   | AK001171  | 40508.023 | 35226     |
| L09070    | 503.061   | 679.773   | NM_00549E | 43755     | 47082.328 | AF086491  | 10469.664 | 9312.507  |

|           |           |           |           |           |           |           |           |           |
|-----------|-----------|-----------|-----------|-----------|-----------|-----------|-----------|-----------|
| NM_000062 | 18516.652 | 16087.623 | NM_013270 | 2367.367  | 2972.317  | NM_014856 | 2197.266  | 2068.731  |
| AF084560  | 9231.599  | 13435.653 | NM_000204 | 1127.653  | 1810.096  | AK021611  | 3569.38   | 3394.115  |
| NM_015715 | 2593.253  | 3711.515  | NM_020122 | 33945.168 | 30798.975 | NM_003492 | 1721.571  | 1661.663  |
| NM_000032 | 4298.827  | 5460.361  | NM_013432 | 19748.592 | 18973.867 | NM_000620 | 795.291   | 1215.643  |
| NM_002083 | 659.034   | 1122.469  | AB020716  | 1745.698  | 1691.265  | NM_000905 | 12128.844 | 9400.713  |
| NM_002035 | 6954.193  | 9588.859  | NM_002298 | 62849.066 | 63119.23  | SR1       | 67584.789 | 62592.57  |
| NM_014900 | 3842.088  | 5598.987  | AK027130  | 2027.98   | 2211.894  | SR3       | 41767.75  | 44118.016 |
| BF342908  | 441.914   | 669.819   | NM_005479 | 56665.383 | 53714.73  | SR5       | 7777.575  | 10123.371 |
| AF118073  | 872.518   | 1247.004  | NM_005730 | 65482.48  | 65716.75  | SR7       | 5729.472  | 47532.277 |
| AK023510  | 4481.363  | 4249.783  | X82240    | 28327.25  | 32838.277 | SR9       | 14028.219 | 3111.563  |
| NM_004345 | 3286.51   | 3563      | NM_013995 | 15109.062 | 17263.193 | CY3Cy5    | 6519.112  | 486.64    |
| NM_006528 | 259.753   | 229.784   | BC021298  | 1571.022  | 1600.467  | U63828    | 8152.796  | 8993.478  |
| NM_014570 | 5072.292  | 5369.758  | U52096    | 11728.905 | 11658.017 | Z36794    | 4225.346  | 5231.876  |
| NM_014822 | 2673.084  | 3634.881  | AB013897  | 4202.41   | 4076.951  | Z36828    | 10287.048 | 8120.39   |
| NM_005296 | 3025.265  | 3340.685  | NM_005526 | 44109.43  | 47440.074 | AF086121  | 32568.973 | 19745.391 |
| NM_001337 | 912.596   | 1377.745  | AK001669  | 3563.202  | 3508.678  | AF086140  | 3359.42   | 3208.177  |
| NM_003611 | 2696.847  | 2543.07   | NM_006195 | 3240.516  | 3413.275  | NM_015696 | 1119.557  | 977.486   |
| AB014538  | 4322.917  | 5605.5    | NM_006190 | 51311.832 | 48143.711 | AK022551  | 6614.789  | 7344.53   |
| NM_006209 | 634.291   | 826.831   | NM_006368 | 5102.672  | 4428.652  | AF085968  | 4243.545  | 3447.77   |
| AK025118  | 9421.688  | 10936.585 | NM_004133 | 1344.716  | 1356.027  | AK023665  | 853.988   | 735.923   |
| NM_000727 | 1357.219  | 1826.967  | BF344046  | 4825.948  | 5005.965  | AB011136  | 5218.691  | 4836.3    |
| NM_002621 | 421.315   | 459.614   | AF432218  | 49523.063 | 56853.113 | AF085898  | 8520.377  | 7429.76   |
| NM_005385 | 7350.561  | 5733.792  | NM_004286 | 11695.303 | 11995.813 | AK021552  | 486.895   | 365.11    |
| NM_018985 | 6321.818  | 5044.03   | AL133644  | 16400.535 | 18646.332 | AL442094  | 1782.871  | 1901.915  |
| NM_013443 | 2532.057  | 3052.708  | NM_002706 | 8160.833  | 10455.049 | AL161960  | 3424.257  | 2790.279  |
| NM_000925 | 17984.951 | 21028.824 | NM_004199 | 1205.679  | 1802.044  | AL049964  | 5030.249  | 5923.05   |
| NM_000465 | 4848.907  | 6261.131  | NM_006876 | 3655.486  | 4153.066  | AF038184  | 1950.256  | 2188.938  |
| AF116685  | 328.437   | 737.317   | NM_000293 | 2851.831  | 3141.173  | AK022485  | 1769.846  | 2679.105  |
| NM_000123 | 4383.929  | 7165.213  | NM_003748 | 2313.631  | 2499.406  | AK023395  | 23591.059 | 15928.693 |
| AL137501  | 4189.677  | 4210.462  | NM_005398 | 382.906   | 507.34    | AK023818  | 16851.801 | 19062.625 |
| BE858979  | 494.934   | 848.31    | NM_012269 | 1567.887  | 1452.06   | AK024139  | 933.418   | 899.731   |
| NM_000122 | 4175.566  | 3096.047  | AF153821  | 2527.326  | 2239.108  | AK024206  | 17532.146 | 12472.379 |
| NM_006240 | 878.151   | 1152.244  | NM_013370 | 6198.954  | 6827.051  | AK026273  | 51589.703 | 44286.945 |
| NM_007026 | 5731.427  | 6577.05   | NM_001374 | 1776.431  | 2143.586  | NM_020250 | 52976.5   | 50578.066 |
| M37712    | 12120.577 | 8909.977  | M62399    | 12106.127 | 13889.661 | AF055007  | 1670.065  | 1615.655  |
| NM_002648 | 12091.761 | 10624.148 | NM_002357 | 2070.104  | 1954.253  | NM_012337 | 3287.398  | 2974.654  |
| AF070670  | 10645.366 | 9028.592  | U71600    | 7623.051  | 7619.871  | AL389879  | 44559     | 36429.055 |
| NM_016156 | 5059.532  | 7071.065  | NM_004472 | 1474.062  | 1600.617  | AK022869  | 3567.646  | 3273.776  |
| NM_016528 | 4059.765  | 4416.832  | AB037862  | 3448.542  | 3821.565  | NM_016111 | 38574.992 | 38667.809 |
| NM_015974 | 2479.603  | 2478.586  | NM_005392 | 2928.078  | 3469.859  | AF085958  | 78215.625 | 62903.402 |
| NM_014384 | 3022.434  | 3872.658  | AL133572  | 14688.192 | 15831.333 | AF086021  | 12588.263 | 11228.164 |
| NM_002573 | 6832.695  | 5512.273  | AK022500  | 12488.667 | 13683.674 | AL117655  | 691.643   | 524.893   |
| AF133424  | 1853.438  | 2139.64   | NM_003447 | 2222.04   | 2898.684  | AK024472  | 5615.428  | 3962.21   |
| NM_005003 | 35017.441 | 29713.586 | NM_005014 | 4377.866  | 5233.003  | AF087981  | 584.864   | 598.844   |
| AL133037  | 1626.494  | 3380.945  | NM_006944 | 584.293   | 1009.628  | NM_017976 | 6645.654  | 6399.388  |
| NM_020350 | 5188.646  | 4945.532  | NM_004407 | 1427.428  | 1632.733  | U06700    | 3191.425  | 2921.793  |
| NM_000350 | 3887.739  | 4896.05   | NM_000070 | 3187.237  | 3616.632  | NM_017918 | 20539.424 | 20714.078 |
| X91103    | 6395.46   | 9243.816  | NM_001202 | 2115.963  | 2628.696  | NM_017855 | 63642.363 | 60882.984 |
| AA419164  | 3331.565  | 5338.721  | AB037804  | 709.285   | 645.756   | AB007954  | 5303.714  | 5392.434  |
| L35251    | 5847.717  | 9540.956  | U34249    | 1524      | 1554.272  | AK026494  | 7370.152  | 6615.413  |
| BE910395  | 5926.405  | 8962.509  | NM_003289 | 60662.207 | 60286.125 | AK022067  | 1161.607  | 1336.974  |
| N46828    | 3793.367  | 4658.919  | AI200114  | 995.804   | 1199.87   | AK023508  | 1690.413  | 1906.483  |
| BI908302  | 14734.614 | 17691.711 | M74220    | 987.815   | 1098.693  | AK025840  | 3131.297  | 2733.083  |

|           |           |           |           |           |           |           |           |           |
|-----------|-----------|-----------|-----------|-----------|-----------|-----------|-----------|-----------|
| AA460969  | 6216.463  | 6915.328  | M23254    | 1971.22   | 2526.158  | AK026915  | 4485.974  | 3855.783  |
| BG695859  | 5945.199  | 5653.613  | BI756258  | 4640.329  | 6083.335  | AL110259  | 1058.427  | 942.808   |
| M85079    | 2262.772  | 2400.833  | J04599    | 2536.129  | 3238.601  | AB033100  | 56527.668 | 52167.547 |
| X07437    | 3943.13   | 4396.857  | AF110020  | 2173.089  | 1971.21   | AL390138  | 8076.568  | 9008.496  |
| NM_000641 | 3307.189  | 3678.998  | AA608557  | 14784.239 | 16366.027 | AL137290  | 10553.397 | 9975.394  |
| AE006466  | 1954.255  | 2160.832  | AL050095  | 22310.252 | 24588.461 | AK023458  | 2897.13   | 2973.432  |
| BC008737  | 52580.695 | 59681.594 | U03272    | 3744.971  | 4667.764  | AK001551  | 6969.172  | 5243.907  |
| BC011655  | 8682.594  | 9741.603  | NM_012253 | 25453.311 | 26784.844 | AK001825  | 2460.148  | 2270.065  |
| BC002396  | 11532.699 | 13589.051 | NM_000258 | 60962.477 | 60593.895 | AK024714  | 1191.499  | 1151.204  |
| AF112219  | 12107.458 | 12739.451 | AB033055  | 38698.305 | 41583.125 | AK022363  | 3184.844  | 2486.369  |
| NM_000521 | 404.703   | 412.502   | AF311287  | 18271.762 | 19094.662 | AL353949  | 554.2     | 394.598   |
| NM_004135 | 7226.944  | 4977.41   | NM_003098 | 4697.334  | 4690.946  | NM_005181 | 2599.077  | 2875.726  |
| Y10518    | 22375.756 | 37588.348 | NM_014781 | 9172.516  | 8605.128  | AF026945  | 1269.228  | 1471.523  |
| AF155135  | 10733.07  | 14619.688 | BU629989  | 2526.296  | 2142.752  | AF143676  | 8432.343  | 8460.985  |
| NM_014790 | 4087.613  | 5101.987  | X87896    | 4163.606  | 4395.867  | U66044    | 50353.152 | 45883.707 |
| NM_003571 | 15353.345 | 23705.193 | M88310    | 7447.817  | 7891.039  | NM_005247 | 63943.527 | 59872.523 |
| AB032965  | 19138.957 | 25987.293 | D16856    | 890.05    | 1045.089  | NM_005283 | 3842.081  | 3154.035  |
| NM_020370 | 1175.769  | 2018.691  | NM_000042 | 6105.553  | 5238.66   | AL122089  | 1947.641  | 1842.687  |
| NM_004767 | 1330.818  | 2611.75   | AF035787  | 7033.667  | 5000.032  | AA203665  | 18321.961 | 22592.357 |
| BF310159  | 24427.949 | 28764.32  | NM_005024 | 1536.114  | 1328.417  | U95646    | 4694.101  | 4877.944  |
| NM_000316 | 409.771   | 778.828   | NM_003403 | 3266.632  | 3646.114  | Y16705    | 3138.061  | 2939.315  |
| NM_018986 | 8686.949  | 10908.347 | NM_014808 | 8870.492  | 11004.543 | AF279775  | 12060.181 | 10607.057 |
| AB044934  | 1588.664  | 1922.864  | AB006627  | 3970.27   | 6076.935  | NM_006262 | 4639.26   | 4008.618  |
| U27655    | 8421.443  | 8449.902  | NM_000416 | 14700.815 | 22405.633 | AK026598  | 5389.886  | 8067.442  |
| NM_003360 | 5057.997  | 5205.407  | NM_002965 | 1097.1    | 1373.551  | AK023602  | 3008.34   | 3844.186  |
| Z21965    | 13443.566 | 13111.667 | AB007883  | 9836.268  | 9543.714  | NM_018097 | 58623.164 | 52682.719 |
| NM_012427 | 2511.268  | 2809.168  | NM_003839 | 1188.297  | 1978.855  | AK026813  | 1891.551  | 1584.636  |
| AF131857  | 35986.281 | 29581.313 | NM_006391 | 1442.003  | 1330.543  | AK027225  | 2342.168  | 1971.516  |
| NM_000852 | 434.337   | 476.725   | AY009397  | 57669.887 | 60519.023 | AK023083  | 3167.743  | 3117.014  |
| NM_000396 | 1729.199  | 2074.89   | NM_007037 | 62643.703 | 62734     | AF130093  | 1269.918  | 1076.976  |
| AW797282  | 430.065   | 498.192   | NM_016335 | 1790.793  | 1638.409  | AF116622  | 1250.203  | 1272.114  |
| NM_002402 | 1639.669  | 3570.153  | NM_003165 | 6087.375  | 6376.562  | AF217967  | 1700.269  | 1648.949  |
| L09070    | 576.005   | 735.616   | NM_003906 | 33227.32  | 25098.023 | NM_017447 | 2880.108  | 3557.317  |
| NM_000062 | 21008.033 | 20929.559 | AL359590  | 59584.266 | 59251.539 | AL049452  | 1612.561  | 1661.08   |
| NM_009590 | 4609.241  | 4318.822  | NM_002861 | 13348.557 | 13092.008 | NM_016622 | 5592.946  | 4967.669  |
| NM_014747 | 16598.969 | 25336.25  | NM_003080 | 5106.851  | 4767.033  | AK026976  | 3893.082  | 4317.866  |
| Y19240    | 9813.563  | 16509.006 | NM_004042 | 759.491   | 787.624   | AF070559  | 1578.294  | 1423.166  |
| AF091029  | 5383.532  | 7308.238  | NM_013268 | 1228.916  | 1593.021  | D42043    | 56059.207 | 52596.559 |
| X97074    | 10718.416 | 13615.004 | NM_002645 | 9162.973  | 9924.698  | BC024009  | 8275.615  | 6635.468  |
| AL117235  | 1266.652  | 2322.78   | AB033027  | 2299.742  | 1863.497  | AF128543  | 28584.846 | 24703.912 |
| NM_014822 | 3025.517  | 5391.298  | AF320293  | 829.736   | 833.918   | AK022071  | 1685.49   | 1500.954  |
| NM_005296 | 3025.901  | 4270.811  | NM_001171 | 1530.873  | 1345.068  | NM_004185 | 2028.751  | 2175.459  |
| NM_001337 | 1176.498  | 1760.089  | S81591    | 2025.972  | 1884.542  | X94290    | 2472.475  | 2367.005  |
| NM_003611 | 2894.847  | 3461.45   | NM_006323 | 27019.154 | 37216.414 | AK026685  | 52396.27  | 42492.031 |
| AB014538  | 5248.003  | 7124.008  | NM_016466 | 4883.978  | 6418.77   | AF090927  | 59369.914 | 57579.242 |
| NM_006209 | 646.94    | 757.126   | NM_001493 | 11479.793 | 11385.747 | AL137642  | 1504.372  | 1310.555  |
| AK025118  | 9010.304  | 11432.935 | NM_003716 | 1176.417  | 1453.307  | AL133619  | 14346.101 | 11931.319 |
| NM_000727 | 1308.107  | 1778.194  | NM_014841 | 1963.157  | 2287.52   | AL157496  | 1456.476  | 1572.994  |
| NM_002621 | 453.269   | 587.145   | NM_014426 | 19298.713 | 25004.324 | AK025902  | 9784.695  | 8983.048  |
| NM_005385 | 6830.709  | 7004.613  | NM_006816 | 62618.305 | 61727.395 | NM_004517 | 4889.801  | 5126.742  |
| NM_018985 | 6782.895  | 7651.517  | AK026518  | 63031.543 | 64430     | AI017418  | 854.385   | 810.566   |
| NM_006074 | 48004.895 | 50621.172 | AF132734  | 52599.168 | 50143.887 | NM_000679 | 5771.424  | 5531.08   |
| AF208232  | 3007.442  | 3727.48   | NM_018379 | 9467.068  | 6385.363  | AF218006  | 61415.887 | 67521.336 |

|           |           |           |           |           |           |           |           |           |
|-----------|-----------|-----------|-----------|-----------|-----------|-----------|-----------|-----------|
| NM_00298E | 2150.099  | 2615.177  | NM_016403 | 45493.055 | 41884.793 | AK026935  | 49161.973 | 46792.953 |
| NM_00418E | 1088.985  | 1537.408  | NM_015603 | 2322.332  | 1950.146  | NM_020162 | 6336.063  | 5803.917  |
| NM_01625E | 9993.972  | 14787.637 | AK021788  | 1335.937  | 956.325   | AK027124  | 60393.141 | 59317.66  |
| AF203032  | 2546.792  | 2980.963  | NM_001921 | 22860.891 | 23193.85  | AB037813  | 597.829   | 589.896   |
| AB014542  | 17737.637 | 17754.5   | NM_006230 | 33375.504 | 37356.195 | M31212    | 28405.291 | 28253.104 |
| NM_014640 | 2575.438  | 2622.625  | NM_014699 | 9868.032  | 10755.789 | NM_001821 | 14673.396 | 10785.195 |
| NM_015974 | 2683.128  | 3498.583  | NM_013400 | 35198.074 | 37809.617 | NM_005647 | 2548.632  | 2821.009  |
| NM_014384 | 3219.157  | 4511.785  | AK026257  | 5372.796  | 5854.99   | X64978    | 30888.633 | 34651.168 |
| NM_002573 | 6735.041  | 8182.868  | AK023836  | 13311.332 | 8711.402  | NM_000912 | 52691.258 | 57848.863 |
| AF133424  | 2370.452  | 3722.15   | NM_018109 | 6290.243  | 5721.006  | NM_00234E | 3017.539  | 2849.205  |
| NM_005003 | 38694.758 | 46861.367 | AJ299442  | 12502.286 | 13601.007 | U57971    | 3831.297  | 3431.663  |
| AF084560  | 9675.527  | 14584.078 | AB040897  | 1609.028  | 1689.477  | X89673    | 3082.135  | 2652.19   |
| NM_01571E | 2479.446  | 4064.703  | NM_000129 | 3986.163  | 4402.998  | AK024593  | 3703.507  | 3725.448  |
| NM_000032 | 4005.378  | 6140.451  | NM_003762 | 12933.993 | 14476.682 | Z83934    | 1319.418  | 1153.318  |
| NM_002083 | 501.35    | 787.398   | NM_01844E | 8725.936  | 10621.984 | NM_01835E | 3366.86   | 2983.745  |
| NM_00203E | 6982.484  | 8858.126  | NM_000187 | 2158.088  | 2457.844  | AK022020  | 2878.068  | 2402.477  |
| NM_014900 | 2944.545  | 3449.184  | D87292    | 4431.013  | 4285.367  | U17634    | 1093.589  | 1042.285  |
| BF342908  | 360.993   | 369.979   | NM_00549E | 4958.777  | 5962.697  | AK000263  | 19143.975 | 16325.952 |
| AF118073  | 946.371   | 982.78    | NM_004407 | 1549.627  | 1884.115  | Y13895    | 1464.957  | 1150.774  |
| AK023510  | 4179.641  | 4308.589  | NM_000070 | 3890.211  | 3454.981  | L14723    | 28134.559 | 31394.529 |
| NM_00434E | 3567.53   | 4290.479  | NM_001202 | 3343.516  | 3664.68   | AK024462  | 60274.129 | 62080.375 |
| NM_000702 | 50534.621 | 60285.07  | AB037804  | 812.765   | 962.27    | NM_005711 | 5294.938  | 6806.933  |
| X71490    | 13415.692 | 16509.008 | U34249    | 1746.213  | 1884.411  | NM_019601 | 1245.694  | 1344.845  |
| AF257081  | 1182.432  | 1380.89   | NM_003289 | 60937.188 | 61152.211 | NM_00220E | 2789.327  | 2380.651  |
| NM_00168E | 36595.051 | 29416.162 | AI200114  | 867.453   | 947.417   | NM_007074 | 1288.158  | 1059.398  |
| NM_003631 | 794.547   | 656.617   | M74220    | 783.245   | 893.588   | NM_006614 | 946.011   | 827.321   |
| NM_00021E | 258.763   | 486.11    | M23254    | 1869.812  | 2621.469  | NM_002230 | 6631.774  | 5842.218  |
| NM_002232 | 1377.95   | 1940.713  | BE618539  | 3817.366  | 2395.059  | NM_00381E | 14345.588 | 11279.187 |
| NM_01610E | 8066.613  | 10342.892 | R28062    | 6396.883  | 5801.681  | NM_001430 | 3309.299  | 3322.483  |
| NM_014570 | 5137.979  | 4741.112  | AI627464  | 1907.74   | 2148.862  | AB010098  | 1740.172  | 1971.923  |
| AF112219  | 11427.969 | 13598.801 | BI756258  | 4532.044  | 4529.972  | U17989    | 4590.478  | 4663.568  |
| NM_00262E | 277.174   | 606.275   | AI342225  | 58829.496 | 63676.355 | U62325    | 3233.378  | 2925.715  |
| NM_00413E | 9147.842  | 13802.37  | AA634103  | 59423.566 | 62484.461 | AL137595  | 1728.816  | 1739.661  |
| NM_000203 | 435.71    | 658.689   | J04599    | 1601.389  | 1975.406  | NM_01802E | 1808.395  | 1860.052  |
| NM_013443 | 2795.958  | 2892.68   | AF110020  | 1455.253  | 1902.471  | AF249267  | 58973.766 | 57794.348 |
| NM_00092E | 17245.816 | 23439.816 | AA707922  | 819.216   | 1144.304  | NM_004113 | 627.54    | 669.42    |
| NM_00046E | 4627.071  | 6239.165  | AA608557  | 14236.044 | 16588.146 | X84939    | 5881.976  | 4788.933  |
| AF116685  | 429.917   | 727.931   | AL050095  | 19118.852 | 23284.736 | NM_018320 | 55799.977 | 51376.188 |
| NM_000123 | 3826.852  | 4539.755  | NM_005892 | 11796.4   | 13370.019 | NM_00206E | 5287.306  | 4350.003  |
| AL137501  | 3071.789  | 3096.559  | NM_00647E | 1330.647  | 2015.581  | NM_01605E | 8794.491  | 6177.885  |
| BE858979  | 489.181   | 508.402   | AF311287  | 18263.555 | 20261.01  | AF188492  | 811.903   | 935.077   |
| NM_000122 | 4811.884  | 4858.93   | NM_00309E | 5513.323  | 5952.542  | M65066    | 19315.443 | 16080.937 |
| NM_006712 | 52092.676 | 53073.609 | NM_014781 | 10426.205 | 10630.482 | NM_016951 | 2604.052  | 2559.059  |
| NM_006240 | 1258.069  | 1375.94   | BU629989  | 2312.946  | 2653.962  | NM_013251 | 1205.86   | 1153.709  |
| NM_00702E | 5982.206  | 6825.612  | X87896    | 4562.472  | 4274.224  | NM_01232E | 1358.388  | 1618.914  |
| M37712    | 12623.757 | 9773.306  | M88310    | 8007.077  | 8982.891  | NM_00308E | 60880.461 | 65940.984 |
| NM_00264E | 13280.813 | 14210.777 | NM_000042 | 6011.936  | 8022.728  | NM_016084 | 27944.672 | 27952.916 |
| AF070670  | 11297.866 | 10160.578 | AF035787  | 5049.914  | 3337.595  | AF095289  | 35950.789 | 39959.754 |
| NM_01615E | 5677.53   | 7454.155  | NM_005024 | 398.437   | 398.199   | NM_005537 | 5098.59   | 4464.835  |
| NM_01652E | 4282.487  | 4701.857  | NM_003403 | 2511.794  | 2378.089  | AC003962  | 656.496   | 791.529   |
| CY3Cy5    | 1573.943  | 175.141   | NM_01480E | 8669.511  | 12925.054 | NM_019003 | 3141.875  | 3010.325  |
| NM_00049E | 645.595   | 291.118   | AB006627  | 3336.93   | 3880.213  | NM_01593E | 31549.426 | 31400.453 |
| NM_000664 | 2961.541  | 1961.597  | NM_00041E | 12321.186 | 14810.175 | AF182412  | 2078.198  | 1855.803  |

|           |           |           |           |           |           |           |           |           |
|-----------|-----------|-----------|-----------|-----------|-----------|-----------|-----------|-----------|
| AK026155  | 3222.135  | 3136.642  | NM_003382 | 1015.212  | 1403.698  | AK027200  | 2793.69   | 2695.313  |
| NM_018052 | 9041.893  | 7509.345  | NM_002965 | 787.117   | 1806.637  | S78372    | 760.952   | 842.237   |
| AF143322  | 1023.139  | 1102.232  | AB007883  | 10179.931 | 10110.356 | U03106    | 21466.441 | 27239.322 |
| AK022386  | 2605.551  | 2435.216  | AY009397  | 61447.023 | 66026.953 | NM_000075 | 31740.951 | 32791.926 |
| NM_002767 | 47392.129 | 32507.338 | NM_005014 | 4067.818  | 6651.17   | NM_006845 | 58874.168 | 59184.875 |
| AF131846  | 6349.463  | 5067.142  | NM_006944 | 833.253   | 1424.947  | NM_014885 | 651.263   | 815.566   |
| AF088069  | 13261.706 | 8280.367  | NM_003165 | 7952.448  | 7608.069  | M73239    | 874.162   | 1140.825  |
| AF086551  | 1748.455  | 1600.207  | NM_003906 | 42967.211 | 39157.469 | NM_004945 | 5005.978  | 4467.084  |
| NM_013393 | 13682.47  | 11667.931 | AL359590  | 62197.547 | 60580.758 | NM_020242 | 1815.845  | 1644.207  |
| AK025082  | 3588.958  | 3580.798  | NM_002861 | 15160.875 | 15992.175 | NM_001785 | 32875.762 | 29328.119 |
| AF086535  | 1753.955  | 1529.326  | NM_003080 | 7474.364  | 6620.251  | NM_007175 | 59730.125 | 60085.465 |
| AB040901  | 3878.061  | 3166.813  | NM_004042 | 496.832   | 478.174   | NM_017682 | 1605.7    | 1419.843  |
| AL137406  | 12464.087 | 16244.11  | NM_013265 | 1414.046  | 1695.271  | NM_002205 | 9286.374  | 7797.71   |
| NM_000495 | 835.982   | 557.798   | NM_002645 | 8782.911  | 9376.981  | NM_002291 | 1048.718  | 1351.705  |
| NM_000664 | 3260.9    | 3416.427  | AB033027  | 2013.609  | 1624.378  | AL137477  | 21437.834 | 18552.41  |
| SR1       | 69947.734 | 62833.426 | AF320293  | 442.922   | 481.847   | NM_016645 | 13122.513 | 11298.368 |
| SR3       | 39214.602 | 44982.293 | NM_001171 | 869.479   | 1044.992  | NM_014255 | 7799.854  | 8262.144  |
| SR5       | 4901.661  | 6378.855  | S81591    | 1332.886  | 1080.891  | NM_015967 | 5166.597  | 5311.652  |
| SR7       | 4828.167  | 47454.621 | NM_006323 | 25949.307 | 33332.965 | NM_002405 | 8882.328  | 10487.352 |
| SR9       | 16397.063 | 5315.086  | NM_016466 | 5036.101  | 5436.873  | NM_004994 | 55369.168 | 50806.555 |
| CY3Cy5    | 4360.814  | 344.41    | NM_001493 | 10691.057 | 10307.375 | NM_006610 | 47492.828 | 45722.027 |
| AK000872  | 3970.809  | 3383      | NM_003716 | 1515.761  | 1695.179  | NM_017625 | 937.596   | 1048.448  |
| AK027147  | 22406.045 | 18530.426 | NM_014841 | 1822.795  | 1939.471  | NM_003791 | 9903.969  | 8488.479  |
| AF086285  | 1361.453  | 857.122   | NM_000255 | 61368.457 | 58918.238 | NM_018017 | 15067.686 | 18577.814 |
| AF085924  | 1272.766  | 1177.747  | AB033055  | 40094.582 | 47814.754 | AK001296  | 46237.125 | 51180.461 |
| AK023887  | 883.954   | 823.619   | NM_016403 | 44183.945 | 43780.809 | AK000173  | 1122.158  | 754.858   |
| AF088022  | 13138.429 | 12161.061 | NM_015603 | 2954.54   | 2173.373  | NM_018365 | 3504.645  | 3106.493  |
| AK026537  | 8643.782  | 8922.399  | AK021788  | 1122.722  | 1219.155  | NM_006585 | 58767.215 | 53861.383 |
| NM_015485 | 6343.781  | 3944.224  | NM_001921 | 22294.092 | 21942.926 | AJ272180  | 2981.828  | 2598.563  |
| AF085992  | 1175.928  | 1252.078  | NM_006230 | 29479.863 | 31922.916 | AK025709  | 2185.884  | 2034.077  |
| NM_002665 | 23986.889 | 23069.621 | NM_014699 | 11719.252 | 9310.124  | NM_019015 | 50562.414 | 48053.707 |
| AF202145  | 7748.836  | 6583.949  | NM_013400 | 32901.563 | 35260.773 | NM_012261 | 22040.365 | 19938.031 |
| AK022412  | 15827.469 | 8502.729  | AK026257  | 4528.075  | 5160.264  | NM_015555 | 11709.385 | 11321.852 |
| AK023073  | 1465.447  | 615.541   | AK023836  | 15997.306 | 7837.232  | NM_006095 | 6256.471  | 6682.552  |
| AK023922  | 1079.841  | 1275.846  | NM_018109 | 6226.607  | 5548.508  | AF272379  | 10930.939 | 10248.927 |
| AK022438  | 2422.518  | 1664.1    | AJ299442  | 10969.308 | 11259.133 | AK022643  | 2028.01   | 2080.182  |
| AK023316  | 525.661   | 464.016   | AB040897  | 681.302   | 805.212   | AB046808  | 3693.106  | 3751.349  |
| AK023764  | 913.447   | 943.633   | NM_000129 | 4200.975  | 5314.348  | AK026265  | 3152.217  | 3442.993  |
| AK024082  | 682.24    | 604.37    | NM_003762 | 12592.922 | 15221.274 | AK027179  | 2034.588  | 2195.517  |
| AK025072  | 7653.7    | 7179.498  | NM_018446 | 7824.286  | 8017.668  | AF015313  | 1050.363  | 1153.816  |
| AK022410  | 1366.674  | 930.477   | NM_000187 | 1789.613  | 2291.938  | NM_006465 | 3366.162  | 2345.564  |
| L10378    | 20692.59  | 21286.186 | NM_014465 | 2802.379  | 3066.827  | NM_005681 | 4444.458  | 3712.926  |
| AK022179  | 2699.898  | 3414.003  | D87292    | 4174.703  | 4495.128  | NM_015155 | 5809.802  | 5483.079  |
| AK022173  | 999.192   | 1094.953  | NM_005495 | 5835.694  | 7625.006  | NM_012384 | 5606.682  | 5031.315  |
| AJ227860  | 2754.045  | 1662.86   | NM_016335 | 9531.437  | 9787.456  | NM_004653 | 8963.851  | 7877.737  |
| AL157448  | 1843.616  | 1963.323  | NM_001202 | 3368.918  | 3741.372  | AF233453  | 7148.472  | 6311.532  |
| AF026942  | 6367.484  | 7265.158  | AB037804  | 884.532   | 739.593   | D87454    | 23266.285 | 15801.535 |
| AJ276429  | 5364.884  | 4551.763  | U34249    | 2028.355  | 2327.213  | NM_007020 | 5971.982  | 5307.494  |
| AL117657  | 848.376   | 776.727   | NM_003289 | 59517.527 | 65070.457 | NM_000713 | 45398.969 | 38723.801 |
| AK023589  | 3171.611  | 2913.789  | AI200114  | 1481.67   | 1915.207  | NM_016055 | 32343.523 | 25041.92  |
| AK021590  | 1361.973  | 1230.647  | M74220    | 968.364   | 993.223   | NM_013291 | 14255.565 | 12978.345 |
| AB002441  | 568.963   | 734.825   | M23254    | 2208.811  | 2548.231  | NM_002935 | 18237.119 | 14886.878 |
| AK023998  | 3201.742  | 2701.513  | BE618539  | 5938.531  | 5745.68   | NM_014161 | 6964.82   | 6114.216  |



|           |           |           |           |           |           |           |           |           |
|-----------|-----------|-----------|-----------|-----------|-----------|-----------|-----------|-----------|
| AK021643  | 1959.002  | 1730.188  | R28062    | 6434.331  | 4907.737  | BF312817  | 11313.991 | 10842.152 |
| Z11802    | 1868.203  | 1424.37   | AI627464  | 1536.87   | 1617.64   | AF284580  | 2125.888  | 2474.823  |
| NM_014054 | 4337.328  | 2159.623  | BI756258  | 3291.064  | 3239.126  | AK024961  | 3060.894  | 2667.438  |
| AK022031  | 2515.735  | 2344.049  | AI342225  | 60118.121 | 64541.629 | NM_01606E | 9724.95   | 6500.223  |
| AF003738  | 561.483   | 506.751   | AA634103  | 60005.246 | 64707.523 | NM_002711 | 1003.202  | 940.8     |
| AF086480  | 2014.938  | 1681.219  | J04599    | 1916.636  | 2342.953  | NM_00019E | 54739.992 | 58579.512 |
| AK022122  | 1424.543  | 1552.088  | AF110020  | 1696.24   | 2714.509  | NM_00377E | 53351.492 | 69272.766 |
| AK026084  | 465.156   | 798.464   | AA608557  | 14786.218 | 17228.07  | NM_001041 | 934.766   | 961.74    |
| AK022415  | 7226.057  | 5340.546  | AL050095  | 19817.652 | 21294.779 | NM_00069E | 1019.567  | 1181.845  |
| AL137368  | 5660.57   | 4648.459  | U03272    | 866.625   | 1152.939  | AK023263  | 3134.8    | 3893.395  |
| AK021932  | 1600.606  | 1233.887  | AF075085  | 63093.957 | 66180.414 | NM_00462E | 3880.058  | 3512.727  |
| AK026787  | 1476.719  | 1248.243  | NM_00589E | 10809.53  | 11799.743 | AK021445  | 4356.504  | 3830.448  |
| AK023542  | 2069.214  | 1932.926  | NM_00647E | 1332.026  | 1800.321  | NM_017934 | 34725.891 | 31700.418 |
| AK000203  | 2897.34   | 1776.291  | AF132734  | 40494.648 | 50499.008 | NM_01416E | 60575.863 | 63054.988 |
| AK021845  | 2993.699  | 3033.327  | NM_01837E | 10469.805 | 9828.52   | AF211971  | 8541.938  | 5587.037  |
| NM_01859E | 9277.276  | 8689.099  | NM_00004E | 7552.881  | 8918.024  | NM_002931 | 5034.074  | 3936.65   |
| NM_01850E | 7471.5    | 7343.448  | AF035787  | 7361.451  | 7312.872  | NM_01344E | 58012.898 | 63547.387 |
| NM_01644E | 11316.004 | 11265.676 | NM_005024 | 688.62    | 1091.612  | X65232    | 46962.016 | 48238.625 |
| AL049670  | 8701.106  | 8433.689  | NM_00340E | 2625.371  | 2427.732  | M33782    | 4479.426  | 4452.434  |
| AK021465  | 1488.815  | 1361.998  | NM_01480E | 9715.438  | 11756.694 | NM_00219E | 1409.234  | 1150.563  |
| NM_01851E | 5960.616  | 5166.866  | AB006627  | 3987.283  | 4966.614  | NM_01775E | 23465.17  | 22533.859 |
| NM_01856E | 724.195   | 576.803   | NM_00041E | 13938.456 | 8175.419  | NM_01841E | 3330.26   | 3616.294  |
| AL161991  | 20297.186 | 9934.7    | NM_00296E | 897.315   | 1092.139  | NM_00460E | 15974.318 | 15668.561 |
| NM_017941 | 2503.08   | 2996.861  | AB007883  | 6355.944  | 5611.195  | D70833    | 63485.473 | 60534.832 |
| BE900527  | 2551.528  | 2609.039  | NM_006391 | 1883.647  | 1407.123  | NM_016621 | 4502.687  | 4185.099  |
| D28384    | 67787.695 | 68748.406 | AK093780  | 30166.234 | 37955.734 | NM_00297E | 6546.572  | 9110.713  |
| AF118079  | 67735.43  | 65862.766 | AY009397  | 60821.668 | 67555.57  | AK023511  | 14938.564 | 17645.139 |
| AL365413  | 2581.133  | 2337.923  | NM_007037 | 59893.266 | 60906.152 | NM_01455E | 11240.117 | 11537.136 |
| NM_00525E | 13139.759 | 12526.14  | NM_00164E | 980.583   | 1200.486  | NM_00161E | 58888.316 | 62542.051 |
| NM_00394E | 1541.043  | 2133.225  | NM_00549E | 5543.926  | 7229.459  | NM_00272E | 4737.612  | 4410.893  |
| AK025062  | 3445.251  | 3083.851  | AF038196  | 5578.332  | 7229.036  | NM_01437E | 57109.215 | 58028.699 |
| Z27405    | 9200.045  | 8544.742  | NM_00485E | 37975.969 | 45076.324 | NM_01781E | 37963.879 | 41336.164 |
| AK023412  | 2679.008  | 3416.636  | NM_01635E | 4538.207  | 5788.98   | AF204173  | 2842.192  | 3353.562  |
| NM_014617 | 67435.352 | 62449.168 | NM_005014 | 3833.131  | 4704.459  | J03260    | 8642.254  | 8717.435  |
| AK074682  | 8738.115  | 8622.771  | NM_006944 | 1049.134  | 1426.748  | U13738    | 3933.889  | 4542.787  |
| X74605    | 1351.248  | 1254.582  | NM_004407 | 1746.2    | 2085.884  | AF068236  | 58571.012 | 63165.707 |
| AK024513  | 1172.923  | 1156.251  | NM_00007E | 10882.634 | 13010.533 | H94487    | 11295.179 | 9949.004  |
| BC036692  | 4708.927  | 5466.106  | NM_003304 | 993.004   | 1073.348  | BG681747  | 42148.051 | 36558.715 |
| AJ009640  | 4374.249  | 5164.459  | NM_00632E | 29370.912 | 15185.433 | H63077    | 3864.462  | 3493.403  |
| Y11163    | 2888.415  | 2818.643  | NM_01646E | 4630.508  | 3452.789  | AA679352  | 10422.398 | 11003.72  |
| AF086391  | 1139.956  | 1002.901  | NM_00149E | 8615.171  | 6534.271  | D45917    | 11204.238 | 14290.44  |
| AF147340  | 880.88    | 1016.045  | NM_00371E | 1071.913  | 1258.239  | BI823872  | 1530.376  | 1444.796  |
| AK025119  | 1408.74   | 809.191   | NM_014841 | 1988.761  | 2078.805  | AA430552  | 19268.898 | 21036.91  |
| NM_00636E | 934.416   | 696.488   | NM_01442E | 18291.076 | 21914.283 | X66142    | 8070.872  | 7560.206  |
| AJ224170  | 11744.46  | 11204.521 | NM_00681E | 56757.23  | 57846.602 | NM_00591E | 2567.152  | 2485.569  |
| AL137389  | 1091.627  | 1259.928  | AK026518  | 53911.738 | 58445.52  | R45054    | 10937.565 | 9945.313  |
| AF085866  | 11648.882 | 11193.68  | NM_00025E | 59056.309 | 60743.836 | NM_003731 | 57948.703 | 61207.277 |
| AK000806  | 13356.706 | 12179.228 | AB033055  | 35591.301 | 44230.762 | NM_00544E | 44369.273 | 50679.957 |
| NM_016471 | 12582.171 | 11807.431 | AF311287  | 29250.189 | 35883.809 | NM_01329E | 35690.684 | 36697.855 |
| Z11852    | 837.748   | 1085.349  | NM_00309E | 5189.507  | 6869.702  | NM_00238E | 5279.23   | 4838.901  |
| NM_001145 | 1666.937  | 1927.829  | NM_014781 | 8266.026  | 9310.724  | NM_00006E | 12517.604 | 10779.369 |
| NM_005364 | 7971.461  | 7801.343  | BU629989  | 4130.921  | 4403.376  | AB023217  | 1309.996  | 1082.483  |
| AK023482  | 12758.519 | 12186.026 | X87896    | 5033.816  | 8066.401  | L08902    | 2977.69   | 2951.056  |

|           |           |           |           |           |           |           |           |           |
|-----------|-----------|-----------|-----------|-----------|-----------|-----------|-----------|-----------|
| AK022798  | 845.43    | 1297.422  | M88310    | 6527.977  | 10194.899 | J02639    | 8928.972  | 8869.028  |
| AL157423  | 916.224   | 1070.109  | D16856    | 677.38    | 1245.434  | M58050    | 10123.571 | 10186.679 |
| AK023115  | 808.678   | 1060.01   | NM_014465 | 3979.109  | 4287.298  | NM_007263 | 22874.719 | 21798.213 |
| AK023176  | 2731.442  | 2871.681  | D87292    | 4924.447  | 5017.909  | AF206020  | 17467.865 | 13461.673 |
| NM_006826 | 31370.363 | 16549.553 | NM_005498 | 2217.66   | 1730.623  | NM_014410 | 12874.525 | 11043.585 |
| AB007973  | 25301.408 | 17355.248 | NM_016335 | 1561.569  | 1117.616  | AF305835  | 578.275   | 899.528   |
| M96843    | 5951.261  | 4506.536  | NM_003165 | 4447.167  | 2416.045  | AB020668  | 13185.29  | 16413.58  |
| NM_017791 | 2011.65   | 2696.306  | NM_003906 | 25987.064 | 17275.461 | NM_006203 | 61050.246 | 60637.059 |
| NM_005882 | 22478.676 | 23867.055 | AL359590  | 54546.914 | 57107.258 | NM_013261 | 3851.174  | 3893.308  |
| BC012304  | 11684.397 | 14259.478 | NM_002861 | 10263.103 | 9299.257  | NM_003558 | 545.075   | 884.708   |
| AB046815  | 6896.483  | 6789.331  | NM_003080 | 5380.498  | 4049.384  | AF309553  | 8808.283  | 8634.684  |
| NM_000440 | 10020.524 | 9943.084  | NM_013268 | 1013.377  | 1251.093  | NM_003605 | 4532.767  | 4677.273  |
| NM_001297 | 12070.918 | 8888.594  | NM_002645 | 8154.323  | 10019.617 | NM_006139 | 3303.164  | 3822.394  |
| NM_004403 | 38004.223 | 28606.104 | AB033027  | 3662.968  | 3616.617  | NM_001900 | 63783.344 | 65223.898 |
| X64993    | 5191.225  | 3777.421  | AK021805  | 33741.539 | 45120.938 | NM_002150 | 16992.547 | 17373.016 |
| NM_004434 | 39673.883 | 29686.18  | AB014550  | 5180.161  | 5505.69   | NM_004595 | 17029.48  | 19158.896 |
| NM_006269 | 1364.142  | 1833.865  | AF320294  | 10540.091 | 12229.689 | NM_020178 | 542.505   | 736.147   |
| NM_016230 | 6535.559  | 9073.477  | AF320293  | 1227.589  | 1328.673  | NM_002264 | 1087.874  | 836.425   |
| NM_001083 | 1170.709  | 1020.797  | AF161436  | 8461.974  | 12232.446 | NM_014754 | 35930.637 | 30380.309 |
| AK023966  | 17329.373 | 19179.178 | NM_020402 | 7792.902  | 10531.086 | D49387    | 3065.52   | 3920.285  |
| AK025702  | 9572.243  | 8049.615  | NM_004299 | 4722.301  | 6552.679  | NM_000116 | 5331.182  | 4628.976  |
| D17064    | 1272.045  | 1427.592  | NM_001171 | 3234.662  | 3348.41   | NM_006698 | 16454.748 | 16899.404 |
| NM_018958 | 1322.29   | 1402.136  | NM_002250 | 19635.234 | 21535.463 | NM_006804 | 38472.672 | 33210.914 |
| AL050200  | 1171.583  | 1105.687  | S81591    | 1342.612  | 1642.3    | AK025641  | 61638.066 | 61460.531 |
| NM_002367 | 1862.282  | 1852.577  | AF075085  | 65664.445 | 75697.93  | AB040457  | 1262.372  | 1645.585  |
| AK022038  | 1683.906  | 1703.456  | NM_005892 | 4143.623  | 2945.953  | AB014514  | 10977.806 | 10653.999 |
| AF253321  | 1293.287  | 973.757   | NM_006478 | 855.628   | 963.562   | NM_002865 | 16505.084 | 17042.574 |
| U80735    | 16119.199 | 17527.027 | AF132734  | 45297.625 | 33262.121 | NM_003566 | 4233.21   | 3484.821  |
| NM_017850 | 5666.698  | 6388.338  | NM_018379 | 6505.827  | 3324.633  | NM_004249 | 413.589   | 337.385   |
| NM_016522 | 1609.249  | 1349.666  | NM_016403 | 23003.146 | 18190.594 | NM_007159 | 63684.797 | 59417.422 |
| NM_002224 | 27445.896 | 24239.701 | NM_015603 | 1818.058  | 1358.469  | NM_018390 | 3399.114  | 3309.24   |
| X07979    | 29982.027 | 29511.174 | NM_001921 | 13479.74  | 12489.403 | AB037724  | 19330.168 | 18720.318 |
| NM_003874 | 3134.653  | 2873.538  | NM_006230 | 16595.531 | 16354.423 | AK025086  | 4474.851  | 4618.564  |
| NM_000082 | 2412.466  | 2111.951  | NM_014699 | 10375.717 | 9501.612  | AK026151  | 22209.043 | 14367.61  |
| L13857    | 3879.493  | 2987.932  | NM_013400 | 19255.689 | 17200.102 | NM_014140 | 1863.502  | 1690.974  |
| NM_018098 | 7702.769  | 8112.772  | AK026257  | 3043.4    | 3272.614  | NM_002916 | 7020.498  | 8584.43   |
| AF286164  | 1658.219  | 2327.245  | AK023836  | 22988.574 | 26249.305 | M20700    | 10572.912 | 9845.354  |
| AF146277  | 9930.659  | 12444.743 | NM_018109 | 7016.212  | 8821.759  | NM_001034 | 13220.237 | 11502.141 |
| NM_002559 | 1796.498  | 2593.38   | AJ299442  | 12700.624 | 17786.807 | NM_002689 | 4775.901  | 4782.148  |
| AF055033  | 788.161   | 935.045   | AB040897  | 1130.92   | 1914.145  | NM_017686 | 2433.856  | 2684.251  |
| NM_017700 | 1945.337  | 2318.223  | NM_000129 | 5027.36   | 6517.769  | AL096734  | 2049.106  | 2086.282  |
| M37191    | 12451.032 | 12618.791 | NM_002156 | 83.976    | 5183.934  | AK000800  | 3874.371  | 4166.941  |
| J04422    | 952.571   | 781.157   | NM_003762 | 13471.393 | 20764.367 | NM_018154 | 8132.304  | 8288.948  |
| NM_005242 | 1725.64   | 1788.273  | NM_018446 | 8684.411  | 10363.227 | NM_005358 | 844.815   | 1322.11   |
| NM_003020 | 1689.412  | 1784.696  | NM_000187 | 1923.886  | 3076.493  | BC006287  | 6859.463  | 7082.261  |
| NM_003404 | 53061.777 | 55289.289 | CY3Cy5    | 1018.074  | 76.694    | AB023198  | 9279.243  | 9536.511  |
| NM_001114 | 3403.805  | 3819.495  | NM_017532 | 8341.452  | 7843.264  | NM_005231 | 11721.522 | 12987.945 |
| NM_004455 | 988.233   | 556.328   | AF086184  | 39319.535 | 31442.496 | AF064729  | 4133.244  | 4109.525  |
| NM_006010 | 28445.275 | 18199.242 | NM_018275 | 25159.984 | 20211.086 | NM_005412 | 29649.191 | 30600.129 |
| K03191    | 8814.118  | 7498.991  | AL049266  | 12152.218 | 6857.45   | NM_012113 | 3242.694  | 4107.532  |
| NM_005079 | 58231.102 | 57960.969 | AK021560  | 1692.261  | 1385.805  | NM_014556 | 10288.358 | 10279.966 |
| NM_005192 | 55172.883 | 57472.941 | AF088045  | 2294.978  | 1671.97   | NM_001615 | 60355.578 | 67442.039 |
| NM_004585 | 3033.615  | 3081.024  | AF007149  | 3295.482  | 2056.199  | NM_002725 | 3818.449  | 3852.352  |

|           |           |           |           |           |           |           |           |           |
|-----------|-----------|-----------|-----------|-----------|-----------|-----------|-----------|-----------|
| NM_015032 | 5424.342  | 4538.325  | NM_014705 | 1240.609  | 1281.748  | NM_014375 | 57317.07  | 59612.367 |
| AK022956  | 12605.41  | 16947.299 | AK001469  | 8451.485  | 7753.449  | NM_017812 | 30845.957 | 27809.816 |
| AK023121  | 3393.047  | 2826.187  | AF035318  | 1573.455  | 1191.78   | AF204173  | 2810.7    | 2687.881  |
| NM_014104 | 34600.859 | 29458.283 | NM_015456 | 11913.441 | 8363.577  | J03260    | 8832.542  | 8168.953  |
| NM_002392 | 3206.933  | 3148.701  | AK025056  | 5459.437  | 3016.947  | U13738    | 3643.812  | 4128.591  |
| NM_002749 | 37602.734 | 44032.207 | AF140710  | 10277.881 | 7090.9    | AF068236  | 60261.961 | 61887.434 |
| NM_018216 | 20727.553 | 20231.613 | NM_017532 | 5850.047  | 4438.051  | H94487    | 12503.763 | 14371.149 |
| NM_003390 | 10466.145 | 10084.174 | SR2       | 75274.484 | 62980.34  | BG681747  | 52693.594 | 51433.391 |
| AL137747  | 4850.425  | 5528.301  | SR4       | 24194.455 | 21837.814 | H63077    | 3962.179  | 3867.021  |
| AF077188  | 28538.457 | 30763.072 | SR6       | 3193.397  | 3619.297  | AA679352  | 14028.5   | 12461.892 |
| NM_012446 | 10219.605 | 12060.484 | SR8       | 11493.381 | 30110.178 | AA437291  | 4059.495  | 4332.197  |
| NM_018338 | 1304.658  | 1532.284  | SR10      | 42070.332 | 14697.312 | X04503    | 5394.497  | 5710.786  |
| NM_006984 | 1288.696  | 1154.812  | CY3Cy5    | 984.271   | 128.514   | D45917    | 11041.711 | 11609.876 |
| AF231919  | 7093.59   | 8616.636  | AL157477  | 5716.397  | 3537.753  | X52001    | 16433.26  | 17451.551 |
| NM_018214 | 2324.13   | 2745.019  | AB002318  | 3535.042  | 1901.676  | X66142    | 10005.651 | 12083.434 |
| Y11718    | 1061.109  | 857.294   | AL357535  | 5221.18   | 3714.709  | NM_005913 | 3855.945  | 5491.829  |
| NM_005076 | 3104.035  | 3309.662  | AL049951  | 3712.283  | 1803.875  | R45054    | 10828.66  | 10774.374 |
| NM_019023 | 31619.348 | 22693.287 | AK024963  | 2152.312  | 1416.314  | AL117398  | 5564.982  | 5514.968  |
| NM_004420 | 2327.123  | 1564.291  | AK023725  | 2418.437  | 1682.864  | AY007158  | 58821.203 | 64111.836 |
| NM_002970 | 1209.962  | 1337.59   | AK022936  | 17601.502 | 11978.693 | NM_001720 | 8229.561  | 9433.77   |
| NM_005499 | 56163.813 | 55315.102 | AK024385  | 6989.423  | 4438.318  | NM_013292 | 30318.922 | 30241.666 |
| NM_013270 | 2268.642  | 2405.507  | AL137727  | 5795.839  | 3013.413  | NM_002387 | 4831.09   | 4503.107  |
| NM_000506 | 668.216   | 611.24    | L17327    | 2043.422  | 1705.525  | NM_000069 | 11645.047 | 11751.42  |
| NM_015387 | 9794.604  | 7781.661  | AF074986  | 1623.659  | 1170.355  | AB023217  | 1281.883  | 1357.983  |
| NM_001733 | 5505.851  | 5412.66   | AL049240  | 9605.518  | 4903.687  | L08902    | 3052.382  | 2377.485  |
| NM_005065 | 3128.065  | 3986.613  | U80773    | 2497.036  | 1300.818  | J02639    | 9517.417  | 7524.466  |
| NM_017825 | 49495.285 | 48904.129 | AK021745  | 3833.12   | 1916.307  | M58050    | 9572.257  | 9545.12   |
| NM_014035 | 2865.892  | 3369.888  | L38937    | 8759.114  | 4302.446  | NM_007263 | 18621.881 | 17801.09  |
| NM_013432 | 21898.287 | 20339.129 | U90907    | 667.614   | 565.73    | AF206020  | 16466.664 | 16216.102 |
| AB020716  | 3227.155  | 3630.238  | AK024327  | 2463.867  | 1607.921  | NM_014410 | 15817.769 | 13578.663 |
| AK027130  | 4187.327  | 4079.385  | AK024395  | 681.86    | 486.681   | AF305835  | 610.931   | 552.683   |
| NM_005479 | 61715.203 | 59822.059 | AF147327  | 898.654   | 1565.357  | AF312769  | 4684.439  | 4392.019  |
| NM_005730 | 48775.711 | 52828.043 | AK000801  | 14911.05  | 8141.383  | AB020668  | 13322.131 | 14264.94  |
| X82240    | 36072.375 | 40055.391 | D85433    | 7554.537  | 4058.484  | NM_006203 | 61065.691 | 59605.934 |
| NM_013995 | 20520.139 | 20964.584 | AK025109  | 8435.664  | 4345.416  | NM_013261 | 4553.024  | 5629.388  |
| BC021298  | 1744.99   | 1012.571  | AK026057  | 4149.442  | 2123.787  | NM_003558 | 1400.675  | 1631.658  |
| U52096    | 11751.651 | 8473.017  | AK025167  | 1140.046  | 543.915   | AF309553  | 10322.142 | 12933.535 |
| AB013897  | 4817.215  | 4417.242  | AK026713  | 953.368   | 623.634   | NM_003605 | 4653.577  | 5034.345  |
| NM_005526 | 45407.238 | 45451.293 | AK021627  | 4701.522  | 2716.544  | NM_006139 | 2076.637  | 2817.952  |
| AK001669  | 4947.237  | 4427.21   | AF085859  | 2393.92   | 1459.577  | NM_001900 | 62335.355 | 64052.621 |
| NM_006195 | 2735.912  | 2874.132  | AK026307  | 1015.566  | 700.8     | NM_003993 | 8217.531  | 8582.672  |
| NM_006190 | 51460.824 | 48483.199 | AF075047  | 1038.227  | 519.507   | NM_002975 | 4964.609  | 5013.413  |
| NM_006368 | 5163.088  | 4790.678  | AL049975  | 1368.498  | 885.82    | AK023511  | 18171.316 | 15988.777 |
| NM_004133 | 850.512   | 703.745   | AL080067  | 2201.952  | 1225.286  | NM_002264 | 1677.01   | 1618.868  |
| NM_001618 | 15057.872 | 15019.967 | AL117464  | 5716.932  | 3763.563  | NM_014754 | 39983.086 | 43364.367 |
| NM_003658 | 791.804   | 1301.842  | AL080160  | 1832.978  | 1452.913  | D49387    | 2155.234  | 1868.525  |
| BC000401  | 32548.852 | 37339.43  | L23849    | 1400.018  | 904.885   | AF050146  | 20978.627 | 16339.379 |
| NM_006425 | 12101.115 | 14042.28  | AL049997  | 31393.973 | 16593.877 | NM_000116 | 5715.552  | 4887.77   |
| BF344046  | 6207.431  | 7188.091  | AK024118  | 2975.277  | 1453.583  | NM_006698 | 16832.416 | 17169.268 |
| AF432218  | 56395.91  | 58724.008 | X89657    | 854.087   | 463.598   | NM_006804 | 37819.621 | 38082.277 |
| NM_004286 | 20938.932 | 22231.789 | AK024509  | 2395.336  | 1367.509  | NM_001133 | 685.395   | 1361.862  |
| AL133644  | 17040.227 | 17166.396 | NM_017709 | 1686.044  | 1196.852  | AK025641  | 61626.508 | 61578.223 |
| NM_002706 | 9289.187  | 10188.874 | AF049615  | 1606.702  | 1212.886  | AB040457  | 593.078   | 703.536   |

|           |           |           |           |           |           |           |           |           |
|-----------|-----------|-----------|-----------|-----------|-----------|-----------|-----------|-----------|
| NM_004199 | 1545.731  | 1435.851  | NM_014358 | 54224.492 | 32336.756 | AB014514  | 10496.631 | 11673.594 |
| NM_006876 | 3590.86   | 3160.036  | AF009282  | 13853.869 | 7111.306  | NM_002865 | 18885.02  | 23834.391 |
| NM_000293 | 3701.158  | 3073.075  | AF024704  | 13787.101 | 7781.357  | NM_003566 | 5228.443  | 4364.525  |
| NM_003748 | 4043.577  | 5303.173  | AF056431  | 1137.027  | 725.228   | AK026315  | 597.356   | 925.96    |
| NM_005398 | 638.385   | 889.664   | NM_016412 | 2884.313  | 1657.544  | NM_007159 | 60866.074 | 59391.129 |
| NM_012269 | 2232.031  | 1823.912  | AF009293  | 2418.551  | 1122.389  | NM_003731 | 40869.078 | 41871.977 |
| AF153821  | 1951.539  | 1706.266  | NM_004158 | 61240.355 | 60730.395 | NM_005446 | 55469.711 | 52543.922 |
| NM_013370 | 5333.98   | 5685.678  | AF056444  | 20711.131 | 10811.26  | NM_002916 | 4967.858  | 4537.836  |
| NM_001374 | 1998.552  | 1256.346  | AK000989  | 6041.043  | 3177.146  | M20700    | 7920.381  | 6102.271  |
| NM_003310 | 10146.382 | 7545.077  | NM_018065 | 1215.234  | 836.417   | NM_001034 | 11742.229 | 11199.394 |
| AK024461  | 9055.542  | 6926.171  | AK002210  | 13796.304 | 8268.714  | NM_002689 | 5010.5    | 6876.521  |
| AK025485  | 3959.439  | 2834.777  | AK021677  | 5595.423  | 3984.309  | NM_017686 | 1291.515  | 1380.326  |
| NM_017635 | 9353.347  | 9552.098  | AK001057  | 1911.564  | 1304.445  | AL096734  | 846.289   | 965.496   |
| X62534    | 5102.888  | 6127.596  | AK021471  | 1992.734  | 1187.401  | AK000800  | 4092.729  | 4303.618  |
| AF027147  | 55317.242 | 53837.246 | AK021709  | 1910.377  | 1070.145  | NM_018154 | 9003.343  | 9044.2    |
| M62399    | 14659.555 | 14643.737 | AL359563  | 3839.309  | 2454.635  | NM_005358 | 593.734   | 816.143   |
| NM_002357 | 2863.253  | 2923.865  | NM_005304 | 814.629   | 402.192   | BC006287  | 4659.421  | 5850.128  |
| U71600    | 7680.561  | 8749.42   | NM_014477 | 4334.344  | 2315.082  | AB023198  | 8168.29   | 9058.625  |
| NM_004472 | 2552.966  | 3058.621  | AF086478  | 5929.425  | 3928.902  | AF304163  | 9182.035  | 10088.933 |
| AB037862  | 4268.257  | 5866.472  | AF086022  | 1352.159  | 1017.892  | NM_005231 | 10555.366 | 13307.463 |
| NM_005392 | 4006.833  | 4819.837  | AK021514  | 66281.469 | 59572.434 | AF064729  | 4086.023  | 4053.642  |
| AL133572  | 19596.656 | 19660.477 | AJ008134  | 8862.938  | 4964.076  | NM_005412 | 30272.018 | 32763.523 |
| AK022500  | 10949.274 | 12429.225 | S71486    | 6232.667  | 2965.111  | NM_012113 | 3218.835  | 3581.491  |
| NM_003447 | 1987.62   | 1791.984  | L33808    | 31787.438 | 14315.153 | NM_002150 | 17489.615 | 16600.16  |
| NM_005014 | 4672.904  | 4151.2    | AJ008117  | 23963.234 | 10904.306 | NM_004595 | 19414.555 | 28460.863 |
| NM_006944 | 785.617   | 1024.657  | AJ008147  | 59888.172 | 51276.895 | NM_002725 | 4649.682  | 5479.888  |
| NM_004407 | 1951.532  | 2764.423  | AK024369  | 2271.578  | 1258.611  | J03260    | 6724.826  | 6565.979  |
| NM_000070 | 2083.71   | 2433.588  | AL049244  | 489.123   | 241.789   | U13738    | 3114.742  | 3416.578  |
| NM_001202 | 3527.216  | 4269.039  | L43345    | 3249.834  | 1839.431  | AF068236  | 56391.781 | 61659.734 |
| AB037804  | 750.595   | 997.378   | AF180297  | 12001.215 | 5935.81   | H94487    | 9226.558  | 12041.383 |
| U34249    | 1402.047  | 1404.055  | AK023245  | 1908.444  | 1162.777  | BG681747  | 38688.109 | 41720.535 |
| NM_003289 | 59030.363 | 56636.246 | AF147303  | 612.315   | 414.641   | H63077    | 3646.637  | 3922.196  |
| M74220    | 929.555   | 692.71    | AF086224  | 851.345   | 738.008   | AA679352  | 13216.024 | 14407.281 |
| M23254    | 1770.53   | 1746.329  | S56365    | 60716.801 | 55302.781 | AA437291  | 4238.86   | 5798.979  |
| BE618539  | 3150.122  | 3232.114  | AF186017  | 614.58    | 496.702   | X04503    | 5696.3    | 5535.918  |
| R28062    | 10035.43  | 8794.729  | AK023607  | 2372.895  | 1289.803  | D45917    | 8049.931  | 8491.391  |
| U38545    | 466.03    | 624.917   | AK026874  | 2765.112  | 1220.676  | X52001    | 13046.522 | 15246.226 |
| AI627464  | 3900.241  | 5461.028  | AK024178  | 1535.955  | 866.711   | BI823872  | 1192.93   | 1501.667  |
| BI756258  | 7475.937  | 9329.863  | D17217    | 1948.288  | 1554.486  | AA430552  | 15348.123 | 17730.998 |
| AI342225  | 59739.129 | 59151.055 | AF088033  | 5655.763  | 3002.365  | X66142    | 6587.816  | 7078.783  |
| AA634103  | 57432.266 | 60697.547 | NM_020422 | 9333.476  | 4784.307  | NM_005913 | 2563.878  | 3112.717  |
| J04599    | 2771.137  | 2565.837  | AJ227897  | 831.307   | 450.894   | R45054    | 11940.294 | 12926.954 |
| AF110020  | 1229.21   | 1009.743  | AK023628  | 1479.459  | 1186.502  | AL117398  | 5905.385  | 6674.766  |
| AA707922  | 773.905   | 1229.812  | AY007156  | 2774.975  | 1459.477  | AY007158  | 55436.559 | 63278.848 |
| AA608557  | 26370.803 | 26909.877 | AF086408  | 65428.785 | 58634.555 | NM_001720 | 10183.665 | 9376.006  |
| AL050095  | 6426.556  | 5776.836  | AK023979  | 6950.17   | 3796.684  | NM_018390 | 3914.829  | 4312.284  |
| U03272    | 1483.769  | 1305.825  | NM_017847 | 2982.88   | 1763.347  | NM_007263 | 19308.51  | 24329.816 |
| NM_012253 | 26638.105 | 28551.617 | AL049675  | 4441.851  | 2445.165  | AF206020  | 8742.388  | 9090.427  |
| NM_000258 | 58484.223 | 54210.902 | AL050151  | 1694.027  | 1028.396  | AF312769  | 2655.449  | 2524.005  |
| AB033055  | 31722.635 | 27303.311 | NM_003537 | 47172.367 | 24048.15  | AB020668  | 8134.648  | 8727.687  |
| AF311287  | 16683.754 | 14910.07  | AF056419  | 42703.43  | 30211.479 | NM_006203 | 58788.199 | 55407.965 |
| NM_003098 | 6038.674  | 7657.456  | AF074983  | 2228.652  | 1498.844  | NM_013261 | 2824.663  | 2915.907  |
| NM_014781 | 10552.952 | 11088.924 | AK021862  | 1207.246  | 723.053   | AF309553  | 7108.515  | 7067.658  |

|           |           |           |           |           |           |           |           |           |
|-----------|-----------|-----------|-----------|-----------|-----------|-----------|-----------|-----------|
| BU629989  | 2511.157  | 2104.769  | AK024177  | 5879.914  | 4466.532  | NM_00360E | 5255.384  | 3941.768  |
| X87896    | 4898.639  | 6291.666  | AK024827  | 18591.111 | 11418.839 | NM_00613E | 1662.021  | 2017.661  |
| M88310    | 9142.854  | 9660.424  | AK021952  | 1096.002  | 716.571   | NM_00010C | 45903.906 | 46154.293 |
| D16856    | 868.464   | 713.421   | K01564    | 3418.338  | 2533.253  | NM_00190C | 60315.316 | 65125.379 |
| NM_00004E | 6165.895  | 6134.765  | AB023175  | 2815.148  | 1930.571  | NM_00399E | 6301.568  | 7660.976  |
| AF035787  | 5860.487  | 5722.079  | NM_000737 | 7031.071  | 3182.757  | NM_01896I | 4831.561  | 5824.66   |
| NM_005024 | 815.24    | 1052.621  | NM_00083E | 12386.498 | 5874.344  | NM_00558E | 7521.039  | 8589.578  |
| NM_00340E | 3618.037  | 3200.988  | AK024102  | 34037.781 | 19015.953 | NM_01224E | 2398.38   | 2549.064  |
| NM_01480E | 12595.704 | 16974.225 | NM_00129C | 1704.687  | 1285.176  | NM_00689E | 2728.875  | 2792.617  |
| AB006627  | 1760.33   | 2368.338  | AL079273  | 9889.448  | 5799.203  | NM_00113C | 59777.352 | 58997.93  |
| NM_00041E | 18333.869 | 19695.08  | NM_00504E | 893.875   | 932.709   | NM_00297E | 5314.444  | 5425.486  |
| NM_00338E | 1039.153  | 1366.198  | AK026129  | 3337.761  | 2173.279  | AK023511  | 15929.021 | 14998.148 |
| NM_00296E | 1518.736  | 2155.156  | NM_00174E | 60084.863 | 54034.734 | NM_01455E | 10947.138 | 10339.258 |
| AB007883  | 6354.931  | 6161.66   | NM_00371E | 16213.084 | 10056.452 | NM_00161E | 58965.535 | 57655.348 |
| NM_00383E | 794.946   | 962.275   | D31886    | 8420.493  | 4301.621  | AB014514  | 7781.355  | 10623.356 |
| NM_006391 | 1695.588  | 3446.932  | U92024    | 838.163   | 625.566   | NM_00286E | 14120.945 | 17024.316 |
| AY009397  | 55350.367 | 53905.129 | AK023330  | 10039.599 | 7291.374  | NM_00548E | 785.946   | 1080.912  |
| NM_007037 | 13606.44  | 13808.881 | AF075071  | 4891.158  | 2870.664  | NM_00356E | 4644.02   | 3362.327  |
| NM_01633E | 1893.578  | 1030.326  | AF001892  | 769.552   | 893.394   | NM_00715E | 60385.965 | 58718.008 |
| NM_00316E | 8794.524  | 7152.565  | X93500    | 3980.944  | 3779.94   | NM_00373I | 55624.402 | 52000.754 |
| NM_00390E | 15388.868 | 17612.008 | AK026597  | 1329.747  | 1181.262  | NM_00544E | 55578.191 | 50734.227 |
| AL359590  | 59843.039 | 61165.266 | U79271    | 4630.997  | 4703.338  | NM_01329E | 44126.422 | 42281.699 |
| NM_00286I | 17964.822 | 17724.922 | NM_01988E | 2379.381  | 2818.438  | NM_002387 | 5597.694  | 5217.95   |
| NM_00308C | 5332.602  | 4410.091  | AK024609  | 12827.499 | 12642.241 | NM_00006E | 10804.268 | 11987.86  |
| NM_00404E | 926.539   | 757.212   | AK023660  | 872.253   | 1042.726  | AB023217  | 1491.744  | 1586.067  |
| NM_01326E | 1673.986  | 1513.09   | NM_01812C | 26949.1   | 25187.137 | L08902    | 3063.399  | 4038.459  |
| NM_00264E | 8788.218  | 7800.141  | NM_015991 | 1922.781  | 1594.807  | J02639    | 9691.203  | 12198.275 |
| AB033027  | 2571.842  | 2489.761  | NM_00556E | 1251.311  | 1082.156  | M58050    | 9192.354  | 10789.229 |
| AF320293  | 673.403   | 576.259   | NM_00493E | 5317.277  | 3937.552  | NM_02017E | 1692.031  | 2127.857  |
| NM_001171 | 1583.878  | 1610.803  | NM_00523E | 2067.999  | 1884.347  | NM_002264 | 2169.556  | 2352.35   |
| S81591    | 2443.549  | 2598.484  | NM_006654 | 1359.644  | 1769.061  | NM_014754 | 44854.465 | 56186.668 |
| NM_00632E | 37972.605 | 42470.719 | NM_00316E | 1880.536  | 2212.274  | D49387    | 2151.086  | 2710.102  |
| NM_01646E | 8074.07   | 8252.655  | NM_00039E | 6672.3    | 6632.013  | AF050146  | 19564.875 | 19079.674 |
| NM_00149E | 11910.812 | 11222.823 | NM_00326E | 1524.756  | 1715.756  | NM_00011E | 4773.755  | 4632.127  |
| NM_00371E | 1869.011  | 2917.246  | NM_00235C | 12315.348 | 10607.09  | NM_00669E | 15369.614 | 14736.95  |
| NM_014841 | 2510.232  | 3485.88   | NM_012417 | 4322.002  | 3374.492  | NM_006804 | 43399.277 | 42931.762 |
| NM_01442E | 27616.291 | 34675.816 | NM_00254E | 1950.134  | 2019.986  | NM_01596E | 19316.445 | 18715.135 |
| NM_00681E | 33764.551 | 36691.137 | NM_00296E | 828.146   | 764.195   | NM_00305I | 13009.494 | 11027.283 |
| AK026518  | 63010.863 | 60966.43  | BF246606  | 709.832   | 673.498   | NM_14534E | 18149.098 | 18119.641 |
| AF132734  | 46268.395 | 31365.463 | NM_01428E | 1439.244  | 1310.923  | AJ278917  | 59642.586 | 57136.418 |
| NM_01837E | 10813.205 | 6854.546  | NM_00234E | 1360.18   | 1641.821  | AK025641  | 59942.93  | 59816.305 |
| NM_01640E | 23590.359 | 19299.963 | D13631    | 5009.799  | 4381.135  | NM_00103E | 1104.998  | 845.93    |
| NM_01560E | 2698.849  | 2565.176  | NM_00371E | 6492.46   | 5530.571  | AB037724  | 18710.795 | 22502.395 |
| AK021788  | 1676.99   | 1830.112  | NM_002184 | 2399.631  | 2954.118  | AK025086  | 3925.271  | 5079.434  |
| NM_001921 | 19646.248 | 23470.877 | NM_01488E | 8262.941  | 8670.994  | AK026151  | 16085.688 | 14607.136 |
| NM_00623C | 30306.721 | 28013.529 | NM_01780E | 9649.735  | 9669.639  | NM_01414C | 1686.665  | 2038.659  |
| NM_01469E | 6851.443  | 5604.724  | M86841    | 1431.653  | 1826.652  | NM_00291E | 4717.031  | 5363.631  |
| NM_01340C | 32252.123 | 28420.416 | U56387    | 1671.725  | 2366.948  | M20700    | 9502.727  | 9440.912  |
| AK026257  | 4203.172  | 3020.231  | AL049296  | 6392.379  | 6391.531  | NM_001034 | 11839.659 | 10867.698 |
| AK023836  | 15690.585 | 12837.92  | NM_014471 | 63674.625 | 62175.023 | NM_00268E | 3848.06   | 3903.485  |
| NM_01810E | 8179.365  | 9193.855  | NM_004397 | 3194.146  | 2751.503  | NM_01768E | 1294.812  | 1261.173  |
| AJ299442  | 15411.237 | 18149.525 | NM_00318E | 983.211   | 1650.376  | AL096734  | 944.116   | 1133.278  |
| AB040897  | 1322.114  | 1371.526  | NM_02023E | 11108.223 | 8094.484  | AK000800  | 3535.08   | 3830.03   |

|           |           |           |           |           |           |           |           |           |
|-----------|-----------|-----------|-----------|-----------|-----------|-----------|-----------|-----------|
| NM_000129 | 5413.802  | 5551.009  | D49356    | 1322.412  | 2041.043  | NM_018154 | 7533.744  | 7341.602  |
| NM_003762 | 20934.994 | 21502.189 | AJ250475  | 3958.217  | 4191.606  | NM_005358 | 780.799   | 644.45    |
| NM_018446 | 11707.862 | 14583.974 | NM_000800 | 5472.16   | 5715.309  | BC006287  | 6732.835  | 8324.051  |
| NM_000187 | 2218.805  | 2960.116  | NM_018579 | 5145.627  | 4390.895  | AB023198  | 8364.666  | 8668.612  |
| NM_014465 | 3483.997  | 4433.008  | NM_006201 | 4786.951  | 4159.699  | AF304163  | 9364.936  | 7831.576  |
| D87292    | 4689.937  | 4980.035  | NM_007110 | 3057.953  | 2385.207  | NM_005231 | 12346.402 | 10563.476 |
| NM_005498 | 2054.545  | 1685.437  | NM_001255 | 17871.828 | 16212.228 | AF064729  | 4536.417  | 3284.044  |
| NM_004407 | 1223.04   | 951.042   | U50383    | 37205.578 | 34608.707 | NM_005412 | 31625.381 | 26919.654 |
| NM_000070 | 2105.644  | 1606.02   | AK025085  | 12774.011 | 9813.552  | AF088031  | 1118.787  | 971.988   |
| NM_001202 | 3402.762  | 3070.39   | NM_016317 | 745.607   | 874.101   | AK002025  | 74338.063 | 62944.07  |
| AB037804  | 779.256   | 602.69    | NM_006290 | 18367.389 | 11605.916 | AK026299  | 2781.495  | 2279.897  |
| U34249    | 1527.339  | 1292.644  | AK022290  | 1502.552  | 1820.285  | NM_017794 | 2262.12   | 1933.891  |
| NM_003288 | 55373.422 | 57677.559 | NM_003680 | 40250.082 | 43805.879 | AK025170  | 3512.308  | 2851.107  |
| AI200114  | 534.626   | 456.976   | AF118124  | 23584.41  | 22376.617 | AK025697  | 8443.061  | 5472.813  |
| M74220    | 1057.889  | 1037.379  | NM_004849 | 25400.219 | 26663.207 | AK021734  | 3835.147  | 2618.239  |
| M23254    | 2103.135  | 2440.458  | AL137527  | 24954.979 | 28251.221 | NM_021976 | 3377.649  | 1994.958  |
| BE618539  | 3363.676  | 2785.333  | AK026068  | 1841.454  | 1806.648  | SR2       | 38881.184 | 30880.518 |
| R28062    | 9649.731  | 7911.562  | AK024186  | 354.604   | 616.72    | SR8       | 5080.207  | 9460.126  |
| U38545    | 437.868   | 501.342   | J04974    | 40909.34  | 47486.695 | SR10      | 17229.805 | 3709.101  |
| AI627464  | 3387.808  | 4408.916  | NM_017675 | 4597.117  | 4735.527  | AK026802  | 1831.313  | 1538.797  |
| BI756258  | 5726.364  | 6466.737  | NM_007014 | 4310.927  | 3966.252  | NM_014948 | 3515.176  | 3007.266  |
| AI342225  | 59165.414 | 57638.039 | AL096740  | 1909.655  | 2039.459  | AL080221  | 1963.659  | 1425.357  |
| AA634103  | 56596.359 | 61863.027 | AF191545  | 1660.602  | 1574.996  | AK026591  | 1301.926  | 961.558   |
| J04599    | 2333.953  | 2235.828  | NM_014554 | 10159.024 | 8671.022  | AK001889  | 2640.492  | 1879.292  |
| AF110020  | 1422.218  | 1658.094  | AL137484  | 4101.724  | 4044.691  | AK025726  | 8404.415  | 6171.997  |
| AA707922  | 548.249   | 809.863   | AK023968  | 4540.175  | 6624.714  | AJ227869  | 3593.693  | 2349.514  |
| AA608557  | 24719.535 | 25881.949 | NM_004652 | 2437.309  | 2588.699  | AL117613  | 8961.67   | 5804.475  |
| AL050095  | 5458.037  | 5907.662  | NM_000353 | 1026.857  | 796.44    | AL137753  | 7877.374  | 5897.402  |
| U03272    | 1229.671  | 1622.439  | AK025425  | 60519.539 | 55222.914 | AK021785  | 604.488   | 553.351   |
| AF075085  | 58038.398 | 63731.984 | AK025974  | 44749.027 | 45864.688 | AL110262  | 21753.193 | 10898.079 |
| NM_005892 | 6896.885  | 7767.671  | NM_016532 | 7609.5    | 7237.52   | AK025627  | 22228.59  | 13311.941 |
| NM_006478 | 1354.797  | 1479.772  | X98115    | 4252.117  | 4265.276  | AK025191  | 1555.807  | 1423.173  |
| AF311287  | 14842.361 | 10738.252 | NM_005781 | 10811.349 | 9793.563  | AK026816  | 1979.827  | 2247.13   |
| NM_003098 | 5450.583  | 4953.85   | BC036740  | 33994.375 | 35849.832 | AB033031  | 2859.746  | 2246.446  |
| NM_014781 | 10525.785 | 10603.229 | NM_001747 | 10089.174 | 11086.701 | AF085872  | 18137.566 | 13880.261 |
| BU629989  | 2526.806  | 2160.089  | NM_001148 | 38435.598 | 29866.484 | AK022538  | 53406.395 | 42987.359 |
| X87896    | 4831.587  | 6042.759  | AF242522  | 28493.051 | 29184.959 | AK022342  | 1595.276  | 1457.435  |
| M88310    | 10091.562 | 11759.201 | AJ008152  | 14851.807 | 17882.131 | AF147420  | 4311.01   | 3184.43   |
| D16856    | 951.658   | 950.351   | NM_003657 | 4633.87   | 4874.982  | AL049312  | 3599.79   | 2840.569  |
| NM_000042 | 6652.631  | 6639.272  | NM_000588 | 1127.426  | 1758.93   | AL050072  | 8217.641  | 6227.929  |
| AF035787  | 4836.404  | 3944.799  | S67970    | 1768.478  | 1949.626  | AL117590  | 1665.072  | 1294.318  |
| NM_005024 | 536.078   | 728.168   | AF221520  | 7809.151  | 6446.107  | AL049357  | 19013.555 | 10476.318 |
| NM_003403 | 3505.859  | 3302.923  | NM_006941 | 61094.125 | 59367.855 | AL050129  | 488.682   | 395.877   |
| NM_014808 | 10729.148 | 15059.275 | AB037852  | 1957.771  | 1681.81   | AK027180  | 4770.109  | 2459.031  |
| AB006627  | 1766.597  | 2355.61   | NM_005360 | 4330.173  | 4222.273  | AK022236  | 9732.358  | 10802.928 |
| NM_000416 | 16303.51  | 18194.49  | NM_004349 | 9721.049  | 8668.985  | AL390180  | 2386.455  | 3246.026  |
| NM_003382 | 698.817   | 704.724   | NM_002092 | 31255.359 | 35229.328 | AK025154  | 2218.962  | 2449.669  |
| NM_002965 | 1459.412  | 2040.963  | NM_018077 | 8488.815  | 8890.127  | AF009262  | 22625.957 | 18390.09  |
| AB007883  | 6208.715  | 5124.19   | NM_016839 | 46653.941 | 48842.336 | AF009306  | 1926.786  | 1945.305  |
| NM_006391 | 1321.634  | 3316.283  | NM_005968 | 56401.379 | 59191.125 | AF050198  | 2158.429  | 1996.862  |
| AY009397  | 54577.031 | 52871.051 | AK021416  | 2373.328  | 2901.585  | AK024346  | 5310.321  | 4382.972  |
| NM_007037 | 13026.756 | 12993.033 | NM_018471 | 24147.576 | 23116.188 | AF056422  | 2388.899  | 1718.786  |
| NM_005014 | 5342.423  | 6451.641  | NM_003819 | 27495.229 | 23597.02  | AF090892  | 572.843   | 500.898   |

|           |           |           |             |           |           |           |           |           |
|-----------|-----------|-----------|-------------|-----------|-----------|-----------|-----------|-----------|
| NM_006944 | 1002.421  | 1013.493  | NM_006560   | 12810.224 | 10569.618 | AK001089  | 2218.946  | 1894.251  |
| NM_003165 | 7620.669  | 5805.254  | NM_016183   | 14381.425 | 12095.363 | AK001919  | 847.803   | 726.214   |
| NM_003906 | 11046.756 | 6450.015  | NM_004872   | 14558.996 | 10659.074 | AK021535  | 964.997   | 916.773   |
| AL359590  | 58143.121 | 56463.688 | NM_001958   | 58043.031 | 60171.715 | AK021753  | 7350.09   | 3597.23   |
| NM_002861 | 15918.668 | 13493.473 | NM_004757   | 9191.839  | 8260.461  | AK001139  | 7051.151  | 4105.815  |
| NM_003080 | 4469.537  | 3738.695  | NM_015904   | 20514.617 | 19767.793 | AK002090  | 735.221   | 532.047   |
| NM_004042 | 1017.662  | 1143.151  | NM_001960   | 56855.266 | 58208.215 | AK021618  | 798.634   | 638.606   |
| NM_013268 | 1370.43   | 1465.553  | NM_018122   | 12024.451 | 13217.476 | AK021822  | 1558.458  | 1038.678  |
| NM_002645 | 8868.152  | 9650.634  | NM_007058   | 26764.555 | 36658.512 | AF293335  | 64767.48  | 66225.766 |
| AB033027  | 2823.604  | 2142.688  | NM_001528   | 8440.843  | 8498.158  | AK024431  | 17888.77  | 22060.033 |
| AF320293  | 764.282   | 496.703   | NM_017947   | 3782.11   | 3528.673  | AF116635  | 1865.262  | 2205.389  |
| NM_001171 | 1361.3    | 1300.52   | NM_002494   | 39947.504 | 36383.285 | X96644    | 5581.939  | 5310.135  |
| S81591    | 2421.452  | 2126.311  | M58510      | 28311.092 | 26548.738 | Z34281    | 45483.168 | 33014.609 |
| NM_006323 | 45026.574 | 55459.082 | NM_000782   | 4677.967  | 3730.664  | NM_018678 | 64759.238 | 71133.125 |
| NM_016466 | 7626.658  | 8354.424  | BE396003    | 4684.966  | 5696.912  | AJ008122  | 61001.574 | 54200.273 |
| NM_001493 | 11866.621 | 11037.246 | AK023300    | 8780.329  | 9683.269  | NM_006220 | 5924.822  | 4374.604  |
| NM_003716 | 3693.294  | 4686.57   | NM_018082   | 5001.438  | 4684.685  | AK022667  | 9286.667  | 6574.894  |
| NM_014841 | 2792.254  | 3379.547  | NM_003904   | 13702.374 | 12909.982 | AK026667  | 950.762   | 812.174   |
| NM_016370 | 8667.789  | 11317.472 | NM_006234   | 49936.871 | 53225.547 | NM_014174 | 6913.778  | 5048.844  |
| NM_014426 | 26221.135 | 30477.895 | AK026387    | 2789.573  | 2619.104  | AF147337  | 3845.621  | 2858.419  |
| NM_006816 | 34673.895 | 35926.055 | AB028987    | 21241.938 | 18648.701 | AK025203  | 70436.711 | 65748.766 |
| AK026518  | 60411.258 | 59025.438 | NM_003594   | 5435.818  | 4288.373  | AK026981  | 5537.647  | 4034.122  |
| NM_000258 | 61104.98  | 59252.098 | NM_005521   | 21079.574 | 20856.885 | NM_006394 | 691.079   | 525.833   |
| AB033055  | 31435.236 | 35773.676 | AF164438    | 27166.809 | 27736.324 | AK023819  | 1801.152  | 1481.237  |
| NM_016403 | 23662.49  | 16864.766 | AK022284    | 4256.946  | 4549.023  | AL133656  | 4943.56   | 2725.131  |
| NM_015603 | 5178.792  | 5140.815  | AF060937    | 2219.285  | 2560.771  | AL050037  | 10337.339 | 5216.726  |
| AK021788  | 1246.209  | 897.202   | AB040893    | 10733.921 | 12914.853 | NM_001417 | 49363.105 | 27216.373 |
| NM_001921 | 20041.859 | 22825.344 | AK025844    | 5563.861  | 6011.274  | AK027107  | 3009.524  | 3513.906  |
| NM_006230 | 31684.541 | 34645.055 | NM_004024   | 11875.86  | 13151.279 | AB040887  | 5615.895  | 5095.378  |
| NM_014698 | 8086.27   | 10343.664 | X52345      | 54111     | 56035.859 | AK025196  | 18986.947 | 17610.148 |
| NM_013400 | 36172.145 | 45074.77  | NM_006965   | 16276.437 | 21700.92  | AJ227879  | 933.938   | 883.838   |
| AK026257  | 4538.759  | 3908.379  | AF027142    | 57666.043 | 59943.281 | AK024800  | 1718.087  | 1848.19   |
| AK023836  | 18648.787 | 17420.869 | NM_016372   | 62346.215 | 59273.797 | AK000401  | 4170.29   | 3828.632  |
| NM_018108 | 8902.493  | 7559.976  | AB020705    | 10009.464 | 9556.685  | AF305068  | 2344.074  | 1838.592  |
| AJ299442  | 14316.829 | 16198.353 | NM_014333   | 521.009   | 1154.911  | D17231    | 60305.082 | 56647.203 |
| AB040897  | 1448.295  | 1564.955  | NM_002980   | 3432.143  | 3726.633  | AF531295  | 2405.799  | 2106.203  |
| NM_000128 | 5955.674  | 9239.74   | NM_015886   | 1928.634  | 2712.055  | X60484    | 1665.369  | 1174.278  |
| NM_003762 | 19672.604 | 21897.619 | NM_020358   | 581.773   | 874.727   | AF055019  | 2245.653  | 1970.083  |
| NM_018446 | 13867.642 | 15773.704 | NM_004262   | 390.664   | 936.69    | NM_003525 | 9235.151  | 6095.524  |
| NM_000187 | 2439.579  | 2893.56   | NM_007102   | 56563.699 | 58277.695 | AK000229  | 2024.503  | 1696.723  |
| NM_014465 | 4075.053  | 4859.767  | BG491613    | 16318.222 | 17821.637 | AF056432  | 3638.352  | 3010.719  |
| D87292    | 5385.351  | 5855.638  | AA397813    | 54324.602 | 54529.523 | AK001987  | 38031.332 | 29497.215 |
| NM_005498 | 2480.691  | 2580.023  | W47350      | 8620.106  | 8091.513  | NM_013332 | 5643.984  | 4803.483  |
| NM_016335 | 1908.213  | 2103.68   | AI160964    | 1775.223  | 2606.532  | X56199    | 7914.726  | 4945.772  |
| NM_000372 | 421.429   | 485.223   | W68291      | 28900.85  | 27515.955 | NM_005193 | 8955.418  | 5009.66   |
| NM_001202 | 3549.508  | 2914.106  | N64384      | 10372.778 | 9038.711  | AL162006  | 1070.467  | 836.674   |
| AB037804  | 673.1     | 874.905   | H-X 53655 I | 3993.134  | 4078.737  | NM_017971 | 46285.027 | 20063.213 |
| U34249    | 1239.402  | 1276.546  | H-U 05770 I | 17238.574 | 16656.605 | AF090097  | 2478.657  | 1410.073  |
| NM_003288 | 61151.156 | 60138.66  | H-M 65199   | 46163.465 | 48064.633 | NM_014750 | 3758.38   | 4315.995  |
| AI200114  | 1048.586  | 1216.839  | H-M 32315   | 4079.548  | 4222.325  | NM_015912 | 3969.75   | 6365.238  |
| M74220    | 1049.303  | 1170.361  | H-V00536M   | 8713.279  | 8681.706  | NM_000460 | 4337.768  | 6360.771  |
| M23254    | 2239.363  | 2636.75   | H-D85429M   | 33517.73  | 37660.891 | AB002339  | 6387.04   | 5693.427  |
| BE618539  | 2896.754  | 3200.746  | BF439832    | 4723.072  | 6761.867  | NM_005104 | 24223.076 | 33601.68  |

|           |           |           |           |           |           |           |           |           |
|-----------|-----------|-----------|-----------|-----------|-----------|-----------|-----------|-----------|
| R28062    | 9233.524  | 9021.98   | BG819162  | 4120.295  | 5015.469  | NM_00688E | 36160.543 | 38816.031 |
| AI627464  | 3757.628  | 4383.057  | NM_01208E | 58052.785 | 59681.648 | AL137423  | 6232.558  | 6508.67   |
| BI756258  | 6205.385  | 8103.482  | NM_00013E | 2624.837  | 2511.337  | AB018322  | 23391.654 | 25995.531 |
| AI342225  | 58053.469 | 60042.32  | NM_006664 | 12432.446 | 10849.149 | NM_00706E | 48318.73  | 53061.887 |
| AA634103  | 53056.223 | 58123.27  | NM_00241E | 909.512   | 1445.767  | AF113211  | 2383.197  | 2084.907  |
| J04599    | 2930.271  | 3537.088  | NM_00272E | 4006.62   | 4506.979  | AL117568  | 4400.498  | 3464.165  |
| AF110020  | 851.561   | 1164.81   | NM_00045C | 1199.731  | 1500.84   | NM_00084E | 3571.594  | 2469.955  |
| AA707922  | 672.95    | 807.915   | NM_00044E | 2135.559  | 2618.553  | S71805    | 2095.643  | 1292.687  |
| AA608557  | 23581.498 | 27722.008 | NM_00451E | 12503.149 | 13317.379 | NM_018391 | 3136.132  | 2777.026  |
| AL050095  | 5944.199  | 6736.568  | NM_00170E | 59929.23  | 59258.984 | U90917    | 1193.067  | 1084.776  |
| U03272    | 1330.778  | 1380.051  | NM_01773E | 9362.491  | 9511.448  | AK022140  | 9456.085  | 7443.111  |
| AF075085  | 60022.973 | 65202.043 | AB033044  | 38762.484 | 45093.188 | AK023372  | 55527.086 | 45774.313 |
| NM_00589E | 6312.488  | 6963.824  | AB014564  | 4633.461  | 4745.775  | U21072    | 2255.362  | 1504.233  |
| NM_00647E | 1582.437  | 1454.424  | NM_02023C | 9541.137  | 10917.349 | AK024377  | 901.841   | 610.791   |
| AF132734  | 48574.898 | 49895.465 | NM_00676E | 55362.117 | 56085.918 | AL137461  | 1888.454  | 1775.674  |
| NM_01837E | 10639.201 | 8782.472  | NM_00635E | 3577.507  | 4495.487  | AF114264  | 15039.581 | 15729.035 |
| NM_00004E | 5992.938  | 4755.749  | NM_01643C | 1902.886  | 3663.361  | NM_00554E | 765.091   | 996.988   |
| AF035787  | 5092.653  | 4140.271  | NM_004447 | 17211.176 | 18157.688 | NM_017514 | 622.367   | 765.213   |
| NM_005024 | 540.196   | 677.947   | NM_001204 | 9412.483  | 8969.839  | AB018261  | 1171.298  | 1416.082  |
| NM_00340E | 3523.789  | 3758.792  | BF131321  | 3266.868  | 3473.673  | NM_01897E | 6743.47   | 8284.427  |
| NM_01480E | 9689.725  | 11478.478 | NM_01654C | 1281.31   | 1615.591  | AB037828  | 1677.522  | 1411.694  |
| AB006627  | 1316.102  | 1561.629  | NM_01211E | 7004.206  | 7223.313  | AB023210  | 869.992   | 1018.995  |
| NM_00041E | 13960.979 | 14270.892 | NM_00002C | 15562.239 | 16700.42  | AB037786  | 4430.052  | 3585.379  |
| NM_00338E | 823.15    | 856.929   | NM_00284E | 260.976   | 720.689   | NM_00364E | 18152.535 | 15502.335 |
| NM_00296E | 1167.233  | 1586.34   | NM_00095E | 1509.388  | 1872.848  | AB037735  | 1351.953  | 1125.44   |
| AB007883  | 5731.384  | 5112.283  | AB033091  | 9273.829  | 11768.087 | AK002177  | 10511.823 | 7313.099  |
| NM_00383E | 516.523   | 741.206   | NM_004557 | 29124.598 | 32946.508 | AK024429  | 3395.128  | 2775.516  |
| NM_006391 | 1374.782  | 2768.158  | NM_00374E | 8707.785  | 8667.693  | NM_00349E | 67638.945 | 65705.031 |
| AK093780  | 38702.91  | 49196.797 | NM_005094 | 8849.358  | 8701.689  | AB000509  | 3110      | 2755.068  |
| NM_007037 | 13190.87  | 14023.156 | BE382905  | 1472.235  | 1381.242  | AB018314  | 2684.504  | 2297.904  |
| NM_00164E | 1041.916  | 1111.041  | NM_00215E | 33873.742 | 37819.391 | NM_00437E | 1828.651  | 1471.898  |
| NM_00549E | 10005.804 | 10917.186 | NM_001701 | 711.863   | 1152.317  | AJ238899  | 1746.876  | 1290.743  |
| AF038196  | 8383.088  | 10257.133 | AK022558  | 5920.899  | 7179.717  | NM_018037 | 4853.378  | 4619.666  |
| NM_00485E | 10860.797 | 13598.224 | NM_00647E | 57466.871 | 56190.762 | NM_001110 | 3419.769  | 2708.877  |
| NM_01635E | 1525.623  | 1683.031  | AK023787  | 4919.927  | 4423.322  | NM_000841 | 14626.298 | 8380.695  |
| NM_005014 | 4578.191  | 6342.618  | NM_00213E | 7216.725  | 6964.321  | NM_00124E | 2335.266  | 1417.09   |
| NM_006944 | 969.386   | 1324.607  | NM_015697 | 14386.584 | 13769.326 | AJ008139  | 16368.599 | 13592.741 |
| NM_004407 | 1406.938  | 1488.987  | AF086489  | 1241.323  | 1471.698  | NM_00432E | 17021.418 | 17871.227 |
| NM_00007C | 2121.047  | 2681.27   | AB018258  | 976.008   | 1118.208  | NM_00088E | 1509.981  | 1486.472  |
| NM_003304 | 975.131   | 515.639   | NM_00595E | 57632.023 | 44110.465 | NM_004577 | 9466.471  | 8649.027  |
| AB023156  | 656.515   | 929.906   | BF337921  | 5455.142  | 6366.909  | NM_015507 | 6317.609  | 7866.999  |
| NM_00632E | 35606.945 | 32139.842 | U53532    | 7099.309  | 7001.454  | AF007157  | 60521.738 | 61829.445 |
| NM_01646E | 7245.721  | 6764.494  | NM_00174C | 8345.451  | 9425      | D38553    | 6241.929  | 6434.232  |
| NM_00149E | 10455.523 | 8912.665  | NM_012484 | 12184.924 | 12199.946 | NM_00617C | 18282.24  | 17821.633 |
| NM_00371E | 1445.5    | 1514.54   | AL096732  | 7839.587  | 8400.008  | NM_01429E | 10554.55  | 7853.786  |
| NM_014841 | 2037.306  | 2537.83   | AB006423  | 1544.971  | 2278.083  | AK001581  | 3043.934  | 2345.937  |
| NM_01442E | 25971.584 | 29142.42  | AJ132084  | 907.887   | 1141.873  | NM_00586E | 4464.429  | 3868.529  |
| NM_00681E | 32094.15  | 36533.586 | NM_00571E | 60299.355 | 55432.836 | NM_00054E | 14045.775 | 10689.817 |
| NM_00025E | 54744.59  | 51643.879 | NM_00346E | 56505.785 | 52477.859 | AK022541  | 11949.801 | 10023.041 |
| AB033055  | 28888.352 | 28608.424 | NM_00609E | 18292.629 | 19849.66  | AB002297  | 4964.101  | 4357.218  |
| AF311287  | 16061.742 | 16205.79  | AK023915  | 22672.162 | 26690.859 | NM_00502C | 60538.863 | 57623.281 |
| NM_00309E | 6118.439  | 7530.625  | AB051453  | 3377.437  | 4720.522  | NM_014077 | 5125.833  | 4404.969  |
| NM_014781 | 9829.28   | 10591.123 | AK026842  | 1177.936  | 1085.194  | NM_01841E | 2967.985  | 2817.46   |



|           |           |           |             |           |           |           |           |           |
|-----------|-----------|-----------|-------------|-----------|-----------|-----------|-----------|-----------|
| BU629989  | 2899.268  | 2801.122  | NM_002395   | 2140.887  | 2590.096  | NM_012325 | 14176.911 | 11852.037 |
| X87896    | 4977.856  | 5500.288  | AB023203    | 7419.868  | 8171.884  | M14087    | 16142.591 | 12950.299 |
| M88310    | 9531.822  | 10327.84  | NM_014963   | 5571.954  | 5525.917  | NM_000885 | 27964.283 | 17297.746 |
| D16856    | 910.237   | 680.337   | NM_004259   | 5771.76   | 5621.521  | M59040    | 7075.86   | 3719.371  |
| NM_014465 | 3311.004  | 1787.95   | NM_016271   | 13460.225 | 13433.737 | X15880    | 70393.766 | 65727.656 |
| D87292    | 3691.066  | 2315.011  | NM_016619   | 2939.43   | 3728.576  | NM_006795 | 1118.222  | 1104.392  |
| NM_005495 | 1744.098  | 1435.989  | NM_014481   | 3725.599  | 3700.274  | X04366    | 2929.226  | 3212.892  |
| NM_016335 | 1961.173  | 1658.313  | U22172      | 5436.774  | 5846.461  | NM_000505 | 63537.953 | 64776.129 |
| NM_003165 | 8772.805  | 8989.605  | AB032960    | 4029.838  | 4432.837  | NM_018655 | 1403.196  | 1346.598  |
| NM_003905 | 12410.607 | 8534.202  | NM_014264   | 28680.316 | 29836.232 | NM_000665 | 5345.488  | 6437.213  |
| AL359590  | 54430.91  | 53054.293 | AF020089    | 4354.181  | 4101.844  | NM_003481 | 10666.572 | 8862.971  |
| NM_002861 | 14420.789 | 13767.239 | NM_006257   | 3761.647  | 3793.135  | AB046814  | 1547.258  | 1160.386  |
| NM_003080 | 4364.459  | 3166.564  | NM_016281   | 23963.705 | 25134.158 | NM_017664 | 7486.954  | 6538.725  |
| NM_004042 | 1024.182  | 853.951   | NM_004734   | 44486.699 | 55192.945 | AK025523  | 1237.148  | 1375.516  |
| NM_013265 | 1288.036  | 1183.003  | AK024793    | 5126.788  | 5106.785  | NM_007055 | 10954.733 | 9080.99   |
| NM_002645 | 10044.437 | 10576.939 | AF208291    | 1609.816  | 1966.627  | NM_006870 | 12727.267 | 10776.588 |
| AB033027  | 2573.867  | 2941.279  | NM_004877   | 44098.859 | 49163.43  | NM_007355 | 10558.255 | 11125.367 |
| AK021805  | 12472.149 | 14412.633 | L10284      | 63054.699 | 60885.527 | L13283    | 4513.2    | 3596.832  |
| AB014550  | 4945.855  | 5303.989  | NM_000275   | 4029.428  | 4494.687  | NM_013327 | 3486.644  | 2692.988  |
| AF320294  | 2900.317  | 2935.537  | NM_000019   | 63748.559 | 61063.094 | AF303888  | 15709.945 | 11857.037 |
| AF320293  | 996.929   | 1009.552  | AK023701    | 3374.119  | 4476.692  | NM_000077 | 2445.682  | 1772.965  |
| AF161436  | 9059.119  | 9505.544  | NM_002980   | 4088.644  | 4103.87   | AF176646  | 2058.751  | 1290.972  |
| NM_020402 | 4612.016  | 4506.84   | NM_015885   | 1906.011  | 2048.752  | NM_003672 | 38248.762 | 20542.811 |
| NM_004295 | 4743.154  | 6091.458  | NM_004262   | 470.437   | 935.644   | NM_002574 | 84009.906 | 65773.625 |
| NM_001171 | 2162.661  | 1715.849  | NM_007102   | 60516.465 | 65237.617 | NM_012391 | 6900.329  | 6459.486  |
| NM_002250 | 22315.951 | 19877.795 | BG491613    | 17193.029 | 23371.594 | NM_005254 | 5005.795  | 6572.045  |
| S81591    | 2254.589  | 1995.691  | AA397813    | 59307.441 | 59462.832 | NM_005611 | 1579.166  | 2040.162  |
| AF075085  | 65802.43  | 68914.305 | W47350      | 8919.901  | 9034.156  | AF141655  | 7033.414  | 6441.98   |
| NM_005892 | 5285.393  | 3775.738  | AI160964    | 1982.853  | 2457.498  | NM_007345 | 4123.018  | 4486.081  |
| NM_006475 | 1246.426  | 958.073   | W68291      | 28337.168 | 32742.307 | NM_004830 | 1988.955  | 2255.248  |
| AF132734  | 48350.711 | 42425.223 | N64384      | 10366.688 | 11376.06  | AF132362  | 61999.902 | 65369.73  |
| NM_018375 | 10562.688 | 7964.426  | H-X 53655 I | 3918.345  | 3978.331  | NM_007007 | 17678.584 | 19487.902 |
| NM_016403 | 26618.916 | 27724.408 | H-U 05770 I | 17659.32  | 19127.629 | NM_006385 | 8520.125  | 7450.854  |
| NM_015603 | 3140.299  | 2217.709  | H-M 65199   | 49070.551 | 54264.766 | NM_006555 | 26471.082 | 25259.826 |
| AK021788  | 1066.916  | 960.622   | H-M 32315   | 3561.081  | 3973.197  | NM_004501 | 50520.594 | 43557.594 |
| NM_001921 | 16453.703 | 15401.34  | H-V00536M   | 8858.544  | 8535.697  | NM_004965 | 22509.504 | 20849.424 |
| NM_006230 | 26481.447 | 24538.988 | H-D85429M   | 32631.607 | 33915.102 | NM_006700 | 3854.613  | 3635.78   |
| NM_014695 | 6304.545  | 4433.217  | BF439832    | 4917.223  | 6537.396  | NM_006445 | 23239.17  | 19693.029 |
| NM_013400 | 31057.82  | 28417.484 | BG819162    | 3707.201  | 4072.747  | NM_012105 | 47118.234 | 41985.012 |
| AK026257  | 4239.544  | 4382.435  | M38449      | 21260.016 | 20237.635 | AF019633  | 6267.346  | 5218.721  |
| AK023836  | 21710.883 | 27578.66  | AK025495    | 546.987   | 1518.412  | AB002361  | 27255.477 | 21956.561 |
| NM_018105 | 10733.859 | 11736.433 | NM_001091   | 3350.796  | 4127.01   | NM_018060 | 14323.883 | 12744.049 |
| AJ299442  | 13103.292 | 14423.824 | NM_002415   | 1141.384  | 1079.674  | NM_014235 | 7323.729  | 5958.291  |
| BE734914  | 339.22    | 705.303   | NM_002725   | 3877.591  | 4088.702  | NM_017662 | 13855.352 | 10155.241 |
| AB040897  | 1423.326  | 1772.798  | NM_000450   | 960.504   | 1256.686  | U88837    | 4145.039  | 2775.24   |
| NM_000125 | 5373.542  | 6160.047  | NM_000445   | 2540.54   | 2821.011  | NM_017445 | 32026.912 | 19968.596 |
| NM_003762 | 19947.477 | 23094     | NM_004513   | 12167.375 | 13366.612 | NM_017582 | 17968.99  | 11536.192 |
| NM_018445 | 13057.147 | 13365.169 | NM_001705   | 53969.742 | 57861.754 | NM_015235 | 7210.706  | 4414.177  |
| NM_000187 | 2436.151  | 2288.566  | NM_017735   | 9351.739  | 9643.387  | AK026962  | 5829.151  | 3078.381  |
| CY3Cy5    | 1096.549  | 96.968    | AB033044    | 33364.141 | 35812.438 | D00265    | 52993.645 | 56038.402 |
| NM_017532 | 4181.306  | 4454.441  | AB014564    | 4761.327  | 6006.499  | NM_000775 | 1789.425  | 2120.679  |
| AF086184  | 4305.71   | 4151.102  | NM_020230   | 11154.543 | 14132.273 | NM_006294 | 66623.055 | 65421.238 |
| NM_018275 | 3476.072  | 3288.982  | NM_006762   | 57451.863 | 60761.23  | NM_003743 | 4262.689  | 4453.044  |

|           |           |           |           |           |           |            |           |           |
|-----------|-----------|-----------|-----------|-----------|-----------|------------|-----------|-----------|
| AL049266  | 9220.71   | 8415.476  | NM_006352 | 4476.156  | 5043.089  | AB037797   | 1712.671  | 1733.553  |
| AF007149  | 3972.435  | 3146.307  | NM_016430 | 1933.431  | 4184.062  | NM_001520  | 2583.751  | 2714.125  |
| NM_014705 | 1024.454  | 813.627   | NM_004447 | 17635.248 | 18542.146 | AL050367   | 713.003   | 560.208   |
| AK001469  | 9132.397  | 8235.876  | NM_001204 | 7942.142  | 7798.255  | NM_017870  | 4020.894  | 3417.981  |
| AF035318  | 1797.014  | 1368.452  | BF131321  | 4639.408  | 5906.234  | AL133633   | 5175.727  | 4852.816  |
| NM_015456 | 10166.77  | 9471.502  | NM_016540 | 899.873   | 1302.896  | NM_012252  | 3537.061  | 3100.899  |
| AF140710  | 2715.835  | 1630.934  | NM_012116 | 6835.535  | 6902.792  | AK026817   | 9054.238  | 6798.839  |
| NM_017532 | 3200.202  | 2814.51   | NM_000020 | 17967.592 | 17579.664 | AL157442   | 60113.547 | 60030.027 |
| SR4       | 19512.271 | 29379.873 | NM_002845 | 128.129   | 770.549   | AB011148   | 8023.326  | 6387.918  |
| SR6       | 2623.189  | 3076.85   | NM_000956 | 1346.478  | 1450.911  | AL389938   | 66660     | 65742.805 |
| SR8       | 7153.337  | 50414.891 | AB033091  | 9630.032  | 12578.459 | NM_001946  | 61716.676 | 54182.762 |
| AL157477  | 5637.903  | 5873.176  | NM_004557 | 27758.496 | 32701.154 | NM_007084  | 8013.478  | 5110.922  |
| AB002318  | 2846.906  | 1729.499  | NM_016372 | 57546.406 | 54736.711 | M97191     | 66957.758 | 65126.191 |
| AL357535  | 922.131   | 820.216   | AB020705  | 9633.01   | 11441.734 | AK023015   | 12615.019 | 7145.903  |
| AL049951  | 5033.726  | 3251.379  | BE382905  | 1189.535  | 1858.307  | NM_003457  | 44432.848 | 24258.326 |
| AK024963  | 2059.286  | 2090.426  | NM_002152 | 29259.537 | 28452.205 | AV752086   | 2261.812  | 2501.323  |
| AK023725  | 2979.805  | 2717.384  | NM_001701 | 1259.802  | 2144.261  | NM_016102  | 47331.793 | 52685.41  |
| AK022936  | 19247.033 | 21013.152 | AK022558  | 6166.677  | 7308.583  | NM_004376  | 4803.593  | 5081.387  |
| AK024385  | 2690.033  | 2707.821  | NM_006476 | 59039.344 | 58788.523 | NM_006846  | 61285.691 | 66950.336 |
| AL137727  | 10012.233 | 8437.467  | AK023787  | 5562.048  | 4762.354  | NM_005603  | 62548.793 | 64399.695 |
| L17327    | 1565.729  | 1286.423  | NM_002133 | 6380.577  | 6810.14   | NM_001061  | 3241.271  | 3773.498  |
| AF074986  | 1247.312  | 1159.53   | NM_015697 | 13172.556 | 16122.893 | AI075338   | 7165.528  | 6914.103  |
| AL049240  | 8425.564  | 6187.061  | AF086489  | 1038.829  | 1424.598  | BG744154   | 33387.637 | 33742.563 |
| U80773    | 2282.146  | 1874.574  | AB018258  | 732.823   | 1101.949  | Z11694     | 25398.432 | 25147.938 |
| AK021745  | 3812.794  | 3244.734  | NM_005953 | 56078.668 | 47050.234 | BF983177   | 10639.799 | 8386.913  |
| L38937    | 6150.42   | 4335.048  | BF337921  | 5336.939  | 6272.39   | Z26317     | 7765.054  | 6671.64   |
| U90907    | 1318.744  | 1073.9    | U53532    | 7276.297  | 8748.908  | X16983     | 61816.695 | 58819.762 |
| AK024327  | 2516.348  | 1418.631  | NM_001740 | 9602.137  | 10605.722 | X56160     | 10299.723 | 10070.256 |
| NM_014135 | 2228.965  | 867.677   | NM_012484 | 11252.056 | 13188.546 | BG679991   | 3643.604  | 3469.367  |
| AK024395  | 1590.092  | 1353.096  | AL096732  | 7038.498  | 7644.205  | H-Y 000971 | 14105.377 | 13902.121 |
| AK000801  | 24427.064 | 22555.203 | AB006423  | 1414.327  | 1945.899  | H-M 59964  | 1462.915  | 1385.262  |
| AK025109  | 8306.048  | 8408.238  | AJ132084  | 891.987   | 1067.725  | H-Y 007111 | 64683.133 | 65977.508 |
| AK026057  | 1603.521  | 1748.168  | NM_005719 | 61059.539 | 59005.395 | H-X 167071 | 11694.686 | 10148.803 |
| AK021627  | 5062.713  | 5049.483  | NM_003462 | 55792.023 | 55975.078 | AL038354   | 16427.787 | 12419.043 |
| AF085859  | 1444.811  | 781.4     | NM_006093 | 16371.049 | 22156.492 | R14607     | 11085.792 | 7249.498  |
| AF075047  | 1106.994  | 1026.376  | NM_000139 | 2303.851  | 2922.385  | W84867     | 1963.796  | 1371.304  |
| AF147403  | 1853.704  | 1460.494  | NM_006664 | 12338.219 | 14479.315 | BF245026   | 909.401   | 557.925   |
| AL049260  | 1055.591  | 1088.845  | AB051453  | 3049.167  | 2836.03   | NM_000592  | 1310.729  | 1383.549  |
| AL049975  | 1223.053  | 2206.531  | AK026842  | 994.021   | 1184.593  | NM_016584  | 51986.66  | 53998.746 |
| AL080067  | 614.596   | 317.192   | NM_002395 | 2148.847  | 2458.648  | NM_001815  | 9061.703  | 8920.823  |
| AL117464  | 2302.288  | 1450.827  | AB023203  | 4627.862  | 4861.38   | NM_000064  | 45086.754 | 48588.621 |
| AL050033  | 1277.757  | 428.873   | NM_014963 | 3932.123  | 4600.975  | NM_003264  | 3093.018  | 4026.92   |
| AL080160  | 1288.819  | 782.788   | NM_004259 | 5977.58   | 5533.545  | NM_006725  | 24438.998 | 25473.33  |
| AL117529  | 1087.643  | 523.924   | NM_016271 | 13080.431 | 11692.644 | NM_003326  | 6115.928  | 6403.858  |
| AL049997  | 35780.402 | 36071.344 | NM_016619 | 2563.984  | 3010.896  | NM_004566  | 64877.773 | 71087.43  |
| AK024118  | 3547.583  | 3673      | NM_014481 | 3290.281  | 4521.964  | NM_000202  | 13406.083 | 14484.171 |
| AL110258  | 547.512   | 746.539   | U22172    | 6906.724  | 6177.747  | NM_005496  | 16428.248 | 15076.75  |
| X89657    | 1286.28   | 1157.2    | AB032960  | 3629.819  | 5045.11   | NM_016606  | 2914.101  | 3158.552  |
| AK024509  | 1747.814  | 1356.388  | NM_014264 | 26945.578 | 32439.602 | NM_002856  | 9543.331  | 9180.533  |
| AL050185  | 816.918   | 569.825   | AF020089  | 4386.759  | 4573.36   | NM_004817  | 5389.345  | 5423.383  |
| NM_017705 | 788.198   | 569.383   | NM_006257 | 3866.348  | 4308.954  | NM_018975  | 30062.762 | 25901.521 |
| AF049615  | 910.952   | 836.698   | NM_016281 | 26029.311 | 29780.346 | AB023215   | 41403.258 | 41673.672 |
| NM_014356 | 58348.328 | 53768.07  | NM_004734 | 47563.621 | 50963.84  | NM_001284  | 45884.426 | 44240.879 |

|           |           |           |             |           |           |           |           |           |
|-----------|-----------|-----------|-------------|-----------|-----------|-----------|-----------|-----------|
| AF009282  | 16132.722 | 17798.74  | AK024793    | 5468.5    | 5196.432  | NM_003242 | 52738.113 | 49275.629 |
| AF024704  | 1110.53   | 1159.746  | AF208291    | 1515.48   | 1729.998  | NM_002842 | 1776.771  | 1773.704  |
| AF056431  | 1247.882  | 1307.879  | NM_004877   | 47008.695 | 53068.426 | U31099    | 3920.304  | 3800.16   |
| NM_016412 | 856.76    | 561.698   | L10284      | 64157.703 | 61636.172 | NM_001105 | 43057.043 | 36821.535 |
| AF009293  | 2249.409  | 1997.848  | NM_000276   | 3794.815  | 5118.292  | NM_005585 | 1313.964  | 1097.566  |
| NM_004155 | 58372.785 | 55271.66  | NM_000019   | 62054.984 | 62902.984 | NM_002075 | 19072.104 | 15415.153 |
| AF056444  | 7418.49   | 5633.398  | AK023701    | 4614.387  | 5984.83   | Y08756    | 66850.305 | 65538.516 |
| AK000989  | 5230.571  | 4692.822  | NM_003742   | 8546.986  | 8901.445  | AY007090  | 2130.135  | 1695.983  |
| NM_018065 | 353.82    | 288.238   | NM_005094   | 8425.207  | 10716.435 | NM_006432 | 2355.149  | 1514.685  |
| AK002210  | 6976.367  | 5635.324  | NM_015886   | 1727.288  | 1866.495  | AK021426  | 1129.283  | 1261.97   |
| AK001808  | 935.622   | 860.249   | NM_020358   | 742.522   | 1156.97   | NM_018073 | 2442.735  | 2892.793  |
| AK021471  | 2600.939  | 2285.669  | NM_004262   | 693.879   | 778.762   | AL137529  | 2247.98   | 2965.62   |
| AK021709  | 1286.374  | 1088.17   | NM_007102   | 59118.672 | 70501     | NM_012332 | 9550.876  | 11079.115 |
| AL359563  | 4829.172  | 5881.646  | BG491613    | 15865.228 | 21313.299 | AK026648  | 3913.026  | 4937.071  |
| NM_014477 | 758.69    | 1086.191  | AA397813    | 57823.164 | 56533.172 | NM_000497 | 4447.052  | 5429      |
| AL109791  | 1817.548  | 2282.521  | W47350      | 7832.744  | 8069.257  | NM_017421 | 4134.029  | 4604.779  |
| L40521    | 685.23    | 1030.234  | AI160964    | 1499.665  | 2394.389  | NM_000273 | 3094.653  | 3593.047  |
| AF086478  | 7646.229  | 7946.147  | W68291      | 30163.301 | 31112.756 | NM_002892 | 35736.758 | 43258.617 |
| AF086022  | 672.382   | 765.076   | N64384      | 10206.82  | 10354.802 | NM_005397 | 9241.086  | 10571.086 |
| AK021514  | 66598.859 | 64558.402 | H-X 53655 I | 4264.84   | 4072.507  | AB014511  | 11754.572 | 12505.925 |
| AJ008134  | 1126.806  | 1230.657  | H-U 05770 I | 16492.451 | 17845.613 | NM_001662 | 27832.662 | 30401.227 |
| S71486    | 5360.069  | 5309.855  | H-M 65199   | 47110.164 | 46215.246 | AB011100  | 6225.026  | 7005.96   |
| L33808    | 15704.244 | 11835.232 | H-M 32315   | 3813.83   | 4185.186  | U61741    | 3824.032  | 4126.115  |
| AJ008117  | 9561.494  | 8034.498  | H-V00536M   | 8535.789  | 9269.903  | NM_012402 | 15487.622 | 15795.817 |
| AJ008147  | 26709.822 | 26104.939 | H-D85429M   | 32892.648 | 30898.342 | M76676    | 14039.203 | 11902.451 |
| AK024369  | 2095.21   | 1918.811  | BF439832    | 4480.385  | 5913.839  | NM_003857 | 1572.283  | 1641.142  |
| AL049244  | 538.213   | 578.566   | BG819162    | 4240.247  | 4682.123  | AL137690  | 1151.976  | 1080.147  |
| L43345    | 4888.241  | 4134.415  | M38449      | 21726.934 | 22334.281 | Z83804    | 4608.431  | 3784.032  |
| AF180297  | 10305.18  | 8193.669  | AK025495    | 706.654   | 1225.759  | NM_004382 | 6118.33   | 4706.866  |
| AK023245  | 2097.653  | 1881.117  | NM_001091   | 3093.231  | 4168.858  | U67784    | 4933.526  | 4390.655  |
| AF086224  | 1122.381  | 823.262   | AK023915    | 21344.381 | 23756.773 | NM_007362 | 8252.322  | 5800.85   |
| S56365    | 34922.066 | 26911.574 | AB014564    | 5286.011  | 7486.257  | NM_014582 | 2482.369  | 2708.346  |
| AK023607  | 2440.568  | 2174.867  | NM_020232   | 11224.143 | 14443.957 | AB028998  | 681.527   | 1065.074  |
| AK027209  | 588.624   | 830.832   | NM_006762   | 58154.496 | 58304.395 | NM_000153 | 1319.701  | 1360.159  |
| AK026874  | 711.219   | 1229.121  | NM_006352   | 3647.218  | 4676.752  | NM_002033 | 1413.088  | 1797.241  |
| AK024178  | 462.219   | 573.647   | NM_016432   | 2683.276  | 4296.934  | AK091794  | 853.737   | 991.088   |
| AF088033  | 2052.583  | 1745.42   | NM_004447   | 18402.951 | 17211.225 | NM_004111 | 6959.847  | 8229.229  |
| NM_020422 | 15638.512 | 19853.004 | NM_016542   | 336.081   | 919.577   | AF085966  | 6880.936  | 7865.821  |
| AJ227897  | 1032.308  | 1153.62   | NM_000022   | 16487.35  | 17390.131 | NM_005312 | 8215.18   | 9442.283  |
| AK023628  | 849.724   | 818.469   | NM_000956   | 1606.62   | 2170.382  | NM_016312 | 8840.344  | 12372.892 |
| AY007156  | 3690.765  | 3224.789  | NM_002442   | 16778.209 | 15863.145 | NM_003362 | 31255.467 | 35336.617 |
| AF086408  | 56722.465 | 60113.215 | AB033091    | 8481.553  | 10639.053 | NM_000057 | 3630.272  | 3365.031  |
| AK023979  | 4143.944  | 4834.444  | NM_004557   | 24319.289 | 24609.684 | NM_018343 | 11004.51  | 11733.331 |
| NM_017847 | 3564.881  | 3567.692  | NM_014757   | 9474.368  | 12119.246 | AK095793  | 1752.711  | 2069.444  |
| AL049675  | 2597.519  | 2627.402  | NM_017893   | 1792.611  | 1931.896  | NM_003177 | 7120.561  | 8831.968  |
| AL050151  | 3364.126  | 3432.049  | NM_001584   | 11270.486 | 12656.831 | NM_017712 | 1799.652  | 2081.725  |
| NM_003537 | 14206.686 | 13145.676 | NM_012259   | 61591.184 | 60754.082 | AF064078  | 4936.871  | 4970.681  |
| AF056419  | 16037.675 | 14157.978 | AF272357    | 7929.448  | 9367.307  | AL049688  | 7111.308  | 6628.581  |
| AF074983  | 2560.798  | 2342.395  | NM_016372   | 60702.109 | 62546.145 | NM_002737 | 9399.799  | 7526.039  |
| AK021862  | 1311.146  | 1170.138  | AB020705    | 8690.253  | 10376.252 | Z25427    | 6621.272  | 5670.858  |
| AK024177  | 675.078   | 675.057   | NM_014333   | 688.908   | 1283.255  | NM_004672 | 21298.773 | 17089.002 |
| AK024827  | 458.727   | 587.258   | NM_002982   | 3769.614  | 4497.497  | NM_001353 | 12811.86  | 11426.762 |
| AK021952  | 998.775   | 747.044   | NM_016274   | 8748.43   | 10367.226 | NM_006214 | 3575.485  | 3023.857  |

|           |           |           |           |           |           |             |           |           |
|-----------|-----------|-----------|-----------|-----------|-----------|-------------|-----------|-----------|
| AF090102  | 400.015   | 329.51    | NM_014946 | 3434.083  | 3072.611  | AJ010228    | 22181.787 | 16892.191 |
| K01564    | 3476.024  | 2655.573  | NM_014251 | 6176.347  | 6749.768  | NM_00519E   | 8591.554  | 6936.238  |
| AB023175  | 2137.321  | 2154.84   | AK022750  | 14480.649 | 14505.864 | NM_00437E   | 5534.984  | 6246.917  |
| NM_000737 | 2649.724  | 2945.818  | NM_004251 | 18252.574 | 19314.268 | NM_00027E   | 1139.714  | 1325.276  |
| NM_00083E | 1580.332  | 1876.572  | BF337921  | 6337.898  | 6916.798  | NM_006061   | 1300.052  | 1513.087  |
| AK024102  | 27337.721 | 30247.191 | NM_012484 | 10854.742 | 12525.134 | NM_00684E   | 61195.043 | 61593.074 |
| NM_00129C | 1118.621  | 1180.716  | AL096732  | 6837.603  | 9122.951  | NM_00560E   | 70008.43  | 65672.258 |
| AL079273  | 4579.72   | 5135.011  | AB006423  | 1443.269  | 2019.541  | NM_001061   | 2358.377  | 2923.54   |
| NM_00504E | 1991.198  | 4170.079  | AJ132084  | 940.341   | 1186.069  | AI075338    | 5489.572  | 6688.767  |
| AK026129  | 1591.325  | 1543.281  | NM_00571E | 57206.676 | 64406.566 | BG744154    | 28759.602 | 33633.016 |
| NM_00174E | 58147.102 | 56479.211 | NM_00346E | 56531.789 | 50808.195 | Z11694      | 20007.895 | 21734.416 |
| AK024200  | 906.901   | 977.102   | NM_00609E | 16524.842 | 19248.332 | BF983177    | 7552.11   | 8350.186  |
| NM_00371E | 982.01    | 1112.75   | NM_00013E | 2037.977  | 2239.445  | Z26317      | 5172.771  | 6494.093  |
| D31886    | 7942.393  | 8885.565  | NM_006664 | 11224.409 | 11928.563 | X16983      | 55304.504 | 59244.34  |
| U92024    | 647.237   | 692.746   | NM_00241E | 1044.551  | 1304.55   | X56160      | 8283.976  | 9541.59   |
| AK023330  | 4994.213  | 4300.922  | NM_00272E | 4128.944  | 4972.698  | BG679991    | 3032.614  | 3556.065  |
| AF075071  | 1817.735  | 1660.3    | NM_00045C | 1177.188  | 1406.429  | H-Y 00097 I | 12438.213 | 13969.144 |
| AL080213  | 565.455   | 515.469   | NM_00044E | 2709.604  | 3324.401  | H-M 59964   | 1012.317  | 907.392   |
| AF001892  | 1114.646  | 1227.96   | NM_00451E | 13364.451 | 16865.523 | H-Y 00711 I | 62839.648 | 62244.328 |
| X93500    | 3807.18   | 3187.873  | NM_00170E | 64658.699 | 71938.617 | H-X 16707 I | 12388.996 | 11564.678 |
| AK026597  | 618.15    | 350.74    | NM_01773E | 10546.964 | 12706.006 | AL038354    | 16869.535 | 14486.177 |
| U79271    | 2712.137  | 2654.538  | AB033044  | 42380.504 | 51243.223 | R14607      | 11709.26  | 9058.729  |
| NM_01988E | 2196.455  | 2193.92   | NM_00027E | 3332.673  | 3627.969  | W84867      | 2007.832  | 1842.711  |
| AK024609  | 10955.494 | 9770.906  | NM_00001E | 58356.867 | 59670.766 | NM_00571E   | 9585.561  | 6284.585  |
| AK023660  | 1120.969  | 980.915   | AK023701  | 4510.416  | 5143.081  | NM_018264   | 2541.958  | 1540.59   |
| NM_01812C | 9999.297  | 8696.948  | NM_00374E | 9374.685  | 9969.815  | NM_00181E   | 7148.472  | 7956.86   |
| NM_015991 | 892.657   | 970.249   | NM_005094 | 8033.95   | 11046.854 | NM_000064   | 35463.066 | 40602.355 |
| NM_00556E | 645.25    | 767.482   | AK022558  | 5955.215  | 7921.901  | NM_003264   | 1276.762  | 1641.492  |
| NM_00493E | 675.467   | 859.756   | NM_00647E | 58644.016 | 66702.469 | NM_00672E   | 11637.739 | 14511.668 |
| NM_00523E | 818.855   | 708.474   | AK023787  | 5681.797  | 5428.11   | NM_00332E   | 3809.953  | 4427.427  |
| X99658    | 722.722   | 877.932   | NM_00213E | 6803.718  | 7607.204  | NM_00020E   | 10704.487 | 12163.076 |
| NM_006654 | 2038.304  | 2749.585  | NM_015697 | 13989.441 | 15832.919 | NM_00549E   | 13702.035 | 13594.924 |
| NM_00316E | 2282.762  | 2715.574  | AF086489  | 1183.181  | 1596.033  | NM_01660E   | 2405.86   | 2510.783  |
| NM_00039E | 5678.044  | 5192.648  | NM_03294E | 10751.469 | 11508.298 | NM_00285E   | 8850.221  | 11696.585 |
| NM_00326E | 2481.056  | 2314.825  | NM_007177 | 44783.332 | 44234.473 | NM_004817   | 4288.587  | 5705.147  |
| NM_00235C | 14059.472 | 14511.995 | NM_00080E | 939.924   | 1365.029  | NM_01897E   | 28581.334 | 33780.523 |
| NM_012417 | 4587.182  | 4495.758  | AB018258  | 1298.189  | 1687.964  | AB023215    | 27869.271 | 34197.316 |
| NM_00254E | 2891.226  | 3117.086  | AL359592  | 1483.935  | 1461.497  | NM_001284   | 42375.98  | 48853.973 |
| NM_00296E | 796.608   | 829.541   | NM_00607E | 16594.932 | 18769.045 | NM_00324E   | 22553.193 | 27613.418 |
| BF246606  | 1148.069  | 1006.321  | NM_000824 | 602.46    | 1371.198  | NM_00284E   | 1423.469  | 2104.348  |
| NM_01428E | 1288.07   | 1397.785  | NM_00048E | 1571.232  | 1906.813  | U31099      | 2618.566  | 3099.62   |
| NM_00234E | 1653.148  | 1640.094  | NM_00595E | 63053.938 | 50336.059 | NM_00110E   | 44211.078 | 41803.832 |
| D13631    | 5274.529  | 5477.965  | M38449    | 20370.863 | 22055.57  | NM_00558E   | 1360.962  | 1241.815  |
| NM_00371E | 4950.568  | 4107.984  | NM_001091 | 3441.613  | 4170.141  | NM_00207E   | 18374.146 | 15757.669 |
| NM_002184 | 1746.678  | 1977.338  | AK023915  | 22989.084 | 23711.686 | Y08756      | 62245.371 | 61584.281 |
| NM_01488E | 9678.444  | 8761.681  | AB051453  | 3268.035  | 3589.26   | AY007090    | 2316.603  | 2373.371  |
| NM_01780E | 961.925   | 971.567   | AK026842  | 1340.864  | 1727.696  | NM_00643E   | 2568.115  | 1981.144  |
| M86841    | 967.663   | 1046.856  | NM_00239E | 2711.688  | 4334.965  | AV752086    | 2469.824  | 2267.887  |
| U56387    | 1659.664  | 1683.434  | AB023203  | 5214.421  | 5851.639  | NM_01610E   | 48928.992 | 47234.102 |
| AL049296  | 8351.117  | 9754.56   | NM_01496E | 4162.708  | 4773.077  | AL137529    | 2602.794  | 3439.551  |
| NM_014471 | 5185.422  | 5320.748  | NM_00425E | 6092.338  | 6576.119  | NM_017421   | 4313.179  | 4530.839  |
| NM_00318E | 925.213   | 844.618   | NM_016271 | 14056.456 | 14984.421 | NM_00027E   | 2419.345  | 3081.247  |
| NM_02023E | 13984.964 | 12859.87  | NM_01661E | 2610.775  | 2974.482  | NM_00289E   | 27864.406 | 40828.32  |

|           |           |           |           |           |           |             |           |           |
|-----------|-----------|-----------|-----------|-----------|-----------|-------------|-----------|-----------|
| D49356    | 2334.316  | 2630.977  | NM_014481 | 3245.342  | 3444.863  | NM_005397   | 8999.29   | 11603.583 |
| AJ250475  | 2725.294  | 2659.795  | U22172    | 6071.398  | 6555.017  | AB014511    | 10532.77  | 13566.819 |
| NM_00080C | 3019.453  | 3735.158  | AB032960  | 3719.838  | 4122.737  | NM_001662   | 20584.699 | 25576.068 |
| NM_018579 | 6735.532  | 6660.734  | NM_014264 | 27233.508 | 31433.709 | AB011100    | 4251.411  | 5534.955  |
| NM_006201 | 4720.79   | 3791.867  | AF020089  | 4008.431  | 5074.118  | U61741      | 3242.231  | 4246.386  |
| NM_007110 | 3477.113  | 2491.734  | NM_006257 | 3933.737  | 4895.991  | NM_012402   | 11621.131 | 15055.379 |
| NM_001255 | 15870.276 | 15048.765 | NM_016281 | 19525.832 | 20154.986 | M76676      | 9608.03   | 11645.587 |
| U50383    | 33248.156 | 31092.201 | NM_004734 | 41284.289 | 46648.832 | NM_003857   | 1161.659  | 1926.823  |
| AK025085  | 15624.261 | 15456.645 | AK024793  | 5054.393  | 7031.906  | AL137690    | 1158.755  | 1225.879  |
| NM_016317 | 1658.061  | 1448.905  | AF208291  | 1605.475  | 1610.622  | Z83804      | 4940.129  | 4331.296  |
| NM_00629C | 17920.154 | 13817.813 | NM_004877 | 45091.668 | 49827.82  | NM_004386   | 6030.032  | 5165.979  |
| AK022290  | 1755.363  | 1685.046  | L10284    | 63263.621 | 58889.559 | U67784      | 4984.62   | 5061.268  |
| NM_00368C | 38313.727 | 38858.582 | CY3Cy5    | 16549.76  | 737.142   | NM_007366   | 7821.224  | 6507.05   |
| AF118124  | 23668.039 | 22814.379 | NM_000905 | 16970.852 | 11896.209 | NM_000592   | 1097.224  | 1064.33   |
| NM_004849 | 17638.459 | 15741.677 | AK023269  | 6084.813  | 5236.811  | NM_016584   | 48450.324 | 47487.109 |
| AL137527  | 27959.344 | 24337.057 | AF070564  | 26052.1   | 17363.992 | NM_002033   | 739.446   | 1309.568  |
| AK024186  | 605.529   | 745.801   | AK021439  | 54311.574 | 36782.613 | NM_004111   | 6303.404  | 7553.269  |
| J04974    | 2750.86   | 2311.14   | AL110111  | 6474.514  | 5186.667  | AF085966    | 6397.015  | 8940.062  |
| NM_017675 | 566.516   | 496.473   | AF070543  | 4492.55   | 4252.556  | NM_005316   | 8553.856  | 10301.241 |
| NM_007014 | 3189.364  | 3309.123  | AF086525  | 1854.18   | 1540.333  | NM_016316   | 5703.146  | 6813.75   |
| AL096740  | 1655.241  | 1681.641  | AF086509  | 1307.78   | 1032.611  | NM_003366   | 21227.645 | 24791.398 |
| AF191545  | 1599.239  | 1859.162  | NM_014778 | 10534.344 | 7810.342  | NM_000057   | 3448.198  | 4011.264  |
| NM_014554 | 6759.115  | 6815.723  | AK001171  | 48337.223 | 35981.188 | NM_018343   | 10966.584 | 13523.003 |
| AL137484  | 781.135   | 790.355   | AF086491  | 11447.085 | 8442.042  | AK095793    | 1520.68   | 2143.207  |
| AK023968  | 3836.698  | 3574.57   | NM_014856 | 3699.385  | 2976.824  | NM_003177   | 6763.849  | 8879.419  |
| NM_004652 | 3454.813  | 3202.867  | NM_003492 | 2642.29   | 2486.707  | NM_017719   | 1446.969  | 2390.121  |
| AB040948  | 1005.427  | 744.925   | NM_00062C | 1367.277  | 1260.12   | AF064078    | 4198      | 5273.719  |
| AK025425  | 59676.859 | 56900.043 | NM_000905 | 11480.476 | 6119.307  | AL049688    | 4761.383  | 6389.538  |
| AK025974  | 12533.037 | 12628.543 | SR1       | 81303.414 | 63461.535 | NM_002737   | 5256.792  | 6007.51   |
| NM_016532 | 7365.486  | 7822.179  | SR3       | 57362.809 | 39229.727 | Z25427      | 5485.63   | 6399.051  |
| X98115    | 6092.404  | 6149.021  | SR5       | 7848.171  | 6287.182  | NM_004672   | 18156.594 | 22519.355 |
| NM_005781 | 6560.806  | 6186.76   | SR7       | 7951.892  | 44274.469 | NM_001353   | 7302.459  | 8089.208  |
| BC036740  | 12494.627 | 11759.985 | CY3Cy5    | 23261.963 | 1070.85   | NM_006214   | 3570.787  | 3597.523  |
| NM_001747 | 12534.651 | 11991.778 | U63828    | 9235.704  | 6888.812  | AJ010228    | 23102.328 | 19996.613 |
| NM_001148 | 50254.891 | 28933.26  | Z36794    | 2323.894  | 2231.05   | NM_005196   | 8335.094  | 7493.157  |
| AF242522  | 31554.771 | 27884.596 | NM_015696 | 2147.448  | 2077.488  | NM_018073   | 3202.835  | 3163.376  |
| AJ008152  | 2960.871  | 2546.105  | AK022551  | 11615.305 | 10324.889 | AI075338    | 5374.632  | 6890.038  |
| NM_003657 | 5568.745  | 4771.304  | AF085968  | 9001.761  | 8171.428  | BG744154    | 32110.832 | 40695.051 |
| NM_000586 | 504.024   | 693.55    | AK023665  | 1149.305  | 760.164   | Z11694      | 19848.07  | 24296.064 |
| S67970    | 1513.645  | 1538.873  | AB011136  | 7708.488  | 4704.379  | BF983177    | 5344.168  | 5608.027  |
| AF221520  | 10287.309 | 13722.862 | AF085898  | 10309.883 | 6204.181  | Z26317      | 3599.835  | 4148.771  |
| NM_006941 | 23352.029 | 25579.615 | AL161960  | 4454.858  | 3148.525  | X16983      | 57932.84  | 64217.582 |
| AB037852  | 1403.488  | 1807.729  | AK022485  | 1648.477  | 1064.791  | X56160      | 6876.156  | 8795.673  |
| NM_00536C | 371.131   | 543.231   | AK023395  | 12240.284 | 6526.327  | BG679991    | 2448.775  | 2850.198  |
| NM_004349 | 3130.141  | 3336.913  | AK023818  | 22470.842 | 16112.365 | H-Y 00097 I | 11053.18  | 14327.308 |
| NM_002092 | 29943.35  | 31412.307 | AK024139  | 778.702   | 551.129   | H-M 59964   | 884.317   | 965.982   |
| NM_005966 | 49014.457 | 48453.898 | AK023895  | 1382.287  | 839.939   | H-Y 00711 I | 62810.609 | 65960.281 |
| AK021416  | 1842.324  | 1955.077  | NM_02025C | 66206.922 | 67882.625 | H-X 16707 I | 6988.121  | 9528.364  |
| NM_018471 | 20863.166 | 20985.004 | AF055007  | 2683.924  | 2082.934  | H-U76456M   | 441.529   | 763.067   |
| NM_003819 | 35522.617 | 37050.281 | NM_012337 | 3440.532  | 1929.35   | AL038354    | 18775.156 | 24517.625 |
| NM_00656C | 13391.785 | 14467.322 | AL389879  | 37666.691 | 19745.426 | R14607      | 5714.362  | 6523.565  |
| NM_016183 | 12312.547 | 10920.837 | AK022869  | 3369.828  | 1810.746  | W84867      | 1330.02   | 1453.242  |
| NM_004872 | 14582.564 | 12471.739 | NM_016111 | 41663.684 | 24380.463 | NM_005716   | 8792.73   | 8881.565  |

|           |           |           |           |           |           |           |           |           |
|-----------|-----------|-----------|-----------|-----------|-----------|-----------|-----------|-----------|
| NM_00195E | 16950.949 | 14628.173 | AF085958  | 73938.375 | 62732.578 | NM_018264 | 2741.211  | 1574.213  |
| NM_004757 | 8777.285  | 8478.978  | AF086021  | 15498.528 | 7525.871  | NM_01458C | 3028.468  | 2183.783  |
| NM_015904 | 20613.338 | 20723.41  | AL117655  | 759.373   | 594.082   | AB028998  | 895.951   | 772.316   |
| NM_00196C | 55485.719 | 59072.902 | AK024472  | 5978.836  | 2864.797  | NM_01660E | 2705.927  | 2478.914  |
| NM_018122 | 10304.249 | 10067.149 | NM_01791E | 31310.016 | 16098.343 | NM_00285E | 8048.236  | 8834.675  |
| NM_00705E | 29389.563 | 23875.756 | NM_01785E | 78105.68  | 63018.949 | NM_004817 | 4243.296  | 4373.992  |
| NM_00039E | 983.825   | 810.924   | AK026494  | 8321.896  | 4849.603  | NM_01897E | 31595.453 | 39616.551 |
| NM_00152E | 1451.635  | 1316.252  | AK022067  | 556.618   | 467.121   | AB023215  | 36176.141 | 41408.777 |
| NM_017947 | 4098.991  | 5066.769  | AK023508  | 1773.874  | 951.829   | NM_001284 | 48939.121 | 52499.563 |
| NM_002494 | 11671.293 | 11384.724 | AK025840  | 6361.6    | 4149.47   | NM_00324E | 26073.439 | 25223.916 |
| M58510    | 6770.761  | 7573.776  | AK026915  | 5652.663  | 3496.499  | NM_00284E | 1157.727  | 1215.503  |
| NM_00336E | 632       | 749.333   | AL110259  | 1201.663  | 898.826   | U31099    | 2312.503  | 2562.212  |
| NM_000782 | 2033.246  | 2295.823  | AB033100  | 66462.656 | 49595.047 | NM_00110E | 37996.941 | 37694.672 |
| BE396003  | 9046.597  | 10184.493 | AL390138  | 5708.112  | 3138.084  | NM_00558E | 727.802   | 1198.535  |
| NM_003904 | 13172.025 | 13311.844 | AL137290  | 10644.676 | 6189.254  | NM_00207E | 10595.194 | 12486.568 |
| NM_006234 | 49850.008 | 48574.441 | NM_014124 | 65478.055 | 41109.262 | Y08756    | 60149.238 | 65859.102 |
| AB028987  | 11133.275 | 10582.324 | AF119888  | 1960.961  | 1119.286  | NM_00556E | 17309.166 | 20202.09  |
| NM_003594 | 6639.716  | 6315.098  | AK001551  | 5979.935  | 3863.6    | AY007090  | 1132.868  | 1585.32   |
| NM_005521 | 17319.344 | 17408.996 | AK001825  | 2795.457  | 2020.184  | NM_00510E | 5220.59   | 5788.964  |
| AF164438  | 2693.851  | 2456.182  | AK024714  | 2096.449  | 1610.917  | NM_00451E | 3127.373  | 2709.79   |
| AK022284  | 1077.335  | 911.261   | AK022363  | 3940.667  | 3506.345  | NM_006501 | 1496.649  | 1681.948  |
| AF060937  | 1663.878  | 1236.187  | NM_005181 | 3624.102  | 2351.883  | NM_00271E | 19026.027 | 22055.594 |
| AB040893  | 4432.171  | 4429.697  | AF026945  | 1789.472  | 1060.247  | AB035356  | 551.453   | 813.595   |
| AK025844  | 798.132   | 902.033   | AF143676  | 10115.078 | 6021.407  | AV752086  | 1604.699  | 1816.869  |
| NM_004024 | 2468.244  | 2065.959  | U66044    | 41002.82  | 22992.648 | NM_01610E | 23365.313 | 29086.402 |
| X52345    | 39095.047 | 34637.563 | NM_005247 | 66083.32  | 56246.234 | NM_00437E | 4990.63   | 4497.462  |
| NM_00696E | 14702.668 | 12306.99  | NM_00528E | 3223.372  | 1723.687  | NM_00027E | 1428.932  | 1280.937  |
| AF027142  | 52088.027 | 52768.672 | AL122089  | 1894.596  | 1080.252  | NM_016131 | 18493.566 | 21201.744 |
| NM_01637E | 27890.34  | 27434.182 | AA203665  | 12536.028 | 8204.188  | NM_00682E | 1574.837  | 2117.862  |
| AB020705  | 9438.73   | 9924.738  | U95646    | 3770.907  | 1683.296  | NM_01214E | 16803.828 | 15563.287 |
| NM_01433E | 1180.556  | 912.72    | Y16705    | 3045.341  | 2055.059  | NM_01642E | 3193.256  | 3136.618  |
| NM_00298C | 3595.967  | 4147.5    | AF279775  | 8931.045  | 5253.743  | AB011100  | 4361.187  | 5538.777  |
| NM_01588E | 2653.888  | 3128.06   | NM_00626E | 4774.694  | 2485.574  | U61741    | 3191.54   | 4042.682  |
| NM_02035E | 2269.812  | 2952.843  | AK026598  | 4321.474  | 2711.845  | NM_01240E | 12260.6   | 13918.042 |
| NM_00426E | 1045.493  | 1013.134  | AK023602  | 1597.542  | 998.737   | M76676    | 10575.73  | 11412.058 |
| NM_00710E | 45462.59  | 42025.914 | NM_018097 | 67795.688 | 57048.375 | NM_003857 | 1298.371  | 1790.488  |
| BG491613  | 15791.706 | 16185.907 | AF130043  | 956.055   | 794.507   | AL137690  | 1058.945  | 1474.213  |
| AA397813  | 57957.465 | 57573.027 | Y11167    | 4185.898  | 3607.8    | Z83804    | 5036.677  | 5062.921  |
| W47350    | 3647.407  | 3643.663  | AK026813  | 1791.119  | 1642.989  | NM_00438E | 4258.592  | 5155.957  |
| AI160964  | 3319.009  | 3547.704  | AK023083  | 6196.793  | 6893.771  | U67784    | 4068      | 5163.617  |
| W68291    | 24974.588 | 27073.414 | AF130093  | 2230.326  | 2682.272  | NM_00736E | 5668.572  | 6804.643  |
| N64384    | 2638.681  | 2399.758  | AF116622  | 1303.346  | 1333.869  | NM_00059E | 1311.623  | 1565.489  |
| H-X 53655 | 1389.191  | 1313.077  | AF217967  | 1846.215  | 2156.278  | NM_016584 | 39476.137 | 49546.914 |
| H-U 05770 | 16633.178 | 15773.715 | NM_017447 | 4673.642  | 3332.559  | NM_00181E | 5622.574  | 6371.947  |
| H-M 65199 | 16679.242 | 15237.502 | AL049452  | 972.992   | 612.908   | NM_000064 | 26350.164 | 27892.01  |
| H-M 32315 | 2768.802  | 3231.877  | NM_01662E | 7051.047  | 4830.643  | NM_003264 | 1169.803  | 1424.724  |
| H-V00536M | 7006.925  | 6945.374  | AK026976  | 4589.779  | 4829.624  | NM_00672E | 9861.081  | 9915.146  |
| H-D85429M | 29840.461 | 30956.096 | AF070559  | 1500.557  | 1070.864  | NM_00332E | 3924.566  | 4138.898  |
| BF439832  | 4870.738  | 4885.084  | D42043    | 51364.656 | 45965.086 | NM_00456E | 60889.805 | 60254.18  |
| BG819162  | 1170.474  | 1038.056  | BC024009  | 7853.093  | 5988.732  | NM_00020E | 9640.661  | 9624.529  |
| NM_01208E | 43496.469 | 39286.898 | AF128543  | 18475.174 | 19861.191 | NM_00549E | 14563.721 | 11644.704 |
| NM_00013E | 2335.139  | 2727.342  | NM_00418E | 1837.302  | 1646.995  | NM_006214 | 3502.736  | 3943.34   |
| NM_006664 | 4555.361  | 4939.702  | AF052119  | 1146.924  | 1211.037  | AJ010228  | 10711.206 | 10368.671 |

|           |           |           |           |           |           |           |           |           |
|-----------|-----------|-----------|-----------|-----------|-----------|-----------|-----------|-----------|
| NM_00241E | 970.951   | 920.149   | X94290    | 4927.217  | 5187.803  | NM_00519E | 7542.169  | 7481.398  |
| NM_00272E | 2730.981  | 2930.82   | AK026685  | 41096.801 | 42260.098 | AK021426  | 835.871   | 1122.951  |
| NM_00045C | 1697.152  | 2050.955  | AL133619  | 22486.158 | 22568.096 | NM_01807E | 2313.374  | 2972.859  |
| NM_00044E | 1294.357  | 1384.968  | AK025902  | 6903.131  | 8049.804  | AL137529  | 2617.369  | 3819.343  |
| NM_00451E | 6414.077  | 6366.557  | NM_004517 | 9257.96   | 7027.856  | NM_01233E | 8903.351  | 10729.09  |
| NM_00170E | 56727.555 | 56646.875 | AI017418  | 1073.664  | 1235.693  | AK026648  | 2947.36   | 3294.176  |
| NM_01773E | 6152.746  | 6125.869  | NM_00067E | 3829.157  | 3795.597  | NM_000497 | 2503.534  | 3466.483  |
| AB033044  | 9776.111  | 9069.786  | AF218006  | 68039.797 | 65753.836 | NM_017421 | 3697.255  | 3610.337  |
| AB014564  | 6870.752  | 6672.507  | AK026935  | 42015.086 | 39203.934 | AK025977  | 68942.828 | 65791.023 |
| NM_02023C | 12217.97  | 12127.963 | NM_02016E | 12835.545 | 11072.872 | AK023130  | 9427.814  | 11970.357 |
| NM_00676E | 53055.988 | 52768.906 | AK027124  | 67635.273 | 62277.383 | NM_00027E | 1785.704  | 2414.792  |
| NM_00635E | 4657.002  | 4767.584  | AB037813  | 559.778   | 735.19    | NM_00289E | 24723.178 | 32313.242 |
| NM_01643C | 2345.141  | 2783.788  | M31212    | 37394.918 | 34829.395 | NM_00048E | 2088.22   | 2762.424  |
| NM_004447 | 21440.711 | 22493.088 | NM_001821 | 14511.246 | 10005.28  | BE876237  | 3284.521  | 4474.561  |
| NM_001204 | 3546.104  | 3512.409  | NM_005647 | 2603.4    | 2531.156  | NM_005397 | 7856.912  | 8512.512  |
| BF131321  | 1145.092  | 1205.955  | X64978    | 24699.77  | 22251.914 | NM_00080E | 12624.285 | 14411.529 |
| NM_01211E | 3928.283  | 4337.344  | NM_00091E | 59695.383 | 55835.402 | NM_00632C | 2818.087  | 3165.575  |
| NM_00002C | 3798.197  | 3737.787  | NM_00234E | 3697.789  | 2941.716  | AB014511  | 9681.759  | 10579.096 |
| NM_00095E | 917.761   | 1029.87   | U57971    | 3219.276  | 3037.216  | NM_01425E | 7921.842  | 7778.749  |
| AB033091  | 5384.94   | 5802.916  | X89673    | 2593.226  | 2224.837  | NM_00166E | 17087.717 | 18949.602 |
| NM_004557 | 4412.614  | 3579.783  | AK024593  | 4090.261  | 3423.326  | NM_00571E | 9955.597  | 10096.528 |
| NM_00374E | 6255.915  | 6741.885  | Z83934    | 2028.097  | 2077.172  | NM_018264 | 2456.486  | 3061.089  |
| NM_005094 | 8407.429  | 9692.659  | NM_01835E | 5894.894  | 6479.181  | NM_01458C | 3095.078  | 3715.62   |
| BE382905  | 1618.251  | 1592.053  | AK022020  | 4261.649  | 4321.019  | AB028998  | 1049.689  | 1371.64   |
| NM_00215E | 16659.6   | 20602.047 | U17634    | 734.668   | 439.04    | NM_00015E | 567.349   | 733.007   |
| NM_001701 | 1202.29   | 1150.5    | AK000263  | 24456.756 | 23732.555 | NM_00203E | 1180.954  | 1251.557  |
| AK022558  | 6923.947  | 7505.855  | Y13895    | 2342.487  | 2636.851  | NM_004111 | 5249.857  | 6458.276  |
| NM_00647E | 60249.457 | 59962.305 | L14723    | 23848.916 | 21836.887 | AF085966  | 8151.022  | 12742.898 |
| AK023787  | 2968.894  | 2888.507  | AK024462  | 46171.664 | 47625.805 | NM_00531E | 8602.048  | 13264.485 |
| NM_00213E | 1705.568  | 1786.415  | NM_019601 | 1902.117  | 1806.671  | NM_01631E | 7194.129  | 7903.397  |
| NM_015697 | 10784.421 | 13156.939 | NM_00220E | 2065.411  | 2412.076  | NM_00336E | 18719.197 | 18653.506 |
| AF086489  | 2116.271  | 2017.938  | NM_007074 | 1366.258  | 1533.627  | NM_000057 | 2383.717  | 2016.978  |
| AB018258  | 784.685   | 675.969   | NM_006614 | 1178.025  | 1237.54   | NM_01834E | 9601.124  | 10604.902 |
| NM_00595E | 57101.141 | 34106.445 | NM_00223C | 9851.933  | 9628.197  | AK095793  | 1516.858  | 1962.048  |
| BF337921  | 1498.201  | 1802.99   | NM_00381E | 15455.624 | 12796.999 | NM_003177 | 6043.509  | 7163.642  |
| U53532    | 8852.123  | 9747.018  | NM_00143C | 2525.038  | 2612.535  | NM_01771E | 1537.858  | 1828.638  |
| NM_00174C | 3787.793  | 3816.828  | AB010098  | 1670.995  | 1697.508  | AF064078  | 3854.014  | 4607.127  |
| NM_012484 | 11339.562 | 11696.712 | U17989    | 4353.332  | 3902.386  | AL049688  | 3621.261  | 4267.197  |
| AL096732  | 2095.605  | 2478.576  | U62325    | 4444.343  | 4031.543  | NM_002737 | 4494.906  | 4200.632  |
| AB006423  | 1298.923  | 1816.481  | AL137595  | 2028.757  | 2185.951  | Z25427    | 4603.343  | 4293.352  |
| AJ132084  | 1094.007  | 1253.152  | NM_01802E | 2458.009  | 2180.437  | NM_00467E | 15629.165 | 17448.072 |
| NM_00571E | 57833.641 | 59215.754 | AF249267  | 65275.395 | 58779.273 | NM_00135E | 4173.901  | 4538.244  |
| NM_00346E | 5847.872  | 5451.127  | NM_004113 | 1103.529  | 1109.271  | CY3Cy5    | 2910.358  | 214.564   |
| NM_00609E | 12895.563 | 13236.979 | X84939    | 7313.149  | 6900.364  | AF252284  | 5375.971  | 4132.563  |
| AK023915  | 9553.753  | 11476.39  | NM_01832C | 57630.781 | 56929.789 | BU727558  | 3209.64   | 2361.978  |
| AB051453  | 3482.167  | 4309.332  | NM_00206E | 9642.31   | 9878.235  | AK025794  | 12364.982 | 9495.908  |
| AK026842  | 2069.845  | 2257.144  | NM_01605E | 13306.255 | 13233.258 | NM_003541 | 2170.879  | 2065.456  |
| NM_00239E | 1057.05   | 1112.889  | AF188492  | 2033.582  | 1781.489  | AK024522  | 2795.917  | 1872.117  |
| AB023203  | 7086.646  | 7334.742  | M65066    | 34362.805 | 39244.906 | NM_00719E | 4242.009  | 3718.437  |
| NM_01496E | 3968.751  | 4754.949  | NM_016951 | 4786.661  | 6865.263  | NM_01495E | 953.143   | 735.677   |
| NM_00425E | 5369.805  | 5679.182  | NM_01232E | 2165.222  | 2720.2    | M33197    | 75114.195 | 64006.227 |
| NM_016271 | 5173.421  | 5376.77   | NM_00308E | 67541.25  | 67360.75  | AK023220  | 1214.211  | 1144      |
| NM_01661E | 4839.833  | 4360.639  | NM_016084 | 45273.492 | 45072.73  | AK024566  | 1263.911  | 1623.397  |

|             |           |           |           |           |           |           |           |           |
|-------------|-----------|-----------|-----------|-----------|-----------|-----------|-----------|-----------|
| NM_014481   | 5276.447  | 6048.272  | AF095289  | 51060.141 | 60137.547 | AF038182  | 3317.816  | 4285.622  |
| U22172      | 1492.35   | 1694.495  | NM_005537 | 8559.119  | 8529.222  | NM_016475 | 5312.483  | 5843.576  |
| AB032960    | 3312.113  | 3751.837  | AC003962  | 1174.57   | 905.862   | AF086472  | 2101.872  | 2360.777  |
| NM_014264   | 29003.359 | 27168.113 | NM_019003 | 6333.037  | 5893.752  | AF252284  | 5623.926  | 5664.349  |
| AF020089    | 1381.759  | 1435.796  | NM_015935 | 27081.279 | 26134.791 | BU727558  | 3867.063  | 4020.912  |
| NM_006257   | 5827.297  | 5493.292  | AF182412  | 2140.961  | 2483.079  | SR1       | 82634.328 | 63822.84  |
| NM_016281   | 10221.497 | 9876.421  | AK027200  | 3029.841  | 3360.04   | SR3       | 43934.523 | 59964.535 |
| NM_004734   | 30154.213 | 34756.992 | S78372    | 540.626   | 766.717   | SR5       | 6349.94   | 10291.341 |
| AK024793    | 3517.282  | 3267.18   | U03106    | 19871.912 | 23638.828 | SR7       | 3733.585  | 41303.07  |
| NM_004877   | 15652.268 | 16233.434 | NM_000075 | 34562.32  | 40386.137 | SR9       | 9842.481  | 2287.293  |
| L10284      | 58483.699 | 60961.355 | NM_006845 | 50333.055 | 53579.492 | CY3Cy5    | 1791.432  | 170.092   |
| NM_000276   | 1324.139  | 1205.638  | NM_014885 | 922.493   | 1134.932  | L77559    | 1019.89   | 806.409   |
| NM_000019   | 47854.703 | 44303.41  | M73239    | 1082.906  | 1632.26   | NM_005596 | 3823.449  | 2751.224  |
| AK023701    | 3008.506  | 2740.07   | NM_004945 | 7701.242  | 7508.001  | Y10515    | 1563.642  | 1277.741  |
| NM_014333   | 885.853   | 1078.334  | NM_020242 | 3209.023  | 2669.056  | AK023636  | 12218.199 | 8319.831  |
| NM_002980   | 3833.799  | 4188.023  | NM_001788 | 37454.426 | 46072.648 | D25272    | 3955.387  | 3484.677  |
| NM_015886   | 2103.286  | 2735.025  | NM_007178 | 64107.348 | 62029.477 | M33197    | 75783.625 | 64061.242 |
| NM_020358   | 1110.051  | 906.857   | NM_017682 | 1205.24   | 1130.87   | NM_020166 | 3337.024  | 3634.234  |
| NM_004262   | 833.666   | 887.887   | NM_002209 | 12445.574 | 10916.914 | AL832699  | 11593.392 | 13497.292 |
| NM_007102   | 46765.848 | 46698.922 | NM_002291 | 980.371   | 911.698   | NM_012191 | 2706.956  | 2062.179  |
| BG491613    | 14898.396 | 16523.469 | AL137477  | 31585.658 | 32120.676 | M33197    | 66425.25  | 66957.484 |
| AA397813    | 58381.082 | 58121.727 | NM_014256 | 10058.709 | 10340.913 | AK000757  | 791.816   | 1247.505  |
| W47350      | 3844.191  | 3582.241  | NM_015967 | 8450.544  | 10141.94  | AL359577  | 1769.193  | 1955.204  |
| AI160964    | 3140.456  | 3688.753  | NM_003595 | 863.348   | 1054.618  | NM_018136 | 6481.745  | 5832.308  |
| W68291      | 23512.656 | 22416     | NM_002409 | 4365.83   | 5497.753  | NM_014805 | 6453.86   | 7912.331  |
| N64384      | 2513.908  | 1948.064  | NM_004994 | 65989.727 | 61598.926 | AF052120  | 4812.798  | 10008.975 |
| H-X 53655 I | 1370.728  | 1269.545  | NM_006610 | 49544.891 | 46721.105 | NM_014871 | 2040.918  | 1775.361  |
| H-U 05770 I | 14881.324 | 16102.78  | NM_017626 | 998.084   | 856.206   | M33197    | 66435.188 | 68118.867 |
| H-M 65199   | 16080.696 | 14874.87  | NM_003791 | 9832.204  | 10039.063 | AL137552  | 6099.913  | 5415.459  |
| H-M 32315   | 2811.824  | 2460.939  | NM_018017 | 11251.29  | 10748.176 | M33197    | 66439.695 | 67717.234 |
| H-V00536M   | 6989.588  | 6440.67   | AK001296  | 38840.156 | 39291.699 | AK024779  | 2312.495  | 1700.594  |
| H-D85429M   | 29692.498 | 27422.494 | AK000173  | 1580.852  | 1060.042  | AK024406  | 1991.76   | 1822.877  |
| BF439832    | 5445.272  | 5451.04   | NM_018365 | 6092.079  | 5341.819  | AK024568  | 45826.285 | 33628.848 |
| BG819162    | 1474.391  | 1194.036  | NM_006586 | 59255.125 | 56807.355 | AK024873  | 2168.001  | 2176.865  |
| M38449      | 27247.744 | 23839.898 | AJ272180  | 4541.616  | 4247.158  | M33197    | 66629.844 | 75427.273 |
| AK025495    | 712.726   | 750.523   | AK025709  | 2835.443  | 3256.379  | AK024981  | 47300.688 | 43371.199 |
| NM_001091   | 590.123   | 639.059   | NM_019016 | 34710.328 | 32992.82  | AK027246  | 2338.109  | 2571.702  |
| NM_002416   | 781.061   | 935.556   | NM_012261 | 31009.42  | 31291.908 | U80766    | 8368.744  | 9313.638  |
| NM_002728   | 2324.709  | 2933.51   | AK022643  | 3645.366  | 2575.861  | AK001638  | 2881.376  | 4562.184  |
| NM_000450   | 1354.25   | 1903.847  | AB046808  | 7526.37   | 8043.551  | AF161386  | 22478.154 | 26617.592 |
| NM_000448   | 1299.969  | 1398.103  | AK026265  | 5523.008  | 6663.047  | AL365369  | 4752.196  | 4851.889  |
| NM_004513   | 6401.349  | 7419.404  | AK027179  | 2557.422  | 2672.315  | AK025454  | 9444.013  | 9476.954  |
| NM_001708   | 58193.094 | 58480.895 | AF015313  | 2008.106  | 2152.784  | M33197    | 70876.773 | 64196.988 |
| NM_017735   | 5928.476  | 6184.404  | NM_006466 | 5729.458  | 4989.083  | X05826    | 17677.898 | 16491.545 |
| AB033044    | 10906.223 | 9405.745  | NM_005681 | 5546.542  | 5373.328  | Y11608    | 1251.086  | 1382.074  |
| AB014564    | 7130.75   | 7345.217  | NM_015156 | 7374.442  | 6884.21   | X76386    | 374.834   | 1395.614  |
| NM_020230   | 10849.621 | 10255.579 | NM_012384 | 7305.99   | 6182.594  | AJ001872  | 21350.279 | 26213.576 |
| NM_006762   | 51375.93  | 52423.559 | NM_004653 | 13663.708 | 11257.877 | M33197    | 66254.82  | 68603.711 |
| NM_006352   | 4479.537  | 4654.917  | AF233453  | 10537.231 | 13010.712 | M33197    | 65114.371 | 65148.426 |
| NM_016430   | 2240.499  | 2433.541  | D87454    | 35490.758 | 28612.652 | AL137556  | 3062.219  | 2784.99   |
| NM_004447   | 20267.221 | 21491.764 | NM_007020 | 14256.695 | 12430.323 | NM_014696 | 16802.607 | 11316.452 |
| NM_001204   | 3167.818  | 3452.576  | NM_000713 | 57315.473 | 52437.461 | AL359055  | 4693.115  | 2862.493  |
| BF131321    | 1007.941  | 1065.074  | NM_016055 | 31011.709 | 31027.186 | NM_014906 | 4735.009  | 3997.228  |



|           |           |           |           |           |           |           |           |           |
|-----------|-----------|-----------|-----------|-----------|-----------|-----------|-----------|-----------|
| NM_016540 | 314.352   | 614.469   | NM_013291 | 22958.4   | 18988.168 | AB037771  | 572.301   | 786.834   |
| NM_012116 | 4235.392  | 4236.105  | NM_002936 | 28095.111 | 26255.977 | AK025931  | 66179.039 | 65395.523 |
| NM_000020 | 3487.514  | 2880.42   | NM_014161 | 11679.188 | 12183.804 | M33197    | 3934.817  | 3356.251  |
| NM_000956 | 821.975   | 800.099   | BF312817  | 14376.007 | 14356.19  | AK021972  | 3312.003  | 2708.985  |
| AB033091  | 5150.279  | 6385.125  | AK024961  | 10848.74  | 13100.391 | M33197    | 70091.688 | 64218.602 |
| NM_004557 | 4957.249  | 4045.777  | NM_002711 | 1957.494  | 2651.832  | AK001083  | 3836.667  | 4890.492  |
| NM_016372 | 25872.58  | 22767.248 | NM_000199 | 66225.57  | 63818.82  | AK000185  | 3196.786  | 3556.812  |
| AB020705  | 9145.87   | 7978.649  | NM_003778 | 61872.996 | 74512.719 | NM_017962 | 2272.379  | 2592.914  |
| BE382905  | 1247.863  | 1669.553  | NM_001041 | 959.911   | 1071.815  | NM_017834 | 958.262   | 1290.844  |
| NM_002152 | 14290.813 | 18466.59  | NM_000693 | 924.626   | 1138.063  | AK000865  | 1359.6    | 1424.516  |
| NM_001701 | 1130.841  | 1262.649  | AK023263  | 4981.062  | 5220.452  | M33197    | 66483.398 | 64259.457 |
| AK022558  | 7198.604  | 7944.707  | NM_004622 | 5413.778  | 5932.732  | AF147349  | 16947.824 | 10310.949 |
| NM_006476 | 57234.074 | 58263.699 | AK021445  | 4536.2    | 3969.764  | AL050346  | 51043.449 | 32826.152 |
| AK023787  | 2775.779  | 2779.881  | NM_017934 | 33023.137 | 40162.465 | AK001520  | 11693.911 | 7394.484  |
| NM_002133 | 1822.35   | 1884.752  | NM_014168 | 63013.855 | 62644.676 | AK021731  | 729.94    | 589.171   |
| NM_015697 | 10237.709 | 11268.795 | AF211971  | 14432.855 | 10384.757 | D90070    | 28285.371 | 22984.203 |
| AF086489  | 2742.365  | 1769.634  | NM_002931 | 6595.27   | 5076.414  | Y12235    | 2033.319  | 1896.639  |
| AB018258  | 830.956   | 1243.75   | NM_013448 | 61912.242 | 60140.898 | AF132601  | 888.834   | 902.532   |
| NM_005953 | 58718.469 | 29785.322 | X65232    | 60666.582 | 56931.703 | M33197    | 68823.469 | 64090.262 |
| BF337921  | 1455.581  | 1680.729  | U12767    | 1010.689  | 925.123   | AF086179  | 6005.907  | 4496.164  |
| U53532    | 7655.71   | 8686.574  | U17630    | 3816.986  | 4447.368  | AK025807  | 9063.379  | 9515.631  |
| NM_001740 | 3403.65   | 3655.213  | M33782    | 7289.964  | 6346.172  | AK022478  | 830.612   | 1240.765  |
| NM_012484 | 11030.048 | 11257.806 | NM_002196 | 2384.946  | 2545.291  | NM_018381 | 1817.747  | 1746.707  |
| AL096732  | 2008.758  | 2718.726  | NM_017755 | 33445.41  | 43972.27  | AK026277  | 11909.752 | 12802.832 |
| AB006423  | 1141.189  | 1226.227  | NM_018416 | 6618.744  | 7746.189  | U10509    | 4444.305  | 5965.449  |
| AJ132084  | 1314.167  | 1479.214  | NM_004606 | 26190.766 | 29089.041 | NM_007165 | 72117.188 | 64024.738 |
| NM_005719 | 58927.848 | 59038.848 | D70833    | 67773.594 | 65041.293 | NM_014018 | 15743.092 | 17264.939 |
| NM_003462 | 5655.238  | 4959.367  | NM_016621 | 7308.921  | 8096.533  | AF085956  | 3662.858  | 4026.592  |
| NM_006093 | 10727.043 | 10405.584 | NM_002975 | 8228.705  | 8491.164  | L37699    | 2638.246  | 2164.092  |
| NM_000139 | 964.186   | 931.556   | AK023511  | 25841.727 | 28583.219 | M33197    | 68274.859 | 63572.004 |
| NM_006664 | 4417.73   | 4467.168  | NM_014556 | 17907.141 | 18533.32  | AL050173  | 2960.855  | 1827.548  |
| AB051453  | 3228.723  | 3658.026  | NM_001615 | 67389.195 | 73608.156 | D80002    | 3685.891  | 1742.67   |
| AK026842  | 1359.036  | 1470.877  | NM_002725 | 3243.935  | 2911.037  | U17637    | 25770.027 | 20486.541 |
| NM_002395 | 1710.178  | 1318.005  | NM_014375 | 57823.676 | 58798.887 | AF207831  | 2227.3    | 1780.331  |
| AB023203  | 6741.732  | 7449.377  | NM_017812 | 48009.191 | 56800.016 | AK023174  | 1098.455  | 1625.226  |
| NM_014963 | 4132.031  | 4940.086  | AF204173  | 3419.264  | 3721.134  | M33197    | 68284.859 | 64170.02  |
| NM_004259 | 5900.666  | 5960.394  | J03260    | 13708.369 | 14693.682 | AK024207  | 9213.866  | 8125.952  |
| NM_016271 | 4608.603  | 5031.472  | U13738    | 6628.565  | 7456.644  | AK021843  | 2076.7    | 2955.964  |
| NM_016619 | 3906.336  | 4144.461  | AF068236  | 61669.148 | 69364.875 | AF075025  | 2364.044  | 2982.554  |
| NM_014481 | 5220.624  | 4815.426  | H94487    | 11021.609 | 10540.461 | AF116623  | 1320.622  | 1283.67   |
| U22172    | 1599.035  | 1625.762  | BG681747  | 49468.367 | 55909.023 | AF088008  | 5055.556  | 5109.749  |
| AB032960  | 3536.706  | 4344.237  | H63077    | 3270.024  | 3644.901  | AK023528  | 5722.966  | 6247.961  |
| NM_014264 | 28104.264 | 28199.459 | AA679352  | 18460.988 | 18633.824 | AK023043  | 4849.476  | 5382.283  |
| AF020089  | 1788.152  | 1869.687  | AA437291  | 3706.486  | 3993.626  | NM_004688 | 7261.9    | 4800.424  |
| NM_006257 | 5269.863  | 5838.598  | X04503    | 6147.593  | 6546.819  | AB037725  | 939.568   | 663.086   |
| NM_016281 | 10648.517 | 9728.249  | D45917    | 13599.631 | 13886.563 | M33197    | 67214.898 | 59214.496 |
| NM_004734 | 29757.98  | 30458.977 | X52001    | 17106.428 | 17204.92  | NM_004860 | 6946.75   | 5368.677  |
| AK024793  | 3501.727  | 4241.066  | BI823872  | 1134.98   | 1272.986  | AF217190  | 14205.742 | 15110.641 |
| NM_004877 | 14670.844 | 15489.411 | AA430552  | 20203.4   | 20406.219 | NM_002725 | 14015.137 | 20814.682 |
| L10284    | 59953.047 | 60148.055 | X66142    | 12422.692 | 13041.415 | M33197    | 66602.586 | 80836.711 |
| NM_000276 | 1580.885  | 1443.144  | NM_005913 | 3834.334  | 4223.425  | AK025266  | 6064.042  | 10617.538 |
| NM_000019 | 46406.625 | 47987.305 | R45054    | 22789.508 | 25393.582 | AK001843  | 5082.25   | 7342.905  |
| AK023701  | 3119.332  | 2867.656  | NM_003780 | 63453.418 | 65449.836 | AK000548  | 65872.195 | 69379     |

|           |           |           |           |           |           |           |           |           |
|-----------|-----------|-----------|-----------|-----------|-----------|-----------|-----------|-----------|
| NM_003742 | 6526.789  | 5534.294  | NM_003731 | 57901.09  | 58476.051 | AF009302  | 2090.88   | 1879.035  |
| NM_005094 | 9521.282  | 9025.786  | NM_005446 | 54682.418 | 54048.016 | M33197    | 66381.773 | 68806.945 |
| NM_015886 | 2044.525  | 2256.471  | NM_013292 | 39515.215 | 43799.539 | AK022273  | 18128.984 | 18897.277 |
| NM_020358 | 1053.241  | 1238.114  | NM_002387 | 8245.745  | 8113.387  | NM_015882 | 4412.938  | 4028.361  |
| NM_004262 | 837.61    | 1063.159  | NM_000069 | 11675.591 | 12857.18  | AK027161  | 686.052   | 714.087   |
| NM_007102 | 46437.695 | 51203.012 | AB023217  | 3278.73   | 3194.77   | AK024271  | 2014.523  | 2243.27   |
| BG491613  | 14508.85  | 19225.574 | L08902    | 4157.965  | 3952.18   | AK021650  | 30875.35  | 33258.387 |
| AA397813  | 51100.395 | 56386.797 | J02639    | 15502.023 | 15464.845 | AL050210  | 17174.666 | 10824.837 |
| W47350    | 4346.56   | 3803.996  | M58050    | 13853.741 | 15641.193 | NM_004132 | 9615.71   | 6095.904  |
| AI160964  | 3003.768  | 2905.972  | NM_007263 | 34097.809 | 37930.102 | NM_014844 | 4897.751  | 2340.099  |
| W68291    | 24742.531 | 27139.67  | AF206020  | 13964.285 | 13989.22  | M33197    | 63074.461 | 61976.359 |
| N64384    | 2476.672  | 2094.276  | NM_014410 | 10971.024 | 9322.938  | NM_018492 | 7140.276  | 9086.559  |
| H-X 53655 | 1333.206  | 1272.915  | AF305835  | 840.676   | 1097.585  | NM_003377 | 19876.449 | 27056.965 |
| H-U 05770 | 14698.166 | 16553.379 | AF312769  | 2373.434  | 2585.363  | NM_002220 | 22783.889 | 25859.965 |
| H-M 65199 | 15558.453 | 15225.167 | AB020668  | 7391.797  | 7707.09   | AB033034  | 9960.944  | 13044.348 |
| H-M 32315 | 3675.017  | 3251.592  | NM_006203 | 59535.297 | 58027.449 | D38169    | 19189.865 | 27156.676 |
| H-V00536M | 6849.543  | 6043.566  | NM_013261 | 4390.932  | 4953.729  | M33197    | 66414.164 | 73327.047 |
| H-D85429M | 29215.689 | 25151.695 | AF309553  | 13551.67  | 14097.276 | AJ293294  | 9983.059  | 16136.614 |
| BF439832  | 4717.346  | 4960.473  | NM_003605 | 6356.869  | 5801.296  | NM_018171 | 3947.984  | 5195.124  |
| BG819162  | 1979.315  | 1384.034  | NM_006139 | 2367.021  | 2261.601  | NM_002447 | 63747.676 | 62918.391 |
| M38449    | 25208.066 | 26248.498 | NM_001900 | 67249.711 | 71563.5   | NM_014145 | 28183.295 | 36958.438 |
| AK025495  | 787.667   | 972.174   | NM_003993 | 12770.814 | 13318.369 | NM_002223 | 6108.076  | 4605.463  |
| NM_001091 | 737.394   | 729.778   | NM_002150 | 23248.99  | 21262.059 | M33197    | 66439.82  | 72006.789 |
| AK023915  | 9235.938  | 8563.258  | NM_004595 | 23981.02  | 28407.367 | NM_005490 | 43758.867 | 42438.23  |
| AB014564  | 7746.888  | 9174.631  | NM_020178 | 1218.986  | 1479.347  | NM_003151 | 4462.782  | 3668.997  |
| NM_020230 | 12398.909 | 14237.594 | NM_002264 | 4212.719  | 4125.488  | NM_006811 | 9387.363  | 6369.943  |
| NM_006762 | 53942.594 | 55018.805 | NM_014754 | 53867.313 | 59786.059 | NM_005601 | 6114.125  | 4525.59   |
| NM_006352 | 4662.567  | 5532.613  | D49387    | 3223.553  | 3194.937  | NM_016151 | 51112.602 | 35841.813 |
| NM_016430 | 2296.552  | 3471.599  | AF050146  | 26589.955 | 25395.463 | AK026270  | 1700.424  | 1026.965  |
| NM_004447 | 21872.705 | 25955.16  | NM_000116 | 7210.974  | 7560.212  | NM_004556 | 16263.331 | 6949.71   |
| NM_001204 | 3317.753  | 3805.161  | NM_006698 | 19253.637 | 22058.301 | D90075    | 3763.647  | 1841.819  |
| BF131321  | 1011.944  | 1641.849  | NM_006804 | 43473.59  | 48884.246 | AK023827  | 26160.514 | 30970.924 |
| NM_012116 | 4154.091  | 4284.18   | AK025641  | 63219.875 | 63209.883 | AK021702  | 9128.615  | 11068.27  |
| NM_000020 | 3394.157  | 3095.445  | AB040457  | 715.219   | 908.033   | NM_003885 | 6035.917  | 7872.937  |
| NM_002845 | 427.159   | 556.592   | AB014514  | 9304.311  | 10238.858 | AL161977  | 1314.473  | 1669.93   |
| NM_000956 | 484.591   | 577.171   | NM_002865 | 22553.314 | 23050.801 | NM_016448 | 32404.928 | 42213.605 |
| NM_002442 | 17733.512 | 17659.475 | NM_003566 | 6330.196  | 4750.439  | NM_003936 | 4821.822  | 5813.919  |
| AB033091  | 5254.001  | 6680.173  | NM_004249 | 932.068   | 910.172   | M33197    | 63807.367 | 64061.965 |
| NM_004557 | 5100.434  | 4237.065  | AK026315  | 875.243   | 717.453   | NM_002688 | 2565.577  | 2421.537  |
| NM_014757 | 4205.891  | 3899.219  | NM_007159 | 62925.664 | 60366.961 | NM_004415 | 14252.026 | 12133.944 |
| NM_017893 | 566.813   | 377.962   | NM_018390 | 7037.003  | 7444.466  | NM_014262 | 994.425   | 1236.031  |
| NM_001584 | 12806.14  | 11775.173 | AB037724  | 17230.342 | 17702.178 | NM_007278 | 36595.195 | 43161.086 |
| NM_012259 | 24075.332 | 24605.098 | AK025086  | 5772.627  | 6002.612  | NM_005219 | 27792.818 | 30334.76  |
| AF272357  | 2095.004  | 1917.434  | AK026151  | 25475.158 | 22240.984 | NM_004723 | 8732.26   | 6812.639  |
| NM_016372 | 26191.895 | 23618.115 | NM_014140 | 3906.398  | 4347.125  | M33197    | 66262.516 | 69800.164 |
| AB020705  | 9179.048  | 8211.683  | NM_002916 | 9434.519  | 9368.897  | NM_018413 | 5148.289  | 4290.155  |
| NM_014333 | 984.021   | 930.324   | M20700    | 13408.958 | 12912.864 | AB018299  | 55647.082 | 46071.488 |
| NM_002980 | 3840.645  | 3673.409  | NM_001034 | 18585.766 | 18812.934 | NM_005245 | 7622.874  | 5199.633  |
| NM_016274 | 3116.234  | 3197.788  | NM_002689 | 7010.09   | 6932.259  | NM_002941 | 2027.408  | 1457.315  |
| NM_014946 | 3752.028  | 4399.706  | NM_017686 | 1839.966  | 2035.891  | AK025605  | 4254.722  | 2826.705  |
| NM_014251 | 4582.855  | 5128.735  | AL096734  | 1927.103  | 2071.864  | NM_003783 | 1343.4    | 782.176   |
| AK022750  | 5279.837  | 6032.733  | AK000800  | 5676.448  | 6684.502  | NM_007000 | 9934.818  | 3514.272  |
| NM_004251 | 12221.566 | 13094.703 | NM_018154 | 11888.844 | 11795.804 | M23161    | 17111.557 | 14654.383 |

|           |           |           |           |           |           |           |           |           |
|-----------|-----------|-----------|-----------|-----------|-----------|-----------|-----------|-----------|
| BF337921  | 1715.71   | 2294.673  | NM_005358 | 861.007   | 1121.985  | NM_003197 | 19044.752 | 23083.266 |
| U53532    | 7979.083  | 9923.121  | BC006287  | 9924.81   | 10212.438 | AF176705  | 13758.74  | 16516.047 |
| NM_001740 | 4313.462  | 4372.594  | AB023198  | 15641.154 | 14144.981 | D29012    | 32156.047 | 39986.949 |
| NM_012484 | 11504.69  | 12292.802 | AF304163  | 20414.932 | 21051.977 | NM_017414 | 1226.856  | 1407.702  |
| AL096732  | 2018.818  | 2745.872  | NM_005231 | 16921.135 | 17576.635 | NM_012179 | 29201.709 | 32823.668 |
| AB006423  | 1040.875  | 1611.627  | AF064729  | 5569.261  | 5045.551  | NM_002793 | 6828.987  | 6928.056  |
| AJ132084  | 714.885   | 856.994   | NM_005412 | 43645.871 | 48491.074 | NM_004788 | 2965.212  | 3700.968  |
| NM_005719 | 56764.832 | 57604.754 | NM_012113 | 5498.672  | 5624.763  | M33197    | 66477.484 | 69302.953 |
| NM_003462 | 6067.982  | 5538.288  | NM_014556 | 16791.459 | 17242.332 | AL442083  | 12035.025 | 11326.463 |
| NM_006093 | 11492.521 | 11695.133 | NM_001615 | 67675.93  | 69638.813 | D63487    | 12062.488 | 11768.387 |
| NM_000139 | 1510.811  | 1492.582  | NM_002725 | 3512.182  | 2991.408  | AK097791  | 23229.533 | 24135.787 |
| NM_006664 | 3954.808  | 3260.465  | NM_014375 | 58648.445 | 59761.215 | NM_020367 | 1813.88   | 2169.301  |
| NM_002416 | 914.989   | 819.262   | NM_017812 | 43466.398 | 53973.602 | AK022705  | 5373.461  | 6830.484  |
| NM_002728 | 2795.61   | 2632.843  | AF204173  | 3108.374  | 3898.606  | NM_016404 | 31180.133 | 34673.508 |
| NM_000450 | 1429.967  | 1884.666  | J03260    | 13183.635 | 13679.207 | L03426    | 7242.369  | 7034.791  |
| NM_000448 | 1159.867  | 1022.207  | U13738    | 6357.299  | 6796.54   | NM_004324 | 5390.542  | 4088.235  |
| NM_004513 | 5830.171  | 5682.622  | AF068236  | 63382.703 | 70198.406 | NM_005614 | 40651.738 | 34244.219 |
| NM_001708 | 60822.637 | 61836.016 | H94487    | 11220.599 | 11588.945 | AJ133115  | 10693.683 | 5615.736  |
| NM_017735 | 6146.382  | 6480.329  | BG681747  | 49846.695 | 58249.691 | AF042831  | 776.722   | 444.996   |
| AB033044  | 10222.166 | 8714.834  | H63077    | 3356.652  | 3692.78   | X51630    | 17450.607 | 6400.826  |
| NM_000276 | 1658.384  | 1810.065  | AA679352  | 19130.754 | 20941.551 | AF208502  | 39833.816 | 45696.418 |
| NM_003742 | 5975.319  | 7486.316  | AA437291  | 3752.055  | 3788.161  | M33197    | 62561.262 | 70859.641 |
| NM_005094 | 8226.329  | 9192.026  | X04503    | 6384.815  | 6853.112  | AF264750  | 66273.867 | 68941.898 |
| BE382905  | 1388.19   | 1770.151  | D45917    | 13882.429 | 15048.149 | NM_006980 | 5327.271  | 6037.516  |
| NM_002152 | 14226.608 | 16426.223 | X52001    | 18510.541 | 17750.205 | AK023904  | 24678.533 | 26257.418 |
| NM_001701 | 868.895   | 1050.484  | BI823872  | 1540.631  | 1329.611  | NM_017956 | 36887.605 | 35189.191 |
| AK022558  | 6143.14   | 6795.301  | AA430552  | 18961.299 | 19895.203 | NM_017826 | 1044.201  | 1247.084  |
| NM_006476 | 59046.551 | 64770.672 | X66142    | 10201.531 | 10103.313 | NM_016496 | 3076.707  | 3165.188  |
| AK023787  | 2811.942  | 2560.862  | NM_005913 | 2235.293  | 2445.098  | NM_014309 | 15633.347 | 15760.079 |
| NM_015697 | 10945.026 | 11029.628 | R45054    | 17363.625 | 20793.387 | M33197    | 62415.512 | 62786.25  |
| AF086489  | 1664.231  | 2108.042  | AL117398  | 8728.424  | 8696.491  | NM_004094 | 7733.981  | 8097.162  |
| NM_032943 | 11483.102 | 12342.039 | AY007158  | 61041.566 | 61592.547 | NM_020236 | 4700.165  | 4568.303  |
| NM_007177 | 5571.92   | 5982.774  | NM_001720 | 8090.222  | 7904.495  | AK027059  | 27720.367 | 31147.283 |
| NM_000809 | 1087.521  | 1062.275  | NM_013292 | 34017.836 | 42543.988 | AF151109  | 46953.746 | 47136.672 |
| AB018258  | 869.702   | 852.581   | NM_002387 | 6908.959  | 7224.36   | NM_004751 | 3651.729  | 3118.477  |
| AL359592  | 778.293   | 798.603   | NM_000069 | 10099.428 | 10529.476 | NM_001865 | 66241.039 | 63738.957 |
| NM_006078 | 13007.375 | 13595.433 | AB023217  | 2602.254  | 2369.406  | NM_001918 | 7097.691  | 9928.77   |
| NM_000824 | 1190.12   | 1339.354  | L08902    | 3199.333  | 3293.81   | NM_018245 | 45989.469 | 52321.875 |
| NM_000482 | 1298.885  | 1246.627  | J02639    | 14393.342 | 13143.14  | M33197    | 66576.641 | 75195.008 |
| M38449    | 28423.398 | 32001.551 | M58050    | 13064.354 | 13520.776 | AF252390  | 7597.432  | 8055.812  |
| AK023915  | 8700.175  | 10386.392 | NM_007263 | 32548.451 | 37690.656 | NM_012117 | 24220.736 | 25504.035 |
| AB051453  | 3242.264  | 3585.529  | AF206020  | 14179.348 | 14107.687 | D17130    | 63153.332 | 62677.801 |
| AK026842  | 1361.293  | 1376.078  | NM_014410 | 10869.857 | 10417.863 | X76302    | 9903.872  | 9481.385  |
| NM_002395 | 909.181   | 865.105   | AF305835  | 601.056   | 1201.235  | AK026276  | 2437.977  | 2456.379  |
| AB023203  | 6788.741  | 6323.26   | AF312769  | 2424.173  | 3214.544  | M33197    | 66462.961 | 72609.164 |
| NM_014963 | 3779.68   | 3857.332  | AB020668  | 6632.575  | 7681.099  | X52354    | 4590.283  | 5496.01   |
| NM_004259 | 5434.167  | 4349.964  | NM_006203 | 65140.266 | 62682.914 | NM_005413 | 2364.071  | 2935.239  |
| NM_016271 | 4639.217  | 4082.51   | NM_013261 | 3963.478  | 4936.657  | NM_002315 | 12481.88  | 13138.122 |
| NM_016619 | 3190.082  | 3700.134  | NM_003558 | 547.596   | 812.112   | AK024191  | 2903.5    | 2967.21   |
| NM_014481 | 4719.354  | 6279.114  | AF309553  | 12310.542 | 13145.231 | M33197    | 64780.816 | 61966.199 |
| U22172    | 1970.641  | 2065.204  | NM_003605 | 6406.149  | 6192.636  | NM_014623 | 14553.426 | 8421.699  |
| AB032960  | 2923.809  | 3240.132  | NM_006139 | 2556.887  | 2821.072  | NM_007244 | 48413.199 | 16177.264 |
| NM_014264 | 26484.205 | 24351.627 | NM_001900 | 64473.355 | 83994.883 | BE539299  | 1274.474  | 1400.709  |

|           |           |           |           |           |           |           |           |           |
|-----------|-----------|-----------|-----------|-----------|-----------|-----------|-----------|-----------|
| AF020089  | 1225.904  | 1299.605  | NM_003993 | 12408.13  | 13308.05  | AF193873  | 39035.109 | 43620.793 |
| NM_006257 | 4589.206  | 4407.314  | NM_002975 | 6243.905  | 7540.23   | NM_002628 | 11036.988 | 14921.798 |
| NM_016281 | 10275.421 | 8631.241  | AK023511  | 22700.672 | 23037.174 | M23575    | 5943.998  | 7448.133  |
| NM_004734 | 28715.301 | 30137.533 | NM_020178 | 1503.171  | 1895.389  | AA190729  | 8394.048  | 9306.13   |
| AK024793  | 3166.711  | 2777.58   | NM_002264 | 3910.712  | 4474.501  | BF974315  | 22531.133 | 17965.895 |
| AF208291  | 454.286   | 358.756   | NM_014754 | 53390.227 | 59590.137 | T74985    | 542.21    | 624.807   |
| NM_004877 | 14680.306 | 13649.987 | D49387    | 2228.374  | 2263.789  | AI652705  | 15865.97  | 19863.043 |
| L10284    | 59961.07  | 60976.863 | AF050146  | 22948.934 | 23234.455 | AA973397  | 6272.501  | 6543.837  |
| CY3Cy5    | 9195.539  | 707.313   | NM_000116 | 6171.557  | 6171.86   | AA569974  | 2629.997  | 2631.869  |
| NM_000620 | 2347.767  | 2211.169  | NM_006698 | 19315.734 | 19983.844 | AA923615  | 4159.968  | 5416.613  |
| NM_000905 | 10162.375 | 7981.119  | NM_006804 | 40041.152 | 42110.824 | AA446028  | 1885.265  | 2518.713  |
| AK023269  | 4111.258  | 4057.407  | AK025641  | 63679.242 | 60140.016 | M80583    | 2846.644  | 2793.446  |
| AF070564  | 1931.036  | 1612.433  | AB040457  | 541.885   | 857.824   | AW009565  | 13769.443 | 13424.374 |
| AK021439  | 17544.393 | 14214.319 | AB014514  | 9490.52   | 9476.851  | AW451878  | 532.656   | 908.237   |
| AF052099  | 3905.775  | 3281.933  | NM_002865 | 22795.002 | 21501.082 | M33197    | 2366.583  | 1952.743  |
| AL110111  | 3792.53   | 2648.055  | NM_003566 | 6001.601  | 5580.734  | NM_000853 | 16429.533 | 9958.968  |
| AF070543  | 2502.556  | 2418.598  | NM_004249 | 723.183   | 726.957   | NM_000846 | 926.053   | 436.511   |
| AF086525  | 851.749   | 722.839   | AK026315  | 786.979   | 1147.438  | NM_015675 | 45129.633 | 49176.828 |
| AF086509  | 1518.227  | 1394.3    | NM_007159 | 66050.125 | 61210.586 | AK022267  | 2934.442  | 4613.835  |
| NM_014778 | 10691.63  | 12112.173 | NM_003731 | 65045.613 | 57933.492 | NM_016040 | 8208.505  | 10835.494 |
| AK001171  | 27388.059 | 27224.625 | NM_005446 | 55556.273 | 53164.332 | M33197    | 60537.543 | 66015.18  |
| AF086491  | 1765.853  | 1737.515  | AB037724  | 17897.877 | 17949.254 | AF031136  | 61701.945 | 68216.234 |
| NM_014856 | 4367.708  | 4245.7    | AK025086  | 5835.708  | 5543.576  | NM_006597 | 63258.59  | 63660.238 |
| AK021611  | 1236.592  | 1042.227  | AK026151  | 23906.486 | 21141.535 | NM_007329 | 1116.022  | 1851.042  |
| NM_003492 | 1306.935  | 1059.519  | NM_014140 | 3666.655  | 4004.763  | NM_012483 | 53552.555 | 57510.297 |
| NM_000620 | 1599.589  | 1555.286  | NM_002916 | 9814.076  | 10692.559 | NM_003498 | 22019.949 | 24480.691 |
| NM_000905 | 10500.339 | 7875.336  | M20700    | 11978.301 | 12327.819 | AB023420  | 50189.168 | 52713.348 |
| SR1       | 77587.844 | 62387.953 | NM_001034 | 17496.492 | 17409.314 | M33197    | 66112.945 | 64348.938 |
| SR3       | 40682.309 | 44771.418 | NM_002689 | 6773.982  | 6540.047  | NM_007264 | 64454.52  | 66244.82  |
| SR5       | 6407.692  | 10684.193 | NM_017686 | 1881.684  | 1858.578  | NM_002262 | 3378.739  | 3594.322  |
| SR7       | 6804.563  | 47665.32  | AL096734  | 1689.875  | 1862.664  | NM_016511 | 63757.367 | 64530.824 |
| SR9       | 18067.02  | 4821.989  | AK000800  | 5349.675  | 5677.821  | NM_003556 | 11031.938 | 12211.485 |
| CY3Cy5    | 6448.609  | 448.956   | NM_018154 | 11097.186 | 11469.429 | NM_002185 | 1575.465  | 909.496   |
| U63828    | 3077.119  | 3015.417  | NM_005358 | 766.932   | 1116.707  | M55337    | 8507.33   | 7492.867  |
| Z36828    | 4619.667  | 3662.87   | BC006287  | 8400.617  | 9381.866  | NM_013229 | 2084.782  | 1570.589  |
| AF086121  | 55319.973 | 46834.645 | AB023198  | 15342.883 | 17044.92  | NM_016533 | 66061.531 | 66986.711 |
| AF086140  | 3721.559  | 3372.559  | AF304163  | 19420.941 | 20729.438 | NM_007342 | 10339.049 | 7119.919  |
| AK022551  | 11797.188 | 10917.923 | NM_005231 | 16290.269 | 18526.018 | NM_005672 | 4239.848  | 1403.278  |
| AF085968  | 1090.135  | 986.53    | AF064729  | 4563.524  | 5093.19   | D25217    | 5257.375  | 1534.721  |
| AK023665  | 1167.298  | 1245.555  | NM_005412 | 42155.555 | 47250.27  | M33197    | 63199.684 | 63866.891 |
| AB011136  | 5298.434  | 5319.432  | NM_012113 | 5332.988  | 6738.345  | NM_000103 | 3404.798  | 4640.617  |
| AF085898  | 7105.586  | 6508.578  | NM_002150 | 20870.389 | 16908.016 | NM_004683 | 33266.457 | 36773.984 |
| AK021674  | 729.686   | 564.882   | NM_004595 | 25999.619 | 25716.727 | AK023226  | 5646.61   | 7720.876  |
| AL161960  | 5418.797  | 4789.852  | NM_002725 | 4050.432  | 4672.301  | AK025263  | 1985.894  | 2195.225  |
| AL049964  | 7240.568  | 8008.318  | NM_014375 | 66263.219 | 74260.219 | NM_006931 | 33426.777 | 35950.203 |
| AF038184  | 521.958   | 654.449   | NM_017812 | 46556.02  | 55211.949 | NM_018057 | 21828.084 | 22265.105 |
| AK022485  | 1732.815  | 1665.489  | AF204173  | 3264.663  | 4266.569  | M33197    | 62964.707 | 66450.727 |
| AK023395  | 1837.248  | 1372.724  | J03260    | 11375.648 | 12019.257 | NM_015717 | 12167.028 | 12158.178 |
| AK023522  | 592.255   | 497.605   | U13738    | 6706.851  | 7422.89   | NM_015925 | 11021.196 | 11940.394 |
| AK023895  | 1611.964  | 1418.725  | AF068236  | 64538.641 | 63397.926 | NM_003665 | 3436.64   | 4565.915  |
| AK024206  | 3204.266  | 2524.664  | H94487    | 11391.712 | 11485.556 | AF220217  | 5182.547  | 3461.476  |
| AK026273  | 3617.86   | 2874.815  | BG681747  | 49393.188 | 55992.145 | NM_013323 | 63990.797 | 58955.977 |
| NM_020250 | 36652.301 | 36239.012 | H63077    | 3574.511  | 3752.161  | NM_014937 | 2092.766  | 1904.082  |

|           |           |           |           |           |           |           |           |           |
|-----------|-----------|-----------|-----------|-----------|-----------|-----------|-----------|-----------|
| AF055007  | 2299.824  | 2605.531  | AA679352  | 18834.387 | 21084.332 | NM_01742E | 4360.767  | 4109.976  |
| NM_012337 | 2577.288  | 2725.688  | AA437291  | 3723.863  | 4214.073  | M33197    | 16343.501 | 11655.701 |
| AL389879  | 2722.646  | 2487.202  | X04503    | 6446.22   | 6458.978  | NM_00455E | 30151.807 | 16691.367 |
| AK021542  | 573.483   | 741.574   | D45917    | 14216.519 | 14732.846 | AL079296  | 1954.329  | 1478.044  |
| AK022869  | 2651.035  | 3375.153  | X52001    | 17374.365 | 16459.082 | NM_01477C | 26865.775 | 4998.069  |
| NM_016111 | 10881.48  | 10246.611 | BI823872  | 1160.095  | 1479.995  | AK023103  | 6339.567  | 7893.505  |
| AF085958  | 42650.027 | 35439.754 | AA430552  | 20720.584 | 20983.479 | NM_01785E | 7958.067  | 9896.702  |
| AK021906  | 905.181   | 589.611   | X66142    | 10686.593 | 10854.301 | NM_01905E | 66396.867 | 64077.078 |
| AF086021  | 4893.506  | 4671.83   | NM_005913 | 2392.104  | 2377.25   | NM_013347 | 1501.65   | 2068.809  |
| AF085982  | 884.076   | 900.033   | R45054    | 17374.898 | 18433.402 | D80008    | 5462.399  | 6105.968  |
| AL117655  | 893.478   | 901.546   | AL117398  | 8481.437  | 8578.177  | X56789    | 10556.603 | 12321.545 |
| AK024472  | 4547.634  | 6246.828  | AY007158  | 63495.746 | 68817.008 | AK001069  | 66328.602 | 65020.66  |
| AF087981  | 672.929   | 764.861   | NM_00172C | 11659.041 | 10690.793 | NM_00093E | 8701.999  | 8657.921  |
| NM_01797E | 7879.92   | 7838.479  | NM_01839C | 6451.105  | 6213.163  | NM_00035E | 68380.172 | 63791.07  |
| U06700    | 1125.51   | 1329.547  | NM_007263 | 34933.523 | 42077.344 | NM_00639E | 12602.167 | 13934.052 |
| NM_01791E | 28486.201 | 24527.154 | AF206020  | 15550.473 | 16798.988 | NM_01430E | 13270.211 | 13903.603 |
| NM_01785E | 68320.07  | 67368.961 | NM_01441C | 12156.518 | 11847.526 | NM_00108A | 13292.702 | 14137.362 |
| AK026494  | 2412.663  | 2416.663  | AF305835  | 629.566   | 1165.339  | NM_01598E | 21867.164 | 17367.16  |
| AK023508  | 1030.499  | 718.672   | AF312769  | 2338.168  | 2869.275  | NM_01862E | 9076.069  | 4166.777  |
| AK025840  | 7692.168  | 7647.038  | AB020668  | 7736.748  | 9260.136  | M33197    | 67824.008 | 64168.391 |
| AK026915  | 2126.262  | 1672.694  | NM_006203 | 60444.473 | 61608.5   | NM_005867 | 22603.057 | 17907.939 |
| AL110259  | 666.795   | 544.031   | NM_013261 | 4212.063  | 4354.93   | AK026031  | 62941.492 | 57398.699 |
| AB033100  | 61515.125 | 55015.598 | NM_00355E | 522.297   | 830.963   | NM_01646E | 18017.326 | 13376.105 |
| AL390138  | 2064.889  | 1970.997  | AF309553  | 12508.964 | 11938.07  | NM_00724A | 45801.02  | 21566.574 |
| AL137290  | 3096.657  | 3200.624  | NM_00360E | 5591.879  | 5617.401  | M30629    | 20191.672 | 9085.085  |
| AK022095  | 450.157   | 798.268   | NM_00613E | 1644.303  | 2227.953  | BE539299  | 606.806   | 211.127   |
| AK024180  | 440.847   | 762.749   | NM_00010C | 59794.309 | 59386.172 | NM_00262E | 11489.955 | 15015.11  |
| AK023458  | 822.07    | 483.949   | NM_00190C | 65153.855 | 67726.969 | AA190729  | 8354.628  | 8981.229  |
| AK021606  | 1095.613  | 888.459   | NM_00399E | 12139.146 | 12704.456 | BF974315  | 26388.83  | 26576.258 |
| NM_01412A | 15796.533 | 11344.85  | NM_018961 | 7308.905  | 9019.614  | T74985    | 1179.515  | 1771.628  |
| AF119888  | 613.218   | 689.429   | NM_00558E | 11271.345 | 12908.44  | AI652705  | 18342.621 | 20778.02  |
| AK001551  | 2125.446  | 1880.231  | NM_01224E | 3659.289  | 3733.551  | AA973397  | 5796.727  | 6427.34   |
| AK001825  | 4213.109  | 3190.954  | NM_00689E | 3453.216  | 3962.796  | AA569974  | 3165.351  | 4222.665  |
| AK024714  | 1057.427  | 956.823   | NM_00113C | 63821.238 | 64182.082 | AA446028  | 1884.474  | 2701.333  |
| AK022363  | 2733.132  | 2228.638  | NM_00297E | 6626.554  | 6743.091  | M80583    | 2676.764  | 2966.493  |
| AL353949  | 1005.172  | 820.372   | AK023511  | 25806.33  | 27706.988 | AW009565  | 14644.426 | 16401.488 |
| NM_005181 | 2322.454  | 2489.532  | NM_01455E | 17496.592 | 16178.76  | AW451878  | 840.196   | 1190.687  |
| AF026945  | 3054.572  | 2953.561  | NM_00161E | 65816.625 | 80702.492 | X07767    | 6123.83   | 4465.32   |
| AF143676  | 7766.923  | 8179.341  | AK025886  | 5238.007  | 6715.807  | M33197    | 35734.773 | 24060.26  |
| U66044    | 5418.927  | 5181.768  | NM_00305E | 1985.501  | 2103.268  | AL050139  | 17048.029 | 16082.244 |
| NM_005247 | 8757.488  | 7813.629  | AB014514  | 10245.915 | 10708.947 | NM_00259E | 5285.161  | 6804.79   |
| NM_00528E | 1138.599  | 1101.78   | NM_00286E | 21399.338 | 23273.744 | AF016903  | 65996.977 | 61913.762 |
| AL122089  | 1834.638  | 1658.24   | NM_00356E | 6102.671  | 6798.537  | NM_01567E | 28853.797 | 7600.802  |
| AA203665  | 2921.656  | 2944.734  | NM_00424E | 398.112   | 916.999   | NM_01604C | 8842.009  | 14058.403 |
| U95646    | 3247.932  | 2450.192  | AK026315  | 709.429   | 1319.902  | M33197    | 64275.875 | 69045.211 |
| Y16705    | 2313.48   | 2319.672  | NM_00715E | 60795.621 | 55818.152 | AF031136  | 63408.43  | 69342.789 |
| AF279775  | 2469.859  | 2346.658  | NM_003731 | 60171.629 | 54699.406 | NM_006597 | 62746.746 | 63394.645 |
| NM_00626E | 2431.33   | 2344.259  | NM_00544E | 54782.297 | 52763.609 | NM_00732E | 1373.102  | 1812.031  |
| AK026598  | 3741.91   | 3914.52   | NM_01329E | 39876.043 | 42835.012 | NM_01248E | 62786.488 | 60817.727 |
| AK023602  | 745.148   | 799.803   | NM_002387 | 7469.277  | 9037.753  | NM_00349E | 16755.986 | 16930.617 |
| NM_018097 | 68338.742 | 62703.027 | NM_00006E | 10672.882 | 12832.926 | AB023420  | 45389.574 | 49242.852 |
| AF130043  | 1184.009  | 1078.556  | AB023217  | 2957.856  | 2952.182  | M33197    | 64813.789 | 63840.129 |
| Y11167    | 4237.779  | 3503.5    | L08902    | 3890.931  | 3738.53   | NM_00726A | 63767.484 | 64502.613 |

|           |           |           |           |           |           |           |           |           |
|-----------|-----------|-----------|-----------|-----------|-----------|-----------|-----------|-----------|
| AK026813  | 1632.291  | 1436.236  | J02639    | 16190.386 | 15443.024 | NM_002262 | 2846.059  | 3728.841  |
| AK027225  | 4094.836  | 3018.508  | M58050    | 13546.941 | 16243.995 | NM_016511 | 62692.328 | 63553.145 |
| AK023083  | 5368.296  | 4647.719  | NM_012113 | 5258.588  | 6259.424  | NM_003555 | 8997.839  | 9897.006  |
| AF130093  | 1312.537  | 1189.775  | NM_002150 | 17047.51  | 16491.918 | NM_002543 | 5333.979  | 1918.8    |
| AF116622  | 1655.46   | 1558.046  | NM_004595 | 21838.551 | 23814.068 | NM_002185 | 1766.704  | 1268.636  |
| AF217967  | 1401.807  | 1318.715  | NM_020178 | 1293.309  | 1403.759  | M55337    | 6178.632  | 4062.173  |
| NM_017447 | 6848.518  | 7244.742  | NM_002264 | 4585.912  | 4797.562  | NM_013225 | 1531.808  | 1647.122  |
| AL049452  | 1748.762  | 1768.882  | NM_014754 | 51109.031 | 56477.109 | NM_016533 | 63372.09  | 61957.672 |
| BF345435  | 1077.799  | 1001.036  | D49387    | 2535.04   | 3021.008  | M33197    | 65652.344 | 64186.898 |
| NM_016622 | 5662.935  | 5192.37   | AF050146  | 22140.148 | 22479.963 | NM_014623 | 15252.319 | 18876.518 |
| AK026976  | 5877.372  | 6007.288  | NM_000116 | 6571.344  | 6263.992  | D25217    | 4690.582  | 2093.462  |
| D42043    | 34359.273 | 34310.074 | NM_006698 | 15731.654 | 18402.24  | NM_006351 | 21175.904 | 8867.226  |
| BC024009  | 1177.854  | 1440.514  | NM_006804 | 40347.957 | 45167.879 | M33197    | 68964.125 | 50677.75  |
| AF128543  | 1690.757  | 1495.478  | NM_015969 | 22443.715 | 24613.973 | NM_004683 | 34038.98  | 47964.207 |
| AK022071  | 566.345   | 502.128   | NM_003051 | 12938.772 | 14362.862 | AK023226  | 4821.589  | 6225.145  |
| NM_004185 | 660.257   | 521.412   | NM_145342 | 18419.357 | 22088.998 | AK025263  | 1891.397  | 2176.25   |
| X94290    | 5464.573  | 5617.012  | AJ278917  | 60695.34  | 55774.281 | NM_006931 | 32291.213 | 35301.434 |
| AK026685  | 4811.612  | 5065.809  | AK025641  | 65912.805 | 61104.988 | AJ133127  | 706.527   | 712.255   |
| AF090927  | 27418.715 | 24353.861 | AB040457  | 772.006   | 1326.388  | NM_018057 | 17261.578 | 16727.811 |
| AL137642  | 3039.62   | 3886.475  | AL117398  | 8544.47   | 8090.676  | M33197    | 61933.766 | 66841.219 |
| AL133619  | 22547.381 | 25834.74  | AY007158  | 59000.113 | 119933.42 | NM_015717 | 13167.692 | 15716.926 |
| AL157496  | 327.034   | 737.567   | NM_001720 | 11160.615 | 12179.312 | NM_015925 | 12399.192 | 13307.052 |
| AK025902  | 5618.76   | 6379.4    | NM_018390 | 6311.836  | 6355.257  | AF220217  | 2597.726  | 1357.643  |
| NM_004517 | 11508.608 | 11569.998 | AB037724  | 15050.824 | 15646.438 | NM_013323 | 58810.883 | 52649.68  |
| AI017418  | 880.395   | 888.933   | AK025086  | 5091.483  | 5796.247  | NM_014937 | 1852.516  | 1376.501  |
| NM_000675 | 922.73    | 894.414   | AK026151  | 23904.908 | 19418.229 | NM_017426 | 4131.315  | 4426.229  |
| AF218006  | 18068.938 | 20189.051 | NM_014140 | 3655.579  | 3794.981  | M33197    | 15576.169 | 12559.271 |
| AK026935  | 6749.206  | 6611.291  | NM_002916 | 8487.888  | 9059.951  | NM_000853 | 18649.627 | 18546.355 |
| NM_004752 | 758.732   | 723.468   | M20700    | 12073.37  | 12770.898 | NM_000846 | 694.161   | 994.165   |
| NM_020162 | 17720.537 | 17586.9   | NM_001034 | 16917.004 | 16916.244 | NM_014770 | 22974.457 | 7017.734  |
| AK027124  | 37115.613 | 42351.859 | NM_002689 | 6280.865  | 7825.826  | AB037737  | 2372.388  | 1129.681  |
| AB037813  | 988.59    | 1258.828  | NM_017686 | 1497.612  | 2117.414  | AK023103  | 5870.748  | 9105.163  |
| M31212    | 35749.449 | 37941.063 | AL096734  | 1451.522  | 1905.385  | NM_017855 | 8955.119  | 10520.53  |
| NM_001821 | 9629.522  | 6036.582  | AK000800  | 4918.267  | 5615.424  | NM_019055 | 62389.652 | 62545.445 |
| NM_005647 | 3290.11   | 3662.133  | NM_018154 | 11695.764 | 12419.441 | NM_013347 | 1953.075  | 2497.904  |
| X64978    | 22497.568 | 14279.857 | NM_005355 | 823.356   | 1130.462  | D80008    | 5068.291  | 5538.024  |
| NM_000912 | 24280.531 | 26042.014 | BC006287  | 9295.67   | 11093.707 | X56789    | 9171.282  | 10324.583 |
| NM_002345 | 2856.642  | 1820.089  | AB023198  | 13885.619 | 14343.513 | AK001069  | 65241.512 | 62768.758 |
| U57971    | 830.591   | 986.292   | AF304163  | 18947.801 | 18264.406 | NM_000935 | 9109.662  | 9709.625  |
| X89673    | 1732.008  | 1553.277  | NM_005231 | 16095.374 | 17147.438 | NM_000355 | 62939.066 | 60940.918 |
| AK024593  | 795.072   | 915.294   | AF064729  | 5072.911  | 5186.002  | NM_006395 | 10562.562 | 11431.604 |
| Z83934    | 2837.157  | 2725.528  | NM_005412 | 47294.789 | 51040.879 | NM_014306 | 13774.554 | 13681.04  |
| NM_018355 | 6194.791  | 6371.467  | SB        | 796.943   | 111.542   | NM_018622 | 8329.394  | 3984.973  |
| AK022020  | 6152.694  | 5412.7    | NM_021976 | 6319.388  | 4888.704  | M33197    | 67403.859 | 64333.645 |
| AF147399  | 2386.259  | 2492.874  | AF216077  | 7955.878  | 5950.264  | NM_005867 | 20845.74  | 18828.535 |
| U17634    | 1096.772  | 1535.146  | AF086238  | 948.143   | 812.981   | AK026031  | 58545.512 | 53981.367 |
| AK000263  | 17916.117 | 18245.551 | AK021612  | 25305.344 | 15735.724 | NM_016465 | 17219.559 | 14084.509 |
| Y13895    | 1842.719  | 1940.792  | AF088031  | 1372.701  | 870.175   | NM_007342 | 7348.828  | 7814.824  |
| L14723    | 8130.522  | 7791.811  | AK002025  | 94729.328 | 59392.719 | NM_005672 | 2843.428  | 2890.987  |
| AK024462  | 8239.673  | 7397.156  | AK026299  | 4199.627  | 1988.717  | BE539299  | 449.311   | 419.543   |
| NM_005711 | 742.901   | 983.123   | NM_017794 | 3846.394  | 2023.158  | AF193873  | 23885.268 | 7194.359  |
| NM_019601 | 2981.611  | 3488.905  | AK025170  | 2775.284  | 1255.27   | NM_002625 | 7294.848  | 1957.346  |
| NM_002205 | 2303.281  | 2611.71   | AK025697  | 10165.085 | 4894.818  | AA190729  | 8430.451  | 12925.804 |

|           |           |           |            |           |           |           |           |           |
|-----------|-----------|-----------|------------|-----------|-----------|-----------|-----------|-----------|
| NM_007074 | 1433.654  | 1481.947  | AK021734   | 2732.88   | 1307.992  | BF974315  | 29610.16  | 34932.535 |
| NM_006614 | 1130.549  | 1410.998  | NM_021976  | 5399.291  | 2774.285  | T74985    | 1163.17   | 1668.861  |
| NM_002230 | 17339.367 | 20067.561 | SR2        | 59838.73  | 42171.672 | AI652705  | 13472.745 | 12990.806 |
| NM_003815 | 9313.607  | 9272.241  | SR4        | 22079.908 | 13405.371 | AA973397  | 6214.02   | 7072.172  |
| NM_001430 | 2166.409  | 2510.521  | SR6        | 2480.559  | 1475.772  | AA569974  | 2435.729  | 2624.78   |
| AB010098  | 2554.816  | 2737.42   | SR8        | 9295.574  | 19304.768 | AA446028  | 2110.19   | 2701.094  |
| U17989    | 3193.431  | 3819.932  | SR10       | 29661.391 | 6899.583  | M80583    | 3270.327  | 3402.482  |
| U62325    | 5655.37   | 5702.581  | CY3Cy5     | 1078.168  | 145.003   | AW009565  | 16841.574 | 18151.357 |
| AL137595  | 3435.012  | 3495.853  | AK026802   | 1423.537  | 1126.332  | AW451878  | 723.422   | 1226.474  |
| NM_018025 | 4256.173  | 3870.28   | NM_004544  | 20753.795 | 11318.894 | X07767    | 5880.097  | 4788.301  |
| AF249267  | 29666.857 | 29201.146 | Y15167     | 1932.187  | 859.066   | X65293    | 1300.684  | 1402.74   |
| NM_004113 | 1444.197  | 1844.277  | AL133080   | 4094.33   | 2103.738  | M33197    | 34178.984 | 25757.617 |
| X84939    | 5918.947  | 5994.286  | NM_017792  | 10380.391 | 4414.382  | AL050139  | 16242.806 | 16263.589 |
| NM_018320 | 5130.032  | 5700.04   | AK025213   | 4953.62   | 2111.393  | NM_002593 | 2660.137  | 2821.36   |
| NM_002065 | 12671.247 | 13547.269 | NM_014949  | 4053.271  | 1181.344  | NM_004555 | 35934.277 | 38148.02  |
| NM_016055 | 13738.664 | 14252.047 | AL080221   | 3126.812  | 1680.346  | AL079296  | 1128.442  | 1373.624  |
| AF188492  | 1679.235  | 1601.171  | AK026591   | 1909.135  | 1188.531  | NM_006597 | 54460.383 | 38722.813 |
| M65066    | 46157.406 | 56197.191 | AK001889   | 3874.449  | 2163.544  | NM_007325 | 578.141   | 541.612   |
| NM_016951 | 5607.236  | 6036.838  | AK025726   | 9269.25   | 4944.418  | NM_012483 | 39844.367 | 17674.082 |
| NM_013251 | 1077.574  | 1158.651  | AJ227869   | 4225.727  | 2492.039  | AB023420  | 43673.992 | 56147.078 |
| NM_012325 | 3667.337  | 3130.563  | AK026189   | 2166.084  | 1661.677  | M33197    | 63239.207 | 67828.016 |
| NM_003085 | 14350.646 | 13006.234 | AK026790   | 1415.453  | 1114.141  | NM_007264 | 60482.676 | 62535.43  |
| NM_016084 | 61072.699 | 57138.297 | AL117613   | 9266.555  | 6771.969  | NM_002262 | 3177.386  | 3846.21   |
| AF095289  | 52908.219 | 57021.18  | AL137753   | 10136.065 | 9448.654  | NM_016511 | 61257.906 | 60134.434 |
| NM_005537 | 10560.838 | 11293.419 | AL110262   | 24084.018 | 20264.35  | NM_003555 | 10212.627 | 12283.915 |
| AC003962  | 823.169   | 1313.689  | AK025627   | 19466.275 | 18961.053 | NM_002185 | 1187.214  | 1612.687  |
| NM_019003 | 6697.225  | 7164.267  | AK025191   | 1374.379  | 1466.051  | M55337    | 10218.643 | 10525.227 |
| NM_015935 | 14692.979 | 13614.73  | AK025246   | 11331.053 | 6299.323  | M33197    | 62006.223 | 63819.063 |
| AF182412  | 2481.164  | 2594.952  | AK025847   | 4743.083  | 2651.142  | NM_013225 | 2032.457  | 1905.66   |
| AK027200  | 4648.706  | 5122.752  | AK022538   | 58580.945 | 30475.396 | NM_014751 | 55797.809 | 53039.5   |
| S78372    | 612.711   | 774.608   | AK022342   | 2164.073  | 1696.996  | NM_002347 | 61335.777 | 62091.395 |
| U03106    | 23529.447 | 25688.631 | AF147420   | 4067.516  | 3035.492  | AB046807  | 3643.085  | 2973.833  |
| NM_000075 | 36736.953 | 38191.176 | AL049312   | 3978.138  | 3237.747  | NM_018175 | 1226.547  | 1461.733  |
| NM_006845 | 13526.536 | 12723.055 | AL050072   | 7243.895  | 7193.273  | NM_003505 | 1219.986  | 1492.809  |
| NM_014885 | 1709.805  | 2052.332  | AL117590   | 1808.153  | 2056.305  | M33197    | 60746.945 | 70532.094 |
| M73239    | 2117.105  | 2288.755  | AL049357   | 21892.742 | 18083.158 | NM_014623 | 14693.016 | 16913.289 |
| NM_004945 | 10739.815 | 10380.67  | AK027180   | 5911.478  | 6413.015  | NM_007244 | 53052.305 | 55395.805 |
| NM_020242 | 3334.054  | 3521.086  | unknown (4 | 1025.071  | 918.47    | M30629    | 13328.506 | 14857.871 |
| NM_001785 | 33628.488 | 40607.426 | AK022236   | 12131.818 | 9395.482  | NM_018975 | 16731.131 | 9470.801  |
| NM_007175 | 59364.012 | 58632.84  | AK000073   | 8616.685  | 9238.821  | NM_003355 | 23004.598 | 9732.031  |
| NM_017682 | 1605.841  | 1765.743  | AK000618   | 1276.698  | 1049.603  | NM_005074 | 4373.342  | 1940.879  |
| NM_002205 | 15392.55  | 16070.874 | AK024773   | 1724.26   | 1065.175  | NM_004170 | 11786.745 | 15459.892 |
| NM_002291 | 1063.502  | 1087.905  | AL390180   | 1258.418  | 634.141   | NM_018057 | 13758.757 | 17742.941 |
| AL137477  | 31699.525 | 29319.459 | AL137370   | 1398.399  | 1236.231  | M33197    | 61932.551 | 64575.961 |
| NM_016645 | 19334.039 | 19891.191 | AF009262   | 36413.496 | 47641.93  | NM_015717 | 14615.6   | 15801.619 |
| NM_014255 | 2820.369  | 2554.237  | AK024346   | 5584.464  | 1744.555  | NM_015925 | 11028.993 | 12349.312 |
| NM_015967 | 8768.456  | 8820.239  | AF056422   | 2558.481  | 1840.984  | NM_003665 | 4450.927  | 5480.512  |
| NM_012237 | 1725.506  | 1523.34   | AF090892   | 1422.109  | 1320.111  | AF220217  | 4488.683  | 5732.99   |
| NM_003595 | 2928.821  | 3097.859  | AK001089   | 3060.725  | 2502.081  | NM_013323 | 62939.746 | 63458.984 |
| NM_002405 | 4250.22   | 4942.832  | AK001919   | 1083.644  | 1098.895  | NM_014937 | 2006.775  | 2355.384  |
| NM_004994 | 61856.754 | 58246.832 | AK021535   | 1364.563  | 1501.005  | NM_017425 | 7332.137  | 7765.23   |
| NM_006610 | 9450.329  | 7217.07   | AK021753   | 7749.395  | 7055.347  | M33197    | 22047.369 | 20542.766 |
| NM_017625 | 612.842   | 724.458   | AK001139   | 5735.967  | 5619.188  | AF016903  | 60521.922 | 62965.465 |

|           |           |           |           |           |           |           |           |           |
|-----------|-----------|-----------|-----------|-----------|-----------|-----------|-----------|-----------|
| NM_001333 | 947.823   | 803.563   | AK002090  | 1465.968  | 1615.383  | NM_015675 | 30850.299 | 26283.842 |
| NM_003791 | 8545.263  | 9164.18   | AK021618  | 1544.186  | 1448.879  | AK022267  | 1954.042  | 1894.106  |
| NM_018017 | 7693.286  | 7098.835  | AK021822  | 1677.044  | 1676.501  | NM_016040 | 5413.575  | 4888.22   |
| AK001296  | 26902.883 | 22112.715 | AF116620  | 11793.069 | 9610.77   | M33197    | 61540.457 | 63194.215 |
| AK000173  | 2583.576  | 2007.848  | AF293335  | 84024.344 | 63467.367 | AF031136  | 62201.18  | 71565.398 |
| NM_018365 | 9885.21   | 11548.089 | AK024431  | 20020.059 | 24083.256 | NM_005867 | 25235.115 | 13610.212 |
| NM_006586 | 15324.986 | 14970.699 | AF116635  | 2048.626  | 1245.929  | AK026031  | 53617.41  | 36516.734 |
| AJ272180  | 5428.279  | 6225.151  | NM_018678 | 67635.148 | 60806.762 | NM_016468 | 18047.879 | 6352.794  |
| AK025709  | 4305.082  | 3941.084  | AJ008122  | 64876.77  | 59495.887 | NM_005672 | 5448.669  | 8294.986  |
| NM_019016 | 20537.834 | 13304.686 | NM_006220 | 7551.924  | 8443.488  | D25217    | 6937.815  | 7630.175  |
| NM_012261 | 41054.313 | 42238.223 | AK022667  | 14700.466 | 17693.463 | NM_006351 | 29385.787 | 39981.422 |
| NM_015556 | 35585.754 | 34662.367 | AK026667  | 1516.836  | 1801.689  | M33197    | 63881.32  | 64710.379 |
| NM_006095 | 7200.047  | 8277.92   | NM_014174 | 7904.02   | 3157.874  | NM_000103 | 2712.06   | 2450.536  |
| AF272379  | 15443.755 | 16001.965 | AF147337  | 4501.013  | 2869.763  | NM_004683 | 28696.957 | 26722.234 |
| AK022643  | 2046.59   | 1312.696  | AK026981  | 6513.363  | 5659.486  | AK023226  | 5526.572  | 7568.589  |
| AB046808  | 6899.116  | 6678.788  | NM_006394 | 751.396   | 1046.9    | M33197    | 66139.305 | 61346.824 |
| AK026265  | 6171.467  | 7207.788  | AK023819  | 1247.688  | 1385.465  | NM_001467 | 6923.574  | 4934.932  |
| AK027179  | 729.299   | 823.787   | AL133656  | 4088.045  | 3066.36   | NM_018066 | 59994.762 | 58174     |
| AF015313  | 2034.765  | 1962.895  | AL050037  | 14368.835 | 11011.521 | NM_006931 | 23643.758 | 20075.838 |
| NM_006466 | 7143.948  | 6906.875  | NM_001417 | 59829.523 | 57787.246 | NM_020344 | 23828.686 | 28321.262 |
| NM_005681 | 3781.017  | 3156.064  | AK023557  | 1682.227  | 2282.439  | AF119868  | 780.284   | 1315.022  |
| NM_015156 | 7083.216  | 8110.815  | AK027107  | 4159.17   | 3436.068  | NM_005050 | 10962.603 | 9822.012  |
| NM_012384 | 7900.689  | 7963.049  | AB040887  | 8044.065  | 5928.586  | M33197    | 64511.039 | 67465.156 |
| NM_004653 | 19248.904 | 21313.648 | AK025196  | 7817.966  | 4837.236  | M33197    | 44307.934 | 20734.15  |
| AF233453  | 8942.933  | 6890.294  | AK024800  | 2641.87   | 3383.848  | AL050139  | 18357.879 | 9188.288  |
| D87454    | 44764.355 | 45062.031 | AK000401  | 7093.413  | 8398.11   | NM_002593 | 1580.169  | 801.5     |
| NM_007020 | 23714.473 | 22869.512 | AF305068  | 3466.394  | 4144.576  | NM_014770 | 37209.648 | 36941.668 |
| NM_000713 | 29889.432 | 31345.922 | D17231    | 67146.414 | 65661.656 | AB037737  | 3345.251  | 4443.851  |
| NM_016055 | 5163.981  | 5103.149  | AF531295  | 3551.501  | 4064.652  | M33197    | 64853.23  | 66949.875 |
| NM_013291 | 34218.5   | 33583.809 | X60484    | 1278.564  | 1969.198  | AK023103  | 5769.818  | 6788.099  |
| NM_002936 | 39084.699 | 41125.914 | AF056432  | 7306.039  | 6147.522  | NM_017858 | 8570.194  | 9404.908  |
| NM_014161 | 22405.992 | 22041.283 | AK001987  | 41611.734 | 33985.801 | NM_019059 | 64099.305 | 62358.824 |
| BF312817  | 12481.403 | 12637.688 | X56199    | 4678.522  | 3799.998  | NM_013347 | 1771.478  | 1392.113  |
| AF284580  | 5323.058  | 6359.023  | NM_005193 | 9119.264  | 8149.026  | X56789    | 4212.782  | 2134.07   |
| AK024961  | 11333.987 | 10250.193 | AL162006  | 1800.525  | 1640.633  | AK001069  | 67817.75  | 63785.379 |
| NM_016068 | 27904.4   | 22787.215 | NM_017971 | 38963.66  | 30891.035 | M33197    | 67343.172 | 64259.055 |
| NM_002711 | 2103.744  | 2120.472  | AF090097  | 3134.334  | 2383.341  | NM_000935 | 4622.112  | 3327.459  |
| NM_000199 | 45431.918 | 42528.578 | NM_014750 | 6336.389  | 7086.288  | NM_000359 | 49893.563 | 46059.145 |
| NM_003778 | 60262.645 | 60531.238 | NM_015912 | 2663.246  | 2345.997  | NM_006395 | 7992.886  | 7901.82   |
| NM_001041 | 1041.398  | 1013.655  | NM_000460 | 4350.557  | 3687.432  | NM_014306 | 13715.813 | 22646.012 |
| NM_000693 | 749.647   | 662.099   | AB002339  | 8122.326  | 4894.528  | NM_001084 | 9857.705  | 9013.055  |
| AK023263  | 5193.959  | 5463.997  | NM_006888 | 56221.977 | 57268.094 | NM_015983 | 12905.565 | 11322.438 |
| NM_004622 | 5741.815  | 6547.177  | AL137423  | 10071.537 | 12625.293 | NM_018622 | 7775.504  | 6859.802  |
| AK021445  | 2883.685  | 3102.078  | AB018322  | 19063.691 | 20205.473 | M33197    | 66996.82  | 63853.59  |
| NM_017934 | 10914.581 | 10282.374 | NM_007068 | 42691.367 | 46555.145 | CY3Cy5    | 2285.537  | 160.733   |
| NM_014168 | 57838.934 | 54032.73  | NM_000843 | 2343.087  | 3042.844  | NM_006981 | 2260.799  | 1458.889  |
| AF211971  | 16402.201 | 13890.61  | NM_018391 | 5836.66   | 2488.613  | AF086354  | 1031.161  | 1423.306  |
| NM_002931 | 6001.443  | 5943.657  | U90917    | 3543.1    | 2623.823  | AF086429  | 5884.438  | 5986.893  |
| NM_013448 | 30981.959 | 29714.875 | AK022140  | 10027.618 | 7955.553  | NM_019060 | 1319.574  | 1341.854  |
| X65232    | 40541.898 | 38306.145 | U21072    | 2680.773  | 2346.934  | AF086302  | 473.924   | 465.153   |
| U12767    | 1435.206  | 1613.018  | AK024377  | 1170.789  | 1431.167  | AF086439  | 5011.084  | 4317.415  |
| U17630    | 2060.937  | 2086.308  | AL137461  | 1709.869  | 1691.14   | AK026512  | 2175.956  | 2836.656  |
| M33782    | 11094.53  | 10387.583 | AF114264  | 7821.087  | 9407.572  | NM_018482 | 2433.903  | 2154.958  |



|           |           |           |           |           |           |           |           |           |
|-----------|-----------|-----------|-----------|-----------|-----------|-----------|-----------|-----------|
| NM_00219E | 1179.383  | 1388.175  | NM_017514 | 1006.254  | 709.109   | AF090945  | 7476.946  | 7414.306  |
| NM_01775E | 26519.561 | 24189.424 | AB018261  | 676.225   | 365.215   | NM_006981 | 3216.259  | 3057.181  |
| NM_01841E | 3676.115  | 4650.031  | AB037828  | 2030.92   | 2734.04   | SR2       | 50483.563 | 59986.332 |
| NM_00460E | 21442.701 | 23375.637 | AB023210  | 2219.341  | 2351.242  | SR6       | 1448.45   | 1599.299  |
| D70833    | 64625.938 | 62584.473 | AB037786  | 6196.981  | 6483.014  | SR8       | 4713.143  | 18904.832 |
| NM_016621 | 6113.535  | 5762.033  | AJ238899  | 4365.196  | 3231.001  | SR10      | 16308.773 | 6651.096  |
| NM_00297E | 4185.105  | 3825.77   | NM_001110 | 4844.967  | 4051.735  | CY3Cy5    | 4012.817  | 470.082   |
| AK023511  | 27562.564 | 32474.322 | NM_000841 | 12200.233 | 10486.197 | AK026718  | 3427.598  | 3552.632  |
| NM_01455E | 20533.633 | 16308.531 | NM_00073E | 612.248   | 768.405   | AK022035  | 14970.852 | 11026.428 |
| NM_00161E | 62382.242 | 65347.797 | NM_00124E | 3072.407  | 3016.682  | M33197    | 85744.141 | 63239.488 |
| NM_00272E | 2500.025  | 2510.015  | AJ008139  | 19915.188 | 17011.867 | AK023612  | 973.611   | 810.028   |
| NM_01437E | 9397.189  | 8600.484  | NM_00432E | 22972.131 | 19366.377 | AF147437  | 4755.073  | 4028.767  |
| NM_01781E | 38349.406 | 42370.289 | NM_00088E | 1786.489  | 1382.958  | M33197    | 77543.359 | 63194.988 |
| AF204173  | 3601.647  | 4232.837  | NM_004577 | 10640.717 | 7189.187  | AL137269  | 3673.498  | 2959.506  |
| J03260    | 6125.896  | 6950.95   | NM_015507 | 1746.38   | 1064.651  | AK021983  | 3755.518  | 3473.024  |
| U13738    | 8724.479  | 10266.288 | D38553    | 8546.991  | 10274.864 | Y11681    | 18859.867 | 16665.889 |
| AF068236  | 54758.133 | 55361.227 | NM_00617C | 26253.385 | 29949.941 | AL110135  | 19112.16  | 19848.434 |
| H94487    | 1564.736  | 1440.726  | NM_01429E | 19957.998 | 20304.285 | NM_00699E | 20591.82  | 12467.966 |
| BG681747  | 50933.027 | 52128.898 | NM_014077 | 8418.723  | 6728.3    | M33197    | 86894.758 | 63240.035 |
| H63077    | 558.581   | 796.299   | M14087    | 18771.771 | 16414.922 | M33197    | 65291.797 | 60711.227 |
| AA679352  | 19976.494 | 19182.291 | NM_00088E | 19689.156 | 18797.338 | AK022084  | 2878.558  | 2246.532  |
| AA437291  | 818.043   | 818.203   | M59040    | 6157.86   | 6419.606  | AK023891  | 1303.262  | 2429.549  |
| X04503    | 6133.787  | 5982.612  | X15880    | 67722.375 | 67218.875 | AK026878  | 2487.382  | 3039.826  |
| D45917    | 7456.967  | 7325.574  | NM_00679E | 857.466   | 1049.503  | AK000777  | 2153.951  | 1716.027  |
| X52001    | 7316.542  | 7262.035  | X04366    | 4996.637  | 4467.476  | AF144233  | 3534.538  | 3074.039  |
| BI823872  | 605.945   | 821       | NM_00050E | 67910.086 | 65436.824 | AF085975  | 13825.652 | 14242.472 |
| AA430552  | 4165.253  | 3900.803  | NM_01865E | 1881.375  | 1282.144  | AF075103  | 2804.527  | 2780.535  |
| X66142    | 9316.224  | 8159.773  | NM_00066E | 6016.661  | 4876.967  | AL137390  | 2106.975  | 2163.927  |
| NM_00591E | 696.636   | 706.425   | NM_003481 | 14179.604 | 15679.784 | AL137611  | 5848.155  | 5594.591  |
| R45054    | 10774.951 | 11658.808 | NM_00705E | 9839.836  | 5889.743  | AL359566  | 28887.1   | 24454.561 |
| NM_00378C | 41041.133 | 46712.703 | NM_00687C | 15646.039 | 10657.436 | AL137427  | 11136.166 | 10033.031 |
| NM_003731 | 51077.578 | 43405.477 | NM_00735E | 11526.557 | 10387.206 | AL157460  | 2955.368  | 2372.365  |
| NM_00544E | 22485.957 | 21581.84  | NM_013327 | 4704.526  | 4112.716  | M33197    | 67328.945 | 63993.785 |
| NM_01329E | 17201.371 | 17340.842 | AF303888  | 18577.1   | 19293.023 | M33197    | 65422.883 | 61313.496 |
| NM_002387 | 9531.474  | 9679.549  | NM_000077 | 2789.824  | 2423.186  | AK024198  | 2302.816  | 944.649   |
| NM_00006E | 4115.035  | 4810.15   | AF176646  | 1759.802  | 1581.602  | AL049846  | 2898.076  | 3258.373  |
| AB023217  | 3455.166  | 3212.991  | NM_00367E | 44002.906 | 45624.906 | AK024161  | 2386.115  | 2613.589  |
| L08902    | 3172.833  | 3248.613  | NM_002574 | 83616.477 | 63437.348 | AK021682  | 68829.32  | 59952.195 |
| J02639    | 31620.59  | 32054.105 | NM_012391 | 9845.957  | 9615.572  | AK022141  | 1145.436  | 856.927   |
| M58050    | 14844.739 | 15319.548 | NM_005254 | 9950.79   | 10333.774 | AK022046  | 2217.731  | 2151.433  |
| NM_00726E | 45136.441 | 50385.84  | NM_005611 | 3098.257  | 2266.928  | AK027207  | 1960.541  | 2145.586  |
| AF206020  | 2891.159  | 3361.138  | AF141655  | 5342.224  | 3537.601  | AF083120  | 3432.676  | 4872.403  |
| NM_01441C | 1806.573  | 1652.991  | NM_00734E | 3959.084  | 1408.795  | AF143323  | 1387.234  | 1385.863  |
| AF305835  | 898.059   | 982.951   | NM_007007 | 24316.084 | 33281.41  | M33197    | 67449.867 | 61270.613 |
| AF312769  | 615.026   | 631.679   | NM_00638E | 9064.146  | 9162.771  | AK022013  | 3922.028  | 3303.705  |
| AB020668  | 1544.511  | 1395.754  | NM_00655E | 40751.723 | 51406.738 | AK022155  | 8506.643  | 7004.368  |
| NM_00620E | 7212.692  | 8191.553  | NM_00670C | 4972.538  | 5706.865  | AK022288  | 2066.679  | 1487.47   |
| NM_013261 | 2230.556  | 2428.432  | NM_01210E | 41230.258 | 18425.75  | AK021916  | 1976.088  | 2421.14   |
| AF309553  | 15675.231 | 16468.449 | AF019633  | 6252.396  | 3542.733  | AK024201  | 1464.543  | 1598.572  |
| NM_00360E | 6357.569  | 5032.363  | AB002361  | 17360.455 | 14376.08  | AK022174  | 1375.567  | 1939.639  |
| NM_00613E | 2166.34   | 2510.693  | NM_01766E | 17686.561 | 15996.185 | M33197    | 64349.266 | 58574.492 |
| NM_00190C | 62863.188 | 62011.809 | U88837    | 4999.212  | 5149.841  | AL049299  | 4864.659  | 5116.272  |
| NM_00399E | 15342.144 | 17347.613 | NM_01744E | 40237.148 | 37006.109 | NM_00608E | 74690.383 | 63273.129 |

|           |           |           |             |           |           |           |           |           |
|-----------|-----------|-----------|-------------|-----------|-----------|-----------|-----------|-----------|
| NM_00215C | 3745.362  | 3475.814  | NM_017582   | 22465.27  | 21210.559 | NM_01826E | 2291.794  | 2148.497  |
| NM_00459E | 20764.107 | 20259.973 | NM_015239   | 7323.147  | 7685.835  | AF130086  | 14052.123 | 13075.024 |
| NM_02017E | 1470.699  | 1370.813  | AK026962    | 5951.365  | 6009.05   | AK023858  | 8748.415  | 7582.917  |
| NM_002264 | 4960.125  | 4873.225  | D00265      | 64266.32  | 59976.836 | M33197    | 67337.148 | 62900.363 |
| NM_014754 | 51862.402 | 51556.371 | NM_000779   | 2172.179  | 2608.427  | AF250920  | 4808.511  | 4730.578  |
| D49387    | 1148.873  | 1222.032  | NM_004552   | 67431.227 | 72181.352 | NM_017733 | 3410.12   | 2958.276  |
| AF050146  | 10459.705 | 9383.838  | NM_000143   | 6623.13   | 4857.51   | NM_014042 | 13592.378 | 10949.484 |
| NM_000116 | 6720.583  | 6550.748  | AF317889    | 648.635   | 356.2     | D17152    | 40701.145 | 37782.973 |
| NM_00669E | 16559.324 | 16777.371 | NM_006294   | 63438.281 | 62965.363 | AK024464  | 28249.928 | 30302.773 |
| NM_006804 | 13291.63  | 13345.34  | AL137294    | 1250.907  | 1108.215  | AK026748  | 983.223   | 1617.883  |
| NM_001133 | 650.91    | 673.788   | NM_003743   | 5065.901  | 6993.331  | M33197    | 3891.117  | 3468.728  |
| AK025641  | 23791.986 | 24789.252 | AB037797    | 3632.249  | 3354.813  | AL137380  | 1278.77   | 756.417   |
| AB040457  | 513.249   | 448.534   | NM_00152C   | 4625.344  | 5134.645  | M33197    | 66217.594 | 63952.922 |
| AB014514  | 6459.226  | 7270.263  | AL050367    | 1714.262  | 1687.185  | AL137658  | 46991.563 | 33359.684 |
| NM_00286E | 22824.535 | 23579.867 | AL133633    | 7465.935  | 3888.382  | D16888    | 3264.625  | 3417.685  |
| NM_00356E | 6940.619  | 5273.842  | NM_012252   | 5443.416  | 2893.107  | U79277    | 844.672   | 1110.981  |
| AK026315  | 1009.614  | 1153.125  | AK026817    | 8458.892  | 7891.847  | AF068298  | 8462.446  | 7998.967  |
| NM_00715E | 66210.859 | 65591.344 | AB011148    | 8078.406  | 8006.875  | Z70770    | 4982.814  | 5345.604  |
| NM_01839C | 9294.517  | 7428.396  | AL389938    | 67676.039 | 64977.398 | AJ227900  | 5412.924  | 5040.544  |
| AB037724  | 9056.057  | 8897.484  | NM_001949   | 67088.773 | 63249.66  | AK023242  | 2726.476  | 2598.491  |
| AK025086  | 3620.615  | 3661.856  | NM_007084   | 6452.885  | 5991.152  | M33197    | 67564.5   | 63037.316 |
| AK026151  | 7010.787  | 5654.591  | M97191      | 67044.492 | 73103.203 | AK024101  | 2122.661  | 2412.722  |
| NM_01414C | 3777.673  | 4185.548  | AK023015    | 17249.824 | 16661.1   | AJ012500  | 13917.313 | 12391.927 |
| NM_00291E | 10004.334 | 12561.973 | NM_003457   | 37071.266 | 33719.004 | AF085833  | 1842.797  | 1760.541  |
| M20700    | 10967.638 | 11360.512 | AV752086    | 3113.91   | 3306.593  | L19368    | 1073.575  | 1136.895  |
| NM_001034 | 19114.553 | 18950.107 | NM_016102   | 46005.379 | 51353.625 | U00944    | 1549.661  | 1685.857  |
| NM_00268E | 8606.146  | 8995.382  | NM_00437E   | 6835.61   | 6203.223  | BC035058  | 5568.646  | 6644.614  |
| NM_01768E | 1611.039  | 1976.207  | NM_000272   | 1298.254  | 1314.239  | X57566    | 17057.338 | 14708.24  |
| AL096734  | 3227.997  | 3541.752  | NM_00684E   | 62212.922 | 67842.891 | M33197    | 70144.203 | 63219.57  |
| AK000800  | 5902      | 6189.025  | NM_005603   | 63258.703 | 66125.797 | NM_01861E | 20714.135 | 19012.76  |
| NM_018154 | 12540.474 | 13403.595 | NM_001061   | 3534.149  | 3854.021  | AK023809  | 2824.902  | 2367.781  |
| NM_00535E | 1239.355  | 1381.143  | AI075338    | 4048.793  | 4820.895  | M87943    | 68645.57  | 63258.309 |
| BC006287  | 9597.872  | 10975.177 | BG744154    | 47030.113 | 53612.039 | AL360137  | 2149.062  | 1857.474  |
| AB023198  | 23909.262 | 28517.045 | Z11694      | 43611.203 | 49935.672 | U28131    | 67285.664 | 67592.953 |
| AF304163  | 32891.457 | 34700.82  | BF983177    | 7395.174  | 7685.057  | AY007106  | 4065.835  | 4724.153  |
| NM_005231 | 17239.973 | 17523.73  | Z26317      | 7190.414  | 7265.482  | AF015910  | 62776.941 | 62043.25  |
| AF064729  | 2797.734  | 2826.611  | X56160      | 8564.797  | 6062.326  | BC009993  | 1671.001  | 1294.846  |
| NM_005412 | 47143.723 | 45041.813 | BG679991    | 2517.568  | 1568.077  | M33197    | 60177.449 | 59117.328 |
| NM_012113 | 7518.709  | 8575.209  | H-Y 00097 I | 15692.768 | 13426.752 | AB049150  | 862.498   | 716.024   |
| NM_01455E | 17439.504 | 12172.053 | H-M 59964   | 1356.588  | 1170.162  | NM_016824 | 8650.954  | 8357.322  |
| NM_00161E | 62892.586 | 65541.516 | H-Y 00711 I | 67635.203 | 71328.984 | NM_003031 | 10387.349 | 9757.701  |
| NM_00272E | 2821.187  | 2966.526  | H-X 16707 I | 9960.923  | 9190.092  | X89674    | 752.527   | 822.546   |
| NM_01437E | 8911.985  | 8258.342  | AL038354    | 19452.256 | 21794.777 | NM_00717C | 2192.85   | 2465.72   |
| NM_017812 | 35294.438 | 37584.211 | R14607      | 6347.221  | 5738.466  | NM_00300E | 2523.769  | 2721.465  |
| AF204173  | 3580.864  | 3700.873  | W84867      | 1715.077  | 1652.83   | NM_00410C | 861.194   | 802.029   |
| J03260    | 6955.36   | 7534.569  | BF245026    | 1324.916  | 1472.919  | M33197    | 65724.711 | 62175.355 |
| U13738    | 9050.266  | 10139.44  | NM_000592   | 1627.141  | 1687.235  | AF317550  | 832.432   | 848.557   |
| AF068236  | 50371.773 | 51873.516 | NM_016584   | 52893.004 | 47719.445 | AK025416  | 1052.058  | 1244.813  |
| H94487    | 1275.688  | 1451.668  | NM_00181E   | 8037.798  | 7771.28   | AK022165  | 1835.391  | 1705.768  |
| BG681747  | 51281.793 | 52353.59  | NM_000064   | 44725.453 | 37565.281 | AF090883  | 2351.819  | 2003.913  |
| H63077    | 754.972   | 931.703   | NM_003264   | 1947.295  | 1670.268  | U23860    | 1442.026  | 1191.376  |
| AA679352  | 18893.494 | 18270.131 | NM_00672E   | 9793.811  | 8527.159  | M33197    | 67246.68  | 67580.508 |
| AA437291  | 700.663   | 652.959   | NM_00332E   | 5260.638  | 6570.164  | AK022372  | 3629.593  | 2866.688  |

|           |           |           |           |           |           |           |           |           |
|-----------|-----------|-----------|-----------|-----------|-----------|-----------|-----------|-----------|
| X04503    | 5226.291  | 4864.414  | NM_004568 | 63601.016 | 67823.234 | NM_015916 | 4444.374  | 3345.935  |
| D45917    | 7390.101  | 8208.973  | NM_000202 | 17985.363 | 19702.541 | NM_003520 | 944.465   | 775.956   |
| X52001    | 6906.333  | 7537.688  | NM_005496 | 23147.891 | 21946.295 | NM_015888 | 61764.602 | 57594.07  |
| BI823872  | 874.91    | 706.867   | NM_016608 | 3231.917  | 3912.824  | NM_000212 | 946.366   | 645.53    |
| AA430552  | 3821.409  | 3512.283  | NM_002858 | 12968.636 | 14211.412 | M33197    | 61895.512 | 54781.461 |
| X66142    | 9000.783  | 7676.351  | NM_004817 | 5846.944  | 7459.99   | NM_004276 | 6162.648  | 4264.7    |
| NM_005913 | 960.743   | 1098.271  | AB023215  | 37884.176 | 29747.41  | NM_002332 | 35420.117 | 21360.586 |
| R45054    | 10083.218 | 10484.936 | NM_001284 | 50945.469 | 43710.598 | NM_002858 | 6700.807  | 4871.501  |
| AL117398  | 7605.576  | 7592.483  | NM_003242 | 56721.367 | 50535.949 | NM_005246 | 12420.644 | 9764.916  |
| AY007158  | 55170.34  | 55187.949 | NM_002849 | 2138.264  | 2185.558  | NM_017651 | 2786.126  | 2344.688  |
| NM_001720 | 764.831   | 567.626   | U31099    | 3258.526  | 3511.974  | AF161339  | 4393.019  | 2829.901  |
| NM_013292 | 16448.676 | 14322.281 | NM_001105 | 27285.482 | 22291.809 | M33197    | 65009.367 | 57658.91  |
| NM_002387 | 9178.899  | 7831.314  | NM_005585 | 1567.002  | 1876.364  | AK000354  | 16095.508 | 11834.698 |
| NM_000069 | 3283.704  | 3360.682  | NM_002075 | 14876.929 | 13139.402 | AL161984  | 1502.224  | 969.748   |
| AB023217  | 3570.565  | 2858.715  | Y08756    | 57054.559 | 56351.699 | NM_014882 | 4666.066  | 3274.366  |
| L08902    | 2419.067  | 2840.541  | AY007090  | 2040.664  | 1946.479  | M33197    | 67277.398 | 63094.926 |
| J02639    | 30012.221 | 31164.711 | NM_006439 | 1492.674  | 1508.027  | NM_001510 | 3493.463  | 1952.054  |
| M58050    | 15350.308 | 14786.892 | NM_018073 | 3841.68   | 3324.45   | AK024474  | 16374.24  | 9395.85   |
| NM_007263 | 47052.809 | 52683.219 | NM_012332 | 12578.154 | 10770.104 | NM_006862 | 823.775   | 573.131   |
| AF206020  | 3291.144  | 3494.219  | AK026648  | 4553.494  | 3749.227  | NM_017901 | 4514.541  | 4189.245  |
| NM_014410 | 2180.956  | 1882.824  | NM_000497 | 3378.198  | 3038.626  | NM_004272 | 2921.328  | 2506.369  |
| AF305835  | 875.23    | 1020.429  | NM_017421 | 6050.136  | 4639.498  | NM_000358 | 4050.549  | 2156.89   |
| AB020668  | 1194.858  | 1262.993  | NM_000273 | 3128.966  | 3846.276  | NM_001930 | 12288.915 | 7810.077  |
| NM_006203 | 9369.34   | 10887.404 | NM_002899 | 39819.645 | 44146.879 | AK025270  | 2336.774  | 1301.699  |
| NM_013261 | 2418.8    | 2836.337  | NM_005397 | 8786.544  | 8056.315  | NM_001564 | 7143.86   | 4540.759  |
| AF309553  | 14868.208 | 15695.798 | AB014511  | 13784.362 | 13522.332 | M33197    | 60549.652 | 58630.012 |
| NM_003605 | 6203.067  | 5190.011  | NM_001662 | 38980.813 | 37285.438 | AF263537  | 14722.608 | 8634.933  |
| NM_006139 | 2698.569  | 2770.129  | AB011100  | 5367.531  | 6120.429  | NM_015895 | 11458.879 | 7448.229  |
| NM_001900 | 63106.105 | 64607.344 | U61741    | 4121.794  | 4176.683  | NM_000188 | 2360.803  | 1636.207  |
| NM_003993 | 15558.814 | 17194.283 | NM_012402 | 17849.943 | 17126.422 | AL050050  | 3740.683  | 1605.86   |
| NM_002975 | 4699.047  | 4880.63   | M76676    | 14268.089 | 13860.029 | NM_005256 | 845.148   | 685.341   |
| AK023511  | 31650.543 | 38773.145 | NM_003857 | 1886.315  | 1975.893  | NM_004690 | 4573.854  | 2656.77   |
| NM_020178 | 1326.444  | 1403.564  | AL137690  | 1503.613  | 1865.629  | M33197    | 62906.426 | 55246.617 |
| NM_002264 | 5864.521  | 5978.425  | Z83804    | 5890.625  | 5862.259  | NM_003252 | 21907.043 | 16505.137 |
| NM_014754 | 48460.59  | 46591.91  | NM_004386 | 5270.993  | 5623.446  | NM_001228 | 7298.739  | 5516.089  |
| D49387    | 1518.757  | 1101.333  | U67784    | 4473.531  | 4662.937  | AK026607  | 1385.532  | 1104.227  |
| AF050146  | 10399.964 | 8598.524  | NM_007366 | 4956.635  | 4595.269  | NM_016561 | 42522.457 | 33262.641 |
| NM_000116 | 6691.949  | 7083.534  | NM_000153 | 1314.015  | 1303.836  | NM_014245 | 59046.902 | 53147.574 |
| NM_006698 | 17262.057 | 18666.057 | NM_002033 | 1968.669  | 1930.529  | L36531    | 1526.763  | 967.335   |
| NM_006804 | 14571.563 | 15108.485 | AK091794  | 1626.83   | 1701.637  | AL110226  | 64490.848 | 67735.273 |
| AK025641  | 20313.711 | 21478.57  | NM_004111 | 6757.186  | 7162.311  | AB046822  | 1374.734  | 1134.535  |
| AB040457  | 348.456   | 544.812   | AF085966  | 9455.421  | 8682.211  | NM_015885 | 6108.387  | 5065.198  |
| AB014514  | 6397.598  | 6413.607  | NM_005316 | 9466.74   | 9357.988  | AK024809  | 705.152   | 454.678   |
| NM_002865 | 21795.127 | 21728.605 | NM_016316 | 9350.763  | 7537.285  | NM_000308 | 4373.5    | 2973.512  |
| NM_003566 | 7126.722  | 4795.716  | NM_003369 | 28975.068 | 25770.77  | X69636    | 11939.745 | 8179.779  |
| NM_004249 | 894.763   | 728.722   | NM_000057 | 4070.615  | 3852.438  | M33197    | 65256.938 | 60743.738 |
| AK026315  | 992.988   | 1452.258  | NM_018343 | 12000.154 | 11987.514 | NM_013974 | 5730.316  | 4406.985  |
| NM_007159 | 62432.508 | 59984.934 | AK095793  | 2800.701  | 2581.367  | NM_017547 | 5902.307  | 4091.414  |
| NM_003731 | 57302.953 | 53135.844 | NM_003177 | 8922.525  | 8459.556  | NM_003983 | 10064.946 | 9721.621  |
| NM_005446 | 23047.586 | 21157.541 | NM_017719 | 2398.608  | 2286.906  | AK023708  | 1991.767  | 1528.058  |
| AB037724  | 8663.93   | 8711.519  | AF064078  | 6193.642  | 6964.272  | NM_002108 | 5034.837  | 3546.297  |
| AK025086  | 3550.109  | 3219.122  | AL049688  | 7498.416  | 7654.784  | NM_018464 | 52829.93  | 44533.422 |
| AK026151  | 7304.799  | 6809.523  | NM_002737 | 6984.286  | 6629.461  | D43948    | 13290.543 | 11069.998 |

|           |           |           |             |           |           |           |           |           |
|-----------|-----------|-----------|-------------|-----------|-----------|-----------|-----------|-----------|
| NM_01414C | 3980.014  | 4748.681  | Z25427      | 8050.392  | 8243.396  | NM_01231C | 53448.477 | 53267.969 |
| NM_00291E | 9453.554  | 9326.742  | NM_004672   | 29222.48  | 28678.219 | BE410824  | 2045.532  | 1309.874  |
| M20700    | 11164.276 | 12558.549 | NM_001353   | 10673.376 | 11278.429 | BF382116  | 20824.846 | 12379.245 |
| NM_001034 | 19556.166 | 22130.199 | NM_006214   | 4170.979  | 5214.054  | NM_003193 | 30012.543 | 25853.143 |
| NM_00268E | 8034.383  | 9194.591  | AJ010228    | 25369.246 | 24468.063 | AF113216  | 3413.502  | 2250.479  |
| NM_01768E | 1595.682  | 2373.114  | NM_00519E   | 8357.892  | 8050.501  | NM_01758E | 3260.699  | 2036.364  |
| AL096734  | 2608.955  | 3288.327  | NM_00437E   | 7003.64   | 8412.825  | AK023582  | 2265.846  | 1226.23   |
| AK000800  | 5740.488  | 7257.773  | NM_000272   | 2052.437  | 2314.782  | NM_000124 | 3053.446  | 2579.618  |
| NM_018154 | 12308.963 | 12033.505 | NM_006061   | 982.418   | 1177.74   | NM_01799E | 13573.03  | 12807.277 |
| NM_00535E | 1176.873  | 1160.941  | NM_00684E   | 61758.766 | 66038.055 | NM_014517 | 7993.201  | 7342.971  |
| BC006287  | 9370.526  | 10224.118 | NM_005603   | 64560.547 | 62838.594 | NM_00546E | 4028.984  | 3906.702  |
| AB023198  | 22311.268 | 23859.871 | NM_001061   | 3899.589  | 5119.849  | NM_00426E | 6138.172  | 5901.358  |
| AF304163  | 31503.443 | 33438.48  | AI075338    | 3663.063  | 3696.8    | NM_00340E | 1502.268  | 1477.135  |
| NM_005231 | 16556.529 | 17614.145 | BG744154    | 40351.777 | 43092.531 | D31765    | 15663.695 | 12969.282 |
| AF064729  | 3033.45   | 3454.742  | Z11694      | 37936.184 | 38747.824 | NM_006107 | 25030.207 | 13636.112 |
| NM_005412 | 46489.039 | 44357.676 | BF983177    | 5066.198  | 4088.508  | NM_00417E | 4355.157  | 4739.701  |
| NM_012113 | 7577.051  | 8004.17   | Z26317      | 4418.939  | 4336.156  | AF288288  | 57600.105 | 55528.844 |
| NM_00215C | 3810.072  | 3827.053  | X16983      | 57143.027 | 56849.137 | NM_01764E | 44251.516 | 35852.07  |
| NM_00459E | 19205.264 | 17789.654 | X56160      | 7102.636  | 6549.131  | AL050368  | 3598.21   | 4035.613  |
| NM_00272E | 1986.783  | 2118.524  | BG679991    | 2218.407  | 1926.827  | NM_003092 | 43486.363 | 39902.75  |
| NM_01437E | 8849.599  | 8471.942  | H-Y 00097 I | 16769.611 | 13444.686 | M33197    | 67089.008 | 68427.758 |
| NM_017812 | 34616.152 | 38965.195 | H-M 59964   | 1542.292  | 1089.461  | NM_005861 | 20032.844 | 13124.486 |
| AF204173  | 3439.614  | 3746.315  | H-Y 00711 I | 64688.086 | 68679.266 | NM_01884E | 9294.599  | 8059.161  |
| J03260    | 5641.708  | 5260.979  | H-X 16707 I | 9182.716  | 9161.906  | NM_00376C | 38848.473 | 30559.52  |
| U13738    | 8700.769  | 9755.105  | AL038354    | 19646.596 | 22846.771 | AB037759  | 2273.924  | 1816.382  |
| AF068236  | 51992.023 | 53138.039 | R14607      | 6213.002  | 6451.584  | AK025998  | 10800.699 | 6796.094  |
| H94487    | 1222.883  | 1329.439  | W84867      | 1776.337  | 1914.657  | AL080080  | 11983.509 | 7231.41   |
| BG681747  | 50924.973 | 50830.973 | NM_00571E   | 11925.025 | 12002.638 | M33197    | 8201.424  | 6009.625  |
| H63077    | 542.312   | 758.954   | NM_018264   | 2974.313  | 2885.673  | NM_001161 | 31735.148 | 28195.828 |
| AA679352  | 21063.828 | 21482.234 | NM_00181E   | 7579.145  | 10259.107 | NM_004044 | 25974.656 | 19814.439 |
| X04503    | 5281.65   | 5047.094  | NM_000064   | 38846.574 | 41907.176 | NM_000221 | 64292.996 | 62276.512 |
| D45917    | 8258.38   | 7850.191  | NM_003264   | 1860.989  | 2467.651  | H75678    | 7031.197  | 4963.394  |
| X52001    | 6341.007  | 6955.025  | NM_00672E   | 12910.173 | 12543.185 | NM_00253E | 2615.458  | 2452.846  |
| BI823872  | 816.315   | 975.713   | NM_00332E   | 4948.036  | 5444.007  | NM_006452 | 35702.758 | 26851.443 |
| AA430552  | 4065.025  | 4703.328  | NM_00456E   | 62831.676 | 62271.207 | AB002359  | 10838.67  | 6937.753  |
| X66142    | 8620.732  | 7445.494  | NM_000202   | 17143.264 | 15777.582 | M33197    | 26904.389 | 18048.016 |
| NM_005913 | 912.999   | 735.308   | NM_00549E   | 19013.172 | 15567.095 | AB007864  | 6023.874  | 3764.502  |
| R45054    | 8650.575  | 8243.595  | NM_01660E   | 2845.09   | 2364.813  | NM_00219E | 11377.191 | 7883.292  |
| AL117398  | 7698.533  | 8015.74   | NM_00285E   | 11374.67  | 10446.465 | AK025905  | 4702.763  | 3353.431  |
| AY007158  | 53981.574 | 52053.387 | NM_004817   | 5993.315  | 5161.239  | AL121733  | 5502.923  | 4381.358  |
| NM_01839C | 9317.992  | 9756.634  | NM_01897E   | 37197.531 | 35981.09  | BE958072  | 6274.641  | 4495.86   |
| NM_007263 | 40192.313 | 44229.172 | AB023215    | 29308.584 | 28938.988 | M33197    | 59704.125 | 57933.738 |
| AF206020  | 3117.824  | 3151.798  | NM_001284   | 48751.289 | 49248.609 | NM_017532 | 2627.982  | 1703.621  |
| NM_01441C | 1811.911  | 1714.549  | NM_003242   | 48219.918 | 42577.395 | NM_01448C | 10627.897 | 7066.47   |
| AF305835  | 1097.333  | 1333.396  | NM_00284E   | 1588.495  | 1595.305  | NM_00593E | 2087.875  | 1764.024  |
| AF312769  | 581.849   | 348.748   | U31099      | 3098.159  | 3532.685  | NM_01416E | 12378.252 | 8751.066  |
| AB020668  | 1483.733  | 1583.814  | NM_00110E   | 23771.471 | 19072.83  | NM_004964 | 28356.412 | 18083.287 |
| NM_006203 | 9511.911  | 10337.689 | NM_00558E   | 1527.625  | 1563.542  | NM_005197 | 20501.908 | 11900.374 |
| NM_013261 | 2016.97   | 2280.605  | NM_00207E   | 15208.995 | 15608.241 | AL137421  | 63539.566 | 60007.887 |
| AF309553  | 14552.444 | 16279.588 | Y08756      | 54220.336 | 56686.551 | M33197    | 64957.109 | 62322.914 |
| NM_00360E | 5780.591  | 5462.599  | AY007090    | 1856.948  | 2042.298  | NM_007241 | 1232.382  | 1125.439  |
| NM_00613E | 2017.129  | 2223.825  | NM_00643E   | 1471.681  | 1694.664  | M33197    | 62236.91  | 58551.535 |
| NM_00010C | 59857.176 | 62061.898 | AV752086    | 2936.578  | 3540.912  | NM_001154 | 15317.629 | 11170.776 |

|           |           |           |           |           |           |           |           |           |
|-----------|-----------|-----------|-----------|-----------|-----------|-----------|-----------|-----------|
| NM_003993 | 14298.521 | 14203.349 | NM_016102 | 36969.059 | 44307.125 | NM_001819 | 5972.198  | 4111.126  |
| NM_018961 | 5393.852  | 5781.841  | AL137529  | 3031.003  | 3819.498  | NM_016938 | 2149.041  | 1674.325  |
| NM_005586 | 4129.641  | 4731.468  | NM_012332 | 11736.159 | 14567.621 | NM_001993 | 3016.604  | 2305.224  |
| NM_012242 | 4827.177  | 4886.021  | AK026648  | 5561.558  | 5311.351  | BF575833  | 1265.803  | 832.523   |
| NM_006896 | 2416.924  | 1414.642  | NM_000497 | 3755.323  | 4063.615  | NM_015725 | 23344.717 | 15636.08  |
| NM_001130 | 38497.426 | 39766.039 | NM_017421 | 7225.229  | 5211.093  | R61452    | 4803.384  | 3358.01   |
| NM_002975 | 4198.605  | 3737.098  | NM_000273 | 2853.144  | 3942.086  | R19938    | 39159.773 | 26280.494 |
| AK023511  | 31483.877 | 31395.41  | NM_002899 | 36878.238 | 36944.375 | N94487    | 39534.172 | 29367.631 |
| NM_014556 | 19568.941 | 16874.217 | NM_005397 | 11161.747 | 12825.775 | AI886795  | 8923.581  | 6464.001  |
| NM_001615 | 64995.402 | 69400.758 | AB014511  | 13866.781 | 17014.09  | D10495    | 7029.232  | 5659.29   |
| AB014514  | 6500.886  | 6326.262  | NM_001662 | 33272.32  | 38443.512 | BF344679  | 10530.699 | 8037.803  |
| NM_002865 | 20045.977 | 21337.338 | AB011100  | 4757.223  | 5615.28   | BG743223  | 1576.122  | 952.611   |
| NM_003566 | 6765.266  | 5949.122  | U61741    | 4042.795  | 4132.833  | M36634    | 4967.071  | 3896.144  |
| NM_004249 | 819.062   | 898.282   | NM_012402 | 17011.164 | 15580.038 | M14156    | 57849.227 | 56629.031 |
| AK026315  | 887.946   | 803.393   | M76676    | 13193.395 | 12930.339 | U87939    | 2878.739  | 2532.256  |
| NM_003731 | 54635.465 | 51992.762 | NM_003857 | 1796.017  | 1907.767  | U86961    | 3318.868  | 3378.68   |
| NM_005446 | 24778.184 | 21918.467 | AL137690  | 1499.924  | 1960.58   | U47924    | 646.725   | 833.175   |
| NM_013292 | 17520.689 | 16227.941 | Z83804    | 6077.008  | 6452.423  | NM_005191 | 5749.058  | 5376.038  |
| NM_002387 | 9958.477  | 8823.517  | NM_004386 | 5623.663  | 5896.234  | AK094237  | 8499.965  | 7900.585  |
| NM_000069 | 4157.471  | 3878.535  | U67784    | 4391.694  | 4569.291  | L07592    | 2434.274  | 2352.265  |
| AB023217  | 3578.931  | 3531.948  | NM_007366 | 4992.003  | 5088.8    | M33197    | 66865.531 | 76339.656 |
| L08902    | 2584.986  | 2507.336  | NM_000592 | 1532.716  | 1839.012  | NM_002983 | 28867.242 | 15944.144 |
| J02639    | 30275.631 | 26605.727 | NM_016584 | 48766.813 | 49920.199 | NM_000074 | 26582.646 | 19335.57  |
| M58050    | 14515.154 | 13912.871 | NM_000153 | 1141.08   | 1199.165  | BF434335  | 60201.02  | 59871.66  |
| NM_002150 | 3460.703  | 3389.929  | NM_002033 | 1611.129  | 1964.744  | M57627    | 1940.616  | 1187.147  |
| NM_004595 | 23053.721 | 23150.234 | AK091794  | 992.582   | 1217.785  | NM_002993 | 3466.597  | 3027.086  |
| NM_020178 | 1509.208  | 1440.573  | NM_004111 | 7898.302  | 7695.041  | AK026946  | 5805.504  | 4769.386  |
| NM_002264 | 6302.387  | 6099.543  | AF085966  | 8879.815  | 8957.784  | M33197    | 61426.957 | 60961.488 |
| NM_014754 | 50476.293 | 51414.148 | NM_005316 | 9181.396  | 10861.831 | NM_003192 | 9511.942  | 7238.937  |
| D49387    | 1290.194  | 1275.771  | NM_016316 | 9099.221  | 9360.995  | NM_018449 | 14549.57  | 10511.702 |
| AF050146  | 11184.173 | 9074.532  | NM_003369 | 31036.447 | 28422.982 | AF086129  | 3528.203  | 3442.199  |
| NM_000116 | 7046.141  | 6258.231  | NM_000057 | 4829.797  | 5053.604  | D79994    | 3417.582  | 3378.254  |
| NM_006698 | 15144.781 | 18184.373 | NM_018343 | 16972.385 | 21351.652 | NM_014458 | 51056.09  | 50673.602 |
| NM_006804 | 13856.036 | 13518.736 | AK095793  | 3303.38   | 5186.714  | L10333    | 1681.484  | 1591.774  |
| NM_015969 | 21394.51  | 21885.504 | NM_003177 | 9242.537  | 13292.983 | AF235049  | 18628.863 | 17585.658 |
| NM_003051 | 5967.557  | 5234.717  | NM_017719 | 2114.807  | 2849.81   | M33197    | 67351.617 | 66545.453 |
| NM_001133 | 921.934   | 757.391   | AF064078  | 5712.2    | 6391.978  | NM_007369 | 3454.515  | 3839.308  |
| NM_145342 | 8144.716  | 8904.247  | AL049688  | 6782.323  | 7257.411  | NM_014776 | 8323.89   | 9846.71   |
| AJ278917  | 3225.821  | 3240.607  | NM_002737 | 6024.254  | 6248.76   | NM_006480 | 60462.109 | 62556.641 |
| AK025641  | 20501.791 | 21604.098 | Z25427    | 8025.589  | 8587.022  | NM_007223 | 63392.039 | 64899.395 |
| NM_001038 | 833.344   | 1179.444  | NM_004672 | 26571.184 | 29517.795 | NM_000145 | 3267.081  | 3294.197  |
| AB040457  | 532.613   | 824.486   | NM_001353 | 10964.879 | 11790.125 | AF030107  | 56183.773 | 59253.754 |
| NM_018390 | 9100.173  | 9004.053  | NM_006214 | 4330.019  | 5844.218  | NM_000871 | 5501.038  | 4677.41   |
| AB037724  | 8375.772  | 7874.697  | AJ010228  | 25339.105 | 26794.254 | NM_018968 | 9018.311  | 9074.619  |
| AK025086  | 3989.863  | 3782.905  | NM_005198 | 8655.367  | 10034.978 | AF086924  | 63541.957 | 63683.684 |
| AK026151  | 9085.68   | 8336.971  | AK021426  | 598.788   | 1077.149  | NM_005164 | 1175.036  | 1617.286  |
| NM_014140 | 3606.724  | 3659.464  | NM_018073 | 3407.392  | 3861.416  | NM_001995 | 9493.192  | 10279.648 |
| NM_002916 | 8213.329  | 9292.188  | NM_006061 | 764.486   | 1123.205  | NM_000183 | 15896.563 | 18825.896 |
| M20700    | 8754.312  | 8726.164  | NM_006848 | 60349.633 | 74944.258 | AY004175  | 4251.801  | 4727.557  |
| NM_001034 | 18337.473 | 19434.482 | NM_005603 | 60610.93  | 63558.766 | M33197    | 60786.941 | 63919.066 |
| NM_002689 | 9109.569  | 9594.981  | NM_001061 | 3138.238  | 3342.699  | NM_012327 | 6958.279  | 8016.759  |
| NM_017686 | 1893.946  | 2139.675  | AI075338  | 3246.995  | 3215.114  | NM_000904 | 10776.484 | 11219.684 |
| AL096734  | 2649.699  | 3020.322  | BG744154  | 43015.676 | 47401.539 | NM_016048 | 6389.826  | 6703.75   |

|           |           |           |             |           |           |           |           |           |
|-----------|-----------|-----------|-------------|-----------|-----------|-----------|-----------|-----------|
| AK000800  | 5740.804  | 6397.95   | Z11694      | 38691     | 43586.801 | NM_00037E | 15723.935 | 15402.522 |
| NM_018154 | 11924.883 | 11678.822 | BF983177    | 5950.489  | 5436.848  | NM_00026E | 58221.188 | 60657.141 |
| NM_00535E | 1061.179  | 1087.414  | Z26317      | 5902.061  | 5392.269  | NM_01884E | 13112.04  | 14288.498 |
| BC006287  | 8931.003  | 9004.354  | X16983      | 62740.766 | 62957.586 | NM_00223E | 23718.162 | 23543.107 |
| AB023198  | 23367.563 | 20144.195 | X56160      | 11260.523 | 15024.601 | NM_01790E | 55140.773 | 57051.285 |
| AF304163  | 32620.643 | 33041.422 | BG679991    | 2671.805  | 3847.28   | NM_00681E | 55161.551 | 58063.547 |
| NM_005231 | 19187.773 | 19455.229 | H-Y 00097 I | 17248.338 | 20313.357 | NM_00280E | 22632.846 | 25284.176 |
| AF064729  | 3934.168  | 5058.074  | H-M 59964   | 1489.016  | 1994.28   | M33197    | 60938.551 | 66475.43  |
| NM_00541E | 52069.152 | 53873.676 | H-Y 00711 I | 66016.367 | 64443.246 | NM_00171E | 26038.512 | 37591.117 |
| SB        | 597.512   | 92.556    | H-X 16707 I | 9338.833  | 9481.841  | NM_00203C | 2361.759  | 3057.158  |
| NM_02197E | 5674.808  | 5187.681  | AL038354    | 19114.639 | 23494.432 | NM_00607E | 1619.251  | 2341.766  |
| AF216077  | 1017.757  | 993.091   | R14607      | 6808.001  | 7371.192  | NM_004951 | 2311.064  | 2054.987  |
| AK021612  | 2742.789  | 2605.347  | W84867      | 2173.625  | 2130.893  | NM_006564 | 16553.148 | 17133.66  |
| AF088031  | 921.414   | 1147.224  | NM_00571E   | 13228.727 | 13994.243 | NM_00480E | 6472.073  | 7556.826  |
| AK002025  | 78307.57  | 63365.887 | NM_018264   | 2840.392  | 3349.663  | M33197    | 64949.387 | 65359.281 |
| AK026299  | 4147.467  | 3582.024  | NM_01458C   | 2731.158  | 3075.268  | NM_00263E | 40044.91  | 41606.723 |
| NM_017794 | 2414.9    | 2160.132  | AB028998    | 2238.06   | 2088.188  | M33197    | 62123.301 | 60278.305 |
| AK025170  | 654.792   | 434.939   | NM_01660E   | 2838.488  | 3353.977  | NM_00287E | 8851.295  | 10211.709 |
| AK001478  | 558.899   | 338.461   | NM_00285E   | 12378.776 | 13306.851 | NM_01772E | 5116.872  | 6974.841  |
| AK025697  | 7888.167  | 4582.411  | NM_004817   | 6773.258  | 7164.012  | AK022922  | 5788.102  | 6979.054  |
| AK021734  | 891.137   | 1033.007  | NM_01897E   | 38807.547 | 41678.238 | NM_00646E | 16677.779 | 16896.127 |
| NM_02197E | 5148.119  | 3363.633  | AB023215    | 40819.422 | 45870.023 | AK024750  | 29003.109 | 29874.209 |
| SR2       | 42897.75  | 42193.766 | NM_001284   | 52928.363 | 55947.105 | NM_00040C | 61114.809 | 58724.355 |
| SR6       | 2443.571  | 2677.375  | NM_00324E   | 55609.137 | 55180.188 | M33197    | 61630.742 | 64249     |
| SR8       | 7164.197  | 20079.061 | NM_00284E   | 1831.911  | 2109.766  | NM_00261E | 11699.998 | 13780.489 |
| SR10      | 18541.477 | 6538.96   | U31099      | 2745.908  | 3743.151  | NM_00441E | 21510.447 | 24378.904 |
| CY3Cy5    | 9569.267  | 3156.627  | NM_00110E   | 28243.203 | 29457.119 | U47635    | 7649.795  | 8408.905  |
| NM_004544 | 17344.926 | 21419.291 | NM_00558E   | 1849.17   | 2941.468  | NM_01865C | 6597.895  | 9180.584  |
| AF086041  | 1724.07   | 1639.593  | NM_00207E   | 19217.295 | 23716.531 | AK026945  | 10891.43  | 13753.134 |
| Y15167    | 2139.472  | 1296.428  | Y08756      | 64224.203 | 64510.801 | NM_00282E | 5644.698  | 7111.741  |
| AL133080  | 4353.5    | 3860.05   | NM_00556E   | 24100.18  | 32407.338 | NM_01436E | 4023.752  | 3601.725  |
| NM_01779E | 8330.293  | 8177.039  | AY007090    | 2055.229  | 2691.127  | M33197    | 61768.992 | 64200.066 |
| AK025213  | 4091.549  | 4542.174  | NM_00643E   | 1832.608  | 1967.352  | NM_00139E | 37301.727 | 40284.766 |
| NM_01494E | 4212.976  | 3780.017  | NM_00510E   | 6246.693  | 6463.208  | AB050049  | 16835.328 | 18919.859 |
| AL080221  | 4390.893  | 4137.862  | NM_00451E   | 5357.991  | 4623.707  | J05125    | 1607.388  | 2776.797  |
| NM_003507 | 955.61    | 1145.398  | NM_006501   | 2373.427  | 2681.562  | NM_00181E | 5096.087  | 4730.255  |
| AK026591  | 1774.273  | 1690.403  | NM_00271E   | 27710.879 | 32389.82  | NM_01693E | 1167.664  | 1487.852  |
| AK001889  | 3772.058  | 3201.27   | AB035356    | 715.267   | 1320.943  | NM_00199E | 2519.436  | 3060.126  |
| AK025726  | 6485.61   | 4254.622  | AV752086    | 3085.431  | 3566.901  | BF575833  | 624.324   | 1262.464  |
| AJ227869  | 3004.74   | 1874.887  | NM_01610E   | 36504.281 | 43589.098 | NM_01572E | 12549.75  | 14106.078 |
| AK026189  | 731.959   | 483.542   | NM_00437E   | 5657.675  | 6201.986  | R61452    | 2362.727  | 2950.204  |
| AL117613  | 7296.076  | 5763.227  | NM_00027E   | 1656.481  | 2553.022  | R19938    | 28691.463 | 32586.893 |
| AL137753  | 9989.016  | 9837.848  | NM_016131   | 23333.346 | 27912.842 | N94487    | 20550.857 | 23350.811 |
| AL110262  | 12694.692 | 8517.085  | NM_00682E   | 5485.503  | 5961.674  | AI886795  | 17721.674 | 17929.438 |
| AK025627  | 2221.078  | 2023.77   | NM_01214E   | 18167.568 | 19787.861 | D10495    | 8192.429  | 9923.833  |
| U00945    | 396.391   | 215.626   | NM_01642E   | 4354.917  | 4838.026  | BF344679  | 9857.106  | 10108.463 |
| AK025191  | 459.019   | 528.15    | AB011100    | 5305.616  | 8288.137  | BG743223  | 2258.26   | 2379.561  |
| AK025246  | 3124.62   | 2576.061  | U61741      | 4713.051  | 5626.816  | M36634    | 4613.521  | 5790.723  |
| AK025847  | 1069.969  | 828.925   | NM_01240E   | 18565.084 | 21352.932 | M14156    | 59394.898 | 60851.238 |
| AK026442  | 496.397   | 600.084   | M76676      | 14324.648 | 15344.154 | U87939    | 2575.509  | 3334.694  |
| AB033031  | 4414.305  | 3872.558  | NM_003857   | 1499.569  | 2352.241  | U86961    | 3873.256  | 4512.544  |
| AF085872  | 1028.626  | 796.961   | AL137690    | 1991.804  | 2986.916  | U47924    | 759.628   | 1334.089  |
| AK022538  | 3545.888  | 2750.606  | Z83804      | 7163.136  | 8383.552  | NM_005191 | 6442.836  | 7708.053  |

|           |           |           |           |           |           |           |           |           |
|-----------|-----------|-----------|-----------|-----------|-----------|-----------|-----------|-----------|
| AK022342  | 534.962   | 395.278   | NM_004386 | 7150.12   | 9950.164  | AK094237  | 11249.16  | 12180.795 |
| AL049312  | 1502.803  | 1069.607  | U67784    | 5107.682  | 6297.481  | L07592    | 2931.199  | 3399.169  |
| AL050072  | 569.356   | 929.002   | NM_007366 | 5249.706  | 6245.596  | M33197    | 61224.918 | 69916.813 |
| AL117590  | 861.547   | 866.661   | NM_000592 | 1400.655  | 1607.445  | AK027244  | 817.753   | 1316.355  |
| AL049357  | 7022.366  | 5317.595  | NM_016584 | 56226.047 | 54774.637 | L40520    | 4771.431  | 7693.556  |
| AL117659  | 443.438   | 457.967   | NM_001815 | 8394.408  | 9442.472  | BF434335  | 60089.707 | 59131.629 |
| AK027180  | 4907.95   | 3461.701  | NM_000064 | 43636.066 | 47749.434 | M57627    | 1705.192  | 2088.097  |
| unknown ( | 1381.305  | 1078.521  | NM_003264 | 1952.153  | 2287.477  | NM_002993 | 3396.774  | 4529.275  |
| AK022236  | 12961.688 | 15595.384 | NM_006725 | 12391.459 | 12348.765 | AK026946  | 5764.834  | 6726.589  |
| AK000073  | 6194.874  | 6343.055  | NM_003326 | 5392.379  | 6467.208  | M33197    | 60793.492 | 62762.066 |
| AK000618  | 357.505   | 746.464   | NM_004568 | 66368.781 | 78778.742 | NM_003192 | 8337.401  | 9822.055  |
| AK024773  | 862.588   | 795.63    | NM_000202 | 15711.722 | 15587.852 | NM_018445 | 12337.514 | 13457.677 |
| AL390180  | 550.633   | 654.384   | NM_005496 | 18349.107 | 17300.889 | AF086129  | 3405.902  | 4141.408  |
| AF009262  | 31931.598 | 30276.322 | NM_006214 | 4674.699  | 5136.165  | D79994    | 5406.812  | 7129.288  |
| AF009306  | 2486.228  | 2795.537  | AJ010228  | 25512.695 | 29412.619 | NM_014458 | 56245.633 | 57864.176 |
| AF050198  | 2778.623  | 3215.271  | NM_005198 | 9898.628  | 11798.996 | AF235049  | 20487.174 | 24937.045 |
| AK024346  | 6029.394  | 4618.057  | NM_018073 | 3563.794  | 4032.817  | NM_007366 | 3606.606  | 5400.839  |
| AF056422  | 1132.945  | 850.183   | AL137529  | 3428.494  | 3993.274  | NM_014776 | 8569.419  | 10505.522 |
| AF090892  | 466.44    | 289.485   | NM_012332 | 14008.874 | 17120.51  | NM_006480 | 59980.918 | 65675.945 |
| AK001089  | 585.975   | 831.851   | AK026648  | 4792.55   | 5883.454  | NM_007223 | 61008.594 | 66565.727 |
| AK001919  | 1713.641  | 2184.667  | NM_000497 | 3795.133  | 4480.724  | NM_000145 | 3843.002  | 4172.8    |
| AK021535  | 1123.708  | 888.72    | NM_017421 | 6631.367  | 5899.032  | AF030107  | 48669.668 | 59257.602 |
| AK021753  | 1526.498  | 1223.022  | AK025977  | 63953.215 | 63352.055 | NM_000871 | 6099.921  | 6467.679  |
| AK001139  | 464.795   | 521.448   | AK023130  | 12463.273 | 17834.471 | NM_018968 | 9982.17   | 11126.967 |
| AK002090  | 1163.77   | 956.248   | NM_000273 | 3337.805  | 4783.121  | AF086924  | 60468.758 | 65561.625 |
| AK021618  | 1795.473  | 1337.594  | NM_002899 | 39365.543 | 43942.156 | M33197    | 61548.043 | 65031.758 |
| AK021822  | 1045.375  | 887.572   | NM_000486 | 3298.676  | 4230.256  | NM_001154 | 17071.225 | 26628.85  |
| AF116620  | 10549.357 | 11137.903 | BE876237  | 2606.395  | 3415.424  | NM_000183 | 15793.797 | 17492.148 |
| AF293335  | 5426.116  | 6735.907  | NM_005397 | 10200.314 | 11312.698 | AY004175  | 3958.13   | 4495.74   |
| AK024431  | 13923.19  | 16908.566 | NM_000806 | 27922.674 | 28495.766 | M33197    | 60455.148 | 61228.398 |
| AF116635  | 621.628   | 803.655   | NM_006320 | 5581.977  | 5949.604  | NM_012327 | 6519.012  | 8128.422  |
| X96644    | 5530.457  | 6749.08   | AB014511  | 14104.09  | 16211.588 | NM_000904 | 11312.987 | 12797.206 |
| Z34281    | 21279.277 | 17278.332 | NM_014252 | 11171.616 | 13044.855 | NM_016048 | 6728.148  | 7167.862  |
| NM_018678 | 5232.255  | 4979.435  | NM_001662 | 34402.348 | 39931.598 | NM_000375 | 12241.721 | 12596.583 |
| AJ008122  | 10694.974 | 12120.698 | NM_005718 | 12468.725 | 14375.883 | NM_000265 | 54517.848 | 57687.293 |
| NM_006220 | 3017.955  | 3153.374  | NM_018264 | 2868.036  | 3504.451  | NM_018845 | 19504.504 | 20541.076 |
| AK022667  | 11618.852 | 10081.672 | NM_014580 | 3164.28   | 3012.885  | AJ000096  | 1746.766  | 1961.44   |
| AK026667  | 605.46    | 607.921   | AB028998  | 2192.867  | 2134.072  | NM_002236 | 21516.199 | 22331.324 |
| AK000944  | 435.189   | 337.425   | NM_000153 | 1020.968  | 1516.131  | NM_017905 | 55531.539 | 57683.773 |
| NM_014174 | 6240.226  | 4326.788  | NM_002033 | 1671.483  | 2147.819  | NM_006815 | 60602.902 | 59542.918 |
| AF147337  | 3173.242  | 2123.364  | AK091794  | 915.833   | 1068.951  | M33197    | 66685.023 | 73793.789 |
| AK025203  | 25249.096 | 18039.209 | NM_004111 | 7920.181  | 8459.571  | NM_001716 | 27005.641 | 37003.066 |
| AK026981  | 3211.19   | 2774.257  | AF085966  | 8426.25   | 9274.508  | NM_002030 | 2444.635  | 3085.669  |
| NM_006394 | 1033.508  | 1271.556  | NM_005316 | 9509.436  | 11737.14  | NM_006073 | 2212.928  | 2721.066  |
| AK023819  | 483.33    | 613.274   | NM_016316 | 8179.759  | 8838.138  | NM_004951 | 2928.324  | 3440.102  |
| AL133656  | 1059.275  | 757.27    | NM_003369 | 31450.17  | 33255.762 | NM_006564 | 18044.801 | 22688.93  |
| AL050037  | 12335.146 | 7838.878  | NM_000057 | 3991.209  | 4553.518  | NM_004802 | 6857.444  | 7635.003  |
| NM_001417 | 55270.781 | 42787.105 | NM_018343 | 12891.896 | 12809.624 | M33197    | 66928.781 | 71506.984 |
| AK023557  | 2319.622  | 3207.287  | AK095793  | 2690.51   | 2970.757  | NM_002983 | 29787.314 | 31932.496 |
| AK027107  | 1595.043  | 1879.103  | NM_003177 | 8110.245  | 9803.189  | NM_000074 | 44880.531 | 49074.75  |
| AB040887  | 3580.555  | 5837.062  | NM_017719 | 1947.904  | 2101.944  | M33197    | 62242.176 | 64013.641 |
| AK025196  | 1570.385  | 1776.101  | AF064078  | 5798.077  | 6254.146  | NM_002878 | 9240.781  | 10270.045 |
| AJ227879  | 2482.194  | 2847.659  | AL049688  | 6264.691  | 6768.135  | NM_017723 | 4036.969  | 4822.852  |

|           |           |           |           |           |           |           |           |           |
|-----------|-----------|-----------|-----------|-----------|-----------|-----------|-----------|-----------|
| AK024800  | 1561.326  | 1377.698  | NM_002737 | 5031.216  | 4997.954  | AK022922  | 3272.168  | 3265.561  |
| AK000401  | 6423.135  | 6464.607  | Z25427    | 7846.774  | 9157.473  | NM_006462 | 11764.344 | 12224.641 |
| AF305068  | 1256.254  | 1490.356  | NM_004672 | 27200.309 | 32236.57  | AK024750  | 26241.377 | 27699.924 |
| D17231    | 61148.094 | 62267.207 | NM_001353 | 9574.246  | 9796.911  | NM_000400 | 62639.086 | 60593.277 |
| AF531295  | 1937.374  | 2095.17   | CY3Cy5    | 7908.359  | 410.312   | M33197    | 62640.313 | 65275.445 |
| X60484    | 943.299   | 882.932   | AF252284  | 3852.6    | 1925.849  | NM_002613 | 11174.048 | 13227.463 |
| AF055019  | 1170.901  | 1079.197  | AK025794  | 13071.38  | 8990.844  | NM_004419 | 22933.131 | 26085.51  |
| NM_003525 | 11911.778 | 9372.563  | NM_003541 | 3020.348  | 2550.097  | U47635    | 7929.741  | 9154.325  |
| AK000229  | 1660.283  | 1312.552  | NM_007198 | 4961.417  | 3326.806  | NM_018650 | 6997.097  | 9832.218  |
| AF056432  | 4488.252  | 4447.939  | M33197    | 82902.516 | 62841.008 | AK026945  | 11324.448 | 15375.934 |
| AK001987  | 12098.59  | 10060.631 | AK023220  | 1783.45   | 886.484   | NM_002828 | 5892.757  | 7878.347  |
| NM_013332 | 8460.712  | 7140.401  | AK024566  | 1354.029  | 824.497   | NM_014369 | 3766.465  | 4215.272  |
| X56199    | 1058.113  | 796.405   | AF038182  | 4047.378  | 3752.754  | M33197    | 60061.617 | 62287.059 |
| NM_005193 | 4640.91   | 4391.221  | NM_016475 | 6696.227  | 5614.077  | NM_001398 | 37844.941 | 43701.926 |
| AL162006  | 1682.333  | 1478.703  | AF086472  | 3076.261  | 3473.61   | AB050049  | 18017.723 | 20001.459 |
| NM_017971 | 4453.402  | 3307.131  | AF252284  | 5291.321  | 4804.596  | J05125    | 1033.667  | 1606.163  |
| AF090097  | 1654.735  | 1080.471  | BU727558  | 2425.005  | 1839.076  | NM_005164 | 930.16    | 1405.838  |
| AF054998  | 434.955   | 570.52    | SR3       | 55534.691 | 52224.477 | NM_001995 | 10331.369 | 13117.921 |
| NM_014750 | 4120.728  | 4447.554  | SR5       | 7191.508  | 8312.795  | NM_015725 | 9506.774  | 11669.603 |
| NM_015912 | 1546.612  | 1812.934  | SR7       | 6598.906  | 40800.219 | R61452    | 2723.134  | 3130.913  |
| NM_000460 | 3570.532  | 4841.749  | SR9       | 22201.844 | 4747.721  | R19938    | 35436.363 | 39886.918 |
| AB002339  | 8924.177  | 9497.02   | CY3Cy5    | 6727.461  | 529.341   | N94487    | 31220.131 | 34674.672 |
| NM_005104 | 24838.916 | 25829.691 | NM_005598 | 779.558   | 562.716   | AI886795  | 12699.143 | 12400.939 |
| NM_006888 | 43580.168 | 46231.203 | AK023636  | 2585.358  | 2290.995  | D10495    | 5959.528  | 5820.18   |
| AL137423  | 7994.148  | 8925.337  | M33197    | 97715.672 | 63817.07  | BF344679  | 8285.713  | 7693.044  |
| AB018322  | 5408.57   | 6861.462  | AL832699  | 11670.241 | 8548.502  | BG743223  | 1603.215  | 1770.357  |
| NM_007068 | 4395.907  | 4970.555  | NM_012191 | 3096.088  | 1986.083  | M36634    | 4010.996  | 4630.991  |
| AF113211  | 311.342   | 504.604   | M33197    | 77913.828 | 62524.23  | M14156    | 57007.473 | 60857.391 |
| AL117568  | 6639.899  | 6592.134  | AK000757  | 757.824   | 767.637   | U87939    | 4452.807  | 4477.769  |
| NM_000843 | 862.295   | 689.415   | AL359577  | 2831.375  | 2955.542  | U86961    | 5898.3    | 6455.12   |
| S71805    | 3123.082  | 1532.398  | NM_018139 | 9944.562  | 7982.63   | U47924    | 929.417   | 1537.084  |
| NM_018391 | 3703.013  | 3473.921  | NM_014871 | 4936.371  | 4259.882  | NM_005191 | 6997.264  | 8195.049  |
| U90917    | 1879.981  | 1315.566  | M33197    | 85418.453 | 63012.445 | AK094237  | 10050.149 | 10817.896 |
| AK022140  | 3954.649  | 3830.189  | AL137552  | 4738.092  | 4985.296  | L07592    | 2999.812  | 3457.462  |
| AK023372  | 15092.292 | 11513.08  | M33197    | 68743.555 | 62866.355 | M33197    | 62909.258 | 66921.984 |
| AF086527  | 670.459   | 842.423   | AK024406  | 1274.104  | 1324.106  | AK027244  | 1161.941  | 1504.454  |
| U21072    | 2508.804  | 2635.668  | AK024568  | 1747.944  | 1380.659  | L40520    | 4083.383  | 4930.767  |
| AK024377  | 1197.983  | 1290.975  | M33197    | 68245.688 | 67196.742 | NM_002633 | 39088.641 | 47467.555 |
| U38438    | 469.708   | 501.281   | AK024981  | 46526.379 | 42526.895 | AF086129  | 1801.343  | 2892.438  |
| AK025621  | 547.729   | 717.81    | AK027246  | 2212.038  | 1554.27   | D79994    | 2833.736  | 3990.278  |
| AL137461  | 562.809   | 790.992   | U80766    | 5522.113  | 4047.071  | NM_014458 | 5657.9    | 6639.674  |
| NM_017514 | 1387.666  | 1903.347  | AK001638  | 3057.441  | 3199.844  | AF235049  | 11209.808 | 13173.788 |
| AB018261  | 1395.01   | 1570.719  | AF161386  | 25769.699 | 19113.615 | M33197    | 62963.883 | 63719.719 |
| NM_018972 | 5211.351  | 6019.238  | AL365369  | 6548.365  | 5313.613  | NM_007369 | 3604.7    | 4035.531  |
| AB037828  | 1403.771  | 1649.274  | AK025454  | 7579.837  | 7155.752  | NM_014776 | 8630.813  | 8740.593  |
| AB023210  | 2150.01   | 2368.6    | M33197    | 73585.586 | 62230.227 | NM_006480 | 59928.164 | 62169.332 |
| AB037786  | 2466.731  | 2312.348  | X05826    | 23304.004 | 22148.781 | NM_007223 | 59049.227 | 65280.496 |
| NM_003648 | 21456.256 | 22370.434 | Y11608    | 1546.265  | 1295.3    | NM_000145 | 2960.218  | 3172.736  |
| AB037735  | 1657.014  | 1836.711  | AJ001872  | 17327.764 | 17048.16  | AF030107  | 58265.367 | 60658.402 |
| AK002177  | 3049.79   | 2896.593  | AJ227882  | 936.837   | 1212.245  | NM_000871 | 6557.868  | 6286.709  |
| AK024429  | 1907.8    | 1789.909  | M33197    | 68905.508 | 61103.145 | M33197    | 59109.02  | 67085.281 |
| NM_003496 | 29476.723 | 23467.221 | M33197    | 68547.5   | 65279.824 | NM_018968 | 12276.271 | 14197.764 |
| AB000509  | 4209.961  | 3910.027  | AL137556  | 1937.97   | 1345.559  | AF086924  | 60672.867 | 67587.586 |



|           |           |           |           |           |           |           |           |           |
|-----------|-----------|-----------|-----------|-----------|-----------|-----------|-----------|-----------|
| AB018314  | 2763.777  | 2351.958  | NM_014696 | 7326.164  | 7251.15   | NM_000264 | 2212.22   | 2730.978  |
| NM_00437E | 707.312   | 661.328   | AL359055  | 3082.038  | 3050.279  | AB058740  | 50950.078 | 58251.828 |
| AJ238899  | 1371.073  | 1315.534  | NM_01490E | 3345.095  | 3033.562  | NM_00338E | 2032.941  | 2822.302  |
| NM_018037 | 6110.021  | 7585.216  | AB037771  | 446.93    | 580.166   | NM_00188E | 2388.572  | 2395.209  |
| NM_001110 | 6808.175  | 8557.633  | AK025931  | 12094.697 | 11367.415 | NM_00439Z | 1780.221  | 2015.688  |
| NM_00322Z | 796.408   | 1363.283  | M33197    | 5970.81   | 5307.402  | M33197    | 64688.895 | 68607.625 |
| NM_000841 | 2479.447  | 2375.927  | AK021972  | 1396.644  | 883.134   | NM_001154 | 15153.665 | 18902.996 |
| NM_01656Z | 427.569   | 528.918   | M33197    | 68718.984 | 61191.988 | NM_00181E | 7419.342  | 8126.225  |
| NM_00073E | 570.492   | 612.052   | AK001083  | 4850.571  | 4911.513  | NM_01693E | 1976.401  | 2666.771  |
| NM_00124E | 2731.476  | 1909.228  | AK000185  | 3961.885  | 4663.709  | NM_00166Z | 3647.321  | 4813.477  |
| AJ008139  | 14966.57  | 14911.565 | NM_01796Z | 3116.883  | 4099.061  | NM_00421E | 13748.142 | 17667.42  |
| NM_00432E | 12220.637 | 12667.14  | AK027227  | 1146.076  | 731.539   | NM_01653C | 4103.054  | 6286.038  |
| NM_00088Z | 1240.686  | 1495.701  | NM_017834 | 1457.655  | 1554.484  | NM_014804 | 2259.423  | 2816.183  |
| NM_004577 | 13076.357 | 14280.888 | AK000865  | 2309.087  | 2459.377  | NM_01245E | 10287.508 | 12161.531 |
| NM_015507 | 454.408   | 661.209   | M33197    | 68328.578 | 68964.758 | NM_00280E | 19902.961 | 26227.889 |
| AF007157  | 19392.396 | 20197.494 | AF147349  | 21622.496 | 18221.709 | M33197    | 67052.484 | 79179.773 |
| D38553    | 5855.122  | 5764.223  | AL050346  | 10742.444 | 9723.851  | NM_00171E | 27455.787 | 32379.838 |
| NM_00617C | 14050.44  | 11748.264 | AK001520  | 16739.498 | 15863.505 | NM_00203C | 2874.957  | 2481.083  |
| NM_01429E | 17316.279 | 14681.888 | AK021731  | 966.44    | 907.581   | NM_00607Z | 2129.555  | 2662.84   |
| AK001581  | 4124.438  | 4371.37   | D90070    | 34040.625 | 29131.479 | NM_004951 | 2416.12   | 2332.385  |
| NM_00586Z | 2079.458  | 1877.948  | M33197    | 68541.625 | 64509.656 | NM_006564 | 16166.736 | 17786.023 |
| NM_00054E | 6487.313  | 5992.972  | AF086179  | 6677.538  | 5789.732  | NM_00480Z | 7620.585  | 8567.273  |
| AK022541  | 12786.857 | 12024.082 | AK025807  | 7829.42   | 6923.966  | M33197    | 65105.137 | 73197.078 |
| AB002297  | 8218.126  | 7018.896  | AK022478  | 880.907   | 803.548   | NM_00298Z | 30186.6   | 31963.801 |
| NM_00502C | 18572.941 | 15664.879 | NM_018381 | 2621.832  | 2322.508  | NM_000074 | 42895.707 | 48287.5   |
| NM_014077 | 10521.374 | 8870.167  | AK026277  | 14277.437 | 13874.404 | NM_02039Z | 774.691   | 1267.881  |
| NM_01841Z | 5330.402  | 6154.704  | U10509    | 4881.53   | 4592.171  | BF434335  | 62230.141 | 70071.219 |
| NM_01232E | 10383.651 | 10600.021 | NM_00716Z | 61627.316 | 57774.883 | M57627    | 2070.687  | 2452.8    |
| M14087    | 7201.483  | 6259.452  | NM_019116 | 3934.207  | 5717.973  | NM_00299Z | 4011.673  | 5308.546  |
| AJ272324  | 497.499   | 430.746   | AF147318  | 3669.569  | 4376.829  | AK026946  | 6191.707  | 7014.502  |
| NM_00088E | 4699.501  | 5699.141  | L37699    | 2428.971  | 2262.849  | M33197    | 66147.641 | 76416.5   |
| X15880    | 41908.598 | 32978.66  | M33197    | 67875.461 | 73836.953 | NM_00319Z | 9468.261  | 10556.086 |
| X04366    | 5831.088  | 6584.951  | AL050173  | 1973.915  | 1475.416  | NM_01844E | 15416.488 | 17132.285 |
| NM_00050E | 10598.984 | 11604.022 | D80002    | 2985.285  | 2930.169  | NM_00139E | 14833.983 | 16657.588 |
| NM_01865E | 1941.902  | 1864.349  | U17637    | 730.616   | 754.771   | AB050049  | 12100.698 | 13509.349 |
| NM_00066E | 6171.354  | 7862.459  | AF207831  | 2040.162  | 1803.412  | J05125    | 1259.95   | 2185.742  |
| NM_003481 | 11748.634 | 10865.823 | NM_01827Z | 2569.589  | 2870.032  | NM_005164 | 1980.531  | 2887.698  |
| AB002347  | 857.384   | 635.21    | AF086125  | 2047.692  | 1745.579  | NM_00199E | 9499.48   | 13109.207 |
| AB046814  | 1838.083  | 1440.003  | AK023547  | 1512.891  | 1693.913  | NM_00018Z | 15504.504 | 17410.17  |
| NM_01777E | 570.805   | 474.112   | U67847    | 4254.873  | 4106.699  | AY004175  | 6702.157  | 6217.232  |
| NM_017664 | 9961.714  | 7875.409  | AK021933  | 964.732   | 946.926   | M33197    | 63715.137 | 69499.836 |
| AK025523  | 1260.749  | 1627.417  | M33197    | 68602.234 | 64366.008 | NM_012327 | 10494.552 | 11024.747 |
| NM_00705E | 6697.627  | 6162.51   | AK024207  | 10422.737 | 9510.837  | NM_01604E | 7302.539  | 8832.039  |
| NM_00687C | 12351.978 | 11120.076 | AK021843  | 4524.724  | 3659.031  | NM_00037E | 16593.709 | 18726.492 |
| NM_00735E | 12431.987 | 15395.776 | AF116623  | 1456.652  | 2353.977  | NM_00026E | 60963.926 | 60818.77  |
| L13283    | 6349.982  | 5314.076  | AF088008  | 6319.895  | 7021.345  | NM_01884E | 17983.342 | 19185.74  |
| NM_013327 | 5411.826  | 5055.922  | AK023528  | 4488.499  | 5377.239  | M33197    | 60245.832 | 69792.258 |
| AF303888  | 18376.027 | 17162.164 | AK023043  | 1769.291  | 2092.329  | M16796    | 948.72    | 1783.754  |
| NM_000077 | 2289.99   | 3380.2    | NM_00468E | 7956.002  | 7501.996  | AF279890  | 27987.85  | 34034.547 |
| AF176646  | 656.595   | 544.458   | AB037725  | 1230.925  | 911.166   | NM_00223E | 14964.919 | 18567.305 |
| NM_00367Z | 4301.494  | 4573.724  | M33197    | 68051.758 | 70539.367 | NM_01206E | 14335.283 | 17498.295 |
| NM_002574 | 69157.109 | 63587.145 | NM_00486C | 7328.359  | 7864.08   | NM_00168E | 64349.754 | 65786.289 |
| NM_012391 | 5187.602  | 5904.084  | AF217190  | 14467.738 | 13972.135 | NM_016601 | 6169.4    | 6471.897  |

|           |           |           |           |           |           |           |           |           |
|-----------|-----------|-----------|-----------|-----------|-----------|-----------|-----------|-----------|
| NM_005254 | 8520.116  | 11633.649 | AB028981  | 17194.391 | 16875.432 | NM_017905 | 46893.613 | 49899.648 |
| NM_005611 | 3512.003  | 4233.675  | NM_006800 | 1222.495  | 1114.984  | M33197    | 63782.477 | 71974.672 |
| AF141655  | 1326.362  | 1410.421  | M33197    | 68135.188 | 68482.141 | NM_006815 | 50963.203 | 57105.34  |
| NM_007345 | 3187.027  | 3354.515  | AK025266  | 5488.325  | 5521.668  | M33197    | 63102.789 | 72885.648 |
| NM_004830 | 1790.911  | 2221.136  | AK001843  | 4376.367  | 4069.533  | AK027244  | 939.056   | 1116.301  |
| AF132362  | 62365.5   | 67186.148 | AK000548  | 56587.07  | 56141.555 | L40520    | 3286.315  | 3784.516  |
| NM_007007 | 21248.605 | 21013.766 | NM_003920 | 39385.289 | 44623.316 | NM_002633 | 27441.02  | 30529.494 |
| NM_006386 | 3847.905  | 3200.346  | NM_004787 | 51227.836 | 49424.426 | M33197    | 60071.512 | 64030.973 |
| NM_006555 | 33579.961 | 36566.883 | AF087984  | 7618.749  | 7406.951  | NM_017723 | 6088.254  | 6262.364  |
| NM_004501 | 49012.547 | 45959.43  | AF009302  | 3322.255  | 2845.458  | AK022922  | 3672.672  | 3538.845  |
| NM_004966 | 27089.973 | 29176.855 | M33197    | 67702.805 | 66999.461 | NM_006462 | 11329.698 | 13309.176 |
| NM_006700 | 3567.736  | 3880.721  | AK022273  | 26769.457 | 28602.994 | AK024750  | 19372.449 | 22690.506 |
| NM_006445 | 23601.629 | 19298.406 | AK027161  | 798.955   | 949.126   | NM_002613 | 7915.722  | 9193.693  |
| NM_012105 | 18117.52  | 15969.68  | AK024271  | 2716.235  | 2808.26   | NM_004415 | 16983.707 | 19335.195 |
| AF019633  | 4278.573  | 3506.087  | AK021650  | 35938.211 | 41866.566 | U47635    | 6768.983  | 7096.386  |
| AB002361  | 3441.489  | 2416.635  | AL050210  | 25557.531 | 16679.379 | NM_018650 | 5266.379  | 5997.326  |
| NM_018060 | 16800.131 | 18847.07  | NM_014844 | 765.973   | 1131.512  | AK026945  | 9786.285  | 11653.778 |
| NM_014235 | 11702.625 | 8775.376  | M33197    | 68613.055 | 64345.742 | NM_002825 | 5617.012  | 6085.205  |
| NM_017662 | 11699.646 | 9220.382  | NM_018492 | 7458.854  | 7328.632  | NM_014365 | 2783.004  | 2673.271  |
| U88837    | 5502.319  | 4954.82   | NM_003377 | 15244.084 | 16413.947 | M33197    | 61688.785 | 64806.57  |
| NM_017445 | 43310.414 | 46229.719 | NM_002220 | 3075.55   | 2985.698  | CY3Cy5    | 6885.32   | 757.537   |
| NM_017582 | 29328.5   | 35420.336 | AB033034  | 9482.381  | 8857.846  | AL834159  | 6581.453  | 6494.53   |
| NM_015235 | 8271.109  | 8457.637  | M33197    | 67784.078 | 74756.688 | NM_000164 | 44247.254 | 33836.043 |
| AK026962  | 4567.654  | 4234.277  | AJ293294  | 10538.62  | 11201.899 | AK021971  | 1323.681  | 1599.292  |
| D00265    | 59731.359 | 58190.477 | NM_018171 | 2626.228  | 2575.628  | AK025253  | 4558.61   | 6813.479  |
| NM_000775 | 951.659   | 1211.019  | NM_002447 | 53172.016 | 55293.578 | AF131777  | 2015.691  | 1774.253  |
| NM_004552 | 60243.105 | 58385.676 | NM_014145 | 25932.961 | 23536.482 | AK025004  | 3012.851  | 3435.323  |
| NM_000143 | 5848.422  | 7848.341  | NM_014141 | 15321.935 | 14242.727 | AL136818  | 2305.135  | 2654.104  |
| AF317889  | 1481.923  | 1669.638  | NM_002223 | 6571.119  | 6322.834  | AF146798  | 7501.803  | 7802.001  |
| NM_006294 | 60833.645 | 61987.203 | M33197    | 68175.227 | 70220.234 | AK022049  | 1542.705  | 1345.059  |
| AL137294  | 785.818   | 1032.865  | NM_005490 | 45158.266 | 45196.684 | AF086517  | 28159.15  | 27506.395 |
| NM_003743 | 2954.801  | 2981.117  | NM_003151 | 5570.492  | 5439.532  | AK025740  | 35001.898 | 30243.523 |
| AB037797  | 2348.793  | 2093.157  | NM_006811 | 9830.925  | 11302.744 | AK000311  | 5133.663  | 3887.298  |
| NM_001520 | 4582.462  | 4098.466  | NM_005601 | 5025.528  | 4894.955  | AK021747  | 2481.72   | 2220.485  |
| AL050367  | 783.548   | 751.371   | NM_016151 | 43505.824 | 45050.391 | AK025640  | 11133.294 | 9558.421  |
| NM_017870 | 1075.985  | 889.864   | AK026270  | 1847.608  | 1624.479  | AL834159  | 6650.132  | 5491.071  |
| AL133633  | 7742.014  | 6950.604  | NM_004556 | 21039.828 | 19597.02  | NM_000164 | 54375.082 | 38910.59  |
| NM_012252 | 4297.317  | 3555.881  | D90075    | 3527.841  | 3819.495  | SR1       | 69360.172 | 63981.898 |
| AK026817  | 3234.948  | 3079.684  | M33197    | 68048.656 | 72912.07  | SR3       | 41388.895 | 46377.555 |
| AL157442  | 46493.711 | 40818.117 | NM_014857 | 2257.453  | 1429.379  | SR5       | 5092.144  | 5575.048  |
| AB011148  | 4514.723  | 4309.706  | AK023827  | 1097.927  | 1067.127  | SR7       | 5525.521  | 38512.91  |
| AL389938  | 15497.035 | 12320.776 | AK021702  | 6249.036  | 6088.729  | SR9       | 13422.396 | 2595.347  |
| NM_001945 | 57699.617 | 58142.262 | NM_003885 | 4196.405  | 4191.959  | CY3Cy5    | 3317.948  | 173.213   |
| NM_007084 | 1709.729  | 1406.528  | AL161977  | 2317.257  | 1989.05   | D55638    | 902.565   | 1031.608  |
| M97191    | 21215.623 | 24172.646 | NM_016445 | 10415.34  | 8657.045  | L23870    | 763.01    | 1226.153  |
| AK023015  | 18469.365 | 22085.871 | NM_003936 | 3834.74   | 4093.767  | D55644    | 842.684   | 888.519   |
| NM_003457 | 20683.441 | 20261.029 | M33197    | 68152.961 | 68516.828 | Z97017    | 668.234   | 927.442   |
| AV752086  | 2297.585  | 2876.735  | NM_002685 | 2708.068  | 2815.2    | D16951    | 1648.873  | 1753.471  |
| NM_016102 | 10599.026 | 15294.837 | NM_020365 | 1527.309  | 1530.381  | L33807    | 3730.594  | 4797.07   |
| NM_004375 | 7459.699  | 7006.218  | NM_004415 | 10897.497 | 9519.257  | U80774    | 875.565   | 1278.474  |
| NM_000272 | 1240.104  | 1481.5    | NM_007275 | 39737.273 | 35782.605 | NM_006545 | 59715.766 | 56253.434 |
| NM_006061 | 520.842   | 873.927   | NM_005215 | 24916.172 | 22660.342 | NM_016534 | 3175.294  | 2904.219  |
| NM_006845 | 56975.238 | 63605.617 | NM_004723 | 10716.041 | 9789.683  | AL137645  | 51333.477 | 49589.723 |

|             |           |           |           |           |           |           |           |           |
|-------------|-----------|-----------|-----------|-----------|-----------|-----------|-----------|-----------|
| NM_005603   | 15262.196 | 14672.129 | M33197    | 67065.828 | 65371.867 | AK026141  | 3295.581  | 5091.971  |
| NM_001061   | 1730.113  | 2473.988  | NM_018413 | 4278.69   | 4458.889  | AK022894  | 3306.97   | 2889.94   |
| AI075338    | 413.071   | 606.25    | AB018299  | 52900.422 | 56869.137 | AF217993  | 8750.679  | 7970.789  |
| BG744154    | 33672.953 | 36888.711 | NM_005245 | 10105.676 | 11380.654 | AF131823  | 1600.678  | 1485.528  |
| Z11694      | 29784.621 | 30092.223 | NM_002941 | 2840.249  | 3157.104  | AK026324  | 19505.436 | 13553.763 |
| X16983      | 5607.941  | 5969.536  | AK025605  | 4315.002  | 4287.173  | AK024518  | 30004.973 | 32286.869 |
| X56160      | 1025.119  | 930.617   | NM_003783 | 1533.966  | 1575.117  | AK024586  | 2278.269  | 2661.239  |
| H-Y 00097 I | 12938.192 | 10492.929 | NM_007000 | 4834.39   | 4981.566  | AK025017  | 9647.365  | 9403.516  |
| H-M 59964   | 553.257   | 607.765   | M23161    | 10967.696 | 10574.225 | AK024534  | 1569.101  | 1553.438  |
| H-Y 00711 I | 63114.25  | 59675.922 | NM_006100 | 1567.901  | 1506.906  | AK024616  | 742.403   | 1075.682  |
| H-X 16707 I | 2812.806  | 2971.645  | NM_003197 | 14884.995 | 12596.535 | AK024914  | 7508.837  | 7875.729  |
| H-U76456M   | 539.335   | 320.333   | AF176705  | 14078.451 | 12096.368 | AK025346  | 66511.938 | 76278.68  |
| AL038354    | 18935.631 | 18100.053 | D29012    | 27968.184 | 29570.287 | AK022583  | 9106.32   | 8735.388  |
| W84867      | 1006.122  | 1188.173  | NM_017414 | 847.263   | 1031.924  | AF052121  | 14966.107 | 13032.437 |
| BF245026    | 1139.044  | 1123.002  | NM_012179 | 31110.641 | 31121.357 | AL359062  | 8828.008  | 8644.126  |
| NM_000592   | 1658.585  | 1758.305  | NM_002793 | 8458.688  | 8902.916  | NM_019095 | 63428.191 | 63889.836 |
| NM_016584   | 11361.569 | 11806.485 | NM_004788 | 4147.167  | 3857.424  | Y12020    | 65679.664 | 67728.18  |
| NM_001815   | 1983.294  | 2751.488  | M33197    | 66747.359 | 64613.324 | AJ001905  | 5241.087  | 4674.16   |
| NM_000064   | 8064.15   | 8540.122  | AL442083  | 12057.621 | 10771.479 | U17635    | 1992.171  | 2142.469  |
| NM_003264   | 1969.695  | 2484.05   | D63487    | 14054.235 | 13278.275 | AL049930  | 1434.193  | 1402.081  |
| NM_006725   | 1953.468  | 2436.055  | AK097791  | 17475.475 | 16734.162 | AF086198  | 37404.832 | 41508.508 |
| NM_003326   | 4634.305  | 5215.183  | NM_020367 | 1449.948  | 1317.594  | AL137382  | 61625.465 | 63656.91  |
| NM_004568   | 61716.109 | 62697.184 | AK022705  | 4440.303  | 4210.997  | AK024599  | 4782.048  | 4310.776  |
| NM_000202   | 18790.113 | 22205.764 | NM_016404 | 27085.768 | 28544.996 | NM_018012 | 797.477   | 795.016   |
| NM_005496   | 18625.596 | 18992.602 | L03426    | 7843.186  | 8772.772  | AK024928  | 1137.61   | 1123.36   |
| NM_016608   | 1400.31   | 1499.953  | M33197    | 68435.078 | 66535.836 | NM_014450 | 10691.914 | 10866.671 |
| NM_002858   | 11137.259 | 12382.522 | NM_020163 | 6412.731  | 6388.363  | AB007975  | 1860.055  | 2375.002  |
| NM_004817   | 4647.854  | 4483.217  | NM_005614 | 46046.852 | 55376.613 | AK024152  | 2995.247  | 2982.855  |
| NM_018975   | 30089.432 | 27273.9   | AJ133115  | 13082.094 | 11399.972 | AL137603  | 931.448   | 1344.454  |
| AB023215    | 8869.401  | 9553.969  | X51630    | 19366.014 | 19006.09  | AK021821  | 1669.111  | 1812.377  |
| NM_001284   | 46408.93  | 40649.391 | NM_005056 | 3621.751  | 3855.74   | AL049328  | 1733.744  | 1859.349  |
| NM_003242   | 13884.809 | 10181.096 | NM_001965 | 1298.142  | 1209.902  | AK021415  | 13514.425 | 3434.792  |
| NM_002849   | 1046.649  | 1111.519  | AF208502  | 22027.197 | 18576.713 | AK000030  | 2494.112  | 2563.451  |
| U31099      | 910.45    | 635.567   | M33197    | 67772.398 | 74970.328 | NM_017932 | 1903.368  | 1835.051  |
| NM_001105   | 2361.928  | 1789.084  | AF264750  | 66671.523 | 63484.055 | AK000910  | 6033.881  | 5747.851  |
| NM_005585   | 1272.558  | 1201.832  | NM_006980 | 4616.755  | 5008.778  | AK000107  | 1314.239  | 1446.809  |
| NM_002075   | 2638.57   | 2145.42   | AK023904  | 12754.229 | 12071.282 | AK000795  | 732.829   | 775.253   |
| Y08756      | 1528.435  | 1546.387  | NM_017956 | 17366.963 | 16469.537 | AK000951  | 2024.734  | 1268.087  |
| AY007090    | 541.308   | 740.53    | NM_017826 | 1363.804  | 812.748   | AF130064  | 56703.672 | 60055.879 |
| NM_006439   | 1104.416  | 1421.146  | NM_016496 | 3015.208  | 2239.196  | U17624    | 2227.513  | 1795.708  |
| AL137529    | 3090.065  | 3753.088  | NM_014309 | 15054.522 | 13288.872 | AK025184  | 1498.012  | 1118.1    |
| AK026648    | 5913.69   | 6054.551  | M33197    | 66429.047 | 62034.871 | D16988    | 63443.977 | 61043.813 |
| AK025977    | 30497.09  | 30562.316 | NM_004094 | 6610.91   | 7380.854  | AK001959  | 20629.955 | 17913.119 |
| AK023130    | 14581.44  | 15789.19  | NM_020236 | 5104.039  | 6153.736  | U36217    | 8700.642  | 7290.158  |
| NM_000273   | 843.244   | 1190.804  | AK027059  | 28464.545 | 26742.789 | AL389880  | 801.246   | 685.559   |
| NM_002899   | 9909.716  | 11067.229 | AF151109  | 58484.668 | 54425.777 | AL157452  | 944.21    | 913.961   |
| NM_005397   | 9294.659  | 9445.434  | NM_015414 | 66643.586 | 65066.559 | AK024155  | 53990.711 | 54511.281 |
| AB014511    | 12921.709 | 12013.759 | L34070    | 29187.547 | 30266.584 | AL359334  | 35574.875 | 29330.055 |
| NM_001662   | 33342.816 | 31624.338 | M33197    | 67289.664 | 65755.969 | AK027095  | 3837.178  | 4455.598  |
| AB011100    | 4149.606  | 4164.987  | NM_004751 | 3937.912  | 3820.801  | AF062097  | 5181.612  | 5298.643  |
| U61741      | 2558.871  | 2360.45   | NM_001865 | 68068.977 | 72411.297 | BC030949  | 6603.87   | 5448.793  |
| NM_012402   | 19036.244 | 13076.375 | NM_006441 | 16595.385 | 16135.019 | AF116615  | 5764.373  | 3504.633  |
| M76676      | 8708.543  | 7103.582  | NM_001918 | 5528.403  | 5682.157  | NM_018546 | 13712.483 | 7710.648  |

|             |           |           |           |           |           |           |           |           |
|-------------|-----------|-----------|-----------|-----------|-----------|-----------|-----------|-----------|
| NM_003857   | 1114.239  | 1281.589  | NM_018245 | 10717.104 | 9508.17   | U52699    | 62245.352 | 56738.523 |
| AL137690    | 1873.968  | 1661.405  | M33197    | 67957.867 | 72460.469 | S71613    | 2822.409  | 2047.53   |
| Z83804      | 5083.586  | 4136.009  | AF252390  | 3510.531  | 3228.148  | AJ011910  | 24920.086 | 17105.67  |
| NM_004386   | 3026.153  | 2215.398  | NM_012117 | 17648.391 | 15048.27  | AK024378  | 3651.231  | 2298.406  |
| U67784      | 3147.632  | 3038.817  | D17130    | 67280.07  | 64662.719 | NM_014026 | 8207.23   | 5439.146  |
| NM_007366   | 2927.925  | 3737.004  | X76302    | 11478.611 | 8667.14   | D61703    | 20411.057 | 14011.965 |
| NM_000153   | 2243.901  | 1935.834  | AK026276  | 1817.436  | 1551.266  | AL050376  | 532.029   | 712.177   |
| AK091794    | 910.795   | 964.796   | M33197    | 65302.684 | 63555.926 | AL359652  | 2656.137  | 1938.388  |
| NM_004111   | 2135.827  | 2027.256  | X52354    | 4462.374  | 5725.872  | AK022423  | 2882.025  | 1903.273  |
| AF085966    | 7212.862  | 8875.962  | NM_005413 | 2046.304  | 2147.474  | AF088021  | 15578.764 | 7466.226  |
| NM_005316   | 9673.228  | 11430.254 | NM_002315 | 10055.326 | 10092.604 | BF509267  | 3758.382  | 2530.079  |
| NM_016316   | 6561.69   | 6914.6    | AK024191  | 3514.172  | 3738.246  | NM_002455 | 8404.494  | 4867.318  |
| NM_018343   | 10109.958 | 9183.755  | NM_006608 | 11838.036 | 10978.046 | AK026728  | 651.391   | 276.578   |
| AK095793    | 1189.392  | 1181.441  | NM_000457 | 12446.039 | 10842.109 | NM_002955 | 14503.062 | 10321.72  |
| NM_003177   | 7458.822  | 7819.949  | M33197    | 1102.443  | 1256.96   | AB046773  | 1143.421  | 748.95    |
| NM_017719   | 1988.356  | 2029.02   | M34356    | 5365.209  | 6269.166  | AK000899  | 29489.021 | 20858.838 |
| AF064078    | 6340.813  | 5549.695  | M33197    | 67230.555 | 78148.445 | NM_017991 | 3535.833  | 2548.197  |
| AL049688    | 3035.18   | 2538.488  | NM_014623 | 17272.961 | 18384.783 | L37198    | 4174.7    | 2933.609  |
| NM_002737   | 2299.334  | 1954.496  | NM_007244 | 4380.808  | 4600.658  | U67822    | 2690.199  | 2087.151  |
| Z25427      | 4836.675  | 4910.97   | M30629    | 5317.033  | 5695.986  | AK021921  | 1415.841  | 993.156   |
| NM_004672   | 21308.441 | 18684.719 | AF193873  | 5911.542  | 4799.468  | AK025431  | 1640.734  | 1043.761  |
| NM_001353   | 2707.482  | 2597.635  | NM_002628 | 3993.259  | 3522.448  | AF086274  | 66266.938 | 63475.344 |
| NM_006214   | 4140.323  | 4479.498  | M23575    | 2047.955  | 2048.514  | AK023682  | 1907.375  | 1093.019  |
| AJ010228    | 13465.966 | 11638.524 | AA190729  | 7939.075  | 8558.13   | AF000991  | 1211.166  | 650.399   |
| NM_005198   | 8128.529  | 7784.846  | BF974315  | 24034.246 | 22117.244 | AK000685  | 21738.967 | 10316.328 |
| NM_004376   | 7574.418  | 8693.896  | T74985    | 1222.807  | 1444.902  | D28381    | 28261.375 | 16455.344 |
| NM_000272   | 1298.911  | 1731.953  | AI652705  | 8136.843  | 6691.907  | BE706519  | 2437.903  | 1778.319  |
| NM_006061   | 695.973   | 877.833   | AA973397  | 4755.194  | 4818.075  | NM_019096 | 15873.592 | 8405.655  |
| NM_006848   | 58124.832 | 63609.996 | AA569974  | 2958.031  | 2364.622  | NM_014725 | 2391.647  | 1294.9    |
| NM_005603   | 16096.565 | 16675.607 | AA446028  | 1710.094  | 2411.21   | NM_006892 | 5456.975  | 2783.066  |
| NM_001061   | 1734.66   | 2084.889  | M80583    | 3313.996  | 3540.073  | NM_019117 | 3105.505  | 1866.109  |
| AI075338    | 269.095   | 769.242   | AW009565  | 13225.329 | 13208.021 | NM_018305 | 4145.25   | 2725.839  |
| BG744154    | 34484.863 | 39729.191 | AW451878  | 1317.47   | 1035.902  | NM_017658 | 13902.644 | 8064.362  |
| Z11694      | 34541.703 | 35478.992 | X07767    | 8034.811  | 9192.137  | NM_018675 | 37214.352 | 32666.867 |
| X16983      | 6240.003  | 7195.794  | X65293    | 2422.398  | 2418.357  | NM_016643 | 996.47    | 742.733   |
| X56160      | 1214.8    | 974.105   | M33197    | 3868.641  | 3882.898  | NM_002580 | 760.711   | 544.833   |
| H-Y 00097 I | 13504.19  | 12759.129 | NM_000853 | 7276.092  | 7404.176  | NM_006775 | 14124.92  | 9370.742  |
| H-M 59964   | 638.445   | 683.081   | AF016903  | 12566.518 | 13734.19  | NM_019847 | 4132.507  | 2991.542  |
| H-Y 00711 I | 56715.34  | 58667.93  | NM_015675 | 10826.881 | 11389.127 | D17093    | 33392.18  | 30819.578 |
| H-X 16707 I | 2530.108  | 2119.87   | AK022267  | 1474.37   | 1165.711  | AK022784  | 1291.834  | 950.456   |
| H-U76456M   | 355.748   | 280.483   | NM_016040 | 7554.62   | 8715.404  | AL117521  | 9565.95   | 7783.888  |
| AL038354    | 15032.616 | 11492.899 | M33197    | 66734.859 | 66598.945 | NM_000731 | 803.208   | 720.962   |
| W84867      | 892.66    | 908.099   | NM_006597 | 57952.305 | 57943.672 | AK021913  | 40587.75  | 29729.982 |
| NM_005718   | 12093.71  | 7451.536  | NM_007329 | 494.1     | 877.044   | AL137489  | 48455.449 | 46758.434 |
| NM_007067   | 381.539   | 297.236   | NM_012483 | 52330.234 | 51274.309 | AF009311  | 20586.451 | 12509.937 |
| NM_018264   | 2813.257  | 2076.146  | NM_003498 | 17400.107 | 17159.953 | S73397    | 5909.705  | 4289.294  |
| NM_001815   | 2451.228  | 2857.063  | AB023420  | 37150.984 | 40553.348 | AL050219  | 2277.743  | 1726.481  |
| NM_000064   | 6753.034  | 8234.013  | NM_002262 | 2820.723  | 3732.145  | L37709    | 1456.527  | 860.828   |
| NM_003264   | 1915.346  | 2338.532  | NM_016511 | 57018.406 | 54866.594 | AK024433  | 8243.995  | 7352.64   |
| NM_006725   | 1786.678  | 2045.474  | NM_003559 | 8511.298  | 9004.396  | U82321    | 2135.408  | 1906.109  |
| NM_003326   | 5187.519  | 5567.768  | NM_002185 | 1282.932  | 1190.811  | AK023856  | 3096.975  | 2118.286  |
| NM_004568   | 60762.809 | 62576.68  | M55337    | 4478.44   | 4264.716  | AB014557  | 5868.097  | 3279.963  |
| NM_000202   | 19255.588 | 20821.732 | NM_013229 | 1667.316  | 1756.956  | NM_005578 | 8322.792  | 2993.578  |

|           |           |           |           |           |           |           |           |           |
|-----------|-----------|-----------|-----------|-----------|-----------|-----------|-----------|-----------|
| NM_005496 | 18356.279 | 17555.832 | NM_016533 | 63019.871 | 63674.621 | NM_003653 | 20156.113 | 11630.685 |
| NM_016608 | 1318.071  | 1651.602  | NM_007342 | 10386.072 | 13334.304 | NM_018457 | 54786.426 | 50793.348 |
| NM_002858 | 11346.763 | 13147.859 | NM_005672 | 888.119   | 1050.598  | NM_002953 | 12547.727 | 9247.144  |
| NM_004817 | 5477.441  | 6557.237  | D25217    | 4039.245  | 4710.795  | NM_002187 | 2515.062  | 1824.389  |
| NM_018975 | 29802.576 | 29618.285 | NM_006351 | 21000.924 | 25322.662 | NM_014246 | 29685.729 | 25943.223 |
| AB023215  | 8867.036  | 8247.225  | M33197    | 67795.945 | 64958.797 | NM_014859 | 1978.389  | 1750.878  |
| NM_001284 | 45225.727 | 39058.754 | NM_004683 | 15300.832 | 15420.535 | AF311912  | 1356.054  | 889.471   |
| NM_003242 | 16140.33  | 13650.784 | AK025263  | 2059.239  | 2013.424  | NM_001116 | 1467.487  | 1275.349  |
| NM_002849 | 1107.949  | 1140.185  | NM_006931 | 19035.17  | 17481.016 | BC035395  | 27468.496 | 25766.064 |
| U31099    | 733.118   | 546.863   | NM_018057 | 7434.729  | 8035      | NM_001703 | 51124.305 | 53463.23  |
| NM_001105 | 2381.141  | 1498.893  | M33197    | 62123.172 | 60389.945 | NM_020126 | 13053.938 | 11678.22  |
| NM_005585 | 1025.543  | 920.18    | NM_015717 | 9855.427  | 11188.835 | NM_013982 | 12068.066 | 9552.932  |
| NM_002075 | 1861.496  | 1471.076  | NM_015925 | 8327.59   | 9728.77   | NM_005049 | 9064.165  | 7372.249  |
| Y08756    | 1444.322  | 1298.541  | NM_003665 | 3887.635  | 4440.036  | NM_003882 | 1726.269  | 1209.235  |
| AV752086  | 2384.203  | 1876.786  | AF220217  | 4199.379  | 4555.644  | NM_004630 | 24859.328 | 25188.158 |
| NM_016102 | 9645.106  | 8813.968  | NM_013323 | 63227.988 | 56995.527 | NM_014826 | 32886.141 | 25681.652 |
| AL137529  | 3075.11   | 3599.597  | NM_014937 | 3059.706  | 3576.27   | AF201947  | 1916.805  | 940.576   |
| NM_012332 | 8683.28   | 9304.922  | NM_017426 | 6896.154  | 9530.013  | U01147    | 3273.941  | 2186.552  |
| AK026648  | 6452.937  | 6858.518  | M33197    | 29931.494 | 25730.598 | NM_004040 | 38573.305 | 25251     |
| NM_000497 | 3824.098  | 4613.524  | NM_004558 | 2279.444  | 1979.427  | NM_006116 | 9527.268  | 5083.079  |
| NM_017421 | 7473.336  | 8486.334  | AL079296  | 1099.664  | 1284.776  | NM_005456 | 1807.968  | 960.815   |
| AK025977  | 29815.98  | 33279.766 | NM_014770 | 3044.068  | 2630.648  | BF219403  | 56991.895 | 59392.906 |
| AK023130  | 14057.717 | 18262.031 | AB037737  | 2897.556  | 2651.524  | NM_016119 | 8368.745  | 7956.352  |
| NM_002899 | 9520.653  | 10675.805 | M33197    | 68453.617 | 66898.313 | AK075450  | 6065.037  | 4798.371  |
| NM_005397 | 10640.24  | 12322.334 | AK023103  | 4727.804  | 4355.801  | AF178983  | 34000.508 | 33855.602 |
| AB014511  | 13602.937 | 16919.553 | NM_017858 | 8127.696  | 8303.293  | NM_001324 | 18784.34  | 15446.032 |
| NM_001662 | 30907.582 | 28378.053 | NM_019059 | 66020.922 | 64107.465 | AB037795  | 3997.195  | 3713.494  |
| AB011100  | 3483.456  | 3597.149  | NM_013347 | 2315.861  | 2961.761  | AK022975  | 3293.455  | 2977.519  |
| U61741    | 2933.127  | 3246.75   | D80008    | 4374.563  | 4219.188  | NM_015344 | 2673.04   | 2057.868  |
| NM_012402 | 11987.289 | 11099.539 | X56789    | 5429.378  | 4582.119  | NM_004288 | 7371.814  | 5028.809  |
| M76676    | 9133.021  | 7726.73   | AK001069  | 68039.797 | 61493.273 | AL122055  | 12385.02  | 8384.142  |
| NM_003857 | 1227.793  | 1285.731  | NM_000935 | 4245.976  | 4126.024  | NM_005132 | 50853.742 | 39178.828 |
| AL137690  | 1755.589  | 2000.986  | NM_000359 | 54663.668 | 49279.148 | X07695    | 2315.968  | 1445.635  |
| Z83804    | 4710.795  | 3393.127  | NM_006395 | 6963.996  | 8455.457  | D87458    | 6418.291  | 5214.176  |
| NM_004386 | 2612.373  | 2316.116  | NM_014306 | 18485.604 | 23431.43  | AK021750  | 27155.971 | 19297.072 |
| U67784    | 2929.07   | 3318.48   | NM_001084 | 12053.187 | 14265.414 | NM_003626 | 4039.811  | 2682.751  |
| NM_007366 | 2611.54   | 2158.373  | NM_015983 | 21715.809 | 19564.311 | NM_006932 | 1241.112  | 850.277   |
| NM_000592 | 1185.233  | 1193.16   | NM_018622 | 12598.179 | 12555.699 | AK023594  | 8733.619  | 5870.607  |
| NM_016584 | 10104.546 | 8053.275  | NM_005867 | 29292.494 | 32395.527 | AB010099  | 54580.102 | 52229.922 |
| NM_000153 | 1891.916  | 1660.062  | AK026031  | 59369.938 | 51918.906 | AB039920  | 30030.504 | 18786.193 |
| NM_002033 | 1961.979  | 2593.892  | NM_016468 | 23177.92  | 25152.117 | AB046782  | 3876.111  | 2527.764  |
| AK091794  | 762.486   | 1129.707  | NM_007244 | 5543.449  | 5760.742  | AF300612  | 66361.766 | 67367.398 |
| NM_004111 | 2221.751  | 2445.169  | M30629    | 6833.303  | 6427.368  | AF208005  | 2295.937  | 1569.494  |
| AF085966  | 7615.699  | 8267.812  | BE539299  | 712.437   | 723.031   | NM_002231 | 43158.191 | 29912.842 |
| NM_005316 | 9017.99   | 10891.462 | AF193873  | 6627.882  | 5049.206  | NM_020474 | 17772.814 | 11035.471 |
| NM_016316 | 7371.498  | 8452.991  | NM_002628 | 3515.124  | 2863.104  | NM_002643 | 4880.865  | 3531.32   |
| NM_003369 | 17428.477 | 20678.01  | M23575    | 1171.252  | 1117.887  | NM_017807 | 8181.453  | 4894.402  |
| NM_000057 | 4261.606  | 4895.818  | AA190729  | 7204.46   | 6847.842  | NM_014746 | 1979.524  | 1449.491  |
| NM_018343 | 10511.432 | 10374.267 | BF974315  | 23179.156 | 20414.908 | NM_002788 | 60924.063 | 58817.133 |
| AK095793  | 1563.4    | 1757.088  | T74985    | 1335.411  | 3358.999  | NM_000462 | 42129.855 | 39281.766 |
| NM_003177 | 7712.43   | 6849.35   | AI652705  | 9526.395  | 8555.878  | NM_003336 | 21894.828 | 17695.164 |
| NM_017719 | 1647.657  | 1946.11   | AA973397  | 6062.589  | 6039.19   | NM_005805 | 53010.766 | 50835.805 |
| AF064078  | 6591.351  | 7187.856  | AA569974  | 3210.876  | 2483.861  | NM_004181 | 52688.027 | 41601.586 |

|             |           |           |           |           |           |           |           |           |
|-------------|-----------|-----------|-----------|-----------|-----------|-----------|-----------|-----------|
| AL049688    | 2744.568  | 3360.965  | AA446028  | 1532.764  | 1813.314  | NM_00390C | 34167.465 | 23966.201 |
| NM_002737   | 2412.777  | 2076.847  | M80583    | 2373.054  | 1619.677  | NM_003337 | 7226.517  | 5074.912  |
| Z25427      | 5203.245  | 4908.836  | AW009565  | 15294.313 | 17537.73  | AF298152  | 8849.274  | 5045.462  |
| NM_004672   | 21728.256 | 20029.854 | X07767    | 8615.985  | 8965.323  | AF117233  | 16542.697 | 11680.353 |
| NM_001353   | 2845.826  | 2633.625  | M33197    | 54798.145 | 59190.621 | NM_01584E | 2667.194  | 1909.274  |
| NM_006214   | 4682.273  | 4470.037  | NM_002593 | 2868.698  | 3521.586  | NM_001723 | 6189.561  | 4276.362  |
| AJ010228    | 12902.625 | 11922.05  | AF016903  | 42218.609 | 46978.441 | NM_01601E | 3318.223  | 2992.379  |
| NM_00519E   | 6032.115  | 5059.004  | NM_015675 | 14932.335 | 14129.056 | M94362    | 49334.746 | 42555.176 |
| AK021426    | 513.172   | 438.381   | AK022267  | 1284.642  | 884.831   | AK024707  | 3130.39   | 2301.386  |
| NM_018073   | 2291.054  | 1949.933  | NM_01604C | 7339.87   | 7504.552  | NM_01425E | 2778.359  | 2317.127  |
| NM_006061   | 536.818   | 570.976   | M33197    | 67722.313 | 72526.531 | AK022909  | 5677.322  | 4174.534  |
| NM_00684E   | 55417.391 | 63476.715 | AF031136  | 64576.863 | 65302.492 | NM_00653C | 15980.85  | 9122.296  |
| NM_005603   | 16783.717 | 17382     | NM_006597 | 67419.617 | 72992.477 | NM_003587 | 62082.82  | 64104.445 |
| NM_001061   | 1814.942  | 3075.598  | NM_012483 | 51290.238 | 49308.043 | X90978    | 2766.338  | 1874.423  |
| AI075338    | 541.324   | 525.387   | NM_00349E | 19861.854 | 17848.893 | AF217226  | 33496.844 | 22533.385 |
| BG744154    | 36678.461 | 44164.711 | NM_007264 | 54138.02  | 54068.531 | AL359578  | 766.887   | 429.807   |
| Z11694      | 36223.875 | 36506.883 | NM_002262 | 1515.299  | 1492.915  | NM_005522 | 919.615   | 568.054   |
| X16983      | 6864.072  | 8666.86   | NM_016511 | 65727.227 | 65327.715 | NM_00576C | 38600.781 | 29996.307 |
| X56160      | 1056.214  | 1229.726  | NM_003559 | 10962.711 | 13640.737 | NM_014212 | 4625.969  | 3063.105  |
| BG679991    | 671.333   | 798.141   | NM_002185 | 1659.565  | 2011.326  | NM_00726E | 7227.65   | 6169.02   |
| H-Y 00097 I | 13758.523 | 14648.603 | M55337    | 3995.241  | 3670.415  | AK023639  | 33413.992 | 29167.707 |
| H-M 59964   | 637.852   | 561.091   | NM_013229 | 2399.861  | 2900.006  | AL122118  | 678.709   | 698.03    |
| H-Y 00711 I | 58499.148 | 60813.426 | D25217    | 5401.368  | 5171.877  | AL137700  | 2635.075  | 2229.415  |
| H-X 16707 I | 2769.379  | 2920.151  | NM_006351 | 21279.09  | 23385.205 | NM_004904 | 3978.448  | 2604.767  |
| H-U76456M   | 352.814   | 458.421   | M33197    | 66664.633 | 68785.352 | NM_003083 | 34067.859 | 28249.264 |
| AL038354    | 16740.086 | 15596.963 | NM_004683 | 17473.809 | 15684.889 | NM_00678E | 10392.941 | 8621.034  |
| W84867      | 785.115   | 713.072   | AK023226  | 4418.08   | 4559.577  | NM_000982 | 9615.245  | 7738.851  |
| NM_00571E   | 12662.134 | 8547.209  | AK025263  | 1993.26   | 2074.343  | NM_001024 | 64688.531 | 63197.125 |
| NM_007067   | 891.541   | 451.14    | NM_006931 | 17965.994 | 17022.057 | NM_016093 | 66295.844 | 63902.348 |
| NM_018264   | 2262.014  | 1694.574  | M33197    | 63244.176 | 64337.52  | NM_012423 | 59652.988 | 57325.863 |
| NM_01458C   | 1230.813  | 1228.581  | NM_015717 | 9974.224  | 10857.685 | AK026367  | 54844.445 | 55123.164 |
| AB028998    | 2502.483  | 2001.723  | NM_015925 | 8906.03   | 9910.615  | AK026491  | 38296.41  | 40648.789 |
| NM_01660E   | 2577.071  | 3197.132  | NM_003665 | 5271.426  | 6320.012  | NM_00101E | 66441.898 | 67048.516 |
| NM_00285E   | 12911.326 | 16096.59  | AF220217  | 5758.178  | 8108.771  | AL110170  | 66399.672 | 68122.438 |
| NM_004817   | 5961.321  | 6888.17   | NM_013323 | 63617.02  | 61570.844 | NM_00419C | 58904.488 | 54483.734 |
| NM_01897E   | 34141.688 | 38131.262 | NM_014937 | 2987.645  | 3670.535  | NM_01427E | 22656.939 | 18113.076 |
| AB023215    | 11144.93  | 12996.962 | NM_01742E | 7888.51   | 10310.626 | NM_00040E | 17797.678 | 14517.263 |
| NM_001284   | 50175.262 | 58398.594 | M33197    | 28770.623 | 36836.5   | AB044137  | 1465.266  | 986.116   |
| NM_003242   | 16288.224 | 15669.693 | NM_00084E | 1645.91   | 2428.608  | NM_00092C | 2847.56   | 2238.813  |
| NM_00284E   | 1322.013  | 1648.974  | NM_01477C | 7314.538  | 5162.508  | NM_013311 | 22053.154 | 18635.111 |
| U31099      | 1198.722  | 1245.778  | AB037737  | 3033.965  | 2844.266  | NM_000291 | 56897.16  | 55883.727 |
| NM_001105   | 2943.829  | 2749.622  | M33197    | 68152.836 | 70177.844 | NM_018081 | 8630.145  | 8228.192  |
| NM_00558E   | 1387.872  | 1579.489  | AK023103  | 4245.719  | 4215.01   | NM_01464E | 8305.557  | 8216.844  |
| NM_00207E   | 2135.798  | 2562.041  | NM_01785E | 7108.599  | 6944.238  | AL117488  | 6118.512  | 6335.857  |
| Y08756      | 1451.641  | 1602.046  | NM_019059 | 66575.742 | 61688.438 | NM_01224C | 9035.483  | 9207.848  |
| NM_005563   | 17580.67  | 17907.385 | NM_013347 | 1528.48   | 1337.609  | NM_01900E | 13832.288 | 12408.392 |
| AY007090    | 444.788   | 432.832   | D80008    | 4122.794  | 3548.567  | NM_00473E | 31949.697 | 38231.773 |
| NM_00643E   | 551.448   | 660.402   | X56789    | 5246.242  | 4329.823  | AV752216  | 3071.989  | 3700.793  |
| NM_005102   | 5404.333  | 4385.216  | AK001069  | 67581.609 | 61706.324 | NM_005341 | 8307.452  | 8041.186  |
| NM_00451E   | 867.716   | 653.509   | NM_00093E | 4030.835  | 3642.019  | AF181999  | 4963.974  | 4840.023  |
| NM_006501   | 1412.336  | 1002.118  | NM_000359 | 50677.332 | 43287.285 | NM_001934 | 8743.024  | 8931.862  |
| NM_00271E   | 21249.115 | 16801.389 | NM_00639E | 6320.816  | 6038.713  | AB011090  | 4142.399  | 4041.05   |
| AB035356    | 754.808   | 868.71    | NM_01430E | 15594.737 | 14577.85  | NM_00020E | 673.765   | 767.571   |

|           |           |           |           |           |           |           |           |           |
|-----------|-----------|-----------|-----------|-----------|-----------|-----------|-----------|-----------|
| AV752086  | 2282.197  | 2302.879  | NM_001084 | 11282.69  | 11568.196 | NM_018682 | 11671.406 | 11024.53  |
| NM_016102 | 9027.38   | 9390.372  | NM_015983 | 21774.031 | 21414.191 | AB033024  | 4960.593  | 4679.348  |
| NM_004376 | 6469.847  | 5141.543  | NM_018622 | 14654.228 | 19566.588 | NM_018942 | 17978.428 | 15837.122 |
| NM_000272 | 1073.054  | 1196.172  | M33197    | 67458.023 | 65735.383 | NM_005531 | 20162.516 | 18512.643 |
| NM_016131 | 20293.324 | 21729.994 | NM_005867 | 27332.742 | 31628.611 | NM_006977 | 2700.381  | 2402.572  |
| NM_006822 | 3604.472  | 4492.5    | AK026031  | 57257.285 | 53259.27  | NM_002479 | 4357.984  | 6170.325  |
| NM_012142 | 14676.471 | 17212.576 | NM_016468 | 21594.332 | 24836.814 | NM_000348 | 49256.375 | 52262.793 |
| NM_016429 | 7787.157  | 7602.922  | NM_007342 | 11720.658 | 14515.627 | NM_004950 | 8782.769  | 9084.127  |
| AB011100  | 4578.699  | 5294.44   | NM_005672 | 6501.452  | 7259.367  | NM_000724 | 10210.262 | 10012.025 |
| U61741    | 2856.556  | 3498.494  | BE539299  | 1043.646  | 705.869   | NM_000553 | 855.756   | 1015.064  |
| NM_012402 | 12237.739 | 12838.155 | AF193873  | 5997.428  | 5632.221  | NM_002557 | 39801.633 | 46806.066 |
| M76676    | 12235.303 | 14694.038 | NM_002628 | 4255.135  | 3704.922  | NM_004477 | 1621.267  | 2427.487  |
| NM_003857 | 1648.484  | 2176.435  | M23575    | 1850.363  | 1911.969  | BE728156  | 1101.826  | 1042.851  |
| AL137690  | 2113.555  | 2651.512  | AA190729  | 6821.701  | 6465.422  | Y10802    | 1291.877  | 1465.73   |
| Z83804    | 5865.93   | 5764.816  | BF974315  | 22996.682 | 20452.668 | AI417775  | 661.269   | 905.374   |
| NM_004386 | 3244.075  | 3183.243  | T74985    | 1728.792  | 1108.137  | BI762229  | 16754.641 | 21313.486 |
| U67784    | 3255.815  | 4071.266  | AI652705  | 8413.001  | 8372.637  | AA131406  | 1306.954  | 1404.847  |
| NM_007366 | 2675.513  | 2757.259  | AA973397  | 5547.159  | 4772.792  | BG618320  | 58617.789 | 60320.707 |
| NM_000592 | 1532.589  | 1654.93   | AA569974  | 2546.065  | 2432.812  | M28983    | 1448.788  | 1458.812  |
| NM_016584 | 11509.195 | 9815.196  | AA446028  | 1481.158  | 1378.171  | Y00787    | 9982.308  | 10635.661 |
| NM_001815 | 2321.972  | 2500.455  | M80583    | 2255.367  | 1320.547  | NM_007276 | 9481.646  | 9555.193  |
| NM_000064 | 7220.648  | 5742.993  | AW009565  | 12128.983 | 11173.061 | N34462    | 22626.969 | 25465.924 |
| NM_003264 | 1740.238  | 1514.194  | X07767    | 8493.428  | 9693.798  | AI658778  | 10323.354 | 10979.516 |
| NM_006725 | 1781.009  | 1470.694  | X65293    | 3042.832  | 3339.831  | L19067    | 11622.89  | 12971.896 |
| NM_003326 | 4317.705  | 3841.179  | M33197    | 53879.563 | 54804.609 | Z48482    | 1647.317  | 1888.33   |
| NM_004568 | 62343.891 | 59178.504 | AL050139  | 19396     | 24694.934 | W60413    | 12092.392 | 11366.219 |
| NM_000202 | 15892.572 | 13106.504 | NM_002593 | 2381.715  | 2694.162  | BI823365  | 11505.714 | 10691.063 |
| NM_005496 | 16651.221 | 12810.563 | NM_004558 | 31736.799 | 38302.551 | X06318    | 2061.924  | 1984.457  |
| NM_006214 | 5798.396  | 7611.317  | AL079296  | 3381.499  | 4001.941  | NM_019101 | 3524.192  | 3413.573  |
| AJ010228  | 16515.816 | 21882.949 | NM_006597 | 66359.211 | 71526.133 | NM_004703 | 11656.794 | 12054.706 |
| NM_005198 | 8499.54   | 9646.809  | NM_012483 | 42648.504 | 40897.895 | NM_001512 | 2660.174  | 2854.037  |
| NM_018073 | 2757.245  | 3504.418  | NM_003498 | 14372.981 | 14354.183 | NM_014706 | 13225.373 | 14350.174 |
| AL137529  | 3638.868  | 3840.996  | AB023420  | 32878.391 | 32660.594 | AK023172  | 1033.464  | 1694.169  |
| NM_012332 | 9705.705  | 11454.251 | M33197    | 67228.914 | 82975.055 | AF139768  | 1009.848  | 1260.413  |
| AK026648  | 5444.445  | 5619.615  | NM_007264 | 55727.668 | 61155.328 | AJ001348  | 4682.326  | 5086.585  |
| NM_000497 | 3975.542  | 5281.208  | NM_002262 | 1555.809  | 1944.11   | NM_014007 | 2887.301  | 4575.342  |
| NM_017421 | 7534.438  | 7577.674  | NM_016511 | 56407.832 | 58601.574 | AB033006  | 9660.614  | 9383.886  |
| AK025977  | 28376.217 | 29200.754 | NM_003559 | 7715.215  | 6439.555  | AF020314  | 12106.708 | 14272.84  |
| AK023130  | 13155.401 | 14789.723 | NM_002185 | 1218.954  | 1104.752  | NM_016332 | 39297.137 | 43830.73  |
| NM_000273 | 615.948   | 842.824   | M55337    | 13305.614 | 8852.002  | AK023936  | 1922.353  | 2983.334  |
| NM_002899 | 10253.563 | 12786.781 | M33197    | 66598.016 | 81532.32  | NM_006457 | 5142.678  | 6352.606  |
| NM_000486 | 1524.753  | 2041.341  | NM_013229 | 2155.761  | 1603.432  | NM_003682 | 4105.775  | 4781.588  |
| BE876237  | 1827.049  | 2299.74   | NM_016533 | 66649.898 | 71695.516 | NM_000207 | 2601.376  | 2996.151  |
| NM_005397 | 9689.712  | 9106.071  | NM_014751 | 46419.5   | 49214.699 | NM_002531 | 6301.89   | 6928.735  |
| NM_000806 | 5331.698  | 4624.044  | NM_002347 | 65748.344 | 74469.414 | NM_006314 | 58441.199 | 56270.57  |
| NM_006320 | 6463.807  | 4543.877  | AB046807  | 3470.793  | 4213.709  | NM_001782 | 13659.492 | 14347.557 |
| AB014511  | 13156.938 | 12587.857 | NM_018176 | 1467.928  | 1340.911  | NM_002754 | 1206.864  | 1298.986  |
| NM_014252 | 10465.489 | 9134.86   | NM_003508 | 1529.471  | 2332.72   | NM_000797 | 30292.754 | 34556.34  |
| NM_001662 | 30972.066 | 26334.002 | M33197    | 67347.617 | 82691.633 | NM_014927 | 806.754   | 858.393   |
| NM_005718 | 15179.772 | 17982.064 | NM_014623 | 20446.439 | 25382.279 | AF217525  | 1387.527  | 1447.741  |
| NM_018264 | 2649.764  | 2253.661  | NM_007244 | 49801.137 | 55457.441 | AL080148  | 62075.344 | 61049.805 |
| NM_014580 | 1576.26   | 1643.926  | M30629    | 20472.316 | 27029.484 | NM_012105 | 8468.849  | 9160.002  |
| AB028998  | 3075.13   | 3470.692  | NM_018976 | 16151.361 | 16538.963 | NM_000197 | 699.706   | 834.135   |

|           |           |           |           |           |           |           |           |           |
|-----------|-----------|-----------|-----------|-----------|-----------|-----------|-----------|-----------|
| NM_000153 | 2102.454  | 2121.578  | NM_003355 | 21611.979 | 18426.145 | S82470    | 9807.413  | 10320.975 |
| NM_002033 | 1592.706  | 1652.641  | NM_005074 | 2274.717  | 2545.737  | AB020695  | 810.866   | 1174.446  |
| AK091794  | 603.507   | 762.735   | NM_013272 | 4119.204  | 4249.55   | AB028982  | 3500.581  | 4049.491  |
| NM_004111 | 2735.155  | 2778.526  | NM_004170 | 7077.29   | 6811.239  | NM_002004 | 8125.209  | 8538.022  |
| AF085966  | 7330.979  | 9765.237  | NM_018057 | 5518.636  | 5634.206  | NM_005121 | 2111.806  | 2340.3    |
| NM_005316 | 8918.501  | 9988.408  | M33197    | 67081.828 | 80567.313 | NM_000747 | 9874.799  | 9507.614  |
| NM_016316 | 5603.245  | 5573.942  | NM_015717 | 6946.711  | 7715.511  | AJ275973  | 23190.311 | 30389.912 |
| NM_003366 | 17060.051 | 17898.906 | NM_015925 | 7974.916  | 7745.455  | U76362    | 31602.883 | 42338.234 |
| NM_000057 | 3784.268  | 3780.874  | NM_003665 | 4134.955  | 3831.906  | NM_003060 | 587.437   | 783.277   |
| NM_018343 | 11057.625 | 10939.554 | AF220217  | 3870.351  | 3693.233  | AK021489  | 59765.59  | 56798.004 |
| AK095793  | 1419.691  | 1576.669  | NM_013323 | 54249.477 | 55839.555 | NM_004525 | 1897.751  | 2315.645  |
| NM_003177 | 7773.467  | 7983.908  | NM_014937 | 2211.301  | 2802.256  | NM_003895 | 1398.656  | 1474.401  |
| NM_017719 | 1719.348  | 1685.237  | NM_017426 | 6669.88   | 6480.619  | NM_004317 | 9248.223  | 9782.548  |
| AF064078  | 6336.565  | 5897.458  | M33197    | 29490.795 | 22242.326 | NM_014645 | 8914.365  | 9364.996  |
| AL049688  | 2750.663  | 2248.041  | NM_000853 | 17234.41  | 19582.449 | NM_014708 | 7814.492  | 8122.573  |
| NM_002737 | 2554.505  | 1840.497  | AF016903  | 66000.086 | 82221.906 | NM_003693 | 7442.347  | 7777.657  |
| Z25427    | 5288.228  | 4463.469  | NM_015675 | 34806.133 | 38450.906 | NM_000356 | 63745.074 | 63146.523 |
| NM_004672 | 21027.736 | 20191.416 | AK022267  | 2843.8    | 4127.737  | NM_018134 | 64792.461 | 61871.621 |
| NM_001353 | 2572.053  | 2569.347  | NM_016040 | 9329.279  | 13364.622 | NM_002193 | 4854.019  | 6120.635  |
| CY3Cy5    | 2544.717  | 220.706   | M33197    | 66990.617 | 81299.93  | X76770    | 11779.829 | 12251.297 |
| AF252284  | 5034.274  | 4162.043  | AF031136  | 65840.445 | 74715.891 | AB037808  | 4672.704  | 5465.8    |
| AK025794  | 17548.596 | 15853.512 | NM_005867 | 27141.5   | 24640.533 | NM_016038 | 10605.622 | 11941.808 |
| NM_003541 | 3505.621  | 4350.935  | AK026031  | 42388.203 | 40578.375 | Z36821    | 41970.852 | 47818.191 |
| AF131835  | 556.368   | 419.073   | NM_016468 | 17184.645 | 18073.141 | AF289485  | 10785.662 | 13104.28  |
| AK024522  | 851.4     | 704.103   | NM_007342 | 10811.56  | 13809.308 | AF130092  | 18671.145 | 21877.865 |
| NM_007198 | 5707.297  | 4672.797  | NM_005672 | 4531.776  | 3670.328  | NM_016095 | 11980.661 | 11396.553 |
| NM_014958 | 509.896   | 493.872   | D25217    | 5319.566  | 5481.038  | AK024794  | 4006.429  | 5528.209  |
| M33197    | 79489.625 | 62327.516 | NM_006351 | 22657.529 | 25036.162 | NM_019853 | 13493.53  | 17339.281 |
| AK023220  | 1298.962  | 882.507   | M33197    | 68045.742 | 69228.992 | NM_017992 | 3109.679  | 3594.817  |
| AK024566  | 1153.905  | 1101.002  | NM_000103 | 5939.156  | 4417.504  | NM_005400 | 1790.826  | 2131.549  |
| AF038182  | 4837.055  | 5549.905  | NM_004683 | 24578.123 | 20310.438 | BF851643  | 588.15    | 536.101   |
| NM_016475 | 6829.226  | 6013.242  | AK023226  | 4390.07   | 4276.493  | AK023061  | 1161.147  | 1419.912  |
| AF086472  | 2840.711  | 2467.368  | AK025263  | 3022.049  | 3053.567  | NM_007255 | 11321.219 | 9794.799  |
| AF252284  | 5165.84   | 5194.088  | M33197    | 64707.402 | 66086.57  | NM_003668 | 12246.792 | 13457.771 |
| SR3       | 37857.273 | 47979.691 | NM_001467 | 8677.229  | 10273.314 | NM_013384 | 67330.969 | 63433.676 |
| SR5       | 5552.653  | 7021.415  | NM_018066 | 64221.328 | 62084.277 | NM_001187 | 2616.229  | 3229.081  |
| SR7       | 4949.506  | 49228.129 | NM_006931 | 20197.141 | 23786.773 | NM_018241 | 5472.365  | 5289.566  |
| SR9       | 19209.441 | 5959.691  | NM_020344 | 21390.824 | 23176.693 | NM_005834 | 10981.869 | 10478.665 |
| CY3Cy5    | 4792.251  | 354.581   | AF119868  | 1641.595  | 2050.129  | NM_002557 | 32023.061 | 38790.824 |
| L77559    | 1545.661  | 1347.391  | NM_005050 | 16544.037 | 19560.672 | NM_004477 | 1446.48   | 2043.795  |
| NM_005598 | 1100.662  | 607.618   | M33197    | 67134.594 | 76581.305 | BE728156  | 1256.942  | 1327.891  |
| AK023636  | 6072.276  | 4006.917  | NM_019844 | 863.429   | 1544.721  | AI417775  | 1405.142  | 1507.495  |
| D25272    | 1023.327  | 813.56    | M33197    | 59332.113 | 53345.871 | BI762229  | 16465.844 | 24039.604 |
| M33197    | 76367.406 | 62269.195 | AL050139  | 19939.875 | 17197.238 | AA131406  | 1054.03   | 1255.717  |
| NM_020168 | 1410.046  | 1837.029  | NM_002593 | 2537.438  | 2996.427  | BG618320  | 58400.203 | 60460.148 |
| AF085825  | 716.788   | 613.44    | NM_004558 | 26594.293 | 35163.797 | M28983    | 965.108   | 973.975   |
| AL832699  | 13824.657 | 13733.267 | AL079296  | 2187.409  | 2466.336  | Y00787    | 9165.697  | 10867.782 |
| NM_012191 | 2562.455  | 2358.314  | NM_014770 | 14891.083 | 10945.74  | NM_007276 | 9503.84   | 10375.062 |
| M33197    | 71161.828 | 62240.043 | AB037737  | 3049.846  | 2701.916  | N34462    | 21836.182 | 25402.482 |
| AK000757  | 1836.751  | 1800.833  | M33197    | 63785.109 | 62422.77  | AI658778  | 11059.64  | 11753.863 |
| AL359577  | 4085.354  | 4264.232  | AK023103  | 4892.433  | 5053.056  | L19067    | 11807.942 | 13781.885 |
| NM_018133 | 13640.892 | 13521.262 | NM_017858 | 8354.575  | 6231.898  | Z48482    | 2083.631  | 2069.12   |
| AF052120  | 3920.955  | 4979.635  | NM_019059 | 63428.449 | 61580.793 | W60413    | 11129.606 | 11325.166 |



|           |           |           |           |           |           |           |           |           |
|-----------|-----------|-----------|-----------|-----------|-----------|-----------|-----------|-----------|
| NM_014871 | 5901.373  | 4957.277  | NM_013347 | 1415.65   | 1248.412  | BI823365  | 13563.654 | 15440.345 |
| M33197    | 73202.898 | 62247.922 | D80008    | 4722.167  | 4825.304  | X06318    | 2225.013  | 2921.129  |
| AL137552  | 1506.719  | 1121.253  | X56789    | 6071.518  | 6834.586  | NM_016217 | 55198.066 | 60028.453 |
| M33197    | 68294.398 | 69643.758 | NM_000935 | 4231.395  | 4668.852  | AK025971  | 10303.388 | 10845.758 |
| AK024779  | 1211.754  | 1334.26   | NM_000359 | 49191.469 | 44528.063 | NM_002618 | 23191.152 | 22848.992 |
| AK024406  | 1131.339  | 1320.161  | NM_006395 | 5346.832  | 4795.498  | BE394704  | 1663.641  | 2633.42   |
| AK024568  | 2101.612  | 1460.683  | NM_014306 | 15784.069 | 14457.909 | NM_004703 | 11682.314 | 16285.971 |
| AK024981  | 51098.43  | 48866.094 | NM_001084 | 10017.314 | 9087.617  | NM_001512 | 2305.431  | 2672.46   |
| AK027246  | 3070.838  | 3421.651  | NM_015983 | 15889.267 | 15189.01  | NM_014706 | 12971.391 | 13649.376 |
| U80766    | 3886.497  | 4536.228  | NM_018622 | 12437.81  | 16782.828 | AK023172  | 1156.304  | 1272.022  |
| AK001638  | 4082.108  | 4541.263  | M33197    | 67658.195 | 65812.789 | AF139768  | 617.519   | 935.039   |
| AF161386  | 27816.691 | 28440.949 | CY3Cy5    | 5023.201  | 263.989   | AJ001348  | 4953.514  | 5597.233  |
| AL365369  | 9520.194  | 8892.534  | NM_006981 | 6620.086  | 5046.835  | NM_014007 | 3496.399  | 4728.164  |
| AK025454  | 3571.832  | 3998.441  | AF086354  | 2367.405  | 1908.35   | AB033006  | 8631.843  | 9320.725  |
| M33197    | 72248.453 | 61972.895 | AF086429  | 5160.56   | 5178.512  | AF020314  | 12340.676 | 14366.749 |
| X05826    | 28179.855 | 27655.861 | NM_019060 | 869.165   | 849.36    | NM_016332 | 40468.168 | 47120.875 |
| Y11608    | 1430.172  | 1329.253  | AF086377  | 681.347   | 901.568   | AK023936  | 1677.083  | 1527.065  |
| AJ001872  | 1360.549  | 1381.009  | AF086439  | 3725.256  | 3169.235  | NM_006457 | 4753.203  | 6652.052  |
| AJ227882  | 868.057   | 1116.37   | M33197    | 87415.914 | 64166.043 | NM_003682 | 2843.708  | 3767.652  |
| M33197    | 67883.734 | 63880.73  | AF038171  | 2875.134  | 2064.395  | NM_000207 | 2510.243  | 3070.137  |
| M33197    | 68382.961 | 70493.32  | AF052160  | 976.562   | 1308.894  | NM_002531 | 6361.872  | 7372.545  |
| NM_014696 | 6477.409  | 6309.568  | AK026512  | 3182.28   | 2579.285  | NM_006314 | 59609.012 | 60154.125 |
| AL359055  | 3548.141  | 3507.652  | NM_018482 | 4990.108  | 3902.418  | NM_001782 | 14313.713 | 15726.861 |
| NM_014908 | 4883.044  | 4663.577  | NM_017880 | 2772.136  | 2207.067  | NM_002754 | 1120.468  | 1121.046  |
| AB037771  | 573.29    | 499.859   | AF090945  | 9902.979  | 9438.916  | NM_000797 | 26641.555 | 31708.58  |
| M33197    | 6075.432  | 4177.202  | NM_006981 | 3009.844  | 2572.988  | NM_014927 | 708.66    | 617.134   |
| AK025137  | 1793.832  | 1474.971  | SR2       | 53835.371 | 54117.082 | AF217525  | 917.315   | 1051.901  |
| AK001083  | 5507.01   | 5672.937  | SR4       | 24203.926 | 23418.254 | AL080148  | 60049.262 | 60239.613 |
| AK000185  | 2707.115  | 2754.67   | SR6       | 2577.967  | 3298.375  | NM_002479 | 4951.242  | 4996.578  |
| NM_017962 | 1868.284  | 2213.503  | SR8       | 10088.285 | 35449.188 | NM_000348 | 49953.727 | 48063.164 |
| AK027227  | 722.547   | 798.573   | SR10      | 34118.871 | 12102.28  | NM_012105 | 7823.295  | 9291.532  |
| NM_017834 | 1294.238  | 1231.663  | CY3Cy5    | 4118.329  | 168.409   | S82470    | 8135.61   | 7709.898  |
| AK000865  | 2152.811  | 1845.742  | AF088010  | 1615.262  | 2091.175  | AB028982  | 4004.68   | 5173.458  |
| M33197    | 68410.438 | 67924.5   | AK002014  | 2488.211  | 2235.254  | NM_002004 | 7853.805  | 8936.897  |
| AF147349  | 30262.109 | 25030.57  | AK026718  | 8321.666  | 8428.965  | NM_005121 | 2085.324  | 2598.327  |
| AL050346  | 19795.518 | 20811.764 | AF085899  | 813.751   | 960.186   | NM_000747 | 8975.889  | 9397.695  |
| AK001520  | 22769.256 | 22460.908 | AK022035  | 12341.45  | 11016.289 | AJ275973  | 23893.309 | 27801.439 |
| AK021731  | 1519.301  | 1476.966  | M33197    | 80034.969 | 63318.34  | U76362    | 31387.449 | 39582.902 |
| D90070    | 33778.566 | 29100.238 | NM_004337 | 6205.447  | 6030.784  | NM_003060 | 623.901   | 1189.791  |
| AF132601  | 897.415   | 985.4     | AK023612  | 984.02    | 1026.462  | AK021489  | 54862.922 | 56756.211 |
| M33197    | 68439.148 | 63858.461 | AF147437  | 4272.976  | 3730.129  | NM_004525 | 1919.916  | 2505.281  |
| AF086179  | 7300.528  | 5668.287  | M33197    | 71790.648 | 62528.637 | NM_003895 | 1630.962  | 1620.066  |
| AK025807  | 10968.289 | 12059.998 | AF147360  | 935.327   | 1203.078  | NM_004317 | 9575.196  | 9897.709  |
| AK022478  | 2067.004  | 2518.598  | AL137269  | 7185.042  | 6109.072  | NM_014645 | 9299.272  | 9328.266  |
| NM_018381 | 4242.553  | 5694.478  | AK021983  | 5971.692  | 5822.951  | NM_014708 | 6673.011  | 7037.041  |
| AK022769  | 794.777   | 1104.464  | Y11681    | 24981.75  | 22702.568 | NM_003693 | 6434.264  | 7612.71   |
| U10509    | 5117.536  | 5043.093  | AL110135  | 36049.973 | 37199.484 | NM_000356 | 55679.43  | 58504.379 |
| NM_007165 | 26269.963 | 24089.113 | NM_006993 | 30724.803 | 25057.789 | NM_018134 | 58669.625 | 60248.75  |
| NM_014018 | 20469.676 | 19822.643 | M33197    | 94716.57  | 64646.063 | NM_013247 | 8806.852  | 9457.968  |
| AF085956  | 9942.658  | 10137.558 | AF086316  | 1016.573  | 1124.198  | NM_006770 | 9207.729  | 9214.56   |
| NM_019116 | 3650.059  | 4717.369  | M33197    | 67797.586 | 68400.711 | NM_001388 | 12501.307 | 14185.209 |
| AF147318  | 1594.061  | 1466.75   | AL359626  | 2632.906  | 2418.671  | X76770    | 9936.38   | 11335.391 |
| L37699    | 2929.894  | 2626.502  | AK022084  | 3166.144  | 2896.04   | AB037808  | 3226.183  | 3930.664  |

|           |           |           |           |           |           |           |           |           |
|-----------|-----------|-----------|-----------|-----------|-----------|-----------|-----------|-----------|
| M33197    | 68295.711 | 71862.695 | AK023891  | 2450.391  | 2347.967  | NM_01603E | 9170.802  | 9159.61   |
| D80002    | 4250.294  | 3629.831  | AK000777  | 3950.119  | 3271.634  | AF090911  | 1032.045  | 1092.255  |
| U17637    | 1275.13   | 1200.358  | M33197    | 66818.547 | 61398.277 | Z36821    | 37415.191 | 45215.887 |
| AF207831  | 4485.787  | 4446.741  | AF144233  | 5206.231  | 5284.411  | AF289485  | 8308.235  | 10601.744 |
| AK023174  | 1511.2    | 1445.724  | AF085925  | 1161.427  | 1059.51   | AF130092  | 17867.686 | 22428.672 |
| NM_00354E | 995.018   | 1228.848  | AK022986  | 876.607   | 812.225   | NM_01609E | 11266.28  | 11369.115 |
| M33197    | 68456.484 | 68836.398 | AF085975  | 10809.097 | 12251.059 | AK024794  | 4453.078  | 5198.738  |
| NM_01827E | 803.643   | 794.137   | AF075103  | 1663.271  | 1108.915  | NM_01985E | 13554.765 | 15670.576 |
| AF086125  | 2275.922  | 2978.982  | M33197    | 69963.289 | 62392.492 | NM_01799E | 3627.96   | 4514.392  |
| AL079279  | 910.579   | 1075.695  | AL137390  | 4928.892  | 4524.178  | NM_00540C | 1453.259  | 2208.515  |
| AK023547  | 1631.816  | 2380.836  | AL137611  | 8840.247  | 8387.009  | AK023061  | 1495.464  | 1971.451  |
| U67847    | 6528.931  | 7595.896  | AL359566  | 41801.879 | 41826.402 | NM_00725E | 11348.722 | 10071.039 |
| AK021933  | 1568.297  | 1532.645  | AL137427  | 6920.494  | 6879.188  | NM_00366E | 11877.441 | 11738.513 |
| AK024207  | 14090.982 | 14272.33  | AL157460  | 3182.352  | 3230.843  | NM_01338E | 66257.836 | 63231.766 |
| AK021843  | 3488.521  | 3238.836  | M33197    | 72221.258 | 62688.324 | NM_001187 | 2822.849  | 3143.333  |
| AF075025  | 1301.72   | 1409.075  | M33197    | 67614.945 | 71163.734 | NM_018241 | 5265.589  | 5589.546  |
| AF116623  | 874.093   | 831.75    | AK024198  | 854.443   | 1438.243  | NM_00583E | 10000.674 | 10363.85  |
| AF088008  | 4946.002  | 4288.921  | AL049846  | 3661.427  | 4024.814  | AF000381  | 14677.293 | 13246.336 |
| AK023528  | 1749.022  | 1969.425  | AK024161  | 3593.092  | 3699.518  | NM_00072E | 8907.206  | 9674.293  |
| AK023043  | 1297.807  | 1180.572  | AK021682  | 59191.25  | 53814.203 | NM_00055E | 961.196   | 1025.393  |
| NM_00468E | 8789.732  | 6041.301  | AK022141  | 1421.148  | 1369.127  | NM_00255E | 22686.242 | 26198.434 |
| AB037725  | 1940.211  | 1614.648  | AK023942  | 65088.457 | 61924.285 | NM_004477 | 980.381   | 1371.209  |
| M33197    | 68367     | 78399.891 | M33197    | 67870.641 | 68336.797 | BE728156  | 682.67    | 717.576   |
| NM_00486C | 9948.409  | 10365.994 | AK022046  | 1376.264  | 1773.25   | AI417775  | 1259.605  | 1535.867  |
| AF217190  | 17974.771 | 13918.541 | AK027207  | 2174.076  | 2067.661  | BI762229  | 14957.994 | 20396.033 |
| AB028981  | 34855.336 | 32842.602 | AF083120  | 1402.187  | 1313.444  | AA131406  | 1106.763  | 873.78    |
| NM_00680C | 2527.183  | 2162.457  | AF143323  | 1638.338  | 969.386   | BG618320  | 59494.402 | 62117.027 |
| NM_00247E | 642.066   | 616.897   | AJ227892  | 10872.641 | 11220.331 | M28983    | 1034.378  | 1231.876  |
| NM_00272E | 15317.012 | 14188.935 | M33197    | 67796.023 | 66632.758 | Y00787    | 9131.288  | 9820.793  |
| M33197    | 68223.664 | 74470.156 | AK022013  | 4296.779  | 4650.675  | NM_00727E | 9275.559  | 9293.764  |
| AK025266  | 5922.531  | 5692.623  | AK022155  | 6709.671  | 6448.25   | N34462    | 18129.611 | 22761.375 |
| AK001843  | 7767.089  | 10123.754 | AK022288  | 1674.294  | 1858.643  | AI658778  | 10733.543 | 13030.414 |
| AK000548  | 64239.184 | 64956.035 | AK021916  | 919.557   | 835.395   | L19067    | 11930.325 | 14770.715 |
| NM_00392C | 29843.789 | 36960.438 | AK024201  | 1288.002  | 1519.126  | Z48482    | 2031.297  | 2304.349  |
| NM_004787 | 11055.906 | 14047.321 | AK022174  | 1339.566  | 1548.024  | W60413    | 10951.519 | 11143.411 |
| AF087984  | 10289.541 | 11669.575 | AK022331  | 1663.967  | 1605.535  | BI823365  | 14076.515 | 13536.326 |
| AF009302  | 7110.38   | 7321.093  | M33197    | 68031.305 | 66441.273 | X06318    | 2446.744  | 2529.991  |
| M33197    | 65057.199 | 68187.68  | AL049299  | 1073.865  | 1298.768  | NM_016217 | 55090.523 | 57061.367 |
| AK022273  | 3627.995  | 3030.813  | NM_00608E | 70030.063 | 62382     | AK025971  | 9676.15   | 10302.984 |
| NM_01588E | 744.987   | 821.404   | NM_01826E | 2203.93   | 1955.751  | NM_00261E | 23485.732 | 25516.111 |
| AK027161  | 1030.454  | 1287.448  | AF130086  | 14090.681 | 15081.868 | L27479    | 2231.448  | 2599.868  |
| AK024271  | 3520.12   | 3975.074  | AK023858  | 9175.566  | 9357.889  | NM_00219E | 4118.3    | 4118.292  |
| AK021650  | 7122.18   | 5981.487  | M33197    | 68812.984 | 62212.578 | AB033006  | 6750.839  | 7679.834  |
| AL050210  | 16714.279 | 7567.58   | AF250920  | 7162.899  | 6825.443  | AF020314  | 10464.679 | 12455.203 |
| NM_00413E | 615.587   | 481.164   | NM_01773E | 5005.596  | 4862.733  | NM_01633E | 23697.777 | 27303.162 |
| NM_01484E | 5139.416  | 4935.974  | NM_01404E | 14844.677 | 15450.185 | AK023936  | 1589.26   | 1428.928  |
| NM_01849E | 8667.98   | 9595.794  | D17152    | 50204.863 | 51036.863 | NM_00645E | 4024.313  | 4909.57   |
| NM_00134E | 656.187   | 608.156   | AK024464  | 27031.84  | 29945.252 | NM_00368E | 2277.898  | 2722.57   |
| NM_00314E | 1027.959  | 985.63    | AK026748  | 1182.873  | 1179.506  | NM_00020E | 1982.254  | 2519.174  |
| NM_00337E | 18635.787 | 16909.23  | AK023638  | 654.398   | 800.694   | NM_002531 | 5032.566  | 6225.59   |
| NM_00222C | 1304.933  | 1236.217  | M33197    | 5221.193  | 4866.722  | NM_00631E | 57550.695 | 58559.398 |
| AB033034  | 9863.312  | 7801.604  | AK025423  | 4726.76   | 3980.912  | NM_00178E | 12636.781 | 13665.491 |
| D38169    | 5013.984  | 4380.802  | AL050022  | 1049.777  | 1079.307  | NM_00275E | 1215.016  | 1426.774  |

|           |           |           |           |           |           |           |           |           |
|-----------|-----------|-----------|-----------|-----------|-----------|-----------|-----------|-----------|
| M33197    | 68450.844 | 69485.031 | AF009272  | 681.869   | 918.474   | NM_000797 | 24909.232 | 31420.945 |
| AJ293294  | 12266.887 | 12865.941 | AL137380  | 1713.945  | 1595.48   | NM_014927 | 1413.981  | 1484.034  |
| NM_018171 | 4319.135  | 5195.081  | M33197    | 67288.867 | 69823.922 | NM_016293 | 15910.659 | 20224.102 |
| NM_002447 | 8667.37   | 9007.807  | AL137658  | 46782.664 | 44224.703 | AF217525  | 1211.509  | 1440.198  |
| NM_014145 | 31192.938 | 33220.41  | D16888    | 3019.507  | 2988.459  | AL080148  | 58513.844 | 60823.445 |
| NM_014141 | 5396.563  | 4998.446  | U79277    | 1227.224  | 1564.048  | NM_006731 | 1726.04   | 1758.61   |
| NM_002223 | 2516.314  | 2401.882  | AF068298  | 14962.388 | 15869.08  | NM_018487 | 3182.269  | 3470.455  |
| M33197    | 65585.188 | 64610.57  | Z70770    | 3862.757  | 4434.762  | NM_020134 | 6610.37   | 6688.333  |
| NM_005490 | 27526.094 | 28782.416 | AJ227900  | 6733.96   | 7562.073  | NM_014061 | 2772.156  | 2976.54   |
| NM_003151 | 4994.864  | 5355.639  | AK023242  | 3153.253  | 4079.454  | BC034395  | 14640.896 | 16029.906 |
| NM_006811 | 11658.333 | 11830.006 | M33197    | 64921.902 | 64158.762 | NM_002479 | 4905.483  | 5260.475  |
| NM_005601 | 2223.171  | 2244.912  | AJ012500  | 9331.297  | 10624.515 | NM_000348 | 47890.793 | 49690.988 |
| NM_016151 | 8512.148  | 7607.516  | AF085833  | 2424.793  | 2786.294  | NM_005050 | 24956.674 | 28394.926 |
| AK026270  | 3294.332  | 2026.81   | L19368    | 1266.277  | 807.276   | NM_004950 | 8875.541  | 8732.389  |
| NM_004550 | 26829.414 | 25698.779 | U00944    | 1843.339  | 2070.647  | AF040248  | 3780.783  | 4593.692  |
| D90075    | 5786.532  | 5429.154  | BC035058  | 2416.253  | 2320.808  | NM_014228 | 2424.122  | 3086.099  |
| M33197    | 68369.547 | 65809.789 | X57566    | 21792.588 | 18664.563 | AL832292  | 7081.907  | 8425.994  |
| NM_014857 | 2602.227  | 2165.675  | M33197    | 66170.008 | 65639.938 | NM_003045 | 31626.027 | 38674.551 |
| AK023827  | 2681.712  | 2309.836  | NM_018616 | 36537.73  | 42806.152 | NM_005662 | 16340.64  | 19758.738 |
| AK021702  | 7877.037  | 6575.502  | AK023809  | 2752.239  | 3607.131  | NM_003060 | 904.552   | 1399.8    |
| NM_003885 | 7165.681  | 6734.73   | AL137590  | 1699.953  | 1994.722  | AK021489  | 52394.742 | 57560.316 |
| AL161977  | 3055.262  | 1989.217  | M87943    | 63182.426 | 58740.176 | NM_004525 | 2001.625  | 2735.957  |
| NM_016448 | 5482.812  | 4463.453  | AL360137  | 2498.856  | 2668.004  | NM_003895 | 1201.36   | 1486.116  |
| NM_003930 | 6576.418  | 5164.998  | U28131    | 65874.164 | 62362.305 | NM_004317 | 8622.831  | 9656.249  |
| M33197    | 68164.242 | 66747.063 | AY007106  | 4908.331  | 6181.592  | NM_014645 | 9843.241  | 9975.56   |
| NM_002688 | 5008.742  | 6477.327  | AF015910  | 66674.891 | 74261.734 | NM_014708 | 6654.927  | 7083.639  |
| NM_020360 | 1596.584  | 1696.08   | BC009993  | 3678.084  | 4846.872  | NM_003693 | 5762.372  | 6470.285  |
| NM_004415 | 2965.008  | 3431.702  | M33197    | 63572.961 | 63387.754 | NM_000350 | 58844.547 | 54741.848 |
| NM_007278 | 44491.348 | 43828.211 | AB049150  | 1670.043  | 1576.953  | NM_018134 | 59674.02  | 58832.18  |
| NM_005210 | 20271.67  | 19021.4   | NM_016824 | 12527.707 | 13142.478 | NM_013247 | 9499.749  | 10395.674 |
| NM_004723 | 13043.979 | 14319.335 | NM_003031 | 17453.582 | 18582.414 | NM_006770 | 9135.821  | 9352.465  |
| M33197    | 66926.547 | 62589.418 | X89674    | 1274.151  | 1471.616  | BE394704  | 1637.519  | 2037.521  |
| NM_018413 | 4457.61   | 4921.367  | NM_007170 | 2268.956  | 2464.075  | NM_004703 | 12328.706 | 12474.342 |
| AB018299  | 12352.998 | 14299.663 | NM_003008 | 3652.95   | 3577.794  | NM_001512 | 2252.156  | 2385.627  |
| NM_005245 | 15313.559 | 12593.6   | NM_004100 | 1000.885  | 834.135   | NM_014700 | 12007.928 | 14027.6   |
| NM_002941 | 2796.878  | 2664.948  | M33197    | 66004.25  | 64652.402 | AK023172  | 1275.135  | 1485.736  |
| AK025605  | 5231.681  | 4902.38   | AF317550  | 1015.235  | 1509.747  | AF139768  | 943.574   | 921.51    |
| NM_003783 | 2619.423  | 2413.225  | NM_003543 | 703.155   | 599.944   | AJ001348  | 4079.187  | 3936.89   |
| NM_007000 | 8310.751  | 8495.364  | AK025416  | 1729.765  | 1596.551  | NM_014007 | 2773.845  | 3290.792  |
| M23161    | 25230.418 | 20675.42  | AK022165  | 1900.206  | 2207.034  | NM_001187 | 3149.808  | 4175.096  |
| NM_006100 | 1877.894  | 1861.109  | AF090883  | 2115.191  | 1873.145  | NM_018241 | 4642.198  | 4931.24   |
| NM_003197 | 15576.842 | 11060.462 | U23860    | 1504.093  | 1620.892  | NM_005834 | 7292.444  | 7382.625  |
| AF176705  | 26899.666 | 16199.118 | M33197    | 67153.625 | 65155.105 | AF000381  | 12374.47  | 11209.393 |
| D29012    | 42124.398 | 46256.258 | AL049263  | 858.239   | 435.089   | NM_018075 | 543.419   | 706.768   |
| NM_017414 | 1399.413  | 1358.027  | AK022372  | 5698.771  | 6012.335  | NM_012105 | 6959.504  | 9440.758  |
| NM_012179 | 28074.902 | 26265.164 | AJ227863  | 1113.722  | 1348.027  | NM_000197 | 1142.382  | 1114.325  |
| NM_002793 | 8761.192  | 8068.566  | NM_015916 | 5576.183  | 6645.399  | S82470    | 7851.357  | 7435.488  |
| NM_004788 | 6075.085  | 6033.483  | NM_003520 | 2112.141  | 2112.524  | AB020695  | 1001.903  | 1112.09   |
| M33197    | 67178.281 | 64342.012 | AK027157  | 799.77    | 590.31    | AB028982  | 3305.074  | 3908.249  |
| AL442083  | 22422.68  | 20101.301 | NM_015889 | 67385.688 | 73571.219 | NM_002004 | 4208.166  | 4771.482  |
| D63487    | 16050.772 | 16273.696 | NM_000212 | 1740.936  | 1605.607  | NM_005121 | 1712.724  | 2182.455  |
| AK097791  | 9145.525  | 9646.148  | M33197    | 67800.188 | 67111.047 | NM_001643 | 57308.168 | 58022.617 |
| NM_020367 | 1215.265  | 1160.895  | NM_004276 | 8442.195  | 8666.624  | NM_020221 | 2055.674  | 2237.729  |

|           |           |           |           |           |           |           |           |           |
|-----------|-----------|-----------|-----------|-----------|-----------|-----------|-----------|-----------|
| AK022705  | 4167.849  | 4284.756  | NM_002332 | 43324.723 | 50866.492 | NM_000747 | 7438.58   | 8250.886  |
| NM_016404 | 24192.959 | 26100.691 | NM_002859 | 7228.36   | 6996.295  | NM_005415 | 8624.795  | 8714.332  |
| L03426    | 6034.711  | 6825.272  | NM_005246 | 11255.371 | 14486.825 | AK026841  | 2407.107  | 2583.642  |
| M33197    | 67395.672 | 70176.172 | NM_017651 | 3582.99   | 3432.427  | AL137708  | 554.286   | 402.9     |
| NM_020163 | 4589.47   | 4316.52   | AF161339  | 5310.446  | 5631.829  | AJ275973  | 21496.328 | 23502.939 |
| NM_004324 | 7133.452  | 6864.32   | M33197    | 65377.047 | 68621.383 | NM_006493 | 1935.978  | 2186.253  |
| NM_005614 | 43190.414 | 43228.008 | AK000354  | 21646.219 | 23486.691 | U76362    | 33887.57  | 36387.602 |
| AJ133115  | 15417.608 | 10787.448 | AL161984  | 1687.473  | 1966.525  | NM_016217 | 52298.352 | 57860.277 |
| AF042831  | 1241.847  | 999.715   | NM_003950 | 767.107   | 787.834   | AK025971  | 8679.905  | 8689.571  |
| X51630    | 26993.51  | 29952.998 | NM_014882 | 5102.694  | 5009.671  | NM_002618 | 15820.587 | 17919.012 |
| NM_005056 | 4369.437  | 3651.38   | M33197    | 66676.93  | 69390.297 | L27479    | 1757.299  | 2296.224  |
| NM_001965 | 1893.83   | 1480.764  | NM_001510 | 2943.153  | 3310.5    | NM_002193 | 2643.318  | 3373.809  |
| AF208502  | 29814.66  | 21037.291 | AK024474  | 13988.482 | 14432.708 | NM_001388 | 12243.117 | 14572.73  |
| M33197    | 68307.82  | 68752.156 | NM_006862 | 1569.211  | 1730.651  | X76770    | 9586.993  | 13200.789 |
| AF264750  | 68079.352 | 66005.133 | NM_017901 | 4883.735  | 5643.427  | AB037808  | 3710.063  | 4888.749  |
| NM_006980 | 5373.494  | 5519.783  | NM_004272 | 5074.855  | 5499.784  | NM_016038 | 7867.974  | 9492.969  |
| AK023904  | 9260.452  | 8190.164  | NM_000358 | 5609.396  | 5398.654  | Z36821    | 26863.342 | 32502.617 |
| NM_017956 | 7885.884  | 7201.533  | NM_001930 | 20612.029 | 17936.432 | AF289485  | 5539.073  | 6997.517  |
| NM_017826 | 1851.735  | 1881.132  | AK025270  | 2809.888  | 2874.192  | AF130092  | 10067.272 | 10780.299 |
| NM_016496 | 3486.733  | 3291.498  | NM_001564 | 10647.629 | 9842.489  | NM_016095 | 8880.243  | 10015.166 |
| NM_014309 | 24704.426 | 26097.443 | M33197    | 67069.148 | 63629.504 | AK024794  | 3704.388  | 3724.816  |
| M33197    | 64891.973 | 60964.262 | AF263537  | 16099.706 | 17172.951 | NM_019853 | 12502.79  | 13094.054 |
| NM_004094 | 8857.658  | 10953.125 | NM_015895 | 16327.338 | 17841.295 | NM_017992 | 2687.098  | 2835.158  |
| NM_020236 | 8378.243  | 8685.155  | NM_000189 | 4003.401  | 4131.786  | NM_005400 | 1453.776  | 1141.411  |
| AK027059  | 43192.363 | 44544.824 | AL050050  | 4647.964  | 3498.41   | BF851643  | 488.225   | 369.847   |
| AF151109  | 63812.125 | 60386.828 | NM_005256 | 859.375   | 1219.971  | AK023061  | 1162.657  | 1656.056  |
| NM_015414 | 63420.531 | 64135.66  | NM_004690 | 5401.247  | 5008.99   | NM_007255 | 9713.856  | 7833.358  |
| L34070    | 31595.633 | 35370.887 | M33197    | 66167.133 | 60066.105 | NM_003668 | 10958.009 | 10390.22  |
| M33197    | 65422.961 | 68502.508 | NM_013374 | 65409.906 | 61556     | NM_013384 | 66024.5   | 65817.68  |
| NM_016219 | 24867.486 | 23233.23  | NM_003252 | 20836.564 | 22356.414 | CY3Cy5    | 2751.832  | 129.908   |
| NM_004751 | 2811.225  | 2231.736  | NM_001228 | 8056.854  | 7181.4    | NM_016346 | 9159.987  | 12440.665 |
| NM_001865 | 68061.664 | 68195.273 | AK026607  | 1418.724  | 1355.788  | AF088047  | 2006.387  | 2134.702  |
| NM_006241 | 683.718   | 613.86    | NM_016561 | 52774.156 | 53381.352 | AF086445  | 1444.503  | 1672.769  |
| NM_006441 | 18844.617 | 15874.127 | NM_014245 | 61583.461 | 59053.063 | AF086281  | 3999.944  | 4904.559  |
| NM_001918 | 6446.795  | 4857.953  | AL110226  | 67042.648 | 62955.75  | AF086372  | 3958.263  | 6196.432  |
| NM_018245 | 6656.137  | 5687.712  | AB046822  | 856.2     | 1325.623  | AF086393  | 1351.06   | 2272.408  |
| M33197    | 68388.281 | 66962.641 | NM_015885 | 7231.268  | 7372.769  | AF086453  | 1468.887  | 2961.507  |
| AF252390  | 1511.685  | 1654.716  | AK024809  | 1896.594  | 1448.075  | AF070621  | 17380.604 | 23771.867 |
| NM_012117 | 16353.854 | 13112.878 | NM_000308 | 6506.351  | 6176.635  | NM_020240 | 5364.963  | 7178.222  |
| D17130    | 65607.234 | 64194.414 | X69636    | 10907.088 | 10624.839 | AK023678  | 37335.574 | 38686.672 |
| X76302    | 11968.921 | 12991.813 | M33197    | 64874.844 | 66456.258 | AF052090  | 9140.521  | 10526.747 |
| AK026276  | 3415.691  | 2982.955  | NM_004173 | 63724.598 | 58620.844 | AL355730  | 816.099   | 882.554   |
| M33197    | 64253.898 | 67674.117 | NM_013974 | 5684.321  | 5825.392  | U79273    | 2983.036  | 1757.271  |
| X52354    | 8281.359  | 8131.216  | NM_017547 | 8130.566  | 7804.215  | AK022050  | 3628.903  | 2682.26   |
| NM_005413 | 973.595   | 1057.245  | NM_003983 | 14019.384 | 16195.536 | NM_016346 | 3411.172  | 2864.884  |
| NM_002315 | 2674.859  | 2528.491  | AK023708  | 2001.953  | 2456.141  | SR2       | 41967.289 | 44295.012 |
| AK024191  | 4105.909  | 5221.806  | NM_002108 | 2901.427  | 2994.077  | SR4       | 12786.048 | 13569.568 |
| AV693985  | 1125.947  | 1015.771  | M33197    | 67348.578 | 63674.297 | SR6       | 1415.51   | 1900.035  |
| NM_006608 | 4791.368  | 4172.305  | NM_018464 | 51229.18  | 54763.898 | SR8       | 5484.881  | 17380.539 |
| NM_000457 | 3390.566  | 3107.032  | D43948    | 11500.749 | 9185.801  | SR10      | 17711.469 | 6404.783  |
| M34356    | 4965.156  | 4235.336  | NM_012310 | 44989.598 | 48682.184 | CY3Cy5    | 3414.764  | 141.872   |
| M33197    | 68305.836 | 74395.984 | BE410824  | 1618.784  | 1292.965  | AB042410  | 2413.508  | 2682.952  |
| NM_014623 | 21259.951 | 23689.736 | BF382116  | 20855.805 | 13164.757 | AF086102  | 8737.198  | 6831.261  |

|           |           |           |           |           |           |           |           |           |
|-----------|-----------|-----------|-----------|-----------|-----------|-----------|-----------|-----------|
| NM_007244 | 12465.453 | 12199.989 | NM_003193 | 22430.533 | 18524.574 | AF116682  | 64227.75  | 63042.051 |
| M30629    | 12522.155 | 12032.909 | AF113216  | 5018.534  | 5028.512  | AL137259  | 8502.979  | 10212.911 |
| BE539299  | 1044.934  | 892.963   | NM_017589 | 4531.354  | 4133.415  | AF086079  | 647.539   | 849.312   |
| AF193873  | 2017.293  | 1507.55   | AK023582  | 3206.653  | 2797.73   | AL122107  | 28793.918 | 29047.01  |
| NM_00262E | 3213.868  | 2947.383  | NM_000124 | 3898.17   | 3287.593  | AF075021  | 4653.519  | 4747.318  |
| M23575    | 1614.128  | 1431.722  | NM_017996 | 16749.395 | 16244.635 | AK025140  | 12847.245 | 14579.291 |
| AA190729  | 8844.367  | 9457.258  | NM_014517 | 8767.218  | 10158.768 | AK023259  | 1024.197  | 1459.171  |
| BF974315  | 28889.076 | 26536.238 | NM_005466 | 5966.831  | 5498.458  | AK001503  | 10556.801 | 13234.925 |
| T74985    | 854.708   | 864.278   | NM_004269 | 6280.133  | 6424.263  | AK021812  | 502.965   | 721.125   |
| AI652705  | 6036.874  | 6663.107  | NM_003409 | 2120.348  | 2828.625  | AK022880  | 2093.164  | 1233.403  |
| AA973397  | 6241.13   | 7204.096  | M33197    | 65087.547 | 63882.934 | NM_003601 | 22828.43  | 13006.481 |
| AA569974  | 3337.74   | 3542.162  | D31765    | 12394.532 | 11945.541 | AF086375  | 912.059   | 440.466   |
| AA923615  | 1326.735  | 1828.56   | NM_006107 | 31538.584 | 25870.85  | AK001228  | 3296.921  | 2257.48   |
| AA446028  | 2471.295  | 2738.655  | NM_004175 | 3939.868  | 4630.465  | AK026778  | 2563.755  | 1604.449  |
| M80583    | 1461.042  | 1506.704  | AF288288  | 61112.293 | 58708.742 | AF074987  | 5286.594  | 2879.083  |
| AW009565  | 16275.825 | 14980.854 | NM_017646 | 33314.043 | 35177.977 | AK001058  | 28233.422 | 18973.205 |
| AW451878  | 782.191   | 936.459   | AL050368  | 5835.339  | 6904.741  | AK026239  | 2801.76   | 1772.695  |
| H18633    | 613.539   | 789.207   | NM_003092 | 32641.139 | 32231.158 | AF086283  | 1434.181  | 1246.222  |
| X07767    | 9088.567  | 9200.325  | M33197    | 66267.836 | 64347.441 | AK027041  | 4144.857  | 4206.964  |
| X65293    | 2872.889  | 2549.003  | NM_005861 | 19228.51  | 17003.316 | AK022064  | 477.195   | 370.572   |
| M33197    | 3474.072  | 2513.349  | NM_01884E | 12082.246 | 11081.987 | AK024332  | 839.138   | 790.118   |
| NM_000853 | 12461.68  | 10879.977 | NM_00376C | 33081.039 | 32101.533 | NM_00535E | 60324.371 | 55804.586 |
| NM_00084E | 610.306   | 749.972   | AB037759  | 2607.343  | 2589.487  | AK027195  | 1081.104  | 1080.028  |
| AF016903  | 25295.379 | 29435.021 | AL080080  | 18112.727 | 20848.129 | AK000937  | 2427.849  | 2685.54   |
| NM_01567E | 11387.981 | 11064.348 | M33197    | 13881.123 | 11977.404 | AK001125  | 1087.442  | 627.346   |
| AK022267  | 1211.066  | 1030.709  | NM_001161 | 38077.672 | 39855.449 | AK023718  | 19095.666 | 14114.463 |
| NM_01604C | 8602.532  | 8486.218  | NM_004044 | 32765.408 | 37922.68  | AF075089  | 11117.66  | 9966.788  |
| M33197    | 66978.219 | 69162.57  | NM_000221 | 65118.309 | 64589.727 | AF241255  | 1263.164  | 1182.714  |
| AF031136  | 31361.482 | 28630.59  | H75678    | 9801.976  | 9251.168  | AF086007  | 66901.195 | 64287.949 |
| NM_006597 | 65811.578 | 61153.902 | NM_00253E | 3231.281  | 3518.035  | AK000803  | 8249.545  | 7283.373  |
| NM_00732E | 699.225   | 747.892   | NM_006452 | 45368.516 | 53494.422 | AK022374  | 1560.569  | 1191.12   |
| NM_012483 | 9928.127  | 12888.842 | AB002359  | 15634.222 | 15143.543 | AF085926  | 23302.949 | 15797.888 |
| NM_00349E | 13372.292 | 13149.667 | M33197    | 39585.781 | 37809.629 | AF085948  | 826.605   | 569.681   |
| AB023420  | 27926.238 | 29203.559 | AB007864  | 10521.784 | 10295.276 | AL137307  | 11728.734 | 8621.265  |
| M33197    | 66360.172 | 67733.586 | NM_00219E | 18221.791 | 16519.105 | AL137468  | 12205.26  | 8005.703  |
| NM_007264 | 14959.7   | 15395.949 | AF024693  | 1055.532  | 1168.355  | AL162007  | 35118.195 | 17878.297 |
| NM_016511 | 20295.125 | 21897.299 | AK025905  | 6405.036  | 7087.053  | AL390137  | 17203.334 | 8025.17   |
| NM_00355E | 6282.615  | 6599.007  | AL121733  | 4626.139  | 5288.698  | AL137340  | 1070.506  | 660.69    |
| NM_002543 | 385.975   | 754.295   | BE958072  | 5772.856  | 5051.493  | AL137542  | 953.66    | 661.797   |
| NM_00218E | 1320.928  | 1501.226  | M33197    | 65203.551 | 65214.512 | AL162045  | 1364.309  | 1258.453  |
| M55337    | 993.587   | 943.709   | NM_017532 | 3618.986  | 3657.241  | X92185    | 540.732   | 263.027   |
| NM_01322E | 1703.685  | 1797.36   | NM_01448C | 11212.499 | 9749.871  | AK022437  | 38949.098 | 21593.098 |
| NM_016533 | 56925.531 | 52226.344 | NM_00593E | 1981.54   | 1714.317  | AK024213  | 57133.297 | 48926.047 |
| NM_007342 | 14276.862 | 14053.625 | NM_014169 | 18844.744 | 18604     | AK025093  | 1691.746  | 1109.624  |
| NM_005672 | 2960.427  | 2328.647  | NM_004964 | 42293.848 | 40414.352 | AK022184  | 4162.917  | 2276.626  |
| D25217    | 7685.79   | 6805.567  | NM_005197 | 29065.799 | 27658.682 | AB007959  | 2618.505  | 1658.41   |
| NM_006351 | 28720.814 | 32316.453 | AL137421  | 66562.492 | 64780.164 | AK026002  | 622.351   | 494.429   |
| M33197    | 68480.344 | 68941.742 | M33197    | 68093.43  | 66114.641 | AK024360  | 1148.418  | 1004.833  |
| NM_004683 | 10741.205 | 10195.458 | NM_007241 | 2105.202  | 1920.834  | AK023394  | 1214.577  | 1368.46   |
| AK023226  | 5447.868  | 6118.432  | M33197    | 67112.992 | 73724.047 | AF090093  | 47244.422 | 47268.129 |
| AK025263  | 2186.945  | 2025.951  | NM_001154 | 23541.016 | 28011.344 | AF161340  | 23759.113 | 23493.439 |
| NM_006931 | 8253.453  | 8549.021  | NM_00181E | 5274.048  | 4995.476  | AF242771  | 4089.456  | 4188.658  |
| AJ133127  | 672.491   | 709.004   | NM_01693E | 2098.293  | 2682.655  | NM_018562 | 44828.684 | 39559.961 |

|           |           |           |           |           |           |           |           |           |
|-----------|-----------|-----------|-----------|-----------|-----------|-----------|-----------|-----------|
| NM_019844 | 465.634   | 747.678   | NM_001993 | 3537.871  | 3300.405  | AF098666  | 2526.805  | 2166.665  |
| NM_018057 | 1424.343  | 1398.668  | BF575833  | 1340.283  | 1736.968  | AF161365  | 1352.787  | 1106.893  |
| M33197    | 62766.379 | 64106.141 | NM_015725 | 31729.09  | 37428.523 | AK021969  | 2889.915  | 1621.068  |
| NM_015717 | 2861.794  | 2988.136  | R61452    | 4655.752  | 4955.542  | AK022065  | 2929.851  | 1903.763  |
| NM_015925 | 8055.334  | 8455.034  | R19938    | 40054.152 | 41334.297 | AK022221  | 19115.057 | 12064.434 |
| NM_003665 | 1956.123  | 2036.819  | N94487    | 43215.891 | 43452.461 | AK022356  | 2028.995  | 1268.128  |
| AF220217  | 4054.869  | 5258.506  | AI886795  | 16293.952 | 14669.007 | AK021998  | 3481.216  | 2482.523  |
| NM_013323 | 18617.258 | 18718.414 | D10495    | 8765.816  | 8650.985  | AK022126  | 3530.604  | 3250.328  |
| NM_014937 | 2688.889  | 3420.644  | BF344679  | 8044.968  | 7536.836  | AK022256  | 626.911   | 724.83    |
| NM_017426 | 8639.948  | 9152.735  | BG743223  | 1405.591  | 1311.515  | AK022383  | 1651.858  | 1422.188  |
| M33197    | 20623.41  | 14113.888 | M36634    | 3996.107  | 4321.821  | AF086262  | 7292.25   | 5200.798  |
| NM_004555 | 3795.766  | 3095.439  | M14156    | 54420.855 | 53726.875 | AF086292  | 40467.926 | 27234.672 |
| AL079296  | 1870.604  | 1858.464  | U87939    | 3508.25   | 3610.722  | AK023769  | 2826.557  | 2595.969  |
| NM_014770 | 1540.442  | 1687.757  | U86961    | 4714.202  | 4763.765  | AK024342  | 62372.695 | 47661.328 |
| AB037737  | 3332.014  | 3537.648  | U47924    | 899.257   | 964.22    | AL137712  | 19202.24  | 10799.596 |
| M33197    | 68459.438 | 71014.117 | NM_005191 | 7903.448  | 8097.741  | AL137606  | 2275.785  | 1448.72   |
| AK023103  | 5519.713  | 6127.753  | AK094237  | 9923.177  | 9206.538  | AK023839  | 4107.203  | 3254.519  |
| NM_017855 | 8907.816  | 8693.48   | L07592    | 3328.492  | 2761.505  | L77599    | 61060.941 | 60197.398 |
| NM_019055 | 68378.352 | 70822.961 | M33197    | 66520.734 | 64979.746 | AK022743  | 24701.316 | 20774.982 |
| NM_013347 | 2119.258  | 2103.269  | NM_002983 | 38539.828 | 38514.145 | AF035306  | 8111.205  | 7018.099  |
| D80008    | 5342.147  | 5504.043  | NM_000074 | 43237.219 | 46630.285 | AK091662  | 1663.732  | 2071.967  |
| X56789    | 4020.239  | 3696.234  | NM_020393 | 2085.138  | 1322.021  | AB038318  | 1170.687  | 1333.194  |
| AK001069  | 44476.688 | 42824.289 | BF434335  | 63271.57  | 62582.172 | NM_003954 | 3217.094  | 2480.77   |
| M33197    | 66864.18  | 64427.508 | M57627    | 2498.95   | 2225.914  | NM_016345 | 3029.796  | 2148.742  |
| NM_000935 | 1161.951  | 1333.151  | NM_002993 | 5489.424  | 5823.43   | AK022003  | 841.626   | 460.188   |
| NM_000355 | 10979.905 | 11056.442 | AK026946  | 9203.01   | 9565.141  | AK023877  | 1132.769  | 1131.006  |
| NM_006395 | 3304.164  | 3306.648  | M33197    | 63031.965 | 64047.781 | AK024046  | 8055.975  | 7884.402  |
| NM_014305 | 17137.855 | 18276.232 | NM_003192 | 12258.114 | 12807.519 | NM_017931 | 15159.31  | 15568.615 |
| NM_001084 | 6443.53   | 5711.194  | NM_018449 | 19940.887 | 22701.15  | AK022793  | 4067.656  | 3710.066  |
| NM_015983 | 5824.389  | 5182.735  | AF086129  | 5551.233  | 6443.72   | AJ227910  | 6410.519  | 5041.181  |
| NM_018622 | 11369.49  | 11310.627 | D79994    | 6030.265  | 7291.498  | AF001893  | 13495.759 | 8131.447  |
| M33197    | 64009.934 | 65852.43  | NM_014455 | 37968.922 | 40684.496 | X04236    | 18724.674 | 14585.974 |
| NM_005867 | 25497.174 | 25790.895 | AF235049  | 15749.529 | 15670.51  | AK093746  | 48945.406 | 37998.492 |
| AK026031  | 12958.229 | 12704.171 | M33197    | 66393.242 | 65592.898 | D16875    | 872.852   | 955.969   |
| NM_016465 | 16216.673 | 13785.813 | NM_007369 | 4085.588  | 5358.74   | Y10516    | 18893.904 | 16580.736 |
| NM_007244 | 10078.464 | 7747.24   | NM_014776 | 8264.753  | 8481.552  | AF056451  | 25963.031 | 19175.451 |
| M30629    | 11124.137 | 8957.985  | NM_006480 | 62270.406 | 61591.965 | AF015039  | 17229.133 | 16586.656 |
| BE539299  | 1233.113  | 1201.875  | NM_007223 | 64803.441 | 65682.648 | U50528    | 5176.257  | 4269.408  |
| AF193873  | 2203.392  | 1733.656  | NM_000145 | 4494.486  | 4428.094  | AB020632  | 6725.07   | 5343.74   |
| NM_002625 | 3387.192  | 3177.105  | AF030107  | 55379.203 | 54772.66  | NM_018614 | 65457.543 | 59802.965 |
| M23575    | 2145.725  | 2239.857  | NM_000871 | 5570.795  | 4418.799  | AL117549  | 5979.086  | 4521.909  |
| AA190729  | 9491.063  | 9777.771  | NM_018965 | 7392.215  | 6921.663  | NM_005222 | 15363.488 | 11426.747 |
| BF974315  | 31147.838 | 35211.641 | AF086924  | 63814.387 | 65534.32  | BC024308  | 5735.684  | 5546.024  |
| T74985    | 1009.502  | 1458.688  | NM_005164 | 2069.926  | 2336.482  | NM_000535 | 5167.052  | 4697.688  |
| AI652705  | 5175.001  | 5133.128  | NM_001995 | 16505.77  | 16598.486 | AK001838  | 70848.664 | 63611.039 |
| AA973397  | 6020.601  | 7143.794  | NM_000183 | 19208.02  | 19276.541 | NM_018295 | 1240.632  | 1324.068  |
| AA569974  | 3139.076  | 3194.069  | AY004175  | 10490.862 | 9269.173  | AF070574  | 668.838   | 620.632   |
| AA923615  | 1060.165  | 1829.725  | M33197    | 62019.781 | 65724.344 | AF190900  | 6460.922  | 4955.126  |
| AA446028  | 2665.279  | 3354.476  | NM_012327 | 12345.022 | 13238.909 | NM_020404 | 58261.059 | 57369.867 |
| M80583    | 1596.767  | 1689.895  | NM_000904 | 15143.357 | 16160.515 | BE972401  | 30952.502 | 26852.635 |
| AW009565  | 16411.24  | 15429.162 | NM_016045 | 8514.927  | 9058.667  | U56725    | 2223.932  | 2098.884  |
| X07767    | 7844.369  | 8684.789  | NM_000375 | 15319.865 | 18416.793 | NM_017425 | 2363.909  | 2063.618  |
| X65293    | 2347.588  | 2763.883  | NM_000265 | 59814.145 | 58639.996 | AB007922  | 2412.708  | 1475.931  |

|           |           |           |           |           |           |           |           |           |
|-----------|-----------|-----------|-----------|-----------|-----------|-----------|-----------|-----------|
| M33197    | 36284.281 | 33364.414 | NM_018849 | 22960.611 | 21674.533 | NM_015982 | 9866.676  | 8999.613  |
| AL050139  | 12928.332 | 15596.38  | NM_002236 | 16136.537 | 16826.295 | NM_013986 | 56449.371 | 61100.449 |
| NM_002593 | 765.766   | 938.243   | NM_017905 | 49531.578 | 50617.949 | U55055    | 2797.772  | 2262.636  |
| AF016903  | 24463.928 | 27799.346 | NM_006815 | 58404.121 | 56472.09  | AK022186  | 1116.306  | 817.428   |
| NM_015675 | 10729.495 | 9273.238  | NM_002806 | 27858.162 | 30606.598 | AK021485  | 1001.084  | 1112.489  |
| AK022267  | 1253.198  | 999.566   | M33197    | 64938.102 | 65266.816 | AB018319  | 10789.241 | 10132.609 |
| NM_016040 | 9421.17   | 9357.676  | NM_001716 | 36130.832 | 40261.957 | AK001101  | 10429.488 | 6944.781  |
| M33197    | 67969.383 | 66274.391 | NM_002030 | 2360      | 2854.123  | BM973473  | 3110.112  | 2241.6    |
| AF031136  | 31703.408 | 31019.412 | NM_006073 | 2617.805  | 2455.912  | AK021637  | 1942.756  | 1532.196  |
| NM_006597 | 67237.961 | 67324.32  | NM_004951 | 3791.734  | 3874.357  | AK021658  | 1069.251  | 558.892   |
| NM_012483 | 6995.735  | 8756.563  | NM_006564 | 18329.764 | 19299.547 | D61705    | 678.083   | 566.762   |
| NM_003498 | 13756.515 | 14125.013 | NM_004802 | 6561.76   | 7160.08   | U17631    | 1260.521  | 960.782   |
| AB023420  | 26572.244 | 30014.313 | M33197    | 65333.66  | 60273.867 | AL137723  | 3588.375  | 2950.731  |
| M33197    | 62970.777 | 66200.633 | NM_002633 | 50969.754 | 51865.602 | AL137311  | 804.047   | 751.538   |
| NM_007264 | 16809.656 | 19835.037 | M33197    | 65425.828 | 60107.938 | NM_014288 | 20942.729 | 17333.016 |
| NM_002262 | 766.837   | 577.908   | NM_002878 | 21922.23  | 18650.438 | AF035300  | 3621.133  | 2676.589  |
| NM_016511 | 22653.066 | 22434.66  | NM_017723 | 8177.708  | 6717.127  | NM_017703 | 15328.798 | 12994.71  |
| NM_003559 | 5932.373  | 6145.194  | AK022922  | 4028.132  | 4196.088  | NM_015320 | 9744.494  | 7347.221  |
| NM_002185 | 1323.034  | 1696.362  | NM_006462 | 12060.865 | 12060.332 | NM_004055 | 4876.34   | 3103.292  |
| M55337    | 836.935   | 1039.797  | AK024750  | 18354.365 | 18811.184 | NM_014726 | 50266.152 | 41233.543 |
| NM_013229 | 1652.419  | 1456.051  | NM_000400 | 61398.621 | 53517.512 | NM_000926 | 1990.07   | 1871.325  |
| NM_016533 | 61165.574 | 58335.703 | M33197    | 67214.984 | 60356.34  | AJ297349  | 1776.213  | 1676.206  |
| M33197    | 64813.664 | 69495.234 | NM_002613 | 10335.772 | 9357.587  | NM_006596 | 8149.341  | 6368.256  |
| NM_014623 | 17549.703 | 19695.617 | NM_004419 | 19772.453 | 17787.574 | NM_005936 | 6030.791  | 5571.266  |
| D25217    | 6822.633  | 5818.799  | U47635    | 9897.545  | 8315.771  | U43586    | 5140.35   | 6398.239  |
| NM_006351 | 30991.406 | 34595.094 | NM_018650 | 8065.724  | 8639.875  | NM_006271 | 17358.775 | 17569.084 |
| M33197    | 68122.531 | 63974.945 | AK026945  | 14394.51  | 19762.479 | NM_018647 | 1517.503  | 1551.767  |
| NM_004683 | 11468.35  | 10310.762 | NM_002828 | 8069.36   | 8754.719  | NM_003026 | 844.605   | 1141.894  |
| AK023226  | 5427.256  | 6165.873  | NM_014369 | 5580.034  | 5253.089  | NM_000721 | 67214.617 | 61029.816 |
| AK025263  | 2430.72   | 2075.561  | M33197    | 67733.477 | 65437.836 | NM_003933 | 2001.28   | 1411.753  |
| NM_006931 | 6288.674  | 6814.699  | AB050049  | 21136.52  | 23296.758 | NM_018640 | 626.284   | 527.681   |
| AJ133127  | 892.983   | 848.511   | J05125    | 1912.205  | 4604.5    | NM_005095 | 4958.692  | 4393.131  |
| NM_019844 | 877.857   | 702.949   | NM_001819 | 5736.842  | 5091.869  | NM_000055 | 646.264   | 475.383   |
| NM_018057 | 1070.916  | 1249.026  | NM_016938 | 1795.274  | 1926.026  | NM_003163 | 7407.159  | 6562.003  |
| M33197    | 62429.156 | 64129     | NM_001993 | 2989.77   | 2820.206  | NM_016205 | 9685.214  | 5197.733  |
| NM_015717 | 2677.28   | 2673.833  | BF575833  | 1389.785  | 1777.431  | NM_005755 | 7840.618  | 4270.213  |
| NM_015925 | 6696.271  | 7028.827  | NM_000175 | 800.241   | 1362.201  | AF149724  | 3759.128  | 2384.648  |
| NM_003665 | 1796.072  | 1948.266  | NM_015725 | 28099.32  | 28845.139 | BC020745  | 1336.943  | 802.262   |
| AF220217  | 4117.824  | 5172.72   | R61452    | 5932.403  | 5317.213  | NM_006367 | 26628.852 | 17540.73  |
| NM_013323 | 17537.043 | 17100.986 | R19938    | 40455.688 | 41880.48  | NM_006732 | 59530.289 | 59438.941 |
| NM_014937 | 2721.866  | 3532.052  | N94487    | 42344.934 | 41765.051 | NM_004354 | 12400.99  | 8210.606  |
| NM_017426 | 8812.447  | 8109.718  | AI886795  | 16839.234 | 15183.283 | NM_004661 | 5029.365  | 3143.368  |
| M33197    | 15615.36  | 14415.546 | D10495    | 9475.733  | 10298.795 | NM_002009 | 1955.428  | 2250.469  |
| NM_000853 | 11334.479 | 9892.276  | BF344679  | 7443.725  | 8946.162  | NM_001610 | 5159.301  | 5601.536  |
| NM_000846 | 682.73    | 808.369   | BG743223  | 1291.423  | 1256.843  | NM_001241 | 3199.591  | 3643.867  |
| NM_014770 | 1452.255  | 1275.884  | M36634    | 4107.988  | 3973.882  | AF217504  | 5579.969  | 7473.148  |
| AB037737  | 4188.225  | 4340.628  | M14156    | 47974.387 | 49718.793 | AK027102  | 25053.973 | 29175.736 |
| M33197    | 68501.43  | 76002.438 | U87939    | 3831.476  | 4471.566  | NM_017919 | 17216.273 | 20461.381 |
| AK023103  | 5492.301  | 5259.927  | U86961    | 4072.517  | 4881.815  | NM_014456 | 13982.437 | 19236.408 |
| NM_017858 | 8054.335  | 7195.257  | U47924    | 1107.97   | 1026.887  | NM_004740 | 22571.396 | 21545.588 |
| NM_019059 | 68305.609 | 68362.203 | NM_005191 | 9386.512  | 9060.906  | NM_003805 | 4709.554  | 4994.988  |
| NM_013347 | 2092.17   | 3009.469  | AK094237  | 11070.661 | 10536.599 | NM_019886 | 8936.979  | 8428.096  |
| D80008    | 5985.062  | 7159.025  | L07592    | 2925.125  | 2959.139  | NM_003278 | 61926.18  | 55121.355 |

|           |           |           |           |           |           |           |           |           |
|-----------|-----------|-----------|-----------|-----------|-----------|-----------|-----------|-----------|
| X56789    | 2948.655  | 2944.789  | AK027244  | 1597.818  | 1267.998  | NM_000426 | 828.042   | 661.77    |
| AK001069  | 36984.426 | 34608.777 | L40520    | 6525.867  | 6491.727  | M29540    | 528.185   | 313.536   |
| M33197    | 64865.645 | 65818.281 | NM_020393 | 4039.753  | 3895.516  | AK021957  | 63494.352 | 62067.238 |
| NM_000935 | 1146.447  | 1138.523  | BF434335  | 67308.398 | 67788.922 | U95031    | 1412.907  | 1127.1    |
| NM_000359 | 9697.067  | 10950.45  | M57627    | 2974.006  | 2539.807  | NM_004771 | 4144.354  | 3238.187  |
| NM_006395 | 2814.706  | 3363.397  | NM_002993 | 5038.723  | 6162.48   | AL365514  | 2528.449  | 1653.477  |
| NM_014306 | 15673.385 | 16891.207 | AK026946  | 5665.339  | 5570.639  | NM_018295 | 2915.698  | 2698.19   |
| NM_001084 | 6189.904  | 6308.46   | M33197    | 62491     | 69305.063 | NM_002104 | 3020.246  | 2896.241  |
| NM_015983 | 6195.938  | 5504.425  | NM_003192 | 12375.246 | 11490.584 | NM_005504 | 31505.885 | 30897.697 |
| NM_018622 | 11737.867 | 9928.3    | NM_018449 | 16604.527 | 15624.947 | AF234654  | 3469.248  | 3409.134  |
| M33197    | 62713.414 | 62852.117 | AF086129  | 4921.59   | 4998.296  | NM_000110 | 6032.875  | 5576.814  |
| NM_005867 | 26090.916 | 25744.055 | D79994    | 7116.861  | 6535.507  | NM_016002 | 51725.102 | 54646.035 |
| AK026031  | 11813.407 | 11045.638 | NM_014458 | 39378.086 | 41080.508 | NM_014545 | 3150.526  | 4084.764  |
| NM_016468 | 15088.094 | 13513.738 | AF235049  | 16362.375 | 14825.282 | NM_000531 | 1578.573  | 2739.513  |
| NM_007342 | 11521.898 | 11364.842 | M33197    | 67036.492 | 68468.406 | NM_017832 | 7351.381  | 9450.345  |
| NM_005672 | 2859.934  | 2534.14   | NM_007369 | 4173.444  | 4032.654  | NM_001713 | 14405.597 | 18296.428 |
| BE539299  | 1126.036  | 915.101   | NM_014776 | 8265.897  | 8745.681  | NM_014498 | 20514.596 | 27594.393 |
| AF193873  | 2261.758  | 2214.212  | NM_006480 | 62724.906 | 64919.137 | NM_002375 | 47959.352 | 54971.191 |
| NM_002628 | 3571.911  | 3320.583  | NM_007223 | 66495.867 | 71133.75  | NM_000988 | 60496.367 | 66081.523 |
| M23575    | 1632.784  | 1898.445  | NM_000145 | 4350.578  | 4730.36   | NM_001813 | 6942.321  | 6872.156  |
| AA190729  | 8906.633  | 8317.607  | AF030107  | 60898.184 | 58968.859 | AF055016  | 10045.696 | 7247.544  |
| BF974315  | 28555.764 | 25661.637 | NM_000871 | 5252.06   | 5252.751  | NM_007234 | 17070.58  | 14595.833 |
| T74985    | 1166.943  | 1358.338  | NM_018968 | 9407.843  | 9557.051  | Y16704    | 62447.625 | 57215.992 |
| AI652705  | 5661.136  | 5994.861  | AF086924  | 66764.953 | 68581.859 | NM_014567 | 4387.832  | 3331.778  |
| AA973397  | 5648.929  | 5984.09   | M33197    | 66896.688 | 73049.102 | NM_017842 | 2574.322  | 1350.097  |
| AA569974  | 3253.016  | 2750.877  | NM_001154 | 20983.049 | 23238.094 | NM_019057 | 5834.86   | 3457.814  |
| AA923615  | 1623.999  | 2296.855  | NM_000183 | 26044.898 | 32794.473 | NM_002677 | 3367.354  | 3703.495  |
| AA446028  | 2806.491  | 3804.239  | AY004175  | 8366.968  | 7747.279  | NM_012082 | 1305.656  | 1851.113  |
| M80583    | 1684.688  | 1926.327  | M33197    | 61601.242 | 67474.148 | NM_001537 | 9312.688  | 9983.912  |
| AW009565  | 14826.17  | 13839.912 | NM_012327 | 10265.27  | 12037.859 | U80743    | 2973.18   | 2652.312  |
| H18633    | 697.413   | 584.175   | NM_000904 | 14058.071 | 15049.477 | NM_001352 | 10658.64  | 9728.16   |
| X07767    | 8578.258  | 8332.314  | NM_016048 | 8207.866  | 9286.333  | D15050    | 2708.4    | 2624.71   |
| X65293    | 2592.247  | 2348.421  | NM_000375 | 13720.125 | 17100.969 | NM_014724 | 476.748   | 601.396   |
| M33197    | 33311.215 | 28049.455 | NM_000265 | 64985.555 | 65062.012 | NM_006527 | 19028.463 | 15867.422 |
| AL050139  | 12383.932 | 13667.94  | NM_018849 | 22224.119 | 20144.102 | NM_006627 | 5244.67   | 4039.462  |
| NM_002593 | 710.899   | 853.352   | NM_002236 | 15461.913 | 14095.94  | NM_007363 | 31993.557 | 28552.156 |
| NM_004558 | 3847.664  | 3721.862  | NM_017905 | 45809.031 | 42614.523 | NM_003093 | 55842.578 | 58407.438 |
| AL079296  | 1654.559  | 1703.758  | NM_006815 | 57827.461 | 58576.477 | U05589    | 4449.367  | 4733.092  |
| NM_006597 | 68039.586 | 71636.805 | NM_002806 | 29402.859 | 30105.879 | NM_014473 | 33466.961 | 46403.535 |
| NM_012483 | 9282.166  | 9448.448  | M33197    | 66098.117 | 68447.398 | NM_003095 | 60571.734 | 63030.266 |
| NM_003498 | 13088.631 | 13716.36  | NM_001716 | 35670.648 | 37768.141 | NM_002295 | 59323.879 | 63316.328 |
| AB023420  | 29065.047 | 29709.059 | NM_002030 | 2779.217  | 3051.916  | NM_003133 | 27672.578 | 39411.715 |
| M33197    | 68383.563 | 76338.57  | NM_006073 | 2289.75   | 2802.133  | NM_001762 | 29507.795 | 43702.445 |
| NM_007264 | 16957.955 | 18054.432 | NM_004951 | 3968.332  | 3462.962  | NM_016306 | 33592.266 | 41026.402 |
| NM_016511 | 22001.225 | 23642.51  | NM_006564 | 17657.283 | 17783.199 | NM_003755 | 1562.353  | 837.911   |
| NM_003559 | 6040.989  | 7455.322  | NM_004802 | 6949.188  | 7207.223  | NM_013238 | 6403.318  | 4615.869  |
| NM_002543 | 533.082   | 674.535   | M33197    | 67416.18  | 71813.211 | BE258640  | 31456.828 | 23891.732 |
| NM_002185 | 1361.064  | 1752.789  | NM_002983 | 40271.082 | 35408.938 | NM_003314 | 11358.349 | 8954.776  |
| M55337    | 1168.959  | 1349.022  | NM_000074 | 42382.84  | 45342.547 | NM_016623 | 19104.299 | 10646.771 |
| M33197    | 68012.555 | 78643.633 | NM_002878 | 16756.639 | 16522.857 | NM_001334 | 3162.003  | 2145.41   |
| NM_013229 | 1814.029  | 2140.018  | NM_017723 | 6995.494  | 7028.498  | NM_001246 | 4294.39   | 4146.947  |
| NM_016533 | 65932.063 | 67867.109 | AK022922  | 4209.73   | 4275.502  | AL365411  | 7452.776  | 8577.322  |
| NM_014751 | 2067.774  | 2167.92   | NM_006462 | 11141.203 | 10615.074 | M24470    | 1641.793  | 1576.462  |



|           |           |           |           |           |           |           |           |           |
|-----------|-----------|-----------|-----------|-----------|-----------|-----------|-----------|-----------|
| NM_002347 | 31051.227 | 31475.807 | AK024750  | 20776.055 | 17463.355 | NM_016066 | 24466.596 | 22962.979 |
| AB046807  | 1429.835  | 1340.698  | NM_000400 | 61496.813 | 53900     | NM_001246 | 2159.385  | 3450.203  |
| NM_018176 | 823.279   | 509.886   | M33197    | 65906.164 | 65106.766 | AK024677  | 1640      | 1706.328  |
| NM_003508 | 961.984   | 975.201   | NM_002613 | 11247.864 | 10121.034 | NM_000036 | 2863.675  | 3239.93   |
| M33197    | 64198.004 | 71052.195 | NM_004419 | 22113.18  | 21551.037 | AF254082  | 58326.078 | 58176.727 |
| NM_014623 | 17267.77  | 21103.381 | U47635    | 9291.227  | 8944.367  | AF205718  | 21134.924 | 16204.487 |
| NM_007244 | 9230.484  | 9526.63   | NM_018650 | 6610.75   | 6988.398  | NM_003420 | 1706.807  | 1488.372  |
| M30629    | 9523.989  | 8637.563  | AK026945  | 14425.41  | 20269.256 | AY004252  | 2401.513  | 2940.706  |
| NM_018976 | 23753.217 | 23706.617 | NM_002828 | 8051.131  | 8357.325  | NM_006261 | 13573.659 | 15393.968 |
| NM_003355 | 37013.816 | 44807.176 | NM_014369 | 5316.389  | 4532.76   | AK027045  | 2885.068  | 3774.477  |
| NM_005074 | 1330.755  | 1536.452  | M33197    | 67697.242 | 67397.945 | AF169796  | 9825.492  | 13248.522 |
| NM_013272 | 5284.024  | 4253.341  | NM_001398 | 37441.004 | 42797.949 | AK026157  | 1574.496  | 1922.909  |
| NM_004170 | 2806.614  | 2786.015  | AB050049  | 22731.363 | 25311.15  | AK001814  | 18889.717 | 23124.967 |
| NM_018057 | 878.797   | 960.821   | J05125    | 1747.018  | 1739.993  | NM_007222 | 5952.056  | 6959.078  |
| M33197    | 67884.195 | 73243.859 | NM_005164 | 1522.248  | 1413.837  | NM_003435 | 14086.522 | 19568.227 |
| NM_015717 | 3424.232  | 3739.268  | NM_001995 | 15329.061 | 17369.209 | NM_016291 | 19827.857 | 21616.695 |
| NM_015925 | 7500.981  | 8464.753  | NM_001993 | 3068.596  | 3685.296  | NM_005937 | 55711.328 | 58224.895 |
| NM_003665 | 2181.161  | 2517.099  | BF575833  | 808.502   | 1194.567  | AB037809  | 3296.928  | 2590.238  |
| AF220217  | 5284.851  | 6409.371  | R61452    | 3394.514  | 3582.331  | AB011129  | 1327.368  | 843.946   |
| NM_013323 | 21201.27  | 20746.078 | R19938    | 31993.385 | 29567.65  | NM_014391 | 14626.876 | 8665.497  |
| NM_014937 | 3536.921  | 4491.099  | N94487    | 35743.75  | 38105.457 | NM_004270 | 2929.739  | 1849.834  |
| NM_017426 | 11168.323 | 12968.834 | AI886795  | 12901.889 | 12879.619 | L09102    | 59505.617 | 61280.684 |
| M33197    | 26164.328 | 22958.77  | D10495    | 8133.22   | 8844.978  | U68488    | 2284.304  | 2993.524  |
| NM_000853 | 12566.317 | 13984.448 | BF344679  | 6864.952  | 6402.402  | NM_000675 | 821.055   | 1162.496  |
| NM_000846 | 694.673   | 890.028   | BG743223  | 1746.567  | 1348.409  | NM_016247 | 35176.469 | 35031.387 |
| AF016903  | 19327.336 | 22192.797 | M36634    | 4274.979  | 3540.588  | NM_001157 | 856.857   | 1152.544  |
| NM_015675 | 10040.709 | 11494.292 | M14156    | 55054.668 | 54327.734 | NM_012282 | 1873.365  | 2412.656  |
| AK022267  | 1248.64   | 1232.893  | U87939    | 3087.229  | 3439.755  | NM_006710 | 1219.824  | 1271.3    |
| NM_016040 | 8226.988  | 8898.759  | U86961    | 4335.847  | 4147.465  | NM_003323 | 25023.965 | 24379.705 |
| M33197    | 66983.695 | 72938.563 | U47924    | 958.768   | 577.341   | BG685310  | 4270.806  | 3471.712  |
| AF031136  | 26719.428 | 27765.098 | NM_005191 | 8466.77   | 8097.081  | AW300857  | 59212.805 | 59437.488 |
| NM_005867 | 33656.809 | 29626.215 | AK094237  | 10191.386 | 9912.24   | H85962    | 54938.898 | 57889.082 |
| AK026031  | 16550.461 | 15906.828 | L07592    | 3363.303  | 2855.067  | BG742446  | 4148.757  | 3998.925  |
| NM_016468 | 18828.498 | 16564.188 | M33197    | 63462.277 | 73954.695 | AA864554  | 3129.786  | 2832.298  |
| NM_007342 | 14341.571 | 16409.488 | AK027244  | 1341.574  | 1120.307  | X66945    | 13638.774 | 16613.064 |
| NM_005672 | 3162.595  | 2656.886  | L40520    | 5891.863  | 5459.743  | AI160703  | 2471.281  | 3150.72   |
| D25217    | 7953.847  | 7766.067  | NM_002633 | 47100.648 | 48387.754 | X12830    | 10741.602 | 12975.614 |
| NM_006351 | 30758.902 | 36744.559 | AF086129  | 4846.908  | 6071.301  | U00482    | 6589.689  | 8873.9    |
| M33197    | 68107.586 | 70647.063 | D79994    | 6340.957  | 6307.897  | Z80998    | 1062.191  | 1286.399  |
| NM_004683 | 9973.711  | 9730.648  | NM_014458 | 44932.164 | 42367.227 | K01904    | 46608.742 | 46336.273 |
| AK023226  | 5885.093  | 7580.494  | L10333    | 410.263   | 688.356   | BE538886  | 3252.577  | 3924.988  |
| AK025263  | 2293.368  | 2299.367  | AF235049  | 13173.109 | 12216.023 | NM_002228 | 1341.053  | 856.906   |
| M33197    | 65268.473 | 62588.785 | M33197    | 66295.828 | 75370.57  | M57650    | 58506.918 | 55851.957 |
| NM_001467 | 8196.264  | 8233.842  | NM_007369 | 4068.879  | 3820.625  | BC023978  | 2102.723  | 2024.481  |
| NM_018066 | 14094.002 | 16090.604 | NM_014776 | 7346.243  | 6776.422  | M21302    | 4686.573  | 3040.757  |
| NM_006931 | 6707.562  | 6478.772  | NM_006480 | 63203.109 | 63027.484 | NM_002512 | 61029.066 | 56645.957 |
| NM_020344 | 11051.42  | 11651.118 | NM_007223 | 62770.43  | 72955.906 | NM_004908 | 946.566   | 1128.548  |
| AF119868  | 1290.901  | 1220.616  | NM_000145 | 3788.298  | 4037.347  | NM_016171 | 57282.371 | 60749.676 |
| NM_005050 | 16142.983 | 12478.277 | AF030107  | 60504.785 | 58507.004 | NM_014443 | 14297.787 | 11854.669 |
| M33197    | 66031.219 | 70009.25  | NM_000871 | 5370.172  | 4608.702  | NM_005212 | 10042.894 | 9812.107  |
| NM_019844 | 982.134   | 970.225   | M33197    | 63763.227 | 77621.883 | M14584    | 2468.205  | 2393.771  |
| M33197    | 50750.801 | 39692.172 | NM_018968 | 9827.668  | 8881.912  | NM_006415 | 5092.06   | 5421.415  |
| AL050139  | 14406.165 | 15485.275 | AF086924  | 61622.84  | 69056.813 | AF035035  | 1647.613  | 2285.431  |

|           |           |           |           |           |           |           |           |           |
|-----------|-----------|-----------|-----------|-----------|-----------|-----------|-----------|-----------|
| NM_002593 | 453.42    | 718.042   | NM_000264 | 1839.776  | 2194.188  | AB020676  | 4151.93   | 4862.451  |
| NM_004558 | 4342.683  | 4296.767  | AB058740  | 54576.465 | 54188.645 | AK024715  | 1842.204  | 1575.177  |
| AL079296  | 4508.947  | 4044.84   | NM_003385 | 2677.292  | 3006.013  | U90942    | 55977.707 | 57715.363 |
| NM_014770 | 1378.159  | 1383.288  | NM_001888 | 3292.834  | 3267.184  | NM_014942 | 1868.037  | 2004.118  |
| AB037737  | 3647.593  | 4381.422  | NM_004392 | 1481.732  | 1322.085  | NM_018360 | 8973.021  | 8319.29   |
| M33197    | 63380.297 | 67648.023 | M33197    | 66649.297 | 78279.969 | AK022489  | 620.19    | 713.695   |
| AK023103  | 7031.819  | 7684.36   | NM_001154 | 21080.438 | 22699.334 | AL365415  | 2852.116  | 3351.047  |
| NM_017858 | 9109.398  | 10801.189 | NM_001819 | 5150.507  | 5509.31   | L29147    | 59167.457 | 58886.578 |
| NM_019058 | 61610.414 | 65048.492 | NM_016938 | 1801.946  | 1585.392  | NM_001525 | 62125.5   | 59746.648 |
| NM_013347 | 2388.297  | 2356.909  | NM_001663 | 8876.66   | 9205.325  | NM_006055 | 17476.064 | 24077.59  |
| D80008    | 5728.908  | 6196.833  | NM_004218 | 21848.393 | 23038.279 | NM_004296 | 3347.628  | 4747.194  |
| X56789    | 4697.578  | 5195.532  | NM_016530 | 8850.651  | 9586.613  | NM_005048 | 3047.603  | 3962.413  |
| AK001069  | 42137.594 | 38922.281 | NM_014804 | 3371.985  | 2972.5    | NM_005972 | 4991.439  | 5913.635  |
| M33197    | 68335.5   | 65890.93  | NM_012455 | 14201.477 | 13077.595 | NM_001060 | 1222.057  | 1747.34   |
| NM_000935 | 1216.034  | 1450.565  | NM_002806 | 25607.625 | 27763.715 | NM_018841 | 12963.042 | 11816.559 |
| NM_000358 | 7826.123  | 7193.183  | M33197    | 61565.801 | 72560.594 | NM_005226 | 2784.016  | 2890.11   |
| NM_006395 | 2279.584  | 2768.868  | NM_001716 | 32288.596 | 35031.973 | AK022859  | 1948.744  | 1973.397  |
| NM_014306 | 12934.161 | 12884.175 | NM_002030 | 2326.319  | 2361.534  | NM_020228 | 29171.219 | 31458.377 |
| NM_001084 | 4794.948  | 3904.497  | NM_006073 | 2174.804  | 2222.625  | AK024685  | 7627.195  | 9153.456  |
| NM_015983 | 3710.292  | 2778.225  | NM_004951 | 4049.958  | 3406.514  | NM_003676 | 15613.749 | 18489.646 |
| NM_018622 | 10146.46  | 11379.398 | NM_006564 | 11963.487 | 12821.812 | AF113007  | 29335.004 | 29676.197 |
| M33197    | 63781.688 | 63902.055 | NM_004802 | 6747.251  | 6911.936  | NM_000688 | 6659.635  | 6442.759  |
| CY3Cy5    | 3794.486  | 198.263   | M33197    | 64231.699 | 68794.039 | U39573    | 3245.856  | 3552.929  |
| NM_006981 | 2623.132  | 2622.374  | NM_002983 | 34242.449 | 31145.566 | D82061    | 11957.696 | 13687.124 |
| AF086429  | 636.508   | 697.14    | NM_000074 | 45191.508 | 45688.281 | AJ293009  | 9382.864  | 13512.001 |
| NM_019060 | 601.026   | 446.839   | NM_020393 | 1170.333  | 1647.07   | NM_000374 | 7190.907  | 8694.468  |
| AF086377  | 1017.758  | 854.825   | BF434335  | 65634.945 | 75319.578 | NM_000502 | 38556.805 | 30413.127 |
| AF086439  | 802.979   | 801.198   | M57627    | 2453.895  | 2312.369  | NM_001358 | 36372.543 | 29915.795 |
| M33197    | 70554.164 | 62694.012 | NM_002993 | 4222.743  | 5038.859  | NM_002245 | 1847.415  | 2092.903  |
| AF038171  | 3304.964  | 2814.024  | AK026946  | 8498.408  | 9612.108  | NM_004980 | 58871.684 | 57790.77  |
| AF052160  | 936.059   | 1079.063  | M33197    | 65856.445 | 85249.258 | NM_003224 | 5324.728  | 6474.984  |
| AK026512  | 2351.377  | 2273.649  | NM_003192 | 11438.974 | 12163.981 | NM_004227 | 4278.798  | 5946.5    |
| NM_018482 | 4878.478  | 4406.881  | NM_018449 | 18089.355 | 18288.602 | NM_005282 | 14439.315 | 19265.881 |
| NM_006981 | 2350.82   | 2386.675  | NM_001398 | 40192.789 | 37636.387 | NM_001736 | 6990.748  | 10359.243 |
| SR2       | 46530.52  | 54757.988 | AB050049  | 22018.104 | 20531.688 | AB028949  | 1777.67   | 2206.509  |
| SR4       | 14221.252 | 19062.197 | J05125    | 1523.887  | 1805.916  | AL137580  | 3061.314  | 3973.886  |
| SR6       | 1727.855  | 2472.1    | NM_005164 | 1151.566  | 1043.294  | NM_004101 | 2853.777  | 3452.336  |
| SR8       | 7716.679  | 27783.305 | NM_001995 | 14024.569 | 13919.193 | NM_002995 | 60172.813 | 58838.953 |
| SR10      | 23878.957 | 11017.869 | NM_000183 | 21808.982 | 22414.998 | AB033114  | 1185.122  | 1297.4    |
| CY3Cy5    | 1897.214  | 120.618   | AY004175  | 7409.206  | 6190.167  | NM_015978 | 13958.505 | 11008.099 |
| AF088010  | 1165.473  | 1204.499  | M33197    | 63082.391 | 65900.555 | NM_003810 | 2290.611  | 2246.367  |
| AK026718  | 4869.674  | 5593.662  | NM_012327 | 11680.027 | 13711.431 | NM_018973 | 16160.986 | 17647.66  |
| AF085899  | 1107.163  | 1275.968  | NM_000904 | 14962.158 | 16228.902 | NM_002591 | 56802.469 | 52457.871 |
| AK022035  | 3580.51   | 2906.871  | NM_016048 | 8528.146  | 8966.503  | AL049334  | 510.16    | 563.684   |
| M33197    | 67933.219 | 62262.137 | NM_000375 | 12181.736 | 12999.162 | NM_020216 | 5728.884  | 6421.598  |
| NM_004337 | 6106.391  | 6165.719  | NM_000265 | 62712.223 | 60307.352 | NM_001923 | 2213.624  | 1309.914  |
| AF075016  | 540.214   | 516.983   | NM_018849 | 19815.732 | 18363.783 | AK021860  | 6356.227  | 7396.139  |
| AF085848  | 639.689   | 312.738   | M33197    | 65199.031 | 66925.289 | AB046816  | 3374.829  | 2837.669  |
| AK023612  | 1522.678  | 1451.533  | M16796    | 1187.72   | 1647.06   | AL137266  | 9418.955  | 10377.055 |
| AK021983  | 6289.528  | 5204.086  | AF279890  | 16199.255 | 15879.099 | NM_016457 | 2065.538  | 1576.722  |
| Y11681    | 27594.189 | 24407.188 | NM_002236 | 11194.481 | 11267.539 | NM_005057 | 2548.319  | 2207.825  |
| AL110135  | 9537.688  | 11097.124 | NM_012069 | 12491.313 | 13891.895 | AF143321  | 2790.097  | 3148.414  |
| NM_006993 | 22789.635 | 25410.689 | NM_001689 | 61925.598 | 58878.422 | AB046842  | 7058.229  | 8186.623  |

|           |           |           |           |           |           |           |           |           |
|-----------|-----------|-----------|-----------|-----------|-----------|-----------|-----------|-----------|
| M33197    | 71052.766 | 62768.625 | NM_016601 | 4131.491  | 3945.6    | NM_00485C | 4522.37   | 6313.218  |
| M33197    | 67286.766 | 62705.938 | NM_017905 | 40139.035 | 42353.313 | NM_002822 | 29520.607 | 37499.16  |
| AL359626  | 974.445   | 967.232   | M33197    | 66566.227 | 70743.805 | BF306955  | 8077.719  | 10233.511 |
| AK022084  | 443.281   | 865.959   | NM_006815 | 55372.059 | 54341.438 | NM_001394 | 16651.652 | 10833.939 |
| AK026878  | 702.674   | 1062.602  | M33197    | 64248.008 | 113283.25 | NM_018441 | 36626.289 | 36110.496 |
| AK000777  | 1983.906  | 1362.951  | AK027244  | 2143.058  | 2256.702  | NM_000778 | 31971.695 | 29522.16  |
| M33197    | 60597.352 | 56549.313 | L40520    | 6093.36   | 5986.998  | NM_001605 | 4867.408  | 4775.735  |
| AF085969  | 1095.153  | 1108.999  | NM_002633 | 46591.652 | 46620.965 | BE733234  | 1796.769  | 2195.834  |
| AF144233  | 1980.396  | 1910.539  | M33197    | 62726.848 | 60831.949 | NM_000675 | 2040.368  | 2863.057  |
| AF085925  | 1271.296  | 1023.006  | NM_002878 | 16754.646 | 17605.615 | NM_016247 | 30940.354 | 37881.523 |
| AK022986  | 920.929   | 1018.951  | NM_017723 | 5748.876  | 6287.677  | NM_001157 | 679.923   | 967.663   |
| AF085975  | 2202.325  | 2033.805  | AK022922  | 3753.873  | 3783.448  | NM_012282 | 1805.86   | 1834.993  |
| AF075103  | 1819.005  | 1564.391  | NM_006462 | 10219.713 | 9533.362  | NM_00671C | 1343.894  | 1378.432  |
| AL137390  | 5916.399  | 5798.447  | AK024750  | 16757.33  | 14313.446 | NM_003323 | 28858.102 | 28442.256 |
| AL137611  | 7462.246  | 6240.218  | NM_00040C | 54408.043 | 49942.145 | BG685310  | 6447.837  | 7570.291  |
| AL359566  | 24361.625 | 20407.656 | M33197    | 64588.297 | 61413.063 | AW300857  | 58147.441 | 55977.441 |
| AL137427  | 4262.003  | 3925.162  | NM_002613 | 11286.938 | 9959.237  | H85962    | 56448.898 | 54412.527 |
| AL157460  | 2506.018  | 2298.14   | NM_004419 | 18417.127 | 18119.01  | BG742446  | 4620.855  | 5606.458  |
| M33197    | 65213.605 | 62973.461 | U47635    | 9239.864  | 9461.717  | AA864554  | 2245.162  | 2141.953  |
| M33197    | 63138.09  | 59489.555 | NM_01865C | 6541.111  | 7278.807  | X66945    | 10767.534 | 8599.048  |
| AK024198  | 1099.195  | 895.616   | AK026945  | 12964.602 | 17606.639 | AI160703  | 1406.252  | 1061.238  |
| AL049846  | 1017.031  | 1165.039  | NM_002828 | 6860.027  | 6894.198  | X12830    | 9030.208  | 7074.061  |
| AK024161  | 4186.368  | 4126.197  | NM_014369 | 5036.715  | 4544.148  | U00482    | 5658.999  | 4567.658  |
| AK021682  | 7205.946  | 7005.091  | M33197    | 64832.445 | 62236.988 | Z80998    | 812.151   | 1289.017  |
| AK022141  | 965.063   | 947.802   | CY3Cy5    | 8172.128  | 474.197   | K01904    | 47567.383 | 53403.293 |
| AK023942  | 6335.112  | 7418.01   | AL834159  | 9838.871  | 9211.004  | BE538886  | 4596.177  | 5642.158  |
| M33197    | 64065.684 | 59999.762 | NM_000164 | 46455.211 | 49100.617 | NM_002228 | 1802.946  | 2231.911  |
| AK022046  | 2065.713  | 2386.695  | AK025253  | 5080.938  | 4773.083  | M57650    | 58732.316 | 57969.512 |
| AK027207  | 1191.537  | 944.912   | AK025004  | 3603.185  | 2802.95   | BC023978  | 3452.324  | 3250.988  |
| M33197    | 65641.266 | 57525.051 | AL136818  | 2797.834  | 2222.629  | M21302    | 20377.176 | 18711.881 |
| AK022013  | 1701.362  | 1441.324  | AF146798  | 7574.926  | 6503      | AK024865  | 3930.162  | 4063.368  |
| AK022155  | 2180.909  | 2034.065  | AK022049  | 1973.068  | 1572.75   | NM_00721C | 1923.558  | 1730.129  |
| AK022288  | 839.656   | 882.416   | AF086517  | 29574.844 | 27449.682 | NM_001483 | 7189.595  | 4149.146  |
| AK021916  | 907.142   | 906.196   | AK025740  | 51289.754 | 51224.715 | NM_014443 | 13576.248 | 13332.52  |
| AK024201  | 1321.051  | 812.667   | AK000311  | 8542.708  | 7761.102  | NM_005212 | 9507.547  | 10001.538 |
| AK022174  | 930.989   | 748.467   | AK021747  | 4089.094  | 4468.743  | M14584    | 1620.825  | 1902.057  |
| AK022331  | 1063.767  | 1127.454  | AK025640  | 15673.999 | 16304.776 | NM_006415 | 4940.326  | 4606.518  |
| M33197    | 61847.441 | 64864.926 | AL834159  | 7501.714  | 6055.938  | AF035035  | 1383.907  | 1671.227  |
| AF048848  | 937.228   | 1201.785  | NM_000164 | 51127.145 | 43747.984 | AB020676  | 5840.459  | 6065.55   |
| AL117236  | 2096.585  | 1550.84   | SR1       | 84129.219 | 64476.203 | AK024715  | 3049.227  | 3287.844  |
| AL049299  | 1027.85   | 1179.44   | SR3       | 53630.133 | 56100.285 | U90942    | 57536.109 | 58431.148 |
| NM_006088 | 42289.508 | 45782.402 | SR5       | 7286.685  | 8388.853  | NM_014942 | 2132.592  | 2741.154  |
| NM_018265 | 1871.14   | 2242.784  | SR7       | 7505.435  | 52439.523 | NM_01836C | 11059.544 | 11303.17  |
| AF130086  | 7689.235  | 7401.08   | SR9       | 29557.139 | 6507.231  | AK022489  | 1440.192  | 1732.093  |
| AK023858  | 3100.001  | 2824.218  | CY3Cy5    | 7339.38   | 339.914   | AL365415  | 1886.893  | 1946.331  |
| M33197    | 62814.348 | 59542.574 | D55644    | 7429.953  | 13297.09  | L29147    | 58941.602 | 54980.105 |
| AF250920  | 6108.744  | 6649.54   | L19362    | 510.445   | 471.59    | NM_001525 | 56661.188 | 53793.773 |
| NM_017733 | 4588.015  | 4106.261  | L33807    | 4824.021  | 4533.637  | NM_006055 | 14366.845 | 14352.668 |
| NM_014042 | 11707.227 | 12158.404 | NM_006545 | 65081.473 | 58610.063 | NM_004296 | 3281.995  | 3639.012  |
| D17152    | 41101.918 | 40610.27  | NM_016534 | 5282.427  | 4820.246  | NM_005048 | 2626.661  | 3462.895  |
| AK024464  | 18852.484 | 19704.006 | AB021923  | 3954.346  | 4129.235  | NM_005972 | 4733.045  | 5370.247  |
| AK026748  | 696.59    | 1164.438  | NM_016456 | 74909.469 | 63556.258 | NM_00106C | 1404.091  | 1920.578  |
| AK023638  | 1648.943  | 1193.644  | AK022677  | 6412.729  | 6748.179  | NM_018841 | 12713.649 | 11434.564 |

|           |           |           |           |           |           |           |           |           |
|-----------|-----------|-----------|-----------|-----------|-----------|-----------|-----------|-----------|
| M33197    | 6207.097  | 5188.124  | AL137645  | 24702.551 | 20737.58  | NM_005226 | 3105.8    | 2605.822  |
| AK025423  | 8285.771  | 6658.162  | AF217993  | 8596.559  | 7444.719  | AK022859  | 5315.513  | 4737.472  |
| AL050022  | 1746.103  | 1449.821  | AK026324  | 20280.945 | 16560.221 | NM_014464 | 574.821   | 642.057   |
| AL137380  | 2163.059  | 1823.582  | AK024518  | 46646.363 | 53997.629 | L09102    | 59863.379 | 64158.906 |
| M33197    | 67821.352 | 67586.469 | AK024586  | 2643.244  | 2564.592  | U68488    | 1367.603  | 1556.849  |
| AL137658  | 37186.094 | 28338.504 | AK025017  | 10057.136 | 10388.503 | NM_003676 | 15628.565 | 18350.51  |
| D16888    | 1921.821  | 1900.551  | AK024534  | 1329.62   | 1562.823  | AF113007  | 27070.953 | 32111.785 |
| U79277    | 1346.971  | 1305.682  | AK024914  | 9375.162  | 8045.257  | NM_000688 | 6413.347  | 7449.78   |
| AF068298  | 8861.992  | 10267.25  | AK025346  | 67546.469 | 65530.359 | U39573    | 2823.02   | 3712.753  |
| Z70770    | 1321.627  | 1386.801  | AK022583  | 11880.872 | 10836.384 | D82061    | 10820.321 | 11341.3   |
| AJ227900  | 5718.333  | 5545.566  | AL137534  | 72093.094 | 63400.301 | AJ293009  | 7637.234  | 8761.572  |
| AK023242  | 3632.619  | 3726.583  | AF052121  | 10547.666 | 10942.359 | NM_000374 | 6984.692  | 8208.113  |
| M33197    | 62674.004 | 64311.273 | AL359062  | 6222.904  | 6580.379  | NM_000502 | 40255.609 | 38065.66  |
| AK024101  | 509.9     | 1103.055  | AK026869  | 5648.913  | 5574.502  | BF088089  | 500.474   | 728.522   |
| AJ012500  | 2886.096  | 3660.628  | NM_019099 | 69876.719 | 63088.047 | NM_001359 | 43525.051 | 44829.645 |
| AF085833  | 2211.736  | 2297.994  | AJ227904  | 886.259   | 795.654   | NM_002245 | 3025.805  | 3257.177  |
| L19368    | 843.021   | 1001.514  | Y12020    | 59961.074 | 57341.609 | NM_004980 | 52627.695 | 55034.43  |
| U00944    | 2265.863  | 2397.915  | AJ011597  | 1232.816  | 1258.803  | NM_003224 | 3753.1    | 3710.529  |
| BC035058  | 2057.219  | 2032.676  | AJ001905  | 4283.362  | 3683.074  | NM_004227 | 2854.526  | 2587.749  |
| X57566    | 15505.542 | 14494.773 | U17635    | 2363.699  | 2147.777  | NM_005282 | 11342.396 | 10121.924 |
| M33197    | 62297.027 | 61532.09  | AL049930  | 932.461   | 978.51    | NM_001736 | 5634.145  | 5529.669  |
| NM_018616 | 33582.355 | 29616.379 | AF086198  | 54953.215 | 59690.262 | AB028949  | 1740.556  | 2025.149  |
| AK023809  | 2622.814  | 2464.147  | AL137382  | 67185.375 | 67697.461 | AL137580  | 2608.228  | 3830.073  |
| AL137590  | 617.91    | 626.409   | AK024599  | 8514.985  | 8553.529  | NM_004101 | 2723.082  | 3556.935  |
| M87943    | 62140.246 | 56684.336 | NM_014450 | 15952.23  | 15805.2   | NM_002995 | 57680.738 | 58036.215 |
| AL360137  | 2578.528  | 2285.068  | AB007975  | 1861.975  | 1986.529  | AB033114  | 1336.034  | 1743.413  |
| U28131    | 58142.535 | 52600.859 | AK024152  | 3340.876  | 3350.015  | NM_015978 | 18982.365 | 22341.061 |
| AY007106  | 4628.629  | 4243.407  | AL137603  | 873       | 784.647   | NM_003810 | 3529.369  | 4442.049  |
| AF015910  | 12748.72  | 11961.41  | AK026888  | 4632.995  | 6031.466  | NM_004908 | 1719.352  | 1807.584  |
| BC009993  | 2163.681  | 2244.644  | AK021821  | 2382.947  | 2008.186  | NM_016171 | 55443.082 | 61794.246 |
| M33197    | 64452.719 | 62432.641 | AL049328  | 2381.04   | 2227.364  | NM_018973 | 15069.714 | 16234.828 |
| AB049150  | 1430.88   | 1607.381  | AK000030  | 2350.593  | 2265.567  | NM_002591 | 53092.934 | 52805.059 |
| NM_016824 | 11839.229 | 13192.945 | NM_017932 | 2462.716  | 2976.416  | AL049334  | 526.204   | 708.219   |
| NM_003031 | 11487.964 | 12324.461 | AK000910  | 6355.775  | 6770.01   | NM_020216 | 4705.972  | 4894.348  |
| X89674    | 595.74    | 607.359   | AF252280  | 40417.031 | 48472.652 | AK021860  | 6740.591  | 6728.688  |
| NM_007170 | 1468.044  | 1525.722  | AK000107  | 1593.172  | 1559.521  | AB046816  | 2605.11   | 3206.031  |
| NM_003008 | 5559.272  | 5870.27   | AK000951  | 2105.765  | 1640.801  | AL137266  | 9836.629  | 9742.607  |
| NM_004100 | 924.138   | 835.566   | AF130064  | 67285.617 | 68695.906 | NM_016457 | 2029.871  | 2395.022  |
| M33197    | 60248.18  | 61546.031 | U17624    | 2940.638  | 3223.198  | NM_005057 | 2834.948  | 2574.789  |
| AF317550  | 1422.544  | 1579.927  | AK025184  | 2759.211  | 2921.579  | AF143321  | 2300.617  | 2345.514  |
| NM_003543 | 762.89    | 903.517   | D16988    | 67480.922 | 65730.094 | AB046842  | 5176.619  | 4956.65   |
| AK025416  | 1955.288  | 2680.736  | AK001959  | 27580.359 | 28483.953 | NM_004850 | 3654.895  | 4008.192  |
| AK022165  | 1311.379  | 1836.255  | U36217    | 10223.375 | 9197.582  | NM_002822 | 32435.953 | 39189.07  |
| U58662    | 549.718   | 576.669   | AL389880  | 985.863   | 847.551   | BF306955  | 7945.813  | 9316.149  |
| AF090883  | 1682.595  | 1590.955  | AL157452  | 892.876   | 1014.842  | NM_001394 | 16051.171 | 13491.938 |
| U23860    | 991.907   | 1101.161  | AK024155  | 60734.832 | 57044.813 | NM_018441 | 37224.379 | 40821.129 |
| M33197    | 63064.156 | 60854.164 | AL359334  | 40321.789 | 34504.043 | NM_000778 | 35232.891 | 45672.945 |
| AL049263  | 2143.134  | 2001.459  | AK027095  | 3157.281  | 2958.544  | NM_001609 | 6430.24   | 6713.974  |
| AK022372  | 5367.931  | 5621.639  | AF062097  | 5021.383  | 4845.347  | BE733234  | 3734.539  | 2751.697  |
| AJ227863  | 1770.996  | 1146.789  | BC030949  | 8252.942  | 7424.513  | NM_020228 | 28664.775 | 30255.635 |
| AF086258  | 871.329   | 965.705   | AF116615  | 6024.307  | 5568.946  | AK024685  | 11856.096 | 11378.795 |
| NM_015916 | 5238.907  | 4720.232  | U17636    | 67576.281 | 63894.953 | NM_001157 | 1032.182  | 1324.374  |
| NM_003520 | 1612.889  | 1334.945  | NM_018546 | 14999.491 | 16391.008 | NM_012282 | 1600.575  | 2081.603  |

|           |           |           |           |           |           |           |           |           |
|-----------|-----------|-----------|-----------|-----------|-----------|-----------|-----------|-----------|
| AK027157  | 959.647   | 936.635   | U52699    | 67545.375 | 63732.898 | NM_00671C | 972.57    | 1411.083  |
| NM_01588E | 57962.711 | 58959.004 | S71613    | 3663.953  | 3778.073  | NM_00332E | 26758.998 | 27174.252 |
| NM_00021E | 1632.223  | 2150.571  | AJ011910  | 19009.65  | 17993.877 | BG685310  | 5174.788  | 5143.371  |
| NM_00427E | 7705.551  | 6923.304  | AK024378  | 2328.093  | 2121.408  | AW300857  | 57518.652 | 58335.094 |
| NM_00233E | 44561.004 | 43888.172 | NM_01402E | 12283.851 | 11503.84  | H85962    | 58323.039 | 60392.523 |
| NM_00285E | 3609.603  | 3444.998  | D61703    | 23351.736 | 22926.371 | BG742446  | 4489.046  | 5107.807  |
| NM_00524E | 1793.621  | 1892.369  | AL050376  | 806.552   | 907.795   | AA864554  | 2305.995  | 2260.302  |
| NM_017651 | 2207.591  | 2255.529  | AL359652  | 3115.831  | 3030.07   | X66945    | 12381.367 | 13048.908 |
| AF161339  | 3241.981  | 3032.658  | AK022423  | 3949.908  | 4022.115  | AI160703  | 1989.56   | 1973.471  |
| M33197    | 61472.66  | 60996.449 | AF088021  | 12888.05  | 14522.004 | X12830    | 9910.106  | 9498.173  |
| NM_003881 | 835.194   | 828.843   | BF509267  | 5797.459  | 5936.645  | U00482    | 5605.691  | 5862.667  |
| AK000354  | 18472.734 | 17811.549 | NM_00245E | 10288.184 | 10522.736 | Z80998    | 1521.788  | 1417.082  |
| AL161984  | 2543.673  | 2294.371  | NM_00295E | 15178.662 | 14424.958 | K01904    | 33327.773 | 21241.316 |
| NM_00395C | 907.652   | 1045.547  | AB046773  | 1104.193  | 1268.867  | BE538886  | 3448.918  | 3708.837  |
| NM_01488E | 5388.384  | 5694.222  | AK000899  | 23990.607 | 24636.85  | NM_00222E | 2039.908  | 2623.09   |
| M33197    | 63526.031 | 61052.094 | NM_017991 | 2607.529  | 2733.844  | M57650    | 59114.203 | 60594.426 |
| NM_00151C | 2212.667  | 1930.595  | L37198    | 4013.043  | 4465.598  | BC023978  | 3962.695  | 5173.802  |
| AK024474  | 5490.099  | 6035.527  | U67822    | 2053.092  | 1820.909  | M21302    | 22411.217 | 28821.775 |
| NM_00686E | 2810.533  | 2481.388  | AK021921  | 916.005   | 1018.919  | AK024865  | 5404.065  | 5288.116  |
| NM_017901 | 5078.935  | 5086.489  | AK025431  | 852.125   | 836.53    | NM_00721C | 3628.166  | 3236.05   |
| NM_00427E | 6582.804  | 6864.26   | AK023662  | 2725.422  | 3443.956  | NM_00148E | 8626.876  | 12774.825 |
| AK025270  | 3133.483  | 3060.783  | AF086274  | 67778.352 | 62859.09  | NM_01494E | 1867.574  | 2513.363  |
| M33197    | 60481.996 | 61882.156 | AK023682  | 2571.4    | 2340.003  | NM_01836C | 8080.614  | 10203.419 |
| AF263537  | 14562.944 | 13729.349 | AK024024  | 4030.573  | 4636.92   | AL365415  | 1584.856  | 2309.241  |
| NM_01589E | 15014.893 | 14472.771 | AF000991  | 1302.746  | 1222.562  | L29147    | 57208.594 | 58920.551 |
| NM_00467E | 1020.601  | 1071.904  | AK000685  | 25358.568 | 23150.318 | NM_00152E | 56700.863 | 57990.227 |
| NM_00018E | 3808.604  | 4194.296  | BE706519  | 1310.649  | 1514.19   | NM_00605E | 12996.377 | 14224.413 |
| AL050050  | 3335.538  | 2634.085  | NM_01909E | 15784.528 | 14239.99  | NM_00429E | 2568.715  | 3124.599  |
| NM_00525E | 896.515   | 871.857   | NM_01472E | 2650.014  | 2162.857  | NM_00504E | 2060.884  | 2402.471  |
| NM_00469C | 4746.284  | 4659.103  | NM_00689E | 9720.548  | 9357.743  | NM_00597E | 4152.459  | 4001.6    |
| M33197    | 60156.551 | 60364.438 | NM_019117 | 4302.187  | 3805.977  | NM_00106C | 1330.263  | 1329.52   |
| NM_013374 | 61144.461 | 56480.465 | NM_01830E | 4720.602  | 5363.917  | NM_018841 | 14544.31  | 13492.041 |
| NM_00325E | 16762.949 | 16144.438 | NM_01765E | 9250.379  | 8305.948  | NM_00522E | 3379.926  | 3389.506  |
| NM_00122E | 6824.966  | 5774.098  | NM_01867E | 24262.777 | 24626.703 | AL133105  | 11503.901 | 10377.494 |
| AK026607  | 2409.189  | 2154.607  | NM_01664E | 1163.142  | 1294.227  | AK022859  | 3868.109  | 3380.976  |
| NM_016561 | 61729.145 | 58015.656 | NM_00677E | 10940.476 | 11423.57  | NM_014464 | 445.161   | 729.575   |
| NM_01424E | 42316.414 | 40800     | NM_019847 | 4828.077  | 5456.601  | NM_000214 | 1218.034  | 1578.9    |
| L36531    | 1002.363  | 847.043   | D17093    | 38964.094 | 48561.984 | NM_014864 | 10336.056 | 13424.645 |
| AL110226  | 57259.941 | 52559.766 | AK022784  | 1034.425  | 960.934   | NM_00372E | 58566.098 | 57647.109 |
| AB046822  | 1315.189  | 1229.872  | AL117521  | 8924.661  | 9430.264  | NM_01435E | 39198.719 | 47011.457 |
| NM_01588E | 6730.016  | 5458.568  | AK021913  | 25460.551 | 23185.994 | NM_012481 | 12201.737 | 14427.866 |
| X69636    | 5518.087  | 5177.171  | AL137489  | 49833.887 | 49073.387 | L09102    | 60255.426 | 62515.891 |
| M33197    | 62676.09  | 63110.367 | AF009311  | 13921.673 | 12168.172 | NM_00067E | 1189.089  | 1587.042  |
| NM_00417E | 7587.51   | 7557.431  | S73397    | 8060.308  | 8884.538  | NM_016247 | 34713.762 | 43239.813 |
| NM_013974 | 2522.991  | 2397.618  | AK023939  | 969.971   | 1059.487  | NM_00165E | 59312.121 | 59971.645 |
| NM_017547 | 8100.502  | 7484.475  | AL050219  | 1848.746  | 1694.76   | NM_006827 | 36821.098 | 40315.727 |
| NM_00398E | 10348.977 | 10206.189 | U82321    | 2036.726  | 2306.128  | AK021761  | 21257.779 | 25323.693 |
| AK023708  | 1884.262  | 1794.759  | AK023856  | 3541.146  | 3587.585  | AK024536  | 10371.84  | 11020.166 |
| NM_00210E | 1284.716  | 986.121   | AB014557  | 4581.342  | 3954.721  | NM_01866E | 14912.499 | 14239.141 |
| M33197    | 63190.727 | 60020.703 | NM_00557E | 7896.378  | 4881.806  | NM_004227 | 2785.181  | 3431.828  |
| NM_018464 | 39042.742 | 38045.684 | NM_00365E | 26058.467 | 26737.154 | NM_00528E | 10808.197 | 11461.517 |
| D43948    | 8002.137  | 8602.39   | NM_018457 | 57241.867 | 60425.063 | NM_00173E | 5431.667  | 5999.585  |
| NM_01231C | 30451.326 | 31741.01  | NM_00295E | 18787.285 | 21127.484 | AB028949  | 1185.973  | 1315.884  |

|           |           |           |           |           |           |           |           |           |
|-----------|-----------|-----------|-----------|-----------|-----------|-----------|-----------|-----------|
| BE410824  | 1853.944  | 1461.018  | NM_002187 | 2029.09   | 1747.54   | AL137580  | 2303.208  | 2851.279  |
| BF382116  | 24345.305 | 14518.703 | NM_014246 | 15384.262 | 14960.249 | NM_004101 | 2631.14   | 2762.134  |
| NM_003193 | 11107.521 | 9191.242  | NM_014859 | 1449.47   | 1448.123  | NM_002995 | 59319.012 | 54185.523 |
| AF113216  | 4347.291  | 3788.86   | NM_001116 | 1221.698  | 1246.763  | AB033114  | 1915.68   | 2053.327  |
| NM_017589 | 7469.849  | 5940.425  | BC035395  | 33725.438 | 41939.969 | NM_015978 | 13439.846 | 13564.411 |
| AK023582  | 4920.863  | 4362.411  | NM_001703 | 40574.777 | 47615.355 | NM_003810 | 3615.587  | 2875.421  |
| NM_000124 | 2774.251  | 2479.207  | NM_020126 | 9016.995  | 9666.845  | NM_004908 | 1159.745  | 1180.352  |
| NM_017996 | 13472.272 | 13503.604 | NM_013982 | 12537.798 | 12734.29  | NM_016171 | 57474.281 | 61537.547 |
| NM_014517 | 10633.97  | 10610.983 | NM_005049 | 11887.336 | 11716.155 | NM_014443 | 15802.156 | 16295.758 |
| NM_005466 | 6147.367  | 5801.703  | NM_003882 | 1241.857  | 1030.217  | NM_005212 | 11235.993 | 13190.524 |
| NM_004269 | 5523.935  | 6489.785  | NM_004630 | 23096.703 | 24402.502 | M14584    | 3838.183  | 2996.709  |
| NM_003409 | 1456.691  | 1789.063  | AK023001  | 18434.816 | 20008.33  | NM_006419 | 7246.729  | 7478.926  |
| M33197    | 63711.883 | 64506.461 | NM_014826 | 37257.73  | 41542.938 | AB020676  | 4791.923  | 6697.146  |
| D31765    | 7630.394  | 6183.796  | AF201947  | 1670.302  | 1926.618  | AK024715  | 1986.212  | 3336.391  |
| NM_006107 | 28093.988 | 19510.34  | U01147    | 6366.999  | 7266.618  | U90942    | 59127.273 | 59244.523 |
| NM_004175 | 4232.992  | 4475.525  | NM_004040 | 29157.879 | 31211.693 | NM_000778 | 25497.727 | 30760.32  |
| AF288288  | 26202.049 | 20422.061 | NM_006116 | 13321.246 | 14194.471 | NM_001609 | 4122.014  | 5528.067  |
| NM_017646 | 12528.788 | 10852.594 | NM_005456 | 2683.271  | 2738.066  | BE733234  | 1728.76   | 2563.273  |
| AL050368  | 4571.556  | 4062.693  | BF219403  | 64179.527 | 65157.133 | NM_020228 | 26411.777 | 27547.051 |
| NM_003092 | 23445.055 | 21825.002 | NM_016119 | 10296.922 | 10006.625 | AK024685  | 7247.894  | 7660.969  |
| M33197    | 62583.074 | 61360.484 | AK075450  | 5320.531  | 6621.468  | NM_003676 | 16471.291 | 18030.496 |
| BE243152  | 852.551   | 754.139   | AF178983  | 21908.928 | 23203.59  | AF113007  | 29627.537 | 29318.824 |
| NM_005861 | 1727.426  | 1399.371  | NM_001324 | 21119.934 | 19276.984 | NM_000688 | 6362.345  | 5886.642  |
| NM_018848 | 11969.008 | 10542.033 | AB037795  | 5064.307  | 5118.161  | U39573    | 3382.772  | 3385.356  |
| NM_003760 | 8873.241  | 8170.341  | D43949    | 6994.333  | 6472.078  | D82061    | 11930.451 | 12263.723 |
| AB037759  | 3109.355  | 2955.462  | AF111849  | 48014.387 | 51224.879 | AJ293009  | 9013.141  | 9136.544  |
| AL080080  | 16113.026 | 14788.509 | AK022975  | 3088.083  | 2787.966  | NM_000374 | 7497.99   | 6777.013  |
| M33197    | 12342.182 | 10057.796 | NM_015344 | 3067.256  | 3463.616  | NM_000502 | 38062.094 | 30306.086 |
| NM_001161 | 34511.762 | 39389.727 | NM_004288 | 11532.548 | 13248.145 | NM_001359 | 35855.738 | 27207.219 |
| NM_004044 | 27892.809 | 32034.107 | AL122055  | 13462.723 | 13476.85  | NM_005175 | 59336.012 | 57697.301 |
| NM_000221 | 22325.621 | 17596.889 | NM_005132 | 57868.098 | 58373.895 | NM_001696 | 25340.959 | 35610.953 |
| H75678    | 9384.275  | 9381.428  | X07695    | 1702.165  | 1977.025  | NM_004975 | 47092.348 | 44275.188 |
| NM_002535 | 2996.123  | 3272.208  | D87458    | 4619.707  | 4670.057  | NM_002245 | 2975.756  | 2030.927  |
| NM_006452 | 40377.648 | 46317.742 | AK021750  | 22033.762 | 20943.912 | D87445    | 14668.647 | 16374.925 |
| AB002359  | 14801.101 | 11784.979 | NM_003626 | 4902.121  | 4784.232  | NM_000238 | 18499.572 | 20805.113 |
| M33197    | 27466.396 | 23936.84  | NM_006932 | 1320.846  | 1369.696  | NM_002247 | 5178.784  | 6431.911  |
| AB007864  | 3294.323  | 2756.36   | AK023594  | 6454.965  | 6262.992  | NM_004980 | 54592.289 | 58022.211 |
| NM_002198 | 13267.645 | 12462.393 | AB010099  | 57354.734 | 58498.277 | AB011094  | 48400.207 | 54622.551 |
| AF024693  | 797.33    | 617.076   | AB039920  | 27446.25  | 27982.123 | NM_003224 | 4508.942  | 5877.573  |
| AK025905  | 3328.531  | 3185.862  | AB046782  | 6522.438  | 6079.171  | AK024865  | 2565.677  | 3391.493  |
| AL121733  | 2045.67   | 2520.857  | AF300612  | 67079.109 | 68370.844 | NM_007210 | 1661.406  | 2319.987  |
| BE958072  | 1591.007  | 1438.057  | AF208005  | 3464.888  | 3218.258  | NM_001483 | 7491.464  | 8352.809  |
| M33197    | 59549.727 | 56020.23  | NM_002231 | 55201.391 | 53104.203 | NM_018973 | 17476.615 | 16012.855 |
| NM_017532 | 3305.41   | 2775.216  | NM_020474 | 20925.086 | 23018.912 | NM_002591 | 50828.816 | 46366.379 |
| NM_014480 | 8214.174  | 6765.884  | NM_002643 | 6764.925  | 7660.521  | NM_020216 | 4973.632  | 5298.629  |
| NM_005938 | 1882.421  | 1761.854  | NM_017807 | 11372.668 | 13066.641 | AK021860  | 7770.31   | 6618.483  |
| NM_014169 | 14093.667 | 13358.188 | NM_014746 | 2363.611  | 3052.646  | AB046816  | 1847.029  | 1840.781  |
| NM_004964 | 28816.039 | 25593.156 | NM_002788 | 64177.473 | 58944.23  | AL137266  | 9361.927  | 7823.34   |
| NM_005197 | 16417.445 | 13104.538 | NM_000462 | 27653.891 | 27256.285 | NM_016457 | 2187.015  | 3232.111  |
| AL137421  | 58711.016 | 55042.383 | NM_003336 | 20726.625 | 19961.139 | NM_005057 | 3161.414  | 4684.582  |
| M33197    | 63246.246 | 63298.895 | NM_005805 | 47026.121 | 49929.168 | AF143321  | 2637.264  | 2619.69   |
| NM_007241 | 1757.45   | 1408.155  | NM_004181 | 45011.301 | 45224.941 | AB046842  | 7409.878  | 6875.104  |
| M33197    | 66216.578 | 63528.598 | NM_003900 | 37339.09  | 40591.375 | NM_004850 | 6255.083  | 5283.336  |

|           |           |           |           |           |           |           |           |           |
|-----------|-----------|-----------|-----------|-----------|-----------|-----------|-----------|-----------|
| NM_001154 | 20901.979 | 22077.381 | NM_003337 | 7641.662  | 8840.394  | NM_002822 | 26726.414 | 34511.926 |
| NM_001819 | 1647.765  | 1556.6    | AF298152  | 8365.247  | 6583.647  | BF306955  | 5906.338  | 8622.443  |
| NM_016938 | 1542.271  | 2152.75   | AF117233  | 19731.895 | 17556.789 | NM_001394 | 20175.275 | 28093.857 |
| NM_001993 | 618.958   | 767.174   | NM_015848 | 1868.855  | 1677.601  | NM_018441 | 32403.498 | 33255.168 |
| BF575833  | 1101.697  | 1181.494  | NM_001723 | 3990.082  | 3535.109  | CY3Cy5    | 4147.663  | 244.641   |
| NM_015725 | 11236.509 | 12588.944 | NM_016018 | 4583.041  | 4092.187  | BM664556  | 3709.9    | 1947.336  |
| R61452    | 3299.901  | 3351.398  | M94362    | 50485.129 | 52038.32  | AL359586  | 4607.556  | 4443.794  |
| R19938    | 20347.918 | 21464.102 | AK024707  | 3738.898  | 3352.816  | AF035290  | 3649.086  | 5656.064  |
| N94487    | 9874.072  | 10342.645 | NM_014255 | 2382.96   | 2251.046  | AK023216  | 1538.6    | 2381.686  |
| AI886795  | 12195.828 | 10462.917 | AK022909  | 6257.273  | 5667.644  | M33197    | 67142.219 | 65316.18  |
| D10495    | 7937.654  | 7971.1    | NM_006530 | 19803.256 | 19362.775 | NM_017986 | 18254.355 | 9525.261  |
| BF344679  | 5351.09   | 4767.425  | NM_003587 | 64994.773 | 59273.633 | AK024846  | 10266.677 | 6967.097  |
| M36634    | 1214.303  | 1378.797  | X90978    | 3990.59   | 3356.739  | BM664556  | 1947.532  | 1863.34   |
| M14156    | 2167.996  | 1833.152  | NM_004387 | 540.242   | 565.908   | SR3       | 37982.629 | 39262.086 |
| U87939    | 3020.88   | 2550.656  | AF217226  | 37675.789 | 43397.793 | SR7       | 3411.606  | 34088.656 |
| U86961    | 3366.666  | 3559.58   | AL359578  | 603.993   | 685.12    | SR9       | 1318.867  | 1255.312  |
| NM_005191 | 5965.722  | 5507.065  | NM_005522 | 1185.812  | 1517.07   | CY3Cy5    | 5515.242  | 594.43    |
| AK094237  | 4729.093  | 4002.97   | NM_005760 | 33283.387 | 32943.973 | U52839    | 3764.198  | 1967.304  |
| L07592    | 1894.299  | 1220.599  | NM_014212 | 5612.518  | 5438.071  | X78262    | 685.927   | 276.576   |
| M33197    | 62803.789 | 58444.023 | NM_007265 | 8002.879  | 9073.533  | AK021796  | 961.363   | 613.208   |
| NM_002983 | 37281.102 | 33450.5   | AK023639  | 42523.539 | 48909.754 | AF007146  | 840.944   | 533.912   |
| NM_000074 | 10237.532 | 10832.76  | AL122118  | 985.283   | 1052.759  | AL117427  | 23317.787 | 19330.133 |
| NM_020393 | 939.204   | 885.328   | AL137700  | 2967.975  | 3206.421  | AF052118  | 29976.051 | 25216.207 |
| BF434335  | 49704.637 | 45648.707 | NM_004904 | 5275.77   | 4520.849  | AK023305  | 67153.211 | 60479.73  |
| M57627    | 3616.928  | 3854.911  | NM_003083 | 26018.178 | 24172.551 | AK000788  | 1826.834  | 960.992   |
| NM_002993 | 1912.128  | 2093.059  | NM_006789 | 12985.138 | 14725.829 | AK025089  | 17925.848 | 13115.309 |
| AK026946  | 10335.862 | 11104.286 | NM_000982 | 12677.829 | 11435.65  | AK023298  | 638.245   | 342.168   |
| M33197    | 61152.355 | 62124.32  | NM_001024 | 66723.445 | 63030.789 | M33197    | 68623.57  | 63221.23  |
| NM_003192 | 11912.527 | 10993.748 | NM_016093 | 66926.727 | 59723.156 | AK001279  | 3016.55   | 3856.367  |
| NM_018449 | 13201.686 | 12448.211 | NM_012423 | 64479.348 | 61548.68  | AF086407  | 1702.396  | 2330.321  |
| AF086129  | 3862.603  | 4613.718  | AK026367  | 62153.273 | 58927.109 | AF085949  | 917.833   | 879.038   |
| D79994    | 5298.202  | 6629.418  | AK026491  | 52870.355 | 53870.246 | AK001567  | 1620.179  | 1451.788  |
| NM_014458 | 6592.989  | 5962.003  | NM_001015 | 63159.195 | 63473.008 | M33197    | 69226.852 | 63149.758 |
| L10333    | 512.044   | 541.489   | AL110170  | 65876.711 | 61342.625 | AF075006  | 1435.6    | 699.049   |
| AF235049  | 8300.068  | 8480.261  | NM_004190 | 65826.211 | 60719.719 | M33197    | 67456.539 | 68424.313 |
| NM_007369 | 2508.818  | 2863.47   | NM_014275 | 29689.234 | 28244.158 | AK000903  | 61791.137 | 59195.879 |
| NM_014776 | 4563.182  | 4150.554  | NM_000409 | 20123.602 | 17918.789 | AK023938  | 3290.607  | 2274.104  |
| NM_006480 | 15705.295 | 15005.937 | AB044137  | 1512.582  | 1482.97   | AK026896  | 1229.128  | 612.164   |
| NM_007223 | 46370.438 | 47742.238 | NM_000920 | 4225.62   | 4225.313  | AL110169  | 2064.14   | 1423.32   |
| NM_000145 | 3276.501  | 3438.574  | NM_020375 | 30530.564 | 37145.391 | AK022088  | 2283.16   | 1536.177  |
| AF030107  | 54679.43  | 56149.535 | NM_016049 | 39903.473 | 52015.684 | NM_013391 | 1342.622  | 759.837   |
| NM_000871 | 2115.274  | 1861.061  | NM_013311 | 26804.414 | 28140.969 | M33197    | 67463.859 | 68317.992 |
| NM_018968 | 1519.542  | 1772.974  | NM_000291 | 67214.367 | 68636.586 | AL157466  | 9146.172  | 5658.005  |
| AF086924  | 53952.68  | 50196.465 | NM_018081 | 10968.261 | 10814.535 | AL389981  | 3596.357  | 2806.535  |
| NM_005164 | 1720.017  | 2098.221  | NM_014649 | 10200.175 | 11142.532 | AK024336  | 4851.585  | 7928.819  |
| NM_001995 | 16573.043 | 19697.17  | AL117488  | 5565.592  | 5750.23   | AK023862  | 1064.736  | 1182.188  |
| NM_000183 | 17537.854 | 22913.809 | NM_012240 | 10661.804 | 10380.132 | AK022016  | 944.463   | 1127.417  |
| AY004175  | 6138.783  | 6177.917  | NM_019005 | 14605.209 | 16159.392 | AK021628  | 910.128   | 697.186   |
| M33197    | 59938.473 | 62795.676 | NM_004739 | 31720.068 | 34798.043 | M33197    | 67291.758 | 68176.148 |
| NM_012327 | 5451.936  | 6912.542  | AV752216  | 4999.029  | 5909.261  | NM_018603 | 886.822   | 1299.005  |
| NM_000904 | 12852.006 | 12528.097 | NM_005341 | 8164.619  | 8125.52   | AK022118  | 5515.142  | 5914.741  |
| NM_016048 | 6718.172  | 7716.835  | AF181999  | 5309.203  | 5296.152  | AK026453  | 15844.409 | 15934.084 |
| NM_000375 | 10422.47  | 9822.346  | NM_001934 | 8840.006  | 8687.578  | AF116678  | 574.348   | 655.535   |

|           |           |           |           |           |           |           |           |           |
|-----------|-----------|-----------|-----------|-----------|-----------|-----------|-----------|-----------|
| NM_000265 | 57194.566 | 53878.117 | AB011090  | 4916.338  | 5880.028  | M33197    | 67520.258 | 70854.469 |
| NM_018849 | 3720.515  | 3803.282  | NM_000209 | 908.214   | 741.464   | D17203    | 63209.043 | 60884.398 |
| NM_002236 | 735.284   | 751.682   | NM_018682 | 15027.202 | 14734.307 | NM_006495 | 10379.469 | 7836.562  |
| NM_017905 | 8850.578  | 9643.991  | AB033024  | 3780.673  | 3714.595  | NM_005288 | 2486.884  | 2321.18   |
| NM_006815 | 60191.66  | 58539.395 | NM_018942 | 21500.955 | 21192.068 | AK022101  | 1016.808  | 741.842   |
| M33197    | 59825.211 | 61852.559 | NM_005531 | 22182.855 | 21948.947 | NM_003251 | 6520.294  | 4097.008  |
| NM_001716 | 26230.348 | 29143.273 | NM_006977 | 3689.722  | 2908.72   | AF086203  | 1211.019  | 383.506   |
| NM_002030 | 1700.242  | 1925.943  | NM_002479 | 3528.905  | 3780.02   | AB046772  | 3310.073  | 1834.781  |
| NM_006073 | 1150.614  | 1142.778  | NM_000348 | 45365.656 | 48045.363 | M33197    | 67519.367 | 71480.734 |
| NM_004951 | 3223.697  | 2439.354  | NM_005059 | 37007.004 | 38946.184 | AL442080  | 5832.772  | 4303.457  |
| NM_006564 | 5758.321  | 5065.296  | NM_004950 | 9219.955  | 8314.279  | AY007143  | 39777.051 | 28092.393 |
| NM_004802 | 3437.722  | 3450.928  | NM_000724 | 12500.082 | 12646.11  | L15557    | 3855.209  | 3338.251  |
| M33197    | 63575.027 | 60164.238 | NM_002557 | 30395.572 | 29193.479 | AK022729  | 3896.305  | 4103.939  |
| NM_002633 | 41511.613 | 48271.973 | NM_004477 | 1416.655  | 1373.376  | NM_006168 | 19813.49  | 19174.354 |
| NM_002878 | 6685.146  | 7141.958  | BE728156  | 972.196   | 902.199   | AL050374  | 5306.526  | 5544.205  |
| NM_017723 | 3664.393  | 3145.084  | BI762229  | 25187.676 | 28302.02  | M33197    | 68732.68  | 63095.492 |
| AK022922  | 3454.212  | 3249.959  | AA131406  | 709.161   | 1307.677  | M28639    | 10023.14  | 9500.984  |
| NM_006462 | 8264.818  | 7119.447  | BG618320  | 62112.355 | 59899.664 | AL122073  | 26202.645 | 26757.967 |
| AK024750  | 1037.771  | 1425.982  | M28983    | 761.8     | 870.337   | AF116655  | 6485.806  | 6862.866  |
| NM_000400 | 19599.477 | 19074.43  | Y00787    | 7696.725  | 8777.333  | AJ243222  | 3234.639  | 3215.956  |
| M33197    | 61525.91  | 59555.461 | NM_007276 | 10997.844 | 10373.141 | AK026132  | 4182.531  | 4998.441  |
| NM_002613 | 6742.254  | 6397.53   | N34462    | 23422.473 | 24581.09  | Y11162    | 1248.452  | 1324.337  |
| NM_004419 | 9895.91   | 9418.722  | AI658778  | 15618.85  | 17737.236 | AF070584  | 4507.843  | 4610.113  |
| U47635    | 7031.057  | 6417.196  | L19067    | 14632.194 | 14846.551 | AF052109  | 7170.23   | 4141.532  |
| NM_018650 | 3837.119  | 4030.521  | Z48482    | 1676.07   | 1766.889  | M33197    | 67571.211 | 62523.422 |
| AK026945  | 14741.278 | 17651.037 | W60413    | 9406.533  | 10489.399 | NM_003353 | 67528.867 | 66283.07  |
| NM_002828 | 4508.938  | 5568.948  | BI823365  | 9109.591  | 10146.091 | X82127    | 65764.563 | 59940.805 |
| NM_014369 | 4710.469  | 4046.887  | X06318    | 1939.908  | 1798.2    | AL122044  | 12224.089 | 8260.401  |
| M33197    | 61090.32  | 62665.973 | NM_019101 | 3049.863  | 3223.507  | NM_018296 | 5658.807  | 3111.26   |
| NM_001398 | 26894.479 | 27076.488 | NM_013247 | 12283.962 | 13356.703 | NM_005752 | 8531.806  | 4908.513  |
| AB050049  | 22289.262 | 18707.516 | NM_006770 | 8259.343  | 8646.666  | M33197    | 67446.938 | 65305.613 |
| J05125    | 1447.209  | 1107.73   | BE394704  | 1738.036  | 2474.827  | AF070578  | 1523.859  | 1175.248  |
| NM_001819 | 1681.667  | 1925.064  | NM_004703 | 14557.813 | 14477.177 | L13743    | 3409.172  | 2952.287  |
| NM_016938 | 1608.376  | 2300.976  | NM_001512 | 2392.072  | 2006.791  | U84519    | 13210.545 | 14481.724 |
| NM_001993 | 655.477   | 945.987   | NM_014706 | 15803.002 | 15024.582 | Z11849    | 17591.309 | 16397.996 |
| BF575833  | 1039.568  | 1552.288  | AK023172  | 1557.637  | 1543.047  | M33197    | 67181.719 | 68376.664 |
| R61452    | 3679.203  | 3954.114  | AF139768  | 1042.551  | 928.545   | AF052103  | 11819.23  | 13870.699 |
| R19938    | 20925.256 | 22763.373 | AJ001348  | 3020.075  | 3044.576  | AF075050  | 4032.98   | 4505.565  |
| N94487    | 10011.694 | 9244.994  | NM_014007 | 2998.752  | 3699.973  | AK024842  | 2030.669  | 1929.492  |
| AI886795  | 12362.112 | 9941.192  | AB033006  | 8597.78   | 8376.214  | AK022962  | 559.091   | 481.118   |
| D10495    | 9377.005  | 8900.981  | AF020314  | 8197.503  | 8399.404  | NM_018382 | 1951.921  | 1763.435  |
| BF344679  | 5492.271  | 5542.601  | NM_016332 | 36933.543 | 41673.941 | BC022303  | 787.29    | 1292.678  |
| M36634    | 1444.546  | 1748.623  | AK023936  | 2058.065  | 2331.715  | AB018327  | 5180.552  | 4316.759  |
| M14156    | 2235.07   | 2063.443  | NM_006457 | 5777.079  | 7880.405  | AF303889  | 1644.988  | 1280.614  |
| U87939    | 3182.636  | 2499.598  | NM_003682 | 4145.796  | 4150.825  | M33197    | 67475.305 | 76408.32  |
| U86961    | 3262.611  | 2687.877  | NM_000207 | 2990.118  | 2842.734  | AK022649  | 15919.476 | 12680     |
| NM_005191 | 5494.819  | 6164.799  | NM_002531 | 4226.399  | 4258.237  | NM_016507 | 13334.675 | 10994.84  |
| AK094237  | 3834.867  | 4204.48   | NM_006314 | 57331.449 | 58041.695 | NM_002024 | 18002.467 | 12205.363 |
| L07592    | 2119.264  | 1609.426  | NM_001782 | 18241.723 | 18194.629 | NM_002743 | 16924.527 | 17739.428 |
| M33197    | 64060.953 | 78377.367 | NM_002754 | 1220.826  | 1022.644  | AF173358  | 36895.832 | 31496.736 |
| AK027244  | 1618.424  | 1630.537  | NM_000797 | 18006.488 | 21223.879 | NM_016366 | 15963.39  | 18115.418 |
| L40520    | 5707.182  | 3994.741  | NM_014927 | 782.368   | 885.717   | NM_001563 | 13976.462 | 13252.054 |
| BF434335  | 53704.996 | 59634.727 | AF217525  | 824.049   | 967.612   | NM_000266 | 4000.917  | 3551.863  |



|           |           |           |           |           |           |           |           |           |
|-----------|-----------|-----------|-----------|-----------|-----------|-----------|-----------|-----------|
| M57627    | 2770.448  | 3220.349  | AL080148  | 62154.242 | 59431.012 | X89666    | 7915.546  | 11773.438 |
| NM_002993 | 1938.951  | 2690.077  | AF000381  | 12991.811 | 13371.678 | NM_017425 | 1250.215  | 1177.998  |
| AK026946  | 10072.189 | 13118.759 | NM_012105 | 9299.196  | 10912.335 | NM_003104 | 13702.421 | 15309.221 |
| M33197    | 59215.203 | 63879.844 | S82470    | 11720.708 | 10470.721 | NM_014581 | 9437.202  | 14416.65  |
| NM_003192 | 11553.004 | 10894.419 | AB028982  | 3698.676  | 3877.475  | NM_000895 | 1864.286  | 2396.361  |
| NM_018445 | 15442.574 | 14970.043 | NM_002004 | 8160.397  | 7875.14   | M33197    | 64286.355 | 62664.449 |
| AF086129  | 3886.15   | 4863.546  | NM_005121 | 2297.651  | 2954.218  | NM_014405 | 5516.506  | 5597.339  |
| D79994    | 5202.943  | 7106.743  | NM_000747 | 8222.341  | 7341.893  | Z11801    | 3143.527  | 3472.405  |
| NM_014455 | 5884.977  | 5397.246  | AJ275973  | 29265.506 | 35366.527 | S68954    | 18303.486 | 6477.926  |
| L10333    | 504.099   | 615.326   | U76362    | 25002.832 | 27053.459 | S81335    | 8946.237  | 10068.282 |
| AF235049  | 7722.766  | 8787.259  | NM_003060 | 808.662   | 672.715   | NM_006197 | 6020.452  | 3507.756  |
| M33197    | 63075.535 | 63509.371 | AK021489  | 62629.301 | 58890.145 | NM_014181 | 2896.442  | 2708.617  |
| NM_007365 | 3130.877  | 3264.08   | NM_004525 | 2026.517  | 1897.462  | M29273    | 2461.014  | 2061.041  |
| NM_014775 | 3875.764  | 4195.731  | NM_003895 | 1556.593  | 1416.329  | NM_004854 | 15258.379 | 12780.208 |
| NM_006480 | 16350.839 | 17176.207 | NM_004317 | 12627.231 | 14374.209 | AJ245418  | 38958.258 | 28868.352 |
| NM_007223 | 43958.699 | 44258.777 | NM_014645 | 8981.634  | 9354.767  | NM_006377 | 12530.511 | 10725.793 |
| NM_000145 | 3450.902  | 4116.948  | NM_014705 | 8573.706  | 8761.022  | NM_002435 | 4847.112  | 3862.631  |
| AF030107  | 49644.422 | 53480.816 | NM_003693 | 6341.939  | 6779.599  | NM_018362 | 13948.276 | 11403.568 |
| NM_000871 | 1702.307  | 1776.98   | NM_000355 | 65356.465 | 61605.113 | M33197    | 67569.844 | 69859.344 |
| NM_018965 | 1780.386  | 1498.051  | NM_018134 | 65914.43  | 62963.051 | NM_004755 | 3340.694  | 3691.621  |
| AF086924  | 47876.004 | 41921.859 | L27479    | 2448.525  | 2853.136  | AF192403  | 605.19    | 746.022   |
| M33197    | 67310.93  | 70287.32  | NM_002193 | 3858.429  | 3665.374  | NM_002185 | 3225.241  | 3822.07   |
| NM_001154 | 20050.52  | 17352.352 | NM_001385 | 22198.557 | 21083.455 | NM_006182 | 2044.707  | 2447.887  |
| NM_000183 | 18015.691 | 21957.455 | X76770    | 13873.29  | 13943.508 | AL137543  | 3465.426  | 4068.254  |
| AY004175  | 7965.827  | 7883.342  | AB037808  | 5461.386  | 5015.39   | NM_004444 | 47944.828 | 49191.617 |
| M33197    | 60246.84  | 62876.898 | NM_016035 | 14557.228 | 16010.749 | NM_004245 | 17694.297 | 18422.832 |
| NM_012327 | 5020.167  | 6650.69   | Z36821    | 23219.201 | 22703.32  | NM_004961 | 1140.539  | 1158.129  |
| NM_000904 | 13280.217 | 17003.502 | AF289485  | 13663.82  | 13852.481 | NM_005207 | 4123.861  | 3571.532  |
| NM_016045 | 8136.484  | 10072.39  | AF130092  | 10089.366 | 11793.153 | NM_003087 | 16763.098 | 13997.542 |
| NM_000375 | 11434.087 | 11806.466 | NM_016095 | 14835.519 | 12414.984 | NM_001630 | 6454.68   | 5912.177  |
| NM_000265 | 61427.016 | 59980.832 | AK024794  | 4972.896  | 4857.218  | AF132200  | 443.289   | 530.313   |
| NM_018845 | 4663.935  | 4514.493  | NM_019853 | 14147.541 | 16340.645 | AF305081  | 6532.777  | 6848.123  |
| NM_002235 | 1027.146  | 1305.941  | NM_017992 | 4077.818  | 4523.375  | AF118078  | 4871.698  | 4331.288  |
| NM_017905 | 7539.447  | 7498.604  | NM_005400 | 1980.499  | 2014.714  | NM_020165 | 1482.721  | 1674.629  |
| NM_006815 | 52610.957 | 55084.527 | AK023061  | 1971.697  | 1846.592  | AL157428  | 2328.001  | 2022.969  |
| NM_002805 | 21254.695 | 25703.631 | NM_007255 | 8357.299  | 7401.032  | BE904175  | 752.955   | 868.117   |
| M33197    | 61908.086 | 69268.836 | NM_003665 | 13810.978 | 14153.94  | NM_005855 | 7097.639  | 6947.304  |
| NM_001715 | 21978.564 | 23843.559 | NM_013384 | 65742.648 | 67036.063 | NM_014931 | 11138.613 | 12556.324 |
| NM_002030 | 1502.892  | 1462.098  | NM_001187 | 3392.444  | 3321.779  | NM_014487 | 14072.456 | 14300.983 |
| NM_006073 | 855.23    | 927.527   | NM_018241 | 6432.807  | 5650.164  | NM_018070 | 4294.15   | 4397.385  |
| NM_004951 | 3045.492  | 2985.176  | NM_005834 | 14022.084 | 13264.471 | NM_002484 | 27843.111 | 43270.801 |
| NM_006564 | 4916.717  | 5333.099  | NM_005055 | 34464.797 | 44677.324 | AK025941  | 5351.528  | 6814.465  |
| NM_004802 | 3120.634  | 3414.313  | NM_004950 | 7962.978  | 7636.831  | NM_018175 | 2389.969  | 2619.594  |
| M33197    | 67603.875 | 72794.609 | NM_000724 | 11555.974 | 10599.485 | AF059531  | 32546.406 | 21450.35  |
| NM_002983 | 33279.234 | 22707.297 | NM_000553 | 657.378   | 806.425   | NM_002707 | 25866.527 | 20751.389 |
| NM_000074 | 9647.171  | 8772.057  | NM_002557 | 26663.129 | 23010.496 | AF029777  | 7943.682  | 6221.884  |
| M33197    | 61539.383 | 62198.203 | NM_004477 | 1340.024  | 1434.715  | NM_003352 | 2969.304  | 2455.225  |
| NM_002875 | 7476.156  | 9127.744  | BE728156  | 920.517   | 935.204   | AK026884  | 60373.758 | 57147.75  |
| NM_017723 | 4593.96   | 4764.452  | BI762229  | 24928.529 | 23772.092 | S82198    | 6598.413  | 4999.122  |
| AK022922  | 4209.078  | 3707.772  | AA131406  | 782.092   | 722.472   | NM_002594 | 10104.958 | 8996.058  |
| NM_006462 | 9177.92   | 7716.29   | BG618320  | 58084.09  | 62167.781 | NM_001155 | 7985.91   | 8484.071  |
| AK024750  | 816.185   | 1195.101  | M28983    | 918.98    | 612.149   | NM_031407 | 11494.569 | 10352.013 |
| NM_000400 | 18687.012 | 17277.951 | Y00787    | 6574.775  | 5834.499  | NM_002215 | 757.323   | 516.215   |

|           |           |           |           |           |           |           |           |           |
|-----------|-----------|-----------|-----------|-----------|-----------|-----------|-----------|-----------|
| M33197    | 59741.039 | 59833.746 | NM_007276 | 9949.939  | 9777.591  | M33197    | 62954.113 | 65331.383 |
| NM_002613 | 5931.576  | 6048.367  | N34462    | 23009.068 | 20293.578 | AK000410  | 64150.332 | 63379.066 |
| NM_004419 | 9847.904  | 10412.327 | AI658778  | 13500.696 | 14539.754 | NM_020193 | 4190.525  | 6634.562  |
| U47635    | 6159.666  | 7140.187  | L19067    | 14442.666 | 12710.144 | D86982    | 2260.789  | 3769.858  |
| NM_018650 | 3432.595  | 3443.698  | Z48482    | 1676.529  | 1663.861  | NM_005619 | 2648.244  | 3224.782  |
| AK026945  | 13095.959 | 15306.587 | W60413    | 7374.482  | 7723.232  | D87440    | 23435.15  | 32173.408 |
| NM_002828 | 4341.82   | 4812.1    | BI823365  | 7869.56   | 7524.286  | AK000332  | 62152.266 | 62123.703 |
| NM_014369 | 4489.835  | 4045.906  | X06318    | 2120.708  | 1647.122  | AL080156  | 3116.194  | 3645.1    |
| M33197    | 62339.09  | 61927.301 | NM_016217 | 51524.059 | 52533.664 | M33197    | 868.678   | 559.058   |
| NM_001398 | 24349.391 | 25735.061 | AK025971  | 14077.937 | 11492.751 | NM_006738 | 6445.21   | 6987.962  |
| AB050049  | 20940.141 | 21336.092 | NM_002618 | 13828.203 | 13446.905 | NM_002288 | 2590.947  | 2833.765  |
| J05125    | 1497.724  | 1531.917  | BE394704  | 2093.881  | 2047.491  | NM_013351 | 58854.648 | 55726.121 |
| NM_005164 | 1679.182  | 1415.001  | NM_004703 | 14333.902 | 14163.133 | NM_012340 | 24027.088 | 17712.432 |
| NM_001998 | 15785.777 | 17621.104 | NM_001512 | 1991.855  | 1796.708  | NM_006022 | 4964.296  | 4405.651  |
| NM_001993 | 1284.311  | 1833.662  | NM_014706 | 14712.688 | 17647.723 | AK025110  | 2251.296  | 2071.822  |
| BF575833  | 1069.209  | 1493.607  | AK023172  | 1416.502  | 1652.157  | X52339    | 59976.496 | 60450.922 |
| NM_015728 | 10010.083 | 11610.574 | AJ001348  | 2890.317  | 3019.2    | M33197    | 63314.031 | 65807.695 |
| R61452    | 2523.663  | 3126.77   | NM_014007 | 3162.748  | 4059.171  | AB046830  | 4984.796  | 4495.574  |
| R19938    | 24981.297 | 29107.002 | AB033006  | 8121.175  | 8154.569  | NM_007122 | 7386.781  | 6789.017  |
| N94487    | 11255.214 | 11341.979 | AF020314  | 8805.047  | 8471.63   | NM_001488 | 2740.949  | 2186.275  |
| AI886795  | 13886.076 | 12765.014 | NM_016332 | 37586.703 | 43279.367 | NM_016202 | 31829.586 | 22446.59  |
| D10495    | 9357.802  | 10483.673 | AK023936  | 1631.381  | 1795.221  | NM_012476 | 4718.654  | 3920.078  |
| BF344679  | 5153.213  | 5610.132  | NM_006457 | 5684.24   | 6109.966  | NM_016604 | 3731.108  | 3629.316  |
| M36634    | 877.698   | 1016.046  | NM_003682 | 3624.915  | 3649.153  | M33197    | 61324.148 | 63195.281 |
| M14156    | 2069.476  | 2022.962  | NM_000207 | 2932.143  | 2698.766  | NM_006276 | 5629.747  | 6415.803  |
| U87939    | 2746.803  | 2699.013  | NM_002531 | 4292.973  | 3710.013  | NM_003407 | 7735.177  | 8844.39   |
| U86961    | 2845.945  | 2929.517  | NM_006314 | 53958.453 | 58473.496 | NM_007209 | 61720.57  | 60114.254 |
| NM_005191 | 4451.813  | 5450.989  | NM_001782 | 20898.861 | 22215.004 | NM_003729 | 7891.11   | 7855.248  |
| AK094237  | 3398.649  | 3407.299  | NM_002754 | 983.472   | 843.814   | L05096    | 30706.941 | 27360.635 |
| L07592    | 2122.23   | 2028.192  | NM_000797 | 15931.775 | 15118.924 | BC015899  | 18880.252 | 18055.82  |
| M33197    | 61697.906 | 67070.211 | AF217525  | 700.857   | 766.885   | M33197    | 62660.184 | 67462.328 |
| AK027244  | 1526.053  | 1745.365  | AL080148  | 60618.66  | 62418.324 | NM_002848 | 3801.489  | 4093.848  |
| L40520    | 4778.722  | 4311.708  | NM_002479 | 3832.813  | 3755.615  | NM_007180 | 9984.67   | 7969.978  |
| NM_002633 | 31708.148 | 30574.223 | NM_000348 | 51913.625 | 58442.922 | NM_005609 | 2505.036  | 2079.453  |
| AF086129  | 5663.291  | 7659.929  | NM_018075 | 598.875   | 272.522   | NM_005476 | 17218.059 | 14289.38  |
| D79994    | 6658.359  | 8328.631  | NM_012105 | 9218.793  | 10127.487 | NM_005660 | 13910.613 | 11276.11  |
| NM_014458 | 7192.96   | 8087.003  | S82470    | 10251.505 | 10241.614 | AK023902  | 8178.438  | 6899.953  |
| L10333    | 689.421   | 780.88    | AB028982  | 3646.993  | 4374.555  | NM_000401 | 2148.366  | 2163.036  |
| AF235049  | 9836.591  | 11769.672 | NM_002004 | 7941.852  | 7446.146  | M33197    | 593.575   | 431.356   |
| M33197    | 61220.664 | 67615.109 | NM_005121 | 2137.919  | 2800.125  | NM_005223 | 1922.965  | 1700.033  |
| NM_007369 | 4038.287  | 4487.071  | NM_000747 | 7936.008  | 8194.186  | AB011173  | 11009.072 | 9199.26   |
| NM_014776 | 4533.889  | 4957.881  | AJ275973  | 29576.475 | 32328.75  | AB023195  | 5289.186  | 4279.072  |
| NM_006480 | 16284.609 | 16514.434 | U76362    | 23689.705 | 23727.613 | U43431    | 4670.029  | 4362.567  |
| NM_007223 | 43045.898 | 45011.68  | NM_003060 | 854.322   | 915.026   | X57147    | 1600.959  | 1439.802  |
| NM_000145 | 2411.637  | 2896.69   | AK021489  | 56955.184 | 57995.762 | AK021563  | 1950.498  | 1843.498  |
| AF030107  | 36452.094 | 42969.438 | NM_004525 | 2124.225  | 1712.95   | AB006622  | 3200.498  | 3546.243  |
| NM_000871 | 1670.714  | 1952.621  | NM_003895 | 1514.185  | 1333.378  | M33197    | 62684.52  | 63191.469 |
| M33197    | 58334.707 | 60425.324 | NM_004317 | 11467.703 | 12153.693 | AK097041  | 11818.655 | 13187.36  |
| NM_018968 | 1886.991  | 1991.619  | NM_014645 | 7649.236  | 9072.739  | AF068744  | 59680.5   | 63109.633 |
| AF086924  | 47934.527 | 51532.758 | NM_014708 | 7880.963  | 6689.694  | NM_004497 | 848.371   | 1077.278  |
| NM_000264 | 1141.89   | 989.045   | NM_003693 | 6022.405  | 5190.012  | AK000762  | 4189.634  | 3865.339  |
| AB058740  | 15375.228 | 14102.136 | NM_000356 | 63750.996 | 60894.574 | NM_004571 | 2869.468  | 4754.935  |
| NM_003388 | 923.382   | 1044.613  | NM_018134 | 63388.035 | 62736.148 | NM_016260 | 1018.161  | 1289.583  |

|           |           |           |           |           |           |           |           |           |
|-----------|-----------|-----------|-----------|-----------|-----------|-----------|-----------|-----------|
| NM_00188E | 2269.011  | 1902.585  | NM_013247 | 11213.083 | 11497.25  | NM_00289E | 3473.976  | 3951.988  |
| NM_00439Z | 895.088   | 821.28    | NM_00677C | 9340.357  | 11409.392 | AF276513  | 4391.526  | 3768.509  |
| M33197    | 64253.371 | 71928.961 | NM_00138E | 18577.088 | 18789.393 | M33197    | 59844.195 | 64206.848 |
| NM_00115A | 18379.455 | 17281.037 | X76770    | 11652.43  | 12032.342 | M95610    | 58114.332 | 57553.93  |
| NM_00181E | 1501.564  | 1716.052  | AB037808  | 4757.844  | 5387.016  | NM_00311E | 11498.557 | 9551.46   |
| NM_01693E | 1306.449  | 1459.609  | NM_01603E | 13647.46  | 13954.96  | L02922    | 53159.324 | 52853.141 |
| NM_00166E | 8640.669  | 9926.279  | Z36821    | 21866.029 | 22422.563 | NM_001797 | 16784.389 | 16607.32  |
| NM_00421E | 20673.271 | 24236.574 | AF289485  | 12565.772 | 12091.498 | NM_00315A | 5919.544  | 5392.007  |
| NM_01653C | 7005.662  | 9550.265  | AF130092  | 9756.403  | 11341.128 | NM_00423E | 5885.968  | 6093.06   |
| NM_01480A | 2849.193  | 3022.156  | NM_01609E | 13718.317 | 12858.617 | AK023459  | 18878.277 | 19216.818 |
| NM_01245E | 10447.529 | 10656.395 | AK024794  | 5505.231  | 5420.156  | BI762154  | 5108.41   | 6423.472  |
| NM_00280E | 24589.609 | 28406.68  | NM_01985E | 14352.37  | 16242.402 | U13022    | 5567.606  | 4173.285  |
| M33197    | 61273.359 | 71007.086 | NM_01799Z | 3890.056  | 3991.156  | R23251    | 43339.863 | 43126.98  |
| NM_00171E | 23091.9   | 26086.318 | NM_00540C | 2235.141  | 1948.461  | AA702640  | 9154.909  | 9136.351  |
| NM_00203C | 1655.705  | 1640.834  | AK023061  | 1236.03   | 1563.944  | T68583    | 19156.393 | 21384.414 |
| NM_00607E | 531.086   | 656.877   | NM_00725E | 7494.275  | 6500.8    | AA481944  | 58814.559 | 62008.352 |
| NM_004951 | 2116.657  | 2185.98   | NM_00366E | 12073.961 | 12536.561 | X14390    | 573.835   | 776.001   |
| NM_00656A | 4101.952  | 4250.126  | NM_01338A | 64696.238 | 65300.836 | AF038440  | 5435.336  | 7347.992  |
| NM_00480Z | 2735.846  | 3423.155  | NM_001187 | 3274.63   | 3399.698  | M31158    | 12307.143 | 15476.566 |
| M33197    | 60090.777 | 60816.828 | NM_018241 | 5917.674  | 5464.886  | H00742    | 6461.275  | 7004.941  |
| NM_00298E | 24839.166 | 18430.904 | NM_00583A | 14915.276 | 16654.051 | D42108    | 18396.822 | 19451.926 |
| NM_00007A | 8978.646  | 7963.798  | AF000381  | 14549.342 | 14679.994 | BG700922  | 4917.525  | 7060.275  |
| NM_02039E | 927.585   | 962.186   | NM_00072A | 9814.772  | 9815.96   | AI366068  | 6497.126  | 10502.59  |
| BF434335  | 45332.285 | 43516.891 | NM_002557 | 25714.334 | 23298.617 | BG565837  | 1378.069  | 1710.407  |
| M57627    | 2399.472  | 2487.334  | NM_004477 | 869.531   | 1145.958  | N57553    | 27152.154 | 27846.291 |
| NM_00299E | 1538.784  | 1817.406  | BE728156  | 639.98    | 956.896   | M33197    | 59964.75  | 57423.207 |
| AK026946  | 7654.054  | 8746.646  | AI417775  | 286.603   | 688.028   | NM_01820Z | 59789.57  | 59683.227 |
| M33197    | 66708.063 | 67952.195 | BI762229  | 23453.307 | 23885.143 | AB023197  | 26125.938 | 20368.111 |
| NM_00319Z | 8994.306  | 8122.449  | AA131406  | 772.883   | 715.012   | NM_02217E | 47578.313 | 38685.719 |
| NM_01844E | 13293.891 | 11855.441 | BG618320  | 54664.465 | 58204.73  | AB040970  | 13147.254 | 11316.191 |
| NM_00139E | 26743.283 | 26159.814 | Y00787    | 6296.896  | 6179.459  | NM_01833C | 9002.763  | 7600.522  |
| AB050049  | 21812.891 | 23692.707 | NM_00727E | 9571.995  | 10292.361 | AB023222  | 4667.516  | 4842.841  |
| J05125    | 1527.772  | 1847.843  | N34462    | 21018.051 | 21171.77  | AB033088  | 9338.231  | 9817.065  |
| NM_00516A | 1516.672  | 1834.938  | AI658778  | 14374.335 | 15298.008 | M33197    | 63036.711 | 62694.27  |
| NM_00199E | 14127.096 | 17473.143 | L19067    | 13215.789 | 12514.165 | U50342    | 59014.883 | 59448.152 |
| NM_00018E | 17226.334 | 19564.76  | Z48482    | 1793.916  | 1623.636  | NM_00029E | 3524.448  | 3523.144  |
| AY004175  | 5539.236  | 5486.689  | W60413    | 7160.317  | 6080.716  | NM_00071E | 2248.839  | 1684.967  |
| M33197    | 60123.203 | 67608.055 | BI823365  | 8400.888  | 7545.691  | AF026932  | 2780.095  | 3038.548  |
| NM_012327 | 8662.305  | 9006.551  | X06318    | 1913.863  | 1474.5    | AF103795  | 7973.101  | 7828.834  |
| NM_00090A | 10355.964 | 10849.72  | NM_016217 | 48454.938 | 42947.254 | NM_00621E | 2173.314  | 2050.332  |
| NM_01604E | 5989.219  | 7184.008  | AK025971  | 9329.313  | 8486.135  | M33197    | 61926.164 | 64014.41  |
| NM_00037E | 8156.588  | 9843.498  | NM_00261E | 13402.252 | 13200.765 | NM_00702A | 24071.48  | 32429.271 |
| NM_00026E | 50848.668 | 54714.102 | L27479    | 3075.361  | 3289.359  | NM_013231 | 11697.423 | 14737.191 |
| NM_01884E | 3155.138  | 3803.016  | NM_00219E | 4137.792  | 3754.313  | NM_01210E | 13057.955 | 15303.321 |
| M33197    | 59445.539 | 63836.172 | AB033006  | 7916.526  | 7444.335  | NM_00625A | 7545.005  | 8175.942  |
| M16796    | 1137.969  | 1219.59   | AF020314  | 8407.765  | 8483.011  | X95425    | 41188.484 | 50175.5   |
| AF279890  | 1495.418  | 1615.204  | NM_01633Z | 34600.965 | 39108.895 | NM_00442Z | 13366.338 | 13188.314 |
| NM_00223E | 673.608   | 681.335   | AK023936  | 1740.856  | 1680.384  | NM_01656Z | 4742.547  | 4844.556  |
| NM_01206E | 864.513   | 764.466   | NM_006457 | 4947.441  | 6206.624  | AY009399  | 33422.746 | 34299.891 |
| NM_00168E | 63027.355 | 61228.262 | NM_00368Z | 3594.088  | 3505.498  | NM_00489E | 49802.289 | 51085.461 |
| NM_016601 | 1460.373  | 1254.077  | NM_000207 | 2643.306  | 2444.978  | U80018    | 3767.915  | 3528.457  |
| NM_01790E | 8128.754  | 6957.451  | NM_002531 | 4124.591  | 4076.827  | NM_000717 | 3197.508  | 2945.224  |
| M33197    | 67252.07  | 71573.969 | NM_00631A | 51661.445 | 55670.863 | M33197    | 59466.668 | 63094.34  |

|           |           |           |           |           |           |           |           |           |
|-----------|-----------|-----------|-----------|-----------|-----------|-----------|-----------|-----------|
| NM_00681E | 55542.402 | 52673.293 | NM_001782 | 18291.791 | 17318.391 | NM_00484E | 20936.09  | 20601.371 |
| M33197    | 67940.961 | 86581.75  | NM_002754 | 1006.408  | 895.551   | NM_007107 | 19477.574 | 19482.484 |
| AK027244  | 1975.914  | 2018.354  | NM_000797 | 17466.363 | 17285.135 | NM_000047 | 62209.355 | 59233.188 |
| L40520    | 4719.988  | 4168.877  | NM_014927 | 886.809   | 918.289   | M68874    | 864.513   | 1152.888  |
| NM_002633 | 32219.957 | 34415.148 | NM_016293 | 15886.956 | 18192.637 | NM_00631E | 23492.525 | 19446.076 |
| M33197    | 61303.219 | 62975.797 | AF217525  | 614.763   | 777.381   | NM_01822E | 6117.062  | 5795.455  |
| NM_00287E | 5345.347  | 5371.179  | AL080148  | 55709.332 | 58251.051 | NM_00460E | 2602.642  | 2743.207  |
| NM_002412 | 775.198   | 684       | NM_006731 | 1429.009  | 1185.404  | NM_00666C | 20676.115 | 21423.496 |
| NM_017723 | 2646.915  | 2545.118  | NM_018487 | 1272.934  | 2059.377  | NM_00668E | 59145.82  | 59000.824 |
| AK022922  | 2951.108  | 3432.793  | NM_020134 | 4590.222  | 3720.77   | AF154121  | 5586.309  | 5854.766  |
| NM_006462 | 7663.015  | 8248.862  | NM_014061 | 2510.512  | 2183.939  | NM_01213E | 45477.082 | 48465.918 |
| AK024750  | 1056.968  | 999.638   | BC034395  | 7343.007  | 7082.273  | AF121856  | 17410.215 | 24724.055 |
| NM_00040C | 15280.172 | 13135.584 | NM_002479 | 3340.906  | 3510.888  | NM_006421 | 10670.61  | 11647.563 |
| M33197    | 58812.684 | 59894.875 | NM_00034E | 24720.383 | 18709.631 | NM_017457 | 29338.979 | 30352.328 |
| NM_002613 | 6036.73   | 5727.153  | NM_005059 | 33506.043 | 36599.707 | NM_00376E | 33604.559 | 40672.879 |
| NM_00441E | 8721.745  | 8083.692  | NM_00495C | 8653.414  | 9212.244  | NM_00586E | 1500.357  | 1566.649  |
| U47635    | 6505.865  | 7086.782  | AF040248  | 3430.893  | 3648.502  | M33197    | 61317.027 | 62024.164 |
| NM_01865C | 4229.453  | 4998.208  | NM_01422E | 3493.21   | 3586.557  | NM_001201 | 6932.245  | 6055.854  |
| AK026945  | 10968.462 | 12355.006 | AL832292  | 10951.631 | 10402.543 | NM_01661E | 2561.366  | 2021.242  |
| NM_00282E | 3268.271  | 3631.069  | NM_00304E | 28192.682 | 32133.561 | AB014568  | 61461.672 | 55527.559 |
| NM_01436E | 3447.139  | 3002.265  | NM_005662 | 23772.742 | 29762.498 | AK022238  | 837.076   | 844.256   |
| M33197    | 65638.883 | 66430.203 | NM_00306C | 936.077   | 767.043   | NM_01224E | 21226.99  | 19207.426 |
| CY3Cy5    | 5701.499  | 475.64    | AK021489  | 62901.746 | 63332.027 | AK022546  | 51644.734 | 52544.328 |
| AL834159  | 5646.886  | 5262.167  | NM_00452E | 1826.802  | 1701.017  | NM_014067 | 56148.098 | 52469.742 |
| NM_000164 | 983.885   | 732.7     | NM_00389E | 1490.442  | 1477.727  | NM_002914 | 25949.119 | 23418.342 |
| AK021971  | 1800.992  | 1773.806  | NM_004317 | 11652.626 | 12824.745 | NM_02038E | 9272.803  | 7349.95   |
| AK025253  | 2710.894  | 2695.489  | NM_01464E | 8493.12   | 8202.575  | NM_014877 | 975.901   | 874.133   |
| AK025004  | 3312.006  | 3341.693  | NM_01470E | 8761.869  | 8698.569  | NM_006541 | 2796.834  | 3994.56   |
| AL136818  | 2692.98   | 2668.442  | NM_003693 | 5769.182  | 5982.177  | M33197    | 63574.398 | 62795.074 |
| AF146798  | 1827.732  | 2031.973  | NM_00035E | 63253.461 | 61669.867 | NM_00570E | 16437.287 | 18679.861 |
| AK022049  | 2015.396  | 2284.814  | NM_018134 | 60447.785 | 60947.5   | NM_00432E | 8491.693  | 10395.821 |
| AF086517  | 2878.303  | 2444.615  | NM_013247 | 12871.343 | 12318.498 | NM_004581 | 19710.191 | 21212.574 |
| AK025740  | 31386.805 | 27155.664 | NM_00677C | 11268.932 | 12703.75  | NM_006817 | 30723.379 | 33194.871 |
| AK000311  | 11000.679 | 10398.79  | BE394704  | 1751.442  | 2422.774  | NM_00710E | 31700.344 | 32915.566 |
| AK025640  | 8192.436  | 8441.181  | NM_004703 | 14376.375 | 13627.253 | NM_015921 | 51642.145 | 46043.141 |
| AF131772  | 1200.303  | 1060.882  | NM_001512 | 2167.738  | 1894.129  | AB040900  | 26013.686 | 24110.834 |
| AL137685  | 574.465   | 880.848   | NM_01470E | 16199.843 | 15874.014 | NM_00108C | 5191.091  | 5085.22   |
| AL834159  | 5771.411  | 6799.999  | AK023172  | 1766.121  | 2056.266  | NM_001482 | 1878.437  | 1516.348  |
| NM_000164 | 1649.652  | 2001.556  | AJ001348  | 2717.298  | 3032.39   | NM_00311E | 11424.056 | 9437.978  |
| SR5       | 5090.362  | 6817.518  | NM_001187 | 3075.571  | 2874.298  | L02922    | 54435.289 | 48974.551 |
| SR7       | 5113.672  | 50692.41  | NM_018241 | 5740.665  | 6152.239  | NM_001797 | 15438.687 | 14373.841 |
| SR9       | 20547.973 | 6487.006  | NM_005834 | 12737.065 | 12414.75  | NM_003154 | 5451.563  | 4579.898  |
| CY3Cy5    | 6101.835  | 677.061   | AF000381  | 12150.264 | 12950.199 | NM_00423E | 4978.852  | 4922.719  |
| L23870    | 1218.052  | 1601.988  | NM_01807E | 580.025   | 819.69    | AK023459  | 17696.67  | 17301.783 |
| D55644    | 917.128   | 1127.496  | NM_01210E | 9243.55   | 9753.174  | BI762154  | 5062.777  | 6286.167  |
| D16951    | 1953.247  | 1429.203  | S82470    | 10802.787 | 9672.976  | U13022    | 5412.836  | 5105.918  |
| L33807    | 5555.83   | 5704.908  | AB028982  | 3989.594  | 3455.074  | R23251    | 45870.301 | 47441.578 |
| U80774    | 802.141   | 1142.446  | NM_002004 | 7351.385  | 7603.907  | AA702640  | 8777.439  | 8601.568  |
| NM_00654E | 12303.852 | 10763.88  | NM_005121 | 2110.675  | 2700.578  | T68583    | 20520.172 | 20121.641 |
| NM_016534 | 7321.823  | 6335.19   | NM_001643 | 63037.422 | 63248.527 | AA481944  | 60965.652 | 67433.492 |
| AK024240  | 1946.033  | 1816.407  | AK021818  | 509.856   | 910.594   | X14390    | 749.822   | 597.337   |
| NM_01645E | 71728.344 | 64459.184 | NM_020221 | 2438.286  | 2778.241  | AF038440  | 6327.998  | 10758.802 |
| AK022677  | 6331.399  | 7441.933  | NM_000747 | 7407.898  | 6454.156  | M31158    | 12825.206 | 15850.457 |

|           |           |           |           |           |           |           |           |           |
|-----------|-----------|-----------|-----------|-----------|-----------|-----------|-----------|-----------|
| AF035288  | 1007.261  | 1252.187  | NM_005415 | 10781.693 | 9850.296  | H00742    | 5716.133  | 5824.934  |
| AL137645  | 2269.352  | 2626.336  | AK026841  | 5622.814  | 5930.417  | D42108    | 12652.893 | 12791.19  |
| AK022894  | 6233.223  | 5216.347  | AL137708  | 894.239   | 738.673   | BG700922  | 3327.929  | 3566.313  |
| AF217993  | 4045.596  | 3616.213  | U76362    | 21606.088 | 18357.338 | AI366068  | 5219.792  | 5935.073  |
| AF131823  | 1489.417  | 1657.124  | NM_016217 | 48466.484 | 55072.383 | BG565837  | 983.318   | 903.807   |
| AK026324  | 10571.131 | 9762.108  | AK025971  | 11014.384 | 10141.44  | N57553    | 25245.326 | 24167.883 |
| AK024518  | 46838.387 | 46510.883 | NM_002618 | 10255.23  | 9744.791  | M33197    | 59217.121 | 65418.77  |
| AK025017  | 1412.387  | 1341.317  | L27479    | 2861.038  | 3398.923  | NM_016545 | 9264.854  | 7056.379  |
| AK024914  | 5284.448  | 5088.081  | NM_002193 | 3591.753  | 3409.365  | NM_001440 | 60318.359 | 52891.055 |
| AK025346  | 66047.523 | 65740.016 | NM_001388 | 16420.016 | 16972.879 | NM_022173 | 47939.34  | 39678.551 |
| AK022583  | 7418.587  | 5303.065  | X76770    | 11450.68  | 12451.84  | AB040970  | 12107.086 | 10310.646 |
| AL137534  | 56324.906 | 37792.355 | AB037808  | 4798.925  | 4801.591  | NM_018330 | 7732.371  | 6020.081  |
| AF052121  | 643.49    | 492.322   | NM_016038 | 13851.283 | 14399.31  | AB023222  | 4103.063  | 4002.141  |
| AL359062  | 4029.244  | 2812.165  | Z36821    | 24309.736 | 19514.314 | AB033088  | 8347.14   | 8355.513  |
| AK026869  | 1676.802  | 1055.974  | AF289485  | 12801.512 | 12301.786 | M33197    | 60815.477 | 60570.535 |
| NM_019095 | 65544.844 | 64067.469 | AF130092  | 10832.625 | 10333.099 | U50342    | 60069.34  | 59160.426 |
| AJ227904  | 886.473   | 939.549   | NM_016095 | 13146.142 | 10736.319 | NM_000295 | 3503.647  | 3382.345  |
| Y12020    | 4717.918  | 4708.022  | AK024794  | 5763.931  | 6789.385  | NM_000710 | 1994.119  | 1542.444  |
| AJ011597  | 622.92    | 563.923   | NM_019853 | 15588.822 | 18313.072 | AF026932  | 2691.918  | 3111.146  |
| AJ001905  | 987.77    | 830.284   | NM_017992 | 4402.513  | 4966.55   | AF103795  | 8300.813  | 8240.865  |
| U17635    | 1306.777  | 1405.843  | NM_005400 | 2519.744  | 2794.268  | NM_006215 | 2152.964  | 2295.847  |
| AL049930  | 597.898   | 932.171   | AK023061  | 2216.912  | 1995.768  | M33197    | 62476.184 | 62480.926 |
| AF086198  | 48528.566 | 53239.715 | CY3Cy5    | 5132.221  | 115.246   | NM_007024 | 22837.9   | 24740.271 |
| AL137382  | 11634.744 | 10715.382 | NM_016346 | 8510.271  | 8124.185  | NM_013231 | 14459.198 | 21584.492 |
| AK024599  | 7082.693  | 6806.945  | AF088047  | 782.008   | 579.305   | NM_012100 | 14367.51  | 23868.039 |
| AK024928  | 621.022   | 503.206   | AF086445  | 866.66    | 927.895   | NM_006254 | 8050.473  | 12997.938 |
| NM_014450 | 17979.117 | 19498.438 | AF086281  | 3117.668  | 2573.065  | X95425    | 20454.219 | 21335.316 |
| AB007975  | 1951.941  | 1443.913  | AF086393  | 842.109   | 588.173   | NM_004422 | 9579.401  | 10342.394 |
| AK024152  | 804.099   | 827.773   | AF086453  | 1400.827  | 1276.529  | NM_016562 | 4724.133  | 4539.919  |
| AL137603  | 1202.648  | 742.851   | AF070621  | 22032.813 | 18857.484 | AY009399  | 33007.25  | 32813.066 |
| AK026888  | 5333.09   | 4323.931  | NM_020240 | 6857.433  | 6062.498  | NM_004895 | 48908.34  | 47770.453 |
| AK021821  | 1807.003  | 1225.659  | AK023678  | 59638.688 | 53723.977 | M33197    | 61064.996 | 63762.875 |
| AL049328  | 2657.282  | 2538.862  | AF052090  | 13348.97  | 13134.795 | M95610    | 61412.973 | 60034.027 |
| AK000030  | 1740.803  | 1967.424  | AL355730  | 1306.352  | 1113.184  | NM_000717 | 3257.505  | 2699.11   |
| NM_017932 | 1748.638  | 1909.341  | U79273    | 4577.257  | 3063.239  | M33197    | 58282.652 | 64211.328 |
| AK000910  | 1871.378  | 1883.883  | AK022050  | 4954.905  | 3400.641  | NM_004845 | 18766.574 | 17700.979 |
| AF252280  | 2169.401  | 1982.231  | NM_016346 | 5757.282  | 4172.821  | NM_007107 | 17969.447 | 16433.824 |
| AK000107  | 1297.42   | 1205.742  | SR2       | 56777.563 | 51736.441 | NM_000047 | 60815.453 | 57455.488 |
| AK000795  | 411.224   | 555.749   | SR4       | 19543.648 | 18136.139 | M68874    | 881.296   | 954.845   |
| AK000951  | 1307.865  | 1809.687  | SR6       | 2314.342  | 2341.105  | NM_006310 | 20488.344 | 19001.145 |
| AF130064  | 59912.102 | 60642.887 | SR8       | 8091.01   | 27078.465 | NM_018220 | 5910.601  | 6081.289  |
| U17624    | 2924.506  | 3425.894  | SR10      | 29042.605 | 10208.947 | NM_004605 | 2196.423  | 2231.1    |
| AK025184  | 1643.019  | 1425.649  | CY3Cy5    | 4320.156  | 85.499    | NM_006660 | 20074.65  | 19447.973 |
| D16988    | 65851.117 | 73057.188 | AB042410  | 3089.74   | 3380.433  | NM_006685 | 60066.273 | 61875.922 |
| U36217    | 9639.086  | 10112.676 | AF086102  | 6962.477  | 5957.888  | AF154121  | 7016.79   | 7229.318  |
| AL389880  | 1216.012  | 1019.424  | AF116682  | 63601.848 | 60019.281 | NM_012130 | 55044.699 | 57071.289 |
| AL157452  | 853.328   | 780.07    | AL137259  | 7696.871  | 6385.745  | AF121856  | 13363.064 | 14931.72  |
| AK024155  | 46169.07  | 34718.645 | AL122107  | 15940.5   | 15608.101 | NM_006421 | 9904.497  | 11616.552 |
| AL359334  | 35142.336 | 14453.978 | AF075021  | 2989.133  | 2800.889  | NM_017457 | 31951.676 | 34856.926 |
| AK027095  | 3479.291  | 2956.095  | AK025140  | 12120.361 | 10101.629 | NM_003765 | 21851.127 | 22899.449 |
| AF062097  | 5390.033  | 3669.793  | AK001503  | 14903.092 | 13278.017 | NM_005868 | 1528.294  | 2028.667  |
| BC030949  | 10681.366 | 8937.964  | AF085894  | 1235.63   | 1580.066  | M33197    | 62635.125 | 61026.137 |
| AF116615  | 6572.591  | 4405.96   | AK022880  | 2855.829  | 2469.238  | NM_018202 | 58251.004 | 58305.746 |

|           |           |           |           |           |           |           |           |           |
|-----------|-----------|-----------|-----------|-----------|-----------|-----------|-----------|-----------|
| NM_01854E | 10988.702 | 11286.021 | NM_003601 | 29383.748 | 24165.623 | AB023197  | 17769.961 | 18020.822 |
| U52699    | 35541.707 | 28529.684 | AF086375  | 653.968   | 553.23    | AB014568  | 59696.188 | 56727.438 |
| S71613    | 3231.935  | 3404.613  | AK001228  | 3935.793  | 2902.274  | AK022238  | 758.662   | 994.939   |
| AJ011910  | 11129.025 | 9586.377  | AF074987  | 6844.542  | 5771.907  | NM_01224E | 16652.771 | 14639.174 |
| NM_01402E | 11367.397 | 10889.122 | AK001058  | 46823.441 | 44032.801 | AK022546  | 46070.395 | 44524     |
| D61703    | 1804.139  | 2124.735  | AF086283  | 2876.279  | 3298.123  | NM_014067 | 50717.488 | 51806.539 |
| AL050376  | 1014.126  | 758.714   | AK027041  | 5283.437  | 5258.585  | NM_002914 | 25935.367 | 24971.055 |
| AL359652  | 1841.586  | 1492.796  | AK024332  | 1261.968  | 1099.262  | NM_02038E | 8072.078  | 6546.298  |
| NM_00245E | 10279.656 | 8596.116  | NM_00535E | 66594.148 | 62249.07  | NM_014877 | 826.592   | 636.165   |
| NM_00295E | 12535.855 | 10296.056 | AK000937  | 2083.688  | 2166.72   | NM_006541 | 2310.163  | 2175.278  |
| AB046773  | 1471.948  | 1205.193  | AK023718  | 25067.803 | 23094.535 | M33197    | 59598.617 | 58675.34  |
| AK000899  | 16507.367 | 12363.407 | AF075089  | 11296.43  | 9645.03   | NM_00570E | 17686.381 | 18218.215 |
| NM_017991 | 1361.678  | 1053.891  | AF086007  | 73931.797 | 62849.953 | NM_00432E | 10007.993 | 13210.597 |
| L37198    | 2260.129  | 1528.342  | AK000803  | 8622.263  | 9878.71   | NM_004581 | 25189.748 | 41524.844 |
| U67822    | 3048.723  | 1945.126  | AK022374  | 2235.785  | 2303.68   | NM_006817 | 32121.547 | 39727.754 |
| AK021921  | 890.736   | 733.525   | AF085926  | 31813.771 | 32025.197 | NM_00710E | 32713.275 | 34228.777 |
| AK025431  | 1291.078  | 1013.283  | AF085948  | 1680.917  | 1663.192  | NM_015921 | 54392.715 | 50552.813 |
| AF086274  | 62753.172 | 60834.363 | AL137307  | 14607.855 | 14152.689 | AB040900  | 29695.723 | 33275.18  |
| AK023682  | 2834.239  | 1774.146  | AL137468  | 12204.695 | 10738.773 | NM_00108C | 3748.132  | 4277.573  |
| AK024024  | 2894.579  | 1994.909  | AL162007  | 40523.574 | 29433.863 | NM_00148E | 1139.663  | 1764.595  |
| AF000991  | 1070.06   | 785.172   | AL390137  | 44996.961 | 31988.85  | NM_00121E | 497.695   | 521.086   |
| AK000685  | 27151.094 | 23722.641 | AL137340  | 1052.78   | 950.938   | U80018    | 1962.543  | 2120.549  |
| D28381    | 34915.238 | 31966.551 | AL162045  | 1686.463  | 1653.528  | NM_001797 | 14156.205 | 13807.846 |
| AK023543  | 372.638   | 776.887   | X92185    | 456.108   | 643.725   | NM_003154 | 5747.024  | 5406.207  |
| BE706519  | 810.606   | 1006.991  | AK022437  | 54899.457 | 53927.246 | NM_00423E | 5404.147  | 5269.378  |
| NM_01909E | 7409.343  | 6854.833  | AK024213  | 66360.664 | 62242.715 | AK023459  | 17575.828 | 18602.381 |
| NM_01472E | 679.179   | 783.74    | AK025093  | 1343.05   | 759.308   | BI762154  | 4480.097  | 5007.681  |
| NM_01830E | 2731.05   | 3089.444  | AK022184  | 3297.979  | 3292.048  | U13022    | 4685.413  | 4174.713  |
| NM_01765E | 1623.05   | 1502.459  | AB007959  | 2776.038  | 2815.903  | R23251    | 46196.16  | 50520.203 |
| NM_01867E | 1600.957  | 1505.722  | AK026002  | 621.328   | 701.427   | AA702640  | 9247.124  | 9319.188  |
| NM_01664E | 1306.563  | 1646.843  | AK024360  | 688.542   | 862.345   | T68583    | 19854.625 | 19143.363 |
| NM_00258C | 1245.777  | 1289.733  | AK023394  | 998.595   | 946.777   | AA481944  | 60967.754 | 62236.414 |
| NM_00677E | 5337.415  | 5391.094  | AF090093  | 54349.879 | 54071.402 | AF038440  | 4959.896  | 5977.829  |
| NM_019847 | 4511.043  | 4994.98   | AF161340  | 20769.328 | 22925.762 | M31158    | 14069.341 | 15981.894 |
| D17093    | 29318.348 | 24893.268 | AF242771  | 2572.776  | 2562.353  | H00742    | 6902.566  | 8273.985  |
| AK022784  | 606.357   | 411.267   | NM_01856E | 39534.191 | 37930     | D42108    | 15949.125 | 16525.445 |
| AL117521  | 6573.448  | 4878.704  | AF098666  | 2897.93   | 4135.834  | BG700922  | 4180.256  | 3768.317  |
| NM_000731 | 815.362   | 839.07    | AF161365  | 1668.382  | 1435.168  | AI366068  | 5255.232  | 5353.378  |
| AK021913  | 5905.803  | 3696.68   | AK021969  | 3113.92   | 3247.838  | BG565837  | 1071.874  | 862.775   |
| AL137489  | 44456.941 | 32805.227 | AK022065  | 2607.385  | 2603.631  | N57553    | 30817.678 | 46043.684 |
| AF009311  | 2616.003  | 1902.986  | AK022221  | 25580.162 | 21022.76  | M33197    | 61072.297 | 62181.109 |
| S73397    | 8858.987  | 7783.177  | AK022356  | 2434.141  | 1598.615  | NM_01654E | 6468.224  | 8052.43   |
| AK023939  | 1189.392  | 854.904   | AK021998  | 3106.448  | 2224.418  | NM_00144C | 56675.605 | 56188.316 |
| L37709    | 555.422   | 870.381   | AK022126  | 6041.339  | 5355.765  | NM_001201 | 3018.072  | 2983.428  |
| AK024433  | 7731.475  | 9028.439  | AK022256  | 1795.078  | 1288.555  | NM_01661E | 1771.294  | 1239.401  |
| U82321    | 1785.458  | 1962.052  | AK022383  | 4602.785  | 3543.158  | NM_00071E | 1395.838  | 1295.624  |
| AK023856  | 3961.073  | 4869.797  | AF086262  | 5713.045  | 6010.935  | AF026932  | 2657.217  | 2761.245  |
| AB014557  | 1331.565  | 971.12    | AF086292  | 15588.25  | 16458.893 | AF103795  | 6721.554  | 6944.744  |
| NM_00557E | 5044.617  | 4175.488  | AK023769  | 758.868   | 969.02    | NM_00621E | 2646.046  | 2941.356  |
| NM_00365E | 21644.107 | 22032.936 | AK024342  | 46216.68  | 45754.082 | M33197    | 60850.777 | 65578.281 |
| NM_018457 | 9778.455  | 9177.037  | AL137712  | 15656.967 | 18342.355 | NM_007024 | 21880.643 | 23286.084 |
| NM_00295E | 14034.227 | 13647.972 | AL137606  | 588.187   | 739.198   | NM_013231 | 13580.761 | 14831.658 |
| NM_002187 | 749.983   | 693.14    | L77599    | 63676.09  | 60758.797 | NM_01210E | 15213.848 | 16010.448 |

|           |           |           |           |           |           |           |           |           |
|-----------|-----------|-----------|-----------|-----------|-----------|-----------|-----------|-----------|
| NM_014246 | 2205.506  | 2338.315  | AK021673  | 62281.93  | 56811.055 | NM_006254 | 8374.043  | 9528.711  |
| NM_014859 | 1510.951  | 1566.239  | AB014543  | 17594.75  | 16557.998 | X95425    | 30683.213 | 30105.127 |
| AF311912  | 1063.214  | 1080.736  | NM_018445 | 7691.559  | 10315.308 | NM_004422 | 11564.544 | 10883.474 |
| NM_001116 | 764.585   | 762.075   | AK022743  | 16403.625 | 16028.085 | NM_016562 | 6475.877  | 6360.224  |
| BC035395  | 27494.721 | 25935.016 | AF035306  | 4418.721  | 4367.206  | M33197    | 66622.883 | 67743.086 |
| NM_001703 | 22808.402 | 21891.08  | AK091662  | 1237.653  | 1453.752  | AY009399  | 37795.207 | 44412.684 |
| NM_020126 | 4680.211  | 4386.954  | AB038318  | 823.492   | 780.554   | NM_004895 | 51024.145 | 48765.078 |
| NM_013982 | 11822.315 | 8180.339  | NM_003954 | 3985.805  | 3781.6    | U59748    | 11652.004 | 12971.159 |
| NM_005049 | 13986.064 | 9744.83   | NM_016348 | 2353.558  | 2066.678  | L32537    | 891.767   | 844.201   |
| NM_003882 | 963.271   | 826.585   | AF009290  | 570.647   | 383.172   | NM_014303 | 50969.836 | 42217.859 |
| NM_004630 | 18322.059 | 11053.726 | AK022003  | 910.499   | 775.161   | AF130062  | 682.425   | 937.355   |
| AK023001  | 6933.221  | 7654.095  | AK023877  | 868.889   | 633.703   | NM_014863 | 1034.997  | 1257.539  |
| AF201947  | 2324.838  | 2188.368  | AK024046  | 6628.674  | 7513.667  | M33197    | 62627.902 | 64581.859 |
| U01147    | 8623.121  | 6854.853  | NM_017931 | 8083.311  | 8102.495  | M95610    | 44159.039 | 45756.266 |
| NM_004040 | 6362.22   | 7183.225  | AK022793  | 3613.386  | 3724.48   | NM_003118 | 3160.536  | 3233.198  |
| NM_006116 | 4212.438  | 5142.816  | AJ227910  | 6038.441  | 5165.849  | L02922    | 27807.465 | 24827.762 |
| NM_005456 | 455.135   | 655.653   | AF001893  | 11733.357 | 8805.208  | NM_004045 | 31743.699 | 23888.203 |
| BF219403  | 11173.849 | 11516.24  | X04236    | 18108.887 | 21965.996 | NM_001891 | 6721.439  | 5831.807  |
| NM_016119 | 11138.274 | 11240.371 | AK093746  | 27365.355 | 29020.34  | NM_012139 | 49508.633 | 47728.32  |
| AK075450  | 851.116   | 878.286   | D16875    | 787.366   | 797.891   | AF121856  | 14931.758 | 15974.867 |
| AF178983  | 2118.435  | 1864.95   | AK027171  | 4167.866  | 4149.876  | NM_006421 | 11015.638 | 12373.043 |
| NM_001324 | 17398.176 | 15124.641 | AK021945  | 16213.185 | 19311.461 | NM_017457 | 31740.328 | 32448.289 |
| AB037795  | 4606.25   | 4447.46   | L23545    | 2947.909  | 2750.221  | NM_003765 | 26029.049 | 26212.453 |
| D43949    | 5202.196  | 5129.355  | AK024153  | 5146.983  | 5786.678  | NM_005868 | 1764.062  | 2542.148  |
| AF111849  | 38870.383 | 37195.047 | Y10516    | 14624.866 | 14270.704 | M33197    | 59521.152 | 65018.367 |
| AK022975  | 3900.223  | 3448.803  | AF056451  | 13076.938 | 15804.824 | NM_018202 | 64379.188 | 63612.145 |
| NM_015344 | 2573.195  | 2255.328  | AF015039  | 15221.673 | 16129.97  | AB023197  | 22149.232 | 19772.305 |
| NM_004288 | 9069.762  | 9234.64   | U50528    | 4455.628  | 4999.734  | NM_022173 | 42649.805 | 41043.156 |
| AL122055  | 9150.596  | 8493.336  | AB020632  | 5616.593  | 5724.821  | AB040970  | 8952.313  | 9902.479  |
| NM_005132 | 53474.953 | 54765.309 | NM_018614 | 69195.156 | 62577.23  | NM_018330 | 5135.697  | 5734.341  |
| X07695    | 1128.422  | 1180.276  | AL117549  | 5057.632  | 4531.349  | AB023222  | 2673.529  | 3364.961  |
| D87458    | 3406.854  | 3598.822  | NM_005222 | 11825.078 | 10446.892 | AB033088  | 5869.937  | 7105.648  |
| AK021750  | 8974.517  | 5537.52   | BC024308  | 7405.37   | 6304.745  | M33197    | 60141.27  | 62388.16  |
| NM_003626 | 5295.745  | 3502.106  | NM_000538 | 6207.938  | 5803.927  | U50342    | 54561.215 | 51555.984 |
| NM_006932 | 3274.637  | 3608.899  | AK001838  | 73949.625 | 62902.68  | NM_000295 | 1681.188  | 1186.803  |
| AB032989  | 1548.632  | 1596.659  | NM_018295 | 5157.248  | 4330.976  | NM_001080 | 6125.281  | 6259.268  |
| AB010099  | 7775.364  | 5552.64   | AF070574  | 1982.297  | 1604.327  | NM_001482 | 2365.018  | 2312.588  |
| AB039920  | 6302.43   | 7132.514  | AF190900  | 6438      | 7052.773  | NM_001215 | 789.697   | 677.501   |
| AB046782  | 7532.955  | 7861.682  | NM_020404 | 39674.797 | 46618.934 | U80018    | 3360.924  | 4329.284  |
| AF300612  | 38135.996 | 41772.355 | BE972401  | 20790.08  | 22763.377 | NM_000717 | 3364.789  | 3297.986  |
| AF208005  | 4058.871  | 4490.737  | U56725    | 600.158   | 827.836   | M33197    | 60525.879 | 65710.359 |
| NM_002231 | 43440.289 | 40851.762 | NM_017425 | 2399.607  | 2302.302  | NM_004845 | 18024.723 | 17497.857 |
| NM_020474 | 20943.068 | 21079.105 | AB007922  | 1806.082  | 1951.553  | NM_007107 | 15926.15  | 14558.34  |
| NM_002643 | 6311.076  | 6836.166  | NM_015982 | 7121.717  | 7327.22   | NM_000047 | 61457.477 | 57487.844 |
| NM_017807 | 8817.676  | 8212.407  | NM_003746 | 59565.379 | 56210.207 | M68874    | 879.777   | 967.865   |
| NM_014746 | 2795.605  | 3009.077  | NM_002910 | 67523.328 | 66350.648 | NM_006319 | 20669.023 | 30570.299 |
| NM_002788 | 56246.582 | 59981.922 | AC096970  | 47836.426 | 52869.059 | NM_018226 | 4622.782  | 5566.289  |
| NM_000462 | 13943.932 | 14866.118 | NM_014627 | 12012.944 | 10146.285 | NM_004605 | 1829.646  | 2663.159  |
| NM_003336 | 16834.805 | 16085.989 | NM_013938 | 39683.828 | 40250.902 | Z36813    | 13265.667 | 12011.251 |
| NM_005805 | 18723.066 | 19393.383 | NM_013986 | 67467.047 | 62583.129 | NM_006660 | 16549.707 | 19110.383 |
| NM_004181 | 14809.78  | 12058.012 | U55055    | 3164.315  | 4419.484  | NM_001486 | 1748.027  | 1951.165  |
| NM_003900 | 32329.414 | 26100.744 | AK022186  | 635.992   | 790.15    | NM_004727 | 1451.418  | 1643.68   |
| NM_003337 | 7904.204  | 7201.885  | AK021485  | 611.802   | 710.954   | NM_000555 | 3152.106  | 4761.437  |

|           |           |           |           |           |           |           |           |           |
|-----------|-----------|-----------|-----------|-----------|-----------|-----------|-----------|-----------|
| AF298152  | 5683.311  | 4019.271  | AB018319  | 8647.967  | 8435.38   | NM_00668E | 62157.398 | 60296.77  |
| AF117233  | 17739.25  | 17997.578 | AK001101  | 6436.013  | 5098.915  | M33197    | 56562.273 | 53524.215 |
| NM_01584E | 1202.109  | 1136.908  | BM973473  | 2972.01   | 2442.91   | AF154121  | 1165.608  | 714.802   |
| NM_001723 | 3832.652  | 4102.945  | AK021637  | 1904.347  | 1877.758  | M33197    | 66783.828 | 76127.023 |
| NM_01601E | 3198.309  | 2147.3    | AK021658  | 1758.976  | 1157.635  | NM_01654E | 10571.187 | 9422.472  |
| M94362    | 34681.711 | 32691.553 | D61705    | 848.48    | 833.449   | NM_00144C | 60711.918 | 60511.648 |
| AK024707  | 5139.99   | 4361.647  | U17631    | 2714.547  | 2692.563  | NM_001201 | 5504.019  | 5787.927  |
| AK022909  | 5484.341  | 6325.63   | AL137723  | 4639.286  | 4233.125  | NM_01661E | 2107.234  | 1891.016  |
| NM_00653C | 15910.828 | 14731.005 | AL137311  | 547.699   | 705.4     | AB014568  | 58311.066 | 54083.691 |
| NM_003587 | 4993.981  | 5152.588  | NM_01428E | 18111.865 | 21822.189 | AK022238  | 688.828   | 906.173   |
| X90978    | 4004.77   | 4945.336  | AF035300  | 3524.493  | 3852.774  | NM_01224C | 16707.688 | 17484.244 |
| NM_004387 | 878.353   | 911.399   | NM_017703 | 15537.382 | 16381.747 | AK022546  | 42089.926 | 39620.742 |
| AF217226  | 9687.024  | 7947.116  | NM_01532C | 5910.991  | 6068.269  | NM_014067 | 46986.066 | 46397.512 |
| AL359578  | 742.843   | 907.957   | NM_00405E | 4297.087  | 4636.582  | NM_002914 | 19578.24  | 20002.217 |
| NM_005522 | 1875.412  | 2440.461  | NM_01472E | 44299.531 | 56517.797 | NM_02038E | 6895.9    | 7083.184  |
| NM_00576C | 14675.034 | 12748.369 | AJ297349  | 2711.996  | 2555.497  | NM_014877 | 516.619   | 794.653   |
| NM_014212 | 4749.604  | 4430.343  | NM_00582E | 6552.544  | 5715.185  | NM_006541 | 2080.633  | 2697.503  |
| NM_00726E | 5975.541  | 6452.387  | NM_00161E | 5948.542  | 5305.446  | M33197    | 62691.883 | 64468.488 |
| AK023639  | 33959.926 | 34443.313 | NM_00659E | 6444.663  | 6339.706  | NM_00570E | 7589.777  | 8303.621  |
| AL122118  | 1168.91   | 1489.177  | NM_004463 | 973.382   | 1253.04   | NM_00432E | 6675.713  | 7483.26   |
| AL137700  | 3277.511  | 3602.515  | NM_00593E | 3279.07   | 3051.722  | NM_004581 | 14351.612 | 15299.055 |
| NM_004904 | 4780.1    | 4631.639  | U43586    | 3848.488  | 3610.035  | NM_006817 | 29806.102 | 37934.375 |
| NM_003083 | 4363.902  | 4595.516  | NM_006271 | 11989.181 | 11263.862 | NM_00710E | 30067.035 | 36754.18  |
| NM_00678E | 12328.776 | 11597.797 | NM_018647 | 2037.911  | 2176.708  | NM_015921 | 48470.613 | 52517.344 |
| NM_000982 | 8342.728  | 7109.586  | NM_00302E | 1098.062  | 860.461   | AB040900  | 21739.6   | 23779.895 |
| NM_012423 | 60425.238 | 58624.875 | NM_000721 | 67781.703 | 66772.82  | CY3Cy5    | 3487.071  | 192.131   |
| AK026367  | 62027.898 | 52511.723 | NM_003933 | 3955.561  | 3857.282  | NM_006917 | 3614.016  | 4034.156  |
| AK026491  | 58104.234 | 59779.555 | NM_01864C | 869.56    | 669.054   | AF086225  | 2180.18   | 2243.915  |
| NM_00419C | 61197.684 | 59780.238 | NM_00509E | 5415.867  | 5540.598  | NM_005844 | 28533.568 | 26539.361 |
| NM_01427E | 27573.207 | 23313.201 | NM_00005E | 969.081   | 726.019   | AK024941  | 7414.248  | 5633.375  |
| NM_00040E | 4046.348  | 3621.215  | NM_003163 | 21515.018 | 19455.355 | AF056434  | 9966.061  | 8329.94   |
| NM_00092C | 2487.175  | 2901.417  | NM_01620E | 10246.361 | 8549.054  | AF086199  | 3679.617  | 3074.27   |
| NM_02037E | 23979.266 | 26274.012 | NM_00575E | 11768.443 | 10842.413 | M33197    | 80957.633 | 65490.355 |
| NM_01604E | 40929.426 | 43720.879 | AF149724  | 4803.646  | 4573.076  | AK025489  | 5708.682  | 4351.347  |
| NM_013311 | 23426.525 | 23612.184 | BC020745  | 2037.237  | 1656.725  | AB075853  | 867.667   | 1040.82   |
| NM_000291 | 59211.258 | 62958.992 | NM_006367 | 43459.746 | 56052.977 | AL390152  | 15637.91  | 14376.912 |
| NM_018081 | 5675.715  | 5596.006  | NM_006732 | 67397.508 | 74230.164 | AK026721  | 4683.748  | 4475.497  |
| NM_01464E | 8527.09   | 8297.253  | NM_004354 | 15598.683 | 18307.598 | AK023027  | 17323.008 | 16123.728 |
| AL117488  | 2856.642  | 2336.43   | NM_004661 | 6995.956  | 6566.136  | AK025598  | 2877.682  | 2722.578  |
| NM_01224C | 8374.69   | 8220.263  | NM_00200E | 1576.274  | 1236.799  | AB002348  | 75108.102 | 65156.879 |
| NM_01900E | 7892.999  | 8143.753  | NM_00161C | 5549.781  | 5473.159  | NM_006917 | 4211.133  | 3904.153  |
| NM_00473E | 7002.57   | 6401.356  | NM_001241 | 2957.834  | 2700.14   | SR2       | 49068.152 | 56822.398 |
| AV752216  | 4664.763  | 4634.589  | AF217504  | 5441.168  | 5689.061  | SR4       | 17772.879 | 18761.84  |
| NM_005341 | 6798.638  | 6476.559  | AK027102  | 23156.342 | 21656.58  | SR6       | 1961.362  | 2429.591  |
| AF181999  | 3834.334  | 3831.137  | AL109714  | 1735.616  | 2017.339  | SR8       | 6678.977  | 25697.561 |
| NM_001934 | 7351.113  | 6719.849  | NM_004632 | 9655.766  | 10310.615 | SR10      | 20704.623 | 9461.837  |
| AB011090  | 4304.572  | 4107.168  | NM_01791E | 11632.357 | 12253.009 | CY3Cy5    | 2172.396  | 119.279   |
| NM_00020E | 972.588   | 534.954   | NM_01445E | 12253.328 | 11489.415 | AK025948  | 1044.401  | 985.835   |
| NM_01868E | 19594.018 | 19592.928 | NM_00474C | 24213.014 | 20741.246 | AK000674  | 1594.113  | 2249.515  |
| NM_01894E | 10482.775 | 10462.639 | NM_00380E | 3896.524  | 4489.423  | AJ238555  | 2429.763  | 3337.08   |
| NM_005531 | 16465.391 | 14477.786 | NM_01988E | 12825.367 | 14256.1   | AL353948  | 72019.867 | 64722.781 |
| NM_006977 | 2528.32   | 1881.127  | NM_00327E | 65368.914 | 64832.082 | M33197    | 78559.727 | 65376.316 |
| NM_00247E | 947.742   | 985.927   | NM_00042E | 1174.438  | 1004.079  | AK025869  | 26457.699 | 20736.609 |



|           |           |           |           |           |           |           |           |           |
|-----------|-----------|-----------|-----------|-----------|-----------|-----------|-----------|-----------|
| NM_00034E | 4146.083  | 4589.698  | M29540    | 542.115   | 503.461   | AL050088  | 14986.281 | 12990.857 |
| NM_00505E | 29781.123 | 37052.699 | AK021957  | 67783.844 | 69083.086 | AK024939  | 5398.746  | 5043.334  |
| NM_00495C | 2943.953  | 3638.845  | U95031    | 2642.426  | 2507.609  | AK001561  | 21527.314 | 17376.746 |
| NM_000724 | 8493.161  | 8845.374  | NM_004771 | 6205.351  | 6627.475  | AB007880  | 10564.985 | 10299.892 |
| NM_002557 | 9886.454  | 9360.008  | AL365514  | 3302.807  | 3562.526  | AK024950  | 6035.209  | 6421.332  |
| NM_004477 | 621.604   | 983.482   | NM_01829E | 4667.854  | 4814.9    | M33197    | 71044.969 | 64767.688 |
| BE728156  | 952.441   | 1015.605  | NM_002104 | 2854.474  | 3743.242  | NM_01414E | 17979.699 | 19121.438 |
| AI417775  | 415.547   | 495.829   | NM_005504 | 32271.525 | 43541.516 | AF147356  | 1015.151  | 1649.822  |
| BI762229  | 17441.672 | 19513.828 | AF234654  | 3991.892  | 4854.955  | NM_01884E | 3959.073  | 4072.175  |
| AA131406  | 662.288   | 418.863   | NM_000110 | 5121.803  | 5325.806  | AL049461  | 1307.845  | 977.336   |
| BG618320  | 2032.763  | 1556.19   | NM_01600E | 56185.215 | 56082.09  | AL109782  | 21250.824 | 20644.363 |
| Y00787    | 1180.631  | 1129.862  | NM_01454E | 4029.248  | 5342.257  | M33197    | 65905.719 | 64810.363 |
| NM_00727E | 7045.205  | 6176.587  | NM_000531 | 1591.48   | 1919.505  | AK026259  | 66794.805 | 64414.305 |
| N34462    | 3481.085  | 3451.059  | NM_01783E | 4726.455  | 4696.953  | M33197    | 66575.727 | 64497.25  |
| AI658778  | 18207     | 16812.209 | NM_00171E | 11782.282 | 11649.272 | NM_01812E | 2529.925  | 2191.546  |
| L19067    | 11220.946 | 9908.414  | NM_015367 | 29548.504 | 32205.785 | AK024506  | 17060.359 | 16309.826 |
| Z48482    | 1618.411  | 1001.232  | NM_01449E | 11762.837 | 12153.555 | NM_01417E | 5669.331  | 5388.063  |
| W60413    | 2362.82   | 2092.032  | NM_00237E | 36259.219 | 34789.766 | AF086326  | 12851.842 | 12626.048 |
| BI823365  | 4204.934  | 5345.253  | NM_00098E | 66248.219 | 65762.805 | M33197    | 65997.797 | 64433.348 |
| X06318    | 1490.528  | 1172.144  | NM_00181E | 6159.588  | 4729.068  | AL049937  | 1159.132  | 1617.7    |
| NM_019101 | 1729.452  | 1101.151  | AF055016  | 11147.047 | 8322.483  | AL080057  | 1984.379  | 2369.482  |
| NM_013247 | 7132.73   | 7763.63   | NM_007234 | 22397.893 | 19950.559 | M33197    | 65690.594 | 66969.25  |
| NM_00677C | 2679.75   | 3667.664  | Y16704    | 65638.109 | 59698.977 | M33197    | 67470.688 | 64479.328 |
| BE394704  | 1818.335  | 1568.738  | NM_014567 | 11088.586 | 9293.215  | AK024470  | 3778.151  | 3740.645  |
| NM_00470E | 9265.944  | 10094.346 | NM_01784E | 4201.376  | 3598.91   | NM_01793E | 1553.396  | 1758.777  |
| NM_00151E | 721.603   | 682.528   | NM_019057 | 14277.59  | 11801.398 | NM_00422E | 8022.477  | 7027.698  |
| NM_01470E | 10269.33  | 12035.702 | NM_002677 | 3485.364  | 3635.141  | AL137436  | 1204.45   | 889.059   |
| AK023172  | 1485.081  | 1687.128  | NM_01208E | 1633.437  | 1924.943  | AK023400  | 2931.702  | 3246.466  |
| AF139768  | 815.194   | 883.14    | NM_001537 | 10929.215 | 11566.301 | AK023961  | 1455.819  | 1207.888  |
| AJ001348  | 903.876   | 858.748   | U80743    | 3251.707  | 3034.587  | M33197    | 69202.484 | 64623.672 |
| NM_014007 | 2155.357  | 3359.762  | NM_00135E | 15202.718 | 15412.556 | AF056430  | 3603.464  | 3137.535  |
| AB033006  | 4831.354  | 5039.419  | D15050    | 3214.051  | 2559.433  | AF009291  | 2883.806  | 2701.605  |
| AF020314  | 1137.065  | 1110.602  | NM_014724 | 722.958   | 565.479   | M33197    | 70129.297 | 64797.977 |
| NM_01633E | 14024.24  | 11880.688 | NM_006527 | 24003.459 | 22899.176 | NM_01805E | 10328.429 | 10979.203 |
| AK023936  | 1815.753  | 1584.123  | NM_006627 | 7339.38   | 6789.697  | AK002199  | 4433.208  | 3301.607  |
| NM_006457 | 3876.738  | 4420.538  | NM_00736E | 37430.23  | 34852.305 | AK021662  | 3674.248  | 3897.895  |
| NM_00368E | 3668.819  | 3356.014  | NM_00309E | 58374.852 | 57688.59  | AK001038  | 2563.332  | 2503.903  |
| NM_000207 | 2198.94   | 1754.84   | U05589    | 3413.336  | 3589.424  | AK001802  | 2187.969  | 2067.411  |
| NM_002531 | 620.931   | 686.03    | NM_01447E | 28009.152 | 29136.281 | AK021469  | 4941.132  | 4504.069  |
| NM_006314 | 10304.088 | 8893.431  | NM_00309E | 64552.09  | 63676.426 | AK021706  | 4838.191  | 4949.219  |
| NM_00178E | 17869.969 | 15308.874 | NM_01638E | 6370.051  | 6388.997  | M33197    | 64784.758 | 66121     |
| NM_002754 | 1731.637  | 1482.293  | NM_00229E | 66517.641 | 60254.504 | AK023633  | 3668.701  | 4624.701  |
| NM_000797 | 3398.518  | 3406.997  | NM_00313E | 32066.848 | 26761.271 | M84507    | 1674.474  | 1948.542  |
| NM_014927 | 1304.952  | 1449.421  | NM_00176E | 32689.297 | 28469.455 | NM_00537E | 845.418   | 1055.261  |
| AF217525  | 1475.967  | 1232.369  | NM_01630E | 27287.98  | 25474.172 | NM_00617E | 3765.643  | 2582.445  |
| AL080148  | 2376.201  | 1843.979  | NM_00375E | 2467.157  | 2271.277  | AL360165  | 6131.122  | 4835.577  |
| AF000381  | 6582.667  | 8037.435  | NM_01323E | 7784.701  | 7397.002  | M33197    | 72087.992 | 64740.188 |
| NM_01807E | 678.939   | 646.768   | BE258640  | 47357.98  | 44306.785 | AJ008132  | 26471.961 | 23605.32  |
| NM_01210E | 7273.106  | 9074.23   | NM_003314 | 14633.955 | 12467.085 | NM_005281 | 13981.313 | 15033.738 |
| S82470    | 9750.791  | 9520.584  | NM_01662E | 27328.557 | 29874.262 | NM_00554E | 13063.495 | 13159.162 |
| AB020695  | 697.303   | 718.208   | NM_001334 | 29944.074 | 22367.055 | AJ008115  | 55346.988 | 52604.156 |
| AB028982  | 1837.447  | 2122.12   | NM_00124E | 3470.962  | 3247.145  | AF083125  | 5087.886  | 3911.892  |
| NM_002004 | 5271.351  | 5766.787  | AL365411  | 13668.797 | 14329.252 | U72851    | 2518.976  | 2392.521  |

|           |           |           |           |           |           |           |           |           |
|-----------|-----------|-----------|-----------|-----------|-----------|-----------|-----------|-----------|
| NM_005121 | 1743.884  | 2215.085  | M24470    | 1810.901  | 1858.362  | M33197    | 71537.539 | 64698.953 |
| NM_000747 | 3984.005  | 4095.613  | NM_016066 | 25476.107 | 28046.334 | AK022970  | 1870.906  | 2277.953  |
| AJ275973  | 19316.879 | 19257.6   | NM_001249 | 1668.215  | 2117.884  | AK026212  | 2680.644  | 2925.153  |
| U76362    | 1091.687  | 1320.185  | AK024677  | 3279.213  | 3509.705  | AF086222  | 3449.432  | 3471.756  |
| NM_00306C | 793.144   | 711.047   | NM_000036 | 3731.527  | 4045.314  | AF086415  | 11613.824 | 10834.021 |
| AK021489  | 57068.992 | 58282.313 | AF254082  | 64253.859 | 64444.664 | AJ227885  | 2597.622  | 1809.581  |
| NM_00452E | 1203.471  | 1535.066  | AF205718  | 25677.523 | 26339.686 | AK026859  | 1933.932  | 1571.923  |
| NM_00389E | 1228.967  | 1177.926  | NM_00342C | 2217.644  | 2494.907  | D86961    | 3524.556  | 2011.233  |
| NM_004317 | 11728.544 | 10748.5   | AY004252  | 2274.682  | 2236.356  | AJ227896  | 51120.234 | 42690.387 |
| NM_01464E | 5257.53   | 4377.104  | NM_006261 | 10901.146 | 13797.579 | L32841    | 10931.299 | 10038.702 |
| NM_01470E | 6629.845  | 4570.324  | AK027045  | 3368.89   | 4824.065  | M33197    | 64440.824 | 63711.855 |
| NM_00369E | 4447.449  | 4046.955  | AF169796  | 7889.659  | 8406.57   | AF131770  | 12485.422 | 10085.06  |
| NM_00035E | 25877.141 | 41426.832 | AK026157  | 1403.428  | 1457.998  | NM_00643E | 28792.662 | 25203.834 |
| NM_018134 | 7936.267  | 7748.819  | AK001814  | 20365.9   | 17152.898 | AF025441  | 3322.757  | 3812.689  |
| L27479    | 2787.305  | 3272.509  | NM_00722E | 4799.299  | 4247.055  | U62823    | 9641.936  | 11162.761 |
| NM_00219E | 1153.631  | 1422.459  | NM_00343E | 9992.94   | 7965.982  | NM_00353E | 40651.664 | 44488.477 |
| NM_00138E | 13113.36  | 14988.148 | NM_016291 | 18357.16  | 15438.425 | AK026768  | 7693.702  | 7690.256  |
| X76770    | 10951.834 | 12533.396 | NM_005937 | 62972.727 | 59762.207 | M33197    | 65861.633 | 64008.527 |
| AB037808  | 5623.783  | 6151.076  | AB037809  | 4221.818  | 3273.738  | AK000852  | 63299.258 | 60451.363 |
| NM_00591E | 487.194   | 777.164   | AB011129  | 2914.444  | 2457.992  | AF251188  | 14190.734 | 14146.504 |
| NM_01603E | 20041.82  | 23591.588 | NM_014391 | 34214.59  | 29311.68  | AK026418  | 9768.609  | 9049.462  |
| AF090911  | 500.128   | 804.462   | NM_00427C | 4633.203  | 3867.977  | AF086194  | 56491.805 | 48906.727 |
| Z36821    | 9979.231  | 11546.951 | L09102    | 66978.258 | 74471.563 | AK026811  | 10432.808 | 9445.299  |
| AF289485  | 12945.857 | 16401.998 | U68488    | 1303.865  | 1526.774  | NM_00030C | 4200.388  | 4393.58   |
| AF130092  | 1891.532  | 2327.543  | NM_00067E | 1253.623  | 1477.533  | M33197    | 65164.723 | 69425.219 |
| NM_01609E | 10822.396 | 10863.39  | NM_016247 | 25284.439 | 29297.924 | AV756917  | 5831.779  | 5864.614  |
| AK024794  | 5102.857  | 4896.163  | NM_001157 | 1110.265  | 874.256   | NM_01838C | 25678.691 | 20584.973 |
| NM_01985E | 12267.598 | 11910.172 | NM_01228E | 2048.154  | 2833.716  | AK001442  | 6627.484  | 5018.18   |
| NM_01799E | 3611.59   | 3252.448  | NM_00671C | 1309.018  | 1388.233  | NM_01207C | 3772.391  | 2642.259  |
| NM_00540C | 1942.931  | 2247.638  | NM_00332E | 32075.135 | 35719.223 | NM_01903E | 1903.334  | 1497.638  |
| BF851643  | 350.652   | 616.261   | BG685310  | 6240.417  | 6790.009  | AF183423  | 2919.344  | 2185.123  |
| AK023061  | 1865.614  | 1814.802  | AW300857  | 63321.395 | 60608.883 | M33197    | 65889.844 | 64664.828 |
| NM_00725E | 3179.415  | 2541.531  | H85962    | 62538.102 | 61639.379 | U92023    | 2084.167  | 1589.84   |
| NM_00366E | 11086.153 | 9818.723  | BG742446  | 4129.053  | 5299.371  | U12129    | 11583.68  | 8987.055  |
| NM_013384 | 60956.793 | 60283.016 | AA864554  | 2557.573  | 2840.289  | S81242    | 65920.273 | 65869.914 |
| NM_001187 | 4082.099  | 3414.082  | X66945    | 10574.264 | 9009.203  | AF230801  | 4858.625  | 4874.254  |
| NM_018241 | 7399.199  | 9374.64   | AI160703  | 2113.524  | 2466.228  | AF075072  | 6807.687  | 7918.823  |
| NM_005834 | 18378.705 | 25828.141 | X12830    | 7554.864  | 6704.653  | M33197    | 70753.719 | 64464.941 |
| NM_00505E | 24061.477 | 27205.455 | U00482    | 4795.529  | 4331.342  | NM_00250E | 8861.262  | 9586.644  |
| NM_00495C | 2560.54   | 3056.668  | Z80998    | 543.015   | 906.278   | U38442    | 1575.706  | 1346.939  |
| NM_000724 | 8243.822  | 10052.195 | K01904    | 40238.895 | 39455.164 | AF110136  | 2246.596  | 2157.652  |
| NM_002557 | 10544.551 | 11883.989 | BE538886  | 2821.326  | 2274.724  | AK026706  | 5510.969  | 5180.67   |
| NM_004477 | 997.58    | 1309.096  | NM_00222E | 2090.672  | 1469.179  | AB007936  | 66193.773 | 64356.199 |
| BE728156  | 937.915   | 1068.613  | M57650    | 63446.238 | 62771.711 | AF005258  | 2543.482  | 2428.225  |
| BI762229  | 18372.125 | 23449.92  | BC023978  | 4092.064  | 4110.358  | NM_01541E | 15240.397 | 14022.828 |
| AA131406  | 790.526   | 1168.824  | M21302    | 12693.275 | 11911.153 | NM_00389E | 14449.33  | 13850.791 |
| BG618320  | 1803.437  | 2141.896  | NM_00251E | 64446.918 | 62214.297 | X99662    | 17095.998 | 17679.375 |
| Y00787    | 925.973   | 838.111   | NM_00490E | 2380.142  | 2868.738  | NM_00347E | 67653.758 | 64352.988 |
| NM_00727E | 6747.109  | 5741.501  | NM_016171 | 65549.289 | 66886.688 | NM_01432E | 3771.465  | 3567.032  |
| N34462    | 3205.471  | 3562.919  | NM_01444E | 12608.973 | 12437.726 | M33197    | 65491.41  | 65388.68  |
| AI658778  | 17722.887 | 19063.023 | NM_00521E | 9902.709  | 10317.758 | NM_01775E | 1169.673  | 1401.978  |
| L19067    | 11494.25  | 12327.031 | M14584    | 1462.227  | 1342.46   | NM_00601E | 62158.613 | 62699.945 |
| Z48482    | 1488.333  | 983.142   | NM_00641E | 6456.367  | 6165.111  | NM_00188E | 1698.949  | 3174.803  |

|           |           |           |           |           |           |           |           |           |
|-----------|-----------|-----------|-----------|-----------|-----------|-----------|-----------|-----------|
| W60413    | 1520.51   | 1449.71   | AF035035  | 1566.786  | 1753.383  | NM_014891 | 19043.746 | 25851.227 |
| BI823365  | 3189.076  | 2711.586  | AB020676  | 3947.828  | 3780.27   | NM_013392 | 20217.814 | 21276.383 |
| X06318    | 1090.109  | 903.497   | AK024715  | 1622.425  | 1886.182  | M33197    | 65616.953 | 66228.578 |
| NM_016217 | 21533.09  | 17304.805 | U90942    | 62175.352 | 62367.258 | NM_003236 | 4727.695  | 5440.853  |
| AK025971  | 13697.938 | 16502.629 | NM_014942 | 1575.058  | 1584.035  | NM_003458 | 1935.906  | 1341.208  |
| NM_002618 | 5751.993  | 10334.361 | NM_018360 | 8537.58   | 8760.181  | AF052692  | 2375.611  | 2485.698  |
| BE394704  | 1173.13   | 1675.306  | AL365415  | 1948.025  | 2044.688  | AL079314  | 5660.055  | 5783.174  |
| NM_004703 | 8339.415  | 9267.988  | L29147    | 63491.367 | 63226.172 | NM_001260 | 7699.567  | 6503.152  |
| NM_001512 | 655.677   | 1149.592  | NM_001525 | 66284.477 | 65235.152 | NM_018117 | 6810.136  | 4117.324  |
| NM_014706 | 9158.558  | 10229.149 | NM_006055 | 13183.731 | 13918.165 | NM_006995 | 3492.935  | 2909.756  |
| AK023172  | 1520.005  | 2056.59   | NM_004296 | 2258.173  | 2433.51   | NM_006286 | 2345.384  | 2146.119  |
| AF139768  | 840.867   | 1070.909  | NM_005048 | 2168.55   | 2058.137  | M33197    | 66515.883 | 64349.465 |
| AJ001348  | 916.622   | 891.689   | NM_005972 | 3265.006  | 2721.392  | NM_004331 | 16818.262 | 19576.723 |
| NM_014007 | 2131.884  | 3766.926  | NM_001060 | 1405.711  | 1356.053  | BE886648  | 3761.093  | 2034.533  |
| AB033006  | 4247.216  | 4521.398  | NM_018841 | 17150.371 | 15363.307 | NM_015703 | 34613.66  | 48210.848 |
| AF020314  | 924.016   | 1102.084  | NM_005226 | 2485.056  | 2333.983  | AB018337  | 5204.733  | 6848.13   |
| NM_016332 | 14895.999 | 14750.847 | AK022859  | 4301.653  | 3917.714  | NM_014485 | 3813.994  | 4400.165  |
| AK023936  | 2066.348  | 2148.641  | NM_020228 | 15582.797 | 19577.078 | AK025273  | 5491.716  | 5818.784  |
| NM_006457 | 3999.028  | 4657.241  | AK024685  | 6098.49   | 6638.987  | M33197    | 65698.727 | 67872.43  |
| NM_003682 | 3737.663  | 3959.656  | NM_003676 | 17658.105 | 20799.186 | NM_002214 | 1947.61   | 1936.068  |
| NM_000207 | 1375.515  | 1544.734  | AF113007  | 32876.23  | 36743.645 | NM_001911 | 9544.944  | 6268.277  |
| NM_002531 | 610.556   | 513.363   | NM_000688 | 8206.745  | 8430.432  | NM_006503 | 3691.742  | 2692.847  |
| NM_006314 | 9926.57   | 8693.42   | U39573    | 2185.464  | 2216.136  | AB002321  | 2744.891  | 665.642   |
| NM_001782 | 17092.42  | 14976.313 | D82061    | 11656.343 | 13551.578 | M33197    | 7388.955  | 7865.735  |
| NM_002754 | 1389.511  | 1186.581  | AJ293009  | 7573.375  | 8125.468  | AB020698  | 4692.127  | 3179.51   |
| NM_000797 | 2365.017  | 2458.872  | NM_000374 | 5620.432  | 6124.641  | NM_004651 | 7170.916  | 5339.287  |
| NM_014927 | 622.952   | 543.222   | NM_000502 | 17185.754 | 18989.631 | NM_003363 | 771.411   | 731.531   |
| AF217525  | 676.865   | 630.224   | BF088089  | 536.211   | 790.387   | M33197    | 63622.672 | 61807.895 |
| AL080148  | 2434.835  | 2439.617  | NM_001359 | 36499.316 | 47930.871 | NM_017565 | 29050.115 | 30113.797 |
| NM_002479 | 2124.48   | 1598.311  | NM_002245 | 1779.223  | 1695.255  | NM_001456 | 2938.29   | 3228.077  |
| NM_000348 | 5170.02   | 8016.574  | NM_004980 | 49738.426 | 50474.77  | NM_002906 | 1119.997  | 1631.857  |
| NM_018075 | 588.606   | 744.337   | NM_003224 | 4767.386  | 4430.488  | AK024480  | 3215.708  | 3232.578  |
| NM_012105 | 6520.491  | 8706.761  | NM_004227 | 3657.396  | 3742.093  | Y13871    | 52253.566 | 54432.441 |
| S82470    | 10069.945 | 9800.813  | NM_005282 | 9623.529  | 9962.937  | NM_012134 | 1044.628  | 1045.909  |
| AB020695  | 531.109   | 530.618   | NM_001736 | 7356.675  | 8104.231  | AL137725  | 50340.914 | 28848.658 |
| AB028982  | 1316.033  | 1534.969  | AB028949  | 1289.857  | 1339.466  | M33197    | 65399.859 | 67906.383 |
| NM_002004 | 4838.033  | 5276.995  | AL137580  | 2467.926  | 2346.074  | X74070    | 63396.395 | 65976.016 |
| NM_005121 | 1743.892  | 2478.799  | NM_004101 | 2638.658  | 2614.325  | AF027219  | 3157.844  | 3719.895  |
| NM_000747 | 3817.994  | 4685.577  | NM_002995 | 63427.398 | 59746.902 | NM_006333 | 16318.282 | 18622.195 |
| AJ275973  | 16034.541 | 16112.53  | AB033114  | 1186.095  | 1271.472  | M33197    | 63299.406 | 65214.152 |
| U76362    | 1007.091  | 1236.442  | NM_015978 | 11959.703 | 10997.143 | NM_007043 | 3862.173  | 3464.354  |
| NM_003060 | 927.59    | 723.867   | NM_003810 | 4064.258  | 3270.259  | BE378791  | 1499.733  | 1714.533  |
| AK021489  | 52227.41  | 55822.551 | NM_018973 | 19242.16  | 18205.162 | U94388    | 3728.547  | 3876.617  |
| NM_004525 | 1460.861  | 1644.928  | NM_002591 | 49583.145 | 45600.84  | NM_012322 | 12369.859 | 13512.467 |
| NM_003895 | 1170.992  | 1559.779  | AL049334  | 1018.075  | 1604.549  | M33197    | 65319.488 | 67144.227 |
| NM_004317 | 10740.143 | 12731.658 | NM_020216 | 6128.539  | 7051.999  | NM_004885 | 65841.172 | 65864.719 |
| NM_014645 | 4361.615  | 4093.255  | AK021860  | 6040.963  | 5850.098  | AK025314  | 7986.659  | 9060.487  |
| NM_014708 | 6479.39   | 5957.066  | AB046816  | 2763.957  | 3188.302  | NM_002105 | 9506.181  | 10793.424 |
| NM_003693 | 2783.677  | 1921.813  | AL137266  | 11577.379 | 13707.46  | NM_000984 | 64019.969 | 63504.168 |
| NM_000356 | 21934.965 | 16996.957 | NM_016457 | 2713.192  | 2650.935  | NM_002453 | 22129.15  | 29570.57  |
| NM_018134 | 5329.632  | 4573.076  | NM_005057 | 2928.997  | 2977.269  | AK000780  | 61000.809 | 64255.699 |
| NM_013247 | 10457.385 | 9005.729  | AF143321  | 1570.083  | 1791.968  | NM_000131 | 1984.058  | 1664.838  |
| NM_006770 | 3186.699  | 4125.088  | AB046842  | 4220.183  | 4492.462  | NM_001836 | 1906.191  | 1806.96   |

|           |           |           |           |           |           |             |           |           |
|-----------|-----------|-----------|-----------|-----------|-----------|-------------|-----------|-----------|
| NM_00138E | 12843.128 | 15058.45  | NM_00485C | 3579.306  | 4071.288  | AK026043    | 3393.697  | 3120.399  |
| X76770    | 10014.194 | 12993.84  | NM_00282Z | 25207.504 | 25385.223 | NM_00500E   | 20315.252 | 22841.756 |
| AB037808  | 4869.376  | 5276.056  | BF306955  | 5594.805  | 4618.764  | AK027033    | 6098.354  | 6717.429  |
| NM_01603E | 18090.557 | 17624.186 | NM_001394 | 23721.414 | 18468.16  | NM_00010E   | 29223.197 | 31934.588 |
| Z36821    | 10149.477 | 10196.746 | NM_018441 | 29168.373 | 28956.875 | NM_00300C   | 51105.781 | 55524.176 |
| AF289485  | 14225.915 | 17938.984 | NM_00077E | 33064.383 | 33536.613 | NM_00249E   | 46689.18  | 49337.434 |
| AF130092  | 1300.047  | 1751.549  | NM_00160E | 5695.854  | 5326.799  | NM_016284   | 5910.36   | 4004.656  |
| NM_01609E | 9763.537  | 9704.617  | BE733234  | 2292.108  | 2073.042  | NM_01459E   | 10056.944 | 6999.679  |
| AK024794  | 5079.727  | 5601.078  | NM_00067E | 1431.807  | 2119.325  | NM_00683E   | 35364.555 | 32411.479 |
| NM_01985E | 11028.279 | 11558.234 | NM_016247 | 24292.891 | 24372.125 | NM_012257   | 4498.136  | 4566.895  |
| NM_01799Z | 3049.759  | 3077.853  | NM_001157 | 1118.429  | 1053.876  | U37690      | 63500.188 | 61593.391 |
| NM_00540C | 1908.323  | 2129.9    | NM_01228Z | 2396.852  | 2227.34   | NM_00512C   | 6301.893  | 5600.75   |
| AK023061  | 1668.772  | 1566.108  | NM_00671C | 1451.141  | 1355.934  | AB029012    | 56858.477 | 57573.824 |
| NM_00725E | 2715.016  | 3062.224  | NM_00332Z | 34333.215 | 38447.953 | M33197      | 65496.504 | 70470.828 |
| NM_00366E | 9597.882  | 9017.085  | BG685310  | 6027.922  | 6842.101  | NM_00629E   | 3965.478  | 4043.892  |
| NM_013384 | 60045.957 | 62430.238 | AW300857  | 62854.66  | 60779.18  | AF060936    | 50593.578 | 58035.914 |
| NM_001187 | 3265.921  | 2402.184  | H85962    | 62413.098 | 64973.273 | NM_00556E   | 2481.56   | 3429.278  |
| NM_018241 | 5495.802  | 4253.972  | BG742446  | 3778.815  | 3511.344  | NM_018167   | 2325.16   | 3228.11   |
| NM_005834 | 13518.582 | 11007.928 | AA864554  | 2956.642  | 3077.444  | AK024149    | 4747.869  | 5491.993  |
| AF000381  | 6261.625  | 5012.815  | X66945    | 9201.16   | 9447.279  | M33197      | 65220.203 | 71993.773 |
| NM_000724 | 7380.049  | 8431.55   | AI160703  | 1692.146  | 1810.217  | AJ011129    | 34569.813 | 39529.285 |
| NM_002557 | 9528.321  | 10408.851 | X12830    | 8085.917  | 8687.263  | NM_00103E   | 2307.087  | 2848.061  |
| NM_004477 | 824.097   | 1352.187  | U00482    | 4874.395  | 6049.6    | NM_006387   | 16477.238 | 19045.639 |
| BE728156  | 778.568   | 811.754   | Z80998    | 809.562   | 993.019   | NM_00564E   | 9133.363  | 7870.12   |
| BI762229  | 18332.756 | 25032.951 | K01904    | 39971.387 | 44560     | NM_00663E   | 9858.116  | 6547.132  |
| AA131406  | 584.169   | 587.913   | BE538886  | 2286.956  | 2145.798  | NM_00169Z   | 2233.816  | 1486.834  |
| BG618320  | 1955.872  | 2286.461  | NM_00222E | 1996.126  | 1575.226  | BI767871    | 33811.633 | 24494.48  |
| M28983    | 508.385   | 634.631   | M57650    | 64030.41  | 60528.887 | AA418907    | 6948.396  | 6885.93   |
| Y00787    | 1358.325  | 1265.607  | BC023978  | 2438.399  | 2370.57   | M65291      | 1996.153  | 1969.404  |
| NM_00727E | 6539.306  | 6973.321  | M21302    | 9334.603  | 8817.185  | AA115473    | 20838.732 | 20522.254 |
| N34462    | 2255.415  | 2963.658  | AK024865  | 5351.224  | 4577.898  | AA872397    | 23549.563 | 26588.625 |
| AI658778  | 16070.924 | 15564.301 | NM_00721C | 3066.971  | 2384.667  | M24283      | 17356.998 | 16506.42  |
| L19067    | 11786.718 | 12037.776 | NM_00148Z | 11732.214 | 8841.705  | AA709414    | 7258.127  | 7339.755  |
| Z48482    | 1046.384  | 1016.751  | NM_01444Z | 14268.444 | 12845.245 | D12676      | 15417.782 | 17017.195 |
| W60413    | 1105.84   | 1439.676  | NM_00521Z | 9828.302  | 11218.055 | NM_00093E   | 63648.469 | 65893.648 |
| BI823365  | 3105.206  | 3393.969  | M14584    | 1327.894  | 1187.549  | NM_00429E   | 65249.859 | 67524.063 |
| X06318    | 1069.902  | 969.2     | NM_00641E | 6349.882  | 6074.748  | H-X 02812 I | 7307.355  | 9797.768  |
| NM_016217 | 24339.49  | 24295.744 | AF035035  | 1825.372  | 1891.034  | U75898      | 23850.65  | 25220.107 |
| AK025971  | 9377.115  | 7898.012  | AB020676  | 3893.603  | 4199.126  | M29039      | 5721.411  | 6379.915  |
| NM_00261E | 5065.093  | 3835.748  | AK024715  | 2454.542  | 2858.95   | M59815      | 1726.303  | 1558.413  |
| L27479    | 2937.374  | 2363.195  | U90942    | 62816.164 | 68165.164 | M33210      | 1056.895  | 933.042   |
| NM_00219E | 1431.26   | 487.083   | NM_01494Z | 1806.211  | 1929.248  | M33197      | 60907.52  | 62163.34  |
| AB033006  | 4113.5    | 4175.073  | NM_01836C | 8633.471  | 8893.82   | NM_01840Z   | 3778.083  | 5956.916  |
| AF020314  | 1077.312  | 1062.804  | AK022489  | 574.289   | 689.555   | NM_01800E   | 7384.371  | 7172.946  |
| NM_01633Z | 11059.185 | 11279.84  | AL365415  | 1944.508  | 2083.431  | AK075081    | 8258.655  | 10288.149 |
| AK023936  | 1803.183  | 1860.44   | L29147    | 62630.012 | 63048.539 | NM_00089E   | 22949.805 | 30633.955 |
| NM_006457 | 4285.277  | 5810.275  | NM_00152E | 63797.125 | 61511.664 | NM_00382C   | 60643.914 | 57938.41  |
| NM_00368Z | 5108.063  | 5088.498  | NM_00605E | 15190.975 | 21176.811 | NM_01591E   | 13012.985 | 8539.064  |
| NM_000207 | 1546.98   | 1891.234  | NM_00429E | 1973.555  | 2358.76   | M33197      | 61343.934 | 67909.172 |
| NM_002531 | 769.815   | 791.532   | NM_00504E | 1947.557  | 1678.422  | NM_01651E   | 41561.078 | 38726.691 |
| NM_006314 | 8712.235  | 8229.534  | NM_00597Z | 3032.852  | 3018.013  | NM_00618E   | 60870.637 | 57964.469 |
| NM_00178Z | 15896.319 | 16545.348 | NM_00106C | 1290.063  | 1434.564  | NM_01480C   | 8495.646  | 9005.479  |
| NM_002754 | 1613.615  | 1370.145  | NM_018841 | 17048.174 | 16288.354 | NM_001557   | 2657.471  | 2773.241  |

|           |           |           |           |           |           |           |           |           |
|-----------|-----------|-----------|-----------|-----------|-----------|-----------|-----------|-----------|
| NM_000797 | 2651.232  | 2868.113  | NM_005226 | 1732.207  | 2056.015  | AF147311  | 13413.451 | 14562.306 |
| NM_016293 | 1359.462  | 1676.351  | AK022859  | 4061.39   | 3686.48   | NM_002131 | 60866.254 | 58716.262 |
| AL080148  | 2408.688  | 2574.504  | L09102    | 65692.836 | 68191.555 | NM_017927 | 15537.621 | 16921.867 |
| NM_006731 | 955.633   | 1118.605  | U68488    | 1446.853  | 1332.36   | M33197    | 65544.805 | 67251.195 |
| NM_020134 | 1594.554  | 1634.432  | NM_003676 | 18000.742 | 21154.199 | NM_001203 | 12174.526 | 14739.444 |
| NM_014061 | 2543.517  | 2867.787  | AF113007  | 33541.949 | 42444.73  | NM_004796 | 62953.348 | 65478.641 |
| BC034395  | 405.838   | 482.584   | NM_000688 | 9000.651  | 10493.821 | NM_006733 | 1287.053  | 3188.049  |
| NM_002479 | 1327.3    | 1167.254  | U39573    | 2327.088  | 2723.357  | NM_002036 | 2616.872  | 4598.279  |
| NM_000348 | 4221.924  | 3007.23   | D82061    | 12397.799 | 12972.196 | NM_014047 | 39164.813 | 37625.914 |
| NM_005059 | 25297.457 | 18317.729 | AJ293009  | 7359.02   | 8404.27   | NM_001508 | 2763.029  | 3494.309  |
| NM_004950 | 2801.314  | 1671.374  | NM_000374 | 5636.537  | 6266.436  | AF037332  | 12093.44  | 14833.38  |
| AF040248  | 1369.029  | 1501.035  | NM_000502 | 16402.332 | 19036.242 | NM_014571 | 2075.035  | 2124.282  |
| NM_014228 | 2515.552  | 3137.384  | NM_001359 | 36664.582 | 40371.152 | NM_020151 | 39455.145 | 41589.844 |
| AL832292  | 7918.122  | 9894.066  | NM_002245 | 1584.577  | 1825.185  | NM_005891 | 46280.305 | 54377.68  |
| NM_003045 | 5972.364  | 9927.219  | NM_004980 | 42298.879 | 46334.398 | NM_001645 | 3230.412  | 4006.232  |
| NM_005662 | 15012.309 | 20072.438 | NM_003224 | 4689.893  | 5156.425  | NM_003956 | 5658.013  | 6661.541  |
| NM_003060 | 1096.3    | 1580.751  | NM_004227 | 3352.257  | 4047.334  | M33197    | 62948.402 | 55852.148 |
| NM_004525 | 1446.825  | 1447.14   | NM_005282 | 10361.435 | 10852.81  | NM_003500 | 17845.662 | 12177.978 |
| NM_003895 | 970.212   | 783.443   | NM_001736 | 7288.278  | 8458.295  | NM_014317 | 7655.383  | 6911.298  |
| NM_004317 | 10442.102 | 10960.641 | AB028949  | 1289.238  | 1417.3    | L09234    | 30727.17  | 27510.908 |
| NM_014645 | 3629.288  | 3459.454  | AL137580  | 2178.702  | 2362.156  | NM_000056 | 2701.946  | 2225.836  |
| NM_014708 | 4646.479  | 4417.16   | NM_004101 | 1963.556  | 2305.592  | AK026740  | 2780.688  | 2625.883  |
| NM_003693 | 1820.471  | 1900.976  | NM_002995 | 65269.906 | 63116.461 | NM_017881 | 13509.503 | 13019.362 |
| NM_000356 | 19190.559 | 21689.342 | AB033114  | 1163.493  | 1240.286  | NM_018896 | 7100.011  | 7524.672  |
| NM_018134 | 4820.711  | 4220.958  | NM_015978 | 10333.41  | 10635.691 | AF069307  | 6460.598  | 6752.396  |
| NM_013247 | 8933.533  | 9590.245  | NM_003810 | 3446.406  | 2995.56   | U92978    | 5923.188  | 6520.088  |
| NM_006770 | 3523.592  | 2977.234  | NM_004908 | 1418.315  | 1433.162  | NM_018034 | 15715.04  | 16912.322 |
| BE394704  | 1155.431  | 1742.789  | NM_016171 | 63687.133 | 66193     | M33197    | 63081.031 | 68894.984 |
| NM_004703 | 8518.507  | 8374.741  | NM_018973 | 17683.322 | 15773.94  | AB037831  | 16647.334 | 20112.34  |
| NM_001512 | 753.443   | 786.567   | NM_002591 | 47467.367 | 45692.883 | BE789195  | 2600.645  | 2817.765  |
| NM_014706 | 9839.111  | 9405.563  | AL049334  | 610.442   | 947.857   | NM_016946 | 2545.35   | 2965.841  |
| AK023172  | 1932.911  | 1931.267  | NM_020216 | 4612.015  | 5116.546  | M33197    | 62719.172 | 62916.168 |
| AF139768  | 607.96    | 685.134   | AK021860  | 5527.039  | 5483.369  | NM_005326 | 57468.609 | 57259.191 |
| AJ001348  | 875.6     | 373.771   | AB046816  | 2415.592  | 2320.075  | NM_007286 | 1081.599  | 1187.552  |
| NM_014007 | 2254.056  | 1938.197  | AL137266  | 11760.995 | 12526.513 | NM_014066 | 3744.225  | 4010.019  |
| NM_018241 | 5075.14   | 5847.508  | NM_016457 | 2415.213  | 2646.218  | NM_003356 | 8092.824  | 5101.287  |
| NM_005834 | 12293.295 | 16404.326 | NM_005057 | 3352.584  | 3607.367  | M33197    | 66069.336 | 63035.922 |
| AF000381  | 6706.463  | 8501.238  | AF143321  | 898.396   | 1403.248  | AF119917  | 2057.875  | 2398.235  |
| NM_018075 | 767.453   | 968.119   | AB046842  | 4226.137  | 4538.935  | AK021834  | 934.164   | 934.226   |
| S82470    | 6667.826  | 5985.506  | NM_004850 | 3474.871  | 4238.306  | NM_017915 | 3502.471  | 3142.827  |
| AB028982  | 1172.509  | 1036.482  | NM_002822 | 25629.742 | 25952.926 | AL050097  | 1558.331  | 1741.215  |
| NM_002004 | 4181.375  | 4221.972  | BF306955  | 3604.304  | 3544.056  | AK021513  | 1792.488  | 1528.024  |
| NM_005121 | 1753.261  | 2549.674  | NM_001394 | 22443.602 | 20964.303 | NM_003579 | 5666.081  | 5569.074  |
| NM_001643 | 54388.523 | 57419.852 | NM_018441 | 26958.109 | 27596.188 | AL049283  | 3724.236  | 4248.697  |
| AK021818  | 749.576   | 714.576   | NM_000778 | 31402.096 | 31527.844 | M33197    | 63595.32  | 64213.313 |
| NM_020221 | 1569.059  | 1549.897  | NM_001609 | 4974.257  | 5037.965  | NM_002401 | 64484.172 | 63026.16  |
| NM_000747 | 4419.859  | 4202.674  | BE733234  | 2355.087  | 2214.816  | NM_001274 | 7079.899  | 8671.483  |
| NM_005415 | 8932.681  | 7868.505  | NM_020228 | 11087.773 | 10089.768 | NM_003913 | 1662.893  | 1673.482  |
| AK026841  | 3485.523  | 2922.064  | AK024685  | 5356.017  | 4475.53   | NM_002227 | 8442.173  | 8777.573  |
| AL137708  | 754.968   | 670.173   | NM_001157 | 1195.505  | 1202.019  | NM_007196 | 4163.116  | 4052.695  |
| AJ275973  | 23948.061 | 24169.256 | NM_012282 | 1918.093  | 2012.621  | AB002301  | 1600.449  | 1632.372  |
| NM_006493 | 1775.395  | 1241.346  | NM_006710 | 1473.431  | 1801.71   | AB014530  | 12372.37  | 15711.642 |
| U76362    | 1112.691  | 598.183   | NM_003323 | 31572.982 | 41897.582 | NM_005986 | 8817.845  | 8766.734  |

|           |           |           |           |           |           |             |           |           |
|-----------|-----------|-----------|-----------|-----------|-----------|-------------|-----------|-----------|
| AK025971  | 7455.853  | 8662.217  | BG685310  | 5556.96   | 6108.594  | AB014607    | 18827.34  | 15852.311 |
| NM_00261E | 4100.334  | 5299.868  | AW300857  | 59621.473 | 56896.992 | AF134401    | 2891.205  | 2832.438  |
| L27479    | 3183.347  | 4698.137  | H85962    | 59444.602 | 59776.605 | NM_00103E   | 2316.858  | 3912.751  |
| NM_00219E | 1345.667  | 1761.257  | BG742446  | 3485.278  | 3470.058  | NM_006387   | 12954.134 | 15907.203 |
| NM_00138E | 10771.895 | 13856.49  | AA864554  | 2633.166  | 2752.471  | NM_00663E   | 4237.961  | 2209.365  |
| AB037808  | 3601.656  | 4514.882  | X66945    | 8605.624  | 8844.238  | NM_00169E   | 1833.879  | 1427.554  |
| NM_01603E | 14098.023 | 16187.325 | AI160703  | 1555.443  | 1287.651  | BI767871    | 29370.02  | 20052.582 |
| Z36821    | 7225.094  | 7103.972  | X12830    | 5466.046  | 5393.431  | AA418907    | 5591.258  | 4107.877  |
| AF289485  | 9613.008  | 10269.598 | U00482    | 3351.142  | 3545.336  | M65291      | 4265.918  | 4384.563  |
| AF130092  | 1486.293  | 1632.512  | Z80998    | 660.497   | 773.89    | AA115473    | 22935.104 | 24300.947 |
| NM_01609E | 9945.045  | 10332.279 | K01904    | 39639.023 | 45265.664 | AA872397    | 26553.791 | 26847.17  |
| AK024794  | 3573.814  | 4202.042  | BE538886  | 2393.404  | 2165.656  | M24283      | 16984.348 | 15955.212 |
| NM_01985E | 10774.928 | 12016.609 | NM_00222E | 2133.066  | 1408.398  | AA709414    | 6921.198  | 6397.426  |
| NM_01799E | 3434.697  | 3429.335  | M57650    | 62418.648 | 62499.914 | D12676      | 11932.791 | 11630.614 |
| NM_00540C | 2028.293  | 2037.192  | BC023978  | 3269.126  | 3391.655  | NM_00093E   | 62269.051 | 64078.824 |
| BF851643  | 421.276   | 368.369   | M21302    | 9404.49   | 8451.373  | NM_00429E   | 63064.805 | 65294.887 |
| AK023061  | 1345.14   | 1410.061  | AK024865  | 4249.723  | 3543.597  | H-X 02812 I | 5763.242  | 6279.076  |
| NM_00725E | 3131.901  | 3048.021  | NM_00721C | 2340.196  | 2236.173  | U75898      | 10710.105 | 13202.658 |
| NM_00366E | 7946.207  | 6401.747  | NM_00148E | 10854.662 | 10612.346 | M29039      | 1931.255  | 2154.051  |
| NM_01338A | 60492.035 | 58214.973 | NM_01494E | 1613.876  | 2047.336  | M33197      | 3734.419  | 2953.919  |
| CY3Cy5    | 3199.339  | 180.103   | NM_01836C | 8693.926  | 9641.792  | AB011146    | 5669.386  | 5748.838  |
| NM_01634E | 4164.581  | 2948.541  | AK022489  | 641.482   | 643.526   | NM_01800E   | 7266.032  | 8620.566  |
| AF086281  | 868.479   | 812.023   | AL365415  | 2148.247  | 2695.677  | AK075081    | 5724.012  | 7216.52   |
| AF086453  | 638.556   | 487.69    | L29147    | 62714.105 | 63514.148 | NM_00089E   | 20275.248 | 29045.191 |
| AF070621  | 22825.805 | 23808.645 | NM_00152E | 61488.391 | 60316.984 | NM_01591E   | 10333.302 | 7108.289  |
| NM_02024C | 8203.522  | 9250.766  | NM_00605E | 14947.836 | 15634.331 | M33197      | 63198.098 | 65280.695 |
| AK023678  | 38729.434 | 38394.371 | NM_00429E | 2321.023  | 2723.386  | NM_01651E   | 43995.645 | 38349.926 |
| AF052090  | 7978.898  | 5979.995  | NM_00504E | 1754.895  | 1729.41   | NM_00618E   | 61069.059 | 60385.367 |
| AL355730  | 968.239   | 919.84    | NM_00597E | 3462.663  | 2979.369  | NM_01480C   | 8668.948  | 9239.042  |
| U79273    | 6092.213  | 3260.232  | NM_00106C | 1247.859  | 1425.8    | NM_001557   | 4181.772  | 4127.057  |
| AK022050  | 842.313   | 575.108   | NM_018841 | 19317.104 | 22501.658 | AF147311    | 15704.102 | 15216.182 |
| NM_01634E | 3550.223  | 2799.438  | NM_00522E | 1577.357  | 1713.692  | NM_002131   | 61623.184 | 62323.156 |
| SR2       | 39578.25  | 39199.262 | AL133105  | 12436.301 | 13074.235 | NM_017927   | 15310.417 | 15173.946 |
| SR4       | 11007.865 | 12088.165 | AK022859  | 4199.658  | 4383.288  | M33197      | 64215.945 | 67481.531 |
| SR6       | 1287.81   | 1616.121  | NM_000214 | 862.842   | 655.588   | NM_00120E   | 13198.246 | 15132.595 |
| SR8       | 5613.329  | 15746.28  | NM_014864 | 10987.1   | 13012.301 | NM_00479E   | 62325.504 | 63769.023 |
| SR10      | 17801.314 | 6958.029  | NM_00372E | 45921.797 | 53414     | NM_00673E   | 1304.74   | 1653.025  |
| CY3Cy5    | 1353.134  | 115.157   | NM_01435E | 27987.518 | 29812.977 | NM_014047   | 29054.977 | 30593.086 |
| AB042410  | 1388.173  | 1352.576  | NM_012481 | 7482.729  | 6869.718  | AK022901    | 4982.861  | 5513.716  |
| AF116682  | 48752.395 | 44609.551 | L09102    | 66291.43  | 73834.633 | NM_00150E   | 1615.743  | 1627.182  |
| AL137259  | 2053.097  | 2089.566  | U68488    | 1121.663  | 1357.238  | AF037332    | 8437.858  | 8584.813  |
| AL122107  | 2247.237  | 1809.999  | NM_00067E | 998.547   | 1205.778  | M33197      | 63529.773 | 64499.684 |
| AF075021  | 3497.25   | 3775.464  | NM_016247 | 22849.861 | 23160.648 | AJ011129    | 20157.031 | 18932.156 |
| AK025140  | 10581.304 | 10646.031 | NM_00165E | 60099.227 | 68908.758 | NM_00164E   | 4151.276  | 2666.123  |
| AK022880  | 2230.782  | 1806.591  | NM_006827 | 38552.84  | 51093.691 | NM_00395E   | 4883.815  | 3897.868  |
| NM_003601 | 31472.18  | 25243.549 | AK021761  | 21962.889 | 25773.256 | M33197      | 63411.938 | 61847.32  |
| AF086375  | 906.726   | 769.656   | AK024536  | 4708.474  | 4611.854  | NM_014317   | 6754.745  | 5487.877  |
| AK001228  | 4675.745  | 3971.251  | NM_01866E | 11838.974 | 10933.032 | L09234      | 25470.393 | 21781.256 |
| AK026778  | 9446.486  | 8926.976  | NM_004227 | 3644.735  | 3603.98   | NM_00005E   | 3281.817  | 3092.174  |
| AF074987  | 6261.094  | 4852.566  | NM_00528E | 10799.813 | 11354.402 | AK026740    | 2485.298  | 2444.15   |
| AK001058  | 10200.856 | 7368.801  | NM_00173E | 7352.12   | 8184.721  | NM_017881   | 13111.903 | 12373.089 |
| AK026239  | 4266.405  | 2547.103  | AB028949  | 1531.042  | 1478.05   | NM_018034   | 14004.594 | 15245.515 |
| AK027041  | 1296.429  | 1630.006  | AL137580  | 1961.571  | 2734.215  | M33197      | 62700.73  | 64955.293 |

|           |           |           |           |           |           |             |           |           |
|-----------|-----------|-----------|-----------|-----------|-----------|-------------|-----------|-----------|
| AK022064  | 323.448   | 730.623   | NM_004101 | 1994.061  | 2097.864  | AB037831    | 12889.739 | 16797.43  |
| AK024332  | 1198.737  | 1126.541  | NM_002995 | 60940.141 | 59119.051 | NM_012103   | 27169.184 | 34111.859 |
| NM_005355 | 8175.167  | 8540.13   | AB033114  | 918.39    | 1180.62   | AL122077    | 32199.941 | 37785.613 |
| AK000937  | 578.359   | 607.42    | NM_015978 | 9249.508  | 10050.697 | NM_014632   | 2653.154  | 2484.969  |
| AK023718  | 24611.428 | 25624.967 | NM_003810 | 3762.433  | 3755.377  | NM_006422   | 3412.543  | 4730.788  |
| AF075089  | 1034.49   | 1000.315  | NM_004908 | 1173.98   | 1248.395  | BE789195    | 2600.823  | 2560.883  |
| AF086007  | 25351.574 | 28710.637 | NM_016171 | 61856.355 | 63639.27  | NM_016946   | 1508.306  | 1382.774  |
| AK000803  | 8351.448  | 9202.791  | NM_014443 | 11371.935 | 10264.989 | M33197      | 62279.875 | 63662.219 |
| AK022374  | 1649.016  | 1430.573  | NM_005212 | 9130.151  | 10182.258 | NM_014065   | 3451.56   | 2607.364  |
| AF085926  | 2645.83   | 2380.783  | M14584    | 1277.517  | 1224.058  | AF119917    | 1762.096  | 1394.281  |
| AF085948  | 729.54    | 932.392   | NM_006419 | 6857.934  | 5847.792  | AK021834    | 606.005   | 659.982   |
| AL137307  | 14340.1   | 12622.011 | AF035035  | 1546.737  | 1478.81   | NM_017915   | 2914.475  | 2696.707  |
| AL137468  | 10771.26  | 9714.007  | AB020676  | 3887.588  | 3746.536  | AL050097    | 1483.331  | 1273.706  |
| AL162007  | 30462.924 | 22810.258 | AK024715  | 2117.925  | 2136.27   | AK021513    | 2396.823  | 2024.315  |
| AL390137  | 9338.295  | 6035.906  | U90942    | 62286.16  | 61320.563 | AL049283    | 3610.005  | 3658.282  |
| AL137340  | 1074.948  | 982.838   | NM_000778 | 31337.824 | 40925.66  | NM_001274   | 6598.32   | 6847.252  |
| AL137542  | 1170.542  | 1127.511  | NM_001609 | 5274      | 6464.973  | NM_003913   | 2395.452  | 2853.511  |
| AL162045  | 1464.623  | 1053.968  | BE733234  | 1911.092  | 1505.673  | NM_002227   | 6588.004  | 7068.501  |
| AK022437  | 44670.738 | 27388.434 | NM_020228 | 13221.103 | 16061.92  | NM_007195   | 3672.354  | 3835.195  |
| AK024213  | 59803.617 | 57542.891 | AK024685  | 5204.815  | 5665.846  | AB002301    | 1228.604  | 1307.371  |
| AB007959  | 2376.298  | 2324.233  | NM_003676 | 16180.367 | 17703.076 | AB014530    | 12637.709 | 14870.603 |
| AK026002  | 874.602   | 950.458   | AF113007  | 31228.666 | 34717.48  | M33197      | 65059.766 | 63956.668 |
| AK024360  | 590.009   | 650.35    | NM_000688 | 8032.627  | 8532.435  | NM_005985   | 11079.704 | 11411.997 |
| AF090093  | 52940.195 | 55591.164 | U39573    | 1916.131  | 1907.093  | AB014607    | 14924.256 | 10519.017 |
| AF161340  | 16743.795 | 16479.951 | D82061    | 10811.192 | 12118.018 | NM_020151   | 14153.376 | 11545.449 |
| NM_018562 | 44819.055 | 49026.844 | AJ293009  | 6948.122  | 8001.23   | NM_005891   | 14743.278 | 11656.863 |
| AF098666  | 456.623   | 565.029   | NM_000374 | 4066.727  | 4810.388  | NM_006387   | 15197.877 | 17026.791 |
| AF161365  | 600.58    | 558.609   | NM_000502 | 12559.918 | 12653.943 | NM_005646   | 5990.713  | 4996.86   |
| AK021969  | 2679.256  | 2792.982  | NM_001359 | 33472.813 | 37408.852 | NM_001692   | 1156.269  | 1090.282  |
| AK022065  | 2952.697  | 2970.746  | NM_005175 | 63395.48  | 66122.859 | BI767871    | 25884.039 | 17367.799 |
| AK022221  | 12457.727 | 9476.772  | NM_001696 | 23312.215 | 23559.018 | AA418907    | 4832.766  | 3606.771  |
| AK022356  | 790.431   | 686.317   | NM_004975 | 19363.709 | 11765.895 | M65291      | 3158.473  | 2707.375  |
| AK021998  | 672.401   | 512.47    | NM_002245 | 1831.624  | 1399.801  | AA115473    | 18272.482 | 17117.84  |
| AK022126  | 3311.923  | 2211.049  | D87445    | 12733.237 | 13843.248 | AA872397    | 26332.408 | 22460.26  |
| AK022256  | 758.45    | 567.085   | NM_000238 | 14483.241 | 13618.604 | M24283      | 15662.548 | 14685.433 |
| AF086262  | 7776.927  | 10915.005 | NM_002247 | 4344.688  | 4021.629  | NM_000935   | 62147.297 | 65642.688 |
| AF086292  | 1417.695  | 1251.815  | NM_004980 | 43835.379 | 45310.465 | NM_004295   | 60349.875 | 67530.656 |
| AK023769  | 969.144   | 922.296   | AB011094  | 46521.949 | 51839.496 | H-X 02812 I | 6730.55   | 7584.68   |
| AK024342  | 6708.919  | 8067.59   | NM_003224 | 5122.984  | 5538.876  | U75898      | 21280.43  | 22997.787 |
| AL137712  | 2246.922  | 2372.693  | AK024865  | 4514.015  | 5706.85   | M29039      | 2943.545  | 3259.304  |
| AL137606  | 537.305   | 797.675   | NM_007210 | 2607.882  | 3338.796  | M59815      | 911.155   | 944.985   |
| L77599    | 19035.439 | 19458.035 | NM_001483 | 10681.755 | 9977.256  | M33210      | 1351.765  | 1736.151  |
| AK021673  | 57137.875 | 57116.672 | NM_018973 | 15896.861 | 15621.857 | M33197      | 2058.463  | 1497.17   |
| AB014543  | 9039.132  | 10318.126 | NM_002591 | 40718.992 | 41224.828 | AB011146    | 3602.291  | 2970.88   |
| NM_018445 | 7600.055  | 8345.14   | AL049334  | 805.419   | 862.931   | NM_005326   | 22488.273 | 21652.568 |
| AK022743  | 5549.308  | 6605.634  | NM_020216 | 5086.72   | 6588.543  | NM_014800   | 5044.673  | 5240.037  |
| AF035306  | 2460.331  | 2510.073  | AK021860  | 4047.829  | 3946.948  | NM_001557   | 3006.477  | 3623.122  |
| AK091662  | 1801.579  | 2019.725  | AB046816  | 2072.622  | 1863.964  | NM_002131   | 54346.18  | 48851.598 |
| NM_003954 | 4093.837  | 4327.792  | AL137266  | 11433.738 | 12162.387 | NM_006733   | 1062.789  | 1136.693  |
| NM_016348 | 1871.092  | 1651.906  | NM_016457 | 2665.927  | 2645.478  | NM_002035   | 795.697   | 1029.479  |
| AF009290  | 346.77    | 529.53    | NM_005057 | 3011.979  | 2886.806  | NM_014047   | 39176.469 | 42541.266 |
| AK022003  | 767.276   | 727.343   | AF143321  | 1211.755  | 1155.398  | NM_001508   | 2195.439  | 1904.153  |
| AK023877  | 746.432   | 668.607   | AB046842  | 3904.017  | 3862.361  | M33197      | 61794.063 | 64083.586 |

|           |           |           |           |           |           |           |           |           |
|-----------|-----------|-----------|-----------|-----------|-----------|-----------|-----------|-----------|
| AK024046  | 7661.889  | 9961.063  | NM_004850 | 3907.96   | 4206.609  | AF037332  | 11225.351 | 15018.888 |
| NM_017931 | 3859.186  | 4263.212  | NM_002822 | 25102.418 | 23087.756 | NM_014571 | 834.068   | 1294.232  |
| AK022793  | 3008.202  | 3992.009  | BF306955  | 3788.015  | 3368.974  | NM_006052 | 1997.033  | 2721.151  |
| AJ227910  | 7648.382  | 9965.202  | NM_001394 | 23704.967 | 20311.066 | AB040912  | 5022.321  | 5949.888  |
| AF001893  | 13916.737 | 12941.935 | NM_018441 | 29969.002 | 35387.59  | NM_003871 | 3034.338  | 4215.998  |
| X04236    | 18180.807 | 20320.471 | CY3Cy5    | 6863.564  | 407.446   | NM_006243 | 4034.188  | 5904.78   |
| AK093746  | 7103.757  | 7618.512  | BM664556  | 3036.138  | 3084.578  | M33197    | 59078.121 | 64750.664 |
| D16875    | 2222.566  | 3074.152  | AL359586  | 1963.828  | 1630.807  | AJ011129  | 12093.337 | 11434.738 |
| AK027171  | 3868.721  | 4486.023  | AF035290  | 2197.624  | 2599.289  | NM_014488 | 2585.075  | 4292.783  |
| AK021945  | 13187.878 | 13674.696 | AK023216  | 1546.279  | 1806.036  | NM_013388 | 16144.903 | 20086.627 |
| L23545    | 2299.061  | 2232.422  | M33197    | 82807.016 | 65375.984 | AK022817  | 5279.311  | 4576.544  |
| AK024153  | 6446.47   | 7716.603  | AK023288  | 2629.822  | 2141.627  | NM_018034 | 14367.702 | 12257.366 |
| Y10516    | 15700.414 | 17425.641 | NM_017986 | 17001.721 | 21263.297 | M33197    | 61056.504 | 61369.004 |
| AF056451  | 1290.415  | 1761.077  | BM664556  | 2786.305  | 2967.004  | AB037831  | 10867.965 | 9680.249  |
| AF015039  | 13021.916 | 14589.42  | SR3       | 40135.406 | 40906.316 | NM_012103 | 39368.012 | 39701.617 |
| U50528    | 3680.503  | 3712.231  | CY3Cy5    | 13951.463 | 1466.679  | AL122077  | 52308.418 | 53151.836 |
| AB020632  | 5416.054  | 5024.87   | U52839    | 2786.26   | 2530.44   | NM_014632 | 3399.995  | 4521.221  |
| NM_018614 | 69446.688 | 65357.41  | U58667    | 605.502   | 734.272   | NM_006422 | 4610.734  | 5273.392  |
| AL117549  | 5323.571  | 4602.955  | M33197    | 86091.648 | 65150.715 | BE789195  | 3777.732  | 4920.807  |
| NM_005222 | 1679.256  | 1566.159  | AK026984  | 92147.234 | 64895.297 | NM_016946 | 2726.499  | 3750.933  |
| BC024308  | 1788.518  | 1667.642  | AK021796  | 1094.191  | 1029.834  | M33197    | 61932.996 | 64001.398 |
| NM_000538 | 6376.87   | 5739.888  | AK023305  | 74878.359 | 65243.766 | NM_007258 | 2765.218  | 3466.74   |
| AK001838  | 73893.313 | 65127.305 | AK023967  | 16461.412 | 57648.871 | NM_018402 | 985.152   | 809.619   |
| NM_018295 | 923.858   | 902.603   | AK000788  | 2013.421  | 1540.397  | NM_018008 | 3361.611  | 3124.034  |
| AF070574  | 1450.497  | 1197.767  | AK025089  | 19957.547 | 21579.697 | AK075081  | 3683.715  | 4247.48   |
| AF190900  | 6904.377  | 9311.852  | AK023298  | 1114.011  | 701.048   | NM_000895 | 13040.969 | 17263.99  |
| NM_020404 | 2900.558  | 3525.022  | M33197    | 77448.242 | 65216.145 | NM_003820 | 58198.797 | 59504.855 |
| BE972401  | 10975.431 | 12876.359 | AK001279  | 4191.48   | 4860.382  | NM_015915 | 6034.362  | 5542.42   |
| U56725    | 432.693   | 846.811   | AF086407  | 1076.489  | 1289.902  | M33197    | 60911.32  | 67289.742 |
| NM_017425 | 2537.578  | 3834.849  | AK001567  | 1653.761  | 1716.666  | NM_016518 | 16056.439 | 14209.478 |
| AB007922  | 1717.893  | 1759.323  | AF075006  | 848.628   | 863.249   | NM_006185 | 26583.037 | 26104.867 |
| NM_015982 | 726.28    | 1081.531  | M33197    | 65171.254 | 70105.633 | AB014607  | 11851.345 | 11388.421 |
| NM_003746 | 57887.211 | 60234.352 | AK000903  | 61542.148 | 62560.086 | AF134401  | 3243.689  | 4331.798  |
| NM_002910 | 6049.614  | 6337.601  | AK023938  | 7104.067  | 7704.341  | NM_005891 | 38704.719 | 28379.646 |
| AC096970  | 8821.643  | 9588.83   | AK026896  | 620.236   | 763.164   | NM_001645 | 1872.561  | 1478.632  |
| NM_014627 | 13053.507 | 12180.656 | AL110169  | 2697.576  | 2138.979  | NM_003956 | 3867.07   | 3474.526  |
| NM_013938 | 16233.513 | 15147.85  | AK022088  | 1826.769  | 2333.648  | M33197    | 62088.453 | 67445.18  |
| NM_013986 | 65054.914 | 68611.18  | NM_013391 | 853.767   | 1148.504  | NM_003500 | 20142.557 | 17644.215 |
| U55055    | 3441.459  | 4054.01   | AL157466  | 9867.987  | 11698.07  | NM_014317 | 6798.931  | 8556.747  |
| AK022186  | 598.107   | 531.879   | AL389981  | 2126.097  | 2420.542  | L09234    | 27691.773 | 35727.445 |
| AB018319  | 7497.791  | 7077.973  | AK024336  | 3666.693  | 4642.958  | NM_000058 | 2383.744  | 2652.253  |
| AK001101  | 5150.542  | 3708.052  | AK023862  | 887.01    | 924.808   | AK026740  | 2830.888  | 4209.387  |
| BM973473  | 2891.446  | 2512.921  | NM_018621 | 1271.293  | 1787.758  | NM_017881 | 17767.697 | 19878.104 |
| AK021637  | 697.976   | 664.721   | M33197    | 71299.344 | 65145.445 | M33197    | 62894.668 | 65505.574 |
| AK021658  | 640.911   | 740.022   | AK022118  | 3884.95   | 4486.988  | NM_017634 | 3923.088  | 4180.589  |
| D61705    | 505.775   | 490.121   | AK026453  | 15870.095 | 15405.231 | NM_018896 | 1824.581  | 2082.118  |
| AL137723  | 6484.565  | 4841.519  | M33197    | 65247.824 | 86648.664 | AJ300465  | 3007.758  | 3081.983  |
| AL137311  | 740.262   | 1065.816  | NM_006495 | 9185.077  | 9714.298  | X86400    | 887.322   | 1360.008  |
| NM_014288 | 16062.417 | 20316.877 | NM_005288 | 1253.618  | 1205.157  | NM_000810 | 1911.562  | 1614.839  |
| AF035300  | 4267.218  | 4672.728  | NM_003251 | 4190.245  | 3611.345  | AF069307  | 1288.837  | 1125.104  |
| NM_017703 | 13536.797 | 16399.07  | AB046772  | 3291.856  | 4345.32   | M33197    | 63412.105 | 64453.395 |
| NM_015320 | 2020.523  | 2313.763  | AL442080  | 5517.378  | 5730.479  | U92978    | 1384.325  | 1301.307  |
| NM_004055 | 1089.477  | 1236.878  | AY007143  | 36384.207 | 44758.828 | AB011146  | 5387.04   | 5396.632  |



|           |           |           |           |           |           |           |           |           |
|-----------|-----------|-----------|-----------|-----------|-----------|-----------|-----------|-----------|
| NM_014726 | 42848.715 | 47389.324 | AK022729  | 2551.941  | 3202.561  | NM_014066 | 2794.005  | 2209.118  |
| AJ297349  | 3367.964  | 3966.178  | NM_006168 | 10473.461 | 12950.317 | AB035130  | 4380.991  | 3534.976  |
| NM_005828 | 6125.545  | 7207.727  | AL050374  | 2790.536  | 3127.831  | NM_003356 | 6346.113  | 6129.994  |
| NM_001619 | 1392.049  | 1531.732  | M33197    | 79310.18  | 65061.926 | M33197    | 63825.039 | 69137.953 |
| NM_006599 | 2648.419  | 2466.151  | M28639    | 10067.364 | 10357.495 | AF119917  | 2372.943  | 2858.202  |
| NM_005936 | 2157.634  | 2464.018  | AL122073  | 28196.129 | 29145.156 | NM_017915 | 3734.308  | 3756.444  |
| U43586    | 3641.668  | 3016.164  | AF116655  | 7550.69   | 7162.043  | AL050097  | 1425.489  | 1916.271  |
| NM_006271 | 7777.799  | 7661.156  | AJ243222  | 1498.329  | 1770.735  | AK021513  | 1347.734  | 1316.42   |
| NM_018647 | 2418.88   | 2775.46   | AK026132  | 4030.225  | 6183.946  | NM_003579 | 5830.606  | 6957.773  |
| NM_003026 | 860.147   | 510.748   | Y11162    | 1773.075  | 2345.935  | AL049283  | 3534.968  | 3603.834  |
| NM_000721 | 63634.391 | 61757.801 | AF070584  | 4543.996  | 4954.082  | M33197    | 65086.594 | 67011.102 |
| NM_003933 | 1530.204  | 1260.511  | AF052109  | 5224.408  | 3270.431  | NM_002401 | 57840.828 | 59609.328 |
| NM_018640 | 765.387   | 762.237   | NM_003353 | 72827.063 | 65415.723 | NM_001274 | 4474.782  | 5814.497  |
| NM_005095 | 5480.14   | 5235.004  | X82127    | 56954.699 | 57396.066 | NM_003913 | 1800.867  | 2103.046  |
| NM_003163 | 993.169   | 790.897   | AL122044  | 7761.707  | 5605.888  | NM_002227 | 2289.283  | 2134.541  |
| NM_016205 | 3104.507  | 2096.292  | NM_018296 | 3595.895  | 2681.024  | NM_007196 | 6555.912  | 5901.496  |
| NM_005759 | 8470.89   | 11264.066 | M33197    | 64281.836 | 65262.461 | AB014530  | 5919.721  | 6315.198  |
| AF149724  | 3270.668  | 3216.814  | AF070578  | 1063.312  | 1324.583  | M33197    | 65552.688 | 68549.297 |
| BC020745  | 2249.894  | 2212.888  | U84519    | 4580.82   | 6193.576  | CY3Cy5    | 7613.139  | 344.404   |
| NM_006367 | 33863.41  | 38619.609 | Z11849    | 13894.889 | 15405.239 | AK054960  | 44706.449 | 47885.559 |
| NM_006732 | 25161.045 | 25609.064 | M33197    | 68548.375 | 65299.98  | L15344    | 3194.059  | 2893.601  |
| NM_004354 | 10673.021 | 11743.152 | AF052103  | 1514.37   | 1722.061  | AK024150  | 2418.279  | 2086.003  |
| NM_004661 | 6036.593  | 5931.424  | AF075050  | 3358.715  | 3807.296  | AF070536  | 5492.904  | 5619.85   |
| NM_002009 | 1175.716  | 1178.532  | AK024842  | 1803.872  | 1446.822  | AK022297  | 4318.093  | 3769.339  |
| NM_001610 | 3912.381  | 4296.368  | NM_018382 | 1422.381  | 1397.622  | U79300    | 3991.426  | 3800.223  |
| NM_001241 | 3917.682  | 3928.627  | AB018327  | 4206.73   | 4372.63   | AK025151  | 29154.115 | 29186.014 |
| AF217504  | 5498.512  | 6273.218  | M33197    | 68421.18  | 65333.352 | AK025550  | 7888.176  | 7670.362  |
| AK027102  | 19379.486 | 14904.507 | AK022649  | 12254.12  | 10851.195 | AF088076  | 52040.707 | 54320.883 |
| AL109714  | 2479.129  | 2516.881  | NM_016507 | 8651.354  | 9346.53   | AF086543  | 7289.568  | 5672.787  |
| NM_004632 | 9891.806  | 11394.072 | NM_002024 | 12830.318 | 10586.588 | AB046797  | 2244.609  | 1874.239  |
| NM_017919 | 7753.756  | 8140.692  | NM_002743 | 14478.392 | 14168.628 | AK002098  | 3688.112  | 3123.257  |
| NM_014456 | 15637.523 | 15619.729 | AF173358  | 24420.42  | 23518.607 | AK024298  | 967.494   | 784.696   |
| NM_004740 | 21721.709 | 17355.43  | NM_016366 | 9220.697  | 9349.896  | AB011128  | 56529.992 | 52488.121 |
| NM_003805 | 3300.762  | 2808.879  | NM_000266 | 3024.903  | 3478.759  | AK026742  | 1663.411  | 1786.251  |
| NM_019886 | 9227.001  | 8004.676  | X89666    | 4136.33   | 4938.006  | AK025074  | 11143.002 | 9320.872  |
| NM_003278 | 20154.625 | 17937.623 | NM_003104 | 14712.071 | 16478.443 | AK054960  | 51217.805 | 43153.965 |
| NM_000426 | 839.865   | 983.183   | NM_014581 | 1551.641  | 2237.91   | L15344    | 2442.709  | 2321.328  |
| M29540    | 816.779   | 634.143   | M33197    | 68369.398 | 65449.051 | SR1       | 68722.016 | 62371.563 |
| AK021957  | 70381.063 | 65295.172 | NM_014406 | 4559.177  | 4363.153  | SR3       | 45614.301 | 50717.5   |
| U95031    | 1153.984  | 910.297   | S68954    | 19285.588 | 7519.011  | SR5       | 6756.451  | 7734.368  |
| NM_004771 | 7628.028  | 7166.527  | S81335    | 2462.088  | 2672.586  | SR7       | 5592.642  | 35632.945 |
| AL365514  | 4505.411  | 5872.605  | NM_006197 | 4131.403  | 1576.583  | SR9       | 15954.298 | 3436.891  |
| NM_018299 | 4267.326  | 4449.418  | NM_014181 | 1659.062  | 1080.066  | CY3Cy5    | 7259.71   | 406.204   |
| NM_002104 | 2585.833  | 2847.481  | M29273    | 1441.945  | 1222.182  | U50524    | 1006.934  | 719.268   |
| NM_005504 | 20661.152 | 22060.361 | NM_004854 | 11488.049 | 13509.44  | U52050    | 981.327   | 857.015   |
| AF234654  | 3209.473  | 3825.098  | AJ245418  | 26261.5   | 34482.156 | U73799    | 9761.177  | 9061.337  |
| NM_000110 | 6070.034  | 6415.172  | NM_006377 | 7800.822  | 9393.344  | Z36826    | 1848.203  | 1527.975  |
| NM_016002 | 30007.918 | 31805.383 | NM_002436 | 2287.056  | 2271.338  | AJ227854  | 1729.035  | 1949.627  |
| NM_014549 | 3144.496  | 3633.202  | NM_018362 | 12552.965 | 13629.505 | AK002195  | 1451.169  | 1564.614  |
| NM_000531 | 580.964   | 951.968   | NM_004755 | 4254.374  | 5567.643  | AF086128  | 854.554   | 1043.449  |
| NM_017832 | 4676.503  | 6000.599  | NM_002186 | 1642.512  | 2136.442  | AK022850  | 3963.605  | 3679.627  |
| NM_001713 | 3286.185  | 3411.208  | AL137543  | 2855.333  | 3416.307  | NM_016490 | 10048.881 | 9665.648  |
| NM_015367 | 30341.844 | 27843.369 | NM_004444 | 1680.408  | 2068.771  | AF038193  | 1522.709  | 1441.063  |

|           |           |           |           |           |           |           |           |           |
|-----------|-----------|-----------|-----------|-----------|-----------|-----------|-----------|-----------|
| NM_01449E | 6937.494  | 7717.38   | NM_001957 | 4066.408  | 4567.499  | AL137498  | 13954.158 | 13469.7   |
| NM_00237E | 17128.598 | 16496.627 | AK024533  | 2931.344  | 3268.148  | AK024289  | 5815.353  | 5004.093  |
| NM_00098E | 68541.508 | 63301.512 | NM_00273E | 26046.82  | 28994.113 | S66168    | 36141.129 | 32610.246 |
| NM_00181E | 7305.104  | 5627.648  | NM_00424E | 3410.529  | 3500.986  | AF131837  | 1252.911  | 1480.179  |
| AF055016  | 13204.053 | 8347.126  | NM_005207 | 4459.588  | 4552.373  | NM_003851 | 47636.949 | 47885.363 |
| NM_007234 | 17705.48  | 14640.288 | NM_003087 | 12434.431 | 13276.897 | U79244    | 1043.694  | 836.412   |
| Y16704    | 68109.078 | 63125.777 | NM_001630 | 6756.987  | 9802.269  | AK022482  | 9273.176  | 8150.276  |
| NM_014567 | 4398.322  | 3387.505  | AF305081  | 4397.803  | 3615.104  | AK023811  | 884.606   | 1341.421  |
| NM_01784E | 5238.795  | 3308.8    | AF118078  | 3650.68   | 3475.645  | AK024135  | 2165.307  | 2195.679  |
| NM_019057 | 6588.203  | 4951.807  | NM_02016E | 1287.487  | 1410.03   | AK022803  | 16500.498 | 17772.055 |
| NM_002677 | 2263.598  | 2046.967  | BE904175  | 895.243   | 1476.054  | AK023517  | 6028.993  | 5930.965  |
| NM_01208E | 886.156   | 1227.808  | NM_00585E | 4517.215  | 6379.138  | AK023869  | 17518.639 | 17712.896 |
| NM_001537 | 10491.192 | 9318.327  | NM_014931 | 8672.885  | 13219.529 | AK025156  | 56136.492 | 55857.414 |
| U80743    | 3779.515  | 2562.901  | NM_014487 | 13084.5   | 16061.438 | AK022116  | 18267.33  | 19928.887 |
| NM_00135E | 14042.856 | 12835.456 | NM_018070 | 2481.724  | 2405.116  | AF026526  | 4400.465  | 4202.813  |
| D15050    | 3022.766  | 2258.487  | NM_002484 | 11204.858 | 11252.25  | AK026207  | 7575.543  | 7096.477  |
| NM_014724 | 442.395   | 587.875   | M33197    | 63780.727 | 62922.184 | AK024984  | 55784.855 | 54988.578 |
| NM_006527 | 18583.674 | 15694.01  | AL162052  | 5006.055  | 5381.596  | AK000276  | 1272.573  | 1148.441  |
| NM_006627 | 8831.422  | 8131.497  | AK025941  | 3909.575  | 4086.529  | AL110236  | 1481.188  | 1772.981  |
| NM_00736E | 41591.398 | 38906.93  | NM_01817E | 2103.998  | 2278.911  | AF085955  | 1764.067  | 1961.696  |
| NM_00309E | 58324.25  | 57061.32  | AF059531  | 24328.932 | 19354.908 | AF075106  | 22542.979 | 23458.801 |
| U05589    | 4434.722  | 4215.249  | NM_002707 | 22454.564 | 14309.131 | AK023339  | 16535.111 | 15797.914 |
| NM_01447E | 24373.463 | 27815.535 | AF029777  | 5978.319  | 4525.209  | AF085981  | 1198.914  | 1223.195  |
| NM_00309E | 60540.301 | 58169.223 | NM_00335E | 2571.833  | 3231.29   | AF086008  | 5772.91   | 5008.178  |
| NM_01638E | 4017.103  | 3087.857  | AK026884  | 58239.008 | 51233.953 | AF087970  | 959.921   | 931.663   |
| NM_00229E | 61779.547 | 62443.426 | S82198    | 2833.309  | 1905.488  | AF086029  | 883.028   | 996.786   |
| NM_00313E | 41270.086 | 38073.504 | NM_002594 | 6009.892  | 5102.492  | AF075115  | 1555.94   | 1616.964  |
| NM_00176E | 35981.25  | 33075.727 | NM_001159 | 4165.799  | 4085.678  | U05597    | 3580.648  | 3693.656  |
| NM_01630E | 26783.994 | 26008.314 | NM_031407 | 12181.387 | 15030.796 | AK026366  | 67741.156 | 72128.281 |
| NM_00375E | 3440.127  | 3093.77   | M33197    | 66375.813 | 65166.82  | AK024229  | 52938.934 | 54439.145 |
| NM_01323E | 7172.062  | 6152.622  | AK000410  | 54933.516 | 59763.965 | AK021824  | 1945.569  | 2080.185  |
| BE258640  | 44378.512 | 37939.367 | NM_02019E | 2986.669  | 4906.822  | AK021467  | 24468.365 | 24688.027 |
| NM_003314 | 16364.507 | 14840.186 | D86982    | 524.787   | 1061.146  | NM_020371 | 4456.393  | 4260.185  |
| NM_01662E | 25976.568 | 22967.771 | NM_00561E | 1229.394  | 1660.518  | AK022498  | 5770.719  | 5631.792  |
| AF201932  | 1090.435  | 860.772   | D87440    | 6471.705  | 6969.233  | AJ245433  | 67385.484 | 67693.273 |
| NM_001334 | 1153.621  | 1152.956  | AK000332  | 2227.848  | 2399.603  | AK021942  | 67571.617 | 67287.125 |
| NM_00124E | 1124.383  | 1055.628  | AL080156  | 1102.959  | 1338.295  | NM_014127 | 3653.654  | 3555.613  |
| AL365411  | 10771.167 | 8744.46   | NM_00673E | 5316.69   | 5378.887  | AL360187  | 3271.457  | 3727.334  |
| M24470    | 1097.097  | 1249.557  | NM_00228E | 1876.287  | 1732.952  | AK021878  | 3347.578  | 3974.429  |
| NM_01606E | 11931.395 | 11709.385 | NM_006694 | 27816.836 | 28055.725 | AK021817  | 14695.411 | 14242.173 |
| AK024677  | 3606.214  | 3384.847  | NM_013351 | 70146.211 | 62405.48  | AL080103  | 1705.388  | 1845.659  |
| NM_00003E | 3874.602  | 3439.619  | NM_012340 | 19046.576 | 21999.045 | AK023217  | 3393.16   | 3457.451  |
| AF254082  | 66618.477 | 65355.758 | NM_00602E | 4692.701  | 6302.96   | AK021883  | 1127.646  | 1096.371  |
| AF205718  | 4895.869  | 4983.859  | AK025110  | 2100.806  | 2252.8    | AF090902  | 19994.48  | 20091.268 |
| NM_003420 | 1589.299  | 2126.509  | X52339    | 61597.727 | 52153.629 | AK091038  | 4309.539  | 4554.974  |
| AY004252  | 2179.9    | 2452.409  | M33197    | 65274.82  | 67842.258 | AK024193  | 5901.857  | 5615.59   |
| NM_006261 | 2018.849  | 1957.603  | AB046830  | 3821.059  | 3075.218  | NM_01857E | 909.732   | 935.4     |
| AK027045  | 3507.057  | 3316.858  | NM_00712E | 4331.911  | 4095.346  | NM_01854E | 1190.867  | 796.234   |
| AF169796  | 5134.029  | 4735.817  | NM_00148E | 1836.386  | 1541.014  | AK024438  | 49937.938 | 46958.152 |
| AK026157  | 2163.305  | 2265.467  | NM_01620E | 21395.508 | 23625.549 | AL390170  | 2104.962  | 2030.897  |
| AK001814  | 22260.162 | 23965.436 | NM_01247E | 3634.405  | 3824.096  | AK022887  | 1611.105  | 1610.081  |
| NM_00722E | 5115.832  | 4783.63   | NM_016604 | 4757.713  | 5132.489  | AK000745  | 49687.715 | 50493.738 |
| NM_00343E | 5609.05   | 4945.701  | M33197    | 64375.051 | 66193.078 | NM_00529E | 1998.098  | 1719.157  |

|           |           |           |           |           |           |           |           |           |
|-----------|-----------|-----------|-----------|-----------|-----------|-----------|-----------|-----------|
| NM_016291 | 12255.656 | 10735.438 | NM_006276 | 9481.276  | 11924.294 | NM_015901 | 2345.955  | 1997.382  |
| NM_003413 | 524.666   | 478.451   | NM_003407 | 2033.777  | 2669.334  | AF130065  | 2696.056  | 2214.533  |
| NM_005937 | 58334.027 | 56036.074 | NM_007209 | 65088.762 | 65250.031 | Z83935    | 4525.336  | 4216.845  |
| AB037809  | 2720.726  | 2170.445  | NM_003729 | 8502.068  | 8401.333  | NM_006365 | 1785.539  | 1084.326  |
| AB011129  | 2441.584  | 1354.591  | L05096    | 29501.266 | 30868.795 | AF093744  | 39599.227 | 45625.949 |
| NM_014391 | 15352.269 | 13223.859 | BC015899  | 16123.478 | 16228.62  | NM_018687 | 58472.238 | 57523.27  |
| NM_00427C | 4080.975  | 3350.319  | M33197    | 65234.387 | 66111.938 | M57417    | 67371.773 | 61590.992 |
| L09102    | 12964.124 | 11762.938 | NM_015914 | 3285.19   | 3892.169  | NM_01772E | 2831.074  | 2807.646  |
| U68488    | 591.105   | 555.005   | NM_00718C | 8188.113  | 6957.587  | U80772    | 1914.404  | 1642.126  |
| NM_000675 | 892.998   | 1093.527  | NM_005609 | 2485.174  | 2046.792  | NM_006185 | 6881.661  | 6723.022  |
| NM_016247 | 4449.839  | 6012.58   | NM_005476 | 14333.463 | 16094.094 | AJ272177  | 3097.581  | 3231.253  |
| NM_001157 | 442.851   | 694.825   | NM_00566C | 8074.523  | 3968.398  | AK026402  | 59049.902 | 58362.621 |
| NM_012282 | 1924.2    | 2198.624  | AK023902  | 6294.256  | 4277.712  | AF111846  | 4058.49   | 3933.662  |
| NM_00671C | 1199.028  | 968.395   | NM_000401 | 1820.386  | 1206.14   | Z36850    | 5123.477  | 3732.043  |
| NM_003323 | 26582.543 | 25516.244 | NM_005223 | 1522.771  | 1503.476  | AK024618  | 8882.81   | 6943.082  |
| BG685310  | 5133.182  | 6146.787  | AB011173  | 8591.734  | 8045.051  | AL049969  | 2622.771  | 2294.889  |
| AW300857  | 21307.229 | 21206.996 | AB023195  | 4790.661  | 3716.381  | NM_00522C | 8974.482  | 8691.94   |
| H85962    | 24132.982 | 25294.338 | U43431    | 3361.028  | 4325.323  | NM_018615 | 924.177   | 935.455   |
| BG742446  | 2625.998  | 2506.808  | X57147    | 1690.406  | 1879.306  | X79308    | 5919.209  | 5103.605  |
| AA864554  | 4291.874  | 4550.301  | AK021563  | 823.517   | 742.706   | AF086476  | 3358.76   | 3569.618  |
| X66945    | 8919.056  | 8711.127  | M33197    | 62887.777 | 65737.969 | NM_01766C | 13234.79  | 12140.277 |
| AI160703  | 1081.04   | 960.364   | AK097041  | 5989.434  | 6291.369  | AB011151  | 45809.566 | 45125.324 |
| X12830    | 2284.739  | 2825.647  | AF068744  | 49565.355 | 48209.816 | U92995    | 8333.687  | 8349.398  |
| U00482    | 1438.243  | 1604.71   | AK000762  | 2835.57   | 3246.466  | NM_00710E | 3290.093  | 3505.725  |
| Z80998    | 455.202   | 770.997   | NM_004571 | 1306.482  | 1851.975  | AL137555  | 7456.167  | 6366.492  |
| K01904    | 34834.457 | 31097.834 | NM_002895 | 1649.396  | 1769.214  | AL133017  | 3290.701  | 2539.837  |
| BE538886  | 1645.042  | 2036.271  | AF276513  | 5278.701  | 6452.538  | U84506    | 8097.396  | 6635.345  |
| NM_00222E | 1990.767  | 1348.266  | M33197    | 65213.125 | 79474.445 | U21556    | 68093.422 | 73324.484 |
| M57650    | 58709.02  | 54921.59  | M95610    | 67140.383 | 59977.73  | AB002444  | 2204.795  | 1761.701  |
| BC023978  | 1276.519  | 1152.712  | NM_003118 | 8527.108  | 4857.693  | AB002344  | 10463.643 | 9080.379  |
| M21302    | 1671.247  | 1530.765  | L02922    | 49848.02  | 40167.172 | BF210352  | 2892.188  | 2596.585  |
| NM_002512 | 61593.512 | 65672.305 | NM_001797 | 10223.214 | 8596.45   | NM_006825 | 7082.674  | 7286.038  |
| NM_00490E | 1079.461  | 964.012   | NM_003154 | 3201.234  | 2615.432  | NM_017665 | 29603.027 | 30259.453 |
| NM_016171 | 65104.07  | 69027.883 | NM_004235 | 2936.226  | 2400.885  | AF147379  | 61143.992 | 60115.254 |
| NM_014443 | 3712.884  | 3814.822  | AK023459  | 13346.566 | 9744.592  | AK023760  | 13673.049 | 12626.675 |
| NM_005212 | 6829.462  | 7254.477  | BI762154  | 3471.409  | 2949.653  | X98415    | 64361.656 | 61572.023 |
| M14584    | 656.418   | 767.452   | U13022    | 3672.551  | 2511.993  | AK024205  | 4913.813  | 4491.791  |
| NM_006415 | 5814.454  | 6330.484  | R23251    | 36082.801 | 38162.473 | AF086034  | 29830.088 | 27181.438 |
| AF035035  | 1349.301  | 1370.135  | AA702640  | 5093.734  | 4368.674  | AK000174  | 1721.931  | 1598.848  |
| AB020676  | 2824.36   | 2910.957  | T68583    | 9938.657  | 9125.969  | AF130071  | 5307.284  | 5217.187  |
| AK024715  | 1596.531  | 1511.76   | AA481944  | 47047.516 | 46680.602 | AJ272057  | 3778.306  | 3678.542  |
| U90942    | 47249.91  | 48459.094 | AF038440  | 1107.365  | 1209.605  | NM_004402 | 1543.258  | 1304.594  |
| NM_014942 | 825.727   | 950.308   | M31158    | 10736.719 | 11263.526 | AK024216  | 47833.598 | 51245.539 |
| NM_01836C | 5948.684  | 6510.098  | H00742    | 1730.525  | 1772.208  | Y16752    | 16858.256 | 15702.187 |
| AK022489  | 543.597   | 725.325   | D42108    | 2977.972  | 3732.281  | NM_014694 | 853.616   | 806.504   |
| AL365415  | 1854.322  | 1940.817  | BG700922  | 3358.898  | 3692.704  | NM_020155 | 2362.996  | 2740.967  |
| L29147    | 8457.432  | 9209.243  | AI366068  | 3971.623  | 4213.608  | NM_01483C | 4050.304  | 4602.598  |
| NM_001525 | 68391.25  | 64740.688 | N57553    | 26857.467 | 33206.988 | AF355402  | 10112.338 | 11152.095 |
| NM_006055 | 11422.516 | 13673.753 | M33197    | 62597.09  | 63879.676 | AK000407  | 7205.908  | 7269.345  |
| NM_004295 | 1228.198  | 1665.808  | NM_018202 | 62525.277 | 61419.762 | NM_020524 | 28884.865 | 27829.033 |
| NM_00504E | 920.275   | 1042.854  | AB023197  | 25739.268 | 20272.885 | NM_001995 | 12122.147 | 8450.749  |
| NM_005972 | 1854.139  | 1812.127  | NM_022173 | 34356.07  | 29817.904 | X64977    | 5627.629  | 4233.752  |
| NM_00106C | 1007.784  | 1184.751  | NM_000716 | 1555.178  | 576.541   | AF064851  | 2737.651  | 2367.898  |

|           |           |           |           |           |           |           |           |           |
|-----------|-----------|-----------|-----------|-----------|-----------|-----------|-----------|-----------|
| NM_018841 | 11515.656 | 10277.736 | AF026932  | 2026.241  | 1885.249  | NM_002602 | 47559.328 | 36098.336 |
| AK022859  | 1040.765  | 1027.406  | AF103795  | 3039.986  | 1879.553  | NM_016235 | 2403.696  | 2023.135  |
| NM_020228 | 2443.447  | 1854.077  | NM_006215 | 1110.71   | 788.045   | NM_003383 | 1222.732  | 806.154   |
| AK024685  | 624.028   | 531.48    | M33197    | 65216.012 | 68248.008 | D17271    | 28505.002 | 28340.283 |
| NM_003676 | 13584.881 | 13696.728 | NM_007024 | 8380.977  | 9207.183  | X91648    | 3441.456  | 3468.99   |
| AF113007  | 27963.623 | 29915.338 | NM_013231 | 2417.372  | 2329.778  | AK026658  | 1552.481  | 1704.136  |
| NM_000688 | 10297.171 | 12246.454 | NM_012106 | 9149.146  | 11089.247 | AF282264  | 15313.194 | 14262.029 |
| U39573    | 1357.692  | 1832.219  | NM_006254 | 6799.669  | 9360.467  | AF086322  | 2226.713  | 1904.514  |
| D82061    | 7776.447  | 8200.002  | X95425    | 2685.613  | 2803.447  | Z70717    | 4130.02   | 3433.361  |
| AJ293009  | 5898.312  | 6912.912  | NM_004422 | 4365.094  | 4670.45   | AK024736  | 5829.91   | 5017.334  |
| NM_000374 | 2929.323  | 4048.527  | NM_016562 | 1499.281  | 2203.783  | NM_018235 | 1691.298  | 1970.496  |
| NM_000502 | 2508.991  | 2738.746  | AY009399  | 33909.785 | 38604.734 | U88892    | 4508.352  | 4235.621  |
| NM_001355 | 12917.853 | 14552.32  | NM_004895 | 14578.245 | 15503.923 | AK023755  | 2830.504  | 2800.528  |
| NM_002245 | 1222.654  | 1211.317  | U80018    | 5527.89   | 4285.209  | NM_005725 | 2064.063  | 2050.371  |
| NM_004980 | 8377.246  | 9851.165  | M33197    | 65214.215 | 77547.789 | NM_012211 | 2393.526  | 2071.453  |
| NM_003224 | 6818.079  | 8208.275  | NM_004845 | 9674.614  | 9548.443  | AB040877  | 10370.308 | 9662.9    |
| NM_004227 | 3589.398  | 4718.556  | NM_007107 | 18931.959 | 20897.326 | AB040927  | 3079.223  | 3149.877  |
| NM_005282 | 8820.342  | 9720.352  | NM_000047 | 65261.16  | 64582.313 | AK026737  | 10001.033 | 9634.696  |
| NM_001736 | 9841.375  | 10012.12  | M68874    | 682.206   | 984.121   | NM_000210 | 1731.756  | 1860.816  |
| AB028949  | 1221.362  | 1359.191  | NM_006319 | 18702.494 | 19663.74  | NM_006285 | 9154.725  | 10765.964 |
| AL137580  | 1640.914  | 1813.949  | NM_004605 | 4981.642  | 3100.283  | NM_019067 | 8713.339  | 7863.849  |
| NM_004101 | 1479.546  | 2042.419  | NM_006660 | 20082.209 | 9866.175  | AF251025  | 1462.517  | 1409.709  |
| NM_002995 | 30607.002 | 29536.627 | NM_006685 | 61978.43  | 57416.43  | NM_015677 | 15247.959 | 15306.463 |
| AB033114  | 839.866   | 734.991   | AF154121  | 901.873   | 771.9     | NM_001772 | 16873.77  | 14006.25  |
| NM_015978 | 2795.311  | 3329.556  | NM_012139 | 14206.174 | 13065.066 | AL162032  | 1323.869  | 605.812   |
| NM_003810 | 1460.463  | 1452.544  | AF121856  | 11574.486 | 12532.719 | AB011087  | 2152.678  | 2313.647  |
| NM_018973 | 10619.77  | 9881.386  | NM_006421 | 5474.989  | 7253.445  | AF161341  | 14527.67  | 13285.648 |
| NM_002591 | 2131.677  | 1957.759  | NM_017457 | 22533.307 | 30636.764 | AJ249902  | 6247.31   | 5543.673  |
| AL049334  | 776.079   | 737.238   | NM_003765 | 6026.201  | 7169.071  | NM_004384 | 8832.351  | 8241.738  |
| NM_020216 | 3310.033  | 3525.435  | NM_005868 | 2187.672  | 2144.046  | L05500    | 36560.906 | 34486.598 |
| AK021860  | 2738.731  | 2821.513  | M33197    | 69159.547 | 65442.742 | NM_012306 | 35626.215 | 34903.051 |
| AB046816  | 2005.673  | 1760.276  | NM_001201 | 6285.764  | 4329.288  | AF222903  | 6207.028  | 6175.718  |
| AL137266  | 12225.13  | 13036.57  | NM_016618 | 3430.542  | 3418.832  | NM_006226 | 11363.829 | 10501.631 |
| NM_016457 | 3281.302  | 3615.527  | AB014568  | 57284.551 | 54529.59  | L10374    | 39776.777 | 33794.566 |
| NM_005057 | 3148.687  | 4418.694  | AK022238  | 770.465   | 577.456   | NM_000245 | 9897.157  | 9259.856  |
| AB046842  | 3716.229  | 4191.682  | NM_012249 | 17831.254 | 13699.715 | NM_014310 | 866.304   | 1075.505  |
| NM_004850 | 3001.307  | 3070.828  | AK022546  | 41995.027 | 42259.582 | NM_005860 | 11479.702 | 10707.873 |
| NM_002822 | 20410.279 | 19978.924 | NM_014067 | 58756.059 | 53771     | AF095288  | 40928.941 | 41755.695 |
| BF306955  | 1646.9    | 1785.839  | NM_002914 | 23966.957 | 24024.543 | AF130114  | 765.01    | 1179.58   |
| NM_001394 | 21049.814 | 18740.625 | NM_020385 | 8166.746  | 7802.287  | AK026271  | 17213.656 | 18474.969 |
| NM_018441 | 23682.111 | 26562.414 | NM_014877 | 871.51    | 1006.526  | NM_001795 | 21973.465 | 27163.428 |
| NM_000778 | 31713.117 | 33217.309 | NM_006541 | 3018.707  | 3257.161  | AF090895  | 3858.096  | 3785.891  |
| NM_001605 | 5619.839  | 6247.444  | M33197    | 63098.664 | 64924.605 | NM_005610 | 4038.162  | 3979.206  |
| BE733234  | 2472.159  | 2643.575  | NM_005705 | 11139.312 | 6220.884  | AL133651  | 2767.205  | 2727.579  |
| NM_000675 | 797.038   | 554.341   | NM_004328 | 5766.088  | 5781.79   | AB014532  | 16190.785 | 16446.025 |
| NM_016247 | 3659.518  | 2719.111  | NM_004581 | 11231.279 | 10387.71  | NM_003478 | 7508.94   | 6664.01   |
| NM_001157 | 440.024   | 343.789   | NM_006817 | 27682.27  | 28646.338 | NM_016237 | 18272.023 | 16537.189 |
| NM_012282 | 1894.357  | 2150.415  | NM_007108 | 34374.137 | 28658.43  | NM_004924 | 13383.154 | 13094.39  |
| NM_006710 | 1182.553  | 1213.058  | NM_015921 | 51083.52  | 53328.484 | NM_001798 | 7669.836  | 6380.557  |
| NM_003323 | 23721.775 | 25437.189 | AB040900  | 25397.121 | 28037.176 | NM_001211 | 11119.457 | 10108.695 |
| BG685310  | 5006.305  | 5255.98   | NM_001080 | 7235.044  | 5646.919  | NM_006505 | 1338.466  | 1262.616  |
| AW300857  | 21740.801 | 20866.092 | NM_001482 | 1278.9    | 978.968   | AB033050  | 4877.331  | 5036.481  |
| H85962    | 25805.191 | 27108.707 | NM_003118 | 10258.453 | 10026.536 | NM_004356 | 48626.457 | 49760.848 |

|           |           |           |           |           |           |           |           |           |
|-----------|-----------|-----------|-----------|-----------|-----------|-----------|-----------|-----------|
| BG742446  | 2555.442  | 3417.297  | L02922    | 56943.352 | 60370.602 | BC015022  | 7477.245  | 7071.938  |
| AA864554  | 3689.551  | 3071.273  | NM_001797 | 12825.661 | 13506.495 | AB033086  | 2050.004  | 1686.811  |
| X66945    | 8310.657  | 7196.542  | NM_003154 | 3507.135  | 3202.324  | NM_002406 | 65316.09  | 65043.828 |
| AI160703  | 1113.585  | 1099.208  | NM_004235 | 3808.219  | 3027.751  | U87169    | 6869.794  | 7599.85   |
| X12830    | 2514.478  | 2656.912  | AK023459  | 16751.145 | 16048.056 | NM_002073 | 6594.338  | 6678.907  |
| U00482    | 1999.136  | 2181.83   | BI762154  | 4295.731  | 4158.335  | AF117222  | 2525.978  | 2574.372  |
| Z80998    | 589.014   | 987.72    | U13022    | 4860.24   | 3847.346  | NM_001935 | 63460.531 | 61872.262 |
| K01904    | 34763.031 | 32907.441 | R23251    | 43183.086 | 47601.184 | NM_001745 | 1372.341  | 1531.506  |
| BE538886  | 1732.587  | 2192.542  | AA702640  | 9373.057  | 8431.336  | AF090327  | 1531.157  | 1841.545  |
| NM_002228 | 2172.534  | 1430.518  | T68583    | 19253.139 | 17459.797 | NM_003291 | 8813.877  | 8164.848  |
| M57650    | 52853.457 | 55448.273 | AA481944  | 53305.32  | 55894.152 | AK022950  | 5338.162  | 5515.088  |
| BC023978  | 1333.373  | 1127.775  | AF038440  | 3453.258  | 3819.179  | S75755    | 10768.724 | 9775.866  |
| M21302    | 1854.161  | 1673.849  | H00742    | 2329.52   | 1860.907  | AF176518  | 1573.565  | 1423.836  |
| AK024865  | 4734.513  | 3930.113  | D42108    | 3333.762  | 3147.672  | AB014576  | 44674.617 | 52340.844 |
| NM_007210 | 2417.503  | 2290.307  | BG700922  | 2632.978  | 2227.869  | NM_019044 | 30439.723 | 28188.635 |
| NM_001483 | 8834.812  | 7889.992  | AI366068  | 3587.227  | 3652.504  | AK000145  | 1679.307  | 1272.568  |
| NM_014443 | 2806.66   | 2109.945  | N57553    | 23118.521 | 15993.279 | AF174601  | 10191.077 | 9499.339  |
| NM_005212 | 4917.198  | 2657.736  | M33197    | 59897.133 | 62635.566 | AF279865  | 2221.78   | 2298.925  |
| NM_006419 | 5331.48   | 4720.867  | NM_016545 | 11814.638 | 6914.023  | NM_014700 | 2633.975  | 2377.895  |
| AF035035  | 1405.499  | 1581.003  | NM_001440 | 60096.863 | 57097.184 | NM_014714 | 2264.647  | 1998.366  |
| AB020676  | 2402.145  | 2206.842  | NM_022173 | 40709.012 | 52926.16  | NM_015644 | 5842.32   | 5549.45   |
| AK024715  | 1411.936  | 1720.004  | AB040970  | 11920.23  | 9821.099  | NM_005687 | 14955.834 | 14327.676 |
| U90942    | 46353.387 | 49554.035 | NM_018330 | 7412.869  | 5576.178  | NM_005983 | 9675.15   | 8903.158  |
| NM_014942 | 1009.437  | 1048.114  | AB023222  | 4713.429  | 4867.262  | AB016902  | 16493.045 | 14612.846 |
| NM_018360 | 5789.132  | 5939.174  | AB033088  | 12331.371 | 10824.255 | AF272378  | 66413.109 | 58905.141 |
| AL365415  | 1685.211  | 2276.85   | M33197    | 61335.125 | 67621.117 | AK026980  | 7736.682  | 8310.646  |
| L29147    | 7194.7    | 7206.213  | U50342    | 62032.902 | 66413.766 | NM_020368 | 10082.372 | 11545.958 |
| NM_001525 | 61637.625 | 60177.637 | NM_000295 | 3750.133  | 3765.871  | AF024708  | 59059.375 | 57067.02  |
| NM_006055 | 10297.478 | 11927.248 | NM_000716 | 2632.573  | 2516.005  | NM_006467 | 15949.545 | 13854.131 |
| NM_004296 | 1660.789  | 2215.809  | AF026932  | 2770.086  | 2609.172  | NM_017566 | 12545.314 | 13822.133 |
| NM_005048 | 840.234   | 890.22    | AF103795  | 6722.12   | 6991.962  | NM_006582 | 2441.664  | 2870.006  |
| NM_005972 | 2021.091  | 2223.37   | NM_006215 | 1928.016  | 1565.02   | AB033019  | 12245.742 | 10567.206 |
| NM_001060 | 1307.812  | 1376.672  | M33197    | 63233.855 | 69056.063 | NM_001452 | 1565.044  | 1704.036  |
| NM_018841 | 10737.338 | 10257.06  | NM_007024 | 13251.916 | 13987.259 | NM_006162 | 3177.41   | 2975.896  |
| AK022859  | 924.782   | 713.996   | NM_013231 | 5393.266  | 6163.102  | NM_014764 | 16111.84  | 16028.702 |
| L09102    | 14842.517 | 13738.795 | NM_012106 | 11838.19  | 15058.527 | NM_018078 | 6873.503  | 6641.757  |
| U68488    | 730.914   | 675.519   | NM_006254 | 7533.977  | 4525.024  | NM_016013 | 822.3     | 937.24    |
| NM_003676 | 13145.078 | 8875.071  | X95425    | 3434.485  | 2253.932  | NM_016050 | 2090.731  | 2453.118  |
| AF113007  | 25424.053 | 13120.007 | NM_004422 | 4937.046  | 3265.672  | NM_007080 | 25605.785 | 22882.852 |
| NM_000688 | 8728.997  | 5936.797  | NM_016562 | 1751.266  | 1436.075  | AK026912  | 13137.259 | 11550.198 |
| U39573    | 792.797   | 959.213   | AY009399  | 32396.27  | 21172.549 | AK023531  | 36162.621 | 32351.654 |
| D82061    | 6580.452  | 6487.945  | NM_004895 | 15027.481 | 10283.16  | NM_006348 | 3019.041  | 2872.847  |
| AJ293009  | 4870.105  | 5618.1    | M33197    | 62523.035 | 66585.828 | AF067972  | 43873.941 | 45812.965 |
| NM_000374 | 2327.238  | 2522.51   | M95610    | 41549.414 | 28428.102 | NM_004958 | 3394.265  | 4021.297  |
| NM_000502 | 2830.022  | 2564.968  | NM_000717 | 4503.006  | 4359.14   | D87076    | 7685.906  | 9393.601  |
| NM_001359 | 12841.82  | 15092.388 | M33197    | 61444.438 | 68025.125 | NM_014145 | 4911.984  | 5678.772  |
| NM_002245 | 787.25    | 935.749   | NM_004845 | 10591.622 | 10640.325 | AB020635  | 13144.221 | 13067.28  |
| NM_004980 | 9943.959  | 10602.767 | NM_007107 | 20064.189 | 20720.537 | NM_006515 | 2481.946  | 2635.433  |
| NM_003224 | 6060.551  | 6045.514  | NM_000047 | 59360.402 | 60715.855 | NM_005224 | 1297.068  | 1200.724  |
| NM_004227 | 3815.755  | 3944.034  | M68874    | 975.903   | 995.826   | NM_012144 | 22750.584 | 21870.777 |
| NM_005282 | 7234.146  | 7359.035  | NM_006319 | 19545.088 | 21891.465 | X65231    | 64053.59  | 61045.184 |
| NM_001736 | 8206.081  | 8820.749  | NM_018226 | 6714.084  | 7208.053  | NM_002908 | 9797.427  | 9220.351  |
| AB028949  | 994.459   | 1166.243  | NM_004605 | 2692.175  | 2458.1    | AF205632  | 9924.456  | 9286.705  |

|           |           |           |           |           |           |           |           |           |
|-----------|-----------|-----------|-----------|-----------|-----------|-----------|-----------|-----------|
| AL137580  | 1770.874  | 1863.334  | NM_006660 | 22357.779 | 21223.094 | NM_005378 | 63122.238 | 58139.352 |
| NM_004101 | 1550.363  | 2204.896  | NM_006685 | 58112.914 | 64582.863 | NM_002397 | 5167.091  | 4880.999  |
| NM_002995 | 26617.598 | 26002.244 | AF154121  | 3619.191  | 3141.298  | AF000672  | 4347.664  | 3553.377  |
| AB033114  | 883.152   | 1004.108  | NM_012139 | 26749.23  | 25424.768 | NM_017652 | 46541.988 | 43161.695 |
| NM_015978 | 2795.14   | 3123.651  | AF121856  | 14606.352 | 18525.24  | D70832    | 63554.629 | 57362.508 |
| NM_003810 | 1275.888  | 1242.683  | NM_006421 | 7497.1    | 11566.202 | NM_002379 | 49852.477 | 57012.941 |
| NM_004908 | 1726.312  | 1323.333  | NM_017457 | 24808.568 | 21783.623 | L12347    | 46609.316 | 53297.082 |
| NM_016171 | 58722.027 | 64209.746 | NM_003765 | 9395.141  | 6008.903  | NM_001622 | 22498.346 | 23975.76  |
| NM_018973 | 9207.97   | 4674.218  | NM_005868 | 2126.511  | 1300.453  | NM_018477 | 14612.681 | 19179.148 |
| NM_002591 | 1869.701  | 1009.742  | M33197    | 64019.098 | 63572.684 | U20536    | 2872.835  | 4192.438  |
| AL049334  | 746.118   | 641.838   | AB014568  | 61814.824 | 62054.367 | AI298534  | 5267.171  | 5462.856  |
| NM_020216 | 2386.98   | 2281.361  | AK022238  | 949.082   | 854.236   | R71691    | 14870.597 | 14967.174 |
| AK021860  | 3613.528  | 3031.417  | NM_012249 | 20215.793 | 23979.23  | AW167715  | 5422.788  | 5797.157  |
| AB046816  | 2041.729  | 1980.984  | AK022546  | 40686.207 | 38931.895 | AA424735  | 20677.896 | 20896     |
| AL137266  | 11936.22  | 13993.213 | NM_014067 | 52894.344 | 53831.602 | U78294    | 4893.242  | 5172.512  |
| NM_016457 | 2748.019  | 3069.935  | NM_002914 | 22596.41  | 20841.615 | AA171613  | 1788.261  | 1676.775  |
| NM_005057 | 3125.219  | 3867.356  | NM_020385 | 6353.424  | 6289.186  | BI760394  | 6770.192  | 6604.894  |
| AF143321  | 407.289   | 676.186   | NM_014877 | 1390.143  | 1190.126  | AA555216  | 1107.215  | 1078.363  |
| AB046842  | 3806.013  | 4041.92   | NM_006541 | 2775.023  | 2758.77   | U09117    | 63008.297 | 62396.816 |
| NM_004850 | 3286.517  | 3294.22   | M33197    | 62450.832 | 61803.086 | M21054    | 3148.52   | 3519.997  |
| NM_002822 | 21750.01  | 23253.316 | NM_005705 | 15287.335 | 11971.665 | M18468    | 3285.483  | 3875.534  |
| BF306955  | 1292.714  | 1432.483  | NM_004328 | 7563.414  | 7504.352  | H66070    | 37100.902 | 43001.117 |
| NM_001394 | 23417.748 | 25717.602 | NM_004581 | 15234.948 | 16442.061 | AA164741  | 1582.38   | 1731.535  |
| NM_018441 | 23080.68  | 24865.203 | NM_006817 | 36355.383 | 44136.141 | AI189375  | 4796.792  | 4763.364  |
| NM_000778 | 28751.852 | 30382.656 | NM_007108 | 37121.066 | 37945.406 | AI978885  | 11318.858 | 12185.935 |
| NM_001609 | 5817.961  | 5648.959  | NM_015921 | 53740.234 | 58302.793 | NM_000303 | 21488.314 | 22038.24  |
| BE733234  | 2543.692  | 2523.446  | AB040900  | 35112.246 | 43418.547 | NM_001939 | 27543.721 | 30435.873 |
| NM_020228 | 2727.308  | 2976.7    | NM_001080 | 9501.72   | 5485.838  | NM_003279 | 56985.398 | 58920.461 |
| AK024685  | 916.148   | 1000.433  | NM_001482 | 1578.724  | 811.683   | NM_004393 | 1297.428  | 1399.72   |
| NM_012282 | 2289.852  | 1320.085  | NM_001797 | 12539.511 | 13102.337 | AB018345  | 1211.362  | 861.523   |
| NM_006710 | 1040.865  | 546.678   | NM_003154 | 4555.669  | 4064.975  | NM_005832 | 3273.672  | 1924.753  |
| NM_003323 | 23038.709 | 21414.691 | NM_004235 | 4516.062  | 4191.783  | AW407841  | 8837.997  | 9247.283  |
| BG685310  | 3965.988  | 3202.569  | AK023459  | 17871.943 | 15709.599 | NM_004155 | 8280.119  | 8667.304  |
| AW300857  | 17652.262 | 15063.116 | BI762154  | 4018.45   | 3861.036  | NM_001831 | 3632.245  | 3098.539  |
| H85962    | 22162.678 | 17449.055 | U13022    | 4832.167  | 4923.27   | NM_014586 | 21604.662 | 23468.484 |
| BG742446  | 2276.997  | 2073.904  | R23251    | 49125.84  | 53446.816 | NM_014366 | 36165.082 | 42225.852 |
| AA864554  | 3418.275  | 3393.339  | BG763477  | 704.248   | 577.113   | NM_000923 | 2723.096  | 2971.241  |
| X66945    | 6981.149  | 7192.116  | AA702640  | 8564.921  | 9255.174  | NM_006453 | 4868.776  | 5607.32   |
| AI160703  | 1226.046  | 1664.488  | T68583    | 18770.379 | 18374.516 | NM_018096 | 4155.969  | 4681.198  |
| X12830    | 2724.17   | 2402.98   | AA481944  | 60172.363 | 62835.465 | AL390078  | 5599.709  | 6117.833  |
| U00482    | 2212.934  | 2399.432  | X14390    | 1158.664  | 933.541   | NM_004036 | 8293.303  | 8312.554  |
| Z80998    | 803.873   | 817.857   | AF038440  | 5046.996  | 4739.469  | NM_015986 | 5914.563  | 6792.5    |
| K01904    | 35925.234 | 34351.137 | H00742    | 4722.285  | 4221.172  | NM_014959 | 24318.279 | 26701.703 |
| BE538886  | 1678.717  | 1724.916  | D42108    | 3925.156  | 4208.537  | NM_003992 | 13053.301 | 14262.327 |
| NM_002228 | 2350.621  | 1880.74   | BG700922  | 3700.449  | 3703.193  | NM_000137 | 2077.554  | 2446.752  |
| M57650    | 56970.547 | 60947.441 | AI366068  | 4699.804  | 5625.061  | AF293339  | 2114.937  | 1558.089  |
| BC023978  | 1371.492  | 1325.462  | N57553    | 36020.895 | 17358.852 | NM_001739 | 4576.399  | 5730.671  |
| M21302    | 1776.476  | 1868.674  | M33197    | 58479.848 | 63057.473 | AF163572  | 36653.746 | 43857.906 |
| AK024865  | 4117.171  | 3987.722  | NM_016545 | 12043.333 | 5801.182  | NM_000897 | 12392.332 | 12983.755 |
| NM_007210 | 2586.813  | 2522.001  | NM_001201 | 4356.036  | 2742.129  | NM_006411 | 32626.58  | 34031.355 |
| NM_001483 | 8964.227  | 6625.016  | NM_016618 | 2095.901  | 1310.978  | NM_014182 | 4789.946  | 4870.854  |
| AL365415  | 1579.699  | 920.561   | NM_000716 | 2816.456  | 2947.137  | NM_014342 | 6190.242  | 7690.281  |
| L29147    | 5670.443  | 3513.245  | AF026932  | 3084.549  | 3024.04   | NM_004853 | 17763.082 | 19682.107 |

|           |           |           |           |           |           |           |           |           |
|-----------|-----------|-----------|-----------|-----------|-----------|-----------|-----------|-----------|
| NM_00152E | 55786.934 | 56260.938 | AF103795  | 7824.455  | 8209.149  | NM_001494 | 33774.578 | 41723.863 |
| NM_00605E | 9343.376  | 7720.541  | NM_00621E | 2368.683  | 2612.688  | NM_017707 | 2172.357  | 2126.462  |
| NM_00429E | 1444.448  | 1179.93   | M33197    | 61223.051 | 65561.367 | NM_00420E | 6218.664  | 7305.4    |
| NM_00504E | 1111.698  | 1125.248  | NM_007024 | 17376.049 | 17455.172 | NM_01588E | 1832.143  | 1591.355  |
| NM_00597E | 2036.489  | 1674.824  | NM_013231 | 10737.239 | 12659.035 | NM_00460E | 54106.223 | 51746.176 |
| NM_00106C | 1465.955  | 1307.412  | NM_01210E | 12221.754 | 13240.797 | AK022849  | 8463.99   | 8004.353  |
| NM_018841 | 9699.156  | 8668.967  | NM_006254 | 8736.39   | 9876.287  | AF040964  | 24361.873 | 23483.016 |
| AL133105  | 9579.596  | 11408.546 | X95425    | 18516.965 | 16953.195 | Z70704    | 3153.534  | 3097.451  |
| AK022859  | 2079.085  | 1396.306  | NM_00442E | 11855.666 | 11896.786 | NM_01436E | 5438.885  | 6131.612  |
| NM_000214 | 446.819   | 375.138   | NM_01656E | 6555.214  | 6575.256  | NM_00137E | 12375.554 | 14036.842 |
| NM_014864 | 9953.361  | 10988.664 | AY009399  | 47328.855 | 46299.43  | NM_00231E | 4303.584  | 4944.875  |
| NM_00372E | 7291.289  | 6548.071  | NM_00489E | 18220.088 | 17536.33  | NM_016937 | 13035.414 | 13448.662 |
| NM_01435E | 4136.575  | 4407.322  | U59748    | 4422.965  | 4690.554  | NM_01232E | 6979.017  | 7091.639  |
| NM_012481 | 6263.7    | 6225.679  | NM_01430E | 18569.25  | 20617.332 | NM_007341 | 2830.881  | 2925.442  |
| L09102    | 14761.363 | 14323.068 | NM_01486E | 1331.136  | 747.836   | NM_01650E | 2796.203  | 3108.536  |
| U68488    | 771.566   | 973.753   | M33197    | 66044.648 | 60273.297 | NM_00645E | 45230.672 | 47437.301 |
| NM_00067E | 902.998   | 984.199   | NM_00311E | 8487.597  | 5824.477  | AK026062  | 9843.971  | 13087.134 |
| NM_016247 | 4453.12   | 4597.076  | L02922    | 46924.633 | 35320.582 | AF047002  | 45684.504 | 47134.77  |
| NM_00165E | 51708.316 | 62071.84  | NM_00404E | 52347.887 | 48003.281 | AL050082  | 6835.793  | 6750.52   |
| AK021761  | 12832.826 | 17658.939 | NM_001891 | 6867.785  | 7497.167  | NM_01658E | 5242.665  | 4727.933  |
| AK024536  | 1484.026  | 663.87    | NM_003227 | 619.201   | 1055.659  | NM_00313E | 16659.383 | 16593.979 |
| NM_01866E | 4360.557  | 1992.447  | NM_01213E | 32768.734 | 24307.846 | AA203126  | 3151.525  | 4064.398  |
| NM_004227 | 3392.76   | 3089.012  | AF121856  | 13661.112 | 13438.838 | L12347    | 29957.338 | 36158.656 |
| NM_00528E | 6552.094  | 4616.601  | NM_006421 | 11429.069 | 12266.643 | Z36788    | 4668.05   | 4925.588  |
| NM_00173E | 7513.559  | 7172.641  | NM_017457 | 30681.047 | 32001.178 | NM_018477 | 11042.655 | 11496.9   |
| AB028949  | 845.845   | 865.221   | NM_00376E | 39648.613 | 38533.07  | AW167715  | 6476.766  | 7213.676  |
| AL137580  | 1750.195  | 1459.985  | NM_00586E | 3207.5    | 3414.253  | U78294    | 3881.612  | 4262.07   |
| NM_004101 | 1332.033  | 1579.697  | M33197    | 60456.246 | 67663.234 | AA171613  | 1074.104  | 1099.123  |
| NM_00299E | 22563.389 | 21765.285 | NM_01820E | 62125.133 | 63382.699 | BI760394  | 6862.753  | 6604.543  |
| AB033114  | 730.859   | 1019.593  | AB023197  | 18493.533 | 17660.678 | AA555216  | 1132.727  | 997.856   |
| NM_01597E | 2830.849  | 3106.368  | NM_02217E | 17425.324 | 18516.518 | U09117    | 67502.391 | 65540.188 |
| NM_00381C | 2002.677  | 2080.07   | AB040970  | 13928.914 | 11708.397 | M21054    | 3546.262  | 4151.043  |
| NM_00490E | 1398.888  | 1623.65   | NM_01833C | 8541.983  | 8526.139  | M18468    | 2464.913  | 2660.952  |
| NM_016171 | 56675.438 | 61844.535 | AB033088  | 11313.709 | 5857.215  | H66070    | 46491.473 | 55211.664 |
| NM_01444E | 4176.256  | 4126.034  | NM_00108C | 16020.722 | 16793.881 | AA164741  | 1923.438  | 2379.693  |
| NM_00521E | 6537.488  | 6200.672  | NM_00148E | 3549.904  | 3619.096  | AI189375  | 6305.692  | 5516.948  |
| M14584    | 865.38    | 1153.874  | NM_00121E | 1104.254  | 1154.662  | NM_00166E | 41936.59  | 42019.445 |
| NM_00641E | 7363.74   | 7163.69   | U80018    | 3325.881  | 4469.937  | AF097645  | 1702.052  | 1670.422  |
| AF035035  | 1386.214  | 1756.225  | NM_000717 | 4632.349  | 5600.748  | AB014599  | 3642.839  | 3449.018  |
| AB020676  | 2635.82   | 2175.79   | M33197    | 59296.992 | 66224.719 | NM_00439E | 747.472   | 1026.432  |
| AK024715  | 1504.222  | 1501.534  | NM_00484E | 6398.025  | 5511.198  | AB018345  | 1671.052  | 2300.997  |
| U90942    | 49595.91  | 49316.176 | NM_007107 | 17838.254 | 21063.398 | NM_00583E | 846.843   | 1167.681  |
| NM_00077E | 32645.824 | 45552.809 | NM_000047 | 59462.598 | 64786.078 | AW407841  | 3190.99   | 2785.584  |
| NM_00160E | 5951.517  | 9608.881  | M68874    | 977.028   | 1081.493  | NM_001831 | 3240.321  | 3724.356  |
| BE733234  | 2448.92   | 3892.537  | NM_00631E | 15909.548 | 18908.201 | NM_01458E | 18413.791 | 17752.455 |
| NM_02022E | 3285.328  | 3881.615  | NM_01822E | 6417.661  | 8138.181  | NM_01436E | 30226.113 | 34172.645 |
| NM_00367E | 10737.718 | 7802.137  | NM_00460E | 2631.478  | 2585.706  | NM_00092E | 3195.85   | 3662.414  |
| AF113007  | 24445.041 | 20048.031 | Z36813    | 6361.759  | 7005.795  | NM_00645E | 4890.085  | 5298.858  |
| NM_00068E | 8396.413  | 6994.856  | NM_00666C | 21671.021 | 21603.725 | NM_01809E | 3207.142  | 3693.674  |
| U39573    | 1104.975  | 979.979   | NM_004727 | 2609.98   | 1031.369  | AL390078  | 5641.37   | 6429.626  |
| D82061    | 6615.401  | 6190.897  | NM_00055E | 4357.557  | 3059.622  | NM_00403E | 8109.89   | 8539.211  |
| AJ293009  | 4639.573  | 4154.841  | NM_00668E | 62968.805 | 64496.777 | NM_01598E | 5976.386  | 6004.668  |
| NM_000374 | 2066.84   | 2568.122  | M33197    | 59405.496 | 60889.535 | NM_01495E | 26593.689 | 24104.207 |

|           |           |           |           |           |           |           |           |           |
|-----------|-----------|-----------|-----------|-----------|-----------|-----------|-----------|-----------|
| NM_000502 | 2222.911  | 1992.019  | AF154121  | 4694.411  | 4283.232  | NM_003992 | 13665.771 | 12602.449 |
| NM_001359 | 12508.449 | 13308.507 | M33197    | 64762.516 | 90276.211 | NM_002379 | 53105.785 | 55858.801 |
| NM_005175 | 59490.898 | 65055.746 | NM_016545 | 15572.137 | 13748.685 | AB007929  | 8912.302  | 9029.598  |
| NM_001696 | 19577.09  | 20141.449 | NM_001440 | 62064.051 | 60996.941 | NM_012102 | 6264.827  | 4930.718  |
| NM_004975 | 967.969   | 754.041   | NM_001201 | 5206.465  | 5134.395  | NM_005017 | 31197.844 | 32142.795 |
| NM_002245 | 1142.893  | 955.229   | NM_016618 | 2082.208  | 2690.448  | AF163572  | 15094.51  | 13835.878 |
| D87445    | 10563.771 | 10043.726 | AB014568  | 56588.883 | 59081.445 | NM_000897 | 5978.82   | 4359.311  |
| NM_000238 | 2441.848  | 2678.393  | AK022238  | 2554.805  | 1384.551  | NM_000487 | 949.855   | 749.656   |
| NM_002247 | 3755.441  | 4061.217  | NM_012249 | 13103.65  | 9639.813  | NM_014342 | 6558      | 8375.104  |
| NM_004980 | 8464.438  | 7499.134  | AK022546  | 38567.535 | 42640.773 | NM_000452 | 1073.409  | 1231.366  |
| AB011094  | 43733.805 | 42386.438 | NM_014067 | 50416.852 | 47615.617 | NM_004853 | 17286.91  | 17822.248 |
| NM_003224 | 6684.874  | 6541.263  | NM_002914 | 22368.213 | 22281.105 | NM_001494 | 32583.529 | 37588.219 |
| AK024865  | 4332.458  | 6490.037  | NM_020385 | 6447.846  | 6704.906  | NM_017707 | 2359.487  | 2490.015  |
| NM_007210 | 2835.327  | 3393.558  | NM_014877 | 680.65    | 741.512   | NM_004206 | 5651.271  | 6649.893  |
| NM_001483 | 8195.803  | 13565.456 | NM_006541 | 2540.308  | 2774.732  | NM_004603 | 55764.508 | 52505.094 |
| NM_018973 | 8115.123  | 6192.91   | M33197    | 59803.457 | 60809.742 | AK022849  | 7754.265  | 7567.423  |
| NM_002591 | 1773.738  | 1027.897  | NM_005705 | 13358.181 | 11052.203 | AF040964  | 24907.895 | 20969.801 |
| AL049334  | 657.816   | 1055.861  | NM_004328 | 10606.76  | 9765.592  | AK023527  | 858.901   | 829.314   |
| NM_020216 | 2416.832  | 2303.604  | NM_004581 | 12785.299 | 9404.273  | NM_001939 | 35500.141 | 33048.34  |
| AK021860  | 2508.318  | 1758.872  | NM_006817 | 37786.824 | 22026.963 | NM_014363 | 1757.449  | 1968.62   |
| AB046816  | 2198.252  | 1872.752  | NM_007108 | 49340.324 | 41699.977 | NM_000557 | 5448.865  | 5505.568  |
| AL137266  | 12331.498 | 13253.772 | NM_015921 | 53775.293 | 55986.27  | NM_003239 | 588.991   | 475.06    |
| NM_016457 | 3483.89   | 3951.298  | AB040900  | 32041.867 | 34633.273 | NM_001375 | 3961.102  | 3581.177  |
| NM_005057 | 3011.441  | 2615.048  | CY3Cy5    | 4661.133  | 376.848   | M20699    | 1102.088  | 828.899   |
| AF143321  | 519.009   | 673.046   | NM_006917 | 1206.877  | 1520.219  | NM_004774 | 2510.421  | 2437.598  |
| AB046842  | 3193.873  | 3280.892  | AF086225  | 4525.396  | 5216.535  | NM_016937 | 4384.378  | 4390.606  |
| NM_004850 | 3027.828  | 3127.529  | NM_005844 | 15377.273 | 20985.689 | NM_012328 | 5005.348  | 5865.377  |
| NM_002822 | 20081.793 | 24211.113 | AK024941  | 6735.243  | 9060.196  | NM_007341 | 2731.836  | 2952.346  |
| BF306955  | 1549.998  | 1390.839  | AF056434  | 6776.721  | 9439.955  | NM_016508 | 2665.976  | 2542.125  |
| NM_001394 | 21651.139 | 19066.721 | AF086199  | 1183.46   | 1833.203  | NM_006456 | 24325.639 | 22848.494 |
| NM_018441 | 22101.744 | 22400.461 | M33197    | 78810.305 | 63485.891 | AK026062  | 6848.153  | 7001.733  |
| CY3Cy5    | 4619.635  | 394.155   | AK025489  | 4972.553  | 5943.562  | AF047002  | 39845.852 | 45761.035 |
| BM664556  | 3251.868  | 2395.493  | AB075853  | 1037.242  | 1379.757  | AL050082  | 5786.163  | 6415.079  |
| AL359586  | 2338.432  | 1974.636  | AL390152  | 14937.632 | 16444.092 | NM_006623 | 66214.352 | 58581.84  |
| AF035290  | 2413.064  | 2013.179  | AK026721  | 5749.285  | 5626.615  | NM_016588 | 4683.378  | 4635.902  |
| AK023216  | 2296.871  | 1813.981  | AK023027  | 11456.049 | 12710.121 | NM_003135 | 14905.288 | 12845.031 |
| M33197    | 81976.641 | 64221.234 | AK025598  | 2803.646  | 3855.329  | NM_006765 | 824.244   | 865.754   |
| AK023288  | 3977.242  | 3592.63   | AB002348  | 80275.375 | 63476.531 | NM_000137 | 6237.315  | 5221.215  |
| NM_017986 | 3660.766  | 3121.33   | NM_006917 | 2349.119  | 2289.699  | L12347    | 23805.063 | 24791.07  |
| AK024846  | 17491.531 | 18946.85  | SR10      | 28903.783 | 12126.381 | NM_001622 | 6685.738  | 5882.003  |
| BM664556  | 2284.213  | 2057.367  | CY3Cy5    | 3225.353  | 145.949   | Z36788    | 1186.118  | 887.827   |
| SR3       | 30564.783 | 41878.988 | AK025948  | 1575.358  | 1947.217  | NM_018477 | 2346.194  | 2210.878  |
| SR7       | 2887.629  | 31226.5   | AJ238555  | 2051.712  | 4210.696  | R71691    | 3141.442  | 2460.507  |
| CY3Cy5    | 7652.351  | 889.001   | AL353948  | 40036.676 | 48875.578 | AW167715  | 2584.449  | 2701.13   |
| M33197    | 77614.508 | 64138.258 | M33197    | 76945.609 | 63039.055 | BI760394  | 3691.613  | 3694.009  |
| AK026984  | 78224.336 | 64132.75  | AL050088  | 8092.621  | 9724.756  | AA555216  | 1711.934  | 1812.881  |
| AK023631  | 1370.269  | 1693.895  | AK024939  | 6409.373  | 7861.266  | U09117    | 59847.328 | 59526.512 |
| AK021796  | 1441.932  | 1132.677  | AK001561  | 10714.725 | 12467.972 | M21054    | 2249.811  | 2101.539  |
| AF007146  | 981.164   | 1028.79   | AB007880  | 6664.992  | 6899.39   | M18468    | 2304.044  | 2419.342  |
| AL110283  | 345.127   | 437.306   | AK024950  | 3479.181  | 4198.698  | H66070    | 24237.875 | 25471.678 |
| AL117427  | 10854.984 | 12224.32  | M33197    | 72962.789 | 63426.574 | AA164741  | 1503.5    | 1783.62   |
| AF052118  | 25332.092 | 22473.406 | NM_014146 | 18234.422 | 20246.311 | AI189375  | 4598.062  | 4727.18   |
| AK023305  | 9246.344  | 7351.152  | AF147356  | 1156.8    | 1328.419  | NM_001665 | 37115.891 | 39738.535 |



|           |           |           |           |           |           |           |           |           |
|-----------|-----------|-----------|-----------|-----------|-----------|-----------|-----------|-----------|
| AK025089  | 28600.643 | 33997.789 | AL049461  | 1802.84   | 2679.417  | AF097645  | 1897.879  | 1343.85   |
| AK023298  | 542.834   | 531.096   | M33197    | 66972.242 | 67373.211 | NM_001773 | 1908.031  | 1663.579  |
| M33197    | 71782.289 | 64029.313 | AK026052  | 1259.9    | 1216.857  | Z70704    | 7521.134  | 7152.979  |
| AK001279  | 3266.156  | 3077.024  | NM_018126 | 2964.669  | 3528.154  | AF264014  | 23946.656 | 26765.5   |
| AF086407  | 685.675   | 732.714   | NM_014799 | 716.761   | 1131.086  | NM_004155 | 4851.606  | 5777.04   |
| AK001567  | 2110.93   | 2447.214  | AK024506  | 12327.933 | 14623.805 | NM_014586 | 2374.199  | 2105.524  |
| M33197    | 49429.922 | 45370.441 | NM_014179 | 4811.112  | 4123.06   | NM_014366 | 5240.643  | 5936.072  |
| AF075006  | 1911.453  | 1550.006  | AF086326  | 10575.523 | 14194.703 | NM_000923 | 1248.223  | 1196.166  |
| M33197    | 68191.625 | 63845.613 | M33197    | 67114.234 | 63006.414 | NM_006453 | 1970.167  | 1959.429  |
| AK000903  | 66733.453 | 67443.453 | AL050027  | 635.924   | 1460.905  | NM_018096 | 2632.901  | 2250.46   |
| AK023938  | 4254.743  | 5195.777  | M33197    | 67008.555 | 67998.734 | AL390078  | 1855.903  | 1967.517  |
| AK026896  | 900.091   | 922.902   | AK024470  | 4257.242  | 4775.019  | NM_004036 | 3540.586  | 3193.177  |
| AL110169  | 3255.108  | 3542.323  | NM_017935 | 1663.869  | 2535.258  | NM_015986 | 3863.004  | 4174.568  |
| AK022088  | 1226.83   | 1636.17   | NM_004226 | 9897.065  | 12241.354 | NM_006546 | 1603.575  | 1634.429  |
| NM_013391 | 2270.895  | 2702.967  | AL137436  | 1527.7    | 4000.605  | NM_014955 | 11165.661 | 11823.811 |
| M33197    | 66640.883 | 65323.758 | AK023400  | 1302.092  | 1855.807  | NM_003992 | 8120.422  | 8756.229  |
| AL389981  | 1119.94   | 1126.501  | AF056430  | 2400.254  | 3292.827  | AF279265  | 4880.992  | 4801.154  |
| AK024336  | 4675.02   | 5425.683  | NM_014906 | 1510.83   | 2297.504  | NM_007350 | 746.095   | 785.319   |
| AK023862  | 1458.468  | 1259.613  | AF009291  | 1967.24   | 2566.198  | NM_005213 | 32044.443 | 34031.973 |
| NM_018621 | 3253.18   | 2614.871  | AK002199  | 2360.281  | 2885.496  | AB040914  | 3365.01   | 3246.424  |
| AK022016  | 590.621   | 570.94    | AK021662  | 1866.66   | 3359.352  | NM_002997 | 21596.504 | 19184.17  |
| AK022118  | 3088.535  | 3347.215  | AK001038  | 3730.333  | 4993.23   | NM_002379 | 52258.551 | 51915.324 |
| AK026453  | 16666.143 | 16194.66  | AK021469  | 5847.075  | 7239.78   | AB007929  | 9970.324  | 9101.217  |
| M33197    | 76706.227 | 63946.078 | M33197    | 66906.773 | 76897.844 | NM_004579 | 18950.219 | 16715.313 |
| AK022101  | 885.999   | 811.018   | AK023633  | 3555.195  | 3248.353  | AA203126  | 4791.252  | 4718.08   |
| NM_003251 | 763.376   | 501.505   | NM_006179 | 2730.672  | 3141.505  | AB043997  | 868.481   | 1131.212  |
| AF086203  | 876.755   | 677.883   | AL360165  | 5039.249  | 7622.872  | NM_004853 | 2353.371  | 2828.908  |
| AB046772  | 4875.957  | 5309.664  | NM_005281 | 10894.866 | 14122.618 | NM_001494 | 2612.422  | 3699.954  |
| M33197    | 73833.086 | 63833.684 | NM_005549 | 5858.376  | 7582.693  | NM_004206 | 1238.337  | 1341.154  |
| AL442080  | 9480.795  | 12514.466 | AJ008115  | 41263.125 | 46386.105 | NM_004603 | 40235.766 | 43161.188 |
| L15557    | 4052.746  | 4326.487  | AF083125  | 7033.386  | 7997.213  | AK022849  | 7217.007  | 6893.219  |
| AK022729  | 3112.847  | 2900.396  | U72851    | 1546.599  | 1979.862  | AF040964  | 18385.799 | 16850.141 |
| NM_006165 | 5986.271  | 5500.432  | AK022970  | 1995.94   | 2913.03   | NM_001935 | 23649.758 | 21044.551 |
| AL050374  | 3954.771  | 4350.32   | AK026212  | 3975.398  | 5096.844  | NM_003279 | 56634.922 | 58361.277 |
| M33197    | 76100.625 | 64014.156 | AF086222  | 3681.384  | 4482.853  | AB014599  | 10543.641 | 9788.49   |
| AL122073  | 34737.969 | 31527.25  | AF086415  | 13495.101 | 18200.795 | NM_004393 | 1457.794  | 1718.894  |
| AF116655  | 8982.322  | 9096.908  | D28391    | 66345.883 | 67897.742 | AB018345  | 1187.743  | 996.786   |
| AJ243222  | 2103.32   | 2100.81   | M33197    | 66757.063 | 69715.625 | NM_005832 | 2218.723  | 2103.99   |
| AK026132  | 5400.865  | 6324.988  | AK026859  | 1975.951  | 1995.526  | AW407841  | 12475.407 | 8632.482  |
| Y11162    | 2385.546  | 2779.406  | D86961    | 3823.477  | 4945.555  | U15197    | 2304.543  | 2171.927  |
| AF070584  | 4979.667  | 5515.994  | AJ227896  | 15503.852 | 21974.393 | NM_001879 | 10704.571 | 8993.1    |
| AF052109  | 6591.05   | 2776.407  | M33197    | 66893.125 | 76719.992 | NM_016586 | 3858.48   | 3927.026  |
| NM_003353 | 66260.273 | 63744.164 | AF131770  | 11359.857 | 15724.218 | NM_003135 | 10179.006 | 11067.547 |
| AK026502  | 414.885   | 436.321   | NM_006432 | 27905.084 | 37328.574 | NM_000137 | 1539.944  | 1440.029  |
| X82127    | 15500.179 | 12254.331 | AF025441  | 3751.71   | 4991.946  | NM_012102 | 4998.359  | 3867.065  |
| AL122044  | 7132.346  | 6392.182  | U62823    | 8673.881  | 9463.933  | NM_005017 | 6739.597  | 6599.992  |
| NM_018296 | 3673.886  | 3790.082  | NM_003535 | 44670.359 | 48326.383 | AF163572  | 5964.266  | 5687.422  |
| L13743    | 1005.707  | 911.542   | M33197    | 64860.469 | 62932.238 | NM_000897 | 2823.595  | 2352.766  |
| U84519    | 2697.336  | 2218.161  | AK000852  | 64574.258 | 62419.109 | NM_006411 | 15081.033 | 13991.709 |
| Z11849    | 20259.822 | 16946.908 | AF251188  | 15573.297 | 21815.318 | NM_014182 | 2912.87   | 3046.484  |
| M33197    | 71476.078 | 63507.25  | AK026418  | 15231.636 | 20258.586 | AB040884  | 1449.725  | 1644.537  |
| AF052103  | 858.288   | 883.649   | AF086194  | 61972.141 | 61963.758 | NM_000492 | 27907.691 | 28018.293 |
| AF075050  | 4251.262  | 4624.473  | AK026811  | 13809.768 | 16662.473 | NM_012085 | 1769.84   | 1247.495  |

|           |           |           |           |           |           |           |           |           |
|-----------|-----------|-----------|-----------|-----------|-----------|-----------|-----------|-----------|
| AK024842  | 3128.25   | 2534.497  | NM_017743 | 2892.826  | 3045.083  | NM_001170 | 18333.078 | 19026.293 |
| NM_018382 | 2569.902  | 1759.31   | NM_000300 | 5533.405  | 4513.998  | AL137716  | 1958.079  | 2416.455  |
| AB018327  | 9027.391  | 9545.204  | M33197    | 67020.922 | 66034.305 | NM_004696 | 3577.148  | 4104.687  |
| AF303889  | 1441.398  | 1514.244  | AV756917  | 8676.494  | 10561.568 | NM_014342 | 5633.687  | 5686.341  |
| M33197    | 72854.547 | 63949.547 | NM_018380 | 17657.779 | 22233.473 | Z50169    | 2480.277  | 2030.91   |
| AK022649  | 17527.49  | 17294.529 | AK001442  | 2594.281  | 2832.563  | NM_014470 | 1785.451  | 2323.834  |
| AF180736  | 708.006   | 1136.454  | NM_012070 | 3493.645  | 5329.396  | NM_001665 | 28439.705 | 33349.758 |
| NM_016507 | 7283.115  | 7914.011  | NM_019038 | 1235.526  | 1673.555  | AF097645  | 1262.406  | 1744.301  |
| NM_002024 | 9807.902  | 8086.997  | AF183423  | 1361.339  | 1636.249  | Z70704    | 2284.965  | 2844.014  |
| NM_002743 | 24452.988 | 22451.381 | M33197    | 66547.938 | 70929.07  | NM_014363 | 1678.678  | 2056.299  |
| AF173358  | 10871.768 | 9407.648  | U92023    | 1818.308  | 2265.045  | NM_000557 | 1754.965  | 1277.032  |
| NM_001563 | 13769.394 | 13052.453 | U12129    | 8981.745  | 9610.023  | NM_001375 | 4205.901  | 3963.37   |
| NM_000266 | 3950.744  | 2578.086  | S81242    | 64058.098 | 65552.586 | NM_002312 | 937.293   | 829.487   |
| X89666    | 7097.974  | 7225.99   | AF230801  | 4108.973  | 4853.65   | NM_004774 | 2716.235  | 2393.891  |
| NM_017429 | 2042.05   | 1742.069  | AF075072  | 5844.39   | 6872.277  | NM_016937 | 3996.327  | 3439.508  |
| NM_003104 | 15852.587 | 15754.559 | M33197    | 64604.555 | 65270.355 | NM_002690 | 3897.032  | 3654.271  |
| NM_014581 | 2339.968  | 2705.651  | NM_002509 | 9454.101  | 10214.78  | NM_012328 | 6702.957  | 7884.401  |
| NM_000898 | 704.626   | 1512.963  | U38442    | 1331.245  | 2005.656  | NM_007341 | 3114.854  | 3152.187  |
| M33197    | 66854.273 | 63734.27  | AF110136  | 2970.725  | 3340.774  | NM_016508 | 2278.949  | 2666.981  |
| NM_014406 | 6609.546  | 6823.768  | AK026706  | 5424.773  | 5761.633  | NM_006456 | 38133.953 | 44549.691 |
| Z11801    | 1287.136  | 1235.511  | AB007936  | 65145.945 | 62384.285 | AK026062  | 7936.28   | 9139.798  |
| AK027253  | 818.659   | 715.047   | AK001558  | 623.423   | 650.221   | AF047002  | 40386.566 | 41370.133 |
| S68954    | 21398.875 | 6532.459  | AF005258  | 2609.672  | 1991.357  | AL050082  | 5382.187  | 5525.545  |
| S81335    | 2593.813  | 2265.86   | NM_000887 | 3373.655  | 2279.976  | NM_006623 | 61232.129 | 59373.773 |
| NM_006197 | 6575.596  | 5284.29   | M33197    | 67069.891 | 65056.48  | CY3Cy5    | 3663.688  | 224.301   |
| NM_014181 | 3571.251  | 4003.477  | X99659    | 66933.797 | 69293.242 | NM_016134 | 1882.037  | 1993.375  |
| M29273    | 920.906   | 986.504   | NM_015416 | 10250.804 | 13619.434 | AL390185  | 14158.531 | 13908.514 |
| NM_004854 | 6668.259  | 7433.834  | NM_002731 | 1238.536  | 1858.274  | AF086235  | 19536.564 | 18713.77  |
| AJ245418  | 11537.675 | 11330.955 | NM_003899 | 6966.215  | 8945.522  | AF143886  | 2906.095  | 3370.446  |
| NM_006377 | 6072.482  | 5601.104  | X99662    | 9670.035  | 11079.466 | AK025975  | 15735.78  | 13321.348 |
| AF244129  | 487.687   | 772.325   | NM_003473 | 58957.98  | 61521.813 | AK025583  | 65752.195 | 67895.531 |
| NM_002436 | 1282.719  | 1560.309  | NM_014325 | 5172.923  | 5069.087  | NM_014664 | 3680.807  | 3955.965  |
| NM_018362 | 17128.26  | 17037.889 | M33197    | 66777.375 | 70525.133 | AL109788  | 18163.697 | 15463.063 |
| M33197    | 66655.938 | 69765.711 | NM_017753 | 904.872   | 1729.87   | NM_014952 | 66658.688 | 68887.563 |
| NM_004755 | 5444.519  | 6135.484  | NM_012453 | 854.514   | 1273.96   | AL133053  | 3364.647  | 2737.726  |
| NM_002186 | 2211.151  | 1890.035  | NM_006016 | 53894.406 | 60774.348 | NM_018142 | 23381.07  | 20191.785 |
| NM_006182 | 865.535   | 1042.166  | NM_001242 | 64096.586 | 60717.699 | NM_017653 | 8532.395  | 7356.303  |
| AL137543  | 5832.234  | 6604.25   | NM_001882 | 963.617   | 1393.733  | AL109695  | 30289.219 | 14813.521 |
| NM_004444 | 5964.421  | 5403.292  | NM_014891 | 17508.943 | 20558.498 | NM_016134 | 3124.917  | 2117.025  |
| NM_001957 | 6195.213  | 6877.774  | NM_013392 | 15718.078 | 16118.977 | SR2       | 60265.117 | 61358.676 |
| AK024533  | 4323.788  | 4229.796  | M33197    | 66691.695 | 66464.852 | SR4       | 23912.35  | 36042.984 |
| NM_002736 | 25517.553 | 28982.145 | NM_003236 | 2955.412  | 3861.462  | SR6       | 2167.061  | 4279.113  |
| NM_004246 | 5930.001  | 5592.971  | NM_003458 | 1333.688  | 1981.755  | SR8       | 8535.046  | 45783.082 |
| NM_005207 | 7255.444  | 6247.288  | AF052692  | 2434.346  | 3698.408  | SR10      | 21399.488 | 10680.409 |
| NM_003087 | 5534.307  | 5386.646  | NM_002820 | 839.52    | 1110.687  | CY3Cy5    | 3152.269  | 139.474   |
| NM_001630 | 6281.571  | 5093.229  | NM_000179 | 8710.182  | 7089.102  | NM_014819 | 8841.864  | 9897.114  |
| AF132200  | 656.653   | 779.59    | NM_005215 | 2276.599  | 1020.913  | NM_017609 | 2102.007  | 1996.457  |
| AF305081  | 8078.558  | 9309.961  | AF062739  | 3098.787  | 3343.736  | AF086040  | 3160.193  | 3238.753  |
| AF118078  | 5217.152  | 4204.834  | NM_006602 | 4860.9    | 4578.652  | AB032988  | 3899.82   | 3780.859  |
| NM_020169 | 2490.874  | 3545.354  | M33197    | 66602.18  | 68694.938 | AK023559  | 32797.363 | 31634.514 |
| AL157428  | 1942.999  | 2692.223  | AL079314  | 4840.301  | 6940.847  | AB037859  | 65729.25  | 78391.219 |
| BE904175  | 2153.796  | 3426.153  | NM_001260 | 4160.212  | 5249.148  | AL049233  | 8855.049  | 8132.673  |
| NM_005858 | 7725.585  | 7896.051  | NM_001950 | 6733.021  | 10614.078 | NM_017696 | 17803.754 | 16462.932 |

|           |           |           |           |           |           |           |           |           |
|-----------|-----------|-----------|-----------|-----------|-----------|-----------|-----------|-----------|
| NM_014931 | 15084.634 | 15375.941 | AK026364  | 3985.211  | 4719.561  | AL050166  | 10389.1   | 9412.214  |
| NM_014487 | 16376.156 | 19868.482 | NM_018117 | 2944.059  | 3643.177  | AK024254  | 4497.663  | 4495.744  |
| NM_018070 | 3380.803  | 3523.636  | NM_006999 | 2763.919  | 3820.488  | NM_018456 | 7082.445  | 6962.473  |
| NM_002484 | 11802.669 | 11797.985 | NM_006286 | 3182.481  | 3120.709  | AK026697  | 1610.352  | 1311.93   |
| M33197    | 62705.945 | 58260.051 | M33197    | 65824.516 | 68131.344 | NM_019021 | 4123.402  | 3720.139  |
| AL162052  | 4461.757  | 4976.344  | NM_004331 | 16594.496 | 22648.482 | NM_004717 | 1370.816  | 1233.249  |
| AK025941  | 5748.198  | 5584.091  | NM_015996 | 2931.072  | 3367.297  | AK002183  | 2169.635  | 1675.902  |
| NM_018179 | 2629.066  | 2896.437  | NM_015703 | 31190.824 | 35658.711 | NM_018996 | 1732.015  | 1612.288  |
| AF059531  | 21462.193 | 17898.963 | AB018337  | 4892.045  | 5334.09   | AL137304  | 3704.002  | 2713.771  |
| NM_002707 | 35052.527 | 33231.906 | NM_014489 | 3907.246  | 5270.609  | AL049274  | 1335.098  | 695.09    |
| AF029777  | 7640.114  | 5712.489  | AK025273  | 7468.009  | 8015.092  | NM_018279 | 7170.439  | 6155.269  |
| NM_003352 | 3693.485  | 2863.506  | M33197    | 66850.281 | 69865.109 | AF147369  | 1402.992  | 1641.441  |
| AK026884  | 57106.477 | 56380.816 | NM_002205 | 3927.754  | 4948.894  | AK026883  | 7155.586  | 9167.044  |
| S82198    | 1802.151  | 1646.416  | NM_002214 | 6475.118  | 7643.613  | NM_014350 | 23168.158 | 20223.123 |
| NM_002594 | 4921.35   | 6128.346  | NM_001911 | 3750.726  | 3844.5    | U00925    | 30883.381 | 30087.84  |
| NM_001159 | 1454.638  | 1808.591  | NM_000537 | 2146.88   | 1994.948  | AK025190  | 709.593   | 729.621   |
| NM_031407 | 13905.521 | 11959.252 | NM_006503 | 2411.742  | 2054.57   | AK026743  | 237.232   | 963.389   |
| M33197    | 67485.82  | 63760.68  | AB002321  | 1443.727  | 1459.629  | AK025214  | 699.477   | 1059.772  |
| AK000410  | 30113.646 | 37156.813 | NM_002515 | 980.463   | 1686.676  | AK025846  | 3301.498  | 2906.79   |
| NM_020193 | 5144.553  | 6086.608  | M33197    | 8171.397  | 9623.262  | AK026805  | 22125.662 | 21205.225 |
| D86982    | 1229.366  | 1733.093  | AB020698  | 2856.911  | 3205.661  | AB037765  | 3196.715  | 3112.774  |
| NM_005619 | 1923.513  | 2384.554  | U68382    | 12833.48  | 16592.566 | AK025068  | 5352.252  | 5359.629  |
| D87440    | 8612.354  | 9309.6    | NM_003969 | 7871.199  | 9715.594  | AK026720  | 2801.9    | 2894.021  |
| AK000332  | 5368.743  | 5986.307  | NM_004651 | 8793.874  | 9201.388  | AL137566  | 6967.169  | 6617.497  |
| AL080156  | 1175.409  | 1915.513  | NM_003363 | 1591.553  | 1583.628  | AF087962  | 18517.313 | 16006.879 |
| NM_006738 | 8653.948  | 9170.498  | M33197    | 63849.273 | 66410.906 | AL050197  | 5972.874  | 4814.739  |
| NM_002285 | 2037.229  | 2071.683  | NM_017569 | 23259.959 | 24870.5   | AF085870  | 34516.301 | 34734.004 |
| NM_006694 | 30291.51  | 30158.631 | NM_001456 | 3586.396  | 3564.094  | AL050063  | 1362.383  | 791.073   |
| NM_013351 | 58555.473 | 58949.566 | NM_002906 | 996.135   | 1409.212  | AL050124  | 604.421   | 842.652   |
| NM_012340 | 6293.504  | 6668.157  | AK024480  | 3465.34   | 3800.663  | AL110190  | 8887.349  | 8872.146  |
| NM_006022 | 3669.823  | 4190.572  | Y13871    | 48956.41  | 53997.02  | AL117656  | 2231.496  | 2624.375  |
| AK025110  | 3298.059  | 2661.516  | NM_012134 | 922.42    | 1057.399  | AJ001893  | 8029.069  | 9679.684  |
| X52339    | 66701.313 | 65998.445 | AL137725  | 47008.195 | 35177.406 | NM_018225 | 57236.699 | 57711.301 |
| M33197    | 66572.641 | 72639.594 | M33197    | 66713.977 | 71630.375 | AK025534  | 2254.739  | 2309.806  |
| AB046830  | 5684.857  | 6932.349  | AJ008151  | 52269.34  | 58917.543 | AK022577  | 782.828   | 967.692   |
| NM_007122 | 3982.208  | 5197.234  | NM_005228 | 5072.65   | 5784.569  | AF091526  | 9801.695  | 11232.587 |
| NM_001488 | 3321.196  | 3507.211  | NM_002354 | 4430.63   | 4617.134  | AK026705  | 11645.932 | 10540.819 |
| NM_016202 | 16893.607 | 14116.095 | NM_004091 | 5153.975  | 3676.183  | NM_003602 | 9740.344  | 9649.166  |
| NM_012476 | 1884.041  | 1831.787  | X74070    | 64390.199 | 70534.734 | AF009258  | 58493.016 | 57579.324 |
| NM_016604 | 6952.692  | 6848.184  | AF027219  | 3261.286  | 3170.881  | AF009305  | 10231.758 | 9206.273  |
| M33197    | 64088.266 | 66255.016 | NM_006333 | 12986.137 | 15220.567 | NM_006193 | 6815.756  | 5462.353  |
| NM_006276 | 8500.247  | 10038.281 | M33197    | 60756.32  | 65267.91  | AF056454  | 949.04    | 992.807   |
| NM_003407 | 3500.572  | 4075.247  | NM_002898 | 29809.777 | 37492.617 | AF009270  | 3468.637  | 2954.212  |
| NM_007209 | 62674.953 | 63914.086 | AK022749  | 25364.994 | 32490.551 | AF009318  | 7812.443  | 6594.956  |
| NM_003729 | 11579.755 | 11255.331 | BF031409  | 25772.717 | 34888.457 | AF056421  | 5444.522  | 4434.033  |
| L05096    | 37170.992 | 40135.035 | NM_007043 | 4781.241  | 5596.115  | AF090889  | 831.711   | 770.45    |
| BC015899  | 42395.137 | 28265.961 | BE378791  | 1963.488  | 2072.112  | AK001085  | 6274.414  | 6005.7    |
| M33197    | 58913.41  | 62118.609 | U94388    | 2953.773  | 3419.213  | AK001906  | 12527.536 | 6818.549  |
| NM_015914 | 3071.373  | 3423.333  | NM_012322 | 12281.197 | 13159.66  | AK021528  | 1649.159  | 649.377   |
| NM_007180 | 7213.703  | 8719.886  | M33197    | 58040.402 | 58382.441 | AK001136  | 2980.525  | 3561.344  |
| NM_005609 | 3667.818  | 3882.147  | NM_004889 | 62364.98  | 61487.953 | AK021617  | 1010.72   | 1259.448  |
| NM_005476 | 15363.891 | 12159.54  | AK025314  | 10405.691 | 8327.853  | AK021810  | 3302.284  | 3803.511  |
| NM_005660 | 11402.701 | 11922.161 | NM_002109 | 11981.524 | 9906.939  | AF086317  | 10342.011 | 10741.052 |

|           |           |           |            |           |           |           |           |           |
|-----------|-----------|-----------|------------|-----------|-----------|-----------|-----------|-----------|
| AK023902  | 8344.926  | 8527.086  | NM_000984  | 62335.898 | 58283.844 | U16850    | 15346.575 | 16209.016 |
| NM_000401 | 4190.102  | 3719.926  | NM_002453  | 37048.688 | 31572.195 | AL390178  | 3676.651  | 3737.848  |
| NM_005223 | 2269.827  | 2886.995  | AK000780   | 59813.785 | 59582.922 | NM_005383 | 1620.376  | 1688.553  |
| AB011173  | 13877.685 | 12518.838 | M33197     | 63874.73  | 61003.512 | Z36806    | 1419.517  | 1392.648  |
| AB023195  | 8368.9    | 7756.117  | NM_000131  | 2544.286  | 2529.716  | NM_005366 | 3690.102  | 3402.106  |
| U43431    | 4370.419  | 3698.849  | NM_001836  | 1414.02   | 1161.377  | NM_018616 | 2748.87   | 2405.158  |
| X57147    | 2397.465  | 2327.415  | M64714     | 1728.161  | 1537.332  | AJ008121  | 63128.297 | 60094.668 |
| AK021563  | 1176.995  | 1087.239  | AK026043   | 2051.63   | 2120.891  | AJ008153  | 10976.941 | 11218.838 |
| AB006622  | 1495.808  | 1376.019  | NM_005006  | 15655.447 | 18330.572 | AK023739  | 3253.295  | 2780.067  |
| M33197    | 66580.383 | 72146.195 | AK027033   | 5299.104  | 5743.093  | NM_005830 | 17364.951 | 15983.566 |
| AK097041  | 6576.198  | 7768.14   | NM_000106  | 12524.142 | 12723.107 | AL389983  | 9243.824  | 8390.382  |
| AF068744  | 19853.799 | 21712.232 | NM_003000  | 47092.109 | 51564.625 | AJ008159  | 3324.61   | 2441.283  |
| NM_004497 | 991.489   | 1219.381  | NM_002495  | 35783.23  | 38517.262 | AK000995  | 8406.93   | 7463.458  |
| AK000762  | 3035.556  | 3388.326  | M33197     | 60636.402 | 62374.773 | U00959    | 6931.764  | 5754.355  |
| NM_004571 | 1970.501  | 2213.294  | NM_016284  | 8471.345  | 9496.971  | NM_014576 | 56761.238 | 50670.277 |
| NM_002895 | 1900.581  | 2076.92   | NM_014593  | 8423.138  | 7700.045  | AF147306  | 12951.376 | 10137.317 |
| AF276513  | 5427.212  | 5628.859  | NM_006833  | 40923.031 | 31113.104 | AF086267  | 17079.76  | 11982.199 |
| M33197    | 66350.656 | 80556.859 | NM_012257  | 5303.229  | 2730.351  | X74606    | 1330.912  | 476.726   |
| M95610    | 61871.727 | 63402.297 | U37690     | 57941.637 | 55617.258 | AK026785  | 4323.471  | 5417.187  |
| NM_003118 | 2009.174  | 2113.264  | NM_005120  | 2947.976  | 1862.987  | AK022994  | 1172.184  | 1366.51   |
| L02922    | 43653.637 | 44842.898 | AB029012   | 54977.332 | 40120.328 | AL049466  | 6994.41   | 9153.71   |
| NM_001797 | 5302.928  | 4850.405  | M33197     | 61724.566 | 58725.805 | AB037802  | 1735.134  | 2011.708  |
| NM_003154 | 1467.458  | 1578.125  | NM_006299  | 4811.96   | 3631.435  | AL137450  | 7077.32   | 7371.244  |
| NM_004235 | 841.509   | 724.351   | AF060936   | 44018.617 | 37169.633 | AK023058  | 10466.695 | 11302.155 |
| AK023459  | 19371.119 | 22045.352 | NM_005566  | 3258.287  | 2504.516  | AJ227878  | 2139.898  | 2120.259  |
| BI762154  | 1180.579  | 1264.396  | NM_018167  | 2354.162  | 1939.994  | NM_012064 | 33492.09  | 29453.709 |
| U13022    | 4009.25   | 4304.557  | AK024149   | 3844.575  | 3575.863  | AK001460  | 2309.234  | 2113.745  |
| R23251    | 38237.082 | 44610.43  | AK023094   | 1415.885  | 1387.799  | AK092508  | 16643.307 | 15429.36  |
| BG763477  | 453.424   | 577.937   | M33197     | 63628.633 | 60206.434 | AK027111  | 66527.758 | 68183.508 |
| AA702640  | 8350.111  | 8813.461  | M33197     | 66699.516 | 74101.18  | NM_003516 | 1604.967  | 1890.871  |
| T68583    | 4893.811  | 4893.128  | AJ011129   | 17161.512 | 19091.969 | M60749    | 5820.729  | 5619.964  |
| AA481944  | 12803.497 | 11572.049 | NM_001039  | 1782.225  | 1840.221  | AF056424  | 1055.081  | 2276.303  |
| AF038440  | 2037.45   | 2457.656  | NM_006387  | 14375.385 | 16284.269 | X79986    | 7647.777  | 7292.047  |
| M31158    | 11278.507 | 15062.923 | NM_005646  | 5807.856  | 6241.546  | NM_003523 | 30101.697 | 25934.697 |
| H00742    | 2495.046  | 2493.761  | NM_006639  | 3384.421  | 2941.42   | X01448    | 3435.094  | 3000.478  |
| D42108    | 2297.368  | 3030.088  | NM_001692  | 1668.633  | 1178.785  | NM_016503 | 14447.382 | 11245.391 |
| BG700922  | 3405.522  | 4204.063  | BI767871   | 13012.798 | 8917.498  | AK056351  | 58076.02  | 57874.695 |
| AI366068  | 3520.452  | 3770.979  | AA418907   | 3386.237  | 2082.708  | NM_014690 | 26805.873 | 19191.086 |
| N57553    | 17871.184 | 18012.621 | M65291     | 1797.55   | 867.311   | NM_017696 | 6366.951  | 4921.752  |
| M33197    | 49347.977 | 49223.156 | AA115473   | 15026.063 | 12089.806 | AF086490  | 3648.735  | 1096.966  |
| NM_018202 | 66567.922 | 69247.602 | AA872397   | 23898.289 | 17275.973 | AK021666  | 38516.57  | 43502.836 |
| AB023197  | 26036.92  | 23502.98  | M24283     | 19910.018 | 14138.568 | AK024081  | 4474.14   | 4922.419  |
| NM_022173 | 18416.168 | 18259.084 | AA709414   | 6415.92   | 3812.646  | AK024825  | 9606.347  | 10047.888 |
| AB040970  | 13711.343 | 12530.444 | D12676     | 14053.745 | 10610.359 | NM_000795 | 1474.59   | 1375.951  |
| NM_018330 | 8630.234  | 8136.009  | NM_000939  | 61956.309 | 60487.063 | AB037761  | 44681.391 | 54538.52  |
| AB023222  | 5312.448  | 4591.952  | NM_004295  | 64279.129 | 61664.313 | NM_014006 | 65743.133 | 74501.398 |
| AB033088  | 21146.453 | 20573.061 | H-X 028121 | 10154.314 | 8862.091  | NM_014731 | 23568.34  | 24188.158 |
| M33197    | 63641.418 | 66081.242 | U75898     | 20891.816 | 16571.602 | AF035191  | 28632.734 | 28653.086 |
| U50342    | 60922.086 | 57936.129 | M29039     | 5500.825  | 4446.577  | NM_004056 | 2853.736  | 3028.89   |
| NM_000295 | 3864.036  | 3135.419  | M59815     | 1828.093  | 1692.432  | NM_004527 | 5220.359  | 5466.187  |
| NM_000716 | 2501.64   | 1903.445  | M33210     | 1642.672  | 1010.796  | NM_012062 | 21562.264 | 22850.695 |
| AF026932  | 1723.333  | 1447.876  | M33197     | 62304.66  | 60172.422 | AK026717  | 1900.301  | 2371.898  |
| AF103795  | 3319.023  | 3026.621  | NM_007259  | 3235.339  | 3253.057  | NM_001507 | 5695.778  | 4420.729  |

|           |           |           |           |           |           |           |           |           |
|-----------|-----------|-----------|-----------|-----------|-----------|-----------|-----------|-----------|
| NM_00621E | 1027.082  | 1034.18   | NM_01840Z | 1828.681  | 1633.927  | X92108    | 2049.841  | 2486.729  |
| M33197    | 65732.117 | 62717.234 | NM_018009 | 7191.813  | 6153.341  | AL389876  | 9314.803  | 8727.598  |
| NM_007024 | 8759.123  | 10438.601 | AK075081  | 5462.977  | 5665.119  | AK022120  | 9062.067  | 8595.665  |
| NM_013231 | 2794.704  | 2877.901  | NM_00089E | 25499.906 | 20179.416 | Z70762    | 1640.436  | 1388.49   |
| NM_01210E | 11777.616 | 13510.942 | NM_00382C | 61653.688 | 60234.383 | D17099    | 1382.423  | 1342.099  |
| NM_006254 | 10298.772 | 12168.528 | NM_01591E | 14863.231 | 9123.387  | BF037206  | 8885.727  | 4021.04   |
| X95425    | 837.452   | 1035.66   | M33197    | 61949.785 | 63344.379 | AW511510  | 1577.255  | 1396.748  |
| NM_00442Z | 6109.868  | 6948.425  | NM_01651E | 42891.355 | 33357.082 | U52827    | 6971.235  | 7376.438  |
| NM_01656Z | 4050.353  | 3467.558  | NM_00618E | 56990.426 | 56656.246 | AB031547  | 7370.659  | 8851.971  |
| AY009399  | 28631.709 | 30698.828 | NM_01480C | 9277.159  | 7246.935  | NM_00397C | 6209.816  | 6683.208  |
| NM_00489E | 3784.163  | 3787.557  | NM_001557 | 2748.953  | 2148.398  | AK022496  | 3895.589  | 5452.526  |
| U80018    | 2417.886  | 2778.919  | AF147311  | 15186.149 | 13020.646 | AB042636  | 2419.547  | 2726.875  |
| NM_000717 | 3508.247  | 3061.734  | NM_002131 | 61742     | 60209.832 | AB033035  | 4761.445  | 6040.697  |
| M33197    | 66786.109 | 66890.344 | NM_017927 | 15128.743 | 11277.038 | NM_00288Z | 10280.972 | 12082.574 |
| NM_00484E | 3968.527  | 4433.263  | M33197    | 64108.668 | 62616.836 | NM_01901Z | 3162.115  | 3461.814  |
| NM_007107 | 21215.508 | 22268.211 | NM_00120Z | 17032.936 | 16001.796 | NM_000141 | 1242.806  | 1349.928  |
| NM_000047 | 1391.82   | 1365.203  | NM_00479E | 62697.492 | 61416.453 | NM_01615C | 22043.316 | 21543.021 |
| M68874    | 1149.326  | 1077.108  | NM_00673Z | 1294.073  | 1348.4    | U57058    | 2886.054  | 2686.045  |
| NM_00631E | 14139.04  | 13194.736 | NM_00203E | 1183.709  | 882.381   | AL137452  | 4796.995  | 5412.769  |
| NM_01822E | 7550.084  | 6240.407  | NM_014047 | 48804.258 | 38221.219 | NM_00431Z | 63499.527 | 65070.086 |
| NM_00460E | 4416.23   | 4425.369  | AK022901  | 6477.207  | 5588.983  | NM_001347 | 16527.506 | 16485.537 |
| NM_00666C | 20472.148 | 21834.123 | NM_00150E | 1754.873  | 1138.169  | AK024549  | 65715.055 | 65983.703 |
| NM_00668E | 13287.79  | 13701.192 | AF037332  | 13271.015 | 9891.117  | NM_00633E | 61346.758 | 59264.375 |
| NM_01213E | 11576.708 | 14148.518 | NM_014571 | 1495.961  | 895.715   | NM_007164 | 50500.68  | 44198.891 |
| AF121856  | 13160.27  | 17242.389 | NM_020151 | 30108.49  | 27715.205 | NM_000261 | 2809.641  | 2865.414  |
| NM_006421 | 5447.219  | 5833.16   | NM_005891 | 47518.723 | 46341.199 | NM_00260E | 3126.422  | 2615.872  |
| NM_017457 | 19714.953 | 24998.506 | NM_00164E | 3874.299  | 2738.774  | NM_00257C | 5458.062  | 4237.07   |
| NM_00376E | 10858.292 | 9982.563  | NM_00395E | 5294.478  | 3788.361  | NM_00318Z | 5393.324  | 4496.589  |
| NM_00586E | 1549.635  | 1562.346  | M33197    | 63265.258 | 64311.922 | NM_019851 | 10531.082 | 11302.547 |
| M33197    | 42751.578 | 45664.535 | NM_00350C | 24635.871 | 17743.818 | NM_00323E | 1330.238  | 1237.991  |
| NM_001201 | 1420.498  | 1322.832  | NM_014317 | 7898.265  | 6147.363  | NM_01409E | 40226.59  | 48263.949 |
| NM_01661E | 2185.946  | 1592.947  | L09234    | 38139.902 | 30715.875 | NM_00570E | 23748.391 | 26215.047 |
| AB014568  | 11752.771 | 9822.552  | NM_00005E | 2433.872  | 1931.989  | NM_001261 | 14616.443 | 18676.463 |
| AK022238  | 1219.786  | 1214.574  | AK026740  | 4046.639  | 2652.406  | NM_001977 | 5279.937  | 5854.705  |
| NM_01224E | 9941.554  | 9026.379  | NM_017881 | 11921.074 | 9596.74   | NM_00721E | 2917.175  | 3988.505  |
| AK022546  | 22272.529 | 21206.654 | NM_01889E | 7455.276  | 6003.844  | AK026854  | 5757.37   | 7437.894  |
| NM_014067 | 18994.662 | 17222.059 | AF069307  | 7413.71   | 5553.182  | NM_00126E | 36386.188 | 39430.559 |
| NM_002914 | 21673.334 | 22195.133 | U92978    | 6012.76   | 5360.362  | NM_00250E | 10976.692 | 11990.85  |
| NM_02038E | 5275.681  | 4247.913  | NM_018034 | 13731.796 | 14541.695 | NM_00490E | 11691.51  | 10798.217 |
| NM_014877 | 1197.534  | 1232.43   | M33197    | 60107.434 | 61536.082 | X98261    | 1261.677  | 1036.232  |
| NM_006541 | 3088.25   | 3694.402  | AB037831  | 11538.087 | 9776.498  | NM_012447 | 37131.762 | 37672.824 |
| M33197    | 65027.906 | 65004.309 | NM_01210Z | 47185.16  | 43298.355 | NM_00636E | 6916.762  | 7275.302  |
| NM_00570E | 11826.585 | 11447.201 | AL122077  | 34779.32  | 29507.914 | AK027013  | 53095.859 | 52248.215 |
| NM_00432E | 9252.097  | 10068.831 | NM_01463Z | 3160.788  | 3086.998  | NM_001344 | 51728.066 | 50793.879 |
| NM_004581 | 15067.949 | 16402.586 | NM_00642Z | 5785.073  | 5333.514  | NM_018294 | 6157.299  | 6172.839  |
| NM_006817 | 37037.922 | 49324.445 | BE789195  | 1676.764  | 1655.01   | AL389934  | 24571.912 | 22779.377 |
| NM_00710E | 35376.012 | 35381.875 | NM_01694E | 2269.404  | 2229.027  | NM_00433C | 10768.58  | 9889.865  |
| NM_015921 | 43949.766 | 47683.699 | M33197    | 64064.258 | 60718.238 | AF151802  | 19760.289 | 18799     |
| AB040900  | 36468.449 | 38740.883 | NM_00532E | 31923.145 | 18153.195 | AB006746  | 4844.676  | 3194.057  |
| NM_00108C | 9923.948  | 9079.075  | NM_00728E | 2945.624  | 1856.088  | NM_00649E | 17267.998 | 14871.87  |
| NM_00148Z | 2314.023  | 2411.866  | NM_01406E | 4289.1    | 2882.225  | AB023233  | 5768.342  | 3858.297  |
| NM_00311E | 1496.592  | 1682.188  | AB035130  | 4043.852  | 2306.807  | AL133071  | 1372.109  | 574.566   |
| L02922    | 43790.023 | 43064.234 | NM_00335E | 4775.061  | 3736.142  | NM_00436E | 10875.946 | 1862.44   |

|           |           |           |             |           |           |           |           |           |
|-----------|-----------|-----------|-------------|-----------|-----------|-----------|-----------|-----------|
| NM_001797 | 4487.396  | 4012.681  | M33197      | 65553.211 | 61198.766 | AB040898  | 4005.724  | 2884.028  |
| NM_003154 | 1325.947  | 1996.412  | AF119917    | 2306.229  | 1804.819  | NM_016155 | 18241.748 | 21189.02  |
| AK023459  | 18119.494 | 20187.975 | AK021834    | 833.283   | 309.598   | NM_001224 | 32341.531 | 35628.309 |
| BI762154  | 1063.526  | 1281.074  | NM_017915   | 3802.462  | 2884.732  | NM_017811 | 19364.191 | 23062.17  |
| U13022    | 4101.235  | 4116.762  | AL050097    | 1262.085  | 1065.766  | NM_001565 | 9586.774  | 9119.903  |
| R23251    | 41127.652 | 52471.809 | AK021513    | 2040.849  | 1446.255  | NM_004131 | 3578.308  | 3521.403  |
| BG763477  | 659.954   | 927.579   | NM_003579   | 7056.882  | 4930.486  | AK023284  | 2887.198  | 3085.26   |
| AA702640  | 7890.196  | 7992.147  | AL049283    | 5141.829  | 4091.283  | AF106069  | 1003.103  | 1017.165  |
| T68583    | 5651.394  | 5843.439  | M33197      | 62198.609 | 57170.871 | NM_005101 | 12569.72  | 12126.687 |
| AA481944  | 15065.362 | 16423.334 | NM_002401   | 60165.359 | 57143.805 | NM_004205 | 743.48    | 507.572   |
| AF038440  | 1842.086  | 2526.916  | NM_001274   | 9167.182  | 7103.904  | AF130060  | 66034.961 | 67756.648 |
| M31158    | 12774.836 | 15680.188 | NM_003913   | 1818.204  | 1236.654  | NM_007057 | 51409.5   | 50074.18  |
| H00742    | 2923.226  | 3437.719  | NM_002227   | 6106.78   | 5426.693  | NM_000177 | 7911.466  | 7013.301  |
| D42108    | 2502.219  | 2803.159  | NM_007199   | 10491.034 | 8630.595  | NM_003387 | 40639.199 | 44059.352 |
| BG700922  | 3347.26   | 3741.162  | AB002301    | 1283.719  | 882.658   | U60665    | 6789.011  | 6313.143  |
| AI366068  | 3525.734  | 3803.34   | AB014530    | 25253.508 | 20154.684 | NM_005507 | 61364.23  | 65786     |
| N57553    | 19021.189 | 18211.078 | M33197      | 64786.699 | 64865.324 | AY014403  | 4586.148  | 2553.138  |
| M33197    | 61286.691 | 66921.828 | NM_005989   | 12695.746 | 12131.029 | NM_006912 | 47595.91  | 19711.461 |
| NM_016545 | 7964.072  | 7652.825  | AB014607    | 12824.983 | 9817.117  | X12534    | 8644.596  | 2786.844  |
| NM_001440 | 46815.68  | 45255.691 | AF134401    | 3151.257  | 2408.289  | NM_001363 | 31224.17  | 31018.283 |
| NM_022173 | 19309.879 | 18298.629 | AF282874    | 6675.921  | 7108.256  | NM_014323 | 15698.414 | 16591.051 |
| AB040970  | 13847.233 | 11823.53  | NM_001039   | 2304.987  | 2157.27   | NM_003205 | 4237.175  | 4469.249  |
| NM_018330 | 7882.932  | 6670.551  | NM_006387   | 16225.714 | 16151.576 | AB002324  | 5385.207  | 5375.544  |
| AB023222  | 5604.714  | 6234.758  | NM_005646   | 7667.745  | 6357.499  | AL359938  | 1930.312  | 3154.17   |
| AB033088  | 20058.771 | 20349.41  | NM_006639   | 3690.789  | 2748.028  | NM_002165 | 1137.634  | 831.591   |
| M33197    | 62947.535 | 66837.867 | NM_001692   | 1551.542  | 932.341   | AK026231  | 6150.424  | 5592.972  |
| U50342    | 64545.133 | 63722.711 | BI767871    | 17985.844 | 11174.773 | NM_002140 | 55029.203 | 56040.168 |
| NM_000295 | 4136.426  | 4084.485  | AA418907    | 3283.573  | 2483.705  | NM_020143 | 16647.533 | 17558.047 |
| NM_000716 | 2620.832  | 2397.414  | M65291      | 1671.507  | 852.242   | NM_012465 | 9808.738  | 10508.352 |
| AF026932  | 1771.447  | 1679.303  | AA115473    | 16289.193 | 13838.874 | NM_005131 | 4976.811  | 5468.917  |
| AF103795  | 2993.487  | 2713.127  | AA872397    | 26033.668 | 20353.922 | NM_007056 | 8142.454  | 11437.262 |
| NM_006215 | 877.927   | 1245.888  | M24283      | 21924.76  | 17249.01  | AF083383  | 7203.001  | 6765.14   |
| M33197    | 63762.641 | 65479.797 | AA709414    | 5244.96   | 3307.606  | NM_006925 | 6496.677  | 6546.81   |
| NM_007024 | 9827.549  | 10951.83  | D12676      | 10908.819 | 9714.2    | NM_004890 | 66222.742 | 69788.352 |
| NM_013231 | 2962.5    | 3353.253  | NM_000939   | 62339.621 | 60412.777 | AK023181  | 16104.752 | 14505.95  |
| NM_012106 | 11611.447 | 13468.426 | NM_004295   | 61539.191 | 59150.805 | NM_004294 | 18992.158 | 18887.074 |
| NM_006254 | 9747.926  | 11282.147 | H-X 02812 I | 9873.802  | 8467.158  | NM_005051 | 51794.023 | 52989.785 |
| X95425    | 798.772   | 740.936   | U75898      | 14763.753 | 12778.257 | NM_001968 | 54060.754 | 50431.836 |
| NM_004422 | 5036.825  | 5454.514  | M29039      | 4449.651  | 3553.447  | AB002366  | 1742.798  | 1117.738  |
| NM_016562 | 4065.605  | 3912.47   | M59815      | 1378.347  | 1110.19   | AF264627  | 65293.605 | 57602.316 |
| AY009399  | 32724.057 | 33570.73  | M33197      | 4712.15   | 4328.681  | NM_018130 | 26198.914 | 10425.788 |
| NM_004895 | 3619.358  | 3567.698  | AB011146    | 9083.504  | 9355.737  | AF085878  | 4896.028  | 897.778   |
| M33197    | 61528.438 | 63696.789 | NM_003679   | 1215.605  | 1095.342  | NM_004453 | 6246.381  | 7050.732  |
| M95610    | 28299.154 | 24115.729 | NM_018009   | 9336.657  | 4980.6    | NM_016229 | 29229.613 | 30906.219 |
| NM_000717 | 3702.321  | 2684.887  | AK075081    | 7876.716  | 7021.328  | NM_018244 | 13496.388 | 21739.154 |
| M33197    | 63855.066 | 68601.445 | NM_000895   | 28698.42  | 20594.818 | NM_002492 | 61613.363 | 66381.531 |
| NM_004845 | 2951.287  | 3871.754  | NM_003820   | 60746.375 | 60532.02  | AB046855  | 2126.783  | 2299.75   |
| NM_007107 | 19980.51  | 22577.834 | NM_015915   | 15401.516 | 9808.398  | NM_005642 | 14415.33  | 14023.33  |
| NM_000047 | 1415.991  | 1507.001  | M33197      | 59561.074 | 60826.785 | NM_018105 | 2851.579  | 2841.169  |
| M68874    | 900.443   | 1005.069  | NM_016518   | 42088.91  | 36955.512 | AK023452  | 16161.375 | 19762.223 |
| NM_006319 | 17038.752 | 18525.781 | NM_006185   | 55299.992 | 55302.379 | AF155065  | 1344.429  | 1536.401  |
| NM_018226 | 7734.254  | 8003.26   | NM_014800   | 9341.255  | 8179.275  | NM_000332 | 2200.864  | 1760.285  |
| NM_004605 | 5309.435  | 6428.405  | NM_001557   | 2579.003  | 2287.461  | AK022215  | 14003.737 | 12945.55  |

|           |           |           |           |           |           |           |           |           |
|-----------|-----------|-----------|-----------|-----------|-----------|-----------|-----------|-----------|
| NM_00666C | 18725.752 | 18750.32  | AF147311  | 15326.137 | 13259.012 | U90305    | 4384.694  | 4121.702  |
| NM_00668E | 12056.837 | 13139.859 | NM_002131 | 57902.969 | 56578.797 | NM_001527 | 39142.516 | 34644.18  |
| NM_01213C | 10972.453 | 13034.758 | NM_017927 | 13484.072 | 11763.837 | AK025269  | 51132.734 | 50631.254 |
| AF121856  | 15699.994 | 17632.818 | M33197    | 62578.793 | 63383.66  | NM_00143E | 1511.591  | 1509.729  |
| NM_006421 | 6772.585  | 7363.563  | NM_001203 | 13883.274 | 13244.754 | AB040971  | 3530.473  | 3364.928  |
| NM_017457 | 18814.715 | 19739.137 | NM_00479E | 53137.145 | 50937.469 | NM_00656Z | 19521.82  | 18254.705 |
| NM_00376E | 11548.781 | 10854.631 | NM_006733 | 1278.824  | 1154.204  | X65665    | 1469.609  | 816.105   |
| NM_00586E | 1570.232  | 1440.011  | NM_00203E | 1097.202  | 783.654   | NM_003112 | 3577.917  | 1587.455  |
| M33197    | 47331.883 | 50420.168 | NM_014047 | 45411.301 | 39872.055 | AL080170  | 9949.267  | 11834.396 |
| NM_01820Z | 43880.586 | 40641.738 | AK022901  | 6327.404  | 4925.729  | AB039903  | 14922.826 | 15973.974 |
| AB023197  | 7637.527  | 6708.004  | NM_00150E | 1613.43   | 1322.169  | NM_00054Z | 56206.121 | 58014.563 |
| AB014568  | 12514.941 | 10817.507 | AF037332  | 10604.801 | 11427.496 | NM_01462E | 1125.69   | 1480.116  |
| AK022238  | 1203.194  | 1313.158  | M33197    | 65168.895 | 64969.309 | NM_006851 | 3539.105  | 4813.841  |
| NM_01224C | 7962.419  | 6308.92   | AJ011129  | 16064.316 | 14011.399 | AK001560  | 6073.906  | 6331.597  |
| AK022546  | 21127.332 | 21488.936 | NM_00164E | 4012.499  | 2321.475  | AB001328  | 5272.047  | 6936.516  |
| NM_014067 | 19249.609 | 17717.533 | NM_00395E | 5796.546  | 3197.555  | NM_00094E | 1018.321  | 1264.553  |
| NM_002914 | 19884.289 | 19479.887 | M33197    | 64216.336 | 67722.188 | H99588    | 4403.938  | 4334.386  |
| NM_02038E | 5792.895  | 4464.637  | NM_00350C | 23557.381 | 17827.918 | X00588    | 16138.019 | 16398.314 |
| NM_014877 | 1450.593  | 1072.688  | NM_014317 | 7777.91   | 7219.441  | AI359037  | 60667.434 | 64298.59  |
| NM_006541 | 2249.711  | 2115.784  | L09234    | 39492.586 | 34266.695 | J04513    | 1964.873  | 2733.704  |
| M33197    | 63197.543 | 62388.934 | NM_00005E | 2771.475  | 2184.191  | BI754285  | 6033.735  | 7002.495  |
| NM_00570E | 10058.766 | 8783.267  | AK026740  | 3225.275  | 3333.294  | X15998    | 22779.16  | 21597.291 |
| NM_00432E | 9571.726  | 9590.332  | NM_017881 | 11303.809 | 9205.841  | M76482    | 1822.812  | 2017.967  |
| NM_004581 | 14231.809 | 15651.497 | NM_01889E | 6278.447  | 5287.436  | X17519    | 1125.295  | 989.559   |
| NM_006817 | 32745.043 | 40439.176 | AF069307  | 6771.135  | 6161.846  | NM_00188Z | 11190.832 | 11696.945 |
| NM_00710E | 38602.473 | 31285.889 | U92978    | 4918.163  | 4454.552  | NM_00462E | 10015.169 | 10215.333 |
| NM_015921 | 49252.34  | 47903.867 | NM_018034 | 11611.981 | 12419.836 | L31785    | 3419.812  | 3748.85   |
| AB040900  | 28303.404 | 23328.664 | AB037831  | 9411.34   | 8536.738  | H-M 69043 | 26504.457 | 25923.145 |
| NM_00108C | 9615.851  | 9472.952  | NM_012103 | 41826.973 | 32943.172 | AF077374  | 4629.316  | 4469.1    |
| NM_00148Z | 1778.477  | 2103.043  | AL122077  | 39509.285 | 33016.496 | U43901    | 2071.931  | 1280.974  |
| U80018    | 1238.821  | 1124.08   | NM_01463Z | 3377.63   | 2709.16   | X59065    | 5218.047  | 2698.282  |
| NM_001797 | 5031.855  | 4917.857  | NM_00642Z | 5047.147  | 4802.604  | M59828    | 36177.664 | 13948.054 |
| NM_003154 | 1558.04   | 1365.114  | BE789195  | 1433.654  | 1230.599  | NM_00216E | 7264.136  | 2154.851  |
| AK023459  | 18533.414 | 17304.262 | NM_01694E | 3173.23   | 3703.729  | NM_01565E | 1468.208  | 1715.721  |
| BI762154  | 861.569   | 1371.232  | M33197    | 61645.188 | 60476.16  | NM_00058E | 8725.561  | 7818.239  |
| U13022    | 4690.105  | 4273.478  | NM_00725E | 2445.469  | 2151.776  | NM_01654E | 40630.02  | 46041.832 |
| R23251    | 42149.699 | 54133.785 | NM_01840Z | 2011.041  | 1486.221  | AF309653  | 9193.654  | 8715.406  |
| BG763477  | 573.18    | 557.015   | NM_01406E | 4517.241  | 2441.523  | NM_00262C | 60057.324 | 59482.758 |
| AA702640  | 8528.345  | 9273.85   | AB035130  | 3937.557  | 2852.223  | S79267    | 3883.582  | 4723.827  |
| T68583    | 5899.586  | 5747.202  | NM_00335E | 6074.155  | 4965.93   | NM_00181E | 2913.394  | 3294.948  |
| AA481944  | 16669.061 | 14028.02  | M33197    | 61552.52  | 58813.48  | NM_003784 | 59778.512 | 59896.512 |
| AF038440  | 2019.328  | 1792.604  | AF119917  | 2511.612  | 1868.784  | NM_00019E | 57879.684 | 58479.082 |
| M31158    | 12501.83  | 15108.183 | AK021834  | 912.324   | 327.592   | NM_00544E | 29234.439 | 26323.973 |
| H00742    | 3487.825  | 3382.209  | NM_01791E | 3504.125  | 2857.001  | NM_01489E | 4643.619  | 6201.007  |
| D42108    | 2278.91   | 2252.546  | AL050097  | 1101.54   | 733.952   | NM_00363C | 16936.188 | 20384.186 |
| BG700922  | 3384.141  | 3686.2    | AK021513  | 1170.823  | 757.095   | NM_00004E | 10020.54  | 11444.662 |
| AI366068  | 3174.421  | 3722.58   | NM_00357E | 7968.328  | 6845.495  | NM_00321E | 8545.255  | 7924.065  |
| N57553    | 21023.84  | 21829.268 | AL049283  | 4160.508  | 3545.406  | NM_00670E | 16375.209 | 16042.503 |
| M33197    | 62632.703 | 65323.664 | M33197    | 61295.984 | 62282.652 | NM_00061Z | 49535.305 | 46570.023 |
| NM_01654E | 8589.553  | 8149.224  | NM_002401 | 59740.496 | 59944.082 | NM_004257 | 45379.477 | 45593.367 |
| NM_00144C | 53574.676 | 53405.465 | NM_001274 | 8011.356  | 6098.359  | NM_002844 | 416.311   | 873.136   |
| NM_001201 | 558.265   | 733.777   | NM_003913 | 1705.673  | 1397.545  | NM_00068Z | 8228.824  | 8306.354  |
| NM_00071E | 2455.606  | 1738.363  | NM_002227 | 6256.772  | 4696.687  | NM_00362E | 11978.49  | 11746.884 |

|           |           |           |             |           |           |           |           |           |
|-----------|-----------|-----------|-------------|-----------|-----------|-----------|-----------|-----------|
| AF026932  | 1659.174  | 1565.911  | NM_007199   | 9098.797  | 6067.229  | NM_005901 | 10566.117 | 10170.365 |
| AF103795  | 4017.565  | 3000.768  | AB002301    | 1304.422  | 742.173   | NM_004248 | 21737.043 | 23529.432 |
| NM_006215 | 1099.732  | 920.463   | AB014530    | 20643.697 | 17260.156 | NM_000955 | 674.413   | 539.374   |
| M33197    | 60785.328 | 69558.406 | M33197      | 64007.875 | 60923.344 | NM_004910 | 5940.68   | 7177.192  |
| NM_007024 | 10460.593 | 12429.112 | NM_005989   | 10647.449 | 9920.515  | AB013452  | 5525.88   | 5531.854  |
| NM_013231 | 3490.664  | 3912.271  | AB014607    | 13951.526 | 13798.146 | M93107    | 12755.844 | 12431.502 |
| NM_012106 | 14124.561 | 15664.114 | AF134401    | 3372.819  | 4836.353  | BC001479  | 38270.746 | 41260.227 |
| NM_006254 | 12816.189 | 12939.811 | NM_020151   | 27627.975 | 33044.93  | NM_002461 | 59247.527 | 55932.496 |
| X95425    | 1591.783  | 1328.827  | NM_005891   | 37401.676 | 42955.027 | NM_005771 | 3609.074  | 3670.964  |
| NM_004422 | 6888.246  | 6262.415  | NM_006387   | 14555.801 | 11334.173 | AB032986  | 57068.707 | 57013.992 |
| NM_016562 | 6209.235  | 5225.276  | NM_005646   | 7044.668  | 4810.465  | NM_017528 | 58397.352 | 57812.574 |
| M33197    | 60393.656 | 67442.281 | NM_006639   | 4666.103  | 3411.207  | NM_016032 | 19627.629 | 20730.41  |
| AY009399  | 38707.035 | 40983.414 | NM_001692   | 1783.949  | 939.864   | NM_014324 | 57032.324 | 59044.973 |
| NM_004895 | 5267.343  | 5333.953  | BI767871    | 20946.35  | 13751.389 | NM_001687 | 56670.027 | 52699.816 |
| U59748    | 2371.874  | 2839.691  | AA418907    | 3533.294  | 2199.061  | AK026374  | 9380.893  | 9465.534  |
| L32537    | 1016.648  | 1013.509  | M65291      | 1457.346  | 1154.888  | NM_003455 | 26632.625 | 35082.188 |
| NM_014303 | 12558.698 | 13023.76  | AA115473    | 14524.551 | 13675.345 | NM_013345 | 59056.102 | 57960.828 |
| M33197    | 60521.371 | 65827.734 | AA872397    | 19498.252 | 15738.974 | NM_006861 | 6760.995  | 6860.674  |
| M95610    | 36956.32  | 36776.559 | M24283      | 18305.455 | 16173.441 | AK023142  | 5689.15   | 5709.87   |
| NM_003118 | 3065.5    | 3324.917  | AA709414    | 5271.175  | 4104.927  | U61740    | 56562.109 | 54299.176 |
| L02922    | 22843.563 | 23144.684 | D12676      | 10861.652 | 7894.122  | NM_006405 | 60225.348 | 60384.734 |
| NM_004045 | 39362.211 | 25280.24  | NM_000939   | 62957.602 | 60236.289 | AB049054  | 17884.684 | 18841.941 |
| NM_001891 | 2866.626  | 1797.118  | NM_004295   | 57802.031 | 58224.516 | NM_015071 | 6052.375  | 6076.519  |
| NM_012135 | 12050.935 | 12635.019 | H-X 02812 I | 7948.38   | 7217.171  | NM_013227 | 10204.021 | 9164.216  |
| AF121856  | 17549.482 | 19989.256 | U75898      | 15971.809 | 13910.397 | Z83803    | 2450.358  | 2109.92   |
| NM_006421 | 8429.487  | 8953.058  | M29039      | 3970.979  | 3706.749  | AF027205  | 50533.633 | 45241.238 |
| NM_017457 | 26653.533 | 31287.174 | M59815      | 1009.36   | 1186.529  | AF075012  | 4392.367  | 2875.271  |
| NM_003765 | 21839.51  | 18007.32  | M33197      | 6349.626  | 6101.768  | NM_001570 | 3013.828  | 1481.571  |
| NM_005868 | 2533.341  | 2078.176  | AB011146    | 10393.756 | 12885.831 | AB040672  | 14574.272 | 14604.683 |
| M33197    | 56207.371 | 58178.691 | NM_003679   | 994.875   | 1075.192  | NM_002192 | 16091.636 | 15007.246 |
| NM_018202 | 55370.887 | 55107.758 | NM_005326   | 35294.195 | 37979.441 | NM_005491 | 24401.396 | 23603.602 |
| AB023197  | 17013.697 | 13601.506 | NM_007286   | 2055.704  | 2276.267  | NM_003865 | 20452.893 | 22517.676 |
| NM_022173 | 13517.599 | 14333.85  | NM_014800   | 9414.544  | 7671.418  | AK025599  | 3168.341  | 3953.967  |
| AB040970  | 9411.814  | 9109.44   | NM_001557   | 2473.965  | 2583.996  | X63417    | 8784.757  | 12124.752 |
| NM_018330 | 5609.687  | 5820.277  | AF147311    | 19070.012 | 18556.197 | S94539    | 56946.91  | 57762.184 |
| AB023222  | 4033.397  | 3461.494  | NM_002131   | 55102.027 | 56535.957 | S45570    | 1004.632  | 1166.803  |
| AB033088  | 12974.098 | 12246.493 | NM_017927   | 16023.562 | 10048.995 | NM_006402 | 7609.172  | 8098.436  |
| M33197    | 60307.102 | 63925.922 | M33197      | 62970.332 | 61744.914 | NM_005785 | 9482.371  | 9819.168  |
| U50342    | 54015.949 | 54044.156 | NM_001203   | 15850.137 | 15580.323 | NM_018248 | 9192.672  | 10003.334 |
| NM_000295 | 1516.417  | 1058.129  | NM_004799   | 55513.805 | 55309.949 | AK001695  | 22675.256 | 24760.527 |
| NM_001080 | 14829.928 | 10006.116 | NM_006733   | 1498.219  | 1511.612  | NM_017886 | 23416.84  | 21849.855 |
| NM_001482 | 2937.652  | 2524.037  | NM_002039   | 1588.1    | 1162.538  | NM_006252 | 9745.23   | 8602.978  |
| NM_001215 | 510.194   | 776.644   | NM_014047   | 46396.465 | 37572.57  | NM_001721 | 2561.102  | 2499.183  |
| U80018    | 2679.565  | 3283.153  | AK022901    | 6689.197  | 6434.13   | NM_014397 | 31506.951 | 33814.078 |
| NM_000717 | 4109.836  | 3465.145  | NM_001508   | 1437.014  | 1360.357  | AB023182  | 7104.089  | 6810.675  |
| M33197    | 61282.82  | 66575.039 | M33197      | 63089.82  | 69438.625 | NM_003607 | 4467.699  | 4387.063  |
| NM_004845 | 3129.901  | 3754.359  | AF037332    | 11125.817 | 12103.907 | NM_006575 | 6523.961  | 5936.597  |
| NM_007107 | 16577.496 | 15539.087 | NM_014571   | 1403.741  | 1308.184  | NM_013254 | 6868.996  | 7169.998  |
| NM_000047 | 1554.719  | 1375.21   | NM_006052   | 2658.648  | 2832.245  | NM_000437 | 45052.336 | 44821.836 |
| M68874    | 931.768   | 1099.106  | AB040912    | 25843.15  | 27069.781 | AB046819  | 56565.68  | 50979.723 |
| NM_006319 | 13455.317 | 10606.424 | NM_003871   | 4836.047  | 4863.097  | NM_006090 | 21838.777 | 17151.188 |
| NM_018226 | 6323.937  | 4518.394  | NM_006243   | 6646.655  | 7744.947  | NM_002900 | 36794.465 | 20433.918 |
| NM_004605 | 3789.591  | 3359.021  | NM_007252   | 773.94    | 968.583   | NM_000542 | 52385.77  | 55606.391 |



|           |           |           |           |           |           |           |           |           |
|-----------|-----------|-----------|-----------|-----------|-----------|-----------|-----------|-----------|
| Z36813    | 5182.549  | 5331.877  | M33197    | 66031.352 | 74513.391 | NM_01462E | 1136.79   | 1383.929  |
| NM_00666C | 12998.503 | 13175.158 | AJ011129  | 14476.039 | 16373.605 | NM_006851 | 3873.315  | 4027.124  |
| NM_00148E | 547.62    | 700.977   | NM_001039 | 1601.659  | 1995.454  | AK001560  | 5541.295  | 5258.717  |
| NM_004727 | 523.084   | 783.48    | NM_00573E | 1444.395  | 1044.634  | AB001328  | 6481.863  | 7770.5    |
| NM_00668E | 8412.142  | 8173.187  | NM_01448E | 5718.596  | 5505.03   | NM_00094E | 1302.731  | 1506.253  |
| M33197    | 31429.447 | 26675.557 | NM_013389 | 12594.849 | 12795.234 | H99588    | 4308.471  | 4398.616  |
| M33197    | 66426.102 | 75876.383 | AB014567  | 1520.396  | 1313.808  | X00588    | 15570.755 | 15665.716 |
| NM_01654E | 15014.697 | 11730.086 | AK022817  | 6612.508  | 4511.783  | AI359037  | 59634.609 | 58119.164 |
| NM_00144C | 63336.086 | 60571.055 | NM_018034 | 18683.078 | 16638.723 | J04513    | 2004.511  | 2252.498  |
| NM_001201 | 772.555   | 729.571   | AB037831  | 12732.396 | 12165.687 | BI754285  | 6970.968  | 7310.45   |
| NM_01661E | 2264.937  | 2066.1    | NM_012103 | 43958.563 | 47922.387 | X15998    | 26561.881 | 27679.248 |
| AB014568  | 11732.961 | 10954.969 | AL122077  | 34529.434 | 47431.148 | M76482    | 1795.874  | 1735.65   |
| AK022238  | 1473.252  | 1809.656  | NM_014632 | 3396.402  | 4315.985  | X17519    | 786.292   | 646.582   |
| NM_01224E | 11190.389 | 11477.593 | NM_006422 | 5021.107  | 5869.871  | NM_00188E | 11434.286 | 10713.377 |
| AK022546  | 15513.728 | 14268.174 | BE789195  | 1266.837  | 945.755   | NM_00462E | 10102.706 | 9442.984  |
| NM_014067 | 13213.684 | 11508.057 | NM_01694E | 2744.322  | 2627.897  | L31785    | 3774.237  | 4135.516  |
| NM_002914 | 18101.75  | 16158.104 | M33197    | 64966.316 | 71526.711 | H-M 69043 | 25375.926 | 25287.604 |
| NM_02038E | 5211.328  | 3862.695  | NM_007259 | 2755.261  | 3360.501  | AF077374  | 4699.763  | 4522.849  |
| NM_014877 | 1004.351  | 836.563   | NM_018402 | 1634.24   | 1779.88   | U43901    | 2000.693  | 2195.38   |
| NM_006541 | 2151.217  | 2504.464  | NM_018009 | 8102.732  | 7677.963  | X59065    | 4975.503  | 4719.359  |
| M33197    | 59924.684 | 64077.102 | AK075081  | 4977.022  | 7219.656  | M59828    | 41233.328 | 38949.105 |
| NM_00570E | 7736.255  | 7330.566  | NM_00089E | 21783.709 | 27610.223 | AJ010482  | 7475.618  | 8251.072  |
| NM_00432E | 7876.7    | 8981.285  | NM_00382C | 64712.77  | 65181.84  | NM_00089E | 2204.916  | 1259.899  |
| NM_004581 | 11188.555 | 12174.64  | NM_01591E | 12750.376 | 16186.438 | NM_01654E | 20543.66  | 23109.754 |
| NM_006817 | 27190.164 | 31822.422 | M33197    | 66746.289 | 78124.32  | AF309653  | 7536.413  | 6396.8    |
| NM_00710E | 30190.729 | 24183.641 | NM_01651E | 31113.361 | 37073.422 | NM_00262C | 57798.855 | 57695.855 |
| NM_015921 | 39642.637 | 40359.309 | NM_00618E | 51841.945 | 58293.902 | S79267    | 4392.842  | 5053.008  |
| AB040900  | 26509.826 | 29815.49  | NM_005989 | 12446.867 | 12619.61  | NM_00181E | 3067.772  | 3495.962  |
| CY3Cy5    | 3095.694  | 185.453   | AB014607  | 21093.799 | 17662.668 | NM_003784 | 59602.078 | 60374.699 |
| AF086225  | 4878.794  | 4247.51   | AF134401  | 4929.833  | 5300.528  | NM_00019E | 43361.434 | 41912.059 |
| NM_005844 | 2203.37   | 2244.56   | NM_020151 | 32731.313 | 30395.385 | NM_00544E | 31240.457 | 27674.768 |
| AK024941  | 6586.013  | 5448.322  | NM_005891 | 43391.449 | 42666.465 | NM_01489E | 5849.98   | 6200.728  |
| M33197    | 60952.227 | 59730.453 | NM_00164E | 4460.322  | 4338.565  | NM_00363C | 14790.633 | 16342.895 |
| AK025489  | 7522.863  | 5939.512  | NM_00350C | 20011.904 | 24530.318 | NM_00004E | 10605.119 | 11828.415 |
| AB075853  | 1059.824  | 723.503   | NM_014317 | 6972.339  | 10443.378 | NM_00321E | 8859.472  | 10297.813 |
| AL390152  | 3072.375  | 2329.564  | L09234    | 32808.133 | 47879.563 | NM_00670E | 14457.76  | 16582.553 |
| AK026721  | 5455.853  | 5965.818  | NM_000059 | 1995.516  | 2712.765  | NM_00061E | 47551.184 | 48915.695 |
| AK025598  | 1679.441  | 1665.208  | AK026740  | 2840.968  | 3334.65   | NM_004257 | 46610.184 | 45126.555 |
| AB002348  | 19054.924 | 17772.439 | NM_017881 | 10322.903 | 12447.253 | NM_002844 | 457.607   | 913.399   |
| SR2       | 36793.18  | 49568.25  | M33197    | 60461.699 | 67568.117 | NM_00068E | 7527.404  | 8944.289  |
| SR4       | 10002.91  | 12553.665 | NM_017634 | 4708.872  | 6013.613  | NM_00362E | 12504.327 | 11715.779 |
| SR6       | 1041.81   | 1764.956  | NM_00081E | 1241.11   | 1238.323  | NM_005901 | 11300.796 | 11791.957 |
| SR8       | 4999.824  | 19887.408 | NM_01889E | 3763.554  | 4191.976  | NM_00424E | 20128.813 | 20185.559 |
| SR10      | 15866.923 | 7689.844  | AJ300465  | 3446.377  | 2778.12   | NM_00095E | 508.049   | 831.533   |
| CY3Cy5    | 3144.421  | 198.13    | X86400    | 3402.03   | 4141.135  | AL080170  | 10058.682 | 7838.075  |
| AK025948  | 1951.005  | 2235.229  | NM_00081C | 2051.03   | 2505.95   | AB039903  | 14132.409 | 9718.315  |
| AK000674  | 677.016   | 580.604   | AF069307  | 4836.976  | 6716.028  | M93107    | 11354.515 | 12222.085 |
| AJ238555  | 2219.824  | 2906.671  | M33197    | 66494.672 | 73797.805 | BC001479  | 30547.76  | 30886.465 |
| AL353948  | 7152.176  | 7457.273  | U92978    | 3057.215  | 3918.208  | NM_002461 | 61261.152 | 58266.719 |
| M33197    | 75734.531 | 63677.293 | M33197    | 6507.044  | 4432.972  | NM_005771 | 1925.118  | 1572.531  |
| AK025869  | 8838.772  | 8309.975  | AB011146  | 13586.717 | 15708.759 | AB032986  | 56374.496 | 57189.754 |
| AK024939  | 5490.583  | 5106.104  | NM_003679 | 1113.623  | 1711.151  | NM_01752E | 55871.273 | 52350.465 |
| AK001561  | 1800.341  | 1549.711  | NM_00532E | 36768.648 | 42488.371 | NM_01603E | 8476.558  | 8015.632  |

|           |           |           |           |           |           |           |           |           |
|-----------|-----------|-----------|-----------|-----------|-----------|-----------|-----------|-----------|
| AB007880  | 3821.713  | 2808.266  | NM_007286 | 2899.096  | 2965.92   | NM_014324 | 57021.91  | 60257.02  |
| M33197    | 71515.547 | 63435.105 | NM_014069 | 4465.212  | 5995.068  | NM_001687 | 57285.07  | 53416.418 |
| NM_014146 | 18743.166 | 17216.129 | AB035130  | 3663.085  | 4715.727  | AK026374  | 8485.344  | 7788.732  |
| AF147356  | 1142.047  | 1144.537  | NM_003359 | 5110.323  | 6266.781  | NM_003456 | 24507.904 | 30660.838 |
| NM_018843 | 2909.735  | 2549.336  | M33197    | 60210.484 | 61936.797 | NM_013346 | 60386.109 | 58449.559 |
| AL049461  | 1060.889  | 1085.236  | AF119917  | 1970.21   | 3213.271  | NM_006861 | 7135.451  | 8651.078  |
| M33197    | 75512.75  | 63468.746 | NM_017915 | 3490.473  | 3418.833  | AK023142  | 5834.281  | 5642.333  |
| M33197    | 66660.922 | 67730.563 | NM_003579 | 4535.34   | 4199.429  | U61740    | 60150.055 | 57904.547 |
| AK025161  | 503.186   | 586.814   | AL049283  | 3296.741  | 3621.468  | NM_006406 | 58726.684 | 57054.988 |
| AK026259  | 10276.734 | 9363.336  | M33197    | 61037.98  | 62707.855 | AB049054  | 18138.406 | 17137.041 |
| AK026701  | 14664.377 | 25411.695 | NM_002401 | 61815.781 | 62665.809 | NM_015071 | 5862.907  | 6209.612  |
| M33197    | 66939.164 | 64639.957 | NM_001274 | 7185.734  | 9375.423  | NM_013227 | 10858.78  | 9898.66   |
| NM_018126 | 3386.45   | 3832.773  | NM_003913 | 1210.522  | 1184.188  | Z83803    | 2319.139  | 2190.812  |
| AK024506  | 6961.255  | 5732.398  | NM_002227 | 6255.34   | 5986.214  | AF027205  | 47887.598 | 50320.871 |
| NM_014179 | 3528.405  | 3041.804  | NM_007199 | 2693.252  | 2850.491  | AF075012  | 5312.858  | 5111.457  |
| AF086326  | 9630.256  | 9930.493  | AB014530  | 13909.212 | 23665.568 | NM_001570 | 3779.083  | 3711.297  |
| M33197    | 68278.703 | 63318.48  | M33197    | 66091.992 | 64623.086 | NM_015656 | 1861.734  | 1232.635  |
| AL080057  | 1379.495  | 1090.027  | CY3Cy5    | 7560.792  | 669.824   | NM_000586 | 10354.631 | 8440.052  |
| M33197    | 65916.344 | 65481.473 | AK054960  | 31197.08  | 39004.859 | NM_005491 | 22231.248 | 22295.34  |
| AK024470  | 6022.647  | 5364.488  | AK024150  | 3177.533  | 3775.33   | NM_003866 | 14314.313 | 13199.364 |
| NM_017936 | 1894.871  | 1791.107  | AF070536  | 4862.636  | 6617.123  | AK025599  | 2310.97   | 2487.144  |
| NM_004226 | 9294.819  | 9188.403  | AK022297  | 1570.098  | 1993.139  | NM_006402 | 6794.644  | 7481.24   |
| AL137436  | 679.583   | 729.519   | U79300    | 3650.764  | 4883.369  | NM_005786 | 6842.668  | 6027.726  |
| AK023400  | 1383.518  | 1139.674  | AK025151  | 24369.031 | 28073.576 | NM_018246 | 8912.823  | 10196.337 |
| M33197    | 64165.023 | 62708.145 | AK025550  | 8930.245  | 10571.719 | AK001695  | 21517.678 | 21299.564 |
| AF056430  | 1325.017  | 1330.612  | AF088076  | 52376.801 | 58657.203 | NM_017886 | 23501.939 | 23035.895 |
| AF009291  | 1512.019  | 1395.017  | AF086543  | 10001.917 | 10361.646 | NM_006252 | 9347.958  | 9528.494  |
| M33197    | 63555.066 | 60081.648 | AB046797  | 1596.973  | 1380.706  | NM_001721 | 2606.102  | 2634.604  |
| AK021662  | 1584.986  | 1625.181  | AK002098  | 3861.669  | 4382.99   | NM_014397 | 34287.906 | 34664.402 |
| AK001038  | 2731.983  | 3140.803  | AK024298  | 1257.632  | 3500.282  | AB023182  | 7476.31   | 7622.237  |
| AK021469  | 2146.48   | 2395.445  | AB011128  | 55494.02  | 56221.848 | NM_003607 | 4331.191  | 4217.809  |
| M33197    | 65851.43  | 63503.512 | AK026742  | 1645.914  | 2006.354  | NM_006576 | 7286.879  | 7370.074  |
| AK023633  | 3769.632  | 4035.482  | AK025074  | 8658.601  | 10128.762 | NM_013254 | 8158.106  | 7951.188  |
| AF085967  | 684.802   | 742.025   | AK054960  | 37026.984 | 39824.395 | NM_000437 | 49115.199 | 48974.324 |
| NM_006179 | 1869.253  | 1724.898  | L15344    | 2577.598  | 2734.338  | AB046819  | 57714.117 | 52913.285 |
| AL360165  | 6723.535  | 6056.865  | SR3       | 50619.605 | 58572.703 | NM_006090 | 22803.725 | 25947.961 |
| M33197    | 77150.125 | 63694.293 | SR5       | 6891.383  | 8087.615  | NM_002900 | 50085.512 | 44386.301 |
| AJ008132  | 22095.844 | 19202.08  | SR7       | 5726.754  | 59106.77  | NM_004910 | 6276.543  | 4597.957  |
| NM_005281 | 2330.348  | 2067.108  | SR9       | 21746.217 | 6248.501  | AB013452  | 4895.504  | 3709.348  |
| NM_005546 | 2295.093  | 2358.917  | CY3Cy5    | 5744.079  | 181.584   | NM_006851 | 3481.529  | 4730.909  |
| AJ008115  | 15367.355 | 13726.199 | U73799    | 5722.217  | 6447.374  | AK001560  | 4511.954  | 4193.554  |
| AF083125  | 5497.66   | 4788.775  | AK021668  | 83754.594 | 64332.004 | AB001328  | 5734.015  | 6956.967  |
| U72851    | 859.142   | 807.715   | AF086148  | 87605.906 | 64278.465 | H99588    | 2300.263  | 2783.818  |
| M33197    | 65435.75  | 59360.004 | AF086128  | 984.787   | 1017.428  | J04513    | 2460.354  | 2765.456  |
| AK022970  | 1437.516  | 1261.13   | NM_016490 | 8514.455  | 10037.911 | BI754285  | 5763.25   | 6536.522  |
| AK026212  | 3244.506  | 3845.475  | AL137498  | 16891.773 | 19320.773 | X15998    | 23371.57  | 23455.842 |
| AF086222  | 3325.599  | 4571.364  | NM_003851 | 46408.379 | 57190.934 | M76482    | 3262.94   | 3271.893  |
| AF086415  | 17410.846 | 18793.172 | U79244    | 599.02    | 1017.858  | X17519    | 853.881   | 951.757   |
| D28391    | 61639.273 | 62509.031 | AK022482  | 4569.459  | 6114.556  | NM_001883 | 11772.962 | 11784.456 |
| M33197    | 45844.148 | 46057.426 | AK024135  | 1384.063  | 1742.934  | NM_004626 | 10782.259 | 11558.652 |
| AK026859  | 702.218   | 782.445   | AK022803  | 8140.341  | 9659.785  | L31785    | 3699.181  | 4095.304  |
| D86961    | 3798.688  | 2948.973  | AK023517  | 6972.167  | 10643.616 | H-M 69043 | 25787.963 | 25371.574 |
| AJ227896  | 1496.202  | 1555.039  | AK024195  | 6843.202  | 24559.908 | AF077374  | 4544.636  | 4719.521  |

|           |           |           |           |           |           |           |           |           |
|-----------|-----------|-----------|-----------|-----------|-----------|-----------|-----------|-----------|
| L32841    | 11429.097 | 10931.466 | AK025156  | 47545.199 | 56929.512 | U43901    | 2023.249  | 2238.763  |
| M33197    | 64280.43  | 62656.836 | AK022116  | 14377.934 | 20029.508 | X59065    | 5391.783  | 5297.489  |
| AF131770  | 10298.567 | 10332.232 | AF026526  | 5635.512  | 8439.813  | M59828    | 47335.93  | 45207.723 |
| NM_006432 | 21851.713 | 22743.895 | AK026207  | 9353.846  | 11196.801 | AJ010482  | 6455.38   | 6435.094  |
| AF025441  | 3938.714  | 3584.147  | NM_020181 | 2432.989  | 4157.087  | NM_000896 | 2717.646  | 2230.377  |
| U62823    | 3515.423  | 2873.537  | AK024984  | 35595.477 | 41317.008 | AB040672  | 14977.72  | 12187.27  |
| NM_003535 | 12849.25  | 11246.806 | AL110236  | 1589.386  | 1727.538  | NM_002192 | 13507.75  | 8533.471  |
| AK026768  | 5260.097  | 5077.549  | AF085955  | 1164.637  | 1542.493  | NM_014896 | 3398.416  | 4131.219  |
| M33197    | 63619.82  | 58806.789 | AF075106  | 23059.439 | 27278.975 | NM_003630 | 12449.246 | 13692.728 |
| AK000852  | 11075.474 | 10778.989 | AK023339  | 13607.1   | 12505.798 | NM_000046 | 7232.292  | 7515.893  |
| AF251188  | 15956.298 | 15944.283 | AF085981  | 1082.951  | 1393.931  | NM_006706 | 11553.937 | 15225.2   |
| AK026418  | 13377.348 | 12425.505 | AF086008  | 6664.522  | 6545.85   | NM_000612 | 38751.746 | 48625.398 |
| AF086194  | 49440.18  | 46469.113 | AF087970  | 1334.449  | 1334.226  | NM_002844 | 493.23    | 642.534   |
| AK026811  | 16586.979 | 12212.914 | AF086029  | 819.335   | 1224.925  | NM_000683 | 8958.22   | 10766.179 |
| NM_017743 | 3031.436  | 3550.732  | U05597    | 2772.309  | 3282.292  | NM_003626 | 10213.481 | 11486.738 |
| NM_000300 | 3410.246  | 2669.572  | AK026366  | 65847.656 | 71644.508 | NM_005901 | 11196.796 | 13883.5   |
| M33197    | 65108.52  | 63187.906 | AK024229  | 52228.098 | 60155.641 | NM_004246 | 23582     | 26888.498 |
| AV756917  | 11696.391 | 13087.938 | AK021824  | 526.87    | 1104.629  | NM_000956 | 787.472   | 733.999   |
| NM_018380 | 9871.768  | 9098.795  | AK021467  | 17116.818 | 20198.533 | NM_001313 | 3441.835  | 3435.906  |
| AK001442  | 1678.052  | 1601.909  | NM_014127 | 4420.162  | 7050.71   | NM_004796 | 1487.346  | 1720.214  |
| NM_012070 | 3622.857  | 3882.824  | AL360187  | 2539.019  | 3685.874  | NM_000435 | 30880.715 | 32296.553 |
| NM_019036 | 1253.842  | 1582.749  | AK021878  | 2898.194  | 3773.843  | NM_001842 | 54595.301 | 59628.523 |
| NM_001351 | 918.566   | 956.86    | AK021817  | 11155.703 | 14572.825 | NM_007281 | 1019.799  | 1211.855  |
| M33197    | 66849.563 | 65407.848 | AL080103  | 1284.311  | 2124.985  | AB017169  | 2175.173  | 2242.321  |
| U92023    | 1710.718  | 1605.641  | AK023217  | 2397.611  | 3472.214  | AL080170  | 10458.36  | 10651.401 |
| U12129    | 1920.854  | 1560.504  | AF090902  | 18885.596 | 22649.092 | AB039903  | 17702.527 | 15951.419 |
| S81242    | 61278.207 | 61615.539 | AF119887  | 51182.574 | 54062.492 | NM_000542 | 55873.207 | 51651.027 |
| AF230801  | 1611.475  | 1094.771  | AK091038  | 2502.85   | 3238.762  | NM_014625 | 1260.242  | 1103.939  |
| AF075072  | 1524.011  | 1401.809  | AK024193  | 5694.285  | 7331.722  | NM_005826 | 3415.93   | 3541.541  |
| M33197    | 64743.707 | 60952.535 | NM_018576 | 1270.656  | 1570.752  | NM_000466 | 8411.042  | 10066.579 |
| NM_002506 | 1682.03   | 1843.965  | AK024438  | 34972.547 | 41413.324 | NM_015544 | 756.994   | 888.561   |
| U38442    | 1473.754  | 1674.606  | AL390170  | 3059.858  | 4124.796  | NM_015906 | 22472.748 | 20849.713 |
| AF110136  | 1331.802  | 1405.694  | AK022887  | 1941.638  | 2876.698  | AK022600  | 47008.508 | 49016.855 |
| AK026706  | 3767.271  | 2991.823  | AK000745  | 53278.016 | 59876.648 | NM_006406 | 57491.199 | 56813.855 |
| AB007936  | 24543.514 | 21777.531 | NM_005296 | 1179.091  | 1545.19   | AB049054  | 18317.283 | 21136.523 |
| AF005258  | 342.555   | 692.025   | M57417    | 61136.164 | 61539.125 | NM_015071 | 6372.614  | 6430.34   |
| NM_000887 | 1155.052  | 922.842   | NM_017726 | 2432.712  | 3454.775  | NM_013227 | 12694.543 | 15834.878 |
| M33197    | 68121.844 | 63335.051 | U80772    | 2018.146  | 2943.98   | Z83803    | 2944.923  | 3076.803  |
| X99659    | 23344.807 | 25003.076 | NM_006186 | 4883.237  | 7795.579  | AF027205  | 52630.813 | 49684.141 |
| NM_015416 | 12547.42  | 14207.186 | AJ272177  | 2094.989  | 3229.262  | AF075012  | 4518.247  | 4760.672  |
| NM_002731 | 1341.352  | 1951.099  | AK026402  | 61189.664 | 61595.563 | NM_001570 | 3542.44   | 3316.906  |
| NM_003896 | 5904.584  | 6116.559  | AF111846  | 4044.791  | 3958.554  | NM_015656 | 1580.716  | 1732.388  |
| X99662    | 6060.048  | 6652.862  | Z36850    | 706.594   | 1365.455  | NM_000586 | 9469.24   | 9152.719  |
| NM_003473 | 20102.127 | 19522.08  | AK024618  | 4247.257  | 5023.636  | NM_016546 | 43297.875 | 49130.984 |
| NM_014325 | 5341.81   | 5649.177  | AL049969  | 2090.423  | 2554.587  | AF309653  | 9236.364  | 8262.388  |
| M33197    | 66940.094 | 63385.191 | NM_005220 | 7465.377  | 8341.475  | NM_002620 | 51718.164 | 55507.949 |
| NM_012453 | 986.512   | 1164.626  | X79308    | 6209.383  | 8308.266  | S79267    | 3944.183  | 3974.973  |
| NM_006016 | 36439.664 | 36834.266 | AF086476  | 1830.771  | 2329.636  | NM_001816 | 3081.295  | 2973.06   |
| NM_001242 | 44526.266 | 47832.652 | NM_017660 | 14435.143 | 19106.629 | NM_003784 | 58603.191 | 56253.184 |
| NM_014891 | 15419.309 | 17028.547 | NM_007106 | 4178.806  | 7587.124  | NM_000195 | 58139.27  | 53340.164 |
| NM_013392 | 8214.012  | 8315.909  | AL133017  | 4233.67   | 5885.698  | NM_005445 | 29010.234 | 18950.484 |
| M33197    | 64784.531 | 66790.297 | U84506    | 5305.922  | 6488.81   | AB046819  | 51381.125 | 49307.805 |
| NM_003456 | 670.598   | 568.445   | U21556    | 65862.102 | 68157.453 | NM_006090 | 16353.616 | 16969.527 |

|           |           |           |           |           |           |           |           |           |
|-----------|-----------|-----------|-----------|-----------|-----------|-----------|-----------|-----------|
| AF052692  | 1989.668  | 1870.122  | AB002444  | 1807.475  | 2455.169  | NM_00290C | 41846.082 | 44616.727 |
| NM_000179 | 7928.505  | 8601.014  | AB002344  | 10590.767 | 15852.637 | NM_00491C | 5391.731  | 4709.089  |
| NM_005215 | 1038.032  | 1248.163  | BF210352  | 3186.98   | 5577.892  | BC001479  | 31896.184 | 32384.199 |
| AF062739  | 1771.323  | 1686.401  | AK023760  | 16026.364 | 22145.918 | NM_002461 | 56193.484 | 55645.375 |
| NM_006602 | 2915.157  | 3255.102  | X98415    | 65639.867 | 68398.703 | NM_005771 | 2442.902  | 2154.085  |
| M33197    | 68745.938 | 63400.328 | AK024205  | 6033.671  | 7638.432  | AB032986  | 59707.766 | 56228.051 |
| AL079314  | 5965.274  | 5651.394  | AF086034  | 25510.986 | 26240.998 | NM_01752E | 57969.133 | 57028.402 |
| NM_00126C | 3919.728  | 3935.968  | AK000174  | 1468.433  | 1722.664  | NM_016032 | 17975.518 | 18341.93  |
| NM_00195C | 8990.596  | 9556.535  | AF130071  | 2548.395  | 3022.824  | NM_014324 | 52530.629 | 59856.109 |
| AK026364  | 4516.143  | 4965.173  | AJ272057  | 8189.756  | 10087.555 | NM_001687 | 54758.598 | 51005.199 |
| NM_018117 | 3345.963  | 3387.407  | NM_004402 | 2766.942  | 3696.014  | AK026374  | 7718.558  | 7738.283  |
| NM_00699E | 3247.547  | 3473.038  | AK024216  | 48624.906 | 59650.719 | NM_001169 | 7508.722  | 7839.988  |
| NM_00628E | 3398.977  | 2698.842  | Y16752    | 22753.703 | 28633.266 | AK024648  | 45949.984 | 51792.043 |
| M33197    | 66582.398 | 64409.742 | NM_014694 | 1034.805  | 1642.932  | NM_00071E | 1672.804  | 1785.797  |
| NM_004331 | 13944.017 | 19303.781 | AK000407  | 6509.71   | 10561.024 | NM_00345E | 22323.578 | 30133.297 |
| BE886648  | 999.76    | 1069.349  | NM_020524 | 33396.859 | 42337.641 | AB032526  | 630.723   | 712.42    |
| NM_01599E | 3182.122  | 3254.029  | NM_00199E | 12178.634 | 12227.898 | NM_000171 | 9406.175  | 9880.352  |
| NM_01570E | 19143.479 | 19697.678 | X64977    | 8163.068  | 9284.104  | AL354615  | 3361.698  | 3080.732  |
| AB018337  | 6415.81   | 8192.229  | AF064851  | 3870.524  | 5620.496  | NM_01334E | 61068     | 58979.566 |
| NM_01448E | 6512.679  | 7204.824  | NM_002602 | 36520.906 | 39548.988 | NM_00370E | 13050.682 | 10495.662 |
| AK025273  | 8576.648  | 9180.349  | X91648    | 3228.496  | 4232.399  | NM_006861 | 6788.445  | 5650.551  |
| M33197    | 62636.781 | 55941.965 | AK026658  | 1890.793  | 2634.83   | AJ010482  | 2961.345  | 2903.124  |
| NM_001911 | 2645.3    | 2518.545  | AF282264  | 14761.429 | 19198.133 | NM_00089E | 2159.93   | 1804.475  |
| NM_00650E | 3661.989  | 3932.529  | AF086322  | 2524.984  | 3114.365  | AB040672  | 13825.885 | 11018.866 |
| AB002321  | 2305.833  | 2851.456  | Z70717    | 2674.75   | 2778.499  | NM_00219E | 12821.708 | 10358.268 |
| M33197    | 5810.025  | 5581.566  | AK024736  | 3469.54   | 3739.171  | NM_005491 | 18506.184 | 17163.742 |
| AB020698  | 3692.643  | 3386.763  | NM_01823E | 1695.001  | 2160.884  | NM_00386E | 12944.697 | 12432.064 |
| U68382    | 12613.243 | 11537.881 | NM_00572E | 2192.742  | 2909.191  | AK025599  | 3075.677  | 3064.867  |
| NM_00396E | 14042.969 | 13700.48  | NM_012211 | 1966.35   | 2722.701  | X63417    | 8616.924  | 9000.376  |
| NM_004651 | 6858.532  | 5673.586  | AB040877  | 12119.036 | 16078.993 | S94539    | 56600.402 | 55619.359 |
| NM_00336E | 1665.597  | 1812.48   | AB040927  | 3296.772  | 3917.135  | NM_00640E | 6209.438  | 6669.915  |
| M33197    | 61964.734 | 61155.117 | NM_00021C | 2228.955  | 2840.422  | NM_00578E | 7982.173  | 6826.482  |
| NM_01756E | 9040.101  | 9551.083  | NM_00628E | 7320.911  | 9752.832  | NM_01824E | 7245.819  | 6774.597  |
| NM_00145E | 3702.463  | 3158.35   | NM_019067 | 7620.075  | 10188.302 | AK001695  | 22109.467 | 20083.508 |
| AK024480  | 2521.863  | 3014.063  | AF251025  | 1082.972  | 1532.266  | NM_01788E | 22245.549 | 21996.674 |
| Y13871    | 18773.777 | 20275.891 | NM_015677 | 8522.728  | 12188.393 | NM_00625E | 7161.351  | 7325.442  |
| NM_012134 | 1148.114  | 1095.76   | NM_00177E | 14955.13  | 18734.367 | NM_001721 | 2305.707  | 2158.516  |
| AL137725  | 32244.404 | 18577.992 | AB011087  | 2860.004  | 3145.864  | NM_014397 | 31036.709 | 27366.391 |
| M33197    | 62971.344 | 60919.902 | AJ249902  | 8128.753  | 9746.229  | AB023182  | 6315.31   | 5884.308  |
| AJ008151  | 21637.672 | 21400.816 | NM_01230E | 20031.162 | 23158.27  | NM_003607 | 3657.753  | 3831.102  |
| NM_00522E | 2937.994  | 2728.273  | AF222903  | 7539.726  | 8746.562  | NM_00657E | 7158.083  | 6307.848  |
| NM_002354 | 1577.483  | 1707.604  | NM_00622E | 9572.221  | 10771.761 | NM_013254 | 6975.32   | 5768.31   |
| NM_004091 | 4954.775  | 4869.061  | L10374    | 32799.922 | 28991.313 | NM_000437 | 45101.547 | 38494.875 |
| X74070    | 65973.164 | 76073.102 | NM_00024E | 19554.965 | 22408.881 |           |           |           |
| AF027219  | 1540.745  | 1703.536  | NM_01431C | 1155.04   | 1735.813  |           |           |           |
| NM_00633E | 7410.49   | 7901.353  | NM_00586C | 19081.771 | 23163.912 |           |           |           |
| M33197    | 64592.555 | 66295.25  | AF095288  | 57497.93  | 60415.5   |           |           |           |
| NM_00289E | 16810.83  | 16937.395 | AK025116  | 971.3     | 1636.453  |           |           |           |
| AK022749  | 9725.109  | 9195.061  | AK026271  | 16869.201 | 23788.957 |           |           |           |
| BF031409  | 17588.592 | 18228.932 | NM_00179E | 20133.449 | 26397.496 |           |           |           |
| NM_00704E | 4819.436  | 5876.57   | AF090895  | 4553.605  | 6121.591  |           |           |           |
| BE378791  | 1885.698  | 2379.527  | NM_00561C | 4874.795  | 5603.934  |           |           |           |
| U94388    | 2261.286  | 2536.786  | AL133651  | 3041.395  | 4273.605  |           |           |           |

|           |           |           |           |           |           |
|-----------|-----------|-----------|-----------|-----------|-----------|
| NM_012322 | 9765.492  | 9003.439  | AB014532  | 15641.796 | 18551.127 |
| M33197    | 59472.82  | 58459.344 | NM_003478 | 6677.515  | 7994.594  |
| NM_004888 | 54823.699 | 53289.695 | BE275227  | 740.148   | 1495.118  |
| AK025314  | 3461.231  | 3477.816  | NM_004924 | 11209.391 | 13914.969 |
| NM_002108 | 10923.989 | 10135.378 | NM_001798 | 5961.006  | 5843.129  |
| NM_000984 | 63396.367 | 62675.883 | NM_001211 | 8848.742  | 8647.179  |
| NM_002453 | 20590.871 | 20278.889 | AB033050  | 4418.398  | 4743.836  |
| AK000780  | 51600.75  | 54983.344 | NM_004356 | 57667.047 | 52553.602 |
| M33197    | 62038.082 | 60373.297 | BC015022  | 8537.812  | 6985.971  |
| NM_000131 | 873.217   | 1006.726  | AB033086  | 1095.542  | 1063.827  |
| NM_001836 | 928.972   | 1062.05   | NM_002406 | 65888.617 | 71678.906 |
| M64714    | 1864.738  | 1993.273  | U87169    | 6525.768  | 8513.697  |
| AK026043  | 1345.155  | 1150.986  | NM_002073 | 5931.963  | 5643.351  |
| NM_005006 | 15062.771 | 16438.396 | AF117222  | 1269.025  | 1895.523  |
| AK027033  | 6241.151  | 6510.547  | NM_001935 | 65768.133 | 74775.156 |
| NM_000106 | 6443.662  | 7262.591  | NM_001749 | 1681.882  | 1312.986  |
| NM_003000 | 38123.461 | 47388.512 | AF090327  | 1959.596  | 1630.55   |
| NM_002495 | 27919.525 | 29250.547 | NM_003291 | 10934.71  | 8744.293  |
| M33197    | 66098.922 | 67202.992 | AK022950  | 5671.999  | 4396.005  |
| NM_016284 | 10287.136 | 9915.027  | S75755    | 8992.883  | 5873.066  |
| NM_014593 | 4890.824  | 3454.353  | AF176518  | 1801.028  | 1541.434  |
| NM_006833 | 33804.426 | 38848.555 | AB014576  | 49729.871 | 41991.113 |
| NM_012257 | 3637.525  | 4409.667  | NM_019044 | 34899.395 | 27317.457 |
| U37690    | 35669.406 | 33894.773 | AK000145  | 1384.448  | 1274.758  |
| NM_005120 | 2660.949  | 3186.323  | AF279865  | 2015.982  | 1779.058  |
| AB029012  | 9876.238  | 8648.985  | NM_014700 | 2902.47   | 2521.421  |
| M33197    | 59429.969 | 61968.707 | NM_014714 | 1911.53   | 1407.833  |
| AJ010278  | 969.086   | 838.753   | NM_015644 | 5447.094  | 3576.733  |
| NM_006298 | 4493.438  | 4338.402  | NM_005687 | 13918.876 | 12130.413 |
| AF060936  | 8732.851  | 7837.644  | NM_005983 | 11289.01  | 10184.621 |
| NM_005568 | 1178.637  | 1148.356  | AB016902  | 11791.685 | 9540.702  |
| NM_018167 | 2123.948  | 2010.451  | AF272378  | 64728.613 | 61486.063 |
| AK024149  | 1568.497  | 1900.986  | M61870    | 5056.683  | 3867.586  |
| AK023094  | 705.181   | 952.241   | AK026980  | 5062.289  | 3225.132  |
| M33197    | 58143.258 | 57819.242 | AJ277915  | 1454.955  | 954.035   |
| M33197    | 66650.57  | 75249.109 | NM_020368 | 9060.255  | 7518.849  |
| AJ011129  | 1516.306  | 1424.317  | AF024708  | 55291.613 | 43204.086 |
| AF282874  | 602.45    | 336.044   | NM_006467 | 14946.306 | 10024.462 |
| NM_001038 | 1558.531  | 1696.775  | NM_017566 | 11600.943 | 8792.542  |
| NM_006387 | 13823.785 | 13863.057 | NM_006582 | 4284.049  | 2862.18   |
| NM_005646 | 6736.104  | 6315.029  | AB033019  | 10992.726 | 7620.655  |
| NM_006638 | 1885.178  | 2071.673  | NM_001452 | 1528.12   | 1349.814  |
| NM_001692 | 852.69    | 816.128   | NM_006162 | 4247.403  | 3501.526  |
| BI767871  | 1247.46   | 957.494   | NM_014764 | 19903.527 | 16957.584 |
| AA418907  | 723.422   | 912.323   | NM_018078 | 6927.676  | 5536.649  |
| AA115473  | 5925.833  | 5368.466  | NM_016013 | 1273.947  | 1064.283  |
| AA872397  | 4672.972  | 4128.473  | NM_016050 | 2530.147  | 1757.799  |
| M24283    | 23253.619 | 20154.652 | NM_007080 | 28087.6   | 19446.852 |
| AA709414  | 1356.506  | 1462.443  | AK026912  | 16355.646 | 11243.979 |
| D12676    | 2801.036  | 2980.984  | AK023531  | 29715.65  | 20563.479 |
| NM_000938 | 54108.277 | 54985.547 | NM_006697 | 36981.551 | 33426.055 |
| NM_004295 | 26002.645 | 25940.832 | M19182    | 3990.53   | 3244.792  |
| H-X 02812 | 13729.611 | 13526.541 | AK025707  | 5705.615  | 4271.557  |

|           |           |           |           |           |           |
|-----------|-----------|-----------|-----------|-----------|-----------|
| U75898    | 812.657   | 768.626   | NM_006242 | 2624.757  | 1897.06   |
| M29039    | 4647.438  | 4277.388  | X78712    | 5290.277  | 4631.463  |
| M33210    | 1075.008  | 968.261   | NM_001497 | 3082.064  | 2264.231  |
| M33197    | 45776.371 | 46856.086 | NM_004130 | 9174.916  | 7012.949  |
| NM_007259 | 3011.538  | 3335.156  | NM_006348 | 2731.916  | 2351.572  |
| NM_018402 | 1282.586  | 1323.087  | AF067972  | 49272.371 | 39526.063 |
| NM_018009 | 4258.227  | 3728.024  | NM_004958 | 2732.408  | 2434.774  |
| AK075081  | 4596.518  | 4916.261  | D87076    | 8735.873  | 7693.063  |
| NM_000895 | 21683.443 | 25572.889 | NM_014149 | 5234.86   | 3573.858  |
| NM_003820 | 35363.078 | 33284.723 | AB020635  | 21502.387 | 17269.277 |
| NM_015915 | 6161.132  | 4932.437  | NM_006515 | 3042.022  | 2575.671  |
| M33197    | 63376.766 | 61442.039 | NM_005224 | 1614.293  | 1410.106  |
| NM_016518 | 29344.277 | 33143.398 | NM_012144 | 24210.322 | 22021.547 |
| NM_006185 | 19128.115 | 21728.75  | X65231    | 63368.18  | 61226.094 |
| NM_014800 | 7518.755  | 8830.22   | NM_002908 | 9989.634  | 6480.451  |
| NM_001557 | 1966.134  | 2030.711  | AF205632  | 9225.989  | 6571.147  |
| AF147311  | 10723.409 | 10876.88  | NM_005378 | 62233.398 | 61013.145 |
| NM_002131 | 58404.125 | 56871.637 | NM_002397 | 4766.204  | 3365.673  |
| NM_017927 | 7755.083  | 8255.852  | AF000672  | 4684.968  | 3515.519  |
| M33197    | 64930.934 | 61244.887 | NM_017652 | 36269.355 | 25362.826 |
| NM_001203 | 8342.667  | 9640.352  | X59268    | 8319.29   | 8380.526  |
| NM_004799 | 11308.156 | 10214.989 | D70832    | 63768.363 | 62693.184 |
| NM_006733 | 925.835   | 1310.689  | NM_001429 | 36288.754 | 26359.254 |
| NM_014047 | 30313.588 | 27338.586 | NM_002379 | 59446.93  | 59705.379 |
| AK022901  | 1791.905  | 1996.369  | AB007929  | 9176.186  | 8395.643  |
| AF037332  | 8005.552  | 7181.118  | NM_004579 | 18720.283 | 16616.01  |
| NM_014571 | 1201.184  | 885.073   | AA203126  | 4485.436  | 4497.771  |
| NM_020151 | 24810.209 | 26304.121 | L12347    | 36198.457 | 31636.748 |
| NM_005891 | 34321.359 | 37162.074 | NM_001622 | 21444.234 | 17491.451 |
| NM_001645 | 2280.783  | 2638.706  | Z36788    | 6738.658  | 5861.586  |
| NM_003956 | 2892.947  | 3753.055  | NM_018477 | 16820.451 | 16461.189 |
| M33197    | 60926.609 | 64083.008 | U20536    | 2020.246  | 1621.075  |
| NM_003500 | 18254.045 | 18716.75  | AI298534  | 4053.601  | 3359.929  |
| NM_014317 | 5786.521  | 6016.294  | R71691    | 19594.088 | 19173.668 |
| L09234    | 32984.945 | 37173.855 | AW167715  | 5997.829  | 5283.606  |
| NM_000059 | 2384.778  | 2371.739  | AA424735  | 10148.093 | 8844.095  |
| AK026740  | 2557.179  | 2748.767  | U78294    | 3520.165  | 3158.329  |
| NM_017881 | 4962.989  | 5190.085  | AA171613  | 1457.217  | 1416.006  |
| NM_018896 | 1695.145  | 1764.208  | BI760394  | 6549.681  | 5015.761  |
| AF069307  | 6798.37   | 6367.036  | AA555216  | 1148.675  | 1197.443  |
| U92978    | 3281.519  | 3235.478  | U09117    | 63996.613 | 61626.539 |
| NM_018034 | 4444.575  | 3776.434  | M21054    | 3016.108  | 2650.33   |
| M33197    | 56461.602 | 59242.141 | M18468    | 3403.602  | 2519.915  |
| AB037831  | 4722.267  | 4864.407  | H66070    | 52130.852 | 37294.449 |
| NM_012103 | 31114.754 | 31589.563 | AA164741  | 1490.799  | 1107.792  |
| AL122077  | 6104.004  | 5700.691  | AI189375  | 5173.542  | 3751.236  |
| NM_014632 | 2089.657  | 1522.788  | AI978885  | 10702.347 | 8822.883  |
| NM_006422 | 4095.691  | 4074.192  | NM_000303 | 20263.383 | 14071.157 |
| BE789195  | 700.888   | 888.594   | NM_001939 | 19579.83  | 17161.566 |
| NM_016946 | 1666.769  | 1591.697  | NM_003279 | 16501.629 | 14317.06  |
| M33197    | 60967.961 | 63531.91  | AB014599  | 9480.463  | 7886.635  |
| NM_005326 | 9921.263  | 10811.775 | NM_004393 | 1690.052  | 1746.387  |
| NM_007286 | 956.58    | 1153.352  | AB018345  | 1646.896  | 1326.283  |

|             |           |           |           |           |           |
|-------------|-----------|-----------|-----------|-----------|-----------|
| NM_014069   | 6401.815  | 5393.381  | NM_005832 | 2219.585  | 2021.167  |
| AB035130    | 2183.37   | 2193.768  | AW407841  | 10861.859 | 9327.337  |
| NM_003359   | 4440.35   | 4709.741  | U15197    | 2480.765  | 2512.673  |
| M33197      | 44669.527 | 47023.359 | NM_001879 | 4763.05   | 3809.135  |
| AF119917    | 1783.125  | 1725.222  | AF264014  | 37086.012 | 33307.508 |
| NM_017915   | 2071.516  | 2662.937  | L09098    | 1095.216  | 872.885   |
| AL050097    | 850.327   | 624.805   | NM_004155 | 11081.953 | 8119.704  |
| AK021513    | 786.631   | 1156.221  | NM_001831 | 2431.785  | 1559.934  |
| NM_003579   | 3235.444  | 3048.418  | NM_014586 | 27564.662 | 19193.059 |
| AL049283    | 1997.214  | 1897.475  | NM_014366 | 35240.086 | 31582.393 |
| M33197      | 57472.578 | 58337.68  | NM_000923 | 2727.844  | 2404.912  |
| NM_002401   | 22518.92  | 22024.939 | NM_006453 | 5463.085  | 4046.524  |
| NM_001274   | 8075.945  | 8019.805  | NM_018096 | 3094.905  | 2095.487  |
| NM_003913   | 1360.857  | 1700.057  | AL390078  | 4523.811  | 3118.094  |
| NM_002227   | 5307.993  | 6382.573  | NM_004036 | 10086.05  | 7067.839  |
| NM_007199   | 7866.355  | 8579.104  | NM_015986 | 7574.181  | 5107.819  |
| AB002301    | 1801.223  | 1717.367  | NM_014959 | 25548.055 | 20418.621 |
| AB014530    | 6747.686  | 7849.881  | NM_003992 | 19318.592 | 11549.051 |
| M33197      | 61445.887 | 59924.348 | NM_000137 | 1574.201  | 1191.057  |
| NM_005989   | 3107.427  | 3019.304  | NM_012102 | 14742.61  | 13338.154 |
| AB014607    | 5349.438  | 5166.745  | NM_005017 | 52113.824 | 49874.715 |
| AF134401    | 2996.093  | 3230.517  | AF163572  | 33552.719 | 31588.104 |
| AF282874    | 557.806   | 738.622   | NM_000897 | 11614.058 | 9898.421  |
| NM_001039   | 1147.672  | 1322.883  | NM_000487 | 1359.158  | 1403.953  |
| NM_006387   | 10988.711 | 11740.191 | NM_006411 | 19116.438 | 16904.535 |
| NM_005646   | 5500.145  | 5898.247  | NM_014182 | 4719.844  | 4794.148  |
| NM_006639   | 2057.755  | 2085.722  | AB040884  | 1623.383  | 1449.205  |
| NM_001692   | 899.753   | 894.605   | NM_001170 | 22503.766 | 17023.15  |
| BI767871    | 1288.436  | 807.132   | NM_014342 | 6921.559  | 5746.299  |
| AA115473    | 5153.75   | 5103.267  | NM_004853 | 19732.592 | 15325.931 |
| AA872397    | 3938.409  | 4340.597  | NM_001494 | 37628.719 | 28168.617 |
| M24283      | 21792.795 | 22238.65  | NM_017707 | 2695.299  | 2133.489  |
| AA709414    | 1170.094  | 1447.435  | NM_004206 | 5452.323  | 4022.759  |
| D12676      | 2468.853  | 2584.394  | NM_004603 | 52121.668 | 45772.867 |
| NM_000939   | 46080.203 | 48016.473 | AK022849  | 8214.997  | 7058.782  |
| NM_004295   | 19531.715 | 17397.775 | AF040964  | 29642.738 | 23647.332 |
| H-X 02812 I | 12034.354 | 12369.521 | Z70704    | 1739.67   | 1006.939  |
| U75898      | 790.526   | 887.801   | NM_014363 | 3454.226  | 2921.454  |
| M29039      | 3829.739  | 4451.256  | NM_000557 | 8168.339  | 5306.52   |
| M33210      | 1159.981  | 862.987   | NM_003239 | 1053.778  | 718.012   |
| M33197      | 830.398   | 699.205   | NM_001375 | 22890.35  | 19219.041 |
| AB011146    | 5125.745  | 4927.454  | NM_002312 | 3577.356  | 3184.227  |
| NM_003679   | 856.402   | 967.525   | M20699    | 2898.576  | 2454.287  |
| NM_018009   | 3879.343  | 3222.834  | NM_004774 | 8909.275  | 7239.99   |
| AK075081    | 3845.779  | 3808.256  | NM_016937 | 4713.718  | 3561.847  |
| NM_000895   | 15408.97  | 20012.064 | NM_002690 | 5225.73   | 4174.38   |
| NM_003820   | 31134.033 | 34084.891 | NM_012328 | 6602.773  | 6603.74   |
| NM_015915   | 4976.665  | 5767.279  | NM_007341 | 3886.059  | 2919.773  |
| M33197      | 57148.621 | 60154.172 | NM_016508 | 2889.681  | 2503.238  |
| NM_016518   | 25764.787 | 24772.174 | NM_006456 | 46836.59  | 37785.914 |
| NM_006185   | 16197.168 | 16471.521 | AK026062  | 11464.318 | 8942.286  |
| NM_014800   | 6046.874  | 6538.189  | AF047002  | 48771.965 | 41159.695 |
| NM_001557   | 1884.035  | 1607.072  | AL050082  | 6789.388  | 4922.535  |

|           |           |           |           |           |           |
|-----------|-----------|-----------|-----------|-----------|-----------|
| AF147311  | 8196.259  | 10087.558 | NM_006623 | 62953.23  | 60954.574 |
| NM_002131 | 50447.922 | 54001.762 | NM_016588 | 6559.669  | 5759.025  |
| NM_017927 | 8481.613  | 9506.795  | NM_003135 | 15619.476 | 11364.169 |
| M33197    | 59266.25  | 56389.137 | NM_004579 | 16170.107 | 11252.621 |
| NM_001203 | 8048.455  | 7735.679  | AA203126  | 2933.11   | 2458.802  |
| NM_004799 | 11507.951 | 10511.71  | L12347    | 20311.781 | 14979.849 |
| NM_006733 | 1013.945  | 994.576   | NM_001622 | 12934.062 | 9763.041  |
| NM_014047 | 29312.148 | 31716.299 | Z36788    | 3455.473  | 2386.022  |
| AK022901  | 1970.635  | 2282.188  | NM_018477 | 15425.719 | 14092.792 |
| AF037332  | 7680.862  | 6307.267  | U20536    | 1942.745  | 1700.662  |
| M33197    | 56930.125 | 57205.48  | AI298534  | 3943.256  | 2984.877  |
| AJ011129  | 1178.057  | 1507.775  | R71691    | 15395.479 | 11775.351 |
| NM_001645 | 1832.622  | 2127.016  | AW167715  | 4295.637  | 3361.063  |
| NM_003956 | 2292.635  | 2781.885  | AA424735  | 6653.824  | 5240.497  |
| M33197    | 61489.414 | 65926.969 | U78294    | 2083.264  | 1987.569  |
| NM_003500 | 15383.593 | 15544.595 | AA171613  | 1906.709  | 1586.624  |
| NM_014317 | 4883.702  | 5503.201  | BI760394  | 5718.833  | 4211.69   |
| L09234    | 32545.6   | 35193.664 | AA555216  | 969.022   | 646.744   |
| NM_000059 | 2794.465  | 2017.835  | U09117    | 61162.043 | 61661.691 |
| AK026740  | 2651.688  | 2830.227  | M21054    | 2546.651  | 2168.392  |
| NM_017881 | 4322.497  | 5271.799  | M18468    | 2825.28   | 2019.115  |
| NM_018896 | 1108.271  | 1340.774  | H66070    | 45058.828 | 29777.98  |
| AF069307  | 5794.395  | 4971.245  | AA164741  | 1112.116  | 704.761   |
| U92978    | 3073.112  | 3222.786  | AI189375  | 4600.434  | 2574.915  |
| NM_018034 | 3193.983  | 3134.216  | NM_001665 | 36345.461 | 35689.469 |
| M33197    | 56680.555 | 58630.918 | AF097645  | 1334.44   | 1728.207  |
| AB037831  | 4467.346  | 4726.087  | NM_003279 | 41919.625 | 36900.348 |
| NM_012103 | 32946.25  | 34909.781 | AB014599  | 9930.858  | 8841.977  |
| AL122077  | 4870.384  | 4672.557  | NM_004393 | 1896.728  | 2171.288  |
| NM_014632 | 1551.158  | 1564.747  | AB018345  | 1285.156  | 1108.57   |
| NM_006422 | 5703.71   | 6852.868  | NM_005832 | 1497.058  | 1137.797  |
| BE789195  | 699.932   | 885.284   | AW407841  | 12270.699 | 8041.411  |
| NM_016946 | 2032.094  | 1849.406  | U15197    | 2412.134  | 2190.224  |
| M33197    | 54525.754 | 52985.574 | NM_001879 | 8321.477  | 5822.554  |
| NM_007259 | 2034.338  | 1496.803  | AF264014  | 33880.855 | 28182.898 |
| NM_018402 | 729.827   | 820.428   | NM_004155 | 8803.236  | 6572.724  |
| NM_014069 | 4885.197  | 3593.363  | NM_001831 | 1467.016  | 1139.191  |
| AB035130  | 2075.411  | 1969.141  | NM_014586 | 20477.498 | 16366.114 |
| NM_003359 | 4895.673  | 5281.41   | NM_014366 | 30492.213 | 29676.131 |
| M33197    | 46186.004 | 48032.25  | NM_000923 | 3023.961  | 3304.338  |
| AF119917  | 1629.536  | 1939.549  | NM_006453 | 5359.764  | 6013.312  |
| AL050097  | 954.04    | 658.689   | NM_018096 | 2466.526  | 2681.426  |
| AK021513  | 1085.495  | 896.047   | AL390078  | 4642.692  | 5043.967  |
| NM_003579 | 3545.695  | 3406.552  | NM_004036 | 8483.6    | 8193.666  |
| AL049283  | 1657.814  | 2210.311  | NM_015986 | 6247.129  | 5348.285  |
| M33197    | 49351.789 | 50839.512 | NM_014959 | 16718.246 | 16386.275 |
| NM_002401 | 20264.389 | 19770.99  | NM_003992 | 10924.324 | 13469.978 |
| NM_001274 | 7769.791  | 7006.918  | NM_002379 | 55245.305 | 56631.039 |
| NM_003913 | 2185.9    | 2230.132  | AB007929  | 9854.755  | 11094.767 |
| NM_002227 | 4935.254  | 5060.672  | NM_012102 | 19494.631 | 17341.303 |
| NM_007199 | 5688.529  | 5562.935  | NM_005017 | 50787.352 | 52087.5   |
| AB002301  | 1329.428  | 1395.34   | AF163572  | 32213.209 | 28087.654 |
| AB014530  | 4734.746  | 4942.399  | NM_000897 | 12728.729 | 11107.464 |



|             |           |           |           |           |           |
|-------------|-----------|-----------|-----------|-----------|-----------|
| M33197      | 62773.695 | 65138.379 | NM_000487 | 1995.168  | 1933.44   |
| NM_005989   | 2603.199  | 2838.835  | NM_006411 | 34473.332 | 28158.332 |
| AB014607    | 3620.022  | 4024.781  | NM_014182 | 4819.089  | 3922.624  |
| AF134401    | 2255.55   | 2033.666  | AB040884  | 851.866   | 1271.056  |
| NM_020151   | 15908.082 | 11844.864 | NM_001170 | 17239.9   | 17760.787 |
| NM_005891   | 23196.654 | 21090.303 | NM_014342 | 4397.85   | 5515.167  |
| NM_006387   | 10993.699 | 11382.842 | NM_000452 | 1674.053  | 1300.304  |
| NM_005646   | 5042.998  | 5134.203  | NM_004853 | 15880.556 | 14340.188 |
| NM_006639   | 2085.484  | 2609.042  | NM_001494 | 34123.852 | 36651.324 |
| NM_001692   | 876.192   | 802.029   | NM_017707 | 1778.728  | 1933.548  |
| BI767871    | 1286.167  | 1362.13   | NM_004206 | 5254.489  | 6699.424  |
| AA418907    | 778.19    | 992.648   | NM_004603 | 49122.301 | 51967.758 |
| AA115473    | 5548.985  | 5739.826  | AK022849  | 7054.834  | 6856.435  |
| AA872397    | 4959.721  | 5616.619  | AF040964  | 25438.313 | 30085.883 |
| M24283      | 20255.324 | 20489.752 | NM_001939 | 27606.643 | 26762.994 |
| AA709414    | 1530.447  | 1464.743  | NM_014363 | 2560.548  | 2698.716  |
| D12676      | 2013.786  | 2008.754  | NM_000557 | 8933.34   | 10959.279 |
| NM_000939   | 54410.863 | 56708.086 | NM_003239 | 964.183   | 1488.613  |
| NM_004295   | 25821.678 | 25000.275 | NM_001375 | 21724.037 | 33111.633 |
| H-X 02812 I | 11083.952 | 10929.603 | NM_002312 | 4288.548  | 5027.154  |
| U75898      | 637.955   | 644.437   | M20699    | 3648.641  | 4492.943  |
| M29039      | 3182.058  | 3548.577  | NM_004774 | 10255.788 | 10637.043 |
| M33210      | 1037.594  | 1101.664  | NM_016937 | 7807.616  | 7840.138  |
| M33197      | 1658.44   | 1590.159  | NM_002690 | 3751.699  | 2762.983  |
| AB011146    | 5330.457  | 4829.9    | NM_012328 | 5364.12   | 6173.992  |
| NM_005326   | 4516.623  | 3560.502  | NM_007341 | 2798.382  | 2758.178  |
| NM_014800   | 4310.241  | 4969.294  | NM_016508 | 2761.385  | 2083.131  |
| NM_001557   | 1081.483  | 1099.613  | NM_006456 | 43222.605 | 38495.898 |
| AF147311    | 8177.438  | 9623.031  | AK026062  | 7254.286  | 7158.267  |
| NM_002131   | 53110.902 | 54948.605 | AF047002  | 42033.277 | 41415.348 |
| NM_017927   | 7680.616  | 8345.057  | AL050082  | 5974.948  | 5834.764  |
| M33197      | 60411.5   | 63122.238 | NM_006623 | 60129.48  | 63310.012 |
| NM_001203   | 8545.807  | 9341.386  | NM_016588 | 5056.486  | 5452.584  |
| NM_004799   | 13194.189 | 12327.971 | NM_003135 | 15083.023 | 16618.072 |
| NM_006733   | 1204.482  | 1342.04   | NM_000137 | 2135.376  | 2343.125  |
| NM_014047   | 26975.75  | 25989.869 | L12347    | 24515.662 | 25517.271 |
| AK022901    | 1403.941  | 1738.982  | NM_001622 | 14057.626 | 15236.917 |
| M33197      | 58095.953 | 62218.23  | Z36788    | 6509.376  | 7976.406  |
| AF037332    | 8083.508  | 7769.196  | NM_018477 | 15768.909 | 16412.441 |
| NM_014571   | 1262.481  | 1306.531  | U20536    | 1864.054  | 2030.674  |
| NM_006052   | 3478.63   | 3435.208  | AI298534  | 3073.011  | 3114.218  |
| AB040912    | 3687.006  | 3069.546  | R71691    | 15426.914 | 16539.779 |
| NM_006243   | 3685.151  | 4030.866  | AW167715  | 4851.771  | 5422.789  |
| NM_007252   | 1024.771  | 1228.147  | AA424735  | 9169.492  | 7783.904  |
| M33197      | 57320.516 | 61421.117 | U78294    | 4389.36   | 4347.14   |
| AJ011129    | 1744.54   | 1728.546  | AA171613  | 3371.339  | 1886.858  |
| NM_001039   | 658.844   | 1068      | BI760394  | 7855.924  | 4809.378  |
| NM_005738   | 492.535   | 619.257   | AA555216  | 3486.435  | 1460.65   |
| NM_014488   | 2706.129  | 3981.525  | U09117    | 58385.734 | 57127.09  |
| NM_013389   | 1398.815  | 1296.155  | M21054    | 3949.999  | 3996.944  |
| AB014567    | 1178.568  | 1300.431  | M18468    | 2550.303  | 2145.519  |
| AK022817    | 4248.345  | 3908.342  | H66070    | 39147.355 | 27727.74  |
| NM_018034   | 3402.383  | 3028.042  | AA164741  | 905.641   | 879.623   |

|           |           |           |           |           |           |
|-----------|-----------|-----------|-----------|-----------|-----------|
| M33197    | 56681.563 | 59797.574 | AI189375  | 5683.821  | 6049.45   |
| AB037831  | 3954.29   | 4078.392  | AF097645  | 1607.424  | 1766.893  |
| NM_012103 | 31928.408 | 36090.23  | NM_001773 | 1179.681  | 1634.837  |
| AL122077  | 3781.142  | 4496.339  | Z70704    | 4661.96   | 4833.736  |
| NM_014632 | 1944.099  | 1966.44   | AF264014  | 28972.131 | 37610.684 |
| NM_006422 | 4553.886  | 5149.798  | L09098    | 1649.884  | 1433.974  |
| BE789195  | 904.217   | 962.359   | NM_004155 | 10037.638 | 8519.431  |
| NM_016946 | 2121.428  | 1809.684  | NM_001831 | 1508.186  | 1836.662  |
| M33197    | 57717.625 | 56850.996 | NM_014586 | 22955.57  | 30109.623 |
| NM_007259 | 1761.425  | 1378.93   | NM_014366 | 27271.27  | 28049.541 |
| NM_018402 | 640.008   | 630.974   | NM_000923 | 2436.067  | 2590.017  |
| NM_018009 | 2145.622  | 2039.464  | NM_006453 | 5588.688  | 5444.073  |
| AK075081  | 2975.292  | 2318.711  | NM_018096 | 4872.751  | 3906.158  |
| NM_000895 | 11879.786 | 11361.13  | AL390078  | 3274.635  | 3560.462  |
| NM_003820 | 30874.477 | 24123.506 | NM_004036 | 7711.314  | 7334.486  |
| NM_015915 | 4041.57   | 3341.635  | NM_015986 | 6719.359  | 6379.269  |
| M33197    | 56863.109 | 56868.246 | NM_006546 | 2712.607  | 1862.669  |
| NM_016518 | 20281.676 | 20887.014 | NM_014959 | 19481.379 | 19832.182 |
| NM_006185 | 9993.972  | 9999.892  | NM_003992 | 15670.741 | 8330.066  |
| NM_005989 | 3102.775  | 3195.027  | AF279265  | 6427.628  | 4570.569  |
| AB014607  | 4784.599  | 5170.167  | NM_005213 | 30772.582 | 25341.029 |
| AF134401  | 3117.04   | 3379.962  | AB040914  | 4383.807  | 3487.743  |
| NM_020151 | 20475.055 | 18656.605 | NM_002997 | 19359.102 | 23478.008 |
| NM_005891 | 30548.953 | 29979.051 | AB007929  | 9386.129  | 10439.25  |
| NM_001645 | 2025.352  | 1845.401  | NM_004579 | 20383.52  | 20933.205 |
| NM_003956 | 2508.939  | 2429.106  | AA203126  | 4228.816  | 5068.558  |
| M33197    | 57324.262 | 62386.094 | AB043997  | 1273.529  | 1270.439  |
| NM_003500 | 12758.189 | 13060.702 | NM_004853 | 15312.519 | 15468.513 |
| NM_014317 | 4149.742  | 3961.056  | NM_001494 | 29385.086 | 38090.508 |
| L09234    | 27107.152 | 27796.568 | NM_017707 | 1800.752  | 1867.882  |
| NM_000059 | 2036.939  | 2214.501  | NM_004206 | 5265.119  | 6207.031  |
| AK026740  | 2341.27   | 2341.125  | NM_004603 | 49605.234 | 55357.129 |
| NM_017881 | 2934.411  | 2502.965  | AK022849  | 8254.731  | 10505.392 |
| M33197    | 59782.789 | 63075.613 | AF040964  | 23916.439 | 29096.549 |
| NM_017634 | 2183.567  | 2044.626  | NM_001939 | 32481.736 | 24418.725 |
| AJ300465  | 893.868   | 563.332   | NM_003279 | 46330.605 | 38304.602 |
| X86400    | 1929.285  | 1395.982  | AB014599  | 11524.917 | 6910.494  |
| AF069307  | 4436.613  | 3201.929  | NM_004393 | 1885.251  | 1708.678  |
| M33197    | 58156.211 | 60918.305 | AB018345  | 1793.614  | 1662.945  |
| U92978    | 2328.355  | 1922.357  | NM_005832 | 2218.725  | 2421.777  |
| M33197    | 1968.49   | 1387.772  | AW407841  | 15325.225 | 12710.938 |
| AB011146  | 6688.926  | 7533.25   | U15197    | 2955.524  | 2713.429  |
| NM_003679 | 958.659   | 698.08    | NM_001879 | 10305.409 | 10180.76  |
| NM_005326 | 7039.545  | 6011.33   | NM_016588 | 2618.374  | 2705.02   |
| NM_014069 | 3821.313  | 2679.294  | NM_003135 | 10105.546 | 9667.95   |
| AB035130  | 1447.228  | 1294.747  | NM_000137 | 1200.145  | 1006.19   |
| NM_003359 | 3024.583  | 2824.218  | NM_012102 | 16994.664 | 21228.418 |
| M33197    | 32878.176 | 33971.754 | NM_005017 | 52419.918 | 57627.082 |
| AF119917  | 1547.448  | 1424.221  | AF163572  | 30516.961 | 32892.703 |
| NM_017915 | 623.088   | 864.405   | NM_000897 | 12254.596 | 17320.428 |
| AL050097  | 547.109   | 521.205   | NM_000487 | 1945.781  | 2274.797  |
| NM_003579 | 1880.367  | 1406.911  | NM_006411 | 38400.078 | 42856.035 |
| AL049283  | 761.691   | 699.667   | NM_014182 | 5569.208  | 6824.257  |

|           |           |           |           |           |           |
|-----------|-----------|-----------|-----------|-----------|-----------|
| M33197    | 33236.449 | 36388.176 | AB040884  | 1498.736  | 1889.179  |
| NM_002401 | 14450.754 | 14707.288 | NM_000492 | 34911.516 | 38591.25  |
| NM_001274 | 5149.916  | 4735.256  | NM_012089 | 2449.313  | 2238.196  |
| NM_003913 | 1327.146  | 1505.122  | AK024382  | 2558.898  | 1276.771  |
| NM_002227 | 4563.286  | 4849.052  | NM_001170 | 14647.247 | 12813.844 |
| NM_007199 | 5625.293  | 5011.284  | AL137716  | 1891.338  | 2191.662  |
| AB002301  | 1082.878  | 1045.564  | NM_004696 | 5134.44   | 5933.624  |
| AB014530  | 4559.731  | 4461.684  | NM_014342 | 5695.977  | 6613.478  |
| M33197    | 61903.605 | 61213.438 | Z50169    | 2443.527  | 2163.207  |
| CY3Cy5    | 7423.537  | 578.567   | NM_014470 | 2785.449  | 4321.867  |
| AF070536  | 1721.484  | 2140.935  | NM_001665 | 26458.977 | 22598.457 |
| AK022297  | 548.215   | 365.243   | Z70704    | 1603.025  | 1450.981  |
| U79300    | 1304.956  | 1160.172  | NM_014363 | 2629.961  | 2210.037  |
| AK025151  | 5693.21   | 4382.836  | NM_000557 | 8139.531  | 10824.96  |
| AK025550  | 6447.062  | 5865.578  | NM_001375 | 20920.061 | 27289.34  |
| AF088076  | 34000.59  | 35375.234 | NM_002312 | 3175.948  | 4551.717  |
| AF086543  | 8724.807  | 7770.246  | M20699    | 3755.88   | 4693.138  |
| AB046797  | 814.567   | 625.515   | NM_004774 | 11913.123 | 11373.665 |
| AK002098  | 3087.3    | 2688.275  | NM_016937 | 8981.608  | 9799.691  |
| AB011128  | 13922.224 | 10178.452 | NM_002690 | 5468.255  | 5157.117  |
| AK026742  | 1488.253  | 1288.354  | NM_012328 | 6554.761  | 7568.927  |
| AK025074  | 7037.052  | 6620.465  | NM_007341 | 5140.358  | 4723.658  |
| AK054960  | 12273.544 | 11026.035 | NM_016508 | 2537.739  | 1716.113  |
| L15344    | 1456.396  | 1202.341  | NM_006456 | 32863.672 | 24609.049 |
| SR1       | 74456.234 | 63135.09  | AK026062  | 7471.87   | 8389.015  |
| SR3       | 26067.518 | 26682.102 | AF047002  | 47030.871 | 50117.883 |
| SR5       | 4351.456  | 4242.549  | AL050082  | 7615.773  | 5583.016  |
| SR7       | 3413.696  | 29926.018 | NM_006623 | 60577.77  | 59185.535 |
| SR9       | 13595.902 | 3552.323  | CY3Cy5    | 2518.617  | 123.174   |
| CY3Cy5    | 3387.966  | 239.23    | NM_016134 | 1118.471  | 1244.243  |
| U73799    | 605.083   | 444.425   | AL390185  | 7779.291  | 8062.378  |
| Z36826    | 1061.391  | 954.353   | AF086235  | 26811.104 | 39157.137 |
| AK021668  | 55264.613 | 50117.98  | AF143886  | 2834.854  | 3671.606  |
| AK002195  | 1276.932  | 1300.349  | AK025975  | 2881.452  | 4457.337  |
| AF086128  | 1081.097  | 1000.323  | AK025583  | 77539.875 | 64745.465 |
| AK026099  | 807.514   | 941.645   | NM_014664 | 4825.258  | 7942.204  |
| AK022850  | 1895.006  | 1308.991  | AL109788  | 14797.32  | 16049.753 |
| NM_016490 | 929.826   | 883.009   | NM_014952 | 65276.203 | 60178.199 |
| AF038193  | 644.215   | 470.477   | AL133053  | 3030.575  | 3655.15   |
| AL137498  | 14862.737 | 14867.813 | NM_018142 | 14821.799 | 17319.477 |
| S66168    | 2282.821  | 1691.897  | NM_017653 | 9847.652  | 11163.084 |
| NM_003851 | 28083.189 | 26755.881 | AL109695  | 28671.91  | 33698.066 |
| U79244    | 785.793   | 722.139   | NM_016134 | 1030.152  | 1225.767  |
| AK022482  | 1607.35   | 1427.84   | SR2       | 53258.551 | 58061.531 |
| AK022803  | 1137.849  | 1152.293  | SR6       | 2076.658  | 2752.799  |
| AK023517  | 4938.543  | 4810.903  | SR8       | 8098.406  | 36053.563 |
| AK023869  | 14712.37  | 18745.693 | SR10      | 28730.455 | 13696.929 |
| AK022116  | 1451.377  | 1517.183  | CY3Cy5    | 2169.604  | 118.68    |
| AF026526  | 2599.686  | 3588.916  | NM_014819 | 11841.745 | 18095.592 |
| AK026207  | 6396.4    | 5692.938  | NM_017609 | 2591.931  | 3311.371  |
| NM_020181 | 301.44    | 478.147   | AF086040  | 3146.613  | 4466.958  |
| AK024984  | 2317.722  | 2040.113  | AB032988  | 5078.761  | 5734.524  |
| AK000276  | 420.948   | 383.868   | AB037859  | 71990.656 | 64810.523 |

|           |           |           |           |           |           |
|-----------|-----------|-----------|-----------|-----------|-----------|
| AL110236  | 1246.837  | 1136.432  | AL049233  | 3409.97   | 3844.215  |
| AF085955  | 817.592   | 880.064   | NM_017696 | 7426.833  | 9853.781  |
| AF075106  | 19464.967 | 18434.717 | AL050166  | 8536.102  | 10196.404 |
| AK023339  | 15596.481 | 17663.916 | NM_018456 | 7223.481  | 7045.845  |
| AF085981  | 982.692   | 935.904   | NM_018279 | 10532.943 | 23271.9   |
| AF086008  | 1026.773  | 945.602   | NM_014350 | 18629.117 | 21603.434 |
| AF087970  | 984.967   | 909.812   | U00925    | 28355.664 | 33074.563 |
| AF086029  | 501.532   | 279.24    | AK025214  | 545.217   | 590.484   |
| AF075115  | 903.61    | 1095.203  | AK026805  | 10712.743 | 12541.202 |
| U05597    | 2117.425  | 1742.862  | AB037765  | 4096.087  | 5461.816  |
| AK026366  | 60774.805 | 57809.195 | AK025068  | 4453.827  | 5796.182  |
| AK024229  | 34922.063 | 37761.859 | AK026720  | 2628.764  | 3843.516  |
| AK021824  | 873.895   | 887.364   | AL137566  | 3252.104  | 4015.053  |
| AK021467  | 909.77    | 716.935   | AF087962  | 9155.479  | 12308.515 |
| NM_020371 | 2679.927  | 2639.613  | AL050197  | 6320.492  | 6672.756  |
| AK022498  | 5897.424  | 6289.274  | AF085870  | 9547.548  | 12212.529 |
| AJ245433  | 2621.938  | 2835.346  | AL050063  | 788.141   | 1232.106  |
| AK021942  | 54976.441 | 49544.91  | AL080217  | 586.676   | 1063.126  |
| NM_014127 | 2660.788  | 3320.404  | AL117580  | 14341.46  | 18575.441 |
| AL360187  | 756.998   | 1014.374  | AL110190  | 6169.328  | 6600.717  |
| AK021878  | 1689.013  | 1956.423  | AJ001893  | 8154.708  | 12592.452 |
| AK021817  | 1568.306  | 1513.071  | NM_018225 | 54593.82  | 58097.527 |
| AL080103  | 634.209   | 788.325   | AK025534  | 1958.527  | 2968.137  |
| AK023217  | 2592.493  | 2718.464  | AK022577  | 861.134   | 1135.253  |
| AK021883  | 508.497   | 429.439   | AF091526  | 5313.474  | 6455.133  |
| AF090902  | 10903.952 | 10694.768 | AK026705  | 6967.976  | 9019.978  |
| AF119887  | 2419.29   | 2290.984  | NM_003602 | 3707.407  | 5107.057  |
| AK091038  | 2942.689  | 3699.865  | AF009258  | 72375.602 | 64803.207 |
| AK024193  | 4518.783  | 4663.053  | AF009305  | 3650.43   | 4205.914  |
| NM_018578 | 456.826   | 342.477   | NM_006193 | 1139.335  | 1251.124  |
| NM_018543 | 448.16    | 367.39    | AF009270  | 1426.543  | 1628.918  |
| AK024438  | 5781.647  | 4435.006  | AF009318  | 3687.238  | 4849.153  |
| AL390170  | 2136.993  | 2430.948  | AF056421  | 2778.728  | 3522.16   |
| AK022887  | 1441.419  | 1450.237  | AF090889  | 786.885   | 1306.283  |
| AK000745  | 36570.961 | 33348.879 | AK001085  | 2244.881  | 3519.617  |
| NM_005299 | 1882.373  | 1967.215  | AK001906  | 6434.142  | 9782.455  |
| NM_015901 | 1132.23   | 995.444   | AK021528  | 1513.829  | 1647.747  |
| AF130065  | 667.879   | 856.801   | AK021746  | 1634.869  | 1968.955  |
| Z83935    | 660.728   | 942.317   | AK001136  | 1885.889  | 2951.267  |
| NM_006365 | 1272.302  | 1090.499  | AK021617  | 748.257   | 1170.006  |
| AF093744  | 43038.875 | 48644.918 | AK021810  | 2055.462  | 2421.629  |
| NM_018687 | 17802.621 | 18109.484 | AL390178  | 3879.296  | 5089.697  |
| M57417    | 11968.459 | 12592.21  | NM_005383 | 685.468   | 1173.536  |
| NM_017728 | 2116.129  | 2615.513  | NM_005368 | 1187.823  | 1522.439  |
| U80772    | 1590.219  | 1703.668  | NM_018618 | 2003.061  | 2675.014  |
| NM_006189 | 1056.626  | 987.529   | AJ008121  | 65568.344 | 68797.68  |
| AJ272177  | 2219.544  | 2365.262  | AJ008153  | 9577.115  | 12163.373 |
| AK026402  | 51743.59  | 46331.633 | AK023739  | 2007.478  | 2290.32   |
| AF111846  | 3745.384  | 3549.979  | NM_005830 | 16506.984 | 18845.275 |
| M11948    | 60954.344 | 58278.777 | AL389983  | 7104.637  | 8561.674  |
| Z36850    | 788.6     | 876.831   | AJ008159  | 2358.609  | 3029.944  |
| AK024618  | 2070.573  | 1589.811  | AK000995  | 4203.301  | 5187.146  |
| AL049969  | 2052.641  | 1840.163  | U00959    | 4987.612  | 7884.641  |

|           |           |           |           |           |           |
|-----------|-----------|-----------|-----------|-----------|-----------|
| NM_00522C | 1171.757  | 1062.985  | NM_01457E | 54680.523 | 57178.945 |
| NM_01861E | 475.284   | 274.206   | AF147306  | 9521.147  | 11800.726 |
| AK000470  | 545.125   | 448.047   | AF086267  | 12514.119 | 16399.195 |
| X79308    | 3252.23   | 2937.727  | X74606    | 1305.13   | 1883.061  |
| AF086476  | 1147.432  | 717.713   | NM_01218E | 5110.295  | 6455.007  |
| NM_01766C | 12211.546 | 12297.355 | AK026785  | 3412.651  | 4735.52   |
| AB011151  | 3911.092  | 3587.232  | AK022994  | 880.285   | 1400.833  |
| U92995    | 4405.08   | 5340.49   | AL137450  | 8362.965  | 8686.107  |
| Z70769    | 936.321   | 1134.75   | AK023058  | 4302.219  | 5309.799  |
| NM_00710E | 3786.02   | 5617.386  | AJ227878  | 975.943   | 1418.819  |
| AL137555  | 7401.463  | 7170.461  | NM_012064 | 21598.994 | 23383.967 |
| AL133017  | 3451.864  | 3339.908  | AK001460  | 2185.604  | 2790.936  |
| U84506    | 520.235   | 583.342   | AK092508  | 7245.06   | 8370.45   |
| U21556    | 52980.25  | 57728.07  | AK027111  | 65799.727 | 70963.906 |
| AB002444  | 905.94    | 1172.621  | NM_00351E | 1383.777  | 2049.313  |
| AB002344  | 9289.355  | 8150.61   | M60749    | 6502.498  | 7979.408  |
| BF210352  | 3432.206  | 4126.123  | X79986    | 3077.268  | 4573.762  |
| NM_00682E | 6931.311  | 7590.671  | NM_00352E | 16873.23  | 22264.418 |
| NM_01766E | 18531.578 | 16554.314 | X01448    | 3115.717  | 3546.511  |
| AF147379  | 20481.852 | 18395.576 | NM_01650E | 11818.676 | 15514.371 |
| AK023760  | 16832.156 | 14746.928 | AK056351  | 62234.523 | 61735.52  |
| X98415    | 58314.637 | 56791.52  | NM_01469C | 31826.896 | 48220.977 |
| AK024205  | 4458.614  | 3583.774  | NM_01769E | 5804.174  | 7941.58   |
| AF086034  | 20796.232 | 18677.779 | AF086490  | 3587.971  | 4572.967  |
| AK000174  | 2438.005  | 2294.433  | AF131738  | 46006.316 | 51259.938 |
| AF130071  | 750.002   | 565.84    | AK021666  | 15224.449 | 18725.408 |
| AJ272057  | 4475.961  | 4420.646  | AK024081  | 2178.587  | 2589.599  |
| NM_00440E | 2049.39   | 1945.582  | AK024825  | 8632.682  | 10640.611 |
| AK024216  | 44107.461 | 52596.199 | NM_00079E | 1107.057  | 1301.491  |
| Y16752    | 2658.285  | 2855.12   | AB037761  | 57392.961 | 47071.191 |
| NM_014694 | 1194.336  | 1308.133  | NM_01400E | 65659.719 | 64906.098 |
| NM_02015E | 2221.388  | 2415.299  | NM_014731 | 28109.211 | 19359.641 |
| NM_01483C | 5635.167  | 5599.415  | AF035191  | 29498.275 | 20472.176 |
| AF355402  | 10272.825 | 10754.555 | NM_00405E | 2308.196  | 1556.295  |
| AK000407  | 5646.417  | 6799.53   | NM_004527 | 2422.099  | 2207.965  |
| NM_020524 | 17528.594 | 17651.1   | NM_01206E | 23632.084 | 16890.436 |
| NM_00199E | 12087.023 | 8111.305  | NM_001507 | 3112.717  | 2762.393  |
| X64977    | 8911.8    | 5931.614  | X92108    | 1903.163  | 2039.674  |
| AF064851  | 1744.636  | 1809.102  | AL389876  | 4918.331  | 6085.834  |
| NM_00260E | 24626.764 | 15336.037 | AK022120  | 3540.928  | 4510.546  |
| NM_01623E | 581.582   | 629.733   | Z70762    | 1464.043  | 2488.917  |
| X89672    | 611.224   | 667.08    | D17099    | 919.937   | 1284.522  |
| NM_00338E | 1060.225  | 947.213   | BF037206  | 3778.17   | 5720.314  |
| D17271    | 24430.566 | 22692.93  | AK021474  | 38704.348 | 51347.801 |
| X91648    | 2992.061  | 2439.216  | AK023642  | 957.469   | 1268.394  |
| AK026658  | 1996.146  | 1756.446  | U52827    | 2752.219  | 3210.663  |
| AF282264  | 17836.527 | 17910.105 | AB031547  | 6548.173  | 4716.037  |
| AF086322  | 2614.925  | 2696.673  | NM_00397C | 8091.602  | 8170.904  |
| Z70717    | 2709.247  | 2227.997  | AK022496  | 4888.568  | 3366.451  |
| AK024736  | 1133.706  | 600.631   | AB042636  | 3236.477  | 2404.221  |
| NM_01823E | 1272.413  | 1711.277  | AB033035  | 5759.761  | 2860.258  |
| U88892    | 1658.033  | 1681.857  | NM_00288E | 10637.056 | 8820.488  |
| AK023755  | 416.882   | 457.358   | NM_01901E | 935.273   | 701.921   |

|           |           |           |           |           |           |
|-----------|-----------|-----------|-----------|-----------|-----------|
| NM_005725 | 1789.841  | 1841.654  | NM_000141 | 1215.794  | 661.381   |
| NM_012211 | 769.823   | 1145.967  | NM_016150 | 7764.416  | 4567.244  |
| AB040877  | 1971.648  | 2322.215  | U57058    | 2830.029  | 1440.195  |
| AB040927  | 1490.334  | 1684.188  | AL137452  | 4754.017  | 3944.313  |
| AK026737  | 3845.019  | 3626.042  | NM_004312 | 64909.66  | 64663.727 |
| NM_000210 | 2496.127  | 2675.214  | NM_001347 | 12947.266 | 18076.168 |
| NM_006289 | 7739.378  | 7623.766  | AK024549  | 43651.133 | 52447.645 |
| NM_019067 | 6710.399  | 6382.759  | NM_006338 | 17815.148 | 26156.057 |
| AF251025  | 1501.079  | 1777.801  | NM_007164 | 16121.184 | 23087.432 |
| NM_015677 | 11121.203 | 10900.777 | NM_000261 | 1596.984  | 2254.093  |
| NM_001772 | 5039.705  | 4520.898  | NM_002606 | 1462.966  | 2388.05   |
| AL162032  | 691.386   | 1181.551  | NM_002570 | 4568.041  | 6487.386  |
| AB011087  | 3444.002  | 3287.196  | NM_003183 | 4471.722  | 6952.806  |
| AF161341  | 4190.098  | 3830.333  | NM_003585 | 1457.384  | 1873.501  |
| AJ249902  | 1758.992  | 1935.093  | NM_019851 | 4629.035  | 5519.76   |
| NM_004384 | 10511.983 | 10065.447 | NM_003238 | 969.201   | 1418.301  |
| L05500    | 23352.313 | 20448.986 | NM_014096 | 48283.52  | 49855.145 |
| NM_012306 | 7775.118  | 7649.019  | NM_005706 | 26474.492 | 22826.146 |
| AF222903  | 8083.884  | 8171.029  | NM_001261 | 15034.856 | 10763.45  |
| NM_006226 | 6550.058  | 6659.367  | NM_001977 | 7427.009  | 5486.094  |
| L10374    | 9648.601  | 8694.398  | NM_007219 | 3966.494  | 2447.907  |
| NM_000249 | 5510.928  | 6945.648  | AK026854  | 8765.164  | 5227.821  |
| NM_014310 | 1142.612  | 1203.902  | NM_001269 | 21355.398 | 17982.719 |
| NM_005860 | 6663.167  | 6845.791  | NM_002506 | 3096.1    | 2957.311  |
| AF095288  | 23116.582 | 23776.842 | NM_004906 | 14848.896 | 11812.35  |
| AK025116  | 841.446   | 928.106   | NM_012447 | 11419.584 | 10582.265 |
| AF130114  | 537.381   | 938.656   | NM_006366 | 1176.719  | 982.548   |
| AK026271  | 8470.684  | 11547.151 | AK027013  | 44392.141 | 46317.207 |
| NM_001799 | 9897.295  | 11098.422 | NM_001344 | 41458.926 | 48347.281 |
| AF090895  | 5991.649  | 6339.526  | NM_018294 | 3117.55   | 3939.231  |
| NM_005610 | 4755.888  | 5213.793  | AL389934  | 6305.221  | 8194.923  |
| AL133651  | 3409.848  | 3300.861  | NM_004330 | 8902.095  | 11973.65  |
| AB014532  | 5204.338  | 4667.365  | AF151802  | 9639.195  | 12551.146 |
| NM_003478 | 4104.008  | 4310.768  | AB006746  | 1081.993  | 1547.159  |
| BE275227  | 1013.189  | 1179.382  | NM_006498 | 2746.393  | 4268.078  |
| NM_016237 | 13151.377 | 14212.214 | AB023233  | 3475.101  | 5035.446  |
| NM_004924 | 8213.289  | 10422.472 | NM_004369 | 2645.451  | 3597.699  |
| NM_001798 | 3175.402  | 4348.441  | NM_004370 | 1844.171  | 2139.085  |
| NM_001211 | 5003.333  | 5469.837  | AB040898  | 1855.084  | 2347.658  |
| NM_006505 | 816.701   | 676.933   | NM_016155 | 18429.324 | 13134.628 |
| AB033050  | 4227.021  | 4083.652  | NM_001224 | 32660.135 | 21398.098 |
| NM_004356 | 56112.758 | 54783.73  | NM_017811 | 20778.463 | 12523.331 |
| NM_001855 | 843.823   | 775.95    | NM_001569 | 8910.851  | 5170.516  |
| BC015022  | 9013.03   | 8861.051  | NM_004131 | 1466.884  | 878.282   |
| AB033086  | 1451.01   | 1792.746  | AK023284  | 3981.213  | 2526.797  |
| NM_002406 | 27504.529 | 30730.537 | NM_005101 | 9907.2    | 7210.973  |
| U87169    | 4138.313  | 4923.293  | AF130060  | 23501.217 | 21626.223 |
| NM_002073 | 2042.461  | 1963.244  | NM_007057 | 23533.131 | 21345.533 |
| NM_001935 | 58700.906 | 60170.723 | NM_000177 | 3292.435  | 2965.759  |
| NM_001749 | 1157.923  | 1413.119  | NM_003387 | 26005.484 | 31060.551 |
| AF090327  | 608.728   | 650.51    | U60665    | 4579.766  | 6186.846  |
| NM_003291 | 5683.75   | 4580.302  | NM_005507 | 65051.363 | 65719.578 |
| AK022950  | 3094.676  | 3150.221  | AL080133  | 9485.192  | 11287.784 |

|           |           |           |           |           |           |
|-----------|-----------|-----------|-----------|-----------|-----------|
| S75755    | 3945.258  | 2953.045  | AY014403  | 3492.499  | 3411.096  |
| AF176518  | 1368.437  | 1296.138  | NM_006912 | 14480.836 | 16910.381 |
| AB014576  | 15381.499 | 14835.228 | X12534    | 5383.147  | 7856.811  |
| NM_019044 | 11049.531 | 12725.616 | NM_018367 | 1908.609  | 3026.875  |
| AK000145  | 1914.408  | 1787.952  | NM_001363 | 20639.602 | 28486.549 |
| AF174601  | 8615.55   | 10286.645 | NM_014323 | 18659.047 | 12472.374 |
| AF279865  | 1533.363  | 1750.63   | NM_003205 | 6025.756  | 3538.906  |
| NM_014700 | 2846.294  | 3546.385  | AB002324  | 4892.576  | 2286.517  |
| NM_014714 | 1004.928  | 974.983   | AK026231  | 3932.891  | 2679.143  |
| NM_015644 | 4589.356  | 3890.584  | NM_002140 | 30632.402 | 14009.491 |
| NM_005687 | 13356.509 | 12983.049 | NM_020143 | 11839.153 | 9933.475  |
| NM_005983 | 16417.08  | 16908.32  | NM_012469 | 8768.229  | 6796.785  |
| AB016902  | 3360.885  | 3495.076  | NM_005131 | 4595.56   | 3850.312  |
| AF272378  | 19336.947 | 16724.639 | NM_007056 | 5832.64   | 4793.792  |
| M61870    | 966.978   | 1125.475  | AF083383  | 5576.182  | 6161.47   |
| AK026980  | 3048.992  | 2976.58   | NM_006925 | 6479.529  | 7112.163  |
| AJ277915  | 406.208   | 570.628   | NM_004890 | 62885.91  | 56869.035 |
| NM_020368 | 8355.685  | 9265.864  | AK023181  | 8942.945  | 8916.485  |
| AF024708  | 33955.945 | 34714.527 | NM_004294 | 3205.176  | 3494.437  |
| NM_006467 | 8318.96   | 10320.596 | NM_005051 | 48738.008 | 48025.68  |
| NM_017566 | 3598.301  | 3134.899  | NM_001968 | 57509.594 | 57044.008 |
| NM_006582 | 2801.172  | 2552.955  | D17259    | 65701.25  | 64268.102 |
| AB033019  | 3085.596  | 2511.41   | AB002366  | 1641.341  | 1926.683  |
| NM_001452 | 951.097   | 895.77    | AF264627  | 69144.422 | 64592.379 |
| NM_006162 | 3495.437  | 3375.581  | NM_018130 | 22190.826 | 33108.125 |
| NM_014764 | 14695.143 | 15407.372 | AF085878  | 1068.993  | 1546.062  |
| NM_018078 | 4618.039  | 4475.054  | AB006630  | 2065.257  | 2959.372  |
| NM_016013 | 831.564   | 877.977   | NM_004453 | 7924.331  | 6429.145  |
| NM_016050 | 1974.275  | 1706.381  | NM_016229 | 21053.789 | 15123.848 |
| NM_007080 | 24544.223 | 26987.756 | NM_018244 | 11259.358 | 8784.203  |
| AK026912  | 14165.382 | 15750.354 | NM_002492 | 60597.02  | 59717.395 |
| AK023531  | 12559.988 | 12305.278 | AB046855  | 2565.737  | 2231.783  |
| NM_006697 | 31126.109 | 29489.869 | NM_005642 | 17822.969 | 6398.153  |
| M19182    | 3282.477  | 2686.687  | NM_018105 | 4339.771  | 2163.263  |
| AK025707  | 4455.389  | 4485.994  | AK023452  | 16973.02  | 12109.393 |
| NM_006242 | 917.908   | 949.647   | AF155065  | 712.068   | 761.044   |
| X78712    | 3324.447  | 4160.835  | NM_000332 | 1058.499  | 1212.687  |
| NM_001497 | 1396.331  | 1555.599  | AK022215  | 16332.538 | 14938.637 |
| NM_004130 | 3102.728  | 2997.823  | U90305    | 820.336   | 1133.614  |
| NM_006348 | 1679.656  | 1861.24   | NM_001527 | 38995.578 | 36549.426 |
| AF067972  | 20109.338 | 17679.002 | AK025269  | 8204.622  | 7485.936  |
| NM_004958 | 1882.282  | 1770.16   | NM_001438 | 1016.517  | 1566.118  |
| D87076    | 6561.95   | 5970.498  | AB040971  | 1243.902  | 1001.937  |
| NM_014149 | 2480.282  | 2325.073  | NM_006562 | 5871.606  | 6812.482  |
| AB020635  | 4805.219  | 4152.338  | X65665    | 793.433   | 1221.273  |
| NM_006515 | 1566.649  | 1569.847  | NM_003112 | 1773.667  | 2829.636  |
| NM_005224 | 1944.267  | 1693.036  | AL080170  | 9467.964  | 5497.931  |
| NM_012144 | 1255.936  | 1214.874  | AB039903  | 16008.563 | 10290.312 |
| X65231    | 47941.109 | 52631.711 | NM_000542 | 43270.523 | 30345.781 |
| NM_002908 | 9035.455  | 9483.391  | NM_006851 | 4646.355  | 3725.931  |
| AF205632  | 6108.408  | 6203.985  | AK001560  | 2715.335  | 2746.209  |
| NM_005378 | 12196.523 | 14530.045 | AB001328  | 1789.943  | 1892.373  |
| NM_002397 | 3903.814  | 4989.25   | NM_000948 | 1282.083  | 1297.047  |

|           |           |           |           |           |           |
|-----------|-----------|-----------|-----------|-----------|-----------|
| AF000672  | 3946.116  | 3214.063  | H99588    | 2546.244  | 1911.091  |
| NM_017652 | 5316.886  | 4423.277  | X00588    | 2783.616  | 649.962   |
| X59268    | 5196.184  | 4680.1    | AI359037  | 60735.383 | 45744.012 |
| D70832    | 48727.977 | 47083.371 | BI754285  | 782.79    | 910.44    |
| NM_001429 | 10757.899 | 9661.833  | X15998    | 2150.393  | 1850.287  |
| NM_002379 | 29480.816 | 33676.855 | NM_001883 | 1991.619  | 2122.321  |
| AB007929  | 6187.925  | 7218.844  | NM_004628 | 5270.213  | 5284.976  |
| NM_004579 | 10055.674 | 11059.763 | L31785    | 3930.524  | 4179      |
| AA203126  | 2463.733  | 2643.354  | H-M 69043 | 26539.107 | 27196.557 |
| L12347    | 551.536   | 486.435   | AF077374  | 3853.379  | 3439.915  |
| NM_001622 | 2926.472  | 3014.498  | U43901    | 2003.354  | 2051.749  |
| Z36788    | 1172.206  | 1452.667  | X59065    | 1407.011  | 1458.525  |
| NM_018477 | 11748.922 | 12867.16  | M59828    | 38875.082 | 35358.98  |
| U20536    | 1216.746  | 1240.409  | NM_002168 | 10556.019 | 14864.724 |
| AI298534  | 497.5     | 627.969   | NM_015658 | 2938.013  | 1559.78   |
| R71691    | 10829.97  | 11411.134 | NM_000589 | 13317.252 | 8636.628  |
| AW167715  | 1662.672  | 2319.163  | NM_016546 | 41281.441 | 35510.859 |
| AA424735  | 1308.388  | 1168.58   | AF309653  | 4937.232  | 3573.803  |
| U78294    | 477.078   | 570.284   | NM_002620 | 28075.609 | 31513.736 |
| AA171613  | 664.981   | 982.342   | S79267    | 1337.951  | 1757.527  |
| BI760394  | 2484.008  | 2531.149  | NM_001816 | 1921.008  | 2440.002  |
| AA555216  | 814.961   | 1194.718  | NM_003784 | 61495.703 | 62116.027 |
| U09117    | 5103.342  | 5553.603  | NM_000195 | 45696.242 | 47039.813 |
| M21054    | 1120.91   | 1237.668  | NM_005445 | 30031.877 | 26907.439 |
| M18468    | 2606.48   | 2819.515  | NM_014899 | 3056.889  | 2530.432  |
| H66070    | 3697.65   | 3070.869  | NM_003630 | 16525.086 | 9108.216  |
| AA164741  | 746.587   | 673.834   | NM_000046 | 9941.729  | 6934.782  |
| AI189375  | 1394.988  | 1207.084  | NM_003219 | 2872.141  | 1910.684  |
| AI978885  | 1732.198  | 1487.589  | NM_006709 | 5417.149  | 4493.086  |
| NM_000303 | 5790.813  | 5429.199  | NM_000612 | 39522.859 | 37376.035 |
| NM_001939 | 11004.989 | 11325.374 | NM_004257 | 39670.93  | 37944.543 |
| NM_003279 | 2350.772  | 2785.97   | NM_000683 | 1277.226  | 1359.913  |
| AB014599  | 5524.925  | 4966.92   | NM_003629 | 3613.184  | 3698.971  |
| NM_004393 | 1324.697  | 1479.091  | NM_005901 | 11712.181 | 12397.165 |
| AB018345  | 1494.293  | 1150.54   | NM_004248 | 3997.631  | 3592.947  |
| NM_005832 | 932.047   | 1416.666  | NM_004910 | 5944.956  | 2377.066  |
| AW407841  | 3977.309  | 3807.301  | AB013452  | 4539.6    | 3992.827  |
| U15197    | 3617.716  | 3406.502  | M93107    | 12355.844 | 11222.103 |
| NM_001879 | 3955.858  | 3295.703  | BC001479  | 13862.75  | 15399.4   |
| AF264014  | 26848.996 | 31587.01  | NM_002461 | 48842.879 | 54698.828 |
| L09098    | 411.563   | 578.645   | NM_005771 | 1040.237  | 1103.262  |
| NM_004155 | 8050.384  | 7808.683  | AB032986  | 65613.938 | 69311     |
| NM_014586 | 12810.788 | 13498.191 | NM_017528 | 60187.285 | 61487.492 |
| NM_014366 | 20874.133 | 22296.393 | NM_016032 | 6338.868  | 7492.98   |
| NM_000923 | 2075.844  | 2188.692  | NM_014324 | 62106.914 | 66331.352 |
| NM_006453 | 3680.771  | 3684.032  | NM_001687 | 62465.598 | 59530.504 |
| NM_018096 | 2085.885  | 2213.663  | AK026374  | 4249.507  | 2984.246  |
| AL390078  | 502.869   | 586.286   | NM_003459 | 8469.864  | 5361.903  |
| NM_004036 | 5675.893  | 4802.227  | NM_013349 | 46895.379 | 36274.586 |
| NM_015986 | 5764.646  | 4392.349  | NM_006861 | 7219.051  | 5388.612  |
| NM_014959 | 2348.906  | 2112.543  | AK023142  | 2492.636  | 1817.651  |
| NM_003992 | 8070.854  | 7202.291  | U61740    | 53659.406 | 51898.242 |
| NM_000137 | 1073.944  | 1040.85   | NM_006409 | 60366.828 | 63185.137 |



|           |           |           |           |           |           |
|-----------|-----------|-----------|-----------|-----------|-----------|
| NM_012102 | 9182.491  | 9797.094  | AB049054  | 8473.242  | 7005.748  |
| NM_005017 | 18601.287 | 20293.902 | NM_015071 | 2276.64   | 2196.439  |
| AF163572  | 5136.222  | 5499.156  | NM_013227 | 4884.1    | 4319.633  |
| NM_000897 | 1157.053  | 1116.08   | Z83803    | 1687.531  | 2033.87   |
| NM_000487 | 973.213   | 1224.876  | AF027205  | 29600.43  | 28555.004 |
| NM_006411 | 9936.508  | 9551.235  | AF075012  | 2847.926  | 2879.442  |
| NM_014182 | 3765.946  | 3595.506  | NM_001570 | 2697.06   | 2753.317  |
| AB040884  | 686.584   | 623.821   | AB040672  | 8755.704  | 7042.166  |
| NM_001170 | 3262.007  | 3680.854  | NM_002192 | 5528.025  | 5961.143  |
| NM_014342 | 3500.723  | 3528.96   | NM_005491 | 18527.492 | 21654.225 |
| NM_004853 | 9436.542  | 9408.671  | NM_003869 | 4496.166  | 8069.678  |
| NM_001494 | 26406.877 | 31145.012 | AK025599  | 3075.999  | 4834.522  |
| NM_017707 | 1536.365  | 1782.139  | X63417    | 7375.388  | 8766.261  |
| NM_004206 | 4405.508  | 5033.183  | S94539    | 15913.816 | 22470.932 |
| NM_004603 | 11342.659 | 9933.598  | NM_006402 | 7246.626  | 8607.779  |
| AK022849  | 4430.355  | 3899.186  | NM_005785 | 3109.666  | 2865.006  |
| AF040964  | 17715.236 | 12679.948 | NM_018248 | 4141.04   | 4505.041  |
| NM_001773 | 510.717   | 622.748   | AK001695  | 16605.859 | 11614.476 |
| Z70704    | 1499.258  | 1445.605  | NM_017886 | 15079.461 | 6636.128  |
| NM_014363 | 1540.695  | 1469.631  | NM_006252 | 2762.239  | 2122.711  |
| NM_000557 | 1966.714  | 1644.596  | NM_001721 | 2312.797  | 2019.482  |
| NM_001375 | 15168.426 | 15009.305 | NM_014397 | 29573.063 | 30083.641 |
| NM_002312 | 1106.427  | 1095.586  | AB023182  | 5297.692  | 3635.674  |
| M20699    | 3188.792  | 3611.762  | NM_003607 | 1741.328  | 1462.926  |
| NM_004774 | 4224.488  | 5064.194  | NM_006575 | 2858.982  | 2809.026  |
| NM_016937 | 3071.171  | 2842.14   | NM_013254 | 6535.571  | 6620.785  |
| NM_002690 | 2058.044  | 1972.007  | NM_000437 | 42952.66  | 36820.867 |
| NM_012328 | 3884.139  | 4563.767  | AB046819  | 45541.625 | 49117.664 |
| NM_007341 | 1101.138  | 965.372   | NM_006090 | 22608.896 | 28471.703 |
| NM_016508 | 1383.672  | 1516.681  | NM_002900 | 20468.211 | 20885.25  |
| NM_006456 | 3123.654  | 3620.106  | NM_000542 | 32761.525 | 41460.965 |
| AK026062  | 3784.231  | 4362.739  | NM_014625 | 1897.43   | 779.318   |
| AF047002  | 30620.033 | 30792.063 | NM_006851 | 3832.046  | 5299.009  |
| AL050082  | 4686.961  | 4541.73   | AK001560  | 1368.167  | 2374.733  |
| NM_006623 | 39354.984 | 38071.613 | AB001328  | 1074.395  | 1567.484  |
| NM_016588 | 3312.666  | 3217.663  | NM_000948 | 1076.521  | 1511.446  |
| NM_003135 | 15363.896 | 12773.051 | H99588    | 2187.815  | 2642.762  |
| NM_004579 | 9086.344  | 10584.485 | X00588    | 1507.983  | 1250.361  |
| AA203126  | 2113.045  | 2377.747  | AI359037  | 59455.242 | 61216.055 |
| L12347    | 657.058   | 649.79    | X15998    | 1505.141  | 978.804   |
| NM_001622 | 1990.608  | 2006.475  | NM_001883 | 1305.206  | 785.491   |
| Z36788    | 832.623   | 840.552   | NM_004628 | 5179.81   | 3351.593  |
| NM_018477 | 12024.585 | 13106.844 | L31785    | 3108.448  | 2575.425  |
| U20536    | 1396.867  | 1600.668  | H-M 69043 | 25731.73  | 22936.484 |
| R71691    | 10843.646 | 11525.713 | AF077374  | 2944.64   | 1916.612  |
| AW167715  | 1638.99   | 2141.272  | U43901    | 2013.19   | 1141.723  |
| AA424735  | 1138.364  | 1360.891  | X59065    | 1053.969  | 833.9     |
| U78294    | 628.13    | 764.238   | M59828    | 33185.051 | 26481.645 |
| AA171613  | 452.568   | 632.548   | AJ010482  | 5829.507  | 5298.441  |
| BI760394  | 1682.92   | 1747.216  | NM_000896 | 1197.979  | 1134.422  |
| AA555216  | 844.796   | 1089.135  | NM_016546 | 31578.543 | 38994.617 |
| U09117    | 4575.163  | 5807.445  | AF309653  | 4083.712  | 3301.664  |
| M21054    | 1117.948  | 1406.121  | NM_002620 | 34229.652 | 27724.113 |

|           |           |           |           |           |           |
|-----------|-----------|-----------|-----------|-----------|-----------|
| M18468    | 1730.2    | 1757.96   | S79267    | 1887.042  | 2678.609  |
| H66070    | 1202.031  | 1111.278  | NM_001816 | 2502.819  | 3271.596  |
| AA164741  | 557.99    | 473.802   | NM_003784 | 61199.457 | 67311.422 |
| AI189375  | 886.827   | 903.086   | NM_000195 | 45863.602 | 56297.566 |
| NM_001665 | 22729.91  | 17013.555 | NM_005445 | 27701.057 | 23447.836 |
| NM_003279 | 1305.579  | 1696.979  | NM_014899 | 2647.925  | 3072.279  |
| AB014599  | 4528.121  | 4126.672  | NM_003630 | 17412.969 | 18188.449 |
| NM_004393 | 1771.639  | 1882.538  | NM_000046 | 10007.694 | 10058.792 |
| AB018345  | 1110.607  | 873.005   | NM_003219 | 3273.984  | 2578.456  |
| NM_005832 | 999.12    | 884.251   | NM_006709 | 5217.492  | 4088.044  |
| AW407841  | 3709.521  | 3055.578  | NM_000612 | 32505.982 | 27221.713 |
| U15197    | 3058      | 2988.451  | NM_004257 | 36034.387 | 16903.742 |
| NM_001879 | 2928.991  | 3040.479  | NM_000683 | 1231.723  | 907.739   |
| AF264014  | 19084.941 | 22318.957 | NM_003629 | 3109.561  | 2509.899  |
| NM_004155 | 6356.345  | 6026.722  | NM_005901 | 10724.843 | 8976.132  |
| NM_014586 | 7654.115  | 6693.307  | NM_004248 | 1606.47   | 1236.468  |
| NM_014366 | 18055.324 | 19694.773 | AL080170  | 7440.227  | 7200.027  |
| NM_000923 | 2162.231  | 2064.021  | AB039903  | 13298.96  | 13615.32  |
| NM_006453 | 3204.216  | 3303.332  | M93107    | 10787.56  | 11815.442 |
| NM_018096 | 1961.946  | 1496.411  | BC001479  | 19978.055 | 18312.193 |
| NM_004036 | 5476.944  | 4260.084  | NM_002461 | 55107.875 | 56601.617 |
| NM_015986 | 3557.82   | 3157.237  | NM_005771 | 2838.596  | 1164.247  |
| NM_014959 | 1857.868  | 1286.205  | AB032986  | 60166.539 | 61967.781 |
| NM_003992 | 5589.917  | 4386.094  | NM_017528 | 57599.242 | 65607.242 |
| NM_002379 | 34458.922 | 25103.732 | NM_016032 | 6493.609  | 9681.953  |
| AB007929  | 5803.362  | 5135.823  | NM_014324 | 59956.367 | 63500.875 |
| NM_012102 | 4857.043  | 5081.598  | NM_001687 | 56734.656 | 58304.949 |
| NM_005017 | 16889.111 | 19769.795 | AK026374  | 3825.989  | 3624.816  |
| AF163572  | 4300.552  | 4726.012  | NM_003459 | 7968.059  | 7471.839  |
| NM_000897 | 1093.511  | 1140.628  | NM_013349 | 46178.754 | 46360.008 |
| NM_000487 | 777.702   | 838.252   | NM_006861 | 7677.61   | 6904.647  |
| NM_006411 | 9479.783  | 9462.936  | AK023142  | 2046.746  | 2092.333  |
| NM_014182 | 2939.722  | 3085.162  | U61740    | 46734.359 | 39386.949 |
| NM_001170 | 2539.853  | 2797.431  | NM_006409 | 57507.855 | 46714.059 |
| NM_014342 | 3262.717  | 3110.433  | AB049054  | 8606.384  | 5780.826  |
| NM_004853 | 7407.06   | 6800.104  | NM_015071 | 2564.187  | 1879.088  |
| NM_001494 | 24511.271 | 28261.396 | NM_013227 | 3978.719  | 3529.305  |
| NM_017707 | 1842.646  | 1918.728  | Z83803    | 1850.145  | 2341.916  |
| NM_004206 | 3958.032  | 4311.75   | AF027205  | 28954.072 | 27361.947 |
| NM_004603 | 6233.845  | 5478.001  | AF075012  | 2680.407  | 2706.158  |
| AK022849  | 3048.196  | 2115.866  | NM_001570 | 2714.814  | 2341.461  |
| AF040964  | 9885.8    | 5953.083  | NM_015658 | 1419.425  | 1209.831  |
| NM_001939 | 11223.936 | 8315.637  | NM_000589 | 12525.983 | 12282.806 |
| NM_014363 | 1521.496  | 1186.236  | NM_005491 | 19233.41  | 18278.82  |
| NM_000557 | 1793.398  | 1663.093  | NM_003869 | 9073.249  | 9375.944  |
| NM_001375 | 13919.026 | 15499.812 | AK025599  | 2923.199  | 2585.971  |
| NM_002312 | 653.151   | 756.436   | X63417    | 6783.102  | 4762.677  |
| M20699    | 3281.821  | 3044.225  | NM_006402 | 7876.356  | 10476.373 |
| NM_004774 | 4650.896  | 4859.592  | NM_005785 | 3091.581  | 4639.235  |
| NM_016937 | 2850.143  | 3561.844  | NM_018248 | 3705.883  | 3885.067  |
| NM_002690 | 1819.081  | 1939.956  | AK001695  | 17142.855 | 15971.945 |
| NM_012328 | 3622.561  | 4333.335  | NM_017886 | 15066.842 | 13040.444 |
| NM_007341 | 1322.393  | 1705.812  | NM_006252 | 2841.492  | 2770.534  |

|           |           |           |           |           |           |
|-----------|-----------|-----------|-----------|-----------|-----------|
| NM_01650E | 1695.856  | 1910.93   | NM_001721 | 2227.343  | 2086.098  |
| NM_00645E | 2146.103  | 2223.01   | NM_014397 | 31924.416 | 27796.281 |
| AK026062  | 2921.137  | 3272.306  | AB023182  | 5858.896  | 4268.554  |
| AF047002  | 27366.281 | 28611.854 | NM_003607 | 2643.473  | 1042.49   |
| AL050082  | 3764.19   | 3452.167  | NM_00657E | 3438.063  | 2080.371  |
| NM_00662E | 33868.602 | 28441.211 | NM_013254 | 6334.624  | 5333.496  |
| NM_01658E | 3027.818  | 1987.43   | NM_000437 | 46200.598 | 43668.324 |
| NM_00313E | 14180.925 | 11688.679 | AB046819  | 48143.379 | 50546.395 |
| L12347    | 580.367   | 671.442   | NM_00609C | 22193.129 | 24914.576 |
| NM_00162E | 2279.448  | 2606.845  | NM_00290C | 21489.764 | 22442.604 |
| Z36788    | 882.438   | 923.56    | NM_00491C | 4234.077  | 3806.777  |
| NM_018477 | 10479.628 | 11880.717 | AB013452  | 4329.225  | 4759.674  |
| U20536    | 662.634   | 681.374   | NM_006851 | 3529.096  | 3819.228  |
| AI298534  | 396.407   | 601.191   | AK001560  | 3458.327  | 3154.214  |
| R71691    | 9961.503  | 10455.898 | AB001328  | 2203.714  | 2435.502  |
| AW167715  | 2345.506  | 3111.225  | NM_00094E | 1097.451  | 746.781   |
| AA424735  | 1070.008  | 1565.676  | AI359037  | 59326.934 | 63744.051 |
| BI760394  | 1816.08   | 1913.751  | BI754285  | 806.541   | 942.605   |
| AA555216  | 1051.591  | 1121      | X15998    | 1642.364  | 1581.004  |
| U09117    | 4481.589  | 5288.293  | M76482    | 583.832   | 671.841   |
| M21054    | 981.33    | 880.805   | NM_00188E | 1956.376  | 1818.147  |
| M18468    | 1279.497  | 1409.873  | NM_00462E | 4824.612  | 6524.089  |
| H66070    | 1303.664  | 1007.08   | L31785    | 3570.43   | 3528.186  |
| AA164741  | 476.655   | 578.074   | H-M 69043 | 26557.236 | 20468.076 |
| AI189375  | 1206.69   | 818.712   | AF077374  | 3109.93   | 2224.67   |
| AI978885  | 1653.057  | 890.191   | U43901    | 2218.56   | 1569.063  |
| NM_01447C | 2726.834  | 1690.81   | X59065    | 1290.014  | 1029.905  |
| NM_00166E | 21011.191 | 13573.456 | M59828    | 36787.559 | 28137.293 |
| Z70704    | 1219.923  | 568.353   | AJ010482  | 6183.687  | 5761.524  |
| AF264014  | 19871.328 | 24159.047 | NM_00089E | 1280.833  | 1293.496  |
| NM_00415E | 5129.714  | 5510.837  | AB040672  | 3024.006  | 3420.535  |
| NM_01458E | 8602.131  | 10039.258 | NM_00219E | 3171.748  | 3428.746  |
| NM_01436E | 17493.328 | 19032.824 | NM_01489E | 3949.564  | 4580.957  |
| NM_00092E | 1843.648  | 2214.12   | NM_00363C | 15593.177 | 22953.291 |
| NM_00645E | 2275.009  | 2369.708  | NM_00004E | 10004.579 | 9023.618  |
| NM_01809E | 1189.643  | 1077.21   | NM_00321E | 5084.387  | 4129.557  |
| AL390078  | 469.296   | 464.443   | NM_00670E | 6832.813  | 5946.219  |
| NM_00403E | 4665.673  | 5400.763  | NM_00061E | 35931.477 | 22721.512 |
| NM_01598E | 2832.423  | 2295.011  | NM_004257 | 39978.383 | 30831.09  |
| NM_00654E | 1784.459  | 1830.102  | NM_00068E | 907.746   | 1020.91   |
| NM_01495E | 1303.556  | 1497.723  | NM_00362E | 2570.861  | 2659.494  |
| NM_00399E | 4250.198  | 4412.439  | NM_005901 | 11770.317 | 14466.49  |
| AF279265  | 2398.853  | 2359.485  | NM_00424E | 1836.426  | 1630.392  |
| NM_00521E | 9962.963  | 7201.761  | NM_00131E | 517.317   | 1152.714  |
| AB040914  | 603.684   | 364.516   | NM_00479E | 1032.853  | 761.519   |
| NM_002997 | 5074.921  | 2753.771  | NM_00043E | 3724.037  | 2197.498  |
| NM_00237E | 28476.256 | 19124.318 | NM_00184E | 46137.656 | 44290.625 |
| AB007929  | 4949.875  | 2453.048  | AB017169  | 1322.281  | 1369.176  |
| NM_00457E | 8580.773  | 5259.233  | AL080170  | 7609.293  | 8341.76   |
| AA203126  | 1978.993  | 1007.188  | AB039903  | 12122.528 | 13052.338 |
| AB043997  | 599.601   | 580.072   | NM_00054E | 24949.754 | 28626.09  |
| NM_00485E | 5497.712  | 6009.314  | NM_01462E | 708.409   | 838.355   |
| NM_001494 | 20070.602 | 25320.307 | NM_00582E | 5004.501  | 5159.722  |

|           |           |           |           |           |           |
|-----------|-----------|-----------|-----------|-----------|-----------|
| NM_017707 | 1232.397  | 1449.113  | NM_000466 | 6150.366  | 6406.43   |
| NM_004206 | 3087.598  | 2896.154  | NM_015908 | 25096.359 | 27861.9   |
| NM_004603 | 7946.671  | 8961.746  | AK022600  | 19868.988 | 22246.566 |
| AK022849  | 3101.918  | 2887.857  | AK023142  | 2699.414  | 3146.084  |
| AF040964  | 11461.31  | 9856.012  | U61740    | 45240.605 | 40231.883 |
| NM_001939 | 6689.271  | 5344.028  | NM_006409 | 57191.41  | 57246.094 |
| NM_003279 | 1429.187  | 1213.449  | AB049054  | 11482.713 | 5007.2    |
| AB014599  | 4895.155  | 2936.856  | NM_015071 | 4855.905  | 2567.79   |
| NM_004393 | 1665.228  | 1455.206  | NM_013227 | 4069.288  | 4843.057  |
| AB018345  | 650.048   | 339.092   | Z83803    | 1934.712  | 1992.851  |
| NM_005832 | 878.43    | 342.018   | AF027205  | 23218.889 | 24020.395 |
| AW407841  | 3112.155  | 1361.799  | AF075012  | 3389.225  | 3130.708  |
| U15197    | 4014.515  | 3321.454  | NM_001570 | 2782.322  | 2514.623  |
| NM_001879 | 4685.646  | 6268.266  | NM_015658 | 1447.842  | 1068.161  |
| NM_016588 | 1915.24   | 2103.821  | NM_000589 | 12777.186 | 6191.383  |
| NM_003135 | 8531.169  | 8655.12   | NM_016546 | 35947.945 | 28758.801 |
| NM_000137 | 517.456   | 730.875   | AF309653  | 3331.697  | 3371.042  |
| NM_012102 | 5578.058  | 6710.298  | NM_002620 | 33717.289 | 38327.473 |
| NM_005017 | 15446.033 | 17231.576 | S79267    | 2081.584  | 2792.437  |
| AF163572  | 3896.268  | 4472.669  | NM_001816 | 2142.379  | 2716.791  |
| NM_000897 | 1122.571  | 1013.483  | NM_003784 | 61438.91  | 64173.82  |
| NM_000487 | 897.176   | 1091.983  | NM_000195 | 53989.457 | 59779.008 |
| NM_006411 | 7801.509  | 7898.466  | NM_005445 | 28457.629 | 26362.805 |
| NM_014182 | 2286.749  | 2609.189  | AB046819  | 39506.578 | 48723.426 |
| AB040884  | 601.005   | 550.975   | NM_006090 | 19884.25  | 22663.518 |
| NM_000492 | 17953.598 | 18584.449 | NM_002900 | 36828.938 | 38015.613 |
| NM_012089 | 1211.643  | 1154.9    | NM_004910 | 5078.987  | 5389.216  |
| NM_001170 | 2121.857  | 1589.384  | AB013452  | 4324.712  | 4567.683  |
| NM_004696 | 955.897   | 479.332   | M93107    | 8750.352  | 9220.144  |
| NM_014342 | 4301.716  | 6511.998  | BC001479  | 15254.363 | 13636.803 |
| NM_014470 | 1457.516  | 1755.021  | NM_002461 | 55055.465 | 56572.391 |
| NM_001665 | 15431.492 | 15878.828 | NM_005771 | 897.6     | 672.338   |
| Z70704    | 1257.957  | 1394.987  | AB032986  | 57172.453 | 56801.57  |
| NM_014363 | 952.117   | 958.744   | NM_017528 | 51716.648 | 54406.645 |
| NM_000557 | 1393.571  | 1570.063  | NM_016032 | 9060.265  | 3901.67   |
| NM_001375 | 15564.098 | 19271.865 | NM_014324 | 54652.691 | 53318.691 |
| NM_002312 | 1272.694  | 1383.123  | NM_001687 | 51299.438 | 45709.355 |
| M20699    | 2791.307  | 2993.237  | AK026374  | 4702.303  | 3178.358  |
| NM_004774 | 3445.698  | 3398.281  | NM_001169 | 5856.806  | 3254.438  |
| NM_016937 | 3105.575  | 3178.401  | AK024648  | 44194.199 | 32728.799 |
| NM_002690 | 1581.669  | 1280.996  | NM_000719 | 1383.151  | 800.899   |
| NM_012328 | 3278.522  | 4189.547  | NM_003459 | 7394.286  | 5571.006  |
| NM_007341 | 1424.909  | 1200.239  | NM_000171 | 1937.625  | 1124.836  |
| NM_016508 | 1447.969  | 1229.66   | AL354615  | 2678.58   | 1723.645  |
| NM_006456 | 2144.329  | 1141.735  | NM_013349 | 47009.676 | 47707.141 |
| AK026062  | 2849.883  | 1713.834  | NM_003705 | 6064.089  | 4120.475  |
| AF047002  | 29849.336 | 27900.99  | NM_006861 | 7702.416  | 6291.643  |
| AL050082  | 4782.225  | 6477.249  | AJ010482  | 5746.499  | 3706.58   |
| NM_006623 | 28204.959 | 31575.984 | NM_000896 | 2285.92   | 1704.937  |
| NM_016134 | 1469.041  | 2126.139  | AB040672  | 13644.585 | 9962.032  |
| AL390185  | 1566.988  | 2239.03   | NM_002192 | 7113.863  | 5634.429  |
| AK025975  | 686.619   | 642.972   | NM_005491 | 20338.986 | 15827.121 |
| AK025583  | 71474.836 | 60692.629 | NM_003869 | 7783.887  | 6686.635  |

|           |           |           |           |           |           |
|-----------|-----------|-----------|-----------|-----------|-----------|
| NM_014664 | 3636.198  | 3603.337  | AK025599  | 2732.075  | 2195.153  |
| AL109788  | 9089.835  | 6411.693  | X63417    | 8175.231  | 6084.184  |
| NM_014952 | 7122.188  | 5466.34   | S94539    | 15880.863 | 12523.64  |
| AL133053  | 2622.817  | 1978.91   | NM_006402 | 6727.865  | 4054.923  |
| NM_018142 | 8242.286  | 6453.771  | NM_005785 | 2870.491  | 1825.708  |
| NM_017653 | 8258.636  | 7968.802  | NM_018248 | 3842.076  | 2417.832  |
| AL109695  | 22039.471 | 16330.617 | AK001695  | 18666.195 | 12779.622 |
| NM_016134 | 888.982   | 730.378   | NM_017886 | 18005.295 | 10559.483 |
| SR2       | 41459.922 | 40769.379 | NM_006252 | 2835.701  | 1669.909  |
| SR4       | 11649.45  | 15323.025 | NM_001721 | 2250.945  | 1304.143  |
| SR6       | 1499.802  | 2390.933  | NM_014397 | 29948.191 | 27271.42  |
| SR8       | 6215.771  | 24129.793 | AB023182  | 5461.472  | 5800.979  |
| SR10      | 19920.814 | 9674.442  | NM_003607 | 1907.64   | 1664.255  |
| CY3Cy5    | 907.853   | 91.609    | NM_006575 | 3372.285  | 2568.517  |
| NM_017609 | 2373.23   | 2958.128  | NM_013254 | 6526.041  | 5006.895  |
| AF086040  | 1143.58   | 1254.111  | NM_000437 | 47799.117 | 41611.492 |
| AB032988  | 5373.766  | 8633.844  |           |           |           |
| AK023559  | 6813.441  | 8119.432  |           |           |           |
| AL050166  | 5875.203  | 3319.681  |           |           |           |
| AK024254  | 1645.089  | 1754.57   |           |           |           |
| NM_018456 | 5285.553  | 5378.07   |           |           |           |
| AK026697  | 739.614   | 463.537   |           |           |           |
| NM_019021 | 2978.672  | 2360.975  |           |           |           |
| AK002183  | 1857.872  | 1534.132  |           |           |           |
| NM_018996 | 673.092   | 706.948   |           |           |           |
| AL137304  | 4013.563  | 3573.368  |           |           |           |
| AL049274  | 617.559   | 589.284   |           |           |           |
| NM_018279 | 5097.213  | 5995.8    |           |           |           |
| AF147369  | 449.388   | 412.894   |           |           |           |
| AK026883  | 975.302   | 693.926   |           |           |           |
| NM_014350 | 17113.896 | 16198.698 |           |           |           |
| U00925    | 31998.932 | 25225.867 |           |           |           |
| AK026385  | 1113.364  | 661.564   |           |           |           |
| AK026743  | 907.691   | 736.686   |           |           |           |
| AB037765  | 3732.947  | 3178.892  |           |           |           |
| AK025068  | 3832.815  | 3676.264  |           |           |           |
| AK026720  | 1696.634  | 1826.535  |           |           |           |
| AL137566  | 3393.509  | 3093.747  |           |           |           |
| AF087962  | 3879.462  | 3425.523  |           |           |           |
| AL050197  | 3804.565  | 3379.656  |           |           |           |
| AF085870  | 820.674   | 609.817   |           |           |           |
| AL050063  | 482.787   | 640.052   |           |           |           |
| AL080217  | 556.469   | 770.972   |           |           |           |
| AL117580  | 1594.28   | 2813.524  |           |           |           |
| AL110190  | 4960.719  | 3873.549  |           |           |           |
| AJ001893  | 5434.171  | 6162.208  |           |           |           |
| AK025534  | 1811.49   | 2520.783  |           |           |           |
| AK022577  | 1512.95   | 2134.993  |           |           |           |
| AF091526  | 1850.324  | 2813.146  |           |           |           |
| AK022170  | 673.947   | 745.094   |           |           |           |
| AF009258  | 54623.758 | 37239     |           |           |           |
| AF009305  | 1962.748  | 1991.092  |           |           |           |
| NM_006193 | 446.342   | 379.191   |           |           |           |

|           |           |           |
|-----------|-----------|-----------|
| AF056454  | 577.842   | 750.564   |
| AF009270  | 876.125   | 1023.146  |
| AF009318  | 1711.213  | 1478.288  |
| AF056421  | 838.258   | 544.972   |
| AF090889  | 812.238   | 1012.449  |
| AK001085  | 1258.926  | 1574.351  |
| AK001906  | 1225.145  | 1166.59   |
| AK021528  | 1744.933  | 2031.585  |
| AK021746  | 1648.139  | 1460.773  |
| AK001136  | 1687.091  | 1638.645  |
| AK021617  | 691.275   | 723.868   |
| AK021810  | 881.212   | 763.87    |
| AF086317  | 8084.659  | 3725.26   |
| AL390178  | 2919.988  | 3353.419  |
| NM_005383 | 1767.407  | 437.459   |
| Z36806    | 586.11    | 211.079   |
| AJ008121  | 46383.941 | 31229.205 |
| AJ008153  | 4201.583  | 2460.05   |
| AK023739  | 1058.776  | 937.994   |
| NM_005830 | 12341.612 | 12703.942 |
| AL389983  | 4049.112  | 4086.788  |
| AJ008159  | 1051.18   | 1331.88   |
| AK000995  | 2251.235  | 1984.716  |
| U00959    | 4659.069  | 4856.827  |
| AF147306  | 6995.95   | 6822.534  |
| AF086267  | 6003.815  | 5239.784  |
| X74606    | 2806.847  | 3933.803  |
| NM_012183 | 994.002   | 1523.055  |
| AK026785  | 3917.969  | 4127.414  |
| AK001938  | 463.401   | 385.222   |
| AK022994  | 1032.574  | 1147.831  |
| AL049466  | 4232.753  | 2990.064  |
| AB037802  | 1384.477  | 483.184   |
| AL137450  | 9662.688  | 13456.885 |
| AK023058  | 2502.48   | 3273.612  |
| AJ227878  | 1547.495  | 1240.974  |
| NM_012064 | 3368.163  | 4505.06   |
| AK092508  | 2988.464  | 1975.34   |
| AK027111  | 55117.898 | 45168.898 |
| NM_003518 | 1249.658  | 1381.321  |
| M60749    | 5993.076  | 6225.608  |
| AF056424  | 501.21    | 726.393   |
| X79986    | 1890.711  | 1914.537  |
| NM_003523 | 10459.331 | 9249.799  |
| X01448    | 3177.609  | 2617.695  |
| AK056351  | 60139.41  | 53930.078 |
| NM_014690 | 32071.676 | 28567.543 |
| NM_017698 | 7791.627  | 7799.118  |
| AF086490  | 5460.892  | 7998.918  |
| AF131738  | 45846.461 | 34146.934 |
| AK021666  | 3449.905  | 2965.302  |
| AK024081  | 1047.873  | 1010.63   |
| AK024825  | 8587.562  | 7107.73   |

|           |           |           |
|-----------|-----------|-----------|
| NM_00079E | 1087.19   | 1022.252  |
| AB037761  | 30207.715 | 13088.831 |
| NM_01400E | 38320.637 | 38831.672 |
| NM_014731 | 22716.773 | 30511.543 |
| AF035191  | 25370.65  | 32769.477 |
| NM_00405E | 2392.823  | 2841.129  |
| NM_004527 | 3564.523  | 4025.049  |
| NM_01206E | 13965.188 | 8829.933  |
| AK026717  | 638.466   | 506.289   |
| NM_001507 | 2955.819  | 3969.632  |
| X92108    | 2068.193  | 1865.372  |
| AL389876  | 2891.598  | 2764.426  |
| AK022120  | 1490.325  | 2204.963  |
| AL137363  | 368.321   | 422.545   |
| Z70762    | 1713.809  | 1707.14   |
| D17099    | 972.563   | 1078.177  |
| BF037206  | 2042.741  | 2506.126  |
| AK021474  | 12410.169 | 13110.252 |
| AK023642  | 1499.537  | 1262.858  |
| AW511510  | 427.737   | 731.007   |
| U52827    | 1487.755  | 1540.852  |
| AB031547  | 813.541   | 855.647   |
| NM_00397C | 4020.838  | 2405.698  |
| AK022496  | 2033.007  | 1465.493  |
| AB042636  | 790.151   | 410.566   |
| AB033035  | 3437.248  | 1707.146  |
| NM_00288E | 11604.559 | 9899.408  |
| NM_01901E | 1606.146  | 748.672   |
| NM_000141 | 1014.304  | 507.291   |
| NM_01615C | 2122.583  | 1527.639  |
| U57058    | 1916.35   | 2200.584  |
| AL137452  | 5302.77   | 5527.979  |
| NM_00431E | 27646.762 | 30123.113 |
| NM_001347 | 13004.654 | 16445.955 |
| AK024549  | 13668.213 | 14904.789 |
| NM_00633E | 4948.778  | 5313.027  |
| NM_00716E | 7712.203  | 6888.608  |
| NM_000261 | 1904.799  | 2010.212  |
| NM_00260E | 2116.525  | 2763.911  |
| NM_00257C | 7183.25   | 8929.87   |
| NM_00318E | 7111.353  | 11370.272 |
| NM_001657 | 520.774   | 909.651   |
| NM_00358E | 1523.115  | 2074.164  |
| NM_019851 | 7497.542  | 8922.059  |
| NM_00323E | 649.97    | 762.728   |
| NM_01409E | 27458.926 | 24808.855 |
| NM_00570E | 6844.694  | 5451.8    |
| NM_001261 | 5160.312  | 3198.25   |
| NM_001977 | 3206.515  | 1579.436  |
| NM_00721E | 1821.833  | 1505.057  |
| AK026854  | 4638.673  | 3402.543  |
| NM_00126E | 6633.709  | 4963.813  |
| NM_00250E | 716.985   | 737.349   |

|           |           |           |
|-----------|-----------|-----------|
| NM_00490E | 9631.561  | 6629.398  |
| X98261    | 474.696   | 432.081   |
| NM_012447 | 21658.525 | 19169.074 |
| AK027013  | 26929.176 | 28023.977 |
| NM_001344 | 32105.994 | 36186.898 |
| NM_018294 | 3348.794  | 3197.763  |
| AL389934  | 4491.78   | 4710.988  |
| NM_00433C | 9661.822  | 8670.473  |
| AF151802  | 13378.249 | 11594.698 |
| AB006746  | 1894.201  | 1729.231  |
| NM_00649E | 1955.604  | 2201.773  |
| AB023233  | 3692.312  | 4628.084  |
| NM_00436E | 1208.187  | 1445.723  |
| NM_00437C | 1890.156  | 2232.619  |
| AB040898  | 1230.676  | 990.957   |
| NM_01615E | 1169.864  | 1248.402  |
| NM_001224 | 9996.53   | 8219.375  |
| NM_017811 | 9993.443  | 8751.212  |
| NM_00156E | 6155.402  | 5442.711  |
| AK023284  | 3246.329  | 2575.106  |
| AF106069  | 672.221   | 462.54    |
| NM_005101 | 5457.25   | 5616.929  |
| NM_00420E | 662.385   | 581.607   |
| AF130060  | 16885.416 | 18750.865 |
| NM_007057 | 17565.576 | 16785.82  |
| NM_000177 | 4611.019  | 4448.351  |
| NM_003387 | 24065.377 | 28964.238 |
| U60665    | 6756.334  | 6195.331  |
| NM_005507 | 61618.645 | 59244.746 |
| AL080133  | 7931.934  | 7463.945  |
| AY014403  | 5399.625  | 3920.406  |
| NM_006912 | 9761.132  | 12231.869 |
| X12534    | 8692.729  | 10453.712 |
| NM_018367 | 2016.647  | 2441.516  |
| NM_001363 | 21992.051 | 19722.623 |
| NM_014323 | 8512.571  | 8656.194  |
| NM_00320E | 3011.517  | 3185.812  |
| AB002324  | 1400.78   | 1607.915  |
| AK026231  | 2660.775  | 2457.929  |
| NM_00214C | 20902.402 | 19017.203 |
| NM_020143 | 9922.314  | 9654.266  |
| NM_01246E | 7191.245  | 7525.631  |
| NM_005131 | 3089.231  | 3959.594  |
| NM_00705E | 4619.829  | 5664.798  |
| AF083383  | 5675.65   | 7057.482  |
| NM_00692E | 5932.996  | 7406.925  |
| NM_00489C | 50371.68  | 51606.77  |
| AK023181  | 8098.287  | 7908.452  |
| NM_004294 | 3295.838  | 2895.08   |
| NM_005051 | 36824.703 | 31119.902 |
| NM_00196E | 51313.625 | 43516.215 |
| D17259    | 61483.691 | 64633.039 |
| AB002366  | 2097.082  | 1640.087  |



|           |           |           |
|-----------|-----------|-----------|
| AF264627  | 59827.082 | 59100.422 |
| NM_018130 | 18765.412 | 20275.773 |
| AF085878  | 1396.506  | 1283.425  |
| AB006630  | 2353.541  | 2747.521  |
| NM_004453 | 3774.682  | 4147.688  |
| NM_016229 | 6124.167  | 5518.281  |
| NM_018244 | 7041.756  | 6751.765  |
| NM_002492 | 23051.18  | 19251.934 |
| AB046855  | 1704.523  | 1848.097  |
| NM_005642 | 10831.498 | 10952.313 |
| NM_018105 | 3587.557  | 3450.359  |
| AK023452  | 12118.727 | 12612.074 |
| AF155065  | 594.138   | 800.005   |
| NM_000332 | 921.408   | 925.992   |
| AK022215  | 13384.648 | 13266.186 |
| U90305    | 1360.54   | 1628.965  |
| NM_001527 | 30962.518 | 26848.086 |
| AK025269  | 5563.933  | 4980.978  |
| NM_001438 | 1173.609  | 1150.577  |
| AB040971  | 1132.455  | 1064.034  |
| NM_006562 | 3934.316  | 4003.836  |
| X65665    | 1285.848  | 1405.946  |
| NM_003112 | 1539.272  | 1959.453  |
| NM_018951 | 531.212   | 565.43    |
| AL080170  | 6434.539  | 7588.641  |
| AB039903  | 11719.355 | 12369.815 |
| NM_000542 | 5627.393  | 6983.037  |
| NM_014625 | 754.189   | 773.824   |
| NM_006851 | 2590.925  | 2635.708  |
| AK001560  | 1757.447  | 1721.566  |
| AB001328  | 1176.208  | 1125.187  |
| NM_000948 | 990.599   | 1281.353  |
| H99588    | 1688.589  | 1782.716  |
| X00588    | 1942.174  | 2051.544  |
| AI359037  | 42055.828 | 45698.453 |
| BI754285  | 460.33    | 1043.156  |
| X15998    | 825.73    | 1038.357  |
| M76482    | 485.308   | 631.717   |
| X17519    | 653.739   | 792.985   |
| NM_001883 | 800.826   | 808.953   |
| NM_004628 | 3978.871  | 3775.94   |
| L31785    | 2669.042  | 3204.076  |
| H-M 69043 | 19957.273 | 18639.484 |
| AF077374  | 2149.087  | 2276.936  |
| U43901    | 2882.005  | 2807.152  |
| X59065    | 1551.179  | 1804.885  |
| M59828    | 38111.449 | 42218.957 |
| NM_002168 | 10955.04  | 9702.078  |
| NM_015658 | 1399.745  | 1814.451  |
| NM_000589 | 6950.96   | 7199.319  |
| NM_016546 | 23609.141 | 28100.215 |
| AF309653  | 1933.967  | 2062.456  |
| NM_002620 | 12574.656 | 12084.903 |

|           |           |           |
|-----------|-----------|-----------|
| S79267    | 2287.035  | 2241.843  |
| NM_00181E | 1654.638  | 1227.86   |
| NM_003784 | 50335.301 | 55625.641 |
| NM_00019E | 24787.553 | 25393.035 |
| NM_00544E | 18516.498 | 16389.385 |
| NM_01489E | 2739.867  | 2993.452  |
| NM_00363C | 10459.078 | 12809.494 |
| NM_00004E | 7177.96   | 8558.375  |
| NM_00321E | 2001.302  | 2433.675  |
| NM_00670E | 3998.728  | 4838.012  |
| NM_00061E | 29996.367 | 34270.605 |
| NM_004257 | 30691.748 | 31236.223 |
| NM_00068E | 1051.397  | 1128.189  |
| NM_00362E | 2855.733  | 2552.207  |
| NM_005901 | 9387.104  | 11425.448 |
| NM_00424E | 2825.419  | 4231.592  |
| NM_00095E | 423.116   | 475.39    |
| NM_01906E | 497.273   | 822.405   |
| NM_00491C | 2751.906  | 2471.7    |
| AB013452  | 3863.479  | 3576.751  |
| M93107    | 6464.088  | 6869.629  |
| BC001479  | 6475.729  | 6868.35   |
| NM_002461 | 46881.805 | 48420.395 |
| NM_005771 | 1388.708  | 1574.219  |
| AB032986  | 50889.117 | 48399.453 |
| NM_01752E | 51712.848 | 52059.039 |
| NM_01603E | 2661.26   | 3374.512  |
| NM_014324 | 48000.742 | 49645.863 |
| NM_001687 | 45698.676 | 47470.797 |
| AK026374  | 1421.927  | 1843.156  |
| NM_00345E | 5070.069  | 7013.331  |
| NM_01334E | 31267.225 | 36552.137 |
| NM_006861 | 6968.877  | 8254.135  |
| AK023142  | 2022.922  | 2669.295  |
| U61740    | 33047.07  | 34993.727 |
| NM_00640E | 56367.133 | 56237.664 |
| AB049054  | 9025.666  | 8416.323  |
| NM_015071 | 2446.412  | 3152.527  |
| NM_013227 | 4945.91   | 4228.899  |
| Z83803    | 1721.968  | 1700.752  |
| AF027205  | 26584.791 | 32416.119 |
| AF075012  | 2859.307  | 4393.27   |
| NM_00157C | 2487.83   | 2822.587  |
| AB040672  | 798.763   | 689.339   |
| NM_00219E | 1575.031  | 1266.924  |
| NM_005491 | 13630.016 | 10869.877 |
| NM_00386E | 2147.277  | 2089.965  |
| AK025599  | 2715.878  | 3679.482  |
| X63417    | 6123.617  | 7177.357  |
| S94539    | 8766.482  | 8048.05   |
| S45570    | 406.55    | 632.438   |
| NM_00640E | 4142.979  | 4410.128  |
| NM_00578E | 2686.051  | 2751      |

|           |           |           |
|-----------|-----------|-----------|
| NM_01824E | 2620.289  | 2390.86   |
| AK001695  | 11276.348 | 12226.989 |
| NM_01788E | 11272.756 | 12813.876 |
| NM_00625E | 2559.855  | 3202.621  |
| NM_001721 | 2548.935  | 2886.346  |
| NM_014397 | 25120.855 | 30424.205 |
| AB023182  | 3570.649  | 3477.884  |
| NM_003607 | 1620.186  | 1836.658  |
| NM_00657E | 2650.104  | 2434.792  |
| NM_013254 | 5831.013  | 4759.519  |
| NM_000437 | 49086.32  | 48540.664 |
| AB046819  | 44677.945 | 52278.754 |
| NM_00609C | 22861.041 | 27433.551 |
| NM_00290C | 15513.99  | 17422.744 |
| NM_00054E | 5898.485  | 5950.307  |
| NM_01462E | 660.935   | 534.297   |
| NM_006851 | 2257.74   | 2400.57   |
| AK001560  | 1543.057  | 1366.72   |
| AB001328  | 1067.21   | 1208.782  |
| NM_00094E | 1041.388  | 1068.67   |
| H99588    | 1373.42   | 1521.869  |
| X00588    | 1873.501  | 1810.509  |
| AI359037  | 33159.617 | 33798.582 |
| BI754285  | 591.952   | 385.254   |
| X15998    | 1021.992  | 788.729   |
| M76482    | 442.075   | 740.785   |
| X17519    | 430.177   | 644.094   |
| NM_00188E | 810.784   | 937.652   |
| NM_00462E | 4112.611  | 4797.825  |
| L31785    | 2735.994  | 3746.505  |
| H-M 69043 | 17785.605 | 16392.336 |
| AF077374  | 1937.376  | 1517.573  |
| U43901    | 2374.097  | 1964.739  |
| X59065    | 1640.596  | 1080.34   |
| M59828    | 30744.082 | 28142.859 |
| AJ010482  | 7228.028  | 7850.043  |
| NM_00089E | 1333.135  | 1555.089  |
| NM_01654E | 21251.154 | 18994.127 |
| AF309653  | 1859.656  | 1145.535  |
| NM_00262C | 11882.563 | 11004.224 |
| S79267    | 2155.132  | 2269.571  |
| NM_00181E | 1034.351  | 1228.988  |
| NM_003784 | 53064.559 | 57182.066 |
| NM_00019E | 18865.027 | 19160.191 |
| NM_00544E | 13412.009 | 11421.753 |
| NM_01489E | 1916.515  | 2258.162  |
| NM_00363C | 8588.523  | 8115.782  |
| NM_00004E | 5893.172  | 6285.511  |
| NM_00321E | 1994.207  | 1809.535  |
| NM_00670E | 3952.894  | 4201.515  |
| NM_00061E | 23954.424 | 27953.232 |
| NM_004257 | 27217.174 | 30662.391 |
| NM_00068E | 1127.995  | 1563.227  |

|           |           |           |
|-----------|-----------|-----------|
| NM_00362  | 3020.733  | 2659.591  |
| NM_005901 | 7776.379  | 8353.772  |
| NM_00424  | 2212.479  | 1826.57   |
| NM_00095  | 638.702   | 749.696   |
| NM_01906  | 456.912   | 748.962   |
| NM_00236  | 961.592   | 1251.795  |
| AL080170  | 8909.099  | 11910.4   |
| AB039903  | 15732.476 | 16280.334 |
| M93107    | 5580.415  | 5089.466  |
| BC001479  | 6619.341  | 5865.32   |
| NM_002461 | 34869.898 | 26070.938 |
| NM_005771 | 1144.933  | 1074.529  |
| AB032986  | 50165.707 | 51083.969 |
| NM_01752  | 51129.156 | 51557.559 |
| NM_01603  | 1501.274  | 1527.086  |
| NM_01432  | 26296.555 | 32321.859 |
| NM_001687 | 30934.115 | 33048.996 |
| AK026374  | 1723.474  | 1365.757  |
| NM_00345  | 5041.677  | 7146.807  |
| NM_01334  | 24070.264 | 25976.66  |
| NM_006861 | 5853.277  | 6029.665  |
| AK023142  | 2098.078  | 2214.098  |
| U61740    | 26596.9   | 28500.799 |
| NM_00640  | 55440.73  | 59155.566 |
| AB049054  | 8456.435  | 8694.961  |
| NM_015071 | 2217.543  | 2761.479  |
| NM_013227 | 4002.663  | 3727.052  |
| Z83803    | 1557.033  | 1345.156  |
| AF027205  | 23737.363 | 21901.949 |
| AF075012  | 2740.638  | 3109.159  |
| NM_001570 | 3403.296  | 4099.951  |
| NM_01565  | 2519.568  | 2565.736  |
| NM_00058  | 10562.959 | 11949.438 |
| NM_005491 | 9745.021  | 5735.69   |
| NM_00386  | 1465.809  | 594.195   |
| AK025599  | 2007.417  | 1591.115  |
| X63417    | 6386.676  | 5481.979  |
| S94539    | 7634.991  | 6673.315  |
| S45570    | 443.307   | 729.301   |
| NM_00640  | 3271.83   | 3385.699  |
| NM_00578  | 2509.652  | 2061.425  |
| NM_01824  | 2583.552  | 2333.914  |
| AK001695  | 9228.628  | 8818.622  |
| NM_01788  | 10873.387 | 11645.104 |
| NM_00625  | 2357.863  | 3512.975  |
| NM_001721 | 1786.877  | 2466.089  |
| NM_014397 | 20905.885 | 23176.01  |
| AB023182  | 3287.426  | 3230.733  |
| NM_003607 | 1186.454  | 1463.106  |
| NM_00657  | 2308.893  | 2743.712  |
| NM_01325  | 4946.958  | 6166.446  |
| NM_000437 | 39019.105 | 37686.352 |
| AB046819  | 34105.414 | 38766.16  |

|           |           |           |
|-----------|-----------|-----------|
| NM_00609C | 20269.914 | 22887.305 |
| NM_00290C | 15118.585 | 15528.732 |
| NM_00491C | 4136.174  | 3704.394  |
| AB013452  | 4308.637  | 4778.86   |
| NM_006851 | 1962.906  | 1383.509  |
| AK001560  | 1090.418  | 452.943   |
| AB001328  | 973.121   | 572.567   |
| NM_00094E | 842.838   | 544.909   |
| H99588    | 1296.588  | 1003.154  |
| X00588    | 1804.431  | 1655.432  |
| AI359037  | 31212.984 | 29892.613 |
| X15998    | 1359.653  | 1411.726  |
| X17519    | 509.565   | 539.092   |
| NM_00188E | 710.921   | 1249.285  |
| NM_00462E | 3134.703  | 3674.369  |
| L31785    | 2445.094  | 3481.195  |
| H-M 69043 | 15873.699 | 15195.634 |
| AF077374  | 1539.552  | 1330.989  |
| U43901    | 1712.344  | 1720.256  |
| X59065    | 1370.026  | 1418.852  |
| M59828    | 32028.344 | 26989.518 |
| AJ010482  | 6917.025  | 7364.335  |
| NM_00089E | 1278.829  | 1237.678  |
| AB040672  | 975.455   | 926.797   |
| NM_00219E | 2380.162  | 2166.184  |
| NM_01489E | 2506.946  | 1865.029  |
| NM_00363C | 8729.922  | 5747.84   |
| NM_00004E | 6537.695  | 4032.777  |
| NM_00321E | 1581.053  | 661.576   |
| NM_00670E | 3130.314  | 2165.09   |
| NM_00061E | 16912.615 | 13646.799 |
| NM_004257 | 19203.127 | 13088.421 |
| NM_00068E | 730.71    | 946.09    |
| NM_00362E | 2170.581  | 1757.449  |
| NM_005901 | 6855.804  | 7842.263  |
| NM_00424E | 1293.277  | 1273.952  |
| NM_00095E | 314.059   | 380.004   |
| NM_00131E | 496.938   | 771.438   |
| NM_00236E | 246.301   | 665.83    |
| NM_00479E | 1052.121  | 1198.674  |
| NM_00043E | 709.549   | 876.72    |
| NM_00184E | 2828.536  | 2709.731  |
| AB017169  | 1819.432  | 1993.542  |
| AL080170  | 7628.249  | 9906.859  |
| AB039903  | 13717.313 | 13124.682 |
| NM_00054E | 9047.623  | 9754.398  |
| NM_01462E | 1074.985  | 1158.964  |
| NM_00582E | 3403.711  | 3929.55   |
| NM_00046E | 2702.835  | 3794.698  |
| NM_01554A | 692.262   | 718.065   |
| NM_01590E | 14475.982 | 7836.333  |
| AK022600  | 1007.514  | 473.098   |
| AK023142  | 1340.813  | 815.174   |

|           |           |           |
|-----------|-----------|-----------|
| U61740    | 17915.859 | 11655.248 |
| NM_00640  | 49183.188 | 55724.457 |
| AB049054  | 6281.047  | 5490.436  |
| NM_015071 | 1834.485  | 1831.47   |
| NM_013227 | 2881.694  | 2555.694  |
| Z83803    | 877.414   | 861.532   |
| AF027205  | 17124.566 | 15697.073 |
| AF075012  | 1552.48   | 1758.635  |
| NM_001570 | 1704.894  | 1978.437  |
| NM_015658 | 1379.826  | 1548.678  |
| NM_000589 | 7296.937  | 7415.519  |
| NM_016546 | 27731.49  | 27560.148 |
| AF309653  | 3007.16   | 2112.213  |
| NM_002620 | 11940.179 | 10019.929 |
| S79267    | 1821.826  | 1499.323  |
| NM_001816 | 2102.163  | 1807.373  |
| NM_003784 | 57577.863 | 60818.754 |
| NM_000195 | 32399.744 | 28533.33  |
| NM_005445 | 21549.941 | 19064.186 |
| AB046819  | 18622.061 | 23732.834 |
| NM_006090 | 8563.944  | 11489.638 |
| NM_002900 | 8886.342  | 10259.097 |
| NM_004910 | 2832.927  | 3024.474  |
| AB013452  | 4051.145  | 2163.42   |
| M93107    | 4439.83   | 2635.784  |
| BC001479  | 4053.379  | 2849.319  |
| NM_002461 | 25088.654 | 20298.232 |
| NM_005771 | 852.813   | 910.263   |
| AB032986  | 46462.395 | 50889.836 |
| NM_017528 | 44716.543 | 46875.207 |
| NM_016032 | 2358.929  | 2338.991  |
| NM_014324 | 46512.871 | 43663.707 |
| NM_001687 | 41005     | 34028.219 |
| AK026374  | 1580.979  | 1451.399  |
| NM_001169 | 3998.388  | 4098.365  |
| AK024648  | 29142.613 | 32557.682 |
| NM_000719 | 1082.277  | 933.098   |
| NM_003459 | 5309.8    | 5834.195  |
| AL354615  | 2042.825  | 1672.845  |
| NM_013349 | 45104.223 | 50898.609 |
| NM_003705 | 5803.161  | 5354.465  |
| NM_006861 | 9603.716  | 9008.732  |
| AJ010482  | 4066.131  | 5636.754  |
| NM_000896 | 1135.684  | 1207.409  |
| AB040672  | 529.374   | 778.794   |
| NM_002192 | 1285.713  | 1309.769  |
| NM_005491 | 8244.481  | 3047.972  |
| NM_003869 | 996.584   | 490.768   |
| AK025599  | 1672.388  | 1611.632  |
| X63417    | 4872.564  | 5142.772  |
| S94539    | 9088.286  | 8716.507  |
| NM_006402 | 3765.263  | 2843.52   |
| NM_005785 | 2673.5    | 1820.426  |

|                  |           |           |
|------------------|-----------|-----------|
| <b>NM_01824</b>  | 2155.524  | 1708.113  |
| <b>AK001695</b>  | 6544.059  | 5243.857  |
| <b>NM_01788</b>  | 10975.281 | 7370.186  |
| <b>NM_00625</b>  | 2367.874  | 1767.059  |
| <b>NM_001721</b> | 2149.349  | 1701.8    |
| <b>NM_01439</b>  | 25587.725 | 18364.85  |
| <b>AB023182</b>  | 3751.941  | 2887.431  |
| <b>NM_003607</b> | 1591.512  | 1250.399  |
| <b>NM_00657</b>  | 2869.729  | 2031.584  |
| <b>NM_01325</b>  | 6373.388  | 5056.989  |
| <b>NM_000437</b> | 46416.656 | 38466.441 |























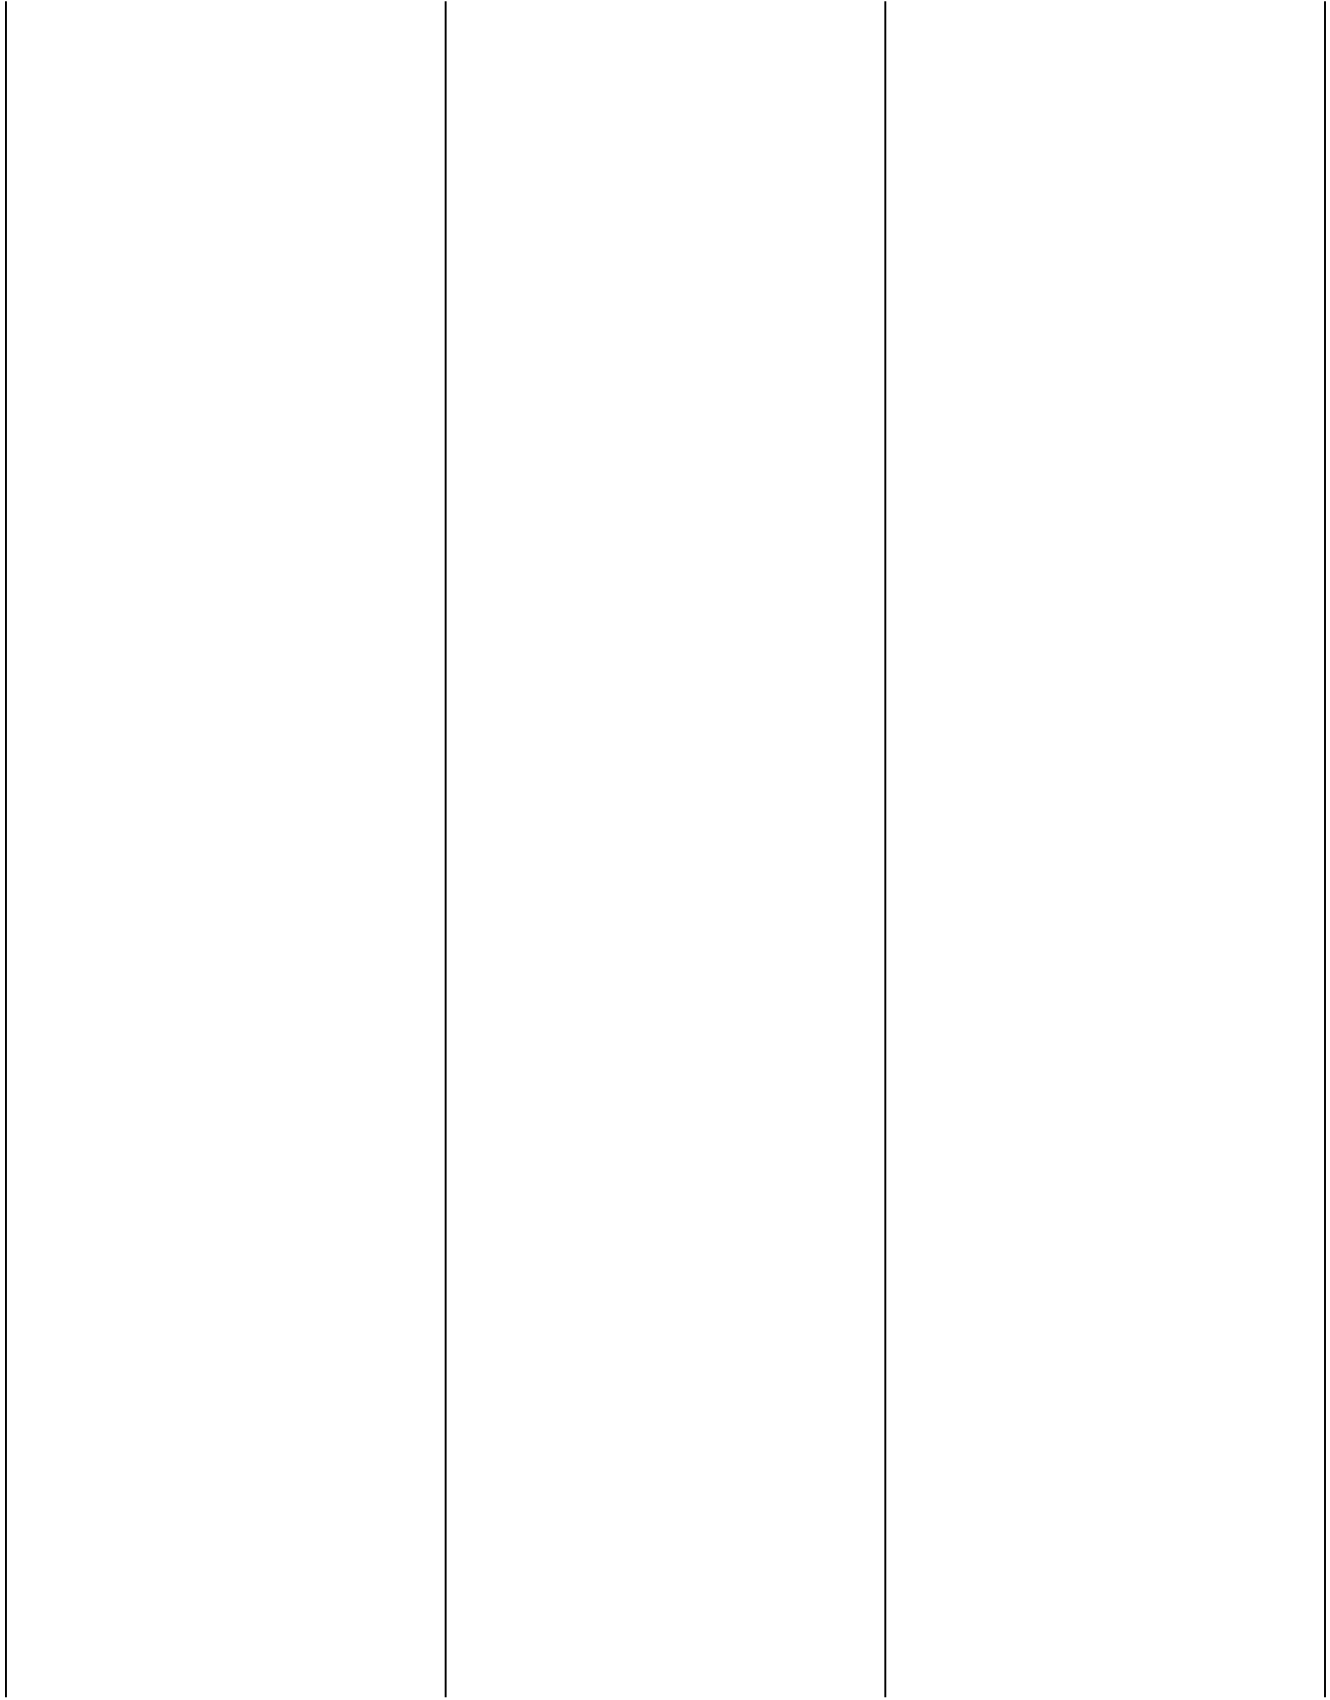

















| <i>Replicate 1</i> |                |                 | <i>Replicate 2</i> |                |                 |
|--------------------|----------------|-----------------|--------------------|----------------|-----------------|
|                    | <i>control</i> | <i>2uM TPEN</i> |                    | <i>control</i> | <i>2uM TPEN</i> |
| <b>ID</b>          | <b>AMPCH1</b>  | <b>AMPCH2</b>   | <b>ID</b>          | <b>AMPCH1</b>  | <b>AMPCH2</b>   |
| CY3Cy5             | 7233.78        | 81.803          | CY3Cy5             | 22761.316      | 655.398         |
| NM_006003          | 30074.832      | 24847.238       | NM_006003          | 11874.078      | 14209.968       |
| NM_006555          | 8810           | 7483.321        | NM_006555          | 5867.445       | 5925.951        |
| NM_004271          | 56109.461      | 56205.785       | NM_004271          | 36631.523      | 44150.844       |
| AF129928           | 2098.209       | 2062.675        | AF129928           | 1787.751       | 2090.001        |
| AF070610           | 565.063        | 1278.096        | AK022282           | 904.939        | 871.88          |
| AK022282           | 1165.839       | 750.308         | NM_018266          | 2247.246       | 2257.609        |
| NM_018266          | 4199.337       | 2803.611        | NM_004867          | 1080.037       | 1144.727        |
| NM_004867          | 1105.816       | 1020.919        | AL050021           | 10452.697      | 12175.713       |
| AL050021           | 24383.037      | 21007.787       | AB002448           | 584.833        | 748.67          |
| AB002448           | 2070.068       | 1557.344        | AF070580           | 711.444        | 736.112         |
| AF070580           | 569.665        | 949.183         | NM_003838          | 10545.241      | 13326.744       |
| NM_003838          | 3177.101       | 3153.592        | AB032991           | 1017.569       | 2435.559        |
| AB032991           | 4617.473       | 3955.189        | AK026985           | 5761.215       | 8429.268        |
| AK026985           | 8025.048       | 8235.279        | AF007153           | 608.803        | 981.879         |
| AF007153           | 433.422        | 406.035         | AK000855           | 1307.859       | 1905.252        |
| AK000855           | 2582.886       | 2807.28         | NM_006003          | 8556.785       | 11973.278       |
| NM_006003          | 36078.539      | 35166.719       | NM_006555          | 4903.941       | 5487.544        |
| NM_006555          | 8181.343       | 7894.268        | SR1                | 64058.305      | 54011.832       |
| SR1                | 69656.898      | 68088.266       | SR3                | 35316.852      | 44456.203       |
| SR3                | 54879.23       | 46697.727       | SR5                | 5967.656       | 6924.391        |
| SR5                | 8343.079       | 7113.917        | SR7                | 5502.02        | 35081.879       |
| SR7                | 8414.205       | 36548.48        | SR9                | 10833.112      | 3200.137        |
| CY3Cy5             | 15415.432      | 278.22          | CY3Cy5             | 35452.832      | 2107.907        |
| M21536             | 1526.244       | 1194.895        | M21536             | 631.149        | 770.224         |
| NM_014029          | 64004.422      | 69971.57        | NM_014029          | 43227.152      | 53662.906       |
| L08443             | 10537.921      | 9502.15         | Z83937             | 1994.496       | 2325.791        |
| L38936             | 2292.562       | 1645.828        | L08443             | 5532.488       | 6014.963        |
| D55643             | 5657.49        | 3805.636        | L38936             | 2157.61        | 2453.333        |
| AK025818           | 4911.043       | 3808.073        | D55643             | 4616.217       | 3887.121        |
| AK023185           | 7013.863       | 4148.93         | AK025818           | 3973.464       | 3824.438        |
| AL359622           | 1405.232       | 1616.998        | AK023185           | 3846.505       | 3669.66         |
| AL050204           | 5278.861       | 4537.308        | AL359622           | 1535.53        | 1305.407        |
| AF085999           | 1207.855       | 1429.147        | AL050204           | 4899.383       | 5613.988        |
| AK025316           | 2958.747       | 2588.935        | AF085999           | 1490.107       | 1418.349        |
| AK026357           | 4706.186       | 4710.487        | AK025316           | 2535.391       | 2884.289        |
| NM_018323          | 12363.707      | 12048.92        | AK026357           | 3074.591       | 4296.513        |
| NM_014235          | 15969.324      | 18016.238       | NM_018323          | 8081.213       | 10478.916       |
| AK026922           | 3917.156       | 3698.02         | NM_014235          | 9015.128       | 12524.264       |
| AK022426           | 882.702        | 879.175         | AK026922           | 2415.999       | 3439.512        |
| AJ270695           | 1364.397       | 1602.624        | AK022426           | 2072.365       | 2142.175        |
| AK024517           | 3194.649       | 1768.446        | AK022645           | 989.457        | 1065.438        |
| AK024585           | 2628.938       | 1964.872        | NM_014353          | 829.453        | 851.582         |
| AK024887           | 4716.214       | 3809.3          | AF070541           | 1444.653       | 1556.52         |
| AK025005           | 1814.129       | 1493.88         | AF070552           | 9415.791       | 12261.878       |
| AK023089           | 4474.364       | 3617.159        | AJ270695           | 594.013        | 665.799         |
| AK026059           | 67112.094      | 81583.781       | AK024517           | 4247.332       | 4269.937        |
| AK025814           | 6307.336       | 6154.791        | AK024585           | 1770           | 2152.64         |

|           |           |           |            |           |           |
|-----------|-----------|-----------|------------|-----------|-----------|
| AK000655  | 12257.475 | 13750.378 | AK024887   | 4496.448  | 4035.492  |
| AL117611  | 1568.712  | 2269.271  | AK025005   | 2039.015  | 2006.4    |
| AF131841  | 484.732   | 725.477   | AK023089   | 4254.342  | 4233.784  |
| NM_017936 | 5158.386  | 5961.951  | AK026059   | 62203.258 | 64405.801 |
| Y10209    | 416.491   | 674.279   | AK026942   | 2293.749  | 2008.752  |
| X64983    | 1068.753  | 1236.858  | AK025814   | 3869.406  | 3913.121  |
| D63134    | 1747.372  | 2096.229  | AK000655   | 18499.109 | 21587.588 |
| AJ227893  | 941.979   | 1189.588  | AL117611   | 1345.494  | 1574.652  |
| Y10513    | 5543.321  | 6929.842  | NM_017936  | 5799.095  | 7054.051  |
| AK055950  | 1807.364  | 1273.7    | Y10209     | 642.024   | 823.074   |
| AL050122  | 1040.796  | 760.242   | X64983     | 968.587   | 1073.945  |
| AK000839  | 22375.369 | 19198.781 | D63134     | 2239.414  | 2179.3    |
| AF086195  | 867.938   | 896.663   | AJ227893   | 1456.598  | 1461.111  |
| AK021963  | 597.466   | 484.959   | X64990     | 569.436   | 573.296   |
| AK022183  | 557.222   | 600.353   | Y10513     | 8105.374  | 7928.096  |
| AK026345  | 4976.484  | 3947.931  | AK055950   | 1778.464  | 1909.081  |
| AB007971  | 758.659   | 537.202   | AL050122   | 1178.801  | 1458.838  |
| NM_018278 | 5205.774  | 4593.52   | AK000839   | 14170.78  | 15823.73  |
| AK026328  | 1048.278  | 1154.218  | AF086195   | 943.301   | 1118.023  |
| AK000417  | 2177.958  | 2659.334  | AK022183   | 638.829   | 541.768   |
| AK000864  | 8236.713  | 7719.071  | NM_018168  | 722.267   | 593.632   |
| AK022414  | 4364.272  | 4986.6    | AK026345   | 4835.731  | 4572.675  |
| NM_016094 | 8420.78   | 4852.926  | AB007971   | 534.373   | 936.855   |
| AK025003  | 2662.74   | 1683.667  | NM_018278  | 4423.588  | 5301.586  |
| NM_001427 | 2505.669  | 1797.966  | AK000417   | 1414.746  | 1664.22   |
| NM_016175 | 1471.365  | 1138.39   | AK000864   | 12508.04  | 12638.624 |
| M15639    | 5468.833  | 3947.716  | AK022414   | 1889.312  | 1750.728  |
| AF130084  | 1811.511  | 1839.72   | NM_017624  | 6398.526  | 6617.664  |
| AF133334  | 17609.6   | 12853.925 | NM_017928  | 1646.872  | 1964.344  |
| NM_016290 | 6854.455  | 6546.939  | AK000907   | 5782.391  | 5085.146  |
| AK026498  | 2731.894  | 2892.237  | NM_016094  | 7564.604  | 7543.512  |
| AF086151  | 1474.095  | 1506.004  | AK025003   | 4710.29   | 4708.4    |
| AK095587  | 11440.067 | 14180.403 | AK023601   | 440.348   | 619.632   |
| AF086043  | 2166.572  | 2175.597  | NM_001427  | 2587.254  | 2911.45   |
| AK024174  | 2177.18   | 1592.242  | NM_016175  | 2361.158  | 2451.028  |
| AK000038  | 3761.623  | 3123.01   | M15639     | 7070.971  | 6566.45   |
| BC010084  | 1353.042  | 1584.061  | AF130084   | 3913.281  | 3228.806  |
| U10513    | 4224.893  | 3230.739  | AF133334   | 19913.666 | 21031.018 |
| L10151    | 62811.168 | 64107.199 | AK023617   | 651.016   | 490.442   |
| AK022203  | 2170.293  | 2186.635  | NM_016290  | 7602.266  | 7226.787  |
| BC032236  | 759.871   | 970.718   | AK026498   | 2837.465  | 2760.389  |
| AK023037  | 2423.949  | 2654.064  | AK095587   | 8093.918  | 9709.021  |
| L37704    | 964.696   | 734.63    | AF086043   | 2077.849  | 2040.797  |
| AB007968  | 2514.431  | 1561.756  | AK024174   | 1210.63   | 1277.356  |
| NM_005664 | 35600.563 | 36637.234 | AK000038   | 3567.281  | 3938.905  |
| NM_006270 | 48386.719 | 45250.648 | BC010084   | 2110.434  | 2159.841  |
| U50277    | 924.392   | 663.011   | U10513     | 2991.366  | 3152.132  |
| Z48633    | 4130.616  | 3930.852  | L10151     | 42137.207 | 53491.699 |
| M62627    | 23130.646 | 27060.197 | AK022203   | 1226.983  | 1085.915  |
| NM_006686 | 6300.946  | 5786.871  | AK023037   | 2434.177  | 2137.732  |
| AK002209  | 1476.54   | 1945.027  | unknown (4 | 466.433   | 1042.22   |
| NM_017854 | 55656.906 | 61640.051 | L37704     | 933.298   | 1367.346  |
| NM_014354 | 3478.66   | 3847.892  | AB007968   | 2731.536  | 2483.358  |

|           |           |           |           |           |           |
|-----------|-----------|-----------|-----------|-----------|-----------|
| AL137548  | 14128.579 | 12613.28  | AL117544  | 1127.577  | 1130.462  |
| AK095051  | 3032.36   | 2109.991  | NM_005664 | 46779.648 | 53020.367 |
| AF088062  | 2455.236  | 2069.642  | NM_006270 | 48097.715 | 48101.477 |
| AK024929  | 3325.606  | 3666.92   | S81580    | 762.174   | 517.859   |
| NM_017779 | 781.629   | 1584.324  | U50277    | 2597.172  | 2250.568  |
| D17232    | 32897.406 | 44475.844 | Z48633    | 6781.585  | 7340.681  |
| NM_005260 | 10147.725 | 10976.897 | M62627    | 18016.711 | 21157.93  |
| AF085880  | 14460.294 | 13721.358 | NM_006686 | 8528.71   | 10015.016 |
| NM_016158 | 1486.796  | 2213.626  | AK002209  | 1665.944  | 1799.626  |
| AF000990  | 2872.111  | 2748.182  | NM_017854 | 62117.508 | 61445.383 |
| AK026663  | 1578.239  | 635.638   | NM_014354 | 3737.874  | 4352.333  |
| NM_001174 | 1053.135  | 637.476   | AL137548  | 9849.341  | 10317.058 |
| U69645    | 882.036   | 523.244   | AK095051  | 1765.08   | 1670.902  |
| NM_019082 | 7747.656  | 5251.794  | AF088062  | 1460.78   | 1322.428  |
| NM_001424 | 976.485   | 1025.469  | AK024929  | 2160.43   | 2133.535  |
| AB040950  | 1748.04   | 1267.626  | NM_017779 | 1065.892  | 1414.293  |
| NM_014003 | 5107.072  | 4142.559  | D17232    | 28251.443 | 36549.293 |
| NM_001356 | 1158.328  | 1144.838  | NM_005260 | 9825.173  | 7269.054  |
| AB002282  | 66743.82  | 83757.609 | AF085880  | 9128.158  | 7104.831  |
| AB037805  | 3343.38   | 3203.105  | NM_016158 | 864.963   | 930.611   |
| NM_006373 | 5370.352  | 6589.897  | AF000990  | 1892.698  | 1378.162  |
| AF085922  | 839.717   | 1059.48   | AK026663  | 1698.202  | 1723.125  |
| AK001007  | 2088.089  | 2035.703  | NM_001174 | 2064.657  | 2057.369  |
| NM_014485 | 1073.488  | 1063.05   | U69645    | 921.591   | 1142.271  |
| AF116655  | 25719.633 | 22199.781 | NM_019082 | 9794.075  | 8018.474  |
| AF086134  | 908.998   | 564.003   | NM_001424 | 3158.771  | 3269.267  |
| AF009308  | 41121.781 | 43924.293 | AB040950  | 2823.951  | 2822.5    |
| AB032969  | 67109.445 | 68432.188 | NM_014003 | 7707.177  | 7801.845  |
| Y11610    | 5326.128  | 5672.168  | NM_001356 | 2895.282  | 3151.506  |
| AF085940  | 1054.114  | 1017.423  | AB002282  | 54060.645 | 54543.895 |
| L37695    | 2057.517  | 1962.748  | AB037805  | 13881.201 | 16469.244 |
| NM_004627 | 18949.092 | 19116.5   | NM_006373 | 10657.268 | 14100.199 |
| AK026523  | 17410.057 | 17395.227 | AK001007  | 1946.279  | 2106.938  |
| AL050217  | 33419.004 | 42705.289 | NM_014485 | 1043.78   | 1156.149  |
| NM_005424 | 1969.977  | 1221.259  | AF116655  | 14740.893 | 14899.048 |
| NM_005975 | 1875.153  | 1267.221  | AF009308  | 21935.447 | 21515.785 |
| AY007220  | 14538.48  | 12471.037 | AB032969  | 44790.922 | 52127.762 |
| NM_004438 | 2288.735  | 2738.684  | Y11610    | 3402.054  | 3136.95   |
| NM_003808 | 1265.407  | 1079.444  | AF085940  | 677.173   | 536.323   |
| AK023666  | 646.431   | 911.207   | L37695    | 1616.906  | 1012.05   |
| NM_005399 | 1733.001  | 1750.05   | NM_004627 | 10142.347 | 9549.337  |
| NM_006573 | 792.202   | 913.366   | AK026523  | 16871.551 | 13550.82  |
| NM_005118 | 1198.957  | 1000.047  | AL050217  | 35568.762 | 34496.52  |
| NM_015185 | 5789.333  | 4821.588  | AF278532  | 377.94    | 401.26    |
| NM_005374 | 850.525   | 735.791   | NM_005928 | 3411.984  | 3687.504  |
| AF011757  | 779.219   | 688.928   | NM_005424 | 4383.406  | 4036.356  |
| NM_003632 | 1961.954  | 1802.666  | NM_005975 | 3631.12   | 3773.646  |
| NM_002194 | 6945.326  | 6227.074  | AY007220  | 21941.537 | 24239.596 |
| AB028989  | 2590.518  | 2604.165  | NM_004438 | 3690.927  | 4198.604  |
| NM_016166 | 26097.932 | 30983.33  | NM_003808 | 2343.469  | 2455.672  |
| NM_002086 | 25327.184 | 27470.861 | AK023666  | 1820.922  | 2071.894  |
| NM_016248 | 5151.783  | 5202.362  | NM_005399 | 2267.458  | 2476.524  |
| NM_005489 | 58902.492 | 57482.719 | NM_006573 | 781.823   | 815.367   |

|           |           |           |           |           |           |
|-----------|-----------|-----------|-----------|-----------|-----------|
| NM_00264  | 821.938   | 672.9     | NM_005118 | 1149.034  | 1001.76   |
| AK025329  | 4171.612  | 2492.402  | NM_015185 | 4280.413  | 3969.398  |
| AL137679  | 1365.885  | 1172.966  | NM_005374 | 749.733   | 786.741   |
| NM_00178  | 6991.292  | 4401.729  | AF011757  | 842.765   | 911.124   |
| AK025026  | 1749.323  | 1691.458  | NM_003632 | 1650.759  | 1767.89   |
| AK023052  | 2118.224  | 2544.017  | NM_002194 | 2758.92   | 2667.247  |
| AB018350  | 1080.979  | 928.835   | AB028989  | 842.308   | 778.179   |
| NM_00645  | 62736.027 | 73591.516 | NM_01616  | 19555.008 | 15541.396 |
| NM_01846  | 5799.05   | 3875.696  | NM_00208  | 16685.482 | 13092.189 |
| NM_00270  | 12341.939 | 10342.412 | NM_01624  | 4219.594  | 2820.234  |
| NM_005591 | 23227.717 | 19705.154 | NM_00548  | 54025.867 | 53249.426 |
| NM_00237  | 1225.162  | 1066.477  | NM_004464 | 414.701   | 451.072   |
| NM_00312  | 731.945   | 831.688   | NM_00239  | 1467.806  | 1382.047  |
| AK024251  | 1277.167  | 1332.647  | NM_005417 | 1732.605  | 2051.115  |
| NM_00254  | 5753.319  | 6948.436  | NM_00264  | 6012.856  | 5792.299  |
| NM_00668  | 66820.984 | 67079.422 | AK025329  | 16187.657 | 17277.432 |
| NM_005411 | 8700.211  | 11035.302 | NM_00125  | 1069.526  | 1014.016  |
| NM_00438  | 2239.732  | 3405.971  | AL137679  | 2894.487  | 3485.324  |
| NM_004617 | 1106.769  | 799.274   | NM_00178  | 17091.938 | 22341.676 |
| NM_00566  | 1344.034  | 736.107   | AB040965  | 882.971   | 918.423   |
| NM_012177 | 1865.88   | 1645.591  | AK025026  | 6001.952  | 7676.1    |
| NM_00666  | 35349.07  | 38594.992 | AK023052  | 2499.904  | 2717.358  |
| NM_002807 | 4090.549  | 2288.592  | AB018350  | 1404.172  | 1541.849  |
| NM_00279  | 57455.035 | 58112.891 | NM_00645  | 61666.164 | 60955.988 |
| NM_00279  | 21027.57  | 12271.632 | NM_017541 | 214.635   | 444.538   |
| NM_01838  | 3408.439  | 3229.502  | NM_01846  | 4445.158  | 4945.034  |
| NM_01494  | 648.38    | 954.006   | NM_00270  | 9387.444  | 9816.951  |
| BF217579  | 17821.932 | 16319.918 | NM_005591 | 12321.723 | 13117.839 |
| NM_00433  | 10595.854 | 9977.425  | NM_00237  | 890.255   | 956.913   |
| AF040965  | 21772.266 | 16514.352 | NM_00312  | 555.424   | 696.857   |
| AB037840  | 5746.353  | 5290.184  | AK024251  | 1254.298  | 648.416   |
| NM_007011 | 2142.828  | 1679.947  | NM_00254  | 3202.489  | 2932.991  |
| Y10210    | 14963.962 | 14860.87  | NM_00668  | 58798.945 | 57249.969 |
| AB020689  | 6372.357  | 6706.862  | NM_005411 | 9924.535  | 8089.71   |
| AK023916  | 1202.058  | 1369.65   | NM_00480  | 952.757   | 1314.595  |
| NM_00320  | 7386.711  | 8926.593  | NM_004617 | 3666.034  | 4518.544  |
| NM_002514 | 2100.342  | 3913.834  | NM_00566  | 4548.814  | 4309.852  |
| AF177238  | 1730.219  | 1557.019  | NM_00674  | 644.509   | 806.72    |
| AF191770  | 527.027   | 883.943   | NM_012177 | 9852.361  | 9218.123  |
| NM_02048  | 9528.595  | 10511.364 | NM_00666  | 57057.734 | 59410.125 |
| NM_014947 | 60492.695 | 72089.57  | NM_002807 | 12530.655 | 12087.015 |
| AK023243  | 1398.25   | 740.741   | NM_00279  | 47672.184 | 50850.293 |
| NM_01440  | 945.789   | 538.477   | NM_00279  | 23737.217 | 29407.998 |
| NM_00142  | 4831.126  | 3513.498  | NM_01838  | 7222.298  | 10498.571 |
| AK022358  | 13374.369 | 12289.924 | NM_01494  | 1303.7    | 1962.593  |
| NM_01420  | 62689.453 | 55236.645 | BF217579  | 16030.717 | 20452.547 |
| NM_018141 | 27481.895 | 17348.904 | NM_00433  | 8197.478  | 8492.231  |
| NM_016504 | 64501.84  | 62168.926 | AF040965  | 10989.81  | 11564.289 |
| U25752    | 63597.039 | 62819.863 | AB037840  | 4472.863  | 5129.084  |
| X96646    | 66465.477 | 57573.09  | NM_007011 | 1227.799  | 1187.635  |
| NM_00485  | 14300.372 | 15846.544 | Y10210    | 7824.864  | 9150.175  |
| NM_00695  | 2245.285  | 3208.628  | AB020689  | 3647.412  | 3782.843  |
| NM_00505  | 1693.135  | 3977.528  | AK023916  | 963.482   | 969.66    |

|           |           |           |           |           |           |
|-----------|-----------|-----------|-----------|-----------|-----------|
| NM_00319E | 11454.718 | 5844.466  | NM_003203 | 5668.546  | 5204.033  |
| NM_00036E | 4953.444  | 4174.371  | NM_002514 | 1213.317  | 916.073   |
| NM_01345C | 1636.979  | 1118.707  | AF177238  | 1164.085  | 1106.262  |
| NM_00453E | 986.738   | 923.157   | AF191770  | 593.746   | 614.838   |
| NM_003077 | 4520.354  | 2432.945  | NM_020482 | 4714.159  | 3828.653  |
| NM_00210E | 5871.621  | 2880.634  | NM_014947 | 60088.16  | 57234.039 |
| NM_01848E | 3409.226  | 1884.158  | AB033112  | 3129.54   | 3601.554  |
| L13203    | 9437.901  | 6894.156  | NM_005674 | 529.086   | 560.999   |
| NM_01804C | 2943.934  | 1965.966  | AK023243  | 3594.424  | 4337.073  |
| AB042646  | 41956.449 | 45227.727 | NM_014409 | 3428.216  | 3094.822  |
| NM_003431 | 5204.474  | 4989.484  | BE791857  | 580.444   | 941.121   |
| M29581    | 11127.239 | 12229.389 | NM_006867 | 618.198   | 987.462   |
| AL096747  | 2795.571  | 3194.319  | NM_001422 | 3707.192  | 5299.358  |
| AB021641  | 2232.074  | 2213.414  | AK022358  | 11855.345 | 11366.547 |
| NM_01240E | 18188.934 | 22636.619 | NM_01420E | 20276.182 | 20222.551 |
| AK026849  | 22011.322 | 24854.451 | NM_018141 | 15729.033 | 14374.979 |
| NM_018677 | 2737.158  | 1699.05   | NM_016504 | 42466.887 | 47157.906 |
| NM_00278E | 2169.601  | 1329.973  | U25752    | 57263.324 | 52527.332 |
| X78947    | 540.68    | 612.013   | X96646    | 31280.039 | 34604.063 |
| NM_000041 | 29363.793 | 35823.563 | NM_00485E | 9644.363  | 9641.021  |
| W69211    | 1192.996  | 889.181   | NM_006952 | 814.135   | 657.941   |
| AA449931  | 14307.022 | 10634.449 | NM_00319E | 16513.471 | 15350.001 |
| AA877347  | 43541.621 | 42536.07  | AF220415  | 945.007   | 1297.933  |
| R54049    | 1388.365  | 754.422   | NM_005174 | 55515.043 | 53324.91  |
| S57235    | 28104.27  | 23982.434 | NM_00036E | 8523.427  | 10399.624 |
| AI376272  | 8719.934  | 9376.346  | NM_01345C | 3889.126  | 5344.832  |
| BF242229  | 4673.16   | 5088.055  | NM_00453E | 2214.297  | 2981.896  |
| X75756    | 62046.605 | 59032.391 | NM_003077 | 5615.646  | 7173.376  |
| AI754623  | 10696.668 | 9439.968  | NM_00210E | 2574.094  | 2857.09   |
| AA401326  | 52461.004 | 47993.074 | NM_01848E | 1595.489  | 1300.088  |
| N55461    | 1458.645  | 1716.701  | L13203    | 4316.735  | 4423.107  |
| AA504482  | 14460.078 | 16323.94  | NM_01804C | 1817.295  | 1230.326  |
| BI602175  | 2900.478  | 4359.104  | AB042646  | 19657.348 | 21797.266 |
| NM_00410E | 16394.943 | 20047.891 | NM_003431 | 2971.103  | 3082.337  |
| BF307652  | 5249.808  | 5054.421  | M29581    | 4756.397  | 5244.105  |
| NM_017772 | 2271.808  | 1929.543  | AL096747  | 2133.147  | 1878.932  |
| AF116574  | 1952.094  | 3338.687  | AB021641  | 810.894   | 1170.842  |
| NM_00552E | 1251.443  | 1596.964  | NM_01240E | 11533.996 | 9549.545  |
| NM_00586E | 7330.432  | 8079.185  | NM_01227E | 1825.185  | 1746.932  |
| AF105067  | 3591.737  | 4330.743  | AF023142  | 812.365   | 556.942   |
| NM_01867E | 1816.408  | 2224.367  | NM_01610C | 960.61    | 719.869   |
| NM_006014 | 4406.023  | 2573.237  | NM_014057 | 2742.546  | 2968.915  |
| NM_00628C | 54095     | 50149.262 | NM_00155C | 22245.07  | 27811.723 |
| NM_00215E | 1672.981  | 2238.559  | AK026849  | 17225.699 | 23720.172 |
| NM_001771 | 36813.82  | 36590.359 | NM_018677 | 3738.729  | 4049.211  |
| NM_00206E | 2052.521  | 1521.695  | NM_00278E | 3357.168  | 5007.511  |
| NM_00735E | 64821.672 | 53293.559 | X78947    | 1374.057  | 1463.616  |
| NM_00609E | 1524.474  | 873.15    | NM_000041 | 54494.84  | 52176.5   |
| NM_00686E | 63252.516 | 53482.59  | W69211    | 643.745   | 1355.152  |
| NM_015364 | 24503.906 | 21604.986 | AA449931  | 12585.163 | 13748.339 |
| NM_006611 | 1141.653  | 1367.253  | AA877347  | 25400.244 | 30662.738 |
| NM_00496E | 6225.96   | 6344.152  | R54049    | 408.556   | 499.638   |
| NM_001181 | 1639.385  | 1823.059  | S57235    | 23487.9   | 29130.754 |

|           |           |           |           |           |           |
|-----------|-----------|-----------|-----------|-----------|-----------|
| NM_005535 | 63998.527 | 52130.32  | AI376272  | 7031.563  | 7397.193  |
| AB037857  | 5122.841  | 6106.526  | BF242229  | 2711.897  | 2682.487  |
| NM_005012 | 416.66    | 730.799   | X75756    | 61919.078 | 56621.074 |
| NM_013262 | 15256.019 | 19042.428 | AI754623  | 6344.539  | 6099.852  |
| NM_007185 | 24740.166 | 34098.539 | AA401326  | 45130.578 | 48731.313 |
| NM_012285 | 7408.651  | 7872.23   | N55461    | 1386.107  | 1162.528  |
| NM_005264 | 3155.979  | 4819.478  | AA504482  | 10736.461 | 11153.63  |
| NM_020373 | 1618.525  | 2533.217  | BI602175  | 2245.733  | 2172.209  |
| NM_000714 | 17438.994 | 18754.479 | NM_004109 | 11697.975 | 9822.854  |
| NM_002556 | 4788.694  | 5428.441  | BF307652  | 3917.672  | 4179.666  |
| NM_018089 | 7253.032  | 9118.941  | NM_017772 | 2444.106  | 3119.627  |
| L21934    | 2394.831  | 1575.003  | AF116574  | 3565.155  | 3809.554  |
| AL117442  | 15641     | 13736.567 | NM_005529 | 1427.042  | 1628.977  |
| NM_007185 | 6374.835  | 5082.431  | NM_005869 | 7721.858  | 10107.844 |
| NM_014341 | 8839.925  | 6300.407  | AF105067  | 4527.508  | 5375.45   |
| NM_014229 | 4005.868  | 3077.139  | NM_018676 | 1896.011  | 2378.605  |
| NM_013265 | 45517.238 | 43819.34  | NM_012072 | 1552.147  | 2114.902  |
| NM_014964 | 10824.453 | 10707.429 | NM_006014 | 2794.048  | 3712.223  |
| NM_014016 | 19730.857 | 16161.813 | NM_006280 | 58935.805 | 53906.91  |
| NM_013433 | 1885.216  | 2121.448  | NM_002155 | 1274.11   | 2560.156  |
| NM_003794 | 18057.822 | 16863.287 | NM_001771 | 24924.252 | 33070.801 |
| NM_019892 | 17744.863 | 23138.844 | NM_002066 | 2115.874  | 2432.164  |
| NM_016169 | 13273.493 | 16453.137 | NM_007355 | 62503.941 | 57195.309 |
| NM_004533 | 1041.261  | 1343.593  | NM_006096 | 1036.958  | 1161.155  |
| NM_012135 | 1566.686  | 1850.117  | NM_006869 | 52776.777 | 51594.445 |
| M37190    | 916.854   | 1087.457  | NM_015364 | 9558.283  | 10496.029 |
| NM_006812 | 20276.348 | 27781.365 | NM_006611 | 394.991   | 438.931   |
| AK024434  | 31803.809 | 33553.43  | NM_004963 | 1924.99   | 2139.005  |
| NM_002385 | 21122.02  | 27610.09  | NM_001181 | 1093.157  | 1645.972  |
| NM_016069 | 60635.469 | 56224.449 | NM_005535 | 61632.57  | 54771.586 |
| NM_017612 | 6425.775  | 7726.03   | AB037857  | 5759.528  | 4926.014  |
| NM_013236 | 18112.174 | 15568.001 | NM_005012 | 568.107   | 671.818   |
| NM_017841 | 13699.876 | 15573.582 | NM_013262 | 10435.047 | 10080.546 |
| NM_001254 | 11148.526 | 11319.404 | NM_007185 | 14872.71  | 14642.955 |
| NM_020412 | 18277.129 | 15578.153 | NM_012285 | 5982.938  | 6674.181  |
| NM_003032 | 38979.582 | 20882.025 | NM_005264 | 4041.617  | 6801.293  |
| NM_017453 | 33693.645 | 23004.338 | NM_020373 | 2634.158  | 2510.405  |
| AF038564  | 10686.411 | 8666.685  | NM_000714 | 13378.433 | 15022.135 |
| AB033768  | 1184.907  | 1475.53   | NM_002556 | 4829.364  | 5200.941  |
| NM_017659 | 5144.876  | 4956.625  | NM_018089 | 10096.78  | 10777.262 |
| NM_006904 | 8662.926  | 9207.434  | L21934    | 2235.777  | 1925.385  |
| NM_004217 | 30328.949 | 31260.283 | AL117442  | 12357.725 | 12646.854 |
| NM_006347 | 25212.439 | 28389.213 | NM_007185 | 4155.973  | 4584.997  |
| NM_020406 | 4046.618  | 4282.642  | NM_014341 | 6358.791  | 6639.181  |
| NM_014685 | 39587.586 | 45371.48  | NM_014229 | 3695.228  | 3430.351  |
| NM_016100 | 1244.056  | 1691.226  | NM_013265 | 28315.486 | 32778.922 |
| NM_014057 | 4730.019  | 5757.32   | NM_014964 | 5302.696  | 6150.828  |
| NM_001550 | 34899.168 | 35887.262 | NM_014016 | 7286.554  | 7087.543  |
| AK026849  | 31588.9   | 32662.914 | NM_013433 | 3039.6    | 3092.807  |
| NM_018677 | 5569.471  | 6148.931  | AJ224867  | 673.26    | 718.349   |
| NM_002785 | 5010.778  | 6559.301  | NM_003794 | 14961.94  | 13303.241 |
| X78947    | 1232.041  | 1566.892  | NM_019892 | 10333.918 | 11232.417 |
| NM_000041 | 61533.617 | 58720.16  | NM_016169 | 10259.475 | 10898.737 |

|           |           |           |           |           |           |
|-----------|-----------|-----------|-----------|-----------|-----------|
| W69211    | 1908.228  | 2442.945  | NM_004533 | 960.72    | 766.259   |
| AA449931  | 17283.195 | 21851.932 | NM_012135 | 1341.133  | 1942.02   |
| AA877347  | 48303.277 | 48021.543 | M37190    | 1411.298  | 1232.014  |
| R54049    | 2003.868  | 1677.52   | NM_006812 | 11420.961 | 12900.688 |
| BI755551  | 554.97    | 494.988   | AK024434  | 25167.865 | 29803.258 |
| S57235    | 28626.982 | 29679.303 | NM_002388 | 15188.779 | 16535.355 |
| AI376272  | 8117.096  | 4832.753  | NM_016069 | 50340.457 | 46141.469 |
| BF242229  | 4262.811  | 4236.899  | NM_017612 | 4841.042  | 4801.709  |
| X75756    | 62224.816 | 60954.031 | NM_013236 | 15021.128 | 15160.147 |
| AI754623  | 9474.115  | 8367.084  | NM_017841 | 10325.173 | 9450.397  |
| AA401326  | 33217.844 | 37898.953 | NM_001254 | 7862.403  | 6339.493  |
| N55461    | 1093.597  | 1409.264  | NM_020412 | 31934     | 34870.527 |
| AA504482  | 18781.387 | 19981.164 | NM_003032 | 28353.016 | 30023.021 |
| BI602175  | 2869.72   | 4211.09   | NM_017453 | 16604.113 | 16568.246 |
| NM_016516 | 2594.257  | 2722.203  | AF038564  | 10045.315 | 6592.014  |
| AF263538  | 3634.079  | 3526.802  | AB033768  | 1115.02   | 1266.054  |
| AF116574  | 4363.277  | 5430.927  | NM_017659 | 5040.334  | 4764.801  |
| NM_005529 | 2566.02   | 2527.26   | NM_006904 | 20047.305 | 18924.898 |
| NM_005869 | 9898.296  | 11514.57  | NM_004217 | 16252.827 | 15150.598 |
| AF105067  | 6071.637  | 7054.038  | NM_006347 | 18622.945 | 16672.08  |
| NM_018676 | 2320.442  | 2571.428  | NM_020406 | 2868.747  | 2675.858  |
| NM_012072 | 2220.738  | 2561.075  | NM_014685 | 24688.275 | 18711.473 |
| NM_006014 | 4209.769  | 5378.149  | NM_016100 | 1344.555  | 1060.516  |
| NM_006280 | 63280.574 | 61324.191 | NM_014057 | 3712.557  | 4377.582  |
| NM_002155 | 2879.498  | 5050.663  | NM_001550 | 23563.34  | 27178.266 |
| NM_001771 | 43870.902 | 46111.5   | AK026849  | 21171.75  | 26861.348 |
| NM_002066 | 1838.887  | 1666.63   | NM_018677 | 3672.469  | 3531.148  |
| NM_007355 | 61407.598 | 67598.648 | NM_002785 | 5546.078  | 5270.222  |
| NM_006096 | 2053.883  | 2020.889  | X78947    | 1104.581  | 746.847   |
| NM_006869 | 48021.703 | 44074.637 | NM_000041 | 57385.059 | 52041.25  |
| NM_015364 | 23854.203 | 13906.464 | W69211    | 1909.309  | 1489.506  |
| NM_006611 | 1353.703  | 1090.054  | AA449931  | 20176.041 | 19132.027 |
| NM_004963 | 5555.81   | 5716.622  | AA877347  | 41456.395 | 45777.324 |
| NM_001181 | 1492.647  | 2217.542  | R54049    | 1254.374  | 1333.575  |
| NM_005535 | 62561.164 | 57330.02  | S57235    | 30760.539 | 33717.043 |
| AB037857  | 6821.363  | 7144.773  | AI376272  | 9159.4    | 8803.003  |
| NM_005012 | 422.441   | 621.643   | BF242229  | 3368.942  | 2981.967  |
| NM_013262 | 13986.683 | 16845.016 | X75756    | 57010.488 | 55781.863 |
| NM_007185 | 19946.875 | 24974.543 | AI754623  | 9480.314  | 7844.835  |
| NM_012278 | 1908.713  | 2690.946  | AA401326  | 50160.172 | 51786.344 |
| AF023142  | 758.704   | 1116.069  | N55461    | 1198.117  | 967.662   |
| NM_020373 | 4180.022  | 4310.587  | AA504482  | 9172.457  | 8354.729  |
| NM_000714 | 24836.209 | 27117.516 | BI602175  | 1627.035  | 1552.142  |
| NM_002556 | 5275.068  | 5797.838  | NM_016516 | 2520.197  | 2616.852  |
| NM_018089 | 11231.489 | 15745.553 | AF263538  | 5459.708  | 4397.965  |
| L21934    | 2191.261  | 3413.444  | AF116574  | 4190.854  | 5153.667  |
| AL117442  | 16231.302 | 22239.51  | NM_005529 | 2040.973  | 2560.902  |
| NM_007188 | 7382.48   | 10621.942 | NM_005869 | 9038.094  | 11955.914 |
| NM_014341 | 12991.074 | 12474.001 | AF105067  | 6123.8    | 6325.84   |
| NM_014229 | 4619.813  | 3009.837  | NM_018676 | 2569.075  | 2174.159  |
| NM_013265 | 40395.461 | 32024.33  | NM_012072 | 1751.147  | 1251.828  |
| NM_014964 | 9110.495  | 8249.658  | NM_006014 | 3900.197  | 2517.129  |
| NM_014016 | 17920.477 | 14221.019 | NM_006280 | 55729.605 | 52085.098 |

|           |           |           |           |           |           |
|-----------|-----------|-----------|-----------|-----------|-----------|
| NM_013433 | 963.247   | 1265.234  | NM_002155 | 1905.402  | 2851.642  |
| AJ224867  | 1017.642  | 845.845   | NM_001771 | 32779.766 | 39483.215 |
| NM_003794 | 16942.959 | 14310.946 | NM_002066 | 2592.173  | 2560.423  |
| NM_019892 | 16269.683 | 20095.246 | NM_007355 | 63209.438 | 56537.668 |
| NM_016169 | 15282.918 | 19659.561 | NM_006096 | 1518.819  | 1590.035  |
| NM_004533 | 1697.796  | 1909.381  | NM_006869 | 62244     | 55840.84  |
| BF307652  | 8801.598  | 10665.324 | NM_015364 | 16310.278 | 15757.355 |
| NM_017772 | 6162.207  | 9337.295  | NM_006611 | 783.691   | 644.135   |
| NM_006812 | 17727.115 | 15942.657 | NM_004963 | 4311.817  | 3161.186  |
| AK024434  | 27252.654 | 22999.613 | NM_001181 | 1081.122  | 993.326   |
| NM_002388 | 18016.076 | 22343.1   | NM_005535 | 63055.18  | 57860.102 |
| NM_016069 | 57856.055 | 48456.789 | AB037857  | 5878.706  | 4096.865  |
| NM_017612 | 4403.632  | 5812.602  | NM_005012 | 490.396   | 498.247   |
| NM_013236 | 17356.102 | 22395.869 | NM_013262 | 10655.371 | 8664.991  |
| NM_017841 | 13347.634 | 18814.967 | NM_007185 | 15018.503 | 15579.328 |
| NM_001254 | 12655.94  | 17721.908 | NM_012278 | 1717.378  | 1528.819  |
| NM_020412 | 30387.379 | 37795.957 | AF023142  | 863.858   | 528.207   |
| NM_003032 | 44417.203 | 41219.434 | NM_020373 | 3305.144  | 3885.461  |
| NM_017453 | 31512.914 | 11475.245 | NM_000714 | 15617.75  | 21386.895 |
| AF038564  | 11526.673 | 6354.516  | NM_002556 | 5324.524  | 5422.941  |
| AB033768  | 1789.754  | 1570.023  | NM_018089 | 9658.822  | 9044.888  |
| NM_004217 | 22862.414 | 26758.369 | L21934    | 1896.593  | 1654.295  |
| NM_006347 | 23364.846 | 26664.811 | AL117442  | 14748.862 | 13700.583 |
| NM_020406 | 4207.575  | 6067.178  | NM_007188 | 5966.992  | 5823.255  |
| NM_014685 | 44813.879 | 46168.719 | NM_014341 | 7381.032  | 7873.427  |
| NM_012288 | 7335.425  | 8002.046  | NM_006446 | 418.413   | 428.784   |
| NM_005264 | 6017.77   | 9756.81   | NM_014229 | 3831.407  | 4169.056  |
| NM_001550 | 28562.25  | 23207.842 | NM_013265 | 35925.559 | 41120.613 |
| AK026849  | 24911.938 | 24425.592 | NM_014964 | 8009.159  | 7468.603  |
| NM_018677 | 5705.541  | 6280.604  | NM_014016 | 10517.528 | 8626      |
| NM_002785 | 3604.226  | 4660.971  | NM_013433 | 4569.672  | 3429.364  |
| X78947    | 909.242   | 1102.41   | AJ224867  | 1074.199  | 782.585   |
| NM_000041 | 62814.109 | 56237.582 | NM_003794 | 16480.594 | 13523.51  |
| W69211    | 1483.959  | 1713.294  | NM_019892 | 10760.357 | 10295.497 |
| AA449931  | 17924.221 | 21008.086 | NM_016169 | 10063.889 | 8851.868  |
| AA877347  | 48616.242 | 53094.66  | NM_004533 | 919.215   | 791.391   |
| R54049    | 1722.953  | 2170.143  | BF307652  | 3802.049  | 3277.073  |
| BI755551  | 2007.591  | 2061.848  | NM_017772 | 3049.76   | 2457.791  |
| S57235    | 31866.801 | 28028.031 | NM_006812 | 13226.049 | 18191.748 |
| AI376272  | 8205.781  | 6868.025  | AK024434  | 30363.557 | 42394.527 |
| BF242229  | 3557.749  | 1649.853  | NM_002388 | 15345.145 | 17605.605 |
| X75756    | 63634.188 | 59481.441 | NM_016069 | 49763.293 | 36763.672 |
| AI754623  | 8212.731  | 6021.086  | NM_017612 | 4490.241  | 3992.48   |
| N55461    | 1311.63   | 1496.86   | NM_013236 | 15047.365 | 13298.196 |
| AA504482  | 16367.102 | 14944.521 | NM_017841 | 9395.536  | 9130.176  |
| BI602175  | 3422.964  | 4651.128  | NM_001254 | 8156.381  | 6992.623  |
| NM_016516 | 4423.955  | 4704.732  | NM_020412 | 31874.826 | 34434.227 |
| AF263538  | 4754.19   | 5964.156  | NM_003032 | 32671.082 | 31316.688 |
| NM_012135 | 1858.336  | 2292.79   | NM_017453 | 21637.5   | 20148.541 |
| M37190    | 1095.238  | 2028.826  | AF038564  | 8860.84   | 7802.239  |
| NM_002155 | 3060.631  | 4003.76   | AB033768  | 1469.76   | 1051.528  |
| NM_001771 | 52849.84  | 54970.328 | NM_017659 | 6317.823  | 5444.691  |
| NM_002066 | 2569.75   | 2829.32   | NM_006904 | 23459.832 | 21528.49  |



|           |           |           |           |           |           |
|-----------|-----------|-----------|-----------|-----------|-----------|
| NM_007355 | 60088.063 | 93271.695 | NM_004217 | 22365.148 | 19217.107 |
| NM_006096 | 1794.558  | 2371.578  | NM_006347 | 21119.209 | 16809.469 |
| NM_006869 | 63998.859 | 59353.941 | NM_020406 | 3622.467  | 2991.908  |
| NM_015364 | 24924.723 | 36589.176 | NM_014685 | 32435.068 | 19441.682 |
| NM_006611 | 716.21    | 1011.817  | NM_012288 | 6143.39   | 5316.774  |
| NM_004963 | 3672.603  | 5205.563  | NM_005264 | 4719.915  | 5698.833  |
| NM_001181 | 1311.383  | 1732.44   | NM_001550 | 28389.973 | 39398.602 |
| NM_005535 | 61428.598 | 59691.793 | AK026849  | 22577.039 | 34441.52  |
| AB037857  | 4388.887  | 4454.961  | NM_018677 | 5556.709  | 4816.938  |
| NM_005012 | 1452.282  | 1053.016  | NM_002785 | 4947.458  | 4884.439  |
| AF218021  | 1520.866  | 862.788   | X78947    | 937.561   | 950.539   |
| NM_013262 | 15423.916 | 10546.279 | NM_000041 | 61502.398 | 53317.16  |
| NM_007185 | 19563.078 | 17600.912 | W69211    | 1633.642  | 1175.59   |
| NM_003221 | 757.841   | 545.63    | AA449931  | 19327.215 | 17457.516 |
| NM_003357 | 35913.309 | 40474.031 | AA877347  | 40401.344 | 44740.926 |
| AF195420  | 870.994   | 753.519   | R54049    | 1810.995  | 1139.732  |
| AK023261  | 5899.714  | 6146.904  | S57235    | 27418.967 | 26459.256 |
| NM_005097 | 2645.192  | 3370.807  | AI376272  | 9002.63   | 7665.339  |
| NM_012278 | 1738.334  | 2494.063  | BF242229  | 3049.749  | 3109.677  |
| AF023142  | 658.869   | 1292.216  | X75756    | 56987.734 | 53871.563 |
| NM_016100 | 2553.439  | 2270.795  | AI754623  | 9151.19   | 8103.651  |
| NM_014057 | 5243.432  | 5483.642  | AA401326  | 47734.137 | 48388.691 |
| NM_000341 | 2810.772  | 2701.843  | N55461    | 1239.31   | 1135.37   |
| AK023533  | 1420.786  | 1387.245  | AA504482  | 11513.371 | 9966.679  |
| NM_012450 | 3221.791  | 4694.03   | BI602175  | 1942.955  | 1680.589  |
| NM_007071 | 20870     | 28554.883 | NM_016516 | 2688.011  | 1993.77   |
| NM_016582 | 16266.521 | 20533.271 | AF263538  | 4778.101  | 3767.651  |
| NM_014229 | 4207.158  | 4465.088  | NM_012135 | 1590.653  | 1108.205  |
| NM_013265 | 40247.117 | 45034.992 | M37190    | 1176.595  | 1218.065  |
| NM_014964 | 6024.523  | 8179.456  | NM_002155 | 2334.458  | 4170.968  |
| NM_014016 | 11620.495 | 13687.127 | NM_001771 | 34076.652 | 45976.602 |
| NM_013433 | 5835.486  | 7837.542  | NM_002066 | 2421.571  | 2436.906  |
| AJ224867  | 845.416   | 1079.031  | NM_007355 | 53527.324 | 41783.965 |
| NM_003794 | 19327.619 | 18414.75  | NM_006096 | 1589.217  | 1347.555  |
| NM_019892 | 13547.424 | 10643.548 | NM_006869 | 64296.945 | 57088.973 |
| NM_016169 | 11103.992 | 6582.051  | NM_015364 | 16417.92  | 12684.158 |
| NM_004533 | 1157.019  | 1009.572  | NM_006611 | 805.805   | 795.049   |
| BF307652  | 1917.424  | 1778.221  | NM_004963 | 3734.011  | 2709.807  |
| NM_017772 | 2071.55   | 1842.321  | NM_001181 | 1133.238  | 1096.837  |
| AF116574  | 4151.827  | 4290.564  | NM_005535 | 62026.059 | 53585.016 |
| NM_005529 | 2270.261  | 2388.186  | AB037857  | 4591.188  | 3739.515  |
| NM_005869 | 10779.828 | 12168.272 | NM_005012 | 672.969   | 370.38    |
| AF105067  | 6745.048  | 7045.398  | AF218021  | 1552.689  | 1385.154  |
| NM_018676 | 3046.751  | 3976.096  | NM_013262 | 11497.652 | 10546.475 |
| NM_012072 | 2363.61   | 2391.862  | NM_007185 | 19132.748 | 18158.482 |
| NM_006014 | 4282.364  | 4439.57   | NM_003221 | 1290.15   | 958.815   |
| NM_006280 | 65203.68  | 55484.039 | NM_003357 | 35980.656 | 40769.234 |
| NM_020406 | 2980.774  | 3168.888  | AF195420  | 853.56    | 757.106   |
| NM_014685 | 50834.734 | 48644.477 | AK023261  | 4887.395  | 4106.795  |
| NM_012288 | 6182.704  | 6755.762  | NM_005097 | 2622.01   | 2066.49   |
| NM_005264 | 2977.077  | 3768.61   | NM_012278 | 1523.984  | 1261.14   |
| NM_020373 | 2058.809  | 2508.195  | AF023142  | 668.805   | 591.349   |
| NM_000714 | 19353.479 | 20825.906 | NM_016100 | 894.222   | 886.68    |

|           |           |           |           |           |           |
|-----------|-----------|-----------|-----------|-----------|-----------|
| NM_002556 | 5287.688  | 6216.441  | NM_014057 | 3290.274  | 2530.613  |
| NM_018089 | 11715.65  | 14440.561 | NM_000341 | 2319.627  | 2575.025  |
| L21934    | 2364.695  | 1300.189  | AK023533  | 1469.507  | 1398.69   |
| AL117442  | 14470.976 | 8802.892  | NM_012450 | 3743.508  | 3075.51   |
| NM_004695 | 2020.186  | 1475.897  | NM_007071 | 14583.313 | 14874.728 |
| AF299075  | 4360.906  | 3731.116  | NM_016582 | 24052.674 | 29923.131 |
| NM_000340 | 1027.551  | 1054.509  | NM_014229 | 4812.929  | 5437.026  |
| NM_007188 | 6599.382  | 7399.19   | NM_013265 | 37040.969 | 43492.5   |
| NM_001214 | 19098.945 | 25002.943 | NM_014964 | 8211.556  | 9501.748  |
| AK022409  | 2054.498  | 2823.164  | NM_014016 | 10381.043 | 9975.691  |
| U16851    | 24624.104 | 34029.113 | NM_013433 | 3872.654  | 3414.49   |
| NM_014341 | 9818.524  | 12523.021 | AJ224867  | 827.645   | 560.88    |
| NM_020309 | 1426.863  | 1639.644  | NM_003794 | 15424.267 | 12384.577 |
| NM_016516 | 3227.877  | 3099.656  | NM_019892 | 10001.487 | 10652.897 |
| AF263538  | 2549.503  | 2834.074  | NM_016169 | 10323.26  | 10167.827 |
| NM_012135 | 1157.345  | 1519.018  | NM_004533 | 1281.824  | 811.618   |
| M37190    | 1069.553  | 1289.041  | BF307652  | 4525.926  | 3801.413  |
| NM_006812 | 13922.028 | 18471.848 | NM_017772 | 3361.921  | 2482.205  |
| AK024434  | 21668.033 | 29822.053 | AF116574  | 3473.607  | 3630.071  |
| NM_002388 | 18475.805 | 23606.924 | NM_005529 | 2066.974  | 2138.776  |
| NM_016069 | 59076.121 | 52633.477 | NM_005869 | 8825.377  | 7511.403  |
| NM_017612 | 4377.755  | 6058.187  | AF105067  | 4824.061  | 3753.51   |
| NM_013236 | 14917.301 | 7319.526  | NM_018676 | 2265.072  | 1454.315  |
| NM_017841 | 5058.528  | 3144.542  | NM_012072 | 1590.658  | 1420.36   |
| NM_001254 | 10107.728 | 7539.068  | NM_006014 | 3623.234  | 2672.222  |
| NM_020412 | 43363.184 | 39016.254 | NM_006280 | 64574.789 | 55441.227 |
| NM_003032 | 43420.848 | 38764.313 | NM_020406 | 4818.102  | 5340.663  |
| NM_017453 | 30204.764 | 25721.174 | NM_014685 | 30778.82  | 23334.398 |
| AF038564  | 10949.776 | 10895.963 | NM_012288 | 6705.923  | 8333.073  |
| NM_006904 | 20839.191 | 29974.664 | NM_005264 | 4047.856  | 6730.103  |
| NM_004217 | 23904.143 | 30872.678 | NM_020373 | 3229.976  | 5269.821  |
| NM_006347 | 21876.172 | 25956.529 | NM_000714 | 16688.555 | 20182.297 |
| CY3Cy5    | 13559.289 | 175.65    | NM_002556 | 5932.583  | 6909.091  |
| NM_002054 | 1484.226  | 1860.991  | NM_018089 | 8896.709  | 8611.363  |
| AF086332  | 44668.328 | 43894.262 | L21934    | 2010.446  | 1385.996  |
| AF086347  | 21283.213 | 23382.092 | AL117442  | 13972.446 | 11391.022 |
| AF086388  | 2141.184  | 2091.529  | NM_004695 | 1712.232  | 1216.621  |
| AK001043  | 25923.531 | 29815.277 | AF299075  | 5984.006  | 3412.372  |
| AK024535  | 37720.082 | 39102.211 | NM_000340 | 1103.425  | 957.015   |
| AL359608  | 2852.678  | 2167.476  | NM_007188 | 6081.246  | 5672.495  |
| NM_016498 | 65644.695 | 74827.359 | NM_001214 | 16586.098 | 16155.131 |
| NM_016551 | 5816.829  | 6102.545  | AK022409  | 1992.516  | 1844.54   |
| AK024631  | 4853.374  | 4837.418  | U16851    | 19904.193 | 13897.357 |
| AF087977  | 2845.811  | 2998.834  | NM_014341 | 8026.789  | 7410.719  |
| AK026949  | 2751.397  | 3376.959  | NM_020309 | 1043.5    | 1169.636  |
| SB        | 605.483   | 651.6     | NM_016516 | 2619.55   | 2811.06   |
| NM_002054 | 1933.105  | 2213.648  | AF263538  | 4640.341  | 4643.687  |
| SR2       | 66368.023 | 70110.719 | NM_012135 | 1467.076  | 1613.314  |
| SR4       | 15996.106 | 14382.437 | M37190    | 852.51    | 1586.976  |
| SR8       | 16415.949 | 33507.57  | NM_006812 | 16974.887 | 24003.553 |
| SR10      | 50636.523 | 17833.727 | AK024434  | 23775.646 | 18680.551 |
| CY3Cy5    | 19831.309 | 310.696   | NM_002388 | 18102.082 | 20459.535 |
| NM_014332 | 531.677   | 728.184   | NM_016069 | 60937.727 | 52220.707 |

|           |           |           |           |           |           |
|-----------|-----------|-----------|-----------|-----------|-----------|
| AF086068  | 3135.053  | 3141.413  | NM_017612 | 4441.863  | 4970.86   |
| AF086091  | 703.003   | 712.43    | NM_013236 | 14944.01  | 13289.16  |
| AF075018  | 1291.551  | 1298.101  | NM_017841 | 9526.002  | 8191.51   |
| AK024239  | 3684.714  | 4310.78   | NM_001254 | 8735.463  | 6540.884  |
| AF147390  | 1076.423  | 1262.682  | NM_020412 | 34565.117 | 33610.887 |
| AF085879  | 1350.136  | 1305.753  | NM_003032 | 35972.723 | 34835.926 |
| AF075019  | 2328.699  | 2738.565  | NM_017453 | 22970.229 | 18409.762 |
| AF147388  | 840.858   | 1038.218  | AF038564  | 9557.506  | 7257.659  |
| AK021498  | 13519.742 | 14795.95  | AB033768  | 1105.889  | 1377.252  |
| AF085874  | 13950.289 | 16346.923 | NM_017659 | 6721.89   | 4461.962  |
| AF147346  | 1598.566  | 2075.16   | NM_006904 | 24462.527 | 20829.053 |
| AK026959  | 2239.662  | 2862.306  | NM_004217 | 22071.066 | 19673.844 |
| NM_019556 | 2055.846  | 2724.298  | NM_006347 | 21856.813 | 19318.566 |
| NM_004753 | 46188.188 | 50473.082 | CY3Cy5    | 25044.381 | 1021.915  |
| NM_015462 | 14812.249 | 13922.774 | NM_002054 | 2010.952  | 1978.709  |
| AK000127  | 877.962   | 713.709   | AF086332  | 46238.59  | 48647.539 |
| AF086242  | 1433.429  | 1350.388  | AJ404614  | 1306.301  | 1153.485  |
| AF086370  | 1414.917  | 1532.253  | AF086347  | 22357.982 | 21259.162 |
| AK026868  | 2603.506  | 2233.35   | AF086388  | 4043.68   | 4330.997  |
| AK022200  | 10799.76  | 13062.253 | AF086444  | 451.27    | 542.878   |
| AK023396  | 1350.567  | 1404.473  | AK001043  | 19632.648 | 17752.869 |
| AF264625  | 1380.299  | 1479.593  | AK024535  | 28532.713 | 27045.6   |
| AF088025  | 1738.441  | 1779.014  | AL359608  | 2973.109  | 2844.141  |
| AF075098  | 1060.766  | 1298.531  | NM_016498 | 48045.887 | 51390.586 |
| AF085934  | 2749.315  | 3274.826  | NM_016551 | 6152.695  | 6663.921  |
| AF147423  | 1957.741  | 1858.866  | AK024631  | 4069.396  | 4157.385  |
| AF075088  | 3128.137  | 2769.557  | AF087977  | 5722.115  | 6757.889  |
| AK023971  | 61154.254 | 113064.37 | AK026949  | 4766.159  | 5235.349  |
| AL133103  | 5729.804  | 5775.011  | SB        | 586.972   | 687.088   |
| BC015321  | 2820.443  | 3550.834  | NM_002054 | 4699.532  | 3835.566  |
| AL157450  | 6084.861  | 7569.009  | SR2       | 48666.223 | 51114.574 |
| AL359594  | 2669.659  | 3341.021  | SR4       | 23945.102 | 26431.061 |
| AL137293  | 3859.004  | 4642.476  | SR6       | 3473.021  | 3579.353  |
| AL157490  | 27775.346 | 32985.715 | SR8       | 8645.544  | 26869.373 |
| AL390167  | 7758.233  | 7698.489  | SR10      | 19876.617 | 6582.114  |
| AK023657  | 2702.285  | 2788.716  | CY3Cy5    | 21270.672 | 791.872   |
| AK001022  | 1403.49   | 1171.422  | NM_014332 | 1447.842  | 1510.447  |
| AL049351  | 39127.625 | 45074.648 | AF086068  | 3335.027  | 2563.361  |
| AK021826  | 10220.455 | 11975.063 | AK026322  | 793.21    | 948.691   |
| AK025341  | 1422.334  | 1228.924  | AF086059  | 3274.49   | 3490.502  |
| AK021838  | 40185.148 | 50302.973 | AF086091  | 2715.028  | 2679.046  |
| AF083118  | 2829.493  | 2213.707  | AF075018  | 1245.045  | 1275.451  |
| AF211977  | 782.535   | 1050.107  | AK024239  | 2245.09   | 2149.038  |
| AK000957  | 498.001   | 883.946   | AF147390  | 1035.094  | 579.858   |
| AF089811  | 5201.99   | 4759.395  | AF085879  | 997.303   | 775.85    |
| AF147444  | 3691.778  | 3441.422  | AF075019  | 3892.102  | 3659.208  |
| NM_016566 | 1587.946  | 1469.758  | AF147388  | 3176.832  | 2890.553  |
| AK021909  | 3345.511  | 3636.806  | AK021498  | 13162.934 | 10757.198 |
| AK022043  | 2338.568  | 2177.429  | AF085874  | 16256.831 | 14730.203 |
| AK022168  | 1113.918  | 1422.672  | AF147346  | 3276.111  | 4045.93   |
| AK022201  | 2495.462  | 2907.378  | AK026959  | 3583.276  | 4799.457  |
| AK022353  | 16061.934 | 16632.756 | NM_019556 | 1577.412  | 2075.528  |
| AF064848  | 41894.641 | 52360.5   | NM_004753 | 62644.773 | 64293.25  |

|           |           |           |           |           |           |
|-----------|-----------|-----------|-----------|-----------|-----------|
| U61089    | 11306.116 | 13159.908 | NM_015462 | 10700.283 | 11321.771 |
| AK001036  | 6826.363  | 6939.319  | AF147377  | 3219.204  | 3736.997  |
| AK024858  | 31040.035 | 37390.586 | AK026700  | 3496.66   | 3512.184  |
| NM_001049 | 21986.262 | 20968.813 | AK000127  | 2855.387  | 2753.834  |
| AK024554  | 4145.992  | 4055.226  | AF086242  | 1483.337  | 1289.17   |
| AF068294  | 11227.242 | 11748.169 | AF086370  | 2497.986  | 2629.551  |
| AK025909  | 14190.504 | 13927.723 | AK026868  | 2747.368  | 2347.675  |
| AK026138  | 6207.615  | 6997.13   | AK022245  | 1319.379  | 1230.805  |
| Z70706    | 1195.403  | 1117.482  | AK026500  | 593.464   | 365.98    |
| NM_018101 | 27591.818 | 28183.033 | AK022200  | 14635.473 | 13363.427 |
| AF293366  | 2992.338  | 2650.629  | AK026967  | 1244.573  | 780.98    |
| BF526704  | 4392.517  | 4278.813  | AK024604  | 1052.463  | 737.522   |
| AJ491695  | 21516.207 | 24172.75  | AK023396  | 2271.83   | 1559.186  |
| AF052107  | 39504.898 | 42180.961 | AF264625  | 2650.539  | 2321.799  |
| AK022430  | 4285.02   | 4501.885  | AF088025  | 3545.259  | 3043.274  |
| AL137279  | 4508.233  | 4717.026  | AK024286  | 1832.737  | 1304.681  |
| AK023981  | 4922.724  | 4785.395  | AF075098  | 952.545   | 729.831   |
| AK025037  | 2502.58   | 2713.702  | AF085934  | 2777.787  | 1877.062  |
| AK021874  | 39598.914 | 33871.383 | AF147423  | 1888.64   | 1637.02   |
| AF086384  | 61091.496 | 113423.99 | AF075088  | 4068.835  | 3455.071  |
| M77818    | 46794.402 | 48143.953 | AK023971  | 57610.641 | 55499.152 |
| AF009267  | 6964.707  | 6689.902  | AK024738  | 4526.929  | 3894.856  |
| AK027129  | 20945.543 | 21668.975 | AL133103  | 6179.351  | 7213.191  |
| NM_015698 | 8696.664  | 8944.66   | BC015321  | 5718.733  | 6346.76   |
| AK024138  | 10500.442 | 10670.017 | AL157450  | 7374.426  | 7895.131  |
| Y10505    | 7535.877  | 7770.734  | AL359594  | 5251.348  | 5323.021  |
| U00946    | 23418.785 | 26155.578 | AL137293  | 13886.81  | 14724.617 |
| NM_005615 | 14241.046 | 13313.031 | AL137458  | 4964.378  | 5295.598  |
| Z34290    | 3665.683  | 4281.036  | AL157490  | 35877.18  | 43290.578 |
| AF070642  | 14487.214 | 15805.493 | AL390167  | 6803.359  | 7218.12   |
| AK027125  | 7967.944  | 7506.239  | AK023657  | 2602.241  | 2801.118  |
| D16918    | 1742.12   | 1909.31   | AK001022  | 885.553   | 729.979   |
| D16467    | 3968.307  | 4216.533  | AL049351  | 48431.395 | 52664.105 |
| AF090932  | 6798.295  | 7452.257  | AL137508  | 1257.315  | 1297.412  |
| AF166125  | 1879.046  | 1463.106  | AK021826  | 11276.328 | 8523.414  |
| AF225425  | 13952.958 | 14658.729 | AK024541  | 1757.538  | 1450.213  |
| NM_014737 | 25109.881 | 26328.627 | AK025341  | 3547.034  | 2759.007  |
| NM_003488 | 24658.32  | 27420.488 | AK021838  | 37922.461 | 41824.105 |
| NM_001454 | 61554.414 | 108047.71 | AK021990  | 2752.359  | 2505.959  |
| NM_006558 | 13826.252 | 14782.251 | AF083118  | 4255.743  | 2990.443  |
| NM_005797 | 2976.911  | 3300.984  | AF132602  | 852.003   | 979.281   |
| NM_004824 | 8687.915  | 7898.869  | AF211977  | 1007.445  | 1061.588  |
| M17733    | 60814.641 | 117155.57 | AK000957  | 2004.416  | 1756.128  |
| U83191    | 2845.563  | 1546.36   | AF089811  | 4337.652  | 3680.579  |
| NM_013952 | 28961.422 | 35307.375 | AF147444  | 4670.244  | 4132.053  |
| AK021434  | 22662.268 | 25878.969 | NM_016566 | 2360.274  | 1933.154  |
| NM_016479 | 37063.379 | 34572.207 | NM_014126 | 751.676   | 778.857   |
| AK000933  | 41604.621 | 45186.023 | AK021909  | 2849.838  | 3674.918  |
| Y10205    | 2572.107  | 2957.242  | AK022043  | 3737.201  | 4811.686  |
| NM_014628 | 5278.113  | 6546.528  | AK022168  | 3375.344  | 3361.827  |
| AK025277  | 4220.395  | 5130.688  | AK022327  | 3778.501  | 3565.611  |
| AF086095  | 2435.042  | 2661.223  | AK021959  | 1979.335  | 1878.34   |
| NM_018352 | 4025.574  | 3599.082  | AK022061  | 1591.041  | 1467.364  |

|           |           |           |           |           |           |
|-----------|-----------|-----------|-----------|-----------|-----------|
| AK026880  | 6798.155  | 6582.525  | AK022201  | 4537.557  | 5135.97   |
| AF086061  | 1001.313  | 906.694   | AK022353  | 12263.201 | 14759.95  |
| AL080092  | 27801.219 | 28519.49  | AF064848  | 27072.191 | 28902.467 |
| AF075069  | 2051.154  | 1544.387  | U61089    | 9255.371  | 9443.159  |
| NM_005422 | 1295.902  | 968.787   | AK001036  | 3892.369  | 3890.812  |
| AK024427  | 12961.985 | 10871.424 | AK024858  | 19525.625 | 20477.041 |
| NM_003006 | 5528.579  | 5213.737  | Y16697    | 1775.956  | 1530.345  |
| NM_000493 | 2854.047  | 2346.942  | NM_001049 | 17923.725 | 15080.168 |
| AF272035  | 18386.699 | 20435.125 | AK024554  | 3406.251  | 2502.965  |
| AY009133  | 2033.115  | 2436.637  | AF068294  | 8366.605  | 7029.68   |
| NM_000965 | 1360.154  | 1747.608  | AK025909  | 9249.55   | 6046.385  |
| NM_013403 | 19100.189 | 20800.523 | AK026138  | 6186.709  | 4951.202  |
| NM_004123 | 1747.529  | 1854.187  | Z70706    | 1744.416  | 1559.587  |
| NM_000674 | 1748.656  | 1461.582  | NM_000549 | 1361.49   | 1098.667  |
| NM_016232 | 5515.424  | 6790.685  | NM_018101 | 16073.195 | 12095.411 |
| AF178930  | 4779.04   | 5047.416  | AF293366  | 2461.34   | 2073.453  |
| M74161    | 14796.913 | 15647.111 | BF526704  | 2805.615  | 2440.407  |
| NM_016542 | 15658.986 | 16166.746 | AJ491695  | 20773.668 | 18867.908 |
| NM_000484 | 5330.904  | 6365.686  | AF052107  | 50207.914 | 55153.023 |
| NM_003855 | 932.857   | 1130.744  | AK022430  | 11078.001 | 11425.448 |
| S40369    | 11720.782 | 13912.045 | AL137279  | 3005.285  | 2622.233  |
| NM_015831 | 4559.69   | 4602.011  | AK023981  | 2630.808  | 2771.574  |
| AK023154  | 13565.182 | 13113.62  | AK025037  | 1760.865  | 2236.129  |
| Z36820    | 4777.164  | 4786.933  | AK021874  | 36492.559 | 39636.414 |
| NM_003967 | 22437.365 | 24325.398 | AF086384  | 64955.313 | 64549.715 |
| NM_012451 | 13718.706 | 12606.394 | M77818    | 25181.578 | 22248.785 |
| NM_006624 | 32294.777 | 31725.563 | AF009267  | 5489.459  | 5694.3    |
| AF130079  | 1036.705  | 1223.841  | AK027129  | 10387.606 | 8331.456  |
| NM_017667 | 6504.171  | 6907.946  | L19367    | 1261.36   | 952.77    |
| AK002211  | 34307.277 | 34230.301 | NM_015698 | 3970.224  | 3646.271  |
| NM_012127 | 18913.244 | 22884.637 | AK024138  | 8657.975  | 6349.375  |
| NM_014454 | 9773.042  | 9930.5    | Y10505    | 6033.013  | 4505.781  |
| NM_017489 | 10226.943 | 10537.238 | AF056443  | 1127.063  | 1207.318  |
| NM_002824 | 28240.055 | 34147.852 | U00946    | 12012.948 | 10973.917 |
| NM_006835 | 48661.016 | 54805.543 | NM_005615 | 30852.828 | 35655.109 |
| NM_006023 | 38696.301 | 39411.867 | Z34290    | 3299.667  | 3939.668  |
| NM_014673 | 19311.846 | 18736.99  | AF070642  | 13323.151 | 14884.141 |
| AB002330  | 10238.917 | 10942.989 | AK027125  | 8910.581  | 9309.927  |
| AL137509  | 52339.352 | 57583.605 | AK025311  | 2865.5    | 2549.673  |
| NM_006538 | 25257.813 | 27008.219 | D16918    | 8881.685  | 9068.093  |
| NM_019887 | 25530.818 | 29147.648 | D16467    | 4165.14   | 5349.362  |
| NM_004050 | 46864.371 | 53391.016 | AF090932  | 6710.426  | 7566.944  |
| NM_006024 | 30218.5   | 32580.828 | AF166125  | 4173.273  | 4930.672  |
| NM_020191 | 6650.854  | 6424.623  | AF225425  | 18333.447 | 21276.018 |
| NM_017434 | 11316.504 | 12260.648 | NM_014737 | 14469.182 | 13033.115 |
| NM_020182 | 2660.662  | 2340.825  | NM_003488 | 13822.215 | 11482.042 |
| AL137669  | 7664.459  | 8666.515  | NM_001454 | 58868.027 | 57417.965 |
| AJ275213  | 4637.312  | 4858.572  | NM_006558 | 7685.29   | 6579.521  |
| AB032958  | 8489.58   | 10846.231 | Z22780    | 596.069   | 582.122   |
| NM_014263 | 10840.516 | 11437.159 | NM_005797 | 1352.064  | 1343.148  |
| NM_020361 | 3229.797  | 3870.517  | NM_004824 | 3862.58   | 2776.895  |
| NM_015907 | 7804.401  | 8346.529  | M17733    | 63395.016 | 68291.797 |
| NM_001912 | 6478.027  | 6217.161  | U83191    | 1728.559  | 1838.078  |

|           |           |           |           |           |           |
|-----------|-----------|-----------|-----------|-----------|-----------|
| NM_013267 | 13954.648 | 16881.463 | NM_013952 | 12845.637 | 10309.339 |
| NM_002454 | 10287.948 | 11661.898 | AK021434  | 12404.545 | 10821.895 |
| NM_001917 | 12249.928 | 13044.813 | NM_016479 | 26596.875 | 25938.504 |
| NM_005956 | 59212.969 | 132481.92 | AK000933  | 18951.934 | 14884.939 |
| NM_003043 | 47926.949 | 52073.289 | Y10205    | 2502.074  | 1837.129  |
| D87077    | 4512.525  | 4834.487  | NM_014626 | 6206.667  | 5181.583  |
| NM_014308 | 1177.842  | 867.596   | NM_013937 | 1062.341  | 1023.873  |
| L07033    | 5967.958  | 6405.137  | AK025277  | 4177.052  | 4847.339  |
| AK026341  | 9025.356  | 10930.47  | AF086095  | 3278.068  | 3433.233  |
| NM_018943 | 17825.434 | 18308.191 | NM_018352 | 3120.308  | 3147.265  |
| AJ292757  | 1994.424  | 1811.51   | AK026880  | 9454.843  | 10824.648 |
| U01922    | 3801.998  | 3313.697  | AF086061  | 3061.35   | 3391.852  |
| NM_003996 | 2689.618  | 2741.322  | X79985    | 1066.895  | 1092.187  |
| NM_004469 | 1308.586  | 809.221   | AL080092  | 12291.119 | 15056.243 |
| NM_002510 | 3232.651  | 3341.859  | AF075069  | 1801.301  | 2297.562  |
| NM_020386 | 1285.418  | 1202.279  | NM_005422 | 2101.843  | 2484.017  |
| NM_001270 | 6051.39   | 6696.326  | AK024427  | 8857.683  | 6242.846  |
| NM_001952 | 49364.383 | 51263.559 | NM_003006 | 3575.918  | 2793.091  |
| NM_003223 | 28935.125 | 27381.65  | NM_000493 | 1477.061  | 970.019   |
| NM_006713 | 62858.184 | 83709.602 | AF272035  | 10553.639 | 9902.915  |
| NM_020201 | 31639.203 | 28225.598 | AY009133  | 2036.178  | 2316.301  |
| U81557    | 3716.372  | 3353.613  | NM_000965 | 2003.114  | 1736.916  |
| NM_014878 | 10815.564 | 10092.67  | NM_013403 | 14103.321 | 12008.554 |
| AK023530  | 3749.625  | 2826.732  | NM_004123 | 1801.428  | 1575.756  |
| NM_016019 | 31447.951 | 32851.098 | NM_000674 | 1389.204  | 1011.492  |
| NM_012245 | 36725.934 | 32094.635 | AB020671  | 588.595   | 615.848   |
| NM_003986 | 1385.845  | 829.747   | AK024257  | 792.277   | 717.715   |
| NM_001533 | 56562.539 | 58427.879 | AF178930  | 3297.264  | 3788.207  |
| NM_003977 | 65125.82  | 70979.172 | M74161    | 10289.641 | 11209.235 |
| NM_005998 | 62415.563 | 60594.336 | NM_016542 | 10695.851 | 12064.388 |
| U28424    | 3824.192  | 3560.93   | NM_000484 | 5813.906  | 6126.443  |
| BF541372  | 7152.624  | 6763.608  | NM_003855 | 2272.941  | 2179.842  |
| AF092137  | 15098.453 | 11465.412 | S40369    | 20530.854 | 20545.74  |
| NM_004623 | 10599.741 | 10304.047 | NM_015831 | 10169.903 | 11356.043 |
| NM_004793 | 32283.59  | 29710.189 | AK023154  | 9426.954  | 10379.953 |
| NM_004390 | 35073.07  | 36457.41  | Z36820    | 5353.63   | 5915.677  |
| AL050028  | 21180.232 | 18392.551 | NM_003967 | 18935.406 | 20564.162 |
| NM_000371 | 1707.691  | 2104.205  | NM_012451 | 10955.104 | 10834.311 |
| BE732255  | 20498.646 | 20806.719 | NM_006624 | 19343.363 | 15544.194 |
| NM_004955 | 14811.056 | 16788.014 | NM_007069 | 869.846   | 570.638   |
| NM_003364 | 9522.669  | 9106.251  | AF130079  | 933.869   | 529.145   |
| NM_017803 | 5814.609  | 6086.788  | NM_017667 | 3412.937  | 3156.323  |
| NM_015863 | 1378.168  | 1166.074  | AK002211  | 19190.014 | 14939.393 |
| NM_005994 | 40626.289 | 40365.453 | NM_012127 | 10242.737 | 7859.578  |
| AB027508  | 13496.196 | 11795.033 | NM_014454 | 6200.621  | 5122.302  |
| NM_016331 | 11294.336 | 11835.441 | NM_017489 | 4493.104  | 4064.834  |
| NM_014360 | 62880.828 | 84092.883 | NM_002824 | 20185.822 | 17833.621 |
| NM_018952 | 1803.335  | 1918.785  | NM_006835 | 33615.305 | 31499.666 |
| NM_007358 | 20474.215 | 23166.047 | NM_006023 | 23133.893 | 22375.879 |
| NM_001571 | 9868.848  | 9407.558  | NM_014673 | 11172.067 | 11842.513 |
| AF126749  | 2511.954  | 2178.19   | AB002330  | 6615.895  | 6917.406  |
| NM_018108 | 5285.154  | 4673.43   | NM_006538 | 15993.363 | 19630.125 |
| NM_003408 | 1067.62   | 1148.262  | NM_006024 | 15040.79  | 20073.195 |

|           |           |           |           |           |           |
|-----------|-----------|-----------|-----------|-----------|-----------|
| NM_00345C | 426.88    | 563.215   | NM_020191 | 2616.179  | 2872.99   |
| AK021577  | 3464.558  | 3120.309  | NM_017434 | 36436.336 | 39920.551 |
| NM_003433 | 24823.482 | 24068.809 | NM_020405 | 1268.802  | 1284.912  |
| NM_005221 | 12459.62  | 12344.266 | NM_020182 | 2313.642  | 2705.854  |
| NM_00587C | 2363.235  | 1840.043  | AL137669  | 7377.125  | 8258.914  |
| NM_018561 | 5191.493  | 4649.502  | AJ275213  | 3362.979  | 3523.701  |
| NM_007193 | 1177.245  | 1652.223  | AB032958  | 10807.623 | 10783.771 |
| NM_001994 | 28212.295 | 33043.605 | NM_014263 | 7375.15   | 4553.726  |
| J00129    | 46644.668 | 56270.852 | NM_020361 | 1937.922  | 1799.182  |
| NM_00332C | 10900.596 | 10497.036 | NM_015907 | 4012.626  | 3365.951  |
| L10146    | 13311.429 | 11530.202 | NM_001912 | 4847.174  | 4535.842  |
| NM_000685 | 24893.02  | 30468.758 | NM_013267 | 12274.162 | 9900.705  |
| AK025657  | 28615.318 | 33102.609 | NM_002454 | 7483.553  | 5039.082  |
| AF142063  | 2766.598  | 2548.744  | NM_001917 | 8510.908  | 6774.022  |
| W42849    | 7457.034  | 7294.415  | NM_005956 | 61694.758 | 57223.953 |
| AI889961  | 14760.338 | 13714.445 | NM_003043 | 50845.293 | 54306.953 |
| AI360116  | 33206.066 | 29240.262 | D87077    | 2871.851  | 2921.345  |
| NM_013983 | 3674.829  | 3278.207  | NM_014308 | 805.098   | 1063.175  |
| AI572835  | 36093.684 | 33860.965 | L07033    | 3977.168  | 4893.535  |
| R20392    | 39958.316 | 35020.934 | AK023934  | 1005.302  | 1107.918  |
| AA486367  | 12722.346 | 7890.466  | AK000142  | 2450.744  | 2455.61   |
| N56684    | 3566.484  | 3013.787  | NM_005993 | 11935.593 | 15230.449 |
| M55153    | 8002.966  | 8730.255  | AK026341  | 6116.063  | 8311.235  |
| AF414120  | 2780.683  | 3207.392  | NM_018943 | 17691.9   | 20057.65  |
| AL136131  | 723.958   | 828.039   | AJ292757  | 2274.916  | 2528.116  |
| NM_033357 | 17318.74  | 17741.313 | AK025239  | 731.539   | 1002.781  |
| AF335109  | 8070.234  | 8513.45   | U01922    | 7308.18   | 7839.958  |
| NM_003263 | 7840.873  | 8228.761  | NM_003999 | 2305.62   | 2645.771  |
| U59911    | 23749.121 | 27281.574 | NM_004469 | 732.961   | 1012.867  |
| NM_004957 | 19454.23  | 18464.451 | NM_00251C | 2038.468  | 2314.04   |
| AV697672  | 1227.656  | 1254.003  | NM_020386 | 807.738   | 910.184   |
| NM_000942 | 53978.949 | 53915.121 | NM_00127C | 4109.473  | 3714.247  |
| NM_002982 | 2665.42   | 1946.125  | NM_001952 | 34568.688 | 28083.57  |
| NM_00219C | 1361.222  | 1505.236  | NM_003223 | 18529.346 | 15320.185 |
| AK056773  | 12298.23  | 13211.072 | NM_006713 | 42887.855 | 43999.996 |
| NM_002182 | 65510.984 | 63562.063 | NM_020201 | 17653.105 | 17047.133 |
| NM_01647C | 11609.349 | 12265.203 | U81557    | 3033.452  | 2154.563  |
| AL365408  | 61097.145 | 71909.195 | NM_014878 | 8271.104  | 5635.176  |
| AK026204  | 17318.439 | 16152.26  | AK023530  | 2818.823  | 1966.59   |
| NM_014635 | 7311.927  | 5259.566  | NM_016019 | 26679.619 | 16881.547 |
| NM_004145 | 29019.342 | 33726.461 | NM_012245 | 24697.852 | 17220.123 |
| AK023196  | 18705.156 | 17789.678 | NM_003986 | 1189.364  | 1073.949  |
| NM_018728 | 12207.984 | 9692.605  | NM_001533 | 41340.656 | 48003.145 |
| AK024014  | 41651.563 | 39171.746 | NM_006929 | 41191.48  | 44543.449 |
| NM_000865 | 11573.263 | 10407.272 | NM_003977 | 46509.961 | 48051.422 |
| NM_000867 | 5407.662  | 4892.062  | NM_005998 | 37785.234 | 44149.641 |
| AF076642  | 3130.341  | 3477.522  | U28424    | 9615.443  | 9591.572  |
| NM_002386 | 2932.376  | 3431.139  | BF541372  | 20825.576 | 19255.115 |
| NM_005314 | 1221.32   | 1457.751  | AF092137  | 17125.809 | 16029.35  |
| NM_004885 | 14126.878 | 12431.208 | NM_004623 | 8791.499  | 8781.972  |
| NM_005145 | 32159.25  | 37266.883 | NM_004793 | 18936.791 | 19239.18  |
| NM_012152 | 51027.504 | 48691.516 | NM_00439C | 19927.799 | 20272.381 |
| NM_00194C | 10680.576 | 11184.134 | AL050028  | 11165.73  | 8716.307  |

|           |           |           |           |           |           |
|-----------|-----------|-----------|-----------|-----------|-----------|
| U83115    | 34405.422 | 34217.48  | NM_000371 | 1358.134  | 915.189   |
| NM_016234 | 27176.568 | 32494.123 | BE732255  | 12646.192 | 10060.233 |
| NM_001876 | 17388.246 | 18997.408 | NM_004955 | 9095.57   | 9047.171  |
| NM_016144 | 9461.504  | 10321.145 | NM_003364 | 4558.135  | 3385.289  |
| AL133099  | 10176.654 | 11388.14  | NM_017803 | 4992.913  | 4198.946  |
| NM_016082 | 7271.591  | 6633.722  | NM_015863 | 1255.942  | 976.741   |
| NM_000433 | 4082.968  | 3584.275  | NM_005994 | 36374.84  | 34756.262 |
| NM_000190 | 28545.111 | 33831.57  | AB027508  | 10445.819 | 11099.295 |
| X15667    | 21898.906 | 25050.652 | NM_016331 | 9159.177  | 10205.556 |
| NM_017512 | 2236.187  | 2416.917  | NM_014360 | 55329.117 | 55583.996 |
| NM_018661 | 2034.249  | 2325.843  | NM_018952 | 1782.595  | 1799.966  |
| NM_002249 | 64146.738 | 61259.148 | AB033053  | 678.456   | 700.779   |
| AK096507  | 579.215   | 655.692   | NM_007358 | 13561.101 | 15725.711 |
| NM_007126 | 64178.484 | 61155.055 | NM_001571 | 3831.69   | 3815.42   |
| NM_004311 | 35274.383 | 39159.117 | AF126749  | 1914.183  | 2231.104  |
| NM_005624 | 13063.415 | 13045.751 | NM_018108 | 5024      | 5217.051  |
| NM_002302 | 2473.184  | 2464.427  | NM_003408 | 4871.119  | 5304.895  |
| AK026958  | 2570.744  | 2538.958  | NM_003450 | 4719.01   | 4530.145  |
| NM_000579 | 4148.454  | 4448.283  | AK021577  | 2555.797  | 3180.511  |
| NM_001480 | 8153.57   | 6473.581  | NM_003433 | 20637.377 | 20197.234 |
| AF263462  | 10094.108 | 10452.443 | NM_005221 | 8286.784  | 8437.15   |
| AB040962  | 2635.768  | 2522.623  | NM_005870 | 1269.254  | 1177.77   |
| NM_000639 | 974.652   | 863.797   | NM_018561 | 3453.846  | 3374.139  |
| NM_015599 | 3609.507  | 2245.024  | NM_007193 | 802.247   | 874.413   |
| AB037902  | 985.666   | 868.691   | NM_001994 | 23314.166 | 20062.063 |
| NM_018696 | 43201.266 | 37759.418 | J00129    | 36029.02  | 35162.945 |
| NM_000136 | 53381.23  | 49867.359 | NM_003320 | 9307.904  | 8412.179  |
| AL157456  | 5138.989  | 5342.639  | L10146    | 12588.815 | 11739.774 |
| AL162056  | 3916.594  | 3436.248  | NM_000685 | 17726.457 | 16129.759 |
| NM_000380 | 50404.715 | 43359.27  | AK025657  | 33014.066 | 34943.195 |
| NM_004628 | 10043.861 | 10631.558 | AF142063  | 2909.773  | 2895.013  |
| AF085734  | 603.041   | 475.426   | W42849    | 6943.521  | 6863.306  |
| NM_014876 | 13375.328 | 14057.803 | AI889961  | 10354.239 | 9505.786  |
| NM_005406 | 9146.33   | 8695.056  | AI360116  | 23694.25  | 24852.902 |
| NM_003328 | 8245.168  | 9428.014  | NM_013983 | 2680.044  | 2843.12   |
| X93921    | 7851.508  | 7826.314  | AI572835  | 28301.441 | 34929.898 |
| AF073482  | 13626.057 | 11761.181 | R20392    | 34417.988 | 42528.93  |
| NM_005990 | 15038.45  | 14774.129 | AA486367  | 9569.141  | 8520.61   |
| NM_016276 | 67559.203 | 62527.328 | N56684    | 1352.39   | 1595.143  |
| NM_017762 | 14791.194 | 13514.956 | M55153    | 3482.661  | 3974.223  |
| NM_001863 | 69482.141 | 58789.879 | AF414120  | 1463.902  | 1798.102  |
| NM_000921 | 29923.518 | 28530.518 | AK097322  | 3500.725  | 3391.827  |
| NM_000098 | 7724.286  | 6526.634  | AL136131  | 9468.26   | 9816.963  |
| NM_000016 | 41586.707 | 39239.281 | NM_033357 | 15176.613 | 16451.621 |
| AK026913  | 11295.129 | 11292.046 | AF335109  | 6944.475  | 7558.299  |
| J00129    | 43285.719 | 47282.395 | NM_003263 | 3557.854  | 4083.024  |
| NM_003320 | 10171.703 | 9676.333  | U59911    | 14228.321 | 15992.246 |
| L10146    | 15519.053 | 14859.357 | NM_004957 | 11396.078 | 10952.143 |
| NM_000685 | 20896.182 | 23021.719 | AV697672  | 747.497   | 716.388   |
| AK025657  | 31449.219 | 29825.445 | NM_000942 | 41214.977 | 41968.898 |
| AF142063  | 2903.31   | 2923.271  | NM_002982 | 2814.839  | 2408.839  |
| W42849    | 7724.771  | 8117.411  | NM_002190 | 1590.228  | 1444.165  |
| AI889961  | 12302.092 | 12152.818 | AK056773  | 8117.257  | 8605.888  |



|           |           |           |           |           |           |
|-----------|-----------|-----------|-----------|-----------|-----------|
| AI360116  | 29783.701 | 33779.777 | NM_002182 | 54619.242 | 54711.98  |
| NM_013983 | 3153.682  | 2961.193  | NM_016470 | 9338.084  | 10105.328 |
| AI572835  | 33242.113 | 31795.086 | AL365408  | 55930.441 | 53566.121 |
| R20392    | 36673.523 | 33277.074 | AK026204  | 10107.904 | 9031.578  |
| AA486367  | 11785.54  | 7317.771  | NM_014635 | 5996.496  | 3707.036  |
| N56684    | 2815.774  | 2477.73   | NM_004145 | 31385.105 | 40093.379 |
| M55153    | 6252.077  | 7634.457  | AK023196  | 17472.488 | 20185.664 |
| AF414120  | 3672.245  | 4133.647  | NM_018728 | 11376.752 | 10970.144 |
| AK097322  | 1658.217  | 1733.576  | AK024014  | 43212.391 | 48961.926 |
| AL136131  | 11471.941 | 11871.132 | NM_000865 | 9526.371  | 9725.859  |
| NM_033357 | 1856.632  | 2634.735  | NM_000867 | 3997.201  | 4336.93   |
| AF335109  | 7873.655  | 7746.701  | AF076642  | 2956.58   | 3673.802  |
| NM_003263 | 6265.092  | 6375.191  | NM_002386 | 14238.47  | 13593.096 |
| U59911    | 20787.178 | 19975.814 | NM_005314 | 11383.239 | 11209.271 |
| NM_004482 | 3262.213  | 2491.884  | NM_004885 | 11850.112 | 13270.858 |
| NM_000352 | 1444.716  | 1276.809  | NM_005145 | 22718.697 | 26210.443 |
| NM_000942 | 50902.121 | 48234.605 | NM_012152 | 49614.047 | 52532.441 |
| NM_002982 | 2409.364  | 2064.296  | NM_001940 | 9521.45   | 10012.728 |
| NM_002190 | 1251.04   | 1496.913  | U83115    | 25778.131 | 27588.066 |
| AK056773  | 12057.506 | 12432.246 | NM_016234 | 20990.273 | 18485.098 |
| NM_016470 | 12421.357 | 13092.002 | NM_001876 | 11733.162 | 11768.103 |
| AL365408  | 64085.555 | 64242.516 | NM_016144 | 8875.204  | 7640.185  |
| AK026204  | 14819.649 | 16206.022 | AL133099  | 9515.822  | 9132.613  |
| NM_014635 | 6369.375  | 5017.752  | NM_016082 | 4344.235  | 4443.236  |
| NM_004145 | 37966.863 | 38961.184 | NM_000433 | 3263.674  | 3366.324  |
| AK023196  | 16619.68  | 17869.152 | NM_000190 | 22715.223 | 23182.629 |
| NM_018728 | 11314.339 | 8168.965  | X15667    | 17323.539 | 17198.559 |
| AK024014  | 33348.395 | 37429.457 | NM_017512 | 1722.083  | 1413.123  |
| NM_000865 | 9809.148  | 9918.527  | NM_018661 | 2273.779  | 2649.124  |
| NM_000867 | 4112.741  | 3854.8    | NM_002249 | 59472.477 | 53586.32  |
| AF076642  | 3761.786  | 4193.903  | AK096507  | 645.032   | 777.182   |
| NM_002386 | 21230.982 | 23610.055 | NM_007126 | 58018.473 | 55384.57  |
| NM_005314 | 7859.021  | 7928.252  | NM_004311 | 25908.74  | 34901.695 |
| NM_004885 | 1665.237  | 1207.643  | NM_005624 | 12850.219 | 12524.954 |
| NM_005145 | 28849.221 | 35330.555 | NM_002302 | 4011.945  | 3733.224  |
| NM_012152 | 48000.164 | 46730.27  | AB020672  | 1418.444  | 1570.131  |
| NM_001940 | 11051.153 | 12027.402 | AK026958  | 2203.148  | 2206.193  |
| U83115    | 29956.381 | 29343.393 | NM_000579 | 2287.689  | 2746.056  |
| NM_007193 | 2533.449  | 3006      | NM_001480 | 2032.007  | 1565.073  |
| NM_001994 | 30841.789 | 28919.848 | AF263462  | 6051.789  | 7087.148  |
| NM_016144 | 11693.948 | 10674.508 | AB040962  | 3451.732  | 3703.063  |
| AL133099  | 11464.033 | 11054.831 | NM_000639 | 775.019   | 705.218   |
| NM_016082 | 6352.951  | 6400.395  | NM_015599 | 2496.504  | 1489.867  |
| NM_000433 | 7168.692  | 7078.816  | AB037902  | 793.435   | 686.417   |
| NM_000190 | 28156.982 | 32888.227 | NM_018696 | 38139.566 | 36474.453 |
| X15667    | 22457.295 | 24403.48  | NM_000136 | 41063.047 | 39537.215 |
| NM_002249 | 63700.262 | 66861.656 | AL157456  | 4147.089  | 3893.574  |
| AK096507  | 581.96    | 777.599   | AL162056  | 3300.011  | 3469.597  |
| NM_007126 | 66600.531 | 62622.656 | NM_000380 | 60007.973 | 47361.27  |
| NM_004311 | 34685.996 | 32743.119 | NM_004628 | 8085.485  | 8538.202  |
| NM_005624 | 9930.072  | 11123.461 | AF085734  | 552.561   | 464.331   |
| NM_002302 | 2586.025  | 2410.764  | NM_014876 | 10857.399 | 10950.664 |
| AB020672  | 1617.466  | 1219.198  | NM_005406 | 8597.72   | 9149.492  |

|           |           |           |           |           |           |
|-----------|-----------|-----------|-----------|-----------|-----------|
| AK026958  | 1456.932  | 1618.769  | NM_003328 | 9524.785  | 9963.443  |
| NM_001480 | 2079.989  | 1396.2    | X93921    | 5553.029  | 5618.93   |
| AF263462  | 9033.135  | 9808.871  | AF073482  | 9751.117  | 9758.572  |
| AB040962  | 2760.361  | 3369.579  | NM_005990 | 17731.717 | 17790.783 |
| NM_000639 | 1933.927  | 1994.377  | NM_016276 | 62048.484 | 63635.188 |
| AV697672  | 1934.655  | 1782.825  | NM_017762 | 13248.701 | 12539.433 |
| AB037902  | 1064.489  | 951.604   | NM_001863 | 61234.59  | 56926.727 |
| NM_018696 | 41807.82  | 40752.379 | NM_000921 | 26521.266 | 28498.213 |
| NM_000136 | 45534.203 | 44504.211 | NM_000098 | 6072.078  | 6288.745  |
| NM_000380 | 49277.512 | 41740.879 | NM_000016 | 33111.398 | 37740.074 |
| NM_004628 | 11708.715 | 12054.608 | AK026913  | 8034.011  | 7716.609  |
| NM_014876 | 12529.497 | 13626.325 | J00129    | 34576.672 | 30272.482 |
| NM_005406 | 8572.483  | 8747.063  | NM_003320 | 8326.992  | 7200.294  |
| NM_003328 | 9028.321  | 8340.536  | L10146    | 13063.313 | 11419.194 |
| X93921    | 7299.086  | 6298.381  | NM_000685 | 18174.717 | 18313.273 |
| AF073482  | 12143.514 | 10442.78  | AK025657  | 27854.771 | 30477.258 |
| NM_017762 | 8955.819  | 7485.215  | AF142063  | 2489.748  | 2941.582  |
| NM_001863 | 69056.43  | 57393.215 | W42849    | 6330.481  | 6573.751  |
| NM_000921 | 26721.662 | 28601.547 | AI889961  | 8938.023  | 9336.505  |
| NM_000098 | 6809.831  | 6644.846  | AI360116  | 24332.494 | 22526.25  |
| NM_000016 | 36243.023 | 37784.387 | NM_013983 | 1775.075  | 1911.689  |
| AK026913  | 11692.868 | 11028.352 | AI572835  | 27904.398 | 30827.852 |
| NM_016234 | 34524.52  | 30552.078 | R20392    | 40237.949 | 41372.992 |
| NM_001876 | 20272.092 | 18871.506 | AA486367  | 14381.218 | 8681.432  |
| L10146    | 17306.166 | 16122.63  | N56684    | 2965.697  | 2604.813  |
| NM_000685 | 23539.113 | 26547.012 | M55153    | 5806.659  | 6050.425  |
| AK025657  | 25817.172 | 28182.555 | AF414120  | 2550.436  | 3029.716  |
| AF142063  | 2495.386  | 2309.547  | AK097322  | 1462.75   | 1553.093  |
| W42849    | 12920.725 | 10231.535 | AL136131  | 10590.272 | 13466.76  |
| AI360116  | 33172.648 | 31493.227 | NM_033357 | 16425.539 | 16828.168 |
| NM_013983 | 3033.995  | 3505.716  | AF335109  | 8073.918  | 7707.938  |
| R20392    | 35165.848 | 33286.566 | NM_003263 | 5491.508  | 5106.729  |
| AA486367  | 11506.485 | 6925.104  | U59911    | 15824.738 | 16672.451 |
| N56684    | 2664.849  | 2081.11   | NM_004482 | 2482.024  | 2344.335  |
| M55153    | 6348.388  | 6100.132  | NM_000352 | 1437.348  | 1150.969  |
| AF414120  | 3136.021  | 2775.709  | NM_000942 | 42206.496 | 42393.59  |
| AK097322  | 2571.761  | 2360.879  | NM_002982 | 2162.743  | 1838.056  |
| AL136131  | 15675.298 | 15850.147 | NM_002190 | 1197.726  | 1408.889  |
| AF335109  | 2766.51   | 2495.015  | AK056773  | 6534.125  | 8529.354  |
| NM_003263 | 1424.315  | 1701.296  | NM_002182 | 55296.633 | 55129.754 |
| U59911    | 19669.842 | 20288.336 | NM_016470 | 7677.858  | 9602.798  |
| NM_004482 | 4508.637  | 4563.473  | AL365408  | 61360.844 | 60504.863 |
| NM_000352 | 1117.699  | 1044.245  | AK026204  | 11372.403 | 10594.766 |
| NM_015599 | 5821.328  | 4618.322  | NM_014635 | 5053.952  | 3669.74   |
| NM_014635 | 7298.085  | 5304.076  | NM_004145 | 23830.404 | 26832.352 |
| NM_004145 | 27023.189 | 32794.191 | AK023196  | 16123.081 | 17198.91  |
| AK023196  | 15901.143 | 16221.414 | NM_018728 | 10366.494 | 8731.071  |
| NM_018728 | 11559.314 | 9175.272  | AK024014  | 43154.676 | 45487.121 |
| AK024014  | 34357.504 | 33756.496 | NM_000865 | 10679.327 | 10431.981 |
| NM_000865 | 8956.698  | 9840.864  | NM_000867 | 3476.476  | 3351.351  |
| NM_000867 | 4396.691  | 3811.816  | AF076642  | 2870.71   | 2785.882  |
| AF076642  | 3450.797  | 4048.075  | NM_002386 | 20216.102 | 20251.488 |
| NM_005314 | 10794.931 | 10787.271 | NM_005314 | 10764.146 | 11917.464 |

|           |           |           |           |           |           |
|-----------|-----------|-----------|-----------|-----------|-----------|
| NM_004885 | 11537.516 | 11487.993 | NM_004885 | 10886.709 | 12696.452 |
| NM_005145 | 28156.797 | 29014.049 | NM_005145 | 23547.951 | 24813.443 |
| NM_012152 | 45008.898 | 48718.047 | NM_012152 | 53107.465 | 52668.652 |
| AK024093  | 9347.807  | 10208.253 | NM_001940 | 10097.88  | 9728.688  |
| NM_001940 | 8844.199  | 9199.469  | U83115    | 28384.039 | 30616.166 |
| U83115    | 29073.363 | 32985.102 | NM_007193 | 1408.373  | 1971.583  |
| NM_001264 | 31123.385 | 32969.547 | NM_001994 | 25047.012 | 19192.416 |
| NM_013364 | 26829.309 | 28618.301 | NM_016144 | 8612.061  | 7907.709  |
| NM_004676 | 5832.052  | 6871.724  | AL133099  | 7989.63   | 8204.649  |
| NM_007193 | 3177.969  | 3553.884  | NM_016082 | 4849.324  | 5523.088  |
| NM_001994 | 31530.67  | 31631.279 | NM_000433 | 3900.646  | 3927.126  |
| J00129    | 44374.48  | 46007.238 | NM_000190 | 20765.412 | 22918.473 |
| NM_003320 | 11023.706 | 11730.121 | X15667    | 15177.806 | 16435.229 |
| AL137631  | 20004.053 | 24780.395 | NM_017512 | 1304.831  | 1797.504  |
| NM_016057 | 23254.063 | 26501.512 | NM_018661 | 1453.053  | 1971.583  |
| NM_014677 | 5108.636  | 4929.996  | NM_002249 | 60062.293 | 51895.055 |
| NM_006855 | 2189.384  | 2111.559  | AK096507  | 576.856   | 622.591   |
| AK022790  | 33060.105 | 35234.117 | NM_007126 | 59456.371 | 55213.594 |
| NM_004311 | 30717.195 | 35922.637 | NM_004311 | 28510.463 | 36142.117 |
| NM_005624 | 10511.469 | 10166.743 | NM_005624 | 10531.009 | 10744.037 |
| NM_002302 | 2365.933  | 2421.768  | NM_002302 | 3308.179  | 3539.925  |
| AB020672  | 1235.299  | 924.724   | AB020672  | 1361.149  | 1081.783  |
| NM_000579 | 2170.584  | 1918.71   | AK026958  | 2040.709  | 2373.219  |
| NM_001480 | 1872.26   | 1074.454  | NM_000579 | 2471.286  | 2513.628  |
| AF263462  | 7593.147  | 8255.519  | NM_001480 | 1503.146  | 1362.367  |
| AB040962  | 3413.755  | 3452.839  | AF263462  | 7401.978  | 7818.669  |
| NM_000639 | 619.985   | 563.788   | AB040962  | 3505.145  | 3290.649  |
| AV697672  | 1680.831  | 1433.76   | NM_000639 | 1267.84   | 810.812   |
| NM_000942 | 36942.66  | 32477.039 | AV697672  | 2482.602  | 2569.172  |
| NM_002182 | 63455.246 | 55490.723 | AB037902  | 631.693   | 502.755   |
| AK026204  | 22300.738 | 22547.395 | NM_018696 | 37410.254 | 37051.719 |
| NM_000098 | 5809.507  | 5350.8    | NM_000136 | 46530.73  | 39720.332 |
| NM_000016 | 32212.664 | 37204.047 | AL157456  | 4266.184  | 4189.782  |
| AK026913  | 8460.236  | 8050.835  | AL162056  | 3021.852  | 3845.268  |
| NM_016234 | 29116.076 | 31818.828 | NM_000380 | 57520.559 | 49263.813 |
| NM_001876 | 18138.574 | 19664.547 | NM_004628 | 8036.53   | 9525.555  |
| NM_016144 | 10335.479 | 10808.579 | NM_014876 | 9319.567  | 10658.074 |
| AL133099  | 11165.563 | 11071.531 | NM_005406 | 7750.877  | 8070.765  |
| NM_016082 | 6993.552  | 6749.188  | NM_003328 | 8468.837  | 8581.675  |
| NM_000433 | 4431.893  | 4521.43   | X93921    | 6125.286  | 5675.775  |
| NM_000190 | 26284.961 | 27749.072 | AF073482  | 7365.748  | 7430.866  |
| X15667    | 21134.781 | 21170.748 | NM_005990 | 17703.258 | 17069.168 |
| NM_017512 | 2194.29   | 2378.172  | NM_016276 | 63854.691 | 59451.09  |
| NM_018661 | 2365.19   | 2378.377  | NM_017762 | 13767.585 | 14762.088 |
| NM_001678 | 714.063   | 979.923   | NM_001863 | 62782.766 | 54161.738 |
| AK023078  | 17615.221 | 15412.46  | NM_000921 | 23650.768 | 24202.713 |
| NM_002239 | 63657.051 | 52035.293 | NM_000098 | 6377.702  | 6114.894  |
| NM_002249 | 67296.992 | 56890.961 | NM_000016 | 35280.188 | 38818.57  |
| NM_015684 | 24039.088 | 23313.07  | AK026913  | 7856.204  | 6786.853  |
| NM_003945 | 39799.578 | 41476.605 | NM_016234 | 29532.783 | 28995.15  |
| NM_004482 | 2039.459  | 1675.523  | NM_001876 | 11248.7   | 11340.369 |
| NM_015599 | 3785.115  | 2245.135  | L10146    | 13154.276 | 12227.216 |
| AB037902  | 886.433   | 840.126   | NM_000685 | 17524.545 | 18587.744 |

|           |           |           |           |           |           |
|-----------|-----------|-----------|-----------|-----------|-----------|
| NM_01869  | 40937.473 | 38958.797 | AK025657  | 27145.973 | 31352.199 |
| NM_00013  | 50069.762 | 44605.793 | AF142063  | 2394.888  | 2464.481  |
| AL157456  | 4964.967  | 4706.006  | W42849    | 6078.412  | 7122.623  |
| AL162056  | 4503.417  | 3709.744  | AI889961  | 8864.044  | 7795.921  |
| NM_00038  | 51744.777 | 42958.445 | AI360116  | 23188.768 | 21540.752 |
| NM_00462  | 10654.62  | 10064.24  | NM_013983 | 2894.767  | 2339.973  |
| NM_01487  | 13653.155 | 13586.545 | AI572835  | 28253.975 | 29565.182 |
| NM_00540  | 8327.947  | 7294.027  | R20392    | 33544.988 | 35966.98  |
| X93921    | 5715.708  | 4874.345  | AA486367  | 9843.6    | 6869.743  |
| AF073482  | 10753.342 | 9075.76   | N56684    | 2345.248  | 2184.318  |
| NM_00599  | 16211.118 | 14723.453 | M55153    | 5607.216  | 5798.082  |
| NM_00092  | 26887.088 | 21317.055 | AF414120  | 2459.961  | 2711.227  |
| CY3Cy5    | 30400.975 | 502.056   | AK097322  | 1385.422  | 1146.279  |
| NM_00649  | 64125.508 | 59394.707 | AL136131  | 12085.712 | 12080.065 |
| NM_00689  | 4935.761  | 5818.193  | NM_033357 | 17042.168 | 15759.085 |
| AK023616  | 3751.456  | 4154.335  | AF335109  | 8437.652  | 8095.546  |
| AK022249  | 435.189   | 640.958   | NM_003263 | 4698.771  | 5131.469  |
| AK025665  | 10379.599 | 15499.203 | U59911    | 15031.387 | 15909.479 |
| AL355694  | 2363.951  | 2339.195  | NM_004482 | 2308.418  | 2574.123  |
| AK027152  | 975.436   | 1292.78   | NM_000352 | 2067.296  | 1600.846  |
| AL049257  | 586.316   | 689.496   | NM_015599 | 3093.685  | 2280.027  |
| AF191492  | 2254.923  | 2816.109  | NM_014635 | 5403.029  | 3924.063  |
| BC037530  | 69448.234 | 67230.617 | NM_004145 | 23135.629 | 24446.82  |
| NM_014851 | 19445.709 | 22473.945 | AK023196  | 14436.023 | 15416.674 |
| AL355743  | 3768.484  | 3316.812  | NM_018728 | 8606.099  | 8093.361  |
| L77571    | 900.184   | 926.095   | AK024014  | 37266.727 | 39612.234 |
| X81896    | 1575.845  | 1175.282  | NM_000865 | 9287.263  | 9759.636  |
| AF070595  | 1444.368  | 1379.449  | NM_000867 | 3028.171  | 3114.919  |
| NM_00649  | 49340.926 | 42637.613 | AF076642  | 2587.9    | 2694.383  |
| NM_00689  | 4555.847  | 3398.129  | NM_002386 | 18416.268 | 18243.756 |
| SR1       | 69847.727 | 66288.344 | NM_005314 | 8748.611  | 9486.816  |
| SR3       | 56985.152 | 38823.617 | NM_004885 | 8271.342  | 10569.199 |
| SR5       | 9800.727  | 3678.552  | NM_005145 | 22547.523 | 23994.221 |
| SR7       | 10538.513 | 29090.709 | NM_012152 | 45616.672 | 51437.824 |
| SR9       | 35578.336 | 2499.93   | AK024093  | 9281.561  | 9430.34   |
| CY3Cy5    | 8612.564  | 85.64     | NM_001940 | 8574.642  | 7377.288  |
| M74093    | 7135.19   | 7297.473  | U83115    | 30108.771 | 30980.459 |
| M28219    | 8310.366  | 9470.911  | NM_001264 | 35692.863 | 40399.762 |
| L17326    | 1459.029  | 2117.269  | NM_013364 | 55734.77  | 54824.5   |
| D17207    | 13302.498 | 14861.371 | NM_014368 | 2638.918  | 2851.405  |
| D55640    | 7167.684  | 7973.294  | NM_000850 | 3665.471  | 3484.235  |
| AF085897  | 2156.798  | 2405.854  | NM_004676 | 6300.148  | 7114.288  |
| AF085822  | 3325.366  | 4365.793  | NM_007193 | 1874.933  | 1927.862  |
| AK021510  | 2123.178  | 2853.054  | NM_001994 | 36574.566 | 43719.98  |
| AK022711  | 1856.37   | 2524.095  | J00129    | 50151.527 | 51309.734 |
| AK024310  | 1639.508  | 2270.66   | NM_003320 | 10387.402 | 9181.706  |
| AK023039  | 1441.399  | 1464.914  | AL137631  | 15186.015 | 16470.375 |
| AL109688  | 10412.081 | 10159.682 | NM_016057 | 18864.73  | 21955.57  |
| AF074981  | 3183.643  | 3483.76   | NM_014677 | 4843.865  | 5217.255  |
| AK025863  | 4717.754  | 3549.987  | NM_006855 | 1885.66   | 1985.457  |
| D42044    | 4874.518  | 4221.284  | AK022790  | 27772.127 | 27127.488 |
| AK023009  | 1713.142  | 1098.493  | NM_004311 | 24666.963 | 28687.34  |
| AK026149  | 7347.746  | 3917.384  | NM_005624 | 9959.278  | 9764.986  |

|           |           |           |           |           |           |
|-----------|-----------|-----------|-----------|-----------|-----------|
| AF038185  | 9581.653  | 5809.948  | NM_002302 | 2689.137  | 3048.083  |
| AB027011  | 45596.828 | 36654.461 | AB020672  | 669.651   | 681.867   |
| AK025305  | 1546.92   | 482.919   | AK026958  | 1799.499  | 1738.609  |
| AK024615  | 1756.619  | 1903.487  | NM_000579 | 2126.633  | 2199.688  |
| AK025054  | 5558.286  | 6283.68   | NM_001480 | 1124.793  | 1125.403  |
| AK024556  | 1637.905  | 2238.438  | AF263462  | 5862.235  | 7231.603  |
| AK024935  | 1925.748  | 2641.394  | AB040962  | 2964.714  | 3162.06   |
| NM_00716E | 805.76    | 613.251   | NM_000639 | 806.052   | 690.898   |
| AK022811  | 3654.427  | 4024.322  | AV697672  | 1467.674  | 1372.23   |
| AL117635  | 3140.542  | 3599.055  | NM_000942 | 55036.457 | 52661.379 |
| AK025332  | 5590.764  | 5900.928  | NM_002982 | 2827.245  | 2874.77   |
| AB040929  | 907.452   | 893.164   | NM_002190 | 1576.187  | 1957.806  |
| AB020735  | 2497.409  | 2947.966  | AK056773  | 11456.362 | 14312.246 |
| AL109700  | 1428.325  | 1443.158  | NM_002182 | 61522.16  | 58267.992 |
| AJ011596  | 16720.037 | 12085.709 | NM_016470 | 12351.546 | 14036.731 |
| U17639    | 1084.817  | 367.759   | AL365408  | 60072.766 | 60518.434 |
| AL049215  | 68222.711 | 79037.742 | AK026204  | 11717.948 | 9956.408  |
| X51779    | 4959.29   | 2477.867  | NM_00009E | 4365.638  | 4750.517  |
| AL049254  | 3520.279  | 1834.593  | NM_00001E | 29009.256 | 32817.266 |
| AK024331  | 3179.521  | 3526.661  | AK026913  | 7120.85   | 7595.811  |
| AK024452  | 2970.07   | 3239.37   | NM_016234 | 23458.156 | 28171.555 |
| AK021556  | 623.763   | 1195.026  | NM_00187E | 13002.029 | 15253.381 |
| AJ249975  | 1733.248  | 2794.821  | NM_016144 | 8994.66   | 10403.992 |
| AK021733  | 1245.127  | 1386.827  | AL133099  | 8779.154  | 9263.384  |
| AK021551  | 4599.424  | 5934.643  | NM_016082 | 5448.418  | 6269.036  |
| AK025117  | 2982.897  | 3450.091  | NM_000433 | 3423.546  | 3629.257  |
| AK022357  | 976.212   | 744.23    | NM_000190 | 22913.65  | 26239.711 |
| AK000024  | 30568.938 | 35257.328 | X15667    | 19167.691 | 21312.525 |
| AK026693  | 3214.072  | 3788.819  | NM_017512 | 1773.946  | 1707.306  |
| NM_01228E | 1482.413  | 1201.391  | NM_018661 | 1968.976  | 2567.514  |
| AK001128  | 1711.408  | 1260.382  | NM_00167E | 996.201   | 1381.198  |
| AK000090  | 2896.353  | 1398.107  | AK023078  | 13697.846 | 15823.931 |
| AK000794  | 19923.475 | 12033.643 | NM_002239 | 59244.23  | 52514.371 |
| AK000950  | 19510.898 | 8714.633  | NM_002249 | 61782.969 | 56074.445 |
| AK026812  | 12054.78  | 4894.697  | NM_015684 | 20143.938 | 20991.725 |
| AK000176  | 8871.271  | 4064.477  | NM_00394E | 36079.059 | 46230.98  |
| AK000831  | 23791.637 | 9155.6    | NM_004981 | 61905.484 | 54207.887 |
| AK000981  | 6622.43   | 2711.113  | AK096507  | 437.522   | 684.758   |
| X95095    | 13780.753 | 16567.523 | NM_016524 | 6220.405  | 6171.796  |
| AB007902  | 4171.614  | 4588.283  | NM_00712E | 60763.273 | 54178.691 |
| AF078528  | 21639.584 | 35269.09  | NM_004482 | 1510.84   | 1846.588  |
| AF161411  | 7605.176  | 7914.092  | NM_000352 | 774.769   | 828.254   |
| AK000450  | 50786.711 | 53982.57  | NM_015599 | 3102.235  | 2200.702  |
| NM_018224 | 22832.113 | 28275.938 | AB037902  | 740.619   | 832.869   |
| NM_01989E | 6351.905  | 6577.916  | NM_01869E | 48281.941 | 41533.566 |
| NM_01856E | 14943.766 | 17254.33  | NM_00013E | 43715.992 | 41680.027 |
| NM_00053E | 1604.358  | 1792.001  | AL157456  | 3884.414  | 3626.737  |
| J04118    | 3585.473  | 4437.925  | AL162056  | 3494.702  | 3302.488  |
| AK025325  | 30632.52  | 36608.785 | NM_000380 | 61611.32  | 50022.41  |
| S75762    | 924.994   | 1070.342  | NM_00462E | 9669.594  | 9965.454  |
| AK023838  | 945.781   | 1320.343  | AF085734  | 763.454   | 500.672   |
| U50531    | 15879.521 | 19947.189 | NM_01487E | 10211.357 | 11231.85  |
| NM_00531E | 5073.191  | 5697.29   | NM_00540E | 8788.153  | 9029.766  |

|           |           |           |           |           |           |
|-----------|-----------|-----------|-----------|-----------|-----------|
| U85653    | 658.872   | 492.959   | NM_003328 | 10125.549 | 9369.791  |
| L09099    | 68180.063 | 78204.453 | X93921    | 6879.726  | 6021.895  |
| AL117474  | 4100.558  | 2263.181  | AF073482  | 7743.79   | 8421.445  |
| NM_005421 | 4468.115  | 1706.236  | NM_005990 | 19223.818 | 20276.123 |
| AK024580  | 68983.242 | 71678.594 | NM_016276 | 61004.199 | 70347.313 |
| AL442093  | 20080.877 | 8764.763  | NM_017762 | 14069.102 | 14384.249 |
| Z36874    | 66994.008 | 78161.117 | NM_001863 | 63992.664 | 53885.328 |
| AK095477  | 5565.058  | 6706.011  | NM_000921 | 21751.283 | 18341.674 |
| AK023326  | 2710.339  | 3186.655  | CY3Cy5    | 45902.348 | 1743.22   |
| AK022462  | 10445.811 | 11781.151 | NM_006497 | 62063.141 | 56084.922 |
| NM_020530 | 4067.687  | 5732.854  | NM_006892 | 3461.55   | 4194.213  |
| AK022418  | 10389.591 | 11505.238 | AK023616  | 8844.351  | 9239.01   |
| AF279777  | 1750.865  | 2475.201  | AK022249  | 3051.245  | 3076.31   |
| AK021748  | 63615.172 | 77430.867 | AK025665  | 9236.485  | 10676.155 |
| AL137257  | 15043.857 | 17459.031 | U92981    | 1032.009  | 1401.869  |
| AF086503  | 2390.93   | 1930.826  | AL355694  | 5301.029  | 4474.86   |
| AK026683  | 14214.637 | 17677.475 | AK027152  | 2384.279  | 2341.646  |
| D16906    | 1098.395  | 1310.031  | AL049257  | 1536.596  | 2027.821  |
| AL079309  | 14020.205 | 17780.207 | AF191492  | 2719.054  | 2796.72   |
| AK022335  | 2643.315  | 3265.451  | NM_014851 | 20659.865 | 26262.551 |
| AL110280  | 5439.668  | 4855.801  | AL355743  | 3954.113  | 5636.4    |
| AK024235  | 684.635   | 728.839   | L77571    | 3425.901  | 4426.604  |
| NM_017458 | 3080.208  | 1873.18   | X81896    | 4285.898  | 4852.865  |
| AF086196  | 1511.865  | 576.306   | AF070595  | 2792.09   | 2517.749  |
| NM_005542 | 65429.965 | 50599.656 | NM_006497 | 53169.688 | 51307.043 |
| NM_000267 | 9450.794  | 9983.532  | NM_006892 | 3282.146  | 2893.234  |
| NM_016603 | 7666.857  | 8685.298  | SR1       | 69184.016 | 63305.297 |
| NM_004398 | 64675.684 | 74968.242 | SR3       | 38307.668 | 42121.992 |
| NM_014968 | 15104.831 | 19756.203 | SR5       | 5574.512  | 6422.343  |
| NM_014962 | 857.115   | 989.049   | SR7       | 5771.879  | 39555.082 |
| D87684    | 14542.678 | 11816.83  | SR9       | 17351.852 | 3218.207  |
| NM_006317 | 66436.648 | 91921.438 | CY3Cy5    | 50546.609 | 1819.071  |
| NM_001218 | 14909.04  | 18399.807 | M74093    | 7105.206  | 6898.514  |
| NM_000730 | 20124.68  | 31417.076 | M28219    | 10804.931 | 10823.481 |
| AF085885  | 3644.681  | 4382.425  | M90754    | 1509.372  | 1284.471  |
| M24751    | 3325.848  | 4932.748  | L17326    | 3079.748  | 2930.17   |
| AK026569  | 66662.367 | 90665.047 | D17207    | 13133.399 | 14631.384 |
| AL049974  | 5362.359  | 6193.021  | D55640    | 11021.085 | 11718.613 |
| AK022953  | 1187.82   | 1345.959  | AF085897  | 19826.615 | 21773.055 |
| AF009319  | 10186.901 | 8323.279  | NM_017418 | 1300.5    | 1640.176  |
| AL365519  | 2026.681  | 1563.849  | AF085822  | 3834.019  | 3779.455  |
| NM_018465 | 16790.521 | 11399.678 | AK021510  | 1943.576  | 1999.574  |
| Z36845    | 3296.957  | 1361.003  | AK023039  | 2164.626  | 2673.713  |
| M73792    | 2894.722  | 1018.71   | AL109688  | 15690.942 | 17329.125 |
| NM_016127 | 26378.854 | 12285.29  | AF074981  | 8618.827  | 11300.167 |
| AF085939  | 2685.69   | 1581.568  | AK025863  | 3943.542  | 4351.372  |
| NM_006792 | 47020.746 | 23920.438 | D42044    | 3508.351  | 3978.729  |
| NM_005878 | 66143.148 | 82984.336 | AK023009  | 1511.532  | 1322.144  |
| AF039697  | 830.674   | 1355.918  | AK026149  | 10215.56  | 9129.826  |
| NM_004934 | 1728.598  | 2048.45   | AF038185  | 7828.298  | 6665.208  |
| AF284436  | 6136.099  | 6278.563  | AB027011  | 35097.691 | 37371.609 |
| NM_004445 | 2418.84   | 2758.808  | AK025305  | 1771.614  | 2033.201  |
| U39657    | 17495.672 | 18115.363 | AF131788  | 1355.33   | 1120.846  |

|           |           |           |           |           |           |
|-----------|-----------|-----------|-----------|-----------|-----------|
| NM_016340 | 6692.292  | 7846.245  | AF131805  | 1182.987  | 1085.336  |
| NM_006449 | 6710.933  | 7977.982  | AK024532  | 1322.79   | 1509.45   |
| BF216030  | 14279.902 | 16515.092 | AK024615  | 5153.369  | 6089.035  |
| NM_002757 | 1381.507  | 1456.684  | AK024556  | 9403.081  | 9782.044  |
| NM_003684 | 4539.938  | 5875.917  | AK024728  | 1711.777  | 1664.56   |
| NM_005657 | 5828.266  | 6819.328  | AK024935  | 6320.809  | 6400.37   |
| NM_017671 | 1972.254  | 2089.329  | AK025107  | 1413.845  | 1321.385  |
| AB040883  | 2972.825  | 3657.824  | NM_007168 | 1612.155  | 1706.476  |
| NM_018639 | 2856.462  | 2926.695  | AK022811  | 3149.289  | 4097.807  |
| AF264628  | 1234.716  | 1309.549  | AL117635  | 5943.271  | 7414.063  |
| NM_001715 | 27776.9   | 25377.238 | AK025332  | 21415.344 | 25960.553 |
| NM_004395 | 14529.925 | 7400.32   | AB040929  | 2027.907  | 2023.875  |
| NM_002663 | 2534.624  | 929.645   | AB020735  | 4767.761  | 5478.916  |
| NM_006094 | 14882.023 | 7627.369  | AL109700  | 2720.094  | 3279.27   |
| AF080158  | 3255.119  | 1816.675  | D17010    | 1655.397  | 1712.438  |
| AB037794  | 6858.927  | 2413.538  | AJ011596  | 34273.027 | 39935.902 |
| NM_014178 | 31554.906 | 36830.977 | X79984    | 1250.082  | 1213.951  |
| NM_001251 | 56946.059 | 56867.242 | U17639    | 2170.305  | 1831      |
| NM_004789 | 985.728   | 842.201   | AL049215  | 65799.781 | 63737.926 |
| AB011112  | 18619.42  | 31123.23  | X51779    | 8953.216  | 9755.029  |
| NM_018669 | 9854.718  | 13608.688 | X81001    | 3125.577  | 3021.995  |
| NM_002623 | 5284.211  | 6351.112  | AL049254  | 6515.316  | 7161.446  |
| NM_018844 | 5797.537  | 6706.444  | AK024331  | 4910.125  | 5910.907  |
| AF279778  | 2692.635  | 3260.264  | AK024452  | 5889.14   | 7265.641  |
| NM_015477 | 9598.422  | 11019.646 | AK021733  | 3188.372  | 4099.417  |
| AK023212  | 6341.71   | 6660.012  | NM_012449 | 3221.37   | 3254.28   |
| AL353943  | 4119.111  | 4355.059  | AK021551  | 5714.923  | 6422.627  |
| BE568801  | 7576.01   | 8763.911  | AK025117  | 4271.296  | 4663.4    |
| AB002336  | 2002.882  | 2154.539  | AK022357  | 791.875   | 1171.703  |
| NM_003127 | 2406.405  | 2530.67   | AB015616  | 774.164   | 1212.782  |
| NM_013286 | 17919.42  | 18236.592 | AK000024  | 49434.617 | 54006.555 |
| NM_006082 | 67082.859 | 77538.477 | AB020691  | 1090.714  | 1441.655  |
| NM_006633 | 487.615   | 541.546   | AK026693  | 5534.316  | 5709.48   |
| NM_016262 | 1932.417  | 1951.951  | NM_012285 | 4344.737  | 4402.073  |
| AB011116  | 19445.713 | 14992.898 | AK001128  | 2252.088  | 2168.969  |
| AB037858  | 3819.177  | 2762.532  | AK000090  | 3020.537  | 2631.65   |
| NM_005775 | 2195.264  | 754.599   | AK000950  | 13048.308 | 10206.932 |
| NM_017639 | 1908.732  | 823.669   | AK026812  | 11790.728 | 9120.465  |
| NM_004385 | 3970.925  | 1302.136  | AK000176  | 6797.909  | 5487.499  |
| L25629    | 1704.255  | 2080.892  | AK000831  | 19381.932 | 18945.732 |
| AJ245539  | 782.991   | 998.466   | AK000981  | 6774.654  | 7537.558  |
| NM_001490 | 2759.556  | 3712.305  | X95095    | 33195.492 | 47035.785 |
| NM_017740 | 6181.729  | 7702.542  | AB007902  | 7254.272  | 8853.918  |
| AB033052  | 9814.448  | 12928.139 | AF078528  | 23741.479 | 32228.252 |
| NM_018227 | 2215.138  | 2346.28   | AF161411  | 6180.55   | 6278.587  |
| AF050199  | 502.833   | 764.04    | AK000450  | 32310.533 | 42178.953 |
| NM_003340 | 34405.855 | 38938.348 | NM_018224 | 35986.039 | 51249.129 |
| U46752    | 5560.386  | 7105.413  | NM_019896 | 10229.839 | 10087.732 |
| NM_002794 | 65197.105 | 62252.113 | NM_018569 | 17133.088 | 19351.191 |
| BF244646  | 63172.246 | 71180.461 | NM_000539 | 1499.286  | 1938.81   |
| AK024030  | 14040.185 | 14049.188 | J04118    | 3113.745  | 3440.855  |
| AF275808  | 3769.392  | 4526.123  | AK025325  | 36134.914 | 48451.324 |
| AK024038  | 11397.027 | 11845.253 | S75762    | 1765.028  | 1835.96   |

|           |           |           |           |           |           |
|-----------|-----------|-----------|-----------|-----------|-----------|
| NM_00205E | 3267.23   | 3453.124  | AK023838  | 2075.963  | 2193.845  |
| NM_00580E | 20931.277 | 26375.652 | U50531    | 19629.238 | 23971.379 |
| NM_01551E | 18466.342 | 21168.689 | NM_00531E | 18672.508 | 19984.18  |
| AK001579  | 42118.66  | 46685.168 | AB015434  | 1213.9    | 1967.344  |
| NM_00267C | 16842.688 | 10632.164 | AL117474  | 3809.05   | 3053.164  |
| AF163302  | 7408.296  | 6165.001  | NM_005421 | 9314.663  | 6535.077  |
| NM_00640E | 8517.675  | 3599.299  | AK024580  | 65205.148 | 63132.504 |
| NM_00241E | 11904.857 | 6113.125  | AL442093  | 14169.179 | 13522.433 |
| NM_00593E | 1171.82   | 515.419   | Z36874    | 55177.688 | 55387.766 |
| NM_01241E | 5393.573  | 1743.234  | AK095477  | 5163.37   | 5500.119  |
| NM_003924 | 577.664   | 969.853   | AK023326  | 3136.355  | 3478.946  |
| NM_003454 | 4725.58   | 5800.421  | AK022462  | 9645.792  | 10329.308 |
| NM_00341E | 46084.121 | 48803.195 | NM_02053C | 9785.626  | 9602.536  |
| NM_01790E | 2886.275  | 3454.345  | AK022418  | 14412.038 | 12756.936 |
| NM_00688E | 4435.012  | 6145.128  | AF279777  | 3411.855  | 2905.161  |
| M25077    | 14791.852 | 18466.682 | AK021748  | 60110.145 | 60506.887 |
| NM_01870E | 11519.563 | 12538.888 | AK021771  | 1503.439  | 1589.071  |
| M62843    | 1223.59   | 1155.279  | AL137257  | 14708.988 | 17823.564 |
| U96131    | 3301.117  | 3554.539  | AF086503  | 1906.326  | 2119.381  |
| NM_00151E | 1051.136  | 808.475   | AK000543  | 28427.535 | 34071.973 |
| NM_00459E | 8024.927  | 8672.242  | AK026683  | 14171.361 | 13407.528 |
| NM_00577E | 42493.145 | 47516.164 | D16906    | 1816.652  | 1697.973  |
| NM_00103E | 67683.781 | 71297.508 | AJ012492  | 1265.931  | 1601.476  |
| NM_018084 | 56428.844 | 53371.836 | AL079309  | 10003.659 | 10188.735 |
| AF164797  | 70078.57  | 62033.52  | AK022335  | 4045.316  | 4292.284  |
| NM_01784C | 59423.875 | 53244.629 | AL110280  | 29117.078 | 34858.195 |
| AK001052  | 68446.039 | 57900.426 | AK024235  | 1537.538  | 1584.568  |
| NM_00141E | 69618.359 | 59045.02  | NM_01745E | 6681.096  | 5696.915  |
| NM_004564 | 30920.391 | 15963.702 | AK024203  | 1181.982  | 786.975   |
| NM_00096E | 69939.586 | 57865.082 | AF086196  | 3061.004  | 1970.574  |
| NM_00327C | 4067.431  | 1571.727  | AF075087  | 1126.827  | 851.523   |
| NM_016591 | 1768.695  | 777.22    | NM_00554E | 58953     | 58371.156 |
| AL157437  | 48480.949 | 21338.17  | NM_000267 | 11409.833 | 11318.437 |
| NM_00600E | 10950.373 | 11848.796 | NM_01660E | 6799.058  | 7157.727  |
| NM_00262E | 64650.133 | 63890.582 | NM_00439E | 64191.414 | 62216.074 |
| NM_014364 | 4535.517  | 4248.808  | NM_016181 | 1333.881  | 1976.214  |
| NM_00168E | 60951.816 | 58973.875 | NM_01496E | 9500.751  | 11185.396 |
| NM_006067 | 53716.012 | 56415.566 | NM_01496E | 2729.697  | 2493.495  |
| NM_000284 | 24649.465 | 31683.574 | D87684    | 12844.21  | 10474.079 |
| NM_00481E | 18370.109 | 21047.576 | NM_00158E | 3713.851  | 4021.819  |
| AK023008  | 6108.698  | 6940.729  | NM_006317 | 62958.973 | 61134.008 |
| NM_00468E | 25479.016 | 30726.92  | NM_00121E | 12201.437 | 14565.814 |
| NM_00602E | 14776.49  | 14739.724 | NM_00073C | 24860.467 | 36468.219 |
| BG339855  | 2372.184  | 3031.309  | U31734    | 65102.16  | 63745.641 |
| AB040956  | 11202.814 | 12617.054 | AF085885  | 4962.845  | 5117.639  |
| NM_016587 | 7809.829  | 6620.291  | M24751    | 4991.038  | 4623.254  |
| NM_00351E | 9937.639  | 10396.011 | AK026569  | 66077.672 | 66658.32  |
| NM_01795E | 10843.557 | 12537.628 | AL049974  | 5315.107  | 5958.771  |
| BC000124  | 6353.431  | 6504.979  | AK022953  | 3682.546  | 3701.833  |
| Z11773    | 4352.154  | 3915.211  | AF009319  | 30421.768 | 35844.309 |
| NM_006914 | 2263.888  | 2116.703  | AL365519  | 2882.99   | 2980.43   |
| NM_00344E | 67981.188 | 59813.328 | NM_01846E | 12960.008 | 12056.955 |
| NM_00148E | 27446.486 | 24645.361 | Z36845    | 3834.139  | 3616.768  |



|           |           |           |           |           |           |
|-----------|-----------|-----------|-----------|-----------|-----------|
| NM_002702 | 3039.043  | 2193.328  | M73792    | 2869.696  | 2863.23   |
| NM_001989 | 35473.086 | 20995.207 | NM_016127 | 26330.146 | 22922.123 |
| NM_002653 | 39534.117 | 26432.408 | AF085939  | 3998.615  | 3226.966  |
| NM_005604 | 3126.148  | 1452.497  | NM_006792 | 29676.33  | 33563.852 |
| S69023    | 5230.073  | 1892.151  | NM_005876 | 66855.461 | 63488.195 |
| NM_003474 | 4817.293  | 4828.086  | AF039697  | 1650.85   | 1591.681  |
| NM_004625 | 8773.694  | 9704.659  | NM_004934 | 1745.072  | 1661.365  |
| NM_007179 | 38279.348 | 38479.043 | AF284436  | 3472.855  | 3907.248  |
| NM_001306 | 2887.25   | 3055.029  | NM_004445 | 6279.125  | 5217.12   |
| AB046861  | 1417.287  | 1707.738  | U39657    | 32921.473 | 36790.41  |
| AB028173  | 1092.352  | 907.337   | NM_016340 | 9166.709  | 7953.93   |
| NM_005940 | 2332.274  | 2429.654  | NM_018373 | 7857.636  | 6777.458  |
| AF061034  | 53808.656 | 56200.91  | NM_006449 | 6502.605  | 7023.238  |
| X03655    | 3782.426  | 4843.721  | BF216030  | 30498.303 | 37875.363 |
| BG696293  | 5809.333  | 7042.692  | AF131839  | 2197.824  | 2625.72   |
| AA777410  | 1533.745  | 2696.061  | NM_002757 | 1923.659  | 2339.251  |
| BG113873  | 4173.066  | 4764.81   | NM_003684 | 4078.044  | 4560.864  |
| BC013135  | 63550.563 | 60894.039 | NM_005657 | 5039.15   | 5419.943  |
| AI625002  | 1773.399  | 1597.283  | NM_017671 | 3817.874  | 3450.894  |
| H07899    | 1241.864  | 1649.159  | AB040883  | 4536.42   | 6464.128  |
| AA281652  | 17797.338 | 19262.307 | NM_018639 | 7878.983  | 8436.969  |
| U31905    | 8176.243  | 9482.15   | AF264628  | 3182.911  | 3609.55   |
| X52479    | 8400.49   | 7806.745  | NM_001146 | 1940.218  | 2228.852  |
| BC013200  | 7549.313  | 7884.258  | NM_001715 | 39051.402 | 46307.758 |
| AW408832  | 7029.227  | 5383.24   | NM_004395 | 29219.029 | 29692.059 |
| AA486364  | 42724.816 | 35847.746 | NM_002663 | 5254.811  | 4575.238  |
| M15476    | 59056.848 | 55529.906 | NM_006094 | 13031.474 | 11215.292 |
| U57456    | 5985.296  | 3685.429  | AF080158  | 3658.021  | 2987.249  |
| N70057    | 38259.398 | 23850.891 | AB037794  | 7123.845  | 5108.193  |
| NM_002202 | 10202.778 | 3269.307  | NM_014178 | 34694.512 | 41824.766 |
| AL137938  | 14252.467 | 12736.749 | NM_001251 | 58678.551 | 60935.379 |
| AF228704  | 2960.368  | 3911.459  | NM_006605 | 1189.337  | 1805.174  |
| NM_004215 | 11105.462 | 10871.183 | NM_004789 | 3074.254  | 3786.052  |
| AK022746  | 6916.981  | 6895.536  | AB011112  | 17778.219 | 19896.625 |
| NM_006568 | 13247.289 | 14892.396 | NM_018669 | 11386.397 | 11831.615 |
| NM_006440 | 14604.408 | 17951.791 | NM_002623 | 5215.118  | 5766.706  |
| NM_004847 | 48492.383 | 49130.57  | NM_018844 | 9110.709  | 10228.313 |
| NM_002255 | 10531.597 | 12311.759 | AF279778  | 5081.256  | 5542.567  |
| AF151889  | 19687.584 | 27112.973 | NM_015477 | 5604.122  | 6566.898  |
| BC034483  | 3173.573  | 3820.822  | AK023212  | 4252.723  | 4547.341  |
| NM_003620 | 8397.991  | 9694.566  | AL353943  | 2930.22   | 3995.887  |
| NM_013289 | 1953.363  | 1642.889  | BE568801  | 6012.26   | 6698.567  |
| AA586375  | 5769.313  | 5756.97   | AB002336  | 2117.5    | 2227.919  |
| BE910339  | 55220.266 | 50615.66  | NM_003127 | 1936.489  | 2321.219  |
| U89715    | 11189.302 | 12954.877 | NM_013286 | 11272.084 | 11947.056 |
| AF254067  | 36413.816 | 38409.48  | NM_006082 | 64257.266 | 69827.383 |
| NM_016363 | 22783.854 | 25639.758 | NM_006633 | 1842.723  | 1929.812  |
| AY009090  | 25538.791 | 32975.422 | NM_016262 | 1562.478  | 1700.371  |
| NM_005592 | 2114.6    | 2247.389  | AB011116  | 15452.407 | 16032.159 |
| U81380    | 951.129   | 987.473   | AB037858  | 4628.297  | 5185.582  |
| NM_002303 | 1228.279  | 926.094   | NM_000173 | 1508.523  | 1495.703  |
| NM_016509 | 3778.786  | 2135.687  | NM_005775 | 3535.39   | 2889.808  |
| NM_012296 | 3780.575  | 2589.087  | NM_017639 | 5684.205  | 5743.424  |

|           |           |           |           |           |           |
|-----------|-----------|-----------|-----------|-----------|-----------|
| NM_00453E | 10311.646 | 4227.207  | NM_00438E | 7656.457  | 7133.903  |
| NM_01467E | 5611.595  | 1682.212  | L25629    | 2649.245  | 2519.127  |
| NM_005227 | 5764.871  | 6088.24   | AJ245539  | 1359.293  | 1295.197  |
| NM_00028E | 25390.906 | 17173.883 | NM_00149C | 4766.124  | 6046.814  |
| NM_016454 | 19059.75  | 23062.436 | NM_01774C | 17092.6   | 17257.734 |
| NM_00346E | 6225.413  | 7164.464  | AB033052  | 15048.443 | 15967.363 |
| NM_01643E | 1710.272  | 2066.915  | NM_018227 | 4823.112  | 4502.083  |
| NM_00085E | 3601.85   | 4678.397  | AF050199  | 2084.666  | 1845.402  |
| NM_00548C | 4134.386  | 6848.898  | NM_00334C | 35015.133 | 42798.027 |
| AB034694  | 1893.855  | 1752.431  | U46752    | 10648.904 | 11200.891 |
| NM_00327E | 5133.694  | 6533.639  | NM_002794 | 55569.926 | 53523.738 |
| AK026404  | 7568.216  | 8712.769  | BF244646  | 62275.703 | 60592.809 |
| NM_01794E | 17476.508 | 21118.932 | AK024030  | 12335.526 | 11778.942 |
| NM_006744 | 2505.608  | 2962.045  | AF275808  | 5605.532  | 5163.433  |
| NM_018231 | 17978.334 | 20125.035 | AK024038  | 9569.098  | 9428.817  |
| NM_00583E | 8750.497  | 8736.246  | NM_00205E | 4729.297  | 4158.188  |
| NM_00310C | 22366.869 | 21069.209 | NM_00580E | 19280.535 | 19863.063 |
| NM_00676E | 11506.572 | 9292.714  | NM_01551E | 14938.056 | 12394.092 |
| NM_01332E | 14072.042 | 9484.119  | AK001579  | 58306.363 | 52695.527 |
| AB020627  | 7251.875  | 4818.1    | NM_00267C | 21090.111 | 23908.443 |
| NM_00200E | 4297.542  | 2459.956  | AF163302  | 13546.171 | 14297.276 |
| NM_005387 | 17261.436 | 11499.898 | NM_00640E | 16426.031 | 14826.456 |
| NM_01828E | 5912.332  | 5442.718  | NM_00241E | 11777.817 | 10409.335 |
| AB018260  | 7322.305  | 9646.681  | NM_00593E | 1681.6    | 1455.808  |
| NM_01598E | 829.484   | 563.681   | NM_01241E | 4798.828  | 4623.828  |
| NM_01476E | 7846.74   | 8339.042  | NM_003924 | 2207.543  | 2252.725  |
| NM_016627 | 26032.732 | 36657.277 | NM_003454 | 4148.049  | 4313.453  |
| NM_016121 | 5502.777  | 5552.172  | NM_00341E | 49615.184 | 53018.098 |
| NM_01476E | 8846.365  | 9776.408  | NM_01790E | 3710.484  | 4173.437  |
| NM_00634E | 58911.875 | 52897.305 | NM_00688E | 3398.026  | 4298.091  |
| AK026264  | 42528.559 | 47506.047 | M25077    | 10595.854 | 11679.144 |
| AF222927  | 4149.517  | 3716.947  | NM_01870E | 9006.144  | 7634.039  |
| NM_01434E | 13822.33  | 14553.29  | M62843    | 1944.348  | 2172.505  |
| NM_018217 | 9529.337  | 8517.151  | U96131    | 2114.429  | 2357.922  |
| AF241831  | 7978.992  | 7305.047  | NM_00459E | 6099.309  | 5431.157  |
| NM_00303E | 4846.518  | 3330.138  | NM_00577E | 31224.49  | 33139.055 |
| NM_00273E | 5457.806  | 3299.189  | NM_00103E | 64412.199 | 62694.719 |
| M31008    | 1999.147  | 1110.797  | NM_018084 | 30555.781 | 27997.826 |
| NM_00628E | 2198.743  | 1101.754  | AF164797  | 57571.195 | 50035.652 |
| NM_016224 | 11222.98  | 3511.716  | NM_01784C | 33969.367 | 37215.426 |
| NM_00717E | 55678.715 | 49422.141 | AK001052  | 49601.348 | 46558.277 |
| NM_00130E | 3627.376  | 4012.056  | NM_00141E | 65507.566 | 55655.758 |
| AB028173  | 1490.071  | 1356.304  | NM_004564 | 19409.734 | 15343.714 |
| NM_00594C | 2315.845  | 2631.716  | NM_00096E | 65656.195 | 61865.785 |
| AF061034  | 46012.461 | 46331.809 | NM_00327C | 3628.181  | 3440.958  |
| X03655    | 3677.262  | 4439.322  | NM_016591 | 4441.921  | 4149.963  |
| BG696293  | 5746.259  | 6845.806  | AL157437  | 42201.328 | 39668.563 |
| AA777410  | 1740.059  | 2619.354  | NM_00600E | 9169.602  | 9356.946  |
| BG113873  | 4215.562  | 4754.996  | NM_00262E | 59411.973 | 55470.617 |
| BC013135  | 63022.363 | 59925.973 | NM_014364 | 16851.096 | 16942.049 |
| AI625002  | 1766.458  | 1680.614  | NM_00168E | 61581.848 | 57169.629 |
| H07899    | 1165.356  | 1219.773  | NM_006067 | 52198.242 | 56254.688 |
| AA281652  | 18596.473 | 19414.902 | NM_000284 | 18440.787 | 20356.607 |

|           |           |           |           |           |           |
|-----------|-----------|-----------|-----------|-----------|-----------|
| U31905    | 9629.902  | 9902.175  | NM_004813 | 12879.946 | 13080.387 |
| X52479    | 8574.944  | 8200.415  | AK023008  | 3652.91   | 3860.228  |
| BC013200  | 6839.544  | 7335.754  | NM_004689 | 18076.063 | 17012.795 |
| AW408832  | 6523.422  | 5999.028  | NM_006026 | 16736.344 | 18066.621 |
| AA486364  | 38332.109 | 43392.863 | BG339855  | 2053.149  | 2309.433  |
| M15476    | 66443.859 | 61510.668 | AB040956  | 8004.355  | 8255.837  |
| U57456    | 7122.545  | 4596.236  | NM_016587 | 4493.738  | 3502.626  |
| N70057    | 37429.512 | 32379.838 | NM_003516 | 5349.266  | 4940.08   |
| AK000124  | 5703.939  | 2997.92   | NM_017953 | 5179.533  | 5678.694  |
| NM_004480 | 12295.034 | 4796.41   | BC000124  | 6002.546  | 6054.64   |
| NM_014914 | 9844.607  | 3113.094  | Z11773    | 3135.126  | 3403.278  |
| NM_004215 | 18815.541 | 23581.238 | NM_006914 | 2122.275  | 1917.804  |
| NM_006440 | 14215.353 | 18303.051 | NM_003446 | 59192.457 | 54510.672 |
| NM_004847 | 56492.781 | 51986.199 | NM_001485 | 21355.373 | 21895.529 |
| NM_002255 | 6966.288  | 8912.67   | NM_002702 | 2151.727  | 2338.7    |
| AF151889  | 19745.682 | 28033.428 | NM_001989 | 24603.605 | 24840.529 |
| BC034483  | 3459.413  | 4073.143  | NM_002653 | 26037.291 | 25851.744 |
| NM_003620 | 8903.652  | 10215.045 | NM_005604 | 3898.977  | 3738.054  |
| NM_013289 | 1490.268  | 1639.823  | S69023    | 4394.664  | 4398.184  |
| AA586375  | 5565.302  | 5939.551  | NM_003474 | 4202.101  | 3991.632  |
| BE910339  | 50674.379 | 51767.043 | NM_004625 | 31637.777 | 36106.055 |
| U89715    | 10499.231 | 12179.638 | NM_007179 | 62631.801 | 62715.246 |
| AF254067  | 36529.945 | 37734.891 | NM_001306 | 8460.898  | 9059.331  |
| NM_016363 | 23015.262 | 22054.494 | AB046861  | 2044.716  | 2496.532  |
| AY009090  | 23818.109 | 23331.156 | AB028173  | 1777.65   | 1482.976  |
| NM_005592 | 1119.86   | 1023.225  | NM_005940 | 1744.831  | 1807.382  |
| U81380    | 559.48    | 664.722   | AF061034  | 42324.938 | 43682.313 |
| NM_002303 | 1183.308  | 1229.82   | X03655    | 1681.908  | 2037.945  |
| NM_016509 | 3290.885  | 2925.005  | BG696293  | 5630.239  | 6501.069  |
| NM_012296 | 3963.777  | 3252.013  | AA777410  | 611.115   | 1334.146  |
| NM_004536 | 11268.533 | 6427.478  | BG113873  | 2769.937  | 3539.602  |
| NM_014672 | 5999.027  | 3195.458  | BC013135  | 53578.023 | 58030.059 |
| NM_003474 | 5083.702  | 2087.853  | AI625002  | 1113.337  | 1290.094  |
| NM_004625 | 12451.197 | 3769.785  | H07899    | 1062.508  | 1080.271  |
| NM_016454 | 25073.625 | 37428.961 | AA281652  | 10253.482 | 11587.897 |
| NM_003469 | 6196.388  | 8518.48   | U31905    | 3702.497  | 4208.575  |
| NM_000859 | 3655.772  | 4702.65   | X52479    | 4558.125  | 5324.432  |
| NM_005480 | 4602.861  | 6568.279  | BC013200  | 2683.839  | 2952.57   |
| AB034694  | 1945.287  | 1800.563  | AW408832  | 3265.11   | 3833.402  |
| NM_003273 | 4932.027  | 6263.337  | AA486364  | 45742.43  | 47975.746 |
| AK026404  | 7568.589  | 9771.144  | M15476    | 61607.387 | 58569.867 |
| NM_017948 | 15986.807 | 21687.225 | U57456    | 3949.329  | 4026.973  |
| NM_006744 | 2329.688  | 2798.819  | N70057    | 32819.719 | 38734.535 |
| NM_018231 | 20180.824 | 21623.385 | NM_002202 | 10589.458 | 9710.393  |
| NM_005833 | 9037.7    | 8544.009  | AL137938  | 19615.998 | 17933.662 |
| NM_003100 | 23523.564 | 20945.686 | AF228704  | 7632.741  | 7726.739  |
| NM_006768 | 9593.875  | 10673.268 | NM_004215 | 12638.874 | 15048.979 |
| NM_013322 | 14193.537 | 13313.22  | AK022746  | 6136.402  | 6985.906  |
| AB020627  | 5176.539  | 4790.374  | NM_006568 | 11780.599 | 13315.642 |
| NM_002003 | 4161.314  | 3344.807  | NM_006440 | 20284.795 | 21423.232 |
| NM_005387 | 20366.174 | 18487.027 | NM_004847 | 59718.332 | 55748.5   |
| NM_006846 | 1161.346  | 875.432   | NM_002255 | 6497.325  | 6748.117  |
| AL137938  | 27475.436 | 11159.406 | AF151889  | 12845.783 | 12413.008 |

|           |           |           |           |           |           |
|-----------|-----------|-----------|-----------|-----------|-----------|
| AF228704  | 10733.69  | 3810.585  | BC034483  | 2320.488  | 2296.279  |
| NM_018289 | 6782.211  | 9120.116  | NM_003620 | 6198.077  | 5852.411  |
| AB018260  | 6352.188  | 9156.488  | NM_013289 | 1490.101  | 1752.212  |
| NM_015985 | 521.227   | 628.527   | AA586375  | 4189.72   | 4588.22   |
| NM_014766 | 7418.84   | 8385.976  | BE910339  | 39081.16  | 48476.082 |
| NM_016627 | 26462.152 | 34293.883 | U89715    | 6735.037  | 8692.367  |
| NM_016121 | 5595.575  | 6254.35   | AF254067  | 21427.729 | 22760.828 |
| NM_014769 | 9814.283  | 11621.432 | NM_016363 | 14252.796 | 13377.55  |
| NM_006349 | 61038.383 | 52746.313 | AY009090  | 16489.332 | 16028.751 |
| AK026264  | 42408.582 | 44599.559 | NM_005592 | 1036.545  | 1435.435  |
| AF222927  | 3856.051  | 3818.866  | U81380    | 1949.972  | 1748.369  |
| NM_014345 | 13600.181 | 13044.021 | NM_002303 | 1464.494  | 1649.378  |
| NM_018217 | 9597.17   | 8819.294  | NM_016509 | 3738.99   | 3911.863  |
| AF241831  | 7839.508  | 7844.087  | NM_012296 | 3692.078  | 3535.315  |
| NM_003033 | 5550.039  | 4607.873  | NM_004536 | 10614.762 | 11212.748 |
| NM_002733 | 7474.48   | 5521.662  | NM_014672 | 4888.93   | 5017.987  |
| M31008    | 1537.69   | 1243.965  | NM_005227 | 8888.799  | 9165.325  |
| NM_006288 | 1610.043  | 1111.333  | NM_000286 | 29406.123 | 17902.455 |
| NM_016224 | 12053.599 | 7314.258  | NM_016454 | 23292.467 | 31214.916 |
| NM_005227 | 10765.104 | 6533.966  | NM_003469 | 9517.752  | 11673.755 |
| NM_000286 | 36531.598 | 9505.479  | NM_016433 | 2403.845  | 1858.459  |
| AB046861  | 1842.595  | 2176.373  | NM_000859 | 3473.487  | 3158.147  |
| AB028173  | 1137.829  | 1437.93   | NM_005480 | 2367.967  | 2536.733  |
| NM_005940 | 2803.658  | 2705.146  | AB034694  | 1176.45   | 976.271   |
| AF061034  | 47375.602 | 46777.488 | NM_003273 | 2726.083  | 2765.548  |
| X03655    | 3224.217  | 3896.718  | AK026404  | 5734.229  | 5177.859  |
| BG696293  | 7359.503  | 8748.35   | NM_017948 | 8869.818  | 10236.05  |
| AA777410  | 1639.332  | 2194.548  | NM_006744 | 1794.169  | 2577.091  |
| BG113873  | 4988.121  | 5518.093  | NM_018231 | 16902.396 | 17661.98  |
| BC013135  | 64585.094 | 61815.867 | NM_005833 | 5807.536  | 5198.194  |
| AI625002  | 1757.747  | 1495.013  | NM_003100 | 13680.269 | 14648.178 |
| H07899    | 1227.848  | 1034.692  | NM_006768 | 7397.879  | 7805.623  |
| AA281652  | 18938.395 | 20660.822 | NM_013322 | 10954.725 | 11876.359 |
| U31905    | 9838.425  | 9207.815  | AB020627  | 6609.704  | 6362.248  |
| X52479    | 9200.364  | 8233.48   | NM_002003 | 4408.95   | 4894.667  |
| BC013200  | 7638.891  | 7481.292  | NM_005387 | 15957.932 | 18526.965 |
| AW408832  | 6383.353  | 6627.356  | NM_006846 | 1209.302  | 1286.28   |
| AA486364  | 41778.906 | 43328.574 | NM_018289 | 7976.334  | 8602.739  |
| M15476    | 60836.973 | 60210.102 | AB018260  | 6137.869  | 6858.271  |
| U57456    | 7595.154  | 6113.296  | NM_015985 | 1093.229  | 870.451   |
| N70057    | 39771.191 | 41654.816 | NM_014766 | 7107.018  | 7412.942  |
| AK000124  | 5178.341  | 3440.15   | NM_016627 | 22980.25  | 24874.865 |
| NM_004480 | 13733.281 | 6898.391  | NM_016121 | 5095.234  | 4831.051  |
| NM_014914 | 12921.648 | 7357.649  | NM_014769 | 10021.948 | 10156.814 |
| NM_003620 | 8002.488  | 8645.272  | NM_006349 | 57330.25  | 54337.977 |
| NM_013289 | 1395.055  | 1625.549  | AK026264  | 53729.555 | 50446.68  |
| AA586375  | 4908.71   | 4852.289  | AF222927  | 4104.543  | 4045.854  |
| BE910339  | 49217.684 | 47647.613 | NM_014345 | 9836.815  | 9370.416  |
| U89715    | 9981.813  | 12527.629 | NM_018217 | 5735.442  | 4857.319  |
| AF254067  | 36033.461 | 39804.258 | AF241831  | 6119.379  | 5560.242  |
| NM_016363 | 23586.082 | 27851.258 | NM_003033 | 4455.33   | 3540.445  |
| AY009090  | 24107.598 | 32251.922 | NM_002733 | 4999.129  | 3843.865  |
| NM_005592 | 1248.846  | 1468.031  | M31008    | 2201.158  | 1660.859  |

|           |           |           |           |           |           |
|-----------|-----------|-----------|-----------|-----------|-----------|
| U81380    | 713.77    | 778.645   | NM_006288 | 1821.762  | 1365.552  |
| NM_002303 | 1606.594  | 1752.44   | NM_016224 | 12227.917 | 13003.389 |
| NM_016509 | 4070.172  | 4084.533  | NM_007179 | 62049.41  | 60091.824 |
| NM_012296 | 3775.149  | 3905.575  | NM_001306 | 7506.979  | 7224.345  |
| AF041038  | 4738.483  | 4705.339  | AB046861  | 2801.575  | 2862.415  |
| NM_004536 | 12998.894 | 12297.922 | AB028173  | 1644.973  | 1436.754  |
| NM_014672 | 7083.243  | 5649.141  | NM_005940 | 2035.229  | 2091.119  |
| AB058719  | 5927.566  | 6180.802  | AF061034  | 50255.344 | 54453.34  |
| AK025935  | 9364.885  | 9003.928  | X03655    | 3341.517  | 3429.888  |
| AB032953  | 2958.592  | 2556.034  | BG696293  | 6860.808  | 7434.67   |
| NM_016441 | 6522.515  | 5239.696  | AA777410  | 1109.118  | 1473.882  |
| NM_006334 | 2139.367  | 1789.424  | BG113873  | 3789.229  | 4407.231  |
| NM_003474 | 5987.666  | 2834.404  | BC013135  | 63057.313 | 60155.543 |
| NM_004625 | 16134.037 | 7769.004  | AI625002  | 1456.972  | 1630.331  |
| NM_007179 | 56316.547 | 46454.867 | H07899    | 1590.506  | 1623.425  |
| NM_001306 | 4596.277  | 2037.619  | AA281652  | 14886.828 | 14854.414 |
| NM_007163 | 2368.269  | 2880.696  | U31905    | 9041.111  | 8363.582  |
| NM_000583 | 16273.542 | 20042.998 | X52479    | 8316.33   | 7395.2    |
| NM_004254 | 5169.678  | 5720.317  | BC013200  | 3260.202  | 3555.925  |
| AB046833  | 1804.349  | 1843.23   | AW408832  | 4341.454  | 4499.245  |
| AY007135  | 62545.281 | 59687.086 | AA486364  | 51036.141 | 49406.039 |
| AF202889  | 56041.484 | 45222.648 | M15476    | 61034.215 | 55541.641 |
| NM_005833 | 8988.442  | 10817.142 | U57456    | 3930.597  | 3454.411  |
| NM_003100 | 18282.338 | 19944.102 | N70057    | 35390.504 | 40117.801 |
| NM_006768 | 12956.277 | 18147.561 | AK000124  | 4672.391  | 4646.727  |
| NM_013322 | 13174.39  | 13762.668 | NM_004480 | 10772.888 | 8862.744  |
| AB020627  | 7678.624  | 8515.625  | NM_014914 | 10327.644 | 9732.586  |
| NM_002003 | 4991.7    | 4705.971  | NM_004215 | 16884.852 | 18942.875 |
| NM_005387 | 19775.285 | 25150.73  | AK022746  | 8323.802  | 7293.43   |
| NM_006846 | 1125.371  | 1132      | NM_006568 | 13461.84  | 13279.975 |
| AL137938  | 26613.955 | 20214.551 | NM_006440 | 18538.303 | 18382.816 |
| AF228704  | 10912.52  | 10170.606 | NM_004847 | 59349.156 | 58047.043 |
| NM_004215 | 21398.439 | 17537.42  | NM_002255 | 7342.241  | 7942.695  |
| AK022746  | 9141.63   | 7090.229  | AF151889  | 14790.011 | 14637.354 |
| NM_006568 | 16611.107 | 13750.736 | BC034483  | 2239.848  | 2408.86   |
| NM_006440 | 18764.168 | 14587.271 | NM_003620 | 6189.754  | 5532.526  |
| NM_004847 | 54877.285 | 49864.574 | NM_013289 | 2202.622  | 2087.036  |
| NM_002255 | 9695.148  | 5369.123  | AA586375  | 6755.25   | 6234.779  |
| AF151889  | 18700.402 | 10953.903 | BE910339  | 46982.59  | 51622.141 |
| BC034483  | 2015.637  | 1193.21   | U89715    | 7765.39   | 9434.219  |
| NM_006288 | 886.851   | 1587.639  | AF254067  | 30480.352 | 31314.277 |
| NM_016224 | 9918.339  | 12516.615 | NM_016363 | 23746.979 | 22572.895 |
| NM_005227 | 9592.852  | 11152.785 | AY009090  | 19265.377 | 17329.557 |
| NM_000286 | 33176.621 | 30031.211 | NM_005592 | 1696.144  | 1263.225  |
| NM_016454 | 23050.631 | 33465.715 | NM_002303 | 1155.785  | 1370.037  |
| NM_003469 | 8022.379  | 9482.045  | NM_016509 | 4835.756  | 3565.272  |
| NM_016433 | 2682.618  | 2839.507  | NM_012296 | 3196.604  | 3194.599  |
| NM_000859 | 4457.186  | 5300.022  | NM_004536 | 11131.498 | 10446.23  |
| NM_005480 | 3254.302  | 5203.771  | NM_014672 | 5020.29   | 4718.569  |
| AB034694  | 1930.082  | 1528.907  | NM_003474 | 4211.463  | 3335.046  |
| NM_003273 | 4952.806  | 6389.833  | NM_004625 | 23940.572 | 21516.137 |
| AK026404  | 8441.863  | 7823.084  | NM_016454 | 23667.063 | 24683.699 |
| NM_017948 | 15157.719 | 16828.178 | NM_003469 | 9113.781  | 9866.373  |

|           |           |           |           |           |           |
|-----------|-----------|-----------|-----------|-----------|-----------|
| NM_000392 | 8116.786  | 7730.117  | NM_016433 | 1221.372  | 1306.401  |
| AF208536  | 2974.538  | 2222.526  | NM_000859 | 2992.047  | 2594.111  |
| AB037848  | 2657.379  | 2491.281  | NM_005480 | 3196.419  | 2985.121  |
| AF082657  | 9460.907  | 6330.934  | AB034694  | 1585.919  | 1423.121  |
| NM_006744 | 2624.126  | 1729.498  | NM_003273 | 3776.604  | 4066.881  |
| AF297659  | 1673.942  | 1157.468  | AK026404  | 6585.218  | 6133.582  |
| NM_018231 | 20042.422 | 8306.25   | NM_017948 | 12302.158 | 14832.202 |
| AK000124  | 4554.724  | 5104.736  | NM_006744 | 2982.099  | 2747.071  |
| NM_004480 | 11868.59  | 13056.636 | NM_018231 | 19508.225 | 18922.191 |
| NM_014914 | 10358.372 | 10431.631 | NM_005833 | 7567.957  | 6170.737  |
| NM_018289 | 6853.682  | 6873.988  | NM_003100 | 15936.245 | 15164.104 |
| AB018260  | 8838.52   | 10731.248 | NM_006768 | 7952.468  | 6830.261  |
| NM_015985 | 707.36    | 585.775   | NM_013322 | 10673.113 | 10317.29  |
| NM_014766 | 8132.354  | 8261.815  | AB020627  | 6429.032  | 6008.469  |
| NM_016627 | 20104.855 | 22752.836 | NM_002003 | 6025.343  | 5505.251  |
| NM_016121 | 6434.235  | 6381.659  | NM_005387 | 17392.014 | 16665.693 |
| NM_014769 | 11939.781 | 11275.95  | NM_006846 | 1403.412  | 1423.268  |
| NM_006349 | 56724.457 | 49441.301 | AL137938  | 21430.822 | 17019.096 |
| AK026264  | 44936.727 | 41484.516 | AF228704  | 7296.413  | 6453.761  |
| AF222927  | 3971.464  | 3016.533  | NM_018289 | 8895.786  | 9276.341  |
| NM_014345 | 14043.033 | 11791.297 | AB018260  | 6567.284  | 6291.415  |
| NM_018217 | 9622.819  | 6762.61   | NM_015985 | 937.602   | 1145.427  |
| AF241831  | 8377.479  | 5502.176  | NM_014766 | 7711.509  | 6942.393  |
| NM_003033 | 5430.703  | 3087.825  | NM_016627 | 23578.025 | 23692.793 |
| U96113    | 4764.25   | 3590.647  | NM_016121 | 4778.954  | 5591.813  |
| NM_002733 | 6329.256  | 2822.072  | NM_014769 | 9789.592  | 9683.946  |
| M31008    | 1993.334  | 690.754   | NM_006349 | 56187.699 | 53733.164 |
| CY3Cy5    | 5416.769  | 64.7      | AK026264  | 52448.781 | 50647.902 |
| U93051    | 28889.793 | 20106.447 | AF222927  | 4207.115  | 4544.958  |
| AF086409  | 763.189   | 660.391   | NM_014345 | 10682.584 | 10897.286 |
| AK024268  | 3560.774  | 4201.52   | NM_018217 | 7193.074  | 6728.969  |
| AF086295  | 1271.737  | 1725.544  | AF241831  | 6776.877  | 6579.402  |
| AF086344  | 5437.851  | 7057.782  | NM_003033 | 5032.067  | 3987.95   |
| AF086424  | 2928.962  | 3100.385  | NM_002733 | 4271.763  | 2888.779  |
| AL110130  | 711.503   | 1009.157  | M31008    | 2094.566  | 1241.123  |
| AF052116  | 1439.212  | 1416.018  | NM_006288 | 1748.509  | 1530.63   |
| NM_018087 | 11974.859 | 12617.97  | NM_016224 | 12271.908 | 10946.208 |
| AL360260  | 2406.298  | 2811.732  | NM_005227 | 7802.133  | 7681.434  |
| AK023647  | 2347.77   | 3084.383  | NM_000286 | 27246.443 | 14444.095 |
| AL096749  | 45107.02  | 48292.297 | AB046861  | 2317.44   | 2807.674  |
| AK023620  | 6130.017  | 7374.334  | AB028173  | 1490.563  | 1449.075  |
| AF086189  | 8986.079  | 11726.171 | NM_005940 | 2498.118  | 2767.677  |
| AL050055  | 8938.641  | 9036.938  | AF061034  | 54212.836 | 56279.695 |
| U93051    | 30342.518 | 35403.457 | X03655    | 3615.818  | 3584.021  |
| SR2       | 63568.023 | 61147.297 | BG696293  | 7262.5    | 7015.469  |
| SR4       | 31976.303 | 34819.203 | BG113873  | 2995.194  | 3605.991  |
| SR6       | 4875.268  | 4585.986  | BC013135  | 64796.891 | 64262.207 |
| SR8       | 18761.102 | 31826.439 | AI625002  | 1459.553  | 1405.873  |
| SR10      | 51066.191 | 16721.969 | H07899    | 1350.112  | 1205.715  |
| CY3Cy5    | 19100.578 | 114.613   | AA281652  | 16257.297 | 15310.36  |
| AL359931  | 4700.031  | 3347.437  | U31905    | 10542.566 | 9785.5    |
| AF086052  | 356.557   | 313.018   | X52479    | 11146.14  | 10961.186 |
| AK000954  | 6188.722  | 6495.994  | BC013200  | 5707.542  | 7558.003  |

|           |           |           |           |           |           |
|-----------|-----------|-----------|-----------|-----------|-----------|
| AF086099  | 2959.574  | 2944.997  | AW408832  | 4868.818  | 4798.78   |
| AK021922  | 957.782   | 1193.263  | AA486364  | 53574.879 | 54543.012 |
| AK025800  | 14290.245 | 16578.523 | M15476    | 62990.184 | 59475.262 |
| AK022333  | 3707.884  | 5043.948  | U57456    | 3356.753  | 2960.223  |
| AL137407  | 12488.385 | 11578.577 | N70057    | 27247.209 | 23732.156 |
| AF085839  | 966       | 923.7     | AK000124  | 5094.63   | 3710.585  |
| NM_018178 | 5496.868  | 5819.75   | NM_004480 | 10541.503 | 7911.389  |
| AK025204  | 1992.366  | 2069.585  | NM_014914 | 10684.258 | 8974.68   |
| AK027256  | 1257.223  | 1411.711  | NM_003620 | 7033.325  | 5538.952  |
| AL365406  | 654.03    | 1258.077  | NM_013289 | 1454.686  | 1683.104  |
| NM_019000 | 5680.316  | 5541.09   | AA586375  | 6910.782  | 6577.185  |
| AF143330  | 1848.9    | 2072.649  | BE910339  | 51744.246 | 54905.531 |
| AK025178  | 10371.546 | 9954.252  | U89715    | 8151.415  | 10421.53  |
| AF147359  | 2718.332  | 2813.348  | AF254067  | 30750.357 | 36696.055 |
| NM_014835 | 22797.24  | 32045.764 | NM_016363 | 24209.898 | 25096.279 |
| AK001822  | 12721.266 | 12401.221 | AY009090  | 19917.898 | 15949.67  |
| AK026969  | 10817.787 | 10410.025 | NM_005592 | 2168.237  | 2058.149  |
| AF086287  | 2644.884  | 2643.116  | U81380    | 1346.15   | 790.931   |
| AK022613  | 66254.508 | 69954.086 | NM_002303 | 1463.532  | 1587.462  |
| AL359557  | 3161.305  | 3347.297  | NM_016509 | 5958.434  | 5610.394  |
| AK027257  | 863.259   | 1031.89   | NM_012296 | 6242.935  | 7402.998  |
| AK024582  | 1086.455  | 1399.822  | AF041038  | 5393.362  | 6232.572  |
| AK024143  | 1453.578  | 1510.825  | NM_004536 | 13403.067 | 14213.676 |
| AK022099  | 1749.061  | 1933.2    | NM_014672 | 5585.137  | 4821.568  |
| AL137366  | 705.223   | 1295.567  | AB058719  | 8297.067  | 8368.519  |
| BC031635  | 3536.593  | 3839.016  | AK025935  | 5780.605  | 5743.554  |
| AF085916  | 966.67    | 1048.745  | AB032953  | 1126.581  | 1156.877  |
| AF085950  | 1098.793  | 1739.882  | NM_016441 | 1812.354  | 1409.026  |
| AL359598  | 3175.139  | 4397.907  | NM_006334 | 2785.679  | 2420.64   |
| AF085980  | 2604.629  | 2525.934  | NM_003474 | 3811.944  | 2872.828  |
| AF085927  | 5873.021  | 6280.597  | NM_004625 | 29548.516 | 22963.182 |
| AF085954  | 10205.35  | 13749.71  | NM_007179 | 58674.746 | 53095.211 |
| AL137337  | 2919.563  | 2975.229  | NM_001306 | 8168.665  | 6372.975  |
| AL137541  | 624.736   | 928.543   | NM_007163 | 2000.983  | 1768.325  |
| AL161969  | 1533.573  | 1785.992  | NM_000583 | 16682.537 | 16828.877 |
| AL442095  | 10843.161 | 10460.454 | NM_004254 | 6464.975  | 6638.456  |
| AL137378  | 4688.849  | 4764.069  | AB046833  | 1405.364  | 1901.823  |
| AL137609  | 39427.516 | 48760.176 | AY007135  | 61444.406 | 64562.434 |
| AL353946  | 8062.035  | 8511.866  | AF202889  | 55384.137 | 56040.465 |
| X69081    | 11473.596 | 11557.134 | NM_005833 | 7704.012  | 7244.655  |
| NM_005714 | 13741.688 | 13165.567 | NM_003100 | 15847.959 | 14536.029 |
| AL137474  | 2954.186  | 2181.404  | NM_006768 | 10769.237 | 10494.157 |
| AL133023  | 708.372   | 998.813   | NM_013322 | 11946.857 | 12320.567 |
| AK023484  | 523.636   | 703.949   | AB020627  | 6994.65   | 7977.117  |
| AK021572  | 3106.456  | 4082.768  | NM_002003 | 7863.829  | 8742.342  |
| AK021631  | 443.088   | 770.85    | NM_006846 | 1339.778  | 2064.589  |
| AK026757  | 1295.562  | 1743.965  | AL137938  | 23452.115 | 20144.971 |
| AK023294  | 1428.805  | 1395.377  | AF228704  | 9825.642  | 7743.112  |
| NM_017808 | 1217.188  | 1361.601  | NM_004215 | 16863.67  | 15637.484 |
| AF095854  | 5488.174  | 4732.104  | AK022746  | 6823.536  | 6084.987  |
| NM_014162 | 2643.289  | 2769.652  | NM_006568 | 4508.362  | 3839.841  |
| AF288405  | 308.365   | 692.367   | NM_006440 | 7264.569  | 6117.479  |
| NM_014133 | 370.935   | 810.201   | NM_004847 | 58029.5   | 56030.926 |

|           |           |           |           |           |           |
|-----------|-----------|-----------|-----------|-----------|-----------|
| AF159093  | 8370.248  | 9206.516  | NM_002255 | 5693.621  | 5437.188  |
| AF113679  | 3896.063  | 4333.433  | AF151889  | 13170.104 | 11772.842 |
| AK021997  | 6100.052  | 6139.042  | BC034483  | 2040.781  | 1737.178  |
| AK022125  | 1954.231  | 2050.487  | NM_006288 | 2120.937  | 1605.618  |
| AK022244  | 18200.807 | 18853.307 | NM_016224 | 17427.824 | 17322.104 |
| AK022381  | 11351.766 | 10348.815 | NM_005227 | 7948.433  | 9320.802  |
| AK022012  | 3224.981  | 2739.494  | NM_000286 | 30430.025 | 19075.652 |
| AK022149  | 669.02    | 666.699   | NM_016454 | 23521.668 | 31499.418 |
| AK022286  | 5259.783  | 5098.235  | NM_003469 | 9920.098  | 12860.715 |
| AK022411  | 763.022   | 658.747   | NM_016433 | 1710.562  | 1328.163  |
| AL137364  | 1822.085  | 1481.172  | NM_000859 | 3651.57   | 3142.433  |
| NM_001052 | 6269.681  | 4677.638  | NM_005480 | 2919.498  | 2961.086  |
| Z70696    | 2266.941  | 2295.554  | AB034694  | 1378.397  | 1225.824  |
| NM_005792 | 9010.225  | 10254.928 | NM_003273 | 4498.949  | 4433.396  |
| AF048847  | 16051.422 | 17661.143 | NM_017948 | 13010.299 | 14744.108 |
| L37718    | 58126.941 | 73167.75  | NM_000392 | 9629.285  | 8996.989  |
| AL137717  | 9687.392  | 10088.234 | AF208536  | 2006.649  | 1285.042  |
| AF035297  | 8930.261  | 10505.572 | AB037848  | 2496.479  | 1788.984  |
| NM_014039 | 9503.742  | 10201.037 | AF082657  | 3681.976  | 3165.337  |
| S67154    | 12510.517 | 13158.317 | NM_006744 | 2730.775  | 2290.216  |
| AK026181  | 37073.746 | 34951.512 | AF297659  | 2115.57   | 2149.321  |
| NM_014367 | 5463.901  | 5893.99   | NM_018231 | 21848.852 | 18227.496 |
| AK024901  | 1031.497  | 1457.782  | AK000124  | 5003.542  | 3886.993  |
| NM_019073 | 824.798   | 1164.824  | NM_004480 | 10487.815 | 8599.597  |
| AK025835  | 303.024   | 713.918   | NM_014914 | 12968.632 | 11821.98  |
| NM_002365 | 4459.424  | 4369.699  | NM_018289 | 8592.176  | 8374.023  |
| AF161441  | 18307.199 | 17527.289 | AB018260  | 6186.98   | 6371.982  |
| AF067777  | 59363.035 | 65453.738 | NM_015985 | 1075.213  | 664.023   |
| U17613    | 690.905   | 778.023   | NM_014766 | 7492.399  | 6874.641  |
| AK027211  | 898.286   | 1120.224  | NM_016627 | 24579.332 | 25188.98  |
| AJ299406  | 3239.915  | 3567.502  | NM_016121 | 6098      | 6454.144  |
| AK021891  | 3917.561  | 5861.982  | NM_014769 | 12138.109 | 14023.718 |
| Y10697    | 4929.767  | 5439.073  | NM_006349 | 60825.688 | 54024.531 |
| AY007166  | 58610.68  | 63359.219 | AK026264  | 52172.141 | 52569.027 |
| NM_004937 | 11597.69  | 13371.627 | AF222927  | 3903.322  | 3502.974  |
| L13197    | 21078.008 | 30130.719 | NM_014345 | 11441.832 | 9012.106  |
| AF056450  | 8188.366  | 10633.358 | NM_018217 | 7186.251  | 5412.031  |
| NM_000729 | 25268.195 | 28696.186 | AF241831  | 6422.513  | 5524.961  |
| AK024007  | 8977.459  | 9843.639  | NM_003033 | 3824.38   | 3097.405  |
| AF116699  | 4688.178  | 5332.558  | U96113    | 1881.25   | 1320.54   |
| AF119908  | 1369.053  | 1574.723  | NM_002733 | 4588.079  | 3331.175  |
| U50539    | 1784.614  | 2044.248  | M31008    | 2379.295  | 1794.138  |
| AK000653  | 45332.07  | 45093.906 | CY3Cy5    | 18964.045 | 202.773   |
| AK000908  | 3638.265  | 4596.498  | U93051    | 26711.527 | 22887.025 |
| AF086211  | 1021.575  | 714.346   | AK024268  | 6008.743  | 6720.004  |
| L77586    | 2278.197  | 2301.53   | AF086295  | 1943.432  | 2044.656  |
| X96660    | 8467.658  | 9901.838  | AF086344  | 5730.439  | 6245.934  |
| AK000993  | 2390.854  | 2941.146  | AF086424  | 5557.274  | 5756.094  |
| AK023519  | 9723.381  | 8024.565  | AL110130  | 1562.735  | 1843.314  |
| NM_016444 | 3376.252  | 2637.588  | AF052116  | 2845.594  | 2399.721  |
| NM_017839 | 1672.543  | 1671.678  | NM_018087 | 5945.247  | 5813.492  |
| NM_003707 | 35832.965 | 37418.293 | AL360260  | 3991.54   | 3205.547  |
| AL137718  | 4034.118  | 4438.633  | AK023647  | 2906.74   | 3007.593  |



|           |           |           |           |           |           |
|-----------|-----------|-----------|-----------|-----------|-----------|
| NM_00346C | 19893.488 | 24867.799 | AL096749  | 35139.301 | 37817.535 |
| U94354    | 1564.86   | 1465.984  | AK023620  | 5091.227  | 4725.796  |
| NM_002904 | 37498.676 | 42208.484 | AF086189  | 11835.698 | 11510.121 |
| NM_01418E | 14857.867 | 15260.309 | AL050055  | 7048.318  | 5823.441  |
| NM_00568E | 18036.766 | 19485.605 | U93051    | 19297.342 | 17281.74  |
| NM_006767 | 3394.884  | 3285.314  | SR2       | 26236.588 | 25983.594 |
| AK021451  | 5000.847  | 6778.363  | SR4       | 13093.381 | 10822.859 |
| AK001971  | 4063.789  | 4521.372  | SR6       | 2441.979  | 1292.477  |
| AF086468  | 1965.9    | 2292.765  | SR8       | 6232.708  | 16295.188 |
| AK027239  | 7120.545  | 6365.685  | SR10      | 20381.109 | 5022.706  |
| AF005082  | 42021.723 | 33853.043 | CY3Cy5    | 28813.506 | 328.643   |
| AL117595  | 9968.586  | 7363.667  | AL359931  | 3911      | 3824.315  |
| AB028988  | 57009.445 | 52603.785 | AK000954  | 3965.873  | 4829.949  |
| AK023072  | 2636.757  | 1236.229  | AF086099  | 2888.184  | 2868.405  |
| AF086105  | 20800.02  | 25401.213 | AK021922  | 1349.718  | 1188.877  |
| AK026600  | 5979.676  | 5982.02   | AK025800  | 6698.569  | 6826.344  |
| AF251189  | 2390.327  | 1747.985  | AK022333  | 3801.603  | 3884.58   |
| AK026733  | 1307.827  | 1165.146  | AL137407  | 6200.693  | 6896.097  |
| AF161429  | 24420.855 | 20922.611 | AF147439  | 427.906   | 854.782   |
| AK021495  | 9739.489  | 9987.313  | AF085839  | 1102.234  | 748.587   |
| AF064846  | 5638.89   | 4601.402  | NM_01817E | 2039.104  | 2821.596  |
| AL110227  | 6143.929  | 5869.856  | AK025204  | 1799.687  | 2175.387  |
| NM_00140C | 28936.221 | 35523.074 | AK027256  | 1674.624  | 1484.264  |
| AB033281  | 14767.262 | 14525.043 | AL365406  | 2856.041  | 3239.918  |
| NM_00288E | 56308.281 | 66303.289 | NM_01900C | 2436.938  | 2319.933  |
| AB011161  | 3277.363  | 2835.947  | AF143330  | 1466.32   | 1990.226  |
| NM_000827 | 2011.593  | 1861.995  | AK025178  | 5621.403  | 4540.301  |
| NM_002944 | 24097.402 | 27030.301 | AF147359  | 2894.836  | 2235.8    |
| AF327354  | 5942.188  | 6412.602  | NM_01483E | 27255.814 | 29582.572 |
| NM_00625E | 1129.179  | 660.359   | AK001822  | 11757.082 | 8521.879  |
| NM_003961 | 56502.77  | 74499.453 | AK026969  | 5768.512  | 5570.468  |
| AB014513  | 8868.104  | 10149.141 | AF086287  | 1980.39   | 1379.519  |
| NM_004747 | 8163.496  | 7531.198  | AF086356  | 1094.228  | 1116.517  |
| AK024430  | 60023.898 | 66602.789 | AK027183  | 1916.54   | 1227.181  |
| NM_002341 | 47890.918 | 46948.695 | AK022613  | 62243.012 | 53623.207 |
| AL137651  | 11840.793 | 12966.046 | AK023843  | 1462.423  | 1380.92   |
| NM_01894E | 20288.35  | 17069.307 | AL359557  | 15320.715 | 13518.661 |
| AB029018  | 1463.918  | 1073.267  | AK027257  | 2373.434  | 2098.588  |
| NM_00081E | 7613.814  | 6458.889  | AK024582  | 2605.507  | 2832.951  |
| NM_00665C | 5636.12   | 5452.573  | AK024143  | 2065.272  | 1551.034  |
| AK024436  | 3329.661  | 2999.107  | AK022099  | 2198.68   | 1460.089  |
| NM_00664E | 5249.957  | 5328.59   | AL137366  | 1519.464  | 1386.981  |
| NM_004711 | 7994.072  | 6477.728  | BC031635  | 4387.037  | 3793.515  |
| NM_00646E | 19814.643 | 18148.287 | AF085916  | 1116.318  | 1239.083  |
| NM_001444 | 61577.453 | 66155.109 | AF085950  | 4621.175  | 4289.286  |
| AK027208  | 2350.615  | 2841.126  | AL359598  | 1761.41   | 2239.475  |
| NM_016521 | 24611.379 | 31501.906 | AF085980  | 1745.609  | 2112.905  |
| X98494    | 24737.848 | 29696.727 | AF085927  | 3612.207  | 3657.149  |
| NM_00124C | 20886.479 | 20914.238 | AF085954  | 10097.417 | 11286.443 |
| NM_00270E | 28737.668 | 33513.352 | AL137337  | 1922.649  | 2138.031  |
| NM_00109E | 5584.933  | 6412.093  | AL137541  | 1194.848  | 781.08    |
| NM_00682E | 8996.236  | 10467.983 | AL161969  | 1693.128  | 1607.325  |
| NM_016567 | 27909.938 | 34209.078 | AL442095  | 15867.67  | 17770.209 |

|           |           |           |           |           |           |
|-----------|-----------|-----------|-----------|-----------|-----------|
| NM_007031 | 3136.655  | 3727.85   | AL137378  | 4359.677  | 3645.091  |
| NM_002657 | 4760.149  | 4757.301  | AL137609  | 25574.508 | 19878.209 |
| NM_004089 | 36382.914 | 37363.426 | AL353946  | 4453.752  | 3406.497  |
| NM_001350 | 19899.283 | 10367.238 | X69081    | 5761.878  | 4510.815  |
| NM_014809 | 5591.87   | 3390.9    | NM_005714 | 12585.058 | 10166.775 |
| NM_016074 | 47839.141 | 50698.887 | AL137474  | 5579.36   | 4921.022  |
| NM_003921 | 10454.723 | 7984.526  | AL133023  | 1915.499  | 1849.046  |
| NM_004209 | 43129.594 | 45637.723 | AK023484  | 1528.586  | 1588.559  |
| NM_006336 | 1031.181  | 1304.402  | AK021572  | 5008.316  | 4199.142  |
| NM_001843 | 9931.364  | 9754.941  | AK021631  | 2493.764  | 3015.61   |
| NM_013266 | 1928.169  | 2111.391  | AK026757  | 3119.234  | 3974.708  |
| NM_000419 | 4395.503  | 3947.959  | AK023294  | 1434.565  | 1741.437  |
| NM_017769 | 7834.065  | 5844.257  | NM_017809 | 1597.736  | 1392.467  |
| NM_002589 | 17606.826 | 10274.43  | AF095854  | 3487.231  | 2679.834  |
| NM_002776 | 9862.194  | 8509.972  | NM_014162 | 5609.506  | 4991.167  |
| AK023398  | 13899.01  | 16055.237 | AF288405  | 1051.651  | 1015.097  |
| NM_001907 | 1911.094  | 2577.182  | NM_014133 | 2032.71   | 1778.161  |
| NM_015711 | 59734.348 | 72746.563 | AF113689  | 1151.79   | 1099.266  |
| NM_000050 | 4597.865  | 5148.687  | AF159093  | 4759.723  | 5281.733  |
| NM_000481 | 3085.41   | 4169.29   | AF113679  | 3236.203  | 2975.812  |
| AK025681  | 5061.447  | 5815.69   | AK021997  | 5516.787  | 4527.423  |
| NM_014909 | 21831.258 | 22651.975 | AK022125  | 2927.312  | 1985.564  |
| NM_012137 | 17444.432 | 17343.48  | AK022244  | 17883.877 | 13240.783 |
| NM_004483 | 60596.43  | 59739.371 | AK022381  | 9163.796  | 6860.143  |
| NM_001513 | 60546.445 | 57991.523 | AK022012  | 1534.071  | 2033.504  |
| NM_001281 | 19755.453 | 18391.148 | AK022149  | 1301.738  | 882.089   |
| NM_016835 | 2116.429  | 2176.241  | AK022286  | 3874.687  | 2589.714  |
| AF070600  | 61164.07  | 64351.938 | AL137364  | 2339.719  | 2273.641  |
| AB014522  | 34790.176 | 34758.898 | NM_001052 | 10772.502 | 9629.251  |
| NM_014875 | 21526.619 | 21911.609 | Z70696    | 2344.473  | 2447.317  |
| AB033023  | 41165.367 | 47323.457 | NM_005792 | 5370.473  | 5529.596  |
| BC027895  | 4900.351  | 3913.964  | AF048847  | 10711.587 | 10388.143 |
| U63542    | 1480.504  | 776.334   | L37718    | 60245.051 | 64417.074 |
| AF161361  | 2667.715  | 906.358   | AL137717  | 11353.785 | 12077.459 |
| AF024703  | 33563.805 | 41307.223 | AF035297  | 5511.519  | 6209.402  |
| NM_016531 | 3444.392  | 3457.989  | NM_014039 | 6485.79   | 6712.908  |
| NM_003593 | 20631.959 | 25462.373 | S67154    | 5244.956  | 4979.194  |
| NM_014383 | 60752.047 | 61944.367 | AK026181  | 26255.176 | 33434.074 |
| NM_000244 | 21617.004 | 22651.131 | U82320    | 960.691   | 1233.848  |
| NM_014285 | 16324.072 | 16380.842 | NM_014367 | 4970.244  | 5096.258  |
| AF026816  | 57649.801 | 56935.574 | BF205340  | 1556.026  | 1694.952  |
| NM_004719 | 10180.17  | 10897.19  | AK024901  | 1167.943  | 1570.81   |
| NM_018553 | 11050.729 | 10909.275 | NM_019073 | 938.834   | 1479.218  |
| NM_004704 | 13680.933 | 14738.026 | AK025835  | 710.762   | 821.593   |
| NM_005455 | 15348.448 | 21174.949 | NM_002365 | 6064.346  | 4462.172  |
| NM_014633 | 6649.29   | 4450.083  | AF161441  | 11741.504 | 9172.638  |
| NM_001970 | 60746.109 | 64122.875 | AF067777  | 61197.254 | 61867.641 |
| NM_006810 | 38855.305 | 32684.709 | U17613    | 1923.251  | 1914.607  |
| AK024054  | 29432.799 | 30462.922 | AK027211  | 1372.795  | 1360.434  |
| AL049674  | 1571.045  | 1562.172  | AJ299406  | 2552.282  | 2279.228  |
| NM_001969 | 2890.704  | 2520.117  | AK021891  | 4853.955  | 4801.978  |
| NM_004116 | 16658.066 | 17117.619 | Y10697    | 5802.5    | 6562.103  |
| AK024508  | 16619.447 | 16728.125 | AY007166  | 47493.977 | 54369.461 |

|           |           |           |           |           |           |
|-----------|-----------|-----------|-----------|-----------|-----------|
| AK027213  | 19784.688 | 13206.885 | NM_004937 | 16923.717 | 19730.523 |
| NM_014596 | 17298.844 | 17128.84  | L13197    | 13308.223 | 15686.377 |
| NM_006703 | 28266.068 | 31633.555 | AF056450  | 6721.218  | 7053.658  |
| NM_004037 | 7580.244  | 6661.63   | NM_000729 | 21903.186 | 26866.172 |
| NM_005116 | 12867.443 | 11554.862 | AK024007  | 6047.984  | 6649.704  |
| NM_002766 | 14660.361 | 8393.604  | AF116699  | 4981.398  | 5230.351  |
| AJ404857  | 1052.057  | 1624.228  | AF119908  | 1245.203  | 1373.081  |
| NM_000788 | 36560.609 | 41775.48  | AK000653  | 14570.512 | 15620.498 |
| AF254088  | 8374.321  | 9558.146  | AK000908  | 1368.665  | 1718.059  |
| NM_001420 | 5296.202  | 6403.831  | AF086211  | 1009.599  | 978.114   |
| NM_000248 | 5276.06   | 4823.001  | L77586    | 1863.151  | 1737.23   |
| AB031046  | 4293.683  | 4535.163  | X96660    | 3231.198  | 3450.986  |
| NM_002449 | 60964.602 | 64585.008 | AK000993  | 980.869   | 1518.561  |
| AK025388  | 5671.768  | 6016.44   | AK023519  | 3237.944  | 3671.64   |
| NM_006147 | 719.492   | 653.946   | NM_016444 | 2924.659  | 3315.187  |
| AB006631  | 8785.862  | 7735.134  | NM_017839 | 1811.624  | 2405.192  |
| AF291181  | 1660.178  | 1785.167  | NM_003707 | 32601.818 | 36524.977 |
| NM_005741 | 13316.075 | 13264.329 | AL137718  | 2547.931  | 2591.804  |
| NM_000964 | 14872.588 | 16388.98  | NM_003460 | 14641.638 | 17585.164 |
| NM_012185 | 1504.139  | 1443.412  | U94354    | 1003.342  | 950.546   |
| BF343886  | 2077.896  | 2212.834  | NM_002904 | 11171.703 | 13213.408 |
| NM_013263 | 27016.793 | 21227.734 | NM_014189 | 5542.264  | 6659.861  |
| AF116238  | 7452.203  | 4580.338  | NM_005686 | 8601.014  | 9836.208  |
| NM_006982 | 4583.302  | 1829.62   | NM_006767 | 2538.859  | 2902.782  |
| AB033085  | 10135.937 | 4565.545  | AK021451  | 4873.976  | 7286.58   |
| L09100    | 4902.891  | 5142.892  | AK001971  | 3223.063  | 3962.583  |
| NM_005472 | 11647.603 | 16190.149 | AF086468  | 2914.733  | 3206.431  |
| NM_004313 | 1645.403  | 978.983   | AK027239  | 3870.413  | 4254.692  |
| NM_013435 | 1678.448  | 1066.799  | AF005082  | 25828.791 | 24968.398 |
| NM_000132 | 46458.84  | 48298.262 | AL117595  | 7482.822  | 7621.938  |
| NM_001727 | 34640.984 | 34624.082 | AB028988  | 40568.898 | 45357.172 |
| NM_004076 | 8299.246  | 9641.405  | AK023072  | 1480.609  | 1602.059  |
| NM_007123 | 57775.277 | 58309.914 | AF086105  | 16972.57  | 16966.539 |
| BG717460  | 11184.258 | 12091.629 | AK026600  | 2417.211  | 2412.314  |
| AA778392  | 47309.344 | 52129.988 | Z70700    | 379.023   | 772.123   |
| AI478178  | 11587.798 | 14324.663 | AF251189  | 1464.333  | 1268.259  |
| AA101279  | 5239.259  | 5884.258  | AK026733  | 907.341   | 987.086   |
| M19154    | 14906.977 | 14026.248 | AF161429  | 7418.697  | 7094.093  |
| AA399410  | 19210.764 | 16333.281 | AK021495  | 7169.984  | 7251.358  |
| AA137031  | 5404.809  | 4741.45   | AF064846  | 4579.999  | 4126.473  |
| AA292226  | 20984.094 | 21573.576 | AL110227  | 4635.024  | 4182.276  |
| NM_000500 | 3151.503  | 3794.991  | NM_001400 | 48041.66  | 50268.129 |
| M29873    | 1025.721  | 1260.925  | AB033281  | 6853.443  | 8235.073  |
| J04449    | 463.691   | 691.374   | NM_002882 | 47997.723 | 49547.063 |
| BC007031  | 13552.754 | 11622.03  | AB011161  | 3121.02   | 3159.343  |
| AF129756  | 53063.129 | 49588.727 | NM_000827 | 2583.782  | 2990.926  |
| NM_002957 | 40825.578 | 36320.035 | NM_002944 | 11594.342 | 13223.801 |
| BC036369  | 7221.783  | 6257.771  | AF327354  | 3484.38   | 4624.584  |
| X12492    | 57316.52  | 54059.434 | NM_006259 | 1458.097  | 1506.533  |
| NM_005009 | 40332.82  | 35881.895 | NM_003961 | 56974.934 | 58415.699 |
| NM_003110 | 8229.657  | 10285.031 | AB014513  | 10994.355 | 13289.285 |
| NM_003612 | 10327.657 | 12696.421 | NM_004747 | 7225.626  | 7201.308  |
| NM_013230 | 4918.444  | 3807.263  | AK024430  | 62641.93  | 58368.844 |

|           |           |           |           |           |           |
|-----------|-----------|-----------|-----------|-----------|-----------|
| X72308    | 19959.912 | 19613.916 | NM_002341 | 26247.99  | 32131.703 |
| NM_00540E | 2651.009  | 2724.669  | AL137651  | 5818.25   | 6448.915  |
| BC008376  | 50040.098 | 51984.781 | NM_01894E | 9856.356  | 10104.618 |
| X87895    | 691.223   | 969.675   | AB029018  | 1741.439  | 1906.647  |
| AB041269  | 7998.921  | 9337.589  | NM_00081E | 5966.02   | 5150.638  |
| AK024908  | 15388.177 | 15953.838 | NM_00665C | 4434.98   | 4369.204  |
| NM_01827C | 23794.926 | 25833.514 | AK024436  | 2081.365  | 2074.379  |
| NM_00026C | 60174.645 | 56955.254 | NM_00664E | 2087.28   | 2235.383  |
| NM_01416C | 11804.294 | 12484.072 | NM_00086E | 1062.491  | 1143.578  |
| AF230877  | 39943.723 | 30987.682 | NM_004711 | 5175.477  | 5204.216  |
| NM_01766E | 14186.237 | 5311.189  | NM_00646E | 9964.918  | 8119.083  |
| AB033049  | 60165.531 | 58568.492 | AK023050  | 817.446   | 620.097   |
| NM_00040E | 1667.499  | 1600.639  | NM_001444 | 49197.926 | 52377.699 |
| NM_00568E | 3653.375  | 3799.522  | AK027208  | 2045.777  | 1951.619  |
| NM_00292E | 3533.001  | 2577.768  | NM_016521 | 20187.496 | 18124.217 |
| NM_00023E | 1177.382  | 746.688   | X98494    | 23032.867 | 21805.242 |
| NM_018697 | 4574.647  | 4334.098  | NM_00124C | 14300.431 | 14739.938 |
| AF090116  | 1761.224  | 1601.046  | NM_00270E | 18787.479 | 21223.104 |
| NM_01403C | 61512.316 | 55513.871 | NM_00109E | 3824.68   | 4331.99   |
| NM_004224 | 10713.453 | 20356.074 | NM_00682E | 8306.863  | 8112.561  |
| Z21967    | 15477.012 | 14788.597 | NM_016567 | 16693.066 | 17821.336 |
| NM_00373E | 2317.771  | 2090.911  | NM_007031 | 2995.116  | 2641.877  |
| NM_004377 | 16595.336 | 18416.197 | NM_002657 | 2084.419  | 2200.324  |
| AB037815  | 55189.84  | 48096.789 | NM_00408E | 21025.721 | 26266.131 |
| NM_00364E | 14462.967 | 9809.581  | NM_00135C | 17393.586 | 20990.926 |
| AF263613  | 12976.981 | 10090.11  | NM_01480E | 5863.342  | 6776.326  |
| NM_000097 | 4860.884  | 5245.837  | NM_016074 | 28456.881 | 35306.547 |
| NM_00150E | 9092.349  | 9811.784  | NM_003921 | 6523.184  | 5364.336  |
| AK022878  | 18211.51  | 19208.17  | NM_00420E | 27092.756 | 28019.389 |
| NM_01809E | 599.614   | 1111.902  | NM_00184E | 7856.147  | 8387.201  |
| AF217187  | 15525.995 | 16825.992 | NM_01326E | 1326.139  | 1333.859  |
| NM_01775C | 5546.116  | 6060.349  | NM_00041E | 2789.188  | 2128.037  |
| AK027122  | 32226.307 | 43580.91  | NM_01776E | 4442.727  | 3670.469  |
| AK026196  | 8260.858  | 9541.169  | NM_00258E | 15739.305 | 12304.455 |
| NM_004977 | 19340.777 | 14171.975 | NM_00277E | 10596.904 | 9267.604  |
| NM_00470C | 1920.467  | 1225.431  | AK023398  | 16793.135 | 15124.092 |
| NM_00686E | 23233.447 | 14022.98  | NM_001907 | 1800.403  | 1553.87   |
| NM_004161 | 32277.654 | 23089.271 | NM_015711 | 62166.168 | 57624.969 |
| NM_00129E | 2014.488  | 1704.207  | NM_00005C | 2865.83   | 3790.034  |
| NM_005161 | 2445.415  | 1681.472  | NM_000481 | 2510.435  | 2991.157  |
| AB037749  | 1220.08   | 1056.188  | AK025681  | 4423.218  | 4877.122  |
| NM_00146E | 6369.41   | 7974.749  | NM_01490E | 14932.235 | 15607.317 |
| NM_00407E | 4497.206  | 5148.607  | NM_012137 | 11112.706 | 11513.034 |
| AF068286  | 3012.2    | 3300.229  | NM_00448E | 36644.223 | 43055.469 |
| AB040957  | 12771.574 | 11074.852 | NM_00151E | 62291.766 | 61476.441 |
| NM_00689C | 1591.396  | 1630.632  | NM_001281 | 13317.475 | 14618.075 |
| NM_005881 | 8375.295  | 8279.913  | NM_01683E | 2657.741  | 2903.498  |
| NM_005794 | 557.243   | 828.708   | NM_003981 | 24565.035 | 36316.551 |
| L40519    | 1925.397  | 1098.349  | U26596    | 36548.93  | 44176.902 |
| NM_004204 | 6940.369  | 4037.802  | AF070600  | 52848.5   | 55498.84  |
| AK002181  | 2973.58   | 4302.919  | AB014522  | 15309.758 | 15366.16  |
| AF118064  | 715.899   | 507.224   | NM_01487E | 10213.188 | 9634.158  |
| NM_001641 | 47420.395 | 46765.113 | AB033023  | 24257.219 | 28121.994 |

|           |           |           |           |           |           |
|-----------|-----------|-----------|-----------|-----------|-----------|
| BC015750  | 63128.227 | 57724.129 | BC027895  | 1709.144  | 1380.238  |
| AK025769  | 20590.814 | 23500.461 | AF161361  | 1441.82   | 1156.285  |
| AW945166  | 5479.835  | 5886.935  | AF024703  | 22515.611 | 20539.389 |
| NM_005236 | 13412.179 | 13103.696 | NM_016531 | 1555.469  | 1497.065  |
| NM_006384 | 29305.484 | 28830.971 | NM_003593 | 7505.072  | 7003.149  |
| NM_013257 | 5080.066  | 2594.867  | NM_014383 | 53496.887 | 49262.137 |
| AB044546  | 2386.805  | 1229.858  | NM_000244 | 6503.483  | 7361.706  |
| NM_014225 | 50391.734 | 34713.059 | NM_014285 | 6201.564  | 7173.86   |
| AF163473  | 4746.645  | 3672.315  | AF026816  | 20592.992 | 22763.693 |
| NM_006256 | 17765.961 | 11255.551 | NM_004719 | 3710.837  | 4045.311  |
| NM_002846 | 12333.302 | 21278.016 | NM_018553 | 2790.208  | 3487.188  |
| NM_002837 | 14880.85  | 14679.688 | NM_004704 | 6838.183  | 8026.313  |
| U06715    | 1389.372  | 1503.324  | NM_005455 | 5538.423  | 7118.748  |
| NM_013402 | 9274.751  | 9443.33   | NM_014633 | 4514.744  | 3940.149  |
| NM_002662 | 1431.354  | 1184.027  | NM_001970 | 55645.527 | 50009.918 |
| NM_004313 | 1648.01   | 2115.963  | NM_006810 | 23529.416 | 31442.404 |
| NM_013435 | 2630.698  | 2269.419  | AK024054  | 12318.556 | 14659.915 |
| NM_000132 | 42683.035 | 36828.191 | AL049674  | 953.337   | 805.739   |
| NM_001727 | 27776.494 | 9567.905  | NM_004116 | 7188.229  | 7097.63   |
| NM_004076 | 7725.284  | 5751.068  | AK024508  | 6443.015  | 6391.734  |
| NM_007123 | 60016     | 59791.484 | AK027213  | 7398.427  | 7721.42   |
| BG717460  | 11923.611 | 12212.728 | NM_014596 | 9096.806  | 8680.167  |
| AA778392  | 48461.117 | 52767.867 | NM_006703 | 15388.901 | 13656.583 |
| AI478178  | 13296.242 | 14119.594 | NM_004037 | 4758.328  | 3859.529  |
| AA101279  | 5126.593  | 5715.147  | NM_005116 | 7500.335  | 8077.566  |
| M19154    | 12762.193 | 12508.875 | NM_002766 | 8971.03   | 7507.072  |
| AA399410  | 16789.215 | 14777.156 | AJ404857  | 2838.892  | 2669.948  |
| AA137031  | 4174.876  | 3092.282  | NM_000788 | 12766.938 | 13401.777 |
| AA292226  | 21689.324 | 19433.262 | AF254088  | 3589.48   | 3298.66   |
| NM_000500 | 2621.959  | 2446.248  | NM_001420 | 1985.336  | 2362.275  |
| M29873    | 768.101   | 929.719   | NM_000248 | 2883.559  | 2749.094  |
| J04449    | 681.167   | 759.001   | AB031046  | 2434.979  | 3068.994  |
| AF129756  | 57414.738 | 49526.762 | NM_002449 | 37342.855 | 44326.129 |
| X12492    | 57886.98  | 51875.938 | AK025388  | 2494.473  | 2499.591  |
| NM_017540 | 4747.265  | 5864.209  | NM_006147 | 755.727   | 1069.925  |
| NM_002396 | 745.462   | 698.299   | AB006631  | 3908.515  | 4065.804  |
| NM_006755 | 30430.938 | 30570.68  | AF291181  | 917.796   | 1141.496  |
| NM_013230 | 5050.594  | 5915.25   | NM_005741 | 4916.727  | 5457.018  |
| X72308    | 20305.09  | 23128.096 | NM_000964 | 3691.059  | 3733.242  |
| NM_005408 | 2139.594  | 2327.792  | BF343886  | 1067.596  | 901.334   |
| BC008376  | 43399.988 | 30955.725 | AF116238  | 1929.534  | 1747.41   |
| X87895    | 704.646   | 1217.527  | NM_006982 | 1203.669  | 1725.606  |
| AB041269  | 9131.604  | 9202.559  | AB033085  | 2962.717  | 2519.104  |
| AK024908  | 14639.089 | 15916.577 | L09100    | 4929.012  | 5197.532  |
| NM_018270 | 26082.922 | 33077.883 | NM_005472 | 6467.082  | 6943.631  |
| NM_000260 | 60790.625 | 62562.406 | NM_004313 | 19446.084 | 13438.311 |
| NM_014160 | 11184.218 | 12104.937 | NM_013435 | 1458.223  | 1375.2    |
| AF230877  | 42220.215 | 45962.469 | NM_000132 | 23439.674 | 19173.32  |
| NM_017668 | 14133.515 | 12578.233 | NM_001727 | 21732.746 | 22728.551 |
| AB033049  | 59422.645 | 69767.789 | NM_004076 | 3592.873  | 3660.373  |
| NM_000406 | 1638.238  | 1502.308  | NM_007123 | 28516.518 | 29619.168 |
| NM_005682 | 3324.129  | 3314.499  | BG717460  | 3136.774  | 3792.013  |
| NM_002926 | 3812.299  | 3436.665  | AA778392  | 16544.74  | 20026.621 |

|           |           |           |           |           |           |
|-----------|-----------|-----------|-----------|-----------|-----------|
| NM_000233 | 1438.152  | 1120.311  | AI478178  | 3568.43   | 4824.302  |
| AF090116  | 2485.204  | 2323.941  | AA101279  | 1667.699  | 2312.464  |
| NM_004224 | 16104.263 | 30559.84  | M19154    | 4980.288  | 5462.812  |
| Z21967    | 19586.758 | 19706.021 | AA399410  | 8329.972  | 7196.879  |
| NM_00373E | 2738.398  | 2628.845  | AA137031  | 1839.216  | 1887.452  |
| L09100    | 2628.941  | 2860.254  | AA292226  | 12691.423 | 13266.748 |
| NM_005472 | 5089.814  | 5550.984  | NM_000500 | 1338.511  | 1732.854  |
| NM_00364E | 18138.596 | 17538.744 | J04449    | 1877.151  | 1921.715  |
| AF263613  | 12740.58  | 15038.681 | BC007031  | 7593.2    | 9782.738  |
| NM_000097 | 3663.733  | 2761.571  | AF129756  | 28740.492 | 32611.209 |
| NM_00150E | 6442.426  | 4242.066  | NM_002957 | 29246.789 | 28164.141 |
| AK022878  | 16582.611 | 15839.264 | BC036369  | 4872.506  | 4829.517  |
| AF217187  | 16237.54  | 16758.248 | X12492    | 36381.895 | 38334.246 |
| NM_017750 | 6069.813  | 6273.634  | NM_00500E | 23962.602 | 20808.004 |
| AK027122  | 33650.539 | 43908.406 | NM_003110 | 7325.568  | 7530.625  |
| AK026196  | 8946.331  | 10140.629 | NM_003612 | 7125.603  | 6308.267  |
| NM_004977 | 24220.561 | 33095.281 | NM_013230 | 5268.851  | 5654.405  |
| NM_004700 | 2253.389  | 1946.185  | X72308    | 28811.35  | 31703.4   |
| NM_00686E | 26907.766 | 18901.115 | NM_00540E | 2162.074  | 2029.777  |
| NM_004161 | 29490.318 | 12950.144 | BC008376  | 42203.684 | 45042.281 |
| NM_00129E | 2227.277  | 1675.05   | AB041269  | 2300.031  | 2122.482  |
| NM_005161 | 2178.642  | 1044.779  | AK024908  | 5690.577  | 5626.364  |
| AB037749  | 1665.325  | 1158.9    | NM_018270 | 7355.251  | 7641.561  |
| NM_001462 | 7839.405  | 9512.622  | NM_000260 | 53597.992 | 52411.754 |
| NM_004072 | 4243.118  | 4618.211  | NM_014160 | 3580.558  | 4515.473  |
| AF068286  | 2699.938  | 2553.972  | AF230877  | 13497.494 | 16611.594 |
| AB040957  | 14412.706 | 11872.381 | NM_01766E | 8243.851  | 7654.901  |
| NM_006890 | 1378.938  | 1408.026  | NM_00292E | 2337.222  | 2317.45   |
| NM_003110 | 11396.856 | 11752.052 | NM_000233 | 888.81    | 956.9     |
| NM_003612 | 4280.739  | 3572.004  | NM_018697 | 2992.569  | 2820.738  |
| L40519    | 3095.425  | 2365.225  | AF090116  | 2364.593  | 1439.598  |
| NM_004204 | 6759.652  | 7452.322  | NM_014030 | 60174.043 | 51042.738 |
| AK002181  | 2260.529  | 1922.871  | NM_004224 | 8671.215  | 10989.971 |
| AF118064  | 845.518   | 781.075   | Z21967    | 7942.755  | 5694.936  |
| NM_001641 | 47650.012 | 47617.91  | NM_00373E | 2257.602  | 1615.786  |
| BC015750  | 60396.086 | 58236.148 | NM_004377 | 17328.914 | 16515.629 |
| AK025769  | 20482.098 | 20154.979 | AB037815  | 52436.531 | 46913.152 |
| AW945166  | 5596.727  | 6267.095  | NM_00364E | 12339.851 | 12127.832 |
| NM_00523E | 13813.416 | 12532.229 | AF263613  | 8663.686  | 9135.83   |
| NM_006384 | 29798.777 | 34956.031 | NM_000097 | 2331.706  | 2670.888  |
| NM_013257 | 4120.18   | 1971.503  | NM_00150E | 3393.96   | 3641.938  |
| AB044546  | 2185.808  | 367.735   | AK022878  | 6909.843  | 7612.641  |
| NM_01422E | 50614.555 | 22451.623 | AF217187  | 9219.881  | 11289.544 |
| AF163473  | 3970.995  | 2480.591  | NM_017750 | 2834.872  | 3158.289  |
| NM_00625E | 14391.89  | 6404.21   | AK027122  | 16802.936 | 15767.076 |
| NM_00284E | 13208.25  | 22452.975 | AK026196  | 4796.824  | 6478.667  |
| AL133077  | 46479.172 | 41867.191 | NM_004977 | 7170.357  | 7670.75   |
| AK025211  | 11115.935 | 12959.649 | NM_004700 | 1904.404  | 1969.682  |
| U06715    | 1285.145  | 1274.771  | NM_004161 | 19115.314 | 21019.973 |
| NM_013402 | 9796.154  | 9353.856  | NM_00129E | 780.327   | 1105.89   |
| NM_002662 | 1280.154  | 1290.529  | NM_005161 | 738.875   | 1326.864  |
| NM_004377 | 15665.369 | 20009.166 | AB037749  | 1465.471  | 1337.831  |
| AB037815  | 32506.113 | 30614.76  | NM_020347 | 1154.897  | 1069.9    |

|           |           |           |           |           |           |
|-----------|-----------|-----------|-----------|-----------|-----------|
| NM_000132 | 40121.332 | 37851.121 | NM_001462 | 4025.577  | 4369.781  |
| NM_001727 | 35121.59  | 30456.688 | NM_004072 | 2595.878  | 2223.471  |
| NM_004076 | 7352.028  | 8213.132  | AF068286  | 1473.365  | 1512.356  |
| NM_007123 | 50035.344 | 43697.223 | AB040957  | 9636.95   | 7637.656  |
| BG717460  | 11310.051 | 11827.577 | NM_006890 | 1962.657  | 2312.752  |
| AA778392  | 46234.266 | 49222.238 | NM_005881 | 4696.423  | 5334.307  |
| AI478178  | 13132.344 | 13989.958 | NM_004204 | 4997.214  | 5076.259  |
| AA101279  | 5209.31   | 5352.674  | AK002181  | 1959.503  | 2306.852  |
| M19154    | 14347.148 | 14656.354 | AF118064  | 790.823   | 1002.974  |
| AA399410  | 18776.277 | 19943.146 | NM_001641 | 25840.314 | 22399.102 |
| AA137031  | 5363.363  | 5007.303  | BC015750  | 65232.449 | 55898.164 |
| AA292226  | 16443.242 | 6626.363  | AK025769  | 10311.709 | 13488.42  |
| NM_000500 | 2262.807  | 794.861   | AW945166  | 2179.229  | 1894.721  |
| M29873    | 1069.982  | 380.993   | NM_005236 | 6132.853  | 6006.981  |
| J04449    | 722.33    | 319.35    | NM_006384 | 14606.904 | 13845.672 |
| BC007031  | 14984.584 | 9333.051  | NM_013257 | 3554.313  | 2786.068  |
| AF129756  | 59877.676 | 53471.953 | AB044546  | 1440.594  | 1731.714  |
| BC036369  | 5611.413  | 5780.733  | NM_014225 | 31451.568 | 36076.406 |
| X12492    | 57543.922 | 53146.117 | AF163473  | 2660.905  | 2688.189  |
| NM_017540 | 5255.589  | 5186.673  | NM_006256 | 8782.087  | 9892.521  |
| NM_006755 | 33580.926 | 37087.797 | NM_002846 | 6221.513  | 12885.094 |
| NM_005881 | 12167.421 | 11907.869 | NM_002837 | 4520.415  | 4620.613  |
| NM_005794 | 711.52    | 406.26    | AL133077  | 31425.039 | 35824.055 |
| NM_000260 | 59449.348 | 58095.422 | AK025211  | 3625.047  | 3803.155  |
| NM_014160 | 11033.773 | 13011.241 | U06715    | 1180.264  | 1228.64   |
| AF230877  | 40870.383 | 42471.086 | NM_013402 | 4868.183  | 3759.33   |
| NM_017668 | 14067.454 | 7919.739  | NM_004313 | 1495.16   | 1461.747  |
| AB033049  | 58157.055 | 59479.047 | NM_013435 | 1490.846  | 1925.594  |
| NM_000406 | 1732.412  | 1821.27   | NM_000132 | 25313.014 | 29026.143 |
| NM_005682 | 3547.844  | 4097.133  | NM_001727 | 17876.168 | 19385.975 |
| NM_002926 | 5522.493  | 5283.605  | NM_004076 | 5679.893  | 6477.881  |
| NM_000233 | 1268.103  | 702.86    | NM_007123 | 47122.578 | 47792.082 |
| NM_018697 | 4730.318  | 1867.991  | BG717460  | 4823.443  | 5203.869  |
| AF090116  | 1405.145  | 672.566   | AA778392  | 37202.113 | 39424.758 |
| NM_014030 | 60752.773 | 59900.59  | AI478178  | 8102.323  | 8111.541  |
| NM_004224 | 19087.275 | 30222.066 | AA101279  | 2519.559  | 2799.65   |
| NM_000254 | 18029.547 | 10127.401 | M19154    | 8327.696  | 8951.853  |
| Z21967    | 17036.973 | 12579.107 | AA399410  | 7615.017  | 7749.25   |
| NM_003738 | 1639.122  | 1035.209  | AA137031  | 2792.097  | 2468.393  |
| NM_016185 | 59963.047 | 49075.137 | AA292226  | 7636.829  | 5972.378  |
| AF052693  | 14351.787 | 14513.523 | NM_000500 | 1840.709  | 1834.006  |
| NM_001129 | 58709.848 | 53260.625 | M29873    | 1312.757  | 1549.409  |
| L09100    | 3795.958  | 4047.435  | J04449    | 818.84    | 1150.104  |
| NM_005472 | 6878.193  | 8427.334  | BC007031  | 11936.119 | 13931.147 |
| NM_004313 | 1289.655  | 2051.156  | AF129756  | 28263.371 | 24480.852 |
| NM_013435 | 940.39    | 895.832   | X12492    | 33943.914 | 37984.004 |
| AB020706  | 10002.12  | 9522.326  | NM_017540 | 1812.069  | 1513.027  |
| NM_007166 | 21565.822 | 23813.449 | NM_006755 | 8093.102  | 5415.675  |
| NM_016223 | 58241.18  | 55164.266 | NM_013230 | 4103.672  | 4434.1    |
| NM_002869 | 12726.243 | 8293.74   | X72308    | 23422.373 | 24492.697 |
| NM_018086 | 42644.098 | 46922.609 | NM_005408 | 1864.625  | 2007.978  |
| NM_004161 | 32340.324 | 36207.91  | BC008376  | 46111.723 | 49521.941 |
| NM_001295 | 2300.965  | 3078.113  | X87895    | 557.949   | 870.819   |

|           |           |           |           |           |           |
|-----------|-----------|-----------|-----------|-----------|-----------|
| NM_005161 | 3756.425  | 5352.057  | AB041269  | 7964.288  | 8037.477  |
| AB037749  | 2033.056  | 644.644   | AK024908  | 9285.573  | 9020.075  |
| NM_001462 | 5643.399  | 2145.848  | NM_018270 | 14709.222 | 13791.265 |
| NM_004072 | 3085.968  | 2116.579  | NM_000260 | 59892.742 | 63251.641 |
| AF068286  | 1876.339  | 676.274   | NM_014160 | 5673.291  | 5475.499  |
| AB040957  | 11741.096 | 6640.492  | AF230877  | 26243.275 | 28407.115 |
| NM_006890 | 1260.086  | 739.823   | NM_017668 | 10792.529 | 9806.752  |
| NM_003110 | 7119.212  | 3730.563  | AB033049  | 61345.145 | 57459.082 |
| NM_003612 | 5000.197  | 3887.302  | NM_000406 | 1761.944  | 1785.673  |
| X72308    | 11773.839 | 13898.646 | NM_005682 | 2508.928  | 2370.647  |
| NM_005408 | 2561.336  | 2745.266  | NM_002926 | 3391.64   | 3398.842  |
| BC008376  | 33557.004 | 43364.234 | NM_000233 | 1310.3    | 1401.507  |
| X87895    | 643.401   | 864.589   | NM_018697 | 2936.697  | 3803.426  |
| AB041269  | 4439.218  | 4147.719  | AF090116  | 1697.093  | 1633.788  |
| AK024908  | 12532.216 | 13932.539 | NM_014030 | 59080.484 | 48174.078 |
| NM_018270 | 13801.136 | 11390.067 | NM_004224 | 7337.835  | 10143.481 |
| U06715    | 1810.02   | 1782.655  | Z21967    | 7401.847  | 4905.027  |
| NM_013402 | 11054.208 | 11128.011 | NM_003738 | 1340.181  | 1304.181  |
| NM_002662 | 674.083   | 978.969   | L09100    | 1908.234  | 1765.087  |
| NM_004377 | 14387.122 | 10713.29  | NM_005472 | 2983.781  | 3032.106  |
| AB037815  | 47176.43  | 45572.934 | NM_003645 | 11335.04  | 13831.487 |
| NM_003645 | 20466.563 | 21269.803 | AF263613  | 7718.329  | 9457.906  |
| AF263613  | 13448.091 | 12268.421 | NM_000097 | 2935.579  | 2671.631  |
| NM_000097 | 5275.005  | 5432.328  | NM_001509 | 3889.321  | 4835.669  |
| NM_001509 | 5010.31   | 2095.225  | AK022878  | 10539.1   | 11227.412 |
| AK022878  | 11160.639 | 2126.764  | NM_018099 | 541.097   | 880.27    |
| AF217187  | 10195.997 | 5051.911  | AF217187  | 8839.333  | 10574.313 |
| NM_017750 | 4084.574  | 1733.62   | NM_017750 | 3201.728  | 3236.476  |
| AK027122  | 31716.07  | 24828.18  | AK027122  | 21150.547 | 22602.229 |
| AK026196  | 7328.755  | 5976.992  | AK026196  | 6772.292  | 6900.765  |
| AL137668  | 1357.734  | 814.435   | NM_004977 | 9401.387  | 10965.382 |
| AV704019  | 659.301   | 328.906   | NM_004700 | 3464.181  | 3823.385  |
| NM_004977 | 17173.533 | 18792.947 | NM_006868 | 14956.941 | 13840.994 |
| NM_004888 | 52611.008 | 49200.238 | NM_004161 | 25621.174 | 21632.918 |
| NM_002251 | 1020.851  | 892.777   | NM_001295 | 2123.116  | 2619.135  |
| NM_012283 | 60779.445 | 53698.32  | NM_005161 | 1638.037  | 1721.689  |
| NM_004700 | 2391.914  | 2170.09   | AB037749  | 745.027   | 1010.781  |
| NM_004162 | 35999.086 | 34077.645 | NM_020347 | 709.789   | 1182.795  |
| NM_006868 | 20058.318 | 16854.027 | NM_001462 | 3539.465  | 3690.982  |
| NM_017540 | 4803.303  | 4645.926  | NM_004072 | 2764.239  | 2599.486  |
| NM_006755 | 26513.482 | 31669.033 | AF068286  | 1384.081  | 1198.665  |
| NM_005881 | 6773.874  | 4153.961  | AB040957  | 9541.818  | 8628.707  |
| NM_005794 | 875.276   | 1099.659  | NM_006890 | 1615.263  | 1224.17   |
| L40519    | 2966.011  | 3273.252  | NM_003110 | 4363.745  | 3231.778  |
| NM_004204 | 6972.452  | 7279.777  | NM_003612 | 2197.122  | 1959.947  |
| AK002181  | 3178.218  | 3343.344  | L40519    | 1469.829  | 1398.06   |
| NM_001641 | 40490.309 | 16511.221 | NM_004204 | 4994.204  | 5333.699  |
| BC015750  | 60888.492 | 54095.5   | AK002181  | 2051.832  | 1990.031  |
| AK025769  | 15568.603 | 13910.919 | NM_001641 | 28513.914 | 30703.367 |
| AW945166  | 3882.672  | 2497.447  | BC015750  | 63205.402 | 49864.789 |
| NM_005236 | 13370.029 | 9536.763  | AK025769  | 12180.16  | 12153.816 |
| NM_006384 | 21598.877 | 7544.156  | AW945166  | 3305.857  | 3392.504  |
| NM_013257 | 4829.024  | 2075.622  | NM_005236 | 8883.848  | 7737.447  |



|           |           |           |           |           |           |
|-----------|-----------|-----------|-----------|-----------|-----------|
| AB044546  | 5467.462  | 1441.449  | NM_006384 | 19985.965 | 17669.227 |
| NM_014225 | 61066.371 | 46626.828 | NM_013257 | 4909.969  | 4859.906  |
| AF163473  | 5674.714  | 5903.268  | AB044546  | 1832.2    | 1425.892  |
| NM_006256 | 21311.123 | 18880.742 | NM_014225 | 43144.16  | 37944.68  |
| NM_002846 | 11969.688 | 27224.336 | AF163473  | 3623.452  | 3929.598  |
| NM_002837 | 16119.83  | 14155.187 | NM_006256 | 11533.688 | 10270.173 |
| AL133077  | 48523.996 | 43984.582 | NM_002846 | 10751.807 | 21326.797 |
| AK025211  | 7871.645  | 6819.414  | AL133077  | 32495.168 | 39811.238 |
| CY3Cy5    | 17126.584 | 396.194   | AK025211  | 4665.213  | 5274.884  |
| NM_005456 | 1728.33   | 3217.318  | U06715    | 909.92    | 863.787   |
| AL832550  | 902.435   | 1417.535  | NM_013402 | 3956.727  | 3918.527  |
| AF131798  | 518.994   | 980.148   | NM_002662 | 583.743   | 752.507   |
| AK001731  | 1548.318  | 2580.837  | NM_004377 | 8075.699  | 6462.722  |
| AF052108  | 562.042   | 1247.944  | AB037815  | 30958.346 | 28701.9   |
| AF052176  | 546.955   | 851.077   | NM_000132 | 26219.355 | 28452.055 |
| AF086477  | 993.73    | 1841.155  | NM_001727 | 23526.645 | 23580.332 |
| NM_001412 | 7836.24   | 4612.483  | NM_004076 | 6979.315  | 7976.437  |
| AF095771  | 829.182   | 386.532   | NM_007123 | 44094.023 | 50070.941 |
| NM_015942 | 10882.117 | 10143.021 | BG717460  | 4902.053  | 5174.415  |
| NM_017907 | 10931.283 | 10301.135 | AA778392  | 32646.617 | 40196.324 |
| NM_005456 | 2091.205  | 2197.73   | AI478178  | 6858.857  | 7694.181  |
| NM_006534 | 14953.797 | 17577.135 | AA101279  | 2662.72   | 3319.208  |
| SR1       | 70511.109 | 67825.664 | M19154    | 11936.536 | 11420.426 |
| SR3       | 45363.219 | 53865.895 | AA399410  | 11540.916 | 8972.698  |
| SR5       | 4791.431  | 5279.168  | AA137031  | 3586.044  | 3447.312  |
| SR7       | 5464.54   | 32631.359 | AA292226  | 11324.255 | 10622.445 |
| SR9       | 16711.758 | 3624.676  | NM_000500 | 2014.745  | 2011.366  |
| CY3Cy5    | 15802.06  | 525.981   | M29873    | 1781.372  | 2110.196  |
| U40710    | 240.37    | 708.018   | J04449    | 1390.736  | 1029.065  |
| U58666    | 387.933   | 613.766   | BC007031  | 14336.761 | 13967.55  |
| U03241    | 437.477   | 785.823   | AF129756  | 49050.316 | 45244.063 |
| U62539    | 735.437   | 1054.578  | BC036369  | 4785.205  | 4205.314  |
| AF086110  | 420.138   | 898.475   | X12492    | 45864.664 | 47377.563 |
| NM_016418 | 3605.318  | 6226.247  | NM_017540 | 2335.648  | 1939.744  |
| AK025908  | 10154.566 | 12554.297 | NM_006755 | 8785.498  | 6253.797  |
| AK022204  | 1142.857  | 1103.514  | NM_005881 | 4358.067  | 3511.787  |
| AF086147  | 767.794   | 456.42    | NM_000260 | 61448.695 | 53393.273 |
| AL109716  | 491.546   | 692.985   | NM_014160 | 5635.54   | 6551.87   |
| AK027065  | 3429.973  | 3476.097  | AF230877  | 26535.004 | 32047.1   |
| AL353944  | 1217.178  | 1366.943  | NM_017668 | 8793.653  | 9386.206  |
| S83249    | 493.622   | 730.905   | AB033049  | 61801.09  | 56934.367 |
| AK023569  | 1818.922  | 2386.526  | NM_000406 | 643.124   | 943.826   |
| AF085912  | 398.411   | 618.86    | NM_005682 | 1305.89   | 1778.572  |
| AK001127  | 2173.468  | 2807.018  | NM_002926 | 2045.122  | 1947.208  |
| U79256    | 25970.322 | 42613.086 | NM_000233 | 1207.683  | 1071.021  |
| AK023304  | 467.949   | 685.537   | NM_018697 | 3639.145  | 3811.007  |
| AK023761  | 525.442   | 1200.632  | AF090116  | 2248.142  | 2622.436  |
| AK023963  | 16914.15  | 27034.268 | NM_014030 | 64240.219 | 58807.063 |
| AK022473  | 19596.553 | 40296.293 | NM_004224 | 11102.842 | 14190.009 |
| AK023380  | 795.649   | 1338.302  | NM_000254 | 11775.205 | 9821.473  |
| AK023810  | 1346.559  | 1965.585  | Z21967    | 11241.605 | 9455.917  |
| AK024860  | 940.16    | 1081.102  | NM_003738 | 1911.693  | 1822.675  |
| AF086154  | 2180.318  | 910.865   | NM_012110 | 30294.545 | 33077.441 |

|           |           |           |           |           |           |
|-----------|-----------|-----------|-----------|-----------|-----------|
| AF086205  | 1414.001  | 652.807   | NM_005461 | 561.266   | 689.869   |
| AK026723  | 968.599   | 793.17    | AF052693  | 8380.003  | 8163.931  |
| AF147395  | 3888.925  | 3722.303  | NM_001129 | 30379.898 | 30567.021 |
| AK026447  | 1027.048  | 1375.956  | L09100    | 1789.851  | 2036.018  |
| AF085985  | 475.229   | 485.705   | NM_005472 | 2350.735  | 2309.634  |
| AF086011  | 906.763   | 753.008   | NM_004313 | 889.471   | 719.65    |
| AK025217  | 1549.551  | 2800.022  | NM_013435 | 658.266   | 1037.949  |
| AF087972  | 5027.057  | 6754.002  | AB020706  | 6756.486  | 6842.067  |
| AL137342  | 17922.486 | 25712.402 | NM_007166 | 15891.052 | 16042.316 |
| AF075105  | 2579.476  | 3742.785  | NM_016223 | 63238.52  | 59584.531 |
| AK025102  | 1886.485  | 3403.639  | NM_002869 | 9175.475  | 9754.279  |
| AF086562  | 1769.874  | 2494.012  | NM_018086 | 31072.301 | 35694.395 |
| Y11897    | 453.897   | 855.544   | NM_004161 | 21967.012 | 24291.563 |
| AK021749  | 1038.42   | 1851.58   | NM_001295 | 2026.312  | 2276.782  |
| AJ011980  | 881.818   | 1070.271  | NM_005161 | 2345.292  | 2076.474  |
| AK025669  | 104.83    | 844.333   | AB037749  | 2000.767  | 1780.133  |
| AK022741  | 413.526   | 777.675   | NM_001462 | 5790.246  | 6206.517  |
| NM_002237 | 1853.397  | 2785.095  | NM_004072 | 3591.21   | 3525.094  |
| NM_005117 | 2222.312  | 3046.02   | AF068286  | 2228.458  | 1721.569  |
| AJ007733  | 2441.882  | 2396.4    | AB040957  | 12183.31  | 9432.371  |
| AK021625  | 2013.58   | 1163.239  | NM_006890 | 1479.469  | 1464.131  |
| AK021679  | 1253.79   | 792.168   | NM_003110 | 5919.701  | 5617.096  |
| AK001380  | 3076.961  | 1429.783  | NM_013230 | 4421.412  | 4319.736  |
| AK026753  | 548.67    | 805.401   | X72308    | 14511.468 | 15256.523 |
| AL117553  | 918.064   | 929.546   | NM_005408 | 1077.571  | 1178.029  |
| AK024938  | 343.208   | 498.211   | BC008376  | 26533.182 | 33393.215 |
| AK025312  | 3663.872  | 3819.816  | AB041269  | 3310.06   | 2383.833  |
| AK027205  | 561.939   | 954.637   | AK024908  | 6996.849  | 5209.895  |
| NM_018606 | 757.85    | 1255.641  | NM_018270 | 7711.488  | 7200.237  |
| AK022062  | 1094.891  | 1359.807  | U06715    | 1640.177  | 1271.011  |
| AK026493  | 672.988   | 1175.167  | NM_013402 | 8454.173  | 7624.42   |
| AK002042  | 917.078   | 1772.616  | NM_002662 | 1044.384  | 847.251   |
| AL049268  | 1232.568  | 1725.823  | NM_004377 | 16564.922 | 16478.596 |
| AK025092  | 2394.873  | 3467.448  | AB037815  | 47134.758 | 46680.723 |
| AF130047  | 663.161   | 1200.505  | NM_003645 | 11334.369 | 12160.327 |
| AF085904  | 949.584   | 1128.36   | AF263613  | 8685.753  | 8548.544  |
| Z83944    | 643.983   | 828.749   | NM_000097 | 1902.107  | 1655.163  |
| AF085871  | 2722.807  | 3747.796  | NM_001509 | 4641.89   | 4075.167  |
| AL137284  | 1859.91   | 2572.438  | AK022878  | 10866.59  | 9018.555  |
| AK001013  | 1342.311  | 2167.521  | NM_017750 | 3375.662  | 3696.77   |
| NM_005296 | 3471.566  | 3624.795  | AK027122  | 21673.234 | 19332.492 |
| AF026564  | 1676.986  | 877.308   | AK026196  | 6475.353  | 8146.31   |
| X97301    | 1548.755  | 738.996   | AL137668  | 1151.479  | 916.014   |
| AL110141  | 67366.555 | 60538.594 | NM_013348 | 3355.914  | 3463.901  |
| U80761    | 19150.432 | 23460.305 | NM_004977 | 10664.421 | 12638.225 |
| Y16701    | 3594.989  | 3850.311  | NM_004888 | 39789.219 | 44145.34  |
| M21539    | 753.58    | 1065.979  | NM_012283 | 59646.344 | 54103.375 |
| Y11161    | 7128.42   | 11028.821 | NM_004700 | 1646.134  | 1797.959  |
| AF130117  | 753.915   | 1280.775  | NM_004162 | 15456.713 | 12208.195 |
| AB007861  | 1345.924  | 2247.796  | NM_017540 | 3319.644  | 2569.431  |
| AK024125  | 554.712   | 853.42    | NM_006755 | 14464.238 | 11122.355 |
| AK024761  | 5736.85   | 7991.151  | NM_005881 | 5718.191  | 4776.071  |
| M55536    | 7537.551  | 10401.774 | L40519    | 1342.812  | 1500.331  |

|           |           |           |           |           |           |
|-----------|-----------|-----------|-----------|-----------|-----------|
| AF086067  | 3523.101  | 4432.85   | NM_004204 | 5047.642  | 4031.257  |
| Z70766    | 799.084   | 1334.526  | AK002181  | 2342.986  | 2428.872  |
| AK000660  | 6263.429  | 8335.202  | NM_001641 | 34074.191 | 24064.828 |
| AK026298  | 58.432    | 962.922   | AW945166  | 4502.021  | 3880.676  |
| AL049289  | 697.912   | 938.333   | NM_005236 | 10878.384 | 10218.489 |
| NM_014711 | 1784.883  | 2897.011  | NM_006384 | 17131.316 | 17579.66  |
| AK022015  | 2847.225  | 3679.016  | AB044546  | 1119.107  | 1051.775  |
| D17234    | 762.049   | 1120.84   | NM_014225 | 46090.707 | 49193.09  |
| AK002208  | 12249.595 | 13560.698 | AF163473  | 2283.918  | 2210.795  |
| D63135    | 1529.461  | 692.376   | NM_006256 | 9879.477  | 8379.408  |
| AB033083  | 3775.62   | 1998.571  | NM_002846 | 3707.784  | 12845.056 |
| NM_01782E | 8937.139  | 5826.605  | NM_002837 | 8147.71   | 7306.623  |
| AY007113  | 1054.06   | 546.24    | CY3Cy5    | 5545.801  | 307.514   |
| AF130083  | 6100.963  | 4987.263  | NM_005456 | 1258.66   | 1262.872  |
| AB002437  | 44147.5   | 49778.652 | NM_006534 | 17211.281 | 19415.729 |
| AK024013  | 1138.867  | 1533.71   | AL832550  | 1012.516  | 1535.245  |
| AK023496  | 650.306   | 836.275   | AF131798  | 554.782   | 433.558   |
| AL049471  | 2858.025  | 4215.652  | AK001731  | 3190.647  | 3793.895  |
| AK022250  | 701.283   | 1059.523  | AF052108  | 1613.937  | 1970.991  |
| NM_01959E | 20588.861 | 28738.375 | AF052176  | 905.282   | 1162.038  |
| J05063    | 767.606   | 1064.17   | AF086477  | 1380.699  | 1762.041  |
| NM_01236E | 201.221   | 624.94    | NM_001412 | 8187.646  | 8393.651  |
| AF222904  | 1109.309  | 1448.323  | AF095771  | 966.089   | 1634.615  |
| NM_00622E | 43511.879 | 51550.844 | AF071111  | 1031.344  | 874.633   |
| NM_003254 | 23894.936 | 37962.605 | U00954    | 716.343   | 1083.037  |
| NM_01773C | 6309.903  | 7347.826  | NM_015942 | 13092.767 | 12305.942 |
| NM_01463C | 9947.594  | 10510.989 | NM_017907 | 11476.785 | 8916.857  |
| AF022728  | 1664.966  | 1637.156  | NM_005456 | 2073.907  | 1774.324  |
| AK025813  | 2552.265  | 315.799   | NM_006534 | 16082.735 | 11999.543 |
| AK021829  | 1041.952  | 211.408   | SR1       | 69332.898 | 64022.555 |
| NM_014681 | 918.525   | 323.352   | SR3       | 42366.09  | 35250.422 |
| NM_007182 | 3776.458  | 2359.27   | SR5       | 5025.559  | 4067.913  |
| NM_019063 | 31117.393 | 44796.113 | SR7       | 6462.118  | 36431.383 |
| NM_01433E | 1521.687  | 1965.572  | SR9       | 20670.066 | 3177.083  |
| NM_01245E | 22446.434 | 23887.701 | CY3Cy5    | 8637.8    | 361.828   |
| AB002308  | 647.734   | 816.502   | U84521    | 16088.831 | 20195.068 |
| NM_003324 | 18736.211 | 31592.586 | U03241    | 1144.819  | 1308.25   |
| NM_012143 | 10140.86  | 10803.286 | U62539    | 785.371   | 600.654   |
| NM_00665E | 2802.219  | 3717.641  | AF086110  | 770.276   | 1070.407  |
| AF085892  | 3669.764  | 4677.208  | NM_01641E | 5169.016  | 4181.75   |
| AF075114  | 8422.86   | 12719.617 | AK025908  | 9619.854  | 11979.739 |
| AL359562  | 3383.184  | 4513.681  | AK022204  | 1270.787  | 898.136   |
| AK022218  | 56597.09  | 55467.848 | AF086147  | 620.895   | 763.306   |
| NM_007112 | 3609.414  | 4556.208  | AL109726  | 814.35    | 569.195   |
| AK026037  | 1141.251  | 1519.107  | AK027065  | 4706.582  | 6364.552  |
| S82075    | 1484.63   | 1889.419  | AL353944  | 1221.517  | 1388.686  |
| M34571    | 988.284   | 1110.343  | AK001127  | 2877.206  | 1909.429  |
| M98457    | 453.193   | 703.147   | U79256    | 44763.684 | 39951.145 |
| NM_00324E | 475.58    | 525.559   | AK023761  | 664.508   | 909.218   |
| AK026201  | 7685.388  | 2764.926  | AK023963  | 20758.475 | 20056.445 |
| AB028962  | 1237.634  | 427.781   | AK022473  | 22837.861 | 30757.641 |
| U63041    | 3704.276  | 2171.952  | AK023380  | 618.145   | 613.122   |
| NM_000297 | 13607.225 | 8030.217  | AK023810  | 1578.782  | 1143.984  |

|           |           |           |           |           |           |
|-----------|-----------|-----------|-----------|-----------|-----------|
| AF149019  | 20471.146 | 17995.844 | AK024860  | 925.911   | 843.51    |
| NM_013354 | 1844.026  | 2447.355  | AF086154  | 914.728   | 635.078   |
| AK023954  | 4184.72   | 4984.389  | AF086205  | 1138.129  | 958.663   |
| NM_003930 | 1737.455  | 1362.067  | AK026723  | 632.883   | 900.342   |
| NM_013416 | 5481.707  | 5958.507  | AK024169  | 1376.641  | 1412.093  |
| AB040934  | 1050.744  | 1305.61   | AF147395  | 4568.828  | 6323.661  |
| NM_000598 | 70.364    | 826.503   | AK026447  | 2838.356  | 4406.146  |
| NM_005092 | 788.42    | 1374.618  | AF087967  | 486.243   | 972.283   |
| NM_001883 | 3270.981  | 3962.216  | AF085985  | 1217.453  | 745.738   |
| NM_015722 | 9559.867  | 11604.025 | AF086011  | 909.236   | 604.781   |
| NM_016086 | 2608.99   | 2895.013  | AK025217  | 946.593   | 696.458   |
| NM_004382 | 1436.672  | 1259.348  | AF087972  | 4772.339  | 3246.952  |
| NM_000831 | 1499.717  | 1547.492  | AL137342  | 15222.895 | 12465.406 |
| AF272377  | 4970.838  | 2002.006  | AF075105  | 2592.874  | 2563.847  |
| NM_006569 | 1319.996  | 428.141   | AK025102  | 2422.415  | 2389.9    |
| NM_017795 | 2002.017  | 744.982   | AF086562  | 2063.176  | 2032.735  |
| NM_015216 | 5223.438  | 2631.694  | Y11897    | 637.021   | 747.357   |
| NM_018348 | 3341.726  | 1972.3    | AK021749  | 1570.233  | 1972.326  |
| AF119900  | 15487.46  | 11029.335 | AJ011980  | 780.117   | 1147.826  |
| AF130087  | 3619.582  | 3469.109  | AK025669  | 890.533   | 1024.433  |
| AK027031  | 14591.945 | 13936.925 | AK022741  | 868.77    | 781.887   |
| NM_018383 | 12225.319 | 11840.731 | NM_002237 | 2766.38   | 3608.224  |
| NM_003590 | 8536.767  | 8049.516  | NM_005117 | 4442.827  | 5395.832  |
| AJ278476  | 13716.642 | 14737.26  | AJ007733  | 1816.448  | 2248.214  |
| NM_002358 | 1596.301  | 1476.125  | AK021625  | 3565.277  | 3867.897  |
| NM_012225 | 4225.905  | 4358.872  | AK021679  | 1243.512  | 1875.652  |
| AB014595  | 9189.211  | 10324.694 | AK001380  | 6101.898  | 4368.526  |
| AB024704  | 51051.129 | 52989.43  | AK026753  | 649.518   | 918.243   |
| NM_006322 | 3370.384  | 4089.898  | AL117553  | 632.686   | 776.468   |
| AK002081  | 2843.12   | 3510.647  | AK025312  | 4545.687  | 4808.316  |
| NM_002210 | 6865.463  | 7722.951  | AK027205  | 959.204   | 1520.261  |
| NM_016369 | 519.191   | 653.862   | NM_018606 | 709.459   | 659.612   |
| AF231022  | 52676.285 | 53222.414 | AK022062  | 930.107   | 633.598   |
| NM_005500 | 5070.678  | 1724.345  | AK002042  | 1119.966  | 891.31    |
| U66702    | 56100.625 | 44800     | AL049268  | 1296.191  | 1194.456  |
| AK025582  | 3199.106  | 1498.159  | AK025092  | 2900.506  | 3138.1    |
| NM_003884 | 2656.799  | 1060.508  | AF130047  | 483.253   | 679.205   |
| NM_014888 | 8114.972  | 4202.586  | AF085904  | 711.613   | 1126.594  |
| NM_003344 | 6365.453  | 3046.848  | Z83944    | 996.901   | 1382.824  |
| NM_002772 | 1164.403  | 965.429   | AF085871  | 3166.13   | 3578.62   |
| U82970    | 1284.132  | 926.458   | AL137284  | 2113.716  | 2666.11   |
| NM_005925 | 851.28    | 666.971   | AK001013  | 2084.284  | 2838.573  |
| NM_007173 | 645.476   | 755.573   | NM_005298 | 5219.366  | 4844.911  |
| AJ278478  | 3441.269  | 2763.922  | AK001394  | 1124.426  | 1248.557  |
| NM_014300 | 24935.75  | 25828.924 | AF026564  | 1662.803  | 2316.83   |
| NM_014606 | 1221.047  | 918.136   | X97301    | 1936.799  | 1725.85   |
| Y19188    | 3322.802  | 4113.871  | AL110141  | 67038.758 | 60262.391 |
| NM_014466 | 1704.995  | 2081.899  | AF116636  | 1426.644  | 1016.197  |
| NM_003732 | 11016.571 | 13357.536 | U80761    | 26103.299 | 35276.539 |
| AF216381  | 26927.434 | 38842.602 | Y16701    | 7380.248  | 8427.669  |
| AL137614  | 2025      | 2649.676  | U61100    | 1234.089  | 1032.176  |
| AK023683  | 449.073   | 1004.917  | NM_018582 | 955.932   | 1410.207  |
| AK023093  | 4420.295  | 5089.83   | M21539    | 1245.282  | 1517.721  |

|           |           |           |           |           |           |
|-----------|-----------|-----------|-----------|-----------|-----------|
| AF272373  | 6674.46   | 8637.914  | Y11161    | 6229.431  | 6918.345  |
| NM_016327 | 8880.217  | 10198.316 | AF130117  | 989.307   | 556.85    |
| NM_004985 | 10171.771 | 11474.483 | AB007861  | 2168.875  | 1314.388  |
| AK074832  | 9638.719  | 5481.102  | AK024125  | 1131.72   | 818.834   |
| NM_006235 | 14562.358 | 8670.534  | AK024761  | 7905.083  | 7507.787  |
| AK026353  | 1206.775  | 433.732   | M55536    | 16364.053 | 14856.085 |
| L24123    | 3030.082  | 1979.476  | AF086067  | 5144.983  | 5042.129  |
| D80001    | 2655.972  | 2106.909  | AK000660  | 5163.16   | 5411.056  |
| AK024288  | 2124.718  | 1754.238  | AK026298  | 544.325   | 470.712   |
| NM_006521 | 6687.897  | 4741.625  | AL049289  | 871.69    | 1086.278  |
| NM_002892 | 2274.708  | 1217.962  | NM_014711 | 3000.691  | 3163.981  |
| M62324    | 3057.947  | 2904.264  | AK022015  | 3600.97   | 4324.455  |
| NM_016200 | 29215.707 | 32013.457 | D17234    | 611.548   | 1011.184  |
| BE082230  | 22613.863 | 32195.428 | AK002208  | 15805.825 | 16784.553 |
| NM_018246 | 1652.539  | 1849.598  | D63135    | 1526.576  | 1278.539  |
| NM_007039 | 1457.139  | 1885.861  | AB033083  | 9089.034  | 10350.179 |
| NM_017857 | 8037.212  | 9664.066  | NM_017828 | 10161.798 | 8958.442  |
| NM_006849 | 7465.475  | 9542.336  | AY007113  | 1203.642  | 1115.528  |
| AJ272267  | 1620.165  | 1103.139  | AF130083  | 15426.652 | 13657.003 |
| NM_002676 | 2896.196  | 1688.492  | AL110185  | 66348.656 | 57483.195 |
| NM_002103 | 1518.093  | 1008.627  | NM_002700 | 30099.127 | 31446.939 |
| NM_006665 | 2026.941  | 1072.686  | AB002437  | 63815.539 | 52569.434 |
| AK026256  | 1585.946  | 1300.048  | AK024013  | 1665.482  | 2284.104  |
| NM_000270 | 12045.362 | 10208.953 | AK023496  | 694.415   | 1133.081  |
| U83111    | 861.421   | 654.299   | NM_006777 | 3543.87   | 3709.833  |
| U89277    | 2452.028  | 2325.265  | AK024969  | 6421.744  | 4552.467  |
| AB046837  | 1571.065  | 1461.632  | AL049471  | 3350.588  | 2670.491  |
| AK022332  | 2690.213  | 2394.972  | AK022250  | 712.166   | 735.113   |
| NM_006465 | 819.738   | 775.461   | NM_019598 | 24741.689 | 17544.234 |
| NM_006769 | 12139.556 | 11998.61  | J05063    | 984.536   | 1250.588  |
| NM_001189 | 2052.71   | 2298.538  | NM_012369 | 367.091   | 731.768   |
| NM_006992 | 1584.636  | 2020.371  | AF222904  | 1210.421  | 940.166   |
| AF055009  | 57640.133 | 54679.164 | NM_006225 | 62544.48  | 55653.688 |
| AL365370  | 5488.333  | 6001.893  | NM_003254 | 25022.059 | 23108.662 |
| L08442    | 405.926   | 831.226   | NM_017730 | 7738.394  | 9949.941  |
| AB014593  | 2386.497  | 3134.143  | NM_014630 | 9126.519  | 7458.438  |
| NM_016305 | 6768.41   | 9009.312  | AF022728  | 1168.797  | 1237.349  |
| D12485    | 1557.23   | 1299.802  | AK025813  | 642.684   | 321.517   |
| AK023204  | 1055.92   | 805.617   | NM_014681 | 1169.797  | 1310.948  |
| NM_003449 | 1952.754  | 1439.635  | NM_007182 | 5056.576  | 4003.071  |
| NM_002478 | 1086.931  | 851.962   | NM_019063 | 45230.227 | 48839.961 |
| D28449    | 14198.031 | 12481.4   | NM_014336 | 1868.822  | 1398.224  |
| NM_003281 | 1317.012  | 1149.915  | NM_012456 | 35062.645 | 34698.184 |
| AA460480  | 788.876   | 592.984   | AB002308  | 1323.485  | 989.759   |
| AI298884  | 19931.68  | 20010.354 | NM_003324 | 26685.047 | 30170.789 |
| D87845    | 1109.579  | 1254.307  | NM_012143 | 8591.148  | 7220.676  |
| X53279    | 787.372   | 835.857   | NM_017506 | 630.234   | 875.831   |
| M83254    | 4752.596  | 5752.444  | NM_006658 | 3774.493  | 4928.419  |
| S56770    | 2135.016  | 2139.048  | AF085892  | 5841.894  | 6934.38   |
| AI193606  | 705.776   | 620.386   | AF075114  | 15440.352 | 15443.611 |
| H58872    | 21179.803 | 25553.926 | AL359562  | 4610.051  | 3127.703  |
| J02938    | 1036.183  | 1262.321  | AK022218  | 60046.258 | 56577.848 |
| J04543    | 13045.601 | 15305.005 | NM_007112 | 4899.57   | 4697.358  |

|           |           |           |           |           |           |
|-----------|-----------|-----------|-----------|-----------|-----------|
| S60415    | 1028.219  | 1461.735  | AK026037  | 1529.166  | 1853.822  |
| AA456295  | 4201.311  | 5982.832  | S82075    | 2235.313  | 2178.874  |
| BE733577  | 7668.639  | 9527.601  | M34571    | 1564.985  | 1889.781  |
| AI817942  | 3413.501  | 4313.602  | M98457    | 271.824   | 1395.731  |
| BG762340  | 2122.034  | 1948.768  | AB037745  | 7345.138  | 7914.91   |
| AA009484  | 2422.486  | 3221.388  | NM_017717 | 1607.759  | 1870.32   |
| NM_002044 | 15884.397 | 19413.076 | AK026201  | 5312.769  | 4921.837  |
| AL137262  | 1067.921  | 971.949   | AB028962  | 1902.97   | 2174.32   |
| NM_020437 | 3906.678  | 2599.63   | U63041    | 5408.447  | 7310.108  |
| NM_018643 | 1220.149  | 903.828   | NM_000297 | 26352.953 | 34776.406 |
| NM_016186 | 547.899   | 599.887   | AF149019  | 23789.6   | 26031.178 |
| M30142    | 5969.827  | 3956.1    | NM_013354 | 2243.6    | 2557.385  |
| NM_005018 | 562.785   | 621.563   | AK023954  | 5391.821  | 6366.411  |
| NM_013378 | 16368.629 | 18416.275 | NM_003930 | 3365.426  | 3762.428  |
| NM_001085 | 265.376   | 516.273   | NM_013416 | 7037.268  | 5881.441  |
| NM_006110 | 1669.712  | 1436.31   | AB040934  | 1416.3    | 1506.631  |
| NM_016453 | 1574.985  | 1905.179  | NM_000598 | 1109.651  | 1055.4    |
| AB018301  | 410.389   | 1042.451  | NM_005092 | 1008.058  | 1231.427  |
| NM_017701 | 3415.328  | 5248.542  | NM_001883 | 4933.724  | 5403.413  |
| NM_014226 | 8729.798  | 12215.093 | NM_015722 | 5271.583  | 3374.578  |
| AF142567  | 4347.003  | 5894.119  | NM_000905 | 562.061   | 470.081   |
| NM_006202 | 67471.469 | 66504.984 | NM_016086 | 2856.128  | 3028.517  |
| NM_017410 | 8000.862  | 9724.918  | NM_004382 | 1911.653  | 1916.356  |
| AY009398  | 811.985   | 843.583   | NM_000831 | 2015.428  | 2106.989  |
| NM_002860 | 8775.499  | 6564.053  | NM_014618 | 9724.743  | 10440.666 |
| NM_006169 | 3907.752  | 3520.718  | AA902333  | 26363.488 | 31232.324 |
| NM_001218 | 729.982   | 547.078   | NM_015641 | 13109.009 | 14535.902 |
| NM_014183 | 1297.035  | 827.936   | AF272377  | 3653.779  | 2475.056  |
| AB046780  | 23244.078 | 21132.361 | NM_006569 | 1828.848  | 2155.716  |
| NM_018353 | 3307.388  | 1791.218  | NM_017795 | 10034.977 | 9002.336  |
| NM_003560 | 18345.764 | 15979.111 | NM_015216 | 7519.507  | 7203.134  |
| NM_014403 | 5874.574  | 5956.107  | NM_018348 | 3804.521  | 3556.953  |
| AL050100  | 699.121   | 803.804   | AF119900  | 20828.918 | 24165.863 |
| NM_000748 | 15184.617 | 15713.8   | AF130087  | 6174.52   | 7932.89   |
| NM_004925 | 1386.062  | 1815.501  | AK027031  | 15906.746 | 19100.311 |
| NM_004922 | 6099.848  | 6868.172  | NM_018383 | 16988.512 | 20097.584 |
| NM_002871 | 1056.842  | 1545.343  | NM_003590 | 20215.996 | 25342.988 |
| BE873653  | 66623.609 | 56337.992 | AJ278476  | 16228.967 | 17846.965 |
| NM_006987 | 938.099   | 1385.089  | NM_002358 | 1108.87   | 1155.668  |
| NM_001282 | 7427.096  | 7546.296  | NM_012225 | 3822.223  | 3686.069  |
| NM_016830 | 18632.854 | 21684.342 | AB014595  | 12793.902 | 13433.302 |
| U44105    | 634.868   | 980.387   | AB024704  | 52723.164 | 56630.602 |
| NM_016103 | 2678.053  | 2791.052  | NM_006322 | 3949.941  | 3196.275  |
| AL133654  | 10154.601 | 11564.188 | AK002081  | 2645.672  | 1827.114  |
| L25080    | 12010.592 | 9329.758  | NM_002210 | 7633.636  | 5251.042  |
| NM_003143 | 58137.719 | 48428.133 | NM_016369 | 599.029   | 753.329   |
| AK026289  | 4020.542  | 4072.369  | AF231022  | 51957.066 | 54141.902 |
| NM_003258 | 5304.767  | 4316.586  | NM_005500 | 11057.169 | 11207.788 |
| AL133068  | 5389.012  | 4760.295  | U66702    | 67185.859 | 62307.332 |
| NM_003463 | 3803.476  | 3604.512  | AK025582  | 6232.064  | 6981.036  |
| NM_004944 | 1470.881  | 1863.646  | NM_003884 | 2889.26   | 2547.302  |
| AK024964  | 1327.507  | 1239.382  | NM_014888 | 13637.855 | 10704.468 |
| M20697    | 513.195   | 627.289   | NM_003344 | 13262.351 | 12815.623 |

|           |           |           |           |           |           |
|-----------|-----------|-----------|-----------|-----------|-----------|
| NM_015046 | 2989.942  | 3460.519  | NM_002772 | 1494.247  | 1091.948  |
| NM_002014 | 29547.477 | 34552.48  | U82970    | 1767.251  | 1999.685  |
| NM_002538 | 7501.315  | 7370.456  | NM_005925 | 1474.701  | 1625.816  |
| NM_016585 | 17487.979 | 18888.58  | NM_007173 | 757.701   | 772.992   |
| NM_003333 | 67828.336 | 48643.703 | AJ278478  | 3842.389  | 5051.244  |
| NM_002013 | 18187.25  | 24184.701 | NM_014300 | 27606.609 | 25519.02  |
| NM_006927 | 22523.604 | 31869.352 | NM_014606 | 1425.556  | 1108.839  |
| NM_014601 | 2520.714  | 3106.829  | Y19188    | 2190.506  | 2868.495  |
| NM_017761 | 15764.699 | 16191.704 | NM_014466 | 1771.184  | 2069.291  |
| NM_006928 | 902.716   | 933.712   | NM_003732 | 8406.252  | 7467.734  |
| AF237700  | 1958.275  | 1696.313  | AF216381  | 33994.855 | 42143.84  |
| NM_003449 | 2993.478  | 2849.893  | AL137614  | 4266.944  | 4850.344  |
| NM_002478 | 3059.544  | 3129.289  | AK023683  | 1026.811  | 1297.013  |
| D38163    | 640.387   | 776.425   | AK023093  | 613.063   | 837.824   |
| D28449    | 20060.344 | 18668.572 | AB023163  | 4388.027  | 4716.109  |
| NM_003281 | 1661.483  | 1594.641  | NM_006618 | 6258.071  | 5300.719  |
| AI298884  | 22650.67  | 23213.871 | AF272373  | 5976.451  | 6317.198  |
| D87845    | 1901.992  | 1811.929  | NM_016327 | 11796.849 | 12620.912 |
| X53279    | 701.922   | 617.958   | NM_004985 | 11188.813 | 11180.012 |
| M83254    | 3543.547  | 4222.719  | AK074832  | 31040.455 | 33550.93  |
| S56770    | 1196.506  | 1496.067  | NM_016269 | 1536.538  | 1344.461  |
| AI193606  | 930.504   | 737.058   | NM_006235 | 41280.832 | 39141.227 |
| H58872    | 18010.813 | 16702.148 | AK026353  | 3745.729  | 2873.008  |
| J02938    | 567.512   | 439.288   | L24123    | 14880.193 | 15912.2   |
| J04543    | 5686.814  | 5621.237  | D80001    | 12216.063 | 14587.255 |
| AA456295  | 3518.611  | 4859.969  | AK024288  | 14464.296 | 14000.069 |
| BE733577  | 5771.605  | 6975.264  | NM_006521 | 19326.197 | 17314.836 |
| AI817942  | 4153.982  | 5094.643  | NM_002892 | 9060.874  | 8454.787  |
| BG762340  | 1052.466  | 936.779   | M62324    | 2760.533  | 2432.161  |
| AA009484  | 643.928   | 924.678   | NM_016200 | 32518.277 | 34220.469 |
| AF209930  | 2142.01   | 2630.241  | BE082230  | 28076.662 | 22605.264 |
| AL133109  | 858.052   | 766.829   | AK025929  | 37262.703 | 30857.396 |
| AF203728  | 671.531   | 733.474   | NM_001384 | 2781.08   | 1537.467  |
| NM_018643 | 811.747   | 477.427   | NM_018246 | 1578.498  | 744.449   |
| M30142    | 6974.214  | 3745.248  | NM_007039 | 1816.13   | 1845.255  |
| NM_005018 | 963.886   | 1087.531  | NM_017857 | 10719.384 | 10589.302 |
| NM_013378 | 19286.092 | 21048.545 | NM_006849 | 7246.625  | 7936.046  |
| NM_001085 | 881.143   | 1056.106  | AJ272267  | 3925.901  | 3733.743  |
| NM_006110 | 2715.417  | 2437.403  | NM_000673 | 929.866   | 634.744   |
| NM_016453 | 2047.042  | 1943.615  | NM_002676 | 14888.824 | 12690.305 |
| NM_017701 | 1371.269  | 1504.949  | NM_002103 | 4791.804  | 3629.227  |
| NM_014226 | 3541.341  | 4441.229  | NM_006665 | 7903.386  | 10116.254 |
| AF142567  | 2488.104  | 2985.999  | AK026256  | 4642.309  | 4288.84   |
| NM_005621 | 3035.145  | 3059.187  | NM_000270 | 32558.162 | 30033.375 |
| NM_006202 | 66775.102 | 58702.234 | U83111    | 1823.657  | 1832.034  |
| NM_017410 | 9215.634  | 10513.564 | U89277    | 9252.656  | 11474.698 |
| AY009398  | 577.321   | 940.685   | AB046837  | 3367.951  | 3158.517  |
| D12485    | 4228.279  | 5283.034  | AK026670  | 1180.906  | 1296.049  |
| AK023204  | 2700.636  | 3153.428  | NM_002876 | 2113.059  | 1539.847  |
| NM_001218 | 628.168   | 339.527   | AK022332  | 4981.806  | 6069.047  |
| NM_014183 | 823.362   | 481.067   | NM_006465 | 793.8     | 864.343   |
| AB046780  | 24542.141 | 18465.105 | NM_006769 | 15772.425 | 16144.623 |
| NM_018353 | 3499.828  | 2358.524  | NM_001189 | 2168.966  | 2987.896  |

|           |           |           |           |           |           |
|-----------|-----------|-----------|-----------|-----------|-----------|
| NM_003560 | 16572.947 | 12932.645 | NM_006992 | 3103.982  | 3461.283  |
| NM_014403 | 4939.424  | 4351.567  | AF055009  | 63541.176 | 53961.199 |
| AL050100  | 409.892   | 582.215   | AL365370  | 3164.255  | 3352.881  |
| NM_000748 | 15636.426 | 16415.781 | L08442    | 669.107   | 549.895   |
| NM_004925 | 2849.11   | 2678.441  | AB014593  | 2300.938  | 2978.929  |
| NM_004922 | 7373.957  | 7396.902  | NM_016305 | 6782.645  | 7829.257  |
| NM_002871 | 913.18    | 816.28    | D12485    | 5632.114  | 8034.2    |
| BE873653  | 63538.578 | 54251.348 | AK023204  | 3128.001  | 3572.541  |
| NM_006987 | 268.445   | 629.782   | NM_003449 | 5123.375  | 3251.582  |
| NM_001282 | 6761.475  | 5662.706  | NM_002478 | 7231.183  | 9333.844  |
| NM_016830 | 17529.15  | 19570.127 | D38163    | 1312.238  | 1467.075  |
| U44105    | 988.592   | 1358.285  | NM_004967 | 574.444   | 957.525   |
| NM_016103 | 2586.919  | 3051.729  | D28449    | 29548.676 | 47925.02  |
| AL133654  | 7259.146  | 6860.621  | NM_003281 | 2445.713  | 2546.803  |
| AL137262  | 3529.371  | 4205.614  | AA460480  | 2654.09   | 2953.49   |
| NM_020437 | 6821.934  | 7927.605  | AI298884  | 27510.596 | 26649.191 |
| L25080    | 6497.781  | 4489.676  | D87845    | 3999.545  | 6392.311  |
| NM_003143 | 57605.32  | 43501.961 | X53279    | 1550.042  | 1881.119  |
| AK026289  | 3644.913  | 2628.051  | M83254    | 13196.085 | 18396.637 |
| NM_003258 | 4352.875  | 3035.732  | S56770    | 3115.823  | 4303.038  |
| AL133068  | 5027.776  | 4449.429  | AI193606  | 1069.848  | 931.612   |
| NM_003463 | 2669.57   | 1751.443  | H58872    | 28467.195 | 43366.324 |
| NM_004944 | 1154.615  | 943.026   | J02938    | 1771.044  | 2108.666  |
| AK024964  | 1485.729  | 677.871   | J04543    | 19237.332 | 20837.117 |
| M20697    | 752.249   | 741.618   | S60415    | 1585.948  | 1657.485  |
| NM_015046 | 3051.722  | 3270.906  | AA456295  | 3414.933  | 4074.154  |
| NM_002014 | 32255.049 | 37645.09  | BE733577  | 6109.821  | 6833.796  |
| NM_002538 | 9962.078  | 8289.132  | AI817942  | 3865.275  | 3208.858  |
| NM_016585 | 19980.635 | 18435.193 | BG762340  | 2477.007  | 1778.953  |
| NM_003333 | 67970.695 | 49274.434 | AA009484  | 1161.631  | 1408.112  |
| NM_002013 | 14656.046 | 15784.607 | NM_002044 | 18468.809 | 17127.418 |
| NM_006927 | 12297.667 | 13373.339 | AL137262  | 3487.832  | 2919.894  |
| NM_014601 | 2572.281  | 3082.232  | NM_020437 | 5296.311  | 3287.194  |
| NM_017761 | 24681.617 | 31424.863 | NM_018643 | 2546.699  | 1925.897  |
| NM_006928 | 1588.884  | 1430.854  | NM_016186 | 815.82    | 599.287   |
| AF237700  | 2866.288  | 2143.659  | M30142    | 8555.368  | 5436.961  |
| NM_002860 | 18573.674 | 18726.684 | NM_005018 | 2639.607  | 3538.25   |
| NM_006169 | 13245.633 | 14295.525 | NM_013378 | 26741.348 | 29299.691 |
| D28449    | 17370.301 | 14661.286 | NM_001085 | 2032.65   | 2286.832  |
| NM_003281 | 1922.613  | 1604.185  | NM_006110 | 3173.286  | 2098.55   |
| AA460480  | 1225.771  | 805.716   | NM_016453 | 3072.396  | 4052.984  |
| AI298884  | 12828.574 | 6053.601  | NM_017701 | 3010.342  | 2975.852  |
| D87845    | 1097.843  | 948.101   | NM_014226 | 6898.293  | 7432.703  |
| M83254    | 2680.853  | 3139.992  | AF142567  | 3707.221  | 4363.215  |
| S56770    | 2030.841  | 2337.517  | NM_005621 | 485.842   | 629.669   |
| AI193606  | 827.789   | 1188.901  | NM_006202 | 63787.016 | 59386.633 |
| H58872    | 16613.926 | 14799.155 | NM_017410 | 10743.175 | 11673.085 |
| J02938    | 1029.796  | 645.266   | AY009398  | 866.346   | 849.817   |
| J04543    | 11057.777 | 6579.79   | NM_002860 | 17165.967 | 17903.203 |
| AA456295  | 3118.647  | 2591.682  | NM_006169 | 12765.716 | 8474.78   |
| BE733577  | 3857.972  | 3358.843  | NM_014183 | 1985.626  | 1069.731  |
| AI817942  | 1048.027  | 981.542   | AB046780  | 35433.313 | 44852.543 |
| BG762340  | 528.107   | 498.78    | NM_018353 | 7694.063  | 6053.092  |



|           |           |           |           |           |           |
|-----------|-----------|-----------|-----------|-----------|-----------|
| AA009484  | 2832.818  | 2610.128  | NM_003560 | 27519.979 | 36079.941 |
| AF209930  | 2203.904  | 2736.454  | NM_014403 | 8958.852  | 9611.717  |
| AL133109  | 905.189   | 967.648   | AL050100  | 2175.036  | 3417.242  |
| AF203728  | 944.547   | 694.791   | NM_000748 | 27703.516 | 33862.766 |
| AB051826  | 825.717   | 1024.195  | NM_004925 | 4925.603  | 7804.61   |
| M30142    | 3189.536  | 1599.928  | NM_004922 | 10715.51  | 13810.789 |
| NM_005018 | 532.658   | 483.654   | NM_002871 | 1117.18   | 949.23    |
| NM_013378 | 8783.405  | 9470.644  | BE873653  | 67536.484 | 63208.824 |
| NM_001085 | 546.248   | 518.899   | NM_006987 | 1715.115  | 1166.017  |
| NM_006110 | 1470.5    | 1215.236  | NM_001282 | 9036.803  | 6207.767  |
| NM_016453 | 2341.413  | 1740.404  | NM_016830 | 20477.615 | 13784.343 |
| NM_017701 | 794.428   | 618.8     | U44105    | 1603.462  | 1744.387  |
| NM_014226 | 2952.841  | 2693.733  | NM_016103 | 3384.487  | 3514.472  |
| NM_006202 | 66164.039 | 54768.949 | AL133654  | 9185.911  | 7948.011  |
| NM_017410 | 6943.852  | 5981.367  | L25080    | 44668.941 | 41741.523 |
| AY009398  | 1006.901  | 495.126   | NM_003143 | 65043.871 | 46291.203 |
| X99680    | 17803.242 | 17871.283 | AK026289  | 8597.833  | 7225.291  |
| NM_001448 | 1154.635  | 1094.963  | NM_003258 | 8886.419  | 12079.285 |
| NM_016072 | 1184.422  | 1102.953  | AL133068  | 33615.035 | 36576.34  |
| AK026349  | 1726.748  | 1978.228  | NM_003463 | 9763.106  | 8682.399  |
| NM_014733 | 2174.339  | 1893.052  | NM_004944 | 2391.113  | 2802.296  |
| D12485    | 4503.988  | 5387.353  | AK024964  | 2298.373  | 2397.077  |
| AK023204  | 2739.823  | 2491.396  | M20697    | 1587.534  | 1209.955  |
| NM_003449 | 4462.381  | 4240.968  | NM_015046 | 7305.464  | 9096.151  |
| NM_002478 | 5263.45   | 5252.383  | NM_002014 | 40350.047 | 47092.645 |
| NM_003234 | 2057.408  | 1033.182  | NM_002538 | 15514.327 | 14970.768 |
| NM_004858 | 2123.078  | 1286.981  | NM_016585 | 26148.602 | 30598.785 |
| S78774    | 2828.336  | 2523.365  | NM_003333 | 65035.73  | 52034.246 |
| NM_004922 | 4521.576  | 3628.818  | NM_002013 | 21269.736 | 27147.473 |
| BE873653  | 61187.656 | 50468.008 | NM_006927 | 27597.139 | 33334.867 |
| NM_006987 | 1066.785  | 1032.828  | NM_014601 | 3105.878  | 3620.115  |
| NM_001282 | 5553.208  | 5130.14   | NM_017761 | 26659.574 | 21003.051 |
| NM_016830 | 14082.592 | 10561.354 | NM_006928 | 1290.824  | 1253.628  |
| AL133654  | 7809.351  | 7150.288  | AF237700  | 3968.583  | 2730.826  |
| AL137262  | 2195.239  | 2624.861  | NM_003449 | 4682.637  | 5152.215  |
| NM_020437 | 5422.74   | 5472.984  | NM_002478 | 5693.544  | 5916.4    |
| NM_004010 | 1055.192  | 1281.055  | D38163    | 1950.198  | 2394.943  |
| NM_018643 | 3910.629  | 3206.466  | D28449    | 34588.961 | 46202.32  |
| NM_016186 | 967.668   | 691.052   | NM_003281 | 2913.579  | 5028.779  |
| NM_006928 | 626.241   | 610.409   | AA460480  | 2335.88   | 1941.31   |
| AF237700  | 531.351   | 334.312   | AI298884  | 29576.941 | 31411.906 |
| NM_002860 | 8433.243  | 7162.088  | D87845    | 3557.205  | 4481.86   |
| NM_006169 | 3640.659  | 2823.984  | X53279    | 1615.327  | 2077.795  |
| NM_001218 | 931.403   | 496.363   | M83254    | 27004.674 | 15933.913 |
| NM_014183 | 1387.264  | 729.361   | S56770    | 3475.883  | 5050.155  |
| AB046780  | 27074.314 | 14699.807 | AI193606  | 1035.845  | 940.538   |
| NM_018353 | 5359.698  | 2218.762  | H58872    | 23920.723 | 24676.15  |
| NM_003560 | 22666.193 | 20531.309 | J02938    | 1159.957  | 1603.722  |
| AL050100  | 1342.304  | 1783.094  | J04543    | 19476.777 | 21898.75  |
| NM_020139 | 3935.557  | 3831.145  | S60415    | 1417.415  | 1668.114  |
| AL080207  | 611.229   | 780.837   | AA456295  | 3258.425  | 3011.48   |
| NM_000748 | 20131.139 | 19363.057 | BE733577  | 6873.965  | 7325.615  |
| NM_000048 | 2555.392  | 2853.354  | AI817942  | 3243.025  | 3341.126  |

|           |           |           |           |           |           |
|-----------|-----------|-----------|-----------|-----------|-----------|
| AF104032  | 58063.16  | 50828.332 | BG762340  | 2617.37   | 2072.016  |
| U53531    | 963.671   | 674.627   | AF209930  | 2138.751  | 1959.003  |
| NM_004925 | 3681.563  | 3716.705  | AF203728  | 936.131   | 1323.378  |
| AF209930  | 1049.324  | 1182.679  | NM_004010 | 574.115   | 419.429   |
| AL133109  | 932.034   | 717.055   | NM_018643 | 3012.935  | 1660.282  |
| AF203728  | 1210.356  | 839.312   | NM_016186 | 684.129   | 548.53    |
| L25080    | 14753.465 | 11491.672 | M30142    | 7142.966  | 4469.322  |
| NM_003143 | 61334.625 | 40883.07  | NM_005018 | 5148.1    | 2871.807  |
| AK026289  | 5526.677  | 2977.781  | NM_013378 | 32829.496 | 41227.867 |
| NM_003258 | 6509.891  | 3373.585  | NM_001085 | 1830.993  | 2321.289  |
| AL133068  | 20315.691 | 13524.163 | NM_006110 | 3426.118  | 1762.149  |
| NM_004944 | 1794.768  | 1997.658  | NM_016453 | 3215.505  | 3989.706  |
| AK024964  | 2149.538  | 1362.529  | NM_017701 | 3027.034  | 3004.406  |
| M20697    | 2260.983  | 1953.372  | NM_014226 | 8463.842  | 10324.599 |
| NM_015046 | 6120.272  | 4685.981  | AF142567  | 3258.257  | 3502.995  |
| NM_002014 | 36751.109 | 37067.359 | NM_006202 | 67223.805 | 61639.199 |
| NM_002538 | 11488.138 | 8297.266  | NM_017410 | 9571.342  | 7214.278  |
| NM_016585 | 19240.189 | 19439.631 | AY009398  | 893.604   | 1011.083  |
| NM_003333 | 67081.883 | 52125.813 | D12485    | 4496.206  | 3738.309  |
| NM_002013 | 2171.553  | 3015.615  | AK023204  | 3260.152  | 3059.589  |
| NM_006927 | 24890.967 | 18537.135 | NM_001218 | 2332.681  | 2590.157  |
| NM_014601 | 3952.033  | 3126.455  | AB046780  | 36618.098 | 35740.371 |
| NM_017761 | 24169.895 | 24856.027 | NM_018353 | 8635.356  | 5337.846  |
| CY3Cy5    | 7839.861  | 67.308    | NM_016373 | 627.335   | 450.121   |
| NM_006325 | 15116.095 | 15599.587 | NM_003560 | 25872.092 | 25755.459 |
| AF088024  | 2099.301  | 1597.973  | NM_014403 | 8098.141  | 6115.224  |
| AK025887  | 2717.478  | 2479.442  | AL050100  | 1942.722  | 1835.829  |
| AB037719  | 3233.331  | 3421.723  | NM_000748 | 25544.139 | 27694.238 |
| AK024694  | 3902.651  | 4785.106  | NM_004925 | 5139.33   | 5831.704  |
| AF086229  | 4859.924  | 4845.115  | NM_004922 | 12101.111 | 13570.21  |
| AK026143  | 7113.933  | 7118.338  | NM_002871 | 1135.783  | 919.294   |
| AL137578  | 771.86    | 793.926   | BE873653  | 62512.531 | 58758.359 |
| AL110252  | 2729.518  | 2637.147  | NM_006987 | 1593.131  | 1323.461  |
| AL050143  | 1551.614  | 1325.914  | NM_001282 | 11019.335 | 9832.111  |
| AL080059  | 2631.869  | 2922.67   | NM_016830 | 23139.361 | 26763.578 |
| AL080219  | 2990.703  | 3925.479  | U44105    | 1266.86   | 1448.863  |
| AK026709  | 1082.421  | 1264.48   | NM_016103 | 3133.74   | 2340.373  |
| AK024165  | 1870.94   | 2350.636  | AL133654  | 9281.06   | 8380.693  |
| NM_006325 | 8664.014  | 8613.521  | AL137262  | 3531.799  | 4031.952  |
| SR2       | 57173.773 | 50507.863 | NM_020437 | 6756.954  | 6565.295  |
| SR4       | 21173.84  | 19866.424 | L25080    | 47952.063 | 43895.426 |
| SR6       | 2789.67   | 2006.598  | NM_003143 | 47116.582 | 37296.094 |
| SR8       | 10769.204 | 36454.301 | AK026289  | 10176.455 | 9531.882  |
| SR10      | 41384.32  | 13673.061 | NM_003258 | 8764.157  | 8385.254  |
| CY3Cy5    | 9952.573  | 48.311    | AL133068  | 55750.523 | 48692.504 |
| L35592    | 15117.042 | 15092.744 | NM_003463 | 8438.229  | 7159.259  |
| NM_012079 | 2754.42   | 1972.656  | NM_004944 | 1960.747  | 2081.646  |
| AL360274  | 26004.064 | 34041.293 | AK024964  | 1922.422  | 1071.367  |
| NM_014050 | 22399.693 | 26209.215 | M20697    | 1522.637  | 1134.209  |
| AF085854  | 2392.57   | 2268.077  | NM_015046 | 5861.047  | 7555.347  |
| AF074997  | 1321.345  | 1385.107  | NM_002014 | 39986.816 | 44164.816 |
| NM_014068 | 2470.179  | 2922.881  | NM_002538 | 12057.042 | 8372.218  |
| NM_017814 | 7840.45   | 8377.008  | NM_016585 | 23879.629 | 26149.836 |

|           |           |           |           |           |           |
|-----------|-----------|-----------|-----------|-----------|-----------|
| AF074996  | 2824.258  | 2684.389  | NM_003333 | 62829.996 | 53269.992 |
| AF131811  | 5301.06   | 5416.11   | NM_002013 | 20584.439 | 29378.539 |
| AF293026  | 19985.746 | 19212.086 | NM_006927 | 25142.553 | 32280.088 |
| AF236158  | 3088.506  | 4392.313  | NM_014601 | 4711.739  | 6318.34   |
| AF217986  | 9134.59   | 10221.617 | NM_017761 | 28517.625 | 37920.227 |
| AK026320  | 1604.102  | 2012.104  | NM_006928 | 1208.645  | 670.633   |
| AL137530  | 1664.544  | 2199.567  | AF237700  | 3148.348  | 2222.525  |
| NM_015953 | 8035.273  | 8457.843  | NM_002860 | 18472.355 | 21209.457 |
| AF147310  | 1611.027  | 2120.469  | NM_006169 | 12646.378 | 12360.316 |
| AK024775  | 6524.158  | 7607.735  | D38163    | 13180.709 | 16872.732 |
| AK025562  | 1456.611  | 1760.096  | NM_004967 | 4005.982  | 3054.362  |
| AK026699  | 2485.256  | 3075.057  | D28449    | 25143.352 | 35506.68  |
| AK025182  | 1288.916  | 1212.817  | NM_003281 | 4161.336  | 5768.361  |
| AK025589  | 14812.629 | 13988.535 | AA460480  | 6390.232  | 7550.47   |
| AK026734  | 1146.022  | 979.698   | AI298884  | 33494.711 | 42439.352 |
| AL137616  | 3309.357  | 3712.838  | D87845    | 3056.549  | 3034.448  |
| AK021752  | 2486.877  | 1867.923  | X53279    | 1014.411  | 904.089   |
| AL050012  | 1110.824  | 1288.74   | M83254    | 9950.305  | 10412.651 |
| AL109706  | 16054.008 | 16276.075 | S56770    | 3200.607  | 2629.409  |
| AK001118  | 2202.802  | 2473.932  | AI193606  | 1203.529  | 1261.051  |
| AF035291  | 68944.492 | 71699.031 | H58872    | 25651.557 | 29754.172 |
| AK026291  | 19413.648 | 19624.238 | J02938    | 1537.919  | 935.562   |
| AK021924  | 7234.635  | 5425.387  | J04543    | 17745.268 | 20021.775 |
| AL049285  | 912.71    | 619.628   | S60415    | 741.483   | 982.416   |
| AL117520  | 4880.193  | 4913.338  | AA456295  | 4177.491  | 4179.863  |
| AL049303  | 2708.414  | 2839.204  | BE733577  | 5603.783  | 4435.339  |
| AL080208  | 1014.772  | 1103.768  | AI817942  | 3531.301  | 3843.454  |
| L23851    | 1033.284  | 1256.155  | BG762340  | 2868.462  | 2770.644  |
| AK022310  | 1002.113  | 1058.931  | AA009484  | 971.293   | 1249.885  |
| AK021784  | 895.35    | 1053.136  | AF209930  | 1719.491  | 1264.844  |
| AF230800  | 4305.037  | 4125.313  | AL133109  | 926.64    | 592.309   |
| NM_018520 | 3786.913  | 3831.183  | AF203728  | 900.707   | 1061.616  |
| AK026647  | 1352.506  | 1492.501  | AB051826  | 684.634   | 756.154   |
| AK022152  | 3931.787  | 4467.207  | M30142    | 8548.144  | 6594.289  |
| AK027027  | 2945.948  | 3029.122  | NM_005018 | 2167.065  | 2876.766  |
| NM_014911 | 1851.037  | 1925.485  | NM_013378 | 33951.488 | 35172.875 |
| AF009289  | 14935.596 | 13300.562 | NM_001085 | 2341.27   | 2425.147  |
| AF040247  | 2510.38   | 2464.439  | NM_006110 | 4834.379  | 5872.596  |
| AF056439  | 1457.11   | 1499.335  | NM_016453 | 4267.417  | 5875.663  |
| AF007835  | 1131.789  | 1346.522  | NM_017701 | 2925.02   | 2279.551  |
| AF009303  | 7412.283  | 9623.042  | NM_014226 | 9578.186  | 7576.218  |
| NM_004474 | 8010.562  | 8755.648  | AF142567  | 3840.008  | 3758.6    |
| AF056449  | 4562.499  | 3860.345  | NM_005621 | 490.445   | 697.68    |
| AK021463  | 1122.258  | 932.416   | NM_006202 | 57788.848 | 53888.934 |
| AK021698  | 1428.056  | 1042.112  | NM_003391 | 569.252   | 841.048   |
| AK001082  | 7070.922  | 7460.472  | NM_017410 | 11917.359 | 15234.259 |
| AK001871  | 1413.024  | 1463.68   | AY009398  | 717.231   | 1352.794  |
| AK021521  | 1549.835  | 1143.578  | X99680    | 16880.648 | 18147.699 |
| AK021743  | 11235.014 | 10992.972 | NM_001448 | 2224.397  | 2911.677  |
| AK024144  | 13668.259 | 13727.061 | NM_016072 | 14146.461 | 16000.22  |
| Y08959    | 2094.47   | 2315.062  | AK026349  | 1404.389  | 1405.772  |
| NM_005346 | 36514.965 | 44472.996 | NM_014733 | 1946.942  | 1632.778  |
| NM_005343 | 56251.281 | 65119.82  | D12485    | 4692.044  | 4113.506  |

|           |           |           |           |           |           |
|-----------|-----------|-----------|-----------|-----------|-----------|
| AF196865  | 4585.52   | 4691.714  | AK023204  | 3066.541  | 2936.976  |
| AJ008141  | 852.614   | 1107.873  | NM_003449 | 4941.468  | 5093.242  |
| AF147432  | 6358.91   | 6714.926  | NM_002478 | 7051.943  | 6614.157  |
| AK024690  | 3349.039  | 3178.899  | NM_003234 | 5297.66   | 2603.362  |
| AK023250  | 12052.545 | 12974.898 | NM_004858 | 4411.555  | 2190.265  |
| AK024882  | 4409.923  | 5011.354  | S78774    | 12761.234 | 15112.769 |
| NM_014062 | 32029.248 | 30740.932 | NM_004922 | 17164.771 | 17819.752 |
| NM_006304 | 66104.602 | 70391.32  | NM_002871 | 1230.486  | 966.77    |
| X74804    | 1794.178  | 1829.198  | BE873653  | 61432.324 | 60714.406 |
| AF293367  | 7352.604  | 7194.063  | NM_006987 | 1743.931  | 1914.649  |
| AF086231  | 8067.778  | 7791.911  | NM_001282 | 10787.536 | 8666.769  |
| AK001494  | 6279.501  | 5667.995  | NM_016830 | 21413.123 | 19028.932 |
| AL133438  | 7095.908  | 6094.718  | U44105    | 1346.273  | 1425.11   |
| AK024978  | 26614.43  | 31920.904 | NM_016103 | 3610.856  | 4144.083  |
| U12897    | 3918.624  | 3562.212  | AL133654  | 9140.503  | 8222.673  |
| NM_020357 | 23835.344 | 25064.18  | AL137262  | 4084.557  | 4538.425  |
| AK026836  | 3455.516  | 3385.175  | NM_020437 | 6044.979  | 3666.265  |
| T59562    | 49061.563 | 53291.281 | X87888    | 539.641   | 668.723   |
| NM_018219 | 2053.749  | 2575.163  | NM_018643 | 3107.772  | 2887.109  |
| AK026368  | 903.636   | 933.216   | NM_016186 | 715.149   | 1075.674  |
| U62822    | 27774.404 | 5594.692  | NM_006928 | 1240.61   | 974.448   |
| AK057143  | 14516.306 | 16994.035 | AF237700  | 2112.212  | 1111.011  |
| NM_015594 | 51399.566 | 49624.582 | NM_002860 | 21500.076 | 25771.436 |
| AK024399  | 812.885   | 1002.057  | NM_006169 | 19629.49  | 16972.941 |
| AF056423  | 6316.879  | 7044.021  | NM_001218 | 4459.491  | 4915.549  |
| K01884    | 1088.96   | 1293.353  | NM_014183 | 2989.431  | 4570.774  |
| U00962    | 36923.848 | 33672.344 | AB046780  | 41863.641 | 52498.012 |
| NM_000522 | 502.278   | 1178.362  | NM_018353 | 7412.694  | 3953.994  |
| AK026130  | 46791.695 | 45295.379 | NM_003560 | 27043.777 | 28267.174 |
| NM_012480 | 10041.123 | 9812.476  | NM_014403 | 9601.176  | 9914.137  |
| NM_003830 | 846.466   | 1119.119  | AL050100  | 2675.807  | 3490.229  |
| NM_000842 | 1274.296  | 1299.385  | NM_020139 | 6283.541  | 8018.856  |
| NM_015642 | 1998.914  | 1946.162  | AL080207  | 981.171   | 1104.535  |
| NM_004640 | 25702.922 | 31618.955 | NM_000748 | 22873.762 | 20155.197 |
| NM_016222 | 15204.118 | 15147.088 | NM_000048 | 5169.819  | 5483.673  |
| AB037823  | 9327.65   | 10735.558 | AF104032  | 54804.926 | 49248.859 |
| NM_015380 | 25137.834 | 25653.699 | U53531    | 947.906   | 856.171   |
| BE254485  | 6092.476  | 6568.839  | NM_004925 | 3868.196  | 3548.485  |
| NM_002732 | 1169.552  | 1155.809  | AF209930  | 2684.535  | 2240.222  |
| AK022694  | 2625.025  | 2670.426  | AL133109  | 1707.766  | 1785.668  |
| AK021893  | 6698.341  | 8664.527  | AB051826  | 682.415   | 600.53    |
| NM_001048 | 16200.686 | 19562.527 | L25080    | 45095.238 | 44472.316 |
| NM_001506 | 3050.566  | 4688.376  | NM_003143 | 60372.332 | 52835.742 |
| AK026497  | 9990.5    | 10280.81  | AK026289  | 9295.418  | 8013.375  |
| BE958139  | 3643.342  | 3746.988  | NM_003258 | 7198.247  | 5118.938  |
| AF085359  | 1392.51   | 1235.698  | AL133068  | 34293.512 | 31702.846 |
| AL080060  | 36527.656 | 40104.988 | NM_003463 | 7589.259  | 4228.931  |
| NM_005267 | 6014.232  | 6188.939  | NM_004944 | 2577.514  | 3113.332  |
| U80763    | 1143.078  | 1576.831  | AK024964  | 3075.495  | 1430.058  |
| AF086017  | 2487.619  | 2492.242  | M20697    | 2174.618  | 2785.358  |
| NM_005780 | 19706.41  | 17762.033 | NM_015046 | 6511.499  | 6072.404  |
| NM_003285 | 1534.806  | 1664.581  | NM_002014 | 49830.172 | 48649.832 |
| NM_000888 | 14995.895 | 14622.711 | NM_002538 | 15008.943 | 14776.78  |

|           |           |           |           |           |           |
|-----------|-----------|-----------|-----------|-----------|-----------|
| NM_000595 | 45904.223 | 53140.145 | NM_016585 | 26111.736 | 35015.133 |
| X99663    | 14045.188 | 15533.14  | NM_003333 | 60760.824 | 58890.395 |
| NM_016552 | 11560.062 | 15855.826 | NM_002013 | 18818.025 | 17375.822 |
| AK025340  | 746.722   | 855.826   | NM_006927 | 24603.324 | 24573.611 |
| NM_003565 | 5293.319  | 6042.39   | NM_014601 | 3506.835  | 3489.042  |
| NM_004841 | 4383.182  | 4315.617  | NM_017761 | 27718.289 | 27991.85  |
| NM_004114 | 722.065   | 761.646   | CY3Cy5    | 6380.678  | 88.825    |
| NM_018440 | 14596.33  | 19898.281 | NM_006325 | 15458.86  | 16112.418 |
| AK025470  | 6485.887  | 4850.012  | AF088024  | 1641.739  | 1779.878  |
| M35410    | 7051.65   | 7178.759  | AK025887  | 946.535   | 1087.533  |
| AB023227  | 3813.834  | 4192.901  | AB037719  | 2890.161  | 2741.74   |
| NM_005776 | 37655.832 | 39811.402 | AK024694  | 3097.215  | 3468.461  |
| AK023071  | 13574.223 | 14690.08  | AF086229  | 537.416   | 493.266   |
| NM_002632 | 857.75    | 1002.641  | AK026143  | 5750.626  | 4578.902  |
| NM_001953 | 69265.016 | 70493.742 | AL137578  | 634.967   | 888.456   |
| NM_001406 | 803.74    | 848.041   | AL110252  | 2981.128  | 2754.376  |
| NM_002292 | 5653.782  | 6303.683  | AL050143  | 1603.934  | 1488.238  |
| NM_000166 | 2213.686  | 1669.76   | AL080059  | 1149.771  | 1012.752  |
| AF305200  | 1261.173  | 1604.146  | AL080219  | 3322.459  | 3397.755  |
| NM_014583 | 748.241   | 421.398   | AK026709  | 1361.534  | 1650.297  |
| NM_006613 | 29419.896 | 26608.502 | AK024165  | 762.353   | 771.795   |
| NM_004638 | 27712.039 | 28857.627 | NM_006325 | 16333.462 | 17984.521 |
| L40027    | 8160.403  | 8263.046  | SR2       | 58497.609 | 63897.805 |
| NM_003718 | 62429.43  | 71317.852 | SR4       | 22162.928 | 26073.201 |
| NM_007062 | 4235.897  | 4423.593  | SR6       | 3212.846  | 3447.397  |
| NM_014180 | 30002.207 | 34017.031 | SR8       | 11058.313 | 41857.547 |
| NM_017706 | 3863.912  | 4079.073  | SR10      | 37334.223 | 16459.152 |
| AF334406  | 2608.385  | 2929.698  | CY3Cy5    | 7122.2    | 115.5     |
| NM_017444 | 16631.51  | 16946.311 | L35592    | 13024.077 | 11553.181 |
| NM_018025 | 2885.653  | 3126.359  | NM_012079 | 2072.385  | 1716.738  |
| NM_015995 | 14434.464 | 14790.792 | AL360274  | 25374.434 | 25081.289 |
| NM_003804 | 24248.238 | 24752.189 | NM_014050 | 23978.551 | 29813.561 |
| NM_018453 | 13450.422 | 14274.078 | AF085854  | 3533.14   | 3466.628  |
| NM_016108 | 11060.659 | 10315.766 | AF074997  | 2071.028  | 1952.844  |
| S49432    | 8053.013  | 6004.36   | NM_014068 | 1550.065  | 1305.232  |
| D86984    | 4605.159  | 5039.784  | NM_017814 | 9583.481  | 7836.936  |
| NM_015958 | 1169.609  | 923.155   | AF074996  | 4628.263  | 4289.769  |
| AF217974  | 9916.976  | 9945.249  | AF131811  | 6342.69   | 4651.647  |
| NM_001910 | 5086.059  | 4469.721  | AF293026  | 16644.055 | 12297.004 |
| NM_001905 | 10956.376 | 12375.062 | AF236158  | 1540.196  | 1170.159  |
| NM_012198 | 16338.046 | 18279.555 | AF217986  | 9230.777  | 8894.916  |
| NM_003368 | 9187.973  | 11534.81  | AK026320  | 1970.983  | 1972.94   |
| AB040886  | 2927.913  | 3824.177  | AL137530  | 3564.147  | 3503.192  |
| NM_001460 | 968.126   | 964.255   | NM_015953 | 7195.865  | 7809.248  |
| AB029020  | 7896.656  | 8207.787  | AF147310  | 1882.86   | 2232.649  |
| AK022759  | 7677.555  | 8675.166  | AK024775  | 7488.183  | 8867.661  |
| NM_012333 | 23450.471 | 25519.857 | AK025562  | 2105.777  | 2142.208  |
| AF217798  | 5226.099  | 5728.999  | AK026699  | 2589.911  | 2975.812  |
| AF161472  | 8022.414  | 9088.295  | AK025182  | 1564.967  | 1321.462  |
| NM_015873 | 10117.104 | 9774.783  | AK025589  | 8187.507  | 9342.731  |
| NM_000377 | 11370.521 | 11121.675 | AK026734  | 1433.19   | 1361.525  |
| NM_006818 | 2818.428  | 2563.722  | AL137616  | 5947.238  | 6015.878  |
| NM_016823 | 10456.752 | 9769.441  | AK021752  | 2495.71   | 2388.282  |

|           |           |           |           |           |           |
|-----------|-----------|-----------|-----------|-----------|-----------|
| AL570170  | 4642.753  | 4652.539  | AL050012  | 1640.603  | 1318.824  |
| D56495    | 3343.104  | 3109.94   | AL109706  | 18955.313 | 17330.334 |
| U09410    | 7240.044  | 6106.292  | AK001118  | 2337.48   | 2312.251  |
| NM_020229 | 3738.342  | 3140.505  | AF035291  | 67017.945 | 66683.805 |
| NM_001186 | 11572.249 | 10266.94  | AK026291  | 16014.15  | 15186.856 |
| NM_004502 | 9820.485  | 10014.256 | AK021924  | 1244.935  | 1089.2    |
| AF000560  | 16874.754 | 18669.084 | AL049285  | 1825.423  | 1070.645  |
| NM_013282 | 16996.082 | 15929.057 | AL117520  | 6450.68   | 6957.643  |
| NM_005777 | 18849.383 | 22886.934 | AL049303  | 4210.799  | 4433.737  |
| NM_012345 | 8272.069  | 9876.358  | AL080208  | 1578.984  | 2184.916  |
| U94387    | 438.216   | 1128.112  | L23851    | 1399.714  | 1929.344  |
| NM_015001 | 29163.182 | 33813.441 | AK022310  | 1197.849  | 1278.482  |
| NM_019027 | 3754.286  | 4765.183  | AK021784  | 1389.793  | 1475.621  |
| NM_016107 | 16647.529 | 16069.688 | AF230800  | 4957.083  | 5097.252  |
| NM_002567 | 48724.137 | 46805.656 | NM_018520 | 4177.32   | 4427.218  |
| AF225422  | 35123.711 | 34597.828 | AK026647  | 2225.356  | 2554.809  |
| AB040960  | 28602.244 | 32922.184 | AK022152  | 5323.56   | 6065.563  |
| NM_015946 | 6131.848  | 6116.84   | AK097417  | 944.498   | 662.668   |
| NM_006303 | 24590.088 | 18907.682 | AK027027  | 2532.871  | 2574.022  |
| AK026904  | 11912.754 | 11680.317 | NM_014911 | 2819.127  | 2736.735  |
| AB002364  | 1902.676  | 1671.259  | AF009289  | 12505.455 | 12432.42  |
| NM_003793 | 1549.988  | 1579.873  | AF040247  | 2825.461  | 2112.313  |
| NM_001985 | 10484.027 | 8896.3    | AF056439  | 2439.662  | 2519.975  |
| NM_000102 | 6869.76   | 6675.089  | AF007835  | 3017.859  | 3768.564  |
| NM_002490 | 27967.256 | 28403.998 | AF009303  | 8436.496  | 9451.321  |
| BE563532  | 5178.64   | 5240.689  | NM_004474 | 10498.323 | 11438.217 |
| NM_001916 | 27697.426 | 30630.053 | AF056449  | 5908.847  | 6533.473  |
| NM_002491 | 2973.036  | 2817.434  | AK001033  | 2813.406  | 3441.825  |
| NM_014820 | 22356.109 | 21332.156 | AK001781  | 836.967   | 1056.639  |
| NM_005035 | 7501.479  | 7613.048  | AK021463  | 1204.991  | 1076.142  |
| NM_019014 | 20007.975 | 23482.273 | AK021698  | 2519.182  | 2357.293  |
| NM_002097 | 46258.051 | 46763.734 | AK001082  | 14901.266 | 17051.906 |
| X04706    | 33644.969 | 36903.523 | AK001871  | 1476.618  | 1680.4    |
| NM_018039 | 2304.42   | 2035.606  | AK021521  | 1041.248  | 1284.289  |
| NM_006494 | 25202.184 | 24986.377 | AK021743  | 27500.902 | 32570.801 |
| X52343    | 12665.869 | 12830.096 | AK024144  | 15767.923 | 16138.991 |
| NM_005853 | 5001.551  | 4466.119  | Y08959    | 4175.97   | 4351.784  |
| X99681    | 1958.57   | 1873.294  | NM_005346 | 42409.293 | 49636.434 |
| NM_003120 | 27405.279 | 24937.139 | NM_005343 | 63904.816 | 59335.145 |
| X52360    | 10990.905 | 11271.451 | AB032985  | 1523.024  | 1953.256  |
| NM_002636 | 61364.746 | 50116.836 | AF196865  | 5401.328  | 6158.852  |
| NM_016494 | 62524.992 | 58776     | AJ008114  | 66761.016 | 68722.758 |
| NM_020384 | 9468.994  | 9123.729  | AJ008141  | 1622.507  | 1435.38   |
| NM_006058 | 54490.023 | 55166.367 | AF147432  | 6645.805  | 7260.457  |
| NM_006628 | 25070.537 | 26454.596 | AK024690  | 3570.841  | 3735.097  |
| M97496    | 64417.844 | 76789.273 | AK024882  | 4993.409  | 5062.533  |
| NM_002309 | 971.513   | 930.3     | NM_014062 | 33376.664 | 38959.816 |
| AK026074  | 4954.484  | 4834.329  | AL109720  | 807.313   | 759.581   |
| NM_003172 | 13964.324 | 12717.497 | NM_006304 | 65985.602 | 73400.148 |
| NM_004809 | 14112.96  | 13307.119 | X74804    | 2112.347  | 2058.868  |
| AA903183  | 3608.415  | 2867.508  | AF293367  | 6698.729  | 7427.438  |
| H41522    | 14683.253 | 15664.575 | AF086231  | 8573.981  | 9966.578  |
| AA460291  | 49675.832 | 49643.129 | AK001494  | 5620.553  | 5934.704  |

|           |           |           |           |           |           |
|-----------|-----------|-----------|-----------|-----------|-----------|
| BI821333  | 24003.936 | 27399.783 | AL133438  | 6655.224  | 7378.66   |
| X51841    | 65879.539 | 67963.523 | AK024978  | 42657.699 | 49732.797 |
| AF051344  | 63376.469 | 61767.488 | U12897    | 3914.066  | 4504.461  |
| BG506100  | 20744.93  | 23512.721 | AJ227894  | 887.043   | 924.209   |
| X53586    | 3583.345  | 3465.294  | NM_020357 | 28211.457 | 31520.672 |
| M17176    | 3320.549  | 3491.757  | AK026836  | 4595.369  | 4246.338  |
| M26576    | 1419.392  | 1257.657  | T59562    | 63105.707 | 52878.18  |
| M32972    | 20253.053 | 19642.529 | NM_018219 | 3264.666  | 3388.292  |
| D11151    | 1281.738  | 913.959   | AK026368  | 993.804   | 1084.959  |
| D89854    | 2913.684  | 2495.673  | NM_014114 | 4581.113  | 5872.468  |
| M13207    | 3951.476  | 4265.6    | U62822    | 25311.67  | 7014.086  |
| X14885    | 1196.558  | 1300.943  | AF056423  | 9503.367  | 10034.252 |
| M97815    | 2419.662  | 2450.019  | U00956    | 830.056   | 1039.311  |
| NM_003001 | 5326.515  | 5097.297  | X04293    | 1883.428  | 1514.579  |
| NM_012400 | 1465.04   | 1391.449  | AK026475  | 1781.654  | 1884.913  |
| NM_005384 | 4147.406  | 3873.497  | K01884    | 2014.211  | 2194.825  |
| NM_006850 | 690.846   | 629.623   | U00962    | 57133.496 | 57342.051 |
| AB013103  | 1597.335  | 1674.967  | NM_000522 | 1062.874  | 1191.993  |
| AF019225  | 8231.964  | 8369.174  | AK026130  | 60705.672 | 63143.32  |
| Z36803    | 24435.316 | 26655.332 | NM_012480 | 12724.891 | 13346.302 |
| NM_013371 | 1476.727  | 1553.1    | NM_003830 | 1416.32   | 1468.609  |
| NM_000707 | 19821.027 | 22623.617 | NM_000842 | 1382.743  | 1643.071  |
| AF202092  | 30301.025 | 36540.277 | NM_015642 | 2412.298  | 2206.358  |
| NM_003201 | 21226.49  | 18848.033 | NM_004640 | 29599.553 | 35118.066 |
| AB011139  | 8895.515  | 8177.352  | NM_002901 | 1336.293  | 1655.098  |
| NM_006919 | 5557.747  | 5920.912  | NM_016222 | 13633.617 | 16945.822 |
| AK022625  | 54624.109 | 53797.266 | AB037823  | 10097.708 | 13230.045 |
| NM_005425 | 2175.393  | 2081.235  | NM_015380 | 26437.91  | 32338.664 |
| AK023084  | 21803.998 | 23587.154 | BE254485  | 5741.708  | 8140.278  |
| AK025588  | 23052.652 | 26074.051 | NM_002732 | 1610.884  | 1790.84   |
| NM_003188 | 8625.951  | 8850.093  | AK022694  | 3131.8    | 4391.113  |
| NM_007118 | 2391.631  | 2315.786  | BE958139  | 3069.871  | 3115.706  |
| U59431    | 28649.98  | 32223.828 | AF085359  | 1806.884  | 1803.06   |
| U49349    | 3892.465  | 4109.443  | AF086516  | 2501.762  | 3136.08   |
| NM_020152 | 7572.702  | 7285.222  | D86978    | 20090.75  | 21543.766 |
| NM_013404 | 8145.73   | 8682.112  | AL080060  | 63833.672 | 78405.32  |
| AF300648  | 726.929   | 1084.796  | NM_005267 | 10529.875 | 13418.147 |
| NM_002364 | 890.012   | 1156.218  | U80763    | 854.259   | 990.847   |
| NM_003966 | 1627.937  | 1890.272  | AF086017  | 2811.499  | 3177.219  |
| BC012333  | 21162.664 | 19688.838 | NM_005780 | 26764.27  | 34544.348 |
| AF237952  | 14438.336 | 15286.072 | NM_003285 | 3540.196  | 3001.843  |
| AL079287  | 4620.84   | 4787.216  | NM_000888 | 13157.459 | 14345.7   |
| NM_014427 | 11396.581 | 13787.498 | NM_000595 | 54279.117 | 53053.371 |
| AB046769  | 12261.151 | 14941.244 | X99663    | 23186.09  | 26356.666 |
| NM_015922 | 18810.58  | 20530.891 | NM_016552 | 19395.58  | 25986.711 |
| NM_020381 | 7524.348  | 8174.904  | AK025340  | 2232.604  | 2366.033  |
| NM_002957 | 19345.271 | 19333.703 | NM_003565 | 5928.388  | 7544.138  |
| NM_018106 | 14764.811 | 16080.53  | NM_004841 | 4271.183  | 4786.153  |
| NM_003725 | 6653.022  | 8964.769  | NM_004114 | 1378.6    | 1421.728  |
| BE899154  | 4541.358  | 4322.715  | NM_018440 | 14776.016 | 21816.682 |
| NM_004863 | 9239.204  | 11393.283 | AK025470  | 2308.081  | 2339.823  |
| U15688    | 5804.647  | 6622.11   | M35410    | 8769.235  | 11064.305 |
| NM_018448 | 18552.742 | 19685.975 | AB023227  | 7133.748  | 7652.283  |

|           |           |           |           |           |           |
|-----------|-----------|-----------|-----------|-----------|-----------|
| NM_018184 | 19954.412 | 24079.313 | NM_004041 | 6152.048  | 6002.899  |
| AB046823  | 2899.4    | 3008.688  | AK022888  | 8365.477  | 6704.198  |
| NM_004929 | 2696.544  | 2592.626  | AK024484  | 12957.169 | 13213.566 |
| NM_004662 | 1365.908  | 1240.494  | NM_002632 | 1229.338  | 1502.962  |
| NM_016639 | 67028.453 | 65845.094 | NM_001953 | 64318.59  | 82985.555 |
| U61739    | 35422.465 | 35625.238 | NM_001406 | 1282.83   | 1393.688  |
| AJ132089  | 2566.948  | 2407.34   | NM_002292 | 12542.357 | 14362.861 |
| U92819    | 11567.743 | 11659.721 | NM_000166 | 2531.101  | 3146.326  |
| AB020626  | 4740.054  | 4512.541  | AF305200  | 2749.458  | 2748.278  |
| NM_002036 | 38916.797 | 36248.246 | NM_006613 | 34209.375 | 33628.289 |
| NM_014305 | 6803.819  | 6500.765  | NM_004638 | 39136.43  | 41220.25  |
| U87972    | 6793.047  | 7560.084  | NM_005373 | 825.215   | 1120.166  |
| NM_017925 | 7658.605  | 8455.94   | L40027    | 8501.543  | 9019.218  |
| AK022208  | 32414.713 | 32191.875 | NM_003718 | 63205.957 | 57689.457 |
| NM_003171 | 17964.656 | 14252.23  | NM_007062 | 2567.138  | 2448.96   |
| NM_006437 | 31652.799 | 31367.742 | NM_002010 | 809.857   | 974.75    |
| NM_017890 | 10926.601 | 8728.513  | NM_014180 | 32113.809 | 39061.992 |
| AK021654  | 9649.182  | 9096.519  | NM_017706 | 3917.729  | 4248.894  |
| NM_016481 | 3483.558  | 3819.167  | AF334406  | 3259.211  | 3669.052  |
| NM_003925 | 20093.348 | 22144.506 | NM_017444 | 15371.845 | 16571.473 |
| Z15114    | 17803.084 | 17338.451 | NM_018025 | 3240.342  | 3818.019  |
| AB040812  | 55569.957 | 51648.648 | NM_015999 | 14920.15  | 16906.037 |
| NM_006285 | 19854.789 | 21270.33  | NM_003804 | 31030.15  | 36380.461 |
| NM_000215 | 9855.675  | 10405.457 | NM_018453 | 13182.969 | 12559.132 |
| AK027148  | 38807.055 | 40440.809 | NM_004708 | 65978.766 | 65987.594 |
| NM_005084 | 9686.321  | 9422.84   | NM_016001 | 24750.666 | 24354.922 |
| NM_007283 | 19957.469 | 19044.521 | NM_016108 | 10561.341 | 9629.716  |
| NM_006111 | 16503.717 | 16915.768 | AL137722  | 1557.869  | 1403.148  |
| AK026071  | 24797.963 | 27712.842 | S49432    | 20475.197 | 21348.945 |
| NM_006628 | 24068.588 | 27564.707 | D86984    | 6479.268  | 6845.417  |
| M97496    | 62582.32  | 68886.438 | NM_015959 | 1783.866  | 2121.711  |
| NM_002309 | 2953.189  | 5369.355  | AF217974  | 16405.482 | 16015.776 |
| NM_003172 | 13850.464 | 15646.757 | NM_001910 | 4512.544  | 4762.296  |
| NM_004809 | 13106.049 | 13665.253 | AK023354  | 732.041   | 744.399   |
| AA903183  | 2891.573  | 2497.331  | NM_001909 | 12943.941 | 17134.893 |
| H41522    | 11852.174 | 7987.018  | NM_012198 | 15502.254 | 18600.59  |
| AA460291  | 48666.043 | 48744.586 | NM_003368 | 12497.388 | 15130.187 |
| BI821333  | 23929.59  | 24884.592 | AB040886  | 3155.085  | 4204.728  |
| X51841    | 65446.301 | 69087.711 | NM_001460 | 1078.99   | 1103.827  |
| AF051344  | 58422.887 | 53176.801 | AB029020  | 5809.457  | 5462.38   |
| BG506100  | 20025.1   | 19539.426 | AK022759  | 7224.403  | 7423.318  |
| X53586    | 3717.867  | 3976.938  | NM_012333 | 22762.396 | 26356.629 |
| M17176    | 2516.399  | 2589.705  | AF217798  | 5913.754  | 4925.619  |
| M26576    | 1595.832  | 1042.656  | AF161472  | 8591.626  | 7900.829  |
| M32972    | 19381.693 | 17779.092 | AL133642  | 21309.334 | 20439.313 |
| D89854    | 2375.294  | 2006.455  | AB011154  | 5031.656  | 5010.6    |
| M13207    | 4090.468  | 4146.343  | AF124432  | 4041.079  | 4130.911  |
| X14885    | 963.269   | 1082.547  | NM_006330 | 45100.496 | 49979.102 |
| M97815    | 2146.658  | 2147.406  | NM_015873 | 12894.137 | 12421.776 |
| AF085893  | 3548.739  | 4045.156  | NM_000377 | 12825.826 | 12761.68  |
| NM_003102 | 1517.606  | 1388.215  | NM_006818 | 4143.66   | 3994.031  |
| NM_006850 | 1013.122  | 706.14    | NM_016823 | 11642.952 | 11399.197 |
| AF019225  | 8688.031  | 9694.363  | AL570170  | 5824.647  | 5064.202  |



|           |           |           |           |           |           |
|-----------|-----------|-----------|-----------|-----------|-----------|
| Z36803    | 26065.979 | 25159.402 | D56495    | 2124.618  | 1685.038  |
| AF202092  | 31271.543 | 32778.348 | U09410    | 6251.616  | 7564.133  |
| NM_003201 | 18340.729 | 14249.932 | NM_020229 | 5601.551  | 6823.845  |
| AB011139  | 8650.517  | 7280.447  | NM_001186 | 11295.865 | 14153     |
| NM_006919 | 4237.473  | 4604.823  | NM_004502 | 12799.102 | 13598.558 |
| AK022625  | 53902.859 | 51941.383 | AF000560  | 17067.238 | 20269.791 |
| NM_005425 | 6975.35   | 5580.017  | NM_013282 | 7144.491  | 10144.563 |
| AK023084  | 19138.32  | 18886.373 | NM_005777 | 21747.193 | 31008.109 |
| AK025588  | 23267.895 | 26489.834 | NM_012345 | 10445.432 | 11606.121 |
| NM_003188 | 9679.615  | 9700.622  | U94387    | 1011.553  | 926.315   |
| NM_007118 | 2211.12   | 2139.836  | NM_005826 | 51809.164 | 51629.316 |
| U59431    | 30718.223 | 31541.807 | NM_004592 | 8208.704  | 8256.197  |
| U49349    | 2892.546  | 2859.592  | NM_015001 | 39906.156 | 45256.867 |
| NM_020152 | 6448.693  | 5809.391  | NM_019027 | 2862.827  | 2846.495  |
| NM_013404 | 6309.648  | 7003.013  | NM_016107 | 17056.932 | 17635.238 |
| NM_002364 | 924.27    | 1144.194  | NM_002567 | 49113.996 | 50750.75  |
| NM_003966 | 3036.95   | 2558.471  | NM_001404 | 8463.958  | 8661.192  |
| NM_020384 | 11723.778 | 11097.057 | NM_001605 | 49710.629 | 52739.574 |
| NM_006058 | 58631.07  | 50737.836 | AF225422  | 42901.34  | 46811.633 |
| AL079287  | 4921.631  | 4847.553  | AB040960  | 27848.369 | 22266.664 |
| AB046769  | 11629.99  | 13801.408 | NM_015946 | 6951.446  | 7867.355  |
| NM_015922 | 21608.215 | 23037.141 | NM_006303 | 26352.563 | 23938.994 |
| NM_003725 | 5860.815  | 6549.81   | AK026904  | 7155.749  | 8324.347  |
| BE899154  | 4576.569  | 4711.759  | AB002364  | 1389.858  | 1284.208  |
| NM_004863 | 8629.473  | 6993.278  | NM_001985 | 9043.249  | 10429.416 |
| AB032963  | 1031.684  | 1039.396  | NM_000102 | 8761.551  | 9600.456  |
| U15688    | 5869.998  | 5136.95   | NM_002490 | 25891.719 | 30748.521 |
| NM_018448 | 16716.025 | 14576.325 | BE563532  | 4632.966  | 5348.051  |
| NM_018184 | 16263.109 | 17012.875 | NM_001916 | 24067.723 | 26877.664 |
| AB046823  | 2408.05   | 2754.522  | NM_002491 | 2546.033  | 3000.389  |
| NM_004929 | 2555.629  | 2737.449  | NM_015425 | 9366.517  | 9782.681  |
| NM_004662 | 1726.36   | 1399.288  | NM_015153 | 13592.006 | 13668.25  |
| NM_016639 | 64512.512 | 58661.313 | AB032966  | 60654.531 | 53360.629 |
| U61739    | 38643.109 | 38701.371 | M26747    | 3095.424  | 3081.744  |
| AJ132089  | 1647.549  | 2146.123  | NM_014820 | 21431.592 | 20751.264 |
| U92819    | 9647.269  | 9728.813  | NM_005035 | 8074.007  | 7872.548  |
| AB020626  | 4966.604  | 4901.654  | NM_019014 | 15721.677 | 17081.811 |
| NM_002036 | 44179.316 | 42374.836 | NM_002097 | 49019.051 | 48761.215 |
| NM_012400 | 2407.402  | 2117.255  | X04706    | 41879.523 | 45729.504 |
| NM_005384 | 5939.119  | 5237.019  | NM_018039 | 1938.139  | 2112.076  |
| U87972    | 5364.612  | 6800.87   | NM_006494 | 27507.447 | 26543.402 |
| NM_017925 | 8728.064  | 9658.595  | X52343    | 15353.899 | 14691.025 |
| AK022208  | 32136.154 | 32155.387 | NM_005853 | 3967.635  | 3272.825  |
| NM_003171 | 16617.006 | 14200.24  | X99681    | 4234.489  | 3709.214  |
| NM_006437 | 27606.797 | 29888.959 | NM_003120 | 29015.875 | 26192.582 |
| NM_017890 | 5927.224  | 5590.143  | X52360    | 18047.043 | 17335.414 |
| AK021654  | 5933.108  | 6694.285  | NM_002636 | 65352.605 | 63067.449 |
| NM_016481 | 3547.902  | 3244.822  | NM_016494 | 63184.23  | 67436.547 |
| NM_003925 | 19173.867 | 19827.75  | NM_020384 | 8688.36   | 10677.577 |
| Z15114    | 16436.174 | 17000.041 | NM_006628 | 31824.604 | 42708.961 |
| AB040812  | 51408.492 | 46357.152 | M97496    | 64005.984 | 66169.133 |
| NM_017625 | 1832.933  | 1496.002  | NM_002309 | 4089.259  | 4022.639  |
| NM_001348 | 31867.102 | 35503.297 | AK026074  | 6823.188  | 7059.312  |

|           |           |           |           |           |           |
|-----------|-----------|-----------|-----------|-----------|-----------|
| NM_000215 | 7746      | 7417.662  | NM_003172 | 14186.522 | 14359.92  |
| AK027148  | 41947.742 | 41370.566 | NM_004809 | 21138.092 | 20518.695 |
| NM_005084 | 11888.437 | 13708.896 | AA903183  | 3421.352  | 3733.919  |
| NM_007283 | 14880.72  | 12968.956 | H41522    | 20909.334 | 20110.027 |
| NM_006111 | 16735.283 | 15057.688 | AA460291  | 59103.336 | 57828.465 |
| AK026071  | 25436.191 | 24534.244 | BI821333  | 21371.414 | 25164.373 |
| BC012333  | 22107.807 | 19739.557 | X51841    | 60957.793 | 68362.227 |
| AF237952  | 15287.962 | 12245.792 | AF051344  | 61126.852 | 59791.805 |
| NM_002309 | 885.848   | 732.546   | BG506100  | 23265.104 | 27910.512 |
| NM_003172 | 13936.246 | 13913.993 | M26576    | 1618.537  | 1778.092  |
| NM_004809 | 13648.372 | 13431.616 | M32972    | 21606.068 | 20062.545 |
| AA903183  | 4919.959  | 3568.795  | D11151    | 1441.985  | 931.437   |
| H41522    | 11462.345 | 12016.929 | D89854    | 2715.429  | 2677.747  |
| AA460291  | 46296.305 | 46319.68  | M13207    | 4150.984  | 3856.545  |
| BI821333  | 22523.369 | 24495.453 | X14885    | 1775.734  | 1981.239  |
| X51841    | 65474.656 | 66694.602 | M97815    | 3411.408  | 3331.582  |
| AF051344  | 64604.742 | 51704.828 | NM_003001 | 5446.687  | 6147.083  |
| BG506100  | 19073.16  | 20126.23  | NM_012400 | 2444.459  | 2721.992  |
| X53586    | 2948.875  | 3506.153  | NM_006850 | 1490.379  | 1833.742  |
| M17176    | 2419.456  | 2492.072  | AB013103  | 2351.629  | 2673.638  |
| M26576    | 1252.063  | 1067.604  | AF019225  | 10418.821 | 11386.263 |
| M32972    | 19674.016 | 18555.094 | Z36803    | 28572.385 | 30228.701 |
| D89854    | 2785.727  | 2917.937  | NM_013371 | 1790.492  | 1950.504  |
| M13207    | 3376.345  | 3821.81   | NM_000707 | 22257.275 | 23413.152 |
| X14885    | 3581.15   | 3782.082  | AF202092  | 33109.613 | 40029.988 |
| M97815    | 6882.313  | 6272.385  | NM_003201 | 21189.293 | 17223.658 |
| AF085893  | 4649.239  | 4918.664  | AB011139  | 10351.407 | 8881.599  |
| NM_003102 | 3355.976  | 2623.353  | NM_006919 | 4825.71   | 5560.823  |
| NM_014305 | 8098.977  | 5998.054  | AK022625  | 54196.422 | 55062.727 |
| AB011139  | 8501.43   | 7907.851  | NM_005425 | 3967.431  | 4970.361  |
| AK022625  | 50539.234 | 49505.27  | AK023084  | 29824.039 | 32878.805 |
| NM_005425 | 2201.318  | 1666.211  | NM_003188 | 11643.953 | 14030.739 |
| AK023084  | 19594.531 | 18777.121 | NM_007118 | 2168.833  | 2667.417  |
| AK025588  | 22437.889 | 22832.424 | U59431    | 53607.117 | 57362.402 |
| NM_003188 | 6969.871  | 6346.765  | U49349    | 5401.316  | 4804.582  |
| NM_007118 | 1930.41   | 1774.275  | NM_020152 | 8282.487  | 6361.835  |
| U59431    | 35283.32  | 31578.977 | NM_013404 | 8391.144  | 8113.234  |
| U49349    | 4170.324  | 3436.116  | NM_002364 | 1075.086  | 772.842   |
| NM_020152 | 6841.51   | 5896.044  | NM_003966 | 1895.123  | 2257.76   |
| NM_013404 | 6700.695  | 7090.381  | BC012333  | 18152.191 | 16996.998 |
| AF300648  | 5381.426  | 4846.485  | AF237952  | 14711.009 | 13971.157 |
| NM_006157 | 3948.073  | 3694.422  | AL079287  | 4381.15   | 5469.77   |
| NM_002364 | 557.546   | 604.645   | NM_014427 | 16105.552 | 17327.365 |
| NM_003966 | 1696.116  | 1649.642  | AB046769  | 14979.751 | 16216.5   |
| AK024443  | 62899.289 | 65636.234 | NM_015922 | 19607.707 | 21328.104 |
| X06710    | 4956.701  | 5058.821  | NM_020381 | 6733.959  | 7709.701  |
| AK000896  | 7030.314  | 6466.994  | NM_002957 | 22179.139 | 22066.604 |
| NM_003872 | 4016.986  | 3265.584  | NM_018106 | 14105.826 | 16860.725 |
| NM_020384 | 5748.208  | 5973.538  | NM_003725 | 5290.383  | 7881.277  |
| NM_006058 | 52011.273 | 44315.176 | BE899154  | 4434.157  | 4735.347  |
| NM_006628 | 23217.139 | 19949.904 | NM_004863 | 8931.293  | 10193.208 |
| M97496    | 66811.93  | 58503.996 | AB032963  | 1927.957  | 2427.97   |
| AF297866  | 12998.798 | 12428.383 | U15688    | 10820.128 | 13259.622 |

|           |           |           |           |           |           |
|-----------|-----------|-----------|-----------|-----------|-----------|
| NM_002864 | 5097.427  | 4084.816  | NM_018448 | 21296.826 | 26097.35  |
| NM_017817 | 7791.805  | 7041.309  | NM_018184 | 17562.104 | 20046.414 |
| NM_018184 | 18129.453 | 17609.693 | AB046823  | 3276.395  | 3589.743  |
| AB046823  | 2457.914  | 2374.729  | NM_004929 | 3475.861  | 3998.62   |
| NM_004929 | 2737.149  | 2718.915  | NM_004662 | 1747.576  | 1950.335  |
| NM_004662 | 2571.816  | 2186.909  | NM_016639 | 60504.625 | 64523.727 |
| NM_016639 | 63641.758 | 63021.602 | U61739    | 53316.289 | 57334.23  |
| U61739    | 41204.723 | 42849.41  | AJ132089  | 2047.523  | 2129.382  |
| AJ132089  | 3130.056  | 3290.544  | U92819    | 11233.141 | 11811.919 |
| U92819    | 12149.162 | 11122.31  | AB020626  | 8435.474  | 8961.606  |
| AB020626  | 6003.416  | 5106.048  | NM_002036 | 60256.004 | 61184.18  |
| NM_002036 | 43534.328 | 43002.617 | NM_014305 | 6926.651  | 7015.92   |
| NM_012400 | 2551.773  | 2446.496  | NM_012123 | 33601.637 | 30038.561 |
| NM_005384 | 7401.391  | 6620.914  | U87972    | 8405.074  | 9361.468  |
| NM_006850 | 921.328   | 631.776   | NM_017925 | 9110.597  | 10168.868 |
| AB013103  | 1971.831  | 1915.529  | AK022208  | 35589.953 | 34739.34  |
| AF019225  | 7725.769  | 7363.439  | NM_003171 | 14407.571 | 12049.289 |
| Z36803    | 25511.123 | 25994.748 | NM_006437 | 29420.99  | 31211.09  |
| NM_013371 | 1303.677  | 960.375   | NM_017890 | 6711.37   | 7048.226  |
| NM_000707 | 13764.139 | 12135.916 | AK021654  | 6263.372  | 7136.316  |
| AF202092  | 18068.318 | 14075.448 | NM_016481 | 3225.269  | 2387.649  |
| NM_003201 | 11735.064 | 7115.732  | NM_003925 | 22868.123 | 24740.859 |
| NM_006111 | 14715.173 | 15326.639 | Z15114    | 21780.768 | 24428.453 |
| AK026071  | 21631.174 | 23439.906 | AB040812  | 56090.754 | 50647.961 |
| BC012333  | 22154.645 | 22447.994 | NM_017625 | 1215.551  | 1127.814  |
| AF237952  | 15205.587 | 14230.188 | NM_006285 | 15319.3   | 14668.757 |
| AL079287  | 6777.722  | 6069.334  | NM_003656 | 65475.699 | 57735.676 |
| NM_014427 | 11681.566 | 11950.676 | NM_001348 | 36226.051 | 42124.707 |
| AB046769  | 11251.477 | 10644.168 | NM_000215 | 10226.916 | 10799.42  |
| NM_015922 | 13129.93  | 12273.066 | AK027148  | 46694.297 | 44275.508 |
| NM_020381 | 7189.378  | 6874.714  | NM_005084 | 11740.356 | 10861.882 |
| NM_002957 | 19693.361 | 18547.438 | NM_007283 | 17773.596 | 16061.056 |
| NM_018106 | 13379.641 | 12866.374 | NM_006111 | 15385.631 | 15607.286 |
| NM_003725 | 5043.941  | 5352.001  | AK026071  | 31811.594 | 35403.453 |
| BE899154  | 4048.836  | 4193.174  | NM_006628 | 30234.896 | 33131.418 |
| NM_004863 | 7999.905  | 7732.806  | M97496    | 63756.758 | 58624.137 |
| AK024573  | 5498.517  | 5445.89   | NM_002309 | 1116.147  | 984.091   |
| NM_002299 | 8241.793  | 8212.87   | AK026074  | 5994.762  | 5442.083  |
| D79998    | 5310.1    | 5582.865  | NM_003172 | 13301.474 | 12004.176 |
| AB032963  | 1522.936  | 1222.583  | NM_004809 | 19821.422 | 19418.939 |
| NM_000385 | 4674.961  | 4644.137  | AA903183  | 3416.301  | 3243.65   |
| AF301013  | 9070.726  | 7727.622  | H41522    | 20705.57  | 17013.852 |
| NM_018992 | 66553.352 | 61655.473 | AA460291  | 57136.258 | 51728.672 |
| U15688    | 6528.931  | 5934.877  | BI821333  | 20383.859 | 20963.557 |
| NM_000483 | 10380.956 | 8289.752  | X51841    | 62476.215 | 58877.203 |
| NM_018448 | 7200.691  | 4516.014  | AF051344  | 62378.844 | 57153.844 |
| NM_012123 | 35455.41  | 28883.957 | BG506100  | 21429.508 | 21043.727 |
| U87972    | 7169.063  | 6059.922  | X53586    | 3607.987  | 4775.373  |
| NM_017925 | 5000.813  | 3485.015  | M17176    | 2029.907  | 2210.685  |
| AK022208  | 26662.52  | 27723.668 | M26576    | 1529.924  | 1477.843  |
| NM_003171 | 15762.552 | 11257.544 | M32972    | 21557.59  | 19040.932 |
| NM_006437 | 28202.066 | 27938.943 | D11151    | 1101.853  | 1442.526  |
| NM_017890 | 5380.205  | 4470.005  | D89854    | 2723.014  | 2068.967  |

|           |           |           |           |           |           |
|-----------|-----------|-----------|-----------|-----------|-----------|
| AK021654  | 5112.949  | 4690.706  | M13207    | 4005.158  | 3665.365  |
| NM_016481 | 2747.017  | 1823.65   | X14885    | 1886.573  | 1494.111  |
| NM_003925 | 12507.595 | 11672.057 | M97815    | 3551.622  | 2824.585  |
| Z15114    | 12759.164 | 11760.916 | AF085893  | 5006.563  | 3968.427  |
| AB040812  | 49520.531 | 47329.672 | NM_003102 | 2291.715  | 2420.381  |
| NM_017625 | 1495.493  | 1241.813  | NM_006850 | 827.292   | 514.084   |
| NM_006285 | 17557.945 | 14496.945 | AB013103  | 2569.909  | 2634.711  |
| NM_003656 | 70535.727 | 64598.617 | AF019225  | 10399.141 | 9995.792  |
| NM_001348 | 29261.67  | 22922.637 | Z36803    | 30771.121 | 29745.529 |
| NM_000215 | 8021.947  | 7081.326  | NM_013371 | 2700.919  | 2723.612  |
| AK027148  | 39428.988 | 32953.262 | NM_000707 | 22399.406 | 22336.719 |
| NM_005084 | 7051.459  | 4822.458  | AF202092  | 33259.188 | 34217.309 |
| CY3Cy5    | 14636.405 | 365.202   | NM_003201 | 20996.506 | 14184.707 |
| NM_006079 | 12947.566 | 17665.291 | AB011139  | 9317.893  | 7877.926  |
| NM_006696 | 3841.635  | 5988.199  | NM_006919 | 4365.837  | 5327.875  |
| NM_002763 | 11695.286 | 15747.812 | AK022625  | 60514.691 | 52858.246 |
| AF070628  | 1099.797  | 1878.527  | NM_005425 | 3900.077  | 3254.187  |
| AF038194  | 324.237   | 620.108   | AK023084  | 29481.381 | 26093.908 |
| U79293    | 911.963   | 1150.39   | AK025588  | 32245.232 | 31027.422 |
| NM_015434 | 5278.53   | 7532.152  | NM_003188 | 9665.056  | 9599.782  |
| NM_014055 | 4011.379  | 6904.927  | NM_007118 | 2313.541  | 1886.071  |
| AK023940  | 682.923   | 1006.952  | U59431    | 53083.703 | 53352.336 |
| NM_018691 | 3022.182  | 3998.726  | U49349    | 5103.423  | 4601.906  |
| AK001020  | 3926.458  | 3898.79   | NM_020152 | 7686.1    | 6636.669  |
| AF086431  | 3585.352  | 3607.524  | NM_013404 | 7269.675  | 6537.565  |
| AL110204  | 861.676   | 866.194   | AF300648  | 565.93    | 499.493   |
| NM_014188 | 68070.375 | 68236.352 | NM_002364 | 1028.5    | 699.499   |
| AK026365  | 7542.489  | 10272.978 | NM_003966 | 1693.269  | 1605.473  |
| NM_006079 | 14964.042 | 14911.841 | NM_020384 | 12485.474 | 13251.675 |
| NM_006696 | 5232.107  | 5964.549  | NM_006058 | 56622.516 | 55271.199 |
| SR1       | 68544.844 | 64506.031 | AL079287  | 4864.994  | 5281.661  |
| SR3       | 53579.367 | 49129.469 | NM_014427 | 16340.955 | 18272.191 |
| SR5       | 7077.915  | 4486.337  | AB046769  | 14207.627 | 16162.685 |
| SR7       | 8024.17   | 34182.215 | NM_015922 | 17967.986 | 18614.309 |
| SR9       | 24608.984 | 2287.286  | NM_020381 | 7907.882  | 8004.583  |
| CY3Cy5    | 5185.697  | 81.739    | NM_002957 | 26368.674 | 22660.16  |
| Z36825    | 4539.498  | 7681.662  | NM_018106 | 14355.321 | 14907.325 |
| U52838    | 2195.612  | 3139.23   | NM_003725 | 6280.26   | 6086.173  |
| Z36846    | 693.748   | 891.14    | BE899154  | 5007.938  | 4609.827  |
| AF086127  | 523.61    | 973.333   | NM_004863 | 10059.465 | 7955.131  |
| AF086157  | 4883.349  | 5938.669  | AB032963  | 2003.213  | 1915      |
| D17018    | 2548.739  | 3083.608  | U15688    | 6820.806  | 5984.26   |
| AB046852  | 1348.345  | 1438.798  | NM_018448 | 20214.43  | 20176.811 |
| AF086167  | 1436.207  | 1671.805  | NM_018184 | 15656.19  | 18718.779 |
| AL109727  | 844.419   | 820.505   | AB046823  | 3173.92   | 2963.855  |
| AF085891  | 8091.967  | 10395.441 | NM_004929 | 3629.726  | 2724.977  |
| AF019618  | 3696.046  | 3645.243  | NM_004662 | 1826.391  | 1486.295  |
| AK025656  | 4747.818  | 3531.005  | NM_016639 | 62608.18  | 63718.016 |
| AF161414  | 9894.232  | 8076.22   | U61739    | 51932.648 | 53029.035 |
| AK025967  | 1224.152  | 569.923   | AJ132089  | 1968.594  | 1855.225  |
| AL110177  | 4193.327  | 1945.453  | U92819    | 12214.594 | 12222.377 |
| AK022686  | 12392.276 | 17054.541 | AB020626  | 8904.139  | 8767.892  |
| AK023516  | 8309.332  | 14107.432 | NM_002036 | 51465.77  | 55367.105 |

|           |           |           |           |           |           |
|-----------|-----------|-----------|-----------|-----------|-----------|
| AK023864  | 19663.406 | 29274.908 | NM_012400 | 2498.981  | 2706.293  |
| AK023017  | 7807.758  | 14242.315 | NM_005384 | 6463.257  | 6769.924  |
| AK023610  | 600.765   | 1256.083  | NM_012123 | 32317.154 | 33275.523 |
| AK023908  | 18429.969 | 27538.701 | U87972    | 8285.747  | 9464.612  |
| AK024236  | 2500.4    | 3851.13   | NM_017925 | 7530.46   | 7550.885  |
| AK022098  | 2053.675  | 2811.962  | AK022208  | 32454.02  | 24690.047 |
| AB040933  | 2083.425  | 3263.914  | NM_003171 | 12452.933 | 8527.377  |
| AK022072  | 1274.967  | 1855.501  | NM_006437 | 27767.211 | 24573.359 |
| AK026900  | 4917.808  | 5646.69   | NM_017890 | 6759.492  | 4122.709  |
| AK025020  | 14537.181 | 14513.03  | AK021654  | 6149.08   | 4655.199  |
| AF086009  | 1146.319  | 1160.432  | NM_016481 | 3632.896  | 2128.078  |
| AF086463  | 7860.926  | 8322.152  | NM_003925 | 22074.186 | 19288.58  |
| AK024130  | 1360.372  | 1201.949  | Z15114    | 19844.811 | 17011.598 |
| AK024598  | 6145.794  | 4855.47   | AB040812  | 53539.637 | 48371.043 |
| AF087983  | 2180.511  | 1625.121  | NM_017625 | 1128.061  | 887.8     |
| NM_020234 | 3519.811  | 2374.448  | NM_006285 | 15952.473 | 13633.845 |
| AJ011377  | 5020.083  | 7421.859  | NM_003656 | 65324.273 | 58602.672 |
| AL137734  | 2942.214  | 5020.13   | NM_001348 | 36039.863 | 35063.945 |
| AK023784  | 1859.742  | 3434.229  | NM_000215 | 11482.983 | 12103.144 |
| AK026323  | 5346.477  | 6944.934  | AK027148  | 51486.734 | 44634.863 |
| AL109710  | 1868.068  | 2373.234  | NM_005084 | 10955.271 | 9215.092  |
| AK021538  | 2414.653  | 4044.418  | NM_007283 | 17770.73  | 16566.705 |
| AK023793  | 11827.507 | 15100.869 | NM_006111 | 15365.943 | 14482.38  |
| AK022185  | 946.488   | 1099.787  | AK026071  | 32235.91  | 31456.621 |
| AK023286  | 9652.309  | 11517.647 | BC012333  | 24342.779 | 22959.695 |
| AK021544  | 1279.2    | 1763.333  | AF237952  | 16099.972 | 16851.521 |
| AL079282  | 1668.922  | 1992.717  | NM_002309 | 824.186   | 786.412   |
| AF116714  | 1728.39   | 1432.434  | AK026074  | 5568.939  | 6409.049  |
| NM_014058 | 4676.657  | 3879.879  | NM_003172 | 12092.471 | 12242.153 |
| AK025045  | 608.522   | 478.086   | NM_004809 | 15907.42  | 15693.265 |
| AK026340  | 982.381   | 988.095   | AA903183  | 3058.16   | 2430.707  |
| AK022388  | 791.53    | 592.744   | H41522    | 17783.877 | 14977.543 |
| AK027170  | 593.804   | 643.391   | AA460291  | 59529.359 | 48311.199 |
| AK021781  | 335.017   | 709.761   | BI821333  | 19752.039 | 17164.398 |
| NM_018584 | 670.016   | 764.576   | X51841    | 62336.766 | 57938.516 |
| AY007126  | 16556.262 | 25108.26  | AF051344  | 59170.578 | 55822.227 |
| AF085951  | 11313.965 | 17350.195 | BG506100  | 18108.332 | 13485.064 |
| AF131787  | 823.215   | 1234.5    | X53586    | 3701.808  | 4168.171  |
| AF087989  | 2816.083  | 3932.531  | M17176    | 2401.973  | 1668.192  |
| Z70715    | 2383.507  | 3360.185  | M26576    | 1291.376  | 1294.36   |
| NM_018182 | 9083.441  | 14461.24  | M32972    | 19983.16  | 15537.866 |
| U80771    | 8819.854  | 13886.928 | D11151    | 1093.016  | 990.603   |
| NM_006188 | 981.344   | 1338.659  | D89854    | 2795.418  | 2197.139  |
| AJ272173  | 22937.719 | 33137.5   | M13207    | 3969.091  | 3546.892  |
| Z24724    | 16269.596 | 21723.566 | X14885    | 2943.826  | 2524.521  |
| AK022712  | 15189.024 | 19775.719 | M97815    | 2798.171  | 2273.26   |
| AK024132  | 4441.73   | 5257.631  | AF085893  | 5116.332  | 4142.563  |
| AK021863  | 46834.969 | 56257.957 | NM_003102 | 2367.238  | 2357.232  |
| AK024208  | 1207.453  | 1256.252  | NM_014305 | 8124.792  | 7112.167  |
| NM_020428 | 1134.706  | 615.179   | AB011139  | 9017.314  | 6936.483  |
| NM_005684 | 780.381   | 883.871   | NM_006919 | 4372.609  | 4923.666  |
| AK022293  | 1289.321  | 1000.265  | AK022625  | 56463.465 | 51245.902 |
| AL117439  | 2652.413  | 2222.507  | NM_005425 | 2371.625  | 2056.213  |

|           |           |           |           |           |           |
|-----------|-----------|-----------|-----------|-----------|-----------|
| AL133065  | 3485.63   | 2615.721  | AK023084  | 24301.691 | 20045.354 |
| NM_005297 | 8180.161  | 6215.76   | AK025588  | 30249.65  | 27008.756 |
| U80769    | 1760.556  | 1287.604  | NM_003188 | 10044.52  | 6723.688  |
| NM_014565 | 1045.564  | 692.335   | NM_007118 | 2131.96   | 1464      |
| AK025052  | 5867.068  | 8436.703  | U59431    | 52971.41  | 38565.781 |
| NM_014385 | 2518.762  | 2765.82   | U49349    | 4286.5    | 3102.59   |
| NM_002545 | 413.597   | 891.889   | NM_020152 | 7399.578  | 6704.537  |
| U85044    | 1448.571  | 2172.925  | NM_013404 | 6186.289  | 5625.875  |
| BC018880  | 893.266   | 1524.154  | AF300648  | 606.81    | 496.825   |
| AF086090  | 3040.167  | 4721.272  | NM_006157 | 762.387   | 743.27    |
| AK002173  | 41598.32  | 49328.633 | NM_002364 | 573.952   | 419.384   |
| NM_017745 | 6802.048  | 10528.915 | NM_003965 | 1760.792  | 1539.914  |
| NM_020185 | 35665.227 | 46446.754 | AK024443  | 61538.027 | 63577.445 |
| U88897    | 9273.871  | 13116.913 | X06710    | 3968.534  | 4307.213  |
| NM_003493 | 67502.445 | 70816.508 | AK000896  | 6052.263  | 6036.596  |
| AL133430  | 39803.367 | 46946.633 | NM_003872 | 1848.303  | 1689.608  |
| AF070633  | 63762.629 | 61152.754 | NM_020384 | 12293.621 | 11226.445 |
| Y16184    | 444.539   | 476.674   | NM_006055 | 55963.227 | 56253.703 |
| S51971    | 67839.602 | 69251.016 | NM_006625 | 37497.375 | 45602.148 |
| AF054996  | 37038.078 | 41714.512 | M97496    | 62672.941 | 65206.027 |
| AF090098  | 9524.512  | 7190.041  | NM_001659 | 43047.516 | 41650.418 |
| AF146694  | 4353.491  | 4996.175  | AB020663  | 2813.217  | 2709.944  |
| AK057104  | 2827.191  | 2255.98   | AF297866  | 17762.527 | 17934.504 |
| AK024979  | 48349.473 | 43903.313 | NM_002864 | 3109.156  | 3100.615  |
| AF233648  | 4276.657  | 2565.129  | NM_017817 | 4935.618  | 4541.81   |
| NM_013435 | 51029.367 | 54680.473 | NM_018184 | 16368.664 | 16410.525 |
| NM_003405 | 63236.434 | 68275.633 | AB046823  | 3157.289  | 2329.1    |
| NM_018315 | 5650.149  | 7564.33   | NM_004929 | 3734.726  | 2462.419  |
| AB011180  | 3803.298  | 4339.428  | NM_004662 | 2009.393  | 978.822   |
| NM_007167 | 6955.029  | 10148.021 | NM_016639 | 64040.094 | 58625.016 |
| NM_014832 | 4090.531  | 5222.521  | U61739    | 47307.656 | 40977.121 |
| NM_003243 | 296.875   | 680.617   | AJ132089  | 2663.475  | 1874.005  |
| NM_002477 | 28864.678 | 35739.773 | U92819    | 10867.024 | 8330.26   |
| NM_004673 | 794.631   | 1010.985  | AB020626  | 8626.752  | 5765.984  |
| Y17180    | 67581.719 | 71857.93  | NM_002035 | 59458.207 | 53136.379 |
| NM_005645 | 4521.181  | 4417.141  | NM_012400 | 2106.432  | 1689.252  |
| AK021566  | 1133.763  | 1600.653  | NM_005384 | 5771.403  | 4239.218  |
| NM_002037 | 3924.618  | 4216.832  | AB013103  | 2580.899  | 2731.267  |
| NM_016345 | 4159.329  | 5431.57   | AF019225  | 10232.48  | 7539.169  |
| NM_020157 | 53506.766 | 51287.445 | Z36803    | 31406.773 | 28752.262 |
| X64991    | 2609.5    | 3134.777  | NM_013371 | 2037.295  | 2060.955  |
| AK025703  | 12990.39  | 12063.937 | NM_000707 | 23647.689 | 22765.053 |
| NM_018185 | 7323.806  | 5977.529  | AF202092  | 34159.789 | 40752.375 |
| AK022598  | 10262.828 | 9508.52   | NM_003201 | 23324.176 | 17395.484 |
| AK024306  | 1182.575  | 1156.419  | NM_007283 | 17064.961 | 16285.311 |
| NM_018322 | 23741.148 | 20699.152 | NM_006111 | 14662.616 | 14938.639 |
| AK025862  | 12302.311 | 7459.973  | AK026071  | 30445.41  | 30270.695 |
| AK026495  | 2549.586  | 1217.395  | BC012333  | 25901.213 | 29125.438 |
| AL137493  | 2056.72   | 3044.677  | AF237952  | 17039.307 | 15188.94  |
| NM_004797 | 488.435   | 769.016   | AL079287  | 5013.783  | 3974.337  |
| NM_002457 | 1375.4    | 1597.939  | NM_014427 | 16052.807 | 11380.031 |
| NM_001335 | 22642.609 | 30795.096 | AB046769  | 16521.961 | 10922.77  |
| NM_003637 | 957.393   | 1497.868  | NM_015922 | 19931.76  | 13323.762 |

|           |           |           |           |           |           |
|-----------|-----------|-----------|-----------|-----------|-----------|
| BC035133  | 1098.262  | 1293.816  | NM_020381 | 8320.981  | 4473.917  |
| NM_004233 | 22809.715 | 34415.691 | NM_002957 | 24704.137 | 12275.357 |
| NM_001544 | 23348.467 | 30703.785 | NM_018106 | 14429.593 | 10799.581 |
| X58531    | 2703.567  | 4513.176  | NM_003725 | 6407.76   | 4622.642  |
| AB011168  | 20266.426 | 28754.086 | BE899154  | 5369.937  | 4030.365  |
| BE794262  | 10059.776 | 12344.741 | NM_004863 | 10193.999 | 7195.522  |
| NM_003212 | 19255.502 | 27092.381 | AK024573  | 5145.732  | 5341.389  |
| NM_006382 | 7667.671  | 8314.775  | NM_002299 | 10418.425 | 7752.647  |
| NM_004811 | 28201.539 | 31952.006 | D79998    | 7721.056  | 7470.694  |
| AK021910  | 67793.328 | 69770.117 | AB032963  | 1620.337  | 1573.257  |
| M62402    | 951.976   | 1006.755  | NM_000385 | 6378.864  | 5105.509  |
| NM_004748 | 10274.711 | 8967.631  | AF301013  | 12816.611 | 10528.511 |
| NM_002668 | 37751.098 | 36228.457 | NM_018992 | 59216.063 | 68595.109 |
| NM_001058 | 1211.048  | 800.781   | U15688    | 7541.018  | 6607.302  |
| NM_014316 | 25223.711 | 15633.732 | NM_000483 | 15769.021 | 15864.797 |
| NM_004054 | 9884.065  | 7711.454  | NM_018448 | 21261.479 | 20785.689 |
| NM_001138 | 17942.207 | 9665.461  | AF085893  | 3581.112  | 3166.432  |
| NM_003443 | 63874.02  | 71618.547 | NM_003102 | 2220.817  | 1925.103  |
| NM_002025 | 5180.506  | 6819.074  | NM_014305 | 7472.567  | 6138.813  |
| AB015228  | 3321.394  | 4908.98   | NM_012123 | 35154.328 | 15818.357 |
| AL049685  | 3965.169  | 5089.114  | U87972    | 8668.019  | 3672.851  |
| AK026800  | 13933.772 | 24837.318 | NM_017925 | 9567.037  | 4209.221  |
| NM_001442 | 1571.206  | 2281.506  | AK022208  | 36752.973 | 14951.555 |
| NM_017775 | 16813.129 | 24521.461 | NM_003171 | 14252.405 | 4754.542  |
| AK001958  | 2767.563  | 3242.019  | NM_006437 | 28606.031 | 15949.328 |
| AK025947  | 8620.17   | 12692.706 | NM_017890 | 6652.848  | 3296.692  |
| AF217973  | 17732.764 | 29976.684 | AK021654  | 6545.396  | 3700.885  |
| NM_007033 | 17092.604 | 20972.244 | NM_016481 | 3364.204  | 1739.841  |
| AF226048  | 15306.517 | 18481.869 | NM_003925 | 20427.996 | 15511.099 |
| NM_005573 | 17275.037 | 18854.42  | Z15114    | 18687.344 | 13822.011 |
| AV723708  | 423.472   | 657.657   | AB040812  | 50487.375 | 46185.441 |
| D50918    | 42047.871 | 46073.586 | NM_017625 | 1131.889  | 1135.077  |
| U48734    | 20293.986 | 18897.307 | NM_006285 | 15035.623 | 9999.803  |
| NM_006400 | 17017.318 | 23977.521 | NM_003656 | 65407.242 | 66380.008 |
| NM_003903 | 10184.105 | 11374.859 | NM_001348 | 37921.336 | 32866.25  |
| NM_017955 | 10268.715 | 9289.858  | NM_000215 | 12431.021 | 11370.947 |
| NM_016060 | 10150.998 | 8967.825  | AK027148  | 50821.559 | 42549.406 |
| NM_002208 | 27725.303 | 24774.654 | NM_005084 | 11486.232 | 11436.805 |
| NM_007216 | 5977.246  | 4709.093  | CY3Cy5    | 18546.518 | 547.211   |
| AK023518  | 4315.054  | 3038.739  | NM_006079 | 14551.088 | 17141.252 |
| NM_000095 | 10221.522 | 6606.883  | NM_006696 | 5175.207  | 6809.047  |
| NM_013390 | 13770.835 | 18998.648 | NM_002763 | 10853.035 | 14841.455 |
| NM_002829 | 2120.038  | 2731.946  | AF070628  | 1928.912  | 1745.859  |
| J02783    | 41710.66  | 53137.246 | U79293    | 917.818   | 940.347   |
| NM_018137 | 934.477   | 1551.482  | NM_015434 | 5114.98   | 5778.523  |
| NM_006577 | 45458.879 | 53079.035 | NM_014055 | 3308.492  | 2917.758  |
| NM_004413 | 615.362   | 758.454   | AK023940  | 984.62    | 861.728   |
| NM_005317 | 2827.021  | 3881.695  | NM_018691 | 2487.602  | 2290.978  |
| AF120493  | 1943.196  | 2907.536  | AK001020  | 1498.23   | 1107.778  |
| U12597    | 7348.793  | 10972.517 | AF086431  | 3843.916  | 3423.979  |
| U28055    | 1402.974  | 1869.295  | AL110204  | 2090.614  | 2062.867  |
| AB044343  | 30725.33  | 38978.91  | NM_014188 | 65208.117 | 60747.363 |
| NM_001285 | 1066.625  | 950.637   | AK026365  | 6685.126  | 5347.453  |

|           |           |           |           |           |           |
|-----------|-----------|-----------|-----------|-----------|-----------|
| NM_018409 | 1376.054  | 1882.215  | NM_006079 | 11157.317 | 10276.467 |
| NM_014662 | 2108.215  | 2330.628  | NM_006696 | 4455.716  | 3566.624  |
| NM_005178 | 31199.701 | 36708.188 | SR1       | 66444.633 | 66672.383 |
| NM_017702 | 14215.469 | 13828.516 | SR3       | 47066.199 | 50754.016 |
| AB014516  | 20113.451 | 24559.721 | SR5       | 5522.39   | 5099.735  |
| Z83950    | 4498.834  | 4052.318  | SR7       | 5214.188  | 34554.371 |
| AL080063  | 5572.659  | 5019.508  | SR9       | 20324.289 | 3361.093  |
| NM_005625 | 25524.932 | 23214.791 | CY3Cy5    | 20865.707 | 514.41    |
| X15262    | 9047.934  | 7042.097  | U70772    | 696.492   | 631.364   |
| NM_005475 | 3225.701  | 2173.668  | Z36825    | 12831.832 | 14470.256 |
| NM_007289 | 8674.37   | 5506.851  | U30889    | 978.658   | 1069.335  |
| NM_004219 | 73554.414 | 62748.395 | U52838    | 2578.913  | 2677.562  |
| NM_004575 | 511.449   | 795.343   | Z36846    | 698.867   | 996.774   |
| AB023232  | 3960.732  | 6343.501  | AF086127  | 710.229   | 1004.963  |
| NM_017420 | 1326.932  | 2387.881  | AF086157  | 3515.3    | 4139.313  |
| AL137589  | 3586.967  | 5303.205  | AF088026  | 632.338   | 831.155   |
| AF036943  | 1272.432  | 1753.707  | D17018    | 3370.792  | 2880.446  |
| NM_002502 | 19037.996 | 28179.76  | AB046852  | 1739.809  | 1347.524  |
| AF226732  | 23151.623 | 29370.205 | AF086167  | 1827.567  | 1578.633  |
| NM_006312 | 17000.5   | 19320.615 | AL109727  | 945.04    | 711.274   |
| NM_002805 | 2919.18   | 3137.578  | AF085891  | 9807.527  | 8840.552  |
| NM_004290 | 754.054   | 653.498   | AF019618  | 2454.049  | 1862.167  |
| NM_016135 | 509.677   | 398.705   | AK025656  | 3913.002  | 2500.881  |
| NM_003662 | 927.055   | 791.884   | AF161414  | 13334.254 | 12000.684 |
| NM_002939 | 31643.068 | 28377.756 | AK025967  | 1312.386  | 1378.659  |
| NM_015836 | 56092.414 | 53617.805 | AL110177  | 4081.009  | 3266.386  |
| NM_004713 | 5061.135  | 3715.924  | AK022686  | 20048.9   | 21156.496 |
| NM_003769 | 1973.175  | 1429.013  | AK023516  | 8152.068  | 8184.03   |
| NM_001698 | 35105.398 | 25213.818 | AK023864  | 37429.578 | 41766.543 |
| NM_000661 | 66985.492 | 73925.992 | AK024183  | 497.627   | 506.244   |
| NM_000973 | 68345.664 | 65914.508 | AK023017  | 10027.227 | 13689.208 |
| NM_000944 | 10067.772 | 6704.931  | AK023610  | 1250.664  | 1305.954  |
| NM_012239 | 5060.104  | 3189.924  | AK023908  | 31199.236 | 41508.512 |
| NM_012262 | 3842.742  | 2068.571  | AK024236  | 2843.353  | 3704.145  |
| S70004    | 5595.14   | 6584.282  | AK022098  | 2653.275  | 3145.312  |
| AF105378  | 8656.314  | 14194.616 | AK026751  | 889.062   | 885.631   |
| NM_000167 | 6997.202  | 9076.882  | AB040933  | 2636.909  | 2575.387  |
| AY007125  | 6211.934  | 8571.803  | AK021875  | 774.164   | 896.504   |
| AB032987  | 6386.804  | 10760.12  | AK022072  | 1530.834  | 1198.806  |
| NM_017567 | 24013.115 | 29561.525 | AK026900  | 4282.641  | 3628.135  |
| NM_000691 | 10451.942 | 14469.501 | AK025020  | 9991.882  | 7382.244  |
| Y18643    | 751.863   | 723.763   | AF086009  | 1371.487  | 988.985   |
| NM_000305 | 534.977   | 652.835   | AF086463  | 8382.003  | 7693.624  |
| D86971    | 38927.754 | 48977.73  | AK024130  | 1275.258  | 749.214   |
| NM_003073 | 15380.9   | 17226.607 | AL137270  | 502.937   | 615.13    |
| NM_014048 | 1701.925  | 1681.943  | AK024598  | 5325.503  | 5128.372  |
| AF274863  | 2021.718  | 2758.35   | AF087983  | 2868.142  | 3247.819  |
| AF319458  | 1265.816  | 1172.975  | NM_020234 | 4258.954  | 5074.218  |
| AF024697  | 11174.469 | 10788.783 | AJ011377  | 7373.776  | 8785.667  |
| NM_018651 | 1456.476  | 1225.115  | AL137734  | 2735.253  | 3048.615  |
| AF164156  | 1045.832  | 413.689   | AK023784  | 4478.361  | 5220.971  |
| NM_005612 | 5643.106  | 2788.345  | AK026323  | 7291.719  | 8578.099  |
| AB040918  | 13453.299 | 9502.012  | AL109710  | 2399.076  | 2828.735  |



|           |           |           |           |           |           |
|-----------|-----------|-----------|-----------|-----------|-----------|
| NM_01585  | 8633.215  | 5931.106  | AK021538  | 3286.986  | 3826.606  |
| X60152    | 2983.938  | 2041.474  | AK023793  | 18087.785 | 16198.093 |
| NM_00231  | 5246.828  | 3064.541  | AK022185  | 739.725   | 834.073   |
| NM_012421 | 25500.207 | 30796.16  | AK023286  | 10344.927 | 8114.821  |
| AB014601  | 3503.508  | 4532.737  | AK021544  | 1707.864  | 1587.099  |
| AK001393  | 29667.256 | 40260.355 | AL079282  | 1733.791  | 1918.273  |
| NM_00002  | 14256.868 | 18419.881 | AK022079  | 423.793   | 529.02    |
| AF022654  | 1609.672  | 2154.545  | AF116714  | 2215.686  | 1822.8    |
| NM_001143 | 1849.414  | 1789.615  | NM_01405  | 5937.983  | 4624.794  |
| NM_00328  | 1577.584  | 1540.64   | AK025045  | 678.65    | 569.617   |
| AK022638  | 23644.988 | 28674.896 | AK002005  | 1005.46   | 2261.489  |
| BG698409  | 11882.521 | 14439.694 | AK026340  | 1402.415  | 1446.092  |
| U36798    | 846.886   | 936.956   | AK022388  | 517.198   | 666.923   |
| AA220921  | 20212.045 | 25808.951 | AK027170  | 629.134   | 1020.363  |
| N67770    | 3461.63   | 4138.992  | AY007126  | 28239.158 | 28297.518 |
| AA486200  | 65863.258 | 63369.805 | AF085951  | 13672.172 | 13452.419 |
| U90065    | 1484.175  | 1478.909  | AF131787  | 1351.14   | 1214.513  |
| AJ005898  | 20281.762 | 21761.738 | AF087989  | 4334.954  | 5506.696  |
| X57303    | 12826.99  | 12839.193 | Z70715    | 2707.814  | 3484.903  |
| AA463224  | 2643.858  | 2298.6    | NM_01818  | 12639.525 | 16227.431 |
| BG248802  | 17901.703 | 14853.734 | U80771    | 10547.055 | 11566.353 |
| L19605    | 3173.822  | 2132.456  | NM_00618  | 1423.711  | 1071.666  |
| AA876532  | 19543.91  | 14575.304 | AJ272173  | 33356.75  | 38544.441 |
| S74349    | 1937.413  | 1230.772  | Z24724    | 16860.191 | 15087.059 |
| X07979    | 59176.66  | 50720.855 | AK022712  | 17172.107 | 17420.773 |
| BG324670  | 809.033   | 442.149   | AK024132  | 4545.611  | 5113.406  |
| BG744224  | 33149.039 | 28118.9   | AK021863  | 44103.559 | 52764.492 |
| NM_00639  | 3105.062  | 3868.09   | AK024208  | 771.719   | 862       |
| NM_01492  | 1111.556  | 1428.054  | NM_02042  | 1027.982  | 657.501   |
| NM_005477 | 29976.793 | 38749.535 | NM_005684 | 1244.98   | 781.27    |
| NM_00701  | 1086.513  | 1486.393  | AK022293  | 1531.863  | 1351.378  |
| NM_00431  | 2777.462  | 2863.495  | AL117439  | 2385.141  | 2229.398  |
| L09089    | 3851.55   | 4293.719  | AL133065  | 3548.287  | 3474.126  |
| NM_00264  | 4006.5    | 4745.739  | NM_005297 | 7689.155  | 6816.823  |
| X03084    | 1060.234  | 482.79    | U80769    | 2613.538  | 2585.997  |
| M15530    | 9177.511  | 11277.204 | NM_01456  | 1162.71   | 979.022   |
| NM_00048  | 3204.265  | 3329.017  | U85044    | 2391.17   | 2523.856  |
| NM_001877 | 6651.733  | 8101.31   | BC018880  | 1473.726  | 1900.738  |
| NM_014207 | 17585.525 | 18835.072 | AF086090  | 3988.149  | 4388.622  |
| AK002163  | 6562.227  | 6666.294  | AK002173  | 41432.105 | 47804.652 |
| NM_002287 | 4463.454  | 3925.422  | NM_01774  | 8677.295  | 11059.309 |
| NM_012344 | 6285.794  | 4626.177  | NM_02018  | 45341.762 | 51937.152 |
| NM_002351 | 4479.543  | 3516.624  | M87929    | 694.613   | 1466.748  |
| NM_01438  | 2705.53   | 2771.876  | U88897    | 10197.239 | 9014.18   |
| NM_001704 | 2045.884  | 1277.808  | NM_00349  | 57439.852 | 57952.469 |
| AB036432  | 33675.809 | 28678.09  | AL133430  | 50691.641 | 55989.563 |
| NM_00364  | 1356.947  | 786.401   | AF070633  | 53703.766 | 53452.086 |
| NM_00348  | 6682.202  | 4800.104  | Y16184    | 458.771   | 811       |
| NM_00405  | 773.527   | 996.516   | S51971    | 64423.613 | 66705.781 |
| NM_001634 | 33944.492 | 42355.141 | NM_01837  | 532.957   | 729.4     |
| NM_002267 | 15549.2   | 16920.268 | AF054996  | 37465.969 | 38861.48  |
| NM_00641  | 6003.118  | 8660.388  | AF090098  | 10538.976 | 6742.394  |
| NM_00306  | 17146.234 | 20563.277 | AF146694  | 4754.73   | 4785.815  |

|           |           |           |           |           |           |
|-----------|-----------|-----------|-----------|-----------|-----------|
| NM_014041 | 36489.145 | 45383.676 | AK057104  | 2603.38   | 2743.608  |
| NM_007169 | 17466.871 | 19159.246 | AL133555  | 1194.515  | 1098.979  |
| NM_014313 | 1545.742  | 2191.519  | AK024979  | 61121.582 | 64646.355 |
| AK024966  | 8856.755  | 9997.355  | AF233648  | 3319.805  | 3247.049  |
| NM_017585 | 31180.73  | 36746.359 | NM_013439 | 55156.156 | 52047.73  |
| NM_000033 | 5330.083  | 6617.958  | NM_003406 | 64363.25  | 58950.617 |
| AF224741  | 1656.81   | 1365.739  | NM_018316 | 12803.616 | 12436.063 |
| NM_006594 | 4953.336  | 5403.84   | AB011180  | 10733.271 | 12173.701 |
| NM_004177 | 2326.914  | 1821.823  | NM_007167 | 11692.308 | 11443.362 |
| NM_012429 | 2458.052  | 1603.961  | NM_014832 | 4129.244  | 5018.371  |
| NM_004871 | 9653.537  | 6726.172  | NM_003243 | 826.149   | 787.613   |
| NM_005698 | 12683.208 | 8356.267  | Y17180    | 63821.387 | 64882.656 |
| AF202146  | 12202.442 | 6955.619  | NM_005649 | 4812.44   | 6145.745  |
| NM_014868 | 15467.271 | 23532.256 | AK021566  | 1109.563  | 1252.699  |
| AL442089  | 33984.137 | 44426.484 | NM_002037 | 5183.381  | 4351.708  |
| NM_001200 | 4767.626  | 5381.358  | NM_016346 | 7748.677  | 8944.572  |
| AB007964  | 605.214   | 929.732   | NM_020157 | 64817.914 | 59003.926 |
| AF128541  | 9808.658  | 12533.053 | X64991    | 3649.602  | 4616.758  |
| AK026305  | 14942.062 | 15652.946 | AK025703  | 15954.385 | 14705.154 |
| NM_002552 | 5531.326  | 7561.735  | NM_018185 | 8661.415  | 7263.081  |
| NM_014321 | 11946.796 | 14670.374 | AK022598  | 9373.649  | 8736.31   |
| AK022733  | 4283.55   | 5358.593  | AK024306  | 1705.225  | 1515.302  |
| AB011132  | 12217.983 | 12888.047 | NM_018322 | 27272.387 | 27443.73  |
| NM_020362 | 18713.574 | 20086.828 | AK025862  | 14932.997 | 13241.119 |
| AB040937  | 5759.493  | 5488.893  | AK026495  | 2687.553  | 2873.285  |
| AF275798  | 47640.758 | 49021.609 | AL137493  | 2973.382  | 3047.738  |
| NM_005441 | 20199.262 | 16897.834 | NM_004797 | 649.34    | 773.915   |
| NM_016079 | 35476.789 | 34972.305 | NM_002457 | 1702.893  | 1570.33   |
| AK023108  | 5915.366  | 6166.227  | NM_001338 | 34450.793 | 36753.82  |
| AK026409  | 59848.598 | 47846.105 | NM_003637 | 1954.146  | 2446.524  |
| AF097025  | 16498.484 | 13579.269 | BC035133  | 2566.824  | 2448.331  |
| Y11339    | 17982.432 | 12114.833 | NM_004233 | 24385.09  | 28399.125 |
| AB030176  | 1869.838  | 1278.238  | AB011168  | 17311.574 | 17623.279 |
| NM_003937 | 1310.623  | 847.443   | BE794262  | 14057.547 | 12668.377 |
| NM_002537 | 18053.84  | 11023.049 | NM_003212 | 29667.939 | 28150.824 |
| NM_003139 | 8518.655  | 5336.898  | NM_006382 | 11589.302 | 10348.942 |
| NM_012316 | 11210.552 | 6910.147  | NM_004811 | 30065.807 | 33209.18  |
| AK001393  | 30002.779 | 39646.359 | AK021910  | 58849.414 | 62256.086 |
| NM_000023 | 13090.521 | 22643.902 | M62402    | 1181.495  | 1316.916  |
| AF022654  | 1499.345  | 2337.544  | NM_002547 | 749.292   | 1048.451  |
| NM_001143 | 1377.876  | 1571.828  | NM_004748 | 11141.909 | 10096.693 |
| NM_003282 | 1532.676  | 1931.809  | NM_002668 | 39053.625 | 45437.578 |
| AK022638  | 22964.795 | 31465.244 | NM_001058 | 1312.423  | 1116.608  |
| BG698409  | 11385.679 | 14776.785 | NM_001380 | 557.305   | 572.509   |
| U36798    | 697.326   | 999.915   | NM_014316 | 22687.117 | 22088.916 |
| AA220921  | 18876.518 | 25799.898 | NM_004054 | 12144.784 | 12700.789 |
| N67770    | 2969.512  | 3476.292  | NM_001138 | 18752.762 | 19996.629 |
| AA486200  | 67723.43  | 69369.539 | NM_003443 | 60451.977 | 53652.336 |
| U90065    | 1273.545  | 1329.028  | NM_002025 | 6992.179  | 6797.756  |
| AJ005898  | 18724.002 | 18441.963 | AB015228  | 4011.068  | 3877.429  |
| X57303    | 12420.293 | 13739.218 | AL049685  | 3211.876  | 2405.136  |
| AA463224  | 2341.616  | 1925.764  | AK026800  | 19842.439 | 18849.42  |
| BG248802  | 16448.102 | 13297.179 | NM_001442 | 3313.237  | 2791.32   |

|           |           |           |           |           |           |
|-----------|-----------|-----------|-----------|-----------|-----------|
| L19605    | 2661.744  | 2116.935  | NM_017775 | 23304.346 | 29268.646 |
| AA876532  | 19581.506 | 17015.336 | AK001958  | 3921.234  | 4498.833  |
| S74349    | 1720.996  | 1246.313  | AK025947  | 10432.579 | 13304.696 |
| X07979    | 59892.297 | 52559.883 | AF217973  | 22814.354 | 24693.648 |
| BG744224  | 33542.227 | 25631.699 | NM_007033 | 24104.154 | 22865.629 |
| NM_018026 | 13816.192 | 11583.32  | AF226048  | 16880.584 | 16980.629 |
| NM_001707 | 37546.008 | 26938.227 | NM_005573 | 20938.027 | 17573.762 |
| AK022983  | 2169.756  | 1252.179  | AV723708  | 495.797   | 600.731   |
| NM_014923 | 1421.077  | 1304.294  | D50918    | 45524.5   | 52861.449 |
| NM_005477 | 29861.82  | 40241.465 | U48734    | 19735.074 | 22938.828 |
| NM_007018 | 904.641   | 1013.525  | NM_006400 | 16980.639 | 20988.371 |
| NM_004318 | 2272.504  | 2307.521  | NM_003903 | 10731.975 | 10883.87  |
| L09089    | 4007.909  | 4420.884  | NM_017955 | 13280.729 | 13940.837 |
| NM_002640 | 3632.487  | 4189.986  | NM_016060 | 11009.789 | 10864.58  |
| M15530    | 8341.784  | 13378.227 | NM_002208 | 27021.152 | 32388.564 |
| NM_000488 | 2915.367  | 3729.761  | NM_007216 | 6570.861  | 6503.125  |
| NM_001877 | 7073.495  | 8021.061  | AK023518  | 4987.262  | 4583.641  |
| NM_014207 | 17993.424 | 17460.564 | NM_000095 | 11834.463 | 13429.516 |
| AK002163  | 6548.645  | 5605.869  | NM_013390 | 16595.131 | 17457.939 |
| NM_002287 | 4471.879  | 3786.307  | NM_002829 | 3286.318  | 3123.573  |
| NM_012344 | 6189.063  | 4701.888  | J02783    | 50514.574 | 53774.746 |
| NM_002351 | 4609.403  | 4466.268  | NM_018137 | 1836.179  | 1340.633  |
| NM_014385 | 2734.519  | 2555.019  | NM_006577 | 53637.414 | 48949.043 |
| NM_001704 | 2573.412  | 1918.267  | NM_004413 | 1570.198  | 1572.016  |
| AB036432  | 33200.043 | 30061.424 | NM_005317 | 6771.108  | 6582.139  |
| NM_003643 | 1301.332  | 810.012   | AF120493  | 2804.39   | 3382.721  |
| NM_003480 | 6975.792  | 5809.781  | U12597    | 10140.748 | 11637.482 |
| NM_012421 | 28108.137 | 19323.975 | U28055    | 1980.508  | 2111.071  |
| AB014601  | 4828.748  | 2319.917  | AB044343  | 55367.391 | 49731.871 |
| NM_002267 | 17554.371 | 17500.854 | NM_001285 | 1666.891  | 1463.239  |
| NM_006412 | 5909.323  | 7870.271  | NM_018409 | 2300.225  | 2166.387  |
| NM_003063 | 15547.215 | 18154.441 | NM_014662 | 2658.683  | 2629.448  |
| NM_014041 | 33795.379 | 46047.281 | NM_005178 | 40742.371 | 47761.711 |
| NM_007169 | 17220.418 | 21445.955 | NM_017702 | 14662.217 | 15697.794 |
| NM_014313 | 811.657   | 994.076   | AB014516  | 26121.994 | 28391.965 |
| AK024966  | 6441.349  | 7417.883  | Z83950    | 4173.784  | 4236.813  |
| NM_017585 | 27439.49  | 35357.906 | AL080063  | 8806.151  | 8521.137  |
| NM_000033 | 5387.358  | 6877.286  | NM_016590 | 1349.039  | 1436.362  |
| AF224741  | 1725.181  | 1639.065  | NM_005625 | 26946.104 | 31250.592 |
| NM_006594 | 4650.425  | 4158.434  | X15262    | 9515.914  | 10105.53  |
| NM_004177 | 2232.307  | 1621.987  | NM_005475 | 2703.913  | 2823.504  |
| NM_012429 | 2264.782  | 1665.599  | NM_007289 | 8995.499  | 8887.774  |
| NM_004871 | 10411.801 | 7100.875  | NM_004219 | 65864.57  | 73799.703 |
| AB040903  | 601.091   | 349.804   | NM_004575 | 1541.336  | 1135.015  |
| NM_005698 | 12803.423 | 7217.208  | AB023232  | 6491.229  | 5969.166  |
| AF202146  | 13226.235 | 9599.761  | NM_017420 | 1973.762  | 2223.879  |
| NM_006393 | 4666.752  | 2616.105  | AL137589  | 3877.474  | 3256.001  |
| NM_001200 | 4573.521  | 5766.217  | AF036943  | 1286.537  | 1468.306  |
| AB007964  | 1373.705  | 1534.662  | NM_002502 | 22795.164 | 26173.057 |
| AF128541  | 7184.452  | 8939.46   | AF226732  | 37578.652 | 39161.352 |
| AK026305  | 12405.229 | 15715.19  | NM_006312 | 17385.047 | 18509.924 |
| NM_002552 | 5722.325  | 8700.643  | NM_002805 | 3568.107  | 3437.058  |
| NM_014321 | 11663.17  | 14073.544 | NM_004290 | 711.01    | 593.389   |

|           |           |           |           |           |           |
|-----------|-----------|-----------|-----------|-----------|-----------|
| AK022733  | 2903.721  | 3756.955  | NM_016135 | 474.891   | 436.552   |
| AB011132  | 10430.35  | 11190.25  | NM_003662 | 1148.247  | 926.214   |
| NM_020362 | 16698.693 | 18055.641 | NM_002939 | 34683.93  | 39313.605 |
| AB040937  | 6179.652  | 7258.209  | NM_015836 | 63306     | 54770.41  |
| AF275798  | 46195.238 | 48891.688 | NM_004713 | 5402.279  | 5105.702  |
| NM_005441 | 17113.295 | 17146.605 | NM_003769 | 1810.103  | 2138.004  |
| NM_016079 | 34408.988 | 34739.016 | NM_001698 | 35776.066 | 43421.414 |
| AK023108  | 6944.284  | 6381.77   | NM_000661 | 60828.988 | 67128.617 |
| AK026409  | 62273.547 | 44794.602 | NM_000973 | 64697.207 | 70053.891 |
| AF097025  | 18221.637 | 14731.477 | NM_000944 | 10864.783 | 8882.83   |
| Y11339    | 20619.027 | 15159.828 | NM_012239 | 5844      | 6114.333  |
| AB030176  | 1896.159  | 1180.107  | NM_012262 | 3438.888  | 3293.373  |
| NM_003937 | 1045.203  | 597.725   | S70004    | 16086.254 | 15085.308 |
| NM_002537 | 17470.518 | 12078.596 | AF105378  | 26416.484 | 25464.115 |
| NM_003139 | 8245.81   | 5032.72   | NM_000167 | 7873.805  | 8889.982  |
| NM_012316 | 12530.751 | 10300.196 | AY007125  | 8126.57   | 8130.469  |
| NM_004059 | 1112.281  | 874.822   | AB032987  | 6387.991  | 5252.771  |
| NM_001634 | 37206.969 | 19654.969 | NM_017567 | 32266.34  | 30033.979 |
| AF022654  | 1544.043  | 1742.674  | NM_000691 | 21584.594 | 28227.846 |
| NM_001143 | 1567.711  | 2128.063  | Y18643    | 6028.274  | 7644.168  |
| NM_003282 | 1473.292  | 1737.881  | NM_000305 | 505.099   | 877.85    |
| AK022638  | 22039.787 | 24102.586 | D86971    | 44377.934 | 47544.602 |
| BG698409  | 10768.195 | 13316.934 | NM_002434 | 539.157   | 695.393   |
| U36798    | 1407.897  | 1117.246  | NM_003073 | 19091.139 | 20920.064 |
| AA220921  | 18626.158 | 24774.449 | NM_014048 | 1577.575  | 2034.129  |
| N67770    | 2406.24   | 3020.346  | AF274863  | 2287.052  | 3391.023  |
| AA486200  | 59754.043 | 57674.547 | AF319458  | 1767.517  | 2021.823  |
| U90065    | 1147.848  | 1435.734  | AF024697  | 12957.416 | 12238.485 |
| AJ005898  | 18494.885 | 21982.418 | NM_018651 | 1568.054  | 1736.076  |
| X57303    | 11759.122 | 13841.498 | AF164156  | 974.538   | 921.497   |
| AA463224  | 2452.835  | 2078.894  | NM_005612 | 7045.711  | 4368.584  |
| BG248802  | 16465.016 | 14798.168 | AK025281  | 957.517   | 1283.331  |
| L19605    | 3046.009  | 2736.361  | AB040918  | 24963.746 | 24072.613 |
| AA876532  | 22177.85  | 16180.3   | NM_015859 | 8621.451  | 7286.644  |
| S74349    | 1519.245  | 1513.994  | X60152    | 2759.015  | 2884.192  |
| X07979    | 62520.574 | 50630.641 | NM_002316 | 5757.184  | 5942.104  |
| BG744224  | 35567.352 | 29730.924 | NM_012421 | 35674.648 | 37975.469 |
| NM_018026 | 14487.811 | 12964.652 | AB014601  | 7467.297  | 8507.977  |
| NM_001707 | 38093.383 | 23350.896 | AK001393  | 36246.77  | 42282.539 |
| AK022983  | 2457.668  | 1641.603  | NM_000023 | 20006.41  | 18681.111 |
| NM_014868 | 17843.68  | 12254.197 | AF022654  | 1544.735  | 1431.501  |
| AL442089  | 28842.1   | 18027.82  | NM_001143 | 1980.521  | 1618.35   |
| M15530    | 6851.682  | 8757.666  | NM_003282 | 2210.15   | 1939.624  |
| NM_000488 | 2148.878  | 2541.189  | AK022638  | 21469.082 | 22721.111 |
| NM_001877 | 6143.138  | 6602.644  | BG698409  | 17812.846 | 18106.209 |
| NM_014207 | 16940.406 | 19515.773 | U36798    | 760.742   | 1074.061  |
| AK002163  | 5804.901  | 6304.427  | AA220921  | 20928.35  | 26665.68  |
| NM_002287 | 3463.949  | 3830.045  | U90065    | 1384.808  | 1834.035  |
| NM_012344 | 5805.205  | 5454.875  | AJ005898  | 27144.223 | 28177.195 |
| NM_002351 | 4423.348  | 4813.989  | X57303    | 17997.961 | 17281.207 |
| NM_014385 | 2375.772  | 2928.803  | AA463224  | 3612.368  | 3630.695  |
| NM_001704 | 2902.273  | 2438.787  | BG248802  | 18190.813 | 22823.85  |
| AB036432  | 32403.807 | 34079.379 | L19605    | 4633.014  | 4950.033  |

|           |           |           |           |           |           |
|-----------|-----------|-----------|-----------|-----------|-----------|
| NM_014872 | 7171.233  | 6826.324  | AA876532  | 25169.35  | 26815.113 |
| NM_003643 | 1135.279  | 1032.841  | S74349    | 1886.338  | 2144.225  |
| NM_003480 | 6527.022  | 5968.585  | X07979    | 61891.48  | 60789.16  |
| NM_000899 | 1603.311  | 1275.702  | BG324670  | 1096.932  | 1248.536  |
| NM_032951 | 3718.584  | 3253.853  | BG744224  | 43234.613 | 50114.09  |
| NM_000503 | 18928.047 | 17157.924 | NM_006393 | 11716.537 | 11377.285 |
| NM_002405 | 34995.148 | 26273.113 | NM_014923 | 2226.899  | 1890.727  |
| AK000004  | 6789.826  | 5465.168  | NM_005477 | 42621.426 | 42032.305 |
| NM_012421 | 30155.402 | 19088.092 | NM_007018 | 968.027   | 1046.292  |
| AB014601  | 5108.154  | 2904.36   | NM_004318 | 3981.765  | 2726.398  |
| AK001393  | 31405.811 | 21275.041 | L09089    | 7245.615  | 6749.957  |
| NM_000023 | 13992.445 | 8033.315  | NM_002640 | 4112.893  | 3803      |
| NM_014861 | 1572.068  | 1415.623  | X03084    | 873.463   | 574.598   |
| NM_012434 | 3722.563  | 4359.871  | NM_000949 | 701.233   | 601.263   |
| NM_005694 | 15079.62  | 13337.108 | M15530    | 15221.225 | 17967.193 |
| AF224741  | 1675.545  | 1539.728  | NM_000488 | 3441.776  | 4651.271  |
| NM_006594 | 4575.114  | 4724.908  | NM_001877 | 8917.138  | 9555.689  |
| NM_004177 | 2204.644  | 2354.738  | NM_014207 | 20661.203 | 21507.002 |
| NM_012429 | 2277.141  | 2137.235  | AF169158  | 1117.496  | 2683.051  |
| NM_004871 | 10138.127 | 9015.433  | AK002163  | 8806.936  | 9845.803  |
| NM_005698 | 11357.575 | 8649.326  | NM_002287 | 6884.844  | 7995.18   |
| AF202146  | 13659.066 | 9437.88   | NM_012344 | 8962.368  | 9261.813  |
| NM_006393 | 5437.283  | 2979.343  | NM_002351 | 5810.217  | 6787.998  |
| NM_014923 | 1841.293  | 800.464   | NM_014385 | 4281.86   | 5111.545  |
| NM_005477 | 35200.402 | 18182.777 | NM_001704 | 4119.839  | 3207.598  |
| NM_007018 | 1256.66   | 485.795   | AB036432  | 53056.891 | 55711.719 |
| NM_004318 | 3609.604  | 1334.177  | NM_003643 | 1895.32   | 1433.558  |
| L09089    | 6038.068  | 2377.137  | NM_003480 | 7975.719  | 7442.098  |
| NM_002640 | 4000.837  | 1846.448  | NM_004059 | 1389.593  | 1051.257  |
| NM_002537 | 12654.148 | 12536.7   | NM_001634 | 45435.91  | 35707.879 |
| NM_003139 | 6574.297  | 6952.629  | NM_002267 | 20495.848 | 16324.403 |
| NM_012316 | 8537.787  | 9569.032  | NM_006412 | 7693.421  | 7137.247  |
| NM_004059 | 1298.969  | 792.887   | NM_003063 | 27281.588 | 24474.037 |
| NM_001634 | 35665.23  | 30526.486 | NM_014041 | 41353.813 | 40624.398 |
| NM_002267 | 16850.094 | 13432.342 | NM_007169 | 19786.215 | 16996.496 |
| NM_006412 | 6782.497  | 5197.429  | NM_014313 | 1141.307  | 1091.902  |
| NM_003063 | 16212.535 | 10804.685 | AK024966  | 12499.883 | 12404.329 |
| NM_014041 | 38505.16  | 26118.018 | NM_017585 | 47432.652 | 45236.273 |
| NM_007169 | 18547.77  | 11905.432 | NM_000033 | 7100.406  | 6892.157  |
| NM_014313 | 1078.172  | 426.859   | AF224741  | 2398.098  | 2148.823  |
| AK024966  | 8114.547  | 4937.516  | NM_006594 | 8632.593  | 9448.767  |
| AF178941  | 57016.262 | 39252.66  | NM_004177 | 2536.104  | 3212.202  |
| NM_016033 | 17918.518 | 8579.498  | NM_012429 | 3523.075  | 3561.982  |
| NM_017585 | 32807.074 | 20012.678 | NM_004871 | 12031.777 | 10853.958 |
| U61737    | 63675.621 | 51913.371 | AB040903  | 742.749   | 671.275   |
| X06389    | 2453.037  | 1219.448  | NM_005698 | 14966.268 | 12681.004 |
| NM_000033 | 6611.817  | 4678.873  | AF202146  | 14155.192 | 12446.577 |
| NM_018026 | 9009.593  | 8714.984  | NM_014868 | 24239.658 | 25728.939 |
| NM_001707 | 33733.711 | 23160.654 | AL442089  | 46181.609 | 45960.375 |
| AK022983  | 1831.685  | 1093.011  | NM_001200 | 4697.722  | 4144.808  |
| NM_014868 | 15318.745 | 10577.323 | AB007964  | 1123.799  | 892.157   |
| AL442089  | 29856.928 | 22405.18  | AF128541  | 12355.452 | 11010.026 |
| NM_001200 | 5134.021  | 3015.56   | AK026305  | 19436.957 | 14518.486 |

|           |           |           |           |           |           |
|-----------|-----------|-----------|-----------|-----------|-----------|
| AF128541  | 8665.063  | 5725.895  | NM_002552 | 5672.162  | 4421.756  |
| AK026305  | 14802.242 | 8397.184  | NM_014321 | 12070.929 | 11581.204 |
| NM_002552 | 6637.484  | 4286.993  | AK022733  | 3976.219  | 3617.579  |
| NM_014321 | 15346.142 | 9057.684  | AB011132  | 12329.977 | 10662.301 |
| AK022733  | 4543.682  | 3292.397  | NM_020362 | 19498.754 | 19995.074 |
| AB011132  | 12785.324 | 8855.18   | AB040937  | 6006.951  | 5620.186  |
| NM_020362 | 19886.732 | 13740.163 | AF275798  | 48737.34  | 47360.887 |
| AB040937  | 7095.339  | 4346.994  | NM_016079 | 36798.77  | 30785.943 |
| AF275798  | 53432.379 | 44431.688 | AK023108  | 9343.654  | 9899.539  |
| NM_005441 | 23471.973 | 15014.753 | AF097025  | 30201.672 | 30031.234 |
| NM_016079 | 44555.539 | 37679.484 | Y11339    | 24040.063 | 20261.225 |
| AK023108  | 8921.809  | 7593.943  | AB030176  | 2064.456  | 2473.82   |
| AK026409  | 63090.137 | 52794.949 | NM_003937 | 1403.595  | 1643.048  |
| AF097025  | 26338.238 | 16995.875 | NM_002537 | 21734.834 | 18985.039 |
| Y11339    | 25660.869 | 19830.211 | NM_003139 | 8669.607  | 7469.389  |
| AB030176  | 2106.911  | 1499.938  | NM_012316 | 12537.126 | 11384.983 |
| NM_003937 | 1510.441  | 1165.218  | AK001393  | 42699.324 | 48322.777 |
| NM_172140 | 9071.056  | 12234.407 | NM_000023 | 21001.109 | 26056.645 |
| AK026783  | 1008.923  | 1064.296  | AF022654  | 3214.022  | 2839.702  |
| AF088040  | 431.915   | 1022.406  | NM_001143 | 2027.255  | 2384.841  |
| AK021814  | 2726.217  | 4223.447  | NM_003282 | 1567.929  | 1610.44   |
| AF088035  | 5263.69   | 6532.423  | AK022638  | 19261.795 | 16746.525 |
| AF086251  | 969.036   | 1730.87   | BG698409  | 17898.063 | 14257.328 |
| NM_018092 | 1514.264  | 362.689   | U36798    | 832.693   | 861.589   |
| AL109698  | 1131.706  | 852.024   | AA220921  | 22045.223 | 22756.377 |
| AF217980  | 8719.097  | 3408.37   | N67770    | 4667.409  | 4337.937  |
| AL117461  | 3514.756  | 2400.403  | AA486200  | 64960.77  | 57550.219 |
| NM_016499 | 1783.433  | 793.771   | U90065    | 1471.714  | 1398.359  |
| NM_172140 | 9722.877  | 4461.339  | AJ005898  | 25314.406 | 29481.113 |
| SR4       | 30157.77  | 42522.191 | BG248802  | 16794.152 | 16633.936 |
| SR6       | 4446.627  | 5813.457  | L19605    | 4344.015  | 4095.449  |
| SR8       | 17481.961 | 48216.777 | S74349    | 2327.897  | 2467.468  |
| SR10      | 51534.906 | 22725.732 | X07979    | 62075.488 | 56659.121 |
| CY3Cy5    | 3188.674  | 72.44     | BG324670  | 1563.124  | 1674.744  |
| AK000122  | 25776.762 | 28229.008 | BG744224  | 49720.77  | 50976.816 |
| AK023159  | 5743.073  | 7013.583  | NM_018026 | 15744.867 | 16749.76  |
| AK001091  | 13196.623 | 21176.971 | NM_001707 | 39133.766 | 37733.195 |
| U80775    | 1413.43   | 2492.078  | AK022983  | 2547.49   | 2640.668  |
| AF086428  | 5167.35   | 6576.798  | NM_014923 | 2199.823  | 2168.396  |
| AK025310  | 4697.427  | 6427.874  | NM_005477 | 41862.879 | 42487.469 |
| AL049353  | 1951.631  | 2847.641  | NM_007018 | 961.649   | 1116.404  |
| AL117598  | 2399.988  | 976.767   | NM_004318 | 3606.107  | 3612.694  |
| AL109670  | 2140.574  | 483.105   | L09089    | 6934.816  | 6022.028  |
| AF085831  | 1601.861  | 294.083   | NM_002640 | 4361.358  | 3633.087  |
| AL832149  | 4242.652  | 1597.496  | M15530    | 12128.297 | 11014.166 |
| AK022839  | 3013.549  | 1503.615  | NM_000488 | 2931.369  | 3120.843  |
| NM_018350 | 2060.561  | 1400.644  | NM_001877 | 9959.019  | 15269.116 |
| AK025839  | 3004.983  | 1121.216  | NM_014207 | 19876.529 | 23789.297 |
| NM_003946 | 4782.55   | 2615.355  | AK002163  | 7407.464  | 7981.491  |
| AB045292  | 5484.633  | 6573.46   | NM_002287 | 4021.054  | 4192.399  |
| AK025699  | 28123.42  | 37825.563 | NM_012344 | 7674.999  | 6492.21   |
| AF147316  | 853.926   | 1550.856  | NM_002351 | 5282.363  | 4832.248  |
| AF147353  | 712.852   | 2544.521  | NM_014385 | 4568.52   | 5087.459  |

|           |           |           |           |           |           |
|-----------|-----------|-----------|-----------|-----------|-----------|
| NM_018024 | 17610.221 | 21502.355 | NM_001704 | 3720.504  | 3168.128  |
| AK025826  | 6126.654  | 7789.225  | AB036432  | 50352.363 | 53125.82  |
| AK026439  | 3382.785  | 6116.008  | NM_003643 | 1934.684  | 1670.644  |
| AK025278  | 1494.205  | 1197.975  | NM_003480 | 8988.286  | 8742.759  |
| AK026466  | 1015.68   | 1456.734  | NM_012421 | 35422.727 | 40046.055 |
| AK026828  | 867.92    | 1596.921  | AB014601  | 5409.691  | 4445.787  |
| NM_003787 | 693.181   | 1245.965  | NM_002267 | 22782.455 | 24149.471 |
| AF147419  | 6417.213  | 2043.957  | NM_006412 | 8784.569  | 10011.967 |
| AK024280  | 1516.319  | 517.568   | NM_003063 | 26322.094 | 26550.814 |
| AF075036  | 3136.933  | 1502.621  | NM_014041 | 43939.176 | 45444.348 |
| NM_014797 | 5557.183  | 3096.998  | NM_007169 | 19995.748 | 18222.133 |
| AK027139  | 1608.946  | 903.264   | NM_014313 | 1154.841  | 1048.568  |
| AL831841  | 5500.068  | 2244.191  | AK024966  | 11672.022 | 8678.781  |
| AL110165  | 7058.501  | 10212.382 | NM_017585 | 47587.918 | 44872.965 |
| AL117652  | 3682.173  | 5970.146  | NM_000033 | 6853.719  | 7615.374  |
| AL050168  | 7649.682  | 11276.506 | AF224741  | 2132.758  | 1852.151  |
| AL117447  | 2987.075  | 4993.828  | NM_006594 | 6612.08   | 6530.084  |
| AL122122  | 6021.414  | 8485.295  | NM_004177 | 2024.256  | 1843.102  |
| AK022135  | 4307.963  | 4674.869  | NM_012429 | 2381.18   | 2128.399  |
| AK022898  | 1144.986  | 2272.387  | NM_004871 | 10210.265 | 8819.189  |
| NM_017559 | 57263.422 | 65128.18  | AB040903  | 551.299   | 583.982   |
| NM_014896 | 2374.792  | 3520.763  | NM_005698 | 14453.522 | 14664.557 |
| AF009269  | 2698.165  | 4086.102  | AF202146  | 15059.926 | 13968.847 |
| AF009313  | 5291.344  | 3492.384  | NM_006393 | 11583.164 | 9486.957  |
| AF090887  | 1290.927  | 288.684   | X83412    | 789.302   | 760.618   |
| NM_015883 | 2789.736  | 1297.481  | NM_001200 | 4026.965  | 5066.794  |
| AF056429  | 1198.289  | 497.882   | AB007964  | 1029.922  | 1220.391  |
| AF070547  | 5449.315  | 2977.164  | AF128541  | 9894.125  | 11656.294 |
| AK021609  | 795.625   | 1199.769  | AK026305  | 19105.367 | 18915.236 |
| AK021801  | 1133.316  | 1580.829  | NM_002552 | 7453.397  | 8492.604  |
| AK001153  | 763.147   | 1377.074  | NM_014321 | 13380.697 | 13448.512 |
| AK002184  | 2113.689  | 3283.333  | AK022733  | 3934.902  | 3733.539  |
| AK021652  | 1313.474  | 2259.591  | AB011132  | 11486.559 | 10665.794 |
| AK021859  | 874.441   | 569.717   | NM_020362 | 18448.17  | 17767.016 |
| M64700    | 1027.042  | 829.829   | AB040937  | 6216.347  | 5660.235  |
| NM_001267 | 1657.264  | 1961.587  | AF275798  | 49049.027 | 47781.922 |
| L41143    | 19346.879 | 29987.227 | NM_005441 | 17182.16  | 16535.857 |
| NM_005331 | 66205.336 | 85121.719 | NM_016079 | 37369.875 | 37852.383 |
| NM_014111 | 2459.788  | 3813.884  | AK023108  | 9427.838  | 9459.94   |
| S85075    | 2076.48   | 2699.362  | AK026409  | 63494.852 | 57448.57  |
| AJ008129  | 8903.28   | 11090.505 | AF097025  | 24994.324 | 23403.4   |
| AJ008158  | 1425.25   | 2121.006  | Y11339    | 25227.576 | 22500.238 |
| AF161451  | 21295.918 | 15829     | AB030176  | 1836.023  | 1819.275  |
| X02067    | 37484.277 | 25472.16  | NM_003937 | 1532.833  | 1135.01   |
| AY007163  | 21493.18  | 11102.049 | NM_002537 | 20568.084 | 18247.779 |
| NM_006236 | 63235.379 | 54898.5   | NM_003139 | 8512.546  | 7064.772  |
| AK023734  | 2235.945  | 1597.602  | NM_012316 | 11162.051 | 11660.182 |
| D17265    | 44480.984 | 19509.445 | NM_004059 | 1263.186  | 1279.569  |
| AF085827  | 3375.803  | 2860.657  | NM_001634 | 42990.828 | 34025.711 |
| AK002171  | 18098.713 | 23882.543 | AF022654  | 1769.504  | 2021.677  |
| AJ002572  | 6333.377  | 8323.953  | NM_001143 | 2349.954  | 2719.119  |
| AK026897  | 16259.864 | 22688.217 | NM_003282 | 1445.625  | 2049.388  |
| AB037861  | 14898.107 | 18101.18  | AK022638  | 20251.189 | 22058.174 |

|           |           |           |           |           |           |
|-----------|-----------|-----------|-----------|-----------|-----------|
| AK021887  | 17733.385 | 20425.561 | BG698409  | 18774.773 | 18930.195 |
| AF086180  | 50085.59  | 54246.215 | U36798    | 1230.287  | 1652.263  |
| NM_002503 | 65477.164 | 59092.238 | AA220921  | 23323.953 | 28531.955 |
| NM_005319 | 11657.354 | 12224.951 | N67770    | 4739.886  | 5089.444  |
| NM_019058 | 1473.822  | 2131.32   | AA486200  | 64631.227 | 59447.594 |
| AK022351  | 3325.748  | 2169.937  | U90065    | 1618.256  | 1717.084  |
| S74319    | 578.441   | 847.19    | AJ005898  | 29386.217 | 28073.262 |
| AK022059  | 937.044   | 1771.591  | X57303    | 19967.598 | 19371.977 |
| NM_020194 | 8673.44   | 10906.909 | AA463224  | 3310.917  | 2833.243  |
| AK026853  | 1661.942  | 2111.991  | BG248802  | 17771.016 | 18004.844 |
| AF038183  | 44715.184 | 56576.648 | L19605    | 3594.856  | 3652.154  |
| NM_017882 | 8896.744  | 13005.888 | AA876532  | 28243.576 | 33237.371 |
| NM_003521 | 3354.058  | 3112.976  | S74349    | 1749.649  | 1770.28   |
| NM_003547 | 4337.245  | 2865.407  | X07979    | 63239.941 | 58795.957 |
| AL049980  | 9296.022  | 9937.962  | BG324670  | 870.096   | 851.439   |
| AF070529  | 1844.19   | 2034.707  | BG744224  | 46807.184 | 48069.426 |
| AK022978  | 6062.488  | 3843.455  | NM_018026 | 15413.218 | 16416.141 |
| AK021447  | 12637.659 | 11288.445 | NM_001707 | 37580.559 | 37931.496 |
| AK025096  | 5038.014  | 6738.668  | AK022983  | 2640.84   | 2448.018  |
| L31955    | 820.873   | 1293.958  | NM_014868 | 19739.809 | 19563.729 |
| AF131774  | 6635.023  | 9990.584  | AL442089  | 42825.27  | 39212.734 |
| AK025793  | 1253.959  | 2891.65   | NM_000949 | 968.917   | 643.138   |
| AK000151  | 1566.497  | 2495.99   | M15530    | 13783.216 | 16340.24  |
| AL389942  | 3980.281  | 7237.979  | NM_000488 | 3043.927  | 3671.395  |
| D17052    | 10963.602 | 13324.417 | NM_001877 | 9642.727  | 12881.181 |
| D28378    | 67936.102 | 73526.734 | NM_014207 | 18944.492 | 20013.732 |
| AL137479  | 1242.983  | 596.116   | AF169158  | 710.567   | 582.553   |
| NM_004211 | 5894.731  | 6886.991  | AK002163  | 7951.569  | 7071.37   |
| Y10776    | 7235.18   | 8914.02   | NM_002287 | 5209.468  | 5589.998  |
| AK027241  | 12978.212 | 7723.364  | NM_012344 | 10093.445 | 11676.896 |
| NM_006978 | 8993.897  | 11791.417 | NM_002351 | 6204.499  | 8083.251  |
| NM_004561 | 2068.981  | 3196.666  | NM_014385 | 4628.89   | 4952.55   |
| AK024812  | 8082.803  | 11331.453 | NM_001704 | 3853.602  | 3635.064  |
| M20642    | 2114.296  | 3093.567  | AB036432  | 59823.969 | 53599.715 |
| AK026412  | 3708.65   | 6217.844  | NM_014872 | 8274.039  | 8087.942  |
| X89669    | 5485.263  | 7876.032  | NM_003643 | 1387.498  | 1814.967  |
| U92013    | 38809.43  | 52223.789 | NM_003480 | 9514.929  | 7263.27   |
| AK023965  | 5735.212  | 7274.805  | NM_000899 | 1919.271  | 1841.823  |
| AK026211  | 2116.042  | 2865.591  | NM_032951 | 4690.954  | 5352.609  |
| X58968    | 10927.411 | 15554.292 | NM_000503 | 32092.23  | 40877.344 |
| U92020    | 12548.389 | 14991.022 | NM_002405 | 35337.711 | 37393.172 |
| AL117542  | 2521.105  | 3090.174  | AK000004  | 6049.197  | 5204.596  |
| X04215    | 1475.473  | 1569.673  | NM_012421 | 33555.277 | 34381.695 |
| NM_017782 | 14934.764 | 13780.329 | AB014601  | 5032.209  | 5261.368  |
| NM_018149 | 13991.598 | 19841.787 | AK001393  | 36142.527 | 39485.07  |
| D16944    | 2035.931  | 2624.16   | NM_000023 | 24524.791 | 19669.68  |
| NM_018468 | 29350.578 | 43537.91  | NM_014861 | 3100.081  | 3911.417  |
| Z36814    | 4155.394  | 6063.905  | NM_012434 | 5931.839  | 6110.38   |
| D17045    | 1714.355  | 2115.123  | NM_005694 | 20358.07  | 21960.008 |
| AK000827  | 5284.89   | 4554.854  | M91368    | 529.978   | 512.374   |
| AB040878  | 6653.899  | 5942.684  | AF224741  | 2519.831  | 3339.083  |
| S74647    | 2359.832  | 3748.999  | NM_006594 | 9440.513  | 11186.767 |
| NM_003506 | 1629.893  | 1553.431  | NM_004177 | 2932.16   | 2922.782  |



|           |           |           |           |           |           |
|-----------|-----------|-----------|-----------|-----------|-----------|
| NM_018093 | 32524.188 | 47702.957 | NM_012429 | 3112.787  | 2999.557  |
| NM_003389 | 2815.709  | 4170.477  | NM_004871 | 11546.734 | 10723.592 |
| NM_000430 | 4202.009  | 5392.07   | NM_005698 | 15563.962 | 13027.65  |
| AB033030  | 2944.165  | 3745.711  | AF202146  | 17282.719 | 16063.494 |
| NM_016656 | 2732.762  | 2510.889  | NM_006393 | 21021.783 | 21200.986 |
| NM_015963 | 20852.078 | 14706.455 | NM_014923 | 2487.335  | 1823.377  |
| AB007871  | 31301.053 | 29501.52  | NM_005477 | 44413.992 | 46207.258 |
| NM_017813 | 16148.129 | 13918.2   | NM_007018 | 1071.888  | 1031.398  |
| NM_003840 | 25186.621 | 39649.324 | NM_004318 | 3578.064  | 2687.97   |
| NM_018378 | 3207.654  | 4303.585  | L09089    | 5489.185  | 4445.666  |
| NM_018423 | 3798.658  | 4931.89   | NM_002640 | 3956.926  | 3680.086  |
| NM_000745 | 9348.947  | 10794.671 | NM_002537 | 22711.141 | 21756.469 |
| AF116705  | 39771.988 | 52865.352 | NM_003139 | 8223.018  | 8211.144  |
| NM_004460 | 2406.441  | 3103.874  | NM_012316 | 13786.325 | 14483.815 |
| NM_006072 | 9238.321  | 12581.247 | NM_004059 | 1357.246  | 834.366   |
| BE794490  | 2550.876  | 3535.199  | NM_001634 | 45479.527 | 38869.664 |
| NM_003561 | 5789.955  | 7937.706  | NM_014302 | 876.152   | 524.212   |
| NM_002991 | 840.473   | 690.946   | NM_002267 | 25452.926 | 23165.707 |
| AJ008149  | 41978.535 | 16606.998 | NM_006412 | 11576.401 | 14849.592 |
| NM_001192 | 2575.068  | 2546.524  | NM_003063 | 36489.496 | 36587.395 |
| NM_002353 | 2812.437  | 3289.642  | NM_014041 | 43575.945 | 48336.773 |
| NM_012153 | 4426.493  | 2875.324  | NM_007169 | 24941.301 | 27921.988 |
| NM_013241 | 3973.769  | 4356.303  | NM_014313 | 1164.632  | 1153.549  |
| Z24725    | 651.589   | 972.794   | AK024966  | 15880.895 | 15147.712 |
| AF161362  | 11908.926 | 11925.929 | AF178941  | 60854.961 | 58489.012 |
| AK024078  | 1092.508  | 1512.079  | NM_016033 | 20296.959 | 17552.707 |
| NM_015939 | 19706.512 | 21115.648 | NM_017585 | 51307.16  | 52303.145 |
| AB046840  | 3132.99   | 3353.182  | U61737    | 60819.246 | 56714.301 |
| AF174487  | 5577.193  | 4510.79   | Y10506    | 375.099   | 503.215   |
| NM_006407 | 22827.848 | 26756.736 | X06389    | 4330.202  | 3934.929  |
| NM_007373 | 14509.517 | 12474.031 | NM_000033 | 8386.739  | 7802.608  |
| M34572    | 1509.97   | 1931.304  | NM_018026 | 14291.269 | 14586.678 |
| NM_004791 | 1973.558  | 1685.67   | NM_001707 | 38884.289 | 38211.051 |
| X55525    | 2811.251  | 1604.251  | AK022983  | 2439.434  | 3001.013  |
| NM_001873 | 1292.452  | 1191.484  | NM_014868 | 20788.305 | 22532.816 |
| AB029025  | 1685.613  | 2264.228  | AL442089  | 54323.48  | 46780.777 |
| NM_007100 | 67751.258 | 62239.977 | X83412    | 645.51    | 829.4     |
| NM_003940 | 2172.772  | 3416.198  | NM_001200 | 4528.303  | 4927.244  |
| M26880    | 1196.988  | 1009.684  | AB007964  | 1178.88   | 1162.438  |
| NM_016572 | 1779.717  | 1420.159  | AF128541  | 14252.032 | 14402.17  |
| NM_000027 | 2598.099  | 2156.108  | AK026305  | 26536.887 | 28672.014 |
| NM_017548 | 60211.746 | 57614.695 | NM_002552 | 8151.027  | 11661.138 |
| AF134802  | 13737.743 | 10399.279 | NM_014321 | 15987.476 | 15471.364 |
| NM_018222 | 2037.687  | 2712.895  | AK022733  | 4845.331  | 4514.635  |
| NM_004308 | 27697.32  | 30335.789 | AB011132  | 12830.604 | 13093.248 |
| AF112366  | 5964.73   | 7591.674  | NM_020362 | 20857.703 | 21330.541 |
| NM_004274 | 3487.081  | 4760.563  | AB040937  | 5970.976  | 5402.677  |
| AK024002  | 31957.83  | 46483.629 | AF275798  | 46942.859 | 31306.986 |
| NM_020399 | 23006.865 | 29638.432 | NM_005441 | 18381.121 | 16638.289 |
| NM_004071 | 4482.417  | 2988.989  | NM_016079 | 41936.102 | 39831.852 |
| NM_001316 | 25184.953 | 12307.619 | AK023108  | 9479.229  | 8714.317  |
| NM_004264 | 2737.846  | 1537.715  | AK026409  | 63265.586 | 64952.719 |
| AK024788  | 5405.417  | 5174.037  | AF097025  | 27743.393 | 24665.447 |

|           |           |           |           |           |           |
|-----------|-----------|-----------|-----------|-----------|-----------|
| AK022696  | 5622.863  | 3403.261  | Y11339    | 25317.268 | 18481.328 |
| NM_001206 | 4662.31   | 7037.673  | AB030176  | 2286.446  | 2144.158  |
| NM_005016 | 7425.555  | 10137.005 | NM_003937 | 1296.013  | 1193.376  |
| NM_014469 | 7427.175  | 9235.666  | CY3Cy5    | 10135.687 | 314.717   |
| NM_014852 | 12189.926 | 15089.033 | NM_172140 | 8449.099  | 7662.669  |
| NM_000344 | 27064.588 | 19733.047 | AK026783  | 1193.35   | 884.928   |
| AF248650  | 11351.497 | 6100.567  | AK021814  | 2373.459  | 2154.044  |
| S74678    | 61217.816 | 46073.723 | AF088035  | 2982.603  | 2579.408  |
| AF248651  | 3331.577  | 3037.263  | AF086251  | 887.03    | 1227.872  |
| NM_001356 | 46422.691 | 47554.023 | NM_018092 | 1510.457  | 1553.652  |
| NM_004836 | 27269.967 | 26277.529 | AF217980  | 7536.673  | 6623.987  |
| AB037751  | 19858.338 | 19780.314 | AL117461  | 3144.681  | 2656.86   |
| S79281    | 28977.998 | 26958.221 | NM_016499 | 2993.631  | 3348.514  |
| AK025585  | 8725.789  | 7361.09   | NM_172140 | 5278.633  | 4310.467  |
| NM_001414 | 23783.629 | 34228.219 | SR2       | 56850.301 | 54707.652 |
| D16891    | 21565.078 | 25195.809 | SR4       | 16463.422 | 13931.556 |
| NM_017760 | 25095.414 | 27815.588 | SR10      | 31907.176 | 10237.352 |
| NM_015936 | 29798.789 | 42183.891 | CY3Cy5    | 9383.301  | 293.528   |
| Z36876    | 5221.096  | 7019.806  | AK000122  | 28818.658 | 25243.922 |
| NM_000892 | 1567.105  | 1167.138  | AK023159  | 3862.096  | 3500.464  |
| NM_000126 | 28752.174 | 10803.617 | AK001091  | 13049.792 | 11948.651 |
| AK022291  | 2068.089  | 1217.409  | U80775    | 1422.46   | 1062.68   |
| BF239974  | 9598.887  | 9396.345  | AF086428  | 3964.711  | 3290.492  |
| NM_000104 | 2605.767  | 2607.578  | AK025310  | 2221.387  | 1384.675  |
| NM_005015 | 35151.809 | 20047.559 | AL117598  | 4215.082  | 3802.85   |
| NM_004255 | 67200.563 | 71085.242 | AL109670  | 3592.28   | 3696.976  |
| NM_000266 | 65538.156 | 68899.945 | AF085831  | 2690.259  | 3238.395  |
| AF182288  | 13329.208 | 15824.829 | AL832149  | 6248.957  | 6326.067  |
| NM_004491 | 5076.103  | 3017.922  | NM_018350 | 2609.994  | 3546.966  |
| AK026810  | 7490.618  | 3417.697  | AK025839  | 2369.976  | 1808.102  |
| NM_015629 | 21580.947 | 13594.13  | NM_003946 | 2655.05   | 2824.581  |
| AF218032  | 17033.656 | 11898.38  | AB045292  | 3037.784  | 3085.419  |
| NM_017542 | 19790.58  | 20257.449 | AK022998  | 2146.769  | 1729.316  |
| AK024407  | 2927.151  | 3581.028  | AK025699  | 10730.132 | 11237.072 |
| NM_018419 | 1558.862  | 2220.931  | NM_018024 | 8867.483  | 8658.38   |
| NM_014240 | 6334.093  | 7528.392  | AK025826  | 3228.892  | 2782.934  |
| BE379399  | 3496.444  | 4275.9    | AK026439  | 4522.286  | 4208.638  |
| NM_015877 | 14144.405 | 18137.482 | AK025278  | 1780.766  | 1334.48   |
| AF060935  | 14833.598 | 13806.79  | AF147419  | 14754.408 | 17700.529 |
| AK026886  | 2678.098  | 3428.77   | AK024280  | 3297.916  | 3656.566  |
| D83778    | 2994.384  | 1442.761  | AF075036  | 5126.417  | 5013.813  |
| NM_006470 | 3629.881  | 2022.934  | AK027139  | 1790.394  | 2093.84   |
| NM_002855 | 37437.758 | 20692.498 | AL110165  | 4980.882  | 5597.115  |
| AB038463  | 2569.066  | 2291.384  | AL117652  | 1105.283  | 1336.122  |
| M30262    | 9015.353  | 7018.603  | AL122122  | 2283.065  | 2187.576  |
| NM_005460 | 1250.833  | 998.181   | AK022135  | 5534.271  | 4537.34   |
| AF160477  | 8970.115  | 11654.848 | AK022898  | 1162.824  | 1203.12   |
| M12883    | 10028.728 | 10188.305 | NM_017559 | 59057.105 | 57788.828 |
| BG288747  | 12760.776 | 17563.742 | NM_014896 | 1954.649  | 1985.04   |
| U37448    | 2062.875  | 1928.329  | AF009269  | 3018.457  | 3338.006  |
| BG435851  | 870.148   | 1028.141  | AF009313  | 6645.632  | 7541.767  |
| AA927698  | 1203.083  | 1363.341  | AF056420  | 950.427   | 863.49    |
| AI498426  | 3715.272  | 4893.154  | AF090887  | 2299.919  | 3026.984  |

|           |           |           |           |           |           |
|-----------|-----------|-----------|-----------|-----------|-----------|
| BG824773  | 1078.738  | 1222.787  | AF009279  | 1490.117  | 839.913   |
| D01038    | 50077.332 | 48742.07  | AK001110  | 18643.486 | 17294.908 |
| J05008    | 2896.536  | 4150.986  | AK021652  | 1300.938  | 1931.453  |
| U11087    | 2237.149  | 2986.538  | M64700    | 1299.484  | 1212.17   |
| D50640    | 1355.518  | 1669.109  | NM_001267 | 1452.849  | 1458.759  |
| D43747    | 1371.086  | 1520.224  | L41143    | 13756.1   | 12854.007 |
| M98776    | 4947.732  | 5442.2    | NM_005331 | 67471.789 | 68283.039 |
| X99135    | 63890.031 | 62842.762 | NM_014111 | 3500.997  | 3889.02   |
| AF009744  | 5622.11   | 5447.702  | S85075    | 1964.527  | 2195.418  |
| AF104921  | 44017.207 | 34981.344 | AJ008129  | 7681.054  | 7344.071  |
| NM_00069E | 58115.363 | 46394.195 | AJ008158  | 1017.281  | 1443.614  |
| AF031167  | 723.55    | 589.429   | AF161451  | 27769.658 | 29777.576 |
| NM_003204 | 13847.79  | 8546.624  | X02067    | 37569.93  | 32733.547 |
| AF254069  | 1438.539  | 876.061   | AY007163  | 29599.111 | 26972.611 |
| AL117600  | 24207.783 | 26215.441 | NM_006236 | 67785.883 | 63439.949 |
| NM_001712 | 3462.132  | 4794.205  | AK023734  | 4525.944  | 4645.95   |
| NM_004487 | 63738.246 | 72778.859 | AF085827  | 3834.306  | 4432.503  |
| AB029000  | 12184.98  | 15121.476 | AK002171  | 9958.438  | 8529.789  |
| AK026965  | 54400.461 | 59874.883 | AJ002572  | 3823.422  | 4223.975  |
| AK025859  | 12158.908 | 7014.14   | AK026897  | 11935.633 | 14846.828 |
| AL117499  | 34816.617 | 23742.486 | AF086180  | 34506.691 | 38822.48  |
| NM_007054 | 3978.6    | 3122.807  | NM_002503 | 67833.43  | 67096.375 |
| AB007957  | 1874.632  | 1989.951  | NM_005319 | 9879.149  | 7500.954  |
| AK000160  | 2721.609  | 3099.503  | NM_01905E | 1565.055  | 1253.182  |
| NM_005311 | 2393.696  | 2638.856  | AK022351  | 3828.918  | 3271.374  |
| NM_01623E | 947.822   | 1061.293  | NM_020194 | 8172.242  | 8812.372  |
| NM_00096C | 2090.491  | 2803.337  | AK026853  | 1418.499  | 1489.088  |
| NM_00535E | 12546.743 | 13382.136 | AF038183  | 45183.598 | 51744.68  |
| NM_002511 | 3136.875  | 3909.552  | NM_017882 | 8245.95   | 8157.986  |
| NM_000794 | 758.795   | 1201.19   | NM_003521 | 5221.537  | 5611.155  |
| NM_00408E | 9834.457  | 6412.008  | NM_003547 | 5953.444  | 4340.811  |
| NM_006032 | 15694.286 | 8053.214  | AL049980  | 11083.75  | 11096.669 |
| NM_01478E | 9649.531  | 3529.942  | AF070529  | 3106.771  | 2840.597  |
| NM_002153 | 1415.894  | 2043.953  | AK022978  | 6832.043  | 5856.945  |
| AB040890  | 4027.087  | 4572.144  | AK021447  | 15275.759 | 15083.216 |
| AK024233  | 3077.923  | 2816.333  | AK025096  | 4790.794  | 5529.003  |
| AK021870  | 2052.394  | 1906.543  | AF131774  | 4628.249  | 5836.047  |
| U06680    | 3752.439  | 4772.171  | AK025793  | 1204.831  | 1829.911  |
| NM_005123 | 1531.265  | 2586.823  | D17052    | 7867.048  | 7360.036  |
| NM_015584 | 22540.029 | 27163.102 | D28378    | 68133.773 | 64668.348 |
| NM_001697 | 64777.422 | 53506.516 | AL137479  | 1616.511  | 1713.718  |
| NM_01609E | 56299.766 | 55430.609 | NM_004211 | 6074.726  | 5358.044  |
| AK025125  | 1157.109  | 1148.156  | Y10776    | 5547.89   | 4572.565  |
| AF156548  | 4568.529  | 3954.927  | AK027241  | 17082.424 | 15693.902 |
| NM_004663 | 4173.82   | 3539.124  | NM_00697E | 7130.846  | 7467.812  |
| AB024411  | 2364.505  | 2710.006  | NM_004561 | 1481.733  | 1189.385  |
| NM_002444 | 32657.91  | 37963.176 | AK024812  | 6809.389  | 7989.381  |
| NM_001104 | 5131.116  | 4704.607  | M20642    | 1716.982  | 1746.131  |
| NM_00298E | 16576.699 | 19749.742 | AK026412  | 3957.699  | 4792.521  |
| U88898    | 3003.09   | 3872.491  | X89669    | 7536.191  | 8452.895  |
| NM_020154 | 44304.586 | 51846.086 | U92013    | 51899.379 | 51366.211 |
| NM_00466E | 16818.119 | 17877.902 | AK023965  | 5185.449  | 5260.026  |
| NM_00530C | 5250.591  | 5697.015  | AK026211  | 1996.28   | 1884.24   |

|           |           |           |           |           |           |
|-----------|-----------|-----------|-----------|-----------|-----------|
| NM_000893 | 1727.304  | 1442.532  | X58968    | 7044.034  | 7377.274  |
| NM_014070 | 2730.064  | 960.068   | U92020    | 16146.962 | 15741.604 |
| NM_016280 | 1662.587  | 1277.421  | AL117542  | 5992.284  | 4842.993  |
| NM_016027 | 1667.068  | 2274.277  | AL109712  | 66927.031 | 67185.539 |
| NM_014297 | 5692.687  | 3351.363  | X04215    | 2804.02   | 2711.845  |
| NM_018156 | 49111.188 | 41737.285 | NM_017782 | 15547.51  | 17002.236 |
| X98266    | 3934.633  | 3432.252  | NM_018149 | 9909.928  | 12811.915 |
| U00930    | 51730.164 | 50436.301 | D16944    | 1611.318  | 1420.686  |
| AK024958  | 4619.059  | 6061.173  | D17045    | 2060.181  | 1341.024  |
| NM_014575 | 13169.98  | 13995.064 | AK000827  | 4822.553  | 5311.599  |
| NM_002439 | 12356.049 | 5978.828  | NM_000242 | 1085.372  | 980.395   |
| AL117552  | 3114.537  | 1731.766  | AB040878  | 4730.357  | 3707.711  |
| NM_002692 | 20319.842 | 13000.063 | S74647    | 2254.557  | 1982.721  |
| NM_007064 | 7659.292  | 6083.823  | NM_003506 | 2425.382  | 2352.836  |
| NM_006281 | 2770.288  | 2106.502  | NM_018093 | 26431.154 | 20895.393 |
| NM_002738 | 5524.663  | 4729.206  | NM_003389 | 4607.896  | 4934.147  |
| U23460    | 66701.664 | 61093.039 | NM_000430 | 4062.299  | 4067.489  |
| NM_005356 | 12479.184 | 15320.118 | AB033030  | 4226.589  | 4777.156  |
| Z25434    | 9557.946  | 11485.464 | NM_016656 | 2296.913  | 1812.964  |
| NM_012396 | 27003.248 | 37059.902 | NM_015963 | 22738.303 | 22884.457 |
| AF229804  | 46143.48  | 50411.789 | NM_017813 | 15527.557 | 15117.941 |
| AF151638  | 1277.394  | 1367.763  | NM_003840 | 22892.785 | 25082.244 |
| U90552    | 8788.666  | 7360.721  | NM_018378 | 4347.905  | 4852.062  |
| AB038463  | 2574.259  | 1255.643  | NM_018423 | 3785.918  | 2954.709  |
| M30262    | 9190.088  | 4440.409  | NM_001741 | 29045.193 | 32111.523 |
| NM_005460 | 1602.151  | 1311.798  | NM_000745 | 8329.092  | 8119.716  |
| AF160477  | 9539.102  | 10337.081 | AF116705  | 45172.289 | 49541.879 |
| M12883    | 7171.438  | 6208.186  | NM_004460 | 1634.74   | 1237.446  |
| BG288747  | 11838.261 | 14815.189 | NM_006072 | 5309.074  | 4793.25   |
| BG617923  | 1201.529  | 2140.888  | BE794490  | 1717.798  | 1209.667  |
| U37448    | 3929.163  | 4896.842  | AJ008149  | 52746.473 | 56181.496 |
| BG435851  | 718.179   | 1050.474  | NM_001192 | 2595.06   | 2130.763  |
| AA927698  | 667.667   | 571.768   | NM_002353 | 2361.094  | 1623.794  |
| AI498426  | 1959.278  | 1464.414  | NM_012153 | 5080.782  | 4125.087  |
| BG824773  | 875.482   | 457.18    | NM_013241 | 2854.678  | 2743.166  |
| AB019205  | 3725.319  | 2322.032  | Z24725    | 1148.129  | 1334.579  |
| J05008    | 2300.686  | 2185.312  | AF161362  | 10014.463 | 10109.166 |
| U11087    | 4152.637  | 3995.826  | AK024078  | 963.917   | 1405.74   |
| D50640    | 1461.911  | 2212.452  | NM_003928 | 68238.57  | 64259.98  |
| D43747    | 638.776   | 1925.694  | NM_015939 | 21668.313 | 20620.76  |
| M98776    | 4240.722  | 5321.304  | AB046840  | 3646.368  | 4076.799  |
| AF009744  | 8092.63   | 9016.409  | AF174487  | 9861.686  | 11032.949 |
| NM_001072 | 2192.036  | 1323.479  | NM_017699 | 314.973   | 1075.223  |
| AF031167  | 872.475   | 356.754   | NM_005041 | 1553.273  | 948.157   |
| NM_003204 | 13338.97  | 5967.282  | NM_006407 | 16017.989 | 13543.795 |
| AF254069  | 1364.679  | 961.558   | X55525    | 3164.229  | 2947.705  |
| AL117600  | 22360.818 | 21075.369 | NM_005046 | 975.866   | 1337.386  |
| NM_001712 | 2426.419  | 2161.1    | NM_001873 | 1328.479  | 1474.939  |
| NM_004487 | 53770.895 | 52992.797 | AB029025  | 1488.109  | 1886.076  |
| AB029000  | 11038.239 | 9483.29   | NM_001308 | 414.27    | 903.59    |
| AK026965  | 59415.371 | 62864.496 | NM_007100 | 68065.141 | 64808.398 |
| AK025859  | 17564.465 | 22537.186 | NM_003940 | 1987.735  | 1561.852  |
| AL117499  | 32612.479 | 40763.145 | M26880    | 1120.439  | 857.848   |

|           |           |           |           |           |           |
|-----------|-----------|-----------|-----------|-----------|-----------|
| NM_007054 | 3139.492  | 1997.619  | NM_000027 | 2696.903  | 2955.295  |
| AB007957  | 1331.493  | 892.407   | NM_017548 | 65442.809 | 62482.93  |
| AK000160  | 2375.947  | 2328.812  | AF134802  | 16556.277 | 19472.064 |
| NM_005311 | 2260.056  | 1755.939  | NM_018222 | 4877.784  | 4376.732  |
| NM_005905 | 5449.919  | 4000.285  | NM_005740 | 9398.382  | 10118.181 |
| NM_016235 | 604.457   | 812.623   | NM_004308 | 31498.656 | 36387.102 |
| NM_000960 | 2742.274  | 3399.401  | AF112366  | 7757.612  | 5217.758  |
| AF172932  | 714.67    | 1084.304  | NM_004274 | 4629.285  | 3490.457  |
| NM_005355 | 12175.817 | 14402.862 | NM_001316 | 29003.82  | 31129.721 |
| NM_002511 | 2367.18   | 2464.982  | NM_004264 | 3283.069  | 2783.119  |
| NM_000794 | 704.801   | 1382.596  | AK024788  | 4227.394  | 2879.654  |
| NM_004085 | 14078.854 | 20370.949 | NM_004473 | 1284.484  | 1179.505  |
| NM_006470 | 6649.86   | 7327.698  | AK022696  | 6436.701  | 5006.102  |
| NM_002855 | 22619.068 | 18024.729 | NM_001206 | 3909.543  | 4358.039  |
| NM_002153 | 1333.961  | 1202.874  | NM_005016 | 7000.308  | 7432.695  |
| AB040890  | 2457.969  | 1846.034  | NM_014469 | 8597.726  | 9626.782  |
| AK024233  | 3440.434  | 2632.33   | NM_014852 | 17630.482 | 17846.4   |
| AK021870  | 1705.46   | 2095.822  | NM_000344 | 33132.93  | 43972.574 |
| U06680    | 3718.419  | 4326.525  | AF248650  | 13429.941 | 14205.759 |
| NM_005123 | 829.854   | 1082.356  | S74678    | 66571.344 | 58946.141 |
| NM_015584 | 24547.25  | 32006.5   | AF248651  | 4447.657  | 4684.486  |
| NM_001697 | 62572.027 | 65368.727 | NM_001358 | 46954.906 | 51324.492 |
| NM_016095 | 61232.82  | 58255.816 | NM_004836 | 37441.543 | 36762.051 |
| AK025125  | 941.549   | 893.167   | AB037751  | 22576.463 | 27084.039 |
| AF156548  | 3787.272  | 3154.04   | S79281    | 15671.218 | 13271.381 |
| NM_004663 | 4195.78   | 4055.916  | AK025585  | 8220.674  | 5086.292  |
| AB024411  | 3173.161  | 4150.898  | NM_001414 | 14883.113 | 10825.221 |
| NM_002444 | 26427.449 | 24241.244 | D16891    | 13279.684 | 8370.155  |
| NM_001104 | 5537.628  | 5712.014  | NM_017760 | 11582.472 | 6036.968  |
| NM_002985 | 16201.626 | 20367.797 | NM_000126 | 33730.656 | 36277.719 |
| U88898    | 2264.699  | 3355.995  | AK022291  | 2575.45   | 1918.89   |
| NM_020154 | 45620.465 | 49554.254 | BF239974  | 9681.377  | 8141.028  |
| NM_004665 | 12923.114 | 9184.8    | NM_000104 | 4233.313  | 4401.46   |
| NM_005300 | 7124.321  | 8464.565  | NM_005015 | 42193.332 | 51518.422 |
| NM_000893 | 2798.937  | 4580.842  | NM_004255 | 65589.164 | 67656.969 |
| NM_000695 | 43650.281 | 52316.457 | NM_000269 | 66978.078 | 65013.676 |
| NM_005091 | 1223.589  | 666.434   | AF182288  | 11653.399 | 13498.299 |
| NM_016280 | 1504.896  | 287.285   | NM_004491 | 7037.387  | 5561.309  |
| NM_016027 | 1480.396  | 392.524   | L14787    | 1191.996  | 571.602   |
| NM_014297 | 5337.538  | 2977.115  | AK026810  | 8975.008  | 7953.612  |
| NM_018156 | 50194.57  | 42872.41  | NM_015629 | 25791.824 | 29086.248 |
| X98266    | 4233.806  | 4529.137  | AF218032  | 20167.213 | 17795.039 |
| U00930    | 32961.914 | 21464.076 | NM_017542 | 24836.313 | 25671.379 |
| AK024958  | 2791.277  | 3068.094  | AK024407  | 4256.878  | 4537.071  |
| NM_014575 | 14404.987 | 13837.235 | NM_004182 | 61835.629 | 54988.285 |
| NM_002435 | 16497.086 | 21390.748 | NM_018419 | 1826.528  | 1551.997  |
| AL117552  | 3158.042  | 3416.567  | NM_014240 | 3984.961  | 2838.987  |
| NM_002692 | 18417.07  | 9613.067  | BE379399  | 2672.248  | 1991.874  |
| NM_007064 | 6844.02   | 3241.551  | NM_015877 | 15267.703 | 13090.481 |
| NM_006281 | 3007.536  | 2312.82   | AF060935  | 8232.305  | 4811.219  |
| NM_002735 | 3160.791  | 3239.277  | AK026886  | 2031.075  | 1547.702  |
| U23460    | 64770.223 | 56910.832 | D83778    | 3451.346  | 2405.097  |
| NM_005356 | 16471.604 | 16038.125 | NM_006470 | 5031.817  | 4203.348  |

|           |           |           |           |           |           |
|-----------|-----------|-----------|-----------|-----------|-----------|
| Z25434    | 12765.789 | 16303.351 | NM_002855 | 52991.316 | 48619.531 |
| NM_005884 | 26701.691 | 36900.582 | AB038463  | 3310.088  | 3553.227  |
| NM_012395 | 22845.113 | 24972.324 | M30262    | 16636.105 | 19153.129 |
| AF229804  | 53559.539 | 49524.281 | NM_005460 | 2586.614  | 2768.323  |
| AF151638  | 1639.836  | 2541.828  | AF160477  | 12130.891 | 13009.369 |
| U90552    | 14439.714 | 17371.229 | NM_003226 | 1205.131  | 1520.616  |
| NM_006032 | 7860.665  | 10718.195 | M12883    | 8449.719  | 9894.552  |
| NM_014785 | 9731.11   | 7896.743  | BG288747  | 13687.715 | 17991.744 |
| NM_005460 | 1174.996  | 695.336   | BG617923  | 1636.416  | 1669.307  |
| AF160477  | 6285.133  | 2665.23   | U37448    | 3532.141  | 3837.205  |
| M12883    | 6089.66   | 4413.219  | BG435851  | 1082.225  | 1477.053  |
| BG288747  | 11808.216 | 14775.114 | AA927698  | 2362.409  | 2573.323  |
| BG617923  | 837.809   | 618.587   | AI498426  | 4239.541  | 3860.567  |
| U37448    | 2613.613  | 2843.54   | BG824773  | 2040.382  | 1803.829  |
| BG435851  | 873.718   | 670.936   | D01038    | 58184.66  | 58774.598 |
| AA927698  | 1028.203  | 1089.618  | AB019205  | 4767.038  | 4139.548  |
| AI498426  | 2213.106  | 1078.62   | J05008    | 3001.441  | 2415.817  |
| AB019205  | 4419.318  | 2876.299  | U11087    | 2627.89   | 2587.177  |
| J05008    | 3351.109  | 3141.397  | D50640    | 1324.512  | 1111.159  |
| U11087    | 3254.647  | 3390.757  | D43747    | 970.804   | 937.54    |
| D50640    | 2043.616  | 1963.2    | M98776    | 5962.885  | 4497.438  |
| D43747    | 1582.178  | 1126.671  | X99135    | 63367.977 | 60217.898 |
| M98776    | 4183.792  | 5909.614  | AF009744  | 5613.492  | 4648.465  |
| X99135    | 60415.688 | 56186.805 | AF104921  | 48758.977 | 54824.328 |
| AF009744  | 6947.012  | 6369.024  | NM_000695 | 61723.953 | 58905.941 |
| NM_001072 | 3112.508  | 3256.371  | NM_005091 | 1073.417  | 421.207   |
| NM_014070 | 1587.027  | 1552.139  | AF031167  | 1192.98   | 1907.787  |
| AK025859  | 9862.34   | 3161.578  | NM_003204 | 22883.043 | 21515.926 |
| AL117499  | 29121.375 | 8527.117  | AF254069  | 1703.388  | 1894.552  |
| NM_007054 | 3293.705  | 960.346   | AL117600  | 27821.627 | 28011.541 |
| AB007957  | 1509.186  | 578.611   | NM_001712 | 2471.198  | 3270.172  |
| AK000160  | 2509.545  | 2448.66   | NM_004487 | 63605.691 | 60690.691 |
| NM_005311 | 2433.747  | 1416.836  | AB029000  | 16378.848 | 19208.117 |
| NM_005905 | 6189.229  | 2378.074  | AK026965  | 64060.875 | 62985.18  |
| NM_000960 | 2093.111  | 1295.552  | AK025859  | 17227.58  | 16434.867 |
| NM_005355 | 15549.079 | 13404.494 | AL117499  | 40433.035 | 51629.969 |
| NM_002511 | 4472.687  | 4335.8    | NM_007054 | 5880.846  | 6219.439  |
| NM_000794 | 1166.266  | 1531.761  | AB007957  | 2418.477  | 2462.553  |
| AF295378  | 13032.396 | 15171.873 | AK000160  | 5087.18   | 5561.966  |
| NM_004085 | 23246.264 | 25139.238 | NM_005311 | 3300.203  | 3629.167  |
| NM_012445 | 64376.809 | 57648.063 | NM_005905 | 9068.919  | 8883.395  |
| NM_018104 | 7791.979  | 9120.189  | NM_016235 | 966.625   | 1103.508  |
| NM_006080 | 1000.872  | 1396.418  | NM_000960 | 1996.556  | 2419.587  |
| NM_004425 | 15313.158 | 22009.238 | AF172932  | 530.519   | 914.264   |
| U64564    | 4595.533  | 5333.539  | NM_005355 | 15654.959 | 15264.189 |
| NM_006470 | 5548.661  | 6292.535  | NM_002511 | 4699.647  | 3949.642  |
| NM_002855 | 27116.766 | 36639.344 | NM_000794 | 1084.19   | 1205.497  |
| AB038463  | 3216.996  | 2875.81   | NM_004085 | 16928.604 | 13985.435 |
| M30262    | 2936.773  | 3184.152  | NM_006032 | 22042.842 | 16702.068 |
| NM_015310 | 3143.537  | 1065.648  | NM_014785 | 10497.908 | 9466.085  |
| NM_016154 | 37035.176 | 16781.703 | NM_002153 | 1825.811  | 2310.672  |
| NM_005013 | 39938.004 | 18818.791 | AB040890  | 4463.892  | 4793.662  |
| AB002338  | 3621.018  | 2168.261  | AK024233  | 4290.057  | 4992.191  |

|           |           |           |           |           |           |
|-----------|-----------|-----------|-----------|-----------|-----------|
| AI524814  | 5940.607  | 4634.641  | AK021870  | 2453.509  | 2827.257  |
| AB024411  | 4228.363  | 3517.366  | U06680    | 5960.172  | 6567.266  |
| NM_002444 | 27419.104 | 18398.105 | NM_005123 | 1356.839  | 2479.985  |
| NM_001104 | 5928.708  | 5213.678  | NM_015584 | 26562.912 | 32984.695 |
| NM_002989 | 22167.615 | 17482.596 | NM_001697 | 67152.039 | 71532.797 |
| U88898    | 2044.583  | 1884.97   | NM_016098 | 66266.008 | 61605.684 |
| NM_020154 | 48082.57  | 47347.988 | AK025125  | 1727.619  | 1907.492  |
| NM_004665 | 19347.014 | 16574.561 | AF156548  | 6025.305  | 5721.912  |
| NM_005300 | 7631.645  | 6566.621  | NM_004663 | 7089.402  | 6734.699  |
| NM_000893 | 5725.747  | 6148.414  | AB024411  | 5938.856  | 6079.422  |
| NM_000698 | 63033.059 | 58924.176 | NM_002444 | 29867.957 | 37462.988 |
| NM_005091 | 1868.77   | 1907.115  | NM_001104 | 7711.125  | 7016.276  |
| AF031167  | 1570.055  | 2148.27   | NM_002989 | 23413.096 | 22207.143 |
| NM_003204 | 15758.774 | 21061.486 | U88898    | 1773.463  | 1964.923  |
| AF254069  | 2016.201  | 2811.838  | NM_020154 | 36639.309 | 38366     |
| AL117600  | 22577.926 | 28838.924 | NM_004665 | 13453.004 | 14087.426 |
| NM_001712 | 3883.139  | 4428.053  | NM_005300 | 5612.906  | 5230.712  |
| NM_004487 | 31086.484 | 38215.164 | NM_000893 | 4842.514  | 4582.895  |
| AB029000  | 10550.123 | 8221.612  | NM_014070 | 3661.641  | 2430.691  |
| AK026965  | 19818.721 | 24410.609 | NM_016280 | 3189.362  | 2901.922  |
| AF229804  | 63317.949 | 52342.832 | NM_016027 | 2548.559  | 1992.059  |
| U90552    | 12568.015 | 6602.03   | NM_014297 | 6334.873  | 6076.326  |
| NM_006032 | 18246.893 | 10879.43  | NM_018156 | 63478.957 | 56534.406 |
| NM_014788 | 12843.963 | 10335.237 | X98266    | 6179.774  | 6891.276  |
| NM_002153 | 2659.56   | 3894.81   | U00930    | 51450.672 | 50877.164 |
| AB040890  | 4219.816  | 3779.798  | AK024958  | 3501.337  | 4318.406  |
| AK024233  | 4797.202  | 5267.558  | NM_014575 | 18178.682 | 19104.084 |
| AK021870  | 3222.619  | 2805.934  | NM_002439 | 18661.07  | 18642.477 |
| U06680    | 5438.266  | 4357.243  | AL117552  | 3651.989  | 4262.889  |
| NM_005123 | 1579.308  | 1230.281  | NM_002692 | 26765.742 | 27759.535 |
| NM_015584 | 31663.537 | 32845.758 | NM_007064 | 12192.854 | 13824.175 |
| NM_001697 | 65981.727 | 60884.57  | NM_006281 | 3839.6    | 3969.768  |
| NM_016098 | 60079.258 | 57741.113 | NM_002738 | 3030.805  | 2971.94   |
| AB032525  | 1085.499  | 965.734   | U23460    | 68575.734 | 61961.969 |
| NM_002063 | 1766.944  | 1252.695  | NM_005356 | 9686.587  | 11097.564 |
| NM_006667 | 63636.461 | 60072.496 | Z25434    | 12583.226 | 10143.282 |
| AK025125  | 1144.274  | 1785.154  | NM_005884 | 24649.41  | 29158.799 |
| NM_000815 | 3317.555  | 4013.123  | NM_012399 | 22361.227 | 22626.66  |
| NM_001293 | 1323.938  | 1893.582  | AF229804  | 65167.496 | 63165.535 |
| AB023173  | 10749.498 | 11585.881 | AF151638  | 1080.073  | 879.752   |
| AF156548  | 6370.664  | 6147.501  | U90552    | 22015.117 | 20646.604 |
| NM_000387 | 13462.464 | 16348.381 | AB038463  | 2751.366  | 2404.644  |
| NM_004663 | 3355.894  | 4880.86   | M30262    | 12904.653 | 11442.505 |
| NM_001072 | 3695.042  | 2243.285  | NM_005460 | 2296.493  | 2385.895  |
| NM_014070 | 6309.582  | 7052.75   | AF160477  | 11057.695 | 12460.207 |
| NM_016280 | 3916.103  | 4054.617  | NM_003226 | 1113.149  | 1206.227  |
| NM_016027 | 2515.493  | 1552.829  | M12883    | 8437.11   | 9707.649  |
| NM_014297 | 10739.203 | 7747.071  | BG288747  | 14585.761 | 17655.064 |
| NM_018156 | 59430.359 | 46210.051 | BG617923  | 1413.718  | 1792.865  |
| X98266    | 5322.659  | 3637.364  | U37448    | 4032.819  | 4824.367  |
| U00930    | 47781.66  | 41115.031 | BG435851  | 1173.14   | 1565.813  |
| AK024958  | 2943.697  | 2822.193  | AA927698  | 1607.85   | 2024.504  |
| NM_014575 | 18859.438 | 14677.15  | AI498426  | 3500.912  | 3814.831  |

|           |           |           |           |           |           |
|-----------|-----------|-----------|-----------|-----------|-----------|
| NM_002439 | 19791.141 | 13732.841 | BG824773  | 1520.116  | 1351.881  |
| AL117552  | 4707.695  | 4882.731  | AB019205  | 6277.489  | 7070.265  |
| NM_002692 | 28373.016 | 21843.436 | J05008    | 3635.861  | 3434.426  |
| AB023190  | 68042.297 | 46662.773 | U11087    | 3304.56   | 2689.889  |
| NM_007064 | 7486.938  | 8911.233  | D50640    | 1335.205  | 1714.195  |
| NM_006281 | 4423.861  | 5974.823  | D43747    | 980.48    | 1714.277  |
| NM_002738 | 3641.811  | 4152.054  | M98776    | 6511.682  | 6007.366  |
| U23460    | 64896.355 | 57225.699 | X99135    | 60760.898 | 60275.398 |
| NM_005356 | 14202.098 | 15109.6   | AF009744  | 5486.583  | 4420.807  |
| Z25434    | 11533.938 | 13120.697 | NM_001072 | 2621.429  | 1611.104  |
| NM_005884 | 22155.027 | 23519.617 | AF031167  | 1029.485  | 1033.71   |
| NM_012398 | 22633.84  | 25286.375 | NM_003204 | 24368.729 | 21309.918 |
| CY3Cy5    | 32527.127 | 2878.467  | AF254069  | 2293.644  | 2093.662  |
| NM_015400 | 7554.977  | 10885.764 | AL117600  | 30827.764 | 30264.664 |
| AK026464  | 2255.851  | 3131.935  | NM_001712 | 3060.989  | 3323.917  |
| AK022400  | 1368      | 1228.49   | NM_004487 | 64539.32  | 61255.066 |
| AF052100  | 1587.565  | 1149.156  | AB029000  | 16058.189 | 17806.998 |
| AL110235  | 976.696   | 838.935   | AK026965  | 63519.984 | 61709.785 |
| U79245    | 1080.378  | 1105.57   | AK025859  | 17705.26  | 16640.186 |
| AF085983  | 910.593   | 819.671   | AL117499  | 37323.645 | 47326.574 |
| AF052105  | 1886.076  | 2133.522  | NM_007054 | 5334.569  | 5186.389  |
| AK001204  | 18893.225 | 17705.658 | AB007957  | 2463.454  | 2524.708  |
| NM_004774 | 6009.568  | 5628.958  | AK000160  | 4433.605  | 4675.501  |
| NM_005234 | 10075.131 | 9269.365  | NM_005311 | 3358.137  | 4346.599  |
| SR1       | 68559.492 | 63947.375 | NM_005905 | 12775.951 | 13833.206 |
| SR3       | 27943.652 | 19775.793 | NM_016235 | 1674.453  | 1772.354  |
| SR5       | 1556.497  | 1248.728  | NM_000960 | 2156.256  | 2897.109  |
| SR7       | 6249.608  | 29274.996 | AF172932  | 1163.566  | 1042.078  |
| SR9       | 15095.183 | 1366.598  | NM_005359 | 16278.688 | 17256.943 |
| CY3Cy5    | 5168.522  | 193.347   | NM_002511 | 5984.584  | 7026.213  |
| L34409    | 18950.125 | 33396.973 | NM_000794 | 1087.293  | 1263.756  |
| U12210    | 3352.703  | 5347.896  | NM_004085 | 15354.664 | 11601.512 |
| Z83936    | 1350.891  | 1631.166  | NM_006470 | 4623.168  | 3406.674  |
| L08440    | 7859.392  | 12045.881 | NM_002855 | 53113.113 | 47962.223 |
| M73799    | 4331.855  | 5719.727  | NM_002153 | 1663.254  | 2332.16   |
| NM_018364 | 5109.297  | 2820.29   | AB040890  | 4205.095  | 4531.638  |
| NM_006778 | 1050.076  | 840.627   | AK024233  | 4924.869  | 4983.309  |
| NM_007022 | 3772.157  | 2517.504  | AK021870  | 2271.86   | 2643.487  |
| AL049943  | 40378.73  | 40791.945 | U06680    | 6159.782  | 5912.533  |
| AL137303  | 2059.735  | 2008.136  | NM_005123 | 1552.387  | 1882.77   |
| NM_015681 | 7350.481  | 8149.914  | NM_015584 | 28713.535 | 31904.871 |
| AF070582  | 2053.269  | 2161.283  | NM_001697 | 66362.711 | 78092.484 |
| NM_006383 | 5561.117  | 3811.762  | NM_016098 | 64411.941 | 59350.18  |
| AK024351  | 1361.721  | 3736.276  | AK025125  | 1688.848  | 1781.776  |
| AK024867  | 1222.192  | 2929.474  | AF156548  | 5727.346  | 5802.189  |
| AK025002  | 8202.513  | 4275.347  | NM_004663 | 5664.252  | 5873.017  |
| AK024820  | 1218.324  | 733.375   | AB024411  | 5021.101  | 5275.048  |
| AF052117  | 789.912   | 661.07    | NM_002444 | 31370.676 | 41609.75  |
| AB033105  | 1451.672  | 689.535   | NM_001104 | 9733.751  | 10911.802 |
| X64989    | 794.073   | 888.292   | NM_002989 | 26138.928 | 27192.289 |
| Y10512    | 1786.806  | 823.447   | U88898    | 2189.849  | 1969.029  |
| AL110175  | 771.703   | 2588.984  | NM_020154 | 38913.652 | 44752.727 |
| AF288406  | 793.475   | 1937.66   | NM_004665 | 13887.799 | 13631.649 |



|           |           |           |           |           |           |
|-----------|-----------|-----------|-----------|-----------|-----------|
| AK027156  | 17252.768 | 38983.18  | NM_005300 | 4632.744  | 4797.518  |
| AL157504  | 4948.011  | 8042.961  | NM_000893 | 4107.105  | 3488.552  |
| AK023328  | 7669.805  | 12060.692 | NM_000698 | 66233.641 | 58929.848 |
| NM_015931 | 3036.886  | 2966.473  | NM_016280 | 3739.582  | 2868.235  |
| AL442096  | 2826.682  | 1811.365  | NM_016027 | 1717.221  | 1431.164  |
| AK000901  | 2003.523  | 1692.745  | NM_014297 | 6996.069  | 7438.284  |
| AB007866  | 1358.661  | 2998.223  | X98266    | 5370.496  | 6128.193  |
| X77485    | 22157.926 | 30148.543 | U00930    | 51462.934 | 51146.305 |
| NM_014495 | 5078.08   | 6654.166  | AK024958  | 3624.029  | 4258.411  |
| AK021555  | 1830.421  | 2510.747  | NM_014575 | 21683.684 | 21498.107 |
| AF133333  | 11878.694 | 6123.403  | NM_002439 | 22337.342 | 22955.957 |
| NM_018368 | 2522.672  | 1442.284  | AL117552  | 4023.681  | 4434.459  |
| NM_018340 | 2585.604  | 4309.2    | NM_002692 | 28536.453 | 33795.75  |
| AF049883  | 1866.178  | 2533.174  | NM_007064 | 10585.179 | 11087.898 |
| L10148    | 67013.734 | 74066.742 | NM_006281 | 3508.131  | 4071.186  |
| L37703    | 34421.539 | 50455.109 | NM_002738 | 3818.845  | 4858.902  |
| M32220    | 7299.839  | 3645.081  | U23460    | 66121.242 | 62732.559 |
| D17188    | 29416.117 | 16219.335 | NM_005356 | 9798.548  | 11704.296 |
| AJ001432  | 50044.824 | 30536.432 | Z25434    | 11777.909 | 8757.613  |
| NM_020435 | 16996.795 | 12593.995 | NM_005884 | 26730.76  | 34248.863 |
| AF052169  | 1368.21   | 1186.665  | NM_012399 | 25288.586 | 28524.139 |
| AK024900  | 3381.618  | 3764.304  | AF229804  | 65894.438 | 57610.309 |
| AF119879  | 65749.68  | 77154     | AF151638  | 1439.569  | 1187.098  |
| L16951    | 1574.281  | 2536.635  | U90552    | 22007.639 | 19865.977 |
| AY007095  | 1285.176  | 2889.969  | NM_006032 | 25501.064 | 23509.834 |
| AF086244  | 4471.015  | 6426.763  | NM_014788 | 10804.531 | 9426.022  |
| AL161992  | 3624.858  | 5529.126  | NM_005460 | 1943.405  | 2137.218  |
| AK023910  | 4415.699  | 5681.576  | AF160477  | 12275.904 | 11440.927 |
| NM_006695 | 2866.949  | 3516.073  | NM_003226 | 1340.128  | 1223.796  |
| NM_004815 | 1551.956  | 3167.414  | BG288747  | 13922.905 | 17919.525 |
| NM_004147 | 1506.556  | 2961.474  | BG617923  | 1327.418  | 1375.239  |
| AK000959  | 1305.482  | 2898.491  | U37448    | 4254.437  | 5043.488  |
| AK025922  | 1307.401  | 659.502   | BG435851  | 1284.257  | 2067.522  |
| AF123659  | 3842.198  | 3158.729  | AA927698  | 2093.226  | 2274.629  |
| NM_005155 | 29424.299 | 38885.324 | AI498426  | 3708.499  | 4127.954  |
| NM_019095 | 23376.127 | 31904.906 | BG824773  | 1511.488  | 1479.487  |
| AB020684  | 7089.979  | 8942.33   | AB019205  | 4884.595  | 4248.844  |
| AF077036  | 57961.047 | 58091.48  | J05008    | 3950.853  | 3671.248  |
| NM_020421 | 536.897   | 1347.25   | U11087    | 4988.73   | 6181.486  |
| D17094    | 966.234   | 2761.611  | D50640    | 2494.916  | 2320.084  |
| L37690    | 34672.387 | 42436.605 | D43747    | 1523.827  | 1645.129  |
| D61707    | 1138.073  | 1451.292  | M98776    | 7136.592  | 5721.217  |
| AF029325  | 1952.974  | 3763.853  | X99135    | 61556.41  | 68876.68  |
| NM_005704 | 2162.27   | 4581.575  | AF009744  | 6283.938  | 5055.31   |
| AF097021  | 2026.322  | 4327.094  | NM_001072 | 2223.672  | 1411.487  |
| NM_001365 | 3507.866  | 3151.401  | NM_014070 | 3231.752  | 2804.296  |
| BF308728  | 3780.871  | 2010.342  | AK025859  | 14160.877 | 10543.364 |
| NM_018315 | 45058.078 | 35148.715 | AL117499  | 36259.652 | 38830.574 |
| AF051151  | 717.56    | 1114.079  | NM_007054 | 4912.332  | 5267.396  |
| AF142421  | 6156.341  | 4113.507  | AB007957  | 2065.646  | 2680.722  |
| NM_014247 | 2170.768  | 3527.333  | AK000160  | 4303.526  | 4712.179  |
| NM_018695 | 68538.438 | 64670.262 | NM_005311 | 3803.179  | 4590.973  |
| NM_006343 | 369.152   | 1088.108  | NM_005905 | 12416.299 | 13674.451 |

|           |           |           |           |           |           |
|-----------|-----------|-----------|-----------|-----------|-----------|
| NM_014786 | 1601.09   | 2487.347  | NM_016235 | 1265.282  | 1438.729  |
| NM_015716 | 11395.166 | 14263.002 | NM_000960 | 2750.205  | 3066.858  |
| NM_005402 | 10563.019 | 12050.339 | AF172932  | 923.427   | 1074.118  |
| AF055027  | 17738.482 | 27351.771 | NM_005359 | 16845.365 | 19476.398 |
| U63541    | 14176.905 | 23280.865 | NM_002511 | 6138.196  | 6738.827  |
| AB033045  | 4637.552  | 4977.789  | NM_000794 | 1101.093  | 1691.727  |
| AF055006  | 16280.292 | 10964.106 | AF295378  | 10018.914 | 9880.749  |
| NM_004935 | 4249.681  | 1808.849  | NM_004085 | 24829.463 | 28640.652 |
| NM_006951 | 1967.522  | 990.229   | NM_012445 | 62850.277 | 71064.859 |
| NM_001896 | 14260.783 | 8558.988  | NM_018104 | 13950.317 | 15367.308 |
| NM_014023 | 1218.231  | 1191.159  | NM_006080 | 1135.935  | 1068.774  |
| NM_002745 | 17788.945 | 17729.334 | NM_004429 | 19798.619 | 19930.35  |
| D26488    | 22045.771 | 15374.104 | U64564    | 5425.753  | 6150.988  |
| NM_001432 | 1761.622  | 1743.616  | NM_006470 | 5231.864  | 5161.43   |
| AK002193  | 1241.223  | 1438.08   | NM_002855 | 62644.742 | 55988.234 |
| AF097431  | 3680.661  | 6069.354  | AB038463  | 3439.496  | 3617.214  |
| NM_001978 | 1660.353  | 2670.069  | M30262    | 17177.959 | 18748.947 |
| NM_005897 | 811.43    | 1515.006  | NM_015310 | 4567.569  | 2595.394  |
| NM_002579 | 531.567   | 1409.901  | NM_016154 | 47159.711 | 51729.5   |
| NM_004221 | 3319.243  | 4810.981  | NM_005013 | 49277.805 | 54937.867 |
| NM_003019 | 4007.545  | 5583.783  | AB002338  | 4477.056  | 4753.555  |
| M90657    | 1046.993  | 2165.868  | AI524814  | 6736.685  | 6384.337  |
| NM_006699 | 5283.459  | 8025.78   | AB024411  | 5469.001  | 5764.046  |
| AK025645  | 5745.189  | 3694.495  | NM_002444 | 31101.627 | 39101.465 |
| AK023266  | 1746.432  | 1288.141  | NM_001104 | 9443.201  | 10263.892 |
| NM_006814 | 23089.51  | 20072.768 | NM_002989 | 27038.387 | 27271.66  |
| NM_005067 | 13750.55  | 11697.564 | U88898    | 2514.534  | 2869.605  |
| AB007899  | 1737.602  | 2190.389  | NM_020154 | 39647.949 | 43224.699 |
| NM_002817 | 21181.781 | 24716.238 | NM_004665 | 14768.141 | 14807.527 |
| NM_002801 | 34174.473 | 48138.773 | NM_005300 | 6307.046  | 5951.342  |
| BE905810  | 3419.932  | 4274.784  | NM_000893 | 6822.614  | 6157.012  |
| NM_014780 | 2481.541  | 2749.928  | NM_000698 | 64430.07  | 62894.84  |
| NM_014167 | 848.091   | 1642.534  | NM_005091 | 1813.367  | 1904.049  |
| NM_016063 | 3649.133  | 7022.099  | AF031167  | 1814.333  | 1738.402  |
| U82987    | 11468.351 | 14495.363 | NM_003204 | 25502.793 | 20847.928 |
| NM_005732 | 2609.753  | 4062      | AF254069  | 2120.721  | 2767.594  |
| NM_014890 | 1645.081  | 2883.371  | AL117600  | 32982.492 | 38184.379 |
| AK056481  | 8989.508  | 12229.055 | NM_001712 | 2482.707  | 2634.513  |
| NM_005433 | 2112.344  | 2484.893  | NM_004487 | 62493.578 | 64342.941 |
| AF232000  | 67435.273 | 71924.172 | AB029000  | 13211.072 | 12929.154 |
| NM_004430 | 661.288   | 1459.066  | AK026965  | 61443.359 | 66949.789 |
| NM_002955 | 2000.471  | 3541.623  | AF229804  | 63991.195 | 60964.375 |
| NM_001938 | 14966.152 | 9626.09   | AF151638  | 986.623   | 952.484   |
| AF230808  | 12070.073 | 9311.795  | U90552    | 28093.672 | 31688.646 |
| U18910    | 3011.772  | 2703.821  | NM_006032 | 30471.025 | 30107.742 |
| NM_005238 | 40130.992 | 44807.016 | NM_014788 | 12194.107 | 10554.539 |
| S83390    | 814.719   | 1155.005  | NM_002153 | 1704.684  | 2642.355  |
| NM_001280 | 35713.055 | 37930.02  | AB040890  | 4697.189  | 5669.229  |
| NM_002948 | 66638.281 | 58483.512 | AK024233  | 5409.099  | 5957.011  |
| AF113008  | 7262.358  | 9396.72   | AK021870  | 2770.318  | 3100.538  |
| NM_020217 | 10152.831 | 12465.681 | U06680    | 5202.181  | 5921.281  |
| AF205435  | 41373.211 | 50684.539 | NM_005123 | 1327.814  | 1548.658  |
| L05093    | 66989.742 | 74440.352 | NM_015584 | 27679.512 | 30586.473 |

|           |           |           |           |           |           |
|-----------|-----------|-----------|-----------|-----------|-----------|
| NM_006923 | 8075.294  | 13547.155 | NM_001697 | 63127.137 | 64735.027 |
| J03866    | 31370.984 | 28920.271 | NM_016098 | 62422.5   | 62872.613 |
| AK022836  | 18658.043 | 13613.729 | AB032525  | 2011.099  | 1719.081  |
| NM_012343 | 59865.469 | 57909.504 | NM_002063 | 3126.588  | 3493.349  |
| NM_000397 | 5908.82   | 4946.841  | NM_006667 | 61084.125 | 67683.406 |
| AL137703  | 1792.708  | 2157.607  | AK025125  | 1647.688  | 1648.755  |
| NM_001809 | 7690.19   | 5069.593  | NM_000815 | 5295.851  | 5788.969  |
| AL117477  | 10107.269 | 11782.186 | NM_001293 | 2020.767  | 2390.269  |
| NM_012107 | 11528.863 | 16010.258 | AB023173  | 11089.29  | 11342.433 |
| AB037760  | 6476.152  | 8896.338  | AF156548  | 5662.321  | 5567.993  |
| NM_015680 | 13415.584 | 18738.207 | NM_000387 | 54523.453 | 54140.727 |
| AB037770  | 1065.947  | 1223.898  | NM_004663 | 5325.786  | 5332.202  |
| NM_018118 | 842.058   | 3082.924  | NM_001072 | 3586.932  | 3368.371  |
| L35035    | 15270.416 | 21880.996 | NM_014070 | 4224.92   | 2954.165  |
| NM_018047 | 4840.612  | 4053.594  | NM_016280 | 4384.182  | 4209.198  |
| NM_005022 | 3165.457  | 3119.933  | NM_016027 | 1968.378  | 2100.643  |
| NM_001288 | 1337.446  | 1808.191  | NM_014297 | 6982.451  | 8221.448  |
| NM_003564 | 11870.515 | 12115.633 | NM_018156 | 62699.387 | 58793.328 |
| NM_002581 | 4807.341  | 6234.202  | X98266    | 5101.375  | 6014.477  |
| X56134    | 5780.723  | 5303.554  | U00930    | 48753.391 | 49830.168 |
| NM_001456 | 2228.351  | 2021.975  | AK024958  | 3226.57   | 3620.191  |
| AI421041  | 65174.469 | 61408.055 | NM_014575 | 18060.875 | 19980.74  |
| BI759091  | 7323.776  | 10123.901 | NM_002439 | 16404.543 | 11940.688 |
| BG685843  | 49417.871 | 52346.078 | AL117552  | 3226.798  | 2233.142  |
| BI490011  | 8950.059  | 12901.229 | NM_002692 | 32021.508 | 39503.527 |
| AF035771  | 1499.385  | 2369.527  | AB023190  | 66814.758 | 58591.754 |
| N20475    | 16353.97  | 23654.033 | NM_007064 | 11807.185 | 11165.702 |
| BI199286  | 5806.257  | 9033.604  | NM_006281 | 2886.49   | 3493.495  |
| AA026626  | 4401.567  | 6304.448  | NM_002738 | 2917.797  | 3398.26   |
| NM_007181 | 24078.305 | 20713.756 | U23460    | 63817.125 | 64032.852 |
| AB007857  | 2879.895  | 3205.569  | NM_005356 | 9998.719  | 11301.461 |
| NM_001778 | 64572.809 | 63949.848 | Z25434    | 14822.646 | 13648.31  |
| NM_004997 | 54390.223 | 52486.98  | NM_005884 | 26698.146 | 27451.162 |
| NM_005923 | 10681.874 | 6632.168  | NM_012399 | 23597.984 | 21889.281 |
| NM_003465 | 3878.831  | 2379.061  | CY3Cy5    | 2397.877  | 143.196   |
| AF289028  | 3646.13   | 2731.298  | NM_004774 | 7737.899  | 4207.372  |
| NM_005127 | 34417.707 | 37836.652 | NM_005234 | 14142.157 | 10200     |
| NM_005567 | 31153.281 | 27872.541 | NM_015400 | 16045.126 | 12172.665 |
| NM_005216 | 15572.091 | 13011.794 | AL359561  | 858.957   | 1089.075  |
| NM_003965 | 2235.37   | 1816.005  | AK026464  | 5049.59   | 5434.48   |
| NM_004584 | 7108.14   | 5707.569  | AK001362  | 1118.704  | 1156.675  |
| X15183    | 66957.242 | 53904.574 | AK023491  | 905.286   | 1035.357  |
| AF212842  | 2862.838  | 6171.448  | AK022400  | 2761.531  | 2251.142  |
| NM_018404 | 3035.563  | 3772.76   | AF052100  | 3025.345  | 2389.715  |
| M27544    | 26256.74  | 34689.945 | AL110235  | 1752.248  | 2155.87   |
| NM_002258 | 978.416   | 2251.882  | U79245    | 1520.082  | 1602.502  |
| NM_001118 | 8153.12   | 11051.037 | AF085983  | 1569.073  | 1335.174  |
| AL133097  | 16345.957 | 25604.75  | AF052105  | 2982.933  | 2940.307  |
| NM_001165 | 34020.719 | 45857.313 | AK001204  | 24396.246 | 21297.27  |
| NM_001492 | 1755.687  | 1367.757  | NM_004774 | 10343.03  | 10545.359 |
| AB012643  | 37567.578 | 23881.76  | NM_005234 | 15422.732 | 16911.16  |
| AB023170  | 3262.428  | 2041.38   | SR1       | 68430.469 | 62757.535 |
| NM_014153 | 24992.43  | 15567.365 | SR3       | 48047.09  | 29284.154 |

|           |           |           |           |           |           |
|-----------|-----------|-----------|-----------|-----------|-----------|
| NM_002296 | 35880.953 | 15031.169 | SR5       | 5302.334  | 4726.976  |
| NM_000414 | 12638.123 | 6551.841  | SR7       | 7370.527  | 42810.34  |
| NM_018845 | 11859.461 | 11029.929 | SR9       | 22044.236 | 3190.618  |
| AY008372  | 1523.803  | 1239.467  | CY3Cy5    | 5382.652  | 190.079   |
| NM_005505 | 9387.486  | 10057.347 | L34409    | 41198.27  | 31305.859 |
| AK026964  | 965.501   | 1259.071  | U12210    | 4428.375  | 2254.684  |
| NM_000079 | 6150.046  | 3526.475  | Z83936    | 1010.356  | 1261.376  |
| NM_016208 | 31989.037 | 46211.082 | L08440    | 27893.088 | 33518.953 |
| NM_001635 | 644.924   | 1387.067  | M73799    | 10356.598 | 12992.256 |
| NM_005638 | 18937.973 | 25831.887 | AF086119  | 3143.834  | 3427.161  |
| NM_007235 | 26432.121 | 36812.766 | NM_018364 | 8983.62   | 7522.382  |
| NM_007269 | 7898.29   | 12037.88  | NM_006778 | 2825.063  | 2801.352  |
| AK026014  | 7962.552  | 12126.737 | NM_007022 | 4903.561  | 3424.079  |
| X74609    | 64353.84  | 54197.438 | AL049943  | 61539.105 | 58931.32  |
| AB002316  | 2080.254  | 1842.58   | AL137303  | 3895.698  | 4631.931  |
| NM_018990 | 8893.411  | 5909.717  | AL355708  | 1709.238  | 1498.66   |
| NM_013363 | 1318.92   | 1075.838  | AB002449  | 1703.033  | 2491.837  |
| NM_000947 | 3346.305  | 3461.879  | U79248    | 1522.92   | 3569.84   |
| AL096750  | 63568.777 | 55500.949 | NM_016480 | 28786.934 | 13543.572 |
| NM_016061 | 11637.731 | 17677.549 | AK001489  | 1482.09   | 1490.618  |
| NM_016062 | 29200.807 | 28694.531 | NM_015681 | 11820.827 | 9745.149  |
| NM_004153 | 6314.811  | 6377.709  | AF070582  | 2837.242  | 3056.451  |
| AK024740  | 6335.671  | 5836.791  | NM_006383 | 7351.976  | 6623.293  |
| AF078164  | 11168.011 | 7444.766  | AK024351  | 3156.819  | 1724.767  |
| NM_019049 | 2905.141  | 1584.42   | AK024564  | 2480.018  | 2279.903  |
| NM_004656 | 7041.839  | 11204.892 | AK024867  | 7065.49   | 6730.535  |
| AF247820  | 119.892   | 1966.684  | AK024886  | 1794.543  | 1671.743  |
| NM_005022 | 2308.25   | 1742.247  | AK025002  | 7156.448  | 10180.149 |
| NM_003564 | 9563.959  | 8429.378  | AF086124  | 2168.211  | 2511.547  |
| AF317516  | 13553.538 | 11696.549 | AK024820  | 3030.408  | 4497.088  |
| NM_002581 | 4491.221  | 5145.93   | AF052117  | 1777.684  | 2084.875  |
| AI417964  | 6098.535  | 7854.018  | AB033105  | 3398.074  | 4697.976  |
| J03571    | 52688.063 | 52575.582 | AF038192  | 1502.51   | 1890.747  |
| X56134    | 4965.032  | 4914.442  | AJ001865  | 2921.172  | 3126.794  |
| NM_001456 | 2167.712  | 2315.529  | AJ227875  | 514.501   | 917.821   |
| H44784    | 1397.51   | 999.103   | D61704    | 31902.117 | 16386.166 |
| AI421041  | 60049.719 | 46635.934 | AJ227889  | 1860.383  | 1602.858  |
| NM_001778 | 55159.633 | 38845.473 | Y12017    | 1535.202  | 1376.766  |
| NM_004997 | 49356.789 | 43761.121 | X64989    | 1103.142  | 934.486   |
| NM_005923 | 8883.5    | 7067.987  | Y10512    | 1967.194  | 2016.389  |
| NM_003465 | 3724.775  | 3284.609  | AL110175  | 4021.267  | 3554.548  |
| AF289028  | 2828.427  | 2482.708  | AF288406  | 1425.201  | 1169.349  |
| NM_005127 | 29760.496 | 35753.77  | AK027156  | 32809.242 | 34283.523 |
| NM_005567 | 26902.777 | 32481.354 | AL157504  | 8454.152  | 8374.072  |
| NM_005216 | 13284.407 | 17865.859 | AK023328  | 24290.863 | 25708.469 |
| NM_003965 | 1480.284  | 1764.103  | NM_015931 | 534.797   | 954.079   |
| NM_004584 | 6626.048  | 7420.799  | AL353947  | 672.385   | 1451.065  |
| X15183    | 64719.246 | 56750.492 | AL442096  | 4334.445  | 3587.855  |
| AK023618  | 9602.044  | 7134.051  | AK023299  | 937.951   | 852.049   |
| AF212842  | 1987.022  | 2580.865  | NM_018228 | 3240.301  | 2990.93   |
| NM_018047 | 4279.288  | 3225.749  | AJ270693  | 3079.507  | 3504.718  |
| AB023170  | 3067.767  | 2162.28   | NM_017790 | 5345.91   | 6163.874  |
| NM_014153 | 23430.012 | 20023.865 | AK000861  | 1024.72   | 531.21    |

|           |           |           |           |           |           |
|-----------|-----------|-----------|-----------|-----------|-----------|
| NM_002296 | 33033.047 | 21839.305 | AK000023  | 6531.541  | 4880.747  |
| NM_000414 | 10421.946 | 7754.502  | AK000901  | 1961.322  | 1533.125  |
| NM_018845 | 12279.46  | 11359.829 | AB007866  | 2127.745  | 1667.435  |
| AY008372  | 571.574   | 1000.059  | AF075086  | 65538.852 | 57735.156 |
| NM_005505 | 8035.438  | 12853.54  | X77485    | 67425.133 | 68753.766 |
| NM_000079 | 5765.925  | 5861.761  | NM_014499 | 5186.29   | 4091.95   |
| AL110245  | 10283.332 | 9189.653  | AK021555  | 2119.64   | 2991.548  |
| NM_016208 | 28394.672 | 18962.348 | AB046765  | 3942.582  | 5598.275  |
| AB007857  | 1777.155  | 1269.153  | AF133333  | 19933.049 | 20676.967 |
| AB002316  | 2200.633  | 2755.124  | NM_018368 | 2251.825  | 986.285   |
| NM_018990 | 9362.618  | 8101.821  | AK024011  | 1747.773  | 776.213   |
| NM_013363 | 1397.258  | 1759.361  | AL390145  | 896.133   | 481.907   |
| NM_000947 | 3482.303  | 3346.493  | AF119913  | 2251.183  | 693.906   |
| AL096750  | 63819.738 | 59518.629 | NM_018340 | 3888.655  | 5103.385  |
| NM_016061 | 10575.402 | 10344.643 | AF049883  | 3060.378  | 3241.945  |
| NM_016062 | 29795.947 | 38459.91  | U10512    | 761.467   | 933.932   |
| NM_004153 | 6334.037  | 10005.23  | L10148    | 60170.508 | 58770.879 |
| AK024740  | 5218.992  | 5761.913  | AK026247  | 1190.636  | 813.16    |
| AF078164  | 11242.082 | 9786.552  | AK023302  | 641.604   | 976.561   |
| NM_019049 | 3240.077  | 3286.466  | L37703    | 62549.648 | 57361.461 |
| AF130101  | 1867.463  | 1270.07   | AK023767  | 41946.18  | 40956.254 |
| NM_004656 | 4382.091  | 2827.462  | S81579    | 1740.066  | 1520.552  |
| NM_001492 | 1962.334  | 1420.253  | AF084516  | 2372.371  | 2511.449  |
| AB012643  | 36219.039 | 24545.9   | AL137554  | 708.465   | 661.332   |
| NM_003564 | 10341.357 | 10123.011 | AJ001907  | 6963.462  | 8258.729  |
| AF317516  | 14253.336 | 13914.813 | M32220    | 15614.649 | 20257.441 |
| NM_002581 | 4053.151  | 4461.056  | D17188    | 33660.023 | 28697.654 |
| AI417964  | 6844.477  | 6574.855  | AJ001432  | 62366.887 | 61193.684 |
| J03571    | 54822.23  | 51659.539 | NM_020435 | 29553.15  | 39201.848 |
| T64134    | 1799.118  | 3221.365  | AF052169  | 3122.019  | 2247.681  |
| X56134    | 5411.436  | 7263.925  | AJ012499  | 67782.086 | 66721.758 |
| NM_001456 | 2357.626  | 3351.056  | AK024900  | 8706.771  | 4829.12   |
| H44784    | 2040.349  | 1371.723  | AK026249  | 3703.563  | 3973.805  |
| AI421041  | 62796.84  | 53256.383 | AF119879  | 62975.199 | 52924.406 |
| BI759091  | 5528.534  | 5916.359  | L16951    | 804.812   | 573.394   |
| BG685843  | 35244.898 | 22873.609 | Y10482    | 60672.363 | 56037.02  |
| BI490011  | 5792.938  | 3858.327  | AY007095  | 1442.683  | 1950.034  |
| AF035771  | 1010.478  | 868.212   | AF086244  | 7547.091  | 7567.474  |
| N20475    | 12611.052 | 9033.139  | AL161992  | 10172.963 | 11217.397 |
| BI199286  | 4348.273  | 3473.41   | AK023551  | 1727.097  | 1625.017  |
| AA026626  | 3001.554  | 2347.544  | AK023910  | 4209.192  | 3122.592  |
| X74609    | 76653.406 | 62122.852 | D16991    | 5652.753  | 5797.762  |
| NM_003965 | 1418.923  | 2054.847  | AK023538  | 2530.967  | 2657.459  |
| NM_004584 | 6998.722  | 8459.087  | U17620    | 1320.911  | 1287.26   |
| X15183    | 64809.844 | 59758.68  | NM_006695 | 10261.791 | 7259.842  |
| AK023618  | 9911.71   | 9876.145  | NM_004815 | 3414.766  | 3499.248  |
| AF212842  | 2026.872  | 4342.321  | NM_004147 | 2189.422  | 1906.814  |
| NM_018404 | 1045.931  | 1959.058  | AK000959  | 1485.46   | 1124.576  |
| M27544    | 20722.52  | 32926.754 | AB037743  | 5768.096  | 5718.08   |
| NM_001118 | 5813.647  | 6626.622  | AB046820  | 5095.057  | 7559.414  |
| AL133097  | 13919.705 | 12611.749 | AK025922  | 4160.106  | 5765.954  |
| NM_001165 | 31611.303 | 25269.133 | NM_014646 | 1113.731  | 868.998   |
| NM_001381 | 64571.426 | 65702.836 | NM_006375 | 1261.788  | 1070.693  |

|           |           |           |           |           |           |
|-----------|-----------|-----------|-----------|-----------|-----------|
| U90908    | 1144.864  | 648.406   | AF123659  | 5445.807  | 3330.375  |
| NM_00645E | 7456.433  | 6773.132  | NM_004881 | 30647.078 | 27262.082 |
| NM_01445E | 1431.353  | 1484.3    | U94903    | 1866.366  | 1351.466  |
| NM_00409E | 3848.12   | 3842.627  | AF009300  | 3526.092  | 2610.087  |
| NM_00144E | 19607.598 | 16737.645 | NM_00515E | 24997.191 | 26081.568 |
| NM_001387 | 1365.687  | 1221.526  | NM_01909E | 28611.133 | 36605.332 |
| AF086122  | 2362.1    | 2194.106  | U80764    | 29913.432 | 42027.816 |
| AK024397  | 35281.723 | 31989.309 | AB020684  | 18909.969 | 20090.289 |
| AF073931  | 1922.028  | 1354.419  | AF077036  | 66403.266 | 56597.766 |
| NM_018047 | 3947.937  | 3218.566  | NM_020421 | 3741.625  | 3931.446  |
| NM_00502E | 2858.838  | 2212.676  | L37690    | 32292.004 | 19077.166 |
| NM_00128E | 1408.858  | 3327.018  | D61707    | 1839.361  | 1866.365  |
| NM_00562E | 29705.182 | 26174.551 | AK021610  | 3952.543  | 3866.375  |
| NM_01660E | 64675.223 | 62553.34  | Z36835    | 20864.27  | 18251.238 |
| S78203    | 3089.458  | 3311.24   | NM_00464E | 4466.44   | 3071.463  |
| NM_01620E | 26224.73  | 33292.152 | AF029325  | 3051.034  | 3296.607  |
| NM_00163E | 533.706   | 2045.805  | NM_005704 | 5254.996  | 4740.692  |
| NM_00563E | 10517.799 | 10861.868 | AF097021  | 2961.176  | 3409.204  |
| NM_00723E | 22219.852 | 19498.031 | NM_00136E | 5644.757  | 11263.333 |
| NM_00726E | 5711.557  | 5006.773  | NM_000677 | 19820.588 | 25293.793 |
| AK026014  | 6229.466  | 6200.743  | BF308728  | 6835.196  | 6272.754  |
| NM_01484E | 5196.332  | 4669.445  | NM_01328C | 1032.093  | 671.875   |
| NM_00429E | 4167.218  | 3510.137  | NM_01831E | 52201.949 | 54605.848 |
| NM_00123E | 1110.028  | 1391.581  | AF051151  | 1546.802  | 1056.772  |
| NM_007181 | 20566.223 | 13881.472 | AF142421  | 10603.447 | 5487.867  |
| AB007857  | 1997.354  | 2020.496  | M84131    | 1408.801  | 1248.279  |
| NM_00177E | 61191.664 | 50994.223 | AB037836  | 4537.278  | 3960.435  |
| NM_004997 | 56436.816 | 46902.043 | NM_014247 | 3392.845  | 4611.036  |
| NM_00592E | 11514.779 | 8780.49   | NM_01869E | 67965.266 | 63753.969 |
| NM_00346E | 4855.926  | 3307.412  | NM_00634E | 1706.555  | 1503.71   |
| AF289028  | 3561.258  | 2011.488  | NM_01478E | 2254.795  | 3029.586  |
| NM_005127 | 31987.432 | 22999.561 | NM_00142E | 927.6     | 1487.834  |
| NM_005567 | 30165.898 | 24125.449 | NM_01571E | 11299.057 | 11838.827 |
| NM_00521E | 14250.04  | 11307.689 | NM_00573E | 5175.446  | 3686.01   |
| J04948    | 2516.786  | 2591.451  | AB023166  | 1397.217  | 1276.609  |
| NM_01804E | 868.456   | 1325.981  | AB028966  | 25903.037 | 19838.266 |
| AK022564  | 67212.602 | 75597.766 | NM_00540E | 12235.554 | 10707.434 |
| NM_00149E | 1505.472  | 2055.781  | AF055027  | 13739.792 | 8971.709  |
| AB01264E  | 31634.197 | 34528.074 | U63541    | 15390.179 | 15611.729 |
| AB023170  | 2956.423  | 4085.096  | AB033045  | 3562.776  | 2880.153  |
| NM_01415E | 23541.123 | 34191.266 | AF055006  | 25456.727 | 25689.746 |
| NM_00229E | 34373.207 | 42181.137 | NM_00493E | 9142.988  | 10732.967 |
| NM_000414 | 11325.1   | 10086.625 | NM_006951 | 3555.994  | 4180.026  |
| NM_01884E | 11528.616 | 9053.507  | NM_00189E | 17956.83  | 11477.501 |
| NM_00550E | 7477.702  | 5833.375  | NM_01402E | 1773.885  | 1163.436  |
| AK026964  | 2034.87   | 1511.843  | NM_00274E | 15044.412 | 9330.134  |
| NM_001134 | 10811.984 | 8362.066  | D26488    | 20892.723 | 9895.665  |
| NM_01601E | 23790.654 | 17651.273 | NM_00143E | 2943.367  | 1660.653  |
| NM_020407 | 4260.313  | 3971.628  | AK002193  | 1893.507  | 1258.128  |
| AF118274  | 24740.898 | 20471.701 | AB014554  | 5665.095  | 6253.741  |
| NM_018344 | 2529.154  | 2433.38   | AF097431  | 7482.247  | 10102.557 |
| NM_00007E | 5729.405  | 5549.387  | NM_00197E | 4587.056  | 5872.754  |
| NM_00008E | 1844.288  | 2274.773  | NM_005897 | 552.299   | 1175.086  |

|           |           |           |           |           |           |
|-----------|-----------|-----------|-----------|-----------|-----------|
| AL110245  | 11479.507 | 9594.192  | NM_002579 | 786.234   | 1179.144  |
| X74609    | 65914.461 | 56251.621 | NM_004221 | 3889.144  | 5157.859  |
| AB002316  | 2246.435  | 3626.813  | NM_003019 | 3257.783  | 2393.012  |
| NM_018990 | 14280.26  | 18996.611 | AL109790  | 3044.567  | 2378.979  |
| NM_013363 | 1558.25   | 2607.197  | NM_003628 | 2994.472  | 2338.881  |
| NM_000947 | 3492.041  | 3459.204  | NM_002407 | 1090.74   | 782.538   |
| AL096750  | 60284.426 | 54432.203 | M90657    | 1883.741  | 2960.801  |
| NM_016061 | 11056.359 | 9568.229  | NM_006699 | 7680.084  | 6685.187  |
| NM_016062 | 32648.135 | 29002.143 | AK025645  | 5527.32   | 6029.084  |
| NM_004153 | 5879.624  | 5215.362  | AK023266  | 2419.311  | 3700.306  |
| AK024740  | 6842.983  | 4963.699  | NM_006814 | 35385.551 | 40631.051 |
| AF078164  | 12688.113 | 7615.197  | NM_005067 | 14375.268 | 15677.474 |
| NM_019049 | 3397.155  | 2379.521  | AB007899  | 1844.554  | 1372.401  |
| AF130101  | 1510.156  | 1343.507  | NM_002817 | 24114.922 | 27179.135 |
| NM_004656 | 5120.988  | 4525.812  | NM_002801 | 34870.676 | 40568.117 |
| AF071569  | 9126.283  | 6145.456  | BE905810  | 3729.984  | 2106.711  |
| NM_002269 | 5074.089  | 5638.552  | NM_014780 | 2860.194  | 1951.385  |
| AF086328  | 10333.299 | 10914.739 | NM_018116 | 828.874   | 1035.126  |
| AK001099  | 1263.796  | 1253.201  | NM_014730 | 7402.155  | 7322.253  |
| AK023753  | 4046.398  | 3647.355  | NM_014167 | 2245.219  | 2022.931  |
| AF086441  | 24581.699 | 21215.217 | NM_016063 | 6660.315  | 6920.517  |
| NM_014117 | 7230.334  | 5257.375  | U82987    | 13156.062 | 10755.42  |
| AK023609  | 3457.593  | 2597.782  | NM_005732 | 3881.054  | 4204.658  |
| NM_018019 | 5453.931  | 4249.036  | NM_014890 | 2566.146  | 3488.239  |
| AK027220  | 2187.508  | 1564.743  | AK056481  | 8470.523  | 8576.797  |
| NM_018011 | 13179.072 | 11184.327 | NM_005433 | 1191.072  | 1638.376  |
| NM_080824 | 1380.067  | 1042.693  | AF232000  | 63920.414 | 59248.094 |
| SR2       | 57272.852 | 51628.398 | NM_005758 | 9116.57   | 7717.956  |
| SR4       | 19160.051 | 13082.876 | AF044774  | 3779.819  | 3094.132  |
| SR6       | 2965.903  | 1392.547  | NM_004430 | 700.809   | 820.266   |
| SR8       | 11184.903 | 37118.273 | NM_002955 | 2794.747  | 2568.588  |
| SR10      | 34964.266 | 7926.446  | NM_001938 | 10631.519 | 10508.651 |
| CY3Cy5    | 7041.376  | 132.92    | AF230808  | 21333.154 | 21500.627 |
| AK021847  | 1979.055  | 1469.749  | U18910    | 4351.199  | 4675.933  |
| AK023086  | 4897.403  | 4612.366  | NM_005238 | 56897.164 | 55697.004 |
| AK002078  | 2925.516  | 2317.932  | S83390    | 724.612   | 776.005   |
| AF085837  | 5512.785  | 6523.891  | AK075306  | 21453.998 | 23974.551 |
| AK023165  | 2515.575  | 2659.249  | AB037820  | 2123.445  | 1582.798  |
| NM_016115 | 3956.931  | 4183.315  | NM_001280 | 37252.324 | 44373.344 |
| NM_014950 | 6564.496  | 6575.71   | AB019572  | 65021.676 | 63368.164 |
| X89067    | 2515.821  | 2763.778  | NM_002948 | 65378.074 | 55530.52  |
| AF147376  | 2711.537  | 2635.268  | AF113008  | 6012.731  | 2753.603  |
| AK027190  | 2980.639  | 2972.143  | NM_020217 | 8561.822  | 6621.218  |
| AL360136  | 1920.942  | 2570.237  | NM_018135 | 63927.809 | 63033.172 |
| AF086259  | 3947.101  | 4488.311  | AF205435  | 40178.641 | 41159.219 |
| AF086369  | 1323.292  | 1606.05   | L05093    | 64602.363 | 66341.719 |
| NM_018280 | 8808.214  | 5726.025  | NM_006923 | 8427.176  | 5164.814  |
| AK024381  | 1827.238  | 1911.958  | NM_004615 | 615.194   | 488.042   |
| AK026503  | 2151.808  | 2420.251  | AF119889  | 40052.547 | 30993.592 |
| AK026671  | 1510.772  | 1882.547  | J03866    | 23810.596 | 15852.238 |
| AF086087  | 9734.723  | 9153.229  | AK022836  | 16982.068 | 12547.703 |
| AF075084  | 3630.981  | 4471.048  | NM_012343 | 60958.281 | 53247.199 |
| AF075091  | 679.852   | 925.255   | NM_000397 | 6703.239  | 7154.96   |

|           |           |           |           |           |           |
|-----------|-----------|-----------|-----------|-----------|-----------|
| AK000671  | 73546.156 | 63468.297 | NM_002046 | 63959.527 | 63859.816 |
| AK094020  | 1049.68   | 1568.428  | AL157461  | 1942.399  | 1455.096  |
| AL137425  | 2318.422  | 2320.108  | BF217340  | 1162.837  | 1360.722  |
| AL137637  | 905.896   | 1033.491  | NM_003078 | 5654.365  | 6468.377  |
| AL359584  | 1587.909  | 2076.748  | AL137703  | 2500.23   | 2146.719  |
| AL137285  | 2646.855  | 2419.29   | NM_001809 | 10502.93  | 8993.982  |
| AL137456  | 1162.324  | 1225.138  | AL117477  | 10131.82  | 8906.271  |
| AL157489  | 897.791   | 853.079   | NM_012107 | 10823.431 | 11774.356 |
| AL390157  | 878.111   | 920.194   | AB037760  | 6123.126  | 4983.997  |
| AL050085  | 2141.644  | 2732.251  | NM_015680 | 9340.198  | 9875.847  |
| AK001308  | 10499.675 | 1566.547  | M22637    | 6628.893  | 4824.499  |
| AK024127  | 1922.6    | 2892.85   | AB037770  | 1327.806  | 1957.719  |
| AK021574  | 5088.83   | 5743.226  | NM_018118 | 1638.983  | 2408.531  |
| NM_017621 | 13658.382 | 17137.736 | L35035    | 11171.035 | 8954.48   |
| AF131767  | 7128.558  | 8254.819  | NM_007152 | 5903.852  | 4258.335  |
| AK021907  | 2693.826  | 2070.43   | NM_018293 | 4659.892  | 3015.52   |
| AK022029  | 2593.414  | 2617.64   | AF073931  | 834.144   | 934.187   |
| AK022320  | 1927.156  | 1486.912  | NM_018047 | 6895.628  | 8700.87   |
| AK022058  | 1774.045  | 1229.922  | NM_005022 | 6798.17   | 6913.439  |
| AK024326  | 3017.278  | 3338.732  | NM_001288 | 2133.958  | 2748.032  |
| AL137345  | 2704.683  | 3001.684  | NM_003564 | 19845.756 | 24647.662 |
| AK000967  | 4995.895  | 4628.631  | AK023414  | 1168.534  | 2156.56   |
| AK021583  | 4496.203  | 5475.187  | AF317516  | 20774.99  | 25078.342 |
| AL137442  | 4115.594  | 3702.856  | NM_002581 | 7111.101  | 6982.223  |
| AL049281  | 1797.198  | 2091.076  | AI417964  | 11400.967 | 11997.203 |
| NM_001208 | 51177.156 | 42314.688 | J03571    | 54861.379 | 52416.613 |
| AL050061  | 7547.106  | 2662.278  | T57791    | 1155.869  | 1480.727  |
| AK025522  | 22698.221 | 11617.897 | T64134    | 756.941   | 891.205   |
| AK025464  | 72135.008 | 71469.289 | X56134    | 6119.308  | 6792.998  |
| BE746723  | 1065.083  | 971.463   | NM_001456 | 2320.274  | 2553.188  |
| NM_020408 | 1577.034  | 1041.28   | H44784    | 2216.48   | 2289.144  |
| NM_004988 | 21249.119 | 17638.654 | AI421041  | 63450.324 | 59340.484 |
| AF147362  | 664.09    | 3679.341  | BI759091  | 7191.023  | 7138.095  |
| AF147365  | 768.077   | 1211.521  | BG685843  | 37740.891 | 37382.973 |
| AF076617  | 71738.703 | 74999.016 | BI490011  | 6484.566  | 6382.576  |
| AK025129  | 1297.893  | 1131.662  | N20475    | 14392.266 | 13890.131 |
| NM_014392 | 30299.086 | 28312.303 | BI199286  | 4952.169  | 5709.1    |
| AK023291  | 12801.215 | 10325.696 | AA026626  | 3200.063  | 3671.93   |
| BF541820  | 945.955   | 1314.36   | H61726    | 1397.889  | 1068.362  |
| AF119911  | 12008.182 | 11133.25  | M15465    | 13472.287 | 9418.867  |
| AF116656  | 7638.471  | 6764.312  | NM_007181 | 23170.979 | 23574.42  |
| NM_001050 | 7554.034  | 6659.983  | AB007857  | 3990.396  | 4398.318  |
| AF132206  | 2338.004  | 2197.42   | NM_001778 | 60905.941 | 57645.902 |
| AJ001869  | 18616.418 | 20201.379 | NM_004997 | 60015.613 | 59233.512 |
| NM_005295 | 3240.043  | 3065.903  | NM_005923 | 17570.27  | 15470.026 |
| NM_020213 | 6928.556  | 8166.478  | NM_003465 | 7813.628  | 9485.843  |
| D17267    | 9052.247  | 9150.509  | AF289028  | 4251.912  | 3080.857  |
| AJ238214  | 1649.56   | 1854.795  | NM_005127 | 40624.641 | 52420.535 |
| AB040944  | 3191.666  | 3956.376  | NM_005567 | 28378.363 | 34199.254 |
| NM_018145 | 3057.511  | 3002.346  | NM_005216 | 20131.566 | 22415.33  |
| NM_018476 | 18786.35  | 12387.128 | NM_006626 | 1010.187  | 878.191   |
| AF220492  | 29795.158 | 26039.568 | NM_003965 | 2047.59   | 2647.956  |
| X89671    | 6200.533  | 5480.156  | NM_004584 | 5201.006  | 4787.547  |



|           |           |           |           |           |           |
|-----------|-----------|-----------|-----------|-----------|-----------|
| NM_014941 | 7723.067  | 10243.283 | X15183    | 62872.02  | 60226.309 |
| NM_018372 | 7413.893  | 8632.363  | AK023618  | 14289.25  | 18058.826 |
| NM_013253 | 4192.059  | 6148.217  | AF212842  | 3210.357  | 8220.654  |
| NM_005895 | 8166.559  | 10447.947 | NM_018404 | 2807.026  | 2293.526  |
| D82345    | 4333.677  | 4301.344  | M27544    | 27312.273 | 20680.059 |
| NM_003814 | 4109.672  | 5084.189  | NM_002258 | 882.096   | 827.839   |
| NM_002968 | 1609.109  | 1922.622  | NM_001118 | 5827.418  | 7675.722  |
| AK026898  | 5180.512  | 4796.352  | AL133097  | 10613.059 | 10795.015 |
| NM_006637 | 1865.975  | 1832.856  | NM_001165 | 33935.539 | 32303.002 |
| AK022419  | 1122.821  | 1432.094  | NM_001381 | 62032.328 | 62909.09  |
| AJ251832  | 972.669   | 1041.151  | NM_006458 | 8092.97   | 5159.667  |
| NM_013938 | 4040.725  | 4076.931  | NM_014459 | 1257.925  | 1042.402  |
| AF086145  | 1783.595  | 1379.961  | NM_001492 | 5716.009  | 6704.127  |
| Z70709    | 2841.833  | 3082.83   | AB012643  | 51395.914 | 51747.699 |
| BC002538  | 6288.865  | 4750.064  | AB023170  | 7003.536  | 6625.362  |
| AK022355  | 1363.761  | 1074.983  | NM_014153 | 32773.84  | 43315.262 |
| NM_017838 | 3741.973  | 3667.023  | NM_002296 | 38035.09  | 31441.25  |
| AK096584  | 43197.711 | 39959.426 | NM_000414 | 12087.591 | 9204.441  |
| AL078636  | 2663.424  | 2544.946  | NM_018845 | 14183.729 | 13286.634 |
| AK022382  | 723.318   | 809.58    | AY008372  | 1174.171  | 750.464   |
| AL080128  | 11930.39  | 8617.312  | NM_005505 | 10673.505 | 7857.649  |
| AB037787  | 13536.296 | 13309.41  | AK026964  | 1648.188  | 1288.34   |
| AB033072  | 2743.421  | 2990.933  | NM_000079 | 10305.254 | 11061.254 |
| AB040892  | 4763.658  | 6417.483  | AL110245  | 14560.467 | 18596.553 |
| NM_018268 | 54553.816 | 54907.777 | NM_016208 | 33030.848 | 40309     |
| AF230904  | 22420.736 | 26995.555 | NM_001635 | 902.882   | 1026.385  |
| NM_017598 | 10505.688 | 12655.929 | NM_005638 | 16816.35  | 18288.139 |
| AL157480  | 5014.292  | 5841.897  | NM_007235 | 33319.402 | 38379.059 |
| NM_014388 | 2156.339  | 2231.644  | NM_007269 | 8471.106  | 7711.768  |
| NM_018110 | 3920.13   | 3474.452  | AK026014  | 7819.118  | 8575.697  |
| NM_006253 | 6855.768  | 7347.357  | NM_014845 | 6604.449  | 7938.09   |
| NM_003868 | 1331.835  | 1700.48   | NM_004298 | 6779.795  | 5953.163  |
| NM_018262 | 2416.287  | 2530.924  | NM_001232 | 1230.388  | 1026.695  |
| NM_006207 | 1948.67   | 2006.374  | AB002316  | 3654.584  | 5133.607  |
| NM_003220 | 5398.701  | 5619.402  | NM_018990 | 13107.636 | 12883.76  |
| AF009674  | 19167.307 | 17924.891 | NM_013363 | 2279.239  | 2985.569  |
| NM_000360 | 2818.669  | 2903.204  | NM_000947 | 5213.032  | 7014.453  |
| NM_000844 | 1798.097  | 2289.641  | AL096750  | 61318.148 | 59462.813 |
| NM_005510 | 20268.293 | 19782.719 | NM_016061 | 14947.716 | 19249.695 |
| Z36817    | 2634.147  | 1505.179  | NM_016062 | 38571.133 | 45011.879 |
| NM_014505 | 21202.041 | 19703.193 | NM_004153 | 9199.513  | 11534.122 |
| NM_004209 | 13823.191 | 11210.919 | AK024740  | 9443.178  | 11665.932 |
| NM_002201 | 70756.234 | 84558.648 | AF078164  | 13127.56  | 12500.454 |
| AK025047  | 4685.493  | 5555.428  | NM_019049 | 4420.5    | 5219.707  |
| NM_006808 | 10335.168 | 13791.153 | NM_005447 | 819.579   | 1280.476  |
| NM_006763 | 12336.756 | 15344.278 | NM_012413 | 926.409   | 1625.661  |
| NM_006119 | 11144.194 | 12813.883 | AF130101  | 2012.035  | 2160.656  |
| NM_004465 | 2979.852  | 3526.33   | NM_004656 | 6644.441  | 8247.859  |
| AK026927  | 7697.033  | 9070.781  | AF071569  | 8604.661  | 2637.967  |
| NM_014059 | 19984.469 | 23851.346 | NM_002269 | 7468.083  | 7703.517  |
| BE884341  | 6661.254  | 7680.843  | J04948    | 2986.529  | 4272.449  |
| AF231997  | 3752.438  | 3422.46   | NM_018043 | 1873.624  | 2156.958  |
| NM_007125 | 5054.748  | 5156.357  | AK022564  | 65787.711 | 51591.051 |

|           |           |           |           |           |           |
|-----------|-----------|-----------|-----------|-----------|-----------|
| NM_00259E | 16376.72  | 15087.95  | NM_003564 | 17865.332 | 23000.164 |
| NM_020184 | 3076.518  | 4050.905  | AK023414  | 875.094   | 1576.172  |
| NM_00581E | 1919.657  | 2656.403  | AF317516  | 19068.346 | 21884.783 |
| NM_00122E | 3405.787  | 4016.784  | NM_002581 | 7305.398  | 8023.042  |
| NM_01491E | 945.535   | 946.214   | AI417964  | 10685.98  | 11515.313 |
| NM_00025C | 1817.457  | 2677.445  | J03571    | 51150.719 | 52044.27  |
| NM_018147 | 21758.877 | 21103.387 | T57791    | 1133.356  | 1725.847  |
| NM_018967 | 10204.937 | 9684.129  | T64134    | 1572.167  | 1655.027  |
| AJ278018  | 1414.034  | 1001.922  | X56134    | 4471.218  | 5926.545  |
| NM_00185C | 1264.13   | 1184.778  | NM_00145E | 3304.929  | 3605.719  |
| NM_00216C | 2292.563  | 2261.526  | H44784    | 2690.88   | 2462.46   |
| NM_00567E | 1612.396  | 1761.256  | AI421041  | 63113.148 | 60945.824 |
| NM_00325E | 49224.113 | 53127.961 | BI759091  | 8358.646  | 9230.35   |
| NM_006587 | 1321.133  | 1528.19   | BG685843  | 44961.391 | 51881.832 |
| D21064    | 1180.446  | 1209.239  | BI490011  | 8681.831  | 11327.668 |
| NM_00281E | 9080.686  | 9210.394  | AF035771  | 1708.039  | 2011.362  |
| NM_02036E | 4497.776  | 6046.29   | N20475    | 16288.527 | 17454.418 |
| NM_00398E | 4463.302  | 6173.157  | BI199286  | 4764.613  | 3513.719  |
| AY007092  | 5415.018  | 6061.773  | AA026626  | 3838.339  | 4110.617  |
| NM_00190E | 2111.631  | 1718.068  | H61726    | 5355.323  | 6064.26   |
| AL137605  | 65277.328 | 71165.688 | NM_00592E | 12634.102 | 13006.13  |
| NM_016261 | 2072.78   | 1993.314  | NM_00346E | 5267.594  | 3806.556  |
| NM_00651E | 2679.421  | 2836.182  | AF289028  | 3827.966  | 2739.725  |
| NM_004607 | 70837.578 | 83076.852 | NM_005127 | 37073.098 | 48597.258 |
| NM_01207E | 3117.661  | 4126.633  | NM_005567 | 29693.043 | 37722.652 |
| NM_00728E | 52630.016 | 61708.578 | NM_00521E | 19941.986 | 23623.363 |
| D14678    | 10906.461 | 12105.099 | NM_00662E | 1341.424  | 1098.177  |
| NM_016221 | 4252.308  | 4321.388  | NM_00396E | 2764.669  | 4203.284  |
| NM_018113 | 1227.322  | 1629.851  | NM_004584 | 3356.746  | 4578.294  |
| U73377    | 4880.158  | 4845.415  | X15183    | 61433.84  | 59052.66  |
| NM_01616E | 4540.948  | 4629.354  | AK023618  | 12799.627 | 13761.517 |
| AF130056  | 4550.935  | 5211.561  | AF212842  | 3292.034  | 8513.403  |
| NM_00666E | 21290.408 | 15270.518 | NM_018404 | 3485.385  | 3561.588  |
| NM_004031 | 2599.39   | 2951.003  | M27544    | 29885.137 | 37824.855 |
| NM_004514 | 7270.702  | 6860.848  | NM_00225E | 1047.012  | 1398.768  |
| NM_00616E | 3090.324  | 3191.467  | NM_001118 | 8445.661  | 8828.653  |
| NM_00127E | 24237.393 | 21778.992 | AL133097  | 14214.697 | 14264.715 |
| NM_003091 | 39411.801 | 40999.402 | NM_001165 | 36251.66  | 43292.883 |
| NM_004247 | 7225.314  | 7469.418  | NM_001381 | 58459.453 | 60412.621 |
| NM_01772E | 9924.158  | 9351.482  | NM_00645E | 10502.442 | 10202.188 |
| AL137730  | 11484.71  | 10975.586 | NM_01445E | 1200.838  | 1829.094  |
| NM_00450C | 66490.758 | 60040.027 | AF073931  | 547.282   | 1282.669  |
| NM_00327E | 19832.781 | 15256.108 | NM_018047 | 4667.632  | 4055.125  |
| AL137681  | 6132.033  | 6912.977  | NM_000414 | 11215.675 | 5969.453  |
| AK025694  | 71614.859 | 76675.336 | NM_01884E | 14107.257 | 10115.478 |
| NM_00409E | 10651.213 | 10429.677 | AY008372  | 1077.362  | 998.284   |
| NM_01436E | 2069.981  | 1870.911  | NM_00550E | 13074.803 | 16516.256 |
| NM_005147 | 14638.884 | 14193.681 | AK026964  | 2076.744  | 2262.276  |
| NM_01466E | 9245.354  | 7323.172  | NM_00007E | 10802.667 | 12513.094 |
| BC030636  | 3643.586  | 3073.324  | AL110245  | 10791.162 | 12338.872 |
| NM_00047E | 1242.469  | 716.151   | NM_01620E | 36741.539 | 43860.797 |
| AF132733  | 4769.474  | 4391.604  | NM_00563E | 15760.716 | 17695.426 |
| NM_001071 | 17019.277 | 15727.441 | NM_00723E | 32220.629 | 35698.941 |

|           |           |           |           |           |           |
|-----------|-----------|-----------|-----------|-----------|-----------|
| NM_006187 | 7146.292  | 7631.253  | NM_007269 | 7757.255  | 7433.212  |
| NM_020354 | 13297.689 | 15007.424 | AK026014  | 6330.647  | 5811.886  |
| AB033016  | 22722.262 | 20768.738 | NM_014845 | 5664.095  | 3894.534  |
| D87452    | 7694.493  | 7735.752  | NM_004298 | 6701.971  | 6409.019  |
| AB037864  | 4720.205  | 5048.729  | NM_001232 | 1251.409  | 1905.121  |
| L26494    | 8229.081  | 8612.81   | NM_007181 | 21043.566 | 20833.502 |
| NM_000346 | 835.386   | 1108.009  | AB007857  | 2583.347  | 3400.497  |
| BF382513  | 24944.285 | 27278.721 | AB002316  | 4315.826  | 5683.97   |
| AB020713  | 31615.219 | 34740.266 | NM_000947 | 5425.974  | 6292.727  |
| NM_016558 | 13445.131 | 12835.447 | AL096750  | 61966.117 | 56705.02  |
| NM_007145 | 12599.236 | 11922.736 | NM_016061 | 13301.795 | 16366.803 |
| AL133112  | 1637.869  | 1847.696  | NM_016062 | 40996.379 | 45437.84  |
| NM_002199 | 7572.082  | 6844.308  | NM_004153 | 10414.903 | 12811.335 |
| BC005219  | 6446.271  | 6400.326  | AK024740  | 10178.068 | 11417.303 |
| NM_004268 | 3416.066  | 3642.667  | AF078164  | 17522.359 | 21590.473 |
| NM_000950 | 72144.82  | 70191.633 | NM_019049 | 4679.737  | 5116.008  |
| NM_005139 | 9054.216  | 8390.521  | NM_005447 | 934.896   | 1708.761  |
| NM_001275 | 72617.039 | 68773.125 | AF130101  | 1712      | 1867.892  |
| NM_000322 | 57161.309 | 54904.18  | NM_004656 | 4645.835  | 3886.912  |
| L10139    | 4820.669  | 6082.524  | AF071569  | 9388.625  | 7384.194  |
| NM_000039 | 70044.156 | 67671.586 | NM_002269 | 7052.497  | 7459.949  |
| AA478950  | 8301.355  | 8430.405  | J04948    | 3882.822  | 4903.478  |
| BF942101  | 15663.367 | 14409.798 | NM_018043 | 1802.107  | 1928.964  |
| BI825012  | 62915.863 | 60142.723 | AK022564  | 64200.813 | 57678.246 |
| M21574    | 2482.668  | 2525.689  | NM_001492 | 3556.945  | 4253.896  |
| BM051302  | 3195.483  | 3612.912  | AB012643  | 34792.906 | 37966.922 |
| BE314182  | 29700.994 | 37655.133 | NM_003564 | 18824.682 | 20441.762 |
| AI808029  | 3403.178  | 3977.731  | AK023414  | 1330.559  | 1681.911  |
| AI971217  | 1548.093  | 1677.308  | AF317516  | 11012.882 | 1351.665  |
| X03225    | 9491.993  | 9533.083  | NM_002581 | 7460.153  | 9001.297  |
| AK097395  | 38669.559 | 39749.102 | AI417964  | 11910.827 | 13628.567 |
| M12783    | 6955.64   | 6609.633  | J03571    | 54562.797 | 54193.023 |
| AK091535  | 3431.363  | 3583.251  | T57791    | 1650.003  | 1809.162  |
| AF085357  | 11021.402 | 11682.145 | T64134    | 1671.037  | 2282.84   |
| NM_003841 | 24255.908 | 30757.705 | X56134    | 6633.061  | 8207.038  |
| AF296673  | 9903.988  | 11710.206 | NM_001456 | 3730.72   | 4283.755  |
| AK022132  | 7579.896  | 8086.659  | H44784    | 2246.885  | 1794.421  |
| NM_004079 | 28877.576 | 23524.773 | AI421041  | 54246.711 | 55438.848 |
| NM_002996 | 1026.628  | 989.795   | BI759091  | 7260.825  | 7623.45   |
| NM_000383 | 5042.721  | 4805.919  | BG685843  | 39488.645 | 40299.305 |
| NM_004633 | 4045.256  | 4847.333  | BI490011  | 7428.418  | 7090.074  |
| X01394    | 71060.227 | 75931.188 | AF035771  | 1297.711  | 823.396   |
| AB037752  | 24310.793 | 33391.531 | N20475    | 18603.57  | 17928.779 |
| AF317425  | 4205.173  | 4192.872  | BI199286  | 5717.567  | 4514.669  |
| NM_018002 | 5039.314  | 5011.103  | AA026626  | 4422.622  | 3356.354  |
| AK024821  | 9577.919  | 8072.523  | H61726    | 2016.937  | 1335.034  |
| AB002340  | 14013.083 | 14287.563 | AF007190  | 2496.495  | 2123.313  |
| NM_000224 | 14672.407 | 17161.518 | X74609    | 58761.883 | 56498.668 |
| NM_014328 | 7956.87   | 9743.671  | NM_006626 | 1123.944  | 733.635   |
| NM_006414 | 13921.536 | 16042.755 | NM_003965 | 2953.608  | 2963.702  |
| NM_014322 | 25953.342 | 36249.996 | X15183    | 59322.207 | 56788.887 |
| NM_004122 | 10629.505 | 10453.632 | AK023618  | 15327.427 | 17015.189 |
| NM_002928 | 37311.969 | 44744.277 | AF212842  | 2934.386  | 10129.292 |

|           |           |           |           |           |           |
|-----------|-----------|-----------|-----------|-----------|-----------|
| NM_00016C | 6078.523  | 6082.243  | NM_018404 | 3281.54   | 3412.026  |
| NM_003301 | 2628.409  | 2570.778  | M27544    | 13436.171 | 15751.514 |
| NM_00095E | 4748.708  | 4529.03   | NM_00225E | 1886.886  | 2335.272  |
| U27768    | 6222.48   | 4270.263  | NM_001118 | 11013.723 | 12564.081 |
| U66582    | 24024.99  | 28722.289 | AL133097  | 16675.906 | 17062.018 |
| NM_01847E | 17295.361 | 14680.41  | NM_001165 | 40989.66  | 48963.426 |
| NM_01436Z | 2897.871  | 2305.117  | NM_001381 | 57468.555 | 61721.051 |
| NM_01830E | 5472.071  | 5504.085  | U90908    | 1474.445  | 1606.593  |
| NM_00183Z | 46016.309 | 46941.754 | NM_00645E | 11704.571 | 12474.27  |
| NM_01777A | 35376.141 | 40086.316 | NM_01445E | 1009.874  | 1654.096  |
| NM_016297 | 4106.07   | 4183.033  | NM_00409Z | 4128.042  | 3416.809  |
| NM_00175Z | 9545.855  | 7525.4    | NM_00144E | 26384.984 | 22249.52  |
| BC003406  | 1473.331  | 1178.276  | NM_001387 | 1189.577  | 942.818   |
| AL137672  | 1820.004  | 1893.496  | AF086122  | 2492.442  | 1761.407  |
| NM_002241 | 715.113   | 800.389   | AK024397  | 38761.129 | 44264.551 |
| NM_012281 | 11984.003 | 15964.406 | AF073931  | 1083.384  | 788.863   |
| NM_00550E | 2350.19   | 2400.903  | NM_018047 | 4817.303  | 4349.1    |
| AF091034  | 6498.377  | 6798.949  | NM_00502Z | 4034.397  | 3615.353  |
| NM_005301 | 67260.742 | 65398.527 | NM_00128E | 2066.323  | 2210.04   |
| NM_01665Z | 4401.654  | 4894.619  | NM_00562E | 38386.723 | 43446.574 |
| AB035124  | 18508.984 | 16694.051 | NM_01660E | 61074.703 | 62841.879 |
| AF060170  | 2274.805  | 2143.286  | S78203    | 5972.672  | 7188.409  |
| NM_01660Z | 1454.181  | 1335.868  | NM_01620E | 27751.893 | 35876.215 |
| NM_00440E | 10743.917 | 12506.433 | NM_00163E | 1002.919  | 1469.401  |
| AK023397  | 3499.347  | 3844.485  | NM_00563E | 20439.275 | 23355.527 |
| NM_00172E | 6187.883  | 7116.65   | NM_00723E | 40612.023 | 51097.43  |
| NM_00026Z | 4573.313  | 5826.1    | NM_00726E | 9608.183  | 11143.166 |
| AK024393  | 688.272   | 806.427   | AK026014  | 9304.95   | 8735.043  |
| AK022537  | 11219.016 | 9570.429  | NM_01484E | 8256.428  | 8724.334  |
| AF064597  | 1661.545  | 1924.435  | NM_00429E | 8087.26   | 8183.418  |
| NM_00634E | 5797.488  | 6434.626  | NM_00123Z | 1447.247  | 1538.818  |
| NM_00687E | 24395.395 | 29127.172 | NM_007181 | 23128.242 | 15860.627 |
| D87119    | 20910.037 | 22246.943 | AB007857  | 2712.355  | 2292.372  |
| AB037769  | 845.68    | 721.281   | NM_00177E | 58808.07  | 54596.215 |
| AL050040  | 1181.857  | 1093.966  | NM_004997 | 57318.789 | 51773.121 |
| NM_00655E | 24097.271 | 21019.51  | NM_00592Z | 14685.895 | 13677.177 |
| AL133066  | 972.018   | 1385.043  | NM_00346E | 5556.397  | 3582.613  |
| AF264717  | 4172.842  | 4363.356  | AF289028  | 5538.489  | 4884.707  |
| NM_01226C | 11925.372 | 10594.697 | NM_005127 | 36987.41  | 49081.441 |
| NM_001141 | 1395.122  | 1604.546  | NM_005567 | 29492.518 | 32461.238 |
| NM_00001E | 15473.863 | 18973.984 | NM_00521E | 17981.461 | 17928.479 |
| AB028992  | 677.808   | 919.977   | J04948    | 4764.562  | 6168.316  |
| NM_00127E | 73446.922 | 62787.754 | NM_01804Z | 1977.42   | 2499.813  |
| NM_00032Z | 51202.352 | 51154.391 | AK022564  | 61100.617 | 60317.934 |
| L10139    | 6226.123  | 9002.547  | NM_00149Z | 2336.818  | 2993.862  |
| NM_00003E | 69504.359 | 63184.16  | AB012643  | 35121.379 | 45043.461 |
| NM_02047C | 13998.331 | 16511.076 | AB023170  | 2127.731  | 2438.912  |
| NM_00657A | 1197.119  | 2327.986  | NM_01415Z | 14242.207 | 13955.221 |
| AA478950  | 7698.146  | 7531.071  | NM_00229E | 46014.617 | 53072.195 |
| BF942101  | 13924.035 | 12787.618 | NM_000414 | 15210.718 | 18157.742 |
| BI825012  | 60265.973 | 52696.23  | AL133033  | 1210.681  | 1129.807  |
| M21574    | 3316.503  | 2878.846  | NM_01884E | 19195.43  | 21796.547 |
| BM051302  | 2514.695  | 2462.466  | AY008372  | 1099.854  | 923.514   |

|           |           |           |           |           |           |
|-----------|-----------|-----------|-----------|-----------|-----------|
| BE314182  | 27254.26  | 25905.842 | NM_005505 | 11213.759 | 11878.397 |
| AI808029  | 2594.094  | 3001.605  | AK026964  | 1949.449  | 1542.226  |
| AI971217  | 1062.624  | 1310.607  | NM_001134 | 15795.675 | 17021.641 |
| X03225    | 9046.179  | 9599.19   | NM_016016 | 29618.1   | 24026.189 |
| AK097395  | 42648.047 | 43993.223 | NM_020407 | 4472.194  | 4497.264  |
| M12783    | 6987.76   | 6222.017  | AF118274  | 12228.173 | 4754.198  |
| AK091535  | 3312.917  | 2372.877  | NM_018344 | 2559.082  | 983.37    |
| AF085357  | 11662.376 | 9931.318  | NM_000079 | 9783.172  | 9996.521  |
| NM_003841 | 34961.785 | 45500.348 | NM_000083 | 3622.74   | 3752.33   |
| AF296673  | 9344.477  | 8113.801  | AL110245  | 11315.94  | 9486.878  |
| NM_000383 | 4914.355  | 4319.926  | AF007190  | 920.443   | 1171.416  |
| NM_004633 | 3968.546  | 3797.943  | X74609    | 61517.773 | 60901.094 |
| X01394    | 72456.281 | 67225.242 | AB002316  | 2889.431  | 4193.977  |
| NM_000041 | 70121.875 | 59337.031 | NM_018990 | 12597.541 | 12286.327 |
| NM_002984 | 15865.242 | 18568.098 | NM_013363 | 3233.573  | 4137.631  |
| AB037752  | 24578.084 | 28053.506 | NM_000947 | 6268.85   | 7443.185  |
| AF317425  | 3997.03   | 3338.232  | AL096750  | 60223.969 | 60755.383 |
| NM_018002 | 5510.649  | 5386.556  | NM_016061 | 14922.86  | 16572.195 |
| AK024821  | 8044.669  | 6624.284  | NM_016062 | 36967.383 | 41361.723 |
| AB002340  | 11487.279 | 10219.331 | NM_004153 | 9573.407  | 11128.846 |
| NM_000224 | 13645.48  | 13397.352 | AK024740  | 9287.469  | 10046.076 |
| NM_014328 | 6663.193  | 8247.505  | AF078164  | 17509.738 | 17699.961 |
| NM_006414 | 13467.062 | 18874.959 | NM_019049 | 4854.889  | 5162.821  |
| NM_014322 | 26273.271 | 37669.313 | NM_005447 | 641.258   | 1312.142  |
| NM_004122 | 10287.907 | 10472.65  | NM_012413 | 941.14    | 1039.195  |
| NM_002928 | 40271.766 | 45480.352 | AF130101  | 2177.431  | 2458.113  |
| NM_000160 | 6007.129  | 5742.026  | NM_004656 | 4623.426  | 3635.374  |
| NM_003301 | 2437.863  | 2464.454  | AF247820  | 484.994   | 687.559   |
| NM_000955 | 5652.774  | 4208.78   | AF071569  | 11805.813 | 10341.4   |
| U27768    | 6900.143  | 6020.345  | NM_002269 | 8001.681  | 6375.193  |
| NM_001742 | 669.904   | 540.023   | CY3Cy5    | 5386.575  | 115.183   |
| NM_005139 | 10066.632 | 10737.703 | NM_080824 | 1075.075  | 729.234   |
| NM_018308 | 5542.954  | 4284.659  | AF086328  | 19865.141 | 12655.051 |
| NM_001832 | 42923.086 | 41221.203 | AF086427  | 9351.938  | 8541.614  |
| NM_017774 | 33917.465 | 34323.781 | AK023753  | 16766.242 | 22946.795 |
| AB037716  | 3263.552  | 3362.925  | AF086441  | 68578.32  | 65909.125 |
| NM_016297 | 2531.368  | 2736.226  | AK027255  | 1746.242  | 1958.811  |
| NM_001752 | 8809.95   | 7891.407  | AK023609  | 5705.393  | 4437.338  |
| BC003406  | 891.929   | 899.318   | NM_018019 | 5736.719  | 3684.789  |
| AL137672  | 1492.683  | 1721.477  | AK027220  | 2668.01   | 2420.927  |
| NM_002241 | 1164.185  | 677.24    | NM_018011 | 13554.847 | 11240.091 |
| NM_012281 | 10583.457 | 11568.158 | NM_080824 | 770.755   | 797.981   |
| NM_005509 | 4597.113  | 7135.02   | SR2       | 53827.402 | 47733.281 |
| AF091034  | 6696.856  | 8490.608  | SR4       | 18640.92  | 16670.541 |
| NM_005301 | 67317.031 | 60541.484 | SR6       | 2735.963  | 2363.126  |
| NM_004167 | 665.334   | 466.499   | SR8       | 10020.168 | 28332.109 |
| NM_016653 | 4485.661  | 4117.161  | SR10      | 33990.813 | 11642.96  |
| AB035124  | 19609.049 | 16651.473 | CY3Cy5    | 5760.72   | 118.772   |
| AF060170  | 3240.091  | 2869.462  | AK024874  | 842.145   | 1109.227  |
| NM_016602 | 2107.709  | 2565.261  | AF086071  | 973.806   | 920.952   |
| NM_004409 | 12319.839 | 14065.835 | AK021847  | 1474.278  | 1140.667  |
| AK023397  | 3154.581  | 2912.891  | AK023086  | 11332.368 | 19573.74  |
| NM_000262 | 3383.078  | 3021.657  | AF241534  | 3598.902  | 5803.478  |

|           |           |           |           |           |           |
|-----------|-----------|-----------|-----------|-----------|-----------|
| NM_017831 | 3185.398  | 4214.43   | AF085855  | 772.133   | 1557.336  |
| AK024393  | 894.257   | 862.222   | AF085877  | 1205.53   | 1867.23   |
| AK022537  | 9290.292  | 6814.261  | NM_016115 | 3125.554  | 2719.952  |
| AF064597  | 4056.433  | 3211.152  | NM_014950 | 5326.48   | 4198.833  |
| NM_006345 | 5739.884  | 5994.755  | AL080180  | 2536.011  | 2317.398  |
| NM_006875 | 25201.762 | 33206.195 | X89067    | 3317.419  | 3428.283  |
| D87119    | 22765.211 | 36466.531 | AK027250  | 629.251   | 1281.333  |
| AB037769  | 952.521   | 916.242   | AF147376  | 5476.963  | 5320.121  |
| AL050040  | 1115.762  | 1421.058  | AK027190  | 3508.959  | 3824.799  |
| NM_006556 | 24435.396 | 23916.434 | AL360136  | 2471.915  | 2301.874  |
| AL133066  | 1583.179  | 2069.332  | AF086259  | 6589.604  | 6631.812  |
| AF264717  | 4393.001  | 4367.163  | AF086369  | 1078.803  | 1216.354  |
| NM_012260 | 22197.184 | 21885.09  | AK026867  | 795.393   | 1216.745  |
| NM_001141 | 1818.773  | 2019.989  | NM_018280 | 4548.418  | 3757.134  |
| NM_000018 | 14835.678 | 15404.038 | AK026671  | 6426.625  | 9176.589  |
| AB028992  | 980.888   | 1550.661  | AF086087  | 22618.262 | 33073.254 |
| NM_018479 | 16899.33  | 18902.703 | AK094020  | 1325.465  | 2047.441  |
| NM_014362 | 3623.789  | 2876.916  | AL137425  | 2453.853  | 4306.455  |
| L10139    | 4795.863  | 3701.167  | AL137637  | 1235.568  | 1730.432  |
| NM_000039 | 68634.625 | 61942.5   | AL359584  | 3112.464  | 2549.684  |
| NM_020470 | 14278.819 | 12788.86  | AL137285  | 3976.908  | 3873.46   |
| NM_006574 | 1596.581  | 1524.511  | AL137456  | 3016.597  | 2767.573  |
| AA478950  | 7961.271  | 7094.322  | AL157489  | 1743.358  | 1440.471  |
| BF942101  | 14479.344 | 12600.887 | AL390157  | 1795.221  | 1782.338  |
| BI825012  | 63376.566 | 52652.77  | AK021649  | 1233.721  | 1044.078  |
| M21574    | 4848.444  | 4471.217  | AL080151  | 2830.679  | 3341.612  |
| BM051302  | 4681.988  | 4830.115  | AL050085  | 2035.822  | 1866.926  |
| BE314182  | 28927.246 | 29779.221 | AK024127  | 1525.912  | 861.483   |
| AI808029  | 2344.156  | 2572.724  | AK023574  | 2335.897  | 3994.766  |
| AI971217  | 2824.504  | 6090.874  | AF083117  | 869.746   | 1933.773  |
| X03225    | 10848.782 | 15397.254 | AF090920  | 1072.052  | 3595.223  |
| AK097395  | 43425.621 | 43898.691 | AK021907  | 3564.706  | 3806.083  |
| M12783    | 6987.592  | 7216.816  | AK022029  | 2296.113  | 2740.576  |
| AK091535  | 3448.61   | 2870.627  | AK022167  | 1851.311  | 1838.489  |
| AF085357  | 12217.09  | 11953.684 | AK022320  | 5198.526  | 5905.988  |
| AK092768  | 856.026   | 871.459   | AK022058  | 5209.103  | 5156.244  |
| NM_003841 | 46752.477 | 47667.906 | AK024326  | 3408.211  | 3620.835  |
| AF296673  | 11290.557 | 10164.228 | U61088    | 1312.929  | 1176.688  |
| AL137698  | 1112.345  | 979.326   | AF086467  | 2934.551  | 2476.173  |
| AK024821  | 9088.546  | 7023.562  | AL137345  | 5112.931  | 3002.729  |
| AB002340  | 12246.146 | 10770.657 | BE746723  | 1029.719  | 800.337   |
| NM_000224 | 11643.613 | 12450.145 | NM_020408 | 1930.264  | 2838.704  |
| NM_014328 | 6407.154  | 6166.835  | NM_004988 | 43317.148 | 48435.516 |
| NM_006414 | 11974.356 | 10434.442 | AF147362  | 1840.443  | 1979.076  |
| NM_014322 | 23996.674 | 21571.967 | AF147365  | 901.464   | 882.574   |
| NM_004122 | 8530.243  | 6853.273  | S72917    | 1283.589  | 1302.208  |
| NM_002928 | 36363.871 | 39337.512 | AF076617  | 68460.297 | 76703.969 |
| NM_000160 | 5302.281  | 4688.162  | AK025129  | 5380.418  | 5725.671  |
| NM_003301 | 2462.495  | 2947.71   | NM_001050 | 13332.267 | 10349.575 |
| NM_000955 | 6156.37   | 6614.071  | AF132206  | 9015.126  | 10487.313 |
| U27768    | 10949.765 | 16505.9   | AJ001869  | 35599.594 | 32734.49  |
| AF305550  | 6766.843  | 7791.408  | AJ002969  | 494.412   | 1476.157  |
| U66582    | 24983.59  | 24060.143 | AF070579  | 1123.549  | 976.604   |

|           |           |           |           |           |           |
|-----------|-----------|-----------|-----------|-----------|-----------|
| S73288    | 1415.966  | 1299.902  | NM_005295 | 4611.972  | 4457.774  |
| NM_006198 | 4992.7    | 4424.33   | NM_020213 | 7905.568  | 10937.564 |
| NM_003812 | 2618.591  | 2137.013  | D17267    | 16080.161 | 26437.221 |
| NM_004678 | 3739.972  | 2871.959  | AJ238214  | 5095.47   | 5873.44   |
| NM_000950 | 73145     | 58480.453 | AB040944  | 8215.11   | 9439.398  |
| NM_005138 | 10733.375 | 11970.973 | NM_018145 | 7385.194  | 7608.987  |
| NM_001275 | 71281.016 | 73088.344 | NM_018476 | 42601.48  | 48460.898 |
| NM_000322 | 53716.879 | 51070.73  | AF220492  | 26575.463 | 30361.613 |
| NM_152747 | 2161.651  | 1850.736  | X89671    | 5357.654  | 4979.213  |
| NM_017415 | 3226.533  | 5488.631  | NM_014941 | 10076.705 | 9774.52   |
| NM_001667 | 67484.906 | 61220.031 | NM_018372 | 8326.924  | 6458.409  |
| AB046834  | 1932.799  | 1583.093  | NM_013253 | 3448.318  | 3117.816  |
| AB029033  | 52949.648 | 50240.938 | D82345    | 2737.671  | 2751.11   |
| AF091034  | 5631.196  | 5314.015  | NM_003814 | 3477.053  | 2724.476  |
| NM_005301 | 64019.363 | 53491.246 | NM_002968 | 2663.449  | 1982.835  |
| NM_016653 | 3226.098  | 3208.384  | AK026898  | 6001.197  | 5114.169  |
| AB035124  | 19709.242 | 20386.49  | NM_006637 | 3885.134  | 4780.917  |
| NM_004408 | 14436.262 | 20795.861 | AK022419  | 3167.681  | 3107.235  |
| AK023397  | 4344.808  | 4227.975  | AJ251832  | 1458.356  | 1857.144  |
| NM_001725 | 7672.702  | 7924.616  | NM_014624 | 650.369   | 1370.735  |
| NM_004079 | 28870.133 | 35198.586 | NM_013936 | 7351.008  | 5548.144  |
| NM_002996 | 878.552   | 858.441   | AF086145  | 2029.454  | 1496.79   |
| NM_000383 | 5350.918  | 4869.022  | Z70709    | 3857.379  | 3740.25   |
| NM_004633 | 4028.237  | 4128.209  | BC002538  | 5486.015  | 5132.839  |
| X01394    | 68979.547 | 67355.656 | AK022355  | 3350.466  | 3471.746  |
| NM_000041 | 68872.914 | 60950.402 | NM_017836 | 6341.25   | 8900.522  |
| NM_002984 | 14614.756 | 12254.698 | AK096584  | 63330.766 | 64938.129 |
| AB037752  | 28979.732 | 33235.359 | Z29070    | 2170.933  | 3329.65   |
| AF317425  | 5285.75   | 4273.639  | AL078636  | 5137.09   | 6914.828  |
| NM_018002 | 6024.755  | 5091.54   | AK022382  | 2461.167  | 2293.915  |
| NM_001141 | 1513.264  | 1402.385  | AL080128  | 14361.921 | 22120.352 |
| NM_000018 | 10909.42  | 15431.464 | AB037787  | 20247.236 | 25335.566 |
| AB028992  | 2159.402  | 2110.436  | AB033072  | 1649.958  | 1939.538  |
| NM_018479 | 16834.086 | 16354.076 | AB040892  | 4628.316  | 4995.589  |
| NM_014362 | 2444.227  | 2354.603  | AF230904  | 25861.43  | 18457.393 |
| NM_018308 | 5425.527  | 4039.627  | NM_017596 | 12122.625 | 9067.563  |
| NM_001832 | 50333.5   | 45383.168 | AL157480  | 5999.236  | 5120.367  |
| NM_017774 | 35505.668 | 37286.84  | NM_014386 | 3378.515  | 2403.828  |
| AB037716  | 3125.316  | 3038.669  | NM_018110 | 4932.438  | 3807.516  |
| NM_001926 | 2001.383  | 4832.895  | NM_006253 | 8031.233  | 7618.769  |
| NM_016297 | 4368.673  | 5609.014  | NM_003866 | 1747.797  | 1624.375  |
| NM_001752 | 9531.573  | 8825.448  | NM_018262 | 2746.34   | 1972.588  |
| BC003406  | 1065.087  | 944.738   | NM_006207 | 2259.295  | 1765.198  |
| AL137672  | 2023.605  | 1625.814  | NM_003220 | 8053.975  | 7949.559  |
| X64177    | 2302.401  | 4479.983  | AF009674  | 33441.02  | 31489.525 |
| NM_015994 | 7191.605  | 5468.881  | NM_000360 | 3627.534  | 2729.917  |
| NM_014065 | 3178.21   | 2861.582  | NM_000844 | 4300.594  | 5444.574  |
| NM_001695 | 10254.115 | 6484.01   | NM_005510 | 23442.063 | 36145.668 |
| NM_002248 | 5690.85   | 4958.491  | Z36817    | 2377.343  | 2742.504  |
| NM_012281 | 10095.974 | 8879.766  | NM_014505 | 60512.078 | 60252.355 |
| AK025772  | 6858.622  | 5301.818  | NM_004209 | 17607.148 | 22866.82  |
| NM_005509 | 2264.252  | 1564.346  | NM_002201 | 62859.953 | 74344.953 |
| NM_000262 | 3427.342  | 3038.447  | AK025047  | 6554.65   | 9073.051  |

|           |           |           |           |           |           |
|-----------|-----------|-----------|-----------|-----------|-----------|
| NM_017831 | 2090.69   | 1882.708  | NM_006806 | 6504.045  | 7807.43   |
| NM_005485 | 3032.747  | 2604.106  | NM_006763 | 11063.561 | 10083.972 |
| AK024393  | 1642.866  | 2460.19   | NM_006119 | 11597.43  | 10421.608 |
| AK022537  | 10372.977 | 10097.804 | NM_004465 | 3414.194  | 3310.56   |
| AF064597  | 1697.37   | 1390.138  | AK026927  | 7571.909  | 6892.617  |
| NM_006345 | 5284.953  | 3655.43   | NM_014059 | 19007.693 | 12471.291 |
| NM_006875 | 21984.506 | 16350.891 | NM_001761 | 8938.204  | 4936.654  |
| NM_006556 | 22574.014 | 18100.561 | BE884341  | 6202.79   | 4610.881  |
| AL133066  | 1195.044  | 630.501   | AF231997  | 6506.029  | 4896.416  |
| AF264717  | 5288.692  | 4109.436  | NM_007125 | 5438.148  | 4409.729  |
| NM_012260 | 21753.373 | 15687.525 | NM_002598 | 17167.336 | 14747.734 |
| CY3Cy5    | 9439.195  | 466.793   | NM_020184 | 4473.985  | 4111.951  |
| NM_005060 | 1572.147  | 2671.874  | NM_005815 | 2871.11   | 2963.648  |
| NM_005437 | 11373.842 | 16847.834 | NM_001229 | 5286.697  | 4845.775  |
| NM_018319 | 5616.073  | 9337.849  | NM_014916 | 2617.163  | 1689.958  |
| AL359559  | 878.464   | 1207.852  | NM_000250 | 2102.72   | 1684.121  |
| AY008301  | 665.077   | 1040.141  | NM_018147 | 24067.275 | 22851.59  |
| AK024063  | 857.74    | 1382.969  | NM_018967 | 22272.572 | 18565.617 |
| AK021714  | 2672.716  | 6110.009  | AJ278018  | 1157.937  | 1367.141  |
| NM_020314 | 6974.695  | 9606.748  | NM_001850 | 3405.177  | 3259.729  |
| AK022972  | 7172.605  | 11075.583 | NM_002160 | 4332.912  | 4398.726  |
| AK025996  | 3816.374  | 6212.004  | NM_005675 | 2137.267  | 2638.572  |
| NM_017598 | 419.237   | 781.458   | NM_003259 | 63419.039 | 65499.27  |
| AF088015  | 455.49    | 771.302   | NM_006587 | 1958.416  | 1691.247  |
| NM_005715 | 14836.1   | 18469.838 | D21064    | 1497.97   | 647.022   |
| AK026992  | 5813.861  | 7386.645  | NM_002812 | 7036.334  | 5916.877  |
| X81895    | 1512.032  | 1561.116  | NM_020365 | 5672.988  | 7359.678  |
| AL137343  | 2091.097  | 2961.395  | NM_003982 | 5695.161  | 5713.668  |
| NM_005060 | 3734.143  | 4491.985  | NM_002079 | 13029.349 | 11910.646 |
| NM_005437 | 16922.17  | 16086.525 | NM_002112 | 16859.291 | 10858.479 |
| SR3       | 50153.383 | 35543.242 | NM_004121 | 22674.486 | 17448.32  |
| SR5       | 6158.089  | 4329.449  | AY007092  | 6203.906  | 5233.434  |
| SR7       | 6609.038  | 28209.176 | NM_001902 | 2158.158  | 1799.423  |
| SR9       | 21445.184 | 2476.36   | AL137605  | 64330.898 | 61877.543 |
| CY3Cy5    | 4357.562  | 145.738   | NM_016261 | 2656.293  | 2765.11   |
| M25785    | 1553.643  | 2630.567  | NM_006519 | 2136.485  | 2507.606  |
| M32443    | 2544.377  | 4450.427  | NM_004607 | 69091.734 | 64594.031 |
| M73048    | 805.726   | 1259.369  | NM_012076 | 5252.219  | 4892.838  |
| D16908    | 1273.674  | 1843.805  | NM_007285 | 55822.648 | 58382.848 |
| D16477    | 756.513   | 1234.728  | D14678    | 19551.779 | 17150.895 |
| AK024759  | 679.565   | 833.489   | NM_016221 | 5861.778  | 4351.427  |
| AK023754  | 1719.176  | 1455.794  | NM_018113 | 1750.546  | 1884.464  |
| AK024737  | 4176.324  | 4059.244  | U73377    | 10716.847 | 9394.847  |
| AB007890  | 24338.299 | 16062.131 | NM_016162 | 5777.902  | 5379.334  |
| AF070591  | 2606.144  | 2334.392  | AF130056  | 4303.136  | 4476.99   |
| NM_020411 | 1298.663  | 519.921   | NM_006662 | 39613.758 | 41682.906 |
| AL359605  | 5646.227  | 4211.542  | NM_004031 | 4760.411  | 5187.078  |
| AB020633  | 2260.608  | 1192.02   | NM_004514 | 8410.981  | 7601.847  |
| AK025445  | 17534.59  | 8670.295  | NM_006163 | 3293.815  | 3083.755  |
| AL357200  | 2568.205  | 1960.275  | NM_001272 | 27283.068 | 20277.982 |
| NM_017727 | 14047.525 | 9030.551  | NM_016303 | 3070.154  | 3071.157  |
| AK025051  | 1946.168  | 1699.207  | NM_006196 | 42844.285 | 46586.5   |
| AK024553  | 52716.328 | 52174.449 | AV733560  | 6407.218  | 4722.944  |



|           |           |           |           |           |           |
|-----------|-----------|-----------|-----------|-----------|-----------|
| AK024930  | 1176.755  | 1474.76   | D17129    | 63770.094 | 60234.367 |
| AF086168  | 1483.087  | 1024.867  | NM_003091 | 43217.559 | 34428.348 |
| AF007132  | 1343.185  | 651.455   | NM_004247 | 8738.591  | 7979.239  |
| AK026711  | 920.998   | 572.748   | NM_017722 | 10386.927 | 10089.959 |
| NM_017864 | 12162.604 | 9154.688  | AL137730  | 17176.434 | 17870.309 |
| NM_004869 | 5089.841  | 3589.525  | NM_004500 | 60523.055 | 60847.32  |
| AF136408  | 866.634   | 853.439   | NM_003276 | 21610.006 | 17198.785 |
| AL110203  | 955.365   | 492.606   | AL137681  | 6718.683  | 7201.106  |
| X93501    | 606.177   | 662.022   | AK025694  | 60285.301 | 69583.453 |
| AJ011602  | 1540.335  | 1035.419  | NM_002157 | 68087.609 | 77123.344 |
| AJ002787  | 8966.854  | 6644.979  | NM_004095 | 23094.531 | 19148.891 |
| Z70764    | 2374.834  | 2101.042  | NM_014365 | 1934.516  | 1431.634  |
| Z83948    | 2616.396  | 2277.151  | NM_005147 | 19116.959 | 15478.247 |
| AK026860  | 2077.12   | 1781.176  | NM_014665 | 10904.59  | 9481.921  |
| NM_014895 | 779.584   | 938.216   | NM_005588 | 622.481   | 692.718   |
| AK023435  | 1078.803  | 1807.223  | BC030636  | 3263.757  | 3351.445  |
| AK026808  | 335.684   | 711.607   | NM_000476 | 2400.182  | 2320.566  |
| AK022309  | 2177.912  | 2307.12   | AF132733  | 6926.597  | 6461.697  |
| AK000063  | 1468.529  | 1301.975  | NM_001071 | 14754.544 | 13792.153 |
| AK000792  | 849.405   | 410.832   | NM_006187 | 6793.62   | 5588.597  |
| AK000949  | 3234.428  | 2599.592  | NM_020354 | 11965.268 | 11749.115 |
| AK027068  | 1708.914  | 1318.416  | AF202637  | 14304.394 | 14656.6   |
| AK000165  | 1026.407  | 436.87    | NM_000026 | 62645.445 | 58176.438 |
| AK000974  | 4650.659  | 3726.796  | AB033016  | 31739.502 | 33776.387 |
| NM_006233 | 14150.812 | 17459.631 | D87452    | 9314.641  | 9979.415  |
| AK021889  | 678.712   | 907.648   | AB037864  | 7235.418  | 8189.246  |
| AK000992  | 982.337   | 1184.413  | L26494    | 11820.218 | 14675.095 |
| L23544    | 15731.776 | 27340.66  | NM_000346 | 1803.247  | 2192.986  |
| NM_019020 | 2955.727  | 4464.641  | AK024322  | 2265.988  | 2719.18   |
| AF119892  | 527.359   | 1024.218  | BF382513  | 40258.906 | 38386.133 |
| NM_016474 | 1533.026  | 1809.524  | AB020713  | 34279.406 | 31254.086 |
| AF143879  | 9344.277  | 10315.783 | AK025426  | 10682.606 | 10740.672 |
| AK024621  | 24511.572 | 22669.619 | NM_016558 | 13370.619 | 13800.821 |
| AL157449  | 38435.586 | 37100.789 | NM_007145 | 14912.121 | 12981.608 |
| AL117582  | 2624.11   | 1845.465  | AL133112  | 2449.039  | 2487.589  |
| AK025525  | 1703.781  | 1897.691  | NM_002199 | 17636.09  | 17486.582 |
| L09095    | 27630.023 | 21617.045 | BC005219  | 9914.646  | 9199.079  |
| NM_018233 | 36888.633 | 30932.652 | NM_004268 | 3701.63   | 3359.131  |
| AV740891  | 3950.445  | 4168.84   | NM_000950 | 63246.809 | 65260.152 |
| AF143329  | 737.049   | 744.54    | NM_005139 | 10610.111 | 11776.418 |
| AF090916  | 918.199   | 918.312   | NM_001275 | 65786.539 | 65139.641 |
| AL390183  | 593.007   | 954.248   | NM_000322 | 57177.723 | 57561.133 |
| AK001857  | 1285.693  | 1723.618  | L10139    | 14132.663 | 16089.088 |
| AF067801  | 450.502   | 937.31    | NM_000039 | 68460.531 | 69620.867 |
| AL133577  | 3804.92   | 6617.372  | NM_020470 | 31774.969 | 39684.883 |
| AF279773  | 1268.728  | 2213.232  | NM_006574 | 2597.301  | 4199.168  |
| AK025378  | 9075.2    | 14729.659 | AA478950  | 15362.021 | 21712.135 |
| NM_000479 | 4702.687  | 6931.607  | BF942101  | 16043.912 | 19541.539 |
| AF038199  | 3250.609  | 3618.732  | BI825012  | 63136.012 | 59550.953 |
| AF086035  | 11908.072 | 17477.936 | M21574    | 3637.679  | 5020.464  |
| AK022159  | 8351.251  | 9613.255  | BM051302  | 4157.299  | 5621.351  |
| AJ012491  | 772.316   | 825.939   | BE314182  | 42492.508 | 52564.555 |
| AF007136  | 1866.777  | 1193.647  | AI808029  | 2743.861  | 3871.589  |

|           |           |           |           |           |           |
|-----------|-----------|-----------|-----------|-----------|-----------|
| U25750    | 12627.082 | 12218.554 | AI971217  | 1391.02   | 1333.683  |
| AK023691  | 13641.601 | 13714.904 | X03225    | 10132.294 | 10070.088 |
| AK026744  | 1070.004  | 1005.506  | AK097395  | 57408.238 | 53772.66  |
| AK002105  | 529.821   | 523.186   | M12783    | 8792.919  | 9045.823  |
| NM_005234 | 14216.848 | 9904.687  | AK091535  | 3171.883  | 2881.577  |
| BC023536  | 1393.25   | 849.32    | AF085357  | 12375.616 | 12866.613 |
| NM_001803 | 27291.674 | 19626.316 | AK092768  | 1226.659  | 1039.265  |
| NM_012297 | 12237.614 | 15722.549 | NM_003841 | 61018.051 | 56198.707 |
| AB007925  | 44911.074 | 55961.82  | AF296673  | 13688.412 | 13727.826 |
| NM_018180 | 1026.835  | 1779.834  | AK022132  | 1222.843  | 963.958   |
| NM_000361 | 9086.667  | 10844.002 | NM_004079 | 32552.586 | 28822.125 |
| NM_002475 | 46826.246 | 56891.059 | NM_002996 | 1915.375  | 1895.139  |
| NM_018203 | 961.41    | 1759.65   | NM_000383 | 6144.035  | 6283.796  |
| NM_014244 | 608.877   | 1028.071  | NM_004633 | 5343.122  | 6157.131  |
| NM_000910 | 2677.291  | 4203.643  | X01394    | 64105.84  | 67589.852 |
| AL117560  | 28972.357 | 30503.637 | NM_000041 | 68025.219 | 73744.75  |
| M24749    | 9251.167  | 9623.585  | NM_002984 | 18363.598 | 21896.164 |
| NM_005831 | 57583.285 | 56840.324 | AB037752  | 44981.656 | 48953.02  |
| NM_005850 | 69228.727 | 66380.023 | AF317425  | 6974.336  | 8667.617  |
| NM_000554 | 41276.234 | 35594.727 | NM_018002 | 8231.503  | 9744.846  |
| AF009317  | 8136.595  | 6737.376  | AK024821  | 11651.451 | 12975.401 |
| AK026583  | 11359.874 | 7708.67   | AB002340  | 26722.051 | 40328.363 |
| AF218031  | 10112.551 | 10821.705 | NM_000224 | 30851.852 | 46534.383 |
| AF210650  | 4629.311  | 2897.561  | NM_014328 | 8007.478  | 12493.053 |
| NM_018356 | 3689.598  | 3092.424  | NM_006414 | 16704.205 | 19349.838 |
| AF085896  | 1393.805  | 781.934   | NM_014322 | 29263.754 | 31545.508 |
| X74613    | 51587.668 | 52266.277 | NM_004122 | 12345.729 | 12448.289 |
| AF075080  | 20725.086 | 18092.764 | NM_002928 | 52532.531 | 56666.59  |
| NM_004616 | 1280.703  | 1970.777  | NM_000160 | 6310.934  | 6269.996  |
| NM_003821 | 10097.723 | 13838.568 | NM_003301 | 4740.284  | 4021.275  |
| NM_017692 | 4034.985  | 6434.574  | NM_000955 | 8403.267  | 8016.218  |
| NM_018173 | 607.583   | 1277.695  | U27768    | 11564.729 | 10596.19  |
| NM_000812 | 3995.459  | 7408.047  | NM_001742 | 978.23    | 735.81    |
| AK024747  | 17156.207 | 20766.018 | U66582    | 26091.357 | 25128.102 |
| NM_006390 | 3540.975  | 4423.326  | NM_018479 | 17644.164 | 16359.032 |
| NM_006506 | 1731.647  | 2168.383  | NM_014362 | 2902.733  | 2588.076  |
| NM_003235 | 25703.461 | 26989.943 | NM_018308 | 7594.59   | 6566.74   |
| AB042562  | 2111.792  | 1766.311  | NM_001832 | 62083.359 | 57662.477 |
| NM_016009 | 8414.745  | 6247.407  | NM_017774 | 33094.395 | 31930.404 |
| NM_002378 | 6222.745  | 5304.605  | AB037716  | 3817.149  | 3948.347  |
| NM_001364 | 924.286   | 780.558   | NM_001926 | 555.277   | 674.305   |
| NM_017431 | 655.166   | 683.07    | NM_016297 | 7933.659  | 8414.948  |
| NM_006097 | 4880.17   | 3812.151  | NM_001752 | 10120.862 | 11279.787 |
| NM_006113 | 1422.756  | 1021.801  | BC003406  | 1272.276  | 1472.54   |
| NM_015313 | 2764.229  | 1874.028  | AL137672  | 2723.044  | 3434.31   |
| AK022287  | 11239.371 | 7943.885  | NM_002241 | 1852.183  | 1886.858  |
| NM_015897 | 1987.704  | 2090.052  | NM_012281 | 24277.93  | 26797.914 |
| AF177473  | 59879.734 | 74649.109 | NM_005509 | 3382.137  | 3033.188  |
| NM_000546 | 13756.586 | 22635.705 | AF091034  | 7839.14   | 7538.064  |
| AB018257  | 5783.258  | 8239.024  | NM_005301 | 65502.75  | 59812.082 |
| NM_002708 | 22731.967 | 34597.297 | NM_004167 | 1081.67   | 760.836   |
| AK001059  | 1772.76   | 2884.111  | NM_016653 | 4686.889  | 5661.363  |
| NM_007282 | 6926.806  | 9143.197  | AB035124  | 19550.777 | 16292.088 |

|           |           |           |           |           |           |
|-----------|-----------|-----------|-----------|-----------|-----------|
| NM_01777C | 706.72    | 1149.142  | AF060170  | 5051.17   | 5661.202  |
| NM_01761C | 1902.282  | 2569.752  | NM_016602 | 3348.901  | 3836.492  |
| AL122070  | 641.305   | 706.969   | NM_004409 | 18856.877 | 18572.971 |
| AK025133  | 35733.395 | 44371.77  | AK023397  | 5558.609  | 6056.631  |
| AB020704  | 1727.292  | 1599.772  | NM_001725 | 12781.273 | 12816.555 |
| NM_020197 | 804.269   | 782.96    | NM_000262 | 7421.795  | 7021.137  |
| NM_004087 | 6028.628  | 6148.967  | NM_017831 | 3682.243  | 3915.08   |
| NM_01870C | 1199.669  | 1399.652  | AK024393  | 1724.943  | 1643.282  |
| NM_000119 | 8542.188  | 8027.837  | AK022537  | 11429.333 | 12934.613 |
| NM_001065 | 2857.338  | 2421.338  | AF116632  | 1017.609  | 622.33    |
| AK027100  | 956.269   | 936.136   | AF064597  | 2431.484  | 2377.221  |
| NM_003622 | 5142.207  | 3389.078  | NM_006345 | 6948.66   | 7005.709  |
| NM_007115 | 3220.623  | 2615.832  | NM_006875 | 25743.811 | 27942.32  |
| AK021645  | 656.324   | 913.261   | D87119    | 38262.766 | 38801.035 |
| NM_001491 | 3530.275  | 5112.07   | AB037769  | 1205.08   | 724.53    |
| NM_002642 | 395.35    | 638.905   | AL050040  | 1595.463  | 1902.811  |
| AK026541  | 3151.752  | 6389.329  | NM_006556 | 26247.105 | 28755.361 |
| NM_005899 | 26738.037 | 43009.672 | AL133066  | 1732.205  | 1985.178  |
| D42055    | 9102.466  | 12588.556 | AF264717  | 6771.465  | 6280.39   |
| AL137349  | 4910.212  | 6952.385  | NM_01226C | 34120.039 | 37378.09  |
| NM_003339 | 1615.789  | 2048.571  | NM_001141 | 4291.056  | 4330.297  |
| NM_004562 | 653.154   | 925.225   | NM_000018 | 18668.016 | 26060.738 |
| NM_016476 | 50145.906 | 56249.602 | AB028992  | 1473.503  | 1211.277  |
| NM_015902 | 5994.179  | 4986.399  | NM_001275 | 67695.609 | 66123.695 |
| NM_020155 | 10348.213 | 12577.994 | NM_000322 | 53510.164 | 58928.688 |
| BE874471  | 4837.453  | 6181.559  | L10139    | 13209.745 | 15867.104 |
| NM_006121 | 3691.038  | 4242.975  | NM_000039 | 66361.773 | 61086.836 |
| AK023520  | 9291.499  | 7968.389  | NM_02047C | 29161.277 | 29905.17  |
| NM_004693 | 1088.654  | 1009.023  | NM_006574 | 1766.373  | 2358.168  |
| NM_007211 | 10348.482 | 8614.681  | AA478950  | 13655.228 | 14798.498 |
| AB011152  | 2017.321  | 1999.577  | BF942101  | 14551.01  | 15755.872 |
| NM_014956 | 10772.872 | 9181.495  | BI825012  | 64487.637 | 56313.52  |
| AB014592  | 902.236   | 786.509   | M21574    | 3268.618  | 2799.144  |
| NM_016952 | 1664.02   | 1264.905  | BM051302  | 3384.978  | 3809.462  |
| NM_001654 | 5882.016  | 4824.87   | BE314182  | 36428.973 | 37718.777 |
| U48728    | 513.207   | 596.559   | AI808029  | 2468.413  | 2563.22   |
| NM_005436 | 16594.041 | 17556.646 | AI971217  | 1659.179  | 1371.897  |
| AK024418  | 1631.264  | 3173.17   | X03225    | 9785.504  | 11444.138 |
| NM_003367 | 6844.813  | 8911.548  | AK097395  | 56305.543 | 55635.633 |
| NM_005194 | 3106.781  | 4160.029  | M12783    | 8185.747  | 8539.887  |
| AB002296  | 3307.124  | 5922.401  | AK091535  | 3101.382  | 3399.077  |
| NM_014315 | 7946.682  | 9839.432  | AF085357  | 11898.533 | 14895.85  |
| NM_012087 | 3370.173  | 4708.405  | AK092768  | 1278.653  | 1328.243  |
| AF165520  | 7380.557  | 8682.356  | NM_003841 | 54473.199 | 55470.879 |
| AK026072  | 1688.531  | 1979.757  | AF296673  | 13707.115 | 14844.042 |
| NM_004289 | 1383.407  | 1584.716  | AB032956  | 610.111   | 787.529   |
| NM_015679 | 8927.479  | 11335.678 | AL137698  | 1244.693  | 927.36    |
| AK025353  | 35802.504 | 29882.07  | NM_000383 | 4689.115  | 5165.009  |
| AK056896  | 56026.035 | 45465.789 | NM_004633 | 4475.847  | 5188.5    |
| AK022763  | 38567.246 | 31834.875 | X01394    | 66285.242 | 61719.469 |
| AF288207  | 37519.313 | 29527.355 | NM_000041 | 61372.375 | 58673.75  |
| NM_001001 | 65080.879 | 56185.855 | NM_002984 | 15592.719 | 18956.031 |
| NM_001774 | 56409.684 | 47076.195 | AB037752  | 41100.031 | 40599.875 |

|           |           |           |           |           |           |
|-----------|-----------|-----------|-----------|-----------|-----------|
| NM_006830 | 63920.285 | 63613.914 | AF317425  | 5841.347  | 5224.638  |
| AK026414  | 18400.17  | 20879.111 | NM_018002 | 6962.388  | 8918.852  |
| D17297    | 1438.746  | 1855.551  | AK024821  | 10361.068 | 10113.101 |
| NM_004074 | 38201.023 | 51418.93  | AB002340  | 21183.348 | 20230.268 |
| NM_002626 | 59580.348 | 58949.223 | NM_000224 | 25734.893 | 26693.367 |
| NM_018436 | 33669.32  | 47278.773 | NM_014328 | 6662.976  | 8370.682  |
| AF157115  | 9148.28   | 11729.172 | NM_006414 | 14096.168 | 17528.32  |
| AJ223353  | 12245.195 | 15291.678 | NM_014322 | 27987.145 | 33887.66  |
| NM_012241 | 11620.536 | 12919.223 | NM_004122 | 10685.96  | 10866.8   |
| AF250288  | 556.917   | 891.246   | NM_002928 | 47956.059 | 54465.137 |
| NM_018486 | 3449.167  | 3988.402  | NM_000160 | 5596.555  | 5779.009  |
| AL080201  | 47644.117 | 46679.727 | NM_003301 | 4343.936  | 4601.854  |
| NM_015363 | 1909.849  | 1327.3    | NM_000955 | 7985.492  | 8497.475  |
| NM_001806 | 10632.974 | 7742.619  | U27768    | 10937.206 | 9748.362  |
| AB040941  | 7715.312  | 5811.283  | NM_001742 | 815.537   | 777.749   |
| AL137241  | 1251.024  | 867.547   | U66582    | 28284.59  | 28090.332 |
| AB037742  | 4112.516  | 3024.418  | NM_000950 | 62689.262 | 60884.766 |
| AF272375  | 2805.632  | 2564.685  | NM_005139 | 11470.985 | 13341.426 |
| NM_014519 | 5973.407  | 4770.27   | NM_018308 | 7627.568  | 6734.329  |
| NM_002517 | 2286.209  | 2177.43   | NM_001832 | 62217.805 | 55648.266 |
| NM_007147 | 54254.715 | 43212.418 | NM_017774 | 28521.693 | 29386.047 |
| X65463    | 6058.333  | 4699.762  | AB037716  | 3044.664  | 3586.767  |
| NM_002238 | 3442.08   | 6658.02   | NM_001926 | 343.302   | 582.421   |
| NM_004868 | 1771.516  | 3944.537  | NM_016297 | 6279.926  | 6682.22   |
| NM_004669 | 1636.844  | 2661.16   | NM_001752 | 9399.05   | 9372.694  |
| NM_007028 | 10169.934 | 11057.405 | BC003406  | 1553.928  | 1344.645  |
| AF130728  | 895.695   | 1747.125  | AL137672  | 2534.437  | 2583.594  |
| NM_001289 | 30871.84  | 49806.086 | NM_002241 | 1156.368  | 1443.375  |
| NM_001131 | 68755.391 | 78372.469 | NM_012281 | 22043.738 | 21174.443 |
| M54894    | 1136.87   | 1704.886  | NM_005509 | 3067.591  | 2962.556  |
| BG752013  | 843.486   | 1152.086  | AF091034  | 7049.975  | 8040.104  |
| X07696    | 18950.443 | 21807.26  | NM_005301 | 63605.273 | 56948.207 |
| AA481015  | 2274.652  | 2474.701  | NM_004167 | 830.071   | 879.003   |
| AI925826  | 27890.127 | 29016.916 | NM_016653 | 4568.342  | 4845.283  |
| U04209    | 13702.638 | 9013.05   | AB035124  | 19998.199 | 18545.84  |
| AI393201  | 21770.914 | 21079.199 | AF060170  | 5229.832  | 5612.089  |
| M34664    | 64462.488 | 59199.281 | NM_016602 | 2624.393  | 2785.611  |
| Z15108    | 6116.09   | 4834.92   | NM_004409 | 16775.781 | 18223.605 |
| M55284    | 1153.895  | 1206.43   | AK023397  | 5734.536  | 5698.817  |
| AA001218  | 1881.747  | 1485.349  | NM_001725 | 13315.655 | 13489.107 |
| AA679391  | 1793.094  | 2166.854  | NM_004079 | 39407.777 | 38973.285 |
| BG682146  | 6624.319  | 4958.75   | NM_002996 | 1814.667  | 1909.1    |
| AA884709  | 967.054   | 735.683   | NM_000262 | 7316.576  | 6327.549  |
| NM_004541 | 54932.953 | 42558.191 | NM_017831 | 3211.186  | 3935.434  |
| NM_005582 | 6229.777  | 9309.625  | AK024393  | 1253.469  | 1335.827  |
| NM_012266 | 6344.806  | 8440.929  | AK022537  | 10505.014 | 10572.73  |
| NM_004559 | 4631.661  | 6728.148  | AF116632  | 671.689   | 623.552   |
| X56692    | 26877.369 | 41858.527 | AF064597  | 2126.523  | 2224.304  |
| NM_014476 | 904.456   | 1228.458  | NM_006345 | 6820.147  | 5786.445  |
| NM_014278 | 1868.105  | 4060.589  | NM_006875 | 24391.273 | 24821.16  |
| NM_005838 | 1266.684  | 1478.727  | D87119    | 31945.105 | 34063.813 |
| NM_000734 | 12910.101 | 16190.757 | AB037769  | 1267.173  | 721.335   |
| NM_012331 | 6535.389  | 7284.811  | AL050040  | 1691.99   | 1663.961  |

|           |           |           |           |           |           |
|-----------|-----------|-----------|-----------|-----------|-----------|
| NM_006644 | 11443.107 | 8813.254  | NM_006556 | 23908.814 | 24662.57  |
| NM_006583 | 63975.59  | 10110.392 | AL133066  | 1309.476  | 1622.614  |
| NM_006065 | 1351.808  | 1234.58   | AF264717  | 6009.024  | 6908.715  |
| NM_014339 | 41806.227 | 38749.406 | NM_012260 | 30001.725 | 26508.238 |
| NM_001495 | 3099.557  | 2638.145  | NM_001141 | 4036.933  | 3962.875  |
| NM_002288 | 722.828   | 619.704   | NM_000018 | 16699.629 | 25271.539 |
| NM_004416 | 24245.994 | 20935.74  | AB028992  | 1335.569  | 1274.253  |
| NM_000628 | 3577.661  | 3620.494  | NM_018479 | 20191.963 | 21636.029 |
| AB005216  | 1286.865  | 1000.152  | NM_014362 | 3208.037  | 3025.9    |
| AF015041  | 5503.118  | 4150.211  | L10139    | 15154.313 | 15873.546 |
| NM_002363 | 1005.597  | 649.28    | NM_000039 | 64353.316 | 60946     |
| X82693    | 35584     | 51522.113 | NM_020470 | 28790.102 | 30965.184 |
| NM_007176 | 4082.514  | 5745.251  | NM_006574 | 1686.102  | 2146.812  |
| NM_002722 | 1193.401  | 2325.014  | AA478950  | 12645.663 | 13335.197 |
| AF317058  | 550.193   | 885.338   | BF942101  | 14393.989 | 15401.242 |
| AL137576  | 11324.812 | 9835.047  | BI825012  | 63637.168 | 58739.891 |
| NM_006516 | 19236.324 | 15649.247 | M21574    | 2591.264  | 2916.261  |
| NM_000355 | 4035.255  | 3872.034  | BM051302  | 3296.664  | 3291.81   |
| NM_005451 | 3338.379  | 3319.323  | BE314182  | 36371.438 | 34299.023 |
| NM_007172 | 5306.583  | 4475.442  | AI808029  | 2674.117  | 2450.956  |
| NM_013333 | 38460.066 | 28757.719 | AI971217  | 1483.18   | 1283.327  |
| NM_003400 | 18187.316 | 16569.021 | X03225    | 9640.841  | 10177.719 |
| NM_014824 | 4667.784  | 9536.374  | AK097395  | 59525.949 | 56397.309 |
| NM_014741 | 3851.536  | 5394.756  | M12783    | 7863.3    | 8322.897  |
| AF212247  | 3432.458  | 6147.988  | AK091535  | 2541.408  | 2795.543  |
| AF161407  | 26249.965 | 37569.609 | AF085357  | 11894.838 | 11859.328 |
| NM_014738 | 5957.996  | 6032.541  | AK092768  | 900.235   | 1151.091  |
| NM_016406 | 4415.907  | 5697.778  | NM_003841 | 65059.906 | 58789.195 |
| NM_018080 | 10912.153 | 11529.174 | AF296673  | 13216.3   | 12279.217 |
| AL050107  | 1195.311  | 762.654   | AB032956  | 700.779   | 808.81    |
| NM_005713 | 2358.169  | 1777.318  | AL137698  | 851.292   | 1380.743  |
| AK021951  | 918.054   | 815.795   | AK024821  | 8929.67   | 5263.513  |
| AK023553  | 2952.987  | 2361.267  | AB002340  | 18275.467 | 15945.867 |
| NM_014600 | 1527.326  | 1440.393  | NM_000224 | 21552.27  | 21356.785 |
| NM_016733 | 1700.09   | 1290.254  | NM_014328 | 6502.044  | 7824.762  |
| AF181994  | 4182.658  | 3489.886  | NM_006414 | 13052.788 | 15268.177 |
| NM_018962 | 4314.892  | 3602.07   | NM_014322 | 26042.012 | 29059.502 |
| AF125100  | 3510.918  | 2804.394  | NM_004122 | 10718.722 | 10103.979 |
| NM_004669 | 4149.55   | 6259.009  | NM_002928 | 46422.07  | 47306.313 |
| NM_007028 | 13097.734 | 15461.7   | NM_000160 | 5198.681  | 5302.549  |
| AF130728  | 855.909   | 999.052   | NM_003301 | 4236.824  | 4057.084  |
| NM_001289 | 14883.437 | 17828.025 | NM_000955 | 8182.807  | 7252.841  |
| M54894    | 612.047   | 884.512   | U27768    | 11223.263 | 9347.058  |
| BG752013  | 574.338   | 914.383   | NM_001742 | 737.87    | 781.778   |
| X07696    | 17456.682 | 18254.271 | AF305550  | 11165.872 | 13006.233 |
| AA481015  | 2111.503  | 2405.042  | U66582    | 26486.607 | 27000.893 |
| AI925826  | 24655.158 | 26271.662 | NM_006198 | 6498.208  | 7159.712  |
| U04209    | 11960.276 | 7890.086  | NM_003812 | 3970.63   | 4115.062  |
| AI393201  | 19704.387 | 21363.324 | NM_000849 | 746.071   | 831.958   |
| Z15108    | 5612.338  | 4231.611  | NM_004678 | 4251.445  | 4611.727  |
| M55284    | 1099.053  | 796.576   | NM_000950 | 59291.047 | 64281.504 |
| AA001218  | 1608.634  | 1331.895  | NM_005139 | 13667.01  | 21988.039 |
| AA679391  | 1682.093  | 1929.166  | NM_001275 | 63079.84  | 61654.945 |

|           |           |           |           |           |           |
|-----------|-----------|-----------|-----------|-----------|-----------|
| BG682146  | 5946.5    | 3952.799  | NM_000322 | 61707.785 | 59571.973 |
| AA884709  | 657.895   | 666.631   | NM_152747 | 2711.321  | 2496.163  |
| AK022417  | 4557.78   | 3758.225  | NM_017415 | 2197.67   | 2033.095  |
| U50534    | 3330.966  | 2175.552  | NM_001667 | 64933.516 | 59538.738 |
| NM_005582 | 12760.765 | 17152.332 | AB046834  | 3464.417  | 3062.36   |
| NM_012266 | 5916.79   | 6958.881  | AB029033  | 60288.539 | 56928.285 |
| X56692    | 12770.899 | 17043.969 | AF091034  | 6635.937  | 7979.45   |
| NM_014278 | 1222.873  | 2005.983  | NM_005301 | 61966.918 | 54712.043 |
| NM_005838 | 774.192   | 1035.645  | NM_004167 | 1011.439  | 882.068   |
| NM_000734 | 10654.782 | 11547.094 | NM_016653 | 4104.252  | 4578.482  |
| NM_012331 | 6342.121  | 7314.959  | AB035124  | 19165.168 | 15739.483 |
| NM_006644 | 12139.188 | 11945.412 | AF060170  | 4929.445  | 4520.635  |
| NM_006583 | 63532.719 | 8607.165  | NM_016602 | 2882.097  | 2941.131  |
| NM_006065 | 1249.335  | 1133.92   | NM_004409 | 17829.598 | 17312.156 |
| NM_014339 | 35437.73  | 28888.875 | AK023397  | 6033.258  | 7174.308  |
| NM_001495 | 2398.631  | 2155.047  | NM_001725 | 14335.885 | 21268.516 |
| NM_002288 | 786.627   | 655.078   | NM_004079 | 37190.699 | 37929.813 |
| NM_004416 | 22832.158 | 16899.668 | NM_002996 | 1605.099  | 1645.632  |
| NM_000628 | 3498.083  | 2755.375  | NM_000383 | 6452.577  | 7671.448  |
| AB005216  | 1196.877  | 750.214   | NM_004633 | 5831.091  | 6138.92   |
| AF015041  | 5665.872  | 3611.88   | X01394    | 62040.461 | 60214.309 |
| NM_002363 | 987.222   | 618.758   | NM_000041 | 61279.199 | 63477.484 |
| NM_002238 | 4166.929  | 2903.514  | NM_002984 | 19633.658 | 23394.943 |
| NM_004868 | 3389.574  | 2888.672  | AB037752  | 46974.559 | 48353.031 |
| AF317058  | 839.853   | 612.468   | AF317425  | 6199.795  | 6121.021  |
| AL137576  | 10237.934 | 9449.516  | NM_018002 | 7455.659  | 7963.024  |
| NM_006516 | 20300.123 | 17705.662 | NM_001141 | 3586.136  | 3833.893  |
| NM_000355 | 3980.771  | 4041.085  | NM_000018 | 13328.986 | 13554.031 |
| NM_005451 | 3444.193  | 3663.382  | AB028992  | 1143.909  | 1210.866  |
| NM_007172 | 5052.403  | 3887.007  | NM_018479 | 17646.305 | 16447.371 |
| NM_013333 | 36417.988 | 25741.715 | NM_014362 | 2911.419  | 2669.612  |
| NM_003400 | 16742.775 | 13815.996 | NM_018308 | 7432.354  | 7828.651  |
| NM_006705 | 10150.622 | 8336.043  | NM_001832 | 60658.684 | 56132.191 |
| NM_014439 | 2212.521  | 1292.863  | NM_017774 | 31809.488 | 29725.402 |
| NM_014741 | 6058.999  | 7042.011  | AB037716  | 3868.333  | 3518.698  |
| AF212247  | 3117.986  | 3727.973  | NM_016297 | 7003.57   | 6552.927  |
| AF161407  | 31038.207 | 46918.648 | NM_001752 | 9662.268  | 9129.244  |
| NM_014738 | 4270.209  | 5245.586  | BC003406  | 1781.584  | 1506.453  |
| NM_016406 | 4446.864  | 5763.47   | AL137672  | 2320.185  | 2377.094  |
| NM_018080 | 10351.972 | 9909.152  | X64177    | 2454.019  | 5456.326  |
| NM_014453 | 34553.922 | 25136.02  | NM_015994 | 8736.277  | 7896.202  |
| NM_005713 | 2409.981  | 2177.207  | NM_002235 | 1785.4    | 1619.336  |
| AK021951  | 1221.792  | 854.248   | NM_002241 | 1822.04   | 1446.993  |
| AK023553  | 3270.359  | 2272.01   | NM_014065 | 3435.239  | 3186.547  |
| NM_014600 | 2025.132  | 1722.871  | NM_001695 | 11865.287 | 11191.328 |
| NM_016733 | 1718.426  | 1252.417  | NM_002248 | 9439.367  | 10278.104 |
| AF181994  | 4077.638  | 3270.742  | NM_012281 | 21969.045 | 17990.33  |
| NM_018962 | 3488.416  | 2169.209  | AK025772  | 8322.959  | 7271.438  |
| AF125100  | 3328.037  | 2353.866  | NM_005509 | 2814.628  | 2336.049  |
| X82693    | 40854.535 | 29250.502 | AL137698  | 1109.24   | 90.965    |
| M54894    | 642.219   | 683.386   | NM_000262 | 6650.013  | 6752.002  |
| X07696    | 8992.308  | 9967.987  | NM_017831 | 3420.682  | 3414.248  |
| AA481015  | 1693.637  | 1707.501  | AK024393  | 1561.939  | 1204.682  |

|           |           |           |           |           |           |
|-----------|-----------|-----------|-----------|-----------|-----------|
| AI925826  | 21129.223 | 19854.016 | AK022537  | 11283.637 | 9923.643  |
| U04209    | 13456.016 | 9236.87   | AF064597  | 2261.386  | 1996.735  |
| AI393201  | 19786.525 | 21366.361 | NM_006345 | 7174.045  | 5591.533  |
| M34664    | 62360.969 | 52389.559 | NM_006875 | 23482.729 | 23725.451 |
| Z15108    | 6728.599  | 5471.972  | D87119    | 34859.277 | 33838.016 |
| M55284    | 1256.428  | 1025.283  | AL050040  | 1528.253  | 1219.817  |
| AA001218  | 1859.024  | 1811.952  | NM_006556 | 25938.615 | 24651.924 |
| AA679391  | 1565.021  | 1898.216  | AL133066  | 1659.27   | 1571.871  |
| BG682146  | 5831.115  | 4399.209  | AF264717  | 5831.409  | 5128.684  |
| AA884709  | 938.9     | 594.478   | NM_012260 | 29299.574 | 26930.848 |
| AK022417  | 4919.207  | 3211.466  | CY3Cy5    | 11086.487 | 424.624   |
| U50534    | 3041.778  | 1910.292  | NM_005060 | 4331.161  | 4409.743  |
| NM_014824 | 5526.036  | 3904.225  | NM_005437 | 14496.05  | 17402.125 |
| NM_006644 | 8862.478  | 7151.422  | NM_018319 | 9996.867  | 13651.001 |
| NM_006583 | 75019.5   | 5056.867  | AL359559  | 766.011   | 885.179   |
| NM_006065 | 1687.113  | 1886.845  | AY008301  | 900.652   | 1526.141  |
| NM_014339 | 27497.227 | 31822.256 | AK024063  | 1035.964  | 1187.08   |
| NM_001495 | 1136.322  | 1401.689  | AK021714  | 3866.968  | 5203.422  |
| NM_002288 | 718.456   | 745.007   | NM_020314 | 6341.789  | 9273.068  |
| NM_004416 | 22651.379 | 20987.701 | AK022972  | 6928.2    | 7656.082  |
| NM_000628 | 3862.402  | 4828.955  | AK025996  | 6131.741  | 7149.141  |
| AB005216  | 1362.812  | 1224.317  | NM_017598 | 982.58    | 1285.313  |
| NM_000325 | 9928.105  | 9417.289  | AF088015  | 837.95    | 1791.644  |
| AF015041  | 5715.248  | 4401.73   | NM_005715 | 29063.684 | 40886.902 |
| NM_002363 | 810.19    | 694.247   | AK026992  | 5525.878  | 6799.353  |
| AK000184  | 1893.45   | 1734.152  | X81895    | 1324.522  | 1314.841  |
| AF055020  | 23114.041 | 18170.799 | AL137343  | 2030.575  | 2162.07   |
| NM_006986 | 5482.449  | 3937.489  | NM_005060 | 5391.239  | 3507.414  |
| AF272043  | 2143.627  | 1056.975  | NM_005437 | 17029.977 | 16226.825 |
| NM_002587 | 59233.27  | 50190.574 | SR1       | 69227.102 | 65391.23  |
| NM_002238 | 4563.26   | 2604.942  | SR3       | 55181.555 | 53984.141 |
| NM_004868 | 3070.109  | 2445.273  | SR5       | 6703.386  | 7116.608  |
| NM_004669 | 5345.101  | 3705.915  | SR7       | 8083.831  | 46321.336 |
| NM_007028 | 16656.781 | 8067.119  | SR9       | 26997.162 | 5532.595  |
| NM_015865 | 1037.444  | 1396.179  | CY3Cy5    | 11586.882 | 974.26    |
| NM_003055 | 16969.26  | 19777.6   | M25785    | 1850.433  | 1746.219  |
| NM_005075 | 640.429   | 255.448   | M32443    | 6481.207  | 7150.386  |
| NM_006841 | 1062.557  | 1123.687  | M73048    | 2636.842  | 3390.372  |
| NM_000355 | 3028.473  | 4132.294  | D16908    | 2377.772  | 3020.385  |
| NM_005451 | 910.055   | 1360.726  | D16477    | 1723.42   | 2387.924  |
| NM_007172 | 2366.021  | 2454.171  | AK024759  | 1047.679  | 1335.717  |
| NM_013333 | 38256.32  | 37943.609 | AK025078  | 1232.152  | 1459.791  |
| NM_002333 | 8255.309  | 7976.942  | AK023754  | 3667.478  | 3814.618  |
| NM_003400 | 16873.453 | 17690.326 | AK021689  | 1099.112  | 1259.892  |
| NM_006705 | 11109.936 | 9079.896  | AK024737  | 6438.696  | 7259.819  |
| NM_014439 | 1701.175  | 1281.447  | AB007890  | 38591.586 | 46126.004 |
| NM_005582 | 19567.434 | 13852.353 | AF070591  | 3265.803  | 3560.041  |
| NM_012266 | 8577.147  | 5392.001  | NM_020411 | 2234.904  | 2193.616  |
| NM_004559 | 6158.521  | 3180.379  | AF275800  | 5954.534  | 6550.47   |
| X56692    | 29769.574 | 19123.477 | AL359605  | 11332.054 | 12242.566 |
| NM_014476 | 1137.285  | 551.281   | AB020633  | 2933.769  | 3266.469  |
| NM_014278 | 1948.694  | 2243.906  | AK025445  | 20363.709 | 18175.77  |
| NM_018962 | 3678.677  | 3589.517  | AL357200  | 4735.138  | 4139.018  |

|           |           |           |           |           |           |
|-----------|-----------|-----------|-----------|-----------|-----------|
| AF125100  | 3002.72   | 3772.661  | NM_017727 | 14043.588 | 15192.462 |
| X82693    | 35856.434 | 42258.496 | AK024527  | 974.723   | 981.768   |
| NM_007176 | 12234.8   | 13324.863 | AK025051  | 2307.276  | 2796.208  |
| NM_002722 | 3185.791  | 3914.047  | AK024553  | 68923.586 | 70272.453 |
| M22538    | 21223.559 | 14817.782 | AK024930  | 1957.838  | 2504.353  |
| NM_006028 | 957.889   | 502.264   | AK026702  | 638.334   | 647.144   |
| NM_014904 | 1850.552  | 1175.38   | AF086168  | 2241.245  | 2283.971  |
| AL137576  | 9626.141  | 4929.067  | AF007132  | 1311.712  | 739.472   |
| NM_018358 | 8907.821  | 5855.295  | AK026711  | 943.584   | 1099.903  |
| NM_016321 | 722.729   | 250.02    | NM_017864 | 13819.585 | 17982.59  |
| AF131781  | 10784.193 | 7023.647  | NM_004869 | 6490.042  | 7657.83   |
| NM_006516 | 19962.594 | 11473.409 | AF136408  | 2487.584  | 5617.325  |
| AK022417  | 3934.407  | 3794.683  | AL110203  | 1587.559  | 1416.992  |
| U50534    | 2594.805  | 2831.358  | X51527    | 893.167   | 865.834   |
| NM_014824 | 6207.242  | 16277.779 | X93501    | 805.465   | 858.565   |
| NM_014504 | 3803.482  | 3509.539  | AJ011602  | 2064.984  | 1839.031  |
| NM_014408 | 5043.268  | 4737.666  | AJ002787  | 19289.102 | 20501.449 |
| NM_014741 | 3633.265  | 3736.319  | Z70764    | 4033.788  | 3131.302  |
| AF212247  | 5320.279  | 4046.611  | AL049252  | 914.044   | 985.602   |
| AF161407  | 28073.021 | 25714.098 | Z83948    | 4022.854  | 4070.622  |
| NM_014738 | 5621.618  | 4396.235  | AF086214  | 1421.77   | 2009.24   |
| NM_016406 | 4729.718  | 3862.21   | AK026860  | 7711.504  | 8956.021  |
| NM_018080 | 10231.082 | 6071.071  | AK024211  | 2866.662  | 2399.619  |
| NM_014453 | 34424.227 | 17366.803 | NM_014898 | 1925.036  | 1918.632  |
| NM_005713 | 2017.982  | 1012.234  | AK023435  | 2071.122  | 2125.354  |
| AK021951  | 1143.672  | 466.422   | AK026808  | 772.413   | 1104.7    |
| AK023553  | 3189.744  | 1626.231  | AK022309  | 2527.622  | 3002.978  |
| NM_014600 | 1840.536  | 959.934   | AK000063  | 1737.484  | 1811.822  |
| NM_016733 | 1784.078  | 944.28    | AK000949  | 3050.127  | 2648.652  |
| AF181994  | 4097.493  | 2795.362  | AK027068  | 2270.768  | 2434.894  |
| CY3Cy5    | 2815.31   | 166.538   | AK000165  | 1254.71   | 962.439   |
| NM_058197 | 4371.16   | 3297.659  | AK000974  | 5977.322  | 5999.737  |
| AF086314  | 792.905   | 1221.774  | NM_006233 | 23588.795 | 23685.434 |
| NM_016364 | 1377.299  | 1498.959  | AK021889  | 1699.011  | 1386.081  |
| AF086419  | 4179.572  | 2898.523  | AK000992  | 2520.6    | 2357.671  |
| AF086461  | 1210.586  | 1409.126  | L23544    | 29106.746 | 36679     |
| AL833296  | 4696.888  | 4155.426  | NM_019020 | 4551.482  | 5349.537  |
| AL110240  | 7412.276  | 7769.65   | NM_016474 | 2383.759  | 2116.431  |
| AK025695  | 6191.966  | 10074.264 | AF143879  | 13091.701 | 14496.784 |
| AK025442  | 5280.656  | 8804.694  | AK024621  | 30330.566 | 34547.375 |
| AL050041  | 2071.858  | 3561.671  | AL157449  | 48610.758 | 54205.777 |
| NM_058197 | 6771.596  | 13928.457 | AL117582  | 2289.745  | 1599.03   |
| SR4       | 23143.75  | 45500.121 | AK025525  | 3198.1    | 3694.198  |
| SR6       | 2947.692  | 5955.528  | L09095    | 30988.799 | 33576.398 |
| SR8       | 13676.051 | 50801.625 | NM_018233 | 45885.477 | 53735.551 |
| SR10      | 40595.477 | 22799.121 | AV740891  | 5546.634  | 6660.444  |
| CY3Cy5    | 11278.635 | 391.027   | AF143329  | 1323.235  | 1484.702  |
| AK024713  | 647.029   | 260.48    | AF090916  | 2143.742  | 2012.398  |
| AK024204  | 298.901   | 315.413   | AL390183  | 1420.165  | 1283.115  |
| AK023737  | 1168.365  | 2220.96   | Y13897    | 2146.359  | 2466.637  |
| NM_006609 | 4652.097  | 2758.259  | AK001857  | 3191.226  | 3338.869  |
| AK023525  | 6503.644  | 6348.675  | AF067801  | 936.573   | 1115.245  |
| AF085829  | 1441.607  | 1436.535  | AL133577  | 8190.764  | 8891.095  |



|           |           |           |           |           |           |
|-----------|-----------|-----------|-----------|-----------|-----------|
| AF075029  | 797.774   | 1310.255  | AF279773  | 1427.93   | 1316.181  |
| AK021903  | 6801.967  | 11434.465 | AK025378  | 21130.309 | 22552.965 |
| AL390143  | 8037.05   | 12693.029 | NM_000479 | 7356.957  | 6924.515  |
| AL162075  | 2724.357  | 4458.029  | AF038199  | 5125.215  | 5735.115  |
| AF147384  | 1616.659  | 2621.019  | AF086035  | 16742.871 | 21047.906 |
| AK021595  | 2309.141  | 3989.942  | AK022159  | 14712.848 | 16261.622 |
| AK021648  | 832.518   | 2295.398  | D16905    | 920.996   | 803.894   |
| NM_018410 | 5144.556  | 12103.241 | AJ012491  | 1149.773  | 1234.86   |
| AF147404  | 393.719   | 1280.083  | AF007136  | 1548.437  | 1388.401  |
| AF086278  | 608.426   | 1269.736  | U25750    | 25961.412 | 25831.248 |
| AF086355  | 1331.959  | 2540.018  | AK023691  | 16542.744 | 17997.496 |
| AL110173  | 879.213   | 498.646   | AK023502  | 1817.163  | 1980.623  |
| AK024106  | 1127.972  | 728.493   | AF014456  | 1161.316  | 1114.851  |
| AK027254  | 1909.425  | 1004.613  | AK026744  | 2129.333  | 2363.243  |
| AK021772  | 3778.463  | 6533.31   | AK002105  | 887.489   | 920.146   |
| AK026297  | 6340.512  | 7712.255  | NM_005234 | 20745.967 | 19605.332 |
| NM_015372 | 775.934   | 935.453   | BC023536  | 2291.304  | 1854.232  |
| AF085919  | 651.066   | 1418.456  | NM_001803 | 36750.25  | 38731.734 |
| AF085933  | 861.369   | 1353.433  | NM_012297 | 32728.627 | 31206.416 |
| AF147431  | 922.282   | 1285.885  | NM_018180 | 3016.251  | 2931.614  |
| AK026422  | 13176.155 | 16291.038 | NM_000361 | 24194.043 | 24982.557 |
| AF085938  | 865.131   | 980.443   | NM_002475 | 67148.383 | 68204.938 |
| AK022264  | 1204.4    | 2526.735  | NM_003836 | 53572.398 | 57202.609 |
| AL137331  | 2092.751  | 3601.134  | NM_017987 | 3308.373  | 4304.979  |
| AL162040  | 14178.929 | 28037.248 | NM_018203 | 1158.753  | 1180.962  |
| AL442084  | 1173.615  | 3019.231  | NM_014244 | 1339.647  | 1418.095  |
| AL137371  | 12965.332 | 30402.744 | NM_000910 | 3906.901  | 4332.072  |
| AL137596  | 4311.855  | 11067.701 | AF086001  | 67942.281 | 82265.953 |
| AL353942  | 21975.287 | 42022.551 | AL117560  | 37722.43  | 48097.762 |
| Z38010    | 22078.373 | 43367.848 | M24749    | 13478.572 | 15698.275 |
| AK025799  | 750.925   | 546.362   | NM_005831 | 67829.578 | 67702.961 |
| AL110206  | 2574.786  | 1786.574  | NM_005850 | 68439.359 | 74307.227 |
| NM_004821 | 1884.71   | 1448.381  | NM_000554 | 56546.84  | 58547.145 |
| AK024292  | 838.438   | 793.729   | AF009317  | 11887.405 | 8631.594  |
| AK026263  | 3134.402  | 5835.964  | AK026583  | 16529.65  | 16779.082 |
| AK023643  | 1142.965  | 1246.875  | AF218031  | 14137.11  | 16494.639 |
| AL390159  | 931.373   | 1390.275  | AF210650  | 5571.147  | 5186.837  |
| NM_014157 | 553.009   | 1564.578  | NM_018356 | 4583.736  | 5223.427  |
| AF090933  | 701.92    | 882.654   | AF085896  | 1803.822  | 1817.266  |
| AF111851  | 6829.487  | 8764.031  | X74613    | 59889.023 | 58975.516 |
| AF152529  | 614.04    | 1182.54   | AF075080  | 59240.488 | 60360.051 |
| AL360200  | 1120.516  | 2585.693  | NM_004616 | 2935.88   | 2632.657  |
| AK021992  | 1696.114  | 2769.897  | NM_003821 | 18882.686 | 20844.486 |
| AK022102  | 980.736   | 2356.004  | NM_017692 | 6390.861  | 7150.247  |
| AK022235  | 1092.523  | 2704.508  | NM_003975 | 3929.34   | 4875.505  |
| AK022378  | 4012.031  | 10286.545 | NM_004834 | 26096.59  | 30672.998 |
| AK022009  | 421.268   | 1555.783  | NM_018173 | 1306.203  | 1319.893  |
| AK022139  | 770.138   | 2036.47   | NM_000812 | 3798.549  | 4653.325  |
| AK022274  | 700.415   | 1759.573  | AK024747  | 23774.336 | 27049.258 |
| AK022401  | 979.829   | 2254.896  | NM_006390 | 5146.826  | 5831.632  |
| AK022078  | 444.325   | 641.779   | NM_003580 | 10791.178 | 12302.108 |
| NM_020224 | 9576.35   | 4441.267  | NM_006506 | 2587.11   | 2747.59   |
| U17617    | 4080.11   | 7101.275  | NM_003235 | 58094.707 | 57504.035 |

|           |           |           |           |           |           |
|-----------|-----------|-----------|-----------|-----------|-----------|
| NM_01410C | 354.101   | 836.196   | AB042562  | 3239.884  | 3060.562  |
| AK022952  | 9754.966  | 6459.947  | NM_016009 | 12480.65  | 14021.1   |
| BF218888  | 1003.625  | 1874.555  | NM_002378 | 17466.332 | 17958.275 |
| AK054831  | 44608.031 | 44602.363 | NM_001364 | 1726.605  | 1655.78   |
| AK021770  | 1169.558  | 2149.834  | NM_003726 | 1050.537  | 1162.4    |
| AK027248  | 3025.686  | 6370.334  | NM_017431 | 1171.6    | 1098.492  |
| AK022804  | 18794.082 | 29226.707 | NM_006097 | 7747.188  | 7999.736  |
| AF009263  | 2486.994  | 5858.23   | NM_006113 | 3038.384  | 3025.181  |
| AF009283  | 1890.716  | 4643.943  | NM_015313 | 3525.172  | 2778.799  |
| M15640    | 761.244   | 1664.343  | AK022287  | 16131.403 | 15358.297 |
| AF086329  | 4934.723  | 10093.712 | NM_015897 | 3849.402  | 3264.59   |
| U92989    | 4753.204  | 3510.769  | AF177473  | 68199.539 | 79409.289 |
| AF075102  | 2734.829  | 2908.036  | NM_000546 | 52834.41  | 56735.789 |
| NM_018463 | 22321.717 | 12603.576 | AB023223  | 1829.666  | 1959.311  |
| X74956    | 48731.277 | 25224.834 | AB018257  | 8912.38   | 8100.911  |
| AF132197  | 9551.374  | 6124.752  | NM_002708 | 31316.941 | 35728.715 |
| AK025546  | 856.454   | 476.698   | AK001059  | 5154.914  | 4486.449  |
| AL137487  | 2142.418  | 3004.769  | NM_007282 | 10199.303 | 10131.462 |
| AK023800  | 1098.877  | 1000.795  | NM_017770 | 1247.182  | 1504.467  |
| AK024120  | 3141.943  | 5890.605  | NM_017610 | 2678.288  | 2488.507  |
| U50526    | 1118.336  | 1513.575  | AL122070  | 1337.388  | 1314.279  |
| S75105    | 8113.772  | 10191.592 | AL133604  | 830.706   | 760.603   |
| AF056455  | 17208.461 | 26769.646 | AK025133  | 50825.895 | 56851.363 |
| NM_018510 | 1350.598  | 2637.713  | AB020704  | 6230.029  | 6251.916  |
| U50537    | 758.817   | 1590.859  | NM_020197 | 1271.801  | 1302.275  |
| AK024988  | 1324.971  | 2678.02   | NM_004087 | 8939.746  | 9071.64   |
| AF026943  | 5077.198  | 13539.944 | NM_018700 | 3191.754  | 4636.027  |
| L77582    | 996.264   | 1833.736  | NM_000119 | 17351.01  | 17863.207 |
| NM_005419 | 4314.208  | 10232.856 | NM_001065 | 4696.209  | 3969.614  |
| L31956    | 411.654   | 1612.038  | AK027100  | 1407.038  | 1365.598  |
| NM_003479 | 27288.873 | 49509.465 | AY010111  | 1143.204  | 713.46    |
| NM_006773 | 4013.408  | 3340.767  | NM_016950 | 1110.313  | 729.684   |
| AK024439  | 17519.666 | 13453.907 | NM_003622 | 8269.8    | 5533.777  |
| X89676    | 2102.911  | 1640.143  | NM_007115 | 4243.423  | 4528.632  |
| NM_012444 | 560.599   | 341.817   | AK021645  | 1840.525  | 1613.12   |
| Z32684    | 4620.327  | 3418.104  | NM_013339 | 5079.903  | 5104.075  |
| NM_016512 | 1004.582  | 544.726   | NM_001491 | 13665.203 | 12692.619 |
| NM_017488 | 5519.139  | 5566.268  | NM_002642 | 941.459   | 931.203   |
| AY009400  | 9659.656  | 6057.216  | AK026541  | 6568.634  | 7233.848  |
| NM_005069 | 980.443   | 1296.569  | NM_005899 | 66350.602 | 66382.453 |
| AF086401  | 4962.901  | 7654.45   | D42055    | 13412.48  | 15228.882 |
| L23869    | 1706.883  | 3128.596  | AL137349  | 9265.987  | 9687.859  |
| Z21853    | 3519.195  | 3989.237  | NM_003339 | 2885.791  | 2881.304  |
| U80770    | 942.023   | 1064.663  | NM_004562 | 910.469   | 1083.724  |
| AB075846  | 721.799   | 866.389   | NM_016476 | 68548.414 | 66771.133 |
| NM_018342 | 2743.27   | 3817.907  | NM_015902 | 10201.702 | 6539.383  |
| BC020260  | 6048.637  | 6365.927  | NM_020155 | 17136.355 | 19784.572 |
| D17156    | 12850.749 | 10327.666 | BE874471  | 7179.857  | 7957.854  |
| L04461    | 1329.046  | 4525.806  | NM_006121 | 5822.612  | 5870.467  |
| AK022343  | 7289.608  | 15431.757 | AK023520  | 14152.854 | 13642.331 |
| AK026400  | 1736.863  | 5399.562  | NM_004693 | 1770.414  | 2029.499  |
| NM_004148 | 6097.48   | 5063.467  | NM_007211 | 24225.857 | 22628.232 |
| X03168    | 3291.397  | 2170.274  | AB011152  | 3973.265  | 3277.213  |

|           |           |           |           |           |           |
|-----------|-----------|-----------|-----------|-----------|-----------|
| NM_00516E | 6238.073  | 5229.363  | NM_01495E | 15714.295 | 12974.404 |
| NM_017801 | 6804.302  | 3695      | AB014592  | 2078.479  | 1971.707  |
| NM_00734E | 3449.898  | 1823.639  | NM_016952 | 2251.175  | 2510.983  |
| NM_016953 | 631.256   | 513.065   | NM_001654 | 8395.861  | 9531.1    |
| U65473    | 13063.834 | 4820.291  | U48728    | 1135.939  | 1225.601  |
| D63481    | 48039.559 | 44075.352 | NM_00543E | 38718.809 | 44719.258 |
| AY009951  | 667.475   | 871.045   | AK024418  | 6165.987  | 6840.159  |
| AL157424  | 1369.779  | 1084.176  | NM_003367 | 25541.219 | 21763.77  |
| AK024422  | 483.838   | 1439.343  | NM_005194 | 22785.674 | 24087.293 |
| NM_002673 | 517.905   | 837.731   | AB002296  | 6433.391  | 6212.301  |
| NM_00387E | 7586.249  | 6528.738  | NM_01431E | 14072.34  | 13669.271 |
| AJ276310  | 709.048   | 625.78    | NM_012087 | 6478.161  | 6257.603  |
| NM_01229E | 14164.301 | 13198.592 | AF165520  | 13123.178 | 14844.425 |
| NM_01591C | 1281.134  | 1550.85   | AK026072  | 3051.767  | 3442.697  |
| NM_000222 | 688.089   | 1037.693  | NM_00428E | 2344.385  | 2386.094  |
| AL133666  | 5570.454  | 6251.99   | NM_01567E | 12630.745 | 12951.694 |
| NM_000663 | 3768.444  | 9887.303  | AF299118  | 62880.641 | 69073.148 |
| NM_01598E | 45197.855 | 59405.645 | AK025353  | 50737.828 | 55702.266 |
| NM_001043 | 13177.25  | 21484.982 | AK056896  | 65391.289 | 63273.172 |
| NM_01439E | 590.048   | 743.568   | AK022763  | 54813.359 | 55064.891 |
| AF113685  | 1814.848  | 1898.452  | NM_00097E | 65473.074 | 66361.406 |
| NM_00547C | 11014.431 | 6520.077  | NM_00100C | 66919.148 | 65618.805 |
| AF142570  | 1679.678  | 709.319   | AF288207  | 54456.73  | 57389.98  |
| NM_00422E | 18450.758 | 9724.6    | NM_001001 | 63493.055 | 61457.84  |
| NM_003862 | 1846.57   | 953.461   | NM_001774 | 67697.383 | 66142.023 |
| NM_002873 | 5872.649  | 1968.91   | NM_005023 | 1299.003  | 1479.228  |
| NM_015571 | 20912.666 | 16413.844 | NM_00683C | 67466.133 | 73399.492 |
| NM_004701 | 12513.671 | 10317.058 | AK026414  | 43645.285 | 46584.617 |
| AK025554  | 2172.488  | 1264.38   | D17297    | 2641.933  | 2595.498  |
| BI824151  | 7190.009  | 8626.45   | NM_004074 | 48417.672 | 50285.004 |
| AK021791  | 8645.38   | 9678.672  | NM_00262E | 65388.215 | 59728.066 |
| NM_004052 | 2623.561  | 2259.815  | NM_01843E | 47543.051 | 47220.914 |
| NM_004394 | 13021.026 | 11466.076 | AF157115  | 18171.264 | 18328.979 |
| NM_005727 | 61107.406 | 60094.926 | AJ223353  | 22700.008 | 24990.275 |
| AK027242  | 4818.646  | 6272.34   | NM_012241 | 21030.604 | 23764.348 |
| NM_00127E | 41609.168 | 57816.367 | AF250288  | 2596.51   | 1859.488  |
| NM_01905E | 10125.11  | 18555.957 | NM_01848E | 5368.374  | 5176.219  |
| NM_02019E | 1641.047  | 4293.825  | NM_005324 | 36052.66  | 36529.223 |
| U96136    | 1178.001  | 2299.78   | AL080201  | 53886.277 | 55991.148 |
| NM_01758E | 12338.923 | 22261.498 | NM_015363 | 3988.54   | 3577.682  |
| NM_005941 | 1314.012  | 929.441   | NM_00180E | 14463.691 | 13823.683 |
| NM_015884 | 756.143   | 464.187   | AB040941  | 11849.163 | 10340.716 |
| AF201380  | 3372.263  | 3629.691  | AL137241  | 2231.916  | 1614.531  |
| NM_012392 | 3703.889  | 2090.924  | AB037742  | 6195.219  | 4813.446  |
| NM_014833 | 35130.691 | 18932.4   | AF272375  | 3830.189  | 4612.549  |
| NM_00004E | 1485.207  | 459.706   | NM_01451E | 8476.944  | 8159.763  |
| NM_00387E | 12716.392 | 8490.998  | NM_002517 | 4947.716  | 5273.037  |
| NM_004832 | 1871.054  | 1990.374  | NM_007147 | 65380.125 | 64361.711 |
| NM_005957 | 742.722   | 548.899   | X65463    | 9098.46   | 8580.688  |
| AK024374  | 2675.025  | 3378.991  | NM_00223E | 6799.514  | 8570.807  |
| NM_007101 | 2311.38   | 2462.8    | NM_00486E | 6609.466  | 7060.096  |
| AB033062  | 2165.665  | 2219.797  | NM_00466E | 7041.193  | 6761.657  |
| NM_016437 | 52106.57  | 51883.188 | NM_00702E | 19525.242 | 18001.006 |

|           |           |           |           |           |           |
|-----------|-----------|-----------|-----------|-----------|-----------|
| NM_002720 | 13657.375 | 13781.576 | AF130728  | 2346.313  | 2195.603  |
| AK024716  | 42877.672 | 47182.516 | NM_004987 | 1672.991  | 2089.91   |
| X67155    | 3113.457  | 3809.776  | NM_001289 | 46349.488 | 50935.563 |
| NM_020380 | 6692.011  | 7941.776  | NM_001131 | 66493.797 | 66806.516 |
| AL137519  | 2086.008  | 1534.524  | M54894    | 2010.925  | 1926.921  |
| NM_001330 | 39196.543 | 65330.789 | BG752013  | 2934.586  | 3274.587  |
| NM_015927 | 859.51    | 2352.716  | X07696    | 36415.531 | 44844.254 |
| NM_004779 | 12863.396 | 21656.293 | AA481015  | 2837.129  | 2759.672  |
| NM_019071 | 10892     | 18562.957 | AI925826  | 43163.098 | 42928.773 |
| NM_001913 | 8783.788  | 7421.015  | U04209    | 25344.152 | 21018.154 |
| AK025594  | 1565.762  | 1418.165  | AI393201  | 37040.16  | 39593.27  |
| AB040931  | 5532.825  | 4172.372  | M34664    | 64789.766 | 62359.063 |
| NM_003599 | 843.992   | 562.654   | Z15108    | 8618.482  | 7913.719  |
| NM_015911 | 1914.892  | 1137.263  | M55284    | 2962.933  | 2681.846  |
| BC011826  | 5673.152  | 2836.857  | AA001218  | 3886.175  | 2865.31   |
| NM_017647 | 4296.534  | 1527.166  | AA679391  | 4285.095  | 4107.307  |
| NM_012091 | 1348.887  | 950.21    | BG682146  | 11352.011 | 14026.216 |
| NM_012321 | 7550.842  | 5633.489  | AA884709  | 2120.396  | 2313.246  |
| D13642    | 7798.734  | 5491.444  | NM_004541 | 64427.48  | 57222.484 |
| NM_004741 | 24703.018 | 14989.801 | NM_012266 | 11479.899 | 10573     |
| NM_018032 | 5774.065  | 6498.031  | NM_004559 | 10421.408 | 8167.435  |
| NM_003675 | 27807.051 | 23021.539 | X56692    | 57398.578 | 56238.598 |
| NM_017518 | 4775.834  | 5097.437  | NM_014476 | 1723.419  | 1858.107  |
| NM_004117 | 8172.461  | 6785.719  | NM_014278 | 3791.78   | 4140.298  |
| NM_016594 | 31066.551 | 33060.594 | NM_005838 | 3171.24   | 3051.863  |
| NM_030752 | 17135.393 | 18267.596 | NM_000734 | 30356.828 | 32564.076 |
| D26068    | 47807.594 | 39184.172 | NM_012331 | 15104.385 | 17020.32  |
| NM_018559 | 32184.326 | 29431.129 | NM_006644 | 18163.467 | 16076.198 |
| NM_017593 | 12534.529 | 23947.193 | NM_006583 | 75985.07  | 34131.801 |
| NM_004282 | 33427.574 | 53231.531 | NM_006065 | 2946.067  | 2229.001  |
| AF188747  | 3075.038  | 8533.158  | NM_014339 | 60080.164 | 58413.461 |
| NM_002773 | 1821.427  | 5913.726  | NM_001495 | 6490.736  | 6009.912  |
| NM_013411 | 2951.465  | 2953.977  | NM_002288 | 1485.496  | 1012.384  |
| NM_020200 | 1964.983  | 1333.264  | NM_004416 | 33552.66  | 33212.555 |
| NM_001248 | 518.701   | 452.88    | NM_000628 | 7510.816  | 8635.736  |
| NM_000156 | 385.759   | 245.58    | AB005216  | 3200.929  | 3029.472  |
| NM_000180 | 41980.063 | 27038.717 | AF015041  | 14551.503 | 14823.058 |
| NM_000858 | 15882.854 | 4151.872  | NM_002363 | 2234.434  | 2120.959  |
| AF254087  | 2891.379  | 1356.109  | X82693    | 63508.074 | 55619.426 |
| NM_017715 | 2505.406  | 2254.492  | NM_007176 | 17389.719 | 18175.158 |
| AL117607  | 4469.216  | 4501.474  | NM_002722 | 7582.547  | 7171.286  |
| AB037774  | 3656.359  | 6296.681  | AF317058  | 1500.61   | 1237.452  |
| NM_005438 | 1901.118  | 2516.963  | AK025965  | 1101.498  | 665.591   |
| AK024361  | 2397.75   | 2636.31   | AL137576  | 18840.689 | 17470.6   |
| NM_004350 | 14427.519 | 14007.21  | NM_006516 | 29365.336 | 33765.629 |
| NM_018044 | 12104.88  | 12055.659 | NM_000355 | 9632.326  | 10247.518 |
| NM_004503 | 724.484   | 1048.254  | NM_005451 | 6866.629  | 6226.461  |
| NM_001717 | 869.49    | 1124.912  | NM_007172 | 7643.935  | 7728.817  |
| AF274347  | 7901.5    | 7136.281  | NM_013333 | 54272.973 | 54883.91  |
| AK001144  | 904.488   | 1452.719  | NM_002333 | 16188.709 | 18551.412 |
| NM_018555 | 6691.584  | 13599.821 | NM_003400 | 22652.268 | 26259.244 |
| NM_005122 | 819.675   | 1197.836  | NM_014824 | 8764.789  | 11247.282 |
| AL133055  | 478.677   | 1818.091  | NM_014504 | 6719.329  | 6189.354  |

|           |           |           |           |           |           |
|-----------|-----------|-----------|-----------|-----------|-----------|
| NM_014552 | 4499.35   | 8613.227  | NM_014408 | 25232.051 | 23263.801 |
| NM_003072 | 27627.076 | 47099.516 | NM_014741 | 11412.966 | 11132.491 |
| L09081    | 22596.053 | 20084.045 | AF212247  | 10334.136 | 9845.631  |
| NM_000218 | 59733.168 | 64319.176 | AF161407  | 63722.473 | 50244.02  |
| NM_016113 | 20962.385 | 18099.057 | NM_014738 | 8962.61   | 9031.636  |
| NM_014222 | 4461.255  | 4964.098  | NM_016406 | 7792.598  | 8004.052  |
| NM_000509 | 5116.788  | 3222.569  | NM_018080 | 21433.744 | 20558.408 |
| NM_004542 | 1444.094  | 770.985   | NM_005713 | 4287.983  | 4020.735  |
| X06182    | 4703.577  | 3555.443  | AK021951  | 1571.908  | 1723.208  |
| BE908993  | 53241.844 | 37062.777 | AK023553  | 5816.461  | 4563.982  |
| AB012701  | 9090.276  | 5147.044  | NM_014600 | 3689.64   | 3257.577  |
| M61156    | 9771.988  | 11474.97  | NM_016733 | 2879.002  | 2711.336  |
| R44005    | 47174.563 | 52739.531 | AF181994  | 7775.869  | 6829.001  |
| AI942392  | 4898.799  | 4907.659  | NM_018962 | 11485.478 | 11252.787 |
| M55040    | 1671.256  | 1558.309  | AF125100  | 7313.331  | 7074.481  |
| AW009739  | 3637.14   | 3633.99   | NM_004669 | 8311.893  | 12390.196 |
| BC036805  | 7023.16   | 7285.462  | NM_007028 | 20079.74  | 18502.102 |
| Z74615    | 64046.746 | 62682.566 | AF130728  | 2348.399  | 2677.763  |
| X03884    | 17565.348 | 20976.168 | NM_004987 | 2225.207  | 2157.873  |
| U36759    | 1228.544  | 1987.179  | NM_001289 | 46177.09  | 56119.566 |
| AF090901  | 1064.089  | 2638.698  | NM_001131 | 65997.227 | 64688.773 |
| AF004231  | 1170.068  | 2488.122  | M54894    | 1634.844  | 1717.142  |
| AF001862  | 11728.949 | 23196.676 | BG752013  | 2977.852  | 3033.498  |
| NM_002451 | 6958.717  | 8298.024  | X07696    | 35781.051 | 39382.152 |
| AF119902  | 1010.755  | 1080.396  | AA481015  | 2608.171  | 2485.256  |
| NM_020525 | 28757.418 | 20248.098 | AI925826  | 53660.211 | 48504.766 |
| X62468    | 1351.256  | 1070.565  | U04209    | 26226.686 | 19137.316 |
| NM_003890 | 14085.021 | 10073.213 | AI393201  | 37555.477 | 39617.383 |
| BF127978  | 6014.889  | 4912.167  | Z15108    | 10526.128 | 10490.638 |
| AF110801  | 648.877   | 544.947   | M55284    | 3902.515  | 4668.831  |
| NM_016579 | 57564.93  | 39539.207 | AA001218  | 4620.454  | 4145.261  |
| AB018297  | 2526.435  | 1571.594  | AA679391  | 3100.296  | 3872.973  |
| AK022565  | 7934.419  | 4017.413  | BG682146  | 12938.323 | 12098.618 |
| AK023151  | 4620.957  | 3124.898  | AA884709  | 1731.977  | 2228.135  |
| AB033076  | 1982.722  | 1207.24   | AK022417  | 15484.754 | 14566.394 |
| AK022876  | 2918.555  | 4249.864  | U50534    | 5638.371  | 5219.966  |
| AF134894  | 55277.473 | 54171.285 | NM_005582 | 32875.047 | 36663.402 |
| NM_003938 | 11163.86  | 9489.021  | X56692    | 58713.477 | 57007.273 |
| NM_014827 | 15422.794 | 13522.442 | NM_014476 | 1394.247  | 1469.52   |
| NM_004126 | 6751.416  | 7395.92   | NM_014278 | 2635.093  | 3324.974  |
| U87460    | 20124.475 | 23216.785 | NM_005838 | 2908.44   | 2385.218  |
| NM_003617 | 1229.434  | 1638.728  | NM_000734 | 28050.361 | 28951.908 |
| NM_001841 | 4320.417  | 5815.653  | NM_012331 | 13679.436 | 14333.436 |
| NM_002054 | 6039.443  | 7331.423  | NM_006644 | 16005.408 | 14289.122 |
| NM_004125 | 2526.162  | 5289.824  | NM_006583 | 69792.258 | 25093.732 |
| NM_000823 | 2504.126  | 5702.314  | NM_006065 | 2129.601  | 2116.882  |
| NM_003317 | 4866.064  | 9477.47   | NM_014339 | 59076.059 | 58041.953 |
| NM_001139 | 6433.622  | 12999.14  | NM_001495 | 7138.638  | 6240.125  |
| NM_001441 | 2127.976  | 2830.447  | NM_002288 | 1472.294  | 1222.306  |
| NM_018324 | 1872.301  | 1579.39   | NM_004416 | 32381.346 | 32172.463 |
| AF064255  | 56826.656 | 51889.094 | NM_000628 | 5522.857  | 4800.56   |
| NM_016368 | 59015.137 | 56709.613 | AB005216  | 2478.648  | 2166.605  |
| U08853    | 5558.596  | 3944.8    | AF015041  | 15339.127 | 13661.633 |

|           |           |           |           |           |           |
|-----------|-----------|-----------|-----------|-----------|-----------|
| NM_004261 | 25824.441 | 12874.438 | NM_002363 | 2279.842  | 2236.117  |
| NM_016006 | 1459.461  | 850.712   | NM_002238 | 6885.501  | 7188.796  |
| NM_016245 | 4108.901  | 2426.922  | NM_004868 | 7126.066  | 7609.873  |
| AF005632  | 7828.791  | 3260.723  | NM_007176 | 18308.936 | 19163.537 |
| NM_000903 | 3201.37   | 1991.306  | NM_002722 | 7608.623  | 6689.018  |
| NM_004493 | 18710.586 | 10691.913 | AF317058  | 1431.465  | 1457.238  |
| AF309489  | 744.799   | 561.756   | AK025965  | 1592.097  | 1186.608  |
| NM_000288 | 2925.981  | 2915.216  | AL137576  | 16864.092 | 15184.486 |
| NM_004762 | 10174.708 | 10646.445 | NM_006516 | 27464.393 | 27123.434 |
| NM_006641 | 60902.156 | 60692.285 | NM_000355 | 9147.289  | 8837.277  |
| NM_000634 | 27397.402 | 30110.566 | NM_005451 | 6553.814  | 6570.792  |
| NM_014679 | 61194.836 | 60429.953 | NM_007172 | 7681.241  | 7644.393  |
| AB040969  | 4563.767  | 4942.398  | NM_013333 | 54230.563 | 46553.816 |
| NM_014936 | 5064.724  | 11139.171 | NM_003400 | 23766.838 | 25515.037 |
| NM_003943 | 2909.93   | 8648.061  | NM_006705 | 32510.941 | 36456.691 |
| NM_019052 | 9394.841  | 22961.699 | NM_014439 | 4402.849  | 4691.988  |
| NM_003202 | 1137.399  | 2790.143  | NM_014504 | 6581.108  | 4770.894  |
| NM_000289 | 14622.609 | 8852.258  | NM_014741 | 9683.233  | 10273.274 |
| NM_001500 | 860.988   | 751.957   | AF212247  | 11057.868 | 10645.319 |
| NM_004388 | 3052.912  | 2432.345  | AF161407  | 65096.051 | 58403.957 |
| NM_020379 | 619.73    | 615.503   | NM_014738 | 10336.531 | 9198.888  |
| AL110127  | 2656.016  | 1489.378  | NM_016406 | 8018.126  | 7656.97   |
| NM_002528 | 5123.455  | 2403.105  | NM_018080 | 20105.402 | 18266.354 |
| D38438    | 9074.287  | 3526.323  | AL050107  | 595.702   | 757.456   |
| AV714945  | 1022.236  | 442.759   | NM_014453 | 55770.316 | 45450.559 |
| AF007872  | 2876.067  | 1399.531  | NM_005713 | 3146.327  | 2966.605  |
| M30938    | 11698.573 | 10736.098 | AK021951  | 1687.969  | 1450.464  |
| NM_015148 | 2529.324  | 3130.824  | AK023553  | 5663.584  | 4865.189  |
| NM_004714 | 3424.719  | 3453.577  | NM_014600 | 4132.913  | 3384.294  |
| NM_002497 | 20478.725 | 17125.479 | NM_016733 | 2413.528  | 2589.839  |
| AB025194  | 16643.045 | 15074.787 | AF181994  | 7189.636  | 6763.418  |
| NM_006239 | 1955.556  | 2844.354  | NM_018962 | 13316.335 | 12604.506 |
| NM_017897 | 2701.489  | 7012.392  | AF125100  | 6913.479  | 6994.481  |
| NM_004265 | 1579.879  | 4708.22   | X82693    | 58884.672 | 49950.016 |
| NM_002572 | 5796.535  | 10166.609 | AF130728  | 2192.354  | 2374.763  |
| NM_016113 | 18479.107 | 16310.331 | NM_004987 | 2271.326  | 1918.331  |
| NM_014222 | 4322.658  | 5387.776  | NM_001289 | 47189.523 | 47434.77  |
| L14819    | 588.272   | 610.265   | M54894    | 1957.82   | 1527.744  |
| NM_000509 | 5130.356  | 2940.758  | BG752013  | 3165.335  | 3041.25   |
| NM_004542 | 1172.752  | 941.876   | H69204    | 944.59    | 1009.941  |
| X06182    | 4190.992  | 2043.991  | X07696    | 36587.074 | 38905.121 |
| BE908993  | 51860.918 | 19885.855 | AA481015  | 2780.983  | 2564.724  |
| AB012701  | 7311.527  | 3202.496  | AI925826  | 51061.102 | 49443.656 |
| M61156    | 6298.213  | 3287.855  | U04209    | 23912.098 | 18121.535 |
| R44005    | 41182.305 | 27621.91  | AI393201  | 36199.246 | 38022.59  |
| AI942392  | 4444.792  | 2408.286  | M34664    | 65628.883 | 59709.473 |
| M55040    | 1793.077  | 2486.905  | Z15108    | 11779.188 | 11962.608 |
| AW009739  | 3222.844  | 3201.925  | M55284    | 3315.698  | 3004.646  |
| BC036805  | 5894.948  | 4413.469  | AA001218  | 4731.066  | 4333.172  |
| Z74615    | 56837.785 | 58587.895 | AA679391  | 3034.733  | 4437.843  |
| X03884    | 15514.159 | 15137.254 | BG682146  | 11221.734 | 11908.914 |
| U36759    | 1120.076  | 1552.965  | AA884709  | 1801.789  | 1781.028  |
| X91625    | 3397.694  | 3432.207  | AK022417  | 15612.138 | 17193.398 |

|           |           |           |           |           |           |
|-----------|-----------|-----------|-----------|-----------|-----------|
| AF090901  | 1112.23   | 1220.387  | U50534    | 6527.938  | 5906.679  |
| AF004231  | 2680.814  | 2499.844  | NM_014824 | 8058.117  | 8905.952  |
| NM_016044 | 2632.663  | 4609.149  | NM_005838 | 2220.11   | 1844.36   |
| NM_000520 | 3043.283  | 7217.305  | NM_000734 | 23273.469 | 20878.432 |
| X62468    | 738.738   | 858.226   | NM_012331 | 13081.822 | 11387.886 |
| NM_003890 | 10567.342 | 8229.082  | NM_006644 | 17202.504 | 13156.004 |
| BF127978  | 5194.101  | 4508.618  | NM_006583 | 75258.555 | 19799.01  |
| AF110801  | 560.291   | 740.3     | NM_006065 | 2855.012  | 3213.149  |
| NM_016579 | 56041.598 | 54786.438 | NM_014339 | 65410.676 | 59276.422 |
| AB018297  | 2349.977  | 1789.97   | NM_001495 | 8827.154  | 7203.516  |
| AK022565  | 8096.496  | 3835.888  | NM_002288 | 1496.379  | 1196.497  |
| AK023151  | 4939.674  | 2566.153  | NM_004416 | 32377.035 | 31525.445 |
| AB033076  | 1694.838  | 715.557   | NM_000628 | 5551.445  | 6132.091  |
| AK022876  | 2182.588  | 959.478   | AB005216  | 1833.036  | 1450.143  |
| AF134894  | 48459.145 | 26060.76  | NM_000325 | 18724.156 | 18000.402 |
| NM_003938 | 9234.089  | 5096.856  | AF015041  | 13069.332 | 13468.309 |
| NM_014827 | 16867.986 | 17168.041 | NM_002363 | 2161.335  | 2075.85   |
| NM_004126 | 6269.008  | 7673.194  | AK000184  | 3145.353  | 3564.334  |
| U87460    | 15833.883 | 11922.317 | AF055020  | 54700.148 | 49753.266 |
| NM_003617 | 948.406   | 811.835   | NM_006986 | 11189.833 | 12019.778 |
| NM_001841 | 3637.888  | 3586.678  | AF272043  | 3940.457  | 4426.209  |
| NM_002054 | 5971.114  | 7603.46   | NM_002587 | 60503.148 | 59728.379 |
| AF300649  | 15370.922 | 13489.797 | NM_002238 | 8277.73   | 8451.439  |
| NM_004125 | 3902.503  | 4246.562  | NM_004868 | 7518.051  | 10801.937 |
| NM_000823 | 6633.593  | 6334.765  | NM_004669 | 8107.969  | 9357.103  |
| NM_001139 | 3840.654  | 5003.546  | NM_007028 | 22946.578 | 25429.189 |
| L09081    | 3903.669  | 6381.523  | NM_015865 | 2136.311  | 1949.061  |
| NM_000218 | 62569.789 | 62925.977 | NM_003055 | 34082.332 | 43964.75  |
| AF064255  | 52929.793 | 52994.559 | NM_006841 | 2929.735  | 2292.773  |
| NM_016368 | 56528.672 | 57890.633 | NM_000355 | 8069.554  | 6879.974  |
| U08853    | 5657.577  | 4278.725  | NM_005451 | 8517.734  | 6875.863  |
| NM_004261 | 26005.58  | 14497.514 | NM_007172 | 8210.608  | 6702.122  |
| NM_016006 | 1485.91   | 1114.803  | NM_013333 | 56395.48  | 50470.996 |
| NM_016245 | 4345.702  | 2958.826  | NM_002333 | 17645.162 | 15040.947 |
| AF005632  | 9317.552  | 4065.083  | NM_003400 | 23613.818 | 25065.781 |
| NM_000903 | 2991.234  | 2099.729  | NM_006705 | 39712.23  | 40814.559 |
| NM_004493 | 15636.186 | 5326.276  | NM_005582 | 41624.535 | 47046.816 |
| AF309489  | 419.768   | 193.112   | NM_012266 | 14318.688 | 15424.773 |
| NM_000288 | 3222.176  | 2629.77   | NM_004559 | 11291.058 | 11707.517 |
| NM_004762 | 10876.329 | 13061.819 | X56692    | 66691.469 | 75711.805 |
| NM_006641 | 60183.617 | 59311.695 | NM_014476 | 1779.923  | 2271.268  |
| NM_000634 | 25043.207 | 18719.99  | NM_014278 | 2988.26   | 5087.454  |
| NM_014679 | 56862.965 | 51322.754 | NM_018962 | 15748.858 | 10811.936 |
| AB040969  | 4337.54   | 5977.643  | AF125100  | 6794.494  | 8782.745  |
| NM_003467 | 17971.832 | 11741.823 | X82693    | 62622.281 | 46064.219 |
| NM_014936 | 3612.944  | 3541.582  | NM_007176 | 17696.592 | 14298.899 |
| NM_003943 | 4467.866  | 4662.257  | NM_002722 | 8314.845  | 8274.968  |
| NM_003202 | 1186.028  | 3090.982  | AF317058  | 1268.036  | 1070.693  |
| AF119902  | 1872.382  | 4372.382  | AK025965  | 1235.683  | 744.578   |
| NM_020525 | 5372.907  | 9990.711  | M22538    | 34371.531 | 34146.781 |
| NM_004388 | 3264.297  | 2973.275  | NM_006028 | 2163.567  | 2171.952  |
| NM_020379 | 537.855   | 763.13    | NM_014904 | 3482.789  | 3602.898  |
| AL110127  | 2214.033  | 1762.339  | AL137576  | 17409.682 | 25649.574 |

|           |           |           |           |           |           |
|-----------|-----------|-----------|-----------|-----------|-----------|
| NM_00252E | 5194.805  | 2996.406  | NM_01835E | 16826.896 | 21559.75  |
| D38438    | 8173.96   | 3621.393  | NM_016321 | 2211.807  | 2491.911  |
| AV714945  | 1051.035  | 489.381   | AF131781  | 14509.896 | 16496.307 |
| AF007872  | 2007.888  | 638.929   | NM_00651E | 29776.297 | 37824.313 |
| M30938    | 7349.167  | 3806.853  | AK022417  | 11475.674 | 9041.636  |
| NM_01514E | 1893.589  | 1686.291  | U50534    | 4078.192  | 3301.155  |
| NM_004714 | 2717.665  | 1728.379  | NM_014824 | 6810.04   | 5168.426  |
| NM_005401 | 570.813   | 749.601   | NM_014504 | 6142.544  | 4204.444  |
| NM_002497 | 17168.01  | 7618.875  | NM_01440E | 26485.711 | 16870.443 |
| AB025194  | 17171.297 | 16384.887 | NM_014741 | 11121.284 | 9179.261  |
| NM_00623E | 3080.193  | 4931.616  | AF212247  | 10709.657 | 7733.577  |
| BC020863  | 1374.455  | 1596.152  | AF161407  | 60975.504 | 46305.488 |
| NM_017897 | 4604.196  | 3811.812  | NM_01473E | 9559.099  | 8888.951  |
| NM_002572 | 6323.117  | 11555.637 | NM_01640E | 8083.499  | 8073.27   |
| NM_001441 | 2242.376  | 5644.988  | NM_01808C | 21447.084 | 21056.854 |
| NM_018324 | 1906.832  | 4039.245  | AL050107  | 1137.505  | 488.116   |
| L14819    | 551.367   | 581.03    | NM_014453 | 57303.441 | 45216.594 |
| NM_00050E | 4806.667  | 3156.993  | NM_005713 | 3720.111  | 3244.333  |
| NM_004542 | 1211.374  | 1209.564  | AK021951  | 7076.508  | 8277.686  |
| X06182    | 4559.158  | 2839.458  | AK023553  | 5868.724  | 5363.357  |
| BE908993  | 52824.059 | 26083.498 | NM_01460C | 5243.464  | 6466.855  |
| AB012701  | 8710.28   | 3993.097  | NM_016733 | 3035.103  | 2841.612  |
| M61156    | 8337.794  | 3814.481  | AF181994  | 7214.651  | 7567.116  |
| R44005    | 37400.012 | 13713.398 | CY3Cy5    | 9707.069  | 313.957   |
| AI942392  | 3559.299  | 971.587   | NM_058197 | 5091.695  | 4372.466  |
| M55040    | 1364.594  | 738.638   | AF086403  | 333.992   | 514.544   |
| AW009739  | 2686.459  | 1690.405  | AF086452  | 613.127   | 867.895   |
| BC036805  | 5189.309  | 2168.429  | AF086314  | 1461.605  | 1647.072  |
| Z74615    | 60923.914 | 62678.664 | NM_016364 | 2405.465  | 2224.458  |
| X03884    | 16941.006 | 19093.975 | AF086419  | 9642.479  | 11646.08  |
| U36759    | 884.192   | 1002.106  | AF086461  | 2091.114  | 2316.972  |
| X91625    | 2828.872  | 2544.813  | AK000789  | 684.269   | 905.24    |
| AF090901  | 1098.855  | 1209.441  | AF131795  | 1206.651  | 1196.502  |
| AF004231  | 3241.897  | 4345.677  | AL833296  | 8653.398  | 9629.265  |
| AF001862  | 12371.481 | 10579.174 | AL110240  | 10268.748 | 12154.968 |
| NM_016044 | 3004.414  | 2040.585  | AK025695  | 4701.199  | 4018.348  |
| NM_00052C | 2307.831  | 3815.998  | AK025442  | 3691.768  | 3456.027  |
| NM_00028E | 16431.215 | 19348.65  | AL050041  | 2028.108  | 2072.74   |
| NM_00150C | 2353.132  | 5430.524  | NM_058197 | 4695.046  | 4840.696  |
| AB033076  | 1892.597  | 1550.508  | SR2       | 62476.656 | 61876.574 |
| AK022876  | 2221.179  | 1750.275  | SR4       | 19766.838 | 16451.906 |
| AF134894  | 41567.48  | 25990.975 | SR6       | 2692.18   | 1628.132  |
| NM_00393E | 9908.114  | 6528.946  | SR8       | 8726.204  | 19669.395 |
| NM_014827 | 13447.647 | 8978.678  | SR10      | 31919.201 | 7232.177  |
| NM_00412E | 5372.912  | 4450.641  | CY3Cy5    | 7539.005  | 165.95    |
| U87460    | 13636.497 | 6075.335  | AK024713  | 915.239   | 577.217   |
| NM_003617 | 845.732   | 528.644   | AK024204  | 1292.392  | 1376.716  |
| NM_001841 | 2839.461  | 1058.212  | AK023737  | 1966.586  | 2633.049  |
| NM_002054 | 3829.288  | 1050.038  | NM_00660E | 8664.371  | 8877.332  |
| AF300649  | 12447.003 | 4934.946  | NM_01411E | 779.836   | 949.313   |
| NM_00412E | 3047.887  | 1745.294  | AK023525  | 9409.929  | 10579.582 |
| NM_000823 | 5896.771  | 3941.35   | AF085829  | 2876.64   | 4069.175  |
| NM_004414 | 2608.697  | 3045.357  | AF075029  | 1431.237  | 1353.181  |



|           |           |           |           |           |           |
|-----------|-----------|-----------|-----------|-----------|-----------|
| NM_003317 | 18296.389 | 13659.061 | AK021903  | 10419.49  | 8249.378  |
| NM_001139 | 6034.292  | 4311.179  | AL390143  | 12364.576 | 15444.851 |
| NM_004609 | 60488.359 | 59882.297 | AL162075  | 2979.323  | 3227.72   |
| NM_003772 | 1379.93   | 1903.443  | AF147384  | 3126.714  | 3565.368  |
| NM_001541 | 9920.399  | 9809.729  | AK021595  | 2487.614  | 2650.243  |
| NM_005416 | 2639.313  | 2065.161  | AK021648  | 1153.365  | 1386.138  |
| NM_000218 | 60545.605 | 66881.5   | AF147358  | 19607.391 | 26486.211 |
| NM_016113 | 15016.526 | 25544.924 | NM_018410 | 5410.413  | 6957.907  |
| NM_014222 | 7177.743  | 15944.038 | AF147404  | 892.427   | 1282.418  |
| AK026317  | 15976.642 | 13008.763 | AF086278  | 411.745   | 746.92    |
| X82207    | 50352.305 | 45422.395 | AF086355  | 1149.96   | 812.548   |
| NM_015044 | 9910.519  | 7862.408  | AK027174  | 1008.389  | 796.435   |
| NM_002867 | 702.995   | 638.639   | AL110173  | 1666.438  | 1856.22   |
| BF217496  | 11045.076 | 8476.811  | AK024106  | 2416.282  | 2605.877  |
| NM_004762 | 8905.963  | 6717.995  | AK025833  | 782.434   | 920.789   |
| NM_006641 | 60886.961 | 50866.676 | AK027254  | 5332.215  | 4712.02   |
| NM_000634 | 25581.32  | 13260.249 | NM_017597 | 350.476   | 746.818   |
| NM_014679 | 51058.063 | 17858.404 | AK021772  | 9681.575  | 12665.347 |
| AB040969  | 3283.175  | 1172.625  | AK026297  | 9553.782  | 12883.869 |
| NM_003467 | 11462.685 | 2694.702  | AF075081  | 1203.175  | 1139.906  |
| NM_014936 | 2347.342  | 1128.423  | NM_015372 | 2513.114  | 2759.454  |
| NM_003943 | 3632.014  | 2174.867  | AF085919  | 1225.348  | 1494.291  |
| NM_019052 | 7161.503  | 9284.307  | AF085933  | 2315.256  | 2662.551  |
| NM_003202 | 1036.02   | 1804.747  | AF147431  | 1978.956  | 2158.327  |
| AF119902  | 1420.465  | 1168.125  | AK026422  | 21255.84  | 24446.789 |
| NM_020525 | 34539.039 | 22846.883 | AF085938  | 1317.003  | 1537.403  |
| X62468    | 938.931   | 860.269   | AK022264  | 2388.297  | 2485.617  |
| NM_003890 | 11450.431 | 11219.462 | AL137331  | 3648.223  | 4932.2    |
| BF127978  | 5463.494  | 4607.829  | AL162040  | 13612.216 | 17752.789 |
| AF110801  | 970.67    | 1090.197  | AL442084  | 1115.506  | 980.237   |
| AB018297  | 5000.748  | 9055.724  | AL137371  | 12011.051 | 11255.215 |
| AK022565  | 11496.038 | 20476.227 | AL137596  | 3675.155  | 3579.106  |
| AK023151  | 8863.563  | 17669.764 | AL353942  | 23242.27  | 28198.211 |
| NM_017897 | 3965.551  | 3213.597  | Z38010    | 51812.047 | 59155.281 |
| NM_004265 | 1367.91   | 917.894   | AF088003  | 1009.577  | 933.969   |
| NM_002572 | 3368.667  | 2740.123  | AK025799  | 1587.357  | 1887.654  |
| NM_001441 | 1942.092  | 1547.711  | AK022857  | 1365.158  | 2128.775  |
| NM_018324 | 1523.418  | 1282.752  | AL110206  | 6262.874  | 7034.882  |
| AF064255  | 59040.785 | 49175.43  | NM_004821 | 3323.352  | 3339.785  |
| NM_016368 | 60314.883 | 50503.406 | AK024292  | 1937.134  | 1978.319  |
| U08853    | 5594.681  | 2330.383  | AK026263  | 13112.304 | 13149.498 |
| NM_004261 | 24962.094 | 8030.463  | AK023643  | 2023.519  | 3054.224  |
| NM_016006 | 1395.979  | 511.317   | AL390159  | 2734.001  | 3010.27   |
| NM_016245 | 3599.842  | 1315.563  | NM_014157 | 1034.776  | 1328.681  |
| AF005632  | 8865.24   | 3465.904  | AF090933  | 1568.332  | 1362.05   |
| NM_000903 | 3103.016  | 1961.34   | AF111851  | 13809.671 | 13846.039 |
| NM_004493 | 17547.711 | 7952.102  | AF152529  | 1356.308  | 1224.584  |
| AF309489  | 877.158   | 838.672   | AL360200  | 1771.422  | 2361.737  |
| NM_004047 | 30311.494 | 18863.322 | NM_014083 | 576.151   | 877.345   |
| NM_004823 | 3528.79   | 2974.979  | AK021992  | 2487.554  | 3047.217  |
| Y17179    | 62759.074 | 63617.887 | AK022102  | 1075.827  | 1238.365  |
| NM_000891 | 1261.622  | 1375.547  | AK022235  | 1087.27   | 945.299   |
| AK026840  | 4543.618  | 8786.773  | AK022378  | 3518.789  | 2840.065  |

|           |           |           |           |           |           |
|-----------|-----------|-----------|-----------|-----------|-----------|
| NM_00028E | 6041.833  | 10704.027 | AK022401  | 709.316   | 452.205   |
| NM_016044 | 2645.966  | 1826.227  | AK022078  | 1349.147  | 1876.026  |
| NM_00052C | 1684.674  | 706.85    | AL133104  | 709.629   | 881.418   |
| NM_00028E | 12268.754 | 4763.557  | AF075101  | 1110.095  | 1297.344  |
| NM_00150C | 1049.372  | 512.045   | AF130108  | 614.041   | 732.245   |
| NM_00438E | 3013.715  | 1715.244  | NM_020224 | 18558.789 | 18331.102 |
| AL110127  | 2504.365  | 753.211   | U17617    | 8539.541  | 9634.062  |
| NM_00252E | 4093.854  | 1132.677  | NM_01410C | 1009.217  | 1277.967  |
| D38438    | 7981.877  | 3581.593  | AK022952  | 14607.817 | 15832.353 |
| AV714945  | 752.759   | 405.097   | BF218888  | 1944.008  | 2355.969  |
| AF007872  | 2793.075  | 2432.576  | AF147407  | 510.659   | 1003.025  |
| M30938    | 10060.526 | 5490.123  | AK054831  | 55102.359 | 59436.871 |
| NM_01514E | 2127.078  | 1363.912  | AK021770  | 1331.027  | 1153.896  |
| NM_004714 | 2806.629  | 1854.462  | AK027248  | 4018.458  | 4341.05   |
| NM_002497 | 20209.475 | 7586.789  | AK022804  | 25711.41  | 36449.074 |
| AB025194  | 30569.906 | 45213.578 | AF009263  | 4158.198  | 3933.258  |
| NM_00623E | 2744.647  | 7216.846  | AF009283  | 982.432   | 644.411   |
| BC020863  | 2040.535  | 4114.882  | AF086329  | 12112.956 | 10851.514 |
| CY3Cy5    | 6540.384  | 270.327   | U92989    | 7490.841  | 7878.384  |
| NM_00475E | 1073.046  | 965.886   | X74956    | 54456.43  | 58633.199 |
| NM_00516E | 6208.386  | 6613.654  | AF132197  | 14383.439 | 13978.688 |
| AL117623  | 1091.686  | 710.529   | AK025546  | 2042.101  | 2142.853  |
| AF085988  | 854.082   | 952.693   | AF278761  | 604.437   | 894.991   |
| AK025785  | 5517.41   | 7061.909  | AL137487  | 4492.602  | 3927.831  |
| AF038190  | 820.562   | 1026.38   | AK023800  | 2069.052  | 2141.216  |
| AF143877  | 1177.782  | 1774.312  | AK024120  | 6065.785  | 7909.665  |
| NM_00073E | 62390.281 | 57667.367 | U50526    | 2068.044  | 2882.59   |
| AF086474  | 1310.838  | 1723.131  | S75105    | 16409.703 | 22414.156 |
| AF086529  | 777.795   | 1232.552  | AF056455  | 37921.715 | 48549.449 |
| AF086023  | 4686.648  | 5856.799  | NM_01851C | 2909.105  | 4160.572  |
| AF131803  | 19331.725 | 16532.1   | U50537    | 1730.051  | 2124.066  |
| AF086538  | 1605.315  | 1183.722  | AK024988  | 3092.279  | 2800.513  |
| NM_00477E | 2740.245  | 2006.235  | AV749548  | 920.461   | 1131.336  |
| AK023353  | 5546.192  | 4204.342  | AK025719  | 1570.187  | 1227.526  |
| NM_00475E | 1128.652  | 838.635   | AF026943  | 4500.024  | 5114.768  |
| NM_00516E | 6788.259  | 5117.666  | L77582    | 1533.999  | 1680.031  |
| SR1       | 73592.039 | 60549.301 | NM_02044E | 2051.919  | 1892.597  |
| SR3       | 41405.898 | 39750.945 | NM_00541E | 4918.804  | 6133.661  |
| SR5       | 5011.162  | 4183.518  | L31956    | 897.449   | 1008.875  |
| SR7       | 5326.998  | 29396.777 | NM_00347E | 27642.494 | 35239.32  |
| SR9       | 15236.055 | 2234.757  | NM_00677E | 6264.485  | 6923.322  |
| CY3Cy5    | 7516.084  | 304.465   | Z32684    | 6236.473  | 6848.413  |
| AF182420  | 732.678   | 663.83    | NM_01651E | 2937.882  | 2635.768  |
| U84517    | 13426.379 | 15448.86  | NM_01748E | 11997.084 | 11157.191 |
| U03237    | 752.145   | 586.096   | AY009400  | 14342.53  | 9203.334  |
| AB033113  | 1624.87   | 2171.136  | NM_00506E | 1805.71   | 1676.633  |
| AK025877  | 2877.271  | 3552.168  | AF086401  | 8550.319  | 11476.209 |
| NM_01814E | 1862.092  | 3121.716  | L23869    | 3751.126  | 4394.341  |
| AK001921  | 8414.638  | 13874.81  | Z21853    | 5431.305  | 5708.081  |
| AF088004  | 2839.008  | 3894.409  | U80770    | 2547.511  | 4026.896  |
| AF086149  | 2550.52   | 2508.295  | AB075846  | 1765.285  | 1621.237  |
| NM_01827E | 3137.311  | 2934.243  | NM_01834E | 6211.699  | 7226.497  |
| AK024944  | 4137.417  | 3308.375  | BC020260  | 16465.129 | 19221.396 |

|           |           |           |           |           |           |
|-----------|-----------|-----------|-----------|-----------|-----------|
| AF075068  | 74378.313 | 60374.156 | D17156    | 13578.045 | 11644.712 |
| S81893    | 11709.226 | 9007.203  | L04461    | 1542.739  | 1312.251  |
| NM_007202 | 2933.036  | 2344.778  | AK026938  | 41047.762 | 48030.871 |
| NM_003663 | 4770.934  | 3623.772  | AK024373  | 22203.814 | 27675.893 |
| AK021777  | 1935.998  | 2127.784  | AK022343  | 34390.801 | 47251.879 |
| AF007137  | 3223.157  | 2975.479  | AF119870  | 382.591   | 759.671   |
| AK023292  | 613.321   | 722.379   | AK026400  | 3040.195  | 3047.796  |
| AK022452  | 728.646   | 1136.595  | NM_004148 | 17293.059 | 18814.045 |
| AK023375  | 3133.182  | 7369.52   | X03168    | 5208.259  | 6863.184  |
| AK023781  | 848.38    | 1198.087  | NM_005168 | 10570.542 | 13602.408 |
| AK024129  | 627.799   | 731.584   | NM_017801 | 13283.146 | 14335.604 |
| AK024366  | 1273.995  | 1800.788  | NM_007348 | 5904.085  | 5287.916  |
| AK022171  | 2499.494  | 3652.631  | NM_016953 | 1764.916  | 1619.342  |
| AK025913  | 1741.438  | 2588.435  | U65473    | 33355.188 | 40725.43  |
| AF147389  | 494.037   | 567.092   | D63481    | 53000.844 | 56044.625 |
| AK021930  | 655.787   | 951.186   | AY009951  | 1629.892  | 1466.36   |
| NM_01650C | 4922.14   | 4116.407  | AL157424  | 5986.252  | 6095.256  |
| NM_018354 | 1798.84   | 2075.785  | AK024422  | 1294.967  | 1269.252  |
| AF087966  | 453.285   | 473.215   | NM_002673 | 1199.973  | 1737.424  |
| AF087974  | 3997.066  | 3466.736  | NM_003876 | 12654.876 | 19399.84  |
| NM_018004 | 931.015   | 831.722   | AJ276310  | 1947.721  | 1953.536  |
| X78938    | 3709.704  | 3667.192  | NM_012295 | 26131.059 | 31846.873 |
| AL359056  | 579.024   | 737.165   | NM_01591C | 1971.108  | 1639.839  |
| AK021497  | 2176.541  | 2341.857  | NM_000222 | 1047.092  | 1027.374  |
| AF124367  | 759.724   | 926.564   | AL133666  | 13600.559 | 13767.976 |
| AK000798  | 443.584   | 624.674   | NM_003604 | 1100.191  | 953.575   |
| AK025615  | 30946.982 | 44135.922 | NM_000663 | 3476.19   | 3063.017  |
| AK023803  | 1343.872  | 2634.164  | NM_00471C | 12200.939 | 11336.671 |
| AK022379  | 980.221   | 1377.122  | NM_004396 | 32714.422 | 42607.996 |
| AK025231  | 67941.43  | 59921.344 | NM_017999 | 7664.06   | 8719.796  |
| AK025338  | 3976.223  | 4981.745  | NM_015989 | 55636.539 | 60455.582 |
| AK001132  | 371.996   | 499.973   | NM_001043 | 14687.067 | 19227.711 |
| AK022321  | 666.293   | 756.727   | NM_014399 | 1585.089  | 1656.529  |
| AK023296  | 627.884   | 802.519   | AF113685  | 4959.728  | 5353.192  |
| AK001439  | 836.584   | 673.39    | NM_00547C | 18165.412 | 21894.057 |
| AK023462  | 2986.748  | 4673.137  | AF142570  | 3380.382  | 3556.192  |
| AF210649  | 584.326   | 615.452   | NM_004225 | 27095.117 | 29293.523 |
| AK001115  | 3296.473  | 3523.496  | NM_003862 | 2796.447  | 3393.232  |
| NM_01409E | 3256.234  | 2873.478  | NM_002873 | 12763.11  | 11000.69  |
| AL133050  | 932.655   | 1143.45   | NM_015571 | 29568.502 | 27920.514 |
| AK024131  | 9754.186  | 7638.506  | NM_004701 | 16025.71  | 14903.783 |
| AL110172  | 1310.311  | 929.148   | AK025554  | 4070.83   | 2753.653  |
| AK025323  | 815.83    | 880.635   | BI824151  | 10174.587 | 6591.82   |
| NM_01332E | 13882.444 | 15156.402 | AK021791  | 11754.163 | 13872.644 |
| BC037322  | 712.802   | 983.838   | NM_005019 | 1450.659  | 698.086   |
| Y10202    | 663.245   | 1122.823  | NM_004052 | 4773.28   | 4997.521  |
| Y12022    | 2829.786  | 5215.447  | NM_004394 | 19050.896 | 22221.332 |
| AK001375  | 1331.596  | 1709.896  | NM_005727 | 58439.551 | 57684.836 |
| NM_019597 | 5311.192  | 5829.315  | AK027242  | 6278.565  | 5331.782  |
| AL137559  | 1074.404  | 1424.113  | NM_001279 | 46846.574 | 53725.387 |
| AF026944  | 8727.253  | 6012.493  | NM_00501C | 8642.579  | 8056.875  |
| AK021493  | 5483.1    | 6816.309  | NM_019055 | 7890.542  | 7286.865  |
| NM_006161 | 25328.131 | 27870.627 | NM_020199 | 1800.04   | 907.613   |

|           |           |           |           |           |           |
|-----------|-----------|-----------|-----------|-----------|-----------|
| NM_006192 | 664.899   | 793.273   | U96136    | 912.861   | 791.541   |
| AF085881  | 1423.796  | 1447.152  | NM_017586 | 56281.344 | 56767.238 |
| AK022737  | 10212.025 | 11704.137 | NM_005941 | 3027.091  | 3118.458  |
| NM_003472 | 45842.219 | 52372.898 | NM_015884 | 2190.624  | 2191.296  |
| U92980    | 2194.635  | 1956.087  | AF201380  | 6607.591  | 7539.797  |
| AF133658  | 1293.201  | 1152.709  | NM_003619 | 1386.361  | 1293.983  |
| AB048287  | 15904.862 | 16108.354 | NM_012392 | 6609.838  | 5828.067  |
| Y11159    | 2298.33   | 2262.998  | NM_014833 | 53303.121 | 56711.992 |
| AB020648  | 3653.873  | 4886.837  | NM_000045 | 5318.595  | 5543.169  |
| AF086173  | 4395.405  | 4250.728  | NM_003878 | 26548.176 | 38597.316 |
| NM_018366 | 7471.571  | 7600.09   | NM_004832 | 4101.795  | 4484.802  |
| NM_019848 | 20496.572 | 20429.08  | NM_005957 | 2529.772  | 2124.508  |
| AL833005  | 4972.725  | 5608.523  | AK024374  | 4835.562  | 2795.211  |
| L43366    | 3750.999  | 4386.378  | NM_007101 | 5470.975  | 4972.368  |
| AK026124  | 7120.529  | 12326.185 | NM_018234 | 1275.682  | 954.735   |
| NM_015509 | 10200.424 | 16438.109 | AB033062  | 4408.439  | 4662.279  |
| AL110157  | 7096.182  | 9037.026  | NM_016437 | 55666.543 | 54862.566 |
| NM_002319 | 5137.998  | 6109.993  | NM_002720 | 13852.843 | 9910.159  |
| L38712    | 21572.438 | 22116.553 | AK024716  | 50284.379 | 42159.926 |
| U84508    | 1968.269  | 2130.802  | X67155    | 4451.855  | 3005.493  |
| NM_017793 | 3358.468  | 3224.051  | NM_020380 | 8401.354  | 9479.254  |
| NM_012131 | 3338.159  | 4093.375  | AL137519  | 1069.626  | 625.922   |
| S41540    | 2839.539  | 2610.9    | NM_002890 | 60363.633 | 56789.02  |
| AK026947  | 61494.914 | 57500.414 | NM_001330 | 66107.797 | 69066.953 |
| U84526    | 14632.301 | 14992.421 | NM_015927 | 5448.344  | 4764.032  |
| L23401    | 3847.222  | 5003.078  | NM_004779 | 29602.033 | 36747.496 |
| NM_018090 | 68685.141 | 68581.414 | NM_019071 | 12008.159 | 13144.819 |
| AK022728  | 46016.641 | 57847.043 | NM_001913 | 14182.222 | 13679.28  |
| AL109678  | 2302.931  | 1869.79   | AK025594  | 2728.03   | 2610.945  |
| AL137524  | 6901.986  | 7119.628  | AB040931  | 15084.481 | 14640.739 |
| AF218008  | 5728.789  | 5794.869  | NM_003599 | 2071.374  | 1868.333  |
| M22404    | 49963.055 | 57555.867 | NM_015911 | 3204.145  | 3224.049  |
| AF052115  | 2495.489  | 3006.654  | BC011826  | 10584.201 | 10691.082 |
| NM_014019 | 37017.535 | 37901.793 | NM_017647 | 9830.953  | 10741.453 |
| NM_012368 | 1860.294  | 1976.201  | NM_012091 | 3363.988  | 3505.947  |
| AK022097  | 17898.598 | 35270.098 | NM_012321 | 16588.227 | 15666.97  |
| NM_002166 | 30679.721 | 48687.594 | D13642    | 12012.211 | 11261.903 |
| NM_004660 | 14330.372 | 21683.057 | NM_004741 | 45004.539 | 24417.533 |
| NM_006165 | 2404.224  | 2726.586  | NM_018032 | 9706.967  | 5206.417  |
| NM_016011 | 15273.238 | 17850.256 | NM_003675 | 53670.273 | 54400.84  |
| AL035307  | 3506.828  | 3517.496  | NM_017518 | 9600.609  | 12041.686 |
| AK023772  | 789.129   | 1107.606  | NM_004117 | 8951.219  | 6452.388  |
| NM_012234 | 4383.116  | 4335.021  | NM_016594 | 38836.039 | 32866.852 |
| NM_006204 | 473.311   | 522.265   | NM_030752 | 19171.383 | 14478.899 |
| NM_012155 | 14001.105 | 12979.069 | D26068    | 51556.035 | 43137.152 |
| AF144700  | 3828.809  | 4611.146  | NM_018559 | 52647.957 | 51723.988 |
| NM_002599 | 391.15    | 668.99    | NM_017593 | 11436.37  | 8853.567  |
| NM_004105 | 13985.259 | 18048.717 | NM_004282 | 36827.734 | 42247.477 |
| AB046825  | 4155.743  | 5295.303  | AF188747  | 3505.415  | 3415.7    |
| X64975    | 2371.992  | 2294.992  | NM_002773 | 1792.684  | 1126.12   |
| AF064876  | 526.53    | 548.971   | NM_013411 | 6041.291  | 5822.956  |
| AF071509  | 907.808   | 634.382   | AB007956  | 837.864   | 1432.201  |
| AL050297  | 7392.09   | 7769.166  | NM_020200 | 5181.88   | 5327.098  |

|           |           |           |           |           |           |
|-----------|-----------|-----------|-----------|-----------|-----------|
| AK026966  | 4710.113  | 4424.786  | NM_001248 | 1595.21   | 1794.854  |
| AF185573  | 565.108   | 446.875   | NM_000156 | 523.684   | 729.825   |
| AK025268  | 1243.228  | 1190.541  | NM_000180 | 53040.406 | 57065.352 |
| NM_005203 | 655.054   | 566.144   | NM_000858 | 33064.328 | 34442.238 |
| NM_006566 | 914.002   | 962.538   | AF254087  | 6331.764  | 5354.273  |
| AK026154  | 17673.779 | 26430.617 | NM_017715 | 5214.527  | 5563.548  |
| AK027073  | 1106.589  | 1607.881  | AL117607  | 8008.556  | 8189.913  |
| NM_000384 | 807.777   | 709.434   | AB037774  | 4644.354  | 2813.423  |
| AB018325  | 11393.228 | 14861.802 | NM_005438 | 4058.321  | 3124.089  |
| NM_003603 | 902.849   | 591.461   | AK024361  | 5714.061  | 5900.067  |
| NM_005428 | 7575.618  | 10296.329 | NM_004350 | 21269.049 | 19893.08  |
| NM_017974 | 1865.202  | 2246.209  | NM_018044 | 13064.377 | 11117.848 |
| NM_003979 | 1744.049  | 2236.404  | NM_004503 | 1169.572  | 1613.166  |
| X14677    | 9079.829  | 10625.459 | NM_001717 | 2083.602  | 1252.857  |
| NM_005863 | 6422.963  | 7833.724  | AF274347  | 13404.296 | 11543.916 |
| U17077    | 7283.771  | 11579.449 | AK001144  | 2080.357  | 1046.902  |
| NM_000915 | 6182.991  | 7637.38   | NM_018555 | 13397.557 | 11652.982 |
| NM_002344 | 801.693   | 829.613   | NM_005122 | 2353.545  | 1786.298  |
| AK024475  | 1095.671  | 1454.338  | AL133055  | 926.984   | 576.181   |
| AJ278865  | 1142.332  | 1424.711  | NM_014552 | 21252.869 | 20588.666 |
| NM_014433 | 2345.363  | 2551.667  | NM_003072 | 34148.086 | 29724.842 |
| NM_002062 | 26140.027 | 21260.961 | L09081    | 49555.266 | 42436.883 |
| NM_014394 | 69963.094 | 66337.57  | NM_000218 | 62335.332 | 60295.781 |
| NM_018140 | 5437.455  | 5047.733  | NM_016113 | 45346.797 | 50190.949 |
| NM_016948 | 5093.796  | 5953.518  | NM_014222 | 9198.755  | 11383.197 |
| NM_000142 | 2938.25   | 3521.203  | L14819    | 1492.455  | 1481.118  |
| AK097045  | 2855.135  | 4474.337  | NM_000509 | 8539.563  | 7142.961  |
| AF161356  | 67559.094 | 65125.648 | NM_004542 | 3047.509  | 2815.382  |
| AB014548  | 7094.92   | 9307.182  | AI742810  | 305.377   | 917.466   |
| NM_018256 | 9212.346  | 10871.013 | X06182    | 9509.726  | 10218.71  |
| AK025150  | 3323.626  | 3380.037  | BE908993  | 55540.52  | 57640.922 |
| AK024611  | 26374.455 | 35801.219 | AB012701  | 16821.705 | 15735.84  |
| BC010420  | 11257.807 | 19314.438 | M61156    | 12957.267 | 9606.52   |
| NM_012280 | 43776.82  | 48967.098 | R44005    | 58624.551 | 56538.266 |
| NM_018172 | 13650.223 | 17044.17  | AI942392  | 9366.605  | 9407.689  |
| U03886    | 7492.688  | 9302.666  | M55040    | 3110.494  | 2774.734  |
| AK022040  | 1554.375  | 2238.955  | AW009739  | 5550.262  | 5730.012  |
| AK022722  | 2118.087  | 2099.385  | BC036805  | 11278.104 | 11370.464 |
| NM_003591 | 23985.322 | 23682.617 | Z74615    | 58478.73  | 61968.758 |
| AL080111  | 5939.245  | 5382.972  | X03884    | 30725.666 | 29680.502 |
| NM_003550 | 9153.223  | 8619.248  | U36759    | 2572.752  | 2458.594  |
| NM_014642 | 9703.847  | 9931.772  | X91625    | 4899.779  | 4403.309  |
| NM_003829 | 3121.175  | 2326.021  | AF090901  | 2171.407  | 1714.053  |
| AL110168  | 8209.695  | 7244.81   | AF004231  | 9677.738  | 8301.101  |
| NM_014522 | 839.595   | 707.735   | AF001862  | 19097.064 | 16359.773 |
| NM_016147 | 10123.651 | 9785.433  | NM_002451 | 10455.571 | 9838.748  |
| NM_002833 | 2898.288  | 3176.987  | AF119902  | 2624.878  | 2850.325  |
| NM_016592 | 1489.665  | 2416.802  | NM_020525 | 57347.598 | 47892.359 |
| NM_018527 | 1858.343  | 1614.587  | X62468    | 2929.744  | 3499.333  |
| NM_018326 | 6018.902  | 5289.912  | NM_003890 | 30736.412 | 33130.145 |
| NM_001868 | 1206.602  | 1615.677  | BF127978  | 11404.243 | 11122.082 |
| NM_014773 | 1373.246  | 1105.747  | AF110801  | 1795.728  | 2031.648  |
| NM_005606 | 7341.775  | 10331.529 | NM_016579 | 55401.984 | 58462.809 |

|           |           |           |           |           |           |
|-----------|-----------|-----------|-----------|-----------|-----------|
| AF134707  | 1788.146  | 2299.763  | AB018297  | 3873.733  | 4808.06   |
| NM_001223 | 1759.693  | 2165.38   | AK022565  | 15357.585 | 15934.359 |
| BE730629  | 2463.473  | 2819.371  | AK023151  | 10456.255 | 10039.409 |
| NM_018162 | 832.669   | 1029.656  | AB033076  | 4067.786  | 3832.495  |
| AK027167  | 6726.847  | 6956.414  | AK022876  | 7096.858  | 6817.836  |
| AK025265  | 4146.203  | 3749.521  | AF134894  | 57862.395 | 50385.824 |
| NM_013279 | 1574.896  | 1768.633  | NM_003938 | 17999.77  | 13785.578 |
| NM_018652 | 35444.016 | 39529.496 | NM_014827 | 26191.887 | 26049.211 |
| AB011166  | 4114.232  | 3305.822  | NM_004126 | 10640.365 | 11307.402 |
| AK024460  | 6527.188  | 7360.608  | U87460    | 26664.855 | 26894.037 |
| NM_006606 | 9112.52   | 9544.326  | NM_003617 | 2514.792  | 2325.101  |
| S78570    | 1497.882  | 1336.051  | NM_001841 | 6302.663  | 4935.556  |
| NM_005243 | 21420.934 | 19172.586 | NM_002054 | 12776.698 | 10277.427 |
| NM_006218 | 3231.686  | 2967.969  | AF300649  | 37897.41  | 38751.434 |
| NM_016265 | 5918.667  | 5098.125  | NM_004125 | 12632.71  | 11115.927 |
| NM_002095 | 14431.299 | 12054.381 | NM_000823 | 19364.945 | 19524.441 |
| AK022814  | 4353.146  | 4627.497  | NM_003317 | 50097.387 | 44708.984 |
| NM_006268 | 3194.507  | 3694.864  | NM_001139 | 14470.47  | 13091.849 |
| X78931    | 1251.634  | 1449.988  | NM_001441 | 6291.961  | 6823.635  |
| NM_006442 | 59686.238 | 57697.539 | NM_018324 | 3935.938  | 3604.364  |
| NM_005098 | 433.686   | 650.729   | AF064255  | 60286.027 | 62180.488 |
| NM_016427 | 9139.44   | 13824.651 | NM_016368 | 62308.852 | 63283.859 |
| NM_006706 | 993.867   | 889.823   | U08853    | 8813.326  | 9036.939  |
| NM_002505 | 434.065   | 580.1     | NM_004261 | 43486.094 | 48223.313 |
| U80741    | 16864.604 | 22360.148 | NM_016006 | 3135.857  | 3487.342  |
| NM_014497 | 4320.685  | 7405.495  | NM_016245 | 9343.22   | 9163.15   |
| AL133598  | 15765.7   | 15158.234 | AF005632  | 18273.074 | 18760.191 |
| NM_015511 | 10783.963 | 11179.973 | NM_000903 | 6542.11   | 8143.068  |
| NM_006625 | 11542.712 | 10939.646 | NM_004493 | 32747.643 | 41615.02  |
| NM_004891 | 28171.156 | 23989.195 | AF309489  | 2141.354  | 1979.105  |
| NM_002831 | 18039.105 | 18639.203 | AB013889  | 666.964   | 578.448   |
| AL833409  | 9641.147  | 9715.75   | NM_000288 | 5868.487  | 5808.053  |
| NM_015966 | 1153.264  | 846.934   | NM_004762 | 17342.668 | 16607.779 |
| NM_000147 | 3591.279  | 2661.761  | NM_006641 | 60353.75  | 58503.797 |
| NM_000158 | 6516.944  | 4970.019  | NM_000634 | 54800.941 | 51297.59  |
| NM_000670 | 1000.206  | 938.659   | NM_014679 | 62907.723 | 57015.969 |
| NM_006416 | 4635.451  | 5601.36   | AB040969  | 8019.131  | 7334.183  |
| NM_000151 | 11155.261 | 12901.946 | NM_003467 | 29101.404 | 30190.871 |
| NM_003773 | 1200.863  | 1551.123  | NM_014936 | 6831.678  | 7077.131  |
| NM_002879 | 2250.583  | 3062.016  | NM_003943 | 10903.896 | 10828.733 |
| AB028999  | 2382.892  | 2853.807  | NM_019052 | 13166.433 | 15904.576 |
| AB018348  | 15252.279 | 17972.023 | NM_003202 | 3317.386  | 2406.814  |
| NM_013369 | 1127.567  | 1853.755  | NM_000289 | 21331.082 | 19859.139 |
| NM_003686 | 4341.943  | 5407.512  | NM_001500 | 2196.403  | 1935.565  |
| NM_014812 | 4373.042  | 5906.665  | NM_004388 | 7164.102  | 7287.704  |
| NM_002049 | 7071.725  | 8196.254  | NM_020379 | 1773.849  | 2680.904  |
| AK026312  | 1968.886  | 1861.406  | AL110127  | 4894.419  | 5573.347  |
| NM_017776 | 3030.286  | 3144.552  | AK001997  | 1535.188  | 1212.191  |
| U81599    | 1572.18   | 1675.862  | NM_002528 | 9575.18   | 8519.782  |
| AF275722  | 1830.482  | 3479.776  | D38438    | 25219.922 | 25218.387 |
| NM_003206 | 1650.305  | 1337.205  | AV714945  | 2629.05   | 2440.242  |
| AK000564  | 978.597   | 916.809   | AF089897  | 951.005   | 626.714   |
| X60155    | 1377.161  | 1190.739  | AF007872  | 4052.494  | 3863.143  |

|           |           |           |           |           |           |
|-----------|-----------|-----------|-----------|-----------|-----------|
| AB037901  | 18612.682 | 19444.682 | M30938    | 13699.911 | 8776.328  |
| AV762646  | 456.898   | 752.488   | NM_015148 | 3554.957  | 2180.678  |
| NM_006129 | 2773.345  | 2552.412  | NM_004714 | 7020.104  | 6433.196  |
| NM_000582 | 32392.4   | 39815.363 | NM_005401 | 1296.188  | 1310.455  |
| NM_005593 | 4158.598  | 4576.07   | NM_002497 | 32052.775 | 25803.609 |
| AJ224741  | 1269.785  | 1068.572  | AB025194  | 42684.512 | 45375.918 |
| NM_004684 | 5746.375  | 5766.452  | NM_006239 | 8487.748  | 9109.14   |
| BF338709  | 4656.024  | 8282.616  | BC020863  | 3197.513  | 3521.647  |
| M18182    | 608.448   | 999.068   | NM_017897 | 11639.149 | 14583.446 |
| W96179    | 4412.901  | 5637.961  | NM_004265 | 3016.489  | 3376.51   |
| AW247841  | 23693.186 | 36845.902 | NM_002572 | 8198.097  | 9256.007  |
| BG568198  | 4186.101  | 5269.867  | NM_016113 | 49696.93  | 49530.895 |
| M76559    | 8092.253  | 11082.979 | NM_014222 | 8865.287  | 10777.444 |
| U11058    | 2077.838  | 2497.865  | L14819    | 1995.551  | 3181.168  |
| AI222585  | 1555.755  | 2216.645  | NM_000509 | 9467.93   | 8932.859  |
| AA411678  | 13392.787 | 13955.552 | NM_004542 | 2151.597  | 2718.588  |
| AA862813  | 37638.879 | 36228.945 | AI742810  | 847.419   | 1006.872  |
| AA398427  | 3457.886  | 4105.824  | X06182    | 9386.344  | 10560.214 |
| T55728    | 10213.418 | 10451.193 | BE908993  | 57933.34  | 57452.871 |
| H20856    | 3931.812  | 2367.995  | AB012701  | 15898.433 | 15608.96  |
| N62586    | 3841.473  | 4590.835  | M61156    | 13613.793 | 13365.126 |
| AA242743  | 49149.559 | 49612.883 | R44005    | 63454.859 | 57809.914 |
| NM_006759 | 10194.047 | 9999.09   | AI942392  | 8626.534  | 8015.351  |
| NM_006831 | 6007.016  | 3667.771  | M55040    | 2877.885  | 1726.461  |
| AL162044  | 10845.336 | 9550.278  | AW009739  | 4842.905  | 2135.77   |
| AK024004  | 1470.526  | 1206.502  | BC036805  | 10883.531 | 8656.093  |
| AK022365  | 1117.962  | 1032.862  | Z74615    | 60285.168 | 60510.445 |
| BE892273  | 62190.98  | 53606.223 | X03884    | 29125.689 | 18441.488 |
| AF026929  | 1948.668  | 3198.431  | U36759    | 2352.013  | 2243.386  |
| NM_016734 | 2640.415  | 2929.763  | X91625    | 5763.367  | 6385.763  |
| AF035803  | 813.381   | 441.121   | AF090901  | 3219.365  | 3128.858  |
| Y08147    | 19860.902 | 23015.986 | AF004231  | 8724.075  | 10454.715 |
| D00174    | 37644.328 | 45441.859 | AF001862  | 21329.578 | 25124.137 |
| AB000520  | 17556.652 | 25675.281 | NM_016044 | 5249.774  | 5764.678  |
| NM_016382 | 517.94    | 588.644   | NM_000520 | 3446.486  | 5081.42   |
| AK023117  | 4082.978  | 3660.305  | X62468    | 3107.098  | 3401.489  |
| AL122046  | 4327.629  | 3879.584  | NM_003890 | 30950.412 | 36643.145 |
| AF119914  | 1377.231  | 2020.494  | BF127978  | 12624.876 | 14132.682 |
| NM_000855 | 6610.683  | 6754.883  | AF110801  | 1612.839  | 2210.312  |
| NM_005539 | 12696.674 | 10624.735 | NM_016579 | 63015.32  | 58894.266 |
| NM_005077 | 2828.295  | 2674.729  | AB018297  | 3756.653  | 4935.8    |
| NM_001990 | 3525.363  | 3372.167  | AK022565  | 13179.718 | 14129.028 |
| NM_002141 | 3684.056  | 3608.798  | AK023151  | 8810.774  | 8194.777  |
| NM_006907 | 2434.679  | 1489.005  | AB033076  | 4217.11   | 3232.15   |
| NM_002689 | 722.956   | 521.105   | AK022876  | 6722.688  | 6373.933  |
| NM_006267 | 2447.681  | 2122.138  | AF134894  | 60330.535 | 53135.59  |
| NM_002661 | 28875.174 | 32886.359 | NM_003938 | 14931.827 | 12709.969 |
| AK023982  | 1933.423  | 2792.326  | NM_014827 | 22039.809 | 18492.869 |
| NM_018469 | 2801.344  | 4181.259  | NM_004126 | 9581.951  | 4701.294  |
| Y11312    | 3212.099  | 3598.555  | U87460    | 26861.828 | 22279.963 |
| NM_003039 | 18998.525 | 17872.484 | NM_003617 | 2053.133  | 1974.453  |
| NM_002635 | 56484.941 | 48926.574 | NM_001841 | 6204.003  | 3326.119  |
| AF100756  | 10271.506 | 9246.119  | NM_002054 | 13830.391 | 12349.448 |

|           |           |           |           |           |           |
|-----------|-----------|-----------|-----------|-----------|-----------|
| NM_006825 | 10807.39  | 10186.896 | AF300649  | 39968.965 | 46672.949 |
| NM_004862 | 2475.727  | 2403.285  | NM_004125 | 13078.082 | 16652.014 |
| NM_001661 | 2208.262  | 1692.714  | NM_000823 | 14204.049 | 15768.354 |
| NM_014563 | 2662.415  | 2488.897  | NM_003317 | 53961.25  | 52464.559 |
| NM_020150 | 4340.471  | 4189.753  | NM_001139 | 18176.277 | 22465.574 |
| NM_007150 | 10499.822 | 8657.985  | L09081    | 50151.008 | 51394.434 |
| NM_016520 | 22512.943 | 16517.971 | NM_000218 | 60949.617 | 64894.148 |
| AB018353  | 7977.066  | 7236.464  | AF064255  | 63535.492 | 62686.27  |
| NM_007036 | 6032.568  | 4764.555  | NM_016368 | 62256.637 | 63114.563 |
| NM_002617 | 3688.695  | 3998.177  | U08853    | 9311.979  | 9502.16   |
| NM_003313 | 39067.848 | 40184.645 | NM_004261 | 44594.922 | 45830.426 |
| AF090907  | 5162.235  | 7680.266  | NM_016006 | 3398.336  | 2747.319  |
| AK024476  | 13447.085 | 26420.869 | NM_016245 | 9620.829  | 9470.639  |
| X74794    | 28034.932 | 37050.531 | AF005632  | 18543.643 | 17426.98  |
| AL050298  | 6796.526  | 7315.953  | NM_000903 | 7088.578  | 6160.101  |
| NM_007079 | 53665.578 | 51608.57  | NM_004493 | 28804.754 | 26122.242 |
| M20696    | 6978.626  | 5427.218  | AF309489  | 2918.294  | 2273.475  |
| NM_002915 | 1777.17   | 1557.402  | NM_000288 | 5260.39   | 4222.781  |
| NM_006736 | 6326.995  | 6357.447  | NM_004762 | 14219.662 | 7369.379  |
| NM_003640 | 2900.621  | 2572.892  | NM_006641 | 59062.117 | 62492.25  |
| NM_014444 | 8849.605  | 7639.018  | NM_000634 | 52191.844 | 40856.035 |
| NM_012248 | 8440.257  | 6372.107  | NM_014679 | 61137.02  | 52602.168 |
| NM_014970 | 10997.811 | 9862.467  | AB040969  | 8730.663  | 8315.616  |
| NM_014393 | 5870.981  | 5792.713  | NM_003467 | 30974.271 | 42034.281 |
| NM_004223 | 33953.824 | 33786.23  | NM_014936 | 5754.569  | 6700.002  |
| NM_006813 | 2411.734  | 1739.887  | NM_003943 | 8529.888  | 9046.123  |
| NM_001355 | 33803.438 | 29750.367 | NM_019052 | 12430.822 | 19030.326 |
| U63336    | 1001.718  | 705.381   | NM_003202 | 2626.292  | 2867.378  |
| NM_000582 | 29931.992 | 24068.801 | AF119902  | 3579.02   | 3928.327  |
| NM_005593 | 5355.72   | 4075.094  | NM_020525 | 59038.563 | 55887.203 |
| AJ224741  | 1409.014  | 1327.347  | NM_004388 | 7943.726  | 12008.652 |
| NM_004684 | 5573.987  | 3586.954  | NM_020379 | 1614.678  | 2255.801  |
| BF338709  | 4010.949  | 4264.649  | AL110127  | 4677.058  | 4695.266  |
| AF204171  | 888.994   | 1032.748  | AK001997  | 1227.026  | 995.76    |
| M18182    | 696.512   | 991.495   | NM_002528 | 10196.815 | 9193.014  |
| W96179    | 5735.368  | 9495.813  | D38438    | 23462.695 | 21672.148 |
| AW247841  | 24828.961 | 29670.715 | AV714945  | 2227.312  | 1719.381  |
| BG568198  | 4539.568  | 4576.668  | AF007872  | 4325.71   | 4227.477  |
| M76559    | 7596.541  | 8365.178  | M30938    | 14862.815 | 11679.045 |
| AF043473  | 346.262   | 753.529   | NM_015148 | 3684.384  | 3595.081  |
| U03884    | 1889      | 1707.621  | NM_004714 | 6241.603  | 4277.557  |
| U11058    | 6616.603  | 5178.607  | NM_005401 | 1211.761  | 561.103   |
| AI222585  | 2153.45   | 2974.343  | NM_017677 | 981.485   | 701.803   |
| AA411678  | 13440.621 | 9997.377  | NM_002497 | 29376.377 | 18186.389 |
| AA862813  | 37239.828 | 26343.756 | NM_006239 | 9108.371  | 11374.874 |
| AA398427  | 3296.593  | 2850.735  | BC020863  | 3164.546  | 3072.799  |
| T55728    | 10809.962 | 10319.629 | NM_017897 | 12414.908 | 14941.04  |
| H20856    | 3977.288  | 2335.844  | NM_004265 | 3011.025  | 3736.693  |
| N62586    | 4188.692  | 4114.861  | NM_002572 | 8104.047  | 8294.341  |
| AA242743  | 37956.117 | 36515.102 | NM_001441 | 7005.442  | 7607.075  |
| NM_015361 | 31152.08  | 30047.244 | NM_018324 | 5569.689  | 5970.311  |
| NM_004310 | 12068.834 | 10509.391 | L14819    | 1758.305  | 2804.614  |
| NM_015537 | 18128.76  | 16726.736 | NM_000509 | 9254.58   | 7320.671  |



|           |           |           |           |           |           |
|-----------|-----------|-----------|-----------|-----------|-----------|
| AK024004  | 1220.179  | 717.217   | NM_004542 | 2456.776  | 2560.172  |
| AK022365  | 928.664   | 748.024   | X06182    | 9612.815  | 8483.251  |
| BE892273  | 58604.605 | 49552.68  | BE908993  | 59893.504 | 52703.805 |
| AF026929  | 782.721   | 1000.62   | AB012701  | 17129.092 | 16402.518 |
| NM_016734 | 2424.291  | 3042.809  | M61156    | 13303.904 | 12057.28  |
| AF035803  | 670.131   | 526.322   | R44005    | 52926.383 | 52348.289 |
| Y08147    | 21490.771 | 18951.813 | AI942392  | 9337.852  | 8708.891  |
| D00174    | 35394.113 | 36767.195 | M55040    | 2724.844  | 2246.112  |
| AB000520  | 17095.582 | 15735.699 | AW009739  | 4833.201  | 3819.47   |
| NM_016382 | 888.284   | 352.586   | BC036805  | 11210.918 | 4470.783  |
| AK023117  | 4266.374  | 3215.87   | Z74615    | 59656.73  | 58566.082 |
| AL122046  | 4143.81   | 2954.385  | X03884    | 29660.602 | 23224.836 |
| AF119914  | 1069.169  | 706.4     | U36759    | 2578.31   | 2037.017  |
| NM_000855 | 9483.38   | 8325.126  | X91625    | 6192.172  | 4203.958  |
| NM_005536 | 12403.611 | 8716.917  | AF004231  | 11289.945 | 11832.538 |
| NM_005077 | 2440.36   | 1944.042  | AF001862  | 24284.129 | 28785.895 |
| NM_001990 | 3273.364  | 3416.654  | NM_016044 | 6553.628  | 8500.423  |
| NM_002141 | 4364.456  | 5890.338  | NM_000520 | 3636.638  | 4295.232  |
| NM_006129 | 3020.021  | 3540.017  | NM_000289 | 23733.652 | 26421.908 |
| NM_006267 | 2468.734  | 1736.64   | NM_001500 | 2338.552  | 2408.402  |
| NM_002661 | 26827.021 | 25388.951 | AB033076  | 4177.876  | 4719.354  |
| NM_001263 | 513.048   | 525.542   | AK022876  | 6257.164  | 6660.545  |
| AK023982  | 1411.819  | 1334.326  | AF134894  | 59046.277 | 56208.031 |
| NM_018466 | 2700.038  | 2388.347  | NM_003938 | 15680.082 | 13381.896 |
| Y11312    | 5036.201  | 8535.604  | NM_014827 | 22044.955 | 20257.441 |
| NM_003039 | 19112.809 | 14461.858 | NM_004126 | 10651.339 | 12783.595 |
| NM_002635 | 58031.508 | 49463.148 | U87460    | 24470.068 | 22230.168 |
| AF100756  | 9723.328  | 6906.334  | NM_003617 | 2060.68   | 1922.413  |
| NM_006825 | 8282.101  | 5429.214  | NM_001841 | 6144.445  | 4413.755  |
| NM_004862 | 2406.71   | 1940.192  | NM_002054 | 11148.514 | 8380.221  |
| NM_001661 | 1919.408  | 1520.017  | AF300649  | 34929.922 | 29508.979 |
| NM_014563 | 2042.548  | 1651.654  | NM_004125 | 11354.234 | 7589.219  |
| NM_020150 | 4244.198  | 3949.65   | NM_000823 | 15627.946 | 10881.239 |
| NM_007150 | 9861.955  | 8875.816  | NM_004414 | 6466.409  | 6498.554  |
| NM_006831 | 7187.518  | 6172.651  | NM_003317 | 52737.703 | 52577.457 |
| AL162044  | 14833.98  | 23594.113 | NM_001139 | 15533.162 | 13415.791 |
| AB018353  | 7657.176  | 5549.018  | NM_004609 | 59973.852 | 58645.031 |
| NM_007036 | 5584.497  | 3585.864  | NM_001541 | 39243.938 | 46068.324 |
| NM_002617 | 1775.763  | 1539.043  | NM_005416 | 6232.717  | 7596.728  |
| NM_003313 | 39741.391 | 37634.508 | NM_004670 | 795.081   | 1215.728  |
| AF090907  | 4072.417  | 4165.001  | L09081    | 55611.145 | 50577.195 |
| AK024476  | 8764.818  | 7752.372  | NM_000218 | 57990.309 | 61976.773 |
| X74794    | 29285.352 | 34433.793 | NM_016113 | 54706.508 | 53325.152 |
| AL050298  | 8324.729  | 11315.02  | NM_014222 | 12141.736 | 14780.378 |
| NM_007079 | 54100.57  | 47816.359 | AK026317  | 24945.219 | 26792.309 |
| M20696    | 6708.15   | 4571.463  | X82207    | 60257.91  | 58165.242 |
| NM_002915 | 2198.334  | 1517.835  | NM_015044 | 17854.904 | 19954.832 |
| NM_006736 | 6059.887  | 4759.29   | NM_002867 | 2397.712  | 2553.375  |
| NM_003640 | 2329.947  | 1981.006  | BF217496  | 29439.23  | 34364.164 |
| NM_014444 | 8515.975  | 6925.185  | NM_004762 | 15340.492 | 16739.422 |
| NM_012248 | 8846.712  | 6445.781  | NM_006641 | 57020.563 | 55744.809 |
| NM_014970 | 16154.19  | 11641.105 | NM_000634 | 47199.805 | 43408.594 |
| NM_014393 | 6771.603  | 5598.355  | NM_014679 | 60930.637 | 57853.852 |

|           |           |           |           |           |           |
|-----------|-----------|-----------|-----------|-----------|-----------|
| NM_004223 | 30953.172 | 24894.682 | AB040969  | 7002.715  | 5760.397  |
| NM_006813 | 1631.915  | 1104.526  | NM_003467 | 26196.941 | 18085.061 |
| NM_001355 | 34521.656 | 31468.078 | NM_014936 | 5054.321  | 3414.388  |
| U63336    | 1176.844  | 764.157   | NM_003943 | 8772.808  | 7283.375  |
| NM_006907 | 2468.652  | 2675.538  | NM_019052 | 9416.604  | 12719.378 |
| NM_002686 | 860.108   | 1003.343  | NM_003202 | 2423.696  | 2422.152  |
| AJ224741  | 1562.766  | 1394.17   | AF119902  | 3197.516  | 2645.688  |
| NM_004684 | 5736.098  | 3105.341  | NM_020525 | 60975.164 | 53791.465 |
| BF338709  | 4130.335  | 4465.927  | NM_003890 | 40938.965 | 47536.805 |
| AF204171  | 1208.745  | 987.423   | BF127978  | 17234.252 | 19380.57  |
| M18182    | 489.352   | 551.676   | AF110801  | 2450.036  | 2881.557  |
| W96179    | 3392.278  | 2859.994  | NM_016579 | 58288.852 | 57843.25  |
| AW247841  | 24188.16  | 31314.943 | AB018297  | 5310.476  | 6287.939  |
| BG568198  | 4911.781  | 7894.174  | AK022565  | 19905.721 | 20186.813 |
| M76559    | 8490.104  | 8146.748  | AK023151  | 15482.892 | 15824.833 |
| AF043473  | 925.873   | 1001.654  | NM_017897 | 8457.565  | 8964.415  |
| U03884    | 1911.007  | 1347.17   | NM_004265 | 3521.79   | 5023.083  |
| U11058    | 1812.654  | 1390.074  | NM_002572 | 8050.593  | 9342.802  |
| AI222585  | 1340.161  | 1647.333  | NM_001441 | 7242.177  | 9107.974  |
| AA411678  | 13267.046 | 8940.669  | NM_018324 | 3834.683  | 4620.153  |
| AA862813  | 33467.082 | 24966.205 | AF064255  | 61031.059 | 61122.426 |
| AA398427  | 3085.609  | 2641.23   | NM_016368 | 60471.41  | 57836.809 |
| T55728    | 9129.305  | 7319.637  | U08853    | 9561.63   | 6792.281  |
| H20856    | 5226.006  | 3145.889  | NM_004261 | 43226.391 | 36526.082 |
| N62586    | 4318.719  | 4606.585  | NM_016006 | 3084.142  | 2168.56   |
| AA242743  | 48989.402 | 48241.523 | NM_016245 | 8688.731  | 5070.22   |
| NM_015361 | 38493.238 | 34027.328 | AF005632  | 20014.881 | 12783.742 |
| NM_004310 | 12592.448 | 10615.538 | NM_000903 | 7182.624  | 5407.147  |
| NM_015537 | 14117.736 | 13368.68  | NM_004493 | 31252.275 | 26019.617 |
| NM_016520 | 27412.049 | 40259.918 | AF309489  | 3369.551  | 1904.856  |
| AF035803  | 447.791   | 345.288   | NM_004047 | 46417.656 | 29659.145 |
| Y08147    | 18201.324 | 16711.264 | AB013889  | 1312.748  | 823.458   |
| D00174    | 33294.566 | 34003.367 | Y17179    | 59208.707 | 62595.164 |
| AB000520  | 15643.399 | 15248.236 | NM_000891 | 5011.02   | 5335.713  |
| AK023117  | 4155.818  | 4578.55   | AK026840  | 7332.225  | 7894.992  |
| AL122046  | 5876.224  | 7803.858  | NM_000288 | 7775.749  | 8784.848  |
| AF119914  | 833.194   | 820.559   | NM_016044 | 4421.625  | 5100.585  |
| NM_000855 | 9360.108  | 8850.105  | NM_000520 | 3270.089  | 3558.26   |
| NM_005536 | 11911.77  | 8240.56   | NM_000289 | 21997.35  | 22986.574 |
| NM_005077 | 2339.223  | 1791.531  | NM_001500 | 2033.495  | 1548.265  |
| NM_004423 | 13716.604 | 14398.349 | NM_004388 | 6544.089  | 6326.731  |
| NM_001990 | 3047.007  | 2409.018  | NM_020379 | 1360.773  | 1496.237  |
| NM_002141 | 4123.185  | 3529.137  | AL110127  | 4948.537  | 3333.265  |
| NM_001804 | 1154.922  | 1093.526  | NM_002528 | 9050.931  | 3291.971  |
| NM_003311 | 4834.091  | 4967.336  | D38438    | 22643.426 | 12951.979 |
| NM_003776 | 6110.229  | 5872.083  | AV714945  | 3079.949  | 1486.893  |
| NM_007098 | 2451.2    | 2633.156  | AF007872  | 4710.537  | 3513.663  |
| NM_015719 | 2082.717  | 3160.747  | M30938    | 15271.622 | 6640.15   |
| NM_012464 | 425.444   | 743.854   | NM_015148 | 4140.086  | 2210.419  |
| NM_006129 | 2633.189  | 2311.719  | NM_004714 | 8234.622  | 4633.977  |
| NM_000582 | 30611.742 | 38519.828 | NM_005401 | 1735.108  | 2317.702  |
| NM_005593 | 5709.337  | 6522.582  | NM_017677 | 852.487   | 1041.334  |
| NM_016077 | 6793.724  | 6868.339  | NM_002497 | 35416.613 | 43703.656 |

|           |           |           |           |           |           |
|-----------|-----------|-----------|-----------|-----------|-----------|
| AF100756  | 12559.322 | 19979.215 | AB025194  | 49979.191 | 50061.043 |
| NM_006825 | 9793.97   | 8108.155  | NM_006239 | 8987.448  | 10047.161 |
| NM_004862 | 2353.701  | 1936.336  | BC020863  | 2862.591  | 2882.995  |
| NM_001661 | 2178.964  | 1683.478  | CY3Cy5    | 3380.617  | 163.714   |
| NM_014563 | 1850.418  | 1472.38   | NM_004758 | 1004.44   | 735.125   |
| NM_020150 | 4431.592  | 3588.877  | NM_005163 | 7879.454  | 10362.541 |
| NM_007150 | 9480.167  | 5736.239  | AL117623  | 1100.326  | 1303.522  |
| NM_006831 | 6509.326  | 3648.053  | AF085988  | 1153.039  | 1047.276  |
| AL162044  | 10661.892 | 9190.659  | AK025785  | 10519.689 | 14091.306 |
| AK024004  | 2406.015  | 2318.54   | AF038190  | 1283.613  | 1889.614  |
| AK022365  | 1882.393  | 1449.622  | AF143877  | 1508.219  | 1419.785  |
| BE892273  | 61906.184 | 53977.613 | NM_000738 | 60731     | 60259.281 |
| NM_001355 | 34123.684 | 31575.184 | AF086474  | 1742.294  | 2825      |
| NM_001216 | 595.576   | 392.745   | AF086529  | 921.826   | 590.292   |
| U63336    | 1353.838  | 1798.122  | AF086023  | 6087.361  | 4129.385  |
| NM_006907 | 2960.095  | 2623.43   | AF131803  | 23237.664 | 30451.664 |
| NM_002686 | 650.727   | 638.162   | AF086558  | 687.786   | 724.415   |
| NM_006267 | 2506.027  | 2727.17   | AF086538  | 933.671   | 457.085   |
| NM_002661 | 33374.758 | 39877.176 | NM_004776 | 2124.892  | 1431.422  |
| AK023982  | 1617.29   | 1281.166  | AK023353  | 5757.225  | 5799.519  |
| NM_018466 | 2656.046  | 1455.526  | NM_004758 | 1542.129  | 1157.784  |
| Y11312    | 2707.011  | 1892.963  | NM_005163 | 7428.307  | 4007.026  |
| AF020774  | 1589.342  | 965.135   | SR1       | 68856.508 | 60773.219 |
| AB014533  | 20618.324 | 20327.57  | SR3       | 47658.992 | 45622.012 |
| M11427    | 1151.111  | 954.646   | SR5       | 4103.797  | 2461.052  |
| NM_003039 | 18993.602 | 12357.194 | SR7       | 9008.575  | 49771.711 |
| NM_014509 | 2464.96   | 1941.267  | SR9       | 18125.52  | 3028.577  |
| NM_015361 | 37623.398 | 40461.453 | CY3Cy5    | 3903.104  | 216.687   |
| NM_004310 | 17400.24  | 29648.406 | AF182420  | 606.46    | 575.504   |
| NM_015537 | 12728.896 | 14478.889 | U84517    | 18914.477 | 21518.715 |
| NM_016520 | 20665.91  | 16315.533 | U03237    | 716.295   | 551.509   |
| AB018353  | 8028.257  | 9094.407  | AB033113  | 2291.61   | 2176.557  |
| NM_007036 | 6740.215  | 9320.993  | AK025877  | 3066.975  | 4779.186  |
| NM_002617 | 4483.911  | 4692.525  | NM_018148 | 1421.465  | 1562.422  |
| NM_003313 | 31702.639 | 23433.439 | AK001921  | 7927.742  | 5532.732  |
| AF090907  | 5197.87   | 5004.857  | AF088004  | 2972.096  | 2743.416  |
| AK024476  | 9510.411  | 8437.64   | AF086149  | 3100.629  | 3892.239  |
| X74794    | 26619.52  | 17771.43  | NM_018273 | 2846.928  | 2324.95   |
| AL050298  | 6183.492  | 4168.311  | AK024944  | 3719.872  | 2569.58   |
| NM_007079 | 55434.133 | 42147.785 | AF075068  | 64323.988 | 51187.957 |
| M20696    | 8257.129  | 4648.761  | S81893    | 17071.008 | 14346.322 |
| NM_002915 | 2524.813  | 1644.679  | AK022034  | 817.474   | 567.01    |
| NM_006736 | 5861.16   | 4947.68   | NM_007202 | 2666.445  | 825.354   |
| NM_003640 | 2461.345  | 1875.954  | NM_003663 | 4799.087  | 2568.989  |
| NM_014444 | 8583.097  | 6705.673  | AK021777  | 2304.222  | 3174.008  |
| NM_012248 | 8267.182  | 6809.589  | AF007137  | 3588.289  | 3788.167  |
| NM_014393 | 6205.704  | 5048.727  | AK023292  | 885.889   | 910.138   |
| NM_006813 | 1413.645  | 691.165   | AK023752  | 656.702   | 593.911   |
| CY3Cy5    | 1686.652  | 72.59     | AK022452  | 914.633   | 961.27    |
| NM_078467 | 8206.92   | 14853.267 | AK023375  | 4227.31   | 4973.627  |
| NM_013345 | 2165.947  | 2892.656  | AK023781  | 1154.331  | 918.603   |
| AL117454  | 26631.484 | 37709.746 | AK024129  | 527.636   | 807.032   |
| AF272890  | 1058.159  | 1371.588  | AK024366  | 1711.659  | 1997.679  |

|           |           |           |           |           |           |
|-----------|-----------|-----------|-----------|-----------|-----------|
| U00684    | 1689.608  | 2087.541  | AK022171  | 3813.208  | 5355.574  |
| NM_016459 | 33801.398 | 38282.016 | AK025913  | 2227.781  | 1690.683  |
| AF086227  | 1769.088  | 2198.85   | AK021930  | 650.014   | 845.998   |
| AK026246  | 2725.339  | 3519.358  | NM_016500 | 5924.033  | 6833.092  |
| AF070524  | 833.89    | 988.315   | NM_018354 | 2471.333  | 4058.738  |
| AF035281  | 1550.792  | 2600.101  | AF087966  | 770.116   | 1486.238  |
| AK026304  | 492.318   | 540.836   | AF085987  | 342.042   | 498.973   |
| AF070625  | 3228.12   | 4017.623  | AF086015  | 589.44    | 719.444   |
| AL365512  | 1521.327  | 2160.921  | AF087985  | 324.722   | 527.046   |
| AK001740  | 4829.92   | 6753.456  | AF087971  | 1798.993  | 2018.383  |
| SR2       | 55241.105 | 60104.551 | AF087974  | 2956.682  | 2041.809  |
| SR8       | 7522.265  | 31990.762 | NM_018004 | 964.563   | 760.479   |
| SR10      | 23188.172 | 6037.771  | X78938    | 7146.463  | 9193.444  |
| CY3Cy5    | 1741.798  | 41.571    | AL359056  | 668.802   | 919.878   |
| AK091573  | 485.426   | 732.034   | AK021497  | 1690.483  | 1773.666  |
| AF131814  | 1634.412  | 1836.928  | AF124367  | 832.805   | 702.11    |
| AL359600  | 1805.111  | 2567.259  | AK000798  | 382.55    | 615.912   |
| AL360144  | 2241.555  | 3137.996  | AK025615  | 46250.672 | 52783.246 |
| BC028617  | 869.017   | 997.912   | AK023803  | 1649.267  | 2605.987  |
| AL117653  | 469.051   | 611.125   | AK022379  | 1821.167  | 2447.229  |
| AF087999  | 1002.658  | 1480.096  | AK025338  | 5868.288  | 8996.301  |
| NM_003740 | 2653.219  | 2999.863  | AK001132  | 800.836   | 778.983   |
| AL050078  | 1485.701  | 1598.887  | AK022321  | 401.784   | 323.443   |
| NM_018538 | 971.751   | 1084.594  | AK023296  | 325.449   | 353.262   |
| NM_013346 | 1382.399  | 1565.564  | AK001439  | 807.582   | 1194.461  |
| NM_017851 | 1761.232  | 1603.404  | AK023462  | 4152.022  | 5290.491  |
| AK026182  | 62030.906 | 65044.277 | AF210649  | 720.386   | 612.684   |
| AK025603  | 3105.372  | 5377.613  | AK001115  | 3259.99   | 2436.648  |
| AK024637  | 7931.501  | 7863.353  | NM_014099 | 5172.078  | 6944.746  |
| AL110293  | 439.779   | 428.034   | AL133050  | 1414.843  | 2491.442  |
| AK026238  | 1102.438  | 1072.681  | AK027233  | 5457.326  | 7242.483  |
| AK026694  | 574.904   | 682.95    | AK023343  | 999.496   | 1433.667  |
| AK025564  | 1226.733  | 1187.587  | AK025323  | 631.158   | 724.776   |
| AK026286  | 1578.952  | 1939.746  | NM_013326 | 15457.937 | 12215.649 |
| AK026731  | 2169.01   | 2505.283  | BC037322  | 829.829   | 1090.526  |
| AL133446  | 2941.836  | 3320.778  | Y10202    | 638.696   | 380.268   |
| AF147406  | 598.25    | 491.479   | Y12022    | 3367.444  | 4875.78   |
| NM_006553 | 1792.134  | 2131.491  | AK001375  | 1985.807  | 3242.904  |
| U56251    | 2103.354  | 2623.305  | NM_019597 | 9203.286  | 9665.514  |
| BC035667  | 734.181   | 1408.385  | AL137559  | 1548.5    | 1946.792  |
| AL050043  | 990.627   | 1053.039  | AK021493  | 9287.077  | 13912.277 |
| AL117571  | 1336.345  | 1217.602  | NM_006161 | 37240.484 | 47188     |
| L22263    | 761.995   | 632.942   | NM_006192 | 938.671   | 825.932   |
| AK025010  | 993.152   | 1488.381  | AF085881  | 1140.092  | 615.815   |
| AL137470  | 654.695   | 599.763   | AK022737  | 11346.596 | 12355.106 |
| AL137709  | 2319.75   | 3088.094  | NM_003472 | 60810.773 | 55255.363 |
| AK023277  | 874.739   | 871.837   | U92980    | 1971.87   | 2401.365  |
| AK000425  | 4016.234  | 5521.659  | AF133658  | 1676.495  | 2445.38   |
| AK022933  | 514.407   | 685.725   | AB048287  | 15497.327 | 21689.451 |
| NM_014276 | 3920.059  | 4754.213  | Y11159    | 3185.036  | 4650.757  |
| AF035303  | 410.069   | 436.007   | AB020648  | 4279.332  | 6577.064  |
| AF056438  | 2115.356  | 2133.818  | AK025798  | 27075.533 | 33241.266 |
| AF003737  | 62254.281 | 61466.285 | AF086173  | 1116.16   | 505.924   |

|           |           |           |           |           |           |
|-----------|-----------|-----------|-----------|-----------|-----------|
| AK001011  | 11346.041 | 13799.145 | AK025164  | 1012.443  | 1208.217  |
| AK021690  | 950.866   | 1242.608  | NM_018366 | 9349.532  | 8770.694  |
| AK001840  | 891.093   | 1131.978  | NM_019848 | 20037.889 | 20671.783 |
| AK021486  | 835.852   | 997.643   | AL833005  | 5055.995  | 6432.339  |
| NM_005444 | 4548.043  | 4852.006  | L43366    | 2951.817  | 2461.042  |
| V00589    | 38730.996 | 52495.566 | AK026124  | 3201.82   | 3156.01   |
| AL390163  | 832.139   | 821.419   | NM_015509 | 7344.604  | 4447.667  |
| NM_018572 | 1317.435  | 1452.556  | AL110157  | 5113.953  | 2588.629  |
| AK000175  | 4281.145  | 4192.39   | NM_002319 | 6649.569  | 6918.703  |
| AL137736  | 2986.206  | 3281.515  | L38712    | 20600.42  | 12702.006 |
| AF143870  | 985.205   | 860.304   | U84508    | 2053.932  | 2159.909  |
| NM_004192 | 10127.387 | 10021.346 | NM_017793 | 4882.939  | 7301.764  |
| AK024160  | 1022.967  | 1367.957  | NM_012131 | 5026.16   | 8613.386  |
| AK025077  | 1264.046  | 1347.969  | S41540    | 4398.566  | 5918.611  |
| L43350    | 1750.756  | 2044.325  | AK026947  | 63111.438 | 58149.5   |
| NM_020317 | 4503.793  | 10587.098 | U84526    | 16574.178 | 13435.706 |
| AL080234  | 4516.63   | 5447.11   | L23401    | 4276.34   | 4147.794  |
| AK027025  | 2649.707  | 3256.256  | NM_018090 | 60471.586 | 57139.313 |
| AK025105  | 987.461   | 793.862   | AK022728  | 53490.313 | 56960.738 |
| AB002446  | 709.765   | 514.021   | AL109678  | 3625.358  | 4179.188  |
| AF212220  | 7656.379  | 5498.711  | AL137524  | 10571.372 | 13749.327 |
| AF147387  | 4767.311  | 5762.886  | AF218008  | 6893.645  | 9160.904  |
| NM_012081 | 2130.386  | 2524.967  | M22404    | 48299.508 | 52440.418 |
| AL137463  | 607.354   | 803.314   | AF052115  | 1759.034  | 2110.869  |
| AF085909  | 30033.289 | 38043.926 | NM_014019 | 19525.588 | 9337.214  |
| AF090888  | 799.741   | 680.505   | Z70711    | 929.323   | 637.84    |
| AK027193  | 2039.529  | 2153.475  | AF116653  | 817.493   | 1198.775  |
| AF086471  | 9244.614  | 7854.776  | NM_012368 | 1849.491  | 2353.186  |
| NM_018455 | 8279.832  | 7777.521  | AK022097  | 12556.619 | 14436.001 |
| AF113018  | 1262.704  | 1206.581  | NM_002166 | 33169.805 | 37243.992 |
| AK021996  | 1053.782  | 1532.157  | NM_004660 | 19782.148 | 29471.314 |
| AL049337  | 4986.442  | 5848.492  | NM_006165 | 3428.488  | 4802.163  |
| Z27200    | 2021.895  | 2680.585  | NM_016011 | 19213.391 | 13975.225 |
| AF070571  | 6960.288  | 7265.859  | AL035307  | 3603.222  | 4819.641  |
| AK023554  | 3616.906  | 3853.871  | AK023772  | 1033.485  | 1677.115  |
| NM_003513 | 20438.324 | 25102.234 | NM_012234 | 5742.577  | 8376.093  |
| AL079294  | 512.602   | 955.352   | NM_012155 | 20440.021 | 27846.236 |
| AK024844  | 1387.863  | 1712.575  | AF144700  | 4290.219  | 4661.394  |
| AL049437  | 1004.21   | 1489.854  | NM_004105 | 13435.686 | 10412.737 |
| AF161427  | 60101.227 | 72212.117 | AB046825  | 4312.796  | 5696.855  |
| AK021715  | 14370.07  | 14798.301 | X64975    | 1780.852  | 2482.941  |
| AK000315  | 12537.802 | 11132.833 | AF064876  | 618.013   | 1078.302  |
| AK023248  | 1519.95   | 1104.348  | AF071509  | 456.245   | 879.546   |
| NM_012404 | 30441.268 | 25703.092 | AL050297  | 8416.936  | 8893.904  |
| AF251190  | 780.354   | 905.782   | AK026966  | 6281.293  | 6895.13   |
| AF130075  | 10891.21  | 10360.794 | AF185573  | 932.762   | 1201.309  |
| L29496    | 710.318   | 534.82    | AJ009817  | 409.646   | 763.301   |
| NM_000928 | 782.778   | 994.244   | AK025268  | 1777.813  | 2151.85   |
| NM_007002 | 11490.914 | 11401.057 | NM_005203 | 694.538   | 605.466   |
| NM_012121 | 1453.148  | 1897.569  | NM_006566 | 573.231   | 770.62    |
| NM_014155 | 3375.986  | 3449.669  | AK026154  | 16764.207 | 15417.923 |
| AK026331  | 19748.277 | 20763.338 | AL117546  | 49648.469 | 51190.93  |
| M30773    | 2438.238  | 2442.875  | AK027073  | 1120.645  | 1870.548  |

|           |           |           |           |           |           |
|-----------|-----------|-----------|-----------|-----------|-----------|
| NM_01633E | 10542.039 | 11106.995 | NM_000384 | 1320.75   | 1577.771  |
| AF113699  | 20281.049 | 22724.229 | AB018325  | 14873.287 | 15498.987 |
| AK021897  | 8065.895  | 7675.273  | NM_003603 | 813.932   | 1299.753  |
| AK001051  | 2726.031  | 3173.064  | NM_00542E | 8630.718  | 12468.737 |
| NM_018317 | 998.283   | 880.034   | NM_017974 | 2936.792  | 3349.057  |
| AF086051  | 1164.937  | 1152.386  | NM_003979 | 3641.126  | 4364.837  |
| AL049370  | 4247.502  | 4409.924  | X14677    | 12680.176 | 15777.683 |
| AL365410  | 9181.954  | 15329.305 | NM_005863 | 6036.655  | 6342.127  |
| D17082    | 15980.129 | 21143.428 | U17077    | 7714.684  | 9025.845  |
| D17252    | 43816.344 | 55435.438 | NM_000915 | 5669.066  | 8030.049  |
| D16476    | 504.283   | 566.698   | NM_002344 | 666.464   | 1266.597  |
| NM_003673 | 5088.102  | 4840.915  | AK024475  | 1403.531  | 1774.871  |
| Z36823    | 20099.309 | 18473.756 | AJ278865  | 310.975   | 913.816   |
| NM_00184E | 2098.739  | 2282.027  | AB026542  | 24310.045 | 41470.086 |
| NM_003734 | 21737.574 | 23276.686 | NM_01984E | 12433.717 | 13468.261 |
| NM_01493E | 16722.566 | 16419.736 | NM_014433 | 2676.975  | 4136.878  |
| X99660    | 39225.809 | 49982.508 | NM_002062 | 26720.566 | 33537.371 |
| X03635    | 3820.954  | 3895.009  | NM_014394 | 58201.23  | 55469.066 |
| NM_004351 | 11724.936 | 10904.781 | NM_018140 | 6404.12   | 8364.156  |
| NM_00423E | 7881.026  | 8081.203  | NM_01694E | 6597.961  | 6927.408  |
| AB011093  | 12827.598 | 14893.873 | NM_000142 | 3391.604  | 3526.278  |
| NM_00561E | 795.372   | 548.503   | AF272372  | 60305.238 | 53439.301 |
| NM_020533 | 17806.055 | 20893.758 | AK097045  | 4772.075  | 7042.286  |
| NM_001894 | 18975.131 | 23466.658 | AB014548  | 11868.87  | 13685.689 |
| NM_000614 | 1176.534  | 1376.257  | NM_01825E | 11124.744 | 10894.925 |
| AK022884  | 2661.464  | 2976.875  | AK025150  | 3426.222  | 4898.091  |
| NM_006620 | 8483.883  | 9862.614  | AK024611  | 38258.387 | 48789.73  |
| NM_001397 | 1431.915  | 1666.028  | BC010420  | 13723.093 | 17609.482 |
| NM_005543 | 957.029   | 888.999   | NM_012280 | 56849.848 | 50594.758 |
| Y08770    | 557.597   | 376.743   | NM_018172 | 14106.28  | 13370.504 |
| NM_004772 | 4263.396  | 3805.555  | U03886    | 7749.929  | 6882.1    |
| NM_003714 | 1744.626  | 1922.65   | AK022040  | 1259.006  | 1326.624  |
| U42977    | 8997.738  | 9654.638  | AK022722  | 1566.405  | 1390.273  |
| NM_002881 | 11901.45  | 11416.775 | NM_003591 | 26715.396 | 32254.279 |
| NM_00366E | 7734.644  | 7208.313  | AL080111  | 6485.027  | 7029.576  |
| NM_00328E | 5496.272  | 5632.448  | NM_003550 | 10424.183 | 9604.228  |
| NM_018242 | 1820.326  | 2080.926  | NM_014642 | 11256.702 | 16382.87  |
| M83822    | 2926.237  | 2669.692  | NM_003829 | 3124.903  | 1220.859  |
| NM_018434 | 433.367   | 377.593   | AL110168  | 4598.637  | 2680.615  |
| NM_003914 | 498.02    | 480.285   | NM_014522 | 773.084   | 1269.645  |
| NM_020423 | 2172.511  | 2783.208  | AK026015  | 771.516   | 1065.978  |
| AK021437  | 1510.832  | 1636.579  | NM_016147 | 9661.455  | 7810.723  |
| NM_003831 | 3782.872  | 4240.991  | NM_002833 | 3321.017  | 4698.231  |
| NM_00175E | 1295.748  | 1315.332  | NM_016592 | 1911.761  | 3224.59   |
| AB007965  | 12620.619 | 13799.788 | NM_018527 | 644.464   | 620.769   |
| NM_01764E | 1042.386  | 1182.832  | NM_00186E | 1156.908  | 744.774   |
| NM_00006E | 2041.129  | 2684.004  | NM_014773 | 1431.336  | 1813.458  |
| NM_00119E | 13210.295 | 16976.422 | NM_00560E | 8500.423  | 11711.568 |
| NM_01600E | 1952.626  | 2340.434  | AF134707  | 1922.555  | 2644.291  |
| NM_017744 | 1107.823  | 1304.578  | NM_001223 | 564.074   | 876.635   |
| NM_001924 | 9552.4    | 14884.367 | BE730629  | 2576.625  | 3003.625  |
| NM_01770E | 8716.313  | 10571.282 | AK027167  | 5724.955  | 8174.796  |
| AB002325  | 854.329   | 629.419   | AK025265  | 4781.099  | 6028.832  |

|           |           |           |           |           |           |
|-----------|-----------|-----------|-----------|-----------|-----------|
| NM_001796 | 4268.017  | 3664.527  | NM_013279 | 672.79    | 1148.752  |
| AB040880  | 1493.952  | 1100.802  | NM_018652 | 36736.406 | 42796.363 |
| NM_009587 | 16610.998 | 14572.536 | AB011166  | 4164.637  | 3935.846  |
| NM_017820 | 1991.32   | 1540.309  | AK024460  | 8397.676  | 8767.351  |
| NM_001097 | 424.796   | 639.38    | NM_006606 | 8176.128  | 8309.717  |
| NM_002630 | 1655.147  | 2156.853  | S78570    | 1269.892  | 1289.029  |
| AJ295149  | 63295.922 | 63193.457 | NM_005243 | 24279.842 | 21958.252 |
| NM_013438 | 7369.651  | 8131.893  | NM_006218 | 3821.727  | 2122.796  |
| NM_014688 | 6860.589  | 5750.193  | NM_016265 | 7114.241  | 8110.182  |
| AL359623  | 2702.008  | 2278.245  | NM_002095 | 15827.104 | 15591.624 |
| AK026920  | 8323.125  | 10193.206 | AK022814  | 6799.956  | 8837.678  |
| AL137255  | 3514.493  | 5419.833  | NM_006268 | 2901.359  | 2179.473  |
| NM_003370 | 17751.865 | 30473.025 | NM_005515 | 441.487   | 321.264   |
| AB037715  | 6773.628  | 10586.901 | X78931    | 1121.399  | 855.193   |
| AF250924  | 14383.61  | 16070.568 | NM_006442 | 60791.242 | 54208.031 |
| D86979    | 4053.338  | 6248.176  | NM_003902 | 38494.223 | 20291.453 |
| NM_018212 | 1004.676  | 1279.681  | NM_005098 | 566.853   | 554       |
| AB023230  | 2686.046  | 2411.428  | NM_016427 | 13118.633 | 18255.652 |
| AF018081  | 44273.137 | 35572.594 | NM_006706 | 1810.237  | 2034.9    |
| NM_020202 | 26286.568 | 25179.363 | NM_002505 | 457.263   | 827.559   |
| AF024540  | 2633.652  | 2064.545  | U80741    | 17661.023 | 13512.899 |
| NM_002188 | 4258.05   | 3661.861  | NM_014497 | 3947.87   | 3983.801  |
| NM_001668 | 3968.664  | 8304.218  | AL133598  | 19246.348 | 21810.197 |
| AK025362  | 2840.062  | 4056.314  | NM_015511 | 13148.863 | 15136.903 |
| AK021776  | 2243.189  | 2200.79   | NM_006625 | 13430.496 | 15887.078 |
| AK026042  | 2824.68   | 2294.76   | NM_004891 | 32564.68  | 39177.227 |
| NM_014233 | 52054.297 | 49955.695 | NM_002831 | 18890.348 | 18602.633 |
| NM_002137 | 54899.934 | 52611.332 | AL833409  | 7158.114  | 3613.328  |
| NM_002911 | 2951.456  | 3011.687  | NM_015966 | 1547.096  | 1906.314  |
| U94386    | 1752.38   | 1438.222  | NM_000147 | 3243.528  | 2762.105  |
| NM_016000 | 52441.188 | 52418.594 | NM_000158 | 6598.61   | 3661.938  |
| NM_006372 | 13945.359 | 12129.058 | NM_000670 | 1237.266  | 1337.197  |
| NM_014150 | 2333.745  | 3020.813  | NM_006416 | 4961.442  | 5154.095  |
| NM_006805 | 46900.395 | 51607.887 | NM_000151 | 15591.427 | 14542.762 |
| NM_004681 | 29903.324 | 37837.668 | NM_003773 | 1401.837  | 960.258   |
| AB033096  | 18865.221 | 17921.871 | NM_003935 | 1557.685  | 1246.539  |
| NM_014886 | 2898.62   | 2703.206  | NM_002879 | 3184.581  | 4818.672  |
| L31408    | 26298.643 | 28115.447 | AB028999  | 2918.402  | 4038.334  |
| NM_001545 | 18128.762 | 16115.172 | AB018348  | 12681.102 | 13600.329 |
| NM_004446 | 27717.932 | 19534.822 | NM_013369 | 1326.228  | 2328.713  |
| AL133566  | 1583.421  | 1802.019  | NM_003686 | 4132.939  | 3890.333  |
| M36118    | 27309.57  | 22275.793 | NM_014812 | 5835.607  | 4509.314  |
| NM_003398 | 23382.898 | 17657.457 | NM_004641 | 2140.766  | 2539.934  |
| J02625    | 27384.18  | 35205.152 | NM_002049 | 10019.242 | 13243.1   |
| Y17175    | 63113.801 | 71722.43  | AK026312  | 1543.012  | 2136.336  |
| NM_004549 | 29096.041 | 29832.004 | NM_017776 | 3493.342  | 3581.584  |
| NM_005333 | 35319.152 | 37007.059 | U81599    | 1370.018  | 1035.201  |
| NM_000767 | 774.508   | 675.298   | AF275722  | 1128.251  | 727.871   |
| AK026161  | 2175.096  | 1915.484  | NM_003206 | 1318.501  | 809.404   |
| NM_004553 | 49714.789 | 48291.102 | AK000564  | 1109.933  | 802.295   |
| D63484    | 3637.725  | 3277.924  | X60155    | 1170.926  | 851.123   |
| AK026745  | 6781.009  | 5943.581  | AB037901  | 15471.074 | 11692.12  |
| AL157440  | 5070.66   | 3917.041  | AV762646  | 1003.678  | 1287.03   |

|           |           |           |           |           |           |
|-----------|-----------|-----------|-----------|-----------|-----------|
| NM_016423 | 12371.04  | 11826.33  | NM_012464 | 296.558   | 1055.049  |
| AB040975  | 1915.862  | 2323.417  | NM_006129 | 2828.523  | 2894.042  |
| AK055844  | 2265.129  | 3529.41   | NM_000582 | 31957.691 | 41602.781 |
| NM_018288 | 18913.297 | 19272.988 | NM_005593 | 6780.219  | 6949.044  |
| NM_003146 | 12167.648 | 11781.603 | AJ224741  | 2295.827  | 3797.928  |
| X52342    | 805.49    | 939.186   | NM_004684 | 7195.867  | 7809.607  |
| NM_003131 | 15791.841 | 13847.703 | BF338709  | 3359.335  | 4070.481  |
| NM_005239 | 10809.953 | 10050.692 | AF204171  | 1214.752  | 1411.574  |
| AK022889  | 14666.509 | 9661.609  | M18182    | 652.319   | 622.458   |
| X52357    | 54310.188 | 54942.316 | W96179    | 6171.815  | 8254.973  |
| AF211891  | 2215.964  | 1661.08   | AW247841  | 24908.34  | 25537.854 |
| NM_005641 | 3121.526  | 2144.313  | BG568198  | 1592.136  | 1596.759  |
| NM_003796 | 35431.016 | 45219.605 | M76559    | 8234.503  | 5188.148  |
| NM_002973 | 5260.884  | 8258.513  | U03884    | 1608.486  | 1943.243  |
| NM_004436 | 20290.576 | 19485.063 | U11058    | 2583.145  | 2540.55   |
| NM_006580 | 9419.236  | 9489.945  | AI222585  | 1702.36   | 1908.569  |
| NM_001305 | 9265.292  | 9119.704  | AA411678  | 13715.997 | 11915.688 |
| NM_005082 | 1031.005  | 1089.438  | AA862813  | 41867.758 | 40045.246 |
| D17028    | 50193.031 | 55459.203 | AA398427  | 3957.351  | 3740.915  |
| NM_013442 | 40446.668 | 46501.066 | T55728    | 10998.186 | 8597.525  |
| BG611243  | 7225.947  | 7486.327  | H20856    | 4054.402  | 1548.298  |
| AI417481  | 1810.051  | 1447.08   | N62586    | 3793.36   | 3154.247  |
| BI906766  | 10443.722 | 8029.397  | AA242743  | 43590.805 | 36770.688 |
| U60519    | 1076.435  | 1165.815  | NM_006759 | 11045.771 | 8662.132  |
| AA282906  | 10255.535 | 14616.553 | NM_006831 | 5109.858  | 3008.932  |
| AI480307  | 10018.337 | 14344.012 | AL162044  | 12497.771 | 9517.065  |
| X51420    | 4305.569  | 5956.037  | AK024004  | 1323.555  | 1565.848  |
| D28235    | 840.306   | 847.424   | AK022365  | 1126.868  | 1379.791  |
| X51757    | 2044.922  | 2521.383  | BE892273  | 59790.594 | 57498.57  |
| L24038    | 3008.438  | 2946.104  | AF026929  | 1547.729  | 1348.006  |
| NM_053056 | 999.282   | 1270.867  | NM_016734 | 2859.489  | 1733.089  |
| NM_006186 | 1209.83   | 726.015   | AF035803  | 626.477   | 780.466   |
| NM_002751 | 7854.049  | 7936.553  | Y08147    | 21607.314 | 13193.336 |
| M55593    | 3344.987  | 3307.623  | D00174    | 40338.266 | 35662.363 |
| NM_005918 | 43561.965 | 32368.441 | AB000520  | 19051.896 | 18346.158 |
| AK023011  | 50166.465 | 48732.469 | NM_016382 | 430.429   | 736.199   |
| NM_016816 | 2344.37   | 2510.343  | AK023117  | 4224.462  | 4154.507  |
| L17325    | 1881.01   | 1912.918  | AL122046  | 4394.529  | 3936.796  |
| NM_017716 | 2072.114  | 2396.79   | AF119914  | 834.802   | 1333.355  |
| M58603    | 11310.534 | 9833.996  | NM_000855 | 10408.137 | 11112.032 |
| NM_003639 | 12018.394 | 9767.156  | NM_005536 | 10773.408 | 7219.498  |
| NM_001549 | 966.705   | 997.143   | NM_005077 | 1653.844  | 1274.486  |
| NM_000115 | 8022.032  | 7673.608  | NM_001990 | 3172.951  | 2701.476  |
| AF308801  | 4402.843  | 5165.09   | NM_002141 | 4661.561  | 4997.448  |
| NM_007318 | 62129.922 | 57258.273 | NM_006907 | 2120.188  | 1287.601  |
| NM_014874 | 3472.98   | 3310.496  | NM_002686 | 642.079   | 510.366   |
| NM_012397 | 664.817   | 748.044   | NM_006267 | 2617.632  | 2332.985  |
| NM_005765 | 20852.957 | 22381.004 | NM_002661 | 37469.621 | 44003.977 |
| NM_002762 | 4423.489  | 6347.632  | NM_001263 | 617.225   | 753.986   |
| NM_006324 | 14252.971 | 16657.75  | AK023982  | 1399.088  | 901.985   |
| NM_016848 | 20218.113 | 23082.721 | NM_018466 | 2844.404  | 1468.524  |
| NM_000514 | 15539.755 | 14772.218 | Y11312    | 3426.985  | 2396.757  |
| AL137432  | 2213.481  | 2556.595  | NM_003039 | 22512.977 | 18244.621 |



|           |           |           |           |           |           |
|-----------|-----------|-----------|-----------|-----------|-----------|
| NM_000957 | 5236.967  | 4367.413  | NM_002635 | 58993.75  | 38424.328 |
| NM_019043 | 7256.457  | 6066.592  | AF100756  | 11473.044 | 11038.063 |
| NM_003240 | 26599.818 | 26445.764 | NM_006825 | 10437.892 | 7248.389  |
| NM_016564 | 63794.621 | 58239.973 | NM_004862 | 2622.684  | 1597.205  |
| NM_000796 | 728.126   | 1424.31   | NM_001661 | 2017.829  | 1254.845  |
| AK021660  | 4724.978  | 5082.16   | NM_014563 | 2094.401  | 826.151   |
| AB007933  | 63985.711 | 59712.242 | NM_020150 | 4216.577  | 3951.179  |
| NM_005469 | 7755.64   | 11136.856 | NM_007150 | 9328.503  | 5915.43   |
| NM_016361 | 3439.342  | 5372.613  | NM_016520 | 20295.514 | 14901.169 |
| NM_003708 | 61607.582 | 60563.027 | AB018353  | 6366.381  | 4265.067  |
| NM_014349 | 11577.364 | 12639.937 | NM_007036 | 6456.971  | 5503.061  |
| AB040895  | 600.448   | 608.48    | NM_002617 | 5342.683  | 5130.664  |
| NM_018210 | 1970.232  | 1654.033  | NM_003313 | 46597.641 | 46477.762 |
| NM_001096 | 8769.262  | 7107.36   | AF090907  | 3941.265  | 2596.972  |
| NM_016014 | 2675.528  | 3000.165  | AK024476  | 9026.251  | 5924.137  |
| NM_000198 | 820.237   | 832.263   | X74794    | 30829.355 | 27972.723 |
| NM_018327 | 4005.183  | 6241.163  | AL050298  | 7896.973  | 8040.089  |
| NM_001684 | 1131.717  | 1556.227  | NM_007079 | 57710.309 | 52600.871 |
| NM_013309 | 2026.825  | 2235.346  | M20696    | 6967.675  | 7001.362  |
| AF038186  | 5377.168  | 6035.746  | NM_002915 | 2542.098  | 3028.08   |
| NM_003664 | 5535.344  | 6672.777  | NM_006736 | 5683.564  | 3761.225  |
| NM_002426 | 4193.189  | 4510.771  | NM_003640 | 3210.891  | 3911.21   |
| AK027182  | 1574.371  | 1390.999  | NM_014444 | 10178.349 | 12458.374 |
| J03651    | 14992.576 | 15584.528 | NM_012248 | 9538.05   | 5933.661  |
| U61738    | 13680.304 | 15126.884 | NM_014970 | 11345.639 | 11611.139 |
| AJ132087  | 2313.133  | 3854.354  | NM_014393 | 6305.183  | 4329.267  |
| U92818    | 2906.698  | 2906.96   | NM_004223 | 35383.906 | 34513.348 |
| NM_000442 | 7412.946  | 7505.421  | NM_006813 | 1266.365  | 714.935   |
| NM_002934 | 3357.734  | 2938.67   | NM_001355 | 40079.457 | 43829.617 |
| AL050114  | 2058.864  | 2639.32   | U63336    | 816.768   | 826.44    |
| AK021492  | 9588.57   | 20563.332 | NM_000582 | 28794.316 | 35334.199 |
| AK023794  | 41890.195 | 46423.242 | NM_005593 | 2132.667  | 1400.215  |
| NM_019885 | 2872.258  | 2368.584  | AJ224741  | 621.255   | 754.281   |
| AB033103  | 1789.504  | 1072.493  | NM_004684 | 6627.255  | 5908.505  |
| NM_002907 | 3073.083  | 1265.238  | BF338709  | 3375.599  | 4165.868  |
| AK024098  | 2188.752  | 1682.245  | AF204171  | 1217.775  | 1664.456  |
| AK001116  | 850.466   | 737.47    | M18182    | 654.013   | 504.503   |
| AK022371  | 7977.5    | 6734.739  | W96179    | 3984.094  | 3420.004  |
| D42045    | 5298.284  | 4224.035  | AW247841  | 34645.863 | 45123.867 |
| AB007953  | 3879.916  | 3896.979  | BG568198  | 5267.092  | 7943.278  |
| NM_014002 | 11765.742 | 11529.38  | M76559    | 12282.994 | 11976.585 |
| NM_004197 | 21304.547 | 21172.355 | AF043473  | 659.793   | 1808.872  |
| NM_004073 | 2913.466  | 4694.509  | U11058    | 2719.519  | 3345.105  |
| NM_001278 | 6976.32   | 7611.167  | AI222585  | 1537.458  | 2017.454  |
| NM_019105 | 10059.448 | 10273.474 | AA411678  | 14590.394 | 13725.233 |
| NM_000294 | 9753.769  | 9809.125  | AA862813  | 41401.422 | 34171.973 |
| AJ272212  | 3926.093  | 4675.839  | AA398427  | 3413.412  | 3534.671  |
| NM_005677 | 7749.619  | 11250.207 | T55728    | 9857.652  | 6349.335  |
| AF229803  | 1501.509  | 1705.891  | H20856    | 4044.918  | 1723.944  |
| AF151810  | 1040.927  | 937.02    | N62586    | 3704.846  | 5035.463  |
| NM_002130 | 31357.75  | 25749.602 | AA242743  | 49958.922 | 53940.645 |
| NM_004436 | 21293.719 | 25309.684 | NM_015361 | 39420.609 | 49812.035 |
| NM_006580 | 10242.282 | 14122.726 | NM_004310 | 15647.038 | 22621.195 |

|           |           |           |           |           |           |
|-----------|-----------|-----------|-----------|-----------|-----------|
| NM_00130E | 10279.032 | 12775.969 | NM_015537 | 17361.291 | 11653.827 |
| NM_005082 | 1321.084  | 1042.369  | AK024004  | 1290.68   | 1195.064  |
| D17028    | 52967.145 | 49675.754 | AK022365  | 1460.301  | 1624.013  |
| NM_013442 | 41849.43  | 32604.34  | BE892273  | 53947.598 | 47781.184 |
| BG611243  | 6859.757  | 4783.611  | AF026929  | 1603.652  | 1509.033  |
| AI417481  | 1139.58   | 894.452   | NM_016734 | 2524.463  | 1552.274  |
| BI906766  | 9663.309  | 6558      | AF035803  | 849.856   | 1252.111  |
| U60519    | 834.249   | 607.83    | Y08147    | 31200.203 | 37408.418 |
| AA282906  | 9147.999  | 8354.608  | D00174    | 48457.84  | 46087.652 |
| L02870    | 41755.141 | 37819.84  | AB000520  | 22615.783 | 35455.93  |
| BG755482  | 26573.941 | 25376.92  | NM_016382 | 945.943   | 895.08    |
| AI480307  | 9524.717  | 10054.876 | AK023117  | 4159.789  | 2755.027  |
| X51420    | 4022.142  | 4398.018  | AL122046  | 4177.095  | 3330.659  |
| D28235    | 892.1     | 697.313   | AF119914  | 820.693   | 1043.766  |
| X51757    | 2210.116  | 2027.483  | NM_000855 | 10763.467 | 12239.442 |
| L24038    | 2918.979  | 2585.539  | NM_005536 | 15908.738 | 19088.195 |
| NM_05305E | 996.451   | 1062.03   | NM_005077 | 2927.278  | 3210.846  |
| NM_00618E | 1310.142  | 1218.339  | NM_001990 | 3758.63   | 5652.815  |
| M55593    | 2932.67   | 2336.89   | NM_002141 | 4866.595  | 5351.949  |
| AK001883  | 36128.113 | 38461.063 | NM_006129 | 3226.974  | 2363.671  |
| NM_01462E | 2829.183  | 1961.564  | NM_006267 | 2622.566  | 1845.48   |
| L17325    | 1944.585  | 2182.811  | NM_002661 | 30174.854 | 37676.223 |
| NM_01771E | 2325.229  | 2816.464  | NM_001263 | 494.871   | 442.198   |
| M58603    | 12578.224 | 11867.587 | AK023982  | 1621.677  | 892.849   |
| NM_00363E | 12034.524 | 10998.493 | NM_01846E | 2630.898  | 1533.883  |
| NM_00154E | 1208.086  | 532.269   | Y11312    | 4268.819  | 4401.445  |
| NM_000115 | 8101.016  | 5816.138  | NM_003039 | 22745.619 | 34986.227 |
| AF308801  | 3574.039  | 2611.601  | NM_002635 | 56850.684 | 55156.18  |
| NM_00576E | 19032.098 | 13568.467 | AF100756  | 11239.996 | 11420.146 |
| NM_002762 | 4243.347  | 3520.523  | NM_006825 | 14078.957 | 18449.84  |
| NM_006324 | 15004.056 | 16534.188 | NM_004862 | 3510.508  | 4875.699  |
| NM_01684E | 18788.904 | 17096.986 | NM_001661 | 3669.911  | 4540.74   |
| NM_000514 | 15323.637 | 14322.595 | NM_014563 | 2317.77   | 1596.554  |
| AL137432  | 2742.31   | 2987.037  | NM_020150 | 4353.934  | 4614.855  |
| NM_000957 | 5348.251  | 4933.445  | NM_007150 | 10691.79  | 10390.571 |
| NM_019043 | 6505.606  | 4608.72   | NM_006831 | 6971.127  | 4170.491  |
| NM_003240 | 26366.201 | 24707.588 | AL162044  | 13385.111 | 9305.607  |
| NM_016564 | 63831.223 | 60881.426 | AB018353  | 8804.977  | 6964.35   |
| NM_00079E | 526.718   | 711.799   | NM_007036 | 6154.261  | 3662.898  |
| AK021660  | 3407.022  | 2398.614  | NM_002617 | 4473.54   | 4599.815  |
| AB007933  | 61754.527 | 54820.664 | NM_003313 | 41528.098 | 41008.496 |
| NM_00379E | 35577.918 | 29986.361 | AF090907  | 6674.021  | 7653.772  |
| NM_002973 | 5531.604  | 4875.374  | AK024476  | 12672.199 | 16537.617 |
| NM_00370E | 62209.891 | 59252.316 | X74794    | 31616.428 | 29026.357 |
| NM_01434E | 13133.061 | 13976.728 | AL050298  | 9866.598  | 8335.495  |
| AB040895  | 871.511   | 558.499   | NM_007079 | 55061.68  | 54410.926 |
| NM_018210 | 2184.136  | 1793.561  | M20696    | 8194.971  | 9961.013  |
| NM_00109E | 8068.336  | 4360.809  | NM_002915 | 2747.552  | 3999      |
| NM_01330E | 2292.041  | 1618.421  | NM_006736 | 8677.697  | 10376.413 |
| AF038186  | 5403.011  | 5725.15   | NM_003640 | 4779.427  | 7125.629  |
| NM_003664 | 4147.127  | 4336.224  | NM_014444 | 12180.188 | 14683.509 |
| NM_00242E | 4422.147  | 5071.396  | NM_01224E | 11865.638 | 12142.393 |
| AK027182  | 1503.402  | 1682.365  | NM_014970 | 14175.89  | 17986.561 |

|           |           |           |           |           |           |
|-----------|-----------|-----------|-----------|-----------|-----------|
| J03651    | 15726.659 | 12363.91  | NM_014393 | 9091.049  | 13623.887 |
| U61738    | 12612.768 | 10450.016 | NM_004223 | 39680.031 | 46458.543 |
| AJ132087  | 1482.352  | 1349.367  | NM_006813 | 1782.306  | 2404.527  |
| U92818    | 2174.861  | 1396.916  | NM_001355 | 46371.848 | 47291.758 |
| NM_000442 | 5628.18   | 3498.586  | U63336    | 988.735   | 1107.079  |
| NM_002934 | 3051.81   | 2204.776  | NM_006907 | 2495.715  | 1172.284  |
| AK023011  | 47396.234 | 38104.469 | NM_002686 | 662.548   | 476.464   |
| NM_016816 | 2340.311  | 1231.609  | AJ224741  | 1875.777  | 1920.825  |
| AK023794  | 41611.285 | 42273.168 | NM_004684 | 3737.815  | 2699.566  |
| NM_019885 | 2748.469  | 2344.121  | BF338709  | 864.198   | 974.374   |
| AB033103  | 1605.867  | 1208.287  | AF204171  | 1217.098  | 1594.742  |
| NM_002907 | 3044.056  | 1292.585  | M18182    | 820.262   | 876.179   |
| D42045    | 6520.53   | 9897.201  | W96179    | 6173.277  | 8998.091  |
| NM_014002 | 11611.157 | 8844.714  | AW247841  | 32704.137 | 41774.656 |
| NM_004197 | 22343.119 | 17477.428 | BG568198  | 3376.669  | 3205.344  |
| NM_004073 | 3338.208  | 4048.058  | M76559    | 11793.948 | 15824.154 |
| NM_001278 | 6835.974  | 8116.829  | AF043473  | 829.586   | 1211.288  |
| NM_019105 | 10314.818 | 10749.053 | U03884    | 2231.521  | 2691.245  |
| NM_000294 | 9734.083  | 9666.172  | U11058    | 2911.646  | 4775.984  |
| AJ272212  | 3833.701  | 3948.466  | AI222585  | 2264.12   | 3610.807  |
| NM_001626 | 60141.609 | 52192.84  | AA411678  | 20325.758 | 25716.604 |
| NM_005677 | 10312.994 | 11515.363 | AA862813  | 47368.391 | 43355.938 |
| AF229803  | 1323.295  | 1059.448  | AA398427  | 3581.626  | 3925.693  |
| AF151810  | 935.454   | 622.557   | T55728    | 11846.589 | 11445.65  |
| NM_002130 | 26764.344 | 18092.551 | H20856    | 4227.694  | 2621.275  |
| NM_005469 | 6637.156  | 5962.573  | N62586    | 4290.195  | 4261.648  |
| NM_016361 | 3294.021  | 1857.457  | AA242743  | 56367.477 | 53735.809 |
| NM_001305 | 10197.796 | 12025.306 | NM_015361 | 41532.859 | 43758.516 |
| NM_005082 | 1216.947  | 931.942   | NM_004310 | 14233.288 | 14873.344 |
| D17028    | 54860.301 | 55888.867 | NM_015537 | 10118.041 | 12897.668 |
| NM_013442 | 39956.375 | 43168.531 | NM_016520 | 27027.926 | 29768.867 |
| BG611243  | 7080.902  | 5203.718  | Y08147    | 18318.754 | 9994.498  |
| AI480307  | 9873.81   | 7243.49   | D00174    | 42009.535 | 42665.914 |
| X51420    | 4468.619  | 4043.377  | AB000520  | 17850.23  | 10618.488 |
| D28235    | 911.387   | 693.884   | AK023117  | 4085.169  | 3511.547  |
| X51757    | 2211.452  | 2386.663  | AL122046  | 5253.998  | 4483.538  |
| L24038    | 3320.685  | 3164.609  | AF119914  | 1041.7    | 1585.515  |
| NM_053056 | 1119.969  | 1265.423  | NM_000855 | 12997.708 | 17118.631 |
| NM_006186 | 1388.025  | 998.365   | NM_005536 | 18606.77  | 24053.557 |
| NM_002751 | 7506.595  | 7277.953  | NM_005077 | 2780.585  | 3842.897  |
| M55593    | 3267.725  | 2996.317  | NM_004423 | 12586.46  | 16002.12  |
| AK001883  | 36537.773 | 27307.014 | NM_001990 | 3777.359  | 2868.922  |
| NM_014629 | 2607.458  | 901.569   | NM_002141 | 3760.183  | 3022.65   |
| AL050114  | 1378.462  | 626.672   | NM_003311 | 3184.964  | 2554.088  |
| AK021492  | 7160.888  | 2996.537  | NM_003776 | 6901.654  | 4808.19   |
| NM_014874 | 3128.227  | 2942.499  | NM_015719 | 1628.146  | 2159.482  |
| NM_005765 | 18683.283 | 18025.908 | NM_012464 | 466.345   | 860.05    |
| NM_002762 | 3912.016  | 4404.186  | NM_006129 | 1959.638  | 1628.284  |
| NM_006324 | 11873.486 | 8862.779  | NM_000582 | 13897.629 | 13691.366 |
| NM_016564 | 66322.234 | 54128.863 | NM_005593 | 6327.777  | 6035.473  |
| NM_000796 | 722.189   | 698.178   | NM_016077 | 6069.359  | 2378.381  |
| AF279656  | 1976.389  | 2412.721  | AF100756  | 13530.449 | 11733.247 |
| AK021660  | 5736.501  | 6993.729  | NM_006825 | 16802.131 | 18088.676 |

|           |           |           |           |           |           |
|-----------|-----------|-----------|-----------|-----------|-----------|
| AB007933  | 61881.879 | 57494.438 | NM_004862 | 3608.055  | 5099.358  |
| NM_006702 | 7811.914  | 8201.062  | NM_001661 | 2403.332  | 3477.028  |
| NM_001396 | 30793.684 | 26731.859 | NM_014563 | 4041.963  | 5118.507  |
| NM_014474 | 3662.892  | 3607.465  | NM_020150 | 5536.204  | 5039.544  |
| NM_016249 | 3998.042  | 3453.266  | NM_007150 | 11801.137 | 6783.079  |
| NM_006181 | 2201.943  | 1683.493  | NM_006831 | 6607.091  | 2393.943  |
| NM_003796 | 32092.805 | 13440.438 | AL162044  | 11875.206 | 8671.042  |
| NM_002973 | 4400.787  | 3183.76   | AK024004  | 1564.11   | 1089.321  |
| NM_004436 | 18170.9   | 10141.598 | AK022365  | 939.057   | 935.7     |
| NM_006580 | 8630.992  | 4505.787  | BE892273  | 60249.941 | 52645.227 |
| NM_016277 | 3671.684  | 3491.123  | AF026929  | 1381.013  | 1040.27   |
| NM_007247 | 5856.506  | 8110.304  | NM_016734 | 2238.398  | 605.096   |
| NM_006554 | 12560.286 | 20548.387 | NM_001355 | 32236.514 | 25829.342 |
| X99962    | 16377.123 | 18154.303 | U63336    | 960.364   | 800.49    |
| AK023221  | 19666.873 | 12178.81  | NM_006907 | 2320.018  | 976.927   |
| NM_003664 | 4836.771  | 4220.299  | NM_002686 | 1004.849  | 560.692   |
| NM_002426 | 3904.628  | 3815.307  | NM_006267 | 3120.007  | 2316.054  |
| AJ132087  | 1476.573  | 847.522   | NM_002661 | 34052.414 | 33518.484 |
| U92818    | 2403.186  | 1685.682  | NM_001263 | 865.956   | 996.331   |
| NM_000442 | 6692.411  | 5987.192  | AK023982  | 2592.637  | 4481.774  |
| NM_002934 | 3613.276  | 3237.921  | NM_018466 | 4555.069  | 4904.637  |
| AK023011  | 54751.414 | 47324.957 | Y11312    | 6114.94   | 7959.612  |
| NM_016816 | 2308.081  | 1655.141  | AB014533  | 14412.917 | 15560.067 |
| L17325    | 2004.032  | 1512.825  | M11427    | 906.984   | 774.305   |
| NM_017716 | 2206.329  | 3000.336  | NM_000744 | 1260.748  | 1087.374  |
| M58603    | 11321.9   | 8439.584  | NM_003039 | 17167.068 | 6609.204  |
| NM_003639 | 11397.005 | 8513.349  | NM_014509 | 1519.742  | 1587.792  |
| NM_001549 | 1098.656  | 223.004   | NM_020372 | 26549.016 | 11631.775 |
| NM_000115 | 6755.784  | 4289.899  | NM_002635 | 55420.262 | 24508.227 |
| AF308801  | 4017.61   | 2768.791  | NM_004979 | 1109.794  | 304.672   |
| NM_007318 | 63894.344 | 56611.707 | NM_015361 | 19390.77  | 12952.721 |
| AF151810  | 768.664   | 819.679   | NM_004310 | 12682.243 | 11369.275 |
| NM_002130 | 30381.262 | 35685.945 | NM_015537 | 14594.855 | 10230.607 |
| NM_005469 | 5602.945  | 5781.051  | NM_016520 | 27540.775 | 24672.193 |
| NM_016361 | 3019.359  | 2025.249  | AB018353  | 9145.536  | 7388.854  |
| NM_003708 | 61546.57  | 51731.309 | NM_007036 | 7094.397  | 3125.027  |
| NM_014349 | 9585.459  | 7520.914  | NM_002617 | 6367.375  | 4753.626  |
| AB040895  | 642.247   | 978.99    | NM_003313 | 50534.055 | 46796.008 |
| NM_004820 | 554.468   | 799.468   | AF090907  | 7966.973  | 10454.949 |
| NM_018210 | 2239.227  | 1574.992  | AK024476  | 12756.158 | 15261.717 |
| NM_001096 | 8779.42   | 4853.213  | X74794    | 37281.289 | 43970.262 |
| NM_016014 | 3220.823  | 2308.836  | AL050298  | 10530.684 | 8473.066  |
| NM_000198 | 982.387   | 698.155   | NM_007079 | 57118.41  | 50221.504 |
| NM_018327 | 3562.295  | 3066.588  | M20696    | 4882.595  | 2278.64   |
| NM_017581 | 2246.583  | 2077.986  | NM_002915 | 2012.773  | 1019.238  |
| AA488804  | 9886.176  | 8429.821  | NM_006736 | 6563.049  | 6818.525  |
| NM_006539 | 539.406   | 586.155   | NM_003640 | 2708.672  | 2043.69   |
| NM_001684 | 1541.531  | 1687.802  | NM_014444 | 8938.703  | 5226.748  |
| NM_000808 | 688.134   | 377.555   | NM_012248 | 8905.802  | 3512.716  |
| NM_016318 | 13931.189 | 7528.071  | NM_014970 | 10381.731 | 6808.855  |
| NM_013309 | 1503.176  | 812.059   | NM_014393 | 4737.723  | 2744.934  |
| NM_019891 | 2249.17   | 1262.939  | NM_004223 | 24311.773 | 12436.865 |
| AF038186  | 4887.161  | 2725.827  | NM_006813 | 936.412   | 400.238   |

|           |           |           |           |           |           |
|-----------|-----------|-----------|-----------|-----------|-----------|
| AL050114  | 1051.389  | 452.992   | CY3Cy5    | 1680.813  | 97.228    |
| AK021492  | 5438.847  | 2831.571  | NM_078467 | 7432.086  | 4908.459  |
| AK023794  | 41903.754 | 27504.537 | NM_013345 | 2003.064  | 2673.526  |
| NM_019885 | 2376.379  | 1043.532  | AL117454  | 44174.34  | 52196.773 |
| AB033103  | 2606.874  | 1366.868  | AF272890  | 1804.688  | 2867.545  |
| NM_002907 | 2930.152  | 1191.421  | U00684    | 3735.867  | 4287.712  |
| AK024098  | 2292.187  | 1112.304  | NM_016459 | 42044.918 | 39274.199 |
| AK001116  | 638.392   | 547.852   | AF086227  | 2723.857  | 2994.736  |
| AK022371  | 6908.127  | 5127.654  | AK026246  | 4693.202  | 4389.427  |
| D42045    | 5241.897  | 4082.866  | AF070524  | 1768.569  | 1880.876  |
| AB007953  | 3599.676  | 2659.53   | AF035281  | 2035.496  | 2141.725  |
| NM_014002 | 11496.536 | 8294.606  | AK026304  | 812.381   | 792.068   |
| NM_004197 | 18970.428 | 16460.416 | AF070625  | 5331.503  | 4324.166  |
| NM_004073 | 3034.618  | 2795.857  | AL365512  | 2239.521  | 2073.509  |
| NM_001278 | 6017.625  | 4732.218  | AK001740  | 15020.525 | 15396.339 |
| NM_019105 | 9202.723  | 7481.304  | AF131793  | 1268.159  | 1332.033  |
| NM_000294 | 7064.651  | 3192.039  | NM_078467 | 10821.349 | 13107.833 |
| AJ272212  | 3335.719  | 1798.508  | SR2       | 54969.047 | 54849.355 |
| NM_001626 | 53829.563 | 39141.234 | SR4       | 18006.678 | 26937.619 |
| NM_005677 | 7338.271  | 4281.396  | SR6       | 2388.173  | 2979.198  |
| CY3Cy5    | 2062.307  | 214.741   | SR8       | 8573.078  | 25990.699 |
| NM_004957 | 2991.722  | 4990.888  | SR10      | 28874.758 | 10330.705 |
| NM_005252 | 1450.379  | 3162.702  | CY3Cy5    | 1827.48   | 116.83    |
| AL359211  | 462.979   | 1030.943  | AK091573  | 1137.224  | 1538.514  |
| AF070526  | 543.538   | 1537.46   | AF131814  | 1859.149  | 3234.598  |
| U79264    | 3451.45   | 6402.541  | AL359600  | 2044.349  | 1106.984  |
| NM_015695 | 13981.416 | 34352.703 | AL360144  | 3396.971  | 4075.69   |
| AF070530  | 9164.606  | 13367.437 | BC028617  | 1062.974  | 1671.057  |
| NM_006420 | 2166.142  | 2448.531  | AL117653  | 822.54    | 1178.812  |
| AF131855  | 1197.834  | 1089.996  | AF087999  | 2080.512  | 2862.258  |
| AF086046  | 4158.531  | 6484.847  | NM_003740 | 6093.206  | 7158.876  |
| AK023309  | 744.476   | 1095.001  | AL050078  | 7282.717  | 6619.462  |
| AK000724  | 3391.978  | 3805.036  | NM_018538 | 1628.104  | 1029.966  |
| NM_003720 | 22075.322 | 22873.604 | NM_013346 | 1909.749  | 1584.512  |
| NM_005252 | 1671.01   | 1377.343  | AF131784  | 696.004   | 427.209   |
| SR1       | 67362.805 | 55022.969 | NM_017851 | 2067.674  | 1615.466  |
| SR3       | 29541.723 | 14599.376 | AK026182  | 60394.223 | 56181.871 |
| SR5       | 3201.218  | 2316.698  | AK025603  | 3037.196  | 2628.361  |
| SR7       | 3875.024  | 17690.859 | NM_016085 | 20223.955 | 18146.586 |
| SR9       | 13215.148 | 1897.545  | AK025768  | 3649.094  | 3458.926  |
| CY3Cy5    | 1090.976  | 132.369   | AL117502  | 7458.673  | 11675.118 |
| Z36818    | 672.459   | 1246.123  | AK001846  | 2838.347  | 6013.169  |
| Z36842    | 851.25    | 1992.211  | AF147300  | 1218.366  | 2366.231  |
| AF086137  | 3140.932  | 6520.625  | AK024637  | 9451.228  | 10043.5   |
| AF086155  | 906.947   | 1676.617  | AK024108  | 819.972   | 755.747   |
| AF086526  | 1099.201  | 2218.021  | AL110293  | 925.461   | 878.437   |
| AK025788  | 6771.098  | 8347.798  | AK025148  | 503.883   | 642.345   |
| AF086164  | 1140.784  | 1547.53   | AK025359  | 658.629   | 1256.556  |
| AK025577  | 2631.948  | 3593.992  | AK026238  | 1425.677  | 767.696   |
| AK000216  | 1053.335  | 1513.922  | AK026694  | 1402.026  | 1629.204  |
| AK023440  | 1084.237  | 1437.023  | AK025564  | 2732.839  | 5022.886  |
| AB033041  | 25971.182 | 17309.588 | AK026286  | 3360.964  | 5253.932  |
| NM_014894 | 67492.789 | 70053.93  | AK026731  | 3060.107  | 3016.673  |

|           |           |           |           |           |           |
|-----------|-----------|-----------|-----------|-----------|-----------|
| AY007155  | 741       | 591.43    | AK021754  | 588.662   | 582.109   |
| AK027160  | 19031.945 | 11539.028 | AK023501  | 722.491   | 938.062   |
| AK022678  | 849.979   | 1930.25   | AL133446  | 5164.096  | 5659.807  |
| AK023473  | 325.078   | 877.688   | AF147406  | 1021.512  | 1081.266  |
| AK023835  | 3058.003  | 6398.963  | NM_006553 | 2425.936  | 2237.735  |
| AK023012  | 317.497   | 1240.788  | U56251    | 5354.948  | 4423.566  |
| AK023906  | 3277.674  | 5756.254  | AK024689  | 886.92    | 384.865   |
| AK024962  | 1232.763  | 2280.329  | BC035667  | 1211.395  | 1131.246  |
| AK022164  | 438.095   | 1108.957  | AL049277  | 5876.105  | 5029.749  |
| AK025135  | 7277.288  | 10289.101 | AL049988  | 464.992   | 482.864   |
| NM_017926 | 2441.024  | 4606.692  | AL080104  | 1872.71   | 1772.841  |
| AY007145  | 4049.468  | 6092.383  | AL117506  | 1479.161  | 2038.375  |
| D38549    | 2557.341  | 3118.408  | AL050043  | 3550.241  | 4013.725  |
| AK024780  | 1679.569  | 1412.929  | AL117571  | 2254.561  | 2107.783  |
| AF085947  | 753.941   | 1248.41   | L22263    | 1621.793  | 1632.544  |
| U10510    | 8382.276  | 6859.149  | AK025010  | 831.925   | 1517.217  |
| AK023018  | 2102.492  | 4922.273  | AL137470  | 1772.477  | 1643.979  |
| AK022672  | 1793.278  | 4307.717  | AL137709  | 3156.73   | 5042.327  |
| AK023870  | 3116.429  | 5459.053  | AK023277  | 1320.934  | 1720.423  |
| AK021599  | 1472.965  | 3363.372  | AK000425  | 5363.721  | 8724.328  |
| BC030975  | 496.354   | 1487.282  | AK022933  | 636.153   | 744.554   |
| AF116677  | 365.322   | 916.394   | NM_014276 | 10888.065 | 9787.293  |
| NM_014156 | 5877.047  | 5575.737  | AF009288  | 792.353   | 854.8     |
| AK021795  | 1525.613  | 2276.49   | AF035303  | 1079.096  | 980.695   |
| AL162042  | 3059.67   | 5216.821  | AF056438  | 5027.232  | 4182.428  |
| AK026131  | 1043.518  | 1425.034  | AF003737  | 58871.867 | 53901.938 |
| AK023312  | 1859.935  | 1525.698  | AF009296  | 1630.479  | 1321.592  |
| AL133570  | 1104.388  | 817.695   | AK001011  | 11933.858 | 10964.168 |
| AK021462  | 456.251   | 516.508   | AK001398  | 639.688   | 636.041   |
| AF131836  | 1905.436  | 4160.058  | AK021457  | 780.334   | 848.259   |
| AF275804  | 9024.361  | 21560.398 | AK021690  | 1223.849  | 1462.269  |
| AL137488  | 2350.114  | 6669.784  | AK001078  | 591.792   | 788.859   |
| AL049447  | 53125.57  | 59783.918 | AK001840  | 2196.307  | 2195.261  |
| AB020637  | 1953.628  | 4405.207  | AK021486  | 1896.712  | 2049.607  |
| NM_005286 | 8056.825  | 14296.645 | AK021740  | 796.074   | 710.755   |
| AK024365  | 7480.771  | 13264.646 | NM_005444 | 5348.718  | 6548.141  |
| AJ251759  | 2116.327  | 3993.54   | V00589    | 56908.602 | 53973.145 |
| AK024371  | 3767.569  | 7875.367  | AL390163  | 1557.76   | 1257.018  |
| NM_005454 | 807.819   | 952.918   | NM_018572 | 1840.472  | 2078.675  |
| AB019569  | 68487.648 | 96826.563 | AK024838  | 1016.6    | 523.164   |
| AL050205  | 8533.87   | 6565.594  | AK000175  | 7072.149  | 7418.397  |
| NM_005691 | 1227.581  | 972.941   | AL137736  | 9456.121  | 11279.854 |
| AF086156  | 353.91    | 359.138   | AF143870  | 1474.33   | 1724.752  |
| AF086528  | 913.596   | 660.048   | AK021427  | 946.381   | 574.126   |
| NM_006543 | 775.299   | 776.841   | NM_004192 | 12205.654 | 11610.49  |
| AF086252  | 1438.124  | 3107.159  | AK024160  | 1516.568  | 1238.637  |
| AK026703  | 1166.547  | 3999.698  | AK025077  | 1901.667  | 1007.571  |
| NM_017866 | 8383.403  | 18127.664 | NM_006417 | 15311.83  | 14701.718 |
| NM_003536 | 1920.354  | 4144.11   | L43350    | 1550.66   | 1278.994  |
| AF116707  | 8412.998  | 14733.327 | NM_020317 | 5128.368  | 7022.467  |
| U90910    | 8829.883  | 13762.161 | AL080234  | 5177.977  | 5243.287  |
| AK025765  | 1619.484  | 2364.054  | AK027025  | 2534.103  | 2161.473  |
| AK024263  | 1474.335  | 1967.868  | AK025105  | 972.39    | 1028.498  |

|           |           |           |           |           |           |
|-----------|-----------|-----------|-----------|-----------|-----------|
| NM_016613 | 4764.731  | 7368.178  | AB002446  | 794.84    | 858.822   |
| AF086414  | 4276.89   | 4731.495  | AF212220  | 10373.323 | 9439.947  |
| AJ012490  | 9672.563  | 9721.809  | AF147387  | 6286.013  | 8867.714  |
| U84516    | 18049.219 | 14132.711 | NM_012081 | 2054.933  | 2793.914  |
| AL049270  | 3851.567  | 2331.63   | AL137463  | 970.212   | 1296.825  |
| U88834    | 11438.293 | 8271.718  | AF085909  | 49248.563 | 35319.977 |
| BC025324  | 845.118   | 726.591   | AF090888  | 1488.477  | 1368.858  |
| NM_006087 | 67620.672 | 72851.336 | AK027193  | 3706.425  | 5622.702  |
| NM_003533 | 1006.186  | 727.286   | AF086471  | 9891.958  | 12644.874 |
| AL157478  | 594.854   | 445.725   | NM_018455 | 10262.223 | 13610.911 |
| AK023726  | 8597.289  | 6977.148  | AF113018  | 2388.484  | 3511.801  |
| AK024906  | 589.888   | 429.161   | AK021996  | 2005.025  | 4134.705  |
| NM_005607 | 2355.477  | 3338.701  | AL049337  | 14963.508 | 18160.139 |
| NM_006761 | 44907.832 | 62815.934 | Z27200    | 2781.426  | 3437.115  |
| NM_003453 | 8793.635  | 16917.354 | AF070571  | 8846.561  | 8028.886  |
| NM_018371 | 20937.336 | 34065.059 | AK023554  | 6997.999  | 7025.6    |
| NM_014390 | 22616.068 | 33157.297 | NM_003513 | 16272.139 | 10512.196 |
| NM_018143 | 1819.328  | 1695.282  | AL079294  | 691.773   | 783.074   |
| X78924    | 9768.293  | 13334.757 | AK024844  | 1653.592  | 1435.837  |
| NM_013250 | 1502.247  | 1844.139  | AL049437  | 766.179   | 906.126   |
| NM_001889 | 10917.8   | 17174.563 | AF161427  | 58010.922 | 57485.484 |
| X89668    | 24567.438 | 42230.465 | AK021715  | 16902.238 | 12443.92  |
| NM_004458 | 2153.627  | 4666.566  | AK000315  | 13746.026 | 11321.769 |
| NM_006901 | 2023.543  | 2885.129  | AK023248  | 2030.049  | 1833.606  |
| NM_018530 | 7064.94   | 6671.272  | NM_012404 | 37311.594 | 27741.279 |
| AK022855  | 14375.001 | 13654.094 | AF251190  | 1056.051  | 1402.007  |
| AK023816  | 1457.036  | 1107.924  | AF130075  | 25561.521 | 21045.799 |
| AF305686  | 4461.655  | 3160.19   | L29496    | 786.783   | 924.659   |
| AF085832  | 1071.519  | 731.189   | NM_000928 | 1408.79   | 2603.232  |
| AK025981  | 3628.159  | 2742.921  | NM_007002 | 13139.511 | 20191.934 |
| AF086266  | 701.769   | 635.552   | NM_012121 | 2167.23   | 1302.281  |
| AK025337  | 1637.524  | 2920.491  | NM_003255 | 806.514   | 878.289   |
| AB028984  | 987.843   | 1868.047  | NM_014155 | 4751.468  | 10122.936 |
| NM_005602 | 1611.768  | 4586.886  | AK026331  | 30868.67  | 45160.207 |
| NM_003573 | 19098.869 | 34374.379 | M30773    | 3922.533  | 3774.443  |
| NM_000296 | 7009.77   | 17503.016 | NM_016338 | 21318.598 | 28886.277 |
| NM_012302 | 603.776   | 1498.495  | AF113699  | 56723.082 | 58949.77  |
| NM_017422 | 31015.633 | 47622.148 | AK021897  | 9681.663  | 16316.832 |
| NM_005879 | 682.686   | 929.145   | AK001051  | 3547.386  | 4068.366  |
| AF147790  | 412.759   | 512.917   | NM_018317 | 1689.554  | 1692.858  |
| NM_018969 | 781.121   | 1346.884  | AF086051  | 2625.44   | 2325.325  |
| NM_004112 | 7499.703  | 8773.437  | AK026434  | 645.014   | 775.632   |
| AK025592  | 1866.59   | 2156.82   | AK024356  | 830.336   | 763.245   |
| NM_004635 | 3866.585  | 3123.081  | AL049370  | 7999.028  | 7208.221  |
| AK023023  | 7000.419  | 5784.99   | AL365410  | 9318.843  | 8352.518  |
| NM_015993 | 4516.661  | 3786.986  | D17082    | 19419.559 | 17105.275 |
| NM_002659 | 3187.958  | 2496.383  | D17252    | 50921.25  | 41132.73  |
| Z36776    | 2611.8    | 1938.127  | D16476    | 633.048   | 627.585   |
| AB029015  | 1389.24   | 931.67    | NM_003673 | 8484.164  | 7061.633  |
| NM_020345 | 987.578   | 1567.677  | Z36823    | 33624.328 | 30597.506 |
| NM_003287 | 1731.756  | 3877.013  | NM_001849 | 4313.882  | 3554.035  |
| NM_012325 | 22064.629 | 53253.934 | NM_003734 | 36859.766 | 46152.047 |
| NM_014434 | 3224.81   | 10732.717 | NM_003247 | 321.235   | 818.978   |

|           |           |           |           |           |           |
|-----------|-----------|-----------|-----------|-----------|-----------|
| NM_019607 | 10293.554 | 33010.934 | NM_014935 | 26877.105 | 19142.604 |
| U79260    | 5412.491  | 11090.342 | X99660    | 50650.664 | 50241.242 |
| NM_001895 | 11652.943 | 23992.348 | X03635    | 7371.994  | 10813.741 |
| NM_006447 | 3602.551  | 6358.994  | X97671    | 576.502   | 832.016   |
| AF119851  | 995.18    | 1853.011  | NM_004351 | 21399.869 | 22610.551 |
| NM_014129 | 5221.765  | 8147.939  | NM_004236 | 12806.09  | 16411.432 |
| D87455    | 2105.405  | 2326.225  | AB011093  | 17411.539 | 24750.625 |
| AF080577  | 1144.019  | 1792.98   | NM_002462 | 1102.693  | 945.701   |
| L22005    | 12953.729 | 15240.97  | NM_005618 | 767.166   | 953.88    |
| NM_012291 | 19135.928 | 18002.865 | NM_020533 | 31094.621 | 28466.438 |
| NM_013368 | 2066.013  | 2022.538  | NM_001894 | 27420.377 | 23279.965 |
| NM_003807 | 25966.182 | 15214.025 | NM_000614 | 1303.227  | 940.407   |
| NM_004358 | 4790.216  | 3560.532  | AK022884  | 5047.578  | 5032.176  |
| NM_001790 | 2480.152  | 1840.929  | AF305072  | 826.311   | 731.395   |
| NM_018243 | 3277.402  | 2036.076  | NM_006620 | 10984.411 | 9799.883  |
| NM_014939 | 2849.203  | 2442.45   | NM_001397 | 1568.243  | 1283.87   |
| Y17866    | 1214.362  | 834.863   | NM_005543 | 1354.64   | 1086.361  |
| NM_003005 | 6271.388  | 3651.546  | Y08770    | 628.952   | 768.469   |
| NM_000873 | 3684.794  | 3401.093  | NM_004772 | 5615.048  | 4342.415  |
| AB033025  | 389.002   | 823.778   | NM_003714 | 5684.141  | 6064.951  |
| NM_004418 | 11114.078 | 19176.273 | NM_004004 | 494.131   | 467.462   |
| NM_014445 | 35570.465 | 54244.863 | U42977    | 13129.885 | 13789.301 |
| AL832826  | 2287.278  | 3024.929  | NM_002881 | 18848.387 | 25247.975 |
| NM_016123 | 1000.912  | 1596.565  | NM_003666 | 18059.121 | 22790.791 |
| AB048365  | 1862.226  | 2418.437  | NM_003288 | 7408.298  | 4201.937  |
| NM_000391 | 6452.05   | 8241.211  | NM_018242 | 1870.934  | 1704.391  |
| AF229179  | 690.742   | 960.236   | M83822    | 4885.851  | 5034.388  |
| NM_014771 | 6564.769  | 6166.351  | NM_018434 | 1044.32   | 1074.88   |
| NM_002275 | 10112.358 | 9026.46   | NM_003914 | 1053.08   | 1412.723  |
| AB032945  | 1202.885  | 712.785   | NM_020423 | 3784.969  | 3575.262  |
| AK025215  | 15155.295 | 12174.388 | AK021437  | 6638.508  | 7829.749  |
| BF569160  | 917.283   | 781.06    | NM_003831 | 6230.733  | 5763.673  |
| AK024625  | 592.679   | 589.836   | NM_001759 | 1554.019  | 1317.649  |
| NM_018131 | 3359.183  | 1873.513  | AB007965  | 18073.961 | 15720.945 |
| NM_014834 | 549.872   | 585.103   | NM_017649 | 1256.301  | 1121.13   |
| NM_017636 | 10001.572 | 5633.202  | NM_000066 | 2891.43   | 2360.078  |
| NM_012468 | 595.113   | 349.702   | NM_001196 | 12507.525 | 14479.027 |
| NM_006150 | 2917.2    | 2665.213  | NM_016008 | 3475.061  | 3693.875  |
| NM_014943 | 7579.293  | 10242.631 | NM_017744 | 1417.79   | 1425.315  |
| AK024392  | 3146.392  | 6103.358  | NM_001924 | 10011.68  | 9775.883  |
| NM_013260 | 1862.173  | 4518.11   | NM_017705 | 11295.817 | 8544.03   |
| NM_018300 | 1473.11   | 2209.432  | AB002325  | 1277.707  | 1135.637  |
| NM_004875 | 4937.525  | 6769.831  | NM_001796 | 13667.649 | 10221.203 |
| NM_018254 | 15488.052 | 21540.18  | AB040880  | 1371.171  | 1209.368  |
| NM_017745 | 3474.649  | 4133.827  | NM_009587 | 24371.594 | 19222.166 |
| NM_018433 | 3287.715  | 4227.583  | NM_017820 | 2501.767  | 1766.163  |
| NM_000937 | 680.075   | 668.004   | NM_001097 | 608.527   | 584.321   |
| AB028451  | 1994.278  | 1765.349  | NM_002630 | 3160.922  | 4326.834  |
| AK024810  | 16121.893 | 11421.22  | AJ295149  | 58194.863 | 60216.375 |
| AK022615  | 44050.668 | 24805.742 | NM_013438 | 9627.054  | 8774.948  |
| NM_004043 | 8040.886  | 5708.434  | NM_014688 | 16906.246 | 16566.568 |
| BM458096  | 17062.898 | 10480.015 | AB037784  | 807.95    | 1011.673  |
| NM_005626 | 11440.155 | 6598.459  | AL359623  | 4258.123  | 6614.705  |



|           |           |           |           |           |           |
|-----------|-----------|-----------|-----------|-----------|-----------|
| D29958    | 26223.57  | 12728.278 | AK026920  | 11967.909 | 11051.089 |
| NM_015971 | 16547.275 | 8149.077  | AL137255  | 10114.723 | 9303.074  |
| D17257    | 61175.809 | 47156.48  | NM_003370 | 19198.176 | 17765.906 |
| NM_002842 | 4276.39   | 3204.867  | AB037715  | 15824.623 | 14299.552 |
| NM_012126 | 914.608   | 655.11    | AF250924  | 34199.813 | 34469.883 |
| NM_004807 | 1641.451  | 1893.137  | D86979    | 4902.807  | 5112.789  |
| AF219140  | 479.546   | 843.087   | NM_018212 | 922.123   | 579.705   |
| J03569    | 60904.504 | 64147.152 | AB023230  | 4139.081  | 3400.937  |
| NM_003115 | 6715.186  | 9454.108  | AF018081  | 53491.582 | 47225.715 |
| NM_000687 | 26410.316 | 26307.039 | NM_020202 | 32505.068 | 26467.279 |
| NM_000446 | 698.12    | 975.81    | AF024540  | 3362.146  | 1919.938  |
| NM_018200 | 2126.864  | 2252.472  | NM_002189 | 5914.59   | 4259.306  |
| NM_014838 | 1808.255  | 1733.399  | NM_001668 | 4520.709  | 3834.517  |
| NM_007212 | 394.425   | 855.219   | AK025362  | 3327.092  | 4654.869  |
| AF005067  | 1911.339  | 1499.796  | AK021776  | 3452.839  | 5344.294  |
| NM_005710 | 12807.956 | 9043.671  | AK026042  | 3520.048  | 2488.629  |
| AF252284  | 2619.465  | 1964.586  | NM_014233 | 59734.156 | 58140.516 |
| NM_014930 | 2749.661  | 1406.736  | NM_002137 | 54163.578 | 56370.027 |
| NM_001530 | 4710.875  | 3056.507  | NM_002911 | 4426.77   | 5556.262  |
| U80232    | 11096.725 | 6471.873  | U94386    | 2376.518  | 3710.044  |
| M27877    | 29383.598 | 14363.978 | NM_016000 | 60676.262 | 64820.117 |
| D70836    | 41370.34  | 17295.197 | NM_006372 | 19651.875 | 27527.447 |
| D16878    | 1050.367  | 690.767   | NM_014150 | 3476.832  | 3705.954  |
| NM_007035 | 5225.463  | 6840.688  | NM_006805 | 61131.711 | 57314.039 |
| AB019562  | 1551.638  | 2555.574  | AF132027  | 59317.047 | 56736.91  |
| AF036364  | 2953.904  | 4544.606  | NM_004681 | 34861.957 | 27202.398 |
| AK022847  | 4302.94   | 6392.38   | AB033096  | 17513.27  | 16478.646 |
| NM_020203 | 1931.786  | 4412.149  | NM_014886 | 3633.302  | 2828.082  |
| L40992    | 694.111   | 1260.526  | L31408    | 29572.039 | 18185.627 |
| U20582    | 12787.882 | 18602.211 | NM_001545 | 22228.621 | 16765.076 |
| NM_000337 | 643.416   | 1232.381  | NM_004446 | 34001.148 | 24021.553 |
| NM_002079 | 7506.849  | 8909.418  | AL133566  | 2320.67   | 1898.602  |
| U13697    | 645.772   | 896.74    | M36118    | 53751.98  | 54313.75  |
| U04270    | 29403.719 | 34771.457 | NM_003399 | 30924.826 | 21890.43  |
| L02840    | 3992.026  | 2039.306  | J02625    | 26529.789 | 26453.127 |
| AA629719  | 60191.105 | 49677.918 | Y17175    | 62573.035 | 64130.309 |
| AA927528  | 4406.341  | 2707.867  | NM_004549 | 36918.609 | 48606.898 |
| X02152    | 63385.875 | 55701.074 | NM_005333 | 39905.266 | 37595.645 |
| BG676364  | 5218.292  | 3323.266  | NM_000767 | 1054.986  | 601.89    |
| BG181154  | 1156.839  | 677.9     | AK026161  | 2500.088  | 2279.391  |
| AA843679  | 12974.838 | 7880.525  | NM_004553 | 55299.344 | 56058.301 |
| H68922    | 559.322   | 388.366   | D63484    | 5561.781  | 6757.557  |
| AF097159  | 1183.316  | 631.519   | AK026745  | 10324.276 | 15213.95  |
| NM_014684 | 938.162   | 946.906   | AL157440  | 5958.267  | 9803.236  |
| AK027247  | 1409.636  | 1625.785  | NM_016423 | 14817.808 | 19689.604 |
| NM_002480 | 6918.177  | 8183.951  | AB040975  | 3323.624  | 3353.718  |
| NM_017571 | 8904.825  | 10529.337 | NM_005119 | 32792.816 | 25133.354 |
| L03169    | 995.464   | 1377.441  | NM_003168 | 15029.233 | 13843.008 |
| NM_001928 | 2065.105  | 3115.154  | AK055844  | 3776.649  | 3176.846  |
| NM_006399 | 1023.456  | 1088.225  | NM_018288 | 20442.801 | 19002.164 |
| NM_018965 | 555.525   | 1035.765  | NM_003146 | 12296.236 | 12008.053 |
| NM_000185 | 9223.576  | 8657.561  | X52342    | 801.882   | 876.297   |
| Y00816    | 1497.245  | 1966.647  | NM_003131 | 16541.123 | 12042.459 |

|           |           |           |           |           |           |
|-----------|-----------|-----------|-----------|-----------|-----------|
| NM_004512 | 12391.635 | 14676.984 | NM_005239 | 16735.703 | 14707.758 |
| NM_004380 | 25459.082 | 21880.178 | AK022889  | 17572.279 | 14296.227 |
| NM_004119 | 870.564   | 530.017   | X52357    | 57831.77  | 55975.645 |
| AY007378  | 3157.467  | 2426.609  | AF211891  | 3334.703  | 3351.79   |
| D26070    | 1739.505  | 1117.03   | NM_005641 | 4028.172  | 2964.178  |
| NM_001642 | 7739.424  | 4801.552  | NM_003796 | 40389.727 | 51463.141 |
| NM_001055 | 28165.191 | 25843.012 | NM_002973 | 8176.912  | 14622.889 |
| NM_002271 | 55458.164 | 49623.383 | NM_004436 | 21672.73  | 30994.988 |
| NM_018361 | 4062.646  | 4612.896  | NM_006580 | 15542.691 | 17524.508 |
| NM_019893 | 468.564   | 445.327   | NM_001305 | 15040.874 | 11461.806 |
| AB040966  | 6986.727  | 8386.87   | NM_005082 | 1282.56   | 1878.666  |
| NM_020132 | 7418.46   | 9807.837  | D17028    | 53669.121 | 59496.316 |
| NM_016467 | 8100.847  | 8263.117  | NM_013442 | 45613.785 | 54156.156 |
| NM_007253 | 2767.011  | 3950.488  | BG611243  | 9672.488  | 13105.276 |
| NM_000555 | 16785.873 | 19620.33  | AI417481  | 2186.667  | 2756.134  |
| NM_000835 | 578.34    | 806.185   | BI906766  | 13420.962 | 16728.84  |
| NM_006805 | 22288.502 | 11382.084 | U60519    | 2183.012  | 2703.352  |
| NM_006634 | 1016.388  | 447.418   | AA282906  | 19630.766 | 21025.451 |
| NM_016465 | 3475.126  | 2488.467  | L02870    | 54753.309 | 52644.535 |
| NM_000325 | 631.272   | 326.509   | BG755482  | 46785.898 | 50080.543 |
| NM_013395 | 1064.991  | 479.728   | AI480307  | 16962.348 | 19874.801 |
| NM_002410 | 820.629   | 375.995   | X51420    | 7011.914  | 7687.295  |
| AL122120  | 4035.169  | 1527.78   | D28235    | 1426.073  | 2108.647  |
| NM_018835 | 3283.773  | 3746.553  | X51757    | 2852.853  | 3992.476  |
| NM_003401 | 1770.761  | 1777.988  | L24038    | 3953.822  | 2840.925  |
| AL137724  | 2690.729  | 2928.525  | NM_053055 | 1544.143  | 1902.803  |
| NM_004755 | 1959.131  | 2039.879  | NM_006186 | 3457.08   | 2588.031  |
| NM_002913 | 2512.897  | 3434.423  | NM_002751 | 14807.625 | 13384.888 |
| AK022797  | 1199.715  | 1175.672  | M55593    | 6393.278  | 5817.148  |
| NM_007370 | 3519.921  | 4413.946  | NM_005915 | 52014.164 | 46787.242 |
| NM_006231 | 1177.31   | 1956.621  | AK023011  | 48234.191 | 48948.961 |
| AK023471  | 1593.11   | 2728.224  | NM_016816 | 2771.04   | 2337.177  |
| AF044578  | 3317.495  | 5226.951  | L17325    | 3065.076  | 3917.804  |
| NM_001945 | 3567.101  | 4471.687  | NM_017716 | 2479.95   | 2649.621  |
| NM_001067 | 10966.748 | 11072.444 | M58603    | 13270.693 | 10935.103 |
| NM_014034 | 4838.621  | 4808.376  | NM_003639 | 15018.887 | 24050.732 |
| NM_005335 | 21481.242 | 12813.629 | NM_001549 | 2184.192  | 3788.937  |
| J04474    | 8008.553  | 6139.324  | NM_000115 | 10249.32  | 13985.367 |
| NM_003761 | 34941.453 | 16728.535 | AF308801  | 6027.492  | 8121.494  |
| NM_014011 | 5527.954  | 2772.323  | NM_007315 | 58525.145 | 60873.34  |
| AK025994  | 4061.897  | 2330.313  | NM_014874 | 4364.807  | 4713.521  |
| NM_013985 | 3035.834  | 1861.68   | NM_012397 | 736.559   | 995.233   |
| NM_001735 | 1736.292  | 1132.449  | NM_005765 | 26154.076 | 26147.791 |
| AF036364  | 2766.194  | 4214.46   | NM_002762 | 10346.684 | 10763.265 |
| AK022847  | 4513.327  | 5325.491  | NM_006324 | 16819.285 | 16919.703 |
| NM_020203 | 2189.293  | 3050.789  | NM_016845 | 35065.344 | 36925.27  |
| L40992    | 456.193   | 550.252   | NM_000514 | 35571.84  | 40518.664 |
| U20582    | 12111.046 | 14809.587 | AL137432  | 4236.698  | 5942.613  |
| NM_000337 | 391.032   | 532.468   | NM_000957 | 10597.165 | 10628.324 |
| NM_002075 | 7053.56   | 6730.663  | NM_019043 | 7874.743  | 5954.082  |
| U13697    | 578.705   | 885.108   | NM_003240 | 40864.738 | 40745.633 |
| U04270    | 26747.596 | 30336.623 | NM_016564 | 55460.512 | 59333.492 |
| L02840    | 3752.176  | 2558.964  | NM_000796 | 1516.22   | 1713.558  |

|           |           |           |           |           |           |
|-----------|-----------|-----------|-----------|-----------|-----------|
| AA629719  | 57967.152 | 54681.871 | AK021660  | 15983.881 | 16598.654 |
| AA927528  | 4918.056  | 3782.142  | AB007933  | 57770.898 | 58642.293 |
| X02152    | 59976.742 | 56523.738 | NM_005469 | 8169.338  | 10731.801 |
| BG676364  | 5247.655  | 3127.315  | NM_016361 | 6258.361  | 7096.654  |
| BG181154  | 1109.421  | 640.618   | NM_003708 | 58018.258 | 61901.336 |
| AA843679  | 11470.502 | 5902.443  | NM_014349 | 15394.211 | 16700.336 |
| H68922    | 702.93    | 306.093   | AB040895  | 1065.72   | 859.604   |
| AF090906  | 2567.402  | 1261.371  | NM_004820 | 546.406   | 673.179   |
| AB023219  | 3774.587  | 1597.199  | NM_018210 | 3340.914  | 4993.842  |
| NM_014148 | 1667.187  | 771.772   | NM_001096 | 11072.018 | 12876.186 |
| NM_002480 | 6798.841  | 6754.46   | NM_016014 | 4586.992  | 6173.153  |
| NM_017571 | 8368.995  | 7404.613  | NM_000198 | 1200.525  | 1333.392  |
| L03169    | 912.106   | 1271.41   | NM_018327 | 7594.532  | 7977.997  |
| NM_001928 | 2051.08   | 2074.108  | NM_001684 | 1912.375  | 2001.493  |
| NM_006399 | 991.374   | 921.096   | NM_013309 | 6199.083  | 6450.894  |
| NM_018965 | 530.343   | 670.628   | AF038186  | 7763.989  | 7438.968  |
| NM_000185 | 8425.074  | 8418.558  | NM_003664 | 9007.136  | 9973.055  |
| Y00816    | 1742.614  | 2211.307  | NM_002426 | 9260.841  | 11206.734 |
| NM_004512 | 12863.82  | 17245.523 | AK027182  | 3350.093  | 3993.711  |
| NM_004380 | 22102.799 | 18218.795 | J03651    | 17147.461 | 13982.783 |
| NM_004119 | 968.356   | 684.833   | U61738    | 27032.607 | 27151.461 |
| AY007378  | 3079.688  | 2157.219  | AJ132087  | 1949.065  | 1703.314  |
| D26070    | 1725.634  | 858.312   | U92818    | 6200.59   | 5038.776  |
| NM_001642 | 7083.293  | 3632.82   | NM_000442 | 12668.979 | 14691.876 |
| NM_001542 | 554.001   | 417.69    | NM_002934 | 6581.451  | 6590.523  |
| NM_002280 | 616.33    | 406.827   | AL050114  | 1661.569  | 2065.427  |
| NM_007035 | 5881.917  | 3090.001  | AK021492  | 9181.93   | 10055.874 |
| AB019562  | 1399.186  | 619.244   | AK023794  | 55884.137 | 57329.734 |
| NM_002271 | 56857.512 | 49156.582 | NM_019885 | 3246.587  | 2206.138  |
| NM_018361 | 3972.08   | 4130.369  | AB033103  | 2464.331  | 2643.453  |
| NM_019893 | 349.037   | 540.133   | NM_002907 | 4451.348  | 3811.513  |
| AB040966  | 6976.656  | 7061.427  | AK024098  | 3468.708  | 5500.758  |
| NM_020132 | 6839.836  | 6755.651  | AK001116  | 1423.938  | 2065.655  |
| NM_016467 | 8222.362  | 7157.658  | AK022371  | 8653.625  | 10313.966 |
| NM_007253 | 2807.003  | 3566.727  | D42045    | 6816.248  | 6488.198  |
| NM_000558 | 13539.832 | 13849.257 | AB007953  | 4840.739  | 4454.41   |
| NM_000835 | 513.45    | 747.483   | NM_014002 | 18978.949 | 18889.227 |
| NM_006808 | 23445.564 | 12824.165 | NM_004197 | 42193.793 | 40964.125 |
| NM_006634 | 1363.618  | 869.384   | NM_004073 | 5159.173  | 5866.309  |
| NM_016465 | 3378.042  | 2233.921  | NM_001278 | 9934.285  | 11419.906 |
| NM_000328 | 679.222   | 254.089   | NM_019105 | 15722.235 | 18266.52  |
| NM_013399 | 1175.222  | 557.439   | NM_000294 | 14732.99  | 17678.037 |
| NM_002410 | 925.308   | 324.7     | AJ272212  | 6723.724  | 6773.576  |
| AL122120  | 4524.983  | 1633.067  | NM_001626 | 61303.262 | 59037.934 |
| NM_014684 | 1143.618  | 277.041   | NM_005677 | 16243.207 | 14763.381 |
| AK027247  | 1235.283  | 430.872   | AF229803  | 3431.87   | 2864.143  |
| AL137724  | 2645.784  | 2216.633  | AF151810  | 1601.712  | 1764.53   |
| NM_004758 | 1740.141  | 1694.718  | NM_002130 | 40666.723 | 32839.223 |
| NM_002913 | 2649.406  | 2043.036  | NM_004436 | 21283.252 | 25315.457 |
| AK022797  | 1300.496  | 1231.677  | NM_006580 | 14507.454 | 15502.866 |
| NM_007370 | 3576.107  | 3563.074  | NM_001305 | 18829.574 | 28731.74  |
| NM_006231 | 980.728   | 1283.388  | NM_005082 | 1366.78   | 1007.655  |
| AK023471  | 1328.075  | 1356.566  | D17028    | 54257.543 | 52254.945 |

|           |           |           |           |           |           |
|-----------|-----------|-----------|-----------|-----------|-----------|
| AF044578  | 2991.385  | 3072.506  | NM_013442 | 53823.594 | 53239.867 |
| NM_00194E | 3791.673  | 3283.238  | BG611243  | 9101.832  | 11606.18  |
| NM_001067 | 11205.708 | 8572.161  | AI417481  | 2770.217  | 4382.718  |
| NM_014034 | 5094.738  | 4972.555  | BI906766  | 15765.865 | 29999.922 |
| NM_00533E | 23195.787 | 18297.297 | U60519    | 1845.042  | 2956.903  |
| J04474    | 8739.142  | 6902.641  | AA282906  | 17413.141 | 19891.012 |
| NM_003761 | 36586.609 | 17814.547 | L02870    | 59431.297 | 55977.223 |
| NM_014011 | 5862.724  | 3001.406  | BG755482  | 46885.125 | 49843.422 |
| AK025994  | 4062.839  | 2435.636  | AI480307  | 19071.355 | 19760.645 |
| L29306    | 403.239   | 313.385   | X51420    | 6712.411  | 6902.536  |
| NM_01398E | 3367.423  | 1776.789  | D28235    | 1246.367  | 1185.82   |
| NM_00173E | 901.329   | 681.602   | X51757    | 3091.757  | 3478.948  |
| NM_00105E | 32750.961 | 14205.361 | L24038    | 4099.545  | 4281.469  |
| NM_02020E | 1962.041  | 1774.937  | NM_05305E | 1777.875  | 2043.649  |
| U20582    | 11305.639 | 9973.887  | NM_00618E | 3498.886  | 2516.822  |
| NM_00207E | 6793.104  | 6194.456  | NM_002751 | 15001.453 | 14942.434 |
| U13697    | 622.102   | 644.328   | M55593    | 5244.055  | 4804.24   |
| U04270    | 29000.285 | 30325.004 | AK001883  | 45390.996 | 47799.84  |
| Z34820    | 784.234   | 1068.862  | NM_01462E | 3287.441  | 2140.073  |
| L02840    | 3031.045  | 2016.79   | AK025587  | 716.101   | 425.887   |
| AA629719  | 62006.984 | 58595.844 | L17325    | 2401.611  | 2962.877  |
| AA927528  | 4821.685  | 4008.231  | NM_01771E | 2387.118  | 2293.917  |
| X02152    | 63761.746 | 59720.773 | M58603    | 16286.48  | 25069.115 |
| BG676364  | 6390.062  | 4963.031  | NM_00363E | 11691.414 | 10562.137 |
| BG181154  | 1349.393  | 847.53    | NM_00154E | 1397.92   | 770.929   |
| AA843679  | 11541.004 | 6828.808  | NM_000115 | 9363.049  | 8737.379  |
| H68922    | 649.342   | 464.898   | AF308801  | 5335.057  | 6286.165  |
| AF090906  | 1779.517  | 831.443   | NM_00731E | 57172.445 | 59884.285 |
| AB023219  | 3948.031  | 1128.411  | NM_014874 | 3912.644  | 5837.005  |
| NM_01414E | 551.982   | 245.029   | NM_012397 | 608.634   | 954.49    |
| NM_01883E | 3834.117  | 1885.467  | NM_00576E | 24308.264 | 28310.398 |
| NM_003401 | 1667.043  | 820.909   | NM_00276E | 11234.693 | 11341.004 |
| NM_00639E | 927.747   | 544.229   | NM_006324 | 16903.705 | 17227.615 |
| NM_00018E | 6386.028  | 5349.899  | NM_01684E | 36331.25  | 35567.152 |
| Y00816    | 1209.949  | 1160.848  | NM_000514 | 37167.594 | 33006.617 |
| NM_00451E | 9403.338  | 11250.048 | AL137432  | 2912.004  | 2704.481  |
| NM_00438E | 22043.281 | 18878.309 | NM_000957 | 9631.903  | 6952.387  |
| U86813    | 436.542   | 937.807   | NM_01904E | 8705.358  | 7652.014  |
| NM_00411E | 1136.704  | 1297.287  | NM_00324E | 41251.086 | 42952.488 |
| AY007378  | 3355.1    | 3988.592  | NM_016564 | 59111.973 | 62388.367 |
| D26070    | 1654.32   | 1345.123  | NM_00079E | 1515.274  | 1702.146  |
| NM_00164E | 7603.949  | 7549.926  | AK021660  | 13907.731 | 11794.026 |
| NM_00339E | 569.795   | 704.827   | AB007933  | 57274.617 | 57393.895 |
| NM_000501 | 61716.852 | 56190.863 | NM_00379E | 37843.719 | 35382.586 |
| NM_000114 | 4094.752  | 3153.448  | NM_00297E | 7030.685  | 6253.341  |
| NM_00515E | 3017.31   | 1571.837  | NM_00370E | 57263.695 | 59531.609 |
| NM_01519E | 1612.909  | 928.671   | NM_01434E | 17525.166 | 21674.811 |
| X98834    | 4898.762  | 2753.363  | AB040895  | 1438.935  | 2012.115  |
| NM_00703E | 4995.183  | 2998.697  | NM_00482E | 757.049   | 507.997   |
| AB019562  | 1554.905  | 725.467   | NM_01821E | 2395.602  | 2314.736  |
| AF036364  | 2707.854  | 1514.822  | NM_00109E | 10140.53  | 8099.839  |
| AK022847  | 4373.198  | 2077.94   | NM_016014 | 4287.784  | 4097.989  |
| AK000271  | 683.929   | 604.445   | NM_00019E | 1150.345  | 1296.86   |

|           |           |           |           |           |           |
|-----------|-----------|-----------|-----------|-----------|-----------|
| NM_005173 | 424.103   | 430.634   | NM_018327 | 7260.219  | 8026.11   |
| NM_006808 | 23621.645 | 16355.495 | NM_001684 | 1377.747  | 1766.834  |
| NM_006634 | 1326.394  | 1028.037  | NM_013309 | 4865.169  | 4998.221  |
| NM_016465 | 3681.62   | 3952.598  | AF038186  | 7553.832  | 7291.652  |
| NM_000328 | 1357.276  | 1855.106  | NM_003664 | 9425.209  | 9401.259  |
| NM_013398 | 723.633   | 726.02    | NM_002426 | 10321.977 | 9081.597  |
| NM_002410 | 712.852   | 497.529   | AK027182  | 2765.495  | 2324.298  |
| AL122120  | 4074.419  | 2601.048  | J03651    | 20355.25  | 17018.207 |
| NM_014684 | 770.675   | 464.642   | U61738    | 25989.896 | 24558.68  |
| AK027247  | 1237.172  | 706.768   | AJ132087  | 2180.986  | 1313.927  |
| NM_002480 | 5978.167  | 3114.759  | U92818    | 6275.213  | 5002.929  |
| NM_017571 | 8015.103  | 3089.837  | NM_000442 | 11930.595 | 9027.033  |
| L03169    | 901.637   | 380.691   | NM_002934 | 6480.885  | 5002.55   |
| NM_001928 | 1561.81   | 774.476   | AK023011  | 50487.422 | 43678.855 |
| NM_013988 | 2696.264  | 2602.526  | NM_016816 | 3691.311  | 2029.768  |
| NM_001738 | 1096.957  | 1116.842  | AK023794  | 51316.258 | 52856.469 |
| NM_001055 | 33502.027 | 53405.664 | NM_019885 | 3120.12   | 3062.363  |
| NM_015878 | 282.92    | 182.005   | NM_005328 | 679.032   | 996.632   |
| NM_002271 | 56588.766 | 52311.957 | AB033103  | 2118.408  | 1218.428  |
| NM_018361 | 3633.417  | 3437.627  | NM_002907 | 3746.645  | 1650.169  |
| NM_019893 | 559.671   | 690.412   | AK024098  | 3566.11   | 3021.915  |
| AB040966  | 6019.387  | 4640.78   | AK001116  | 1356.842  | 1295.868  |
| NM_020132 | 5814.617  | 5851.749  | AK022371  | 8408.564  | 9562.697  |
| NM_016467 | 7104.806  | 5806.226  | D42045    | 6564.059  | 5965.91   |
| NM_007253 | 2396.734  | 2148.751  | AB007953  | 4760.324  | 4263.097  |
| NM_019108 | 788.164   | 574.415   | NM_014002 | 16319.393 | 16184.761 |
| L08436    | 697.956   | 603.13    | NM_004197 | 39743.246 | 35563.105 |
| NM_000558 | 9339.015  | 4824.969  | NM_004073 | 5594.432  | 6005.113  |
| NM_004198 | 568.342   | 255.368   | NM_001278 | 9827.106  | 9588.446  |
| NM_014170 | 2334.732  | 1149.745  | NM_019105 | 14529.002 | 13297.606 |
| AF116652  | 60355.52  | 40889.773 | NM_000294 | 16804.65  | 12597.114 |
| AF090906  | 1433.361  | 870.245   | AJ272212  | 8100.031  | 7741.231  |
| AB023219  | 3489.655  | 3107.211  | NM_001626 | 62158.445 | 58889.813 |
| NM_018835 | 3570.985  | 4038.974  | NM_005677 | 15501.753 | 11151.396 |
| NM_003401 | 1669.529  | 1734.936  | AF229803  | 4360.192  | 4035.889  |
| AL137724  | 3174.463  | 6250.627  | AF151810  | 1944.989  | 1527.953  |
| NM_004758 | 1744.144  | 2389.628  | NM_002130 | 41668.781 | 26034.373 |
| NM_002913 | 2610.372  | 2438.949  | NM_005469 | 10277.659 | 8805.453  |
| AK022797  | 1060.455  | 823.93    | NM_016361 | 7062.398  | 4853.611  |
| NM_007370 | 3157.23   | 2307.312  | NM_001305 | 14239.034 | 15737.015 |
| NM_006231 | 987.183   | 1203.333  | NM_005082 | 1215.145  | 1227.546  |
| AK023471  | 1155.301  | 1195.93   | D17028    | 59711.871 | 60282.313 |
| AF044578  | 2777.2    | 2931.35   | NM_013442 | 48876.195 | 46220.293 |
| NM_001948 | 3291.438  | 2481.469  | BG611243  | 8608.412  | 6879.334  |
| NM_001067 | 11356.094 | 7551.957  | AI417481  | 2258.996  | 1736.179  |
| NM_014034 | 4699.324  | 2165.498  | BI906766  | 11773.193 | 11160.491 |
| NM_005335 | 18599.639 | 5987.691  | U60519    | 1765.641  | 2198.727  |
| J04474    | 7509.452  | 3138.305  | AA282906  | 18601.896 | 20436.014 |
| NM_003761 | 30535.268 | 8962.751  | L02870    | 53840.449 | 55392.199 |
| NM_014011 | 4935.031  | 1877.27   | BG755482  | 47011.738 | 49369.527 |
| AK025994  | 4340.19   | 2032.557  | AI480307  | 17820.313 | 17535.813 |
| CY3Cy5    | 562.644   | 172.957   | X51420    | 7190.586  | 7032.06   |
| AK022262  | 1174.591  | 1482.211  | D28235    | 1492.52   | 1171.092  |

|           |           |           |           |           |           |
|-----------|-----------|-----------|-----------|-----------|-----------|
| AF088039  | 69743.781 | 63900.516 | X51757    | 3323.889  | 3087.371  |
| AF086220  | 1612.912  | 2268.921  | L24038    | 4303.937  | 3186.593  |
| AK023941  | 1446.175  | 1700.915  | NM_053056 | 1891.861  | 1273.448  |
| AF086265  | 312.915   | 226.008   | NM_006186 | 4352.002  | 2967.807  |
| AL390083  | 4380.507  | 2174.361  | NM_002751 | 19659.025 | 14470.254 |
| AK075087  | 351.969   | 485.186   | M55593    | 6502.915  | 3294.557  |
| AK026571  | 2569.452  | 2655.42   | AK001883  | 53823.711 | 49665.586 |
| AK024673  | 4019.111  | 9128.39   | NM_014629 | 3409.335  | 1644.905  |
| AF070618  | 1368.971  | 4075.823  | AK025587  | 813.132   | 231.256   |
| SR2       | 43154.023 | 27512.461 | AL050114  | 1639.016  | 1042.403  |
| SR4       | 11321.66  | 12526.876 | AK021492  | 10227.435 | 6145.21   |
| SR6       | 1908.647  | 4131.143  | NM_014874 | 3319.1    | 5266.481  |
| SR10      | 20487.723 | 10616.177 | NM_012397 | 315.233   | 831.317   |
| CY3Cy5    | 1724.533  | 251.827   | NM_005765 | 22401.314 | 31269.807 |
| AK025132  | 692.838   | 1186.423  | NM_002762 | 9078.206  | 8043.878  |
| AK025157  | 3858.608  | 4463.003  | NM_006324 | 13612.62  | 9208.201  |
| AK022633  | 684.629   | 779.075   | NM_016848 | 29400.941 | 26229.248 |
| AK000079  | 579.399   | 423.612   | NM_000514 | 29275.633 | 29402.965 |
| NM_012243 | 1434.393  | 738.77    | AL137432  | 3068.536  | 4807.746  |
| AK025743  | 1463.807  | 934.353   | NM_000957 | 7780.491  | 9085.922  |
| AK023974  | 2694.194  | 2495.875  | NM_019043 | 8179.47   | 9222.569  |
| AK023768  | 1177.155  | 1568.128  | NM_003240 | 37655.828 | 43100.852 |
| NM_014729 | 559.988   | 929.228   | NM_016564 | 60984.402 | 61012.727 |
| AF147335  | 961.698   | 1494.137  | NM_000796 | 1283.334  | 1951.222  |
| AK000711  | 1719.883  | 2455.877  | AF279656  | 3552.344  | 3061.416  |
| BI768072  | 646.874   | 1141.101  | AK021660  | 12745.751 | 10571.573 |
| AK022216  | 8651.24   | 21657.186 | AB007933  | 56795.953 | 58642.41  |
| U00960    | 1499.417  | 3044.114  | NM_006702 | 16879.25  | 10974.689 |
| AK026419  | 441.632   | 519.241   | NM_001396 | 51242.852 | 50710.828 |
| AK025276  | 3285.745  | 4238.054  | NM_014474 | 4661.471  | 3799.716  |
| AK026457  | 2331.026  | 2541.644  | NM_016249 | 11304.331 | 8473.15   |
| AK026825  | 1426.829  | 1441.773  | NM_006181 | 3311.498  | 2060.405  |
| NM_013355 | 705.143   | 501.866   | NM_003796 | 42033.832 | 22109     |
| NM_003847 | 15143.8   | 10088.56  | NM_002973 | 8047.379  | 4568.139  |
| AK021973  | 472.787   | 500.644   | NM_004436 | 23797.15  | 13710.964 |
| AL122113  | 6079.678  | 13098.084 | NM_006580 | 17842.773 | 10570.447 |
| AK024415  | 2522.476  | 9947.39   | NM_016277 | 4435.318  | 4479.275  |
| AK023515  | 537.535   | 527.864   | NM_007247 | 6911.575  | 7248.09   |
| AL137623  | 25225.779 | 25044.225 | NM_006554 | 10230.345 | 13279.908 |
| AK026485  | 571.966   | 972.657   | X99962    | 22367.977 | 18277.475 |
| AJ227874  | 1250.908  | 1266.308  | AK023221  | 21220.26  | 12776.964 |
| AF009276  | 416.695   | 240.238   | NM_003664 | 7421.299  | 6761.085  |
| AF056428  | 9959.153  | 11157.455 | NM_002426 | 9001.425  | 9992.513  |
| AF069136  | 360.793   | 775.926   | AK027182  | 2497.448  | 3330.932  |
| AK021594  | 497.7     | 657.595   | J03651    | 20485.836 | 36912.582 |
| AK021635  | 1454.37   | 3179.751  | U61738    | 24569.777 | 32197.229 |
| AK021856  | 1414.221  | 2898.184  | AJ132087  | 2541.674  | 2789.83   |
| NM_017929 | 920.455   | 1326.353  | U92818    | 5686.25   | 4235.164  |
| NM_018472 | 1029.557  | 1926.314  | NM_000442 | 12087.096 | 10234.585 |
| AF085923  | 246.291   | 269.223   | NM_002934 | 6519.344  | 3815.246  |
| AJ008128  | 28918.871 | 18502.334 | AK023011  | 56907.555 | 44747.426 |
| AL449243  | 10701.116 | 5804.534  | NM_016816 | 3359.322  | 1477.028  |
| M12211    | 3973.103  | 1857.013  | L17325    | 3692.324  | 3561.785  |

|           |           |           |           |           |           |
|-----------|-----------|-----------|-----------|-----------|-----------|
| AJ008131  | 23126.594 | 11002.899 | NM_000115 | 11048.229 | 6007.16   |
| AF086338  | 332.59    | 250.289   | AF308801  | 6074.913  | 3613.41   |
| AK024303  | 598.915   | 704.008   | NM_007318 | 55993.723 | 56066.164 |
| AL160131  | 11554.294 | 16772.061 | AF229803  | 2807.408  | 2650.584  |
| AF086045  | 2735.134  | 3279.471  | AF151810  | 1335.105  | 1250.623  |
| AK027028  | 3658.915  | 2535.917  | NM_002130 | 43466.949 | 47612.566 |
| AK027069  | 573.351   | 614.474   | NM_005469 | 7246.391  | 7677.67   |
| AK026916  | 2689.718  | 3506.508  | NM_016361 | 5271.679  | 3936.955  |
| AK026914  | 2634.948  | 7419.137  | NM_003708 | 58810.492 | 57870.676 |
| Y11166    | 2434.422  | 4024.548  | NM_014349 | 18362.436 | 16721.715 |
| AK024942  | 2198.701  | 2742.599  | AB040895  | 1301.899  | 1324.074  |
| AJ227873  | 9402.05   | 10847.299 | NM_004820 | 535.349   | 874.665   |
| AK022886  | 2956.447  | 3183.121  | NM_018210 | 3276.426  | 4807.149  |
| AK024665  | 3806.132  | 5946.425  | NM_001096 | 11044.008 | 12681.276 |
| AF147363  | 732.891   | 950.333   | NM_016014 | 4473.861  | 5139.293  |
| AJ227880  | 449.576   | 765.95    | NM_000198 | 1875.951  | 1380.651  |
| AK000691  | 1034.752  | 1528.813  | NM_018327 | 6802.394  | 4112.167  |
| AK001448  | 1200.16   | 1458.526  | NM_017581 | 3284.583  | 1732.338  |
| AK026890  | 527.703   | 800.684   | NM_019891 | 3194.998  | 1802.022  |
| AF131817  | 581.796   | 301.915   | AF038186  | 7665.776  | 3793.6    |
| AL049321  | 2119.884  | 1489.595  | AK001883  | 46982.863 | 50395.813 |
| NM_003546 | 2693.389  | 1488.538  | NM_014629 | 2380.095  | 1698.65   |
| AF118077  | 2179.438  | 1353.689  | AL050114  | 1295.426  | 505.393   |
| AL137625  | 381.371   | 352.961   | AK021492  | 7748.227  | 4687.625  |
| AK025750  | 1053.089  | 944.637   | AK023794  | 48719.262 | 39394.238 |
| BF031253  | 612.004   | 773.422   | NM_019885 | 3609.674  | 2728.819  |
| AK025783  | 1992.261  | 3002.319  | AB033103  | 2689.073  | 2632.344  |
| AF113675  | 929.106   | 1296.27   | NM_002907 | 4374.023  | 4068.651  |
| AK024514  | 529.813   | 737.766   | AK024098  | 4120.858  | 7430.059  |
| NM_020119 | 2023.413  | 2880.762  | AK001116  | 1701.393  | 1589.295  |
| AL049417  | 3166.024  | 9055.209  | AK022371  | 8074.324  | 6876.029  |
| NM_005166 | 11242.304 | 33718.734 | D42045    | 7275.729  | 4296.551  |
| AL109818  | 558.893   | 2694.972  | NM_004197 | 52266.855 | 55817.434 |
| NM_000066 | 2676.55   | 2808.444  | NM_004073 | 7565.961  | 14652.722 |
| AB033046  | 13693.6   | 14216.238 | NM_001278 | 12810.223 | 19312.807 |
| NM_015918 | 4621.884  | 7005.279  | NM_019105 | 26418.064 | 35651.75  |
| NM_013249 | 324.675   | 900.157   | NM_005677 | 14816.214 | 8192.556  |
| AB029041  | 50036.77  | 46805.508 | CY3Cy5    | 4799.722  | 207.687   |
| AK026642  | 621.391   | 705.886   | NM_004957 | 4968.015  | 4600.248  |
| AL359063  | 538.964   | 581.701   | NM_005252 | 3729.87   | 3968.748  |
| AL079292  | 1886.33   | 1693.809  | AL359211  | 1733.207  | 1452.445  |
| X89667    | 3546.5    | 2789.536  | AF070526  | 2858.021  | 2791.417  |
| NM_014027 | 3216.001  | 2118.687  | U79264    | 6050.017  | 6197.537  |
| AF116621  | 3328.975  | 2101.031  | NM_015699 | 20299.082 | 21669.521 |
| AF086554  | 2491.443  | 2142.161  | AK023619  | 981.689   | 1286.277  |
| AL390136  | 21835.188 | 10364.167 | AF070530  | 17123.568 | 26241.73  |
| AK023156  | 378.124   | 619.044   | AF086487  | 1482.521  | 1697.202  |
| AF086398  | 58754.184 | 61893.727 | NM_006420 | 3555.494  | 3698.508  |
| AK024545  | 1184.722  | 1118.739  | AF131855  | 1781.594  | 1787.013  |
| AK023444  | 796.103   | 812.261   | AF086046  | 7070.58   | 7088.647  |
| AK025953  | 1073.868  | 1552.071  | AK023309  | 1764.275  | 1940.938  |
| NM_003180 | 1500.356  | 3836.261  | AK000724  | 6687.405  | 7195.314  |
| D17216    | 7964.803  | 30512.213 | NM_003720 | 40890.621 | 55491.473 |

|           |           |           |           |           |           |
|-----------|-----------|-----------|-----------|-----------|-----------|
| AL137581  | 2086.825  | 8512.089  | NM_004957 | 5610.333  | 6101.289  |
| NM_015564 | 1117.899  | 1802.514  | NM_005252 | 3366.6    | 2983.022  |
| AF160476  | 819.054   | 1239.105  | SR1       | 67982.703 | 64402.457 |
| L22650    | 1501.231  | 1716.096  | SR3       | 55317.684 | 55930     |
| AB014520  | 25216.029 | 21562.002 | SR5       | 6852.113  | 7636.75   |
| AF161420  | 1035.806  | 1277.68   | SR7       | 7590.55   | 53258.551 |
| NM_004907 | 2230.448  | 2426.889  | SR9       | 27853.088 | 6334.083  |
| NM_002891 | 373.637   | 473.516   | CY3Cy5    | 10563.423 | 543.135   |
| NM_001775 | 2143.739  | 1520.036  | Z36818    | 1436.639  | 1870.907  |
| X04526    | 14667.088 | 6647.772  | Z36842    | 2381.444  | 4127.717  |
| D26067    | 2199.506  | 1202.641  | AF086137  | 4506.211  | 5666.767  |
| AF227924  | 1985.595  | 899.829   | AF086155  | 1961.959  | 1906.945  |
| NM_005716 | 19130.428 | 9510.668  | AF086526  | 3285.328  | 5905.895  |
| NM_006183 | 2057.022  | 1274.901  | AK025788  | 12040.48  | 13174.813 |
| S59184    | 1498.007  | 2136.585  | AF086164  | 2559.762  | 2336.918  |
| NM_005130 | 355.018   | 587.359   | AK025577  | 6389.966  | 5254.365  |
| NM_006661 | 3378.061  | 3541.706  | AK000216  | 2546.241  | 2528.064  |
| NM_005746 | 17959.34  | 15502.828 | AK023440  | 2375.288  | 3058.421  |
| NM_004588 | 1540.469  | 4423.667  | AB033041  | 32688.758 | 33351.961 |
| NM_004572 | 368.248   | 1456.563  | AY007155  | 1508.889  | 2166.618  |
| AJ008144  | 656.394   | 655.642   | AK027160  | 33885.957 | 28318.377 |
| NM_007314 | 5314.997  | 4649.054  | AK022678  | 1793.362  | 1808.699  |
| NM_016073 | 774.995   | 757.482   | AK023473  | 1193.343  | 1330.241  |
| NM_006600 | 14008.273 | 12988.916 | AK023835  | 4837.518  | 8153.593  |
| AF297709  | 3755.183  | 4891.614  | AK024159  | 391.791   | 568.484   |
| L77564    | 633.422   | 691.771   | AK023012  | 1258.344  | 1221.18   |
| NM_015384 | 1792.872  | 1549.562  | AK023906  | 6723.41   | 8316.082  |
| AK023327  | 3189.886  | 2833.483  | AK024234  | 1640.466  | 1942.516  |
| AB046858  | 1558.803  | 1307.307  | AK024962  | 4039.755  | 3760.964  |
| D50914    | 4888.32   | 2840.29   | AK022164  | 1118.597  | 1040.792  |
| NM_002007 | 391.549   | 268.395   | AK025135  | 15834.052 | 19643.395 |
| NM_002305 | 4526.513  | 2063.184  | NM_017926 | 4539.131  | 5108.224  |
| AK025439  | 2880.007  | 1355.741  | AY007145  | 8818.437  | 8304.749  |
| NM_001737 | 3456.68   | 1971.292  | AK021573  | 1681.429  | 1950.112  |
| Z36784    | 862.202   | 978.49    | D38549    | 7202.969  | 7471.626  |
| NM_016626 | 10216.275 | 12384.865 | AK024780  | 3019.373  | 2972.568  |
| NM_007213 | 720.331   | 608.463   | AF085947  | 2374.057  | 2963.823  |
| NM_019064 | 1693.428  | 3013.696  | AF086000  | 823.602   | 953.27    |
| NM_000094 | 19211.033 | 48422.879 | AL359591  | 743.4     | 785.148   |
| NM_016302 | 1388.151  | 1798.102  | AK022389  | 650.295   | 745.453   |
| NM_004159 | 16323.963 | 14079.981 | AK022123  | 3024.483  | 3202.741  |
| NM_003249 | 5210.914  | 7513.991  | AF075116  | 1729.904  | 1687.448  |
| M21897    | 1099.462  | 1431.963  | U10510    | 16752.35  | 19016.477 |
| AF301463  | 852.507   | 806.25    | AK023018  | 4351.997  | 3675.355  |
| NM_015984 | 4331.45   | 3795.186  | AK022672  | 3805.952  | 4257.811  |
| NM_006894 | 2134.442  | 980.021   | AK023870  | 7827.243  | 6774.276  |
| AK023031  | 1903.023  | 851.682   | AK021599  | 2975.087  | 3484.629  |
| NM_005717 | 60069.629 | 28527.873 | BC030975  | 1305.064  | 1702.799  |
| NM_012090 | 1404.755  | 1039.961  | AK025619  | 977.013   | 998.097   |
| BE793385  | 1177.246  | 2882.919  | AF116677  | 745.11    | 1054.557  |
| AF177292  | 550.58    | 1193.848  | AK022010  | 700.806   | 840.363   |
| NM_003088 | 7684.137  | 9852.797  | NM_014159 | 11309.828 | 9795.543  |
| AF043290  | 1002.948  | 923.383   | AK021795  | 4155.789  | 5061.23   |



|           |           |           |           |           |           |
|-----------|-----------|-----------|-----------|-----------|-----------|
| NM_004082 | 3902.475  | 4742.072  | AL162042  | 9630.648  | 12259.839 |
| NM_01439E | 6760.077  | 12890.649 | AK026131  | 2997.173  | 3005.081  |
| NM_002614 | 1583.87   | 4528.686  | AK023312  | 3501.279  | 3229.616  |
| NM_00565E | 6215.904  | 15809.526 | AK022483  | 1571.917  | 1639.74   |
| NM_00269E | 3311.635  | 2596.519  | AL133570  | 1737.55   | 1881.177  |
| NM_00214E | 936.77    | 1224.833  | AK026496  | 1454.739  | 2502.214  |
| AL137449  | 1681.76   | 1917.32   | AK023392  | 732.613   | 803.261   |
| U88153    | 3243.022  | 3651.935  | AF131836  | 7425.264  | 7807.925  |
| X03910    | 19054.752 | 15559.529 | AF275804  | 15829.122 | 13833.848 |
| NM_01842E | 11181.031 | 10091.812 | AL137488  | 5689.77   | 5448.649  |
| NM_00505E | 423.241   | 477.096   | AL049447  | 70781.836 | 61571.012 |
| NM_006924 | 17959.145 | 11993.177 | NM_020527 | 7589.37   | 6685.65   |
| NM_016024 | 4271.262  | 2401.55   | AB020637  | 4038.306  | 3483.229  |
| NM_018107 | 3390.564  | 1885.369  | NM_005286 | 18469.619 | 17096.764 |
| NM_01227E | 727.957   | 410.933   | AK024365  | 17225     | 19659.752 |
| NM_018387 | 14709.676 | 6514.939  | AJ251759  | 4189.736  | 3776.221  |
| BF310673  | 2050.4    | 1070.62   | AK024371  | 9947.052  | 9332.262  |
| R97012    | 47158.027 | 21825.281 | NM_005454 | 3302.627  | 2705.866  |
| U77700    | 8610.007  | 8411.365  | AB019569  | 67877.383 | 68195.102 |
| NM_006567 | 10252.797 | 12743.249 | NM_012409 | 6297.712  | 6699.551  |
| AF038554  | 29050.465 | 18084.496 | AK021708  | 800.469   | 1002.484  |
| AF264621  | 9054.423  | 6611.132  | AL050205  | 12884.416 | 12966.801 |
| NM_00587E | 22245.02  | 16847.02  | AK023947  | 911.451   | 1150.663  |
| NM_004184 | 27829.82  | 28662.744 | NM_005691 | 2776.629  | 2859.181  |
| AJ295148  | 1258.174  | 4450.768  | AB045832  | 659.429   | 768.341   |
| AF176701  | 531.771   | 2229.904  | AF086156  | 963.992   | 909.382   |
| NM_00045E | 3215.075  | 2899.882  | AK023814  | 1172.715  | 1629.744  |
| NM_00249E | 17564.297 | 18929.93  | AF130063  | 2180.408  | 2998.856  |
| NM_016243 | 3338.231  | 3988.355  | AF086528  | 1856.001  | 2179.429  |
| X53943    | 481.356   | 503.168   | AL162043  | 1332.586  | 1572.763  |
| NM_014402 | 41934.41  | 29457.766 | NM_006543 | 2148.816  | 2887.049  |
| NM_00464E | 12108.051 | 11263.353 | AF086252  | 3653.174  | 2840.314  |
| NM_00654C | 4840.241  | 4410.257  | AK026703  | 3462.979  | 3164.811  |
| NM_01776E | 1696.44   | 1564.203  | NM_01759E | 430.396   | 984.207   |
| NM_002811 | 8176.663  | 4462.548  | AK024367  | 1171.104  | 1128.726  |
| NM_02031C | 2612.757  | 1498.719  | NM_01786E | 14603.087 | 11781.727 |
| AK024444  | 417.728   | 293.764   | AJ131244  | 815.842   | 918.985   |
| NM_005802 | 3237.162  | 1311.567  | NM_00353E | 3959.806  | 3783.909  |
| AB002331  | 2253.745  | 885.373   | AF116707  | 16157.304 | 20316.391 |
| NM_002504 | 2527.033  | 1335.971  | U90910    | 22437.754 | 20759.102 |
| AB046775  | 1905.896  | 1470.253  | AL049979  | 800.421   | 923.274   |
| X74862    | 1492.865  | 1245.173  | AK025765  | 4606.947  | 3956.338  |
| X65663    | 8861.388  | 9893.474  | AK024263  | 2595.57   | 2599.376  |
| NM_00318E | 3070.887  | 3067.981  | NM_016613 | 9891.677  | 10798.636 |
| NM_00445E | 6222.625  | 6150.122  | AF086414  | 13270.438 | 14255.794 |
| NM_004284 | 9326.696  | 9310.644  | AJ012490  | 29989.918 | 32059.922 |
| NM_00712E | 10409.407 | 15447.375 | U84516    | 28597.984 | 26465.961 |
| Z46967    | 1119.291  | 3603.257  | AL049270  | 4154.849  | 4033.158  |
| NM_017583 | 10806.76  | 12207.86  | U88834    | 33880.848 | 34232.852 |
| Y16132    | 15633.343 | 14848.998 | BC025324  | 3966.575  | 3478.182  |
| NM_016593 | 2444.82   | 3549.046  | NM_006087 | 67484.117 | 72994.82  |
| NM_002521 | 1333.903  | 1779      | AK023564  | 1045.413  | 847.954   |
| NM_001150 | 1313.164  | 1969.143  | NM_003533 | 3207.145  | 3484.017  |

|           |           |           |           |           |           |
|-----------|-----------|-----------|-----------|-----------|-----------|
| NM_002856 | 4021.401  | 6260.392  | AL157478  | 2006.833  | 2956.414  |
| NM_003225 | 732.261   | 1134.967  | AK023726  | 29268.891 | 37486.082 |
| NM_000096 | 874.261   | 1117.664  | AK024906  | 2278.355  | 2564.216  |
| AA418251  | 794.084   | 857.796   | NM_005607 | 4763.744  | 4348.256  |
| AA143087  | 13105.869 | 8815.405  | NM_006761 | 60920.93  | 52820.047 |
| BI870965  | 6772.189  | 4159.805  | NM_014897 | 2832.532  | 3047.594  |
| BI835536  | 7465.363  | 3106.626  | NM_003453 | 15256.746 | 13201.791 |
| BF205051  | 5272.069  | 3621.129  | NM_018371 | 35370.211 | 28816.627 |
| X02761    | 6850.169  | 5128.431  | NM_014390 | 41271.359 | 46419.031 |
| M91463    | 1170.778  | 1027.174  | NM_018143 | 2774.139  | 4320.87   |
| U88317    | 679.295   | 1001.383  | X78924    | 22762.25  | 21663.1   |
| J03060    | 2615.447  | 2681.604  | NM_013250 | 1998.659  | 1828.642  |
| X54156    | 622.13    | 659.039   | NM_001889 | 16451.912 | 17102.105 |
| NM_003743 | 1436.686  | 1175.633  | NM_004999 | 942.065   | 969.861   |
| AA829383  | 13191.958 | 17492.127 | X89668    | 51213.402 | 56145.5   |
| AF131748  | 5562.926  | 16063.746 | NM_004458 | 3950.802  | 5389.413  |
| NM_002349 | 937.951   | 1315.183  | NM_006901 | 4596.551  | 6243.2    |
| NM_005080 | 10926.103 | 14390.995 | NM_018530 | 24256.207 | 27777.721 |
| NM_004887 | 5008.712  | 6683.468  | AJ003145  | 1562.194  | 1504.218  |
| NM_006404 | 838.576   | 1495.162  | AK022855  | 25989.801 | 31066.334 |
| NM_014795 | 1145.707  | 1286.062  | AK023816  | 4227.878  | 4712.843  |
| NM_002986 | 1063.187  | 1966.998  | AL050102  | 1875.423  | 1607.223  |
| M15330    | 1402.905  | 3427.068  | AF305686  | 9151.488  | 12948.843 |
| NM_014396 | 2686.865  | 2280.968  | AF085832  | 3480.063  | 3261.633  |
| AK027201  | 1908.061  | 1688.963  | AK025981  | 6260.949  | 7444.449  |
| NM_000489 | 14952.077 | 11359.627 | AF113212  | 1563.314  | 1936.784  |
| X98507    | 6620.518  | 4519.545  | AF086266  | 1576.715  | 1921.622  |
| NM_016030 | 60832.852 | 46858.273 | AK025337  | 3221.119  | 2618.093  |
| NM_014669 | 7453.551  | 5026.791  | AB028984  | 1957.154  | 2031.806  |
| NM_005652 | 19925.02  | 8890.898  | NM_005602 | 5217.127  | 6734.479  |
| AK026686  | 462.635   | 293.657   | NM_003573 | 42283.211 | 39877.703 |
| NM_005902 | 3617.78   | 2961.157  | NM_000296 | 17658.605 | 18642.314 |
| NM_002850 | 59983.918 | 62544.961 | NM_012302 | 1351.622  | 1349.973  |
| NM_004302 | 580.799   | 755.162   | NM_017422 | 64860.418 | 61080.59  |
| NM_005903 | 1944.895  | 1787.033  | NM_006149 | 633.28    | 776.422   |
| NM_000861 | 1284.693  | 2363.325  | NM_005879 | 1253.734  | 1367.015  |
| NM_019062 | 2031.997  | 5915.421  | AF147790  | 1258.948  | 1211.422  |
| AL133064  | 3267.355  | 4300.045  | NM_018969 | 811.872   | 1036.949  |
| NM_006227 | 4908.285  | 6262.101  | NM_004112 | 18335.83  | 15303.91  |
| NM_002905 | 3633.199  | 4302.89   | AY007233  | 621.539   | 645.318   |
| NM_000700 | 2269.459  | 2936.82   | AK025592  | 4559.582  | 6911.886  |
| NM_019028 | 15984.243 | 17366.904 | NM_004635 | 6978.856  | 8851.79   |
| NM_000431 | 2848.685  | 2912.029  | AK023023  | 14326.521 | 13961.605 |
| NM_013421 | 2240.725  | 2538.79   | NM_015993 | 7918.47   | 8954.55   |
| NM_012474 | 5037.334  | 6811.873  | NM_002659 | 7477.837  | 9193.453  |
| AB033118  | 1284.039  | 1872.575  | Z36776    | 5585.573  | 5812.154  |
| NM_019606 | 4025.17   | 2553.787  | AB029015  | 3737.514  | 4821.625  |
| NM_001690 | 7443.714  | 4796.5    | NM_002067 | 65812.055 | 61909.535 |
| AF034374  | 12199.047 | 9236.045  | NM_001059 | 67823     | 68240.797 |
| NM_001682 | 3385.313  | 1633.288  | NM_020345 | 1924.106  | 1630.303  |
| AK025130  | 2523.272  | 1680.973  | NM_003287 | 3437.942  | 3039.558  |
| AK023232  | 5455.53   | 5078.933  | NM_012325 | 39496.965 | 53232.586 |
| NM_006380 | 1665.605  | 1346.51   | NM_014434 | 5062.941  | 6439.017  |

|           |           |           |           |           |           |
|-----------|-----------|-----------|-----------|-----------|-----------|
| AB020710  | 1835.76   | 1420.163  | NM_019607 | 14155.75  | 15839.617 |
| NM_016174 | 7395.998  | 9965.805  | U79260    | 11016.978 | 11736.609 |
| NM_020377 | 1083.865  | 1226.684  | NM_001895 | 19268.107 | 22990.902 |
| U88896    | 1625.005  | 1407.211  | NM_006447 | 5824.089  | 5986.579  |
| AF116702  | 68315.352 | 61043.926 | AF119851  | 2199.816  | 3201.411  |
| X58794    | 3804.833  | 15300.421 | NM_014129 | 9138.611  | 13194.701 |
| NM_001735 | 2483.839  | 7196.267  | D87455    | 4063.826  | 3447.585  |
| Z70701    | 13465.199 | 12819.295 | AF080577  | 1917.488  | 2012.693  |
| AB040972  | 3904.594  | 5610.33   | L22005    | 23814.791 | 21496.516 |
| AF148505  | 2389.021  | 2777.939  | NM_012291 | 26912.004 | 26188.77  |
| NM_018686 | 12079.671 | 12344.681 | NM_013368 | 4036.809  | 4986.522  |
| NM_017676 | 1533.215  | 2049.593  | NM_003807 | 57746.336 | 59979.848 |
| AK021764  | 571.053   | 700.06    | NM_004358 | 8185.271  | 8190.333  |
| NM_005431 | 3486.31   | 3350.854  | NM_001790 | 5113.958  | 5497.997  |
| NM_002894 | 8750.354  | 6013.144  | NM_018243 | 7021.023  | 5314.785  |
| NM_004260 | 8957.964  | 5673.379  | NM_014939 | 6219.276  | 5242.548  |
| AL050067  | 1549.19   | 1045.595  | Y17866    | 3270.389  | 3433.143  |
| NM_004972 | 6008.408  | 3129.987  | AK024247  | 1261.173  | 1330.637  |
| NM_006251 | 3401.664  | 1952.568  | NM_003005 | 15652.472 | 15880.333 |
| NM_004103 | 8325.743  | 5750.718  | NM_000873 | 6223.125  | 7350.799  |
| NM_002314 | 6569.921  | 4784.536  | AF063936  | 1982.623  | 1936.323  |
| NM_001744 | 2145.344  | 2746.46   | AB033025  | 1264.331  | 961.867   |
| NM_006296 | 2981.735  | 4082.781  | NM_004418 | 19433.266 | 20985.084 |
| Z25433    | 2108.147  | 1974.958  | NM_000917 | 45145.023 | 54425.113 |
| NM_005922 | 2824.421  | 2750.47   | NM_005389 | 41782.281 | 47877.605 |
| NM_018638 | 8639.847  | 11958.503 | NM_014445 | 49934.133 | 45891.523 |
| NM_003915 | 7149.439  | 21521.633 | AL832826  | 4356.745  | 3967.302  |
| NM_000382 | 3398.836  | 9489.714  | NM_016123 | 1992.263  | 1797.409  |
| NM_016593 | 2608.263  | 3236.13   | AB048365  | 4976.489  | 9056.204  |
| NM_002521 | 1280.81   | 1412.054  | NM_000391 | 11712.833 | 14644.763 |
| NM_001150 | 1438.867  | 1784.961  | AF229179  | 1651.007  | 1490.776  |
| NM_002856 | 3715.45   | 4575.601  | NM_014771 | 11530.237 | 9981.231  |
| NM_003225 | 746.735   | 922.241   | NM_002275 | 24370.152 | 27674.537 |
| NM_000096 | 942.958   | 1200.206  | AB032945  | 2005.711  | 2087.072  |
| AA418251  | 732.633   | 1019.321  | AK025215  | 22569.742 | 24202.801 |
| AA143087  | 13451.002 | 11791.297 | BF569160  | 2850.475  | 2972.957  |
| BI870965  | 6817.931  | 4902.663  | AK024625  | 2332.844  | 2324.552  |
| BI835536  | 7277.156  | 4272.196  | NM_018131 | 7324.729  | 5796.755  |
| BF205051  | 5756.041  | 4142.997  | NM_014834 | 1543.643  | 1633.93   |
| X02761    | 7416.828  | 4089.434  | NM_017636 | 22696.723 | 26662.361 |
| M91463    | 955.707   | 435.536   | NM_012468 | 2266.852  | 2358.831  |
| J03060    | 2113.085  | 1169.599  | NM_002430 | 1056.447  | 1411.614  |
| X54156    | 649.887   | 825.884   | NM_006150 | 9803.916  | 11162.121 |
| NM_003743 | 1806.466  | 1819.412  | NM_014943 | 18735.869 | 18289.609 |
| AA829383  | 8621.2    | 6977.431  | AK024392  | 7071.777  | 12805.322 |
| AF012434  | 28811.754 | 19068.824 | NM_013260 | 4500.723  | 5446.489  |
| NM_004887 | 4386.838  | 4214.486  | NM_005249 | 1180.785  | 1351.616  |
| NM_006404 | 765.245   | 605.327   | NM_018300 | 3261.483  | 3019.845  |
| NM_014795 | 1280.871  | 1127.861  | NM_004875 | 8553.615  | 7154.405  |
| NM_002986 | 1070.294  | 1235.796  | NM_018254 | 39350.051 | 36020.914 |
| M15330    | 1602.528  | 3824.738  | NM_017745 | 7760.757  | 12730.081 |
| NM_014396 | 2838.893  | 3148.75   | NM_018433 | 6612.591  | 7496.782  |
| AK027201  | 1801.266  | 1901.586  | NM_000937 | 1465.233  | 1250.632  |

|           |           |           |           |           |           |
|-----------|-----------|-----------|-----------|-----------|-----------|
| NM_00048  | 14583.374 | 12636.968 | AB028451  | 4136.132  | 3194.997  |
| X98507    | 8062.065  | 8061.127  | AK024810  | 27667.936 | 27756.695 |
| NM_01603  | 59411.039 | 54648.367 | AK022615  | 62863.758 | 60211.281 |
| NM_01466  | 7477.432  | 5924.7    | NM_004043 | 15469.091 | 13800.774 |
| NM_00565  | 22998.049 | 11613.653 | BM458096  | 31216.199 | 27005.779 |
| AK026686  | 432.677   | 401.281   | NM_00562  | 21182.559 | 20641.414 |
| NM_00590  | 3148.528  | 1456.101  | D29958    | 41417.559 | 37226.773 |
| NM_00285  | 58113.887 | 55534.938 | NM_015971 | 30534.496 | 38541.715 |
| NM_00430  | 625.404   | 625.291   | D17257    | 59101.684 | 60212.082 |
| NM_00590  | 2174.772  | 2235.89   | NM_00284  | 12968.118 | 14700.17  |
| NM_000861 | 1008.857  | 959.134   | AF290204  | 1027.947  | 1447.859  |
| U77493    | 1085.677  | 1179.769  | NM_01212  | 2778.86   | 4249.839  |
| Y16132    | 24009.664 | 31094.834 | NM_00391  | 1087.456  | 937.332   |
| NM_00290  | 3801.702  | 4076.201  | NM_004807 | 2341.373  | 2215.655  |
| NM_00070  | 1487.564  | 1647.344  | AF219140  | 1134.522  | 1565.533  |
| NM_01902  | 9028.178  | 8922.872  | J03569    | 59581.742 | 59657.883 |
| NM_000431 | 2167.462  | 1855.891  | NM_003115 | 13932.786 | 14214.107 |
| NM_013421 | 2009.669  | 2498.411  | NM_000687 | 39112.855 | 33721.789 |
| NM_012474 | 5709.146  | 8796.764  | NM_00044  | 1527.769  | 1624.367  |
| AB033118  | 1317.715  | 1906.492  | NM_01820  | 4129.238  | 3587.961  |
| NM_01960  | 4093.888  | 3654.156  | NM_01483  | 3800.668  | 2812.338  |
| NM_00169  | 8737.396  | 6810.87   | NM_00721  | 1214.318  | 1223.403  |
| AF034374  | 12976.815 | 11312.045 | AF005067  | 3943.455  | 3591.882  |
| NM_00168  | 3193.509  | 2155.08   | NM_00571  | 25859.086 | 23361.066 |
| AK025130  | 2977.223  | 2324.15   | AF252284  | 6621.284  | 6013.008  |
| AK023232  | 5841.733  | 4694.574  | NM_01493  | 9888.391  | 8268.228  |
| NM_00638  | 1770.864  | 1034.696  | NM_00153  | 9799.611  | 8234.44   |
| AB020710  | 1525.399  | 715.61    | U80232    | 26982.51  | 25526.732 |
| NM_016174 | 5570.088  | 3450.397  | M27877    | 56345.32  | 58516.094 |
| NM_020377 | 1152.6    | 970.704   | D70836    | 66761.789 | 64004.305 |
| U88896    | 1906.716  | 1814.652  | D16878    | 2207.83   | 3882.711  |
| AF116702  | 58440.895 | 31618.709 | NM_00703  | 9643.55   | 9530.298  |
| NM_005724 | 7399.446  | 6221.499  | AB019562  | 4183.367  | 3846.573  |
| X58794    | 2359.573  | 2835.439  | AF036364  | 5441.313  | 6509.55   |
| NM_00173  | 3256.197  | 2871.367  | AK022847  | 7896.645  | 9439.375  |
| NM_00234  | 2227.118  | 8091.472  | NM_02020  | 9319.155  | 10142.568 |
| NM_00508  | 17838.789 | 33786.484 | L40992    | 1798.758  | 1836.475  |
| AF148505  | 2614.745  | 2287.806  | U20582    | 19202.033 | 18700.436 |
| NM_01868  | 11135.455 | 9133.578  | NM_000337 | 1463.211  | 1581.571  |
| NM_01767  | 1189.583  | 1194.863  | NM_00207  | 13257.525 | 16518.717 |
| AK021764  | 814.013   | 776.542   | AI660957  | 1497.489  | 1882.561  |
| NM_005431 | 3619.062  | 5292.695  | U13697    | 1761.512  | 1919.917  |
| NM_00426  | 8299.186  | 6821.832  | X75308    | 708.106   | 891.405   |
| AL050067  | 1548.103  | 1275.765  | U04270    | 53859.934 | 56837.496 |
| NM_00497  | 6345.094  | 5064.053  | J03810    | 906.014   | 822.862   |
| NM_006251 | 4009.527  | 1981.826  | Z34820    | 1345.98   | 1195.389  |
| NM_00410  | 9781.055  | 5642.262  | L02840    | 29357.67  | 18588.365 |
| NM_002314 | 6265.278  | 3294.06   | BG569143  | 518.688   | 495.698   |
| NM_001744 | 1255.446  | 808.107   | AA629719  | 62395.25  | 62869.301 |
| NM_00629  | 2041.946  | 1345.702  | AA927528  | 9916.409  | 10383.884 |
| Z25433    | 1814.965  | 1565.442  | X02152    | 65524.051 | 64290.977 |
| NM_00592  | 3106.678  | 3431.458  | BG676364  | 12399.105 | 14303.968 |
| NM_01863  | 7809.799  | 7575.629  | BG181154  | 3561.955  | 3708.247  |

|           |           |           |           |           |           |
|-----------|-----------|-----------|-----------|-----------|-----------|
| AL137593  | 25622.65  | 14172.336 | AA843679  | 27820.928 | 41051.781 |
| NM_003915 | 3677.485  | 3391.976  | H68922    | 1721.961  | 2680.934  |
| NM_000382 | 3398.374  | 2701.735  | AF097159  | 3289.332  | 6242.063  |
| AL133064  | 8073.821  | 22737.689 | NM_014684 | 2157.798  | 1618.852  |
| NM_006227 | 7079.919  | 15911.379 | AK027247  | 3025.937  | 2493.25   |
| NM_001150 | 1463.174  | 1396.166  | NM_002480 | 17893.23  | 22533.477 |
| NM_002856 | 3642.222  | 3213.599  | NM_017571 | 16814.352 | 12544.968 |
| NM_003225 | 758.191   | 741.501   | L03169    | 1978.052  | 1671.439  |
| NM_000096 | 979.2     | 835.73    | NM_001928 | 5851.946  | 5109.772  |
| AA418251  | 753.121   | 923.254   | NM_006399 | 2297.82   | 1901.631  |
| AA143087  | 15732.729 | 14948.959 | NM_018965 | 1348.174  | 1478.687  |
| BI870965  | 7090.772  | 7212.658  | NM_000185 | 28640.111 | 21584.896 |
| BI835536  | 7940.884  | 5918.871  | Y00816    | 3146.685  | 2767.946  |
| BF205051  | 5265.975  | 5208.604  | NM_004512 | 38618.055 | 41428.969 |
| X02761    | 8098.504  | 6523.461  | NM_004380 | 54583.715 | 53056.473 |
| M91463    | 979.304   | 511.026   | U86813    | 1497.264  | 1748.289  |
| U88317    | 469.473   | 261.386   | NM_004119 | 5420.504  | 6705.669  |
| J03060    | 1984.381  | 974.009   | AY007378  | 8809.865  | 8172.075  |
| NM_003743 | 1142.474  | 493.098   | D26070    | 4174.106  | 5035.421  |
| AA829383  | 9054.058  | 6971.108  | NM_001642 | 14813.119 | 19848.277 |
| AF012434  | 23960.701 | 11969.021 | NM_001542 | 1804.022  | 3186.847  |
| NM_018124 | 10745.465 | 7433.931  | NM_002280 | 4412.67   | 5363.205  |
| Z70701    | 30122.982 | 49961.102 | NM_017459 | 1051.065  | 1318.428  |
| AB040972  | 7104.214  | 26669.65  | NM_001055 | 60559.223 | 48639.551 |
| X98507    | 7148.943  | 6184.75   | NM_002271 | 64370.113 | 62025.797 |
| NM_014669 | 7482.653  | 7120.99   | NM_018361 | 7317.777  | 7487.561  |
| NM_005652 | 17563.002 | 13752.894 | NM_019893 | 882.43    | 821.595   |
| AK026686  | 492.848   | 509.959   | AB040966  | 12382.336 | 11585.263 |
| NM_005902 | 3468.911  | 3924.135  | NM_020132 | 15103.664 | 12327.909 |
| NM_002850 | 61616.105 | 62415     | NM_016467 | 14743.44  | 12526.342 |
| NM_005903 | 1659.825  | 1587.562  | NM_007253 | 7186.394  | 5582.74   |
| NM_000861 | 1621.747  | 2554.204  | NM_000558 | 24463.596 | 22112.836 |
| U77493    | 681.124   | 336.325   | NM_000835 | 2502.41   | 2297.525  |
| NM_019062 | 996.396   | 426.717   | NM_001830 | 925.131   | 812.968   |
| NM_003873 | 664.883   | 431.463   | NM_001149 | 600.958   | 715.26    |
| NM_000263 | 2864.746  | 3093.569  | NM_006808 | 50647.977 | 56271.059 |
| AF073519  | 10000.747 | 6546.531  | NM_006634 | 2965.604  | 3744.022  |
| AB001451  | 595.159   | 403.169   | NM_016465 | 9104.698  | 8243.827  |
| NM_017583 | 15456.124 | 14310.054 | NM_000328 | 1762.294  | 1716.668  |
| NM_016593 | 5538.11   | 20090.482 | NM_013399 | 4465.088  | 4961.818  |
| NM_002521 | 3527.953  | 13974.664 | NM_002410 | 2109.833  | 2819.008  |
| NM_000271 | 14552.131 | 11675.586 | AL122120  | 8317.454  | 8105.532  |
| NM_006184 | 9852.341  | 9260.42   | NM_018835 | 6246.683  | 5501.293  |
| AB018268  | 9123.591  | 9092.212  | NM_003401 | 3716.112  | 2981.099  |
| NM_019045 | 264.5     | 245.019   | AL137724  | 5935.774  | 5957.47   |
| NM_006380 | 2200.623  | 2256.143  | NM_004758 | 6763.62   | 6135.492  |
| AB020710  | 1933.273  | 2159.835  | NM_002913 | 4750.982  | 4125.169  |
| NM_016174 | 6179.086  | 7615.586  | AK022797  | 2546.426  | 2117.956  |
| NM_020377 | 969.897   | 1035.764  | NM_007370 | 7472.831  | 11184.111 |
| U88896    | 1560.298  | 1511.273  | NM_006231 | 2108.177  | 2139.535  |
| AF116702  | 62885.668 | 59067.438 | AK023471  | 3237.878  | 3249.814  |
| NM_005724 | 6024.625  | 4792.523  | AF044578  | 13278.382 | 9006.821  |
| X58794    | 1600.008  | 1477.939  | NM_001948 | 6648.851  | 6124.983  |

|           |           |           |           |           |           |
|-----------|-----------|-----------|-----------|-----------|-----------|
| NM_001735 | 1937.1    | 1053.713  | NM_001067 | 20517.484 | 16484.238 |
| NM_002349 | 629.144   | 349.56    | NM_014034 | 9360.935  | 10175.155 |
| NM_005080 | 9620.042  | 6601.219  | NM_005335 | 42455.516 | 51898.492 |
| NM_004887 | 6754.55   | 6236.137  | J04474    | 15186.548 | 16297.878 |
| NM_006404 | 903.972   | 837.643   | NM_003761 | 60240.824 | 57001.781 |
| NM_014795 | 1220.457  | 699.68    | NM_004726 | 1147.063  | 1380.126  |
| NM_002986 | 1117.66   | 705.159   | NM_014011 | 10287.93  | 10145.379 |
| M15330    | 1895.411  | 3632.793  | AK025994  | 8912.918  | 10442.92  |
| NM_014396 | 5924.194  | 16744.539 | L29306    | 2358.098  | 2274.319  |
| AK027201  | 4161.021  | 16090.094 | NM_013989 | 11584.24  | 17263.414 |
| NM_000489 | 38299.152 | 56863.473 | NM_001738 | 4109.669  | 7715.852  |
| AL137593  | 19205.846 | 11621.867 | NM_002270 | 916.078   | 805.79    |
| NM_003915 | 2265.797  | 1373.026  | AF036364  | 5177.706  | 5126.595  |
| NM_000382 | 2324.844  | 2072.362  | AK022847  | 6995.126  | 6398.46   |
| AL133064  | 3091.791  | 3150.842  | NM_020203 | 8004.335  | 9169.846  |
| NM_006227 | 4841.739  | 5590.047  | L40992    | 1584.973  | 1503.142  |
| NM_002905 | 4001.767  | 4665.883  | U20582    | 16919.877 | 16953.635 |
| NM_000700 | 2531.007  | 2819.093  | NM_000337 | 1090.807  | 1381.541  |
| NM_019025 | 14680.846 | 12277.636 | NM_002079 | 12255.787 | 11405.015 |
| NM_000431 | 2751.555  | 1827.496  | AI660957  | 1162.803  | 1281.953  |
| NM_013421 | 1942.683  | 1764.358  | U13697    | 1802.201  | 1603.714  |
| NM_012474 | 5147.525  | 5537.418  | U04270    | 43088.563 | 40743.305 |
| AB033118  | 1338.733  | 1704.289  | J03810    | 967.584   | 972.431   |
| NM_019606 | 3990.647  | 1944.543  | Z34820    | 777.202   | 652.22    |
| NM_001690 | 7672.941  | 3822.946  | L02840    | 19682.957 | 11004.557 |
| AF034374  | 12277.102 | 7016.797  | BG569143  | 1270.538  | 1085.516  |
| NM_016118 | 5400.314  | 1167.117  | AA629719  | 61472.523 | 60780.941 |
| NM_018674 | 15308.672 | 8776.904  | AA927528  | 9694.155  | 9501.548  |
| NM_001683 | 23905.973 | 14162.376 | X02152    | 61505.742 | 60346.762 |
| NM_001682 | 3961.438  | 4018.337  | BG676364  | 13784.707 | 13331.669 |
| NM_014405 | 2948.563  | 2713.678  | BG181154  | 3006.702  | 2923.118  |
| NM_000816 | 730.989   | 691.096   | AA843679  | 30415.117 | 37881.664 |
| NM_014925 | 1815.617  | 2836.783  | H68922    | 3230.317  | 3558.396  |
| AK025130  | 6011.121  | 19878.006 | AF090906  | 6278.118  | 9223.799  |
| NM_017875 | 3420.533  | 12987.871 | AB023219  | 9552.893  | 11089.875 |
| AK023232  | 13935.79  | 33775.094 | NM_014148 | 1550.116  | 1756.516  |
| NM_018124 | 6552.725  | 3646.874  | NM_002480 | 14558.93  | 11996.165 |
| Z70701    | 13245.682 | 11489.203 | NM_017571 | 15206.32  | 8443.409  |
| AB040972  | 3637.639  | 4294.539  | L03169    | 2030.358  | 1610.947  |
| AF148505  | 2540.798  | 2980.214  | NM_001925 | 5749.021  | 6258.672  |
| NM_018686 | 10929.795 | 9403.299  | NM_006399 | 2353.313  | 1948.031  |
| NM_017676 | 1353.538  | 1430.259  | NM_018965 | 1296.956  | 1150.801  |
| AK021764  | 575.616   | 495.311   | NM_000185 | 19928.85  | 15467.681 |
| NM_005431 | 3483.404  | 2900.592  | Y00816    | 2542.621  | 2882.993  |
| NM_002894 | 8387.646  | 4895.949  | NM_004512 | 32371.643 | 30831.719 |
| NM_004629 | 3146.508  | 1581.366  | NM_004380 | 39585.98  | 44385.352 |
| NM_004260 | 9384.249  | 4605.023  | NM_004119 | 4448.333  | 4585.681  |
| AL050067  | 1279.158  | 597.325   | AY007378  | 8096.475  | 7945.624  |
| NM_004972 | 6263.968  | 2308.823  | D26070    | 4107.518  | 3704.57   |
| NM_006251 | 4518.402  | 3001.372  | NM_001642 | 14668.936 | 13600.286 |
| NM_004103 | 14089.858 | 11182.808 | NM_001542 | 1649.456  | 1826.322  |
| NM_002314 | 7792.158  | 6529.228  | NM_002280 | 4790.251  | 5805.199  |
| NM_001744 | 2213.18   | 2104.58   | NM_017459 | 1500.297  | 1535.653  |

|           |           |           |           |           |           |
|-----------|-----------|-----------|-----------|-----------|-----------|
| NM_006296 | 4970.091  | 14576.145 | NM_007035 | 11061.198 | 14221.807 |
| Z25433    | 4139.616  | 13991.562 | AB019562  | 4645.008  | 5938.488  |
| NM_005922 | 5616.584  | 18031.689 | NM_002271 | 59494.945 | 56480.301 |
| NM_018638 | 14238.928 | 32830.465 | NM_018361 | 6831.804  | 5972.046  |
| CY3Cy5    | 2552.012  | 113.406   | NM_019893 | 731.833   | 817.017   |
| NM_003942 | 2245.634  | 2652.174  | AB040966  | 12572.755 | 11729.446 |
| NM_004452 | 2507.272  | 3201.958  | NM_020132 | 16056.726 | 15944.209 |
| AK022632  | 1410.661  | 2291.041  | NM_016467 | 14985.765 | 16832.389 |
| AK021554  | 2266.667  | 4046.172  | NM_007253 | 7169.565  | 7663.268  |
| NM_020235 | 4139.745  | 5702.68   | NM_000558 | 24307.783 | 24773.631 |
| AK000532  | 1045.407  | 1259.548  | NM_000835 | 1720.29   | 1882.355  |
| AL109681  | 924.088   | 1221.45   | NM_001830 | 676.943   | 334.444   |
| AL162039  | 4492.437  | 4187.342  | NM_001149 | 530.817   | 518.664   |
| AK024896  | 3561.583  | 3867.435  | NM_006808 | 35205.988 | 36395.379 |
| AL353952  | 480.15    | 525.802   | NM_006634 | 2379.939  | 2087.522  |
| BU165106  | 2040.767  | 2334.92   | NM_016465 | 8718.228  | 7482.05   |
| AF038202  | 6458.643  | 4737.533  | NM_000328 | 2054.491  | 1204.757  |
| AB040925  | 4649.344  | 3435.321  | NM_013399 | 4586.018  | 4300.605  |
| NM_003942 | 14512.077 | 15092.156 | NM_002410 | 2442.225  | 2285.387  |
| NM_004452 | 2785.063  | 2977.751  | AL122120  | 9238.781  | 6779.714  |
| SR1       | 69569.164 | 63264.363 | NM_014684 | 2442.548  | 2403.893  |
| SR3       | 49577.266 | 56484.328 | AK027247  | 3533.189  | 4084.178  |
| SR7       | 4234.224  | 22595.725 | AL137724  | 5829.936  | 4098.805  |
| AF018254  | 1234.496  | 1686.797  | NM_004758 | 6801.395  | 4650.824  |
| NM_016240 | 2546.249  | 3920.81   | NM_002913 | 4479.477  | 3888.569  |
| AK026459  | 719.642   | 1042.886  | AK022797  | 2741.267  | 1978.78   |
| AL049390  | 2282.033  | 2224.094  | NM_007370 | 6938.751  | 7098.893  |
| AK000584  | 4856.467  | 4230.517  | NM_006231 | 2274.196  | 2193.437  |
| AJ297363  | 1010.199  | 879.797   | AK023471  | 3188.387  | 4079.748  |
| AK026379  | 1919.258  | 1419.945  | AF044578  | 13997.659 | 12717.151 |
| AK022965  | 2215.662  | 2185.087  | NM_001948 | 7614.074  | 11538.855 |
| AK024278  | 6797.062  | 6124.691  | NM_001067 | 21419.902 | 24202.988 |
| NM_018022 | 1750.301  | 1724.998  | NM_014034 | 7966.703  | 7175.779  |
| AB056722  | 7933.693  | 8342.921  | NM_005335 | 36758.27  | 32790.234 |
| NM_013242 | 5301.706  | 5354.089  | J04474    | 15071.522 | 14557.193 |
| AK023198  | 4636.186  | 4080.447  | NM_003761 | 53817.766 | 51606.906 |
| NM_012066 | 13667.034 | 12789.955 | NM_004726 | 1398.232  | 1514.28   |
| AF052168  | 10447.189 | 8205.504  | NM_014011 | 9684.876  | 8101.708  |
| AK024947  | 8465.329  | 21536.914 | AK025994  | 8530.534  | 6998.383  |
| AK095125  | 1125.913  | 1001.161  | L29306    | 1447.692  | 1165.767  |
| AK024059  | 1940.302  | 2099.12   | NM_013989 | 11129.114 | 10301.877 |
| AB007928  | 1365.149  | 1227.781  | NM_001738 | 3453.895  | 3774.257  |
| AK023645  | 2065.417  | 1526.826  | NM_002270 | 761.209   | 655.59    |
| D83543    | 827.145   | 672.186   | NM_001055 | 54687.789 | 48482.246 |
| NM_016930 | 2480.759  | 2086.845  | NM_020203 | 6864.446  | 5201.833  |
| AJ001861  | 3225.679  | 3110.045  | L40992    | 1617.837  | 1309.851  |
| X64981    | 1562.445  | 1776.869  | U20582    | 20263.816 | 19103.803 |
| X75692    | 3984.179  | 3169.45   | NM_000337 | 1381.794  | 1374.473  |
| Y10511    | 14409.844 | 14801.343 | NM_002079 | 12747.666 | 12338.566 |
| AK021832  | 1385.485  | 1374.915  | AI660957  | 1352.828  | 2016.018  |
| AK021505  | 5429.848  | 8816.016  | U13697    | 1867.49   | 1830.635  |
| AK021598  | 4575.757  | 5590.871  | X75308    | 644.919   | 1004.163  |
| AK026416  | 25650.387 | 20400.545 | U04270    | 54502.957 | 57935.449 |

|           |           |           |           |           |           |
|-----------|-----------|-----------|-----------|-----------|-----------|
| AK025797  | 6167.037  | 5819.76   | J03810    | 1116.263  | 1021.438  |
| AK000019  | 755.181   | 585.991   | Z34820    | 930.832   | 965.613   |
| AK024156  | 1185.596  | 1266.726  | L02840    | 19755.408 | 12018.312 |
| AF086288  | 1639.135  | 1306.936  | BG569143  | 661.824   | 545.566   |
| NM_016944 | 677.174   | 750.584   | AA629719  | 62025.648 | 59106.18  |
| AK023109  | 1567.47   | 2321.97   | AA927528  | 9891.266  | 9301.478  |
| NM_005293 | 25919.467 | 27638.076 | X02152    | 64356.469 | 62568.215 |
| S50185    | 1652.186  | 2330.809  | BG676364  | 15082.505 | 14978.912 |
| AF133332  | 5601.865  | 4711.825  | BG181154  | 2915.577  | 2086.158  |
| AK022805  | 2878.595  | 1863.353  | AA843679  | 31850.893 | 31677.623 |
| AK024606  | 14643.201 | 12516.697 | H68922    | 1893.142  | 1818.653  |
| NM_016417 | 24964.074 | 21352.084 | AF090906  | 6467.217  | 5279.354  |
| L10147    | 19374.475 | 16067.212 | AB023219  | 8590.146  | 6744.023  |
| AL080118  | 6211.563  | 5495.722  | NM_014148 | 1687.764  | 1579.69   |
| AL049378  | 3765.304  | 3253.844  | NM_018835 | 7796.489  | 6759.688  |
| L09086    | 1274.638  | 1225.225  | NM_003401 | 3955.515  | 3676.989  |
| L37702    | 22879.998 | 20607.184 | NM_006399 | 2191.214  | 1276.793  |
| AK022812  | 863.384   | 823.044   | NM_018965 | 1121.775  | 844.058   |
| U79301    | 8403.046  | 9779.087  | NM_000185 | 26256.787 | 20946.939 |
| AK022260  | 9248.983  | 10601.736 | Y00816    | 2902.569  | 3155.519  |
| M32219    | 11144.207 | 10260.821 | NM_004512 | 33845.527 | 34510.441 |
| BC018868  | 2215.706  | 1581.327  | NM_004380 | 53973.914 | 52648.551 |
| AF086174  | 524.836   | 629.892   | U86813    | 1920.442  | 1819.59   |
| AF007128  | 10652.099 | 8609.938  | NM_004119 | 5691.997  | 6550.317  |
| AJ012498  | 1197.75   | 1135.586  | AY007378  | 8957.541  | 9830.171  |
| NM_005973 | 27813.547 | 26333.754 | D26070    | 3853.622  | 3953.884  |
| AK025823  | 2493.666  | 3266.86   | NM_001642 | 13846.64  | 13833.114 |
| AK026691  | 1159.855  | 1312.726  | NM_001542 | 1451.015  | 1540.998  |
| AL359941  | 2670.921  | 3464.249  | NM_003392 | 1432.013  | 1360.007  |
| U52076    | 755.205   | 729.477   | NM_002280 | 3999.883  | 3850.207  |
| AF035278  | 1699.672  | 1625.101  | NM_017459 | 1237.395  | 1219.293  |
| AF086493  | 3183.143  | 2735.667  | NM_000501 | 61350.496 | 63585.594 |
| AL050202  | 1398.522  | 1324.143  | NM_000114 | 11051.948 | 11213.302 |
| U32999    | 13783.17  | 14250.13  | NM_005156 | 5451.758  | 4766.276  |
| U66052    | 5241.699  | 5545.26   | NM_015193 | 6108.596  | 4993.481  |
| NM_000857 | 1742.101  | 1538.939  | X98834    | 8575.387  | 8414.228  |
| L20688    | 52711.859 | 57133.102 | NM_007035 | 10312.589 | 10036.243 |
| X69111    | 22676.473 | 22117.168 | AB019562  | 4181.261  | 4136.834  |
| AF252283  | 1140.615  | 1207.292  | AF036364  | 5523.068  | 5341.209  |
| AB037799  | 5179.935  | 5073.836  | AK022847  | 8165.477  | 8504.61   |
| AB007950  | 24597.705 | 29730.469 | AK000271  | 1631.298  | 795.198   |
| AK025593  | 2712.396  | 2734.714  | NM_005173 | 985.401   | 786.502   |
| AB018304  | 4132.841  | 4249.409  | NM_001830 | 579.417   | 641.161   |
| NM_007061 | 19343.861 | 19408.338 | NM_001149 | 818.462   | 469.514   |
| NM_001088 | 27112.379 | 29473.752 | NM_006808 | 38837.148 | 45086.035 |
| BC015991  | 9497.324  | 9521.695  | NM_006634 | 2985.501  | 3053.215  |
| U94902    | 2742.04   | 3633.675  | NM_016465 | 9602.878  | 10104.795 |
| U46214    | 6708.656  | 8373.209  | NM_000328 | 1935.938  | 1397.99   |
| NM_004765 | 1944.743  | 2007.162  | NM_013399 | 3270.825  | 2821.343  |
| AK022246  | 2095.978  | 2262.647  | NM_002410 | 1836.821  | 1317.089  |
| X75684    | 1687.688  | 1267.314  | AL122120  | 7733.902  | 5908.991  |
| AF113701  | 21690.848 | 16587.648 | NM_014684 | 2564.507  | 2057.89   |
| Y11158    | 3381.053  | 4519.794  | AK027247  | 3184.168  | 2571.13   |



|           |           |           |           |           |           |
|-----------|-----------|-----------|-----------|-----------|-----------|
| NM_006771 | 26477.211 | 39866.793 | NM_002480 | 15551.657 | 15822.24  |
| NM_014718 | 4825.349  | 4863.147  | NM_017571 | 16876.174 | 11558.667 |
| NM_000632 | 1787.411  | 1447.48   | L03169    | 2281.257  | 1651.102  |
| AB002298  | 1386.245  | 1434.976  | M81349    | 352.694   | 447.988   |
| AK024488  | 1539.396  | 2321.109  | NM_001928 | 6352.423  | 4858.234  |
| AK023249  | 58198.344 | 57580.797 | NM_013989 | 9207.516  | 7473.539  |
| NM_017442 | 11771.105 | 9072.319  | NM_001738 | 2708.557  | 2355.638  |
| NM_000743 | 2553.419  | 2717.002  | NM_001055 | 56567.164 | 47167.441 |
| NM_007218 | 2966.051  | 3506.226  | NM_002271 | 61630.445 | 61880.633 |
| Z25436    | 3157.044  | 5756.653  | NM_018361 | 8063.642  | 6648.162  |
| NM_005275 | 5083.255  | 8954.669  | NM_019893 | 1285.221  | 1265.957  |
| NM_003844 | 41747.305 | 49036.707 | AB040966  | 13833.603 | 16575.535 |
| NM_002005 | 21572.982 | 23099.172 | NM_020132 | 15988.683 | 16590.682 |
| NM_012324 | 19603.217 | 24938.207 | NM_016467 | 14328.34  | 11550.422 |
| AK000039  | 3456.233  | 4033.931  | NM_007253 | 7390.311  | 8142.905  |
| AL137352  | 3230.797  | 3363.672  | NM_019106 | 3954.492  | 4004.594  |
| NM_014749 | 2185.654  | 1997.69   | L08436    | 1608.89   | 1554.155  |
| NM_004489 | 6882.252  | 6865.327  | AB033002  | 2698.292  | 2831.156  |
| BF240063  | 1439.733  | 1110.831  | NM_000558 | 32749.566 | 35615.121 |
| BI461699  | 1808.562  | 2061.965  | NM_004198 | 1709.748  | 1636.495  |
| AK090409  | 1860.556  | 2435.763  | NM_014170 | 6984.333  | 11035.861 |
| AF172264  | 810.689   | 1420.864  | AF116652  | 59620.164 | 65828.188 |
| U80756    | 51846.539 | 52832.285 | NM_000835 | 1426.229  | 1570.066  |
| NM_018161 | 4804.038  | 5165.795  | AF090906  | 5019.474  | 2928.236  |
| NM_005248 | 36486.281 | 31587.396 | AB023219  | 7483.316  | 4605.651  |
| NM_004810 | 3296.683  | 3313.83   | NM_014148 | 1044.42   | 776.475   |
| AL117629  | 5402.879  | 5136.58   | NM_018835 | 6395.52   | 5271.574  |
| NM_002595 | 2260.483  | 3286.326  | NM_003401 | 3572.35   | 2927.816  |
| NM_015726 | 1840.414  | 1169.599  | AL137724  | 6169.945  | 5222.93   |
| AF174604  | 4040.698  | 3813.653  | NM_004758 | 8020.267  | 6548.577  |
| AB002379  | 11368.22  | 9562.689  | NM_002913 | 5129.619  | 6188.53   |
| AF113223  | 4007.903  | 3745.007  | AK022797  | 4110.509  | 6049.074  |
| AB046851  | 891.783   | 858.441   | NM_007370 | 9575.366  | 16473.438 |
| NM_005745 | 21536.533 | 28190.918 | NM_006231 | 2325.793  | 3226.368  |
| NM_019858 | 62041.977 | 73548.195 | AK023471  | 2894.793  | 3139.763  |
| NM_014548 | 4548.223  | 4980.503  | AF044578  | 11209.602 | 9323.153  |
| NM_004437 | 1617.199  | 2739.823  | NM_001948 | 6886.643  | 7258.689  |
| AK025875  | 1612.987  | 1446.209  | NM_001067 | 20367.982 | 18658.666 |
| BC014152  | 62050.727 | 65224.281 | NM_014034 | 12648.118 | 20632.541 |
| NM_000226 | 7653.027  | 7194.404  | NM_005335 | 38788.633 | 39107.516 |
| AB037779  | 64620.957 | 57933.371 | J04474    | 14564.988 | 13712.928 |
| NM_000393 | 1179.422  | 1731.637  | NM_003761 | 56015.715 | 49849.93  |
| NM_012339 | 2157.346  | 2318.293  | NM_004726 | 1505.401  | 1277.314  |
| NM_005787 | 28575.01  | 22973.02  | NM_014011 | 11034.009 | 8280.155  |
| NM_002143 | 4582.266  | 4774.133  | AK025994  | 8117.082  | 6549.701  |
| AF284421  | 46139.805 | 44475.055 | L29306    | 2608.389  | 1445.545  |
| NM_006048 | 12591.051 | 15237.381 | CY3Cy5    | 5762.312  | 277.491   |
| NM_006360 | 45406.656 | 33661.34  | AK022262  | 4152.939  | 5172.932  |
| NM_003968 | 6226.772  | 5263.003  | AF088039  | 66348.813 | 64195.488 |
| NM_002810 | 63472.633 | 73538.961 | AF086220  | 4365.824  | 5512.067  |
| NM_003343 | 20622.416 | 22137.283 | AK023941  | 3374.486  | 3028.088  |
| NM_002789 | 42353.887 | 51295.48  | AF086265  | 976.528   | 857.04    |
| NM_003470 | 18757.328 | 28229.373 | AL390083  | 14907.726 | 7204.392  |

|           |           |           |           |           |           |
|-----------|-----------|-----------|-----------|-----------|-----------|
| AL080137  | 1420.641  | 3589.149  | AB020702  | 823.393   | 659.02    |
| NM_017679 | 5082.203  | 5971.536  | AL050227  | 984.507   | 782.269   |
| AF155103  | 4654.021  | 4767.195  | AF085905  | 830.086   | 1100.515  |
| NM_017704 | 3488.638  | 3380.348  | AK075087  | 1388.113  | 1483.919  |
| BC006359  | 4181.637  | 4818.559  | AK026571  | 7769.509  | 9652.763  |
| AK026127  | 1730.998  | 1768.283  | AK024673  | 9858.682  | 12797.788 |
| BC016062  | 23073.225 | 19677.094 | AF070618  | 2354.961  | 1605.232  |
| NM_002814 | 5762.175  | 6877.052  | SR2       | 64843.457 | 67807.656 |
| NM_012250 | 17464.717 | 13776.879 | SR4       | 29290.162 | 40556.16  |
| NM_006283 | 13647.38  | 18610.264 | SR6       | 3323.001  | 4606.455  |
| NM_017530 | 8527.937  | 8014.619  | SR8       | 15064.833 | 51861.492 |
| AL360183  | 3146.026  | 3107.293  | SR10      | 48497.07  | 23057.76  |
| AK027046  | 1687.391  | 1267.12   | CY3Cy5    | 10604.516 | 469.128   |
| NM_003113 | 5286.38   | 4415.956  | AL049365  | 30311.188 | 35732.18  |
| NM_016578 | 8591.974  | 10328.94  | AB007877  | 785.244   | 1440.978  |
| NM_003822 | 1004.207  | 1015.493  | AK025132  | 1708.053  | 2518.376  |
| NM_015832 | 16422.324 | 11148.671 | AK025157  | 9257.815  | 10575.9   |
| NM_001326 | 11707.183 | 8776.208  | AK022001  | 1158.55   | 1465.663  |
| NM_014319 | 2550.035  | 2819.046  | AK022633  | 2566.424  | 2909.603  |
| NM_004865 | 9599.957  | 9752.987  | AK027199  | 880.629   | 664.494   |
| NM_017923 | 1209.736  | 1310.154  | AK000079  | 1685.888  | 1217.507  |
| AB019566  | 67111.063 | 72782.789 | NM_012243 | 3178.617  | 1308.31   |
| NM_000981 | 66278.383 | 71960.102 | AK025743  | 4577.792  | 2398.279  |
| NM_002047 | 38336.859 | 25213.977 | AL137466  | 902.56    | 818.211   |
| NM_001031 | 67082.391 | 69351.5   | AL122040  | 779.8     | 1149.61   |
| NM_007208 | 23574.479 | 19552.385 | AK023974  | 7031.656  | 7403.576  |
| NM_000996 | 65241.316 | 63194.391 | AK023768  | 3430.746  | 4589.871  |
| NM_000985 | 27708.664 | 20354.658 | NM_014729 | 1535.729  | 2634.491  |
| BF130622  | 26271.127 | 15979.466 | AF147335  | 3093.704  | 1755.453  |
| NM_003859 | 17937.223 | 20044.781 | AK000711  | 4675.12   | 7750.8    |
| NM_001861 | 2215.287  | 2418.253  | BI768072  | 2602.973  | 3447.02   |
| AK025558  | 19516.725 | 18241.973 | AK022216  | 20382.234 | 26098.74  |
| AK024355  | 3028.729  | 3125.431  | AK025812  | 21390.262 | 25466.611 |
| NM_001864 | 48210.316 | 45610.941 | AK021459  | 581.097   | 1574.598  |
| NM_003477 | 24018.092 | 26172.258 | U00960    | 4407.88   | 5983.063  |
| NM_002654 | 55057.836 | 55550.059 | AK026419  | 2553.861  | 2855.629  |
| NM_015478 | 1712.454  | 1664.393  | AK026789  | 832.188   | 858.013   |
| NM_020382 | 5305.547  | 4313.013  | AK025276  | 14278.909 | 14871.113 |
| NM_007192 | 7474.553  | 6363.01   | AK026027  | 887.768   | 724.492   |
| AB002337  | 14863.893 | 13674.021 | AK026457  | 6830.301  | 5771.791  |
| NM_014933 | 9147.325  | 8849.061  | AK026825  | 3077.83   | 3039.156  |
| NM_003076 | 39090.68  | 35298.723 | NM_013355 | 2747.266  | 1427.308  |
| AK024250  | 1166.545  | 852.033   | NM_003847 | 61974.418 | 58709.355 |
| NM_003456 | 15861.087 | 14197.949 | AK021973  | 2694.107  | 4602.815  |
| NM_002585 | 9226.326  | 8372.773  | AL050165  | 65759.406 | 72651.477 |
| AB029016  | 2429.803  | 2802.083  | AL117445  | 5259.61   | 8054.6    |
| NM_002701 | 3325.907  | 2095.8    | AL122113  | 18913.547 | 25536.23  |
| NM_005693 | 864.915   | 751.029   | AK024415  | 6340.745  | 9149.507  |
| X97303    | 14467.585 | 10889.797 | AK023515  | 1349.814  | 1699.889  |
| AJ290954  | 3276.534  | 4160.371  | AL137544  | 560.669   | 1022.642  |
| AK025451  | 4349.721  | 5564.778  | AL137623  | 60637.348 | 51908.176 |
| NM_002783 | 11645.676 | 15300.073 | AK026485  | 1359.748  | 1750.594  |
| X52005    | 23510.625 | 37291.398 | AL137361  | 492.63    | 706.998   |

|           |           |           |           |           |           |
|-----------|-----------|-----------|-----------|-----------|-----------|
| NM_001047 | 1331.6    | 2192.753  | AJ227874  | 3261.538  | 3071.124  |
| AK024396  | 12120.479 | 16760.215 | AF056418  | 822.874   | 788.366   |
| U58514    | 3291.465  | 4295.026  | AF127772  | 908.439   | 1321.273  |
| M57627    | 796.908   | 1192.154  | AF009276  | 1495.014  | 1759.777  |
| W74254    | 992.794   | 1064.182  | AF056428  | 42880.219 | 41454.66  |
| M58603    | 3365.127  | 3358.215  | AF069136  | 1214.888  | 1428.157  |
| AA443286  | 3672.675  | 2718.946  | AK021594  | 2276.882  | 3137.027  |
| AB003334  | 12693.881 | 12426.332 | AK002150  | 1443.5    | 2089.116  |
| AW276315  | 2795.334  | 3388.933  | AK021635  | 3393.898  | 4773.074  |
| AA490737  | 6747.491  | 5745.472  | AK021856  | 5567.582  | 7605.244  |
| AI878886  | 40165.883 | 44091.266 | S97393    | 1940.491  | 3747.949  |
| BG697179  | 21466.357 | 24532.182 | BE698533  | 839.284   | 1619.049  |
| NM_002136 | 66066.828 | 67301.313 | NM_017929 | 2350.795  | 2588.793  |
| BM012504  | 18975.854 | 20919.889 | NM_018605 | 222.341   | 1063.909  |
| AA664145  | 4277.207  | 4567.806  | NM_018472 | 3136.489  | 3323.641  |
| X72308    | 64392.43  | 62293.246 | AL133108  | 837.746   | 1159.625  |
| T50790    | 4507.995  | 4259.008  | AF085923  | 1188.059  | 949.475   |
| R48168    | 16604.91  | 15838.63  | AJ008128  | 62715.719 | 55225.98  |
| BC008837  | 2282.963  | 2083.345  | AL449243  | 22225.824 | 11381.988 |
| NM_006819 | 61170.086 | 56217.813 | M12211    | 14689.24  | 10948.33  |
| NM_014744 | 3664.249  | 4392.668  | AJ008131  | 63631.734 | 62470.086 |
| AF146759  | 4077.985  | 6494.308  | AF086338  | 1318.48   | 1395.85   |
| AB032993  | 9027.336  | 9009.345  | NM_006272 | 1319.09   | 1096.447  |
| NM_000854 | 4097.062  | 3379.793  | AK024303  | 2297.468  | 2723.006  |
| NM_001901 | 578.3     | 973.038   | AL160131  | 23914.826 | 25093.346 |
| AL117423  | 9355.727  | 13271.658 | AF086045  | 6217.343  | 6550.052  |
| NM_002084 | 2335.006  | 3272.801  | AK027069  | 2066.46   | 3066.119  |
| D16892    | 9365.919  | 7728.789  | AK026916  | 7656.311  | 9413.924  |
| NM_004750 | 3972.372  | 4688.769  | AK026914  | 8771.462  | 11034.87  |
| NM_007295 | 7053.683  | 7374.459  | Y13808    | 1461.284  | 1951.558  |
| AK023317  | 1054.151  | 1336.125  | Y11166    | 5992.389  | 7001.38   |
| NM_003651 | 34506.156 | 36342.031 | AK024942  | 8319.576  | 8487.382  |
| NM_014012 | 1817.702  | 1875.526  | AJ227873  | 29037.566 | 30720.348 |
| NM_000418 | 2472.9    | 2970.163  | AK022886  | 6928.444  | 7265.867  |
| NM_013246 | 1809.571  | 2250.141  | AK024665  | 9019.335  | 10582.751 |
| NM_018431 | 968.888   | 1316.028  | AF147363  | 1350.891  | 1556.442  |
| NM_000591 | 4069.095  | 5201.041  | AJ227880  | 1609.586  | 1989.338  |
| NM_000565 | 2379.67   | 2581.137  | AK000691  | 3434.741  | 3585.942  |
| NM_002019 | 395.973   | 547.474   | AK001448  | 3387.421  | 3432.766  |
| AF253318  | 4493.359  | 4301.55   | AK026890  | 1776.416  | 1728.919  |
| NM_017767 | 28488.775 | 29827.453 | AF131817  | 1757.895  | 939.885   |
| NM_003262 | 6338.843  | 7232.224  | AL049321  | 4530.855  | 2859.143  |
| NM_020125 | 920.534   | 1239.172  | NM_003546 | 6543.612  | 4227.089  |
| AK022832  | 2779.22   | 3568.576  | AF118077  | 9167.904  | 8619.994  |
| NM_017784 | 1398.606  | 1404.05   | AL137625  | 1996.348  | 2289.977  |
| NM_014641 | 2995.311  | 4180.372  | AK025750  | 2745.877  | 2732.664  |
| NM_004462 | 3797.192  | 3545.118  | BF031253  | 3273.459  | 3433.082  |
| NM_000343 | 844.531   | 950.774   | AK025783  | 5025.261  | 3410.941  |
| NM_020246 | 3291.215  | 4669.61   | AK024514  | 2194.871  | 3346.637  |
| NM_016354 | 3944.483  | 6159.454  | NM_020119 | 4674.373  | 6090.801  |
| NM_001044 | 1169.241  | 1471.163  | AL049417  | 9599.527  | 14235.113 |
| NM_004644 | 2234.335  | 3658.153  | AK023507  | 2136.17   | 4250.862  |
| AV681967  | 1629.963  | 1771.9    | NM_005169 | 32165.545 | 39003.344 |

|           |           |           |           |           |           |
|-----------|-----------|-----------|-----------|-----------|-----------|
| NM_018250 | 2231.945  | 2353.056  | AL109818  | 1701.098  | 2388.585  |
| NM_016553 | 11655.854 | 12116.045 | NM_000068 | 8285.043  | 7852.92   |
| AB023136  | 2681.348  | 3292.937  | AB033046  | 27782.23  | 31493.162 |
| NM_003795 | 44925.484 | 31832.055 | NM_015918 | 13084.089 | 17310.668 |
| NM_014232 | 5264.749  | 5781.873  | AK023228  | 1295.241  | 2069.778  |
| NM_005701 | 2656.302  | 1537.576  | NM_013249 | 985.208   | 1515.087  |
| NM_001231 | 858.921   | 1478.083  | AB029041  | 65954.641 | 66731.203 |
| AB023139  | 13582.6   | 16611.934 | AK026642  | 1630.469  | 1641.478  |
| NM_017885 | 7037.937  | 12973.416 | AL359063  | 1319.559  | 1485.183  |
| D80004    | 994.921   | 1498.639  | AL079292  | 4459.954  | 4845.236  |
| NM_000946 | 5560.888  | 8485.507  | X89667    | 16226.157 | 14270.597 |
| NM_016070 | 6676.26   | 15271.136 | NM_014027 | 7520.76   | 5415.902  |
| NM_016390 | 3691.765  | 6417.5    | NM_020467 | 586.573   | 819.138   |
| NM_016101 | 9794.785  | 10100.124 | AF116621  | 10648.079 | 8072.092  |
| NM_005859 | 65470.34  | 58405.375 | AF086554  | 11939.058 | 10878.383 |
| NM_020313 | 1389.042  | 1097.406  | AL390136  | 58442.348 | 46968.488 |
| NM_014628 | 5737.339  | 5050.011  | AK023156  | 1184.266  | 820.731   |
| AK025630  | 2860.844  | 3483.843  | AF086398  | 61887.773 | 60374.469 |
| AL365404  | 52274.609 | 54978.281 | AK024545  | 3686.484  | 1641.428  |
| AK022907  | 27158.26  | 38070.965 | AK023444  | 2528.969  | 2938.281  |
| NM_014793 | 4518.73   | 7825.807  | AK025953  | 2946.986  | 5258.719  |
| NM_004245 | 5656.625  | 5911.566  | NM_003180 | 4674.95   | 6413.878  |
| NM_003241 | 3385.124  | 3484.907  | AF086406  | 41157.051 | 49204.336 |
| NM_002685 | 5092.366  | 3952.428  | D17216    | 9605.057  | 15054.662 |
| AK024504  | 2377.932  | 1452.652  | AL137581  | 4423.095  | 7066.283  |
| AF039023  | 2837.357  | 2122.838  | J05158    | 1332.644  | 2113.743  |
| NM_005511 | 4359.806  | 3453.548  | NM_015564 | 2889.69   | 4331.138  |
| NM_014698 | 55750.992 | 40132.34  | AF160476  | 1979.22   | 2441.743  |
| NM_018475 | 15928.429 | 8397.905  | L22650    | 4093.797  | 4334.592  |
| AK025451  | 5283.093  | 9093.54   | AB014520  | 63917.035 | 60295.781 |
| NM_002783 | 10177.401 | 15454.466 | AF161420  | 3500.245  | 5015.402  |
| X52005    | 25740.48  | 49534.621 | NM_004907 | 10697.139 | 12002.518 |
| NM_001047 | 1302.585  | 1615.12   | NM_002891 | 1327.649  | 1274.339  |
| AK024396  | 11963.675 | 17441.299 | NM_001775 | 5274.907  | 4835.229  |
| U58514    | 3367.023  | 7195.067  | BE083789  | 965.173   | 787.761   |
| M57627    | 1855.105  | 4805.245  | X04526    | 37048.133 | 13590.243 |
| W74254    | 1517.704  | 2409.475  | D26067    | 5355.171  | 4095.264  |
| M58603    | 8349.465  | 8398.196  | AF227924  | 5398.871  | 2677.881  |
| AA443286  | 3543.772  | 2746.898  | NM_005716 | 59655.121 | 44803.855 |
| AB003334  | 10959.077 | 10140.84  | NM_006183 | 6014.359  | 5328.603  |
| AW276315  | 2655.734  | 2796.482  | NM_016087 | 719.429   | 976.423   |
| AA490737  | 6473.027  | 5991.406  | S59184    | 3403.01   | 2291.797  |
| AI878886  | 39558.395 | 43524.211 | NM_005130 | 1038.449  | 975.998   |
| BG697179  | 32631.99  | 41957.906 | NM_006661 | 13811.95  | 4451.733  |
| NM_002136 | 60745.301 | 73110.992 | M54886    | 2488.812  | 1615.938  |
| BM012504  | 19875.93  | 22994.971 | NM_005746 | 38291.949 | 53762.711 |
| AA664145  | 4987.247  | 4580.604  | NM_004588 | 3111.347  | 5232.235  |
| X72308    | 65081.293 | 54954.023 | U16126    | 5998.51   | 8003.348  |
| T50790    | 5754.394  | 4277.476  | NM_004572 | 808.929   | 1328.405  |
| R48168    | 16357.881 | 8342.121  | NM_002172 | 64221.367 | 70195.758 |
| AB040954  | 7372.221  | 4077.93   | AJ008144  | 2739.676  | 3829.504  |
| NM_002081 | 1629.598  | 684.468   | NM_007314 | 14503.553 | 17305.408 |
| AF146759  | 4488.716  | 7064.839  | NM_016073 | 2382.306  | 2910.867  |

|           |           |           |           |           |           |
|-----------|-----------|-----------|-----------|-----------|-----------|
| AB032993  | 10189.631 | 10228.83  | NM_006600 | 33827.066 | 38171.246 |
| NM_000854 | 5728.846  | 7370.888  | AF297709  | 9616.158  | 10786.93  |
| NM_001901 | 773.728   | 952.607   | L77564    | 2267.388  | 2468.715  |
| AL117423  | 11928.69  | 19207.348 | NM_015384 | 5544.478  | 5971.379  |
| NM_006140 | 667.288   | 1327.507  | AK023327  | 9481.779  | 8593.666  |
| NM_002084 | 2771.509  | 3998.086  | AB046858  | 4128.262  | 3719.585  |
| D16892    | 12767.156 | 9053.769  | D50914    | 14974.999 | 11939.948 |
| NM_004750 | 3872.45   | 4647.392  | BE878692  | 1184.021  | 583.86    |
| NM_007295 | 7788.265  | 7609.446  | NM_002007 | 1917.541  | 1619.151  |
| AK023317  | 366.371   | 1366.466  | NM_002305 | 18904.076 | 9374.823  |
| NM_003651 | 34287.727 | 24232.385 | AK025439  | 7837.75   | 4517.335  |
| NM_014012 | 3786.228  | 2891.997  | NM_001737 | 14966.701 | 10695.384 |
| NM_000418 | 3074.062  | 2086.85   | Z36784    | 2206.548  | 1305.755  |
| NM_013246 | 2546.813  | 2457.431  | NM_016626 | 19877.242 | 10176.465 |
| NM_000591 | 5588.422  | 3749.801  | NM_007213 | 2744.566  | 1146.289  |
| NM_000565 | 2621.262  | 1774.574  | AF131842  | 1143.036  | 1604.566  |
| AF253318  | 4650.222  | 3707.515  | NM_019064 | 4049.508  | 6135.291  |
| NM_017767 | 27909.906 | 27801.777 | NM_018939 | 841.703   | 978.775   |
| NM_006148 | 2686.685  | 3526.396  | NM_000094 | 57748.453 | 64253.152 |
| AJ290954  | 3934.547  | 6003.585  | AK024732  | 22140.117 | 26066.498 |
| AK022832  | 3069.167  | 3046.065  | NM_016302 | 3036.27   | 4290.042  |
| NM_017784 | 1503.702  | 1205.598  | NM_004159 | 40907.801 | 46720.777 |
| NM_014641 | 3627.846  | 4751.007  | AK021866  | 1136.48   | 1582.865  |
| NM_004462 | 5108.932  | 5567.712  | NM_003249 | 11656.595 | 17474.727 |
| NM_020246 | 3510.174  | 2295.609  | M21897    | 2913.494  | 3379.542  |
| NM_016354 | 4489.58   | 3275.93   | AF301463  | 2245.409  | 2796.898  |
| NM_001044 | 1329.683  | 643.54    | NM_015984 | 11860.764 | 14196.636 |
| NM_004644 | 2060.798  | 2165.112  | AK022471  | 493.372   | 942.926   |
| AV681967  | 3531.429  | 3519.696  | NM_006894 | 8073.186  | 4340.143  |
| NM_018250 | 3270.685  | 2809.24   | AK023031  | 5594.836  | 2631.884  |
| NM_016553 | 13519.547 | 15855.956 | NM_005717 | 67372.773 | 59700.922 |
| AB023136  | 1033.784  | 1353.285  | NM_012090 | 5324.834  | 2383.272  |
| NM_003795 | 61407.07  | 56906.504 | BE793385  | 2463.516  | 2899.146  |
| NM_014232 | 8629.821  | 10315.708 | AF177292  | 1749.945  | 730.818   |
| NM_005701 | 2787.153  | 1970.473  | NM_003088 | 14177.105 | 6636.766  |
| NM_001231 | 1341.413  | 1132.895  | AF043290  | 3330.592  | 693.143   |
| NM_006819 | 63282.867 | 58253.82  | NM_004082 | 9758.569  | 13265.836 |
| NM_014744 | 4098.732  | 4072.745  | NM_014398 | 26926.123 | 34980.359 |
| D80004    | 985.105   | 644.302   | NM_005934 | 59583.063 | 59312.801 |
| NM_000946 | 6110.596  | 4200.586  | NM_002614 | 4640.729  | 5526.034  |
| NM_016070 | 3408.084  | 2123.353  | NM_005655 | 16156.445 | 21367.885 |
| NM_016390 | 4243.804  | 4229.125  | NM_002698 | 11525.321 | 21469.438 |
| NM_016101 | 11632.513 | 9139.771  | AF069138  | 1357.219  | 2214.042  |
| NM_005859 | 65805.625 | 56561.785 | NM_002148 | 2130.972  | 3433.948  |
| NM_020313 | 1323.646  | 671.799   | AL137449  | 3799.354  | 4648.483  |
| NM_014628 | 5683.751  | 4025.829  | U88153    | 10301.677 | 11955.892 |
| AK025630  | 3823.552  | 4157.467  | X03910    | 46025.063 | 51684.145 |
| AK022907  | 38106.523 | 40424.988 | NM_018428 | 49404.559 | 46875.945 |
| NM_014793 | 6101.848  | 7780.01   | NM_005058 | 1225.673  | 1410.649  |
| NM_004245 | 15956.576 | 15496.797 | NM_006924 | 55453.598 | 54964.539 |
| NM_003241 | 6617.114  | 7197.043  | NM_016024 | 10559.719 | 8030.629  |
| NM_002685 | 9857.491  | 10347.479 | NM_018107 | 7458.99   | 4936.211  |
| AK024504  | 3882.26   | 3572.753  | NM_012279 | 2482.822  | 1327.483  |

|           |           |           |           |           |           |
|-----------|-----------|-----------|-----------|-----------|-----------|
| AF039023  | 4469.3    | 5239.705  | NM_018387 | 38366.105 | 14968.588 |
| NM_005511 | 6203.709  | 7310.749  | BF310673  | 5549.222  | 2272.918  |
| NM_014698 | 61714.805 | 56154.52  | R97012    | 65624.281 | 50499.402 |
| NM_018475 | 11315.391 | 8055.848  | U77700    | 18581.354 | 5321.148  |
| NM_003262 | 8570.326  | 6760.598  | NM_006567 | 20708.859 | 9411.981  |
| NM_020125 | 1376.229  | 1058.294  | AF038554  | 47616.449 | 17867.889 |
| X52005    | 27758.973 | 25954.721 | AF264621  | 26723.152 | 6548.895  |
| NM_001047 | 1688.976  | 1330.281  | NM_005875 | 47499.59  | 58146.855 |
| AK024396  | 16981.205 | 14975.909 | NM_004184 | 43539.227 | 46985.973 |
| U58514    | 3721.584  | 3038.667  | NM_000439 | 3213.608  | 4377.121  |
| M57627    | 973.4     | 644.956   | AJ295148  | 2529.467  | 3448.805  |
| W74254    | 1458.428  | 1199.227  | AF176701  | 1560.799  | 2282.093  |
| M58603    | 11813.605 | 10928.642 | NM_000456 | 8198.737  | 10384.847 |
| AA443286  | 6096.183  | 4700.151  | AF190122  | 804.906   | 1235.62   |
| AB003334  | 20758.271 | 22678.234 | NM_002496 | 54763.008 | 53540.035 |
| AW276315  | 4675.159  | 6223.982  | NM_016243 | 10150.499 | 11429.628 |
| AA490737  | 11779.79  | 11956.702 | X53943    | 1222.403  | 1749.782  |
| BG697179  | 43660.281 | 45935.246 | NM_014402 | 65501.098 | 72283.57  |
| NM_002136 | 67011.055 | 69749.344 | NM_004649 | 26886.424 | 30573.559 |
| BM012504  | 31743.996 | 36216.734 | NM_006540 | 12557.352 | 11226.235 |
| AA664145  | 9985.474  | 11867.126 | NM_017766 | 4878.698  | 5267.542  |
| X72308    | 59070.508 | 62558.684 | NM_002811 | 21123.6   | 14925.853 |
| T70999    | 1363.855  | 1980.684  | NM_020310 | 7032.604  | 4963.295  |
| T50790    | 11422.92  | 11021.929 | AK024444  | 1256.985  | 773.353   |
| R48168    | 27340.473 | 25016.572 | NM_005802 | 9314.11   | 4367.798  |
| AB040954  | 11412.941 | 12355.518 | AB002331  | 6108.51   | 3553.365  |
| NM_002081 | 1897.539  | 2047.455  | NM_002504 | 8410.738  | 3471.222  |
| AB023139  | 17468.365 | 15713.423 | AB046775  | 8727.618  | 3700.738  |
| NM_017885 | 8240.628  | 7652.606  | X74862    | 3385.785  | 1517.111  |
| D16892    | 15260.077 | 11209.46  | X65663    | 23135.268 | 7010.192  |
| NM_004750 | 5619.007  | 8111.473  | NM_003185 | 5997.331  | 2406.049  |
| NM_007295 | 13164.823 | 16428.123 | NM_004456 | 13228.439 | 3304.841  |
| AK023317  | 579.915   | 1018.879  | NM_004284 | 24702.125 | 29409.715 |
| NM_003651 | 44711.371 | 43407.07  | NM_007129 | 23875.406 | 32312.205 |
| NM_014012 | 1430.227  | 1956.576  | AY004253  | 37624.797 | 42926.223 |
| NM_000418 | 4548.552  | 5528.446  | Z46967    | 3236.163  | 4468.79   |
| NM_013246 | 3219.511  | 4881.395  | NM_017583 | 24901.834 | 30442.248 |
| NM_018431 | 1549.849  | 2103.037  | Y16132    | 54320.422 | 53968.711 |
| NM_000591 | 7236.358  | 9274.502  | NM_016593 | 5729.244  | 8428.612  |
| NM_000565 | 4525.101  | 5763.367  | NM_002521 | 4207.029  | 5578.507  |
| NM_002019 | 1353.218  | 2067.652  | NM_001150 | 6279.653  | 7878.324  |
| AF253318  | 7423.318  | 7857.129  | NM_002856 | 13912.986 | 19442     |
| NM_017767 | 44180.469 | 46508.016 | NM_003225 | 2145.656  | 2916.427  |
| AK024848  | 26696.545 | 31593.256 | NM_000096 | 2144.95   | 2521.447  |
| NM_004852 | 1056.588  | 1380.301  | AA418251  | 1782.036  | 2418.974  |
| NM_000543 | 1758.91   | 1503.699  | AA143087  | 44962.148 | 43031.367 |
| U06699    | 37625.473 | 42086.109 | U25804    | 613.018   | 695.69    |
| AJ290954  | 4070.425  | 3302.023  | BI870965  | 26858.738 | 16624.615 |
| AK025451  | 10325.093 | 5548.091  | BI835536  | 19022.018 | 18104.521 |
| NM_002783 | 8579.714  | 5345.845  | BF205051  | 12972.107 | 10984.596 |
| NM_003038 | 2809.922  | 3707.147  | X02761    | 35418.957 | 14944.021 |
| NM_018155 | 22254.928 | 27581.096 | M91463    | 4004.731  | 1404.276  |
| AL050358  | 7564.983  | 10903.888 | U88317    | 1018.16   | 479.724   |

|           |           |           |           |           |           |
|-----------|-----------|-----------|-----------|-----------|-----------|
| NM_004731 | 1905.618  | 1836.146  | J03060    | 6106.517  | 2140.66   |
| NM_000544 | 7703.978  | 7420.1    | X54156    | 2255.512  | 438.692   |
| NM_001044 | 1836.691  | 2397.229  | NM_003743 | 5454.178  | 5983.006  |
| NM_004644 | 3644.886  | 5412.182  | AA829383  | 23992.068 | 33174.602 |
| AV681967  | 2882.137  | 3847.48   | L22524    | 470.008   | 1663.28   |
| NM_018250 | 3555.361  | 3808.935  | AF012434  | 59970.133 | 64957.371 |
| NM_016553 | 16749.016 | 21866.686 | AF131748  | 14945.229 | 20406.83  |
| AB023136  | 1125.264  | 1597.527  | NM_002349 | 3922.369  | 5849.165  |
| NM_003795 | 60934.688 | 54984.133 | NM_005080 | 32465.725 | 47770.695 |
| NM_014232 | 9856.723  | 12767.676 | NM_004887 | 19906.201 | 26677.658 |
| NM_005701 | 3796.642  | 3857.118  | NM_006404 | 2463.335  | 3385.954  |
| NM_001231 | 1274.899  | 1740.203  | NM_014795 | 3192.671  | 3383.536  |
| NM_006819 | 64459.215 | 60556.469 | NM_002986 | 4886.04   | 6831.971  |
| NM_014744 | 4430.717  | 3852.546  | M15330    | 5142.551  | 7938.06   |
| AF146759  | 4810.649  | 4049.896  | NM_014396 | 8978.075  | 10396.754 |
| AB032993  | 10462.892 | 6177.258  | AK027201  | 5844.973  | 6114.616  |
| NM_000854 | 6408.595  | 2956.529  | NM_000489 | 54047.805 | 47896.711 |
| AL117423  | 10675.261 | 5333.336  | X98507    | 20211.938 | 13226.924 |
| NM_006140 | 4317.579  | 1703.278  | NM_016030 | 61062.059 | 66573.461 |
| NM_002084 | 4098.327  | 2097.123  | NM_014669 | 22970.178 | 24992.301 |
| NM_005511 | 7981.535  | 12173.952 | NM_005652 | 60532.715 | 59838.277 |
| NM_014698 | 57946.32  | 58934.621 | AK026686  | 1425.313  | 1116.935  |
| NM_018475 | 12955.364 | 16168.698 | NM_005902 | 7332.741  | 3680.282  |
| NM_003262 | 9387.044  | 11084.637 | NM_002850 | 62642.09  | 59931.316 |
| NM_020125 | 1348.075  | 1096.158  | NM_005302 | 795.003   | 461.384   |
| AK022832  | 5050.028  | 7091.239  | NM_004302 | 1984.553  | 508.928   |
| NM_017784 | 2695.164  | 2773.755  | NM_005903 | 5336.033  | 5860.574  |
| NM_014641 | 4438.957  | 2613.378  | NM_000861 | 5341.741  | 7059.452  |
| NM_004462 | 6906.131  | 3778.484  | NM_000024 | 895.093   | 1452.391  |
| AB020664  | 1774.374  | 1030.943  | U77493    | 4294.062  | 4631.403  |
| NM_006640 | 28934.686 | 13312.909 | NM_019062 | 5592.805  | 6947.396  |
| NM_019112 | 8634.376  | 5166.911  | AL133064  | 8766.25   | 11319.935 |
| NM_012336 | 8610.543  | 4717.062  | NM_006227 | 14504.483 | 20738.936 |
| NM_020246 | 3431.259  | 1289.573  | NM_002905 | 14760.357 | 23001.754 |
| NM_000084 | 5558.976  | 2805.276  | NM_000700 | 9145.523  | 14254.668 |
| NM_016354 | 3287.076  | 1493.018  | NM_019028 | 53165.031 | 50664.547 |
| AB040954  | 12583.374 | 13985.821 | NM_000431 | 6046.932  | 7267.348  |
| NM_002081 | 1778.12   | 1728.643  | NM_013421 | 8862.18   | 10098.117 |
| AB023139  | 14158.168 | 10585.308 | NM_012474 | 12732.744 | 14672.333 |
| NM_017885 | 4422.114  | 2002.231  | AB033118  | 3117.609  | 3144.209  |
| D80004    | 1146.793  | 530.69    | NM_019606 | 10505.564 | 6116.112  |
| NM_000946 | 5940.765  | 2509.925  | NM_001690 | 21290.648 | 8922.251  |
| NM_016070 | 4494.927  | 2631.149  | AF034374  | 42958.461 | 20111.57  |
| NM_016390 | 3420.546  | 1370.674  | NM_001682 | 8426.109  | 4341.391  |
| NM_016101 | 10894.736 | 5105.269  | AK025130  | 7929.882  | 5444.624  |
| NM_005859 | 81504.008 | 61025.887 | AK023232  | 24071.563 | 14203.948 |
| NM_020313 | 1304.314  | 555.443   | NM_006380 | 4742.774  | 2288.466  |
| NM_014628 | 5294.698  | 2652.558  | AB020710  | 4215.442  | 1769.366  |
| AK025630  | 2941.806  | 1637.413  | NM_016174 | 25269.023 | 6434.594  |
| AL365404  | 53872.762 | 31396.121 | NM_020377 | 4710.555  | 2501.674  |
| AK022907  | 21119.553 | 10172.313 | U88896    | 7067.066  | 9011.397  |
| NM_014793 | 3662.9    | 2061.611  | AF116702  | 62575.961 | 65384.074 |
| NM_004245 | 8646.04   | 4573.002  | NM_005724 | 21514.791 | 27831.641 |

|           |           |           |           |           |           |
|-----------|-----------|-----------|-----------|-----------|-----------|
| NM_003241 | 3796.282  | 2330.354  | X58794    | 7628.224  | 8653.441  |
| NM_002685 | 4456.34   | 2220.098  | NM_001735 | 8243.269  | 9950.516  |
| AK024504  | 2531.438  | 971.367   | Z70701    | 31369.031 | 33901.727 |
| AF039023  | 2579.679  | 1870.185  | AB040972  | 14450.517 | 18990.193 |
| CY3Cy5    | 1981.971  | 1168.553  | AF148505  | 7829.249  | 14146.185 |
| NM_145904 | 23945.48  | 21708.066 | NM_018686 | 29913.018 | 34615     |
| AK022063  | 4890.076  | 3586.385  | NM_017676 | 3267.652  | 4252.409  |
| AF086345  | 3641.538  | 2743.957  | AK021764  | 1483.167  | 1364.865  |
| AF086464  | 435.481   | 545.574   | NM_005431 | 9359.704  | 6812.889  |
| AL049278  | 1822.527  | 1718.16   | NM_002894 | 22712.713 | 9302.05   |
| AL117519  | 1493.736  | 1530.018  | NM_006251 | 10000.471 | 5507.648  |
| AK001595  | 1794.786  | 2484.856  | NM_004103 | 38003.063 | 9652.378  |
| NM_018015 | 3658.661  | 7490.588  | NM_002314 | 16440.797 | 5510.13   |
| NM_003715 | 4700.211  | 6004.548  | NM_001744 | 4744.586  | 1512.689  |
| NM_145904 | 34709.773 | 47396.477 | NM_006296 | 5334.236  | 1266.127  |
| SR2       | 35553.219 | 26555.406 | Z25433    | 6938.667  | 4108.06   |
| SR4       | 9411.061  | 8725.991  | NM_005922 | 8269.028  | 11581.336 |
| SR6       | 983.191   | 444.243   | NM_018638 | 30063.332 | 32539.492 |
| SR8       | 4356.672  | 13048.574 | AL137593  | 60428.082 | 55505.754 |
| SR10      | 13737.054 | 2489.297  | NM_003915 | 9306.669  | 9885.607  |
| AF086395  | 5669.035  | 4801.273  | NM_000382 | 6824.908  | 8685.645  |
| AF086049  | 1211.769  | 1572.065  | NM_016593 | 5010.273  | 8167.195  |
| AK026142  | 3356.731  | 3998.238  | NM_002521 | 3884.586  | 5351.795  |
| AK021494  | 3206.69   | 2726.544  | NM_001150 | 8690.947  | 10702.842 |
| AF075023  | 1323.876  | 1705.36   | NM_002856 | 17537.936 | 22957.387 |
| AL360160  | 48988.031 | 45836.453 | NM_003225 | 1749.575  | 2064.779  |
| AK001092  | 65226.133 | 68697.078 | NM_000096 | 1806.222  | 2892.487  |
| NM_014144 | 1276.516  | 1496.082  | AA418251  | 2027.63   | 2417.267  |
| AF147345  | 2346.417  | 2703.211  | AA143087  | 38105.52  | 22255.846 |
| AF147373  | 2836.583  | 4472.045  | BI870965  | 28304.072 | 13571.564 |
| AF086253  | 812.03    | 448.304   | BF205051  | 19107.264 | 30083.418 |
| AF086337  | 572.481   | 452.835   | X02761    | 48454.742 | 55642.363 |
| AK021642  | 3003.54   | 3823.13   | U88317    | 846.378   | 305.202   |
| AK021987  | 879.593   | 831.232   | J03060    | 5715.394  | 1542.783  |
| AK026905  | 710.748   | 595.867   | X54156    | 1243.766  | 415.447   |
| NM_000134 | 521.732   | 1150.351  | NM_003743 | 3299.11   | 447.233   |
| AF075108  | 954.369   | 953.509   | AA829383  | 20029.725 | 20604.273 |
| AL035369  | 1534.474  | 1820.688  | L22524    | 618.839   | 1200.853  |
| AF075097  | 5256.815  | 7932.277  | AF012434  | 57616.57  | 59736.723 |
| AK022801  | 415.655   | 817.073   | NM_018124 | 26592.5   | 29442.559 |
| AL133075  | 4121.703  | 6526.472  | NM_004887 | 18366.197 | 23704.33  |
| AL137630  | 1822.162  | 1780.603  | NM_006404 | 2422.716  | 3341.681  |
| AL137277  | 8102.482  | 8099.035  | NM_014795 | 3033.656  | 3649.22   |
| BC023609  | 1278.104  | 900.363   | NM_002986 | 3086.522  | 4408.982  |
| AK024457  | 5354.827  | 6281.473  | M15330    | 3663.552  | 5944.335  |
| AK026894  | 760.669   | 774.246   | NM_014396 | 9271.502  | 7188.119  |
| AF161369  | 3100.883  | 5120.054  | AK027201  | 5933.308  | 4867.56   |
| AK027176  | 4522.656  | 4562      | NM_000489 | 44764.848 | 41894.195 |
| Y12019    | 2676.269  | 2549.116  | X98507    | 19848.014 | 10839.342 |
| AK021898  | 2241.459  | 4811.016  | AK026686  | 1430.595  | 2309.497  |
| AK022024  | 1528.99   | 1696.726  | NM_005902 | 10175.593 | 12485.071 |
| AK022301  | 699.875   | 875.25    | NM_002850 | 60510.113 | 63474.777 |
| AK021948  | 1933.364  | 1112.486  | NM_005302 | 534.011   | 292.963   |



|           |           |           |           |           |           |
|-----------|-----------|-----------|-----------|-----------|-----------|
| AF230317  | 359.528   | 1091.215  | NM_004302 | 1163.945  | 397.81    |
| AK023806  | 2490.501  | 2637.421  | NM_005903 | 4021.129  | 535.258   |
| Y16696    | 12027.932 | 12071.283 | NM_000861 | 4151.964  | 5044.131  |
| AK026094  | 2602.231  | 1914.805  | NM_000024 | 1015.187  | 1227.531  |
| AF161344  | 8576.756  | 9267.579  | U77493    | 3489.856  | 4755.936  |
| AF086027  | 1461.659  | 1332.683  | NM_019062 | 4745.703  | 6546.336  |
| NM_001207 | 60309.941 | 48025.27  | NM_017583 | 29475.775 | 34454.598 |
| NM_006638 | 3370.728  | 3435.495  | Y16132    | 49490.84  | 57061.824 |
| X14675    | 1433.037  | 1775.67   | NM_002905 | 18472.172 | 30142.152 |
| AF071170  | 473.616   | 453.932   | NM_000700 | 10256.126 | 17978.924 |
| AF075075  | 1163.143  | 1560.761  | NM_019028 | 51842.027 | 51973.645 |
| NM_018304 | 6567.284  | 3556.096  | NM_000431 | 5922.846  | 6273.059  |
| NM_016472 | 1871.632  | 2654.487  | NM_013421 | 8329.557  | 8489.457  |
| AK023042  | 1086.608  | 1758.083  | NM_012474 | 11543.447 | 12679.232 |
| NM_016550 | 4263.833  | 3312.5    | AB033118  | 3616.861  | 3482.657  |
| AK024813  | 6251.417  | 5261.954  | NM_019606 | 9242.215  | 4510.543  |
| AJ227909  | 27525.586 | 47487.191 | NM_001690 | 21303.748 | 7266.734  |
| NM_014186 | 6030.198  | 6172.98   | NM_001682 | 10958.794 | 11543.962 |
| AF056442  | 1220.208  | 1437.629  | AK025130  | 9167.482  | 12115.852 |
| AK024752  | 34110.414 | 33114.203 | AK023232  | 31380.576 | 37173.957 |
| BG117194  | 684.808   | 759.372   | NM_006380 | 4863.789  | 5465.621  |
| AF131859  | 3404.875  | 3318.786  | AB020710  | 6809.793  | 8060.682  |
| AF086118  | 6367.943  | 6632.327  | NM_016174 | 26407.01  | 7278.527  |
| NM_014138 | 966.809   | 923.302   | NM_020377 | 4142.161  | 1041.242  |
| AK025044  | 1560.895  | 1069.464  | U88896    | 5119.855  | 747.22    |
| AK023690  | 531.42    | 369.458   | AF116702  | 59483.191 | 62005.938 |
| NM_014723 | 1243.417  | 2876.914  | NM_005724 | 20344.719 | 28025.381 |
| AB011106  | 1787.554  | 3472.82   | X58794    | 7465.412  | 9239      |
| D26362    | 1709.685  | 2669.686  | NM_001735 | 7623.976  | 9765.682  |
| NM_013452 | 2439.53   | 2953.723  | NM_002349 | 5104.211  | 6390.619  |
| AY009402  | 3176.912  | 3266.021  | NM_005080 | 38450.289 | 43190.43  |
| NM_018451 | 713.555   | 466.818   | AF148505  | 8872.857  | 14526.121 |
| NM_012443 | 839.956   | 1274.759  | NM_018686 | 32327.256 | 38286.676 |
| NM_002584 | 4832.99   | 3516.743  | NM_017676 | 3772.906  | 4714.76   |
| AK022199  | 578.497   | 768.161   | AK021764  | 1268.303  | 1409.502  |
| NM_003524 | 5396.743  | 4591.712  | NM_005431 | 10935.989 | 7799.391  |
| NM_005913 | 721.708   | 777.181   | AL050067  | 9802.25   | 12417.402 |
| S39891    | 2445.865  | 3531.777  | NM_004972 | 31726.949 | 34847.129 |
| R17536    | 474.725   | 668.968   | NM_006251 | 12911.673 | 17405.557 |
| AF278605  | 6230.806  | 5464.432  | NM_004103 | 46435.965 | 46118.531 |
| NM_006497 | 26986.645 | 14289.491 | NM_002314 | 22387.32  | 26189.756 |
| AK022329  | 414.006   | 398.25    | NM_001744 | 4911.264  | 1197.574  |
| AL133599  | 839.166   | 541.752   | NM_006296 | 5736.549  | 1962.078  |
| AL050379  | 1792.226  | 3678.384  | Z25433    | 6278.85   | 1766.479  |
| NM_003161 | 2023.979  | 2638.911  | NM_005922 | 6308.89   | 1375.019  |
| NM_014496 | 921.564   | 793.509   | NM_018638 | 27477.125 | 28527.854 |
| NM_016215 | 31667.877 | 25705.238 | AL137593  | 57741.414 | 58342.375 |
| NM_001501 | 12045.643 | 13370.991 | NM_003915 | 8374.262  | 8936.727  |
| NM_006176 | 38632.543 | 36886.445 | NM_000382 | 6114.229  | 7098.708  |
| AL137459  | 1505.461  | 1683.033  | AL133064  | 11386.868 | 16354.7   |
| AB007932  | 5355.147  | 5109.566  | NM_006227 | 17111.678 | 20290.785 |
| AF219257  | 41855.25  | 38248.285 | NM_001150 | 8844.356  | 11508.944 |
| NM_003978 | 464.976   | 464.359   | NM_002856 | 18605.445 | 24154.385 |

|           |           |           |           |           |           |
|-----------|-----------|-----------|-----------|-----------|-----------|
| NM_002561 | 22217.736 | 20718.094 | NM_003225 | 2024.54   | 3099.99   |
| NM_006103 | 48823.961 | 35553.227 | NM_000096 | 2134.213  | 3000.73   |
| AL359933  | 19753.34  | 15289.761 | AA418251  | 1904.044  | 2087.648  |
| NM_001302 | 1017.542  | 941.87    | AA143087  | 50530.961 | 41384.402 |
| M17783    | 5259.728  | 2730.687  | U25804    | 785.519   | 641.98    |
| NM_018590 | 3264.171  | 1905.111  | BI835536  | 29039.773 | 36048.988 |
| NM_003178 | 1858.377  | 1455.444  | BF205051  | 18340.482 | 22141.529 |
| NM_012437 | 5378.109  | 2656.296  | X02761    | 50566.73  | 54248.063 |
| NM_002607 | 851.003   | 2099.172  | M91463    | 5286.84   | 5546      |
| AF116712  | 672.677   | 1269.209  | U88317    | 1679.551  | 1884.079  |
| AF116626  | 4317.462  | 4694.32   | J03060    | 8653.417  | 8197.645  |
| NM_001760 | 22068.973 | 22273.953 | X54156    | 2070.576  | 991.516   |
| NM_002527 | 1058.956  | 1182.317  | NM_003743 | 6551.151  | 2579.802  |
| NM_005890 | 1325.869  | 910.468   | AA829383  | 21487.479 | 10110.769 |
| NM_007065 | 42941.699 | 41264.879 | AF012434  | 53729.566 | 57131.121 |
| AF149785  | 8420.2    | 7900.931  | NM_018124 | 25017.932 | 26825.994 |
| NM_012068 | 12276.979 | 12812.767 | Z70701    | 40954.027 | 45540.469 |
| NM_004064 | 6901.175  | 6056.399  | AB040972  | 13015.728 | 16763.08  |
| NM_001256 | 4494.018  | 4398.356  | X98507    | 19585.609 | 22642.309 |
| NM_014704 | 5941.693  | 6310.437  | NM_014669 | 23463.152 | 26073.582 |
| NM_020205 | 741.501   | 955.622   | NM_005652 | 62262.516 | 59459.129 |
| NM_001227 | 903.46    | 994.688   | AK026686  | 1241.392  | 1436.195  |
| NM_001191 | 15231.986 | 12049.97  | NM_005902 | 8258.152  | 4923.593  |
| NM_014344 | 2552.421  | 2201.431  | NM_002850 | 64164.758 | 61433.41  |
| AL110261  | 11814.414 | 6886.634  | NM_004302 | 2001.254  | 2707.103  |
| AK021786  | 945.341   | 542.417   | NM_005903 | 4549.562  | 5052.716  |
| AF245505  | 1922.996  | 935.104   | NM_000861 | 5437.381  | 6718.986  |
| M26663    | 495.838   | 1325.571  | NM_000024 | 832.526   | 1332.895  |
| NM_004279 | 14648.768 | 13577.896 | AB037734  | 960.37    | 1273.817  |
| NM_004851 | 16916.398 | 15945.158 | U77493    | 3452.525  | 3339.056  |
| NM_001908 | 5282.951  | 4035.856  | NM_019062 | 4399.874  | 1386.298  |
| NM_000285 | 12545.582 | 8281.47   | NM_003873 | 2895.755  | 1485.828  |
| NM_005911 | 46467.051 | 35401.953 | NM_000263 | 7799.728  | 2980.441  |
| AV702690  | 2065.427  | 1993.072  | AF073519  | 35608.25  | 41617.809 |
| AL117452  | 11060.522 | 9140.435  | AB001451  | 2165.992  | 3281.799  |
| NM_012230 | 1042.359  | 912.522   | NM_016593 | 7751.731  | 11409.766 |
| NM_014038 | 7680.178  | 6883.728  | NM_002521 | 6469.807  | 7777.809  |
| NM_002061 | 3435.937  | 2947.703  | NM_000271 | 58818.16  | 56552.809 |
| AF169974  | 3475.376  | 3359.929  | NM_006184 | 25928.043 | 25827.643 |
| NM_004522 | 1030.465  | 801.274   | AB018268  | 35531.793 | 39346.516 |
| NM_005733 | 1809.92   | 1626.684  | NM_019045 | 956.784   | 733.775   |
| NM_018138 | 3422.191  | 3401.341  | NM_006380 | 4546.102  | 3316.227  |
| NM_019619 | 3492.039  | 2619.178  | AB020710  | 4614.325  | 2214.542  |
| AF183411  | 2377.235  | 3773.327  | NM_020377 | 5960.456  | 8945.892  |
| U63785    | 1155.059  | 1817.053  | U88896    | 6533.31   | 7413.822  |
| NM_005966 | 1636.939  | 778.175   | AF116702  | 64605.172 | 61027.422 |
| NM_003156 | 3637.902  | 1736.933  | NM_005724 | 19082.248 | 23523.666 |
| AF090944  | 800.992   | 301.987   | X58794    | 7749.674  | 8028.944  |
| NM_006473 | 1621.681  | 2176.918  | NM_001735 | 8017.651  | 7707.233  |
| NM_005653 | 2156.182  | 2226.772  | NM_002349 | 4433.443  | 1792.201  |
| NM_014553 | 3528.996  | 2401.1    | NM_005080 | 35808.375 | 15800.853 |
| NM_003440 | 624.985   | 543.414   | NM_004887 | 23869.393 | 10185.578 |
| NM_004698 | 6037.435  | 3769.489  | NM_006404 | 3150.083  | 905.553   |

|           |           |           |           |           |           |
|-----------|-----------|-----------|-----------|-----------|-----------|
| U41387    | 45107.773 | 29638.887 | NM_014795 | 7404.017  | 5286.41   |
| NM_004516 | 14190.359 | 12275.642 | NM_002986 | 3585.952  | 4577.792  |
| NM_006513 | 2834.269  | 1776.253  | M15330    | 3811.373  | 5376.833  |
| NM_003685 | 19032.631 | 14797.661 | NM_014396 | 10100.068 | 9934.71   |
| NM_006295 | 7914.404  | 6328.129  | AK027201  | 6624.844  | 7410.768  |
| NM_001540 | 4595.208  | 3536.421  | NM_000489 | 56286.406 | 57054.621 |
| NM_012111 | 20111.34  | 16757.523 | AL137593  | 57844.172 | 49479.211 |
| NM_004470 | 22739.539 | 27753.971 | NM_003915 | 6442.186  | 5500.289  |
| NM_001418 | 11116.843 | 7887.532  | NM_000382 | 5157.907  | 5404.01   |
| NM_003756 | 47144.328 | 26665.467 | AL133064  | 9382.721  | 8709.242  |
| AL049680  | 3971.069  | 2933.536  | NM_006227 | 14176.889 | 12517.297 |
| AL133660  | 1923.378  | 804.769   | NM_002905 | 13786.015 | 9204.598  |
| NM_005932 | 1094.526  | 557.368   | NM_000700 | 8262.066  | 4878.082  |
| BF036874  | 3804.8    | 4417.991  | NM_019028 | 54518.199 | 21862.004 |
| BE888487  | 654.635   | 1011.525  | NM_013421 | 11458.188 | 15504.032 |
| AF182419  | 4680.624  | 4613.705  | NM_012474 | 16154.081 | 22682.596 |
| NM_004293 | 560.497   | 571.303   | AB033118  | 3424.779  | 5041.177  |
| NM_007016 | 2421.783  | 1921.331  | NM_019606 | 11655.87  | 13980.15  |
| NM_002703 | 8772.378  | 6593.349  | NM_001690 | 29634.346 | 34192.336 |
| NM_005375 | 2535.863  | 2700.668  | AF034374  | 56261.508 | 33487.629 |
| NM_005985 | 17585.813 | 13825.624 | NM_016118 | 22444.105 | 6812.275  |
| NM_015906 | 4376.99   | 5527.518  | NM_018674 | 61045.246 | 48368.621 |
| AK023759  | 3076.734  | 3801.199  | NM_001683 | 57933.641 | 42056.625 |
| L25270    | 46311.84  | 38576.406 | NM_001682 | 12615.652 | 3999.326  |
| AB033111  | 1809.958  | 1847.427  | NM_014405 | 18046.229 | 21079.451 |
| AJ276316  | 1709.755  | 1684.768  | NM_000816 | 2680.6    | 3673.125  |
| AF229246  | 34158.699 | 25586.271 | NM_014928 | 7025.626  | 7731.569  |
| S64709    | 3263.893  | 4437.024  | AK025130  | 8803.376  | 10689.949 |
| NM_018488 | 2106.666  | 1782.858  | NM_017875 | 5421.579  | 5630.605  |
| X56465    | 1110.225  | 771.586   | AK023232  | 29817.863 | 30323.594 |
| NM_003071 | 14892.661 | 9610.322  | NM_018124 | 19711.316 | 17040.842 |
| NM_013310 | 6127.789  | 3574.379  | Z70701    | 33282.652 | 27933.379 |
| BC004958  | 3846.966  | 1714.989  | AB040972  | 13888.67  | 10882.315 |
| NM_005762 | 9114.66   | 4960.038  | AF148505  | 5616.492  | 3878.918  |
| X84370    | 11265.511 | 18872.314 | NM_018686 | 29027.096 | 14360.984 |
| NM_004039 | 971.12    | 1607.496  | AK021764  | 1792.347  | 2588.953  |
| AB014558  | 1239.87   | 1436.814  | NM_005431 | 12117.41  | 15502.267 |
| NM_006287 | 1530.679  | 1295.207  | NM_002894 | 31136.354 | 31503.984 |
| NM_000118 | 5586.006  | 3517.382  | AL050067  | 7854.597  | 2418.448  |
| NM_000913 | 1009.51   | 1050.658  | NM_004972 | 29002.836 | 10164.909 |
| NM_001298 | 58016.211 | 62480.355 | NM_006251 | 10219.073 | 2988.073  |
| BG325046  | 5246.091  | 4522.874  | NM_004103 | 39062.672 | 7848.112  |
| AI351740  | 23257.246 | 17550.293 | NM_002314 | 19942.135 | 22984.145 |
| AA444051  | 17294.842 | 15407.279 | NM_001744 | 5457.451  | 7930.97   |
| NM_007164 | 24950.768 | 21399.234 | NM_006296 | 6568.612  | 8251.802  |
| BE783826  | 63910.797 | 66476.391 | Z25433    | 6855.787  | 7963.447  |
| X04827    | 2448.729  | 2803.118  | NM_005922 | 9474.626  | 11480.277 |
| H07088    | 4307.851  | 3948.187  | NM_018638 | 29083.732 | 32791.414 |
| AI004656  | 2692.936  | 2246.745  | CY3Cy5    | 873.438   | 139.943   |
| BC020596  | 2034.972  | 2095.514  | NM_003942 | 2142.482  | 2042.859  |
| AF116606  | 55588.191 | 52627.914 | NM_004452 | 1819.449  | 1633.221  |
| X98922    | 5890.136  | 5737.777  | AK022632  | 1107.783  | 725.892   |
| AK098435  | 7730.342  | 8006.01   | AK021554  | 1101.576  | 572.673   |

|           |           |           |           |           |           |
|-----------|-----------|-----------|-----------|-----------|-----------|
| AK092872  | 6144.967  | 6888.264  | NM_020235 | 4383.958  | 2016.233  |
| AF230496  | 2022.725  | 3196.225  | AK000532  | 998.538   | 839.928   |
| M16801    | 1733.118  | 2620.378  | AL109681  | 662.577   | 900.035   |
| M94065    | 4196.096  | 5340.234  | AL162039  | 6511.851  | 4714.551  |
| NM_00606E | 2864.794  | 2881.01   | AK024896  | 3012.797  | 2886.166  |
| NM_002704 | 533.158   | 927.465   | AL353952  | 560.301   | 531.64    |
| U16752    | 940.541   | 716.491   | AK021912  | 1781.236  | 4393.611  |
| M30134    | 654.972   | 341.44    | BU165106  | 2225.232  | 2525.901  |
| NM_00203E | 12904.853 | 8424.999  | AF038202  | 1846.526  | 2556.052  |
| NM_00572E | 23920.012 | 17040.914 | AL360198  | 410.651   | 1330.005  |
| NM_01549E | 2278.027  | 2833.393  | AB040925  | 1909.6    | 4345.954  |
| NM_003747 | 1251.85   | 1237.008  | NM_003942 | 2962.358  | 6000.395  |
| AB037744  | 1699.306  | 1025.174  | NM_004452 | 1767.419  | 2349.569  |
| AF141901  | 598.878   | 583.862   | SR1       | 65917.961 | 57510.84  |
| AL109708  | 1050.102  | 1008.794  | SR3       | 34481.59  | 16480.713 |
| L29143    | 2901.264  | 2219.157  | SR5       | 4238.87   | 5286.008  |
| AF234532  | 2847.031  | 2620.475  | SR7       | 5397.993  | 38398.008 |
| NM_00241E | 1439.809  | 1642.272  | SR9       | 11961.133 | 1066.777  |
| NM_00209C | 1025.235  | 1479.121  | CY3Cy5    | 627.05    | 92.052    |
| NM_00448E | 864.204   | 2081.012  | M26147    | 333.623   | 406.317   |
| NM_01329E | 20258.914 | 28392.697 | AF018254  | 833.014   | 892.25    |
| AL117478  | 3690.256  | 5146.673  | NM_01624C | 2177.815  | 1623.862  |
| NM_005307 | 8069.336  | 13023.616 | AK026459  | 1090.045  | 1262.15   |
| NM_00595E | 6842.482  | 11366.534 | AL049390  | 1309.392  | 1054.701  |
| AF225426  | 1294.24   | 2123.942  | AK000584  | 5284.46   | 4319.735  |
| NM_00520E | 19663.641 | 21448.781 | AJ297363  | 1167.535  | 950.032   |
| AF099740  | 964.86    | 973.358   | AK026379  | 2329.632  | 1141.895  |
| NM_006117 | 10003.73  | 8918.15   | AF075002  | 515.243   | 350.913   |
| NM_00222E | 1592.288  | 1285.002  | AK022965  | 1732.994  | 2292.13   |
| NM_00622E | 471.794   | 408.289   | AK024278  | 8632.894  | 12871.212 |
| NM_01541E | 31686.52  | 15811.355 | NM_018022 | 2446.9    | 3970.431  |
| NM_004897 | 3098.014  | 1819.424  | AB056722  | 9370.864  | 12949.229 |
| NM_00255E | 1261.19   | 658.689   | NM_013242 | 4927.651  | 3259.416  |
| AF225418  | 1944.51   | 1688.335  | AK023198  | 4041.02   | 3245.607  |
| NM_00030E | 1975.393  | 1530.251  | NM_01206E | 12272.728 | 15396.513 |
| NM_00452E | 15537.598 | 11838.49  | AF052168  | 11839.02  | 9306.152  |
| AK026381  | 27246.922 | 24781.08  | AK024947  | 5877.562  | 3033.569  |
| NM_00457E | 685.117   | 1262.339  | AK095125  | 1306.507  | 2223.478  |
| NM_000647 | 3148.737  | 4223.898  | AK024059  | 1919.21   | 1795.553  |
| NM_017604 | 6375.834  | 7655.197  | AB007928  | 1154.642  | 942.091   |
| NM_01773E | 20827.393 | 29667.512 | AK023645  | 1748.049  | 940.119   |
| NM_016557 | 3366.893  | 4507.98   | NM_01693C | 3031.46   | 1127.711  |
| NM_00062E | 3961.399  | 3971.593  | AJ001861  | 3277.043  | 2590.086  |
| AF161348  | 2640.271  | 2637.391  | AJ227865  | 628.695   | 1264.086  |
| NM_018467 | 33556.094 | 34868.375 | NM_00518E | 966.217   | 1521.062  |
| AF150735  | 8223.229  | 5385.351  | X64981    | 2645.531  | 5129.352  |
| NM_01818E | 2022.438  | 1522.88   | X75692    | 1378.029  | 1241.323  |
| NM_01238E | 7349.511  | 10733.915 | X64988    | 1008.178  | 1894.373  |
| BF038366  | 1989.822  | 2657.037  | AK021832  | 694.697   | 660.188   |
| NM_00245E | 13425.453 | 18929.082 | AK021505  | 2801.647  | 1542.579  |
| NM_012304 | 752.185   | 1181.612  | AK021598  | 3263.948  | 4022.977  |
| NM_01644C | 45797.781 | 53124.719 | AK025238  | 614.794   | 676.312   |
| NM_000314 | 14744.932 | 18250.787 | AK026416  | 15037.05  | 8875.354  |

|           |           |           |           |           |           |
|-----------|-----------|-----------|-----------|-----------|-----------|
| AB002369  | 1846.901  | 2987.304  | AK025797  | 1855.381  | 3863.444  |
| S74620    | 1374.091  | 1690.239  | NM_017759 | 506.066   | 1069.535  |
| AF305239  | 3016.668  | 3032.231  | AK000853  | 277.281   | 217.421   |
| NM_002827 | 21375.291 | 22531.336 | AK000085  | 375.386   | 309.497   |
| NM_00194E | 1084.974  | 1851.057  | AK000019  | 811.138   | 550.727   |
| BF035425  | 58602.41  | 56198.016 | AK000645  | 844.032   | 632.61    |
| NM_00160E | 701.336   | 878.634   | AK024156  | 837.521   | 849.02    |
| NM_00015E | 62319.559 | 63340.5   | AF086288  | 1577.869  | 1010.75   |
| NM_01463E | 2066.281  | 2746.234  | AF119866  | 571.776   | 470.455   |
| NM_00050E | 668.682   | 680.498   | NM_016944 | 797.242   | 755.424   |
| AB014558  | 2587.023  | 3263.201  | AK023109  | 1921.797  | 1144.587  |
| NM_006287 | 2745.783  | 3018.468  | NM_005293 | 28035.58  | 26119.596 |
| NM_000118 | 9256.62   | 10528.481 | S50185    | 832.102   | 1825.613  |
| NM_00129E | 65040.242 | 73001.125 | AF133332  | 9329.838  | 13000.134 |
| BG325046  | 8375.585  | 9738.881  | AK022805  | 2888.349  | 2011.594  |
| AI351740  | 41655.348 | 52622.609 | NM_017503 | 423.539   | 195.94    |
| AA444051  | 28915.629 | 33673.434 | AK024606  | 2241.682  | 1960.089  |
| NM_007164 | 40483.68  | 43829.023 | NM_016417 | 32262.518 | 35743.473 |
| BE783826  | 56417.102 | 62752.609 | NM_01910E | 1092.29   | 804.548   |
| X04827    | 6070.138  | 9279.713  | L10147    | 30248.316 | 46168.016 |
| H07088    | 5607.621  | 8451.514  | AL080118  | 9659.82   | 14373.924 |
| AI004656  | 4344.823  | 6304.208  | AL049378  | 3023.49   | 2454.576  |
| BC020596  | 2872.423  | 4900.412  | L09086    | 1181.519  | 593.475   |
| AF116606  | 61666.801 | 66955.906 | L37702    | 16774.586 | 14705.918 |
| X98922    | 8236.519  | 11907.878 | AK022812  | 808.74    | 651.636   |
| AK098435  | 10487.735 | 15227.263 | AK022433  | 236.211   | 730.307   |
| AK092872  | 6748.181  | 9665.688  | U79301    | 7166.256  | 5219.5    |
| AF230496  | 2309.663  | 2589.957  | AK022260  | 6438.159  | 5312.097  |
| M16801    | 1794.682  | 1813.964  | M32219    | 13458.419 | 22381.836 |
| NM_013334 | 26743.01  | 29119.543 | BC018868  | 2167.022  | 1341.529  |
| U16752    | 4364.409  | 6926.265  | AF086174  | 616.936   | 620.662   |
| M30134    | 1125.106  | 1856.219  | AF007128  | 10827.234 | 5301.45   |
| NM_00203E | 26574.744 | 27595.27  | AJ012498  | 891.796   | 584.249   |
| NM_015493 | 4164.546  | 5350.19   | NM_005973 | 24088.816 | 19610.76  |
| NM_003747 | 1330.524  | 1751.635  | X04547    | 1808.408  | 1223.326  |
| AB037744  | 3156.66   | 4608.664  | AK025823  | 2532.284  | 2854.503  |
| AF141901  | 630.945   | 1434.463  | AK026691  | 847.214   | 632.158   |
| NM_00700E | 1339.488  | 1728.808  | AL359941  | 4690.287  | 3501.861  |
| AL109708  | 1455.739  | 2081.357  | U52076    | 1620.071  | 2411.37   |
| L29143    | 4598.887  | 5478.341  | AF035278  | 3268.697  | 6289.454  |
| AF234532  | 3987.796  | 5058.54   | AF086493  | 3869.121  | 6921.399  |
| NM_00241E | 2362.481  | 2871.238  | AL050202  | 1275.989  | 907.203   |
| NM_00209C | 1106.198  | 1767.025  | U32999    | 13050.903 | 5180.006  |
| NM_00448E | 1039.073  | 2817.495  | U66052    | 6082.484  | 4420.19   |
| NM_01329E | 17090.09  | 20498.197 | NM_000857 | 1372.357  | 934.299   |
| AL117478  | 3490.614  | 3873.964  | L20688    | 55026.801 | 53945.5   |
| NM_005307 | 8512.556  | 10115.462 | X69111    | 22326.35  | 17862.816 |
| NM_00595E | 6367.987  | 9384.368  | AF252283  | 866.346   | 954.106   |
| AF225426  | 1463.513  | 1572.43   | AB037799  | 6037.077  | 6356.083  |
| NM_00520E | 21730.939 | 27298.051 | AB007950  | 24096.939 | 37716.793 |
| X84370    | 16688.439 | 23586.061 | AL133111  | 992.19    | 1716.418  |
| NM_00403E | 1583.365  | 2270.605  | AK025593  | 4646.992  | 8399.681  |
| NM_00222E | 3249.045  | 4433.449  | AB018304  | 3347.897  | 3221.76   |

|           |           |           |           |           |           |
|-----------|-----------|-----------|-----------|-----------|-----------|
| NM_006229 | 986.813   | 1662.215  | NM_007061 | 14292.675 | 12039.907 |
| NM_015415 | 46282.227 | 48010.594 | NM_001088 | 25099.305 | 18247.756 |
| NM_004897 | 4867.462  | 6842.497  | BC015991  | 8593.512  | 4299.806  |
| NM_002555 | 2167.421  | 2606.132  | U46214    | 3434.22   | 1309.681  |
| AF225418  | 2769.864  | 3815.326  | NM_000310 | 17547.838 | 6144.34   |
| NM_000309 | 3330.186  | 4125.213  | AF161343  | 4876.231  | 1869.036  |
| NM_004528 | 22595.666 | 31548.6   | NM_004765 | 1332.958  | 1044.948  |
| AK026381  | 36602.156 | 37136.605 | AF009307  | 603.612   | 410.587   |
| AK023107  | 10272.593 | 13144.079 | AK022246  | 2878.326  | 1479.217  |
| NM_004578 | 644.332   | 744.765   | X75684    | 1693.574  | 1111.926  |
| NM_000647 | 3054.683  | 3098.383  | D17200    | 1028.434  | 2356.409  |
| NM_017604 | 6240.531  | 8157.294  | AF113701  | 38660.359 | 50541.988 |
| NM_017738 | 20413.246 | 25485.316 | Y11158    | 3213.007  | 1993.697  |
| NM_016557 | 2943.944  | 3926.065  | NM_006771 | 24232.082 | 14829.232 |
| NM_000623 | 2919.531  | 2013.749  | NM_014718 | 4438.997  | 2563.469  |
| AF161348  | 1497.171  | 1019.292  | AB028953  | 508.757   | 572.476   |
| NM_018467 | 23803.992 | 17082.053 | NM_000632 | 1745.858  | 1090.53   |
| NM_006068 | 2529.923  | 1633.568  | AB002298  | 1405.22   | 1631.646  |
| NM_002704 | 486.072   | 461.612   | AK024488  | 2201.712  | 4971.312  |
| AF150735  | 12964.39  | 15662.119 | AK023249  | 54454.836 | 56310.285 |
| NM_018183 | 3229.109  | 3532.783  | NM_007360 | 863.481   | 1239.07   |
| NM_012382 | 7214.921  | 8361.269  | NM_017442 | 19197.9   | 30681.055 |
| BF038366  | 1949.394  | 2895.336  | NM_000743 | 2967.486  | 1711.014  |
| NM_002452 | 14540.138 | 18300.451 | NM_007218 | 3502.844  | 1655.571  |
| NM_012304 | 861.602   | 1016.14   | Z25436    | 1981.554  | 1054.71   |
| NM_016440 | 46411.672 | 45116.586 | NM_005275 | 3306.016  | 1367.483  |
| NM_007194 | 3751.962  | 4486.567  | NM_003844 | 30528.277 | 7913.082  |
| NM_000314 | 10364.017 | 6926.307  | NM_002005 | 28015.121 | 11745.461 |
| AB002369  | 1435.267  | 1046.649  | NM_012324 | 5531.331  | 4102.714  |
| S74620    | 933.67    | 1127.852  | AK000039  | 1087.718  | 947.329   |
| AF305239  | 2016.735  | 1197.371  | AL137352  | 2603.747  | 1681.58   |
| NM_002827 | 12457.585 | 8157.38   | NM_014749 | 2637.89   | 1569.745  |
| BF035425  | 62225.445 | 53969.004 | D49958    | 718.272   | 374.978   |
| NM_001608 | 502.252   | 423.69    | NM_004489 | 9355.146  | 13047.43  |
| NM_000159 | 61610.855 | 59221.16  | BF240063  | 1744.918  | 2925.649  |
| NM_014638 | 1295.551  | 1122.274  | BI461699  | 3527.642  | 6425.961  |
| AF099740  | 720.583   | 589.219   | AF172264  | 756.835   | 462.936   |
| NM_006117 | 9195.378  | 4831.986  | U80756    | 52038.594 | 38046.555 |
| NM_006287 | 2554.927  | 3924.965  | NM_018161 | 4545.958  | 4530.874  |
| NM_000118 | 9758.919  | 11548.154 | NM_005248 | 36918.328 | 21811.211 |
| NM_000913 | 2509.641  | 3072.49   | NM_004810 | 3126.944  | 3469.757  |
| NM_001298 | 64611.715 | 77016.516 | AL117629  | 7971.125  | 14092.39  |
| BG325046  | 8994.884  | 12863.557 | NM_002595 | 3567.841  | 5877.527  |
| AI351740  | 46226.551 | 48576.984 | NM_015726 | 3181.048  | 4360.196  |
| AA444051  | 27796.369 | 26681.818 | AF174604  | 5651.37   | 10130.247 |
| NM_007164 | 39182.734 | 41930.613 | AB002379  | 9970.622  | 8000.883  |
| BE783826  | 60338.348 | 62230.387 | AF113223  | 4089.084  | 2455.489  |
| X04827    | 2939.082  | 1917.542  | AB046851  | 1574.685  | 1415.293  |
| H07088    | 4563.149  | 2830.07   | NM_005745 | 18957.381 | 7230.973  |
| AI004656  | 3142.124  | 2258.13   | NM_019858 | 57872.023 | 43519.184 |
| BC020596  | 1794.63   | 1448.192  | NM_018174 | 1314.754  | 708.968   |
| AF116606  | 57024.227 | 50606.289 | NM_014548 | 4606.404  | 2873.389  |
| X98922    | 5879.774  | 5017.365  | NM_004437 | 2586.686  | 1984.63   |

|           |           |           |           |           |           |
|-----------|-----------|-----------|-----------|-----------|-----------|
| AK098435  | 7435.815  | 5887.542  | AK025875  | 1746.747  | 1270.296  |
| AK092872  | 4970.688  | 3248.641  | BC014152  | 55059.379 | 51387.117 |
| AF230496  | 1358.528  | 1033.247  | NM_012418 | 1071.477  | 1145.452  |
| M16801    | 1335.629  | 1486.76   | NM_000226 | 1277.046  | 921.986   |
| NM_013334 | 13933.42  | 7522.284  | AB037779  | 60555.668 | 55801.762 |
| NM_007008 | 942.241   | 998.924   | NM_000655 | 2501.373  | 4642.042  |
| AL109708  | 838.716   | 679.325   | NM_000393 | 2064.726  | 4184.158  |
| L29143    | 3247.16   | 2251.051  | NM_000889 | 6005.05   | 6458.823  |
| AF234532  | 2899.838  | 1893.437  | NM_005761 | 670.754   | 544.865   |
| NM_002418 | 1290.374  | 882.004   | NM_012339 | 2126.541  | 1841.773  |
| NM_002090 | 1208.639  | 536.137   | NM_005787 | 30621.803 | 18984.404 |
| NM_004485 | 703.77    | 703.439   | NM_002143 | 6223.693  | 8378.163  |
| NM_013296 | 10503.363 | 6292.22   | AF284421  | 33668.348 | 44007.336 |
| AL117478  | 1903.101  | 1029.657  | NM_006048 | 14830.727 | 21286.846 |
| NM_005307 | 6218.621  | 3387.928  | NM_006360 | 52333.406 | 56001.16  |
| NM_005958 | 4355.178  | 2914.792  | NM_003968 | 9671.586  | 11655.375 |
| AF225426  | 886.484   | 833.309   | NM_002786 | 449.359   | 458.059   |
| NM_005208 | 14873.639 | 10600.289 | NM_002810 | 59799.531 | 59797.867 |
| NM_000421 | 914.455   | 695.283   | NM_003343 | 28835.291 | 25313.494 |
| AK025687  | 27130.637 | 21529.961 | NM_002789 | 38915.387 | 18607.469 |
| AF218941  | 3482.957  | 4152.688  | NM_003470 | 17655     | 7152.069  |
| AL137264  | 34838.574 | 33596.293 | NM_017679 | 8081.39   | 5697.467  |
| NM_002226 | 633.869   | 697.72    | AF155103  | 6166.343  | 4885.314  |
| X84370    | 8783.753  | 7075.52   | NM_017704 | 3925.613  | 3283.004  |
| NM_004039 | 1128.841  | 1074.492  | BC006359  | 5822.996  | 5145.453  |
| NM_006854 | 14882.165 | 7929.055  | AK026127  | 2344.523  | 2044.109  |
| NM_004580 | 3381.894  | 2008.021  | BC016062  | 24075.297 | 14833.717 |
| NM_020387 | 55582.117 | 38684.227 | NM_002814 | 5993.181  | 5689.758  |
| NM_007246 | 1719.271  | 700.772   | NM_012250 | 29395.301 | 45584.355 |
| AK026248  | 1575.416  | 1275.167  | NM_006283 | 18260.48  | 32159.879 |
| NM_000647 | 1896.303  | 734.086   | Y08267    | 5020.326  | 9072.967  |
| NM_017604 | 3498.947  | 2062.346  | AB016898  | 898.078   | 677.017   |
| NM_017738 | 13579.571 | 9900.52   | NM_017530 | 8799.976  | 4582.329  |
| NM_016557 | 1884.46   | 1529.095  | AB029030  | 431.291   | 609.47    |
| NM_000623 | 2028.125  | 1094.907  | AL360183  | 3442.326  | 2287.229  |
| AF161348  | 1397.964  | 1193.165  | AK027046  | 1998.923  | 3159.71   |
| NM_018467 | 21194.125 | 18625.074 | NM_003113 | 9048.924  | 14635.191 |
| NM_006068 | 3018.153  | 3712.27   | NM_016578 | 13014.271 | 19228.697 |
| NM_002704 | 509.183   | 883.456   | NM_003822 | 1280.162  | 2712.603  |
| U16752    | 977.342   | 1088.364  | NM_015832 | 20469.955 | 15916.135 |
| NM_002038 | 13690.944 | 10853.769 | NM_001326 | 17837.477 | 8613.499  |
| NM_005729 | 19916.094 | 11737.479 | NM_014319 | 3533.393  | 2173.635  |
| NM_015493 | 1653.728  | 1480.977  | NM_004865 | 9348.41   | 4683.129  |
| NM_001608 | 619.027   | 322.585   | NM_017923 | 979.245   | 934.386   |
| NM_000159 | 56527.672 | 59668.309 | NM_002047 | 39532.836 | 22786.549 |
| NM_014638 | 1211.737  | 855.696   | NM_001031 | 57354.676 | 51976.586 |
| AF099740  | 975.04    | 592.262   | NM_007208 | 25649.209 | 16017.753 |
| NM_006117 | 8739.902  | 5256.284  | NM_000999 | 60313.777 | 53388.535 |
| NM_002225 | 1573.955  | 1168.888  | NM_000985 | 32830.516 | 16244.157 |
| NM_006229 | 642.56    | 496.042   | BF130622  | 43571.125 | 53007.121 |
| NM_015415 | 31964.439 | 21563.801 | NM_003859 | 23047.439 | 32871.094 |
| NM_004897 | 2929.972  | 3724.977  | NM_000236 | 2554.688  | 4129.362  |
| NM_002555 | 1286.006  | 1216.075  | NM_002903 | 59838.906 | 44211.469 |

|           |           |           |           |           |           |
|-----------|-----------|-----------|-----------|-----------|-----------|
| AF225418  | 2019.84   | 1643.185  | NM_001861 | 2284.897  | 1166.305  |
| NM_000309 | 1757.122  | 1513.19   | AK025558  | 19442.303 | 14051.048 |
| NM_004528 | 15504.127 | 16101.826 | AK024355  | 3496.666  | 2785.712  |
| AK026381  | 27221.824 | 36054.383 | NM_001864 | 51217.523 | 53856.844 |
| NM_002450 | 12607.647 | 28695.59  | NM_003477 | 39976.227 | 55156.441 |
| NM_001686 | 707.804   | 649.428   | NM_002654 | 53761.715 | 54629.715 |
| NM_000705 | 580.097   | 677.98    | NM_015478 | 1959.515  | 1762.119  |
| NM_004231 | 56110.238 | 54532.934 | NM_020382 | 7413.585  | 3270.937  |
| NM_013334 | 16780.104 | 9876.515  | NM_018267 | 782.613   | 580.224   |
| AF150735  | 6906.124  | 5264.927  | NM_007192 | 22104.916 | 9086.648  |
| NM_018183 | 1698.383  | 1258.162  | AB002337  | 14425.839 | 4995.942  |
| NM_012382 | 3802.755  | 2374.988  | NM_014933 | 10656.721 | 6045.926  |
| BF038366  | 850.119   | 785.817   | AK024250  | 1561.288  | 1789.304  |
| NM_002452 | 7493.371  | 6793.4    | NM_003456 | 17075.834 | 10931.477 |
| NM_016440 | 27401.475 | 20072.113 | NM_002585 | 10497.11  | 7160.814  |
| NM_007194 | 2405.065  | 1811.662  | AB029016  | 3216.606  | 2892.087  |
| NM_000314 | 7958.072  | 4502.183  | AK000445  | 595.877   | 644.316   |
| AB002369  | 950.115   | 855.77    | NM_002701 | 6301.294  | 8489.973  |
| S74620    | 557.087   | 510.51    | NM_005693 | 2121.879  | 3274.841  |
| AF305239  | 880.615   | 408.751   | X97303    | 16952.104 | 11964.811 |
| CY3Cy5    | 600.804   | 145.597   | L32162    | 462.571   | 538.049   |
| NM_004176 | 3730.594  | 6293.418  | AJ290954  | 3348.293  | 4269.62   |
| NM_004548 | 31761.816 | 50785.766 | AK025451  | 6469.466  | 7885.443  |
| AB029001  | 1851.349  | 7486.044  | NM_002783 | 11089.3   | 18782.412 |
| AB006624  | 2734.303  | 4949.929  | X52005    | 47799.477 | 60599.238 |
| AL109717  | 1168.205  | 2082.438  | NM_001047 | 2258.87   | 5192.027  |
| AF146693  | 520.241   | 623.891   | AK024396  | 20685.09  | 31909.92  |
| AF271070  | 11074.98  | 10940.82  | U58514    | 5075.448  | 7034.452  |
| NM_014903 | 324.15    | 483.073   | M57627    | 1397.097  | 2044.507  |
| AK055959  | 727.525   | 971.196   | W74254    | 1746.139  | 1871.749  |
| AF052141  | 610.805   | 630.468   | M58603    | 10536.71  | 7132.994  |
| AF052149  | 1967.933  | 2181.62   | AA443286  | 4038.472  | 1508.431  |
| AK025586  | 1001.859  | 970.023   | AB003334  | 13554.602 | 9626.268  |
| AL137512  | 566.285   | 471.172   | AW276315  | 3092.315  | 2082.635  |
| NM_004176 | 3563.321  | 2715.602  | AA490737  | 7701.498  | 5978.548  |
| NM_004548 | 21998.637 | 8985.719  | AI878886  | 42231.59  | 31527.486 |
| SR1       | 51658.816 | 24127.916 | BG697179  | 23635.275 | 16937.76  |
| SR3       | 19987.16  | 7256.099  | NM_002136 | 55533.863 | 53194.961 |
| SR5       | 1858.178  | 1011.609  | BM012504  | 18886.234 | 14400.505 |
| SR7       | 2602.594  | 7438.253  | AA664145  | 4914.719  | 3870.727  |
| SR9       | 7237.317  | 727.641   | X72308    | 57007.547 | 56336.43  |
| CY3Cy5    | 341.407   | 157.921   | T70999    | 893.16    | 1568.961  |
| L32606    | 511.593   | 1037.819  | T50790    | 8151.551  | 14028.194 |
| AK091125  | 490.288   | 1008.455  | R48168    | 17323.283 | 14816.303 |
| D16904    | 530.805   | 1762.985  | BC008837  | 2767.267  | 2110.501  |
| D16474    | 4092.792  | 5488.863  | NM_006819 | 42969.938 | 39455.426 |
| AL080072  | 509.759   | 798.415   | NM_014744 | 3772.61   | 5146.426  |
| AK024898  | 436.418   | 632.08    | AF146759  | 4245.477  | 6207.613  |
| AL035301  | 351.888   | 704.958   | AB032993  | 13579.955 | 16848.848 |
| NM_017687 | 1615.667  | 2427.743  | NM_000854 | 10269.357 | 15745.038 |
| NM_017975 | 2169.266  | 2190.878  | NM_001901 | 1187.567  | 1802.742  |
| AK025036  | 701.892   | 1096.146  | AL117423  | 17394.623 | 26752.84  |
| AK024843  | 11980.021 | 11630.896 | NM_006140 | 681.542   | 934.659   |



|           |           |           |           |           |           |
|-----------|-----------|-----------|-----------|-----------|-----------|
| AF074994  | 591.563   | 665.171   | NM_002084 | 3830.618  | 4561.294  |
| NM_01767C | 4622.606  | 3305.628  | D16892    | 15255.966 | 9768.938  |
| NM_00436E | 8512.68   | 5834.671  | NM_00475C | 3797.407  | 4501.801  |
| AK026168  | 1076.434  | 576.687   | NM_00729E | 8447.835  | 5452.092  |
| AJ296152  | 5115.437  | 1823.298  | NM_003651 | 36128.676 | 21626.301 |
| AK001067  | 1612.555  | 1078.993  | NM_014012 | 1025.289  | 944.772   |
| AK027088  | 6541.51   | 2908.91   | NM_00041E | 2969.493  | 2454.277  |
| AB037721  | 4740.083  | 2299.63   | NM_01324E | 2366.748  | 2281.206  |
| AK024525  | 2630.939  | 2758.94   | NM_018431 | 863.52    | 744.264   |
| AK024909  | 421.99    | 758.33    | NM_000591 | 4371.331  | 4288.501  |
| AK024544  | 1094.531  | 2303.365  | NM_00056E | 2874.572  | 2403.791  |
| AK021705  | 1519.099  | 1699.402  | NM_00201E | 1112.377  | 1984.017  |
| NM_016141 | 24595.721 | 24213.357 | AF253318  | 6580.062  | 5181.577  |
| AL109702  | 632.104   | 592.559   | NM_017767 | 33673.492 | 26133.229 |
| AK025624  | 6644.028  | 8231.531  | NM_00326E | 5408.542  | 4101.773  |
| AK026684  | 777.191   | 1440.896  | NM_02012E | 965.574   | 949.2     |
| AL110125  | 5626.892  | 5596.902  | AK022832  | 3207.92   | 3099.18   |
| AK022764  | 315.353   | 465.065   | NM_017784 | 1900.288  | 2891.579  |
| AJ011600  | 1159.068  | 895.425   | NM_014641 | 4517.491  | 2727.021  |
| AJ002785  | 880.559   | 324.792   | NM_00446E | 5956.857  | 2573.896  |
| Z70716    | 325.014   | 272.229   | NM_00034E | 710.993   | 1394.409  |
| Z83945    | 1083.81   | 812.919   | NM_02024E | 3468.304  | 2489.698  |
| AK022422  | 336.601   | 664.359   | NM_016354 | 3641.007  | 2941.457  |
| AK023485  | 566.218   | 1111.904  | NM_001044 | 957.758   | 744.32    |
| AK022474  | 8646.489  | 12334.02  | AV681967  | 2143.35   | 3049.979  |
| AK022392  | 1179.042  | 2062.61   | NM_01825C | 2428.227  | 1672.008  |
| AL117451  | 360.656   | 526.89    | AB023136  | 1229.83   | 1471.194  |
| AL049280  | 1455.844  | 1964.347  | NM_00379E | 50779.477 | 54019.066 |
| AK025212  | 3629.743  | 4085.942  | NM_01423E | 8128.707  | 14671.916 |
| AB021925  | 295.357   | 254.962   | NM_005701 | 2267.352  | 1956.168  |
| AL157503  | 4082.39   | 2545.972  | NM_001231 | 1144.39   | 1982.292  |
| AK000053  | 527.145   | 477.577   | AB023139  | 11984.542 | 8233.923  |
| AK000786  | 832.525   | 447.074   | NM_01788E | 5801.94   | 3980.896  |
| AK000935  | 921.068   | 564.109   | D80004    | 1108.789  | 795.328   |
| AK021458  | 2643.238  | 1392.404  | X63966    | 787.32    | 1566.643  |
| NM_017674 | 7236.508  | 2846.057  | NM_00094E | 9872.713  | 15002.98  |
| AK000811  | 460.731   | 368.523   | NM_01607C | 5294.864  | 6224.986  |
| AK000966  | 938.519   | 289.583   | NM_01639C | 4252.456  | 3508.083  |
| NM_01863C | 2854.726  | 2360.31   | NM_016101 | 13162.524 | 10670.979 |
| AF086175  | 612.317   | 575.926   | NM_00585E | 59393.633 | 56464.504 |
| AK002196  | 463.075   | 363.414   | NM_02031E | 1196.511  | 1180.63   |
| NM_00457E | 1606.359  | 2152.34   | NM_01462E | 6429.276  | 5512.123  |
| AF040097  | 728.562   | 881.255   | AK025630  | 4559.005  | 3332.094  |
| NM_02043E | 366.782   | 496.801   | AL365404  | 42172.242 | 37689.188 |
| AK024182  | 1200.809  | 1910.528  | AK022907  | 17120.965 | 10541.226 |
| NM_00691E | 7851.857  | 10421.854 | NM_01479E | 2657.403  | 1882.027  |
| NM_00049E | 7438.926  | 7248.559  | NM_00424E | 6255.875  | 3563.459  |
| AK001880  | 3026.537  | 2876.165  | NM_003241 | 3665.45   | 2481.769  |
| AF156166  | 3703.97   | 3496.975  | NM_00268E | 4806.844  | 2688.029  |
| NM_01437E | 2540.727  | 1580.729  | AK024504  | 3725.323  | 6814.866  |
| NM_01420E | 14422.485 | 5862.49   | AF039023  | 5115.647  | 9592.271  |
| NM_001651 | 3971.443  | 3735.617  | NM_005511 | 9043.537  | 14343.587 |
| L32786    | 1332.794  | 907.814   | NM_01469E | 50588.73  | 43346.551 |

|           |           |           |           |           |           |
|-----------|-----------|-----------|-----------|-----------|-----------|
| AL355720  | 2796.446  | 1594.236  | NM_018475 | 6923.132  | 4298.021  |
| AK002023  | 2268.595  | 1590.522  | AK025451  | 6304.541  | 8507.6    |
| AF150156  | 557.98    | 283.787   | NM_002783 | 11000.778 | 15311.041 |
| NM_016464 | 517.83    | 288.427   | X52005    | 45036.258 | 53327.184 |
| L40402    | 1346.669  | 734.929   | NM_001047 | 1922.529  | 3745.594  |
| Z36780    | 1705.974  | 2302.094  | AK024396  | 24740.914 | 36049.508 |
| AK022403  | 921.022   | 1494.611  | U58514    | 7871.507  | 13008.417 |
| AK022955  | 4208.433  | 3909.911  | M57627    | 2060.837  | 4313.962  |
| AK021760  | 465.507   | 407.279   | W74254    | 2103.553  | 2047.308  |
| BC035855  | 1437.808  | 1552.914  | M58603    | 12791.254 | 17686.107 |
| AL137408  | 13099.518 | 13644.988 | AA443286  | 3988.434  | 2916.693  |
| AF054995  | 1346.251  | 1416.906  | AB003334  | 15885.891 | 21298.803 |
| AL080176  | 2835.785  | 2647.578  | AW276315  | 1897.434  | 2320.247  |
| AK023627  | 2031.002  | 2032.15   | AA490737  | 4574.631  | 2002.232  |
| AK025949  | 1248.003  | 1552.864  | BG697179  | 24456.635 | 19080.791 |
| Y10259    | 2682.256  | 2094.054  | NM_002136 | 59281.758 | 41294.047 |
| AK021725  | 2728.169  | 3597.578  | BM012504  | 17986.133 | 11859.828 |
| AF119893  | 502.03    | 451.861   | AA664145  | 5073.813  | 4522.022  |
| NM_002408 | 3576.527  | 2924.513  | X72308    | 56170.57  | 45114.832 |
| AK024282  | 845.137   | 850.305   | T70999    | 860.206   | 2665.345  |
| AF085838  | 3350.143  | 2024.443  | T50790    | 9892.625  | 14173.057 |
| NM_018277 | 692.608   | 419.448   | R48168    | 26126.488 | 42419.93  |
| AF014455  | 270.065   | 167.989   | AB040954  | 10824.999 | 15400.497 |
| AF086335  | 1215.473  | 607.9     | NM_002081 | 1451.109  | 1022.372  |
| AB011118  | 15008.5   | 7938.703  | AF146759  | 3078.305  | 4126.609  |
| S66666    | 391.271   | 322.459   | AB032993  | 13411.764 | 16775.162 |
| AK021476  | 1408.399  | 630.957   | NM_000854 | 9166.785  | 11696.01  |
| NM_015376 | 4858.488  | 2978.424  | NM_001901 | 1051.388  | 957.058   |
| NM_013341 | 394.609   | 361.949   | AL117423  | 18978.174 | 33055.52  |
| NM_004066 | 471.127   | 692.304   | NM_006140 | 923.725   | 1574.179  |
| NM_004941 | 3443.636  | 3338.345  | NM_007003 | 440.147   | 1414.148  |
| AF151831  | 1941.599  | 2437.026  | NM_002084 | 3845.891  | 4433.48   |
| AB011121  | 399.079   | 420.476   | D16892    | 17450.914 | 15774.478 |
| AF083255  | 4507.416  | 5015.953  | NM_004750 | 5335.523  | 10060.532 |
| AK022605  | 650.061   | 786.423   | NM_007295 | 10579.813 | 9574.294  |
| AL049955  | 15010.068 | 10289.48  | AK023317  | 968.637   | 1588.844  |
| AF155654  | 5966.911  | 8733.264  | NM_003651 | 22303.9   | 16295.383 |
| AF088044  | 557.704   | 610.691   | NM_014012 | 2361.552  | 2938.918  |
| AK000028  | 2128.993  | 2753.426  | NM_000418 | 2589.78   | 1301.498  |
| NM_013320 | 40020.988 | 23675.438 | NM_013246 | 1838.3    | 984.076   |
| AJ245902  | 548.681   | 358.786   | NM_018431 | 773.605   | 463.996   |
| AL050039  | 506.36    | 435.343   | NM_000591 | 5056.847  | 5299.792  |
| AF009316  | 452.771   | 331.288   | NM_000565 | 3763.402  | 6587.752  |
| BE816678  | 328.343   | 327.59    | NM_002019 | 1687.107  | 2693.909  |
| AF087987  | 848.901   | 409.386   | AF253318  | 2986.527  | 6249.564  |
| H09474    | 2643.451  | 1427.578  | NM_017767 | 30407.693 | 31400.832 |
| AB002368  | 8835.179  | 7103.893  | NM_006148 | 442.316   | 546.791   |
| AL360263  | 47145.406 | 27470.949 | AJ290954  | 4523.503  | 5288.661  |
| BC012757  | 688       | 579.335   | AK022832  | 3324.502  | 3127.497  |
| M96686    | 262.778   | 795.759   | NM_017784 | 1615.635  | 820.62    |
| NM_004062 | 3584.252  | 5268.694  | NM_014641 | 5705.599  | 8267.269  |
| NM_005883 | 762.043   | 1766.315  | NM_004462 | 6874.374  | 6776.876  |
| NM_004449 | 996.137   | 1218.82   | AB037739  | 590.958   | 1021.339  |

|           |           |           |           |           |           |
|-----------|-----------|-----------|-----------|-----------|-----------|
| NM_014591 | 2161.004  | 3051.637  | NM_000343 | 1176.021  | 2259.157  |
| NM_014592 | 858.527   | 2024.74   | NM_020246 | 4089.65   | 4919.17   |
| NM_001945 | 305.538   | 412.901   | NM_016354 | 3109.744  | 4517.676  |
| NM_020039 | 1411.035  | 1582.06   | NM_001044 | 1234.815  | 1251.827  |
| NM_006653 | 623.928   | 558.29    | NM_004644 | 1870.965  | 2602.552  |
| NM_014442 | 3573.979  | 2895.638  | AV681967  | 1591.778  | 1443.014  |
| AB002313  | 881.671   | 879.257   | NM_018250 | 2287.497  | 2111.142  |
| AB011167  | 2512.851  | 1978.663  | NM_016553 | 17327.068 | 28387.686 |
| NM_005409 | 935.099   | 812.576   | AB023136  | 1461.314  | 2964.587  |
| NM_000208 | 4849.606  | 3095.347  | NM_003795 | 55367.391 | 52206.68  |
| NM_002188 | 38778.813 | 21360.184 | NM_014232 | 5653.145  | 3993.962  |
| AK027119  | 21749.523 | 13448.497 | NM_005701 | 1943.707  | 1098.511  |
| AB037727  | 35993.418 | 21073.092 | NM_001231 | 1170.78   | 2106.666  |
| NM_005426 | 662.483   | 560.113   | NM_006819 | 48455.871 | 52013.359 |
| NM_004763 | 421.807   | 270.864   | NM_014744 | 4139.346  | 4494.074  |
| NM_014063 | 10612.699 | 8662.617  | D80004    | 675.721   | 711.338   |
| D86964    | 7428.616  | 8796.543  | NM_000946 | 7973.979  | 9111.286  |
| AL049801  | 1820.64   | 2554.274  | NM_016070 | 7413.793  | 9332.102  |
| NM_016395 | 19641.25  | 21135.711 | NM_016390 | 6341.264  | 8839.531  |
| NM_003152 | 3640.844  | 3628.927  | NM_016101 | 15755.706 | 23781.035 |
| NM_006342 | 2842.085  | 2563.135  | NM_020313 | 1593.747  | 2200.028  |
| NM_016396 | 1885.291  | 1933.977  | NM_014628 | 7603.934  | 8769.477  |
| NM_005689 | 1755.4    | 1730.865  | AK025630  | 4102.037  | 6442.706  |
| NM_005552 | 32902.508 | 27065.393 | AL365404  | 53613.746 | 53830.543 |
| NM_006717 | 2155.111  | 2002.661  | AK022907  | 19779.707 | 22004.457 |
| AL109786  | 1563.535  | 1835.728  | NM_014793 | 2749.321  | 3791.839  |
| AK026479  | 3858.094  | 2707.94   | NM_004245 | 6642.889  | 5784.886  |
| AK022860  | 3829.364  | 3525.449  | NM_003241 | 7154.171  | 9758.075  |
| X60188    | 25376.559 | 11834.358 | NM_002685 | 8104.042  | 11884.102 |
| NM_005977 | 1742.349  | 834.118   | AK024504  | 2396.186  | 1819.58   |
| NM_002747 | 537.868   | 479.791   | AF039023  | 3215.79   | 1902.997  |
| NM_006265 | 13833.263 | 7664.141  | NM_005511 | 5935.555  | 4784.533  |
| NM_003126 | 745.053   | 690.959   | NM_014698 | 33937.066 | 28914.1   |
| NM_006059 | 3026.267  | 2986.546  | NM_018475 | 10644.841 | 16024.288 |
| NM_000347 | 16481.979 | 20320.4   | NM_003262 | 10239.575 | 14588.715 |
| M13452    | 3435.442  | 4664.108  | NM_020125 | 1066.007  | 1214.955  |
| AF082075  | 2165.026  | 3187.128  | X52005    | 41913.641 | 50356.09  |
| NM_016114 | 3746.847  | 4364.709  | NM_001047 | 1728.656  | 2837.095  |
| AY007114  | 1727.882  | 2445.832  | AK024396  | 15599.072 | 19150.762 |
| AF086604  | 816.154   | 783.571   | U58514    | 5972.378  | 8716.942  |
| AB000895  | 1358.206  | 1569.688  | M57627    | 1834.466  | 3692.372  |
| X80031    | 1220.175  | 1686.183  | W74254    | 2649.562  | 5161.803  |
| AF019382  | 1813.348  | 2121.632  | AB003334  | 20368.543 | 34587.051 |
| NM_015601 | 780.186   | 941.581   | AW276315  | 4521.702  | 5718.145  |
| NM_001780 | 13586.151 | 10254.862 | AA490737  | 10351.977 | 12056.288 |
| AJ277442  | 879.091   | 727.966   | AI878886  | 54418.875 | 56052.473 |
| NM_004569 | 2101.682  | 1458.805  | BG697179  | 32600.314 | 40681.75  |
| AF089088  | 1464.271  | 1658.894  | NM_002136 | 53857.133 | 52260.848 |
| L07557    | 4265.82   | 3651.612  | BM012504  | 26515.596 | 41245.93  |
| NM_002796 | 22553.801 | 12248.387 | AA664145  | 7685.97   | 11904.303 |
| D78514    | 7125.855  | 4373.966  | X72308    | 58773.063 | 56924.34  |
| AK021665  | 954.83    | 945.535   | T70999    | 513.244   | 1263.93   |
| NM_013366 | 397.069   | 269.313   | T50790    | 7703.588  | 4381.138  |

|           |           |           |           |           |           |
|-----------|-----------|-----------|-----------|-----------|-----------|
| NM_002787 | 30888.254 | 21508.055 | R48168    | 16543.836 | 8902.439  |
| U95006    | 17803.371 | 25236.184 | AB040954  | 6510.837  | 4736.377  |
| NM_003347 | 11016.87  | 20176.229 | NM_002081 | 1749.221  | 1184.546  |
| AF273051  | 1525.143  | 3363.987  | AB023139  | 15995.432 | 26516.707 |
| NM_014516 | 15089.069 | 22572.803 | NM_017885 | 5133.955  | 2588.339  |
| AK021868  | 3316.124  | 4444.98   | D16892    | 15772.221 | 11451.251 |
| AK000643  | 53966.465 | 68623.586 | NM_004750 | 4335.203  | 7335.38   |
| NM_018421 | 5867.003  | 7511.684  | NM_007295 | 8408.31   | 6221.601  |
| AB014574  | 48845.664 | 64009.883 | AK023317  | 642.208   | 956.405   |
| NM_020127 | 2658.807  | 4317.436  | NM_003651 | 51224.852 | 58357.91  |
| NM_015623 | 10829.756 | 11807.902 | NM_014012 | 1673.123  | 3116.265  |
| AB045116  | 1084.016  | 1207.623  | NM_000418 | 5174.303  | 7638.314  |
| L49054    | 1058.833  | 1387.177  | NM_013246 | 4569.458  | 7279.854  |
| NM_014727 | 3764.124  | 4338.328  | NM_018431 | 1731.986  | 3582.157  |
| BE885010  | 1286.302  | 1439.57   | NM_000591 | 6686.286  | 10645.704 |
| NM_002943 | 2646.702  | 2293.594  | NM_000565 | 4471.236  | 6539.493  |
| AL133649  | 1286.821  | 1176.118  | NM_002019 | 1063.038  | 2281.851  |
| AB018303  | 939.835   | 1105.501  | NM_000799 | 594.594   | 1566.927  |
| NM_006454 | 8851.468  | 13375.279 | AF253318  | 7402.876  | 11163.684 |
| NM_015846 | 7364.964  | 14703.095 | NM_017767 | 38567.66  | 53760.035 |
| NM_015972 | 40870.434 | 50135.578 | AK024848  | 22002.383 | 31827.775 |
| NM_001644 | 694.236   | 790.824   | NM_000543 | 1064.679  | 1688.145  |
| NM_016132 | 2169.829  | 4012.383  | U06699    | 18479.727 | 26289.205 |
| NM_018006 | 3486.464  | 4860.177  | NM_006148 | 892.54    | 1664.324  |
| NM_016090 | 2299.656  | 2854.208  | AJ290954  | 5715.718  | 9791.428  |
| NM_001013 | 56137.605 | 63800.453 | AK025451  | 6441.3    | 5369.878  |
| AK024040  | 10754.628 | 11854.912 | NM_002783 | 16130.707 | 18889.324 |
| NM_005061 | 10377.249 | 11522.195 | NM_003038 | 1715.478  | 818.082   |
| NM_000997 | 55925.723 | 66970.07  | NM_018155 | 13146.477 | 7750.24   |
| AF182417  | 59381.898 | 55683.793 | AL050358  | 1782.141  | 1665.815  |
| AL137354  | 44064.734 | 30146.807 | NM_004731 | 1338.593  | 1211.951  |
| NM_001023 | 60078.387 | 65348.98  | NM_000544 | 7387.892  | 10147.609 |
| AK021571  | 15771.529 | 11051.986 | NM_001044 | 1576.5    | 3270.656  |
| AK022178  | 1792.735  | 2570.316  | NM_004644 | 3395.916  | 5407.336  |
| NM_006011 | 1543.473  | 1648.293  | AV681967  | 3287.831  | 5673.135  |
| L00635    | 2312.123  | 2533.25   | NM_018250 | 4331.827  | 7155.305  |
| NM_002541 | 4527.688  | 7605.804  | NM_016553 | 17163.635 | 26399.506 |
| NM_000056 | 10343.76  | 15200.433 | AB023136  | 1382.302  | 2845.508  |
| NM_016311 | 25616.643 | 36385.984 | NM_003795 | 56860.738 | 52083.43  |
| NM_001867 | 52694.707 | 67306.234 | NM_014232 | 8559.163  | 14691.889 |
| NM_002300 | 52345.016 | 77314.078 | NM_005701 | 2113.38   | 2074.92   |
| NM_000290 | 11989.744 | 23810.59  | NM_001231 | 1797.621  | 3964.389  |
| NM_016538 | 5577.862  | 10627.749 | NM_006819 | 58150.551 | 52479.574 |
| AK023275  | 12369.498 | 15198.5   | NM_014744 | 3199.082  | 2206.505  |
| AJ223352  | 7604.539  | 12820.441 | AF146759  | 3185.257  | 2186.673  |
| NM_012238 | 3831.572  | 6682.984  | AB032993  | 9965.859  | 5851.558  |
| NM_016539 | 13853.543 | 15784.973 | NM_000854 | 6498.069  | 4489.766  |
| NM_006807 | 20826.094 | 21580.574 | NM_001901 | 834.944   | 465.772   |
| NM_000326 | 656.379   | 980.607   | AL117423  | 19018.865 | 28786.008 |
| L16464    | 1288.085  | 1960.042  | NM_006140 | 973.769   | 1896.669  |
| NM_006532 | 12354.689 | 16080.249 | NM_002084 | 3712.677  | 5186.842  |
| U07132    | 11845.055 | 13061.556 | NM_005511 | 7494.897  | 8314.021  |
| NM_003436 | 847.408   | 1090.833  | NM_014698 | 36073.164 | 30649.143 |

|           |           |           |           |           |           |
|-----------|-----------|-----------|-----------|-----------|-----------|
| AK027006  | 369.738   | 447.627   | NM_018475 | 7797.338  | 3419.732  |
| AB034691  | 550.792   | 562.597   | NM_003262 | 4650.221  | 2657.493  |
| NM_001675 | 1419.803  | 4639.11   | NM_020125 | 1050.839  | 768.839   |
| NM_003422 | 3349.84   | 4718.218  | AK022832  | 5228.63   | 8199.351  |
| NM_001451 | 2123.291  | 2911.638  | NM_017784 | 2938.607  | 4393.096  |
| NM_014779 | 3110.098  | 3468.153  | NM_014641 | 4456.576  | 3759.073  |
| NM_014446 | 1577.498  | 3128.648  | NM_004462 | 6144.453  | 4790.244  |
| U58096    | 26524.254 | 32637.416 | AB020664  | 2226.498  | 3473.854  |
| NM_016929 | 17373.818 | 23761.568 | NM_006640 | 25801.523 | 17133.285 |
| NM_012323 | 2304.267  | 5662.502  | NM_000869 | 525.243   | 276.954   |
| NM_006942 | 693.436   | 1699.724  | NM_000343 | 719.507   | 859.596   |
| NM_018199 | 947.487   | 2122.035  | NM_019112 | 9147.831  | 7733.179  |
| NM_013943 | 1530.91   | 3211.966  | NM_012336 | 9979.692  | 8426.97   |
| NM_001639 | 15559.361 | 24966.006 | NM_020161 | 601.594   | 1022.124  |
| H39560    | 409.713   | 1106.107  | NM_020246 | 3790.882  | 3749.999  |
| BG534366  | 20419.885 | 28572.727 | NM_000084 | 5952.612  | 5527.909  |
| BG698522  | 31195.49  | 36989.211 | NM_016354 | 5934.984  | 7557.189  |
| AA152346  | 1336.376  | 2366.004  | AB040954  | 8924.041  | 5805.432  |
| L15189    | 3827.391  | 5029      | NM_002081 | 1591.452  | 1828.749  |
| AB023420  | 22349.889 | 24840.547 | AB023139  | 11932.324 | 6039.995  |
| BI822179  | 14515.55  | 21841.818 | NM_017885 | 5836.114  | 2698.494  |
| AF022912  | 7110.537  | 7484.244  | D80004    | 1150.139  | 889.58    |
| AA477428  | 23251.605 | 25735.064 | X63966    | 787.955   | 1727.4    |
| AA156342  | 3470.676  | 3674.979  | NM_000946 | 9561.702  | 14154.07  |
| R45594    | 24381.313 | 24565.539 | NM_016070 | 6225.915  | 5437.025  |
| AI143386  | 833.641   | 933.443   | NM_016390 | 4414.591  | 2672.666  |
| H46425    | 6761.22   | 7559      | NM_016101 | 13063.555 | 9648.278  |
| AI355949  | 1517.752  | 1818.556  | NM_005859 | 60490.766 | 55072.348 |
| AA278152  | 21005.605 | 21597.695 | NM_020313 | 1537.173  | 1038.285  |
| H75530    | 6949.45   | 9463.815  | NM_014628 | 5760.397  | 3819.269  |
| NM_005036 | 1307.704  | 1287.136  | AK025630  | 3199.706  | 2774.66   |
| NM_018201 | 4757.342  | 7986.958  | AL365404  | 47524.531 | 41715.945 |
| NM_014438 | 1471.472  | 2976.21   | AK022907  | 16860.322 | 11906.875 |
| NM_014880 | 2392.33   | 4289.002  | NM_014793 | 2920.782  | 2316.177  |
| NM_003764 | 6029.788  | 7430.588  | NM_004245 | 5282.812  | 2702.579  |
| NM_019618 | 281.443   | 772.178   | NM_003241 | 6193.894  | 7747.805  |
| NM_004829 | 2805.721  | 4955.301  | NM_002685 | 4745.275  | 2511.987  |
| NM_006793 | 46340.012 | 50514.824 | AK024504  | 2408.443  | 1465.661  |
| NM_001538 | 10739.212 | 26273.328 | AF039023  | 4170.452  | 6819.829  |
| X97261    | 11364.544 | 45876.406 | NM_145904 | 35015.965 | 26181.264 |
| NM_001468 | 897.108   | 1501.341  | AF086434  | 1236.352  | 551.4     |
| NM_005410 | 707.904   | 739.293   | AK022063  | 11637.243 | 8265.618  |
| D87666    | 49478.137 | 66399.047 | AF086345  | 9766.29   | 8047.45   |
| NM_002921 | 572.761   | 1002.711  | AF086464  | 1503.091  | 1634.65   |
| NM_001315 | 3783.075  | 5042.748  | AL049278  | 4003.281  | 4489.227  |
| AF286095  | 6280.3    | 9585.496  | AL117519  | 3320.119  | 5583.594  |
| NM_000878 | 2537.698  | 4315.129  | AK001595  | 3670.481  | 2463.594  |
| S66407    | 2668.21   | 4773.977  | NM_018015 | 3048.04   | 1252.129  |
| NM_016523 | 474.626   | 635.725   | NM_003715 | 11965.828 | 18469.473 |
| NM_004258 | 56354.832 | 45357.402 | NM_145904 | 27453.305 | 37420.371 |
| NM_001981 | 9626.524  | 9295.252  | NM_021969 | 700.351   | 1397.107  |
| NM_001585 | 54766.918 | 50242.973 | SR2       | 56767.004 | 62015.074 |
| AK026108  | 15766.759 | 7455.917  | SR4       | 22162.203 | 39867.559 |

|           |           |           |           |           |           |
|-----------|-----------|-----------|-----------|-----------|-----------|
| AF149304  | 971.557   | 1633.965  | SR6       | 3728.787  | 5504.311  |
| NM_012095 | 9078.762  | 16467.17  | SR8       | 11419.151 | 43692.57  |
| NM_016435 | 566.76    | 771.207   | CY3Cy5    | 4969.79   | 126.578   |
| X73079    | 40555.555 | 44480.969 | AF086395  | 13014.587 | 15696.395 |
| NM_019091 | 1083.643  | 1212.04   | AF086049  | 4254.609  | 3130.102  |
| L07518    | 513.955   | 674.674   | AF114263  | 1269.41   | 1039.911  |
| AF264781  | 2549.259  | 3774.528  | AK026142  | 5754.27   | 4566.867  |
| AK022823  | 435.826   | 924.743   | AF085834  | 631.452   | 738.095   |
| NM_002456 | 728.767   | 890.244   | AK021494  | 7753.466  | 8994.497  |
| NM_016124 | 5140.652  | 9302.125  | AK022117  | 774.516   | 796.697   |
| NM_015945 | 6049.381  | 9764.476  | AF075023  | 3902.972  | 3828.684  |
| NM_006555 | 3945.067  | 3685.203  | AL360160  | 62903.551 | 54727.199 |
| NM_014521 | 1450.168  | 1114.675  | AK001092  | 60632.273 | 64561.785 |
| NM_002445 | 1911.062  | 2160.277  | NM_014144 | 3820.184  | 4676.22   |
| NM_017805 | 404.949   | 340.398   | AF147345  | 7602.097  | 9792.057  |
| AK023202  | 3081.949  | 2231.656  | AF147373  | 12193.454 | 17363.875 |
| D63877    | 2279.944  | 1083.337  | AK022044  | 524.835   | 1061.13   |
| AF131760  | 1360.097  | 800.801   | AK026209  | 505.492   | 1078.896  |
| NM_018695 | 1472.815  | 627.285   | AF086253  | 3061.425  | 4010.636  |
| NM_006461 | 2224.276  | 1138.42   | AK021642  | 8267.116  | 9275.025  |
| NM_002825 | 3347.933  | 7335.005  | AK022455  | 1778.745  | 1491.965  |
| AF159141  | 7853.493  | 10079.345 | AK021987  | 3217.62   | 2687.537  |
| NM_002420 | 430.772   | 913.887   | AK026905  | 2596.871  | 1451.38   |
| NM_016455 | 46677.195 | 54902.75  | NM_000134 | 1461.131  | 1373.286  |
| AK022233  | 5174.496  | 8767.023  | AF075108  | 2675.266  | 4160.235  |
| AK026410  | 18678.896 | 24723.338 | NM_005060 | 1929.951  | 1957.315  |
| NM_014637 | 8469.039  | 9567.344  | AF085935  | 1782.288  | 1905.196  |
| NM_013375 | 27163.568 | 26492.689 | AL035369  | 2906.941  | 2528.684  |
| AF113208  | 9903.001  | 10279.936 | AF075097  | 12481.224 | 4203.244  |
| NM_006153 | 3874.45   | 3277.382  | AL133075  | 13981.059 | 21880.271 |
| NM_012164 | 2346.46   | 2344.607  | AL137692  | 849.562   | 1327.327  |
| AK026010  | 298.954   | 291.331   | AL137630  | 4658.292  | 5652.408  |
| AB011156  | 606.9     | 333.917   | AK055236  | 1088.759  | 1660.423  |
| NM_018075 | 392.753   | 216.519   | AL137277  | 33879.441 | 46767.133 |
| NM_004760 | 9174.979  | 3693.381  | AL137447  | 1408.937  | 1770.982  |
| NM_006752 | 4001.077  | 1682.993  | AL157467  | 1244.871  | 1604.578  |
| NM_006805 | 4740.411  | 2123.368  | BC023609  | 3945.406  | 5271.396  |
| NM_012323 | 2066.757  | 5539.943  | AK023264  | 769.433   | 906.997   |
| NM_006942 | 519.629   | 1128.434  | AK024457  | 16442.965 | 21238.404 |
| NM_018195 | 975.541   | 1207.045  | AK026894  | 2704.425  | 1829.344  |
| NM_013943 | 1236.673  | 1690.873  | AK026372  | 875.253   | 864.368   |
| NM_001635 | 9642.942  | 7818.405  | AF161369  | 8634.515  | 7407.29   |
| BG534366  | 11518.297 | 8732.968  | AK027176  | 8437.389  | 9134.914  |
| BG698522  | 17423.742 | 12052.958 | AF073328  | 3225.313  | 3837.165  |
| AA152346  | 713.853   | 599.182   | AF129266  | 1219.321  | 957.709   |
| L15189    | 1984.294  | 1431.981  | AF211968  | 820.279   | 1050.083  |
| AB023420  | 12742.387 | 7944.922  | Y12019    | 6444.854  | 6178.264  |
| BI822179  | 8405.098  | 6470.321  | AF147418  | 1482.751  | 440.644   |
| AF022912  | 3696.669  | 2622.709  | AL137326  | 1413.013  | 1682.768  |
| AA477428  | 12659.433 | 10660.326 | AK021898  | 6904.58   | 9341.058  |
| AA156342  | 1751.335  | 1157.776  | AK022024  | 5042.911  | 8288.89   |
| R45594    | 12957.229 | 8206.541  | AK022163  | 731.191   | 1185.441  |
| AI143386  | 327.953   | 267.167   | AK022301  | 2307.699  | 4034.535  |

|           |           |           |           |           |           |
|-----------|-----------|-----------|-----------|-----------|-----------|
| H46425    | 3284.364  | 1709.405  | AK021948  | 4513.797  | 6515.211  |
| AI355949  | 611.058   | 426.107   | AK022054  | 1037.142  | 1537.148  |
| AA278152  | 9759.876  | 4104.889  | AK022191  | 434.691   | 665.521   |
| H75530    | 2909.6    | 1583.303  | U48697    | 618.71    | 1183.468  |
| AK000554  | 1303.618  | 610.785   | AF230317  | 1162.564  | 990.147   |
| NM_006472 | 1789.957  | 896.377   | AK023806  | 7073.017  | 7199.824  |
| NM_003764 | 3753.193  | 2837.328  | Y16696    | 29878.928 | 19578.414 |
| NM_004829 | 1429.815  | 1333.817  | AK026094  | 5342.526  | 4411.062  |
| NM_006793 | 27418.207 | 16611.504 | AF161344  | 19231.172 | 14321.93  |
| NM_001538 | 6446.055  | 6981.342  | AF086027  | 2316.158  | 2332.675  |
| X97261    | 6522.893  | 12122.502 | NM_001207 | 65182.629 | 62143.719 |
| NM_001468 | 286.58    | 276.93    | NM_006638 | 6463.063  | 6110.313  |
| D87666    | 46135.523 | 24098.182 | X14675    | 4086.847  | 2856.217  |
| NM_001315 | 1936.796  | 1553.226  | AF071170  | 1390.112  | 492.064   |
| AF286095  | 2725.599  | 2287.935  | AF075075  | 2779.739  | 3659.039  |
| NM_000878 | 1336.521  | 1135.819  | NM_005453 | 493.683   | 1055.618  |
| S66407    | 1215.129  | 1087.707  | NM_018304 | 20993.197 | 23530.785 |
| NM_004258 | 38379.434 | 22703.801 | NM_016472 | 4076.514  | 5356.044  |
| NM_001981 | 5336.925  | 2860.031  | AF086064  | 735.837   | 608.285   |
| NM_001585 | 48323.234 | 28844.775 | AK023042  | 3855.816  | 4506.817  |
| AK026108  | 12077.415 | 4752.125  | NM_016550 | 6985.999  | 4603.715  |
| NM_014448 | 732.391   | 346.215   | AK024813  | 11352.767 | 8284.793  |
| U58096    | 12435.072 | 3552.463  | AJ227909  | 44002.859 | 44793.988 |
| X73079    | 19936.295 | 11212.525 | AK021880  | 1503.609  | 1124.557  |
| NM_019091 | 399.031   | 267.771   | AK024107  | 1201.42   | 1160.575  |
| AF264781  | 1273.097  | 706.971   | AL109684  | 748.847   | 903.111   |
| NM_016124 | 2091.743  | 1902.653  | NM_014186 | 14632.532 | 12405.199 |
| NM_015948 | 3264.953  | 4032.294  | AF056442  | 3839.188  | 2828.531  |
| NM_000804 | 337.072   | 407.836   | AK024752  | 55276.609 | 29793.717 |
| NM_006555 | 2544.355  | 2404.182  | AK024181  | 1237.466  | 1389.074  |
| NM_014521 | 1289.015  | 1069.407  | AF131859  | 8103.629  | 11903.262 |
| NM_002445 | 1542.515  | 1718.991  | AK023632  | 1191.849  | 1680.95   |
| NM_017809 | 292.337   | 466.324   | AF086118  | 15678.563 | 22688.623 |
| AK023202  | 2565.657  | 1869.061  | NM_014138 | 3705.49   | 4654.054  |
| D63877    | 1994.549  | 1284.554  | AK025044  | 12108.514 | 14368.496 |
| AF131760  | 1055.543  | 667.538   | AK023644  | 2939.215  | 3773.759  |
| NM_018698 | 1043.954  | 542.881   | NM_014723 | 2682.545  | 3747.66   |
| NM_006461 | 1953.071  | 1030.772  | AB011106  | 2894.483  | 2247.043  |
| NM_018201 | 2990.655  | 1855.919  | D26362    | 3092.41   | 3214.355  |
| NM_014438 | 1081.992  | 662.875   | NM_013452 | 6712.754  | 2731.043  |
| AF159141  | 4039.574  | 2700.773  | AY009402  | 6050.722  | 5084.536  |
| NM_016458 | 27646.492 | 15869.845 | NM_018451 | 1973.895  | 960.108   |
| AK022233  | 2201.008  | 1908.486  | NM_012443 | 1059.11   | 846.631   |
| AL137713  | 145.339   | 158.286   | NM_007009 | 751.452   | 416.229   |
| AK026410  | 10353.065 | 9076.839  | NM_002584 | 9193.956  | 8408.634  |
| NM_014637 | 6116.082  | 5306.48   | AK022154  | 819.122   | 818.739   |
| NM_013379 | 21961.086 | 24504.887 | AK022199  | 1691.987  | 2226.427  |
| AF113208  | 7221.488  | 10167.86  | NM_006211 | 1606.612  | 1607.47   |
| NM_006153 | 3173.415  | 3856.509  | NM_003524 | 10594.074 | 6764.171  |
| NM_012164 | 2061.058  | 2160.181  | AK021438  | 661.851   | 531.1     |
| AB011156  | 532.265   | 499.61    | NM_005913 | 2468.14   | 1207.018  |
| NM_018079 | 353.897   | 357.958   | S39891    | 5249.12   | 7725.849  |
| NM_004760 | 8847.536  | 4819.391  | R17536    | 1623.216  | 2657.596  |

|           |           |           |           |           |           |
|-----------|-----------|-----------|-----------|-----------|-----------|
| NM_006752 | 3649.442  | 2422.106  | AK021624  | 1946.211  | 2914.11   |
| NM_006809 | 5112.003  | 2997.41   | AF278605  | 15156.432 | 24650.045 |
| AF149304  | 477.248   | 269.053   | NM_006497 | 65425.809 | 65589.703 |
| NM_012095 | 4956.043  | 2707.554  | AK022329  | 2781.497  | 2972.552  |
| NM_018199 | 390.115   | 573.805   | AL133599  | 2934.074  | 3801.311  |
| NM_013943 | 1054.616  | 790.99    | AB037776  | 1644.379  | 1963.892  |
| NM_001639 | 7952.682  | 7570.917  | AF196976  | 13645.812 | 9649.558  |
| H39560    | 221.681   | 435.164   | AL050379  | 3985.294  | 4070.917  |
| BG534366  | 11510.523 | 11651.696 | NM_003161 | 3305.47   | 1346.6    |
| BG698522  | 17825.326 | 15409.58  | NM_014496 | 1762.69   | 1201.352  |
| AA152346  | 610.81    | 881.485   | NM_016215 | 54723.801 | 49831.023 |
| L15189    | 1800.308  | 2280.657  | AK026919  | 1016.476  | 1189.742  |
| AB023420  | 15094.14  | 26055.846 | NM_001501 | 26424.646 | 24452.404 |
| BI822179  | 10113.05  | 26163.668 | NM_006176 | 59473.254 | 59714.086 |
| AF022912  | 3814.343  | 4454.47   | AL137459  | 3692.084  | 4191.647  |
| AA477428  | 11393.624 | 10630.456 | AB037812  | 1212.829  | 1295.52   |
| AA156342  | 1724.8    | 1796.563  | AB007932  | 15024.594 | 17683.598 |
| R45594    | 12677.874 | 11655.646 | AF219257  | 67405.836 | 71446.938 |
| H46425    | 3570.558  | 3420.349  | NM_003978 | 2374.373  | 1586.247  |
| AI355949  | 624.178   | 465.074   | NM_002561 | 44733.453 | 21863.256 |
| AA278152  | 9338.797  | 5275.272  | NM_006206 | 780.628   | 1197.561  |
| H75530    | 3239.799  | 2402.621  | NM_000805 | 1642.845  | 2438.021  |
| AK000554  | 1084.667  | 885.592   | AL359933  | 50713.859 | 58513.641 |
| NM_006472 | 1748.199  | 1174.668  | NM_001302 | 2576.209  | 3807.796  |
| NM_002826 | 2127.578  | 1067.439  | M17783    | 21138.494 | 29613.102 |
| X97261    | 6547.82   | 24123.455 | NM_018590 | 9166.275  | 12283.724 |
| NM_001468 | 348.11    | 454.298   | NM_002607 | 1544.466  | 2404.553  |
| NM_005410 | 233.039   | 255.877   | AF116712  | 1613.587  | 1390.988  |
| D87666    | 41542.293 | 24276.664 | AF116626  | 6245.338  | 3365.396  |
| NM_001315 | 1774.326  | 1797.656  | NM_001760 | 32249.672 | 22381.652 |
| AF286095  | 2925.222  | 3225.968  | NM_002527 | 2101.47   | 1678.054  |
| NM_000878 | 1454.069  | 2313.005  | NM_005890 | 2994.145  | 1752.594  |
| S66407    | 1551.256  | 1859.506  | NM_007065 | 62102.527 | 57161.293 |
| NM_004258 | 47561.66  | 37407.797 | AF149785  | 16384.871 | 14827.124 |
| NM_001981 | 5429.332  | 5331.271  | NM_012068 | 24472.924 | 24162.318 |
| NM_014654 | 581.594   | 1225.689  | NM_004064 | 16434.488 | 19033.443 |
| NM_001585 | 50635.691 | 64972.313 | NM_001256 | 10644.184 | 12122.26  |
| AK026108  | 14788.756 | 13599.367 | NM_014704 | 15618.933 | 17204.055 |
| NM_006379 | 1721.506  | 2434.277  | NM_020205 | 2890.625  | 2791.609  |
| BF571428  | 7310.235  | 5570.772  | NM_001227 | 2391.128  | 1203.908  |
| AB037723  | 15645.088 | 10942.619 | NM_013342 | 4492.203  | 6561.726  |
| NM_006246 | 3072.926  | 2792.645  | NM_014344 | 2925.86   | 3630.887  |
| NM_004316 | 672.448   | 799.524   | AB040917  | 1562.806  | 2083.426  |
| NM_014446 | 626.099   | 429.562   | AL110261  | 51581.199 | 60127.98  |
| U58096    | 12874.218 | 4948.153  | AA203539  | 2357.562  | 2927.745  |
| NM_016929 | 8511.58   | 3785.003  | AF245505  | 4562.966  | 4310.719  |
| NM_012323 | 1137.904  | 883.887   | NM_004279 | 17775.111 | 7375.474  |
| NM_003054 | 1151.434  | 2903.786  | NM_004851 | 21777.318 | 9925.963  |
| NM_002219 | 4740.806  | 3100.428  | NM_001908 | 10289.271 | 6585.688  |
| AF182404  | 4599.87   | 4449.799  | NM_000285 | 20232.723 | 13104.386 |
| NM_006555 | 2657.789  | 2706.15   | NM_005911 | 59108.754 | 55789.453 |
| NM_014521 | 1670.9    | 1687.087  | AV702690  | 3965.699  | 3224.403  |
| NM_002445 | 1544.865  | 1927.259  | AL117452  | 20356.109 | 19344.941 |



|           |           |           |           |           |           |
|-----------|-----------|-----------|-----------|-----------|-----------|
| NM_01780E | 306.578   | 281.49    | NM_01223C | 2432.815  | 2562.852  |
| AK023202  | 2427.216  | 2322.923  | NM_01403E | 17196.85  | 21007.436 |
| D63877    | 2245.379  | 2349.65   | NM_002061 | 6178.13   | 7559.987  |
| AF131760  | 1004.229  | 1119.668  | AF169974  | 11046.174 | 13367.922 |
| NM_01869E | 1331.161  | 5112.514  | NM_004522 | 2336.736  | 2593.059  |
| NM_006461 | 2608.955  | 6381.393  | NM_005733 | 3896.808  | 2716.489  |
| NM_018201 | 2825.29   | 3491.892  | NM_01813E | 9005.172  | 5641.265  |
| NM_01443E | 793.332   | 761.477   | NM_01961E | 6893.069  | 5804.255  |
| NM_01488C | 1082.607  | 1035.987  | AF090944  | 2557.635  | 1521.356  |
| NM_003764 | 3280.733  | 1691.304  | NM_006473 | 2760.4    | 1765.739  |
| NM_00482E | 1236.854  | 818.812   | NM_005653 | 4101.054  | 2564.898  |
| NM_00679E | 25120.566 | 11316.054 | NM_014553 | 5248.255  | 3284.086  |
| NM_00153E | 5287.171  | 4270.865  | NM_00344C | 1621.89   | 1125.779  |
| NM_00680E | 4216.804  | 3679.318  | NM_00469E | 10698.154 | 8723.374  |
| AF149304  | 550.861   | 484.295   | U41387    | 56636.117 | 49808.305 |
| NM_01209E | 5244.04   | 4770.435  | NM_00451E | 32508.455 | 41955.824 |
| X73079    | 20237.271 | 13447.239 | NM_006513 | 5014.46   | 5732.222  |
| NM_019091 | 512.304   | 336.584   | NM_00368E | 39432.34  | 48061.914 |
| AF264781  | 1354.486  | 850.178   | NM_00248E | 1508.785  | 1254.306  |
| AK024215  | 4783.833  | 4271.381  | NM_00629E | 17905.1   | 13653.65  |
| AB044661  | 2585.924  | 2010.656  | NM_00154C | 7730.198  | 4918.822  |
| NM_00060E | 12902.839 | 7654.085  | NM_012111 | 41597.07  | 20174.975 |
| NM_016124 | 2359.743  | 1545.721  | NM_00447C | 39865.852 | 20096.805 |
| NM_01907E | 237.088   | 157.826   | NM_005932 | 1759.355  | 1182.397  |
| U53530    | 1905.092  | 1275.432  | BF036874  | 8005.519  | 7033.328  |
| NM_00659E | 822.861   | 415.911   | BE888487  | 2770.789  | 3536.285  |
| NM_01594E | 2536.126  | 1316.948  | AF182419  | 8728.849  | 5771.729  |
| NM_006472 | 1415.914  | 1165.719  | NM_004293 | 1069.506  | 446.783   |
| NM_00282E | 1792.99   | 1529.196  | NM_00701E | 4407.508  | 3759.66   |
| AF159141  | 3575.284  | 2644.403  | NM_002703 | 16671.025 | 14276.398 |
| NM_01645E | 28304.24  | 17928.453 | NM_00537E | 4355.315  | 4208.991  |
| AK022233  | 2020.727  | 1858.39   | NM_00598E | 42422.02  | 44094.727 |
| AK026410  | 10232.826 | 7775.766  | NM_01590E | 13508.478 | 21242.102 |
| NM_014637 | 5251.238  | 3431.34   | AK023759  | 9906.95   | 13734.321 |
| NM_01337E | 21936.207 | 17387.18  | L25270    | 60985.617 | 60875.055 |
| AF113208  | 7654.999  | 6458.212  | AB033111  | 4560.49   | 4204.629  |
| NM_00615E | 3207.964  | 2743.028  | AJ276316  | 5959.981  | 3730.108  |
| NM_012164 | 2206.763  | 1667.954  | AF229246  | 59565.242 | 44679.73  |
| AK026010  | 353.562   | 270.545   | S64709    | 8222.904  | 3956.11   |
| AB011156  | 464.823   | 292.79    | NM_01848E | 6710.015  | 3995.438  |
| NM_01807E | 494.411   | 450.844   | X56465    | 2134.572  | 1019.297  |
| NM_00476C | 8399.324  | 3889.451  | NM_003071 | 30300.73  | 20927.398 |
| NM_006752 | 3522.377  | 2055.42   | NM_00310E | 1094.858  | 606.192   |
| NM_02100E | 282.861   | 360.296   | NM_01331C | 10015.118 | 4903.991  |
| SB        | 780.174   | 538.778   | BC004958  | 5723.609  | 3127.842  |
| AF086387  | 413.889   | 495.395   | NM_005762 | 11893.836 | 7105.947  |
| AL389941  | 501.868   | 607.296   | X84370    | 21563.904 | 24109.184 |
| AB037756  | 896.155   | 976.421   | NM_00403E | 1752.923  | 2149.417  |
| AK001853  | 1799.068  | 1589.946  | NM_00050E | 1157.274  | 996.544   |
| AK025071  | 426.119   | 407.475   | AB014558  | 2269.132  | 1715.055  |
| AK022848  | 3672.589  | 1541.977  | NM_006287 | 3425.9    | 2938.071  |
| AL049957  | 850.056   | 496.175   | NM_00011E | 9078.531  | 7396.238  |
| NM_02100E | 618.059   | 1293.01   | NM_000913 | 2639.933  | 2556.668  |

|           |           |           |           |           |           |
|-----------|-----------|-----------|-----------|-----------|-----------|
| SB        | 1909.818  | 3931.103  | NM_001298 | 67825.344 | 69903.039 |
| SR2       | 71385.172 | 60354.316 | BG325046  | 10099.626 | 11249.895 |
| SR6       | 1960.098  | 8979.27   | AI351740  | 42375.586 | 51079.266 |
| SR8       | 9332.437  | 77349.141 | AA444051  | 31575.422 | 38472.336 |
| SR10      | 31239.025 | 25058.094 | NM_007164 | 24628.379 | 27455.582 |
| CY3Cy5    | 4592.414  | 308.747   | BE783826  | 66579.953 | 71684.266 |
| AF086063  | 509.707   | 300.325   | X04827    | 8021.854  | 11247.726 |
| AF086098  | 754.472   | 591.141   | H07088    | 8604.241  | 10756.915 |
| AF086076  | 362.938   | 441.179   | AI004656  | 6536.626  | 5029.496  |
| AL833393  | 1260.362  | 1103.012  | BC020596  | 4134.245  | 3038.464  |
| AF088005  | 1299.482  | 1109.588  | AF116606  | 63355.668 | 60167.707 |
| AF086096  | 1659.442  | 2206.676  | X98922    | 10207.785 | 7660.186  |
| AL390132  | 483.044   | 542.462   | AK098435  | 12923.185 | 11410.284 |
| NM_017933 | 7977.262  | 7450.167  | AK092872  | 8079.204  | 6994.314  |
| NM_017819 | 4866.161  | 3307.069  | AF230496  | 2853.376  | 2317.962  |
| NM_014803 | 448.801   | 362.139   | M16801    | 2552.386  | 2535.359  |
| AK024956  | 286.823   | 390.243   | M94065    | 3837.354  | 2859.049  |
| AF147386  | 879.552   | 878.825   | NM_006068 | 6515.865  | 8400.644  |
| AF273052  | 6438.063  | 3667.827  | NM_002704 | 1384.162  | 1839.336  |
| NM_017943 | 5489.538  | 3521.232  | U16752    | 2202.29   | 1654.384  |
| AF147383  | 1923.388  | 2388.69   | M30134    | 1175.186  | 873.077   |
| AK025682  | 2371.067  | 6180.085  | NM_002038 | 28529.971 | 27198.994 |
| AL389986  | 9415.813  | 32095.379 | NM_005729 | 38858.727 | 41454.426 |
| AF088052  | 1891.505  | 9983.069  | NM_015493 | 2970.658  | 3829.059  |
| AK027155  | 3044.516  | 2092.841  | NM_003747 | 1866.24   | 2251.09   |
| AK024528  | 12421.426 | 9215.23   | AB037744  | 4028.243  | 4110.982  |
| NM_015370 | 2219.502  | 1661.088  | AF141901  | 3665.6    | 4477.326  |
| AF085917  | 1019.493  | 1216.839  | NM_007008 | 2652.707  | 4474.654  |
| AF085989  | 664.376   | 881.014   | AL109708  | 2462.432  | 3928.853  |
| AL360139  | 55881.066 | 58120.48  | L29143    | 8485.738  | 11576.907 |
| AF075110  | 4851.454  | 6803.233  | AF234532  | 6920.247  | 11562.722 |
| AL137323  | 764.068   | 1117.633  | NM_002418 | 3528.167  | 3231.578  |
| AL137494  | 6103.369  | 12459.461 | NM_002090 | 1251.374  | 1030.96   |
| AL162037  | 6085.992  | 12934.167 | NM_004485 | 1513.192  | 1560.823  |
| AL390150  | 2136.503  | 7485.507  | NM_013296 | 18000.959 | 12110.751 |
| AL137575  | 348.391   | 3364.956  | AL117478  | 4234.136  | 2958.881  |
| NM_002761 | 1067.303  | 4923.401  | NM_005307 | 14571.864 | 11937.317 |
| AK056674  | 597.461   | 603.028   | NM_005958 | 6587.521  | 5775.331  |
| AK022042  | 499.24    | 550.661   | AF225426  | 1831.892  | 2017.506  |
| AL117588  | 387.168   | 322.7     | NM_005208 | 27909     | 21438.611 |
| AK024653  | 22897.139 | 14784.277 | AF099740  | 2295.679  | 2689.428  |
| AF103907  | 803.967   | 975.018   | NM_006117 | 12769.752 | 10445.521 |
| AF094508  | 428.366   | 440.806   | NM_002225 | 2814.75   | 2013.903  |
| AF161351  | 1276.701  | 1544.288  | NM_006229 | 892.966   | 884.189   |
| NM_014130 | 368.839   | 1423.867  | NM_015415 | 45835     | 37722.297 |
| AF111782  | 6311.968  | 9584.172  | NM_004897 | 5109.369  | 5974.234  |
| AF151530  | 2822.593  | 4877.35   | NM_002555 | 2806.341  | 2684.581  |
| AK021991  | 1111.456  | 2921.953  | AF225418  | 2897.383  | 3209.694  |
| AK022093  | 5663.285  | 11631.214 | NM_000309 | 3382.483  | 4404.668  |
| AK022232  | 441.717   | 1582.188  | NM_004528 | 37075.902 | 44111.281 |
| AK022376  | 1928.711  | 7269.566  | AK026381  | 50041.988 | 48584.938 |
| AK022005  | 1308.761  | 5130.785  | AK023107  | 12429.31  | 15885.094 |
| AK022137  | 768.936   | 3665.29   | NM_004578 | 1216.181  | 990.528   |

|           |           |           |           |           |           |
|-----------|-----------|-----------|-----------|-----------|-----------|
| AK022272  | 2200.331  | 10307.016 | NM_000647 | 3686.958  | 2235.559  |
| AF279780  | 23224.563 | 10549.422 | NM_017604 | 6086.398  | 4404.96   |
| AK023878  | 383.361   | 356.982   | NM_017738 | 34819.133 | 23774.695 |
| AK021851  | 444.92    | 577.333   | NM_016557 | 4090.396  | 3723.115  |
| L37717    | 691.528   | 900.053   | NM_000623 | 4172.171  | 3133.238  |
| AJ131609  | 4354.126  | 4876.269  | AF161348  | 2477.716  | 2380.032  |
| BC019280  | 5005.364  | 7873.313  | NM_018467 | 44151.367 | 41056.5   |
| AF086498  | 911.602   | 1921.511  | AF150735  | 11161.426 | 9847.031  |
| AK000687  | 1285.076  | 2043.693  | NM_018183 | 2662.919  | 2736.627  |
| AF079567  | 2403.33   | 3879.899  | NM_012382 | 10090.658 | 11399.6   |
| AL049311  | 1301.896  | 2579.506  | BF038366  | 2127.445  | 2630.834  |
| AK000016  | 5119.841  | 11281.087 | NM_002452 | 15383.047 | 21862.629 |
| AK023367  | 1929.99   | 3694.544  | NM_012304 | 1406.099  | 2046.518  |
| AL080209  | 2227.068  | 3508.438  | NM_016440 | 51018.813 | 54750.688 |
| AL137431  | 665.616   | 1047.768  | NM_007194 | 5684.564  | 10078.571 |
| NM_016255 | 1413.811  | 5546.066  | NM_000314 | 14696.206 | 11657.926 |
| NM_014318 | 3185.444  | 10032.751 | AB002369  | 2137.655  | 2008.714  |
| AL133089  | 2414.78   | 1943.722  | S74620    | 2126.727  | 1806.921  |
| AK023526  | 959.572   | 679.17    | AF305239  | 3387.355  | 1996.277  |
| BE266129  | 1288.284  | 1610.494  | NM_002827 | 29641.199 | 15779.241 |
| AK025602  | 17954.529 | 26323.283 | NM_001946 | 1165.186  | 1254.878  |
| AK026309  | 5990.693  | 11712.022 | BF035425  | 64451.699 | 59959.438 |
| AL137486  | 11473.981 | 20031.311 | NM_001608 | 935.683   | 961.053   |
| AL110162  | 2064.42   | 4716.208  | NM_014638 | 2618.555  | 2893.552  |
| AF119880  | 596.145   | 1444.949  | NM_000508 | 1326.868  | 1384.283  |
| AK022681  | 10947.427 | 19110.635 | AB014558  | 2429.886  | 2023.024  |
| NM_017708 | 844.181   | 1824.247  | NM_006287 | 3690.515  | 2958.771  |
| BE895529  | 5492.79   | 9985.964  | NM_000118 | 7999.236  | 5479.713  |
| AF056453  | 1165.616  | 6020.337  | NM_000913 | 2376.362  | 2054.713  |
| AK000964  | 1249.139  | 3172.118  | NM_001298 | 62675.961 | 58323.563 |
| AL117536  | 15193.982 | 16675.814 | BG325046  | 9759.092  | 10318.641 |
| NM_017751 | 10590.712 | 12553.2   | AI351740  | 42003.133 | 47908.305 |
| NM_003771 | 2762.737  | 3079.668  | AA444051  | 27619.594 | 30965.57  |
| NM_017860 | 1788.834  | 4340.56   | NM_007164 | 48400.809 | 53099.391 |
| X91195    | 62422.773 | 68816.383 | BE783826  | 61625.219 | 61045.938 |
| AF086190  | 1426.498  | 6882.358  | X04827    | 6651.2    | 7619.396  |
| NM_006143 | 1128.843  | 4950.118  | H07088    | 7214.925  | 8718.333  |
| AL050035  | 9135.105  | 30797.354 | AI004656  | 6421.531  | 7804.93   |
| AK024449  | 422.419   | 2053.715  | BC020596  | 4004.098  | 4346.996  |
| AF090101  | 704.267   | 3174.778  | AF116606  | 57752.313 | 57373.863 |
| AF040723  | 49253.707 | 46775.77  | X98922    | 10474.723 | 11834.055 |
| NM_015527 | 7443.915  | 10761.012 | AK098435  | 13473.833 | 11593.594 |
| X89675    | 1993.746  | 3841.604  | AK092872  | 8480.725  | 5421.024  |
| NM_012188 | 1157.952  | 1768.964  | AF230496  | 2119.614  | 1981.493  |
| NM_005798 | 17218.559 | 23933.15  | M16801    | 2669.621  | 2762.994  |
| NM_004218 | 3193.059  | 4912.242  | U16752    | 3011.323  | 3603.838  |
| NM_016288 | 60583.375 | 60148.285 | M30134    | 1237.942  | 931.982   |
| NM_001464 | 1238.371  | 1961.236  | NM_002038 | 26414.693 | 18225.422 |
| NM_002051 | 5810.665  | 8625.772  | NM_005729 | 37773.086 | 35082.688 |
| AK022177  | 1461.698  | 3118.855  | NM_015493 | 3053.5    | 3656.316  |
| AK023852  | 664.206   | 1661.12   | NM_003747 | 2033.31   | 1777.68   |
| AF086466  | 4618.647  | 7434.102  | AB037744  | 3959.484  | 4321.811  |
| AB007962  | 8799.807  | 13667.161 | AF141901  | 1119.455  | 1214.587  |

|           |           |           |           |           |           |
|-----------|-----------|-----------|-----------|-----------|-----------|
| AF005081  | 1678.313  | 3737.736  | NM_007008 | 1807.878  | 2039.63   |
| AK026438  | 593.034   | 1169.433  | AL109708  | 2273.186  | 2318.214  |
| AK021546  | 970.204   | 1371.156  | L29143    | 6388.985  | 7783.284  |
| AL050186  | 20012.367 | 16311.193 | AF234532  | 6163.209  | 7368.237  |
| AK021918  | 5903.638  | 6824.124  | NM_002418 | 3297.978  | 4548.757  |
| AF069137  | 561.964   | 3024.47   | NM_002090 | 1513.036  | 2152.385  |
| AK021669  | 6426.433  | 21771.15  | NM_004485 | 1339.54   | 1812.017  |
| AL080113  | 53021.574 | 67994.844 | NM_013296 | 18468.99  | 18604.305 |
| AL050083  | 1363.028  | 6356.556  | AL117478  | 3986.237  | 3856.946  |
| AK022766  | 892.628   | 4341.399  | NM_005307 | 14567.473 | 9928.869  |
| AL049422  | 8272.496  | 23583.289 | NM_005958 | 7574.032  | 8704.396  |
| NM_000093 | 2026.328  | 3200.266  | AF225426  | 2027.397  | 2412.32   |
| NM_001779 | 11381.814 | 12762.219 | NM_005208 | 33372.93  | 35730.895 |
| AB033059  | 2073.143  | 2883.292  | X84370    | 26175.736 | 32724.619 |
| NM_016484 | 3517.056  | 4647.146  | NM_004039 | 1886.754  | 2354.095  |
| AK026114  | 1005.676  | 1629.179  | NM_002225 | 4012.809  | 4555.687  |
| NM_014452 | 1309.283  | 2327.699  | NM_006229 | 1200.021  | 946.363   |
| NM_014683 | 830.25    | 1470.403  | NM_015415 | 43745.223 | 32676.197 |
| AK021536  | 12333.681 | 18260.916 | NM_004897 | 5422.111  | 3771.705  |
| AF079529  | 326.312   | 1368.136  | NM_002555 | 2471.271  | 2152.71   |
| NM_002600 | 1444.597  | 2817.977  | AF225418  | 2649.424  | 3079.428  |
| NM_003646 | 27978.164 | 23814.561 | NM_000309 | 3348.043  | 3751.789  |
| NM_006663 | 1456.819  | 2815.009  | NM_004528 | 38664.141 | 43075.727 |
| NM_006092 | 1404.4    | 2751.418  | AK026381  | 49623.715 | 47378.879 |
| NM_003939 | 801.239   | 1318.925  | AK023107  | 10929.551 | 13877.379 |
| NM_012424 | 1041.85   | 1381.32   | NM_004578 | 1056.935  | 1157.485  |
| NM_002446 | 2905.906  | 3379.01   | NM_000647 | 2994.512  | 3132.665  |
| NM_000863 | 2037.136  | 7334.876  | AB046793  | 482.997   | 598.039   |
| NM_006651 | 8363.184  | 24590.768 | NM_017604 | 5956.161  | 5381.563  |
| NM_005336 | 15936.751 | 37198.723 | NM_017738 | 40524.602 | 44870.922 |
| NM_001419 | 16625.813 | 40855.535 | NM_016557 | 4578.704  | 4370.414  |
| AF119817  | 58211.375 | 70402.258 | NM_000623 | 4549.42   | 2551.475  |
| AL035306  | 4913.702  | 15093.126 | AF161348  | 2663.112  | 2295.788  |
| NM_004230 | 12070.613 | 13021.294 | NM_018467 | 53355.523 | 51485.305 |
| NM_014503 | 1754.946  | 2003.607  | NM_006068 | 7804.068  | 8935.622  |
| NM_014659 | 3070.271  | 4134.511  | NM_002704 | 1834.856  | 2269.605  |
| NM_004399 | 9420.624  | 9907.742  | AF150735  | 10921.763 | 7404.575  |
| NM_006337 | 8813.662  | 9825.555  | NM_018183 | 2508.37   | 2371.713  |
| NM_004507 | 5103.565  | 5134.991  | NM_012382 | 10245.563 | 10575.284 |
| NM_002710 | 36461.75  | 26972.928 | BF038366  | 2710.278  | 2588.289  |
| NM_014060 | 7272.619  | 10438.832 | NM_002452 | 15392.865 | 20469.91  |
| NM_004749 | 14329.421 | 17748.588 | NM_012304 | 1503.742  | 2343.258  |
| BQ446064  | 2372.129  | 4310.764  | NM_016440 | 45546.539 | 49160.492 |
| AF302502  | 3198.406  | 5033.774  | NM_007194 | 4351.291  | 6948.544  |
| AF274571  | 2428.465  | 4135.839  | NM_000314 | 14734.823 | 17235.617 |
| NM_005449 | 1272.759  | 2361.823  | AB002369  | 2179.889  | 3053.828  |
| NM_003879 | 3560.893  | 6536.855  | S74620    | 1917.736  | 2145.653  |
| NM_016052 | 16785.707 | 14965.916 | AF305239  | 3220.958  | 2641.602  |
| NM_005427 | 1614.161  | 1685.07   | NM_002827 | 31366.92  | 29571.746 |
| NM_016312 | 1393.759  | 1027.869  | NM_001946 | 1487.861  | 1503.937  |
| AF234887  | 833.858   | 2744.388  | BF035425  | 65016.621 | 58139.348 |
| NM_001776 | 1842.417  | 7788.063  | NM_001608 | 983.145   | 853.691   |
| NM_001792 | 670.773   | 2037.15   | NM_000159 | 65279.992 | 61919.461 |

|           |           |           |           |           |           |
|-----------|-----------|-----------|-----------|-----------|-----------|
| NM_001903 | 496.076   | 1847.09   | NM_014638 | 3230.303  | 3810.398  |
| U87223    | 15094.021 | 36140.352 | AF099740  | 2389.603  | 2872.405  |
| NM_005857 | 6028.103  | 5651.734  | NM_006117 | 16667.563 | 15107.506 |
| NM_002429 | 549.823   | 385.598   | NM_006287 | 5316.947  | 7552.098  |
| NM_000429 | 3123.763  | 4494.433  | NM_000118 | 8087.2    | 3988.269  |
| AK027037  | 1119.184  | 1419.376  | NM_000913 | 2837.484  | 2032.359  |
| NM_003875 | 18690.215 | 19700.371 | NM_001298 | 62986.613 | 59055.711 |
| AF191687  | 6265.685  | 9440.697  | BG325046  | 9278.487  | 8152.466  |
| NM_003046 | 486.868   | 851.951   | AI351740  | 43281.211 | 43825.289 |
| NM_000274 | 26596.506 | 23836.33  | AA444051  | 28989.502 | 32124.598 |
| NM_000170 | 7338.578  | 9615.401  | NM_007164 | 52776.203 | 54822.273 |
| NM_000281 | 666.149   | 1050.49   | BE783826  | 61460.68  | 62436.609 |
| AK001295  | 4200.082  | 5710.708  | X04827    | 6947.16   | 7989.863  |
| NM_006031 | 5650.31   | 9674.573  | H07088    | 7339.132  | 9301.302  |
| NM_002715 | 7807.843  | 14613.346 | AI004656  | 6968.293  | 9345.525  |
| NM_001020 | 53963.801 | 65895.25  | BC008428  | 1915.292  | 2506.58   |
| AB020660  | 2882.985  | 3976.354  | BC020596  | 4661.664  | 7511.88   |
| NM_006659 | 52522.289 | 55046.34  | AF116606  | 59348.137 | 62428.609 |
| NM_018051 | 2111.661  | 2651.965  | X98922    | 11133.055 | 14302.541 |
| NM_015371 | 11997.541 | 29397.641 | AK098435  | 15056.962 | 16696.658 |
| AB040915  | 6181.025  | 22688.621 | AK092872  | 10406.986 | 10378.528 |
| AF147791  | 565.976   | 3048.377  | AF230496  | 2739.127  | 2720.48   |
| NM_001328 | 53966.176 | 66704.898 | M16801    | 2860.586  | 2732.056  |
| NM_005749 | 13661.177 | 34953.246 | NM_013334 | 47320.309 | 40309.539 |
| NM_006696 | 4178.025  | 5455.639  | AF141901  | 1349.937  | 1872.982  |
| NM_004599 | 17244.176 | 16885.361 | NM_007008 | 2379.643  | 2127.262  |
| NM_006037 | 2819.885  | 3271.875  | AL109708  | 1796.647  | 1325.12   |
| NM_015871 | 15774.178 | 19973.707 | L29143    | 6662.301  | 4809.176  |
| NM_019037 | 20544.18  | 24544.719 | AF234532  | 5240.568  | 4487      |
| NM_015891 | 8644.257  | 8617.418  | NM_002418 | 3291.347  | 3219.607  |
| NM_006802 | 2244.995  | 3638.895  | NM_002090 | 1347.242  | 1372.463  |
| AB037778  | 2992.618  | 4715.291  | NM_004485 | 1564.013  | 2323.923  |
| NM_005066 | 51850.094 | 45106.387 | NM_013296 | 18712.014 | 24411.838 |
| NM_003089 | 16889.734 | 19313.217 | AL117478  | 4131.009  | 5617.021  |
| NM_003753 | 41335.691 | 34584.254 | NM_005307 | 16081.468 | 19771.844 |
| NM_006223 | 5199.958  | 7140.402  | NM_005958 | 7054.627  | 9174.486  |
| NM_017590 | 5847.158  | 7579.413  | NM_013436 | 945.316   | 1272.323  |
| AB011145  | 11569.789 | 12938.751 | AF225426  | 1853.559  | 2787.408  |
| NM_003750 | 50065.164 | 33373.953 | NM_005208 | 33959.602 | 46656.547 |
| NM_015251 | 295.989   | 365.901   | NM_000421 | 3145.419  | 3044.971  |
| M92422    | 9100.785  | 5610.25   | AK025687  | 54162.449 | 57636.438 |
| NM_017868 | 7330.541  | 22938.801 | AF218941  | 11383.684 | 12976.094 |
| NM_001874 | 220.075   | 1531.428  | AL137264  | 58816.387 | 54824.859 |
| NM_001869 | 320.682   | 1944.342  | NM_002226 | 1528.468  | 1536.885  |
| X69637    | 307.222   | 1787.685  | X84370    | 27814.934 | 29069.59  |
| NM_004212 | 624.03    | 1213.733  | NM_004039 | 2401.057  | 3383.47   |
| NM_018159 | 47796.035 | 47933.344 | NM_000508 | 1537.225  | 1704.802  |
| NM_000819 | 26091.338 | 23438.701 | AB014558  | 3568.406  | 4868.67   |
| NM_002513 | 13074.131 | 14116.994 | NM_006854 | 25628.219 | 34163.5   |
| NM_017424 | 5053.422  | 8789.438  | NM_004580 | 6766.187  | 3665.398  |
| NM_001522 | 28037.512 | 29736.66  | NM_020387 | 61397.785 | 58825.422 |
| NM_000883 | 17972.617 | 20268.895 | NM_007246 | 2673.298  | 2202.267  |
| AF254086  | 3363.911  | 5682.044  | AK026248  | 3258.459  | 3552.667  |

|           |           |           |           |           |           |
|-----------|-----------|-----------|-----------|-----------|-----------|
| AL390142  | 2499.198  | 2668.409  | NM_004578 | 1091.905  | 1117.606  |
| NM_006565 | 2590.643  | 2382.273  | NM_000647 | 2560.977  | 2344.139  |
| AB007930  | 5882.517  | 6264.565  | NM_017604 | 5691.737  | 6930.755  |
| X76978    | 393.128   | 458.246   | NM_017738 | 39482.422 | 46142.988 |
| AJ005273  | 2289.979  | 2806.509  | NM_016557 | 3858.265  | 5604.764  |
| AK021892  | 1993.156  | 2216.239  | NM_000623 | 3953.468  | 5901.799  |
| NM_017637 | 234.643   | 364.024   | AF161348  | 3171.818  | 4229.357  |
| NM_003121 | 25618.762 | 13613.581 | NM_018467 | 47281.781 | 51465.703 |
| NM_003437 | 3409.783  | 2685.383  | NM_006068 | 8306.825  | 10711.096 |
| NM_018337 | 15226.82  | 8824.454  | NM_002704 | 1609.077  | 2152.938  |
| NM_018045 | 4624.058  | 4952.542  | U16752    | 3860.552  | 3723.23   |
| NM_006481 | 12880.887 | 14516.328 | M30134    | 1502.009  | 1863.655  |
| AB011115  | 1908.48   | 8855.462  | NM_002038 | 37590     | 34611.359 |
| NM_003910 | 50833.781 | 62451.172 | NM_005729 | 46778.148 | 50085.434 |
| AB007913  | 5177.97   | 18769.744 | NM_015493 | 3526.613  | 3927.725  |
| L09080    | 12980.751 | 12960.383 | NM_003747 | 1942.025  | 1640.118  |
| NM_007326 | 12137.124 | 9357.33   | AB037744  | 4458.832  | 4253.561  |
| AK023080  | 382.175   | 527.777   | NM_001608 | 887.043   | 777.277   |
| NM_001886 | 4285.934  | 4427.847  | NM_000159 | 63716.902 | 63231.102 |
| NM_004467 | 825.745   | 886.54    | NM_014638 | 2103.918  | 2100.928  |
| NM_018058 | 18779.373 | 12005.264 | AF099740  | 1931.839  | 1495.697  |
| NM_004548 | 21833.557 | 17559.396 | NM_006117 | 13872.557 | 12893.953 |
| X69079    | 46031.594 | 30888.131 | NM_002225 | 3339.833  | 3146.241  |
| BI759406  | 25412.664 | 13138.312 | NM_006229 | 1462.749  | 1655.258  |
| R76099    | 8007.581  | 5412.122  | NM_015415 | 50016.945 | 52154.055 |
| S74445    | 1155.882  | 916.06    | NM_004897 | 5693.398  | 8280.481  |
| BI763360  | 3769.707  | 3168.574  | NM_002555 | 2930.412  | 3549.582  |
| D25538    | 1736.384  | 1402.747  | AF225418  | 2972.826  | 4300.813  |
| NM_000360 | 26281.545 | 15924.36  | NM_000309 | 3630.216  | 5841.614  |
| D49950    | 366.119   | 388.378   | NM_004528 | 41651.031 | 49071.613 |
| NM_001849 | 798.855   | 720.295   | AK026381  | 51670.324 | 54829.16  |
| X03635    | 4432.758  | 3120.697  | NM_002450 | 23417.953 | 51951.617 |
| BC011847  | 57789.387 | 67378.922 | NM_001686 | 1711.335  | 1924.336  |
| X03348    | 1785.273  | 1386.187  | NM_004978 | 1279.651  | 1329.145  |
| AF353674  | 4795.667  | 3795.52   | NM_000705 | 1408.786  | 1797.75   |
| BC002645  | 9036.445  | 6721.663  | NM_004231 | 61551.621 | 59186.98  |
| NM_021138 | 9552.305  | 26406.871 | NM_016577 | 3388.75   | 3548.675  |
| BC002792  | 10732.337 | 33941.508 | AK023107  | 13155.199 | 12739.092 |
| NM_005847 | 415.117   | 2027.229  | NM_013334 | 31649.545 | 22335.984 |
| NM_002286 | 51164.559 | 39420.941 | AF150735  | 11869.861 | 15582.385 |
| NM_002164 | 701.632   | 576.81    | NM_018183 | 3042.437  | 3472.604  |
| NM_003811 | 12277.52  | 9708.963  | NM_012382 | 12006.144 | 16443.566 |
| NM_002981 | 6503.267  | 3925.245  | BF038366  | 2179.875  | 2818.934  |
| NM_001244 | 2165.346  | 1281.414  | NM_002452 | 17009.553 | 23661.242 |
| NM_012275 | 286.086   | 256.187   | NM_012304 | 1550.396  | 1942.61   |
| NM_006137 | 898.726   | 530.713   | NM_016440 | 48384.629 | 44226.969 |
| NM_016139 | 38062.668 | 17061.998 | NM_007194 | 4666.915  | 5277.807  |
| AL117468  | 4155.25   | 3521.387  | NM_000314 | 14488.354 | 10535.29  |
| NM_019613 | 5466.081  | 3919.387  | AB002369  | 2424.679  | 1615.51   |
| NM_005382 | 739.284   | 1028.736  | S74620    | 2247.534  | 2320.728  |
| AK027086  | 2358.936  | 2741.119  | AF305239  | 3721.103  | 2190.85   |
| AB032997  | 782.592   | 756.477   | NM_002827 | 35571.008 | 28461.051 |
| AL096857  | 2950.197  | 3240.623  | NM_001946 | 1554.344  | 1386.223  |

|           |           |           |           |           |           |
|-----------|-----------|-----------|-----------|-----------|-----------|
| X07203    | 18790.406 | 9580.618  | BF035425  | 63210.48  | 57909.277 |
| AB040104  | 438.313   | 285.73    | CY3Cy5    | 3990.783  | 92.356    |
| NM_003834 | 4648.352  | 3338.187  | NM_004176 | 7818.578  | 5088.985  |
| NM_005959 | 5328.293  | 3619.217  | NM_004548 | 51945.207 | 34224.105 |
| NM_003381 | 1221.773  | 631.398   | AK027120  | 1590.252  | 1013.86   |
| NM_005756 | 1032.816  | 362.082   | AB029001  | 4080.767  | 3092.375  |
| NM_003702 | 16511.168 | 4217.513  | AB006624  | 9403.847  | 7876.438  |
| NM_000369 | 1359.489  | 916.51    | AL109717  | 6698.718  | 7134.348  |
| NM_004405 | 3117.345  | 10467.821 | AK025473  | 1350.252  | 1143.393  |
| NM_001988 | 17053.713 | 42445.813 | AF146693  | 2120.196  | 1529.735  |
| AF073770  | 1398.81   | 812.287   | AF271070  | 27332.34  | 19794.277 |
| AL359401  | 4873.235  | 2180.024  | NM_014903 | 1287.961  | 1271.869  |
| NM_012213 | 771.855   | 514.082   | AK055959  | 2308.658  | 2314.719  |
| NM_016573 | 3826.312  | 1938.838  | AF052141  | 2056.917  | 2072.252  |
| NM_001303 | 8857.263  | 4593.134  | AY007128  | 626.563   | 718.338   |
| NM_001979 | 357.187   | 312.328   | AF052149  | 8419.497  | 7671.791  |
| AB040896  | 998.384   | 879.366   | AK025586  | 2627.34   | 2085.459  |
| NM_001107 | 2874.218  | 2142.622  | AL137512  | 1436.55   | 1374.977  |
| AF084645  | 324.779   | 338.033   | NM_004176 | 8708.548  | 6187.168  |
| AF151851  | 6488.567  | 6083.801  | NM_004548 | 50527.195 | 36421.648 |
| AF220417  | 1797.413  | 1872.54   | SR1       | 56087.602 | 54189.359 |
| NM_001122 | 22074.445 | 11371.767 | SR3       | 50358.098 | 39093.906 |
| NM_004591 | 4170.195  | 3156.883  | SR5       | 6187.991  | 4733.736  |
| AL133027  | 1227.411  | 933.401   | SR7       | 7392.447  | 34832.051 |
| AB037732  | 1286.871  | 986.246   | SR9       | 22124.723 | 2437.451  |
| NM_005767 | 379.923   | 260.641   | CY3Cy5    | 4549.561  | 98.05     |
| NM_001837 | 339.906   | 159.381   | L32606    | 1765.295  | 1161.32   |
| NM_001839 | 51509.215 | 38519.02  | L05148    | 2006.298  | 1625.324  |
| BC016029  | 1197.739  | 1515.041  | AK091125  | 3015.105  | 2491.385  |
| M27487    | 55559.082 | 66082.461 | D16904    | 641.974   | 482.201   |
| NM_002611 | 1247.28   | 746.865   | D16474    | 18753.123 | 16110.457 |
| AL133602  | 925.68    | 809.361   | AL080072  | 2105.205  | 1685.501  |
| AF037219  | 2902.115  | 1879.507  | AK024898  | 1048.341  | 670.046   |
| AK026075  | 419.596   | 310.711   | AL035301  | 1168.28   | 977.704   |
| NM_000251 | 3023.837  | 2323.574  | NM_017687 | 4128.184  | 3488.668  |
| AF118071  | 188.476   | 153.266   | NM_017975 | 5846.167  | 6281.772  |
| NM_006038 | 2816.621  | 2651.351  | AK025036  | 3029.379  | 5667.106  |
| AB011133  | 2880.623  | 2688.884  | AK024843  | 38214.684 | 49485.863 |
| NM_017572 | 27957.811 | 15461.254 | AF074994  | 1669.432  | 1856.763  |
| NM_018444 | 1481.257  | 1273.575  | NM_017670 | 13386.078 | 10402.426 |
| NM_000252 | 912.974   | 658.527   | AK021468  | 818.503   | 903.839   |
| NM_006947 | 7920.007  | 4535.782  | BC033020  | 1452.479  | 1217.595  |
| NM_017917 | 2169.951  | 1324.611  | NM_004366 | 44416.16  | 32870.887 |
| NM_004090 | 3937.642  | 2346.343  | AK026168  | 3246.952  | 2321.025  |
| NM_014634 | 5160.331  | 3027.104  | AJ296152  | 15924.95  | 10031.192 |
| NM_001919 | 17526.824 | 5178.224  | AK001067  | 5547.741  | 4180.51   |
| BC031485  | 2089.657  | 795.025   | AK027088  | 23142.838 | 14500.266 |
| NM_004092 | 5337.059  | 1790.984  | AB037721  | 30282.246 | 18102.041 |
| X15624    | 3449.366  | 12620.545 | AK024525  | 23160.162 | 12112.059 |
| NM_001886 | 2977.853  | 2156.958  | AK024909  | 1807.082  | 1673.942  |
| NM_018058 | 13375.997 | 6309.433  | AK025042  | 1891.262  | 1297.454  |
| NM_004548 | 15512.105 | 10005.326 | AK024544  | 6174.392  | 5621.952  |
| X69079    | 39611.938 | 18014.646 | AK024629  | 897.968   | 1608.687  |

|           |           |           |           |           |           |
|-----------|-----------|-----------|-----------|-----------|-----------|
| BI759406  | 19518.764 | 11514.195 | AK025097  | 666.557   | 646.225   |
| R76099    | 6078.188  | 4144.368  | AK021705  | 4250.195  | 3499.014  |
| S74445    | 860.362   | 587.147   | NM_016141 | 66522.641 | 62203.895 |
| BI763360  | 3188.236  | 3102.073  | AL109702  | 1943.005  | 1510.224  |
| D25538    | 1293.73   | 1306.929  | AK025624  | 18027.91  | 18432.664 |
| NM_000360 | 21126.648 | 13845.165 | AK026684  | 1915.956  | 2908.615  |
| D49950    | 341.642   | 495.585   | AL110125  | 38616.781 | 45084.277 |
| NM_001849 | 617.177   | 610.933   | AK022764  | 1357.833  | 1386.204  |
| X03635    | 3065.39   | 2048.078  | AK002118  | 727.396   | 647.288   |
| BC011847  | 52331.301 | 67414.664 | AJ011594  | 704.665   | 272.713   |
| X03348    | 1315.732  | 905.478   | X89744    | 772.258   | 613.46    |
| AF353674  | 3073.956  | 1833.699  | AJ011600  | 7429.664  | 5282.306  |
| BC002645  | 3726.877  | 2133.611  | AJ002785  | 5161.433  | 3328.547  |
| NM_021138 | 2642.018  | 1131.746  | Z70716    | 2134.669  | 1472.418  |
| BC002792  | 4253.681  | 2542.218  | AL049251  | 1137.767  | 936.249   |
| NM_001523 | 470.649   | 264.843   | Z83945    | 4623.446  | 3984.027  |
| NM_017423 | 749.473   | 351.001   | AF086216  | 1116.619  | 853.793   |
| NM_003811 | 10245.515 | 9205.972  | AK022422  | 1626.09   | 1423.523  |
| NM_002981 | 4982.736  | 2946.065  | AK023485  | 1423.291  | 1517.923  |
| NM_001244 | 1637.347  | 805.956   | AK022474  | 26686.164 | 27533.977 |
| NM_006137 | 769.873   | 445.325   | AK022392  | 6671.96   | 7672.221  |
| NM_016139 | 29039.061 | 14534.86  | AL117451  | 1872.131  | 2867.002  |
| AL117468  | 3183.37   | 2494.578  | AL049280  | 7291.75   | 8779.12   |
| NM_019613 | 4721.948  | 3023.283  | AK025212  | 13152.848 | 10980.597 |
| NM_005382 | 576.498   | 904.886   | AB021925  | 1279.224  | 1074.288  |
| AK027086  | 2128.277  | 2289.189  | AL157503  | 9709.053  | 7665.224  |
| AB032997  | 735.917   | 690.95    | AK000053  | 1490.802  | 1016.222  |
| AL096857  | 3016.081  | 3274.576  | AK000786  | 3418.015  | 2300.981  |
| X07203    | 19511.002 | 14389.03  | AK000935  | 2230.322  | 1619.447  |
| AB040104  | 440.722   | 417.699   | AK021458  | 11315.453 | 9277.46   |
| NM_003834 | 3441.847  | 2461.705  | NM_017674 | 32336.527 | 22434.994 |
| NM_005959 | 5372.409  | 4381.177  | AK000811  | 1292.121  | 1070.456  |
| NM_003381 | 1181.399  | 832.514   | AK000966  | 2261.089  | 2090.582  |
| NM_005756 | 1006.424  | 662.703   | NM_018630 | 11914.624 | 10916.806 |
| NM_003702 | 13803.327 | 6182.085  | AF086175  | 1945.911  | 2101.254  |
| NM_000369 | 600.913   | 536.716   | AK002196  | 1556.068  | 1238.37   |
| NM_004405 | 920.498   | 489.525   | NM_004576 | 8828.362  | 13569.727 |
| NM_001988 | 5220.764  | 1810.582  | AF040097  | 3366.685  | 4555.323  |
| L09080    | 6820.952  | 2086.138  | NM_020436 | 1292.751  | 2236.215  |
| NM_007326 | 10763.176 | 3725.064  | AK024182  | 3722.264  | 6407.591  |
| NM_012213 | 505.239   | 330.184   | NM_006913 | 27497.945 | 44909.066 |
| NM_016573 | 3191.227  | 1601.33   | AF177229  | 541.366   | 473.314   |
| NM_001303 | 8146.784  | 4001.146  | NM_000499 | 20056.414 | 16132.315 |
| NM_001979 | 299.515   | 284.193   | AK001880  | 8724.043  | 7146.171  |
| AB040896  | 860.878   | 924.881   | AF156166  | 14223.053 | 13476.043 |
| NM_001107 | 2594.176  | 1956.431  | NM_014373 | 8302.712  | 5344.682  |
| AF084645  | 260.116   | 254.301   | NM_014206 | 32324.357 | 18015.473 |
| AF151851  | 5663.013  | 4254.581  | NM_001651 | 18589.492 | 15313.127 |
| AF220417  | 1662.31   | 1467.955  | L32786    | 4862.904  | 3722.253  |
| NM_001122 | 26258.912 | 19234.014 | U03239    | 1684.762  | 1225.169  |
| NM_004591 | 4429.301  | 3910.853  | AL355720  | 10598.253 | 6142.202  |
| AL133027  | 1156.697  | 1103.932  | AK002023  | 11911.557 | 10721.09  |
| AB037732  | 1463.952  | 1469.704  | AF150156  | 1581.895  | 1444.333  |



|           |           |           |           |           |           |
|-----------|-----------|-----------|-----------|-----------|-----------|
| NM_005767 | 376.466   | 296.683   | NM_016464 | 1944.116  | 1670.032  |
| NM_001837 | 267.099   | 208.765   | L40402    | 10670.944 | 8913.325  |
| NM_001838 | 50838.008 | 44463.91  | Z36780    | 10148.376 | 9993.029  |
| BC016029  | 482.727   | 209.866   | AK022403  | 5802.615  | 5646.46   |
| M27487    | 27269.17  | 8734.61   | AK022955  | 12760.318 | 12594.246 |
| NM_002288 | 45246.879 | 19237.088 | AF131741  | 1121.194  | 808.001   |
| NM_002164 | 756.465   | 293.834   | AK021760  | 2050.868  | 2126.202  |
| NM_017417 | 249.143   | 318.352   | BC035855  | 11706.097 | 13329.973 |
| AL133602  | 811.996   | 477.29    | AL137408  | 50565.664 | 50823.652 |
| AF037219  | 2764.032  | 1351.337  | AF054995  | 5347.306  | 4091.18   |
| AK026075  | 238.645   | 289.874   | AL080176  | 7353.898  | 4781.147  |
| NM_000251 | 2768.873  | 2063.129  | AK023627  | 5429.323  | 4169.931  |
| NM_006038 | 2638.897  | 2045.915  | AK025949  | 3432.327  | 3194.446  |
| AB011133  | 2983.525  | 2786.717  | Y10259    | 7188.208  | 4874.86   |
| NM_017572 | 27062.613 | 14824.343 | AK021725  | 9564.249  | 8470.006  |
| NM_018444 | 1674.002  | 1278.677  | AF119893  | 1736.382  | 1281.185  |
| NM_000252 | 1126.604  | 1062.687  | NM_002408 | 9825.67   | 6087.76   |
| NM_006947 | 7400.893  | 5423.64   | AK024282  | 2742.513  | 1901.072  |
| NM_017917 | 2079.016  | 1448.775  | AF085838  | 8197.39   | 5929.508  |
| NM_004090 | 4797.918  | 3355.573  | NM_018277 | 3816.175  | 2935.107  |
| NM_014634 | 6081.01   | 4075.033  | AF014455  | 1064.889  | 734.374   |
| NM_001918 | 16355.26  | 8732.492  | AF086335  | 4507.531  | 3322.238  |
| BC031485  | 1854.542  | 1457.807  | AL355741  | 762.577   | 580.727   |
| NM_004092 | 5171.572  | 4192.384  | AB011118  | 51824.074 | 43290.5   |
| X15624    | 984.775   | 643.858   | S66666    | 1133.37   | 1314.661  |
| AF073770  | 1371.966  | 596.939   | AK021476  | 5485.905  | 4244.467  |
| AL359401  | 4948.472  | 1491.241  | NM_015376 | 18626.037 | 16601.209 |
| NM_004467 | 353.943   | 421.645   | NM_001176 | 1724.929  | 1929.168  |
| NM_018058 | 12591.468 | 5352.82   | NM_013341 | 1619.66   | 1461.305  |
| NM_004548 | 13753.298 | 6728.881  | NM_016536 | 1539.247  | 1647.982  |
| X69079    | 33793.992 | 17409.336 | NM_004066 | 1304.129  | 2008.725  |
| BI759406  | 18427.557 | 8572.61   | NM_004941 | 17294.156 | 17023.311 |
| R76099    | 5902.38   | 3234.802  | AF151831  | 8455.379  | 10414.055 |
| S74445    | 812.829   | 655.337   | AB011121  | 1919.232  | 1391.302  |
| BI763360  | 3178.743  | 2347.179  | AF083255  | 17045.861 | 17046.387 |
| D25538    | 1294.178  | 1050.251  | AK022605  | 5486.548  | 6648.18   |
| NM_000360 | 22070.215 | 15273.342 | AL049955  | 46006.992 | 49201.086 |
| D49950    | 374.157   | 406.794   | AF155654  | 27392.49  | 27790.896 |
| NM_001848 | 434.644   | 541.244   | AF088044  | 2654.604  | 2974.913  |
| X03635    | 3835.825  | 3692.219  | AK000028  | 7325.725  | 7114.134  |
| BC011847  | 53202.965 | 66329.648 | NM_013320 | 57696.367 | 54669.879 |
| X03348    | 1137.441  | 1070.835  | AJ245902  | 1545.096  | 1155.878  |
| AF353674  | 3254.168  | 3011.638  | AL050039  | 2470.177  | 2008.478  |
| BC002645  | 4599.77   | 3384.481  | AF009316  | 1174.374  | 973.048   |
| NM_021138 | 3152.693  | 2529.606  | BE816678  | 818.691   | 475.921   |
| BC002792  | 4388.497  | 5108.621  | AF087987  | 2441.457  | 1664.121  |
| NM_001523 | 395.283   | 810.685   | Z36840    | 705.08    | 485.104   |
| NM_017423 | 569.681   | 695.361   | AK021723  | 674.154   | 786.005   |
| Z70705    | 384.545   | 230.494   | H09474    | 10467.487 | 9004.433  |
| NM_002611 | 1476.223  | 1161.754  | AB002368  | 21733.967 | 22579.83  |
| NM_005382 | 358.043   | 450.75    | AL360263  | 56877.461 | 55462.965 |
| AK027086  | 1860.538  | 1237.904  | BC012757  | 2447.24   | 1944.908  |
| AB032997  | 503.089   | 274.102   | M96686    | 1393.456  | 1536.995  |

|           |           |           |           |           |           |
|-----------|-----------|-----------|-----------|-----------|-----------|
| AL096857  | 2209.63   | 1251.623  | NM_004062 | 8962.794  | 8561.374  |
| X07203    | 16350.199 | 7186.021  | NM_005883 | 4552.277  | 4839.931  |
| AB040104  | 336.908   | 255.319   | NM_004449 | 3917.124  | 4135.534  |
| NM_003834 | 3900.963  | 3565.519  | NM_014591 | 9225.479  | 9918.216  |
| NM_005959 | 5032.699  | 4426.178  | NM_014592 | 4616.376  | 4955.728  |
| NM_003381 | 1187.89   | 884.77    | NM_001945 | 1857.094  | 1961.636  |
| NM_005756 | 1144.368  | 1121.941  | NM_020039 | 14690.724 | 14606.064 |
| NM_003702 | 16442.424 | 9745.864  | NM_006653 | 2758.718  | 3311.276  |
| NM_000369 | 914.745   | 1044.852  | NM_014442 | 39750.723 | 38743.258 |
| NM_016351 | 1880.728  | 2030.798  | AB002313  | 5428.166  | 6999.925  |
| NM_004405 | 985.347   | 1032.4    | AB011167  | 9725.463  | 9245.474  |
| NM_001988 | 4743.169  | 3069.957  | NM_005409 | 5920.889  | 5820.955  |
| NM_006060 | 1327.318  | 1211.139  | NM_000208 | 16795.629 | 16202.394 |
| NM_005667 | 2790.642  | 2652.784  | NM_002188 | 56542.91  | 56607.254 |
| NM_006308 | 526.317   | 428.784   | AK027119  | 57498.793 | 52334.215 |
| NM_000060 | 300.59    | 287.493   | AB037727  | 53419.129 | 52305.648 |
| NM_009589 | 333.247   | 580.293   | NM_005426 | 3283.467  | 2776.569  |
| L09080    | 6148.416  | 4026.913  | NM_004763 | 1296.665  | 1144.02   |
| NM_007326 | 7915.629  | 4221.979  | NM_014063 | 30102.32  | 22406.676 |
| NM_001886 | 3475.785  | 1526.099  | D86964    | 10047.748 | 9464.735  |
| D83782    | 3287.401  | 2167.454  | AL049801  | 2498.117  | 2713.979  |
| NM_002078 | 1520.651  | 658.441   | NM_016395 | 27538.158 | 47826.574 |
| NM_000287 | 1261.211  | 881.323   | NM_003152 | 4181.285  | 3832.346  |
| NM_001656 | 1121.18   | 765.576   | NM_006342 | 8820.599  | 5485.57   |
| AF091033  | 668.931   | 479.665   | NM_016396 | 6167.232  | 3987.481  |
| NM_001122 | 15710.675 | 7011.226  | NM_005689 | 5198.216  | 5182.843  |
| NM_004591 | 3216.441  | 1622.185  | AF086546  | 1448.64   | 1773.061  |
| AL133027  | 1119.305  | 1006.264  | NM_005552 | 52782.223 | 55779.043 |
| AB037732  | 1165.345  | 1023.964  | NM_006717 | 7265.129  | 6426.825  |
| NM_005767 | 433.381   | 533.039   | AL109786  | 4790.58   | 6723.259  |
| NM_001837 | 318.282   | 336.847   | AK026479  | 15373.604 | 17328.971 |
| NM_001839 | 54428.719 | 63041.254 | AK022860  | 13624.182 | 12786.425 |
| BC016029  | 481.297   | 532.097   | X60188    | 55304.531 | 57178.988 |
| M27487    | 32378.805 | 19315.316 | NM_005977 | 6635.287  | 6473.089  |
| NM_002286 | 48300.098 | 32201.615 | NM_002747 | 2063.49   | 2572.315  |
| NM_002164 | 659.753   | 602.708   | NM_006265 | 41081.57  | 33745.906 |
| NM_003811 | 12003.306 | 14948.767 | NM_003126 | 2938.116  | 2665.898  |
| NM_002981 | 6092.653  | 4602.534  | NM_006059 | 9242.944  | 9895.63   |
| NM_001244 | 1924.63   | 1216.822  | NM_000347 | 53182.578 | 50032.77  |
| NM_012275 | 342.752   | 374.729   | M13452    | 7507.312  | 6262.364  |
| NM_006137 | 892.394   | 795.788   | AF082075  | 3983.844  | 4262.612  |
| NM_016139 | 27854.686 | 11974.763 | NM_016114 | 7680.953  | 6530.772  |
| AL117468  | 3414.48   | 1866.459  | AY007114  | 4047.125  | 3586.346  |
| NM_019613 | 4481.199  | 1830.179  | AF086604  | 2967.764  | 3171.142  |
| BC031485  | 1477.803  | 1009.734  | AB000895  | 4135.796  | 3570.615  |
| NM_004092 | 4758.282  | 2948.53   | X80031    | 2114.812  | 2614.055  |
| X15624    | 856.843   | 552.76    | AF019382  | 6269.815  | 6187.846  |
| AF073770  | 1084.354  | 561.827   | NM_015601 | 1554.229  | 1100.526  |
| AL359401  | 4284.493  | 2239.976  | NM_001780 | 39436.285 | 27462.604 |
| NM_012213 | 729.702   | 433.005   | AJ277442  | 2766.681  | 2943.159  |
| NM_016573 | 3395.704  | 1817.617  | NM_004569 | 4969.077  | 5012.134  |
| NM_001303 | 8231.607  | 4802.285  | AF089088  | 6123.026  | 8817.688  |
| AB040896  | 1003.203  | 1081.484  | L07557    | 11263.914 | 10267.455 |

|           |           |           |           |           |           |
|-----------|-----------|-----------|-----------|-----------|-----------|
| NM_001107 | 2871.859  | 2910.977  | NM_002796 | 50581.766 | 49060.469 |
| AF084645  | 313.16    | 443.575   | D78514    | 16086.681 | 12342.604 |
| AF151851  | 6645.778  | 6346.702  | AK021665  | 4177.619  | 4121.623  |
| NM_005176 | 444.933   | 425.787   | NM_013366 | 1780.981  | 1819.593  |
| NM_003636 | 2860.413  | 2249.428  | NM_002787 | 54563.289 | 52485.766 |
| NM_002234 | 2345.274  | 1908.537  | U95006    | 34895.234 | 43354.652 |
| NM_000701 | 2355.665  | 1550.64   | NM_003347 | 36136.844 | 42324.262 |
| AB022696  | 8681.515  | 6639.625  | AF273051  | 3160.72   | 4218.165  |
| AF137372  | 2504.321  | 1195.214  | NM_014516 | 41005.988 | 43524.895 |
| AF220417  | 1208.315  | 687.146   | AK021868  | 4624.214  | 5397.022  |
| NM_001523 | 387.759   | 345.494   | AK000643  | 55503.777 | 62316.789 |
| NM_017423 | 638.385   | 477.567   | NM_018421 | 10389.021 | 10676.056 |
| NM_002611 | 1102.305  | 633.582   | AB014574  | 55978.379 | 56859.363 |
| NM_017417 | 214.025   | 160.524   | NM_020127 | 5141.706  | 4693.112  |
| AL133602  | 651.208   | 418.908   | NM_015623 | 17980.326 | 16364.18  |
| AF037219  | 2716.93   | 1473.586  | AB045116  | 3119.008  | 2680.303  |
| AK026075  | 272.52    | 220.429   | L49054    | 2299.872  | 2349.026  |
| NM_000251 | 2836.817  | 2707.78   | NM_014727 | 11030.333 | 11006.587 |
| NM_006038 | 2740.135  | 2218.126  | BE885010  | 3635.632  | 3262.588  |
| AB011133  | 2629.978  | 2305.629  | NM_000192 | 1085.995  | 432.626   |
| NM_017572 | 26348.82  | 14074.608 | NM_002943 | 8016.025  | 5251.521  |
| NM_018444 | 1621.165  | 948.442   | AL133649  | 3075.903  | 2449.347  |
| NM_000252 | 979.854   | 723.371   | AB018303  | 2188.645  | 2576.211  |
| NM_006947 | 6914.591  | 3584.847  | NM_006454 | 15502.151 | 22025.857 |
| NM_017917 | 2079.491  | 2000.674  | NM_015846 | 13566.163 | 13736.271 |
| NM_004090 | 3850.606  | 2504.519  | NM_015972 | 43691.746 | 40502.133 |
| NM_014634 | 5283.681  | 2981.165  | NM_001644 | 991.615   | 1073.539  |
| NM_001919 | 16616.393 | 5206.761  | NM_016132 | 3919.658  | 3984.354  |
| CY3Cy5    | 1312.698  | 89.68     | NM_018006 | 8234.81   | 12769.714 |
| NM_003822 | 955.253   | 497.895   | NM_016090 | 3835.945  | 3792.575  |
| NM_004412 | 7430.327  | 4009.099  | NM_001013 | 60582.633 | 58682.266 |
| NM_016647 | 1348.228  | 667.557   | AK024040  | 14505.792 | 11291.257 |
| AK024695  | 1026.182  | 560.802   | AK021571  | 29109.479 | 28662.064 |
| NM_018659 | 727.479   | 561.216   | AK022178  | 7311.294  | 7051.092  |
| AF038174  | 3300.483  | 2615.492  | NM_006011 | 5375.353  | 5382.343  |
| NM_013243 | 766.183   | 778.879   | L00635    | 9742.297  | 8245.209  |
| AF070632  | 661.854   | 592.991   | NM_002541 | 6524.305  | 4421.725  |
| AF161359  | 1543.477  | 1207.557  | NM_000056 | 11099.508 | 8529.078  |
| AL365520  | 1566.608  | 1183.851  | NM_016311 | 24788.541 | 18802.674 |
| AL359338  | 444.632   | 423.949   | NM_001867 | 55091.938 | 53050.719 |
| AK023623  | 9713.577  | 5907.743  | NM_002300 | 59350.23  | 65901.133 |
| AF086534  | 772.373   | 586.07    | NM_000290 | 19552.867 | 23335.109 |
| AF070617  | 1669.955  | 1067.473  | NM_016538 | 11151.912 | 8384.365  |
| NM_014918 | 1791.093  | 1420.902  | AK023275  | 22738.389 | 17271.197 |
| NM_003822 | 867.625   | 929.409   | AJ223352  | 13645.959 | 14148.954 |
| NM_004412 | 6292.093  | 7473.445  | NM_012238 | 8686.586  | 12859.058 |
| SR1       | 68853.742 | 67985.148 | NM_016539 | 23629.963 | 19882.377 |
| SR3       | 52972.852 | 63868.316 | NM_006807 | 32157.066 | 33299.699 |
| SR5       | 3880.898  | 5068.183  | NM_000326 | 920.004   | 1119.171  |
| SR7       | 3620.827  | 27603.078 | L16464    | 2394.605  | 2255.341  |
| SR9       | 9101.692  | 1016.976  | NM_006532 | 35659.246 | 30157.02  |
| CY3Cy5    | 1495.662  | 107.86    | U07132    | 27218.102 | 21172.969 |
| U84515    | 1191.525  | 1022.44   | NM_003436 | 1812.861  | 2371.612  |

|           |           |           |           |           |           |
|-----------|-----------|-----------|-----------|-----------|-----------|
| AF086106  | 871.157   | 907.145   | AK027006  | 713.869   | 772.229   |
| AF086143  | 7910.924  | 5187.013  | AB034691  | 980.565   | 1811.208  |
| AL137254  | 1458.923  | 969.204   | NM_001675 | 2242.312  | 4872.889  |
| AK026359  | 883.477   | 747.34    | NM_003422 | 6584.527  | 6483.527  |
| AF085884  | 1576.029  | 1058.582  | NM_001451 | 4926.692  | 4077.004  |
| S81522    | 5996.848  | 5861.873  | NM_014779 | 6616.464  | 5639.313  |
| S94541    | 993.771   | 1764.898  | NM_014446 | 3770.496  | 2942.921  |
| L36587    | 21833.098 | 18254.264 | U58096    | 33681.871 | 21708.801 |
| AK024228  | 1678.992  | 1313.539  | NM_016929 | 38995.895 | 35387.277 |
| AK022420  | 3365.688  | 1688.347  | NM_012323 | 4353.817  | 4724.354  |
| AK023254  | 596.689   | 572.424   | NM_006942 | 962.443   | 1409.551  |
| AK023945  | 20229.316 | 21326.609 | NM_018199 | 1476.458  | 1921.181  |
| AK022446  | 893.14    | 935.645   | NM_013943 | 5382.655  | 6246.314  |
| AK023352  | 505.404   | 588.698   | NM_001639 | 20610.508 | 23497.656 |
| AK023773  | 1094.741  | 1210.129  | H39560    | 1354.76   | 1609.475  |
| AK024123  | 298.613   | 551.669   | BG534366  | 29155.746 | 33940.102 |
| AK026202  | 407.604   | 256.278   | BG698522  | 51284.297 | 52967.684 |
| AK021539  | 8571.855  | 6752.77   | AA152346  | 3196.515  | 3568.234  |
| AK026738  | 2072.289  | 1577.841  | L15189    | 6109.182  | 5625.477  |
| AK025011  | 1323.753  | 920.729   | AB023420  | 38012.066 | 33269.398 |
| AL157491  | 1767.984  | 1190.734  | BI822179  | 21401.633 | 23990.082 |
| NM_005266 | 3388.686  | 3034.984  | AF022912  | 10084.846 | 8368.739  |
| AF087965  | 569.304   | 647.428   | AA477428  | 34171.242 | 31163.65  |
| AF085998  | 1012.458  | 1114.991  | AA156342  | 5855.149  | 5363.045  |
| AB030240  | 357.248   | 558.014   | R45594    | 32244.453 | 34558.176 |
| AK024681  | 712.584   | 1089.627  | AI143386  | 1371.539  | 1224.631  |
| X68742    | 1188.323  | 2330.438  | H46425    | 27946.775 | 34763.512 |
| AF085990  | 413.484   | 818.129   | AI355949  | 2963.171  | 3818.189  |
| NM_014907 | 24276.803 | 30061.574 | AA278152  | 29171.367 | 33738.988 |
| AB007977  | 15452.734 | 16216.942 | H75530    | 8893.433  | 9221.625  |
| NM_014221 | 7955.85   | 5924.24   | NM_005036 | 1592.06   | 1406.027  |
| AK025181  | 638.53    | 438.102   | NM_018201 | 8419.855  | 6619.322  |
| AK021773  | 2431.035  | 3766.033  | NM_014438 | 3690.828  | 3546.151  |
| AK027074  | 1397.997  | 1588.985  | NM_014880 | 10882.61  | 10175.166 |
| AL365456  | 594.736   | 752.335   | NM_003764 | 10597.044 | 7746.218  |
| NM_018038 | 840.365   | 1043.194  | NM_004829 | 9696.343  | 11008.226 |
| AK022239  | 1227.169  | 1054.092  | NM_006793 | 52156.789 | 54238.805 |
| AK024674  | 648.223   | 651.059   | NM_001538 | 30593.711 | 38998.32  |
| AK024244  | 6424.877  | 4189.36   | X97261    | 15472.541 | 43303.809 |
| AK023812  | 575.496   | 611.002   | NM_001468 | 1877.618  | 1819.04   |
| AL390084  | 1178.079  | 871.909   | NM_005410 | 1638.491  | 2112.999  |
| AK023565  | 613.114   | 475.82    | D87666    | 58923.492 | 59573.871 |
| AK021479  | 619.479   | 480.696   | NM_002921 | 502.792   | 966.438   |
| NM_003835 | 6388.375  | 6059      | NM_001315 | 5131.603  | 5028.875  |
| AK000245  | 2803.49   | 2472.629  | AF286095  | 8728.538  | 7875.874  |
| AF118072  | 1065.895  | 1283.507  | NM_000878 | 5929.317  | 5925.033  |
| AK023724  | 232.737   | 672.543   | S66407    | 7080.81   | 8098.984  |
| AK024112  | 506.797   | 1254.486  | NM_016523 | 638.84    | 1568.284  |
| AF085900  | 25777.904 | 48036.586 | NM_018727 | 668.025   | 674.281   |
| AK026195  | 719.707   | 1011.453  | NM_004258 | 55197.172 | 58636.219 |
| AL079274  | 29857.504 | 19098.887 | NM_001981 | 16987.082 | 23365.318 |
| S46403    | 581.097   | 176.017   | NM_001585 | 57490.32  | 61467.277 |
| AL137398  | 1874.717  | 2278.469  | AK026108  | 57061.008 | 54419.797 |

|           |           |           |           |           |           |
|-----------|-----------|-----------|-----------|-----------|-----------|
| Y12021    | 2949.065  | 3971.578  | AF149304  | 1560.67   | 1758.559  |
| AF127771  | 1102.577  | 1265.412  | NM_012095 | 15419.454 | 14582.636 |
| Z83949    | 352.744   | 232.256   | NM_016438 | 754.976   | 947.615   |
| NM_013300 | 30231.506 | 21641.725 | X73079    | 44901     | 49827.84  |
| AK026039  | 3619.657  | 3414.499  | NM_019091 | 1707.518  | 1118.946  |
| AF108756  | 7760.65   | 5927.48   | L07518    | 998.247   | 961.471   |
| AF116709  | 1282.422  | 1077.037  | AF264781  | 4282.596  | 3757.888  |
| AK025533  | 1430.917  | 1207.232  | NM_002456 | 814.139   | 720.413   |
| AK026499  | 482.64    | 242.249   | NM_016124 | 9492.187  | 13918.905 |
| AK021911  | 9104.661  | 9972.963  | NM_015948 | 19049.107 | 26201.668 |
| D17225    | 749.717   | 1130.744  | NM_000804 | 1407.355  | 1820.717  |
| AF147430  | 340.942   | 679.827   | NM_006555 | 7605.949  | 7835.298  |
| AK025766  | 10804.652 | 15424.361 | NM_014521 | 10216.495 | 9692.923  |
| U35875    | 37057.578 | 54623.703 | NM_002445 | 6579.979  | 7415.14   |
| AK021857  | 54138.027 | 60512.016 | NM_017809 | 1758.11   | 2322.831  |
| AK022257  | 996.07    | 1714.408  | AK023202  | 7880.013  | 8990.406  |
| BE887356  | 48145.074 | 49763.402 | D63877    | 6967.178  | 10288.544 |
| AK024756  | 2313.589  | 1011.386  | AF131760  | 6089.251  | 8563.327  |
| NM_017911 | 1907.426  | 1330.206  | NM_018698 | 3408.779  | 3726.477  |
| AJ224168  | 8859.773  | 8899.569  | NM_006461 | 5714.363  | 5847.408  |
| S69873    | 987.178   | 1007.494  | NM_002826 | 6036.493  | 6896.625  |
| AF147325  | 63419.313 | 66352.938 | AF159141  | 15264.175 | 13739.881 |
| NM_014428 | 1747.68   | 2448.635  | NM_002420 | 1176.05   | 988.645   |
| NM_018497 | 527.482   | 450.025   | NM_016458 | 59951.863 | 58258.074 |
| AK023584  | 552.876   | 351.872   | AK022233  | 6878.727  | 10121.717 |
| D87466    | 5377.211  | 4085.049  | AK026410  | 36280.445 | 38839.234 |
| AK025048  | 618.419   | 413.187   | NM_014637 | 15463.963 | 15869.489 |
| U84522    | 2697.847  | 2023.96   | NM_013379 | 56097.152 | 49760.477 |
| AK021694  | 1808.239  | 989.282   | AF113208  | 47677.172 | 47664.211 |
| AF086013  | 577.341   | 474.742   | NM_006153 | 13285.176 | 14464.104 |
| U84505    | 5724.964  | 5870.351  | NM_012164 | 7121.983  | 7332.298  |
| X81005    | 2147.694  | 1966.606  | AK026010  | 1180.899  | 1502.624  |
| AL049265  | 2405.65   | 2916.054  | NM_004721 | 892.398   | 1185.106  |
| AK022225  | 519.808   | 1048.253  | AB011156  | 2123.45   | 2726.466  |
| AL137635  | 921.702   | 2187.465  | NM_018079 | 1237.043  | 1662.275  |
| AL049430  | 2347.649  | 3897.943  | NM_004760 | 24531.75  | 27211.193 |
| AK021461  | 679.749   | 849.898   | NM_006752 | 11161.393 | 11691.237 |
| AB015349  | 1172.075  | 762.802   | NM_004428 | 573.289   | 627.057   |
| NM_014913 | 25442.84  | 14415.67  | NM_006809 | 14696.648 | 15934.433 |
| NM_005864 | 610.781   | 427.169   | NM_016929 | 47086.598 | 53519.332 |
| NM_012341 | 7511.397  | 7485.142  | NM_012323 | 4375.455  | 4931.432  |
| NM_003256 | 33876.273 | 45120.379 | NM_006942 | 926.92    | 1253.551  |
| D87450    | 3579.515  | 4190.05   | NM_018199 | 2371.504  | 4125.309  |
| NM_017797 | 5102.051  | 6456.93   | NM_013943 | 5058.08   | 5194.001  |
| AK021919  | 519.428   | 646.225   | NM_001639 | 20528.012 | 25776.986 |
| AF000562  | 5671.215  | 4877.176  | H39560    | 1377.393  | 2209.256  |
| AK025713  | 4345.301  | 2480.282  | BG534366  | 29467.381 | 42862.969 |
| NM_018100 | 689.107   | 326.434   | BG698522  | 46001.438 | 47100.344 |
| NM_004075 | 6224.466  | 4801.912  | AA152346  | 3176.943  | 3317.909  |
| NM_001887 | 4225.316  | 5269.953  | L15189    | 5239.892  | 5289.367  |
| NM_006533 | 6179.148  | 6685.448  | AB023420  | 37030.227 | 36752.941 |
| AK026747  | 5888.458  | 6679.122  | BI822179  | 22431.186 | 30069.768 |
| AL110150  | 8323.289  | 8280.003  | AF022912  | 10994.738 | 10878.577 |

|           |           |           |           |           |           |
|-----------|-----------|-----------|-----------|-----------|-----------|
| NM_00199E | 7090.917  | 6225.774  | AA477428  | 36179.566 | 37492.074 |
| X87825    | 3860.918  | 3910.576  | AA156342  | 5469.573  | 6152.876  |
| NM_000914 | 583.163   | 1060.905  | R45594    | 30813.061 | 33255.371 |
| AK001285  | 25726.359 | 26753.809 | AI143386  | 1579.907  | 1766.581  |
| D17215    | 10043.482 | 15940.973 | H46425    | 25814.168 | 30569.359 |
| BE781513  | 1711.38   | 3254.979  | AI355949  | 2949.656  | 3551.545  |
| NM_015714 | 56863.871 | 59642.379 | AA278152  | 28194.467 | 31514.316 |
| AK075564  | 1048.352  | 2009.23   | H75530    | 9038.257  | 9545.806  |
| AK026219  | 1229.116  | 1440.341  | AK000554  | 3981      | 4346.821  |
| D28446    | 2943.708  | 3696.841  | NM_006472 | 7000.733  | 8404.336  |
| NM_000211 | 11035.014 | 8834.396  | NM_014880 | 11745.678 | 11283.299 |
| AB037830  | 1710.279  | 2031.428  | NM_003764 | 10563.995 | 8303.539  |
| NM_01568E | 14753.657 | 15887.479 | NM_004829 | 11086.015 | 17717.387 |
| NM_004357 | 57302.762 | 56536.008 | NM_006793 | 55164.07  | 57220.777 |
| X03324    | 4359.108  | 4896.286  | NM_00153E | 36079.363 | 46853.305 |
| AF130988  | 1258.958  | 1354.171  | X97261    | 15736.623 | 48319.613 |
| NM_01538E | 1113.4    | 650.292   | NM_00146E | 1623.983  | 2361.522  |
| NM_003690 | 6798.736  | 4203.443  | NM_005410 | 1562.787  | 2161.593  |
| NM_00087E | 5757.749  | 3507.368  | D87666    | 57962.238 | 57183.395 |
| NM_014214 | 6420.256  | 5238.873  | NM_002921 | 627.448   | 1552.959  |
| NM_00085E | 842.319   | 731.338   | NM_00131E | 5553.765  | 6179.602  |
| NM_002752 | 3026.582  | 2419.47   | AF286095  | 9232.587  | 9353.97   |
| NM_013281 | 1658.62   | 1831.488  | NM_00087E | 5325.809  | 6073.784  |
| Y11306    | 2604.773  | 2683.948  | S66407    | 3796.271  | 4121.294  |
| NM_016112 | 635.442   | 849.274   | NM_016523 | 1181.724  | 1290.896  |
| X85106    | 620.81    | 835.856   | NM_018727 | 499.682   | 804.176   |
| NM_003931 | 3972.318  | 5203.036  | NM_00425E | 56812.656 | 61323.195 |
| NM_004367 | 638.965   | 1381.292  | NM_001981 | 15992.108 | 20191.406 |
| NM_006681 | 1038.065  | 2055.714  | NM_00158E | 59694.551 | 57316.496 |
| NM_01247E | 56283.563 | 57783.527 | AK026108  | 56424.543 | 57287.809 |
| AF250226  | 18144.031 | 18934.572 | NM_01444E | 5083.772  | 6835.477  |
| NM_003217 | 29994.141 | 36597.418 | U58096    | 38407.77  | 44052.566 |
| NM_006534 | 15873.14  | 12467.728 | X73079    | 50281.422 | 44306.23  |
| NM_017601 | 3021.354  | 2623.942  | NM_019091 | 1624.406  | 1446.86   |
| AF110265  | 16674.924 | 17172.082 | L07518    | 1212.567  | 1267.999  |
| AF272371  | 56471.98  | 63272.27  | AF264781  | 6660.574  | 11670.902 |
| AK021848  | 3309.999  | 4054.252  | AK022823  | 766.276   | 543.816   |
| NM_003704 | 3474      | 3850.238  | NM_00245E | 774.567   | 1008.195  |
| AK023140  | 2503.679  | 2901.107  | NM_016124 | 11110.852 | 17943.434 |
| AF084362  | 1123.599  | 1082.175  | NM_01594E | 18856.348 | 22025.395 |
| NM_00155E | 3530.563  | 2123.91   | NM_000804 | 1265.949  | 2059.049  |
| NM_01417E | 11512.635 | 7793.651  | NM_00655E | 8429.395  | 8807.616  |
| NM_001731 | 27377.072 | 15964.865 | NM_014521 | 9777.94   | 9242.794  |
| AL137506  | 861.671   | 1056.041  | NM_00244E | 6195.999  | 5957.43   |
| AK022961  | 4199.389  | 3458.8    | NM_01780E | 1921.358  | 2101.977  |
| NM_00737E | 6863.293  | 5605.061  | AK023202  | 7196.234  | 7277.124  |
| NM_014371 | 4145.166  | 3564.988  | D63877    | 6829.701  | 8024.173  |
| AF290512  | 8430.124  | 8457.666  | AF131760  | 5559.445  | 6458.494  |
| NM_00671E | 11090.513 | 10000.449 | NM_01869E | 3660.227  | 3845.41   |
| AB002323  | 7333.212  | 8153.447  | NM_006461 | 6319.589  | 7168.562  |
| AK022241  | 13248.305 | 12966.649 | NM_018201 | 11880.137 | 15263.473 |
| AK022587  | 4044.232  | 4800.773  | NM_01443E | 3851.268  | 4656.985  |
| NM_00551E | 447.961   | 908.821   | AF159141  | 17101.205 | 15275.034 |

|           |           |           |           |           |           |
|-----------|-----------|-----------|-----------|-----------|-----------|
| NM_005506 | 2161.668  | 3564.674  | NM_002420 | 1023.332  | 1002.154  |
| NM_005723 | 796.885   | 1202.819  | NM_016458 | 60033.66  | 53073.48  |
| AL137404  | 68905.867 | 67830.492 | AK022233  | 6612.124  | 7716.951  |
| NM_005814 | 5727.056  | 5502.384  | AK026410  | 41921.32  | 42861.816 |
| NM_002851 | 2064.746  | 2165.451  | NM_014637 | 17947.232 | 20158.436 |
| NM_002071 | 2388.103  | 2521.005  | NM_013379 | 56174.59  | 52729.133 |
| NM_005339 | 46685.984 | 38480.41  | AF113208  | 49378.527 | 47937.559 |
| NM_001906 | 9060.484  | 9240.229  | NM_006153 | 20180.43  | 29032.412 |
| NM_004142 | 1189.469  | 1254.408  | NM_012164 | 6802.38   | 8516.065  |
| AF108138  | 5237.605  | 5396.139  | AK026010  | 920.062   | 1330.455  |
| NM_004347 | 619.545   | 414.392   | NM_004721 | 675.54    | 737.692   |
| BF340302  | 7575.034  | 4538.578  | AB011156  | 1856.248  | 1915.862  |
| AK024210  | 3116.497  | 2832.457  | NM_018079 | 2041.23   | 1939.042  |
| NM_002276 | 5661.467  | 5193.284  | NM_004760 | 24040.012 | 26315.432 |
| AL133087  | 3897.78   | 4364.68   | NM_006752 | 10655.325 | 10087.135 |
| NM_018010 | 2716.366  | 2481.166  | NM_004428 | 567.893   | 903.041   |
| NM_002274 | 31778.975 | 33657.383 | NM_006809 | 16542.514 | 19443.922 |
| AL080200  | 1491.296  | 1573.837  | AF149304  | 2385.608  | 3213.85   |
| BF337874  | 8757.418  | 9905.806  | NM_012095 | 22253.764 | 31576.031 |
| NM_003475 | 46498.879 | 48163.73  | NM_006942 | 1108.925  | 1353.654  |
| NM_000243 | 9517.45   | 10517.52  | NM_018199 | 2108.188  | 2061.634  |
| NM_004383 | 22787.865 | 28548.975 | NM_013943 | 4486.374  | 4928.477  |
| AL157475  | 5996.502  | 6896.056  | NM_001639 | 20932.07  | 21602.934 |
| NM_006069 | 61221.207 | 51670.957 | H39560    | 1131.402  | 1410.162  |
| NM_017656 | 2947.743  | 1951.288  | BG534366  | 30690.07  | 30421.707 |
| X16282    | 15518.76  | 10828.796 | BG698522  | 57935.18  | 52651.082 |
| AK022519  | 1565.986  | 1391.723  | AA152346  | 3326.475  | 3520.034  |
| NM_014415 | 2614.516  | 2148.234  | L15189    | 5828.849  | 6026.029  |
| S75264    | 13068.929 | 11652.495 | AB023420  | 39927.789 | 41839.895 |
| AF027513  | 1779.262  | 2252.085  | BI822179  | 22945.133 | 31761.191 |
| NM_001379 | 7741.215  | 7081.623  | AF022912  | 12581.821 | 13720.011 |
| NM_018664 | 1349.882  | 1223.876  | AA477428  | 37999.652 | 45638.367 |
| BC006428  | 4119.915  | 2260.424  | AA156342  | 6302.127  | 6400.262  |
| NM_005034 | 1744.8    | 799.461   | R45594    | 34502.547 | 42373.434 |
| NM_003926 | 14054.151 | 9291.228  | AI143386  | 1332.092  | 1293.322  |
| AF085356  | 2020.392  | 1391.818  | H46425    | 22642.908 | 19445.568 |
| NM_016047 | 32829.504 | 27238.729 | AI355949  | 2453.211  | 2361.565  |
| NM_001499 | 11669.538 | 8479.706  | AA278152  | 26433.971 | 29435.406 |
| BF030165  | 17716.234 | 18928.969 | H75530    | 8734.172  | 8462.953  |
| NM_016732 | 13982.039 | 12073.8   | AK000554  | 3800.339  | 4563.611  |
| NM_014763 | 22005.035 | 21180.746 | NM_006472 | 6752.953  | 9116.009  |
| NM_020185 | 9649.867  | 15683.952 | NM_002826 | 7656.821  | 7382.816  |
| NM_002832 | 8071.317  | 8415.494  | X97261    | 15235.43  | 42316.82  |
| NM_017732 | 6402.446  | 6143.271  | NM_001468 | 1822.134  | 2204.898  |
| NM_003654 | 569.252   | 187.866   | NM_005410 | 966.675   | 892.919   |
| NM_000152 | 55595.941 | 51796.445 | D87666    | 56859.086 | 57226.273 |
| D17222    | 23815.881 | 22208.494 | NM_002921 | 765.876   | 802.903   |
| NM_000154 | 5448.819  | 4588.91   | NM_001315 | 5232.814  | 5715.038  |
| NM_006213 | 968.394   | 2269.553  | AF286095  | 9817.802  | 9694.086  |
| NM_003549 | 627.502   | 457.727   | NM_000878 | 6334.235  | 8005.229  |
| NM_000671 | 2875.288  | 2973.827  | S66407    | 7439.153  | 8294.527  |
| NM_006297 | 33373.27  | 34337.848 | NM_016523 | 808.217   | 656.763   |
| X85325    | 56274.598 | 41195.543 | NM_018727 | 620.688   | 648.118   |

|           |           |           |           |           |           |
|-----------|-----------|-----------|-----------|-----------|-----------|
| AF318366  | 10128.279 | 7108.2    | NM_004258 | 54141.527 | 55764.438 |
| AF182423  | 2691.733  | 1587.286  | NM_001981 | 16601.986 | 20970.428 |
| D26018    | 4751.241  | 2938.478  | NM_014654 | 3172.64   | 4168.75   |
| AK023029  | 403.55    | 499.051   | NM_001585 | 60771.957 | 64713.871 |
| AB037863  | 2563.135  | 3578.107  | AK026108  | 57200.684 | 55272.492 |
| BC000363  | 2018.596  | 1573.315  | NM_006379 | 8319.162  | 11060.771 |
| NM_007237 | 2078.175  | 2006.096  | BF571428  | 22659.59  | 23550.211 |
| NM_004608 | 1077.071  | 975.525   | AB037723  | 52166.691 | 52775.355 |
| NM_018257 | 14480.057 | 13167.259 | NM_006246 | 9081.924  | 9487.279  |
| NM_005919 | 3927.529  | 4136.318  | NM_004316 | 3431.394  | 4531.974  |
| NM_012256 | 58731.52  | 52644.934 | NM_014446 | 5022.088  | 6459.513  |
| NM_006006 | 2160.319  | 2234.877  | U58096    | 37236.668 | 37487.5   |
| NM_016325 | 3052.348  | 4761.989  | NM_016929 | 47414.953 | 50276.676 |
| NM_001604 | 1396.25   | 1286.103  | NM_012323 | 6064.023  | 7128.781  |
| NM_000908 | 1874.546  | 1661.708  | NM_003054 | 3956.374  | 6808.273  |
| AB011102  | 5373.728  | 5748.37   | NM_003042 | 2312.948  | 2508.781  |
| D63480    | 4649.681  | 5015.332  | NM_004790 | 3470.73   | 2836.479  |
| NM_002969 | 9912.845  | 10478.288 | NM_002219 | 12127.045 | 11502.403 |
| NM_006475 | 1096.912  | 1026.79   | AF182404  | 12102.482 | 11356.769 |
| NM_004620 | 4149.704  | 5491.613  | NM_000804 | 1247.14   | 1519.814  |
| AF087940  | 14323.055 | 16912.709 | NM_006555 | 8573.145  | 8156.855  |
| AJ277587  | 3188.527  | 4439.165  | NM_014521 | 9634.018  | 9172.758  |
| D87432    | 5799.024  | 7100.188  | NM_002445 | 7504.94   | 9549.656  |
| Y18483    | 1055.155  | 1237.471  | NM_017809 | 2727.196  | 2745.429  |
| AI565117  | 58977.715 | 59267.246 | AK023202  | 8256.043  | 8617.646  |
| AI299075  | 5449.803  | 4393.316  | D63877    | 6181.633  | 8272.966  |
| M59979    | 2960.802  | 2114.951  | AF131760  | 5877.492  | 10005.146 |
| AB011098  | 2640.147  | 2303.593  | NM_018698 | 3358.116  | 4619.851  |
| AA609759  | 4440.449  | 4729.666  | NM_006461 | 6210.937  | 7016      |
| AA029418  | 13039.281 | 11367.992 | NM_018201 | 10989.391 | 12672.087 |
| AA456001  | 21927.072 | 21373.143 | NM_014438 | 3646.061  | 3417.424  |
| AA176581  | 1236.299  | 1779.674  | NM_014880 | 7511.168  | 8824.604  |
| BI818232  | 464.01    | 508.565   | NM_003764 | 10092.314 | 9483.065  |
| AA451686  | 8312.491  | 10377.601 | NM_019618 | 584.983   | 529.58    |
| AA934644  | 416.471   | 1011.259  | NM_004829 | 10674.196 | 11947.631 |
| NM_017896 | 19737.01  | 13536.69  | NM_006793 | 59818.043 | 58477.891 |
| AB002374  | 6355.109  | 4717.123  | NM_001538 | 41741.098 | 50873.746 |
| U17327    | 2855.271  | 1911.535  | NM_006809 | 15132.534 | 15790.894 |
| AB046781  | 478.468   | 243.949   | AF149304  | 2089.441  | 1643.593  |
| M87790    | 54181.434 | 57026.27  | NM_012095 | 17329.539 | 14654.475 |
| NM_001768 | 2447.062  | 2966.682  | NM_016438 | 739.135   | 898.272   |
| NM_000029 | 16220.823 | 18756.639 | X73079    | 46226.082 | 45129.422 |
| NM_000715 | 1238.918  | 903.678   | NM_019091 | 1554.453  | 1178.283  |
| AF035802  | 7353.819  | 7810.958  | L07518    | 1106.016  | 1134.163  |
| Y08145    | 5163.424  | 4320.388  | AF264781  | 4456.23   | 3731.024  |
| M26123    | 504.183   | 327.558   | NM_002456 | 856.115   | 773.606   |
| NM_001838 | 11605.376 | 11226.314 | AK024215  | 13757.441 | 13229.143 |
| NM_019555 | 1300.895  | 1081.952  | AB044661  | 7887.688  | 7074.216  |
| NM_012096 | 12093.341 | 7683.72   | NM_000606 | 53294.164 | 45197.051 |
| L12052    | 2435.671  | 2430.865  | NM_016124 | 9260.729  | 10623.018 |
| AB028976  | 6857.905  | 6638.123  | NM_019079 | 1610.975  | 1568.568  |
| AK026337  | 10676.892 | 11812.392 | U53530    | 7735.541  | 7291.042  |
| NM_015869 | 1161.778  | 1157.758  | NM_006598 | 3650.232  | 3877.128  |



|           |           |           |           |           |           |
|-----------|-----------|-----------|-----------|-----------|-----------|
| NM_00462E | 917.979   | 1529.07   | NM_01594E | 20341.664 | 21584.334 |
| NM_00189E | 1322.383  | 2692.114  | AK000554  | 3834.008  | 6100.146  |
| NM_01332E | 20955.186 | 16667.914 | NM_006472 | 5740.205  | 6574.044  |
| NM_00079C | 735.214   | 488.37    | NM_00282E | 5734.533  | 4264.854  |
| NM_00266C | 4459.692  | 5939.33   | AF159141  | 17879.736 | 15314.915 |
| NM_01590C | 1079.701  | 1734.599  | NM_00242C | 1045.683  | 1111.783  |
| NM_00370E | 1799.079  | 2416.777  | NM_01645E | 59903.871 | 61438.426 |
| AF182218  | 695.015   | 518.776   | AK022233  | 7350.73   | 9000.188  |
| NM_016122 | 1964.078  | 1477.71   | AK026410  | 41993.016 | 44663.957 |
| AK023749  | 596.926   | 893.658   | NM_014637 | 16307.189 | 16499.654 |
| NM_002337 | 3918.553  | 2756.349  | NM_01337E | 56569.824 | 47209.602 |
| NM_01324E | 1695.468  | 1036.449  | AF113208  | 45148.668 | 38290.281 |
| NM_00642E | 44944.355 | 34896.371 | NM_00615E | 13684.206 | 13066.217 |
| NM_00476E | 1213.684  | 840.475   | NM_012164 | 7017.429  | 6963.309  |
| NM_00581E | 37160.566 | 39255.098 | AK026010  | 1362.033  | 1808.442  |
| AK025520  | 3973.885  | 2300.968  | NM_004721 | 825.818   | 1020.686  |
| NM_00489E | 3466.846  | 5596.726  | AB011156  | 2543.809  | 2937.544  |
| NM_014597 | 23869.914 | 32046.24  | NM_01807E | 1329.662  | 1635.985  |
| BF540935  | 21458.816 | 22203.268 | NM_00476C | 24885.723 | 28628.686 |
| NM_00446E | 791.983   | 751.576   | NM_00675E | 10708.681 | 10124.913 |
| NM_007081 | 2692.204  | 3178.069  | CY3Cy5    | 3813.873  | 146.669   |
| AB032964  | 3205.533  | 4893.312  | NM_02100E | 1389.248  | 1555.996  |
| BE733605  | 7738.693  | 11185.535 | AF086342  | 570.392   | 636.348   |
| NM_003334 | 45253.695 | 52702.652 | AF086451  | 1720.234  | 1527.22   |
| NM_00269E | 3671.378  | 7614.759  | AF086310  | 525.561   | 528.42    |
| NM_003671 | 1470.856  | 1661.25   | AF086387  | 1190.511  | 701.702   |
| AK026000  | 5563.086  | 4336.971  | AK021888  | 1578.005  | 420.487   |
| NM_01783E | 2567.211  | 2697.993  | AK022848  | 10689.164 | 2630.271  |
| NM_00667E | 6403.803  | 5898.983  | AK055302  | 384.192   | 180.381   |
| NM_01984E | 1535.533  | 1384.166  | AL049957  | 1999.505  | 851.759   |
| NM_002951 | 15307.38  | 20616.357 | NM_02100E | 859.849   | 387.315   |
| NM_002317 | 1894.955  | 2218.534  | SB        | 985.828   | 158.85    |
| NM_00032C | 1370.071  | 2001.12   | SR2       | 56067.91  | 46119.57  |
| NM_00313E | 6385.662  | 6796.716  | SR4       | 22960.305 | 27065.869 |
| D63480    | 5474.236  | 4749.099  | SR6       | 2814.605  | 3876.906  |
| NM_00296E | 9458.338  | 9589.914  | SR8       | 10609.868 | 41263.012 |
| NM_00647E | 957.533   | 1196.865  | SR10      | 32791.035 | 10060.871 |
| NM_00462C | 4367.844  | 4904.792  | CY3Cy5    | 9577.441  | 274.9     |
| AF087940  | 14051.76  | 16886.479 | AF086063  | 2065.297  | 1638.462  |
| AJ277587  | 2240.151  | 3608.083  | AF086098  | 4166.214  | 3173.951  |
| D87432    | 5297.01   | 8355.738  | AF086076  | 1069.318  | 948.2     |
| Y18483    | 924.781   | 1284.26   | AL833393  | 3441.24   | 2194.418  |
| AI565117  | 56182.52  | 59965.34  | AF088005  | 3823.917  | 1151.791  |
| U28015    | 530.731   | 892.356   | AF086096  | 6066.872  | 3330.315  |
| AI299075  | 6509.033  | 8281.811  | AL390132  | 692.305   | 433.228   |
| M59979    | 2569.335  | 2484.259  | NM_01793E | 27405.961 | 6237.8    |
| AB011098  | 2039.322  | 1943.61   | NM_01781E | 19304.176 | 15127.009 |
| AA609759  | 3633.76   | 3120.718  | AF086500  | 2088.781  | 577.294   |
| AA029418  | 12569.357 | 10022.256 | AF273052  | 13528.972 | 3761.934  |
| L20815    | 10640.792 | 9874.743  | NM_01794E | 8364.756  | 2564.432  |
| AA176581  | 1095.042  | 1360.656  | AF147383  | 4947.719  | 1473.797  |
| BI818232  | 376.056   | 593.607   | AK025682  | 2411.459  | 752.953   |
| AA451686  | 8994.106  | 9770.882  | NM_01335E | 551.148   | 785.745   |

|           |           |           |           |           |           |
|-----------|-----------|-----------|-----------|-----------|-----------|
| NM_00205C | 6313.848  | 6579.488  | NM_01647E | 39050.063 | 43984.059 |
| NM_007097 | 9798.604  | 10186.348 | AL389986  | 12176.412 | 15248.722 |
| D87446    | 6562.967  | 6969.431  | AF142409  | 738.357   | 661.967   |
| U17327    | 2800.556  | 2347.298  | AF086279  | 1199.024  | 1795.964  |
| AB046781  | 536.575   | 383.613   | AF088052  | 3821.464  | 5133.483  |
| M87790    | 48591.055 | 48869.973 | AK027155  | 22228.756 | 16176.581 |
| NM_00176E | 2210.156  | 3069.515  | AF221846  | 1443.344  | 1243.856  |
| NM_00002E | 16076.419 | 18297.561 | AF264626  | 668.34    | 853.332   |
| NM_00071E | 1278.233  | 1011.062  | AK027219  | 356.991   | 383.654   |
| AF035802  | 8965.583  | 13141.848 | AK024528  | 44887.328 | 12820.968 |
| Y08145    | 5424.011  | 5976.65   | AF075082  | 4116.375  | 1755.557  |
| M26123    | 313.377   | 310.398   | NM_01537C | 13143.04  | 5684.226  |
| NM_00183E | 10911.752 | 11225.971 | AF085917  | 2713.805  | 2030.411  |
| NM_01955E | 976.864   | 940.058   | AF085989  | 1488.503  | 993.994   |
| NM_01209E | 11362.675 | 8249.483  | AL360139  | 63921.684 | 56528.078 |
| NM_00390E | 19803.242 | 17336.777 | AF075110  | 5187.099  | 1879.214  |
| L12052    | 3438.094  | 4697.279  | AK022157  | 433.518   | 470.304   |
| AB028976  | 8062.252  | 9966.722  | AL137323  | 1078.096  | 672.026   |
| AK026337  | 12611.18  | 17121.811 | AL137494  | 6946.884  | 2100.778  |
| NM_01586E | 1847.324  | 2494.343  | AL162037  | 6471.674  | 1109.968  |
| NM_00462E | 1242.606  | 1975.756  | AL390150  | 2277.313  | 2947.366  |
| NM_00189E | 1288.946  | 2053.586  | AL137359  | 663.271   | 1361.245  |
| NM_00090E | 2215.193  | 3548.556  | AL137575  | 704.313   | 1282.738  |
| AB011102  | 6180.264  | 10262.49  | NM_002761 | 2486.925  | 2864.062  |
| NM_00266C | 4290.534  | 5463.612  | AK021962  | 411.254   | 561.417   |
| NM_01590C | 1338.864  | 1010.056  | AK056674  | 2521.373  | 2090.942  |
| NM_00370E | 1588.698  | 2025.531  | AK022856  | 1044.658  | 909.372   |
| AF182218  | 574.371   | 463.937   | AK022042  | 1427.127  | 1037.821  |
| NM_01612E | 1266.266  | 1540.928  | AL117588  | 1349.667  | 909.628   |
| AK023749  | 1453.295  | 1639.011  | AK024653  | 53365.91  | 20672.146 |
| NM_002337 | 4995.497  | 6831.523  | AF103907  | 1944.11   | 929.245   |
| NM_01324E | 2659.096  | 2973.646  | AF094508  | 1656.339  | 816.128   |
| NM_00642E | 48918.289 | 52199.551 | AF161351  | 2024.551  | 949.275   |
| NM_00476E | 1809.182  | 2055.107  | AF257098  | 308.972   | 314.108   |
| NM_00581E | 49218.082 | 50850.625 | AF111782  | 8874.972  | 3604.379  |
| AK025520  | 4142.652  | 2642.173  | AF151530  | 3712.688  | 2000.681  |
| NM_00489E | 3951.549  | 4437.379  | AK021991  | 739.872   | 393.023   |
| NM_014597 | 21623.877 | 21737.713 | AK022093  | 6525.639  | 1461.029  |
| NM_01789E | 15855.617 | 11652.305 | AK022232  | 786.117   | 1330.773  |
| AB002374  | 4796.591  | 2961.393  | AK022376  | 2937.219  | 4183.917  |
| NM_00446E | 914.859   | 1225.651  | AK022005  | 1670.74   | 2126.625  |
| NM_007081 | 3541.949  | 4845.328  | AK022137  | 2026.23   | 2420.864  |
| AB032964  | 5614.082  | 9758.435  | AK022272  | 8978.326  | 10982.539 |
| BE733605  | 10224.487 | 11783.045 | AK022394  | 577.602   | 770.636   |
| NM_00333A | 44143.613 | 44820.367 | AF279780  | 56508.734 | 50887.445 |
| NM_00269E | 3815.156  | 6496.587  | AK022510  | 3542.976  | 2266.728  |
| NM_003671 | 1994.493  | 2209.921  | AK023878  | 2648.699  | 2691.279  |
| AK026000  | 8581.526  | 13137.569 | AK021851  | 1731.431  | 1236.693  |
| NM_01783E | 3281.398  | 5440.056  | L37717    | 1673.291  | 1609.607  |
| NM_00667E | 8478.297  | 10770.098 | AJ131609  | 7594.656  | 5034.209  |
| NM_00302E | 6753.945  | 5632.977  | BC019280  | 7745.604  | 4971.328  |
| NM_00487E | 6239.359  | 8223.102  | AF086498  | 1511.884  | 808.868   |
| NM_01984E | 1311.545  | 1313.036  | AK000687  | 1476.93   | 750.348   |

|           |           |           |           |           |           |
|-----------|-----------|-----------|-----------|-----------|-----------|
| NM_002951 | 16336.147 | 23888.15  | AF079567  | 2480.359  | 886.376   |
| NM_002317 | 2052.536  | 2074.738  | AL049311  | 1852.197  | 1175.175  |
| NM_000320 | 1418.385  | 2065.639  | AK000016  | 6967.458  | 3306.662  |
| NM_003136 | 5832.82   | 5356.851  | AK023367  | 3236.252  | 1562.237  |
| NM_013328 | 19013.066 | 16243.117 | AL080209  | 3388.68   | 1769.447  |
| NM_000790 | 417.673   | 235.754   | AL137431  | 1157.848  | 686.702   |
| NM_006475 | 1683.522  | 2381.557  | NM_016255 | 1389.346  | 1169.15   |
| NM_004620 | 7297.373  | 9945.771  | NM_014318 | 4155.761  | 6156.667  |
| AF087940  | 22163.672 | 28465.678 | AL133089  | 12236.979 | 14996.086 |
| AJ277587  | 4105.373  | 5656.312  | AK023526  | 2062.442  | 2034.41   |
| D87432    | 9288.821  | 15405.825 | BE266129  | 2152.438  | 2034.178  |
| Y18483    | 1435.723  | 1573.813  | AK025602  | 17998.939 | 13246.818 |
| AI565117  | 56669.469 | 56484.219 | AK026309  | 10729.297 | 9921.827  |
| U28015    | 794.132   | 907.61    | AL137486  | 14996.93  | 13629.981 |
| AI299075  | 7226.337  | 5965.459  | AL110162  | 3568.972  | 2925.707  |
| M59979    | 3048.615  | 3005.341  | AF119880  | 1050.773  | 885.114   |
| AB011098  | 2087.69   | 2227.366  | AK022681  | 11175.583 | 6757.899  |
| AA609759  | 3736.404  | 4106.13   | NM_017708 | 1351.851  | 845.547   |
| AA029418  | 12163.272 | 10356.508 | BE895529  | 8433.309  | 4855.119  |
| L20815    | 10104.806 | 10234.306 | AK000964  | 927.664   | 750.256   |
| AI364483  | 56258.047 | 49872.973 | AL117536  | 14062.728 | 7451.457  |
| AA456001  | 20662.934 | 20230.43  | NM_017751 | 15934.61  | 8399.322  |
| AA176581  | 1274.296  | 1851.261  | NM_003771 | 4631.743  | 1440.505  |
| BI818232  | 422.914   | 569.836   | NM_017860 | 1676.884  | 346.945   |
| AA451686  | 8518.907  | 8668.121  | X91195    | 60194.473 | 58024.723 |
| NM_002050 | 5925.418  | 5545.169  | AF086190  | 2487.234  | 4046.635  |
| NM_007097 | 8370.484  | 6943.711  | NM_006143 | 1575.275  | 2422.595  |
| D87446    | 4995.624  | 4021.386  | AL050035  | 16125.651 | 19306.381 |
| BF540935  | 14934.497 | 13356.964 | AK024449  | 565.764   | 914.554   |
| NM_000715 | 1615.838  | 1073.69   | AF090101  | 1795.321  | 2345.25   |
| AF035802  | 9844.925  | 12125.138 | AF040723  | 55683.594 | 57977.641 |
| Y08145    | 7244.639  | 7079.101  | NM_015527 | 8466.464  | 9185.141  |
| M26123    | 632.89    | 557.855   | X89675    | 3862.046  | 3617.257  |
| NM_001838 | 14783.324 | 17177.27  | NM_012189 | 2966.679  | 1957.624  |
| NM_019555 | 2215.963  | 1888.786  | NM_005798 | 21104.117 | 18422.592 |
| NM_012096 | 8917.262  | 4728.172  | NM_004216 | 5630.583  | 5806.184  |
| NM_003905 | 19867.676 | 13937.705 | NM_016289 | 58866.801 | 57722.613 |
| L12052    | 3719.88   | 2712.188  | NM_001464 | 1742.362  | 1667.27   |
| AB028976  | 8449.049  | 6343.043  | NM_002051 | 5962.447  | 5279.154  |
| AK026337  | 6309.622  | 5846.099  | AK022177  | 2014.395  | 1720.929  |
| NM_015869 | 1243.484  | 930.065   | AK023852  | 936.157   | 816.29    |
| AB031038  | 345.056   | 432.327   | AF086466  | 7887.137  | 5056.298  |
| NM_004626 | 618.232   | 852.931   | AB007962  | 10937.011 | 7943.177  |
| NM_001899 | 954.257   | 2029.182  | AF005081  | 3514.326  | 2391.391  |
| NM_004305 | 58567.336 | 55291.105 | AK026438  | 443.091   | 791.198   |
| NM_005992 | 388.481   | 394.728   | AK021546  | 1175.216  | 826.145   |
| NM_003144 | 11701.694 | 10164.665 | AL050186  | 21061.404 | 8491.909  |
| NM_000908 | 1254.189  | 1301.842  | AK021918  | 6838.287  | 1201.343  |
| AB011102  | 4697.763  | 4637.748  | AF069137  | 1074.212  | 1095.596  |
| D63480    | 3273.781  | 2892.357  | AK021669  | 10085.618 | 13165.843 |
| NM_002969 | 6882.633  | 6165.045  | AL080113  | 60256.699 | 59736.434 |
| M81768    | 737.865   | 464.744   | AL050083  | 3625.501  | 4811.425  |
| AK023749  | 788.091   | 930.122   | AK022766  | 1702.549  | 1782.897  |

|           |           |           |           |           |           |
|-----------|-----------|-----------|-----------|-----------|-----------|
| NM_002337 | 4249.998  | 2499.258  | AL049422  | 15268.101 | 17310.24  |
| NM_013245 | 2849.589  | 1467.434  | NM_000093 | 3106.554  | 3893.346  |
| NM_006423 | 46891.039 | 21781.125 | NM_001779 | 15818.182 | 13851.068 |
| NM_004766 | 2193.893  | 1138.39   | AB033059  | 2876.309  | 3139.026  |
| NM_005819 | 35224.363 | 28517.611 | NM_016484 | 5645.512  | 5831.388  |
| AK025520  | 3553.225  | 1850.51   | AK026114  | 3550.946  | 2925.091  |
| NM_004892 | 3334.021  | 3386.516  | NM_014452 | 2457.092  | 2793.634  |
| NM_014597 | 21334.361 | 23569.49  | NM_014683 | 1732.775  | 2402.345  |
| NM_017896 | 17151.125 | 21270.34  | AF023130  | 605.094   | 1631.424  |
| AB002374  | 4475.368  | 5843.886  | AK021536  | 19153.711 | 23320.602 |
| U17327    | 2105.52   | 2239.25   | U31285    | 786.472   | 1264.071  |
| AB046781  | 367.695   | 274.845   | AF079529  | 1169.53   | 1387.771  |
| M87790    | 46653.691 | 45488.242 | NM_002600 | 2424.927  | 2032.968  |
| NM_001768 | 2183.295  | 1979.788  | NM_003646 | 33723.543 | 19306.529 |
| NM_000029 | 16914.715 | 10811.538 | NM_006663 | 1610.425  | 1689.122  |
| NM_017921 | 480.343   | 196.055   | NM_006092 | 2453.887  | 1844.269  |
| NM_003136 | 8741.606  | 7463.757  | NM_003939 | 1144.564  | 1032.096  |
| NM_013328 | 21489.119 | 16434.695 | NM_012424 | 1178.947  | 1001.682  |
| NM_000790 | 796.35    | 477.338   | NM_002446 | 6244.653  | 2658.684  |
| NM_002660 | 2799.629  | 2780.965  | NM_000863 | 3739.732  | 3071.846  |
| NM_015900 | 901.692   | 375.154   | NM_006651 | 17103.6   | 21584.795 |
| NM_003706 | 988.549   | 1178.358  | NM_005336 | 21623.033 | 25895.676 |
| AF182218  | 579.518   | 468.809   | NM_001419 | 24350.092 | 31914.834 |
| NM_005218 | 179.94    | 769.742   | AF119817  | 57323.23  | 60880.195 |
| AL122071  | 931.958   | 2585.266  | AL035306  | 8041.241  | 10296.456 |
| AB033054  | 8587.726  | 14279.987 | NM_004230 | 33800.707 | 31019.609 |
| NM_016122 | 1452.982  | 1587.49   | AK024372  | 1046.588  | 647.193   |
| AF153330  | 887.901   | 719.325   | NM_014503 | 3069.367  | 2077.386  |
| NM_002050 | 7956.959  | 5763.914  | NM_014659 | 7645.156  | 6840.774  |
| NM_007097 | 11097.906 | 7274.89   | NM_004399 | 14312.703 | 11597.822 |
| D87446    | 8526.79   | 6649.747  | NM_006337 | 17909.703 | 16747.666 |
| BF540935  | 23225.875 | 18246.303 | NM_004507 | 8689.156  | 8772.633  |
| NM_004466 | 958.085   | 606.754   | NM_002710 | 46203.609 | 53835.172 |
| NM_007081 | 1915.16   | 1757.352  | NM_014060 | 12444.541 | 15496.281 |
| AB032964  | 2982.83   | 2322.181  | NM_004749 | 30368.615 | 27798.447 |
| BE733605  | 6495.741  | 4167.302  | BQ446064  | 3863.371  | 3106.402  |
| NM_003334 | 30159.902 | 24863.074 | AF302502  | 6659.645  | 5590.34   |
| NM_002693 | 2132.379  | 2033.763  | AF274571  | 4003.635  | 2822.46   |
| NM_003671 | 2512.051  | 3367.613  | NM_005449 | 1588.021  | 1714.242  |
| AK026000  | 4916.028  | 9145.61   | NM_003879 | 5518.524  | 4518.298  |
| NM_017833 | 3508.315  | 7463.808  | NM_016052 | 22324.313 | 11604.35  |
| NM_006675 | 7145.091  | 12487.356 | NM_005427 | 2753.405  | 845.735   |
| NM_003022 | 7280.933  | 8613.311  | NM_016312 | 2216.781  | 2319.763  |
| NM_004873 | 5638.681  | 5731.634  | AF234887  | 1224.542  | 2053.188  |
| NM_019842 | 1565.581  | 1369.877  | NM_001776 | 3374.006  | 4902.978  |
| NM_002951 | 17297.305 | 19811.299 | NM_001792 | 1712.304  | 2302.247  |
| NM_002317 | 2459.631  | 1552.768  | NM_001903 | 1215.107  | 1558.953  |
| NM_000320 | 1589.3    | 1461.016  | U87223    | 43962.855 | 52125.883 |
| NM_145659 | 1091.54   | 843.582   | NM_005857 | 11722.806 | 10819.613 |
| NM_021957 | 411.95    | 357.485   | NM_002429 | 1018.419  | 941.919   |
| AK022138  | 1299.844  | 880.55    | NM_000429 | 7641.286  | 8793.546  |
| AF086191  | 4781.725  | 2755.249  | AK027037  | 2584.191  | 2487.107  |
| NM_017638 | 3393.898  | 2121.836  | NM_003875 | 31632.73  | 34017.332 |

|           |           |           |           |           |           |
|-----------|-----------|-----------|-----------|-----------|-----------|
| AL133052  | 1544.084  | 1232.66   | AF191687  | 10477.649 | 10457.7   |
| AB037824  | 1267.715  | 703.717   | NM_003046 | 2125.27   | 1792.984  |
| AF361494  | 500.76    | 353.246   | NM_000274 | 31621.547 | 23880.189 |
| AK022810  | 706.458   | 642.59    | NM_000170 | 16013.537 | 12993.064 |
| AK001384  | 932.98    | 791.386   | NM_000281 | 1053.393  | 1366.961  |
| AK025437  | 2092.989  | 1771.845  | AK001295  | 5289.312  | 4061.884  |
| AK074164  | 546.307   | 333.326   | NM_006031 | 6923.16   | 6440.382  |
| NM_145659 | 1269.772  | 931.825   | NM_002715 | 10260.835 | 8081.506  |
| NM_021957 | 359.918   | 449.465   | NM_001020 | 57828.145 | 59807.73  |
| SR2       | 29852.527 | 16898.041 | AB020660  | 3581.302  | 1728.05   |
| SR4       | 7946.174  | 5900.798  | NM_006659 | 62249.309 | 41250.156 |
| SR6       | 999.268   | 460.619   | NM_018051 | 3767.47   | 3873.318  |
| AK026818  | 1575.989  | 1684.087  | NM_015371 | 29048.256 | 34506.16  |
| NM_018469 | 1174.703  | 1151.63   | AB040915  | 9670.064  | 12825.684 |
| AL359932  | 623.633   | 407.843   | AF147791  | 1402.554  | 2022.244  |
| AB037850  | 2704.531  | 1477.602  | NM_001328 | 56090.605 | 60320.406 |
| AK002197  | 1837.175  | 938.512   | NM_005749 | 19103.32  | 21454.449 |
| AF087996  | 3438.894  | 2178.748  | NM_006696 | 8666.006  | 10096.695 |
| AK021710  | 1442.439  | 1130.427  | NM_004599 | 27489.01  | 25754.65  |
| AK024551  | 601.911   | 543.354   | NM_006037 | 5909.233  | 5317.056  |
| AL833249  | 3404.611  | 2515.228  | NM_015871 | 26780.822 | 27327.424 |
| AF131852  | 418.37    | 490.991   | NM_019037 | 57921.117 | 56879.57  |
| AK021894  | 1260.93   | 850.636   | NM_015891 | 14563.923 | 12197.74  |
| NM_020424 | 4693.95   | 3179.391  | NM_006802 | 5637.37   | 5912.872  |
| AF147341  | 614.721   | 414.227   | AB037778  | 10126.277 | 10909.895 |
| AB033009  | 25251.549 | 23521.229 | NM_005066 | 56499.016 | 51993.051 |
| AK025126  | 321.206   | 366.091   | NM_003089 | 29503.84  | 24867.299 |
| AK025317  | 10438.823 | 7882.252  | NM_003753 | 43347.031 | 36489.191 |
| AK026725  | 2591.819  | 2697.323  | NM_006223 | 1765.985  | 1551.892  |
| AF147408  | 2527.396  | 1608.482  | NM_017590 | 6667.864  | 4689.893  |
| AK027222  | 4166.635  | 2492.413  | AB011145  | 14016.307 | 8471.439  |
| AF085868  | 457.402   | 530.144   | NM_003750 | 60065.918 | 19010.172 |
| AL080086  | 412.55    | 334.895   | M92422    | 9406.956  | 6958.901  |
| AL049301  | 961.369   | 981.532   | NM_017868 | 10712.934 | 11801.353 |
| AL050042  | 1554.427  | 1439.838  | NM_001874 | 593.267   | 1102.944  |
| AL157458  | 748.285   | 650.681   | NM_001869 | 530.861   | 1474.991  |
| NM_015377 | 941.741   | 702.145   | X69637    | 567.685   | 597.31    |
| AL137531  | 1041.2    | 868.736   | NM_004212 | 1866.708  | 1303.084  |
| AL080085  | 3598.701  | 1763.345  | NM_018159 | 55300.383 | 56248.352 |
| NM_007017 | 1220.216  | 924.397   | NM_000819 | 58278.777 | 60001.922 |
| AL137446  | 3664.571  | 2271.709  | NM_002513 | 18817.871 | 20802.563 |
| AB025286  | 3054.123  | 1963.6    | NM_017424 | 11370.246 | 11830.302 |
| AF056437  | 505.508   | 526.394   | NM_001522 | 52342.746 | 55999.645 |
| AB032364  | 355.572   | 302.335   | NM_000883 | 34384.48  | 44334.051 |
| AF009295  | 592.587   | 487.682   | AF254086  | 11183.89  | 12920.491 |
| NM_005029 | 1623.086  | 1223.884  | AL390142  | 14112.658 | 15627.229 |
| AF056447  | 1618.563  | 1614.984  | NM_006565 | 8160.28   | 8938.323  |
| AK001010  | 1310.596  | 1546.256  | AB007930  | 16631.809 | 17801.711 |
| NM_018076 | 2812.221  | 3576.278  | X76978    | 2698.308  | 2682.215  |
| AK021442  | 2123.418  | 1889.761  | AJ005273  | 7008.553  | 7681.498  |
| AK001076  | 742.15    | 490.347   | AK021892  | 6254.633  | 6683.007  |
| AK001820  | 744.719   | 668.405   | NM_017637 | 1230.731  | 1732.489  |
| AK021482  | 6678.895  | 6447.152  | NM_003121 | 58414.879 | 56699.492 |

|           |           |           |           |           |           |
|-----------|-----------|-----------|-----------|-----------|-----------|
| NM_00615E | 26905.422 | 17499.463 | NM_003437 | 22409.607 | 19204.891 |
| NM_00634E | 1989.918  | 1255.312  | NM_018337 | 53563.707 | 46005.512 |
| AK025240  | 3137.761  | 1715.266  | NM_006481 | 14710.797 | 17320.656 |
| NM_017633 | 8535.943  | 5415.722  | AB011115  | 2759.526  | 3851.461  |
| AF086186  | 24220.703 | 12035.506 | NM_003910 | 53522.906 | 54031.539 |
| NM_017802 | 5510.617  | 2798.927  | AB007913  | 12811.419 | 16942.105 |
| AK023667  | 1330.927  | 643.829   | L09080    | 50431.375 | 47680.699 |
| AJ008137  | 13382.604 | 8097.058  | NM_007326 | 38854.992 | 37033.477 |
| AF085841  | 572.761   | 484.595   | AK023080  | 729.659   | 1304.282  |
| AJ008118  | 60070.258 | 56803.051 | NM_001886 | 15038.542 | 16245.296 |
| AK000939  | 530.203   | 326.99    | NM_004467 | 3888.809  | 4062.776  |
| AL109674  | 1679.598  | 1514.308  | NM_005622 | 3179.14   | 3399.732  |
| AK024512  | 5749.725  | 4455.717  | NM_01805E | 54486.023 | 56837.375 |
| AK023454  | 2522.116  | 3319.532  | NM_00454E | 53999.184 | 56885.395 |
| L23207    | 2318.718  | 2122.636  | X69079    | 59828.695 | 61733.887 |
| NM_018062 | 1282.377  | 1073.071  | BI759406  | 58407.969 | 59919.922 |
| NM_00712E | 15951.813 | 13408.458 | R76099    | 27610.102 | 27044.777 |
| NM_018627 | 984.149   | 657.327   | S74445    | 7421.203  | 7452.101  |
| S82164    | 1804.065  | 1388.326  | BI763360  | 26516.943 | 23885.615 |
| AK024394  | 2152.657  | 1458.418  | D25538    | 6283.56   | 6764.567  |
| AF147374  | 1292.298  | 768.169   | NM_000360 | 59339.289 | 59870.758 |
| AF130091  | 524.486   | 385.509   | D49950    | 2149.409  | 2498.692  |
| L43338    | 14045.824 | 8078.819  | NM_001849 | 2433.625  | 2304.292  |
| AJ227866  | 20141.871 | 12608.382 | X03635    | 23269.809 | 18744.986 |
| AF458223  | 3699.212  | 1350.796  | BC011847  | 64396.086 | 65229.621 |
| AK026822  | 225.212   | 306.698   | X03348    | 5566.83   | 1978.649  |
| AK022838  | 11509.082 | 6392.896  | AF353674  | 15618.272 | 21133.83  |
| NM_00350E | 640.021   | 689.965   | BC002645  | 21218.326 | 23822.719 |
| AF086519  | 1103.49   | 837.479   | NM_021138 | 12135.206 | 14727.211 |
| AF055012  | 6678.086  | 4219.624  | BC002792  | 15481.656 | 20019.482 |
| AK022307  | 2814.99   | 2473.929  | NM_005847 | 854.271   | 1342.113  |
| AF085997  | 553.953   | 843.976   | NM_002286 | 61152.031 | 64372.691 |
| NM_005172 | 3078.574  | 4297.111  | NM_002164 | 2945.015  | 3372.305  |
| AK025192  | 16424.281 | 11724.435 | NM_003811 | 35427.492 | 49452.93  |
| NM_012403 | 3184.094  | 2126.385  | NM_002981 | 13530.568 | 17503.424 |
| AK022611  | 3758.706  | 2718.296  | NM_001244 | 7779.982  | 7540.892  |
| NM_004952 | 2570.076  | 2048.489  | NM_012275 | 1793.549  | 2449.783  |
| AY007239  | 293.165   | 309.186   | NM_006137 | 6490.931  | 11826.288 |
| NM_020414 | 5592.405  | 3654.704  | NM_016139 | 60081.527 | 60700.008 |
| AB037730  | 3797.946  | 2751.106  | AL117468  | 18279.311 | 23043.252 |
| NM_001357 | 8396.703  | 5185.851  | NM_019613 | 15226.412 | 14893.938 |
| NM_003893 | 2673.573  | 1843.19   | NM_005382 | 2796.33   | 3183.149  |
| AB037816  | 1710.523  | 1414.161  | AK027086  | 6805.534  | 7603.513  |
| NM_01426E | 757.971   | 467.099   | AB032997  | 3196.663  | 3529.951  |
| U92026    | 1022.503  | 1011.54   | AL096857  | 11718.86  | 12192.554 |
| AF086234  | 17857.441 | 10545.273 | AB002351  | 1648.769  | 1407.041  |
| AK023680  | 6794.588  | 5248.604  | X07203    | 59047.672 | 61067.262 |
| AF009324  | 2768.768  | 2695.664  | AB040104  | 3046.089  | 2864.416  |
| AK022112  | 311.87    | 506.212   | NM_003834 | 22620.193 | 21516.496 |
| AL137480  | 28140.6   | 20311.189 | NM_005959 | 21047.508 | 14882.372 |
| AK022182  | 1270.525  | 1182.776  | NM_003381 | 8052.833  | 4129.481  |
| D16473    | 2032.864  | 2497.175  | NM_00575E | 6330.797  | 7049.205  |
| AB028968  | 1544.772  | 863.631   | NM_003702 | 59852.969 | 59548.789 |

|           |           |           |           |           |           |
|-----------|-----------|-----------|-----------|-----------|-----------|
| AK001202  | 801.335   | 510.824   | NM_000369 | 3939.992  | 4739.393  |
| AF195764  | 56482.457 | 35446.496 | NM_004405 | 7158.822  | 8259.727  |
| AF055029  | 1606.634  | 1146.573  | NM_001988 | 26004.873 | 31369.102 |
| AB011542  | 1563.944  | 1452.256  | AF073770  | 5406.455  | 5853.926  |
| NM_001853 | 4386.498  | 3510.789  | AL359401  | 12893.859 | 14581.699 |
| U41737    | 373.556   | 358.819   | NM_012213 | 3768.553  | 3960.353  |
| NM_005799 | 993.891   | 720.706   | NM_016573 | 16296.078 | 17273.787 |
| X99661    | 6036.875  | 4978.425  | NM_001303 | 37746.992 | 34978.766 |
| NM_005927 | 2608.509  | 2243.883  | M21304    | 1018.178  | 1727.865  |
| AB028983  | 4604.449  | 2532.967  | NM_001979 | 2579.805  | 3434.197  |
| AB037800  | 2471.304  | 2059.713  | AB040896  | 2791.237  | 4297.278  |
| AK026377  | 1435.209  | 849.947   | NM_001107 | 8382.016  | 12388.539 |
| NM_018660 | 3231.869  | 2147.975  | AF084645  | 999.208   | 1503.013  |
| NM_003394 | 4660.88   | 3226.942  | AF151851  | 26234.566 | 23727.451 |
| NM_014636 | 1074.817  | 660.771   | NM_003471 | 551.082   | 824.236   |
| NM_006747 | 2565.756  | 2497.131  | NM_014379 | 324.861   | 596.704   |
| NM_007086 | 1526.534  | 1544.175  | AF220417  | 3618.28   | 3970.699  |
| NM_003870 | 10746.333 | 10834.178 | NM_001122 | 58981.254 | 54255.465 |
| AK024507  | 1202.07   | 1040.319  | NM_004591 | 27265.676 | 21439.025 |
| NM_001243 | 3214.995  | 2771.323  | NM_006274 | 874.737   | 881.744   |
| AK025997  | 1031.701  | 843.56    | AL133027  | 7955.313  | 5332.627  |
| NM_005546 | 342.147   | 681.267   | AB037732  | 5463.439  | 2552.517  |
| NM_000299 | 464.058   | 470.996   | NM_005767 | 2451.764  | 1851.377  |
| NM_005478 | 603.153   | 777.811   | NM_001837 | 1732.477  | 2560.325  |
| NM_014887 | 1597.286  | 1342.601  | NM_001839 | 59053.402 | 69573.375 |
| NM_018556 | 6257.831  | 4623.12   | BC016029  | 2623.725  | 3428.149  |
| NM_005235 | 394.791   | 487.275   | M27487    | 59478.906 | 55803.34  |
| NM_005600 | 2518.819  | 2094.522  | NM_002611 | 5669.402  | 6883.322  |
| NM_005967 | 10406.752 | 5954.768  | NM_017417 | 2985.009  | 3889.165  |
| AB014566  | 2489.678  | 1582.922  | AL133602  | 6846.652  | 8179.303  |
| NM_015678 | 476.041   | 349.549   | AF037219  | 9171.402  | 11797.39  |
| AK025950  | 220.499   | 189.064   | AK026075  | 1979.927  | 2370.871  |
| NM_014223 | 2077.512  | 1481.373  | NM_000251 | 9672.393  | 10596.096 |
| NM_016194 | 852.531   | 599.515   | AF118071  | 627.592   | 466.218   |
| AL050385  | 1023.707  | 561.183   | NM_006038 | 12486.305 | 11707.761 |
| NM_007027 | 4006.559  | 2651.445  | AB011133  | 8237.328  | 8307.542  |
| NM_000633 | 50865.492 | 42947.02  | NM_017572 | 59431.852 | 53763.895 |
| AB037855  | 2039.951  | 2652.385  | NM_018444 | 5376.523  | 4963.738  |
| AK024524  | 4422.97   | 3388.376  | NM_000252 | 3555.579  | 3002.707  |
| NM_000562 | 5009.103  | 4676.722  | NM_006947 | 23159.141 | 12775.729 |
| NM_019011 | 17323.857 | 16386.92  | NM_017917 | 6649.525  | 2479.202  |
| NM_004879 | 6205.988  | 5845.747  | NM_004090 | 12411.837 | 3685.148  |
| AB020694  | 1888.897  | 1468.721  | NM_014634 | 20816.496 | 16190.021 |
| NM_016071 | 28534.795 | 25561.699 | NM_001919 | 60502.469 | 51895.59  |
| AL050131  | 1005.421  | 1005.377  | BC031485  | 6417.798  | 8516.546  |
| NM_004475 | 9413.419  | 5280.597  | NM_004092 | 21043.01  | 24510.99  |
| NM_001627 | 2652.303  | 2432.22   | X15624    | 4365.048  | 4802.737  |
| NM_002544 | 896.722   | 690.145   | AK023080  | 770.56    | 1435.22   |
| X77690    | 3434.779  | 3693.597  | NM_001886 | 17560.35  | 24997.555 |
| NM_006536 | 1433.604  | 1410.42   | NM_004467 | 2302.403  | 3411.639  |
| NM_005658 | 8940.313  | 7949.942  | NM_005622 | 678.843   | 1344.105  |
| NM_002422 | 1209.342  | 1330.623  | NM_018058 | 39148.125 | 36172.664 |
| NM_006690 | 4261.508  | 2994.394  | NM_004548 | 40478.625 | 49792.758 |

|           |           |           |           |           |           |
|-----------|-----------|-----------|-----------|-----------|-----------|
| NM_006156 | 279.171   | 201.04    | X69079    | 58796.43  | 59643.164 |
| AF218022  | 3002.304  | 2473.904  | BI759406  | 55874.211 | 53860.828 |
| NM_003348 | 2748.72   | 2062.847  | R76099    | 19324.16  | 18715.992 |
| AB006198  | 11539.274 | 11147.148 | S74445    | 4471.517  | 4699.316  |
| U72518    | 3612.474  | 3579.331  | BI763360  | 17647.777 | 14341.372 |
| AF264765  | 558.369   | 650.396   | D25538    | 4293.744  | 3667.7    |
| NM_015322 | 2058.141  | 1785.068  | NM_000360 | 54175.414 | 53852.539 |
| NM_016607 | 2989.536  | 2823.198  | D49950    | 1261.215  | 1440.805  |
| NM_003275 | 389.737   | 259.546   | NM_001849 | 1835.167  | 2009.284  |
| NM_000268 | 28711.576 | 25784.168 | X03635    | 16687.863 | 16742.574 |
| M30493    | 27862.734 | 19897.975 | BC011847  | 56558.559 | 64142.867 |
| AJ008160  | 670.345   | 587.905   | X03348    | 3984.332  | 2518.765  |
| NM_005824 | 1493.95   | 926.251   | AF353674  | 9869.306  | 5464.345  |
| AF052211  | 5600.917  | 3918.505  | BC002645  | 13382.532 | 4070.69   |
| U66561    | 2202.082  | 2035.027  | NM_021138 | 12444.721 | 8332.42   |
| NM_000306 | 3076.102  | 3312.023  | BC002792  | 15214.647 | 19955.957 |
| NM_002200 | 1465.632  | 1346.34   | NM_001523 | 2708.077  | 3373.233  |
| AF017433  | 1148.894  | 913.084   | NM_017423 | 3579.669  | 3708.474  |
| AF130111  | 2121.184  | 1486.137  | Z70705    | 2366.985  | 2604.892  |
| NM_016307 | 6487.475  | 4446.42   | NM_003811 | 33379.523 | 51074.938 |
| AB028449  | 3446.918  | 2622.715  | NM_002981 | 16761.125 | 20703.895 |
| NM_004697 | 4911.65   | 4471.287  | NM_001244 | 10101.427 | 13923.507 |
| AF131776  | 6286.607  | 5457.258  | NM_012275 | 1626.159  | 2357.488  |
| NM_020528 | 6752.821  | 6464.597  | NM_006137 | 5437.603  | 6345.103  |
| NM_007040 | 46454.445 | 38547.41  | NM_016139 | 62496.188 | 58173.867 |
| NM_014483 | 10097.473 | 6708.66   | AL117468  | 18193.988 | 22078.73  |
| AK024249  | 3169.601  | 3259.374  | NM_019613 | 19617.789 | 31221.955 |
| AF239156  | 8376.771  | 8069.539  | NM_005382 | 2807.472  | 3976.969  |
| NM_020390 | 4344.5    | 3469.547  | AK027086  | 6242.457  | 7745.38   |
| NM_003321 | 17109.916 | 16413.34  | AB032997  | 2716.969  | 2197.056  |
| U18937    | 14171.416 | 10050.005 | AL096857  | 8844.983  | 8183.356  |
| U01925    | 706.324   | 477.079   | AB002351  | 955.345   | 1213.337  |
| AJ420488  | 61425.344 | 61289.461 | X07203    | 51173.648 | 48819.039 |
| AF268872  | 2180.98   | 1875.012  | AB040104  | 1839.564  | 1974.116  |
| AK022180  | 57482.66  | 42558.945 | NM_003834 | 17375.043 | 15570.502 |
| NM_001226 | 1261.368  | 1302.971  | NM_005959 | 16039.447 | 14482.926 |
| NM_001336 | 2103.894  | 1337.755  | NM_003381 | 5248.713  | 3941.29   |
| AB050716  | 962.804   | 953.22    | NM_005756 | 3768.72   | 2300.129  |
| AF161353  | 22630.043 | 25046.115 | NM_003702 | 48942.922 | 16903.248 |
| NM_000764 | 4329.859  | 4517.729  | NM_000369 | 4071.445  | 4975.591  |
| NM_004146 | 28392.529 | 22835.844 | NM_004405 | 7415.489  | 9735.09   |
| NM_003002 | 18740.766 | 13384.462 | NM_001988 | 28419.654 | 30923.025 |
| D42047    | 4163.131  | 3562.489  | L09080    | 49477.371 | 51228.48  |
| AB009282  | 15979.177 | 12597.342 | NM_007326 | 39629.828 | 41493.996 |
| NM_005004 | 39587.773 | 20200.447 | NM_012213 | 4047.337  | 5041.482  |
| NM_014639 | 7117.621  | 5878.785  | NM_016573 | 17216.273 | 18609.477 |
| NM_006392 | 4351.901  | 3530.682  | NM_001303 | 41995.961 | 44276.969 |
| NM_014717 | 2620.842  | 2751      | M21304    | 1539.26   | 1845.003  |
| NM_017922 | 2526.051  | 2248.664  | NM_001979 | 2727.36   | 2959.416  |
| NM_002823 | 58035.688 | 58383.324 | AB040896  | 2982.91   | 3727.367  |
| NM_017916 | 15973.788 | 14651.29  | NM_001107 | 8305.197  | 13704.018 |
| NM_001805 | 13270.465 | 16073.918 | AF084645  | 1544.518  | 2285.114  |
| AK022360  | 4367.237  | 5777.971  | AF151851  | 26588.395 | 26455.051 |



|            |           |           |           |           |           |
|------------|-----------|-----------|-----------|-----------|-----------|
| AK095694   | 585.854   | 735.963   | NM_003471 | 602.707   | 979.096   |
| X52341     | 43616.762 | 30983.609 | AF220417  | 3435.977  | 3644.167  |
| NM_003082  | 4871.9    | 3564.045  | NM_001122 | 61358.566 | 58183.461 |
| AL133632   | 4908.045  | 4599.076  | NM_004591 | 25832.91  | 22436.559 |
| NM_004343  | 17657.777 | 9889.274  | AL133027  | 8382.967  | 6852.433  |
| X52355     | 7355.786  | 6669.016  | AB037732  | 4295.091  | 4043.62   |
| NM_006963  | 8531.603  | 7768.258  | NM_005767 | 1599.779  | 979.54    |
| NM_000307  | 928.531   | 716.344   | NM_001837 | 1508.016  | 1035.623  |
| NM_006510  | 21188.967 | 30614.992 | NM_001839 | 61362.133 | 54568.957 |
| NM_003141  | 6441.695  | 8372.029  | BC016029  | 1855.411  | 2896.061  |
| NM_020245  | 7352.948  | 9202.984  | M27487    | 58742.477 | 58878.426 |
| NM_007175  | 876.157   | 1162.623  | NM_002286 | 61596.238 | 65298.09  |
| AB046381   | 675.613   | 735.013   | NM_002164 | 3449.736  | 3337.099  |
| AJ011497   | 7413.989  | 8124.058  | NM_017417 | 1963.969  | 3617.538  |
| NM_003018  | 606.551   | 578.42    | AL133602  | 6209.189  | 7781.563  |
| NM_000336  | 1783.634  | 3058.733  | AF037219  | 10730.027 | 10539.812 |
| W61100     | 52471.086 | 65487.191 | AK026075  | 1746.094  | 2568.502  |
| AA608568   | 10218.731 | 12927.619 | NM_000251 | 13907.175 | 21067.176 |
| BG831301   | 50585.461 | 58584.074 | AF118071  | 625.407   | 1331.844  |
| M14764     | 2173.76   | 2761.187  | NM_006038 | 13961.655 | 13977.576 |
| AA478647   | 6569.21   | 9176.741  | AB011133  | 8131.112  | 8067.246  |
| M35999     | 1269.684  | 2004.167  | NM_017572 | 58525.133 | 51033.047 |
| AW058501   | 1300.931  | 3001.564  | NM_018444 | 5538.681  | 4983.424  |
| M81379     | 589.599   | 963.938   | NM_000252 | 3819.292  | 3906.563  |
| ID 2623896 | 3273.381  | 4781.159  | NM_006947 | 23333.053 | 20694.936 |
| ID 2602214 | 6522.86   | 6182.146  | NM_017917 | 6605.964  | 5669.324  |
| ID 2071279 | 7320.001  | 6062.698  | NM_004090 | 13477.211 | 11431.045 |
| L10709     | 7180      | 5467.155  | NM_014634 | 19549.318 | 11301.684 |
| N35489     | 1886.997  | 1924.683  | NM_001919 | 55113.773 | 26193.43  |
| AA482489   | 455.807   | 470.796   | NM_004092 | 20828.275 | 25517.4   |
| AA458922   | 2344.276  | 2153.107  | X15624    | 4489.547  | 5129.702  |
| NM_004168  | 12042.952 | 11408.447 | AF073770  | 6604.205  | 8128.663  |
| NM_003485  | 6943.057  | 9009.129  | AL359401  | 19701.01  | 20755.537 |
| NM_005038  | 3634.409  | 4110.901  | NM_004467 | 2386.351  | 3476.34   |
| M95923     | 5119.969  | 4200.639  | NM_005622 | 607.31    | 1375.917  |
| NM_002415  | 53228.871 | 54229.5   | NM_018058 | 43105.148 | 47885.492 |
| NM_006332  | 55481.672 | 57944.215 | NM_004548 | 41359.973 | 45209.863 |
| NM_000916  | 4514.548  | 5657.369  | X69079    | 58146.977 | 58114.551 |
| NM_018663  | 6200.555  | 8435.712  | BI759406  | 56723.289 | 55463.828 |
| NM_145904  | 14865.016 | 15202.931 | R76099    | 19370.105 | 24760.34  |
| NM_006796  | 12542.303 | 13464.812 | S74445    | 4897.604  | 6395.75   |
| NM_000706  | 1047.049  | 1375.217  | BI763360  | 20168.961 | 19959.529 |
| NM_015941  | 3847.825  | 3884.184  | D25538    | 4411.473  | 4206.619  |
| NM_003655  | 2635.666  | 3039.31   | NM_000360 | 55153.457 | 51106.227 |
| NM_014837  | 3194.802  | 7366.206  | D49950    | 1519.696  | 1469.214  |
| NM_017729  | 461.977   | 598.92    | NM_001849 | 1585.921  | 1687      |
| NM_005259  | 12785.815 | 14988.197 | X03635    | 18088.131 | 16272.697 |
| NM_002840  | 436.644   | 562.616   | BC011847  | 59980.863 | 68741.633 |
| NM_006174  | 1366.786  | 1916.183  | X03348    | 3979.019  | 3995.641  |
| NM_015850  | 5205.083  | 5235.687  | AF353674  | 10993.122 | 11764.41  |
| NM_004864  | 830.456   | 811.171   | BC002645  | 15463.111 | 11372.489 |
| NM_002838  | 3955.521  | 2893.423  | NM_021138 | 13848.446 | 8628.159  |
| AK027377   | 539.66    | 926.58    | BC002792  | 11884.713 | 8757.354  |

|           |           |           |           |           |           |
|-----------|-----------|-----------|-----------|-----------|-----------|
| BF528358  | 950.891   | 921.319   | NM_001523 | 2473.512  | 759.315   |
| NM_016339 | 678.606   | 1153.587  | NM_017423 | 3396.858  | 2967.21   |
| NM_001732 | 3330.69   | 4707.901  | Z70705    | 2604.411  | 3994.677  |
| NM_018690 | 5975.065  | 6605.707  | NM_002611 | 7233.142  | 8524.706  |
| NM_000860 | 1442.844  | 1558.942  | NM_005382 | 2910.116  | 3784.288  |
| AB037798  | 2439.16   | 2766.831  | AK027086  | 5494.471  | 7655.809  |
| NM_000780 | 976.129   | 1445.168  | AB032997  | 2580.719  | 3126.075  |
| AF272663  | 13044.347 | 15282.908 | AL096857  | 8840.771  | 11584.568 |
| NM_012190 | 2476.717  | 2653.36   | AB002351  | 887.386   | 1358.431  |
| AB033015  | 293.318   | 581.197   | X07203    | 51290.441 | 51721.68  |
| AF277719  | 438.53    | 529.328   | AB040104  | 2985.394  | 5207.523  |
| NM_000791 | 1859.188  | 1707.445  | NM_003834 | 18246.889 | 23633.961 |
| NM_003681 | 3226.427  | 3989.238  | NM_005959 | 16401.746 | 20217.016 |
| NM_004677 | 772.79    | 1224.698  | NM_003381 | 5133.311  | 5664.094  |
| NM_014909 | 5392.585  | 8567.902  | NM_005756 | 4199.392  | 3917.003  |
| NM_015700 | 4409.096  | 7655.4    | NM_003702 | 45110.664 | 38523.977 |
| U66621    | 9914.562  | 17434.629 | NM_000369 | 3274.554  | 3573.605  |
| NM_005720 | 50194.207 | 56380.977 | NM_016351 | 5014.317  | 5647.752  |
| AB040936  | 603.151   | 1522.036  | NM_004405 | 6027.109  | 5488.735  |
| AB023161  | 598.013   | 1101.216  | NM_001988 | 24174.912 | 20353.314 |
| U61736    | 986.864   | 2141.56   | NM_006060 | 4588.715  | 3993.057  |
| AJ132086  | 2041.805  | 3374.984  | NM_005667 | 7767.811  | 7261.567  |
| U92816    | 19421.158 | 31636.449 | NM_006308 | 2996.126  | 1763.977  |
| BC011987  | 498.461   | 2813.427  | NM_000060 | 1345.234  | 933.213   |
| NM_004106 | 1771.597  | 4401.797  | NM_009589 | 917.715   | 443.438   |
| S76984    | 7368.511  | 6568.034  | L09080    | 46289.512 | 44255.957 |
| NM_014495 | 51312.262 | 61286.582 | NM_007326 | 44953.461 | 52526.891 |
| NM_014081 | 1412.212  | 1679.493  | AK023080  | 1203.281  | 1159.654  |
| NM_005651 | 1127.446  | 1025.275  | NM_001886 | 17464.996 | 19553.262 |
| NM_007195 | 1395.911  | 1758.538  | D83782    | 22151.619 | 23167.07  |
| AK023337  | 8066.147  | 12033.464 | NM_002078 | 7139.976  | 8025.773  |
| NM_013275 | 26344.646 | 37535.629 | NM_000287 | 5108.829  | 7808.087  |
| AB037842  | 732.692   | 1356.04   | NM_001656 | 4538.546  | 6310.963  |
| U92074    | 441.091   | 690.12    | AF091033  | 3720.349  | 4273.324  |
| NM_019011 | 3070.732  | 5156.148  | NM_001122 | 56775.023 | 54001.316 |
| AF459094  | 7220.55   | 13229.751 | NM_004591 | 31937.971 | 36424.516 |
| NM_003157 | 4592.559  | 8998.632  | NM_006274 | 670.024   | 1171.72   |
| NM_004938 | 1532.115  | 3882.522  | AL133027  | 8195.915  | 9083.832  |
| NM_014326 | 1349.515  | 3522.751  | AB037732  | 4566.785  | 4879.184  |
| NM_004448 | 1482.036  | 3505.836  | NM_005767 | 1704.948  | 1736.649  |
| NM_015981 | 2477.292  | 6127.917  | NM_001837 | 1557.946  | 1870.487  |
| NM_000455 | 6651.902  | 12124.11  | NM_001839 | 60546.25  | 67699.836 |
| NM_014791 | 6465.221  | 10472.633 | BC016029  | 1656.361  | 2066.768  |
| NM_003318 | 5428.354  | 5944.914  | M27487    | 57497.602 | 57452.961 |
| NM_004362 | 3652.603  | 3893.809  | NM_002286 | 60347.973 | 61649.094 |
| NM_000182 | 12040.476 | 12271.679 | NM_002164 | 2477.587  | 2799.088  |
| AK023384  | 2076.688  | 3179.042  | NM_003811 | 31416.654 | 41395.664 |
| NM_016026 | 9562.148  | 10439.208 | NM_002981 | 16719.459 | 13149.626 |
| NM_020245 | 8646.156  | 13024.569 | NM_001244 | 7804.97   | 5103.032  |
| NM_007175 | 1363.113  | 2012.873  | NM_012275 | 1087.776  | 555.355   |
| AB046381  | 1000.555  | 1793.428  | NM_006137 | 5604.313  | 4116.093  |
| AJ011497  | 11547.06  | 22462.979 | NM_016139 | 59719.324 | 61147.195 |
| NM_003018 | 1092.516  | 1981.608  | AL117468  | 18352.064 | 20729.631 |

|            |           |           |           |           |           |
|------------|-----------|-----------|-----------|-----------|-----------|
| NM_000336  | 2887.603  | 5434.89   | NM_019613 | 19853.926 | 20687.057 |
| W61100     | 55151.355 | 65643.586 | BC031485  | 6109.13   | 7803.487  |
| AA608568   | 15004.434 | 23750.549 | NM_004092 | 16879.508 | 19264.258 |
| BG831301   | 51813.289 | 57502.035 | X15624    | 3641.631  | 4280.261  |
| M14764     | 3837.418  | 5497.072  | AF073770  | 5475.419  | 6842.44   |
| AA478647   | 8288.646  | 12960.524 | AL359401  | 13747.199 | 15059.017 |
| M35999     | 1178.568  | 1276.808  | NM_012213 | 3857.25   | 5393.988  |
| AW058501   | 1357.139  | 1971.405  | NM_016573 | 17588.457 | 19757.078 |
| M81379     | 530.723   | 988.815   | NM_001303 | 41078.77  | 41070.238 |
| ID 2623896 | 3034.939  | 5556.177  | M21304    | 1066.882  | 1240.723  |
| ID 2602214 | 7546.172  | 9194.335  | NM_001979 | 2394.269  | 2250.089  |
| ID 2071279 | 7757.458  | 9171.059  | AB040896  | 3095.39   | 3085.914  |
| L10709     | 7455.776  | 8386.395  | NM_001107 | 8050.582  | 10280.58  |
| N35489     | 2260.855  | 3558.6    | AF084645  | 1127.903  | 1239.683  |
| AA458922   | 1742.013  | 1452.202  | AF151851  | 24645.809 | 26136.523 |
| NM_001719  | 11624.146 | 11091.56  | NM_005176 | 3089.015  | 3071.68   |
| AL080062   | 2356.581  | 2210.596  | NM_003636 | 7273.988  | 8383.693  |
| AF308802   | 1492.733  | 1779.171  | NM_002234 | 13398.132 | 13677.086 |
| L03418     | 557.628   | 693.784   | NM_003471 | 604.547   | 679.011   |
| M95923     | 6866.364  | 9230.82   | NM_000701 | 8005.287  | 5298.016  |
| NM_002415  | 57300.734 | 60377.375 | AB022696  | 47790.777 | 22077.873 |
| NM_006332  | 53179.742 | 58631.684 | NM_002233 | 1390.096  | 479.019   |
| NM_000916  | 4101.52   | 5153.74   | NM_014379 | 617.509   | 781.361   |
| NM_018663  | 6033.884  | 5831.754  | AF137372  | 12086.245 | 14372.055 |
| NM_145904  | 14274.152 | 13805.924 | AF220417  | 4543.058  | 6115.182  |
| NM_006796  | 12557.668 | 12063.783 | NM_001523 | 1755.998  | 2767.656  |
| NM_000706  | 1037.417  | 1230.899  | NM_017423 | 2772.907  | 3119.119  |
| NM_015941  | 3914.803  | 3609.44   | Z70705    | 2309.885  | 2182.029  |
| NM_003655  | 3180.657  | 2985.856  | NM_002611 | 5073.74   | 6884.118  |
| NM_014837  | 3353.063  | 4515.843  | NM_017417 | 2984.603  | 3496.799  |
| NM_017729  | 568.392   | 567.782   | AL133602  | 5764.227  | 5278.568  |
| NM_005259  | 9380.637  | 15545.657 | AF037219  | 8979.754  | 7442.494  |
| NM_002840  | 500.031   | 655.686   | AK026075  | 785.065   | 990.721   |
| NM_006174  | 1345.931  | 1469.579  | NM_000251 | 9754.31   | 8294.391  |
| NM_015850  | 6068.604  | 7616.068  | NM_006038 | 11751.449 | 10901.687 |
| NM_004864  | 764.509   | 970.873   | AB011133  | 8741.346  | 8916.719  |
| NM_002838  | 4040.575  | 4014.424  | NM_017572 | 57583.426 | 51632.559 |
| AK027377   | 352.088   | 432.338   | NM_018444 | 5799.207  | 4275.727  |
| BF528358   | 637.441   | 579.729   | NM_000252 | 3526.578  | 2359.9    |
| NM_016339  | 635.798   | 873.885   | NM_006947 | 22189.475 | 11159.849 |
| NM_006510  | 14548.196 | 26293.18  | NM_017917 | 6303.398  | 1705.267  |
| NM_003141  | 2903.888  | 4637.662  | NM_004090 | 14353.691 | 11238.173 |
| NM_018690  | 5542.199  | 6613.803  | NM_014634 | 22262.146 | 19268.125 |
| NM_000860  | 1734.711  | 1810.662  | NM_001919 | 58845.84  | 53361.656 |
| AB037798   | 1684.865  | 1652.57   | CY3Cy5    | 786.762   | 192.644   |
| NM_000780  | 356.866   | 350.385   | NM_003822 | 1171.828  | 1165.861  |
| AF272663   | 13875.607 | 15200.367 | NM_004412 | 12228.896 | 10906.326 |
| NM_012190  | 2366.266  | 1608.435  | NM_016647 | 1683.137  | 1415.15   |
| AB033015   | 303.497   | 493.606   | AK024695  | 1508.139  | 896.899   |
| AF277719   | 381.887   | 512.404   | NM_018659 | 1007.529  | 1289.604  |
| NM_000791  | 1935.785  | 1615.838  | AF038174  | 5542.317  | 5103.092  |
| NM_003681  | 2580.154  | 2754.303  | NM_013243 | 1211.64   | 1976.324  |
| NM_014909  | 7353.651  | 7371.23   | AF070632  | 1130.092  | 1323.703  |

|            |           |           |           |           |           |
|------------|-----------|-----------|-----------|-----------|-----------|
| NM_015700  | 3441.866  | 4253.75   | AF161359  | 1979.499  | 1795.665  |
| U66621     | 8357.541  | 11112.632 | AL365520  | 1477.78   | 777.375   |
| NM_005720  | 48636.727 | 58742.785 | AL359338  | 722.275   | 447.42    |
| AB040936   | 378.654   | 672.13    | AK023623  | 9861.736  | 6541.833  |
| U61736     | 677.561   | 1029.54   | AF086534  | 668.854   | 431.829   |
| AJ132086   | 1048.25   | 1450.093  | AF070617  | 493.587   | 440.428   |
| U92816     | 10141.099 | 14245.391 | NM_014918 | 2241.055  | 1106.909  |
| NM_004100  | 1210.57   | 2275.942  | NM_003822 | 815.492   | 619.983   |
| NM_003480  | 4792.975  | 5120.063  | NM_004412 | 7927.16   | 3302.532  |
| NM_005030  | 3608.086  | 4446.54   | SR1       | 66526.852 | 56665.449 |
| NM_014081  | 1255.766  | 1091.514  | SR3       | 31381.123 | 12383.134 |
| NM_005651  | 899.974   | 648.868   | SR5       | 5220.095  | 9671.146  |
| NM_007190  | 1071.665  | 1008.887  | SR7       | 4905.996  | 29722.938 |
| AK023337   | 5355.198  | 4153.786  | SR9       | 12589.785 | 934.932   |
| NM_013270  | 15010.246 | 11373.056 | CY3Cy5    | 961.946   | 211.001   |
| AB037842   | 394.845   | 286.068   | U84515    | 1525.624  | 1461.393  |
| NM_019011  | 2092.293  | 1732.524  | AF086106  | 1580.607  | 2665.704  |
| AF459094   | 4283.228  | 3897.223  | AF086143  | 13898.159 | 14389.81  |
| NM_003157  | 2992.661  | 2881.099  | AF086112  | 665.999   | 752.236   |
| NM_004930  | 856.219   | 842.733   | AL137254  | 1715.71   | 1240.042  |
| NM_014320  | 855.301   | 953.354   | AK026359  | 589.538   | 474.034   |
| NM_004440  | 503.293   | 678.182   | AF085884  | 858.661   | 561.898   |
| NM_015981  | 949.447   | 1322.508  | S81522    | 6808.417  | 2406.441  |
| NM_000450  | 3951.758  | 4606.362  | S94541    | 1640.858  | 3085.725  |
| NM_014791  | 3984.548  | 4873.798  | L36587    | 27536.283 | 18989.791 |
| NM_003310  | 3363.152  | 2799.705  | AK024228  | 3262.698  | 5881.324  |
| NM_004360  | 3784.999  | 4776.897  | AK022420  | 4090.734  | 2043.405  |
| NM_000180  | 10430.27  | 11179.904 | AK023254  | 828.911   | 504.787   |
| AK023384   | 1767.272  | 2068.854  | AK023945  | 32516.039 | 46460.148 |
| NM_016020  | 8652.476  | 11057.688 | AK022446  | 1060.889  | 1171.572  |
| AK025111   | 819.948   | 1181.369  | AK023352  | 422.306   | 515.27    |
| NM_001730  | 1542.604  | 2172.632  | AK023773  | 1344.846  | 1166.311  |
| AB046381   | 694.57    | 411.482   | AK024123  | 605.048   | 937.561   |
| AJ011497   | 7821.93   | 8012.739  | AK026202  | 593.693   | 1018.982  |
| NM_003010  | 1465.151  | 1796.954  | AK021539  | 8143.736  | 5940.258  |
| NM_000330  | 1640.219  | 2379.039  | AK021819  | 628.112   | 477.524   |
| W61100     | 51225.688 | 60360.379 | AK026738  | 2543.796  | 3141.953  |
| AA608568   | 9143.462  | 6865.74   | AK025011  | 1334.288  | 665.718   |
| BG831301   | 52945.645 | 50847.102 | AL157491  | 1625.793  | 923.251   |
| M14764     | 2111.325  | 2353.747  | NM_005260 | 2748.283  | 1564.649  |
| AA478647   | 5936.49   | 5533.604  | AF087965  | 705.734   | 398.398   |
| M35999     | 1386.163  | 1206.384  | AF085998  | 756.035   | 495.549   |
| AW058501   | 1394.077  | 1027.572  | AK024681  | 508.09    | 298.204   |
| M81379     | 507.966   | 480.392   | AF085990  | 893.911   | 1548.204  |
| ID 2623896 | 2513.281  | 2783.646  | NM_014907 | 30214.566 | 24697.453 |
| ID 2602214 | 6371.501  | 6592.428  | AB007977  | 28868.92  | 22780.596 |
| ID 2071279 | 6602.345  | 7177.41   | NM_014221 | 9652.599  | 4849.725  |
| L10709     | 6751.033  | 6730.471  | AK025181  | 657.873   | 672.742   |
| N35489     | 2000.092  | 2101.548  | AK021773  | 2865.144  | 2403.635  |
| AI928195   | 598.752   | 681.059   | AK027074  | 2105.105  | 1729.714  |
| AA482489   | 892.938   | 833.965   | AL365456  | 1018.308  | 1031.451  |
| AA458922   | 2421.072  | 2798.886  | NM_018030 | 930.35    | 1283.475  |
| NM_001710  | 9376.946  | 9519.789  | AK022239  | 547.839   | 992.127   |

|           |           |           |           |           |           |
|-----------|-----------|-----------|-----------|-----------|-----------|
| AL080062  | 1932.768  | 1282.135  | AK022364  | 697.572   | 1363.59   |
| AF308802  | 1866.348  | 2309.509  | AK024674  | 824.643   | 1041.352  |
| S76984    | 7330.989  | 6453.711  | AK024244  | 7236.44   | 3479.297  |
| NM_014495 | 58096.211 | 57949.945 | AK023812  | 487.041   | 355.834   |
| NM_006796 | 11845.013 | 8537.656  | AL390084  | 2483.705  | 2395.249  |
| NM_000706 | 1036.507  | 1041.848  | AK023565  | 925.168   | 1473.321  |
| NM_015941 | 3722.277  | 3612.3    | AK021479  | 1048.372  | 1636.06   |
| NM_003655 | 3627.177  | 3737.013  | NM_003835 | 6042.419  | 4168.609  |
| NM_014837 | 3957.056  | 4323.98   | AK000245  | 2376.689  | 1164.987  |
| NM_017729 | 473.613   | 343.236   | AF118072  | 609.006   | 389.383   |
| NM_005259 | 17331.479 | 12709.633 | AF085900  | 32676.139 | 40076.715 |
| NM_002840 | 379.456   | 614.641   | AK026195  | 701.735   | 562.771   |
| NM_006174 | 1432.178  | 1367.403  | AL049443  | 990.089   | 1164.739  |
| NM_015850 | 7536.926  | 5619.738  | AL079274  | 31447.926 | 20479.4   |
| NM_004864 | 1293.749  | 1316.44   | AL137398  | 2516.267  | 1892.513  |
| NM_002838 | 3506.801  | 2253.722  | Y12021    | 3967.927  | 4609.583  |
| NM_014686 | 56195.238 | 60272.324 | AF127771  | 788.057   | 970.519   |
| BF528358  | 610.628   | 723.245   | Z83949    | 384.927   | 1201.671  |
| NM_016339 | 975.296   | 1262.163  | NM_013300 | 56015.867 | 57798.336 |
| NM_002487 | 1440.526  | 2124.365  | AK026039  | 6363.07   | 6885.42   |
| NM_013340 | 1294.618  | 1688.191  | AF108756  | 18998.213 | 18661.25  |
| NM_005462 | 1030.6    | 1117.904  | AF116709  | 2258.429  | 2995.23   |
| NM_012319 | 2544.043  | 4180.884  | AK025533  | 2547.837  | 4876.391  |
| AK026235  | 778.971   | 1108.787  | AK026499  | 732.542   | 455.07    |
| NM_006510 | 8843.337  | 7262.96   | AK021911  | 11999.821 | 7497.642  |
| NM_003141 | 2793.739  | 3796.366  | D17225    | 739.212   | 709.934   |
| NM_020245 | 2972.04   | 3262.027  | AF147430  | 583.603   | 412.602   |
| NM_007175 | 1275.518  | 1798.986  | AK025766  | 12092.814 | 7849.845  |
| NM_019087 | 1767.46   | 1484.645  | U35875    | 38953.426 | 35243.418 |
| NM_016322 | 609.998   | 770.532   | AK021857  | 49644.309 | 53612.484 |
| NM_004277 | 612.142   | 1105.776  | AK022257  | 1861.546  | 2179.184  |
| NM_005072 | 940.622   | 1040.507  | BE887356  | 61573.023 | 59560.949 |
| AF215923  | 3261.089  | 3231.203  | AK001074  | 778.86    | 1290.929  |
| U66621    | 10661.357 | 13043.255 | AK024756  | 2392.115  | 1438.126  |
| NM_005720 | 47785.598 | 41671.563 | NM_017911 | 2126.798  | 1151.425  |
| AB040936  | 714.987   | 845.2     | AJ224168  | 11230.74  | 7936.586  |
| U61736    | 1156.852  | 1433.737  | S69873    | 1508.883  | 1676.049  |
| AJ132086  | 1368.486  | 1177.605  | AF147325  | 67009.469 | 63533.73  |
| U92816    | 10705.14  | 12293.412 | NM_014428 | 2018.495  | 1736.701  |
| NM_004106 | 1791.744  | 5176.547  | NM_018497 | 742.051   | 1110.168  |
| NM_003485 | 4078.107  | 5409.947  | AK023584  | 784.452   | 1188.596  |
| NM_005038 | 3178.615  | 3466.305  | NM_003774 | 641.361   | 602.916   |
| M95923    | 2037.121  | 1701.278  | D87466    | 11602.928 | 10466.444 |
| NM_002415 | 55078.48  | 55833.973 | AK025048  | 980.931   | 871.061   |
| NM_006332 | 55017.539 | 55262.664 | U84522    | 3571.955  | 3358.128  |
| NM_002000 | 637.313   | 362.182   | AK021694  | 2645.873  | 2682.633  |
| NM_000916 | 1919.8    | 2473.779  | AF086013  | 1242.134  | 821.305   |
| NM_018663 | 5073.47   | 5682.974  | U84505    | 3545.064  | 3357.579  |
| NM_145904 | 13754.527 | 12731.5   | X81005    | 2921.924  | 1791.706  |
| NM_000182 | 10590.135 | 8211.956  | AL049265  | 2347.284  | 1870.289  |
| AK023384  | 2005.676  | 2191.035  | AK022225  | 682.836   | 964.73    |
| NM_016026 | 9258.418  | 9366.138  | NM_012352 | 603.249   | 1130.059  |
| AK025111  | 1184.218  | 1424.528  | AL137635  | 988.462   | 1339.795  |

|           |           |           |           |           |           |
|-----------|-----------|-----------|-----------|-----------|-----------|
| NM_001732 | 1966.816  | 2766.289  | AL049430  | 3205.533  | 2705.551  |
| NM_018690 | 6790.041  | 11884.566 | AK021461  | 846.137   | 918.973   |
| NM_000860 | 1594.025  | 2084.876  | AB015349  | 884.293   | 991.188   |
| AB037798  | 1576.954  | 2399.57   | NM_014913 | 30839.924 | 14659.22  |
| NM_000780 | 483.662   | 640.605   | NM_005864 | 818.537   | 444.642   |
| AF272663  | 14525.469 | 15943.372 | NM_012341 | 9454.373  | 7300.027  |
| NM_012190 | 2237.228  | 1936.77   | NM_003256 | 41590.242 | 48105.867 |
| AB033015  | 376.44    | 417.869   | D87450    | 4725.536  | 5115.253  |
| AF277719  | 536.976   | 760.179   | NM_017797 | 6535.39   | 5692.885  |
| NM_000791 | 1541.308  | 1308.075  | AF000562  | 9867.231  | 12889.585 |
| NM_003681 | 2151.948  | 3183.258  | AK025713  | 8755.449  | 10114.189 |
| NM_004800 | 4227.841  | 5733.519  | NM_018100 | 1251.079  | 1585.612  |
| AB037738  | 701.157   | 1026.75   | NM_004075 | 9589.401  | 11773.993 |
| S82769    | 518.884   | 616.919   | NM_001887 | 7737.728  | 12545.826 |
| NM_004677 | 837.725   | 765.39    | NM_006533 | 7589.695  | 10071.073 |
| NM_014954 | 23497.986 | 25593.018 | AK026747  | 9330.192  | 11969.72  |
| NM_014909 | 2886.638  | 3175.63   | AL110150  | 12914.565 | 14899.813 |
| X91148    | 7049.199  | 5854.873  | NM_001998 | 7434.747  | 6436.579  |
| NM_015700 | 10477.318 | 11773.03  | X87825    | 5647.438  | 6532.665  |
| NM_001719 | 12413.851 | 9212.961  | NM_000914 | 505.484   | 1057.965  |
| AL080062  | 1914.907  | 1466.377  | AK001285  | 47551.73  | 56660.902 |
| AF308802  | 1671.871  | 1590.754  | D17215    | 14529.222 | 19662.713 |
| S76984    | 6986.839  | 6768.253  | BE781513  | 1115.689  | 1645.17   |
| NM_014495 | 51605.129 | 63209.383 | NM_015714 | 45564.488 | 39429.035 |
| NM_014081 | 1575.935  | 4062.401  | AK075564  | 1083.956  | 941.326   |
| NM_005651 | 921.728   | 1263.183  | AK026219  | 1767.398  | 2224.609  |
| NM_007195 | 1164.159  | 1165.649  | D28446    | 4900.649  | 6563.227  |
| AK023337  | 6236.515  | 5590.936  | NM_000211 | 11316.029 | 4745.43   |
| NM_013275 | 12824.746 | 11388.156 | AB037830  | 2016.778  | 2167.029  |
| U92074    | 527.305   | 386.583   | NM_015685 | 4553.925  | 4265.49   |
| NM_019011 | 1745.242  | 2060.315  | NM_004357 | 36991.727 | 35889.402 |
| AF459094  | 3863.99   | 5359.613  | X03324    | 6763.589  | 5654.386  |
| NM_003157 | 1959.859  | 2894.965  | AF130988  | 1749.053  | 1297.344  |
| NM_004938 | 1690.789  | 1812.188  | NM_015385 | 1980.789  | 2730.039  |
| NM_014326 | 917.118   | 767.949   | NM_003690 | 12851.937 | 16743.74  |
| NM_004448 | 1027.904  | 1328.259  | NM_000876 | 10963.348 | 12899.957 |
| NM_015981 | 1980.215  | 2804.367  | NM_014214 | 12514.685 | 18017.471 |
| NM_000455 | 3159.166  | 2305.726  | NM_000856 | 2946.505  | 4542.797  |
| NM_014791 | 4095.438  | 4007.701  | NM_002752 | 4765.189  | 4825.08   |
| NM_003318 | 7316.092  | 4672.478  | NM_013281 | 729.832   | 1226.272  |
| CY3Cy5    | 1269.687  | 185.552   | Y11306    | 2902.78   | 4413.425  |
| NM_004102 | 1938.987  | 1626.289  | NM_016112 | 1160.121  | 1648.532  |
| NM_004544 | 3947.92   | 2313.521  | X85106    | 1251.032  | 1778.22   |
| NM_018836 | 934.127   | 801.217   | NM_003931 | 4585.598  | 4791.617  |
| AF052127  | 1745.853  | 2081.17   | NM_006681 | 1087.623  | 1331.603  |
| AK024261  | 421.419   | 323.531   | NM_012479 | 57099.563 | 55855.063 |
| AF052150  | 321.111   | 392.524   | AF250226  | 29223.58  | 28742.475 |
| AK024885  | 1004.282  | 649.014   | NM_003217 | 43440.016 | 45941.406 |
| AL080223  | 1330.389  | 764.845   | NM_006534 | 18272.08  | 8410.623  |
| AK001630  | 3095.078  | 1654.227  | NM_017601 | 3281.527  | 1609.438  |
| NM_014612 | 12583.035 | 8054.262  | AF110265  | 16574.133 | 7706.475  |
| NM_004102 | 1869.244  | 1494.388  | AF272371  | 53188.199 | 47669.641 |
| NM_004544 | 4037.32   | 3244.738  | AK021848  | 3863.386  | 1987.264  |

|           |           |           |           |           |           |
|-----------|-----------|-----------|-----------|-----------|-----------|
| SR1       | 71550.992 | 33191.293 | NM_003704 | 4980.494  | 3879.711  |
| SR3       | 18814.023 | 7212.585  | AF084362  | 1571.809  | 1952.224  |
| SR5       | 1971.096  | 870.371   | NM_001553 | 6126.26   | 7987.674  |
| SR7       | 2404.843  | 6438.599  | NM_014173 | 24957.742 | 35181.758 |
| SR9       | 6721.417  | 488.93    | NM_001731 | 51704.984 | 56743.27  |
| CY3Cy5    | 418.11    | 104.405   | AL137506  | 1583.211  | 2923.312  |
| Z36807    | 27295.928 | 12031.162 | AK022961  | 11736.011 | 14435.479 |
| U52836    | 590.597   | 404.983   | NM_007375 | 13269.162 | 16496.711 |
| NM_017935 | 1230.897  | 1014.619  | NM_014371 | 5703.388  | 5374.752  |
| AK021837  | 1954.134  | 1973.952  | AF290512  | 9732.429  | 11236.676 |
| AF075112  | 517.543   | 324.92    | NM_006716 | 18567.307 | 25471.75  |
| AK001796  | 424.929   | 344.486   | AB002323  | 8903.422  | 11095.416 |
| AF086152  | 8181.639  | 4305.232  | AK022241  | 19672.271 | 15242.088 |
| U78519    | 965.114   | 781.857   | AK022587  | 4904.104  | 3348.592  |
| AK026872  | 1041.789  | 598.084   | NM_005512 | 575.947   | 1290.194  |
| NM_007190 | 4114.549  | 2276.382  | NM_005506 | 2040.873  | 1903.394  |
| U79246    | 1295.922  | 428.19    | NM_005723 | 1128.802  | 742.122   |
| AK022619  | 353.093   | 341.303   | AL137404  | 60055.711 | 57546.176 |
| AK023464  | 401.574   | 546.037   | NM_005814 | 11041.418 | 11347.723 |
| AK023905  | 3588.734  | 2523.561  | NM_002851 | 1585.139  | 907.768   |
| AK024231  | 2236.165  | 2159.159  | NM_002071 | 1463.785  | 700.958   |
| AK022441  | 618.21    | 450.27    | NM_005339 | 27286.824 | 11641.354 |
| AK026208  | 1297.12   | 896.775   | NM_001906 | 14750.239 | 10929.306 |
| NM_016947 | 33436.672 | 13974.99  | NM_004142 | 1537.884  | 958.195   |
| AY007136  | 566.492   | 308.361   | AF108138  | 11040.104 | 18820.547 |
| AL359940  | 977.76    | 900.847   | NM_004347 | 647.821   | 1464.193  |
| NM_018285 | 366.447   | 246.625   | BF340302  | 13802.227 | 15840.228 |
| AK024925  | 11209.412 | 6851.775  | AK024210  | 4142.607  | 6074.144  |
| AL049460  | 4243.161  | 2915.865  | NM_002276 | 8207.287  | 8933.553  |
| AK022396  | 398.357   | 420.642   | AL133087  | 4556.439  | 4739.475  |
| AF075113  | 860.445   | 628.633   | NM_018010 | 3402.25   | 3696.447  |
| AK022892  | 2580.498  | 772.409   | NM_002274 | 39413.074 | 51255.371 |
| AK022980  | 421.31    | 810.385   | AL080200  | 1605.694  | 2204.902  |
| AL359058  | 1417.671  | 1128.408  | BF337874  | 9729.388  | 7817.499  |
| AK026237  | 1065.559  | 936.856   | NM_003475 | 51620.848 | 50019.488 |
| AK023687  | 1183.954  | 977.523   | NM_000243 | 8391.75   | 4482.613  |
| AK002088  | 14772.223 | 10079.152 | NM_004383 | 28046.533 | 26066.398 |
| AK022193  | 328.2     | 354.607   | AL157475  | 8908.539  | 10448.153 |
| AK000106  | 1914.182  | 1462.99   | NM_006069 | 57849.73  | 54724.656 |
| AK022370  | 628.303   | 1152.007  | NM_017656 | 4113.193  | 2308.437  |
| AK026765  | 614.222   | 622.968   | X16282    | 16925.656 | 6192.434  |
| AL080191  | 2234.756  | 1642.964  | AK022519  | 1003.721  | 865.265   |
| AK021639  | 697.405   | 513.274   | NM_014415 | 3476.322  | 2497.042  |
| AK023189  | 1679.888  | 1103.186  | S75264    | 8547.439  | 5690.278  |
| AF306347  | 704.231   | 287.056   | AF027513  | 1991.736  | 1123.754  |
| AF070599  | 1531.645  | 4505.378  | NM_001379 | 12367.718 | 6935.674  |
| NM_005450 | 1520.042  | 2229.154  | NM_018664 | 2051.291  | 2881.752  |
| NM_005285 | 3981.266  | 3102.683  | NM_006873 | 195.033   | 1018.45   |
| AK001918  | 365.898   | 292.258   | BC006428  | 10144.022 | 14416.604 |
| NM_018635 | 21792.646 | 12337.451 | NM_005034 | 3875.925  | 5971.75   |
| AF086048  | 1268.218  | 1076.34   | NM_003926 | 26379.9   | 35284.449 |
| L15616    | 5619.724  | 3751.108  | AF085356  | 3048.671  | 3936.941  |
| AB019565  | 4501.562  | 3801.022  | NM_016047 | 42048.191 | 39470.77  |

|           |           |           |           |           |           |
|-----------|-----------|-----------|-----------|-----------|-----------|
| NM_01694C | 1782.949  | 1368.196  | NM_00149C | 17775.896 | 20315.439 |
| AK025757  | 1670.653  | 1361.824  | BF030165  | 24436.371 | 19978.049 |
| L07394    | 5544.392  | 4794.874  | NM_016732 | 17894.75  | 11312.854 |
| AK056133  | 813.219   | 841.141   | NM_014763 | 25944.707 | 17204.924 |
| NM_01784E | 6495.342  | 4360.336  | NM_02018E | 13064.347 | 17661.551 |
| AK026006  | 1085.475  | 852.428   | NM_002832 | 10869.637 | 9588.226  |
| NM_01908E | 5072.647  | 3332.515  | NM_017732 | 7725.852  | 4612.291  |
| AL122072  | 1900.553  | 1429.472  | NM_003654 | 537.547   | 460.983   |
| AK026221  | 344.1     | 313.157   | NM_000152 | 55548.43  | 50561.215 |
| AK026403  | 1247.677  | 772.234   | D17222    | 32379.02  | 24300.135 |
| U90903    | 844.663   | 713.767   | NM_000154 | 8644.665  | 8841.323  |
| AF278760  | 1482.84   | 1156.115  | NM_006213 | 330.488   | 672.728   |
| AB032954  | 3024.713  | 2729.744  | NM_000671 | 3726.187  | 2451.339  |
| NM_00600E | 11591.53  | 7345.07   | NM_006297 | 36890.438 | 46487.637 |
| AL110197  | 335.515   | 260.676   | S77582    | 341.14    | 1013.146  |
| AF085995  | 420.769   | 357.827   | X85325    | 60978.023 | 57735.172 |
| NM_017632 | 1328.17   | 1102.166  | AF318366  | 20974.789 | 32361.373 |
| AK026655  | 1026.922  | 849.128   | AF182423  | 6010.28   | 7626.49   |
| AF129926  | 1427.484  | 1357.744  | D26018    | 11112.845 | 16067.444 |
| AK025822  | 1643.068  | 1881.316  | AK023029  | 1145.387  | 1155.368  |
| AL360140  | 551.735   | 615.002   | AB037863  | 2824.437  | 2636.33   |
| AF201937  | 21138.621 | 13535.427 | BC000363  | 2408.327  | 2647.91   |
| AL390128  | 1834.391  | 1381.551  | NM_007237 | 2167.776  | 2173.323  |
| AL157429  | 6596.603  | 4021.784  | NM_00460E | 1297.214  | 1102.581  |
| NM_012071 | 7198.455  | 3569.477  | NM_018257 | 18007.947 | 9510.709  |
| AF055018  | 3878.004  | 2228.924  | NM_00591E | 3960.783  | 3238.081  |
| NM_014347 | 9932.59   | 23544.047 | NM_01225E | 54528.984 | 50969.973 |
| NM_00129E | 8828.678  | 6229.661  | NM_00600E | 2073.825  | 1353.951  |
| NM_004344 | 7277.464  | 4840.177  | NM_01632E | 3951.319  | 4950.813  |
| NM_000757 | 712.462   | 653.172   | NM_001604 | 2376.129  | 3270.686  |
| AB046786  | 659.744   | 554.785   | NM_00090E | 2610.385  | 1710.381  |
| NM_01662C | 21358.012 | 13647.702 | AB011102  | 8203.921  | 6980.413  |
| D16914    | 60932.633 | 54046.637 | D63480    | 6465.95   | 7545.363  |
| AA084879  | 650.019   | 1052.649  | NM_00296E | 12964.896 | 16167.469 |
| NM_00083E | 944.059   | 915.445   | NM_00647E | 1283.234  | 1866.714  |
| NM_00028E | 2235.487  | 1920.613  | NM_00462C | 4384.233  | 3446.528  |
| NM_01246C | 1788.193  | 1321.36   | AF087940  | 11291.299 | 7141.295  |
| NM_012118 | 1710.236  | 1544.181  | AJ277587  | 4979.234  | 6910.79   |
| AK024092  | 1035.13   | 847.936   | D87432    | 12618.513 | 15388.475 |
| AK002044  | 3110.732  | 1782.099  | Y18483    | 1500.507  | 2475.449  |
| AK022206  | 382.785   | 220.754   | AI565117  | 57736.75  | 62541.004 |
| NM_00632E | 555.508   | 1334.929  | U28015    | 359.61    | 1106.419  |
| NM_00516E | 338.988   | 258.787   | AI299075  | 11298.27  | 13318.852 |
| NM_00021E | 19121.051 | 16806.607 | M59979    | 6898.161  | 7672.973  |
| BE906107  | 9437.269  | 7249.198  | AB011098  | 3454.641  | 3623.305  |
| NM_01551E | 1523.542  | 1196.093  | AA609759  | 5147.377  | 4059.293  |
| AB033065  | 485.217   | 405.736   | AA029418  | 12774.016 | 13415.625 |
| NM_004857 | 8409.32   | 5613.537  | L20815    | 13917.136 | 16527.234 |
| NM_01210E | 4012.669  | 2486.643  | AI364483  | 57170.109 | 57944.836 |
| NM_00325E | 638.631   | 621.348   | AA456001  | 26742.193 | 30029.912 |
| NM_01328E | 3956.398  | 2455.414  | AA176581  | 2118.544  | 2638.597  |
| NM_00287E | 8668.571  | 5675.234  | AA451686  | 15897.709 | 16683.656 |
| NM_00049C | 704.571   | 649.109   | AA934644  | 548.233   | 723.858   |



|           |           |           |           |           |           |
|-----------|-----------|-----------|-----------|-----------|-----------|
| NM_004839 | 692.374   | 589.157   | NM_017896 | 31052.52  | 28796.014 |
| NM_012193 | 2022.738  | 1218.289  | AB002374  | 8278.857  | 3980.798  |
| NM_003405 | 7252.77   | 3446.939  | U17327    | 3318.475  | 1517.082  |
| NM_004720 | 3296.575  | 1684.528  | M87790    | 56512.91  | 54289.332 |
| NM_001057 | 861.734   | 525.877   | NM_001768 | 3850.395  | 6220.805  |
| NM_007273 | 44388.348 | 36456.52  | NM_000029 | 21057.082 | 28090.529 |
| BE894943  | 941.648   | 1245.082  | NM_000715 | 2278.322  | 3759.415  |
| NM_016422 | 2089.522  | 3112.92   | AF035802  | 15744.704 | 19278.793 |
| NM_017878 | 6115.681  | 5795.979  | Y08145    | 8800.693  | 11112.008 |
| NM_004494 | 40874.453 | 30857.186 | M26123    | 1416.349  | 1519.294  |
| NM_005643 | 6524.582  | 7714.495  | NM_001838 | 22944.561 | 22561.631 |
| NM_003592 | 5754.714  | 4112.488  | NM_019555 | 2721.147  | 3299.143  |
| NM_014953 | 3301.442  | 1860.254  | NM_012096 | 22568.955 | 24035.172 |
| AF179995  | 518.472   | 508.34    | NM_003905 | 33057.711 | 41638.109 |
| NM_016195 | 2643.51   | 996.128   | L12052    | 6581.017  | 8947.065  |
| NM_004523 | 1858.411  | 1357.013  | AB028976  | 11526.09  | 9018.577  |
| NM_004404 | 8238.322  | 5091.769  | AK026337  | 5866.994  | 4914.203  |
| NM_002960 | 3862.599  | 2502.901  | NM_015869 | 1616.103  | 2438.142  |
| AB046788  | 437.552   | 422.343   | NM_004626 | 1414.247  | 2340.054  |
| NM_006790 | 951.668   | 676.635   | NM_001899 | 1484.483  | 2036.887  |
| AL117522  | 16103.39  | 8976.634  | NM_013328 | 28433.256 | 23486.559 |
| AB011541  | 760.866   | 499.254   | NM_000790 | 685.484   | 361.876   |
| NM_001304 | 538.725   | 642.246   | NM_002660 | 5070.185  | 6002.265  |
| NM_003130 | 2200.314  | 1808.386  | NM_015900 | 1522.923  | 794.73    |
| NM_004716 | 31749.043 | 19807.568 | NM_003706 | 2641.562  | 4083.453  |
| D29810    | 1467.499  | 1251.171  | AF182218  | 601.623   | 1200.129  |
| NM_000128 | 1960.05   | 1856.177  | NM_016122 | 3151.403  | 5987.143  |
| AB002384  | 3907.448  | 3077.299  | AK023749  | 1243.226  | 1044.506  |
| NM_018437 | 617.794   | 853.774   | NM_002337 | 8031.542  | 8091.233  |
| NM_000422 | 680.268   | 358.415   | NM_013245 | 4297.128  | 3335.529  |
| AK023164  | 1013.31   | 887.38    | NM_006423 | 59565.266 | 52703.73  |
| NM_005379 | 1517.468  | 1409.97   | NM_004766 | 3175.827  | 2203.458  |
| AK027121  | 9176.143  | 5821.239  | NM_005819 | 49579.793 | 49427.891 |
| NM_017433 | 2397.682  | 1630.919  | AK024722  | 610.822   | 699.216   |
| AL117661  | 2535.86   | 1857.457  | AK025520  | 7418.316  | 4106.539  |
| X64643    | 1683.82   | 1172.232  | NM_004892 | 7792.145  | 11937.698 |
| NM_005380 | 12002.27  | 6739.517  | NM_014597 | 39613.809 | 41871.652 |
| NM_005561 | 6174.95   | 3894.592  | BF540935  | 21804.912 | 15686.099 |
| AF272381  | 8926.099  | 4070.237  | NM_004466 | 667.639   | 753.878   |
| AK022668  | 2632.368  | 2561.852  | NM_007081 | 3783.663  | 3652.26   |
| AW975132  | 2070.743  | 1786.31   | AB032964  | 5349.83   | 4619.151  |
| NM_006051 | 4671.444  | 5407.505  | BE733605  | 13622.621 | 20040.508 |
| NM_018427 | 6053.989  | 25563.404 | NM_003334 | 52831.934 | 49904.938 |
| NM_014663 | 924.518   | 779.075   | NM_002693 | 6989.75   | 10265.278 |
| AF007217  | 839.47    | 524.171   | NM_003671 | 3200.855  | 4554.851  |
| AB037753  | 3136.839  | 2446.511  | AK026000  | 12577.97  | 16156.582 |
| NM_004674 | 1245.666  | 899.85    | NM_017833 | 4953.862  | 3778.78   |
| AB037801  | 2440.413  | 1413.094  | NM_006675 | 14095.666 | 13530.271 |
| AL080159  | 17916.834 | 11142.288 | NM_003022 | 11643.42  | 11250.502 |
| NM_017823 | 31700.346 | 18420.756 | NM_004873 | 8377.192  | 8275.792  |
| U55185    | 1103.205  | 1154.674  | NM_019842 | 4234.099  | 4446.728  |
| U30828    | 10808.056 | 5613.531  | NM_002951 | 30711.957 | 34720.859 |
| AF085886  | 45858.785 | 26475.861 | NM_002317 | 4176.427  | 3597.022  |

|           |           |           |           |           |           |
|-----------|-----------|-----------|-----------|-----------|-----------|
| AK023828  | 8731.743  | 7004.509  | NM_000320 | 2271.444  | 3077.394  |
| NM_006572 | 14587.604 | 7458.025  | NM_003136 | 14211.618 | 14560.227 |
| NM_016641 | 4748.735  | 4411.643  | D63480    | 6194.341  | 3967.003  |
| AB018010  | 853.58    | 969.488   | NM_002969 | 10985.652 | 9885.513  |
| NM_014610 | 8172.727  | 6883.922  | NM_006475 | 1457.532  | 1990.041  |
| NM_006621 | 2082.441  | 2033.644  | NM_004620 | 4511.296  | 3924.243  |
| BF347398  | 7018.095  | 6505.361  | AF087940  | 10300.111 | 8562.725  |
| AK026762  | 2225.477  | 2147.209  | AJ277587  | 4237.036  | 3206.929  |
| NM_004412 | 468.759   | 447.66    | D87432    | 12038.676 | 10474.532 |
| L48516    | 2039.058  | 1744.974  | Y18483    | 1692.699  | 2746.775  |
| NM_016648 | 5615.258  | 4206.072  | AI565117  | 60647.754 | 62114.473 |
| AF083930  | 1743.545  | 1505.391  | U28015    | 577.402   | 1165.365  |
| AB040907  | 304.231   | 745.335   | AI299075  | 15108.56  | 18191.713 |
| NM_003426 | 636.357   | 1135.475  | M59979    | 7113.011  | 9764.492  |
| NM_014862 | 1803.107  | 2527.522  | AB011098  | 5219.362  | 6534.064  |
| AK027159  | 1225.387  | 1757.799  | AA609759  | 6701.282  | 8606.131  |
| AF060169  | 336.854   | 509.033   | AA029418  | 11034.462 | 9000.146  |
| NM_005269 | 792.727   | 1305.606  | L20815    | 11847.7   | 11794.137 |
| D70835    | 62494.48  | 73962.688 | AI364483  | 46929.961 | 43349.105 |
| NM_002697 | 6893.158  | 8762.735  | AA456001  | 25306.566 | 28569.918 |
| AF053952  | 28884.926 | 30024.289 | AA176581  | 2355.178  | 3371.592  |
| NM_003213 | 6223.239  | 7935.813  | BI818232  | 533.04    | 620.05    |
| BF184738  | 819.6     | 1354.618  | AA451686  | 15174.985 | 12155.188 |
| NM_014044 | 2142.156  | 2833.865  | AA934644  | 675.416   | 678.047   |
| NM_000900 | 3008.254  | 5671.078  | NM_002050 | 8441.631  | 9585.793  |
| AK023684  | 5899.326  | 10349.047 | NM_007097 | 15239.223 | 14230.906 |
| NM_000232 | 2497.836  | 6688.193  | D87446    | 11167.163 | 13353.243 |
| J05070    | 1162.329  | 2847.114  | U17327    | 3184.027  | 1338.811  |
| AA700390  | 3767.667  | 5813.451  | AB046781  | 456.459   | 241.893   |
| Y18474    | 1338.201  | 2357.588  | M87790    | 58048.633 | 55301.684 |
| AA436163  | 2082.847  | 5079.176  | NM_001768 | 4276.422  | 4687.952  |
| BI907981  | 4187.647  | 8264.792  | NM_000029 | 22796.16  | 32718.965 |
| BI603841  | 12718.475 | 24547.75  | NM_000715 | 2758.99   | 5108.61   |
| M19888    | 2390.252  | 4759.861  | AF035802  | 16899.303 | 21876.447 |
| Y08136    | 2140.192  | 3737.67   | Y08145    | 13570.111 | 17549.965 |
| AA156863  | 13060.804 | 20037.695 | M26123    | 1222.516  | 1799.179  |
| BI915199  | 1772.456  | 3451.945  | NM_001838 | 23502.49  | 34260.574 |
| R82957    | 51514.715 | 68827.016 | NM_019555 | 1853.934  | 2120.375  |
| BI830442  | 3772.087  | 5643.904  | NM_012096 | 19845.348 | 18778.82  |
| AI218732  | 2778.417  | 4830.675  | NM_003905 | 25633.648 | 15570.883 |
| AF079098  | 2526.915  | 2620.589  | L12052    | 5591.386  | 5523.062  |
| AK023448  | 2097.799  | 3205.551  | AB028976  | 13811.19  | 14698.548 |
| Y18213    | 7792.649  | 11469.23  | AK026337  | 8482.539  | 7529.697  |
| NM_003283 | 5939.787  | 9574.562  | NM_015869 | 1392.218  | 881.401   |
| AF249898  | 8183.135  | 13241.435 | NM_004626 | 989.992   | 1360.279  |
| M69181    | 16195.974 | 29158.375 | NM_001899 | 1134.336  | 1264.897  |
| AK027224  | 418.635   | 1638.172  | NM_000908 | 1504.821  | 2225.575  |
| L09078    | 1424.979  | 7014.733  | AB011102  | 9611.426  | 11814.853 |
| NM_002652 | 605.466   | 1662.239  | NM_002660 | 6147.338  | 6461.454  |
| NM_001311 | 17145.654 | 23353.834 | NM_015900 | 1557.41   | 744.986   |
| NM_017798 | 12254.654 | 21811.65  | NM_003706 | 2611.952  | 3975.027  |
| NM_012410 | 4015.583  | 7033.358  | AF182218  | 778.844   | 1658.02   |
| NM_001111 | 15064.084 | 23636.311 | NM_016122 | 4321.763  | 8686.497  |

|           |           |           |           |           |           |
|-----------|-----------|-----------|-----------|-----------|-----------|
| NM_018049 | 11244.203 | 12722.231 | NM_014742 | 1311.266  | 619.226   |
| AJ133439  | 1168.154  | 1648.588  | AK023749  | 1164.025  | 925.074   |
| NM_014395 | 3139.855  | 2857.275  | NM_002337 | 4567.952  | 1956.595  |
| NM_001561 | 947.584   | 809.422   | NM_013245 | 2542.267  | 1291.1    |
| NM_005160 | 2962.976  | 2168.287  | NM_006423 | 49359.441 | 23787.795 |
| NM_000596 | 393.315   | 468.726   | NM_004766 | 2022.461  | 781.092   |
| X78817    | 33216.473 | 19340.533 | NM_005819 | 37118.004 | 25569.063 |
| AB023135  | 1440.585  | 1223.96   | AK024722  | 295.588   | 973.895   |
| AY009401  | 612.935   | 689.259   | AK025520  | 5029.014  | 1743.78   |
| AF294628  | 773.338   | 795.413   | NM_004892 | 5828.134  | 5443.397  |
| NM_004152 | 282.715   | 1001.844  | NM_014597 | 26949.938 | 19933.291 |
| BU565263  | 50675.613 | 77599.234 | NM_017896 | 22321.777 | 14157.397 |
| NM_005028 | 4136.808  | 7828.192  | AB002374  | 11243.268 | 15884.957 |
| NM_001611 | 682.85    | 1563.077  | NM_004466 | 656.488   | 504.081   |
| M59979    | 832.891   | 1062.539  | NM_007081 | 4186.364  | 3611.458  |
| AB018310  | 1003.899  | 3953.67   | AB032964  | 4301.227  | 4429.972  |
| NM_020133 | 631.562   | 1697.05   | BE733605  | 10895.017 | 10150.352 |
| NM_015379 | 15920.9   | 20158.99  | NM_003334 | 50744.063 | 46053.141 |
| NM_015057 | 402.963   | 269.457   | NM_002693 | 7985.91   | 10494.864 |
| AF303398  | 10131.302 | 7851.327  | NM_003671 | 3406.956  | 6256.767  |
| NM_014810 | 1338.32   | 833.235   | NM_017833 | 7370.011  | 8808.177  |
| NM_004738 | 2735.117  | 1429.798  | NM_006675 | 17535.586 | 22020.42  |
| NM_007357 | 3816.561  | 3051.46   | NM_003022 | 11302.599 | 6379.834  |
| NM_003763 | 5574.457  | 5067.935  | NM_004873 | 9288.486  | 8175.184  |
| AB046836  | 993.514   | 2444.194  | NM_019842 | 2506.746  | 1409.939  |
| NM_017816 | 6596.331  | 6685.853  | NM_002951 | 19300.061 | 13379.606 |
| AJ224166  | 3276.622  | 2879.862  | NM_002317 | 2356.546  | 1281.974  |
| AK026098  | 3550.319  | 5118.617  | NM_000320 | 1381.861  | 958.993   |
| NM_012381 | 1477.827  | 2632.633  | NM_003136 | 11515.926 | 13926.894 |
| M20702    | 432.532   | 812.793   | NM_013328 | 11401.392 | 12428.871 |
| NM_006397 | 26983.307 | 41482.012 | NM_000790 | 827.572   | 1327.131  |
| D83776    | 1634.067  | 3328.784  | NM_006475 | 1046      | 1213.481  |
| NM_004088 | 4078.121  | 4063.394  | NM_004620 | 3570.107  | 2264.737  |
| NM_002180 | 969.653   | 2002.273  | AF087940  | 13104.707 | 9838.718  |
| NM_000138 | 2324.489  | 3340.657  | AJ277587  | 3941.115  | 4506.611  |
| NM_018163 | 1312.562  | 1247.508  | D87432    | 10222.135 | 10663.281 |
| AK026362  | 3172.746  | 2416.611  | Y18483    | 1281.786  | 1907.771  |
| NM_004968 | 1646.161  | 1699.825  | AI565117  | 60142.406 | 59370.652 |
| NM_005908 | 2221.94   | 1875.109  | U28015    | 1189.903  | 1920.822  |
| NM_004785 | 3058.714  | 2298.836  | AI299075  | 14688.553 | 19438.486 |
| NM_002428 | 1875.406  | 1407.455  | M59979    | 5950.257  | 10528.339 |
| NM_014674 | 2791.717  | 1986.342  | AA029418  | 15534.735 | 18339.176 |
| NM_018271 | 798.809   | 484.702   | L20815    | 12795.437 | 11438.844 |
| NM_014652 | 644.331   | 350.094   | AI364483  | 55574.789 | 48238.703 |
| AL133020  | 3855.407  | 2513.561  | AA456001  | 23940.777 | 15300.262 |
| NM_003213 | 5900.073  | 9400.695  | AA176581  | 1039.736  | 1105.722  |
| BF184738  | 923.659   | 1531.08   | BI818232  | 340.433   | 240.895   |
| NM_014044 | 2027.358  | 2368.539  | AA451686  | 13222.1   | 8895.479  |
| NM_000900 | 2107.771  | 2852.531  | NM_002050 | 9172.711  | 10307.888 |
| AK023684  | 4381.988  | 5356.61   | NM_007097 | 16433.672 | 17372.764 |
| NM_000232 | 1652.055  | 2675.523  | D87446    | 7836.931  | 8620.123  |
| J05070    | 825.14    | 1287.978  | BF540935  | 16837.992 | 17752.422 |
| AA700390  | 4499.222  | 17715.994 | NM_000715 | 1330.064  | 774.627   |

|           |           |           |           |           |           |
|-----------|-----------|-----------|-----------|-----------|-----------|
| Y18474    | 851.79    | 2799.757  | AF035802  | 10689.088 | 8040.086  |
| AA436163  | 1190.883  | 1737.05   | Y08145    | 7171.394  | 3647.493  |
| BI907981  | 2663.23   | 3239.561  | M26123    | 861.551   | 619.692   |
| BI603841  | 7517.287  | 7580.701  | NM_001838 | 16959.758 | 11230.897 |
| M19888    | 931.209   | 895.008   | NM_019555 | 1982.383  | 2581.184  |
| Y08136    | 775.889   | 583.008   | NM_012096 | 20705.688 | 20827.631 |
| AA156863  | 4792.312  | 3653.3    | NM_003905 | 38849.598 | 49044.656 |
| BI915199  | 850.695   | 764.827   | L12052    | 8793.697  | 15119.022 |
| R82957    | 41668.484 | 22808.863 | AB028976  | 17538.211 | 23980.867 |
| BI830442  | 1899.439  | 1245.837  | AK026337  | 16653.631 | 19700.445 |
| AI218732  | 1263.547  | 999.89    | NM_015869 | 2196.32   | 2840.553  |
| NM_018890 | 22246.65  | 12163.976 | AB031038  | 809.555   | 1544.942  |
| NM_016204 | 7443.805  | 5906.849  | NM_004626 | 1090.598  | 923.322   |
| NM_003283 | 3555.062  | 3935.456  | NM_001899 | 1446.36   | 1070.956  |
| AF249898  | 4617.061  | 6086.391  | NM_004305 | 55166.418 | 51253.859 |
| M69181    | 7036.987  | 6136.729  | AF072506  | 262.863   | 868.31    |
| L09078    | 271.262   | 607.75    | NM_005992 | 742.603   | 793.266   |
| NM_002652 | 357.338   | 440.899   | NM_003144 | 21159.816 | 26965.066 |
| NM_001311 | 10961.108 | 15693.798 | NM_000908 | 3340.978  | 5070.921  |
| NM_017798 | 7044.436  | 10399.818 | AB011102  | 6627.983  | 8619.554  |
| NM_012410 | 2330.525  | 2661.615  | D63480    | 5288.167  | 6445.462  |
| NM_001111 | 8335.187  | 7145.281  | NM_002969 | 12883.024 | 17068.408 |
| NM_018049 | 5898.782  | 4749.772  | M81768    | 465.829   | 293.011   |
| AJ133439  | 683.48    | 564.597   | AK023749  | 1010.078  | 1013.888  |
| NM_014395 | 2131.001  | 1468.38   | NM_002337 | 8335.422  | 8047.259  |
| NM_001561 | 496.443   | 500.525   | NM_013245 | 3974.591  | 3960.943  |
| NM_005160 | 2132.838  | 1503.436  | NM_006423 | 57890.113 | 57558.402 |
| NM_000596 | 374.286   | 418.484   | NM_004766 | 3650.922  | 4088.71   |
| X78817    | 32259.885 | 18843.227 | NM_005819 | 51040.723 | 55710.738 |
| AB023135  | 1035.554  | 1043.652  | AK025520  | 8145.889  | 5475.541  |
| AY009401  | 695.252   | 634.679   | NM_004892 | 5766.643  | 6465.264  |
| AF294628  | 786.622   | 849.921   | NM_014597 | 34952.328 | 41990.711 |
| NM_002448 | 383.436   | 420.395   | NM_017896 | 25946.143 | 17357.902 |
| AF053952  | 22198.807 | 14495.604 | AB002374  | 8264.309  | 3866.1    |
| BU565263  | 49077.918 | 76031.195 | U17327    | 2964.844  | 1233.731  |
| NM_005028 | 3704.259  | 6851.039  | M87790    | 57420.637 | 57989.551 |
| NM_001611 | 610.018   | 1088.681  | NM_001768 | 3542.788  | 6320.104  |
| M59979    | 676.821   | 776.023   | NM_000029 | 17679.635 | 19317.086 |
| AB018310  | 1276.203  | 2310.174  | NM_003136 | 10546.241 | 6891.624  |
| NM_020133 | 640.025   | 982.5     | NM_013328 | 30010.57  | 21350.848 |
| NM_015379 | 14947.802 | 16720.232 | NM_000790 | 556.319   | 272.14    |
| NM_004878 | 1072.661  | 2597.88   | NM_002660 | 7491.763  | 10984.286 |
| NM_015057 | 321.614   | 321.023   | NM_015900 | 2054.94   | 2874.47   |
| AF303398  | 6918.469  | 5246.27   | NM_003706 | 2618.18   | 4098.644  |
| NM_014810 | 1345.129  | 703.253   | AF182218  | 534.747   | 347.172   |
| NM_004738 | 2424.286  | 1550.024  | AL122071  | 320.852   | 708.254   |
| NM_007357 | 3280.835  | 3289.899  | AB033054  | 7789.958  | 4544.323  |
| NM_003763 | 5331.542  | 4668.13   | NM_016122 | 1807.383  | 1411.031  |
| AK023448  | 1448.981  | 704.726   | AF153330  | 1758.802  | 2714.868  |
| Y18213    | 5090.184  | 2781.984  | NM_001652 | 830.633   | 912.56    |
| NM_017816 | 5690.747  | 7084.101  | NM_002050 | 8947.581  | 8486.827  |
| AJ224166  | 3047.609  | 3049.074  | NM_007097 | 14393.238 | 9509.61   |
| AK026098  | 3308.207  | 4284.355  | D87446    | 8405.279  | 4322.215  |

|           |           |           |           |           |           |
|-----------|-----------|-----------|-----------|-----------|-----------|
| NM_012381 | 1400.592  | 1796.998  | BF540935  | 17327.953 | 8558.691  |
| M20702    | 453.997   | 438.735   | NM_004466 | 1005.099  | 1004.554  |
| NM_006397 | 24443.102 | 21806.027 | NM_007081 | 4728.671  | 6738.662  |
| D83776    | 2018.982  | 2699.915  | AB032964  | 5299.166  | 9150.034  |
| NM_00408E | 5152.077  | 6321.424  | BE733605  | 13852.217 | 18025.691 |
| NM_00218C | 1461.126  | 5053.774  | NM_003334 | 50345.156 | 48337.117 |
| NM_00013E | 2677.31   | 5128.305  | NM_002693 | 5463.32   | 6804.79   |
| NM_018163 | 1486.536  | 1681.439  | NM_003671 | 2904.318  | 4170.015  |
| AK026362  | 3723.147  | 3077.872  | AK026000  | 8892.078  | 10425.617 |
| NM_00496E | 1566.765  | 1877.232  | NM_017833 | 4221.368  | 6353.367  |
| NM_00590E | 1753.171  | 1643.029  | NM_006675 | 16323.693 | 26712.949 |
| NM_00478E | 2603.128  | 2145.908  | NM_003022 | 15796.321 | 21191.258 |
| NM_00242E | 1672.309  | 1603.603  | NM_013306 | 321.08    | 106.491   |
| NM_014674 | 2408.813  | 1895.821  | NM_004873 | 10784.804 | 14770.044 |
| NM_018271 | 653.902   | 648.4     | NM_019842 | 2709.304  | 2518.902  |
| NM_014652 | 568.298   | 383.936   | NM_002951 | 22410.152 | 24630.037 |
| AL133020  | 3931.264  | 3362.623  | NM_002317 | 3948.178  | 6271.955  |
| NM_014044 | 1471.954  | 2106.824  | NM_000320 | 1775.739  | 2123.552  |
| NM_00090C | 1152.629  | 2291.118  | CY3Cy5    | 432.454   | 106.263   |
| AK023684  | 4284.21   | 7404.841  | NM_145659 | 1968.212  | 1444.809  |
| NM_000232 | 1763.386  | 2606.573  | NM_021957 | 1058.444  | 709.429   |
| J05070    | 714.975   | 1410.822  | AK022138  | 2122.776  | 1315.39   |
| AA700390  | 2418.482  | 2887.889  | AF086191  | 8909.148  | 7747.201  |
| Y18474    | 857.245   | 1221.397  | NM_01763E | 6886.503  | 7267.044  |
| AA436163  | 1587.707  | 2741.803  | AL050013  | 1517.42   | 1479.639  |
| BI907981  | 3130.046  | 3642.412  | AL133052  | 4056.804  | 4188.73   |
| BI603841  | 8319.646  | 8624.027  | AB037824  | 2729.857  | 3824.763  |
| M19888    | 1042.47   | 1111.651  | AF361494  | 1118.371  | 1377.83   |
| Y08136    | 820.792   | 889.139   | AK022810  | 1812.678  | 2092.716  |
| AA156863  | 6279.524  | 5312.908  | AK001384  | 2467.156  | 3800.376  |
| BI915199  | 534.056   | 615.764   | AK025437  | 4975.268  | 5816.946  |
| R82957    | 45409.855 | 30542.143 | AK074164  | 1072.758  | 886.948   |
| BI830442  | 1522.239  | 1080.178  | NM_145659 | 2755.301  | 1954.829  |
| AI218732  | 1332.191  | 1152.827  | NM_021957 | 1270.953  | 862.338   |
| NM_01889C | 22261.881 | 11525.499 | SR2       | 47014.305 | 30556.4   |
| NM_016204 | 7039.829  | 5459.652  | SR4       | 15256.756 | 11492.363 |
| AB046836  | 1288.675  | 1259.823  | SR6       | 2317.504  | 1957.818  |
| NM_001311 | 6933.023  | 6129.953  | SR8       | 7664.798  | 18846.686 |
| NM_01779E | 5997.787  | 7110.874  | SR10      | 27957.594 | 6947.022  |
| NM_01241C | 2414.665  | 2655.944  | CY3Cy5    | 564.844   | 84.384    |
| NM_001111 | 9761.638  | 9818.095  | AK026818  | 620.44    | 551.065   |
| NM_01804E | 7629.465  | 8096.888  | NM_018469 | 1898.172  | 1477.532  |
| AJ133439  | 898.31    | 1029.977  | AL359932  | 1241.449  | 717.701   |
| NM_01439E | 1894.398  | 1770.378  | AB037850  | 5760.748  | 4220.29   |
| NM_001561 | 769.71    | 866.244   | AK002197  | 3972.387  | 3287.346  |
| NM_00516C | 2282.828  | 2149.099  | AF087996  | 9658.392  | 12802.154 |
| NM_00059E | 478.341   | 532.384   | AK021710  | 3835.632  | 4322.479  |
| X78817    | 41156.008 | 35880.992 | AK024551  | 1678.516  | 2397.664  |
| AB023135  | 1206.662  | 1538.134  | AL833249  | 9165.45   | 10613.094 |
| AY009401  | 417.197   | 605.245   | NM_018374 | 556.836   | 843.474   |
| AF294628  | 533.961   | 625.332   | AF131852  | 908.02    | 1259.539  |
| AK026960  | 321.956   | 392.341   | AK021894  | 3627.9    | 5304.67   |
| NM_001991 | 1641.284  | 2231.978  | NM_020424 | 8402.675  | 9820.032  |

|           |           |           |           |           |           |
|-----------|-----------|-----------|-----------|-----------|-----------|
| NM_000193 | 5371.24   | 4763.789  | AF438313  | 744.745   | 656.864   |
| BC014586  | 948.265   | 1641.742  | NM_017815 | 823.162   | 698.948   |
| NM_002448 | 334.926   | 187.817   | AF147341  | 1730.579  | 1404.351  |
| AF053952  | 22283.004 | 15927.151 | AB033009  | 47596.277 | 30694.686 |
| NM_003213 | 6396.479  | 5369.648  | AL137761  | 559.864   | 484.709   |
| BF184738  | 918.975   | 956.138   | AK022086  | 772.092   | 738.836   |
| NM_020389 | 445.481   | 349.345   | AF147320  | 3118.155  | 2525.222  |
| NM_015057 | 382.921   | 513.24    | AK027024  | 1395.297  | 1147.452  |
| AF303398  | 9022.436  | 8975.317  | AK022339  | 4186.42   | 3376.285  |
| NM_014810 | 1072.06   | 774.122   | AK025126  | 687.625   | 672.262   |
| NM_004738 | 2628.769  | 2396.003  | AK025317  | 18521.037 | 15772.089 |
| NM_007357 | 3159.883  | 3582.486  | AK026119  | 585.319   | 987.49    |
| NM_003763 | 4950.449  | 6106.958  | AK026725  | 6037.396  | 6132.714  |
| AK023448  | 1452.263  | 1113.011  | NM_005110 | 598.048   | 701.375   |
| Y18213    | 4528.666  | 3709.811  | X92110    | 769.188   | 1067.481  |
| NM_003283 | 3523.033  | 2256.963  | AK023122  | 558.15    | 1045.9    |
| AF249898  | 4778.256  | 2974.253  | AF147408  | 5890.118  | 7804.584  |
| M69181    | 7014.191  | 4149.366  | AK027222  | 12294.722 | 14126.373 |
| NM_002652 | 433.307   | 278.237   | AF054994  | 1262.028  | 2085.779  |
| NM_000547 | 810.758   | 934.876   | AF085868  | 638.147   | 963.242   |
| NM_014652 | 870.262   | 859.647   | AL049275  | 381.413   | 221.975   |
| NM_005028 | 2786.911  | 3308.852  | AK054767  | 882.063   | 984.81    |
| M59979    | 740       | 428.819   | AL080086  | 1929.233  | 1425.403  |
| AB018310  | 770.03    | 809.383   | AL049301  | 3098.312  | 2669.423  |
| NM_020133 | 415.976   | 327.852   | AL050042  | 4524.782  | 3453.741  |
| NM_015379 | 13731.27  | 9178.792  | AL117570  | 832.222   | 695.117   |
| AF144638  | 45240.254 | 54563.129 | AL157458  | 1738.541  | 1564.958  |
| NM_000742 | 991.711   | 859.014   | NM_015377 | 1221.504  | 983.969   |
| NM_002355 | 8556.209  | 5650.292  | AL137531  | 1765.891  | 1248.688  |
| AK026608  | 2086.117  | 1626.847  | AK022210  | 495.32    | 517.312   |
| NM_018890 | 22176.986 | 19229.957 | AL080085  | 6788.474  | 5676.553  |
| NM_016204 | 6162.98   | 7951.567  | NM_007017 | 3050.91   | 2886.237  |
| AB046836  | 945.741   | 1228.078  | AL137446  | 9533.434  | 10720.289 |
| NM_017816 | 5717.632  | 5072.555  | AB025286  | 10342.435 | 10852.81  |
| NM_012381 | 3878.75   | 3320.336  | AF009286  | 1003.049  | 1396.505  |
| NM_006397 | 18426.34  | 13085.213 | NM_015880 | 437.091   | 635.036   |
| D83776    | 1341.038  | 1705.967  | AF056437  | 2124.685  | 3187.588  |
| NM_004088 | 4249.63   | 3912.438  | AB032364  | 952.266   | 1040.955  |
| NM_002180 | 1199.315  | 2082.761  | AF009295  | 1569.598  | 1727.671  |
| NM_000138 | 2373.083  | 2802.232  | NM_005029 | 4480.68   | 3859.143  |
| NM_018163 | 1553.229  | 1664.564  | AF056447  | 4265.085  | 4151.197  |
| AK026362  | 3895.681  | 3282.642  | AK001010  | 4623.158  | 3555.549  |
| NM_004968 | 2332.936  | 2524.988  | NM_018076 | 3390.32   | 2805.27   |
| NM_005908 | 2607.777  | 1912.839  | AK021442  | 7793.563  | 4665.206  |
| NM_004785 | 3438.933  | 2152.317  | AK001076  | 1623.828  | 1402.22   |
| NM_002428 | 1901.735  | 1724.05   | AK001820  | 2576.382  | 2136.679  |
| NM_014674 | 2870.509  | 2350.559  | AK021482  | 21443.502 | 19810.93  |
| NM_018271 | 782.221   | 617.718   | AK021730  | 1092.136  | 970.586   |
| NM_020967 | 518.593   | 429.691   | NM_006158 | 46121.602 | 31255.246 |
| NM_001071 | 4541.252  | 3058.101  | NM_006346 | 3726.496  | 2792.372  |
| AF086181  | 170.589   | 172.59    | AK025240  | 6045.9    | 3917.801  |
| AK021540  | 234.386   | 289.47    | NM_017633 | 16825.641 | 14091.424 |
| AK022258  | 727.304   | 391.293   | AF086186  | 48980.07  | 43087.211 |

|           |           |           |           |           |           |
|-----------|-----------|-----------|-----------|-----------|-----------|
| AF131799  | 435.598   | 356.751   | NM_017802 | 10674.914 | 8675.747  |
| AK000455  | 693.684   | 670.187   | AF155194  | 379.443   | 534.271   |
| NM_00523C | 244.208   | 126.975   | AK023667  | 2834.97   | 4296.1    |
| AK023719  | 2274.922  | 2788.366  | AJ008137  | 27710.467 | 38183.18  |
| AK025590  | 1470.966  | 1752.154  | AF085841  | 1207.262  | 1620.494  |
| AY007149  | 841.887   | 1035.858  | AJ008118  | 61404.77  | 63783.621 |
| NM_020967 | 724.378   | 654.741   | AK000939  | 1236.666  | 1738.994  |
| NM_001071 | 5459.708  | 4803.895  | NM_005523 | 437.027   | 577.555   |
| SR2       | 17753.377 | 9758.923  | AL109674  | 4963.36   | 4652.017  |
| SR4       | 4636.22   | 3329.685  | AK024512  | 11515.421 | 10452.154 |
| SR6       | 617.442   | 360.757   | AK023454  | 6276.52   | 4879.728  |
| SR8       | 3070.076  | 14254.388 | L23207    | 3312.761  | 2952.369  |
| SR10      | 7036.829  | 1515.599  | NM_018062 | 3156.253  | 2113.514  |
| AL157484  | 3955.833  | 3839.256  | NM_007128 | 40227.918 | 35913     |
| AK024850  | 335.661   | 234.707   | NM_007160 | 1244.79   | 825.4     |
| Y09836    | 394.662   | 214.066   | NM_018627 | 2173.19   | 2264.661  |
| AL137597  | 1206.19   | 693.365   | S82164    | 3101.54   | 2281.071  |
| AF086044  | 301.781   | 267.748   | AK024394  | 3373.759  | 2739.098  |
| NM_01492E | 307.071   | 111.641   | AF147374  | 1380.026  | 1001.12   |
| AF131790  | 391.886   | 403.637   | AF130091  | 1144.775  | 981.83    |
| NM_01207E | 858.923   | 766.678   | L43338    | 27163.234 | 20034.631 |
| AB004851  | 326.305   | 333.908   | AJ227866  | 42353.121 | 39619.418 |
| AK023911  | 1738.069  | 1748.721  | AF458223  | 7762.244  | 4843.827  |
| NM_001283 | 3449.956  | 3544.312  | AK026822  | 889.748   | 868.5     |
| AL110237  | 399.595   | 426.747   | AK022838  | 27059.313 | 29300.162 |
| D87470    | 731.033   | 680.714   | NM_003509 | 1160.149  | 1379.329  |
| AF147307  | 2350.858  | 2096.463  | AF086519  | 2896.412  | 2864.716  |
| AK001829  | 694.28    | 729.534   | AF055012  | 12876.795 | 12299.626 |
| NM_01652E | 1681.609  | 1491.73   | AK022307  | 6433.622  | 6841.892  |
| AK024931  | 5909.238  | 5225.497  | AF132201  | 578.573   | 564.837   |
| AK025659  | 888.539   | 516.428   | U00950    | 635.776   | 457.923   |
| AK026788  | 1064.532  | 634.917   | AF085997  | 1097.823  | 1024.463  |
| AK025272  | 1642.922  | 1120.119  | NM_005172 | 12018.155 | 9700.479  |
| AK026824  | 231.287   | 268.144   | AK025192  | 51648.344 | 51322.445 |
| AL365407  | 783.795   | 591.952   | NM_012403 | 9358.729  | 7625.26   |
| AK000840  | 6943.258  | 6220.379  | AK022611  | 10720.06  | 17671.541 |
| AL162073  | 653.03    | 600.68    | NM_004952 | 4676.722  | 2987.888  |
| AL390160  | 409.765   | 463.608   | AY007239  | 1182.801  | 810.181   |
| AJ006835  | 8214.779  | 8806.356  | NM_020414 | 9130.537  | 10238.783 |
| AL110138  | 494.992   | 477.439   | AB037730  | 5944.008  | 5393.963  |
| AL122039  | 490.474   | 549.258   | AF147429  | 2585.131  | 2736.185  |
| AF070577  | 3538.208  | 2809.077  | NM_001357 | 16100.383 | 14566.407 |
| BC028422  | 366.039   | 174.386   | NM_003893 | 5557.555  | 5063.258  |
| AK022219  | 244.145   | 238.903   | AB037816  | 4681.903  | 5602.426  |
| AJ011378  | 571.229   | 465.067   | NM_014265 | 1502.711  | 2075.209  |
| AF009266  | 301.131   | 203.065   | U92026    | 3487.414  | 4597.709  |
| AF009310  | 342.388   | 435.35    | AF086234  | 38121.371 | 44749.855 |
| AF060168  | 783.252   | 687.744   | AK023680  | 14432.753 | 14351.522 |
| AF009275  | 518.007   | 596.228   | AF009324  | 6275.79   | 6347.437  |
| AF015251  | 288.011   | 431.961   | AK022112  | 1339.893  | 1062.108  |
| AF056426  | 475.024   | 396.507   | AL137480  | 52903.531 | 44901.797 |
| AK001096  | 227.723   | 273.685   | AK022182  | 2255.51   | 1401.282  |
| NM_01832E | 377.578   | 352.882   | D16473    | 4418.905  | 3763.25   |

|           |           |           |           |           |           |
|-----------|-----------|-----------|-----------|-----------|-----------|
| AK001150  | 2260.402  | 1914.484  | AB028968  | 4716.565  | 3902.977  |
| AK002123  | 214.065   | 266.951   | AK001202  | 2465.068  | 2289.799  |
| AK021633  | 776.27    | 592.636   | AF195764  | 54155.371 | 55285.242 |
| AF189251  | 253.231   | 242.2     | AF055029  | 4182.167  | 5169.287  |
| NM_005322 | 728.7     | 379.089   | AB011542  | 3285.869  | 2465.613  |
| AK024465  | 4468.411  | 3271.881  | NM_001853 | 9136.387  | 6915.402  |
| AF075119  | 273.334   | 274.286   | U41737    | 1068.602  | 923.69    |
| AK021478  | 1806.244  | 1247.087  | NM_005799 | 2618.323  | 2139      |
| AF131782  | 488.555   | 416.918   | X99661    | 2982.6    | 2584.256  |
| NM_014210 | 2550.45   | 1418.804  | NM_005927 | 4307.064  | 3937.746  |
| AK021603  | 1205.252  | 788.392   | AB028983  | 12630.745 | 11277.039 |
| AL110136  | 1991.864  | 1557.492  | AB037800  | 5273.045  | 5766.527  |
| AJ008130  | 19170.441 | 13500.878 | AK026377  | 3726.343  | 5459.759  |
| AF086502  | 667.59    | 1059.776  | NM_018660 | 6108.296  | 7046.629  |
| L39924    | 903.78    | 1026.788  | NM_003394 | 10212.404 | 12642.895 |
| U52054    | 3288.416  | 3117.831  | NM_014636 | 2109.763  | 2076.732  |
| AK023325  | 711.649   | 636.824   | NM_006747 | 5790.782  | 6703.932  |
| NM_017985 | 1101.741  | 1094.608  | NM_007086 | 3553.084  | 4945.292  |
| AK025866  | 2168.246  | 1997.259  | NM_003870 | 21270.818 | 21782.99  |
| AF088058  | 1473.062  | 1233.545  | AK024507  | 2676.662  | 2520.765  |
| NM_000513 | 598.28    | 521.208   | NM_001243 | 6569.684  | 5042.69   |
| Y11165    | 934.122   | 636.494   | AK025997  | 2577.376  | 2085.879  |
| NM_003530 | 405.201   | 277.682   | NM_005546 | 1112.385  | 780.823   |
| AJ227871  | 404.897   | 255.942   | NM_000299 | 726.094   | 582.825   |
| AK025344  | 970.388   | 696.186   | S51112    | 710.832   | 696.24    |
| D28589    | 10716.273 | 5116.185  | NM_014887 | 3556.771  | 3364.079  |
| AF301223  | 448.411   | 425.961   | NM_002590 | 749.272   | 629.997   |
| NM_017867 | 1766.999  | 960.773   | NM_018556 | 24836.516 | 41754.957 |
| U92820    | 1197.298  | 620.597   | NM_005235 | 2339.253  | 1302.89   |
| NM_017937 | 622.272   | 666.936   | NM_005600 | 5288.937  | 4155.521  |
| AL360266  | 1266.887  | 984.992   | NM_005967 | 20352.541 | 12669.565 |
| AL160132  | 13268.876 | 8675.819  | AB014566  | 5573.917  | 4948.074  |
| NM_019557 | 1049.069  | 819.089   | NM_015678 | 1466.298  | 1448.948  |
| NM_003545 | 183.705   | 283.549   | AK025950  | 644.791   | 983.523   |
| AK024413  | 436.472   | 478.551   | NM_014223 | 4186.706  | 4834.106  |
| AL137752  | 281.209   | 165.86    | NM_016194 | 1558.942  | 1631.445  |
| AK022247  | 614.083   | 762.631   | AL050385  | 2252.06   | 2135.067  |
| AK001453  | 1404.647  | 1737.725  | NM_007027 | 9112.545  | 10121.052 |
| AB007972  | 2016.109  | 2627.12   | NM_000633 | 55678.309 | 56068.742 |
| AL390144  | 3039.515  | 3016.611  | AB037855  | 5322.505  | 6680.824  |
| AK024017  | 879.931   | 846.641   | AK024524  | 10050.719 | 10530.253 |
| X56196    | 558.537   | 388.522   | NM_000562 | 12196.253 | 11631.229 |
| D17220    | 3504.933  | 3195.101  | NM_020353 | 1356.244  | 1069.921  |
| D28363    | 41860.25  | 24096.135 | NM_019011 | 39029.887 | 32828.484 |
| AB011171  | 427.746   | 514.972   | NM_004879 | 12345.718 | 11654.593 |
| NM_003586 | 516.655   | 458.96    | AB020694  | 3722.354  | 2526.36   |
| NM_000922 | 1216.547  | 903.23    | NM_016071 | 47516.707 | 36121.266 |
| NM_013232 | 3675.489  | 2324.628  | AL050131  | 2467.444  | 2100.17   |
| NM_017993 | 490.698   | 383.06    | NM_004475 | 24740.727 | 19421.299 |
| NM_000362 | 358.89    | 221.404   | NM_001627 | 6877.381  | 6258.91   |
| NM_014429 | 1153.719  | 911.196   | NM_002544 | 2684.9    | 3047.526  |
| AK000770  | 828.081   | 580.642   | X77690    | 6866.754  | 3908.382  |
| NM_002370 | 4976.361  | 4601.807  | NM_006536 | 2949.254  | 2326.813  |



|           |           |           |           |           |           |
|-----------|-----------|-----------|-----------|-----------|-----------|
| NM_01567C | 1487.384  | 1540.077  | NM_00565E | 16438.77  | 15095.328 |
| NM_01470E | 654.795   | 332.696   | NM_00242Z | 2764.805  | 2644.954  |
| AK002203  | 282.444   | 172.14    | NM_00669C | 13421.854 | 12989.392 |
| AK026469  | 3148.933  | 2543.845  | NM_00615E | 417.419   | 651.849   |
| D16935    | 2291.668  | 2430.04   | AF218022  | 5654.504  | 6003.689  |
| U92019    | 749.907   | 1015.179  | NM_00334E | 6342.822  | 6268.749  |
| U52835    | 854.885   | 914.615   | AL137663  | 434.475   | 919.186   |
| NM_00075E | 1753.93   | 1741.329  | AB006198  | 26432.246 | 26145.209 |
| AK022148  | 480.743   | 601.738   | U72518    | 6984.26   | 6227.895  |
| Z36811    | 48468.766 | 44427.207 | AF264765  | 1863.818  | 1652.953  |
| NM_01895C | 8519.825  | 6381.568  | NM_01532Z | 4833.416  | 4258.113  |
| K03200    | 2722.124  | 2606.489  | NM_016607 | 14230.605 | 11735.121 |
| U17629    | 1957.635  | 1833.544  | NM_00327E | 1237.546  | 873.674   |
| NM_02042E | 4689.502  | 4452.157  | NM_00026E | 58308.438 | 52293.914 |
| U79265    | 1454.635  | 1335.782  | M30493    | 59687.836 | 56748.613 |
| AK022868  | 3335.445  | 1892.906  | AJ008160  | 2022.073  | 1879.056  |
| NM_002687 | 5358.406  | 4002.915  | NM_005824 | 3252.767  | 2765.15   |
| NM_000627 | 2067.933  | 1216.089  | AF052211  | 13219.604 | 18236.605 |
| NM_00003E | 549.296   | 179.062   | U66561    | 3288.536  | 2403.469  |
| NM_00082E | 463.054   | 336.673   | NM_00030E | 6325.983  | 4488.065  |
| NM_00196E | 254.513   | 202.411   | NM_00220C | 2637.384  | 2192.409  |
| NM_004334 | 1038.125  | 847.083   | AF017433  | 2605.894  | 2273.214  |
| NM_00388E | 3601.11   | 2792.66   | AF130111  | 4739.771  | 4788.409  |
| NM_00584E | 1510.643  | 1009.724  | NM_016307 | 16078.566 | 17108.41  |
| NM_003854 | 214.987   | 289.607   | AB028449  | 8646.545  | 9320.031  |
| NM_01798C | 374.493   | 347.594   | NM_004697 | 8986.002  | 10865.421 |
| NM_00125Z | 26876.068 | 14799.977 | U94384    | 893.229   | 1112.147  |
| AF053712  | 1327.924  | 1348.973  | AF131776  | 13280.094 | 17689.561 |
| NM_003947 | 549.756   | 676.218   | NM_02052E | 15587.091 | 18098.197 |
| NM_002821 | 10277.909 | 8829.342  | NM_00704C | 58733.852 | 57979.102 |
| M96652    | 33597.313 | 23837.641 | NM_01448E | 22593.049 | 22158.916 |
| L41690    | 1525.001  | 1665.166  | AK024249  | 7740.405  | 7785.118  |
| NM_01805E | 853.782   | 959.115   | AF239156  | 16221.365 | 13487.126 |
| NM_00093E | 44312.359 | 29179.707 | NM_02039C | 9871.722  | 7121.766  |
| NM_00518E | 256.181   | 237.382   | NM_003321 | 37320.934 | 33475.383 |
| NM_006514 | 1423.437  | 1746.222  | U18937    | 28797.344 | 22568.727 |
| AF065164  | 3859.787  | 3449.644  | U01925    | 1507.037  | 1220.358  |
| AJ008143  | 12781.909 | 9296.068  | AJ420488  | 60151.891 | 62958.574 |
| NM_007144 | 533.765   | 339.453   | AF268872  | 4876.886  | 3646.492  |
| NM_00509E | 211.944   | 273.687   | AK022180  | 57501.258 | 60442.148 |
| NM_004424 | 5802.328  | 3343.72   | NM_00122E | 2615.142  | 3433.236  |
| AL133117  | 1356.056  | 1000.706  | NM_00133E | 4620.688  | 4745.401  |
| AF070586  | 5280.918  | 3344.731  | AB050716  | 2705.013  | 5219.811  |
| NM_01441Z | 1110.336  | 771.702   | AF161353  | 37260.523 | 30419.27  |
| NM_01330E | 390.307   | 477.017   | NM_000764 | 12550.913 | 7843.477  |
| NM_012227 | 3014.178  | 1921.616  | NM_00414E | 50026.016 | 46504.93  |
| NM_006101 | 1326.796  | 1157.751  | NM_00300Z | 32922.965 | 27230.523 |
| NM_001237 | 5044.859  | 3449.135  | D42047    | 8767.135  | 9541.56   |
| NM_002507 | 1298.821  | 1544.766  | AB009282  | 32721.105 | 37323.34  |
| NM_01596Z | 1795.783  | 2526.001  | NM_005004 | 56061.887 | 54547.988 |
| NM_01614E | 593.394   | 976.224   | NM_01463E | 12083.949 | 13658.22  |
| NM_01607E | 10395.815 | 16601.119 | NM_00639Z | 7320.994  | 7323.12   |
| NM_00379E | 1206.411  | 1300.377  | NM_014717 | 7366.022  | 7623.787  |

|           |           |           |            |           |           |
|-----------|-----------|-----------|------------|-----------|-----------|
| NM_004401 | 8932.261  | 12498.828 | NM_017922  | 6953.488  | 6683.909  |
| NM_001849 | 14496.38  | 24340.471 | NM_002823  | 57026.973 | 58489.281 |
| AF255910  | 1579.645  | 3927.125  | NM_017916  | 34394.449 | 32983.074 |
| NM_000425 | 315.934   | 631.461   | NM_001805  | 40906.387 | 40730.102 |
| NM_016146 | 6480.284  | 13710.192 | AK022360   | 10993.452 | 9811.197  |
| AB046776  | 1568.951  | 4046.869  | AK095694   | 2059.49   | 1691.003  |
| D42084    | 2509.623  | 2195.357  | X52341     | 57654.301 | 54398.871 |
| NM_001734 | 294.209   | 317.374   | NM_003082  | 10028.879 | 5953.333  |
| NM_014693 | 3073.756  | 2927.271  | AL133632   | 13228.832 | 11034.276 |
| AB007896  | 1486.496  | 959.719   | NM_004343  | 37113.582 | 30061.078 |
| AB007916  | 2205.179  | 1862.017  | X52355     | 22762.588 | 22094.777 |
| NM_002874 | 1102.261  | 712.172   | NM_006963  | 22540.594 | 24802.729 |
| AB028980  | 242.817   | 66.298    | NM_000307  | 3244.46   | 4733.85   |
| AF049140  | 3182.109  | 3304.486  | NM_006510  | 42115.98  | 40012.75  |
| AB037793  | 423.169   | 433.703   | NM_003141  | 19171.229 | 24761.08  |
| AL136794  | 2278.447  | 2690.236  | NM_020245  | 19009.932 | 18847.074 |
| BC035601  | 46082.281 | 67020.297 | NM_007175  | 1493.677  | 1781.521  |
| NM_001458 | 2974.819  | 6842.649  | AB046381   | 1442.689  | 1889.347  |
| NM_020388 | 9626.251  | 16770.855 | AJ011497   | 18408.084 | 21914.291 |
| NM_004202 | 46001.855 | 69327.609 | NM_003018  | 1655.701  | 2428.458  |
| AB046829  | 1592.506  | 3917.494  | NM_000336  | 5272.125  | 6642.675  |
| NM_016445 | 2142.815  | 4325.699  | W61100     | 54607.762 | 65882.367 |
| NM_003379 | 44868.77  | 59725.422 | AA608568   | 19413.443 | 20039.832 |
| NM_004521 | 18480.85  | 23534.576 | BG831301   | 55541.672 | 58606.242 |
| AF229162  | 2847.545  | 6296.452  | M14764     | 5862.802  | 6367.949  |
| U02309    | 48342.371 | 70291.539 | AA478647   | 15814.879 | 17530.273 |
| AB028991  | 6691.168  | 12075.395 | M35999     | 3559.759  | 3349.808  |
| AF263547  | 10897.043 | 14560.091 | AW058501   | 3981.228  | 3647.239  |
| NM_003923 | 479.186   | 570.888   | M81379     | 1563.341  | 1593.244  |
| NM_004831 | 2089.119  | 3413.387  | ID 2623896 | 6756.422  | 6019.264  |
| NM_014213 | 8824.82   | 14872.738 | ID 2602214 | 21303.543 | 16170.411 |
| NM_000168 | 4371.945  | 6744.703  | ID 2071279 | 14906.892 | 12749.685 |
| AF294629  | 13475.429 | 20690.934 | L10709     | 14298.685 | 9675.812  |
| NM_000545 | 14536.361 | 25194.119 | N35489     | 4143.099  | 3482.328  |
| NM_002136 | 44496.875 | 67632.5   | AA482489   | 1104.059  | 1070.977  |
| AK025571  | 3554.729  | 6984.027  | AA458922   | 5770.57   | 7786.421  |
| NM_004940 | 460.689   | 1040.742  | NM_004168  | 29862.125 | 49083.582 |
| NM_014463 | 36601.211 | 33968.496 | NM_003485  | 14443.546 | 11738.884 |
| NM_005520 | 22802.068 | 26506.27  | NM_005038  | 7604.792  | 8369.204  |
| AK023265  | 1877.268  | 4544.524  | M95923     | 14310.002 | 12036.925 |
| NM_018723 | 980.412   | 2327.913  | NM_002415  | 60690.008 | 61062.617 |
| AB029009  | 5923.206  | 11719.792 | NM_006332  | 60750.625 | 57101.051 |
| AF112207  | 3840.885  | 7385.365  | NM_002000  | 624.999   | 1059.56   |
| AJ420488  | 48371.406 | 67541.102 | NM_000916  | 9645.899  | 12312.111 |
| NM_005594 | 52783.633 | 41183.457 | NM_018663  | 11782.001 | 14597.178 |
| NM_004461 | 52660.582 | 57358.266 | NM_145904  | 27646.512 | 31574.068 |
| NM_018473 | 3098.469  | 3144.154  | NM_006796  | 26565.15  | 26106.563 |
| BF106121  | 1090.472  | 1805.108  | NM_000706  | 3127.437  | 3308.384  |
| AK022590  | 1476.842  | 1406.493  | NM_015941  | 6823.061  | 7083.601  |
| AK024343  | 1294.961  | 1119.082  | NM_003655  | 7653.591  | 7783.945  |
| NM_001936 | 262.799   | 198.877   | NM_014837  | 9072.432  | 8767.607  |
| NM_002569 | 602.885   | 493.038   | NM_017729  | 1008.094  | 1111.891  |
| M12078    | 4264.29   | 10158.835 | NM_005259  | 39024.16  | 33654.188 |

|            |           |           |           |           |           |
|------------|-----------|-----------|-----------|-----------|-----------|
| NM_004550  | 10878.392 | 17539.475 | NM_002840 | 988.034   | 997.007   |
| NM_000785  | 2697.207  | 7947.044  | NM_006174 | 3246.152  | 3103.318  |
| NM_004110  | 28188.783 | 31057.217 | NM_015850 | 23308.342 | 17345.309 |
| NM_013387  | 45144.012 | 64489.711 | NM_004864 | 2373.341  | 2635.438  |
| NM_005262  | 27668.219 | 29042.566 | NM_002838 | 12611.323 | 13052.203 |
| NM_005757  | 1257.304  | 1783.615  | AK027377  | 1302.521  | 1653.568  |
| NM_016483  | 492.559   | 582.998   | BF528358  | 1496.005  | 2029.392  |
| NM_020128  | 1158.455  | 601.493   | NM_016339 | 1826.474  | 2914.355  |
| NM_005068  | 7058.968  | 7925.286  | AK025111  | 1278.353  | 1352.311  |
| NM_018223  | 3982.125  | 3719.624  | NM_001732 | 5790.279  | 5939.006  |
| NM_006693  | 15647.925 | 10306.709 | NM_018690 | 12673.196 | 12925.157 |
| NM_001722  | 1466.237  | 1719.828  | NM_000860 | 3209.326  | 3274.06   |
| AB046802   | 2384.718  | 2195.526  | AB037798  | 4446.432  | 5784.653  |
| NM_003297  | 738.594   | 990.457   | NM_000780 | 1110.754  | 1530.412  |
| X74861     | 276.641   | 429.216   | AF272663  | 32588.939 | 43213.484 |
| NM_006940  | 806.532   | 601.58    | NM_012190 | 6099.763  | 9296.034  |
| NM_018269  | 5511.106  | 4499.275  | AB033015  | 796.096   | 1118.068  |
| AK024633   | 2410.867  | 2566.803  | AF277719  | 1137.409  | 1515.675  |
| NM_001453  | 2810.058  | 2834.985  | NM_000791 | 4006.135  | 4485.542  |
| NM_005257  | 9968.297  | 7793.954  | NM_003681 | 5996.39   | 7334.879  |
| AF011573   | 7152.358  | 5962.531  | NM_014909 | 19615.883 | 18817.131 |
| NM_002145  | 3294.378  | 2960.536  | NM_015700 | 7651.918  | 7714.782  |
| NM_007245  | 5095.989  | 4557.497  | U66621    | 22859.252 | 22657.443 |
| NM_001890  | 774.718   | 1097.958  | NM_005720 | 60130.215 | 53824.496 |
| NM_001286  | 3224.166  | 4019.891  | AB040936  | 1506.057  | 1917.851  |
| NM_014648  | 664.563   | 869.061   | AB023161  | 350.918   | 464.376   |
| NM_019604  | 500.235   | 639.216   | U61736    | 2818.927  | 3330.457  |
| NM_005073  | 661.515   | 543.816   | AJ132086  | 3459.494  | 4293.298  |
| NM_000951  | 2974.43   | 3044.547  | U92816    | 42491.09  | 47573.609 |
| X52599     | 1948.163  | 1562.844  | NM_004106 | 2751.456  | 4863.3    |
| AA029300   | 2166.107  | 1540.871  | S76984    | 21528.318 | 23698.789 |
| BG708842   | 40660.586 | 32016.957 | NM_014495 | 60170.871 | 52137.371 |
| M19723     | 43917.387 | 60537.242 | NM_014081 | 5517.945  | 6718.946  |
| X06256     | 2180.715  | 2595.469  | NM_005651 | 3142.073  | 4029.909  |
| AA709271   | 981.118   | 1310.788  | AK023699  | 363.13    | 528.882   |
| M34057     | 2637.726  | 2580.416  | NM_005418 | 744.105   | 546.656   |
| ID 1984668 | 1491.28   | 1437.767  | NM_007195 | 2562.529  | 3377.131  |
| ID 1832579 | 2125.373  | 2581.231  | AK023337  | 14903.662 | 19258.521 |
| H-430185 N | 920.826   | 1054.634  | NM_013275 | 36556.746 | 40799.219 |
| D16583     | 3511.363  | 4285.681  | AB037842  | 1585.608  | 1454.824  |
| H44051     | 1001.933  | 1184.45   | U92074    | 650.773   | 1076.715  |
| AA481547   | 17368.443 | 13546.257 | NM_019011 | 4771.319  | 5567.547  |
| AA831880   | 1596.866  | 1739.963  | AF459094  | 9235.001  | 10468.523 |
| T64880     | 4377.083  | 3799.985  | NM_003157 | 7902.113  | 8587.584  |
| NM_002852  | 2585.688  | 3231.855  | NM_004938 | 2164.31   | 2580.662  |
| NM_001817  | 2841.595  | 2183.92   | NM_014326 | 2878.23   | 2540.558  |
| AF063611   | 617.545   | 1027.819  | NM_004448 | 1719.771  | 1559.65   |
| NM_006039  | 1093.715  | 1147.113  | NM_015981 | 4566.463  | 4020.709  |
| NM_002089  | 401.588   | 443.632   | NM_000455 | 8550.365  | 8545.493  |
| M28983     | 229.592   | 127.646   | NM_014791 | 12757.934 | 11748.726 |
| NM_014656  | 6108.703  | 4749.717  | NM_003318 | 9178.508  | 7574.67   |
| NM_002076  | 1918.311  | 1710.54   | NM_004362 | 16326.188 | 17209.512 |
| X05299     | 2212.179  | 1509.352  | NM_000182 | 23205.09  | 25973.678 |

|           |           |           |            |           |           |
|-----------|-----------|-----------|------------|-----------|-----------|
| BM468475  | 508.783   | 571.412   | AK023384   | 6484.096  | 9470.748  |
| NM_00031E | 2699.351  | 2130.16   | NM_01602E  | 23771.627 | 38235.375 |
| NM_00206C | 18000.377 | 13220.881 | NM_02024E  | 23845.797 | 28000.084 |
| AK001230  | 3598.252  | 3915.318  | NM_00717E  | 2117.388  | 2584.716  |
| NM_01468C | 6696.909  | 6769.143  | AB046381   | 2105.699  | 2262.683  |
| NM_005027 | 1914.545  | 2200.849  | AJ011497   | 22816.291 | 29257.084 |
| NM_00461Z | 1335.406  | 1210.221  | NM_00301E  | 2717.984  | 3468.967  |
| NM_00560E | 17383.697 | 16059.042 | NM_00033E  | 6844.847  | 8859.304  |
| NM_00110E | 395.382   | 391.664   | W61100     | 59968.664 | 61446.086 |
| NM_01849C | 1646.387  | 1825.439  | AA608568   | 25553.666 | 31321.533 |
| NM_00477E | 426.509   | 417.52    | BG831301   | 59250.367 | 56990.445 |
| NM_01225E | 494.348   | 236.232   | M14764     | 7300.253  | 7218.506  |
| NM_00622A | 41759.949 | 45901.641 | AA478647   | 16176.194 | 17730.482 |
| AL137300  | 4775.519  | 3980.501  | M35999     | 3463.7    | 3576.392  |
| NM_00022E | 2237.763  | 3518.871  | AW058501   | 4248.688  | 4410.446  |
| NM_00699E | 17623.006 | 15289.918 | M81379     | 1781.509  | 2164.531  |
| NM_00312E | 7828.803  | 7729.897  | ID 2623896 | 7412.252  | 7468.052  |
| NM_00195E | 2902.688  | 3151.611  | ID 2602214 | 21978.869 | 16066.971 |
| AB033064  | 1877.165  | 1767.422  | ID 2071279 | 16342.054 | 14036.075 |
| AK022317  | 5297.708  | 5274.158  | L10709     | 15693.331 | 13323.705 |
| NM_01839E | 5924.728  | 5306.263  | N35489     | 3752.2    | 3541.984  |
| NM_00312A | 6059.408  | 3880.465  | AA482489   | 945.095   | 909.032   |
| NM_00688E | 35179.598 | 17742.643 | AA458922   | 5690.805  | 5768.739  |
| NM_004531 | 3088.461  | 3139.25   | NM_00171E  | 29148.371 | 33552.469 |
| AB040920  | 766.298   | 807.478   | AL080062   | 4425.025  | 4724.504  |
| NM_01572C | 9104.813  | 9160.298  | AF308802   | 4977.293  | 8166.462  |
| AB033070  | 526.271   | 845.171   | M95923     | 15446.271 | 14674.868 |
| AK000158  | 3733.406  | 4580.692  | NM_00241E  | 61635.867 | 59551.27  |
| NM_00576E | 1113.753  | 1481.722  | NM_00633E  | 61192.77  | 62851.395 |
| AK024500  | 12800.406 | 12983.314 | NM_00200C  | 793.582   | 811.843   |
| NM_00256A | 11812.402 | 12136.283 | NM_00091E  | 12826.579 | 16209.809 |
| NM_00096E | 419.313   | 401.068   | NM_01866E  | 15983.683 | 20436.418 |
| NM_01330E | 4458.716  | 3934.897  | NM_145904  | 34902.691 | 41384.414 |
| AF027302  | 3430.109  | 3250.638  | NM_00679E  | 34448.086 | 41484.035 |
| NM_00670E | 16722.951 | 11857.839 | NM_00070E  | 3612.939  | 4468.425  |
| AB037835  | 1304.754  | 1096.052  | NM_015941  | 10698.963 | 12281.547 |
| NM_01622E | 581.1     | 1738.386  | NM_00365E  | 11260.713 | 14851.744 |
| NM_000157 | 2081.584  | 2539.929  | NM_014837  | 13801.793 | 17185.02  |
| NM_01808E | 666.917   | 792.126   | NM_01772E  | 1542.325  | 1698.356  |
| BC013695  | 5369.716  | 3775.911  | NM_00525E  | 48438.016 | 47704.156 |
| NM_00720E | 425.512   | 332.888   | NM_00284C  | 1036.29   | 1369.055  |
| AK023035  | 2664.763  | 1946.906  | NM_00617A  | 3559.925  | 4553.768  |
| NM_01484E | 1574.662  | 1298.483  | NM_01585C  | 24432.172 | 23773.18  |
| AB011164  | 2742.754  | 2173.618  | NM_00486A  | 2185.719  | 3098.638  |
| M24750    | 847.898   | 1002.853  | NM_00283E  | 11090.113 | 8454.112  |
| NM_00596E | 1938.177  | 1861.754  | AK027377   | 1238.914  | 1206.623  |
| NM_00274C | 3311.384  | 3554.207  | BF528358   | 2144.075  | 2192.844  |
| AL117482  | 2108.644  | 2795.622  | NM_01633E  | 1847.999  | 2203.289  |
| NM_00654E | 33281.141 | 23206.566 | NM_00651C  | 45195.332 | 51552.551 |
| AB018324  | 8966.553  | 9184.095  | NM_003141  | 17565.799 | 22618.084 |
| NM_00274Z | 45744.113 | 46253.867 | NM_01869C  | 12881.278 | 11190.995 |
| Z25431    | 1660.748  | 2053.17   | NM_00086C  | 2525.607  | 1940.339  |
| NM_005627 | 8568.076  | 10736.538 | AB037798   | 2952.08   | 1737.1    |

|            |           |           |           |           |           |
|------------|-----------|-----------|-----------|-----------|-----------|
| M64497     | 536.221   | 511.391   | NM_000780 | 826.071   | 1291.073  |
| NM_007274  | 10675.911 | 10222.747 | AF272663  | 40799.941 | 53896.051 |
| NM_003356  | 5379.281  | 5182.043  | NM_012190 | 6422.152  | 7306.584  |
| AF238315   | 410.11    | 512.809   | AB033015  | 747.213   | 1687.983  |
| NM_001890  | 667.322   | 986.638   | AF277719  | 1169.071  | 1379.927  |
| NM_001286  | 2499.868  | 2321.653  | NM_000791 | 4252.209  | 4550.663  |
| NM_014648  | 646.325   | 664.879   | NM_003681 | 6387.455  | 7597.077  |
| NM_019604  | 432.206   | 524.492   | NM_004677 | 563.67    | 529.385   |
| NM_005073  | 629.705   | 619.949   | NM_014909 | 24395.543 | 27399.41  |
| NM_000951  | 2452.345  | 2732.064  | NM_015700 | 10029.231 | 12796.456 |
| X52599     | 1425.45   | 1254.652  | U66621    | 29099.115 | 37139.27  |
| AA029300   | 1957.953  | 1812.443  | NM_005720 | 57173.426 | 56716.438 |
| BG708842   | 41281.324 | 30868.775 | AB040936  | 2457.511  | 3122.925  |
| M19723     | 48431.777 | 47228.473 | U61736    | 3473.177  | 4047.932  |
| X06256     | 1636.408  | 1516.018  | AJ132086  | 4954.851  | 5598.912  |
| AA709271   | 844.094   | 1042.77   | U92816    | 46769.316 | 52446.211 |
| M34057     | 2788.47   | 2601.323  | NM_004106 | 3059.764  | 4806.569  |
| ID 1984668 | 1283.979  | 1290.091  | NM_003485 | 24749.332 | 28964.494 |
| ID 1832579 | 1756.147  | 1795.76   | NM_005038 | 10737.068 | 13447.693 |
| H-430185 N | 872.42    | 858.217   | NM_014081 | 3533.01   | 2599.559  |
| D16583     | 3310.246  | 4306.623  | NM_005651 | 2156.721  | 1366.623  |
| H44051     | 961.675   | 1190.715  | NM_007195 | 2851.255  | 3351.074  |
| AA481547   | 14953.254 | 14582.944 | AK023337  | 14100.227 | 12441.588 |
| AA831880   | 1304.586  | 1731.677  | NM_013275 | 33404.895 | 29025.426 |
| T64880     | 3659.517  | 3876.712  | AB037842  | 1536.508  | 1314.017  |
| AB028990   | 671.62    | 645.424   | NM_019011 | 5093.682  | 5341.322  |
| AK002089   | 198.08    | 245.644   | AF459094  | 8966.25   | 9301.031  |
| AF063611   | 582.955   | 708.095   | NM_003157 | 7893.803  | 7893.574  |
| NM_006039  | 968.995   | 1013.744  | NM_004938 | 2152.715  | 2512.163  |
| NM_002089  | 615.277   | 1051.46   | NM_014326 | 3234.549  | 3081.322  |
| NM_004590  | 265.668   | 271.841   | NM_004448 | 1493.112  | 1711.04   |
| NM_014656  | 4645.16   | 5179.335  | NM_015981 | 4422.345  | 3774.35   |
| NM_002076  | 1533.712  | 1309.4    | NM_000455 | 8850.606  | 8091.878  |
| X05299     | 1978.203  | 2343.05   | NM_014791 | 14059.037 | 13246.432 |
| BM468475   | 479.743   | 478.251   | NM_003318 | 10834.686 | 8355.43   |
| NM_000318  | 2161.975  | 1691.259  | NM_004362 | 19772.355 | 19337.021 |
| NM_002060  | 15289.748 | 11209.406 | NM_000182 | 29192.643 | 36342.289 |
| AK001230   | 2531.508  | 2104.456  | AK023384  | 7605.555  | 10172.254 |
| NM_014680  | 5377.303  | 4387.651  | NM_016026 | 26978.064 | 32920.43  |
| NM_005027  | 2081.769  | 2270.73   | AK025111  | 1806.826  | 2769.687  |
| NM_004612  | 1238.333  | 1106.619  | NM_001732 | 9819.577  | 12059.995 |
| NM_005608  | 14110.232 | 12103.756 | AB046381  | 1425.191  | 1056.478  |
| NM_001106  | 309.571   | 346.501   | AJ011497  | 14938.601 | 12115.633 |
| NM_015583  | 643.395   | 822.291   | NM_003018 | 1521.319  | 1836.588  |
| NM_018490  | 1492.458  | 1667.842  | NM_000336 | 4532.888  | 4987.524  |
| NM_004778  | 479.082   | 573.06    | W61100    | 59672.914 | 54021.457 |
| NM_004352  | 166.12    | 292.031   | AA608568  | 20105.654 | 21249.445 |
| NM_012258  | 400.886   | 335.576   | BG831301  | 55313.391 | 51927.73  |
| NM_007245  | 4121.474  | 3368.468  | M14764    | 5588.436  | 3955.521  |
| NM_000229  | 1835.711  | 2068.212  | AA478647  | 13169.231 | 14846.153 |
| NM_006995  | 16223.167 | 12072.032 | M35999    | 3347.073  | 3448.185  |
| NM_003129  | 7746.501  | 7867.89   | AW058501  | 4287.968  | 4162.44   |
| NM_001956  | 2738.858  | 2420.107  | M81379    | 1556.07   | 1542.962  |

|           |           |           |            |           |           |
|-----------|-----------|-----------|------------|-----------|-----------|
| AB033064  | 1714.326  | 2893.645  | ID 2623896 | 6908.644  | 7285.107  |
| AK022317  | 5052.615  | 7732.07   | ID 2602214 | 21395.393 | 17922.381 |
| NM_018396 | 5074.74   | 5186.401  | ID 2071279 | 15659.607 | 14471.225 |
| NM_003124 | 7022.295  | 6154.908  | L10709     | 16587.939 | 15077.767 |
| NM_006886 | 35304.621 | 15558.74  | N35489     | 3489.795  | 3332.25   |
| NM_004531 | 2603.552  | 2588.327  | AA482489   | 1010.979  | 883.181   |
| AB040920  | 580.905   | 605.553   | AA458922   | 5218.774  | 4130.52   |
| NM_015720 | 7730.389  | 6078.156  | NM_001719  | 28514.576 | 27719.555 |
| AB033070  | 409.18    | 516.81    | AL080062   | 4313.147  | 4377.328  |
| AK000158  | 4118.657  | 5726.613  | AF308802   | 4483.009  | 4750.521  |
| NM_005769 | 1106.576  | 1231.881  | S76984     | 15912.001 | 18019.992 |
| AK024500  | 12456.724 | 12498.794 | NM_014495  | 59253.793 | 54234.828 |
| NM_002564 | 9832.531  | 11341.127 | NM_006796  | 23989.553 | 16623     |
| NM_000963 | 345.817   | 508.882   | NM_000706  | 2838.314  | 2337.936  |
| NM_013308 | 3980.612  | 4644.267  | NM_015941  | 7679.36   | 6852.589  |
| AF027302  | 3987.7    | 4573.922  | NM_003655  | 8547.094  | 7750.845  |
| NM_002852 | 2198.353  | 2819.23   | NM_014837  | 9549.334  | 9224.536  |
| NM_001817 | 2778.457  | 2135.788  | NM_017729  | 1085.771  | 1337.508  |
| NM_016228 | 312.302   | 354.06    | NM_005259  | 37595.766 | 36631.508 |
| NM_000157 | 1610.126  | 1642.653  | NM_002840  | 1231.179  | 1167.254  |
| NM_000712 | 608.015   | 640.411   | NM_006174  | 3235.094  | 3259.376  |
| NM_018088 | 556.279   | 583       | NM_015850  | 22632.619 | 22269.047 |
| BC013695  | 5057.601  | 3518.863  | NM_004864  | 2219.457  | 2591.016  |
| NM_007205 | 441.329   | 263.927   | NM_002838  | 9677.487  | 9475.39   |
| AK023035  | 2314.271  | 1801.914  | AK027377   | 868.498   | 953.634   |
| NM_014846 | 1529.997  | 1342.148  | NM_014686  | 55993.344 | 52990.238 |
| AB011164  | 2910.611  | 1877.9    | BF528358   | 1039.288  | 987.261   |
| M24750    | 762.664   | 691.858   | NM_016339  | 1384.912  | 1452.103  |
| NM_005965 | 1800.623  | 1588.215  | NM_002487  | 5854.13   | 6238.282  |
| NM_002740 | 3111.878  | 2542.075  | NM_013340  | 3496.307  | 3267.151  |
| AL117482  | 2093.517  | 1977.145  | NM_005462  | 3218.94   | 2512.484  |
| NM_006549 | 34083.82  | 22105.17  | NM_012319  | 5734.249  | 5667.521  |
| AB018324  | 7713.95   | 6622.088  | AK026235   | 533.303   | 629.938   |
| NM_002742 | 46739.41  | 50625.152 | NM_006510  | 42989.813 | 47317.008 |
| Z25431    | 1666.219  | 2130.539  | NM_003141  | 17051.852 | 22084.367 |
| NM_005627 | 8170.42   | 11333.473 | NM_020245  | 18008.482 | 20789.143 |
| M64497    | 574.209   | 721.773   | NM_019087  | 3987.096  | 2905.291  |
| NM_007274 | 9527.973  | 10764.182 | NM_016322  | 1851.354  | 1740.502  |
| NM_003356 | 5627.64   | 6278.653  | NM_004277  | 1376.957  | 2021.649  |
| AF238315  | 486.245   | 614.405   | NM_005072  | 1610.258  | 1766.766  |
| NM_006224 | 52263.434 | 48088.625 | AF215923   | 6995.181  | 7936.928  |
| AL137300  | 5229.253  | 4749.14   | U66621     | 24526.242 | 29154.629 |
| NM_014648 | 529.827   | 511.736   | NM_005720  | 57857.305 | 55561.617 |
| NM_019604 | 462.402   | 318.074   | AB040936   | 1836.337  | 2686.332  |
| NM_005073 | 809.63    | 851.372   | AB023161   | 650.716   | 1300.847  |
| NM_000951 | 2378.173  | 2801.275  | U61736     | 2196.44   | 3308.203  |
| X52599    | 1443.535  | 1822.946  | AJ132086   | 2745.044  | 2950.683  |
| AA029300  | 2153.239  | 2470.923  | U92816     | 32965.207 | 32972.762 |
| BG708842  | 43411     | 36268.879 | NM_004106  | 2270.665  | 2509.374  |
| M19723    | 53681.867 | 60291.059 | NM_003485  | 17100.078 | 16652.037 |
| X06256    | 1828.648  | 1754.695  | NM_005038  | 7093.354  | 5704.164  |
| AA709271  | 939.743   | 802.444   | M95923     | 9648.69   | 7218.905  |
| M34057    | 2478.41   | 1865.343  | NM_002415  | 59442.113 | 56687.004 |

|            |           |           |           |           |           |
|------------|-----------|-----------|-----------|-----------|-----------|
| ID 1984668 | 1236.571  | 760.925   | NM_006332 | 60222.215 | 57638.18  |
| ID 1832579 | 1856.903  | 1522.632  | NM_002000 | 922.627   | 1038.67   |
| H-430185 N | 869.326   | 939.103   | NM_000916 | 10555.116 | 12075.094 |
| D16583     | 2654.798  | 2769.46   | NM_018663 | 12498.073 | 15257.476 |
| H44051     | 1010.432  | 1072.652  | NM_145904 | 32451.711 | 45493.277 |
| AA481547   | 15872.148 | 15551.8   | NM_000182 | 19430.412 | 13530.602 |
| AA831880   | 1254.775  | 1974.633  | AK023384  | 5353.298  | 3846.061  |
| T64880     | 4085.428  | 4687.745  | NM_016026 | 18258.926 | 17463.916 |
| AB028990   | 684.898   | 564.357   | AK025111  | 1232.48   | 1244.559  |
| AK002089   | 239.546   | 361.87    | NM_001732 | 5799.039  | 6692.594  |
| NM_006708  | 18555.965 | 12651.821 | NM_018690 | 14533.008 | 17951.605 |
| AB037835   | 1329.799  | 1366.281  | NM_000860 | 3761.546  | 4004.368  |
| BM468475   | 517.795   | 841.831   | AB037798  | 4557.028  | 5053.411  |
| NM_000318  | 2315.973  | 2170.731  | NM_000780 | 1031.278  | 1398.614  |
| NM_002060  | 17108.141 | 16503.408 | AF272663  | 32297.396 | 40744.25  |
| AK001230   | 2993.694  | 4626.899  | NM_012190 | 5554.83   | 5792.977  |
| NM_014680  | 5505.467  | 5073.444  | AF277719  | 957.697   | 1091.278  |
| NM_005027  | 2040.712  | 2767.949  | NM_000791 | 3434.147  | 3658.622  |
| NM_004612  | 1095.491  | 1001.284  | NM_003681 | 5425.812  | 5299.198  |
| NM_005608  | 15226.474 | 10843.905 | NM_004800 | 12093.612 | 9994.023  |
| NM_001106  | 290.83    | 285.025   | AB037738  | 790.065   | 963.371   |
| NM_015583  | 551.203   | 722.904   | S82769    | 497.359   | 921.316   |
| NM_018490  | 1491.47   | 1389.284  | NM_004677 | 651.882   | 432.872   |
| NM_004778  | 331.489   | 227.732   | NM_014954 | 60956.184 | 58163     |
| NM_006245  | 1619.016  | 1675.323  | NM_000807 | 1095.437  | 1407.546  |
| NM_004352  | 294.223   | 491.111   | NM_014909 | 23214.529 | 24168.734 |
| NM_012258  | 327.26    | 253.496   | X91148    | 4164.432  | 4834.364  |
| NM_005103  | 313.531   | 462.099   | NM_015700 | 8403.434  | 8145.295  |
| NM_004822  | 1027.94   | 1608.309  | NM_001719 | 22180.707 | 16066.073 |
| AK022349   | 1095.754  | 1158.371  | AL080062  | 3869.719  | 2103.711  |
| NM_005750  | 380.87    | 676.199   | AF308802  | 3955.164  | 3512.457  |
| NM_004973  | 367.992   | 394.76    | S76984    | 13563.357 | 13080.968 |
| NM_007245  | 4593.14   | 5538.183  | NM_014495 | 59929.844 | 61383.566 |
| NM_001890  | 814.327   | 614.453   | NM_014081 | 3383.397  | 4204.933  |
| NM_001286  | 2756.303  | 2880.734  | NM_005651 | 1861.281  | 2113.108  |
| NM_018229  | 1154.579  | 1852.756  | NM_007195 | 2173.928  | 3000.195  |
| NM_006325  | 4985.058  | 5137.343  | AK023337  | 11541.967 | 11503.542 |
| AY009127   | 10195.419 | 12391.911 | NM_013275 | 31128.527 | 32382.525 |
| NM_014869  | 3302.751  | 4076.029  | AB037842  | 1381.751  | 1309.589  |
| NM_003929  | 202.113   | 300.898   | NM_019011 | 4394.723  | 4621.907  |
| AK000158   | 2734.147  | 5101.927  | AF459094  | 8888.932  | 7619.746  |
| NM_005769  | 902.648   | 975.998   | NM_003157 | 7362.719  | 7048.467  |
| AK024500   | 12074.789 | 10590.782 | NM_004938 | 2308.074  | 2372.238  |
| NM_002564  | 9478.039  | 7391.472  | NM_014326 | 3053.5    | 3045.063  |
| NM_000963  | 347.92    | 390.388   | NM_004448 | 1763.371  | 1512.462  |
| NM_013308  | 4264.714  | 4464.773  | NM_015981 | 4844.195  | 5614.525  |
| AF027302   | 3815.387  | 3895.278  | NM_000455 | 10152.08  | 9570.836  |
| NM_002852  | 1904.665  | 2611.154  | NM_014791 | 13946.855 | 15585.116 |
| NM_001817  | 2695.063  | 2611.615  | NM_003318 | 9477.412  | 7190.635  |
| AF063611   | 668.268   | 927.025   | NM_004362 | 18706.096 | 17215.875 |
| NM_006039  | 954.403   | 1430.174  | CY3Cy5    | 9063.706  | 344.262   |
| NM_002089  | 431.705   | 494.194   | NM_004102 | 11337.414 | 7243.974  |
| NM_004590  | 247.982   | 286.239   | NM_004544 | 12652.361 | 8249.356  |

|           |           |           |           |           |           |
|-----------|-----------|-----------|-----------|-----------|-----------|
| NM_01465€ | 5363.372  | 5964.342  | AF052140  | 1348.482  | 848.701   |
| NM_00207€ | 1902.931  | 2163.044  | NM_01883€ | 5911.666  | 4593.634  |
| X05299    | 2168.985  | 2349.393  | AF007147  | 1984.023  | 1926.624  |
| NM_007274 | 10019.122 | 10590.28  | AF052127  | 10861.505 | 11151.756 |
| NM_00335€ | 5611.969  | 6108.335  | AK024261  | 2208.147  | 2346.442  |
| AF238315  | 546.292   | 983.62    | AF052150  | 1786.239  | 2319.456  |
| NM_006224 | 40239.496 | 49957.879 | AF086481  | 1543.054  | 1216.748  |
| AL137300  | 4082.42   | 5325.083  | AK021982  | 743.472   | 549.327   |
| NM_00022€ | 1705.791  | 2000.267  | AL355689  | 716.729   | 699.755   |
| NM_00699€ | 16015.625 | 11958.284 | AK024885  | 4717.888  | 4614.194  |
| NM_00312€ | 7692.726  | 7117.159  | AK022664  | 467.17    | 760.106   |
| NM_00195€ | 2982.942  | 1964.632  | AL080223  | 5079.608  | 4197.255  |
| AB033064  | 1659.599  | 1525.168  | AK001630  | 10167.34  | 10196.463 |
| AK022317  | 4397.167  | 4149.137  | NM_014612 | 63057.234 | 55969.109 |
| NM_01839€ | 5398.25   | 4938.012  | NM_004102 | 13307.675 | 11448.383 |
| NM_003124 | 6420.369  | 5791.687  | NM_004544 | 11630.133 | 10630.756 |
| NM_00688€ | 31755.018 | 20058.641 | SR1       | 64447.223 | 58309.992 |
| NM_004531 | 3221.902  | 3991.325  | SR3       | 53514.535 | 48878.813 |
| AL133581  | 1249.939  | 1553.418  | SR5       | 6833.097  | 5999.664  |
| NM_00255€ | 503.045   | 681.668   | SR7       | 7508.793  | 40639.016 |
| NM_005031 | 4490.674  | 6322.461  | SR9       | 25386.73  | 3900.13   |
| AB040920  | 690.512   | 1039.945  | CY3Cy5    | 9385.792  | 381.054   |
| NM_00072€ | 494.051   | 542.985   | Z36807    | 54298.734 | 44917.539 |
| NM_004842 | 327.861   | 404.494   | U20896    | 1763.861  | 1119.698  |
| AK024639  | 2358.026  | 1925.574  | U52836    | 2644.471  | 1628.476  |
| NM_01572€ | 8578.813  | 9450.694  | NM_01793€ | 7210.556  | 9441.797  |
| AB007915  | 502.239   | 386.82    | AK021837  | 8949.581  | 10001.159 |
| AB033070  | 470.565   | 701.779   | AF075112  | 3373.581  | 3064.655  |
| AB028990  | 518.627   | 437.343   | AK001796  | 2061.623  | 1865.677  |
| AK002089  | 669.101   | 905.678   | AF086152  | 51930.266 | 49599.133 |
| NM_00670€ | 16403.34  | 10405.022 | U78519    | 4449.576  | 6195.909  |
| AB037835  | 1253.192  | 1104.422  | AK026872  | 6586.821  | 5699.765  |
| NM_01622€ | 423.747   | 358.944   | AL157505  | 2634.019  | 2353.663  |
| NM_000157 | 1665.401  | 1470.887  | S77361    | 642.445   | 588.256   |
| NM_000712 | 400.472   | 373.663   | NM_00719€ | 13736.875 | 11871.314 |
| NM_01808€ | 510.439   | 339.59    | AF043897  | 2725.126  | 2720.964  |
| BC013695  | 5124.319  | 3764.86   | U79246    | 5045.362  | 3904.051  |
| NM_00720€ | 337.272   | 182.852   | AK022619  | 1612.104  | 2019.614  |
| AK023035  | 2548.858  | 1979.49   | AK023464  | 2343.34   | 2026.79   |
| NM_01484€ | 1854.713  | 1818.406  | AK023829  | 606.261   | 448.488   |
| AB011164  | 3339.933  | 2875.728  | AK024157  | 1440.636  | 1330.094  |
| M24750    | 933.86    | 731.521   | AK022963  | 986.804   | 761.071   |
| NM_00596€ | 1806.745  | 2034.846  | AK023563  | 713.899   | 573.063   |
| NM_00274€ | 3449.032  | 3556.426  | AK023905  | 24951.596 | 26099.08  |
| AL117482  | 2274.995  | 2507.708  | AK024231  | 12648.533 | 16621.74  |
| NM_00654€ | 31670.795 | 22390.805 | AK022441  | 2826.777  | 3027.244  |
| AB018324  | 8760.579  | 8563.969  | AK026208  | 4625.521  | 3729.664  |
| NM_002742 | 44057.863 | 43536.52  | NM_016947 | 60916.023 | 58133.926 |
| Z25431    | 1612.312  | 2612.114  | AY007136  | 2244.258  | 1971.164  |
| NM_005627 | 8788.592  | 10705.949 | AK026759  | 299.042   | 664.545   |
| M64497    | 555.517   | 739.502   | AL359940  | 4364.858  | 3770.945  |
| CY3Cy5    | 2172.062  | 118.339   | NM_01828€ | 1883.77   | 1681.289  |
| NM_002711 | 3039.95   | 2918.36   | AF085961  | 967.902   | 924.017   |



|           |           |           |           |           |           |
|-----------|-----------|-----------|-----------|-----------|-----------|
| AF143873  | 876.178   | 727.622   | AK024925  | 53611.141 | 54716.254 |
| AL355732  | 2363.84   | 2189.878  | AK022039  | 963.461   | 1032.111  |
| NM_017966 | 4995.782  | 3391.558  | AL049460  | 19645.43  | 17234.455 |
| AF143327  | 2170.357  | 1301.796  | AK022396  | 3648.854  | 3712.227  |
| AL049990  | 1587.944  | 733.893   | AF075113  | 2250.281  | 2271.549  |
| AF131843  | 1072.686  | 490.75    | AF086037  | 806.367   | 888.149   |
| AK026653  | 617.142   | 500.942   | AK022892  | 19775.176 | 10833.16  |
| NM_020231 | 1260.655  | 823.843   | AK002162  | 881.394   | 749.914   |
| AF075008  | 2391.374  | 1754.139  | AK022980  | 1577.912  | 1337.605  |
| NM_006504 | 1763.794  | 1618.711  | AL359058  | 5351.48   | 4317.61   |
| AF070538  | 484.555   | 739.443   | AK022439  | 843.801   | 618.142   |
| AL137430  | 342.234   | 776.906   | AK026237  | 8267.922  | 7665.93   |
| NM_001073 | 1003.771  | 1272.415  | AK023687  | 5844.147  | 4834.452  |
| NM_002711 | 2253.492  | 2070.888  | AK002088  | 51843.391 | 56923.613 |
| SR1       | 65995.406 | 55307.648 | X98206    | 1397.515  | 1637.51   |
| SR3       | 37239.996 | 22895.955 | AK022193  | 1074.144  | 1244.55   |
| SR5       | 4085.577  | 2134.085  | AK000106  | 5974.359  | 5244.878  |
| SR7       | 3758.896  | 14320.865 | AK022370  | 3082.051  | 3189.597  |
| SR9       | 9964.452  | 757.036   | AK026765  | 4338.268  | 4994.481  |
| CY3Cy5    | 1553.344  | 107.2     | AL117530  | 1588.168  | 1736.643  |
| L38282    | 5400.584  | 3424.032  | AK025016  | 952.356   | 899.707   |
| NM_018056 | 2868.883  | 2199.507  | AL080191  | 14691.905 | 14182.032 |
| L25446    | 1470.884  | 1982.326  | AK021639  | 2789.399  | 2164.114  |
| NM_019006 | 4413.766  | 3568.359  | AK023189  | 5785.757  | 5199.021  |
| M20838    | 1666.067  | 944.121   | AK023872  | 899.53    | 839.195   |
| AK023505  | 2559.597  | 2242.54   | AK022127  | 881.134   | 1041.915  |
| AB037851  | 9277.346  | 5169.803  | AF118062  | 639.357   | 673.242   |
| AL050389  | 6331.642  | 4215.915  | AF306347  | 4588.575  | 4242.159  |
| AK024684  | 1367.144  | 1134.274  | AF070599  | 2513.036  | 2899.017  |
| NM_014945 | 18517.18  | 15389.843 | NM_005450 | 9168.974  | 10519.503 |
| AK001546  | 2088.762  | 2207.277  | AK023600  | 1633.143  | 1506.059  |
| NM_006537 | 7671.881  | 6638.41   | Z83952    | 1158.156  | 964.771   |
| AF007155  | 18118.461 | 14609.84  | NM_005210 | 415.937   | 479.671   |
| AL049282  | 4420.701  | 2860.62   | NM_005525 | 872.926   | 760.948   |
| AK021443  | 3385.059  | 2344.187  | NM_005285 | 17337.553 | 17362.695 |
| AF070569  | 1055.751  | 515.749   | AK001918  | 1982.233  | 2279.778  |
| NM_020233 | 2357.641  | 1115.42   | NM_018635 | 65619.797 | 62018.734 |
| AK024315  | 18732.793 | 10778.585 | AF086048  | 8511.939  | 8529.662  |
| AK024945  | 8549.023  | 9427.199  | L15616    | 19845.84  | 22026.494 |
| AK024579  | 5790.311  | 3498.609  | AB019565  | 22893.936 | 26733.033 |
| AL133118  | 4971.437  | 2661.962  | NM_016940 | 7496.114  | 7030.178  |
| AK023571  | 5017.807  | 2384.68   | AK025757  | 7454.436  | 9932.238  |
| NM_001702 | 3354.359  | 2627.789  | Y16713    | 2118.438  | 2452.922  |
| AK026657  | 1969.565  | 1765.856  | L07394    | 29599.891 | 33036.23  |
| AF087991  | 24509.719 | 18345.672 | AK056133  | 2403.226  | 2393.822  |
| Y12839    | 1032.85   | 1098.129  | NM_017845 | 19278.434 | 16297.805 |
| X64979    | 1207.007  | 1035.347  | AF130080  | 1374.479  | 1330.548  |
| AJ001876  | 807.767   | 605.151   | AK026006  | 3454.916  | 3084.277  |
| AJ227884  | 2895.559  | 1950.069  | NM_019089 | 31077.586 | 28472.68  |
| X64986    | 9935.865  | 5371.658  | AL122072  | 10104.256 | 8583.66   |
| AK000842  | 14235.897 | 14792.49  | AK026221  | 1281.018  | 1451.585  |
| AK023386  | 31693.385 | 35001.828 | AK026403  | 5366.475  | 4518.92   |
| NM_007053 | 31892.063 | 40550.363 | U90904    | 16305.646 | 14373.568 |

|           |           |           |           |           |           |
|-----------|-----------|-----------|-----------|-----------|-----------|
| AK022153  | 8311.39   | 7734.531  | AF088053  | 5064.249  | 4905.026  |
| AK022789  | 2807.186  | 2007.733  | AL133662  | 1828.25   | 2045.807  |
| AK023756  | 507.553   | 535.851   | NM_002565 | 1052.382  | 1115.931  |
| AK002095  | 1498.956  | 968.202   | U90903    | 2322.174  | 2124.365  |
| AK000821  | 10697.295 | 8007.522  | AF278760  | 6525.276  | 4933.153  |
| AK024526  | 15979.142 | 16230.683 | X58061    | 1095.749  | 1398.784  |
| AK000236  | 211.612   | 809.396   | AB032954  | 15645.062 | 13797.135 |
| AK000848  | 1454.632  | 1060.221  | NM_006003 | 33886.117 | 38542.758 |
| AK023307  | 737.199   | 461.254   | AL110197  | 1689.947  | 1859.552  |
| NM_017618 | 2958.143  | 1937.261  | AF085995  | 1682.306  | 1635.268  |
| NM_017848 | 677.004   | 504.677   | NM_017632 | 5352.018  | 5307.377  |
| NM_019056 | 10106.692 | 5519.903  | AK026655  | 4039.076  | 4538.401  |
| AF279783  | 8310.718  | 6286.116  | S41522    | 1120.585  | 1191.482  |
| AF182422  | 20891.854 | 21346.518 | NM_005279 | 1343.656  | 1378.022  |
| NM_016943 | 1917.911  | 3213.265  | AF129926  | 5416.163  | 7979.012  |
| AF070602  | 2337.646  | 3318.694  | AK025822  | 5042.682  | 4969.926  |
| BE393290  | 2867.311  | 2037.149  | AL360140  | 1840.891  | 1468.803  |
| NM_017622 | 1818.88   | 1166.41   | AF201937  | 46835.816 | 41401.574 |
| AF133331  | 4526.606  | 2599.687  | AL390128  | 8513.49   | 8396.302  |
| AK022289  | 4103.419  | 1876.978  | AL157429  | 39531.559 | 41772.305 |
| AF161403  | 32887.941 | 37448.375 | NM_012071 | 23751.254 | 22997.121 |
| S75708    | 21856.82  | 42642.969 | AF055018  | 29525.684 | 32653.932 |
| U79291    | 7824.848  | 9306.013  | NM_001777 | 41667.332 | 42679.082 |
| D17172    | 30499.459 | 30302.055 | U79457    | 17306.264 | 14164.663 |
| AJ227859  | 1560.39   | 1387.446  | AB037832  | 7054.637  | 8847.082  |
| NM_018544 | 1781.882  | 1874.788  | NM_014347 | 28043.9   | 26156.453 |
| L10141    | 15995.331 | 11287     | NM_001296 | 25542.75  | 21299.387 |
| AB020699  | 6157.646  | 4693.423  | NM_004344 | 22936.809 | 22899.219 |
| AF086269  | 2488.06   | 2451.88   | AF085972  | 1315.514  | 2101.157  |
| U90437    | 4862.099  | 3047.398  | NM_000757 | 3344.718  | 2908.27   |
| D17169    | 57092.793 | 44121.84  | AB046786  | 3337.394  | 3222.537  |
| NM_017924 | 6079.558  | 5220.085  | NM_016620 | 49342.367 | 50959.457 |
| S81578    | 2261.041  | 2633.57   | D16914    | 60983.43  | 57730.434 |
| NM_017546 | 11507.402 | 18019.816 | AA084879  | 2595.011  | 3328.293  |
| AJ001889  | 584.418   | 910.129   | NM_000833 | 5215.92   | 6003.938  |
| AF086210  | 909.656   | 763.964   | NM_000283 | 8357.936  | 9606.273  |
| AL137400  | 837.93    | 626.505   | NM_012460 | 6351.362  | 6499.336  |
| NM_006511 | 1751.806  | 1484.658  | X64980    | 702.133   | 883.754   |
| AF007142  | 1205.652  | 859.868   | NM_012118 | 6250.154  | 6181.015  |
| AF119853  | 5730.295  | 4151.658  | AK001133  | 761.331   | 862.808   |
| NM_001126 | 7242.672  | 9184.413  | AK024092  | 4207.103  | 3864.683  |
| AK023673  | 2400.902  | 2883.899  | AK022226  | 1064.374  | 1147.896  |
| NM_018252 | 1671.139  | 1610.259  | AK002044  | 10668.342 | 11204.325 |
| NM_018000 | 62566.848 | 57052.844 | AK021967  | 4351.463  | 3975.319  |
| AF164963  | 1431.477  | 1013.28   | AK022206  | 1894.369  | 1428.946  |
| AF124366  | 37918.363 | 35130.578 | BC032460  | 16103.887 | 13327.606 |
| AF130112  | 2135.39   | 1723.208  | NM_014071 | 5306.537  | 6185.125  |
| NM_000551 | 6184.938  | 4206.586  | AK024404  | 601.422   | 618.58    |
| AL365518  | 1067.823  | 1010.89   | NM_006329 | 1094.915  | 865.624   |
| AF086257  | 6508.11   | 5195.112  | AB032369  | 1011.299  | 890.827   |
| AF075056  | 532.713   | 403.58    | NM_005166 | 1431.098  | 1214.999  |
| AC119751  | 626.807   | 700.789   | NM_000213 | 53801.754 | 56671.246 |
| U00928    | 1669.976  | 1259.027  | BE906107  | 35039.965 | 34525.684 |

|           |           |           |           |           |           |
|-----------|-----------|-----------|-----------|-----------|-----------|
| AK002114  | 5399.422  | 4488.238  | NM_015516 | 9462.869  | 7678.388  |
| AL390184  | 1890.672  | 2800.38   | AB033065  | 2418.979  | 2240.595  |
| NM_018699 | 7377.861  | 12880.227 | NM_005211 | 3226.133  | 3667.419  |
| NM_018048 | 1194.965  | 1195.89   | NM_004857 | 52188.691 | 55249.281 |
| AK026318  | 2116.743  | 2223.943  | NM_012108 | 14710.668 | 19242.1   |
| AF291673  | 2353.091  | 1919.333  | NM_003253 | 3998.379  | 3834.599  |
| NM_004365 | 26053.406 | 18631.65  | NM_013285 | 13449.438 | 15687.33  |
| NM_016355 | 8894.341  | 4860.057  | NM_002872 | 23283.031 | 24725.551 |
| AJ296290  | 4215.789  | 3230.589  | NM_000490 | 4520.679  | 4525.208  |
| NM_020183 | 5805.618  | 5559.244  | AJ225028  | 888.356   | 1207.814  |
| NM_018029 | 569.839   | 887.919   | NM_004839 | 7006.981  | 9651.131  |
| AL389954  | 1040.853  | 1235.268  | NM_012193 | 18963.967 | 24156.42  |
| NM_019852 | 5427.509  | 6340.005  | NM_003405 | 34973.031 | 40124.293 |
| NM_006118 | 8574.014  | 10782.329 | NM_004720 | 13151.694 | 11644.175 |
| AK026225  | 24108.105 | 21631.865 | NM_001057 | 3785.326  | 2979.364  |
| AL050032  | 12540.878 | 13788.507 | NM_004524 | 7838.585  | 6306.286  |
| AF009304  | 893.781   | 1265.259  | NM_006315 | 12155.198 | 10234.216 |
| AF086177  | 11531.919 | 9373.042  | NM_018401 | 2363.391  | 2023.782  |
| NM_018949 | 3017.489  | 3499.17   | NM_005163 | 9725.112  | 8865.838  |
| D17187    | 2323.355  | 2557.02   | NM_007273 | 58883.246 | 57012.133 |
| AJ243672  | 2916.392  | 4297.178  | BE894943  | 4321.521  | 3914.52   |
| AL122087  | 767.104   | 924.489   | AF085994  | 668.963   | 767.213   |
| NM_014767 | 1073.467  | 841.373   | NM_016422 | 6605.821  | 6812.171  |
| Y17867    | 9286.438  | 10478.58  | NM_017878 | 27298.814 | 26122.016 |
| M92642    | 3828.449  | 6211.718  | NM_004494 | 58641.273 | 56996.242 |
| NM_018071 | 8040.922  | 10820.496 | AL049687  | 1063.111  | 938.554   |
| NM_004333 | 6905.638  | 7775.395  | NM_005643 | 23112.936 | 22904.111 |
| M31520    | 68775.117 | 88502.133 | NM_003592 | 23915.188 | 22629.775 |
| NM_002020 | 36767.789 | 40020.383 | NM_014953 | 15036.033 | 10383.814 |
| AL050137  | 5630.183  | 4462.636  | AF179995  | 2380.206  | 2792.722  |
| AK024423  | 6809.658  | 4395.262  | NM_002099 | 683.213   | 892.411   |
| NM_005043 | 57573.52  | 52037.023 | NM_016195 | 8112.39   | 4432.87   |
| NM_005979 | 21537.604 | 23178.074 | NM_004523 | 6568.685  | 5618.921  |
| NM_006282 | 8408.381  | 8285.739  | NM_004404 | 26014.143 | 23711.637 |
| NM_020321 | 1987.457  | 2516.346  | NM_002960 | 22281.314 | 18950.881 |
| NM_000826 | 1477.908  | 1051.825  | AB046788  | 1753.863  | 1711.269  |
| NM_015920 | 44110.938 | 56396.609 | NM_006790 | 7883.644  | 8113.055  |
| AB011113  | 4974.364  | 5672.1    | AL117522  | 59975.406 | 58804.418 |
| NM_004115 | 3087.568  | 4367.82   | AB011541  | 2482.281  | 2134.884  |
| NM_018287 | 1255.349  | 2209.065  | NM_019109 | 818.681   | 566.46    |
| NM_001955 | 4523.848  | 3554.573  | NM_019061 | 18958.834 | 16082.869 |
| AF016004  | 4757.993  | 5510.6    | AB033007  | 9920.733  | 10469.108 |
| NM_003567 | 10721.757 | 8046.712  | NM_003781 | 965.922   | 1306.23   |
| NM_007315 | 1155.686  | 693.666   | NM_001304 | 1231.987  | 1087.559  |
| L20686    | 6279.52   | 5949.155  | NM_000504 | 643.324   | 439.554   |
| NM_000304 | 809.872   | 1159.037  | NM_003130 | 7517.229  | 5925.609  |
| AK023362  | 1860.761  | 3157.772  | NM_004716 | 56731.195 | 55955.316 |
| NM_002460 | 1275.465  | 1221.999  | D29810    | 6463.646  | 6766.565  |
| NM_002675 | 8920.64   | 11351.383 | NM_000128 | 11810.481 | 12542.076 |
| NM_012432 | 60212.793 | 68396.031 | AB002384  | 17815.479 | 17450.404 |
| NM_005007 | 22594.012 | 35145.277 | NM_018437 | 1594.05   | 1868.601  |
| AK024996  | 6982.276  | 8039.424  | NM_000422 | 3923.524  | 3248.006  |
| NM_001258 | 642.049   | 948.206   | AK023164  | 3875.614  | 4097.833  |

|           |           |           |           |           |           |
|-----------|-----------|-----------|-----------|-----------|-----------|
| NM_004417 | 899.399   | 887.727   | NM_005379 | 9186.482  | 7733.681  |
| NM_012290 | 11528.986 | 9625.122  | AK027121  | 27296.887 | 30934.004 |
| NM_002431 | 5384.158  | 3592.412  | NM_017433 | 12944.06  | 11090.104 |
| NM_001827 | 61806.703 | 56253.148 | AL117661  | 6951.185  | 7967.503  |
| NM_020466 | 15235.095 | 15981.258 | X64643    | 4981.42   | 4882.25   |
| AL079280  | 737.365   | 760.02    | NM_005380 | 37957.168 | 44454.309 |
| NM_002853 | 9523.771  | 16668.428 | NM_005561 | 22892.58  | 21315.092 |
| NM_003174 | 3595.564  | 5856.484  | AF272381  | 46582.664 | 45986.445 |
| NM_012307 | 27989.615 | 33237.375 | NM_001518 | 31177.326 | 28327.275 |
| NM_002540 | 1585.089  | 1755.718  | NM_003412 | 62756.523 | 57935.805 |
| NM_006371 | 3825.45   | 4142.341  | NM_018336 | 2056.933  | 1721.837  |
| NM_018834 | 2056.904  | 2002.955  | AK022668  | 11929.327 | 18501.76  |
| AK026882  | 4158.449  | 4210.533  | AW975132  | 7556.594  | 6581.411  |
| NM_004574 | 2667.174  | 2127.803  | NM_006051 | 16739.262 | 15112.981 |
| NM_004848 | 9672.429  | 8360.154  | NM_018427 | 14350.662 | 11081.043 |
| NM_001944 | 555.999   | 751.879   | AB037814  | 1178.222  | 792.582   |
| NM_014813 | 643.374   | 776.367   | NM_014663 | 2394.338  | 1964.44   |
| AF014459  | 5944.54   | 8305.916  | AF007217  | 3677.609  | 2240.668  |
| M64108    | 2708.344  | 4921.013  | AB037753  | 9995.436  | 9546.011  |
| NM_001503 | 10472.154 | 7691.426  | NM_004674 | 4554.474  | 4645.419  |
| NM_006302 | 5567.239  | 7000.278  | AB037801  | 7859.274  | 6729.768  |
| AJ224875  | 7809.766  | 9690.28   | AL080159  | 56389.426 | 52839.559 |
| NM_002149 | 4867.408  | 6269.34   | NM_017823 | 54864.43  | 54568.43  |
| AF043324  | 10831.473 | 12235.904 | U55185    | 3218.882  | 2938.673  |
| AK024172  | 3830.238  | 3745.209  | U30828    | 29021.75  | 29301.748 |
| NM_014814 | 9105.72   | 8288.292  | AF085886  | 55439.035 | 55617.688 |
| NM_002797 | 39330.738 | 44854.59  | AK023828  | 44462.945 | 46958.129 |
| AK024318  | 2585.874  | 2589.239  | NM_006572 | 38306.621 | 50956.375 |
| NM_016129 | 8977.927  | 10736.108 | NM_004784 | 956.372   | 1138.715  |
| NM_002809 | 15982.982 | 17746.232 | AK021815  | 3199.116  | 2888.669  |
| NM_017912 | 46824.762 | 56280.719 | NM_001543 | 5057.82   | 4502.484  |
| NM_000423 | 13138.139 | 18086.031 | NM_016641 | 14198.694 | 13585.38  |
| AB046838  | 7459.03   | 7531.912  | AB018010  | 4525.62   | 4908.974  |
| AK026339  | 635.505   | 801.978   | NM_014610 | 32200.35  | 29632.035 |
| X98411    | 1840.507  | 1909.173  | NM_004737 | 1063.57   | 1092.118  |
| AF116658  | 31244.852 | 41744.23  | NM_000689 | 4306.854  | 3053.214  |
| NM_014865 | 27151.17  | 33275.363 | NM_006621 | 6464.339  | 5762.701  |
| AB032977  | 20533.719 | 21044.068 | BF347398  | 42945.152 | 41798.973 |
| AK001725  | 1297.406  | 1641.278  | AK026762  | 7345.825  | 6414.156  |
| NM_003036 | 3206.552  | 3019.771  | AF078844  | 1261.281  | 1336.308  |
| NM_020529 | 16379.303 | 17178.756 | NM_004412 | 2567.495  | 2355.927  |
| S72604    | 43300.641 | 44617.844 | L48516    | 8123.146  | 9171.643  |
| NM_017984 | 978.692   | 969.678   | NM_016648 | 16195.282 | 19144.4   |
| AF038951  | 22425.385 | 11696.475 | AF083930  | 5546.165  | 5499.073  |
| NM_006492 | 3663.628  | 3187.326  | AB040907  | 1070.161  | 1369.582  |
| AK021811  | 2344.408  | 3604.41   | NM_005986 | 768.798   | 695.889   |
| NM_003428 | 7981.312  | 15573.515 | NM_003426 | 1800.062  | 1943.737  |
| AF055030  | 5318.616  | 6625.815  | NM_014862 | 3339.827  | 3317.436  |
| AK000589  | 5995.968  | 3776.842  | AK027159  | 2502.061  | 2382.966  |
| X53281    | 39136.434 | 34816.836 | AF060169  | 586.145   | 942.794   |
| BC012782  | 5274.715  | 4621.681  | NM_005269 | 2285.667  | 3395.836  |
| AF132026  | 63429.289 | 60305.398 | D70835    | 58883.848 | 58452.371 |
| AL050353  | 3058.51   | 5848.129  | NM_002697 | 11019.021 | 13006.94  |

|           |           |           |           |           |           |
|-----------|-----------|-----------|-----------|-----------|-----------|
| AB037788  | 14658.982 | 13932.302 | NM_002448 | 1614.331  | 1761.964  |
| NM_004587 | 18751.178 | 15921.709 | AF053952  | 59517.965 | 55245.844 |
| NM_000975 | 59730.219 | 58908.172 | NM_003213 | 26566.125 | 29447.783 |
| AF147412  | 56249.238 | 53733.785 | BF184738  | 5076.938  | 5587.426  |
| AK024570  | 18792.254 | 21368.918 | NM_014044 | 12216.587 | 15370.224 |
| AF161401  | 18864.152 | 20886.186 | NM_000900 | 13767.729 | 13635.084 |
| NM_000990 | 27626.668 | 24336.906 | AK023684  | 14055.576 | 14208.704 |
| NM_014740 | 8301.98   | 6380.019  | NM_000232 | 6918.461  | 6697.01   |
| NM_015950 | 25602.127 | 21532.414 | J05070    | 2793.514  | 2541.411  |
| AK024601  | 14266.958 | 14535.603 | AA700390  | 9706.819  | 9002.94   |
| S68069    | 3868.115  | 3317.384  | Y18474    | 4098.945  | 5369.323  |
| AB011095  | 6107.393  | 6964.188  | AA436163  | 8279.878  | 10657.352 |
| NM_002480 | 31466.477 | 17741.08  | BI907981  | 21200.342 | 29236.633 |
| NM_004003 | 36975.879 | 32448.182 | BI603841  | 36816.691 | 48012.234 |
| NM_000180 | 4586.105  | 5151.1    | BG696638  | 364.979   | 623.321   |
| BF244401  | 21818.67  | 38770.953 | M19888    | 4455.463  | 5362.906  |
| NM_004710 | 61140.758 | 55629.773 | Y08136    | 4246.289  | 5412.278  |
| AL359585  | 11690.542 | 8147.112  | AA156863  | 37118.027 | 39905.16  |
| AB046850  | 12499.005 | 10079.38  | BI915199  | 2752.436  | 2846.95   |
| NM_014801 | 12253.707 | 11243.332 | R82957    | 62548.531 | 59072.82  |
| NM_003642 | 11572.613 | 8549.693  | BI830442  | 17797.361 | 22558.25  |
| AB027013  | 21813.465 | 28095.375 | AA398951  | 896.305   | 1448.276  |
| BC032686  | 1144.588  | 1416.653  | AI218732  | 5824.598  | 8425.632  |
| BF185480  | 4831.941  | 5845.476  | AK023448  | 4701.795  | 2758.186  |
| NM_002120 | 37228.48  | 42482.203 | Y18213    | 16602.223 | 11955.618 |
| NM_007100 | 497.92    | 700.801   | NM_003283 | 13754.226 | 11705.194 |
| NM_003074 | 12816.9   | 11288.279 | AF249898  | 15383.918 | 14221.231 |
| AL360195  | 13960.451 | 15572.772 | M69181    | 35009.629 | 34457.707 |
| U14383    | 1197.028  | 1611.44   | AK027224  | 1221.162  | 1140.996  |
| NM_017810 | 2133.796  | 2751.62   | L09078    | 1617.919  | 1567.862  |
| NM_003181 | 59089.035 | 62009.359 | NM_002652 | 1651.065  | 1588.451  |
| NM_004451 | 6612.542  | 7852.716  | NM_001311 | 36962.438 | 35261.273 |
| NM_004364 | 3132.87   | 2386.39   | NM_017790 | 22362.877 | 25039.168 |
| NM_020390 | 3759.371  | 3390.019  | NM_000354 | 1122.481  | 1666.674  |
| NM_003420 | 3004.214  | 2559.896  | NM_012410 | 11686.824 | 15367.168 |
| NM_013380 | 12812.204 | 24142.582 | NM_001111 | 40391.855 | 46982.137 |
| AK026232  | 11517.468 | 8605.421  | NM_018040 | 25038.508 | 28158.369 |
| NM_014892 | 19979.225 | 17083.404 | AJ133439  | 5666.798  | 5580.979  |
| AK023827  | 13646.948 | 19038.342 | NM_014390 | 7603.954  | 7569.564  |
| NM_001117 | 1674.831  | 2835.626  | NM_001561 | 4511.309  | 4924.162  |
| NM_000231 | 763.841   | 817.705   | NM_005160 | 8358.386  | 7410.377  |
| L07517    | 3754.432  | 3864.229  | NM_000590 | 2158.121  | 3275.77   |
| AK022451  | 38138.566 | 37813.004 | X78817    | 63246.402 | 60427.844 |
| NM_014350 | 59445.215 | 58542.016 | AB023135  | 6026.152  | 7525.247  |
| BM918441  | 13409.923 | 12590.565 | AY009401  | 2318.307  | 3180.129  |
| AA425102  | 697.919   | 942.504   | AF294628  | 3885.1    | 3907.039  |
| AA878880  | 826.56    | 1155.477  | NM_004152 | 564.417   | 718.001   |
| AA150828  | 9664.285  | 12725.942 | BU565263  | 64322.816 | 62081.266 |
| H90764    | 4309.038  | 6589.194  | NM_005020 | 10989.897 | 11557.253 |
| AI859208  | 1241.208  | 1696.1    | NM_001611 | 2872.759  | 3399.173  |
| H64379    | 39369.027 | 49197.086 | M59979    | 2069.825  | 1586.205  |
| BE208258  | 61559.758 | 59560.961 | AB018310  | 5423.181  | 5099.379  |
| T72202    | 2553.09   | 2723.415  | NM_020133 | 1456.262  | 1494.274  |

|           |           |           |           |           |           |
|-----------|-----------|-----------|-----------|-----------|-----------|
| BI831922  | 3420.701  | 3988.9    | NM_015379 | 42927.949 | 46934.93  |
| M69238    | 6036.004  | 6282.218  | NM_004878 | 1415.277  | 1705.949  |
| AA664180  | 2068.74   | 2745.449  | NM_015057 | 1326.095  | 1260.91   |
| M80244    | 628.894   | 717.433   | AF303398  | 45339.031 | 48471.301 |
| AA599158  | 25473.861 | 26301.803 | NM_014810 | 5266.055  | 4651.488  |
| BE294756  | 2376.335  | 2397.472  | NM_004738 | 7800.234  | 9370.21   |
| NM_000696 | 8876.072  | 9142.985  | NM_007357 | 12946.01  | 14850.286 |
| L08240    | 3891.177  | 4463.992  | NM_003763 | 20745.74  | 26508.234 |
| NM_017952 | 3604.305  | 4064.596  | AB046836  | 5352.256  | 4156.79   |
| NM_002940 | 5385.957  | 5271.954  | NM_017816 | 18626.105 | 16534.479 |
| NM_016081 | 40617.262 | 56768.668 | AJ224166  | 11053.179 | 8307.038  |
| NM_006389 | 7720.282  | 10072.577 | AK026098  | 11361.692 | 16598.119 |
| M30818    | 3543.667  | 3430.777  | NM_012381 | 4859.414  | 5463.292  |
| NM_000163 | 1414.258  | 1595.614  | M20702    | 1496.464  | 1578.328  |
| NM_005755 | 8616.797  | 9746.769  | NM_006397 | 56007.699 | 47811.563 |
| NM_003329 | 62657.027 | 59257.266 | D83776    | 5929.115  | 6366.187  |
| NM_003299 | 61902.656 | 63243.949 | NM_004088 | 16786.613 | 15074.392 |
| U70981    | 835.566   | 1150.428  | NM_002180 | 3695.782  | 4467.732  |
| NM_014330 | 57698.578 | 62057.738 | NM_000138 | 7974.259  | 9483.48   |
| NM_007034 | 1807.805  | 3294.439  | NM_018163 | 6060.697  | 6819.986  |
| NM_005261 | 2377.952  | 4280.938  | AK026362  | 15138.48  | 17107.223 |
| NM_001560 | 1325.66   | 1868.726  | NM_004968 | 9378.391  | 10459.755 |
| NM_001783 | 62950.609 | 60674.59  | NM_005908 | 9473.086  | 10128.114 |
| J03171    | 7186.408  | 8932.006  | NM_004785 | 12326.669 | 13993.461 |
| NM_005856 | 2353.305  | 3560.732  | AK024079  | 1274.28   | 1541.08   |
| NM_004323 | 60149.105 | 54811.836 | NM_002428 | 6104.871  | 7234.254  |
| NM_002310 | 586.374   | 736.104   | NM_014674 | 9475.132  | 9633.349  |
| NM_005312 | 4544.233  | 4788.948  | NM_018271 | 3072.889  | 3290.344  |
| NM_004210 | 12867.871 | 17042.793 | NM_000547 | 1477.906  | 1969.734  |
| NM_020140 | 2383.204  | 3897.545  | NM_014652 | 3451.045  | 5296.964  |
| NM_007214 | 13977.881 | 9179.21   | AL133020  | 12234.176 | 11774.124 |
| NM_000311 | 19073.873 | 12603.802 | NM_003213 | 26826.939 | 25611.391 |
| NM_017909 | 4718.028  | 3282.515  | BF184738  | 4104.293  | 4256.181  |
| NM_006335 | 22939.422 | 18972.24  | NM_014044 | 10177.559 | 9059.405  |
| NM_000786 | 7890.921  | 5319.188  | NM_000900 | 12413.07  | 11658.408 |
| NM_017731 | 1198.901  | 1518.308  | AK023684  | 14103.602 | 16876.047 |
| AB040891  | 4434.035  | 6216.479  | NM_000232 | 11135.55  | 16745.246 |
| AB037780  | 783.136   | 956.884   | J05070    | 2582.063  | 3448.42   |
| AK025616  | 727.723   | 1315.771  | AA700390  | 9584.293  | 9101.464  |
| NM_007256 | 5182.185  | 7768.792  | Y18474    | 2751.851  | 2768.972  |
| NM_001045 | 41704.078 | 52391.641 | AA436163  | 6202.616  | 6348.114  |
| NM_005697 | 39313.84  | 52611.594 | BI907981  | 19506.541 | 21439.646 |
| NM_003099 | 4913.406  | 5051.557  | BG696638  | 226.841   | 855.325   |
| NM_004781 | 2664.187  | 3060.065  | M19888    | 5223.652  | 5461.22   |
| NM_018303 | 2097.842  | 2128.964  | Y08136    | 4327.978  | 4631.129  |
| NM_014758 | 15804.87  | 17546.104 | AA156863  | 41795.34  | 47887.141 |
| AL133047  | 465.882   | 615.134   | BI915199  | 3720.787  | 5223.265  |
| NM_005124 | 3242.507  | 3103.684  | R82957    | 60484.797 | 57641.691 |
| AK000947  | 5676.842  | 6399.573  | BI830442  | 17261.344 | 17234.053 |
| NM_003897 | 6122.325  | 4022.491  | AA398951  | 696.368   | 806.121   |
| NM_014165 | 32708.043 | 19240.363 | AI218732  | 5364.935  | 5472.436  |
| AL442085  | 11332.854 | 7714.278  | NM_018890 | 55810.602 | 55448.844 |
| NM_013313 | 6939.512  | 7414.543  | NM_016204 | 38322     | 40766.426 |

|           |           |           |           |           |           |
|-----------|-----------|-----------|-----------|-----------|-----------|
| NM_014736 | 12162.737 | 14656.527 | NM_003283 | 12602.851 | 10098.299 |
| AK023886  | 3644.847  | 4948.118  | AF249898  | 14176.157 | 10305.051 |
| NM_002553 | 6164.743  | 8991.572  | M69181    | 30733.813 | 25719.277 |
| AJ404615  | 4638.229  | 7339.453  | AK027224  | 527.621   | 618.691   |
| NM_016053 | 37490.973 | 45252.016 | L09078    | 1773.74   | 2091.922  |
| AB007869  | 8021.643  | 11677.615 | NM_002652 | 1157.596  | 1684.284  |
| AB046844  | 3191.285  | 4767.748  | NM_001311 | 28988.992 | 25631.822 |
| NM_000302 | 4794.956  | 6230.589  | NM_017798 | 20677.359 | 21439.6   |
| NM_013235 | 53378.141 | 51853.855 | NM_000354 | 913.403   | 685.775   |
| NM_016015 | 13638.478 | 13916.366 | NM_012410 | 11136.904 | 10393.043 |
| NM_020120 | 1639.278  | 2235.429  | NM_018049 | 22280.242 | 26754.574 |
| AK022900  | 1155.856  | 1352.363  | AJ133439  | 6832.159  | 8765.705  |
| AB023216  | 653.666   | 555.852   | NM_014395 | 8642.23   | 9140.972  |
| NM_002266 | 60735.102 | 53219.988 | NM_001561 | 5176.238  | 6545.21   |
| NM_014400 | 8360.701  | 12268.085 | NM_005160 | 11273.458 | 12732.981 |
| AL157492  | 1655.705  | 1685.336  | NM_000596 | 2780.294  | 3303.653  |
| AL353957  | 3636.159  | 4020.884  | X78817    | 60509.625 | 57222.938 |
| AK023827  | 10324.546 | 4586.917  | AB023135  | 7043.917  | 6756.296  |
| NM_001117 | 1055.635  | 513.035   | AY009401  | 2248.687  | 2478.495  |
| L07517    | 3456.624  | 2690.143  | AF294628  | 3562.424  | 3906.875  |
| AK022451  | 35615.879 | 25315.359 | NM_002448 | 2058.777  | 2092.217  |
| NM_014359 | 61693.332 | 58881.246 | AF053952  | 61286.07  | 59521.738 |
| BM918441  | 13801.769 | 15562.508 | BU565263  | 62125.105 | 64657.191 |
| AA425102  | 1171.611  | 1465.902  | NM_005028 | 10364.085 | 11822.809 |
| AA878880  | 1330.824  | 2194.906  | NM_001611 | 2902.127  | 3065.004  |
| AA150828  | 10339.262 | 17248.803 | M59979    | 2479.788  | 1863.291  |
| H90764    | 5617.201  | 10623.224 | AB018310  | 5052.942  | 4969.06   |
| AI859208  | 1323.749  | 2044.587  | NM_020133 | 2154.583  | 3404.18   |
| H64379    | 43341.875 | 51780.922 | NM_015379 | 47156.242 | 54708.641 |
| BE208258  | 61539.676 | 57435.918 | NM_004878 | 2001.967  | 2642.465  |
| BI833114  | 1060.878  | 1643.126  | NM_000811 | 1899.374  | 1872.406  |
| T72202    | 3857.211  | 4359.736  | NM_015057 | 1299.24   | 1622.696  |
| BI831922  | 5283.68   | 5164.833  | AF303398  | 43091.727 | 44395.016 |
| M69238    | 6852.189  | 8469.659  | NM_014810 | 5040.937  | 3484.266  |
| AA664180  | 1573.275  | 2138.029  | NM_004738 | 8775.791  | 7254.2    |
| M80244    | 285.542   | 681.929   | NM_007357 | 13345.858 | 13782.458 |
| AA599158  | 18509.422 | 22795.184 | NM_003763 | 19480.969 | 20665.297 |
| BE294756  | 1981.411  | 1981.936  | AK023448  | 4739.431  | 3284.351  |
| AK026092  | 15137.005 | 18226.064 | Y18213    | 22297.207 | 17013.115 |
| AK001175  | 2533.327  | 2080.07   | NM_017816 | 25813.051 | 28463.949 |
| NM_002940 | 4404.352  | 1594.586  | AJ224166  | 14442.262 | 14875.063 |
| NM_016081 | 27890.098 | 16574.141 | AK026098  | 10979.236 | 13645.633 |
| NM_006389 | 6539.662  | 4491.352  | NM_012381 | 6589.491  | 6818.108  |
| M30818    | 2879.328  | 1698.669  | M20702    | 1766.877  | 1880.536  |
| NM_000163 | 1274.795  | 949.824   | NM_006397 | 61528.742 | 57818.844 |
| NM_005755 | 8656.979  | 9570.987  | D83776    | 7875.333  | 8957.059  |
| NM_003329 | 62561.617 | 57956.934 | NM_004088 | 20677.188 | 22410.473 |
| NM_003299 | 61043.25  | 57716.441 | NM_002180 | 3999.306  | 5458.098  |
| U70981    | 591.693   | 991.12    | NM_000138 | 8547.279  | 7544.179  |
| NM_014330 | 55917.59  | 60990.098 | NM_018163 | 5124.035  | 5352.451  |
| NM_007034 | 1993.307  | 2850.554  | AK026362  | 15040.516 | 21310.203 |
| NM_005261 | 654.105   | 1079.954  | NM_004968 | 9423.235  | 9635.403  |
| NM_001560 | 2550.541  | 3350.477  | NM_005908 | 9133.097  | 10816.674 |

|           |           |           |           |           |           |
|-----------|-----------|-----------|-----------|-----------|-----------|
| NM_001783 | 61807.379 | 57518.891 | NM_004785 | 9756.466  | 9865.943  |
| NM_004323 | 59144.75  | 57578.719 | AK024079  | 1236.956  | 1045.756  |
| NM_002310 | 284.273   | 951.197   | NM_002428 | 6692.52   | 8877.53   |
| NM_005312 | 2305.072  | 3209.324  | NM_014674 | 9498.013  | 10881.504 |
| NM_004210 | 10392.881 | 15271.265 | NM_018271 | 3456.798  | 3302.562  |
| NM_020140 | 1892.022  | 2401.969  | NM_000547 | 1063.36   | 959.278   |
| AK026232  | 7975.563  | 7230.164  | NM_014652 | 3055.65   | 2230.689  |
| NM_014892 | 13553.781 | 10788.975 | AL133020  | 11968.319 | 12183.523 |
| NM_017909 | 2734.951  | 638.861   | NM_004152 | 741.751   | 576.35    |
| NM_006335 | 18873.883 | 9071.772  | NM_014044 | 13061.08  | 13527.56  |
| NM_000786 | 6746.551  | 2814.48   | NM_000900 | 14953.327 | 16968.623 |
| NM_017731 | 1319.337  | 1259.404  | AK023684  | 18363.074 | 23971.74  |
| AB040891  | 4648.304  | 4521.997  | NM_000232 | 11911.655 | 12485.848 |
| AB037780  | 806.534   | 1174.764  | J05070    | 3426.804  | 4180.484  |
| AK025616  | 1095.117  | 1855.206  | U76368    | 537.908   | 820.582   |
| NM_007256 | 5798.215  | 8515.631  | AA700390  | 12520.914 | 13180.806 |
| NM_001045 | 43522.605 | 51136.684 | Y18474    | 4000.858  | 4329.793  |
| NM_005697 | 41903.574 | 50962.496 | AA436163  | 7976.209  | 9391.842  |
| NM_003099 | 4055.671  | 4668.81   | BI907981  | 17048.971 | 19096.043 |
| NM_004781 | 1406.793  | 1395.655  | BI603841  | 41795.078 | 47041.125 |
| NM_018303 | 1674.463  | 2171.983  | BG696638  | 299.967   | 744.659   |
| NM_014758 | 15635.719 | 28388.457 | M19888    | 6614.416  | 6774.375  |
| NM_005124 | 2538.697  | 3564.072  | Y08136    | 4959.661  | 6710.618  |
| AK000947  | 4991.993  | 5394.535  | AA156863  | 37550.859 | 41924.633 |
| L08240    | 1910.864  | 1756.848  | BI915199  | 3485.688  | 4317.135  |
| NM_017952 | 1863.49   | 1823.109  | R82957    | 58148.324 | 54374.887 |
| NM_014165 | 29853.373 | 11776.187 | BI830442  | 22776.805 | 25218.477 |
| AL442085  | 11487.634 | 5850.541  | AA398951  | 1012.578  | 995.848   |
| NM_013313 | 6670.674  | 4495.384  | AI218732  | 6231.5    | 6045.649  |
| NM_014736 | 12613.888 | 8319.565  | NM_018890 | 57125.703 | 56066.781 |
| AK023886  | 3153.685  | 3388.826  | NM_016204 | 39225.938 | 38663.363 |
| NM_002553 | 5668.769  | 6072.88   | AB046836  | 7448.573  | 6720.267  |
| AJ404615  | 4227.658  | 3659.305  | NM_001311 | 33504.578 | 24253.621 |
| NM_016053 | 41160.219 | 43624.133 | NM_017798 | 20750.064 | 15855.047 |
| AB007869  | 8054.355  | 10728.192 | NM_000354 | 622.899   | 706.604   |
| AB046844  | 3246.056  | 5317.166  | NM_012410 | 11411.032 | 9334.165  |
| NM_000302 | 5864.316  | 11053.477 | NM_001111 | 36024.875 | 31061.172 |
| NM_013235 | 59938.059 | 52766.859 | NM_018049 | 24851.893 | 22407.082 |
| NM_016015 | 14061.136 | 13802.001 | AJ133439  | 6400.388  | 5147.82   |
| NM_020120 | 1060.164  | 1750.902  | NM_014395 | 7472.097  | 7075.868  |
| AK022900  | 822.507   | 430.814   | NM_001561 | 4287.251  | 4564.156  |
| AB023216  | 2051.211  | 1642.258  | NM_005160 | 11426.257 | 11530.909 |
| NM_002266 | 62453.711 | 52635.945 | NM_000596 | 3010.885  | 3863.205  |
| NM_014400 | 6726.076  | 9722.95   | X78817    | 61281.887 | 53562.801 |
| AL157492  | 1178.971  | 1211.903  | AB023135  | 7857.962  | 8657.297  |
| AL353957  | 3581.568  | 3885.361  | NM_003393 | 776.57    | 1201.184  |
| NM_007214 | 8324.811  | 6244.203  | AY009401  | 2724.607  | 3133.579  |
| NM_000311 | 14342.041 | 9431.196  | AF294628  | 4557.685  | 5369.37   |
| NM_000231 | 741.225   | 239.129   | AK026960  | 2583.136  | 2252.058  |
| L07517    | 3551.004  | 1966.925  | NM_001991 | 9493.012  | 10897.035 |
| AK022451  | 38210.668 | 28572.658 | NM_017852 | 1626.348  | 1723.044  |
| NM_014359 | 58953.219 | 57206.918 | NM_000193 | 30582.762 | 34462.852 |
| BM918441  | 14422.292 | 11166.65  | BC014586  | 3857.49   | 5087.16   |



|           |           |           |           |           |           |
|-----------|-----------|-----------|-----------|-----------|-----------|
| AA425102  | 858.15    | 839.697   | NM_002448 | 2321.152  | 2504.332  |
| AA878880  | 800.469   | 1116.139  | AF053952  | 61644.117 | 56403.074 |
| AA150828  | 9876.286  | 8971.847  | NM_003213 | 37625.57  | 43891.449 |
| H90764    | 3454.117  | 4038.015  | BF184738  | 6884.984  | 7309.691  |
| AI859208  | 1254.193  | 1358.363  | NM_020389 | 1132.081  | 751.469   |
| H64379    | 49151.34  | 54688.02  | NM_005070 | 951.655   | 720.481   |
| BE208258  | 63468.77  | 60633.844 | NM_015057 | 1392.938  | 1281.281  |
| BI833114  | 748.495   | 1514.859  | AF303398  | 38840.445 | 49662.23  |
| T72202    | 3926.12   | 4729.555  | NM_014810 | 7079.305  | 6504.538  |
| BI831922  | 4761.127  | 4808.641  | NM_004738 | 9074.056  | 9576.307  |
| M69238    | 4035.684  | 4120.49   | NM_007357 | 12342.006 | 13967.316 |
| AA664180  | 1624.789  | 1770.034  | NM_003763 | 19260.096 | 22804.6   |
| AA599158  | 23092.76  | 31036.9   | AK023448  | 4591.811  | 3836.366  |
| BE294756  | 2660.762  | 3257.708  | Y18213    | 17948.508 | 13047.162 |
| AK026092  | 17774.336 | 25418.291 | NM_003283 | 15109.784 | 12083.776 |
| AK001175  | 2147.964  | 2262.14   | AF249898  | 15747.904 | 15622.361 |
| NM_003897 | 4408.126  | 3180.283  | M69181    | 32019.166 | 26595.883 |
| NM_003298 | 64547.27  | 45609.664 | AK027224  | 327.151   | 746.666   |
| U70981    | 383.148   | 432.794   | L09078    | 2719.082  | 2719.399  |
| NM_014330 | 64103.887 | 58404.051 | NM_002652 | 2236.923  | 2095.677  |
| NM_007034 | 1710.25   | 1250.771  | NM_000547 | 1221.341  | 1136.755  |
| NM_005261 | 1141.687  | 1331.984  | NM_014652 | 2101.784  | 1613.842  |
| NM_001560 | 3298.328  | 3219.336  | AL133020  | 11437.689 | 10430.615 |
| NM_001783 | 62101.961 | 54610.133 | NM_004152 | 488.142   | 454.217   |
| J03171    | 8758.09   | 9578.994  | BU565263  | 56292.602 | 66577.852 |
| NM_005856 | 3640.592  | 5873.315  | NM_005028 | 12392.066 | 13136.813 |
| NM_004323 | 60057.277 | 59363.785 | NM_001611 | 3138.965  | 3144.046  |
| NM_002310 | 1032.842  | 1423.452  | M59979    | 2974.395  | 3007.139  |
| NM_005312 | 6500.646  | 8435.47   | AB018310  | 5080.639  | 5888.189  |
| NM_001711 | 4941.364  | 6137.782  | NM_020133 | 2305.635  | 2355.43   |
| NM_004210 | 13598.257 | 17794.52  | NM_015379 | 42547.383 | 45902.012 |
| NM_020140 | 929.622   | 1054.196  | NM_004878 | 1715.814  | 1892.677  |
| NM_001496 | 10150.354 | 10314.065 | AF144638  | 59564.734 | 65647.625 |
| NM_001962 | 1902.736  | 2462.913  | BF028822  | 998.007   | 1140.971  |
| NM_002500 | 9982.911  | 9641.519  | NM_005502 | 1185.772  | 1280.378  |
| AK026232  | 9597.092  | 8372.025  | NM_000742 | 3993.416  | 4720.734  |
| NM_014892 | 12167.563 | 9682.553  | NM_002355 | 29185.205 | 30803.959 |
| AK023827  | 9485.574  | 7655.74   | AK026608  | 9478.449  | 8520.799  |
| NM_001117 | 604.818   | 513.097   | AJ252011  | 1691.851  | 1208.267  |
| AF283645  | 12697.974 | 7772.33   | NM_018890 | 52468.953 | 49518.172 |
| NM_016575 | 12358.557 | 11824.672 | NM_016204 | 27899.609 | 23660.65  |
| NM_018557 | 530.718   | 643.778   | AB046836  | 4120.746  | 2954.747  |
| NM_001045 | 43559.426 | 39519.523 | NM_017816 | 18165.35  | 16607.525 |
| NM_005697 | 44026.734 | 46837.324 | AJ224166  | 9573.061  | 7132.457  |
| NM_003098 | 9246.62   | 9287.142  | AK026098  | 9904.726  | 10357.344 |
| NM_004781 | 4957.345  | 6097.649  | NM_012381 | 5316.912  | 4297.165  |
| NM_016315 | 1355.841  | 1262.756  | M20702    | 1510.824  | 1485.815  |
| NM_018303 | 4452.646  | 5459.183  | NM_006397 | 58392.766 | 55690.004 |
| NM_014758 | 26911.076 | 38806.059 | D83776    | 5887.634  | 5745.405  |
| AL133047  | 710.862   | 986.77    | NM_004088 | 17826.895 | 17177.682 |
| NM_005124 | 5360.149  | 6198.286  | NM_002180 | 4105.005  | 5294.941  |
| AK000947  | 5329.05   | 6520.449  | NM_000138 | 8060.381  | 8758.732  |
| L08240    | 1583.167  | 1407.808  | NM_018163 | 6888.949  | 5773.372  |

|           |           |           |           |           |           |
|-----------|-----------|-----------|-----------|-----------|-----------|
| NM_017952 | 1377.649  | 1311.153  | AK026362  | 15890.048 | 13146.76  |
| NM_002940 | 1796.658  | 1522.886  | NM_004968 | 8686.115  | 8339.25   |
| NM_016081 | 24528.857 | 29188.625 | NM_005908 | 9007.43   | 9747.697  |
| NM_006389 | 3655.124  | 4036.403  | NM_004785 | 11968.312 | 11579.322 |
| M30818    | 2207.464  | 1613.878  | AK024079  | 1312.061  | 1194.47   |
| NM_000163 | 882.871   | 707.206   | NM_002428 | 6949.083  | 6309.938  |
| NM_005755 | 6578.81   | 4563.636  | NM_014674 | 9335.572  | 8104.527  |
| NM_003329 | 65148.852 | 55839.676 | NM_018271 | 3679.27   | 3260.087  |
| NM_014400 | 10675.849 | 4892.823  | CY3Cy5    | 3655.196  | 163.016   |
| AL157492  | 2690.657  | 2240.55   | NM_020967 | 2187.175  | 2092.944  |
| AL353957  | 7079.17   | 10121.617 | NM_001071 | 21935.311 | 27958.371 |
| NM_007214 | 14351.871 | 12537.542 | AF086181  | 1897.597  | 3543.519  |
| NM_000311 | 20734.885 | 17457.707 | AK021540  | 1872.139  | 2815.836  |
| NM_017909 | 4897.513  | 3632.754  | D86985    | 863.052   | 892.681   |
| NM_006335 | 24500.576 | 23905.666 | AK022258  | 2344.301  | 2161.419  |
| NM_000786 | 8647.733  | 7843.674  | AF088043  | 1022.411  | 794.361   |
| NM_002519 | 515.052   | 878.346   | AF131799  | 1584.144  | 1396.513  |
| NM_017731 | 2442.439  | 4445.071  | AK000455  | 3234.629  | 2319.597  |
| AB040891  | 4657.087  | 5785.981  | NM_005230 | 874.02    | 729.387   |
| AB037780  | 741.676   | 714.269   | AK023719  | 14873.262 | 14303.454 |
| NM_005845 | 14982.991 | 15878.306 | AF035317  | 527.225   | 773.568   |
| NM_016209 | 9047.534  | 12044.055 | AK025590  | 7621.676  | 6952.044  |
| AK075415  | 728.684   | 1182.541  | AY007149  | 3833.211  | 3026.543  |
| NM_018964 | 8488.527  | 8589.709  | NM_020967 | 2325.74   | 1760.767  |
| NM_000080 | 1827.77   | 1604.829  | NM_001071 | 19772.633 | 14696.398 |
| NM_001829 | 1646.802  | 911.336   | SR2       | 56695.02  | 49074.219 |
| NM_007256 | 3239.817  | 2382.556  | SR4       | 19663.945 | 12195.344 |
| AK026092  | 16301.017 | 7648.792  | SR6       | 2416.45   | 949.208   |
| AK001175  | 3409.871  | 2452.695  | SR8       | 7886.603  | 4967.337  |
| NM_003897 | 6784.845  | 7165.324  | SR10      | 29535.74  | 2889.699  |
| NM_014165 | 36949.473 | 31307.111 | CY3Cy5    | 1298.168  | 82.045    |
| AL442085  | 13391.072 | 12509.81  | AL157484  | 47784.527 | 48965.289 |
| NM_013313 | 7033.018  | 8333.951  | AK024850  | 1658.619  | 2100.534  |
| NM_014736 | 12050.857 | 14476.505 | AK022033  | 422.82    | 1343.387  |
| AK023886  | 4198.975  | 4758.337  | Y09836    | 3116.466  | 4143.514  |
| NM_002553 | 6338.584  | 7658.082  | AL137597  | 5687.836  | 4948.263  |
| AJ404615  | 4461.966  | 4794.415  | AK022144  | 1337.255  | 1375.14   |
| NM_016053 | 43664.543 | 43256.715 | AF086044  | 1259.031  | 1026.758  |
| AB007869  | 3357.644  | 5021.253  | NM_014926 | 1062.394  | 854.098   |
| AB046844  | 3863.93   | 2911.623  | AF131790  | 1762.692  | 1183.592  |
| NM_000302 | 2444.279  | 3144.145  | NM_012075 | 5082.41   | 3318.237  |
| NM_013235 | 53377.457 | 45650.766 | AB004851  | 2448.922  | 2121.976  |
| NM_016015 | 9229.996  | 6804.281  | NM_013381 | 710.847   | 785.041   |
| NM_020120 | 1211.61   | 1147.324  | AK023911  | 21970.814 | 15740.428 |
| AK022900  | 1255.308  | 707.709   | NM_001283 | 11625.387 | 8088.762  |
| AB023216  | 755.515   | 345.434   | AL110237  | 2285.602  | 2662.767  |
| NM_002266 | 58265.699 | 41148.09  | D87470    | 3147.731  | 3108.137  |
| NM_033199 | 1712.398  | 1512.529  | AK024578  | 442.301   | 783.48    |
| AF086261  | 690.845   | 1316.668  | AF147307  | 9107.646  | 7804.227  |
| AF086367  | 449.704   | 968.643   | AK001829  | 3123.952  | 2200.25   |
| AK025088  | 3228.954  | 3047.588  | NM_016525 | 6305.792  | 4564.443  |
| U79295    | 561.798   | 410.027   | AK024931  | 26393.789 | 11211.323 |
| NM_003596 | 935.381   | 568.911   | AL109715  | 1069.061  | 182.384   |

|           |           |           |           |           |           |
|-----------|-----------|-----------|-----------|-----------|-----------|
| AF052181  | 2324.806  | 1335.439  | AK025194  | 558.773   | 809.691   |
| AL050074  | 2768.492  | 2197.271  | AK025659  | 7078.758  | 7942.146  |
| AK026436  | 734.106   | 473.606   | AK026407  | 1332.348  | 1358.445  |
| NM_018061 | 2156.384  | 2086.268  | AK026788  | 8315.174  | 9511.528  |
| NM_015001 | 2111.114  | 1494.941  | AK025272  | 7645.448  | 6423.669  |
| SR2       | 45640.176 | 27420.51  | AK026824  | 1336.765  | 886.557   |
| SR4       | 9826.891  | 5998.436  | AL365407  | 4646.613  | 3040.326  |
| SR6       | 1238.726  | 525.195   | AK022407  | 794.443   | 690.972   |
| SR8       | 11242.606 | 13093.031 | AK000840  | 61541.438 | 49389.734 |
| SR10      | 15838.644 | 2509.647  | AL162073  | 4196.153  | 2946.023  |
| AL109719  | 2253.887  | 1942.815  | AL390160  | 3179.536  | 2470.031  |
| NM_016644 | 1723.985  | 2479.455  | AJ006835  | 25614.92  | 27903.463 |
| AF085836  | 1975.08   | 1150.922  | AF085890  | 467.443   | 512.465   |
| AL049449  | 1533.162  | 1232.568  | AL110138  | 2713.958  | 2239.913  |
| AL359654  | 1227.151  | 1347.786  | AL050153  | 698.112   | 537.288   |
| AK024224  | 2718.687  | 2079.14   | AL122039  | 1255.613  | 432.635   |
| NM_015362 | 5232.806  | 3315.496  | AF070577  | 21647.639 | 4968.938  |
| AF147371  | 2213.481  | 1430.151  | AL137445  | 2220.352  | 3381.242  |
| NM_018982 | 2541.998  | 1885.161  | U92992    | 807.031   | 1034.275  |
| AF086254  | 4307.741  | 3005.706  | BC028422  | 1627.173  | 1589.509  |
| AK026856  | 522.814   | 331.072   | AK022219  | 1527.209  | 1464.089  |
| AL162033  | 4431.618  | 3870.818  | AK024192  | 767.978   | 1086.572  |
| AK026761  | 447.736   | 623.675   | NM_013244 | 851.744   | 950.461   |
| NM_018838 | 8900.729  | 8988.324  | AJ011378  | 4818.713  | 3371.613  |
| AF075083  | 1092.813  | 1352.678  | AK023363  | 481.679   | 804.759   |
| AK021454  | 1339.224  | 985.478   | AF009266  | 1568.41   | 1334.178  |
| AK022069  | 1761.149  | 1559.767  | AF009310  | 2697.093  | 2682.191  |
| AL137457  | 870.519   | 644.781   | AF054991  | 1309.917  | 1281.036  |
| AF085913  | 1542.291  | 911.517   | AF060168  | 3628.898  | 3091.447  |
| AF085944  | 1200.055  | 1137.942  | AF009275  | 2436.492  | 2956.601  |
| AL133038  | 1779.944  | 1582.47   | AF015251  | 1094.156  | 1449.896  |
| AL137414  | 25749.98  | 27759.762 | AF056426  | 2598.848  | 2520.488  |
| AL359574  | 2096.798  | 1673.748  | AF064850  | 694.34    | 883.263   |
| AL133569  | 2967.09   | 2425.898  | AK001096  | 1193.966  | 970.039   |
| AK001910  | 3026.951  | 2108.974  | NM_018329 | 2023.825  | 1763.056  |
| AF124368  | 1564.328  | 2149.188  | AK021565  | 1219.557  | 946.396   |
| AF265210  | 2897.31   | 3880.462  | AK021778  | 1365.924  | 1426.403  |
| AK024241  | 1259.344  | 1619.609  | AK001150  | 11626.809 | 7745.598  |
| AK025061  | 1711.13   | 2594.864  | AK002123  | 1360.828  | 1021.486  |
| AK023882  | 486.494   | 613.472   | AK021633  | 3884.573  | 2049.528  |
| AK026750  | 1232.242  | 1826.846  | AF189251  | 2634.228  | 3252.51   |
| AF072164  | 2617.195  | 2049.274  | NM_005322 | 4801.658  | 4321.196  |
| NM_018610 | 693.278   | 593.375   | AK024465  | 24253.066 | 20657.01  |
| AF181286  | 1203.143  | 1573.66   | AF075119  | 1330.87   | 888.602   |
| AF147317  | 1765.72   | 1413.96   | AK021478  | 10461.251 | 8497.066  |
| AF232216  | 999.01    | 877.052   | AF131782  | 2993.778  | 2021.732  |
| NM_017773 | 2681.306  | 2105.568  | NM_014210 | 10647.536 | 6870.413  |
| AK021940  | 3405.471  | 3343.653  | AK021603  | 19423.504 | 14134.411 |
| AK022338  | 5202.035  | 4077.778  | AL110136  | 10275.78  | 7320.917  |
| U48696    | 1346.211  | 1068.232  | AF075095  | 600.931   | 768.13    |
| AF230316  | 3741.601  | 3017.19   | AJ008130  | 56540.277 | 58307.668 |
| AK024515  | 11966.912 | 12762.355 | NM_003669 | 1307.958  | 1630.638  |
| AF085862  | 4093.121  | 4927.901  | AF086502  | 3842.933  | 4776.678  |

|           |           |           |           |           |           |
|-----------|-----------|-----------|-----------|-----------|-----------|
| NM_01799E | 2003.744  | 2230.683  | L39924    | 4105.656  | 4111.438  |
| AL049271  | 55238.195 | 59399.113 | U52054    | 13054.438 | 14387.907 |
| AK023079  | 35310.648 | 21587.355 | D17226    | 945.058   | 939.26    |
| NM_01960E | 2683.318  | 2186.164  | AK023325  | 4019.226  | 3505.044  |
| AK026198  | 2686.622  | 1917.385  | NM_01798E | 8487.954  | 8363.626  |
| NM_005001 | 16261.439 | 12731.863 | AK025866  | 7903.234  | 7028.223  |
| NM_017787 | 2362.046  | 4346.818  | AF088058  | 13721.022 | 9625.813  |
| NM_02031E | 8877.75   | 5101.328  | NM_000513 | 2911.661  | 2166.176  |
| NM_00568E | 1006.456  | 764.35    | Y11165    | 4204.913  | 3651.45   |
| NM_020427 | 23009.791 | 13801.11  | NM_003530 | 1925.095  | 3036.306  |
| AF085920  | 1372.226  | 1209.647  | AJ227871  | 3419.688  | 2907.168  |
| AK023173  | 21807.133 | 23852.381 | AK025344  | 4326.374  | 3236.679  |
| AK025225  | 1726.587  | 1604.147  | D28589    | 51923.207 | 43986.254 |
| U79275    | 16001.398 | 16784.002 | AF301223  | 1845.609  | 1195.159  |
| AJ227908  | 1460.118  | 1998.867  | NM_017867 | 8283.139  | 5045.34   |
| AF007193  | 1642.702  | 2468.848  | U92820    | 5225.574  | 3197.554  |
| AK022367  | 1029.91   | 1055.542  | NM_017937 | 3454.38   | 2641.245  |
| BC028589  | 1757.723  | 1983.983  | AL360266  | 6199.99   | 5341.513  |
| AF088067  | 9634.482  | 8109.869  | AL160132  | 61757.863 | 61827.051 |
| AF056441  | 1646.193  | 1228.375  | NM_019557 | 4562.745  | 3431.376  |
| NM_018980 | 3226.402  | 3194.521  | NM_00354E | 1193.129  | 1140.101  |
| AF086201  | 1634.545  | 1153.347  | AK024413  | 3026.57   | 3677.028  |
| AK024712  | 2433.674  | 2376.847  | AL137752  | 649.358   | 1113.016  |
| NM_00290E | 5459.948  | 4290.11   | AK022247  | 2581.501  | 3365.039  |
| NM_02024E | 30581.834 | 25286.789 | AK001453  | 5632.429  | 6663.38   |
| X89670    | 1552.998  | 1393.742  | AB007972  | 12110.108 | 14162.873 |
| NM_00172E | 465.265   | 510.273   | AL390144  | 12721.319 | 12721.482 |
| NM_00405E | 5300.12   | 5615.023  | AK024017  | 4388.749  | 4220.972  |
| NM_00148E | 1015.571  | 1942.479  | X56196    | 2012.267  | 2125.595  |
| M20259    | 1133.6    | 1558.767  | D17220    | 14393.443 | 14069.266 |
| NM_020374 | 2549.329  | 3206.52   | D28363    | 55428.16  | 58861.961 |
| NM_01492E | 1915.692  | 1876.229  | AB011171  | 2563.501  | 1744.11   |
| AF183570  | 850.286   | 1005.821  | AF090099  | 1010.114  | 1274.441  |
| NM_005497 | 52863.313 | 44503.492 | AK023606  | 622.678   | 828.859   |
| AK024048  | 1329.885  | 1371.38   | NM_00358E | 3978.804  | 5342.029  |
| AB033093  | 1267.568  | 970.207   | NM_00092E | 5243.25   | 4635.724  |
| NM_00590E | 34964.328 | 24270.133 | NM_01323E | 29949.371 | 24302.777 |
| AK022326  | 952.056   | 740.961   | NM_01799E | 2210.196  | 1987.949  |
| AF085991  | 902.902   | 1032.103  | NM_00036E | 2159.825  | 1366.553  |
| NM_00194E | 770.885   | 560.424   | NM_01442E | 5900.407  | 4554.847  |
| NM_004927 | 9715.229  | 6622.862  | AK000770  | 5322.024  | 4678.952  |
| AB040928  | 572.747   | 439.368   | NM_002370 | 21454.502 | 14145.64  |
| NM_00145E | 2487.449  | 2557.071  | NM_015670 | 6071.739  | 5598.026  |
| NM_01551E | 41734.969 | 49724.23  | NM_01470E | 3014.688  | 2230.313  |
| NM_01741E | 1549.375  | 1716.075  | AK002203  | 1209.35   | 1261.685  |
| NM_005544 | 979.611   | 1190.145  | AK026469  | 33945.848 | 27699.881 |
| NM_002964 | 59567.395 | 58884.809 | D16935    | 9069.791  | 9123.744  |
| AF311862  | 66777.727 | 71223.586 | U92019    | 2690.75   | 2685.816  |
| NM_00321E | 2035.014  | 1837.374  | U52835    | 3943.247  | 3933.981  |
| NM_016447 | 1026.123  | 882.604   | NM_00075E | 7810.447  | 7339.412  |
| NM_01562E | 4744.275  | 3950.276  | AK022148  | 2420      | 2584.989  |
| NM_00489E | 2356.205  | 1620.428  | Z36811    | 59870.188 | 59904.805 |
| AB006628  | 10914.192 | 6631.626  | NM_018950 | 32412.652 | 30164.164 |

|           |           |           |           |           |           |
|-----------|-----------|-----------|-----------|-----------|-----------|
| AF272036  | 911.399   | 930.586   | K03200    | 2534.122  | 2849.367  |
| AF231023  | 2450.455  | 2393.95   | U17629    | 7883.841  | 8096.498  |
| NM_00514E | 7461.125  | 7337.164  | NM_02042E | 15635.159 | 12127.02  |
| AF508940  | 4681.708  | 3200.845  | U79265    | 4604.34   | 3156.262  |
| NM_020237 | 736.584   | 652.673   | AK022868  | 10985.772 | 8151.808  |
| AF130051  | 673.269   | 470.523   | AF217289  | 645.753   | 1091.015  |
| M25753    | 15141.948 | 14485.205 | NM_002687 | 31902.133 | 29390.002 |
| NM_003883 | 2947.675  | 3983.772  | NM_000627 | 9839.282  | 8150.612  |
| NM_01492E | 2829.461  | 4237.438  | NM_00003E | 2797.927  | 1063.835  |
| NM_004203 | 15157.68  | 18765.74  | NM_00082E | 6870.002  | 4887.703  |
| NM_001951 | 843.06    | 1284.181  | NM_001963 | 1516.548  | 1158.489  |
| NM_002391 | 2023.435  | 2175.177  | NM_004334 | 9329.511  | 6290.069  |
| NM_00706E | 4349.993  | 3444.604  | NM_00388E | 42319.785 | 33803.051 |
| NM_003674 | 59669.305 | 54163.73  | NM_005843 | 5739.015  | 5597.79   |
| NM_001197 | 6450.714  | 5146.339  | NM_003854 | 1789.115  | 1658.812  |
| NM_006682 | 1880.505  | 2014.671  | NM_01798C | 1860.152  | 1983.592  |
| NM_014977 | 66839.461 | 70139.945 | NM_001252 | 61827.32  | 59329.387 |
| AK026325  | 1098.496  | 1260.994  | AF053712  | 15815.953 | 14977.589 |
| NM_00123C | 570.975   | 670.298   | NM_003947 | 4283.455  | 4694.306  |
| AK025662  | 1953.981  | 1648.969  | NM_002821 | 44332.328 | 47700.973 |
| NM_000201 | 11670.428 | 9671.13   | M96652    | 65528.723 | 72032.273 |
| AB011539  | 1296.24   | 1004.169  | L41690    | 4969.384  | 4932.107  |
| U37028    | 2624.723  | 2311.401  | NM_01805E | 3050.944  | 3447.42   |
| NM_001793 | 21184.104 | 10021.471 | NM_00217C | 457.928   | 769.807   |
| S81361    | 441.064   | 333.439   | NM_00093E | 56050.578 | 58965.586 |
| AK024313  | 9825.427  | 5954.739  | NM_005183 | 1469.885  | 1403.706  |
| NM_003891 | 3568.15   | 3038.087  | NM_006514 | 6996.388  | 5736.97   |
| AL359575  | 1134.917  | 1248.021  | AF065164  | 25353.082 | 17751.764 |
| NM_002022 | 578.693   | 652.981   | K01900    | 942.203   | 1075.626  |
| NM_015524 | 1239.299  | 1304.405  | AJ008143  | 52916.008 | 56711.184 |
| NM_001673 | 20793.129 | 18682.455 | NM_007144 | 2375.647  | 3011.53   |
| AK023167  | 937.595   | 1807.866  | NM_005093 | 961.439   | 1072.176  |
| NM_01651C | 3909.545  | 5606.135  | NM_004424 | 34426.254 | 27976.025 |
| NM_01427C | 2471.593  | 2347.691  | AL133117  | 5067.418  | 3226.107  |
| NM_000071 | 9652.566  | 9163.417  | AF070586  | 46877.789 | 36386.699 |
| NM_006843 | 4874.574  | 4160.137  | NM_014412 | 4785.281  | 2736.889  |
| NM_004321 | 3097.059  | 2760.885  | NM_013303 | 2315.424  | 2012.947  |
| AF311212  | 1812.719  | 1497.372  | NM_012227 | 10613.436 | 8056.288  |
| NM_00691E | 479.833   | 473.01    | NM_006101 | 5497.911  | 3851.193  |
| NM_00608E | 7742.647  | 7804.904  | NM_001237 | 21010.863 | 17592.229 |
| NM_00452C | 6056.176  | 3814.839  | NM_002507 | 7368.044  | 6986.746  |
| AK027118  | 3683.003  | 2853.119  | NM_015962 | 9208.137  | 10115.454 |
| AK022882  | 19739.98  | 19134.91  | NM_01614E | 1732.294  | 2350.902  |
| NM_00610E | 4890.258  | 2951.598  | NM_01607E | 39106     | 39326.063 |
| NM_005981 | 2001.511  | 1482.93   | NM_00379E | 2418.6    | 1585.713  |
| AF210651  | 843.991   | 617.782   | NM_004401 | 14271.722 | 12101.312 |
| AF090942  | 997.137   | 703.839   | NM_00184E | 48686.707 | 48316.195 |
| NM_01459E | 14679.531 | 10152.693 | AF255910  | 5469.677  | 4264.567  |
| NM_01478E | 1005.051  | 689.305   | NM_00042E | 668.08    | 635.151   |
| AB046784  | 3612.98   | 2083.852  | NM_01614E | 9290.719  | 7777.913  |
| X52402    | 5468.739  | 4552.123  | AB046776  | 5626.874  | 6756.693  |
| AL133663  | 842.071   | 1021.216  | D42084    | 11203.08  | 15054.066 |
| NM_004992 | 1125.053  | 1122.773  | NM_001734 | 1802.891  | 3023.518  |

|           |           |           |           |           |           |
|-----------|-----------|-----------|-----------|-----------|-----------|
| NM_014462 | 3601.807  | 2498.934  | NM_014693 | 19225.914 | 21603.42  |
| NM_014156 | 60619.094 | 59438.293 | AB007896  | 4483.204  | 3838.818  |
| NM_003137 | 10939.622 | 10153.337 | AB007916  | 9357.764  | 7511.515  |
| NM_006938 | 36354.563 | 35015.426 | NM_002874 | 1940.471  | 1678.136  |
| NM_004515 | 927.641   | 820.161   | AF049140  | 8148.241  | 5678.679  |
| NM_020158 | 5130.645  | 5463.285  | AL136794  | 4564.545  | 3005.913  |
| AF176085  | 3049.111  | 2223.268  | BC035601  | 58328.637 | 62247.246 |
| NM_006985 | 25249.09  | 17883.246 | NM_001458 | 9001.377  | 9592.21   |
| NM_003757 | 13361.29  | 10093.056 | NM_020388 | 38991.406 | 41779.563 |
| AK025561  | 775.469   | 688.813   | NM_004202 | 54407.578 | 59400.922 |
| NM_018602 | 49303.828 | 41356.715 | AB046829  | 2815.858  | 2953.21   |
| NM_004096 | 1236.308  | 831.712   | NM_016445 | 7172.613  | 7124.908  |
| NM_017629 | 10586.225 | 7220.883  | NM_003379 | 58747.191 | 55545.27  |
| AL049681  | 2792.001  | 2552.698  | NM_004521 | 28481.666 | 23279.412 |
| NM_006584 | 978.172   | 468.403   | AF229162  | 5371.701  | 4617.67   |
| NM_003551 | 5813.746  | 4852.667  | U02309    | 60668.023 | 62328.07  |
| AF305210  | 681.002   | 638.361   | AB028991  | 17490.158 | 13426.412 |
| AK021900  | 4671.25   | 3122.627  | AF263547  | 29301.822 | 37729.742 |
| NM_002764 | 21614.184 | 13341.374 | NM_004831 | 4809.806  | 6009.142  |
| NM_019857 | 1451.269  | 1362.322  | NM_014213 | 22560.168 | 29488.947 |
| NM_015455 | 53800.902 | 49932.707 | NM_000168 | 14910.409 | 13115.013 |
| AF024702  | 15057.003 | 16386.645 | AF294629  | 46506.078 | 37285.707 |
| NM_001964 | 2731.651  | 2675.084  | NM_000545 | 40977.043 | 38700.496 |
| NM_005962 | 14729.975 | 15398.514 | NM_002136 | 55835.617 | 55325.078 |
| X74864    | 5979.459  | 5436.252  | AK025571  | 15573.23  | 9487.662  |
| AK026804  | 2913.438  | 2241.717  | NM_004940 | 1260.044  | 942.866   |
| NM_016170 | 18835.301 | 17358.525 | NM_014463 | 51867.676 | 50555.879 |
| NM_006166 | 743.47    | 688.556   | NM_005520 | 36042.988 | 30305.324 |
| S72620    | 51149.781 | 37872.5   | AK023265  | 6112.676  | 5962.149  |
| NM_005263 | 7159.995  | 5825.551  | NM_018723 | 4590.013  | 5134.861  |
| AB033022  | 5333.186  | 4308.61   | AB029009  | 12683.03  | 13593.656 |
| NM_016264 | 1054.723  | 742.627   | AF112207  | 7393.475  | 8304.939  |
| NM_006079 | 32038.063 | 17068.336 | AJ420488  | 63321.613 | 64707.246 |
| AB037837  | 2830.203  | 1568.282  | NM_005594 | 61578.555 | 62968.891 |
| NM_001155 | 18864.844 | 17478.67  | NM_004461 | 65326.926 | 71422.148 |
| M62896    | 53699.965 | 44962.707 | NM_018473 | 10707.735 | 10222.103 |
| NM_017736 | 2093.024  | 2660.922  | BF106121  | 4235.012  | 5085.398  |
| NM_000313 | 564.98    | 527.845   | AK022590  | 5133.612  | 4138.454  |
| NM_001498 | 61389.949 | 61122.871 | AK024343  | 5028.445  | 3238.234  |
| AF263523  | 2462.139  | 2676.73   | NM_001936 | 1055.834  | 830.691   |
| L08441    | 17138.793 | 36607.125 | NM_002569 | 2564.836  | 2830.626  |
| AA641953  | 3275.576  | 7864.858  | M12078    | 25972.371 | 24465.213 |
| AI248827  | 7082.434  | 9723.674  | NM_004550 | 26426.799 | 37509.852 |
| R45026    | 58692.5   | 58283.605 | NM_000785 | 6725.208  | 7746.175  |
| BI768063  | 1805.73   | 1740.899  | NM_004110 | 56467.563 | 50454.637 |
| AI970239  | 5711.696  | 6129.417  | NM_013387 | 54699.023 | 57763.773 |
| AA496452  | 27076.561 | 39366.668 | NM_005262 | 58582.984 | 46253.313 |
| X67594    | 7531.002  | 7807.208  | NM_005757 | 3100.912  | 1906.467  |
| NM_001631 | 1307.01   | 1328.263  | NM_016483 | 1350.602  | 1000.954  |
| AB000734  | 14422.389 | 10998.968 | NM_020128 | 3606.117  | 2253.663  |
| NM_005987 | 67194.367 | 70605.164 | NM_005068 | 41305.176 | 41300.176 |
| X87838    | 5824.342  | 3632.205  | NM_018223 | 15424.653 | 14890.585 |
| AK023059  | 1228.876  | 1084.152  | NM_006693 | 53916.777 | 52609.762 |

|           |           |           |            |           |           |
|-----------|-----------|-----------|------------|-----------|-----------|
| AF224266  | 7773.602  | 8968.496  | NM_001722  | 4862.442  | 6540.083  |
| U72882    | 58392.133 | 54138.922 | AB046802   | 13236.591 | 14140.026 |
| NM_014337 | 26585.398 | 23103.176 | NM_003297  | 3021.521  | 4340.694  |
| NM_007161 | 32518.738 | 33552.988 | X74861     | 1399.226  | 2817.04   |
| NM_014387 | 2651.22   | 2577.84   | NM_006940  | 3027.28   | 2297.069  |
| NM_003641 | 7668.868  | 7642.922  | NM_018269  | 20303.369 | 16857.145 |
| NM_012463 | 3307.433  | 3475.07   | AK024633   | 13678.584 | 13478.555 |
| L29140    | 57572.207 | 63735     | NM_001453  | 12947.389 | 12140.284 |
| AK026448  | 8231.079  | 11919.465 | NM_005257  | 46900.191 | 43026.539 |
| AK057418  | 3888.622  | 6532.452  | AF011573   | 36564.863 | 31167.936 |
| L37199    | 449.452   | 811.135   | NM_002145  | 12857.1   | 9068.688  |
| NM_007260 | 2165.01   | 2852.482  | AF101051   | 591.523   | 933.842   |
| AF148646  | 16072.892 | 14785.094 | NM_007245  | 19065.84  | 20165.266 |
| AL110218  | 2212.332  | 2270.27   | NM_001890  | 3738.248  | 6392.075  |
| AB023201  | 2110.273  | 2328.229  | NM_001286  | 11898.354 | 13354.725 |
| X00094    | 835.03    | 1079.197  | NM_014648  | 2247      | 2010.905  |
| NM_003775 | 5251.582  | 4967.872  | NM_019604  | 3435.79   | 3075.331  |
| NM_002082 | 21081.912 | 29000.064 | NM_005073  | 3761.476  | 3078.069  |
| NM_002922 | 17405.105 | 9836.602  | NM_000951  | 18658.92  | 15244.909 |
| AF155657  | 13101.532 | 9361.835  | X52599     | 17438.578 | 14919.687 |
| NM_006056 | 13049.003 | 10563.636 | AA029300   | 8463.258  | 8337.175  |
| AF045229  | 14857.434 | 7510.244  | BG708842   | 58168.27  | 60344.055 |
| NM_001840 | 14410.879 | 10584.96  | M19723     | 57311.586 | 61456.457 |
| NM_016099 | 55928.676 | 46428.754 | X06256     | 22378.209 | 26298.066 |
| NM_000072 | 826.113   | 1130.037  | AA149811   | 379.7     | 686.553   |
| NM_000697 | 2028.956  | 2091.832  | AA709271   | 8918.884  | 10932.509 |
| NM_000017 | 15856.405 | 13369.062 | M34057     | 16350.908 | 16898.77  |
| NM_000237 | 1198.869  | 1349.699  | ID 1984668 | 5364.496  | 6050.009  |
| NM_018346 | 8599.773  | 8103.909  | ID 1832579 | 8642.225  | 9734.832  |
| AL122054  | 1553.238  | 1487.942  | H-430185 N | 4529.842  | 4402.796  |
| AB023151  | 776.944   | 1333.291  | D16583     | 15274.582 | 12854.22  |
| NM_000140 | 27671.225 | 37492.082 | H44051     | 14384.703 | 13246.849 |
| NM_005125 | 9258.743  | 23245.715 | AA481547   | 54309.082 | 52424.664 |
| NM_020038 | 1527.75   | 4194.556  | AA831880   | 5719.054  | 5180.306  |
| NM_016246 | 3739.404  | 3987.946  | T64880     | 20839.654 | 15603.092 |
| NM_005136 | 796.946   | 935.244   | NM_002852  | 15579.14  | 17979.584 |
| NM_004976 | 28748.619 | 23623.396 | NM_001817  | 17886.91  | 19980.121 |
| NM_005737 | 47139.406 | 44229.66  | AF063611   | 3332.165  | 6010.149  |
| NM_001660 | 4960.423  | 4392.15   | NM_006039  | 8390.439  | 9421.704  |
| NM_000752 | 1219.496  | 2084.5    | NM_002089  | 3279.117  | 3244.833  |
| AB040945  | 2248.269  | 1484.429  | NM_004590  | 780.013   | 1136.843  |
| NM_002018 | 12054.454 | 10267.615 | M28983     | 1221.8    | 1142.503  |
| NM_006018 | 1167.747  | 573.332   | NM_014656  | 29729.041 | 22438.613 |
| AF161383  | 7107.211  | 5338.132  | NM_002076  | 13449.433 | 11942.874 |
| NM_000410 | 14131.284 | 13074.933 | X05299     | 9568.283  | 7944.437  |
| AF182814  | 1784.073  | 1290.74   | BM468475   | 2647.515  | 3175.889  |
| NM_005329 | 1596.338  | 3327.506  | NM_000318  | 12549.325 | 11616.399 |
| NM_000107 | 16312.522 | 19250.607 | NM_002060  | 59652.215 | 60300.922 |
| AL157445  | 7100.817  | 16751.266 | AK001230   | 23444.705 | 25745.506 |
| NM_001517 | 26385.836 | 34081.75  | NM_014680  | 39044.289 | 47093.066 |
| NM_005053 | 12653.001 | 16893.467 | NM_005027  | 13115.801 | 16228.477 |
| D86974    | 7107.464  | 9142.782  | NM_004612  | 5987.707  | 6529.738  |
| NM_018283 | 8940.432  | 10848.831 | NM_005608  | 58698.293 | 59018.531 |

|           |           |           |           |           |           |
|-----------|-----------|-----------|-----------|-----------|-----------|
| NM_001983 | 2794.724  | 3124.842  | NM_012294 | 1257.142  | 1703.353  |
| NM_004993 | 578.264   | 508.714   | NM_001106 | 2574.076  | 2783.745  |
| NM_003384 | 7461.849  | 6580.276  | NM_018490 | 8837.251  | 8898.295  |
| Y12337    | 3165.645  | 2776.995  | NM_004778 | 4153.87   | 3578.254  |
| M29551    | 15574.166 | 12257.019 | NM_004352 | 1517.777  | 1450.063  |
| BC028375  | 1336.262  | 1388.515  | NM_012258 | 1798.814  | 1487.339  |
| AB026436  | 3041.86   | 2547.179  | NM_006224 | 64719.289 | 66726.047 |
| NM_016029 | 10267     | 4381.416  | AL137300  | 22202.52  | 23458.139 |
| AK024562  | 2724.508  | 2012.624  | NM_000229 | 17668.635 | 27085.164 |
| NM_014066 | 2259.438  | 1405.086  | NM_006995 | 55776.137 | 57431.219 |
| NM_004573 | 1572.215  | 1118.169  | NM_003129 | 29363.586 | 27379.084 |
| NM_000313 | 531.425   | 406.248   | NM_001956 | 20757.279 | 18640.014 |
| NM_001498 | 62684.461 | 61831.879 | AB033064  | 15377.937 | 15426.94  |
| AF263523  | 2605.214  | 3706.101  | AK022317  | 32418.438 | 27687.734 |
| L08441    | 17706.549 | 33771.586 | NM_018396 | 23419.355 | 21580.506 |
| AA641953  | 1864.772  | 2702.815  | NM_003124 | 50563.426 | 46346.117 |
| AI248827  | 6763.671  | 8605.288  | NM_006886 | 57141.445 | 56362.977 |
| R45026    | 54564.531 | 56389.59  | NM_004531 | 12533.902 | 13704.993 |
| BI768063  | 2172.194  | 2154.032  | AB040920  | 3264.558  | 3908.11   |
| BG386057  | 357.998   | 649.475   | NM_015720 | 55529.551 | 56789.871 |
| AI970239  | 5194.974  | 5729.431  | AB033070  | 2370.628  | 3463.972  |
| AA496452  | 26931.99  | 19946.141 | AK000158  | 29690.42  | 36031.828 |
| X67594    | 12966.151 | 13692.687 | NM_005769 | 10106.345 | 11683.569 |
| AB000734  | 17354.764 | 17185.9   | AK024500  | 60479.461 | 57056.813 |
| NM_000862 | 463.91    | 675.244   | NM_002564 | 59841.285 | 59292.414 |
| NM_005987 | 62482.52  | 64880.789 | Z83806    | 1154.737  | 1056.38   |
| X87838    | 5100.984  | 2887.706  | NM_000963 | 2419.013  | 2298.141  |
| NM_000169 | 6850.161  | 4468.277  | NM_013308 | 19390.393 | 17263.805 |
| NM_014387 | 2968.061  | 3352.869  | AF027302  | 13985.156 | 11453.565 |
| NM_003641 | 7747.998  | 8523.291  | NM_006708 | 57156.234 | 52826.586 |
| NM_012463 | 3131.907  | 3688.981  | AB037835  | 6140.759  | 6437.871  |
| L29140    | 61922.922 | 57360.617 | NM_016228 | 2680.881  | 3970.16   |
| AK026448  | 7871.988  | 8088.582  | NM_000157 | 11182.176 | 12571.526 |
| AK057418  | 4206.695  | 4651.789  | NM_000712 | 949.729   | 1233.439  |
| L37199    | 451.328   | 626.646   | NM_018088 | 5781.105  | 5229.627  |
| NM_007260 | 2846.36   | 3346.911  | BC013695  | 21606.271 | 18586.689 |
| AF148646  | 18671.324 | 17568.992 | NM_007205 | 3357.911  | 2263.099  |
| AL110218  | 2507.816  | 2657.603  | AK023035  | 12798.565 | 10682.855 |
| AB023201  | 2323.781  | 2360.696  | NM_014846 | 7586.759  | 7619.553  |
| X00094    | 1950.681  | 2163.526  | AB011164  | 16813.645 | 16983.965 |
| NM_003775 | 13885.856 | 13555.727 | M24750    | 4098.466  | 5244.861  |
| NM_002082 | 20729.738 | 19331.846 | NM_005965 | 12103.609 | 16656.641 |
| NM_002922 | 6303.743  | 3924.209  | NM_002740 | 14582.507 | 17394.227 |
| AF155657  | 2705.49   | 1892.202  | AL117482  | 10295.213 | 11823.103 |
| NM_006056 | 16243.255 | 16931.313 | NM_006549 | 59547.836 | 63746.93  |
| AF045229  | 16834.244 | 12448.52  | AB018324  | 35057.402 | 40720.246 |
| NM_001840 | 15236.389 | 11536.183 | NM_002742 | 60756.25  | 62456.543 |
| NM_016099 | 57220.73  | 41950.918 | Z25431    | 8758.959  | 9404.125  |
| NM_001155 | 16339.826 | 11879.064 | NM_005627 | 34516.379 | 42828.102 |
| M62896    | 48796.68  | 38718.07  | M64497    | 2283.112  | 2695.142  |
| NM_018346 | 8375.26   | 9210.947  | NM_007274 | 50712.09  | 48070.82  |
| AL122054  | 1137.785  | 1190.466  | NM_003356 | 41884.082 | 37246.105 |
| AB023151  | 915.124   | 1017.134  | AF238315  | 2579.915  | 2830.908  |



|           |           |           |            |           |           |
|-----------|-----------|-----------|------------|-----------|-----------|
| NM_000140 | 23902.416 | 21575.387 | NM_001890  | 3400.758  | 3224.199  |
| NM_005125 | 6754.318  | 7871.358  | NM_001286  | 12665.841 | 11911.252 |
| NM_020038 | 1539.561  | 1793.384  | NM_014648  | 2400.948  | 2620.319  |
| NM_016246 | 4195.876  | 4670.772  | NM_019604  | 3939.898  | 3737.529  |
| NM_005136 | 915.608   | 1323.056  | NM_005073  | 3166.264  | 2635.187  |
| NM_004976 | 29103.213 | 23268.281 | NM_000951  | 17924.428 | 16812.156 |
| NM_005737 | 48308.871 | 43558.996 | X52599     | 18478.74  | 15593.985 |
| NM_001660 | 16560.131 | 13791.861 | AA029300   | 8408.485  | 6691.24   |
| NM_000710 | 509.459   | 805.847   | BG708842   | 59427.828 | 60842.18  |
| NM_000752 | 1266.644  | 1492.198  | M19723     | 57645.66  | 57857.227 |
| AB040945  | 560.16    | 554.02    | X06256     | 20291.535 | 19666.875 |
| NM_002018 | 6721.214  | 6894.553  | AA709271   | 9801.431  | 12118.564 |
| NM_006018 | 990.18    | 1382.424  | M34057     | 20311.854 | 26267.555 |
| AF161383  | 4172.282  | 4368.437  | ID 1984668 | 6208.886  | 7866.894  |
| NM_000410 | 15636.282 | 17252.463 | ID 1832579 | 9075.677  | 10331.307 |
| AF224266  | 7346.987  | 6435.217  | H-430185 M | 4290.534  | 5567.935  |
| U72882    | 51868.457 | 46576.727 | D16583     | 17473.824 | 15039.395 |
| NM_000107 | 17690.279 | 18194.525 | H44051     | 12852.245 | 13611.525 |
| AL157445  | 6624.372  | 6576.152  | AA481547   | 57221.52  | 54397.195 |
| NM_001517 | 33446.188 | 27805.6   | AA831880   | 6171.895  | 7725.027  |
| NM_005053 | 11196.895 | 10461.733 | T64880     | 21068.508 | 20687.748 |
| D86974    | 7459.563  | 8449.254  | AB028990   | 3028.307  | 2375.392  |
| NM_018283 | 9820.362  | 9520.39   | AK002089   | 932.803   | 946.707   |
| NM_001983 | 3222.461  | 3653.013  | AF063611   | 2633.045  | 3107.209  |
| NM_004993 | 390.286   | 631.187   | NM_006039  | 10524.779 | 10391.514 |
| NM_003384 | 8228.073  | 8164.256  | NM_002089  | 4234.017  | 5398.513  |
| Y12337    | 3253.93   | 2927.096  | NM_004590  | 978.898   | 1275.392  |
| M29551    | 23603.48  | 20161.322 | M28983     | 1348.377  | 1298.341  |
| AB023148  | 485.378   | 610.306   | NM_014656  | 35764.746 | 34068.766 |
| NM_002929 | 522.397   | 488.042   | NM_002076  | 14397.303 | 13227.327 |
| AB026436  | 1224.768  | 1052.74   | X05299     | 8876.78   | 6252.896  |
| NM_016029 | 9600.644  | 9713.405  | BM468475   | 3742.219  | 3897.861  |
| AK024562  | 1365.069  | 1934.821  | NM_000318  | 11729.183 | 11422.472 |
| NM_014066 | 1924.941  | 1429.325  | NM_002060  | 59156.965 | 54950.828 |
| NM_004573 | 1476.948  | 1490.875  | AK001230   | 23568.451 | 25687.236 |
| NM_000072 | 793.69    | 556.138   | NM_014680  | 38640.52  | 39644.16  |
| NM_000697 | 2224.251  | 2150.264  | NM_005027  | 13721.825 | 17023.881 |
| AF263523  | 2834.149  | 4261.539  | NM_004612  | 6773.89   | 8217.114  |
| L08441    | 17522.471 | 33232.805 | NM_005608  | 55855.691 | 55745.023 |
| AA641953  | 2037.809  | 2533.274  | NM_012294  | 1279.282  | 1920.11   |
| AI248827  | 7013.644  | 7472.027  | NM_001106  | 2521.304  | 2665.35   |
| R45026    | 53039.535 | 52760.867 | NM_015583  | 3619.608  | 3765.664  |
| BI768063  | 2446.644  | 2477.509  | NM_018490  | 8084.052  | 9834.344  |
| BG386057  | 669.307   | 872.399   | NM_004778  | 4657.168  | 4620.278  |
| AI970239  | 7346.84   | 9900.581  | NM_004352  | 1937.663  | 2093.657  |
| AA496452  | 30225.836 | 30427.211 | NM_012258  | 1913.071  | 1797.971  |
| X67594    | 13697.999 | 15089.062 | AF101051   | 473.189   | 1020.909  |
| BC008837  | 262.953   | 726.085   | NM_007245  | 17587.359 | 16333.963 |
| NM_015869 | 530.902   | 920.62    | NM_000229  | 17816.016 | 18000.223 |
| NM_001631 | 783.327   | 747.139   | NM_006995  | 55172.816 | 55399.195 |
| AB000734  | 7951.308  | 8806.646  | NM_003129  | 32286.678 | 36109.742 |
| NM_005987 | 59694.73  | 63851.145 | NM_001956  | 26027.893 | 36696.957 |
| X87838    | 4785.788  | 5359.426  | AB033064   | 16523.578 | 19162.211 |

|           |           |           |           |           |           |
|-----------|-----------|-----------|-----------|-----------|-----------|
| NM_000169 | 4765.295  | 4058.432  | AK022317  | 36690.383 | 40263.117 |
| AF182814  | 2113.448  | 1892.961  | NM_018396 | 25203.504 | 25090.406 |
| L37199    | 552.981   | 933.223   | NM_003124 | 49505.047 | 44441.266 |
| NM_007260 | 6075.2    | 9422.484  | NM_006886 | 55766.59  | 53245.473 |
| AF148646  | 20448.906 | 25915.404 | NM_004531 | 14677.991 | 14215.579 |
| AL110218  | 3565.427  | 4934.518  | AB040920  | 2922.138  | 3907.153  |
| AB023201  | 2917.614  | 4160.948  | NM_015720 | 53282.152 | 53061.48  |
| X00094    | 2726.151  | 3087.787  | AB033070  | 2749.879  | 3791.585  |
| NM_003775 | 18680.201 | 19503.135 | AK000158  | 32607.703 | 37295.199 |
| NM_002082 | 36882.176 | 47325.289 | NM_005769 | 10405.999 | 12872.942 |
| NM_002922 | 27385.795 | 34167.652 | AK024500  | 55146.645 | 57128.191 |
| AF155657  | 15192.839 | 16955.721 | NM_002564 | 56340.77  | 56786.965 |
| NM_006056 | 20095.186 | 25074.006 | NM_001884 | 576.916   | 729.846   |
| AF045229  | 20638.021 | 23348.627 | Z83806    | 797.113   | 1061.695  |
| NM_001840 | 16014.689 | 18307.412 | NM_000963 | 2474.254  | 2950.339  |
| AK025099  | 2686.579  | 4130.597  | NM_013308 | 20382.219 | 22255.465 |
| NM_016099 | 56404.574 | 55211.023 | AF027302  | 16109.573 | 15371.899 |
| NM_000228 | 375.71    | 645.774   | NM_002852 | 12244.835 | 13001.926 |
| NM_000830 | 1187.264  | 1384.475  | NM_001817 | 16172.395 | 15414.797 |
| NM_005209 | 577.906   | 1152.01   | NM_016228 | 2217.688  | 2496.333  |
| AF148950  | 1144.165  | 1428.409  | NM_000157 | 10686.112 | 11672.602 |
| NM_001155 | 17438.049 | 11791.465 | NM_000712 | 1368.465  | 1598.906  |
| M62896    | 55379.656 | 50479.879 | NM_018088 | 8188.627  | 11156.622 |
| NM_017736 | 2543.61   | 3962.154  | BC013695  | 22202.627 | 25308.041 |
| NM_000390 | 1359.615  | 2030.995  | NM_007205 | 2828.223  | 2623.107  |
| NM_000014 | 786.532   | 1105.699  | AK023035  | 11743.409 | 9931.361  |
| NM_006803 | 1767.685  | 2633.262  | NM_014846 | 7882.859  | 8848.926  |
| NM_002533 | 1566.417  | 2681.943  | AB011164  | 18452.496 | 15957.517 |
| AF235022  | 1269.565  | 1654.714  | M24750    | 3653.426  | 4059.315  |
| AL137764  | 42276.617 | 45486.832 | NM_005965 | 11345.254 | 13498.278 |
| NM_001660 | 21144.336 | 24061.225 | NM_002740 | 13768.388 | 14484.404 |
| NM_000710 | 739.001   | 1430.326  | AL117482  | 9389.752  | 11034.977 |
| NM_000752 | 3723.295  | 7354.645  | NM_006549 | 58743.504 | 60193.125 |
| AB040945  | 3116.846  | 3658.369  | AB018324  | 35471.727 | 43323.332 |
| NM_002018 | 19011.049 | 41242.277 | NM_002742 | 59484.848 | 60999.223 |
| NM_002377 | 818.731   | 1664.169  | Z25431    | 8606.289  | 9258.897  |
| NM_006018 | 1518.726  | 2505.667  | NM_005627 | 33893.293 | 45150.242 |
| AF161383  | 8465.533  | 12810.751 | M64497    | 2244.012  | 3018.622  |
| NM_000410 | 18207.801 | 31251.125 | NM_007274 | 52239.984 | 51649.289 |
| AF224266  | 8701.544  | 11749.771 | NM_003356 | 50714.398 | 43904.25  |
| U72882    | 50921.156 | 52692.289 | AF238315  | 2771.047  | 3282.784  |
| NM_014337 | 21432.646 | 20400.037 | NM_006224 | 61101.973 | 61589.223 |
| NM_007161 | 30251.867 | 30188.516 | AL137300  | 22499.303 | 20441.135 |
| NM_014387 | 2047.973  | 2870.649  | NM_014648 | 2317.521  | 2922.722  |
| NM_003641 | 8372.584  | 8259.683  | NM_019604 | 3882.332  | 5505.5    |
| NM_012463 | 3259.004  | 2646.031  | NM_005073 | 3292.705  | 3512.577  |
| L29140    | 58674.383 | 55314.355 | NM_000951 | 20897.07  | 23411.883 |
| AK026448  | 7984.486  | 8485.396  | X52599    | 20788.123 | 22627.129 |
| AK057418  | 4355.521  | 4714.748  | AA029300  | 8999.129  | 10039.63  |
| AK024562  | 2842.909  | 3150.611  | BG708842  | 55517.332 | 55226.23  |
| NM_014066 | 3223.452  | 6686.733  | M19723    | 56585.289 | 58688.938 |
| NM_004573 | 1621.952  | 2700.473  | X06256    | 19050.568 | 19932.176 |
| NM_000072 | 797.297   | 1042.182  | AA149811  | 832.514   | 1033.234  |

|           |           |           |            |           |           |
|-----------|-----------|-----------|------------|-----------|-----------|
| NM_000697 | 2761.792  | 3812.122  | AA709271   | 9085.633  | 9244.253  |
| NM_000017 | 19502.578 | 40165.91  | M34057     | 17220.729 | 16435.885 |
| NM_000237 | 1619.412  | 3266.27   | ID 1984668 | 5661.667  | 5925.432  |
| NM_018346 | 10616.405 | 21855.646 | ID 1832579 | 8672.358  | 9219.564  |
| AL122054  | 1476.609  | 2439.535  | H-430185 M | 4296.581  | 5421.292  |
| AB023151  | 983.964   | 1717.329  | D16583     | 18062.709 | 18168.506 |
| NM_000140 | 29161.875 | 40232.75  | H44051     | 14896.047 | 17782.203 |
| NM_005125 | 7729.119  | 15275.183 | AA481547   | 57726.316 | 53400.605 |
| NM_015926 | 20798.045 | 29213.848 | AA831880   | 6730.172  | 9283.027  |
| X03757    | 6448.126  | 7823.914  | T64880     | 24791.414 | 24295.342 |
| NM_018658 | 33512.582 | 28066.635 | AB028990   | 3318.415  | 3514.484  |
| NM_005136 | 897.932   | 1102.938  | AK002089   | 1184.648  | 1383.229  |
| AK094513  | 1122.911  | 1328.55   | NM_006708  | 56623.965 | 50904.238 |
| NM_001183 | 11358.525 | 10604.8   | AB037835   | 5873.487  | 6333.206  |
| NM_000890 | 2903.253  | 2132.758  | BM468475   | 3644.322  | 5168.25   |
| NM_004976 | 32191.557 | 24909.115 | NM_000318  | 17112.92  | 19589.707 |
| AK021597  | 2987.546  | 2514.652  | NM_002060  | 58663.047 | 59486.074 |
| NM_005737 | 47282.328 | 41678.344 | AK001230   | 32458.754 | 35121.555 |
| NM_000169 | 6000.655  | 6048.911  | NM_014680  | 49468.082 | 52906.492 |
| AF182814  | 2291.201  | 2786.752  | NM_005027  | 18188.648 | 23094.855 |
| NM_005329 | 1199.072  | 1808.66   | NM_004612  | 7743.945  | 8289.773  |
| NM_000107 | 17829.1   | 23862.508 | NM_005608  | 58550.512 | 52558.352 |
| AL157445  | 6565.007  | 9398.522  | NM_012294  | 1423.607  | 1692.198  |
| NM_001517 | 35141.918 | 39006.301 | NM_001106  | 2638.776  | 2383.712  |
| NM_005053 | 13323.108 | 18850.924 | NM_015583  | 4294.389  | 3658.8    |
| D86974    | 8698.947  | 16902.289 | NM_018490  | 9966.452  | 9713.386  |
| NM_018283 | 16672.529 | 31817.02  | NM_004778  | 4988.094  | 5478.865  |
| NM_001983 | 3695.678  | 6171.616  | NM_006245  | 7662.656  | 9782.237  |
| NM_004993 | 434.461   | 693.298   | NM_004352  | 1674.363  | 2036.454  |
| NM_003384 | 9306.709  | 9984.538  | NM_012258  | 2471.034  | 3478.721  |
| Y12337    | 2844.549  | 2405.468  | NM_005103  | 3302.365  | 5621.022  |
| M29551    | 24476.539 | 18294.287 | NM_004822  | 12677.135 | 18927.975 |
| AB023148  | 557.056   | 353.534   | AK022349   | 8414.768  | 10364.688 |
| NM_002929 | 1589.264  | 1624.978  | NM_005750  | 3032.696  | 5181.349  |
| BC028375  | 1410.855  | 1058.627  | NM_004973  | 2353.795  | 2273.682  |
| AB026436  | 3341.693  | 3166.82   | AF101051   | 972.903   | 1019.989  |
| NM_016029 | 13250.31  | 10937.849 | NM_007245  | 19620.211 | 21039.176 |
| CY3Cy5    | 2472.444  | 159.469   | NM_001890  | 3234.692  | 3242.252  |
| NM_002103 | 8260.602  | 6467.112  | NM_001286  | 11567.433 | 12755.698 |
| NM_003379 | 24390.266 | 17047.816 | NM_018229  | 7200.399  | 7300.241  |
| AK000819  | 717.724   | 738.332   | NM_006325  | 40748.371 | 41051.762 |
| AF201941  | 876.246   | 599.922   | AY009127   | 51828.664 | 54195.063 |
| AF026941  | 1363.092  | 1070.431  | NM_014869  | 18969.855 | 22784.928 |
| NM_007070 | 3985.344  | 4241.401  | NM_003929  | 972.573   | 1134.562  |
| AL133019  | 1472.976  | 833.516   | AK000158   | 40172.781 | 49895.211 |
| NM_014895 | 424.832   | 244.051   | NM_005769  | 10216.974 | 13269.813 |
| NM_017748 | 3644.159  | 2455.941  | AK024500   | 56943.684 | 56170.398 |
| AK025374  | 5957.918  | 2866.958  | NM_002564  | 55135.727 | 59101.18  |
| AK000005  | 3460.562  | 2911.473  | NM_001884  | 953.896   | 1148.247  |
| NM_002103 | 28553.473 | 15434.789 | Z83806     | 1140.772  | 1839.05   |
| NM_003379 | 23724.598 | 10099.201 | NM_000963  | 3928.883  | 4189.13   |
| SR1       | 89016.242 | 29979.156 | NM_013308  | 29026.59  | 35717.25  |
| SR3       | 24718.094 | 7136.674  | AF027302   | 22410.336 | 25852.99  |

|           |           |           |           |           |           |
|-----------|-----------|-----------|-----------|-----------|-----------|
| SR5       | 3049.564  | 1003.959  | NM_002852 | 20296.574 | 26583.502 |
| SR9       | 10665.063 | 531.918   | NM_001817 | 21895.748 | 24198.959 |
| NM_01328E | 4279.029  | 2615.626  | AF063611  | 3731.122  | 5318.732  |
| L07265    | 31910.15  | 23640.129 | NM_006039 | 12753.523 | 15279.936 |
| D16472    | 2961.546  | 2759.136  | NM_002089 | 4777.977  | 5341.42   |
| NM_002813 | 21653.787 | 16283.112 | NM_004590 | 1037.909  | 1332.64   |
| AK022745  | 9775.75   | 4970.109  | M28983    | 1347.009  | 1536.058  |
| AL049450  | 2757.25   | 1337.276  | NM_014656 | 36197.375 | 39966.938 |
| U68494    | 1545.262  | 999.416   | NM_002076 | 15340.918 | 14351.327 |
| AL137360  | 4005.693  | 1364.269  | X05299    | 8682.789  | 7325.422  |
| AK024523  | 4962.44   | 3060.531  | NM_007274 | 56513.898 | 51550.102 |
| AK024543  | 1785.613  | 1441.323  | NM_003356 | 51926.336 | 51103.441 |
| AK024624  | 24601.842 | 22972.227 | AF238315  | 2786      | 3761.704  |
| AK025090  | 934.104   | 1362.008  | NM_006224 | 61674.551 | 64769.113 |
| AK024883  | 3452.177  | 3139.834  | AL137300  | 24690.779 | 25621.379 |
| AF217989  | 4578.879  | 2840.88   | NM_000229 | 18167.719 | 27280.33  |
| AL109696  | 1268.159  | 1764.244  | NM_006995 | 56787.734 | 57286.34  |
| AJ011593  | 3562.579  | 3459.49   | NM_003129 | 29755.023 | 29236.477 |
| AL049239  | 3330.379  | 1373.089  | NM_001956 | 26376.973 | 26068.354 |
| AF086208  | 2417.657  | 1878.648  | AB033064  | 18636.813 | 18932.098 |
| NM_019033 | 555.36    | 506.098   | AK022317  | 42007.68  | 41271.715 |
| AL133101  | 1961.64   | 3532.648  | NM_018396 | 28299.58  | 30313.092 |
| AL353954  | 1804.085  | 1271.937  | NM_003124 | 51865.68  | 53506.418 |
| NM_017630 | 1168.119  | 1086.557  | NM_006886 | 55568.516 | 55737.18  |
| AK000778  | 2493.914  | 1397.667  | NM_004531 | 18601.037 | 20371.988 |
| AL133573  | 7040.345  | 4093.602  | AL133581  | 9376.563  | 12167.316 |
| AK000115  | 3588.217  | 1923.488  | NM_002558 | 4435.6    | 5647.793  |
| AK000958  | 1257.395  | 533.335   | NM_005031 | 25642.406 | 31243.078 |
| BC024924  | 7070.611  | 6592.597  | AB040920  | 4432.563  | 5267.669  |
| AL162066  | 22175.604 | 20602.465 | NM_000720 | 2848.689  | 3714.147  |
| NM_016096 | 22041.35  | 16079.317 | NM_004842 | 2336.618  | 3535.747  |
| U79290    | 1701.832  | 1883.411  | AK024639  | 13903.162 | 14191.406 |
| AF086473  | 383.649   | 371.806   | NM_015720 | 56336.441 | 57266.887 |
| D87682    | 1117.445  | 634.926   | AB007915  | 2985.565  | 3544.13   |
| AF321617  | 6476.165  | 4296.917  | AB033070  | 3117.711  | 3820.316  |
| AF223389  | 608.301   | 540.735   | AB028990  | 2562.406  | 2488.604  |
| NM_015492 | 6495.011  | 5783.326  | AK002089  | 629.796   | 991.118   |
| AF132204  | 3298.51   | 2627.836  | NM_006708 | 54643.965 | 53072.148 |
| AK022874  | 5608.751  | 2873.476  | AB037835  | 5856.594  | 6312.729  |
| AK024602  | 27286.852 | 31401.164 | NM_016228 | 2295.3    | 2820.57   |
| NM_000485 | 6269.951  | 4846.05   | NM_000157 | 10166.085 | 10726.364 |
| NM_018542 | 1601.511  | 1166.328  | NM_000712 | 1183.675  | 1156.969  |
| AK025503  | 2301.868  | 1576.731  | NM_018088 | 7351.612  | 6609.431  |
| AF130073  | 2059.696  | 1389.294  | BC013695  | 22656.328 | 21958.83  |
| AK024225  | 13698.355 | 14044.644 | NM_007205 | 3108.737  | 2549.518  |
| AF086334  | 636.126   | 954.638   | AK023035  | 12536.412 | 13534.957 |
| AF075035  | 11918.409 | 6556.442  | NM_014846 | 7631.813  | 8930.062  |
| AL110180  | 3884.81   | 2474.339  | AB011164  | 17699.584 | 18544.061 |
| NM_004939 | 2392.137  | 1461.291  | M24750    | 3412.273  | 4516.938  |
| NM_001425 | 6424.35   | 5173.656  | NM_005965 | 12145.741 | 13771.786 |
| NM_015710 | 700.037   | 562.032   | NM_002740 | 13478.715 | 13964.675 |
| NM_014158 | 3038.852  | 2101.027  | AL117482  | 9760.971  | 10110.238 |
| AK021591  | 1353.971  | 804.187   | NM_006549 | 59474.898 | 61498.406 |

|           |           |           |           |           |           |
|-----------|-----------|-----------|-----------|-----------|-----------|
| NM_014675 | 1168.908  | 731.792   | AB018324  | 36503.035 | 39925.902 |
| NM_014040 | 4827.145  | 5701.281  | NM_002742 | 61052.047 | 59879.047 |
| AK000799  | 4409.263  | 4118.01   | Z25431    | 8470.632  | 7798.391  |
| AK027091  | 627.879   | 744.706   | NM_005627 | 37577.68  | 39840.793 |
| NM_001526 | 2360.121  | 2155.795  | M64497    | 2705.844  | 3028.596  |
| U31738    | 2012.461  | 1623.354  | CY3Cy5    | 903.901   | 142.599   |
| AF179890  | 9394.626  | 7345.174  | NM_002711 | 2879.604  | 1676.567  |
| AK023536  | 13421.272 | 9604.177  | AF143873  | 631.762   | 659.484   |
| Z36838    | 1712.161  | 1454.298  | AL355732  | 1252.036  | 707.614   |
| AF088054  | 509.028   | 476.996   | NM_017966 | 4852.287  | 6362.705  |
| AK023881  | 4239.755  | 4062.033  | AF143327  | 1366.352  | 620.75    |
| AK027114  | 74429.008 | 65361.785 | AL137535  | 717.59    | 761.26    |
| NM_000552 | 4241.839  | 3206.577  | AL049991  | 684.314   | 1111.663  |
| AK000860  | 3774.39   | 2232.892  | AL049990  | 1712.563  | 2057.318  |
| NM_020145 | 2149.816  | 1299.231  | AF131843  | 1421.402  | 985.653   |
| AK021529  | 3364.955  | 2620.406  | AK026653  | 1111.689  | 506.451   |
| AB037845  | 3791.79   | 2425.513  | NM_020231 | 1978.188  | 1419.99   |
| NM_016190 | 61783.086 | 60721.605 | AF075008  | 2822.302  | 1577.13   |
| AL137579  | 7881.823  | 12160.889 | NM_006504 | 1764.8    | 1153.175  |
| NM_012383 | 4392.636  | 7580.053  | AL137430  | 524.768   | 252.231   |
| AJ271684  | 1398.709  | 1828.028  | NM_002711 | 2624.813  | 1315.724  |
| AF255342  | 9097.159  | 9650.088  | SR1       | 66260.641 | 61028.711 |
| NM_003300 | 10914.722 | 8019.861  | SR3       | 34748.266 | 24149.441 |
| AK026682  | 4349.398  | 2916.544  | SR5       | 3124.59   | 2739.204  |
| NM_017720 | 61320.691 | 57616.773 | SR7       | 4097.406  | 37562.621 |
| NM_006471 | 12302.955 | 9500.515  | SR9       | 17974.113 | 6004.344  |
| NM_004165 | 1466.57   | 657.57    | CY3Cy5    | 1261.532  | 71.316    |
| NM_000366 | 2151.066  | 1880.709  | L38282    | 2905.094  | 1706.063  |
| NM_016586 | 2510.39   | 2421.888  | NM_018056 | 2379.933  | 1079.8    |
| NM_003860 | 2691.238  | 2063.441  | NM_019008 | 2947.299  | 1778.833  |
| NM_005414 | 702.934   | 412.716   | M20838    | 1261.365  | 700.511   |
| NM_004466 | 17462.805 | 16948.625 | AK022738  | 1796.317  | 2796.001  |
| NM_016031 | 6183.625  | 4258.683  | AK023505  | 2444.342  | 1513.7    |
| NM_004804 | 1739.979  | 885.441   | AB037851  | 10557.493 | 6736.57   |
| M92439    | 13162.93  | 6806.602  | AL050389  | 7991.206  | 4891.371  |
| AL117665  | 4186.189  | 2294.5    | AK024684  | 969.926   | 583.55    |
| AF263541  | 1606.864  | 975.77    | NM_014945 | 17477.004 | 9361.886  |
| NM_001262 | 4028.832  | 4826.44   | AK001546  | 1499.116  | 535.493   |
| BE873030  | 3422.818  | 5582.282  | NM_006537 | 6471.827  | 3175.148  |
| BC006990  | 8092.385  | 7704.89   | AF007155  | 22502.336 | 25690.209 |
| NM_002277 | 3903.555  | 2824.23   | AK023055  | 699.587   | 454.801   |
| NM_019114 | 3980.795  | 3404.547  | AL049282  | 4287.621  | 2679.833  |
| M33552    | 26408.121 | 18126.336 | AK021443  | 4345.39   | 6482.04   |
| AJ252060  | 2332.6    | 1805.666  | AF070569  | 1398.48   | 2820.588  |
| NM_006403 | 5884.788  | 6373.453  | NM_020233 | 2573.309  | 2982.521  |
| NM_018977 | 553.11    | 576.717   | AK024315  | 14357.271 | 6682.88   |
| AJ001402  | 1821.437  | 2181.677  | AK024945  | 5531.772  | 3630.804  |
| L25628    | 628.083   | 556.617   | AK024579  | 2942.161  | 2602.954  |
| M37033    | 15666.692 | 10651.298 | AK024998  | 417.823   | 1160.895  |
| NM_007171 | 2262.775  | 2101.363  | AL133118  | 10056.695 | 15337.437 |
| NM_004278 | 1634.604  | 2526.542  | AK023571  | 5573.605  | 3741.08   |
| NM_005632 | 1261.032  | 1099.032  | NM_001702 | 3110.789  | 2099.454  |
| AK021499  | 549.174   | 454.468   | AK026657  | 2224.483  | 1645.533  |

|           |           |           |           |           |           |
|-----------|-----------|-----------|-----------|-----------|-----------|
| AK000336  | 1512.037  | 666.2     | AF087991  | 26001.783 | 21406.379 |
| NM_002795 | 23711.152 | 14349.255 | Y12839    | 903.661   | 1091.885  |
| NM_006292 | 6154.178  | 3895.967  | X64979    | 1461.368  | 2177.163  |
| AB007948  | 1646.571  | 1202.499  | AJ001876  | 922.457   | 718.312   |
| AB033066  | 2419.562  | 2040.781  | AJ227884  | 3134.158  | 2671.442  |
| AF126028  | 1627.442  | 2517.838  | X64986    | 10178.745 | 19532.391 |
| NM_016042 | 709.917   | 1336.537  | Y10510    | 654.315   | 704.747   |
| NM_017640 | 1093.046  | 1159.73   | AK000842  | 10912.068 | 6530.219  |
| NM_017721 | 2458.78   | 2569.587  | AK023386  | 21860.387 | 10339.392 |
| NM_019088 | 10370.625 | 8523.751  | NM_007053 | 35459.227 | 20534.359 |
| AB002373  | 1909.478  | 1669.072  | AK022153  | 3579.149  | 2162.977  |
| NM_016350 | 48344.973 | 32165.24  | AK022789  | 2119.509  | 2176.238  |
| AK024167  | 5460.104  | 4666.929  | AK023756  | 579.4     | 403.71    |
| NM_005026 | 5240.293  | 5022.013  | AK024252  | 715.699   | 1384.287  |
| NM_004140 | 903.607   | 1271.999  | AK002095  | 1547.542  | 1628.871  |
| NM_002866 | 22681.053 | 18463.254 | AK000821  | 13052.626 | 19523.709 |
| AF230809  | 4179.449  | 2406.611  | AK024526  | 18544.508 | 25990.102 |
| NM_017894 | 59154.625 | 60824.047 | AK000848  | 721.415   | 730.448   |
| NM_006509 | 10344.06  | 10205.283 | AK023307  | 743.748   | 734.386   |
| AK025447  | 1602.974  | 1822.094  | NM_017618 | 2431.19   | 3383.437  |
| NM_002624 | 58349.746 | 61660.477 | NM_017848 | 1205.569  | 2120.104  |
| AF006199  | 1218.641  | 871.497   | NM_019056 | 7704.666  | 4495.932  |
| NM_004554 | 26781.906 | 18635.014 | AF279783  | 4933.145  | 2736.675  |
| NM_018119 | 5431.397  | 3600.003  | AF182422  | 16026.24  | 8131.654  |
| NM_014576 | 890.255   | 596.768   | NM_016943 | 723.787   | 395.746   |
| AL162035  | 1540.837  | 1013.596  | AF070602  | 1916.558  | 1277.43   |
| NM_006692 | 1303.453  | 1388.031  | BE393290  | 2367.461  | 1800.703  |
| NM_003084 | 2248.893  | 2911.283  | NM_017622 | 1846.181  | 1039.062  |
| NM_002582 | 11403.018 | 19000.674 | AF133331  | 10673.628 | 13338.306 |
| NM_001009 | 60767.047 | 61154.484 | AK022289  | 4215.919  | 3630.65   |
| NM_001026 | 61240.129 | 58381.988 | L34408    | 486.948   | 318.188   |
| NM_001011 | 71404.086 | 65999.203 | AF161403  | 26506.393 | 15391.199 |
| AB061315  | 1743.375  | 738.716   | S75708    | 10913.706 | 5435.92   |
| D17289    | 10675.881 | 5511.435  | U79291    | 8436.681  | 4561.834  |
| NM_002949 | 38059.754 | 20007.268 | D17172    | 28339.822 | 15482.884 |
| NM_014230 | 9802.337  | 6496.651  | AJ227859  | 1704.233  | 876.508   |
| NM_000235 | 2943.72   | 2181.645  | NM_018544 | 1368.807  | 804.719   |
| NM_015879 | 794.311   | 683.056   | L10141    | 15487.854 | 10870.251 |
| AF068236  | 62149.648 | 49658.688 | AB020699  | 4429.888  | 3322.703  |
| U28480    | 627.747   | 490.647   | AF086269  | 2133.479  | 3191.523  |
| NM_000108 | 17491.148 | 16225.138 | U90437    | 6243.786  | 6542.519  |
| NM_018128 | 4902.7    | 4672.707  | S71604    | 440.399   | 1094.941  |
| NM_016931 | 13666.602 | 14781.694 | D17169    | 58612.781 | 54697.598 |
| NM_004373 | 55893.961 | 37688.633 | NM_017924 | 4002.429  | 2623.253  |
| NM_005566 | 60337.66  | 58547.98  | S81578    | 1626.225  | 931.371   |
| NM_000162 | 4788.047  | 3057.877  | NM_017546 | 8863.682  | 5135.948  |
| NM_016287 | 11689.996 | 8783.903  | AJ001889  | 534.238   | 590.014   |
| NM_003864 | 13112.042 | 12915.067 | AF086210  | 565.365   | 412.884   |
| NM_006824 | 17885.801 | 19094.963 | AL137400  | 530.151   | 291.827   |
| NM_002107 | 2583.797  | 2598.51   | NM_006511 | 2292.635  | 4369.047  |
| NM_002694 | 12690.188 | 13319.376 | AF007142  | 1691.415  | 1606.62   |
| NM_004454 | 1260.146  | 1250.395  | AF119853  | 4511.703  | 3184.151  |
| NM_000966 | 479.359   | 796.57    | AF279782  | 579.131   | 323.714   |

|           |           |           |           |           |           |
|-----------|-----------|-----------|-----------|-----------|-----------|
| NM_012482 | 3776.146  | 3964.648  | NM_001126 | 5801.828  | 3240.927  |
| AF217227  | 1445.521  | 1174.471  | AK023673  | 2563.66   | 1692.287  |
| AK024141  | 4316.452  | 6096.092  | NM_018252 | 1819.275  | 975.912   |
| U13706    | 1344.949  | 1471.995  | NM_018000 | 60433.395 | 48344.809 |
| AF213356  | 1225.027  | 1110.704  | AF164963  | 946.846   | 471.175   |
| BC035716  | 5227.19   | 4685.983  | AF124366  | 36111.125 | 22795.379 |
| NM_018014 | 5242.477  | 3946.488  | AF130112  | 1405.933  | 1197.765  |
| NM_002359 | 32177.133 | 21453.197 | AL365518  | 951.991   | 958.46    |
| AF007192  | 890.939   | 1089.12   | AF086257  | 6466.101  | 6693.958  |
| NM_001276 | 6970.359  | 8122.22   | AF075056  | 396.907   | 1078.405  |
| NM_016157 | 1558.259  | 1852.934  | AC119751  | 1151.2    | 2028.915  |
| NM_014915 | 34498.742 | 41455.559 | U00928    | 1493.548  | 1278.911  |
| NM_012286 | 5106.381  | 5670.254  | AK002114  | 3398.071  | 1800.941  |
| NM_002195 | 13914.629 | 12656.134 | AL390184  | 1135.878  | 428.355   |
| D84294    | 4224.04   | 4682.054  | NM_018699 | 4895.911  | 3105.69   |
| X59770    | 1834.21   | 1519.44   | NM_018048 | 613.851   | 409.854   |
| K02765    | 10101.332 | 6715.164  | AK026318  | 1898.327  | 1624.814  |
| M65134    | 1252.557  | 1016.601  | AF291673  | 2171.757  | 3080.592  |
| BG539651  | 11851.675 | 11478.695 | NM_004365 | 32046.305 | 44059.148 |
| N52646    | 51774.398 | 53109.254 | NM_016355 | 12599.79  | 20847.184 |
| AW160671  | 57712.121 | 56191.695 | AJ296290  | 4144.633  | 2710.797  |
| BI870529  | 17517.039 | 19266.896 | NM_020183 | 6593.856  | 4510.241  |
| AA702698  | 1972.047  | 2191.898  | NM_018029 | 1157.525  | 1063.668  |
| AI681514  | 2191.295  | 2375.899  | AL389954  | 1204.53   | 726.439   |
| NM_001300 | 3266.762  | 3916.718  | NM_019852 | 4317.512  | 2986.452  |
| BG748827  | 11939.396 | 12678.253 | NM_006118 | 5203.614  | 3083.881  |
| AA952897  | 12687.61  | 13267.608 | AK026225  | 19822.406 | 10442.585 |
| BG760342  | 3935.738  | 4059.598  | AL050032  | 5770.753  | 3195.668  |
| AA703141  | 2368.874  | 2406.802  | AF009304  | 1213.634  | 761.086   |
| AI122630  | 11075.643 | 12213.801 | AF086177  | 14193.986 | 12379.958 |
| AF086790  | 3163.449  | 3192.751  | NM_018949 | 1659.768  | 1270.685  |
| AK025966  | 3550.621  | 3058.688  | AK021593  | 446.394   | 288.959   |
| NM_018725 | 843.612   | 1127.749  | D17187    | 2951.055  | 6312.035  |
| NM_003081 | 49992.75  | 59551.922 | AJ243672  | 1874.318  | 3646.213  |
| NM_016495 | 1213.622  | 1250.697  | AL122087  | 1403.792  | 1467.357  |
| D50402    | 48555.695 | 50911.898 | NM_014767 | 878.487   | 753.863   |
| M73547    | 13648.733 | 10822.871 | Y17867    | 4775.988  | 2439.877  |
| AF181722  | 1077.334  | 1169.804  | M92642    | 2195.359  | 1567.328  |
| NM_003687 | 3833.211  | 3234.655  | NM_018071 | 6024.37   | 3479.602  |
| NM_004134 | 6481.751  | 4086.833  | NM_004333 | 5052.495  | 3612.828  |
| NM_005955 | 8946.94   | 6614.924  | M31520    | 58066.668 | 60121.785 |
| NM_004048 | 1547.3    | 1712.336  | NM_002020 | 20954.398 | 25118.803 |
| BE548044  | 430.933   | 490.961   | AL050137  | 5166.958  | 7585.78   |
| NM_012428 | 5217.505  | 7228.104  | AK024423  | 9732.399  | 14223.055 |
| NM_013269 | 13973.586 | 21370.375 | NM_005043 | 58622.445 | 57385.246 |
| NM_001728 | 8937.304  | 19504.908 | NM_005979 | 15922.696 | 12144.617 |
| NM_003824 | 11386.455 | 13446.912 | NM_006282 | 10268.652 | 5778.102  |
| NM_000686 | 1127.237  | 1716.005  | NM_020321 | 875.317   | 716.845   |
| NM_012452 | 6983.598  | 8320.917  | NM_015920 | 42259.09  | 22411.637 |
| AF229166  | 1064.839  | 1282.094  | AB011113  | 2616.419  | 1334.936  |
| NM_006764 | 4673.587  | 8127.327  | NM_004115 | 1268.609  | 609.181   |
| NM_001386 | 3212.216  | 5999.786  | NM_018287 | 1384.871  | 1459.183  |
| NM_005313 | 31939.148 | 42541.051 | NM_001955 | 2902.134  | 1815.863  |

|           |           |           |           |           |           |
|-----------|-----------|-----------|-----------|-----------|-----------|
| NM_017765 | 27561.293 | 30132.301 | AF016004  | 3592.107  | 7217.528  |
| NM_000425 | 918.001   | 1611.24   | NM_003567 | 8347.552  | 12925.77  |
| NM_014721 | 1837.167  | 1701.13   | NM_007315 | 964.862   | 548.211   |
| AK026352  | 1684.983  | 3128.983  | L20686    | 5306.492  | 10432.706 |
| NM_016180 | 1280.13   | 1211.709  | NM_000304 | 1233.556  | 2587.617  |
| NM_005827 | 8452.99   | 10275.539 | AK023362  | 1409.469  | 1217.683  |
| NM_003056 | 9894.492  | 15381.873 | NM_002460 | 1206.539  | 1164.139  |
| NM_016226 | 10718.381 | 30651.684 | NM_002675 | 4939.247  | 2485.358  |
| AK024311  | 1493.068  | 5840.163  | NM_012432 | 54740.426 | 32259.086 |
| AF052155  | 3904.335  | 6086.385  | NM_005007 | 15899.617 | 9802.437  |
| NM_005085 | 4502.473  | 5701.389  | AK024996  | 5955.684  | 4404.915  |
| AF060902  | 3969.24   | 4540.617  | NM_001258 | 511.234   | 1134.156  |
| AF121858  | 18199.09  | 25263.93  | NM_004417 | 776.974   | 484.832   |
| NM_013437 | 660.447   | 1267.387  | NM_012290 | 13309.801 | 20634.602 |
| NM_017681 | 1630.454  | 2852.092  | NM_002431 | 6813.959  | 9038.726  |
| X57655    | 30712.93  | 29960.947 | NM_001827 | 60067.316 | 58743.223 |
| NM_018261 | 1655.21   | 1103.304  | NM_020466 | 7986.688  | 5018.192  |
| NM_014796 | 1531.84   | 1997.981  | AL079280  | 1014.738  | 555.013   |
| AL050288  | 31615.576 | 25955.979 | NM_002853 | 7502.573  | 6888.452  |
| NM_005040 | 5522.76   | 4231.698  | NM_003174 | 2419.141  | 2140.287  |
| NM_016391 | 16688.748 | 14606.631 | NM_012307 | 17513.395 | 7260.215  |
| AF075033  | 6254.686  | 5883.82   | NM_002540 | 1799.619  | 996.241   |
| D50911    | 11241.353 | 6930.332  | NM_006371 | 3313.072  | 1750.198  |
| AB011104  | 1478.451  | 1270.606  | NM_018834 | 2230.854  | 3969.256  |
| AK024069  | 7792.945  | 4597.492  | AK026882  | 2522.365  | 2300.873  |
| NM_004582 | 18405.379 | 16625.371 | NM_004574 | 1971.363  | 1456.789  |
| NM_015640 | 22329.555 | 26509.189 | NM_004848 | 11959.456 | 18717.979 |
| AF233450  | 1206.109  | 2075.499  | NM_001944 | 881.547   | 1227.351  |
| NM_016233 | 2099.22   | 4606.362  | NM_014813 | 942.879   | 1987.424  |
| NM_000821 | 44855.012 | 54129.82  | AF014459  | 6536.433  | 10450.182 |
| NM_020121 | 572.193   | 1071.426  | M64108    | 1394.351  | 1296.645  |
| NM_003145 | 30041.277 | 42588.164 | NM_001503 | 7280.75   | 4140.19   |
| AF311312  | 2083.905  | 4568.933  | NM_006302 | 4078.099  | 2246.993  |
| NM_001276 | 7091.816  | 5835.727  | AJ224875  | 5021.539  | 3018.91   |
| NM_016157 | 1764.264  | 3019.484  | NM_002149 | 3962.861  | 2387.298  |
| NM_014915 | 34025.066 | 54319.508 | AF043324  | 10222.483 | 9211.215  |
| NM_012286 | 5527.744  | 9135.244  | AK024172  | 3212.871  | 3945.856  |
| NM_002195 | 15662.953 | 17865.352 | NM_014814 | 7201.958  | 3914.25   |
| D84294    | 3986.446  | 5321.867  | NM_002797 | 42926.313 | 53444.273 |
| X59770    | 1729.035  | 1641.276  | AK024318  | 3351.901  | 5745.404  |
| K02765    | 11241.721 | 8455.99   | NM_016129 | 8725.357  | 12927.627 |
| M65134    | 1661.224  | 1533.578  | NM_002809 | 14043.811 | 10706.317 |
| BG539651  | 13299.304 | 14296.002 | NM_017912 | 40802.207 | 48633.082 |
| N52646    | 45839.398 | 32921.012 | NM_000423 | 13505.126 | 13375.439 |
| AW160671  | 54359.465 | 34473.797 | AB046838  | 6357.283  | 4204.78   |
| BI870529  | 15757.902 | 12968.048 | AK026339  | 556.53    | 841.665   |
| AA702698  | 1715.484  | 1133.955  | X98411    | 3018.634  | 1813.851  |
| AI681514  | 2150.515  | 1810.358  | AF116658  | 28931.453 | 23544.443 |
| NM_001300 | 3414.202  | 4034.018  | NM_014865 | 17987.324 | 16073.531 |
| BG748827  | 11739.669 | 16422.143 | AB032977  | 10004.655 | 8232.707  |
| AA952897  | 12132.626 | 21351.869 | AK001725  | 2566.047  | 5072.424  |
| BG760342  | 6088.383  | 18608.076 | NM_003036 | 3889.854  | 6586.245  |
| AA703141  | 2488.393  | 5613.767  | NM_020529 | 20507.129 | 34702.387 |



|           |           |           |           |           |           |
|-----------|-----------|-----------|-----------|-----------|-----------|
| AA195244  | 395.042   | 1088.869  | S72604    | 37346.434 | 46199.711 |
| AI122630  | 11334.977 | 19677.283 | NM_017984 | 829.739   | 926.647   |
| NM_002191 | 461.02    | 1789.764  | AF038951  | 18812.4   | 8937.344  |
| AB007875  | 2808.838  | 5186.797  | NM_006492 | 2110.309  | 1118.564  |
| NM_018725 | 875.884   | 1178.715  | AK021811  | 1755.834  | 1073.007  |
| NM_003081 | 47290.605 | 51272.527 | NM_003428 | 4273.785  | 2673.399  |
| NM_016495 | 1360.857  | 1455.828  | AF055030  | 4022.152  | 1830.574  |
| D50402    | 56996.949 | 62214.242 | AK000589  | 5363.662  | 3384.461  |
| M73547    | 15592.911 | 21073.283 | X53281    | 32234.24  | 29563.57  |
| NM_003687 | 4316.244  | 3867.545  | BC012782  | 5364.201  | 8168.185  |
| NM_004134 | 6658.752  | 4908.863  | AF132026  | 58838.445 | 60009.555 |
| NM_005955 | 13677.745 | 13858.525 | AL050353  | 2425.609  | 3227.574  |
| NM_004048 | 1368.943  | 1825.072  | AB037788  | 17683.715 | 16824.807 |
| NM_012428 | 4093.453  | 2783.678  | NM_004587 | 13476.242 | 6485.052  |
| NM_013265 | 13331.477 | 10970.292 | NM_000975 | 56420.688 | 59027.465 |
| NM_001728 | 6318.442  | 6626.389  | AF147412  | 42400.168 | 21274.518 |
| NM_005565 | 347.362   | 231.779   | AK024570  | 18782.633 | 10039.986 |
| NM_003824 | 12510.675 | 17200.564 | AF161401  | 16563.645 | 12789.009 |
| NM_000686 | 1105.791  | 2425.791  | NM_000990 | 22978.574 | 10356.179 |
| NM_012452 | 6424.546  | 9265.828  | NM_014740 | 8119.025  | 6644.854  |
| AF229166  | 892.389   | 1271.963  | NM_015956 | 33940.055 | 46156.504 |
| NM_006764 | 3640.57   | 6588.951  | AK024601  | 15998.358 | 27011.168 |
| AF007192  | 1370.626  | 1939.891  | S68069    | 4881.886  | 7716.418  |
| NM_017765 | 34066.965 | 36817.367 | AB011095  | 3878.394  | 4269.706  |
| NM_000428 | 758.962   | 934.265   | NM_002488 | 31141.709 | 21236.744 |
| NM_014721 | 783.353   | 1222.318  | NM_004003 | 26364.461 | 13317.303 |
| AK026352  | 1730.205  | 2696.415  | NM_000188 | 3336.563  | 1983.465  |
| NM_016180 | 1376.023  | 1172.772  | BF244401  | 11678.017 | 5216.558  |
| NM_005827 | 9049.778  | 6887.947  | NM_004718 | 58753.84  | 38797.328 |
| NM_003056 | 8732.54   | 6448.092  | AL359585  | 10156.271 | 5616.985  |
| NM_016226 | 7436.707  | 6568.707  | AB046850  | 10597.604 | 8097.616  |
| AK024311  | 860.4     | 830.337   | NM_014801 | 5718.112  | 9059.635  |
| AF052155  | 3711.245  | 3597.396  | NM_003642 | 10435.217 | 14611.569 |
| NM_005085 | 5375.573  | 5561.88   | AB027013  | 13017.438 | 19091.879 |
| AF060902  | 3986.067  | 5014.611  | BC032686  | 963.902   | 958.596   |
| AF121858  | 20666.533 | 24366.15  | BF185480  | 5206.627  | 3397.28   |
| NM_013437 | 671.253   | 698.864   | NM_002128 | 31619.352 | 13499.411 |
| NM_017681 | 1642.966  | 2566.773  | NM_007105 | 461.249   | 407.624   |
| X57655    | 31300.596 | 28182.75  | NM_003074 | 8913.779  | 4436.296  |
| AK025966  | 3804.769  | 5132.713  | AL360195  | 12855.483 | 8742.422  |
| NM_014440 | 903.083   | 1339.292  | U14383    | 2048.606  | 1515.417  |
| NM_014796 | 1441.862  | 1568.547  | NM_017810 | 2410.002  | 3427.234  |
| AL050288  | 30368.309 | 27688.033 | NM_003181 | 52156.023 | 54390.984 |
| NM_005040 | 6009.488  | 8296.438  | NM_004451 | 5300.774  | 5215.319  |
| NM_016391 | 18580.213 | 18186.928 | NM_004364 | 1743.622  | 1328.12   |
| AF075033  | 6179.361  | 4397.605  | NM_020395 | 5929.099  | 9728.513  |
| D50911    | 13374.37  | 9654.717  | NM_003425 | 5195.456  | 8907.742  |
| AB011104  | 1937.241  | 1404.823  | NM_013388 | 11260.897 | 10026.928 |
| AK024069  | 7717.05   | 5064.947  | AK026232  | 12196.479 | 10488.375 |
| NM_004582 | 16624.166 | 10733.838 | NM_014892 | 12395.996 | 6104.268  |
| NM_015640 | 18665.244 | 10811.066 | AK023827  | 8886.814  | 8099.511  |
| AF233450  | 918.767   | 1004.693  | NM_001117 | 969.509   | 643.322   |
| NM_016233 | 3041.263  | 2981.86   | NM_000231 | 363.636   | 657.769   |

|           |           |           |           |           |           |
|-----------|-----------|-----------|-----------|-----------|-----------|
| NM_000821 | 45048.992 | 47803.645 | L07517    | 3594.748  | 4489.259  |
| NM_003145 | 30501.586 | 26293.299 | AK022451  | 22126.578 | 26966.221 |
| NM_001632 | 1861.833  | 2214.258  | NM_014359 | 54341.223 | 56265.426 |
| NM_012264 | 1237.568  | 1405.261  | BM918441  | 4882.838  | 7489.529  |
| AF311312  | 1798.857  | 2029.195  | AA425102  | 1089.161  | 1547.554  |
| NM_001179 | 729.148   | 898.492   | AA878880  | 803.137   | 1064.845  |
| NM_005313 | 37676.359 | 47116.41  | AA150828  | 6809.546  | 5222.076  |
| NM_014915 | 33583.102 | 54631.758 | H90764    | 1905.131  | 2294.211  |
| NM_012286 | 5453.373  | 6345.116  | AI859208  | 1671.079  | 1817.267  |
| NM_002195 | 15423.737 | 15491.49  | H64379    | 18657.168 | 18900.68  |
| D84294    | 3722.738  | 4974.317  | BE208258  | 58911.52  | 54505.906 |
| X59770    | 2103.204  | 2075.322  | T72202    | 2171.383  | 1309.958  |
| K02765    | 13351.663 | 14042.764 | BI831922  | 3216.069  | 3304.048  |
| M65134    | 1456.203  | 1479.704  | M69238    | 3604.978  | 4193.894  |
| BG539651  | 13638.009 | 11672.323 | AA664180  | 1349.063  | 1804.287  |
| N52646    | 47560.582 | 51939.238 | M80244    | 1097.931  | 2269.397  |
| AW160671  | 49569.984 | 36778.953 | AA599158  | 28916.73  | 43625.641 |
| BI870529  | 15846.15  | 13699.115 | BE294756  | 2335.165  | 5820.441  |
| AA702698  | 1738.042  | 1543.19   | NM_000696 | 10360.632 | 9115.654  |
| AI681514  | 2323.38   | 1995.933  | L08240    | 2865.72   | 1856.421  |
| NM_001300 | 2955.561  | 2193.308  | NM_017952 | 3383.226  | 2351.069  |
| BG748827  | 11280.666 | 12578.152 | NM_002940 | 4259.552  | 3397.624  |
| AA952897  | 11394.917 | 11827.382 | NM_016081 | 35457.004 | 36563.184 |
| BG760342  | 4915.626  | 5924.764  | NM_006389 | 7771.696  | 5487.899  |
| AA703141  | 2517.397  | 2956.087  | M30818    | 1695.114  | 1244.776  |
| AI122630  | 11032.979 | 13202.918 | NM_000163 | 1155.622  | 1647.124  |
| NM_006589 | 8857.758  | 8915.095  | NM_005755 | 7185.392  | 11890.047 |
| NM_002191 | 365.474   | 764.406   | NM_003329 | 58631.09  | 58122.137 |
| AB007875  | 2978.701  | 2672.304  | NM_003299 | 56098.09  | 59765.723 |
| NM_018261 | 2335.84   | 2544.109  | NM_014330 | 58466.805 | 59017.539 |
| NM_005955 | 13890.379 | 17206.707 | NM_007034 | 1225.898  | 866.924   |
| NM_004048 | 1288.13   | 1609.883  | NM_001560 | 910.589   | 665.41    |
| BE548044  | 509.581   | 349.526   | NM_001783 | 57996.383 | 54323.344 |
| NM_012428 | 6739.573  | 10078.294 | J03171    | 5915.724  | 5850.533  |
| NM_013269 | 13448.475 | 12126.523 | NM_005856 | 1184.491  | 1210.772  |
| NM_001728 | 6052.116  | 5519.387  | NM_004323 | 50029.516 | 56144.305 |
| NM_005565 | 1734.113  | 1195.118  | NM_002310 | 1570.432  | 1897.857  |
| NM_003824 | 11845.58  | 10076.552 | NM_005312 | 7065.006  | 12030.749 |
| NM_000686 | 1146.557  | 1177.095  | NM_004210 | 26273.904 | 45011.082 |
| NM_012452 | 7838.234  | 7345.222  | NM_020140 | 4431.568  | 5438.604  |
| AF229166  | 1135.061  | 1426.207  | NM_007214 | 14871.71  | 14656.95  |
| NM_005137 | 8474.558  | 7535.411  | NM_000311 | 17463.639 | 8911.737  |
| NM_006764 | 4680.402  | 6658.663  | NM_017909 | 4177.383  | 2427.083  |
| NM_001386 | 4098.412  | 7497.555  | NM_006335 | 21038.119 | 11401.019 |
| NM_001163 | 4248.613  | 4386.48   | NM_000786 | 6071.405  | 2186.193  |
| NM_005878 | 6393.656  | 7366.174  | NM_017731 | 1115.385  | 1642.568  |
| AF308602  | 3783.091  | 4227.521  | NM_000351 | 1538.579  | 4654.547  |
| AB011089  | 3055.462  | 3875.111  | AB040891  | 3980.795  | 6254.199  |
| NM_001312 | 874.997   | 1227.431  | AB037780  | 637.974   | 901.526   |
| AF007192  | 1477.686  | 1507.89   | AK025616  | 681.983   | 446.771   |
| NM_001276 | 8668.5    | 11020.687 | NM_007256 | 2694.034  | 3456.015  |
| NM_016157 | 3850.915  | 4034.516  | NM_001045 | 20489.867 | 12423.003 |
| NM_003053 | 8599.316  | 9647.917  | NM_005697 | 25278.627 | 19324.168 |

|           |           |           |           |           |           |
|-----------|-----------|-----------|-----------|-----------|-----------|
| NM_003044 | 4088.69   | 4440.812  | NM_003099 | 5556.262  | 4281.108  |
| NM_006672 | 25237.164 | 27275.951 | NM_004781 | 2521.084  | 1461.26   |
| M31659    | 2784.053  | 3788.238  | NM_018303 | 4564.861  | 10097.705 |
| NM_003056 | 9722.914  | 11975.522 | NM_014758 | 14409.521 | 21347.559 |
| NM_016226 | 7792.177  | 11701.089 | AL133047  | 878.77    | 1688.532  |
| AK024311  | 2023.394  | 3522.978  | NM_005124 | 4398.83   | 8076.806  |
| AF052155  | 3446.264  | 2374.942  | AK000947  | 8017.352  | 8959.739  |
| NM_005085 | 5247.906  | 3971.974  | NM_003897 | 5449.54   | 3528.784  |
| AF060902  | 4531.076  | 3440.512  | NM_014165 | 30442.779 | 15482.85  |
| AF121858  | 25515.24  | 26361.48  | AL442085  | 9509.335  | 5559.327  |
| NM_013437 | 806.497   | 893.795   | NM_013313 | 6873.43   | 8764.295  |
| NM_017681 | 1586.031  | 1303.056  | NM_014736 | 14206.698 | 22714.623 |
| X57655    | 33889.156 | 38162.461 | AK023886  | 3067.194  | 5808.405  |
| AK025966  | 6803.759  | 19635.414 | NM_002553 | 7257.421  | 10588.97  |
| NM_014440 | 664.12    | 814.514   | AJ404615  | 5774.121  | 8924.46   |
| NM_018725 | 1241.545  | 1464.577  | AB046844  | 2219.108  | 3215.017  |
| NM_003081 | 41991.41  | 37464.977 | NM_000302 | 2831.443  | 2093.415  |
| NM_016495 | 1607.72   | 1793.582  | NM_013235 | 50174.934 | 36428.945 |
| D50402    | 48507.109 | 50927.445 | NM_016015 | 9725.81   | 5674.077  |
| M73547    | 17618.85  | 22512.131 | NM_020120 | 1664.963  | 1208.688  |
| AF181722  | 841.714   | 1064.026  | AK022900  | 1410.742  | 1421.67   |
| NM_003687 | 4363.844  | 6170.312  | AB023216  | 1271.051  | 2272.856  |
| NM_004134 | 9392.446  | 12770.572 | NM_002266 | 60544.281 | 55220.73  |
| NM_001632 | 1433.284  | 1528.665  | NM_014400 | 12978.074 | 24775.795 |
| NM_012264 | 850.203   | 698.2     | AL157492  | 2763.676  | 6198.259  |
| AF311312  | 1357.918  | 1478.022  | AL353957  | 5865.788  | 6391.078  |
| NM_005313 | 34545.043 | 37274.125 | AK023827  | 10666.89  | 13754.82  |
| NM_017765 | 34291.336 | 37925.082 | NM_001117 | 818.224   | 894.005   |
| NM_000428 | 802.224   | 906.942   | NM_000231 | 507.159   | 645.466   |
| NM_014721 | 640.797   | 780.455   | L07517    | 3140.29   | 2449.73   |
| AK026352  | 1853.493  | 3748.156  | AK022451  | 25029.246 | 17348.342 |
| AL137705  | 3934.317  | 8139.236  | NM_014359 | 54949.973 | 59293.242 |
| U41898    | 952.877   | 1303.906  | BM918441  | 12778.239 | 16618.766 |
| NM_020346 | 546.486   | 863.346   | AA425102  | 783.685   | 1022.112  |
| AF169257  | 240.656   | 327.367   | AA878880  | 692.454   | 1969.834  |
| NM_014848 | 1163.634  | 1460.996  | AA150828  | 8470.263  | 14018.102 |
| BF217766  | 565.168   | 824.583   | H90764    | 2744.197  | 5627.675  |
| NM_000184 | 2128.083  | 3185.998  | AI859208  | 1920.013  | 4081.146  |
| NM_016180 | 1261.503  | 1555.34   | H64379    | 28565.473 | 30648.273 |
| NM_000112 | 1639.872  | 2779.596  | BE208258  | 57785.297 | 58396.891 |
| NM_005827 | 13329.195 | 39126.434 | BI833114  | 500.018   | 805.33    |
| NM_006589 | 8712.166  | 8206.541  | T72202    | 2557.263  | 2545.027  |
| AB007875  | 2396.357  | 1950.163  | BI831922  | 3439.063  | 3045.811  |
| NM_018261 | 1882.924  | 1522.315  | M69238    | 4464.237  | 5338.305  |
| NM_014796 | 1373.708  | 1089.506  | AA664180  | 1550.396  | 2616.092  |
| AL050288  | 31647.418 | 28090.869 | M80244    | 1699.102  | 2845.704  |
| NM_005040 | 5599.271  | 4931.051  | AA599158  | 19373.389 | 21989.367 |
| NM_016391 | 20590.775 | 20483.844 | BE294756  | 2227.673  | 3554.278  |
| M80783    | 265.53    | 391.012   | AK026092  | 13993.704 | 25303.195 |
| AF075033  | 7047.03   | 8527.165  | AK001175  | 3317.208  | 6078.146  |
| D50911    | 16319.753 | 13976.67  | NM_002940 | 4462.2    | 4342.679  |
| AB011104  | 2115.786  | 3253.529  | NM_016081 | 33903.266 | 38456.195 |
| AK024069  | 8984.175  | 9706.081  | NM_006389 | 8207.85   | 7881.527  |

|           |           |           |           |           |           |
|-----------|-----------|-----------|-----------|-----------|-----------|
| NM_004582 | 18639.133 | 17501.102 | M30818    | 1731.06   | 1124.272  |
| NM_015640 | 21525.416 | 21777.834 | NM_000163 | 1391.753  | 1691.679  |
| AF233450  | 936.25    | 1671.42   | NM_005755 | 10707.979 | 17384.045 |
| NM_016233 | 2326.22   | 3452.053  | NM_003329 | 58583.816 | 60124.133 |
| NM_000821 | 44501.211 | 46509.453 | NM_003299 | 56391.141 | 57323.207 |
| NM_020121 | 513.882   | 747.659   | U70981    | 690.541   | 1513.199  |
| NM_003145 | 33967.02  | 41619.07  | NM_014330 | 55947.414 | 58630.621 |
| CY3Cy5    | 432.627   | 118.593   | NM_007034 | 2320.592  | 5184.605  |
| NM_012469 | 3561.936  | 2336.687  | NM_005261 | 715.907   | 1237.632  |
| NM_134260 | 3810.539  | 2901.49   | NM_001560 | 1550.096  | 1563.905  |
| AF086448  | 1152.404  | 951.374   | NM_001783 | 58166.977 | 56958.996 |
| AF086386  | 957.211   | 544.371   | J03171    | 7034.124  | 7920.941  |
| AF086457  | 795.669   | 369.969   | NM_005856 | 1634      | 2535.004  |
| AK025469  | 944.035   | 612.208   | NM_004323 | 56059.715 | 55891.543 |
| NM_020239 | 1871.062  | 1219.527  | NM_002310 | 822.293   | 1140.585  |
| AF070581  | 842.3     | 451.244   | NM_005312 | 5939.575  | 6650.334  |
| AK024187  | 524.888   | 365.586   | NM_004210 | 25019.105 | 37280.57  |
| NM_003307 | 322.822   | 241.246   | NM_020140 | 5169.456  | 12194.068 |
| AF070565  | 391.08    | 253.558   | AK026232  | 12325.95  | 21967.902 |
| AK021644  | 764.101   | 332.394   | NM_014892 | 17028.85  | 13863.526 |
| NM_012469 | 3136.47   | 2393.444  | NM_017909 | 3836.977  | 2812.118  |
| NM_134260 | 3592.768  | 2603.166  | NM_006335 | 21675.779 | 18044.488 |
| SR2       | 18964.748 | 12468.806 | NM_000786 | 6612.864  | 3056.105  |
| SR4       | 5416.881  | 4184.514  | NM_017731 | 1229.139  | 2625.375  |
| SR6       | 720.474   | 504.687   | AB040891  | 6225.446  | 8620.572  |
| SR8       | 2858.528  | 10358.166 | AB037780  | 617.86    | 1727.025  |
| AK023038  | 612.649   | 660.319   | AK025616  | 1131.11   | 2231.655  |
| AK026206  | 700.73    | 428.875   | NM_007256 | 4520.906  | 7901.876  |
| AF086074  | 1888.712  | 1425.583  | NM_001045 | 42511.141 | 46616.93  |
| AK023964  | 2712.268  | 2225.867  | NM_005697 | 36018.145 | 46551.965 |
| AF086084  | 360.676   | 268.14    | NM_003099 | 8073.816  | 12879.104 |
| AL050184  | 549.347   | 285.679   | NM_004781 | 2786.114  | 4198.169  |
| AK027185  | 839.323   | 350.29    | NM_018303 | 2782.504  | 5249.085  |
| AK025576  | 723.308   | 295.926   | NM_014758 | 13066.432 | 20047.523 |
| AF147385  | 272.224   | 253.647   | AL133047  | 1007.426  | 1207.557  |
| AL442086  | 1838.139  | 930.081   | NM_005124 | 3688.641  | 5749.203  |
| BC034819  | 1618.489  | 1203.343  | AK000947  | 10151.27  | 15658.431 |
| AF147313  | 5231.604  | 3696.816  | L08240    | 3393.796  | 6670.629  |
| AF147382  | 25067.602 | 15453.877 | NM_017952 | 3898.9    | 4896.822  |
| AK001957  | 1284.151  | 835.94    | NM_014165 | 31366.803 | 19187.531 |
| AK000850  | 359.947   | 659.202   | AL442085  | 9436.026  | 7180.134  |
| AK021833  | 576.639   | 1111.926  | NM_013313 | 6300.99   | 5594.91   |
| AF143867  | 383.182   | 550.068   | NM_014736 | 13635.327 | 12839.504 |
| AK025889  | 1828.103  | 2353.59   | AK023886  | 3396.718  | 5373.189  |
| NM_014715 | 1196.046  | 2005.308  | NM_002553 | 7564.773  | 12002.93  |
| AK027134  | 403.603   | 476.632   | AJ404615  | 6000.781  | 10109.818 |
| AK024168  | 447.726   | 344.654   | NM_016053 | 44673.977 | 49800.906 |
| AF264622  | 491.887   | 416.766   | AB007869  | 6750.029  | 12590.184 |
| AK027203  | 703.536   | 527.693   | AB046844  | 2743.704  | 4392.977  |
| AK021793  | 1230.879  | 1282.875  | NM_000302 | 5983.978  | 8155.413  |
| AK022255  | 2084.228  | 1303.664  | NM_013235 | 56532.824 | 48301.34  |
| AF075079  | 334.431   | 264.124   | NM_016015 | 12374.709 | 16979.297 |
| AK022479  | 326.439   | 211.202   | NM_020120 | 2022.211  | 4035.867  |

|           |           |           |           |           |           |
|-----------|-----------|-----------|-----------|-----------|-----------|
| AF086004  | 6373.195  | 3929.229  | AK022900  | 1664.793  | 2281.707  |
| AF086006  | 289.193   | 124.776   | NM_001125 | 529.188   | 923.386   |
| AL137318  | 937.05    | 613.847   | AB023216  | 1065.727  | 2435.8    |
| AL137482  | 541.11    | 377.807   | NM_002266 | 59611     | 56702.82  |
| AL162011  | 4575.37   | 4076.695  | NM_014400 | 9809.59   | 10721.895 |
| AL390177  | 256.475   | 242.978   | AL157492  | 2206.949  | 2689.89   |
| AK056111  | 418.325   | 383.122   | AL353957  | 6406.127  | 11230.453 |
| Y13807    | 651.263   | 582.134   | NM_007214 | 13966.662 | 21433.09  |
| AB037792  | 623.573   | 550.308   | NM_000311 | 16423.527 | 13900.108 |
| AK024158  | 336.267   | 463.629   | NM_000231 | 481.254   | 583.151   |
| AL080082  | 404.284   | 379.198   | L07517    | 3640.931  | 3693.647  |
| AK021623  | 1339.681  | 1858.673  | AK022451  | 27644.844 | 30436.531 |
| AK023733  | 340.852   | 279.584   | NM_014359 | 54032.539 | 57136.48  |
| AK027112  | 2123.968  | 1237.076  | BM918441  | 12926.443 | 10661.167 |
| AL049314  | 2667.699  | 1450.789  | AA425102  | 1141.102  | 1227.263  |
| AF093016  | 9596.409  | 5139.961  | AA878880  | 894.686   | 1676.047  |
| AF161345  | 277.961   | 307.297   | AA150828  | 6992.09   | 11894.916 |
| -         | 261.207   | 139.507   | H90764    | 1530.378  | 2471.186  |
| AF090925  | 242.677   | 202.539   | AI859208  | 2100.266  | 4336.852  |
| NM_014163 | 6956.119  | 4563.412  | H64379    | 20202.492 | 32558.1   |
| NM_014137 | 229.626   | 176.568   | BE208258  | 46543.043 | 51933.676 |
| AK021974  | 594.147   | 427.214   | T72202    | 3647.928  | 6511.053  |
| AK022068  | 310.813   | 277.618   | BI831922  | 4048.138  | 5473.209  |
| AK022229  | 675.758   | 617.747   | M69238    | 6541.372  | 7801.458  |
| AK022362  | 3698.333  | 2982.006  | AA664180  | 1401.683  | 2185.8    |
| AK022004  | 3727.051  | 3259.009  | AA599158  | 29710.996 | 43108.746 |
| AK022390  | 575.263   | 640.52    | BE294756  | 1334.045  | 3246.727  |
| U61096    | 296.66    | 205.197   | AK026092  | 11168.501 | 13991.969 |
| AF085865  | 2768.968  | 2459.469  | AK001175  | 1794.49   | 1659.77   |
| AK025521  | 418.297   | 227.718   | NM_003897 | 4945.858  | 4970.396  |
| NM_001053 | 38857.387 | 28105.037 | NM_003299 | 56553.957 | 54610.41  |
| Z70694    | 1620.001  | 1595.679  | U70981    | 451.793   | 569.531   |
| L77602    | 378.451   | 339.651   | NM_014330 | 59694.156 | 57587.027 |
| NM_015421 | 5816.999  | 3988.451  | NM_007034 | 1503.928  | 1242.605  |
| AF086081  | 2416.508  | 1214.034  | NM_005261 | 679.44    | 1095.927  |
| NM_018111 | 316.831   | 146.385   | NM_001560 | 1194.14   | 2127.226  |
| AK023730  | 280.33    | 72.127    | NM_001783 | 59106.406 | 58461.406 |
| AF161360  | 457.92    | 552.529   | J03171    | 9318.209  | 15414.273 |
| AK021720  | 413.403   | 322.228   | NM_005856 | 1233.918  | 2438.93   |
| NM_016497 | 19240.066 | 9340.194  | NM_004323 | 54276.34  | 54993.102 |
| AF009261  | 717.933   | 549.956   | NM_002310 | 1128.523  | 1686.691  |
| AL133086  | 867.161   | 962.774   | NM_005312 | 8078.543  | 9962.961  |
| NM_012151 | 4632.642  | 3709.488  | NM_001711 | 3579.434  | 4227.153  |
| AF087994  | 899.729   | 1084.181  | NM_004210 | 27801.027 | 28964.307 |
| AJ227912  | 496.487   | 527.356   | NM_020140 | 4037.321  | 5535.907  |
| NM_018195 | 1042.89   | 1056.483  | NM_001496 | 18841.352 | 17843.846 |
| AK025532  | 5997.562  | 5160.863  | NM_001962 | 1347.029  | 3199.828  |
| AK021789  | 565.908   | 480.937   | NM_002500 | 9588.085  | 14380.657 |
| NM_003522 | 437.287   | 233.542   | AK026232  | 9576.18   | 9748.102  |
| BF217847  | 525.336   | 339.721   | NM_014892 | 18233.666 | 30132.563 |
| NM_005320 | 1637.584  | 1157.501  | AK023827  | 12725.882 | 21978.863 |
| U79242    | 272.77    | 289.482   | NM_001117 | 867.614   | 870.109   |
| Y10519    | 275.529   | 224.526   | AF283645  | 11439.572 | 6016.18   |

|           |           |           |           |           |           |
|-----------|-----------|-----------|-----------|-----------|-----------|
| AF119901  | 1933.14   | 1495.801  | NM_016575 | 7909.877  | 6056.401  |
| AK001936  | 721.662   | 463.323   | NM_018557 | 540.7     | 439.326   |
| NM_003770 | 42491.133 | 34753.598 | NM_001045 | 29576.924 | 26320.068 |
| AK001395  | 2901.644  | 2909.142  | NM_005697 | 19692.381 | 28789.711 |
| S57803    | 3843.047  | 4081.761  | NM_003099 | 8629.356  | 15298.401 |
| AK023131  | 976.707   | 1255.723  | NM_004781 | 4670.568  | 9158.086  |
| X78926    | 1079.623  | 1051.456  | NM_016315 | 821.435   | 1411.13   |
| AJ278110  | 716.054   | 739.054   | NM_018303 | 3413.614  | 6335.999  |
| NM_014237 | 1315.373  | 1528.479  | NM_014758 | 24482.959 | 33449.055 |
| NM_020396 | 414.836   | 310.597   | AL133047  | 807.034   | 1515.202  |
| AF029900  | 2254.269  | 2518.292  | NM_005124 | 3320.932  | 2445.645  |
| NM_003325 | 3425.605  | 3676.713  | AK000947  | 7946.031  | 5616.707  |
| NM_016178 | 1351.458  | 1091.741  | L08240    | 2437.683  | 1843.603  |
| AK022639  | 2175.221  | 1602.818  | NM_017952 | 2944.043  | 3205.429  |
| D31766    | 715.283   | 477.175   | NM_002940 | 3675.173  | 2866.302  |
| NM_006547 | 2255.957  | 1025.316  | NM_016081 | 23123.121 | 18600.184 |
| L23867    | 273.108   | 244.946   | NM_006389 | 5483.574  | 6021.619  |
| AL138690  | 1832.656  | 1465.716  | M30818    | 2301.872  | 3458.046  |
| AK000394  | 463.893   | 299.657   | NM_000163 | 1294.804  | 2803.429  |
| NM_013941 | 941.044   | 496.746   | NM_005755 | 8873.3    | 16996.072 |
| AF074989  | 680.713   | 395.866   | NM_003329 | 62256.648 | 56736.379 |
| AK001107  | 470.715   | 404.305   | NM_014400 | 10618.265 | 4733.153  |
| AF147393  | 315.255   | 312.402   | AL157492  | 2545.954  | 1587.233  |
| AL137339  | 28.174    | 3331.87   | AL353957  | 5832.559  | 4871.415  |
| AL080112  | 1113.881  | 1229.341  | NM_007214 | 13845.816 | 9826.485  |
| AL137325  | 541.333   | 840.187   | NM_000311 | 17809.895 | 8757.542  |
| AF147361  | 770.313   | 892.493   | NM_017909 | 4406.902  | 3684.587  |
| NM_001851 | 3352.485  | 3816.086  | NM_006335 | 25331.236 | 36575.496 |
| S67789    | 893.487   | 905.274   | NM_000786 | 6949.381  | 8730.967  |
| AK022689  | 5350.69   | 4622.23   | NM_002519 | 402.221   | 746.907   |
| NM_016227 | 918.332   | 698.622   | AL133561  | 2365.161  | 3340.21   |
| NM_004195 | 14950.139 | 13795.347 | NM_017731 | 1509.224  | 2529.398  |
| NM_004705 | 2811.805  | 2421.348  | AB040891  | 3086.624  | 1741.721  |
| NM_020190 | 11931.785 | 11626.363 | NM_005845 | 30435.58  | 19027.479 |
| AK024003  | 549.732   | 376.62    | NM_016209 | 13140.121 | 6255.137  |
| NM_014357 | 1699.693  | 1681.989  | AK075415  | 1319.543  | 835.651   |
| NM_000121 | 5327.807  | 3625.21   | AK025616  | 719.641   | 593.801   |
| NM_002091 | 4734.649  | 2446.781  | NM_018964 | 9018.604  | 9074.527  |
| AB033092  | 4134.441  | 2404.822  | NM_000080 | 2787.001  | 3524.677  |
| M89957    | 12994.504 | 7154.57   | NM_001829 | 2664.138  | 5141.776  |
| NM_003023 | 449.749   | 371.994   | NM_007256 | 4700.148  | 5984.071  |
| BC035030  | 1498.642  | 1014.06   | AK026092  | 11317.342 | 5860.468  |
| NM_005340 | 25791.381 | 14916.245 | AK001175  | 2277.383  | 1213.224  |
| NM_016201 | 2484.182  | 1901.831  | NM_003897 | 5096.462  | 2741.819  |
| NM_000864 | 1676.166  | 1453.514  | NM_014165 | 35353.746 | 38400.898 |
| NM_017977 | 1118.726  | 983.382   | AL442085  | 5233.09   | 4813.663  |
| AF147727  | 966.634   | 976.894   | NM_013313 | 6033.572  | 9654.895  |
| NM_006751 | 538.288   | 504.644   | NM_014736 | 12786.378 | 19603.266 |
| AB037834  | 1020.471  | 790.996   | AK023886  | 3124.179  | 3558.178  |
| NM_003569 | 1408.522  | 1560.142  | NM_002553 | 4461.82   | 2270.429  |
| NM_002777 | 497.897   | 583.247   | AJ404615  | 3158.049  | 1562.897  |
| AF202635  | 632.223   | 701.048   | NM_016053 | 33501.883 | 18962.021 |
| NM_014125 | 756.6     | 845.874   | AB007869  | 4517.32   | 2931.057  |

|           |           |           |           |           |           |
|-----------|-----------|-----------|-----------|-----------|-----------|
| NM_017904 | 1095.615  | 1061.528  | AB046844  | 1703.956  | 1542.932  |
| NM_013367 | 1780.541  | 1635.247  | NM_000302 | 3468.231  | 5411.315  |
| NM_000321 | 1677.378  | 1143.154  | NM_013235 | 55274.965 | 50265.227 |
| NM_006341 | 5692.303  | 3583.675  | NM_016015 | 10554.603 | 9960.468  |
| NM_001709 | 412.746   | 361.04    | NM_020120 | 2374.75   | 4369.896  |
| NM_006191 | 3168.643  | 1715.405  | AK022900  | 2249.604  | 3343.739  |
| NM_001800 | 1231.234  | 935.017   | NM_001125 | 503.374   | 1088.747  |
| NM_004336 | 4842.935  | 2843.475  | AB023216  | 1356.904  | 2387.737  |
| NM_015949 | 1733.713  | 1388.248  | NM_002266 | 58757.879 | 53894.227 |
| NM_013979 | 1811.096  | 1265.351  | CY3Cy5    | 1599.151  | 57.14     |
| NM_003790 | 1342.502  | 1135.88   | NM_033199 | 1962.243  | 1474.091  |
| NM_000494 | 3055.011  | 1723.377  | NM_015001 | 3183.258  | 2403.751  |
| NM_016023 | 1058.971  | 731.001   | AF086324  | 590.841   | 589.051   |
| NM_003722 | 11081.292 | 8876.251  | AF086261  | 1563.288  | 1423.332  |
| NM_014430 | 284.801   | 204.404   | AF086367  | 939.19    | 1176.117  |
| NM_000495 | 472.573   | 500.662   | AF086437  | 3228.568  | 3051.993  |
| AF085883  | 1144.021  | 1076.572  | AK025088  | 6045.338  | 4731.402  |
| NM_016571 | 757.346   | 775.184   | U79295    | 995.857   | 880.976   |
| NM_003688 | 1064.424  | 1012.07   | AK002107  | 753.951   | 670.549   |
| NM_016446 | 3370.905  | 3584.987  | NM_003596 | 4634.256  | 3872.847  |
| BC036368  | 307.213   | 429.553   | AF052181  | 3510.351  | 2891.482  |
| AK023237  | 293.568   | 385.422   | AL050074  | 7189.763  | 5525.737  |
| NM_001870 | 942.805   | 967.444   | AK026436  | 1014.888  | 847.265   |
| AJ271216  | 1151.864  | 1177.165  | NM_018061 | 2060.042  | 2377.986  |
| U23028    | 2158.691  | 1906.94   | NM_033199 | 1485.075  | 1501.62   |
| NM_000817 | 2121.743  | 1838.321  | NM_015001 | 3073.048  | 4179.036  |
| AF113132  | 12002.623 | 9233.177  | SR2       | 49959.813 | 50746.066 |
| NM_006571 | 1903.733  | 1495.042  | SR4       | 15898.61  | 16156.237 |
| NM_001875 | 198.757   | 147.828   | SR6       | 2254.569  | 1989.742  |
| AK022680  | 1422.433  | 1036.235  | SR8       | 8935.749  | 23333.307 |
| NM_018946 | 8317.302  | 5756.351  | SR10      | 30456.609 | 9053.615  |
| NM_016359 | 5556.827  | 3259.98   | CY3Cy5    | 3390.533  | 112.305   |
| NM_001069 | 44760.027 | 50163.105 | AF088014  | 738.477   | 486.615   |
| NM_004156 | 1118.422  | 820.512   | AL109719  | 1701.361  | 1102.733  |
| AK000561  | 929.695   | 756.187   | AF086093  | 1843      | 1606.371  |
| AB051449  | 12244.992 | 11230.528 | U92022    | 1683.37   | 1805.109  |
| BC009187  | 3406.259  | 2976.147  | NM_003650 | 2153.391  | 1971.51   |
| AL133617  | 696.618   | 688.131   | AK022119  | 13294.979 | 12902.239 |
| NM_016485 | 3838.114  | 3988.857  | AL157488  | 704.494   | 825.855   |
| NM_002615 | 225.163   | 294.198   | NM_016644 | 3072.797  | 2935.033  |
| AF090894  | 509.204   | 364.643   | AF085842  | 753.334   | 812.66    |
| NM_014052 | 8026.992  | 7467.792  | AF147397  | 1373.331  | 1179.326  |
| AK023792  | 230.204   | 301.592   | AK027158  | 1029.224  | 1182.344  |
| NM_020149 | 1244.379  | 1553.832  | AK002187  | 2425.099  | 2727.18   |
| NM_006237 | 650.19    | 683.485   | AF085836  | 6235.004  | 5721.609  |
| NM_001271 | 2242.066  | 1733.031  | AL049449  | 4387.176  | 3456.637  |
| NM_003683 | 3604.024  | 4106.588  | AF147347  | 545.943   | 723.213   |
| AF039019  | 2157.989  | 1941.521  | AL359654  | 5481.737  | 7963.156  |
| NM_012255 | 3034.417  | 2041.711  | AK024224  | 3421.421  | 4160.584  |
| NM_018196 | 808.056   | 487.862   | NM_015362 | 14967.37  | 15138.674 |
| NM_004818 | 2226.845  | 1517.516  | AF147344  | 1185.168  | 1159.773  |
| J04205    | 6992.939  | 5061.206  | AF147371  | 1475.522  | 1648.317  |
| D38491    | 2975.775  | 1542.387  | AK023745  | 1848.189  | 1752.573  |

|           |           |           |           |           |           |
|-----------|-----------|-----------|-----------|-----------|-----------|
| AK026835  | 2017.576  | 1536.517  | NM_018982 | 3772.465  | 3134.271  |
| NM_002819 | 8502.896  | 4760.338  | AF086254  | 6716.481  | 6482.944  |
| NM_003090 | 18009.861 | 10152.604 | AF086294  | 1761.046  | 1460.546  |
| NM_013264 | 3263.405  | 1806.494  | AK026856  | 1435.31   | 873.468   |
| NM_003315 | 7188.788  | 4221.475  | AL162033  | 8846.843  | 6188.967  |
| NM_005570 | 4207.54   | 2599.535  | AL162010  | 688.243   | 452.511   |
| NM_000086 | 4473.548  | 4316.332  | AK026893  | 1304.672  | 1218.829  |
| NM_003752 | 2394.66   | 1832.012  | AK026761  | 853.414   | 988.058   |
| NM_003932 | 6995.483  | 6084.351  | NM_018838 | 13348.563 | 12600.234 |
| NM_016491 | 10355.152 | 8656.833  | AF075083  | 1324.436  | 1488.792  |
| NM_006429 | 15399.288 | 14024.808 | AK021454  | 2089.462  | 2440.856  |
| NM_002516 | 673.287   | 572.307   | AK022069  | 3819.802  | 3653.928  |
| NM_002064 | 778.365   | 1620.656  | AL137457  | 3331.475  | 2773.88   |
| NM_015523 | 4875.359  | 5934.403  | AF075092  | 884.81    | 955.787   |
| NM_015960 | 9995.796  | 12559.949 | AF085944  | 1846.968  | 2862.972  |
| NM_006085 | 4485.177  | 4028.853  | AL133038  | 2727.192  | 3376.014  |
| NM_000907 | 5586.485  | 5172.72   | AL137414  | 2898.835  | 3041.361  |
| AF254085  | 3778.236  | 2985.054  | AL359574  | 3468.784  | 3130.266  |
| AK023541  | 214.516   | 172.307   | AL133569  | 11263.893 | 11209.921 |
| NM_001987 | 1455.835  | 1290.762  | AL137435  | 1186.993  | 977.123   |
| AF244088  | 1253.724  | 980.844   | AL157463  | 787.99    | 961.731   |
| NM_007136 | 810.404   | 487.865   | AL359604  | 1680.056  | 1416.415  |
| AK025434  | 362.889   | 65.038    | AK027189  | 1925.807  | 1629.122  |
| AJ251845  | 478       | 290.412   | AK001910  | 7041.358  | 4408.959  |
| AK000435  | 1313.72   | 902.665   | AK023892  | 1299.043  | 1173.632  |
| AK000569  | 1736.106  | 1460.399  | AF124368  | 3895.435  | 3026.636  |
| NM_006049 | 1761.011  | 1496.483  | AF265210  | 5408.14   | 5202.909  |
| BC016698  | 3890.2    | 3434.558  | AK024241  | 1904.061  | 1922.387  |
| NM_007374 | 398.398   | 337.524   | AK025061  | 3385.036  | 3746.425  |
| NM_006167 | 384.64    | 413.059   | AK023882  | 990.517   | 1094.879  |
| NM_016357 | 796.494   | 739.63    | AK026750  | 2627.128  | 3001.17   |
| NM_014500 | 6307.506  | 5902.009  | AF072164  | 4359.331  | 4061.375  |
| L09071    | 467.587   | 1313.825  | NM_018610 | 1269.904  | 1198.472  |
| NM_005924 | 634.884   | 1323.792  | AF181286  | 723.205   | 707.062   |
| NM_019841 | 363.536   | 593.478   | AK025234  | 565.989   | 435.016   |
| NM_003322 | 476.802   | 774.134   | AF083122  | 974.327   | 945.818   |
| NM_003568 | 425.831   | 663.411   | AF147317  | 2095.258  | 2133.83   |
| BC036375  | 7768.703  | 10268.685 | AF232216  | 2358.361  | 1984.224  |
| NM_000496 | 265.826   | 239.978   | NM_017773 | 19442.301 | 17053.887 |
| BF347926  | 4231.684  | 2723.082  | AK021885  | 1386.239  | 1177.563  |
| N54821    | 8633.229  | 7964.918  | AK022018  | 534.904   | 514.017   |
| BI912037  | 2876.149  | 2478.066  | AK022161  | 1169.233  | 884.984   |
| AA454646  | 11499.726 | 8216.944  | AK022296  | 1400.064  | 1362.1    |
| BF063899  | 1061.302  | 1064.758  | AK021940  | 2868.727  | 3135.073  |
| U18087    | 43056.785 | 36495.555 | AK022052  | 680.668   | 651.59    |
| U66349    | 921.664   | 996.857   | AK022189  | 1647.539  | 1636.147  |
| AA057156  | 5831.691  | 5503.275  | AK022338  | 2017.8    | 3131.781  |
| U19487    | 423.269   | 255.275   | U48696    | 2609.817  | 2001.582  |
| AF166327  | 26822.418 | 16502.039 | AF230316  | 9049.082  | 7152.157  |
| AF260739  | 1347.608  | 1439.929  | L32136    | 798.159   | 526.29    |
| AF531423  | 16643.738 | 14564.374 | AK024515  | 20478.25  | 18869.443 |
| X76555    | 438.223   | 616.759   | AF085862  | 8253.493  | 8904.936  |
| NM_005432 | 2454.731  | 2500.896  | NM_017998 | 3487.006  | 3925.012  |



|           |           |           |           |           |           |
|-----------|-----------|-----------|-----------|-----------|-----------|
| L10386    | 9068.703  | 9330.82   | AL049271  | 58884.293 | 57224.082 |
| AF061812  | 11961.102 | 13425.808 | AK023079  | 51782.023 | 50407.16  |
| AL136756  | 2180.324  | 2514.354  | NM_019609 | 5820.102  | 4688.424  |
| NM_015944 | 798.182   | 874.837   | AK026198  | 6119.759  | 6208.26   |
| NM_001548 | 366.236   | 2218.777  | NM_005001 | 32233.23  | 33601.891 |
| NM_000758 | 4083.851  | 7629.108  | AK024175  | 3753.648  | 5162.739  |
| M17017    | 330.485   | 765.882   | NM_000510 | 3889.272  | 3417.303  |
| NM_002990 | 2211.46   | 3253.975  | BE067520  | 501.976   | 692.575   |
| NM_002432 | 1947.386  | 2599.602  | NM_017787 | 4367.59   | 3560.849  |
| NM_012420 | 204.946   | 331.784   | M20839    | 684.335   | 329.604   |
| NM_002343 | 2301.493  | 3190.394  | NM_020315 | 19069.896 | 21389.109 |
| AB033037  | 1080.766  | 918.261   | NM_005683 | 2589.822  | 1732.874  |
| L40400    | 2562.21   | 2242.345  | NM_020427 | 41039.129 | 34503.453 |
| AK025688  | 1323.282  | 1233.156  | AJ011601  | 487.41    | 467.326   |
| NM_005930 | 270       | 256.932   | AF085920  | 2240.673  | 1987.196  |
| Z36819    | 4303.292  | 4025.819  | AK023173  | 36886.234 | 34341.133 |
| NM_014847 | 18347.586 | 14015.312 | AK025225  | 1646.909  | 1593.608  |
| NM_014448 | 2082.32   | 2062.17   | U79275    | 26510.342 | 25455.637 |
| AL080157  | 1778.017  | 1697.415  | AJ227908  | 1616.124  | 1685.649  |
| NM_005100 | 418.474   | 260.184   | AF007193  | 2337.342  | 2116.012  |
| NM_005308 | 1885.492  | 2071.524  | AK022367  | 2220.702  | 2431.854  |
| NM_000911 | 381.893   | 419.739   | BC028589  | 4363.481  | 4190.686  |
| NM_007227 | 758.924   | 784.441   | AF088067  | 20429.389 | 22675.656 |
| NM_007023 | 642.621   | 744.09    | AK022213  | 1575.102  | 1554.047  |
| NM_005873 | 7319.14   | 7332.914  | AF056441  | 7855.056  | 7783.981  |
| NM_004624 | 2134.318  | 2680.988  | NM_018023 | 519.66    | 764.214   |
| NM_003865 | 710.637   | 1011.155  | AK024142  | 534.353   | 899.781   |
| AB015330  | 9244.428  | 9389.496  | Y10509    | 1477.3    | 1554.55   |
| NM_004315 | 6827.311  | 19402.258 | AK024389  | 17647.047 | 18707.785 |
| NM_020166 | 3566.944  | 5631.359  | AK026793  | 4103.962  | 4857.014  |
| AK023860  | 1961.399  | 2968.592  | NM_001672 | 1100.81   | 1007.217  |
| NM_000031 | 2336.149  | 2619.24   | AJ276253  | 32709.818 | 29876.867 |
| NM_002085 | 14587.146 | 14946.366 | AF147314  | 2517.514  | 2368.952  |
| AK026061  | 253.204   | 326.518   | NM_018980 | 9772.75   | 11243.039 |
| NM_016286 | 5957.956  | 6176.969  | AF086201  | 3108.877  | 3005.541  |
| NM_001567 | 1854.918  | 2358.044  | AK024712  | 1820.044  | 2029.847  |
| NM_004905 | 6054.996  | 4194.82   | NM_002902 | 10093.482 | 8599.823  |
| AF217971  | 3467.737  | 3285.917  | NM_020248 | 49955.148 | 47521.105 |
| NM_001925 | 344.256   | 476.306   | X89670    | 3316.177  | 3310.416  |
| NM_004982 | 1268.854  | 1422.244  | NM_001726 | 981.618   | 913.905   |
| NM_004732 | 930.172   | 906.603   | NM_004053 | 8733.963  | 7548.372  |
| NM_018349 | 1812.479  | 2137.477  | NM_014420 | 738.343   | 696.542   |
| NM_006363 | 3838.711  | 2567.24   | NM_001489 | 2128.867  | 2356.229  |
| NM_020415 | 913.545   | 773.758   | M20259    | 841.246   | 718.774   |
| AL049667  | 1267.385  | 1279.833  | NM_020374 | 4665.968  | 5636.029  |
| NM_000334 | 2655.92   | 3426.118  | NM_014922 | 3565.275  | 3907.64   |
| NM_020400 | 1228.959  | 1568.148  | AF183570  | 1209.737  | 1730.969  |
| NM_001504 | 1291.048  | 1586.391  | NM_005497 | 57649.465 | 56101.797 |
| D50926    | 2109.348  | 2434.396  | AK024048  | 6663.974  | 7146.049  |
| BF205683  | 1737.681  | 2470.103  | AB033093  | 6274.568  | 5988.826  |
| NM_001565 | 638.876   | 650.501   | NM_005912 | 1469.797  | 1856.043  |
| NM_002612 | 225.818   | 462.034   | NM_005909 | 59111.07  | 51911.859 |
| AF135422  | 945.738   | 1459.899  | AK001948  | 632.717   | 774.294   |

|           |           |           |           |           |           |
|-----------|-----------|-----------|-----------|-----------|-----------|
| NM_004479 | 9952.456  | 15372.795 | AK021879  | 841.239   | 1508.247  |
| NM_002610 | 1119.718  | 983.493   | AL355717  | 1418.181  | 986.045   |
| AF070587  | 2996.29   | 2467.777  | AK055991  | 1558.006  | 1707.673  |
| BE250526  | 543.416   | 519.791   | AF113697  | 3204.492  | 2797.695  |
| NM_016819 | 2282.712  | 1833.661  | AK022326  | 4868.946  | 4418.361  |
| NM_012222 | 2804.001  | 3830.449  | AF085991  | 3217.426  | 3873.592  |
| NM_005002 | 1639.733  | 1345.719  | NM_001943 | 2173.172  | 1511.805  |
| NM_006596 | 2398.14   | 2339.501  | NM_004927 | 17407.375 | 12809.953 |
| AK023214  | 5868.823  | 5478.243  | AB040928  | 1566.336  | 1412.058  |
| NM_001469 | 5915.514  | 4407.326  | NM_001459 | 6011.883  | 6546.19   |
| NM_003600 | 6406.154  | 5301.398  | NM_015513 | 54890.668 | 52361.785 |
| NM_017490 | 2987.025  | 2241.304  | NM_006219 | 10841.172 | 10700.913 |
| NM_002718 | 1125.629  | 820.19    | NM_004443 | 26349.615 | 24786.693 |
| AK026727  | 1313.595  | 1725.033  | NM_001932 | 659.066   | 670.462   |
| NM_002830 | 230.088   | 212.011   | NM_017412 | 2499.331  | 3115.857  |
| NM_006247 | 4265.023  | 4791.547  | NM_005544 | 1200.986  | 1282.357  |
| AB032983  | 1248.317  | 2399.982  | NM_002964 | 55819.531 | 55452.586 |
| NM_018281 | 5291.663  | 7681.058  | AF311862  | 56621.309 | 58383.684 |
| NM_004457 | 2965.102  | 2945.775  | NM_003215 | 4415.453  | 5131.091  |
| NM_014049 | 1587.825  | 2077.697  | NM_016447 | 4294.898  | 4657.67   |
| NM_005396 | 429.502   | 338.884   | NM_015626 | 15672.359 | 16011.409 |
| NM_019841 | 454.736   | 1065.945  | NM_004899 | 13902.882 | 14208.737 |
| NM_003322 | 430.302   | 731.436   | AB006628  | 44691.719 | 40057.797 |
| NM_003568 | 488.092   | 817.401   | AF272036  | 4492.672  | 4276.207  |
| BC036375  | 7871.7    | 11817.237 | AF231023  | 3996.766  | 4566.452  |
| NM_000496 | 249.913   | 360.297   | NM_005148 | 12068.731 | 11990.297 |
| BF347926  | 4490.782  | 4872.092  | NM_004746 | 4961.786  | 4230.455  |
| N54821    | 8571.191  | 10474.25  | AF146019  | 8205.695  | 7040.755  |
| BI912037  | 2932.65   | 3165.111  | Z36782    | 11046.099 | 11408.723 |
| AA454646  | 11767.939 | 10959.521 | M70435    | 1098.186  | 896.426   |
| BF063899  | 1369.592  | 1584.755  | NM_003490 | 46420.648 | 52240.223 |
| U18087    | 44342.578 | 42359.277 | AF508940  | 8852.882  | 5892.837  |
| U66349    | 976.46    | 1121.477  | NM_005429 | 599.816   | 452.114   |
| AA057156  | 5748.995  | 6439.919  | NM_020237 | 1322.491  | 1366.838  |
| U19487    | 377.669   | 308.998   | AF130051  | 1473.671  | 1352.491  |
| AF166327  | 28870.453 | 17685.096 | M25753    | 24070.967 | 19218.973 |
| AF260739  | 1103.902  | 774.604   | NM_003883 | 6122.183  | 5645.956  |
| AF531423  | 15816.069 | 13344.031 | NM_014929 | 5606.518  | 4523.613  |
| X76555    | 485.996   | 475.989   | NM_004203 | 27115.248 | 29456.846 |
| NM_005432 | 2963.351  | 2985.746  | NM_001951 | 2145.754  | 1945.329  |
| L10386    | 10064.984 | 9000.968  | NM_002391 | 3051.909  | 2743.524  |
| AF061812  | 14139.449 | 15650.905 | NM_007066 | 10440.222 | 9876.358  |
| AL136756  | 2175.414  | 2595.563  | NM_003674 | 56554.988 | 56486.613 |
| NM_001478 | 26565.576 | 20069.721 | NM_001197 | 11596.532 | 9784.709  |
| M17017    | 369.596   | 1506.817  | NM_006682 | 2071.78   | 2108.238  |
| NM_002990 | 2220.368  | 4493.264  | NM_006410 | 1737.367  | 1415.218  |
| NM_002432 | 1486.232  | 2802.169  | NM_014977 | 56156.605 | 54650.301 |
| NM_012420 | 352.529   | 694.812   | AK026325  | 6762.172  | 7469.963  |
| NM_002343 | 2365.979  | 4601.42   | U83857    | 1125.625  | 1482.274  |
| AB033037  | 1227.317  | 1769.85   | NM_001230 | 1550.641  | 2375.172  |
| L40400    | 2585.667  | 3216.668  | AK025662  | 3081.521  | 2407.687  |
| AK025688  | 1301.892  | 1423.27   | NM_000201 | 21230.725 | 18247.271 |
| NM_005930 | 214.122   | 406.484   | AB011539  | 4763.589  | 4842.692  |

|           |           |           |           |           |           |
|-----------|-----------|-----------|-----------|-----------|-----------|
| Z36819    | 4452.071  | 4708.025  | U37028    | 10131.047 | 10148.025 |
| NM_014847 | 19067.053 | 18923.658 | AB014597  | 4228.82   | 4972.244  |
| NM_014448 | 2073.042  | 2419.636  | NM_001793 | 54655.66  | 57947.695 |
| AL080157  | 2367.294  | 2669.445  | S81361    | 775.3     | 556.904   |
| NM_005100 | 381.039   | 347.61    | AK024313  | 25727.395 | 20476.412 |
| NM_005308 | 1621.272  | 1543.911  | NM_003891 | 7819.864  | 7532.248  |
| NM_000911 | 406.967   | 406.32    | AL359575  | 2741.843  | 2161.637  |
| NM_007227 | 702.168   | 832.707   | NM_002022 | 1322.716  | 1517.717  |
| NM_007023 | 625.647   | 798.375   | NM_015524 | 2906.951  | 2559.908  |
| NM_005873 | 7603.663  | 7488.119  | NM_001673 | 39231.664 | 51651.711 |
| NM_004624 | 2069.498  | 2590.871  | AK023167  | 976.237   | 1125.106  |
| NM_003865 | 775.878   | 1025.053  | NM_016510 | 8588.054  | 9419.254  |
| AB015330  | 9901.979  | 11065.655 | NM_014270 | 7876.421  | 7810.936  |
| L09071    | 426.125   | 707.502   | NM_000071 | 21693.549 | 19591.117 |
| NM_005924 | 780.105   | 840.572   | NM_006843 | 12082.709 | 11430.751 |
| S56138    | 221.214   | 779.786   | NM_004321 | 5974.136  | 5706.178  |
| AK023860  | 2407.111  | 5910.646  | AF311212  | 10760.992 | 9446.365  |
| NM_000031 | 2538.393  | 4668.884  | NM_006915 | 3030.422  | 2625.91   |
| NM_002085 | 15508.546 | 19737.945 | NM_006035 | 3582.313  | 4021.646  |
| AK026061  | 256.526   | 406.542   | NM_006086 | 29323.621 | 31134.227 |
| NM_016286 | 6779.817  | 11166.438 | NM_004520 | 18877.188 | 19394.918 |
| NM_001567 | 2135.105  | 2589.275  | AK027118  | 6491.245  | 5415.235  |
| NM_004905 | 6203.07   | 5667.659  | AK022882  | 33316.5   | 34905.676 |
| AF217971  | 3471.493  | 4295.307  | NM_006105 | 10283.439 | 10047.224 |
| NM_001925 | 325.475   | 568.633   | NM_005981 | 4753.646  | 5207.798  |
| NM_004982 | 1545.106  | 1670.967  | AF210651  | 3219.96   | 3169.609  |
| NM_004732 | 1098.365  | 1241.68   | AF090942  | 2781.101  | 4822.931  |
| NM_018349 | 1884.216  | 2408.861  | NM_014595 | 30272.574 | 17699.383 |
| NM_006363 | 3928.93   | 4138.624  | NM_014789 | 2415.962  | 2085.291  |
| NM_020415 | 998.764   | 1015.372  | AB046784  | 7544.008  | 5746.977  |
| NM_014879 | 216.852   | 303.45    | X52402    | 12058.096 | 9840.292  |
| AL049667  | 1423.579  | 1482.329  | AL133663  | 2436.453  | 2465.735  |
| NM_000334 | 2451.838  | 3276.434  | NM_004992 | 2616.195  | 2250.627  |
| NM_020400 | 1209.725  | 1457.079  | NM_014462 | 7420.854  | 6443.535  |
| NM_001504 | 1640.436  | 1495.76   | NM_014156 | 55793.164 | 56690.543 |
| D50926    | 2219.139  | 2357.231  | NM_003137 | 20512.539 | 18769.926 |
| BF205683  | 1503.623  | 2481.375  | NM_006938 | 52863.895 | 52978.012 |
| NM_001565 | 655.748   | 791.124   | NM_004515 | 1275.202  | 1066.632  |
| NM_000758 | 4566.145  | 5916.848  | NM_020158 | 11699.925 | 11910.841 |
| NM_004479 | 13614.233 | 35863.691 | AF176085  | 6822.121  | 6449.408  |
| NM_002610 | 1335.432  | 1995.49   | NM_006985 | 50138.387 | 45967.539 |
| AF070587  | 2515.516  | 2621.655  | AF265228  | 4170.923  | 3070.766  |
| BE250526  | 641.24    | 879.24    | NM_003757 | 43999.715 | 41485.281 |
| NM_016819 | 2835.099  | 3100.08   | AK025561  | 7635.751  | 6812.774  |
| NM_012222 | 2671.466  | 4099.346  | NM_018602 | 54887.742 | 54255.426 |
| NM_005002 | 1640.569  | 1619.938  | NM_004096 | 6489.546  | 8204.505  |
| NM_006596 | 2419.541  | 2864.962  | NM_017629 | 28238.672 | 26227.258 |
| AK023214  | 5494.068  | 6235.979  | AL049681  | 5374.037  | 5112.933  |
| NM_001469 | 5541.016  | 4428.226  | NM_006584 | 1508.5    | 1574.065  |
| NM_003600 | 6463.241  | 6931.628  | NM_003551 | 11701.161 | 8444.384  |
| NM_017490 | 2954.139  | 2580.587  | AF305210  | 2067.241  | 1858.486  |
| NM_002718 | 1173.634  | 1281.809  | AK021900  | 9100.473  | 7164.238  |
| AK026727  | 1174.373  | 1074.579  | NM_002764 | 36515.852 | 34217.078 |

|           |           |           |           |           |           |
|-----------|-----------|-----------|-----------|-----------|-----------|
| NM_00283C | 304.424   | 231.527   | NM_019857 | 3792.366  | 3624.029  |
| NM_006247 | 4136.244  | 4358.68   | NM_015455 | 58021.883 | 55336.504 |
| AB032983  | 1057.134  | 1017.215  | AF024702  | 26895.969 | 26869.938 |
| NM_018281 | 6716.988  | 8389.732  | NM_001964 | 4963.384  | 4891.411  |
| NM_004457 | 3012.651  | 2587.435  | NM_005962 | 23956.49  | 24750.066 |
| NM_014049 | 1711.589  | 1965.099  | X74864    | 13867.878 | 13130.324 |
| NM_005396 | 348.922   | 454.234   | AK026804  | 6379.87   | 5935.888  |
| NM_004315 | 7127.483  | 8296.654  | NM_016170 | 38410.953 | 41535.563 |
| NM_020166 | 4143.917  | 4724.922  | NM_002114 | 1218.856  | 732.109   |
| NM_003568 | 667.094   | 3174.21   | NM_006166 | 6928.568  | 5692.473  |
| BC036375  | 10226.09  | 24842.654 | S72620    | 57250.984 | 51534.824 |
| NM_000496 | 332.213   | 739.375   | NM_016831 | 2034.825  | 1955.226  |
| BF347926  | 5156.22   | 8763.53   | S73501    | 1154.111  | 1129.887  |
| N54821    | 10093.532 | 17003.139 | NM_005263 | 21071.969 | 30102.664 |
| BI912037  | 3563.248  | 6765.903  | AB033022  | 21931.162 | 23187.59  |
| AA454646  | 12157.085 | 13877.479 | NM_000474 | 1219.993  | 1620.394  |
| BF063899  | 1107.27   | 1845.364  | NM_016264 | 3248.266  | 3562.496  |
| U18087    | 41552.984 | 58684.957 | NM_006079 | 47975.555 | 47517.336 |
| U66349    | 954.996   | 1212.524  | AB037837  | 5894.145  | 5486.775  |
| AA057156  | 5477.109  | 6229.448  | NM_001155 | 34613.477 | 25526.578 |
| U19487    | 412.914   | 354.963   | M62896    | 59414.094 | 50517.043 |
| AF166327  | 24832.383 | 16860.836 | NM_017736 | 3954.355  | 3941.469  |
| AF260739  | 1111.259  | 1119.603  | NM_000390 | 879.79    | 935.339   |
| AF531423  | 16512.998 | 15483.047 | NM_000313 | 1538.829  | 1432.812  |
| X76555    | 446.438   | 290.894   | NM_001498 | 54016.883 | 53168.879 |
| NM_005432 | 2881.196  | 2580.177  | AF263523  | 5295.547  | 8209.574  |
| L10386    | 9553.446  | 7893.863  | L08441    | 33689.133 | 48983.145 |
| AF061812  | 14691.046 | 11970.508 | AA641953  | 3636.201  | 3991.194  |
| AL136756  | 2534.705  | 2673.971  | AI248827  | 13148.845 | 12588.737 |
| NM_001478 | 24419.947 | 20395.91  | R45026    | 58259.668 | 58575.379 |
| NM_002612 | 311.07    | 350.086   | BI768063  | 3937.303  | 3895.189  |
| AF135422  | 1003.394  | 961.746   | BG386057  | 1234.749  | 1355.95   |
| NM_005930 | 688.72    | 2516.717  | AI970239  | 14465.74  | 15492.04  |
| Z36819    | 5044.669  | 12986.682 | AA496452  | 45286.164 | 48167.473 |
| NM_014847 | 29763.006 | 51637.461 | X67594    | 22092.6   | 22326.602 |
| NM_014448 | 2753.533  | 4896.321  | AF363393  | 981.265   | 769.332   |
| AL080157  | 2960.607  | 6055.675  | BC008837  | 1138.889  | 1202.284  |
| NM_005100 | 549.61    | 703.839   | NM_015869 | 2352.551  | 2581.925  |
| NM_005308 | 1863.398  | 2248.538  | NM_001631 | 5418.722  | 7482.715  |
| NM_000911 | 518.143   | 715.395   | AB000734  | 35858.531 | 45543.637 |
| NM_007227 | 755.059   | 760.319   | NM_000862 | 934.199   | 1164.076  |
| NM_007023 | 694.416   | 610.704   | NM_005987 | 57576.801 | 64309.504 |
| NM_005873 | 7435.478  | 7415.543  | X87838    | 11883.517 | 13507.004 |
| NM_004624 | 2268.07   | 2836.615  | AK023059  | 2355.851  | 2526.007  |
| NM_014461 | 1533.838  | 2087.575  | AF224266  | 17779.766 | 13451.984 |
| NM_003865 | 809.125   | 1104.014  | U72882    | 57594.852 | 53806.102 |
| AB015330  | 8807.534  | 5697.439  | NM_014337 | 49177.051 | 47489.969 |
| NM_001455 | 2556.63   | 2759.932  | NM_007161 | 48014.094 | 51069.398 |
| NM_002385 | 1359.406  | 1077.763  | NM_014387 | 5942.431  | 5964.353  |
| NM_001885 | 608.685   | 553.49    | NM_003641 | 14385.373 | 14981.697 |
| AF039196  | 320.189   | 394.09    | NM_012463 | 6623.81   | 6785.068  |
| L09071    | 451.735   | 644.382   | L29140    | 58530.973 | 59636.738 |
| NM_005924 | 642.419   | 799.506   | AK026448  | 13181.137 | 15482.759 |

|           |           |           |           |           |           |
|-----------|-----------|-----------|-----------|-----------|-----------|
| NM_019841 | 440.87    | 679.974   | AK057418  | 8958.859  | 9742.234  |
| NM_003322 | 409.903   | 756.928   | L37199    | 1076.866  | 1201.184  |
| NM_013365 | 2954.37   | 15980.087 | NM_007260 | 5150.283  | 5832.58   |
| NM_005817 | 4937.414  | 23551.375 | AF148646  | 32385.227 | 35360.789 |
| NM_003916 | 6437.822  | 17015.07  | AL110218  | 6919.002  | 7299.023  |
| NM_002870 | 37834.109 | 71049.094 | AB023201  | 7007.665  | 7645.495  |
| NM_002802 | 406.29    | 920.759   | X00094    | 5874.157  | 5689.621  |
| NM_006363 | 4335.888  | 7821.917  | NM_003775 | 27610.291 | 29588.396 |
| NM_020415 | 1197.306  | 2099.91   | NM_002082 | 50086.324 | 54341.586 |
| NM_014879 | 253.896   | 320.89    | NM_002922 | 35345.395 | 37317.996 |
| AL049667  | 1395.557  | 1991.204  | AF155657  | 23562.084 | 21112.314 |
| NM_000334 | 2017.803  | 3176.733  | NM_006056 | 36778.238 | 38814.355 |
| NM_020400 | 1073.893  | 1282.068  | AF045229  | 31369.057 | 36457.848 |
| NM_001504 | 1637.306  | 1413.49   | NM_001840 | 28393.836 | 33871.273 |
| D50926    | 2148.505  | 2278.977  | NM_016099 | 59644.918 | 60003.66  |
| BF205683  | 2177.495  | 3156.832  | NM_000394 | 1198.796  | 1528.948  |
| NM_001565 | 581.669   | 679.116   | NM_000072 | 1691.744  | 1429.893  |
| NM_001548 | 300.988   | 387.196   | NM_000697 | 4563.891  | 4196.105  |
| NM_000758 | 4023.145  | 4320.348  | NM_000017 | 29587.592 | 23887.992 |
| M17017    | 354.652   | 425.767   | NM_000237 | 2287.851  | 2000.22   |
| NM_002990 | 2615.708  | 2534.04   | NM_018346 | 16784.523 | 15079.139 |
| NM_002432 | 1718.082  | 1949.041  | AL122054  | 2708.981  | 2647.95   |
| NM_002343 | 2243.335  | 3173.261  | AB011182  | 501.896   | 494.004   |
| AB033037  | 1124.426  | 1497.92   | AB023151  | 1875.239  | 2020.813  |
| L40400    | 2928.592  | 3550.075  | NM_000140 | 44075.066 | 43517.152 |
| AK025688  | 1831.214  | 2133.429  | NM_005125 | 12727.75  | 12826.923 |
| NM_005396 | 453.56    | 1743.428  | NM_020038 | 3530.015  | 4060.358  |
| NM_004315 | 6666.465  | 20184.242 | NM_016246 | 8610.807  | 9249.575  |
| NM_020166 | 4304.945  | 8173.823  | NM_005136 | 2901.064  | 4553.958  |
| AK023860  | 2704.625  | 4723.098  | NM_004976 | 49896.824 | 56212.953 |
| NM_000031 | 2380.438  | 2544.154  | NM_005737 | 54840.883 | 53451.867 |
| NM_002085 | 14516.615 | 13420.458 | NM_001660 | 33130     | 30021.57  |
| AK026061  | 540.222   | 660.93    | NM_000710 | 1674.757  | 1865.955  |
| NM_016286 | 6293.645  | 7271.534  | NM_000752 | 7024.243  | 7458.538  |
| NM_001567 | 2079.77   | 3042.891  | AB040945  | 6005.981  | 5682.025  |
| NM_004905 | 6886.276  | 6183.49   | NM_002018 | 28806.195 | 29435.271 |
| AF217971  | 4345.898  | 5162.606  | NM_002377 | 1135.331  | 1306.322  |
| NM_001925 | 355.92    | 638.448   | NM_006018 | 3064.5    | 3501.224  |
| AF245517  | 1045.648  | 1011.373  | AF161383  | 16277.483 | 21715.781 |
| NM_004137 | 300.428   | 244.489   | NM_000410 | 37990.723 | 44743.914 |
| NM_014407 | 467.724   | 433.275   | AF182814  | 4555.044  | 3227.153  |
| NM_004982 | 1656.714  | 1886.42   | NM_005329 | 2535.758  | 2438.949  |
| NM_001694 | 47386.594 | 70221.664 | NM_000107 | 27564.324 | 28793.762 |
| AF286370  | 548.5     | 636.568   | AL157445  | 12413.75  | 14351.294 |
| NM_000217 | 252.746   | 437.29    | NM_001517 | 46019.766 | 41883.059 |
| NM_004732 | 876.342   | 1159.186  | NM_005053 | 21440.191 | 22231.41  |
| AK026180  | 665.563   | 808.644   | D86974    | 14466.533 | 14609.153 |
| NM_018349 | 2299.325  | 2769.377  | NM_018283 | 15495.313 | 13687.036 |
| NM_001478 | 31082.848 | 66040.398 | NM_001983 | 6006.248  | 6912.404  |
| NM_002612 | 221.934   | 727.692   | NM_004993 | 648.424   | 1096.885  |
| AF135422  | 1145.918  | 1730.369  | NM_003384 | 17443.328 | 19217.061 |
| NM_004479 | 12281.847 | 17825.697 | Y12337    | 8770.842  | 9255.497  |
| NM_002610 | 1116.119  | 899.422   | M29551    | 35155.398 | 30681.713 |

|           |           |           |           |           |           |
|-----------|-----------|-----------|-----------|-----------|-----------|
| AF070587  | 2303.398  | 1657.794  | AB023148  | 1694.804  | 1532.93   |
| BE250526  | 902.012   | 938.727   | NM_002929 | 3885.599  | 4028.269  |
| NM_016819 | 2492.904  | 2130.344  | BC028375  | 3077.869  | 3911.467  |
| NM_012222 | 2778.421  | 3528.536  | AB026436  | 6472.581  | 6440.364  |
| NM_005002 | 1769.29   | 1361.119  | NM_016029 | 24778.229 | 25276.232 |
| NM_006596 | 2731.903  | 2680.984  | AK024562  | 7425.972  | 9686.378  |
| AK023214  | 6081.111  | 6501.285  | NM_014066 | 4991.76   | 5532.877  |
| NM_001469 | 5270.282  | 4109.011  | NM_004573 | 4182.094  | 3798.188  |
| NM_003600 | 5959.134  | 4377.074  | NM_017736 | 3842.674  | 4330.435  |
| NM_017490 | 3022.927  | 2823.782  | NM_000390 | 793.18    | 739.378   |
| NM_002718 | 1459.533  | 1264.244  | NM_000313 | 1476.455  | 1451.757  |
| AK026727  | 1243.148  | 1350.878  | NM_001498 | 55240.887 | 52894.449 |
| NM_002830 | 224.83    | 277.657   | AF263523  | 5027.242  | 5224.294  |
| NM_006247 | 4283.783  | 4556.736  | L08441    | 32095.988 | 43392.703 |
| AB032983  | 1256.329  | 1579.562  | AA641953  | 4240.892  | 4266.226  |
| NM_018281 | 6860.272  | 7766.234  | AI248827  | 14218.615 | 15422.504 |
| CY3Cy5    | 2301.805  | 124.16    | R45026    | 56239.73  | 53301.246 |
| NM_000945 | 3991.454  | 2789.166  | BI768063  | 4691.849  | 4381.434  |
| NM_002574 | 69792.008 | 71586.273 | BG386057  | 1654.482  | 1462.686  |
| NM_001310 | 7579.629  | 6173.834  | AI970239  | 15076.983 | 14718.352 |
| AK026924  | 7092.047  | 6250.366  | AA496452  | 45893.551 | 47415.129 |
| AL122047  | 4159.971  | 3308.886  | X67594    | 28163.094 | 29568.352 |
| AF052091  | 3524.739  | 3420.327  | AF363393  | 989.846   | 1142.128  |
| AK024447  | 70113.203 | 67447.047 | BC008837  | 1106.296  | 1198.472  |
| AF086458  | 5178.224  | 5532.368  | NM_015869 | 2194.458  | 2458.794  |
| AF086548  | 3130.718  | 3981.034  | NM_001631 | 5584.392  | 5548.019  |
| AK023717  | 3878.351  | 4631.418  | AB000734  | 33925.234 | 38641.402 |
| AK022294  | 2932.961  | 3358.533  | NM_000862 | 1057.001  | 821.481   |
| AF086507  | 1840.484  | 1941.113  | NM_005987 | 57630.383 | 63086.727 |
| U79289    | 2056.698  | 2432.191  | X87838    | 12716.891 | 16496.098 |
| NM_014028 | 2028.891  | 2741.275  | NM_000169 | 16616.314 | 20726.398 |
| NM_000945 | 1168.92   | 1139.703  | NM_014337 | 48162.02  | 44820.672 |
| NM_002574 | 70019.836 | 60247.813 | NM_007161 | 47456.82  | 46567.734 |
| SR1       | 73428.898 | 60651.59  | NM_014387 | 6178.404  | 6650.608  |
| SR3       | 37276.59  | 28311.949 | NM_003641 | 14567.25  | 13616.339 |
| SR5       | 4310.485  | 3333.297  | NM_012463 | 6513.984  | 5992.673  |
| SR7       | 3971.905  | 18159.58  | L29140    | 58397.012 | 56593.145 |
| SR9       | 10022.328 | 810.46    | AK026448  | 15235.766 | 15190.888 |
| CY3Cy5    | 2419.626  | 108.814   | AK057418  | 9357.669  | 9895.198  |
| AK026923  | 2497.936  | 1327.074  | L37199    | 1120.978  | 1180.776  |
| AK021691  | 38331.523 | 42782.441 | NM_007260 | 5806.35   | 6293.683  |
| AK023595  | 2205.611  | 2011.087  | AF148646  | 34182.023 | 33528.27  |
| AK001357  | 823.335   | 1059.08   | AL110218  | 7216.063  | 6902.036  |
| NM_015721 | 10411.506 | 12119.622 | AB023201  | 6739.218  | 7290.126  |
| AF086298  | 4879.613  | 6522.779  | X00094    | 5743.37   | 6056.748  |
| AK027238  | 1395.059  | 2103.263  | NM_003775 | 27454.76  | 28609.871 |
| AK000032  | 1501.287  | 2751.342  | NM_002082 | 41442.836 | 46459.992 |
| AK025758  | 495.54    | 557.091   | NM_002922 | 33472.824 | 34157.852 |
| AL360201  | 697.317   | 1004.557  | AF155657  | 22892.826 | 25139.488 |
| S94540    | 58384.023 | 51124.152 | NM_006056 | 34960.383 | 39945.176 |
| U79297    | 945.518   | 542.758   | AF045229  | 29810.506 | 28329.801 |
| AF052122  | 22702.131 | 15543.026 | NM_001840 | 29078.607 | 32138.633 |
| AK022416  | 1689.669  | 617.02    | NM_016099 | 58727.766 | 55900.508 |

|           |           |           |           |           |           |
|-----------|-----------|-----------|-----------|-----------|-----------|
| AK023224  | 4236.506  | 2352.986  | NM_000394 | 1300.838  | 1537.596  |
| AK023731  | 3558.178  | 1880.819  | NM_001155 | 37224.09  | 50946.066 |
| AK022442  | 881.348   | 645.284   | M62896    | 55775.656 | 53674.25  |
| AK023336  | 1095.922  | 685.447   | NM_000017 | 30041.641 | 23658.27  |
| AK023771  | 748.72    | 520.072   | NM_000237 | 2680.315  | 2314.365  |
| AK024099  | 470.12    | 479.842   | NM_018346 | 17400.057 | 15500.318 |
| AK023727  | 2450.964  | 2598.162  | AL122054  | 2762.155  | 2492.459  |
| AK025271  | 1283.615  | 1343.615  | AB023151  | 1914.086  | 2205.152  |
| AF086204  | 9677.659  | 15229.07  | NM_000140 | 44269.668 | 42779.734 |
| NM_007021 | 2748.383  | 4494.009  | NM_005125 | 11898.017 | 12438.457 |
| AK026283  | 573.142   | 913.134   | NM_020038 | 3201.309  | 3194.194  |
| AK022076  | 474.732   | 1023.445  | NM_016246 | 9040.331  | 8380.47   |
| AK023065  | 723.679   | 983.691   | NM_005136 | 2242.46   | 2528.719  |
| NM_017678 | 816.416   | 1172.643  | NM_004976 | 49560.152 | 49953.016 |
| AK021570  | 1947.572  | 3073.495  | NM_005737 | 59170.289 | 57086.563 |
| AK000103  | 706.326   | 1079.99   | NM_001660 | 31391.318 | 33705.777 |
| AF085959  | 519.236   | 731.545   | NM_000710 | 1576.182  | 1972.362  |
| AK023104  | 1005.906  | 911.168   | NM_000752 | 6155.042  | 7062.938  |
| AK022181  | 1328.807  | 1110.096  | AB040945  | 5752.45   | 5135.064  |
| NM_018474 | 12687.258 | 4633.249  | NM_002018 | 28205.037 | 30413.768 |
| AK024937  | 4594.24   | 2512.553  | NM_002377 | 1305.736  | 1533.898  |
| D17178    | 2696.724  | 3624.748  | NM_006018 | 2880.4    | 2849.026  |
| AK022094  | 4770.353  | 3082.97   | AF161383  | 15620.791 | 17825.652 |
| AK026695  | 1776.488  | 1215.53   | NM_000410 | 36915.051 | 48345.152 |
| AK022220  | 985.888   | 845.774   | AF224266  | 18522.863 | 23881.588 |
| AL137539  | 734.599   | 575.371   | U72882    | 58279.434 | 54400.031 |
| AK000141  | 12692.495 | 16752.596 | NM_005329 | 2333.953  | 2173.318  |
| AL137758  | 4990.265  | 6124.747  | NM_000107 | 25996.826 | 26917.914 |
| AK023865  | 935.134   | 1278.698  | AL157445  | 12875.713 | 14231.103 |
| AK025786  | 1415.903  | 2208.029  | NM_001517 | 46519.879 | 45422.047 |
| AK024188  | 2216.852  | 4795.419  | NM_005053 | 17416.453 | 20026.273 |
| AK024379  | 614.921   | 1135.166  | D86974    | 13446.438 | 13441.396 |
| AK026820  | 768.924   | 934.773   | NM_018283 | 13849.516 | 12833.284 |
| AK001716  | 7094.833  | 8402.724  | NM_001983 | 5946.836  | 5515.358  |
| AK026821  | 1856.84   | 1867.279  | NM_004993 | 1288.888  | 1351.324  |
| AK026280  | 2637.518  | 2753.211  | NM_003384 | 16899.215 | 19131.924 |
| AF113017  | 11784.724 | 14528.684 | Y12337    | 6855.677  | 7313.936  |
| AL080232  | 22332.91  | 22117.795 | M29551    | 39505.383 | 38892.074 |
| AK001120  | 9956.954  | 7367.826  | AB023148  | 1834.443  | 1577.802  |
| AK021980  | 6411.843  | 2159.56   | NM_002929 | 3521.41   | 4003.31   |
| S46402    | 1510.859  | 699.618   | BC028375  | 2944.412  | 3235.564  |
| AF075048  | 1119.329  | 903.611   | AB026436  | 6520.835  | 7239.319  |
| Z83940    | 1891.833  | 2145.466  | NM_016029 | 23472.314 | 20491.385 |
| NM_005800 | 2443.966  | 2184.535  | AK024562  | 7188.22   | 8382.092  |
| AF019617  | 38308.473 | 33905.848 | NM_014066 | 4550.403  | 4361.041  |
| AL137305  | 11839.476 | 10298.035 | NM_004573 | 3731.408  | 4059.107  |
| NM_005290 | 1434.58   | 1682.938  | NM_000072 | 1633.792  | 2055.32   |
| AK025802  | 2236.796  | 2506.566  | NM_000697 | 4185.679  | 5333.46   |
| AF085973  | 1447.275  | 2512.455  | NM_000313 | 1122.34   | 1011.857  |
| NM_018013 | 6214.004  | 11313.048 | NM_001498 | 57048.18  | 56538.91  |
| AK026873  | 4392.127  | 6464.431  | AF263523  | 4627.138  | 5304.801  |
| AK026394  | 4666.143  | 5974.04   | L08441    | 29888.189 | 39951.984 |
| NM_005448 | 1176.837  | 1623.773  | AA641953  | 3434.9    | 4815.814  |

|           |           |           |           |           |           |
|-----------|-----------|-----------|-----------|-----------|-----------|
| AK025943  | 40102.223 | 48676.766 | AI248827  | 16099.535 | 27897.84  |
| BG106479  | 1000.056  | 1431.417  | R45026    | 53409.031 | 51971.809 |
| AF130069  | 25251.615 | 35899.863 | BI768063  | 4959.568  | 4543.65   |
| AL109669  | 3549.455  | 4079.326  | BG386057  | 1303.554  | 1344.71   |
| AB037766  | 4026.687  | 4398.338  | AI970239  | 13303.543 | 13538.325 |
| AL133091  | 835.19    | 1062.478  | AA496452  | 41088.289 | 43179.516 |
| BF842915  | 460.417   | 539.916   | X67594    | 24342.002 | 29495.078 |
| X82545    | 10205.17  | 7243.955  | AF363393  | 668.978   | 834.656   |
| AF302079  | 27621.221 | 13974.53  | BC008837  | 865.452   | 1166.756  |
| AJ224167  | 2785.206  | 1260.963  | NM_015869 | 2259.261  | 2720.325  |
| NM_002550 | 1028.719  | 993.936   | NM_001631 | 4221.034  | 3651.492  |
| NM_000692 | 3173.836  | 2827.087  | AB000734  | 32474.67  | 32071.721 |
| AF086062  | 2641.903  | 2229.893  | NM_000862 | 1231.052  | 1124.467  |
| L47668    | 69343.578 | 74443.484 | NM_005987 | 55361.34  | 58659.535 |
| NM_017920 | 11448.961 | 17592.984 | X87838    | 10156.874 | 10970.646 |
| AK025345  | 1949.097  | 2759.056  | NM_000169 | 13881.057 | 14493.407 |
| D25274    | 16915.568 | 19263.33  | NM_000699 | 561.699   | 522.236   |
| AK000807  | 404.341   | 937.131   | BE799167  | 531.232   | 402.975   |
| U84520    | 13839.676 | 26584.512 | AF182814  | 4310.158  | 4173.245  |
| Z11853    | 726.516   | 1372.511  | L37199    | 1275.88   | 977.325   |
| AL133616  | 4869.779  | 5693.431  | NM_007260 | 5862.726  | 5083.892  |
| AK023391  | 432.779   | 532.395   | AF148646  | 31857.205 | 26974.602 |
| AK026382  | 6350.924  | 12007.636 | AL110218  | 6099.617  | 5880.603  |
| AK091169  | 4875.552  | 7187.352  | AB023201  | 6340.231  | 7211.864  |
| NM_014745 | 61911.863 | 64858.293 | X00094    | 5317.57   | 8135.332  |
| AF086026  | 12216.459 | 16551.479 | NM_003775 | 26785.096 | 29322.604 |
| AL133011  | 1088.77   | 1524.701  | NM_002082 | 46513.117 | 45847.922 |
| NM_016300 | 590.801   | 738.803   | NM_002922 | 31560.025 | 30554.688 |
| NM_015607 | 19154.957 | 17027.311 | AF155657  | 21716.084 | 22730.973 |
| AK026955  | 1236.01   | 1098.252  | NM_006056 | 33606.645 | 35825.965 |
| AL110202  | 23019.281 | 16684.893 | AF045229  | 28434.375 | 32543.018 |
| NM_006228 | 3056.641  | 1079.019  | NM_001840 | 26130.654 | 26156.646 |
| NM_003768 | 20604.586 | 11214.699 | AK025099  | 6571.06   | 6577.803  |
| BF032535  | 3840.573  | 2630.882  | NM_016099 | 57713.414 | 55997.613 |
| NM_018332 | 3593.97   | 2559.164  | NM_000394 | 1205.871  | 1308.727  |
| NM_005096 | 14163.693 | 26814.145 | NM_000228 | 2044.445  | 2199.79   |
| NM_006760 | 2271.79   | 3084.23   | NM_000830 | 3491.039  | 4276.928  |
| NM_012289 | 12892.981 | 23877.582 | NM_014587 | 578.753   | 766.663   |
| AB037775  | 1808.089  | 2731.441  | NM_005209 | 2040.787  | 2696.974  |
| L27560    | 2732.858  | 3955.259  | AF148950  | 4173.715  | 4466.929  |
| AK022517  | 4117.388  | 5135.86   | NM_001155 | 33570.98  | 38415.945 |
| NM_000329 | 21522.756 | 33559.328 | M62896    | 59439.816 | 55338.918 |
| NM_001182 | 35034.348 | 51590.074 | NM_017736 | 3964.057  | 4948.481  |
| NM_000333 | 4122.43   | 5019.07   | NM_000390 | 842.624   | 1396.349  |
| NM_000172 | 12860.91  | 13701.748 | NM_000014 | 1777.942  | 1462.881  |
| NM_002297 | 12364.607 | 14691.39  | NM_006803 | 3414.967  | 3117.544  |
| AB040968  | 33907.418 | 50867.344 | NM_002533 | 3104.975  | 3061.591  |
| U17615    | 4483.411  | 4849.252  | AF235022  | 2672.746  | 2522.927  |
| NM_005303 | 5327.08   | 5582.529  | AL137764  | 50523.949 | 47295.113 |
| NM_016126 | 12155.925 | 10849.55  | NM_001660 | 31315.254 | 32720.314 |
| U84119    | 1582.396  | 1214.276  | NM_000710 | 1564.365  | 1726.855  |
| NM_003608 | 3214.354  | 2777.755  | NM_000752 | 5401.18   | 6211.978  |
| NM_006460 | 4563.057  | 4120.458  | AB040945  | 4841.58   | 4608.625  |



|           |           |           |           |           |           |
|-----------|-----------|-----------|-----------|-----------|-----------|
| L34156    | 1588.097  | 1294.146  | NM_002018 | 25564.1   | 24322.365 |
| NM_003749 | 1045.412  | 1167.691  | NM_002377 | 1023.097  | 1345.435  |
| NM_003557 | 14329.442 | 17384.268 | NM_006018 | 2153.43   | 2690.236  |
| NM_001257 | 38804.086 | 52788.906 | AF161383  | 13824.351 | 15496.401 |
| NM_001795 | 460.145   | 597.834   | NM_000410 | 36275.527 | 44276.707 |
| D85245    | 12836.057 | 19046.014 | AF224266  | 13637.587 | 15050.409 |
| NM_000943 | 1499.763  | 1802.862  | U72882    | 58826.691 | 54647.914 |
| NM_004658 | 7529.682  | 10196.773 | NM_014337 | 52616.598 | 50115.688 |
| NM_001250 | 41151.344 | 57199.445 | NM_007161 | 48809.109 | 52184.695 |
| AF298812  | 2234.351  | 2807.272  | NM_014387 | 5607.253  | 5877.69   |
| NM_004969 | 2977.242  | 3491.502  | NM_003641 | 17454.5   | 23680.811 |
| AJ249900  | 781.867   | 1070.324  | NM_012463 | 6557.436  | 7624.419  |
| AK022581  | 10378.758 | 10187.354 | L29140    | 56626.746 | 57302.566 |
| NM_018054 | 4018.882  | 4854.202  | AK026448  | 16896.285 | 18189.629 |
| NM_006186 | 3343.516  | 4905.161  | AK057418  | 9722.937  | 10665.688 |
| NM_000958 | 5706.944  | 5549.895  | AK024562  | 7030.141  | 5923.757  |
| NM_001401 | 710.625   | 749.024   | NM_014066 | 4609.394  | 3601.601  |
| NM_013271 | 43142.18  | 38224.547 | NM_004573 | 3937.627  | 3456.723  |
| NM_004157 | 4690.47   | 3421.26   | NM_000072 | 1603.925  | 1372.567  |
| NM_000684 | 580.211   | 478.041   | NM_000697 | 4470.724  | 4290.285  |
| NM_007354 | 1872.029  | 625.833   | NM_000017 | 28744.561 | 29877.271 |
| U67037    | 2414.646  | 1214.278  | NM_000237 | 2024.64   | 2409.191  |
| NM_004960 | 38550.414 | 31376.258 | NM_018346 | 16187.226 | 15335.311 |
| AF272370  | 30358.119 | 49445.914 | AL122054  | 2449.753  | 2476.448  |
| AF130050  | 22171.055 | 25153.816 | AB023151  | 1900.509  | 2110.321  |
| AF119898  | 1391.659  | 1744.769  | NM_000140 | 44390.613 | 41909.164 |
| AK023045  | 3104.43   | 4925.141  | NM_005125 | 12457.182 | 12672.178 |
| NM_012197 | 13858.395 | 19553.979 | NM_020038 | 3427.083  | 3817.732  |
| AK024016  | 7278.107  | 8653.124  | NM_016246 | 8147.784  | 7993.269  |
| NM_003581 | 5421.149  | 6424.908  | NM_015926 | 30759.324 | 29859.246 |
| NM_002888 | 498.253   | 642.291   | X03757    | 12516.721 | 12718.96  |
| NM_012407 | 2034.041  | 2526.358  | NM_018658 | 51612.484 | 48463.957 |
| AF302505  | 2938.023  | 3985.503  | NM_005136 | 2710.208  | 2785.827  |
| NM_007186 | 7674.204  | 7895.237  | AK094513  | 2493.747  | 2517.872  |
| NM_007044 | 4213.8    | 4036.635  | NM_001183 | 22876.676 | 29022.617 |
| AF294326  | 9602.017  | 9514.006  | NM_000890 | 10348.283 | 11383.932 |
| NM_014678 | 3047.669  | 3406.507  | NM_004976 | 49880.551 | 53949.625 |
| NM_012317 | 61680.605 | 60237.344 | AK021597  | 5713.458  | 6483.809  |
| NM_017853 | 10445.9   | 11773.17  | NM_005737 | 53479.645 | 54460.352 |
| NM_016097 | 6236.884  | 5246.548  | NM_000169 | 11348.981 | 7293.995  |
| AB035301  | 771.942   | 485.091   | BE799167  | 518.148   | 265.863   |
| AB046800  | 13688.034 | 11244.415 | AF182814  | 4133.778  | 3647.764  |
| NM_002162 | 4514.509  | 3799.035  | NM_005329 | 2292.375  | 2210.212  |
| NM_006438 | 2218.591  | 2391.862  | NM_000107 | 22864.393 | 22085.098 |
| AF209198  | 9731.467  | 3364.011  | AL157445  | 11135.159 | 10300.029 |
| L09247    | 649.513   | 344.745   | NM_001517 | 45784.535 | 39744.047 |
| M69012    | 69930.539 | 67115.508 | NM_005053 | 22509.496 | 19578.188 |
| NM_016347 | 523.316   | 669.92    | D86974    | 13754.378 | 11775.934 |
| NM_006936 | 30490.268 | 47460.082 | NM_018283 | 15156.181 | 12188.681 |
| NM_001327 | 51675.25  | 58511.266 | NM_001983 | 6143.027  | 5284.81   |
| AF321182  | 1025.971  | 988.573   | NM_004993 | 1119.604  | 922.534   |
| AB037722  | 1682.093  | 1447.582  | NM_003384 | 15634.318 | 13980.731 |
| NM_000063 | 3942.484  | 4462.674  | Y12337    | 7287.653  | 6901.74   |

|           |           |           |           |           |           |
|-----------|-----------|-----------|-----------|-----------|-----------|
| NM_01838  | 3366.763  | 3044.206  | M29551    | 40469.965 | 38936.848 |
| AB033026  | 1331.031  | 1393.784  | AB023148  | 2133.379  | 3061.319  |
| AF104914  | 27751.418 | 31559.219 | NM_002929 | 3705.629  | 3935.582  |
| NM_01471  | 17716.84  | 19163.066 | BC028375  | 3384.598  | 3692.911  |
| AB002354  | 935.773   | 796.916   | AB026436  | 6457.712  | 8105.84   |
| NM_00227  | 903.496   | 1082.431  | NM_016029 | 21471.887 | 22165.174 |
| AK023845  | 7770.463  | 7533.693  | CY3Cy5    | 10886.971 | 269.689   |
| NM_00263  | 15880.021 | 16166.642 | NM_002103 | 68054.086 | 62867.172 |
| NM_016487 | 4295.734  | 5007.378  | NM_003379 | 48701.832 | 45707.891 |
| NM_00580  | 23183.541 | 23489.398 | AF143331  | 1740.765  | 1363.936  |
| NM_006401 | 43064.34  | 37606.852 | AK000819  | 2897.04   | 2371.771  |
| NM_015913 | 12709.848 | 10134.303 | AF201941  | 2973.454  | 2223.856  |
| NM_005157 | 8788.332  | 7275.236  | AF143325  | 831.419   | 818.469   |
| NM_01816  | 3839.229  | 1376.553  | AF143878  | 588.826   | 760.925   |
| AK021452  | 1585.12   | 683.069   | AF026941  | 1943.194  | 1476.924  |
| NM_00450  | 6657.357  | 4044.971  | NM_007070 | 5337.597  | 4091.992  |
| S74529    | 62551.137 | 61077.691 | AL133019  | 6047.171  | 4806.989  |
| NM_020227 | 3542.328  | 3988.93   | AK026192  | 1815.016  | 1463.638  |
| NM_005933 | 1056.283  | 688.185   | NM_014895 | 2333.84   | 1794.94   |
| NM_00559  | 1417.194  | 1127.18   | NM_017748 | 12298.136 | 10365.521 |
| NM_001421 | 1037.526  | 930.967   | AK025374  | 2982.593  | 2567.936  |
| U97060    | 1387.371  | 1141.41   | NM_014901 | 12143.644 | 10531.776 |
| M73837    | 5698.845  | 4063.837  | AK000005  | 9033.027  | 7758.395  |
| U69127    | 59974.863 | 54456.547 | NM_002103 | 61195.273 | 50595.105 |
| NM_00583  | 22396.055 | 17378.992 | NM_003379 | 48635.34  | 45404.828 |
| AK023379  | 8427.213  | 9935.72   | SR1       | 65279.617 | 61212.82  |
| NM_00607  | 1746.97   | 2262.299  | SR3       | 57640.32  | 55447.43  |
| AK021904  | 13691.342 | 15860.382 | SR5       | 7759.557  | 9468.307  |
| -         | 3636.81   | 3909.872  | SR7       | 8749.719  | 43504.621 |
| NM_018292 | 1315.161  | 1500.484  | SR9       | 26636.326 | 3925.411  |
| AL049705  | 12150.378 | 11585.464 | CY3Cy5    | 8427.111  | 164.758   |
| NM_01545  | 5763.993  | 5492.188  | NM_01328  | 2272.842  | 2435.167  |
| D13540    | 9366.736  | 7917.629  | M60721    | 2053.587  | 2268.61   |
| NM_016570 | 8112.214  | 7456.057  | L39061    | 3927.486  | 2571.141  |
| NM_004273 | 993.253   | 361.981   | AF071508  | 4632.481  | 3788.876  |
| NM_000690 | 5294.306  | 2735.784  | L07265    | 63351.23  | 55452.5   |
| NM_00015  | 23039.736 | 14740.51  | D16472    | 15621.413 | 11404.737 |
| AK024489  | 2176.763  | 1696.681  | AF085823  | 732.407   | 804.13    |
| NM_000181 | 12336.991 | 10366.108 | AK022467  | 1695.91   | 1131.211  |
| NM_000667 | 835.843   | 708.518   | NM_002813 | 40883.398 | 31949.799 |
| NM_014121 | 2829.55   | 2556.135  | NM_001198 | 767.825   | 827.381   |
| NM_006730 | 2940.355  | 2242.123  | AK022745  | 26171.322 | 23938.451 |
| NM_005644 | 3894.023  | 2979.043  | AL049450  | 11870.003 | 13176.757 |
| NM_018442 | 12718.895 | 9109.128  | AK023481  | 677.934   | 767.192   |
| AF182416  | 15824.545 | 12282.493 | AK022011  | 1905.822  | 1367.563  |
| NM_00599  | 35105.926 | 29868.582 | NM_00508  | 60629.773 | 51492.086 |
| NM_00601  | 2295.837  | 1876.066  | NM_00723  | 2440.554  | 1430.794  |
| NM_004634 | 6034.176  | 6899.367  | AL049340  | 1416.91   | 1349.523  |
| NM_002017 | 9834.934  | 18972.5   | NM_01760  | 5800.513  | 6920.187  |
| NM_017523 | 17484.945 | 21391.223 | AK024644  | 19188.113 | 16390.438 |
| NM_002382 | 58689.293 | 53998.09  | AB019573  | 1296.906  | 1112.296  |
| NM_00215  | 1827.309  | 1846.789  | U68494    | 3278.187  | 3878.473  |
| U13223    | 32841.914 | 39506.789 | AF064254  | 3419.652  | 2645.431  |

|           |           |           |           |           |           |
|-----------|-----------|-----------|-----------|-----------|-----------|
| NM_016270 | 8478.467  | 9966.407  | AK021524  | 846.732   | 884.095   |
| AF269249  | 1510.706  | 1653.174  | AL137360  | 10338.07  | 8760.694  |
| X51417    | 614.864   | 611.207   | AK024523  | 2107.309  | 2216.48   |
| D31763    | 8813.03   | 6453.487  | AK024600  | 7045.411  | 6396.429  |
| NM_014815 | 3578.45   | 1496.261  | AK024907  | 580.904   | 516.786   |
| NM_005443 | 5833.347  | 2319.468  | AK024543  | 5654.29   | 4812.443  |
| NM_007221 | 15099.701 | 9649.109  | AK024624  | 54712.848 | 49966.891 |
| X54163    | 57498.879 | 45437.168 | AK025090  | 2738.159  | 2390.516  |
| AK025395  | 2444.779  | 1607.794  | AK024883  | 12035.609 | 9205.437  |
| NM_000388 | 3189.818  | 3056.234  | AF086215  | 3004.122  | 2614.929  |
| X58377    | 1273.237  | 974.237   | AF217989  | 12663.817 | 10448.627 |
| NM_002469 | 845.144   | 637.96    | NM_017654 | 1645.072  | 1929.197  |
| AI673575  | 980.534   | 887.588   | L77561    | 879.53    | 826.422   |
| BI830936  | 1929.542  | 1875.13   | AL109696  | 2511.905  | 2216.478  |
| U79292    | 56438.965 | 51299.652 | AK022190  | 2976.862  | 2584.137  |
| AA947915  | 1182.111  | 1283.995  | AJ011593  | 6455.99   | 5850.741  |
| BI830753  | 2235.137  | 2511.016  | AJ227907  | 973.109   | 1051.435  |
| X68314    | 6054.896  | 5682.791  | X89743    | 1420.221  | 1299.291  |
| X71973    | 43642.184 | 46941.773 | AJ002784  | 684.14    | 833.772   |
| T49651    | 41016.859 | 51874.391 | U17621    | 1738.632  | 1339.949  |
| N51014    | 2364.085  | 2814.21   | AL049239  | 11168.217 | 8239.794  |
| BE392471  | 27600.717 | 34269.449 | AF086208  | 8274.662  | 11302.296 |
| AI802950  | 8679.357  | 11395.441 | AK023335  | 17709.41  | 20518.629 |
| AI741278  | 1253.927  | 1729.459  | AK023187  | 1395.012  | 1413.931  |
| AL043686  | 12180.782 | 13298.987 | AK022231  | 1174.861  | 1170.281  |
| AA490172  | 2535.177  | 2694.75   | NM_019033 | 2080.501  | 2079.873  |
| AA775212  | 4268.63   | 4574.59   | AL133101  | 5210.109  | 4645.57   |
| NM_000402 | 1909.14   | 1956.431  | AL157459  | 5666.95   | 3773.562  |
| AK026266  | 42293.297 | 15926.722 | AB020654  | 699.892   | 601.73    |
| NM_007124 | 22133.502 | 8587.062  | AL353954  | 3866.067  | 3559.103  |
| NM_003176 | 15104.973 | 7174.686  | NM_017630 | 2008.724  | 2204.935  |
| NM_000723 | 3058.809  | 1321.23   | AK000778  | 7028.632  | 5947.229  |
| AL096751  | 25530.564 | 37955.289 | AK000932  | 485.186   | 448.578   |
| NM_000364 | 2539.477  | 2140.115  | AL133573  | 24840.211 | 21956.787 |
| AF026920  | 35242.668 | 41323.219 | AK000115  | 9187.269  | 8447.188  |
| NM_004931 | 8305.795  | 6984.233  | NM_017959 | 876.088   | 717.104   |
| NM_000607 | 48909.102 | 45698.801 | AK000958  | 3847.62   | 2768.919  |
| AB011099  | 798.861   | 876.887   | BC024924  | 18653.563 | 14474.346 |
| AF090409  | 457.826   | 496.328   | NM_017906 | 12574.269 | 16719.566 |
| NM_002575 | 9426.855  | 8001.349  | AL110286  | 16829.781 | 15106.994 |
| NM_004244 | 7413.7    | 7505.872  | AF086374  | 902.098   | 1001.46   |
| NM_003371 | 67017.188 | 61670.145 | AL162066  | 57654.473 | 52498.996 |
| AK023114  | 11002.277 | 13327.256 | NM_016096 | 49420.461 | 53034.172 |
| NM_003678 | 7142.859  | 11181.865 | U79290    | 4184.891  | 3801.968  |
| NM_014271 | 8010.432  | 6729.587  | AK022121  | 2131.713  | 1572.265  |
| NM_012301 | 7259.886  | 9666.752  | X98114    | 3691.615  | 2586.942  |
| NM_000680 | 1694.346  | 2064.479  | AK024197  | 697.938   | 534.482   |
| NM_014938 | 5449.131  | 6825.557  | NM_014152 | 2472.015  | 2059.864  |
| AF049460  | 766.785   | 988.772   | NM_018608 | 1612.987  | 1344.504  |
| AK001500  | 3410.809  | 1218.36   | AF086473  | 3067.39   | 3150.372  |
| NM_006774 | 1667.888  | 804.683   | D87682    | 2453.875  | 2074.763  |
| NM_020129 | 3410.306  | 2477.707  | AF321617  | 20439.768 | 21945.904 |
| Y16521    | 16845.828 | 19610.572 | M85205    | 1246.216  | 2054.643  |

|           |           |           |           |           |           |
|-----------|-----------|-----------|-----------|-----------|-----------|
| AL050371  | 9005.83   | 9122.271  | AF223389  | 1608.416  | 1584.299  |
| NM_002651 | 4483.387  | 3067.224  | NM_006950 | 437.077   | 793.059   |
| NM_002413 | 19512.588 | 16222.342 | NM_000682 | 954.54    | 793.137   |
| NM_017577 | 1235.691  | 1100.353  | NM_016298 | 3720.965  | 3225.147  |
| NM_016301 | 16494.131 | 14772.428 | AK002146  | 3678.714  | 4856.297  |
| NM_014668 | 19314.83  | 26891.514 | NM_003159 | 4428.772  | 5917.423  |
| NM_004722 | 10727.051 | 13090.794 | AK023494  | 2072.029  | 2945.094  |
| NM_014425 | 4372.799  | 6089.784  | AF086256  | 499.226   | 805.584   |
| NM_012133 | 13072.819 | 16448.137 | NM_015492 | 21058.107 | 18437.182 |
| NM_017954 | 4028.581  | 4197.238  | NM_006933 | 1050.104  | 1055.977  |
| NM_006612 | 11314.463 | 16573.748 | AF132204  | 10954.607 | 10667.558 |
| NM_016451 | 2470.549  | 2705.863  | AK022874  | 19340.939 | 22110.559 |
| NM_007351 | 61619.938 | 56853.582 | AF143875  | 745.032   | 753.928   |
| AL049935  | 25095.16  | 10721.82  | AK024602  | 49919.957 | 54825.477 |
| AB033043  | 37729.531 | 28037.049 | NM_000485 | 12714.511 | 13107.354 |
| NM_014998 | 10417.618 | 5758.002  | NM_018542 | 3431.581  | 3965.318  |
| AK025220  | 5563.533  | 3182.812  | AK025503  | 6042.954  | 8716.653  |
| NM_016308 | 32134.906 | 23906.99  | AF130073  | 6385.661  | 7883.408  |
| D42046    | 7954.61   | 7980.104  | AK024225  | 26731.225 | 28007.523 |
| NM_001033 | 16001.355 | 14313.171 | AF086334  | 1975.022  | 1840.531  |
| NM_004528 | 19838.605 | 16756.846 | NM_003696 | 824.836   | 732.459   |
| NM_002528 | 26237.057 | 23375.375 | AF075035  | 57952.746 | 55122.941 |
| NM_020135 | 5297.2    | 4783.476  | AL110180  | 8684.844  | 6724.626  |
| NM_018518 | 7221.121  | 7102.978  | U00949    | 665.122   | 645       |
| AK023149  | 3405.347  | 2763.676  | NM_007262 | 51858.816 | 56703.109 |
| AK023168  | 7585.121  | 7730.429  | NM_014783 | 11695.345 | 11908.584 |
| NM_006648 | 916.107   | 1273.309  | NM_014053 | 10907.528 | 10837.929 |
| NM_004742 | 5828.615  | 6068.461  | NM_002571 | 1341.284  | 1378.392  |
| NM_014753 | 4240.595  | 4907.433  | NM_004939 | 9240.489  | 9706.113  |
| NM_006585 | 62457.5   | 60637.672 | NM_001425 | 23014.484 | 32978.168 |
| NM_014331 | 13442.022 | 18538.074 | NM_015710 | 2476.521  | 2616.967  |
| NM_006795 | 40655.594 | 44725.645 | NM_014158 | 9075.54   | 9439.269  |
| AF070568  | 1169.725  | 1276.518  | AK021591  | 5554.763  | 4227.143  |
| NM_000240 | 18528.084 | 29893.27  | NM_014675 | 4559.37   | 3992.76   |
| AK055733  | 16124.611 | 16969.754 | NM_014040 | 12540.575 | 14947.279 |
| AF298880  | 9608.188  | 10455.844 | AK000799  | 11410.096 | 11209.194 |
| NM_007221 | 13979.231 | 8133.888  | NM_015582 | 1784.425  | 2036.65   |
| X54163    | 54771.262 | 43363.547 | AK027091  | 3226.271  | 2874.808  |
| AK025395  | 2023.156  | 1345.89   | NM_001526 | 7216.381  | 10037.485 |
| NM_000388 | 3125.342  | 1725.167  | U31738    | 4020.923  | 4907.011  |
| X58377    | 901.183   | 528.55    | AF179890  | 18933.754 | 21252.959 |
| NM_002468 | 1084.629  | 609.29    | AK023536  | 26426.002 | 28326.326 |
| AI673575  | 937.481   | 997.312   | AK026561  | 4668.022  | 4062.943  |
| BI830936  | 2456.64   | 3532.913  | AK021568  | 26163.5   | 22667.623 |
| U79292    | 58087.957 | 47950.477 | Z36838    | 5352.048  | 4408.442  |
| AA947915  | 1615.348  | 1571.303  | AF088054  | 1230.937  | 1209.901  |
| BI830753  | 2107.647  | 2094.973  | AK023881  | 9718.169  | 8807.02   |
| X68314    | 5445.693  | 4979.061  | AK027114  | 56629.066 | 62477.887 |
| X71973    | 38032.996 | 35260.488 | NM_001078 | 9863.135  | 9091.517  |
| T49651    | 38456.855 | 33035.961 | NM_000552 | 18150.574 | 18940.727 |
| N51014    | 2170.511  | 2414.85   | NM_003809 | 1009.567  | 1279.593  |
| BE392471  | 25035.432 | 27641.75  | AK000860  | 14593.826 | 14528.406 |
| AI802950  | 9918.247  | 12762.285 | NM_014961 | 2463.225  | 2665.971  |

|           |           |           |           |           |           |
|-----------|-----------|-----------|-----------|-----------|-----------|
| AI741278  | 1000.702  | 1704.503  | NM_020145 | 7822.496  | 8384.99   |
| AA682423  | 405.731   | 5605.29   | AK021529  | 14597.479 | 12545.386 |
| AL043686  | 11117.655 | 15723.861 | AB037845  | 13322.113 | 10168.441 |
| AA490172  | 1748.314  | 2140.377  | NM_005980 | 2685.947  | 2305.7    |
| AA775212  | 2584.669  | 3237.315  | NM_016190 | 57322.977 | 57359.191 |
| AB011174  | 5427.162  | 6825.409  | AL137579  | 21609.309 | 22238.664 |
| AB040879  | 2466.87   | 3921.936  | NM_012383 | 11878.125 | 11948.277 |
| NM_003176 | 16431.479 | 17582.402 | AJ271684  | 6420.842  | 4560.701  |
| NM_000723 | 3227.965  | 1585.766  | AF255342  | 40294.289 | 52804.242 |
| AL096751  | 22708.188 | 12318.867 | NM_003300 | 33837.836 | 34353.68  |
| NM_000364 | 2564.925  | 1145.246  | AK026682  | 12436.718 | 11497.56  |
| AF026920  | 37202.254 | 32633.293 | NM_017720 | 61054.836 | 61557.324 |
| NM_004931 | 9907.69   | 7603.624  | NM_004655 | 1331.944  | 1433.537  |
| NM_000607 | 49688.289 | 48015.168 | NM_003942 | 4182.31   | 4243.943  |
| AB011099  | 556.278   | 625.844   | NM_006471 | 34698.723 | 29104.969 |
| AF090409  | 821.995   | 1058.823  | NM_004165 | 6165.13   | 2930.679  |
| NM_002575 | 9131.307  | 8023.079  | NM_000368 | 5134.653  | 5355.021  |
| NM_004244 | 7153.823  | 6199.437  | NM_016586 | 4868.001  | 4286.761  |
| NM_003371 | 63801.164 | 54284.445 | BE535363  | 505.069   | 513.545   |
| AK023114  | 10005.686 | 9952.098  | AK023847  | 2183.224  | 2313.41   |
| NM_003678 | 6052.742  | 7543.688  | NM_003860 | 14163.847 | 12277.831 |
| NM_012301 | 2788.573  | 2778.558  | NM_005414 | 2172.573  | 1443.652  |
| NM_014938 | 2330.289  | 2794.51   | NM_004468 | 49399.625 | 53588.398 |
| AF049460  | 605.331   | 797.281   | NM_016031 | 20405.703 | 19334.393 |
| NM_014815 | 3413.207  | 5039.308  | NM_004804 | 5592.42   | 6089.535  |
| NM_005443 | 4159.45   | 4777.723  | M92439    | 50821.461 | 57814.195 |
| NM_020129 | 3381.248  | 2529.944  | AL117665  | 15602.211 | 13478.567 |
| Y16521    | 12715.878 | 6182.52   | AF263541  | 5269.634  | 5089.328  |
| AL050371  | 10395.924 | 8845.223  | AK027169  | 798.022   | 734.13    |
| NM_002651 | 4942.593  | 3464.064  | NM_001262 | 12406.301 | 11829.454 |
| NM_002413 | 23325.791 | 17079.43  | BE873030  | 12069.017 | 11087.521 |
| NM_017577 | 1403.511  | 1409.417  | NM_002440 | 1718.856  | 1618.226  |
| NM_016301 | 18189.471 | 18255.564 | NM_003625 | 4523.908  | 4628.832  |
| NM_014668 | 18704.895 | 17442.893 | BC006990  | 19933.074 | 19252.301 |
| NM_004722 | 10691.917 | 11400.12  | NM_002277 | 23064.787 | 26946.658 |
| NM_014425 | 4569.913  | 4598.77   | NM_019114 | 11345.71  | 13914.624 |
| NM_012133 | 11795.891 | 10479.682 | M33552    | 53146.105 | 54029.613 |
| NM_017954 | 1305.659  | 1222.592  | AJ252060  | 6313.378  | 5056.426  |
| NM_006612 | 8198.939  | 8071.047  | NM_006403 | 14715.32  | 14102.007 |
| NM_016451 | 912.185   | 777.92    | NM_018977 | 1867.968  | 1607.162  |
| NM_007351 | 63108.652 | 57799.754 | AJ001402  | 6025.624  | 4237.448  |
| AK026266  | 41723.703 | 55290.875 | NM_004540 | 1906.454  | 1661.36   |
| NM_007124 | 14704.532 | 16402.758 | NM_003248 | 535.906   | 671.849   |
| AB033043  | 52299.969 | 60234.098 | L25628    | 2147.811  | 2169.227  |
| NM_014999 | 13176.064 | 14453.697 | M37033    | 39835.156 | 35902.207 |
| AK025220  | 5842.645  | 4252.346  | NM_007171 | 6937.023  | 6382.374  |
| NM_016308 | 31348.291 | 19697.564 | NM_004278 | 5919.247  | 5412.84   |
| D42046    | 7488.238  | 6234.433  | NM_005632 | 3915.921  | 4445.64   |
| NM_001033 | 16759.857 | 10501.469 | AK021499  | 2198.198  | 2825.414  |
| NM_004526 | 21845.072 | 16951.822 | AK000336  | 6633.765  | 6768.606  |
| NM_002526 | 30713.363 | 26912.197 | NM_002795 | 58021.594 | 57827.32  |
| NM_020135 | 6149.514  | 5196.854  | NM_006292 | 22968.707 | 19624.887 |
| NM_018518 | 7999.157  | 8508.36   | AB007948  | 5480.371  | 5274.675  |

|           |           |           |           |           |           |
|-----------|-----------|-----------|-----------|-----------|-----------|
| AK023149  | 3830.217  | 3868.32   | AB033066  | 10080.476 | 8188.211  |
| AK023168  | 7925.167  | 10207.296 | AF126028  | 3643.885  | 3749.491  |
| NM_006646 | 1030.749  | 1220.421  | NM_007019 | 50373.563 | 55556.93  |
| NM_004742 | 6118.723  | 5379.26   | NM_007075 | 1745.738  | 2115.746  |
| NM_014753 | 4421.5    | 4242.051  | NM_016042 | 1901.526  | 2458.149  |
| NM_006585 | 52817.426 | 53384.48  | NM_017640 | 3013.721  | 3209.96   |
| NM_014331 | 7637.34   | 7255.047  | NM_017721 | 7170.381  | 7870.435  |
| NM_006795 | 48049.219 | 45126.074 | NM_019088 | 29335.902 | 32493.125 |
| AF070568  | 888.563   | 896.552   | AB002373  | 5068.853  | 5553.197  |
| NM_000240 | 10916.505 | 11441.415 | NM_016350 | 62690.688 | 60904.504 |
| AK055733  | 10835.949 | 10955.32  | AK024167  | 13918.701 | 12493.063 |
| AF298880  | 10222.623 | 10187.271 | AK025308  | 857.504   | 720.35    |
| AK001500  | 2971.567  | 3294.643  | NM_005026 | 15141.851 | 12907.188 |
| NM_006774 | 988.948   | 1224.559  | NM_004140 | 1940.519  | 1563.503  |
| AK025395  | 3248.957  | 4545.687  | NM_002866 | 60219.957 | 55605.023 |
| NM_000388 | 3264.159  | 4053.792  | AF230809  | 11945.659 | 10555.128 |
| X58377    | 1184.911  | 992.969   | NM_017894 | 60324.078 | 58903.973 |
| NM_002469 | 850.87    | 560.196   | NM_006509 | 26339.389 | 25625.586 |
| AI673575  | 636.165   | 747.877   | AK025447  | 4959.991  | 5073.353  |
| BI830936  | 2080.539  | 1693.593  | NM_002624 | 63207.887 | 61977.934 |
| U79292    | 57295.945 | 48821.691 | AF006199  | 3951.172  | 4086.639  |
| AA947915  | 1895.779  | 1772.297  | NM_004554 | 59912.73  | 58268.313 |
| BI830753  | 3382.522  | 5205.714  | NM_018119 | 18438.191 | 17614.277 |
| X68314    | 6233.071  | 6389.52   | NM_014576 | 2696.353  | 2508.24   |
| X71973    | 44972.527 | 47663.258 | AL162035  | 4927.525  | 4976.903  |
| T49651    | 40009.91  | 40090.441 | NM_006692 | 3976.273  | 3799.758  |
| N51014    | 2469.616  | 2435.465  | NM_003084 | 6098.461  | 6307.454  |
| BE392471  | 28185.885 | 26217.781 | NM_002582 | 30404.262 | 30027.906 |
| AI802950  | 9515.894  | 11448.303 | NM_001009 | 62853.867 | 63263.059 |
| AI741278  | 917.954   | 1121.435  | NM_001026 | 61562.793 | 63534.738 |
| AA682423  | 2810.792  | 2802.364  | NM_001011 | 61877.004 | 59903.531 |
| AL043686  | 13982.632 | 14994.543 | AB061315  | 4894.09   | 4136.1    |
| AA490172  | 1720.721  | 1621.463  | D17289    | 30799.908 | 27204.164 |
| AA775212  | 2234.145  | 2352.5    | NM_002949 | 61300.602 | 58983.68  |
| AB011174  | 5778.686  | 7455.172  | NM_014230 | 25525.564 | 22405.695 |
| AB040879  | 1308.371  | 1910.401  | NM_000235 | 7110.1    | 6340.256  |
| AL049935  | 20414.842 | 21176.23  | NM_015879 | 2492.95   | 2633.607  |
| AF090409  | 519.538   | 653.725   | U28480    | 2302.945  | 2276.927  |
| NM_002575 | 10686.542 | 8326.245  | NM_000108 | 45255.672 | 52286.785 |
| NM_004244 | 9542.477  | 14338.011 | NM_018128 | 12230.503 | 13201.177 |
| NM_003371 | 61603.488 | 54107.988 | NM_016931 | 34784.578 | 37067.598 |
| AK023114  | 11698.224 | 10001.521 | NM_004373 | 58160.758 | 55461.086 |
| NM_003678 | 7546.091  | 9237.826  | NM_005566 | 60881.766 | 60870.059 |
| NM_012301 | 7824.34   | 8024.417  | NM_000162 | 19191.48  | 18298.506 |
| NM_000680 | 837.41    | 991.516   | AK027067  | 1330.321  | 1349.913  |
| NM_005631 | 490.933   | 760.007   | NM_016287 | 34031.855 | 33975.836 |
| NM_014419 | 34604.641 | 37784.586 | AK021661  | 1358.054  | 1619.432  |
| NM_014938 | 7201.03   | 8949.411  | NM_003864 | 38789.855 | 37691.93  |
| AF049460  | 838.953   | 800.038   | NM_006824 | 35241.68  | 33250.922 |
| AK026066  | 3583.427  | 3612.554  | NM_002107 | 6710.133  | 6729.438  |
| NM_005244 | 12171.98  | 12855.801 | NM_002694 | 39843.957 | 44893.359 |
| AF054589  | 1357.671  | 1230.884  | NM_004454 | 3201.749  | 3215.321  |
| NM_005270 | 6324.336  | 6221.133  | NM_000966 | 2434.066  | 2250.438  |

|           |           |           |           |           |           |
|-----------|-----------|-----------|-----------|-----------|-----------|
| NM_014815 | 2301.037  | 2676.46   | NM_012482 | 10241.565 | 10859.791 |
| NM_005443 | 4557.164  | 3892.842  | AF217227  | 3028.362  | 3231.282  |
| NM_007221 | 11192.318 | 11889.313 | AK024141  | 20443.867 | 22053.795 |
| X54163    | 57647.07  | 54157.805 | U13706    | 4335.19   | 3645.838  |
| NM_018607 | 735.604   | 421.437   | AF213356  | 3865.982  | 3480.408  |
| NM_002978 | 15553.027 | 9289.832  | BC035716  | 21505.014 | 21372.168 |
| NM_014668 | 21106.52  | 18902.381 | NM_018014 | 11891.031 | 11196.342 |
| NM_004722 | 12007.622 | 11150.281 | NM_001312 | 672.879   | 849.783   |
| NM_014425 | 5379.01   | 5264.32   | AF007192  | 3207.59   | 3156.737  |
| NM_012133 | 13802.94  | 10949.582 | NM_001276 | 19069.145 | 23203.197 |
| NM_017954 | 1249.042  | 1252.068  | NM_016157 | 4382.076  | 4302.231  |
| NM_006612 | 13980.303 | 22557.035 | NM_014915 | 59965.113 | 58992.695 |
| NM_016451 | 4400.054  | 5443.972  | NM_012286 | 14801.316 | 19744.146 |
| NM_007351 | 63417.996 | 58307.977 | NM_002195 | 36765.363 | 41020.313 |
| AK026266  | 48086.941 | 39593.102 | D84294    | 11741.707 | 14639.276 |
| NM_007124 | 23175.297 | 17104.328 | X59770    | 4855.174  | 4821.837  |
| NM_003176 | 16888.867 | 17155.748 | K02765    | 35593.012 | 37429.051 |
| NM_000723 | 874.688   | 874.278   | M65134    | 4363.283  | 4311.4    |
| AL096751  | 15145.075 | 17601.674 | BG539651  | 39643.602 | 41162.871 |
| NM_000364 | 691.388   | 863.352   | N52646    | 56830.328 | 56089.594 |
| AF026920  | 29775.664 | 36800.086 | AW160671  | 61384.656 | 57216.766 |
| NM_004931 | 2870.838  | 3662.059  | BI870529  | 35289.09  | 47690.016 |
| NM_000607 | 46251.16  | 56981.117 | AA702698  | 5071.576  | 4868.783  |
| NM_000240 | 19105.721 | 9171.476  | AI681514  | 6179.257  | 6325.574  |
| AK055733  | 25468.998 | 18011.699 | NM_001300 | 7703.206  | 10041.873 |
| AF298880  | 15949.573 | 10889.634 | BG748827  | 24800.732 | 26205.156 |
| AK001500  | 4425.447  | 2780.204  | AA952897  | 27810.129 | 28086.766 |
| NM_006774 | 2155.258  | 1956.828  | BG760342  | 12548.779 | 11688.352 |
| NM_020129 | 4703.661  | 6516.924  | AA703141  | 5291.345  | 5142.418  |
| Y16521    | 15506.339 | 13677.502 | AA195244  | 1189.228  | 1101.945  |
| AL050371  | 12993.971 | 24331.127 | AI122630  | 23589.498 | 24791.389 |
| NM_002651 | 5353.73   | 4844.525  | AF086790  | 10698.86  | 9458.248  |
| NM_002413 | 28547.596 | 23067.479 | AK025966  | 11042.677 | 9905.715  |
| NM_017577 | 1346.881  | 1187.057  | NM_014440 | 1049.705  | 1267.732  |
| NM_001757 | 1082.176  | 673.545   | NM_018725 | 3041.885  | 3228.279  |
| NM_001647 | 25580.277 | 18014.299 | NM_003081 | 59452.086 | 53721.727 |
| NM_018158 | 3425.988  | 3238.245  | NM_016495 | 4125.485  | 4841.876  |
| NM_016301 | 9335.989  | 14828.629 | D50402    | 61275.004 | 57190.953 |
| AK021975  | 1747.69   | 1949.593  | M73547    | 39841.238 | 43289.797 |
| AB032952  | 53672.352 | 61145.879 | AF181722  | 1704.151  | 1880.183  |
| NM_002522 | 64173.645 | 63533.465 | NM_003687 | 15096.153 | 14026.109 |
| AB011174  | 7315.308  | 4249.662  | NM_004134 | 17310.014 | 16460.662 |
| AB040879  | 2811.567  | 1921.713  | NM_005955 | 45839.742 | 49203.242 |
| AL049935  | 31384.82  | 47109.313 | NM_004048 | 4248.503  | 6000.492  |
| AB033043  | 44159.293 | 42543.73  | BE548044  | 2061.885  | 1609.088  |
| NM_014998 | 15131.363 | 24797.049 | NM_006017 | 851.263   | 921.331   |
| AK025220  | 6290.046  | 6832.794  | NM_012428 | 10644.659 | 10311.324 |
| NM_016308 | 30551.926 | 27596.623 | NM_013269 | 31565.547 | 28525.777 |
| D42046    | 7447.357  | 7727.484  | NM_001728 | 16771.391 | 20456.225 |
| NM_001033 | 17210.084 | 16750.732 | NM_005565 | 860.636   | 1031.568  |
| NM_004526 | 20902.998 | 17637.563 | NM_003824 | 36729.094 | 34071.504 |
| NM_002526 | 33502.316 | 25017.773 | NM_000686 | 3498.141  | 3859.974  |
| NM_020135 | 5761.625  | 4246.301  | NM_012452 | 20908.107 | 19115.014 |

|           |           |           |           |           |           |
|-----------|-----------|-----------|-----------|-----------|-----------|
| NM_01851E | 8434.498  | 5511.236  | AF229166  | 2307.617  | 2528.466  |
| AK023149  | 3371.898  | 1744.742  | NM_006764 | 16017.611 | 16813.598 |
| AK023168  | 8283.265  | 5973.894  | NM_001386 | 12120.593 | 14638.126 |
| NM_00664E | 858.317   | 749.379   | NM_001179 | 1450.342  | 1319.038  |
| NM_00474Z | 2604.429  | 2547.833  | NM_005313 | 56668.609 | 56164.746 |
| NM_01475Z | 944.023   | 1124.582  | NM_01776Z | 58099.047 | 57964.293 |
| NM_00658E | 22524.98  | 26634.725 | NM_00042E | 2908.745  | 3010.513  |
| NM_014331 | 2107.655  | 2315.518  | AB040967  | 625.978   | 907.163   |
| NM_00679E | 37867.324 | 38251.633 | NM_00357E | 1651.649  | 1302.25   |
| AF070568  | 1355.235  | 1628.128  | NM_014721 | 1847.867  | 2023.618  |
| NM_02255Z | 2808.292  | 3232.356  | AK026352  | 7568.624  | 12637.546 |
| NM_01438E | 17482.486 | 26939.549 | AF169257  | 841.719   | 896.454   |
| AF086187  | 2386.703  | 2545.987  | NM_01618C | 3410.564  | 2942.029  |
| AF305836  | 70477.406 | 69247.898 | NM_005827 | 25139.01  | 25471.037 |
| AL137383  | 1115.788  | 1636.099  | NM_00305E | 25585.947 | 23644.404 |
| AL035295  | 3945.843  | 4147.881  | NM_01622E | 17562.455 | 18199.885 |
| NM_01830Z | 7684.656  | 5812.364  | AK024311  | 1809.964  | 1976.956  |
| AK027252  | 5715.092  | 5569.982  | AF052155  | 9270.121  | 8923.762  |
| AF165527  | 2669.138  | 2249.298  | NM_00508E | 20763.686 | 17779.635 |
| NM_01409Z | 728.378   | 529.465   | AF060902  | 12712.437 | 13487.32  |
| AL359596  | 1625.45   | 1645.314  | AF121858  | 53373.73  | 53293.805 |
| U79249    | 570.286   | 721.026   | NM_013437 | 1829.369  | 1795.45   |
| AK022114  | 550.25    | 422.281   | NM_017681 | 3666.28   | 3738.564  |
| AL133585  | 1160.333  | 841.876   | X57655    | 52005.922 | 55349.313 |
| NM_02255Z | 1380.177  | 786.667   | NM_018261 | 4204      | 3542.741  |
| NM_01438E | 10349.96  | 5589.587  | NM_01479E | 3867.21   | 4595.082  |
| SR2       | 42477.121 | 22824.758 | AL050288  | 55536.93  | 52754.559 |
| SR4       | 8697.514  | 5789.385  | NM_00504C | 14006.147 | 14114.298 |
| SR6       | 1391.172  | 419.402   | NM_016391 | 47281.93  | 46188.34  |
| SR8       | 6483.979  | 15754.706 | M80783    | 878.369   | 776.187   |
| SR10      | 20551.035 | 2743.469  | AF075033  | 16456.941 | 14966.24  |
| NM_003887 | 1894.554  | 1660.96   | D50911    | 32139.152 | 28519.4   |
| NM_004267 | 14157.157 | 12828.262 | AB011104  | 3765.228  | 4322.163  |
| AL357212  | 665.415   | 694.304   | AK024069  | 18376.955 | 16619.361 |
| AK026687  | 1653.207  | 1746.148  | NM_00458Z | 36430.391 | 34927.23  |
| AL117444  | 1862.291  | 2170.62   | NM_01564C | 39715.613 | 41739.129 |
| NM_017994 | 7713.354  | 6047.195  | AF233450  | 2134.315  | 1979.5    |
| AK021693  | 2779.805  | 2663.527  | NM_01623Z | 6470.15   | 6350.849  |
| AL050015  | 1079.244  | 773.717   | NM_000821 | 61631.961 | 60921.121 |
| AY007117  | 4142.706  | 4036.632  | NM_020121 | 1524.621  | 1660.631  |
| AF039698  | 2718.625  | 2669.947  | NM_00314E | 55636.496 | 54867.215 |
| AB046828  | 3927.057  | 4177.707  | NM_00163Z | 4647.736  | 4931.78   |
| AF144487  | 440.112   | 396.667   | NM_012264 | 2700.202  | 2270.547  |
| AL137532  | 1785.684  | 1317.491  | AF311312  | 4586.984  | 4071.483  |
| AK025419  | 3683.083  | 2347.635  | NM_00127E | 19559.643 | 18662.191 |
| NM_01325E | 17838.207 | 11437.475 | NM_016157 | 4453.612  | 4274.318  |
| NM_01837E | 5683.575  | 4368.729  | NM_01491E | 60872.535 | 59024.871 |
| AK026838  | 2446.068  | 1836.168  | NM_01228E | 13280.401 | 15306.729 |
| AK022443  | 1374.743  | 987.379   | NM_00219E | 38495.441 | 45006.895 |
| AK023371  | 3794.607  | 2463.647  | D84294    | 10926.517 | 13135.918 |
| AK025112  | 2714.342  | 2081.245  | X59770    | 4868.606  | 5097.17   |
| AK026079  | 1316.237  | 876.83    | K02765    | 35546.293 | 35504.008 |
| AK026675  | 250.596   | 816.104   | M65134    | 4590.321  | 3907.567  |



|           |           |           |           |           |           |
|-----------|-----------|-----------|-----------|-----------|-----------|
| AK025173  | 11757.479 | 11031.115 | BG539651  | 37884.832 | 36012.973 |
| AK025430  | 858.767   | 1195.22   | N52646    | 63925.004 | 60203.547 |
| AK026722  | 848.313   | 810.25    | AW160671  | 60094.031 | 55903.063 |
| AL110133  | 7499.867  | 8187.272  | BI870529  | 34329.992 | 45436.301 |
| AK000529  | 5414.561  | 5663.688  | AA702698  | 4811.819  | 4529.44   |
| AK027243  | 935.551   | 1264.613  | AI681514  | 5253.301  | 5497.682  |
| AF147415  | 805.669   | 640.093   | NM_001300 | 6614.317  | 7242.613  |
| AL117475  | 2701.107  | 2048.555  | BG748827  | 23217.609 | 20137.605 |
| AL049300  | 5961.135  | 4116.935  | AA952897  | 25222.354 | 27359.564 |
| NM_01753E | 4205.527  | 2318.239  | BG760342  | 12835.354 | 17202.121 |
| AK025365  | 2528.675  | 2372.885  | AA703141  | 4599.524  | 4990.034  |
| AK023489  | 821.413   | 1558.365  | AA195244  | 1131.546  | 1158.479  |
| AK021561  | 6969.949  | 7019.812  | AI122630  | 21161.385 | 21971.082 |
| AK025222  | 1493.17   | 1872.854  | NM_006589 | 20535.783 | 19079.604 |
| Y11609    | 5609.592  | 7196.433  | NM_002191 | 1289.192  | 1155.142  |
| NM_01212E | 18092.006 | 15955.197 | AB007875  | 7505.173  | 5804.363  |
| AF009285  | 12508.515 | 11710.551 | NM_01872E | 3118.33   | 2762.777  |
| NM_01212E | 2912.07   | 2880.684  | NM_003081 | 59165.676 | 55134.914 |
| AF056435  | 1683.877  | 1731.395  | NM_01649E | 3549.535  | 3696.248  |
| AF009294  | 3981.659  | 3073.561  | D50402    | 56733.953 | 54905.961 |
| NM_001524 | 870.864   | 669.133   | M73547    | 44438.332 | 53938.719 |
| AK000998  | 524.296   | 542.574   | AF181722  | 1704.395  | 1866.866  |
| AK021684  | 3028.492  | 2858.719  | NM_003687 | 14080.418 | 13982.402 |
| AK021480  | 722.391   | 513.964   | NM_004134 | 16340.006 | 14000.972 |
| AL080186  | 1286.892  | 1109.712  | NM_00595E | 44439.59  | 44107.301 |
| NM_00530E | 63654.91  | 57912.582 | NM_00404E | 3275.777  | 4987.248  |
| NM_00164E | 24491.613 | 19508.098 | BE548044  | 1943.953  | 1921.663  |
| AL137327  | 5202.652  | 6872.568  | AF028832  | 1387.847  | 1714.004  |
| AF358454  | 1428.454  | 1569.379  | NM_006017 | 642.506   | 1004.047  |
| AK026090  | 2440.457  | 2512.177  | NM_01242E | 11097.69  | 11483.779 |
| AF070637  | 1334.9    | 1792.031  | NM_01326E | 30455.734 | 30399.078 |
| AL137634  | 793.844   | 960.775   | NM_00172E | 13195.04  | 13311.781 |
| AK024863  | 8201.361  | 8309.257  | NM_00556E | 728.999   | 940.483   |
| AK026908  | 20923.053 | 23019.008 | NM_003824 | 32532.998 | 33757.129 |
| AF117338  | 13507.061 | 12306.171 | NM_00068E | 3238.459  | 4060.532  |
| AK025567  | 2957.514  | 2573.549  | NM_01245E | 19222.744 | 20523.117 |
| U56857    | 21375.729 | 16252.577 | AF229166  | 2062.799  | 2140.925  |
| L43349    | 417.71    | 594.772   | NM_006764 | 14102.718 | 15677.137 |
| AF086421  | 1211.466  | 1150.194  | NM_00138E | 12329.639 | 14817.006 |
| AF161522  | 2887.649  | 1815.312  | NM_00131E | 675.375   | 589.277   |
| AF086028  | 12743.712 | 21215.746 | AF007192  | 3077.518  | 2839.3    |
| AF038188  | 16220.451 | 13563.544 | NM_01776E | 58645.016 | 57379.531 |
| D17046    | 2955.831  | 4905.801  | NM_00042E | 2506.666  | 3114.644  |
| NM_01764E | 13255.776 | 19100.857 | AB040967  | 802.599   | 737.719   |
| AJ227864  | 671.401   | 945.665   | NM_00357E | 1236.746  | 1348.793  |
| AF157562  | 4310.458  | 4503.748  | NM_014721 | 2286.198  | 2501.187  |
| AK021958  | 9643.234  | 18938.787 | AK026352  | 6215.632  | 11763.688 |
| M31164    | 1877.259  | 4251.859  | AF169257  | 660.214   | 771.726   |
| NM_003511 | 764.997   | 3480.577  | NM_01618E | 2901.71   | 3005.59   |
| NM_003531 | 2612.534  | 3393.394  | NM_005827 | 26666.594 | 36898.227 |
| NM_01779E | 1498.416  | 1593.873  | NM_00305E | 25290.637 | 29858.541 |
| NM_00351E | 985.989   | 754.423   | NM_01622E | 21327.461 | 27890.438 |
| NM_00353E | 660.618   | 1104.072  | AK024311  | 2136.249  | 3305.012  |

|           |           |           |           |           |           |
|-----------|-----------|-----------|-----------|-----------|-----------|
| AL137403  | 4521.797  | 4393.277  | AF052155  | 8934.646  | 9756.078  |
| AL049348  | 1887.575  | 1321.517  | NM_005085 | 22722.166 | 22595.07  |
| NM_018534 | 1338.718  | 919.121   | AF060902  | 13083.635 | 15012.947 |
| AB037847  | 2426.609  | 2263.682  | AF121858  | 54227.023 | 56175.664 |
| NM_00517C | 3389.438  | 3480.644  | NM_013437 | 1943.29   | 2161.322  |
| S96437    | 2378.227  | 1325.83   | NM_017681 | 3306.25   | 3906.461  |
| NM_01517E | 1616.037  | 1065.22   | X57655    | 52751.129 | 56999.809 |
| AL353939  | 2279.666  | 1935.4    | AK025966  | 14913.329 | 13558.522 |
| AL117573  | 6177.57   | 3699.738  | NM_01444C | 1063.346  | 1292.601  |
| NM_016116 | 657.373   | 779.594   | NM_01479E | 3863.013  | 3888.624  |
| NM_01865E | 2912.861  | 2340.406  | AL050288  | 56081.398 | 54583.945 |
| NM_00566E | 2925.115  | 3217.004  | NM_00504C | 13220.222 | 15356.495 |
| X89960    | 931.737   | 1495.855  | NM_016391 | 44974.219 | 45654.059 |
| NM_00655C | 921.911   | 1071.741  | M80783    | 592.906   | 828.195   |
| NM_017644 | 10132.873 | 10890.644 | AF075033  | 15920.086 | 14997.464 |
| NM_00248E | 1668.029  | 1957.067  | D50911    | 32023.986 | 28513.936 |
| AL050068  | 2680.418  | 3850.797  | AB011104  | 3314.007  | 4034.041  |
| AB046766  | 1734.542  | 2394.761  | AK024069  | 19464.334 | 20162.021 |
| AF009323  | 3129.431  | 4763.882  | NM_00458E | 41316.316 | 53781.359 |
| AK001526  | 4785.918  | 3532.112  | NM_01564C | 40571.676 | 48826.57  |
| AF086183  | 1731.762  | 1402.101  | AF233450  | 2674.108  | 3232.143  |
| AK000525  | 2084.857  | 1595.851  | NM_01623E | 7241.098  | 7656.161  |
| AL137434  | 1518.012  | 1004.158  | NM_000821 | 60212.211 | 61577.121 |
| Z36795    | 2143.839  | 2185.22   | NM_020121 | 1261.518  | 1682.279  |
| AL080216  | 3503.225  | 3349.297  | NM_00314E | 59227.898 | 61405.035 |
| NM_00667C | 2805.226  | 2301.719  | NM_00163E | 4199.224  | 5391.762  |
| NM_01242E | 3723.74   | 3049.553  | NM_012264 | 2622.188  | 2790.887  |
| NM_00581E | 1287.142  | 923.951   | AF311312  | 4466.906  | 5157.178  |
| NM_00275C | 8810.438  | 7746.285  | NM_001179 | 1174.999  | 1476.685  |
| NM_000081 | 327.674   | 612.198   | NM_00531E | 59540.785 | 60217.184 |
| AK024134  | 12890.673 | 10075.212 | NM_01491E | 50162.402 | 53450.469 |
| NM_003014 | 1160.864  | 1134.748  | NM_01228E | 15353.016 | 16936.008 |
| NM_01855E | 1370.554  | 1433.095  | NM_00219E | 35671.375 | 40807.109 |
| NM_001974 | 5487.807  | 5308.619  | D84294    | 10870.751 | 16164.485 |
| NM_013957 | 1628.324  | 1928.47   | X59770    | 4442.74   | 4838.074  |
| NM_00246E | 6958.489  | 8653.725  | K02765    | 33046.648 | 33396.766 |
| NM_016541 | 5696.864  | 6987.98   | M65134    | 4354.242  | 4625.111  |
| NM_01854E | 4373.03   | 6038.972  | BG539651  | 36079.23  | 34609.133 |
| NM_01823E | 5768.761  | 4738.673  | N52646    | 59589.641 | 60276.059 |
| NM_00685E | 22181.584 | 15373.487 | AW160671  | 60133.238 | 57144.887 |
| NM_00140E | 10816.047 | 8715.158  | BI870529  | 32974.113 | 43133.09  |
| NM_00388C | 1558.91   | 1353.698  | AA702698  | 4238.051  | 3993.132  |
| AF131778  | 2213.456  | 2191.071  | AI681514  | 6947.446  | 8638.254  |
| NM_00156E | 1967.219  | 1552.304  | NM_00130C | 6815.726  | 8779.403  |
| NM_01327E | 2395.836  | 2833.949  | BG748827  | 20581.684 | 23898.189 |
| NM_006477 | 3346.289  | 2763.298  | AA952897  | 24215.145 | 27668.367 |
| NM_00288C | 4012.737  | 3113.364  | BG760342  | 10508.218 | 11117.222 |
| NM_00067E | 28812.248 | 22482.35  | AA703141  | 4883.012  | 4818.555  |
| NM_00106E | 1621.575  | 1821.686  | AA195244  | 1116.953  | 1145.855  |
| NM_004657 | 9323.396  | 10015.131 | AI122630  | 22012.229 | 26353.324 |
| NM_01817C | 4906.893  | 3274.337  | NM_00658E | 20376.152 | 20700.039 |
| NM_003867 | 5233.083  | 5109.878  | NM_002191 | 1121.564  | 1546.005  |
| AL162062  | 1153.954  | 1588.997  | AB007875  | 7588.949  | 7396.311  |

|           |           |           |           |           |           |
|-----------|-----------|-----------|-----------|-----------|-----------|
| NM_003173 | 16211.296 | 16612.6   | NM_018261 | 5305.895  | 3968.337  |
| NM_005030 | 18012.707 | 16316.598 | NM_005955 | 30945.027 | 32209.469 |
| NM_017584 | 5453.644  | 5422.774  | NM_004048 | 3321.586  | 4292.398  |
| NM_020359 | 5936.454  | 6799.129  | BE548044  | 1990.131  | 1961.715  |
| AB014541  | 40045.246 | 52838.797 | AF028832  | 663.172   | 879.426   |
| NM_002583 | 15967.593 | 14986.087 | NM_006017 | 742.94    | 818.961   |
| NM_006570 | 27768.633 | 28745.24  | NM_012428 | 11136.982 | 10793.837 |
| NM_020348 | 1438.306  | 1456.27   | NM_013269 | 29049.662 | 25522.531 |
| NM_006034 | 25471.588 | 21115.869 | NM_001728 | 12376.29  | 11302.706 |
| AB040943  | 986.85    | 723.448   | NM_005565 | 921.031   | 802.365   |
| NM_005201 | 62220.023 | 34472.359 | NM_003824 | 34926.719 | 35806.867 |
| NM_000092 | 2157.82   | 1185.729  | NM_000686 | 2984.784  | 3642.872  |
| NM_019086 | 9937.843  | 9055.886  | NM_012452 | 17852.215 | 19558.23  |
| NM_018384 | 28731.717 | 26304.418 | AF229166  | 2329.972  | 2834.983  |
| NM_001872 | 1880.845  | 1731.357  | NM_005137 | 23357.678 | 27042.195 |
| AF157323  | 3515.203  | 2984.367  | NM_006764 | 14412.12  | 17256.145 |
| NM_006025 | 1015.199  | 880.661   | NM_001386 | 13484.202 | 17103.271 |
| NM_005877 | 16600.773 | 11223.765 | NM_001163 | 9181.875  | 10145.624 |
| NM_003338 | 6893.271  | 7949.049  | NM_005878 | 18228.777 | 19329.145 |
| NM_013396 | 2429.459  | 2186.668  | AB006713  | 514.144   | 745.404   |
| NM_017752 | 3093.406  | 3219.2    | AF308602  | 9824.608  | 10475.276 |
| D26069    | 16693.865 | 14265.109 | AB011089  | 8127.137  | 8848.925  |
| BF107577  | 50830.691 | 52016.379 | NM_001312 | 562.445   | 970.782   |
| NM_005837 | 21450.408 | 33770.672 | AF007192  | 2814.777  | 3002.885  |
| NM_016625 | 10724.154 | 6045.829  | NM_001276 | 18965.244 | 18433.266 |
| NM_017493 | 2543.123  | 1739.132  | NM_016157 | 4909.348  | 4630.693  |
| NM_006136 | 15896.547 | 10363.017 | NM_003053 | 14350.518 | 14350.438 |
| AF237772  | 1343.019  | 1165.161  | NM_003044 | 15468.667 | 16807.121 |
| AK025934  | 3515.887  | 1706.06   | NM_006672 | 55130.352 | 56816.035 |
| AJ008154  | 2987.331  | 2929.722  | NM_000338 | 1438.629  | 1883.202  |
| NM_003487 | 14634.586 | 8712.123  | M31659    | 2203.21   | 1943.918  |
| NM_006887 | 7944.738  | 5824.246  | NM_003056 | 24764.754 | 23580.035 |
| U90919    | 5617.693  | 4837.503  | NM_016226 | 17775.801 | 17139.369 |
| NM_006177 | 7097.378  | 6613.299  | AK024311  | 1864.176  | 1795.122  |
| AL137286  | 11199.822 | 8678.173  | AF052155  | 9435.928  | 7417.35   |
| NM_016358 | 44913.129 | 39412.914 | NM_005085 | 21026.574 | 20456.445 |
| NM_016275 | 18303.574 | 14764.578 | AF060902  | 14671.645 | 15838.935 |
| NM_020418 | 13812.883 | 14872.36  | AF121858  | 46992.434 | 51818.207 |
| NM_013293 | 6110.503  | 6449.492  | NM_013437 | 1519.451  | 2021.282  |
| AF315592  | 7498.037  | 7391.834  | NM_017681 | 3449.105  | 3870.943  |
| AF095844  | 5172.196  | 5169.146  | X57655    | 50713.684 | 54384.477 |
| NM_015833 | 4330.765  | 4302.512  | AK025966  | 15082.797 | 14199.071 |
| NM_000986 | 66052.172 | 57963.574 | NM_014440 | 1264.261  | 1420.542  |
| AK026760  | 51565.063 | 48334.367 | NM_018725 | 3406.432  | 3299.321  |
| NM_014772 | 5100.721  | 4246.208  | NM_003081 | 60736.727 | 57685.082 |
| AK025248  | 4632.811  | 3309.638  | NM_016495 | 3756.418  | 4290.155  |
| NM_004539 | 21042.457 | 13565.69  | D50402    | 59738.199 | 61642.32  |
| NM_006428 | 26822.139 | 17710.475 | M73547    | 42218.922 | 47964.344 |
| NM_004280 | 14859.756 | 10034.817 | AF181722  | 1776.519  | 2063.728  |
| AF110399  | 3546.346  | 2675.623  | NM_003687 | 14988.831 | 15166.124 |
| AK027094  | 5412.961  | 2455.077  | NM_004134 | 16744.389 | 15779.25  |
| AF174600  | 5734.148  | 4318.167  | NM_001632 | 4333.474  | 5562.438  |
| AK001003  | 1859.601  | 1653.388  | NM_012264 | 2171.318  | 2224.675  |

|             |           |           |           |           |           |
|-------------|-----------|-----------|-----------|-----------|-----------|
| NM_00280C   | 18931.932 | 15893.519 | AF311312  | 3862.463  | 4853.643  |
| NM_00077E   | 3720.314  | 3875.5    | NM_001179 | 1445.052  | 2037.468  |
| AB032981    | 1152.837  | 1229.167  | NM_005313 | 58456.594 | 60243.48  |
| BF217864    | 22024.129 | 22595.861 | NM_01776E | 51669.262 | 54141.164 |
| NM_005917   | 30446.977 | 25754.018 | NM_00042E | 2627.988  | 3474.478  |
| NM_00705Z   | 1255.65   | 1204.66   | NM_00357E | 1653.72   | 1137.882  |
| BC017044    | 927.615   | 1129.649  | NM_014721 | 1795.554  | 2046.695  |
| AV758498    | 1985.725  | 2105.018  | AK026352  | 7052.707  | 18515.908 |
| NM_02019E   | 3244.049  | 3551.136  | AL137705  | 8043.138  | 9129.323  |
| AK024113    | 2174.213  | 2496.868  | U41898    | 2563.847  | 2830.096  |
| NM_018657   | 1953.065  | 2501.084  | NM_02034E | 1406.132  | 1374.183  |
| L40410      | 16627.887 | 13405.255 | AF169257  | 927.722   | 915.32    |
| NM_00705E   | 3722.106  | 3217.775  | NM_01484E | 4120.402  | 4702.481  |
| NM_01665Z   | 2469.529  | 1776.068  | BF217766  | 1837.358  | 2495.619  |
| NM_01631C   | 29799.363 | 24081.869 | NM_000184 | 5442.404  | 6875.294  |
| AK021562    | 1192.583  | 1239.592  | NM_01618C | 3011.663  | 2710.403  |
| BC006560    | 2672.758  | 2531.718  | NM_000112 | 1735.511  | 1833.426  |
| NM_00629E   | 920.739   | 816.126   | NM_005827 | 23086.186 | 25078.934 |
| AF060938    | 35990.449 | 33354.488 | NM_00658E | 18607.078 | 16410.602 |
| NM_00197Z   | 9248.208  | 6699.604  | NM_002191 | 1012.228  | 1028.374  |
| NM_01446E   | 9605.156  | 6804.286  | AB007875  | 6442.092  | 6114.352  |
| NM_00685E   | 10038.35  | 4427.058  | NM_018261 | 4983.949  | 5151.208  |
| X52350      | 65918.961 | 55394.867 | NM_01479E | 4278.596  | 4747.562  |
| AF071554    | 2377.405  | 1865.929  | AL050288  | 55934.73  | 54649.707 |
| NM_002147   | 893.167   | 1285.875  | NM_00504C | 13949.794 | 14784.302 |
| NM_01768E   | 5917.206  | 7132.613  | NM_016391 | 49431.93  | 48056.012 |
| AK025612    | 45891.469 | 49440.734 | M80783    | 914.433   | 2026.384  |
| NM_01226E   | 50981.027 | 43503.645 | AF075033  | 15307.33  | 16104.325 |
| NM_01220Z   | 2675.84   | 3098.029  | D50911    | 33913.074 | 34114.313 |
| NM_00329E   | 597.298   | 858.461   | AB011104  | 3511.296  | 3535.322  |
| NM_00473E   | 15599.982 | 22086.473 | AK024069  | 18708.545 | 15031.408 |
| NM_00689E   | 848.467   | 1028.426  | NM_00458Z | 37428.563 | 33602.086 |
| D50373      | 1800.268  | 2802.125  | NM_01564C | 40869.75  | 46344.148 |
| AA488757    | 52510.238 | 49244.719 | AF233450  | 2565.454  | 2722.659  |
| AA205399    | 1377.891  | 1740.945  | NM_01623Z | 4949.689  | 5588.338  |
| AI394286    | 2619.903  | 3274.426  | NM_000821 | 59331.168 | 57970.695 |
| H07071      | 8562.315  | 9545.625  | NM_020121 | 1424.787  | 1807.073  |
| M25322      | 17582.459 | 19162.324 | NM_00314E | 54874.734 | 52369.844 |
| AA436187    | 699.225   | 743.9     | CY3Cy5    | 6958.735  | 154.325   |
| H-L 27586 I | 3790.932  | 3427.671  | NM_01246E | 19991.227 | 16222.649 |
| ID 214180   | 1028.641  | 615.823   | NM_13426C | 17067.918 | 16242.997 |
| ID 1867426  | 41505.883 | 33261.867 | AF086448  | 5401.087  | 3891.527  |
| ID 396450   | 714.177   | 684.035   | AB019391  | 952.311   | 802.327   |
| W99328      | 3024.399  | 2563.857  | AF086386  | 4752.508  | 4116.188  |
| AI434176    | 1595.122  | 959.547   | AF086413  | 1206.41   | 889.086   |
| H08563      | 4889.073  | 3215.392  | AF086457  | 3020.581  | 2573.078  |
| BE735403    | 3235.815  | 2479.585  | AK025469  | 3662.313  | 2779.291  |
| NM_002631   | 21285.566 | 15271.963 | NM_02023E | 7711.283  | 5559.847  |
| AB033109    | 3768.343  | 4921.153  | AF070581  | 4606.065  | 3425.855  |
| NM_00205Z   | 60389.699 | 58593.258 | AK024187  | 2570.739  | 2302.552  |
| NM_00688E   | 5558.885  | 5847.62   | NM_003307 | 1844.996  | 2098.016  |
| NM_00243E   | 9267.346  | 10428.168 | AF070565  | 2780.438  | 2817.386  |
| NM_01458E   | 18049.553 | 20395.914 | AK021644  | 4773.518  | 4307.796  |

|           |           |           |           |           |           |
|-----------|-----------|-----------|-----------|-----------|-----------|
| NM_000759 | 5159.124  | 6673.023  | NM_016599 | 1223.839  | 1452.847  |
| AK023334  | 13355.23  | 13552.58  | NM_012469 | 15962.488 | 16860.861 |
| D79991    | 3960.736  | 4500.38   | NM_134260 | 18818.695 | 17259.828 |
| AK022425  | 2438.949  | 2820.907  | SR2       | 57123.457 | 54714.297 |
| NM_000054 | 43594.141 | 47013.902 | SR4       | 22566.422 | 21353.914 |
| NM_014713 | 19052.418 | 16683.166 | SR6       | 3145.786  | 2848.816  |
| NM_001812 | 3344.07   | 3017.361  | SR8       | 10668.942 | 29232.457 |
| NM_014785 | 1511.805  | 1462.493  | SR10      | 34648.559 | 9023.237  |
| AK025175  | 1020.026  | 1057.388  | CY3Cy5    | 7102.537  | 190.375   |
| NM_005811 | 13751.495 | 11570.906 | AK023038  | 3835.531  | 3975.015  |
| NM_005764 | 2530.949  | 2045.286  | AK026206  | 4371.909  | 3936.166  |
| NM_016362 | 6512.481  | 4129.129  | AF086074  | 16606.104 | 14824.021 |
| NM_004214 | 13662.381 | 9395.046  | AK023964  | 9785.396  | 8755.043  |
| NM_004329 | 21406.311 | 17819.756 | AF086066  | 725.347   | 480.1     |
| NM_002836 | 14067.911 | 7405.657  | AF086084  | 2109.342  | 2111.806  |
| NM_020167 | 4263.156  | 3636.425  | AK000156  | 835.607   | 926.555   |
| NM_016058 | 15671.897 | 11069.126 | AL050184  | 2687.747  | 1885.161  |
| NM_014005 | 7088.15   | 6196.465  | AF085853  | 2865.324  | 2223.677  |
| NM_006033 | 25840.557 | 36665.395 | AK027185  | 3567.346  | 2351.944  |
| NM_004837 | 7030.309  | 8247.329  | AK025576  | 5111.055  | 3659.35   |
| AY005822  | 10378.054 | 13875.101 | AF147385  | 1229.029  | 1018.871  |
| NM_018129 | 61810.117 | 57431.172 | AL442086  | 16947.992 | 14806.543 |
| AF289022  | 5216.997  | 6231.997  | AK026784  | 444.671   | 533.361   |
| AB002326  | 521.721   | 627.204   | BC034819  | 9747.115  | 9443.73   |
| M17252    | 679.536   | 1192.182  | AF147313  | 47900.316 | 56731.477 |
| NM_016025 | 15240.771 | 12001.366 | AF147382  | 60933.164 | 61914.328 |
| NM_013319 | 4636.636  | 4588.206  | AK001957  | 8116.233  | 7473.799  |
| NM_020410 | 7546.819  | 7769.75   | AK000850  | 1005.362  | 985.822   |
| NM_000453 | 3271.377  | 3976.777  | AK021833  | 3776.035  | 4420.998  |
| J03048    | 15428.663 | 19497.834 | AF143867  | 4281.864  | 4102.047  |
| NM_004583 | 832.407   | 1028.23   | AK025889  | 9261.766  | 8832.926  |
| NM_001103 | 940.184   | 1042.763  | NM_014715 | 5839.473  | 4896.947  |
| AF228710  | 53222.668 | 47119.422 | AF086272  | 954.453   | 519.817   |
| NM_018399 | 628.861   | 723.306   | AK027134  | 3626.125  | 2973.771  |
| AY007131  | 64686.82  | 57003.77  | AK024168  | 2290.476  | 2070.397  |
| U61735    | 4868.485  | 4078.265  | AF222857  | 862.179   | 968.461   |
| NM_001144 | 26990.223 | 15572.816 | AF264622  | 3235.592  | 2689.909  |
| AK023766  | 8595.583  | 6736.87   | AK027203  | 910.335   | 824.822   |
| NM_001897 | 1575.64   | 1660.006  | AK021793  | 10363.283 | 9167.709  |
| NM_003853 | 2181.893  | 1922.553  | AK022255  | 43072.566 | 36391.449 |
| NM_018376 | 2957.581  | 3567.189  | AF075079  | 1499.281  | 1487.169  |
| AL133069  | 10201.861 | 14368.152 | AK022479  | 1941.366  | 1402.066  |
| AL117574  | 1859.992  | 3150.433  | AK023572  | 1682.891  | 1278.392  |
| AK026055  | 10463.744 | 10817.09  | AF086004  | 57881.609 | 55116.637 |
| AK024126  | 733.458   | 750.407   | AF147433  | 974.605   | 1107.762  |
| NM_001516 | 7584.999  | 7190.356  | AF085978  | 588.925   | 764.393   |
| NM_002744 | 14672.234 | 13568.348 | AF085930  | 706.977   | 713.417   |
| NM_015917 | 17531.908 | 16174.697 | AF086006  | 1493.916  | 1684.491  |
| NM_020397 | 1282.793  | 1430.296  | AL137318  | 4288.537  | 4265.779  |
| NM_000061 | 4289.754  | 3480.269  | AL137482  | 2715.307  | 3032.663  |
| AB046859  | 30363.041 | 24712.744 | AL162011  | 23810.385 | 20661.463 |
| NM_005109 | 6731.063  | 5770.52   | AL390177  | 1378.358  | 1486.119  |
| AK023573  | 8673.052  | 7454.713  | AL137678  | 1209.887  | 1195.167  |

|             |           |           |           |           |           |
|-------------|-----------|-----------|-----------|-----------|-----------|
| NM_00273C   | 4264.693  | 3183.208  | AK056111  | 2878.984  | 2541.402  |
| NM_00482E   | 2178.246  | 1499.514  | AL162055  | 981.51    | 772.516   |
| AB011540    | 65273.555 | 53967.855 | Y13807    | 3031.654  | 2140.548  |
| NM_00004C   | 25476.781 | 18619.133 | AK022053  | 729.691   | 777.312   |
| NM_004631   | 6361.775  | 5635.874  | AB037792  | 2993.517  | 2313.401  |
| NM_01226E   | 57008     | 59337.043 | AK022480  | 1977.381  | 2341.206  |
| AA488757    | 56057.047 | 53870.367 | AK024158  | 2640.075  | 2395.558  |
| AA205399    | 1542.097  | 2234.707  | AL080082  | 1240.447  | 1088.165  |
| H07071      | 7774.053  | 8051.886  | AK021623  | 2134.942  | 2094.208  |
| M25322      | 18545.713 | 19252.504 | AK023733  | 1031.553  | 1214.874  |
| AA436187    | 331.225   | 769.587   | AK027112  | 10237.338 | 9506.29   |
| H-L 27586 I | 3853.457  | 3871.426  | AL049314  | 10226.225 | 9003.242  |
| ID 214180   | 742.024   | 1021.23   | AF093016  | 48643.918 | 43770.426 |
| ID 1867426  | 18317.688 | 19875.934 | AF161345  | 1780.911  | 1304.281  |
| ID 396450   | 425.798   | 406.821   | -         | 1615.907  | 1305.047  |
| W99328      | 1591.079  | 1411.983  | AF090925  | 1242.386  | 1084.457  |
| AI434176    | 1330.652  | 1252.222  | NM_014163 | 57940.68  | 57953.684 |
| H08563      | 4065.861  | 3768.299  | AK021659  | 516.099   | 492.689   |
| BE735403    | 3133.323  | 2150.938  | NM_014137 | 1428.994  | 1398.322  |
| NM_00171E   | 592.159   | 693.446   | AK021974  | 3002.686  | 3219.372  |
| AF116659    | 3896.909  | 3268.995  | AK022068  | 1653.006  | 1589.82   |
| NM_000317   | 31659.648 | 22098.988 | AK022229  | 6363.311  | 5966.314  |
| NM_00688E   | 5168.796  | 6673.632  | AK022362  | 17267.465 | 17194.693 |
| AK022425    | 2474.692  | 3231.049  | AK022004  | 16907.58  | 14172.281 |
| NM_000054   | 45585.293 | 46362.461 | AK022136  | 884.119   | 753.365   |
| NM_014713   | 18927.393 | 18679.4   | AK022390  | 3502.436  | 2857.198  |
| NM_001812   | 3408.784  | 2981.469  | AL360138  | 1082.948  | 1189.38   |
| NM_01478E   | 1755.538  | 1916.671  | U61096    | 1645.985  | 1074.48   |
| NM_005811   | 13337.221 | 13336.702 | AF085865  | 11969.996 | 12523.414 |
| NM_005764   | 1892.51   | 2318.714  | X78261    | 1588.271  | 1592.298  |
| NM_016362   | 3144.575  | 2401.061  | AK025521  | 1315.38   | 1401.196  |
| NM_004214   | 5246.999  | 2951.407  | NM_001053 | 59492.125 | 62162.648 |
| NM_00432E   | 6336.064  | 4060.378  | Z70694    | 13898.764 | 19395.951 |
| NM_00283E   | 5606.993  | 3687.394  | L77602    | 3940.75   | 4259.263  |
| NM_020167   | 3718.407  | 3241.561  | NM_015421 | 24257.029 | 21409.555 |
| NM_01605E   | 12753.526 | 8369.806  | AF086081  | 12241.339 | 10308.941 |
| NM_01400E   | 7875.228  | 6890.063  | NM_018634 | 1343.536  | 1128.211  |
| NM_01768E   | 5497.866  | 4471.235  | NM_018111 | 1873.239  | 1290.379  |
| AK025612    | 46081.207 | 43912.23  | AK023730  | 803.745   | 916.263   |
| NM_00037C   | 1131.932  | 1530.609  | AF161360  | 4338.089  | 4372.791  |
| NM_01331E   | 5024.249  | 4949.936  | AK021720  | 2828.1    | 2605.947  |
| NM_02041C   | 7676.935  | 8997.122  | NM_016497 | 66701.727 | 64125.414 |
| NM_000453   | 3657.381  | 4086.975  | AK000617  | 951.802   | 605.098   |
| J03048      | 17818.361 | 22580.203 | AF009261  | 2813.725  | 2922.438  |
| NM_004583   | 533.316   | 924.818   | AL133086  | 4030.731  | 4336.766  |
| NM_001103   | 879.037   | 1453.334  | NM_012151 | 21883.396 | 23270.768 |
| AF228710    | 49198.805 | 47618.145 | AF087994  | 3595.747  | 3909.682  |
| AY007131    | 40943.406 | 34872.543 | AJ227912  | 2099.78   | 2602.592  |
| U61735      | 2760.516  | 1757.983  | NM_01819E | 5278.51   | 4610.831  |
| NM_001144   | 11862.714 | 6493.61   | AK025532  | 50606.309 | 56057.816 |
| AK023766    | 4886.726  | 3696.952  | AK021789  | 1221.892  | 1330.318  |
| NM_001897   | 1606.492  | 1455.52   | AF086383  | 805.658   | 1036.401  |
| NM_003853   | 2130.47   | 2596.556  | NM_003522 | 2440.939  | 2444.184  |

|             |           |           |           |           |           |
|-------------|-----------|-----------|-----------|-----------|-----------|
| AB033109    | 2887.246  | 2813.783  | BF217847  | 2853.879  | 2944.405  |
| NM_002053   | 61322.641 | 56059.559 | NM_005320 | 19806.537 | 16812.604 |
| NM_01743E   | 3705.15   | 3490.018  | U79242    | 1321.21   | 1484.609  |
| U59209      | 3692.211  | 3867.205  | Y10519    | 1772.665  | 1582.107  |
| AK024126    | 726.713   | 1096.909  | AF056452  | 1664.16   | 1911.375  |
| NM_00151E   | 8079.267  | 7784.313  | AF119901  | 12589.045 | 12215.104 |
| NM_002744   | 15543.14  | 15837.346 | AL049782  | 956.609   | 1023.255  |
| NM_015917   | 18718.197 | 17951.07  | AK001936  | 3513.136  | 3712.555  |
| NM_020397   | 1268.552  | 1789.252  | NM_003770 | 60789.457 | 68979.672 |
| NM_000061   | 3229.227  | 3694.142  | AF222023  | 1006.559  | 1047.522  |
| AB046859    | 24603.256 | 21137.68  | AK001395  | 13445.285 | 15497.808 |
| NM_00510E   | 3377.104  | 3017.749  | S57803    | 26397.791 | 26680.422 |
| AK023573    | 2926.839  | 1784.029  | AF131822  | 1317.93   | 1302.335  |
| NM_002730   | 1713.473  | 747.962   | AK023131  | 9157.906  | 8280.884  |
| NM_00482E   | 1425.749  | 953.997   | AJ276248  | 841.258   | 715.183   |
| AB011540    | 44649.586 | 37861.711 | AF090100  | 544.553   | 634.372   |
| NM_000040   | 13335.15  | 8994.815  | X78926    | 4429.194  | 3247.692  |
| NM_004631   | 4885.623  | 5570.94   | AJ278110  | 3430.873  | 3732.209  |
| NM_006033   | 28715.588 | 34433.902 | NM_014237 | 7396.499  | 6497.541  |
| NM_004837   | 8488.009  | 7993.197  | NM_02039E | 2048.775  | 2545.542  |
| NM_00329E   | 637.29    | 1014.749  | AF029900  | 14392.94  | 14844.021 |
| NM_00473E   | 12257.438 | 13825.528 | NM_00332E | 14897.344 | 14838.143 |
| H07071      | 8961.004  | 10264.319 | NM_01617E | 5684.824  | 5770.438  |
| M25322      | 18709.916 | 22008.471 | AK022639  | 18772.328 | 19945.102 |
| AA436187    | 438.168   | 846.395   | D31766    | 4134.468  | 4165.104  |
| H-L 27586 I | 4318.341  | 4802.457  | NM_006547 | 12283.116 | 8916.364  |
| ID 214180   | 1042.143  | 1150.934  | AK022175  | 680.206   | 767.75    |
| ID 1867426  | 33561.25  | 42928.766 | L23867    | 2520.993  | 2167.631  |
| W99328      | 1544      | 1484.693  | AB020968  | 961.184   | 682.891   |
| AI434176    | 871.069   | 547.338   | AL138690  | 7216.874  | 7051.366  |
| H08563      | 1008.855  | 461.628   | AK000394  | 2085.625  | 1887.697  |
| BE735403    | 1356.62   | 1018.61   | NM_013941 | 4213.532  | 5036.814  |
| AF116659    | 2992.461  | 1792.763  | AF074989  | 3846.747  | 3962.349  |
| NM_000317   | 23241.172 | 19147.207 | AK001107  | 3540.601  | 3394.187  |
| NM_01837E   | 3682.715  | 3381.08   | AF147393  | 2399.85   | 2369.281  |
| NM_01761E   | 1055.187  | 2178.636  | AK022368  | 813.244   | 773.203   |
| AK022425    | 2172.938  | 2737.99   | AL137339  | 652.088   | 706.192   |
| NM_000054   | 33509.004 | 37192.75  | AL080112  | 6557.181  | 6512.785  |
| NM_014713   | 15309.79  | 13451.712 | AL137325  | 1961.24   | 1696.148  |
| NM_001812   | 3946.998  | 3807.534  | AF147361  | 4138.488  | 3883.103  |
| NM_004214   | 16552.242 | 18436.457 | NM_001851 | 12911.152 | 10367.563 |
| NM_00432E   | 24041.244 | 36247.883 | S67789    | 3853.194  | 2914.775  |
| NM_00283E   | 16820.127 | 19085.572 | AK022689  | 25136.953 | 22800.719 |
| NM_020167   | 5259.263  | 6639.827  | NM_016227 | 3837.222  | 2823.065  |
| AL049963    | 26302.551 | 26645.789 | NM_00419E | 60689.711 | 57576.27  |
| NM_01605E   | 13681.853 | 12725.871 | NM_00470E | 11447.87  | 10278.115 |
| NM_01400E   | 4660.978  | 5124.619  | NM_020190 | 57137.289 | 56774.75  |
| NM_00463E   | 10355.107 | 8400.57   | AK024003  | 2621.549  | 3548.54   |
| NM_00489E   | 4147.795  | 2167.842  | NM_014357 | 17228.338 | 17385.104 |
| NM_00397E   | 1474.106  | 1495.964  | NM_004067 | 2231.65   | 1961.749  |
| NM_01768E   | 3042.862  | 2043.933  | NM_000121 | 42963.145 | 36129.602 |
| AK025612    | 40310.305 | 47325.434 | NM_002091 | 49279.289 | 44664.75  |
| NM_01226E   | 58429.668 | 56470.629 | AB033092  | 19766.027 | 17603.518 |

|           |           |           |           |           |           |
|-----------|-----------|-----------|-----------|-----------|-----------|
| NM_012203 | 3028.268  | 5311.684  | M89957    | 50101.473 | 37757.84  |
| AL157469  | 964.828   | 1057.57   | NM_003023 | 1903.476  | 1636.772  |
| NM_002868 | 4681.042  | 6846.87   | BC035030  | 22970.176 | 23376.998 |
| AK024100  | 10162.382 | 10663.206 | NM_005435 | 745.712   | 758.701   |
| NM_005135 | 1295.879  | 1405.93   | NM_005340 | 62291.105 | 60570.816 |
| NM_003827 | 14104.671 | 15062.532 | NM_016201 | 27633.623 | 26738.479 |
| NM_001144 | 35118.199 | 51305.496 | NM_000864 | 8259.957  | 8347.694  |
| AK023766  | 9208.209  | 10748.346 | NM_017977 | 9473.554  | 8951.754  |
| NM_001897 | 1912.467  | 2706.604  | AF147727  | 9133.507  | 8302.957  |
| NM_003853 | 2218.717  | 2599.835  | NM_006751 | 2220.67   | 2438.185  |
| AB033109  | 2381.382  | 3200.709  | AB037834  | 4103.067  | 2976.546  |
| NM_002053 | 45006.789 | 48167.426 | NM_003569 | 6517.401  | 6620.725  |
| NM_006889 | 2763.702  | 2702.182  | NM_002777 | 1682.314  | 1247.827  |
| NM_002438 | 4580.289  | 4111.208  | AF202635  | 2127.294  | 2347.014  |
| NM_014589 | 7662.484  | 6569.792  | NM_014125 | 3842.638  | 4101.33   |
| NM_000759 | 1673.076  | 2329.927  | NM_017904 | 5850.313  | 5601.774  |
| AK023334  | 7360.461  | 5585.067  | NM_013367 | 8023.883  | 6821.861  |
| NM_002563 | 27739.52  | 28128.598 | AL137550  | 1228.131  | 1085.073  |
| NM_002437 | 6581.568  | 7016.909  | NM_000321 | 8194.933  | 7315.957  |
| D79991    | 3783.894  | 4340.546  | NM_006341 | 45632.723 | 57194.199 |
| AB011540  | 60101.629 | 57347.09  | NM_001709 | 4166.865  | 5023.555  |
| NM_000040 | 21080.949 | 21959.25  | NM_006191 | 12511.907 | 11904.393 |
| NM_004631 | 6271.636  | 7213.296  | NM_001800 | 5990.479  | 4462.257  |
| NM_006033 | 29248.387 | 36886.441 | NM_004336 | 23005.941 | 19287.404 |
| NM_004837 | 10252.839 | 10868.46  | NM_015949 | 7196.191  | 6365.125  |
| NM_000370 | 1993.303  | 2611.783  | NM_013979 | 8563.536  | 7180.088  |
| AY005822  | 10391.359 | 14082.053 | NM_003790 | 20352.943 | 19269.307 |
| NM_018129 | 59404.348 | 61288.035 | NM_000494 | 25159.252 | 26208.41  |
| AF289022  | 6468.497  | 10373.928 | NM_016023 | 5396.396  | 5155.561  |
| AB002326  | 616.811   | 796.237   | NM_003722 | 60245.91  | 59223.219 |
| M17252    | 872.156   | 954.927   | NM_014430 | 1419.948  | 1243.31   |
| NM_016025 | 13812.445 | 12230.317 | NM_000495 | 3004.118  | 3541.06   |
| NM_013319 | 4502.095  | 5651.904  | AF085883  | 6740.049  | 7448.958  |
| NM_000746 | 2036.886  | 2761.852  | NM_016571 | 6512.13   | 6167.029  |
| NM_000722 | 1378.066  | 1811.443  | NM_003688 | 4804.941  | 4939.339  |
| NM_006030 | 1031.35   | 1059.392  | NM_016446 | 29972.598 | 25021.654 |
| NM_020410 | 4515.083  | 4220.861  | BC036368  | 2084.578  | 2025.193  |
| AF000143  | 39151.023 | 40480.781 | AK023237  | 1093.962  | 814.937   |
| NM_014211 | 870.868   | 869.593   | NM_001870 | 4395.487  | 3257.885  |
| NM_000814 | 2225.706  | 1847.241  | AJ271216  | 4930.228  | 3892.022  |
| NM_000453 | 3095.494  | 3593.028  | U23028    | 8769.681  | 9276.35   |
| J03077    | 39030.66  | 46405.055 | NM_000817 | 16337.721 | 21150.889 |
| J03048    | 18581.203 | 26542.543 | AF113132  | 64038.309 | 65767.75  |
| AF116659  | 3902.016  | 4234.446  | NM_006571 | 8934.131  | 8893.387  |
| NM_000317 | 29091.367 | 24814.834 | NM_001875 | 1079.916  | 1018.235  |
| NM_018376 | 2275.194  | 2417.516  | AK022680  | 7444.067  | 6971.083  |
| NM_017615 | 3424.537  | 4125.641  | NM_018946 | 37774.871 | 35473.262 |
| U59209    | 7348.144  | 7630.917  | NM_016359 | 25229.826 | 18142.686 |
| AK023824  | 13091.615 | 14886.697 | NM_001069 | 61062.465 | 65914.32  |
| AL133069  | 9111.025  | 14582.126 | NM_004156 | 5189.66   | 5303.061  |
| AL117574  | 642.439   | 670.083   | AK000561  | 4058.839  | 4392.71   |
| AK026055  | 9705.163  | 11065.325 | AB051449  | 57355.02  | 58939.434 |
| AK024126  | 1103.603  | 1581.948  | BC009187  | 14645.705 | 16026.594 |



|           |           |           |           |           |           |
|-----------|-----------|-----------|-----------|-----------|-----------|
| NM_001516 | 7085.374  | 7562.792  | AL133617  | 3199.12   | 3798.055  |
| NM_002744 | 11244.729 | 14120.131 | NM_016485 | 18502.436 | 18481.744 |
| NM_015917 | 14107.027 | 14353.854 | NM_002615 | 1704.92   | 1750.485  |
| NM_020397 | 924.722   | 1074.15   | AF090894  | 3758.504  | 3509.875  |
| NM_000061 | 3148.681  | 3378.521  | NM_013344 | 701.23    | 690.539   |
| AB046859  | 36277.777 | 36569.203 | NM_014052 | 35307.082 | 33646.863 |
| NM_005109 | 8004.179  | 7786.886  | AK023792  | 1261.793  | 1139.461  |
| AK023573  | 8797.194  | 9516.521  | NM_020149 | 6386.952  | 5564.858  |
| NM_002730 | 4407.669  | 4628.084  | NM_006237 | 5343.823  | 4285.025  |
| NM_004828 | 3815.663  | 5554.22   | NM_001271 | 9737.48   | 6642.065  |
| CY3Cy5    | 2115.294  | 97.46     | NM_003683 | 16915.715 | 14261.843 |
| NM_001824 | 71579.047 | 63110.844 | AF039019  | 9475.655  | 9017.089  |
| AF035314  | 617.776   | 411.167   | NM_012255 | 14218.453 | 13267.887 |
| NM_018036 | 1204.46   | 677.263   | NM_018196 | 3944.922  | 4038.849  |
| AF052087  | 726.908   | 549.738   | NM_004818 | 15015.319 | 15704.255 |
| AF007143  | 1320.783  | 930.197   | J04205    | 32512.771 | 35707.586 |
| AF147417  | 460.029   | 417.382   | D38491    | 14020.347 | 7698.458  |
| AK023656  | 1585.907  | 973.243   | AK026835  | 9407.434  | 7185.927  |
| AF086511  | 4141.93   | 8399.864  | NM_002819 | 43443.254 | 41721.895 |
| AK022989  | 7657.645  | 13206.327 | NM_003090 | 60697.02  | 57771.855 |
| AK001604  | 5153.285  | 5348.183  | NM_013264 | 13458.625 | 11267.426 |
| AF086497  | 751.463   | 517.913   | NM_003315 | 33795.406 | 33678.898 |
| NM_020141 | 7379.073  | 5393.718  | NM_005570 | 22833.322 | 21820.637 |
| AL359627  | 771.417   | 1808.021  | NM_000086 | 34533.055 | 40412.211 |
| NM_006482 | 1820.425  | 1620.935  | NM_003752 | 12661.531 | 13372.054 |
| NM_001824 | 73028.813 | 63097.215 | NM_003932 | 31561.094 | 33429.293 |
| SR1       | 72807.625 | 62996.293 | NM_016491 | 48858.445 | 54796.242 |
| SR3       | 37590.566 | 32111.242 | NM_006429 | 60813.746 | 59603.441 |
| SR5       | 4119.062  | 3126.82   | NM_002516 | 5733.658  | 6241.44   |
| SR7       | 4421.724  | 18577.148 | NM_002064 | 3668.708  | 4153.978  |
| SR9       | 15022.836 | 1817.343  | NM_015523 | 21312.588 | 19559.25  |
| CY3Cy5    | 2577.234  | 145.196   | NM_015960 | 52860.156 | 51229.074 |
| U15553    | 5037.942  | 2868.606  | NM_006085 | 18411.795 | 15454.011 |
| Z36829    | 860.31    | 627       | NM_000907 | 23458.898 | 23273.002 |
| AK024734  | 10450.367 | 7530.284  | AF254085  | 14567.475 | 15496.86  |
| NM_017741 | 2032.703  | 1377.124  | AK023541  | 712.194   | 866.407   |
| NM_005887 | 5318.987  | 6758.431  | NM_001987 | 7350.727  | 7574.363  |
| AK024921  | 528.847   | 917.063   | AF244088  | 14006.244 | 13105.678 |
| AL110232  | 1155.573  | 1272.288  | NM_007136 | 4915.873  | 4572.129  |
| AK026103  | 3312.568  | 2448.027  | AK025434  | 1249.478  | 1220.271  |
| NM_016353 | 24105.707 | 18707.736 | AJ251845  | 2097.183  | 1588.958  |
| AK022567  | 939.698   | 850.388   | AK000435  | 10662.99  | 9946.499  |
| AL080280  | 9663.881  | 6739.746  | AK000569  | 16456.705 | 16815.592 |
| AB028947  | 1813.902  | 1156.544  | NM_006049 | 7813.82   | 8484.559  |
| AK023437  | 4597.536  | 3648.792  | NM_017661 | 665.207   | 901.149   |
| AK022897  | 1880.705  | 1045.737  | BC016698  | 15882.843 | 18093.686 |
| AK023898  | 6642.462  | 4424.386  | NM_007374 | 3012.832  | 2753.581  |
| AK021619  | 744.591   | 595.523   | AK000049  | 684.201   | 997.086   |
| AK025872  | 842.099   | 663.697   | NM_006167 | 2322.765  | 2563.217  |
| AF131762  | 5529.556  | 5627.351  | NM_016357 | 3426.653  | 3144.035  |
| AY007089  | 3321.851  | 2884.507  | NM_014500 | 38950.859 | 39507.734 |
| AK021816  | 6775.916  | 7414.306  | L09071    | 1852.473  | 2189.191  |
| D43770    | 20540.35  | 16773.092 | NM_005924 | 2578.848  | 2091.107  |

|           |           |           |           |           |           |
|-----------|-----------|-----------|-----------|-----------|-----------|
| AF087976  | 442.592   | 1056.601  | NM_019841 | 1937.741  | 2165.194  |
| AK021519  | 1265.608  | 984.324   | NM_003322 | 3208.785  | 3219.043  |
| NM_014254 | 6378.279  | 4001.704  | NM_003568 | 1930.243  | 1987.283  |
| AF086036  | 444.931   | 450.654   | BC036375  | 38807.754 | 44439.824 |
| U09197    | 1564.687  | 546.768   | NM_000496 | 1255.869  | 1188.271  |
| AK025218  | 912.365   | 690.718   | BF347926  | 21437.588 | 22591.563 |
| AJ227899  | 1960.448  | 1587.113  | N54821    | 39364.914 | 54093.789 |
| AL359607  | 2345.504  | 2260.415  | BI912037  | 22013.273 | 25057.332 |
| AF161371  | 6162.693  | 3979.864  | AA454646  | 44426.813 | 52463.875 |
| AK022464  | 1762.82   | 1446.191  | BF063899  | 4723.791  | 4515.491  |
| AF086230  | 1372.458  | 1161.802  | U18087    | 58182.758 | 62358.387 |
| AK023408  | 3525.398  | 2604.764  | U66349    | 4514.992  | 4346.671  |
| AK000144  | 1960.384  | 1279.055  | AA057156  | 27885.5   | 29163.848 |
| AK000942  | 566.59    | 591.728   | U19487    | 3303.663  | 4094.662  |
| AL117533  | 1685.706  | 1935.833  | AF166327  | 60266.125 | 60037.281 |
| AK026036  | 1664.954  | 2015.329  | AF260739  | 11647.001 | 11831.193 |
| AK023422  | 3333.716  | 3582.136  | AF531423  | 49653.375 | 53672.363 |
| AK095193  | 1660.252  | 2460.603  | X76555    | 3577.068  | 3718.468  |
| AK025081  | 1828.444  | 1444.927  | NM_005432 | 21827.328 | 26216.387 |
| AL122088  | 1845.399  | 1077.685  | L10386    | 37674.098 | 42980.422 |
| AF119912  | 633.06    | 288.964   | AF061812  | 62133.176 | 56127.633 |
| AL137518  | 1677.507  | 1044.932  | AL136756  | 16096.333 | 15867.302 |
| T99941    | 10466.844 | 9114.946  | NM_015944 | 4829.422  | 4500.852  |
| AF113678  | 2821.943  | 2241.698  | NM_000758 | 16887.514 | 17471.574 |
| AL137313  | 63008.125 | 59181.848 | M17017    | 2142.871  | 2757.079  |
| AB002363  | 6959.613  | 5729.427  | NM_002990 | 10451.926 | 11012.959 |
| NM_005284 | 4679.692  | 4018.968  | NM_002432 | 16739.039 | 13375.375 |
| AF086351  | 627.394   | 560.654   | NM_012420 | 1722.502  | 1827.446  |
| D83199    | 12938.855 | 10827.554 | NM_002343 | 16311.074 | 18572.148 |
| AK025957  | 706.024   | 620.873   | AB033037  | 4831.29   | 6738.049  |
| Y16708    | 1420.658  | 884.194   | L40400    | 24700.51  | 31405.785 |
| AL157453  | 2356.603  | 1475.069  | AK025688  | 6360.917  | 7155.922  |
| NM_019040 | 8765.443  | 8263.63   | NM_005930 | 1541.071  | 1764.223  |
| NM_005978 | 2117.034  | 1655.831  | Z36819    | 18274.797 | 19191.857 |
| Y16711    | 1156.469  | 1290.498  | NM_014847 | 63283.645 | 60516.32  |
| AJ272179  | 6459.096  | 6137.527  | NM_001195 | 699.19    | 613.485   |
| AJ007015  | 5609.869  | 3401.872  | NM_014448 | 19294.332 | 18455.313 |
| AL049317  | 2681.686  | 3426.332  | AL080157  | 19660.318 | 21831.939 |
| AL050090  | 2035.57   | 2271.512  | NM_005100 | 1817.308  | 2023.733  |
| AF086309  | 679.09    | 589.455   | NM_005308 | 9850.957  | 11677.387 |
| AF238870  | 693.355   | 576.246   | NM_000911 | 3392.604  | 3801.44   |
| AK026279  | 2873.433  | 1847.74   | NM_007227 | 3489.188  | 3941.96   |
| AF130094  | 11878.224 | 7470.993  | NM_007023 | 3441.828  | 4023.236  |
| AK026673  | 2887.668  | 1587.131  | NM_005873 | 31210.404 | 35979.586 |
| AF170935  | 17222.254 | 11095.486 | NM_004624 | 12293.348 | 13599.227 |
| AB007978  | 1143.209  | 959.578   | NM_003865 | 4350.526  | 4245.875  |
| AF217970  | 1339.965  | 928.146   | AB015330  | 56698.934 | 52897.148 |
| AF086297  | 1344.321  | 1104.89   | NM_004315 | 23498.717 | 24967.951 |
| AK025455  | 2166.936  | 1624.587  | NM_020166 | 18229.236 | 15449.971 |
| AK026799  | 9859.02   | 5694.552  | S56138    | 922.125   | 894.633   |
| AK022549  | 1451.27   | 1017.319  | AK023860  | 24778.305 | 24057.527 |
| Z70714    | 3589.424  | 2748.681  | NM_000031 | 8595.128  | 7682.158  |
| AK021640  | 11851.333 | 10206.619 | NM_002085 | 49029.887 | 52742.512 |

|           |           |           |           |           |           |
|-----------|-----------|-----------|-----------|-----------|-----------|
| NM_016565 | 64760.598 | 57538.719 | AK026061  | 1838.991  | 1728.598  |
| U84509    | 2794.335  | 2585.374  | NM_016286 | 30692.871 | 37796.539 |
| AK002036  | 3502.441  | 3085.617  | NM_001567 | 10015.047 | 13375.248 |
| U84512    | 317.642   | 369.486   | NM_004905 | 28199.16  | 28781.385 |
| AK025775  | 4398.66   | 3900.408  | AF217971  | 29957.896 | 31355.074 |
| AB046791  | 906.533   | 941.07    | NM_001925 | 2482.748  | 2902.644  |
| AF043469  | 2643.297  | 2603.901  | NM_004982 | 12533.727 | 12758.902 |
| AL109671  | 903.674   | 987.497   | NM_004732 | 13401.007 | 11713.174 |
| NM_012375 | 728.763   | 545.385   | NM_018349 | 13600.011 | 13441.083 |
| AK022008  | 2475.088  | 1622.873  | NM_006363 | 16676.313 | 17946.73  |
| NM_018186 | 1744.677  | 1342.565  | NM_020415 | 6558.634  | 7676.399  |
| AL080188  | 2976.579  | 1645.017  | NM_014879 | 1450.879  | 2089.317  |
| NM_002390 | 4284.652  | 3312.086  | AL049667  | 13506.049 | 15032.064 |
| NM_006142 | 2231.734  | 1807.421  | NM_000334 | 28712.377 | 32520.98  |
| NM_014910 | 10196.339 | 9235.814  | NM_020400 | 5212.965  | 5955.647  |
| AK001064  | 4436.645  | 3660.342  | NM_001504 | 23693.82  | 21950.914 |
| AB029031  | 2993.361  | 2483.415  | NM_001565 | 2471.96   | 2923.435  |
| NM_001294 | 9486.143  | 8116.962  | NM_002612 | 1738.045  | 1693.64   |
| AF302786  | 3451.139  | 3264.075  | AF135422  | 5071.661  | 3716.197  |
| AL122083  | 5412.856  | 4428.019  | NM_004479 | 56532.855 | 50919.145 |
| NM_019095 | 7695.733  | 8593.706  | NM_002610 | 4120.877  | 2981.071  |
| AK022212  | 58779.555 | 54964.395 | AF070587  | 9578.646  | 6507.554  |
| X64974    | 4848.546  | 6009.455  | BE250526  | 3913.428  | 4104.39   |
| NM_000834 | 9296.989  | 13468.337 | NM_016819 | 13869.57  | 13458.464 |
| NM_006485 | 41688.559 | 32795.348 | NM_012222 | 37468.973 | 45619.844 |
| NM_012455 | 4676.029  | 4025.562  | NM_005002 | 6930.391  | 7997.95   |
| NM_012360 | 594.035   | 841.685   | NM_006596 | 9760.72   | 10269.432 |
| AL137268  | 3319.766  | 2975.044  | AK023214  | 39636.797 | 40761.914 |
| AK001130  | 625.031   | 606.276   | NM_001469 | 22627.439 | 21135.598 |
| AK022398  | 667.319   | 497.608   | NM_003600 | 48941     | 40507.23  |
| AK024109  | 6966.147  | 4255.595  | NM_017490 | 18822.059 | 17564.424 |
| AF088048  | 2746.853  | 1812.525  | NM_002718 | 8040.889  | 9206.43   |
| AK001143  | 3181.719  | 2195.805  | AK026727  | 11424.783 | 15039.376 |
| AK001701  | 4416.377  | 2180.229  | NM_002830 | 1590.414  | 2008.979  |
| AK022205  | 1141.031  | 571.952   | NM_006247 | 17928.346 | 20939.42  |
| AK024955  | 61320.059 | 59798.875 | AB032983  | 15220.948 | 15836.122 |
| NM_016580 | 2305.029  | 1677.777  | NM_018281 | 41428.137 | 43827.168 |
| AF169693  | 2022.899  | 2172.053  | NM_004457 | 12700.777 | 12309.018 |
| L23206    | 9363.71   | 7705.492  | NM_014049 | 7103.113  | 7309.355  |
| NM_012192 | 5077.359  | 3698.228  | NM_005396 | 6240.278  | 6065.963  |
| NM_006293 | 2812.941  | 2042.513  | NM_019841 | 2121.292  | 2168.113  |
| NM_007225 | 5906.348  | 4781.635  | NM_003322 | 3300.925  | 3142.129  |
| AB011105  | 3613.122  | 3530.443  | NM_003568 | 1542.461  | 2217.875  |
| NM_002213 | 1182.195  | 1105.197  | BC036375  | 35377.281 | 36131.859 |
| NM_018970 | 390.413   | 431.042   | NM_000496 | 1021.056  | 1137.457  |
| NM_004814 | 3491.053  | 2342.192  | BF347926  | 19100.117 | 15879.88  |
| D86976    | 13702.648 | 9135.865  | N54821    | 36078.25  | 41294.977 |
| AF307080  | 732.55    | 535.226   | BI912037  | 18966.969 | 22524.053 |
| NM_004057 | 5039.535  | 4152.625  | AA454646  | 44499.512 | 52070.473 |
| NM_018971 | 1183.401  | 1012.118  | BF063899  | 4481.919  | 5099.033  |
| K03175    | 1266.013  | 1129.428  | U18087    | 61145.793 | 62704.613 |
| NM_003015 | 1749.372  | 1514.812  | U66349    | 4625.423  | 5330.07   |
| NM_003711 | 2352.925  | 1162.147  | AA057156  | 27948.166 | 28755.41  |

|           |           |           |           |           |           |
|-----------|-----------|-----------|-----------|-----------|-----------|
| NM_006496 | 7026.719  | 4122.537  | U19487    | 3156.43   | 3339.721  |
| NM_004826 | 4406.524  | 2753.705  | AF166327  | 60925.273 | 54846.32  |
| NM_013314 | 4659.67   | 3139.965  | AF260739  | 10495.381 | 10754.803 |
| NM_003182 | 669.272   | 455.901   | AF531423  | 57052.168 | 58227.93  |
| NM_004431 | 28852.904 | 28544.713 | X76555    | 3995.131  | 4526.586  |
| NM_002012 | 3232.79   | 3117.183  | NM_005432 | 26106.717 | 35449.797 |
| NM_002070 | 31548.799 | 24649.049 | L10386    | 36555.742 | 42241.012 |
| AF227969  | 5186.119  | 5554.734  | AF061812  | 60303.316 | 58042.375 |
| AF116657  | 1055.794  | 993.096   | AL136756  | 16891.969 | 19039.576 |
| NM_004102 | 571.631   | 583.763   | NM_001478 | 63011.172 | 59523.82  |
| NM_003944 | 60955.676 | 57700.297 | M17017    | 2004.18   | 2387.85   |
| NM_016120 | 66577.945 | 59623.703 | NM_002990 | 8593.128  | 8889.171  |
| NM_002893 | 1345.665  | 1707.668  | NM_002432 | 15254.47  | 12359.879 |
| NM_002393 | 26714.363 | 29574.67  | NM_012420 | 1654.801  | 1639.529  |
| NM_002669 | 4085.204  | 2492.662  | NM_002343 | 13860.589 | 14854.813 |
| AB014600  | 6792.599  | 5481.123  | AB033037  | 4134.425  | 5308.341  |
| NM_018312 | 4153.831  | 2889.482  | L40400    | 23152.365 | 23671.535 |
| X98259    | 1641.9    | 1339.728  | AK025688  | 6522.777  | 7569.492  |
| NM_014792 | 787.845   | 760.228   | NM_005930 | 1470.622  | 2282.078  |
| U05255    | 775.249   | 813.354   | Z36819    | 18270.838 | 19603.48  |
| X98260    | 14420.877 | 17172.742 | NM_014847 | 61770.242 | 57787.355 |
| NM_007217 | 8631.67   | 6390.126  | NM_001195 | 709.165   | 713.182   |
| NM_014777 | 31751.229 | 20541.967 | NM_014448 | 19364.291 | 19208.721 |
| NM_001102 | 6648.691  | 4960.208  | AL080157  | 19674.895 | 19377.105 |
| NM_003803 | 3115.959  | 2252.464  | NM_005100 | 1977.527  | 1698.307  |
| NM_002818 | 63308.152 | 43632.949 | NM_005308 | 9062.25   | 10303.963 |
| NM_001937 | 11542.277 | 9883.43   | NM_000911 | 3295.134  | 3809.229  |
| AK024778  | 1089.58   | 806.663   | NM_007227 | 3535.809  | 4009.315  |
| AL157500  | 958.123   | 790.012   | NM_007023 | 3287.496  | 4266.208  |
| AK025498  | 3372.613  | 3339.796  | NM_005873 | 31253.012 | 34340.621 |
| NM_001395 | 24976.854 | 26895.52  | NM_004624 | 11237.929 | 13404.813 |
| NM_002068 | 1387.274  | 1523.914  | NM_003865 | 5404.891  | 6167.609  |
| NM_019854 | 839.809   | 848.185   | AB015330  | 55078.57  | 53666.992 |
| NM_013338 | 3177.106  | 2722.607  | L09071    | 2094.335  | 2599.346  |
| NM_014671 | 14446.98  | 12403.576 | NM_005924 | 3074.919  | 2948.46   |
| NM_001814 | 8577.704  | 6226.835  | S56138    | 865.948   | 868.199   |
| NM_005656 | 2955.122  | 3380.697  | AK023860  | 19642.588 | 17137.535 |
| NM_006012 | 8124.745  | 7557.308  | NM_000031 | 8261.947  | 8430.92   |
| NM_002151 | 2514.171  | 2275.058  | NM_002085 | 48097.395 | 45289.809 |
| NM_014889 | 3230.695  | 2605.889  | AK026061  | 1677.103  | 1746.006  |
| AF173935  | 1231.957  | 905.95    | NM_016286 | 25706.486 | 29496.861 |
| AK025322  | 27346.973 | 23323.539 | NM_001567 | 9317.979  | 10947.341 |
| NM_017887 | 6207.499  | 5802.156  | NM_004905 | 31732.633 | 44835.172 |
| NM_017650 | 526.054   | 625.429   | AF217971  | 29407.307 | 33831.258 |
| NM_000526 | 3961.051  | 3398.354  | NM_001925 | 2745.611  | 2915.333  |
| AF007152  | 3743.747  | 2762.102  | NM_004982 | 13368.64  | 13585.222 |
| NM_017575 | 582.04    | 455.605   | NM_004732 | 13519.772 | 14081.2   |
| AL122100  | 2112.851  | 1710.155  | NM_018349 | 15287.822 | 14962.826 |
| NM_005310 | 7902.284  | 3968.348  | NM_006363 | 15177.03  | 14288.441 |
| NM_014423 | 12759.074 | 9829.652  | NM_020415 | 5814.776  | 6489.746  |
| BE904126  | 46782.578 | 40494.52  | NM_014879 | 1068.843  | 1222.675  |
| AF272380  | 59350.84  | 42722.551 | AL049667  | 12109.829 | 11874.127 |
| NM_033288 | 943.37    | 1186.937  | NM_000334 | 29213.18  | 32094.125 |

|           |           |           |           |           |           |
|-----------|-----------|-----------|-----------|-----------|-----------|
| NM_003269 | 1683.564  | 2175.064  | NM_001504 | 24090.109 | 21862.768 |
| AK000102  | 2519.64   | 2791.894  | NM_000758 | 19399.965 | 20437.713 |
| AB040916  | 5462.905  | 4695.157  | NM_004479 | 48713.945 | 38836.297 |
| NM_005587 | 4120.49   | 3605.791  | NM_002610 | 3874.521  | 2849.557  |
| AF038362  | 3518.413  | 2958.791  | AF070587  | 8972.806  | 5670.666  |
| NM_005195 | 46700.059 | 44137.891 | BE250526  | 3418.816  | 3903.611  |
| L40392    | 3386.763  | 2574.836  | NM_016819 | 11731.206 | 11687.107 |
| BF541482  | 574.791   | 441.605   | NM_012222 | 30730.371 | 33062.887 |
| NM_001007 | 62551.371 | 59284.047 | NM_005002 | 7131.204  | 9772.99   |
| NM_003017 | 14271.482 | 10849.662 | NM_006596 | 9955.32   | 12313.881 |
| NM_020366 | 7362.479  | 5275.9    | AK023214  | 38586.969 | 40277.891 |
| AK021608  | 3607.586  | 3489.643  | NM_001469 | 22163.691 | 20018.986 |
| NM_004297 | 2451.365  | 2280.99   | NM_003600 | 51845.207 | 45309.262 |
| NM_006044 | 9182.252  | 13874.078 | NM_017490 | 19255.971 | 18443.156 |
| NM_003635 | 5089.577  | 5920.796  | NM_002718 | 6778.728  | 6700.394  |
| NM_000662 | 3223.791  | 3734.927  | AK026727  | 9132.744  | 9855.621  |
| NM_000292 | 6081.962  | 6171.939  | NM_002830 | 1311.61   | 1135.377  |
| NM_003689 | 59494.652 | 58419.906 | NM_006247 | 17326.188 | 18515.473 |
| NM_016173 | 1234.805  | 1459.429  | AB032983  | 15671.96  | 16096.854 |
| NM_004427 | 16968.248 | 30965.768 | NM_018281 | 39435.289 | 41260.129 |
| U90549    | 12191.452 | 23427.469 | NM_004457 | 11255.448 | 13283.162 |
| NM_004965 | 57362.813 | 45505.09  | NM_014049 | 8123.357  | 9130.602  |
| AF312393  | 52363.191 | 43489.793 | NM_005396 | 5114.8    | 5936.645  |
| AF272898  | 15879.225 | 13788.021 | NM_004315 | 25190.674 | 28051.811 |
| AB037817  | 1322.45   | 1194.23   | NM_020166 | 20766.758 | 20415.021 |
| AB032951  | 13664.334 | 10588.509 | NM_003568 | 1780.71   | 1737.782  |
| NM_003417 | 557.082   | 594.217   | BC036375  | 30780.695 | 29786.482 |
| NM_005149 | 12483.857 | 10476.386 | NM_000496 | 957.671   | 1008.021  |
| AK024073  | 1562.224  | 944.89    | BF347926  | 18148.506 | 14902.474 |
| NM_018083 | 3469.406  | 2920.82   | N54821    | 34360.996 | 33691.59  |
| AL110188  | 9664.808  | 9329.543  | BI912037  | 19583.33  | 22608.156 |
| D70834    | 44965.883 | 48827.156 | AA454646  | 43285.02  | 48202.738 |
| NM_000970 | 60964.832 | 65220.641 | BF063899  | 4524.003  | 5489.617  |
| NM_012465 | 1687.647  | 1901.652  | U18087    | 58521.008 | 57475.586 |
| M60499    | 2697.809  | 4966.467  | U66349    | 4559.889  | 4923.617  |
| NM_001614 | 67040.844 | 78900.789 | AA057156  | 26593.711 | 28369.871 |
| NM_000366 | 850.952   | 954.839   | U19487    | 3496.437  | 3813.373  |
| NM_003833 | 47960.953 | 50626.547 | AF166327  | 59488.766 | 55260.324 |
| AK000868  | 11165.533 | 10600.523 | AF260739  | 10123.789 | 9382.335  |
| NM_001233 | 3480.855  | 3429.617  | AF531423  | 53697.047 | 53867.297 |
| NM_001234 | 2056.584  | 2376.187  | X76555    | 2895.784  | 3162.264  |
| AA485362  | 2215.726  | 3165.356  | NM_005432 | 22481.809 | 24004.52  |
| AJ222801  | 13637.137 | 12635.255 | L10386    | 34891.977 | 35252.074 |
| W72207    | 25108.131 | 23869.553 | AF061812  | 58572.797 | 54616.895 |
| BI772354  | 1553.873  | 1252.589  | AL136756  | 18063.699 | 19224.482 |
| AA733033  | 3175.317  | 2790.424  | NM_001478 | 60731.445 | 60220.961 |
| AA583574  | 2315.113  | 3012.407  | NM_002612 | 1419.114  | 1464.712  |
| AI690184  | 61337.48  | 57752.652 | AF135422  | 6379.623  | 5567.405  |
| T48692    | 514.07    | 953.8     | NM_005930 | 1298.839  | 1554.738  |
| AA927490  | 3073.774  | 3638.405  | Z36819    | 15723.779 | 14070.254 |
| NM_003779 | 666.455   | 1006.465  | NM_014847 | 62847.855 | 61626.918 |
| NM_020164 | 18004.488 | 14564.628 | NM_001195 | 559.845   | 723.742   |
| AK023521  | 17759.041 | 16897.803 | NM_014448 | 18209.598 | 19359.012 |

|           |           |           |           |           |           |
|-----------|-----------|-----------|-----------|-----------|-----------|
| NM_014267 | 33785.816 | 31733.15  | AL080157  | 19855.707 | 22983.559 |
| NM_001481 | 519.958   | 247.353   | NM_005100 | 1667.167  | 1703.555  |
| U30872    | 2237.276  | 2420.611  | NM_005308 | 9681.726  | 11945.717 |
| NM_020469 | 10266.612 | 9831.082  | NM_000911 | 3708.033  | 4044.411  |
| NM_002639 | 1917.615  | 3080.179  | NM_007227 | 3114.139  | 2986.159  |
| NM_014734 | 4071.972  | 6802.669  | NM_007023 | 2721.056  | 2636.404  |
| AK026408  | 2252.862  | 5210.3    | NM_005873 | 29287.15  | 26753.566 |
| NM_005025 | 1328.624  | 1324.305  | NM_004624 | 11567.074 | 12351.538 |
| NM_006307 | 894.343   | 706.118   | NM_014461 | 2289.485  | 2396.125  |
| M74782    | 4302.756  | 3639.244  | NM_003865 | 4313.923  | 4656.648  |
| NM_017818 | 4928.444  | 3980.75   | AB015330  | 54191.176 | 48942.645 |
| NM_020433 | 1338.106  | 1763.701  | NM_001455 | 9717.896  | 10938.459 |
| NM_001767 | 430.801   | 520.901   | NM_002385 | 17861.395 | 17558.227 |
| AF028823  | 8390.591  | 7979.845  | NM_001885 | 1773.019  | 1762.825  |
| NM_004295 | 63815.266 | 58022.621 | AF039196  | 2131.051  | 2508.52   |
| NM_002087 | 35449.246 | 28191.262 | NM_001463 | 781.02    | 939.288   |
| AB023154  | 2212.461  | 1732.917  | L09071    | 2470.324  | 2389.424  |
| NM_014585 | 1025.784  | 1004.551  | NM_005924 | 3134.453  | 3260.806  |
| AF200815  | 878.675   | 1400.81   | NM_019841 | 2421.958  | 2578.6    |
| NM_001056 | 1093.13   | 1294.88   | NM_003322 | 3272.129  | 4168.179  |
| AY026461  | 4824.877  | 4745.026  | NM_013365 | 9515.087  | 10641.185 |
| AK025708  | 5507.109  | 5341.259  | NM_005817 | 17498.855 | 19789.301 |
| NM_000405 | 1870.651  | 1921.916  | NM_003916 | 26199.17  | 22947.432 |
| NM_005564 | 57721.766 | 57725.109 | NM_002870 | 58753.387 | 56142.082 |
| NM_004508 | 5584.793  | 5892.047  | NM_002802 | 2128.694  | 2037.203  |
| AL137619  | 6585.753  | 6552.286  | NM_006363 | 14843.355 | 16893.752 |
| AB007859  | 1539.155  | 1917.032  | NM_020415 | 6899.038  | 8688.038  |
| NM_006754 | 740.703   | 815.44    | NM_014879 | 1084.45   | 1639.678  |
| NM_001127 | 4752.858  | 5609.421  | AL049667  | 12510.966 | 12993.653 |
| NM_012430 | 3735.886  | 3629.628  | NM_000334 | 29244.027 | 30994.754 |
| NM_003917 | 47966.344 | 45027.945 | NM_001504 | 22204.885 | 18124.631 |
| NM_007077 | 3370.783  | 3091.128  | NM_001565 | 2891.834  | 2720.041  |
| NM_002956 | 3365.968  | 3745.853  | NM_000758 | 19367.162 | 20052.076 |
| AB018739  | 3899.844  | 4197.047  | M17017    | 2269.756  | 2614.326  |
| NM_006750 | 56237.09  | 50056.41  | NM_002990 | 10903.312 | 12655.657 |
| AK001913  | 5339.174  | 5642.241  | NM_002432 | 13420.354 | 13823.076 |
| NM_004292 | 2365.621  | 2645.622  | NM_012420 | 1601.7    | 1855.759  |
| NM_015484 | 6197.424  | 5762.884  | NM_002343 | 15742.567 | 18429.912 |
| NM_018046 | 1085.001  | 1002.215  | AB033037  | 5386.628  | 6246.503  |
| NM_013316 | 5009.438  | 4934.712  | L40400    | 20752.623 | 20806.684 |
| M20701    | 41054.785 | 40609.656 | AK025688  | 6632.593  | 6844.145  |
| NM_002912 | 2483.954  | 4071.64   | NM_004457 | 9529.541  | 8428.599  |
| NM_013284 | 4449.304  | 4675.082  | NM_014049 | 5609.857  | 5627.593  |
| NM_006739 | 2775.184  | 2193.843  | NM_005396 | 5181.371  | 5284.729  |
| NM_013274 | 6038.433  | 6086.108  | NM_004315 | 24964.561 | 27300.797 |
| AL050187  | 1434.172  | 1447.904  | NM_020166 | 20708.135 | 20651.803 |
| NM_007127 | 522.476   | 631.761   | S56138    | 840.057   | 1070.698  |
| NM_012387 | 30808.436 | 33315.477 | AK023860  | 29333.748 | 38776.289 |
| NM_014735 | 1785.014  | 2323.44   | NM_000031 | 9156.801  | 9921.314  |
| NM_004252 | 33769.211 | 50293.82  | NM_002085 | 51029.945 | 55358.801 |
| AF172929  | 7026.366  | 8075.346  | AK026061  | 2037.861  | 1965.582  |
| NM_006398 | 29722.023 | 30394.703 | NM_016286 | 28887.846 | 28914.906 |
| AK025655  | 3188.21   | 3689.357  | NM_001567 | 11255.886 | 10735.078 |

|           |           |           |           |           |           |
|-----------|-----------|-----------|-----------|-----------|-----------|
| NM_001362 | 1686.121  | 1089.685  | NM_004905 | 27548.418 | 23653.27  |
| NM_004056 | 1295      | 1039.972  | AF217971  | 26092.24  | 24414.875 |
| NM_001614 | 64823.164 | 78467.797 | NM_001925 | 2203.021  | 2498.056  |
| NM_000366 | 850.456   | 801.216   | AF245517  | 4827.734  | 4688.763  |
| NM_003833 | 47902.02  | 49180.344 | NM_004137 | 1948.996  | 2410.813  |
| AK000868  | 12765.091 | 13705.668 | NM_014407 | 2726.7    | 2875.222  |
| NM_001233 | 3404.769  | 3788.998  | NM_004982 | 10811.188 | 12445.853 |
| NM_001234 | 1846.494  | 2093.031  | NM_001694 | 59910.109 | 62226.102 |
| BF679789  | 11506.737 | 13833.246 | AF286370  | 4460.406  | 5448.45   |
| H97792    | 18665.014 | 22712.314 | NM_000217 | 2229.23   | 2487.196  |
| L33404    | 939.658   | 1374.517  | NM_004732 | 13600.547 | 14563.133 |
| M13509    | 4276.651  | 5407.815  | AK026180  | 3055.131  | 3070.106  |
| X04076    | 6873.384  | 6220.716  | NM_018349 | 13723.119 | 13873.888 |
| W95082    | 279.017   | 617.031   | NM_001478 | 64869.258 | 60824.824 |
| AA485362  | 2265.971  | 2259.595  | NM_002612 | 1130.112  | 1115.022  |
| AJ222801  | 12260.959 | 12013.445 | AF135422  | 4769.612  | 4341.275  |
| W72207    | 25586.824 | 30146.078 | NM_004479 | 57926.781 | 52233.02  |
| BI772354  | 1580.904  | 1932.449  | NM_002610 | 4166.54   | 3304.926  |
| AA733033  | 3366.072  | 4347.704  | AF070587  | 8718.945  | 5718.031  |
| AA583574  | 2379.126  | 3567.7    | BE250526  | 3842.81   | 3404.409  |
| U67733    | 1364.825  | 1247.226  | NM_016819 | 12736.225 | 9983.522  |
| AI690184  | 58033.422 | 61943.852 | NM_012222 | 33673.902 | 32999.02  |
| T48692    | 688.592   | 716.702   | NM_005002 | 6325.929  | 6475.815  |
| AA927490  | 3476.035  | 4309.505  | NM_006596 | 9197.979  | 8622.158  |
| NM_005052 | 11576.379 | 10609.496 | AK023214  | 41166.719 | 40760.414 |
| BF038439  | 859.835   | 888.171   | NM_001469 | 21425.727 | 18450.52  |
| AF319476  | 1427.09   | 1611.836  | NM_003600 | 46407.75  | 43052.801 |
| NM_014267 | 35433.168 | 36496.656 | NM_017490 | 18542.555 | 17631.801 |
| U30872    | 2587.162  | 2694.722  | NM_002718 | 7645.889  | 7819.038  |
| AF111783  | 638.942   | 633.061   | AK026727  | 8586.784  | 10247.995 |
| NM_020469 | 10148.542 | 10724.479 | NM_002830 | 1440.497  | 1167.84   |
| NM_002639 | 1770.564  | 1868.632  | NM_006247 | 17707.699 | 19803.199 |
| NM_014734 | 4310.405  | 5024.443  | AB032983  | 14984.301 | 14730.419 |
| NM_002289 | 1966.603  | 2503.087  | NM_018281 | 39180.348 | 39462.566 |
| AK026408  | 3235.767  | 3887.05   | CY3Cy5    | 692.3     | 123.133   |
| NM_005025 | 475.868   | 629.179   | NM_000945 | 2151.865  | 1120.867  |
| NM_006307 | 1101.947  | 1087.722  | NM_002574 | 67403.594 | 68425.531 |
| M74782    | 3917.55   | 2736.424  | NM_001310 | 3960.396  | 2137.536  |
| NM_017818 | 4596.934  | 4487.777  | AK026924  | 4059.423  | 1658.992  |
| NM_020433 | 1301.422  | 1867.302  | AL122047  | 2959.364  | 1586.457  |
| NM_001767 | 604.63    | 913.257   | AF052091  | 757.505   | 518.298   |
| AF028823  | 11136.788 | 15429.317 | AK024447  | 53325.234 | 48637.809 |
| NM_004970 | 476.959   | 683.853   | AF052145  | 782.796   | 886.481   |
| NM_004295 | 58384.805 | 64109.094 | AF086458  | 2350.185  | 3065.147  |
| NM_002087 | 39048.648 | 44102.355 | AF086548  | 1620.544  | 1239.92   |
| AB023154  | 2267.852  | 1858.541  | AK023717  | 1914.711  | 1130.765  |
| NM_014585 | 1282.561  | 1907.165  | AK022294  | 1333.778  | 974.505   |
| AF200815  | 1321.812  | 2009.61   | AF086507  | 998.684   | 597.829   |
| NM_012465 | 1776.89   | 1383.724  | U79289    | 629.918   | 513.654   |
| M60499    | 3470.78   | 4238.564  | NM_014028 | 2015.45   | 901.469   |
| AY026461  | 5305.844  | 5977.142  | NM_000945 | 1822.016  | 1162.471  |
| AK025708  | 6401.921  | 5481.29   | NM_002574 | 62791.426 | 55425.547 |
| NM_000405 | 1749.501  | 2288.567  | SR1       | 62111.289 | 56753.426 |

|           |           |           |           |           |           |
|-----------|-----------|-----------|-----------|-----------|-----------|
| NM_005564 | 56372.965 | 69561.523 | SR3       | 40528.91  | 34695.598 |
| NM_004508 | 5190.378  | 6795.852  | SR5       | 6622.302  | 10474.026 |
| AL137619  | 10034.507 | 11288.592 | SR7       | 6314.306  | 51404.238 |
| AB007859  | 1482.578  | 1893.608  | SR9       | 16300.658 | 3506.256  |
| NM_006754 | 730.248   | 1235.982  | CY3Cy5    | 1221.55   | 126.409   |
| NM_001127 | 7551.485  | 15590.757 | AK026923  | 2087.143  | 794.584   |
| NM_012430 | 5692.274  | 8851.79   | U61091    | 443.626   | 271.664   |
| NM_003917 | 54759.93  | 57190.598 | AK021691  | 34188.438 | 31634.93  |
| NM_007077 | 4251.246  | 6394.362  | AK023595  | 630.703   | 1022.409  |
| NM_002956 | 4079.473  | 5004.828  | AK001357  | 559.916   | 467.47    |
| AB018739  | 4032.513  | 4838.049  | NM_015721 | 4901.662  | 3633.943  |
| NM_006750 | 56801.953 | 57447.594 | AF086298  | 1177.939  | 802.416   |
| NM_020164 | 21056.465 | 16400.838 | AK027238  | 885.482   | 634.378   |
| AK023521  | 18738.939 | 15227.799 | AK000032  | 459.943   | 383.349   |
| NM_004292 | 2465.996  | 3114.491  | S94540    | 55694.914 | 59489.105 |
| NM_015484 | 7922.198  | 8925.334  | U79297    | 1260.688  | 1636.935  |
| NM_018046 | 1016.015  | 856.557   | AK002164  | 1091.233  | 2029.102  |
| NM_013316 | 5271.547  | 6103.089  | AF052122  | 25138.164 | 24513.256 |
| M20701    | 38018.906 | 40610.324 | AK022416  | 822.108   | 576.588   |
| NM_002912 | 2397.61   | 2968.91   | AK023224  | 1655.892  | 842.967   |
| NM_013284 | 4837.153  | 6700.868  | AK023731  | 1175.574  | 530.744   |
| NM_006739 | 2757.034  | 4440.217  | AK022442  | 461.485   | 338.22    |
| NM_013274 | 6510.246  | 6577.21   | AK023336  | 577.086   | 454.259   |
| AL050187  | 1027.576  | 1188.435  | AK023727  | 2112.202  | 3561.339  |
| NM_007127 | 588.664   | 880.871   | AK025271  | 735.32    | 746.236   |
| NM_012387 | 32498.922 | 34804.625 | AF086204  | 5761.642  | 3680.313  |
| NM_014735 | 1720.999  | 2345.699  | NM_007021 | 1370.711  | 703.371   |
| NM_004252 | 31890.619 | 44010.43  | AK026283  | 446.26    | 326.158   |
| AF172929  | 9503.817  | 19508.088 | AK023065  | 366.137   | 474.174   |
| NM_006398 | 30834.652 | 43892.371 | NM_017678 | 422.435   | 361.081   |
| AK025655  | 4559.076  | 8146.84   | AK021570  | 585.143   | 606.252   |
| NM_001362 | 1494.976  | 1798.829  | AL360204  | 846.331   | 1114.486  |
| NM_004056 | 1177.616  | 1140.467  | AK000103  | 1254.219  | 1192.056  |
| NM_001056 | 1547.006  | 1726.405  | AK026294  | 360.222   | 725.453   |
| NM_003833 | 51726.066 | 58486.863 | AF085959  | 1028.788  | 1936.444  |
| AK000868  | 14937.938 | 17070.127 | AF075107  | 743.981   | 1255.307  |
| NM_001233 | 3545.464  | 4203.075  | AK023104  | 1361.077  | 3104.117  |
| NM_001234 | 2006.97   | 2295.288  | AK022181  | 1582.171  | 3244.965  |
| BF679789  | 13458.681 | 18488.035 | NM_018474 | 8035.537  | 3287.015  |
| H97792    | 17680.221 | 21920.342 | AK024937  | 2990.973  | 1727.838  |
| L33404    | 1528.455  | 2005.91   | D17178    | 1661.045  | 872.476   |
| M13509    | 5123.631  | 6873.548  | AK022094  | 2287.394  | 1144.914  |
| X04076    | 8596.932  | 12931.985 | AK026695  | 1093.485  | 585.716   |
| W95082    | 704.478   | 1309.371  | AK022220  | 575.387   | 372.488   |
| AA485362  | 2849.26   | 3029.231  | AL137539  | 378.87    | 324.696   |
| AJ222801  | 17295.014 | 19980.436 | AK000141  | 6610.584  | 3653.082  |
| W72207    | 26267.859 | 28751.234 | AL137758  | 3500.576  | 2666.591  |
| BI772354  | 1882.146  | 1730.491  | AK025786  | 1107.497  | 636.731   |
| AA733033  | 3493.507  | 4420.947  | AK024188  | 951.479   | 673.2     |
| AA583574  | 2290.84   | 3184.017  | AK026820  | 551.782   | 460.5     |
| U67733    | 723.002   | 1084.891  | AK001716  | 3336.28   | 1979.127  |
| AI690184  | 59788.246 | 60916.922 | AF113683  | 533.602   | 383.411   |
| T48692    | 1273.011  | 1820.672  | NM_014095 | 326.125   | 436.451   |



|           |           |           |           |           |           |
|-----------|-----------|-----------|-----------|-----------|-----------|
| AA927490  | 4110.873  | 7700.935  | AK026821  | 1962.869  | 1329.554  |
| NM_005052 | 10740.502 | 12838.907 | AK026280  | 3087.934  | 3592.132  |
| BF038439  | 855.734   | 1049.153  | AF113017  | 12987.918 | 18846.4   |
| AF319476  | 1618.198  | 2429.559  | AL080232  | 22254.109 | 35998.129 |
| AK001913  | 5975.565  | 6836.796  | AK001120  | 20370.818 | 29655.443 |
| NM_002289 | 2036.368  | 1794.296  | AF264629  | 816.684   | 1181.312  |
| AK026408  | 2904.636  | 3333.387  | AK021980  | 4939.603  | 2257.574  |
| NM_006307 | 945.948   | 1428.126  | S46402    | 1177.161  | 544.696   |
| M74782    | 3235.013  | 3019.483  | AF075048  | 524.548   | 403.663   |
| NM_017818 | 4234.563  | 4711.614  | Z83940    | 1317.103  | 931.715   |
| NM_020433 | 1233.578  | 1693.385  | NM_005800 | 1764.771  | 1057.414  |
| NM_001767 | 557.533   | 712.162   | AF019617  | 14759.592 | 14590.754 |
| AF028823  | 12501.349 | 15618.42  | AL137305  | 6417.211  | 4492.114  |
| NM_004970 | 529.301   | 959.269   | NM_005290 | 869.292   | 1226.503  |
| NM_004295 | 60214.492 | 64447.199 | AK025802  | 1515.512  | 1252.463  |
| NM_002087 | 40939.434 | 43362.559 | AF085973  | 728.296   | 572.183   |
| AB023154  | 2140.917  | 1724.423  | NM_018013 | 2247.152  | 1460.8    |
| NM_001714 | 677.153   | 560.313   | AK026873  | 3042.871  | 2289.983  |
| NM_014585 | 1095.247  | 1259.324  | AK026394  | 3898.23   | 3176.542  |
| AF200815  | 1080.355  | 1885.654  | NM_005448 | 1254.913  | 918.779   |
| NM_014564 | 706.948   | 1096.732  | AK025943  | 34814.582 | 15817.938 |
| NM_013441 | 6485.814  | 6644.651  | BG106479  | 1023.31   | 1104.919  |
| NM_014421 | 3898.55   | 5349.496  | AF130069  | 28131.176 | 23088.387 |
| AB033028  | 1753.967  | 2856.01   | AL109669  | 4319.373  | 5191.728  |
| NM_017680 | 1265.545  | 2569.403  | AB037766  | 4207.539  | 4705.014  |
| NM_012465 | 1698.425  | 2027.038  | AK026995  | 1063.867  | 1559.466  |
| M60499    | 3225.43   | 3492.387  | AL133091  | 949.893   | 1526.868  |
| NM_001614 | 67529.195 | 62997.406 | BF842915  | 835.6     | 1771.747  |
| NM_000366 | 1236.559  | 1358.339  | X82545    | 14176.851 | 15114.048 |
| NM_004300 | 3398.212  | 2989.067  | AF302079  | 20066.018 | 7931.521  |
| AB007859  | 1468.786  | 1722.849  | AJ224167  | 677.018   | 600.246   |
| NM_006754 | 694.975   | 939.885   | NM_002550 | 813.934   | 461.076   |
| NM_001127 | 5292.313  | 7745.103  | NM_000692 | 1846.461  | 843.859   |
| NM_012430 | 4572.236  | 7390.502  | AF086062  | 1759.507  | 1459.727  |
| NM_003917 | 59009.152 | 57344.371 | AF000268  | 167.88    | 987.243   |
| NM_007077 | 5041.662  | 5859.925  | L47668    | 36297.957 | 43855.988 |
| NM_002956 | 3923.643  | 4594.422  | NM_017920 | 2272.737  | 2673.968  |
| AB018739  | 3605.316  | 3702.703  | AK025345  | 1345.069  | 986.272   |
| NM_006750 | 58108.316 | 54919.977 | D25274    | 16847.045 | 11259.261 |
| NM_020164 | 18456.164 | 13402.692 | U84520    | 7028.443  | 4617.344  |
| AK023521  | 16718.402 | 16288.759 | AL133616  | 3821.174  | 2925.011  |
| NM_014267 | 37284.203 | 43749.953 | AK026382  | 3771.352  | 1950.418  |
| NM_001481 | 733.633   | 767.63    | AK091169  | 5167.208  | 4381.746  |
| U30872    | 3274.926  | 4687.767  | NM_014745 | 55143.969 | 51283.316 |
| AF111783  | 877.886   | 1077.184  | AF086026  | 14023.047 | 13567.478 |
| NM_020469 | 11543.53  | 12127.241 | AL133011  | 1420.842  | 1143.331  |
| NM_002639 | 2298.155  | 2216.401  | NM_016300 | 2076.971  | 2538.611  |
| NM_014734 | 4673.977  | 4868.947  | NM_015607 | 18554.125 | 20802.082 |
| NM_001362 | 1887.284  | 1951.567  | AK026955  | 1628.121  | 3172.409  |
| NM_004056 | 894.209   | 849.862   | AL110202  | 30848.045 | 33967.895 |
| NM_001056 | 2012.668  | 2689.437  | NM_006228 | 2332.098  | 961.988   |
| AY026461  | 5414.094  | 6447.108  | NM_003768 | 17271.889 | 6524.292  |
| AK025708  | 6766.313  | 7017.287  | NM_018393 | 2178.779  | 1314.079  |

|           |           |           |           |           |           |
|-----------|-----------|-----------|-----------|-----------|-----------|
| NM_00040E | 2489.659  | 3487.243  | BF032535  | 2532.605  | 1647.437  |
| NM_005564 | 61590.02  | 59321.613 | NM_018332 | 3136.201  | 1626.778  |
| NM_00450E | 5655.228  | 5064.753  | NM_00509E | 4958.779  | 3860.036  |
| NM_00640E | 55787.578 | 52981.855 | NM_00676C | 1624.67   | 2841.125  |
| NM_00674E | 690.176   | 1019.829  | NM_01228E | 8547.771  | 9480.289  |
| NM_004694 | 3701.191  | 4706.233  | AB037775  | 797.696   | 1711.706  |
| NM_000324 | 1689.572  | 2270.982  | L27560    | 1200.899  | 1484.53   |
| AL137619  | 9273.387  | 10408.606 | AK022517  | 4050.517  | 3982.722  |
| NM_00361E | 583.907   | 505.233   | NM_00032E | 28357.846 | 21838.809 |
| NM_00505E | 10125.998 | 10976.28  | NM_001182 | 16072.904 | 8667.912  |
| BF038439  | 847.409   | 1023.245  | NM_00033E | 2623.242  | 2086.309  |
| AF319476  | 1165.075  | 1145.196  | NM_00017E | 7667.524  | 6560.762  |
| AK001913  | 5353.935  | 6201.51   | NM_002297 | 5368.01   | 3504.13   |
| NM_00429E | 2502.642  | 2752.433  | AB040968  | 22439.055 | 19458.1   |
| NM_015484 | 6383.467  | 6209.262  | X85323    | 1310.189  | 1576.229  |
| NM_01804E | 1204.908  | 1307.635  | U17615    | 3974.458  | 3977.823  |
| NM_01331E | 6814.593  | 8449.455  | NM_00530E | 5329.51   | 5399.823  |
| M20701    | 41199.059 | 36773.652 | NM_01612E | 15906.426 | 23973.156 |
| NM_00291E | 2919.985  | 3145.019  | U84119    | 2045.941  | 4503.492  |
| NM_013284 | 4918.679  | 5112.727  | NM_00360E | 5366.58   | 6793.431  |
| NM_00673E | 3120.091  | 2508.766  | NM_00646C | 3509.009  | 1885.248  |
| NM_013274 | 5487.729  | 5075.316  | L34156    | 1349.173  | 836.435   |
| AL050187  | 1178.549  | 1196.734  | NM_00374E | 802.448   | 613.275   |
| NM_007127 | 1055.77   | 1265.621  | NM_003557 | 5542.303  | 5999.28   |
| NM_012387 | 36788.375 | 52298.453 | NM_001257 | 6923.421  | 7759.377  |
| NM_01473E | 1441.535  | 2114.512  | NM_00179E | 874.454   | 1613.508  |
| NM_00425E | 30226.084 | 39570.398 | D85245    | 2804.772  | 4894.491  |
| AF172929  | 7173.438  | 7773.924  | NM_00094E | 1522.926  | 2063.374  |
| NM_00639E | 30940.42  | 32132.176 | NM_00465E | 6327.293  | 4749.468  |
| AK025655  | 3823.839  | 4190.855  | NM_00125C | 25279.838 | 17703.518 |
| CY3Cy5    | 927.994   | 98.018    | AF298812  | 7560.988  | 10589.008 |
| NM_01224E | 30872.852 | 39006.652 | NM_00496E | 2058.79   | 1639.702  |
| NM_13326E | 2029.187  | 1850.869  | AJ249900  | 681.735   | 762.776   |
| AF086176  | 564.511   | 615.185   | AK022581  | 7305.173  | 4273.425  |
| NM_01774E | 933.946   | 750.214   | NM_018054 | 2661.044  | 2283.084  |
| NM_00510E | 993.644   | 882.88    | NM_00618E | 1420.213  | 1898.855  |
| AK02229E  | 3286.712  | 2389.036  | NM_00095E | 12022.849 | 13084.479 |
| AB051436  | 2066.853  | 925.997   | NM_001401 | 842.445   | 676.175   |
| AK026482  | 9124.348  | 4484.597  | NM_013271 | 38249.609 | 25601.939 |
| AL137473  | 2178.845  | 1459.851  | NM_004157 | 6523.666  | 12027.75  |
| AJ001873  | 4998.461  | 2606.256  | NM_000684 | 925.959   | 2401.028  |
| AL137476  | 3733.635  | 2075.122  | NM_007354 | 1077.755  | 636.898   |
| AF052174  | 2576.364  | 1467.068  | U67037    | 1242.409  | 775.145   |
| AF070590  | 721.612   | 328.564   | NM_00496C | 28075.564 | 13490.729 |
| NM_01224E | 17476.697 | 7553.61   | AF272370  | 19621.246 | 10909.577 |
| NM_13326E | 1308.17   | 672.17    | AF130050  | 22674.438 | 14758.596 |
| SR2       | 26023.74  | 9161.018  | AF119898  | 1015.469  | 1691.936  |
| SR4       | 7796.667  | 3092.709  | AK023045  | 782.092   | 952.415   |
| SR6       | 983.899   | 647.191   | NM_012197 | 8968.508  | 10103.562 |
| SR8       | 4139.197  | 8744.036  | AK024016  | 6929.105  | 11913.475 |
| SR10      | 13421.031 | 2178.222  | NM_003581 | 3546.173  | 6549.128  |
| AK024432  | 1059.938  | 1357.522  | NM_00288E | 929.787   | 1469.161  |
| NM_018067 | 6320.931  | 5159.579  | NM_012407 | 1967.602  | 1944.408  |

|           |          |          |           |           |           |
|-----------|----------|----------|-----------|-----------|-----------|
| NM_018956 | 9331.566 | 7229.74  | AF302505  | 2035.913  | 1890.746  |
| NM_014787 | 1158.718 | 930.644  | NM_007186 | 3786.414  | 2644.475  |
| AL122109  | 351.547  | 469.801  | NM_007044 | 3040.765  | 2228.712  |
| AF074988  | 1433.121 | 922.489  | AF294326  | 10412.324 | 6183.668  |
| AK024946  | 555.13   | 391.754  | NM_014678 | 2280.842  | 1862.828  |
| AK026375  | 2514.161 | 1395.254 | NM_012317 | 57259.121 | 58295.172 |
| U85992    | 952.888  | 616.983  | NM_017853 | 7208.316  | 4663.231  |
| AF131745  | 2078.208 | 656.033  | NM_016097 | 9867.104  | 9037.956  |
| AL117565  | 2747.237 | 1390.383 | AB035301  | 935.163   | 818.995   |
| AK022109  | 1127.083 | 650.722  | AB046800  | 16403.881 | 23995.74  |
| U00953    | 390.053  | 416.23   | NM_002162 | 7046.481  | 10282.619 |
| AK025650  | 1411.069 | 1338.706 | NM_006438 | 3668.354  | 5537.773  |
| AK026401  | 1443.18  | 1717.396 | AF209198  | 8505.609  | 4480.287  |
| AK026773  | 847.709  | 814.491  | L09247    | 576.013   | 408.91    |
| AK026452  | 416.914  | 118.597  | M69012    | 58483.141 | 58391.648 |
| AK022604  | 737.817  | 376.07   | NM_016347 | 548.443   | 378.734   |
| U66048    | 600.61   | 497.295  | NM_006936 | 24696.443 | 16596.061 |
| AK023401  | 3145.139 | 1104.974 | NM_001327 | 39339.098 | 55849.801 |
| AK001865  | 1046.653 | 479.927  | AF321182  | 621.975   | 888.505   |
| AK024035  | 10656.47 | 5361.533 | AB037722  | 1447.054  | 3538.074  |
| AL050079  | 863.138  | 587.728  | NM_003652 | 1013.845  | 1442.501  |
| AL080233  | 861.242  | 445.918  | NM_000063 | 2180.857  | 1835.193  |
| AL117663  | 624.574  | 564.204  | NM_018389 | 2028.841  | 1338.975  |
| NM_014293 | 2758.109 | 1765.652 | AB033026  | 825.711   | 1212.615  |
| AK023429  | 336.709  | 297.05   | AF104914  | 24002.816 | 21510.033 |
| AK022276  | 602.32   | 502.579  | NM_014716 | 11570.312 | 8027.046  |
| AK026881  | 453.338  | 250.942  | AB002354  | 348.728   | 360.953   |
| AL133653  | 234.112  | 344.923  | AK023845  | 2941.567  | 2551.87   |
| AK023774  | 646.794  | 538.468  | NM_002638 | 24965.188 | 38342.633 |
| AL049377  | 452.691  | 402.645  | NM_016487 | 4047.289  | 5274.302  |
| AK001432  | 832.336  | 759.617  | NM_005808 | 23939.227 | 21168.357 |
| AL133568  | 3001.304 | 2489.623 | NM_006401 | 52323.117 | 58980.191 |
| AF009265  | 2024.373 | 1570.224 | NM_015913 | 20210.848 | 31748.473 |
| AF009309  | 1803.245 | 1117.471 | NM_005157 | 15376.001 | 22244.707 |
| NM_002360 | 1612.561 | 891.238  | NM_018169 | 3393.04   | 2535.337  |
| AF009322  | 485.428  | 449.866  | AK021452  | 993.656   | 542.984   |
| AF056425  | 1050.647 | 432.379  | NM_004506 | 5046.463  | 3459.835  |
| NM_018033 | 5152.838 | 2659.736 | S74529    | 56416.434 | 56706.254 |
| AK001945  | 480.509  | 399.145  | NM_020227 | 573.196   | 939.13    |
| AK021541  | 232.137  | 186.302  | NM_005933 | 1091.651  | 1887.327  |
| AK021630  | 547.663  | 539.724  | NM_005596 | 1574.97   | 2004.75   |
| AK021831  | 564.77   | 489.934  | NM_001421 | 1064.214  | 2393.308  |
| NM_020153 | 763.065  | 694.616  | U97060    | 1085.667  | 1557.996  |
| NM_005321 | 942.854  | 818.745  | M73837    | 3261.149  | 2249.808  |
| AF073520  | 3724.486 | 3137.373 | U69127    | 52436     | 31044.646 |
| AF143885  | 293.56   | 262.27   | NM_005839 | 14896.28  | 5281.552  |
| NM_014015 | 4322.004 | 3576.323 | AK023379  | 5264.172  | 3496.555  |
| AK026839  | 924.934  | 757.632  | NM_006076 | 941.362   | 689.973   |
| AJ008123  | 4336.757 | 3173.982 | AK021904  | 11937.43  | 6555.369  |
| AJ008156  | 729.537  | 576.767  | -         | 3766.506  | 6689.697  |
| AF161437  | 2372.483 | 1697.443 | NM_018292 | 1489.092  | 1659.186  |
| AF086158  | 5377.863 | 2476.667 | AL049705  | 12137.485 | 14175.733 |
| AF086050  | 1739.865 | 1131.067 | NM_015458 | 8833.859  | 14478.837 |

|           |           |           |           |           |           |
|-----------|-----------|-----------|-----------|-----------|-----------|
| AF147375  | 850.452   | 446.365   | D13540    | 13569.537 | 17395.465 |
| X51524    | 2729.567  | 1410.801  | NM_016570 | 12323.159 | 17520.373 |
| AK025759  | 2351.665  | 1827.911  | NM_004273 | 665.621   | 451.037   |
| AK024105  | 701.398   | 417.344   | NM_000690 | 2285.999  | 1214.155  |
| AJ238556  | 545.276   | 299.519   | NM_000155 | 15320.191 | 7220.126  |
| AK021516  | 1183.204  | 720.613   | AK024489  | 1821.938  | 1817.743  |
| Z70699    | 415.377   | 300.396   | NM_000181 | 5571.426  | 6663.811  |
| NM_006895 | 1456.333  | 980.73    | NM_000667 | 410.272   | 765.75    |
| AL080066  | 11422.697 | 10909.238 | NM_014121 | 1683.572  | 4299.442  |
| AL137620  | 624.896   | 745.179   | NM_006730 | 5574.457  | 5286.614  |
| NM_005294 | 1695.274  | 1575.317  | NM_005644 | 4251.042  | 8054.635  |
| AK024362  | 698.504   | 630.336   | NM_018442 | 13193.144 | 13570.033 |
| AF118068  | 2549.26   | 3209.08   | AF182416  | 15438.321 | 9122.465  |
| NM_004164 | 360.26    | 534.339   | NM_005995 | 33624.016 | 16236.334 |
| NM_019015 | 1052.243  | 877.4     | NM_006015 | 1320.053  | 785.314   |
| M87931    | 434.932   | 502.04    | NM_004634 | 3167.309  | 2303.453  |
| NM_003544 | 39038.551 | 14913.557 | NM_002017 | 4941.897  | 4619.344  |
| AK001187  | 1211.16   | 613.679   | NM_017523 | 13543.062 | 7439.475  |
| NM_003525 | 9657.115  | 6447.808  | NM_002382 | 49390.941 | 52375.344 |
| AF056436  | 1563.631  | 966.956   | NM_002155 | 1363.454  | 1702.802  |
| AB023191  | 847.238   | 517.109   | U13223    | 25709.926 | 19125.5   |
| AK027212  | 3988.148  | 2168.24   | NM_016270 | 7872.259  | 8279.016  |
| X56197    | 726.422   | 524.729   | AF269249  | 1788.619  | 3500.713  |
| NM_005195 | 2738.295  | 1541.98   | X51417    | 1679.399  | 2413.762  |
| U90905    | 666.355   | 718.489   | D31763    | 12099.258 | 10992.865 |
| AF161422  | 946.995   | 737.379   | AB040889  | 444.532   | 912.69    |
| AL137384  | 613.372   | 199.873   | NM_014815 | 3456.406  | 3333.569  |
| AF070619  | 1148.224  | 737.943   | NM_005443 | 4785.539  | 3188.823  |
| NM_000787 | 594.427   | 894.528   | NM_007221 | 12742.636 | 6155.384  |
| U57962    | 2793.35   | 5634.693  | X54163    | 54798.336 | 32530.955 |
| NM_016175 | 5707.825  | 5994.165  | AK025395  | 1703.087  | 1207.359  |
| NM_005574 | 7825.463  | 5744.134  | NM_000385 | 1746.502  | 3207.784  |
| NM_017895 | 7763.219  | 6329.337  | X58377    | 577.226   | 993.77    |
| NM_001612 | 1865.444  | 1416.372  | NM_002465 | 788.468   | 1826.27   |
| AK027002  | 2509.433  | 2635.781  | BI830936  | 1799.069  | 2260.021  |
| AB025254  | 2211.728  | 2443.389  | U79292    | 42133.945 | 44287.227 |
| NM_004081 | 1023.123  | 1001.363  | AA947915  | 971.302   | 807.72    |
| AK001039  | 2637.236  | 2066.968  | BI830753  | 1632.308  | 1497      |
| AK026465  | 1114.632  | 816.242   | X68314    | 3054.678  | 2473.121  |
| AK024321  | 454.448   | 377.537   | X71973    | 40925.664 | 39415.164 |
| U52834    | 295.85    | 310.016   | T49651    | 34733.617 | 33130.125 |
| M34428    | 227.508   | 272.126   | N51014    | 2005.277  | 1908.611  |
| NM_003532 | 714.967   | 517.292   | BE392471  | 26141.123 | 21701.744 |
| NM_017865 | 6178.658  | 2962.794  | AI802950  | 6639.848  | 8162.529  |
| AF075100  | 419.749   | 356.441   | AI741278  | 490.228   | 740.589   |
| AF203447  | 7520.657  | 4238.224  | AA682423  | 1399.405  | 1306.5    |
| NM_018502 | 1504.348  | 1108.784  | AL043686  | 5924.485  | 6612.696  |
| AB040976  | 8064.776  | 8409.018  | AA490172  | 3574.439  | 5437.077  |
| NM_018641 | 2174.435  | 2515.817  | AA775212  | 4944.626  | 5571.746  |
| NM_002221 | 2730.048  | 2716.051  | NM_000402 | 2834.344  | 4369.06   |
| NM_002371 | 518.042   | 681.044   | AK026266  | 47734.938 | 37216.902 |
| AK024502  | 6532.451  | 4475.517  | NM_007124 | 20101.645 | 13160.775 |
| NM_001124 | 1839.378  | 3024.643  | NM_003175 | 11074.021 | 4986.774  |

|           |           |           |           |           |           |
|-----------|-----------|-----------|-----------|-----------|-----------|
| NM_004586 | 1950.063  | 2056.138  | NM_000723 | 2034.926  | 851.262   |
| NM_004844 | 3179.674  | 2377.092  | AL096751  | 7501.628  | 9840.873  |
| NM_000051 | 1912.433  | 1682.778  | NM_000364 | 1120.934  | 1748.458  |
| NM_005709 | 343.115   | 407.075   | AF026920  | 8885.803  | 14813.931 |
| NM_004180 | 4695.277  | 2847.005  | NM_004931 | 12990.435 | 21362.889 |
| NM_004786 | 17281.578 | 7258.342  | NM_000607 | 27322.951 | 41191.41  |
| AF302109  | 655.872   | 414.624   | AB011099  | 802.771   | 1455.552  |
| AL117485  | 8384.769  | 5518.299  | AF090409  | 308.29    | 266.012   |
| NM_003505 | 385.326   | 317.71    | NM_002575 | 4860.474  | 3717.876  |
| NM_007191 | 1315.262  | 964.701   | NM_004244 | 6577.54   | 6127.234  |
| AL109667  | 479.519   | 403.794   | NM_003371 | 59734.563 | 55397.043 |
| NM_000840 | 383.216   | 242.082   | AK023114  | 6967.031  | 5202.034  |
| AJ008142  | 32575.545 | 34927.219 | NM_003678 | 5983.114  | 8691.295  |
| NM_001343 | 1693.818  | 2134.171  | NM_012301 | 3617.471  | 3576.007  |
| NM_007275 | 15489.162 | 13406.147 | NM_000680 | 648.963   | 1204.689  |
| NM_019025 | 42485.527 | 30715.359 | NM_005631 | 538.65    | 333.683   |
| NM_018461 | 4010.603  | 3408.656  | NM_014938 | 7586.463  | 11697.82  |
| AF235023  | 3115.594  | 2554.573  | AF049460  | 1124.329  | 2193.731  |
| NM_006910 | 3015.515  | 2181.282  | AK001500  | 2289.683  | 1165.079  |
| AF162667  | 2103.584  | 2352.905  | NM_006774 | 1602.78   | 1727.666  |
| AB046847  | 1898.214  | 1262.297  | NM_020129 | 3866.681  | 4792.227  |
| NM_000447 | 1945.138  | 1477.214  | Y16521    | 6522.561  | 9304.897  |
| NM_006354 | 3076.452  | 2520.558  | AL050371  | 10246.337 | 16102.649 |
| AF303378  | 3873.797  | 2385.182  | NM_002651 | 5005.952  | 8238.389  |
| NM_016037 | 8093.229  | 3621.884  | NM_002413 | 17662.516 | 18291.48  |
| NM_000043 | 3624.363  | 3301.85   | NM_017577 | 1184.961  | 1382.616  |
| NM_015965 | 647.18    | 266.233   | NM_016301 | 11704.602 | 6470.284  |
| NM_000417 | 2995.662  | 1931.613  | NM_014668 | 7936.82   | 6332.782  |
| NM_020356 | 2119.375  | 1163.178  | NM_004722 | 7874.673  | 6134.544  |
| NM_006144 | 1033.75   | 1319.221  | NM_014425 | 1622.627  | 1429.543  |
| AL136549  | 11954.109 | 10549.233 | NM_012133 | 11340.11  | 10374.444 |
| NM_012168 | 1534.346  | 1871.844  | NM_017954 | 745.558   | 783.787   |
| NM_007038 | 2800.978  | 2974.187  | NM_006612 | 10024.651 | 14283.56  |
| AF311324  | 5089.565  | 4414.063  | NM_016451 | 2980.156  | 2640.832  |
| AF124433  | 972.096   | 668.184   | NM_007351 | 60868.758 | 61360.945 |
| NM_001461 | 466.279   | 479.231   | AL049935  | 24810.238 | 12787.894 |
| AF061556  | 1042.955  | 833.627   | AB033043  | 23002.492 | 16700.211 |
| AL162049  | 1883.547  | 1161.299  | NM_014999 | 8914.59   | 4054.475  |
| AF036144  | 496.345   | 295.68    | AK025220  | 6786.64   | 5969.816  |
| NM_001823 | 248.151   | 143.709   | NM_016308 | 37828.711 | 50476.383 |
| NM_005032 | 864.23    | 720.477   | D42046    | 6519.239  | 9675.779  |
| NM_004160 | 5148.949  | 3755.221  | NM_001033 | 18080.404 | 28915.186 |
| AL109677  | 1172.823  | 719.401   | NM_004526 | 23246.365 | 37590.391 |
| NM_003941 | 41577.48  | 22576.098 | NM_002526 | 12294.343 | 15262.492 |
| AF177909  | 1176.522  | 884.486   | NM_020135 | 6712.447  | 8798.726  |
| NM_002664 | 14332.194 | 7312.617  | NM_018518 | 7527.809  | 9203.315  |
| AB018271  | 1216.015  | 1191.66   | AK023149  | 2391.256  | 1879.625  |
| AL137665  | 3335.636  | 2550.093  | AK023168  | 7263.669  | 10245.269 |
| NM_016434 | 1820.642  | 1296.938  | NM_006646 | 657.07    | 726.161   |
| U36561    | 56681.535 | 61594.953 | NM_004742 | 2631.932  | 2374.016  |
| AF205437  | 1204.643  | 1012.491  | NM_014753 | 2276.344  | 1519.516  |
| AF034102  | 29401.832 | 15871.266 | NM_006585 | 52056.285 | 54641.063 |
| AB037748  | 1132.177  | 2101.49   | NM_014331 | 9921.136  | 14144.32  |

|           |           |           |           |           |           |
|-----------|-----------|-----------|-----------|-----------|-----------|
| AB002306  | 2656.357  | 2691.75   | NM_006795 | 45884.992 | 42859.227 |
| NM_00130C | 1935.028  | 2820.026  | AF070568  | 2714.69   | 3217.174  |
| NM_012472 | 453.687   | 568.262   | NM_000277 | 522.176   | 699.962   |
| NM_018187 | 6583.954  | 6842.167  | NM_00024C | 17119.41  | 19894.275 |
| NM_00301E | 24680.912 | 24940.799 | AK055733  | 21500.498 | 25768.545 |
| NM_005463 | 43222.406 | 35457.582 | AF298880  | 12063.078 | 13702.929 |
| NM_001325 | 1971.094  | 2074.177  | NM_007221 | 13690.173 | 10583.376 |
| NM_018282 | 14845.24  | 11328.604 | X54163    | 53771.648 | 51511.699 |
| BC019932  | 2200.802  | 1892.475  | AK025395  | 1694.242  | 1076.955  |
| AF114818  | 4557.653  | 3792.942  | NM_00038E | 1987.008  | 1490.242  |
| AK025106  | 1809.06   | 1578.733  | X58377    | 1538.152  | 1968.651  |
| NM_020144 | 4143.387  | 3069.264  | NM_002469 | 1060.803  | 1978.197  |
| NM_00390E | 43333.313 | 21131.688 | AI673575  | 397.621   | 1353.164  |
| BE893142  | 2766.15   | 1418.202  | BI830936  | 932.231   | 1758.175  |
| NM_003103 | 5030.988  | 2972.605  | U79292    | 10640.689 | 15641.868 |
| NM_01534C | 8162.508  | 4682.292  | AA947915  | 1222.763  | 2131.496  |
| NM_006451 | 5670.109  | 2634.336  | BI830753  | 2891.494  | 3444.633  |
| NM_002094 | 2166.992  | 1123.608  | X68314    | 5180.438  | 4627.956  |
| NM_002937 | 952.626   | 602.556   | X71973    | 45561.734 | 49339.91  |
| NM_003191 | 6579.404  | 4153.118  | T49651    | 35887.77  | 31266.002 |
| NM_018235 | 51416.84  | 33971.164 | N51014    | 1532.541  | 1778.805  |
| NM_012104 | 25150.814 | 14041.93  | BE392471  | 24523.471 | 19759.244 |
| NM_020142 | 5360.467  | 6510.174  | AI802950  | 4031.567  | 4510.822  |
| NM_000774 | 5456.796  | 6058.709  | AI741278  | 618.781   | 848.522   |
| NM_017781 | 51466.016 | 54323.422 | AA682423  | 2005.6    | 1946.556  |
| NM_006004 | 55428.301 | 42206.684 | AL043686  | 11099.089 | 17555.359 |
| NM_004894 | 22584.025 | 15418.174 | AA490172  | 2311.054  | 4109.773  |
| AB028960  | 1363.597  | 1248.927  | AA775212  | 2868.808  | 2835.9    |
| NM_00564E | 30249.352 | 22373.646 | AB011174  | 6118.512  | 7951.959  |
| NM_006943 | 8871.32   | 6362.853  | AB040879  | 3431.413  | 6438.27   |
| NM_006741 | 13523.891 | 9941.608  | NM_003176 | 13397.977 | 7949.466  |
| NM_01416E | 7311.676  | 3880.419  | NM_000723 | 2125.841  | 898.008   |
| AL117606  | 9171.695  | 6709.138  | AL096751  | 16574.947 | 7634.761  |
| NM_01233C | 2457.298  | 1716.393  | NM_000364 | 2037.981  | 2761.461  |
| AF294278  | 3274.577  | 2135.814  | AF026920  | 16825.83  | 22176.486 |
| NM_018211 | 1897.551  | 1704.313  | NM_004931 | 14347.493 | 21269.303 |
| NM_01452C | 5075.969  | 3594.168  | NM_000607 | 29214.686 | 44340.434 |
| NM_00261E | 2648.935  | 1898.149  | AB011099  | 929.66    | 1364.323  |
| AK025712  | 18048.6   | 10040.37  | AF035799  | 647.691   | 1034.939  |
| NM_005634 | 2508.939  | 1903.966  | AF090409  | 780.185   | 994.268   |
| NM_017757 | 6583.931  | 3984.257  | NM_002575 | 7130.136  | 4412.362  |
| NM_00214E | 31912.818 | 15758.016 | NM_004244 | 7915.123  | 6790.204  |
| AB007892  | 1917.319  | 1613.18   | NM_003371 | 58379.145 | 53675.816 |
| NM_018207 | 3345.212  | 5916.904  | AK023114  | 7472.75   | 6328.036  |
| AB029021  | 27501.637 | 27498.236 | NM_00367E | 3612.861  | 3028.111  |
| NM_002101 | 1285.829  | 1716.04   | NM_012301 | 3820.225  | 3769.265  |
| NM_005423 | 1022.379  | 1420.152  | NM_00068C | 708.694   | 736.586   |
| Z36789    | 1251.759  | 1323.542  | NM_005631 | 1023.876  | 1192.044  |
| J02874    | 6074.782  | 9377.302  | NM_01493E | 7657.396  | 12014.453 |
| BF310427  | 7099.533  | 8229.909  | AF049460  | 1096.302  | 1834.447  |
| N94424    | 520.448   | 565.211   | NM_014815 | 4039.226  | 6568.755  |
| AA045192  | 2065.046  | 2875.157  | NM_005443 | 7061.495  | 10282.126 |
| H45617    | 339.955   | 351.807   | NM_020129 | 2762.197  | 2158.765  |

|            |           |           |           |           |           |
|------------|-----------|-----------|-----------|-----------|-----------|
| M92642     | 3508.31   | 3131.19   | Y16521    | 8129.757  | 3748.6    |
| H-U 44385  | 21104.025 | 11656.953 | NM_018667 | 458.975   | 650.626   |
| ID 1654970 | 8508.535  | 5494.703  | AL050371  | 12000.526 | 17024.963 |
| ID 2531132 | 12012.75  | 7007.364  | NM_002651 | 5090.294  | 9396.495  |
| ID 4365538 | 721.598   | 557.79    | NM_002413 | 14672.036 | 21157.039 |
| AA485665   | 399.264   | 345.039   | NM_017577 | 1655.553  | 2269.521  |
| BF125928   | 11407.504 | 7072.919  | NM_016301 | 17262.982 | 24533.094 |
| BG571026   | 2400.737  | 2184.933  | NM_014668 | 12903.475 | 12019.82  |
| AA489017   | 13288.085 | 8325.972  | NM_004722 | 10205.742 | 10379.519 |
| NM_001140  | 1073.823  | 2192.984  | NM_014425 | 2561.321  | 2945.767  |
| NM_016059  | 286.634   | 444.602   | NM_012133 | 10356.498 | 8758.565  |
| AK022845   | 878.771   | 1384.9    | NM_017954 | 785.423   | 989.292   |
| NM_003004  | 400.733   | 557.688   | NM_006612 | 10341.537 | 9204.979  |
| S77835     | 883.108   | 1446.49   | NM_016451 | 3811.772  | 7270.503  |
| NM_002985  | 1909.194  | 3603.091  | NM_007351 | 55587.988 | 56130.258 |
| AB018347   | 14913.474 | 17270.27  | AK026266  | 49483.746 | 52327.559 |
| AB033073   | 6766.474  | 8808.8    | NM_007124 | 27699.574 | 35118.797 |
| NM_003284  | 4593.946  | 4991.652  | AB033043  | 27396.691 | 29744.105 |
| NM_018152  | 941.707   | 1135.907  | NM_014999 | 9758.495  | 5340.534  |
| NM_000319  | 5686.286  | 6439.785  | AK025220  | 4213.555  | 2415.059  |
| NM_003257  | 369.604   | 649.591   | NM_016308 | 28056.361 | 13774.425 |
| NM_012461  | 5118.752  | 4310.487  | D42046    | 7010.385  | 8142.509  |
| AK001379   | 1840.961  | 1965.421  | NM_001033 | 19177.73  | 24252.318 |
| NM_017450  | 2140.441  | 1567.217  | NM_004526 | 25884.576 | 38417.773 |
| NM_002023  | 827.342   | 841.767   | NM_002526 | 12213.116 | 17316.305 |
| NM_002839  | 835.376   | 757.477   | NM_020135 | 6431.533  | 11525.879 |
| NM_001616  | 333.735   | 322.899   | NM_018518 | 8448.896  | 10793.132 |
| NM_005904  | 437.22    | 404.486   | AK023149  | 4366.692  | 5853.264  |
| NM_005273  | 20394.563 | 12016.059 | AK023168  | 9716.294  | 5986.865  |
| NM_000524  | 414.735   | 554.208   | NM_006646 | 1271.802  | 1082.463  |
| NM_007072  | 2613.348  | 5313.995  | NM_004742 | 4469.967  | 4396.374  |
| NM_012320  | 2365.707  | 4285.352  | NM_014753 | 3651.286  | 3523.553  |
| NM_018208  | 1882.34   | 2623.536  | NM_006585 | 59875.367 | 53605.637 |
| NM_015929  | 3290.576  | 5383.34   | NM_014331 | 9744.459  | 10045.351 |
| U90653     | 7285.21   | 8811.04   | NM_006795 | 51640.461 | 43702.371 |
| NM_000196  | 445.628   | 877.603   | AF070568  | 3782.583  | 4593.75   |
| NM_018339  | 3168.413  | 3660.731  | NM_000277 | 908.167   | 1339.496  |
| NM_006745  | 15762.372 | 22218.641 | NM_000240 | 19554.348 | 22741.23  |
| NM_000275  | 1060.279  | 1493.627  | AK055733  | 27785.307 | 33946.422 |
| AK000037   | 1602.193  | 1190.241  | AF298880  | 16617.219 | 19511.322 |
| NM_014760  | 1926.053  | 2107.065  | AK001500  | 4077.677  | 4751.391  |
| NM_018713  | 705.518   | 1452.125  | NM_006774 | 2183.577  | 4010.436  |
| AJ006268   | 755.398   | 1065.355  | AK025395  | 1428.166  | 908.286   |
| AF190864   | 4343.299  | 4846.073  | NM_000388 | 2220.682  | 1727.499  |
| NM_001177  | 2932.71   | 2834.781  | NM_002469 | 786.619   | 586.605   |
| NM_014447  | 1720.521  | 1311.365  | AI673575  | 604.655   | 754.005   |
| NM_002356  | 744.434   | 700.51    | BI830936  | 1130.838  | 1830.984  |
| NM_006691  | 1156.885  | 861.796   | U79292    | 30954.748 | 39574.332 |
| NM_001505  | 895.714   | 831.493   | AA947915  | 1160.814  | 1894.002  |
| NM_003710  | 4828.004  | 3323.79   | BI830753  | 2071.84   | 4140.146  |
| Z83805     | 452.033   | 511.768   | X68314    | 2198.133  | 3718.941  |
| NM_004666  | 1044.092  | 1187.954  | X71973    | 57123.324 | 57020.637 |
| NM_003614  | 5402.059  | 4405.581  | T49651    | 49355.844 | 31292.586 |

|            |           |           |           |           |           |
|------------|-----------|-----------|-----------|-----------|-----------|
| NM_014257  | 7129.943  | 5674.069  | N51014    | 1856.556  | 1773.245  |
| NM_000025  | 16553.471 | 35189.766 | BE392471  | 31690.699 | 26405.385 |
| D38521     | 3968.391  | 4709.028  | AI802950  | 6075.49   | 6649.326  |
| NM_000403  | 11857.156 | 17172.906 | AI741278  | 748.506   | 1319.063  |
| NM_018127  | 11120.636 | 14663.058 | AA682423  | 2401.696  | 3205.883  |
| AB020677   | 6467.83   | 9868.391  | AL043686  | 10026.898 | 10505.579 |
| AB033097   | 3098.185  | 4587.496  | AA490172  | 2989.598  | 4788.746  |
| NM_000135  | 2236.501  | 3059.041  | AA775212  | 4460.913  | 5378.949  |
| AJ223948   | 5347.071  | 6906.467  | AB011174  | 5205      | 7108.292  |
| NM_016218  | 404.447   | 578.469   | AB040879  | 2647.088  | 4788.325  |
| AK022947   | 1423.845  | 1371.743  | AB011099  | 396.834   | 288.707   |
| AL050029   | 1308.788  | 1571.48   | NM_002575 | 4039.582  | 2589.838  |
| AL049966   | 438.906   | 551.02    | NM_004244 | 8553.586  | 7007.184  |
| NM_005204  | 7049.778  | 5887.272  | NM_003371 | 51895.441 | 47082.074 |
| NM_016203  | 1169.886  | 1610.95   | NM_001164 | 530.912   | 1137.332  |
| NM_002759  | 2342.985  | 2366.521  | AK023114  | 10666.749 | 15385.391 |
| NM_007271  | 1994.301  | 1849.908  | NM_003678 | 6075.374  | 9786.671  |
| NM_006255  | 2514.376  | 3282.355  | NM_012301 | 3856.834  | 5564.055  |
| BE392143   | 3376.864  | 2759.433  | NM_000680 | 621.164   | 1263.034  |
| NM_005813  | 2930.448  | 1905.674  | NM_005631 | 311.859   | 226.947   |
| AB037718   | 5890.573  | 5008.56   | NM_014419 | 20887.209 | 17068.523 |
| AL389994   | 1134.217  | 957.475   | NM_014938 | 4108.178  | 3392.008  |
| NM_003909  | 5009.434  | 4674.437  | AF049460  | 732.858   | 645.802   |
| NM_001277  | 8613.034  | 7976.267  | AK026066  | 2429.643  | 2283.927  |
| NM_003659  | 4959.05   | 4912.533  | NM_005244 | 15677.762 | 19042.213 |
| NM_001862  | 50875.008 | 64131.969 | AF054589  | 5584.444  | 5298.267  |
| NM_006531  | 2428.103  | 5450.88   | NM_005270 | 1046.702  | 1817.909  |
| AB029021   | 38120.953 | 50505.902 | NM_014815 | 3439.109  | 4516.594  |
| NM_002101  | 1210.401  | 2160.008  | NM_005443 | 5749.45   | 8094.81   |
| NM_005423  | 849.265   | 1639.202  | NM_007221 | 17071.188 | 23251.092 |
| Z36789     | 457.42    | 733.99    | NM_018607 | 447.777   | 245.349   |
| J02874     | 6388.796  | 9543.771  | NM_002978 | 5683.042  | 2254.852  |
| BF310427   | 5609.441  | 7170.896  | NM_014668 | 5938.433  | 7703.23   |
| N94424     | 433.469   | 810.394   | NM_004722 | 6576.085  | 8784.987  |
| AA045192   | 1861.785  | 3356.371  | NM_014425 | 2598.147  | 4818.835  |
| H45617     | 686.159   | 786.275   | NM_006612 | 11703.024 | 14562.771 |
| M92642     | 4288.529  | 4347.655  | NM_016451 | 2555.43   | 1414.862  |
| H-U 44385  | 21852.275 | 15761.271 | NM_007351 | 59731.32  | 54603.777 |
| ID 1654970 | 8234.38   | 5614.83   | AK026266  | 39114.078 | 28835.234 |
| ID 2531132 | 12053.58  | 7897.242  | NM_007124 | 17166.934 | 10296.702 |
| ID 4365538 | 754.986   | 782.243   | NM_003176 | 10061.852 | 6895.24   |
| AA485665   | 454.786   | 453.782   | NM_000723 | 2000.609  | 2235.967  |
| BF125928   | 11493.547 | 8068.257  | AL096751  | 16379.846 | 16124.573 |
| BG571026   | 2507.574  | 2249.327  | NM_000364 | 1925.977  | 3235.093  |
| AA489017   | 12151.619 | 6979.808  | AF026920  | 46040.699 | 50994.988 |
| NM_004843  | 1176.806  | 4114.25   | NM_004931 | 9517.598  | 8109.281  |
| AK022845   | 638.994   | 1508      | NM_000607 | 56803.234 | 57470.277 |
| NM_003004  | 264.2     | 800.021   | NM_000240 | 9772.034  | 3713.051  |
| S77835     | 884.301   | 1467.3    | AK055733  | 24362.207 | 15755.191 |
| NM_002985  | 1881.518  | 3761.646  | AF298880  | 9076.044  | 5222.149  |
| AB018347   | 16370.091 | 23111.697 | AK001500  | 1821.013  | 1002.43   |
| AB033073   | 5977.184  | 8391.664  | NM_006774 | 1795.041  | 1661.246  |
| NM_003284  | 3586.362  | 3994.532  | NM_020129 | 3136.14   | 6883.667  |



|           |           |           |           |           |           |
|-----------|-----------|-----------|-----------|-----------|-----------|
| NM_018152 | 867.781   | 1212.849  | Y16521    | 10654.444 | 14756.637 |
| NM_000319 | 5382.481  | 6506.768  | AL050371  | 8538.664  | 10893.853 |
| NM_003257 | 430.364   | 782.689   | NM_002651 | 2684.967  | 1791.725  |
| NM_012461 | 5479.674  | 5387.613  | NM_002413 | 14689.571 | 8572.522  |
| AK001379  | 1923.253  | 2155.754  | NM_017577 | 769.935   | 876.16    |
| NM_017450 | 2856.817  | 2700.939  | NM_001757 | 595.982   | 786.414   |
| NM_002023 | 924.687   | 1241.382  | NM_001647 | 10948.396 | 9849.46   |
| NM_002839 | 837.1     | 827.26    | NM_018158 | 1790.137  | 1693.667  |
| AF190500  | 442.731   | 631.215   | NM_016301 | 12086.983 | 10153.113 |
| NM_001616 | 381.211   | 493.781   | AK021975  | 2220.189  | 3825.362  |
| NM_005904 | 579.487   | 321.581   | AB032952  | 46287.504 | 41055.949 |
| NM_005273 | 21978.418 | 13671.996 | NM_002522 | 53925.828 | 60919.52  |
| NM_000524 | 368.055   | 567.298   | AB011174  | 4079.346  | 2192.986  |
| NM_018207 | 2429.884  | 2165.85   | AB040879  | 1285.4    | 922.876   |
| NM_000345 | 54162.895 | 52203.316 | AL049935  | 23661.102 | 13022.197 |
| NM_018208 | 2309.287  | 4790.564  | AB033043  | 12084.741 | 12707.081 |
| NM_015929 | 3592.58   | 7785.434  | NM_014999 | 10373.786 | 9913.669  |
| U90653    | 7818.751  | 13525.67  | AK025220  | 5377.703  | 8129.787  |
| NM_000196 | 432.674   | 955.603   | NM_016308 | 34278.453 | 49423.039 |
| NM_018339 | 3792.199  | 6080.534  | D42046    | 6734.829  | 12047.602 |
| NM_006745 | 16662.252 | 26747.236 | NM_001033 | 16612.201 | 22479.178 |
| NM_000275 | 984.974   | 1324.108  | NM_004526 | 19627.041 | 22496.715 |
| AK000037  | 1315.674  | 1584.924  | NM_002526 | 16812.998 | 9629.932  |
| NM_014760 | 2129.989  | 2647.05   | NM_020135 | 3975.556  | 3735.98   |
| NM_018713 | 741.104   | 1833.833  | NM_018518 | 5017.867  | 4308.091  |
| AJ006268  | 822.879   | 1424.331  | AK023149  | 1950.09   | 2135.198  |
| AF190864  | 4751.075  | 5057.999  | AK023168  | 6139.291  | 8015.781  |
| NM_001177 | 3016.36   | 3633.702  | NM_006646 | 541.164   | 653.827   |
| NM_014447 | 1510.177  | 2051.016  | NM_004742 | 2642.737  | 2740.165  |
| NM_002356 | 829.733   | 620.468   | NM_014753 | 2941.731  | 3268.401  |
| NM_006691 | 1246.224  | 1064.336  | NM_006585 | 44868.309 | 47163.66  |
| NM_001505 | 896.874   | 939.947   | NM_014331 | 9331.024  | 13933.967 |
| NM_003710 | 4726.826  | 4052.779  | NM_006795 | 54682.406 | 57165.598 |
| Z83805    | 493.116   | 563.488   | AF070568  | 4306.207  | 7117.511  |
| NM_004666 | 880.473   | 995.789   | NM_000277 | 1294.422  | 2619.093  |
| NM_003614 | 4922.104  | 3642.082  | CY3Cy5    | 798.278   | 75.342    |
| NM_014257 | 7474.263  | 7138.152  | NM_022552 | 4411.711  | 2527.65   |
| NM_001140 | 1137.958  | 1285.835  | NM_014389 | 17205.852 | 11430.038 |
| NM_016059 | 339.343   | 196.046   | AK025015  | 1012.384  | 1037.745  |
| NM_000403 | 12724.031 | 32925.875 | AF086187  | 3499.613  | 2994.547  |
| NM_018127 | 11599.511 | 24348.998 | AF305836  | 62087.738 | 60362.344 |
| AB020677  | 6903.612  | 13001.973 | AL109784  | 1266.889  | 975.019   |
| AB033097  | 3441.377  | 5881.958  | AL137383  | 748.532   | 591.462   |
| NM_000135 | 2801.641  | 5043.969  | AL035295  | 7032.329  | 5737.146  |
| AJ223948  | 5887.336  | 9098.684  | NM_018302 | 9851.914  | 5852.031  |
| AK022947  | 1577.171  | 2777.606  | AK027252  | 7822.504  | 6251.525  |
| AL050029  | 1458.385  | 2383.546  | AF165527  | 4823.21   | 3658.489  |
| AL049966  | 506.594   | 1008.577  | NM_014092 | 1393.219  | 1103.918  |
| NM_005204 | 7422.557  | 7561.113  | AL359596  | 2839.895  | 2671.118  |
| NM_016203 | 1278.841  | 1549.267  | U79249    | 1691.869  | 1290.956  |
| NM_002759 | 2722.555  | 3271.559  | AK022114  | 1384.356  | 1034.669  |
| NM_007271 | 1934.467  | 2549.162  | AL133585  | 2067.046  | 1750.031  |
| NM_006255 | 2510.062  | 2843.785  | NM_022552 | 4838.98   | 4040.661  |

|            |           |           |           |           |           |
|------------|-----------|-----------|-----------|-----------|-----------|
| BE392143   | 3518.552  | 3446.447  | NM_014389 | 18674.822 | 17977.025 |
| NM_005813  | 2740.643  | 2460.081  | SR2       | 51795.215 | 52718.809 |
| AB037718   | 5524.81   | 4008.873  | SR4       | 18920.764 | 18769.729 |
| AL389994   | 1132.879  | 1188.486  | SR6       | 2784.311  | 2373.087  |
| NM_003909  | 5477.129  | 5287.982  | SR8       | 9222.356  | 27094.402 |
| NM_001277  | 7927.15   | 6471.093  | SR10      | 32143.35  | 9314.854  |
| NM_003659  | 5089.468  | 4909.404  | CY3Cy5    | 1086.327  | 100.566   |
| NM_007072  | 2328.5    | 2772.889  | NM_003887 | 3961.935  | 2461.392  |
| NM_012320  | 2231.278  | 2403.267  | NM_004267 | 21826.227 | 12471.729 |
| AB029021   | 41925.832 | 64847.234 | AL357212  | 905.873   | 685.276   |
| NM_002101  | 1269.491  | 3426.919  | AK026687  | 3330.481  | 3096.443  |
| NM_005423  | 793.648   | 2691.994  | AL117444  | 2975.499  | 2427.04   |
| Z36789     | 401.195   | 956.123   | NM_017994 | 9940.338  | 8109.111  |
| J02874     | 6195.729  | 12389.38  | AK021693  | 4323.408  | 3308.925  |
| BF310427   | 8894.746  | 16217.557 | AB023177  | 1082.683  | 748.344   |
| N94424     | 620.786   | 1189.694  | AL050015  | 1868.786  | 1117.076  |
| AA045192   | 2252.293  | 3824.163  | AY007117  | 6033.302  | 5335.143  |
| H45617     | 495.896   | 980.745   | AF039698  | 4064.794  | 4406.654  |
| M92642     | 4636.757  | 5661.803  | AL109679  | 629.328   | 680.971   |
| H-U 44385  | 22846.254 | 17198.275 | AB046828  | 5361.183  | 4082.145  |
| ID 1654970 | 9568.294  | 9368.82   | AF144487  | 923.059   | 658.113   |
| ID 2531132 | 13290.803 | 12677.769 | AL137532  | 3475.736  | 3144.903  |
| ID 4365538 | 968.979   | 809.868   | AK025419  | 6183.257  | 5009.56   |
| AA485665   | 517.416   | 514.196   | NM_017413 | 516.471   | 845.028   |
| BF125928   | 11197.346 | 8407.48   | NM_013259 | 27035.426 | 24598.309 |
| BG571026   | 2285.584  | 2141.872  | NM_018375 | 15038.248 | 15572.717 |
| AA489017   | 13013.65  | 8656.289  | NM_004913 | 689.849   | 532.813   |
| NM_000025  | 13673.679 | 10428.773 | AK026838  | 4129.417  | 4127.506  |
| D38521     | 5007.759  | 2717.04   | AK022443  | 3027.137  | 2336.8    |
| NM_018152  | 1027.391  | 3796.184  | AK023371  | 6793.377  | 6591.112  |
| NM_000319  | 5450.18   | 13581.097 | AK025112  | 3830.188  | 2005.644  |
| NM_003257  | 354.524   | 1258.422  | AK026079  | 707.435   | 672.294   |
| NM_012461  | 5016.413  | 10119.908 | AK026675  | 842.599   | 687.038   |
| AK001379   | 2214.518  | 4631.419  | AK025173  | 16372.387 | 12642.325 |
| NM_017450  | 3377.081  | 5569.894  | AK025430  | 1157.494  | 1239.278  |
| NM_002023  | 1035.307  | 2514.614  | AK026722  | 1134.899  | 1052.484  |
| NM_002839  | 887.835   | 1657.719  | AL110133  | 10224.299 | 8764.189  |
| AF190500   | 2903.636  | 5744.969  | AL050053  | 650.79    | 391.164   |
| NM_001616  | 320.244   | 842.683   | AK000529  | 7249.11   | 5813.572  |
| NM_005904  | 546.208   | 703.566   | AK027243  | 1915.694  | 1310.768  |
| NM_005273  | 23134.836 | 21061.129 | AF147415  | 1477.74   | 1460.019  |
| NM_000524  | 433.525   | 748.817   | AL049984  | 2591.862  | 1903.367  |
| NM_006576  | 4501.083  | 5675.098  | AK098474  | 1376.771  | 1054.762  |
| AB035266   | 5800.709  | 5129.321  | AL117475  | 5249.018  | 5319.62   |
| NM_003744  | 3765.387  | 2505.02   | AL049300  | 16825.617 | 18479.002 |
| NM_006378  | 2339.34   | 1879.141  | NM_017535 | 9013.63   | 10420.396 |
| NM_018132  | 891.704   | 764.693   | AL080161  | 540.522   | 708.417   |
| NM_018207  | 2185.247  | 1966.195  | AL117539  | 687.368   | 966.243   |
| NM_000345  | 50785.277 | 51910.668 | L23852    | 1100.083  | 926.687   |
| NM_001862  | 54594.32  | 57959.055 | AK025365  | 3249.862  | 2087.719  |
| NM_006531  | 3208.643  | 3207.598  | AK023445  | 664.422   | 573.051   |
| NM_002779  | 5518.523  | 15554.276 | AK023489  | 1311.226  | 1133.334  |
| L40397     | 16708.35  | 38312.996 | AK021561  | 9132.924  | 7882.182  |

|           |           |           |           |           |           |
|-----------|-----------|-----------|-----------|-----------|-----------|
| NM_02019E | 21123.057 | 36431.613 | AK025222  | 779.576   | 801.868   |
| AA098879  | 373.252   | 1406.865  | Y11609    | 8435.717  | 8044.878  |
| AF070525  | 10433.168 | 18762.469 | AJ278482  | 879.419   | 830.969   |
| NM_001177 | 3739.481  | 8106.747  | NM_012122 | 26085.912 | 22259.891 |
| NM_014447 | 2206.391  | 4948.748  | AF009285  | 17703.6   | 14633.995 |
| NM_00235E | 1290.884  | 1433.354  | NM_012125 | 5603.5    | 4918.041  |
| NM_006691 | 4573.506  | 6916.47   | AF056435  | 459.698   | 464.427   |
| NM_00150E | 913.647   | 1659.999  | AB032363  | 780.266   | 801.64    |
| NM_00371C | 5891.392  | 7246.5    | AF009294  | 7048.288  | 5831.297  |
| Z83805    | 570.576   | 983.886   | NM_001524 | 1761.763  | 1385.625  |
| NM_00466E | 1029.5    | 1216.671  | AK000998  | 1005.916  | 1174.972  |
| NM_003614 | 5887.383  | 6647.52   | AK001225  | 1756.755  | 2133.821  |
| NM_014257 | 6558.319  | 8188.688  | AK021435  | 373.999   | 603.064   |
| NM_001140 | 1213.562  | 1589.462  | AK021684  | 6584.03   | 7768.122  |
| NM_004843 | 1269.72   | 1914.316  | AK001060  | 1105.18   | 1555.67   |
| AK022845  | 645.997   | 648.476   | AK001819  | 640.569   | 693.1     |
| NM_003004 | 465.463   | 693.878   | AK021480  | 1352.826  | 1359.58   |
| S77835    | 848.224   | 890.884   | AL080186  | 1835.944  | 1374.239  |
| NM_00298E | 1848.88   | 1890.444  | NM_00530E | 59947.418 | 58379.281 |
| AB018347  | 16448.74  | 13827.245 | NM_00164E | 36322.035 | 26949.916 |
| AB033073  | 6628.264  | 5450.35   | AL137327  | 6681.064  | 6243.741  |
| NM_003284 | 4855.049  | 3597.995  | AF358454  | 704.099   | 528.946   |
| NM_00390E | 5183.85   | 19930.5   | AK026090  | 4093.656  | 3304.252  |
| NM_001277 | 16550.412 | 56433.898 | AF070637  | 2310.233  | 2511.469  |
| NM_00365E | 5044.146  | 13606.339 | AL137634  | 1363.13   | 2854.792  |
| NM_007072 | 3012.708  | 6036.293  | AK024863  | 10216.599 | 9642.58   |
| NM_01232C | 2419.006  | 5933.871  | AJ008135  | 63602.145 | 60277.254 |
| NM_01820E | 2499.72   | 4852.343  | AK026908  | 33816.82  | 28019.738 |
| NM_01592E | 4196.234  | 7353.831  | AF117338  | 19104.643 | 16949.596 |
| U90653    | 8153.26   | 11080.059 | AK025567  | 5246.466  | 4301.492  |
| NM_00019E | 715.982   | 1307.828  | NM_019102 | 883.533   | 1046.929  |
| NM_01833E | 3591.446  | 4411.842  | U56857    | 41766.809 | 40724.543 |
| NM_00674E | 17959.586 | 23787.477 | L43349    | 968.429   | 997.61    |
| NM_00027E | 1187.209  | 1461.996  | BE905682  | 943.42    | 1031.188  |
| AK000037  | 1349.585  | 1070.776  | Z70695    | 403.166   | 498.625   |
| NM_01476C | 2169.208  | 2703.594  | AF086421  | 2748.561  | 2464.299  |
| NM_01839E | 1201.976  | 1101.703  | AK001612  | 877.617   | 961.399   |
| NM_00256C | 41101.91  | 34107.555 | AF161522  | 4911.434  | 4986.368  |
| NM_014404 | 1644.974  | 2257.468  | AF086028  | 25230.738 | 29863.025 |
| NM_018713 | 778.22    | 1273.816  | U46119    | 647.931   | 699.401   |
| NM_015947 | 7605.107  | 8278.729  | NM_019897 | 877.018   | 573.696   |
| NM_002042 | 41617.875 | 26754.137 | AF038188  | 22888.979 | 16664.762 |
| AB028944  | 449.314   | 525.585   | AJ227888  | 485.098   | 635.658   |
| AJ006268  | 802.198   | 1209.672  | D17046    | 4339.693  | 3526.414  |
| M74089    | 4531.682  | 4390.338  | NM_01764E | 19000.248 | 20780.471 |
| AF190864  | 5517.994  | 4793.32   | AJ227864  | 1023.145  | 1141.4    |
| AB032990  | 763.188   | 4761.245  | AF157562  | 6615.979  | 5765.389  |
| NM_00002E | 14442.589 | 25937.303 | AK021958  | 14608.157 | 15599.759 |
| D38521    | 3846.222  | 6032.908  | M31164    | 4303.161  | 4539.563  |
| NM_00040E | 12132.37  | 17177.227 | AF113674  | 28363.709 | 28062.496 |
| NM_018127 | 10942.078 | 17656.566 | NM_003511 | 1393.415  | 3471.131  |
| AB020677  | 6422.126  | 10341.79  | NM_003531 | 3875.194  | 3510.615  |
| AB033097  | 3155.067  | 5236.19   | NM_01779E | 2110.562  | 1915.875  |

|           |           |           |           |           |           |
|-----------|-----------|-----------|-----------|-----------|-----------|
| NM_000135 | 2487.127  | 3037.903  | NM_003510 | 1955.768  | 1435.596  |
| AJ223948  | 5879.783  | 6905.224  | NM_003538 | 805.093   | 892.179   |
| NM_016218 | 586.42    | 442.697   | AL137403  | 8233.618  | 8722.927  |
| AK022947  | 1302.671  | 1808.804  | AL049348  | 2971.225  | 3052.102  |
| AL050029  | 1428.927  | 1585.873  | NM_018534 | 2390.875  | 2549.39   |
| AL049966  | 481.009   | 523.615   | AB037847  | 4428.365  | 4256.128  |
| NM_005204 | 6964.356  | 6132.847  | NM_005170 | 6005.567  | 6229.834  |
| NM_016203 | 1353.807  | 1227.927  | S96437    | 6272.039  | 6491.903  |
| NM_002759 | 2660.057  | 2857.676  | NM_015176 | 2497.695  | 2577.979  |
| NM_007271 | 2091.933  | 2125.093  | AL353939  | 1541.023  | 1573.4    |
| NM_006255 | 2612.19   | 3193.465  | AL117573  | 9360.763  | 6652.803  |
| BE392143  | 3441.036  | 3333.946  | NM_016116 | 904.074   | 687.929   |
| NM_005813 | 3094.303  | 2377.521  | NM_000929 | 566.649   | 552.22    |
| AB037718  | 5827.26   | 5563.41   | NM_018655 | 3922.703  | 3425.465  |
| AL389994  | 1247.652  | 1344.456  | NM_005663 | 4316.144  | 4176.694  |
| CY3Cy5    | 2628.105  | 108.143   | X89960    | 1507.746  | 2020.001  |
| NM_000588 | 26949.996 | 17447.506 | NM_006550 | 1534.817  | 1586.896  |
| AF143872  | 39992.563 | 25527.461 | NM_005773 | 416.081   | 362.378   |
| AF143326  | 4791.75   | 5141.027  | NM_017644 | 13961.313 | 13617.727 |
| AL049229  | 5284.115  | 5317.789  | NM_002482 | 2708.678  | 2563.036  |
| NM_018306 | 68224.195 | 76699.719 | AF009323  | 1441.473  | 1385.349  |
| AK026146  | 7364.262  | 5152.277  | U52829    | 888.636   | 1022.85   |
| AK023152  | 7033.757  | 2605.895  | Z25437    | 920.993   | 835.314   |
| AK000155  | 1533.431  | 2071.287  | AK001526  | 7825.865  | 7448.13   |
| AL389937  | 8954.274  | 14772.119 | NM_000519 | 809.322   | 1051.394  |
| AK025201  | 9509.486  | 16906.639 | AF086183  | 3309.349  | 2253.042  |
| AK021927  | 1343.633  | 2686.26   | AK000525  | 3689.579  | 3981.442  |
| AK022995  | 4789.86   | 7909.878  | AL137434  | 2784.495  | 3355.871  |
| NM_000586 | 5378.504  | 2752.439  | Z36795    | 3466.35   | 4000.743  |
| SR1       | 70989.32  | 61586.996 | AL080216  | 3303.237  | 3457.215  |
| SR3       | 23577.129 | 15939.597 | NM_006670 | 4194.165  | 2900.298  |
| SR5       | 2080.509  | 1734.585  | NM_012425 | 5784.687  | 4050.469  |
| SR7       | 1900.57   | 14150.877 | NM_005816 | 469.569   | 589.87    |
| SR9       | 9525.061  | 2053.926  | NM_002750 | 10593.949 | 10238.347 |
| CY3Cy5    | 4873.662  | 199.532   | NM_000081 | 521.38    | 856.523   |
| L13433    | 2819.392  | 1869.329  | AK024134  | 14308.63  | 14430.167 |
| NM_007220 | 1379.065  | 1170.115  | NM_003014 | 1766.437  | 1725.788  |
| NM_017777 | 4536.271  | 5696.134  | NM_018558 | 2218.845  | 2018.512  |
| AK001499  | 7268.029  | 2947.198  | NM_001974 | 7939.752  | 7828.915  |
| AK023568  | 1134.525  | 1493.365  | NM_013957 | 2258.356  | 2407.779  |
| AK021629  | 2433.359  | 4497.48   | NM_002468 | 5009.729  | 5267.499  |
| AL110257  | 68072.578 | 79091.156 | NM_003028 | 804.355   | 1154.223  |
| AB013384  | 3856.982  | 5177.494  | NM_001566 | 1471.584  | 1328.841  |
| AK024824  | 2135.99   | 2884.213  | NM_016541 | 5027.288  | 4831.725  |
| AK024270  | 1606.411  | 988.309   | NM_018548 | 6784.587  | 9017.554  |
| AK025569  | 4857.33   | 4326.144  | NM_013401 | 1346.918  | 1448.627  |
| AF052146  | 67556.617 | 69719.039 | NM_018238 | 10198.475 | 11168.489 |
| NM_004870 | 5604.152  | 6033.796  | NM_006858 | 37916.117 | 45177.73  |
| AK024242  | 33457.66  | 24360.42  | NM_001405 | 17272.225 | 17023.092 |
| AK024559  | 8452.972  | 5155.66   | NM_003880 | 2825.241  | 2810.831  |
| AK024851  | 2476.58   | 1458.171  | NM_005468 | 448.778   | 761.832   |
| AK024943  | 1071.888  | 733.652   | AF131778  | 3972.146  | 4530.151  |
| AK024577  | 436.823   | 871.878   | NM_001562 | 4080.426  | 3997.773  |

|           |           |           |           |           |           |
|-----------|-----------|-----------|-----------|-----------|-----------|
| AK024995  | 1354.968  | 1633.22   | NM_013278 | 3441.239  | 3220.975  |
| AK022628  | 69051.156 | 64872.504 | NM_006477 | 5310.38   | 3436.423  |
| AK021737  | 17437.145 | 8054.256  | NM_002880 | 5783.188  | 4116.877  |
| AK026295  | 5738.699  | 5968.4    | NM_000678 | 38147.207 | 33124.531 |
| AK022346  | 1535.002  | 1971.437  | NM_001066 | 2482.377  | 1901.007  |
| AK025007  | 6900.747  | 6940.839  | NM_004657 | 9935.837  | 9493.969  |
| AK026490  | 67518.563 | 68903.422 | NM_006291 | 689.476   | 949.528   |
| AJ227861  | 4454.868  | 7140.325  | NM_018170 | 6676.671  | 6668.44   |
| NM_005553 | 4980.105  | 9699.609  | NM_003867 | 8077.869  | 7623.448  |
| AJ001875  | 1364.111  | 1403.498  | AL162062  | 1395.139  | 2155.705  |
| X64985    | 896.863   | 1482.165  | NM_003173 | 23945.896 | 28095.051 |
| Y10507    | 709.836   | 1461.811  | NM_005030 | 20969.807 | 18085.879 |
| AK002028  | 62477.336 | 55204.316 | NM_017584 | 6338.623  | 6508.177  |
| AL050127  | 10963.658 | 8229.162  | NM_020359 | 6223.687  | 5919.834  |
| AK024805  | 14187.938 | 10851.367 | AB014541  | 49364.02  | 56769.602 |
| AK001423  | 3431.042  | 2736.197  | NM_002583 | 21292.736 | 18396.287 |
| AK021989  | 1175.451  | 1312.465  | NM_006570 | 40686.203 | 45843.594 |
| AK022298  | 1129.672  | 913.363   | NM_020348 | 2616.817  | 2412.581  |
| NM_006057 | 3458.53   | 2982.987  | NM_006034 | 33154.988 | 37958.563 |
| AK025784  | 58954.938 | 50812.211 | AB040943  | 1800.26   | 1895.473  |
| U07199    | 13522.295 | 8555.893  | NM_005201 | 60967.656 | 64048.801 |
| AK023713  | 2861.753  | 2402.644  | NM_000092 | 3116.065  | 2474.85   |
| X81445    | 2478.449  | 2321.078  | NM_019086 | 13891.59  | 15596.681 |
| U95091    | 3454.652  | 2260.897  | NM_018384 | 31211.115 | 20155.326 |
| NM_017900 | 58889.703 | 46734.414 | NM_001872 | 3414.223  | 2205.921  |
| S50182    | 2548.933  | 1724.9    | AF157323  | 5219.96   | 4797.428  |
| AL360145  | 3310.175  | 5190.606  | NM_006025 | 988.846   | 1367.419  |
| Y12016    | 4795.487  | 2960.75   | NM_005877 | 19972.535 | 19690.678 |
| AL359943  | 68299.25  | 69435.906 | AK024458  | 612.234   | 736.147   |
| NM_000534 | 4588.906  | 6067.017  | NM_003338 | 7274.948  | 9731.115  |
| AB037853  | 69073.883 | 64415.688 | NM_013396 | 3495.672  | 4044.996  |
| D28450    | 69087.625 | 66632.094 | NM_017752 | 4189.729  | 4217.583  |
| AK056222  | 3302.488  | 3696.572  | D26069    | 20362.535 | 17382.865 |
| L37700    | 2390.118  | 1514.504  | BF107577  | 52818.773 | 52016.938 |
| NM_017665 | 8870.461  | 6546.964  | NM_005837 | 23974.004 | 22962.293 |
| AB007966  | 1327.683  | 2157.835  | NM_016625 | 14196.172 | 9650.429  |
| AB007976  | 1666.985  | 2066.979  | NM_017493 | 3804.788  | 3409.03   |
| AK024819  | 1130.631  | 877.278   | NM_006136 | 20156.568 | 17509.061 |
| AF052106  | 8117.31   | 5091.756  | AF237772  | 2226.399  | 2809.024  |
| AK000441  | 1243.951  | 829.511   | AK025934  | 6404.528  | 8865.812  |
| AK022391  | 3023.569  | 2229.168  | AJ008154  | 5660.569  | 6555.829  |
| NM_016167 | 10071.721 | 5712.19   | NM_003487 | 18571.348 | 14950.527 |
| AK024090  | 44075.871 | 57876.816 | NM_006887 | 11400.174 | 11967.789 |
| AL133574  | 12892.359 | 26931.395 | NM_006177 | 8464.764  | 6724.917  |
| AK021936  | 3837.88   | 5064.761  | AL137286  | 15959.892 | 14013.019 |
| AF147339  | 61516.191 | 66579.953 | NM_016358 | 48728.93  | 44629.492 |
| AL390181  | 50442.301 | 62580.887 | NM_016275 | 22763.523 | 25690.684 |
| NM_017914 | 54672.777 | 39464.973 | NM_020418 | 24230.152 | 35585.418 |
| AK024953  | 10747.311 | 9508.461  | NM_013293 | 7818.364  | 9449.158  |
| AK024276  | 4772.477  | 4991.961  | AF315592  | 8627.448  | 9122.182  |
| S83374    | 6375.544  | 6083.187  | AF095844  | 6771.902  | 7251.316  |
| NM_003150 | 2984.009  | 1726.199  | NM_015833 | 6371.261  | 7439.861  |
| NM_014784 | 5557.604  | 5124.322  | NM_000986 | 56737.621 | 56934.855 |

|           |           |           |             |           |           |
|-----------|-----------|-----------|-------------|-----------|-----------|
| AK026383  | 11166.045 | 20357.301 | AK026760    | 53068.035 | 52576.07  |
| AK023821  | 1055.746  | 2354.868  | NM_014772   | 6394.976  | 6736.232  |
| AB014594  | 5189.704  | 5256.256  | AK025248    | 5600.186  | 4606.296  |
| M94547    | 2068.32   | 1532.788  | NM_004539   | 26473.238 | 26835.594 |
| NM_005087 | 27433.404 | 16893.113 | NM_006428   | 32062.219 | 33238.816 |
| NM_012098 | 7570.32   | 4304.53   | NM_004280   | 19293.166 | 17215.309 |
| NM_018095 | 2740.78   | 1460.672  | AF110399    | 5761.596  | 5990.65   |
| AB023164  | 7339.637  | 4054.885  | AK027094    | 7806.266  | 8675.807  |
| NM_000704 | 4263.906  | 4424.745  | AF174600    | 9121.225  | 10170.327 |
| NM_019605 | 1559.189  | 2355.737  | AK001003    | 2602.358  | 2800.656  |
| Z49090    | 12622.027 | 8870.648  | NM_002800   | 28351.141 | 37361.832 |
| AK021592  | 14768.3   | 17895.854 | BF217864    | 30430.822 | 30112.131 |
| AK025467  | 7115.117  | 6801.492  | NM_005917   | 37652.891 | 42331.371 |
| AK026593  | 9081.371  | 10747.158 | NM_007052   | 1702.682  | 1565.42   |
| AL117666  | 2465.495  | 1840.943  | BC017044    | 1201.21   | 1256.239  |
| Y17865    | 8256.688  | 6238.133  | AV758498    | 3154.405  | 3930.366  |
| NM_005825 | 43448.563 | 50803.168 | NM_020196   | 5735.321  | 9015.635  |
| NM_002756 | 12593.219 | 12416.932 | AB002299    | 678.757   | 899.294   |
| U79299    | 589.282   | 486.388   | AK024113    | 1260.182  | 1594.487  |
| AJ000414  | 2307.435  | 1395.067  | NM_018657   | 3031.864  | 3011.685  |
| AK025674  | 34386.242 | 24967.137 | L40410      | 21961.111 | 22497.068 |
| AF007194  | 20922.912 | 9028.27   | NM_007055   | 4378.84   | 4908.613  |
| NM_019069 | 2855.538  | 1629.533  | NM_016652   | 2557.859  | 2642.907  |
| Z25424    | 11027.427 | 20101.541 | NM_016310   | 36600.738 | 37291.078 |
| NM_002961 | 11405.237 | 19335.1   | AK021562    | 1510.654  | 1905.682  |
| NM_018298 | 2325.596  | 3709.009  | BC006560    | 4962.362  | 5059.305  |
| NM_000676 | 4873.984  | 8669.858  | NM_006298   | 1462.894  | 2404.558  |
| NM_005766 | 765.927   | 625.27    | AF060938    | 52402.176 | 52227.57  |
| NM_004127 | 63986.09  | 64561.129 | NM_001973   | 12681.117 | 12017.659 |
| NM_013324 | 5464.83   | 6221.456  | NM_014468   | 12315.198 | 13303.207 |
| AL133022  | 1475.748  | 2457.425  | NM_006856   | 16512.287 | 16388.553 |
| NM_003953 | 5421.775  | 7453.141  | X52350      | 59479.324 | 58074.027 |
| NM_006301 | 1549.609  | 2014.979  | AF071554    | 3073.645  | 3839.101  |
| NM_012219 | 2132.066  | 1319.754  | NM_002147   | 1590.633  | 1613.185  |
| X72887    | 2079.763  | 1648.318  | NM_017688   | 9060.858  | 7187.556  |
| NM_004529 | 3352.826  | 2265.063  | AK025612    | 50287.602 | 49243.012 |
| NM_000127 | 2955.199  | 3049.69   | NM_012268   | 59736.602 | 62073.004 |
| Y10483    | 48777.48  | 54259.238 | NM_012203   | 3941.547  | 4390.963  |
| NM_006784 | 3250.518  | 3376.391  | NM_003296   | 1058.305  | 1189.732  |
| NM_017876 | 4121.887  | 3447.658  | NM_004736   | 18984.549 | 21247.17  |
| NM_001087 | 67685.352 | 67171.516 | NM_006895   | 959.335   | 1518.061  |
| NM_001826 | 1657.588  | 566.527   | NM_006459   | 27911.443 | 33071.492 |
| AK025352  | 1377.123  | 2304.907  | AA427949    | 831.645   | 1320.039  |
| NM_003721 | 17347.971 | 32488.338 | D50373      | 1990.794  | 2661.646  |
| NM_004724 | 3327.192  | 4485.991  | AA488757    | 55194.293 | 56038.465 |
| NM_001431 | 11889.999 | 18840.33  | AA205399    | 2045.015  | 2744.601  |
| AK022666  | 822.882   | 988.392   | AI394286    | 422.147   | 786.972   |
| NM_000381 | 2407.784  | 3781.518  | H07071      | 13994.644 | 14711.1   |
| NM_000427 | 2385.447  | 3133.299  | M25322      | 27312.16  | 27016.213 |
| NM_006946 | 790.823   | 1043.531  | AA436187    | 1872.923  | 1644.592  |
| NM_000174 | 65783.969 | 77813.758 | H-L 27586 I | 6383.021  | 6893.661  |
| NM_002508 | 4431.892  | 6502.075  | ID 214180   | 1860.799  | 1813.048  |
| NM_014343 | 4416.704  | 6002.417  | ID 1867426  | 50991.242 | 50370.52  |

|           |           |           |           |           |           |
|-----------|-----------|-----------|-----------|-----------|-----------|
| D25303    | 1199.97   | 1551.181  | ID 396450 | 809.401   | 934.148   |
| NM_00233E | 9652.722  | 11535.88  | W99328    | 5465.957  | 5696.219  |
| AF022913  | 3073.737  | 1966.106  | AI434176  | 3293.834  | 3786.121  |
| NM_00002E | 2485.302  | 1571.4    | H08563    | 9582.208  | 8863.096  |
| NM_00138E | 15136.333 | 10541.691 | BE735403  | 4816.13   | 4705.26   |
| M93718    | 16502.279 | 15439.65  | NM_002631 | 30289     | 30622.27  |
| NM_00538E | 4916.013  | 4814.743  | AB033109  | 4767.206  | 4490.035  |
| AK023807  | 37583.098 | 50413.875 | NM_00205E | 59751.902 | 54536.852 |
| NM_01818E | 34427.582 | 36825.5   | NM_00688E | 8731.461  | 9040.785  |
| AK024273  | 4526.557  | 2934.681  | NM_00243E | 11830.442 | 12762.239 |
| X59417    | 27866.299 | 12910.428 | NM_01458E | 20674.008 | 19743.396 |
| NM_01626E | 13647.735 | 22145.789 | NM_00075E | 5023.246  | 5731.315  |
| NM_00333E | 66850.961 | 72618.727 | AK023334  | 18331.424 | 16769.473 |
| AB002376  | 18569.594 | 30350.139 | NM_00256E | 41758.02  | 51004.531 |
| NM_01824E | 1800.841  | 2806.679  | NM_002437 | 9393.134  | 9727.54   |
| NM_00555E | 4902.038  | 7713.768  | D79991    | 5010.693  | 4315.312  |
| NM_016631 | 885.115   | 1764.742  | AK022425  | 3562.288  | 4127.69   |
| AB015617  | 20426.273 | 19501.625 | NM_000054 | 51547.301 | 52504.25  |
| AK022730  | 1918.273  | 1554.508  | NM_01471E | 24710.627 | 27265.676 |
| NM_00225E | 6363.032  | 6024.257  | NM_00181E | 5779.511  | 5457.406  |
| AF064839  | 53039.82  | 57860.473 | NM_01478E | 2563.43   | 2632.819  |
| NM_00543E | 19926.523 | 22568.469 | AK025175  | 1786.478  | 2139.033  |
| AB037810  | 3515.241  | 4101.586  | NM_005811 | 19063.641 | 19993.506 |
| AF222694  | 1082.858  | 1577.579  | NM_005764 | 5182.875  | 5397.589  |
| AL049925  | 5368.96   | 5871.443  | NM_01636E | 10899.354 | 10127.016 |
| NM_01615E | 1924.191  | 1379.151  | NM_004214 | 17249.889 | 15208.354 |
| AK027089  | 6408.638  | 4669.853  | NM_00432E | 29375.994 | 30130.369 |
| X59845    | 2089.737  | 1713.568  | NM_00283E | 26825.773 | 26949.82  |
| NM_006284 | 25896.051 | 20361.684 | NM_020167 | 6648.829  | 6733.453  |
| U18909    | 6339.478  | 5879.869  | NM_01605E | 22969.387 | 24836.678 |
| NM_00348E | 6928.06   | 7245.473  | NM_01400E | 12285.074 | 12490.975 |
| NM_01658E | 25966.84  | 24579.098 | NM_00603E | 34569.656 | 31147.004 |
| NM_003597 | 2094.493  | 1486.782  | NM_004837 | 12056.982 | 10499.822 |
| NM_00256E | 69630.641 | 57394.633 | NM_00037E | 3365.111  | 3619.293  |
| NM_006561 | 1115.892  | 634.947   | BE865893  | 18313.064 | 17452.441 |
| NM_017521 | 3000.979  | 3289.95   | NM_00312E | 58821.887 | 59366.273 |
| AK025200  | 49176.203 | 59162.168 | AY005822  | 11831.036 | 11751.908 |
| NM_00138E | 16224.261 | 23243.564 | NM_01812E | 55418.984 | 54481.012 |
| NM_00102E | 67493.969 | 68687.656 | AF289022  | 7677.48   | 7579.348  |
| NM_00500E | 22535.793 | 15026.148 | AB002326  | 803.411   | 875.05    |
| NM_016304 | 34889.371 | 32388.785 | M17252    | 1295.085  | 1372.142  |
| NM_00601E | 16947.707 | 13948.127 | NM_01602E | 18437.07  | 17621.375 |
| NM_01404E | 20704.557 | 17533.063 | NM_01331E | 7519.119  | 7090.851  |
| L34071    | 10507.969 | 9658.743  | NM_02041E | 11070.3   | 13600.505 |
| AB043007  | 41327.012 | 52947.789 | NM_00045E | 7330.07   | 8584.809  |
| NM_004861 | 9356.169  | 10638.43  | J03048    | 23556.287 | 35811.234 |
| NM_016161 | 1511.93   | 1542.06   | NM_00458E | 1534.899  | 1949.304  |
| AV718258  | 1884.956  | 1779.215  | NM_00110E | 1807.742  | 2518.901  |
| NM_00516E | 11188.841 | 7622.968  | AF228710  | 55718.418 | 57181.664 |
| NM_00513E | 63723.254 | 54535.996 | NM_01839E | 1412.866  | 1659.166  |
| NM_00211E | 68663.219 | 68527.922 | AY007131  | 59773.664 | 59116.938 |
| AK023162  | 4639.119  | 2126.435  | U61735    | 9355.935  | 10375.228 |
| NM_00639E | 10454.439 | 8460.117  | NM_001144 | 39363.441 | 47904.477 |

|           |           |           |             |           |           |
|-----------|-----------|-----------|-------------|-----------|-----------|
| NM_01864  | 8875.145  | 9779.949  | AK023766    | 15662.823 | 16458.578 |
| NM_01826  | 982.399   | 645.229   | NM_001897   | 3730.157  | 5223.495  |
| NM_01344  | 4941.635  | 5671.809  | NM_003853   | 7362.729  | 7929.984  |
| NM_004537 | 4928.926  | 5093.399  | NM_018376   | 5923.2    | 4420.368  |
| AL390134  | 2304.295  | 2421.791  | NM_017615   | 1973.016  | 1626.513  |
| NM_02022  | 9642.929  | 8378.027  | NM_017438   | 7186.517  | 6033.719  |
| NM_01786  | 5806.784  | 6699.628  | U59209      | 7990.626  | 7136.317  |
| NM_003427 | 2161.272  | 1877.449  | NM_020195   | 11496.683 | 11372.216 |
| NM_005920 | 6266.238  | 8489.251  | BC002753    | 530.356   | 757.099   |
| Y09321    | 2120.844  | 1764.624  | AK023824    | 15086.449 | 14665.544 |
| NM_006593 | 1950.703  | 2607.517  | AL133069    | 11964.628 | 13353.19  |
| NM_000376 | 50775.023 | 52156.395 | AL117574    | 951.237   | 999.144   |
| NM_000475 | 14970.587 | 17456.715 | AK026055    | 14579.624 | 15426.932 |
| M61872    | 34577.277 | 44536.762 | AK024126    | 1550.406  | 1445.259  |
| NM_005721 | 5635.846  | 3736.51   | NM_001516   | 11728.192 | 11527.32  |
| AF284223  | 5800.52   | 7175.117  | NM_002744   | 22693.156 | 23981.289 |
| AF176012  | 1257.081  | 1265.775  | NM_015917   | 26781.248 | 27969.012 |
| BE743838  | 14730.209 | 11290.413 | NM_020397   | 2826.951  | 2887.723  |
| AF273046  | 18253.217 | 16523.922 | NM_000061   | 11458.276 | 11766.49  |
| NM_001081 | 7465.999  | 5563.039  | AB046859    | 55704.203 | 50755.801 |
| NM_002483 | 18002.574 | 14015.009 | NM_005109   | 16383.531 | 18698.504 |
| BF002026  | 4740.393  | 2961.897  | AK023573    | 16624.234 | 17174.852 |
| L35594    | 2480.6    | 1880.337  | NM_002730   | 6640.35   | 7927.284  |
| BE790116  | 9934.609  | 9582.127  | NM_004828   | 4261.526  | 5457.646  |
| AI922341  | 17635.496 | 21951.309 | AB011540    | 57837.789 | 64188.586 |
| S57283    | 1693.288  | 1893.574  | NM_000040   | 35331.68  | 37310.727 |
| AA410517  | 2511.525  | 2709.432  | NM_004631   | 10218.563 | 10421.088 |
| M12824    | 8496.837  | 10569.257 | NM_012268   | 50458.883 | 42042.5   |
| W60100    | 3775.859  | 4560.565  | NM_012203   | 3482.076  | 3370.896  |
| M24898    | 3651.983  | 3434.422  | NM_003296   | 1432.117  | 1404.043  |
| U72508    | 1814.887  | 1941.884  | NM_004736   | 18436.699 | 18742.504 |
| AA868504  | 2757.799  | 2728.073  | NM_006895   | 861.091   | 1232.589  |
| AA877845  | 6275.569  | 7378.255  | NM_006459   | 25436.627 | 30950.182 |
| AA664241  | 65883.969 | 64065.816 | AA427949    | 968.59    | 1254.047  |
| AI016456  | 13308.631 | 16563.311 | D50373      | 2103.909  | 2679.12   |
| NM_006066 | 46696.898 | 55907.957 | AA488757    | 58765.996 | 53515.063 |
| AK022230  | 35086.906 | 24158.109 | AA205399    | 2135.519  | 2212.055  |
| AK022147  | 37035.691 | 26621.563 | AI394286    | 145.622   | 648.311   |
| L25664    | 22703.537 | 18303.732 | H07071      | 13202.993 | 13404.418 |
| NM_014940 | 7020.582  | 3031.954  | M25322      | 29927.893 | 30455.145 |
| NM_005783 | 1546.109  | 899.297   | AA436187    | 1648.758  | 1925.337  |
| AK000851  | 1614.387  | 958.409   | H-L 27586 I | 7058.19   | 7501.165  |
| NM_006900 | 17858.977 | 14468.735 | ID 214180   | 1900.846  | 2135.044  |
| AJ289111  | 38715.938 | 34211.309 | ID 1867426  | 48074.195 | 50593.063 |
| NM_016356 | 55518.398 | 36759.578 | ID 396450   | 829.008   | 1459.073  |
| NM_006406 | 17155.748 | 10817.952 | W99328      | 5783.968  | 6202.444  |
| AF216292  | 56876.875 | 50330.746 | AI434176    | 3332.515  | 3932.015  |
| NM_000952 | 18370.268 | 18668.389 | H08563      | 10613.823 | 11499.769 |
| NM_005894 | 1221.298  | 1335.734  | BE735403    | 5359.445  | 6631.215  |
| NM_014584 | 9920.814  | 8478.623  | NM_001718   | 1198.073  | 1179.593  |
| M30627    | 1211.948  | 1081.246  | AF116659    | 5802.412  | 5993.836  |
| NM_005810 | 49866.93  | 51059.227 | NM_000317   | 41385.16  | 38036.73  |
| M28170    | 32435.555 | 30477.525 | NM_006889   | 9821.071  | 8385.699  |



|           |           |           |           |           |           |
|-----------|-----------|-----------|-----------|-----------|-----------|
| NM_001555 | 1627.224  | 1712.381  | NM_002438 | 11492.057 | 11310.489 |
| AK026223  | 11698.364 | 12861.334 | NM_014589 | 19737.557 | 18957.752 |
| NM_000874 | 8673.364  | 8408.778  | NM_000759 | 4727.988  | 4765.119  |
| NM_005854 | 2200.277  | 2534.962  | AK023334  | 17511.891 | 16532.879 |
| AB007863  | 64533.852 | 61924.063 | NM_002563 | 42421.609 | 47893.297 |
| NM_017789 | 3135.524  | 3366.07   | NM_002437 | 11634.474 | 15211.687 |
| D31887    | 6344.472  | 6495.713  | D79991    | 5121.814  | 6106.049  |
| NM_016649 | 7759.358  | 4599.879  | AK022425  | 3755.437  | 3751.771  |
| AK090536  | 27150.146 | 14724.337 | NM_000054 | 51109.363 | 50915.707 |
| D63477    | 1036.226  | 511.824   | NM_014713 | 23107.057 | 23393.311 |
| NM_020243 | 41458.367 | 31459.045 | NM_001812 | 4906.913  | 4663.049  |
| NM_014051 | 11962.878 | 8317.642  | NM_014785 | 2762.449  | 3094.208  |
| AK025398  | 5092.265  | 3325.97   | AK025175  | 1762.53   | 1935.427  |
| AB037750  | 587.464   | 447.923   | NM_005811 | 23598.164 | 24352.211 |
| AK023056  | 3165.772  | 2346.991  | NM_005764 | 4283.579  | 5065.435  |
| AK022207  | 2567.035  | 2336.759  | NM_016362 | 11271.138 | 12477.668 |
| NM_004996 | 6695.062  | 5969.565  | NM_004214 | 17516.779 | 20360.885 |
| NM_017435 | 2446.353  | 5355.981  | NM_004329 | 29871.918 | 38192.074 |
| NM_014037 | 24107.963 | 25252.572 | NM_002836 | 31748.076 | 45007.016 |
| NM_004866 | 37198.531 | 36925.207 | NM_020167 | 7709.368  | 8988.296  |
| NM_018688 | 2347.345  | 2313.263  | NM_016058 | 23081.773 | 26598.111 |
| AK056652  | 9982.044  | 10140.742 | NM_014005 | 12092.944 | 12437.164 |
| NM_015839 | 890.823   | 914.096   | NM_017688 | 8334.085  | 8962.453  |
| AL137438  | 1609.451  | 2239.84   | AK025612  | 53621.168 | 52510.172 |
| NM_017957 | 22714.875 | 27011.82  | NM_000370 | 3489.188  | 3211.257  |
| NM_003024 | 6340.254  | 5915.282  | BE865893  | 20938.119 | 17158.707 |
| NM_013248 | 8796.018  | 9137.104  | NM_003123 | 59262.227 | 54140.98  |
| NM_000034 | 67821.367 | 65242.258 | AY005822  | 12353.59  | 10967.15  |
| NM_012436 | 64510.988 | 69530.289 | NM_018129 | 58063.273 | 54939.172 |
| AK001299  | 61798.16  | 54137.313 | AF289022  | 7304.25   | 7838.466  |
| AB014559  | 39654.477 | 26337.373 | AB002326  | 802.445   | 845.75    |
| NM_016489 | 19981.842 | 13180.477 | M17252    | 1099.814  | 1471.758  |
| NM_005033 | 11374.988 | 9366.056  | NM_016025 | 18302.99  | 19681.727 |
| NM_015932 | 61326.195 | 52000.777 | NM_013319 | 6119.179  | 7002.328  |
| NM_017949 | 1629.634  | 1446.789  | NM_020410 | 10408.078 | 12010.639 |
| AK022169  | 3026.158  | 2153.013  | NM_000453 | 5925.422  | 7271.748  |
| AF015592  | 5387.531  | 3223.682  | NM_004583 | 2251.724  | 2617.393  |
| AK026795  | 1687.808  | 1189.648  | NM_001103 | 1985.995  | 2406.208  |
| NM_016399 | 8804.414  | 7966.818  | AF228710  | 54404.75  | 55510.512 |
| NM_016617 | 18748.369 | 14808.492 | NM_018399 | 1299.48   | 1601.041  |
| NM_002027 | 16556.521 | 16286.61  | AY007131  | 59587.59  | 61385.984 |
| AL162078  | 15190.595 | 13484.563 | U61735    | 9169.938  | 10743.37  |
| NM_000919 | 620.092   | 607.693   | NM_001144 | 40757.844 | 49586.355 |
| NM_013382 | 20826.227 | 22753.35  | AK023766  | 15100.855 | 16756.324 |
| AB002314  | 2933.905  | 3576.823  | NM_001897 | 3880.174  | 4715.062  |
| NM_014043 | 7212.013  | 8139.338  | NM_003853 | 3838.344  | 4600.603  |
| NM_014622 | 1315.432  | 2022.234  | AB033109  | 5022.385  | 5861.329  |
| D11466    | 45361.449 | 49283.746 | NM_002053 | 58285.16  | 57549.754 |
| NM_014056 | 50760.211 | 49740.477 | NM_017438 | 9472.144  | 8191.604  |
| D31885    | 63188.086 | 60077.418 | AK023824  | 17400.623 | 18363.104 |
| AF176012  | 1344.952  | 1015.465  | AL133069  | 13979.254 | 16812.227 |
| BE743838  | 13382.404 | 8850.916  | AL117574  | 1190.399  | 1731.198  |
| AF273046  | 16469.732 | 11971.499 | AK026055  | 17571.389 | 17795.66  |

|           |           |           |             |           |           |
|-----------|-----------|-----------|-------------|-----------|-----------|
| NM_001081 | 6596.179  | 4323.121  | AK024126    | 1575.75   | 1589.708  |
| NM_002483 | 17176.883 | 15534.878 | NM_001516   | 11387.665 | 10344.442 |
| BF002026  | 5875.608  | 4741.349  | NM_002744   | 20836.434 | 20640.08  |
| L35594    | 2580.699  | 2519.781  | NM_020397   | 2674.335  | 3009.623  |
| BE790116  | 11581.11  | 7141.894  | NM_000061   | 10451.829 | 12213.825 |
| AI922341  | 17409.146 | 15192.904 | AB046859    | 50671.738 | 46084.84  |
| S57283    | 1983.894  | 1939.003  | NM_005109   | 16904.473 | 19119.137 |
| AA410517  | 3448.197  | 3450.84   | AK023573    | 17164.18  | 18975.416 |
| M12824    | 8709.027  | 12436.78  | NM_002730   | 6971.389  | 7060.655  |
| W60100    | 4340.794  | 4600.561  | NM_004828   | 4272.298  | 5207.172  |
| M24898    | 5100.5    | 6618.615  | AB011540    | 61438.723 | 59144.652 |
| U72508    | 2865.443  | 2958.845  | NM_000040   | 36271.43  | 35735.18  |
| AA457153  | 9448.856  | 9755.502  | NM_004631   | 9435.679  | 10700.803 |
| AA283122  | 57559.012 | 53559.629 | NM_006033   | 41853.293 | 41175.965 |
| AA868504  | 3132.821  | 4069.218  | NM_004837   | 12671.949 | 12596.947 |
| AA877845  | 8772.607  | 13926.022 | NM_003296   | 1355.202  | 1027.089  |
| AK026281  | 2456.368  | 2808.893  | NM_006459   | 28889.115 | 29971.959 |
| U23862    | 659.771   | 1088.48   | AA427949    | 1814.353  | 1574.061  |
| AK026680  | 20735.693 | 23070.979 | D50373      | 3018.772  | 3022.534  |
| L25664    | 21624.467 | 16931.137 | AA488757    | 56962.039 | 54977.238 |
| NM_014940 | 5890.765  | 2976.488  | AA205399    | 2852.075  | 3106.582  |
| NM_005783 | 1660.895  | 913.033   | H07071      | 15727.99  | 16837.703 |
| AK000851  | 1853.254  | 689.118   | M25322      | 35534.395 | 34846.426 |
| NM_006900 | 16320.783 | 11941.551 | AA436187    | 2798.45   | 2958.719  |
| AJ289111  | 38205.313 | 41749.133 | H-L 27586 I | 8625.742  | 9699.245  |
| NM_016356 | 59215.508 | 51283.672 | ID 214180   | 2041.802  | 2751.198  |
| NM_006406 | 19143.295 | 15249.727 | ID 1867426  | 46029.121 | 45117.695 |
| AF216292  | 56147.301 | 45116.508 | ID 396450   | 1255.196  | 1005.509  |
| NM_000952 | 18020.848 | 17665.777 | W99328      | 7077.073  | 6657.117  |
| NM_005894 | 1339.834  | 1030.722  | AI434176    | 4183.971  | 5070.65   |
| NM_014584 | 12989.218 | 16006.648 | H08563      | 13125.987 | 13976.41  |
| M30627    | 1812.149  | 2058.524  | BE735403    | 7580.576  | 6595.379  |
| NM_005810 | 66449.609 | 64093.848 | NM_001718   | 1459.274  | 1186.266  |
| M28170    | 45015.34  | 54695.91  | AF116659    | 7689.448  | 6736.742  |
| NM_001555 | 2579.802  | 2860.084  | NM_000317   | 42422.344 | 41285.699 |
| AK026223  | 13691.135 | 18645.199 | NM_018376   | 6664.126  | 6616.442  |
| NM_000874 | 10135.315 | 13187.263 | NM_017615   | 1856.523  | 2209.966  |
| NM_005854 | 2961.532  | 5112.333  | AK022425    | 3046.241  | 2591.862  |
| NM_017789 | 3478.992  | 3731.906  | NM_014785   | 2516.463  | 2219.085  |
| D31887    | 7063.427  | 6983.73   | AK025175    | 783.462   | 786.299   |
| NM_005721 | 4172.993  | 4206.943  | NM_005811   | 20415.789 | 16829.762 |
| AF284223  | 3706.358  | 4287.327  | NM_005764   | 5473.997  | 4764.384  |
| D63477    | 1211.495  | 623.864   | NM_016362   | 11675.481 | 9476.585  |
| NM_020243 | 40638.965 | 30989.232 | NM_004214   | 19870.641 | 19678.164 |
| AK025398  | 5100.979  | 3529.076  | NM_004329   | 34640.723 | 35982.789 |
| AK027082  | 839.581   | 382.223   | NM_002836   | 31426.762 | 31316.762 |
| AB037750  | 767.681   | 830.162   | NM_020167   | 8095.545  | 8424.324  |
| AK023056  | 3808.292  | 4281.04   | AL049963    | 39344.152 | 41874.707 |
| AK022207  | 2553.428  | 2779.381  | NM_016058   | 28657.629 | 27652.016 |
| NM_004996 | 7021.239  | 8027.222  | NM_014005   | 15643.148 | 14987.072 |
| NM_017435 | 2861.338  | 8506.788  | NM_004636   | 37481.223 | 41262.289 |
| NM_014037 | 30909.986 | 42783.457 | AK022603    | 1864.391  | 1639.073  |
| NM_004866 | 46696.656 | 55036.68  | NM_004896   | 16264.728 | 15627.699 |

|           |           |           |           |           |           |
|-----------|-----------|-----------|-----------|-----------|-----------|
| NM_01868E | 3517.824  | 3699.203  | NM_013372 | 1885.389  | 2369.398  |
| AK056652  | 14050.349 | 14208.77  | NM_003976 | 5530.467  | 5826.191  |
| NM_01583E | 994.899   | 1261.514  | NM_01768E | 12460.996 | 10823.485 |
| AL137438  | 1962.442  | 2235.248  | AK025612  | 57163.652 | 52791.199 |
| NM_017957 | 24527.441 | 30067.145 | NM_01226E | 55075.527 | 54128.93  |
| NM_003024 | 6347.846  | 7181.678  | NM_012203 | 5303.511  | 6257.482  |
| NM_01324E | 8506.075  | 9511.157  | AL157469  | 887.839   | 1022.879  |
| NM_000034 | 67007.813 | 63269.074 | NM_00286E | 6727.311  | 7565.867  |
| AK022230  | 34784.652 | 39900.125 | AK024100  | 14771.757 | 17148.438 |
| AK022147  | 34577.918 | 41693.652 | NM_00513E | 2188.811  | 1982.887  |
| AK001299  | 61552.98  | 61301.07  | NM_003827 | 16692.828 | 16629.156 |
| AB014559  | 38130.77  | 27973.607 | NM_004583 | 2115.27   | 2292.572  |
| NM_01648E | 19644.832 | 14456.594 | NM_001103 | 1766.444  | 1668.312  |
| NM_005033 | 10831.5   | 8596.726  | AF228710  | 57987.902 | 57733.633 |
| NM_015932 | 63908.613 | 54394.957 | NM_01839E | 1560.029  | 1290.127  |
| NM_01794E | 1688.59   | 1295.609  | AY007131  | 59469.242 | 58946.949 |
| AK022169  | 4152.721  | 3242.574  | U61735    | 8234.497  | 7909.374  |
| AF015592  | 5704.812  | 4763.029  | NM_001144 | 35746.969 | 40360.625 |
| AK026795  | 1673.904  | 1407.767  | AK023766  | 14576.615 | 15299.871 |
| NM_01639E | 10213.988 | 10894.084 | NM_001897 | 3477.149  | 4010.913  |
| NM_016617 | 19395.365 | 17647.9   | NM_003853 | 4094.123  | 4486.926  |
| NM_002027 | 17136.826 | 18246.785 | AB033109  | 5896.579  | 6624.602  |
| AL162078  | 18768.688 | 20983.813 | NM_002053 | 60902.902 | 54175.313 |
| NM_00091E | 926.994   | 1221.825  | NM_00688E | 9455.644  | 9725.227  |
| NM_013382 | 25881.611 | 38943.723 | NM_00243E | 16262.614 | 17565.988 |
| AB002314  | 2958.307  | 3270.608  | NM_01458E | 28822.896 | 30366.633 |
| NM_014043 | 7724.375  | 8568.55   | NM_00075E | 6368.593  | 7901.766  |
| NM_014622 | 1045.752  | 1362.347  | AK023334  | 22928.211 | 20114.363 |
| D11466    | 43112.984 | 51547.051 | NM_002563 | 50143.035 | 53950.324 |
| NM_01405E | 48728.027 | 53678.73  | NM_002437 | 13000.689 | 11768.447 |
| D31885    | 60423.547 | 59035.273 | D79991    | 6756.847  | 6128.604  |
| NM_01664E | 6396.84   | 7746.843  | AB011540  | 57061.477 | 50940.609 |
| AK090536  | 24861.799 | 31445.271 | NM_000040 | 35308.133 | 33795.547 |
| BE743838  | 15665.392 | 14396.15  | NM_004631 | 10462.99  | 10053.998 |
| AF273046  | 16844.273 | 14257.789 | NM_006033 | 38711.43  | 38348.699 |
| NM_001081 | 7492.708  | 5142.315  | NM_004837 | 12404.857 | 11042.318 |
| NM_002483 | 17117.361 | 12931.543 | NM_000370 | 3291.466  | 3747.158  |
| BF002026  | 5261.046  | 4350.449  | BE865893  | 23113.771 | 21325.738 |
| L35594    | 2782.351  | 3280.317  | NM_003123 | 58654.648 | 57026.801 |
| BE790116  | 13025.352 | 10952.775 | AY005822  | 11956.204 | 11726.035 |
| AI922341  | 17788.324 | 19165.18  | NM_01812E | 57211.723 | 57391.645 |
| S57283    | 1648.083  | 1996.02   | AF289022  | 7233.605  | 7948.124  |
| AA410517  | 3408.44   | 4032.44   | AB002326  | 686.607   | 896.248   |
| M12824    | 9019.307  | 10501.957 | M17252    | 1222.666  | 1593.064  |
| W60100    | 4415.759  | 3822.151  | NM_01602E | 17430.979 | 15705.076 |
| M24898    | 5568.975  | 6176.411  | NM_01331E | 6849.033  | 6741.083  |
| U72508    | 3390.267  | 3597.19   | NM_00074E | 4021.446  | 4703.316  |
| AA457153  | 12793.269 | 13145.322 | NM_000722 | 6626.477  | 5183.249  |
| AA283122  | 63766.43  | 60431.715 | NM_006030 | 3829.877  | 4231.083  |
| AA868504  | 4073.496  | 4025.785  | NM_020410 | 11923.888 | 13717.987 |
| AA877845  | 8629.336  | 11288.612 | AF000143  | 57798.473 | 60271.32  |
| AA664241  | 61397.32  | 70145.125 | NM_014211 | 1749.07   | 1759.446  |
| AK026281  | 2166.918  | 3046.806  | NM_000814 | 7126.706  | 7048.471  |

|           |           |           |           |           |           |
|-----------|-----------|-----------|-----------|-----------|-----------|
| AK026680  | 17322.217 | 21485.064 | NM_000453 | 7380.029  | 8208.821  |
| NM_012436 | 67549.828 | 68271.445 | J03077    | 51318.305 | 54827.191 |
| AF216292  | 53385.77  | 40663.578 | J03048    | 25066.725 | 33030.945 |
| NM_000952 | 16161.2   | 12886.479 | NM_001718 | 1488.694  | 1616.062  |
| NM_005894 | 891.41    | 826.043   | AF116659  | 5725.747  | 4806.755  |
| NM_014584 | 10523.744 | 6663.535  | NM_000317 | 38111.066 | 35039.301 |
| M30627    | 1369.537  | 1016.809  | NM_018376 | 6379.304  | 6056.68   |
| NM_005810 | 59067.477 | 56460.355 | NM_017615 | 1811.522  | 1570.776  |
| M28170    | 39188.211 | 40304.609 | NM_017438 | 7033.262  | 6243.843  |
| NM_001555 | 2989.862  | 3092.867  | U59209    | 7113.619  | 7263.977  |
| AK026223  | 18046.348 | 22125.006 | NM_020195 | 12096.002 | 12983.232 |
| NM_000874 | 13411.958 | 12291.771 | AK023824  | 17105.537 | 14630.13  |
| NM_005854 | 3016.171  | 3216.388  | AL133069  | 11698.421 | 12707.13  |
| AB007863  | 61934.766 | 62236.543 | AL117574  | 886.098   | 1355.635  |
| AK024456  | 20772.596 | 24412.02  | AK026055  | 16004.409 | 17536.979 |
| NM_017789 | 3563.046  | 3653.433  | AK024126  | 1132.155  | 1082.141  |
| D31887    | 7488.843  | 8158.351  | NM_001516 | 11337.146 | 10974.89  |
| NM_006180 | 386.855   | 882.484   | NM_002744 | 24102.721 | 24317.748 |
| NM_002313 | 5561.788  | 6033.407  | NM_015917 | 27259.775 | 29473.701 |
| NM_004459 | 4654.412  | 4573.516  | NM_020397 | 3143.444  | 3734.43   |
| NM_001502 | 9330.36   | 12091.128 | NM_000061 | 12206.657 | 10521.002 |
| NM_005721 | 3878.856  | 4818.914  | AB046859  | 55529.16  | 49456.285 |
| AF284223  | 3404.156  | 4112.404  | NM_005109 | 18901.084 | 20150.6   |
| AF176012  | 916.03    | 1404.819  | AK023573  | 18230.943 | 19797.811 |
| NM_013386 | 1060.245  | 660.89    | NM_002730 | 6050.738  | 7102.663  |
| NM_006517 | 706.61    | 750.367   | NM_004828 | 4534.562  | 4857.838  |
| NM_004171 | 8705.117  | 5698.036  | CY3Cy5    | 9535.259  | 390.381   |
| NM_014037 | 29042.215 | 27313.664 | NM_001824 | 68672.328 | 74210.063 |
| NM_004866 | 46144.75  | 50730.73  | AF035314  | 2012.507  | 1840.913  |
| NM_018688 | 4153.134  | 4253.641  | NM_018036 | 2975.313  | 3617.327  |
| AK056652  | 15065.411 | 16068.206 | AF052087  | 2168.968  | 3003.054  |
| NM_015839 | 1053.812  | 1398.745  | AF007143  | 2924.732  | 2704.988  |
| AL137438  | 2833.967  | 3628.715  | AF147417  | 1485.565  | 1416.973  |
| NM_017957 | 28771.271 | 35132.352 | AK023656  | 2983.445  | 2901.959  |
| NM_003024 | 8312.554  | 9345.663  | AF086511  | 5983.048  | 4897.948  |
| NM_013248 | 10811.323 | 14243.915 | AK022989  | 13512.791 | 12377.344 |
| NM_000034 | 67045.695 | 64238.566 | AK001604  | 8298.789  | 7008.748  |
| AK022230  | 39222.082 | 42668.246 | AF086497  | 1557.354  | 1176.712  |
| AK022147  | 34185.727 | 41013.273 | NM_020141 | 13890.099 | 12487.093 |
| L25664    | 21341.645 | 36605.223 | NM_006482 | 3904.893  | 2732.189  |
| NM_014940 | 5535.977  | 5831.603  | NM_001824 | 64115.043 | 60457.055 |
| NM_005783 | 934.8     | 1249.218  | NM_002964 | 700.805   | 587.476   |
| AK000851  | 1132.837  | 1273.314  | SR1       | 62450.445 | 56355.348 |
| NM_006900 | 13408.814 | 17003.869 | SR3       | 53913.68  | 57749.664 |
| AJ289111  | 28811.807 | 42616.402 | SR5       | 7424.791  | 7686.362  |
| NM_016356 | 55002.34  | 52404.16  | SR7       | 8717.913  | 41662.391 |
| NM_006406 | 14264.551 | 15473.754 | SR9       | 26462.76  | 5520.649  |
| D11466    | 48866.766 | 44985.891 | CY3Cy5    | 10984.898 | 517.977   |
| NM_014056 | 48477.621 | 38899.902 | U66050    | 986.866   | 902.421   |
| D31885    | 60414.07  | 52236.91  | U15553    | 10988.049 | 10535.005 |
| NM_016649 | 8355.988  | 6559.293  | U52831    | 847.119   | 791.733   |
| AK090536  | 26232.619 | 18227.756 | Z36829    | 2554.495  | 2306.231  |
| D63477    | 1033.571  | 1197.783  | AK024734  | 19170.688 | 18859.732 |

|           |           |           |           |           |           |
|-----------|-----------|-----------|-----------|-----------|-----------|
| NM_020243 | 41539.477 | 45078.203 | NM_017741 | 4354.285  | 3856.601  |
| NM_014051 | 12237.829 | 14104.716 | AK022223  | 972.486   | 993.7     |
| AK025398  | 5681.376  | 6948.014  | NM_005887 | 9709.533  | 8385.397  |
| AK027082  | 733.941   | 700.6     | AK024921  | 1468.8    | 1399.947  |
| AB037750  | 903.184   | 859.934   | AL110232  | 2642.954  | 2490      |
| AK023056  | 2830.59   | 2470.753  | AK026103  | 5972.979  | 4867.56   |
| NM_001120 | 63351.918 | 59668.277 | NM_016353 | 40402.238 | 47981.762 |
| NM_017888 | 5208.585  | 7116.527  | AK022567  | 3255.806  | 2702.338  |
| NM_004915 | 13145.676 | 24308.832 | AK021687  | 731.39    | 456.577   |
| AK022207  | 2114.624  | 3159.133  | S77357    | 408.353   | 553.506   |
| AV708752  | 7587.621  | 9577.046  | AL080280  | 33404.457 | 47005.773 |
| AF119885  | 3836.904  | 6062.691  | AB028947  | 5686.98   | 6000.822  |
| NM_000750 | 1192.044  | 1674.767  | AK022556  | 1191.497  | 963.673   |
| NM_004996 | 4294.754  | 5238.771  | AK023437  | 11446.046 | 10164.647 |
| NM_005971 | 6880.027  | 8625.949  | AK024147  | 1478.942  | 1440.326  |
| NM_017435 | 1789.141  | 6349.116  | AK022897  | 2140.035  | 2206.844  |
| AK026281  | 4366.45   | 6132.45   | AK023556  | 1171.99   | 1348.522  |
| U23862    | 1126.454  | 1066.839  | AK023898  | 15936.683 | 13132.616 |
| AK026680  | 19904.928 | 14108.517 | AK021619  | 1881.779  | 2095.571  |
| NM_012436 | 61105.551 | 66950.375 | AK022347  | 713.445   | 773.787   |
| AK001299  | 60362.535 | 58950.637 | AK025872  | 2306.868  | 1895.067  |
| AB014559  | 39184.781 | 42325.551 | AF131762  | 12571.261 | 11922.687 |
| NM_016489 | 20862.059 | 22708.715 | AY007089  | 6662.311  | 6677.435  |
| NM_005033 | 10829.545 | 11140.405 | AK021816  | 16839.096 | 16496.822 |
| NM_015932 | 64504.137 | 58841.023 | AK024018  | 588.794   | 613.774   |
| NM_017949 | 1479.635  | 2185.555  | D43770    | 33812.586 | 43868.656 |
| AK022169  | 2974.106  | 3725.724  | AF085960  | 1638.708  | 2123.967  |
| AF015592  | 5284.644  | 5234.988  | AL109691  | 609.634   | 739.555   |
| AK026795  | 1306.071  | 1685.349  | AF087976  | 698.788   | 716.544   |
| NM_016399 | 7805.648  | 10047.604 | AK021519  | 2662.471  | 2636.323  |
| NM_016617 | 17253.791 | 18384.15  | NM_014254 | 11639.722 | 11393.541 |
| NM_002027 | 13781.929 | 16596.701 | AF086036  | 1328.083  | 1937.213  |
| AL162078  | 14165.041 | 17855.938 | AF086010  | 999.149   | 1150.346  |
| NM_000919 | 1727.757  | 2407.206  | U09197    | 2676.906  | 3001.358  |
| NM_013382 | 22393.168 | 37507.188 | AK025218  | 1924.022  | 1721.611  |
| AB002314  | 2840.874  | 4447.898  | AJ227899  | 4572.586  | 4010.19   |
| NM_014043 | 7217.846  | 7817.491  | AL359607  | 6204      | 5563.731  |
| NM_014622 | 973.99    | 1419.727  | AF161371  | 12776.328 | 10863.512 |
| AB011114  | 65947.492 | 63950.645 | AK022464  | 5047.727  | 4545.536  |
| CY3Cy5    | 3440.063  | 74.024    | AF086230  | 4193.072  | 4365.479  |
| NM_019884 | 6322.236  | 4905.45   | AK023408  | 8136.126  | 7722.167  |
| AF088051  | 3277.023  | 2009.626  | AK000144  | 5124.311  | 4659.375  |
| AK023883  | 2832.732  | 2598.065  | AK022275  | 1143.398  | 946.167   |
| AF086366  | 1806.356  | 2018.97   | AK000942  | 1549.885  | 1653.493  |
| AF086360  | 7321.578  | 8293.967  | NM_016349 | 640.531   | 818.405   |
| AF086436  | 9880.987  | 10815.224 | AL117533  | 3040.081  | 2650.922  |
| AF087993  | 5762.253  | 4607.233  | AK026036  | 2908.132  | 3221.573  |
| AF035282  | 1615.916  | 1523.107  | AK023422  | 10976.464 | 11031.745 |
| AK021966  | 3848.348  | 3462.69   | AK022796  | 4705.817  | 3935.171  |
| AB018292  | 24078.629 | 23608.021 | AF090910  | 708.619   | 674.304   |
| AK022842  | 925.489   | 905.223   | AK095193  | 3115.179  | 3137.85   |
| NM_007006 | 23563.033 | 27483.111 | AK025081  | 5561.191  | 4391.25   |
| AL137346  | 4713.578  | 5150.872  | AL122088  | 4866.688  | 4361.016  |

|           |           |           |           |           |           |
|-----------|-----------|-----------|-----------|-----------|-----------|
| NM_017756 | 64612.547 | 59460.984 | AF116633  | 1081.467  | 1090.062  |
| NM_019884 | 7678.448  | 6082.268  | AF119912  | 2064.33   | 2804.835  |
| SR2       | 50594.148 | 43015.359 | AL137518  | 6239.105  | 6466.616  |
| SR4       | 17839.521 | 15138.617 | AK023134  | 799.83    | 742.505   |
| SR6       | 1755.025  | 823.343   | T99941    | 16712.963 | 14154.775 |
| SR8       | 6726.664  | 23025.033 | AF113678  | 3577.614  | 3208.063  |
| SR10      | 23491.857 | 4926.168  | AL137313  | 65115.141 | 67408.078 |
| CY3Cy5    | 2273.223  | 55.153    | AL833529  | 619.619   | 578.243   |
| AF086054  | 6313.666  | 5796.184  | AB002363  | 16035.427 | 21597.152 |
| AK022259  | 69547.906 | 72714.008 | NM_005284 | 11720.615 | 12368.567 |
| AK022461  | 932.857   | 777.318   | AF086351  | 1329.381  | 1367.412  |
| NM_01601C | 9110.568  | 9541.404  | D83199    | 32421.346 | 32782.84  |
| AF147401  | 1561.459  | 1242.635  | AK025957  | 1759.747  | 1755.668  |
| AJ001904  | 714.076   | 571.949   | Y16708    | 3822.439  | 3505.923  |
| AF075022  | 3124.726  | 2727.816  | AL157453  | 6299.781  | 4704.853  |
| AF075060  | 4692.425  | 4101.321  | NM_01904C | 20137.82  | 21363.881 |
| AB002438  | 1603.504  | 1868.725  | NM_005978 | 3008.291  | 2918.625  |
| AF147436  | 1353.06   | 1230.315  | Y16711    | 2343.286  | 2145.076  |
| AK021441  | 2564.708  | 1979.274  | AJ272179  | 15044.112 | 13038.822 |
| AF085846  | 3598.725  | 3042.659  | AJ007015  | 11641.122 | 4950.579  |
| AK023901  | 20396.395 | 15795.228 | AL049317  | 4817.533  | 4175.754  |
| AL109705  | 1211.543  | 813.889   | AL050090  | 3859.167  | 4101.336  |
| AF088057  | 10097.453 | 6734.148  | AF086309  | 2159.571  | 2195.462  |
| AF086255  | 43539.605 | 37314.832 | AF238870  | 2088.865  | 2069.625  |
| AK026847  | 1810.709  | 2085.907  | AK026279  | 5942.393  | 6529.044  |
| AK026891  | 3413.783  | 3483.26   | AF130094  | 31089.27  | 34898.117 |
| AK024595  | 1628.33   | 1037.266  | AK026673  | 6177.164  | 6077.556  |
| AF075032  | 833.391   | 613.328   | AF170935  | 31798.885 | 34787.859 |
| AF085971  | 1773.586  | 1884.38   | AB007978  | 2704.852  | 2060.643  |
| AF147302  | 4135.983  | 3688.956  | AF217970  | 2615.369  | 2724.635  |
| AF085929  | 4903.383  | 4011.643  | AF086297  | 3999.014  | 4222.648  |
| AK001126  | 6599.237  | 6014.791  | AK025455  | 4307.11   | 3737.459  |
| AF085976  | 5231.589  | 5450.225  | AK026799  | 19138.15  | 12902.334 |
| AF075104  | 9211.334  | 8652.298  | NM_01486C | 1955.201  | 1711.503  |
| AL133025  | 1248.993  | 1027.55   | AK022549  | 3726.984  | 3615.129  |
| AL137402  | 10294.943 | 8848.931  | NM_018157 | 1399.769  | 1380.175  |
| AL137617  | 4450.174  | 2927.565  | Z70714    | 8835.164  | 8117.958  |
| AL359568  | 24889.746 | 20006.021 | AK021640  | 25226.689 | 24539.543 |
| AL133564  | 13848.6   | 11285.455 | NM_016565 | 68297.492 | 71480.156 |
| AL137428  | 1547.388  | 952.936   | U84509    | 7443.101  | 8082.036  |
| AL157462  | 1914.914  | 1286.822  | AK002036  | 6408.328  | 3628.633  |
| AL359602  | 12605.175 | 9961.774  | U84512    | 1175.074  | 977.958   |
| NM_01819C | 66776.531 | 62907.211 | AK025775  | 9593.776  | 6888.851  |
| AK021744  | 1766.768  | 1819.023  | AB046791  | 3062.005  | 2452.837  |
| NM_01843C | 13267.124 | 13145.705 | AF043469  | 5226.297  | 5407.212  |
| AL110200  | 5628.642  | 5176.596  | AL109671  | 2943.185  | 2520.464  |
| AL133640  | 4249.318  | 3594.786  | NM_012375 | 1678.227  | 1639.983  |
| AK023783  | 1033.006  | 1198.2    | AK022008  | 5969.136  | 8195.573  |
| AF070647  | 43752.43  | 41241.762 | NM_018186 | 3678.227  | 5127.444  |
| AF116649  | 2953.752  | 1500.904  | AJ132194  | 819.735   | 430.292   |
| AF174394  | 2598.023  | 2269.255  | AL080188  | 7363.965  | 6738.745  |
| AK025924  | 1042.673  | 860.28    | NM_00239C | 8536.477  | 8496.605  |
| AK021876  | 39598.75  | 37588.633 | NM_006142 | 4822.003  | 4190.083  |

|           |           |           |           |           |           |
|-----------|-----------|-----------|-----------|-----------|-----------|
| AK022017  | 1678.139  | 1402.479  | NM_014910 | 18977.59  | 18868.6   |
| AK022160  | 3236.138  | 2243.629  | AK001064  | 8210.179  | 7932.87   |
| AK022295  | 826.391   | 760.606   | AB029031  | 7905.182  | 8683.755  |
| AK021935  | 4905.779  | 3560.606  | NM_001294 | 19852.602 | 22245.139 |
| AK022187  | 14786.349 | 11112.79  | NM_014241 | 777.641   | 737.147   |
| AK022337  | 5437.91   | 4195.968  | AF302786  | 6753.955  | 6055.16   |
| AL133618  | 11172.161 | 11966.243 | AL122083  | 14874.595 | 14132.185 |
| AF230314  | 2818.681  | 2622.811  | NM_019098 | 17922.605 | 22110.736 |
| AK001086  | 1080.929  | 1219.047  | AK022212  | 67888.852 | 65087.109 |
| AJ131610  | 3888.735  | 3469.729  | X64974    | 5025.925  | 627.436   |
| AF119872  | 16453.975 | 13713.687 | NM_000834 | 9085.624  | 2097.831  |
| X99687    | 960.352   | 927.357   | NM_006485 | 61405.926 | 31917.52  |
| AK023255  | 67674.773 | 60484.719 | NM_012459 | 7899.265  | 5190.308  |
| NM_002622 | 19623.838 | 12376.986 | NM_012360 | 1280.942  | 1430.876  |
| AK024185  | 3188.907  | 2387.237  | AL137268  | 6611.007  | 6391.65   |
| AL137562  | 8651.393  | 7119.896  | AK001130  | 1481.135  | 1311.017  |
| M90355    | 70089.875 | 66492.906 | AK022398  | 2107.781  | 1887.083  |
| AK022495  | 4102.653  | 4503.267  | AK024109  | 13748.094 | 13460.747 |
| AK021632  | 1399.885  | 1049.808  | AF088048  | 5474.451  | 5480.369  |
| AK023143  | 1533.714  | 708.418   | AK001143  | 6899.769  | 5811.763  |
| AK026373  | 12014.634 | 12594.134 | AK001701  | 8587.217  | 7182.997  |
| AK021581  | 5010.209  | 2849.228  | AK022205  | 3135.867  | 2747.686  |
| NM_006687 | 5096.332  | 4023.777  | AK024955  | 65445.668 | 60277.977 |
| NM_013301 | 4266.78   | 3197.181  | NM_016580 | 3669.618  | 3950.331  |
| NM_017673 | 1398.318  | 1357.417  | AF169693  | 3289.424  | 4127.853  |
| AB046857  | 1548.639  | 1441.813  | L23206    | 20183.137 | 18613.328 |
| AK024408  | 33473.242 | 28333.6   | NM_012192 | 9964.32   | 9119.411  |
| AJ227905  | 577.62    | 867.291   | NM_006293 | 6300.826  | 6807.15   |
| AF086307  | 27033.58  | 22753.287 | NM_007229 | 13017.064 | 12377.458 |
| L19364    | 5203.658  | 4112.7    | AB011105  | 8188.772  | 7807.637  |
| NM_005390 | 4724.65   | 4402.542  | NM_002213 | 2444.02   | 2302.681  |
| AJ012502  | 21954.061 | 19930.088 | NM_018970 | 975.039   | 1176.873  |
| AK021722  | 1511.201  | 1107.807  | NM_004814 | 7924.99   | 7813.239  |
| NM_000681 | 4251.166  | 4134.845  | D86976    | 24027.148 | 19702.082 |
| AF147445  | 4425.427  | 4423.771  | NM_004057 | 5060.624  | 560.368   |
| Y10508    | 32477.469 | 28650.84  | NM_018971 | 1956.971  | 914.452   |
| NM_005182 | 69513.43  | 72452.656 | K03175    | 2153.232  | 1801.653  |
| D17074    | 2204.417  | 1722.267  | NM_003015 | 4957.317  | 4452.37   |
| AF039944  | 5054.699  | 4052.564  | NM_003711 | 3369.969  | 3019.296  |
| AJ276252  | 1016.589  | 814.012   | NM_006496 | 11468.306 | 11412.674 |
| AK021716  | 11181.642 | 7415.922  | NM_000828 | 1491.998  | 1289.473  |
| AK025035  | 9316.575  | 7806.212  | NM_004826 | 12362.813 | 13909.021 |
| AK002085  | 5359.598  | 3926.259  | NM_013314 | 7785.088  | 8534.385  |
| AB018338  | 29380.258 | 25793.229 | NM_002072 | 802.159   | 881.8     |
| D80010    | 2626.322  | 1994.468  | NM_003182 | 1496.843  | 1312.92   |
| NM_004923 | 2136.321  | 1905.426  | NM_004431 | 46477.965 | 51997.047 |
| NM_003971 | 5918.348  | 4206.185  | NM_002012 | 6495.871  | 5751.119  |
| AK026973  | 994.2     | 776.437   | NM_002070 | 48005.027 | 55327.238 |
| NM_005822 | 1077.641  | 1075.555  | AF227969  | 10340.445 | 11418.839 |
| U81002    | 7989.09   | 6320.237  | AF116657  | 2785.207  | 2572.875  |
| NM_016298 | 18028.25  | 17189.652 | NM_004102 | 1275.833  | 1386.168  |
| NM_014185 | 22811.34  | 21383.025 | NM_003944 | 62078.852 | 62513.617 |
| L38517    | 9566.452  | 9243.261  | NM_016120 | 61447.059 | 59970.109 |

|           |           |           |           |           |           |
|-----------|-----------|-----------|-----------|-----------|-----------|
| AK026101  | 21857.197 | 17802.07  | NM_002893 | 3319.692  | 3697.189  |
| AK022194  | 44459.535 | 44716.691 | NM_002393 | 55202.504 | 54743.785 |
| AF085963  | 4058.548  | 3113.257  | NM_002669 | 8860.192  | 8034.772  |
| AK021436  | 3206.161  | 3938.821  | AB014600  | 14612.914 | 14021.785 |
| U58664    | 2021.164  | 1739.708  | NM_018312 | 8161.425  | 7177.575  |
| AF085937  | 639.306   | 709.69    | X98259    | 3437.485  | 2221.573  |
| AL137569  | 11829.009 | 9739.559  | NM_014792 | 1270.46   | 907.772   |
| AK021920  | 4723.394  | 4067.51   | U05255    | 1785.123  | 1721.144  |
| AL049415  | 8378.28   | 6256.163  | X98260    | 18730.629 | 13324.348 |
| AK022375  | 1766.726  | 1727.43   | NM_007217 | 15047.896 | 11472.414 |
| NM_003378 | 70235.313 | 65205.938 | NM_014777 | 59860.809 | 56637.203 |
| AL110194  | 16030.543 | 10547.406 | NM_001102 | 11281.48  | 8651.447  |
| AF138860  | 2469.027  | 1550.644  | NM_003803 | 9883.895  | 9897.801  |
| AF200348  | 3423.86   | 2778.796  | NM_002818 | 67442.43  | 73247.555 |
| Y11710    | 1093.479  | 890.691   | NM_001937 | 26184.467 | 28065.482 |
| NM_002650 | 4484.722  | 4814.938  | AK024778  | 1804.863  | 1750.963  |
| NM_003260 | 39958.434 | 47487.078 | AL157500  | 595.767   | 868.8     |
| AK024071  | 2285.12   | 2045.82   | AK025498  | 4844.739  | 4796.435  |
| AF056490  | 4095.785  | 5226.028  | NM_001395 | 54269.945 | 55859.781 |
| NM_005538 | 4552.406  | 4765.019  | NM_002068 | 2731.966  | 2978.123  |
| NM_005541 | 7677.329  | 7160.462  | NM_019854 | 1583.994  | 1409.779  |
| AB002319  | 3364.942  | 3285.293  | NM_013338 | 6097.456  | 5850.728  |
| AF039942  | 6249.628  | 5658.11   | NM_014671 | 23525.084 | 24846.779 |
| NM_004421 | 3877.315  | 3624.317  | NM_001814 | 20178.842 | 29025.963 |
| AB046863  | 30483.252 | 37467.066 | NM_005656 | 6531.947  | 5587.488  |
| M62403    | 17525.633 | 15646.404 | NM_006012 | 17766.803 | 15941.603 |
| NM_017883 | 7602.336  | 5713.316  | NM_002151 | 5336.335  | 5330.777  |
| AK025131  | 4136.143  | 3388.474  | NM_014889 | 5898.709  | 5399.786  |
| NM_000754 | 30886.9   | 25611.273 | AF173935  | 1846.573  | 1695.069  |
| NM_014619 | 2182.619  | 2317.749  | AK025322  | 51784.113 | 51520.547 |
| NM_005629 | 33605     | 22730.432 | NM_017887 | 8721.278  | 7568.721  |
| J04621    | 1052.981  | 824.247   | NM_017650 | 903.09    | 914.393   |
| NM_000718 | 4585.086  | 3770.469  | NM_000526 | 13767.183 | 12605.696 |
| NM_000161 | 5109.277  | 4494.519  | AF007152  | 6817.579  | 6888.1    |
| NM_001972 | 841.977   | 706.634   | NM_017575 | 1459.987  | 1544.463  |
| NM_001445 | 2342.899  | 2278.11   | AL122100  | 5024.786  | 4949.315  |
| NM_002006 | 47071.555 | 46339.945 | NM_005310 | 20731.523 | 26609.791 |
| NM_007111 | 20072.273 | 17021.311 | NM_014423 | 21962.438 | 22431.1   |
| NM_002048 | 911.822   | 495.457   | BE904126  | 61155.105 | 63571.195 |
| NM_004702 | 1152.718  | 1140.649  | AF272380  | 59753.563 | 56630.07  |
| NM_007109 | 4070.348  | 5399.01   | NM_033288 | 1371.071  | 1350.339  |
| AK023404  | 14586.378 | 15924.285 | AK000102  | 4589.046  | 4728.277  |
| NM_013239 | 2018.345  | 1720.072  | AB040916  | 10423.748 | 9937.773  |
| NM_001789 | 7382.898  | 5887.187  | NM_005587 | 8598.268  | 8058.314  |
| NM_016004 | 8528.751  | 7740.945  | AF038362  | 8851.165  | 10787.274 |
| NM_002655 | 2244.147  | 1814.475  | NM_005195 | 68649.945 | 68944.516 |
| AB028955  | 43906.871 | 45800.379 | NM_005481 | 4630.51   | 4427.993  |
| U66879    | 35906.082 | 39334.434 | NM_004715 | 16992.391 | 14814.213 |
| NM_016022 | 7632.08   | 7406.486  | L40392    | 5604.821  | 4445.501  |
| NM_004874 | 2680.173  | 1472.265  | BF541482  | 1303.548  | 1176.364  |
| NM_014204 | 2612.836  | 2183.814  | NM_001007 | 68947.258 | 70846.656 |
| S70385    | 29086.268 | 26905.59  | NM_003017 | 22014.246 | 20263.66  |
| M34671    | 10968.046 | 10903.718 | NM_020366 | 12971.188 | 12435.995 |



|           |           |           |           |           |           |
|-----------|-----------|-----------|-----------|-----------|-----------|
| NM_01850E | 9579.93   | 8328.441  | AK021608  | 5641.489  | 5660.503  |
| NM_00408E | 891.317   | 1064.578  | NM_004297 | 4877.253  | 4645.97   |
| NM_014944 | 12699.382 | 11632.239 | NM_006044 | 16445.813 | 18608.701 |
| AF176706  | 5827.82   | 5427.22   | NM_003635 | 9833.446  | 8519.748  |
| NM_00108E | 5784.088  | 5111.6    | NM_000662 | 6084.306  | 5111.29   |
| NM_01467C | 11709.763 | 11260.014 | NM_000292 | 6706.479  | 7210.143  |
| NM_01904E | 10054.655 | 8897.297  | NM_003689 | 59147.309 | 60562.473 |
| NM_00104C | 2908.316  | 2853.444  | NM_016173 | 3118.908  | 3556.396  |
| AF279698  | 9495.703  | 10039.178 | NM_002875 | 12084.364 | 13537.161 |
| NM_01984E | 5313.143  | 4858.603  | U90549    | 15074.534 | 14135.058 |
| NM_00004E | 966.922   | 931.639   | NM_01324C | 30661.805 | 29985.246 |
| AB032996  | 69322.234 | 68293.727 | NM_015874 | 41548.527 | 37043.543 |
| AB040881  | 11286.389 | 10490.522 | NM_004965 | 68291.852 | 62628.695 |
| AY007121  | 4677.817  | 5789.775  | AF312393  | 59794.871 | 56072     |
| NM_003372 | 17997.836 | 17689.422 | AF272898  | 32280.686 | 32677.477 |
| NM_007317 | 11137.861 | 9248.653  | AB037817  | 3422.544  | 2966.323  |
| AB037826  | 602.794   | 660.523   | AB032951  | 32541.498 | 33445.801 |
| AK021466  | 2384.556  | 2991.303  | NM_003417 | 1155.099  | 1219.117  |
| Z36796    | 69215.07  | 74970.68  | NM_005149 | 24563.135 | 25121.676 |
| NM_006443 | 53115.395 | 49619.438 | AK024073  | 2676.719  | 3145.873  |
| NM_002634 | 26520.023 | 24727.393 | NM_018083 | 7476.052  | 8983.439  |
| NM_01774E | 4170.271  | 3637.359  | AL110188  | 20809.523 | 21647.012 |
| NM_00293E | 20632.83  | 24130.154 | D70834    | 58035.301 | 55954.32  |
| AK023652  | 39821.109 | 39072.762 | NM_00097C | 68203.141 | 73585.383 |
| NM_01663E | 32708.715 | 28789.852 | NM_012465 | 2870.258  | 2831.904  |
| AB018274  | 18645.592 | 17302.531 | M60499    | 5224.086  | 5921.299  |
| NM_005871 | 11288.412 | 8468.751  | NM_001614 | 61315.566 | 61319.602 |
| NM_007042 | 7885.646  | 9691.901  | NM_00036E | 1881.798  | 1936.399  |
| NM_016333 | 17972.684 | 16728.127 | NM_003833 | 66754.602 | 59658.176 |
| BE875028  | 10422.461 | 15639.382 | AK000868  | 28783.156 | 32016.523 |
| AK000511  | 12515.748 | 13441.296 | NM_001233 | 10357.585 | 10298.939 |
| AF121255  | 6891.289  | 8365.391  | NM_001234 | 4807.234  | 5077.884  |
| NM_005494 | 13468.734 | 11953.906 | L33404    | 1735.98   | 1587.961  |
| NM_01794E | 1134.271  | 910.175   | M13509    | 9370.42   | 9382.84   |
| NM_004953 | 10132.001 | 9279.196  | X04076    | 14575.194 | 14338.124 |
| NM_01219E | 3112.194  | 2777.157  | W95082    | 866.322   | 804.293   |
| AL049682  | 2116.399  | 1976.01   | AA485362  | 3619.121  | 3699.364  |
| NM_00552E | 14497.124 | 13775.307 | AJ222801  | 32006.227 | 30481.496 |
| AL050199  | 4206.779  | 4819.277  | W72207    | 41627.82  | 44917.789 |
| NM_004901 | 2382.412  | 2188.293  | BI772354  | 3231.685  | 3013.157  |
| NM_016282 | 13687.575 | 13318.351 | AA733033  | 7463.757  | 7466.188  |
| NM_00276E | 13174.436 | 14326.9   | AA583574  | 5436.991  | 5344.663  |
| NM_003434 | 69137.508 | 71514.68  | U67733    | 1223.646  | 1527.32   |
| NM_018181 | 1202.882  | 937.109   | AI690184  | 57302.91  | 59805.859 |
| X68880    | 775.827   | 1027.645  | T48692    | 2053.275  | 2187.32   |
| NM_005654 | 690.785   | 727.149   | AA927490  | 6116.093  | 5856.178  |
| AF024698  | 69377.648 | 68031.875 | NM_003779 | 1954.931  | 1958.112  |
| BE904617  | 62214.918 | 58514.172 | NM_020164 | 30522.965 | 25235.068 |
| AK024495  | 3771.334  | 3373.983  | AK023521  | 35567.836 | 35445.125 |
| AF024694  | 5776.872  | 6755.448  | NM_014267 | 53168.734 | 54595.309 |
| AF091081  | 29282.367 | 30007.424 | NM_001481 | 1292.901  | 1080.561  |
| AK001758  | 4085.26   | 4243.668  | U30872    | 6371.403  | 5453.273  |
| U90842    | 1556.91   | 1244.11   | AF111783  | 1336.116  | 1306.465  |

|           |           |           |           |           |           |
|-----------|-----------|-----------|-----------|-----------|-----------|
| AF086325  | 8692.559  | 8322.636  | NM_000256 | 725.792   | 782.817   |
| NM_004928 | 1840.165  | 1754.898  | NM_020469 | 18132.809 | 19889.111 |
| NM_004959 | 774.059   | 1012.147  | NM_002639 | 4261.098  | 4758.281  |
| AK026022  | 57328.496 | 55242.07  | NM_014734 | 8867.886  | 8998.008  |
| NM_003199 | 8890.108  | 9051.516  | NM_002289 | 4479.033  | 4069.964  |
| NM_006205 | 2165.242  | 2200.065  | AK026408  | 5625.531  | 6205.007  |
| NM_000130 | 9731.426  | 10954.458 | NM_005025 | 1442.818  | 1554.523  |
| AI492087  | 1655.525  | 1670.168  | NM_006307 | 2970.879  | 2688.415  |
| R72122    | 11567.592 | 10638.77  | M74782    | 8401.813  | 7159.146  |
| Z35309    | 16900.436 | 15623.221 | NM_017818 | 8906.993  | 8434.384  |
| X04571    | 2238.29   | 3246.374  | NM_020433 | 3010.953  | 3034.537  |
| AA700005  | 2601.124  | 3281.351  | NM_001767 | 1206.483  | 1304.328  |
| AA292025  | 6008.233  | 6834.087  | AF028823  | 19642.133 | 21466.078 |
| AA437226  | 12952.665 | 15519.992 | NM_004970 | 1066.191  | 1262.017  |
| R36143    | 5731.304  | 6095.377  | NM_004295 | 58965     | 61409.277 |
| XM_056359 | 3383.496  | 3881.613  | NM_002087 | 55621.426 | 58815.543 |
| D10353/NM | 48460.859 | 46750.406 | AB023154  | 3672.647  | 3596.369  |
| M15042    | 15709.116 | 14081.847 | NM_014585 | 3031.083  | 3645.128  |
| AK056843  | 9882.285  | 11220.598 | AF200815  | 2042.614  | 2518.924  |
| U49928    | 68823.594 | 63470.336 | NM_001056 | 2335.91   | 2323.731  |
| AK096645  | 59589.629 | 56830.965 | AY026461  | 10982.19  | 10712.594 |
| AK092859  | 1253.411  | 1650.264  | AK025708  | 12954.973 | 12089.223 |
| NM_005793 | 10280.169 | 11613.93  | NM_000405 | 4142.871  | 4332.141  |
| NM_006112 | 28032.809 | 34387.375 | NM_005564 | 61311.488 | 60305.402 |
| M12807    | 2523.802  | 2578.651  | NM_004508 | 10205.922 | 9644.858  |
| NM_017983 | 1825.143  | 1738.228  | AL137619  | 22480.367 | 24127.109 |
| AF116909  | 1461.442  | 1564.808  | AB007859  | 3114.386  | 2992.62   |
| BE906724  | 2489.124  | 2836.23   | NM_006754 | 1542.965  | 1581.65   |
| NM_002283 | 36694.914 | 36822.738 | NM_001127 | 9160.907  | 10648.739 |
| AJ276095  | 23054.053 | 25305.893 | NM_012430 | 9432.61   | 9889.535  |
| NM_004819 | 10614.812 | 12183.947 | NM_003917 | 56752.16  | 58148.082 |
| NM_007184 | 6196.282  | 8842.525  | NM_007077 | 9257.232  | 9790.189  |
| NM_005291 | 64160.828 | 55595.652 | NM_002956 | 7011.772  | 8456.134  |
| AF253316  | 955.447   | 805.852   | AB018739  | 6519.873  | 6582.084  |
| NM_005855 | 683.861   | 789.42    | NM_006750 | 60671.852 | 58598.16  |
| NM_002923 | 4555.053  | 4051.943  | NM_005538 | 450.587   | 847.213   |
| NM_006794 | 2940.397  | 3680.097  | AK001913  | 10463.732 | 10024.843 |
| NM_018653 | 868.267   | 1235.081  | NM_017737 | 675.55    | 556.497   |
| NM_005388 | 13674.849 | 15623.294 | NM_004292 | 6035.388  | 5668.347  |
| NM_007232 | 63314.023 | 62908.672 | NM_015484 | 12938.069 | 13399.188 |
| NM_016257 | 1537.374  | 2427.515  | NM_018046 | 2904.535  | 3020.068  |
| NM_002717 | 4166.37   | 4548.344  | NM_013316 | 11473.836 | 10967.756 |
| NM_003501 | 9421.104  | 9106.092  | M20701    | 56399.816 | 53170.223 |
| NM_001108 | 13397.436 | 13095.989 | NM_002912 | 6334.776  | 7910.906  |
| NM_014291 | 18692.748 | 16568.963 | NM_013284 | 11597.336 | 15699.283 |
| NM_014631 | 1321.13   | 1217.648  | NM_006739 | 5731.094  | 6626.951  |
| NM_001089 | 15070.604 | 15238.505 | NM_013274 | 12272.084 | 13811.154 |
| NM_000120 | 3960.386  | 4120.926  | AL050187  | 3182.713  | 3180.798  |
| U09384    | 3553.361  | 4087.197  | NM_007127 | 1122.886  | 1003.112  |
| NM_004794 | 21042.672 | 21719.871 | NM_012387 | 49963.227 | 49135.68  |
| NM_002803 | 17824.121 | 17362.512 | NM_014735 | 3675.172  | 3864.306  |
| NM_005508 | 5381.775  | 5183.013  | NM_004252 | 54112.719 | 56384.48  |
| NM_018485 | 911.148   | 890.385   | AF172929  | 15614.038 | 15395.806 |

|           |           |           |           |           |           |
|-----------|-----------|-----------|-----------|-----------|-----------|
| NM_00678E | 2493.436  | 2589.255  | AK025655  | 6350.444  | 7834.857  |
| NM_01656E | 2452.889  | 3093.919  | NM_001362 | 3831.054  | 4057.594  |
| AB033102  | 53493.98  | 56899.586 | NM_00405E | 2417.244  | 1962.421  |
| NM_014774 | 3880.956  | 4263.99   | NM_001614 | 61603.766 | 59768.945 |
| NM_014143 | 22560.541 | 27551.951 | NM_00036E | 1631.754  | 1747.6    |
| NM_00015C | 1557.992  | 1229.389  | NM_003833 | 61046.316 | 56176.379 |
| NM_006212 | 2731.709  | 2835.038  | AK000868  | 28298.688 | 30200.102 |
| AL591715  | 2594.635  | 2302.922  | NM_001233 | 7891.479  | 9452.477  |
| NM_018042 | 29186.119 | 29378.99  | NM_001234 | 4328.928  | 5351.168  |
| BE741525  | 2336.271  | 2440.161  | BF679789  | 26672.389 | 29570.889 |
| BF030555  | 61640.875 | 64854.332 | H97792    | 43187.418 | 47516.953 |
| NM_012433 | 15739.485 | 15602.942 | L33404    | 1979.154  | 2358.511  |
| NM_00560E | 10768.648 | 11185.737 | M13509    | 9805.833  | 11439.132 |
| NM_00257E | 3660.661  | 3386.867  | X04076    | 15638.825 | 16686.803 |
| NM_003582 | 2505.487  | 2364.551  | W95082    | 750.212   | 1088.154  |
| AF057354  | 934.117   | 764.363   | AA485362  | 4054.089  | 4316.301  |
| AF169351  | 16326.912 | 20113.82  | AJ222801  | 25895.711 | 27640.166 |
| M14200    | 68652.711 | 65280.664 | W72207    | 39570.027 | 45018.574 |
| NM_000282 | 3509.075  | 4002.114  | BI772354  | 3220.076  | 3352.943  |
| NM_000532 | 22088.49  | 27844.738 | AA733033  | 5399.402  | 5955.551  |
| NM_016341 | 4863.521  | 6075.983  | AA583574  | 5165.214  | 6256.138  |
| NM_00620E | 3109.637  | 3248.381  | U67733    | 1215.524  | 1035.777  |
| X04571    | 1669.442  | 1779.978  | T48692    | 1574.497  | 1919.448  |
| AA700005  | 1583.936  | 1873.654  | AA927490  | 5840.571  | 6647.903  |
| AA292025  | 5411.608  | 5737.366  | NM_005052 | 15175.17  | 14455.188 |
| AA437226  | 10980.73  | 12815.378 | BF038439  | 1998.61   | 2466.087  |
| R36143    | 6076.948  | 8110.839  | AF319476  | 2465.423  | 2781.624  |
| M15042    | 14261.995 | 15886.244 | NM_014267 | 49522.32  | 52192.02  |
| AK056843  | 15658.971 | 14599.291 | NM_001481 | 1109.715  | 679.731   |
| U49928    | 63275.246 | 66585.008 | U30872    | 5165.062  | 4898.307  |
| AK096645  | 61080.535 | 62554.695 | AF111783  | 1234.293  | 1059.607  |
| AK092859  | 1608.479  | 2133.344  | NM_00025E | 513.917   | 593.009   |
| NM_018291 | 29483.746 | 34773.594 | NM_02046E | 19530.791 | 18808.129 |
| NM_00553C | 13230.396 | 13858.864 | NM_00263E | 4456.283  | 4603.375  |
| NM_00689E | 6671.184  | 6844.344  | NM_014734 | 8926.976  | 9880.542  |
| M12807    | 3679.714  | 3579.024  | NM_00228E | 4803.792  | 5222.228  |
| NM_00176E | 3500.209  | 4531.201  | AK026408  | 5974.105  | 7852.302  |
| NM_003361 | 4128.559  | 4680.767  | NM_00502E | 1270.652  | 1529.901  |
| NM_01209E | 22537.822 | 23610.205 | NM_006307 | 2940.648  | 3379.313  |
| NM_018684 | 59437.566 | 55264.004 | M74782    | 8554.989  | 8188.281  |
| AJ276095  | 22008.572 | 23861.959 | NM_01781E | 8571.282  | 9281      |
| NM_00481E | 7330.926  | 7916.625  | NM_020433 | 2753.658  | 2937.414  |
| NM_007184 | 4674.51   | 5678.305  | NM_001767 | 3023.343  | 2069.939  |
| NM_005291 | 61762.598 | 54694.598 | AF028823  | 15012.733 | 14051.824 |
| NM_002923 | 4028.522  | 4167.888  | NM_00497C | 926       | 805.049   |
| NM_006794 | 3445.593  | 3028.042  | NM_00429E | 57170.508 | 55944.977 |
| NM_018653 | 921.989   | 1180.244  | NM_002087 | 51089.195 | 53435.164 |
| NM_00538E | 16703.375 | 18388.348 | AB023154  | 3525.049  | 3324.207  |
| NM_007232 | 63515.48  | 57759.82  | NM_01458E | 2717.485  | 3059.969  |
| NM_016257 | 2299.49   | 2971.601  | AF200815  | 1989.068  | 2399.346  |
| NM_002717 | 5347.902  | 5458.898  | NM_01246E | 3600.586  | 3114.204  |
| NM_00430E | 62809.359 | 63313.234 | M60499    | 5691.299  | 6226.073  |
| NM_014291 | 15516.612 | 16887.795 | AY026461  | 11364.352 | 10986.674 |

|           |           |           |           |           |           |
|-----------|-----------|-----------|-----------|-----------|-----------|
| NM_014631 | 1824.725  | 1874.707  | AK025708  | 13580.203 | 13413.593 |
| NM_000120 | 4133.628  | 4598.003  | NM_000405 | 3589.566  | 4463.553  |
| NM_004519 | 640.015   | 754.917   | NM_005564 | 60641.934 | 57499.566 |
| U09384    | 3570.892  | 5028.091  | NM_004508 | 10664.322 | 12397.372 |
| NM_004794 | 17755.709 | 18749.422 | AL137619  | 21612.691 | 25621.213 |
| NM_002803 | 13852.318 | 14090.823 | NM_000085 | 503.538   | 584.506   |
| NM_005508 | 4875.868  | 5252.866  | AB007859  | 2680.162  | 2904.299  |
| NM_018485 | 1420.346  | 1668.799  | NM_006754 | 1891.486  | 1822.215  |
| NM_006788 | 2607.602  | 2721.734  | NM_001127 | 9188.145  | 10312.126 |
| NM_016568 | 2104.763  | 2404.2    | NM_012430 | 7179.072  | 7675.531  |
| NM_002987 | 520.617   | 787.017   | NM_003917 | 57719.512 | 53947.02  |
| AB033102  | 59843.93  | 58513.996 | NM_007077 | 8794.591  | 7903.628  |
| NM_014774 | 4144.57   | 3659.439  | NM_002956 | 6986.96   | 7194.034  |
| NM_014143 | 26408.08  | 28107.875 | AB018739  | 6033.738  | 5918.395  |
| M55646    | 49151.23  | 51245.824 | NM_006750 | 61984.195 | 56886.07  |
| NM_006112 | 31426.594 | 41867.293 | NM_020164 | 31885.049 | 31980.088 |
| AB023152  | 996.32    | 998.451   | AK023521  | 35519.855 | 38766.699 |
| AK022872  | 6564.765  | 6582.496  | NM_017737 | 2288.753  | 2150.147  |
| AK024272  | 7998.687  | 8087.285  | NM_004292 | 6323.238  | 5907.793  |
| NM_016381 | 2410.602  | 2457.425  | NM_015484 | 12284.217 | 12856.917 |
| AL591715  | 2688.663  | 3227.66   | NM_018046 | 2786.073  | 2337.293  |
| NM_018042 | 28273.314 | 27014.713 | NM_013316 | 10643.707 | 11158.133 |
| BE741525  | 2140.58   | 2498.065  | M20701    | 54109.723 | 49080.891 |
| BF030555  | 59799.023 | 65562.961 | NM_002912 | 4772.962  | 4587.738  |
| NM_012433 | 13233.64  | 11667.525 | NM_013284 | 9889.977  | 10125.676 |
| NM_005605 | 11018.943 | 12886.643 | NM_006739 | 5654.795  | 7320.282  |
| NM_002576 | 3813.359  | 4234.886  | NM_013274 | 12208.878 | 14699.83  |
| NM_003582 | 2562.744  | 2780.13   | AL050187  | 2723.165  | 2927.556  |
| AF057354  | 845.705   | 710.842   | NM_007127 | 2971.136  | 3023.805  |
| AF169351  | 23566.232 | 25054.691 | NM_012387 | 50316.098 | 45536.953 |
| M14200    | 66279.891 | 61542.73  | NM_014735 | 3318.579  | 3462.31   |
| NM_000282 | 4952.818  | 5028.864  | NM_004252 | 45685.207 | 46178.02  |
| NM_000532 | 21381.994 | 21199.799 | AF172929  | 13724.237 | 13905.513 |
| NM_016341 | 1758.408  | 1999.261  | NM_006398 | 49114.82  | 50051.961 |
| AF231916  | 24744.299 | 28526.584 | AK025655  | 5900.811  | 6092.228  |
| NM_003501 | 14786.186 | 16739.965 | NM_001362 | 3131.446  | 2959.246  |
| NM_000130 | 25069.18  | 27756.971 | NM_004056 | 1754.565  | 1917.712  |
| AF193756  | 1713.274  | 1959.724  | NM_001056 | 2677.252  | 2795.344  |
| NM_004183 | 1214.666  | 729.608   | NM_003833 | 56080.789 | 57806.434 |
| AI492087  | 1716.527  | 2005.321  | AK000868  | 23698.611 | 23022.529 |
| R72122    | 12109.878 | 12614.08  | NM_001233 | 7435.564  | 9199.638  |
| Z35309    | 13770.724 | 12214.152 | NM_001234 | 3343.39   | 4340.864  |
| X04571    | 1726.166  | 2338.856  | BF679789  | 27664.768 | 31107.068 |
| AA700005  | 1666.175  | 2307.285  | H97792    | 39394.082 | 47345.961 |
| AA437226  | 11467.284 | 11622.158 | L33404    | 2002.419  | 2030.675  |
| R36143    | 5490.484  | 6113.62   | M13509    | 9961.385  | 10042.463 |
| XM_056359 | 3497.78   | 3699.333  | X04076    | 14117.518 | 15496.485 |
| D10353/NM | 50803.172 | 54347.012 | W95082    | 868.033   | 1022.136  |
| M15042    | 13141.974 | 14152.466 | AA485362  | 4981.334  | 5974.426  |
| AK056843  | 18370.377 | 20172.9   | AJ222801  | 31383.559 | 32879.012 |
| U49928    | 63624.207 | 64018.609 | W72207    | 38386.758 | 47599.047 |
| AK096645  | 62705.207 | 62961.703 | BI772354  | 4462.912  | 4463.019  |
| AK092859  | 2233.317  | 2559.142  | AA733033  | 5830.631  | 6629.144  |

|           |           |           |           |           |           |
|-----------|-----------|-----------|-----------|-----------|-----------|
| NM_018291 | 28882.014 | 34359.008 | AA583574  | 4820.864  | 5222.135  |
| NM_005530 | 12755.272 | 11147.12  | U67733    | 816.989   | 674.315   |
| NM_006899 | 7443.583  | 6794.714  | AI690184  | 58781.223 | 57648.672 |
| NM_012200 | 3947.948  | 3990.893  | T48692    | 1683.544  | 2034.573  |
| NM_001724 | 3411.385  | 2444.425  | AA927490  | 6166.217  | 6425.869  |
| NM_002283 | 30853.393 | 33583.637 | NM_005052 | 19971.203 | 18363.887 |
| AJ276095  | 16442.756 | 18441.967 | BF038439  | 1917.918  | 1946.956  |
| NM_004819 | 7396.942  | 8001.923  | AF319476  | 2179.963  | 3251.724  |
| NM_007184 | 5224.376  | 6682.225  | NM_005538 | 433.639   | 750.216   |
| NM_005291 | 64014.664 | 63023.063 | AK001913  | 9441.069  | 10260.245 |
| AF253316  | 1103.289  | 1094.827  | NM_002289 | 4433      | 3374.879  |
| NM_006794 | 4049.509  | 5069.301  | AK026408  | 6865.521  | 6837.057  |
| NM_018653 | 1497.284  | 1550.976  | NM_005025 | 1286.921  | 1536.395  |
| NM_005388 | 19942.371 | 23809.49  | NM_006307 | 2668.989  | 3050.515  |
| NM_007232 | 62923.387 | 74025.555 | M74782    | 8475.024  | 7047.212  |
| NM_003027 | 1594.958  | 2088.1    | NM_017818 | 8424.794  | 8965.817  |
| NM_016257 | 2165.326  | 2549.005  | NM_020433 | 2681.805  | 2851.043  |
| NM_002717 | 3905.102  | 3516.961  | NM_001767 | 1135.59   | 1201.443  |
| NM_012114 | 961.955   | 1172.039  | AF028823  | 17109.178 | 16796.318 |
| NM_014486 | 597.508   | 795.358   | NM_004970 | 797.136   | 986.553   |
| NM_003025 | 59235.199 | 57365.578 | NM_004295 | 58698.25  | 58933.027 |
| NM_020179 | 17393.098 | 19985.391 | NM_002087 | 54682.086 | 51154.75  |
| NM_004306 | 64913.895 | 66826.367 | AB023154  | 3221.994  | 3186.365  |
| NM_006786 | 14316.05  | 14843.409 | NM_001714 | 995.121   | 1364.358  |
| NM_006205 | 2565.009  | 2307.571  | NM_014585 | 2222.188  | 2511.162  |
| NM_004283 | 2372.699  | 2448.982  | AF200815  | 1725.038  | 2478.164  |
| NM_004163 | 53039.645 | 54027.141 | NM_014564 | 1259.027  | 1290.682  |
| AK026308  | 3399.453  | 3718.541  | NM_013441 | 15121.484 | 16696.098 |
| NM_013337 | 5303.485  | 6103.606  | NM_014421 | 12120.673 | 13052.254 |
| NM_004193 | 4773.648  | 5299.358  | AB033028  | 1177.761  | 1384.334  |
| NM_002803 | 17037.078 | 17094.467 | NM_017680 | 1871.89   | 1734.641  |
| NM_005508 | 5907.543  | 5838.188  | NM_012465 | 3320.958  | 3805.705  |
| NM_018485 | 810.035   | 1029.079  | M60499    | 5073.521  | 6377.301  |
| NM_006788 | 3155.262  | 3613.007  | NM_001614 | 58215.969 | 57365.559 |
| NM_016568 | 2401.01   | 2545.895  | NM_000366 | 2101.877  | 2426.694  |
| NM_002987 | 929.506   | 989.354   | NM_004300 | 8802.657  | 8525.5    |
| AB033102  | 58281.199 | 59243.293 | NM_000052 | 426.406   | 507.185   |
| NM_014774 | 4971.154  | 5657.593  | AB007859  | 4197.563  | 3619.039  |
| NM_014143 | 26302.707 | 34356.133 | NM_006754 | 1884.005  | 1660.468  |
| M55646    | 53951.609 | 54911.887 | NM_001127 | 10407.142 | 9671.885  |
| NM_006112 | 22646.729 | 27982.359 | NM_012430 | 9892.076  | 10863.286 |
| M12807    | 3398.966  | 3181.016  | NM_003917 | 58608.746 | 52785.34  |
| NM_001765 | 6286.944  | 7665.676  | NM_007077 | 11188.633 | 11041.622 |
| NM_003361 | 4780.699  | 5294.067  | NM_002956 | 9136.01   | 10197.286 |
| NM_012099 | 30130.859 | 28686.838 | AB018739  | 7367.824  | 8085.103  |
| NM_018684 | 62153.043 | 64792.742 | NM_020164 | 34493.406 | 30560.459 |
| NM_017983 | 1590.491  | 1553.334  | AK023521  | 43563.18  | 44626.098 |
| AF116909  | 1366.867  | 1535.042  | NM_014267 | 57660.453 | 52039.508 |
| NM_000282 | 4059.694  | 3767.435  | NM_001481 | 1691.838  | 1300.035  |
| NM_000532 | 22679.539 | 23940.609 | U30872    | 5788.708  | 5650.904  |
| NM_016341 | 2241.336  | 2744.339  | AF111783  | 1327.107  | 1205.047  |
| AF231916  | 18097.066 | 18979.561 | NM_000256 | 975.066   | 584.094   |
| NM_003501 | 15538.017 | 16523.561 | NM_020469 | 18698.254 | 19501.6   |

|           |           |           |           |           |           |
|-----------|-----------|-----------|-----------|-----------|-----------|
| AK022654  | 62406.215 | 61159.395 | NM_002639 | 4016.822  | 4345.83   |
| BC002905  | 12513.458 | 13512.115 | NM_014734 | 8683.839  | 7945.238  |
| NM_018091 | 21256.578 | 26917.797 | NM_001362 | 3023.351  | 2739.282  |
| NM_001108 | 11381.29  | 11124.79  | NM_004056 | 1769.677  | 1330.968  |
| NM_001637 | 1416.452  | 1758.918  | NM_001056 | 2035.043  | 2262.739  |
| NM_016630 | 29968.355 | 32595.207 | AY026461  | 13203.303 | 12784.91  |
| NM_014291 | 16852.008 | 18739.367 | AK025708  | 16851.668 | 15061.791 |
| NM_014631 | 807.052   | 1073.204  | NM_000405 | 4893.172  | 6018.44   |
| NM_001089 | 16290.995 | 20797.66  | NM_005420 | 374.292   | 559.642   |
| NM_001676 | 20881.777 | 25349.607 | NM_006405 | 60234.137 | 57416.387 |
| NM_000220 | 1962.018  | 1701.146  | AJ245946  | 1360.252  | 1330.074  |
| NM_001679 | 49362.484 | 51092.68  | NM_006749 | 2229.26   | 1804.704  |
| NM_004046 | 66436.797 | 62926.254 | NM_004694 | 7761.888  | 6931.965  |
| NM_004983 | 6382.949  | 5861.105  | NM_000324 | 2555.946  | 2861.564  |
| U09384    | 3094.393  | 3808.014  | NM_012206 | 1018.102  | 923.187   |
| NM_006860 | 13890.902 | 12297.263 | AL137619  | 27326.818 | 27742.842 |
| NM_004794 | 19459.291 | 18138.668 | NM_003615 | 1199.282  | 1156.813  |
| NM_018291 | 26264.584 | 29772.162 | NM_005052 | 17645.133 | 15431.41  |
| NM_005530 | 12572.739 | 15904.22  | BF038439  | 1524.279  | 1444.032  |
| NM_006899 | 6509.983  | 7359.605  | AF319476  | 2687.728  | 2817.053  |
| NM_012200 | 3521.206  | 4173.278  | AK001913  | 10407.7   | 14263.282 |
| NM_001724 | 4120.229  | 3782.259  | NM_004292 | 5833.751  | 6269.589  |
| NM_000150 | 7253.313  | 9097.938  | NM_015484 | 11544.847 | 12569.628 |
| AB023152  | 1990.75   | 2153.01   | NM_018046 | 3561.729  | 3479.853  |
| NM_006212 | 4711.476  | 5936.141  | NM_013316 | 9553.016  | 11386.28  |
| AK022872  | 5918.925  | 5888.956  | M20701    | 57159.117 | 53908.156 |
| AK024272  | 7457.271  | 8620.375  | NM_002912 | 4953.565  | 5247.641  |
| NM_016381 | 1622.475  | 1827.469  | NM_013284 | 8956.938  | 10266.753 |
| AL591715  | 1962.588  | 2282.066  | NM_006739 | 5987.115  | 6830.853  |
| BE741525  | 1941.36   | 2257.306  | NM_013274 | 11452.299 | 13086.476 |
| BF030555  | 61035.359 | 59807.578 | AL050187  | 2621.387  | 3102.195  |
| NM_012433 | 12942.741 | 11082.249 | NM_007127 | 1549.389  | 1692.599  |
| NM_005605 | 11064.013 | 10966.7   | NM_012387 | 55934.805 | 52516.906 |
| NM_002576 | 5466.15   | 6413.886  | NM_014735 | 4411.085  | 3621.535  |
| NM_003582 | 3308.781  | 4504.047  | NM_004252 | 54025.477 | 48150.805 |
| AF057354  | 596.744   | 575.278   | AF172929  | 17155.838 | 15782.209 |
| AF169351  | 22049.535 | 21032.139 | NM_006398 | 54762.641 | 53577.438 |
| M14200    | 66028.523 | 59624     | AK025655  | 7395.071  | 7196.705  |
| CY3Cy5    | 4664.09   | 100.19    | CY3Cy5    | 6586.205  | 132.327   |
| NM_000941 | 2947.627  | 2781.693  | NM_012245 | 52576.293 | 48307.066 |
| AK026844  | 4085.173  | 3938.862  | NM_133263 | 4191.584  | 3606.605  |
| AK026735  | 7172.681  | 5781.075  | AF086176  | 3092.595  | 2947.028  |
| AL110104  | 47877.27  | 49664.543 | AF086232  | 557.887   | 1021.236  |
| AF240633  | 2379.966  | 1898.179  | NM_017742 | 3341.913  | 3938.603  |
| AK027056  | 6322.281  | 5012.241  | NM_005108 | 5368.514  | 5585.414  |
| AK024294  | 1883.251  | 1381.123  | AK022292  | 18042.693 | 15270.994 |
| AL110126  | 3356.224  | 2800.373  | AK024173  | 552.555   | 857.815   |
| AF052172  | 54628.828 | 47569.68  | AB051436  | 5378.211  | 3910.433  |
| AB014573  | 8725.06   | 7915.921  | AK026482  | 51721.836 | 45088.117 |
| AK025418  | 945.064   | 708.998   | AL137473  | 6523.902  | 5458.144  |
| AB020643  | 734.995   | 401.966   | AJ001873  | 40635.254 | 38044.109 |
| AK025496  | 9299.291  | 7102.494  | AL137476  | 36838.789 | 26663.182 |
| NM_000941 | 2375.474  | 1594.32   | AF052174  | 9058.534  | 6336.994  |

|           |           |           |           |           |           |
|-----------|-----------|-----------|-----------|-----------|-----------|
| SR1       | 85467.852 | 63230.383 | AF070590  | 3010.35   | 2206.931  |
| SR3       | 40802.918 | 30029.848 | NM_004709 | 1296.095  | 1308.53   |
| SR5       | 4365.752  | 2873.685  | NM_012245 | 59961.234 | 53196.297 |
| SR7       | 4974.328  | 16456.68  | NM_133263 | 4224.26   | 3654.523  |
| SR9       | 14561.354 | 1223.729  | SR2       | 61155.641 | 59894.266 |
| CY3Cy5    | 2741.563  | 83.246    | SR4       | 26023.512 | 28391.744 |
| L10404    | 1985.451  | 2577.225  | SR6       | 4020.179  | 3955.547  |
| AF283776  | 3899.563  | 3443.06   | SR8       | 12389.25  | 36472.098 |
| L10123    | 44868.594 | 47321.305 | SR10      | 37115.988 | 12062.685 |
| D16877    | 11487.815 | 11571.374 | CY3Cy5    | 6149.226  | 125.269   |
| AL049992  | 1888.764  | 2021.237  | AK024432  | 4011.201  | 3582.096  |
| AL109781  | 4441.73   | 3892.575  | AL137513  | 1800.207  | 1794.01   |
| AL079289  | 969.889   | 815.75    | AF088001  | 1560.253  | 1973.285  |
| NM_017594 | 1327.53   | 1795.707  | NM_018067 | 18026.148 | 18141.822 |
| AK027237  | 963.36    | 762.44    | NM_018956 | 51499.426 | 53404.27  |
| AK027104  | 3416.122  | 2258.753  | NM_014787 | 3139.182  | 3189.993  |
| AL133090  | 48583     | 37788.164 | AL122109  | 1889.857  | 1768.278  |
| AF085867  | 3896.847  | 3363.225  | AF074988  | 5215.951  | 3207.374  |
| AF086510  | 4305.445  | 3680.913  | AK024946  | 2412.718  | 1816.039  |
| Z36779    | 8926.52   | 9556.499  | AF052497  | 745.582   | 671.625   |
| NM_002816 | 2504.136  | 1763.803  | AK026375  | 7899.359  | 5593.051  |
| NM_017822 | 7424.674  | 4300.226  | NM_014710 | 873.536   | 919.796   |
| AK024520  | 7763.246  | 6578.981  | U85992    | 2095.543  | 1826.307  |
| AK024592  | 7634.945  | 7312.657  | AL110152  | 2098.616  | 1477.577  |
| AK024904  | 2556.056  | 2522.088  | NM_004795 | 953.594   | 623.35    |
| AK025030  | 2480.837  | 2246.592  | AF131745  | 6208.678  | 5311.374  |
| AK024542  | 2685.337  | 3104.68   | AL117565  | 12263.853 | 11948.979 |
| AK024915  | 1775.79   | 1368.037  | AF147305  | 930.75    | 1011.544  |
| AK091109  | 68302.445 | 61671.477 | AK022109  | 8838.167  | 8801.037  |
| AF032897  | 731.3     | 557.556   | AK022103  | 1566.066  | 1550.508  |
| NM_014967 | 5530.648  | 7046.857  | NM_007030 | 1109.366  | 1633.562  |
| AK022915  | 5638.66   | 5097.778  | AK022111  | 975.387   | 900.674   |
| AK021736  | 802.176   | 775.296   | AK021527  | 1210.783  | 1302.775  |
| AF131834  | 2113.147  | 1554.167  | AF143882  | 2169.737  | 2063.349  |
| AL355711  | 1358.072  | 1058.584  | U00953    | 1427.272  | 1658.698  |
| AK025851  | 1364.436  | 1228.881  | AK025650  | 8261.702  | 10254.903 |
| AJ011409  | 35442.254 | 27206.473 | AK026401  | 7842.186  | 8967.177  |
| AJ227906  | 2442.666  | 2039.719  | AK026773  | 4600.358  | 4017.098  |
| U17633    | 1612.142  | 1075.234  | AK025893  | 1012.866  | 952.345   |
| AF086202  | 25816.754 | 23337.73  | AK026452  | 522.536   | 526.386   |
| AK022352  | 987.309   | 771.647   | AB026054  | 882.477   | 924.143   |
| AK023270  | 5997.306  | 5939.292  | AK022604  | 2509.768  | 1883.936  |
| AF085979  | 24326.076 | 27022.018 | U66048    | 3538.421  | 2651.623  |
| AK023112  | 2263.838  | 2265.626  | AL080095  | 854.625   | 919.208   |
| NM_017806 | 63284.773 | 56497.297 | AK023401  | 16956.338 | 12768.268 |
| AK021895  | 6226.88   | 6618.176  | AK001865  | 3309.595  | 2471.577  |
| AK024563  | 736.508   | 525.777   | AL049331  | 758.287   | 887.974   |
| AK000036  | 13419.06  | 12955.028 | AL050079  | 5388.297  | 5479.876  |
| AK000769  | 1193.593  | 1235.439  | AL080233  | 4634.884  | 4092.394  |
| AK000924  | 1710.756  | 2319.017  | AL050132  | 617.788   | 960.234   |
| AK022252  | 841.613   | 879.184   | AL117663  | 4056.665  | 3577.353  |
| AK000114  | 3335.939  | 2831.575  | NM_014293 | 26995.977 | 23872.58  |
| AK000952  | 15518.462 | 10346.684 | AK023429  | 1366.928  | 1625.076  |

|           |           |           |           |           |           |
|-----------|-----------|-----------|-----------|-----------|-----------|
| AF119862  | 23880.73  | 20110.58  | AK022276  | 1917.952  | 2078.979  |
| U17628    | 2267.896  | 1857.404  | AK026881  | 1407.487  | 1445.658  |
| AF119867  | 17054.396 | 13042.973 | AL133653  | 1114.978  | 1095.716  |
| AL357205  | 8693.193  | 14740.252 | AK023774  | 1835.123  | 2279.504  |
| AF124819  | 1206.495  | 1163.371  | AL049377  | 3637.121  | 3012.624  |
| D17091    | 2958.763  | 2248.697  | AK001432  | 5129.89   | 4375.048  |
| AL133074  | 1570.065  | 1173.902  | AL133568  | 10390.445 | 9446.647  |
| AF086318  | 32097.459 | 33573.348 | AF009265  | 6329.99   | 4990.111  |
| AF088012  | 991.837   | 690.249   | AF009309  | 20731.285 | 16069.13  |
| NM_018121 | 1867.594  | 1456.552  | AF054830  | 483.717   | 529.985   |
| AB050477  | 7521.319  | 6592.542  | NM_002360 | 8672.244  | 7941.406  |
| AK000152  | 2002.089  | 2224.723  | AF009274  | 504.765   | 464.427   |
| AK024300  | 3546.215  | 2840.604  | AF056425  | 11960.081 | 11044.26  |
| L09092    | 1615.569  | 1845.239  | AF090893  | 1575.207  | 1393.219  |
| NM_012132 | 1810.064  | 1563.579  | NM_018033 | 30920.727 | 30983.781 |
| NM_012129 | 1857.63   | 2196.862  | AK001945  | 4490.843  | 5021.176  |
| AK025716  | 3048.368  | 2879.499  | AK021541  | 1082.605  | 998.655   |
| L09268    | 650.909   | 464.422   | AK021766  | 892.403   | 934.968   |
| NM_020186 | 10730.654 | 7880.545  | AK001147  | 1369.126  | 1636.937  |
| AF090947  | 9068.256  | 7669.817  | AK021630  | 2873.593  | 2559.029  |
| NM_005047 | 2773.599  | 2618.632  | AK021831  | 2563.206  | 2728.85   |
| AJ272196  | 29274.947 | 22713.842 | NM_020153 | 2222.435  | 1835.155  |
| AF116662  | 408.318   | 431.568   | NM_005321 | 3563.842  | 2758.195  |
| X58162    | 21643.547 | 29699.727 | AF073520  | 14618.661 | 13649.015 |
| AK022825  | 3564.899  | 3750.136  | AF143885  | 1469.106  | 1397.286  |
| AK001937  | 75323.578 | 62646.328 | NM_014015 | 40581.164 | 42544.859 |
| AL365517  | 2411.689  | 1859.813  | AK026839  | 3316.372  | 3732.424  |
| AK021988  | 20984.449 | 18443.529 | Z34278    | 739.274   | 860.031   |
| AF086494  | 44863.762 | 43319.238 | AJ008123  | 24060.209 | 18934.408 |
| BI769977  | 1971.957  | 2019.018  | AJ008156  | 2924.433  | 2549.463  |
| AL137567  | 1680.159  | 1857.761  | AF147321  | 957.66    | 853.002   |
| AK024913  | 6065.599  | 5228.37   | AF161437  | 8568.084  | 6272.922  |
| AB007961  | 11136.375 | 10511.556 | U73530    | 1350.853  | 1059.678  |
| NM_005547 | 1940.408  | 1315.713  | AF086158  | 15600.376 | 12595.412 |
| S81973    | 1795.564  | 1676.729  | AF086050  | 5016.302  | 4524.41   |
| AF164794  | 9484.964  | 8991.019  | AF147375  | 4711.339  | 4250.96   |
| NM_001173 | 1764.633  | 1608.913  | X51524    | 24823.994 | 24805.164 |
| AB020656  | 2945.537  | 2582.139  | AK025759  | 8141.805  | 8891.688  |
| AK023648  | 6104.384  | 6529.572  | AK024105  | 1632.324  | 1799.971  |
| NM_000412 | 1567.562  | 2031.744  | AJ238556  | 2322.649  | 2245.173  |
| AF077033  | 4145.544  | 3498.282  | AK021516  | 11485.886 | 11641.918 |
| D50406    | 1080.636  | 812.988   | Z70699    | 2986.031  | 3322.575  |
| NM_004991 | 1735.504  | 1665.051  | AL049919  | 849.556   | 810.285   |
| AK026708  | 12339.699 | 11670.891 | NM_006896 | 10238.07  | 8270.237  |
| NM_017903 | 6564.246  | 6619.219  | AL080066  | 28919.203 | 28588.332 |
| NM_018074 | 4460.242  | 3764.99   | AJ227870  | 1299.348  | 1002.613  |
| NM_000909 | 6747.741  | 5870.741  | AL137620  | 1674.166  | 1903.469  |
| U31737    | 1224.39   | 1141.529  | NM_005294 | 13667.18  | 12963.874 |
| AK024828  | 2455.685  | 2608.831  | AK026879  | 1149.1    | 1274.921  |
| AF009315  | 3368.64   | 3902.073  | AF085826  | 3138.503  | 4449.697  |
| NM_019013 | 2126.381  | 2256.199  | AK024362  | 2106.882  | 2527.409  |
| NM_006783 | 2135.47   | 1977.482  | AF118068  | 7838.096  | 8063.045  |
| L37711    | 1305.344  | 1156.832  | NM_004164 | 933.435   | 991.798   |



|           |           |           |           |           |           |
|-----------|-----------|-----------|-----------|-----------|-----------|
| S70313    | 24998.797 | 18922.961 | NM_019018 | 3328.766  | 3212.104  |
| AK021607  | 2001.946  | 1530.376  | M87931    | 2186.478  | 1991.997  |
| AK025860  | 843.745   | 685.384   | NM_003544 | 62548.27  | 58385.121 |
| NM_000216 | 1808.266  | 1536.946  | U17640    | 1396.858  | 1203.214  |
| AF135960  | 3439.112  | 3125.98   | AK001187  | 4340.623  | 4029.927  |
| NM_003010 | 3393.477  | 3441.221  | NM_003529 | 45067.996 | 45251.383 |
| NM_006871 | 1657.224  | 1752.445  | AF086284  | 3184.896  | 3377.638  |
| NM_019074 | 8965.199  | 9885.801  | AF056436  | 6913.072  | 8261.715  |
| NM_018494 | 64873.574 | 61837.207 | AB023191  | 2813.698  | 3527.849  |
| AK000006  | 1391.737  | 1336.071  | AK027212  | 12974.98  | 14455.063 |
| NM_001115 | 3342.596  | 3641.705  | X56197    | 2763.117  | 2936.644  |
| NM_014921 | 1151.092  | 1276.857  | NM_005199 | 20555.031 | 23093.389 |
| NM_016581 | 63785.34  | 59343.027 | U90905    | 4156.283  | 4517.162  |
| NM_013255 | 2855.536  | 2569.283  | AF161422  | 3492.251  | 3114.139  |
| NM_007183 | 821.998   | 723.318   | AL137384  | 2427.94   | 1160.929  |
| AJ238243  | 21714.494 | 17343.125 | AF070619  | 6503.459  | 6102.056  |
| J05046    | 55137.219 | 48490.402 | NM_000787 | 1890.194  | 1743.906  |
| NM_012318 | 4481.532  | 4116.184  | U57962    | 7573.111  | 8400.029  |
| NM_002751 | 16843.32  | 14167.814 | NM_016176 | 15401.655 | 15662.708 |
| NM_004291 | 4334.278  | 4202.594  | NM_005574 | 25001.918 | 21307.732 |
| NM_003816 | 10285.857 | 9512.846  | NM_017895 | 36595.82  | 43333.504 |
| AK022635  | 624.457   | 732.864   | NM_004610 | 20522.086 | 25950.121 |
| NM_004912 | 4372.968  | 3573.061  | NM_001612 | 5017.876  | 4599.67   |
| U79304    | 22579.672 | 23238.607 | AK027002  | 11296.294 | 10445.807 |
| NM_016267 | 8230.583  | 8225.215  | AB025254  | 12531.326 | 11704.266 |
| NM_004671 | 9169.34   | 9415.223  | NM_004081 | 6312.45   | 6208.62   |
| NM_006526 | 5408.571  | 5313.005  | AK001039  | 18836.699 | 16289.265 |
| U35622    | 710.445   | 730.728   | AK026465  | 4435.703  | 3951.555  |
| NM_007045 | 2677.084  | 2801.045  | AK024321  | 2428.19   | 1762.542  |
| NM_012145 | 28615.793 | 26605.434 | U52834    | 1788.805  | 1907.622  |
| AF305779  | 2015.903  | 1896.284  | AJ227898  | 506.066   | 595.254   |
| AF225416  | 7965.469  | 8363.65   | M34428    | 1118.195  | 1173.394  |
| NM_016231 | 3704.72   | 3780.562  | NM_003532 | 3933.325  | 3507.477  |
| NM_002093 | 4634.972  | 3706.583  | NM_017869 | 22211.188 | 21034.893 |
| AB042555  | 26565.211 | 36846.543 | U17627    | 631.688   | 639.36    |
| NM_001729 | 2703.516  | 2080.303  | AF075100  | 1673.569  | 1901.245  |
| NM_017763 | 2441.158  | 2148.536  | AF203447  | 27816.52  | 24311.338 |
| NM_013975 | 3868.544  | 3675.433  | NM_018502 | 7109.75   | 6677.062  |
| NM_003843 | 13333.313 | 11076.08  | AB040976  | 30039.385 | 25131.1   |
| NM_012216 | 3157.479  | 2628.148  | NM_018641 | 6674.42   | 6816.998  |
| NM_005338 | 1212.422  | 985.834   | U49089    | 940.935   | 1108.795  |
| X73502    | 4107.629  | 2836.407  | NM_002221 | 9906.693  | 9455.128  |
| NM_020445 | 64584.25  | 53649.117 | NM_002371 | 1582.213  | 1246.294  |
| NM_016376 | 46474.969 | 44633.914 | NM_002562 | 941.22    | 1144.045  |
| AB046848  | 23337.586 | 20122.082 | AK024502  | 17480.438 | 15577.527 |
| AL133057  | 9590.104  | 9308.063  | NM_001124 | 1413.147  | 1356.485  |
| U04845    | 13114.399 | 10733.25  | NM_004586 | 6386.938  | 6194.121  |
| NM_018103 | 9890.232  | 10154.064 | NM_004844 | 10259.077 | 8881.942  |
| NM_000312 | 5119.667  | 5597.321  | NM_013447 | 647.633   | 637.376   |
| NM_003963 | 3065.044  | 2758.085  | NM_000051 | 7029.216  | 6478.399  |
| AC009729  | 843.757   | 1083.995  | NM_005709 | 1218.41   | 1239.495  |
| NM_016598 | 4526.767  | 4562.327  | NM_004180 | 11900.145 | 10304.369 |
| BE874867  | 64493.879 | 58355.348 | NM_004786 | 44348.996 | 45920.926 |

|           |           |           |           |           |           |
|-----------|-----------|-----------|-----------|-----------|-----------|
| AL136719  | 5996.477  | 5658.443  | AF302109  | 2997.125  | 2635.406  |
| NM_014109 | 9428.276  | 9173.958  | AL117485  | 45920.773 | 49855.547 |
| NM_012160 | 3812.455  | 2917.153  | NM_003505 | 1609.748  | 1689.366  |
| NM_006357 | 63048.531 | 64141.531 | NM_007191 | 6984.48   | 6246.773  |
| NM_014248 | 60796.246 | 58796.281 | AL109667  | 2229.712  | 2907.362  |
| AK027070  | 2287.242  | 1689.983  | NM_000840 | 2041.825  | 2534.384  |
| AF129533  | 1111.641  | 1252.425  | NM_001094 | 813.856   | 733.695   |
| NM_003341 | 19961.199 | 17904.693 | NM_003155 | 673.938   | 476.531   |
| NM_017785 | 1874.495  | 1764.134  | AJ008142  | 61718.539 | 62648.902 |
| NM_006249 | 10429.603 | 8615.314  | AL035289  | 1297.245  | 1501.388  |
| NM_018318 | 755.203   | 772.127   | NM_001343 | 4896.732  | 4436.273  |
| AB020640  | 19061.342 | 18509.719 | NM_007275 | 48969.422 | 52764.656 |
| D29954    | 26211.67  | 22936.549 | NM_019025 | 60328.172 | 57291.234 |
| AF007131  | 8559.649  | 7425.496  | NM_018461 | 15871.675 | 18230.658 |
| NM_006839 | 2525.43   | 2152.02   | AF235023  | 8621.049  | 8188.786  |
| NM_000223 | 1101.654  | 1221.917  | NM_006910 | 9068.947  | 8625.092  |
| NM_005851 | 2707.896  | 2348.359  | AF162667  | 7885.52   | 7356.896  |
| AF119256  | 3167.108  | 3131.984  | AB046847  | 6333.591  | 5490.076  |
| NM_005180 | 9209.345  | 8755.334  | NM_000447 | 6946.231  | 4883.037  |
| NM_003410 | 10554.556 | 12899.913 | NM_006354 | 10894.759 | 9041.556  |
| NM_007146 | 2476.275  | 2376.763  | AF303378  | 16285.149 | 12540.615 |
| NM_002229 | 3817.72   | 4159.902  | NM_016037 | 23317.977 | 16711.371 |
| S69027    | 8963.194  | 9127.194  | NM_000043 | 10516.652 | 11291.065 |
| NM_012119 | 14461.88  | 13382.448 | NM_016140 | 1390.389  | 1299.993  |
| X99631    | 37628.453 | 41315.414 | NM_015965 | 2037.205  | 1784.325  |
| NM_001730 | 4426.785  | 4287.48   | NM_000417 | 9887.099  | 10602.745 |
| AK026290  | 7769.901  | 8436.405  | NM_020356 | 23285.398 | 21494.986 |
| AB014589  | 2871.652  | 3300.582  | AF152527  | 756.512   | 659.404   |
| AF248649  | 1662.239  | 2055.569  | AF225421  | 2796.476  | 1616.38   |
| U37146    | 47621.496 | 44981.371 | NM_004063 | 1432.661  | 1435.939  |
| NM_012086 | 2708.444  | 2761.38   | NM_006144 | 3033.252  | 3019.182  |
| AB040431  | 17791.279 | 15315.82  | AL136549  | 32723.512 | 31097.254 |
| NM_000991 | 66212.016 | 62882.383 | NM_012168 | 6036.816  | 4873.112  |
| NM_016034 | 45424.605 | 40230.875 | NM_002216 | 837.007   | 783.81    |
| X69150    | 68103.727 | 62227.992 | NM_007038 | 14735.038 | 14723.505 |
| NM_001025 | 68160.938 | 68105.75  | AF311324  | 16214.286 | 21840.055 |
| NM_016067 | 65796.773 | 58638.211 | AF124433  | 3336.16   | 2822.326  |
| NM_018285 | 33603.172 | 27248.568 | AK001647  | 1169.118  | 727.791   |
| AK022393  | 27155.502 | 18383.654 | NM_001461 | 1414.737  | 1239.938  |
| AK026302  | 23536.949 | 17597.094 | AF061556  | 3790.408  | 3172.674  |
| NM_012214 | 6316.04   | 5541.057  | AL162049  | 5331.175  | 3661.085  |
| AF049656  | 43069.621 | 39000.637 | AF036144  | 1297.234  | 1021.385  |
| NM_001966 | 2184.941  | 2654.33   | NM_001823 | 682.317   | 624.225   |
| NM_016138 | 5739.024  | 6915.83   | NM_005032 | 2501.726  | 2566.84   |
| Z36833    | 68050.891 | 69691.578 | NM_004160 | 16903.959 | 15437.481 |
| NM_014355 | 12344.441 | 14012.05  | AL109677  | 4947.78   | 4808.092  |
| M21191    | 46950.059 | 50865.313 | NM_003941 | 60718.965 | 64130.617 |
| AF072810  | 2850.223  | 3170.781  | AF177909  | 7005.311  | 6896.094  |
| L19778    | 1375.756  | 1411.066  | NM_002664 | 43357.363 | 50953.43  |
| AF174482  | 42824.641 | 43284.188 | AB018271  | 3946.893  | 4491.588  |
| NM_003528 | 7156.919  | 5794.021  | AL137665  | 18083.594 | 18103.729 |
| NM_017769 | 934.455   | 974.518   | NM_016434 | 12699.494 | 11827.299 |
| D85131    | 16655.705 | 13585.056 | U36561    | 56256.074 | 63247.195 |

|           |           |           |           |           |           |
|-----------|-----------|-----------|-----------|-----------|-----------|
| NM_004956 | 1417.03   | 1349.247  | AF205437  | 3012.364  | 2854.244  |
| D30612    | 10725.89  | 8549.318  | AF034102  | 61836.594 | 59032.777 |
| NM_002163 | 12117.914 | 9878.639  | AB037748  | 2941.787  | 3040.837  |
| U52097    | 29472.93  | 23905.57  | AB002306  | 5985.33   | 5531.794  |
| NM_003416 | 4366.895  | 5685.361  | NM_001300 | 6385.269  | 7333.901  |
| X74497    | 4615.52   | 4455.532  | NM_012472 | 1145.364  | 1512.346  |
| NM_012210 | 2879.388  | 2411.026  | NM_018187 | 18724.605 | 21031.602 |
| U10072    | 5276.796  | 3789.066  | NM_003016 | 53248.766 | 51164.973 |
| AF222749  | 25043.881 | 20715.744 | NM_005463 | 57909.441 | 54135.051 |
| NM_001321 | 10942.679 | 13909.028 | NM_001325 | 6980.127  | 6187.177  |
| AB018264  | 16481.918 | 20413.434 | NM_018282 | 54379.703 | 52280.891 |
| NM_006911 | 1155.772  | 1455.321  | BC019932  | 7495.828  | 6023.924  |
| U92544    | 9527.244  | 14571.339 | AF114818  | 15684.538 | 13568.479 |
| NM_019644 | 2047.844  | 2525.412  | AK025106  | 6045.832  | 6278.959  |
| NM_006791 | 4353.928  | 5489.64   | NM_020144 | 14781.298 | 13002.236 |
| AJ278348  | 38291.43  | 43612.371 | NM_003908 | 58237.441 | 58883.102 |
| NM_015872 | 1085.918  | 1307.23   | BE893142  | 9381.793  | 8018.571  |
| AI285199  | 32219.395 | 38623.59  | NM_003103 | 15529.984 | 13736.638 |
| AA757170  | 190.567   | 441.078   | NM_015340 | 28889.141 | 28530.078 |
| L07738    | 2321.594  | 2132.953  | NM_006451 | 15607.323 | 16124.824 |
| Z48054    | 6541.063  | 7610.158  | NM_002094 | 6022.017  | 6966.615  |
| H90415    | 10296.433 | 9167.917  | NM_002937 | 3073.566  | 3109.232  |
| AA676470  | 51441.188 | 50420.16  | NM_003191 | 30211.373 | 32629.053 |
| AA430512  | 11384.806 | 10081.692 | NM_018235 | 57321.457 | 60230.309 |
| M38258    | 1509.013  | 1321.542  | NM_002424 | 1054.019  | 948.43    |
| AA457155  | 57340.281 | 55720.953 | NM_012104 | 61644.977 | 60408.074 |
| BM014365  | 1859.129  | 1745.642  | NM_000761 | 58894.992 | 60468.156 |
| H91842    | 1457.991  | 1189.957  | NM_020142 | 14312.812 | 13628.654 |
| U78045    | 4906.44   | 3941.322  | NM_000774 | 19945.717 | 21471.385 |
| AA878561  | 62410.148 | 56884.234 | NM_017781 | 56711.238 | 57257.367 |
| BF688309  | 1157.688  | 1065.032  | NM_006004 | 58741.723 | 57405.395 |
| AI538525  | 2596.14   | 2449.161  | NM_004894 | 51175.574 | 53136.453 |
| NM_005205 | 64108.219 | 62533.355 | AB028960  | 1783.309  | 1602.944  |
| BE878426  | 58464.652 | 68549.484 | NM_005648 | 53944.641 | 50691.934 |
| NM_001745 | 44354.73  | 48410.898 | AK000689  | 925.815   | 771.52    |
| NM_003825 | 16875.268 | 22118.08  | NM_006943 | 33116.039 | 27564.404 |
| AK025006  | 16090.079 | 14852.344 | NM_006741 | 56594.176 | 51419.891 |
| AF218014  | 53257.828 | 52557.324 | NM_014166 | 18848.893 | 15705.712 |
| NM_006678 | 14105.013 | 13826.783 | AL117606  | 36134.117 | 36248.43  |
| AY007729  | 58045.727 | 60419.801 | NM_012330 | 8051.604  | 6410.956  |
| NM_014424 | 553.479   | 540.215   | AF294278  | 31377.668 | 31939.43  |
| AF159092  | 1695.501  | 1673.821  | NM_018211 | 11172.635 | 11102.106 |
| BC007318  | 5066.201  | 4741.326  | NM_014520 | 19496.111 | 18165.633 |
| M36693    | 10844.396 | 10250.721 | AL117508  | 786.328   | 832.246   |
| NM_016292 | 23549.525 | 17540.623 | NM_002616 | 9118.507  | 9725.735  |
| NM_002601 | 6406.563  | 4766.767  | AK025712  | 55699.824 | 61189.945 |
| NM_001781 | 1431.187  | 1296.974  | NM_005634 | 8987.04   | 8203.565  |
| NM_014432 | 8693.185  | 7492.882  | NM_017757 | 20445.926 | 20473.563 |
| NM_001558 | 8826.314  | 6273.431  | NM_002146 | 62080.75  | 59031.125 |
| NM_006953 | 873.086   | 600.063   | AB007892  | 5056.977  | 5626.309  |
| NM_002530 | 1642.743  | 1692.201  | NM_018207 | 8912.85   | 9597.817  |
| NM_018941 | 4751.669  | 4479.011  | NM_000345 | 60588.652 | 60698.07  |
| NM_020241 | 916.159   | 1272.756  | NM_001862 | 59663.609 | 56237.109 |

|           |           |           |            |           |           |
|-----------|-----------|-----------|------------|-----------|-----------|
| NM_00589E | 23197.791 | 30286.063 | NM_006531  | 11098.473 | 12289.307 |
| NM_00288E | 54219.867 | 61834.172 | AB029021   | 61493.891 | 58124.578 |
| AF078866  | 1458.988  | 1800.398  | NM_002101  | 5172.675  | 6475.701  |
| BF311880  | 35738.605 | 44608.992 | NM_005423  | 2932.433  | 3217.078  |
| NM_00007E | 687.732   | 528.858   | Z36789     | 749.736   | 1128.516  |
| NM_01607E | 460.82    | 658.879   | J02874     | 24707.555 | 26781.787 |
| NM_00136C | 16001.844 | 17150.262 | BF310427   | 40767.547 | 39686.199 |
| AK026656  | 17954.799 | 16589.369 | N94424     | 2150.216  | 1871.649  |
| NM_000751 | 54741.461 | 51535.883 | AA045192   | 10043.049 | 10463.983 |
| NM_005071 | 1739.955  | 1522.837  | H45617     | 2419.256  | 1973.068  |
| NM_01673C | 56597.34  | 55161.453 | M92642     | 23143.428 | 21611.705 |
| AL035297  | 2166.665  | 2053.241  | AA464532   | 445.855   | 389.055   |
| NM_00440E | 13039.772 | 11842.039 | H-U 44385  | 57230.367 | 56914.813 |
| AJ131244  | 3356.275  | 2964.524  | ID 1654970 | 31203.18  | 32811.258 |
| NM_00253E | 10689.756 | 9385.032  | ID 2531132 | 35809.824 | 38636.516 |
| NM_01238E | 12963.167 | 11151.688 | ID 4365538 | 5320.512  | 5073.46   |
| NM_016651 | 2867.616  | 2842.197  | AA485665   | 1888.06   | 2205.953  |
| NM_001671 | 865.229   | 911.238   | BF125928   | 31620.332 | 34803.727 |
| NM_01984E | 6454.274  | 6703.204  | BG571026   | 9905.125  | 9170.063  |
| NM_01619E | 14730.892 | 13682.12  | AA489017   | 29241.072 | 26830.17  |
| AB046774  | 961.318   | 2471.116  | NM_001140  | 2848.781  | 3257.112  |
| AK022385  | 53715.113 | 58057.477 | NM_00484E  | 3632.802  | 4664.16   |
| NM_00277E | 1202.796  | 1603.438  | AK022845   | 2842.353  | 2683.458  |
| AK024584  | 12195.73  | 7440.19   | NM_003004  | 1071.498  | 1303.908  |
| NM_003504 | 8731.354  | 10092.878 | S77835     | 2900.914  | 4004.22   |
| NM_01329E | 7748.667  | 7883.944  | NM_00298E  | 4893.004  | 6230.267  |
| NM_007267 | 3797.52   | 4814.793  | AB018347   | 57870.082 | 59970.73  |
| Z36816    | 7369.759  | 7515.841  | AB033073   | 42222.078 | 44995.211 |
| NM_00586E | 11668.854 | 10322.058 | NM_003284  | 27039.117 | 26926.188 |
| NM_00641E | 11124.765 | 9857.988  | NM_01815E  | 2976.934  | 2848.796  |
| NM_017684 | 506.762   | 809.782   | NM_00031E  | 13399.31  | 13906.641 |
| AK025542  | 7224.142  | 5671.131  | NM_003257  | 1242.358  | 1642.369  |
| AF207547  | 988.476   | 1089.343  | NM_012461  | 13526.728 | 13103.781 |
| NM_00276E | 19778.506 | 17421.217 | AK001379   | 6950.839  | 6276.607  |
| NM_003691 | 2684.229  | 2405.557  | NM_01745C  | 12560.608 | 13219.122 |
| NM_00295C | 24459.746 | 20596.029 | NM_00202E  | 3886.451  | 4230.15   |
| NM_00231E | 9989.666  | 8959.869  | NM_00283E  | 7489.443  | 7824.239  |
| NM_00143E | 895.403   | 882.091   | AF190500   | 4775.951  | 5067.692  |
| NM_003134 | 62017.449 | 56951.453 | NM_00161E  | 1355.396  | 1528.169  |
| NM_004314 | 6043.99   | 5785.459  | NM_005904  | 1844.798  | 1786.307  |
| NM_018247 | 21239.254 | 20602.541 | NM_00527E  | 56749.84  | 56937.488 |
| NM_01797E | 21554.553 | 22342.17  | NM_000524  | 3376.304  | 3548.442  |
| NM_006911 | 1457.089  | 1911.776  | NM_01864E  | 661.131   | 617.374   |
| U92544    | 9117.776  | 16663.906 | NM_00707E  | 10307.923 | 13503.707 |
| NM_019644 | 1774.89   | 2551.151  | NM_01232C  | 8877.052  | 10327.773 |
| NM_006791 | 4361.101  | 6092.497  | NM_01820E  | 5226.853  | 5832.192  |
| AJ278348  | 38468.688 | 45663.75  | NM_01592E  | 10036.581 | 10435.896 |
| NM_01587E | 1452.65   | 1362.128  | U90653     | 17472.727 | 17866.547 |
| AI285199  | 29602.561 | 31798.541 | NM_00019E  | 1324.081  | 1719.038  |
| BI906283  | 452.534   | 509.323   | NM_01833E  | 9072.605  | 9851.979  |
| AA757170  | 561.203   | 812.299   | NM_00674E  | 37916.105 | 44372.121 |
| L07738    | 2426.421  | 2767.157  | NM_00027E  | 3374.024  | 3149.528  |
| Z48054    | 5925.946  | 6870.957  | AK000037   | 6713.085  | 4713.474  |

|           |           |           |            |           |           |
|-----------|-----------|-----------|------------|-----------|-----------|
| H90415    | 9855.571  | 10700.917 | NM_014760  | 6136.996  | 5912.503  |
| AA676470  | 53959.016 | 49419.758 | NM_018713  | 4533.354  | 5774.727  |
| AA430512  | 10958.737 | 9855.684  | AJ006268   | 2707.798  | 2777.697  |
| M38258    | 1571.028  | 1635.545  | AF190864   | 15956.661 | 15763.541 |
| AA457155  | 54168.148 | 51981.949 | NM_001177  | 8352.49   | 8859.26   |
| BM014365  | 1645.803  | 1953.113  | NM_014447  | 4611.436  | 5341.003  |
| H91842    | 938.491   | 1061.121  | NM_002356  | 4480.045  | 4795.411  |
| U78045    | 5529.783  | 5127.765  | NM_006691  | 6178.915  | 6184.068  |
| AA878561  | 60458.363 | 56447.875 | NM_001505  | 3574.694  | 3724.435  |
| BF688309  | 1210.993  | 1010.331  | NM_003710  | 35898.578 | 38362.816 |
| AI538525  | 2072.185  | 1701.97   | Z83805     | 3501.637  | 3662.16   |
| AF222980  | 1611.809  | 1465.069  | NM_004666  | 4280.662  | 4672.037  |
| AK026758  | 8946.706  | 8874.784  | NM_003614  | 27016.809 | 24872.646 |
| NM_012201 | 7672.553  | 8302.001  | NM_014257  | 28036.439 | 27457.32  |
| NM_001745 | 41587.172 | 53850.137 | NM_000025  | 41998.453 | 50447.23  |
| NM_003825 | 16803.975 | 24138.301 | D38521     | 12989.452 | 18135.098 |
| AK025006  | 12891.971 | 14944.176 | NM_000403  | 31725.162 | 29008.32  |
| AF218014  | 50608.836 | 47242.336 | NM_018127  | 26682.139 | 30375.463 |
| NM_006678 | 13981.022 | 15726.198 | AB020677   | 35492.227 | 36643.383 |
| AY007729  | 57645.328 | 53991.832 | AB033097   | 13109.731 | 13692.386 |
| NM_014424 | 744.418   | 700.393   | NM_000135  | 12041.694 | 11650.322 |
| AF159092  | 2023.023  | 2538.751  | AJ223948   | 20370.771 | 21456.328 |
| BC007318  | 5212.221  | 5779.341  | NM_016218  | 1653.728  | 1589.701  |
| M36693    | 11444.416 | 11210.521 | AK022947   | 4225.886  | 4014.05   |
| NM_016292 | 23973.428 | 23948.461 | AL050029   | 4865.156  | 5074.348  |
| NM_002601 | 7177.502  | 6910.058  | AL049966   | 1337.27   | 1449.758  |
| NM_001781 | 1353.173  | 1490.333  | NM_005204  | 17961.535 | 18603.463 |
| NM_014432 | 6409.64   | 6525.554  | NM_016203  | 2973.329  | 3565.019  |
| NM_001558 | 7294.773  | 6591.354  | NM_002759  | 8456.331  | 8429.024  |
| NM_006953 | 455.679   | 586.168   | NM_007271  | 6571.985  | 7988.079  |
| NM_002530 | 1474.392  | 1555.789  | NM_006255  | 9069.053  | 10426.714 |
| NM_018941 | 4138.862  | 3831.868  | BE392143   | 14337.194 | 15231.074 |
| NM_020241 | 476.63    | 539.073   | NM_005813  | 9788.624  | 9132.517  |
| NM_001321 | 13100.227 | 11452.54  | AB037718   | 23618.732 | 26810.648 |
| AB018264  | 17018.693 | 17696.854 | AL389994   | 3678.312  | 4017.927  |
| AF078866  | 1984.234  | 1816.752  | NM_003909  | 14264.071 | 14126.236 |
| BF311880  | 38732.914 | 49197.27  | NM_001277  | 35415.973 | 35129.391 |
| NM_000078 | 709.567   | 785.063   | NM_003659  | 17984.91  | 18531.914 |
| NM_016075 | 490.596   | 597.796   | NM_001862  | 59553.828 | 58371.777 |
| NM_001360 | 16030.948 | 17385.811 | NM_006531  | 10675.651 | 12741.824 |
| AK026656  | 21969.594 | 34351.121 | AB029021   | 61056.914 | 59083.035 |
| NM_000751 | 58243.68  | 53634.137 | NM_002101  | 3151.237  | 3653.614  |
| NM_005071 | 1648.253  | 2004.991  | NM_005423  | 1759.733  | 2161.172  |
| NM_016730 | 58909.004 | 59620.656 | Z36789     | 640.403   | 1134.403  |
| AL035297  | 2464.229  | 2211.044  | J02874     | 24773.605 | 29345.217 |
| NM_004408 | 12137.715 | 13240.752 | BF310427   | 38705.66  | 41182.09  |
| AJ131244  | 3572.818  | 3436.25   | N94424     | 2140.346  | 2231.641  |
| NM_002532 | 9682.449  | 9610.536  | AA045192   | 9633.001  | 10509.831 |
| NM_012388 | 10940.478 | 11355.076 | AI521645   | 585.624   | 649.684   |
| NM_016651 | 2274.59   | 2850.067  | H45617     | 2368.401  | 2504.531  |
| NM_001671 | 634.167   | 738.469   | M92642     | 23903.369 | 25290.053 |
| NM_019843 | 5454.519  | 5608.721  | H-U 44385  | 60157.383 | 54540.227 |
| NM_016192 | 13182.395 | 11277.739 | ID 1654970 | 31318.301 | 32238.332 |

|           |           |           |            |           |           |
|-----------|-----------|-----------|------------|-----------|-----------|
| BE878426  | 61204.043 | 63145.914 | ID 2531132 | 35168.813 | 39338.207 |
| AK022385  | 56482.734 | 56536.684 | ID 4365538 | 4351.101  | 5876.925  |
| NM_002775 | 1004.68   | 1475.335  | AA485665   | 1909.669  | 2004.732  |
| AK024584  | 11372.991 | 8186.078  | BF125928   | 31867.318 | 34365.547 |
| NM_003504 | 8805.201  | 10074.217 | BG571026   | 10184.569 | 10907.23  |
| NM_013295 | 7968.707  | 9016.823  | AA489017   | 31161.318 | 31071.504 |
| NM_007267 | 4015.03   | 5840.906  | NM_004843  | 3924.937  | 5048.182  |
| AK022830  | 321.03    | 437.586   | AK022845   | 2482.036  | 2374.809  |
| Z36816    | 7334.469  | 9090.55   | NM_003004  | 914.621   | 1263.283  |
| NM_005865 | 15226.496 | 17368.225 | S77835     | 3094.555  | 2832      |
| NM_006413 | 14067.196 | 20906.059 | NM_002985  | 4880.437  | 5883.985  |
| NM_017684 | 558.153   | 786.055   | AB018347   | 56243.105 | 52676.91  |
| AK025542  | 8155.607  | 8624.311  | AB033073   | 44034.711 | 45963.102 |
| AF207547  | 1258.774  | 1546.338  | NM_003284  | 25943.656 | 26925.285 |
| NM_002765 | 20747.496 | 19469.195 | NM_018152  | 3174.696  | 3308.205  |
| NM_003691 | 2674.694  | 3342.5    | NM_000319  | 14109.376 | 13588.658 |
| NM_002950 | 21333.936 | 20302.35  | NM_003257  | 1653.51   | 1579.74   |
| NM_002315 | 8173.181  | 9012.605  | NM_012461  | 12369.254 | 14381.694 |
| NM_001433 | 973.765   | 889.135   | AK001379   | 6310.969  | 5863.689  |
| NM_003134 | 64996.215 | 64892.91  | NM_017450  | 11248.473 | 10793.905 |
| NM_004314 | 5308.172  | 5899.47   | NM_002023  | 3752.817  | 3853.786  |
| NM_018247 | 18681.932 | 20381.008 | NM_002839  | 7899.987  | 7050.575  |
| NM_017979 | 17280.152 | 17903.535 | AF190500   | 4159.827  | 4555.478  |
| NM_005895 | 37180.031 | 47655.414 | NM_001616  | 1473.702  | 1293.312  |
| NM_002885 | 63268.352 | 60453.949 | NM_005904  | 1588.958  | 1908.573  |
| NM_019644 | 2601.933  | 2939.263  | NM_005273  | 59709.277 | 54143.359 |
| NM_006791 | 4003.051  | 6129.077  | NM_000524  | 2319.068  | 2391.344  |
| AJ278348  | 38674.773 | 51788.145 | NM_018645  | 728.491   | 824.339   |
| NM_015872 | 1384.592  | 1453.45   | NM_014682  | 564.853   | 646.12    |
| AI285199  | 35230.707 | 46738.273 | NM_018207  | 10250.917 | 9985.848  |
| BI906283  | 342.792   | 601.965   | NM_000345  | 56760.105 | 62073.211 |
| AA757170  | 737.122   | 618.966   | NM_018205  | 7752.301  | 7069.591  |
| L07738    | 2961.228  | 3317.623  | NM_015929  | 9384.051  | 10819.949 |
| Z48054    | 7201.29   | 9675.499  | U90653     | 17311.023 | 18913.412 |
| H90415    | 17579.297 | 23133.213 | NM_000196  | 1646.477  | 1766.86   |
| AA676470  | 59026.188 | 60173.73  | NM_018339  | 9609.892  | 9703.097  |
| AA430512  | 11853.159 | 14428.533 | NM_006745  | 38373.711 | 44731.695 |
| M38258    | 1772.732  | 1941.556  | NM_000275  | 3172.408  | 3182.587  |
| AA457155  | 60220.66  | 65623.063 | AK000037   | 5540.66   | 4981.293  |
| BM014365  | 1843.067  | 2234.35   | NM_014760  | 5831.597  | 5536.173  |
| H91842    | 991.993   | 1538.247  | NM_018713  | 4520.46   | 5233.688  |
| U78045    | 5684.939  | 7296.839  | AJ006268   | 2564.417  | 2719.116  |
| AA878561  | 68172.453 | 65568.422 | AF190864   | 14176.156 | 15584.726 |
| BF688309  | 1411.746  | 1636.792  | NM_001177  | 7738.234  | 8132.082  |
| AI538525  | 2213.283  | 2189.208  | NM_014447  | 4776.232  | 4287.15   |
| AF222980  | 1459.896  | 1643.826  | NM_002356  | 4291.871  | 4134.818  |
| AK026758  | 6959.784  | 7062.658  | NM_006691  | 5628.161  | 6368.426  |
| NM_012201 | 7554.481  | 7536.356  | NM_001505  | 3295.786  | 3642.432  |
| AB046774  | 2064.133  | 3005.782  | NM_003710  | 36966.387 | 39838.871 |
| AF159092  | 2646.318  | 3764.301  | Z83805     | 2623.625  | 2784.486  |
| BC007318  | 5943.496  | 6699.079  | NM_004666  | 3120.283  | 3832.736  |
| M36693    | 12572.844 | 14803.396 | NM_003614  | 32831.594 | 36533.238 |
| NM_016292 | 29622.859 | 34511.43  | NM_014257  | 35589.996 | 37056.188 |

|           |           |           |            |           |           |
|-----------|-----------|-----------|------------|-----------|-----------|
| NM_002601 | 8053.421  | 7695.456  | NM_001140  | 3816.077  | 3847.447  |
| NM_001781 | 1707.977  | 2092.542  | NM_016059  | 819.554   | 676.715   |
| NM_014432 | 9426.836  | 15028.335 | NM_000403  | 44657.199 | 40445.445 |
| NM_001558 | 9349.873  | 10665.744 | NM_018127  | 28177.742 | 34693.793 |
| NM_006953 | 813.377   | 971.621   | AB020677   | 32294.316 | 33706.984 |
| NM_002530 | 1850.948  | 3057.826  | AB033097   | 13642.252 | 13526.918 |
| U96173    | 2945.818  | 3544.783  | NM_000135  | 7715.618  | 7785.098  |
| NM_018941 | 4877.016  | 5417.962  | AJ223948   | 16939.027 | 18484.742 |
| NM_020241 | 581.593   | 699.82    | NM_016218  | 1826.573  | 1501.738  |
| BE730585  | 3173.067  | 3941.204  | AK022947   | 4449.026  | 3828.081  |
| NM_001980 | 2299.887  | 3009.224  | AL050029   | 5415.673  | 4841.923  |
| NM_005954 | 1600.1    | 2009.879  | AL049966   | 1358.19   | 1454.102  |
| NM_012471 | 1295.322  | 1248.352  | NM_005204  | 17177.625 | 16783.848 |
| NM_001321 | 14376.729 | 13254.911 | NM_016203  | 3399.308  | 2980.723  |
| AB018264  | 15039.92  | 15757.318 | NM_002759  | 7658.891  | 6353.18   |
| NM_006911 | 1562.707  | 2160.271  | NM_007271  | 6190.891  | 5956.167  |
| U92544    | 6615.867  | 11801.808 | NM_006255  | 8726.434  | 10023.137 |
| AB023147  | 4881.904  | 6250.109  | BE392143   | 14205.03  | 14693.752 |
| NM_016615 | 34132.609 | 41800.105 | NM_005813  | 8908.048  | 8345.743  |
| NM_005630 | 1771.694  | 2281.206  | AB037718   | 21915.529 | 23859.557 |
| NM_001046 | 669.929   | 351.131   | AL389994   | 4007.156  | 4416.493  |
| AK023106  | 4100.205  | 6315.599  | NM_003909  | 14729.481 | 16242.398 |
| NM_016730 | 59792.074 | 65754.031 | NM_001277  | 33776.309 | 38160.133 |
| AL035297  | 2213.685  | 2577.063  | NM_003659  | 20940.682 | 21816.234 |
| NM_004408 | 20455.434 | 26224.334 | NM_007072  | 13290.887 | 13166.742 |
| AJ131244  | 3743.47   | 5493.351  | NM_012320  | 10482.028 | 10237.597 |
| NM_002532 | 11158.049 | 13725.602 | AB029021   | 60809.973 | 58997.402 |
| NM_012388 | 13418.603 | 16567.441 | NM_002101  | 4645.619  | 5242.184  |
| NM_016651 | 3461.054  | 5442.477  | NM_005423  | 2619.84   | 3070.761  |
| NM_001671 | 854.762   | 1176.361  | Z36789     | 692.925   | 1167.08   |
| NM_019843 | 6546.864  | 7706.513  | J02874     | 23551.742 | 26707.729 |
| NM_016192 | 15991.945 | 17879.996 | BF310427   | 26982.387 | 31306.822 |
| BE878426  | 60958.879 | 60669.328 | N94424     | 2158.098  | 2321.32   |
| NM_001745 | 46490.012 | 54906.195 | AA045192   | 10535.388 | 10639.47  |
| NM_003825 | 15499.261 | 21959.457 | AI521645   | 639.728   | 863.49    |
| AK025006  | 15365.872 | 17812.529 | H45617     | 2335.403  | 2323.192  |
| AF218014  | 54952.387 | 56745.711 | M92642     | 26046.459 | 26456.283 |
| NM_006678 | 15009.188 | 17438.908 | H-U 44385  | 57324.188 | 54949.949 |
| AY007729  | 66443.68  | 66788.656 | ID 1654970 | 32835.684 | 32233.059 |
| NM_014424 | 857.43    | 762.955   | ID 2531132 | 32402.613 | 34026.309 |
| NM_004314 | 4960.609  | 5982.93   | ID 4365538 | 4303.696  | 4593.404  |
| NM_018247 | 19669.26  | 25251.129 | AA485665   | 2307.099  | 1977.673  |
| NM_017979 | 22049.25  | 26850.258 | BF125928   | 31266.24  | 35468.188 |
| NM_005898 | 29942.158 | 39077.684 | BG571026   | 10260.244 | 10309.474 |
| NM_002888 | 56724.027 | 61773.367 | AA489017   | 30319.283 | 36024.836 |
| AF078866  | 1888.782  | 1936.072  | NM_000025  | 43190.598 | 43700.254 |
| BF311880  | 45054.277 | 56184.973 | D38521     | 11543.511 | 12046.607 |
| NM_000078 | 805.102   | 1178.836  | NM_018152  | 2326.623  | 2868.128  |
| NM_016075 | 821.205   | 878.074   | NM_000319  | 12571.466 | 13189.041 |
| NM_001360 | 17841.078 | 19833.254 | NM_003257  | 1122.214  | 1601.661  |
| AK026656  | 23742.918 | 25246.883 | NM_012461  | 12502.666 | 13373.858 |
| AJ276207  | 21319.705 | 22358.707 | AK001379   | 5949.683  | 6053.99   |
| AB011131  | 9149.867  | 11158.236 | NM_017450  | 10638.766 | 11862.046 |

|           |           |           |           |           |           |
|-----------|-----------|-----------|-----------|-----------|-----------|
| NM_000751 | 61839.711 | 62190.367 | NM_002023 | 3164.672  | 4626.015  |
| NM_014849 | 8765.45   | 9312.281  | NM_002839 | 7183.789  | 8780.387  |
| NM_001042 | 8784.373  | 9352.838  | AF190500  | 4403.795  | 4873.256  |
| NM_012229 | 5443.114  | 7221.256  | NM_001616 | 1232.477  | 1322.61   |
| NM_005071 | 2270.127  | 2538.048  | NM_005904 | 1633.61   | 1767.905  |
| AF222980  | 1207.609  | 1561.247  | NM_005273 | 60445.023 | 51373.195 |
| AK026758  | 9217.229  | 9702.674  | NM_000524 | 1405.488  | 1495.793  |
| NM_012201 | 7225.871  | 7791.835  | NM_006576 | 42819.211 | 41402.672 |
| AB046774  | 1217.097  | 1354.906  | NM_018645 | 633.816   | 764.448   |
| AK022385  | 54060.773 | 56121.578 | AB035266  | 37893.508 | 43153.25  |
| NM_002775 | 1066.316  | 1803.972  | NM_003744 | 15051.099 | 14793.163 |
| AK024584  | 13109.289 | 9864.346  | NM_006378 | 7680.63   | 8900.552  |
| NM_003504 | 10016.994 | 16962.182 | NM_018132 | 2577.331  | 3365.853  |
| NM_013298 | 9055.192  | 10369.582 | NM_003061 | 607.794   | 722.421   |
| NM_007267 | 3946.519  | 4535.811  | NM_018207 | 8850.278  | 9834.953  |
| Z36816    | 8250.801  | 9674.577  | NM_000345 | 57704.641 | 58288.867 |
| NM_005865 | 16140.192 | 16808.91  | NM_001862 | 57618.797 | 59594.305 |
| NM_006413 | 11922.187 | 11975.629 | NM_006531 | 9526.847  | 10292.861 |
| NM_017684 | 917.527   | 1200.094  | NM_002779 | 13256.764 | 13360.921 |
| AK025542  | 6469.001  | 6736.786  | L40397    | 37640.055 | 45572.898 |
| AF207547  | 1488.051  | 1298.848  | NM_020198 | 59599.789 | 57556.059 |
| NM_002768 | 21743.436 | 24651.805 | AA098879  | 1311.547  | 1688.709  |
| NM_003691 | 2951.654  | 3085.858  | AF070525  | 23023.627 | 22816.123 |
| NM_002950 | 23192.039 | 23120.074 | NM_001177 | 7436.184  | 8811.308  |
| NM_002318 | 9840.665  | 12577.677 | NM_014447 | 4085.608  | 5027.687  |
| NM_001433 | 1866.366  | 2739.979  | NM_002356 | 3983.816  | 4590.649  |
| NM_003134 | 66059.289 | 68099.703 | NM_006691 | 5306.212  | 6296.256  |
| CY3Cy5    | 1784.447  | 75.975    | NM_001505 | 3244.733  | 3617.917  |
| NM_022095 | 1339.318  | 1579.871  | NM_003710 | 35217.25  | 34991.402 |
| AF088061  | 3364.123  | 3279.679  | Z83805    | 2464.815  | 2285.861  |
| AF086286  | 3252.997  | 2711.33   | NM_004666 | 2764.888  | 3218.481  |
| AF086376  | 1790.184  | 1626.288  | NM_003614 | 33445.148 | 32727.293 |
| AF086410  | 1134.719  | 1039.101  | NM_014257 | 33581.18  | 33631.234 |
| AF086455  | 697.983   | 744.1     | NM_001140 | 3342.549  | 2963.211  |
| AK022997  | 13439.572 | 8643.931  | NM_016059 | 794.73    | 543.105   |
| NM_017617 | 1608.633  | 1208.475  | NM_004843 | 4228.095  | 4915.099  |
| AF131830  | 1047.651  | 680.643   | AK022845  | 2833.563  | 2967.063  |
| AK027232  | 3937.799  | 2603.672  | NM_003004 | 1168.469  | 1374.023  |
| NM_012204 | 616.592   | 315.737   | S77835    | 3006.681  | 3037.133  |
| NM_022095 | 1343.835  | 664.9     | NM_002985 | 4757.969  | 6737.689  |
| SR2       | 36568.785 | 11055.978 | AB018347  | 58659.793 | 58111.57  |
| SR4       | 10498.383 | 3644.766  | AB033073  | 39594.98  | 37893.898 |
| SR6       | 1408.267  | 492.007   | NM_003284 | 27217.777 | 26807.027 |
| SR8       | 5515.41   | 10477.011 | NM_003909 | 13458.193 | 13301.575 |
| SR10      | 18465.176 | 2235.438  | NM_001277 | 35887.402 | 40400.992 |
| AF086103  | 730.68    | 789.461   | NM_003659 | 21139.303 | 23947.168 |
| AL080135  | 971.314   | 905.817   | NM_007072 | 13146.583 | 14994.565 |
| AK023158  | 1524.643  | 1619.414  | NM_012320 | 9812.954  | 9544.95   |
| AF085852  | 4693.679  | 4346.48   | NM_018208 | 7636.203  | 8095.449  |
| AF042838  | 1815.912  | 1362.472  | NM_015929 | 9806.485  | 10483.251 |
| AL137511  | 663.403   | 558.872   | U90653    | 17007.674 | 19241.928 |
| AF075062  | 7494.918  | 4747.782  | NM_000196 | 1444.866  | 1616.282  |
| NM_004188 | 1183.606  | 939.071   | NM_018339 | 9795.334  | 10280.991 |



|           |           |           |           |           |           |
|-----------|-----------|-----------|-----------|-----------|-----------|
| AF147381  | 10832.92  | 5693.69   | NM_006745 | 39255.516 | 44068.188 |
| AK027101  | 16412.461 | 7699.806  | NM_000275 | 3089.984  | 3251.458  |
| AK024358  | 2822.376  | 1371.329  | AK000037  | 6234.842  | 3994.554  |
| AF088075  | 2071.008  | 884.357   | NM_014760 | 6520.334  | 6547.662  |
| AK026376  | 1897.602  | 865.528   | NM_018398 | 3510.969  | 3747.109  |
| AK027097  | 747.644   | 1026.066  | NM_002560 | 58086.16  | 59430.148 |
| AK024613  | 358.716   | 405.463   | NM_014404 | 15109.125 | 15471.428 |
| AK027198  | 1630.645  | 1876.047  | NM_018713 | 3974.521  | 4426.51   |
| AL162077  | 2333.782  | 2089.357  | NM_015947 | 25845.111 | 28637.064 |
| AK022404  | 334.028   | 595.168   | NM_002042 | 60678.051 | 59146.164 |
| AF147426  | 2644.555  | 2219.987  | AB028944  | 1814.599  | 1938.764  |
| BC019667  | 16807.291 | 11153.068 | AJ006268  | 2638.222  | 2955.957  |
| AK026026  | 14222.585 | 9663.399  | M74089    | 11645.805 | 10568.173 |
| AF085941  | 19606.158 | 11331.205 | AF190864  | 14969.304 | 16023.173 |
| Z69892    | 10594.619 | 6646.949  | NM_000025 | 55088.164 | 56492.043 |
| AK023590  | 578.255   | 686.325   | D38521    | 13202.331 | 11861.214 |
| AF087961  | 615.815   | 280.419   | NM_000403 | 46229.625 | 36299.676 |
| AL137309  | 2814.224  | 1418.638  | NM_018127 | 31195.336 | 31162.309 |
| AL137475  | 918.231   | 603.896   | AB020677  | 36614.023 | 35041.754 |
| AL161956  | 4294.208  | 2267.867  | AB033097  | 15716.956 | 15352.076 |
| AL390176  | 2351.022  | 1261.371  | NM_000135 | 11707.804 | 11076.107 |
| AL137356  | 666.238   | 273.835   | AJ223948  | 18561.82  | 19587.455 |
| AL137547  | 933.703   | 573.807   | NM_016218 | 1102.55   | 1085.397  |
| AK021994  | 1034.152  | 628.851   | AK022947  | 3993.915  | 3749.353  |
| Z70763    | 865.601   | 497.564   | AL050029  | 4786.253  | 4668.347  |
| AK023802  | 15521.247 | 7270.879  | AL049966  | 1307.306  | 1426.989  |
| AK021981  | 433.397   | 491.69    | NM_005204 | 17280.469 | 18729.924 |
| AL359567  | 1346.48   | 1739.925  | NM_016203 | 3519.594  | 3111.432  |
| NM_017726 | 5826.662  | 5702.161  | NM_002759 | 7952.736  | 7755.98   |
| AK026716  | 549.038   | 903.584   | NM_007271 | 6012.725  | 6174.619  |
| AL049325  | 16743.16  | 14468.433 | NM_006255 | 9237.06   | 9082.489  |
| AK023952  | 1091.745  | 1300.322  | BE392143  | 12234.046 | 13706.079 |
| AK000787  | 647.074   | 868.992   | NM_005813 | 8621.896  | 8084.068  |
| AF090885  | 22579.336 | 16182.422 | AB037718  | 20156.273 | 20135.744 |
| AF161342  | 612.417   | 518.467   | AL389994  | 3659.564  | 3351.211  |
| NM_016646 | 638.118   | 717.48    | CY3Cy5    | 1031.79   | 57.728    |
| NM_014082 | 2177.296  | 1591.745  | NM_000588 | 23656.943 | 6014.463  |
| AF100636  | 855.602   | 978.076   | AF143872  | 13533.109 | 6245.4    |
| AF161366  | 623.927   | 437.316   | AF143326  | 1419.826  | 799.068   |
| AK022197  | 1038.596  | 677.883   | AL049229  | 3478.086  | 2106.803  |
| AK021970  | 744.118   | 487.365   | NM_018306 | 53321.949 | 56105.676 |
| AK022066  | 61374.895 | 29504.924 | AK026146  | 3610.706  | 3091.595  |
| AK022224  | 1124.056  | 1053.611  | AK023152  | 5485.5    | 3731.434  |
| AK022359  | 705.802   | 416.364   | AK000155  | 602.43    | 364.679   |
| AK022000  | 833.312   | 361.109   | AL389937  | 2723.684  | 1407.211  |
| AK022129  | 1838.574  | 1088.72   | AK025201  | 4443.799  | 2268.469  |
| AK022263  | 1907.709  | 1174.516  | AK021927  | 626.495   | 492.462   |
| AK022384  | 621.225   | 336.631   | AK022995  | 2970.474  | 1791.941  |
| AF086304  | 19367.465 | 25054.932 | NM_000588 | 24611.949 | 12204.538 |
| AB032976  | 2106.835  | 2419.496  | SR1       | 63124.16  | 56961.977 |
| AF301222  | 21320.994 | 22193.311 | SR3       | 42618.871 | 36869.66  |
| AJ131606  | 1266.785  | 1673.674  | SR5       | 5549.698  | 5003.373  |
| AF215981  | 10783.872 | 10707.137 | SR7       | 6026.683  | 35834.387 |

|           |           |           |           |           |           |
|-----------|-----------|-----------|-----------|-----------|-----------|
| NM_000732 | 37261.715 | 31301.137 | SR9       | 22513.086 | 5615.347  |
| AF130044  | 1022.967  | 811.4     | CY3Cy5    | 2900.787  | 88.926    |
| AF087980  | 1018.007  | 880.524   | L13433    | 2534.431  | 968.929   |
| AK000257  | 776.938   | 705.801   | NM_007220 | 1612.921  | 690.443   |
| NM_006160 | 4286.896  | 2780.327  | NM_017777 | 2813.212  | 1833.324  |
| NM_000529 | 1305.197  | 1367.103  | AK001499  | 5586.312  | 3133.742  |
| AF009259  | 771.222   | 460.032   | AK023568  | 862.417   | 565.359   |
| AF009260  | 847.061   | 425.334   | AK026852  | 1458.218  | 710.987   |
| NM_003079 | 2166.87   | 1140.522  | AK021629  | 1082.117  | 927.777   |
| NM_017902 | 3229.704  | 1808.436  | AL110257  | 64687.23  | 51580.883 |
| NM_017835 | 19894.119 | 23936.924 | AB013384  | 3565.234  | 2103.505  |
| NM_018347 | 4578.106  | 5339.88   | AK024824  | 1944.022  | 1088.919  |
| AK024986  | 600.861   | 927.478   | AK024270  | 6619.758  | 5258.263  |
| AK026730  | 1670.761  | 1884.021  | AK025569  | 7974.733  | 5856.541  |
| AK024739  | 1633.282  | 2300.757  | AK023060  | 2440.997  | 2222.523  |
| AK098681  | 1211.656  | 1802.909  | NM_014870 | 950.89    | 1187.243  |
| AK026772  | 4579.308  | 5157.479  | AK021917  | 1442.749  | 1739.836  |
| NM_014260 | 11258.303 | 12760.64  | AF052146  | 64403.594 | 59980.32  |
| AK026458  | 738.964   | 816.03    | NM_004870 | 9427.784  | 8455.829  |
| AK024154  | 7367.655  | 7648.572  | AK024242  | 29226.586 | 8938.777  |
| AF086341  | 1039.625  | 913.997   | AK024559  | 2090.805  | 1397.292  |
| AK026672  | 765.48    | 786.999   | AK024851  | 1638.991  | 547.857   |
| S83282    | 62525.172 | 53409.188 | AK024943  | 925.201   | 551.042   |
| AK024164  | 24817.086 | 17469.578 | AK022628  | 68005.148 | 73624.547 |
| AF052130  | 6105.385  | 3980.112  | AK021737  | 15276.523 | 10462.249 |
| AF130090  | 30873.146 | 16726.738 | AL357454  | 732.335   | 737.406   |
| AL096727  | 1784.267  | 1337.855  | AK026295  | 1957.349  | 1309.619  |
| AL080110  | 5355.268  | 2829.983  | AK022346  | 767.595   | 435.859   |
| NM_020425 | 1147.755  | 795.391   | AK025007  | 3318.479  | 1869.441  |
| AK024076  | 2894.107  | 1663.435  | NM_016486 | 10776.027 | 7019.169  |
| M87940    | 1208.146  | 833.836   | AL117601  | 917.399   | 606.9     |
| L77588    | 1781.142  | 1130.416  | AK026490  | 56331.551 | 42664.004 |
| NM_014273 | 17569.758 | 21154.436 | AJ227861  | 2889.217  | 1909.585  |
| AF039442  | 2151.526  | 3224.921  | AJ001020  | 1256.909  | 1114.022  |
| NM_004680 | 2941.522  | 3535.744  | NM_005553 | 725.315   | 869.402   |
| AF104260  | 599.068   | 746.114   | AJ001875  | 4335.821  | 5295.922  |
| NM_005671 | 1163.018  | 1785.336  | AJ227883  | 1355.524  | 1908.965  |
| NM_019625 | 23689.689 | 23635.934 | X64985    | 1542.468  | 2208.214  |
| NM_006729 | 4800.662  | 4442.932  | Y10507    | 1091.537  | 967.788   |
| NM_006071 | 2536.892  | 2946.926  | AK002028  | 61716.043 | 55342.637 |
| NM_012236 | 7120.182  | 6928.607  | AL050127  | 4761.508  | 2021.139  |
| NM_013939 | 667.328   | 647.154   | AK024805  | 17367.221 | 9241.167  |
| AB038651  | 4248.87   | 2718.067  | AK000189  | 501.284   | 354.109   |
| AL359603  | 1390.005  | 1464.329  | AK001423  | 1122.63   | 805.806   |
| X84838    | 828.654   | 1146.626  | AK022298  | 7682.15   | 6890.359  |
| NM_013940 | 693.658   | 423.485   | AJ277441  | 52057.539 | 50942.457 |
| AL117643  | 1317.381  | 945.526   | AK000834  | 774.541   | 1184.293  |
| AF069135  | 4998.583  | 2558.206  | NM_006057 | 4886.494  | 3875.635  |
| AK026524  | 1336.311  | 765.101   | AK025784  | 52327.141 | 32253.43  |
| AB011157  | 4803.039  | 2055.993  | U07199    | 9560.379  | 4813.627  |
| U17632    | 541.513   | 533.88    | AK023713  | 2628.212  | 1203.569  |
| AK026764  | 2052.417  | 1093.394  | X81445    | 1297.242  | 822.904   |
| AF113700  | 2727.889  | 1393.71   | U95091    | 2807.865  | 1561.089  |

|           |           |           |           |           |           |
|-----------|-----------|-----------|-----------|-----------|-----------|
| X91348    | 33573.969 | 31910.367 | NM_017900 | 47416.344 | 29400.391 |
| Z36505    | 4246.478  | 4525.031  | S50182    | 2540.998  | 1660.503  |
| NM_001854 | 2689.205  | 3400.186  | AL360145  | 2006.985  | 1839.595  |
| NM_017913 | 2629.028  | 3089.897  | Y12016    | 5918.827  | 6964.263  |
| NM_002755 | 16670.744 | 17227.223 | S75763    | 63593.324 | 60743.781 |
| AK024799  | 54875.668 | 58527.984 | AL359943  | 62948.871 | 52781.117 |
| NM_000924 | 9550.884  | 11504.627 | NM_000534 | 3765.854  | 2767.95   |
| NM_003330 | 7781.59   | 9283.507  | NM_005365 | 457.064   | 856.78    |
| NM_002481 | 357.565   | 828.557   | L10140    | 952.185   | 853.658   |
| NM_003647 | 479.523   | 764.554   | AL133447  | 3088.947  | 4632.226  |
| NM_001695 | 35268.117 | 40885.859 | AB037853  | 63893.113 | 58727.492 |
| AB006589  | 350.073   | 470.412   | D28450    | 61516.363 | 57572.781 |
| NM_018351 | 1360.588  | 1245.98   | AK056222  | 5685.827  | 5849.497  |
| AK023019  | 757.372   | 598.612   | L37700    | 1317.96   | 434.346   |
| NM_147171 | 4591.913  | 3633.818  | NM_017665 | 7967.47   | 4134.21   |
| AF238083  | 10056.527 | 5868.953  | AB007976  | 1315.629  | 943.477   |
| NM_016385 | 2469.865  | 2255.586  | AF052106  | 5530.135  | 2989.479  |
| AB046783  | 1175.667  | 868.336   | AK000441  | 1216.384  | 743.711   |
| NM_000845 | 943.352   | 608.413   | AK022391  | 4736.323  | 6680.102  |
| NM_004604 | 59550.004 | 53161.367 | NM_016167 | 7226.309  | 7233.956  |
| NM_014965 | 6471.734  | 3307.353  | NM_016125 | 1210.985  | 1388.688  |
| NM_004882 | 18176.102 | 9420.238  | AK024090  | 30268.537 | 16604.045 |
| AL390148  | 8842.835  | 4673.227  | AL133574  | 5784.658  | 3111.491  |
| AK024055  | 1082.261  | 688.599   | AK021936  | 1687.627  | 1142.32   |
| NM_013375 | 1276.871  | 1626.797  | AF147339  | 47040.605 | 35864.563 |
| NM_017964 | 2025.057  | 2191.824  | AL390181  | 58649.574 | 52006.383 |
| NM_016272 | 335.028   | 568.642   | NM_017914 | 58835.703 | 56265.383 |
| NM_016425 | 6315.947  | 7134.267  | NM_006350 | 690.699   | 818       |
| NM_004083 | 12434.775 | 13136.37  | AK024953  | 18278.373 | 20600.84  |
| NM_016035 | 37423.645 | 33069.785 | AK024276  | 9396.39   | 13770.972 |
| NM_001184 | 3857.729  | 3925.216  | S83374    | 7403.204  | 7553.34   |
| NM_015530 | 9604.211  | 9463.364  | AL161979  | 620.853   | 813.691   |
| NM_016235 | 5670.192  | 6046.875  | NM_003150 | 2114.741  | 605.934   |
| NM_001755 | 899.82    | 1008.391  | NM_014784 | 3280.015  | 2163.287  |
| BE546276  | 690.289   | 543.22    | AK026383  | 5186.931  | 2722.889  |
| NM_004725 | 10016.395 | 7149.724  | AK023821  | 945.06    | 1028.653  |
| NM_015997 | 7872.58   | 6585.514  | AB014594  | 2166.549  | 1439.34   |
| NM_001167 | 7016.758  | 6368.405  | M94547    | 2045.879  | 1434.199  |
| NM_012115 | 4964.851  | 3803.216  | NM_005087 | 20980.689 | 21347.34  |
| NM_004933 | 27634.811 | 17455.127 | NM_012095 | 3134.312  | 4467.824  |
| M96577    | 22377.236 | 19258.48  | NM_018095 | 4011.086  | 5259.479  |
| NM_013255 | 39863.594 | 39413.203 | AB023164  | 6933.749  | 8360.405  |
| NM_003842 | 5417.187  | 3809.675  | NM_001178 | 1137.258  | 1446.695  |
| NM_016184 | 2235.153  | 1584.983  | AK023696  | 20943.777 | 13157.662 |
| L11238    | 20969.623 | 9885.906  | NM_000704 | 2344.208  | 1518.851  |
| AK025684  | 1012.66   | 833.01    | NM_015987 | 813.205   | 556.85    |
| NM_012205 | 8105.117  | 4323.578  | NM_019605 | 2546.235  | 1587.786  |
| K02046    | 4208.355  | 2056.288  | NM_015365 | 1130.034  | 1434.311  |
| U87223    | 1509.657  | 778.02    | Z49090    | 15435.273 | 11103.305 |
| NM_004995 | 4755.007  | 7156.636  | X75685    | 1218.54   | 1102.442  |
| NM_000385 | 11614.726 | 12526.898 | AK021592  | 17941.52  | 13896.7   |
| NM_007231 | 897.039   | 1280.56   | AF085952  | 799.708   | 1089.593  |
| NM_001190 | 4591.979  | 3798.69   | AK025467  | 13082.119 | 13448.721 |

|           |           |           |           |           |           |
|-----------|-----------|-----------|-----------|-----------|-----------|
| NM_005271 | 17089.613 | 20214.322 | AK026593  | 13346.796 | 11261.956 |
| NM_015654 | 6447.39   | 7517.086  | AL117666  | 1949.348  | 765.71    |
| NM_012244 | 3423.405  | 3709.671  | Y17865    | 3878.291  | 2076.605  |
| NM_004341 | 2682.053  | 2580.878  | NM_005825 | 37981.777 | 36048.055 |
| AB082521  | 11371.475 | 10863.064 | NM_002756 | 11696.072 | 7790.903  |
| AL050182  | 2815.287  | 2129.736  | U79299    | 920.522   | 1047.53   |
| NM_020040 | 2075.886  | 2774.716  | AJ000414  | 2029.076  | 2985.879  |
| NM_002374 | 2797.103  | 2110.359  | AK025674  | 18965.42  | 20994.223 |
| AK026940  | 8563.769  | 5929.896  | AF007194  | 9859.365  | 10790.082 |
| AF155117  | 6118.131  | 5054.401  | NM_019069 | 3164.855  | 3803.702  |
| AB014527  | 1032.205  | 830.853   | NM_004761 | 7955.023  | 9149.497  |
| NM_004411 | 1874.062  | 1462.958  | Z25424    | 7015.144  | 5845.248  |
| NM_015938 | 8901.118  | 6401.765  | U79458    | 7860.266  | 4441.758  |
| NM_000740 | 974.665   | 520.968   | NM_014920 | 746.002   | 831.121   |
| NM_017843 | 9886.078  | 4326.877  | NM_002961 | 7819.723  | 4912.441  |
| U10485    | 1117.763  | 493.941   | NM_018298 | 1663.672  | 1132.267  |
| AK025326  | 22583.615 | 9240.605  | NM_000676 | 4388.447  | 2527.524  |
| NM_016328 | 9959.199  | 12242.419 | AF064770  | 476.835   | 573.35    |
| NM_017544 | 35561.238 | 37138.844 | NM_005766 | 2033.377  | 1788.66   |
| NM_003153 | 2307.962  | 2536.714  | AL117612  | 588.22    | 602.499   |
| NM_016285 | 1505.221  | 2033.322  | NM_004127 | 59429.77  | 65621.242 |
| NM_014707 | 1352.36   | 1818.162  | NM_013324 | 7244.591  | 8973.366  |
| AF025771  | 2218.863  | 2345.767  | AL133022  | 1932.486  | 2300.449  |
| NM_018215 | 3139.768  | 3176.048  | NM_003953 | 8205.071  | 9233.916  |
| AB033110  | 2967.24   | 2925.92   | NM_006301 | 1628.819  | 1524.692  |
| NM_005083 | 51169.371 | 50396.746 | NM_012219 | 1123.971  | 361.987   |
| NM_007187 | 11177.092 | 10870.978 | X72887    | 1470.111  | 806.559   |
| NM_001828 | 520.469   | 453.52    | NM_004529 | 2425.652  | 1403.771  |
| NM_018983 | 14219.471 | 10888.337 | NM_000127 | 1570.72   | 1498.17   |
| NM_003096 | 8901.354  | 5811.566  | Y10483    | 31171.184 | 24615.434 |
| NM_007279 | 7913.602  | 7444.367  | NM_006784 | 2504.121  | 2472.749  |
| BE390833  | 31721.996 | 21058.598 | NM_017876 | 4237.863  | 5079.173  |
| NM_004730 | 13448.728 | 7653.232  | NM_001087 | 65878.352 | 68079.039 |
| NM_000801 | 6753.866  | 4001.781  | NM_001826 | 742.905   | 1271.061  |
| NM_006115 | 46424.559 | 32798.688 | AK025352  | 1175.54   | 2054.61   |
| NM_005801 | 5236.293  | 3106.401  | NM_003721 | 11862.851 | 10873.821 |
| NM_018198 | 4084.634  | 2138.737  | NM_004724 | 1821.905  | 1154.226  |
| NM_001539 | 25357.336 | 13175.671 | NM_001431 | 6971.396  | 4484.756  |
| NM_012267 | 679.555   | 451.905   | NM_000381 | 909.376   | 958.845   |
| NM_016616 | 544.022   | 1198.643  | NM_000427 | 3868.615  | 2770.981  |
| NM_000022 | 14941.087 | 16615.787 | NM_014924 | 1399.956  | 1560.508  |
| NM_016576 | 7730.72   | 9198.643  | NM_006946 | 2540.762  | 1587.608  |
| NM_004213 | 2278.384  | 2668.557  | NM_000174 | 60990.102 | 62330.961 |
| NM_001929 | 58775.836 | 58835.797 | NM_002508 | 2155.687  | 3426.976  |
| NM_000906 | 3388.821  | 4568.06   | NM_014343 | 11975.046 | 13084.36  |
| NM_000480 | 6855.405  | 8818.418  | D25303    | 3007.505  | 3489.787  |
| AF254084  | 50362.379 | 47586.734 | NM_002338 | 14392.944 | 12326.046 |
| AK022648  | 767.234   | 1238.227  | AF022913  | 3049.974  | 864.759   |
| AK022976  | 1665.035  | 2150.317  | NM_000028 | 2529.473  | 1129.701  |
| AB048791  | 6508.945  | 7652.384  | NM_001382 | 9885.224  | 5773.064  |
| NM_003107 | 997.936   | 1313.386  | M93718    | 15942.142 | 14159.715 |
| NM_006874 | 6245.551  | 4494.439  | NM_005386 | 2524.922  | 1971.041  |
| AB046777  | 1946.771  | 1989.515  | AK023807  | 27306.02  | 26137.299 |

|           |           |           |           |           |           |
|-----------|-----------|-----------|-----------|-----------|-----------|
| AJ251844  | 6937.748  | 5798.059  | NM_018188 | 17829.855 | 21067.164 |
| D16815    | 1807.367  | 1125.415  | AK024273  | 3000.555  | 3776.177  |
| NM_00188C | 2307.593  | 1368.312  | X59417    | 32050.105 | 43468.426 |
| AB028943  | 4040.635  | 2329.439  | NM_005659 | 68270.93  | 66313.438 |
| NM_006194 | 1090.621  | 825.706   | D28476    | 10326.632 | 14054.535 |
| AK001603  | 11481.256 | 7734.519  | NM_016263 | 8234.775  | 8343.316  |
| U71601    | 2245.229  | 1287.935  | NM_003335 | 51192.059 | 50422.113 |
| AK025985  | 47379.484 | 45168.352 | AB002376  | 13233.643 | 13408.223 |
| NM_013256 | 4119.193  | 1952.68   | NM_018249 | 1494.411  | 1301.432  |
| NM_004143 | 1517.658  | 974.418   | NM_005558 | 3635.779  | 3097.771  |
| X66087    | 3561.987  | 1633.379  | NM_016631 | 2103.882  | 2152.813  |
| L09070    | 406.615   | 889.029   | AB015617  | 29433.342 | 31422.668 |
| NM_000062 | 9198.344  | 12090.325 | AK022730  | 5521.296  | 4474.439  |
| NM_00959C | 9488.209  | 14239.616 | NM_002256 | 14486.926 | 16003.595 |
| AL133037  | 1065.27   | 2026.46   | AF064839  | 59201.379 | 57847.324 |
| NM_02035C | 5406.306  | 6279.585  | NM_005439 | 25990.164 | 30215.566 |
| NM_00035C | 6118.134  | 7409.669  | AB037810  | 3424.936  | 3497.789  |
| X91103    | 17239.066 | 23907.482 | AF222694  | 1685.717  | 1901.659  |
| AA419164  | 2248.411  | 2586.46   | AL049925  | 7674.705  | 5894.467  |
| L35251    | 4798.769  | 5079.902  | NM_016153 | 934.15    | 233.851   |
| BE910395  | 6463.42   | 6112.744  | AK027089  | 6340.876  | 2637.091  |
| N46828    | 7711.578  | 8560.516  | X59845    | 1232.891  | 858.919   |
| BI908302  | 51497.785 | 56306.363 | NM_006284 | 26445.064 | 23092.676 |
| AA460969  | 4833.972  | 4528.057  | U18909    | 3117.694  | 2370.211  |
| BG695859  | 4097.993  | 4419.112  | NM_003489 | 6827.079  | 6494.013  |
| M85079    | 11692.773 | 9716.387  | NM_016589 | 27495.289 | 33797.375 |
| AA457671  | 16039.704 | 12552.418 | NM_003597 | 962.683   | 1183.149  |
| X07437    | 15485.551 | 12721.479 | NM_002568 | 68020.258 | 69404.984 |
| NM_000641 | 3023.068  | 2067.452  | NM_006561 | 2272.888  | 2860.039  |
| AE006466  | 15578.159 | 10299.376 | NM_017521 | 3298.447  | 4690.748  |
| BC008737  | 57322.973 | 47909.445 | AK025200  | 33868.602 | 25128.996 |
| BC011655  | 5448.639  | 2958.034  | NM_001383 | 13930.853 | 9621.852  |
| BC002396  | 8821.813  | 6330.422  | NM_001029 | 63363.16  | 58524.813 |
| NM_003613 | 2788.74   | 1606.268  | NM_005008 | 33787.738 | 19185.523 |
| NM_005385 | 6264.812  | 11937.905 | NM_016304 | 54755.484 | 54495.707 |
| NM_018985 | 4489.635  | 5921.79   | NM_006013 | 31572.139 | 28074.031 |
| NM_006074 | 53379.16  | 57338.77  | NM_014046 | 32714.209 | 29443.414 |
| AF208232  | 6527.126  | 10212.765 | NM_004861 | 12524.931 | 10211.283 |
| NM_002988 | 7738.72   | 12906.185 | NM_016161 | 1391.628  | 1341.659  |
| NM_004186 | 1852.875  | 2901.057  | AV718258  | 1478.369  | 642.399   |
| NM_016258 | 9165.505  | 13847.693 | NM_005165 | 8804.542  | 3081.573  |
| AF203032  | 9891.556  | 13819.233 | NM_005138 | 48833.125 | 40830.293 |
| AB014542  | 18446.85  | 20043.611 | NM_002115 | 59678.414 | 63162.695 |
| NM_01464C | 1871.953  | 2680.805  | AK023162  | 5694.981  | 6205.594  |
| Y10518    | 52895.418 | 56061.43  | NM_006396 | 12001.581 | 15533.123 |
| AF155135  | 8698.573  | 11005.905 | NM_018649 | 10761.329 | 14284.206 |
| NM_01479C | 2827.685  | 3224.659  | NM_018263 | 920.993   | 840.019   |
| NM_003571 | 23491.918 | 23771.303 | NM_013449 | 3052.876  | 2554.438  |
| AB032965  | 56842.25  | 59737     | NM_004537 | 3915.478  | 2238.907  |
| NM_02037C | 752.309   | 672.523   | AL390134  | 2086.92   | 1630.761  |
| NM_004767 | 2264.241  | 2130.524  | NM_020226 | 9269.604  | 6180.487  |
| BF310159  | 21620.654 | 12886.515 | NM_017865 | 5716.685  | 3760.682  |
| NM_000316 | 380.121   | 399.587   | NM_003427 | 4443.508  | 4312.615  |

|           |           |           |           |           |           |
|-----------|-----------|-----------|-----------|-----------|-----------|
| NM_018986 | 4382.733  | 2923.72   | NM_005920 | 4834.849  | 4499.123  |
| AB044934  | 937.383   | 741.277   | Y09321    | 4403.205  | 5781.037  |
| U27655    | 9903.525  | 5891.697  | NM_006593 | 2422.57   | 3116.548  |
| Z21965    | 48802.961 | 30139.971 | NM_000475 | 20050.861 | 18365.623 |
| NM_012427 | 1984.127  | 1360.115  | M61872    | 35982.348 | 30791.389 |
| AF133424  | 5175.725  | 8724.562  | NM_005721 | 5742.9    | 5438.625  |
| NM_005003 | 29901.969 | 33124.34  | AF284223  | 4457.16   | 2976.51   |
| AF084560  | 14452.762 | 20136.904 | AF176012  | 1368.431  | 864.794   |
| NM_015715 | 1830.379  | 3298.196  | BE743838  | 15970.247 | 14434.852 |
| NM_000032 | 14689.584 | 22958.113 | AF273046  | 6946.712  | 8240.896  |
| NM_002083 | 3295.996  | 4555.405  | NM_001081 | 7858.021  | 10408.61  |
| NM_002035 | 5962.127  | 8740.602  | NM_002483 | 9100.678  | 14226.267 |
| NM_014900 | 3172.338  | 3367.864  | BF002026  | 2090.563  | 3143.171  |
| BF342908  | 1784.252  | 2974.34   | L35594    | 1716.65   | 2528.199  |
| AF118073  | 656.057   | 916.201   | BE790116  | 6565.925  | 8356.807  |
| AK023510  | 4742.143  | 4605.609  | AI922341  | 11751.284 | 16104.276 |
| NM_004345 | 3806.153  | 4874.635  | S57283    | 1473.354  | 1913.606  |
| NM_002232 | 376.356   | 778.239   | AA410517  | 1970.19   | 1628.321  |
| NM_014570 | 4742.889  | 4709.473  | M12824    | 4817.313  | 4168.279  |
| NM_014822 | 2403.199  | 2435.977  | W60100    | 2588.69   | 1914.318  |
| NM_005296 | 2660.041  | 2537.839  | M24898    | 2530.096  | 2180.464  |
| NM_001337 | 597.381   | 730.942   | U72508    | 2189.858  | 2526.367  |
| NM_003611 | 4860.247  | 3361.249  | AA457153  | 11813.149 | 13413.942 |
| AB014538  | 5893.293  | 4943.889  | AA283122  | 56132.617 | 56832.629 |
| NM_006209 | 835.318   | 659.238   | AA868504  | 6088.149  | 5399.631  |
| AK025118  | 8005.331  | 6211.57   | AA877845  | 15696.751 | 16827.117 |
| NM_000727 | 1968.248  | 1719.068  | NM_006066 | 43573.875 | 48987.246 |
| NM_002625 | 244.734   | 700.395   | AK022230  | 23774.455 | 8642.188  |
| NM_004135 | 3964.768  | 4794.9    | AK022147  | 26459.281 | 18893.746 |
| NM_000203 | 512.706   | 794.205   | L25664    | 15702.958 | 13609.026 |
| NM_013443 | 1847.639  | 2524.336  | NM_014940 | 6138.708  | 4220.853  |
| NM_000925 | 15591.877 | 19555.537 | NM_005783 | 1023.606  | 860.88    |
| NM_000465 | 3528.661  | 6388.63   | AK000851  | 2255.166  | 2171.585  |
| AF116685  | 459.504   | 1031.797  | NM_006900 | 3360.479  | 5195.825  |
| NM_000123 | 3575.764  | 6167.336  | AJ289111  | 40367.695 | 57172.688 |
| AL137501  | 2321.084  | 3118.272  | NM_016356 | 7228.715  | 8649.441  |
| NM_000122 | 3541.862  | 3120.261  | NM_006406 | 22051.539 | 33337.316 |
| NM_006712 | 57725.59  | 58549.605 | AF216292  | 58969.043 | 57744.266 |
| NM_006240 | 1933.662  | 1838.59   | NM_000952 | 16340.553 | 21927.609 |
| NM_007026 | 6411.754  | 5245.487  | NM_005894 | 1009.002  | 1192.177  |
| M37712    | 11469.188 | 8218.98   | NM_014584 | 10043.1   | 6783.167  |
| NM_002648 | 10844.114 | 6303.493  | M30627    | 1093.143  | 1010.788  |
| AF070670  | 14780.802 | 7432.825  | NM_005810 | 29196.682 | 26765.148 |
| NM_016156 | 5108.873  | 3983.081  | M28170    | 28897.34  | 22081.455 |
| NM_016528 | 2503.721  | 1741.881  | NM_001555 | 2124.938  | 2574.912  |
| NM_015974 | 2304.992  | 1438.875  | NM_005849 | 823.105   | 1122.089  |
| NM_014384 | 2174.122  | 1943.382  | AK026223  | 19914.721 | 21642.18  |
| NM_002573 | 4679.744  | 3186.444  | NM_000874 | 15471.995 | 12539.827 |
| NM_009590 | 10647.556 | 16884.865 | NM_005854 | 2410.032  | 3140.268  |
| AL133037  | 1337.649  | 2355.729  | NM_017789 | 3883.962  | 3738.697  |
| NM_020350 | 5044.994  | 6085.357  | D31887    | 6800.235  | 6650.631  |
| NM_000350 | 6433.819  | 10424.536 | NM_016649 | 7661.787  | 2790.326  |
| X91103    | 20223.578 | 36250.633 | AK090536  | 27827.232 | 18433.574 |

|           |           |           |           |           |           |
|-----------|-----------|-----------|-----------|-----------|-----------|
| AA419164  | 2201.674  | 4040.155  | D63477    | 1265.361  | 360.812   |
| L35251    | 4982.552  | 7581.369  | NM_020243 | 41936.816 | 44337.656 |
| BE910395  | 7291.602  | 10458.634 | NM_014051 | 12062.032 | 11964.427 |
| N46828    | 10835.826 | 14562.527 | AK025398  | 4978.685  | 7014.69   |
| BI908302  | 49429.684 | 53862.465 | AK027082  | 596.133   | 842.798   |
| AA460969  | 4809.902  | 5789.034  | AB037750  | 470.51    | 813.063   |
| BG695859  | 3508.91   | 4842.084  | AK023056  | 3160.782  | 3692.292  |
| M85079    | 14586.306 | 16446.059 | AK022207  | 2128.619  | 2349.157  |
| AA457671  | 16861.92  | 17027.889 | NM_004996 | 6198.287  | 5290.202  |
| X07437    | 12455.675 | 12214.882 | NM_017435 | 2161.832  | 6901.735  |
| NM_000641 | 3254.072  | 2623.551  | NM_014037 | 17092.08  | 14574.282 |
| AE006466  | 15717.942 | 12203.136 | NM_004866 | 40481.512 | 51393.902 |
| BC008737  | 58131.656 | 55875.813 | NM_018688 | 2919.633  | 3713.063  |
| BC011655  | 5456.282  | 3511.124  | AK056652  | 11641.355 | 11635.039 |
| BC002396  | 9205.372  | 5963.59   | NM_015839 | 1010.665  | 1373.125  |
| AF112219  | 10377.898 | 6586.417  | AL137438  | 3770.701  | 4547.893  |
| NM_006074 | 56761.379 | 59472.84  | NM_017957 | 24525.713 | 28323.146 |
| AF208232  | 6990.167  | 11903.729 | NM_003024 | 8773.416  | 8291.933  |
| NM_002988 | 7715.271  | 12718.355 | NM_013248 | 10780.522 | 10257.656 |
| NM_004186 | 2173.066  | 3720.642  | NM_000034 | 58849.113 | 61785.695 |
| NM_016258 | 8721.22   | 15427.365 | NM_012436 | 58315.262 | 58458.348 |
| AF203032  | 12258.092 | 20458.25  | AK001299  | 49589.379 | 43163.863 |
| AB014542  | 22181.117 | 25808.986 | AB014559  | 22763.375 | 20204.654 |
| NM_014640 | 1925.057  | 3371.676  | NM_016489 | 13283.691 | 14905.577 |
| Y10518    | 55630.293 | 60050.633 | NM_005033 | 11772.513 | 14070.412 |
| AF155135  | 9931.036  | 16112.305 | NM_015932 | 61422.047 | 63538.668 |
| NM_014790 | 3293.106  | 3840.27   | NM_017949 | 1862.89   | 3042.156  |
| NM_003571 | 24036.674 | 28170.314 | AK022169  | 1590.951  | 2554.596  |
| AB032965  | 53456.215 | 58995.992 | AF015592  | 6125.849  | 9836.192  |
| NM_020370 | 802.483   | 1215.568  | AK026795  | 1702.155  | 2768.929  |
| NM_004767 | 2050.736  | 2484.905  | NM_002027 | 15261.504 | 16231.374 |
| BF310159  | 19324.951 | 12683.687 | AL162078  | 11858.889 | 10643.007 |
| NM_000316 | 511.837   | 481.975   | NM_000919 | 1048.398  | 853.495   |
| NM_018986 | 4004.283  | 3795.861  | NM_013382 | 15210.789 | 15713.133 |
| AB044934  | 1043.446  | 939.19    | AB002314  | 2002.019  | 3166.284  |
| U27655    | 11024.074 | 8372.177  | NM_014043 | 11456.16  | 13051.1   |
| Z21965    | 50337.891 | 29730.52  | NM_014622 | 1326.347  | 1519.046  |
| NM_012427 | 2046.089  | 1988.521  | AB011114  | 61402.512 | 60885.113 |
| L09070    | 302.058   | 467.485   | D11466    | 51188.871 | 53889.223 |
| NM_000062 | 11147.134 | 6612.224  | NM_014056 | 47828.863 | 43645.66  |
| AF084560  | 18153.424 | 26295.557 | D31885    | 56624.605 | 55105.156 |
| NM_015715 | 1607.253  | 2633.685  | AF176012  | 1353.625  | 702.432   |
| NM_000032 | 13152.146 | 19648.102 | BE743838  | 14624.063 | 10100.88  |
| NM_002083 | 3186.228  | 4833.229  | AF273046  | 9161.614  | 9307.932  |
| NM_002035 | 6387.468  | 9748.927  | NM_001081 | 7592.55   | 7358.139  |
| NM_014900 | 3467.599  | 5192.291  | NM_002483 | 9286.209  | 13191.222 |
| BF342908  | 2259.499  | 3704.873  | BF002026  | 1814.148  | 2594.377  |
| AF118073  | 601.989   | 1028.891  | L35594    | 785.74    | 1233.5    |
| AK023510  | 5485.346  | 7683.643  | BE790116  | 1328.171  | 2111.671  |
| NM_004345 | 4022.315  | 5985.911  | AI922341  | 4617.631  | 6765.623  |
| NM_002232 | 379.083   | 938.826   | S57283    | 1421.797  | 1953.903  |
| NM_014570 | 4503.312  | 5596.37   | AA410517  | 2264.28   | 3460.455  |
| NM_014822 | 2431.989  | 3277.946  | M12824    | 4422.929  | 5327.325  |

|           |           |           |           |           |           |
|-----------|-----------|-----------|-----------|-----------|-----------|
| NM_005296 | 2919.522  | 3589.585  | W60100    | 3316.629  | 2798.626  |
| NM_001337 | 525.931   | 821.539   | M24898    | 3579.005  | 4215.664  |
| NM_003611 | 4774.876  | 4427.982  | U72508    | 2268.101  | 2037.03   |
| AB014538  | 6019.787  | 6374.65   | AA457153  | 10951.269 | 10096.345 |
| NM_006209 | 979.818   | 1108.26   | AA283122  | 43466.855 | 47807.461 |
| AK025118  | 7915.379  | 6861.507  | AA868504  | 4779.853  | 4811.176  |
| NM_000727 | 2057.804  | 1779.405  | AA877845  | 16364.026 | 20494.191 |
| NM_002621 | 647.241   | 544.763   | AA664241  | 58359.25  | 62025.836 |
| NM_005385 | 6934.378  | 6540.142  | AI016456  | 11619.238 | 12660.585 |
| NM_018985 | 4878.535  | 2878.545  | AK026281  | 4501.381  | 5688.502  |
| NM_000203 | 580.372   | 1051.327  | U23862    | 1270.444  | 1320.902  |
| NM_013443 | 1702.343  | 2263.151  | AK026680  | 22228.211 | 23472.564 |
| NM_000925 | 14094.584 | 18426.162 | L25664    | 15581.233 | 10045.161 |
| NM_000465 | 3582.564  | 5551.632  | NM_014940 | 5966.663  | 3279.622  |
| AF116685  | 1215.861  | 1934.852  | NM_005783 | 998.331   | 544.172   |
| NM_000123 | 4124.841  | 8423.936  | AK000851  | 1997.693  | 1231.508  |
| AL137501  | 2228.288  | 2838.816  | NM_006900 | 1936.656  | 2337.354  |
| BE858979  | 747.611   | 1773.545  | AJ289111  | 38610.418 | 53328.832 |
| NM_000122 | 3476.739  | 4025.486  | NM_016356 | 8143.082  | 12849.434 |
| NM_006712 | 58169.547 | 60087.336 | NM_006406 | 21376.941 | 28657.301 |
| NM_006240 | 2939.625  | 3410.772  | AF216292  | 54396.117 | 54515.609 |
| NM_007026 | 5894.981  | 7273.783  | NM_000952 | 12777.54  | 16449.814 |
| M37712    | 10475.245 | 7719.117  | NM_005894 | 921.988   | 1539.189  |
| NM_002648 | 10485.026 | 7445.554  | NM_014584 | 11338.786 | 15229.639 |
| AF070670  | 14661.374 | 9177.217  | M30627    | 1021.424  | 1361.466  |
| NM_016156 | 4689.592  | 3969.291  | NM_005810 | 38173.195 | 44742.633 |
| NM_016528 | 2547.747  | 2040.537  | M28170    | 32104.828 | 31886.801 |
| NM_015974 | 2016.094  | 1478.551  | NM_001555 | 2238.273  | 1925.392  |
| NM_014384 | 1739.062  | 1755.573  | AK026223  | 15353.864 | 18518.936 |
| NM_002573 | 4998.135  | 3615.972  | NM_000874 | 11869.94  | 11720.515 |
| AF133424  | 4789.363  | 3573.38   | NM_005854 | 2899.197  | 3179.911  |
| NM_005003 | 32000.377 | 19719.648 | AB007863  | 60065.609 | 62619.945 |
| AL133037  | 1041.24   | 2394.714  | NM_017789 | 5314.375  | 6691.291  |
| NM_020350 | 4815.487  | 6192.426  | D31887    | 8094.013  | 8331.965  |
| NM_000350 | 6464.539  | 11273.809 | NM_005721 | 5827.491  | 6244.494  |
| X91103    | 20108.436 | 39627.645 | AF284223  | 4336.035  | 5473.353  |
| AA419164  | 2451.148  | 4305.866  | D63477    | 1035.016  | 339.3     |
| L35251    | 5550.827  | 9315.379  | NM_020243 | 42394.863 | 40853.672 |
| BE910395  | 7074.486  | 10356.58  | AK025398  | 5165.928  | 7033.271  |
| N46828    | 12229.369 | 16780.703 | AK027082  | 642.848   | 969.576   |
| BI908302  | 54634.492 | 57261.961 | AK023056  | 2736.461  | 2983.037  |
| AA460969  | 4836.613  | 6891.046  | AK022207  | 2144.102  | 2972.224  |
| BG695859  | 4465.622  | 5875.229  | NM_004996 | 5918.013  | 9301.541  |
| M85079    | 14914.073 | 20278.609 | NM_017435 | 2478.564  | 8300.146  |
| AA457671  | 17985.266 | 20490.648 | NM_014037 | 21141.227 | 19108.07  |
| X07437    | 17210.318 | 22335.945 | NM_004866 | 43962.539 | 53990.48  |
| NM_000641 | 3161.796  | 3734.084  | NM_018688 | 2909.846  | 2523.942  |
| AE006466  | 18689.625 | 17351.027 | AK056652  | 11936.017 | 13759.393 |
| BC008737  | 56124.941 | 57471.203 | NM_015839 | 952.273   | 1429.166  |
| BC011655  | 5378.79   | 3935.334  | AL137438  | 2923.965  | 4349.025  |
| BC002396  | 8605.967  | 7540.628  | NM_017957 | 29315.592 | 30580.063 |
| AF112219  | 10680.759 | 6096.704  | NM_003024 | 7866.547  | 7541.3    |
| NM_004135 | 5285.083  | 2421.986  | NM_013248 | 13792.642 | 14417.758 |



|           |           |           |           |           |           |
|-----------|-----------|-----------|-----------|-----------|-----------|
| Y10518    | 51765.508 | 66758.508 | NM_000034 | 59787.977 | 61429.648 |
| AF155135  | 10742.999 | 16983.541 | AK022230  | 37261.699 | 41552.277 |
| NM_01479C | 3294.51   | 5444.233  | AK022147  | 39826.891 | 48075.543 |
| NM_003571 | 28332.523 | 44694.316 | AK001299  | 50462.277 | 34925.02  |
| AB032965  | 55039.574 | 64766.746 | AB014559  | 27845.238 | 19838.086 |
| NM_02037C | 753.893   | 1792.419  | NM_016489 | 16577.195 | 12845.93  |
| NM_004767 | 2675.052  | 4242.526  | NM_005033 | 9955.657  | 9168.777  |
| BF310159  | 19813.117 | 21205.131 | NM_015932 | 61657.094 | 58901.656 |
| NM_00031E | 435.95    | 920.504   | NM_017949 | 1951.424  | 3076.542  |
| NM_01898E | 3888.777  | 6214.811  | AK022169  | 1474.227  | 2187.998  |
| AB044934  | 1173.965  | 1875.919  | AF015592  | 5465.957  | 8127.175  |
| U27655    | 11384.055 | 16240.512 | AK026795  | 1125.18   | 1622.675  |
| NM_00336C | 3495.408  | 4535.71   | NM_016399 | 11973.159 | 14506.873 |
| Z21965    | 50890.473 | 48032.012 | NM_016617 | 18953.205 | 24807.197 |
| NM_012427 | 1926.39   | 2031.431  | NM_002027 | 15201.72  | 20534.195 |
| AF131857  | 23349.861 | 17698.203 | AL162078  | 11543.297 | 9586.026  |
| NM_000852 | 511.883   | 735.245   | NM_000919 | 878.111   | 719.802   |
| NM_00039E | 1506.347  | 1248.358  | NM_013382 | 16925.105 | 13441.946 |
| AW797282  | 585.439   | 227.469   | AB002314  | 1667.584  | 1567.996  |
| NM_002402 | 753.853   | 428.171   | NM_014043 | 9196.418  | 11583.104 |
| L09070    | 608.906   | 567.7     | NM_014622 | 1540.023  | 1966.816  |
| NM_000062 | 11214.02  | 8348.87   | D11466    | 53189.641 | 54700.734 |
| NM_00959C | 8880.957  | 7619.911  | NM_01405E | 56189.891 | 57469.484 |
| NM_014747 | 15899.205 | 30208.859 | D31885    | 59567.387 | 57711.363 |
| Y19240    | 9924.822  | 19113.354 | NM_016649 | 10217.517 | 14475.605 |
| AF091029  | 17454.869 | 28285.26  | AK090536  | 26229.041 | 31017.98  |
| X97074    | 53396.234 | 58707.094 | BE743838  | 13114.373 | 5752.934  |
| AL117235  | 991.102   | 2068.189  | AF273046  | 13674.625 | 12319.008 |
| NM_014822 | 2715.086  | 4679.688  | NM_001081 | 8007.085  | 6710.427  |
| NM_00529E | 2862.632  | 4817.63   | NM_002483 | 8333.7    | 8513.729  |
| NM_001337 | 591.325   | 1413.865  | BF002026  | 1562.361  | 2344.627  |
| NM_003611 | 5147.023  | 10014.877 | L35594    | 854.159   | 1249.775  |
| AB014538  | 5667.105  | 10564.806 | BE790116  | 2489.65   | 3379.996  |
| NM_00620E | 1289.488  | 2429.234  | AI922341  | 3396.646  | 5790.904  |
| AK025118  | 7282.906  | 12285.918 | S57283    | 1061.901  | 1589.574  |
| NM_000727 | 2638.27   | 3504.26   | AA410517  | 1178.003  | 1550.554  |
| NM_002621 | 469.359   | 856.407   | M12824    | 3916.801  | 5610.688  |
| NM_00538E | 6005.684  | 7031.786  | W60100    | 3448.372  | 5715.768  |
| NM_01898E | 4767.438  | 4191.074  | M24898    | 3605.975  | 4216.93   |
| NM_006074 | 56483.621 | 56224.379 | U72508    | 2163.121  | 2126.725  |
| AF208232  | 4943.751  | 4244.044  | AA457153  | 11843.801 | 11354.828 |
| NM_00298E | 6044.697  | 5192.406  | AA283122  | 50422.578 | 49273.461 |
| NM_00418E | 1555.226  | 1611.015  | AA868504  | 4847.87   | 5235.482  |
| NM_01625E | 9035.886  | 7371.06   | AA877845  | 18485.092 | 23361.133 |
| AF203032  | 8659.036  | 8693.969  | AA664241  | 60396.117 | 66656.148 |
| AB014542  | 19420.313 | 11357.935 | AK026281  | 4596.765  | 4813.893  |
| NM_01464C | 1848.765  | 1589.929  | U23862    | 2081.262  | 2045.387  |
| NM_015974 | 2054.691  | 3403.927  | AK026680  | 23949.912 | 26966.379 |
| NM_014384 | 2419.249  | 4056.399  | NM_01243E | 56525.816 | 63094.961 |
| NM_002573 | 4229.531  | 7128.656  | AF216292  | 53903.461 | 30777.256 |
| AF133424  | 6299.61   | 14059.951 | NM_000952 | 14355.152 | 11859.146 |
| NM_005003 | 31501.268 | 45570.555 | NM_005894 | 765.562   | 1092.382  |
| AF084560  | 17279.945 | 28670.084 | NM_014584 | 9246.752  | 7070.351  |

|           |           |           |           |           |           |
|-----------|-----------|-----------|-----------|-----------|-----------|
| NM_01571E | 1952.424  | 3987.989  | M30627    | 742.212   | 906.858   |
| NM_00003Z | 11558.604 | 19048.973 | NM_00581C | 10968.787 | 15196.611 |
| NM_00208Z | 3142.762  | 5184.338  | M28170    | 22751.318 | 37142.039 |
| NM_00203E | 6037.005  | 10118.18  | NM_00155E | 1537.347  | 2416.743  |
| NM_01490C | 3224.655  | 4731.409  | AK026223  | 14705.931 | 22810.516 |
| BF342908  | 1601.263  | 2910.379  | NM_000874 | 12728.264 | 16235.395 |
| AF118073  | 484.451   | 1083.802  | NM_005854 | 1563.713  | 3287.918  |
| AK023510  | 5009.85   | 6079.486  | AB007863  | 67466.492 | 72571.063 |
| NM_00434E | 3716.965  | 5576.963  | AK024456  | 20598.957 | 21171.814 |
| NM_00070Z | 47887.742 | 41498.387 | NM_01778E | 2829.107  | 2842.169  |
| X71490    | 23334.531 | 23555.129 | D31887    | 6270.361  | 5222.67   |
| AF257081  | 5565.535  | 5977.675  | NM_00618C | 2532.871  | 3191.344  |
| NM_00652E | 323.99    | 256.476   | NM_00550Z | 1213.921  | 1858.644  |
| NM_00168E | 32362.521 | 15242.489 | NM_00150Z | 7651.342  | 8775.843  |
| NM_00021E | 278.706   | 246.069   | NM_005721 | 5612.093  | 6246.411  |
| NM_01610E | 7282.503  | 5651.293  | AF284223  | 4664.052  | 4566.67   |
| NM_01457C | 4905.428  | 3106.556  | AF176012  | 1474.265  | 1868.496  |
| AF112219  | 10840.337 | 16660.141 | NM_00557E | 1935.922  | 2166.876  |
| NM_000521 | 269.843   | 529.129   | NM_01338E | 1007.349  | 924.515   |
| NM_00262E | 1027.958  | 1563.577  | NM_006424 | 563.969   | 617.934   |
| NM_00413E | 3777.278  | 5216.821  | NM_006517 | 431.149   | 973.144   |
| NM_00020Z | 554.213   | 957.789   | NM_004171 | 669.642   | 1243.29   |
| NM_01344Z | 1637.753  | 2590.695  | NM_014037 | 3397.005  | 5262.962  |
| NM_00092E | 13618.896 | 16858.512 | NM_00486E | 47898.887 | 59325.973 |
| NM_00046E | 3174.093  | 5185.529  | NM_01868E | 3701.14   | 5473.772  |
| AF116685  | 252.582   | 562.169   | AK056652  | 12777.971 | 15535.683 |
| NM_00012Z | 3289.132  | 7036.479  | NM_01583E | 1041.033  | 1440      |
| AL137501  | 1886.699  | 3221.399  | AL137438  | 3002.768  | 4411.223  |
| BE858979  | 881.979   | 1090.742  | NM_017957 | 18964.371 | 26498.367 |
| NM_00012Z | 3357.732  | 2895.805  | NM_003024 | 7675.947  | 8394.143  |
| NM_00671Z | 60602.434 | 57487.156 | NM_01324E | 11152.634 | 11311.713 |
| NM_00624C | 2267.429  | 2217.724  | NM_000034 | 62834.543 | 64263.234 |
| NM_00702E | 6121.452  | 5183.692  | AK022230  | 31072.031 | 32298.555 |
| M37712    | 10720.201 | 6801.48   | AK022147  | 25428.762 | 25253.656 |
| NM_00264E | 10239.374 | 5412.818  | L25664    | 9558.859  | 10168.604 |
| AF070670  | 14839.169 | 9114.664  | NM_00578Z | 1054.235  | 950.304   |
| NM_01615E | 5529.036  | 4617.022  | AK000851  | 1507.756  | 1171.664  |
| NM_01652E | 2675.658  | 2013.051  | NM_00690C | 17152.51  | 21235.885 |
| CY3Cy5    | 3970.734  | 109.046   | AJ289111  | 36901.477 | 42728.313 |
| NM_00049E | 1077.797  | 560.443   | NM_01635E | 57669.676 | 58406.836 |
| NM_000664 | 2907.737  | 1766.064  | NM_00640E | 18774.188 | 19709.971 |
| AK026155  | 1984.441  | 1264.142  | D11466    | 49046.605 | 44643.98  |
| NM_01805Z | 59411.383 | 46096.133 | NM_01405E | 51655.605 | 54781.953 |
| AF143322  | 709.12    | 623.969   | D31885    | 56825.617 | 57196.289 |
| AK022386  | 21324.328 | 18418.27  | NM_01664E | 8394.136  | 8556.218  |
| NM_002767 | 30542.322 | 27151.52  | AK090536  | 29284.326 | 32782.285 |
| AF131846  | 43833.664 | 46536.992 | D63477    | 1346.621  | 1760.554  |
| AF088069  | 10563.983 | 7710.769  | NM_02024Z | 44803.309 | 56285.641 |
| AF086551  | 1576.563  | 1728.968  | NM_014051 | 13737.074 | 18246.305 |
| NM_01339Z | 9925.394  | 9212.457  | AK025398  | 5328.119  | 8286.311  |
| AK025082  | 3386.978  | 2699.951  | AK027082  | 786.053   | 1000.656  |
| AF086535  | 1309.279  | 1459.967  | AB037750  | 566.499   | 491.487   |
| AB040901  | 2415.753  | 2298.124  | AK023056  | 2094.565  | 1797.921  |

|           |           |           |           |           |           |
|-----------|-----------|-----------|-----------|-----------|-----------|
| AL137406  | 6019.897  | 5197.103  | NM_001120 | 61345.199 | 61775.383 |
| NM_00049E | 949.513   | 961.173   | NM_01788E | 5385.015  | 4798.706  |
| NM_000664 | 2596.646  | 2508.665  | NM_004915 | 7539.894  | 8177.244  |
| SR1       | 67354.023 | 61202.961 | AK022207  | 2490.574  | 3866.04   |
| SR3       | 43066.91  | 46385.676 | AV708752  | 7713.533  | 9832.143  |
| SR5       | 4979.199  | 5074.297  | AF119885  | 5214.836  | 6178.918  |
| SR7       | 4555.226  | 33036.66  | NM_000750 | 1730.868  | 1400.464  |
| SR9       | 13830.328 | 2830.783  | NM_00499E | 6822.112  | 6910.389  |
| CY3Cy5    | 7102.932  | 212.122   | NM_005971 | 9459.45   | 11537.151 |
| U84507    | 795.664   | 501.211   | NM_017435 | 2183.909  | 8306.315  |
| AK000872  | 3500.766  | 2764.241  | AK026281  | 2935.533  | 2124.029  |
| AK027147  | 39054.078 | 27197.408 | U23862    | 991.426   | 704.207   |
| AF086285  | 1448.886  | 968.74    | AK026680  | 13500.459 | 11226.229 |
| AF085924  | 501.04    | 693.798   | NM_01243E | 52550.84  | 57485.211 |
| AK023887  | 2195.613  | 2083.273  | AK001299  | 16547.949 | 18202.387 |
| AF088022  | 21517.527 | 18436.191 | AB014559  | 7161.21   | 9409.398  |
| AK026537  | 4660.257  | 4108.397  | NM_01648E | 12425.449 | 14570.408 |
| NM_01548E | 6704.476  | 7675.965  | NM_005033 | 13842.266 | 12984.232 |
| AF147411  | 1569.112  | 1982.636  | NM_015932 | 60885.582 | 61321.195 |
| NM_00266E | 14889.428 | 15049.198 | NM_01794E | 1653.713  | 2929.266  |
| AF202145  | 4343.637  | 5622.293  | AK022169  | 2329.594  | 3261.377  |
| AK022412  | 15208.361 | 8174.548  | AF015592  | 4053.831  | 3475.658  |
| AK023073  | 25029.869 | 14793.958 | AK026795  | 1665.808  | 1967.439  |
| AK023922  | 1471.55   | 730.886   | NM_01639E | 9259.326  | 8248.123  |
| AK022438  | 2121.241  | 1575.48   | NM_016617 | 13147.632 | 8525.589  |
| AK023316  | 1075.743  | 859.813   | NM_002027 | 16820.158 | 19948.834 |
| AK023764  | 1478.562  | 1177.295  | AL162078  | 13528.897 | 16478.381 |
| AK024082  | 1388.077  | 1354.262  | NM_00091E | 1257.724  | 1528.049  |
| AK025072  | 7340.335  | 5081.841  | NM_013382 | 20089.131 | 22821.113 |
| AK022410  | 1565.131  | 1525.172  | AB002314  | 2621.028  | 3010.002  |
| AF086541  | 1355.068  | 1914.906  | NM_014043 | 9258.129  | 9424.342  |
| L10378    | 20538.512 | 16666.17  | NM_014622 | 1121.659  | 1810.32   |
| AK022179  | 2170.648  | 1966.781  | AB011114  | 61807.789 | 63742.246 |
| AK022173  | 1057.775  | 882.227   | CY3Cy5    | 4058.028  | 101.588   |
| AJ227860  | 2410.352  | 2928.593  | NM_019884 | 8573.009  | 5777.02   |
| AL157448  | 1616.993  | 1606.611  | AF088051  | 4328.336  | 3065.354  |
| AF026942  | 5866.589  | 4985.647  | AF086366  | 2249.277  | 1883.446  |
| AJ276429  | 5108.817  | 5459.777  | AF086360  | 6787.484  | 7004.18   |
| AL117657  | 1881.879  | 1946.744  | AF086436  | 1088.713  | 1398.752  |
| AK023589  | 3295.574  | 4841.555  | AF087993  | 8941.21   | 11095.385 |
| AK021590  | 4570.747  | 5428.863  | AF035282  | 1574.895  | 1404.16   |
| AB002441  | 814.555   | 733.55    | AK021966  | 5777.025  | 5059.928  |
| AK023998  | 1712.77   | 1576.765  | AB018292  | 29779.047 | 33796.773 |
| AK021643  | 594.016   | 810.505   | AK022842  | 2389.253  | 3250.648  |
| Z11802    | 757.06    | 942.491   | NM_00700E | 28308.953 | 26475.256 |
| NM_014054 | 3796.359  | 2311.358  | AL137346  | 6796.353  | 5278.705  |
| AK021840  | 63684.199 | 57434.414 | NM_01775E | 67984.617 | 65445.723 |
| AK022228  | 7317.466  | 3819.492  | NM_019884 | 10616.333 | 9313.135  |
| AK022031  | 984.595   | 753.302   | SR2       | 60156.219 | 60476     |
| AF086480  | 5247.054  | 3941.572  | SR4       | 20119.285 | 18454.117 |
| AK022122  | 1764.498  | 1826.091  | SR6       | 11817.635 | 9550.532  |
| AL109713  | 620.402   | 527.999   | SR8       | 10420.009 | 29814.266 |
| AK026084  | 843.154   | 703.138   | SR10      | 36099.195 | 11180.042 |

|           |           |           |           |           |           |
|-----------|-----------|-----------|-----------|-----------|-----------|
| AK022415  | 68005.875 | 68322.656 | CY3Cy5    | 5057.725  | 81.302    |
| AL137368  | 4046.936  | 3211.478  | AF086054  | 8416.325  | 4965.894  |
| AK021932  | 1732.19   | 1719.735  | AK022259  | 68107.203 | 69309.781 |
| AK026787  | 13601.29  | 12508.394 | AK022461  | 1436.582  | 1839.264  |
| AK023542  | 2156.477  | 2342.783  | NM_016010 | 9780.271  | 9759.657  |
| AK000203  | 2821.304  | 3399.068  | AF161442  | 494.025   | 823.403   |
| AK021845  | 32195.379 | 37104.016 | AF147401  | 2369.129  | 1872.004  |
| AK022434  | 925.169   | 937.685   | AJ001904  | 1194.909  | 1098.716  |
| NM_018592 | 7306.732  | 6885.329  | AF075022  | 4059.328  | 3634.51   |
| NM_018503 | 66079.797 | 65847.383 | AF075060  | 6979.372  | 5799.277  |
| NM_016449 | 41693.867 | 49578.246 | AB002438  | 2907.797  | 2701.166  |
| AL049670  | 8311.014  | 7237.394  | AF147436  | 1967.907  | 1741.535  |
| AK021465  | 964.267   | 1025.187  | AK021441  | 3682.742  | 3157.062  |
| NM_018512 | 44147.379 | 53154.254 | AK026018  | 1242.318  | 1035.647  |
| NM_018568 | 687.206   | 923.447   | AF085846  | 5085.467  | 4073.295  |
| AL161991  | 22731.59  | 13150.048 | AK023901  | 30523.889 | 27340.881 |
| D17032    | 31563.234 | 17075.84  | AL109705  | 1964.282  | 1672.974  |
| AL137292  | 1744.831  | 1347.278  | AF147392  | 839.652   | 772.941   |
| NM_017941 | 4273.358  | 2609.96   | AF088057  | 13967.273 | 12935.434 |
| AF301016  | 901.538   | 804.598   | AF086255  | 58345.352 | 52937.109 |
| BE900527  | 3496.494  | 2818.866  | AK022660  | 1411.684  | 1225.307  |
| D28384    | 65621.016 | 60047.754 | AK026847  | 1903.218  | 1415.246  |
| AF118079  | 66228.648 | 59247.859 | AL359560  | 1105.249  | 734.908   |
| AF277572  | 516.34    | 615.512   | AK024595  | 2184.105  | 2245.157  |
| AL365413  | 2943.582  | 3339.004  | AF075032  | 1173.21   | 1570.091  |
| NM_005258 | 13428.71  | 12230.286 | AF085971  | 2086.748  | 2082.097  |
| NM_003948 | 1089.104  | 1250.781  | AF147302  | 4810.112  | 5007.297  |
| AK025062  | 2525.301  | 2708.411  | AF085929  | 8886.852  | 8857.243  |
| Z27405    | 68293.469 | 64552.27  | AK001126  | 9634.447  | 8922.896  |
| AK023412  | 2559.365  | 2942.146  | AF085976  | 6476.178  | 6010.745  |
| NM_014617 | 66086.086 | 61330.371 | AF075104  | 13281.108 | 11757.093 |
| AK074682  | 6011.471  | 6461.238  | AK021724  | 741.695   | 835.443   |
| X74605    | 2420.342  | 2405.31   | AL133025  | 1760.724  | 1758.425  |
| AK024513  | 1452.168  | 1203.603  | AL137402  | 17279.516 | 18599.154 |
| BC036692  | 3881.718  | 5753.198  | AL137617  | 8604.086  | 7156.67   |
| AJ009640  | 3136.855  | 2568.561  | AL359568  | 38975.398 | 34857.059 |
| Y11163    | 895.938   | 1078.035  | AL133564  | 21937.598 | 20800.525 |
| AF147340  | 827.399   | 1285.747  | AL137428  | 2259.54   | 2257.524  |
| L31901    | 907.178   | 483.433   | AL157462  | 3319.602  | 2725.872  |
| AK025119  | 1490.825  | 802.784   | AL359602  | 19715.961 | 18355.768 |
| AJ224170  | 3643.937  | 2730.675  | NM_018190 | 63232.336 | 62857.766 |
| AF085866  | 15266.032 | 12940.108 | AK021744  | 2437.676  | 1818.378  |
| NM_006108 | 1182.572  | 1085.435  | NM_018430 | 16435.969 | 14186.785 |
| AK000806  | 68188.227 | 67177.508 | AL133640  | 6140.126  | 5635.442  |
| NM_016471 | 8855.594  | 8955.494  | AK023783  | 995.039   | 1286.895  |
| Z11852    | 474.074   | 638.053   | AF070647  | 56188.496 | 56160.34  |
| NM_001145 | 1063.861  | 1065.426  | AF116649  | 2183.908  | 1599.323  |
| NM_005364 | 25050.439 | 25897.883 | AF174394  | 3671.901  | 2951.24   |
| AK023482  | 8924.029  | 9946.013  | AK025384  | 915.234   | 603.343   |
| AK022798  | 1160.467  | 1023.559  | AF083121  | 795.317   | 622.462   |
| AL157423  | 721.657   | 979.42    | AF144054  | 929.034   | 856.96    |
| AK023176  | 2209.91   | 2571.209  | AK025924  | 1490.357  | 1634.322  |
| NM_006828 | 28056.346 | 16132.403 | AK021876  | 56936.402 | 55132.703 |

|           |           |           |           |           |           |
|-----------|-----------|-----------|-----------|-----------|-----------|
| AB007973  | 22251.016 | 15233.727 | AK022017  | 2664.336  | 2307.424  |
| NM_002999 | 1417.024  | 1066.973  | AK022160  | 5826.023  | 4097.817  |
| M96843    | 14632.842 | 12401.38  | AK022295  | 1453.777  | 1753.799  |
| NM_017791 | 7345.584  | 6369.517  | AK021935  | 8515.41   | 7620.529  |
| NM_005882 | 16866.184 | 20764.348 | AK022337  | 7501.708  | 6838.341  |
| BC012304  | 7838.787  | 6460.843  | AL133618  | 14196.554 | 9549.545  |
| AB046815  | 5338.409  | 4021.343  | AF230314  | 3899.91   | 2901.48   |
| NM_000440 | 9180.108  | 8189.499  | AK001086  | 1944.6    | 1575.162  |
| NM_001297 | 7170.12   | 8320.62   | AF119872  | 24002     | 21416.178 |
| NM_004403 | 12871.663 | 15605.081 | X99687    | 1762.122  | 1688.697  |
| X64993    | 2264.278  | 3288.598  | AI275123  | 549.293   | 618.488   |
| NM_004434 | 23184.115 | 37589.047 | AK023255  | 67890.555 | 68635.719 |
| NM_006269 | 1577.228  | 1923.805  | NM_002622 | 28446.545 | 23658.904 |
| NM_016230 | 7835.038  | 7806.139  | AK024185  | 3227.535  | 3056.653  |
| NM_001083 | 4713.819  | 5770.378  | NM_015417 | 789.991   | 714.781   |
| AK023966  | 19901.932 | 19781.34  | AL137562  | 10609.305 | 9012.47   |
| AK025702  | 6456.949  | 8593.491  | M90355    | 64740.234 | 57525.184 |
| NM_018958 | 3386.068  | 4057.173  | AK022495  | 5292.887  | 4427.924  |
| AL050200  | 553.823   | 697.131   | AK021632  | 2041.513  | 1659.114  |
| NM_002367 | 1058.361  | 1172.115  | AK023143  | 2016.046  | 1314.851  |
| AK022038  | 2690.272  | 2775.448  | AK026373  | 15528.013 | 19290.168 |
| AF253321  | 6162.89   | 5027.946  | NM_006687 | 7079.484  | 4821.846  |
| U80735    | 11731.029 | 7554.329  | NM_013301 | 6228.087  | 4518.37   |
| NM_017850 | 7069.298  | 5990.543  | NM_017673 | 2171.244  | 1907.308  |
| NM_016522 | 4196.098  | 3397.963  | AB046857  | 2467.098  | 1866.355  |
| NM_002224 | 20723.52  | 18204.318 | AK024408  | 46244.348 | 47719.707 |
| X07979    | 60746.59  | 63375.316 | AJ227905  | 969.09    | 1055.735  |
| NM_003874 | 2702.629  | 2410.225  | AF086307  | 37295.883 | 36126.207 |
| NM_000082 | 1691.818  | 1614.12   | L19364    | 7427.077  | 7587.202  |
| L13857    | 3093.624  | 2794.547  | NM_005390 | 6297.212  | 6172.736  |
| NM_018098 | 12770.678 | 11705.259 | AJ012502  | 28491.025 | 29056.398 |
| AF286164  | 1982.505  | 1760.266  | AK024170  | 1495.5    | 1937.936  |
| AF146277  | 14179.271 | 13320.955 | AK021722  | 1409.301  | 1657.161  |
| NM_002559 | 1439.396  | 1906.105  | NM_000681 | 1216.867  | 1281.632  |
| AF055033  | 58963.539 | 60388.762 | AF147445  | 6570.185  | 6253.966  |
| NM_017700 | 2221.149  | 1746.671  | Y10508    | 36270.398 | 35457.926 |
| M37191    | 35489.605 | 46045.602 | NM_005182 | 68071.844 | 69511.07  |
| J04422    | 378.638   | 945.969   | D17074    | 3403.955  | 4084.249  |
| NM_005242 | 732.682   | 816.008   | AF039944  | 8197.522  | 8401.494  |
| NM_003020 | 800.979   | 777.989   | AB018338  | 40939.508 | 28575.768 |
| NM_003404 | 53911.438 | 66960.898 | D80010    | 3114.401  | 2577.722  |
| NM_001114 | 1828.395  | 2116.628  | NM_004923 | 2593.325  | 2161.757  |
| NM_004455 | 1952.371  | 1478.114  | NM_003971 | 8498.479  | 5527.19   |
| NM_006010 | 28184.977 | 19326.164 | AK026973  | 1107.562  | 949.391   |
| K03191    | 7128.178  | 5080.971  | NM_005822 | 1550.737  | 1398.198  |
| NM_005079 | 37886.934 | 30039.281 | U81002    | 10268.594 | 10200.889 |
| NM_005192 | 50002.133 | 51639.703 | NM_016299 | 23681.461 | 23140.15  |
| NM_004585 | 3806.296  | 3064.054  | NM_014185 | 35325.719 | 40318.164 |
| NM_015032 | 8041.096  | 5143.722  | L38517    | 12569.431 | 11748.023 |
| AK022956  | 10618.37  | 9236.611  | AK026101  | 34215.09  | 38823.836 |
| AK023121  | 2434.511  | 2613.853  | AK022194  | 61899.996 | 63206.734 |
| NM_014104 | 58601.461 | 58044.531 | AF085963  | 3875.625  | 4417.85   |
| NM_002392 | 2422.343  | 2732.666  | AF131851  | 567.467   | 736.062   |

|           |           |           |           |           |           |
|-----------|-----------|-----------|-----------|-----------|-----------|
| NM_002749 | 65016.195 | 70978.656 | AK021436  | 3250.081  | 3618.245  |
| NM_018216 | 18537.053 | 17355.83  | U58664    | 2383.808  | 2564.925  |
| NM_003390 | 9401.176  | 9080.552  | AF085937  | 954.811   | 985.84    |
| AL137747  | 7733.761  | 7400.296  | AL137569  | 22154.869 | 21082.17  |
| NM_014755 | 9451.898  | 10252.482 | AK021920  | 8691.121  | 8867.54   |
| AF077188  | 27425.396 | 31645.23  | AL049415  | 12360.665 | 10774.518 |
| NM_012446 | 7533.94   | 7418.09   | NM_001942 | 708.325   | 703.123   |
| NM_018338 | 2467.293  | 2567.537  | AF200348  | 4180.064  | 3960.13   |
| NM_018685 | 63746.035 | 61483.102 | Y11710    | 1622.636  | 1260.812  |
| NM_006984 | 11323.078 | 10460.55  | J03756    | 1098.235  | 871.646   |
| AF231919  | 2693.931  | 3004.126  | NM_002650 | 6646.544  | 6813.036  |
| NM_018214 | 3052.049  | 3240.511  | NM_003260 | 44194.582 | 51377.023 |
| NM_005076 | 34214.602 | 40385.578 | AK024071  | 3823.512  | 4469.147  |
| NM_019023 | 62611.59  | 57606.324 | AF056490  | 5995.862  | 6430.326  |
| NM_004420 | 1546.314  | 1239.565  | NM_005539 | 6779.057  | 6778.976  |
| NM_002970 | 1973.745  | 1703.797  | NM_005541 | 11899.333 | 13281.865 |
| NM_005499 | 42976.633 | 38005.766 | AB002319  | 4580.978  | 4793.052  |
| NM_013270 | 3367.543  | 2162.274  | AF039942  | 6945.085  | 7521.364  |
| NM_015387 | 9488.862  | 9814.531  | NM_004421 | 5054.946  | 5595.507  |
| NM_000204 | 360.946   | 512.125   | AB046863  | 37868.594 | 44641.098 |
| NM_001733 | 15404.253 | 9547.143  | M62403    | 22347.865 | 21279.945 |
| NM_005065 | 1868.494  | 1503.583  | NM_017883 | 12736.72  | 12364.739 |
| NM_017825 | 43113.281 | 51875.918 | AK025131  | 8576.054  | 8074.695  |
| NM_014035 | 5659.545  | 5323.03   | NM_000754 | 45469.68  | 48093.523 |
| NM_020122 | 35111.301 | 39146.969 | NM_014619 | 4745.776  | 4343.209  |
| NM_013432 | 29048.223 | 37505.691 | NM_005629 | 43189.637 | 50235.656 |
| AB020716  | 1569.88   | 2103.686  | J04621    | 7064.494  | 7191.113  |
| U57341    | 1042.525  | 1189.447  | NM_000718 | 10054.538 | 10696.835 |
| NM_002298 | 64466.867 | 58536.125 | NM_000161 | 9653.761  | 10407.626 |
| AK027130  | 1478.879  | 1768.133  | NM_001972 | 1251.863  | 1113.55   |
| NM_005479 | 47541.074 | 53969.883 | NM_001445 | 2565.099  | 2665.574  |
| NM_005730 | 65807.844 | 62127.555 | AK024455  | 985.438   | 685.053   |
| X82240    | 21862.984 | 21293.887 | NM_002006 | 54988.23  | 54672.781 |
| NM_013995 | 9544.388  | 9688.911  | NM_007111 | 22315     | 19644.453 |
| BC021298  | 1610.224  | 1213.518  | NM_002048 | 1143.946  | 1123.745  |
| U52096    | 17272.445 | 10478.717 | NM_004702 | 1928.324  | 2707.322  |
| AB013897  | 4188.878  | 3380.373  | NM_007109 | 5772.274  | 5454.308  |
| NM_005526 | 48550.086 | 40255.336 | AK023404  | 16957.789 | 17499.961 |
| AK001669  | 5652.356  | 4915.867  | NM_013239 | 3436.183  | 4251.098  |
| NM_006195 | 3283.421  | 2629.809  | NM_001789 | 6108.336  | 5234.633  |
| NM_006190 | 41996.688 | 43391.25  | NM_002655 | 2746.264  | 3227.198  |
| NM_006368 | 8706.401  | 7219.623  | AB028955  | 55361.43  | 56941.582 |
| NM_004133 | 2258.334  | 1761.797  | U66879    | 47843.238 | 52600.617 |
| NM_004433 | 829.319   | 1367.059  | NM_016022 | 9234.18   | 9973.171  |
| NM_001618 | 23560.945 | 21599.842 | NM_004874 | 3957.767  | 3075.766  |
| BC000401  | 25776.266 | 26810.775 | NM_014204 | 4434.479  | 4652.939  |
| NM_006425 | 8695.106  | 10108.939 | S70385    | 47254.551 | 51232.875 |
| BF344046  | 10110.425 | 10151.025 | M34671    | 15322.926 | 16951.297 |
| AF432218  | 35883.594 | 38147.395 | NM_001941 | 2246.895  | 2391.768  |
| NM_004286 | 8266.304  | 6638.203  | NM_018509 | 16534.779 | 18231.5   |
| AL133644  | 32308.445 | 40410.891 | NM_004086 | 2195.726  | 2613.021  |
| NM_002706 | 6849.479  | 6615.904  | NM_014944 | 21580.713 | 22256.99  |
| NM_004199 | 712.12    | 568.341   | NM_001109 | 684.336   | 567.965   |

|           |           |           |           |           |           |
|-----------|-----------|-----------|-----------|-----------|-----------|
| NM_006876 | 3432.846  | 2208.988  | NM_007352 | 797.248   | 773.168   |
| NM_000293 | 2960.057  | 1446.487  | AF176706  | 7737.94   | 7361.499  |
| NM_003748 | 2500.546  | 2157.018  | NM_014484 | 1424.044  | 1654.799  |
| NM_005398 | 516.264   | 634.492   | NM_001086 | 7627.617  | 6663.505  |
| NM_012269 | 1368.169  | 1162.327  | NM_014670 | 14107.523 | 14248.496 |
| AF153821  | 7999.508  | 6252.738  | NM_019048 | 17680.449 | 19445.031 |
| NM_013370 | 7231.771  | 8181.132  | NM_001040 | 4658.643  | 4204.584  |
| NM_001374 | 4084.008  | 3626.645  | AF279698  | 15631.224 | 15916.201 |
| NM_003310 | 10663.761 | 10715.117 | NM_019849 | 8522.313  | 9796.829  |
| AK024461  | 14079.713 | 13744.691 | NM_000049 | 4587.298  | 4320.396  |
| AK025485  | 2303.942  | 2471.612  | AB040881  | 17066.18  | 16981.797 |
| NM_017635 | 8309.381  | 7182.322  | AY007121  | 7861.688  | 10623.155 |
| X62534    | 3931.4    | 4142.758  | NM_007317 | 17709.697 | 18418.178 |
| AF027147  | 56964.004 | 61038.102 | AB037826  | 867.557   | 1261.649  |
| M62399    | 14758.92  | 20622.766 | AK021466  | 4460.786  | 4866.624  |
| NM_002357 | 2129.651  | 2738.963  | Z36796    | 62511.672 | 64939.477 |
| U71600    | 10034.487 | 9865.909  | NM_006443 | 63508.398 | 61660.52  |
| NM_004472 | 2744.285  | 2914.073  | NM_001559 | 1331.72   | 1230.142  |
| AB037862  | 4364.136  | 4683.17   | NM_002634 | 45648.863 | 49938.379 |
| NM_005392 | 2878.537  | 2283.989  | NM_017749 | 8313.646  | 7840.936  |
| AL133572  | 11612.668 | 11595.267 | NM_002938 | 21656.49  | 16884.361 |
| AK022500  | 14418.465 | 12471.022 | AK023652  | 46832.535 | 38079.313 |
| NM_003447 | 1033.911  | 990.539   | AF099032  | 2687.472  | 2756.051  |
| NM_005014 | 5506.666  | 3583.299  | NM_003070 | 8963.909  | 10873.771 |
| NM_006944 | 1256.163  | 1020.79   | AL122101  | 38069.879 | 37476.914 |
| NM_004407 | 2677.403  | 1524.525  | NM_016216 | 24324.459 | 23895.221 |
| NM_000070 | 15928.524 | 11968.169 | AK001649  | 864.744   | 1045.997  |
| NM_001202 | 5110.287  | 4402.617  | NM_016638 | 43188.707 | 46167.742 |
| AB037804  | 1079.501  | 1262.977  | AB018274  | 26368.961 | 26254.475 |
| U34249    | 5217.255  | 4120.739  | NM_005871 | 16503.436 | 15001.883 |
| NM_003289 | 57523.277 | 65244.395 | NM_007042 | 13294.65  | 14307.077 |
| AI200114  | 8288.077  | 6945.5    | NM_016333 | 24231.4   | 18284.498 |
| M74220    | 721.454   | 925.974   | BE875028  | 14320.635 | 13754.08  |
| M23254    | 2958.411  | 2995.05   | AK000511  | 21299.57  | 24882.598 |
| BE618539  | 23593.641 | 23082.385 | NM_005494 | 18009.795 | 16522.117 |
| R28062    | 11504.898 | 13858.553 | NM_017946 | 1949.991  | 1327.958  |
| U38545    | 908.798   | 892.634   | NM_004953 | 19359.994 | 16400.463 |
| AI627464  | 2047.369  | 1902.533  | NM_012199 | 6904.812  | 5820.042  |
| BI756258  | 8937.018  | 10593.917 | AL049682  | 4259.572  | 4012.578  |
| AI342225  | 56511.074 | 72656.875 | NM_005528 | 23902.684 | 25544.938 |
| J04599    | 3677.104  | 4443.315  | AL050199  | 8838.826  | 8878.427  |
| AF110020  | 8919.031  | 12200.641 | NM_004901 | 2856.392  | 2250.002  |
| AA707922  | 371.587   | 594.666   | U77088    | 1147.297  | 1159.403  |
| AA608557  | 15137.791 | 12775.038 | NM_006721 | 31025.377 | 29719.135 |
| AL050095  | 31476.557 | 34395.016 | NM_016282 | 43930.695 | 45116.113 |
| U03272    | 1610.902  | 1221.573  | NM_002765 | 16855.334 | 19032.803 |
| NM_012253 | 21994.25  | 20873.463 | NM_001905 | 5889.179  | 6875.261  |
| NM_000258 | 64052.441 | 56236.949 | AF292100  | 16722.4   | 16388.936 |
| AB033055  | 49627.652 | 37754.863 | NM_003434 | 67032.688 | 70958.539 |
| AF311287  | 41177.621 | 34105.805 | NM_018181 | 1357.232  | 1135.564  |
| NM_003098 | 5838.68   | 6045.389  | X68880    | 1178.062  | 1240.765  |
| NM_014781 | 9871.345  | 8715.805  | NM_005654 | 1066.588  | 1327.841  |
| BU629989  | 3749.693  | 3299.852  | AF024698  | 66860.617 | 71983.039 |

|           |           |           |           |           |           |
|-----------|-----------|-----------|-----------|-----------|-----------|
| X87896    | 5562.007  | 6669.836  | BE904617  | 60862.848 | 60482.246 |
| M88310    | 7181.578  | 6665.974  | AK024495  | 6866.653  | 7163.236  |
| D16856    | 959.12    | 983.905   | AF024694  | 8816.78   | 9307.815  |
| NM_000042 | 4220.153  | 5350.578  | AF091081  | 35538.883 | 39690.484 |
| AF035787  | 27039.971 | 27712.779 | AK001758  | 5620.427  | 5420.724  |
| AF090405  | 776.973   | 560.093   | U90842    | 2651.622  | 2524.575  |
| NM_005024 | 903.8     | 1065.127  | AK025076  | 890.662   | 802.239   |
| NM_003403 | 2355.801  | 2876.752  | AF086325  | 19864.598 | 15862.049 |
| NM_014808 | 10927.467 | 13612.869 | NM_004928 | 2840.488  | 2898.779  |
| AB006627  | 12981.604 | 14305.646 | NM_005081 | 3069.001  | 2700.686  |
| NM_003382 | 865.673   | 938.583   | NM_004959 | 2087.801  | 2272.443  |
| NM_002965 | 1252.356  | 1412.624  | AK026022  | 63371.32  | 60557.691 |
| AB007883  | 27842.941 | 32825.879 | NM_003199 | 16826.184 | 15466.786 |
| NM_006391 | 1244.411  | 840.235   | NM_004306 | 64974.18  | 76389.719 |
| AY009397  | 67175.055 | 75253.469 | NM_001153 | 1373.961  | 1170.068  |
| NM_007037 | 67877.516 | 66873.773 | NM_006786 | 20669.795 | 21985.438 |
| NM_016335 | 9102.094  | 6113.192  | NM_006205 | 4417.151  | 4565.148  |
| NM_003165 | 13863.161 | 10778.725 | NM_004034 | 38995.266 | 39163.469 |
| NM_003906 | 61272.078 | 52684.148 | NM_000130 | 36189.035 | 36090.258 |
| AL359590  | 61763.078 | 56920.688 | AF193756  | 1999.615  | 2177.583  |
| NM_002861 | 20708.254 | 20438.707 | AI492087  | 1831.931  | 2072.403  |
| NM_003080 | 19767.791 | 19966.115 | R72122    | 13759.908 | 16655.072 |
| NM_004042 | 934.031   | 962.391   | Z35309    | 20647.547 | 19700.387 |
| NM_013268 | 1653.672  | 1342.273  | X04571    | 2297.611  | 2432.313  |
| NM_002645 | 10534.088 | 12082.082 | AA700005  | 2462.679  | 2691.435  |
| AB033027  | 5611.736  | 6204.656  | AA292025  | 8615.473  | 8309.146  |
| AF320293  | 2021.459  | 1973.613  | AA437226  | 13556.987 | 15212.715 |
| NM_001171 | 4391.61   | 4519.513  | R36143    | 9561.723  | 8985.518  |
| S81591    | 1073.074  | 692.875   | XM_056359 | 4735.071  | 4910.297  |
| NM_006323 | 28222.486 | 29070.795 | D10353/NM | 53639.957 | 58162.293 |
| NM_016466 | 5494.151  | 5848.583  | M15042    | 23107.301 | 24992.76  |
| NM_001493 | 13830.727 | 14705.88  | AK056843  | 20194.529 | 21834.736 |
| NM_003716 | 964.833   | 1148.446  | U49928    | 62476.172 | 61703.969 |
| NM_014841 | 2371.906  | 3404.142  | AK096645  | 63534.781 | 59586.602 |
| NM_014426 | 17735.053 | 20473.066 | AK092859  | 3037.387  | 3607.768  |
| NM_006816 | 66715.953 | 60181.125 | NM_005793 | 23447.463 | 22594.695 |
| AK026518  | 67384.703 | 60147.121 | M55646    | 57157.273 | 53567.285 |
| AF132734  | 41733.242 | 24392.709 | NM_006112 | 51089.297 | 49230.258 |
| NM_018379 | 9395.856  | 7584.697  | M12807    | 5246.951  | 4904.227  |
| NM_016403 | 60377.617 | 56507.301 | NM_001765 | 6807.235  | 7002.625  |
| NM_015603 | 3049.9    | 2580.814  | NM_003361 | 5873.728  | 5727.17   |
| AK021788  | 2073.497  | 1975.934  | NM_012099 | 36865.969 | 37102.84  |
| NM_001921 | 18265.641 | 18864.258 | NM_018684 | 62926.758 | 61493.211 |
| NM_006230 | 23966.184 | 29357.111 | NM_017983 | 2870.313  | 2988.176  |
| NM_014699 | 38339.992 | 41901.695 | AF116909  | 2336.553  | 2607.175  |
| NM_013400 | 31277.439 | 28629.961 | BE906724  | 3493.95   | 3577.486  |
| AK026257  | 5475.108  | 5455.391  | NM_002283 | 40873.496 | 42853.418 |
| AK023836  | 23938.582 | 28172.785 | AJ276095  | 26608.299 | 29833.266 |
| NM_018109 | 7761.931  | 9042.416  | NM_004819 | 8861.108  | 8606.459  |
| AJ299442  | 16195.761 | 18340.508 | NM_007184 | 6733.106  | 7296.581  |
| AB040897  | 1045.53   | 1164.539  | NM_005291 | 63714.445 | 60661.207 |
| NM_000129 | 7138.385  | 7112.055  | AF253316  | 1222.165  | 1132.207  |
| NM_003762 | 13958.418 | 14629.89  | NM_005855 | 1600.428  | 1548.322  |



|           |           |           |           |           |           |
|-----------|-----------|-----------|-----------|-----------|-----------|
| NM_018446 | 8310.12   | 9500.721  | NM_002923 | 8842.046  | 9266.604  |
| NM_000187 | 2143.879  | 2705.132  | NM_006794 | 6024.787  | 5197.431  |
| NM_014465 | 2117.585  | 2447.534  | NM_018653 | 2239.468  | 1908.011  |
| D87292    | 3275.747  | 3101.855  | NM_005388 | 27580.484 | 29033.033 |
| NM_005498 | 5463.954  | 5937.017  | NM_007232 | 62722.094 | 60117.672 |
| NM_004407 | 2123.498  | 1324.784  | NM_016257 | 4006.602  | 4219.479  |
| NM_000070 | 15570.693 | 10481.861 | NM_002717 | 9077.516  | 9512.214  |
| NM_001202 | 4965.77   | 4626.087  | AF231916  | 22522.617 | 19367.008 |
| AB037804  | 1581.762  | 1347.942  | NM_003501 | 19452.307 | 18329.805 |
| U34249    | 5176.8    | 5052.806  | AK022654  | 63579.645 | 63665.395 |
| NM_003288 | 58871.25  | 63105.871 | BC002905  | 17421.742 | 17816.068 |
| AI200114  | 8939.821  | 9371.916  | NM_018091 | 29784.021 | 35448.063 |
| M74220    | 922.472   | 881.467   | NM_001108 | 15775.646 | 19602.998 |
| M23254    | 3302.397  | 3466.808  | NM_001637 | 2222.125  | 2197.407  |
| BE618539  | 22431.645 | 25281.732 | NM_016630 | 38039.723 | 38059.742 |
| R28062    | 10434.031 | 14356.704 | NM_014291 | 23898.99  | 24585.082 |
| U38545    | 928.467   | 1138.181  | NM_014631 | 1918.124  | 1757.667  |
| AI627464  | 2040.558  | 2274.218  | NM_001089 | 17789.018 | 19020.848 |
| BI756258  | 8282.068  | 10314.278 | NM_000120 | 4440.051  | 4462.488  |
| AI342225  | 61195.699 | 71998.328 | NM_004519 | 1268.796  | 1398.678  |
| AA634103  | 58031.902 | 63867.191 | U09384    | 4553.18   | 5941.875  |
| J04599    | 4010.336  | 4531.917  | NM_004794 | 27718.197 | 30008.645 |
| AF110020  | 9612.203  | 13177.997 | NM_002803 | 24246.111 | 23623.936 |
| AA707922  | 665.311   | 721.303   | NM_005508 | 8452.717  | 9375.313  |
| AA608557  | 16477.906 | 17604.531 | NM_018485 | 1771.937  | 1653.216  |
| AL050095  | 33106.684 | 42557.883 | NM_006788 | 4988.673  | 5181.357  |
| U03272    | 1791.747  | 1565.831  | AK025039  | 495.734   | 683.789   |
| AF075085  | 62669.859 | 67095.953 | NM_016568 | 3531.723  | 3703.371  |
| NM_005892 | 12278.742 | 12489.672 | NM_002987 | 992.076   | 966.049   |
| NM_006478 | 1874.365  | 2477.645  | AB033102  | 60739.121 | 58827.965 |
| AF311287  | 38517.641 | 25006.063 | NM_014774 | 6191.157  | 7014.757  |
| NM_003098 | 5269.274  | 5033.626  | NM_014143 | 36448.625 | 40277.969 |
| NM_014781 | 10139.411 | 8328.525  | NM_012200 | 6210.46   | 5235.449  |
| BU629989  | 3413.34   | 3222.431  | NM_001724 | 5565.981  | 5893.338  |
| X87896    | 5580.113  | 6296.671  | NM_000150 | 9136.931  | 9549.794  |
| M88310    | 7044.243  | 8663.182  | AB023152  | 1040.257  | 1025.322  |
| D16856    | 959.11    | 1204.264  | NM_006212 | 5897.157  | 5622.704  |
| NM_000042 | 6217.373  | 6130.993  | AK022872  | 8900.337  | 8822.008  |
| AF035787  | 22639.508 | 24397.684 | AK024272  | 10818.149 | 9508.296  |
| AF090405  | 884.155   | 1086.547  | NM_016381 | 2777.182  | 2715.039  |
| NM_005024 | 1004.277  | 1071.833  | AL591715  | 3622.238  | 2912.289  |
| NM_003403 | 2851.152  | 2966.438  | NM_018042 | 36215.047 | 35545.297 |
| NM_014808 | 3125.63   | 3302.517  | BE741525  | 2850.013  | 3442.508  |
| AB006627  | 12740.064 | 11796.603 | BF030555  | 57458.953 | 52901.797 |
| NM_000416 | 18364.26  | 21867.969 | NM_012433 | 19242.68  | 16181.433 |
| NM_003382 | 994.195   | 1496.669  | NM_005605 | 13683.528 | 13018.7   |
| NM_002965 | 826.918   | 1197.586  | NM_002576 | 9072.471  | 10830.084 |
| AB007883  | 27168.449 | 33070.766 | NM_003582 | 5361.851  | 5978.121  |
| NM_006391 | 1303.794  | 1000.71   | AF057354  | 1189.123  | 1059.526  |
| AY009397  | 61765.656 | 72974.734 | AF169351  | 26796.68  | 30800.119 |
| NM_007037 | 62634.668 | 63284.309 | M14200    | 63342.148 | 61933.395 |
| NM_005014 | 2912.837  | 3444.196  | NM_000282 | 5544.033  | 6329.895  |
| NM_006944 | 1673.029  | 1875.988  | NM_000532 | 28275.174 | 30634.516 |

|           |           |           |           |           |           |
|-----------|-----------|-----------|-----------|-----------|-----------|
| NM_00316E | 12087.471 | 7904.601  | NM_016341 | 2862.763  | 2920.252  |
| NM_00390E | 61227.227 | 47077.625 | NM_00678E | 24514.254 | 29457.564 |
| AL359590  | 62821.363 | 57151.398 | NM_00620E | 5402.255  | 5644.399  |
| NM_002861 | 24505.455 | 20764.945 | NM_004034 | 39870.426 | 44001.086 |
| NM_00308C | 18158.643 | 19569.467 | NM_00013C | 36182.441 | 40393.895 |
| NM_00404Z | 644.891   | 851.086   | AF193756  | 1726.257  | 1876.822  |
| NM_01326E | 1322.514  | 1431.916  | NM_00418Z | 503.731   | 546.476   |
| NM_00264E | 10743.83  | 11678.618 | AI492087  | 1787.909  | 2280.135  |
| AB033027  | 5060.261  | 5586.851  | R72122    | 13600.589 | 17736.029 |
| AF320293  | 1225.245  | 1541.094  | X04571    | 2349.412  | 2742.598  |
| NM_001171 | 3350.56   | 4214.389  | AA700005  | 2345.391  | 2731.453  |
| S81591    | 985.473   | 701.534   | AA292025  | 8064.874  | 7977.31   |
| NM_00632Z | 25756.945 | 22919.385 | AA437226  | 13720.305 | 14076.986 |
| NM_01646E | 5064.55   | 4569.095  | R36143    | 8158.174  | 8515.987  |
| NM_00149Z | 13774.907 | 14409.455 | XM_056359 | 4449.445  | 4947.639  |
| NM_00371E | 1177.958  | 1416.101  | D10353/NM | 52035.402 | 55961.504 |
| NM_014841 | 2251.501  | 2790.182  | M15042    | 21355.459 | 21915.592 |
| NM_01442E | 18308.055 | 20343.803 | AK056843  | 22362.174 | 23798.398 |
| NM_00681E | 61358.129 | 59052.895 | U49928    | 60039.613 | 65026.23  |
| AK026518  | 59975.617 | 61555.887 | AK096645  | 62510.012 | 61367.559 |
| NM_00025E | 62367.934 | 56457.652 | AK092859  | 2966.843  | 3034.316  |
| AB033055  | 38718.207 | 43229.984 | NM_018291 | 38663.578 | 34394.813 |
| NM_01640Z | 59086.945 | 42609.809 | NM_00553C | 17590.682 | 16919.494 |
| NM_01560Z | 2990.002  | 1938.744  | NM_00689E | 11513.271 | 10863.161 |
| AK021788  | 2148.121  | 2045.862  | NM_00087E | 1262.295  | 1090.261  |
| NM_001921 | 17301.377 | 13737.77  | M12807    | 6627.88   | 6195.738  |
| NM_00623C | 22039.777 | 20477.258 | NM_00176E | 7532.223  | 8079.028  |
| NM_01469E | 34649.059 | 38038.199 | NM_003361 | 7236.481  | 7997.243  |
| NM_01340C | 30891.195 | 31537.801 | NM_01209E | 38223.043 | 40790.445 |
| AK026257  | 5360.909  | 5103.81   | NM_018684 | 63122.121 | 59605.008 |
| AK023836  | 23305.955 | 22329.914 | NM_01798Z | 2880.176  | 2912.643  |
| NM_01810E | 7153.074  | 7227.497  | AJ276095  | 25738.865 | 29652.402 |
| AJ299442  | 14605.927 | 14842.74  | NM_00481E | 8233.899  | 9225.886  |
| AB040897  | 791.471   | 1172.395  | NM_007184 | 5905.996  | 7671.401  |
| NM_00012E | 5916.772  | 6478.936  | NM_005291 | 56408.094 | 49013.039 |
| NM_00376Z | 12384.92  | 12566.006 | AF253316  | 1195.743  | 1379.784  |
| NM_01844E | 7318.675  | 11359.281 | NM_00585E | 1292.32   | 1561.618  |
| NM_000187 | 1797.516  | 2490.465  | NM_00292Z | 7068.033  | 8178.377  |
| NM_01446E | 2452.897  | 3359.817  | NM_006794 | 5008.578  | 4692.134  |
| D87292    | 3399.263  | 3472.567  | NM_01865Z | 1481.568  | 1957.42   |
| NM_00549E | 5373.254  | 5403.136  | NM_00538E | 24947.191 | 24078.535 |
| NM_01633E | 10902.952 | 11186.033 | NM_00723Z | 61194.813 | 61206.313 |
| NM_00120Z | 4901.313  | 3000.872  | NM_016257 | 3651.316  | 4143.965  |
| AB037804  | 1406.595  | 1265.955  | NM_002717 | 8518.679  | 8405.777  |
| U34249    | 4704.793  | 4251.051  | NM_00430E | 57076.496 | 55972.246 |
| NM_00328E | 62375.668 | 56614.215 | NM_001153 | 760.786   | 1217.192  |
| AI200114  | 9092.896  | 9385.364  | AK022654  | 61894.543 | 59980.922 |
| M74220    | 788.229   | 1080.065  | BC002905  | 17645.748 | 16675.25  |
| M23254    | 3269.661  | 3322.001  | NM_018091 | 27261.369 | 26939.85  |
| BE618539  | 21143.391 | 22995     | NM_00110E | 14831.921 | 14005.521 |
| R28062    | 10704.809 | 12599.439 | NM_001637 | 2267.229  | 2218.474  |
| U38545    | 998.505   | 966.058   | NM_01663C | 36888.191 | 41102.277 |
| AI627464  | 1531.28   | 1409.04   | NM_014291 | 23673.488 | 27661.176 |

|           |           |           |           |           |           |
|-----------|-----------|-----------|-----------|-----------|-----------|
| BI756258  | 8312.936  | 9226.213  | NM_014631 | 3277.958  | 3308.176  |
| AI342225  | 59882.18  | 63266.25  | NM_001089 | 17185.705 | 20952.15  |
| AA634103  | 61638.082 | 62364.953 | NM_004519 | 839.222   | 1424.504  |
| J04599    | 3525.345  | 4448.685  | U09384    | 3736.573  | 4655.634  |
| AF110020  | 6168.427  | 8461.756  | NM_004794 | 25244.814 | 30362.074 |
| AA707922  | 484.943   | 802.069   | NM_002803 | 24369.318 | 29218.176 |
| AA608557  | 15108.564 | 15972.333 | NM_005508 | 7995.658  | 9932.104  |
| AL050095  | 23323.133 | 29258.488 | NM_018485 | 1457.964  | 1790.266  |
| U03272    | 1436.939  | 1661.135  | NM_006788 | 4714.55   | 4824.446  |
| AF075085  | 61509.23  | 62922.938 | AK025039  | 588.988   | 533.376   |
| NM_005892 | 10024.177 | 11919.892 | NM_016568 | 3905.372  | 3868.858  |
| NM_006478 | 1849.898  | 2543.062  | NM_002987 | 1077.924  | 888.343   |
| AF132734  | 33963.301 | 37229.52  | AB033102  | 58440.512 | 55074.051 |
| NM_018379 | 8759.643  | 14933.049 | NM_014774 | 6461.156  | 6967.688  |
| NM_000042 | 5533.359  | 3469.111  | NM_014143 | 36942.563 | 41596.848 |
| AF035787  | 19293.969 | 13920.722 | M55646    | 52610.906 | 50820.18  |
| AF090405  | 931.518   | 729.813   | NM_006112 | 45703.039 | 48943.445 |
| NM_005024 | 829.912   | 787.188   | NM_000150 | 7749.216  | 5155.808  |
| NM_003403 | 2463.081  | 2462.294  | AB023152  | 937.506   | 910.473   |
| NM_014808 | 10266.494 | 10939.194 | NM_006212 | 5836.112  | 5732.172  |
| AB006627  | 12429.71  | 12000.177 | AK022872  | 9280.274  | 9351.334  |
| NM_000416 | 16433.074 | 16148.778 | AK024272  | 11098.523 | 10963.45  |
| NM_003382 | 561.969   | 716.108   | NM_016381 | 2611.5    | 2767.179  |
| NM_002965 | 1035.883  | 1279.451  | AL591715  | 3149.52   | 3378.283  |
| AB007883  | 24249.525 | 23393.016 | NM_018042 | 35915.941 | 35379.164 |
| NM_006391 | 1194.369  | 1124.391  | BE741525  | 2689.305  | 2996.043  |
| AK093780  | 28081.271 | 35784.988 | BF030555  | 59243.809 | 56118.695 |
| AY009397  | 64452.668 | 69490.453 | NM_012433 | 19591.398 | 18263.682 |
| NM_007037 | 60869.668 | 62425.113 | NM_005605 | 14207.018 | 14598.085 |
| NM_001649 | 1104.903  | 1586.46   | NM_002576 | 7080.061  | 7391.626  |
| NM_005492 | 9065.364  | 12510.794 | NM_003582 | 4319.227  | 4443.275  |
| AF038196  | 5639.641  | 7060.532  | AF057354  | 1517.851  | 1289.367  |
| NM_004859 | 51261.211 | 55147.602 | AF169351  | 29464.648 | 30148.215 |
| NM_016352 | 7734.377  | 8664.987  | M14200    | 62306.695 | 55422.66  |
| NM_005014 | 3192.137  | 3569.915  | NM_000282 | 6369.515  | 6974.967  |
| NM_006944 | 1125.405  | 1392.02   | NM_000532 | 28898.891 | 33810.152 |
| NM_004407 | 1733.602  | 1969.939  | NM_016341 | 3011.702  | 3003.786  |
| NM_000070 | 15047.17  | 20830.25  | AF231916  | 33603.898 | 32562.488 |
| NM_006323 | 27551.551 | 26833.078 | NM_003501 | 20855.066 | 23495.059 |
| NM_016466 | 4986.543  | 6014.992  | NM_004034 | 37475.578 | 34241.984 |
| NM_001493 | 11407.987 | 11991.563 | NM_000130 | 38087.52  | 35875.43  |
| NM_003716 | 1294.734  | 1406.144  | AF193756  | 2348.073  | 2640.331  |
| NM_014841 | 2136.503  | 2367.526  | NM_004183 | 1970.071  | 1903.905  |
| NM_014426 | 17902.934 | 20253.357 | AI492087  | 2944.656  | 2860.179  |
| NM_006816 | 61932.68  | 56731.996 | R72122    | 15202.18  | 17389.586 |
| AK026518  | 60341.43  | 60792.949 | Z35309    | 22181.674 | 19277.252 |
| NM_000258 | 63069.758 | 58299.371 | X04571    | 2226.668  | 2379.201  |
| AB033055  | 39090.043 | 40831.273 | AA700005  | 2329.893  | 2586.758  |
| AF311287  | 32863.781 | 39123.172 | AA292025  | 8083.712  | 7385.447  |
| NM_003098 | 4832.39   | 7015.262  | AA437226  | 15321.546 | 15640.978 |
| NM_014781 | 9129.431  | 10245.931 | R36143    | 7869.967  | 7801.094  |
| BU629989  | 2095.177  | 3032.877  | XM_056359 | 4804.245  | 5298.243  |
| X87896    | 4152.309  | 5356.349  | D10353/NM | 54175.426 | 53090.316 |

|           |           |           |           |           |           |
|-----------|-----------|-----------|-----------|-----------|-----------|
| M88310    | 4963.869  | 5825.7    | M15042    | 23822.209 | 26396.506 |
| D16856    | 664.544   | 957.899   | AK056843  | 29320.088 | 29040.166 |
| NM_01446E | 2478.967  | 1670.767  | U49928    | 59766.688 | 61152.863 |
| D87292    | 3524.806  | 2743.025  | AK096645  | 62123.988 | 59020.391 |
| NM_00549E | 5085.059  | 4560.052  | AK092859  | 3666.78   | 4005.743  |
| NM_01633E | 8004.795  | 7369.551  | NM_018291 | 40127.617 | 41982.715 |
| NM_00316E | 12309.414 | 11546.447 | NM_005530 | 19222.162 | 20579.309 |
| NM_00390E | 58158.145 | 52853.277 | NM_00689E | 13214.321 | 14736.156 |
| AL359590  | 56461.48  | 53070.762 | NM_012200 | 7577.656  | 7601.347  |
| NM_002861 | 20556.182 | 19185.33  | NM_001724 | 5640.869  | 5560.995  |
| NM_003080 | 19772.113 | 22079.197 | BE906724  | 3454.57   | 2914.104  |
| NM_004042 | 813.487   | 758.057   | NM_002283 | 39088.914 | 38850.289 |
| NM_01326E | 1284.073  | 1850.985  | AJ276095  | 29753.135 | 35585.504 |
| NM_00264E | 9146.408  | 11254.315 | NM_00481E | 9424.194  | 11608.432 |
| AB033027  | 4359.859  | 5926.301  | NM_007184 | 7920.15   | 9518.872  |
| AK021805  | 40313.066 | 46207.289 | NM_005291 | 62990.949 | 60021.781 |
| AB014550  | 5208.586  | 7074.285  | AF253316  | 1126.3    | 1160.874  |
| AF320294  | 14913.943 | 18609.775 | NM_00585E | 1171.787  | 1440.856  |
| AF320293  | 1206.961  | 1839.852  | NM_002923 | 7263.226  | 8003.024  |
| AF161436  | 14132.502 | 19553.219 | NM_006794 | 5245.748  | 4782.08   |
| NM_020402 | 14210.424 | 17280.291 | NM_018653 | 1828.464  | 1732.684  |
| NM_00429E | 4106.225  | 4942.632  | NM_003027 | 2623.301  | 2604.484  |
| NM_001171 | 2894.997  | 4811.272  | NM_016257 | 3371.196  | 3969.297  |
| NM_002250 | 14515.94  | 16556.811 | NM_002717 | 8486.023  | 9034.444  |
| S81591    | 578.61    | 672.037   | NM_012114 | 2073.758  | 2190.237  |
| AF075085  | 61593.246 | 56483.313 | NM_01448E | 1417.941  | 1604.361  |
| NM_005892 | 8900.858  | 6585.231  | NM_00302E | 61345.598 | 60324.777 |
| NM_00647E | 1970.257  | 1959.638  | U52051    | 1049.781  | 762.025   |
| AF132734  | 37268.91  | 38760.465 | NM_02017E | 23787.889 | 27725.492 |
| NM_01837E | 8790.406  | 9770.977  | NM_00430E | 59810.621 | 68163.859 |
| NM_01640E | 56531.621 | 53544.434 | NM_001153 | 3659.764  | 3781.979  |
| NM_01560E | 2451.915  | 2714.95   | NM_00678E | 24368.102 | 29057.633 |
| AK021788  | 1862.164  | 2568.271  | NM_00620E | 4606.48   | 4673.292  |
| NM_001921 | 16645.756 | 17345.254 | NM_00428E | 2884.672  | 2697.356  |
| NM_006230 | 21681.838 | 26120.508 | NM_00416E | 63247.363 | 58818.906 |
| NM_01469E | 35818.168 | 40179.695 | AK026308  | 5085.797  | 4646.231  |
| NM_013400 | 27113.834 | 37898.488 | NM_013337 | 7166.376  | 7355.869  |
| AK026257  | 4685.958  | 5122.555  | NM_00419E | 5754.547  | 6584.862  |
| AK023836  | 23609.896 | 29149.191 | NM_00280E | 21778.326 | 22400.957 |
| NM_01810E | 6489.856  | 8350.334  | NM_00550E | 7474.942  | 8147.521  |
| AJ299442  | 13382.663 | 16388.377 | NM_01848E | 1844.244  | 2403.603  |
| AB040897  | 1517.532  | 1366.322  | NM_00678E | 3979.933  | 4484.412  |
| NM_00012E | 8156.941  | 8671.975  | NM_01656E | 3469.44   | 3339.738  |
| NM_00376E | 13140.902 | 13218.476 | NM_002987 | 2623.4    | 2645.573  |
| NM_01844E | 6037.519  | 6773.902  | AB033102  | 60214.77  | 57938.824 |
| NM_000187 | 1757.548  | 2157.474  | NM_014774 | 8765.542  | 11027.944 |
| CY3Cy5    | 2195.249  | 65.981    | NM_01414E | 36094.957 | 39829.527 |
| NM_01753E | 4748.884  | 4846.07   | M55646    | 59974.965 | 53959.109 |
| AF086184  | 29005.385 | 25871.012 | NM_00611E | 47022.043 | 53195.027 |
| NM_01827E | 24978.418 | 27905.287 | NM_00087E | 654.124   | 872.598   |
| AL049266  | 11087.083 | 10900.563 | M12807    | 5455.046  | 6197.171  |
| AK021560  | 2284.338  | 2523.941  | NM_00176E | 7292.899  | 7802.439  |
| AF088045  | 1455.519  | 1401.765  | NM_003361 | 7935.468  | 9801.233  |

|           |           |           |           |           |           |
|-----------|-----------|-----------|-----------|-----------|-----------|
| AF007149  | 1786.722  | 1711.625  | NM_012099 | 44648.418 | 46050.781 |
| AK001469  | 5166.306  | 4395.228  | NM_018684 | 61016.328 | 64926.41  |
| AF035318  | 2704.054  | 2255.589  | NM_017983 | 2647.382  | 3141.229  |
| NM_015456 | 6532.752  | 5586.916  | AF116909  | 2738.994  | 3275.854  |
| AK025056  | 2933.051  | 2658.664  | NM_000282 | 5118.455  | 4499.746  |
| AF140710  | 7563.034  | 7151.932  | NM_000532 | 27693.256 | 26831.449 |
| NM_017532 | 4665.64   | 4361.56   | NM_016341 | 2603.414  | 2415.302  |
| SR2       | 43411.992 | 44860.652 | AF231916  | 27658.006 | 26809.486 |
| SR4       | 14750.399 | 12961.647 | NM_003501 | 18467.162 | 17739.598 |
| SR6       | 3348.281  | 1963.97   | AK022654  | 60572.223 | 61448.172 |
| SR8       | 10577.05  | 35292.359 | BC002905  | 17817.051 | 18877.627 |
| SR10      | 20852.027 | 4422.559  | NM_001108 | 14081.354 | 15833.447 |
| AL157477  | 5389.943  | 4415.734  | NM_001637 | 2264.53   | 2403.148  |
| AB002318  | 3274.605  | 2948.541  | NM_014631 | 2944.745  | 2854.998  |
| AL357535  | 4682.534  | 4512.658  | NM_001089 | 21833.605 | 28632.012 |
| AL049951  | 2016.135  | 2523.742  | NM_000120 | 5072.653  | 5620.75   |
| AK024963  | 1374.935  | 1439.193  | AF172327  | 63192.258 | 58901.066 |
| AK023725  | 1709.676  | 2187.671  | NM_001676 | 31448.332 | 33939.156 |
| AK022936  | 13269.464 | 13449.795 | NM_000220 | 2896.518  | 3060.154  |
| AK024385  | 6852.991  | 8103.142  | NM_004519 | 1002.767  | 1064.417  |
| AL137727  | 3795.39   | 3931.174  | NM_001679 | 58811.426 | 56879.457 |
| L17327    | 1068.489  | 853.232   | NM_004046 | 62450.73  | 66385.703 |
| AF074986  | 1559.274  | 1667.85   | NM_004983 | 10565.495 | 11863.697 |
| AL049240  | 8061.03   | 8696.333  | U09384    | 4761.233  | 5132.588  |
| U80773    | 2149.982  | 1748.505  | NM_006860 | 20012.232 | 19144.555 |
| AK021745  | 3371.472  | 2987.323  | NM_004794 | 27964.383 | 28298.066 |
| L38937    | 9063.63   | 7793.176  | NM_018291 | 34940.012 | 27516.787 |
| AK024327  | 1275.399  | 1048.532  | NM_005530 | 15946.008 | 12375.296 |
| AK000801  | 9504.354  | 7713.356  | NM_006899 | 10659.363 | 8393.381  |
| D85433    | 3734.917  | 2860.762  | NM_012200 | 5476.841  | 4775.75   |
| AK025109  | 7898.682  | 8956.446  | NM_001724 | 4953.007  | 4697.091  |
| AK026057  | 3319.155  | 3463.406  | NM_000150 | 8161.334  | 7867.905  |
| AK026713  | 1331.343  | 1349.734  | AB023152  | 1535.084  | 1751.921  |
| AK021627  | 4567.814  | 4625.516  | AK022872  | 8285.839  | 8599.255  |
| AF085859  | 2780.549  | 2826.218  | AK024272  | 9902.206  | 10138.357 |
| AK026307  | 2131.243  | 1990.612  | AL591715  | 3663.474  | 3066.597  |
| AF075047  | 912.653   | 657.748   | NM_018042 | 41822.641 | 40937.609 |
| AL049975  | 1361.051  | 1046.734  | BE741525  | 2935.769  | 3181.833  |
| AL080067  | 1879.81   | 2012.658  | BF030555  | 61403.457 | 58822.195 |
| AL117464  | 3726.872  | 3399.448  | NM_012433 | 22358.971 | 18575.234 |
| AL080160  | 1955.812  | 1754.171  | NM_005605 | 16729.625 | 14346.953 |
| AL117529  | 1994.52   | 3746.45   | NM_002576 | 6590.135  | 7374.071  |
| AL049997  | 24111.111 | 24396.469 | NM_003582 | 4429.781  | 4435.733  |
| AK024118  | 4767.354  | 5273.992  | AF057354  | 1471.025  | 1339.751  |
| X89657    | 572.293   | 598.434   | AF169351  | 31031.277 | 31870.219 |
| AK024509  | 2434.758  | 2491.036  | M14200    | 64410.813 | 62455.293 |
| AL050185  | 555.034   | 656.842   | CY3Cy5    | 9007.587  | 209.14    |
| NM_017709 | 1592.359  | 1610.852  | NM_000623 | 853.047   | 1139.71   |
| AF049615  | 2160.418  | 2776.944  | NM_000941 | 4953.704  | 4982.284  |
| NM_014358 | 48761.516 | 52515.301 | AK026844  | 6321.114  | 5920.17   |
| AF009282  | 17325.797 | 16000.123 | AK026735  | 11864.434 | 10265.444 |
| AF024704  | 14578.164 | 13989.688 | AL110104  | 55585.535 | 52125.992 |
| AF056431  | 2188.915  | 2086.697  | AF240633  | 2212.179  | 1751.685  |

|           |           |           |           |           |           |
|-----------|-----------|-----------|-----------|-----------|-----------|
| NM_016412 | 4367.785  | 4599.905  | AK027056  | 10117.125 | 7220.335  |
| AF009293  | 1814.079  | 1905.973  | AK024294  | 2615.325  | 2063.797  |
| NM_004155 | 64468.949 | 82192.5   | AL110126  | 5700.512  | 5028.771  |
| AF056444  | 20494.408 | 18731.143 | AF052172  | 65634.617 | 54946.668 |
| AK000989  | 5258.718  | 4515.382  | AB014573  | 13845.359 | 12633.135 |
| AK002210  | 8302.589  | 8059.791  | AK025418  | 1392.555  | 1500.676  |
| AK001057  | 777.939   | 650.916   | AB020643  | 1232.092  | 1219.774  |
| AK021471  | 1863.667  | 1690.608  | AK025245  | 680.579   | 834.141   |
| AK021709  | 1333.667  | 1370.266  | AK025496  | 20542.84  | 19101.047 |
| AL359563  | 3436.738  | 2694.252  | NM_000623 | 863.339   | 937.22    |
| NM_005304 | 1296.357  | 1186.503  | NM_000941 | 4245.321  | 3858.746  |
| NM_014477 | 6807.368  | 6321.891  | SR1       | 65824.805 | 64780.398 |
| AF086478  | 5656.038  | 5813.48   | SR3       | 55243.273 | 51661.301 |
| AF086022  | 1185.344  | 1348.351  | SR5       | 7834.459  | 6973.521  |
| AK021514  | 67779.164 | 61663.531 | SR7       | 8328.389  | 39900.66  |
| AJ008134  | 25168.734 | 27350.857 | SR9       | 24302.51  | 3837.14   |
| S71486    | 5668.071  | 5007.88   | CY3Cy5    | 7838.881  | 150.154   |
| L33808    | 28934.313 | 34304.805 | L10404    | 2167.804  | 1819.704  |
| AJ008117  | 22512.064 | 22037.369 | AF283776  | 7078.328  | 6191.108  |
| AJ008147  | 63388.301 | 58994.578 | L10123    | 56730.566 | 57503     |
| AK024369  | 2147.803  | 2098.778  | AF071507  | 883.217   | 935.173   |
| L43345    | 2392.524  | 2556.289  | D16877    | 20360.041 | 18503.461 |
| AF180297  | 9470.851  | 9125.906  | L19363    | 1146.092  | 964.689   |
| AK023245  | 1337.409  | 1070.12   | AL049992  | 2345.32   | 1996.678  |
| AF147303  | 563.921   | 918.763   | AL109781  | 6293.758  | 4826.025  |
| AF086224  | 910.221   | 850.054   | AL079289  | 1522.604  | 1756.695  |
| S56365    | 65617.094 | 66996.297 | NM_018484 | 1750.714  | 2056.674  |
| AK023607  | 2046.291  | 1743.921  | NM_017594 | 2205.04   | 1917.336  |
| AK026874  | 4594.265  | 3980.409  | AK027237  | 1534.58   | 1151.339  |
| AK024178  | 631.135   | 788.326   | AF075017  | 687.602   | 986.524   |
| AF088033  | 8921.708  | 8478.599  | AK027104  | 5921.787  | 5014.19   |
| NM_020422 | 7190.879  | 6545.79   | AL133090  | 58697.875 | 54097.496 |
| AJ227897  | 756.022   | 856.529   | AF085867  | 6500.741  | 6388.081  |
| AK023628  | 960.51    | 861.124   | AK026158  | 1593.512  | 1713.13   |
| AY007156  | 2329.807  | 2233.759  | AF086510  | 7905.87   | 8583.863  |
| AF086408  | 67846.414 | 61695.563 | Z36779    | 10813.97  | 8534.213  |
| AK023979  | 8279.586  | 6586.337  | NM_018422 | 1154.675  | 1296.302  |
| NM_017847 | 3371.226  | 2813.898  | NM_002816 | 4263.5    | 3422.391  |
| AL049675  | 4288.78   | 4102.966  | NM_017513 | 1368.132  | 1437.486  |
| AL050151  | 1338.598  | 1535.602  | NM_017822 | 13390.072 | 11902.972 |
| NM_003537 | 39971.172 | 45354.277 | AK024520  | 12551.013 | 10753.228 |
| AF056419  | 46094.719 | 48313.117 | AK024592  | 11736.607 | 10864.089 |
| AF074983  | 1780.214  | 1858.552  | AK024904  | 4203.865  | 3928.059  |
| AK021862  | 925.513   | 888.184   | AK025030  | 4676.034  | 3919.027  |
| AK024177  | 2074.527  | 2452.447  | AK024542  | 3919.711  | 3298.629  |
| AK024827  | 12489.287 | 12402.94  | AK024623  | 359.325   | 499.095   |
| K01564    | 5257.397  | 5797.476  | AK024915  | 2783.833  | 2574.527  |
| AB023175  | 2215.633  | 2093.31   | AK025064  | 443.248   | 621.868   |
| NM_000737 | 8942.71   | 8797.309  | AK091109  | 61944.473 | 58998.941 |
| NM_000839 | 21805.637 | 25942.094 | AF032897  | 1292.46   | 1141.686  |
| AK024102  | 32088.453 | 38373.004 | NM_014967 | 8724.179  | 12337.676 |
| NM_001290 | 1952.738  | 1620.502  | AK022915  | 9212.318  | 8157.657  |
| AL079273  | 10623.556 | 10468.445 | AK021736  | 807.377   | 933.184   |

|           |           |           |           |           |           |
|-----------|-----------|-----------|-----------|-----------|-----------|
| NM_005045 | 865.265   | 520.823   | AF131834  | 3082.985  | 3379.098  |
| AK026129  | 5268.611  | 5224.493  | AL355711  | 2520.689  | 2360.979  |
| NM_001743 | 67116.992 | 65629.086 | AK025851  | 3109.123  | 3722.271  |
| NM_003713 | 27184.482 | 40764.055 | AJ011409  | 45988.512 | 51833.125 |
| D31886    | 7872.065  | 6480.501  | AJ227906  | 8389.607  | 10587.836 |
| U92024    | 1198.485  | 992.79    | AJ011598  | 599.608   | 989.803   |
| AK023330  | 10611.018 | 10251.646 | AJ001906  | 994.562   | 1035.221  |
| AF075071  | 4005.885  | 4944.49   | U17633    | 2784.32   | 2512.962  |
| AF147428  | 687.213   | 1077.765  | AF086202  | 37215.676 | 47876.457 |
| AF001892  | 1428.74   | 1576.113  | AK022352  | 1522.551  | 1229.316  |
| X93500    | 2135.719  | 2363.143  | AK023270  | 10465.785 | 9530.852  |
| U79271    | 4215.557  | 4271.107  | AF085979  | 39511.176 | 43270.777 |
| NM_019885 | 3018.329  | 3038.1    | AK023112  | 3713.839  | 3325.939  |
| AK024609  | 8757.199  | 9029.063  | NM_017806 | 62400.523 | 56916.336 |
| AK023660  | 1286.868  | 1178.279  | AK021895  | 8151.558  | 8706.855  |
| NM_018120 | 32493.699 | 33349.297 | AK024293  | 637.17    | 756.92    |
| NM_015991 | 3085.754  | 3014.845  | AL080107  | 506.188   | 740.398   |
| NM_005562 | 2107.316  | 2065.031  | AK024563  | 566.753   | 576.262   |
| NM_004932 | 3525.2    | 3309.544  | AK000036  | 16106.895 | 15699.462 |
| NM_005233 | 603.695   | 649.177   | AK000769  | 1084.817  | 1094.295  |
| NM_006654 | 1517.24   | 1536.435  | AK000924  | 2086.294  | 2316.747  |
| NM_003162 | 1846.495  | 2284.374  | AK022252  | 1201.356  | 1583.964  |
| NM_000395 | 6937.96   | 6258.705  | AK000114  | 4968.422  | 4920.472  |
| NM_003266 | 1762.87   | 1588.402  | AK000952  | 44771.473 | 44695.711 |
| NM_002350 | 15932.507 | 17298.816 | AF119862  | 31521.451 | 29437.141 |
| NM_012417 | 3806.506  | 3600.641  | U17628    | 3996.847  | 3390.579  |
| NM_002546 | 2316.078  | 1667.429  | AF119867  | 31815.73  | 26748.094 |
| NM_002966 | 1014.867  | 860.346   | AL357205  | 13883.216 | 24974.982 |
| BF246606  | 974.558   | 1226.242  | AF124819  | 2311.58   | 1555.479  |
| NM_014285 | 1519.327  | 1577.019  | D17091    | 4982.49   | 4271.842  |
| NM_002342 | 1181.224  | 1185.541  | AL133074  | 2149.962  | 1784.032  |
| D13631    | 4106.584  | 4117.395  | AF086318  | 30159.605 | 30953.256 |
| NM_003712 | 7689.15   | 7832.685  | AF088012  | 1190.859  | 1027.917  |
| NM_002184 | 3294.424  | 2749.318  | NM_018121 | 2298.469  | 1982.779  |
| NM_014883 | 8886.792  | 8203.836  | AL355692  | 1021.521  | 690.747   |
| NM_017805 | 10685.116 | 10769.929 | AB050477  | 11170.835 | 9899.744  |
| M86841    | 1795.988  | 1683.427  | AK000152  | 3434.114  | 3460.846  |
| U56387    | 1273.064  | 1440.35   | AK024300  | 6778.666  | 6255.923  |
| AL049296  | 5455.092  | 4937.154  | L09092    | 2299.019  | 1880.557  |
| NM_014471 | 62647.738 | 59185.648 | NM_012132 | 2267.152  | 2351.929  |
| NM_004397 | 4631.173  | 4933.975  | NM_012129 | 2313.815  | 1906.173  |
| NM_020235 | 8964.413  | 5291.857  | AK024881  | 864.325   | 840.863   |
| D49356    | 892.159   | 1407.198  | AK025716  | 4115.973  | 3825.262  |
| AJ250475  | 3539.395  | 3683.196  | L09268    | 1158.301  | 943.093   |
| NM_000800 | 6011.458  | 5738.74   | NM_020186 | 15613.598 | 13432.347 |
| NM_018575 | 4284.159  | 4094.323  | AK022424  | 574.988   | 696.25    |
| NM_006201 | 5084.979  | 4878.813  | AF090947  | 15155.602 | 13836.653 |
| NM_007110 | 3389.228  | 3218.32   | BC016962  | 672.746   | 654.889   |
| NM_001255 | 20092.307 | 17314.996 | NM_005047 | 3451.907  | 3117.304  |
| U50383    | 33979.109 | 36257.613 | AJ272196  | 35441.973 | 34667.457 |
| AK025085  | 11110.681 | 9709.378  | X58162    | 25686.328 | 30704.713 |
| NM_016317 | 1121.614  | 1250.564  | AK022825  | 3301.823  | 3227.284  |
| NM_006290 | 12433.577 | 13475.006 | AV756662  | 3052.189  | 2761.64   |

|           |           |           |           |           |           |
|-----------|-----------|-----------|-----------|-----------|-----------|
| AK022290  | 1898.31   | 2263.671  | NM_014702 | 1067.89   | 1101.951  |
| NM_003680 | 36571.293 | 36881.621 | AK001937  | 64336.926 | 57107.73  |
| AF118124  | 18786.74  | 18484.623 | AL365517  | 4310.754  | 3909.198  |
| NM_004849 | 27732.174 | 31730.396 | AK021988  | 30031.348 | 29411.32  |
| AL137527  | 19134.43  | 20163.393 | AF086494  | 59203.605 | 60618.754 |
| AK026068  | 936.131   | 1198.005  | BI769977  | 2338.828  | 1983.838  |
| J04974    | 50987.805 | 51995.652 | AL137567  | 2170.635  | 2278.849  |
| NM_017675 | 8413.246  | 8500.609  | AK024913  | 7087.498  | 6533.123  |
| NM_007014 | 5868.148  | 6165.044  | AB007961  | 17873.082 | 16680.596 |
| AL096740  | 1886.291  | 2187.305  | NM_005547 | 2706.413  | 2498.151  |
| AF191545  | 2810.906  | 2904.499  | AF164794  | 15690.22  | 15919.423 |
| NM_014554 | 8310.792  | 7667.096  | NM_001173 | 3931.913  | 4945.761  |
| AL137484  | 4200.211  | 4289.617  | AB020656  | 4303.109  | 3850.869  |
| AK023968  | 4350.039  | 4258.182  | AK023648  | 9213.022  | 9380.677  |
| NM_004652 | 2486.457  | 2852.45   | NM_000412 | 2437.5    | 2262.796  |
| NM_000353 | 1273.758  | 903.263   | AF077033  | 6453.087  | 5634.837  |
| AK025425  | 67782.18  | 60240.074 | D50406    | 1389.929  | 1337.14   |
| AK025974  | 56795.164 | 56386.262 | NM_004991 | 5457.845  | 4523.459  |
| NM_016532 | 6843.244  | 6268.245  | NM_014191 | 3664.93   | 3614.493  |
| X98115    | 4227.234  | 4572.07   | AK026708  | 21657.668 | 19983.793 |
| NM_005781 | 12708.328 | 12051.802 | NM_017903 | 9263.799  | 8691.543  |
| BC036740  | 43387.402 | 43600.438 | NM_018074 | 7534.537  | 6650.4    |
| NM_001747 | 9564.936  | 9303.131  | NM_000909 | 12225.977 | 10863.238 |
| NM_001148 | 24254.375 | 37842.965 | U31737    | 1838.816  | 1908.484  |
| AF242522  | 21960.199 | 21149.953 | AK024828  | 3769.832  | 4023.343  |
| NM_000588 | 5116.272  | 4465.99   | AF009315  | 7056.738  | 8181.759  |
| S67970    | 2690.404  | 2716.433  | AF085946  | 188.745   | 674.263   |
| AF221520  | 6975.946  | 5576.726  | NM_019013 | 2311.679  | 2308.655  |
| NM_006941 | 63570.805 | 61045.352 | NM_006783 | 1664.386  | 1843.136  |
| AB037852  | 2730.959  | 2412.198  | L37711    | 1924.095  | 1655.506  |
| NM_005360 | 4816.002  | 4545.228  | S70313    | 36033.484 | 37873.176 |
| NM_004349 | 10207.029 | 8976.531  | AK021607  | 2510.405  | 3040.839  |
| NM_002092 | 27676.402 | 30648.684 | AK025860  | 1060.185  | 1190.522  |
| NM_018077 | 7807.516  | 8075.834  | NM_000216 | 2429.129  | 2770.588  |
| NM_016839 | 62636.273 | 60516.098 | AF135960  | 5475.608  | 5819.622  |
| NM_005968 | 64181.18  | 69395.258 | NM_014216 | 40882.063 | 45523.059 |
| AK021416  | 2202.054  | 2812.451  | NM_003010 | 5561.718  | 5001.006  |
| NM_018471 | 23704.918 | 22339.889 | NM_006871 | 3411.031  | 3026.877  |
| NM_003819 | 20587.379 | 18683.262 | NM_019074 | 13988.274 | 13164.055 |
| NM_006560 | 10439.091 | 10022.062 | NM_018494 | 61887.852 | 64768.75  |
| NM_016183 | 17577.744 | 19217.777 | AK000006  | 2156.572  | 1993.664  |
| NM_004872 | 11000.637 | 9931.319  | NM_001115 | 6812.973  | 5777.752  |
| NM_001958 | 67995.188 | 80353.867 | NM_014921 | 2044.842  | 1555.923  |
| NM_004757 | 7373.667  | 5808.957  | NM_016581 | 58384.902 | 64555.48  |
| NM_015904 | 16256.835 | 14771.68  | NM_013255 | 4386.986  | 4490.333  |
| NM_001960 | 68302.391 | 61817.707 | NM_007183 | 1441.83   | 1304.322  |
| NM_018122 | 10923.468 | 9241.285  | AJ238243  | 36009.871 | 40370.77  |
| NM_017947 | 3225.152  | 3057.996  | J05046    | 62115.672 | 64070.453 |
| NM_002494 | 46217.422 | 52001.008 | NM_012318 | 7971.756  | 8218.556  |
| M58510    | 30325.67  | 30318.164 | NM_002751 | 18793.016 | 18320.178 |
| NM_000782 | 7076.496  | 7065.157  | NM_004291 | 6662.451  | 6989.091  |
| BE396003  | 5025.335  | 5163.354  | NM_003816 | 15903.309 | 14526.541 |
| AK023300  | 12636.499 | 11456.793 | AK022635  | 950.082   | 1052.271  |



|           |           |           |           |           |           |
|-----------|-----------|-----------|-----------|-----------|-----------|
| NM_018082 | 5757.161  | 5333.514  | NM_004912 | 6715.831  | 5930.428  |
| NM_003904 | 13996.667 | 15034.826 | U79304    | 35506.199 | 39772.859 |
| NM_006234 | 46850.445 | 50445.305 | NM_016267 | 15643.874 | 15748.856 |
| AK026387  | 3129.237  | 2131.978  | NM_004671 | 21671.941 | 20942.566 |
| AB028987  | 34652.113 | 36471.305 | NM_006526 | 9767.774  | 10935.696 |
| NM_003594 | 4685.376  | 4726.276  | U35622    | 1018.467  | 1158.298  |
| NM_005521 | 19480.219 | 19759.346 | NM_007045 | 6240.014  | 6253.675  |
| AF164438  | 38101.258 | 46743.285 | NM_003627 | 11824.489 | 11104.74  |
| AK022284  | 4275.532  | 4295.817  | AF305779  | 5480.186  | 5247.815  |
| AF060937  | 1200.059  | 1138.607  | AF225416  | 15980.188 | 15830.197 |
| AB040893  | 12457.527 | 11650.694 | NM_016231 | 6540.596  | 6789.253  |
| AK025844  | 7330.121  | 6987.015  | NM_002093 | 8690.504  | 7397.932  |
| NM_016372 | 63802.93  | 60314.969 | AB042555  | 34617.293 | 36651.129 |
| AB020705  | 7458.455  | 7830.19   | NM_001729 | 5178.027  | 5149.485  |
| NM_002980 | 3683.157  | 3752.614  | NM_017763 | 5132.074  | 5979.103  |
| NM_015886 | 1476.576  | 1454.01   | NM_013975 | 6738.326  | 6780.575  |
| NM_020358 | 442.631   | 610.302   | NM_003843 | 24294.891 | 26135.693 |
| NM_004262 | 775.979   | 657.564   | NM_012216 | 5246.441  | 5063.813  |
| NM_007102 | 63993.516 | 68467.281 | NM_005338 | 1666.591  | 1889.246  |
| BG491613  | 18388.211 | 18925.58  | X73502    | 7262.335  | 9958.591  |
| AA397813  | 64103.641 | 58554.496 | NM_020445 | 62810.832 | 62193.711 |
| W47350    | 14890.421 | 14106.848 | NM_016376 | 59965.832 | 61148.77  |
| AI160964  | 1594.133  | 2311.042  | AB046848  | 36462.582 | 42110.633 |
| W68291    | 24999.725 | 28949.721 | AL133057  | 14973.543 | 17346.115 |
| N64384    | 12413.769 | 14198.245 | U04845    | 21672.707 | 23681.172 |
| H-X 53655 | 5158.543  | 5890.18   | NM_018103 | 16406.219 | 17136.924 |
| H-U 05770 | 14270.9   | 12185.899 | AL049689  | 744.52    | 672.606   |
| H-M 65199 | 42369.164 | 40595.285 | NM_000312 | 9542.729  | 9211.533  |
| H-M 32315 | 4445.204  | 4436.651  | NM_003963 | 5655.006  | 7214.134  |
| H-D85429M | 26047.352 | 21616.463 | AC009729  | 5117.883  | 4305.714  |
| NM_000139 | 2258.798  | 2527.635  | AL136719  | 13863.971 | 11738.51  |
| NM_006664 | 9212.798  | 12249.401 | NM_014109 | 16271.31  | 17137.463 |
| NM_002416 | 1331.219  | 1614.259  | NM_012160 | 7469.122  | 6323.327  |
| NM_002728 | 5354.896  | 5923.87   | NM_006357 | 56951.598 | 63398.723 |
| NM_000450 | 744.899   | 958.239   | NM_014248 | 60437.328 | 58299.449 |
| NM_000448 | 5014.572  | 4723.591  | AK027070  | 5816.913  | 5402.777  |
| NM_004513 | 16184.175 | 18843.717 | AF129533  | 2965.505  | 2984.992  |
| NM_001708 | 57300.414 | 53606.258 | NM_003341 | 30740.787 | 26315.447 |
| NM_017735 | 11998.176 | 12113.975 | NM_017785 | 3173.746  | 3936.02   |
| AB033044  | 49081.469 | 48639.574 | NM_006249 | 16400.6   | 15891.639 |
| AB014564  | 4786.016  | 6059.094  | NM_018318 | 1236.555  | 1368.124  |
| NM_020230 | 9561.166  | 10207.642 | AB020640  | 36522.484 | 43659.73  |
| NM_006762 | 61818.297 | 69646.414 | D29954    | 32387.295 | 38778.441 |
| NM_006352 | 2398.182  | 2852.527  | AF007131  | 15251.734 | 15812.664 |
| NM_016430 | 1835.457  | 3744.549  | NM_006839 | 4191.803  | 4094.231  |
| NM_004447 | 13914.051 | 15438.161 | NM_000223 | 2076.643  | 2161.238  |
| NM_001204 | 11366.833 | 13390.012 | NM_005851 | 3037.824  | 2859.74   |
| BF131321  | 4552.176  | 4375.917  | AF119256  | 4679.69   | 4623.894  |
| NM_016540 | 936.848   | 996.969   | NM_007015 | 849.323   | 690.828   |
| NM_012116 | 7737.733  | 7909.309  | NM_005180 | 14451.741 | 14024.004 |
| NM_003742 | 7078.193  | 9187.334  | NM_003410 | 17517.564 | 17113.32  |
| NM_005094 | 7657.811  | 9476.443  | NM_007146 | 4532.892  | 4415.679  |
| BE382905  | 1621.695  | 1507.383  | NM_002229 | 10578.704 | 9737.409  |

|           |           |           |           |           |           |
|-----------|-----------|-----------|-----------|-----------|-----------|
| NM_002152 | 35975.012 | 42761.949 | S69027    | 13258.983 | 10498.371 |
| NM_001701 | 1406.897  | 1501.618  | X99631    | 41620.973 | 39789.695 |
| AK022558  | 5813.123  | 5900.266  | NM_001730 | 8018.553  | 7776.638  |
| NM_006476 | 65771.148 | 58467.457 | AK026290  | 13722.73  | 15485.947 |
| AK023787  | 6610.629  | 7634.392  | AB014589  | 5195.718  | 4717.61   |
| NM_002133 | 7338.627  | 8393.816  | AF248649  | 2736.486  | 2986.144  |
| NM_015697 | 14522.756 | 14558.617 | U37146    | 56636.836 | 54250.211 |
| AF086489  | 1209.659  | 979.417   | NM_012086 | 5956.928  | 5969.247  |
| AB018258  | 1051.69   | 1094.824  | AB040431  | 27401.723 | 26918.668 |
| NM_005953 | 36121.605 | 50133.867 | NM_000991 | 61000.996 | 72007.508 |
| BF337921  | 17984.586 | 21465.869 | NM_016034 | 56688.051 | 55228.09  |
| U53532    | 5723.894  | 5797.687  | X69150    | 61621.426 | 60560.414 |
| NM_001740 | 6922.592  | 7182.823  | NM_001025 | 62411.586 | 69636.641 |
| NM_012484 | 10768.938 | 8722.548  | NM_016067 | 59724.203 | 57279.859 |
| AL096732  | 9495.449  | 9455.802  | NM_018285 | 43588.574 | 47597.234 |
| AB006423  | 1919.971  | 2050.914  | AK022393  | 36706.605 | 36859.027 |
| NM_007312 | 1769.101  | 1104.273  | AK026302  | 31273.34  | 30720.475 |
| AK023915  | 22347.197 | 25700.936 | NM_012214 | 10497.234 | 9162.381  |
| AB051453  | 3803.527  | 3794.475  | AF049656  | 62297.566 | 60629.996 |
| AK026842  | 1372.42   | 1461.255  | NM_001966 | 5631.31   | 5454.965  |
| NM_002395 | 2130.913  | 2043.257  | NM_016138 | 10609.378 | 10078.791 |
| AB023203  | 3734.237  | 4571.383  | Z36833    | 62904.527 | 62354.555 |
| NM_014963 | 4004.254  | 4621.947  | AW963246  | 777.673   | 886.031   |
| NM_004259 | 5080.769  | 5489.979  | NM_014355 | 16313.456 | 16994.221 |
| NM_016271 | 21419.963 | 19295.631 | M21191    | 57072.34  | 61825.852 |
| NM_016619 | 2557.81   | 2029.797  | AF072810  | 4731.988  | 4256.917  |
| NM_014481 | 2749.635  | 3009.155  | L19778    | 2157.859  | 2270.992  |
| U22172    | 12543.129 | 14984.455 | AF174482  | 57895.07  | 59421.609 |
| AB032960  | 3352.371  | 3573.55   | NM_003528 | 14462.159 | 13853.187 |
| NM_014264 | 19636.471 | 21202.162 | NM_017769 | 2888.381  | 3029.692  |
| AF020089  | 3485.937  | 4667.176  | D85131    | 26992.684 | 27422.332 |
| NM_006257 | 4529.703  | 5543.942  | NM_004956 | 2609.127  | 2670.46   |
| NM_016281 | 22421.104 | 18972.859 | D30612    | 15908.75  | 15192.131 |
| NM_004734 | 41433.188 | 47861.922 | NM_002163 | 17002.346 | 16270.364 |
| AK024793  | 5043.593  | 4759.576  | U52097    | 33090.996 | 31472.492 |
| AF208291  | 2364.719  | 2158.225  | NM_003416 | 7255.39   | 8308.297  |
| NM_004877 | 47283.531 | 52162.121 | X74497    | 7669.08   | 7514.28   |
| L10284    | 69035.313 | 70228.992 | NM_012210 | 4718.475  | 4453.154  |
| NM_000276 | 4048.782  | 3901.942  | U10072    | 7406.371  | 6028.904  |
| NM_000019 | 69787.414 | 67561.539 | AF222749  | 45843.48  | 53932.125 |
| AK023701  | 5205.591  | 5405.161  | NM_001321 | 22582.293 | 19511.646 |
| NM_014333 | 975.959   | 924.73    | AB018264  | 25209.27  | 24872.621 |
| NM_002980 | 4010.296  | 4980.128  | NM_006911 | 2174.201  | 2577.002  |
| NM_015886 | 2040.575  | 2231.076  | U92544    | 12869.693 | 16241     |
| NM_020358 | 583.399   | 948.37    | NM_019644 | 2658.665  | 2743.752  |
| NM_004262 | 730.507   | 597.925   | NM_006791 | 7092.12   | 8330.892  |
| NM_007102 | 61819.066 | 73442.922 | AJ278348  | 47564.699 | 49261.586 |
| BG491613  | 18350.992 | 19889.881 | NM_015872 | 1543.045  | 1972.734  |
| AA397813  | 63140.855 | 59271.707 | AI285199  | 44094.348 | 45546.363 |
| W47350    | 14179.037 | 16765.004 | BI906283  | 667.669   | 595.387   |
| AF097935  | 549.366   | 451.301   | AA757170  | 1409.212  | 1269.98   |
| AI160964  | 2362.73   | 3009.167  | L07738    | 4878.026  | 5829.504  |
| W68291    | 25564.098 | 26970.148 | Z48054    | 14279.292 | 17209.105 |

|           |           |           |           |           |           |
|-----------|-----------|-----------|-----------|-----------|-----------|
| N64384    | 12576.71  | 12995.789 | H90415    | 23894.328 | 22475.379 |
| H-X 53655 | 4065.02   | 4777.026  | AA676470  | 56144.355 | 55749.27  |
| H-U 05770 | 14358.639 | 13611.9   | AA430512  | 19637.186 | 19014.5   |
| H-M 65199 | 37615.992 | 35931.664 | M38258    | 3716.8    | 3259.783  |
| H-M 32315 | 3756.337  | 3887.618  | AA457155  | 53930.344 | 59359.039 |
| H-V00536M | 9340.605  | 8622.794  | BM014365  | 2910.161  | 3001.469  |
| H-D85429M | 23517.58  | 22277.475 | H91842    | 2397.286  | 2590.145  |
| BF439832  | 4604.201  | 3337.539  | U78045    | 5632.768  | 6156.614  |
| BG819162  | 5330.396  | 4339.292  | AA878561  | 58383.824 | 59083.574 |
| M38449    | 15726.488 | 14621.76  | BF688309  | 1996.13   | 2038.86   |
| NM_001091 | 6510.756  | 7424.245  | AI538525  | 3462.115  | 3905.483  |
| NM_002416 | 1336.466  | 1358.725  | NM_005205 | 57409.996 | 66055.078 |
| NM_002728 | 4737.658  | 5297.619  | BE878426  | 52980.793 | 51891.387 |
| NM_000450 | 1023.042  | 923.909   | NM_001745 | 52983.836 | 52951.469 |
| NM_000448 | 5757.528  | 5177.6    | NM_003825 | 21523.332 | 25780.025 |
| NM_004513 | 16249.438 | 18002.682 | AK025006  | 21950.867 | 20493.361 |
| NM_001708 | 64713.84  | 57124.234 | AF218014  | 59087.992 | 51461.512 |
| NM_017735 | 12745.461 | 12298.745 | NM_006678 | 21236.477 | 19095.621 |
| AB033044  | 42355.906 | 44913.578 | AY007729  | 59968.039 | 54769.23  |
| AB014564  | 4557.068  | 5029.199  | NM_014424 | 1594.078  | 1238.627  |
| NM_020230 | 10012.8   | 12777.486 | AF159092  | 3458.796  | 3858.401  |
| NM_006762 | 62397.77  | 63650.828 | BC007318  | 9742.694  | 11547.479 |
| NM_006352 | 2918.385  | 3010.649  | M36693    | 21255.943 | 19939.119 |
| NM_016430 | 2027.951  | 3719.843  | NM_016292 | 40325.59  | 43243.43  |
| NM_004447 | 12743.163 | 13188.249 | NM_002601 | 12095.176 | 12161.303 |
| NM_001204 | 7496.39   | 8927.441  | U62858    | 634.652   | 1033.091  |
| BF131321  | 4168.326  | 4845.624  | NM_001781 | 3092.434  | 4639.417  |
| NM_016540 | 720.761   | 870.728   | AF035121  | 284.548   | 706.313   |
| NM_012116 | 7154.725  | 6720.09   | NM_014432 | 11467.425 | 12325.652 |
| NM_000020 | 18137.727 | 15282.791 | NM_001558 | 11243.38  | 11058.475 |
| NM_000956 | 1784.803  | 1236.594  | NM_002530 | 2533.704  | 3419.569  |
| AB033091  | 14416.972 | 14575.02  | NM_018941 | 7360.431  | 7398.204  |
| NM_004557 | 29407.521 | 29922.451 | NM_020241 | 648.373   | 878.443   |
| NM_016372 | 63945.863 | 67071.102 | NM_005898 | 40869.016 | 39263.211 |
| AB020705  | 8610.798  | 8433.345  | NM_002889 | 54137.852 | 48804.816 |
| BE382905  | 1313.622  | 1762.419  | AF078866  | 3449.309  | 3560.921  |
| NM_002152 | 37413.773 | 43277.695 | BF311880  | 43908.383 | 42710.328 |
| NM_001701 | 877.332   | 926.684   | NM_016075 | 1321.332  | 1158.847  |
| AK022558  | 6279.275  | 5625.931  | NM_001360 | 25834.383 | 25298.834 |
| NM_006476 | 64005.289 | 56194.582 | AK026656  | 32508.025 | 35730.727 |
| AK023787  | 7280.839  | 7419.487  | NM_000751 | 58561.766 | 51206.008 |
| NM_002133 | 7175.042  | 8593.813  | NM_005071 | 3173.785  | 3852.779  |
| NM_015697 | 13009.814 | 13658.854 | NM_016730 | 55024.719 | 50013.777 |
| AF086489  | 1118.932  | 1386.606  | AL035297  | 3975.157  | 4302.109  |
| AB018258  | 939.946   | 1335.384  | NM_004408 | 21097.033 | 20725.43  |
| NM_005953 | 40348.316 | 53711.934 | AJ131244  | 6694.497  | 7426.036  |
| BF337921  | 17668.734 | 20149.496 | NM_002532 | 14343.501 | 15696.805 |
| U53532    | 5582.466  | 5854.835  | NM_012388 | 14752.742 | 15661.313 |
| NM_001740 | 6227.278  | 6763.145  | NM_016651 | 4736.177  | 4545.138  |
| NM_012484 | 7599.872  | 7009.824  | NM_001671 | 1003.149  | 1469.996  |
| AL096732  | 8348.808  | 9220.803  | NM_019843 | 7825.084  | 8690.597  |
| AB006423  | 1616.843  | 1528.506  | NM_016192 | 16038.356 | 14060.412 |
| AJ132084  | 611.504   | 615.642   | AB046774  | 1896.243  | 1705.283  |

|           |           |           |           |           |           |
|-----------|-----------|-----------|-----------|-----------|-----------|
| NM_005719 | 65191.367 | 57270.688 | AK022385  | 56883.043 | 57176.672 |
| NM_003462 | 62061.43  | 54710.344 | NM_002775 | 1640.636  | 2185.091  |
| NM_006093 | 16462.67  | 14255.597 | AK024584  | 18946.33  | 10963.074 |
| NM_000139 | 2871.56   | 2950.039  | NM_013298 | 10293.308 | 9324.006  |
| NM_006664 | 10641.229 | 13261.47  | NM_007267 | 6881.356  | 8280.284  |
| AB051453  | 2755.494  | 2915.673  | AK022830  | 1497.047  | 1970.182  |
| NM_002395 | 1905.891  | 1864.773  | NM_005865 | 23485.203 | 24807.602 |
| AB023203  | 4004.313  | 3964.104  | NM_006413 | 19821.316 | 21260.164 |
| NM_014963 | 4128.423  | 3657.036  | NM_017684 | 1423.221  | 1503.273  |
| NM_004259 | 4948.315  | 4694.065  | AK025542  | 13959.898 | 12757.865 |
| NM_016271 | 18998.203 | 16852.209 | AF207547  | 2224.047  | 2163.709  |
| NM_016619 | 2508.538  | 2743.867  | NM_002768 | 32740.32  | 33115.52  |
| NM_014481 | 2537.105  | 2731.41   | NM_003691 | 4451.339  | 4731.243  |
| U22172    | 13652.058 | 13317.24  | NM_002950 | 35033.445 | 33674.746 |
| AB032960  | 3011.648  | 3427.686  | NM_002318 | 15099.339 | 15060.317 |
| NM_014264 | 22824.102 | 20649.424 | NM_001433 | 1414.631  | 1286.587  |
| AF020089  | 5229.628  | 6182.1    | NM_003134 | 54716.816 | 50877.016 |
| NM_006257 | 2465.069  | 2710.954  | NM_004314 | 8558.854  | 9398.472  |
| NM_016281 | 17698.393 | 18609.346 | NM_018247 | 22933.904 | 24651.141 |
| NM_004734 | 36419.777 | 43097.449 | NM_017979 | 26179.123 | 27693.848 |
| AK024793  | 5845.267  | 6840.797  | NM_006911 | 2357.237  | 2007.273  |
| AF208291  | 1746.017  | 2053.389  | U92544    | 16865.361 | 20104.273 |
| NM_004877 | 42345.809 | 43006.629 | NM_019644 | 3646.318  | 4099.481  |
| L10284    | 70365.547 | 63015.047 | NM_006791 | 7646.025  | 8856.431  |
| NM_000276 | 3742.455  | 3715.062  | AJ278348  | 49887.063 | 51907.359 |
| NM_000019 | 68551.172 | 75053.359 | AI285199  | 28887.502 | 28527.443 |
| AK023701  | 5071.238  | 4767.895  | BI906283  | 2863.881  | 2919.17   |
| NM_003742 | 7719.977  | 9327.134  | Z48054    | 12696.967 | 15874.658 |
| NM_005094 | 7618.117  | 8574.359  | H90415    | 24064.58  | 22768.879 |
| NM_015886 | 2886.411  | 2381.293  | AA676470  | 57391.727 | 58123.277 |
| NM_020358 | 817.373   | 568.719   | AA430512  | 18404.467 | 17072.016 |
| NM_007102 | 59188.211 | 63027.598 | M38258    | 3738.083  | 3503.973  |
| BG491613  | 17985.283 | 20214.338 | AA457155  | 53967.207 | 55681.871 |
| AA397813  | 60790.523 | 58678.684 | BM014365  | 2743.529  | 2384.673  |
| W47350    | 14217.674 | 13911.919 | H91842    | 1874.241  | 1715.633  |
| AI160964  | 1997.433  | 2465.268  | U78045    | 6840.667  | 6372.545  |
| W68291    | 26989.473 | 31167.609 | AA878561  | 54964.871 | 56586.758 |
| N64384    | 12192.046 | 12130.842 | BF688309  | 2022.573  | 2373.005  |
| H-X 53655 | 4171.153  | 4036.436  | AI538525  | 3484.036  | 4094.593  |
| H-U 05770 | 12344.227 | 13646.857 | AF222980  | 2493.002  | 2643.724  |
| H-M 65199 | 35041.188 | 38466.789 | AK026758  | 7991.138  | 8785.577  |
| H-M 32315 | 3715.515  | 4969.226  | NM_012201 | 10718.098 | 10669.548 |
| H-V00536M | 8372.313  | 10329.891 | NM_001745 | 55889.871 | 52850.102 |
| H-D85429M | 24997.871 | 26404.723 | NM_003825 | 23964.811 | 27003.955 |
| BF439832  | 4323.976  | 4107.307  | AK025006  | 23640.26  | 22842.736 |
| BG819162  | 4890.13   | 4992.88   | AF218014  | 57450.797 | 57122.289 |
| M38449    | 14713.169 | 13631.77  | NM_006678 | 19008.016 | 21215.131 |
| NM_001091 | 6534.635  | 6048.502  | AF159092  | 1781.948  | 1849.515  |
| AK023915  | 24586.057 | 27932.502 | BC007318  | 8209.621  | 8749.455  |
| AB014564  | 3985.325  | 3827.69   | M36693    | 19800.246 | 18174.422 |
| NM_020230 | 9879.236  | 10220.423 | NM_016292 | 36793.426 | 42038.707 |
| NM_006762 | 61495.328 | 59830.637 | NM_002601 | 13065.926 | 10829.615 |
| NM_006352 | 2980.479  | 2809.528  | U62858    | 681.842   | 531.694   |

|           |           |           |           |           |           |
|-----------|-----------|-----------|-----------|-----------|-----------|
| NM_01643C | 1457.05   | 2553.925  | NM_000877 | 461.461   | 598.217   |
| NM_004447 | 12702.094 | 9883.407  | NM_001781 | 2832.497  | 3306.054  |
| NM_001204 | 8662.368  | 8875.52   | NM_014432 | 12135.55  | 11766.245 |
| BF131321  | 4833.104  | 4982.238  | NM_001558 | 11480.094 | 11782.647 |
| NM_01654C | 955.071   | 837.897   | NM_006953 | 795.273   | 1024.798  |
| NM_012116 | 7537.996  | 9233.786  | NM_00253C | 3139.209  | 3461.502  |
| NM_00002C | 20495.146 | 22116.355 | NM_018941 | 7022.952  | 8449.431  |
| NM_000956 | 2393.856  | 2225.147  | NM_020241 | 849.821   | 1107.222  |
| NM_002442 | 10890.083 | 12511.613 | NM_001321 | 17005.264 | 16828.068 |
| NM_017893 | 967.323   | 1538.671  | AB018264  | 21163.98  | 22536.039 |
| NM_001584 | 9613.819  | 8565.614  | AF078866  | 3567.819  | 3730.365  |
| NM_012259 | 63577.523 | 61378.387 | BF311880  | 54887.449 | 53987.383 |
| AF272357  | 8677.706  | 8010.449  | NM_000078 | 1154.404  | 1322.695  |
| NM_016372 | 63367.039 | 56677.547 | NM_016075 | 1369.156  | 1429.313  |
| AB020705  | 8252.207  | 7427.765  | NM_00136C | 24358.502 | 21926.902 |
| NM_014333 | 502.207   | 641.836   | AK026656  | 33028.922 | 36818     |
| NM_00298C | 4044.711  | 4378.214  | NM_000751 | 59884.605 | 54155.148 |
| NM_016274 | 7494.113  | 7318.646  | NM_005071 | 3283.466  | 3305.064  |
| NM_014946 | 2388.051  | 2478.205  | NM_01673C | 58010.973 | 56951.457 |
| NM_014251 | 5489.053  | 5898.454  | AL035297  | 3740.927  | 4070.039  |
| AK022750  | 13803.489 | 13513.513 | NM_004408 | 21147.83  | 21013.844 |
| NM_004251 | 15599.062 | 13847.117 | AJ131244  | 5759.954  | 6673.963  |
| BF337921  | 15371.778 | 15169.305 | NM_002532 | 15909.25  | 15657.836 |
| U53532    | 5021.796  | 4349.951  | NM_012388 | 12929.521 | 13771.719 |
| NM_00174C | 7494.956  | 7407.558  | NM_016651 | 4736.02   | 5014.287  |
| NM_012484 | 9285.38   | 9399.746  | NM_001671 | 1412.545  | 1518.944  |
| AL096732  | 8603.197  | 8432.396  | NM_019843 | 9820.86   | 10159.607 |
| AB006423  | 1532.324  | 1319.115  | NM_016192 | 23587.107 | 26575.719 |
| AJ132084  | 522.03    | 446.459   | BE878426  | 56418.953 | 54159.785 |
| NM_005719 | 61468.289 | 53727.129 | AK022385  | 61673.223 | 57352.84  |
| NM_003462 | 58870.34  | 49977.742 | NM_002775 | 1768.407  | 2226.707  |
| NM_006664 | 7121.825  | 9294.436  | AK024584  | 20897.053 | 11161.849 |
| NM_002416 | 964.863   | 1243.121  | NM_003504 | 13501.667 | 16030.646 |
| NM_002728 | 3884.604  | 4406.218  | NM_013298 | 11525.548 | 11945.354 |
| NM_00045C | 758.284   | 938.346   | NM_007267 | 6269.022  | 7620.493  |
| NM_000448 | 4137.168  | 3872.343  | AK022830  | 665.236   | 801.687   |
| NM_004513 | 16330.638 | 15777.233 | Z36816    | 14510.122 | 15142.836 |
| NM_001708 | 61370.699 | 53358.746 | NM_005865 | 19963.201 | 17964.143 |
| NM_017735 | 12649.912 | 12966.378 | NM_006413 | 21268.736 | 24111.775 |
| AB033044  | 45833.195 | 44603.719 | NM_017684 | 1455.483  | 1426.611  |
| NM_000276 | 3424.738  | 3374.323  | AK025542  | 11518.024 | 11529.377 |
| NM_000019 | 62528.16  | 56563.844 | AF207547  | 1882.825  | 1958.477  |
| AK023701  | 4221.324  | 4383.693  | NM_002768 | 31094.113 | 31620.543 |
| NM_003742 | 7252.03   | 8143.208  | NM_003691 | 4661.159  | 4938.853  |
| NM_005094 | 5391.728  | 5474.001  | NM_00295C | 34015.555 | 35202.184 |
| BE382905  | 1432.085  | 1021.184  | NM_002318 | 15663.731 | 15133.089 |
| NM_002152 | 32037.008 | 35556.914 | NM_001433 | 1476.039  | 1410.256  |
| NM_001701 | 544.668   | 623.959   | NM_003134 | 60873.172 | 53523.16  |
| AK022558  | 4290.101  | 3754.359  | NM_004314 | 10679.995 | 11509.19  |
| NM_006476 | 62901.664 | 56148.59  | NM_018247 | 30566.877 | 33067.531 |
| AK023787  | 5747.878  | 5026.589  | NM_017979 | 33820.977 | 35267.859 |
| NM_002133 | 6512.698  | 6812.419  | NM_005898 | 44670.676 | 46931.301 |
| NM_015697 | 11607.011 | 12564.917 | NM_002889 | 55437.52  | 53782.566 |

|           |           |           |           |           |           |
|-----------|-----------|-----------|-----------|-----------|-----------|
| NM_032943 | 7337.203  | 7721.129  | NM_019644 | 4402.159  | 5266.271  |
| NM_007177 | 45132.105 | 42398.578 | NM_006791 | 8168.106  | 10086.86  |
| NM_000809 | 1045.148  | 908.409   | AJ278348  | 57526.004 | 53579.023 |
| AB018258  | 572.29    | 722.479   | NM_015872 | 2512.942  | 2157.301  |
| AL359592  | 1422.204  | 1513.732  | AI285199  | 44612.234 | 48708.426 |
| NM_006078 | 17807.807 | 17359.244 | BI906283  | 754.681   | 785.095   |
| NM_000824 | 513.086   | 579.64    | AA757170  | 1284.19   | 1096.333  |
| NM_000482 | 897.611   | 1191.963  | L07738    | 4220.786  | 4035.885  |
| NM_005953 | 40466.547 | 49993.574 | Z48054    | 11024.221 | 12557.046 |
| M38449    | 12889.824 | 10824.563 | H90415    | 22077.24  | 22191.25  |
| NM_001091 | 4127.426  | 3364.09   | AA676470  | 56134.523 | 59485.344 |
| AK023915  | 18298.863 | 18752.449 | AA430512  | 17898.033 | 18304.889 |
| AB051453  | 2561.501  | 2601.603  | M38258    | 3761.988  | 3577.387  |
| AK026842  | 1615.023  | 1045.503  | AA457155  | 55513.973 | 65202.023 |
| NM_002395 | 2036.835  | 1755.101  | BM014365  | 2787.029  | 3079.176  |
| AB023203  | 2346.055  | 2157.607  | H91842    | 1922.966  | 2301.861  |
| NM_014963 | 3100.365  | 2973.288  | U78045    | 9951.008  | 10317.589 |
| NM_004259 | 4303.062  | 4009.109  | AA878561  | 61063.625 | 62636.699 |
| NM_016271 | 19821.908 | 18134.824 | BF688309  | 2323.594  | 2467.361  |
| NM_016619 | 2145.973  | 2138.945  | AI538525  | 3823.849  | 3966.497  |
| NM_014481 | 2359.508  | 2295.279  | AF222980  | 2658.325  | 3112.44   |
| U22172    | 11016.165 | 11326.908 | AK026758  | 13691.434 | 13561.811 |
| AB032960  | 2883.653  | 3477.83   | NM_012201 | 12832.806 | 13625.103 |
| NM_014264 | 19578.189 | 19449.34  | AB046774  | 2239.277  | 2600.995  |
| AF020089  | 4496.722  | 4732.982  | AF159092  | 4279.089  | 4630.94   |
| NM_006257 | 2479.208  | 2295.362  | BC007318  | 8763.499  | 8655.725  |
| NM_016281 | 16413.381 | 12048.573 | M36693    | 21697.25  | 22813.934 |
| NM_004734 | 35663.301 | 39557.277 | NM_016292 | 40131.785 | 44895.953 |
| AK024793  | 4099.825  | 4784.664  | NM_002601 | 12736.005 | 12532.612 |
| AF208291  | 2020.618  | 1908.248  | U62858    | 547.856   | 554.769   |
| NM_004877 | 44940.23  | 44434.273 | NM_000877 | 524.871   | 876.251   |
| L10284    | 65851.539 | 57415.355 | NM_001781 | 2886.025  | 3947.898  |
| CY3Cy5    | 10502.066 | 295.287   | NM_014432 | 13096.34  | 14694.184 |
| NM_000620 | 660.522   | 563.502   | NM_001558 | 13858.154 | 14133.999 |
| NM_000905 | 9756.979  | 9452.942  | NM_006953 | 1162.947  | 1108.677  |
| AK023269  | 3411.315  | 3406.485  | NM_002530 | 3266.981  | 3930.272  |
| AF070564  | 17386.291 | 16798.357 | U96173    | 4008.881  | 4164.921  |
| AK021439  | 46627.699 | 52315.469 | NM_018941 | 8626.51   | 9696.111  |
| AF052099  | 7383.775  | 7503.357  | NM_020241 | 865.14    | 1170.32   |
| AL110111  | 6836.9    | 8568.691  | BE730585  | 5108.018  | 5286.245  |
| AF070543  | 1279.567  | 1321.907  | NM_001980 | 4008.371  | 4253.007  |
| NM_014778 | 4383.227  | 3597.427  | NM_006159 | 647.463   | 788.244   |
| AK001171  | 29402.814 | 29797.768 | NM_005954 | 2530.363  | 2279.242  |
| AF086491  | 7984.51   | 6839.608  | NM_012471 | 1918.279  | 2154.411  |
| NM_014856 | 1242.401  | 1070.355  | NM_001321 | 22446.914 | 22921.99  |
| NM_003492 | 968.753   | 918.039   | AB018264  | 27609.459 | 30220.906 |
| NM_000905 | 7713.827  | 7203.969  | NM_006911 | 2624.504  | 2787.013  |
| SR1       | 84114.625 | 61830.094 | U92544    | 15546.609 | 21628.252 |
| SR3       | 42877.828 | 38608.176 | AB023147  | 8346.84   | 9204.063  |
| SR5       | 5709.572  | 5287.342  | NM_016615 | 44130.191 | 43218.359 |
| SR7       | 5923.22   | 36323.219 | NM_005630 | 3334.408  | 3030.314  |
| SR9       | 15921.388 | 2654.212  | NM_001046 | 732.895   | 973.639   |
| CY3Cy5    | 12298.838 | 409.825   | AK023106  | 6987.525  | 7077.534  |

|           |           |           |           |           |           |
|-----------|-----------|-----------|-----------|-----------|-----------|
| U63828    | 4822.035  | 3795.67   | NM_016730 | 60970.848 | 58912.102 |
| Z36794    | 1481.802  | 1629.629  | AL035297  | 3721.761  | 4041.523  |
| Z36828    | 12502.366 | 12319.32  | NM_004408 | 24489.164 | 25250.516 |
| AF086121  | 36006.488 | 30020.879 | AJ131244  | 5136.938  | 6007.7    |
| AF086140  | 2210.963  | 1956.453  | NM_002532 | 16745.457 | 19539.063 |
| NM_015696 | 532.431   | 548.552   | NM_012388 | 18132.867 | 18305.627 |
| AK022551  | 3377.23   | 2956.764  | NM_016651 | 5490.268  | 6221.904  |
| AF085968  | 2444.101  | 2204.76   | NM_001671 | 1918.166  | 2214.594  |
| AB011136  | 3791.732  | 3569.811  | NM_019843 | 10597.273 | 10584.027 |
| AF085898  | 5686.335  | 4678.345  | NM_016192 | 23572.154 | 22883.764 |
| AL161960  | 2989.4    | 2798.306  | BE878426  | 59088.164 | 58653.91  |
| AL049964  | 5938.548  | 7758.668  | NM_001745 | 55628.82  | 53535.02  |
| AK022485  | 790.245   | 784.396   | NM_003825 | 23008.252 | 26243.703 |
| AK023395  | 10658.888 | 14265.714 | AK025006  | 21696.346 | 20017.119 |
| AK023818  | 12651.419 | 9344.872  | AF218014  | 58795.629 | 56599.617 |
| AK024139  | 617.959   | 802.629   | NM_006678 | 22383.326 | 24082.855 |
| AK023895  | 440.737   | 590.996   | AY007729  | 58148.406 | 58541.465 |
| AK024206  | 19175.383 | 16416.025 | NM_014424 | 1759.735  | 1776.998  |
| AK026273  | 39588.84  | 48798.336 | NM_004314 | 9396.754  | 9431.871  |
| NM_020250 | 50903.766 | 54664.941 | NM_018247 | 29433.813 | 30958.594 |
| AF055007  | 1252.441  | 799.943   | NM_017979 | 31696.867 | 32773.035 |
| NM_012337 | 2165.601  | 2289.742  | NM_005898 | 40555.359 | 42729.535 |
| AL389879  | 34921.223 | 32287.1   | NM_002889 | 60890.012 | 57944.266 |
| AK022869  | 2619.049  | 1703.078  | AF078866  | 3424.645  | 3327.36   |
| NM_016111 | 32166.568 | 32110.359 | BF311880  | 46528.613 | 50009.285 |
| AF085958  | 70348.805 | 64259.184 | NM_000078 | 1168.093  | 1458.889  |
| AF086021  | 10914.055 | 8872.961  | NM_016075 | 1359.32   | 1924.394  |
| AL117655  | 490.485   | 610.059   | NM_001360 | 25716.898 | 25291.121 |
| AK024472  | 7363.45   | 10381.893 | AK026656  | 35376.16  | 37687.246 |
| AF087981  | 659.558   | 947.225   | AJ276207  | 31789.951 | 38397.129 |
| NM_017976 | 6975.466  | 11141.682 | AB011131  | 14391.499 | 14416.326 |
| U06700    | 2281.808  | 2256.348  | NM_000749 | 1361.653  | 1492.679  |
| NM_017918 | 17428.346 | 17133.309 | NM_000751 | 59749.641 | 59750.563 |
| NM_017855 | 69058.039 | 64977.359 | NM_014849 | 14830.125 | 13516.405 |
| AB007954  | 3749.979  | 3263.698  | NM_001042 | 13373.338 | 14025.298 |
| AK026494  | 6301.493  | 5487.611  | NM_012229 | 6880.796  | 6638.124  |
| AK023508  | 1183.943  | 1459.019  | NM_005071 | 2956.013  | 2846.695  |
| AK025840  | 2844.053  | 3019.194  | AF222980  | 2377.693  | 2655.116  |
| AK026915  | 3326.405  | 3195.958  | AK026758  | 14278.568 | 13711.516 |
| AL110259  | 689.949   | 570.497   | NM_012201 | 10949.503 | 11003.845 |
| AB033100  | 55434.18  | 55465.617 | AB046774  | 1825.361  | 2030.871  |
| AL390138  | 4707.162  | 5158.856  | AK022385  | 57073.594 | 55948.262 |
| AL137290  | 8083.474  | 7133.478  | NM_002775 | 1717.175  | 2055.167  |
| NM_014124 | 60173.902 | 50430.949 | AK024584  | 19671.773 | 10313.121 |
| AF119888  | 1053.825  | 1095.84   | NM_003504 | 12721.813 | 14396.646 |
| AK001551  | 5381.861  | 5285.382  | NM_013298 | 11377.753 | 10898.796 |
| AK001825  | 2678.947  | 2271.352  | NM_007267 | 6985.928  | 7644.413  |
| AK024714  | 827.752   | 983.161   | Z36816    | 15352.345 | 19363.709 |
| AK022363  | 2232.44   | 2717.715  | NM_005865 | 25589.76  | 27094.615 |
| AL353949  | 781.908   | 943.919   | NM_006413 | 19015.441 | 20142.133 |
| NM_005181 | 1449.042  | 1337.738  | NM_017684 | 1699.213  | 1674.592  |
| AF026945  | 698.367   | 1019.875  | AK025542  | 14536.439 | 15342.166 |
| AF143676  | 6010.996  | 6320.631  | AF207547  | 2149.588  | 2041.674  |

|           |           |           |           |           |           |
|-----------|-----------|-----------|-----------|-----------|-----------|
| U66044    | 42167.609 | 47807.102 | NM_002768 | 32533.963 | 32287.611 |
| NM_005247 | 69760.625 | 66667.016 | NM_003691 | 4163.108  | 4118.193  |
| NM_005283 | 3011.789  | 2982.232  | NM_002950 | 32377.934 | 31890.697 |
| AL122089  | 1283.033  | 1078.795  | NM_002318 | 14406.697 | 14438.111 |
| AA203665  | 9439.153  | 8943.24   | NM_001433 | 1549.611  | 1563.851  |
| U95646    | 1257.676  | 2212.177  | NM_003134 | 62796.164 | 59834.531 |
| Y16705    | 2409.951  | 2068.591  | CY3Cy5    | 7889.511  | 83.905    |
| AF279775  | 9519.403  | 9913.48   | NM_022095 | 2243.752  | 2214.19   |
| NM_006262 | 3033.237  | 3127.225  | AF088061  | 5050.206  | 4378.131  |
| AK026598  | 2677.018  | 2352.805  | AF086425  | 793.291   | 651.175   |
| AK023602  | 1203.594  | 1124.08   | AF086286  | 5717.152  | 5151.923  |
| NM_018097 | 53107.289 | 49828.465 | AF086376  | 5809.542  | 4661.068  |
| AF130043  | 753.434   | 1026.91   | AF086410  | 1958.518  | 2664.596  |
| Y11167    | 2181.129  | 2525.614  | AF086455  | 671.492   | 596.241   |
| AK026813  | 1973.063  | 1917.583  | AK022997  | 24359.166 | 18969.354 |
| AK027225  | 2450.961  | 2701.304  | NM_017617 | 8104.044  | 5634.03   |
| AK023083  | 3650.253  | 3393.475  | AF131830  | 2811.279  | 2218.736  |
| AF130093  | 1072.55   | 953.548   | NM_014811 | 1470.522  | 1429.661  |
| AF116622  | 937.824   | 786.791   | AK027232  | 21167.941 | 19530.238 |
| AF217967  | 1451.961  | 2608.552  | NM_012204 | 1272.329  | 1248.162  |
| NM_017447 | 5153.066  | 4199.645  | NM_004342 | 756.198   | 827.762   |
| NM_016622 | 3441.663  | 3086.152  | NM_022095 | 3824.287  | 3539.269  |
| AK026976  | 3326.593  | 3978.993  | SR2       | 67583.578 | 71567.016 |
| AF070559  | 1248.009  | 969.24    | SR4       | 35307.855 | 34934.125 |
| D42043    | 48565.152 | 46146.238 | SR6       | 4384.427  | 3672.107  |
| BC024009  | 6668.942  | 6186.78   | SR8       | 15271.19  | 41284.77  |
| AF128543  | 22337.279 | 20844.93  | SR10      | 50556.148 | 16109.123 |
| NM_004188 | 1412.222  | 1073.92   | CY3Cy5    | 14388.087 | 143.155   |
| X94290    | 3064.112  | 3904.347  | AF088064  | 732.561   | 674.914   |
| AK026685  | 49446.543 | 51224.484 | AF086103  | 2245.322  | 1943.799  |
| AF090927  | 65406.703 | 58360.844 | AL080135  | 2086.439  | 1754.398  |
| AL137642  | 1966.07   | 2028.296  | AK023158  | 3826.2    | 2828.127  |
| AL133619  | 17831.084 | 14138.758 | AK000580  | 1757.597  | 1634.613  |
| AK025902  | 6503.236  | 7572.328  | AF085852  | 10794.958 | 9850.38   |
| NM_004517 | 4341.004  | 3980.102  | AF042838  | 4097.453  | 3546.16   |
| AI017418  | 746.805   | 496.839   | AL137511  | 2068.601  | 1800.058  |
| NM_000678 | 3805.216  | 3588.132  | X91221    | 558.083   | 657.6     |
| AF218006  | 69161.117 | 68081.578 | AF075031  | 1223.528  | 1204.384  |
| AK026935  | 43575.152 | 50635.09  | AF075062  | 21376.986 | 17299.197 |
| NM_020162 | 6304.705  | 5104.756  | NM_004188 | 3286.76   | 2853.982  |
| AK027124  | 64822.285 | 57733.352 | AF147381  | 19733.572 | 18160.082 |
| M31212    | 25381.525 | 28906.912 | AB002452  | 976.849   | 1025.43   |
| NM_001821 | 8771.637  | 9855.63   | AK027101  | 51319.758 | 46082.777 |
| NM_005647 | 1977.87   | 1689.664  | AF010236  | 1214.827  | 1183.127  |
| X64978    | 19447.193 | 20933.105 | AK024358  | 6466.482  | 5253.137  |
| NM_000912 | 57335.77  | 52984.582 | NM_014840 | 1186.671  | 866.88    |
| NM_002345 | 2213.938  | 2191.221  | D17085    | 973.814   | 1350.278  |
| U57971    | 3510.918  | 3379.416  | AF088075  | 4550.814  | 4161.519  |
| X89673    | 2826.757  | 2862.643  | AK026376  | 6317.261  | 5913.309  |
| AK024593  | 3264.908  | 3596.254  | AK027097  | 1499.686  | 1477.021  |
| Z83934    | 1517.647  | 1638.318  | AK024613  | 1550.263  | 1459.552  |
| NM_018358 | 4809.315  | 4488.591  | AL117437  | 924.977   | 731.374   |
| AK022020  | 3736.623  | 3518.453  | AK027198  | 4437.007  | 3572.267  |



|           |           |           |           |           |           |
|-----------|-----------|-----------|-----------|-----------|-----------|
| U17634    | 776.657   | 943.839   | AL162077  | 1215.203  | 855.856   |
| AK000263  | 20540.105 | 20162.793 | AK022404  | 1463.844  | 1808.183  |
| Y13895    | 1563.178  | 1707.065  | AF147426  | 5639.592  | 6793.23   |
| L14723    | 32654.438 | 39749.34  | BC019667  | 55806.957 | 55183.574 |
| AK024462  | 53002.816 | 57078.523 | AK026026  | 42869.129 | 40692.457 |
| NM_019601 | 556.193   | 479.884   | AF085941  | 34694.074 | 32182.377 |
| NM_002206 | 1200.032  | 1110.719  | Z69892    | 23557.826 | 20112.42  |
| NM_007074 | 972.477   | 855.449   | AF085977  | 353.128   | 626.574   |
| NM_006614 | 951.867   | 661.323   | AK023590  | 1751.895  | 1678.252  |
| NM_002230 | 4107.037  | 3221.417  | AF087961  | 2371.585  | 1744.532  |
| NM_003815 | 9643.744  | 8033.731  | AL137309  | 6544.062  | 5796.373  |
| NM_001430 | 2167.542  | 1761.95   | AL137475  | 2824.127  | 2953.048  |
| AB010098  | 1260.61   | 1096.179  | AL161956  | 9263.096  | 9960.954  |
| U17989    | 3118.062  | 3078.267  | AL390176  | 4987.795  | 4961.381  |
| U62325    | 2710.8    | 3180.979  | AL137356  | 2451.623  | 2406.561  |
| AL137595  | 1258.512  | 1287      | AL137547  | 2970.25   | 3069.157  |
| NM_018025 | 1930.037  | 1637.269  | AK021994  | 3379.303  | 3705.164  |
| AF249267  | 67146.797 | 62728.953 | Z70763    | 1894.13   | 1763.147  |
| NM_004113 | 903.274   | 797.535   | AK023802  | 50102.113 | 51659.156 |
| X84939    | 7030.276  | 6364.353  | AK021981  | 2191.196  | 1986.427  |
| NM_018320 | 51452.879 | 55466.328 | AL359567  | 3175.538  | 4066.933  |
| NM_002065 | 7196.227  | 6157.956  | NM_017726 | 14261.544 | 14176.229 |
| NM_016055 | 11908.254 | 8816.29   | AK026716  | 1201.836  | 1451.606  |
| AF188492  | 729.577   | 697.596   | AL049325  | 25696.701 | 25618.473 |
| M65066    | 22934.84  | 22602.58  | AK023952  | 3009.61   | 3519.846  |
| NM_016951 | 4005.425  | 4161.288  | AK000787  | 2097.367  | 2024.328  |
| NM_013251 | 1471.175  | 1384.99   | AF090885  | 39284.895 | 42448.926 |
| NM_012325 | 1536.147  | 1564.374  | AF161342  | 1209.116  | 1215.085  |
| NM_003085 | 69659.18  | 66581.852 | NM_016645 | 1111.596  | 1010.273  |
| NM_016084 | 22891.957 | 18328.555 | NM_014082 | 5759.158  | 5346.014  |
| AF095289  | 28773.67  | 32410.346 | AF100636  | 1570.781  | 1578.247  |
| NM_005537 | 3621.922  | 3906.646  | AF161366  | 1077.708  | 812.822   |
| AC003962  | 552.377   | 830.099   | AK022197  | 5436.749  | 4868.707  |
| NM_019003 | 3366.949  | 2982.146  | AK021970  | 2175.887  | 2397.092  |
| NM_015935 | 25484.064 | 25699.279 | AK022066  | 66015.328 | 65564.031 |
| AF182412  | 2101.231  | 2244.72   | AK022224  | 3448.33   | 3561.598  |
| AK027200  | 2530.301  | 2326.985  | AK022359  | 2068.867  | 2065.842  |
| U03106    | 15551.542 | 21132.879 | AK022000  | 4772.643  | 4401.894  |
| NM_000075 | 25045.514 | 25479.434 | AK022129  | 10835.375 | 10479.627 |
| NM_006845 | 59393.137 | 52912.496 | AK022263  | 9945.349  | 8653.339  |
| NM_014885 | 662.572   | 708.439   | AK022384  | 2016.789  | 2148.088  |
| M73239    | 822.81    | 784.832   | AF086304  | 40374.492 | 44619.742 |
| NM_004945 | 6187.323  | 6275.052  | D55641    | 1188.518  | 1345.558  |
| NM_020242 | 2162.134  | 1910.205  | AB032976  | 3734.026  | 3680.111  |
| NM_001785 | 37404.395 | 39150.215 | AF301222  | 37399.227 | 41285.234 |
| NM_007175 | 67254.391 | 60264.82  | AK025114  | 1645.1    | 2237.341  |
| NM_017682 | 1377.276  | 1549.504  | AF215981  | 28579.256 | 29021.994 |
| NM_002205 | 10065.243 | 9714.409  | NM_000732 | 61726.824 | 56992.93  |
| NM_002291 | 925.352   | 1258.947  | AF130044  | 3307.982  | 3101.687  |
| AL137477  | 21003.557 | 24683.514 | AF116709  | 1234.866  | 944.762   |
| NM_016645 | 15729.747 | 17082.994 | AF087980  | 2218.852  | 1664.893  |
| NM_014255 | 7955.775  | 8517.51   | AK000257  | 1894.405  | 1773.901  |
| NM_015967 | 4270.004  | 4429.801  | NM_006160 | 25090.211 | 21269.027 |

|           |           |           |           |           |           |
|-----------|-----------|-----------|-----------|-----------|-----------|
| NM_002409 | 2951.637  | 2711.153  | NM_000529 | 6072.215  | 5129.57   |
| NM_004994 | 54114.613 | 54947.098 | AL110159  | 866.181   | 765.256   |
| NM_006610 | 47202.598 | 46188.691 | AF009259  | 2290.659  | 2877.926  |
| NM_017626 | 670.907   | 516.035   | AF009260  | 2481.198  | 2462.312  |
| NM_003791 | 7340.757  | 7109.496  | NM_003079 | 3787.82   | 3643.034  |
| NM_018017 | 13517.821 | 13612.711 | NM_017902 | 5969.917  | 5886.408  |
| AK001296  | 40070.336 | 46425.605 | NM_017835 | 37525.84  | 39058.578 |
| AK000173  | 761.128   | 1019.804  | NM_018347 | 12915.574 | 10613.251 |
| NM_018365 | 4480.449  | 3167.761  | AF086223  | 6944.371  | 6890.333  |
| NM_006586 | 66600.883 | 53942.73  | AK024986  | 3911.661  | 3174.869  |
| AJ272180  | 3391.417  | 3432.58   | AK026730  | 5391.057  | 4040.498  |
| AK025709  | 2785.35   | 2786.46   | AK024739  | 5480.112  | 5088.134  |
| NM_019016 | 46423.121 | 46725.063 | AK098681  | 3867.271  | 3891.567  |
| NM_012261 | 24882.732 | 28776.652 | AK026772  | 9900.272  | 8999.289  |
| NM_015556 | 14714.576 | 16926.938 | NM_014260 | 30373.652 | 34203.754 |
| NM_006099 | 6621.288  | 8352.188  | AK026458  | 1945.124  | 1849.529  |
| AF272379  | 12522.908 | 16896.828 | AK022266  | 1076.278  | 1125.956  |
| AB046808  | 3756.912  | 2774.785  | AK024154  | 19152.93  | 20131.492 |
| AK026265  | 2698.689  | 2455.786  | AF086341  | 1997.966  | 1894.791  |
| AK027179  | 2869.824  | 2120.542  | AK026672  | 1979.979  | 1848.32   |
| AF015313  | 798.275   | 801.397   | S83282    | 68751.063 | 66850.719 |
| NM_006466 | 3287.693  | 1732.532  | AK024164  | 65062.953 | 57389.449 |
| NM_005681 | 3714.814  | 3219.983  | AF052130  | 12902.642 | 12139.016 |
| NM_015156 | 5058.996  | 4892.139  | AF130090  | 47456.758 | 50804.629 |
| NM_012384 | 5749.451  | 5174.129  | AL096727  | 4818.53   | 5149.517  |
| NM_004653 | 9150.213  | 6795.128  | AL080110  | 11394.667 | 11760.977 |
| AF233453  | 6197.398  | 6149.035  | NM_020425 | 3050.721  | 3005.12   |
| D87454    | 24873.332 | 22548.523 | AK024076  | 10192.024 | 10132.958 |
| NM_007020 | 7014.566  | 4939.405  | M87940    | 3539.81   | 3288.295  |
| NM_000713 | 43862.629 | 44510.188 | L77588    | 6765.262  | 6228.249  |
| NM_016055 | 31824.629 | 30555.537 | NM_014273 | 38848.684 | 37858.809 |
| NM_013291 | 18498.389 | 15689.877 | AF039442  | 2760.877  | 2929.54   |
| NM_002936 | 22410.373 | 19702.035 | NM_004680 | 2429.513  | 2531.559  |
| NM_014161 | 9570.809  | 7782.385  | AF104260  | 946.002   | 889.053   |
| BF312817  | 12896.72  | 13953.366 | NM_005671 | 2499.41   | 2532.965  |
| AF284580  | 3419.443  | 3889.954  | NM_017409 | 1299.918  | 698.256   |
| AK024961  | 6687.883  | 6985.695  | NM_019625 | 49033.547 | 48933.164 |
| NM_016066 | 19710.266 | 20889.516 | NM_006729 | 9306.348  | 9759.327  |
| NM_000199 | 61873.672 | 62415.547 | NM_006071 | 4748.917  | 5300.412  |
| NM_003778 | 63053.926 | 69643.523 | NM_012236 | 26603.271 | 25072.137 |
| NM_001041 | 1039.988  | 987.552   | NM_013939 | 1478.879  | 1283.583  |
| NM_000693 | 638.308   | 513.397   | AB038651  | 10036.093 | 9278.569  |
| AK023263  | 2914.17   | 2852.887  | AL359603  | 2936.968  | 2719.594  |
| NM_004622 | 3956.339  | 4182.702  | X84838    | 1090.97   | 1399.9    |
| AK021445  | 4387.064  | 5634.754  | NM_013940 | 1408.205  | 1331.946  |
| NM_017934 | 34141.152 | 37063.258 | AL117643  | 4080.497  | 3035.862  |
| NM_014166 | 64974.652 | 60846.516 | AF075063  | 724.034   | 713.232   |
| AF211971  | 12348.662 | 9337.642  | AF069135  | 21402.277 | 19711.85  |
| NM_002931 | 5875.78   | 4982.614  | AK026524  | 3255.813  | 2425.065  |
| NM_013446 | 66220.992 | 67933.258 | AB011157  | 11063.82  | 10278.756 |
| X65232    | 60890.305 | 58597.152 | U17632    | 2401.481  | 2298.987  |
| U12767    | 922.377   | 908.361   | AK026764  | 4399.801  | 3992.656  |
| U17630    | 3499.468  | 4164.736  | AF113700  | 7886.143  | 6785.334  |

|           |           |           |           |           |           |
|-----------|-----------|-----------|-----------|-----------|-----------|
| M33782    | 5594.382  | 5046.939  | X91348    | 67385.641 | 70280.211 |
| NM_00219€ | 1227.297  | 1265.872  | Z36505    | 8492.744  | 7918.173  |
| NM_01775€ | 24974.816 | 24828.943 | NM_001854 | 5824.356  | 5254.705  |
| NM_01841€ | 3519.493  | 3887.917  | NM_017913 | 4592.742  | 4159.677  |
| NM_00460€ | 18161.793 | 18884.113 | NM_002755 | 35268.02  | 31638.273 |
| D70833    | 70535.828 | 60071.84  | AK024799  | 67129.797 | 79230.359 |
| NM_016621 | 5767.056  | 5225.111  | NM_000924 | 19278.174 | 19193.375 |
| AK023511  | 14415.427 | 11161.847 | NM_003330 | 18496.406 | 17719.701 |
| NM_01455€ | 9565.109  | 10538.788 | NM_002481 | 604.914   | 597.752   |
| NM_00161€ | 64588.363 | 66856.852 | NM_003647 | 1387.429  | 1289.186  |
| NM_00272€ | 3019.124  | 2702.09   | NM_001699 | 68158.852 | 69808.391 |
| NM_01437€ | 61459.75  | 62327.75  | AB006589  | 960.352   | 1106.001  |
| NM_017812 | 33584.992 | 38352.871 | NM_018351 | 4666.905  | 4455.73   |
| AF204173  | 2535.446  | 2475.906  | AK023019  | 1639.949  | 1274.954  |
| J03260    | 9477.664  | 11236.479 | NM_147171 | 18039.01  | 16106.378 |
| U13738    | 4511.859  | 5614.96   | NM_002962 | 771.079   | 828.462   |
| AF068236  | 63176.457 | 65368.625 | NM_01638€ | 8600.596  | 9319.646  |
| H94487    | 10312.215 | 14086.251 | AB046783  | 3597.715  | 3992.702  |
| BG681747  | 42556.152 | 52897.105 | NM_000845 | 2674.389  | 3047.593  |
| H63077    | 4285.021  | 4239.882  | NM_004604 | 60880.438 | 76458.633 |
| AA679352  | 14474.36  | 14876.858 | NM_014965 | 22646.752 | 22255.26  |
| AA437291  | 3386.16   | 4188.002  | NM_004882 | 61210.066 | 64893.934 |
| X04503    | 5368.531  | 5369.387  | AL390148  | 37511.691 | 33699.227 |
| D45917    | 11431.044 | 11203.03  | AK024055  | 2817.821  | 2719.205  |
| X52001    | 15486.503 | 14826.855 | NM_01337€ | 2688.156  | 2368.323  |
| BI823872  | 1190.123  | 1401.461  | NM_017964 | 3950.228  | 3597.743  |
| AA430552  | 16342.081 | 16264.146 | NM_016272 | 934.163   | 889.28    |
| X66142    | 9652.977  | 13450.646 | NM_01642€ | 11788.942 | 11836.713 |
| NM_005913 | 3088.956  | 3470.135  | NM_004083 | 18236.385 | 15834.956 |
| R45054    | 14126.05  | 19212.834 | NM_016039 | 56697.648 | 54139.727 |
| NM_003780 | 68386.891 | 76827.008 | NM_001184 | 6723.864  | 6646.219  |
| NM_003731 | 56715.273 | 57113.293 | NM_015530 | 20806.17  | 23169.602 |
| NM_00544€ | 54521.598 | 55371.117 | NM_01623€ | 13172.027 | 14839.95  |
| NM_013292 | 29402.795 | 26546.771 | NM_00175€ | 1791.56   | 1884.127  |
| NM_002387 | 3969.26   | 3385.924  | BE546276  | 2049.323  | 1854.059  |
| NM_00006€ | 11580.286 | 9165.813  | NM_004725 | 20227.574 | 16784.449 |
| AB023217  | 1250.277  | 1101.266  | NM_015997 | 36248.691 | 33403.156 |
| L08902    | 3082.853  | 3247.652  | NM_001167 | 26804.566 | 26433.959 |
| J02639    | 8948.054  | 9529.244  | NM_012115 | 14711.489 | 13616.762 |
| M58050    | 12433.308 | 19300.633 | M96577    | 47667.223 | 52675.098 |
| NM_007263 | 25164.939 | 33516.844 | NM_01325€ | 65971.5   | 60756.797 |
| AF206020  | 17003.74  | 19398.498 | NM_003842 | 10270.39  | 11199.155 |
| NM_014410 | 14246.735 | 12539.606 | NM_016184 | 4671.004  | 5670.079  |
| AF305835  | 440.485   | 576.214   | L11238    | 36019.434 | 42268.703 |
| AF312769  | 3373.718  | 3034.526  | AK025684  | 2642.359  | 3079.39   |
| AB020668  | 9893.101  | 9958.845  | NM_012205 | 27957.963 | 29101.49  |
| NM_006203 | 62887.168 | 57792.035 | K02046    | 7544.96   | 7026.711  |
| NM_013261 | 3747.87   | 3542.696  | U87223    | 4859.563  | 4130.323  |
| AF309553  | 9306.854  | 8586.884  | NM_002217 | 1743.503  | 1504.044  |
| NM_00360€ | 4452.538  | 5218.286  | NM_004995 | 7975.105  | 9901.219  |
| NM_00613€ | 1780.931  | 2215.871  | NM_00038€ | 19737.031 | 19292.725 |
| NM_001900 | 68931.961 | 73245.922 | NM_007231 | 1971.952  | 2184.56   |
| NM_003993 | 9838.84   | 9878.144  | NM_001190 | 9638.372  | 10514.431 |

|           |           |           |           |           |           |
|-----------|-----------|-----------|-----------|-----------|-----------|
| NM_002150 | 17974.516 | 16032.411 | NM_005271 | 39467.688 | 43049.441 |
| NM_004595 | 21202.893 | 16615.445 | NM_015654 | 13704.903 | 14389.477 |
| NM_002264 | 1313.555  | 902.503   | NM_012244 | 7312.455  | 7514.992  |
| NM_014754 | 37857.234 | 41877.477 | NM_004341 | 5399.814  | 5522.028  |
| D49387    | 2451.741  | 2538.545  | AB082521  | 40157.863 | 38751.484 |
| AF050146  | 21111.367 | 20711.756 | AK026806  | 999.266   | 681.373   |
| NM_000116 | 5580.516  | 5806.486  | AL050182  | 10247.654 | 8725.973  |
| NM_006695 | 17241.092 | 18043.264 | NM_020040 | 3657.196  | 3488.545  |
| NM_006804 | 44739.227 | 48740.336 | NM_002374 | 14411.379 | 12250.039 |
| AK025641  | 64870.129 | 62955.293 | AK026940  | 17812.707 | 17650.225 |
| AB040457  | 434.399   | 678.02    | AF155117  | 20422.746 | 20044.693 |
| AB014514  | 8626.258  | 8980.227  | AB014527  | 2036.373  | 2388.159  |
| NM_002865 | 17376.195 | 15637.683 | NM_004411 | 4245.069  | 4848.715  |
| NM_003565 | 5291.232  | 3780.69   | NM_015935 | 19022.635 | 22393.156 |
| AK026315  | 1064.649  | 1353.577  | NM_000740 | 2355.131  | 2237.776  |
| NM_007155 | 69995.406 | 66087.742 | NM_017843 | 18598.662 | 16951.104 |
| NM_018390 | 3938.369  | 3794.161  | U10485    | 2361.493  | 2445.623  |
| AB037724  | 18721.488 | 17907.291 | AK025326  | 62366.195 | 55446.422 |
| AK025086  | 3145.53   | 2989.276  | NM_016325 | 18654.422 | 17224.195 |
| AK026151  | 15202.079 | 16536.336 | NM_017544 | 59044.191 | 55070.543 |
| NM_014140 | 2331.694  | 1826.646  | NM_003153 | 4521.337  | 4271.937  |
| NM_002915 | 5788.085  | 6070.535  | NM_016285 | 4344.089  | 4410.866  |
| M20700    | 10226.273 | 9105.88   | NM_014707 | 2306.175  | 2080.758  |
| NM_001034 | 12689.786 | 12984.348 | AF025771  | 4058.866  | 3934.426  |
| NM_002685 | 4418.645  | 4646.873  | NM_018215 | 5472.984  | 5879.587  |
| NM_017685 | 1291.392  | 937.373   | AB033110  | 7521.588  | 9435.713  |
| AL096734  | 1161.822  | 1260.325  | NM_005083 | 63932.152 | 59943.906 |
| AK000800  | 4290.578  | 4799.64   | NM_007187 | 30228.313 | 29329.348 |
| NM_018154 | 8671.298  | 9442.03   | NM_001825 | 1145.297  | 1208.571  |
| NM_005355 | 705.939   | 593.6     | NM_018983 | 29854.627 | 29738.85  |
| BC006287  | 7526.031  | 7031.63   | NM_003095 | 16654.234 | 13072.619 |
| AB023198  | 10301.065 | 9764.214  | NM_007275 | 21283.881 | 19706.846 |
| AF304163  | 12667.214 | 12419.32  | BE390833  | 48708.641 | 46380.516 |
| NM_005231 | 14273.616 | 13554.398 | NM_004730 | 27530.994 | 22146.309 |
| AF064729  | 3988.432  | 4109.92   | NM_000801 | 14789.823 | 14364.913 |
| NM_005412 | 31262.664 | 34640.281 | NM_006115 | 61977.863 | 59556.504 |
| NM_012113 | 4657.659  | 6502.834  | NM_005801 | 13122.793 | 12915.162 |
| NM_014555 | 12760.847 | 15979.606 | NM_018195 | 8446.247  | 7557.301  |
| NM_001615 | 65074.824 | 71494.391 | NM_012267 | 1591.081  | 1483.652  |
| NM_002725 | 4138.098  | 3995.941  | AL110151  | 847.563   | 862.389   |
| NM_014375 | 57935.172 | 60179.527 | NM_003293 | 535.474   | 861.178   |
| NM_017812 | 20327.984 | 21589.977 | NM_016615 | 1528.8    | 1410.627  |
| AF204173  | 1976.93   | 2305.607  | NM_000022 | 27796.217 | 24135.232 |
| J03260    | 10437.021 | 12826.781 | NM_016575 | 14146.287 | 12734.978 |
| U13738    | 3845.732  | 4001.617  | NM_004213 | 4824.49   | 5230.91   |
| AF068236  | 61537.219 | 64826.063 | NM_001925 | 62913.605 | 58354.406 |
| H94487    | 12475.721 | 14808.85  | NM_000905 | 6102.268  | 6642.256  |
| BG681747  | 41059.816 | 53593.066 | NM_000480 | 13457.658 | 13343.069 |
| H63077    | 4352.188  | 4407.25   | AF254084  | 61998.199 | 60757.598 |
| AA679352  | 14684.259 | 17358.188 | AK022648  | 1314.614  | 1231.229  |
| AA437291  | 3467.162  | 3904.445  | AK022976  | 3428.947  | 3758.762  |
| X04503    | 4951.789  | 5289.636  | AB048791  | 22504.895 | 24557.611 |
| D45917    | 10063.305 | 10636.076 | NM_003107 | 3100.175  | 3306.308  |

|           |           |           |           |           |           |
|-----------|-----------|-----------|-----------|-----------|-----------|
| X52001    | 14218.946 | 15096.002 | NM_006874 | 14937.103 | 12668.967 |
| BI823872  | 1129.419  | 1358.907  | AB046777  | 5040.127  | 4278.213  |
| AA430552  | 19584.428 | 19942.203 | AJ251844  | 40260.41  | 40974.332 |
| X66142    | 8658.604  | 8661.607  | D16815    | 4014.815  | 3796.895  |
| NM_005913 | 2357.042  | 2537.141  | NM_001880 | 4846.917  | 4555.509  |
| R45054    | 10478.284 | 10918.731 | AB028943  | 16674.873 | 16290.159 |
| AL117398  | 6088.922  | 7785.469  | NM_006194 | 4855.471  | 4277.418  |
| AY007158  | 62831.34  | 73684.102 | AK001603  | 45138.27  | 45091.348 |
| NM_001720 | 11258.836 | 9551.005  | U71601    | 7926.741  | 7947.708  |
| NM_013292 | 38792.852 | 43720.91  | NM_013256 | 9742.104  | 8456.337  |
| NM_002387 | 6658.677  | 5584.734  | NM_004143 | 5343.053  | 4869.244  |
| NM_000069 | 14182.675 | 12341.617 | X66087    | 7160.946  | 5003.813  |
| AB023217  | 716.134   | 537.297   | L09070    | 1023.013  | 1207.521  |
| L08902    | 1828.96   | 2375.744  | NM_000062 | 16051.523 | 16488.518 |
| J02639    | 9740.795  | 12853.113 | NM_009590 | 22219.189 | 23996.289 |
| M58050    | 9312.531  | 10382.912 | AL133037  | 2311.329  | 2479.506  |
| NM_007263 | 21915.645 | 24694.973 | NM_020350 | 8500.396  | 7247.129  |
| AF206020  | 19645.318 | 20202.568 | NM_000350 | 21148.5   | 21391.807 |
| NM_014410 | 17052.801 | 22477.029 | X91103    | 45193.566 | 52347.414 |
| AF305835  | 560.718   | 837.974   | AA419164  | 4884.741  | 4581.507  |
| AF312769  | 3616.377  | 3476.229  | L35251    | 12130.631 | 11932.094 |
| AB020668  | 8554.916  | 9388.735  | BE910395  | 19904.791 | 20133.129 |
| NM_006203 | 63808.879 | 58984.992 | N46828    | 37517.113 | 40582.578 |
| NM_013261 | 3329.86   | 3901.472  | BI908302  | 60325.223 | 62134.629 |
| NM_003558 | 682.752   | 804.243   | AA460969  | 10077.924 | 10029.729 |
| AF309553  | 9125.889  | 7684.972  | BG695859  | 8090.992  | 9015.716  |
| NM_003605 | 4279.809  | 4667.841  | M85079    | 42687.727 | 52052.504 |
| NM_006139 | 1414.48   | 1497.906  | AA457671  | 50505.129 | 55975.023 |
| NM_001900 | 66088.469 | 65574.133 | X07437    | 42982.059 | 49983.801 |
| NM_003993 | 8287.678  | 9233.621  | NM_000641 | 8480.692  | 7497.088  |
| NM_002975 | 6638.187  | 9124.546  | AE006466  | 45691.02  | 47975.242 |
| AK023511  | 26454.195 | 21718.385 | BC008737  | 60366.875 | 62156.129 |
| NM_020178 | 1339.471  | 832.817   | BC011655  | 9628.113  | 9409.286  |
| NM_002264 | 2818.176  | 2337.368  | BC002396  | 18593.551 | 16237.101 |
| NM_014754 | 43924.73  | 50714.02  | NM_003613 | 6730.733  | 6352.921  |
| D49387    | 715.116   | 928.472   | NM_005385 | 11277.513 | 11879.584 |
| AF050146  | 13855.544 | 15982.264 | NM_018985 | 7566.75   | 6706.713  |
| NM_000116 | 5394.142  | 5427.626  | NM_006074 | 62681.016 | 58702.219 |
| NM_006698 | 16333.19  | 17273.641 | AF208232  | 11976.028 | 13611.167 |
| NM_006804 | 38369.48  | 39417.023 | NM_002988 | 17715.93  | 19096.494 |
| AK025641  | 61746.504 | 60939.352 | NM_004186 | 3881.198  | 3687.148  |
| AB040457  | 929.799   | 735.496   | NM_016258 | 19458.947 | 19199.143 |
| AB014514  | 8432.299  | 9321.702  | AF203032  | 38670.008 | 38882.469 |
| NM_002865 | 17464.793 | 18273.66  | AB014542  | 44039.938 | 42144.766 |
| NM_003566 | 4717.394  | 3671.669  | NM_014640 | 3604.672  | 3672.271  |
| NM_003731 | 55547.504 | 49615.168 | Y10518    | 60408.961 | 59101.66  |
| NM_005446 | 50241.168 | 43368.031 | AF155135  | 22153.318 | 22158.83  |
| AB037724  | 23502.592 | 25262.027 | NM_014790 | 5964.725  | 6162.082  |
| AK025086  | 5753.53   | 5647.702  | NM_003571 | 57099.348 | 53009.328 |
| AK026151  | 25024.775 | 27948.461 | AB032965  | 62848.711 | 60835.199 |
| NM_014140 | 2547.474  | 1978.01   | NM_020370 | 1919.486  | 2046.3    |
| NM_002916 | 610.104   | 868.394   | NM_004767 | 6849.725  | 7243.191  |
| M20700    | 3744.834  | 4084.379  | BF310159  | 41973.641 | 49722.277 |

|           |           |           |           |           |           |
|-----------|-----------|-----------|-----------|-----------|-----------|
| NM_001034 | 11743.851 | 11841.357 | NM_000316 | 1077.104  | 1022.608  |
| NM_002689 | 4743.208  | 5257.096  | NM_018986 | 8041.915  | 7884.78   |
| NM_017686 | 1311.301  | 1483.706  | AB044934  | 2487.751  | 2608.832  |
| AL096734  | 1818.15   | 2535.824  | U27655    | 31948.674 | 34278.086 |
| AK000800  | 4801.924  | 4980.475  | Z21965    | 59115.852 | 59338.664 |
| NM_018154 | 8834.896  | 10195.313 | NM_012427 | 4960.81   | 4616.373  |
| NM_005358 | 965.829   | 1061.652  | AF133424  | 8625.896  | 10111.912 |
| BC006287  | 7161.086  | 7679.96   | NM_005003 | 36358.535 | 35976.938 |
| AB023198  | 8912.832  | 8315.531  | AF084560  | 26506.049 | 27349.41  |
| AF304163  | 11194.104 | 10403.867 | NM_015715 | 3180.103  | 3743.355  |
| NM_005231 | 12825.064 | 13233.223 | NM_000032 | 28996.457 | 31310.779 |
| AF064729  | 3628.058  | 3856.845  | NM_002083 | 8723.081  | 9735.874  |
| NM_005412 | 33615.266 | 33937.543 | NM_002035 | 14937.563 | 19095.549 |
| NM_004595 | 22227.66  | 16254.252 | NM_014900 | 6333.967  | 5821.055  |
| NM_002725 | 5442.586  | 5301.291  | BF342908  | 3813.501  | 3819.447  |
| NM_014375 | 61583.512 | 60024.699 | AF118073  | 1297.938  | 1252.766  |
| NM_017812 | 41822.391 | 48915.348 | AK023510  | 12749.635 | 12737.733 |
| AF204173  | 2187.734  | 2264.406  | NM_004345 | 8944.266  | 8328.088  |
| J03260    | 4034.025  | 5072.375  | NM_006528 | 600.298   | 618.228   |
| U13738    | 770.131   | 879.587   | NM_002232 | 1046.483  | 1086.023  |
| AF068236  | 60936.91  | 62667.164 | NM_014570 | 8404.413  | 7481.518  |
| H94487    | 12327.641 | 13133.449 | NM_014822 | 5521.169  | 5726.239  |
| BG681747  | 41339.438 | 50962.117 | NM_005296 | 7430.974  | 7526.084  |
| H63077    | 3792.917  | 4139.589  | NM_001337 | 1230.979  | 1573.141  |
| AA679352  | 14423.745 | 15835.179 | NM_003611 | 16782.537 | 16100.856 |
| AA437291  | 3620.957  | 4408.288  | AB014538  | 18489.914 | 21369.836 |
| X04503    | 6107.479  | 6717.297  | NM_006209 | 3403.415  | 3771.819  |
| D45917    | 11448.094 | 13992.934 | AK025118  | 14754.285 | 16156.456 |
| X52001    | 16299.948 | 16124.88  | NM_000727 | 7313.435  | 6683.999  |
| BI823872  | 1084.533  | 1112.19   | NM_002621 | 1710.861  | 1532.491  |
| AA430552  | 18163.297 | 19330.34  | NM_004135 | 5382.645  | 5032.456  |
| X66142    | 7703.14   | 8947.674  | NM_000203 | 771.563   | 710.726   |
| NM_005913 | 2454.445  | 2606.448  | NM_013443 | 2880.307  | 3396.089  |
| R45054    | 11228.971 | 9983.317  | NM_000925 | 29109.264 | 31294.377 |
| AL117398  | 6778.337  | 7312.082  | NM_000465 | 6490.313  | 8106.111  |
| AY007158  | 63172.68  | 66016.813 | AF116685  | 612.579   | 704.399   |
| NM_018390 | 4747.864  | 3650.183  | NM_000123 | 6761.817  | 7957.668  |
| NM_007263 | 25966.91  | 28318.908 | AL137501  | 4186.137  | 4053.277  |
| AF206020  | 19581.27  | 18085.377 | BE858979  | 2080.857  | 1978.028  |
| NM_014410 | 6405.321  | 6904.618  | NM_000122 | 6033.317  | 4485.412  |
| AF312769  | 1806.111  | 2272.839  | NM_006712 | 58649.879 | 57050.547 |
| AB020668  | 10617.648 | 10243.601 | NM_006240 | 14682.184 | 13853.661 |
| NM_006203 | 62106.527 | 57954.617 | NM_007026 | 14311.418 | 16380.289 |
| NM_013261 | 3577.374  | 3458.373  | M37712    | 23525.162 | 20295.625 |
| AF309553  | 9118.211  | 10482.857 | NM_002648 | 23129.719 | 25851.76  |
| NM_003605 | 4405.632  | 5963.859  | AF070670  | 41600.309 | 39355.008 |
| NM_006139 | 1917.503  | 2085.642  | NM_016156 | 11030.042 | 11711.11  |
| NM_000100 | 54085.855 | 58405.328 | NM_016528 | 5427.871  | 6670.531  |
| NM_001900 | 66212.539 | 78604.797 | NM_015974 | 5169.739  | 5638.358  |
| NM_003993 | 7838.334  | 7310.834  | NM_014384 | 4069.978  | 4904.601  |
| NM_018961 | 5864.723  | 6319.576  | NM_002573 | 9063.279  | 9479.634  |
| NM_005586 | 8619.573  | 9953.394  | NM_017877 | 1449.07   | 1483.308  |
| NM_012242 | 2567.375  | 2623.04   | NM_009590 | 23142.709 | 22641.301 |

|           |           |           |           |           |           |
|-----------|-----------|-----------|-----------|-----------|-----------|
| NM_00689€ | 2640.965  | 3243.33   | AL133037  | 2184.755  | 2641.493  |
| NM_001130 | 69087.492 | 72107.992 | NM_020350 | 8979.16   | 8023.337  |
| NM_00297€ | 6806.614  | 8886.396  | NM_000350 | 19898.047 | 21950.877 |
| AK023511  | 19905.34  | 19632.432 | X91103    | 38952.664 | 46767.945 |
| NM_01455€ | 12544.637 | 12733.662 | AA419164  | 4833.141  | 5070.425  |
| NM_00161€ | 63847.414 | 54108.656 | L35251    | 11414.421 | 11389.982 |
| AK025886  | 4150.34   | 3001.847  | BE910395  | 18872.34  | 20717.756 |
| NM_00305€ | 1073.584  | 796.484   | N46828    | 38343.008 | 43955.324 |
| AB014514  | 10861.813 | 10330.662 | BI908302  | 60711.527 | 60907.402 |
| NM_00286€ | 16361.138 | 15887.13  | AA460969  | 9788.142  | 10691.663 |
| NM_00356€ | 6288.991  | 5749.652  | BG695859  | 7902.353  | 8734.898  |
| AK026315  | 581.452   | 561.483   | M85079    | 42953.379 | 51974.273 |
| NM_00715€ | 69919.516 | 63803.438 | AA457671  | 50946.414 | 52704.219 |
| NM_003731 | 56537.648 | 53969.227 | X07437    | 42775.391 | 50088.379 |
| NM_00544€ | 51392.871 | 49521.027 | NM_000641 | 8545.36   | 8761.015  |
| NM_01329€ | 35496.168 | 38691.219 | AE006466  | 55056.66  | 56808.73  |
| NM_002387 | 5951.114  | 4653.035  | BC008737  | 62293.246 | 63781.852 |
| NM_00006€ | 12168.923 | 10891.15  | BC011655  | 9175.746  | 9960.638  |
| AB023217  | 1728.7    | 1457.849  | BC002396  | 18306.23  | 18997.424 |
| L08902    | 3308.892  | 3659.889  | AF112219  | 20223.834 | 21235.244 |
| J02639    | 10787.534 | 8300.606  | NM_000521 | 997.838   | 656.621   |
| M58050    | 13240.289 | 11957.035 | NM_006074 | 63022.715 | 56735.457 |
| NM_012113 | 3349.166  | 4190.896  | AF208232  | 12841.234 | 13881.992 |
| NM_002150 | 10767.058 | 9552.907  | NM_00298€ | 18688.725 | 21392.869 |
| NM_00459€ | 14157.382 | 11616.08  | NM_00418€ | 3670.499  | 4242.711  |
| NM_02017€ | 477.395   | 582.341   | NM_01625€ | 18106.117 | 17105.186 |
| NM_002264 | 1191.726  | 913.466   | AF203032  | 35037.633 | 35693.324 |
| NM_014754 | 41320.164 | 42652.949 | AB014542  | 41954.938 | 39838.008 |
| D49387    | 2252.304  | 2656.246  | NM_014640 | 3294.299  | 3991.288  |
| AF050146  | 20830.389 | 19729.988 | Y10518    | 58215.098 | 60175.285 |
| NM_000116 | 5017.723  | 5673.358  | AF155135  | 22878.975 | 24651.039 |
| NM_00669€ | 17796.389 | 22273.299 | NM_014790 | 6014.104  | 7231      |
| NM_006804 | 38145.898 | 37625.859 | NM_003571 | 57917.016 | 53753.242 |
| NM_01596€ | 19006.625 | 19336.35  | AB032965  | 61483.441 | 62868.984 |
| NM_003051 | 12715.831 | 12575.317 | NM_020370 | 1637.51   | 1931.795  |
| NM_14534€ | 16760.955 | 15533.657 | NM_004767 | 6260.887  | 6654.011  |
| AJ278917  | 59265.547 | 52705.191 | BF310159  | 41730.375 | 46772.164 |
| AK025641  | 65014.875 | 56108.711 | NM_00031€ | 1033.51   | 1083.194  |
| AB040457  | 457.122   | 803.829   | NM_01898€ | 6973.353  | 8320.081  |
| AL117398  | 6610.982  | 6837.52   | AB044934  | 2415.764  | 2343.71   |
| AY007158  | 57647.297 | 79791.055 | U27655    | 32166.029 | 33643.246 |
| NM_001720 | 5964.692  | 5463.645  | NM_00579€ | 717.11    | 520.34    |
| NM_018390 | 2032.971  | 2249.679  | Z21965    | 59635.203 | 56289.793 |
| AB037724  | 18689.658 | 18068.639 | NM_012427 | 5101.727  | 5432.694  |
| AK025086  | 3005.365  | 2349.684  | L09070    | 1095.501  | 1127.764  |
| AK026151  | 19867.596 | 19718.057 | NM_000062 | 17423.619 | 17908.389 |
| NM_014140 | 2344.533  | 2236.514  | AF084560  | 32648.939 | 35792.445 |
| NM_00291€ | 5774.494  | 6384.635  | NM_01571€ | 2707.64   | 4023.523  |
| M20700    | 8542.144  | 7927.994  | NM_000032 | 34845.418 | 35208.945 |
| NM_001034 | 12960.23  | 12797.151 | NM_002083 | 8839.681  | 8711.273  |
| NM_00268€ | 3397.91   | 3974.288  | NM_00203€ | 14208.863 | 14074.054 |
| NM_01768€ | 1194.892  | 1011.012  | NM_014900 | 5926.165  | 6220.506  |
| AL096734  | 851.975   | 991.777   | BF342908  | 3298.655  | 4718.955  |

|           |           |           |           |           |           |
|-----------|-----------|-----------|-----------|-----------|-----------|
| AK000800  | 4014.454  | 4217.033  | AF118073  | 1068.288  | 1042.69   |
| NM_018154 | 7860.338  | 7533.417  | AK023510  | 12800.152 | 13027.603 |
| NM_00535E | 546.785   | 528.503   | NM_00434E | 9281.145  | 8888.536  |
| BC006287  | 7715.202  | 6428.712  | NM_00652E | 540.854   | 641.302   |
| AB023198  | 8727.939  | 7005.273  | NM_00223E | 738.451   | 1112.573  |
| AF304163  | 11045.89  | 9332.043  | NM_01457C | 7932.452  | 8893.056  |
| NM_005231 | 12404.123 | 10807.278 | NM_01482E | 5266.666  | 5558.003  |
| AF064729  | 4141.319  | 3761.057  | NM_00529E | 6672.981  | 8638.897  |
| NM_00541E | 33653.375 | 31505.881 | NM_001337 | 1396.828  | 2202.576  |
| CY3Cy5    | 1117.942  | 92.74     | NM_003611 | 16654.041 | 19616.777 |
| AF088031  | 969.946   | 729.164   | AB014538  | 18110.125 | 21922.27  |
| AK002025  | 67208.422 | 48884.758 | NM_00620E | 3685.566  | 3565.413  |
| AK026299  | 2389.013  | 1905.815  | AK025118  | 14607.16  | 15317.817 |
| NM_017794 | 2211.155  | 1672.687  | NM_000727 | 8237.113  | 7695.536  |
| AK025170  | 1934.742  | 1560.638  | NM_002621 | 2126.009  | 1731.786  |
| AK025697  | 7342.688  | 4204.161  | NM_00538E | 14271.749 | 14555.109 |
| AK021734  | 1267.425  | 866.777   | NM_01898E | 9988.231  | 9266.548  |
| NM_02197E | 3475.727  | 1475.516  | NM_00020E | 1069.98   | 1066.501  |
| SR2       | 48263.02  | 19812.223 | NM_01344E | 3094.485  | 3270.49   |
| SR4       | 15087.009 | 5529.519  | NM_00092E | 29214.109 | 33309.988 |
| SR6       | 1925.043  | 626.026   | NM_00046E | 6275.957  | 7643.499  |
| SR8       | 7893.274  | 13489.561 | AF116685  | 620.077   | 564.375   |
| SR10      | 24228.918 | 3179.027  | NM_00012E | 6362.207  | 8683.472  |
| AK026802  | 682.832   | 898.536   | AL137501  | 3751.151  | 3513.442  |
| NM_01779E | 7365.158  | 8694.417  | BE858979  | 2041.922  | 1924.342  |
| AK025213  | 3508.789  | 3332.679  | NM_00012E | 6613.855  | 5135.305  |
| NM_01494E | 3476.655  | 3442.213  | NM_00671E | 62827.035 | 51938.277 |
| AL080221  | 2566.115  | 3215.642  | NM_00624C | 14062.402 | 13411.896 |
| NM_003507 | 804.52    | 1004.084  | NM_00702E | 12592.493 | 13497.027 |
| AK026591  | 1266.017  | 1152.544  | M37712    | 21610.707 | 17330.219 |
| AK001889  | 3499.926  | 3441.948  | NM_00264E | 23373.279 | 25729.883 |
| AK025726  | 5929.072  | 4919.988  | AF070670  | 41215.418 | 39822.156 |
| AJ227869  | 2859.242  | 1470.514  | NM_01615E | 9364.433  | 10817.272 |
| AL117613  | 5693.332  | 2965.367  | NM_01652E | 5634      | 5547.452  |
| AL137753  | 8191.226  | 4439.213  | NM_015974 | 5488.501  | 5439.862  |
| AK021785  | 704.767   | 640.365   | NM_014384 | 4408.232  | 4877.674  |
| AL110262  | 16870.461 | 6710.996  | NM_00257E | 8520.218  | 9725.936  |
| AK025627  | 9965.727  | 5759.31   | AF133424  | 16777.832 | 16714.305 |
| AK025191  | 890.009   | 1150.842  | NM_00500E | 53814.227 | 53666.969 |
| AK026763  | 3258.54   | 2806.45   | AL133037  | 3510.795  | 4251.552  |
| AK025847  | 4967.715  | 5260.395  | NM_02035C | 8921.975  | 7602.875  |
| AK026442  | 1456.481  | 1684.691  | NM_00035C | 18860.953 | 21229.928 |
| AK026816  | 609.463   | 1244.869  | X91103    | 37393.996 | 44802.844 |
| AB033031  | 4409.259  | 6157.354  | AA419164  | 4287.487  | 5088.767  |
| AF085872  | 10487.821 | 8520.553  | L35251    | 10537.566 | 10761.936 |
| AK022538  | 39533.527 | 46093.902 | BE910395  | 17347.225 | 17106.236 |
| AK022342  | 737.199   | 788.631   | N46828    | 35152.559 | 39724.328 |
| AF147420  | 1906.716  | 1678.39   | BI908302  | 60053.695 | 56576.109 |
| AL049312  | 2346.228  | 1614.441  | AA460969  | 9698.436  | 10059.771 |
| AL050072  | 3582.515  | 2612.803  | BG695859  | 9338.199  | 9699.096  |
| AL117590  | 991.573   | 717.224   | M85079    | 43889.098 | 51255.262 |
| AL049357  | 12074.108 | 5784.349  | AA457671  | 51266.75  | 51046.695 |
| AK027180  | 4442.249  | 2059.408  | X07437    | 41829.02  | 46066.375 |



|           |           |           |           |           |           |
|-----------|-----------|-----------|-----------|-----------|-----------|
| AK022236  | 7997.136  | 8974.953  | NM_000641 | 8574.324  | 8178.303  |
| AK000073  | 3840.434  | 4188.314  | AE006466  | 52839.188 | 50433.59  |
| AL390180  | 1265.344  | 1395.268  | BC008737  | 59667.73  | 60204.605 |
| AL137370  | 652.65    | 1274.603  | BC011655  | 9131.253  | 10622.724 |
| AF009262  | 25526.641 | 24170.352 | BC002396  | 19634.027 | 20834.725 |
| AF009306  | 1465.006  | 1828.069  | AF112219  | 20156.699 | 20653.176 |
| AF050198  | 3498.573  | 4322.652  | NM_000521 | 662.003   | 731.86    |
| AK024346  | 5533.543  | 6659.792  | NM_002625 | 1093.975  | 929.429   |
| AF009320  | 241.46    | 845.695   | NM_004135 | 7652.133  | 7300.52   |
| AF056422  | 1525.154  | 907.118   | Y10518    | 61597.891 | 59454.063 |
| AK001089  | 1390.776  | 810.974   | AF155135  | 17647.785 | 19488.436 |
| AK001919  | 989.833   | 696.153   | NM_014790 | 5327.873  | 6815.024  |
| AK021535  | 1034.452  | 651.79    | NM_003571 | 53785.164 | 51298.227 |
| AK021753  | 4116.792  | 2321.554  | AB032965  | 59612.602 | 62603.043 |
| AK001139  | 3060.673  | 1447.333  | NM_020370 | 1714.305  | 1951.934  |
| AK002090  | 856.428   | 643.485   | NM_004767 | 4235.919  | 4502.69   |
| AK021618  | 791.601   | 461.571   | BF310159  | 37083.484 | 38157.297 |
| AK021822  | 1196.44   | 748.284   | NM_000316 | 767.482   | 1280.276  |
| AF116620  | 7487.346  | 9263.029  | NM_018986 | 7353.948  | 8145.36   |
| AF293335  | 70296.742 | 67041.43  | AB044934  | 1880.248  | 2130.728  |
| AK024431  | 11932.81  | 14235.474 | U27655    | 33347.738 | 35952.52  |
| AF116635  | 2821.463  | 3791.7    | NM_003360 | 7842.793  | 7940.353  |
| X96644    | 6574.333  | 8605.606  | Z21965    | 61524.73  | 63553.809 |
| Z34281    | 45332.996 | 53220.168 | NM_012427 | 5366.648  | 6360.047  |
| NM_018678 | 69620.836 | 70862.797 | AF131857  | 36299.297 | 38213.215 |
| AJ008122  | 63858.25  | 57552.672 | NM_000852 | 1355.024  | 1390.888  |
| NM_006220 | 5801.39   | 5558.958  | NM_000399 | 4896.995  | 4837.775  |
| AK022667  | 12515.46  | 15761.352 | AW797282  | 1526.686  | 1769.031  |
| AK026667  | 950.555   | 1797.863  | NM_002402 | 1556.952  | 1708.387  |
| AK000944  | 522.026   | 1145      | L09070    | 1068.084  | 950.394   |
| NM_014174 | 8364.084  | 9862.1    | NM_000062 | 20640.24  | 21623.857 |
| AF147337  | 3354.679  | 4213.687  | NM_017877 | 530.065   | 658.127   |
| AK025203  | 70780.961 | 60060.57  | NM_009590 | 38204.801 | 43584.855 |
| AK026981  | 3604.87   | 2274.469  | NM_014747 | 26408.076 | 28569.977 |
| AK023819  | 385.737   | 494.082   | Y19240    | 22285.188 | 28604.883 |
| AL133656  | 1753.609  | 1011.748  | AF091029  | 34592.684 | 36186.855 |
| AL050037  | 10525.259 | 5098.966  | X97074    | 63838.254 | 59926.488 |
| NM_001417 | 59953.918 | 23324.193 | AL117235  | 1940.065  | 2439.24   |
| AK023557  | 1057.396  | 1494.452  | NM_014822 | 5365.672  | 5746.518  |
| AK027107  | 1932.934  | 1783.737  | NM_005296 | 5964.632  | 7129.508  |
| AB040887  | 4236.228  | 5146.127  | NM_001337 | 1544.269  | 1475.783  |
| AK025196  | 18403.32  | 19355.297 | NM_003611 | 13352.332 | 13478.478 |
| AJ227879  | 1482.268  | 2189.68   | AB014538  | 18018.219 | 20891.793 |
| AK024800  | 5465.238  | 6664.149  | NM_006209 | 3463.306  | 3999.575  |
| AK000401  | 5140.536  | 6932.194  | AK025118  | 14253.027 | 15801.163 |
| AF305068  | 2414.16   | 4004.842  | NM_000727 | 8954.955  | 8130.398  |
| D17231    | 69234.5   | 68213.953 | NM_002621 | 2134.124  | 1603.147  |
| AF531295  | 2311.013  | 3466.905  | NM_005385 | 15152.239 | 16754.604 |
| X60484    | 1522.313  | 1890.012  | NM_018985 | 10668.768 | 9564.981  |
| AF055019  | 2398.315  | 3408.676  | NM_006074 | 61152.633 | 56589.996 |
| NM_003525 | 12236.962 | 15900.157 | AF208232  | 20819.752 | 26137.857 |
| AK000229  | 1690.634  | 1791.104  | NM_002988 | 27385.711 | 26766.199 |
| AF056432  | 3437.27   | 1834.855  | NM_004186 | 4702.036  | 4756.383  |

|           |           |           |           |           |           |
|-----------|-----------|-----------|-----------|-----------|-----------|
| AK001987  | 27963.689 | 14722.626 | NM_016258 | 17258.668 | 16203.91  |
| NM_013332 | 5773.772  | 3223.682  | AF203032  | 46125.523 | 49931.152 |
| X56199    | 3364.477  | 1866.103  | AB014542  | 45044.301 | 45031.797 |
| NM_005193 | 5757.542  | 3354.288  | NM_014640 | 3937.973  | 3891.732  |
| AL162006  | 909.435   | 540.183   | NM_015974 | 4796.635  | 5868.352  |
| NM_017971 | 23680.893 | 12624.697 | NM_014384 | 3835.934  | 4657.105  |
| AF090097  | 1821.841  | 1149.195  | NM_002573 | 7403.792  | 7931.465  |
| NM_014750 | 3357.454  | 2647.841  | AF133424  | 15130.121 | 15610.059 |
| NM_015912 | 1795.813  | 1848.109  | NM_005003 | 49115.676 | 48542.988 |
| NM_000460 | 4087.82   | 4653.515  | AF084560  | 37278.234 | 37714.582 |
| AB002339  | 6854.428  | 8576.882  | NM_015715 | 3163.097  | 3628.684  |
| NM_005104 | 19549.986 | 21021.246 | NM_000032 | 28782.111 | 28749.16  |
| NM_006888 | 47572.141 | 56104.602 | NM_002083 | 8156.66   | 8053.14   |
| AL137423  | 7521.256  | 8244.243  | NM_002035 | 16415.943 | 16727.723 |
| NM_007068 | 43023.578 | 49238.703 | NM_014900 | 6981.342  | 6860.628  |
| AF113211  | 2015.832  | 2668.454  | BF342908  | 4776.128  | 5021.041  |
| AL117568  | 5135.926  | 6701.965  | AF118073  | 1372.611  | 1089.624  |
| NM_000843 | 1904.497  | 2702.921  | AK023510  | 14620.127 | 13395.436 |
| S71805    | 2069.394  | 3554.553  | NM_004345 | 9619.586  | 9899.695  |
| NM_018391 | 4518.695  | 6638.054  | NM_000702 | 62660     | 56253.066 |
| U90917    | 982.696   | 962.403   | X71490    | 57284.691 | 52139.531 |
| AK022140  | 6178.938  | 4142.466  | AF257081  | 30082.5   | 30633.732 |
| AK023372  | 37451.023 | 22605.088 | NM_006528 | 2177.244  | 2275.826  |
| U21072    | 2367.629  | 1514.245  | NM_001688 | 52515.641 | 51023.059 |
| AK024377  | 789.905   | 453.861   | NM_003631 | 919.943   | 1202.616  |
| AL137461  | 907.181   | 1229.587  | NM_000219 | 1255.555  | 1268.002  |
| AF114264  | 6489.297  | 5528.96   | NM_002232 | 1101.101  | 1315.918  |
| NM_017514 | 811.666   | 1326.738  | NM_016106 | 12408.486 | 10528.15  |
| AB018261  | 673.208   | 463.965   | NM_014570 | 8320.013  | 7450.493  |
| NM_018972 | 5869.327  | 6366.729  | AF112219  | 21517.385 | 27875.645 |
| AB037828  | 1259.434  | 1861.834  | NM_000521 | 814.141   | 739.335   |
| AB023210  | 735.488   | 992.456   | NM_002625 | 681.42    | 698.045   |
| AB037786  | 3515.272  | 3742.892  | NM_004135 | 6984.861  | 7197.47   |
| NM_003648 | 17658.678 | 17597.393 | NM_000203 | 1105.399  | 1056.421  |
| AB037735  | 1516.829  | 1807.598  | NM_013443 | 3185.401  | 3088.826  |
| AK002177  | 8187.951  | 7648.184  | NM_000925 | 25638.455 | 23356.398 |
| AK024429  | 2440.138  | 3331.515  | NM_000465 | 6032.048  | 6166.492  |
| NM_003496 | 64086.762 | 61305.781 | AF116685  | 811.261   | 612.996   |
| AB000509  | 3771.097  | 6632.625  | NM_000123 | 7070.333  | 7640.188  |
| AB018314  | 2729.303  | 3624.947  | AL137501  | 3724.785  | 3810.173  |
| NM_004378 | 1158.046  | 997.853   | BE858979  | 2045.468  | 1829.943  |
| AJ238899  | 1024.476  | 619.352   | NM_000122 | 6917.666  | 5028.309  |
| NM_018037 | 5511.438  | 2892.917  | NM_006712 | 60354.656 | 57960.516 |
| NM_001110 | 3759.211  | 2121.734  | NM_006240 | 13674.031 | 14692.327 |
| NM_000841 | 8213.862  | 3890.336  | NM_007026 | 13018.501 | 13365.869 |
| NM_001245 | 2125.709  | 1205.598  | M37712    | 22005.273 | 18560.586 |
| AJ008139  | 11549.462 | 11143.62  | NM_002648 | 24437.182 | 26405.691 |
| NM_004326 | 15242.076 | 16538.777 | AF070670  | 42606.41  | 42321.418 |
| NM_000882 | 2579.574  | 2798.21   | NM_016156 | 10038.038 | 9666.343  |
| NM_004577 | 8594.646  | 12922.495 | NM_016528 | 4952.111  | 5332.953  |
| NM_015507 | 762.256   | 1631.501  | CY3Cy5    | 1147.844  | 79.55     |
| AF007157  | 51779.211 | 51108.313 | NM_002767 | 26006.84  | 27826.004 |
| D38553    | 4591.791  | 5643.783  | AF131846  | 6280.911  | 6483.505  |

|           |           |           |           |           |           |
|-----------|-----------|-----------|-----------|-----------|-----------|
| NM_00617C | 17932.387 | 19091.482 | AF088069  | 11212.595 | 13081.156 |
| NM_01429E | 11516.214 | 12770.458 | AL137406  | 4081.001  | 2955.327  |
| AK001581  | 3096.501  | 3006.758  | SR1       | 90535.133 | 64650.785 |
| NM_00586Z | 3944.989  | 3345.714  | SR3       | 42524.98  | 45490.488 |
| NM_00054E | 11161.692 | 11868.83  | AK027147  | 34888.484 | 41198.027 |
| AK022541  | 13103.279 | 11920.82  | AF088022  | 12800.048 | 6218.54   |
| AB002297  | 5639.836  | 5001.899  | AK026537  | 3233.752  | 1383.986  |
| NM_00502C | 58826.43  | 54284.777 | NM_01548E | 4651.829  | 3121.52   |
| NM_014077 | 5262.223  | 3965.643  | AK022412  | 13773.534 | 9441.748  |
| NM_01841Z | 2845.569  | 1341.84   | AK023073  | 12526.432 | 8080.224  |
| NM_01232E | 10984.591 | 7137.122  | AK023922  | 1060.431  | 987.772   |
| M14087    | 12349.894 | 6435.704  | AK022438  | 2817.015  | 2042.086  |
| NM_00088E | 13874.005 | 5282.994  | AK023764  | 2156.923  | 1918.393  |
| M59040    | 3876.663  | 2519.326  | AK025072  | 6610.368  | 7053.008  |
| X15880    | 68286.148 | 54905.32  | AK022410  | 1045.897  | 1043.984  |
| NM_00679E | 840.874   | 950.387   | L10378    | 16129.657 | 21890.287 |
| X04366    | 3058.952  | 2880.698  | AK022179  | 1705.358  | 1002.817  |
| NM_00050E | 64346.715 | 65069.863 | AL157448  | 1007.644  | 1040.162  |
| NM_00066E | 4713.894  | 5729.386  | AF026942  | 3701.163  | 2706.362  |
| NM_003481 | 10727.741 | 11604.608 | AJ276429  | 4487.163  | 3633.053  |
| AB046814  | 1218.668  | 1660.162  | AK023589  | 2099.753  | 2035.867  |
| NM_017664 | 7343.859  | 7956.715  | AK021590  | 3970.832  | 4003.131  |
| AK025523  | 1044.572  | 2256.257  | AB002441  | 1731.845  | 2737.797  |
| NM_00705E | 11116.306 | 15273.671 | AK023998  | 3626.193  | 4706.395  |
| NM_00687C | 10684.477 | 6121.463  | Z11802    | 1316.383  | 2464.131  |
| NM_00735E | 8991.244  | 7685.545  | NM_014054 | 3590.974  | 2114.43   |
| L13283    | 4322.325  | 1996.802  | AK021840  | 73846.734 | 63620.719 |
| NM_013327 | 2936.477  | 1899.082  | AK022228  | 7024.438  | 5613.117  |
| AF303888  | 16088.223 | 8760.705  | AK022031  | 1536.5    | 1541.291  |
| NM_000077 | 1506.056  | 746.148   | AF003738  | 626.198   | 837.365   |
| AF176646  | 1026.257  | 509.698   | AF086480  | 1262.031  | 1392.906  |
| NM_00367Z | 29544.137 | 14769.004 | AK022122  | 1049.696  | 1030.801  |
| NM_002574 | 69235.445 | 56866.988 | AK022415  | 28063.697 | 32389.984 |
| NM_012391 | 5517.386  | 5278.842  | AL137368  | 3923.692  | 4786.998  |
| NM_005254 | 3454.944  | 4283.791  | AK021932  | 1806.531  | 2204.361  |
| NM_005611 | 1329.095  | 1626.589  | AK026787  | 5900.099  | 6057.289  |
| AF141655  | 5644.013  | 6525.638  | AK023542  | 1299.383  | 1153.205  |
| NM_00734E | 3376.76   | 3729.899  | AK000203  | 1788.305  | 1397.374  |
| NM_00483C | 1843.65   | 2759.092  | AK021845  | 20635.092 | 18769.443 |
| AF132362  | 62524.016 | 69836.508 | NM_01859Z | 7762.57   | 6648.61   |
| NM_007007 | 19078.635 | 22330.945 | NM_01850Z | 65340.773 | 65703.656 |
| NM_00638E | 6173.961  | 8713.969  | NM_01644E | 40258.617 | 44676.559 |
| NM_00655E | 30150.98  | 43710.652 | AL049670  | 8185.149  | 5011.547  |
| NM_004501 | 55971.977 | 55843.559 | AK021465  | 1863.917  | 2234.015  |
| NM_00496E | 27387.1   | 33075.238 | NM_01851Z | 42732.598 | 52165.516 |
| NM_00670C | 3204.283  | 3502.475  | NM_01856E | 1113.594  | 1750.7    |
| NM_00644E | 20402.438 | 23708.441 | AL161991  | 19955.117 | 9945.666  |
| NM_01210E | 36381.527 | 40579.578 | D17032    | 32113.676 | 21799.773 |
| AF019633  | 7082.514  | 10092.374 | AL137292  | 1455.642  | 1173.513  |
| AB002361  | 15517.264 | 9973.336  | NM_017941 | 2708.725  | 1874.277  |
| NM_01806C | 12009.725 | 5692.909  | BE900527  | 3730.579  | 3879.219  |
| NM_01423E | 6842.122  | 3440.568  | D28384    | 73051.047 | 63748.207 |
| NM_01766Z | 10862.92  | 6084.396  | AF118079  | 77320.508 | 63829.996 |

|             |           |           |           |           |           |
|-------------|-----------|-----------|-----------|-----------|-----------|
| U88837      | 3636.661  | 2011.808  | AL365413  | 1320.298  | 1837.045  |
| NM_017446   | 32383.105 | 12099.078 | NM_005258 | 9271.485  | 11923.687 |
| NM_017582   | 20537.498 | 10816.251 | NM_003948 | 1531.423  | 1735.751  |
| NM_015239   | 7539.721  | 4756.27   | AK025062  | 2002.589  | 1274.953  |
| AK026962    | 4545.351  | 2133.945  | Z27405    | 50257.355 | 45957.867 |
| D00265      | 54121.406 | 56073.387 | AK023412  | 2087.99   | 1905.608  |
| NM_000779   | 1138.852  | 1831.395  | NM_014617 | 60639.73  | 55704.758 |
| NM_004552   | 60850.59  | 58484.902 | AK074682  | 6160.617  | 5469.952  |
| NM_000143   | 5490.253  | 7615.745  | X74605    | 1897.917  | 1864.64   |
| AF317889    | 801.783   | 1025.64   | BC036692  | 3224.205  | 2576.127  |
| NM_006294   | 65104.785 | 65675.484 | AJ009640  | 4226.667  | 4136.465  |
| AL137294    | 624.348   | 1369.693  | AF086391  | 1183.257  | 1545.941  |
| NM_003743   | 3958.93   | 5252.766  | AF147340  | 1097.003  | 1313.453  |
| AB037797    | 2500.812  | 3267.57   | AF130074  | 1095.005  | 997.714   |
| NM_001520   | 2581.082  | 3427.893  | AJ224170  | 4095.479  | 3989.715  |
| AL050367    | 623.418   | 818.785   | AF085866  | 10216.254 | 12130.525 |
| NM_017870   | 2247.386  | 2496.831  | AK000806  | 29683.91  | 32438.912 |
| AL133633    | 5838.127  | 5262.868  | NM_016471 | 7990.203  | 9892.65   |
| NM_012252   | 3586.284  | 6246.175  | NM_001145 | 564.315   | 525.899   |
| AK026817    | 6923.711  | 4947.587  | NM_005364 | 17355.943 | 10801.52  |
| AL157442    | 54450.395 | 38153.328 | AK023482  | 7832.437  | 6065.978  |
| AB011148    | 6035.111  | 5032.384  | AK022798  | 898.596   | 961.797   |
| AL389938    | 64581.836 | 54129.629 | AL157423  | 1847.574  | 1870.645  |
| NM_001949   | 64692.375 | 43797.898 | AK023115  | 638.29    | 1004.277  |
| NM_007084   | 3711.156  | 1847.739  | AK023176  | 2144.712  | 2180.011  |
| M97191      | 58806.895 | 48241.828 | NM_006826 | 26611.123 | 13832.598 |
| AK023015    | 14214.229 | 6289.052  | AB007973  | 22985.01  | 17241.232 |
| NM_003457   | 29222.613 | 12779.406 | NM_002999 | 845.925   | 1103.657  |
| AV752086    | 2207.675  | 2740.541  | M96843    | 5910.548  | 7870.21   |
| NM_016102   | 53320.879 | 55144.695 | NM_017791 | 1113.88   | 1646.455  |
| NM_004376   | 4709.8    | 4363.455  | NM_005882 | 13996.822 | 13030.21  |
| NM_000272   | 1510.029  | 2471.09   | BC012304  | 6587.554  | 7236.815  |
| NM_006061   | 575.433   | 1515.042  | AB046815  | 3842.218  | 4280.825  |
| NM_006848   | 62668.246 | 65831.242 | NM_000440 | 9032.612  | 13740.03  |
| NM_005603   | 63466.508 | 62184.254 | NM_001297 | 6124.959  | 9772.073  |
| NM_001061   | 2919.773  | 4956.753  | NM_004403 | 15716.856 | 23352.242 |
| AI075338    | 4457.121  | 6528.017  | X64993    | 2669.534  | 3463.985  |
| BG744154    | 37857.637 | 52627.086 | NM_004434 | 27506.162 | 38214.906 |
| Z11694      | 27823.799 | 39083.543 | NM_006269 | 1023.802  | 1189.844  |
| BF983177    | 5787.228  | 7035.112  | NM_016230 | 6036.67   | 4087.11   |
| Z26317      | 4314.685  | 4621.031  | NM_001083 | 2957.154  | 3022.974  |
| X16983      | 58878.086 | 54425.605 | AK023966  | 16003.641 | 12435.802 |
| X56160      | 6481.873  | 6937.94   | AK025702  | 4417.833  | 3661.759  |
| BG679991    | 2387.661  | 3699.252  | NM_018958 | 3368.821  | 3636.741  |
| H-Y 00097 I | 12576.27  | 9272.636  | NM_002367 | 1231.726  | 1192.47   |
| H-M 59964   | 613.873   | 518.368   | AK022038  | 3172.925  | 3458.233  |
| H-Y 00711 I | 67181.086 | 58035.199 | AF253321  | 4309.126  | 3283.924  |
| H-X 16707 I | 7426.068  | 5836.481  | U80735    | 10876.389 | 9169.455  |
| AL038354    | 17701.883 | 7970.393  | NM_017850 | 4767.415  | 5268.629  |
| R14607      | 6000.275  | 3202.548  | NM_016522 | 1544.712  | 1550.53   |
| W84867      | 1497.537  | 1132.159  | NM_002224 | 15593.938 | 17512.197 |
| BF245026    | 562.5     | 474.714   | X07979    | 13644.851 | 16177.767 |
| NM_000592   | 1896.607  | 2392.249  | NM_003874 | 2607.768  | 3590.611  |

|           |           |           |           |           |           |
|-----------|-----------|-----------|-----------|-----------|-----------|
| NM_016584 | 50075.656 | 50857.496 | NM_000082 | 1730.059  | 2957.202  |
| NM_001815 | 7397.674  | 9123.001  | L13857    | 2360.761  | 3044.896  |
| NM_000064 | 36808.879 | 45372.422 | NM_018098 | 8639.541  | 11038.641 |
| NM_003264 | 1864.141  | 2331.279  | NM_017655 | 1272.993  | 1020.218  |
| NM_006725 | 17578.033 | 25303.699 | AF286164  | 1323.279  | 1694.449  |
| NM_003326 | 5100.301  | 7732.455  | AF146277  | 10331.673 | 9265.576  |
| NM_004568 | 65562.211 | 61060.313 | NM_002559 | 828.286   | 767.054   |
| NM_000202 | 14050.804 | 21243.688 | AF055033  | 43618.465 | 30640.547 |
| NM_005496 | 19432.352 | 25973.457 | NM_017700 | 800.63    | 780.041   |
| NM_016608 | 2669.117  | 3981.18   | M37191    | 27834.533 | 21496.801 |
| NM_002858 | 11176.775 | 14563.623 | NM_003020 | 950.705   | 1045.665  |
| NM_004817 | 5411.627  | 5753.056  | NM_003404 | 48573.145 | 46354.063 |
| NM_018975 | 28528.758 | 25707.643 | NM_001114 | 2926.93   | 5468.522  |
| AB023215  | 30059.766 | 36329.535 | NM_004455 | 836.75    | 509.147   |
| NM_001284 | 51140.57  | 51651.965 | NM_006010 | 24855.408 | 15653.733 |
| NM_003242 | 39400.035 | 31056.953 | K03191    | 5120.499  | 4141.797  |
| NM_002849 | 1417.712  | 836.831   | NM_005079 | 40772.809 | 45380.414 |
| U31099    | 2222.299  | 1840.237  | NM_005192 | 59646.676 | 61034.434 |
| NM_001105 | 21187.287 | 12571.463 | NM_004585 | 2643.375  | 3275.077  |
| NM_005585 | 750.376   | 701.251   | NM_015032 | 5323.731  | 4114.461  |
| NM_002075 | 10320.604 | 6037.729  | AK022956  | 8737.352  | 12773.862 |
| Y08756    | 55093.715 | 40763.523 | AK023121  | 1817.271  | 2636.902  |
| AY007090  | 1201.11   | 1125.129  | NM_014104 | 16356.716 | 25098.271 |
| NM_006439 | 1054.701  | 703.079   | NM_002392 | 1738.104  | 2918.84   |
| NM_018073 | 2805.082  | 4444.847  | NM_002749 | 36097.559 | 45697.391 |
| NM_000497 | 3381.795  | 5041.463  | NM_018216 | 19170.496 | 28756.969 |
| AK023130  | 9898.11   | 13723.113 | NM_003390 | 10055.347 | 10324.165 |
| NM_000273 | 3735.386  | 5958.528  | AL137747  | 5553.91   | 4253.459  |
| NM_005397 | 11001.722 | 12863.03  | NM_014755 | 7468.937  | 5652.174  |
| AB014511  | 11707.455 | 11625.128 | AF077188  | 23489.523 | 17243.16  |
| NM_001662 | 26514.33  | 28621.807 | NM_012446 | 5891.481  | 4313.615  |
| AB011100  | 6499.963  | 9915.986  | NM_018338 | 1736.288  | 1038.01   |
| U61741    | 3228.436  | 2960.906  | NM_018685 | 66542.633 | 64938.547 |
| NM_012402 | 13793.706 | 10666.601 | NM_006984 | 6363.263  | 4946.256  |
| M76676    | 11212.528 | 8293.271  | AF231919  | 3152.947  | 3069.597  |
| NM_003857 | 1350.218  | 1215.888  | NM_018214 | 3676.601  | 3836.566  |
| AL137690  | 1124.851  | 1226.074  | Y11718    | 425.893   | 786.774   |
| Z83804    | 4548.679  | 2444.275  | NM_005076 | 35083.75  | 43995.387 |
| NM_004386 | 4856.165  | 3268.694  | NM_019023 | 67140.523 | 63254     |
| U67784    | 3381.824  | 3332.718  | NM_004420 | 1516.47   | 1230.856  |
| NM_007366 | 4222.728  | 2895.427  | NM_002970 | 1358.327  | 1593.34   |
| NM_000153 | 798.133   | 1234.05   | NM_005499 | 48348.426 | 53016.676 |
| AK091794  | 778.899   | 1330.351  | NM_013270 | 2154.111  | 2351.152  |
| NM_004111 | 6529.105  | 11926.494 | NM_015387 | 9052.354  | 13262.056 |
| AF085966  | 9231.087  | 12046.86  | NM_001733 | 8948.666  | 8333.918  |
| NM_016316 | 8975.554  | 15339.699 | NM_005065 | 1697.045  | 1239.813  |
| NM_003369 | 32766.324 | 44515.859 | NM_017825 | 47169.383 | 50237.395 |
| NM_000057 | 5986.116  | 8686.06   | NM_014035 | 3766.937  | 3212.496  |
| NM_018343 | 11914.428 | 12356.517 | NM_020122 | 29469.1   | 21576.795 |
| AK095793  | 2147.993  | 2136.115  | NM_013432 | 24837.16  | 19056.584 |
| NM_003177 | 6853.546  | 5688.272  | AB020716  | 1343.61   | 1187.854  |
| NM_017719 | 1996.02   | 2674.894  | U57341    | 849.882   | 717.03    |
| AF064078  | 4403.042  | 4547.176  | NM_002298 | 60988.375 | 61455.531 |

|             |           |           |           |           |           |
|-------------|-----------|-----------|-----------|-----------|-----------|
| AL049688    | 6070.64   | 4730.167  | AK027130  | 1175.336  | 6001.442  |
| NM_002737   | 5051.358  | 3851.152  | NM_005479 | 51844.398 | 50061.027 |
| Z25427      | 6408.963  | 4559.203  | NM_005730 | 57504.148 | 58190.301 |
| NM_004672   | 21643.027 | 16183.093 | X82240    | 24039.045 | 29622.561 |
| NM_001353   | 7890.543  | 5517.865  | NM_013995 | 12801.677 | 15566.922 |
| NM_006214   | 3805.171  | 2937.942  | U52096    | 15165.068 | 10927.345 |
| AJ010228    | 19508.596 | 12046.112 | AB013897  | 3680.135  | 3785.79   |
| NM_005198   | 7513.509  | 7074.955  | NM_005526 | 46140.281 | 50201.492 |
| NM_004376   | 4899.133  | 5440.955  | AK001669  | 2557.485  | 2614.576  |
| NM_000272   | 1258.969  | 1369.746  | NM_006195 | 2342.94   | 2687.368  |
| NM_006848   | 62091.629 | 62534.566 | NM_006190 | 39090.793 | 51464.492 |
| NM_005603   | 62700.328 | 62051.324 | NM_006368 | 4683.456  | 6100.86   |
| NM_001061   | 3257.633  | 4575.038  | NM_004133 | 410.809   | 904.497   |
| AI075338    | 5126.081  | 8019.292  | NM_001618 | 13827.324 | 22423.809 |
| BG744154    | 38675.977 | 53255.137 | BC000401  | 21816.184 | 19359.67  |
| Z11694      | 31445.971 | 48299.797 | NM_006425 | 7660.129  | 5514.7    |
| BF983177    | 8515.544  | 15375.698 | BF344046  | 7477.578  | 4730.561  |
| Z26317      | 6183.417  | 9881.346  | AF432218  | 42521.734 | 29640.008 |
| X16983      | 62360.113 | 63542.254 | NM_004286 | 12975.886 | 11670.163 |
| X56160      | 8710.659  | 10360.31  | AL133644  | 32130.238 | 39561.016 |
| BG679991    | 2058.082  | 2878.024  | NM_002706 | 10213.858 | 10750.196 |
| H-Y 00097 I | 14048.542 | 13431.291 | NM_004199 | 870.943   | 1127.342  |
| H-M 59964   | 890.229   | 980.678   | NM_006876 | 3097.075  | 1636.013  |
| H-Y 00711 I | 61488.34  | 64536.219 | NM_000293 | 2372.85   | 1556.591  |
| H-X 16707 I | 7949.171  | 7057.843  | NM_003748 | 2192.401  | 2373.278  |
| AL038354    | 18628.596 | 11538.157 | NM_005398 | 665.924   | 926.302   |
| R14607      | 6233.07   | 3949.904  | NM_012269 | 1392.081  | 1086.101  |
| W84867      | 1547.248  | 1059.09   | AF153821  | 1673.219  | 1547.138  |
| NM_005718   | 11354.352 | 7432.881  | NM_013370 | 6312.437  | 8619.211  |
| NM_018264   | 2308.533  | 1604.751  | NM_001374 | 1028.696  | 1293.605  |
| NM_001815   | 7537.104  | 10142.005 | NM_003310 | 7685.087  | 10794.745 |
| NM_000064   | 37215.414 | 42250.82  | AK024461  | 6098.341  | 9676.805  |
| NM_003264   | 1577.683  | 1584.614  | AK025485  | 2205.375  | 2207.161  |
| NM_006725   | 14461.608 | 16816.207 | NM_017635 | 7711.076  | 6137.272  |
| NM_003326   | 4140.762  | 6009.863  | X62534    | 3796.004  | 4424.088  |
| NM_004568   | 62958.445 | 60750.188 | AF027147  | 51402.32  | 50907.957 |
| NM_000202   | 15791.39  | 23678.941 | M62399    | 12557.233 | 14035.614 |
| NM_005496   | 20902.566 | 29899.398 | NM_002357 | 2429.745  | 2115.486  |
| NM_016608   | 3075.984  | 4877.058  | U71600    | 8197.732  | 6009.401  |
| NM_002858   | 12574.975 | 18927.67  | NM_004472 | 2535.427  | 2281.788  |
| NM_004817   | 6487.205  | 10453.217 | AB037862  | 4899.008  | 4188.734  |
| NM_018975   | 35334.836 | 52192.207 | NM_005392 | 3565.859  | 2882.885  |
| AB023215    | 31758.094 | 42838.668 | AL133572  | 13132.352 | 14775.214 |
| NM_001284   | 42441.645 | 45698.547 | AK022500  | 14927.272 | 16514.186 |
| NM_003242   | 38125.289 | 40860.773 | NM_003447 | 806.732   | 1069.351  |
| NM_002849   | 1407.414  | 1627.579  | NM_005014 | 3568.64   | 2305.448  |
| U31099      | 2540.307  | 2111.613  | NM_006944 | 886.819   | 1079.317  |
| NM_001105   | 23574.758 | 16239.48  | NM_004407 | 1464.265  | 1374.838  |
| NM_005585   | 1180.232  | 836.789   | NM_000070 | 10566.782 | 14703.661 |
| NM_002075   | 12778.481 | 9232.613  | NM_001202 | 2618.183  | 2689.506  |
| Y08756      | 56601.676 | 46603.398 | U34249    | 807.393   | 1670.745  |
| AY007090    | 1295.641  | 1042.311  | NM_003289 | 33658.852 | 46326.336 |
| NM_006439   | 1334.849  | 1264.342  | M74220    | 791.242   | 1655.524  |

|             |           |           |           |           |           |
|-------------|-----------|-----------|-----------|-----------|-----------|
| AV752086    | 2165.174  | 1660.236  | M23254    | 1598.384  | 2584.746  |
| NM_016102   | 32034.021 | 28374.336 | BE618539  | 5015.179  | 6330.624  |
| AL137529    | 2797.495  | 3744.253  | R28062    | 9926.789  | 12645.598 |
| NM_012332   | 7682.09   | 9447.214  | U38545    | 1013.242  | 873.597   |
| NM_000497   | 2949.056  | 3394.195  | AI627464  | 2323.566  | 3433.799  |
| NM_017421   | 3770.01   | 3631.743  | BI756258  | 8303.734  | 9828.544  |
| AK025977    | 60883.625 | 58482.551 | AI342225  | 61528.688 | 68592.414 |
| AK023130    | 11137.213 | 18741.391 | J04599    | 3474.691  | 2926.833  |
| AB014511    | 14136.059 | 21149.504 | AF110020  | 6052.567  | 6829.703  |
| NM_001662   | 27740.262 | 33188.258 | AA707922  | 668.99    | 1290.521  |
| AB011100    | 5681.292  | 6222.699  | AA608557  | 17081.656 | 17670.463 |
| U61741      | 3653.054  | 3564.437  | AL050095  | 26681.873 | 31071.313 |
| NM_012402   | 14211.543 | 13057.524 | NM_012253 | 25074.797 | 26227.098 |
| M76676      | 10948.418 | 8660.385  | NM_000258 | 60972.121 | 57562.223 |
| NM_003857   | 1457.28   | 1520.357  | AB033055  | 43041.031 | 36912.418 |
| AL137690    | 1094.294  | 1104.429  | AF311287  | 32986.781 | 28465.168 |
| Z83804      | 5080.472  | 3202.476  | NM_003098 | 4156.247  | 4674.74   |
| NM_004386   | 5279.596  | 3527.996  | NM_014781 | 7818.222  | 11039.58  |
| U67784      | 3207.869  | 3122.324  | BU629989  | 1534.376  | 2035.174  |
| NM_007366   | 4708.003  | 3800.398  | X87896    | 2970.745  | 5099.4    |
| NM_000592   | 1156.147  | 1193.22   | M88310    | 7037.466  | 9637.505  |
| NM_016584   | 43641.16  | 30924.689 | D16856    | 1104.323  | 1542.678  |
| NM_000153   | 489.266   | 861.988   | NM_000042 | 4254.994  | 6747.516  |
| NM_002033   | 1646.495  | 1872.678  | AF035787  | 4676.58   | 6536.386  |
| AK091794    | 697.694   | 1412.27   | NM_005024 | 729.223   | 684.053   |
| NM_004111   | 6147.974  | 8585.195  | NM_003403 | 2756.816  | 1748.321  |
| AF085966    | 8466.989  | 9575.84   | NM_014808 | 9570.171  | 11878.572 |
| NM_003366   | 40165.082 | 39146.223 | AB006627  | 10844.902 | 11793.123 |
| NM_000057   | 4945.987  | 5214.211  | NM_003382 | 702.04    | 756.435   |
| NM_018343   | 15989.955 | 16789.918 | NM_002965 | 1336.388  | 1482.647  |
| NM_003177   | 7875.336  | 7881.177  | AB007883  | 23395.893 | 22777.494 |
| NM_017719   | 1643.487  | 1730.209  | NM_006391 | 1446.422  | 771.97    |
| AF064078    | 4291.775  | 4833.77   | NM_007037 | 61662.801 | 63242.207 |
| AL049688    | 6408.067  | 5345.101  | NM_016335 | 5680.303  | 2719.16   |
| NM_002737   | 5900.951  | 4683.842  | NM_003165 | 10001.566 | 6673.705  |
| Z25427      | 6318.949  | 5053.628  | NM_003906 | 54034.168 | 44292.863 |
| NM_004672   | 20860.484 | 17473.592 | AL359590  | 61737.406 | 58193.637 |
| NM_001353   | 9065.979  | 7409.282  | NM_002861 | 7830.537  | 10708.392 |
| NM_006214   | 3727.153  | 3070.635  | NM_003080 | 2036.998  | 2812.628  |
| AJ010228    | 18899.883 | 11838.83  | NM_013268 | 1018.7    | 1809.689  |
| NM_005198   | 7597.834  | 8309.39   | NM_002645 | 7985.887  | 10663.417 |
| NM_018073   | 2431.448  | 2161.121  | AB033027  | 2512.238  | 3706.991  |
| NM_006061   | 477.986   | 1226.715  | AF320293  | 538.493   | 943.529   |
| NM_006848   | 60836.309 | 68680.672 | NM_001171 | 2582.34   | 1678.169  |
| NM_005603   | 61381.652 | 67137.883 | S81591    | 650.26    | 403.635   |
| NM_001061   | 2521.601  | 3540.996  | NM_006323 | 28724.281 | 26850.789 |
| AI075338    | 5225.617  | 6274.886  | NM_016466 | 4820.189  | 4009.016  |
| BG744154    | 36459.938 | 46594.609 | NM_001493 | 10837.769 | 7541.773  |
| Z26317      | 8572.938  | 8351.18   | NM_003716 | 1393.266  | 1097.746  |
| X16983      | 61916.395 | 59731.211 | NM_014841 | 2191.135  | 2406.356  |
| X56160      | 12581.326 | 13161.48  | NM_014426 | 18190.211 | 20363.346 |
| H-Y 00097 I | 14512.42  | 13739.109 | AF132734  | 38721.055 | 18931.992 |
| H-M 59964   | 954.221   | 1270.932  | NM_018379 | 7787.672  | 6301.644  |

|             |           |           |           |           |           |
|-------------|-----------|-----------|-----------|-----------|-----------|
| H-Y 00711 I | 62522.387 | 62502.297 | NM_016403 | 54246.648 | 50168.254 |
| H-X 16707 I | 9574.66   | 9944.01   | NM_015603 | 2427.129  | 1545.444  |
| AL038354    | 18317.107 | 13699.437 | AK021788  | 842.642   | 846.498   |
| R14607      | 6939.933  | 5109.212  | NM_001921 | 15771.483 | 21625.264 |
| W84867      | 1984.339  | 1697.887  | NM_006230 | 20145.129 | 32197.258 |
| NM_00571E   | 9869.023  | 6362.677  | NM_014699 | 4328.418  | 6093.865  |
| NM_018264   | 2647.69   | 1783.068  | NM_013400 | 24166.186 | 35684.23  |
| NM_014580   | 1985.077  | 1715.196  | AK026257  | 3514.128  | 4557.169  |
| AB028998    | 1531.529  | 975.443   | AK023836  | 5008.167  | 7019.906  |
| NM_01660E   | 2844.242  | 3888.274  | NM_018109 | 6426.571  | 8368.601  |
| NM_00285E   | 10526.143 | 12242.086 | AJ299442  | 13722.302 | 11999.816 |
| NM_004817   | 4299.061  | 4321.256  | NM_000129 | 5744.982  | 4995.147  |
| NM_01897E   | 28168.539 | 32805.176 | NM_003762 | 13074.697 | 9435.309  |
| AB023215    | 37494.957 | 47888.434 | NM_01844E | 7919.668  | 9188.225  |
| NM_001284   | 47815.84  | 56777.195 | NM_000187 | 2079.675  | 2452.565  |
| NM_00284E   | 2257.995  | 3392.959  | D87292    | 3252.236  | 3211.648  |
| U31099      | 4933.202  | 5556.434  | NM_00549E | 5446.596  | 5497.912  |
| NM_00110E   | 40727.832 | 40060.566 | NM_004407 | 1637.279  | 774.704   |
| NM_00558E   | 1380.76   | 2000.203  | NM_000070 | 9596.747  | 6301.853  |
| Y08756      | 63524.516 | 60580.246 | NM_001202 | 3395.734  | 2681.761  |
| NM_00556E   | 17535.072 | 16774.346 | AB037804  | 804.1     | 971.218   |
| AY007090    | 1438.998  | 1849.073  | U34249    | 1112.927  | 861.626   |
| NM_00643E   | 1533.775  | 1358.878  | NM_00328E | 24586.627 | 30592.656 |
| NM_00510E   | 4395.479  | 3557.673  | M74220    | 580.387   | 1167.407  |
| NM_00451E   | 3807.47   | 4000.424  | M23254    | 1601.692  | 3072.885  |
| NM_006501   | 1743.6    | 1526.449  | BE618539  | 2270.549  | 3087.812  |
| NM_00271E   | 21383.248 | 17224.252 | R28062    | 6114.235  | 8785.639  |
| AB035356    | 625.324   | 678.088   | AI627464  | 2152.07   | 2690.964  |
| AV752086    | 2128.388  | 1588.135  | BI756258  | 5957.872  | 5252.249  |
| NM_01610E   | 36539.66  | 37775.426 | AI342225  | 59367.293 | 61947.125 |
| NM_00437E   | 6032.024  | 4575.866  | AA634103  | 60140.52  | 63773.035 |
| NM_00027E   | 963.295   | 955.961   | J04599    | 2820.62   | 2861.1    |
| NM_016131   | 16777.152 | 20811.645 | AF110020  | 5520.43   | 4986.513  |
| NM_00682E   | 5277.891  | 6982.38   | AA608557  | 16694.129 | 15995.611 |
| NM_01214E   | 14916.356 | 16482.699 | AL050095  | 28917.045 | 28701.91  |
| NM_01642E   | 3962.821  | 5502.146  | U03272    | 1306.254  | 1563.611  |
| AB011100    | 5492.965  | 9313.649  | NM_00589E | 8829.264  | 8732.851  |
| M76676      | 16088.009 | 19066.834 | NM_00647E | 1694.531  | 2293.656  |
| NM_003857   | 1827.362  | 2823.524  | AF311287  | 31324.451 | 24699.133 |
| AL137690    | 1792.789  | 2205.694  | NM_00309E | 4013.954  | 3694.75   |
| NM_00438E   | 6548.291  | 5672.649  | NM_014781 | 8639.607  | 7377.741  |
| U67784      | 4393.127  | 6025.276  | BU629989  | 2067.659  | 1609.608  |
| NM_00736E   | 4935.102  | 5058.332  | X87896    | 2884.623  | 3532.098  |
| NM_00059E   | 886.753   | 1179.797  | M88310    | 6689.78   | 8034.248  |
| NM_016584   | 46849.297 | 36832.523 | D16856    | 825.214   | 1274.834  |
| NM_00181E   | 6568.868  | 5986.152  | NM_00004E | 5106.189  | 8281.839  |
| NM_000064   | 31045.404 | 25284.889 | AF035787  | 4401.461  | 7996.922  |
| NM_003264   | 1289.964  | 948.234   | NM_005024 | 590.276   | 1167.78   |
| NM_00672E   | 9818.142  | 7261.196  | NM_00340E | 2088.664  | 2738.567  |
| NM_00332E   | 4329.252  | 3212.539  | NM_01480E | 8680.795  | 9075.554  |
| NM_00456E   | 65575.055 | 56485.309 | AB006627  | 8523.454  | 10296.198 |
| NM_00020E   | 13481.269 | 9955.788  | NM_00041E | 16173.919 | 19307.609 |
| NM_00549E   | 17488.566 | 9558.133  | NM_00338E | 509.925   | 1029.532  |



|           |           |           |           |           |           |
|-----------|-----------|-----------|-----------|-----------|-----------|
| NM_006214 | 3759.921  | 5883.194  | NM_002965 | 1405.497  | 1131.795  |
| AJ010228  | 17936.232 | 25104.908 | AB007883  | 22837.752 | 18921.473 |
| NM_005198 | 7014.072  | 12000.543 | AY009397  | 61020.844 | 65146.66  |
| NM_018073 | 2273.961  | 3125.956  | NM_007037 | 60061.863 | 63374.832 |
| AL137529  | 2393.015  | 3332.325  | NM_005014 | 3014.446  | 3533.48   |
| AK023130  | 9014.427  | 8556.604  | NM_006944 | 1064.325  | 1528.746  |
| NM_000273 | 2647.735  | 3041.286  | NM_003165 | 9150.865  | 6643.843  |
| NM_002899 | 32017.631 | 43780.172 | NM_003906 | 53123.063 | 42092.445 |
| NM_000486 | 1972.288  | 2666.862  | AL359590  | 60730.793 | 60045.133 |
| BE876237  | 2164.202  | 2024.988  | NM_002861 | 17033.705 | 12651.748 |
| NM_005397 | 7899.597  | 8455.148  | NM_003080 | 4910.03   | 3922.041  |
| NM_000806 | 22426.148 | 19164.186 | NM_013268 | 1080.539  | 1313.478  |
| NM_006320 | 3582.464  | 2042.258  | NM_002645 | 7153.146  | 9353.106  |
| AB014511  | 11524.022 | 10170.507 | AB033027  | 1759.561  | 2816.85   |
| NM_014252 | 11161.37  | 8559.606  | NM_001171 | 931.592   | 1368.37   |
| NM_001662 | 27310.109 | 21775.564 | S81591    | 913.678   | 1035.787  |
| NM_005718 | 6384.116  | 6764.175  | NM_006323 | 26141.914 | 26804.006 |
| NM_018264 | 1615.479  | 1527.299  | NM_016466 | 4618.237  | 4014.81   |
| NM_014580 | 1868.543  | 2329.86   | NM_001493 | 8885.266  | 6841.627  |
| NM_000153 | 783.956   | 883.928   | NM_003716 | 1159.786  | 928.616   |
| NM_002033 | 1593.568  | 2584.403  | NM_014841 | 1745.24   | 1562.77   |
| AK091794  | 886.721   | 1237.622  | NM_014426 | 15546.744 | 14126.71  |
| NM_004111 | 8299.88   | 14899.119 | NM_006816 | 57640.746 | 56712.84  |
| AF085966  | 9586.36   | 13865.329 | AK026518  | 58792.613 | 59857.273 |
| NM_005316 | 7972.295  | 7106.877  | NM_000258 | 58989.563 | 60404.809 |
| NM_016316 | 7569.825  | 6573.662  | AB033055  | 44617.148 | 48179.625 |
| NM_003369 | 24889.432 | 21353.633 | NM_016403 | 53093.324 | 45036.453 |
| NM_000057 | 2380.343  | 2822.149  | NM_015603 | 2202.73   | 1666.785  |
| NM_018343 | 10458.282 | 8526.52   | AK021788  | 1257.166  | 892.006   |
| AK095793  | 1551.198  | 1552.119  | NM_001921 | 14917.975 | 12801.743 |
| NM_003177 | 7180.54   | 5282.358  | NM_006230 | 19317.727 | 17151.67  |
| NM_017719 | 1569.688  | 1312.686  | NM_014699 | 3989.137  | 3449.689  |
| AF064078  | 4217.86   | 4365.492  | NM_013400 | 23955.936 | 25044.627 |
| AL049688  | 4996.252  | 3658.295  | AK026257  | 3248.658  | 3562.123  |
| NM_002737 | 5789.454  | 4474.66   | AK023836  | 6773.467  | 7303.483  |
| Z25427    | 7091.312  | 5432.68   | NM_018109 | 7643.472  | 10699.936 |
| NM_004672 | 21988.012 | 17735.873 | AJ299442  | 11709.111 | 15958.446 |
| NM_001353 | 8480.944  | 6980.175  | NM_000129 | 5031.629  | 4744.619  |
| CY3Cy5    | 6500.544  | 113.098   | NM_003762 | 12349.72  | 9669.8    |
| AF252284  | 6611.413  | 4250.855  | NM_018446 | 7338.051  | 6352.255  |
| BU727558  | 5302.115  | 4072.751  | NM_000187 | 2460.018  | 3099.54   |
| AK025794  | 15963.357 | 18961.572 | NM_014465 | 2502.851  | 2097.431  |
| NM_003541 | 3683.339  | 2950.482  | D87292    | 2784.874  | 2992.1    |
| AF131835  | 468.302   | 566.045   | NM_005498 | 3715.284  | 3999.13   |
| AK024522  | 3219.334  | 4172.815  | NM_016335 | 6403.333  | 7106.733  |
| NM_007198 | 5499.895  | 5701.256  | NM_001202 | 3181.313  | 1929.581  |
| NM_014958 | 1129.323  | 1101.779  | AB037804  | 825.173   | 757.897   |
| M33197    | 71022.539 | 61461.953 | U34249    | 2807.582  | 2040.752  |
| AK023220  | 1111.791  | 1508.58   | NM_003289 | 60214.027 | 60778.199 |
| AK024566  | 1141.267  | 1593.891  | M74220    | 776.123   | 593.915   |
| AF038182  | 3769.383  | 4840.81   | M23254    | 1608.153  | 1813.797  |
| NM_016475 | 6958.325  | 7199.267  | BE618539  | 2032.008  | 2536.812  |
| AF086472  | 2012.467  | 2088.684  | R28062    | 7993.584  | 7967.861  |

|           |           |           |           |           |           |
|-----------|-----------|-----------|-----------|-----------|-----------|
| AF252284  | 6311.311  | 5655.958  | AI627464  | 1629.771  | 2239.819  |
| BU727558  | 2932.252  | 2882.458  | BI756258  | 3055.513  | 4168.114  |
| SR3       | 50079.871 | 50414.461 | AI342225  | 58578.926 | 55871.406 |
| SR5       | 9133.809  | 9100.443  | AA634103  | 57621.555 | 57923.5   |
| SR7       | 7255.538  | 32296.654 | J04599    | 2698.751  | 2646.88   |
| SR9       | 19079.332 | 2500.948  | AF110020  | 4140.129  | 3784.87   |
| CY3Cy5    | 8122.552  | 111.466   | AA707922  | 2911.087  | 2228.078  |
| L77559    | 1928.14   | 1261.298  | AA608557  | 17325.182 | 12613.398 |
| NM_00559E | 4721.179  | 4454.626  | AL050095  | 29803.209 | 23015.9   |
| Y10515    | 2010.509  | 1807.902  | U03272    | 2252.077  | 2874.113  |
| M87942    | 910.076   | 987.918   | AF075085  | 61410.781 | 60512.66  |
| AK023636  | 14114.287 | 15406.091 | NM_005892 | 7136.767  | 7793.5    |
| D25272    | 5313.649  | 5757.802  | NM_00647E | 1485.877  | 2330.528  |
| M33197    | 74175.633 | 62062.301 | AF132734  | 33082.965 | 38859.434 |
| NM_02016E | 3078.959  | 3243.009  | NM_018379 | 7294.563  | 8397.421  |
| D83781    | 3044.947  | 3297.224  | NM_000042 | 4556.716  | 2600.011  |
| AF075013  | 736.511   | 729.83    | AF035787  | 11582.488 | 6399.796  |
| AL832699  | 10985.369 | 11893.659 | NM_003403 | 2060.51   | 1118.311  |
| NM_012191 | 1679.115  | 1781.565  | NM_01480E | 8283.289  | 8832.854  |
| AK000757  | 1039.705  | 1103.537  | AB006627  | 1559.135  | 1811.942  |
| AL359577  | 2687.552  | 2590.34   | NM_00041E | 14453.437 | 16584.127 |
| NM_01813E | 9491.157  | 9693.414  | NM_00296E | 845.887   | 1523.697  |
| AF052120  | 2982.136  | 3136.491  | AB007883  | 3113.144  | 2657.95   |
| NM_014871 | 3347.751  | 3796.837  | NM_006391 | 1118.824  | 376.061   |
| M33197    | 74067.164 | 61691.832 | AK093780  | 24411.645 | 22365.494 |
| AL137552  | 8730.816  | 9423.428  | AY009397  | 61456.211 | 64326.359 |
| M33197    | 69328.539 | 63342.004 | NM_007037 | 60416.18  | 59986.617 |
| AK024558  | 1475.061  | 1059.632  | NM_00164E | 2378.445  | 1691.047  |
| AK024779  | 3610.278  | 3153.852  | NM_005492 | 11423.816 | 9389.153  |
| AK024940  | 1026.879  | 812.629   | AF038196  | 5986.883  | 4295.22   |
| AK024406  | 3150.496  | 3399.127  | NM_00485E | 55338.277 | 54674.148 |
| AK024568  | 55891.242 | 58063.828 | NM_016352 | 7267.814  | 7180.085  |
| AK024873  | 3174.973  | 3825.042  | NM_005014 | 2738.359  | 3859.18   |
| M33197    | 68031.461 | 70400.703 | NM_006944 | 779.153   | 1553.205  |
| AK024981  | 41194.051 | 47430.367 | NM_004407 | 1813.951  | 2143.43   |
| AK027246  | 2167.844  | 2110.221  | NM_000070 | 13555.8   | 16870.572 |
| U80766    | 5261.516  | 5567.153  | NM_006323 | 28488.334 | 36208.758 |
| AK001638  | 3098.488  | 3734.335  | NM_01646E | 4223.967  | 5054.533  |
| AF161386  | 28055.348 | 36177.523 | NM_001493 | 8419.497  | 10112.774 |
| AL365369  | 6358.462  | 7412.93   | NM_00371E | 1377.652  | 1422.376  |
| M33197    | 68664.539 | 66871.313 | NM_014841 | 1952.77   | 2370.723  |
| X05826    | 21420.902 | 23673.887 | NM_01442E | 15543.594 | 9826.861  |
| Y11608    | 1143.867  | 1268.151  | NM_00681E | 51540.48  | 45255.66  |
| X76386    | 1145.456  | 864.784   | AK026518  | 59782.027 | 59607.801 |
| AJ001872  | 19381.287 | 22210.447 | NM_00025E | 54708.426 | 53222.602 |
| AJ227882  | 1764.691  | 2108.932  | AB033055  | 40596.469 | 26817.996 |
| X64984    | 2891.436  | 4315.863  | AF311287  | 34714.676 | 21560.477 |
| M33197    | 68366.961 | 66508.906 | NM_00309E | 5127.633  | 5652.241  |
| M33197    | 67025.586 | 76858.336 | NM_014781 | 7748.421  | 8467.962  |
| AL137556  | 5013.725  | 4132.657  | BU629989  | 2785.614  | 3533.049  |
| NM_01469E | 21385.896 | 21187.027 | X87896    | 3936.606  | 5943.507  |
| AL359055  | 7892.929  | 8067.51   | M88310    | 5467.459  | 6782.17   |
| NM_01490E | 5893.067  | 6821.189  | D16856    | 650.544   | 1057.245  |

|           |           |           |           |           |           |
|-----------|-----------|-----------|-----------|-----------|-----------|
| AB037771  | 926.061   | 636.933   | NM_014465 | 2549.935  | 1128.3    |
| AK025931  | 67530.125 | 73134.367 | D87292    | 3278.161  | 1057.656  |
| M33197    | 3547.865  | 4168.292  | NM_005498 | 3960.777  | 1579.93   |
| AK021972  | 953.457   | 1190.197  | NM_016335 | 4142.88   | 2318.286  |
| AK001083  | 5104.298  | 5263.161  | NM_003906 | 7614.601  | 7144.269  |
| AK000185  | 2897.493  | 2623.089  | AL359590  | 58265.133 | 63582.09  |
| NM_017962 | 3362.017  | 3466.718  | NM_002861 | 7872.414  | 10658.147 |
| AK027227  | 1573.996  | 1610.161  | NM_003080 | 2174.416  | 2444.325  |
| NM_016380 | 847.899   | 956.566   | NM_013268 | 978.991   | 643.965   |
| NM_017834 | 1383.061  | 1446.979  | NM_002645 | 5907.605  | 4196.202  |
| AK000865  | 2101.868  | 2309.893  | AB033027  | 3347.857  | 2162.992  |
| M33197    | 68029.688 | 70258.641 | AK021805  | 32200.777 | 29791.576 |
| AF147349  | 21890.584 | 20583.938 | AB014550  | 4006.306  | 3296.887  |
| AL050346  | 58505.844 | 62157.004 | AF320294  | 11687.874 | 7634.025  |
| AK001520  | 17736.955 | 16864.193 | AF320293  | 1466.519  | 886.207   |
| AK021731  | 1067.5    | 1243.573  | AF161436  | 10199.5   | 10460.229 |
| D90070    | 35637.078 | 41247.441 | NM_020402 | 12179.396 | 13708.907 |
| Y12235    | 2075.594  | 2180.046  | NM_004299 | 3730.593  | 4398.388  |
| AF132601  | 863.493   | 1065.795  | NM_001171 | 2766.823  | 3393.545  |
| M33197    | 68263.453 | 68588.5   | NM_002250 | 15218.265 | 16056.572 |
| AF086179  | 5042.567  | 4417.836  | S81591    | 878.707   | 715.081   |
| AK025807  | 6566.729  | 7242.917  | AF075085  | 55908.492 | 56833.523 |
| AK022478  | 840.402   | 1150.468  | NM_005892 | 4597.885  | 2198.9    |
| NM_018381 | 1865.841  | 1866.835  | NM_006478 | 1444.388  | 664.911   |
| U10509    | 3952.446  | 4030.839  | AF132734  | 35412.273 | 17766.031 |
| NM_007165 | 65867.859 | 64445.371 | NM_018379 | 5262.431  | 3773.306  |
| NM_014018 | 19644.965 | 23352.672 | NM_016403 | 19143.219 | 20990.986 |
| AF085956  | 5310.805  | 5690.185  | NM_015603 | 1360.635  | 1715.09   |
| NM_019116 | 4812.027  | 4243.723  | AK021788  | 646.541   | 824.184   |
| AF147318  | 2145.833  | 2510.703  | NM_001921 | 14241.21  | 22008.695 |
| L37699    | 3306.959  | 2755.617  | NM_006230 | 16968.076 | 22736.523 |
| M33197    | 65041.586 | 74044.492 | NM_014699 | 3544.506  | 4267.591  |
| AL050173  | 4611.29   | 4088.453  | NM_013400 | 19637.148 | 10352.893 |
| D80002    | 4767.437  | 3947.47   | AK026257  | 3135.952  | 1470.026  |
| U17637    | 28153.164 | 37968.953 | AK023836  | 12456.084 | 7163.589  |
| AF207831  | 3068.297  | 2481.638  | NM_018109 | 5673.319  | 3975.227  |
| AK023174  | 969.227   | 1048.698  | AJ299442  | 11574.777 | 7940.458  |
| NM_003548 | 1385.317  | 1247.231  | AB040897  | 1093.591  | 997.698   |
| M33197    | 68005.25  | 70804.992 | NM_000129 | 6352.167  | 6266.938  |
| NM_018272 | 1797.482  | 2317.093  | NM_003762 | 11215.412 | 12434.704 |
| AF086125  | 1942.925  | 2182.583  | NM_018446 | 6542.243  | 7616.708  |
| AL079279  | 671.842   | 1064.539  | NM_000187 | 1720.496  | 1990.732  |
| AK023547  | 1363.911  | 1714.317  | CY3Cy5    | 1784.366  | 51.085    |
| U67847    | 5194.141  | 5975.208  | NM_017532 | 5114.912  | 4784.771  |
| M33197    | 72135.797 | 61558.559 | AF086184  | 26643.678 | 20983.637 |
| AK024207  | 9871.719  | 11117.132 | NM_018275 | 20996.785 | 18172.496 |
| AK021843  | 2641.538  | 3228.153  | AL049266  | 9227.06   | 8362.428  |
| AF075025  | 1401.297  | 1562.893  | AK021560  | 2419.484  | 2531.65   |
| AF116623  | 1012.444  | 1384.153  | AF088045  | 1822.988  | 1445.183  |
| AF088008  | 3602.961  | 3747.488  | AF007149  | 3401.377  | 3374.411  |
| AK023528  | 1414.811  | 1516.669  | NM_014705 | 931.149   | 1149.605  |
| AK023043  | 1229.696  | 1364.847  | AK001469  | 6538.883  | 5483.238  |
| NM_004688 | 9292.752  | 7123.67   | AF035318  | 1649.466  | 1360.121  |

|           |           |           |           |           |           |
|-----------|-----------|-----------|-----------|-----------|-----------|
| AB037725  | 1589.794  | 1262.63   | NM_015456 | 8395.226  | 7682.179  |
| M33197    | 67703.375 | 69938.961 | AK025056  | 4186.887  | 3546.404  |
| NM_017718 | 1225.391  | 691.291   | AF140710  | 9029.604  | 8133.626  |
| NM_004860 | 9482.944  | 10049.73  | NM_017532 | 5763.815  | 5685.697  |
| AF217190  | 17827.006 | 15783.3   | SR2       | 50646.219 | 46590.98  |
| AB028981  | 68076.422 | 67546.898 | SR4       | 17451.307 | 18003.783 |
| NM_006800 | 4071.757  | 4831.678  | SR6       | 2753.02   | 2422.025  |
| NM_002476 | 1208.52   | 1663.797  | SR10      | 33147.883 | 12679.323 |
| NM_002729 | 10333.926 | 11229.799 | CY3Cy5    | 2376.633  | 102.242   |
| M33197    | 67801.805 | 71592.602 | AL157477  | 5610.62   | 4490.548  |
| AK025266  | 4599.833  | 5698.308  | AB002318  | 3576.536  | 2576.782  |
| AK001843  | 3969.73   | 4643.515  | AL357535  | 4546.014  | 4214.182  |
| AK000548  | 61282.34  | 54199.75  | AL049951  | 1978.487  | 2673.264  |
| NM_003920 | 43062.598 | 52295.301 | AK024963  | 2280.682  | 1914.06   |
| NM_004787 | 59313.492 | 58525.031 | AK023725  | 2218.6    | 1984.179  |
| AF087984  | 8176.801  | 8318.204  | AK022936  | 14063.197 | 11998.441 |
| AF009302  | 3121.41   | 3113.01   | AK024385  | 7060.065  | 6140.086  |
| M33197    | 68583.781 | 62230.891 | AL137727  | 4762.167  | 4139.07   |
| AK022273  | 9712.056  | 11705.603 | L17327    | 1341.2    | 1333.19   |
| NM_015882 | 2040.137  | 2302.305  | AF074986  | 2029.789  | 1559.072  |
| AK027161  | 1076.901  | 1269.806  | AF075004  | 600.545   | 715.729   |
| AK024271  | 2333.024  | 2524.828  | AL049240  | 10637.995 | 9881.108  |
| AK021650  | 14650.856 | 15523.575 | U80773    | 2962.367  | 3148.939  |
| AL050210  | 8435.009  | 15733.21  | AK021745  | 4678.813  | 4619.143  |
| NM_004132 | 12340.521 | 10559.146 | L38937    | 9735.204  | 8977.023  |
| NM_014844 | 6100.626  | 5742.661  | U90907    | 701.227   | 962.642   |
| M33197    | 68051.281 | 70213.039 | AK024327  | 2078.676  | 1659.22   |
| NM_018492 | 7560.966  | 7923.692  | AK021700  | 869.979   | 840.706   |
| NM_001346 | 9456.422  | 9526.37   | AK024395  | 661.052   | 621.794   |
| NM_003149 | 4177.447  | 5402.658  | D85433    | 7461.577  | 6778.379  |
| NM_003377 | 16091.312 | 17395.525 | AK025109  | 7763.634  | 6779.463  |
| NM_002220 | 7894.888  | 9440.324  | AK026057  | 3607.096  | 3100.926  |
| AB033034  | 8539.936  | 9239.239  | AK026713  | 1130.276  | 876.245   |
| D38169    | 5598.999  | 5955.419  | AK021627  | 5056.179  | 4053.006  |
| M33197    | 67593.664 | 72586.516 | NM_019596 | 831.371   | 738.231   |
| AJ293294  | 11714.942 | 12811.172 | AF085859  | 3248.929  | 2448.577  |
| NM_018171 | 2817.293  | 3281.132  | AK026307  | 2111.485  | 2152.488  |
| NM_002447 | 24686.021 | 31087.264 | AF075047  | 1692.953  | 1349.795  |
| NM_014145 | 25888.535 | 32975.449 | AL049260  | 633.811   | 830.868   |
| NM_014141 | 19511.734 | 22843.732 | AL049975  | 1392.053  | 1684.064  |
| NM_002223 | 5897.011  | 5972.004  | AL080067  | 1881.605  | 1904.14   |
| M33197    | 68168.375 | 69400.742 | AL117464  | 5724.347  | 4881.472  |
| NM_005490 | 39387.816 | 44192.887 | AL080160  | 2466.523  | 2393.445  |
| NM_003151 | 5928.711  | 6618.014  | L23849    | 1606.871  | 1428.524  |
| NM_006811 | 12446.634 | 10949.895 | AL049997  | 24609.182 | 22204.428 |
| NM_005601 | 5318.37   | 6039.413  | AK024118  | 2550.9    | 2418.03   |
| NM_016151 | 25557.096 | 27965.357 | X89657    | 1164.914  | 924.666   |
| Z29572    | 782.791   | 843.931   | AK024509  | 3103.071  | 2694.265  |
| AK026270  | 2690.403  | 3401.596  | AL050185  | 1036.452  | 1218.398  |
| NM_004556 | 23014.092 | 22959.863 | NM_017709 | 1804.939  | 1426.491  |
| D90075    | 5062.125  | 4789.858  | AF049615  | 2625.002  | 3110.035  |
| M33197    | 66398.633 | 81716.508 | AF024704  | 17374.064 | 15604.994 |
| NM_014857 | 2640.646  | 2545.468  | AF056431  | 2348.43   | 2779.444  |

|           |           |           |           |           |           |
|-----------|-----------|-----------|-----------|-----------|-----------|
| AK023827  | 11389.875 | 11777.351 | NM_016412 | 5495.79   | 5004.266  |
| AK021702  | 7589.438  | 8308.475  | AF009293  | 2721.393  | 3038.84   |
| NM_00388E | 4143.544  | 4268.339  | NM_00415E | 61137.621 | 67248.063 |
| AL161977  | 911.04    | 1001.244  | AF056444  | 24817.807 | 23515.549 |
| NM_01644E | 6643.906  | 7458.265  | AK000989  | 6102.267  | 6228.662  |
| NM_00393E | 2727.199  | 3274.673  | NM_01806E | 559.483   | 877.786   |
| M33197    | 66564.313 | 80108.859 | AK002210  | 12404.68  | 10937.013 |
| NM_00268E | 2564.919  | 2770.813  | AK021677  | 6440.509  | 5770.123  |
| NM_02036E | 698.208   | 916.045   | AK001057  | 1957.844  | 2099.061  |
| NM_00441E | 5225.817  | 7319.491  | AK001808  | 867.268   | 804.209   |
| NM_00727E | 33512.313 | 35239.09  | AK021471  | 2098.232  | 2374.896  |
| NM_00521E | 22050.393 | 24447.164 | AK021709  | 3441.958  | 3314.168  |
| NM_00472E | 8553.892  | 8305.975  | AL359563  | 4839.863  | 4631.581  |
| M33197    | 68793.32  | 65716.367 | NM_005304 | 1629.513  | 1344.625  |
| NM_01841E | 4289.386  | 5012.051  | NM_014477 | 5938.383  | 5263.397  |
| AB018299  | 29072.896 | 34091.82  | AL109791  | 785.29    | 1384.102  |
| NM_00524E | 11258.901 | 10640.524 | AF086478  | 6850.113  | 6927.042  |
| NM_002941 | 1942.127  | 1848.516  | AF086022  | 2074.714  | 2216.113  |
| AK025605  | 5956.516  | 6091.66   | AK021514  | 65015.137 | 57915.648 |
| NM_00378E | 2230.6    | 1880.349  | L33808    | 30021.764 | 29311.338 |
| NM_00700C | 11861.48  | 13117.224 | AJ008117  | 27351.318 | 29394.68  |
| M23161    | 18043.646 | 18085.631 | AJ008147  | 60114.148 | 56479.344 |
| NM_00610C | 2126.269  | 2284.741  | AK024369  | 2233.278  | 2307.433  |
| NM_003197 | 15815.031 | 17685.223 | AL049244  | 629.293   | 1004.04   |
| AF176705  | 13235.726 | 17596.391 | L43345    | 2996.577  | 3099.771  |
| D29012    | 24324.994 | 29867.27  | AF180297  | 9065.654  | 9503.796  |
| NM_017414 | 627.577   | 1016.001  | AK023245  | 2333.441  | 2064.633  |
| NM_01217E | 27985.994 | 33071.379 | AF147303  | 1148.373  | 904.681   |
| NM_00279E | 7557.06   | 8804.428  | AF086224  | 1010.245  | 1109.579  |
| NM_00478E | 3606.026  | 3427.416  | S56365    | 60419.926 | 60156.844 |
| M33197    | 66499.969 | 80828.797 | AF186017  | 821.437   | 738.473   |
| AL442083  | 8620.36   | 11313.519 | AK023607  | 2976.766  | 2608.381  |
| D63487    | 11374.082 | 12582.834 | AK027209  | 527.932   | 640.918   |
| AK097791  | 14032.513 | 14378.751 | AK026874  | 3363.08   | 2821.496  |
| NM_020367 | 1869.572  | 2216.963  | AK024178  | 1382.188  | 1638.334  |
| AK022705  | 4194.363  | 4110.241  | AF088033  | 8629.265  | 8592.011  |
| NM_016404 | 21926.9   | 24993.852 | AJ227897  | 1430.513  | 942.271   |
| L03426    | 5384.941  | 5917.946  | AK023628  | 1036.223  | 794.553   |
| M33197    | 69000.273 | 64510.898 | NM_017847 | 4475.689  | 4801.053  |
| NM_02016E | 3210.259  | 3743.731  | AL050151  | 1918.554  | 2229.82   |
| NM_004324 | 6475.918  | 6691.632  | NM_003537 | 39444.016 | 43905.922 |
| NM_005614 | 36786.289 | 38967.309 | AF056419  | 45837.766 | 45412.945 |
| AJ133115  | 13479.054 | 12035.028 | AF074983  | 4763.92   | 4319.291  |
| AF042831  | 1325.415  | 1083.312  | AK021862  | 1236.025  | 1363.859  |
| X51630    | 23501.668 | 24468.035 | AK024177  | 2142.097  | 1601.6    |
| NM_00505E | 6330.277  | 5485.8    | AK024827  | 14405.659 | 12692.884 |
| NM_00196E | 3631.009  | 3662.58   | AK021952  | 850.813   | 579.4     |
| AF208502  | 32237.695 | 30915.891 | AF090102  | 435.745   | 592.048   |
| M33197    | 66522.211 | 66050.203 | K01564    | 4030.2    | 4580.449  |
| AF264750  | 62278.633 | 58727.512 | AB023175  | 3844.955  | 3816.166  |
| NM_00698C | 5006.556  | 4978.74   | NM_000737 | 9908.333  | 8997.535  |
| AK023904  | 12781.627 | 14552.722 | NM_00083E | 20560.877 | 17960.787 |
| NM_01795E | 26325.203 | 34126.801 | NM_00129C | 3772.332  | 3662.712  |

|           |           |           |           |           |           |
|-----------|-----------|-----------|-----------|-----------|-----------|
| NM_017826 | 908.456   | 999.184   | AK026129  | 3853.994  | 3332.278  |
| NM_016496 | 2925.053  | 3377.005  | AK023330  | 14346.422 | 14853.631 |
| NM_014306 | 17775.328 | 18893.176 | AF075071  | 5028.805  | 4874.393  |
| M33197    | 66075.328 | 62080.27  | AF001892  | 1007.223  | 1118.689  |
| AK027059  | 20824.125 | 20327.094 | X93500    | 3610.573  | 3983.47   |
| AF151109  | 46792.824 | 47978.363 | U79271    | 4221.176  | 4296.856  |
| NM_015414 | 67451.43  | 65588.664 | NM_019886 | 2264.599  | 2470.665  |
| L34070    | 16031.298 | 16797.889 | AK024609  | 12725.071 | 12916.309 |
| M33197    | 69022.875 | 63831.285 | AK023660  | 928.024   | 1143.981  |
| NM_016216 | 40122.586 | 41392.551 | NM_018120 | 32032.566 | 34242.34  |
| NM_004751 | 2363.101  | 2273.682  | NM_015991 | 2982.625  | 3220.072  |
| NM_001865 | 67156.125 | 62417.91  | NM_005562 | 1829.849  | 1864.356  |
| NM_006441 | 18500.945 | 16884.881 | NM_004932 | 3904.729  | 3837.76   |
| NM_001916 | 6853.779  | 6247.781  | NM_006654 | 1572.342  | 1703.705  |
| NM_018245 | 38072.621 | 39249.5   | NM_003162 | 2598.997  | 2128.02   |
| M33197    | 68041.125 | 69456.367 | BF246606  | 1907.28   | 3489.83   |
| AF252390  | 4950.82   | 5005.207  | NM_014289 | 2208.801  | 2160.847  |
| NM_012117 | 20250.262 | 19687.18  | NM_002342 | 1885.01   | 1852.487  |
| D17130    | 67662.789 | 72768.766 | D13631    | 4812.192  | 4714.346  |
| X76302    | 10397.114 | 10932.184 | NM_003712 | 6818.168  | 7025.471  |
| AK026276  | 2147.76   | 2333.699  | NM_002184 | 2906.48   | 3062.226  |
| X52354    | 4259.228  | 4665.738  | NM_014883 | 8091.119  | 7178.966  |
| NM_005413 | 1514.432  | 1910.589  | NM_017805 | 9832.948  | 9876.343  |
| NM_002315 | 9279.782  | 9423.709  | M86841    | 1707.49   | 1920.827  |
| AK024191  | 2871.569  | 2981.039  | U56387    | 1998.114  | 2051.946  |
| AV693985  | 1313.313  | 1664.415  | AJ012370  | 1986.808  | 2774.39   |
| NM_006606 | 11512.756 | 11747.053 | AL049296  | 6356.275  | 5097.3    |
| NM_000457 | 9971.853  | 10899.475 | NM_014471 | 60030.418 | 54512.027 |
| M34356    | 4270.833  | 3426.015  | NM_004397 | 4134.368  | 3795.916  |
| M33197    | 67038.773 | 75434.469 | NM_003189 | 1098.774  | 950.622   |
| NM_014623 | 21280.129 | 21654.641 | NM_020236 | 10916.85  | 6776.054  |
| NM_007244 | 51294.453 | 57643.801 | D49356    | 1199.58   | 1561.871  |
| M30629    | 27580.371 | 28116.326 | AJ250475  | 3662.2    | 4038.371  |
| BE539299  | 1279.362  | 1399.848  | NM_000800 | 7520.665  | 7417.905  |
| AF193873  | 34667.492 | 44931.414 | NM_018579 | 6855.808  | 6871.408  |
| NM_002626 | 9926.559  | 9988.984  | NM_001255 | 17852.781 | 17346.551 |
| M23575    | 5247.996  | 5577.349  | U50383    | 29963.574 | 32980.395 |
| AA190729  | 9156.853  | 8863.528  | AK025085  | 10191.129 | 9260.076  |
| BF974315  | 22406.137 | 26085.998 | NM_016317 | 1044.883  | 990.137   |
| T74985    | 1278.728  | 1198.27   | NM_006290 | 14990.454 | 20757.779 |
| AI652705  | 11280.275 | 12114.462 | AK022290  | 1923.04   | 1876.682  |
| AA973397  | 6557.064  | 7082.328  | NM_003680 | 37875.566 | 46782.516 |
| AA569974  | 3295.316  | 3582.015  | AF118124  | 22434.473 | 22728.018 |
| AA923615  | 3642.429  | 4449.822  | NM_004849 | 26349.941 | 23983.072 |
| AA446028  | 1531.725  | 1715.078  | AL137527  | 19801.928 | 18914.006 |
| M80583    | 2338.016  | 2878.037  | AK026068  | 1233.86   | 1083.41   |
| AW009565  | 12628.705 | 15077.736 | NM_017675 | 7566.445  | 7797.776  |
| AW451878  | 2283.437  | 2552.103  | NM_007014 | 4492.819  | 3989.464  |
| AI570478  | 5339.205  | 5958.493  | AL096740  | 1822.818  | 1573.233  |
| H18633    | 2327.423  | 2510.007  | AF191545  | 2443.15   | 1959.447  |
| X07767    | 9977.935  | 8669.495  | NM_014554 | 8794.156  | 8489.117  |
| X65293    | 2597.755  | 2448.211  | AL137484  | 5254.612  | 4995.722  |
| M33197    | 2206.834  | 1608.181  | AK023968  | 4262.422  | 3841.808  |

|           |           |           |           |           |           |
|-----------|-----------|-----------|-----------|-----------|-----------|
| NM_000853 | 18802.924 | 17832.033 | NM_004652 | 2583.973  | 2165.862  |
| NM_000846 | 1462.762  | 1126.282  | NM_006102 | 1505.553  | 1249.997  |
| AF016903  | 63851.27  | 68024.883 | NM_000353 | 581.479   | 765.881   |
| NM_015675 | 33203.012 | 39647.504 | AK025425  | 54832.219 | 53054.488 |
| AK022267  | 2963.65   | 3268.843  | AK025974  | 38265.348 | 43861.922 |
| NM_016040 | 10000.455 | 9041.108  | NM_016532 | 7931.111  | 6577.725  |
| M33197    | 64499.664 | 68455.461 | X98115    | 5086.633  | 4717.83   |
| AF031136  | 63887.18  | 68757.766 | NM_005781 | 11951.136 | 12773.412 |
| NM_006597 | 65143.883 | 65202.973 | BC036740  | 40241.414 | 43915.996 |
| NM_012483 | 42787.281 | 48481.063 | NM_001747 | 9847.574  | 8623.182  |
| NM_003498 | 16284.849 | 18809.65  | NM_001148 | 24244.768 | 32355.414 |
| AB023420  | 39626.551 | 47089.023 | AF242522  | 21140.449 | 19783.367 |
| M33197    | 68011.367 | 70382.906 | NM_000588 | 3041.926  | 2713.435  |
| NM_003558 | 6722.225  | 7294.848  | S67970    | 1583.66   | 1340.216  |
| NM_002543 | 462.779   | 786.632   | AF221520  | 6632.119  | 5457.873  |
| NM_002185 | 1610.817  | 1415.538  | NM_006941 | 60652.145 | 55373     |
| M55337    | 7470.202  | 9987.117  | AB037852  | 2067.362  | 1671.382  |
| NM_013228 | 1714.55   | 1443.795  | NM_005360 | 4140.748  | 4279.021  |
| NM_016533 | 65569.391 | 67379.344 | NM_004349 | 9720.251  | 8870.839  |
| NM_007342 | 11971.272 | 12570.814 | NM_002092 | 30392.936 | 36893.934 |
| NM_005672 | 4827.449  | 4162.404  | NM_018077 | 9011.115  | 9770.262  |
| D25217    | 6106.018  | 6222.423  | NM_016839 | 52630.68  | 53256.805 |
| NM_006351 | 29769.32  | 32455.299 | NM_005968 | 58948.926 | 58583.18  |
| M33197    | 66166.422 | 64893.055 | AK021416  | 2232.491  | 2907.402  |
| NM_000103 | 1759.218  | 1768.662  | NM_018471 | 23760.84  | 29571.6   |
| NM_004683 | 29504.127 | 30432.947 | NM_003819 | 22941.381 | 22818.508 |
| AK023226  | 5635.104  | 5867.685  | NM_006560 | 11301.676 | 11838.512 |
| AK025263  | 1940.482  | 2555.1    | NM_016183 | 16758.889 | 16659.693 |
| NM_006931 | 18838.338 | 20820.141 | NM_004872 | 12856.311 | 11943.297 |
| NM_018057 | 10784.222 | 11940.83  | NM_001958 | 61231.313 | 54107.887 |
| NM_015717 | 8474.57   | 9051.152  | NM_004757 | 7350.083  | 7069.632  |
| NM_015925 | 10155.424 | 9540.817  | NM_015904 | 16415.361 | 14784.156 |
| NM_003665 | 3675.753  | 3964.718  | NM_001960 | 58484.574 | 58922.277 |
| AF220217  | 4205.293  | 4135.95   | NM_001528 | 5380.701  | 4495.824  |
| NM_013323 | 66279.273 | 56089.371 | NM_017947 | 3892.023  | 3562.282  |
| NM_014937 | 2529.769  | 2502.722  | NM_002494 | 41368.605 | 37117.531 |
| NM_017426 | 5417.881  | 4849.046  | M58510    | 29450.797 | 27460.512 |
| M33197    | 12736.814 | 11010.173 | NM_000782 | 6597.303  | 6211.745  |
| NM_004558 | 40667.754 | 38247.891 | BE396003  | 5939.056  | 5914.721  |
| AL079296  | 2967.44   | 2557.413  | AK023300  | 12465.268 | 12129.321 |
| NM_014770 | 25481.717 | 34920.617 | NM_018082 | 6519.362  | 5207.961  |
| AB037737  | 3625.132  | 3342.203  | NM_003904 | 16139.357 | 15353.417 |
| M33197    | 66295.664 | 68163.563 | NM_006234 | 49830.988 | 52182.461 |
| AK023103  | 5729.679  | 6765.86   | AK026387  | 2865.885  | 3068.28   |
| NM_017858 | 8985.897  | 9903.046  | AB028987  | 29326.035 | 30256.23  |
| NM_019058 | 68324.586 | 68052.266 | NM_003594 | 4656.186  | 4899.194  |
| NM_013347 | 1555.243  | 1630.452  | NM_005521 | 22250.109 | 21463.354 |
| D80008    | 4456.708  | 5488.514  | AF164438  | 37756.363 | 43526.645 |
| X56789    | 5082.575  | 5596.829  | AK022284  | 5431.278  | 5233.836  |
| AK001069  | 66888.727 | 61166.336 | AF060937  | 1540.247  | 1192.23   |
| NM_000935 | 3363.396  | 4228.165  | AB040893  | 12686.837 | 11285.664 |
| NM_000358 | 56214.633 | 52836.25  | AK025844  | 8667.271  | 8305.211  |
| NM_006395 | 7873.324  | 7623.572  | NM_004024 | 15397.754 | 14477.409 |

|           |           |           |             |           |           |
|-----------|-----------|-----------|-------------|-----------|-----------|
| NM_014306 | 14104.02  | 15246.597 | X52345      | 49209.277 | 56915.984 |
| NM_001084 | 9897.527  | 11135.707 | NM_006965   | 14652.904 | 16261.151 |
| NM_015983 | 13839.364 | 14068.071 | AF027142    | 55671.867 | 59199.488 |
| NM_018622 | 12712.993 | 14947.711 | NM_016372   | 59947.324 | 56917.359 |
| M33197    | 68606.969 | 64631.016 | AB020705    | 7671.737  | 6868.125  |
| NM_005867 | 23848.877 | 22931.088 | NM_014333   | 886.004   | 934.655   |
| AK026031  | 64647.984 | 55277.316 | NM_002980   | 3869.519  | 3674.335  |
| NM_016468 | 5149.324  | 3970.009  | NM_015886   | 1835.449  | 1913.006  |
| NM_007244 | 54328.148 | 53431.535 | NM_020358   | 548.982   | 646.836   |
| M30629    | 27063.33  | 28278.533 | NM_004262   | 721.892   | 831.892   |
| BE539299  | 1282.062  | 1124.567  | NM_007102   | 57436.398 | 61493.332 |
| AF193873  | 32198.59  | 37849.172 | BG491613    | 21255.859 | 20595.279 |
| NM_002628 | 10493.315 | 9759.191  | AA397813    | 58518.629 | 59331.059 |
| M23575    | 6394.637  | 6174.685  | W47350      | 14938.31  | 14558.924 |
| AA190729  | 9862.902  | 8657.884  | AI160964    | 1999.265  | 2494.831  |
| BF974315  | 25561.738 | 27466.465 | W68291      | 27419.656 | 27882.369 |
| T74985    | 3030.059  | 3230.109  | N64384      | 12766.394 | 13753.453 |
| AA115901  | 2039.644  | 2082.718  | H-X 53655 I | 5556.269  | 5393.028  |
| AI652705  | 13065.109 | 15789.583 | H-U 05770 I | 16709.813 | 17950.369 |
| AA973397  | 6347.218  | 6857.755  | H-M 65199   | 46302.262 | 46955.223 |
| AA569974  | 2511.014  | 2911.936  | H-M 32315   | 5765.47   | 5769.468  |
| AA446028  | 1699.014  | 1667.21   | H-V00536M   | 10582.354 | 10885.408 |
| M80583    | 2047.271  | 2351.221  | H-D85429M   | 26487.246 | 29949.785 |
| AW009565  | 13323.825 | 12586.241 | BF439832    | 4907.463  | 4825.625  |
| X07767    | 8893.708  | 8139.21   | BG819162    | 4632.284  | 4722.877  |
| X65293    | 1564.699  | 1591.439  | NM_012088   | 54763.512 | 57961.039 |
| M33197    | 39920.023 | 38418.438 | NM_000139   | 2619.312  | 2274.419  |
| AL050139  | 14658.368 | 12406.473 | NM_006664   | 11059.274 | 10439.492 |
| NM_002593 | 1352.583  | 1180.039  | NM_002416   | 1731.787  | 2291.028  |
| NM_006820 | 2695.03   | 2655.134  | NM_002728   | 5225.388  | 4714.549  |
| AF016903  | 64548.797 | 69311.25  | NM_000450   | 1584.139  | 1665.118  |
| NM_015675 | 32125.816 | 29409.967 | NM_000448   | 5618.272  | 6008.896  |
| AK022267  | 2712.054  | 2149.381  | NM_004513   | 16462.504 | 14446.893 |
| NM_016040 | 8379.078  | 6795.639  | NM_001708   | 60074.008 | 55280.215 |
| M33197    | 65823.086 | 67936.703 | NM_017735   | 13105.148 | 12074.067 |
| AF031136  | 65410.938 | 71437     | AB033044    | 48717.922 | 48516.555 |
| U90878    | 1986.239  | 1856.84   | AB014564    | 5318.818  | 6026.241  |
| NM_006597 | 65101.391 | 67553.813 | NM_020230   | 11326.59  | 10193.179 |
| NM_007329 | 1370.613  | 1361.804  | NM_006762   | 56951.512 | 57051.992 |
| NM_012483 | 53185.758 | 58459.488 | NM_006352   | 3431.643  | 3447.235  |
| NM_003498 | 17370.449 | 19023.922 | NM_016430   | 1843.664  | 3344.229  |
| AB023420  | 43884.391 | 50787.273 | NM_004447   | 14420.796 | 16077.979 |
| M33197    | 66234.086 | 82362.961 | NM_001204   | 11004.286 | 11392.544 |
| NM_007264 | 62119.438 | 67562.344 | BF131321    | 5517.124  | 5631.132  |
| NM_002262 | 3020.356  | 3221.86   | NM_016540   | 788.645   | 1050.204  |
| NM_016511 | 64445.48  | 67697.703 | NM_012116   | 7586.334  | 8676.011  |
| NM_003559 | 6969.847  | 7028.731  | NM_000020   | 21412.635 | 22618.648 |
| NM_002185 | 1372.953  | 1312.761  | NM_000956   | 1118.27   | 1439.509  |
| M55337    | 8231.521  | 10711.862 | AB033091    | 12266.045 | 10907.39  |
| NM_013229 | 2122.019  | 1449.917  | NM_004557   | 21254.404 | 20791.428 |
| NM_016533 | 63125.168 | 64450.648 | NM_003742   | 9339.979  | 7887.084  |
| M33197    | 64457.742 | 67092.281 | NM_005094   | 7835.885  | 7721.871  |
| NM_014623 | 15915.121 | 14778.595 | BE382905    | 2075.611  | 2015.59   |



|           |           |           |             |           |           |
|-----------|-----------|-----------|-------------|-----------|-----------|
| D25217    | 7006.559  | 4788.515  | NM_002152   | 35705.574 | 35796.129 |
| NM_006351 | 30906.473 | 22352.342 | AK022558    | 6932.466  | 6341.875  |
| M33197    | 67177.461 | 65035.73  | NM_006476   | 60761.711 | 55366.168 |
| NM_000103 | 2269.505  | 1545.545  | AK023787    | 5832.377  | 5156.339  |
| NM_004683 | 28931.188 | 22919.404 | NM_002133   | 7940.388  | 9110.109  |
| AK023226  | 6043.847  | 4375.786  | NM_015697   | 14642.994 | 14917.7   |
| AK025263  | 2334.918  | 2335.287  | AF086489    | 1009.846  | 922.834   |
| NM_006931 | 29085.719 | 31360.383 | AB018258    | 5492.811  | 3984.013  |
| AJ133127  | 1503.788  | 1717.995  | NM_005953   | 36957.586 | 49535.488 |
| NM_018057 | 16434.359 | 17718.25  | BF337921    | 15851.043 | 16228.981 |
| M33197    | 63869.289 | 63513.305 | U53532      | 8460.621  | 9626.718  |
| NM_015717 | 11992.578 | 11538.841 | NM_001740   | 8322.056  | 8870.244  |
| NM_015925 | 13595.174 | 11478.714 | NM_012484   | 11821.111 | 12865.22  |
| NM_003665 | 3865.625  | 3284.474  | AL096732    | 10261.158 | 10384.786 |
| AF220217  | 4394.788  | 3471.168  | AB006423    | 1969.033  | 2226.397  |
| NM_013323 | 65200.902 | 57878.371 | AJ132084    | 830.964   | 927.648   |
| NM_014937 | 2454.603  | 2423.561  | NM_005719   | 60165.918 | 53103.941 |
| NM_017426 | 6276.067  | 6127.129  | NM_003462   | 59030.477 | 51206.352 |
| M33197    | 18005.408 | 15967.627 | NM_006093   | 15865.213 | 13806.687 |
| NM_000853 | 17863.652 | 16366.082 | AK023915    | 24061.453 | 25196.082 |
| NM_000846 | 909.3     | 874.747   | AB051453    | 3940.06   | 3896.975  |
| NM_014770 | 24094.191 | 20586.922 | AK026842    | 2393.544  | 1519.518  |
| AB037737  | 3491.659  | 2133.687  | NM_002395   | 3424.053  | 3458.281  |
| M33197    | 68856.891 | 59555.563 | AB023203    | 5298.927  | 5867.951  |
| AK023103  | 5640.516  | 4750.063  | NM_014963   | 4754.952  | 4576.486  |
| NM_017858 | 7497.016  | 6556.263  | NM_004259   | 5422.93   | 5432.049  |
| NM_019059 | 67495.383 | 60152.098 | NM_016271   | 22641.389 | 20248.848 |
| NM_013347 | 1959.406  | 1398.258  | NM_016619   | 2889.211  | 2933.904  |
| D80008    | 5062.205  | 4378.854  | NM_014481   | 2901.159  | 3130.297  |
| X56789    | 6831.325  | 6250.474  | U22172      | 10972.527 | 10302.379 |
| AK001069  | 70578.141 | 61022.703 | AB032960    | 3391.301  | 4164.399  |
| NM_000935 | 5933.294  | 5805.056  | NM_014264   | 26960.361 | 32275.758 |
| NM_000359 | 61076.609 | 51887.207 | AF020089    | 3909.493  | 4632.51   |
| NM_006395 | 9341.133  | 7860.173  | NM_006257   | 3586.193  | 3939.208  |
| NM_014306 | 16111.894 | 13678.093 | NM_016281   | 26143.848 | 22914.17  |
| NM_001084 | 13267.644 | 11685.739 | NM_004734   | 43642.766 | 47173.348 |
| NM_015983 | 14152.951 | 11706.274 | AK024793    | 5313.297  | 6862.827  |
| NM_018622 | 12666.415 | 11762.473 | AF208291    | 2033.919  | 2028.521  |
| M33197    | 68443.375 | 65771.445 | NM_004877   | 46435.082 | 48727     |
| NM_005867 | 24219.676 | 22272.633 | L10284      | 61876.238 | 60926.82  |
| AK026031  | 65428.656 | 55736.992 | NM_000276   | 4476.004  | 4609.042  |
| NM_016468 | 23471.938 | 20469.346 | NM_000019   | 61345.012 | 62477.621 |
| NM_007342 | 11373.224 | 11811.736 | AK023701    | 4838.665  | 4213.995  |
| NM_005672 | 4860.725  | 4826.647  | NM_014333   | 2901.564  | 2736.799  |
| BE539299  | 1394.142  | 724.373   | NM_002980   | 3714.554  | 4845.344  |
| AF193873  | 30483.371 | 30453.049 | NM_015886   | 3789.394  | 3549.945  |
| NM_002628 | 11829.923 | 9431.979  | BG491613    | 23707.068 | 23985.656 |
| M23575    | 5718.637  | 4362.537  | AA397813    | 57668.129 | 54221.824 |
| AA190729  | 8755.309  | 6601.584  | W47350      | 15828.609 | 15125.021 |
| BF974315  | 27186.021 | 20865.896 | AI160964    | 2344.654  | 2683.012  |
| T74985    | 1403.811  | 929.287   | W68291      | 27073.438 | 30357.922 |
| AI652705  | 15393.057 | 13907.935 | N64384      | 13908.771 | 14554.142 |
| AA973397  | 6986.483  | 6315.447  | H-X 53655 I | 4547.941  | 4653.177  |

|           |           |           |           |           |           |
|-----------|-----------|-----------|-----------|-----------|-----------|
| AA569974  | 2906.597  | 3320.069  | H-U 05770 | 16442.488 | 17350.682 |
| AA446028  | 1610.836  | 1806.585  | H-M 65199 | 44626.098 | 46019.262 |
| M80583    | 3017.205  | 2276.242  | H-M 32315 | 4746.528  | 6019.708  |
| AW009565  | 14518.6   | 14211.853 | H-V00536M | 10427.671 | 12293.819 |
| AW451878  | 5882.134  | 5182.261  | H-D85429M | 28183.545 | 33317.508 |
| AI570478  | 4929.821  | 6974.065  | BF439832  | 5707.129  | 5414.055  |
| H18633    | 1442.59   | 1453.686  | BG819162  | 5849.204  | 6067.875  |
| X07767    | 7181.375  | 6564.566  | M38449    | 20329.82  | 20158.479 |
| M33197    | 30093.59  | 27463.539 | NM_001091 | 5869.593  | 5693.879  |
| AL050139  | 24367.473 | 23599.727 | NM_002416 | 1859.354  | 2835.848  |
| NM_002593 | 3420.453  | 3309.906  | NM_002728 | 5077.702  | 5363.733  |
| NM_004558 | 44921.141 | 37670.563 | NM_004513 | 15039.954 | 19747.719 |
| AL079296  | 2467.946  | 2411.26   | NM_001708 | 62276.945 | 62968.949 |
| NM_006597 | 67461.148 | 66818.711 | AB033044  | 50809.551 | 47648.035 |
| NM_012483 | 56948.656 | 59556.543 | AB014564  | 5075.866  | 5879.278  |
| NM_003498 | 19605.23  | 15748.265 | NM_020230 | 10995.435 | 12184.33  |
| AB023420  | 44483.676 | 45236.465 | NM_006762 | 60838.781 | 56983.277 |
| M33197    | 63588.047 | 71270.945 | NM_006352 | 3227.355  | 4160.782  |
| NM_007264 | 63738.184 | 62615.551 | NM_016430 | 2314.769  | 5053.707  |
| NM_002262 | 3073.187  | 2688.873  | NM_004447 | 16591.834 | 19497.27  |
| NM_016511 | 65450.117 | 62281.781 | NM_001204 | 11764.11  | 13106.604 |
| NM_003558 | 8898.835  | 7696.89   | BF131321  | 6284.796  | 6969.331  |
| NM_002185 | 1534.309  | 1078.621  | NM_016540 | 1021.458  | 1479.297  |
| M55337    | 8088.697  | 9181.813  | NM_012116 | 8232.062  | 9269.013  |
| M33197    | 65248.813 | 68634.727 | NM_000020 | 24852.889 | 27798.943 |
| NM_013228 | 2754.343  | 2609.472  | NM_000956 | 1594.26   | 1864.77   |
| NM_016533 | 64629.375 | 73202.055 | AB033091  | 12877.677 | 12234.424 |
| NM_014751 | 63460.418 | 68995.648 | NM_004557 | 28879.527 | 31578.453 |
| NM_002347 | 65132     | 68599.672 | NM_016372 | 59510.766 | 59005.258 |
| AB046807  | 3913.518  | 3824.89   | AB020705  | 8682.759  | 9654.789  |
| NM_018176 | 1603.416  | 1330.607  | AK022558  | 6734.736  | 9077.935  |
| NM_003508 | 1488.562  | 1467.341  | NM_006476 | 60298.953 | 60322.449 |
| M33197    | 66867.344 | 68300.969 | NM_002133 | 8285.222  | 10874.172 |
| NM_014623 | 19019.551 | 19163.15  | NM_015697 | 16149.556 | 19520.834 |
| NM_007244 | 55614.984 | 53377.766 | AF086489  | 1136.245  | 1015.044  |
| M30629    | 23779.383 | 23192.51  | AB018258  | 1073.145  | 1101.262  |
| NM_018976 | 21303.635 | 17423.207 | NM_005953 | 35384.16  | 53053.93  |
| NM_003355 | 29564.875 | 22321.9   | BF337921  | 19396.277 | 24176.771 |
| NM_005074 | 6339.747  | 6340.469  | U53532    | 7521.548  | 8995.697  |
| NM_013272 | 3928.128  | 3226.397  | NM_001740 | 7464.356  | 8398.904  |
| NM_004170 | 12413.155 | 10342.504 | NM_012484 | 11058.62  | 12629.085 |
| NM_018057 | 16942.604 | 16459.695 | AL096732  | 9752.315  | 11289.868 |
| M33197    | 66718.836 | 73390.328 | AB006423  | 1650.368  | 2156.117  |
| NM_015717 | 14071.068 | 14534.666 | AJ132084  | 875.949   | 1043.341  |
| NM_015925 | 14171.445 | 12879.095 | NM_005719 | 60058.246 | 56915.121 |
| NM_003665 | 4392.949  | 4424.98   | NM_003462 | 56907.641 | 53600.203 |
| AF220217  | 3958.669  | 3833.191  | NM_006093 | 15524.478 | 16841.125 |
| NM_013323 | 65843.672 | 66834.57  | NM_000139 | 2153.862  | 2597.431  |
| NM_014937 | 2400.456  | 2417.913  | NM_006664 | 10286.05  | 11674.428 |
| NM_017426 | 7287.525  | 7541.958  | AB051453  | 3582.944  | 3111.133  |
| M33197    | 23114.92  | 20397.059 | AK026842  | 3054.529  | 1939.825  |
| NM_000853 | 18280.641 | 18557.281 | AB023203  | 4234.511  | 6374.128  |
| NM_000846 | 1056.227  | 645.37    | NM_014963 | 5832.472  | 6557.5    |

|           |           |           |             |           |           |
|-----------|-----------|-----------|-------------|-----------|-----------|
| AF016903  | 64854.051 | 69997.586 | NM_004259   | 5377.08   | 6416.881  |
| NM_015675 | 37331.07  | 35713.746 | NM_014481   | 3673.429  | 4559.775  |
| AK022267  | 1731.733  | 1869.489  | U22172      | 14147.18  | 12464.424 |
| NM_016040 | 8354.058  | 7120.714  | AB032960    | 3452.593  | 3989.776  |
| M33197    | 66831.578 | 69237.617 | NM_014264   | 27979.922 | 27653.143 |
| NM_005867 | 32156.336 | 22054.086 | AF020089    | 5159.709  | 5796.799  |
| AK026031  | 62909.508 | 56057.309 | NM_006257   | 3906.937  | 4846.902  |
| NM_016468 | 24063.57  | 18346.752 | NM_016281   | 28559.275 | 27097.75  |
| NM_007342 | 12432.087 | 12111.971 | NM_004734   | 41459.766 | 44271.023 |
| NM_005672 | 5128.469  | 4188.588  | AK024793    | 6815.132  | 7175.589  |
| D25217    | 7299.04   | 6384.111  | AF208291    | 2381.215  | 2358.999  |
| NM_006351 | 32150.875 | 30065.723 | NM_004877   | 43606.426 | 48812.051 |
| M33197    | 66403.281 | 67520.031 | L10284      | 61831.145 | 59743.305 |
| NM_000103 | 2963.933  | 2356.437  | NM_000276   | 4426.031  | 4831.563  |
| NM_004683 | 30000.93  | 26224.877 | NM_000019   | 63196.43  | 54601.191 |
| AK023226  | 5174.565  | 3727.604  | AK023701    | 4881.616  | 5029.168  |
| AK025263  | 2247.97   | 1887.198  | NM_003742   | 9645.921  | 10060.339 |
| M33197    | 65495.258 | 65848.336 | NM_005094   | 9108.656  | 9624.076  |
| NM_001467 | 6107.199  | 5529.677  | NM_015886   | 1822.028  | 1857.569  |
| NM_018066 | 63985.02  | 58410.758 | NM_020358   | 2143.024  | 3397.617  |
| NM_006931 | 24313.637 | 25869.826 | AI160964    | 2258.301  | 2928.047  |
| NM_020344 | 25414.586 | 29721.727 | W68291      | 34294.293 | 36318.391 |
| AF119868  | 569.72    | 494.558   | N64384      | 16459.313 | 17012.98  |
| NM_005050 | 11165.204 | 12528.188 | H-X 53655 I | 5863.537  | 5738.25   |
| NM_019844 | 1630.825  | 1180.4    | H-U 05770 I | 18516.064 | 19910.123 |
| M33197    | 51296.18  | 40115.277 | H-M 65199   | 50265.66  | 50178.895 |
| AL050139  | 24246.186 | 18817.482 | H-M 32315   | 5658.451  | 6030.379  |
| NM_002593 | 3190.576  | 2372.482  | H-V00536M   | 11915.355 | 12195.647 |
| NM_004558 | 44984.703 | 39329.773 | H-D85429M   | 27867.82  | 34626.305 |
| AL079296  | 2606.798  | 2205.57   | BF439832    | 5244.669  | 5757.942  |
| NM_014770 | 25136.381 | 28868.07  | BG819162    | 6004.314  | 6490.778  |
| AB037737  | 3619.488  | 2971.129  | M38449      | 17667.865 | 20167.756 |
| M33197    | 67015.883 | 66959.492 | AK025495    | 685.112   | 1082.139  |
| AK023103  | 5944.692  | 5680.439  | NM_001091   | 5518.976  | 5891.599  |
| NM_017858 | 7132.672  | 6421.928  | AK023915    | 24929.705 | 24403.438 |
| NM_019058 | 66394.031 | 65474.992 | AB014564    | 4338.109  | 4281.858  |
| NM_013347 | 1703.422  | 1399.852  | NM_020230   | 10591.93  | 9942.627  |
| D80008    | 3678.792  | 3557.338  | BF131321    | 7548.156  | 9558.594  |
| X56789    | 6243.579  | 5439.347  | NM_016540   | 1116.457  | 1098.786  |
| AK001069  | 68561.859 | 64911.441 | NM_012116   | 8953.701  | 9089.008  |
| M33197    | 69447.844 | 61550.691 | NM_000020   | 29620.662 | 28359.926 |
| NM_000935 | 5439.961  | 5496.511  | NM_000956   | 2048.954  | 2071.142  |
| NM_000358 | 57753.105 | 50067.609 | NM_002442   | 14948.437 | 15781.359 |
| NM_006395 | 10148.092 | 9042.087  | AB033091    | 13142.519 | 11582.254 |
| NM_014306 | 13441.833 | 15145.824 | NM_004557   | 32147.359 | 38106.32  |
| NM_001084 | 13262.851 | 11296.313 | NM_014757   | 14442.174 | 14908.367 |
| NM_015983 | 17206.006 | 13414.813 | NM_017893   | 1190.922  | 1959.45   |
| NM_018622 | 11265.673 | 8921.075  | NM_001584   | 12018.53  | 14840.59  |
| M33197    | 69121.477 | 64401.246 | NM_012259   | 59784.598 | 58358.082 |
| CY3Cy5    | 5656.715  | 339.709   | AF272357    | 11204.06  | 12383.816 |
| NM_006981 | 1931.478  | 2998.864  | NM_016372   | 54628.836 | 55291.547 |
| AF086429  | 3537.727  | 2808.247  | AB020705    | 9992.842  | 11002.434 |
| NM_019060 | 604.024   | 761.885   | NM_014333   | 709.362   | 928.381   |

|           |           |           |           |           |           |
|-----------|-----------|-----------|-----------|-----------|-----------|
| AF086439  | 3282.436  | 3162.443  | NM_002980 | 4020.053  | 3926.725  |
| M33197    | 63062.801 | 54072.473 | NM_016274 | 7161.114  | 7639.816  |
| AF038171  | 1228.535  | 1120.859  | NM_014946 | 2175.901  | 1581.216  |
| AF052160  | 901.626   | 1113.525  | NM_014251 | 7135.711  | 6439.726  |
| AK026512  | 1719.787  | 1810.692  | AK022750  | 15939.426 | 17189.26  |
| NM_018482 | 2436.774  | 2457.364  | NM_004251 | 21923.752 | 28045.92  |
| NM_017880 | 1666.665  | 1870.542  | BF337921  | 24997.078 | 28645.27  |
| AF090945  | 5304.856  | 6633.615  | U53532    | 8648.765  | 9541.729  |
| NM_006981 | 1758.934  | 1881.875  | NM_001740 | 10093.391 | 10077.813 |
| SR2       | 45053.777 | 40479.262 | NM_012484 | 11334.307 | 11038.674 |
| SR4       | 12363.398 | 11319.802 | AL096732  | 9139.25   | 8920.537  |
| SR6       | 1546.43   | 1112.84   | AB006423  | 2065.488  | 2125.375  |
| SR8       | 7640.284  | 29732.467 | AJ132084  | 993.727   | 948.945   |
| SR10      | 22213.021 | 5718.865  | NM_005719 | 56744.125 | 55370.703 |
| CY3Cy5    | 3192.121  | 106.956   | NM_003462 | 55803.02  | 50346.102 |
| AF088010  | 652.093   | 763.847   | NM_006093 | 17889.486 | 19008.35  |
| AK026718  | 1606.189  | 1197.37   | NM_000139 | 2817.017  | 3666.451  |
| AK022035  | 8864.572  | 9982.548  | NM_006664 | 10720.568 | 12673.712 |
| M33197    | 68518.609 | 64126.324 | NM_002416 | 1476.082  | 2104.171  |
| NM_004337 | 4108.493  | 3717.423  | NM_002728 | 4654.384  | 6127.344  |
| AL117497  | 3225.762  | 3819.621  | NM_000450 | 1291.477  | 1386.957  |
| AF075016  | 803.295   | 618.291   | NM_000448 | 5800.878  | 6300.785  |
| AK023612  | 552.25    | 1212.176  | NM_004513 | 15050.856 | 15806.946 |
| AF147437  | 3711.927  | 3507.522  | NM_001708 | 56636.434 | 55491.555 |
| M33197    | 68122.234 | 64348.199 | NM_017735 | 12449.762 | 11393.725 |
| AL137269  | 4356.69   | 4997.789  | AB033044  | 47183.957 | 48481.953 |
| AK021983  | 3375.256  | 2655.021  | NM_000276 | 3900.97   | 3273.9    |
| Y11681    | 15132.515 | 13529.834 | NM_000019 | 59181.199 | 56655.426 |
| AL110135  | 17139.633 | 12957     | AK023701  | 4356.997  | 3783.514  |
| NM_006993 | 25950.494 | 24958.396 | NM_003742 | 7499.074  | 7581.425  |
| M33197    | 72772.508 | 65488.605 | NM_005094 | 6892.911  | 7738.074  |
| M33197    | 61439.488 | 60821.035 | BE382905  | 1752.951  | 1951.43   |
| AL359626  | 809.854   | 804.526   | NM_002152 | 34220.379 | 41294.336 |
| AK022084  | 526.053   | 674.012   | NM_001701 | 1391.922  | 1235.953  |
| AK026878  | 1637.11   | 1825.926  | AK022558  | 6802.535  | 7013.166  |
| AK000777  | 1553.066  | 1478.681  | NM_006476 | 61033.758 | 53426.996 |
| M33197    | 61038.496 | 56837.758 | AK023787  | 7716.991  | 7872.258  |
| AF144233  | 3083.706  | 3978.862  | NM_002133 | 7899.637  | 9530.287  |
| AF085925  | 748.415   | 791.601   | NM_015697 | 16010.313 | 19120.584 |
| AF085975  | 11872.109 | 15372.874 | AF086489  | 1591.197  | 1810.09   |
| AF075103  | 711.829   | 962.288   | NM_032943 | 9923.551  | 11965.898 |
| M33197    | 65975.633 | 64762.586 | NM_007177 | 53473.926 | 49861.734 |
| AL137390  | 3333.769  | 3412.266  | NM_000809 | 1134.383  | 1522.522  |
| AL137611  | 5295.057  | 5492.442  | AB018258  | 1165.932  | 1281.274  |
| AL359566  | 13051.961 | 14475.218 | AL359592  | 2015.563  | 2054.882  |
| AL137427  | 4887.593  | 4798.567  | NM_006078 | 19925.977 | 22327.49  |
| AL157460  | 2839.79   | 2619.096  | NM_000824 | 717.755   | 1050.17   |
| AL359595  | 2407.647  | 5243.09   | NM_000482 | 1420.646  | 1529.019  |
| M33197    | 64807.078 | 71779.477 | NM_005953 | 36605.434 | 53704.625 |
| M33197    | 59486.512 | 60413.914 | M38449    | 14365.249 | 10532.689 |
| AL080134  | 717.508   | 828.542   | NM_001091 | 4213.069  | 3940.221  |
| AL049846  | 1940.325  | 2048.205  | AK023915  | 21913.047 | 21170.578 |
| AK024161  | 1367.083  | 1492.26   | AB051453  | 4321.732  | 5244.849  |

|           |           |           |           |           |           |
|-----------|-----------|-----------|-----------|-----------|-----------|
| AK021682  | 58867.398 | 57152.746 | AK026842  | 1605.472  | 1654.982  |
| AK022141  | 698.858   | 941.389   | NM_002395 | 2363.729  | 2336.249  |
| AK023942  | 58924.328 | 60156.086 | AB023203  | 4841.263  | 5462.305  |
| M33197    | 61292.859 | 59863.184 | NM_014963 | 4661.283  | 4700.57   |
| AK022046  | 640.088   | 803.28    | NM_004259 | 5000.621  | 4821.224  |
| AK027207  | 1198.06   | 1543.411  | NM_016271 | 20944.047 | 20227.396 |
| AF083120  | 921.009   | 1652.779  | NM_016619 | 2864.918  | 3132.859  |
| AF143323  | 854.533   | 1090.635  | NM_014481 | 3447.064  | 4077.906  |
| AJ227892  | 9117.909  | 10429.861 | U22172    | 17614.791 | 16322.144 |
| M33197    | 61978.98  | 59923.238 | AB032960  | 3900.787  | 4894.546  |
| AK022013  | 5796.154  | 6775.481  | NM_014264 | 27805.297 | 25752.316 |
| AK022155  | 10594.15  | 12356.709 | AF020089  | 5007.579  | 5395.448  |
| AK022288  | 2265.31   | 2037.828  | NM_006257 | 4345.674  | 4594.478  |
| AK021916  | 1480.881  | 1643.739  | NM_016281 | 25753.148 | 21839.865 |
| AK024201  | 2041.421  | 2100.544  | NM_004734 | 42943.648 | 48127.773 |
| AK022174  | 1334.739  | 1635.655  | AK024793  | 5540.64   | 5594.216  |
| AK022331  | 1161.696  | 1481.125  | AF208291  | 2251.407  | 2097.024  |
| M33197    | 60134.949 | 61558.383 | NM_004877 | 38950.262 | 43844.762 |
| AL049299  | 726.063   | 1021.187  | L10284    | 62045.918 | 59909.953 |
| NM_006088 | 62314.066 | 63945.496 | CY3Cy5    | 15223.402 | 399.975   |
| NM_018265 | 1663.154  | 1946.844  | NM_000620 | 1423.476  | 1231.362  |
| AF130086  | 8862.72   | 10755.356 | NM_000905 | 11749.448 | 9537.037  |
| AK023858  | 6331.081  | 8274.282  | AK023269  | 5073.392  | 4482.879  |
| M33197    | 63547.84  | 60214.512 | AF070564  | 18144.824 | 15604.202 |
| AF250920  | 3801.53   | 3965.15   | AK021439  | 46705.336 | 55047.578 |
| NM_017733 | 2651.527  | 3362.963  | AF052099  | 8600.565  | 7355.667  |
| NM_014042 | 10802.982 | 12569.541 | AL110111  | 7261.041  | 6114.729  |
| D17152    | 33296.359 | 35000.047 | AF070543  | 2522.076  | 2342.076  |
| AK024464  | 22447.16  | 27292.303 | AF086525  | 1086.232  | 1066.869  |
| AK026748  | 688.591   | 714.936   | AF086509  | 1360.656  | 1202.764  |
| M33197    | 2009.204  | 1431.585  | NM_014778 | 8888.137  | 7941.325  |
| AK025423  | 2942.384  | 2332.379  | AK001171  | 34912.68  | 38887.492 |
| AL050022  | 653.701   | 805.657   | AF086491  | 10918.954 | 10474.27  |
| AF009272  | 518.86    | 487.43    | NM_014856 | 1847.62   | 2521.319  |
| AL137380  | 1246.855  | 1064.966  | AK021611  | 439.799   | 968.372   |
| M33197    | 61432.551 | 61625.02  | NM_003492 | 1760.333  | 1595.945  |
| AL137658  | 37155.664 | 43368.414 | NM_000620 | 1110.165  | 1094.929  |
| D16888    | 1413.365  | 1579.909  | NM_000905 | 10993.479 | 9431.758  |
| U79277    | 818.901   | 1034.153  | SR1       | 69073.023 | 61160.359 |
| AF068298  | 6884.004  | 6743.143  | SR3       | 54553.184 | 50917.988 |
| Z70770    | 4037.773  | 5288.862  | SR5       | 7323.162  | 7315.403  |
| AJ227900  | 4288      | 4622.234  | SR7       | 7624.041  | 36597.383 |
| AK023242  | 2512.165  | 2669.01   | SR9       | 25314.297 | 4454.447  |
| M33197    | 63367.227 | 59944.41  | CY3Cy5    | 20520.023 | 812.565   |
| AJ012500  | 9016.095  | 10070.675 | U63828    | 8152.189  | 6497.664  |
| AF085833  | 1529.216  | 1631.202  | Z36794    | 3025.459  | 2748.884  |
| L19368    | 1436.083  | 1253.436  | Z36828    | 14472.08  | 12614.931 |
| U00944    | 1968.979  | 2143.134  | AF086121  | 46680.586 | 45704.637 |
| BC035058  | 1163.343  | 1005.284  | NM_015696 | 1473.967  | 1659.833  |
| X57566    | 17374.313 | 16846.152 | AK022551  | 7592.291  | 7206.771  |
| M33197    | 68903.453 | 64642.164 | AF085968  | 4973.328  | 4003.466  |
| NM_018616 | 23480.428 | 20361.492 | AK023665  | 1053.853  | 966.306   |
| AK023809  | 2922.283  | 2763.824  | AB011136  | 5913.168  | 6659.114  |

|           |           |           |           |           |           |
|-----------|-----------|-----------|-----------|-----------|-----------|
| M87943    | 63952.238 | 55676.016 | AF085898  | 10117.988 | 10376.044 |
| AL360137  | 2234.351  | 2476.318  | AL442094  | 1599.91   | 1350.866  |
| U28131    | 64203.039 | 54790.496 | AL161960  | 4247.24   | 3324.38   |
| AY007106  | 4263.161  | 4292.709  | AL049964  | 6647.586  | 5892.829  |
| AF015910  | 62469.492 | 63795.633 | AF038184  | 1157.868  | 1043.994  |
| BC009993  | 1791.733  | 1874.834  | AK022485  | 1921.094  | 2095.007  |
| M33197    | 58019.652 | 66233.484 | AK023395  | 17641.85  | 19643.857 |
| AB049150  | 1108.443  | 1124.702  | AK023818  | 21326.574 | 18485.67  |
| NM_016824 | 8797.934  | 7758.285  | AK024139  | 1171.903  | 1237.818  |
| NM_003031 | 10703.911 | 8836.863  | AK023522  | 466.47    | 644.746   |
| X89674    | 2017.099  | 2551.335  | AK023895  | 2005.012  | 1589.861  |
| NM_007170 | 3015.142  | 3655.557  | AK024206  | 22048.887 | 20900.996 |
| NM_003008 | 2152.968  | 2430.626  | AK026273  | 43697.586 | 49848.043 |
| M33197    | 60890.98  | 56458.766 | NM_020250 | 63698.145 | 68062.422 |
| AF317550  | 917.533   | 1065.857  | AF055007  | 2584.656  | 2119.943  |
| NM_003543 | 326.698   | 512.707   | NM_012337 | 3984.145  | 3938.266  |
| AK025416  | 529.894   | 739.194   | AL389879  | 45698.734 | 48880.797 |
| AK022165  | 633.431   | 677.985   | AK022869  | 3755.31   | 3761.935  |
| AF090883  | 1621.85   | 1736.134  | NM_016111 | 51969.371 | 55021.43  |
| U23860    | 2098.864  | 1843.486  | AF085958  | 67876.383 | 68880.133 |
| M33197    | 60358.305 | 61449.008 | AK021906  | 872.948   | 845.091   |
| AK022372  | 6040.724  | 5964.451  | AF086021  | 14711.242 | 14218.596 |
| AJ227863  | 1289.848  | 1445.073  | AF085982  | 405.439   | 891.78    |
| NM_015916 | 5433.034  | 6390.672  | AL117655  | 1131.069  | 1320.701  |
| NM_003520 | 1214.984  | 1462.474  | AK024472  | 4703.026  | 4670.39   |
| NM_015886 | 60314.262 | 59369.012 | AF087981  | 10786.001 | 6220.967  |
| NM_000212 | 1477.577  | 1681.379  | NM_017976 | 8861.934  | 9203.39   |
| M33197    | 59552.609 | 60894.934 | U06700    | 3813.252  | 3444.251  |
| NM_004276 | 5912.021  | 5734.067  | NM_017918 | 30470.74  | 33011.758 |
| NM_002332 | 30919.898 | 35277.113 | NM_017855 | 66916.836 | 76296.406 |
| NM_002859 | 5706.974  | 6587.479  | AB007954  | 8564.184  | 8066.311  |
| NM_005246 | 9492.324  | 10796.043 | AK026494  | 10690.799 | 10281.313 |
| NM_017651 | 1889.639  | 1819.789  | AK022067  | 1044.528  | 1031.182  |
| AF161339  | 3570.392  | 3964.816  | AK023508  | 3447.566  | 3242.492  |
| M33197    | 59591.82  | 62337.035 | AK025840  | 7137.142  | 6562.576  |
| AK000354  | 14851.573 | 15517.54  | AK026915  | 6018.474  | 6514.61   |
| AL161984  | 989.125   | 1285.718  | AL110259  | 1917.678  | 2006.848  |
| NM_003950 | 597.524   | 993.042   | AB033100  | 60841.516 | 76184.781 |
| NM_014882 | 4800.785  | 4163.564  | AL390138  | 7261.543  | 7373.848  |
| M33197    | 62309.973 | 65345.27  | AL137290  | 13787.138 | 11989.878 |
| NM_001510 | 3772.774  | 3688.022  | AK024180  | 60.928    | 2377.076  |
| AK024474  | 18188.164 | 18336.016 | AK023458  | 775.794   | 1162.044  |
| NM_006862 | 1546.963  | 1647      | AK021606  | 1729.35   | 2289.193  |
| NM_017901 | 5833.77   | 7208.907  | NM_014124 | 67000.125 | 68630.969 |
| NM_004272 | 4229.378  | 3711.306  | AF119888  | 2972.047  | 3877.867  |
| NM_000358 | 4162.461  | 4490.441  | AK001551  | 8226.265  | 7698.493  |
| NM_001930 | 15706.94  | 15136.519 | AK001825  | 2928.12   | 2757.926  |
| AK025270  | 2623.59   | 2535.985  | AK024714  | 1303.905  | 1672.766  |
| NM_001564 | 7507.509  | 7294.395  | AK022363  | 3916.341  | 4070.399  |
| M33197    | 59033.699 | 65652.461 | AL353949  | 850.953   | 1073.899  |
| AF263537  | 16018.798 | 15748.76  | NM_005181 | 4702.214  | 4137.501  |
| NM_015895 | 11988.526 | 12596.441 | AF026945  | 2069.428  | 1727.672  |
| NM_004675 | 1690.474  | 2009.057  | AF143676  | 11098.493 | 10667.714 |

|           |           |           |           |           |           |
|-----------|-----------|-----------|-----------|-----------|-----------|
| NM_000189 | 2645.299  | 2613.442  | U66044    | 56506.648 | 55909.012 |
| AL050050  | 4298.711  | 3474.657  | NM_005247 | 62636.871 | 57697.824 |
| NM_005256 | 728.107   | 807.063   | NM_005283 | 3615.679  | 3908.505  |
| NM_004690 | 2861.146  | 3010.98   | AL122089  | 3630.155  | 3263.353  |
| M33197    | 60810.848 | 65006.824 | AF279775  | 9656.923  | 10268.568 |
| NM_013374 | 61411.57  | 61756.156 | NM_006262 | 5323.161  | 5504.176  |
| NM_003252 | 19032.307 | 19008.566 | AK026598  | 4719.484  | 4081.451  |
| NM_001228 | 7423.861  | 7069.743  | AK023602  | 2083.911  | 1971.156  |
| AK026607  | 1332.293  | 1571.297  | NM_018097 | 65838.297 | 62968.648 |
| NM_016561 | 35715.359 | 34184.414 | AF130043  | 1158.941  | 1254.159  |
| NM_014245 | 48296.801 | 53503.875 | Y11167    | 3762.501  | 4153.337  |
| L36531    | 1362.329  | 1025.254  | AK026813  | 2308.863  | 2080.13   |
| AL110226  | 60278.66  | 75627.656 | AK027225  | 2900.782  | 3851.223  |
| AB046822  | 759.968   | 1216.574  | AK023083  | 5092.831  | 6499      |
| NM_015885 | 6452.945  | 7701.409  | AF130093  | 1770.46   | 1989.825  |
| AK024809  | 1085.924  | 1098.851  | AF116622  | 1462.767  | 1361.828  |
| NM_000308 | 4304.98   | 5423.018  | AF217967  | 1798.892  | 1748.855  |
| X69636    | 12357.136 | 13286.231 | NM_017447 | 5228.484  | 4742.018  |
| M33197    | 61428.707 | 66253.852 | AL049452  | 1496.325  | 1459.855  |
| NM_013974 | 4860.758  | 4915.963  | BF345435  | 4260.099  | 4310.097  |
| NM_017547 | 4799.036  | 6207.173  | NM_016622 | 5523.667  | 5168.327  |
| NM_003983 | 15057.884 | 17843.902 | AK026976  | 5634.248  | 5192.857  |
| AK023708  | 1415.682  | 1460.758  | AF070559  | 1422.293  | 1174.335  |
| NM_002108 | 6347.716  | 5379.187  | D42043    | 49345.066 | 52661.445 |
| M33197    | 62384.141 | 67417.875 | BC024009  | 8136.229  | 7720.035  |
| NM_018464 | 42411.09  | 50573.281 | AF128543  | 22100.982 | 23004.779 |
| D43948    | 11046.319 | 9383.616  | AK022071  | 393.559   | 622.904   |
| NM_012310 | 34482.488 | 38203.992 | NM_004189 | 2050.796  | 2003.832  |
| BE410824  | 1051.374  | 1297.642  | X94290    | 4459.227  | 4822.732  |
| BF382116  | 11481.518 | 15153.903 | AK026685  | 47771.207 | 49643.621 |
| NM_003193 | 20737.895 | 20374.941 | AF090927  | 58584.836 | 55490.168 |
| M33197    | 63965.406 | 65467.023 | AL137642  | 2757.362  | 2594.608  |
| AF113216  | 4327.811  | 5010.894  | AL133619  | 19429.121 | 17500.564 |
| NM_017589 | 4477.568  | 5806.821  | AK025902  | 7262.039  | 7560.555  |
| AK023582  | 2685.432  | 2422.424  | NM_004517 | 7279.764  | 6564.495  |
| NM_000124 | 3063.651  | 2919.254  | AI017418  | 1510.688  | 1280.276  |
| NM_017996 | 11067.627 | 11397.296 | NM_000679 | 5555.834  | 4585.952  |
| NM_014517 | 6810.262  | 7316.626  | AF218006  | 62518.516 | 59410.25  |
| NM_005466 | 4707.262  | 4399.123  | AK026935  | 43274.168 | 46328.684 |
| NM_004269 | 6472.943  | 5928.6    | NM_020162 | 10939.742 | 9822.542  |
| NM_003409 | 1488.377  | 1448.271  | AK027124  | 67450.359 | 63646.285 |
| D31765    | 12408.718 | 13040.465 | AB037813  | 892.1     | 1012.675  |
| NM_006107 | 21523.559 | 23211.021 | M31212    | 33673.02  | 36890.922 |
| NM_004175 | 3213.02   | 3560.612  | NM_001821 | 14522.753 | 17312.246 |
| AF288288  | 63037.648 | 63121.422 | NM_005647 | 3086.15   | 3038.96   |
| NM_017646 | 36103.766 | 35585.082 | X64978    | 23155.141 | 24461.063 |
| AL050368  | 4959.39   | 4285.895  | NM_000912 | 56003.082 | 54161.965 |
| NM_003092 | 34454.914 | 37097.801 | NM_002345 | 3086.354  | 3362.52   |
| M33197    | 62371.75  | 62576.758 | U57971    | 4662.112  | 4867.246  |
| NM_005861 | 11844.257 | 10859.002 | X89673    | 3994.947  | 4192.672  |
| NM_018848 | 8016.803  | 7438.658  | AK024593  | 4769.128  | 4542.039  |
| NM_003760 | 27902.217 | 29219.008 | Z83934    | 2354.23   | 2042.049  |
| AB037759  | 2551.446  | 1890.152  | NM_018359 | 6727.175  | 6369.257  |

|           |           |           |           |           |           |
|-----------|-----------|-----------|-----------|-----------|-----------|
| AL080080  | 14525.053 | 12353.731 | AK022020  | 4851.786  | 3782.322  |
| M33197    | 8908.185  | 7476.091  | AF147399  | 797.084   | 724.087   |
| NM_004921 | 2207.221  | 1804.847  | U17634    | 549.055   | 592.216   |
| NM_001161 | 25952.391 | 29011.945 | AK000263  | 21928.396 | 20660.225 |
| NM_004044 | 27501.273 | 31252.68  | Y13895    | 1901.04   | 1453.844  |
| NM_000221 | 59668.336 | 61512.934 | L14723    | 30306.26  | 29050.701 |
| H75678    | 8135.557  | 7798.86   | AK024462  | 53131.816 | 54912.609 |
| NM_002535 | 3113.439  | 3538.967  | NM_005711 | 1014.03   | 1285.488  |
| NM_006452 | 36182.469 | 38322.945 | NM_019601 | 1748.189  | 1688.775  |
| AB002359  | 12369.328 | 13896.295 | NM_002206 | 2419.845  | 3022.484  |
| M33197    | 27248.32  | 29061.275 | NM_007074 | 1307.257  | 1439.318  |
| AB007864  | 7853.377  | 9582.302  | NM_006614 | 1401.554  | 1351.716  |
| NM_002195 | 11891.969 | 13253.959 | NM_002230 | 8622.553  | 7955.552  |
| AF024693  | 1620.669  | 1704.194  | NM_003815 | 13741.301 | 12064.802 |
| AK025905  | 5328.627  | 5233.656  | NM_001430 | 2224.185  | 2219.125  |
| AL121733  | 4896.729  | 5594.203  | AB010098  | 2132.064  | 2034.502  |
| BE958072  | 6930.605  | 7377.127  | U17989    | 5575.977  | 6252.165  |
| M33197    | 59898.457 | 58512.457 | U62325    | 3534.077  | 3524.665  |
| NM_017532 | 3193.749  | 2920.995  | AL137595  | 2359.549  | 2658.818  |
| NM_014480 | 8411.363  | 8070.384  | NM_018025 | 3941.078  | 3412.169  |
| NM_005935 | 1524.448  | 1255.474  | AF249267  | 64067.148 | 63096.895 |
| NM_014165 | 13968.556 | 12679.716 | NM_004113 | 2193.62   | 2155.509  |
| NM_004964 | 30790.301 | 28705.064 | X84939    | 6800.046  | 6707.212  |
| NM_005197 | 23365.889 | 19036.898 | NM_018320 | 41458.691 | 44703.586 |
| AL137421  | 64994.105 | 61771.68  | NM_002069 | 8472.511  | 7415.098  |
| M33197    | 66361.578 | 65136.328 | NM_016056 | 14221.105 | 11863.586 |
| NM_007241 | 1610.389  | 1816.173  | AF188492  | 1321.685  | 1013.683  |
| M33197    | 61035.473 | 68201.828 | M65066    | 27078.846 | 25851.439 |
| NM_001154 | 18295.102 | 20621.469 | NM_016951 | 4797.637  | 5211.258  |
| NM_001815 | 8101.546  | 10293.662 | NM_013251 | 1219.968  | 1486.156  |
| NM_016935 | 2453.519  | 2531.117  | NM_012326 | 2171.443  | 2062.705  |
| NM_001993 | 4138.344  | 5825.104  | NM_003085 | 67838.18  | 69132.875 |
| BF575833  | 2989.184  | 3978.72   | NM_016084 | 36425.945 | 40650.227 |
| NM_000175 | 919.211   | 863.007   | AF095289  | 45419.996 | 56813.176 |
| NM_015725 | 26295.031 | 30624.461 | NM_005537 | 9185.77   | 9471.447  |
| R61452    | 3582.962  | 4361.661  | AC003962  | 1108.87   | 1253.958  |
| R19938    | 40943.031 | 50776.535 | NM_019003 | 5684.133  | 4814.609  |
| N94487    | 35476.223 | 42125.281 | NM_015935 | 29078.494 | 29516.549 |
| AI886795  | 15618.248 | 19286.895 | AF182412  | 2209.708  | 2388.601  |
| D10495    | 8878.471  | 9630.504  | AK027200  | 3978.863  | 2811.755  |
| BF344679  | 10203.883 | 10589.516 | S78372    | 800.286   | 876.16    |
| BG743223  | 1888.837  | 2196.488  | U03106    | 26919.305 | 33130.426 |
| M36634    | 5483.757  | 5737.184  | NM_000075 | 35887.965 | 42869.492 |
| M14156    | 54102.418 | 57022.469 | NM_006845 | 60075.391 | 56507     |
| U87939    | 3750.226  | 3193.524  | NM_014885 | 1077.584  | 1402.222  |
| U86961    | 5201.335  | 5767.628  | M73239    | 1665.404  | 1980.596  |
| U47924    | 1423.451  | 1074.499  | NM_004945 | 10055.679 | 10802.939 |
| NM_005191 | 6403.626  | 6651.183  | NM_020242 | 3316.56   | 3527.441  |
| AK094237  | 10850.276 | 9454.944  | NM_001785 | 43308.027 | 43563.051 |
| L07592    | 3199.203  | 3187.255  | NM_007175 | 64742.652 | 62679.617 |
| M33197    | 61558.82  | 62554.059 | NM_017682 | 1269.195  | 1468.355  |
| NM_002983 | 24338.484 | 32842.082 | NM_002209 | 10059.47  | 9302.592  |
| NM_000074 | 48781.402 | 55188.328 | NM_002291 | 724.83    | 906.767   |



|           |           |           |           |           |           |
|-----------|-----------|-----------|-----------|-----------|-----------|
| NM_020393 | 2897.616  | 3069.435  | AL137477  | 20352.725 | 21866.889 |
| BF434335  | 59319.133 | 64605.848 | NM_016645 | 16475.246 | 16969.783 |
| M57627    | 2938.092  | 3144.337  | NM_014256 | 9155.981  | 9561.696  |
| NM_002993 | 5518.761  | 6311.59   | NM_015967 | 6696.782  | 7582.508  |
| AK026946  | 7344.262  | 7847.853  | NM_003595 | 911.726   | 1097.047  |
| M33197    | 60291.098 | 63236.172 | NM_002409 | 4504.777  | 3956.723  |
| NM_003192 | 9970.093  | 12213.906 | NM_004994 | 59683.66  | 53118.77  |
| NM_018449 | 14935.387 | 18813.035 | NM_006610 | 52893.43  | 45923.578 |
| AF086129  | 5457.482  | 6427.056  | NM_017626 | 1104.648  | 1045.797  |
| D79994    | 5830.902  | 6958.425  | NM_003791 | 12862.955 | 13909.462 |
| NM_014458 | 53193.266 | 53354.281 | NM_018017 | 18088.957 | 19616.145 |
| AF235049  | 19694.461 | 22192.289 | AK001296  | 47816.977 | 50929.5   |
| M33197    | 64516.496 | 59111.793 | AK000173  | 1297.671  | 2130.983  |
| NM_007369 | 4580.731  | 4902.007  | NM_018365 | 6264.11   | 6420.664  |
| NM_014776 | 9249.459  | 11231.395 | NM_006586 | 60991.117 | 51669.148 |
| NM_006480 | 60972.305 | 68726.914 | AJ272180  | 3878.308  | 4063.399  |
| NM_007223 | 63864.277 | 59571.621 | AK025709  | 3086.344  | 2974.174  |
| NM_000145 | 3423.087  | 3025.468  | NM_019016 | 48779.309 | 48475.547 |
| AF030107  | 53018.371 | 52262.359 | NM_012261 | 26878.311 | 27390.047 |
| NM_000871 | 6869.479  | 6728.224  | NM_015556 | 17383.568 | 16364.531 |
| NM_018968 | 11004.567 | 9952.382  | NM_006099 | 6295.64   | 7343.679  |
| AF086924  | 63045.227 | 60519.98  | AF272379  | 11608.282 | 11628.351 |
| NM_005164 | 2336.335  | 2473.975  | AK022643  | 2316.199  | 2594.953  |
| NM_001995 | 11192.073 | 11169.394 | AB046808  | 4962.779  | 4443.035  |
| NM_000183 | 20292.389 | 20398.725 | AK026265  | 3683.367  | 3175.902  |
| AY004175  | 7981.709  | 8545.34   | AK027179  | 2632.317  | 2394.654  |
| M33197    | 62046.914 | 62684.02  | AF015313  | 1540.658  | 1518.93   |
| NM_012327 | 10749.141 | 11948.414 | NM_006466 | 5428.033  | 3650.461  |
| NM_000904 | 12050.104 | 13078.919 | NM_005681 | 3965.993  | 3429.546  |
| NM_016048 | 6810.805  | 6857.458  | NM_015156 | 7384.566  | 6999.843  |
| NM_000375 | 12484.13  | 15551.124 | NM_012384 | 7482.873  | 6814.551  |
| NM_000265 | 61142.551 | 57296.586 | NM_004653 | 12507.509 | 12074.883 |
| NM_018849 | 21822.598 | 26362.209 | AF233453  | 8519.304  | 8137.622  |
| AJ000096  | 827.648   | 718.844   | D87454    | 31992.391 | 30788.35  |
| NM_002236 | 18006.643 | 19132.428 | NM_007020 | 11507.92  | 10640.171 |
| NM_017905 | 50644.191 | 50299.5   | NM_000713 | 50023.219 | 47515.148 |
| NM_006815 | 54082.914 | 56036.059 | NM_016055 | 36193.223 | 37485.086 |
| NM_002806 | 25459.674 | 29451.963 | NM_013291 | 20562.838 | 20138.953 |
| M33197    | 64106.41  | 62252.461 | NM_002936 | 24252.318 | 22962.182 |
| NM_001716 | 28282.314 | 34003.738 | NM_014161 | 10031.036 | 9219.299  |
| NM_002030 | 2304.022  | 2339.689  | BF312817  | 12304.214 | 12310.984 |
| NM_006073 | 1848.04   | 1874.482  | AF284580  | 3129.742  | 3266.625  |
| NM_004951 | 2274.894  | 2049.884  | AK024961  | 7940.57   | 7817.25   |
| NM_006564 | 18225.229 | 16408.822 | NM_016068 | 22016.451 | 19871.795 |
| NM_004802 | 7843.489  | 7941.828  | NM_002711 | 1578.927  | 1846.154  |
| M33197    | 64944.629 | 56483.855 | NM_000199 | 58524.008 | 52973.824 |
| NM_002633 | 41803.051 | 41437.172 | NM_003778 | 61818.469 | 64458.93  |
| U11036    | 1060.975  | 1167.891  | NM_001041 | 1298.123  | 1139.963  |
| NM_002878 | 14730.407 | 15642.809 | NM_000693 | 1519.764  | 1112.84   |
| NM_017723 | 8264.994  | 11035.602 | AK023263  | 4682.965  | 4719.736  |
| AK022922  | 4416.748  | 4770.499  | NM_004622 | 4877.786  | 5402.258  |
| NM_006462 | 14012.226 | 16629.309 | AK021445  | 5400.18   | 5110.271  |
| AK024750  | 26801.146 | 29578.967 | NM_017934 | 37847.813 | 35839.574 |

|           |           |           |           |           |           |
|-----------|-----------|-----------|-----------|-----------|-----------|
| NM_00040C | 59065.133 | 53455.008 | NM_01416E | 62879.109 | 58387.988 |
| M33197    | 65318.012 | 61576.008 | AF211971  | 15016.231 | 12780.294 |
| NM_002613 | 12532.609 | 11975.124 | NM_002931 | 9676.817  | 7798.962  |
| NM_00441E | 20634.48  | 16316.57  | NM_01344E | 63804.746 | 59934.477 |
| U47635    | 8664.11   | 7781.412  | X65232    | 58803.723 | 54646.152 |
| NM_01865C | 7540.636  | 6981.381  | U12767    | 1163.33   | 1343.975  |
| AK026945  | 14544.753 | 12973.699 | U17630    | 4636.956  | 4922.97   |
| NM_00282E | 6940.065  | 7179.593  | M33782    | 7201.583  | 6844.454  |
| NM_01436E | 3479.229  | 3535.887  | NM_00219E | 1534.871  | 1513.234  |
| M33197    | 64887.395 | 55084.934 | NM_01775E | 27896.285 | 24832.699 |
| NM_00139E | 40726.418 | 35648.824 | NM_01841E | 3604.096  | 3709.083  |
| AB050049  | 19735.133 | 19783.143 | NM_00460E | 19104.17  | 16999.188 |
| J05125    | 1735.339  | 2139.333  | D70833    | 68166.617 | 67205.078 |
| NM_00181E | 7447.742  | 7985.223  | NM_016621 | 5990.903  | 5139.215  |
| NM_01693E | 1394.742  | 1373.041  | NM_00297E | 6141.507  | 6585.693  |
| NM_00199E | 3329.908  | 3628.432  | AK023511  | 20447.008 | 20009.846 |
| BF575833  | 1394.115  | 1442.806  | NM_01455E | 12481.428 | 12440.171 |
| R61452    | 2915.808  | 3074.839  | NM_00161E | 62744.242 | 62576.5   |
| R19938    | 43087.926 | 50603.16  | NM_00272E | 4289.13   | 3627.886  |
| N94487    | 41801.594 | 48385.941 | NM_01437E | 61480.758 | 60090.922 |
| AI886795  | 15034.371 | 16861.666 | NM_01781E | 39202.387 | 46454.539 |
| D10495    | 8781.909  | 8534.435  | AF204173  | 2750.424  | 3388.024  |
| BF344679  | 8728.398  | 9797.399  | J03260    | 8935.677  | 10525.733 |
| BG743223  | 1526.143  | 1474.866  | U13738    | 5591.783  | 5750.408  |
| M36634    | 4625.315  | 3850.672  | AF068236  | 60736.984 | 62490.891 |
| M14156    | 54177.094 | 52420.746 | H94487    | 11625.824 | 11058.447 |
| U87939    | 3666.948  | 3175.458  | BG681747  | 48445.668 | 57753.246 |
| U86961    | 6175.757  | 5096.076  | H63077    | 4958.338  | 5168.032  |
| U47924    | 2691.827  | 1669.582  | AA679352  | 17772.08  | 17208.568 |
| NM_005191 | 8184.739  | 7496.168  | AA437291  | 3542.687  | 3668.688  |
| AK094237  | 11486.621 | 8173.375  | X04503    | 6372.17   | 5865.26   |
| L07592    | 2949.035  | 2625.856  | D45917    | 12501.488 | 11973.711 |
| M33197    | 63296.691 | 64123.809 | X52001    | 17443.719 | 16593.541 |
| AK027244  | 1052.752  | 1082.663  | BI823872  | 1166.635  | 1389.866  |
| L40520    | 5731.65   | 5128.075  | AA430552  | 18761.049 | 17462.469 |
| NM_02039E | 724.528   | 991.225   | X66142    | 8693.548  | 9022.342  |
| BF434335  | 60006.074 | 71097.211 | NM_00591E | 2343.336  | 2207.552  |
| M57627    | 2329.574  | 2532.978  | R45054    | 12466.576 | 10646.408 |
| NM_00299E | 4974.961  | 4460.652  | NM_00378E | 60580.898 | 67307.023 |
| AK026946  | 5800.047  | 5001.786  | NM_003731 | 57016.98  | 53377.602 |
| M33197    | 61514.859 | 62639.203 | NM_00544E | 55975.023 | 56046.633 |
| NM_00319E | 10990.51  | 12236.37  | NM_01329E | 40161.883 | 43001.992 |
| NM_01844E | 17290.668 | 18387.887 | NM_002387 | 7037.453  | 6268.282  |
| AF086129  | 4528.728  | 5061.744  | NM_00006E | 12699.82  | 12309.376 |
| D79994    | 4946.943  | 4785.59   | AB023217  | 2237.85   | 2106.917  |
| NM_01445E | 51284.25  | 48572.551 | L08902    | 3480.125  | 3557.272  |
| L10333    | 2837.166  | 1096.694  | J02639    | 11977.517 | 12866.976 |
| AF235049  | 26258.998 | 23733.992 | M58050    | 12199.246 | 11461.922 |
| NM_00736E | 6121.392  | 4421.388  | NM_00726E | 29620.746 | 30877.254 |
| NM_01477E | 12569.519 | 10582.736 | AF206020  | 15402.477 | 14133.357 |
| NM_00648E | 60996.301 | 65591.063 | NM_01441E | 13890.729 | 11440.064 |
| NM_00722E | 60838.473 | 67394.117 | AF312769  | 3829.534  | 3801.858  |
| NM_00014E | 5387.329  | 4750.267  | AB020668  | 11359.665 | 11577.443 |

|           |           |           |           |           |           |
|-----------|-----------|-----------|-----------|-----------|-----------|
| NM_000871 | 7927.981  | 7280.366  | NM_006203 | 62963.547 | 59760.035 |
| NM_018968 | 10632.624 | 8137.062  | NM_013261 | 4598.583  | 4510.74   |
| AF086924  | 62664.695 | 58586.004 | NM_003558 | 812.51    | 733.494   |
| M33197    | 61853.648 | 61693.465 | AF309553  | 11675.003 | 11165.438 |
| NM_001154 | 17320.42  | 18204.379 | NM_003605 | 5264.495  | 5009.709  |
| NM_000183 | 21123.584 | 20473.699 | NM_006139 | 2647.549  | 2690.298  |
| AY004175  | 5882.613  | 6115.376  | NM_001900 | 59584.191 | 72559.055 |
| M33197    | 60051.617 | 68538.883 | NM_003993 | 9500.491  | 10380.43  |
| NM_012327 | 10241.239 | 10178.575 | NM_002150 | 20037.174 | 16578.285 |
| NM_000904 | 11394.482 | 10423.108 | NM_004595 | 24854.004 | 19707.191 |
| NM_016048 | 8482.055  | 7496.197  | NM_020178 | 964.876   | 1094.791  |
| NM_000375 | 14779.244 | 15915.315 | NM_002264 | 2727.8    | 2558.844  |
| NM_000265 | 58904.855 | 55629.211 | NM_014754 | 43789.992 | 47852.773 |
| NM_018849 | 16392.654 | 16192.266 | D49387    | 2406.896  | 2469.273  |
| NM_002236 | 22794.303 | 18549.244 | AF050146  | 20727.447 | 20924.275 |
| NM_017905 | 54910.574 | 50448.855 | NM_000116 | 6424.285  | 6441.171  |
| NM_006815 | 55391.398 | 59057.031 | NM_006698 | 17969.146 | 17645.445 |
| M33197    | 62198.754 | 61311.281 | NM_006804 | 41137.125 | 37173.598 |
| NM_001716 | 29621.924 | 39129.195 | NM_001133 | 975.62    | 947.044   |
| NM_002030 | 3985.986  | 3669.931  | AK025641  | 61679.09  | 57946.227 |
| NM_006073 | 3527.346  | 2830.902  | AB040457  | 807.385   | 843.589   |
| NM_004951 | 3414.144  | 3511.397  | AB014514  | 10334.772 | 10947.57  |
| NM_004802 | 7774.182  | 5838.586  | NM_002865 | 20417.686 | 23377.488 |
| M33197    | 60938.027 | 63876.457 | NM_003566 | 6275.734  | 4096.937  |
| NM_002983 | 25445.264 | 28343.039 | AK026315  | 818.065   | 1286.7    |
| NM_000074 | 40840.648 | 42750.176 | NM_007159 | 65520.086 | 59077.73  |
| M33197    | 64809.418 | 62980.078 | NM_018390 | 4931.297  | 5051.531  |
| NM_002878 | 15898.028 | 14187.735 | AB037724  | 20761.111 | 20803.127 |
| NM_017723 | 5355.086  | 6165.668  | AK025086  | 6194.146  | 5830.992  |
| AK022922  | 4975.453  | 4776.61   | AK026151  | 20626.932 | 21417.377 |
| NM_006462 | 13561.515 | 14573.8   | NM_014140 | 3709.295  | 3294.647  |
| AK024750  | 28002.32  | 25788.734 | NM_002916 | 8121.176  | 9478.406  |
| NM_000400 | 53969.227 | 48648.871 | M20700    | 13151.223 | 12372.884 |
| NM_002613 | 15099.337 | 12144.989 | NM_001034 | 16603.93  | 16905.236 |
| NM_004419 | 27077.256 | 18267.102 | NM_002689 | 4911.584  | 5375.189  |
| U47635    | 11179.388 | 8870.561  | NM_017686 | 1689.028  | 1541.865  |
| NM_018650 | 9945.736  | 8376.536  | AL096734  | 1443.965  | 1497.552  |
| AK026945  | 17311.168 | 13211.524 | AK000800  | 5819.051  | 5398.22   |
| NM_002828 | 8460.916  | 7983.485  | NM_018154 | 9826.026  | 10355.057 |
| M33197    | 64514.266 | 58326.992 | NM_005358 | 915.314   | 1066.63   |
| NM_001398 | 39174.211 | 32686.758 | BC006287  | 9513.176  | 10892.384 |
| AB050049  | 18063.904 | 16230.261 | AB023198  | 14720.625 | 15087.551 |
| J05125    | 2810.66   | 2868.035  | AF304163  | 18466.439 | 18079.83  |
| NM_005164 | 1109.519  | 1322.108  | NM_005231 | 18505.773 | 19185.455 |
| NM_001995 | 11970.337 | 11289.511 | AF064729  | 4557.391  | 4801.851  |
| NM_001993 | 3303.034  | 4107.686  | NM_005412 | 38784.195 | 41342.273 |
| BF575833  | 1062.197  | 1150.668  | NM_012113 | 4953.649  | 5961.373  |
| NM_015725 | 23601.816 | 21835.299 | NM_014556 | 14471.816 | 15848.973 |
| R61452    | 2118.816  | 2322.594  | NM_001615 | 63174.844 | 62106.754 |
| R19938    | 38797.336 | 40114.703 | NM_002725 | 3501.187  | 4122.764  |
| N94487    | 40392.477 | 49370.566 | NM_014375 | 57967.473 | 57943.227 |
| AI886795  | 15220.656 | 16031.796 | NM_017812 | 36637.578 | 44950.305 |
| D10495    | 8654.235  | 9417.11   | AF204173  | 3466.078  | 3456.52   |

|           |           |           |           |           |           |
|-----------|-----------|-----------|-----------|-----------|-----------|
| BF344679  | 8821.4    | 10009.554 | J03260    | 10921.145 | 11623.348 |
| BG743223  | 2199.728  | 2136.779  | U13738    | 5596.615  | 6161.651  |
| M14156    | 59084.641 | 59142.711 | AF068236  | 60695.5   | 62993.547 |
| U87939    | 6903.04   | 4327.826  | H94487    | 11172.287 | 13008.278 |
| U86961    | 7151.563  | 5618.979  | BG681747  | 48106.18  | 54002.93  |
| U47924    | 1614.348  | 1273.455  | H63077    | 4251.843  | 4467.924  |
| NM_005191 | 6950.342  | 6417.136  | AA679352  | 16115.604 | 17461.227 |
| AK094237  | 11045.1   | 9235.89   | AA437291  | 3546.495  | 4005.098  |
| L07592    | 3014.128  | 2461.764  | X04503    | 6742.656  | 6307.047  |
| M33197    | 60217.746 | 58217.957 | D45917    | 12886.909 | 13103.661 |
| AK027244  | 1375.737  | 928.847   | X52001    | 19261.787 | 20717.646 |
| L40520    | 5403.829  | 5141.735  | BI823872  | 1289.982  | 1539.156  |
| NM_002633 | 43931.711 | 35560.207 | AA430552  | 18982.17  | 20894.354 |
| AF086129  | 5698.237  | 5799.474  | X66142    | 9401.656  | 9400.438  |
| D79994    | 5053.399  | 4700.934  | NM_005913 | 2619.097  | 2911.369  |
| NM_014458 | 48801.422 | 55736.988 | R45054    | 12082.118 | 11933.119 |
| AF235049  | 17389.875 | 17935.27  | AL117398  | 8300.973  | 8907.841  |
| M33197    | 61404.125 | 71422.352 | AY007158  | 57589.484 | 65466.391 |
| NM_007369 | 5020.269  | 5174.72   | NM_001720 | 10188.495 | 10295.61  |
| NM_014776 | 11359.829 | 11861.263 | NM_013292 | 43765.191 | 47106.809 |
| NM_006480 | 61322.434 | 66286.281 | NM_002387 | 6967.8    | 6666.887  |
| NM_007223 | 60028.273 | 67224.898 | NM_000069 | 13329.723 | 12877.446 |
| NM_000145 | 4505.129  | 5020.413  | AB023217  | 1904.97   | 1922.717  |
| AF030107  | 51639.293 | 55894.496 | L08902    | 3354.823  | 3652.775  |
| NM_000871 | 7852.584  | 6631.62   | J02639    | 13137.367 | 13251.788 |
| M33197    | 60842.602 | 63689.871 | M58050    | 13899.88  | 15972.588 |
| NM_018968 | 12246.229 | 9414.386  | NM_007263 | 29257.781 | 37643.93  |
| AF086924  | 60152.023 | 66461.398 | AF206020  | 17057.645 | 19261.867 |
| NM_000264 | 1862.588  | 1919.032  | NM_014410 | 15492.785 | 15513.862 |
| AB058740  | 53964.336 | 58064.313 | AF305835  | 843.254   | 1009.789  |
| NM_003385 | 2574.508  | 2076.385  | AF312769  | 4150.479  | 4259.151  |
| NM_001888 | 2242.901  | 1941.902  | AB020668  | 13861.599 | 15772.874 |
| NM_004392 | 2017.23   | 1406.845  | NM_006203 | 63691.516 | 57964.438 |
| M33197    | 63207.734 | 59713.242 | NM_013261 | 5541.605  | 5539.88   |
| NM_001154 | 18197.752 | 10466.844 | NM_003558 | 661.303   | 923.188   |
| NM_001819 | 7780.494  | 5514.6    | AF309553  | 13657.718 | 13987.97  |
| NM_016938 | 1776.679  | 1203.197  | NM_003605 | 5286.249  | 6548.231  |
| NM_001663 | 8320.572  | 9051.374  | NM_006139 | 1986.508  | 2686.321  |
| NM_004218 | 18166.914 | 18829.629 | NM_001900 | 63683.387 | 64382.348 |
| NM_016530 | 7819.023  | 8040.839  | NM_003993 | 9345.078  | 10587.695 |
| NM_014804 | 1509.487  | 1309.822  | NM_002975 | 5649.446  | 6867.346  |
| NM_012455 | 19692.09  | 21971.277 | AK023511  | 23108.049 | 24494.764 |
| NM_002806 | 25922.992 | 25396.297 | NM_020178 | 783.555   | 991.93    |
| M33197    | 64771.5   | 72729.492 | NM_002264 | 2747.249  | 2308.847  |
| NM_001716 | 31193.58  | 35990.75  | NM_014754 | 45902.117 | 46665.938 |
| NM_002030 | 4228.399  | 4702.007  | D49387    | 2916.447  | 2651.274  |
| NM_006073 | 2544.48   | 2678.774  | AF050146  | 23318.596 | 24018.83  |
| NM_004951 | 2489.497  | 1771.283  | NM_000116 | 6166.719  | 7892.368  |
| NM_006564 | 18588.205 | 15947.252 | NM_006698 | 19999.188 | 21111.309 |
| NM_004802 | 7371.736  | 6658.546  | NM_006804 | 45120.879 | 46825.773 |
| M33197    | 60026.586 | 63026.938 | NM_001133 | 675.813   | 647.543   |
| NM_002983 | 29192.215 | 21262.83  | AK025641  | 62345.066 | 55876.094 |
| NM_000074 | 49754.238 | 39063.172 | AB040457  | 993.552   | 1052.794  |

|                  |           |           |                  |           |           |
|------------------|-----------|-----------|------------------|-----------|-----------|
| <b>BF434335</b>  | 60610.887 | 57735.176 | <b>AB014514</b>  | 12237.902 | 13043.553 |
| <b>M57627</b>    | 1893.324  | 1149.435  | <b>NM_002865</b> | 20721.689 | 25180.619 |
| <b>NM_002993</b> | 6137.826  | 3488.906  | <b>NM_003566</b> | 7248.241  | 5141.302  |
| <b>AK026946</b>  | 6810.394  | 3606.615  | <b>AK026315</b>  | 995.839   | 1023.431  |
| <b>M33197</b>    | 61427.141 | 56619.02  | <b>NM_007159</b> | 63404.578 | 56692.23  |
| <b>NM_003192</b> | 10301.848 | 5458.507  | <b>NM_003731</b> | 61496.074 | 53805.594 |
| <b>NM_018449</b> | 16414.082 | 9595.844  | <b>NM_005446</b> | 52712.363 | 51500.973 |
| <b>NM_001398</b> | 42233.828 | 45441.973 | <b>AB037724</b>  | 20364.389 | 18597.527 |
| <b>AB050049</b>  | 17789.111 | 17976.215 | <b>AK025086</b>  | 5840.163  | 5438.852  |
| <b>J05125</b>    | 1098.337  | 1286.424  | <b>AK026151</b>  | 19242.688 | 18320.539 |
| <b>NM_005164</b> | 1593.803  | 1584.711  | <b>NM_014140</b> | 3051.056  | 3209.298  |
| <b>NM_001995</b> | 11222.253 | 11810.256 | <b>NM_002916</b> | 7958.808  | 9700.303  |
| <b>NM_000183</b> | 21818.775 | 22096.342 | <b>M20700</b>    | 12590.004 | 14426.157 |
| <b>AY004175</b>  | 7045.399  | 6917.707  | <b>NM_001034</b> | 16810.592 | 18586.285 |
| <b>M33197</b>    | 61050.121 | 64270.352 | <b>NM_002689</b> | 6206.273  | 7337.495  |
| <b>NM_012327</b> | 10930.846 | 11086.604 | <b>NM_017686</b> | 1697.808  | 1966.775  |
| <b>NM_000904</b> | 11587.893 | 11638.982 | <b>AL096734</b>  | 1828.957  | 2079.174  |
| <b>NM_016048</b> | 7539.125  | 7173.367  | <b>AK000800</b>  | 5655.655  | 5847.498  |
| <b>NM_000375</b> | 16714.596 | 12093.823 | <b>NM_018154</b> | 10474.153 | 10767.102 |
| <b>NM_000265</b> | 57875.23  | 41807.027 | <b>NM_005358</b> | 928.27    | 923.318   |
| <b>NM_018849</b> | 18031.432 | 9862.802  | <b>BC006287</b>  | 9870.716  | 10490.998 |
| <b>M33197</b>    | 59661.02  | 55590.852 | <b>AB023198</b>  | 13416.302 | 13845.119 |
| <b>M16796</b>    | 3272.801  | 1654.176  | <b>AF304163</b>  | 19114.152 | 20892.35  |
| <b>AF279890</b>  | 34537.797 | 18148.816 | <b>NM_005231</b> | 19315.186 | 21721.383 |
| <b>NM_002236</b> | 18689.074 | 8777.866  | <b>AF064729</b>  | 5481.156  | 6140.036  |
| <b>NM_012069</b> | 17660.449 | 8576.219  | <b>NM_005412</b> | 39888.465 | 41278.48  |
| <b>NM_001689</b> | 62176.898 | 55991.691 | <b>NM_012113</b> | 5542.856  | 6078.521  |
| <b>NM_016601</b> | 7345.048  | 4158.951  | <b>NM_002150</b> | 18537.568 | 19576.939 |
| <b>NM_017905</b> | 54146.91  | 32040.67  | <b>NM_004595</b> | 24068.535 | 23405.293 |
| <b>M33197</b>    | 61469.137 | 59313.027 | <b>NM_002725</b> | 4417.468  | 4138.216  |
| <b>NM_006815</b> | 58182.621 | 46829.102 | <b>NM_014375</b> | 62636.488 | 55635.906 |
| <b>M33197</b>    | 60158.242 | 65935.953 | <b>NM_017812</b> | 38166.176 | 46813.891 |
| <b>AK027244</b>  | 1148.281  | 1183.892  | <b>AF204173</b>  | 3102.334  | 3644.591  |
| <b>L40520</b>    | 2363.276  | 2158.627  | <b>J03260</b>    | 11128.841 | 11810.344 |
| <b>NM_002633</b> | 42665.48  | 47581.32  | <b>U13738</b>    | 6949.016  | 7958.318  |
| <b>U11036</b>    | 1561.125  | 1121.726  | <b>AF068236</b>  | 60375.922 | 57169.895 |
| <b>M33197</b>    | 63767.547 | 57414.992 | <b>H94487</b>    | 12312.222 | 13399.167 |
| <b>NM_002878</b> | 21928.609 | 12007.539 | <b>BG681747</b>  | 48836.852 | 50892.262 |
| <b>NM_017723</b> | 6458.915  | 3074.701  | <b>H63077</b>    | 5947.428  | 5915.528  |
| <b>AK022922</b>  | 4313.741  | 1646.562  | <b>AA679352</b>  | 18812.977 | 18450.199 |
| <b>NM_006462</b> | 12193.808 | 4692.982  | <b>AA437291</b>  | 3199.187  | 3321.733  |
| <b>AK024750</b>  | 20443.725 | 8772.692  | <b>X04503</b>    | 7273.467  | 6411.506  |
| <b>NM_000400</b> | 59824.691 | 47410.332 | <b>D45917</b>    | 11918.464 | 11157.09  |
| <b>M33197</b>    | 64270.859 | 56505.707 | <b>X52001</b>    | 21125.16  | 20439.291 |
| <b>NM_002613</b> | 14887.107 | 7113.734  | <b>BI823872</b>  | 1379.388  | 1542.699  |
| <b>NM_004419</b> | 21627.729 | 9041.495  | <b>AA430552</b>  | 21183.797 | 21067.875 |
| <b>U47635</b>    | 7652.87   | 3028.149  | <b>X66142</b>    | 11570.64  | 12231.377 |
| <b>NM_018650</b> | 8190.39   | 5208.759  | <b>NM_005913</b> | 3906.163  | 4169.885  |
| <b>AK026945</b>  | 15046.826 | 7790.613  | <b>R45054</b>    | 15801.124 | 16395.797 |
| <b>NM_002828</b> | 11031.521 | 6343.874  | <b>AL117398</b>  | 9308.269  | 10503.028 |
| <b>NM_014369</b> | 3017.263  | 1744.073  | <b>AY007158</b>  | 57761.867 | 69419.539 |
| <b>M33197</b>    | 64569.266 | 57012.781 | <b>NM_001720</b> | 12371.308 | 13370.846 |
| <b>CY3Cy5</b>    | 6727.566  | 250.921   | <b>NM_018390</b> | 5481.35   | 5655.989  |

|           |           |           |           |           |           |
|-----------|-----------|-----------|-----------|-----------|-----------|
| AL834159  | 3939.072  | 4092.208  | NM_007263 | 28539.197 | 32925.527 |
| NM_000164 | 39863.055 | 52716.031 | AF206020  | 15234.375 | 15631.073 |
| AK025253  | 2619.759  | 3098.487  | NM_014410 | 14590.232 | 15097.606 |
| AK025004  | 1845.19   | 1965.403  | AF305835  | 703.881   | 861.485   |
| AL136818  | 1550.034  | 2342.234  | AF312769  | 3481.282  | 3761.414  |
| AF146798  | 5318.297  | 7114.857  | AB020668  | 13968.298 | 14820.986 |
| AK022049  | 929.459   | 1240.964  | NM_006203 | 65900.227 | 58561.309 |
| AF086517  | 23119.141 | 25183.943 | NM_013261 | 5136.129  | 5183.957  |
| AK025740  | 30468.76  | 42593.832 | NM_003558 | 848.125   | 1163.475  |
| AK000311  | 4771.889  | 6057.461  | AF309553  | 13930.827 | 14049.312 |
| AK021747  | 2192.458  | 2304.632  | NM_003605 | 5724.024  | 6405.598  |
| AK025640  | 9613.611  | 13131.043 | NM_006139 | 2632.084  | 2904.285  |
| AF131772  | 504.389   | 690.711   | NM_000100 | 57708.582 | 57735.648 |
| AL137685  | 1525.159  | 1925.925  | NM_001900 | 64340.945 | 67556.555 |
| AL834159  | 8109.976  | 11681.415 | NM_003993 | 11089.231 | 12084.382 |
| NM_000164 | 42688.438 | 49864.512 | NM_018961 | 8105.992  | 8262.268  |
| SR1       | 71478.961 | 62105.559 | NM_005586 | 11585.264 | 12859.463 |
| SR3       | 42595.016 | 40734.09  | NM_012242 | 3424.229  | 4439.877  |
| SR5       | 4938.887  | 4379.206  | NM_006896 | 3932.013  | 5403.53   |
| SR7       | 5449.308  | 31706.27  | NM_001130 | 60172.566 | 64329.883 |
| SR9       | 14762.058 | 2142.059  | NM_002975 | 7020.789  | 7232.211  |
| CY3Cy5    | 4757.327  | 164.443   | AK023511  | 27665.264 | 32736.613 |
| D16951    | 1072.61   | 1429.963  | NM_014556 | 18109.055 | 20845.254 |
| L19362    | 303.478   | 748.658   | NM_001615 | 61829.188 | 60160.098 |
| L33807    | 2557.935  | 2039.275  | AK025886  | 2759.601  | 2369.766  |
| U80774    | 713.377   | 656.729   | NM_003058 | 1351.822  | 1316.066  |
| NM_006545 | 64265.551 | 55763.254 | AB014514  | 11389.188 | 12642.565 |
| NM_016534 | 2630.552  | 3279.47   | NM_002865 | 21485.248 | 24542.006 |
| AB021923  | 3425.548  | 3297.694  | NM_003566 | 6641.18   | 4425.789  |
| AK024240  | 1102.055  | 1577.881  | AK026315  | 798.156   | 994.767   |
| NM_016456 | 66898.109 | 58081.184 | NM_007159 | 63594.867 | 60935.082 |
| AK022677  | 3907.007  | 5152.229  | NM_003731 | 60089.969 | 55203.668 |
| AL137645  | 37809.098 | 45318.008 | NM_005446 | 58876.961 | 52998.055 |
| AK026141  | 2419.759  | 5676.995  | NM_013292 | 52217.336 | 53101.59  |
| AK022894  | 3519.993  | 2959.637  | NM_002387 | 10129.546 | 9001.548  |
| AF217993  | 6269.224  | 6352.042  | NM_000069 | 18850.949 | 17223.25  |
| AF131823  | 1922.958  | 1804.288  | AB023217  | 2551.912  | 2437.258  |
| AK026324  | 13626.341 | 14691.218 | L08902    | 4449.765  | 3564.641  |
| AK024518  | 17006.43  | 16410.592 | J02639    | 15697.398 | 14615.649 |
| AK024586  | 1795.876  | 1870.433  | M58050    | 13223.044 | 13287.064 |
| AK025017  | 7709.312  | 8974.526  | NM_012113 | 4698.398  | 5592.123  |
| AK024534  | 1830.233  | 2167.203  | NM_002150 | 20441.178 | 18185.09  |
| AK024914  | 6027.755  | 8259.039  | NM_004595 | 23170.086 | 22171.242 |
| AK025346  | 67965.438 | 67103.523 | NM_020178 | 1632.717  | 1254.459  |
| AK022583  | 6671.202  | 9126.261  | NM_002264 | 3094.946  | 3131.675  |
| AL137534  | 67754.031 | 66673.508 | NM_014754 | 44615.723 | 48890.289 |
| AF052121  | 11081.771 | 14045.017 | D49387    | 2625.836  | 2874.491  |
| AL359062  | 6018.444  | 7353.188  | AF050146  | 21039.428 | 22472.768 |
| AK026869  | 3771.674  | 4049.003  | NM_000116 | 6590.776  | 7369.32   |
| AK023150  | 605.054   | 466.943   | NM_006698 | 16465.24  | 17415.586 |
| AK022192  | 760.023   | 1332.232  | NM_006804 | 35547.922 | 38914.543 |
| NM_019095 | 67996.523 | 65254.848 | NM_015969 | 22556.119 | 23293.506 |
| Y12020    | 66077.516 | 59481.871 | NM_003051 | 14873.462 | 15541.448 |

|           |           |           |           |           |           |
|-----------|-----------|-----------|-----------|-----------|-----------|
| AJ011597  | 514.43    | 621.207   | NM_001133 | 817.077   | 730.318   |
| AJ001905  | 4450.083  | 4177.286  | NM_145342 | 23399.568 | 23760.18  |
| U17635    | 1958.617  | 1830.794  | AJ278917  | 64573.691 | 55745.855 |
| AL049930  | 1109.882  | 1100.856  | AK025641  | 63340.188 | 58828.07  |
| AF086198  | 31814.053 | 44144.109 | AL117398  | 7309.766  | 8662.908  |
| AL137382  | 66469.469 | 75585.164 | AY007158  | 55385.027 | 59513.934 |
| AK024599  | 4525.048  | 6297.633  | NM_001720 | 9100.635  | 9248.274  |
| NM_014450 | 7799.625  | 8920.474  | NM_018390 | 4742.318  | 4832.37   |
| AB007975  | 999.546   | 1196.015  | AB037724  | 17885.293 | 16533.369 |
| AK024152  | 2616.223  | 3393      | AK025086  | 4345.381  | 4288.513  |
| AL137603  | 355.597   | 482.329   | AK026151  | 18695.855 | 20532.287 |
| AK026888  | 2451.643  | 2812.842  | NM_014140 | 3720.554  | 4260.563  |
| AK021821  | 1165.286  | 1112.807  | NM_002916 | 7273.01   | 8964.833  |
| AL049328  | 1402.324  | 1518.12   | M20700    | 10192.688 | 9835.067  |
| AK000030  | 1384.642  | 2062.126  | NM_001034 | 14076.359 | 15229.16  |
| NM_017932 | 1414.894  | 1622.397  | NM_002689 | 4902.528  | 5211.82   |
| AK000910  | 4953.337  | 6085.529  | NM_017686 | 1584.385  | 1662.037  |
| AF252280  | 35945.102 | 40157.426 | AL096734  | 1385.155  | 1628.889  |
| AK000107  | 882.768   | 962.567   | AK000800  | 6447.995  | 6335.099  |
| AK000951  | 1370.007  | 1215.693  | NM_018154 | 10103.221 | 11173.772 |
| AF130064  | 59801.578 | 63310.645 | NM_005358 | 796.85    | 959.971   |
| U17624    | 2344.882  | 2980.294  | BC006287  | 10373.296 | 11687.786 |
| AK025184  | 1163.359  | 1533.481  | AB023198  | 12940.04  | 12785.56  |
| D16988    | 67006.578 | 68913.172 | AF304163  | 14349.45  | 10469.014 |
| AK001959  | 19811.137 | 22211.529 | NM_005231 | 14504.419 | 8464.444  |
| U36217    | 6199.901  | 8103.105  | AF064729  | 3802.093  | 2065.875  |
| AL389880  | 605.119   | 664.776   | NM_005412 | 32403.303 | 21864.027 |
| AL157452  | 720.718   | 527.921   | CY3Cy5    | 3417.85   | 138.93    |
| AK024155  | 39331.781 | 49056.559 | NM_021976 | 6066.316  | 5198.502  |
| AL359334  | 18278.203 | 28256.264 | AF216077  | 11261.119 | 10772.738 |
| AK027095  | 2137.734  | 2434.076  | AF086238  | 1906.799  | 1346.533  |
| AF062097  | 2292.575  | 3426.711  | AK021612  | 32601.615 | 38520.367 |
| BC030949  | 3973.503  | 3721.403  | AF147342  | 1270.686  | 1528.145  |
| AF116615  | 2664.628  | 3240.905  | AF088031  | 1640.154  | 1364.161  |
| U17636    | 65079.996 | 59814.148 | AK002025  | 66517.508 | 63511.23  |
| NM_018546 | 8065.212  | 10303.15  | AK026299  | 4903.063  | 4304.656  |
| U52699    | 64983.008 | 63370.477 | NM_017794 | 3850.697  | 3865.553  |
| S71613    | 2067.86   | 2625.626  | AK025170  | 4494.635  | 4450.499  |
| AJ011910  | 18555.451 | 24512.916 | AK001478  | 871.274   | 823.508   |
| AK024378  | 1559.512  | 2400.998  | AK025697  | 12427.771 | 11369.918 |
| NM_014026 | 7575.85   | 8402.148  | AK021734  | 4538.577  | 4637.939  |
| D61703    | 21870.291 | 18978.584 | AF075028  | 1445.125  | 1058.749  |
| AL050376  | 733.626   | 1112.516  | NM_021976 | 4729.085  | 4121.905  |
| AL359652  | 2597.446  | 3230.789  | SR2       | 58893.262 | 52602.941 |
| AK022423  | 3570.756  | 4186.245  | SR4       | 24853.84  | 25082.316 |
| AF088021  | 12488.494 | 13433.119 | SR6       | 2829.92   | 2552.537  |
| BF509267  | 3863.547  | 4355.552  | SR8       | 10474.729 | 29349.791 |
| NM_002455 | 6927.757  | 7119.003  | SR10      | 36138.324 | 11344.112 |
| NM_002955 | 10671.81  | 11422.696 | CY3Cy5    | 2970.704  | 122.392   |
| AB046773  | 698.06    | 734.802   | AK026802  | 1489.681  | 1210.969  |
| AK000899  | 18342.57  | 24521.895 | NM_004544 | 19663.676 | 19198.014 |
| NM_017991 | 1675.423  | 1933.523  | AF086041  | 2146.218  | 1920.892  |
| L37198    | 2551.071  | 3301.271  | Y15167    | 2259.525  | 2286.119  |

|           |           |           |           |           |           |
|-----------|-----------|-----------|-----------|-----------|-----------|
| U67822    | 1069.237  | 1484.405  | AL133080  | 4735.28   | 3634.676  |
| AK021921  | 558.919   | 980.374   | NM_017792 | 9825.582  | 9729.614  |
| AK025431  | 489.736   | 470.292   | AK025213  | 5306.506  | 4834.519  |
| AK023662  | 1587.561  | 2008.634  | NM_014949 | 4275.421  | 3913.999  |
| AF086274  | 65421.566 | 57843.098 | AL080221  | 2646.632  | 3153.943  |
| AF000991  | 631.993   | 795.325   | NM_003507 | 1303.634  | 1458.814  |
| AK000685  | 17453.127 | 26176.836 | AK026591  | 2092.423  | 2233.746  |
| D28381    | 26520.215 | 35886.52  | AK001889  | 4683.383  | 4720.497  |
| AK023543  | 1191.518  | 1174.424  | AK025726  | 11409.925 | 10865.196 |
| BE706519  | 1615.625  | 1760.069  | AJ227869  | 5334.023  | 4594.892  |
| NM_019096 | 12655.064 | 15236.395 | AK026189  | 747.975   | 902.359   |
| NM_014725 | 2187.406  | 2344.186  | AK026790  | 905.249   | 864.161   |
| NM_006892 | 5762.536  | 6252.045  | AL117613  | 14569.946 | 12562.35  |
| NM_019117 | 1955.522  | 3037.918  | AL137753  | 11864.89  | 11792.896 |
| NM_018309 | 3935.17   | 4259.937  | AK021785  | 1211.162  | 1202.392  |
| NM_017658 | 8840.731  | 11592.104 | AL110262  | 32813.773 | 26558.268 |
| NM_018679 | 29636.828 | 32469.328 | AK025627  | 30417.709 | 26001.91  |
| NM_016643 | 671.918   | 815.602   | U00945    | 2669.536  | 2366.597  |
| NM_006779 | 9383.122  | 12011.539 | AK025191  | 2871.394  | 2787.418  |
| NM_019847 | 2919.253  | 3048.179  | AK026763  | 790.457   | 1017.587  |
| D17093    | 21936.258 | 21469.098 | AK025246  | 14837.705 | 14324.842 |
| AL117521  | 5600.793  | 6325.511  | AK025847  | 7250.3    | 6368.66   |
| NM_000731 | 589.632   | 544.542   | AK026442  | 1251.243  | 1163.735  |
| AK021913  | 22424.76  | 24767.438 | AK026816  | 1368.188  | 996.941   |
| AL137489  | 31611.34  | 42151.523 | AB033031  | 4833.043  | 4451.86   |
| AF009311  | 10741.283 | 12848.5   | AF085872  | 28445.068 | 25665.408 |
| AK023939  | 977.473   | 890.155   | AK026517  | 576.789   | 1523.652  |
| AL050219  | 1320.768  | 1336.218  | AK022538  | 63618.656 | 62534.855 |
| AK024433  | 6712.519  | 12626.736 | AL360257  | 886.698   | 637.15    |
| U82321    | 2312.168  | 3645.912  | AK022342  | 2784.658  | 2150.926  |
| AK023856  | 2412.601  | 1607.917  | AF147420  | 6584.773  | 6282.582  |
| AB014557  | 5585.213  | 6694.748  | AL049312  | 6290.811  | 6114.544  |
| NM_005578 | 8397.884  | 6382.36   | AL050072  | 16051.751 | 16468.146 |
| NM_003653 | 19688.418 | 19841.775 | AL080225  | 1312.182  | 1488.828  |
| NM_018457 | 57873.625 | 61631.578 | AL050129  | 1137.211  | 1149.289  |
| NM_002953 | 11120.043 | 12715.243 | AL110223  | 1120.687  | 689.074   |
| NM_002187 | 1588.203  | 1869.753  | AL117659  | 978.575   | 627.667   |
| NM_014246 | 22319.225 | 22052.072 | AK027180  | 7663.913  | 6217.448  |
| NM_014859 | 921.583   | 1321.327  | AK022236  | 9850.811  | 10425.812 |
| AF311912  | 517.093   | 622.549   | AK000073  | 5591.977  | 6159.877  |
| NM_001116 | 840.848   | 932.083   | AK000618  | 2239.187  | 1913.155  |
| BC035395  | 19236.408 | 21168.09  | AK024773  | 1285.64   | 1294.823  |
| NM_001703 | 38553.074 | 47195.57  | AL390180  | 1815.972  | 2376.877  |
| NM_020126 | 5951.623  | 6426.927  | AL137370  | 853.576   | 975.662   |
| NM_013982 | 6797.339  | 8306.278  | AF009262  | 32940.117 | 31672.58  |
| NM_005049 | 5385.804  | 6394.465  | AF009306  | 2026.035  | 1768.905  |
| NM_003882 | 584.3     | 688.749   | AF050198  | 4513.186  | 3771.476  |
| NM_004630 | 18721.131 | 21751.211 | AK024346  | 8006.913  | 7836.624  |
| AK023001  | 15649.236 | 16581.223 | AF009320  | 402.137   | 717.997   |
| NM_014826 | 24135.605 | 22930.998 | AF056422  | 5329.71   | 5242.092  |
| AF201947  | 1233.641  | 1532.632  | AF090892  | 2048.41   | 2713.761  |
| U01147    | 3922.599  | 4974.511  | AK001919  | 2133.254  | 1891.047  |
| NM_004040 | 39495.004 | 53836.625 | AK021535  | 1854.163  | 2091.138  |



|           |           |           |           |           |           |
|-----------|-----------|-----------|-----------|-----------|-----------|
| NM_006116 | 10662.862 | 13424.72  | AK021753  | 13560.207 | 13458.918 |
| NM_005456 | 1344.504  | 911.294   | AK002090  | 2195.56   | 2179.277  |
| BF219403  | 61311.09  | 65738.484 | AK021618  | 1704.563  | 1540.359  |
| AK075450  | 5867.255  | 6908.489  | AK021822  | 2673.431  | 2028.623  |
| AF178983  | 27127.896 | 31028.65  | AF116620  | 12611.32  | 14314.116 |
| NM_001324 | 12604.502 | 12885.833 | AF293335  | 65440.875 | 59439.363 |
| AB037795  | 2733.404  | 3145.231  | AL080065  | 1104.607  | 1002.85   |
| D43949    | 4180.868  | 4226.48   | AK024431  | 18982.172 | 20157.855 |
| AF111849  | 37370.047 | 36775.426 | AF116635  | 971.274   | 1490.321  |
| AK022975  | 1940.567  | 1907.989  | X96644    | 9098.512  | 9285.395  |
| NM_015344 | 1941.805  | 1989.623  | Z34281    | 52303.605 | 52096.695 |
| NM_004288 | 5780.909  | 5028.768  | NM_018678 | 63598.066 | 64627.961 |
| AL122055  | 11058.928 | 14090.884 | AJ008122  | 65609.961 | 58015.434 |
| NM_005132 | 35888.023 | 47433.25  | NM_006220 | 8704.953  | 7152.271  |
| AK021750  | 16992.754 | 18329.963 | AK022667  | 14560.747 | 12738.389 |
| NM_003626 | 2925.552  | 3600.185  | AK026667  | 1725.461  | 2327.421  |
| NM_006932 | 854.005   | 881.013   | AK000944  | 847.83    | 722.867   |
| AK023594  | 5849.998  | 6567.075  | NM_014174 | 10904.035 | 10365.68  |
| AB010099  | 59771.086 | 59262.16  | AF147337  | 5894.712  | 5220.822  |
| AB039920  | 28171.766 | 37513.613 | AK023819  | 2830.83   | 2941.844  |
| AB046782  | 4080.212  | 6105.508  | AL359558  | 769.775   | 740.033   |
| AF300612  | 64648.188 | 61369.602 | AF075067  | 847.686   | 1163.554  |
| AF208005  | 2537.706  | 3163.261  | AL050037  | 15819.82  | 14335.719 |
| NM_020474 | 18772.361 | 20831.26  | NM_001417 | 65145.289 | 52786.152 |
| NM_002643 | 4733.496  | 4444.24   | AK023557  | 2039.33   | 1959.433  |
| NM_017807 | 6322.148  | 8243.203  | AK027107  | 3413.437  | 3827.586  |
| NM_014746 | 1056.389  | 1358.58   | AB040887  | 5157.146  | 5596.352  |
| NM_002788 | 55679.789 | 59770.953 | AK025196  | 18691.367 | 17618.123 |
| NM_000462 | 29606.539 | 28837.461 | AJ227879  | 2881.348  | 2760.817  |
| NM_003336 | 14595.136 | 15944.653 | AK024800  | 1700.189  | 1939.931  |
| NM_005805 | 43516.727 | 55030.984 | AK000401  | 5524.552  | 5241.304  |
| NM_004181 | 41783.777 | 53645.926 | AF305068  | 3175.045  | 3192.874  |
| NM_003900 | 28388.818 | 38749.395 | D17231    | 65621.211 | 61621.789 |
| NM_003337 | 5105.173  | 7600.641  | AF531295  | 3425.961  | 2938.595  |
| NM_001723 | 4463.363  | 6306.935  | X60484    | 2159.398  | 2164.354  |
| NM_016018 | 3482.812  | 4765.269  | AF056427  | 914.204   | 926.382   |
| M94362    | 34903.625 | 47453.758 | AF055019  | 3993.293  | 3936.461  |
| AK024707  | 2343.263  | 2726.208  | NM_003525 | 15206.935 | 13027.51  |
| NM_014255 | 2728.019  | 3732.699  | NM_013332 | 9178.066  | 11621.957 |
| NM_006530 | 16088.483 | 17282.141 | X56199    | 11526.207 | 12360.85  |
| NM_003587 | 64985.828 | 58544.555 | NM_005193 | 16677.471 | 17236.463 |
| X90978    | 2784.156  | 2353.743  | NM_017971 | 55380.754 | 52416.844 |
| AL359578  | 815.229   | 1012.868  | AF090097  | 3784.472  | 3591.844  |
| NM_005522 | 821.031   | 623.444   | AF054998  | 2193.131  | 2616.387  |
| NM_005760 | 33125.379 | 35656.828 | NM_000838 | 1121.495  | 842.456   |
| NM_014212 | 3516.034  | 3819.546  | NM_014750 | 5774.571  | 4719.411  |
| NM_007265 | 5845.745  | 6201.253  | NM_015912 | 2871.346  | 2859.575  |
| AK023639  | 26473.965 | 25465.055 | NM_000460 | 4370.163  | 3942.324  |
| AL122118  | 1338.678  | 1227.37   | AB002339  | 8410.706  | 8324.807  |
| AL137700  | 1651.417  | 1958.659  | NM_005104 | 25517.6   | 24358.195 |
| NM_004904 | 3336.944  | 3428.005  | NM_006888 | 43756.258 | 51295.367 |
| NM_003083 | 26352.861 | 33796.445 | AL137423  | 8822.529  | 8956.037  |
| NM_006788 | 7992.903  | 10940.999 | AB018322  | 5431.268  | 5294.628  |

|           |           |           |           |           |           |
|-----------|-----------|-----------|-----------|-----------|-----------|
| NM_000982 | 7804.972  | 8669.322  | NM_007068 | 53078.945 | 50243.02  |
| NM_001024 | 63153.219 | 62144.016 | AF113211  | 2491.904  | 2396.491  |
| NM_016093 | 64765.352 | 60932.16  | AL117568  | 6606.727  | 6090.865  |
| NM_012423 | 62421.402 | 58291.07  | NM_000843 | 4630.246  | 4296.073  |
| AK026367  | 50341.711 | 53805.91  | S71805    | 2275.177  | 2058.098  |
| AK026491  | 35368.527 | 47531.613 | NM_018391 | 4696.434  | 4847.29   |
| NM_001015 | 64866.762 | 62128.938 | AF086527  | 2292.505  | 1149.826  |
| NM_004190 | 59473.703 | 56365.238 | U21072    | 4840.58   | 4183.244  |
| NM_014275 | 21177.07  | 17378.574 | AK024377  | 1616.159  | 1812.56   |
| NM_000405 | 13305.882 | 8918.306  | U38438    | 673.843   | 856.07    |
| AB044137  | 1884.323  | 2033.163  | AK025621  | 721.729   | 973.393   |
| NM_000920 | 3556.946  | 3866.708  | AL137461  | 1897.75   | 1871.566  |
| NM_020375 | 22152.854 | 24987.16  | AF114264  | 11469.742 | 10598.142 |
| NM_016045 | 26756.176 | 26193.309 | NM_005545 | 876.406   | 983.604   |
| NM_013311 | 18313.871 | 18336.539 | NM_017514 | 962.895   | 1033.358  |
| NM_000291 | 59998.762 | 59618.93  | AB018261  | 898.823   | 832.766   |
| NM_018081 | 6625.012  | 7099.643  | NM_018972 | 6659.287  | 6917.638  |
| NM_014645 | 6316.984  | 8419.58   | AB037828  | 1811.75   | 1810      |
| AL117488  | 4799.863  | 6139.29   | AB023210  | 1432.891  | 1458.089  |
| NM_012240 | 6563.083  | 9082.431  | AB037786  | 5272.409  | 4632.739  |
| NM_019005 | 11752.534 | 14091.463 | NM_003648 | 24324.193 | 25855.947 |
| NM_004735 | 29238.818 | 39770.176 | AB037735  | 2211.516  | 2124.604  |
| AV752216  | 2555.25   | 3161.6    | AK002177  | 15597.859 | 13703.753 |
| NM_005341 | 6753.125  | 8034.245  | AK024429  | 5115.481  | 4798.63   |
| AF181999  | 3900.419  | 4231.931  | NM_003496 | 63254.176 | 72377.297 |
| NM_001934 | 6073.134  | 6947.187  | AB000509  | 4544.66   | 4798.624  |
| AB011090  | 3689.111  | 4100.522  | AB018314  | 4411.323  | 4466.802  |
| NM_000205 | 623.723   | 474.534   | NM_004378 | 3315.077  | 3440.372  |
| NM_018682 | 11789.145 | 12696.352 | AJ238899  | 2856.532  | 3116.951  |
| AB033024  | 4270.735  | 5078.61   | NM_018037 | 12006.662 | 9084.898  |
| NM_018942 | 17513.488 | 14305.668 | NM_001110 | 7131.432  | 6202.196  |
| NM_005531 | 19473.082 | 14452.95  | NM_003222 | 836.069   | 915.845   |
| NM_006977 | 1932.592  | 1854.928  | NM_000841 | 25346.129 | 23041.357 |
| NM_002475 | 4866.449  | 6256.439  | NM_000735 | 3462.765  | 2576.173  |
| NM_000345 | 44962.484 | 54752.34  | NM_001245 | 4455.988  | 3444.67   |
| NM_005055 | 29469.037 | 39172.84  | AJ008139  | 15234.688 | 15692.879 |
| NM_004950 | 8895.441  | 11585.824 | NM_004326 | 21717.494 | 23319.979 |
| NM_000724 | 8342.922  | 10138.196 | NM_000882 | 1238.221  | 1450.631  |
| NM_000553 | 505.823   | 728.928   | NM_004577 | 12474.793 | 11881.137 |
| NM_002557 | 29929.418 | 34078.289 | NM_015507 | 1392.248  | 1469.917  |
| NM_004477 | 1044.82   | 1199.193  | AF007157  | 59092.867 | 57793.48  |
| BE728156  | 734.794   | 908.828   | D38553    | 8083.821  | 8331.665  |
| AI417775  | 699.532   | 544.02    | NM_006170 | 24827.879 | 23573.951 |
| BI762229  | 16660.068 | 22593.551 | NM_014298 | 17112.746 | 13314.951 |
| AA131406  | 688.798   | 1050.41   | AK001581  | 4309.938  | 4530.23   |
| BG618320  | 60140.711 | 62900.313 | NM_005862 | 9338.306  | 6865.146  |
| M28983    | 1836.72   | 2250.968  | NM_000548 | 18965.371 | 16728.461 |
| Y00787    | 7905.868  | 11000.479 | AK022541  | 17494.988 | 17647.803 |
| NM_007276 | 7083.433  | 8609.482  | AB002297  | 8270.893  | 6618.496  |
| N34462    | 17689.545 | 20819.949 | NM_005020 | 64255.859 | 63481.809 |
| AI658778  | 10370.584 | 12043.805 | NM_014077 | 7621.393  | 8054.884  |
| L19067    | 11449.158 | 11798.269 | NM_018412 | 4668.126  | 4817.126  |
| Z48482    | 1344.792  | 1331.735  | NM_012329 | 21412.525 | 21579.438 |

|           |           |           |           |           |           |
|-----------|-----------|-----------|-----------|-----------|-----------|
| W60413    | 8384.679  | 8099.929  | M14087    | 27081.895 | 23249.695 |
| BI823365  | 10416.955 | 9287.833  | NM_000885 | 45115.152 | 43226.57  |
| X06318    | 2041.509  | 1898.493  | NM_012338 | 569.617   | 633.757   |
| NM_019101 | 2163.479  | 1656.906  | M59040    | 10556.275 | 8877.966  |
| NM_013247 | 9613.817  | 11797.494 | X15880    | 63325.25  | 68859.32  |
| NM_006770 | 9336.19   | 10680.856 | NM_006799 | 1059.932  | 896.66    |
| BE394704  | 1368.795  | 1928.057  | X04366    | 4564.87   | 3989.856  |
| NM_004703 | 11283.601 | 17584.945 | NM_000505 | 64666.945 | 55979.68  |
| NM_001512 | 2149.407  | 2671.939  | NM_018656 | 1869.961  | 1616.677  |
| NM_014706 | 11619.584 | 16025.188 | NM_000666 | 6331.065  | 6995.926  |
| AK023172  | 993.441   | 1071.836  | NM_003481 | 16480.854 | 18552.967 |
| AF139768  | 539.746   | 603.007   | AB002347  | 1129.811  | 755.872   |
| AJ001348  | 3753.285  | 5050.458  | AB046814  | 1607.954  | 1191.246  |
| NM_014007 | 3334.339  | 3858.629  | NM_017664 | 10432.675 | 9706.718  |
| AB033006  | 6699.218  | 10626.194 | AK025523  | 1914.591  | 1831.329  |
| AF020314  | 10007.658 | 14202.378 | NM_007059 | 15778.206 | 14526.825 |
| NM_016332 | 33357.617 | 43879.43  | NM_006870 | 16145.774 | 15887.677 |
| AK023936  | 1265.903  | 1939.002  | NM_007359 | 15956.15  | 13835.336 |
| NM_006457 | 3830.873  | 6670.588  | L13283    | 4928.428  | 4158.207  |
| NM_003682 | 2538.015  | 2982.293  | NM_000077 | 3758.588  | 3838.263  |
| NM_000207 | 1581.557  | 2304.044  | AF176646  | 2570.647  | 2550.091  |
| NM_002531 | 5220.068  | 6549.934  | NM_003672 | 43571.949 | 44245.586 |
| NM_006314 | 54198.637 | 57777.191 | NM_002574 | 66492.234 | 72211.734 |
| NM_001782 | 13772.69  | 14908.335 | NM_012391 | 8283.411  | 7647.723  |
| NM_002754 | 781.544   | 650.78    | NM_005254 | 7048.032  | 6694.291  |
| NM_000797 | 25216.568 | 21137.625 | NM_005611 | 2584.453  | 2454.938  |
| AF217525  | 876.309   | 708.23    | AF141655  | 8052.781  | 7567.508  |
| AL080148  | 54349.223 | 41639.648 | NM_007345 | 2729.825  | 3028.022  |
| AF000381  | 14432.006 | 18545.516 | NM_004830 | 2217.841  | 2043.088  |
| NM_012105 | 8397.318  | 10147.119 | AF132362  | 63299.426 | 70406.68  |
| S82470    | 6644.472  | 8477.716  | NM_007007 | 24676.27  | 22792.992 |
| AB028982  | 3047.094  | 4178.052  | NM_006386 | 8450.388  | 8375.547  |
| NM_002004 | 5859.517  | 7966.273  | NM_006559 | 35193.559 | 37115.93  |
| NM_005121 | 1947.53   | 2092.771  | NM_004501 | 61655.91  | 51806.516 |
| NM_000747 | 6462.217  | 10451.25  | NM_004966 | 34265.473 | 33859.293 |
| AJ275973  | 19142.084 | 25279.545 | NM_006700 | 5405.062  | 5241.876  |
| U76362    | 27082.395 | 31959.844 | NM_006445 | 34376.082 | 31926.838 |
| AK021489  | 50002.129 | 54676.633 | NM_012109 | 59360.066 | 52225.305 |
| NM_004525 | 1546.229  | 2250.106  | AF019633  | 11164.205 | 8523.346  |
| NM_003895 | 1130.314  | 1625.386  | AB002361  | 39394.531 | 38502.598 |
| NM_004317 | 8004.417  | 11407.843 | NM_018060 | 19792.047 | 17516.762 |
| NM_014645 | 7314.257  | 6373.674  | NM_014239 | 10061.219 | 9887.736  |
| NM_014708 | 5183.444  | 4783.235  | AK026962  | 8073.067  | 8489.49   |
| NM_003693 | 5316.628  | 3920.405  | D00265    | 60836.59  | 56271.074 |
| NM_000356 | 63146.305 | 55993.457 | NM_000779 | 1653.947  | 1494.583  |
| NM_018134 | 63980.016 | 55574.969 | NM_004552 | 66471.188 | 63922.121 |
| L27479    | 2390.395  | 2244.62   | NM_000143 | 6410.132  | 7026.763  |
| NM_002193 | 4286.85   | 4603.815  | AF317889  | 1007.455  | 1000.224  |
| NM_001388 | 18718.883 | 19796.105 | NM_006294 | 64392.094 | 58279.035 |
| X76770    | 11267.669 | 12770.559 | AL137294  | 1696.106  | 1358.385  |
| AB037808  | 4433.959  | 5272.919  | NM_003743 | 6312.798  | 6177.962  |
| NM_016038 | 8396.452  | 10372.641 | AB037797  | 3519.161  | 4177.979  |
| Z36821    | 32445.551 | 38070.484 | NM_001520 | 3420.357  | 3887.118  |

|           |           |           |             |           |           |
|-----------|-----------|-----------|-------------|-----------|-----------|
| AF289485  | 7718.962  | 9790.019  | AL050367    | 1288.685  | 1412.969  |
| AF130092  | 13493.382 | 16346.296 | NM_017870   | 6363.579  | 5025.899  |
| NM_016095 | 8284.828  | 11515.124 | AL133633    | 8715.663  | 7778.038  |
| AK024794  | 3668.467  | 3644.452  | NM_012252   | 5069.927  | 5164.594  |
| NM_019853 | 12517.146 | 12688.518 | AK026817    | 12560.747 | 10883.905 |
| NM_017992 | 2509.716  | 2606.761  | AL157442    | 63310.023 | 58216.063 |
| NM_005400 | 1057.974  | 1673.084  | AB011148    | 12339.29  | 12157.757 |
| BF851643  | 2243.863  | 2596.569  | NM_001949   | 64319.902 | 65044.969 |
| AK023061  | 811.095   | 1066.097  | NM_007084   | 13697.944 | 14215.146 |
| NM_007255 | 6191.298  | 7155.733  | M97191      | 65267     | 74171.914 |
| NM_003668 | 10392.717 | 8313.345  | AK023015    | 19996.939 | 21833.885 |
| NM_013384 | 64126.992 | 54743.734 | NM_003457   | 55888.578 | 53740.41  |
| NM_001187 | 3618.907  | 2356.608  | AV752086    | 2826.945  | 2742.474  |
| NM_018241 | 4739.976  | 3592.123  | NM_016102   | 48784.625 | 54406.422 |
| NM_005834 | 8454.839  | 6733.77   | NM_004376   | 7086.134  | 6301.368  |
| NM_005059 | 31318.135 | 29995.092 | NM_000272   | 1513.538  | 1705.732  |
| NM_004950 | 7626.054  | 10688.181 | NM_006061   | 587.208   | 674.254   |
| NM_000724 | 9541.938  | 9760.18   | NM_006848   | 58551.887 | 66703.898 |
| NM_002557 | 30563.449 | 35319.063 | NM_005603   | 60845.027 | 65922.773 |
| NM_004477 | 1023.358  | 1324.055  | NM_001061   | 3950.213  | 4997.6    |
| BE728156  | 612.496   | 770.18    | AI075338    | 9303.013  | 9340.123  |
| Y10802    | 558.202   | 832.432   | BG744154    | 37871.852 | 46226.531 |
| AI417775  | 808.728   | 638.335   | Z11694      | 32254.723 | 39823.172 |
| BI762229  | 16339.491 | 19040.088 | BF983177    | 11441.78  | 12381.12  |
| AA131406  | 622.181   | 619.554   | Z26317      | 10794.147 | 9795.131  |
| BG618320  | 58626.555 | 61604.039 | X16983      | 62792.824 | 64252.527 |
| M28983    | 487.098   | 696.326   | X56160      | 14147.596 | 13249.178 |
| Y00787    | 7462.885  | 9274.838  | BG679991    | 4907.004  | 4971.095  |
| NM_007276 | 7868.125  | 8203.651  | H-Y 00097 I | 19949.166 | 19301.701 |
| N34462    | 15372.081 | 16652.121 | H-M 59964   | 1973.967  | 1827.734  |
| AI658778  | 8940.45   | 11026.049 | H-Y 00711 I | 64965.004 | 73686.875 |
| L19067    | 10778.229 | 16248.813 | H-X 16707 I | 18083.137 | 17819.496 |
| Z48482    | 1185.881  | 1138.47   | H-U76456M   | 9333.228  | 3163.231  |
| W60413    | 8518.957  | 7046.387  | AL038354    | 27410.076 | 28207.24  |
| BI823365  | 8052.683  | 4918.126  | R14607      | 20764.578 | 20706.434 |
| X06318    | 1519.697  | 1249.477  | W84867      | 3166.757  | 3305.675  |
| NM_016217 | 56167.813 | 49917.902 | BF245026    | 2273.324  | 1898.659  |
| AK025971  | 10171.758 | 9448.549  | NM_000592   | 1572.11   | 1932.354  |
| NM_002618 | 16099.415 | 15085.318 | NM_016584   | 53739.488 | 49714.109 |
| BE394704  | 1656.384  | 1797.584  | NM_001815   | 7911.419  | 8444.127  |
| NM_004703 | 11626.094 | 12815.893 | NM_000064   | 38693.313 | 43564.465 |
| NM_001512 | 2298.201  | 2450.717  | NM_003264   | 1914.639  | 1939.827  |
| NM_014706 | 12898.656 | 16111.077 | NM_006725   | 20577.26  | 21615.809 |
| AK023172  | 1225.337  | 1143.53   | NM_003326   | 6222.653  | 6154.537  |
| AF139768  | 730.451   | 986.403   | NM_004568   | 64063.129 | 62216.434 |
| AJ001348  | 3859.037  | 4501.975  | NM_000202   | 16547.836 | 15803.879 |
| NM_014007 | 3072.137  | 3627.075  | NM_005496   | 22422.869 | 20852.693 |
| AB033006  | 6802.392  | 9604.775  | NM_016608   | 3219.999  | 3394.897  |
| AF020314  | 10100.348 | 12325.691 | NM_002858   | 14116.417 | 14473.9   |
| NM_016332 | 30295.344 | 36215.512 | NM_004817   | 7628.097  | 8454.126  |
| AK023936  | 1878.9    | 2516.072  | NM_018975   | 36967.703 | 42308.094 |
| NM_006457 | 4292.85   | 5859.722  | AB023215    | 46726.078 | 53319.141 |
| NM_003682 | 2738.197  | 2728.015  | NM_001284   | 52772.922 | 53632.336 |

|           |           |           |           |           |           |
|-----------|-----------|-----------|-----------|-----------|-----------|
| NM_000207 | 1587.905  | 1826.395  | NM_003242 | 59001.652 | 57098.117 |
| NM_002531 | 4568.538  | 4646.75   | NM_002849 | 2568.769  | 2811.417  |
| NM_006314 | 53148.848 | 57154.402 | U31099    | 6830.056  | 7234.904  |
| NM_001782 | 11620.507 | 12435.354 | NM_001105 | 55926.035 | 49988.063 |
| NM_002754 | 1266.866  | 1041.727  | NM_005585 | 1966.599  | 1909.204  |
| NM_000797 | 33381.137 | 28853.676 | NM_002075 | 33018.68  | 36587.867 |
| AF217525  | 2275.584  | 2180.096  | Y08756    | 64031.082 | 66717.875 |
| AL080148  | 60796.574 | 52509.676 | AY007090  | 4193.842  | 3671.631  |
| NM_002479 | 4912.677  | 4126.443  | NM_006439 | 3142.333  | 2849.432  |
| NM_000348 | 41296.805 | 27200.342 | AK021426  | 1111.195  | 1239.693  |
| NM_012105 | 8317.071  | 9138.584  | NM_018073 | 3447.301  | 3303.006  |
| NM_000197 | 1516.626  | 1539.454  | AL137529  | 3549.169  | 3605.534  |
| S82470    | 7504.595  | 7576.952  | NM_012332 | 11131.814 | 12503.637 |
| AB028982  | 3063.011  | 3218.711  | AK026648  | 5062.978  | 4896.599  |
| NM_002004 | 4198.325  | 4168.991  | NM_000497 | 3323.667  | 3247.684  |
| NM_005121 | 2432.587  | 1454.316  | NM_017421 | 5415.156  | 5543.417  |
| NM_000747 | 7503.35   | 5381.383  | AK025977  | 63823.781 | 67310.906 |
| AJ275973  | 19715.459 | 15118.935 | AK023130  | 12899.014 | 11748.114 |
| U76362    | 27362.848 | 22026.641 | NM_000273 | 4024.626  | 4129.644  |
| AK021489  | 52836.281 | 57712.547 | NM_002899 | 43097.82  | 49079.004 |
| NM_004525 | 1303.925  | 1279.174  | NM_005397 | 11404.925 | 13385.099 |
| NM_003895 | 1076.262  | 674.926   | AB014511  | 17401.443 | 16176.967 |
| NM_004317 | 8023.422  | 5400.529  | NM_001662 | 38062.609 | 42844.277 |
| NM_014645 | 7228.482  | 5037.906  | AB011100  | 9321.843  | 8340.172  |
| NM_014708 | 6569.849  | 4819.629  | U61741    | 5607.824  | 5571.134  |
| NM_003693 | 5709.473  | 3192.268  | NM_012402 | 22843.264 | 23395.508 |
| NM_000356 | 55554.113 | 50444.398 | M76676    | 20649.115 | 21323.477 |
| NM_018134 | 63154.555 | 57730.578 | NM_003857 | 2483.009  | 2588.412  |
| NM_013247 | 9588.24   | 6906.638  | AL137690  | 1596.903  | 2154.184  |
| NM_006770 | 8661.851  | 8583.964  | Z83804    | 8032.945  | 7161.699  |
| NM_001388 | 17085.527 | 17449.475 | NM_004386 | 12194.809 | 13247.061 |
| X76770    | 10959.709 | 11290.9   | U67784    | 6915.254  | 8196.072  |
| AB037808  | 3740.376  | 3396.806  | NM_007366 | 12299.226 | 10536.112 |
| NM_016038 | 10959.036 | 7597.316  | NM_014580 | 2938.666  | 3108.162  |
| AF090911  | 1704.51   | 1699.991  | NM_000153 | 1385.915  | 3174.223  |
| Z36821    | 35915.055 | 22718.469 | NM_002033 | 1453.722  | 1895.486  |
| AF289485  | 7658.576  | 4596.86   | AK091794  | 1011.277  | 954.083   |
| AF130092  | 10197.02  | 6611.12   | NM_004111 | 8477.131  | 8720.54   |
| NM_016095 | 7758.838  | 5295.898  | AF085966  | 10995.77  | 10242.676 |
| AK024794  | 3322.744  | 2166.017  | NM_005316 | 11769.271 | 11804.978 |
| NM_019853 | 13586.523 | 7074.582  | NM_016316 | 10102.354 | 10778.649 |
| NM_017992 | 2601.246  | 1609.444  | NM_003369 | 34420.367 | 35972.504 |
| NM_005400 | 1593.839  | 1052.441  | NM_000057 | 5033.765  | 4837.427  |
| AK023061  | 1186.61   | 614.881   | NM_018343 | 17188.223 | 15549.896 |
| NM_007255 | 7794.017  | 5855.752  | AK095793  | 4371.717  | 3636.806  |
| NM_003668 | 10607.851 | 5805.385  | NM_003177 | 11423.198 | 10293.977 |
| NM_013384 | 64434.953 | 54989.398 | NM_017719 | 2761.803  | 2488.773  |
| NM_001187 | 3329.317  | 1467.108  | AF064078  | 7362.883  | 7313.422  |
| NM_018241 | 5568.371  | 3042.451  | AL049688  | 11262.67  | 11064.533 |
| NM_005834 | 9633.47   | 5014      | NM_002737 | 15920.354 | 15245.962 |
| AF000381  | 15728.608 | 11369.515 | Z25427    | 9813.079  | 9375.543  |
| NM_000724 | 9109.253  | 7660.34   | NM_004672 | 31100.422 | 34563.73  |
| NM_002557 | 34097.359 | 20992.096 | NM_001353 | 20408.459 | 21066.285 |

|           |           |           |             |           |           |
|-----------|-----------|-----------|-------------|-----------|-----------|
| NM_004477 | 1404.875  | 795.719   | NM_006214   | 5855.834  | 5377.226  |
| BE728156  | 2909.447  | 1831.535  | AJ010228    | 33493.469 | 36164.832 |
| Y10802    | 3398.308  | 2308.681  | NM_005198   | 10611.47  | 11321.896 |
| AI417775  | 1201.115  | 708.017   | NM_004376   | 6673.313  | 6963.757  |
| BI762229  | 18999.922 | 10838.561 | NM_000272   | 1250.816  | 1733.805  |
| BG618320  | 59755.344 | 51187.621 | NM_006061   | 693.204   | 951.021   |
| Y00787    | 9124.802  | 6043.448  | NM_006848   | 62980     | 65820.977 |
| NM_007276 | 11426.306 | 8662.85   | NM_005603   | 64137.73  | 64664.766 |
| N34462    | 13887.723 | 8353.509  | NM_001061   | 3094.361  | 3796.897  |
| AI658778  | 10144.798 | 7753.913  | AI075338    | 7516.384  | 8171.75   |
| L19067    | 11931.918 | 7346.092  | BG744154    | 37928.719 | 45359.727 |
| Z48482    | 2777.042  | 2091.522  | Z11694      | 29300.758 | 38466.328 |
| W60413    | 8146.222  | 5284.207  | BF983177    | 7309.294  | 8871.392  |
| BI823365  | 10583.262 | 5734.549  | Z26317      | 6709.208  | 6592.327  |
| X06318    | 1860.175  | 1252.702  | X16983      | 63268.809 | 58882.184 |
| NM_016217 | 54497.242 | 40965.691 | X56160      | 11371.823 | 10778.903 |
| AK025971  | 10459.953 | 6942.229  | BG679991    | 4077.04   | 4032.581  |
| NM_002618 | 17687.76  | 11552.591 | H-Y 00097 I | 19665.908 | 20084.137 |
| L27479    | 2432.2    | 3573.916  | H-M 59964   | 1705.259  | 1996.991  |
| NM_002193 | 4396.901  | 3986.748  | H-Y 00711 I | 63444.172 | 68332.211 |
| AB033006  | 8445.279  | 6590.334  | H-X 16707 I | 18793.383 | 20366.416 |
| AF020314  | 12469.106 | 7422.417  | H-U76456M   | 842.97    | 890.388   |
| NM_016332 | 37627.957 | 22402.568 | AL038354    | 25785.762 | 24315.666 |
| AK023936  | 1876.532  | 1114.465  | R14607      | 18352.086 | 17930.164 |
| NM_006457 | 5917.934  | 3796.251  | W84867      | 3088.936  | 2911.233  |
| NM_003682 | 3540.969  | 2836.305  | NM_005718   | 16075.163 | 15047.013 |
| NM_000207 | 3090.631  | 2033.831  | NM_018264   | 3608.377  | 3187.919  |
| NM_002531 | 5633.41   | 3975.887  | NM_001815   | 8379.564  | 10465.525 |
| NM_006314 | 59533.527 | 49710.598 | NM_000064   | 41166.742 | 42899.672 |
| NM_001782 | 13209.162 | 8678.177  | NM_003264   | 1864.667  | 1991.351  |
| NM_002754 | 1607.542  | 698.531   | NM_006725   | 20976.752 | 24028.494 |
| NM_000797 | 29100.111 | 18869.615 | NM_003326   | 5536.541  | 6741.329  |
| NM_014927 | 1731.373  | 671.679   | NM_004568   | 65673.102 | 62516.336 |
| NM_016293 | 17970.109 | 12645.481 | NM_000202   | 15244.553 | 16059.153 |
| AL080148  | 58076.047 | 46467.32  | NM_005496   | 23073.098 | 19440.334 |
| NM_006731 | 1121.332  | 527.733   | NM_016608   | 3359.967  | 3610.083  |
| NM_018487 | 2222.901  | 2251.764  | NM_002858   | 13047.829 | 15246.96  |
| NM_020134 | 6038.724  | 4140.465  | NM_004817   | 7115.263  | 8571.596  |
| NM_014061 | 3013.438  | 1737.29   | NM_018975   | 37142.586 | 47087.059 |
| BC034395  | 12688.332 | 8209.47   | AB023215    | 38059.891 | 40373.574 |
| NM_002479 | 3804.415  | 2222.662  | NM_001284   | 51262.176 | 53704.316 |
| NM_000348 | 52684.059 | 34591.773 | NM_003242   | 57544.711 | 56206.363 |
| NM_005059 | 30096.174 | 25723.236 | NM_002849   | 3733.857  | 3476.135  |
| NM_004950 | 10309.931 | 10679.313 | U31099      | 6630.078  | 7606.098  |
| AF040248  | 5007.3    | 2928.926  | NM_001105   | 56616.648 | 53189.426 |
| NM_014228 | 4391.627  | 2863.783  | NM_005585   | 2410.685  | 2200.095  |
| AL832292  | 10191.686 | 6915.869  | NM_002075   | 30917.924 | 31977.623 |
| NM_003045 | 47012.629 | 31533.412 | Y08756      | 65227.238 | 57898.477 |
| NM_005662 | 29856.127 | 18450.648 | AY007090    | 3438.906  | 3505.752  |
| NM_003060 | 1619.287  | 625.764   | NM_006439   | 3549.722  | 3143.842  |
| AK021489  | 59766.531 | 59016.68  | AV752086    | 4814.506  | 5290.853  |
| NM_004525 | 2217.338  | 1502.579  | NM_016102   | 56230.422 | 55372.234 |
| NM_003895 | 1426.897  | 1113.203  | AL137529    | 3583.235  | 4090.083  |

|           |           |           |           |           |           |
|-----------|-----------|-----------|-----------|-----------|-----------|
| NM_004317 | 9637.444  | 8230.839  | NM_012332 | 10829.913 | 13360.069 |
| NM_014645 | 9873.075  | 8507.697  | AK026648  | 4423.905  | 4929.773  |
| NM_014708 | 7775.981  | 8594.614  | NM_000497 | 3442.566  | 4019.144  |
| NM_003693 | 7394.578  | 7278.235  | NM_017421 | 5606.768  | 7241.164  |
| NM_000356 | 58023.609 | 51457.336 | AK025977  | 66021.227 | 58759.758 |
| NM_018134 | 62021.871 | 70043.57  | AK023130  | 11763.033 | 11248.757 |
| NM_013247 | 9067.871  | 8172.097  | NM_000273 | 4113.727  | 4548.455  |
| NM_006770 | 7850.676  | 5622.796  | NM_002899 | 40321.129 | 47603.84  |
| BE394704  | 1498.362  | 1146.002  | NM_005397 | 10372.74  | 13615.062 |
| NM_004703 | 14071.375 | 10529.945 | AB014511  | 15277.642 | 17708.953 |
| NM_001512 | 2876.568  | 1631.851  | NM_001662 | 29006.139 | 37512.148 |
| NM_014706 | 15560.489 | 10341.784 | AB011100  | 7111.727  | 7341.671  |
| AK023172  | 1438.02   | 700.264   | U61741    | 5492.571  | 5232.075  |
| AJ001348  | 5561.409  | 4298.41   | NM_012402 | 22360.955 | 24971.381 |
| NM_014007 | 4271.617  | 3579.501  | M76676    | 21676.443 | 23290.367 |
| NM_001187 | 3715.969  | 2820.511  | NM_003857 | 2428.882  | 2563.805  |
| NM_018241 | 5983.489  | 4695.247  | AL137690  | 2014.145  | 2046.542  |
| NM_005834 | 12128.36  | 7140.829  | Z83804    | 7687.373  | 6216.07   |
| AF000381  | 18476.053 | 10261.669 | NM_004386 | 11039.077 | 11060.992 |
| NM_012105 | 11790.313 | 7956.176  | U67784    | 6753.233  | 7633.849  |
| S82470    | 8989.678  | 7406.828  | NM_007366 | 14298.855 | 13689.422 |
| AB020695  | 3156.893  | 1877.864  | NM_000592 | 1947.075  | 2251.674  |
| AB028982  | 6134.651  | 4753.609  | NM_016584 | 58768.16  | 55458.441 |
| NM_002004 | 8632.33   | 8065.938  | NM_000153 | 1189.265  | 1047.249  |
| NM_005121 | 2458.729  | 1577.3    | NM_002033 | 1660.366  | 1834.682  |
| NM_001643 | 62056.762 | 58883.758 | AK091794  | 967.292   | 1129.548  |
| NM_020221 | 1798.892  | 1564.398  | NM_004111 | 9374.487  | 10732.513 |
| NM_000747 | 8238.453  | 5876.974  | AF085966  | 10692.051 | 13566.604 |
| NM_005415 | 8739.18   | 5746.488  | NM_005316 | 11447.493 | 11494.937 |
| AK026841  | 2260.511  | 959.991   | NM_016316 | 11171.563 | 10932.406 |
| AJ275973  | 25365.49  | 19614.904 | NM_003369 | 35559.773 | 38963.438 |
| NM_006493 | 2323.814  | 2507.618  | NM_000057 | 5164.207  | 6040.02   |
| U76362    | 30749.713 | 37306.141 | NM_018343 | 16397.615 | 15453.735 |
| NM_016217 | 59925.723 | 50668.117 | AK095793  | 2996.186  | 3051.829  |
| AK025971  | 10929.123 | 7070.717  | NM_003177 | 9578.869  | 10346.072 |
| NM_002618 | 23289.166 | 12046.821 | NM_017719 | 2403.425  | 2070.394  |
| L27479    | 2582.908  | 1614.36   | AF064078  | 6672.624  | 7287.089  |
| NM_002193 | 5015.697  | 2886.008  | AL049688  | 10794.517 | 10801.829 |
| NM_001388 | 19760.328 | 12969.906 | NM_002737 | 17335.391 | 16444.07  |
| X76770    | 14616.335 | 9977.801  | Z25427    | 10600.5   | 10205.36  |
| AB037808  | 4384.743  | 2911.704  | NM_004672 | 31209.268 | 33082.953 |
| NM_016038 | 11319.039 | 8269.192  | NM_001353 | 22224.854 | 19585.865 |
| Z36821    | 36106.992 | 32142.451 | NM_006214 | 5776.064  | 5471.974  |
| AF289485  | 9841.638  | 8334.798  | AJ010228  | 34914.277 | 35840.43  |
| AF130092  | 12581.056 | 8463.479  | NM_005198 | 12346.852 | 14236.104 |
| NM_016095 | 8077.193  | 5344.304  | AK021426  | 1166.578  | 1099.07   |
| AK024794  | 3426.105  | 2068.211  | NM_018073 | 5555.011  | 4981.406  |
| NM_019853 | 15488.865 | 9652.108  | NM_006061 | 665.502   | 889.733   |
| NM_017992 | 3041.308  | 1904.031  | NM_006848 | 62491.598 | 62763.664 |
| NM_005400 | 1375.495  | 657.303   | NM_005603 | 63263.949 | 62116.91  |
| AK023061  | 1391.493  | 601.902   | NM_001061 | 3660.812  | 4220.396  |
| NM_007255 | 8273.657  | 4815.063  | AI075338  | 9286.312  | 8385.175  |
| NM_003668 | 10593.242 | 9535.183  | BG744154  | 40026.793 | 43783.391 |

|           |           |           |             |           |           |
|-----------|-----------|-----------|-------------|-----------|-----------|
| NM_013384 | 66907.914 | 59587.375 | Z11694      | 32439.934 | 35196.488 |
| CY3Cy5    | 3400.717  | 103.07    | BF983177    | 8265.465  | 8014.062  |
| NM_01634E | 4531.631  | 5583.286  | Z26317      | 7297.691  | 7116.46   |
| AF088047  | 197.239   | 792.582   | X16983      | 65742.227 | 57486.059 |
| AF086445  | 721.041   | 944.472   | X56160      | 13855.143 | 15225.207 |
| AF086281  | 2435.382  | 2808.048  | BG679991    | 4485.529  | 4667.378  |
| AF086372  | 680.201   | 1267.065  | H-Y 00097 I | 19049.176 | 19326.592 |
| AF086393  | 575.691   | 1270.938  | H-M 59964   | 2038.945  | 1814.997  |
| AF086453  | 1151.216  | 2393.875  | H-Y 00711 I | 64767.816 | 60622.047 |
| AF070621  | 16527.277 | 29794.602 | H-X 16707 I | 16740.512 | 17749.506 |
| NM_02024C | 4277.431  | 4590.068  | H-U76456M   | 980.157   | 930.775   |
| AK023678  | 43822.344 | 42618.281 | AL038354    | 26867.08  | 25399.318 |
| AF052090  | 7028.237  | 7743.558  | R14607      | 20313.291 | 17354.805 |
| AL355730  | 894.532   | 1040.854  | W84867      | 3085.2    | 2955.259  |
| U79273    | 2532.661  | 2641.66   | NM_00571E   | 15153.927 | 14175.106 |
| AK022050  | 3826.921  | 3194.135  | NM_018264   | 4038.002  | 3445.207  |
| NM_01634E | 4441.819  | 3072.976  | NM_01458C   | 4717.816  | 4117.402  |
| SR2       | 44456.246 | 32123.398 | AB028998    | 1485.352  | 1640.224  |
| SR4       | 16208.281 | 12247.762 | NM_01660E   | 2858.329  | 3323.517  |
| SR6       | 2033.889  | 952.011   | NM_00285E   | 12922.641 | 15278.341 |
| SR8       | 7342.9    | 24857.029 | NM_004817   | 6887.301  | 7880.74   |
| SR10      | 23074.391 | 5684.059  | NM_01897E   | 38119.5   | 47003.309 |
| CY3Cy5    | 2019.215  | 65.593    | AB023215    | 42505.293 | 48232.711 |
| AB042410  | 1732.742  | 1856.101  | NM_001284   | 49196.23  | 50151.852 |
| AF086092  | 1244.766  | 1297.812  | NM_00324E   | 45710.23  | 49592.996 |
| AF086102  | 4957.065  | 5029.454  | NM_00284E   | 2812.327  | 2830.13   |
| AF116682  | 44346.371 | 47175.539 | U31099      | 4155.551  | 4266.818  |
| AL137259  | 4999.255  | 5970.65   | NM_00110E   | 53185.457 | 50105.105 |
| AL122107  | 23709.713 | 38028.09  | NM_00558E   | 1990.577  | 2049.35   |
| AF075021  | 2630.713  | 3865.035  | NM_00207E   | 28481.803 | 30103.348 |
| AK025140  | 11134.277 | 16645.836 | Y08756      | 63691.113 | 61513.465 |
| AK023259  | 900.88    | 1324.365  | NM_00556E   | 22694.99  | 24382.996 |
| AK001503  | 13607.769 | 15256.23  | AY007090    | 2814.514  | 2719.077  |
| AK022880  | 1758.863  | 1208.452  | NM_00643E   | 2913.418  | 2761.18   |
| NM_003601 | 20844.436 | 14016.611 | NM_00510E   | 7606.063  | 8136.906  |
| AF086375  | 589.133   | 593.642   | NM_00451E   | 10345.396 | 11660.417 |
| AK001228  | 3230.553  | 2489.29   | NM_006501   | 3860.229  | 3970.844  |
| AK026778  | 2989.82   | 2285.597  | NM_00271E   | 37840.695 | 41810.105 |
| AF074987  | 5260.77   | 4004.177  | AB035356    | 1145.413  | 957.282   |
| AK001058  | 38842.668 | 30646.336 | AV752086    | 3701.191  | 3905.39   |
| AK026239  | 3808.089  | 3242.727  | NM_01610E   | 62555.426 | 64759.961 |
| AF086283  | 1737.157  | 1421.27   | NM_00437E   | 8244.265  | 8209.688  |
| AK027041  | 2341.833  | 2610.454  | NM_00027E   | 2163.008  | 2178.409  |
| AK022064  | 1516.613  | 1901.826  | NM_016131   | 23419.813 | 26040.352 |
| AK024332  | 725.89    | 799.875   | NM_00682E   | 2645.733  | 2945.614  |
| NM_00535E | 53862.914 | 58903.023 | NM_01214E   | 19370.383 | 22489.568 |
| AK02719E  | 1458.642  | 1381.487  | NM_01642E   | 4197.833  | 5080.127  |
| AK000937  | 1504.407  | 2185.022  | AB011100    | 6780.734  | 8032.354  |
| AK001125  | 559.627   | 758.509   | U61741      | 4571.01   | 4888.123  |
| AK024890  | 321.073   | 922.188   | NM_01240E   | 17545.367 | 19547.166 |
| AK023718  | 18537.576 | 28284.9   | M76676      | 15521.968 | 16105.606 |
| AF075089  | 8508.956  | 13336.159 | NM_003857   | 1787.14   | 2200.099  |
| AF241255  | 697.749   | 1053.425  | AL137690    | 1545.02   | 1803.071  |



|           |           |           |           |           |           |
|-----------|-----------|-----------|-----------|-----------|-----------|
| AF086007  | 67539.359 | 65201.766 | Z83804    | 7250.496  | 7505.956  |
| AK000803  | 5687.225  | 4762.055  | NM_004386 | 8943.498  | 9461.427  |
| AK022374  | 1237.634  | 1015.616  | U67784    | 5784.913  | 6559.813  |
| AF085926  | 24968.229 | 20024.318 | NM_007366 | 9701.894  | 10039.238 |
| AF085948  | 605.497   | 532.188   | NM_000592 | 1768.913  | 1764.528  |
| AL137307  | 9395.029  | 7699.262  | NM_016584 | 60220.754 | 53511.863 |
| AL137468  | 9744.354  | 8088.089  | NM_001815 | 13455.366 | 14364.1   |
| AL162007  | 29081.662 | 21606.891 | NM_000064 | 55901.813 | 52701.527 |
| AL390137  | 33095.609 | 23654.332 | NM_003264 | 2555.301  | 2839.643  |
| AL137340  | 929.811   | 922.495   | NM_006725 | 31111.984 | 34917.707 |
| AL137542  | 604.398   | 468.384   | NM_003326 | 8579.521  | 9576.017  |
| AL162045  | 1002.738  | 1306.416  | NM_004568 | 66186.078 | 69818.406 |
| AK022437  | 40117.781 | 25142.793 | NM_000202 | 18393.516 | 18599.035 |
| AK024213  | 43905.773 | 53952.859 | NM_005496 | 22386.133 | 19450.396 |
| AK025093  | 749.896   | 1131.211  | NM_006214 | 4653.758  | 4971.513  |
| AK022184  | 2907.071  | 4201.325  | AJ010228  | 25680.697 | 25909.43  |
| AB007959  | 2587.53   | 4303.376  | NM_005198 | 8513.514  | 10219.122 |
| AK026002  | 2819.013  | 3299.704  | AK021426  | 674.177   | 889.326   |
| AK024360  | 2964.359  | 5541.902  | NM_018073 | 3658.558  | 3789.998  |
| AK023394  | 932.368   | 1252.298  | AL137529  | 3603.256  | 4934.648  |
| AF090093  | 42794.473 | 55402.523 | NM_012332 | 11389.892 | 14556.323 |
| AF161340  | 15957.321 | 15652.543 | AK026648  | 4739.191  | 5395.5    |
| AF242771  | 2480.136  | 2783.975  | NM_000497 | 3374.385  | 3805.432  |
| NM_018562 | 28574.389 | 30028.002 | NM_017421 | 5160.546  | 6193.722  |
| AF098666  | 2320.499  | 1912.586  | AK025977  | 66991.719 | 67254.133 |
| AF161365  | 1236.276  | 1299.034  | AK023130  | 12339.255 | 13470.746 |
| AK021969  | 2406.44   | 2440.319  | NM_000273 | 3899.324  | 4401.458  |
| AK022065  | 2259.775  | 2212.287  | NM_002899 | 42113.414 | 48485.344 |
| AK022221  | 20425.65  | 17609.166 | NM_000486 | 3858.011  | 4207.931  |
| AK022356  | 2256.691  | 2043.466  | BE876237  | 4471.668  | 5371.051  |
| AK021998  | 3217.035  | 2300.352  | NM_005397 | 12357.538 | 13449.464 |
| AK022126  | 4445.347  | 3960.137  | NM_000806 | 32014.539 | 32018.057 |
| AK022256  | 1341.654  | 1207.122  | NM_006320 | 5513.543  | 4913.514  |
| AK022383  | 3566.824  | 2431.692  | AB014511  | 19249.053 | 20109.129 |
| AF086262  | 2887.042  | 3831.061  | NM_014252 | 16180.626 | 16497.59  |
| AF086292  | 19585.201 | 29139.348 | NM_001662 | 34834.246 | 44425.406 |
| AK023769  | 512.528   | 646.908   | NM_005718 | 10318.133 | 9571.691  |
| AK024342  | 50456.262 | 59928.934 | NM_018264 | 2575.008  | 3013.833  |
| AL137712  | 14194.795 | 20388.592 | NM_014580 | 3289.396  | 3450.135  |
| L77599    | 62656.203 | 63789.871 | AB028998  | 1161.58   | 1744.394  |
| AK021673  | 54666.707 | 57192.219 | NM_000153 | 934.431   | 1151.231  |
| AB014543  | 15002.387 | 28288.316 | NM_002033 | 1673.896  | 2076.097  |
| NM_018445 | 5388.416  | 4897.977  | AK091794  | 1080.281  | 777.568   |
| AK022743  | 12857.996 | 14698.818 | NM_004111 | 8474.184  | 9083.753  |
| AF035306  | 3776.332  | 3786.842  | AF085966  | 10204.58  | 10211.981 |
| AK091662  | 961.029   | 887.802   | NM_005316 | 12109.49  | 13870.937 |
| AB038318  | 882.371   | 968.27    | NM_016316 | 10940.205 | 12969.314 |
| NM_003954 | 2598.778  | 2134.535  | NM_003369 | 38413.484 | 38775.648 |
| NM_016348 | 2106.902  | 1783.397  | NM_000057 | 4841.247  | 4922.083  |
| AK022003  | 670.657   | 463.184   | NM_018343 | 16150.297 | 15004.852 |
| AK023877  | 1093.352  | 725.749   | AK095793  | 3145.08   | 2578.791  |
| AK024046  | 4375.098  | 5010.922  | NM_003177 | 10446.075 | 8483.178  |
| NM_017931 | 9404.927  | 11773.241 | NM_017719 | 2733.653  | 2549.393  |

|           |           |           |           |           |           |
|-----------|-----------|-----------|-----------|-----------|-----------|
| AK022793  | 3435.062  | 4173.818  | AF064078  | 7213.099  | 6948.96   |
| AJ227910  | 4547.446  | 6008.202  | AL049688  | 11071.474 | 9934.647  |
| AF001893  | 8006.91   | 12963.188 | NM_002737 | 16004.305 | 14898.878 |
| X04236    | 17388.389 | 22507.881 | Z25427    | 11265.373 | 10050.841 |
| AK093746  | 34570.277 | 56387.773 | NM_004672 | 31007.863 | 31493.094 |
| D16875    | 820.61    | 1193.429  | NM_001353 | 18028.494 | 20345.629 |
| AK027171  | 3510.624  | 5912.461  | CY3Cy5    | 2002.421  | 101.098   |
| AK021945  | 11746.273 | 22013.189 | AF252284  | 3411.051  | 1491.397  |
| L23545    | 1720.143  | 1794.823  | BU727558  | 892.821   | 297.219   |
| AK024153  | 4082.908  | 4908.001  | AK025794  | 12859.893 | 9301.927  |
| Y10516    | 10809.502 | 12353.155 | NM_003541 | 2849.944  | 2365.28   |
| AF056451  | 12266.202 | 10391.013 | NM_007198 | 3941.368  | 5101.82   |
| AF015039  | 10776.538 | 11078.472 | NM_014958 | 602.394   | 705.282   |
| U50528    | 3428.175  | 2893.775  | M33197    | 67310.234 | 65295.422 |
| AB020632  | 4663.562  | 3456.722  | AK023220  | 1016.592  | 1397.219  |
| NM_018614 | 65667.125 | 59920.063 | AK024566  | 1035.949  | 908.565   |
| AL117549  | 3698.463  | 2963.327  | AF038182  | 2397.391  | 1792.829  |
| NM_005222 | 13305.889 | 11952.02  | NM_016475 | 4160.592  | 2845.517  |
| BC024308  | 6810.325  | 5396.877  | AF086472  | 1724.213  | 1398.272  |
| NM_000538 | 4690.524  | 3655.009  | AF252284  | 4059.812  | 2559.86   |
| AK001838  | 67616.914 | 64454.359 | BU727558  | 2542.105  | 2200.789  |
| NM_018295 | 3541.827  | 3474.96   | SR5       | 5669.334  | 7080.411  |
| AF070574  | 1427.435  | 961.975   | SR7       | 5143.188  | 47998.809 |
| AF190900  | 4704.813  | 5557.958  | SR9       | 14880.102 | 3057.732  |
| NM_020404 | 43264.664 | 41117.012 | CY3Cy5    | 5477.946  | 176.683   |
| BE972401  | 16591.4   | 15562.98  | L77559    | 779.62    | 233.012   |
| U56725    | 527.614   | 778.013   | NM_005598 | 1957.226  | 1620.716  |
| NM_017425 | 1352.06   | 1687.238  | Y10515    | 1282.069  | 1185.934  |
| AB007922  | 1346.094  | 1722.766  | AK023636  | 1461.582  | 1921.556  |
| NM_015982 | 8100.617  | 10645.218 | M33197    | 68960.227 | 63259.082 |
| NM_003746 | 59319.543 | 59012.688 | NM_020168 | 1044.489  | 1379.506  |
| NM_002910 | 60976.801 | 59151.027 | D83781    | 2467.001  | 4233.177  |
| AC096970  | 45304.773 | 54443.129 | AF075013  | 630.465   | 1411.608  |
| NM_014627 | 7859.018  | 10115.676 | AL832699  | 9768.811  | 10238.63  |
| NM_013938 | 33017.965 | 39631.832 | NM_012191 | 1830.144  | 707.325   |
| NM_013986 | 60694.211 | 57487.031 | M33197    | 69767.156 | 63275.039 |
| U55055    | 1915.083  | 1737.562  | AK000757  | 1034.008  | 418.98    |
| AK022186  | 495.194   | 587.817   | AL359577  | 1961.334  | 1167.41   |
| AB018319  | 7650.893  | 5818.142  | NM_018139 | 6097.478  | 4831.436  |
| AK001101  | 6010.146  | 5364.933  | AK026754  | 3002.786  | 3051.931  |
| BM973473  | 2583.49   | 2052.7    | M33197    | 70286.773 | 63177.633 |
| AK021637  | 1939.337  | 1913.415  | AL137552  | 5401.307  | 6175.245  |
| AK021658  | 1437.716  | 1101.352  | M33197    | 68034.133 | 63221.707 |
| D61705    | 637.268   | 635.1     | AK024779  | 1383.578  | 1337.893  |
| U17631    | 2090.539  | 2277.689  | AK024940  | 562.848   | 988.478   |
| AL137723  | 3664.808  | 3982.293  | AK024406  | 1845.403  | 2917.696  |
| AL137311  | 529.788   | 508.215   | AK024568  | 1291.951  | 1916.976  |
| NM_014288 | 14205.798 | 12712.346 | M33197    | 67012.625 | 73811.102 |
| AF035300  | 1976.807  | 1879.271  | AK024981  | 45839.418 | 52923.457 |
| NM_017703 | 10364.174 | 9530.05   | AK027246  | 2651.336  | 2652.19   |
| NM_015320 | 6143.458  | 6497.265  | U80766    | 3297.905  | 3584.938  |
| NM_004055 | 3401.529  | 3190.53   | AK001638  | 2876.096  | 2904.493  |
| NM_014726 | 38742.043 | 47909.313 | AF161386  | 24055.598 | 25103.15  |

|           |           |           |           |           |           |
|-----------|-----------|-----------|-----------|-----------|-----------|
| NM_000926 | 567.427   | 892.716   | AL365369  | 4188.384  | 2322.34   |
| AJ297349  | 2147.194  | 3190.443  | AK025454  | 5836.738  | 3918.484  |
| NM_005828 | 5682.872  | 6691.508  | M33197    | 66389.953 | 60104.676 |
| NM_001619 | 6908.407  | 6852.79   | X05826    | 17437.227 | 10344.42  |
| NM_006599 | 6728.195  | 6973.063  | Y11608    | 1047.21   | 739.924   |
| NM_004463 | 896.634   | 909.483   | X64984    | 2411.567  | 3184.264  |
| NM_005936 | 2830.098  | 3348.125  | M33197    | 67252.555 | 67462     |
| U43586    | 2744.974  | 1991.187  | M33197    | 67059.656 | 72792.859 |
| NM_006271 | 13307.324 | 11345.781 | AL137556  | 2939.533  | 4152.347  |
| NM_018647 | 1476.572  | 1597.394  | NM_014696 | 16447.764 | 23771.699 |
| NM_003026 | 930.47    | 921.042   | AL359055  | 4158.577  | 5858.093  |
| NM_000721 | 63486.32  | 59465.602 | NM_014908 | 3111.368  | 4540.183  |
| NM_003933 | 3595.919  | 3066.431  | AB037771  | 724.798   | 782.042   |
| NM_018640 | 627.66    | 562.457   | AK025931  | 6243.132  | 8922.432  |
| NM_005095 | 5974.876  | 5885.244  | M33197    | 4396.765  | 3911.44   |
| NM_000055 | 661.22    | 480.463   | M33197    | 73501.633 | 63447.848 |
| NM_003163 | 19814.771 | 14923.106 | AK001083  | 3547.122  | 2994.319  |
| NM_016205 | 6604.443  | 5185.104  | AK000185  | 2171.153  | 2224.145  |
| NM_005759 | 5651.193  | 3584      | NM_017962 | 1701.85   | 2252.458  |
| AF149724  | 2407.19   | 1960.11   | AK027227  | 709.874   | 706.167   |
| BC020745  | 1208.158  | 1024.793  | NM_017834 | 861.969   | 830.17    |
| NM_006367 | 22105.051 | 19585.428 | AK000865  | 1497.031  | 1436.233  |
| NM_006732 | 59181.563 | 58742.023 | M33197    | 66919.797 | 72211.984 |
| NM_004354 | 8935.409  | 8486.072  | AF147349  | 18192.418 | 21198.602 |
| NM_004661 | 4449.514  | 4912.044  | AL050346  | 46259.051 | 57645.34  |
| NM_002009 | 944.98    | 1247.44   | AK001520  | 20106.592 | 26881.846 |
| NM_001610 | 3140.533  | 2936.992  | AK021731  | 1594.794  | 1661.746  |
| NM_001241 | 1846.754  | 1627.649  | D90070    | 34400.844 | 55623.371 |
| AF217504  | 4718.739  | 4245.124  | Y12235    | 526.762   | 744.637   |
| AK027102  | 18118.262 | 19417.205 | AF132601  | 405.23    | 1032.286  |
| AL109714  | 1028.792  | 1124.27   | M33197    | 67005.258 | 69752.602 |
| NM_004632 | 6692.687  | 5094.671  | AF086179  | 4916.765  | 4342.877  |
| NM_017919 | 9993.631  | 6282.807  | AK025807  | 6703.741  | 7497.665  |
| NM_014456 | 10895.388 | 9567.201  | AK022478  | 1167.024  | 1192.001  |
| NM_004740 | 19043.125 | 17651.734 | NM_018381 | 2002.368  | 2692.82   |
| NM_003805 | 4352.082  | 3793.145  | M33197    | 65439.582 | 65248.496 |
| NM_019886 | 9103.154  | 9432      | AK026277  | 10172.373 | 5787.424  |
| NM_003278 | 64955.488 | 64501.332 | U10509    | 2578.481  | 2011.379  |
| NM_000426 | 1290.388  | 889.932   | NM_007165 | 53890.719 | 56228.898 |
| AK021957  | 66525.852 | 59440.543 | NM_014018 | 12974.363 | 14738.484 |
| U95031    | 2003.44   | 1625.927  | AF085956  | 3670.965  | 3590.926  |
| NM_004771 | 3802.632  | 3464.516  | NM_019116 | 3011.155  | 3363.166  |
| AL365514  | 1745.366  | 1887.929  | AF147318  | 1747.704  | 2712.863  |
| NM_018299 | 2334.458  | 2075.219  | L37699    | 3152.065  | 2580.072  |
| NM_002104 | 2113.195  | 1743.313  | M33197    | 63768.258 | 71486.75  |
| NM_005504 | 22838.078 | 20144.445 | AL050173  | 3373.463  | 5191.698  |
| AF234654  | 2988.16   | 2125.978  | D80002    | 3652.6    | 5446.246  |
| NM_000110 | 5642.188  | 6901.717  | U17637    | 13162.52  | 15880.551 |
| NM_016002 | 44698.34  | 52480.895 | AF207831  | 1583.829  | 1425.358  |
| NM_014549 | 1856.264  | 1744.714  | AK023174  | 729.161   | 1385.422  |
| NM_000531 | 1331.848  | 1250.156  | NM_003548 | 803.602   | 1251.189  |
| NM_017832 | 4583.121  | 4444.571  | M33197    | 67141.703 | 68647.859 |
| NM_001713 | 9908.772  | 9199.199  | NM_018272 | 949.992   | 1203.602  |

|           |           |           |           |           |           |
|-----------|-----------|-----------|-----------|-----------|-----------|
| NM_015367 | 19333.225 | 16710.043 | AF086125  | 1595.062  | 1811.339  |
| NM_014498 | 11728.005 | 7516.496  | AL079279  | 1109.289  | 1095.177  |
| NM_002375 | 31432.906 | 18724.113 | AK023547  | 1652.271  | 1261.219  |
| NM_000988 | 61373.445 | 56936.367 | U67847    | 3766.767  | 4015.859  |
| NM_001813 | 4235.683  | 3780.039  | AK021933  | 794.099   | 888.102   |
| AF055016  | 7069.174  | 7899.226  | AL137321  | 10682.623 | 8500.268  |
| NM_007234 | 17778.928 | 15235.319 | M33197    | 64579.406 | 60880.262 |
| Y16704    | 65997.664 | 61479.961 | AK024207  | 7691.358  | 4620.989  |
| NM_014567 | 9336.401  | 6775.712  | AK021843  | 1724.286  | 1904.792  |
| NM_017842 | 3025.346  | 2765.254  | AF075025  | 1560.255  | 1362.439  |
| NM_019057 | 10743.557 | 8821.022  | AF116623  | 687.185   | 741.744   |
| NM_002677 | 2750.671  | 2522.658  | AF088008  | 3284.222  | 3576.988  |
| NM_012082 | 1340.826  | 1731.411  | AK023528  | 1444.482  | 1814.434  |
| NM_001537 | 12272.102 | 15920.649 | AK023043  | 1085.918  | 1418.051  |
| U80743    | 1812.664  | 1766.152  | NM_004688 | 7318.523  | 7314.124  |
| NM_001352 | 8076.263  | 6045      | AB037725  | 1726.888  | 2420.066  |
| D15050    | 1885.238  | 1121.268  | M33197    | 63961.457 | 61965.871 |
| NM_006527 | 17348.316 | 11815.941 | NM_017718 | 738.191   | 779.499   |
| NM_006627 | 5427.707  | 4166.209  | NM_004860 | 7661.088  | 11692.67  |
| NM_007363 | 24441.928 | 18652.727 | AF217190  | 16460.076 | 18363.143 |
| NM_003093 | 47486.027 | 33895.633 | AB028981  | 20596.891 | 25752.797 |
| U05589    | 2223.416  | 2123.781  | NM_006800 | 1496.185  | 1650.347  |
| NM_014473 | 23549.84  | 15284.116 | NM_002476 | 927.452   | 932.523   |
| NM_003095 | 59579.207 | 57854.094 | NM_002729 | 12544.511 | 14993.307 |
| NM_016388 | 5181.318  | 3562.503  | M33197    | 66882.07  | 69358.648 |
| NM_002295 | 60701.754 | 53334.477 | AK025266  | 5606.899  | 5716.962  |
| NM_003133 | 18347.75  | 8573.347  | AK001843  | 4465.175  | 5020.785  |
| NM_001762 | 23117.67  | 15752.51  | AK000548  | 61706.684 | 57296.512 |
| NM_016306 | 23354.217 | 22673.084 | NM_003920 | 44236.742 | 47982.371 |
| NM_003755 | 1503.891  | 1304.764  | NM_004787 | 62783.238 | 58143.859 |
| NM_013238 | 6300.137  | 5236.013  | AF087984  | 8203.663  | 8436.379  |
| BE258640  | 34544.754 | 29797.223 | AF009302  | 2415.898  | 2272.2    |
| NM_003314 | 12214.458 | 8208.865  | M33197    | 63843.801 | 58662.238 |
| NM_016623 | 27226.139 | 23405.334 | AK022273  | 11131.897 | 8055.964  |
| NM_001334 | 17381.67  | 11954.265 | NM_015882 | 2326.751  | 2739.732  |
| NM_001246 | 2928.49   | 3751.217  | AK027161  | 771.062   | 849.552   |
| AL365411  | 9511.261  | 10474.503 | AK024271  | 2201.419  | 2805.747  |
| M24470    | 1769.842  | 1691.834  | AK021650  | 26215.805 | 34477.238 |
| NM_016066 | 17909.336 | 12950.377 | AL050210  | 10550.938 | 28469.398 |
| AK024677  | 1751.259  | 901.565   | NM_004132 | 6394.408  | 8132.331  |
| NM_000036 | 2966.249  | 2033.533  | NM_014844 | 4182.45   | 5104.646  |
| AF205718  | 23011.516 | 22712.408 | NM_018492 | 8249.067  | 10629.901 |
| NM_003420 | 1898.308  | 1434.286  | NM_001346 | 464.804   | 1115.825  |
| AY004252  | 1642.002  | 965.452   | NM_003149 | 939.356   | 1311.297  |
| NM_006261 | 10096.439 | 9306.122  | NM_003377 | 15530.429 | 20130.98  |
| AK027045  | 1958.613  | 1598.615  | NM_002220 | 1119.483  | 1487.237  |
| AF169796  | 6418.612  | 4389.88   | AB033034  | 8861.667  | 10412.815 |
| AK026157  | 549.263   | 529.103   | D38169    | 4837.409  | 4908.702  |
| AK001814  | 11400.261 | 5286.382  | M33197    | 65793.555 | 65688.664 |
| NM_007222 | 3621.289  | 2817.7    | AJ293294  | 11458.901 | 11857.941 |
| NM_003435 | 8668.697  | 6704.317  | NM_018171 | 3327.49   | 3432.624  |
| NM_016291 | 14638.781 | 13171.243 | NM_002447 | 28565.865 | 29153.104 |
| NM_005937 | 63892.359 | 57237.426 | NM_014145 | 25048.383 | 26550.758 |

|           |           |           |           |           |           |
|-----------|-----------|-----------|-----------|-----------|-----------|
| AB037809  | 4173.933  | 2138.393  | NM_014141 | 19222.316 | 17840.629 |
| AB011129  | 2507.254  | 1927.586  | NM_002223 | 4451.578  | 3255.985  |
| NM_014391 | 31105.172 | 25593.35  | M33197    | 67231.523 | 62821.102 |
| NM_00427C | 3718.269  | 3117.674  | NM_00549C | 44397.031 | 42989.676 |
| L09102    | 61451.23  | 65023.59  | NM_003151 | 4898.018  | 5344.14   |
| U68488    | 983.63    | 1035.754  | NM_006811 | 8381.146  | 9293.023  |
| NM_000675 | 761.545   | 767.487   | NM_005601 | 4686.856  | 5407.744  |
| NM_016247 | 24017.771 | 28793.305 | NM_016151 | 45153.594 | 54065.043 |
| NM_003323 | 28923.281 | 48479.059 | Z29572    | 579.1     | 1003.448  |
| BG742446  | 3302.202  | 2596.577  | AK026270  | 2386.965  | 3642.463  |
| AA864554  | 1888.73   | 1522.734  | NM_004556 | 23146.555 | 35913.996 |
| X66945    | 9011.873  | 6205.932  | M33197    | 67029.703 | 72998.344 |
| AI160703  | 1344.42   | 874.709   | NM_014857 | 2066.196  | 3293.779  |
| X12830    | 6765.977  | 4002.74   | AK023827  | 1387.879  | 1664.176  |
| U00482    | 3891.431  | 3200.9    | AK021702  | 6529.845  | 8409.134  |
| Z80998    | 614.457   | 646.669   | NM_003885 | 4477.545  | 5512.77   |
| K01904    | 33230.398 | 29206.719 | AL161977  | 1645.797  | 1699.564  |
| BE538886  | 2443.009  | 2463.925  | NM_016448 | 5621.907  | 7119.887  |
| NM_00222E | 1544.55   | 1193.156  | NM_003936 | 4433.923  | 4665.454  |
| M57650    | 60133.184 | 53938.613 | M33197    | 62812.551 | 64202.313 |
| BC023978  | 3866.424  | 3039.867  | NM_002688 | 3765.915  | 3723.478  |
| M21302    | 12518.639 | 12361.199 | NM_020369 | 1990.456  | 3555.661  |
| NM_002512 | 62459.445 | 58422.746 | NM_004415 | 7565.793  | 9226.274  |
| NM_00490E | 791.777   | 690.232   | NM_014262 | 675.145   | 873.886   |
| NM_016171 | 59937.055 | 63329.16  | NM_007278 | 33652.039 | 33520.719 |
| NM_014443 | 13268.378 | 6704.789  | NM_005219 | 18059.654 | 15247.394 |
| M14584    | 1898.943  | 1915.372  | NM_004723 | 6480.814  | 3571.743  |
| NM_006419 | 5413.978  | 7043      | M33197    | 69378.414 | 63203.223 |
| AF035035  | 1327.9    | 2705.793  | NM_018413 | 3283.885  | 3246.709  |
| AB020676  | 4213.762  | 6282.043  | AB018299  | 46525.891 | 56235.965 |
| AK024715  | 2078.345  | 2975.29   | NM_005245 | 8703.921  | 10338.528 |
| U90942    | 57142.621 | 59402.156 | NM_002941 | 2051.845  | 1927.682  |
| NM_014942 | 1910.681  | 3313.432  | AK025605  | 5761.831  | 8980.167  |
| AL365415  | 1831.653  | 1135.699  | NM_003783 | 2631.354  | 3838.269  |
| L29147    | 57260.488 | 55543.09  | NM_00700C | 8702.438  | 12975.394 |
| NM_00152E | 59438.277 | 36735.023 | M23161    | 18613.27  | 22885.943 |
| NM_00605E | 11797.247 | 9617.36   | NM_00610C | 2215.629  | 2748.14   |
| NM_00429E | 1988.231  | 2105.602  | NM_003197 | 15492.924 | 24677.891 |
| NM_00504E | 1568.533  | 1923.344  | AF176705  | 16159.173 | 23081.771 |
| NM_005972 | 3186.359  | 3007.258  | D29012    | 28141.203 | 34221.73  |
| NM_00106C | 1024.432  | 1144.091  | NM_017414 | 1051.97   | 1323.992  |
| NM_018841 | 13924.15  | 11048.662 | NM_012179 | 33250.973 | 38775.145 |
| NM_00522E | 2315.89   | 2334.887  | NM_002793 | 11590.771 | 12093.486 |
| AK022859  | 3700.028  | 3842.696  | NM_00478E | 4712.22   | 4469.039  |
| NM_02022E | 17635.67  | 15149.038 | M33197    | 64396.645 | 67438.875 |
| AK024685  | 7618.855  | 6443.828  | AL442083  | 11572.846 | 12604.294 |
| NM_00367E | 16955.318 | 21176.914 | D63487    | 13460.314 | 13914.246 |
| AF113007  | 26004.572 | 32229.313 | AK097791  | 16201.303 | 17440.854 |
| NM_00068E | 6681.637  | 6779.893  | NM_020367 | 2735.402  | 1952.185  |
| U39573    | 3201.711  | 3564.172  | AK022705  | 4004.521  | 3948.208  |
| D82061    | 11464.017 | 17842.934 | NM_016404 | 19770.186 | 18326.188 |
| AJ293009  | 6990.826  | 11531.21  | L03426    | 4596.927  | 3738.217  |
| NM_000374 | 6528.946  | 11373.553 | M33197    | 63726     | 62440.148 |

|           |           |           |           |           |           |
|-----------|-----------|-----------|-----------|-----------|-----------|
| NM_000502 | 26955.691 | 43757.016 | NM_020163 | 4301.977  | 4549.176  |
| NM_001359 | 30354.914 | 45216.566 | NM_004324 | 4279.044  | 3893.326  |
| NM_002245 | 2088.067  | 2874.322  | NM_005614 | 32193.916 | 33960.18  |
| NM_004980 | 47797.738 | 42969.949 | AJ133115  | 14020.735 | 20737.717 |
| NM_003224 | 3622.586  | 2952.811  | AF042831  | 1259.781  | 1820.898  |
| NM_004227 | 2881.274  | 1968.501  | X51630    | 24077.723 | 30373.426 |
| NM_005282 | 8899.627  | 6933.847  | NM_005056 | 5123.788  | 5881.463  |
| NM_001736 | 5282.915  | 4930.875  | NM_001965 | 1540.345  | 2311.508  |
| AB028949  | 1025.393  | 942.694   | AF208502  | 20070.383 | 20801.443 |
| AL137580  | 2285.616  | 2312.399  | M33197    | 66910.828 | 75811.586 |
| NM_004101 | 1525.825  | 1805.369  | AF264750  | 57976.223 | 59789.438 |
| NM_002995 | 57281.375 | 54551.313 | NM_006980 | 5257.576  | 5463.059  |
| AB033114  | 1224.475  | 878.794   | AK023904  | 8673.266  | 8837.098  |
| NM_015978 | 13170.344 | 15163.974 | NM_017956 | 19236.023 | 20858.355 |
| NM_003810 | 2919.146  | 2948.452  | NM_017826 | 1564.021  | 1442.361  |
| NM_018973 | 13928.522 | 17598.85  | NM_016496 | 3912.699  | 4479.141  |
| NM_002591 | 55897.961 | 55312.016 | NM_014309 | 21166.869 | 21764.732 |
| AL049334  | 1945.39   | 2142.169  | M33197    | 58666.332 | 61046.574 |
| NM_020216 | 4872.957  | 7075.924  | NM_004094 | 8464.42   | 11795.758 |
| AK021860  | 4988.877  | 8171.142  | NM_020236 | 6632.77   | 5440.381  |
| AB046816  | 1825.427  | 2304.511  | AK027059  | 26341.34  | 24127.82  |
| AL137266  | 10717.532 | 14444.716 | AF151109  | 46884.785 | 43141.609 |
| NM_016457 | 2578.206  | 3171.048  | NM_015414 | 61235.469 | 61782.043 |
| NM_005057 | 3202.562  | 2198.096  | L34070    | 15987.161 | 10469.648 |
| AF143321  | 1415.85   | 648.19    | M33197    | 65719.531 | 62199.762 |
| AB046842  | 3920.036  | 3192.038  | NM_016219 | 35368.648 | 26224.412 |
| NM_004850 | 3302.659  | 2752.491  | NM_004751 | 2423.326  | 2364.055  |
| NM_002822 | 22155.875 | 14618.589 | NM_001865 | 62931.922 | 65381.484 |
| BF306955  | 5022.251  | 4375.641  | NM_006441 | 19554.695 | 24518.336 |
| NM_001394 | 16895.668 | 13119.766 | NM_001918 | 5292.296  | 6383.488  |
| NM_018441 | 25127.568 | 22948.273 | NM_018245 | 5460.603  | 6667.846  |
| NM_000778 | 30892.359 | 29357.576 | M33197    | 67201.617 | 67918.406 |
| NM_001609 | 5274.219  | 4860.44   | AF252390  | 3642.025  | 3533.766  |
| BE733234  | 1584.427  | 1902.305  | NM_012117 | 19212.609 | 14230.5   |
| NM_000675 | 905.794   | 939.474   | D17130    | 66273.484 | 63513.297 |
| NM_016247 | 28394.033 | 36273.031 | X76302    | 10655.321 | 12720.188 |
| NM_001157 | 929.622   | 1217.788  | AK026276  | 2879.959  | 3029.109  |
| NM_012282 | 2459.241  | 2619.225  | M33197    | 64481.504 | 66777.188 |
| NM_006710 | 1595.935  | 1897.855  | X52354    | 5139.545  | 5429.062  |
| NM_003323 | 31794.484 | 37049.121 | NM_005413 | 1967.494  | 1990.332  |
| BG685310  | 6408.932  | 7534.963  | NM_002315 | 9426.122  | 8768.591  |
| AW300857  | 57766.379 | 59496.117 | AK024191  | 9139.312  | 8088.889  |
| H85962    | 56838.742 | 59020.891 | NM_006608 | 7201.782  | 4410.214  |
| BG742446  | 5190.778  | 7586.251  | NM_000457 | 7006.919  | 5353.849  |
| AA864554  | 2474.93   | 3747.083  | M34356    | 3682.914  | 2483.414  |
| X66945    | 10927.74  | 15793.063 | M33197    | 67051.703 | 73807.07  |
| AI160703  | 1593.197  | 2151.764  | NM_014623 | 19104.83  | 22999.117 |
| X12830    | 7491.292  | 10920.025 | NM_007244 | 37077.402 | 43616.668 |
| U00482    | 5991.976  | 6266.332  | M30629    | 16431.941 | 21123.975 |
| K01904    | 36409.727 | 21243.451 | BE539299  | 1156.703  | 1302.083  |
| BE538886  | 2709.468  | 2069.426  | AF193873  | 2308.152  | 3809.25   |
| NM_002228 | 1449.701  | 876.568   | NM_002628 | 3307.686  | 3319.43   |
| M57650    | 60608.832 | 55685.867 | M23575    | 1888.003  | 2392.915  |

|           |           |           |           |           |           |
|-----------|-----------|-----------|-----------|-----------|-----------|
| BC023978  | 3826.328  | 3265.616  | AA190729  | 7626.765  | 7497.536  |
| M21302    | 13645.921 | 10696.884 | BF974315  | 23374.744 | 25029.025 |
| AK024865  | 4041.251  | 3958.53   | T74985    | 1126.304  | 1022.912  |
| NM_00721C | 2112.39   | 2051.347  | AI652705  | 9919.034  | 9155.409  |
| NM_001483 | 8427.716  | 6635.345  | AA973397  | 7089.3    | 6238.969  |
| NM_014443 | 15482.529 | 14400.775 | AA569974  | 2985.98   | 3107.357  |
| NM_005212 | 11363.57  | 13608.446 | AA923615  | 3863.424  | 5236.01   |
| M14584    | 2348.303  | 1918.557  | AA446028  | 1886.947  | 1825.045  |
| NM_006419 | 5364.015  | 6312.426  | M80583    | 3097.556  | 2874.832  |
| AF035035  | 1713.392  | 1905.246  | AW009565  | 11295.87  | 10066.018 |
| AB020676  | 4172.923  | 4628.37   | AW451878  | 1602.408  | 1098.172  |
| AK024715  | 1754.544  | 2112.857  | X07767    | 8618.989  | 8759.006  |
| U90942    | 54931.977 | 58247.027 | X65293    | 1782.571  | 1487.351  |
| NM_014942 | 2488.717  | 2709.222  | M33197    | 2066.236  | 1840.608  |
| NM_01836C | 9244.02   | 12816.496 | NM_000853 | 19978.215 | 26499.945 |
| AK022489  | 439.013   | 902.674   | NM_000846 | 1670.816  | 1219.189  |
| AL365415  | 2122.687  | 2983.227  | AF016903  | 53539.609 | 61322.535 |
| L29147    | 59029.797 | 62118.902 | NM_015675 | 14568.296 | 17702.629 |
| NM_001525 | 58894.93  | 57927.477 | AK022267  | 1251.685  | 1302.674  |
| NM_006055 | 14284.474 | 20383.855 | NM_01604C | 6858.866  | 6056.359  |
| NM_004296 | 3080.779  | 1576.425  | M33197    | 67009.109 | 69217.445 |
| NM_005048 | 1558.841  | 1496.533  | AF031136  | 45857.961 | 47479.836 |
| NM_005972 | 3411.433  | 2516.29   | NM_006597 | 59516.766 | 59950.797 |
| NM_00106C | 996.103   | 939.028   | NM_007329 | 627.541   | 625.117   |
| NM_018841 | 14096.602 | 11798.504 | NM_012483 | 51766.496 | 56070.438 |
| NM_005226 | 1908.33   | 2069.076  | NM_003498 | 16443.043 | 17054.709 |
| AK022859  | 3749.065  | 3453.857  | AB023420  | 39857.824 | 43440.32  |
| L09102    | 66461.984 | 66813.906 | M33197    | 67048.938 | 71248.617 |
| U68488    | 1072.439  | 1092.837  | NM_007264 | 53236.871 | 57641.18  |
| NM_003676 | 17156.695 | 20855.768 | NM_002262 | 3027.24   | 3085.245  |
| AF113007  | 30608.521 | 37137.512 | NM_016511 | 58129.688 | 60189.543 |
| NM_000688 | 7463.866  | 6675.493  | NM_003559 | 7798.154  | 7616.912  |
| U39573    | 2618.628  | 2742.522  | NM_002543 | 1281.265  | 412.317   |
| D82061    | 9718.945  | 11239.634 | NM_002185 | 1269.164  | 1597.056  |
| AJ293009  | 6957.95   | 7645.917  | M55337    | 4444.961  | 6126.098  |
| NM_000374 | 5712.555  | 8085.883  | NM_013229 | 1716.526  | 1416.599  |
| NM_000502 | 26651.572 | 44041.324 | NM_016533 | 61561.52  | 65037.457 |
| NM_001359 | 32410.33  | 45328.219 | NM_007342 | 12286.709 | 16534.857 |
| NM_002245 | 1973.115  | 3003.557  | NM_005672 | 2518.289  | 2897.267  |
| NM_00498C | 48544.703 | 52994.727 | D25217    | 4930.886  | 5878.919  |
| NM_003224 | 4105.367  | 5419.86   | NM_006351 | 26796.873 | 25252.379 |
| NM_004227 | 3276.905  | 4090.467  | M33197    | 61222.277 | 65572.773 |
| NM_005282 | 10340.041 | 14332.94  | NM_004683 | 1839.463  | 1462.337  |
| NM_001736 | 6696.71   | 6696.274  | AK023226  | 5622.013  | 5298.23   |
| AB028949  | 1042.563  | 519.539   | AK025263  | 2588.388  | 2403.79   |
| AL137580  | 2008.625  | 1810.195  | NM_006931 | 19839.486 | 19370.033 |
| NM_004101 | 1473.404  | 1701.407  | AJ133127  | 1019.062  | 443.115   |
| NM_002995 | 61470.945 | 56782.988 | NM_019844 | 716.44    | 1024.572  |
| AB033114  | 1003.606  | 977.216   | NM_018057 | 9861.508  | 9702.677  |
| NM_015978 | 11673.45  | 12428.328 | M33197    | 61487.75  | 66557.984 |
| NM_00381C | 3296.378  | 3387.87   | NM_015717 | 9514.154  | 9433.683  |
| NM_004908 | 789.687   | 1282.347  | NM_015925 | 11210.412 | 9689.602  |
| NM_016171 | 61015.027 | 55230.555 | NM_003665 | 3947.505  | 3143.817  |

|           |           |           |           |           |           |
|-----------|-----------|-----------|-----------|-----------|-----------|
| NM_018973 | 14522.062 | 16570.941 | AF220217  | 4076.958  | 4049.138  |
| NM_002591 | 48301.488 | 44889.953 | NM_013323 | 54609.777 | 58763.926 |
| AL049334  | 1117.326  | 1334.425  | NM_014937 | 1746.047  | 1945.443  |
| NM_020216 | 5271.627  | 4430.714  | NM_017426 | 5868.399  | 6050.15   |
| AK021860  | 5929.791  | 7401.332  | M33197    | 15044.042 | 14017.564 |
| AB046816  | 2238.235  | 2818.916  | NM_004558 | 26024.07  | 32823.82  |
| AL137266  | 11881.687 | 12095.808 | AL079296  | 1754.273  | 2469.177  |
| NM_016457 | 2634.247  | 3487.184  | NM_014770 | 13369.153 | 19759.879 |
| NM_005057 | 2786.784  | 3544.469  | AB037737  | 2475.494  | 3279.948  |
| AF143321  | 1617.23   | 2168.107  | M33197    | 64468.688 | 57859.848 |
| AB046842  | 4670.524  | 5685.16   | AK023103  | 4441.015  | 4761.689  |
| NM_004850 | 4795.674  | 6278.646  | NM_017858 | 8026.658  | 8083.85   |
| NM_002822 | 23681.371 | 7355.191  | NM_019059 | 65038.242 | 61600.152 |
| BF306955  | 4343.602  | 3084.86   | NM_013347 | 1711.645  | 1497.899  |
| NM_001394 | 15746.243 | 8502.37   | D80008    | 4510.724  | 4781.426  |
| NM_018441 | 24841.688 | 20912.779 | X56789    | 4564.617  | 4677.986  |
| NM_000778 | 25104.615 | 23810.393 | AK001069  | 63836.305 | 59865.617 |
| NM_001609 | 4135.208  | 3849.064  | M33197    | 64652.898 | 62803.512 |
| BE733234  | 1554.84   | 1713.289  | NM_000935 | 4163.454  | 4275.66   |
| NM_020228 | 13136.8   | 13736.108 | NM_000359 | 49612.668 | 45345.313 |
| AK024685  | 5306.917  | 3846.227  | NM_006395 | 6498.052  | 6742.849  |
| NM_001157 | 934.562   | 918.64    | NM_014306 | 14655.737 | 14207.702 |
| NM_012282 | 2575.66   | 2360.376  | NM_001084 | 11550.01  | 12955.612 |
| NM_006710 | 1365.588  | 1396.339  | NM_015983 | 12507.132 | 12298.716 |
| NM_003323 | 28191.07  | 32067.797 | NM_018622 | 9452.371  | 9449.739  |
| BG685310  | 5602.535  | 6364.192  | M33197    | 63287.063 | 62917.289 |
| AW300857  | 61022.379 | 61308.172 | NM_005867 | 22390.266 | 18725.08  |
| H85962    | 58694.535 | 60073.613 | AK026031  | 60100.871 | 55552.395 |
| BG742446  | 4423.84   | 5206.083  | NM_016468 | 19699.557 | 17523.656 |
| AA864554  | 2355.674  | 3210.359  | NM_007244 | 36028.18  | 47065.223 |
| X66945    | 11324.555 | 13744.896 | M30629    | 18158.01  | 24026.145 |
| AI160703  | 1942.714  | 2865.75   | BE539299  | 941.268   | 1078.844  |
| X12830    | 10184.507 | 11896.9   | AF193873  | 10760.007 | 12043.888 |
| U00482    | 5927.621  | 6910.215  | NM_002628 | 4536.836  | 4451.74   |
| Z80998    | 890.233   | 1051.176  | M23575    | 1263.421  | 1280.704  |
| K01904    | 40003.82  | 43874.113 | AA190729  | 8788.213  | 6960.607  |
| BE538886  | 3001.075  | 3620.599  | BF974315  | 22627.193 | 20772.303 |
| NM_002228 | 2351.885  | 444.902   | T74985    | 1417.546  | 1278.135  |
| M57650    | 64405.527 | 52319.969 | AI652705  | 9841.38   | 9446.628  |
| BC023978  | 3291.624  | 2307.862  | AA973397  | 6413.238  | 6370.831  |
| M21302    | 13837.778 | 11964.458 | AA569974  | 2773.646  | 3113.981  |
| AK024865  | 3772.645  | 3646.199  | AA923615  | 3991.878  | 4277.833  |
| NM_007210 | 1934.846  | 1766.615  | AA446028  | 2757.069  | 2445.865  |
| NM_001483 | 8520.418  | 6958.403  | M80583    | 2166.016  | 2388.691  |
| NM_014942 | 1800.819  | 2029.322  | AW009565  | 12980.944 | 12814.567 |
| NM_018360 | 8576.811  | 8724.074  | AW451878  | 947.401   | 1002.81   |
| AK022489  | 553.284   | 720.367   | AI570478  | 1590.384  | 1102.393  |
| AL365415  | 2571.937  | 2528.331  | X07767    | 8054.807  | 6498.382  |
| L29147    | 62345.848 | 63581.418 | X65293    | 2312.705  | 2027.856  |
| NM_001525 | 61182.793 | 60805.363 | M33197    | 35727.777 | 26909.969 |
| NM_006055 | 14750.834 | 18659.492 | AL050139  | 21006.441 | 19015.982 |
| NM_004296 | 2682.205  | 3439.034  | NM_002593 | 1917.885  | 1613.052  |
| NM_005048 | 2000.313  | 3185.373  | AF016903  | 64180.242 | 63093.063 |



|           |           |           |           |           |           |
|-----------|-----------|-----------|-----------|-----------|-----------|
| NM_005972 | 3853.533  | 5334.754  | NM_015675 | 20108.924 | 18235.254 |
| NM_001060 | 1510.627  | 1761.108  | AK022267  | 1918.888  | 2088.974  |
| NM_018841 | 17478.963 | 19261.334 | NM_016040 | 8076.513  | 6334.458  |
| NM_005226 | 2959.058  | 3819.665  | M33197    | 66264.922 | 67108.094 |
| AL133105  | 12737.664 | 15162.125 | AF031136  | 31823.582 | 28474.195 |
| AK022859  | 4376.462  | 5231.642  | NM_006597 | 66596.148 | 63467.863 |
| NM_000214 | 2359.204  | 1006.747  | NM_007329 | 880.949   | 862.37    |
| NM_014864 | 9112.247  | 5325.193  | NM_012483 | 50419.398 | 52762.57  |
| NM_003728 | 56715.449 | 48914.121 | NM_003498 | 16470.545 | 16113.856 |
| NM_014352 | 30494.295 | 27137.576 | AB023420  | 43045.41  | 46147.398 |
| NM_012481 | 8580.17   | 6999.852  | M33197    | 64676.16  | 68611.797 |
| L09102    | 66413.383 | 62257.426 | NM_007264 | 53902.602 | 57121.754 |
| U68488    | 927.853   | 931.977   | NM_002262 | 2258.638  | 2079.548  |
| NM_000675 | 659.021   | 691.953   | NM_016511 | 59206.785 | 59666.094 |
| NM_016247 | 24937.785 | 25551.197 | NM_003559 | 7444.872  | 6927.359  |
| NM_001658 | 57967.266 | 67036.297 | NM_002185 | 1673.551  | 1515.435  |
| NM_006827 | 39466.98  | 44469.02  | M55337    | 5344.136  | 5175.637  |
| AK021761  | 15207.474 | 18748.76  | NM_013229 | 1794.886  | 1898.41   |
| AK024536  | 8531.584  | 9014.436  | NM_016533 | 66995.141 | 65585.398 |
| NM_018668 | 12739.539 | 15994.826 | M33197    | 64651.512 | 65213.668 |
| NM_004227 | 4048.059  | 4159.761  | NM_014623 | 18594.459 | 17186.363 |
| NM_005282 | 12253.297 | 12067.672 | D25217    | 5791.245  | 6755.851  |
| NM_001736 | 6482.175  | 7244.713  | NM_006351 | 31458.873 | 26293.582 |
| AB028949  | 902.518   | 1689.024  | M33197    | 63055.16  | 63899.473 |
| AL137580  | 2598.31   | 3535.845  | NM_000103 | 825.826   | 751.151   |
| NM_004101 | 2445.975  | 3072.557  | NM_004683 | 10845.543 | 9504.563  |
| NM_002995 | 58798.008 | 62431.141 | AK023226  | 5133.374  | 3741.138  |
| AB033114  | 1293.643  | 1425.881  | AK025263  | 2202.058  | 2382.215  |
| NM_015978 | 15558.554 | 20672.48  | NM_006931 | 19766.125 | 19651.197 |
| NM_003810 | 2792.349  | 4522.572  | AJ133127  | 1097.852  | 752.418   |
| NM_004908 | 985.147   | 1444.444  | NM_019844 | 571.743   | 910.094   |
| NM_016171 | 63614.402 | 65414.586 | NM_018057 | 11960.962 | 12338.599 |
| NM_014443 | 10310.972 | 6610.34   | M33197    | 63251.777 | 68516.141 |
| NM_005212 | 8053.666  | 7399.63   | NM_015717 | 7803.505  | 8465.674  |
| M14584    | 1116.026  | 950.222   | NM_015925 | 10050.289 | 10876.225 |
| NM_006419 | 4716.168  | 4004.364  | NM_003665 | 2974.686  | 3218.793  |
| AF035035  | 1238.76   | 1328.609  | AF220217  | 4558.506  | 5219.406  |
| AB020676  | 3457.756  | 3443.178  | NM_013323 | 61348.453 | 62128.105 |
| AK024715  | 1476.646  | 1705.928  | NM_014937 | 2143.066  | 2319.452  |
| U90942    | 66002.898 | 57681.008 | NM_017426 | 6146.848  | 6012.163  |
| NM_000778 | 27980.498 | 29482.422 | M33197    | 17479.799 | 14884.348 |
| NM_001609 | 4540.677  | 5535.938  | NM_000853 | 21003.553 | 19831.973 |
| BE733234  | 1714.797  | 1900.485  | NM_000846 | 1947.525  | 1399.835  |
| NM_020228 | 21628.627 | 21647.035 | NM_014770 | 14896.213 | 18859.766 |
| AK024685  | 6374.146  | 7660.14   | AB037737  | 2844.034  | 2719.298  |
| NM_003676 | 17770.785 | 18722.857 | M33197    | 65039.43  | 60230.066 |
| AF113007  | 29947.217 | 41528.523 | AK023103  | 4545.003  | 4531.85   |
| NM_000688 | 7302.302  | 8479.458  | NM_017858 | 8042.188  | 7102.727  |
| U39573    | 3072.261  | 4062.739  | NM_019059 | 62668.902 | 59860.258 |
| D82061    | 12372.01  | 14590.355 | D80008    | 4419.01   | 3937.982  |
| AJ293009  | 9135.42   | 8482.812  | X56789    | 4152.222  | 4088.896  |
| NM_000374 | 6357.599  | 8568.519  | AK001069  | 65535.711 | 58843.953 |
| NM_000502 | 27156.551 | 39551.313 | NM_000935 | 3175      | 2929.67   |

|           |           |           |           |           |           |
|-----------|-----------|-----------|-----------|-----------|-----------|
| BF088089  | 583.343   | 895.553   | NM_000359 | 47576.871 | 44417.922 |
| NM_001359 | 30844.475 | 39740.516 | NM_006395 | 4656.148  | 5207.63   |
| NM_005175 | 65674.648 | 68946.68  | NM_014306 | 13643.67  | 13044.077 |
| NM_001696 | 22375.098 | 21594.83  | NM_001084 | 9800.959  | 10044.763 |
| NM_004975 | 31783.863 | 11740.196 | NM_015983 | 8398.938  | 5648.994  |
| NM_002245 | 1593.462  | 1084.925  | NM_018622 | 9753.122  | 7975.647  |
| D87445    | 10950.678 | 7730.942  | M33197    | 64651.105 | 61097.977 |
| NM_000238 | 10775.341 | 8527.88   | NM_005867 | 23802.432 | 20543.238 |
| NM_002247 | 3576.488  | 2579.112  | AK026031  | 55103.105 | 47300.309 |
| NM_004980 | 48402.934 | 44829.699 | NM_016468 | 18453.053 | 16487.191 |
| AB011094  | 37132.852 | 35936.297 | NM_007342 | 11122.999 | 10654.816 |
| NM_003224 | 4078.074  | 3863.822  | NM_005672 | 2917.611  | 2677.827  |
| AK024865  | 3348.96   | 4351.893  | BE539299  | 1154.023  | 1240.391  |
| NM_007210 | 1851.463  | 2229.28   | AF193873  | 11791.609 | 11882.847 |
| NM_001483 | 6553.595  | 7586.607  | NM_002628 | 5554.12   | 4675.293  |
| NM_018973 | 14133.714 | 16446.559 | M23575    | 2199.574  | 2095.34   |
| NM_002591 | 51489.012 | 46557.473 | AA190729  | 7961.113  | 7433.669  |
| AL049334  | 857.906   | 1107.94   | BF974315  | 22040.068 | 18279.92  |
| NM_020216 | 4970.881  | 5605.606  | T74985    | 1501.901  | 892.307   |
| AK021860  | 2921.133  | 3415.088  | AI652705  | 8269.196  | 7214.217  |
| AB046816  | 1822.885  | 2027.682  | AA973397  | 6171.569  | 5206.175  |
| AL137266  | 9119.029  | 10870.431 | AA569974  | 2795.666  | 2580.422  |
| NM_016457 | 2494.025  | 1826.15   | AA446028  | 2267.399  | 1766.278  |
| NM_005057 | 2653.634  | 1022.327  | M80583    | 1693.365  | 2118.212  |
| AF143321  | 1417.693  | 844.065   | AW009565  | 13157.616 | 11136.61  |
| AB046842  | 3611.78   | 3148.095  | AI570478  | 1523.745  | 891.129   |
| NM_004850 | 3416.538  | 3646.676  | X07767    | 6912.483  | 6121.593  |
| NM_002822 | 23027.623 | 14285.836 | X65293    | 1879.015  | 1445.974  |
| BF306955  | 4490.381  | 3891.368  | M33197    | 35003.695 | 26431.881 |
| NM_001394 | 16115.704 | 12008.854 | AL050139  | 20091.115 | 18905.145 |
| NM_018441 | 23343.008 | 20257.154 | NM_002593 | 1623.384  | 1321.147  |
| CY3Cy5    | 9302.427  | 308.009   | NM_004558 | 41750.336 | 36426.168 |
| BM664556  | 3194.335  | 2993.188  | AL079296  | 1943.72   | 1819.998  |
| AL359586  | 1753.275  | 1965.174  | NM_006597 | 62789.02  | 60435.82  |
| AF035290  | 2802.944  | 3371.751  | NM_007329 | 821.481   | 882.812   |
| AK023216  | 1204.443  | 1397.118  | NM_012483 | 44505.621 | 45246.852 |
| M33197    | 71048.977 | 63623.383 | NM_003498 | 12151.371 | 12015.576 |
| AK023288  | 2481.374  | 3123.947  | AB023420  | 27954.336 | 24008.18  |
| NM_017986 | 22778.174 | 25169.666 | M33197    | 62679.293 | 63424.344 |
| AK024846  | 13812.182 | 13278.615 | NM_007264 | 32015.305 | 28893.063 |
| BM664556  | 2264.86   | 2598.289  | NM_002262 | 957.113   | 921.044   |
| SR3       | 48541.176 | 51764.152 | NM_016511 | 53815.301 | 48742.457 |
| CY3Cy5    | 9671.399  | 486.656   | NM_003559 | 5342.217  | 4655.93   |
| U52839    | 3262.224  | 3061.242  | NM_002185 | 1333.477  | 1342.707  |
| U58667    | 560.198   | 907.321   | M55337    | 4290.611  | 4299.29   |
| M33197    | 89951.414 | 67011.898 | M33197    | 64146.051 | 63600.684 |
| AK026984  | 63827.348 | 58156.59  | NM_013229 | 1895.376  | 1887.938  |
| AK021796  | 611.324   | 780.278   | NM_016533 | 63049.879 | 62621.953 |
| AF007146  | 1040.448  | 1198.381  | NM_014751 | 59101.391 | 60202.262 |
| AL117427  | 32815.449 | 17690.84  | NM_002347 | 60625.297 | 60188.484 |
| AF052118  | 29668.631 | 16331.885 | AB046807  | 3996.71   | 3901.643  |
| AK023305  | 69870.711 | 63350.637 | NM_018176 | 1161.062  | 1264.261  |
| AK022428  | 1949.303  | 3068.055  | NM_003508 | 1690.144  | 1378.276  |

|           |           |           |           |           |           |
|-----------|-----------|-----------|-----------|-----------|-----------|
| AK000788  | 1319.275  | 2006.824  | M33197    | 61019.734 | 61513.406 |
| AK025089  | 16582.666 | 16351.93  | NM_014623 | 16956.771 | 16083.763 |
| AK023298  | 690.783   | 687.761   | NM_007244 | 48062.531 | 46488.902 |
| M33197    | 82593.586 | 65750.938 | M30629    | 23100.156 | 20151.473 |
| AK001279  | 2284.809  | 1679.653  | NM_018976 | 19240.238 | 18796.932 |
| AF086407  | 1230.439  | 1077.045  | NM_003355 | 24544.6   | 23346.279 |
| AF085949  | 4240.237  | 2206.411  | NM_005074 | 3908.646  | 3782.021  |
| AK001567  | 3305.872  | 2129.208  | NM_013272 | 2857.897  | 2827.855  |
| M33197    | 77928.648 | 63698.023 | NM_004170 | 2917.405  | 2396.061  |
| AF075006  | 1990.57   | 1432.348  | NM_018057 | 4423.313  | 3504.542  |
| M33197    | 66856.688 | 69013.688 | M33197    | 62894.621 | 66808.883 |
| AK000903  | 68839.883 | 63084.223 | NM_015717 | 5156.052  | 4582.376  |
| AK026896  | 1085.78   | 1219.533  | NM_015925 | 9111.332  | 7749.027  |
| AL110169  | 2134.057  | 2675.946  | NM_003665 | 2937.332  | 2837.57   |
| AK022088  | 2142.882  | 2150.848  | AF220217  | 4709.471  | 4648.621  |
| NM_013391 | 1200.593  | 1036.604  | NM_013323 | 60658.707 | 57874.953 |
| M33197    | 66988.156 | 67799.578 | NM_014937 | 2686.335  | 2464.981  |
| AL157466  | 10880.519 | 7340.737  | NM_017426 | 7489.677  | 7577.253  |
| AL389981  | 2729.771  | 1938.131  | M33197    | 18466.303 | 16381.493 |
| AK024336  | 2982.009  | 1954.594  | NM_000853 | 14302.549 | 13935.504 |
| AK023862  | 942.566   | 628.641   | AF016903  | 62129.168 | 62017.293 |
| NM_018621 | 1783.656  | 1315.131  | NM_015675 | 29054.422 | 25878.568 |
| AK022016  | 994.204   | 621.38    | AK022267  | 1891.746  | 1474.384  |
| M33197    | 76248.141 | 64536.195 | NM_016040 | 6325.03   | 4150.004  |
| AK022118  | 6282.917  | 3894.056  | M33197    | 66317.195 | 67985.797 |
| AK026453  | 20595.51  | 10147.221 | AF031136  | 65849.57  | 66106.164 |
| M33197    | 67237.211 | 66189.305 | NM_005867 | 29096.473 | 27400.273 |
| NM_003251 | 7908.271  | 4618.861  | AK026031  | 50796.965 | 43868.863 |
| AB046772  | 2531.916  | 1693.88   | NM_016468 | 19668.666 | 17034.607 |
| M33197    | 80390.438 | 65253.465 | NM_007342 | 12203.731 | 11588.454 |
| AL442080  | 5350.225  | 3290.949  | NM_005672 | 2312.183  | 2053.937  |
| AY007143  | 42583.676 | 26817.406 | D25217    | 4996.896  | 3724.564  |
| L15557    | 3998.05   | 2538.222  | NM_006351 | 32791.953 | 22158.213 |
| AK022729  | 2572.158  | 1643.91   | M33197    | 57972.988 | 59715.93  |
| NM_006168 | 22602.396 | 12402.428 | NM_004683 | 15669.385 | 14022.241 |
| AL050374  | 7875.96   | 4703.359  | AK023226  | 5945.042  | 4493.283  |
| M33197    | 71776.523 | 63575.449 | AK025263  | 2206.801  | 2074.402  |
| M28639    | 13493.133 | 9101.381  | M33197    | 61937.426 | 64933.566 |
| AL122073  | 28804.219 | 20500.781 | NM_001467 | 8216.298  | 8454.94   |
| AF116655  | 8996.926  | 7314.596  | NM_018066 | 59367.746 | 60471.281 |
| AJ243222  | 4405.656  | 3339.242  | NM_006931 | 26270.273 | 25579.236 |
| AK026132  | 5683.186  | 5016.247  | NM_020344 | 27344.283 | 25008.25  |
| Y11162    | 2210.069  | 2552.605  | AF119868  | 979.895   | 805.461   |
| AF070584  | 6624.494  | 4203.545  | NM_005050 | 9711.544  | 9392.088  |
| AF052109  | 5757.546  | 3697.129  | M33197    | 63952.434 | 65747.188 |
| NM_003353 | 66171.711 | 73107.828 | M33197    | 41920.102 | 28222.975 |
| X82127    | 61805     | 52248.016 | AL050139  | 16865.582 | 14752.495 |
| AL122044  | 12324.376 | 6861.599  | NM_002593 | 1577.951  | 994.208   |
| NM_018296 | 5367.815  | 3125.621  | NM_004558 | 25239.475 | 22933.984 |
| NM_005752 | 8534.264  | 5511.375  | AL079296  | 1930.596  | 1691.956  |
| M33197    | 66795.93  | 68915.344 | NM_014770 | 7356.487  | 6790.051  |
| AF070578  | 3453.777  | 1614.931  | AB037737  | 2976.219  | 2872.596  |
| L13743    | 3970.463  | 2867.302  | M33197    | 65069.262 | 61508.551 |

|           |           |           |           |           |           |
|-----------|-----------|-----------|-----------|-----------|-----------|
| U84519    | 11748.202 | 8141.558  | AK023103  | 4299.227  | 4197.055  |
| Z11849    | 19669.789 | 13549.941 | NM_017858 | 7214.283  | 6311.558  |
| U84527    | 2617.883  | 5766.974  | NM_019059 | 60503.664 | 57708.313 |
| M33197    | 68330.555 | 62837.199 | NM_013347 | 1407.941  | 1087.331  |
| AF052103  | 13837.513 | 13915.387 | D80008    | 3775.212  | 3028.11   |
| AF075050  | 6134.169  | 5809.292  | X56789    | 4555.891  | 4001.55   |
| AK024842  | 2175.822  | 1852.284  | AK001069  | 62879.543 | 56470.781 |
| NM_018382 | 2206.82   | 1433.806  | M33197    | 64561.008 | 60282.758 |
| AB018327  | 6351.541  | 2648.143  | NM_000935 | 4120.219  | 3976.706  |
| AF303889  | 1056.097  | 610.092   | NM_000359 | 52081.449 | 46778.699 |
| M33197    | 66342.664 | 71316.844 | NM_006395 | 6892.2    | 6141.322  |
| NM_016507 | 16350.507 | 16006.781 | NM_014306 | 14015.7   | 12773.344 |
| NM_002024 | 19901.648 | 15842.986 | NM_001084 | 10116.574 | 8512.48   |
| NM_002743 | 22029.127 | 21484.273 | NM_015983 | 12374.148 | 11076.483 |
| AF173358  | 41103.953 | 46492.996 | NM_018622 | 8532.229  | 7260.632  |
| NM_016366 | 18603.416 | 19398.58  | M33197    | 63251.887 | 63066.75  |
| NM_001563 | 12491.056 | 13647.96  | CY3Cy5    | 4185.534  | 101.96    |
| NM_000266 | 3656.649  | 5061.276  | NM_006981 | 2035.747  | 1878.777  |
| X89666    | 7907.088  | 7877.634  | AF086354  | 460.633   | 589.049   |
| NM_017429 | 1317.734  | 1583.491  | AF086429  | 4261.406  | 4216.688  |
| NM_003104 | 23112.172 | 21593.609 | NM_019060 | 1118.658  | 1212.098  |
| NM_014581 | 12121.477 | 11087.045 | AF086377  | 537.635   | 792.652   |
| NM_000898 | 3143.295  | 3308.618  | AF086302  | 770.572   | 783.349   |
| M33197    | 67879.469 | 62461.879 | AF086439  | 4574.086  | 5139.162  |
| NM_014406 | 7144.071  | 4470.548  | M33197    | 60171.117 | 56758.258 |
| Z11801    | 2014.47   | 1178.115  | AF038171  | 2121.28   | 2189.229  |
| AK027253  | 2202.168  | 1154.527  | AF052160  | 972.548   | 1365.917  |
| S68954    | 9188.658  | 14863.614 | AK026512  | 2357.898  | 3220.246  |
| S81335    | 9412.129  | 5953.42   | NM_018482 | 3646.646  | 4182.359  |
| NM_006197 | 8031.13   | 3323.511  | NM_017880 | 2410.744  | 2708.418  |
| NM_014181 | 3892.248  | 3594.611  | AF090945  | 6633.12   | 8102.103  |
| M29273    | 2526.129  | 3033.268  | NM_006981 | 2538.89   | 3015.469  |
| NM_004854 | 19586.537 | 18292.75  | SR2       | 48178.227 | 49789.488 |
| AJ245418  | 40501.066 | 41283.355 | SR4       | 17370.711 | 22836.52  |
| NM_006377 | 19158.715 | 18740.381 | SR6       | 3189.037  | 3618.896  |
| AF244129  | 2874.141  | 2191.717  | SR8       | 7740.737  | 36052.668 |
| NM_002436 | 4885.834  | 4369.248  | SR10      | 28682.521 | 13539.011 |
| NM_018362 | 17142.117 | 13598.079 | CY3Cy5    | 6100.025  | 146.961   |
| M33197    | 69528.031 | 63206.766 | AF088010  | 520.294   | 671.08    |
| NM_004755 | 3325.194  | 2417.745  | AK026718  | 3291.021  | 3387.07   |
| AF192403  | 801.652   | 716.723   | AF085899  | 685.896   | 541.13    |
| NM_002186 | 5179.393  | 3902.808  | AK022035  | 11085.846 | 11259.815 |
| NM_006182 | 2723.863  | 1649.272  | M33197    | 62660.578 | 55874.797 |
| AL137543  | 5014.159  | 3013.114  | NM_004337 | 4773.214  | 4798.609  |
| NM_004444 | 53235.488 | 38229.668 | AL117497  | 4434.226  | 4927.438  |
| NM_001957 | 2797.374  | 1366.592  | AL080215  | 666.736   | 735.139   |
| AK024533  | 63764.613 | 46304.664 | AF075016  | 932.774   | 987.586   |
| NM_002736 | 36855.719 | 18048.035 | AK023612  | 4570.061  | 4955.06   |
| NM_004246 | 20360.547 | 11154.743 | AF147437  | 2709.78   | 2755.346  |
| NM_005207 | 5740.416  | 4506.574  | M33197    | 58927.172 | 53588.672 |
| NM_003087 | 13427.931 | 9069.561  | AF147360  | 2052.071  | 2353.865  |
| NM_001630 | 5136.64   | 4153.176  | AL137269  | 5659.988  | 6966.173  |
| AF305081  | 8845.992  | 7038.369  | AK021983  | 4195.248  | 5584.499  |

|           |           |           |           |           |           |
|-----------|-----------|-----------|-----------|-----------|-----------|
| AF118078  | 5006.863  | 4525.283  | Y11681    | 19426.594 | 22617.807 |
| NM_020169 | 1329.684  | 1246.97   | AL110135  | 22445.33  | 33472.754 |
| AL157428  | 2134.356  | 1763.154  | NM_006993 | 23747.305 | 30292.719 |
| NM_005858 | 7063.115  | 5116.711  | NM_002336 | 656.645   | 555.184   |
| NM_014931 | 13979.896 | 7559.146  | M33197    | 62593.516 | 61780.352 |
| NM_014487 | 15457.335 | 7905.065  | AF086316  | 694.517   | 659.416   |
| NM_018070 | 4465.099  | 2281.223  | M33197    | 58283.203 | 55652.629 |
| NM_002484 | 15885.292 | 6879.665  | AL359626  | 820.621   | 603.325   |
| M33197    | 71664.852 | 63643.098 | AK026878  | 2262.352  | 2286.941  |
| AL162052  | 8109.398  | 5055.734  | AK000777  | 2242.598  | 1839.041  |
| AK025941  | 6294.237  | 3307.848  | AK021589  | 1169.507  | 1016.222  |
| NM_018179 | 4060.518  | 1973.664  | M33197    | 59619.598 | 61979.953 |
| AF059531  | 25719.68  | 11014.146 | AF085969  | 689.878   | 841.206   |
| NM_002707 | 22409.539 | 12820.533 | AF144233  | 4259.77   | 5321.381  |
| AF029777  | 5198.768  | 3987.42   | AF085925  | 972.032   | 1181.755  |
| NM_003352 | 1900.382  | 1215.192  | AK022986  | 630.38    | 966.65    |
| AK026884  | 63609.172 | 58963.078 | AF085975  | 9244.255  | 11454.979 |
| S82198    | 5386.943  | 4000.74   | AF075103  | 4118.267  | 4630.593  |
| NM_002594 | 8666.127  | 7596.683  | M33197    | 60430.34  | 61621.957 |
| NM_001159 | 7334.481  | 6652.277  | AL137390  | 3623.954  | 4844.252  |
| NM_031407 | 11134.916 | 7997.586  | AL137611  | 6568.241  | 9754.487  |
| M33197    | 66999.75  | 67960.203 | AL359566  | 29550.893 | 37231.598 |
| AK000410  | 72409.57  | 63814.164 | AL133110  | 684.608   | 711.45    |
| NM_020193 | 5472.46   | 3388.181  | AL137427  | 6728.047  | 7768.136  |
| D86982    | 1242.549  | 799.086   | AL157460  | 2611.794  | 3406.518  |
| NM_005619 | 2399.995  | 1933.935  | AL359595  | 971.246   | 1316.675  |
| D87440    | 21740.75  | 14095.173 | M33197    | 56834.734 | 58635.305 |
| AK000332  | 66996.477 | 60375.691 | M33197    | 57086.934 | 56689.488 |
| AL080156  | 2797.14   | 1452.874  | AK024198  | 516.162   | 604.69    |
| NM_006738 | 7043.647  | 4200.312  | AL049846  | 2158.547  | 2196.944  |
| NM_002285 | 3995.747  | 2526.791  | AK024161  | 2145.255  | 2059.537  |
| NM_006694 | 33261.047 | 20626.084 | AK021682  | 58889.219 | 56145.66  |
| NM_013351 | 60665.309 | 34220.891 | AK022141  | 1328.115  | 1473.964  |
| NM_012340 | 19935.219 | 10401.793 | AK023942  | 57390.402 | 59655.91  |
| NM_006022 | 4891.698  | 3354.956  | M33197    | 59456.563 | 62433.758 |
| AK025110  | 1926.593  | 1304.275  | AK022046  | 1097.843  | 1306.933  |
| X52339    | 66597.523 | 58516.266 | AK027207  | 1454.663  | 1718.625  |
| M33197    | 66003.914 | 74242.742 | AF083120  | 520.741   | 784.661   |
| AB046830  | 5487.27   | 3988.742  | AF143323  | 606.132   | 776.926   |
| NM_007122 | 6550.584  | 5094.479  | AJ227892  | 10256.704 | 12440.703 |
| NM_001488 | 3032.479  | 1967.599  | M33197    | 58664.992 | 60591.117 |
| NM_016202 | 28070.625 | 21836.783 | AK022013  | 3890.486  | 5700.442  |
| NM_012476 | 4216.663  | 3040.734  | AK022155  | 8357.049  | 10588.404 |
| NM_016604 | 3331.404  | 2410.357  | AK022288  | 1840.69   | 2704.606  |
| M33197    | 67459.961 | 61270.941 | AK021916  | 975.406   | 986.368   |
| NM_006276 | 6177.791  | 5301.207  | AK024201  | 1320.35   | 1519.819  |
| NM_003407 | 10187.145 | 9761.979  | AK022174  | 1670.853  | 1492.948  |
| NM_007209 | 68205.703 | 60151.742 | AK022331  | 1049.479  | 1175.278  |
| NM_003729 | 5439.225  | 5190.255  | M33197    | 61039.492 | 59556.035 |
| L05096    | 28138.793 | 25251.578 | AF048848  | 878.826   | 956.775   |
| BC015899  | 16708.756 | 15605.104 | AL117236  | 315.451   | 673.438   |
| M33197    | 67395.563 | 62547.051 | AL049299  | 1374.246  | 1373.959  |
| NM_002848 | 3208.898  | 3971.776  | NM_006088 | 61786.367 | 60203.66  |

|           |           |           |           |           |           |
|-----------|-----------|-----------|-----------|-----------|-----------|
| NM_015914 | 4905.741  | 5134.064  | NM_018265 | 1681.73   | 2065.884  |
| NM_007180 | 7602.838  | 4145.711  | AF130086  | 11941.114 | 14245.752 |
| NM_005609 | 2432.951  | 1311.436  | AK023858  | 8800.592  | 10230.359 |
| NM_005476 | 13348.698 | 7780.512  | M33197    | 58000.887 | 66863.977 |
| NM_005660 | 11023.745 | 6351.459  | AF250920  | 6419.857  | 9121.658  |
| AK023902  | 6807.713  | 4214.896  | NM_017733 | 3670.97   | 4989.588  |
| NM_000401 | 1780.167  | 1454.602  | NM_014042 | 13189.729 | 15211.526 |
| NM_005223 | 2031.609  | 1978.821  | D17152    | 38423.414 | 49123.398 |
| AB011173  | 11165.757 | 10953.145 | AK024464  | 22266.771 | 28268.17  |
| AB023195  | 4011.065  | 6500.412  | AK026748  | 580.123   | 661.239   |
| U43431    | 4030.772  | 5342.588  | AK023638  | 531.001   | 800.583   |
| X57147    | 1340.463  | 1849.332  | M33197    | 2879.225  | 3031.518  |
| AK021563  | 1527.313  | 1766.109  | AK025423  | 2670.377  | 3213.867  |
| AB006622  | 3422.886  | 4283.85   | AF009272  | 587.331   | 765.065   |
| M33197    | 66760.039 | 61739.816 | AL137380  | 1655.72   | 2148.278  |
| AK097041  | 11195.475 | 13543.367 | M33197    | 58072.285 | 57434.418 |
| AF068744  | 66113.734 | 63694.859 | AL137658  | 37747.188 | 42394.891 |
| AK000762  | 4362.939  | 4673.13   | D16888    | 3003.263  | 3318.629  |
| NM_004571 | 2144.424  | 2262.417  | U79277    | 1193.618  | 1093.079  |
| NM_002895 | 3359.813  | 3721.903  | AF068298  | 8343.901  | 10265.904 |
| AF276513  | 4713.145  | 5277.428  | Z70770    | 5003.425  | 5735.057  |
| M33197    | 66827.5   | 69274.008 | AJ227900  | 5765.807  | 5992.246  |
| M95610    | 67376.813 | 63993.027 | AK023242  | 2871.531  | 3102.25   |
| NM_003118 | 7005.129  | 4843.273  | M33197    | 58038.16  | 63537.512 |
| L02922    | 43618.246 | 37712.41  | AK024101  | 1217.07   | 1358.272  |
| NM_001797 | 10966.902 | 12389.271 | AJ012500  | 10569.752 | 13951.971 |
| NM_003154 | 5026.493  | 6029.805  | AF085833  | 1678.286  | 2348.436  |
| NM_004235 | 4544.951  | 5607.919  | L19368    | 596.593   | 708.681   |
| AK023459  | 19319.781 | 23268.654 | U00944    | 1409.267  | 1561.058  |
| BI762154  | 4696.757  | 6652.199  | BC035058  | 1791.485  | 1963.33   |
| U13022    | 4535.792  | 5744.83   | X57566    | 14245.53  | 16596.807 |
| R23251    | 39371.27  | 48884.43  | M33197    | 59879.125 | 62560.457 |
| AA702640  | 8494.973  | 10270.508 | NM_018616 | 21586.164 | 31385.787 |
| T68583    | 19407.299 | 24450.756 | AK023809  | 2398.179  | 3087.905  |
| AA481944  | 65184.793 | 63155.336 | M87943    | 56597.34  | 57223     |
| AF038440  | 4942.5    | 6660.539  | AL360137  | 2180.33   | 2627.156  |
| M31158    | 14358.619 | 14674.64  | U28131    | 53789.758 | 54506.383 |
| H00742    | 6565.58   | 7297.554  | AY007106  | 4395.034  | 4399.628  |
| D42108    | 18467.906 | 18192.717 | AF015910  | 59921.395 | 54142.211 |
| BG700922  | 4831.097  | 5347.208  | BC009993  | 2281.982  | 2334.499  |
| AI366068  | 5566.964  | 6138.772  | M33197    | 58052.496 | 55449.02  |
| BG565837  | 577.413   | 892.345   | AB049150  | 1015.758  | 1133.556  |
| N57553    | 31024.885 | 26643.705 | NM_016824 | 9393.129  | 10402.64  |
| M33197    | 66527.641 | 61257.234 | NM_003031 | 11291.24  | 12352.588 |
| NM_018202 | 65943.922 | 75015.406 | X89674    | 841.157   | 797.166   |
| AB023197  | 24628.68  | 26240.373 | NM_007170 | 2230.356  | 2783.675  |
| NM_022173 | 37185.965 | 43661.672 | NM_003008 | 3302.923  | 3194.047  |
| AB040970  | 11848.386 | 12568.131 | NM_004100 | 825.033   | 924.362   |
| NM_018330 | 6496.354  | 8155.812  | M33197    | 56814.438 | 55528.676 |
| AB023222  | 4223.584  | 5379.761  | AF317550  | 1000.047  | 1098.61   |
| AB033088  | 9951.554  | 11691.954 | NM_003543 | 588.419   | 677.199   |
| M33197    | 65307.484 | 79722.773 | AK025416  | 1095.667  | 1623.875  |
| U50342    | 65867.773 | 73847.984 | AK022165  | 1232.013  | 1374.172  |

|           |           |           |           |           |           |
|-----------|-----------|-----------|-----------|-----------|-----------|
| NM_000295 | 3242.761  | 3874.806  | AF090883  | 1600.195  | 1859.542  |
| NM_000716 | 1418.831  | 1582.792  | U23860    | 1599.26   | 1871.656  |
| AF026932  | 2668.9    | 3930.133  | M33197    | 55516.426 | 58726.66  |
| AF103795  | 5454.266  | 6954.009  | AL049263  | 695.709   | 834.12    |
| NM_006215 | 1490.04   | 1982.844  | AK022372  | 4266.258  | 5446.447  |
| M33197    | 66950.734 | 62711.449 | AJ227863  | 888.004   | 1011.666  |
| NM_007024 | 19107.5   | 22188.488 | NM_015916 | 4896.01   | 5462.351  |
| NM_013231 | 11240.092 | 12735.194 | NM_003520 | 899.01    | 1368.462  |
| NM_012106 | 13932.925 | 15070.593 | AK027157  | 763.58    | 619.513   |
| NM_006254 | 8436.148  | 9277.283  | NM_015889 | 59641.063 | 54694.75  |
| X95425    | 34041.785 | 29200.41  | NM_000212 | 1651.577  | 1562.077  |
| NM_004422 | 13203.577 | 12258.45  | M33197    | 60250.41  | 55751.043 |
| NM_016562 | 5447.904  | 6312.358  | NM_004276 | 5609.429  | 6108.213  |
| AY009399  | 38573.25  | 41060.082 | NM_002332 | 35609.203 | 42491.887 |
| NM_004895 | 53320.895 | 56802.48  | NM_002859 | 7573.089  | 8542.054  |
| U80018    | 2811.437  | 4119.079  | NM_005246 | 13634.495 | 15424.828 |
| NM_000717 | 2185.39   | 3240.51   | NM_017651 | 2430.139  | 3398.132  |
| M33197    | 63867.391 | 74762.688 | AF161339  | 4074.036  | 5225.46   |
| NM_004845 | 18019.619 | 21575.18  | M33197    | 56336.992 | 55891.594 |
| NM_007107 | 17283.18  | 18446.414 | AK000354  | 12209.847 | 17191.902 |
| NM_000047 | 59484.738 | 61425.926 | AL161984  | 1106.75   | 1122.664  |
| M68874    | 800.772   | 1175.869  | NM_014882 | 3712.223  | 4416.905  |
| NM_006319 | 14846.427 | 18241.338 | NM_000836 | 707.334   | 855.111   |
| NM_018226 | 4662.136  | 5564.647  | M33197    | 57378.875 | 57518.488 |
| NM_004605 | 1776.191  | 2411.531  | NM_001510 | 1996.846  | 2133.58   |
| NM_006660 | 19831.426 | 23639.744 | AK024474  | 12590.96  | 14745.466 |
| NM_006685 | 64147.082 | 69738.516 | NM_006862 | 797.589   | 1003.426  |
| AF154121  | 4244.647  | 4558.234  | NM_017901 | 3879.173  | 5783.917  |
| NM_012139 | 46821.176 | 51264.492 | NM_004272 | 3615.766  | 4958.175  |
| AF121856  | 17973.15  | 17930.367 | NM_000358 | 3908.123  | 3703.577  |
| NM_006421 | 11927.769 | 14979.081 | NM_001930 | 12919.073 | 15217.259 |
| NM_017457 | 31128.867 | 26462.873 | AK025270  | 2458.322  | 1918.198  |
| NM_003765 | 29272.795 | 32153.299 | NM_001564 | 8017.988  | 8719.059  |
| NM_005868 | 1767.387  | 1445.147  | M33197    | 56888.242 | 59084.605 |
| M33197    | 67261.75  | 66118.016 | AF263537  | 17345.939 | 20950.365 |
| NM_001201 | 4782.53   | 5888.585  | NM_004675 | 700.108   | 551.758   |
| NM_016618 | 2210.872  | 2522.816  | NM_000189 | 3195.451  | 3572.22   |
| AB014568  | 59519.617 | 59039.359 | AL050050  | 3932.421  | 2823.216  |
| AK022238  | 666.492   | 1030.143  | NM_005256 | 1011.764  | 1266.042  |
| NM_012249 | 9103.462  | 12603.973 | NM_004690 | 4476.678  | 4872.369  |
| AK022546  | 31931.891 | 42261.977 | M33197    | 56412.164 | 62389.336 |
| NM_014067 | 32872.695 | 36778.98  | NM_013374 | 58135.324 | 56302.117 |
| NM_002914 | 20959.801 | 28528.354 | NM_003252 | 16699.58  | 21337.123 |
| NM_020385 | 5354.257  | 7326.668  | NM_001228 | 5863.632  | 7214.025  |
| NM_006541 | 1614.363  | 2070.149  | AK026607  | 1325.538  | 1335.857  |
| M33197    | 67434.836 | 64800.809 | NM_016561 | 36982.34  | 46399.988 |
| NM_005705 | 14122.421 | 18681.525 | NM_014245 | 54897.672 | 57092.832 |
| NM_004328 | 7299.476  | 10581.689 | L36531    | 1105.907  | 1005.617  |
| NM_004581 | 20543.881 | 26789.137 | AL110226  | 55147.543 | 61039.547 |
| NM_006817 | 38209.523 | 43659.379 | AB046822  | 723.258   | 778.607   |
| NM_007108 | 37413     | 47892.98  | NM_015885 | 5973.779  | 6046.496  |
| NM_015921 | 53517.043 | 54589.449 | AK024809  | 849.662   | 537.712   |
| AB040900  | 28931.441 | 31190.461 | NM_000308 | 4148.988  | 4285.1    |

|           |           |           |           |           |           |
|-----------|-----------|-----------|-----------|-----------|-----------|
| NM_00108C | 6271.413  | 4798.799  | X69636    | 11862.77  | 11932.425 |
| NM_001482 | 2461.934  | 3126.523  | M33197    | 58518.805 | 65488.699 |
| NM_003118 | 6812.987  | 8129.402  | NM_013974 | 7176.633  | 7632.727  |
| L02922    | 51438.055 | 54379.406 | NM_017547 | 6254.547  | 8532.104  |
| NM_001797 | 9490.715  | 12216.313 | NM_003983 | 11728.869 | 14665.034 |
| NM_003154 | 4137.836  | 5097.289  | AK023708  | 1587.411  | 2255.174  |
| NM_004235 | 3189.009  | 4029.154  | NM_002108 | 5013.749  | 7100.979  |
| AK023459  | 17047.541 | 20812.137 | M33197    | 57167.094 | 66230.5   |
| BI762154  | 3394.789  | 4688.228  | NM_018464 | 42870.883 | 52831.934 |
| U13022    | 3482.779  | 4908.78   | D43948    | 10984.963 | 12120.066 |
| R23251    | 40697.781 | 49799.305 | NM_012310 | 39794.121 | 51063.988 |
| BG763477  | 319.98    | 1128.028  | BE410824  | 1095.957  | 1353.086  |
| AA702640  | 8205.923  | 10491.051 | BF382116  | 12708.632 | 19143.979 |
| T68583    | 13848.3   | 19557.395 | NM_003193 | 22921.977 | 29428.324 |
| AA481944  | 62826.262 | 59809.434 | M33197    | 58835.332 | 65410.809 |
| AF038440  | 4238.131  | 5951.024  | AF113216  | 3012.748  | 3874.612  |
| M31158    | 14312.508 | 15829.037 | NM_017589 | 3178.021  | 4000.26   |
| H00742    | 5663.185  | 7741.129  | AK023582  | 2507.229  | 2277.155  |
| D42108    | 17223.648 | 18244.492 | NM_000124 | 1765.951  | 1661.819  |
| BG700922  | 5074.725  | 6776.749  | NM_017996 | 9960.541  | 9888.101  |
| AI366068  | 5168.637  | 6067.844  | NM_014517 | 5828.465  | 4968.048  |
| N57553    | 29779.688 | 38272.074 | NM_005466 | 3212.651  | 2954.138  |
| M33197    | 63963.168 | 61098.707 | NM_004269 | 4955.276  | 5436.801  |
| NM_016545 | 10156.302 | 12595.926 | NM_003409 | 1316.982  | 1415.184  |
| NM_001440 | 65319.809 | 62235.344 | D31765    | 13581.093 | 16418.732 |
| NM_022173 | 36546.434 | 43324.281 | NM_006107 | 22666.51  | 22356.498 |
| AB040970  | 13194.145 | 14929.021 | NM_004175 | 3614.578  | 3744.276  |
| NM_018330 | 8173.958  | 9757.722  | AF288288  | 55543.102 | 56379.211 |
| AB023222  | 4245.271  | 5402.915  | NM_017646 | 40705.219 | 48334.262 |
| AB033088  | 8939.204  | 10122.657 | AL050368  | 6018.011  | 8688.847  |
| M33197    | 64593.133 | 72608.133 | NM_003092 | 35882.48  | 47603.047 |
| U50342    | 65245.758 | 68787.117 | M33197    | 60384.496 | 63970.16  |
| NM_000295 | 3674.843  | 4651.137  | BE243152  | 700.432   | 512.763   |
| NM_000716 | 1461.025  | 2269.796  | NM_005861 | 13691.08  | 16619.326 |
| AF026932  | 2290.866  | 3454.651  | NM_018848 | 8444.829  | 10529.719 |
| AF103795  | 5068.705  | 7031.347  | NM_003760 | 28345.803 | 39717.859 |
| NM_006215 | 1717.294  | 2327.163  | AB037759  | 2665.256  | 2419.597  |
| M33197    | 66101.867 | 68800.234 | AL080080  | 12593.666 | 16385.766 |
| NM_007024 | 15605.986 | 20942.521 | M33197    | 9135.771  | 9816.498  |
| NM_013231 | 11730.662 | 12922.179 | NM_001161 | 24436.979 | 21670.432 |
| NM_012106 | 13322.246 | 14934.405 | NM_004044 | 21702.545 | 19424.111 |
| NM_006254 | 7600.001  | 9222.78   | NM_000221 | 63792.621 | 55348.324 |
| X95425    | 31429.934 | 36897.945 | H75678    | 7007.64   | 6241.146  |
| NM_004422 | 14608.539 | 18566.623 | NM_002535 | 2447.982  | 2450.879  |
| NM_016562 | 7632.613  | 7755.744  | NM_006452 | 36370.387 | 43829.41  |
| AY009399  | 39178.52  | 44846.883 | AB002359  | 11376.734 | 14135.259 |
| NM_004895 | 50287.742 | 56219.738 | M33197    | 25830.148 | 28130.215 |
| M33197    | 66421.133 | 68285.195 | AB007864  | 9083.039  | 11160.372 |
| M95610    | 65759.211 | 63988.336 | NM_002198 | 13705.026 | 18413.625 |
| NM_000717 | 2885.773  | 3570.63   | AF024693  | 1061.214  | 975.207   |
| M33197    | 63026.273 | 87250.961 | AK025905  | 6293.243  | 6414.858  |
| NM_004845 | 20380.422 | 26185.363 | AL121733  | 5103.635  | 6134.904  |
| NM_007107 | 18906     | 22673.33  | BE958072  | 6200.493  | 7044.544  |



|           |           |           |           |           |           |
|-----------|-----------|-----------|-----------|-----------|-----------|
| NM_000047 | 55616.031 | 59851.008 | M33197    | 58423.32  | 54953.223 |
| M68874    | 850.278   | 1426.331  | NM_017532 | 2652.471  | 2717.776  |
| NM_006319 | 15638.182 | 17857.936 | NM_014480 | 9259.969  | 10689.598 |
| NM_018226 | 5506.196  | 6577.153  | NM_005938 | 1872.572  | 1892.291  |
| NM_004605 | 2270.792  | 3160.72   | NM_014169 | 14294.445 | 17754.309 |
| NM_006660 | 20039.291 | 29391.729 | NM_004964 | 33073.285 | 43527.125 |
| NM_006685 | 62753.176 | 73388.555 | NM_005197 | 26658.861 | 34220.203 |
| AF154121  | 1468.713  | 2384.043  | AL137421  | 59676.973 | 56400.695 |
| NM_012139 | 43293.809 | 51769.129 | M33197    | 59116.246 | 57697.453 |
| AF121856  | 16035.8   | 13724     | NM_007241 | 1443.472  | 1492.956  |
| NM_006421 | 8445.191  | 9895.858  | M33197    | 61283.004 | 58659.887 |
| NM_017457 | 30794.787 | 25159.506 | NM_001154 | 15827.735 | 13276.588 |
| NM_003765 | 27490.512 | 25224.5   | NM_001819 | 5138.435  | 4570.409  |
| NM_005865 | 1652.296  | 1966.8    | NM_016938 | 1695.381  | 1713.455  |
| M33197    | 65503.098 | 74373.578 | NM_001993 | 2445.44   | 3011.174  |
| NM_018202 | 65532.117 | 68358.859 | BF575833  | 1293.461  | 1546.376  |
| AB023197  | 22704.584 | 18202.1   | NM_000175 | 511.39    | 584.579   |
| AB014568  | 61246.625 | 65056.098 | NM_015725 | 27705.77  | 34920.68  |
| AK022238  | 663.03    | 1062.522  | R61452    | 4554.227  | 5278.056  |
| NM_012249 | 12980.41  | 16618.307 | R19938    | 45465.996 | 52300.645 |
| AK022546  | 31429.998 | 38880.637 | N94487    | 45936.758 | 52971.738 |
| NM_014067 | 27224.322 | 35978.434 | AI886795  | 17487.691 | 20980.961 |
| NM_020385 | 6497.671  | 7594.304  | D10495    | 8532.813  | 11768.094 |
| NM_014877 | 417.537   | 1212.626  | BF344679  | 9126.82   | 11278.868 |
| NM_006541 | 2069.221  | 3162.412  | BG743223  | 1595.888  | 1722.852  |
| M33197    | 66136.398 | 64511.906 | M36634    | 4252.75   | 4800.929  |
| NM_005705 | 10582.257 | 16366.374 | M14156    | 54700.902 | 53747.211 |
| NM_004325 | 6859.625  | 10409.726 | U87939    | 3299.609  | 3967.405  |
| NM_004581 | 18252.486 | 18315.941 | U86961    | 4720.876  | 5428.075  |
| NM_006817 | 31947.906 | 29310.447 | U47924    | 1276.84   | 1404.155  |
| NM_007105 | 30197.32  | 32245.766 | NM_005191 | 6488.509  | 10730.145 |
| NM_015921 | 59897.559 | 51988.34  | AK094237  | 12588.851 | 16563.066 |
| AB040900  | 27282.822 | 24256.273 | L07592    | 2455.997  | 3285.268  |
| NM_001080 | 5941.899  | 4400.48   | M33197    | 58987.961 | 56718.258 |
| NM_001482 | 2069.906  | 2285.584  | NM_002983 | 28945.617 | 27994.709 |
| U80018    | 3964.831  | 5574.567  | NM_000074 | 52001.32  | 37809.168 |
| NM_001797 | 7774.459  | 10962.154 | NM_020393 | 1244.701  | 725.079   |
| NM_003154 | 2676.928  | 3724.001  | BF434335  | 60736.359 | 57850.598 |
| NM_004235 | 5048.868  | 6971.419  | M57627    | 1922.01   | 2426.229  |
| AK023459  | 17425.904 | 21943.16  | NM_002993 | 4734.238  | 5666.786  |
| BI762154  | 3674.496  | 5730.472  | AK026946  | 6625.607  | 8086.461  |
| U13022    | 3332.291  | 4684.235  | M33197    | 58017.582 | 64339.031 |
| AA702640  | 7832.651  | 11510.065 | NM_003192 | 10946.093 | 12359.538 |
| T68583    | 13978.019 | 18235.352 | NM_018449 | 17360.488 | 22748.295 |
| AA481944  | 62300.734 | 65120.188 | AF086129  | 5663.05   | 6242.478  |
| AF038440  | 3156.019  | 4512.236  | D79994    | 5887.853  | 7269.469  |
| M31158    | 14305.245 | 11969.199 | NM_014455 | 52261.73  | 55887.199 |
| H00742    | 8591.832  | 8853.158  | L10333    | 755.238   | 854.574   |
| D42108    | 15340.709 | 13150.962 | AF235049  | 16152.918 | 22746.496 |
| BG700922  | 4761.091  | 4943.102  | NM_007369 | 4190.311  | 5427.232  |
| AI366068  | 4811.029  | 4811.207  | NM_014776 | 9210.009  | 11552.745 |
| BG565837  | 2517.878  | 1588.568  | NM_006480 | 55283.328 | 61815.461 |
| N57553    | 27298.732 | 19740.031 | NM_007223 | 59468.484 | 63566.152 |

|           |           |           |           |           |           |
|-----------|-----------|-----------|-----------|-----------|-----------|
| M33197    | 63150.453 | 61333.145 | NM_000145 | 3910.316  | 4995.047  |
| NM_01654E | 9396.275  | 8884.446  | AF030107  | 53935.961 | 59374.277 |
| NM_00144C | 64236.82  | 57098.387 | NM_000871 | 4781.279  | 5988.523  |
| NM_001201 | 5651.3    | 5921.131  | NM_01896E | 9361.767  | 12970.139 |
| NM_01661E | 1920.035  | 1373.222  | NM_005164 | 2154.103  | 1885.565  |
| NM_00071E | 1171.81   | 1396.945  | NM_00199E | 12792.41  | 12854.718 |
| AF026932  | 2710.773  | 3978.648  | NM_000183 | 21762.744 | 16741.477 |
| AF103795  | 3827.56   | 5919.281  | AY004175  | 7249.677  | 4034.758  |
| NM_00621E | 1568.937  | 2162.795  | M33197    | 61916.188 | 60122.445 |
| M33197    | 64800.242 | 71601.852 | NM_012327 | 11876.485 | 10455.891 |
| NM_007024 | 13170.479 | 16220.916 | NM_000904 | 11745.591 | 11594.836 |
| NM_013231 | 13750.984 | 14570.867 | NM_01604E | 7154.586  | 8308.91   |
| NM_01210E | 16866.268 | 19460.723 | NM_00037E | 14546.876 | 18121.801 |
| NM_006254 | 7961.862  | 8964.901  | NM_00026E | 52065.688 | 53690.387 |
| X95425    | 16673.908 | 19804.992 | NM_01884E | 20303.441 | 25823.887 |
| NM_00442E | 7045.924  | 5818.051  | NM_00223E | 19552.406 | 24100.117 |
| NM_01656E | 4193.439  | 4596.117  | NM_01790E | 48563.086 | 51636.66  |
| M33197    | 64501.961 | 68142.797 | NM_00681E | 50617.133 | 55954.738 |
| AY009399  | 43818.766 | 48855.426 | M33197    | 59079.848 | 72893.109 |
| NM_00489E | 53784.055 | 60090.93  | NM_00171E | 27100.822 | 42384.375 |
| U59748    | 10075.11  | 11358.838 | NM_00203C | 2366.448  | 2812.943  |
| L32537    | 814.462   | 1135.362  | NM_00607E | 1860.169  | 2988.653  |
| NM_01430E | 44398.707 | 53088.617 | NM_004951 | 2724.681  | 3538.121  |
| NM_01486E | 12873.658 | 9737.559  | NM_006564 | 19800.408 | 27634.215 |
| M33197    | 66974.477 | 64209.84  | NM_00480E | 6387.671  | 9554.137  |
| M95610    | 65475.734 | 69369.258 | NM_00263E | 43237.641 | 40493.758 |
| NM_00311E | 8000.367  | 7959.082  | U11036    | 834.36    | 257.485   |
| L02922    | 46267.449 | 49159.605 | NM_00287E | 17835.572 | 12300.121 |
| NM_00404E | 34358.965 | 38384.949 | NM_01772E | 5933.957  | 3964.217  |
| NM_001891 | 3848.835  | 4412.52   | AK022922  | 4146.306  | 3512.239  |
| NM_01213E | 40151.586 | 44703.602 | NM_00646E | 15187.356 | 14335.571 |
| AF121856  | 17107.674 | 16519.379 | AK024750  | 29489.453 | 26100.643 |
| NM_006421 | 7843.385  | 8499.783  | NM_00040C | 57039.672 | 54432.637 |
| NM_017457 | 29215.459 | 22192.691 | M33197    | 60442.504 | 60700.426 |
| NM_00376E | 12136.273 | 12987.366 | NM_00261E | 12020.387 | 11793.679 |
| NM_00586E | 2482.394  | 2355.45   | NM_00441E | 23124.096 | 26378.324 |
| M33197    | 64720.191 | 68949.492 | U47635    | 8227.557  | 11063.993 |
| NM_01820E | 65786.547 | 66952.281 | NM_01865C | 7361.303  | 9435.803  |
| AB023197  | 27739.338 | 33845.656 | AK026945  | 13925.892 | 13978.455 |
| NM_02217E | 49533.594 | 54936.395 | NM_00282E | 6304.155  | 8371.058  |
| AB040970  | 10859.475 | 10921.42  | NM_01436E | 4118.422  | 4699.076  |
| NM_01833C | 5656.913  | 5148.574  | M33197    | 59030.258 | 61927.273 |
| AB023222  | 3041.546  | 2312.132  | NM_00139E | 39878.594 | 46738.637 |
| AB033088  | 7851.953  | 7590.89   | AB050049  | 17112.451 | 24413.248 |
| M33197    | 67132.898 | 65989.484 | J05125    | 1483.181  | 2189.916  |
| U50342    | 66091.148 | 67822.727 | NM_00181E | 5116.553  | 5150.867  |
| NM_00029E | 2648.187  | 2501.048  | NM_01693E | 2202.674  | 1920.339  |
| NM_00108C | 7910.442  | 6376.474  | NM_00199E | 2215.707  | 1603.663  |
| NM_00148E | 2946.887  | 3400.472  | BF575833  | 1377.895  | 885.381   |
| U80018    | 2503.372  | 4555.867  | R61452    | 3736.98   | 3096.177  |
| NM_000717 | 2576.073  | 3899.63   | R19938    | 45633.027 | 37661.254 |
| M33197    | 61654.637 | 73333.953 | N94487    | 47850.664 | 46234.414 |
| NM_00484E | 15965.976 | 15257.682 | AI886795  | 17215.676 | 14687.142 |

|           |           |           |           |           |           |
|-----------|-----------|-----------|-----------|-----------|-----------|
| NM_007107 | 16099.394 | 10517.596 | D10495    | 9646.226  | 7563.915  |
| NM_000047 | 57508.074 | 61249.895 | BF344679  | 11486.819 | 9007.149  |
| M68874    | 844.07    | 1092.65   | BG743223  | 2169.445  | 1205.827  |
| NM_006319 | 14804.59  | 20387.436 | M36634    | 4215.343  | 3763.941  |
| NM_018226 | 5594.532  | 7684.561  | M14156    | 59730.074 | 54034.977 |
| NM_004605 | 2608.558  | 3078.009  | U87939    | 4160.772  | 3283.715  |
| Z36813    | 14400.004 | 22522.283 | U86961    | 5457.051  | 4624.59   |
| NM_005835 | 1085.002  | 1845.688  | U47924    | 1499.773  | 904.649   |
| NM_006660 | 20283.32  | 24351.816 | NM_005191 | 7027.985  | 6764.586  |
| NM_001486 | 948.81    | 1174.198  | AK094237  | 12695.425 | 11707.158 |
| NM_004727 | 1070.101  | 1312.745  | AK056794  | 639.498   | 444.268   |
| NM_000559 | 4476.078  | 4561.883  | L07592    | 2613.119  | 3987.139  |
| NM_006685 | 66423.734 | 69325.758 | M33197    | 59543.43  | 60333.289 |
| M33197    | 54507.043 | 52629.387 | AK027244  | 1069.338  | 1001.539  |
| AF154121  | 4011.991  | 3359.846  | L40520    | 5038.881  | 6245.659  |
| M33197    | 63644.375 | 91344.938 | NM_020393 | 1336.021  | 908.202   |
| NM_016545 | 10478.427 | 12204.605 | BF434335  | 59678.949 | 52880.578 |
| NM_001440 | 62353.836 | 65496.086 | M57627    | 2280.771  | 2214.8    |
| NM_001201 | 3978.782  | 5632.699  | NM_002993 | 4384.052  | 3438.208  |
| NM_016618 | 2030.434  | 2398.844  | AK026946  | 7750.822  | 6265.496  |
| AB014568  | 46965.074 | 47346.875 | M33197    | 62097.082 | 59941.922 |
| AK022238  | 3200.474  | 4052.26   | NM_003192 | 9691.346  | 7025.674  |
| NM_012249 | 8752.865  | 8537.217  | NM_018449 | 17290.266 | 14843.522 |
| AK022546  | 29141.02  | 41380.18  | AF086129  | 4978.355  | 3448.881  |
| NM_014067 | 28201.16  | 41450.18  | D79994    | 6710.545  | 6179.162  |
| NM_002914 | 18920.199 | 30892.582 | NM_014458 | 57252.918 | 52572.625 |
| NM_020385 | 6718.958  | 9628.728  | L10333    | 1308.266  | 876.519   |
| NM_006541 | 2568.061  | 3351.402  | AF235049  | 18668.852 | 18415.32  |
| M33197    | 65422.82  | 66729.609 | M33197    | 60766.527 | 62160.434 |
| NM_005705 | 16827.719 | 26611.465 | NM_007369 | 5799.623  | 4966.762  |
| NM_004328 | 8366.444  | 11992.287 | NM_014776 | 12026.231 | 10514.113 |
| NM_004581 | 17558.611 | 17723.92  | NM_006480 | 57957.789 | 57648.984 |
| NM_006817 | 21872.826 | 18055.932 | NM_007223 | 60587.137 | 61851.586 |
| NM_007108 | 26109.117 | 26481.211 | NM_000145 | 4312.449  | 3576.582  |
| NM_015921 | 47786.609 | 43245.484 | AF030107  | 59663.637 | 57425.711 |
| AB040900  | 22500.877 | 19197.754 | NM_000871 | 8291.608  | 6816.223  |
| CY3Cy5    | 2351.26   | 63.466    | NM_018968 | 12263     | 11543.221 |
| NM_006917 | 4279.955  | 2856.794  | AF086924  | 57622.637 | 60360.09  |
| AF086225  | 5698.94   | 3202.142  | M33197    | 58776.621 | 61581.641 |
| NM_005844 | 30326.033 | 15850.123 | NM_001154 | 18940.324 | 18876.559 |
| AK024941  | 9294.849  | 5104.984  | NM_000183 | 21473.146 | 18304.561 |
| AF056434  | 18844.9   | 12661.734 | AY004175  | 7766.731  | 5492.12   |
| AF086199  | 2474.935  | 2393.309  | M33197    | 62364.043 | 60965.91  |
| M33197    | 71282.031 | 63370.906 | NM_012327 | 11809.612 | 10305.466 |
| AK025489  | 7915.792  | 5736.622  | NM_000904 | 14652.309 | 13009.58  |
| AB075853  | 1083.802  | 999.258   | NM_016048 | 8829.008  | 8787.228  |
| AL390152  | 24528.139 | 19141.951 | NM_000375 | 17536.061 | 14378.868 |
| AK026721  | 4827.576  | 2825.168  | NM_000265 | 57075.684 | 53498.531 |
| AK023027  | 12802.397 | 7798.829  | NM_018849 | 19348.67  | 14784.263 |
| AK025598  | 3982.944  | 2890.405  | NM_002236 | 27565.43  | 24246.859 |
| AB002348  | 78894.258 | 64774.816 | NM_017905 | 49184.629 | 46300.363 |
| NM_006917 | 4890.87   | 2988.005  | NM_006815 | 60600.859 | 59092.848 |
| SR2       | 58451.941 | 36901.102 | NM_002806 | 32349.088 | 33476.578 |

|           |           |           |           |           |           |
|-----------|-----------|-----------|-----------|-----------|-----------|
| SR4       | 21563.791 | 12727.433 | M33197    | 61907.621 | 67966.523 |
| SR6       | 2560.638  | 1360.417  | NM_001716 | 37696.684 | 39807.156 |
| SR8       | 8909.305  | 25984.311 | NM_002030 | 3337.762  | 2954.601  |
| SR10      | 25482.275 | 5656.734  | NM_006073 | 2709.656  | 2650.986  |
| CY3Cy5    | 3617.885  | 348.876   | NM_004951 | 2731.609  | 1697.073  |
| AK025948  | 1449.674  | 1045.662  | NM_006564 | 23847.795 | 22737.66  |
| AK000674  | 1458.187  | 781.195   | NM_004802 | 9444.442  | 9088.293  |
| AJ238555  | 2923.354  | 2254.105  | M33197    | 57825.445 | 59372.633 |
| AL353948  | 69727.141 | 63009.766 | NM_002983 | 31661.113 | 33222.676 |
| M33197    | 80151.445 | 64884.945 | NM_000074 | 48853.945 | 49546.297 |
| AK025869  | 40731.691 | 28497.818 | NM_002878 | 20277.574 | 16793.066 |
| AL050088  | 20310.781 | 14230.723 | NM_017723 | 5195.5    | 3021.076  |
| AK024939  | 7653.23   | 4618.9    | AK022922  | 3664.628  | 2653.758  |
| AK001561  | 29198.061 | 14774.85  | NM_006462 | 15242.761 | 11285.074 |
| AB007880  | 8895.689  | 4909.357  | AK024750  | 33913.188 | 26708.32  |
| AK024950  | 5607.234  | 3572.905  | NM_000400 | 60508.156 | 51948.023 |
| M33197    | 74265.016 | 63881.547 | M33197    | 62880.242 | 64456.754 |
| NM_014146 | 15888.563 | 8504.727  | NM_002613 | 14026.982 | 10937.013 |
| AF147356  | 1962.253  | 1170.538  | NM_004419 | 29267.037 | 28066.838 |
| NM_018843 | 4060.926  | 1641.532  | U47635    | 10390.45  | 10138.591 |
| AK096204  | 1345.594  | 978.51    | NM_018650 | 10779.58  | 10763.772 |
| AK024275  | 1598.771  | 1046.94   | AK026945  | 20374.178 | 12861.05  |
| AL049461  | 1923.203  | 1146.195  | NM_002828 | 8553.744  | 6922.243  |
| AL109782  | 22510.098 | 12638.465 | NM_014369 | 3648.165  | 2418.382  |
| M33197    | 66091.125 | 74627.57  | M33197    | 64209.926 | 60300.523 |
| AK026052  | 805.995   | 1067.779  | NM_001398 | 45348.012 | 43893.695 |
| AK025161  | 830.988   | 987.73    | AB050049  | 20449.791 | 20213.006 |
| AK025387  | 2490.109  | 1836.652  | J05125    | 2173.599  | 2117.508  |
| AK026259  | 67618.039 | 62466.441 | NM_005164 | 1659.638  | 1354.382  |
| M33197    | 72937.711 | 63588.273 | NM_001995 | 14058.137 | 13181.826 |
| NM_018126 | 2624.626  | 1436.529  | NM_001993 | 2318.742  | 1688.007  |
| AK024506  | 19067.613 | 10801.486 | BF575833  | 1334.415  | 952.483   |
| NM_014179 | 6312.197  | 3831.948  | R61452    | 5078.695  | 3607.22   |
| AF086326  | 12082.245 | 6315.259  | R19938    | 45015.969 | 39101.266 |
| M33197    | 74481.57  | 63982.156 | N94487    | 48792.566 | 42403.258 |
| AL049937  | 1160.16   | 712.877   | AI886795  | 15915.918 | 10598.189 |
| AL080057  | 2153.554  | 1385.726  | D10495    | 7953.154  | 5397.268  |
| AL117453  | 1654.567  | 968.748   | BF344679  | 10864.993 | 8233.791  |
| M33197    | 69579.266 | 58027.816 | BG743223  | 2396.996  | 1793.359  |
| M33197    | 66501.883 | 72023.023 | M36634    | 4882.487  | 3986.474  |
| AK024470  | 6429.696  | 4132.874  | M14156    | 60799.23  | 54887.523 |
| NM_017935 | 2984.395  | 2233.575  | U87939    | 4655.039  | 3827.851  |
| NM_004226 | 12266.238 | 7744.849  | U86961    | 8138.82   | 5717.654  |
| AL137436  | 1007.165  | 872.884   | U47924    | 1900.109  | 1699.315  |
| AK023400  | 1584.057  | 1041.557  | NM_005191 | 9126.076  | 8871.377  |
| AK023961  | 1249.451  | 968.608   | AK094237  | 15171.854 | 13711.729 |
| M33197    | 67660.414 | 61431.305 | AK056794  | 820.949   | 312.733   |
| AF056430  | 3851.802  | 1973.566  | L07592    | 3322.319  | 2489.989  |
| NM_014906 | 1453.721  | 590.39    | M33197    | 56840.852 | 55089.719 |
| AF009291  | 3605.365  | 2002.099  | AK027244  | 1567.903  | 934.031   |
| M33197    | 72387.688 | 63303.457 | L40520    | 5390.143  | 5589.425  |
| NM_018055 | 8484.206  | 4666.442  | NM_002633 | 47499.387 | 44376.129 |
| AK002199  | 2425.154  | 1817.589  | AF086129  | 6160.975  | 3967.854  |

|           |           |           |           |           |           |
|-----------|-----------|-----------|-----------|-----------|-----------|
| AK021662  | 3477.107  | 2346.158  | D79994    | 6978.648  | 5769.925  |
| AK001038  | 3047.654  | 1896.475  | NM_014458 | 51807.336 | 48136.273 |
| AK001802  | 2649.792  | 2350.071  | L10333    | 782.856   | 605.53    |
| AK021469  | 5219.71   | 4941.839  | AF235049  | 17631.941 | 13353.491 |
| AK021706  | 4669.17   | 4456.441  | M33197    | 60555.902 | 63366.68  |
| M33197    | 66361.461 | 73166.625 | NM_007369 | 5237.066  | 3749.751  |
| AK023633  | 6036.654  | 3835.291  | NM_014776 | 10987.011 | 7337.281  |
| M84507    | 1809.505  | 1232.739  | NM_006480 | 59709.461 | 57599.93  |
| NM_005372 | 1428.173  | 1071.521  | NM_007223 | 58653.762 | 53675.117 |
| AF085967  | 3506.319  | 2119.292  | NM_000145 | 4581.947  | 3704.298  |
| NM_006179 | 6089.501  | 3736.823  | AF030107  | 59239.379 | 56706.969 |
| AL360165  | 6980.989  | 4325.896  | NM_000871 | 10635.527 | 7219.991  |
| M33197    | 67305.133 | 64982.961 | M33197    | 60611.691 | 59095.441 |
| AJ008132  | 23193.063 | 11762.031 | NM_018968 | 19198.107 | 14343.699 |
| NM_005281 | 15766.834 | 8203.449  | AF086924  | 59510.641 | 57110.527 |
| NM_005549 | 14628.445 | 6466.479  | NM_000264 | 2272.643  | 1963.394  |
| AJ008115  | 58300.938 | 37868.383 | AB058740  | 59256.309 | 54627.164 |
| AF083125  | 7346.022  | 3594.042  | NM_003385 | 3364.863  | 2270.921  |
| U72851    | 2719.431  | 1891.765  | NM_001888 | 3831.621  | 2856.339  |
| M33197    | 66672.594 | 60563.5   | NM_004392 | 2258.942  | 1505.881  |
| X51526    | 1251.502  | 1145.04   | M33197    | 59213.102 | 58086.328 |
| AK022970  | 1844.691  | 1821.085  | NM_001154 | 20551.824 | 18762.492 |
| AK026212  | 2852.063  | 3125.339  | NM_001819 | 7951.784  | 6840.157  |
| AF086222  | 2854.568  | 3253.556  | NM_016938 | 2168.819  | 1727.223  |
| AF086415  | 9722.824  | 9682.747  | NM_001663 | 8750.16   | 7019.564  |
| D28391    | 65207.305 | 57419.566 | NM_004218 | 24174.232 | 20647.135 |
| M33197    | 66141.008 | 65806.547 | NM_016530 | 10697.021 | 7487.031  |
| AJ227885  | 2418.121  | 1413.818  | NM_014804 | 3731.396  | 2598.006  |
| AF086086  | 2662.84   | 1494.609  | NM_012455 | 22934.188 | 19746.193 |
| AK026859  | 4535.885  | 2904.532  | NM_002806 | 28145.787 | 21682.334 |
| D86961    | 8921.947  | 4516.971  | M33197    | 61129.613 | 62724.52  |
| AJ227896  | 61561.852 | 49761.371 | NM_001716 | 27419.389 | 22694.807 |
| L32841    | 11990.545 | 8229.011  | NM_002030 | 3219.543  | 2222.259  |
| AK025371  | 1882.172  | 1218.759  | NM_006073 | 2842.278  | 1829.997  |
| M33197    | 66583.164 | 71119.398 | NM_004951 | 3206.15   | 2186.485  |
| AF131770  | 10581.426 | 6262.397  | NM_006564 | 25568.635 | 20524.229 |
| NM_006432 | 28410.514 | 22056.59  | NM_004802 | 11543.742 | 9317.396  |
| AK023897  | 3572.735  | 3298.907  | M33197    | 60646.66  | 57427.008 |
| AF025441  | 4657.995  | 4781.835  | NM_002983 | 36195.906 | 29381.133 |
| U62823    | 10245.137 | 10819.178 | NM_000074 | 56118.016 | 50801.23  |
| NM_003535 | 49461.621 | 49170.621 | NM_020393 | 1544.431  | 942.456   |
| AK026768  | 7763.068  | 8024.455  | BF434335  | 59401.051 | 56633.477 |
| M33197    | 66237.141 | 65314.375 | M57627    | 2611.578  | 2452.422  |
| AK000852  | 61131.734 | 59123.496 | NM_002993 | 4900.351  | 3621.556  |
| AF251188  | 13725.346 | 13740.014 | AK026946  | 8942.784  | 6813.256  |
| AK026418  | 11737.547 | 12083.646 | M33197    | 58397.5   | 58501.395 |
| AF086194  | 41917.137 | 47652.48  | NM_003192 | 11865.566 | 9301.304  |
| AK026811  | 10306.194 | 13390.781 | NM_018449 | 20785.695 | 15980.18  |
| NM_017743 | 3412.861  | 1763.994  | NM_001398 | 44983.484 | 33288.063 |
| NM_000300 | 8158.237  | 4045.445  | AB050049  | 21825.566 | 18272.77  |
| M33197    | 66913.398 | 69066.102 | J05125    | 2731.487  | 1997.711  |
| AV756917  | 12006.271 | 6236.491  | NM_005164 | 1586.631  | 1265.25   |
| NM_018380 | 41025.715 | 22776.715 | NM_001995 | 14084.029 | 10934.207 |

|           |           |           |           |           |           |
|-----------|-----------|-----------|-----------|-----------|-----------|
| AK001442  | 11640.764 | 6449.809  | NM_000183 | 23823.506 | 18453.422 |
| NM_01207C | 4160.883  | 2880.566  | AY004175  | 6804.548  | 4528.97   |
| NM_01903E | 1891.352  | 1270.988  | M33197    | 59406.996 | 57213.379 |
| AF183423  | 2778.311  | 2987.75   | NM_012327 | 12730.294 | 9384.854  |
| M33197    | 64624.77  | 63695.824 | NM_000904 | 12892.929 | 10528.493 |
| U92023    | 2493.35   | 2900.455  | NM_01604E | 9030.433  | 8163.783  |
| AF230801  | 6376.008  | 6766.7    | NM_00037E | 17737.328 | 15325.491 |
| AF075072  | 6997.175  | 5639.323  | NM_00026E | 57138.234 | 52945.949 |
| M33197    | 65467.738 | 62683.309 | NM_01884E | 24846.447 | 19424.221 |
| NM_00250E | 12856.615 | 12388.206 | M33197    | 59458.441 | 55627.273 |
| U38442    | 1234.661  | 1845.668  | M16796    | 3066.479  | 2078.073  |
| AF110136  | 3638.095  | 4056.789  | AF279890  | 45695.145 | 36407.711 |
| AK026706  | 5239.263  | 6164.822  | NM_00223E | 29199.172 | 21728.883 |
| AB007936  | 66509.102 | 60553.059 | NM_01206E | 18794.961 | 16026.747 |
| AK001558  | 1337.778  | 1228.721  | NM_00168E | 60001.082 | 54965.789 |
| AF005258  | 3868.842  | 1971.408  | NM_016601 | 7314.614  | 5457.661  |
| NM_000887 | 4920.27   | 2692.271  | NM_01790E | 53501.012 | 44004.184 |
| AF277292  | 2924.107  | 1574.894  | M33197    | 60097.527 | 57607.566 |
| M33197    | 66261.133 | 73059.367 | NM_00681E | 48349.934 | 32528.848 |
| NM_01541E | 14183.125 | 11279.722 | M33197    | 56820.754 | 57831.426 |
| NM_002731 | 1442.752  | 1906.206  | AK027244  | 1724.156  | 881.595   |
| NM_00389E | 9719.296  | 9332.377  | L40520    | 5977.038  | 4455.918  |
| X99662    | 12898.097 | 11773.724 | NM_00263E | 48849.523 | 38184.512 |
| NM_00347E | 65422.75  | 66303.703 | U11036    | 794.323   | 373.201   |
| NM_01432E | 4514.361  | 4653.26   | M33197    | 63239.219 | 55793.148 |
| M33197    | 63367.801 | 68398.711 | NM_00287E | 16352.189 | 12460.108 |
| NM_01775E | 1923.619  | 1941.198  | NM_01772E | 6641.022  | 4563.155  |
| NM_01245E | 654.377   | 1215.047  | AK022922  | 3973.537  | 3124.292  |
| NM_00601E | 53903.688 | 57338.684 | NM_00646E | 14907.539 | 11467.812 |
| NM_00124E | 65232.215 | 60585.109 | AK024750  | 29479.08  | 20111.156 |
| NM_00188E | 1566.486  | 1578.153  | NM_00040E | 58957.32  | 46305.27  |
| NM_014891 | 18030.557 | 17396.775 | M33197    | 64746.098 | 56986.641 |
| NM_01339E | 33176.488 | 33252.348 | NM_00261E | 15832.025 | 9753.591  |
| M33197    | 67315.813 | 65969.305 | NM_00441E | 26136.703 | 20785.758 |
| NM_00217E | 1549.199  | 1117.752  | U47635    | 10333.56  | 5938.292  |
| NM_00345E | 2322.927  | 2682.507  | NM_01865E | 8507.872  | 6089.801  |
| AF052692  | 2113.255  | 2891.476  | AK026945  | 16180.185 | 8133.267  |
| NM_00282E | 1087.884  | 1666.639  | NM_00282E | 6189.674  | 4645.227  |
| NM_00017E | 9069.511  | 4164.799  | NM_01436E | 5103.206  | 3342.258  |
| NM_00521E | 861.08    | 437.781   | M33197    | 61168.379 | 59273.883 |
| AF062739  | 11280.632 | 6968.262  | CY3Cy5    | 10232.233 | 498.147   |
| NM_00660E | 8513.809  | 8202.307  | AL834159  | 8723.219  | 9434.894  |
| AL079314  | 5866.061  | 5848.893  | NM_00016E | 44244.504 | 48767.949 |
| NM_00126E | 7247.956  | 7767.83   | AK021971  | 771.855   | 792.914   |
| NM_00195E | 7388.12   | 8261.227  | AK025253  | 3090.396  | 3379.173  |
| NM_00628E | 2563.362  | 3117.097  | AK025004  | 2605.329  | 2610.419  |
| M33197    | 62603.168 | 71722.586 | AL136818  | 2075.002  | 2898.841  |
| NM_004331 | 19103.193 | 18625.281 | AF146798  | 4697.033  | 5457.419  |
| BE886648  | 1641.274  | 1830.272  | AK022049  | 1351.633  | 1628.335  |
| NM_01599E | 3239.38   | 4111.888  | AF086517  | 23011.4   | 23939.021 |
| NM_01570E | 44559.883 | 48613.516 | AK025740  | 34550.711 | 38528.836 |
| AB018337  | 7355.088  | 6733.429  | AK000311  | 6469.515  | 6545.141  |
| NM_01448E | 5391.37   | 4834.193  | AK021747  | 3517.35   | 3165.006  |

|           |           |           |           |           |           |
|-----------|-----------|-----------|-----------|-----------|-----------|
| AK025273  | 7607.497  | 7063.7    | AK025640  | 11678.675 | 12406.192 |
| NM_002205 | 4933.393  | 5480.413  | AF131772  | 572.824   | 910.836   |
| NM_002214 | 5177.327  | 5836.707  | AL834159  | 5965.9    | 6315.375  |
| NM_001911 | 7771.354  | 6273.026  | SR1       | 64803.125 | 57013.156 |
| NM_000537 | 5472.968  | 5784.729  | SR5       | 6947.223  | 6868.811  |
| NM_006503 | 3798.568  | 4550.055  | SR7       | 8454.7    | 39266.504 |
| AB002321  | 1090.297  | 1769.231  | SR9       | 23984.719 | 5083.691  |
| NM_002515 | 666.338   | 1299.169  | CY3Cy5    | 10501.185 | 573.764   |
| M33197    | 7577.341  | 7078.223  | D55638    | 713.994   | 1014.798  |
| M33197    | 64374.988 | 63111.859 | L23870    | 1039.178  | 956.982   |
| NM_017569 | 28331.182 | 35567.699 | D55644    | 678.359   | 1041.304  |
| NM_001456 | 3084.51   | 4503.802  | Z97017    | 309.406   | 849.044   |
| NM_002906 | 1749.994  | 2278.025  | D16951    | 1077.816  | 1060.127  |
| AK024480  | 4910.94   | 5393.626  | L19362    | 656.226   | 570.331   |
| Y13871    | 59908.742 | 63259.465 | L33807    | 3357.489  | 3093.616  |
| NM_012134 | 1257.533  | 1847.997  | U80774    | 439.897   | 741.955   |
| AL137725  | 25941.596 | 38820.699 | NM_006545 | 61444.746 | 53509.688 |
| M33197    | 64576.434 | 65922.352 | NM_016534 | 4133.86   | 3804.764  |
| AJ008151  | 57794.309 | 59109.871 | AB021923  | 3833.971  | 3741.873  |
| NM_005228 | 4748.243  | 5396.479  | AK024240  | 1838.2    | 1711.716  |
| NM_002354 | 4627.365  | 5023.533  | NM_016456 | 62138.742 | 58693.492 |
| NM_004091 | 10121.196 | 10310.512 | AK022677  | 5759.564  | 6137.787  |
| X74070    | 62740.938 | 66663.523 | AF035288  | 1332.309  | 1135.532  |
| AF027219  | 4019.649  | 4043.037  | AF217993  | 8256.684  | 8695.058  |
| BC022846  | 526.201   | 718.491   | AK024267  | 864.787   | 863.251   |
| NM_006333 | 13429.334 | 14425.83  | AF131823  | 1852.203  | 1725.651  |
| M33197    | 60494.969 | 63920.449 | AK026324  | 14445.658 | 15369.112 |
| NM_007043 | 6209.533  | 6412.634  | AK024518  | 31694.65  | 35565.551 |
| BE378791  | 3130.406  | 3529.01   | AK024586  | 2470.65   | 2411.203  |
| U94388    | 2967.621  | 2938.341  | AK025017  | 9102.236  | 10082.631 |
| NM_012322 | 9347.792  | 10423.198 | AK024534  | 1239.476  | 1096.354  |
| M33197    | 63834.105 | 60289.066 | AK024616  | 555.171   | 566.172   |
| NM_004889 | 63579.309 | 62158.715 | AK024914  | 7717.44   | 8087.364  |
| AK025314  | 9383.972  | 10863.843 | AK025346  | 61185.414 | 64035.594 |
| NM_002109 | 11517.667 | 10210.733 | AK022583  | 11848.087 | 10202.771 |
| NM_000984 | 62065.711 | 67561.039 | AL137534  | 61398.801 | 62443.793 |
| NM_002453 | 31009.555 | 31860.287 | AF052121  | 15248.002 | 14273.413 |
| AK000780  | 58982.227 | 61943.176 | AL359062  | 8520.476  | 7843.667  |
| M33197    | 66102.461 | 63830.582 | AK026869  | 4937.888  | 4409.442  |
| NM_000131 | 2852.981  | 3612.189  | AK023150  | 798.097   | 795.746   |
| NM_001836 | 1061.678  | 1322.115  | AK022192  | 1020.655  | 1029.402  |
| M64714    | 1283.837  | 1441.397  | NM_019099 | 62311.535 | 59925.367 |
| AK026043  | 2994.09   | 3409.934  | AJ227904  | 580.869   | 748.301   |
| NM_005006 | 18586.205 | 21213.266 | AJ011597  | 1034.333  | 986.611   |
| AK027033  | 5520.453  | 6051.039  | AJ001905  | 5849.962  | 5938.478  |
| NM_000106 | 26679.389 | 28749.443 | U17635    | 2991.384  | 3431.763  |
| NM_003000 | 43590.816 | 42357.063 | AL049930  | 1467.212  | 1510.145  |
| NM_002495 | 41966.449 | 39866.051 | Z83946    | 546.343   | 578.801   |
| M33197    | 61672.965 | 59637.23  | AF086198  | 35225.762 | 41322.941 |
| NM_006833 | 33826.395 | 36515.477 | AL137382  | 57788.852 | 62856.637 |
| NM_012257 | 4143.698  | 4353.19   | AK024599  | 6648.958  | 7374.75   |
| U37690    | 59987.406 | 54938.379 | NM_018012 | 699.399   | 647.144   |
| NM_005120 | 2667.835  | 3204.561  | AK024928  | 411.08    | 493.566   |

|             |           |           |           |           |           |
|-------------|-----------|-----------|-----------|-----------|-----------|
| AB029012    | 46923.867 | 46509.086 | NM_014450 | 12986.72  | 14613.567 |
| M33197      | 62487.555 | 57176.223 | AB007975  | 1656.612  | 2066.395  |
| AJ010278    | 1779.507  | 2508.223  | AK024152  | 3153.562  | 3038.866  |
| NM_006295   | 4884.76   | 4708.694  | AL137603  | 617.868   | 692.284   |
| AF060936    | 55777.844 | 50799.488 | AK026888  | 3593.908  | 3179.954  |
| NM_005565   | 4471.171  | 4311.319  | AK021821  | 2027.308  | 1369.753  |
| NM_018167   | 2662.354  | 2555.063  | AL049328  | 2351.574  | 2155.177  |
| AK024149    | 4786.529  | 5250.545  | AK021415  | 640.013   | 577.166   |
| AK023094    | 2612.509  | 3104.858  | AK000030  | 1815.266  | 1805.792  |
| M33197      | 64550.781 | 61657.313 | NM_017932 | 2202.946  | 2132.747  |
| M33197      | 62298.004 | 65408.738 | AK000910  | 7006.71   | 7565.377  |
| AJ011129    | 40348.906 | 41589.953 | AF252280  | 37589.352 | 42854.477 |
| NM_001035   | 1883.138  | 2243.45   | AK000107  | 1337.642  | 1355.319  |
| NM_006387   | 14951.958 | 17908.467 | AK000795  | 864.283   | 805.691   |
| NM_005645   | 8532.46   | 9402.617  | AK000951  | 2163.177  | 2183.599  |
| NM_006635   | 6906.997  | 8275.074  | AF130064  | 59686.172 | 59858.063 |
| NM_001692   | 2850.831  | 2917.19   | U17624    | 2415.006  | 2508.046  |
| BI767871    | 29380.871 | 36794.129 | AK025184  | 1655.153  | 1628.943  |
| AA418907    | 5071.599  | 5698.256  | AK001959  | 22720.354 | 25619.848 |
| M65291      | 1970.914  | 2420.184  | U36217    | 7495.879  | 8146.533  |
| AA115473    | 19913.084 | 25954.896 | AL389880  | 884.614   | 930.107   |
| AA872397    | 26757.51  | 28985.172 | AL157452  | 1148.162  | 1453.528  |
| M24283      | 17077.268 | 18919.854 | AK024155  | 44436.293 | 53723.199 |
| AA709414    | 6467.143  | 7351.327  | AL359334  | 20021.572 | 24308.756 |
| D12676      | 14677.729 | 17099.311 | AK027095  | 2894.689  | 2697.09   |
| NM_000935   | 61780.203 | 56961.328 | AF062097  | 3479.507  | 3526.199  |
| NM_004295   | 63164.359 | 59171.301 | BC030949  | 5730.021  | 4564.722  |
| H-X 02812 I | 7244.973  | 8377.577  | AF116615  | 4045.857  | 3875.685  |
| U75898      | 29028.098 | 30143.941 | U17636    | 60927.074 | 58830.676 |
| M29039      | 4621.536  | 5183.938  | NM_018545 | 11408.734 | 13367.037 |
| M59815      | 1758.145  | 1817.042  | U52699    | 56719.711 | 57269.863 |
| M33197      | 60341.328 | 60264.48  | S71613    | 2641.874  | 2799.015  |
| NM_007255   | 3643.217  | 3533.267  | AJ011910  | 17396.27  | 18791.107 |
| NM_018402   | 3962.973  | 4467.971  | AK024378  | 1518.119  | 2050.287  |
| NM_018005   | 6030.96   | 6844.784  | NM_014025 | 9419.803  | 10865.688 |
| AK075081    | 9351.573  | 10611.176 | D61703    | 19119.736 | 20893.348 |
| NM_000895   | 23383.078 | 19092.967 | AL050376  | 764.181   | 1027.571  |
| NM_003820   | 59729.805 | 62147.063 | AL359652  | 2738.233  | 2768.32   |
| NM_015915   | 13636.676 | 12873.288 | AK022423  | 3030.747  | 3608.938  |
| M33197      | 62280.621 | 72709.773 | BF509267  | 4364.294  | 4646.604  |
| NM_016515   | 43250.82  | 47820.203 | NM_002455 | 8238.81   | 8297.628  |
| NM_006185   | 58652.414 | 60280.156 | AK026728  | 637.06    | 527.568   |
| NM_014800   | 7059.848  | 6808.423  | NM_002955 | 13520.434 | 14397.077 |
| NM_001557   | 2442.51   | 2956.782  | AB046773  | 1065.924  | 939.996   |
| AF147311    | 13225.452 | 13354.066 | AK000899  | 21310.443 | 22100.414 |
| NM_002131   | 60142.258 | 62442.023 | NM_017991 | 2413.568  | 2105.463  |
| NM_017927   | 16542.08  | 18402.076 | L37198    | 3287.514  | 3296.35   |
| M33197      | 63356.852 | 63646.012 | U67822    | 1720.692  | 1669.462  |
| NM_001203   | 13136.992 | 15202.396 | AK021921  | 1153.153  | 1325.168  |
| NM_004795   | 63674.27  | 65860.266 | AK025431  | 695.274   | 1084.542  |
| NM_006733   | 1577.699  | 1878.902  | AK023662  | 2577.158  | 2719.466  |
| NM_002035   | 1578.769  | 1615.297  | AF086274  | 57702.84  | 54718.027 |
| NM_014047   | 40128.73  | 41205.719 | AK023682  | 2190.311  | 2512.154  |



|           |           |           |           |           |           |
|-----------|-----------|-----------|-----------|-----------|-----------|
| AK022901  | 6550.992  | 7894.841  | AK024024  | 3706.305  | 3575.523  |
| NM_00150E | 1743.168  | 1827.525  | AF000991  | 816.945   | 888.552   |
| AF037332  | 8279.926  | 7689.493  | AK000685  | 20101.793 | 24596.518 |
| NM_014571 | 1165.637  | 1816.686  | D28381    | 28807.625 | 32143.105 |
| NM_020151 | 34386.523 | 38813.262 | AK023543  | 740.727   | 884.438   |
| NM_005891 | 45172.043 | 47072.398 | BE706519  | 1701.789  | 2019.389  |
| NM_00164E | 3372.865  | 4014.727  | NM_01909E | 12059.053 | 12964.892 |
| NM_00395E | 5644.22   | 6890.787  | NM_01472E | 2127.883  | 1954.661  |
| M33197    | 61462.895 | 63799.762 | NM_00689E | 6490.614  | 7135.347  |
| NM_00350E | 18566.686 | 18276.643 | NM_019117 | 2933.847  | 3401.515  |
| NM_014317 | 7982.629  | 9671.253  | NM_01830E | 3555.868  | 3596.565  |
| L09234    | 29681.088 | 35528.574 | NM_01765E | 7417.06   | 7681.351  |
| NM_00005E | 2623.146  | 2786.214  | NM_01867E | 30665.332 | 36975.949 |
| AK026740  | 2691.221  | 2932.724  | NM_01664E | 920.992   | 1137.176  |
| NM_017881 | 12117.307 | 12912.523 | NM_00258E | 622.431   | 674.253   |
| NM_01889E | 4903.552  | 5079.571  | NM_00677E | 11729.301 | 10605.438 |
| AF069307  | 4731.47   | 6301.631  | NM_019847 | 4083.61   | 4196.484  |
| U92978    | 6394.081  | 8952.475  | D17093    | 28716.264 | 25370.258 |
| NM_018034 | 13667.081 | 15549.049 | AK022784  | 696.262   | 680.579   |
| M33197    | 60511.992 | 67333.133 | AL117521  | 9219.002  | 9825.505  |
| AB037831  | 11190.426 | 13405.868 | NM_000731 | 575.118   | 819.95    |
| NM_01210E | 32675.965 | 38378.961 | AK021913  | 29683.834 | 29250.66  |
| AL122077  | 38760.785 | 41420.965 | AL137489  | 42275.578 | 48890.449 |
| NM_01463E | 4776.83   | 6097.187  | AF009311  | 14847.65  | 14590.57  |
| NM_00642E | 4632.276  | 5176.946  | S73397    | 5630.684  | 6027.382  |
| BE789195  | 1194.089  | 2608.089  | AK023939  | 708.299   | 1219.71   |
| NM_01694E | 2021.976  | 2271.896  | AL050219  | 1366.902  | 1475.802  |
| M33197    | 63632.168 | 61378.168 | AK024433  | 7434.335  | 7563.985  |
| NM_00532E | 52819.758 | 50542.875 | U82321    | 3478.043  | 2944.334  |
| NM_00728E | 1353.125  | 1080.905  | AK023856  | 3108.481  | 2875.222  |
| NM_01406E | 2942.679  | 3040.463  | AB014557  | 5315.704  | 5522.651  |
| AB035130  | 4959.431  | 4618.214  | NM_00557E | 9997.916  | 6237.552  |
| NM_00335E | 5998.697  | 4628.886  | NM_00365E | 22812.795 | 22377.229 |
| M33197    | 62594.48  | 54787.258 | NM_018457 | 51561.777 | 53385.352 |
| AF119917  | 2293.487  | 3021.207  | NM_00295E | 13464.757 | 14336.532 |
| AK021834  | 583.264   | 1072.862  | NM_002187 | 2337.151  | 2992.689  |
| NM_01791E | 3562.506  | 3274.664  | NM_01424E | 24801.506 | 31700.961 |
| AL050097  | 871.363   | 1530.79   | NM_01485E | 1454.871  | 1365.013  |
| AK021513  | 583.849   | 1248.59   | AF311912  | 756.863   | 945.899   |
| NM_00357E | 5548.103  | 5061.014  | NM_001116 | 1251.155  | 1015.331  |
| AL049283  | 3365.228  | 3389.848  | BC035395  | 24472.471 | 25559.295 |
| M33197    | 62673.891 | 58212.41  | NM_00170E | 38260.008 | 45293.141 |
| NM_002401 | 60684.941 | 58071.355 | NM_02012E | 8454.451  | 9372.576  |
| NM_001274 | 6743.894  | 6936.563  | NM_01398E | 9885.672  | 10799.543 |
| NM_00391E | 1070.252  | 1803.513  | NM_00504E | 10925.098 | 10836.336 |
| NM_002227 | 7548.587  | 5670.145  | NM_00388E | 937.164   | 953.077   |
| NM_00719E | 10765.551 | 12061.689 | NM_00463E | 23780.861 | 23732.271 |
| AB002301  | 2040.229  | 1879.62   | AK023001  | 20982.689 | 20104.711 |
| AB014530  | 21813.291 | 23363.211 | NM_01482E | 30251.727 | 32539.314 |
| M33197    | 65413.09  | 59769.934 | AF201947  | 1822.828  | 1880.573  |
| NM_00598E | 14623.36  | 16536.438 | U01147    | 5292.059  | 5111.478  |
| AB014607  | 25955.646 | 23523.092 | NM_00404E | 31504.268 | 37288.418 |
| AF134401  | 3333.731  | 3752.987  | NM_00611E | 10928.557 | 11179.463 |

|             |           |           |           |           |           |
|-------------|-----------|-----------|-----------|-----------|-----------|
| AF282874    | 438.45    | 1005.343  | NM_005456 | 1520.934  | 1643.876  |
| NM_001039   | 2233.751  | 2749.607  | BF219403  | 60649.379 | 55095.297 |
| NM_006387   | 15170.086 | 17864.947 | NM_016119 | 9577.499  | 10259.021 |
| NM_005646   | 7236.357  | 7381.324  | AK075450  | 4891.449  | 5465.325  |
| NM_006639   | 6067.81   | 5436.311  | AF178983  | 25348.025 | 25901.688 |
| NM_001692   | 2462.27   | 2478.447  | NM_001324 | 14173.595 | 15165.993 |
| BI767871    | 26862.99  | 31696.336 | AB037795  | 3616.272  | 4651.908  |
| AA418907    | 4935.82   | 6056.646  | D43949    | 5160.59   | 5299.061  |
| M65291      | 2048.628  | 2426.433  | AF111849  | 40946.445 | 50339.801 |
| AA115473    | 19454.625 | 23717.678 | AK022975  | 2398.106  | 2362.049  |
| AA872397    | 17418.689 | 18269.354 | NM_015344 | 2467.322  | 2476.34   |
| M24283      | 14780.177 | 16474.369 | NM_004288 | 7624.759  | 7488.484  |
| AA709414    | 7600.232  | 8849.085  | AL122055  | 12548.919 | 12399.167 |
| D12676      | 12967.455 | 15824.522 | NM_005132 | 43041.16  | 50244.824 |
| NM_000939   | 61005.336 | 58847.699 | X07695    | 1299.812  | 1458.244  |
| NM_004295   | 63058.789 | 60416.738 | D87458    | 6004.396  | 6507.687  |
| H-X 02812 I | 6721.844  | 7549.328  | NM_001399 | 524.419   | 545.414   |
| U75898      | 29192.506 | 29710.537 | AK021750  | 29440.73  | 29148.479 |
| M29039      | 4583.651  | 5942.666  | NM_003626 | 3826.996  | 4087.393  |
| M59815      | 2283.286  | 2878.852  | NM_006932 | 1120.074  | 897.821   |
| M33210      | 1348.538  | 1333.554  | AK023594  | 6702.576  | 6587.129  |
| M33197      | 3312.521  | 2192.753  | AB032989  | 641.223   | 531.597   |
| AB011146    | 14708.415 | 9937.798  | AB010099  | 57058.672 | 55220.758 |
| NM_003679   | 1830.164  | 2145.449  | AB039920  | 29977.902 | 33800.602 |
| NM_018009   | 5712.122  | 6569.824  | AB046782  | 7209.959  | 7448.279  |
| AK075081    | 10047.896 | 11289.254 | AF300612  | 59958.105 | 61757.25  |
| NM_000895   | 23457.57  | 22869.205 | AF208005  | 2409.929  | 2464.044  |
| NM_003820   | 61862     | 70056.539 | NM_002231 | 39982.121 | 45849.781 |
| NM_015915   | 15182.202 | 13271.829 | NM_020474 | 19674.859 | 17368.012 |
| M33197      | 62801.09  | 64686.508 | NM_002643 | 5230.899  | 5543.208  |
| NM_016518   | 43173.695 | 46375.969 | NM_017807 | 7655.585  | 8231.598  |
| NM_006185   | 59443.5   | 63978.914 | NM_014746 | 1583.471  | 1583.264  |
| NM_014800   | 7494.173  | 8205.066  | NM_002788 | 60582.914 | 57360.902 |
| NM_001557   | 3170.737  | 3892.836  | NM_000462 | 31353.885 | 30979.072 |
| AF147311    | 14137.309 | 15532.996 | NM_003336 | 16965.43  | 16923.324 |
| NM_002131   | 61638.453 | 61658.551 | NM_005805 | 47567.758 | 56607.777 |
| NM_017927   | 17914.525 | 18529.68  | NM_004181 | 42024.898 | 49177.02  |
| M33197      | 64100.09  | 64964.824 | NM_003900 | 27857.877 | 32151.734 |
| NM_001203   | 16673.906 | 18389.229 | NM_003337 | 7212.687  | 6995.544  |
| NM_004799   | 64862.43  | 71830.797 | AF298152  | 10088.978 | 7390.292  |
| NM_006733   | 1204.913  | 1880.688  | AF117233  | 16363.062 | 18700.391 |
| NM_002039   | 1017.143  | 1190.507  | NM_015848 | 2815.84   | 2977.878  |
| NM_014047   | 37490.367 | 36230.605 | NM_001723 | 5231.171  | 4554.949  |
| AK022901    | 7342.592  | 7247.37   | NM_016018 | 5030.788  | 5048.005  |
| NM_001508   | 3970.115  | 3833.627  | M94362    | 40361.133 | 51372.18  |
| AF037332    | 9116.94   | 7495.711  | AK024707  | 3644.015  | 3403.018  |
| NM_014571   | 2232.617  | 1025.551  | NM_014255 | 2675.98   | 2539.86   |
| M33197      | 63284.715 | 68192.047 | AK022909  | 6256.738  | 7026.137  |
| AJ011129    | 39613.988 | 43405.523 | NM_006530 | 20227.033 | 21006.9   |
| NM_001645   | 3332.735  | 3650.855  | NM_003587 | 62616.563 | 65791.094 |
| NM_003956   | 5759.254  | 6814.514  | X90978    | 4103.874  | 4537.821  |
| M33197      | 63907.594 | 69792.109 | AF217226  | 36010.566 | 35395.461 |
| NM_003500   | 21523.199 | 22340.182 | NM_005522 | 738.094   | 880.783   |

|           |           |           |           |           |           |
|-----------|-----------|-----------|-----------|-----------|-----------|
| NM_014317 | 10645.745 | 10643.828 | NM_005760 | 34686.328 | 34959.715 |
| L09234    | 35906.215 | 42776.98  | NM_014212 | 4375.31   | 3793.273  |
| NM_000059 | 4514.353  | 4231.102  | NM_007265 | 5972.022  | 5945.887  |
| AK026740  | 3293.232  | 3419.508  | AK023639  | 27934.701 | 33995.367 |
| NM_017881 | 11728.71  | 12956.765 | AL122118  | 905.47    | 684.297   |
| NM_018896 | 5025.812  | 6178.634  | AL137700  | 2366.729  | 2377.965  |
| AF069307  | 6861.296  | 8499.521  | NM_004904 | 3858.941  | 3647.306  |
| U92978    | 8076.742  | 9065.991  | NM_003083 | 24945.889 | 25685.156 |
| NM_018034 | 17250.51  | 20236.553 | NM_006789 | 10441.357 | 9502.387  |
| M33197    | 63415.688 | 71045.125 | NM_000982 | 9230.451  | 10088.581 |
| AB037831  | 12639.707 | 14237.849 | NM_001024 | 60021.758 | 60550.75  |
| NM_012103 | 35240.652 | 41123.48  | NM_016093 | 60448.105 | 60457.105 |
| AL122077  | 43150.93  | 42119.148 | NM_012423 | 58975.75  | 55934.496 |
| NM_014632 | 3768.643  | 4166.946  | AK026367  | 52203.395 | 51611.918 |
| NM_006422 | 5005.219  | 4785.038  | AK026491  | 42122.781 | 48355.328 |
| BE789195  | 1596.728  | 2203.753  | NM_001015 | 57566.785 | 60890.109 |
| NM_016946 | 3962.865  | 3057.916  | AL110170  | 61046.098 | 57694.887 |
| M33197    | 66173.68  | 63079.336 | NM_004190 | 55614.734 | 55342.977 |
| NM_007259 | 2676.991  | 2590.044  | NM_014275 | 27770.563 | 28679.746 |
| NM_018402 | 2211.334  | 2552.897  | NM_000409 | 16655.281 | 15669.073 |
| NM_014069 | 3092.957  | 3251.448  | AB044137  | 2032.183  | 1284.897  |
| AB035130  | 4427.213  | 5192.588  | NM_000920 | 3570.257  | 2277.35   |
| NM_003359 | 5358.731  | 5335.175  | NM_020375 | 25898.092 | 18918.973 |
| M33197    | 62223.504 | 59254.859 | NM_000291 | 58261.289 | 55083.594 |
| AF119917  | 2213.858  | 2163.316  | NM_018081 | 9371.664  | 11453.702 |
| AK021834  | 1232.121  | 1524.265  | NM_014649 | 8123.263  | 9639.29   |
| NM_017915 | 3857.584  | 3720.307  | AL117488  | 5016.319  | 5438.566  |
| AL050097  | 1277.812  | 1334.962  | NM_012240 | 7148.575  | 7308.164  |
| AK021513  | 806.706   | 1171.727  | NM_019005 | 11758.705 | 11657.968 |
| NM_003579 | 4888.029  | 5709.024  | NM_004739 | 24767.73  | 23989.547 |
| AL049283  | 3170.264  | 2767.229  | AV752216  | 2799.621  | 2984.549  |
| M33197    | 63447.559 | 60116.016 | NM_005341 | 6709.421  | 6801.597  |
| NM_002401 | 60004.797 | 58026.383 | AF181999  | 4640.195  | 5245.647  |
| NM_001274 | 6690.953  | 7600.238  | NM_001934 | 9055.33   | 9385.846  |
| NM_003913 | 1808.188  | 2310.859  | AB011090  | 6149.318  | 4825.443  |
| NM_002227 | 8088.971  | 6594.358  | NM_000209 | 873.8     | 1095.032  |
| NM_007199 | 4803.228  | 5668.377  | NM_018682 | 14462.202 | 13658.023 |
| AB002301  | 936.733   | 1142.998  | AB033024  | 6682.89   | 6294.105  |
| AB014530  | 19504.721 | 18346.078 | NM_018942 | 23936.383 | 23325.721 |
| M33197    | 66012.297 | 59231.934 | NM_005531 | 21836.285 | 21250.223 |
| NM_005989 | 10144.281 | 10468.994 | NM_006977 | 2659.142  | 2591.732  |
| AB014607  | 22135.678 | 16301.63  | NM_002479 | 5806.426  | 4812.275  |
| AF134401  | 5182.175  | 4514.46   | NM_000348 | 52581.063 | 45195.047 |
| NM_020151 | 23867.568 | 20388.055 | NM_005059 | 31887.289 | 31208.838 |
| NM_005891 | 27835.537 | 42850.227 | NM_004950 | 12426.898 | 11806.4   |
| NM_006387 | 14088.582 | 15943.981 | NM_000724 | 11129.627 | 11086.256 |
| NM_005646 | 7602.132  | 8178.178  | NM_000553 | 801.658   | 993.55    |
| NM_006639 | 5876.279  | 5428.94   | NM_002557 | 38783.93  | 52453.242 |
| NM_001692 | 2916.964  | 2599.34   | NM_004477 | 1508.086  | 1936.208  |
| BI767871  | 32610.551 | 38754.402 | BE728156  | 1010.377  | 1188.215  |
| AA418907  | 8176.376  | 7777.09   | Y10802    | 1077.066  | 1218.186  |
| M65291    | 1939.974  | 2369.53   | AI417775  | 993.324   | 1478.223  |
| AA115473  | 18152.416 | 21353.002 | BI762229  | 20160.555 | 22932.98  |

|            |           |           |           |           |           |
|------------|-----------|-----------|-----------|-----------|-----------|
| AA872397   | 21723.047 | 22612.154 | AA131406  | 785.456   | 808.627   |
| M24283     | 15797.972 | 15659.255 | BG618320  | 56995.684 | 53408.039 |
| AA709414   | 6322.795  | 7863.84   | M28983    | 827.642   | 889.932   |
| D12676     | 14664.995 | 15230.317 | Y00787    | 8129.542  | 8541.872  |
| NM_000939  | 59077.977 | 53368.352 | NM_007276 | 10453.915 | 9865.188  |
| NM_004295  | 60267.852 | 63101.594 | N34462    | 23235.959 | 24004.695 |
| H-X 028121 | 6986.8    | 6940.095  | AI658778  | 13803.181 | 12395.995 |
| U75898     | 25637.408 | 25102.191 | L19067    | 13843.774 | 12698.109 |
| M29039     | 3476.986  | 3772.655  | Z48482    | 1687.196  | 1413.53   |
| M33210     | 1343.385  | 1368.846  | W60413    | 11994.688 | 10947.905 |
| M33197     | 3434.597  | 2982.6    | BI823365  | 13799.922 | 11917.009 |
| AB011146   | 8284.922  | 7166.718  | X06318    | 2826.501  | 3437.17   |
| NM_005326  | 41488.711 | 36976.625 | NM_019101 | 3273.561  | 3746.382  |
| NM_014800  | 8579.701  | 9178.746  | NM_013247 | 10508.027 | 13114.164 |
| NM_001557  | 3042.236  | 2507.607  | NM_006770 | 13139.15  | 13211.818 |
| AF147311   | 15888.521 | 15489.987 | BE394704  | 2097.92   | 2208.125  |
| NM_002131  | 62526.754 | 62655.852 | NM_004703 | 13847.489 | 16703.801 |
| NM_017927  | 18966.494 | 16714.896 | NM_001512 | 2727.57   | 2820.323  |
| M33197     | 63819.07  | 68716.961 | NM_014706 | 15723.149 | 18209.332 |
| NM_001203  | 17340.707 | 16648.59  | AK023172  | 1628.541  | 2118.194  |
| NM_004799  | 62746.348 | 59587.211 | AF139768  | 902.618   | 975.819   |
| NM_006733  | 1211.677  | 1113.65   | AJ001348  | 4706.713  | 5614.561  |
| NM_002039  | 818.145   | 937.607   | NM_014007 | 3559.616  | 3666.822  |
| NM_014047  | 38522.809 | 40605.586 | AB033006  | 10233.37  | 10698.048 |
| AK022901   | 9117.852  | 7855.378  | AF020314  | 17466.422 | 17820.436 |
| NM_001508  | 2043.788  | 2070.106  | NM_016332 | 33515.773 | 38646.441 |
| M33197     | 64186.914 | 68166.18  | AK023936  | 1602.339  | 1798.803  |
| AF037332   | 12001.149 | 13096.14  | NM_006457 | 4500.975  | 5334.285  |
| NM_014571  | 1160.641  | 1853.849  | NM_003682 | 3215.504  | 3468.649  |
| NM_006052  | 2370.146  | 2494.054  | NM_000207 | 2156.434  | 2322.036  |
| AB040912   | 15047.016 | 13797.354 | NM_002531 | 5333.763  | 5042.965  |
| NM_003871  | 13770.866 | 11860.105 | NM_006314 | 54099.609 | 57166.27  |
| NM_006243  | 8199.446  | 6416.626  | NM_001782 | 14249.366 | 14634.582 |
| NM_007252  | 2271.902  | 1911.693  | NM_002754 | 1135.776  | 1235.984  |
| M33197     | 66430.391 | 67893.352 | NM_000797 | 25226.031 | 26117.385 |
| AJ011129   | 42145.664 | 40088.098 | NM_014927 | 867.255   | 1060.445  |
| NM_005738  | 1318.849  | 1465.414  | AF217525  | 1376.801  | 1278.488  |
| NM_014488  | 3837.015  | 3758.433  | AL080148  | 60228.309 | 59358.5   |
| NM_013389  | 23982.975 | 23661.547 | AF000381  | 15872.092 | 18183.576 |
| AB014567   | 1026.021  | 1254.587  | NM_018075 | 569.64    | 552.444   |
| AK022817   | 7911.571  | 8630.813  | NM_012105 | 9987.608  | 11465.731 |
| NM_018034  | 21277.068 | 22847.281 | NM_000197 | 588.959   | 690.378   |
| M33197     | 62473.453 | 81975.547 | S82470    | 11588.93  | 14638.872 |
| AB037831   | 13797.938 | 15123.62  | AB020695  | 596.608   | 745.2     |
| NM_012103  | 37297.242 | 44169.266 | AB028982  | 7329.407  | 7954.055  |
| AL122077   | 45420.648 | 48165.539 | NM_002004 | 5993.723  | 6928.7    |
| NM_014632  | 4671.616  | 4737.037  | NM_005121 | 2608.042  | 2379.107  |
| NM_006422  | 5877.181  | 5574.082  | NM_000747 | 7236.79   | 7858.701  |
| BE789195   | 1491.062  | 1744.893  | AJ275973  | 25297.742 | 30874.555 |
| NM_016946  | 2423.929  | 2843.958  | U76362    | 31620.58  | 36872.836 |
| M33197     | 63627.215 | 78289.289 | NM_003060 | 534.511   | 768.973   |
| NM_007259  | 2628.749  | 2978.087  | AK021489  | 52809.672 | 54501.324 |
| NM_018402  | 2751.654  | 2711.666  | NM_004525 | 1574.478  | 1591.323  |

|           |           |           |           |           |           |
|-----------|-----------|-----------|-----------|-----------|-----------|
| NM_01800E | 5832.365  | 6015.081  | NM_00389E | 1277.452  | 1310.076  |
| AK075081  | 8556.99   | 8341.837  | NM_004317 | 9841.813  | 10750.18  |
| NM_00089E | 18832.191 | 18042.637 | NM_01464E | 7685.997  | 8213.145  |
| NM_00382C | 64926.98  | 79701.484 | NM_01470E | 7184.811  | 8747.701  |
| NM_01591E | 16939.264 | 14394.886 | NM_00369E | 5450.89   | 6256.02   |
| M33197    | 64831.184 | 74353.211 | NM_00035E | 59626.848 | 54125.828 |
| NM_01651E | 41526.391 | 44191.328 | NM_018134 | 59654.641 | 61975.902 |
| NM_00618E | 45082.352 | 39477.164 | L27479    | 2603.271  | 2727.656  |
| NM_00598E | 13036.154 | 11829.09  | NM_00219E | 4960.216  | 5561.462  |
| AB014607  | 26455.859 | 19002.779 | NM_00138E | 22094.475 | 23530.844 |
| AF134401  | 4319.152  | 4598.747  | X76770    | 12860.642 | 12980.563 |
| NM_020151 | 29196.992 | 25802.266 | AB037808  | 6222.484  | 7329.34   |
| NM_005891 | 38764.609 | 40937.625 | NM_01603E | 12592.427 | 13736.478 |
| NM_00164E | 4915.982  | 5657.582  | AF090911  | 524.421   | 540.337   |
| NM_00395E | 4114.505  | 5269.845  | Z36821    | 41648.16  | 40445.715 |
| M33197    | 58083.5   | 78441.219 | AF289485  | 9845.613  | 10736.037 |
| NM_00350C | 18142.738 | 18891.688 | AF130092  | 17522.117 | 18410.77  |
| NM_014317 | 6829.353  | 7677.186  | NM_01609E | 10176.911 | 13246.654 |
| L09234    | 33362.602 | 37427.48  | AK024794  | 3700.917  | 4123.473  |
| NM_00005E | 4064.814  | 3645.729  | NM_01985E | 14834.52  | 11797.093 |
| AK026740  | 2541.797  | 2930.095  | NM_01799E | 3101.652  | 2795.846  |
| NM_017881 | 12612.232 | 13122.315 | NM_00540C | 1693.433  | 1537.249  |
| M33197    | 64680.254 | 79018.578 | AK023061  | 1262.906  | 1428.111  |
| NM_017634 | 5647.973  | 5417.735  | NM_00725E | 6770.359  | 7890.142  |
| NM_00081E | 1181.241  | 1454.221  | NM_00366E | 11840.921 | 12720.346 |
| NM_01889E | 5317.736  | 4031.514  | NM_013384 | 61596.863 | 54527.355 |
| AJ300465  | 10117.6   | 11069.903 | NM_001187 | 3387.509  | 3074.931  |
| X86400    | 3238.458  | 3485.42   | NM_018241 | 5809.993  | 5919.416  |
| NM_00081C | 5285.575  | 6478.734  | NM_005834 | 10491.663 | 12337.126 |
| AF069307  | 5786.884  | 6119.478  | NM_00505E | 31202.379 | 40330.496 |
| M33197    | 65039.301 | 82186.492 | NM_00495C | 11109.808 | 12355.479 |
| U92978    | 1989.802  | 2152.989  | NM_000724 | 11253.813 | 12215.965 |
| M33197    | 2630.491  | 2035.928  | NM_00055E | 610.665   | 688.447   |
| AB011146  | 10524.194 | 7601.014  | NM_002557 | 36903.715 | 50167.727 |
| NM_00367E | 676.48    | 696.583   | NM_004477 | 1772.046  | 2078.328  |
| NM_00532E | 44338.504 | 35788.504 | BE728156  | 1155.284  | 1270.458  |
| NM_00728E | 951.172   | 655.794   | Y10802    | 1388.777  | 1352.364  |
| NM_01406E | 2924.908  | 3337.268  | AI417775  | 757.211   | 599.607   |
| AB035130  | 3435.003  | 3765.375  | BI762229  | 23256.625 | 26833.793 |
| NM_00335E | 5729.97   | 6171.29   | AA131406  | 1516.096  | 1258.48   |
| M33197    | 61172.492 | 52850.152 | BG618320  | 58208.68  | 55617.879 |
| AF119917  | 1957.284  | 2454.788  | M28983    | 939.731   | 911.011   |
| AK021834  | 1049.315  | 1321.285  | Y00787    | 8898.407  | 8281.3    |
| NM_01791E | 3499.965  | 4039.835  | NM_00727E | 12576.2   | 10802.861 |
| AL050097  | 1359.019  | 1523.24   | N34462    | 29385.25  | 30152.715 |
| AK021513  | 796.732   | 1105.189  | AI658778  | 12770.272 | 13655.273 |
| NM_00357E | 6628.778  | 6477.857  | L19067    | 14020.805 | 15389.851 |
| AL049283  | 2715.214  | 2547.71   | Z48482    | 3129.901  | 2991.84   |
| M33197    | 61838.977 | 54231.824 | W60413    | 15864.717 | 16764.664 |
| NM_002401 | 63123.883 | 54202.582 | BI823365  | 10159.019 | 11881.084 |
| NM_001274 | 7443.653  | 8340.845  | X06318    | 1501.497  | 1914.61   |
| NM_00391E | 1262.365  | 1074.95   | NM_016217 | 55088.445 | 60712.785 |
| NM_002227 | 7290.491  | 5030.082  | AK025971  | 11212.094 | 12460.601 |

|           |           |           |           |           |           |
|-----------|-----------|-----------|-----------|-----------|-----------|
| NM_00719  | 12056.928 | 13412.704 | NM_00261  | 23194.746 | 23267.336 |
| AB002301  | 1825.559  | 1309.302  | BE394704  | 2010.809  | 1945.04   |
| AB014530  | 14349.511 | 12964.011 | NM_004703 | 13746.484 | 15142.218 |
| M33197    | 65849.398 | 59832.875 | NM_001512 | 2585.45   | 3513.357  |
| CY3Cy5    | 8697.096  | 272.322   | NM_014706 | 14629.847 | 16373.316 |
| AK054960  | 43504.773 | 25957.27  | AK023172  | 2077.955  | 2283.523  |
| AF070536  | 5576.103  | 2979.708  | AF139768  | 1092.877  | 1311.315  |
| AK022297  | 1662.276  | 1023.551  | AJ001348  | 5562.681  | 6112.026  |
| U79300    | 3004.709  | 2056.632  | NM_014007 | 4878.908  | 4464.249  |
| AK025151  | 30594.391 | 17296.996 | AB033006  | 12866.659 | 13794.248 |
| AK025550  | 7170.713  | 4824.268  | AF020314  | 20602.648 | 23165.74  |
| AF088076  | 51471.059 | 40728.578 | NM_016332 | 41081.195 | 51249.352 |
| AF086543  | 6837.88   | 3738.182  | AK023936  | 1668.598  | 1837.227  |
| AB046797  | 1766.807  | 865.931   | NM_006457 | 5458.266  | 6033.838  |
| AK002098  | 3648.534  | 2183.43   | NM_003682 | 4419.779  | 4540.583  |
| AB011128  | 50408.563 | 36689.531 | NM_000207 | 3039.18   | 3046.916  |
| AK026742  | 1635.036  | 1115.356  | NM_002531 | 9104.474  | 9605.205  |
| AK025074  | 8698.651  | 5355.485  | NM_006314 | 58577.828 | 61994.785 |
| AK054960  | 40720.301 | 23458.615 | NM_001782 | 20590.994 | 22526.916 |
| L15344    | 2037.904  | 1283.163  | NM_002754 | 1613.59   | 1430.396  |
| SR1       | 76207.391 | 62095.422 | NM_000797 | 29858.004 | 31128.285 |
| SR3       | 47375.641 | 24973.428 | NM_014927 | 823.697   | 1050.204  |
| SR5       | 5677.778  | 3590.829  | AF217525  | 1584.304  | 1275.831  |
| SR7       | 6093.476  | 18967.008 | AL080148  | 59731.578 | 61989.094 |
| SR9       | 15268.105 | 945.228   | NM_002479 | 5781.978  | 6032.963  |
| CY3Cy5    | 4047.232  | 111.299   | NM_000348 | 39551.617 | 46586.426 |
| U50524    | 1054.727  | 276.501   | NM_018075 | 583.363   | 495.108   |
| U52050    | 1380.804  | 799.017   | NM_012105 | 10840.9   | 9676.349  |
| U73799    | 6921.278  | 4452.3    | NM_000197 | 732.408   | 519.614   |
| Z36826    | 1024.911  | 790.828   | S82470    | 9386.649  | 6742.735  |
| AK021668  | 62541.168 | 42027.715 | AB020695  | 687.59    | 846.78    |
| AK002195  | 1655.347  | 1336.305  | AB028982  | 9491.126  | 8072.248  |
| AF086128  | 1719.637  | 1093.287  | NM_002004 | 8669.973  | 8030.22   |
| AK023831  | 851.395   | 321.264   | NM_005121 | 2550.462  | 2006.713  |
| AK022850  | 2898.338  | 2128.102  | NM_000747 | 10439.999 | 11870.643 |
| NM_01649C | 8099.319  | 5981.43   | AJ275973  | 26704.17  | 30361.105 |
| AL137498  | 12951.91  | 11702.946 | U76362    | 36561.234 | 41586.184 |
| AK024289  | 4075.676  | 3462.324  | NM_00306C | 892.719   | 809.591   |
| S66168    | 29975.336 | 22146.666 | AK021489  | 55360.496 | 57543.512 |
| AF131837  | 1193.438  | 1145.571  | NM_004525 | 2688.481  | 3102.313  |
| NM_003851 | 42068.223 | 39785.852 | NM_003895 | 1811.894  | 1943.641  |
| U79244    | 864.985   | 497.078   | NM_004317 | 14295.29  | 15165.362 |
| AK022482  | 7579.329  | 4478.175  | NM_014645 | 22033.02  | 23925.475 |
| AK023811  | 1742.532  | 1049.25   | NM_014708 | 10680.119 | 12492.832 |
| AK024135  | 3260.945  | 2439.268  | NM_003693 | 9400.595  | 10349.438 |
| AK022803  | 18690.033 | 16654.068 | NM_000356 | 58671.039 | 61530.176 |
| AK023517  | 5771.088  | 4814.392  | NM_018134 | 56939.027 | 57626.352 |
| AK023869  | 15047.611 | 12995.08  | NM_013247 | 11095.229 | 12705.789 |
| AK022116  | 16121.531 | 17450.336 | NM_00677C | 9538.432  | 9965.87   |
| AF026526  | 4142.876  | 4821.664  | NM_001388 | 22730.369 | 19184.393 |
| AK026207  | 6162.681  | 7806.008  | X76770    | 17539.654 | 13501.125 |
| AK024984  | 41722.984 | 42891.438 | AB037808  | 5444.459  | 3777.574  |
| AK000276  | 431.901   | 538.65    | NM_016038 | 13506.753 | 9426.357  |

|           |           |           |           |           |           |
|-----------|-----------|-----------|-----------|-----------|-----------|
| AL110236  | 1534.763  | 1603.49   | AF090911  | 1148.477  | 713.161   |
| AF085955  | 1033.219  | 1069.322  | Z36821    | 47377.621 | 38051.008 |
| AF075106  | 19265.625 | 16903.871 | AF289485  | 10845.247 | 7264.425  |
| AK023339  | 15676.147 | 15009.61  | AF130092  | 29000.51  | 19925.047 |
| AF085981  | 1502.458  | 1435.623  | NM_016095 | 13360.292 | 10829.612 |
| AF086008  | 4061.122  | 3637.981  | AK024794  | 5038.79   | 5034.508  |
| AF087970  | 800.965   | 768.51    | NM_019853 | 14845.189 | 11430.198 |
| AF086029  | 956.671   | 1013.825  | NM_017992 | 3621.364  | 3839.288  |
| U05597    | 2484.972  | 2377.103  | NM_005400 | 2392.626  | 2182.464  |
| AK026366  | 65086.613 | 62279.75  | BF851643  | 601.415   | 805.565   |
| AK024229  | 47529.547 | 52918.016 | AK023061  | 1462.185  | 1721.715  |
| AK021824  | 8203.741  | 5502.675  | NM_007255 | 15071.858 | 17332.693 |
| AK021467  | 27881.867 | 27156.982 | NM_003668 | 13784.678 | 15827.818 |
| NM_020371 | 7797.304  | 6349.393  | NM_013384 | 61902.234 | 58249.984 |
| AK022498  | 5228.611  | 4350.111  | NM_001187 | 3955.099  | 3524.987  |
| NM_018363 | 1784.032  | 1312.821  | NM_018241 | 5780.22   | 5914.818  |
| NM_014127 | 4161.927  | 4768.358  | NM_005834 | 10731.666 | 12154.251 |
| AL360187  | 3870.39   | 4835      | AF000381  | 14875.672 | 15264.218 |
| AK021878  | 3177.473  | 3845.799  | NM_000724 | 12587.098 | 10047.084 |
| AK021817  | 11836.409 | 10837.257 | NM_000553 | 891.874   | 789.254   |
| AL080103  | 1360.976  | 1626.602  | NM_002557 | 41252.133 | 35422.648 |
| AK023217  | 2995.339  | 2632.788  | NM_004477 | 2216.616  | 1585.429  |
| AK021883  | 980.994   | 834.461   | BE728156  | 1409.323  | 1108.926  |
| AF090902  | 17015.795 | 16427.617 | Y10802    | 1285.349  | 756.301   |
| AF119887  | 61348.141 | 55446.555 | AI417775  | 1644.131  | 550.761   |
| AK091038  | 2371.378  | 1996.609  | BI762229  | 21400.568 | 15330.237 |
| AK024193  | 4640.125  | 4071.347  | AA131406  | 1853.303  | 1193.779  |
| NM_018578 | 686.847   | 1047.918  | BG618320  | 55003.547 | 49598.203 |
| NM_018543 | 726.737   | 794.048   | M28983    | 1054.489  | 697.944   |
| AK024438  | 35866.164 | 31366.775 | Y00787    | 19734.352 | 18050.91  |
| AF161337  | 358.243   | 654.744   | NM_007276 | 10776.139 | 9730.274  |
| AL390170  | 2224.213  | 2411.924  | N34462    | 25113.131 | 28147.896 |
| AK022887  | 1887.592  | 1784.593  | AI658778  | 13666.076 | 15877.312 |
| AK000745  | 41818.016 | 45979.152 | L19067    | 14383.512 | 16308.052 |
| NM_015901 | 2038.851  | 1876.141  | Z48482    | 2134.012  | 2247.344  |
| AF130065  | 830.676   | 948.232   | W60413    | 19840.02  | 20727.744 |
| Z83935    | 2908.083  | 3535.082  | BI823365  | 22859.92  | 22009.627 |
| NM_006365 | 1080.269  | 1324.964  | X06318    | 2960.204  | 3006.69   |
| NM_018687 | 51185.871 | 56038.34  | NM_016217 | 54514.102 | 49635.855 |
| M57417    | 67016.391 | 69064.984 | AK025971  | 12096.092 | 12283.648 |
| NM_017728 | 2064.267  | 2288.463  | NM_002618 | 30944.486 | 30816.994 |
| U80772    | 1540.554  | 2135.833  | L27479    | 2630.427  | 2703.254  |
| NM_006188 | 6927.328  | 6817.888  | NM_002193 | 4124.629  | 4029.086  |
| AJ272177  | 6803.911  | 4179.193  | AB033006  | 10553.334 | 8121.24   |
| AK026402  | 58847.82  | 54783.566 | AF020314  | 15530.877 | 10539.009 |
| AF111846  | 3585.94   | 3182.417  | NM_016332 | 44166     | 35520.285 |
| Z36850    | 1026.895  | 978.332   | AK023936  | 2185.53   | 1571.462  |
| AK024618  | 3931.878  | 4844.793  | NM_006457 | 5625.364  | 4544.161  |
| AL049969  | 1877.533  | 1902.502  | NM_003682 | 4416.748  | 2958.508  |
| NM_005220 | 5717.276  | 5609.063  | NM_000207 | 4038.901  | 2418.131  |
| NM_018618 | 534.899   | 639.229   | NM_002531 | 15643.607 | 8826.869  |
| X79308    | 5263.594  | 5011.874  | NM_006314 | 59168.418 | 51093.441 |
| AF086476  | 1227.855  | 1780.015  | NM_001782 | 17385.066 | 12657.805 |

|           |           |           |           |           |           |
|-----------|-----------|-----------|-----------|-----------|-----------|
| NM_01766C | 11812.291 | 12264.185 | NM_002754 | 1562.101  | 913.86    |
| AB011151  | 33739.496 | 38569.352 | NM_000797 | 29721.098 | 18899.518 |
| U92995    | 7687.153  | 8407.628  | NM_014927 | 1005.479  | 768.441   |
| Z70769    | 1129.945  | 1214.953  | NM_016293 | 34857.305 | 33228.508 |
| AL137555  | 7692.941  | 9453.026  | AF217525  | 1838.279  | 2082.985  |
| AL133017  | 3121.716  | 3730.479  | AL080148  | 56721.5   | 52946.832 |
| U84506    | 6348.189  | 6969.963  | NM_006731 | 1992.656  | 1736.408  |
| U21556    | 61785.57  | 65254.641 | NM_018487 | 4274.858  | 5416.266  |
| AB002444  | 1958.603  | 1620.526  | NM_020134 | 9668.987  | 10225.85  |
| AB002344  | 9930.47   | 9823.752  | NM_014061 | 5843.463  | 5773.695  |
| BF210352  | 2995.884  | 2824.645  | BC034395  | 24905.414 | 24044.793 |
| NM_006829 | 7033.784  | 7117.322  | NM_002479 | 9873.523  | 10296.545 |
| NM_017669 | 24263.855 | 26533.441 | NM_000348 | 55404.762 | 52257.328 |
| AK023760  | 11638.307 | 12839.996 | NM_005059 | 29895.93  | 34057.445 |
| X98415    | 64395.57  | 59224.352 | NM_004950 | 11140.633 | 11076.497 |
| AK024205  | 3536.229  | 4280.515  | AF040248  | 6431.097  | 4398.21   |
| AF086034  | 27062.609 | 22467.141 | NM_014228 | 4703.305  | 3069.267  |
| AK000174  | 1203.555  | 1256.217  | AL832292  | 14350.387 | 10074.055 |
| AF130071  | 4691.602  | 4331.617  | NM_003045 | 42396.063 | 30001.547 |
| AJ272057  | 5534.582  | 4883.527  | NM_005662 | 26700.908 | 18923.305 |
| NM_004402 | 1650.077  | 1956.443  | NM_003060 | 1166.72   | 670.06    |
| AK024216  | 39926.367 | 45921.629 | AK021489  | 58533.441 | 55266.055 |
| Y16752    | 18113.846 | 18889.301 | NM_004525 | 1832.152  | 1213.214  |
| NM_020156 | 2408.542  | 2375.691  | NM_003895 | 2163.434  | 1047.528  |
| NM_014830 | 4005.308  | 4263.946  | NM_004317 | 14605.072 | 8969.691  |
| AF355402  | 11624.56  | 9194.294  | NM_014645 | 22678.299 | 14333.786 |
| AK000407  | 7616.886  | 7163.712  | NM_014708 | 8785.934  | 6101.068  |
| NM_020524 | 26678.551 | 30245.809 | NM_003693 | 8663.325  | 5725.675  |
| NM_001999 | 8187.857  | 15199.278 | NM_000356 | 57116.918 | 50960.914 |
| X64977    | 4527.257  | 9334.826  | NM_018134 | 57913.266 | 53658.82  |
| AF064851  | 2595.805  | 2453.097  | NM_013247 | 14693.616 | 11978.014 |
| NM_002602 | 28318.713 | 38278.922 | NM_006770 | 18988.938 | 16279.779 |
| NM_016239 | 2270.202  | 2638.728  | BE394704  | 1790.896  | 2034.782  |
| X89672    | 339.048   | 602.026   | NM_004703 | 16224.262 | 14013.809 |
| NM_003383 | 813.998   | 1197.669  | NM_001512 | 7575.759  | 6281.334  |
| D17271    | 23029.264 | 22099.494 | NM_014706 | 16664.1   | 19874.664 |
| X91648    | 2936.014  | 3019.084  | AK023172  | 1711.456  | 1561.977  |
| AK026658  | 1832.544  | 1951.575  | AF139768  | 1046.639  | 922.243   |
| AF282264  | 14644.388 | 12892.339 | AJ001348  | 4446.012  | 4369.272  |
| AF086322  | 2075.685  | 2537.763  | NM_014007 | 3449.914  | 3691.756  |
| Z70717    | 2473.467  | 2773.23   | NM_001187 | 3948.21   | 2208.926  |
| AK024736  | 5098.923  | 5094.347  | NM_018241 | 7538.973  | 4952.77   |
| NM_018239 | 1910.144  | 1382.438  | NM_005834 | 13213.604 | 9101.483  |
| U88892    | 4751.93   | 5511.105  | AF000381  | 14985.376 | 10036.594 |
| AK023755  | 2081.525  | 2086.048  | NM_018075 | 756.44    | 475.172   |
| NM_005725 | 3448.847  | 2958.218  | NM_012105 | 11776.668 | 8240.629  |
| NM_012211 | 2482.772  | 2992.658  | S82470    | 13205.662 | 7828.829  |
| AB040877  | 11272.166 | 11451.464 | AB020695  | 938.146   | 304.98    |
| AB040927  | 3042.861  | 2783.921  | AB028982  | 8808.904  | 5787.737  |
| AK026737  | 9024.612  | 9682.428  | NM_002004 | 8061.204  | 5111.586  |
| NM_000210 | 1780.927  | 1804.393  | NM_005121 | 2937.161  | 1369.05   |
| NM_006289 | 13427.841 | 14516.79  | NM_001643 | 59225.203 | 56728.664 |
| NM_019067 | 8943.46   | 10197.224 | NM_020221 | 5246.975  | 4325.395  |



|           |           |           |           |           |           |
|-----------|-----------|-----------|-----------|-----------|-----------|
| AF251025  | 1364.227  | 1706.177  | NM_000747 | 10999.706 | 7775.629  |
| NM_015677 | 16589.838 | 17116.035 | NM_005415 | 10854.855 | 9712.533  |
| NM_001772 | 18392.979 | 17213.23  | AK026841  | 3379.694  | 3220.445  |
| AB011087  | 2285.592  | 2735.055  | AL137708  | 800.759   | 818.426   |
| AF161341  | 11770.955 | 12069.157 | AJ275973  | 27962.537 | 33502.82  |
| AJ249902  | 5428.541  | 6042.583  | NM_006493 | 2509.475  | 2769.964  |
| NM_004384 | 8392.763  | 8792.204  | U76362    | 30942.838 | 32159.189 |
| L05500    | 27484.758 | 26186.939 | NM_016217 | 51533.352 | 48176.484 |
| NM_012306 | 32757.504 | 37580.496 | AK025971  | 12978.158 | 8367.487  |
| AF222903  | 5763.373  | 5364.141  | NM_002618 | 24272.836 | 14277.837 |
| NM_006226 | 9767.111  | 9065.473  | L27479    | 2520.13   | 1576.668  |
| L10374    | 34101.273 | 31494.523 | NM_002193 | 3729.503  | 2374.434  |
| NM_000249 | 10129.064 | 10464.022 | NM_001388 | 18335.912 | 9886.818  |
| NM_014310 | 2665.553  | 1782.528  | X76770    | 17139.701 | 8985.352  |
| NM_005860 | 16735.545 | 19290.004 | AB037808  | 7491.623  | 3933.462  |
| AF095288  | 49306.574 | 52600.832 | NM_016038 | 14601.212 | 8391.436  |
| AF130114  | 603.318   | 1154.905  | Z36821    | 52638.695 | 38188.754 |
| AK026271  | 16286.17  | 17836.793 | AF289485  | 10454.021 | 7004.167  |
| NM_001799 | 20208.619 | 22305.057 | AF130092  | 22586.824 | 14340.885 |
| AF090895  | 3875.545  | 4708.119  | NM_016095 | 11209.502 | 7613.361  |
| NM_005610 | 4220.368  | 3000.368  | AK024794  | 5211.562  | 3683.739  |
| AL133651  | 3252.494  | 3960.575  | NM_019853 | 18326.338 | 9624.646  |
| AB014532  | 17269.143 | 18516.457 | NM_017992 | 4597.884  | 2828.895  |
| NM_003478 | 6605.69   | 7042.123  | NM_005400 | 2296.067  | 1477.057  |
| NM_016237 | 16113.588 | 16924.299 | BF851643  | 755.362   | 291.567   |
| NM_004924 | 11690.338 | 12308.573 | AK023061  | 1380.132  | 1423.638  |
| NM_001798 | 6856.96   | 7523.68   | NM_007255 | 14095.256 | 14502.711 |
| NM_001211 | 8812.867  | 8068.379  | NM_003668 | 13783.453 | 12484.838 |
| AF146760  | 637.355   | 850.786   | NM_013384 | 61771.004 | 57229.027 |
| NM_006505 | 1439.719  | 1473.314  | CY3Cy5    | 9346.294  | 136.501   |
| AB033050  | 4663.037  | 4591.778  | NM_016346 | 8697.075  | 8912.256  |
| NM_004356 | 40602.113 | 45042.855 | AF088047  | 1087.704  | 862.762   |
| NM_001855 | 771.159   | 782.722   | AF086445  | 1116.442  | 906.938   |
| BC015022  | 7015.948  | 6683.54   | AF086281  | 2357.646  | 3146.368  |
| AB033086  | 1316.326  | 1219.501  | AF086372  | 523.031   | 870.012   |
| NM_002406 | 59737.707 | 66031.359 | AF086393  | 1163.006  | 926.838   |
| U87169    | 5849.236  | 6195.982  | AF086453  | 1111.053  | 1484.197  |
| NM_002073 | 4974.433  | 5496.438  | AF070621  | 17947.584 | 19909.918 |
| NM_006043 | 1114.938  | 1951.177  | NM_020240 | 5572.026  | 6196.887  |
| AF117222  | 1922.198  | 1831.905  | AK023678  | 57730.121 | 58704.473 |
| NM_001935 | 61772.082 | 64149.145 | AF052090  | 11161.105 | 11373.324 |
| NM_001749 | 1504.948  | 1940.582  | AL355730  | 1884.924  | 1816.275  |
| AF090327  | 2183.405  | 1925.488  | U79273    | 4284.203  | 5974.073  |
| NM_003291 | 8225.032  | 9526.836  | AK022050  | 8827.177  | 9895.49   |
| AK022950  | 4595.289  | 4859.566  | NM_016346 | 7516.436  | 7122.361  |
| S75755    | 7833.895  | 10312.96  | SR2       | 56434.934 | 52853.301 |
| AF176518  | 1426.801  | 1544.814  | SR4       | 24340.982 | 25414.398 |
| AB014576  | 41513.395 | 54894.598 | SR6       | 2630.381  | 2933.996  |
| NM_019044 | 27964.453 | 30824.287 | SR8       | 9700.739  | 30366.988 |
| AK000145  | 1786.748  | 2288.812  | SR10      | 31536.73  | 9578.918  |
| AF174601  | 7137.036  | 7268.945  | CY3Cy5    | 6129.94   | 66.88     |
| AF279865  | 1362.162  | 1480.836  | AB042410  | 2825.811  | 2687.927  |
| NM_014700 | 2492.04   | 2534.659  | AF086102  | 8040.719  | 8203.592  |

|           |           |           |           |           |           |
|-----------|-----------|-----------|-----------|-----------|-----------|
| NM_014714 | 1234.573  | 1845.75   | AF116682  | 53417.004 | 54353.543 |
| NM_015644 | 4334.676  | 5770.794  | AL137259  | 6555.919  | 9419.154  |
| NM_005687 | 14131.146 | 14982.569 | AF086079  | 674.193   | 777.169   |
| NM_005983 | 8935.653  | 10398.073 | AL122107  | 25968.729 | 27063.67  |
| AB016902  | 16077.939 | 18113.879 | AF075021  | 2419.811  | 2280.543  |
| AF272378  | 62564.551 | 56000.844 | AK025140  | 10858.52  | 10642.468 |
| M61870    | 4854.563  | 4955.072  | AK023259  | 716.246   | 806.495   |
| AK026980  | 5695.4    | 4972.607  | AK001503  | 14547.49  | 14815.231 |
| AJ277915  | 2177.227  | 3142.606  | AK021812  | 721.925   | 545.223   |
| NM_020368 | 9381.419  | 10028.106 | AF085894  | 284.811   | 534.214   |
| AF024708  | 50606.125 | 54364.438 | AK022880  | 3911.571  | 3801.448  |
| NM_006467 | 12765.391 | 13823.896 | NM_003601 | 31091.561 | 33873.5   |
| NM_017566 | 13032.322 | 13325.564 | AF086375  | 926.154   | 916.507   |
| NM_006582 | 2617.313  | 2557.17   | AK001228  | 4181.199  | 4592.785  |
| AB033019  | 10785.864 | 13093.143 | AK026778  | 4198.894  | 3813.571  |
| NM_001452 | 1313.614  | 1793.535  | AF074987  | 6863.285  | 7003.162  |
| NM_006162 | 2871.394  | 3156.377  | AK001058  | 60186.035 | 52421.215 |
| NM_014764 | 14663.952 | 15480.913 | AK026239  | 4832.922  | 4578.313  |
| NM_018078 | 4583.644  | 5300.037  | AF086283  | 2873.666  | 2557.962  |
| NM_016013 | 862.272   | 724.232   | AK027041  | 3964.741  | 4709.509  |
| NM_016050 | 1402.12   | 1645.261  | AK022064  | 712.204   | 798.573   |
| NM_007080 | 20670.492 | 20188.604 | AK024332  | 1556.886  | 1697.079  |
| AK026912  | 11311.931 | 10361.121 | NM_005355 | 56520.297 | 61089.102 |
| AK023531  | 27031.85  | 31630.971 | AK027195  | 1143.321  | 1550.262  |
| NM_006697 | 25875.396 | 26485.338 | AK000937  | 1971.342  | 2453.48   |
| M19182    | 3340.606  | 3102.641  | AK023718  | 20995.354 | 22639.074 |
| AK025707  | 4594.474  | 4550.945  | AF075089  | 7127.754  | 7973.312  |
| NM_006242 | 3750.052  | 3787.473  | AF241255  | 1100.041  | 941.322   |
| AF282887  | 1825.057  | 1914.843  | AF086007  | 65129.68  | 80433.602 |
| X78712    | 5339.996  | 4792.141  | AK000803  | 7804.456  | 7443.66   |
| NM_001497 | 2769.199  | 3707.715  | AK022374  | 1736.13   | 1822.416  |
| NM_004130 | 8124.306  | 7319.432  | AF085926  | 35232.488 | 42254.195 |
| NM_006348 | 2834.519  | 2359.827  | AF085948  | 972.248   | 1029.163  |
| AF067972  | 39064.191 | 47366.125 | AL137307  | 13738.46  | 14580.677 |
| NM_004958 | 3479.62   | 3828.993  | AL137468  | 15265.311 | 16023.203 |
| D87076    | 6795.154  | 9119.873  | AL162007  | 41988.445 | 46926.617 |
| NM_014148 | 4749.957  | 6394.309  | AL390137  | 52223.879 | 55114.84  |
| AB020635  | 14921.311 | 16320.356 | AL137340  | 1487.578  | 1707.345  |
| NM_006515 | 2515.269  | 3388.895  | AL137542  | 1236.93   | 1332.346  |
| NM_005224 | 1332.7    | 1202.667  | AL162045  | 1866.019  | 1985.159  |
| NM_012144 | 17529.467 | 18303.037 | X92185    | 760.382   | 655.938   |
| X65231    | 62232.875 | 55510.645 | AK022437  | 46380.559 | 52608.484 |
| NM_002908 | 8752.343  | 9013.044  | AK024213  | 61675.043 | 65709.664 |
| AF205632  | 8485.642  | 9004.576  | AK025093  | 1402.401  | 1334.194  |
| NM_005378 | 60781.465 | 52405.773 | AK022184  | 2623.822  | 3224.43   |
| NM_002397 | 4591.333  | 3815.758  | AB007959  | 2878.701  | 3130.253  |
| AF000672  | 3578.796  | 4099.009  | AK026002  | 936.708   | 1165.687  |
| NM_017652 | 34789.309 | 37470.242 | AK024360  | 950.38    | 1007.08   |
| X59268    | 7882.759  | 7499.247  | AK026628  | 1012.439  | 728.132   |
| D70832    | 65190.77  | 56734.84  | AK023394  | 1216.767  | 1109.442  |
| NM_001428 | 32855.461 | 37524.047 | AF161340  | 18588.113 | 20351.787 |
| NM_002378 | 32014.518 | 34571.137 | AF242771  | 3021.631  | 3379.518  |
| AB007929  | 12258.046 | 12582.636 | NM_018562 | 34906.043 | 40084.273 |

|           |           |           |           |           |           |
|-----------|-----------|-----------|-----------|-----------|-----------|
| L12347    | 52915.969 | 54770.441 | AF098666  | 3358.755  | 3011.932  |
| NM_001622 | 30189.771 | 37991.078 | AF161365  | 1510.692  | 1854.756  |
| Z36788    | 9732.202  | 12340.139 | AK021969  | 1964.954  | 2311.351  |
| NM_018477 | 16289.914 | 20060.596 | AK022065  | 2188.493  | 2639.659  |
| U20536    | 1507.98   | 1399.107  | AK022221  | 34373.02  | 42953.434 |
| AI298534  | 5302.758  | 6759.683  | AK022356  | 3702.329  | 4106.468  |
| R71691    | 16944.49  | 19746.848 | AK021998  | 10790.287 | 9585.548  |
| AW167715  | 6938.729  | 7330.589  | AK022126  | 7233.528  | 7540.049  |
| AA424735  | 17206.619 | 18285.082 | AK022256  | 2685.224  | 2633.257  |
| U78294    | 3794.533  | 4474.623  | AK022383  | 6235.925  | 6171.261  |
| AA171613  | 1288.73   | 1770.34   | AF086262  | 5140.962  | 5567.494  |
| BI760394  | 5631.872  | 6628.42   | AF086292  | 24332.631 | 24984.658 |
| AA555216  | 1667.843  | 1383.153  | AK023769  | 1024.493  | 980.265   |
| U09117    | 59439.996 | 54691.305 | AK024342  | 48046.711 | 54017.984 |
| M21054    | 3075.508  | 3253.084  | AL137712  | 15328.404 | 17456.799 |
| M18468    | 2236.022  | 2256.777  | AL137606  | 488.262   | 946.454   |
| H66070    | 35552.152 | 42604.633 | L77599    | 62047.195 | 62736.797 |
| AA164741  | 1398.721  | 1775.797  | AK021673  | 56305.199 | 58980.098 |
| AI189375  | 3750.977  | 4228.346  | AK022743  | 16204.853 | 16616.369 |
| AI978885  | 7894.699  | 8372.028  | AF035306  | 6503.212  | 6212.355  |
| NM_000303 | 20686.795 | 23211.131 | AK091662  | 1524.611  | 1659.986  |
| NM_001939 | 33230.598 | 37355.195 | AB038318  | 1106.108  | 1698.071  |
| NM_004393 | 1519.147  | 1574.797  | NM_003954 | 1938.989  | 1434.655  |
| AB018345  | 1277.471  | 1347.426  | NM_016348 | 1175.062  | 1537.167  |
| NM_005832 | 2370.782  | 2314.904  | AK022003  | 531.63    | 672.097   |
| AW407841  | 10737.434 | 8103.72   | AK023877  | 754.662   | 975.431   |
| U15197    | 1588.181  | 1676.549  | AK023640  | 826.323   | 686.333   |
| NM_001879 | 6626.49   | 7154.698  | AK024046  | 5753.673  | 6813.231  |
| AF264014  | 26710.178 | 34978.66  | NM_017931 | 8515.025  | 9976.997  |
| NM_004155 | 6709.19   | 7192.531  | AK022793  | 2875.935  | 3434.755  |
| NM_001831 | 2480.198  | 2507.49   | AJ227910  | 4771.746  | 5131.23   |
| NM_014586 | 18286.336 | 17091.863 | AF001893  | 8517.764  | 11147.981 |
| NM_014366 | 29488.492 | 37453.199 | X04236    | 18661.191 | 20589.52  |
| NM_000923 | 2786.076  | 3069.035  | AK093746  | 29784.295 | 35991.051 |
| NM_006453 | 4342.873  | 4639.734  | D16875    | 764.198   | 1036.484  |
| NM_018096 | 3252.269  | 2546.028  | AK027171  | 4101.2    | 4817.692  |
| AL390078  | 4220.305  | 3874.104  | AK021945  | 13017.415 | 13454.208 |
| NM_004036 | 5950.579  | 6634.644  | L23545    | 2067.161  | 2320.202  |
| NM_015986 | 5124.181  | 4975.61   | AK024153  | 4926.479  | 5587.531  |
| NM_014959 | 16743.436 | 18184.836 | Y10516    | 13336.536 | 14687.569 |
| NM_003992 | 9191.338  | 10151.068 | AF056451  | 18017.963 | 18356.105 |
| NM_000137 | 3744.631  | 4689.769  | AF015039  | 13438.334 | 13312.27  |
| NM_005017 | 57367.906 | 58534.57  | U50528    | 5846.216  | 7110.889  |
| AF163572  | 41013.957 | 50825.129 | AB020632  | 6408.928  | 7702.187  |
| NM_000897 | 18323.951 | 20587.496 | NM_018614 | 62974.781 | 61364.039 |
| NM_000487 | 2267.37   | 2518.989  | AL117549  | 1905.261  | 1820.867  |
| NM_006411 | 36115.453 | 36332.684 | NM_005222 | 19341.74  | 19541.27  |
| NM_014182 | 4366.463  | 4063.095  | BC024308  | 7356.045  | 7125.241  |
| AB040884  | 2070.855  | 2421.877  | NM_000538 | 3228.887  | 3323.955  |
| NM_001170 | 16011.017 | 18486.004 | AK001838  | 65554.633 | 63483.961 |
| NM_014342 | 5862.085  | 6956.237  | NM_018295 | 2973.094  | 3367.313  |
| NM_000452 | 505.537   | 805.595   | AF070574  | 1872.287  | 2060.417  |
| NM_004853 | 14154.133 | 13084.935 | AF190900  | 6433.504  | 6934.674  |

|           |           |           |           |           |           |
|-----------|-----------|-----------|-----------|-----------|-----------|
| NM_001494 | 30077.34  | 31803.125 | NM_020404 | 51394.145 | 53195.25  |
| NM_017707 | 1865.683  | 2060.865  | BE972401  | 19118.152 | 19960.334 |
| NM_004206 | 4996.218  | 4902.224  | U56725    | 855.953   | 972.249   |
| NM_004603 | 50194.203 | 54799.914 | NM_017425 | 2106.465  | 2333.737  |
| AK022849  | 6620.255  | 6974.231  | AB007922  | 1637.445  | 1655.058  |
| AF040964  | 19040.018 | 19894.016 | NM_015982 | 7536.874  | 7871.934  |
| NM_001773 | 888.569   | 1447.5    | NM_003746 | 57575.391 | 54052.445 |
| Z70704    | 5303.887  | 5323.05   | NM_002910 | 63487.762 | 63354.063 |
| NM_014363 | 4666.701  | 4747.986  | AC096970  | 53420.773 | 51973.734 |
| NM_003239 | 1431.14   | 1586.187  | NM_014627 | 9203.94   | 10007.666 |
| NM_001375 | 19624.822 | 19178.383 | NM_013938 | 36437.363 | 40554.422 |
| NM_002312 | 4535.588  | 3720.751  | NM_013986 | 60733.027 | 61030.078 |
| M20699    | 4503.496  | 3656.576  | U55055    | 3505.375  | 2817.88   |
| NM_004774 | 11568.804 | 9936.358  | AK022186  | 712.336   | 699.095   |
| NM_016937 | 6039.381  | 6842.879  | AK021485  | 843.215   | 953.051   |
| NM_002690 | 4259.846  | 4180.969  | AB018319  | 10374.043 | 9468.624  |
| NM_012328 | 6392.534  | 6916.472  | AK001101  | 6170.506  | 6523.073  |
| NM_007341 | 2440.573  | 3052.617  | BM973473  | 2361.541  | 2505.773  |
| NM_016508 | 2405.77   | 3208.614  | AK021637  | 3303.501  | 3368.904  |
| NM_006456 | 36909.637 | 42029.754 | AK021658  | 1929.058  | 1986.667  |
| AK026062  | 7999.729  | 7482.458  | D61705    | 627.09    | 747.329   |
| AF047002  | 36862.09  | 38962.582 | U17631    | 2785.316  | 3437.039  |
| AL050082  | 4936.608  | 4549.165  | AL137723  | 1821.041  | 2106.623  |
| NM_006623 | 62895.227 | 55527.605 | AL137311  | 856.164   | 1055.899  |
| NM_016588 | 4931.916  | 4726.381  | NM_014288 | 19664.955 | 22640.469 |
| NM_003135 | 13952.438 | 14277.713 | AF035300  | 3420.154  | 4063.185  |
| NM_004579 | 7241.584  | 8964.783  | NM_017703 | 13906.599 | 14156.263 |
| AA203126  | 4291.721  | 3595.825  | NM_015320 | 8834.251  | 8789.412  |
| Z36788    | 13876.365 | 12452.401 | NM_004055 | 4754.791  | 4264.054  |
| NM_018477 | 15981.656 | 16549.16  | NM_014726 | 43006.934 | 50414.293 |
| U20536    | 1054.228  | 965.674   | AJ297349  | 2513.816  | 2706.384  |
| AI298534  | 3523.285  | 3811.512  | NM_005828 | 6929.552  | 6790.003  |
| R71691    | 15405.792 | 19008.996 | NM_001619 | 6995.648  | 7285.662  |
| AW167715  | 7829.088  | 7410.049  | NM_006599 | 6566.119  | 6902.052  |
| AA424735  | 16912.301 | 15945.459 | NM_004463 | 958.511   | 1244.823  |
| U78294    | 4898.133  | 5154.444  | NM_005936 | 3187.046  | 4250.711  |
| AA171613  | 1423.166  | 1554.468  | U43586    | 3649.48   | 5022.759  |
| BI760394  | 4150.226  | 5275.322  | NM_006271 | 15665.568 | 15053.649 |
| AA555216  | 1176.323  | 1642.84   | NM_018647 | 1822.511  | 2277.137  |
| U09117    | 58400.047 | 56838.008 | NM_003026 | 1464.415  | 1946.6    |
| M21054    | 2370.522  | 2860.019  | NM_000721 | 63615.105 | 64854.035 |
| M18468    | 2429.183  | 2102.51   | NM_003933 | 4666.796  | 4695.349  |
| H66070    | 32636.287 | 35752.063 | NM_018640 | 658.654   | 754.077   |
| AA164741  | 1323.228  | 1470.336  | NM_005095 | 5566.634  | 6875.154  |
| AI189375  | 4636.086  | 5037.789  | NM_000055 | 1138.213  | 1154.339  |
| AI978885  | 8004.522  | 7861.12   | NM_003163 | 46728.949 | 49524.391 |
| NM_014470 | 4322.861  | 4464.698  | NM_016205 | 11361.937 | 11070.313 |
| NM_001665 | 36138.688 | 41494.953 | NM_005759 | 9684.391  | 9700.539  |
| AF097645  | 2005.031  | 2297.254  | AF149724  | 4040.869  | 4098.178  |
| NM_003279 | 63997.813 | 60261.051 | BC020745  | 2001.642  | 2006.911  |
| AB014599  | 12342.609 | 7616.797  | NM_006367 | 33666.277 | 36581.008 |
| NM_005832 | 2042.27   | 1889.42   | NM_006732 | 64182.98  | 59678.164 |
| AW407841  | 9256.99   | 5733.81   | NM_004354 | 13117.454 | 13792.75  |

|           |           |           |           |           |           |
|-----------|-----------|-----------|-----------|-----------|-----------|
| U15197    | 1828.071  | 1738.951  | NM_004661 | 6510.77   | 5985.668  |
| NM_001879 | 5287.669  | 4087.756  | NM_002009 | 1972.309  | 2370.131  |
| AF264014  | 22893.338 | 24949.359 | NM_001610 | 5027.864  | 4666.454  |
| L09098    | 2394.789  | 2667.335  | NM_001241 | 2525.293  | 2855.823  |
| NM_004155 | 7651.657  | 7579.965  | AF217504  | 6739.4    | 6131.421  |
| NM_001831 | 2315.335  | 1923.028  | AK027102  | 19982.891 | 21699.646 |
| NM_014586 | 11089.304 | 11120.66  | AL109714  | 1606.804  | 1589.232  |
| NM_014366 | 27657.82  | 36318.922 | NM_004632 | 10116.287 | 10057.461 |
| NM_000923 | 2419.442  | 3625.886  | NM_017919 | 13974.354 | 14338.948 |
| NM_006453 | 3824.38   | 4124.146  | NM_014456 | 11625.479 | 13042.309 |
| NM_018096 | 3134.033  | 3177.074  | NM_004740 | 23230.998 | 26415.121 |
| AL390078  | 3896.37   | 4085.028  | NM_003805 | 6340.799  | 6550.951  |
| NM_004036 | 7020.396  | 6301.191  | NM_019886 | 12614.686 | 14106.492 |
| NM_015986 | 5579.274  | 4794.488  | NM_003278 | 66573.445 | 70014.141 |
| NM_014959 | 20518.381 | 19985.52  | NM_000426 | 1662.875  | 1614.991  |
| NM_003992 | 8415.158  | 7416.067  | M29540    | 410.515   | 614.299   |
| NM_002379 | 48305.43  | 55705.363 | AK021957  | 62509.637 | 63116.09  |
| AB007929  | 9032.706  | 9637.037  | U95031    | 3371.002  | 2904.163  |
| NM_012102 | 26130.807 | 35808.398 | NM_004771 | 6459.264  | 6621.606  |
| AF163572  | 30501.326 | 27355.498 | AL365514  | 3466.586  | 2954.698  |
| NM_000897 | 16714.521 | 13356.506 | NM_018299 | 5321.355  | 4846.104  |
| NM_000487 | 1650.268  | 1714.939  | NM_002104 | 3403.94   | 3467.276  |
| NM_006411 | 33977.684 | 30074.305 | NM_005504 | 31024.133 | 35741.309 |
| NM_014182 | 3200.963  | 2129.049  | AF234654  | 3104.465  | 3679.885  |
| AB040884  | 2801.421  | 2699.147  | NM_000110 | 5823.929  | 6055.879  |
| NM_001170 | 17184.291 | 17356.381 | NM_016002 | 51887.676 | 58433.008 |
| NM_014342 | 6072.803  | 5949.703  | NM_014549 | 3295.036  | 2858.901  |
| NM_000452 | 528.882   | 452.522   | NM_000531 | 1540.188  | 1823.991  |
| NM_004853 | 12979.742 | 12954.15  | NM_017832 | 6406.206  | 6875.157  |
| NM_001494 | 27093.662 | 30500.086 | NM_001713 | 10879.14  | 11749.127 |
| NM_017707 | 1239.96   | 1309.632  | NM_015367 | 25395.301 | 25693.014 |
| NM_004206 | 5034.022  | 5665.93   | NM_014498 | 17109.145 | 16157.327 |
| NM_004603 | 48793.125 | 53444.172 | NM_002375 | 45252.719 | 47579.145 |
| AK022849  | 6049.464  | 5401.287  | NM_000988 | 62011.246 | 64003.02  |
| AF040964  | 17709.182 | 16286.18  | NM_001813 | 5275.407  | 6264.175  |
| AK023527  | 740.489   | 492.677   | AF055016  | 10263.489 | 12594.646 |
| NM_001939 | 24529.035 | 25864.398 | NM_007234 | 26371.271 | 25207.303 |
| NM_014363 | 1923.23   | 2826.702  | Y16704    | 64281.355 | 63854.719 |
| NM_001375 | 8928.089  | 10289.258 | NM_014567 | 13714.052 | 14958.463 |
| NM_002312 | 5295.721  | 4641.871  | NM_017842 | 4181.097  | 4195.27   |
| M20699    | 3363.604  | 1985.509  | NM_019057 | 23010.572 | 18487.816 |
| NM_004774 | 5425.545  | 2850.659  | NM_002677 | 2986.66   | 2860.32   |
| NM_016937 | 3201.815  | 2934.921  | NM_012082 | 1650.336  | 1733.211  |
| NM_002690 | 4973.464  | 3082.354  | NM_001537 | 10710.437 | 9551.113  |
| NM_012328 | 7565.017  | 5730.556  | U80743    | 2653.072  | 2956.647  |
| NM_007341 | 2132.374  | 1866.286  | NM_001352 | 13757.238 | 12404.571 |
| NM_016508 | 2422.113  | 2642.623  | D15050    | 3139.594  | 1948.628  |
| NM_006456 | 29848.076 | 30507.863 | NM_014724 | 1021.59   | 770.78    |
| AK026062  | 5686.544  | 4828.336  | NM_006527 | 22445.85  | 22475.123 |
| AF047002  | 31173.963 | 34533.574 | NM_006627 | 7241.16   | 6792.849  |
| AL050082  | 5775.125  | 7853.305  | NM_007363 | 34506.352 | 35592.168 |
| NM_006623 | 63312.609 | 56156.754 | NM_003093 | 57596.402 | 54506.105 |
| NM_016588 | 4762.802  | 5211.386  | U05589    | 3484.588  | 3247.541  |

|           |           |           |           |           |           |
|-----------|-----------|-----------|-----------|-----------|-----------|
| NM_003135 | 12802.9   | 11092.445 | NM_014473 | 30682.951 | 28587.908 |
| NM_000137 | 2137.868  | 2485.844  | NM_003095 | 63797.738 | 60172.195 |
| L12347    | 45604.223 | 50144.594 | NM_016389 | 7870.851  | 7846.817  |
| NM_001622 | 17289.492 | 16751.354 | NM_002295 | 62034.008 | 58099.281 |
| Z36788    | 4941.235  | 5263.509  | NM_003133 | 28710.971 | 30173.543 |
| NM_018477 | 5500.98   | 6041.536  | NM_001762 | 30986.607 | 28193.154 |
| U20536    | 1154.402  | 598.57    | NM_016306 | 30869.012 | 30067.348 |
| AI298534  | 5895.897  | 6550.5    | NM_003755 | 2076.211  | 2486.882  |
| R71691    | 6864.677  | 8553.635  | NM_013238 | 8960.486  | 8814.489  |
| AA171613  | 2108.159  | 2796.37   | BE258640  | 44183.219 | 47215.418 |
| BI760394  | 5536.996  | 7118.367  | NM_003314 | 15129.944 | 15416.338 |
| AA555216  | 3127.009  | 2056.18   | NM_016623 | 29622.023 | 30221.941 |
| U09117    | 52412.621 | 49698.016 | NM_001334 | 35169.758 | 29336.131 |
| M21054    | 1985.743  | 2002.781  | NM_001246 | 3079.175  | 3007.706  |
| M18468    | 1165.289  | 1306.526  | AL365411  | 9534.326  | 8115.607  |
| H66070    | 21258.188 | 20770.412 | M24470    | 1947.98   | 1653.298  |
| AA164741  | 1384.444  | 1493.567  | NM_016066 | 29890.826 | 26960.736 |
| AI189375  | 3775.56   | 4768.269  | AK024677  | 2100.748  | 2385.811  |
| NM_001665 | 33228.355 | 32465.398 | NM_000036 | 3851.449  | 3538.039  |
| AF097645  | 804.619   | 1071.012  | AF254082  | 64002.07  | 58499.652 |
| NM_001773 | 1007.471  | 1066.474  | AF205718  | 24601.328 | 23029.834 |
| Z70704    | 4238.974  | 4530.267  | NM_003420 | 2376.342  | 2083.307  |
| AF264014  | 11894.359 | 10022.715 | AY004252  | 2425.51   | 2340.462  |
| L09098    | 2098.641  | 305.093   | NM_006261 | 11402.417 | 12260.284 |
| NM_004155 | 3123.88   | 1798.87   | AK027045  | 2396.816  | 2344.366  |
| NM_014586 | 12848.426 | 10284.236 | AF169796  | 9100.075  | 8523.904  |
| NM_014366 | 18114.945 | 14611.497 | AK026157  | 1225.487  | 1235.766  |
| NM_018096 | 3459.457  | 2671.599  | AK001814  | 16558.736 | 15179.923 |
| AL390078  | 2805.05   | 2877.006  | NM_007222 | 5192.285  | 4592.443  |
| NM_004036 | 7107.702  | 5694.817  | NM_003435 | 12142.025 | 11504.969 |
| NM_015986 | 4646.6    | 3483.311  | NM_016291 | 21341.189 | 22209.844 |
| NM_006546 | 1732.39   | 2007.459  | NM_005937 | 61399.863 | 54913.598 |
| NM_014959 | 11858.79  | 12277.67  | AB037809  | 6159.692  | 5609.692  |
| NM_003992 | 6304.868  | 5502.874  | AB011129  | 3257.525  | 3451.482  |
| AF279265  | 3974.968  | 4425.447  | NM_014391 | 51070.953 | 45944.199 |
| NM_007350 | 689.792   | 1026.031  | NM_004270 | 3141.09   | 2619.249  |
| NM_005213 | 29397.637 | 34858.762 | L09102    | 66776.922 | 67875.406 |
| AB040914  | 3266.467  | 4031.942  | U68488    | 1758.01   | 1337.914  |
| NM_002379 | 46118.141 | 49562.176 | NM_000675 | 978.355   | 1259.743  |
| AB007929  | 9878.623  | 9916.139  | NM_016247 | 31560.494 | 34778.289 |
| NM_004579 | 14997.327 | 14504.545 | NM_001157 | 1030.44   | 1061.132  |
| AA203126  | 3260.96   | 3072.379  | NM_012282 | 2279.963  | 2281.308  |
| NM_004853 | 7775.037  | 6357.002  | NM_006710 | 1499.847  | 1361.458  |
| NM_001494 | 24575.32  | 22210.535 | NM_003323 | 29746.393 | 31505.186 |
| NM_017707 | 1269.813  | 1004.693  | BG685310  | 6193.473  | 6404.054  |
| NM_004206 | 3081.882  | 2886.871  | AW300857  | 62486.504 | 58358.063 |
| Y08991    | 762.048   | 196.589   | H85962    | 60605.129 | 57430.902 |
| NM_004603 | 47769.516 | 47642.063 | BG742446  | 4146.341  | 3923.364  |
| AK022849  | 5909.873  | 7624.154  | AA864554  | 2783.14   | 2604.214  |
| AF040964  | 15010.033 | 24176.596 | X66945    | 12019.887 | 11577.961 |
| NM_001939 | 20980.293 | 15523.764 | AI160703  | 1624.173  | 1751.887  |
| NM_003279 | 46704.203 | 52100.859 | X12830    | 8862.22   | 9391.245  |
| AB014599  | 7915.296  | 7791.736  | U00482    | 6361.499  | 5711.044  |

|           |           |           |           |           |           |
|-----------|-----------|-----------|-----------|-----------|-----------|
| NM_004393 | 1050.145  | 1037.663  | Z80998    | 970.052   | 973.472   |
| AB018345  | 1025.223  | 939.458   | K01904    | 40042.125 | 44881.406 |
| NM_005832 | 1844.694  | 1929.37   | BE538886  | 4700.949  | 4867.798  |
| AW407841  | 8431.792  | 6228.203  | NM_002228 | 2084.341  | 1545.678  |
| U15197    | 1961.007  | 1777.675  | M57650    | 61649.855 | 62056.387 |
| NM_001879 | 7119.531  | 6554.806  | BC023978  | 5596.895  | 5088.766  |
| NM_016588 | 3165.638  | 3338.507  | M21302    | 24923.148 | 24184.539 |
| NM_003135 | 10620.661 | 10446.765 | NM_002512 | 62061.836 | 54555.82  |
| NM_000137 | 2152.696  | 2114.336  | NM_004908 | 1317.53   | 1461.135  |
| NM_012102 | 3954.736  | 4897.126  | NM_016171 | 59883.063 | 73827.227 |
| NM_005017 | 23540.127 | 20846.064 | NM_014443 | 17935.281 | 15924.223 |
| AF163572  | 17354.076 | 13715.987 | NM_005212 | 10204.171 | 10957.815 |
| NM_000897 | 7253.898  | 7291.24   | M14584    | 1864.451  | 1905.424  |
| NM_000487 | 1628.859  | 1281.251  | NM_006419 | 5142.798  | 6487.715  |
| NM_006411 | 33346.098 | 30962.516 | AF035035  | 1699.087  | 1849.634  |
| NM_014182 | 4757.888  | 3431.888  | AB020676  | 4187.116  | 4108.695  |
| AB040884  | 1772.234  | 1429.409  | AK024715  | 2141.847  | 2188.479  |
| NM_000492 | 23428.082 | 25713.973 | U90942    | 59259.648 | 60837.902 |
| NM_012089 | 812.111   | 679.044   | NM_014942 | 1886.591  | 2031.179  |
| AK024382  | 382.814   | 481.615   | NM_018360 | 9496.228  | 9974.081  |
| NM_001170 | 13905.127 | 14740.207 | AK022489  | 430.058   | 621.075   |
| AL137716  | 1570.683  | 1707.344  | AL365415  | 2263.092  | 1945.153  |
| NM_004696 | 3794.266  | 4010.106  | L29147    | 56702.953 | 52747.121 |
| NM_014342 | 4809.354  | 5418.246  | NM_001525 | 59471.926 | 53865.563 |
| Z50169    | 1576.266  | 1477.363  | NM_006055 | 16159.999 | 17393.193 |
| NM_014470 | 2596.86   | 2622.566  | NM_004296 | 2488.196  | 2620.479  |
| NM_001665 | 31863.58  | 30582.975 | NM_005048 | 2327.984  | 2593.694  |
| AF097645  | 1177.248  | 1476.281  | NM_005972 | 5152.284  | 5036.522  |
| Z70704    | 1603.488  | 1517.054  | NM_001060 | 1683.742  | 1733.914  |
| NM_014363 | 1645.425  | 1569.427  | NM_018841 | 18866.037 | 19241.316 |
| NM_000557 | 3948.118  | 2823.577  | NM_005226 | 3640.288  | 3806.224  |
| NM_001375 | 6734.461  | 4275.848  | AK022859  | 6914.546  | 7076.857  |
| NM_004774 | 7574.159  | 7178.577  | NM_003676 | 16347.326 | 19151.809 |
| NM_016937 | 3628.522  | 4909.496  | AF113007  | 29996.279 | 34776.105 |
| NM_003479 | 1780.099  | 98.885    | NM_000688 | 7692.194  | 8053.383  |
| NM_002690 | 3135.338  | 3033.047  | U39573    | 3814.029  | 3730.391  |
| NM_012328 | 5468.218  | 3335.848  | D82061    | 11450.457 | 13491.33  |
| NM_007341 | 1427.348  | 1269.013  | AJ293009  | 7819.445  | 8802.294  |
| NM_016508 | 1589.414  | 1515.811  | NM_000374 | 6265.375  | 6674.234  |
| NM_006456 | 24497.924 | 23752.736 | NM_000502 | 29984.514 | 33846.945 |
| AK026062  | 5981.304  | 5616.783  | NM_001359 | 31868.941 | 35169.605 |
| AF047002  | 34983.141 | 33205.531 | NM_002245 | 1483.076  | 1774.453  |
| AL050082  | 5303.337  | 5497.793  | NM_004980 | 54517.008 | 53599.949 |
| NM_006623 | 64882.129 | 62783.883 | NM_003224 | 4493.841  | 5337.595  |
| CY3Cy5    | 9175.003  | 288.12    | NM_004227 | 3699.851  | 4384.13   |
| NM_016134 | 1425.85   | 1451.933  | NM_005282 | 11951.07  | 12759.862 |
| AL390185  | 13073.634 | 12159.698 | NM_001736 | 6052.922  | 6941.996  |
| AF086235  | 23851.135 | 15514.619 | AB028949  | 1250.685  | 1700.159  |
| AF143886  | 3251.992  | 3070.673  | AL137580  | 2302.129  | 3010.139  |
| AK025975  | 12197.286 | 24513.113 | NM_004101 | 2951.159  | 2862.083  |
| AK025583  | 65080.535 | 63217.098 | NM_002995 | 60003.711 | 54000.953 |
| NM_014664 | 4630.002  | 4722.173  | AB033114  | 1674.962  | 1750.943  |
| AL109788  | 18172.723 | 19079.34  | NM_015978 | 20239.752 | 21857.631 |

|           |           |           |           |           |           |
|-----------|-----------|-----------|-----------|-----------|-----------|
| NM_014952 | 67976.836 | 63786.344 | NM_003810 | 3808.287  | 4245.695  |
| AL133053  | 2796.411  | 3097.199  | NM_018973 | 17165.373 | 17484.539 |
| NM_018142 | 16799.281 | 16210.275 | NM_002591 | 55643.492 | 45965.074 |
| NM_017653 | 11433.644 | 13144.999 | NM_020216 | 4365.479  | 4322.68   |
| AL109695  | 24178.691 | 14451.157 | AK021860  | 6008.882  | 5188.219  |
| NM_016134 | 1293.52   | 644.906   | AB046816  | 2024.176  | 1895.961  |
| SR2       | 50854.676 | 35570.824 | AL137266  | 11964.183 | 11794.986 |
| SR4       | 18637.697 | 12493.687 | NM_016457 | 2355.823  | 2267.555  |
| SR6       | 2338.854  | 1237.49   | NM_005057 | 3495.034  | 3345.306  |
| SR8       | 9251.924  | 30007.262 | AF143321  | 2181.057  | 2561.072  |
| SR10      | 28438.889 | 6020.838  | AB046842  | 6416.348  | 7047.542  |
| CY3Cy5    | 2116.774  | 71.03     | NM_004850 | 3626.273  | 3845.871  |
| NM_014819 | 10853.96  | 14260.438 | NM_002822 | 25723.107 | 23432.895 |
| NM_017609 | 1915.201  | 2091.146  | BF306955  | 5535.643  | 5471.857  |
| AF086040  | 3023.133  | 2424.666  | NM_001394 | 20988.969 | 19543.473 |
| AB032988  | 4201.656  | 3859.139  | NM_018441 | 35551.445 | 38202.535 |
| AK023559  | 32696.746 | 28654.465 | NM_000778 | 34690.547 | 38459.816 |
| AB037859  | 66857.586 | 63673.418 | NM_001609 | 5415.904  | 4898.555  |
| AL049233  | 7626.124  | 8831.549  | BE733234  | 2174.269  | 2626.916  |
| NM_017696 | 18214.424 | 19158.422 | NM_000675 | 1239.691  | 1054.007  |
| AL050166  | 11086.755 | 15371.423 | NM_016247 | 31155.904 | 37513.414 |
| AK024254  | 4921.719  | 4986.822  | NM_001157 | 1003.291  | 1093.405  |
| NM_018456 | 9662.564  | 9229.254  | NM_012282 | 2399.843  | 1972.849  |
| AK026697  | 2015.713  | 2385.642  | NM_006710 | 2287.706  | 2368.905  |
| NM_019021 | 3491.037  | 4343.797  | NM_003323 | 28353.354 | 32868.496 |
| NM_004717 | 1024.279  | 1348.082  | BG685310  | 6429.053  | 6779.846  |
| AK002183  | 1706.968  | 1913.236  | AW300857  | 60232.957 | 56785.34  |
| NM_018996 | 1732.642  | 1216.563  | H85962    | 60513.98  | 56180.82  |
| AL137304  | 4120.302  | 2109.957  | BG742446  | 3891.206  | 4103.882  |
| AL049274  | 1031.449  | 559.325   | AA864554  | 2602.694  | 2563.169  |
| NM_018279 | 4843.529  | 2872.13   | X66945    | 14277.979 | 13548.78  |
| AK026883  | 4500.65   | 2554.635  | AI160703  | 2026.516  | 1905.657  |
| NM_014350 | 20717.508 | 13735.267 | X12830    | 8529.351  | 7923.152  |
| U00925    | 27618.217 | 18391.596 | U00482    | 6828.504  | 6504.536  |
| AK026743  | 351.572   | 811.537   | Z80998    | 855.72    | 1059.444  |
| AK025214  | 1242.045  | 1109.677  | K01904    | 41217.398 | 50151.395 |
| AK025846  | 2991.978  | 2905.793  | BE538886  | 4057.257  | 3751.554  |
| AK026805  | 24027.691 | 23463.246 | NM_002228 | 1951.733  | 1441.224  |
| AB037765  | 3890.392  | 4578.276  | M57650    | 63340.5   | 62146.918 |
| AK025068  | 5293.716  | 5714.187  | BC023978  | 4258.646  | 4079.001  |
| AK026720  | 3186.226  | 3458.105  | M21302    | 23698.871 | 22961.699 |
| AL137566  | 5664.381  | 6967.599  | AK024865  | 4915.241  | 4542.627  |
| AF087962  | 14444.084 | 13310.349 | NM_007210 | 2385.733  | 2425.916  |
| AL050197  | 6976.57   | 7442.354  | NM_001483 | 8875.104  | 7111.198  |
| AF085870  | 19118.875 | 18220.707 | NM_014443 | 16860.986 | 13551.452 |
| AL050063  | 972.044   | 388.481   | NM_005212 | 10062.223 | 10855.721 |
| AL080217  | 723.694   | 429.295   | M14584    | 2811.509  | 2449.096  |
| AL117580  | 22357.215 | 16145.573 | NM_006419 | 5462.391  | 5697.497  |
| AL110190  | 7267.253  | 5253.779  | AF035035  | 1705.163  | 1792.536  |
| AL117656  | 1333.099  | 1154.168  | AB020676  | 3659.786  | 3596.405  |
| AJ001893  | 6999.208  | 5151.919  | AK024715  | 2398.44   | 2902.243  |
| AK025534  | 2522.389  | 2707.058  | U90942    | 59408.426 | 63764.996 |
| AK022577  | 1020.709  | 1005.81   | NM_014942 | 1872.221  | 1834.695  |



|           |           |           |           |           |           |
|-----------|-----------|-----------|-----------|-----------|-----------|
| AF091526  | 7578.068  | 8676.134  | NM_018360 | 10774.318 | 9790.687  |
| AK022170  | 616.697   | 844.139   | AK022489  | 626.921   | 583.724   |
| AK026705  | 10915.835 | 12123.004 | AL365415  | 2407.444  | 2138.253  |
| NM_003602 | 7047.972  | 8033.147  | L29147    | 58106.41  | 54497.578 |
| AF009258  | 61446.758 | 64557.707 | NM_001525 | 60283.422 | 56930.676 |
| AF009305  | 7091.653  | 8549.664  | NM_006055 | 18867.4   | 17536.598 |
| NM_006193 | 2729.286  | 4010.754  | NM_004296 | 3380.247  | 2939.229  |
| AF056454  | 790.267   | 832.077   | NM_005048 | 2539.456  | 2170.275  |
| AF009270  | 2396.286  | 2898.143  | NM_005972 | 4629.315  | 4216.25   |
| AF009318  | 4852.002  | 4371.534  | NM_001060 | 1465.513  | 1356.516  |
| AF056421  | 3346.062  | 2828.025  | NM_018841 | 18232.816 | 17347.957 |
| AF090889  | 975.529   | 369.092   | NM_005226 | 3384.061  | 3357.763  |
| AK001085  | 4352.887  | 1989.519  | AK022859  | 5911.785  | 6302.726  |
| AK001906  | 6830.284  | 4610.305  | NM_014464 | 488.982   | 749.755   |
| AK021528  | 1394.706  | 1349.387  | L09102    | 58881.973 | 65514.004 |
| AK021746  | 2709.265  | 2322.091  | U68488    | 1915.475  | 1686.924  |
| AK001136  | 2251.793  | 1686.834  | NM_003676 | 17485.443 | 19626.525 |
| AK021617  | 481.586   | 471.722   | AF113007  | 30681.332 | 35341.113 |
| AK021810  | 2020.789  | 1780.612  | NM_000688 | 8020.668  | 7646.347  |
| AF086317  | 7767.379  | 6644.428  | U39573    | 3324.613  | 4161.042  |
| U16850    | 8144.206  | 4191.117  | D82061    | 13359.023 | 14603.5   |
| AL390178  | 4798.436  | 2958.322  | AJ293009  | 8759.102  | 9187.212  |
| NM_005383 | 1356.902  | 1533.55   | NM_000374 | 7272.976  | 8095.751  |
| Z36806    | 854.69    | 578.285   | NM_000502 | 32529.545 | 37254.746 |
| NM_005368 | 2980.332  | 3593.817  | NM_001359 | 33416.922 | 34581.215 |
| NM_018618 | 1990.581  | 2855.408  | NM_002245 | 2005.612  | 1873.872  |
| AJ008121  | 59656.672 | 61683.063 | NM_004980 | 58039.664 | 59925.156 |
| AJ008153  | 11268.186 | 14245.333 | NM_003224 | 4837.715  | 5081.678  |
| AK023739  | 2679.466  | 2875.307  | NM_004227 | 3790.93   | 4118.302  |
| NM_005830 | 17068.283 | 17194.758 | NM_005282 | 13019.401 | 13745.696 |
| AL389983  | 8909.191  | 10530.261 | NM_001736 | 6955.913  | 6525.514  |
| AJ008159  | 3858.326  | 4602.165  | AB028949  | 1517.447  | 1552.15   |
| AK000995  | 5992.887  | 4868.025  | AL137580  | 2581.361  | 2205.256  |
| U00959    | 6130.637  | 3709.204  | NM_004101 | 2310.177  | 2316.702  |
| NM_014578 | 52773.113 | 36378.859 | NM_002995 | 59214.73  | 57949.801 |
| AF147306  | 10601.293 | 5344.556  | AB033114  | 1724.45   | 1707.48   |
| AF086267  | 12468.208 | 8650.954  | NM_015978 | 20177.24  | 19887.9   |
| X74606    | 1325.721  | 1267.793  | NM_003810 | 3451.552  | 3553.236  |
| NM_012183 | 10096.142 | 7807.47   | NM_004908 | 1095.581  | 957.546   |
| AK026785  | 4022.003  | 3029.792  | NM_016171 | 60075.027 | 63278.98  |
| AK022994  | 806.316   | 815.201   | NM_018973 | 17596.668 | 17714.541 |
| AL049466  | 5608.628  | 5245.903  | NM_002591 | 57569.934 | 55588.902 |
| AB037802  | 1672.47   | 1592.28   | AL049334  | 689.701   | 686.419   |
| AK023058  | 9587.268  | 11350.289 | NM_020216 | 4992.891  | 5011.088  |
| AJ227878  | 1407.801  | 1441.221  | AK021860  | 6826.092  | 6022.564  |
| NM_012064 | 26277.494 | 34564.852 | AB046816  | 2291.89   | 2038.397  |
| AK001460  | 2352.36   | 3919.861  | AL137266  | 11535.14  | 11624.508 |
| AK092508  | 11750.888 | 15014.954 | NM_016457 | 2850.986  | 2568.574  |
| AK027111  | 62357.215 | 63391.488 | NM_005057 | 3577.016  | 2766.533  |
| NM_003518 | 1404.087  | 2044.348  | AF143321  | 1982.455  | 1740.756  |
| M60749    | 6064.42   | 7039.354  | AB046842  | 6104.594  | 6282.775  |
| AF056424  | 1674.606  | 1457.519  | NM_004850 | 3769.021  | 3759.86   |
| X79986    | 5290.947  | 5350.191  | NM_002822 | 26088.225 | 22491.152 |

|           |           |           |           |           |           |
|-----------|-----------|-----------|-----------|-----------|-----------|
| NM_003523 | 20901.117 | 16462.465 | BF306955  | 5497.305  | 5496.18   |
| X01448    | 3093.146  | 1930.156  | NM_001394 | 19559.152 | 16060.877 |
| NM_016503 | 13780.176 | 9736.058  | NM_018441 | 34378.434 | 32792.801 |
| AK056351  | 57744.594 | 37195.918 | NM_000778 | 32446.877 | 31481.33  |
| NM_014690 | 28618.033 | 18380.063 | NM_001609 | 4904.514  | 4716.842  |
| NM_017698 | 5299.125  | 4412.154  | BE733234  | 2517.424  | 2358.093  |
| AF086490  | 4036.569  | 3224.288  | NM_020228 | 20579.908 | 17402.133 |
| AF131738  | 43472.227 | 37114.824 | AK024685  | 8758.961  | 7043.525  |
| AK021666  | 20006.459 | 15704.404 | NM_001157 | 1128.379  | 1021.042  |
| AK024081  | 2929.481  | 2496.342  | NM_012282 | 2255.288  | 2317.243  |
| AK024825  | 9439.075  | 6873.499  | NM_006710 | 1487.629  | 1564.011  |
| NM_000795 | 827.44    | 1084.088  | NM_003323 | 29466.857 | 36344.563 |
| AB037761  | 36649.027 | 32196.867 | BG685310  | 6252.308  | 6198.044  |
| NM_014008 | 62689.75  | 56705.031 | AW300857  | 60015.883 | 55421.18  |
| AF035191  | 28457.418 | 41262.699 | H85962    | 60095.984 | 52899.516 |
| NM_004058 | 2743.004  | 3389.084  | BG742446  | 4147.745  | 4460.235  |
| NM_004527 | 3219.383  | 4362.112  | AA864554  | 3493.772  | 2973.545  |
| NM_012062 | 25646.021 | 27788.711 | X66945    | 13584.615 | 12556.967 |
| AK026717  | 1903.22   | 2646.173  | AI160703  | 2615.901  | 2451.614  |
| NM_001507 | 6725.767  | 8685.094  | X12830    | 10413.864 | 10126.213 |
| X92108    | 2932.943  | 3357.082  | U00482    | 6227.192  | 5535.169  |
| AL389876  | 9344.442  | 8937.309  | Z80998    | 1034.314  | 1019.443  |
| AK022120  | 8505.563  | 9934.392  | K01904    | 40471.543 | 43820.086 |
| U52830    | 469.78    | 1175.56   | BE538886  | 6559.15   | 5531.354  |
| AL137363  | 956.917   | 508.489   | NM_002228 | 1912.687  | 1380.58   |
| Z70762    | 1668.989  | 1348.251  | M57650    | 58169.473 | 51988.996 |
| D17099    | 968.674   | 1255.447  | BC023978  | 4022.397  | 3405.401  |
| BF037206  | 7440.223  | 5988.94   | M21302    | 21631.936 | 18692.895 |
| AK021474  | 57694.082 | 52729.754 | AK024865  | 4853.26   | 4226.667  |
| AK023642  | 1352.105  | 1300.103  | NM_007210 | 2444.321  | 1933.978  |
| U52827    | 5112.738  | 3998.291  | NM_001483 | 8303.631  | 5767.029  |
| AB031547  | 5039.877  | 5044.665  | NM_014942 | 2050.174  | 2010.281  |
| NM_003970 | 4478.567  | 3210.828  | NM_018360 | 10541.945 | 10397.825 |
| AK022496  | 3853.248  | 2822.179  | AK022489  | 358.77    | 1060.241  |
| AB042636  | 2039.018  | 1669.975  | AL365415  | 2533.471  | 2605.625  |
| NM_019012 | 2696.934  | 2825.387  | L29147    | 61136.574 | 56466.223 |
| NM_000141 | 1255.864  | 1628.429  | NM_001525 | 59268.953 | 54091.723 |
| NM_016150 | 18986.373 | 21259.813 | NM_006055 | 14979.26  | 14979.292 |
| U57058    | 3213.559  | 4626.77   | NM_004296 | 2602.104  | 2112.637  |
| AL137452  | 4724.755  | 5667.255  | NM_005048 | 2182.391  | 2429.403  |
| NM_004312 | 58517.746 | 63794.391 | NM_005972 | 5088.016  | 4198.295  |
| NM_001347 | 18313.961 | 14361.929 | NM_001060 | 1699.228  | 1804.175  |
| AK024549  | 59888.84  | 56592.754 | NM_018841 | 14841.795 | 15004.853 |
| NM_006338 | 50533.723 | 51361.285 | NM_005226 | 2825.518  | 3155.668  |
| NM_007164 | 37736.582 | 19699.801 | AL133105  | 16456.018 | 17170.389 |
| NM_000261 | 2355.034  | 1905.658  | AK022859  | 4730.716  | 4825.18   |
| NM_002606 | 2247.792  | 1843.985  | NM_014464 | 980.355   | 610.457   |
| NM_002570 | 5168.588  | 4293.87   | NM_000214 | 1002.848  | 1000.45   |
| NM_003183 | 4970.486  | 4264.797  | NM_014864 | 11540.386 | 10955.239 |
| NM_001657 | 694.15    | 684.846   | NM_003728 | 56084.699 | 52084.359 |
| NM_003585 | 1753.78   | 1540.143  | NM_014352 | 38688.492 | 37278.734 |
| NM_019851 | 8097.208  | 7221.677  | NM_012481 | 11794.873 | 8558.009  |
| NM_003238 | 824.887   | 847.856   | L09102    | 59743.879 | 59985.598 |

|           |           |           |           |           |           |
|-----------|-----------|-----------|-----------|-----------|-----------|
| NM_01409E | 37543.75  | 44700.305 | U68488    | 1508.001  | 1245.194  |
| NM_00570E | 16689.02  | 15918.807 | NM_00067E | 1557.511  | 1274.891  |
| NM_001261 | 9606.523  | 8449.425  | NM_016247 | 36827.699 | 39293.723 |
| NM_001977 | 4869.845  | 3823.804  | NM_00165E | 58708.957 | 70321.063 |
| NM_00721E | 3239.136  | 2421.49   | NM_006827 | 37180.336 | 43241.988 |
| AK026854  | 6543.959  | 4276.579  | AK021761  | 19026.74  | 22368.395 |
| NM_00126E | 28380.74  | 32079.531 | AK024536  | 10772.786 | 9852.816  |
| NM_00250E | 7648.537  | 8993.535  | NM_01866E | 17216.781 | 15834.078 |
| NM_00490E | 13631.806 | 15590.845 | NM_004227 | 4330.105  | 4406.033  |
| X98261    | 1328.97   | 1671.719  | NM_00528E | 12917.66  | 12963.024 |
| NM_012447 | 34865.441 | 46985.766 | NM_00173E | 6609.998  | 6316.459  |
| NM_00636E | 4319.407  | 5439.9    | AB028949  | 1419.821  | 1166.549  |
| AK027013  | 55455.996 | 60738.844 | AL137580  | 3013.933  | 2454.879  |
| NM_001344 | 50841.199 | 55188.531 | NM_004101 | 2444.086  | 2711.823  |
| NM_018294 | 4927.93   | 4844.458  | NM_00299E | 60769.914 | 58719.711 |
| AL389934  | 20183.318 | 21548.488 | AB033114  | 1862.436  | 1370.145  |
| NM_00433C | 10620.677 | 5164.595  | NM_01597E | 17529.334 | 17647.141 |
| AF151802  | 16881.174 | 15007.138 | NM_00381C | 3453.462  | 3369.636  |
| AB006746  | 3582.457  | 2282.866  | NM_00490E | 1493.951  | 1323.033  |
| NM_00649E | 12697.764 | 9591.364  | NM_016171 | 58386.516 | 57285.523 |
| AB023233  | 6413.741  | 6395.332  | NM_01444E | 15007.668 | 11544.898 |
| AL133071  | 1376.932  | 1002.148  | NM_00521E | 11161.283 | 10211.041 |
| NM_00436E | 9655.029  | 7775.708  | M14584    | 3221.792  | 2441.167  |
| NM_00437C | 1519.074  | 1283.564  | NM_00641E | 6349.93   | 6196.134  |
| AB040898  | 5395.468  | 4309.749  | AF035035  | 2069.356  | 1734.717  |
| NM_01615E | 16472.896 | 19756.861 | AB020676  | 5254.987  | 4075.463  |
| NM_001224 | 25474.344 | 25412.748 | AK024715  | 2968.312  | 2170.213  |
| NM_017811 | 17694.299 | 14296.641 | U90942    | 58581.789 | 56286.379 |
| NM_00156E | 6708.847  | 6153.976  | NM_00077E | 27724.059 | 29690.746 |
| NM_004131 | 1711.51   | 1505.839  | NM_00160E | 4831.297  | 4912.333  |
| AK023284  | 2684.035  | 2312.967  | BE733234  | 1749.148  | 2604.553  |
| AF106069  | 700.536   | 506.765   | NM_02022E | 22670.846 | 24854.896 |
| NM_005101 | 16272.494 | 21704.732 | AK024685  | 7968.539  | 8002.324  |
| NM_00420E | 1105.313  | 1054.346  | NM_00367E | 17870.688 | 18046.234 |
| AF130060  | 57873.223 | 58662.563 | AF113007  | 31297.967 | 33014.594 |
| NM_007057 | 45325.266 | 53804.332 | NM_00068E | 8051.626  | 6198.039  |
| NM_000177 | 5954.506  | 2700.099  | U39573    | 2897.619  | 2879.575  |
| NM_003387 | 38613.586 | 33709.855 | D82061    | 11125.449 | 11053.684 |
| U60665    | 6178.294  | 4749.378  | AJ293009  | 8527.176  | 8836.965  |
| NM_005507 | 59589.965 | 57910.008 | NM_000374 | 6752.371  | 6275.291  |
| AL080133  | 32830.133 | 30382.555 | NM_00050E | 30411.857 | 33283.957 |
| AY014403  | 2921.375  | 4372.15   | NM_00135E | 30421.541 | 32038.182 |
| NM_00691E | 26582.783 | 20913.736 | NM_00517E | 57190.48  | 55372.469 |
| X12534    | 10175.644 | 7915.255  | NM_00169E | 21760.9   | 20200.918 |
| NM_018367 | 2160.726  | 1992.865  | NM_00497E | 47258.98  | 33402.047 |
| NM_00136E | 24324.074 | 24634.586 | NM_00224E | 2290.566  | 1769.686  |
| NM_01432E | 15835.298 | 15120.246 | D87445    | 16373.253 | 13489.372 |
| NM_00320E | 3565.512  | 3627.853  | NM_00023E | 17979.424 | 13459.074 |
| AB002324  | 4373.581  | 4105.376  | NM_002247 | 5191.22   | 4110.742  |
| AL359938  | 1185.313  | 1021.312  | NM_00498C | 57730.074 | 56287.176 |
| NM_00216E | 552.712   | 455.579   | AB011094  | 47369.004 | 45432.805 |
| AK026231  | 4974.812  | 5378.185  | NM_003224 | 5291.103  | 4711.145  |
| NM_00214C | 39661.699 | 28047.258 | AK024865  | 3510.998  | 3477.16   |

|           |           |           |           |           |           |
|-----------|-----------|-----------|-----------|-----------|-----------|
| NM_020143 | 13507.386 | 10317.429 | NM_007210 | 2069.822  | 1732.076  |
| NM_012469 | 11183.893 | 11462.19  | NM_001483 | 7893.325  | 7777.146  |
| NM_005131 | 6872.157  | 7338.487  | NM_018973 | 17003.23  | 15711.729 |
| NM_007056 | 8591.665  | 8977.535  | NM_002591 | 57701.793 | 42010.445 |
| AF083383  | 7905.065  | 8934.713  | AL049334  | 711.429   | 577.8     |
| NM_006925 | 7445.544  | 5134.754  | NM_020216 | 4561.132  | 4641.152  |
| NM_004890 | 58339.305 | 55159.656 | AK021860  | 5469.973  | 4895.038  |
| AK023181  | 12275.365 | 7285.152  | AB046816  | 2101.637  | 1842.752  |
| NM_004294 | 14473.516 | 10548.591 | AL137266  | 11409.514 | 10978.106 |
| NM_005051 | 46708.055 | 44666.219 | NM_016457 | 2674.556  | 2518.903  |
| NM_001968 | 48979.387 | 41096.738 | NM_005057 | 2713.935  | 2449.547  |
| D17259    | 60716.918 | 55773.824 | AF143321  | 2344.753  | 1992.724  |
| AB002366  | 1374.299  | 1350.246  | AB046842  | 6635.145  | 6728.848  |
| AF264627  | 59172.086 | 55835.934 | NM_004850 | 3741.626  | 3415.521  |
| NM_018130 | 28267.232 | 23936.01  | NM_002822 | 25012.08  | 17667.396 |
| AF085878  | 4540.244  | 3607.799  | BF306955  | 8890.356  | 6730.115  |
| AB006630  | 3117.34   | 2440.069  | NM_001394 | 18660.742 | 14523.336 |
| NM_004453 | 5075.947  | 4974.613  | NM_018441 | 34767.977 | 32419.018 |
| NM_016229 | 24557.527 | 20290.176 | CY3Cy5    | 4308.051  | 170.829   |
| NM_018244 | 10677.357 | 10707.7   | BM664556  | 3122.213  | 2838.388  |
| NM_002492 | 62299.301 | 58961.902 | AL359586  | 1864.62   | 1741.287  |
| AB046855  | 2152.036  | 1539.558  | AF035290  | 2752.468  | 3080.711  |
| NM_005642 | 15142.906 | 15038.633 | AK023216  | 1299.822  | 1245.298  |
| NM_018105 | 4453.065  | 3870.195  | M33197    | 70248.406 | 63603.211 |
| AK023452  | 14280.372 | 12873.684 | AK023288  | 2899.68   | 3132.566  |
| AF155065  | 731.39    | 683.862   | NM_017986 | 13196.916 | 11798.639 |
| NM_000332 | 2035.189  | 1888.628  | AK024846  | 11011.519 | 8639.382  |
| AK022215  | 11400.08  | 10371.477 | BM664556  | 1983.46   | 2078.419  |
| U90305    | 2514.984  | 1836.161  | SR3       | 45092.785 | 39534.664 |
| NM_001527 | 37748.527 | 29424.1   | SR7       | 4882.658  | 31497.178 |
| AK025269  | 46618.051 | 45386.285 | CY3Cy5    | 7895.379  | 534.602   |
| NM_001438 | 1668.298  | 1453.045  | U52839    | 2794.981  | 2441.63   |
| AB040971  | 2762.984  | 2743.526  | M33197    | 81359.766 | 64307.012 |
| NM_006562 | 17284.523 | 15284.331 | AK026984  | 67169.313 | 65110.715 |
| X65665    | 1603.536  | 1257.208  | AK021796  | 984.89    | 717.697   |
| NM_003112 | 3835.06   | 2977.387  | AF007146  | 1059.315  | 898.013   |
| NM_018951 | 602.179   | 624.159   | AL117427  | 18023.654 | 16497.422 |
| AL080170  | 6565.292  | 7313.578  | AF052118  | 30717.066 | 25997.949 |
| AB039903  | 11640.339 | 14451.319 | AK023305  | 63872.793 | 58311.266 |
| NM_000542 | 53609.371 | 61358.367 | AK022428  | 1839.907  | 2102.721  |
| NM_014625 | 1078.189  | 1202.419  | AK025089  | 21435.496 | 21711.656 |
| NM_006851 | 3533.304  | 3319.208  | M33197    | 67129.617 | 65513.715 |
| AK001560  | 4899.887  | 4903.64   | AK001279  | 2662.267  | 2707.541  |
| AB001328  | 4211.463  | 5011.905  | AF086407  | 726.798   | 1056.923  |
| NM_000948 | 803.202   | 827.182   | AF085949  | 902.021   | 553.229   |
| H99588    | 2935.968  | 2597.382  | AK001567  | 1739.095  | 1517.825  |
| X00588    | 13193.757 | 12879.952 | M33197    | 65100.645 | 59964.355 |
| AI359037  | 58870.75  | 61797.289 | AF075006  | 2111.915  | 1470.337  |
| J04513    | 2309.507  | 2503.802  | M33197    | 67112.023 | 65234.422 |
| BI754285  | 4670.482  | 4836.104  | AK000903  | 66940.945 | 67726.313 |
| X15998    | 14244.538 | 13639.463 | AK023938  | 6056.122  | 5664.511  |
| M76482    | 1265.788  | 1238.649  | AK026896  | 1651.444  | 2306.109  |
| NM_001883 | 8943.617  | 8208.713  | AL110169  | 2370.604  | 2517.576  |

|           |           |           |           |           |           |
|-----------|-----------|-----------|-----------|-----------|-----------|
| NM_00462E | 9072.72   | 9436.881  | AK022088  | 1218.75   | 1014.232  |
| L31785    | 3971.491  | 3503.49   | NM_013391 | 1212.077  | 1486.96   |
| H-M 69043 | 25091.977 | 28710.672 | M33197    | 66661.844 | 72465.703 |
| AF077374  | 5094.017  | 4401.629  | AL157466  | 8831.969  | 7888.663  |
| U43901    | 1802.458  | 2094.811  | AL389981  | 1493.843  | 1157.998  |
| X59065    | 4679.031  | 3879.841  | AK024336  | 3450.605  | 3062.409  |
| M59828    | 43803.012 | 44305.863 | AK023862  | 1292.692  | 1050.534  |
| NM_00216E | 10117.761 | 9672.83   | NM_018621 | 2552.042  | 2619.716  |
| NM_01565E | 1865.841  | 2420.504  | AK022016  | 1043.163  | 1249.37   |
| NM_00058E | 8430.844  | 7596.138  | AK022118  | 5118.232  | 4391.511  |
| NM_01654E | 33895.023 | 40028.68  | AK026453  | 16261.06  | 12777.706 |
| AF309653  | 6040.187  | 6742.802  | M33197    | 67018.922 | 67667.531 |
| NM_00262C | 53082.398 | 55333.688 | NM_00528E | 1981.711  | 1930.691  |
| S79267    | 3704.024  | 4097.357  | AK022101  | 873.849   | 680.938   |
| NM_00181E | 2536.185  | 2467.955  | NM_003251 | 4525.696  | 4203.045  |
| NM_00378A | 57428.055 | 59462.867 | AF086203  | 871.068   | 957.318   |
| NM_00019E | 57922.168 | 58397.797 | AB046772  | 2552.136  | 2839.711  |
| NM_00544E | 29401.133 | 22054.359 | M33197    | 67300.516 | 63285.246 |
| NM_01489E | 4754.262  | 4947.129  | AL442080  | 4667.158  | 5452.463  |
| NM_00363C | 17003.105 | 16377.792 | AY007143  | 21919.377 | 19342.502 |
| NM_00004E | 9576.95   | 8979.398  | L15557    | 3662.236  | 2611.504  |
| NM_00321E | 6879.491  | 5267.256  | AK022729  | 2452.253  | 2120.023  |
| NM_00670E | 11482.25  | 9513.268  | NM_00616E | 20669.953 | 19083.135 |
| NM_00061E | 38605.066 | 36721.008 | AL050374  | 4842.499  | 4840.994  |
| NM_004257 | 43609.785 | 51293.129 | M33197    | 68403.422 | 63390.629 |
| NM_00284A | 662.299   | 1111.298  | AL122073  | 29050.4   | 26492.746 |
| NM_00068E | 6410.46   | 7499.247  | AF116655  | 8001.659  | 7028.695  |
| NM_00362E | 9386.382  | 9732.463  | AJ243222  | 1908.356  | 1493.112  |
| NM_005901 | 11292.315 | 10800.231 | AK026132  | 4103.083  | 4141.984  |
| NM_00424E | 20540.984 | 18533.424 | Y11162    | 1549.771  | 1493.673  |
| NM_00095E | 621.496   | 663.912   | AF070584  | 4029.079  | 3693.93   |
| NM_00491C | 5160.279  | 5211.81   | AF052109  | 3880.929  | 6673.943  |
| AB013452  | 4550.418  | 4582.182  | NM_00335E | 67002.469 | 65365.438 |
| M93107    | 9576.185  | 13780.75  | X82127    | 46179.734 | 45249.531 |
| BC001479  | 28495.055 | 34421.805 | AL122044  | 7975.642  | 7944.686  |
| NM_002461 | 56372.895 | 54994.117 | NM_01829E | 2609.721  | 3258.18   |
| NM_005771 | 1688.646  | 2236.737  | NM_00575E | 3215.286  | 2977.223  |
| AB032986  | 56801.508 | 53240.078 | M33197    | 66714.773 | 71615.289 |
| NM_01752E | 56309.789 | 52243.203 | AF070578  | 4218.401  | 3838.674  |
| NM_01603E | 15253.369 | 22613.18  | L13743    | 2180.966  | 1598.252  |
| NM_01432A | 51225.051 | 50921.93  | U84519    | 6845.746  | 5574.479  |
| NM_001687 | 48982.109 | 48755.273 | Z11849    | 17762.73  | 15829.854 |
| AK026374  | 8043.755  | 11052.332 | M33197    | 67121.516 | 63301.727 |
| NM_00345E | 19648.854 | 27709.387 | AF052103  | 7287.101  | 7498.99   |
| NM_01334E | 56903.789 | 55321.387 | AF075050  | 4135.045  | 4326.894  |
| NM_006861 | 6434.981  | 7656.644  | AK024842  | 1433.064  | 1602.825  |
| AK023142  | 4058.106  | 4323.388  | NM_01838E | 1588.5    | 1184.78   |
| U61740    | 59028.328 | 56492.199 | AB018327  | 6547.684  | 5286.5    |
| NM_00640E | 55853.523 | 53995.016 | AF303889  | 1144.146  | 1403.169  |
| AB049054  | 17030.707 | 17595.328 | M33197    | 67023.234 | 66247.117 |
| NM_015071 | 4990.433  | 5354.911  | AK022649  | 15664.019 | 14226.413 |
| NM_013227 | 8949.817  | 8630.724  | NM_016507 | 9206.476  | 8366.716  |
| Z83803    | 2279.1    | 2133.469  | NM_002024 | 15161.576 | 12350.875 |

|           |           |           |           |           |           |
|-----------|-----------|-----------|-----------|-----------|-----------|
| AF027205  | 51383.918 | 46497.215 | NM_002743 | 21012.182 | 19923.037 |
| AF075012  | 4186.929  | 4472.581  | AF173358  | 22864.514 | 20929.135 |
| NM_001570 | 3265.142  | 3094.361  | NM_016366 | 8126.641  | 7241.52   |
| AB040672  | 12944.529 | 13078.013 | NM_001563 | 13477.974 | 14320.029 |
| NM_002192 | 9641.146  | 10416.281 | NM_000266 | 3299.464  | 3800.049  |
| NM_005491 | 19975.66  | 29697.982 | X89666    | 7767.285  | 9001.293  |
| NM_003869 | 12979.716 | 12560.374 | NM_017429 | 1100.991  | 1319.136  |
| AK025599  | 2404.813  | 2750.166  | NM_003104 | 17653.369 | 18426.57  |
| X63417    | 7999.565  | 9697.037  | NM_014581 | 6374.948  | 6072.956  |
| S94539    | 56941.824 | 51313.441 | NM_000898 | 1504.488  | 1598.414  |
| NM_006402 | 7621.676  | 6840.478  | M33197    | 66109.055 | 63298.105 |
| NM_005785 | 5701.547  | 5359.254  | NM_014406 | 6069.026  | 4575.992  |
| NM_018248 | 5643.301  | 6876.088  | Z11801    | 3210.908  | 3235.377  |
| AK001695  | 20262.701 | 18770.064 | AK027253  | 1225.622  | 1245.06   |
| NM_017886 | 19656.375 | 17670.678 | S68954    | 8350.604  | 19994.158 |
| NM_006252 | 7541.519  | 7955.267  | S81335    | 5430.811  | 4862.248  |
| NM_001721 | 2175.402  | 1798.843  | NM_006197 | 7482.797  | 3067.618  |
| NM_014397 | 29618.088 | 37426.77  | NM_014181 | 3639.043  | 3517.472  |
| AB023182  | 7014.965  | 6872.243  | M29273    | 1256.966  | 1542.722  |
| NM_003607 | 3099.559  | 3250.364  | NM_004854 | 10304.199 | 10615.109 |
| NM_006575 | 5970.783  | 6496.265  | AJ245418  | 23139.979 | 24213.32  |
| NM_013254 | 7824.489  | 7998.512  | NM_006377 | 9487.715  | 9681.227  |
| NM_000437 | 40927.344 | 45092.422 | NM_002436 | 2316.862  | 2377.059  |
| AB046819  | 54540.75  | 49142.848 | NM_018362 | 14182.261 | 13613.783 |
| NM_006090 | 25036.082 | 22379.936 | M33197    | 66862.125 | 69629.781 |
| NM_002900 | 42176.301 | 47691.77  | NM_004755 | 4092.414  | 4375.526  |
| NM_000542 | 46758.145 | 50764.758 | NM_002186 | 3472.085  | 3395      |
| NM_014625 | 1061.394  | 1109.863  | NM_006182 | 1874.236  | 2155.933  |
| NM_006851 | 3597.146  | 3336.531  | AL137543  | 4699.626  | 5012.916  |
| AK001560  | 4350.31   | 4184.184  | NM_004444 | 42525.359 | 40543.578 |
| AB001328  | 4055.047  | 4593.107  | NM_001957 | 6476.152  | 5661.815  |
| NM_000948 | 1153.55   | 1178.129  | AK024533  | 55493.301 | 52839.848 |
| H99588    | 3636.468  | 3486.266  | NM_002736 | 37307.617 | 34262.02  |
| X00588    | 11012.576 | 9424.996  | NM_004246 | 19076.193 | 17453.559 |
| AI359037  | 53813.281 | 53013.605 | NM_005207 | 4230.531  | 4558.843  |
| J04513    | 1662.473  | 1482.938  | NM_003087 | 10277.298 | 10543.309 |
| BI754285  | 3768.042  | 3439.225  | NM_001630 | 4860.032  | 5273.084  |
| X15998    | 15687.432 | 17980.1   | AF305081  | 7521.318  | 7546.273  |
| M76482    | 1204.992  | 1451.78   | AF118078  | 3772.98   | 3829.769  |
| X17519    | 929.593   | 1099.587  | NM_020169 | 1888.083  | 2045.032  |
| NM_001883 | 7908.114  | 7691.624  | AL157428  | 2411.142  | 2593.358  |
| NM_004628 | 8273.901  | 7609.841  | BE904175  | 1280.192  | 742.026   |
| L31785    | 4104.829  | 3636.419  | NM_005858 | 6852.793  | 6914.28   |
| H-M 69043 | 25778.508 | 31733.426 | NM_014931 | 14844.936 | 15192.613 |
| AF077374  | 5018.892  | 4670.982  | NM_014487 | 15588.908 | 18008.434 |
| U43901    | 1933.194  | 2218.916  | NM_018070 | 4573.411  | 5616.921  |
| X59065    | 4549.784  | 4304.068  | NM_002484 | 25845.424 | 24278.17  |
| M59828    | 42433.598 | 40993.891 | M33197    | 62771.453 | 61146.891 |
| AJ010482  | 6839.453  | 7002.394  | AL162052  | 10938.63  | 10879.278 |
| NM_000896 | 2300.578  | 2619.303  | AK025941  | 6801.216  | 6437.721  |
| NM_016546 | 31989.436 | 37257.457 | NM_018179 | 3631.661  | 2780.586  |
| AF309653  | 7355.339  | 6223.082  | AF059531  | 24209.676 | 20774.609 |
| NM_002620 | 53886.789 | 53763.313 | NM_002707 | 29361.227 | 31174.502 |

|           |           |           |           |           |           |
|-----------|-----------|-----------|-----------|-----------|-----------|
| S79267    | 3168.839  | 3606.822  | AF029777  | 6612.33   | 7802.281  |
| NM_00181E | 2106.964  | 2529.759  | NM_003352 | 3642.722  | 3458.116  |
| NM_003784 | 56504.465 | 57733.449 | AK026884  | 66805.977 | 62805.023 |
| NM_00019E | 57790.957 | 58989.746 | S82198    | 4323.075  | 4009.835  |
| NM_00544E | 34700.391 | 25360.49  | NM_002594 | 5952.573  | 5129.202  |
| NM_01489E | 3801.35   | 4347.222  | NM_001159 | 5002.379  | 4204.542  |
| NM_00363C | 15390.725 | 13592.531 | NM_031407 | 12989.37  | 15285.017 |
| NM_00004E | 8389.914  | 7476.074  | M33197    | 66796.711 | 68693.266 |
| NM_00321E | 5994.469  | 6123.808  | AK000410  | 67018.633 | 64881.043 |
| NM_00670E | 13056.405 | 13560.35  | NM_020193 | 5386.896  | 4454.414  |
| NM_000612 | 39330.074 | 43366.699 | D86982    | 1683.19   | 1443.126  |
| NM_004257 | 40833.656 | 44358.348 | NM_005619 | 2676.761  | 4447.73   |
| NM_000683 | 6112.76   | 7752.53   | D87440    | 24692.369 | 20048.529 |
| NM_00362E | 11597.4   | 12687.264 | AK000332  | 64710.746 | 62756.66  |
| NM_005901 | 13990.373 | 14204.651 | AL080156  | 2996.149  | 1561.813  |
| NM_00424E | 20907.123 | 20794.145 | NM_00673E | 9831.574  | 6795.106  |
| NM_00095E | 596.014   | 795.345   | NM_00228E | 3100.278  | 2303.199  |
| AL080170  | 9654.3    | 9913.113  | NM_006694 | 37684.477 | 31852.596 |
| AB039903  | 14762.507 | 13966.83  | NM_013351 | 61673.293 | 56714.879 |
| M93107    | 9418.944  | 10397.298 | NM_01234C | 21463.893 | 21753.438 |
| BC001479  | 29212.191 | 37415.453 | NM_006022 | 4824.086  | 4788.186  |
| NM_002461 | 57799.289 | 58017.699 | AK025110  | 2930.179  | 3115.939  |
| NM_005771 | 1751.337  | 1910.721  | X52339    | 66938.711 | 66368.977 |
| AB032986  | 59184.504 | 57545.758 | M33197    | 66471.945 | 77282.563 |
| NM_01752E | 55833.273 | 55111.816 | AB046830  | 6998.686  | 6157.877  |
| NM_016032 | 16335.418 | 21193.729 | NM_007122 | 6185.241  | 5420.986  |
| NM_014324 | 53671.648 | 58593.055 | NM_00148E | 3310.395  | 2809.28   |
| NM_001687 | 53455.703 | 56155.289 | NM_016202 | 26086.791 | 26336.338 |
| AK026374  | 5143.555  | 5173.641  | NM_01247E | 3314.704  | 3468.224  |
| NM_00345E | 18374.227 | 26860.234 | NM_016604 | 4908.858  | 5524.035  |
| NM_01334E | 58676.457 | 56351.613 | M33197    | 66798.688 | 69936.516 |
| NM_006861 | 7343.845  | 8445.283  | NM_00627E | 7669.314  | 7256.06   |
| AK023142  | 3493.649  | 4039.286  | NM_003407 | 10323.974 | 9876.05   |
| U61740    | 58212.402 | 59300.27  | NM_00720E | 65645.828 | 64108.457 |
| NM_00640E | 57607.379 | 58502.41  | NM_00372E | 9375.837  | 9319.11   |
| AB049054  | 18055.248 | 21781.459 | L05096    | 42081.766 | 34491.93  |
| NM_015071 | 5184.324  | 5867.233  | BC015899  | 25532.498 | 18543.686 |
| NM_013227 | 9307.684  | 10096.411 | M33197    | 65368.223 | 62140.086 |
| Z83803    | 2291.772  | 2517.066  | NM_00284E | 3658.283  | 2826.013  |
| AF027205  | 56042.121 | 51840.227 | NM_015914 | 4685.26   | 3628.604  |
| AF075012  | 4304.924  | 5066.888  | NM_00718C | 11825.463 | 13457.402 |
| NM_00157C | 3613.565  | 3782.687  | NM_00560E | 3014.316  | 3418.014  |
| NM_01565E | 1825.212  | 1862.705  | NM_00547E | 17278.168 | 17840.607 |
| NM_00058E | 10553.62  | 9469.063  | NM_00566C | 13466.647 | 13243.706 |
| NM_005491 | 17875.385 | 22033.135 | AK023902  | 7464.804  | 8322.405  |
| NM_00386E | 12472.756 | 14338.705 | NM_000401 | 2273.01   | 1506.18   |
| AK025599  | 2456.888  | 2181.654  | NM_005223 | 1873.816  | 1904.077  |
| X63417    | 6191.098  | 7030.656  | AB011173  | 10653.672 | 12083.412 |
| S94539    | 58128.996 | 55532.41  | AB023195  | 4647.802  | 4661.343  |
| S45570    | 521.879   | 882.105   | U43431    | 3717.955  | 3605.612  |
| NM_006402 | 7148.367  | 5856.302  | X57147    | 1681.856  | 1488.392  |
| NM_00578E | 5850.026  | 4929.805  | AK021563  | 1118.733  | 1261.34   |
| NM_01824E | 4893.406  | 4867.625  | AB006622  | 2533.719  | 2546.561  |

|           |           |           |           |           |           |
|-----------|-----------|-----------|-----------|-----------|-----------|
| AK001695  | 19889.701 | 15534.809 | M33197    | 66522.883 | 64793.547 |
| NM_017886 | 17551.365 | 19527.689 | AK097041  | 10594.443 | 10191.192 |
| NM_006252 | 6236.068  | 6481.089  | AF068744  | 65059.438 | 59236.145 |
| NM_001721 | 2303.79   | 2427.964  | NM_004497 | 1419.185  | 1465.763  |
| NM_014397 | 29384.154 | 32715.111 | AK000762  | 4001.058  | 3419.22   |
| AB023182  | 6327.923  | 6370.385  | NM_004571 | 1810.987  | 728.883   |
| NM_003607 | 2969.713  | 3351.384  | NM_002895 | 2961.749  | 2245.631  |
| NM_006575 | 5088.248  | 6461.362  | AF276513  | 4444.213  | 5146.89   |
| NM_013254 | 7372.658  | 7575.03   | M33197    | 66387.305 | 74819.367 |
| NM_000437 | 38359.625 | 41215.512 | M95610    | 66834.945 | 69210.531 |
| AB046819  | 55413.957 | 53193.363 | NM_003118 | 6449.708  | 6490.151  |
| NM_006090 | 22915.318 | 21511.25  | L02922    | 55521.832 | 53660.055 |
| NM_002900 | 41456.895 | 43742.734 | NM_001797 | 9657.679  | 10428.287 |
| NM_004910 | 6078.518  | 5926.657  | NM_003154 | 3895.503  | 4426.75   |
| AB013452  | 4972.175  | 5240.444  | NM_004235 | 4109.76   | 4430.235  |
| NM_006851 | 3101.251  | 3232.866  | AK023459  | 19064.5   | 16924.678 |
| AK001560  | 4317.46   | 5251.475  | BI762154  | 4926.121  | 4441.967  |
| AB001328  | 3726.314  | 3939.14   | U13022    | 4394.526  | 4449.92   |
| NM_000948 | 1158.336  | 1279.639  | R23251    | 42098.918 | 42462.945 |
| H99588    | 3133.049  | 3108.259  | AA702640  | 9357.787  | 10784.654 |
| X00588    | 9267.79   | 10369.839 | T68583    | 17300.693 | 18500.248 |
| AI359037  | 57465.531 | 56646.09  | AA481944  | 62641.258 | 61454.188 |
| J04513    | 1678.87   | 1650.322  | AF038440  | 5282.138  | 5647.173  |
| BI754285  | 3637.526  | 3713.789  | M31158    | 14038.972 | 14003.999 |
| X15998    | 14631.757 | 14184.286 | H00742    | 4808.174  | 3566.356  |
| M76482    | 1188.684  | 1331.383  | D42108    | 13879.896 | 9724.007  |
| X17519    | 711.096   | 738.294   | BG700922  | 3539.376  | 3889.489  |
| NM_001883 | 7206.725  | 7701.117  | AI366068  | 4058.538  | 4474.391  |
| NM_004628 | 8202.076  | 8403.428  | N57553    | 23762.871 | 31283.822 |
| L31785    | 3746.952  | 3649.725  | M33197    | 62848.996 | 64646.281 |
| H-M 69043 | 24212.26  | 27826.922 | NM_018202 | 66998.117 | 67795.336 |
| AF077374  | 4151.179  | 5004.285  | AB023197  | 33913.762 | 36794.977 |
| U43901    | 2108.388  | 2494.399  | NM_022173 | 46635.977 | 48000.262 |
| X59065    | 4101.479  | 4272.75   | AB040970  | 15226.185 | 15540.64  |
| M59828    | 36543.262 | 44583.742 | NM_018330 | 9057.965  | 9052.079  |
| AJ010482  | 5705.321  | 6446.907  | AB023222  | 5146.039  | 5324.354  |
| NM_000896 | 1786.722  | 2013.353  | AB033088  | 14490.063 | 15791.063 |
| AB040672  | 9160.758  | 8302.077  | M33197    | 66467.5   | 73359.102 |
| NM_002192 | 15690.459 | 11513.454 | U50342    | 63944.953 | 62191.645 |
| NM_014899 | 3488.686  | 4225.866  | NM_000295 | 4075.837  | 4201.478  |
| NM_003630 | 16339.675 | 18170.691 | NM_000716 | 2027.885  | 2520.633  |
| NM_000046 | 8383.691  | 10930.887 | AF026932  | 2940.771  | 3525.038  |
| NM_003219 | 5145.838  | 5846.8    | AF103795  | 5833.546  | 6495.869  |
| NM_006709 | 12508.322 | 12409.722 | NM_006215 | 1870.122  | 1947.464  |
| NM_000612 | 34494.949 | 41280.438 | M33197    | 66972.695 | 65212.922 |
| NM_004257 | 38578.207 | 48110.344 | NM_007024 | 17714.646 | 18428.703 |
| NM_002844 | 378.937   | 555.469   | NM_013231 | 11051.157 | 9361.81   |
| NM_000683 | 5390.204  | 7069.388  | NM_012106 | 11320.49  | 9214.842  |
| NM_003629 | 7989.022  | 8915.035  | NM_006254 | 6728.212  | 7793.818  |
| NM_005901 | 12095.756 | 11357.017 | X95425    | 26909.324 | 27472.543 |
| NM_004248 | 17005.291 | 19716.387 | NM_004422 | 9325.06   | 10794.514 |
| NM_000959 | 363.638   | 553.427   | NM_016562 | 3984.106  | 5990.845  |
| NM_001313 | 2184.986  | 2344.576  | AY009399  | 40273.512 | 53488.309 |



|           |           |           |           |           |           |
|-----------|-----------|-----------|-----------|-----------|-----------|
| NM_004796 | 1213.394  | 1641.971  | NM_004895 | 49297.227 | 59306.758 |
| NM_000435 | 27074.844 | 33263.254 | U80018    | 3248.38   | 3797.529  |
| NM_001842 | 57700.07  | 57145.047 | NM_000717 | 3640.824  | 3517.588  |
| NM_007281 | 601.528   | 691.061   | M33197    | 66218.773 | 79010.813 |
| AB017169  | 1834.118  | 1901.776  | NM_004845 | 21497.516 | 21855.488 |
| AL080170  | 7963.033  | 7645.636  | NM_007107 | 20703.094 | 17977.578 |
| AB039903  | 14634.833 | 15026.766 | NM_000047 | 66100.109 | 67421.656 |
| NM_000542 | 51296.215 | 48523.977 | M68874    | 1065.901  | 990.083   |
| NM_014625 | 2183.752  | 2089.488  | NM_006319 | 17574.457 | 19035.918 |
| NM_005829 | 3953.642  | 4609.064  | NM_018226 | 7163.721  | 8883.573  |
| NM_000466 | 7053.725  | 8081.624  | NM_004605 | 4107.754  | 4345.742  |
| NM_015544 | 366.115   | 747.69    | NM_006660 | 22051.754 | 24770.299 |
| NM_015908 | 22286.258 | 30110.617 | NM_006685 | 65319.191 | 67319.984 |
| AK022600  | 41320.402 | 41799.219 | AF154121  | 3679.47   | 4174.53   |
| AK023142  | 3585.93   | 4972.696  | NM_012139 | 40091.012 | 28016.08  |
| U61740    | 55005.691 | 61110.402 | AF121856  | 14793.553 | 12958.444 |
| NM_006409 | 56813.648 | 59779.734 | NM_006421 | 9379.867  | 11676.104 |
| AB049054  | 14009.926 | 16469.77  | NM_017457 | 25915.582 | 30701.271 |
| NM_015071 | 4174.086  | 4598.005  | NM_003765 | 25754.863 | 31051.096 |
| NM_013227 | 7250.253  | 6237.42   | NM_005868 | 1768.353  | 2590.21   |
| Z83803    | 1576.282  | 2116.016  | M33197    | 64495.594 | 67018.891 |
| AF027205  | 48608.785 | 50306.754 | NM_001201 | 4628.022  | 3317.376  |
| AF075012  | 3559.603  | 4505.648  | NM_016618 | 1975.308  | 1092.13   |
| NM_001570 | 2595.196  | 3157.615  | AB014568  | 61447.48  | 59732.602 |
| NM_015658 | 1550.78   | 1817.45   | AK022238  | 1328.51   | 1069.6    |
| NM_000589 | 9197.843  | 9920.906  | NM_012249 | 16394.594 | 16885.029 |
| NM_016546 | 39111.75  | 48270.711 | AK022546  | 39298.613 | 38020.246 |
| AF309653  | 6384.394  | 6744.935  | NM_014067 | 43590.684 | 42541.824 |
| NM_002620 | 51039.734 | 51948.148 | NM_002914 | 23186.309 | 23624.836 |
| S79267    | 3704.924  | 4005.99   | NM_020385 | 6773.104  | 5805.89   |
| NM_001816 | 2737.103  | 2990.14   | NM_006541 | 2745.987  | 3505.288  |
| NM_003784 | 64125.711 | 68705.805 | M33197    | 66879.508 | 62951.16  |
| NM_000195 | 63336.051 | 55501.695 | NM_005705 | 16420.195 | 18096.332 |
| NM_005445 | 34898.633 | 22582.695 | NM_004328 | 9864.196  | 10683.997 |
| AB046819  | 45663.352 | 49002.285 | NM_004581 | 16846.307 | 15126.567 |
| NM_006090 | 17262.674 | 17594.059 | NM_006817 | 32753.4   | 31390.482 |
| NM_002900 | 32633.385 | 41846.578 | NM_007108 | 38268.379 | 38243.02  |
| NM_004910 | 4084.627  | 5484.742  | NM_015921 | 55703.262 | 54711.855 |
| AB013452  | 4549.455  | 4830.119  | AB040900  | 33236.785 | 38813.672 |
| M93107    | 9781.286  | 10604.101 | NM_001080 | 7592.775  | 7146.957  |
| BC001479  | 27920.037 | 32630.357 | NM_001482 | 1532.694  | 2452.735  |
| NM_002461 | 55910.52  | 59633.695 | NM_003118 | 5129.014  | 2382.635  |
| NM_005771 | 1528.945  | 1943.522  | L02922    | 57439.125 | 50302.098 |
| AB032986  | 55680.941 | 59353.621 | NM_001797 | 8608.761  | 10687.563 |
| NM_017528 | 56383.07  | 58530.949 | NM_003154 | 3857.533  | 5090.568  |
| NM_016032 | 14288.92  | 17479.578 | NM_004235 | 4020.745  | 5055.068  |
| NM_014324 | 51676.215 | 55673.035 | AK023459  | 20995.891 | 24041.914 |
| NM_001687 | 52131.336 | 49018.922 | BI762154  | 5317.699  | 5272.911  |
| AK026374  | 5956.273  | 6865.812  | U13022    | 5083.77   | 4955.11   |
| NM_001169 | 5951.188  | 6600.539  | R23251    | 48454.98  | 52574.379 |
| AK024648  | 42624.727 | 46556.891 | AA702640  | 10806.423 | 11029.38  |
| NM_000719 | 1795.983  | 2359.744  | T68583    | 16849.516 | 18112.129 |
| NM_003459 | 16445.668 | 24283.811 | AA481944  | 62463.02  | 61332.117 |

|           |           |           |           |           |           |
|-----------|-----------|-----------|-----------|-----------|-----------|
| NM_000171 | 4098.037  | 3778.893  | AF038440  | 6025.747  | 6168.832  |
| AL354615  | 2067.126  | 1866.798  | M31158    | 13055.635 | 8943      |
| NM_013349 | 59343.809 | 52180.828 | H00742    | 5316.388  | 5226.685  |
| NM_003705 | 10644.973 | 9310.619  | D42108    | 14433.459 | 14468.706 |
| NM_006861 | 7977.694  | 7309.652  | BG700922  | 3882.05   | 5235.476  |
| AJ010482  | 3750.223  | 3972.055  | AI366068  | 4994.222  | 7341.192  |
| NM_000896 | 1446.641  | 1605.172  | BG565837  | 837.933   | 1284.547  |
| AB040672  | 9356.915  | 9443.071  | N57553    | 27988.977 | 42410.645 |
| NM_002192 | 6470.449  | 6375.357  | M33197    | 62557.387 | 65508.016 |
| NM_005491 | 16271.507 | 22423.303 | NM_016545 | 9064.204  | 14634.396 |
| NM_003869 | 10752.946 | 10257.758 | NM_001440 | 62248.844 | 61689.387 |
| AK025599  | 2381.316  | 2402.714  | NM_022173 | 30898.662 | 8710.597  |
| X63417    | 7506.414  | 7872.579  | AB040970  | 9743.908  | 3342.709  |
| S94539    | 58279.148 | 50174.996 | AB023222  | 4982.583  | 4308.238  |
| S45570    | 311.972   | 471.176   | AB033088  | 12574.977 | 14379.733 |
| NM_006402 | 6415.892  | 6319.054  | M33197    | 65316.719 | 67376.758 |
| NM_005785 | 5736.976  | 4927.212  | U50342    | 64955.773 | 63077.215 |
| NM_018248 | 4781.112  | 7776.494  | NM_000295 | 4076.297  | 5272.555  |
| AK001695  | 18524.066 | 16936.777 | NM_000716 | 1952.906  | 3030.197  |
| NM_017886 | 17443.879 | 17067.963 | AF026932  | 2994.593  | 3071.142  |
| NM_006252 | 6423.886  | 6738.526  | AF103795  | 5574.459  | 5859.585  |
| NM_001721 | 2271.793  | 1924.259  | NM_006215 | 1654.718  | 2134.63   |
| NM_014397 | 28081.934 | 31458.266 | M33197    | 65248.047 | 63263.867 |
| AB023182  | 6614.096  | 5560.701  | NM_007024 | 15284.154 | 11173.887 |
| NM_003607 | 2788.63   | 2262.442  | NM_013231 | 9885.903  | 9927.846  |
| NM_006575 | 7030.873  | 3723.419  | NM_012106 | 12594.89  | 12167.672 |
| NM_013254 | 8284.132  | 6282.558  | NM_006254 | 8298.852  | 9268.046  |
| NM_000437 | 45872.797 | 32773.793 | X95425    | 26405.992 | 30732.553 |
|           |           |           | NM_004422 | 12187.564 | 20063.402 |
|           |           |           | NM_016562 | 4404.985  | 5963.769  |
|           |           |           | AY009399  | 41448.801 | 55945.113 |
|           |           |           | NM_004895 | 50473.531 | 58374.668 |
|           |           |           | M33197    | 63626.813 | 64205.961 |
|           |           |           | M95610    | 61572.762 | 66149.438 |
|           |           |           | NM_000717 | 2236.015  | 563.268   |
|           |           |           | M33197    | 66979.656 | 66871.922 |
|           |           |           | NM_004845 | 19728.762 | 17183.563 |
|           |           |           | NM_007107 | 21321.107 | 20782.994 |
|           |           |           | NM_000047 | 65210.594 | 62363.281 |
|           |           |           | M68874    | 1212.154  | 1050.369  |
|           |           |           | NM_006319 | 18519.121 | 20953.367 |
|           |           |           | NM_018226 | 6497.353  | 7504.496  |
|           |           |           | NM_004605 | 2499.397  | 1748.323  |
|           |           |           | NM_006660 | 20296.213 | 21199.502 |
|           |           |           | NM_006685 | 64827.523 | 62124.707 |
|           |           |           | AF154121  | 2476.652  | 1263.278  |
|           |           |           | NM_012139 | 42921.73  | 44530.707 |
|           |           |           | AF121856  | 15703.269 | 13045.811 |
|           |           |           | NM_006421 | 9610.892  | 12803.182 |
|           |           |           | NM_017457 | 31233.172 | 44592.656 |
|           |           |           | NM_003765 | 23296.328 | 28735.969 |
|           |           |           | NM_005868 | 2545.601  | 2930.899  |
|           |           |           | M33197    | 61350.922 | 66568.016 |

|                  |           |           |
|------------------|-----------|-----------|
| <b>NM_018202</b> | 63397.039 | 61509.344 |
| <b>AB023197</b>  | 28343.443 | 33239.965 |
| <b>AB014568</b>  | 50190.711 | 20060.631 |
| <b>NM_012249</b> | 7873.815  | 2525.321  |
| <b>AK022546</b>  | 29347.688 | 17504.938 |
| <b>NM_014067</b> | 31607.957 | 25238.885 |
| <b>NM_002914</b> | 22932.838 | 20263.709 |
| <b>NM_020385</b> | 5813.131  | 3750.565  |
| <b>NM_006541</b> | 2141.38   | 1570.818  |
| <b>M33197</b>    | 66769.508 | 65882.797 |
| <b>NM_005705</b> | 13416.567 | 13650.037 |
| <b>NM_004328</b> | 7466.146  | 8391.304  |
| <b>NM_004581</b> | 18989.121 | 19285.988 |
| <b>NM_006817</b> | 34543.574 | 36191.137 |
| <b>NM_007108</b> | 38917.457 | 41362.633 |
| <b>NM_015921</b> | 57180.535 | 54304.57  |
| <b>AB040900</b>  | 33340.152 | 40086.211 |
| <b>NM_001080</b> | 9152.236  | 8372.349  |
| <b>NM_001482</b> | 1980.889  | 3109.928  |
| <b>U80018</b>    | 2842.006  | 4678.89   |
| <b>NM_001797</b> | 5203.102  | 3640.074  |
| <b>NM_003154</b> | 2319.073  | 1080.5    |
| <b>NM_004235</b> | 2289.824  | 855.763   |
| <b>AK023459</b>  | 12500.41  | 5714.572  |
| <b>BI762154</b>  | 3033.828  | 2411.229  |
| <b>U13022</b>    | 3527.108  | 1857.353  |
| <b>R23251</b>    | 38014.605 | 24527.793 |
| <b>AA702640</b>  | 7446.777  | 5539.958  |
| <b>T68583</b>    | 11697.072 | 9679.028  |
| <b>AA481944</b>  | 63454.133 | 59193.891 |
| <b>AF038440</b>  | 5397.218  | 5547.706  |
| <b>M31158</b>    | 13974.564 | 13273.481 |
| <b>H00742</b>    | 6112.636  | 6439.055  |
| <b>D42108</b>    | 16246.979 | 17752.889 |
| <b>BG700922</b>  | 3959.297  | 4780.563  |
| <b>AI366068</b>  | 4281.933  | 5480.626  |
| <b>BG565837</b>  | 597.804   | 846.53    |
| <b>N57553</b>    | 28646.596 | 34822.281 |
| <b>M33197</b>    | 63150.934 | 64939.051 |
| <b>NM_016545</b> | 11087.571 | 22364.842 |
| <b>NM_001201</b> | 5546.466  | 7394.338  |
| <b>NM_016618</b> | 2096.011  | 1808.695  |
| <b>NM_000716</b> | 1220.846  | 593.732   |
| <b>AF026932</b>  | 1620.446  | 1033.058  |
| <b>AF103795</b>  | 3062.325  | 1748.963  |
| <b>NM_006215</b> | 1453.445  | 602.929   |
| <b>M33197</b>    | 66015.414 | 63775.703 |
| <b>NM_007024</b> | 10667.302 | 8613.077  |
| <b>NM_013231</b> | 7636.433  | 6634.458  |
| <b>NM_012106</b> | 11097.088 | 8921.591  |
| <b>NM_006254</b> | 7646.625  | 6697.509  |
| <b>X95425</b>    | 23041.635 | 19129.617 |
| <b>NM_004422</b> | 10807.859 | 9522.088  |

|                  |           |           |
|------------------|-----------|-----------|
| <b>NM_016562</b> | 5205.948  | 4837.164  |
| <b>M33197</b>    | 61842.801 | 63543.387 |
| <b>AY009399</b>  | 43177.219 | 46764.297 |
| <b>NM_004895</b> | 46685.594 | 49307.633 |
| <b>U59748</b>    | 10128.335 | 12544.262 |
| <b>L32537</b>    | 1971.873  | 3706.431  |
| <b>NM_014303</b> | 39885.914 | 52657.684 |
| <b>NM_014863</b> | 1886.612  | 3324.743  |
| <b>NM_003118</b> | 6884.374  | 8691.009  |
| <b>L02922</b>    | 54112.086 | 57130.922 |
| <b>NM_004045</b> | 29816.313 | 16950.529 |
| <b>NM_001891</b> | 2113.76   | 1447.406  |
| <b>NM_012139</b> | 38781.859 | 36518.844 |
| <b>AF121856</b>  | 15352.218 | 12289.607 |
| <b>NM_006421</b> | 8446.437  | 8883.604  |
| <b>NM_017457</b> | 26351.463 | 23833.115 |
| <b>NM_003765</b> | 29441.514 | 27383.063 |
| <b>NM_005868</b> | 3062.162  | 2700.958  |
| <b>M33197</b>    | 65229.672 | 62816.543 |
| <b>NM_018202</b> | 64246.672 | 58656.457 |
| <b>AB023197</b>  | 28861.771 | 31035.096 |
| <b>NM_022173</b> | 49549.883 | 54555.668 |
| <b>AB040970</b>  | 12499.769 | 13805.442 |
| <b>NM_018330</b> | 9133.309  | 9600.025  |
| <b>AB023222</b>  | 5909.587  | 7226.294  |
| <b>U50342</b>    | 66786.82  | 68107.766 |
| <b>NM_000295</b> | 3177.381  | 3626.724  |
| <b>NM_001080</b> | 9102.265  | 4751.584  |
| <b>NM_001482</b> | 1679.869  | 1205.386  |
| <b>U80018</b>    | 2635.788  | 2343.201  |
| <b>NM_000717</b> | 3842.252  | 3101.803  |
| <b>M33197</b>    | 65772.07  | 70873.43  |
| <b>NM_004845</b> | 14621.438 | 15172.492 |
| <b>NM_007107</b> | 14063.295 | 12846.143 |
| <b>NM_000047</b> | 62997.91  | 61401.555 |
| <b>M68874</b>    | 904.37    | 929.865   |
| <b>NM_006319</b> | 18256.17  | 17611.598 |
| <b>NM_018226</b> | 5927.184  | 6705.224  |
| <b>NM_004605</b> | 3299.735  | 3244.405  |
| <b>Z36813</b>    | 11637.458 | 13411.444 |
| <b>NM_006660</b> | 18024.223 | 24901.379 |
| <b>NM_001486</b> | 1041.304  | 1593.981  |
| <b>NM_004727</b> | 1519.146  | 1992.142  |
| <b>NM_000559</b> | 6551.608  | 9520.01   |
| <b>NM_006685</b> | 62174.715 | 67583.492 |
| <b>M33197</b>    | 60399.293 | 59824.371 |
| <b>AF154121</b>  | 3207.908  | 3349.915  |
| <b>M33197</b>    | 66111.734 | 73547.367 |
| <b>NM_016545</b> | 8589.256  | 7496.824  |
| <b>NM_001440</b> | 60838.363 | 48486.551 |
| <b>NM_001201</b> | 2774.189  | 2836.389  |
| <b>NM_016618</b> | 2295.049  | 1720.732  |
| <b>AB014568</b>  | 47029.246 | 41935.137 |

|                  |           |           |
|------------------|-----------|-----------|
| <b>AK022238</b>  | 729.434   | 778.526   |
| <b>NM_012249</b> | 10988.988 | 11016.975 |
| <b>AK022546</b>  | 29169.758 | 27723.479 |
| <b>NM_014067</b> | 40151.539 | 43751.281 |
| <b>NM_002914</b> | 21701.078 | 24253.797 |
| <b>NM_020385</b> | 5760.698  | 6193.999  |
| <b>NM_006541</b> | 2153.109  | 2699.597  |
| <b>M33197</b>    | 65684.055 | 60533.418 |
| <b>NM_005705</b> | 12702.938 | 22464.604 |
| <b>NM_004328</b> | 8434.157  | 15272.42  |
| <b>NM_004581</b> | 19321.574 | 24838.771 |
| <b>NM_006817</b> | 32099.916 | 35811.695 |
| <b>NM_007108</b> | 38182.012 | 38781.496 |
| <b>NM_015921</b> | 52361.809 | 55529.773 |
| <b>AB040900</b>  | 28710.543 | 31585.152 |
| <b>CY3Cy5</b>    | 3266.919  | 197.46    |
| <b>NM_006917</b> | 3803.661  | 3726.72   |
| <b>SB</b>        | 3851.484  | 2938.967  |
| <b>AF086225</b>  | 5945.31   | 5828.751  |
| <b>NM_005844</b> | 36214.469 | 26842.912 |
| <b>AK024941</b>  | 5796.749  | 4202.649  |
| <b>AF056434</b>  | 7738.976  | 5454.961  |
| <b>AF086199</b>  | 1556.076  | 1829.973  |
| <b>M33197</b>    | 66152.703 | 66168.852 |
| <b>AK025489</b>  | 5364.063  | 4378.601  |
| <b>AB075853</b>  | 886.59    | 1138.796  |
| <b>AL390152</b>  | 20334.963 | 16069.773 |
| <b>AK026721</b>  | 4218.538  | 3321.737  |
| <b>AK023027</b>  | 14589.972 | 9479.455  |
| <b>AK025598</b>  | 2866.95   | 1838.437  |
| <b>AB002348</b>  | 71447.422 | 64761.023 |
| <b>NM_006917</b> | 2974.377  | 2024.375  |
| <b>SR6</b>       | 2701.315  | 2012.698  |
| <b>SR8</b>       | 9382.246  | 22309.414 |
| <b>SR10</b>      | 31045.93  | 8397.996  |
| <b>CY3Cy5</b>    | 2376.021  | 100.606   |
| <b>AK025948</b>  | 1712.838  | 1602.889  |
| <b>AK000674</b>  | 874.829   | 913.653   |
| <b>AJ238555</b>  | 3276.338  | 3374.736  |
| <b>L23850</b>    | 1081.495  | 1156.875  |
| <b>AL353948</b>  | 66417.758 | 64097.719 |
| <b>M33197</b>    | 71592.969 | 64564.672 |
| <b>AK025869</b>  | 21555.801 | 14746.204 |
| <b>AL050088</b>  | 7935.216  | 7666.308  |
| <b>AK024939</b>  | 4812.697  | 4194.702  |
| <b>AK001561</b>  | 20141.963 | 14667.741 |
| <b>AB007880</b>  | 9668.455  | 7627.507  |
| <b>AK024950</b>  | 6726.991  | 5388.155  |
| <b>M33197</b>    | 73010.43  | 65113.449 |
| <b>NM_014146</b> | 15854.248 | 11692.425 |
| <b>AF147356</b>  | 1168.58   | 889.602   |
| <b>NM_018843</b> | 3996.081  | 2762.007  |
| <b>AK024275</b>  | 2334.716  | 1724.612  |

|                  |           |           |
|------------------|-----------|-----------|
| <b>AL049461</b>  | 1599.933  | 1081.745  |
| <b>AL109782</b>  | 28658.986 | 19417.52  |
| <b>M33197</b>    | 66342.055 | 65481.871 |
| <b>AK026052</b>  | 1571.881  | 1302.959  |
| <b>AK026601</b>  | 1261.911  | 811.131   |
| <b>AK025387</b>  | 2051.646  | 1338.488  |
| <b>AK026259</b>  | 64200.254 | 59900.957 |
| <b>M33197</b>    | 66389.875 | 63849.988 |
| <b>NM_018126</b> | 2102.798  | 1486.991  |
| <b>AK024506</b>  | 13435.936 | 11707.268 |
| <b>NM_014179</b> | 4251.074  | 3649.689  |
| <b>AF086326</b>  | 11061.722 | 7573.301  |
| <b>M33197</b>    | 66052.125 | 66331.813 |
| <b>AL080057</b>  | 2351.705  | 1661.918  |
| <b>M33197</b>    | 61195.094 | 61160.723 |
| <b>M33197</b>    | 68341.813 | 64483.207 |
| <b>AK024470</b>  | 5546.723  | 4991.388  |
| <b>NM_017935</b> | 1923.345  | 1857.399  |
| <b>NM_004226</b> | 10094.867 | 6623.239  |
| <b>AK023400</b>  | 1561.794  | 1421.773  |
| <b>AK023961</b>  | 967.869   | 1157.158  |
| <b>M33197</b>    | 64760.309 | 64878.961 |
| <b>AF009281</b>  | 169.204   | 2138.043  |
| <b>AF056430</b>  | 2786.058  | 2123.594  |
| <b>NM_014906</b> | 1052.998  | 756.199   |
| <b>AF009291</b>  | 2761.607  | 1959.69   |
| <b>M33197</b>    | 66128.828 | 65915.031 |
| <b>NM_018055</b> | 15443.993 | 10030.611 |
| <b>AK002199</b>  | 4159.722  | 3300.839  |
| <b>AK021662</b>  | 6856.549  | 4148.584  |
| <b>AK001038</b>  | 2953.206  | 2168.042  |
| <b>AK001802</b>  | 4057.511  | 2221.436  |
| <b>AK021469</b>  | 5493.96   | 3961.187  |
| <b>AK021706</b>  | 10550.844 | 8147.058  |
| <b>M33197</b>    | 65931.969 | 68473.5   |
| <b>AK023633</b>  | 4826.813  | 4053.886  |
| <b>M84507</b>    | 1412.383  | 1129.903  |
| <b>NM_005372</b> | 1172.5    | 1255.836  |
| <b>AF085967</b>  | 1155.007  | 882.878   |
| <b>NM_006179</b> | 4937.375  | 4068.301  |
| <b>AL360165</b>  | 6070.002  | 5315.268  |
| <b>M33197</b>    | 67643.516 | 62835.566 |
| <b>AJ008132</b>  | 23704.879 | 16940.156 |
| <b>NM_005281</b> | 12323.665 | 9655.946  |
| <b>NM_005549</b> | 7978.38   | 6078.271  |
| <b>AJ008115</b>  | 54166.746 | 49987.195 |
| <b>AF083125</b>  | 5902.869  | 4565.594  |
| <b>U72851</b>    | 2086.685  | 1603.014  |
| <b>AL049241</b>  | 1089.696  | 807.875   |
| <b>M33197</b>    | 69265.797 | 64385.098 |
| <b>X51526</b>    | 1524.471  | 1052.515  |
| <b>AK022970</b>  | 1962.81   | 1487.866  |
| <b>AK026212</b>  | 3345.296  | 2351.869  |

|                  |           |           |
|------------------|-----------|-----------|
| <b>AF086222</b>  | 2530.848  | 2251.005  |
| <b>AF086415</b>  | 13785.726 | 9163.456  |
| <b>D28391</b>    | 58695.965 | 56020.684 |
| <b>M33197</b>    | 59311.641 | 57905.68  |
| <b>AJ227885</b>  | 1950.502  | 1498.887  |
| <b>AF086086</b>  | 661.756   | 585.278   |
| <b>AK026859</b>  | 3897.396  | 2681.864  |
| <b>D86961</b>    | 6105.221  | 4122.864  |
| <b>AJ227896</b>  | 49457.895 | 40861.531 |
| <b>L32841</b>    | 10008.257 | 8366.413  |
| <b>M33197</b>    | 65560.391 | 71174.242 |
| <b>AF131770</b>  | 10224.634 | 8730.414  |
| <b>NM_006432</b> | 30609.162 | 28046.424 |
| <b>AF025441</b>  | 2957.876  | 2497.642  |
| <b>U62823</b>    | 9125.713  | 7591.384  |
| <b>NM_003535</b> | 45818.949 | 38638.664 |
| <b>AK026768</b>  | 7092.083  | 5661.012  |
| <b>M33197</b>    | 62877.555 | 61318.496 |
| <b>AK000852</b>  | 61628.426 | 60773.852 |
| <b>AF251188</b>  | 20975.773 | 14782.033 |
| <b>AK026418</b>  | 12229.396 | 8509.046  |
| <b>AK026811</b>  | 16713.811 | 14076.908 |
| <b>AF086019</b>  | 408.482   | 579.559   |
| <b>NM_017743</b> | 2829.256  | 2501.117  |
| <b>NM_000300</b> | 6717.743  | 5149.213  |
| <b>M33197</b>    | 67552.273 | 64389.137 |
| <b>AV756917</b>  | 9775.748  | 6977.342  |
| <b>NM_018380</b> | 35083.043 | 23068.932 |
| <b>AK001442</b>  | 6850.976  | 5456.026  |
| <b>NM_012070</b> | 5293.043  | 3259.867  |
| <b>NM_019038</b> | 1589.777  | 1504.303  |
| <b>AF183423</b>  | 2509.923  | 2725.694  |
| <b>M33197</b>    | 64185.836 | 65016.977 |
| <b>U92023</b>    | 1911.382  | 1733.072  |
| <b>U12129</b>    | 11661.812 | 8500.926  |
| <b>S81242</b>    | 64189.645 | 60853.453 |
| <b>AF230801</b>  | 2510.155  | 2296.076  |
| <b>AF075072</b>  | 5251.462  | 3710.311  |
| <b>M33197</b>    | 61341.977 | 63793.316 |
| <b>NM_002509</b> | 16862.682 | 13934.563 |
| <b>U38442</b>    | 1307.039  | 765.513   |
| <b>AK026706</b>  | 10638.672 | 6992.198  |
| <b>AB007936</b>  | 60162.223 | 57349.492 |
| <b>AF005258</b>  | 3924.105  | 2311.599  |
| <b>NM_000887</b> | 3962.623  | 3199.371  |
| <b>AF277292</b>  | 2146.617  | 1489.533  |
| <b>M33197</b>    | 60680.199 | 61734.102 |
| <b>NM_015416</b> | 10798.272 | 8359.431  |
| <b>NM_002731</b> | 1657.452  | 1120.475  |
| <b>NM_003899</b> | 7308.441  | 5951.445  |
| <b>X99662</b>    | 12430.273 | 9988.735  |
| <b>NM_003473</b> | 61284.129 | 59051.457 |
| <b>NM_014325</b> | 3267.968  | 2824.329  |

|                  |           |           |
|------------------|-----------|-----------|
| <b>M33197</b>    | 60952.332 | 64200.16  |
| <b>NM_017753</b> | 1553.013  | 1611.302  |
| <b>NM_012453</b> | 401.32    | 1211.489  |
| <b>NM_006016</b> | 50001.004 | 50981.52  |
| <b>NM_001242</b> | 58698.66  | 57799.594 |
| <b>NM_001882</b> | 916.424   | 863.344   |
| <b>NM_014891</b> | 16130.064 | 14600.471 |
| <b>NM_013392</b> | 39767.969 | 34316.48  |
| <b>M33197</b>    | 61032.934 | 65866.359 |
| <b>NM_003236</b> | 12194.671 | 9454.711  |
| <b>NM_003458</b> | 3169.097  | 2367.048  |
| <b>AF052692</b>  | 2924.441  | 2487.306  |
| <b>NM_002820</b> | 1643.268  | 1454.832  |
| <b>NM_000179</b> | 10031.384 | 5894.4    |
| <b>NM_005215</b> | 1142.1    | 889.33    |
| <b>AF062739</b>  | 10029.816 | 9146.933  |
| <b>NM_006602</b> | 6375.844  | 5485.189  |
| <b>AL079314</b>  | 4229.123  | 3402.597  |
| <b>NM_001260</b> | 6129.84   | 4962.397  |
| <b>NM_001950</b> | 6125.446  | 5134.104  |
| <b>AK026364</b>  | 3471.911  | 2812.599  |
| <b>NM_018117</b> | 2743.944  | 2096.866  |
| <b>NM_006999</b> | 2179.9    | 1750.284  |
| <b>NM_006286</b> | 2344.329  | 2110.368  |
| <b>M33197</b>    | 62377.418 | 63291.309 |
| <b>NM_004331</b> | 15625.903 | 14721.997 |
| <b>BE886648</b>  | 1270.776  | 1278.983  |
| <b>NM_015996</b> | 3140.714  | 2880.966  |
| <b>NM_015703</b> | 38773.613 | 33323.945 |
| <b>AB018337</b>  | 5033.117  | 4277.95   |
| <b>NM_014489</b> | 5514.153  | 4385.773  |
| <b>AK025273</b>  | 11393.255 | 10080.808 |
| <b>M33197</b>    | 61923.906 | 63387.09  |
| <b>NM_002205</b> | 7405.818  | 5752.692  |
| <b>NM_002214</b> | 10498.602 | 9000.517  |
| <b>NM_001911</b> | 11075.163 | 7604.204  |
| <b>NM_000537</b> | 5248.634  | 4893.687  |
| <b>NM_006503</b> | 4116.947  | 3255.785  |
| <b>AB002321</b>  | 1156.768  | 1072.215  |
| <b>M33197</b>    | 5590.858  | 4052.431  |
| <b>AB020698</b>  | 2319.736  | 1711.513  |
| <b>U68382</b>    | 10051.657 | 7329.227  |
| <b>NM_003969</b> | 8060.982  | 6302.46   |
| <b>NM_004651</b> | 4999.42   | 4112.815  |
| <b>NM_003363</b> | 665.215   | 672.468   |
| <b>M33197</b>    | 62648.117 | 63349.402 |
| <b>NM_017569</b> | 36844.152 | 35751.953 |
| <b>NM_001456</b> | 4084.297  | 4392.244  |
| <b>NM_002906</b> | 1581.309  | 1539.409  |
| <b>AK024480</b>  | 3841.878  | 3417.731  |
| <b>Y13871</b>    | 59234.68  | 55117.68  |
| <b>NM_012134</b> | 1990.371  | 1830.906  |
| <b>AL137725</b>  | 31483.055 | 31463.078 |



|                  |           |           |
|------------------|-----------|-----------|
| <b>M33197</b>    | 61265.781 | 61177.488 |
| <b>AJ008151</b>  | 56705.672 | 53159.883 |
| <b>NM_005228</b> | 5967.527  | 4580.172  |
| <b>NM_002354</b> | 6625.232  | 5878.168  |
| <b>NM_004091</b> | 11395.121 | 8186.164  |
| <b>X74070</b>    | 59404.016 | 61982.926 |
| <b>AF027219</b>  | 4172.901  | 3035.686  |
| <b>NM_006333</b> | 12090.527 | 8445.603  |
| <b>M33197</b>    | 60594.801 | 62023.566 |
| <b>NM_002898</b> | 37647.828 | 31315.531 |
| <b>AK022749</b>  | 50087.109 | 46079.355 |
| <b>BF031409</b>  | 30148.74  | 28660.393 |
| <b>NM_007043</b> | 3587.067  | 3908.906  |
| <b>BE378791</b>  | 1531.26   | 1246.211  |
| <b>U94388</b>    | 2837.603  | 2511.646  |
| <b>NM_012322</b> | 11481.779 | 11070.521 |
| <b>M33197</b>    | 59544.91  | 63103.457 |
| <b>NM_004889</b> | 57854.215 | 57734.734 |
| <b>AK025314</b>  | 8388.169  | 6962.19   |
| <b>NM_002109</b> | 9204.46   | 8641.227  |
| <b>NM_000984</b> | 61360.953 | 63406.555 |
| <b>NM_002453</b> | 24704.582 | 18561.813 |
| <b>AK000780</b>  | 57707.043 | 55755.09  |
| <b>M33197</b>    | 60018.797 | 63370.805 |
| <b>NM_000131</b> | 3654.351  | 3341.115  |
| <b>NM_001836</b> | 1096.918  | 1086.849  |
| <b>M64714</b>    | 1870.112  | 2329.88   |
| <b>AK026043</b>  | 3105.658  | 4019.118  |
| <b>NM_005006</b> | 17083.188 | 20731.561 |
| <b>AK027033</b>  | 4729.593  | 5736.451  |
| <b>NM_000106</b> | 26123.99  | 25758.383 |
| <b>NM_003000</b> | 40881.039 | 37351.43  |
| <b>NM_002495</b> | 38709.031 | 30953.527 |
| <b>M33197</b>    | 59333.461 | 57028.047 |
| <b>NM_016284</b> | 6220.257  | 5998.361  |
| <b>NM_014593</b> | 4703.079  | 4352.014  |
| <b>NM_006833</b> | 31372.662 | 31752.387 |
| <b>NM_012257</b> | 3308.271  | 3693.203  |
| <b>U37690</b>    | 54085.504 | 46781.828 |
| <b>NM_005120</b> | 2708.466  | 2652.243  |
| <b>AB029012</b>  | 53158.363 | 46760.625 |
| <b>M33197</b>    | 61178.305 | 57965.238 |
| <b>AJ010278</b>  | 952.829   | 958.36    |
| <b>NM_006299</b> | 4707.833  | 3816.088  |
| <b>AF060936</b>  | 45552.781 | 36763.168 |
| <b>NM_005568</b> | 3076.738  | 2334.528  |
| <b>NM_018167</b> | 1969.777  | 1569.974  |
| <b>AK024149</b>  | 3952.299  | 3346.6    |
| <b>AK023094</b>  | 1553.496  | 1726.042  |
| <b>M33197</b>    | 58746.109 | 55294.676 |
| <b>M33197</b>    | 63075.098 | 59390.398 |
| <b>AJ011129</b>  | 40857.582 | 43537.777 |
| <b>AF282874</b>  | 860.675   | 1170.459  |

|                    |           |           |
|--------------------|-----------|-----------|
| <b>NM_001039</b>   | 3025.029  | 3554.288  |
| <b>NM_006387</b>   | 13453.356 | 17473.949 |
| <b>NM_005646</b>   | 7782.89   | 8977.397  |
| <b>NM_006639</b>   | 4983.02   | 6762.563  |
| <b>NM_001692</b>   | 2164.187  | 2416.516  |
| <b>BI767871</b>    | 21481.6   | 31078.17  |
| <b>AA418907</b>    | 1023.774  | 1917.566  |
| <b>M65291</b>      | 535.225   | 1483.956  |
| <b>AA115473</b>    | 12171.456 | 16146.131 |
| <b>AA872397</b>    | 26041.916 | 33616.734 |
| <b>M24283</b>      | 17211.771 | 21795.732 |
| <b>AA709414</b>    | 6486.871  | 9432.188  |
| <b>D12676</b>      | 15681.962 | 15230.868 |
| <b>NM_000939</b>   | 55945.102 | 53754.141 |
| <b>NM_004295</b>   | 56458.082 | 54944.902 |
| <b>H-X 02812 I</b> | 7371.726  | 6296.219  |
| <b>U75898</b>      | 34528.535 | 23776.021 |
| <b>M29039</b>      | 4068.47   | 3355.173  |
| <b>M59815</b>      | 1268.513  | 1114.394  |
| <b>M33210</b>      | 869.885   | 929.81    |
| <b>M33197</b>      | 52296.406 | 50072.938 |
| <b>NM_007259</b>   | 3141.158  | 3932.406  |
| <b>NM_018402</b>   | 2854.427  | 4041.438  |
| <b>NM_018009</b>   | 7095.956  | 9803.984  |
| <b>AK075081</b>    | 7797.987  | 9647.832  |
| <b>NM_000895</b>   | 26922.734 | 38176.777 |
| <b>NM_003820</b>   | 57906.242 | 64894.191 |
| <b>NM_015915</b>   | 15317.945 | 15879.085 |
| <b>M33197</b>      | 59686.656 | 66663.516 |
| <b>NM_016518</b>   | 43905.645 | 56507.652 |
| <b>NM_006185</b>   | 40447.715 | 47992.582 |
| <b>NM_014800</b>   | 5211.38   | 8802.087  |
| <b>NM_001557</b>   | 2328.628  | 3551.545  |
| <b>AF147311</b>    | 17150.264 | 24101.635 |
| <b>NM_002131</b>   | 59359.164 | 64959.758 |
| <b>NM_017927</b>   | 19067.984 | 24523.188 |
| <b>NM_004799</b>   | 58027.195 | 57250.156 |
| <b>NM_006733</b>   | 1278.192  | 1731.522  |
| <b>NM_002039</b>   | 894.653   | 1299.177  |
| <b>NM_014047</b>   | 37867.891 | 41807.305 |
| <b>AK022901</b>    | 6860.866  | 6834.024  |
| <b>NM_001508</b>   | 1586.84   | 1761.577  |
| <b>AF037332</b>    | 10938.396 | 8712.521  |
| <b>NM_014571</b>   | 1471.156  | 1497.231  |
| <b>NM_020151</b>   | 30391.797 | 38612.41  |
| <b>NM_005891</b>   | 44086.801 | 50233.676 |
| <b>NM_001645</b>   | 3214.977  | 4545.518  |
| <b>NM_003956</b>   | 6922.792  | 10136.819 |
| <b>M33197</b>      | 60566.504 | 71625.789 |
| <b>NM_003500</b>   | 19139.9   | 30016.51  |
| <b>NM_014317</b>   | 7366.647  | 11307.165 |
| <b>L09234</b>      | 29144.779 | 36790.168 |
| <b>NM_000059</b>   | 2271.626  | 3323.173  |

|                  |           |           |
|------------------|-----------|-----------|
| <b>AK026740</b>  | 3088.097  | 4030.847  |
| <b>NM_017881</b> | 7486.95   | 9883.381  |
| <b>NM_018896</b> | 5991.692  | 8898.688  |
| <b>AF069307</b>  | 6365.164  | 9916.335  |
| <b>U92978</b>    | 6611.34   | 10457.982 |
| <b>NM_018034</b> | 10089.606 | 15566.941 |
| <b>M33197</b>    | 58668.953 | 65194.578 |
| <b>AB037831</b>  | 10118.849 | 12240.41  |
| <b>NM_012103</b> | 31166.861 | 39248.391 |
| <b>AL122077</b>  | 53301.82  | 54938.805 |
| <b>NM_014632</b> | 4760.891  | 5133.63   |
| <b>NM_006422</b> | 4653.079  | 5874.333  |
| <b>BE789195</b>  | 1558.004  | 2272.017  |
| <b>NM_016946</b> | 2511.746  | 3155.324  |
| <b>M33197</b>    | 61660.203 | 64612.453 |
| <b>NM_005326</b> | 52134.246 | 48743.016 |
| <b>NM_007286</b> | 2284.641  | 2676.844  |
| <b>NM_014069</b> | 2868.261  | 3830.871  |
| <b>AB035130</b>  | 4931.456  | 7557.979  |
| <b>NM_003359</b> | 7627.73   | 12761.244 |
| <b>M33197</b>    | 63331.445 | 56449.422 |
| <b>AF119917</b>  | 2216.656  | 3952.204  |
| <b>AK021834</b>  | 339.031   | 1206.062  |
| <b>NM_017915</b> | 3155.576  | 3567.415  |
| <b>AL050097</b>  | 836.893   | 1390.066  |
| <b>AK021513</b>  | 734.666   | 1266.01   |
| <b>NM_003579</b> | 4526.736  | 6246.865  |
| <b>AL049283</b>  | 2512.316  | 3616.71   |
| <b>M33197</b>    | 60075.68  | 54135.703 |
| <b>NM_002401</b> | 61158.789 | 59331.246 |
| <b>NM_001274</b> | 7742.241  | 11263.584 |
| <b>NM_003913</b> | 1914.568  | 2835.009  |
| <b>NM_002227</b> | 8010.244  | 7619.236  |
| <b>NM_007199</b> | 8412.474  | 11187.868 |
| <b>AB002301</b>  | 824.73    | 1453.33   |
| <b>AB014530</b>  | 23636.871 | 25283.209 |
| <b>M33197</b>    | 62369.797 | 58756.816 |
| <b>NM_005989</b> | 19066.346 | 21833.691 |
| <b>AB014607</b>  | 33545.059 | 31562.471 |
| <b>AF134401</b>  | 4166.046  | 5769.396  |
| <b>AF282874</b>  | 515.415   | 1242.269  |
| <b>NM_001039</b> | 2769.198  | 3063.434  |
| <b>NM_006387</b> | 13859.017 | 16819.559 |
| <b>NM_005646</b> | 8347.847  | 10956.354 |
| <b>NM_006639</b> | 6030.142  | 7929.853  |
| <b>NM_001692</b> | 2526.981  | 3777.667  |
| <b>BI767871</b>  | 27166.883 | 37928.305 |
| <b>AA418907</b>  | 4269.247  | 6174.39   |
| <b>M65291</b>    | 1336.017  | 2051.075  |
| <b>AA115473</b>  | 15055.677 | 21072.566 |
| <b>AA872397</b>  | 24197.68  | 32052.535 |
| <b>M24283</b>    | 14389.037 | 16090.263 |
| <b>AA709414</b>  | 4312.612  | 7127.205  |

|                    |           |           |
|--------------------|-----------|-----------|
| <b>D12676</b>      | 11844.83  | 15579.755 |
| <b>NM_000939</b>   | 58083.359 | 59721.363 |
| <b>NM_004295</b>   | 57513.039 | 63356.664 |
| <b>H-X 02812 I</b> | 7073.739  | 10165.441 |
| <b>U75898</b>      | 33164.914 | 37903.992 |
| <b>M29039</b>      | 3969.237  | 5146.197  |
| <b>M59815</b>      | 1342.561  | 1676.536  |
| <b>M33210</b>      | 1617.453  | 2107.087  |
| <b>M33197</b>      | 3797.24   | 5066.841  |
| <b>AB011146</b>    | 12054.318 | 14623.747 |
| <b>NM_003679</b>   | 1382.974  | 1745.262  |
| <b>NM_018009</b>   | 6030.531  | 8379.872  |
| <b>AK075081</b>    | 6074.437  | 7628.197  |
| <b>NM_000895</b>   | 23137.893 | 25984.598 |
| <b>NM_003820</b>   | 58940.508 | 58508.266 |
| <b>NM_015915</b>   | 15741.677 | 15594.206 |
| <b>M33197</b>      | 61735.023 | 64559.586 |
| <b>NM_016518</b>   | 45376.023 | 52707.543 |
| <b>NM_006185</b>   | 59480.672 | 60048.27  |
| <b>NM_014800</b>   | 5408.238  | 7065.146  |
| <b>NM_001557</b>   | 1745.147  | 2828.092  |
| <b>AF147311</b>    | 15013.165 | 21155.223 |
| <b>NM_002131</b>   | 59671.008 | 60054.09  |
| <b>NM_017927</b>   | 16721.873 | 18516.014 |
| <b>M33197</b>      | 58272.027 | 64950.664 |
| <b>NM_001203</b>   | 13847.413 | 17394.932 |
| <b>NM_004799</b>   | 57824.957 | 62257.902 |
| <b>NM_006733</b>   | 1335.706  | 1675.757  |
| <b>NM_002039</b>   | 793.149   | 1388.27   |
| <b>NM_014047</b>   | 37312.723 | 50478.762 |
| <b>AK022901</b>    | 6946.373  | 7574.811  |
| <b>NM_001508</b>   | 1526.089  | 1757.987  |
| <b>AF037332</b>    | 12291.656 | 13913.229 |
| <b>NM_014571</b>   | 1606.406  | 2427.594  |
| <b>M33197</b>      | 58220.184 | 61537.195 |
| <b>AJ011129</b>    | 50521.207 | 54409.227 |
| <b>NM_001645</b>   | 2989.898  | 3611.267  |
| <b>NM_003956</b>   | 5416.531  | 6229.569  |
| <b>M33197</b>      | 59147.078 | 62544.18  |
| <b>NM_003500</b>   | 22391.863 | 26824.002 |
| <b>NM_014317</b>   | 7482.223  | 9790.574  |
| <b>L09234</b>      | 33936.086 | 43933.984 |
| <b>NM_000059</b>   | 2128.069  | 2615.106  |
| <b>AK026740</b>    | 2288.812  | 3148.74   |
| <b>NM_017881</b>   | 7302.874  | 8201.172  |
| <b>NM_018896</b>   | 4901.812  | 6040.941  |
| <b>AF069307</b>    | 4937.495  | 7123.033  |
| <b>U92978</b>      | 5990.319  | 8303.993  |
| <b>NM_018034</b>   | 12657.788 | 16840.445 |
| <b>M33197</b>      | 58067.402 | 65526.813 |
| <b>AB037831</b>    | 11926.486 | 13416.816 |
| <b>NM_012103</b>   | 37984.461 | 45696.008 |
| <b>AL122077</b>    | 44273.621 | 50548.633 |

|                    |           |           |
|--------------------|-----------|-----------|
| <b>NM_014632</b>   | 3593.186  | 4182.043  |
| <b>NM_006422</b>   | 4919.583  | 5677.76   |
| <b>BE789195</b>    | 1249.263  | 1850.978  |
| <b>NM_016946</b>   | 1900.311  | 2430.588  |
| <b>M33197</b>      | 56925.078 | 62596.441 |
| <b>NM_007259</b>   | 3313.703  | 4772.897  |
| <b>NM_018402</b>   | 3360.993  | 4290.019  |
| <b>NM_014069</b>   | 3113.978  | 2810.175  |
| <b>AB035130</b>    | 4137.287  | 4740.262  |
| <b>NM_003359</b>   | 6438.092  | 6796.73   |
| <b>M33197</b>      | 61311.039 | 57867.965 |
| <b>AF119917</b>    | 2028.369  | 2978.305  |
| <b>AK021834</b>    | 461.57    | 995.558   |
| <b>NM_017915</b>   | 2631.699  | 3166.118  |
| <b>AL050097</b>    | 735.56    | 1426.421  |
| <b>NM_003579</b>   | 3977.476  | 5044.703  |
| <b>AL049283</b>    | 2801.287  | 2781.726  |
| <b>M33197</b>      | 60367.43  | 60741.313 |
| <b>NM_002401</b>   | 56836.328 | 61061.398 |
| <b>NM_001274</b>   | 5955.504  | 6606.017  |
| <b>NM_003913</b>   | 1201.489  | 1807.754  |
| <b>NM_002227</b>   | 6427.13   | 4627.834  |
| <b>NM_007199</b>   | 9830.622  | 11369.175 |
| <b>AB002301</b>    | 1421.804  | 1166.248  |
| <b>AB014530</b>    | 23054.41  | 22877.912 |
| <b>M33197</b>      | 63933.699 | 62051.941 |
| <b>NM_005989</b>   | 12885.11  | 16460.039 |
| <b>AB014607</b>    | 22493.627 | 21622.08  |
| <b>AF134401</b>    | 4727.723  | 5893.23   |
| <b>NM_020151</b>   | 32729.621 | 43625.805 |
| <b>NM_005891</b>   | 44822.086 | 54630.113 |
| <b>NM_006387</b>   | 12744.361 | 14851.024 |
| <b>NM_005646</b>   | 7583.503  | 9077.841  |
| <b>NM_006639</b>   | 4864.927  | 5896.746  |
| <b>NM_001692</b>   | 2246.886  | 2111.61   |
| <b>BI767871</b>    | 26372.072 | 27346.799 |
| <b>AA418907</b>    | 4666.15   | 4933.854  |
| <b>M65291</b>      | 1524.318  | 1703.503  |
| <b>AA115473</b>    | 15755.229 | 18670.344 |
| <b>AA872397</b>    | 14395.359 | 13627.32  |
| <b>M24283</b>      | 13133.865 | 11265.513 |
| <b>AA709414</b>    | 5103.093  | 4244.695  |
| <b>D12676</b>      | 12747.146 | 12533.58  |
| <b>NM_000939</b>   | 57793.047 | 50899.75  |
| <b>NM_004295</b>   | 55644.336 | 53671.445 |
| <b>H-X 02812 I</b> | 6655.143  | 8975.718  |
| <b>U75898</b>      | 33717.742 | 34760.598 |
| <b>M29039</b>      | 3604.742  | 5197.567  |
| <b>M59815</b>      | 1064.432  | 1496.668  |
| <b>M33210</b>      | 869.897   | 1537.122  |
| <b>M33197</b>      | 2698.625  | 3245.515  |
| <b>AB011146</b>    | 9045.316  | 10154.775 |
| <b>NM_003679</b>   | 1162.82   | 1563.861  |

|                  |           |           |
|------------------|-----------|-----------|
| <b>NM_005326</b> | 49538.359 | 48250.375 |
| <b>NM_014800</b> | 8543.491  | 9341.733  |
| <b>NM_001557</b> | 2783.817  | 2854.702  |
| <b>AF147311</b>  | 18944.688 | 17763.359 |
| <b>NM_002131</b> | 60665.371 | 57540.012 |
| <b>NM_017927</b> | 18525.998 | 14943.165 |
| <b>M33197</b>    | 61603.023 | 61162.832 |
| <b>NM_001203</b> | 15486.571 | 10677.407 |
| <b>NM_004799</b> | 56955.691 | 50362.359 |
| <b>NM_006733</b> | 2326.958  | 725.577   |
| <b>NM_002039</b> | 1090.926  | 1003.877  |
| <b>NM_014047</b> | 38321.535 | 39994.605 |
| <b>AK022901</b>  | 5501.708  | 5136.405  |
| <b>NM_001508</b> | 3154.897  | 661.992   |
| <b>M33197</b>    | 58234.109 | 58519.703 |
| <b>AF037332</b>  | 9837.651  | 9325.515  |
| <b>NM_006052</b> | 3118.047  | 3600.188  |
| <b>AB040912</b>  | 39414.945 | 44145.703 |
| <b>NM_003871</b> | 11453.938 | 12466.762 |
| <b>NM_006243</b> | 8484.879  | 8575.536  |
| <b>NM_007252</b> | 1195.202  | 1412.347  |
| <b>M33197</b>    | 57888.578 | 57571.715 |
| <b>AJ011129</b>  | 32953.332 | 36747.773 |
| <b>AF282874</b>  | 1601.957  | 1008.683  |
| <b>NM_001039</b> | 2175.139  | 2404.352  |
| <b>NM_005738</b> | 770.612   | 1175.159  |
| <b>NM_014488</b> | 5056.043  | 4810.515  |
| <b>NM_013389</b> | 28034.158 | 23375.205 |
| <b>AB014567</b>  | 1361.838  | 1268.808  |
| <b>AK022817</b>  | 7517.918  | 4269.205  |
| <b>NM_018034</b> | 18018.678 | 16292.95  |
| <b>M33197</b>    | 59860.316 | 58550.281 |
| <b>AB037831</b>  | 11985.227 | 12224.482 |
| <b>NM_012103</b> | 36002.32  | 46987.5   |
| <b>AL122077</b>  | 38880.504 | 44301.156 |
| <b>NM_014632</b> | 3462.437  | 3456.725  |
| <b>NM_006422</b> | 4774.005  | 4892.646  |
| <b>BE789195</b>  | 1552.687  | 2195.367  |
| <b>NM_016946</b> | 2203.651  | 2419.18   |
| <b>M33197</b>    | 59455.973 | 60380.262 |
| <b>NM_007259</b> | 2541.628  | 2576.243  |
| <b>NM_018402</b> | 2550.523  | 2652.277  |
| <b>NM_018009</b> | 4150.466  | 5667.261  |
| <b>AK075081</b>  | 7481.26   | 8586.688  |
| <b>NM_000895</b> | 20430.225 | 23082.734 |
| <b>NM_003820</b> | 57592.453 | 59909.039 |
| <b>NM_015915</b> | 13012.53  | 15262.536 |
| <b>M33197</b>    | 60118.938 | 62321.695 |
| <b>NM_016518</b> | 36065.188 | 41988.73  |
| <b>NM_006185</b> | 54599.516 | 56319.32  |
| <b>NM_005989</b> | 18691.545 | 15127.923 |
| <b>AB014607</b>  | 30246.934 | 18789.207 |
| <b>AF134401</b>  | 5784.445  | 3790.073  |

|                  |           |           |
|------------------|-----------|-----------|
| <b>NM_020151</b> | 38865.484 | 36408.66  |
| <b>NM_005891</b> | 47482.41  | 46270.262 |
| <b>NM_001645</b> | 3469.151  | 3937.049  |
| <b>NM_003956</b> | 5195.427  | 5223.555  |
| <b>M33197</b>    | 57596.258 | 60730.988 |
| <b>NM_003500</b> | 14986.728 | 17824.615 |
| <b>NM_014317</b> | 7270.824  | 8639.292  |
| <b>L09234</b>    | 36964.902 | 35908.012 |
| <b>NM_000059</b> | 2494.073  | 2678.667  |
| <b>AK026740</b>  | 2763.698  | 3007.21   |
| <b>NM_017881</b> | 9450.731  | 9664.09   |
| <b>M33197</b>    | 57680.41  | 56856.25  |
| <b>NM_017634</b> | 6276.594  | 6982.622  |
| <b>NM_000813</b> | 2181.261  | 3429.607  |
| <b>NM_018896</b> | 3764.806  | 5201.275  |
| <b>AJ300465</b>  | 8897.581  | 10022.674 |
| <b>X86400</b>    | 2681.274  | 3027.874  |
| <b>NM_000810</b> | 2494.798  | 3646.291  |
| <b>AF069307</b>  | 4551.133  | 6498.533  |
| <b>M33197</b>    | 60855.359 | 63862.039 |
| <b>U92978</b>    | 3651.554  | 4690.749  |
| <b>M33197</b>    | 4499.864  | 1518.429  |
| <b>AB011146</b>  | 14121.661 | 14411.97  |
| <b>NM_003679</b> | 1353.184  | 998.464   |
| <b>NM_005326</b> | 48781.953 | 39268.352 |
| <b>NM_007286</b> | 2089.23   | 2152.231  |
| <b>NM_014069</b> | 2487.444  | 2711.56   |
| <b>AB035130</b>  | 3053.869  | 3438.075  |
| <b>NM_003359</b> | 4496.449  | 4403.619  |
| <b>M33197</b>    | 58637.871 | 52226.785 |
| <b>AF119917</b>  | 2346.862  | 2545.823  |
| <b>NM_017915</b> | 3831.334  | 3354.521  |
| <b>AL050097</b>  | 542.342   | 1323.192  |
| <b>AK021513</b>  | 858.676   | 1008.952  |
| <b>NM_003579</b> | 8063.025  | 8011.254  |
| <b>AL049283</b>  | 3582.295  | 3571.4    |
| <b>M33197</b>    | 62471.707 | 55430.699 |
| <b>NM_002401</b> | 58409.492 | 56626.613 |
| <b>NM_001274</b> | 5696.463  | 6564.944  |
| <b>NM_003913</b> | 1150.232  | 2062.962  |
| <b>NM_002227</b> | 6229.596  | 5421.711  |
| <b>NM_007199</b> | 9529.577  | 13090.908 |
| <b>AB002301</b>  | 873.627   | 1345.22   |
| <b>AB014530</b>  | 17096.318 | 19932.266 |
| <b>M33197</b>    | 58953.664 | 62112.195 |
| <b>CY3Cy5</b>    | 12130.622 | 695.659   |
| <b>AK054960</b>  | 41818.168 | 36795.543 |
| <b>L15344</b>    | 4056.096  | 2528.252  |
| <b>AK024150</b>  | 3271.804  | 3034.692  |
| <b>AF070536</b>  | 4935.952  | 3987.703  |
| <b>AK022297</b>  | 1996.855  | 1819.727  |
| <b>U79300</b>    | 4378.487  | 3477.262  |
| <b>AK025151</b>  | 44635.914 | 40519.152 |

|                  |           |           |
|------------------|-----------|-----------|
| <b>AK025550</b>  | 9961.566  | 7396.223  |
| <b>AF088076</b>  | 54948.93  | 54278.879 |
| <b>AF086543</b>  | 11491.652 | 9746.336  |
| <b>AB046797</b>  | 2199.434  | 1731.506  |
| <b>AK002098</b>  | 3639.676  | 3261.191  |
| <b>AK024298</b>  | 416.453   | 687.471   |
| <b>AB011128</b>  | 59065.715 | 53846.523 |
| <b>AK026742</b>  | 1560.512  | 1429.27   |
| <b>AK025074</b>  | 10024.589 | 7653.645  |
| <b>AK054960</b>  | 52329.152 | 43523.48  |
| <b>L15344</b>    | 2730.984  | 2236.573  |
| <b>SR1</b>       | 60091.563 | 59631.988 |
| <b>SR3</b>       | 47896.586 | 42778.91  |
| <b>SR5</b>       | 6745.12   | 6589.894  |
| <b>SR7</b>       | 6149.936  | 44629.777 |
| <b>SR9</b>       | 20467.184 | 3882.451  |
| <b>CY3Cy5</b>    | 8834.759  | 554.664   |
| <b>U50524</b>    | 598.099   | 756.186   |
| <b>U52050</b>    | 1059.937  | 1160.613  |
| <b>U73799</b>    | 6455.697  | 4601.526  |
| <b>Z36826</b>    | 1234.228  | 934.561   |
| <b>AK021668</b>  | 62009.977 | 55516.25  |
| <b>AF086148</b>  | 54865.352 | 48791.848 |
| <b>AJ227854</b>  | 1503.261  | 1495.744  |
| <b>AK002195</b>  | 1813.56   | 1537.303  |
| <b>AF086128</b>  | 1443.056  | 1419.567  |
| <b>AK026099</b>  | 770.919   | 845.044   |
| <b>AK023831</b>  | 693.026   | 705.056   |
| <b>AK022850</b>  | 3883.924  | 3768.303  |
| <b>NM_016490</b> | 14836.307 | 12359.286 |
| <b>AF038193</b>  | 1231.509  | 1178.661  |
| <b>AL137498</b>  | 11955.059 | 10814.271 |
| <b>AK024289</b>  | 5314.475  | 3933.529  |
| <b>S66168</b>    | 34223.008 | 27445.68  |
| <b>AF131837</b>  | 1275.987  | 1116.244  |
| <b>NM_003851</b> | 40216.684 | 37478.523 |
| <b>U79244</b>    | 643.797   | 864.233   |
| <b>AK022482</b>  | 8310.506  | 6990.238  |
| <b>AK023811</b>  | 819.94    | 904.484   |
| <b>AK024135</b>  | 2826.911  | 2399.976  |
| <b>AK022803</b>  | 24149.283 | 17940.82  |
| <b>AK023517</b>  | 5237.719  | 3334.787  |
| <b>AK023869</b>  | 12334.422 | 10080.73  |
| <b>AK025156</b>  | 56385.633 | 59537.605 |
| <b>AK022116</b>  | 33336.273 | 27655.654 |
| <b>AF026526</b>  | 6062.493  | 5404.108  |
| <b>AK026207</b>  | 8611.104  | 7866.932  |
| <b>NM_020181</b> | 491.789   | 513.799   |
| <b>AK024984</b>  | 55751.441 | 59230.5   |
| <b>AK000276</b>  | 769.108   | 657.85    |
| <b>AL110236</b>  | 1554.736  | 1468.377  |
| <b>AF085955</b>  | 1489.464  | 1529      |
| <b>AF075106</b>  | 19518.002 | 15626.733 |



|                  |           |           |
|------------------|-----------|-----------|
| <b>AK023339</b>  | 13516.436 | 11244.766 |
| <b>AF085981</b>  | 1444.684  | 1109.002  |
| <b>AF086008</b>  | 7438.848  | 7042.472  |
| <b>AF087970</b>  | 1210.524  | 1217.519  |
| <b>AF086029</b>  | 950.099   | 959.374   |
| <b>AF075115</b>  | 1167.774  | 1217.01   |
| <b>U05597</b>    | 2827.798  | 2547.327  |
| <b>AK026366</b>  | 58869.547 | 61758.25  |
| <b>AK024229</b>  | 49770.105 | 49883.391 |
| <b>AK021824</b>  | 692.082   | 576.577   |
| <b>AK021467</b>  | 34964.559 | 24933.039 |
| <b>NM_020371</b> | 4638.935  | 3343.187  |
| <b>AK022498</b>  | 5972.459  | 3584.812  |
| <b>AJ245433</b>  | 54475.895 | 58053.375 |
| <b>AK021942</b>  | 56441.211 | 58523.75  |
| <b>NM_014127</b> | 4230.65   | 3704.544  |
| <b>AL360187</b>  | 6352.822  | 5186.451  |
| <b>AK021878</b>  | 3951.691  | 3488.927  |
| <b>AK021817</b>  | 20782.504 | 15930.18  |
| <b>AL080103</b>  | 2609.721  | 2069.708  |
| <b>AK023217</b>  | 2937.199  | 2730.371  |
| <b>AK021883</b>  | 754.93    | 850.047   |
| <b>AF090902</b>  | 29566.525 | 24868.436 |
| <b>AF119887</b>  | 58482.918 | 55446.508 |
| <b>AK091038</b>  | 2407.595  | 1831.587  |
| <b>AK024193</b>  | 5237.176  | 4404.339  |
| <b>NM_018578</b> | 1561.087  | 1511.638  |
| <b>NM_018543</b> | 917.06    | 827.994   |
| <b>AK024438</b>  | 49517.273 | 46268.313 |
| <b>AL390170</b>  | 2060.539  | 2130.8    |
| <b>AK022887</b>  | 2367.104  | 2018.795  |
| <b>AK000745</b>  | 54247.246 | 50219.75  |
| <b>NM_005299</b> | 2800.813  | 2918.487  |
| <b>NM_015901</b> | 3831.541  | 2563.179  |
| <b>AF130065</b>  | 900.985   | 867.214   |
| <b>Z83935</b>    | 4147.716  | 3633.487  |
| <b>NM_006365</b> | 935.628   | 974.436   |
| <b>AF093744</b>  | 41917.813 | 37061.613 |
| <b>NM_018687</b> | 54195.324 | 47738.125 |
| <b>M57417</b>    | 63951.082 | 64729.586 |
| <b>NM_017728</b> | 4438.851  | 3767.45   |
| <b>U80772</b>    | 2227.577  | 1917.987  |
| <b>NM_006189</b> | 7591.018  | 5358.123  |
| <b>AJ272177</b>  | 4588.277  | 4095.413  |
| <b>AK026402</b>  | 58626.992 | 57491.031 |
| <b>AF111846</b>  | 4177.437  | 3889.786  |
| <b>M11948</b>    | 58144.621 | 61813.148 |
| <b>Z36850</b>    | 1048.748  | 1024.805  |
| <b>AK024618</b>  | 7285.582  | 6440.641  |
| <b>AL049969</b>  | 2466.112  | 2182.213  |
| <b>NM_005220</b> | 9898.024  | 8622.938  |
| <b>NM_018619</b> | 786.108   | 918.671   |
| <b>X79308</b>    | 7122.588  | 6070.33   |

|                  |           |           |
|------------------|-----------|-----------|
| <b>AF086476</b>  | 2017.029  | 2085.961  |
| <b>NM_017660</b> | 13051.41  | 9974.574  |
| <b>AB011151</b>  | 53202.836 | 49692.219 |
| <b>U92995</b>    | 9024.491  | 7649.038  |
| <b>Z70769</b>    | 1006.049  | 1067.936  |
| <b>NM_007106</b> | 4063.226  | 4092.808  |
| <b>AL137555</b>  | 12767.03  | 11250.334 |
| <b>AL133017</b>  | 3522.426  | 3217.277  |
| <b>U84506</b>    | 12576.445 | 10585.686 |
| <b>U21556</b>    | 65093.996 | 71159.695 |
| <b>AB002444</b>  | 2495.84   | 1660.825  |
| <b>AB002344</b>  | 11072.995 | 8274.076  |
| <b>BF210352</b>  | 3768.147  | 2681.427  |
| <b>NM_006829</b> | 11233.277 | 9039.906  |
| <b>NM_017669</b> | 44685.027 | 35643.66  |
| <b>AF147379</b>  | 58690.309 | 61964.063 |
| <b>AK023760</b>  | 17523.488 | 23936.545 |
| <b>X98415</b>    | 60816.508 | 64391.672 |
| <b>AK024205</b>  | 4577.705  | 4851.677  |
| <b>AF086034</b>  | 26295.355 | 21699.598 |
| <b>AK000174</b>  | 1481.835  | 1492.48   |
| <b>AF130071</b>  | 6618.336  | 5858.878  |
| <b>AJ272057</b>  | 4720.86   | 4365.961  |
| <b>NM_004402</b> | 3704.165  | 3984.496  |
| <b>AK024216</b>  | 47536.008 | 47269.262 |
| <b>Y16752</b>    | 20300.029 | 18619.367 |
| <b>NM_014694</b> | 1473.938  | 1128.016  |
| <b>NM_020156</b> | 2420.135  | 2189.262  |
| <b>NM_014830</b> | 4983.412  | 4446.426  |
| <b>AF355402</b>  | 10732.13  | 10249.922 |
| <b>AK000407</b>  | 8772.838  | 8536.263  |
| <b>AK026164</b>  | 474.407   | 814.073   |
| <b>NM_020524</b> | 39052.578 | 38785.758 |
| <b>NM_001999</b> | 10498.583 | 11961.128 |
| <b>X64977</b>    | 5573.505  | 6807.883  |
| <b>AF064851</b>  | 3716.462  | 2913.303  |
| <b>NM_002602</b> | 38317.023 | 41561.129 |
| <b>NM_016239</b> | 5126.507  | 5241.561  |
| <b>NM_003383</b> | 2823.038  | 2537.235  |
| <b>D17271</b>    | 28946.693 | 22625.719 |
| <b>X91648</b>    | 3250.817  | 2116.19   |
| <b>AK026658</b>  | 1499.121  | 1471.176  |
| <b>AF282264</b>  | 13778.285 | 10901.635 |
| <b>AF086322</b>  | 2669.226  | 2882.577  |
| <b>Z70717</b>    | 2286.052  | 2385.834  |
| <b>AK024736</b>  | 6164.777  | 6149.358  |
| <b>NM_018239</b> | 2290.633  | 2549.415  |
| <b>U88892</b>    | 7945.085  | 9592.773  |
| <b>AK023755</b>  | 3012.541  | 2498.179  |
| <b>NM_005725</b> | 1673.601  | 1731.005  |
| <b>NM_012211</b> | 2697.481  | 2545.373  |
| <b>AB040877</b>  | 12033.843 | 10213.669 |
| <b>AB040927</b>  | 3913.852  | 3209.603  |

|                  |           |           |
|------------------|-----------|-----------|
| <b>AK026737</b>  | 22649.25  | 19049.5   |
| <b>NM_000210</b> | 2168.721  | 2064.637  |
| <b>NM_006289</b> | 19418.18  | 18774.898 |
| <b>NM_019067</b> | 9317.184  | 8103.598  |
| <b>AF251025</b>  | 1883.936  | 1922.068  |
| <b>NM_015677</b> | 20946.406 | 19448.354 |
| <b>NM_001772</b> | 24137.133 | 20224.484 |
| <b>AB011087</b>  | 2945.176  | 2335.941  |
| <b>AF161341</b>  | 21463.99  | 17280.496 |
| <b>AJ249902</b>  | 7863.75   | 6914.852  |
| <b>NM_004384</b> | 8942.836  | 7986.052  |
| <b>L05500</b>    | 38972.527 | 36781.414 |
| <b>NM_012306</b> | 46185.664 | 51172.582 |
| <b>AF222903</b>  | 6281.538  | 5667.042  |
| <b>NM_006226</b> | 10121.784 | 9058.308  |
| <b>L10374</b>    | 41034.852 | 36587.484 |
| <b>NM_000249</b> | 10984.399 | 12772.161 |
| <b>NM_014310</b> | 2197.788  | 3088.191  |
| <b>NM_005860</b> | 15932.847 | 16546.986 |
| <b>AF095288</b>  | 46274.18  | 51252.73  |
| <b>AK025116</b>  | 1149.513  | 1349.209  |
| <b>AK026271</b>  | 22806.301 | 21298.58  |
| <b>NM_001799</b> | 24624.67  | 23451.834 |
| <b>AF090895</b>  | 5083.899  | 6255.685  |
| <b>NM_005610</b> | 4914.322  | 3620.153  |
| <b>AL133651</b>  | 4634.667  | 5391.323  |
| <b>AB014532</b>  | 28098.063 | 25058.604 |
| <b>NM_003478</b> | 6692.554  | 6163.966  |
| <b>BE275227</b>  | 698.913   | 737.734   |
| <b>NM_016237</b> | 15782.422 | 13140.809 |
| <b>NM_004924</b> | 9069.855  | 7614.597  |
| <b>NM_001798</b> | 8158.628  | 7247.39   |
| <b>NM_001211</b> | 19607.168 | 16463.342 |
| <b>NM_006505</b> | 1446.14   | 1392.727  |
| <b>AB033050</b>  | 5170.701  | 4866.861  |
| <b>NM_004356</b> | 50149.348 | 52015.746 |
| <b>NM_001855</b> | 824.905   | 901.878   |
| <b>BC015022</b>  | 8335.977  | 7914.713  |
| <b>AB033086</b>  | 1824.055  | 1529.731  |
| <b>NM_002406</b> | 63733.227 | 68982.492 |
| <b>U87169</b>    | 5557.432  | 5298.867  |
| <b>NM_002073</b> | 3895.87   | 3703.872  |
| <b>AF117222</b>  | 32904.41  | 12864.498 |
| <b>NM_001935</b> | 60368.555 | 62520.961 |
| <b>NM_001749</b> | 1116.369  | 1058.79   |
| <b>AF090327</b>  | 2061.182  | 1851.348  |
| <b>NM_003291</b> | 12011.823 | 12246.195 |
| <b>AK022950</b>  | 6637.812  | 5766.884  |
| <b>S75755</b>    | 22956.172 | 22948.654 |
| <b>AF176518</b>  | 3380.914  | 2998.637  |
| <b>AB014576</b>  | 58164.711 | 59765.699 |
| <b>NM_019044</b> | 41028.473 | 38787.133 |
| <b>AK000145</b>  | 2426.496  | 2013.464  |

|                  |           |           |
|------------------|-----------|-----------|
| <b>AF174601</b>  | 11137.534 | 11209.477 |
| <b>AF279865</b>  | 2651.897  | 2580.466  |
| <b>NM_014700</b> | 3709.646  | 3296.985  |
| <b>NM_014714</b> | 1532.711  | 1582.556  |
| <b>NM_015644</b> | 5415.848  | 6350.386  |
| <b>NM_005687</b> | 12537.235 | 11423.483 |
| <b>NM_005983</b> | 11152.707 | 12140.703 |
| <b>AB016902</b>  | 22629.076 | 18757.613 |
| <b>AF272378</b>  | 54985.789 | 53319.348 |
| <b>M61870</b>    | 5200.874  | 5653.621  |
| <b>AK026980</b>  | 4239.742  | 4210.252  |
| <b>AJ277915</b>  | 1213.185  | 1298.162  |
| <b>NM_020368</b> | 6859.319  | 6660.573  |
| <b>AF024708</b>  | 48181.406 | 46488.938 |
| <b>NM_006467</b> | 11942.183 | 12945.493 |
| <b>NM_017566</b> | 20732.877 | 20002.359 |
| <b>NM_006582</b> | 3146.848  | 3370.499  |
| <b>AB033019</b>  | 16229.827 | 15733.103 |
| <b>NM_001452</b> | 1714.039  | 1795.879  |
| <b>NM_006162</b> | 3521.607  | 2923.602  |
| <b>NM_014764</b> | 18158.912 | 15899.401 |
| <b>NM_018078</b> | 6852.67   | 6332.706  |
| <b>NM_016013</b> | 1007.461  | 798.422   |
| <b>NM_016050</b> | 1773.437  | 1530.392  |
| <b>NM_007080</b> | 23523.639 | 20326.652 |
| <b>AK026912</b>  | 14225.072 | 11378.331 |
| <b>AK023531</b>  | 46539.961 | 37059.242 |
| <b>NM_006697</b> | 35171.992 | 35293.383 |
| <b>M19182</b>    | 4240.126  | 4546.359  |
| <b>AK025707</b>  | 5388.977  | 4725.261  |
| <b>NM_006242</b> | 3055.369  | 3137.81   |
| <b>AF282887</b>  | 581.281   | 534.521   |
| <b>X78712</b>    | 3558.363  | 3656.69   |
| <b>NM_001497</b> | 1460.77   | 1309.775  |
| <b>NM_004130</b> | 5720.018  | 5255.005  |
| <b>NM_006348</b> | 2037.355  | 1685.573  |
| <b>AF067972</b>  | 49632.742 | 49846.152 |
| <b>NM_004958</b> | 2921.195  | 2976.992  |
| <b>D87076</b>    | 7850.944  | 7345.988  |
| <b>NM_014149</b> | 5579.484  | 5493.199  |
| <b>AB020635</b>  | 19830.264 | 19380.014 |
| <b>NM_006515</b> | 3024.28   | 2992.78   |
| <b>NM_005224</b> | 1446.821  | 1222.124  |
| <b>NM_012144</b> | 32640.514 | 28610.236 |
| <b>X65231</b>    | 58597.68  | 58772.91  |
| <b>NM_002908</b> | 8617.026  | 6703.492  |
| <b>AF205632</b>  | 14629.44  | 11420.617 |
| <b>NM_005378</b> | 58809.449 | 58898.465 |
| <b>NM_002397</b> | 6430.216  | 4331.984  |
| <b>AF000672</b>  | 3871.871  | 3397.167  |
| <b>NM_017652</b> | 52783.238 | 54904.07  |
| <b>X59268</b>    | 9104.041  | 6170.709  |
| <b>NM_001429</b> | 47110.652 | 45195.832 |

|                  |           |           |
|------------------|-----------|-----------|
| <b>NM_002379</b> | 50720.617 | 55163.766 |
| <b>AB007929</b>  | 10294.907 | 11531.677 |
| <b>NM_004579</b> | 17470.309 | 17037.354 |
| <b>AA203126</b>  | 5090.137  | 5024.332  |
| <b>L12347</b>    | 53592.262 | 56297.148 |
| <b>NM_001622</b> | 30701.67  | 29184.383 |
| <b>Z36788</b>    | 15556.447 | 14963.585 |
| <b>NM_018477</b> | 20383.424 | 18587.838 |
| <b>U20536</b>    | 1444.499  | 1519.949  |
| <b>AI298534</b>  | 7577.808  | 7334.742  |
| <b>R71691</b>    | 16535.674 | 14201.778 |
| <b>AW167715</b>  | 9885.787  | 8020.163  |
| <b>AA424735</b>  | 42443.57  | 36903.93  |
| <b>U78294</b>    | 15291.102 | 10937.674 |
| <b>AA171613</b>  | 1428.168  | 1407.168  |
| <b>BI760394</b>  | 10230.009 | 8426.977  |
| <b>AA555216</b>  | 1715.885  | 1492.308  |
| <b>U09117</b>    | 59345.715 | 61916.918 |
| <b>M21054</b>    | 5267.373  | 4676.885  |
| <b>M18468</b>    | 3267.44   | 2539.714  |
| <b>H66070</b>    | 39316.578 | 33798.07  |
| <b>AA164741</b>  | 2027.39   | 1580.214  |
| <b>AI189375</b>  | 5900.841  | 4421.467  |
| <b>NM_000303</b> | 40178.219 | 38035.094 |
| <b>NM_001939</b> | 34492.766 | 30601.889 |
| <b>NM_003279</b> | 59543.195 | 56500.23  |
| <b>AB014599</b>  | 12136.94  | 9682.375  |
| <b>NM_004393</b> | 1364.714  | 995.153   |
| <b>AB018345</b>  | 805.401   | 906.141   |
| <b>NM_005832</b> | 2495.561  | 2079.264  |
| <b>AW407841</b>  | 6662.025  | 5752.367  |
| <b>U15197</b>    | 2168.603  | 2033.086  |
| <b>NM_001879</b> | 9339.213  | 9395.591  |
| <b>AF264014</b>  | 34686.125 | 33062.473 |
| <b>NM_004155</b> | 6190.709  | 5912.769  |
| <b>NM_001831</b> | 3001.903  | 2747.905  |
| <b>NM_014586</b> | 22094.514 | 16985.639 |
| <b>NM_014366</b> | 38665.664 | 30666.229 |
| <b>NM_000923</b> | 4265.271  | 3623.805  |
| <b>NM_006453</b> | 8595.219  | 6668.549  |
| <b>NM_018096</b> | 3275.827  | 2530.955  |
| <b>AL390078</b>  | 6916.793  | 5337.674  |
| <b>NM_004036</b> | 12334.898 | 9942.499  |
| <b>NM_015986</b> | 8480.462  | 7760.096  |
| <b>NM_014959</b> | 41840.473 | 33310.559 |
| <b>NM_003992</b> | 13650.02  | 10766.41  |
| <b>NM_000137</b> | 3308.01   | 4915.47   |
| <b>NM_012102</b> | 26745.348 | 31557.717 |
| <b>NM_005017</b> | 65003.164 | 70179.875 |
| <b>AF163572</b>  | 50238.332 | 47703.41  |
| <b>NM_000897</b> | 25317.584 | 23025.631 |
| <b>NM_000487</b> | 2489.557  | 2489.198  |
| <b>NM_006411</b> | 45616.32  | 42579.535 |

|                  |           |           |
|------------------|-----------|-----------|
| <b>NM_014182</b> | 4036.733  | 4234.004  |
| <b>AB040884</b>  | 1495.17   | 1671.174  |
| <b>NM_001170</b> | 32836.68  | 31676.49  |
| <b>NM_014342</b> | 7474.616  | 6954.561  |
| <b>NM_000452</b> | 1074.001  | 1178.188  |
| <b>NM_004853</b> | 17367.066 | 13594.755 |
| <b>NM_001494</b> | 36409.766 | 28185.799 |
| <b>NM_017707</b> | 2139.688  | 1796.199  |
| <b>NM_004206</b> | 6351.523  | 4900.428  |
| <b>NM_004603</b> | 54076.363 | 50621.32  |
| <b>AK022849</b>  | 10051.016 | 6750.05   |
| <b>AF040964</b>  | 27671.633 | 21264.488 |
| <b>NM_001773</b> | 1964.389  | 3031.766  |
| <b>Z70704</b>    | 4391.862  | 5836.161  |
| <b>NM_014363</b> | 4848.771  | 5144.06   |
| <b>NM_000557</b> | 17631.865 | 18765.67  |
| <b>NM_003239</b> | 2755.308  | 2217.167  |
| <b>NM_001375</b> | 29101.141 | 29304.215 |
| <b>NM_002312</b> | 5340.861  | 5748.042  |
| <b>M20699</b>    | 4214.011  | 4215.331  |
| <b>NM_004774</b> | 13905.407 | 12652.549 |
| <b>NM_016937</b> | 7800.573  | 8472.771  |
| <b>NM_002690</b> | 4554.523  | 4995.827  |
| <b>NM_012328</b> | 8417.186  | 6882.874  |
| <b>NM_007341</b> | 4560.897  | 3906.252  |
| <b>NM_016508</b> | 3216.542  | 2631.748  |
| <b>NM_006456</b> | 58655.41  | 46247.23  |
| <b>AK026062</b>  | 8572.717  | 7166.915  |
| <b>AF047002</b>  | 52932.707 | 46789.09  |
| <b>AL050082</b>  | 7659.187  | 6674.726  |
| <b>NM_006623</b> | 64316.965 | 56498.727 |
| <b>NM_016588</b> | 9480.934  | 7093.344  |
| <b>NM_003135</b> | 18465.004 | 11908.492 |
| <b>NM_004579</b> | 14496.314 | 22050.186 |
| <b>AA203126</b>  | 3683.567  | 5472.883  |
| <b>L12347</b>    | 55321.922 | 54723.555 |
| <b>NM_001622</b> | 24217.451 | 33004.25  |
| <b>Z36788</b>    | 14547.462 | 17466.891 |
| <b>NM_018477</b> | 19411.441 | 24643.672 |
| <b>U20536</b>    | 2376.033  | 2932.823  |
| <b>AI298534</b>  | 10052.519 | 11382.229 |
| <b>R71691</b>    | 18802.158 | 18424.547 |
| <b>AW167715</b>  | 6490.908  | 7214.232  |
| <b>AA424735</b>  | 30499.299 | 29573.037 |
| <b>U78294</b>    | 11126.573 | 10513.209 |
| <b>AA171613</b>  | 1763.283  | 1626.031  |
| <b>BI760394</b>  | 9473.807  | 9739.775  |
| <b>AA555216</b>  | 1892.243  | 1468.674  |
| <b>U09117</b>    | 57925.91  | 58781.504 |
| <b>M21054</b>    | 4907.913  | 4961.485  |
| <b>M18468</b>    | 3864.821  | 3049.689  |
| <b>H66070</b>    | 39390.039 | 31149.674 |
| <b>AA164741</b>  | 2227.508  | 1936.908  |

|                  |           |           |
|------------------|-----------|-----------|
| <b>AI189375</b>  | 6035.929  | 4358.989  |
| <b>AF097645</b>  | 2174.237  | 2391.875  |
| <b>NM_003279</b> | 58248.488 | 57848.219 |
| <b>AB014599</b>  | 10478.688 | 14303.658 |
| <b>NM_004393</b> | 1531.831  | 1848.733  |
| <b>AB018345</b>  | 1034.899  | 1538.196  |
| <b>NM_005832</b> | 2498.093  | 3631.97   |
| <b>AW407841</b>  | 8612.042  | 12757.949 |
| <b>U15197</b>    | 2319.844  | 3306.281  |
| <b>NM_001879</b> | 8923.557  | 12940.196 |
| <b>AF264014</b>  | 33092.246 | 49331.117 |
| <b>L09098</b>    | 665.914   | 1327.624  |
| <b>NM_004155</b> | 5508.785  | 7682.168  |
| <b>NM_001831</b> | 1596.162  | 2153.077  |
| <b>NM_014586</b> | 18098.947 | 17519.527 |
| <b>NM_014366</b> | 31390.697 | 30209.189 |
| <b>NM_000923</b> | 3103.204  | 2919.165  |
| <b>NM_006453</b> | 7382.376  | 5749.516  |
| <b>NM_018096</b> | 4002.517  | 2427.287  |
| <b>AL390078</b>  | 8843.612  | 7299.5    |
| <b>NM_004036</b> | 11608     | 9187.31   |
| <b>NM_015986</b> | 7286.193  | 5814.579  |
| <b>NM_002379</b> | 57138.367 | 53715.633 |
| <b>AB007929</b>  | 17609.906 | 15869.372 |
| <b>NM_012102</b> | 20721.709 | 34034.273 |
| <b>NM_005017</b> | 60321.051 | 58381.781 |
| <b>AF163572</b>  | 45889.242 | 53230.207 |
| <b>NM_000897</b> | 23613.275 | 31450.314 |
| <b>NM_000487</b> | 2685.832  | 3937.23   |
| <b>NM_006411</b> | 45996.27  | 52887.379 |
| <b>NM_014182</b> | 4410.515  | 7058.984  |
| <b>AB040884</b>  | 1099.114  | 1798.526  |
| <b>NM_001170</b> | 29257.891 | 40754.844 |
| <b>NM_014342</b> | 6437.587  | 8969.22   |
| <b>NM_004853</b> | 12920.36  | 17295.457 |
| <b>NM_001494</b> | 28224.799 | 30131.438 |
| <b>NM_017707</b> | 2076.83   | 1842.375  |
| <b>NM_004206</b> | 5892.485  | 5197.057  |
| <b>NM_004603</b> | 53367.012 | 47003.613 |
| <b>AF040964</b>  | 24162.967 | 27938.984 |
| <b>AK023527</b>  | 844.497   | 982.544   |
| <b>NM_001939</b> | 51602.75  | 49577.785 |
| <b>NM_014363</b> | 3096.943  | 3880.84   |
| <b>NM_000557</b> | 15290.086 | 20751.361 |
| <b>NM_003239</b> | 1873.006  | 2473.888  |
| <b>NM_001375</b> | 23233.82  | 27869.332 |
| <b>NM_002312</b> | 4001.443  | 5964.045  |
| <b>M20699</b>    | 2880.297  | 4231.27   |
| <b>NM_004774</b> | 12628.338 | 15769.961 |
| <b>NM_016937</b> | 7925.531  | 11442.886 |
| <b>NM_002690</b> | 4044.024  | 5314.984  |
| <b>NM_012328</b> | 7198.71   | 8562.637  |
| <b>NM_007341</b> | 3103.948  | 4388.203  |

|                  |           |           |
|------------------|-----------|-----------|
| <b>NM_016508</b> | 2553.861  | 4139.98   |
| <b>NM_006456</b> | 52754.578 | 53098.324 |
| <b>AK026062</b>  | 6244.852  | 9392.448  |
| <b>AF047002</b>  | 39723.828 | 45791.664 |
| <b>AL050082</b>  | 7193.029  | 10028.106 |
| <b>NM_006623</b> | 69042.984 | 65031.777 |
| <b>NM_003135</b> | 13103.447 | 16642.645 |
| <b>NM_000137</b> | 5806.166  | 7487.139  |
| <b>NM_001622</b> | 19252.16  | 24878.188 |
| <b>Z36788</b>    | 8738.516  | 12597.405 |
| <b>NM_018477</b> | 15883.614 | 22434.057 |
| <b>U20536</b>    | 1042.197  | 1762.252  |
| <b>AI298534</b>  | 7645.261  | 10618.426 |
| <b>R71691</b>    | 17409.086 | 23562.756 |
| <b>AW167715</b>  | 6695.332  | 9526.801  |
| <b>AA424735</b>  | 26481.641 | 36326.039 |
| <b>U78294</b>    | 7936.656  | 11064.3   |
| <b>AA171613</b>  | 1520.738  | 2375.419  |
| <b>BI760394</b>  | 7328.009  | 10883.079 |
| <b>AA555216</b>  | 1472.852  | 1928.79   |
| <b>U09117</b>    | 59820.285 | 56621.125 |
| <b>M21054</b>    | 4637.187  | 6870.367  |
| <b>M18468</b>    | 2371.132  | 3325.648  |
| <b>H66070</b>    | 35879.246 | 45739.387 |
| <b>AA164741</b>  | 1469.331  | 2482.153  |
| <b>AI189375</b>  | 5067.062  | 6613.459  |
| <b>NM_001665</b> | 38928.32  | 46725.789 |
| <b>AF097645</b>  | 1771.588  | 2413.899  |
| <b>NM_001773</b> | 3026.718  | 3930.032  |
| <b>Z70704</b>    | 9717.434  | 10829.449 |
| <b>L09098</b>    | 430.572   | 1470.116  |
| <b>NM_004155</b> | 5290.272  | 7225.903  |
| <b>NM_001831</b> | 2005.216  | 2862.87   |
| <b>NM_014586</b> | 14903.51  | 21196.129 |
| <b>NM_014366</b> | 29741.535 | 40471.758 |
| <b>NM_000923</b> | 2660.154  | 4127.032  |
| <b>NM_006453</b> | 4668.195  | 7300.384  |
| <b>NM_018096</b> | 2405.274  | 3412.897  |
| <b>AL390078</b>  | 4280.676  | 5606.981  |
| <b>NM_004036</b> | 7092.214  | 10498.715 |
| <b>NM_015986</b> | 6907.157  | 10317.357 |
| <b>NM_006546</b> | 1078.312  | 2120.78   |
| <b>NM_014959</b> | 20761.523 | 26543.965 |
| <b>NM_003992</b> | 8365.841  | 12447.227 |
| <b>AF279265</b>  | 10082.973 | 14330.675 |
| <b>NM_007350</b> | 721.561   | 1394.151  |
| <b>NM_005213</b> | 32886.676 | 41392.559 |
| <b>AB040914</b>  | 5953.705  | 7154.265  |
| <b>NM_002379</b> | 54599.91  | 54805.527 |
| <b>AB007929</b>  | 13185.646 | 14977.85  |
| <b>NM_004579</b> | 17269.684 | 20370.365 |
| <b>AA203126</b>  | 4915.489  | 5686.492  |
| <b>AB043997</b>  | 2508.077  | 3063.534  |



|                  |           |           |
|------------------|-----------|-----------|
| <b>NM_001062</b> | 410.791   | 1350.788  |
| <b>NM_004853</b> | 13623.712 | 18284.199 |
| <b>NM_001494</b> | 30547.391 | 43765.648 |
| <b>NM_017707</b> | 1527.956  | 2208.096  |
| <b>NM_004206</b> | 4845.652  | 6950.644  |
| <b>NM_004603</b> | 44099.773 | 55262.52  |
| <b>AK022849</b>  | 5468.402  | 7088.117  |
| <b>AF040964</b>  | 17189.57  | 23094.85  |
| <b>AK023527</b>  | 1177.957  | 1479.581  |
| <b>NM_001939</b> | 34507.688 | 45757.184 |
| <b>NM_003279</b> | 61405.93  | 60121.172 |
| <b>AB014599</b>  | 10980.855 | 12385.173 |
| <b>NM_004393</b> | 1132.438  | 1314.766  |
| <b>AB018345</b>  | 1738.394  | 1066.263  |
| <b>NM_005832</b> | 3376.627  | 4534.501  |
| <b>AW407841</b>  | 8383.354  | 9191.124  |
| <b>U15197</b>    | 1892.432  | 2826.426  |
| <b>NM_001879</b> | 8648.392  | 10743.336 |
| <b>NM_016588</b> | 4351.176  | 6433.883  |
| <b>NM_003135</b> | 13315.359 | 19354.713 |
| <b>NM_000137</b> | 4930.699  | 6759.138  |
| <b>NM_012102</b> | 14538.327 | 25043.178 |
| <b>NM_005017</b> | 59112.574 | 59147.855 |
| <b>AF163572</b>  | 41463.09  | 52134.965 |
| <b>NM_000897</b> | 18960.357 | 27137.295 |
| <b>NM_000487</b> | 1910.058  | 3112.59   |
| <b>NM_006411</b> | 39231.828 | 49897.387 |
| <b>NM_014182</b> | 3622.906  | 5152.962  |
| <b>AB040884</b>  | 1141.646  | 2064.826  |
| <b>NM_000492</b> | 30833.553 | 46123.133 |
| <b>NM_012089</b> | 1716.498  | 2533.945  |
| <b>AK024382</b>  | 703.559   | 929.628   |
| <b>NM_001170</b> | 26152.582 | 36208.906 |
| <b>AL137716</b>  | 4224.146  | 4308.983  |
| <b>NM_004696</b> | 10216.36  | 13334.654 |
| <b>NM_014342</b> | 5667.253  | 8489.153  |
| <b>Z50169</b>    | 2607.878  | 3448.644  |
| <b>NM_014470</b> | 3442.25   | 4583.559  |
| <b>NM_001665</b> | 35495.699 | 42419.008 |
| <b>AF097645</b>  | 1774.224  | 2158.483  |
| <b>NM_001773</b> | 1586.191  | 2239.495  |
| <b>Z70704</b>    | 3538.417  | 5719.97   |
| <b>NM_014363</b> | 2266.735  | 3803.557  |
| <b>NM_000557</b> | 9701.808  | 16074.403 |
| <b>NM_003239</b> | 1096.816  | 1691.63   |
| <b>NM_001375</b> | 20754.908 | 26439.789 |
| <b>NM_002312</b> | 4257.923  | 6251.088  |
| <b>M20699</b>    | 3387.021  | 4504.966  |
| <b>NM_004774</b> | 11486.46  | 14445.091 |
| <b>NM_016937</b> | 5993.46   | 8317.48   |
| <b>NM_002690</b> | 4107.973  | 6547.732  |
| <b>NM_012328</b> | 6971.745  | 7732.464  |
| <b>NM_007341</b> | 3494.398  | 4337.393  |

|                  |           |           |
|------------------|-----------|-----------|
| <b>NM_016508</b> | 2655.329  | 3921.959  |
| <b>NM_006456</b> | 54663.598 | 52878.777 |
| <b>AK026062</b>  | 7567.541  | 8066.324  |
| <b>AF047002</b>  | 39897.734 | 50292.426 |
| <b>AL050082</b>  | 6392.446  | 8706.934  |
| <b>NM_006623</b> | 61697.969 | 58045.691 |
| <b>CY3Cy5</b>    | 4804.642  | 153.605   |
| <b>NM_016134</b> | 1265.01   | 1616.129  |
| <b>AL390185</b>  | 16903.01  | 21220.199 |
| <b>AF086235</b>  | 21961.602 | 23926.057 |
| <b>AF143886</b>  | 3053.275  | 3585.665  |
| <b>AK025975</b>  | 8227.561  | 11209.382 |
| <b>AK025583</b>  | 58582.176 | 55663.191 |
| <b>NM_014664</b> | 3396.764  | 3969.55   |
| <b>AL109788</b>  | 12549.603 | 16765.105 |
| <b>NM_014952</b> | 60997.094 | 64172.789 |
| <b>AL133053</b>  | 2827.452  | 3198.882  |
| <b>NM_018142</b> | 16760.822 | 19356.592 |
| <b>NM_017653</b> | 8497.229  | 9058.381  |
| <b>AL109695</b>  | 23983.51  | 26878.049 |
| <b>NM_016134</b> | 1852.344  | 1724.286  |
| <b>SR2</b>       | 42801.996 | 52687.082 |
| <b>SR4</b>       | 18219.133 | 24064.803 |
| <b>SR6</b>       | 2467.639  | 3078.476  |
| <b>NM_014819</b> | 13038.119 | 11346.376 |
| <b>NM_017609</b> | 4337.985  | 2977.916  |
| <b>AF086040</b>  | 4367.632  | 3772.423  |
| <b>AB032988</b>  | 5058.806  | 5705.059  |
| <b>AK023559</b>  | 34730.531 | 37411.801 |
| <b>AB037859</b>  | 57623.449 | 60765.105 |
| <b>AL049233</b>  | 9173.803  | 12008.126 |
| <b>NM_017696</b> | 18836.561 | 20832.205 |
| <b>AL050166</b>  | 8920.913  | 11990.725 |
| <b>AK024254</b>  | 3713.476  | 4516.83   |
| <b>NM_018456</b> | 6912.924  | 8790.376  |
| <b>AK026697</b>  | 1150.108  | 1719.356  |
| <b>NM_019021</b> | 3449.521  | 4318.561  |
| <b>NM_004717</b> | 884.629   | 1412.302  |
| <b>AK002183</b>  | 1666.375  | 2281.784  |
| <b>NM_018996</b> | 1739.545  | 1795.734  |
| <b>AL137304</b>  | 3866.074  | 4209.438  |
| <b>AL049274</b>  | 1464.549  | 1728.534  |
| <b>NM_018279</b> | 4124.594  | 4075.429  |
| <b>AF147369</b>  | 1312.615  | 919.972   |
| <b>AK025190</b>  | 939.692   | 853.902   |
| <b>AK025595</b>  | 599.793   | 478.167   |
| <b>AK026743</b>  | 726.121   | 549.914   |
| <b>AK025214</b>  | 1773.456  | 1385.184  |
| <b>AK025846</b>  | 2343.677  | 3141.639  |
| <b>AK026805</b>  | 21171.799 | 25635.877 |
| <b>AB037765</b>  | 3368.052  | 4636.053  |
| <b>AK025068</b>  | 4336.232  | 4772.401  |
| <b>AK026720</b>  | 2159.46   | 3010.316  |

|                  |           |           |
|------------------|-----------|-----------|
| <b>AL137566</b>  | 3927.127  | 5259.776  |
| <b>AF087962</b>  | 12868.561 | 14336.227 |
| <b>AL050197</b>  | 4164.766  | 5550.729  |
| <b>AF085870</b>  | 20462.607 | 23673.338 |
| <b>AL050063</b>  | 1579.885  | 1552.69   |
| <b>AL080217</b>  | 687.477   | 785.86    |
| <b>AL117580</b>  | 31348.578 | 37091.793 |
| <b>AL049355</b>  | 779.906   | 856.441   |
| <b>AL050124</b>  | 1340.588  | 931.118   |
| <b>AL110190</b>  | 7792.555  | 6772.05   |
| <b>NM_018225</b> | 54647.887 | 51270.465 |
| <b>AK025534</b>  | 4423.652  | 3489.208  |
| <b>AK022577</b>  | 1073.521  | 910.568   |
| <b>AF091526</b>  | 19600.361 | 16565.461 |
| <b>AK022170</b>  | 611.993   | 631.232   |
| <b>AL390169</b>  | 597.12    | 735.021   |
| <b>AK026705</b>  | 11332.62  | 15434.233 |
| <b>NM_003602</b> | 5191.185  | 6193.179  |
| <b>AF009258</b>  | 56895.129 | 56648.566 |
| <b>AF009305</b>  | 8790.886  | 9583.188  |
| <b>NM_006193</b> | 2315.753  | 3051.817  |
| <b>AF056454</b>  | 705.927   | 1010.792  |
| <b>AF009270</b>  | 2655.389  | 3405.963  |
| <b>AF009318</b>  | 4747.854  | 5535.653  |
| <b>AF056421</b>  | 3748.65   | 3911.198  |
| <b>AF090889</b>  | 1070.706  | 1405.775  |
| <b>AK001085</b>  | 4022.919  | 5082.064  |
| <b>AK001906</b>  | 8705.737  | 8838.661  |
| <b>AK021528</b>  | 3321.852  | 2737.983  |
| <b>AK021746</b>  | 2728.759  | 3963.763  |
| <b>AK001136</b>  | 3117.419  | 4021.033  |
| <b>AK002066</b>  | 707.034   | 850.443   |
| <b>AK021617</b>  | 801.406   | 1155.429  |
| <b>AF086317</b>  | 10855.712 | 8776.193  |
| <b>U16850</b>    | 16946.529 | 14875.446 |
| <b>AL390178</b>  | 4186.275  | 3854.464  |
| <b>NM_005383</b> | 3484.497  | 2635.608  |
| <b>AF147326</b>  | 1061.801  | 605.014   |
| <b>Z36806</b>    | 878.199   | 717.27    |
| <b>NM_005368</b> | 4098.149  | 2892.179  |
| <b>NM_018618</b> | 2195.527  | 2680.183  |
| <b>AJ008121</b>  | 51910.352 | 51252.777 |
| <b>AJ008153</b>  | 11476.191 | 13861.736 |
| <b>AK023739</b>  | 2911.45   | 3366.938  |
| <b>NM_005830</b> | 15559.912 | 17260.66  |
| <b>AL389983</b>  | 8404.366  | 9932.825  |
| <b>AJ008159</b>  | 2621.22   | 3553.665  |
| <b>AK000995</b>  | 6023.847  | 7258.624  |
| <b>U00959</b>    | 6148.05   | 6689.542  |
| <b>NM_014578</b> | 50654.395 | 52354.617 |
| <b>AF147306</b>  | 8665.666  | 9915.143  |
| <b>AF086267</b>  | 12860.691 | 13423.118 |
| <b>X74606</b>    | 1839.69   | 2183.307  |

|                  |           |           |
|------------------|-----------|-----------|
| <b>AK026785</b>  | 4672.294  | 6895.788  |
| <b>AK001938</b>  | 1568.691  | 1629.324  |
| <b>AK022994</b>  | 1825.074  | 2474.383  |
| <b>AL049466</b>  | 7939.192  | 6113.001  |
| <b>AB037802</b>  | 1972.388  | 1304.267  |
| <b>U17623</b>    | 1093.258  | 939.565   |
| <b>AL137450</b>  | 8559.215  | 6458.896  |
| <b>AK023058</b>  | 20187.922 | 16487.367 |
| <b>AJ227878</b>  | 1666.016  | 1280.47   |
| <b>NM_012064</b> | 46162.117 | 41753.516 |
| <b>AK001460</b>  | 2345.638  | 1610.661  |
| <b>AK092508</b>  | 15302.982 | 19811.41  |
| <b>AK027111</b>  | 55673.012 | 58819.117 |
| <b>NM_003518</b> | 1678.557  | 2252.848  |
| <b>M60749</b>    | 6067.874  | 7776.558  |
| <b>AF056424</b>  | 589.774   | 577.981   |
| <b>X79986</b>    | 3869.094  | 5103.993  |
| <b>NM_003523</b> | 20479.83  | 23960.771 |
| <b>X01448</b>    | 2833.263  | 3784.624  |
| <b>NM_016503</b> | 11216.041 | 12989.738 |
| <b>AK056351</b>  | 53336.992 | 53797.371 |
| <b>NM_014690</b> | 26497.193 | 26153.27  |
| <b>NM_017698</b> | 5795.173  | 6469.095  |
| <b>AF131738</b>  | 42933.703 | 55271.09  |
| <b>AK021666</b>  | 31858.979 | 44470.016 |
| <b>AK024081</b>  | 3914.845  | 6238.936  |
| <b>AK024825</b>  | 9725.479  | 15097.338 |
| <b>NM_000795</b> | 1321.362  | 999.412   |
| <b>AB037761</b>  | 48124.195 | 43854.363 |
| <b>NM_014008</b> | 58572.395 | 53683.461 |
| <b>NM_014731</b> | 27325.395 | 20487.289 |
| <b>AF035191</b>  | 29676.414 | 25740.082 |
| <b>NM_004058</b> | 4072.332  | 3191.596  |
| <b>NM_004527</b> | 6716.65   | 5449.137  |
| <b>NM_012062</b> | 22060.158 | 21237.119 |
| <b>AK026717</b>  | 1494.81   | 1951.47   |
| <b>NM_001507</b> | 4810.806  | 5691.35   |
| <b>X92108</b>    | 1954.569  | 2373.731  |
| <b>AL389876</b>  | 6279.419  | 7891.871  |
| <b>AK022120</b>  | 5839.028  | 9159.671  |
| <b>U52830</b>    | 146.871   | 480.053   |
| <b>Z70762</b>    | 1205.74   | 1129.541  |
| <b>D17099</b>    | 1211.64   | 1415.07   |
| <b>BF037206</b>  | 8105.651  | 8997.801  |
| <b>AB031547</b>  | 6385.178  | 4713.529  |
| <b>NM_003970</b> | 5586.438  | 4840.574  |
| <b>AK022496</b>  | 5119.904  | 4465.818  |
| <b>AB042636</b>  | 3928.448  | 2797.449  |
| <b>AB033035</b>  | 6408.127  | 4462.219  |
| <b>NM_002883</b> | 13022.221 | 11611.17  |
| <b>NM_019012</b> | 3619.125  | 2930.311  |
| <b>NM_000141</b> | 2148.063  | 1724.682  |
| <b>NM_016150</b> | 25606.941 | 19353.688 |

|                  |           |           |
|------------------|-----------|-----------|
| <b>NM_002674</b> | 128.919   | 572.704   |
| <b>U57058</b>    | 3285.419  | 4465.859  |
| <b>AL137452</b>  | 4610.344  | 6014.278  |
| <b>NM_004312</b> | 58340.617 | 58237.395 |
| <b>NM_001347</b> | 15079.361 | 20533.488 |
| <b>AK024549</b>  | 56259.305 | 57475.859 |
| <b>NM_006338</b> | 52357.801 | 48781.203 |
| <b>NM_007164</b> | 28631.832 | 32410.955 |
| <b>NM_000261</b> | 2354.763  | 2830.12   |
| <b>NM_002606</b> | 2389.987  | 2747.779  |
| <b>NM_002570</b> | 5591.496  | 6414.764  |
| <b>NM_003183</b> | 3878.946  | 4040.892  |
| <b>NM_001657</b> | 602.055   | 780.611   |
| <b>NM_003585</b> | 2797.908  | 3206.384  |
| <b>NM_019851</b> | 8784.707  | 12477.717 |
| <b>NM_003238</b> | 1144.729  | 1509.349  |
| <b>NM_014096</b> | 39399.207 | 31263.555 |
| <b>NM_005706</b> | 25019.418 | 20860.303 |
| <b>NM_001261</b> | 15442.135 | 12482.487 |
| <b>NM_001977</b> | 7368.465  | 5321.775  |
| <b>NM_007219</b> | 3887.078  | 2681.051  |
| <b>AK026854</b>  | 7207.284  | 5647.263  |
| <b>NM_001269</b> | 39141.762 | 33849.691 |
| <b>NM_002506</b> | 13870.962 | 12509.07  |
| <b>NM_004906</b> | 15217.826 | 10830.063 |
| <b>X98261</b>    | 1579.196  | 1623.452  |
| <b>NM_012447</b> | 39551.68  | 48176.801 |
| <b>NM_006366</b> | 5246.145  | 6497.357  |
| <b>AK027013</b>  | 53447.102 | 59129.172 |
| <b>NM_001344</b> | 44226.012 | 55262.699 |
| <b>NM_018294</b> | 4723.197  | 5259.703  |
| <b>AL389934</b>  | 17519.814 | 19707.039 |
| <b>NM_004330</b> | 9545.664  | 10095.424 |
| <b>AF151802</b>  | 15225.833 | 17274.557 |
| <b>AB006746</b>  | 2957.112  | 2579.403  |
| <b>NM_006498</b> | 11682.846 | 12610.172 |
| <b>AB023233</b>  | 5912.448  | 6630.104  |
| <b>AL133071</b>  | 1224.118  | 1237.908  |
| <b>NM_004369</b> | 13084.462 | 12420.24  |
| <b>NM_004370</b> | 1991.978  | 1998.19   |
| <b>AB040898</b>  | 4283.764  | 3514.583  |
| <b>NM_016155</b> | 28548.42  | 24160.422 |
| <b>NM_001224</b> | 33724.68  | 22885.324 |
| <b>NM_017811</b> | 21435.689 | 17588.676 |
| <b>NM_001569</b> | 14021.163 | 9826.275  |
| <b>NM_004131</b> | 6225.603  | 3974.547  |
| <b>AK023284</b>  | 3680.291  | 2553.033  |
| <b>AF106069</b>  | 973.543   | 570.382   |
| <b>D87438</b>    | 557.07    | 376.149   |
| <b>NM_005101</b> | 18039.91  | 13902.954 |
| <b>NM_004205</b> | 1327.515  | 892.049   |
| <b>AF130060</b>  | 58160.695 | 60384.121 |
| <b>NM_007057</b> | 54332.902 | 55304.773 |

|                  |           |           |
|------------------|-----------|-----------|
| <b>NM_000177</b> | 6273.829  | 6824.726  |
| <b>NM_003387</b> | 39834.152 | 51586.859 |
| <b>U60665</b>    | 6361.035  | 6168.251  |
| <b>NM_005507</b> | 58512.281 | 60437.578 |
| <b>AL080133</b>  | 39731.836 | 42605.836 |
| <b>AY014403</b>  | 3162.759  | 3812.387  |
| <b>NM_006912</b> | 50172.836 | 51731.785 |
| <b>X12534</b>    | 10731.171 | 9813.501  |
| <b>NM_018367</b> | 2373.428  | 2353.835  |
| <b>NM_001363</b> | 21092.145 | 22700.719 |
| <b>NM_014323</b> | 16894.744 | 12944.657 |
| <b>NM_003205</b> | 5095.125  | 4321.356  |
| <b>AB002324</b>  | 7894.115  | 6390.021  |
| <b>AF205600</b>  | 663.909   | 578.964   |
| <b>AL359938</b>  | 2581.097  | 1646.156  |
| <b>NM_002165</b> | 733.759   | 610.716   |
| <b>AK026231</b>  | 4795.658  | 4138.087  |
| <b>NM_002140</b> | 51842.793 | 47216.344 |
| <b>NM_020143</b> | 17802.17  | 14519.342 |
| <b>NM_012469</b> | 13271.101 | 10503.808 |
| <b>NM_005131</b> | 7168.508  | 6309.256  |
| <b>NM_007056</b> | 9030.395  | 11173.832 |
| <b>AF083383</b>  | 6999.91   | 10080.417 |
| <b>NM_006925</b> | 7629.088  | 8986.581  |
| <b>NM_004890</b> | 56696.219 | 63014.508 |
| <b>AK023181</b>  | 15728.195 | 18881.709 |
| <b>NM_004294</b> | 16514.316 | 18823.346 |
| <b>NM_005051</b> | 39163.793 | 47116.539 |
| <b>NM_001968</b> | 43169.051 | 40646.223 |
| <b>D17259</b>    | 55503.773 | 60656.305 |
| <b>AB002366</b>  | 1858.937  | 1247.068  |
| <b>AF264627</b>  | 57530.785 | 55472.77  |
| <b>NM_018130</b> | 23668.678 | 22798.953 |
| <b>AF085878</b>  | 5893.943  | 5099.755  |
| <b>AB006630</b>  | 2572.711  | 1876.924  |
| <b>NM_004453</b> | 5796.935  | 4359.119  |
| <b>NM_016229</b> | 31430.578 | 20563.24  |
| <b>NM_018244</b> | 17607.967 | 14957.377 |
| <b>NM_002492</b> | 54494.332 | 47067.445 |
| <b>AB046855</b>  | 2733.845  | 1907.961  |
| <b>NM_005642</b> | 14832.964 | 10827.82  |
| <b>NM_018105</b> | 5481.344  | 3087.676  |
| <b>AK023452</b>  | 19625.611 | 15561.021 |
| <b>AF155065</b>  | 1446.288  | 1176.042  |
| <b>NM_000332</b> | 1908.369  | 2356.423  |
| <b>AK022215</b>  | 12432.313 | 15944.49  |
| <b>U90305</b>    | 4612.672  | 5032.731  |
| <b>NM_001527</b> | 31897.279 | 35104.504 |
| <b>AK025269</b>  | 46631.711 | 49500.277 |
| <b>NM_001438</b> | 1464.867  | 1620.566  |
| <b>AB040971</b>  | 2941.277  | 2947.976  |
| <b>NM_006562</b> | 20131.428 | 20604.57  |
| <b>X65665</b>    | 1337.095  | 1642.826  |

|                  |           |           |
|------------------|-----------|-----------|
| <b>NM_003112</b> | 6612.776  | 6332.701  |
| <b>NM_018951</b> | 655.292   | 553.813   |
| <b>AL080170</b>  | 12898.479 | 8814.98   |
| <b>AB039903</b>  | 19564.361 | 16290.875 |
| <b>NM_000542</b> | 53082.527 | 48260.746 |
| <b>NM_014625</b> | 1454.911  | 1066.099  |
| <b>NM_006851</b> | 4116.979  | 2612.874  |
| <b>AK001560</b>  | 11989.348 | 10316.197 |
| <b>AB001328</b>  | 9143.786  | 7110.201  |
| <b>NM_000948</b> | 1495.639  | 1752.273  |
| <b>H99588</b>    | 4928.853  | 3708.373  |
| <b>X00588</b>    | 22582.682 | 18155.451 |
| <b>AI359037</b>  | 53229.211 | 50492.531 |
| <b>J04513</b>    | 3147.82   | 2832.823  |
| <b>BI754285</b>  | 7086.195  | 7734.71   |
| <b>X15998</b>    | 20325.648 | 25984.662 |
| <b>M76482</b>    | 1697.179  | 2034.652  |
| <b>X17519</b>    | 790.426   | 1193.166  |
| <b>NM_001883</b> | 12037.49  | 16699.768 |
| <b>NM_004628</b> | 8733.138  | 11804.698 |
| <b>L31785</b>    | 3689.922  | 3487.318  |
| <b>H-M 69043</b> | 20383.057 | 28881.066 |
| <b>AF077374</b>  | 4794.217  | 4909.66   |
| <b>U43901</b>    | 2009.155  | 2525.765  |
| <b>X59065</b>    | 5876.002  | 6121.224  |
| <b>M59828</b>    | 44497.582 | 47935.594 |
| <b>NM_002168</b> | 8481.521  | 8940.679  |
| <b>NM_015658</b> | 2427.624  | 1648.413  |
| <b>NM_000589</b> | 13528.493 | 8612.709  |
| <b>NM_016546</b> | 50405.773 | 47766.734 |
| <b>AF309653</b>  | 13031.06  | 8022.646  |
| <b>NM_002620</b> | 54863.566 | 52059.07  |
| <b>S79267</b>    | 7158.265  | 5427.998  |
| <b>NM_001816</b> | 3505.977  | 2482.679  |
| <b>NM_003784</b> | 54618.621 | 54828.707 |
| <b>NM_000195</b> | 55774.496 | 55718.84  |
| <b>NM_005445</b> | 39560.656 | 26234.162 |
| <b>NM_014899</b> | 8472.316  | 8017.08   |
| <b>NM_003630</b> | 20868.967 | 18825.533 |
| <b>NM_000046</b> | 13474.883 | 12544.392 |
| <b>NM_003219</b> | 8683.597  | 11094.678 |
| <b>NM_006709</b> | 17015.924 | 19538.479 |
| <b>NM_000612</b> | 44651.871 | 48940.668 |
| <b>NM_004257</b> | 45196.566 | 53324.496 |
| <b>NM_002844</b> | 779.454   | 690.719   |
| <b>NM_000683</b> | 7849.06   | 9388.233  |
| <b>NM_003629</b> | 13433.913 | 13932.942 |
| <b>NM_005901</b> | 10316.993 | 12108.905 |
| <b>NM_004248</b> | 24825.816 | 27741.48  |
| <b>NM_000959</b> | 1175.445  | 1077.964  |
| <b>NM_004910</b> | 8696.295  | 5752.908  |
| <b>AB013452</b>  | 8328.819  | 4980.924  |
| <b>M93107</b>    | 19352.691 | 13814.106 |

|                  |           |           |
|------------------|-----------|-----------|
| <b>BC001479</b>  | 55007.938 | 47981.184 |
| <b>NM_002461</b> | 55472.332 | 52860.82  |
| <b>NM_005771</b> | 2803.944  | 2656.413  |
| <b>AB032986</b>  | 57121.305 | 54461.48  |
| <b>NM_017528</b> | 56117.191 | 54768.133 |
| <b>NM_016032</b> | 23493.297 | 21604.051 |
| <b>NM_014324</b> | 53165.32  | 52764.086 |
| <b>NM_001687</b> | 55375.27  | 50472.59  |
| <b>AK026374</b>  | 11874.712 | 9780.795  |
| <b>NM_003459</b> | 38398.656 | 42432.75  |
| <b>NM_013349</b> | 54336.207 | 58988.914 |
| <b>NM_006861</b> | 6915.365  | 9017.643  |
| <b>AK023142</b>  | 5371.554  | 7789.687  |
| <b>U61740</b>    | 56304.715 | 58067.93  |
| <b>NM_006409</b> | 51974.633 | 56667.953 |
| <b>AB049054</b>  | 17544.92  | 20289.715 |
| <b>NM_015071</b> | 7642.552  | 9117.484  |
| <b>NM_013227</b> | 14367.162 | 14667.618 |
| <b>Z83803</b>    | 2327.173  | 2639.378  |
| <b>AF027205</b>  | 53399.449 | 52070.027 |
| <b>AF075012</b>  | 5423.098  | 6425.129  |
| <b>NM_001570</b> | 3939.225  | 4425.395  |
| <b>AB040672</b>  | 16110.093 | 15096.332 |
| <b>NM_002192</b> | 22595.498 | 20582.672 |
| <b>NM_005491</b> | 23497.945 | 23268.121 |
| <b>NM_003869</b> | 24241.033 | 19384.844 |
| <b>AK025599</b>  | 5261.326  | 2056.162  |
| <b>X63417</b>    | 10210.817 | 7868.347  |
| <b>S94539</b>    | 56439.324 | 51427.234 |
| <b>S45570</b>    | 1078.532  | 482.243   |
| <b>NM_006402</b> | 9323.863  | 5855.674  |
| <b>NM_005785</b> | 7215.618  | 4875.938  |
| <b>NM_018248</b> | 8025.688  | 6173.73   |
| <b>AK001695</b>  | 23654.98  | 17954.244 |
| <b>NM_017886</b> | 34376.25  | 32158.643 |
| <b>NM_006252</b> | 11482.916 | 13701.176 |
| <b>NM_001721</b> | 2884.095  | 3228.493  |
| <b>NM_014397</b> | 27612.213 | 37113.762 |
| <b>AB023182</b>  | 7194.851  | 8695.869  |
| <b>NM_003607</b> | 4160.604  | 3903.137  |
| <b>NM_006575</b> | 7336.296  | 7650.577  |
| <b>NM_013254</b> | 7537.688  | 7340.207  |
| <b>NM_006090</b> | 22785.547 | 22845.738 |
| <b>NM_002900</b> | 48404.828 | 47534.969 |
| <b>NM_000542</b> | 57959.77  | 56890.109 |
| <b>NM_014625</b> | 1573.245  | 1502.795  |
| <b>NM_006851</b> | 5109.177  | 4473.965  |
| <b>AK001560</b>  | 11997.712 | 10874.919 |
| <b>AB001328</b>  | 8776.163  | 9576.124  |
| <b>NM_000948</b> | 2612.586  | 1120.866  |
| <b>H99588</b>    | 5484      | 3237.999  |
| <b>X00588</b>    | 22625.93  | 17402.182 |
| <b>AI359037</b>  | 57687.824 | 54603.453 |



|                  |           |           |
|------------------|-----------|-----------|
| <b>J04513</b>    | 2942.069  | 2205.683  |
| <b>BI754285</b>  | 5995.369  | 4834.787  |
| <b>X15998</b>    | 18651.881 | 13877.406 |
| <b>M76482</b>    | 1864.552  | 1562.877  |
| <b>X17519</b>    | 1254.529  | 1030.605  |
| <b>NM_001883</b> | 13654.48  | 15867.383 |
| <b>NM_004628</b> | 10624.594 | 11101.767 |
| <b>L31785</b>    | 3849.317  | 4394.367  |
| <b>H-M 69043</b> | 22293.494 | 29035.27  |
| <b>AF077374</b>  | 4349.377  | 3877.2    |
| <b>U43901</b>    | 2139.66   | 2305.236  |
| <b>X59065</b>    | 4957.37   | 5537.754  |
| <b>NM_000896</b> | 2858.376  | 3162.155  |
| <b>NM_016546</b> | 46167.203 | 52433.363 |
| <b>AF309653</b>  | 14710.488 | 14146.691 |
| <b>NM_002620</b> | 53757.082 | 54660.93  |
| <b>S79267</b>    | 7166.415  | 7725.77   |
| <b>NM_001816</b> | 3952.302  | 3282.024  |
| <b>NM_003784</b> | 56142.875 | 55092.25  |
| <b>NM_000195</b> | 56194.828 | 48934.605 |
| <b>NM_005445</b> | 44178.137 | 28362.771 |
| <b>NM_014899</b> | 9825.682  | 7788.061  |
| <b>NM_003630</b> | 22652.797 | 19098.391 |
| <b>NM_000046</b> | 14506.37  | 12419.121 |
| <b>NM_003219</b> | 9424.522  | 7083.271  |
| <b>NM_006709</b> | 22005.66  | 18623.889 |
| <b>NM_000612</b> | 54190.383 | 53766.398 |
| <b>NM_004257</b> | 48753.609 | 53160.293 |
| <b>NM_002844</b> | 623.762   | 760.477   |
| <b>NM_000683</b> | 8414.439  | 11349.649 |
| <b>NM_003629</b> | 13350.582 | 13734.697 |
| <b>NM_005901</b> | 10557.574 | 9600.31   |
| <b>NM_004248</b> | 25730.656 | 28262.213 |
| <b>NM_000959</b> | 1026.103  | 999.979   |
| <b>NM_019066</b> | 1111.388  | 1081.407  |
| <b>AL080170</b>  | 9844.077  | 11248.442 |
| <b>AB039903</b>  | 19123.008 | 19792.779 |
| <b>M93107</b>    | 18127.895 | 21142.342 |
| <b>BC001479</b>  | 52832.406 | 51498.559 |
| <b>NM_002461</b> | 57812.992 | 55555.965 |
| <b>NM_005771</b> | 3005.335  | 2912.739  |
| <b>AB032986</b>  | 54807.172 | 59426.426 |
| <b>NM_017528</b> | 54461.395 | 55295     |
| <b>NM_016032</b> | 25791.541 | 27253.119 |
| <b>NM_014324</b> | 54191.48  | 50902.398 |
| <b>NM_001687</b> | 56591.371 | 53805.375 |
| <b>AK026374</b>  | 12636.911 | 12225.997 |
| <b>NM_003459</b> | 44870.066 | 48224.5   |
| <b>NM_013349</b> | 55777.301 | 52368.75  |
| <b>NM_006861</b> | 9249.423  | 7824.645  |
| <b>AK023142</b>  | 8910.093  | 7276.478  |
| <b>U61740</b>    | 56711.91  | 58653.543 |
| <b>NM_006409</b> | 54381.645 | 59971.75  |

|                  |           |           |
|------------------|-----------|-----------|
| <b>AB049054</b>  | 18186.445 | 23115.209 |
| <b>NM_015071</b> | 7597.676  | 9344.118  |
| <b>NM_013227</b> | 13263.236 | 11298.084 |
| <b>Z83803</b>    | 3498.768  | 3482.022  |
| <b>AF027205</b>  | 53850.016 | 54236.289 |
| <b>AF075012</b>  | 5197.305  | 6810.814  |
| <b>NM_001570</b> | 4711.464  | 4983.458  |
| <b>NM_015658</b> | 2033.36   | 2359.934  |
| <b>NM_000589</b> | 10883.732 | 10752.992 |
| <b>AK025599</b>  | 3315.593  | 3792.18   |
| <b>X63417</b>    | 9418.258  | 9702.72   |
| <b>S94539</b>    | 56694.75  | 56332.438 |
| <b>S45570</b>    | 839.188   | 868.614   |
| <b>NM_006402</b> | 11077.329 | 4901.591  |
| <b>NM_005785</b> | 6878.258  | 4555.913  |
| <b>NM_018248</b> | 11142.758 | 7987.3    |
| <b>AK001695</b>  | 27101.379 | 20473.275 |
| <b>NM_017886</b> | 34119.387 | 26524.021 |
| <b>NM_006252</b> | 14217.975 | 11373.219 |
| <b>NM_001721</b> | 3083.917  | 2047.079  |
| <b>NM_014397</b> | 33951.051 | 35920.051 |
| <b>AB023182</b>  | 7026.058  | 7980.688  |
| <b>NM_003607</b> | 4588.865  | 5771.178  |
| <b>NM_006575</b> | 6848.021  | 8307.336  |
| <b>NM_013254</b> | 7061.074  | 6795.746  |
| <b>NM_000437</b> | 45060.148 | 46854.195 |
| <b>AB046819</b>  | 55905.035 | 54339.492 |
| <b>NM_006090</b> | 21253.641 | 24674.209 |
| <b>NM_002900</b> | 45932.961 | 47527.09  |
| <b>NM_004910</b> | 5406.142  | 5965.068  |
| <b>AB013452</b>  | 5471.777  | 6435.129  |
| <b>NM_000948</b> | 1909.392  | 1834.523  |
| <b>H99588</b>    | 6309.292  | 5210.489  |
| <b>X00588</b>    | 19482.857 | 20476.285 |
| <b>AI359037</b>  | 51755.148 | 53253.414 |
| <b>J04513</b>    | 1889.902  | 1595.798  |
| <b>BI754285</b>  | 5924.523  | 3982.939  |
| <b>X15998</b>    | 32966.438 | 24133.148 |
| <b>M76482</b>    | 2729.236  | 2411.279  |
| <b>X17519</b>    | 1791.735  | 767.866   |
| <b>NM_001883</b> | 20454.756 | 14736.837 |
| <b>NM_004628</b> | 11405.521 | 6729.913  |
| <b>L31785</b>    | 5233.545  | 4232.43   |
| <b>H-M 69043</b> | 22268.422 | 27815.393 |
| <b>AF077374</b>  | 4579.77   | 5187.233  |
| <b>U43901</b>    | 1567.332  | 2419.488  |
| <b>X59065</b>    | 6415.929  | 6476.196  |
| <b>M59828</b>    | 43155.902 | 48011.715 |
| <b>AJ010482</b>  | 6666.794  | 7454.449  |
| <b>NM_000896</b> | 2816.665  | 3190.122  |
| <b>AB040672</b>  | 14530.987 | 16463.006 |
| <b>NM_002192</b> | 19578.07  | 21726.898 |
| <b>NM_014899</b> | 6009.194  | 7373.719  |

|                  |           |           |
|------------------|-----------|-----------|
| <b>NM_003630</b> | 13107.594 | 13251.73  |
| <b>NM_000046</b> | 12040.527 | 12812.381 |
| <b>NM_003219</b> | 10503.552 | 8650.587  |
| <b>NM_006709</b> | 18285.105 | 16391.389 |
| <b>NM_000612</b> | 49769.398 | 46020.906 |
| <b>NM_004257</b> | 50298.297 | 48930.754 |
| <b>NM_002844</b> | 980.441   | 868.764   |
| <b>NM_000683</b> | 12355.968 | 6407.679  |
| <b>NM_003629</b> | 13362.114 | 9298.838  |
| <b>NM_005901</b> | 13496.822 | 13587.026 |
| <b>NM_004248</b> | 26466.729 | 20475.51  |
| <b>NM_000959</b> | 1812.034  | 782.463   |
| <b>NM_001313</b> | 3890.365  | 2387.511  |
| <b>NM_004796</b> | 2206.753  | 2222.59   |
| <b>NM_000435</b> | 44410.152 | 43389.309 |
| <b>NM_001842</b> | 51473.301 | 48261.277 |
| <b>NM_007281</b> | 690.673   | 608.469   |
| <b>AB017169</b>  | 2450.415  | 2609.089  |
| <b>AL080170</b>  | 8790.65   | 10482.104 |
| <b>AB039903</b>  | 18107.061 | 19318.717 |
| <b>NM_000542</b> | 50866.707 | 48545.602 |
| <b>NM_014625</b> | 1487.825  | 2419.882  |
| <b>NM_005829</b> | 4581.973  | 5538.248  |
| <b>NM_000466</b> | 16805.572 | 20329.852 |
| <b>NM_015544</b> | 1054.02   | 1059.479  |
| <b>NM_015908</b> | 22227.457 | 27390.004 |
| <b>AK022600</b>  | 47452.785 | 42167.371 |
| <b>AK023142</b>  | 7729.081  | 6528.183  |
| <b>NM_006409</b> | 53387.59  | 52525.035 |
| <b>AB049054</b>  | 19347.43  | 14045.825 |
| <b>NM_015071</b> | 11485.513 | 8905.006  |
| <b>NM_013227</b> | 19661.809 | 13957.346 |
| <b>Z83803</b>    | 3408.628  | 2411.093  |
| <b>AF027205</b>  | 54554.328 | 47517.477 |
| <b>AF075012</b>  | 5490.481  | 4652.759  |
| <b>NM_001570</b> | 4800.732  | 4517.542  |
| <b>NM_015658</b> | 2134.15   | 2536.919  |
| <b>NM_000589</b> | 11379.602 | 12286.389 |
| <b>NM_016546</b> | 47853.168 | 52896.977 |
| <b>AF309653</b>  | 11207.64  | 9465.196  |
| <b>NM_002620</b> | 53516.699 | 51057.684 |
| <b>S79267</b>    | 5058.395  | 5688.457  |
| <b>NM_001816</b> | 2451.785  | 3144.626  |
| <b>NM_003784</b> | 58544.695 | 56452.164 |
| <b>NM_000195</b> | 55771.852 | 55037.164 |
| <b>NM_005445</b> | 36037.348 | 33016.277 |
| <b>AB046819</b>  | 48935.289 | 46988.164 |
| <b>NM_006090</b> | 18654.4   | 22971.617 |
| <b>NM_002900</b> | 36778.387 | 43848.422 |
| <b>NM_004910</b> | 6461.446  | 7596.734  |
| <b>AB013452</b>  | 5673.741  | 6560.263  |
| <b>M93107</b>    | 11660.655 | 12446.27  |
| <b>NM_002461</b> | 52956.781 | 51483.137 |

|                  |           |           |
|------------------|-----------|-----------|
| <b>NM_016032</b> | 23412.652 | 19562.51  |
| <b>NM_014324</b> | 53360.344 | 48388.047 |
| <b>NM_001687</b> | 53972.445 | 49061.941 |
| <b>AK026374</b>  | 13286.093 | 11567.757 |
| <b>NM_001169</b> | 9075.14   | 10184.701 |
| <b>AK024648</b>  | 45237.277 | 50808.148 |
| <b>NM_000719</b> | 2360.957  | 2974.329  |
| <b>NM_003459</b> | 22489.377 | 32259.453 |
| <b>AB032526</b>  | 616.156   | 759.666   |
| <b>NM_000171</b> | 12833.785 | 13517.258 |
| <b>AL354615</b>  | 2653.227  | 2753.097  |
| <b>NM_013349</b> | 58031.516 | 57723.031 |
| <b>NM_003705</b> | 12610.404 | 14207.275 |
| <b>NM_006861</b> | 7501.747  | 8103.328  |
| <b>AJ010482</b>  | 4585.336  | 4974.402  |
| <b>NM_000896</b> | 2152.545  | 3001.983  |
| <b>AB040672</b>  | 9511.093  | 11320.921 |
| <b>NM_002192</b> | 12556.234 | 12264.774 |
| <b>NM_005491</b> | 19005.842 | 23506.652 |
| <b>NM_003869</b> | 8842.247  | 9878.627  |
| <b>AK025599</b>  | 3352.639  | 3931.454  |
| <b>X63417</b>    | 9048.428  | 9314.023  |
| <b>S94539</b>    | 56638.129 | 44896.676 |
| <b>NM_006402</b> | 7352.466  | 3759.726  |
| <b>NM_005785</b> | 6241.151  | 3956.247  |
| <b>NM_018248</b> | 8438.633  | 7412.756  |
| <b>AK001695</b>  | 21610.609 | 21257.377 |
| <b>NM_017886</b> | 27117.273 | 27075.668 |
| <b>NM_006252</b> | 11728.724 | 12483.23  |
| <b>NM_001721</b> | 2593.36   | 2231.815  |
| <b>NM_014397</b> | 27462.453 | 35254.984 |
| <b>AB023182</b>  | 6703.481  | 6327.091  |
| <b>NM_003607</b> | 4495.886  | 4940.997  |
| <b>NM_006575</b> | 7004.484  | 7280.471  |
| <b>NM_013254</b> | 7698.818  | 8139.182  |
| <b>NM_000437</b> | 44508.566 | 47969.184 |
